# Supplementary material for: Transcriptome of rhesus macaque (Macaca mulatta) exposed to total-body irradiation
Source: PubMed Central journal article supplement (PMC7973550; doi:10.1038/s41598-021-85669-6), 2021-03-18
Supplement: 41598_2021_85669_MOESM1_ESM.pdf [file 41598_2021_85669_MOESM1_ESM.pdf]

# **Transcriptome of rhesus macaque (*Macaca mulatta*) exposed to total-body irradiation**

**Yaoxiang Li,<sup>1</sup> Jatinder Singh,<sup>2,3</sup> Rency Varghese,<sup>1</sup> Yubo Zhang,<sup>4</sup> Oluseyi O. Fatanmi,<sup>2,3</sup>**

**Amrita K Cheema,<sup>1,5</sup> Vijay K Singh<sup>2,3,\*</sup>**

**YL and JS have made equal contributions to this study.**

*<sup>1</sup>Department of Oncology, Lombardi Comprehensive Cancer Center, Georgetown University Medical Center, Washington, DC, USA; <sup>2</sup>Division of Radioprotectants, Department of Pharmacology and Molecular Therapeutics, F. Edward Hébert School of Medicine, Uniformed Services University of the Health Sciences, Bethesda, MD, USA; <sup>3</sup>Armed Forces Radiobiology Research Institute, Uniformed Services University of the Health Sciences, Bethesda, MD, USA; <sup>4</sup>Department of Biochemistry and Molecular Medicine, George Washington University, Washington DC, USA; <sup>5</sup>Department of Biochemistry, Molecular and Cellular Biology, Georgetown University Medical Center, Washington DC, USA*

**Supplementary Figure 1.** The percent of uniquely mapped reads (mapping efficiency) of samples to the reference genome ranged from 43% to 86%. Figure is created by the author using Microsoft Excel (URL: <https://www.microsoft.com/en-us/microsoft-365/excel>).

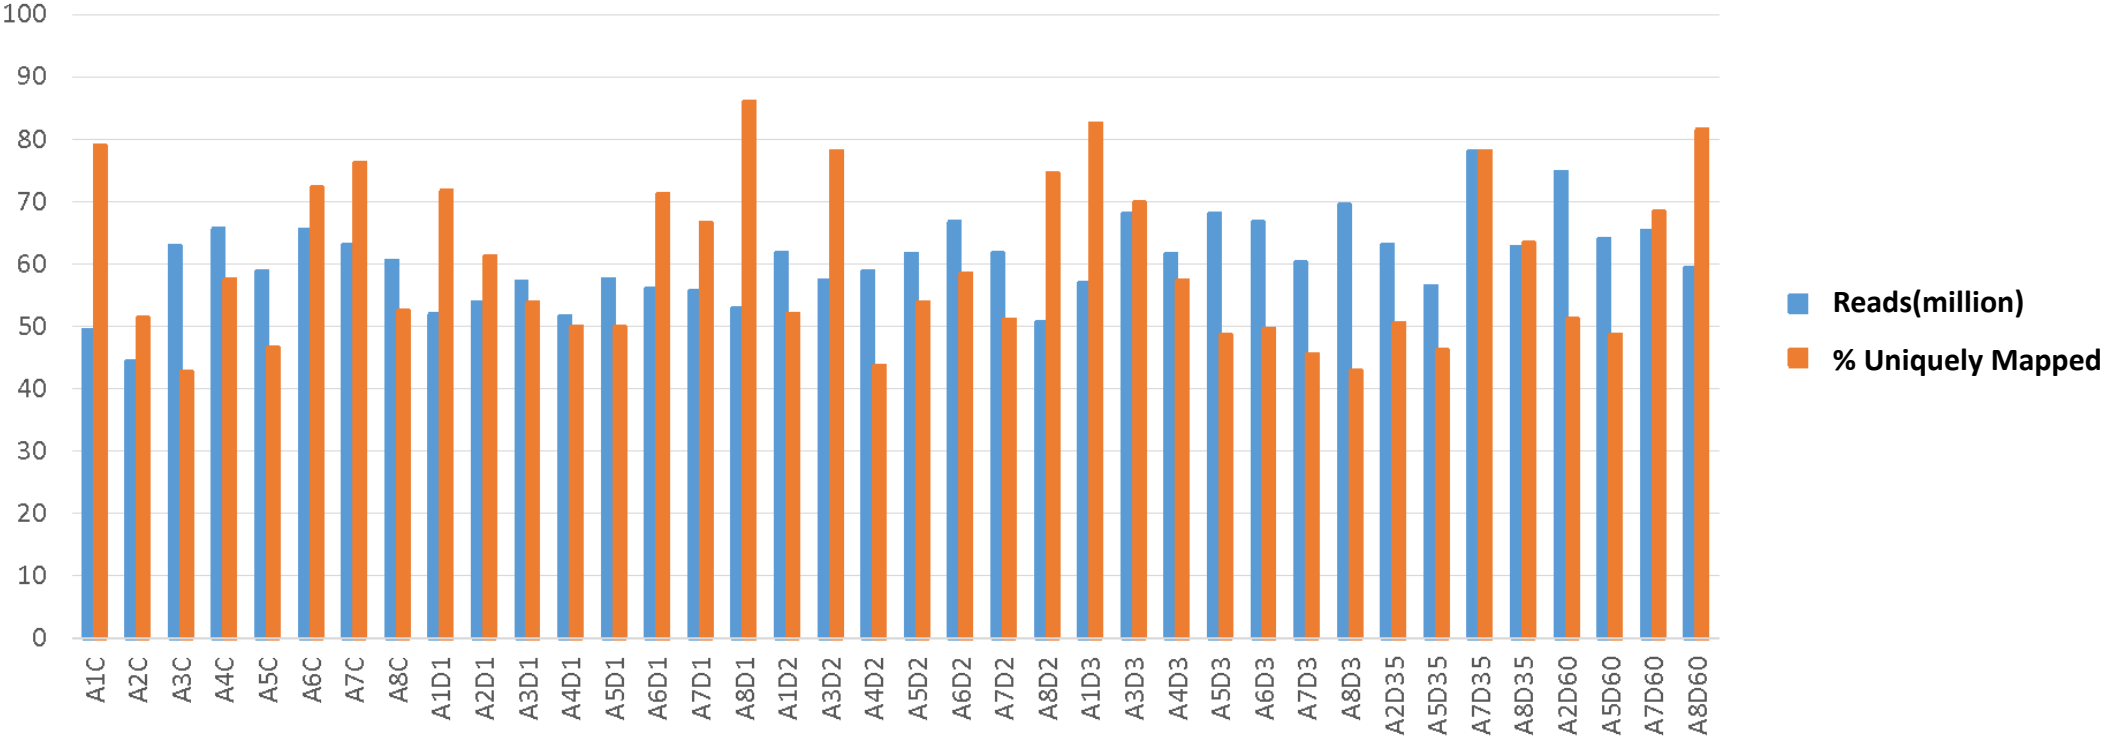

**Supplementary Figure 2.** 6-way Venn diagram of upregulated (**Panel A**)/ downregulated (**Panel B**) differentially expressed genes (DEGs) with a fold change  $\geq 2$ , and FDR cut-off of 0.05, in the survivor and non-survivor groups, for days 1, 2, 3 versus baseline. The six groups are color coded to denote significantly expressed genes within each group and overlap across groups. Venn diagram data was processed using R (version 4.0.3, URL: <https://cran.r-project.org/>) and generated using an online tool (<http://bioinformatics.psb.ugent.be/webtools/Venn/>)

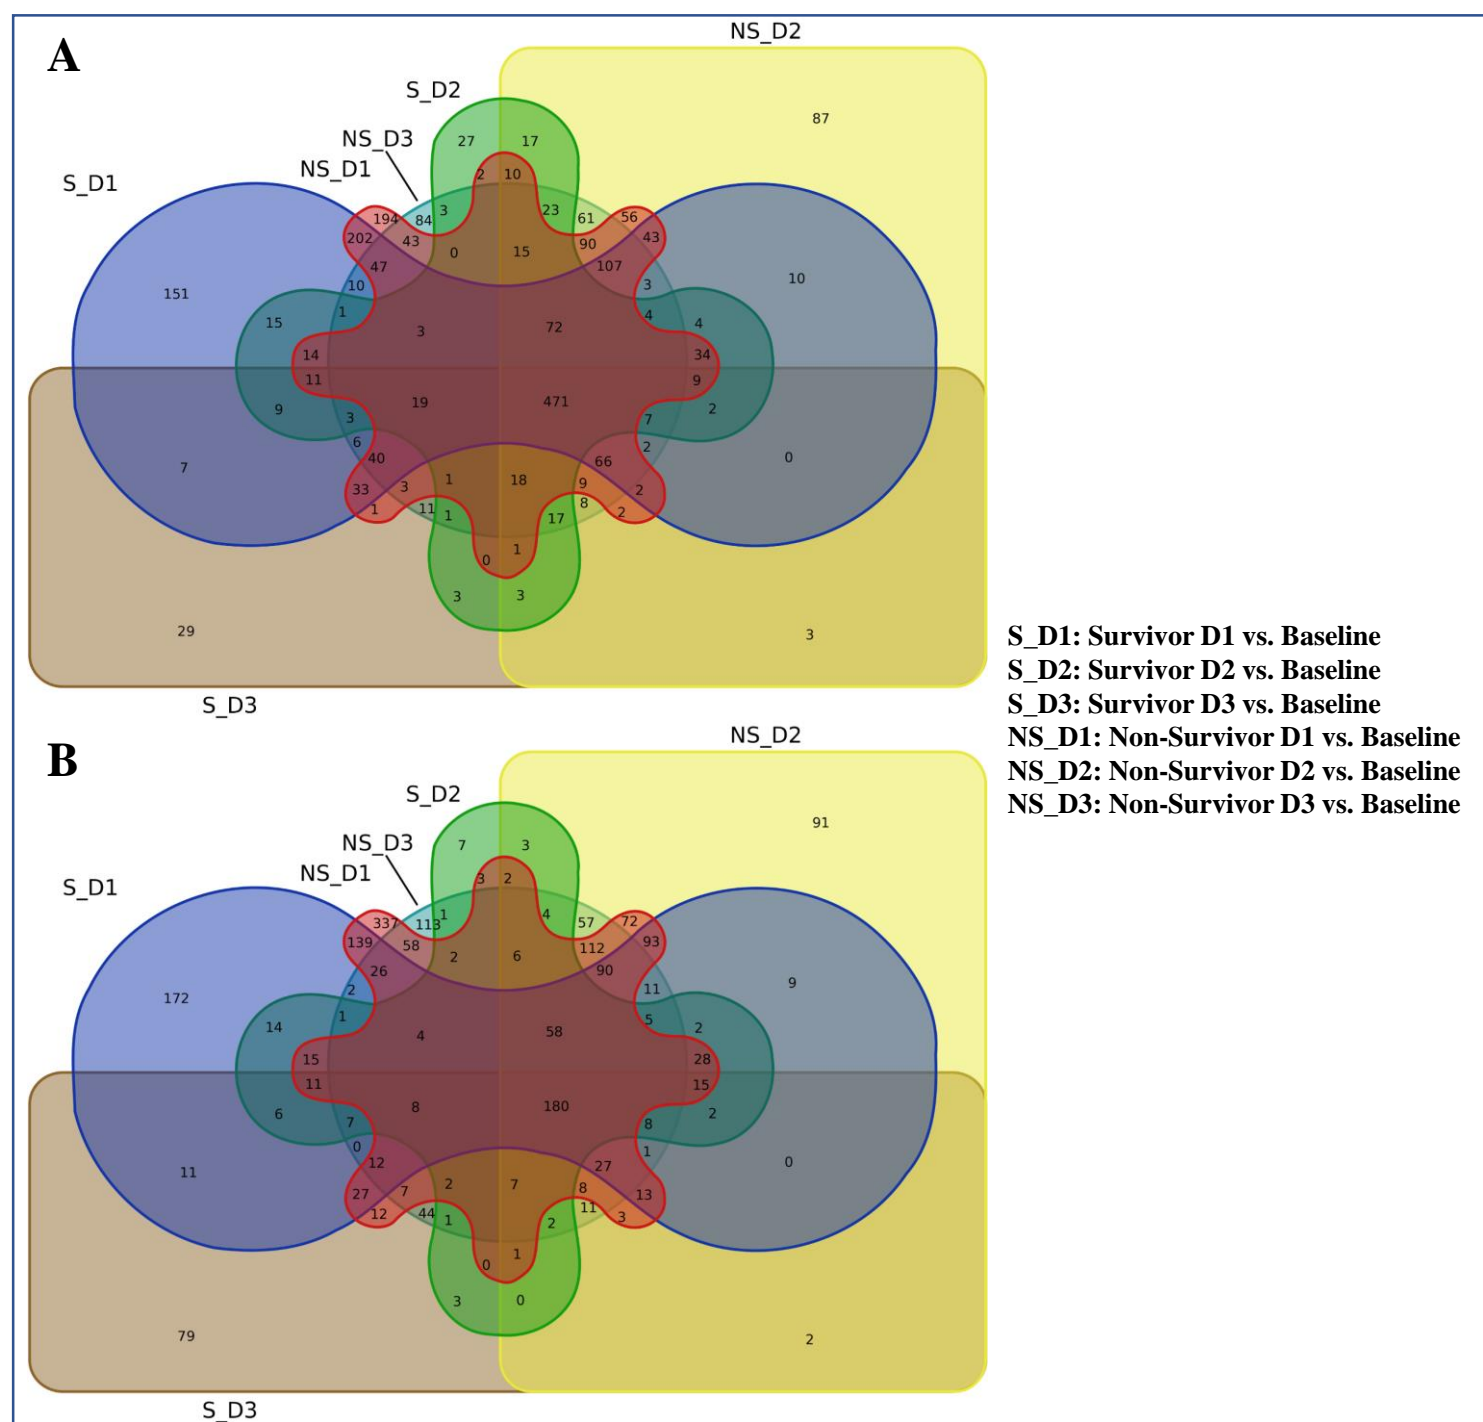

**Supp. Table 1. NHP Cohort sampling details and survival outcomes**

| Animal# | NHP#    | Sex    | Group | Sampling Time Post-Irradiation - Days |     |         |         |      |      |
|---------|---------|--------|-------|---------------------------------------|-----|---------|---------|------|------|
|         |         |        |       | SD (-7) <sup>a</sup>                  | SD1 | SD2     | SD3     | SD35 | SD60 |
| A1      | RA2688M | Male   | Veh   | X <sup>b</sup>                        | X   | X       | X       | Dead | -    |
| A2      | RA2708M | Male   | Veh   | X                                     | X   | Low RNA | Low RNA | X    | X    |
| A3      | RA2270F | Female | Veh   | X                                     | X   | X       | X       | Dead | -    |
| A4      | RA2384F | Female | Veh   | X                                     | X   | X       | X       | Dead | -    |
| A5      | RA2796M | Male   | Veh   | X                                     | X   | X       | X       | X    | X    |
| A6      | RA2693M | Male   | Veh   | X                                     | X   | X       | X       | Dead | -    |
| A7      | RA2698M | Male   | Veh   | X                                     | X   | X       | X       | X    | X    |
| A8      | RA2654F | Female | Veh   | X                                     | X   | X       | X       | X    | X    |

a. SD (-7)= Sampled 7 days prior to Irradiation

b. X= Sequenced



## Supplementary Table 2

### A. Overall radiation effects

|                    |                                                                                            | SD 1 vs. Baseline |             |             |
|--------------------|--------------------------------------------------------------------------------------------|-------------------|-------------|-------------|
| Ensembl Gene ID    | Description                                                                                | Log2(FC)          | p-value     | FDR         |
| ENSMMUG00000049101 | olfactory receptor 2T10 [Source:NCBI gene;Acc:100431025]                                   | 0.498201968       | 0.018785099 | 0.046307017 |
| ENSMMUG00000048289 | olfactory receptor 2T5-like [Source:NCBI gene;Acc:707109]                                  | 0.683801844       | 0.00463043  | 0.013910785 |
|                    |                                                                                            | -                 |             |             |
| ENSMMUG00000017368 | olfactory receptor 2G6 [Source:NCBI gene;Acc:694380]                                       | 0.776701367       | 0.000754872 | 0.0027938   |
| ENSMMUG00000038524 | olfactory receptor 2M4 [Source:NCBI gene;Acc:100424541]                                    | 2.59194334        | 2.13E-41    | 7.02E-39    |
| ENSMMUG00000049432 | olfactory receptor 2T33 [Source:NCBI gene;Acc:706331]                                      | 1.249206954       | 1.36E-17    | 3.77E-16    |
| ENSMMUG00000050812 |                                                                                            | 1.175793013       | 0.001410394 | 0.004888091 |
| ENSMMUG00000064763 |                                                                                            | 0.944209014       | 0.000204876 | 0.000871575 |
| ENSMMUG00000050041 | olfactory receptor 2L5 [Source:NCBI gene;Acc:697549]                                       | 0.908775468       | 0.00859237  | 0.023751136 |
|                    |                                                                                            | -                 |             |             |
| ENSMMUG00000006214 | olfactory receptor family 11 subfamily L member 1 [Source:HGNC Symbol;Acc:HGNC:14998]      | 3.030623468       | 0.000136522 | 0.000602926 |
|                    |                                                                                            | -                 |             |             |
| ENSMMUG00000005955 | germinal center associated signaling and motility like [Source:VGNC Symbol;Acc:VGNC:72806] | 0.563037253       | 0.011466013 | 0.030462374 |
|                    |                                                                                            | -                 |             |             |
| ENSMMUG00000005949 | olfactory receptor 2B11 [Source:NCBI gene;Acc:709256]                                      | 2.168963174       | 4.39E-05    | 0.000215432 |
|                    |                                                                                            | -                 |             |             |
| ENSMMUG00000004566 | zinc finger protein 124 [Source:VGNC Symbol;Acc:VGNC:78836]                                | 3.467873667       | 0.000866997 | 0.003161336 |
|                    |                                                                                            | -                 |             |             |
| ENSMMUG00000000021 | catsper channel auxiliary subunit epsilon [Source:VGNC Symbol;Acc:VGNC:70657]              | 3.419497424       | 0.000546971 | 0.002108546 |
|                    |                                                                                            | -                 |             |             |
| ENSMMUG00000063991 |                                                                                            | 2.427877095       | 0.00301095  | 0.009516706 |
| ENSMMUG00000049847 |                                                                                            | 3.078744825       | 0.005187842 | 0.015310586 |
|                    |                                                                                            | -                 |             |             |
| ENSMMUG00000019994 | serologically defined colon cancer antigen 8 [Source:NCBI gene;Acc:705545]                 | 1.069939492       | 0.005212745 | 0.015362681 |
|                    |                                                                                            | -                 |             |             |
| ENSMMUG00000059561 |                                                                                            | 2.325621318       | 0.000360686 | 0.001450371 |
|                    |                                                                                            | -                 |             |             |
| ENSMMUG00000004265 | phospholipase D family member 5 [Source:VGNC Symbol;Acc:VGNC:76120]                        | 1.700719786       | 0.002194349 | 0.007199601 |
| ENSMMUG00000005668 | kynurenine 3-monooxygenase [Source:VGNC Symbol;Acc:VGNC:74197]                             | 1.040220131       | 1.91E-07    | 1.47E-06    |
| ENSMMUG00000005667 | fumarate hydratase [Source:VGNC Symbol;Acc:VGNC:72659]                                     | 0.687718876       | 0.000433542 | 0.001711776 |
|                    |                                                                                            | -                 |             |             |
| ENSMMUG00000054974 |                                                                                            | 0.881425983       | 0.001175644 | 0.00416602  |
| ENSMMUG00000064824 | gremlin 2, DAN family BMP antagonist [Source:NCBI gene;Acc:708280]                         | 2.345141191       | 1.08E-12    | 1.77E-11    |
|                    |                                                                                            | -                 |             |             |
| ENSMMUG00000059198 |                                                                                            | 1.903796177       | 0.011917265 | 0.031480768 |
|                    |                                                                                            | -                 |             |             |
| ENSMMUG00000054726 |                                                                                            | 0.667884254       | 0.01833837  | 0.045371709 |
| ENSMMUG00000061845 |                                                                                            | 2.350903974       | 5.66E-10    | 6.43E-09    |
| ENSMMUG00000001060 | ryanodine receptor 2 [Source:VGNC Symbol;Acc:VGNC:76954]                                   | 1.548552956       | 1.99E-28    | 1.71E-26    |
|                    |                                                                                            | -                 |             |             |
| ENSMMUG00000015132 | galectin 8 [Source:VGNC Symbol;Acc:VGNC:74258]                                             | 1.212015316       | 0.001148895 | 0.004080985 |
|                    |                                                                                            | -                 |             |             |
| ENSMMUG00000049832 | interferon regulatory factor 2 binding protein 2 [Source:NCBI gene;Acc:718705]             | 0.638231733       | 0.014531361 | 0.03724509  |
|                    |                                                                                            | -                 |             |             |
| ENSMMUG00000046785 |                                                                                            | 2.436050369       | 6.75E-06    | 3.91E-05    |
|                    |                                                                                            | -                 |             |             |
| ENSMMUG00000009226 | mitogen-activated protein kinase kinase kinase 21 [Source:NCBI gene;Acc:712755]            | 0.869824685       | 4.73E-05    | 0.000231229 |
| ENSMMUG00000063981 | nucleoside-triphosphatase, cancer-related [Source:NCBI gene;Acc:712959]                    | 3.6018504         | 1.11E-24    | 6.47E-23    |

|                    |                                                                                                        |   |             |             |             |
|--------------------|--------------------------------------------------------------------------------------------------------|---|-------------|-------------|-------------|
| ENSMMUG00000040055 |                                                                                                        | - | 0.683426784 | 0.000876068 | 0.003189401 |
| ENSMMUG00000061796 |                                                                                                        | - | 1.156977916 | 0.000234567 | 0.000986286 |
| ENSMMUG00000012068 | signal induced proliferation associated 1 like 2 [Source:NCBI gene;Acc:100425123]                      |   | 2.531881213 | 5.01E-12    | 7.51E-11    |
| ENSMMUG00000052961 |                                                                                                        |   | 2.462399181 | 6.68E-07    | 4.68E-06    |
| ENSMMUG00000064226 |                                                                                                        |   | 2.115958719 | 1.97E-06    | 1.27E-05    |
| ENSMMUG00000016204 | translin associated factor X [Source:NCBI gene;Acc:713347]                                             |   | 3.412761944 | 0.00125738  | 0.004416616 |
| ENSMMUG00000050564 |                                                                                                        |   | 1.727577446 | 0.01092665  | 0.029186278 |
| ENSMMUG0000005801  | glyceronephosphate O-acyltransferase [Source:VGNC Symbol;Acc:VGNC:73100]                               |   | 1.973626384 | 1.13E-15    | 2.55E-14    |
| ENSMMUG0000005888  | tetratricopeptide repeat domain 13 [Source:VGNC Symbol;Acc:VGNC:79588]                                 |   | 0.964054571 | 1.12E-08    | 1.04E-07    |
| ENSMMUG0000005886  | chromosome 1 C1orf198 homolog [Source:VGNC Symbol;Acc:VGNC:70389]                                      |   | 0.601053007 | 0.008821616 | 0.024316834 |
| ENSMMUG0000009508  | TATA-box binding protein associated factor 5 like [Source:VGNC Symbol;Acc:VGNC:78148]                  |   | 1.942057133 | 4.29E-07    | 3.10E-06    |
| ENSMMUG00000022094 | ATP binding cassette subfamily B member 10 [Source:NCBI gene;Acc:574117]                               |   | 0.573220389 | 3.50E-06    | 2.14E-05    |
| ENSMMUG00000055996 |                                                                                                        |   | 0.722751206 | 0.003261394 | 0.010232491 |
| ENSMMUG00000017720 | RAB4A, member RAS oncogene family [Source:VGNC Symbol;Acc:VGNC:81545]                                  |   | 0.408570552 | 0.014329518 | 0.036772235 |
| ENSMMUG00000061914 |                                                                                                        |   | 0.573343598 | 0.015597098 | 0.039525798 |
| ENSMMUG00000061675 | 5S ribosomal RNA [Source:RFAM;Acc:RF00001]                                                             |   | 3.079160772 | 0.01855547  | 0.04579699  |
| ENSMMUG0000005185  | regulator of G protein signaling 4 [Source:VGNC Symbol;Acc:VGNC:76690]                                 |   | 2.717486612 | 0.006325443 | 0.018207747 |
| ENSMMUG0000005186  | regulator of G protein signaling 5 [Source:NCBI gene;Acc:693510]                                       |   | 0.800922809 | 0.009360306 | 0.025582996 |
| ENSMMUG00000001152 | NUF2 component of NDC80 kinetochore complex [Source:VGNC Symbol;Acc:VGNC:75405]                        |   | 0.359450371 | 0.00397621  | 0.012165709 |
| ENSMMUG00000039738 | U6 spliceosomal RNA [Source:RFAM;Acc:RF00026]                                                          |   | 1.732908322 | 0.005097665 | 0.015086508 |
| ENSMMUG0000005585  | transmembrane and coiled-coil domains 1 [Source:VGNC Symbol;Acc:VGNC:79118]                            |   | -0.98195721 | 0.000815985 | 0.002997535 |
| ENSMMUG00000017789 | pogo transposable element derived with KRAB domain [Source:VGNC Symbol;Acc:VGNC:76066]                 |   | 0.617155699 | 0.003497011 | 0.010854054 |
| ENSMMUG00000023463 | maelstrom spermatogenic transposon silencer [Source:VGNC Symbol;Acc:VGNC:74362]                        |   | 1.723218878 | 0.008082937 | 0.022536182 |
| ENSMMUG00000051788 | dual specificity phosphatase 27, atypical [Source:NCBI gene;Acc:697299]                                |   | 1.555551462 | 0.011313269 | 0.030132144 |
| ENSMMUG00000008155 | POU class 2 homeobox 1 [Source:VGNC Symbol;Acc:VGNC:76223]                                             |   | 0.890526417 | 0.000862155 | 0.003145327 |
| ENSMMUG00000063120 | cellular repressor of E1A stimulated genes 1 [Source:NCBI gene;Acc:701021]                             |   | 0.690737017 | 0.001756248 | 0.005934189 |
| ENSMMUG00000009184 | myelin protein zero like 1 [Source:NCBI gene;Acc:698437]                                               |   | 2.227489544 | 1.17E-08    | 1.09E-07    |
| ENSMMUG00000010389 | DDB1 and CUL4 associated factor 6 [Source:NCBI gene;Acc:698686]                                        |   | 0.507638899 | 0.016694469 | 0.041948319 |
| ENSMMUG00000060729 | T-box transcription factor 19 [Source:NCBI gene;Acc:699312]                                            |   | 0.501631477 | 0.008893861 | 0.024475034 |
| ENSMMUG00000056707 |                                                                                                        |   | 2.536684968 | 3.90E-06    | 2.36E-05    |
| ENSMMUG00000059777 |                                                                                                        |   | 1.111908874 | 2.33E-10    | 2.81E-09    |
| ENSMMUG00000021078 | ATPase Na <sup>+</sup> /K <sup>+</sup> transporting subunit beta 1 [Source:VGNC Symbol;Acc:VGNC:70176] |   | 1.150226485 | 0.000568288 | 0.002175795 |
| ENSMMUG00000021079 | NME/NM23 family member 7 [Source:VGNC Symbol;Acc:VGNC:75221]                                           |   | 0.935527157 | 0.001014743 | 0.003648155 |
| ENSMMUG00000021080 | basic leucine zipper nuclear factor 1 [Source:VGNC Symbol;Acc:VGNC:70258]                              |   | 1.207146093 | 3.18E-27    | 2.48E-25    |
| ENSMMUG00000000065 | coiled-coil domain containing 181 [Source:VGNC Symbol;Acc:VGNC:70884]                                  |   | 0.973692833 | 2.12E-10    | 2.57E-09    |
| ENSMMUG00000042510 | coagulation factor V [Source:NCBI gene;Acc:704695]                                                     |   | 1.495706278 | 6.34E-26    | 4.13E-24    |
| ENSMMUG00000013044 | selectin P [Source:VGNC Symbol;Acc:VGNC:77157]                                                         |   | 1.250248938 | 1.92E-11    | 2.64E-10    |
| ENSMMUG00000054881 |                                                                                                        |   | 2.933333517 | 0.018489293 | 0.045676531 |
| ENSMMUG00000016579 | selectin L [Source:NCBI gene;Acc:701419]                                                               |   | 2.855179029 | 2.10E-37    | 4.33E-35    |
| ENSMMUG00000016580 | selectin E [Source:VGNC Symbol;Acc:VGNC:77156]                                                         |   | 2.868716123 | 3.30E-47    | 1.96E-44    |

|                    |                                                                                             |   |             |             |             |
|--------------------|---------------------------------------------------------------------------------------------|---|-------------|-------------|-------------|
| ENSMMUG00000016581 | methyltransferase like 18 [Source:VGNC Symbol;Acc:VGNC:74606]                               | - | 0.994518328 | 0.014088583 | 0.036279509 |
| ENSMMUG00000016582 | chromosome 1 C1orf112 homolog [Source:VGNC Symbol;Acc:VGNC:70385]                           | - | 1.658041922 | 1.79E-14    | 3.63E-13    |
| ENSMMUG00000059773 | methyltransferase like 11B [Source:NCBI gene;Acc:705503]                                    | - | 1.499234137 | 1.14E-06    | 7.67E-06    |
| ENSMMUG00000063298 |                                                                                             | - | 1.103610012 | 0.00038912  | 0.001554176 |
| ENSMMUG00000014674 | golgin, RAB6 interacting [Source:VGNC Symbol;Acc:VGNC:73012]                                | - | 1.238384313 | 1.42E-09    | 1.52E-08    |
| ENSMMUG0000007279  | phosphatidylinositol glycan anchor biosynthesis class C [Source:VGNC Symbol;Acc:VGNC:75986] | - | 0.997446031 | 9.11E-06    | 5.16E-05    |
| ENSMMUG00000054261 |                                                                                             | - | 1.185589217 | 0.000639208 | 0.002418847 |
| ENSMMUG00000022798 | aspartyl-tRNA synthetase 2, mitochondrial [Source:VGNC Symbol;Acc:VGNC:71708]               | - | 0.935957239 | 2.10E-07    | 1.60E-06    |
| ENSMMUG00000056971 | Metazoan signal recognition particle RNA [Source:RFAM;Acc:RF00017]                          | - | 1.584625438 | 1.20E-07    | 9.59E-07    |
| ENSMMUG00000060229 |                                                                                             | - | 1.084755067 | 0.000664615 | 0.002500313 |
| ENSMMUG00000025832 |                                                                                             | - | 2.410320957 | 0.020346544 | 0.049562951 |
| ENSMMUG00000022801 | zinc finger and BTB domain containing 37 [Source:VGNC Symbol;Acc:VGNC:79702]                | - | 1.280765367 | 0.000235329 | 0.00098865  |
| ENSMMUG00000000629 | serpin family C member 1 [Source:VGNC Symbol;Acc:VGNC:77360]                                | - | 1.164723172 | 5.00E-23    | 2.47E-21    |
| ENSMMUG00000000630 | ring finger and CCCH-type domains 1 [Source:VGNC Symbol;Acc:VGNC:76861]                     | - | 0.580746936 | 2.21E-05    | 0.000116402 |
| ENSMMUG00000064770 |                                                                                             | - | 1.140140357 | 0.002154517 | 0.007086157 |
| ENSMMUG00000000546 | KIAA0040 ortholog [Source:NCBI gene;Acc:100423509]                                          | - | 1.094044474 | 2.45E-05    | 0.000127808 |
| ENSMMUG00000023216 | astrotactin 1 [Source:VGNC Symbol;Acc:VGNC:70167]                                           | - | 0.558846206 | 0.004515024 | 0.01360378  |
| ENSMMUG00000022935 | BMP/retinoic acid inducible neural specific 2 [Source:VGNC Symbol;Acc:VGNC:70303]           | - | 0.762111977 | 2.10E-05    | 0.00011103  |
| ENSMMUG00000020320 | protein transport protein Sec16B [Source:NCBI gene;Acc:709635]                              | - | 0.884664137 | 1.86E-06    | 1.20E-05    |
| ENSMMUG00000021073 | RAS protein activator like 2 [Source:VGNC Symbol;Acc:VGNC:76670]                            | - | 3.004918591 | 3.33E-34    | 5.21E-32    |
| ENSMMUG00000059117 | Metazoan signal recognition particle RNA [Source:RFAM;Acc:RF00017]                          | - | 1.211241452 | 0.000790378 | 0.002915748 |
| ENSMMUG00000056058 | C-type lectin domain containing 20A [Source:HGNC Symbol;Acc:HGNC:34521]                     | - | 3.316062848 | 2.07E-07    | 1.58E-06    |
| ENSMMUG00000054486 | testis expressed 35 [Source:NCBI gene;Acc:717255]                                           | - | 2.552038198 | 5.48E-06    | 3.24E-05    |
| ENSMMUG00000055256 | family with sequence similarity 163 member A [Source:NCBI gene;Acc:718704]                  | - | 1.496974607 | 1.73E-14    | 3.51E-13    |
| ENSMMUG00000031279 | torsin A interacting protein 2 [Source:NCBI gene;Acc:716654]                                | - | 1.532528861 | 1.35E-26    | 9.71E-25    |
| ENSMMUG00000053617 | torsin 1A interacting protein 2 [Source:NCBI gene;Acc:716691]                               | - | 0.801545086 | 9.22E-07    | 6.30E-06    |
| ENSMMUG00000014873 | torsin 1A interacting protein 1 [Source:VGNC Symbol;Acc:VGNC:79810]                         | - | 0.678483974 | 1.58E-05    | 8.57E-05    |
| ENSMMUG00000046557 | Metazoan signal recognition particle RNA [Source:RFAM;Acc:RF00017]                          | - | 2.770181931 | 0.015196856 | 0.038670106 |
| ENSMMUG00000054568 |                                                                                             | - | 1.530000202 | 5.67E-08    | 4.73E-07    |
| ENSMMUG00000061785 |                                                                                             | - | 1.516605866 | 2.70E-26    | 1.84E-24    |
| ENSMMUG00000052988 | Metazoan signal recognition particle RNA [Source:RFAM;Acc:RF00017]                          | - | 1.220831856 | 0.00289687  | 0.009220989 |
| ENSMMUG00000022884 | glutamate-ammonia ligase [Source:NCBI gene;Acc:715952]                                      | - | 3.867648668 | 1.24E-13    | 2.28E-12    |
| ENSMMUG00000031291 | regulator of G protein signaling like 1 [Source:NCBI gene;Acc:715693]                       | - | 1.720048617 | 2.17E-22    | 1.02E-20    |
| ENSMMUG00000005634 | ribonuclease L [Source:VGNC Symbol;Acc:VGNC:82223]                                          | - | 1.186849456 | 9.60E-07    | 6.53E-06    |
| ENSMMUG00000055481 | regulator of G protein signaling 16 [Source:NCBI gene;Acc:715599]                           | - | 0.960087414 | 5.45E-05    | 0.000262731 |
| ENSMMUG00000008990 | regulator of G protein signaling 8 [Source:NCBI gene;Acc:720353]                            | - | 2.27893476  | 0.008705046 | 0.024035716 |
| ENSMMUG00000008992 | N-acetylneuraminic acid pyruvate lyase [Source:VGNC Symbol;Acc:VGNC:75191]                  | - | 0.365313313 | 0.002380027 | 0.007742005 |
| ENSMMUG00000015084 | laminin subunit gamma 1 [Source:VGNC Symbol;Acc:VGNC:74232]                                 | - | 1.596206061 | 0.016538494 | 0.041570487 |
| ENSMMUG00000001479 | laminin subunit gamma 2 [Source:VGNC Symbol;Acc:VGNC:74233]                                 | - | 3.054677654 | 3.20E-16    | 7.59E-15    |
| ENSMMUG00000001481 | nicotinamide nucleotide adenylyltransferase 2 [Source:VGNC Symbol;Acc:VGNC:75193]           | - | 3.487285632 | 1.59E-08    | 1.44E-07    |

|                    |                                                                                             |             |             |             |
|--------------------|---------------------------------------------------------------------------------------------|-------------|-------------|-------------|
| ENSMMUG00000016399 | ral guanine nucleotide dissociation stimulator like 1 [Source:VGNC Symbol;Acc:VGNC:76868]   | 1.442432899 | 0.000121949 | 0.000544895 |
| ENSMMUG00000016405 | collagen beta(1-O)galactosyltransferase 2 [Source:NCBI gene;Acc:717508]                     | 1.493500983 | 0.009102057 | 0.024964585 |
| ENSMMUG00000064206 | tRNA splicing endonuclease subunit 15 [Source:NCBI gene;Acc:717481]                         | 1.135875584 | 0.017121243 | 0.042795893 |
| ENSMMUG00000054157 |                                                                                             | 2.379094788 | 0.005453476 | 0.015989531 |
| ENSMMUG00000016857 | prostaglandin-endoperoxide synthase 2 [Source:VGNC Symbol;Acc:VGNC:76589]                   | 1.525707172 | 5.84E-10    | 6.63E-09    |
| ENSMMUG00000059986 |                                                                                             | 1.147404752 | 5.40E-08    | 4.53E-07    |
| ENSMMUG00000062021 |                                                                                             | 1.772230013 | 3.73E-06    | 2.27E-05    |
| ENSMMUG00000049590 | regulator of G protein signaling 2 [Source:NCBI gene;Acc:712617]                            | 1.904003305 | 0.006010457 | 0.017412594 |
| ENSMMUG00000052479 |                                                                                             | 1.434042091 | 0.000269407 | 0.001115511 |
| ENSMMUG00000022641 | ubiquitin C-terminal hydrolase L5 [Source:VGNC Symbol;Acc:VGNC:79197]                       | 1.190555296 | 8.78E-05    | 0.000405853 |
| ENSMMUG00000022643 | Ro60, Y RNA binding protein [Source:NCBI gene;Acc:715194]                                   | 1.173921781 | 0.001300549 | 0.004554224 |
| ENSMMUG00000022647 | cell division cycle 73 [Source:VGNC Symbol;Acc:VGNC:70766]                                  | 1.318990509 | 9.35E-09    | 8.79E-08    |
| ENSMMUG00000022648 | beta-1,3-galactosyltransferase 2 [Source:VGNC Symbol;Acc:VGNC:70205]                        | 1.549386447 | 6.83E-07    | 4.78E-06    |
| ENSMMUG00000021082 | potassium sodium-activated channel subfamily T member 2 [Source:VGNC Symbol;Acc:VGNC:73857] | 0.988803412 | 3.60E-11    | 4.82E-10    |
| ENSMMUG00000045497 | complement factor H [Source:NCBI gene;Acc:717346]                                           | 1.296173401 | 2.57E-05    | 0.000133109 |
| ENSMMUG00000000244 | coagulation factor XIII B chain [Source:VGNC Symbol;Acc:VGNC:72463]                         | 0.844876139 | 3.31E-05    | 0.000167407 |
| ENSMMUG00000000009 | protein tyrosine phosphatase receptor type C [Source:VGNC Symbol;Acc:VGNC:76612]            | 2.116340629 | 3.02E-08    | 2.63E-07    |
| ENSMMUG00000017414 | calcium voltage-gated channel subunit alpha1 S [Source:VGNC Symbol;Acc:VGNC:70507]          | 0.989050521 | 2.28E-06    | 1.45E-05    |
| ENSMMUG00000064915 | Metazoan signal recognition particle RNA [Source:RFAM;Acc:RF00017]                          | 1.7354998   | 0.004636848 | 0.013919931 |
| ENSMMUG00000050920 | Metazoan signal recognition particle RNA [Source:RFAM;Acc:RF00017]                          | 1.613528175 | 7.21E-05    | 0.00033846  |
| ENSMMUG00000021642 | fibromodulin [Source:VGNC Symbol;Acc:VGNC:72686]                                            | 1.460476979 | 0.000859716 | 0.003138745 |
| ENSMMUG00000021116 | ATPase plasma membrane Ca <sup>2+</sup> transporting 4 [Source:VGNC Symbol;Acc:VGNC:70183]  | 0.855063537 | 0.009219719 | 0.02524062  |
| ENSMMUG00000055783 |                                                                                             | 2.961498849 | 2.90E-08    | 2.54E-07    |
| ENSMMUG00000008460 | SRY-box transcription factor 13 [Source:VGNC Symbol;Acc:VGNC:77839]                         | 3.089400278 | 0.001862819 | 0.006257497 |
| ENSMMUG00000064841 | golgi transport 1A [Source:NCBI gene;Acc:700305]                                            | 3.112953459 | 0.00190762  | 0.006391778 |
| ENSMMUG00000017114 | pleckstrin homology domain containing A6 [Source:VGNC Symbol;Acc:VGNC:76040]                | 1.676943103 | 2.97E-05    | 0.000152172 |
| ENSMMUG00000063658 | leucine rich repeat neuronal 2 [Source:NCBI gene;Acc:100429709]                             | 1.582663606 | 2.41E-05    | 0.000125609 |
| ENSMMUG00000018797 | contactin 2 [Source:VGNC Symbol;Acc:VGNC:71284]                                             | 1.526037751 | 0.005510787 | 0.016141611 |
| ENSMMUG00000004113 | major facilitator superfamily domain containing 4A [Source:VGNC Symbol;Acc:VGNC:74575]      | 0.928087651 | 2.28E-06    | 1.45E-05    |
| ENSMMUG00000001024 | ETS transcription factor ELK4 [Source:VGNC Symbol;Acc:VGNC:72211]                           | 1.310662217 | 0.009699215 | 0.02634903  |
| ENSMMUG00000004116 | solute carrier family 45 member 3 [Source:VGNC Symbol;Acc:VGNC:77817]                       | 1.538440561 | 0.00103523  | 0.003712361 |

|                    |                                                                                              |             |             |             |
|--------------------|----------------------------------------------------------------------------------------------|-------------|-------------|-------------|
| ENSMMUG00000055835 | nuclear casein kinase and cyclin dependent kinase substrate 1 [Source:NCBI gene;Acc:697298]  | 1.138925832 | 1.18E-05    | 6.55E-05    |
| ENSMMUG00000021426 | solute carrier family 41 member 1 [Source:VGNC Symbol;Acc:VGNC:77515]                        | 0.473011279 | 0.008157603 | 0.022721286 |
| ENSMMUG00000023570 | interleukin 19 [Source:NCBI gene;Acc:694806]                                                 | 3.014085815 | 0.008332328 | 0.023161842 |
| ENSMMUG00000022170 | 6-phosphofructo-2-kinase/fructose-2,6-biphosphatase 2 [Source:VGNC Symbol;Acc:VGNC:75958]    | 0.394506368 | 0.007247914 | 0.020458045 |
| ENSMMUG00000013738 | complement component 4 binding protein alpha [Source:VGNC Symbol;Acc:VGNC:70474]             | 0.345819585 | 0.004882922 | 0.014562365 |
| ENSMMUG00000013596 | complement C3b/C4b receptor 1 (Knops blood group) [Source:NCBI gene;Acc:718120]              | 1.402717118 | 0.001381748 | 0.00480453  |
| ENSMMUG00000040888 | complement C3b/C4b receptor 1 like [Source:HGNC Symbol;Acc:HGNC:2335]                        | 0.52954324  | 0.002273214 | 0.00742223  |
| ENSMMUG00000051230 |                                                                                              | 0.832404681 | 0.000119716 | 0.000535401 |
| ENSMMUG00000057560 |                                                                                              | 0.902127075 | 1.16E-10    | 1.45E-09    |
| ENSMMUG00000064202 |                                                                                              | 1.553494829 | 2.65E-06    | 1.66E-05    |
| ENSMMUG00000003369 | calcium/calmodulin dependent protein kinase IG [Source:VGNC Symbol;Acc:VGNC:70521]           | 0.965186292 | 0.013936527 | 0.035975403 |
| ENSMMUG00000016925 | laminin subunit beta 3 [Source:VGNC Symbol;Acc:VGNC:74230]                                   | -1.19333862 | 0.000644092 | 0.002434222 |
| ENSMMUG00000045482 | G0/G1 switch 2 [Source:NCBI gene;Acc:717581]                                                 | 0.490232982 | 0.000155955 | 0.000678642 |
| ENSMMUG00000016099 | hedgehog acyltransferase [Source:NCBI gene;Acc:712333]                                       | 2.345126402 | 3.74E-08    | 3.19E-07    |
| ENSMMUG00000058133 |                                                                                              | 3.011079896 | 4.92E-07    | 3.52E-06    |
| ENSMMUG00000017396 | 3'(2'), 5'-bisphosphate nucleotidase 1 [Source:NCBI gene;Acc:721277]                         | -1.82580545 | 9.16E-07    | 6.25E-06    |
| ENSMMUG00000007783 | isoleucyl-tRNA synthetase 2, mitochondrial [Source:VGNC Symbol;Acc:VGNC:73458]               | 1.603303106 | 4.88E-20    | 1.71E-18    |
| ENSMMUG00000026897 | mml-mir-215 [Source:miRBase;Acc:MI0003025]                                                   | -1.98410926 | 0.000117224 | 0.000525049 |
| ENSMMUG00000027053 | mml-mir-194-1 [Source:miRBase;Acc:MI0003024]                                                 | 2.020054001 | 0.002012009 | 0.006690156 |
| ENSMMUG00000018525 | presenilin 2 [Source:VGNC Symbol;Acc:VGNC:76436]                                             | 1.487393241 | 2.41E-16    | 5.82E-15    |
| ENSMMUG00000008638 | CDC42 binding protein kinase alpha [Source:VGNC Symbol;Acc:VGNC:70799]                       | 0.378343623 | 0.002185926 | 0.007175141 |
| ENSMMUG00000031497 |                                                                                              | 1.080874594 | 0.008585876 | 0.023737609 |
| ENSMMUG00000008338 | Wnt family member 9A [Source:VGNC Symbol;Acc:VGNC:78796]                                     | 0.698394211 | 0.000897513 | 0.003257742 |
| ENSMMUG00000023096 | obscurin, cytoskeletal calmodulin and titin-interacting RhoGEF [Source:NCBI gene;Acc:694413] | 1.094470778 | 3.01E-16    | 7.19E-15    |
| ENSMMUG00000019513 | U2AF homology motif kinase 1 [Source:VGNC Symbol;Acc:VGNC:79198]                             | 2.241810666 | 0.004985142 | 0.014821502 |
| ENSMMUG00000004049 | activating transcription factor 6 [Source:VGNC Symbol;Acc:VGNC:70171]                        | 0.331411247 | 0.004966086 | 0.014773733 |
| ENSMMUG00000004042 | Fc receptor like A [Source:VGNC Symbol;Acc:VGNC:72526]                                       | 1.531802144 | 0.000492663 | 0.001919147 |
| ENSMMUG00000003775 | Fc fragment of IgG receptor IIb [Source:NCBI gene;Acc:720009]                                | 0.934447971 | 0.007644878 | 0.021465446 |
| ENSMMUG00000054686 |                                                                                              | 2.023132292 | 4.14E-09    | 4.13E-08    |
| ENSMMUG00000008251 | cilia and flagella associated protein 126 [Source:VGNC Symbol;Acc:VGNC:71150]                | 2.103296453 | 0.000394474 | 0.001574709 |
| ENSMMUG00000004516 | apolipoprotein A2 [Source:NCBI gene;Acc:719946]                                              | 1.262627802 | 0.003278171 | 0.010269386 |
| ENSMMUG00000004512 | Fc fragment of IgE receptor Ig [Source:VGNC Symbol;Acc:VGNC:72629]                           | 1.224380902 | 0.000112426 | 0.00050662  |
| ENSMMUG00000004520 | NADH:ubiquinone oxidoreductase core subunit S2 [Source:NCBI gene;Acc:719935]                 | 0.620933142 | 0.001251477 | 0.00440005  |
| ENSMMUG00000050419 | ADAM metalloproteinase with thrombospondin type 1 motif 4 [Source:NCBI gene;Acc:719927]      | 1.041775779 | 5.55E-06    | 3.27E-05    |
| ENSMMUG00000060555 |                                                                                              | 0.805278262 | 0.000793053 | 0.00292416  |
| ENSMMUG00000022630 | protoporphyrinogen oxidase [Source:VGNC Symbol;Acc:VGNC:76365]                               | 1.717586485 | 1.38E-08    | 1.27E-07    |
| ENSMMUG00000022631 | ubiquitin specific peptidase 21 [Source:VGNC Symbol;Acc:VGNC:78741]                          | 1.451003113 | 0.000141392 | 0.000621654 |
| ENSMMUG00000022632 | ubiquitin-fold modifier conjugating enzyme 1 [Source:VGNC Symbol;Acc:VGNC:79643]             | 1.406433487 | 9.98E-08    | 8.04E-07    |

|                    |                                                                                   |             |             |             |
|--------------------|-----------------------------------------------------------------------------------|-------------|-------------|-------------|
| ENSMMUG00000002010 | death effector domain containing [Source:VGNC Symbol;Acc:VGNC:71768]              | 1.273060814 | 3.56E-09    | 3.58E-08    |
| ENSMMUG00000002009 | nitrilase 1 [Source:VGNC Symbol;Acc:VGNC:75351]                                   | 1.161029536 | 8.16E-07    | 5.63E-06    |
| ENSMMUG00000060871 | prefoldin subunit 2 [Source:NCBI gene;Acc:719886]                                 | 1.218733616 | 3.92E-05    | 0.000194052 |
| ENSMMUG00000002007 | kelch domain containing 9 [Source:NCBI gene;Acc:719863]                           | 1.073108198 | 0.001602535 | 0.005459591 |
| ENSMMUG00000064337 | nectin cell adhesion molecule 4 [Source:NCBI gene;Acc:719843]                     | 1.192916159 | 7.83E-08    | 6.41E-07    |
| ENSMMUG00000002005 | Rho GTPase activating protein 30 [Source:NCBI gene;Acc:718236]                    | 0.881301835 | 0.00043396  | 0.001712514 |
| ENSMMUG00000002003 | upstream transcription factor 1 [Source:NCBI gene;Acc:719835]                     | 0.806800233 | 0.00596383  | 0.017291026 |
| ENSMMUG00000013391 | intelectin 1 [Source:NCBI gene;Acc:719807]                                        | -0.75980563 | 0.003057929 | 0.009649276 |
| ENSMMUG00000017333 | CD244 molecule [Source:VGNC Symbol;Acc:VGNC:70821]                                | 0.780105279 | 0.001386076 | 0.004813935 |
| ENSMMUG00000015812 | CD48 molecule [Source:VGNC Symbol;Acc:VGNC:70769]                                 | 0.600322088 | 0.000263128 | 0.001091637 |
| ENSMMUG00000011338 | SLAM family member 8 [Source:VGNC Symbol;Acc:VGNC:77545]                          | 1.085954493 | 7.60E-06    | 4.37E-05    |
| ENSMMUG00000011335 | Fc receptor like 6 [Source:VGNC Symbol;Acc:VGNC:72602]                            | 1.037976515 | 5.89E-15    | 1.26E-13    |
| ENSMMUG00000018444 | dual specificity phosphatase 23 [Source:VGNC Symbol;Acc:VGNC:71880]               | 1.294877533 | 0.002336632 | 0.00761588  |
| ENSMMUG00000060051 | olfactory receptor 6N1-like [Source:NCBI gene;Acc:719970]                         | 0.647582741 | 0.012804136 | 0.033465868 |
| ENSMMUG00000010626 | CD1c molecule [Source:VGNC Symbol;Acc:VGNC:70756]                                 | 2.950264395 | 5.84E-09    | 5.67E-08    |
| ENSMMUG00000062253 | CD1a molecule [Source:NCBI gene;Acc:698438]                                       | 2.184077276 | 3.74E-05    | 0.000186376 |
| ENSMMUG00000020156 | CD1d molecule [Source:VGNC Symbol;Acc:VGNC:70757]                                 | 3.016555191 | 4.29E-07    | 3.10E-06    |
| ENSMMUG00000020155 |                                                                                   | 3.173950334 | 0.004601116 | 0.013843488 |
| ENSMMUG00000003191 | kirre like nephrin family adhesion molecule 1 [Source:VGNC Symbol;Acc:VGNC:73837] | 1.679728282 | 1.56E-13    | 2.83E-12    |
| ENSMMUG00000050541 |                                                                                   | 1.197289054 | 0.005626408 | 0.01643483  |
| ENSMMUG00000019835 | CD5 molecule like [Source:VGNC Symbol;Acc:VGNC:70774]                             | 1.117013182 | 8.37E-08    | 6.82E-07    |
| ENSMMUG00000019833 | Fc receptor like 1 [Source:VGNC Symbol;Acc:VGNC:72528]                            | 1.53468351  | 1.13E-24    | 6.58E-23    |
| ENSMMUG00000019830 | Fc receptor like 2 [Source:VGNC Symbol;Acc:VGNC:72509]                            | 1.748135489 | 8.61E-09    | 8.13E-08    |
| ENSMMUG00000046969 | Fc receptor like 3 [Source:NCBI gene;Acc:718801]                                  | 1.280796383 | 6.24E-11    | 8.11E-10    |
| ENSMMUG00000008973 | Fc receptor like 4 [Source:VGNC Symbol;Acc:VGNC:72527]                            | 1.165309598 | 0.008295137 | 0.023067106 |
| ENSMMUG00000008974 | Fc receptor like 5 [Source:NCBI gene;Acc:718771]                                  | 1.374909874 | 2.05E-05    | 0.000108794 |
| ENSMMUG00000065257 |                                                                                   | 2.378811813 | 0.000380325 | 0.001523561 |
| ENSMMUG00000042886 | ETS variant transcription factor 3 [Source:NCBI gene;Acc:719741]                  | 1.235717742 | 4.71E-06    | 2.82E-05    |
| ENSMMUG00000012436 | Rho guanine nucleotide exchange factor 11 [Source:VGNC Symbol;Acc:VGNC:69829]     | 0.33327486  | 5.10E-06    | 3.02E-05    |
| ENSMMUG00000064007 | leucine rich repeat containing 71 [Source:NCBI gene;Acc:718714]                   | 0.282683499 | 0.013681657 | 0.035427442 |
| ENSMMUG00000040660 | heparin binding growth factor [Source:NCBI gene;Acc:716742]                       | 0.927848569 | 0.002925381 | 0.009297772 |
| ENSMMUG00000000039 | mitochondrial ribosomal protein L24 [Source:VGNC Symbol;Acc:VGNC:74739]           | 1.459317448 | 0.000468144 | 0.001832936 |
| ENSMMUG00000017093 | brevican [Source:VGNC Symbol;Acc:VGNC:70112]                                      | 1.843922317 | 0.018328041 | 0.04536886  |
| ENSMMUG00000060011 | hyaluronan and proteoglycan link protein 2 [Source:NCBI gene;Acc:718500]          | 1.670478248 | 0.016491575 | 0.04147364  |
| ENSMMUG00000017966 | chromosome 1 C1orf61 homolog [Source:NCBI gene;Acc:106992893]                     | 0.666771582 | 0.001076281 | 0.003846085 |

|                     |                                                                                                       |             |             |             |
|---------------------|-------------------------------------------------------------------------------------------------------|-------------|-------------|-------------|
| ENSMMUG00000019034  | chaperonin containing TCP1 subunit 3 [Source:VGNC Symbol;Acc:VGNC:70746]                              | 1.592727357 | 0.000675763 | 0.002537748 |
| ENSMMUG00000016096  | lamin A/C [Source:VGNC Symbol;Acc:VGNC:74427]                                                         | 1.811408374 | 1.77E-05    | 9.56E-05    |
| ENSMMUG00000004648  | KH domain containing 4, pre-mRNA splicing factor [Source:VGNC Symbol;Acc:VGNC:73931]                  | 1.166897404 | 5.95E-14    | 1.14E-12    |
| ENSMMUG000000045167 |                                                                                                       | 1.531029745 | 0.020508925 | 0.049876577 |
| ENSMMUG00000053454  | Ras like without CAAX 1 [Source:NCBI gene;Acc:717985]                                                 | 1.059572746 | 4.77E-05    | 0.000232906 |
| ENSMMUG00000062397  |                                                                                                       | 1.39176744  | 5.77E-12    | 8.56E-11    |
| ENSMMUG00000023145  | RUN and SH3 domain containing 1 [Source:VGNC Symbol;Acc:VGNC:77036]                                   | 1.349809266 | 0.0002415   | 0.001011424 |
| ENSMMUG00000061381  | hyperpolarization activated cyclic nucleotide gated potassium channel 3 [Source:NCBI gene;Acc:717719] | 1.573114469 | 0.00538604  | 0.015826227 |
| ENSMMUG00000023141  | CDC like kinase 2 [Source:VGNC Symbol;Acc:VGNC:71259]                                                 | 1.005230355 | 0.000381172 | 0.001525306 |
| ENSMMUG00000053423  |                                                                                                       | 1.600553183 | 0.003344128 | 0.010445117 |
| ENSMMUG00000003902  | thrombospondin 3 [Source:VGNC Symbol;Acc:VGNC:78345]                                                  | 1.858553022 | 7.38E-08    | 6.06E-07    |
| ENSMMUG00000010978  | S100 calcium binding protein A2 [Source:VGNC Symbol;Acc:VGNC:76956]                                   | 1.089221668 | 1.34E-07    | 1.06E-06    |
| ENSMMUG00000010979  | S100 calcium binding protein A4 [Source:VGNC Symbol;Acc:VGNC:76958]                                   | 0.745926086 | 1.98E-05    | 0.000105216 |
| ENSMMUG00000010980  | S100 calcium binding protein A5 [Source:VGNC Symbol;Acc:VGNC:76959]                                   | 0.940694459 | 0.005132667 | 0.015171907 |
| ENSMMUG00000008917  | S100 calcium binding protein A6 [Source:VGNC Symbol;Acc:VGNC:76960]                                   | 1.105733419 | 9.88E-07    | 6.70E-06    |
| ENSMMUG00000040678  | Metazoan signal recognition particle RNA [Source:RFAM;Acc:RF00017]                                    | 1.910720746 | 0.003150966 | 0.009919089 |
| ENSMMUG00000051645  |                                                                                                       | 2.814602746 | 4.79E-06    | 2.86E-05    |
| ENSMMUG00000061474  |                                                                                                       | 1.729539874 | 9.01E-05    | 0.000415128 |
| ENSMMUG00000042618  | involucrin [Source:NCBI gene;Acc:713728]                                                              | 1.359988317 | 0.000557771 | 0.002141276 |
| ENSMMUG00000017740  | sperm mitochondria associated cysteine rich protein [Source:VGNC Symbol;Acc:VGNC:77816]               | 2.049444447 | 0.000471207 | 0.001843312 |
| ENSMMUG00000055038  |                                                                                                       | 2.026257952 | 2.82E-05    | 0.00014497  |
| ENSMMUG00000054634  | late cornified envelope protein 1C-like [Source:NCBI gene;Acc:713600]                                 | 2.365730087 | 0.002760672 | 0.008827245 |
| ENSMMUG00000051719  | late cornified envelope 1C [Source:HGNC Symbol;Acc:HGNC:29464]                                        | 1.747178452 | 0.004083095 | 0.012456758 |
| ENSMMUG00000058472  | late cornified envelope protein 1C [Source:NCBI gene;Acc:107000798]                                   | 1.421321398 | 0.00028646  | 0.00117451  |
| ENSMMUG00000056940  | late cornified envelope protein 1C [Source:NCBI gene;Acc:713408]                                      | 2.161109716 | 0.000849167 | 0.003105586 |
| ENSMMUG00000055266  | late cornified envelope protein 1C-like [Source:NCBI gene;Acc:107000794]                              | 2.199659511 | 2.69E-05    | 0.000138868 |
| ENSMMUG00000051816  | keratinocyte proline rich protein [Source:NCBI gene;Acc:100424312]                                    | 1.963774445 | 3.20E-08    | 2.77E-07    |
| ENSMMUG00000001966  | chromosome 1 C1orf68 homolog [Source:VGNC Symbol;Acc:VGNC:70436]                                      | 1.737566908 | 0.014206535 | 0.036507176 |
| ENSMMUG00000049843  | late cornified envelope protein 2D [Source:NCBI gene;Acc:100424118]                                   | 2.702212282 | 0.005580171 | 0.016319056 |
| ENSMMUG00000062996  |                                                                                                       | 2.127465209 | 1.59E-06    | 1.04E-05    |
| ENSMMUG00000009040  | cornulin [Source:VGNC Symbol;Acc:VGNC:71397]                                                          | 2.376485894 | 1.93E-06    | 1.24E-05    |
| ENSMMUG00000056511  |                                                                                                       | 1.843004079 | 1.48E-06    | 9.74E-06    |
| ENSMMUG00000059472  | filaggrin family member 2 [Source:HGNC Symbol;Acc:HGNC:33276]                                         | 1.819580901 | 4.11E-11    | 5.48E-10    |
| ENSMMUG00000010067  | MINDY lysine 48 deubiquitinase 1 [Source:VGNC Symbol;Acc:VGNC:74828]                                  | 4.667042887 | 9.17E-06    | 5.19E-05    |
| ENSMMUG00000023234  | ceramide synthase 2 [Source:VGNC Symbol;Acc:VGNC:70946]                                               | 2.934569883 | 0.000914239 | 0.003313334 |
| ENSMMUG00000023235  | SET domain bifurcated histone lysine methyltransferase 1 [Source:NCBI gene;Acc:716141]                | 2.220693922 | 0.002093544 | 0.006922466 |
| ENSMMUG00000012814  | endosulfine alpha [Source:NCBI gene;Acc:715857]                                                       | 2.788247218 | 0.005935426 | 0.017222141 |
| ENSMMUG00000008218  | ADAMTS like 4 [Source:VGNC Symbol;Acc:VGNC:69480]                                                     | 0.882060608 | 0.001885817 | 0.00632587  |

|                     |                                                                                     |             |             |             |
|---------------------|-------------------------------------------------------------------------------------|-------------|-------------|-------------|
| ENSMMUG00000021388  | circadian associated repressor of transcription [Source:VGNC Symbol;Acc:VGNC:71345] | -1.65135635 | 2.53E-10    | 3.04E-09    |
| ENSMMUG00000021386  | aph-1 homolog A, gamma-secretase subunit [Source:VGNC Symbol;Acc:VGNC:69924]        | -0.74182794 | 0.001197999 | 0.004231863 |
| ENSMMUG00000021385  | carbonic anhydrase 14 [Source:VGNC Symbol;Acc:VGNC:70489]                           | -           | -           | -           |
| ENSMMUG00000007244  | OTU deubiquitinase 7B [Source:VGNC Symbol;Acc:VGNC:75634]                           | 1.015101631 | 1.01E-08    | 9.42E-08    |
| ENSMMUG000000052282 |                                                                                     | -           | -           | -           |
| ENSMMUG00000007246  | myotubularin related protein 11 [Source:VGNC Symbol;Acc:VGNC:75016]                 | 1.271928246 | 1.08E-11    | 1.54E-10    |
| ENSMMUG00000007256  | splicing factor 3b subunit 4 [Source:VGNC Symbol;Acc:VGNC:77182]                    | -           | -           | -           |
| ENSMMUG00000007257  | synaptic vesicle glycoprotein 2A [Source:VGNC Symbol;Acc:VGNC:78181]                | 1.305891958 | 1.90E-09    | 2.00E-08    |
| ENSMMUG00000007258  | boIA family member 1 [Source:VGNC Symbol;Acc:VGNC:70373]                            | -           | -           | -           |
| ENSMMUG00000061036  | histone cluster 2, H2ab [Source:NCBI gene;Acc:705170]                               | 1.143548146 | 2.34E-06    | 1.48E-05    |
| ENSMMUG00000037540  | histone cluster 2, H2ac [Source:NCBI gene;Acc:705054]                               | 1.442458768 | 2.16E-11    | 2.96E-10    |
| ENSMMUG00000063990  | Metazoan signal recognition particle RNA [Source:RFAM;Acc:RF00017]                  | -           | -           | -           |
| ENSMMUG00000052382  | histone H4 [Source:NCBI gene;Acc:107000818]                                         | 1.285294192 | 1.65E-14    | 3.36E-13    |
| ENSMMUG00000054615  |                                                                                     | -           | -           | -           |
| ENSMMUG00000051523  | Metazoan signal recognition particle RNA [Source:RFAM;Acc:RF00017]                  | 1.595019077 | 0.000519022 | 0.002009161 |
| ENSMMUG00000054078  | histone H3 [Source:NCBI gene;Acc:114669830]                                         | -           | -           | -           |
| ENSMMUG00000040506  | H2B clustered histone 18 [Source:HGNC Symbol;Acc:HGNC:24700]                        | 2.010238252 | 8.87E-05    | 0.00040974  |
| ENSMMUG00000004362  | Fc fragment of IgG receptor Ia [Source:NCBI gene;Acc:714664]                        | -           | -           | -           |
| ENSMMUG00000062140  |                                                                                     | 1.571788646 | 0.000696493 | 0.002605041 |
| ENSMMUG00000024186  | U1 spliceosomal RNA [Source:RFAM;Acc:RF00003]                                       | -           | -           | -           |
| ENSMMUG00000036857  | U1 spliceosomal RNA [Source:RFAM;Acc:RF00003]                                       | 1.349772547 | 0.019758956 | 0.048344629 |
| ENSMMUG00000061239  |                                                                                     | -           | -           | -           |
| ENSMMUG00000054590  |                                                                                     | 1.470136169 | 1.67E-10    | 2.05E-09    |
| ENSMMUG00000056076  | U1 spliceosomal RNA [Source:RFAM;Acc:RF00003]                                       | -           | -           | -           |
| ENSMMUG00000055754  | U1 spliceosomal RNA [Source:RFAM;Acc:RF00003]                                       | 1.256116461 | 2.77E-05    | 0.000142693 |
| ENSMMUG00000056325  | NBPF member 20 [Source:NCBI gene;Acc:708768]                                        | -           | -           | -           |
| ENSMMUG00000018375  | notch receptor 2 [Source:NCBI gene;Acc:713798]                                      | 1.675729476 | 2.28E-06    | 1.45E-05    |
| ENSMMUG00000017482  | ADAM metalloproteinase domain 30 [Source:NCBI gene;Acc:713727]                      | -           | -           | -           |
| ENSMMUG00000008970  | calsequestrin 2 [Source:VGNC Symbol;Acc:VGNC:70549]                                 | 1.267140719 | 0.000117369 | 0.000525539 |
| ENSMMUG00000008967  | VANGL planar cell polarity protein 1 [Source:VGNC Symbol;Acc:VGNC:78976]            | -           | -           | -           |
| ENSMMUG00000001973  | suppressor of IKBKE 1 [Source:VGNC Symbol;Acc:VGNC:77314]                           | 0.809169873 | 0.019507809 | 0.047810413 |
|                     |                                                                                     | -           | -           | -           |
|                     |                                                                                     | 1.220523119 | 3.11E-08    | 2.70E-07    |
|                     |                                                                                     | -           | -           | -           |
|                     |                                                                                     | 1.422895558 | 3.47E-08    | 2.97E-07    |
|                     |                                                                                     | -           | -           | -           |
|                     |                                                                                     | -2.18575206 | 5.75E-07    | 4.07E-06    |
|                     |                                                                                     | -           | -           | -           |
|                     |                                                                                     | 1.603282761 | 0.001682456 | 0.00570957  |
|                     |                                                                                     | -           | -           | -           |
|                     |                                                                                     | 0.627967456 | 0.011132818 | 0.029683511 |
|                     |                                                                                     | -           | -           | -           |
|                     |                                                                                     | 0.632387108 | 0.011363579 | 0.030233562 |
|                     |                                                                                     | -           | -           | -           |
|                     |                                                                                     | -0.93394788 | 0.015435355 | 0.039149361 |
|                     |                                                                                     | -           | -           | -           |
|                     |                                                                                     | 1.522581034 | 0.005007279 | 0.014866455 |
|                     |                                                                                     | -           | -           | -           |
|                     |                                                                                     | 1.181983416 | 0.009504037 | 0.025899462 |
|                     |                                                                                     | -           | -           | -           |
|                     |                                                                                     | 0.441950056 | 0.000103035 | 0.000469579 |
|                     |                                                                                     | -           | -           | -           |
|                     |                                                                                     | -0.41946477 | 0.001438853 | 0.004972776 |
|                     |                                                                                     | -           | -           | -           |
|                     |                                                                                     | 0.687212212 | 2.69E-06    | 1.68E-05    |
|                     |                                                                                     | -           | -           | -           |
|                     |                                                                                     | 0.797100734 | 2.50E-09    | 2.57E-08    |
|                     |                                                                                     | -           | -           | -           |
|                     |                                                                                     | 2.872408647 | 0.001795572 | 0.006056023 |



|                     |                                                                                                              |             |             |             |
|---------------------|--------------------------------------------------------------------------------------------------------------|-------------|-------------|-------------|
| ENSMMUG00000049105  | NRAS proto-oncogene, GTPase [Source:NCBI gene;Acc:709089]                                                    | 1.521689058 | 0.000672378 | 0.002526314 |
| ENSMMUG00000001978  | adenosine monophosphate deaminase 1 [Source:VGNC Symbol;Acc:VGNC:69806]                                      | 0.899822659 | 3.24E-08    | 2.80E-07    |
| ENSMMUG00000014620  | tripartite motif containing 33 [Source:VGNC Symbol;Acc:VGNC:79028]                                           | 1.128093924 | 0.003696814 | 0.011390765 |
| ENSMMUG00000019528  | adaptor related protein complex 4 subunit beta 1 [Source:VGNC Symbol;Acc:VGNC:69972]                         | 2.7396611   | 1.19E-48    | 8.43E-46    |
| ENSMMUG00000019527  | DNA cross-link repair 1B [Source:VGNC Symbol;Acc:VGNC:71647]                                                 | 1.78614995  | 2.39E-07    | 1.80E-06    |
| ENSMMUG00000006787  | BCL2 like 15 [Source:VGNC Symbol;Acc:VGNC:70162]                                                             | 2.540951282 | 0.001311107 | 0.004586865 |
| ENSMMUG00000006786  | protein tyrosine phosphatase non-receptor type 22 [Source:VGNC Symbol;Acc:VGNC:76603]                        | 1.565084738 | 1.44E-10    | 1.78E-09    |
| ENSMMUG00000017823  | round spermatid basic protein 1 [Source:VGNC Symbol;Acc:VGNC:77105]                                          | 0.906772462 | 0.004408637 | 0.013318412 |
| ENSMMUG00000017819  | putative homeodomain transcription factor 1 [Source:VGNC Symbol;Acc:VGNC:75982]                              | 1.074449104 | 7.09E-06    | 4.10E-05    |
| ENSMMUG00000017817  | membrane associated guanylate kinase, WW and PDZ domain containing 3 [Source:VGNC Symbol;Acc:VGNC:74400]     | 0.665879151 | 8.21E-07    | 5.66E-06    |
| ENSMMUG00000059489  | Mov10 RISC complex RNA helicase [Source:NCBI gene;Acc:705910]                                                | -4.11929694 | 0.001834378 | 0.006172866 |
| ENSMMUG00000007766  | suppression of tumorigenicity 7 like [Source:VGNC Symbol;Acc:VGNC:77954]                                     | 1.991537556 | 2.47E-18    | 7.34E-17    |
| ENSMMUG00000007765  | Wnt family member 2B [Source:VGNC Symbol;Acc:VGNC:78797]                                                     | -1.85915237 | 4.19E-28    | 3.43E-26    |
| ENSMMUG000000037458 | endoplasmic reticulum resident protein 29 [Source:NCBI gene;Acc:720396]                                      | 2.555147235 | 3.70E-05    | 0.000184687 |
| ENSMMUG00000050825  | potassium voltage-gated channel subfamily D member 3 [Source:NCBI gene;Acc:641437]                           | 0.485579731 | 0.000764338 | 0.002826717 |
| ENSMMUG00000014489  | DEAD-box helicase 20 [Source:NCBI gene;Acc:704731]                                                           | 0.808108777 | 7.79E-10    | 8.70E-09    |
| ENSMMUG00000052184  | inka box actin regulator 2 [Source:NCBI gene;Acc:704844]                                                     | 1.292385238 | 0.000687986 | 0.002579077 |
| ENSMMUG00000003581  | transmembrane and immunoglobulin domain containing 3 [Source:NCBI gene;Acc:104564310]                        | 0.55737006  | 0.005669305 | 0.016534079 |
| ENSMMUG00000065322  | ATP synthase peripheral stalk-membrane subunit b [Source:NCBI gene;Acc:704072]                               | 0.840415021 | 8.56E-07    | 5.88E-06    |
| ENSMMUG00000054017  | potassium voltage-gated channel subfamily A member 2 [Source:NCBI gene;Acc:702126]                           | 0.881844941 | 8.84E-05    | 0.000408288 |
| ENSMMUG00000016056  | potassium voltage-gated channel subfamily A member 10 [Source:VGNC Symbol;Acc:VGNC:73963]                    | 0.835893729 | 8.58E-06    | 4.88E-05    |
| ENSMMUG00000062177  |                                                                                                              | 0.681237996 | 3.21E-08    | 2.78E-07    |
| ENSMMUG00000004614  | potassium voltage-gated channel subfamily C member 4 [Source:VGNC Symbol;Acc:VGNC:73974]                     | 0.963139795 | 0.015960713 | 0.040323232 |
| ENSMMUG00000022715  | adenosylhomocysteinase like 1 [Source:VGNC Symbol;Acc:VGNC:81350]                                            | 0.954706779 | 2.86E-07    | 2.13E-06    |
| ENSMMUG00000005820  | adenosine monophosphate deaminase 2 [Source:VGNC Symbol;Acc:VGNC:69807]                                      | 0.935532198 | 0.010678489 | 0.028590359 |
| ENSMMUG00000051186  | proteasome 20S subunit alpha 5 [Source:NCBI gene;Acc:698435]                                                 | 0.934577585 | 1.41E-12    | 2.28E-11    |
| ENSMMUG00000008713  | myosin binding protein H like [Source:NCBI gene;Acc:698183]                                                  | 0.860702296 | 1.59E-08    | 1.44E-07    |
| ENSMMUG00000021837  | seryl-tRNA synthetase 1 [Source:NCBI gene;Acc:695046]                                                        | 0.839014353 | 8.57E-08    | 6.96E-07    |
| ENSMMUG00000017266  | UPF0577 protein KIAA1324 [Source:NCBI gene;Acc:697670]                                                       | 1.73470575  | 3.04E-08    | 2.65E-07    |
| ENSMMUG00000009431  | HEN methyltransferase 1 [Source:VGNC Symbol;Acc:VGNC:73241]                                                  | 2.288823673 | 0.00786733  | 0.022005377 |
| ENSMMUG00000042232  | NBPF member 6 [Source:NCBI gene;Acc:698524]                                                                  | 0.439706248 | 0.000270075 | 0.001116688 |
| ENSMMUG00000002789  | solute carrier family 25 (mitochondrial carrier; phosphate carrier), member 24 [Source:NCBI gene;Acc:694803] | 2.838584265 | 3.87E-23    | 1.94E-21    |
| ENSMMUG00000019714  | vav guanine nucleotide exchange factor 3 [Source:VGNC Symbol;Acc:VGNC:78759]                                 | 2.123553192 | 0.000123554 | 0.000551567 |
| ENSMMUG00000008197  | netrin G1 [Source:VGNC Symbol;Acc:VGNC:75450]                                                                | 2.085414931 | 1.52E-05    | 8.27E-05    |
| ENSMMUG00000060795  |                                                                                                              | 1.984797578 | 3.06E-12    | 4.75E-11    |
| ENSMMUG00000004103  | collagen type XI alpha 1 chain [Source:VGNC Symbol;Acc:VGNC:71289]                                           | 2.392138129 | 1.87E-69    | 6.93E-66    |
| ENSMMUG00000060790  |                                                                                                              | 3.724945356 | 0.000170165 | 0.000734443 |
| ENSMMUG00000022906  | vascular cell adhesion molecule 1 [Source:VGNC Symbol;Acc:VGNC:78761]                                        | -0.727025   | 2.49E-07    | 1.87E-06    |

|                    |                                                                                              |   |             |             |             |
|--------------------|----------------------------------------------------------------------------------------------|---|-------------|-------------|-------------|
| ENSMMUG00000062643 |                                                                                              | - | 2.139953798 | 0.002902809 | 0.00923791  |
| ENSMMUG00000055443 | G protein-coupled receptor 88 [Source:NCBI gene;Acc:716520]                                  |   | 0.398932625 | 0.007849951 | 0.021965051 |
| ENSMMUG00000019106 | cell division cycle 14A [Source:VGNC Symbol;Acc:VGNC:70791]                                  |   | 0.417369344 | 0.007900114 | 0.022080418 |
| ENSMMUG00000019105 | RNA 3'-terminal phosphate cyclase [Source:VGNC Symbol;Acc:VGNC:77043]                        |   | 2.039187607 | 0.000111816 | 0.000504327 |
| ENSMMUG00000007706 | dihydrolipoamide branched chain transacylase E2 [Source:VGNC Symbol;Acc:VGNC:71744]          |   | 2.730176814 | 0.001215227 | 0.004289887 |
| ENSMMUG00000000931 | solute carrier family 35 member A3 [Source:VGNC Symbol;Acc:VGNC:77461]                       |   | 1.804901273 | 2.77E-08    | 2.43E-07    |
| ENSMMUG00000021441 | amylo-alpha-1, 6-glucosidase, 4-alpha-glucanotransferase [Source:VGNC Symbol;Acc:VGNC:69744] |   | 0.579032616 | 0.00011273  | 0.000507527 |
| ENSMMUG00000016335 | palmdelphin [Source:VGNC Symbol;Acc:VGNC:75613]                                              |   | 1.157214069 | 0.008374179 | 0.023256381 |
| ENSMMUG00000038667 |                                                                                              |   | 1.572782155 | 9.35E-05    | 0.000429589 |
| ENSMMUG00000008518 | phospholipid phosphatase related 5 [Source:NCBI gene;Acc:710549]                             |   | 1.634269329 | 5.58E-19    | 1.73E-17    |
| ENSMMUG00000008515 | sorting nexin 7 [Source:NCBI gene;Acc:716015]                                                |   | 1.045910292 | 3.22E-12    | 4.98E-11    |
| ENSMMUG00000049701 |                                                                                              |   | 0.416016121 | 0.00487907  | 0.014558675 |
| ENSMMUG00000049494 |                                                                                              |   | 1.651632933 | 1.73E-06    | 1.12E-05    |
| ENSMMUG00000020726 | dihydropyrimidine dehydrogenase [Source:VGNC Symbol;Acc:VGNC:71982]                          |   | 2.347221136 | 3.32E-30    | 3.31E-28    |
| ENSMMUG00000049297 |                                                                                              |   | 1.462069084 | 4.74E-18    | 1.37E-16    |
| ENSMMUG00000050661 |                                                                                              |   | 1.166321282 | 2.06E-10    | 2.50E-09    |
| ENSMMUG00000001690 | calponin 3 [Source:VGNC Symbol;Acc:VGNC:71278]                                               |   | 1.050381637 | 1.08E-09    | 1.18E-08    |
| ENSMMUG00000056548 | coagulation factor III, tissue factor [Source:NCBI gene;Acc:714456]                          |   | 0.984555433 | 1.05E-12    | 1.72E-11    |
| ENSMMUG00000014013 | ATP binding cassette subfamily D member 3 [Source:VGNC Symbol;Acc:VGNC:69579]                |   | 0.580955529 | 3.17E-07    | 2.33E-06    |
| ENSMMUG00000013858 | ATP binding cassette subfamily A member 4 [Source:VGNC Symbol;Acc:VGNC:69563]                |   | 0.411330075 | 1.38E-07    | 1.09E-06    |
| ENSMMUG00000032677 | microRNA 760 [Source:HGNC Symbol;Acc:HGNC:33666]                                             |   | 0.693202351 | 0.001415739 | 0.004904324 |
| ENSMMUG00000045959 |                                                                                              |   | 1.349903741 | 2.94E-07    | 2.18E-06    |
| ENSMMUG00000015924 | BCAR3 adaptor protein, NSP family member [Source:VGNC Symbol;Acc:VGNC:70235]                 |   | 1.328772261 | 8.31E-13    | 1.39E-11    |
| ENSMMUG00000015922 | formin binding protein 1 like [Source:VGNC Symbol;Acc:VGNC:72543]                            |   | 1.431068905 | 1.76E-14    | 3.57E-13    |
| ENSMMUG00000016812 | coiled-coil domain containing 18 [Source:VGNC Symbol;Acc:VGNC:70913]                         |   | 1.012861231 | 7.22E-05    | 0.000339174 |
| ENSMMUG00000005070 | ecotropic viral integration site 5 [Source:NCBI gene;Acc:706592]                             |   | 2.304982691 | 2.66E-22    | 1.22E-20    |
| ENSMMUG00000014018 | bromodomain testis associated [Source:VGNC Symbol;Acc:VGNC:70282]                            |   | 1.693844558 | 2.56E-05    | 0.000132791 |
| ENSMMUG00000001742 | transforming growth factor beta receptor 3 [Source:VGNC Symbol;Acc:VGNC:78339]               |   | 2.590656924 | 2.22E-26    | 1.53E-24    |
| ENSMMUG00000051155 | U2 spliceosomal RNA [Source:RFAM;Acc:RF00004]                                                |   | 3.304647581 | 0.000191174 | 0.000818923 |
| ENSMMUG00000006819 | helicase for meiosis 1 [Source:NCBI gene;Acc:704516]                                         |   | 0.922257592 | 6.49E-05    | 0.000308074 |
| ENSMMUG00000049678 |                                                                                              |   | 2.489790285 | 1.04E-13    | 1.93E-12    |
| ENSMMUG00000060600 |                                                                                              |   | 1.691050167 | 1.83E-05    | 9.79E-05    |
| ENSMMUG00000053737 | BarH like homeobox 2 [Source:NCBI gene;Acc:696831]                                           |   | 0.561297015 | 0.011450229 | 0.030431344 |
| ENSMMUG00000000663 | guanylate-binding protein 6-like [Source:NCBI gene;Acc:695158]                               |   | 1.711467329 | 2.95E-09    | 3.02E-08    |
| ENSMMUG00000000662 | guanylate-binding protein 1 [Source:NCBI gene;Acc:694538]                                    |   | 1.023073297 | 5.01E-09    | 4.92E-08    |
| ENSMMUG00000050170 |                                                                                              |   | 1.008290257 | 0.00955491  | 0.026004647 |
| ENSMMUG00000018795 | kynurenine aminotransferase 3 [Source:VGNC Symbol;Acc:VGNC:74177]                            |   | 1.006415292 | 0.010389659 | 0.027953309 |
| ENSMMUG00000037887 | RBMX like 1 [Source:NCBI gene;Acc:100424767]                                                 |   | 0.979945054 | 3.30E-09    | 3.35E-08    |

|                    |                                                                                    |             |             |             |
|--------------------|------------------------------------------------------------------------------------|-------------|-------------|-------------|
| ENSMMUG0000002794  | general transcription factor IIB [Source:VGNC Symbol;Acc:VGNC:73306]               | 2.775236215 | 9.00E-33    | 1.18E-30    |
| ENSMMUG00000020588 | protein kinase N2 [Source:VGNC Symbol;Acc:VGNC:76015]                              | 0.980825952 | 1.52E-17    | 4.19E-16    |
| ENSMMUG00000065295 |                                                                                    | 2.791188488 | 1.94E-31    | 2.06E-29    |
| ENSMMUG00000010306 | calcium-activated chloride channel regulator 4 [Source:NCBI gene;Acc:712123]       | 1.234083756 | 0.000475332 | 0.001858471 |
| ENSMMUG0000006836  | chloride channel accessory 1 [Source:NCBI gene;Acc:574295]                         | 2.080479344 | 3.89E-12    | 5.90E-11    |
| ENSMMUG0000001380  | outer dense fiber of sperm tails 2 like [Source:VGNC Symbol;Acc:VGNC:75482]        | 1.723838961 | 0.000827983 | 0.003037099 |
| ENSMMUG00000013203 | zinc finger HIT-type containing 6 [Source:VGNC Symbol;Acc:VGNC:79576]              | 0.697208406 | 0.011693295 | 0.030982949 |
| ENSMMUG00000014573 | dimethylarginine dimethylaminohydrolase 1 [Source:VGNC Symbol;Acc:VGNC:71753]      | 1.049928346 | 4.82E-16    | 1.13E-14    |
| ENSMMUG00000005361 | mucolipin 3 [Source:VGNC Symbol;Acc:VGNC:74505]                                    | 0.826756794 | 0.004388893 | 0.013266873 |
| ENSMMUG00000015402 | lysophosphatidic acid receptor 3 [Source:VGNC Symbol;Acc:VGNC:74287]               | 1.014685494 | 0.001228607 | 0.004328877 |
| ENSMMUG00000010127 | chitobiase [Source:VGNC Symbol;Acc:VGNC:71540]                                     | 1.922607292 | 1.37E-08    | 1.26E-07    |
| ENSMMUG00000022183 | spermatogenesis associated 1 [Source:NCBI gene;Acc:710462]                         | 1.984742895 | 1.83E-23    | 9.66E-22    |
| ENSMMUG00000059938 |                                                                                    | -2.18240135 | 4.33E-09    | 4.30E-08    |
| ENSMMUG00000000404 | uricase [Source:NCBI gene;Acc:714004]                                              | 1.251199423 | 0.005609656 | 0.016392354 |
| ENSMMUG00000003457 | protein kinase cAMP-activated catalytic subunit beta [Source:NCBI gene;Acc:709728] | 1.453457072 | 1.74E-25    | 1.07E-23    |
| ENSMMUG00000057763 |                                                                                    | 1.661154682 | 1.06E-05    | 5.94E-05    |
| ENSMMUG00000050832 |                                                                                    | 3.523089113 | 2.74E-05    | 0.000141169 |
| ENSMMUG00000023345 | adhesion G protein-coupled receptor L4 [Source:VGNC Symbol;Acc:VGNC:69652]         | 1.638661313 | 9.27E-07    | 6.32E-06    |
| ENSMMUG00000049326 | GIPC PDZ domain containing family member 2 [Source:NCBI gene;Acc:707432]           | 0.636836948 | 0.001057265 | 0.003782689 |
| ENSMMUG00000050425 | DnaJ heat shock protein family (Hsp40) member B4 [Source:NCBI gene;Acc:707206]     | 0.503647595 | 0.001254254 | 0.004406676 |
| ENSMMUG00000013853 | ankyrin repeat domain 13C [Source:VGNC Symbol;Acc:VGNC:69695]                      | 0.326418824 | 0.001715572 | 0.005809988 |
| ENSMMUG00000021917 | leucine rich repeat containing 7 [Source:NCBI gene;Acc:702347]                     | 2.317209291 | 0.000613551 | 0.002328887 |
| ENSMMUG00000041837 | Metazoan signal recognition particle RNA [Source:RFAM;Acc:RF00017]                 | -2.31610749 | 7.37E-06    | 4.25E-05    |
| ENSMMUG00000056103 | growth arrest and DNA damage inducible alpha [Source:NCBI gene;Acc:701054]         | 1.637137749 | 5.36E-18    | 1.54E-16    |
| ENSMMUG00000003265 | leptin receptor [Source:VGNC Symbol;Acc:VGNC:81429]                                | 0.913731485 | 6.34E-12    | 9.33E-11    |
| ENSMMUG00000053254 | adenylate kinase 4 [Source:NCBI gene;Acc:698560]                                   | 1.291548867 | 1.86E-16    | 4.53E-15    |
| ENSMMUG00000053072 |                                                                                    | 1.192444373 | 6.40E-08    | 5.32E-07    |
| ENSMMUG00000018566 | Janus kinase 1 [Source:VGNC Symbol;Acc:VGNC:73810]                                 | 0.892831128 | 0.006522462 | 0.018680594 |
| ENSMMUG00000018565 | ribonucleoprotein, PTB binding 2 [Source:VGNC Symbol;Acc:VGNC:76536]               | 3.814580019 | 4.59E-09    | 4.53E-08    |
| ENSMMUG00000065340 |                                                                                    | 2.826496671 | 0.000653067 | 0.002463043 |
| ENSMMUG00000012538 | ubiquitin conjugating enzyme E2 U [Source:VGNC Symbol;Acc:VGNC:79726]              | 0.930953478 | 9.47E-06    | 5.34E-05    |
| ENSMMUG00000020049 | phosphoglucomutase 1 [Source:NCBI gene;Acc:699401]                                 | 0.860683436 | 6.94E-08    | 5.72E-07    |
| ENSMMUG00000020047 | integrin subunit beta 3 binding protein [Source:VGNC Symbol;Acc:VGNC:73787]        | 1.021656522 | 5.97E-09    | 5.80E-08    |
| ENSMMUG00000010351 | KN motif and ankyrin repeat domains 4 [Source:VGNC Symbol;Acc:VGNC:73916]          | 0.595600278 | 0.000506757 | 0.001969394 |
| ENSMMUG00000049952 |                                                                                    | 0.998010257 | 8.53E-13    | 1.42E-11    |
| ENSMMUG00000055834 |                                                                                    | 1.631741389 | 0.000305478 | 0.001246969 |
| ENSMMUG00000022762 | OMA1 zinc metalloproteinase [Source:VGNC Symbol;Acc:VGNC:75485]                    | 1.189888471 | 9.20E-06    | 5.20E-05    |

|                     |                                                                                                                  |             |             |             |
|---------------------|------------------------------------------------------------------------------------------------------------------|-------------|-------------|-------------|
| ENSMMUG00000010406  | protein kinase AMP-activated catalytic subunit alpha 2 [Source:VGNC Symbol;Acc:VGNC:76400]                       | 4.179744406 | 3.89E-05    | 0.000192813 |
| ENSMMUG00000002200  | phospholipid phosphatase 3 [Source:NCBI gene;Acc:715993]                                                         | 2.034053739 | 1.84E-30    | 1.85E-28    |
| ENSMMUG000000059612 |                                                                                                                  | 0.485138913 | 0.000346974 | 0.001400551 |
| ENSMMUG00000005740  | ubiquitin specific peptidase 24 [Source:VGNC Symbol;Acc:VGNC:78743]                                              | 0.538476435 | 0.00335753  | 0.010480355 |
| ENSMMUG00000006754  | tetratricopeptide repeat domain 4 [Source:VGNC Symbol;Acc:VGNC:78668]                                            | 0.942952411 | 6.33E-07    | 4.46E-06    |
| ENSMMUG00000019056  | Fas associated factor 1 [Source:VGNC Symbol;Acc:VGNC:72474]                                                      | -0.52153773 | 0.004972035 | 0.014785499 |
| ENSMMUG00000008828  | BEN domain containing 5 [Source:NCBI gene;Acc:711150]                                                            | 2.070788882 | 1.31E-13    | 2.40E-12    |
| ENSMMUG00000015371  | microtubule associated serine/threonine kinase 2 [Source:VGNC Symbol;Acc:VGNC:74532]                             | 1.368453693 | 3.02E-07    | 2.23E-06    |
| ENSMMUG00000028192  | Y RNA [Source:RFAM;Acc:RF00019]                                                                                  | 2.707435278 | 0.008134759 | 0.022672144 |
| ENSMMUG00000005986  | Kruppel like factor 17 [Source:NCBI gene;Acc:702810]                                                             | 2.168141916 | 1.24E-07    | 9.86E-07    |
| ENSMMUG00000015555  | ST3 beta-galactoside alpha-2,3-sialyltransferase 3 [Source:VGNC Symbol;Acc:VGNC:77828]                           | 3.155057041 | 1.58E-21    | 6.74E-20    |
| ENSMMUG000000053498 |                                                                                                                  | 1.885331083 | 0.000437314 | 0.001724374 |
| ENSMMUG00000012477  | protein tyrosine phosphatase receptor type F [Source:VGNC Symbol;Acc:VGNC:76615]                                 | 0.339239592 | 0.006618238 | 0.018925659 |
| ENSMMUG00000016111  | chromosome 1 C1orf50 homolog [Source:VGNC Symbol;Acc:VGNC:70432]                                                 | 2.271218018 | 0.000411834 | 0.001636961 |
| ENSMMUG00000022381  | prolyl 3-hydroxylase 1 [Source:VGNC Symbol;Acc:VGNC:75648]                                                       | 2.360609737 | 0.000861228 | 0.003143492 |
| ENSMMUG000000057076 | claudin 19 [Source:NCBI gene;Acc:697807]                                                                         | 4.163500932 | 0.000250088 | 0.001044145 |
| ENSMMUG00000013129  | peptidylprolyl isomerase H [Source:NCBI gene;Acc:697669]                                                         | 1.533976089 | 0.001223857 | 0.00431419  |
| ENSMMUG00000013128  | coiled-coil domain containing 30 [Source:VGNC Symbol;Acc:VGNC:70866]                                             | 0.669083166 | 9.17E-05    | 0.00042199  |
| ENSMMUG00000014138  | forkhead box J3 [Source:VGNC Symbol;Acc:VGNC:72596]                                                              | 2.418663843 | 5.68E-13    | 9.69E-12    |
| ENSMMUG000000064973 |                                                                                                                  | 0.685732342 | 3.28E-08    | 2.82E-07    |
| ENSMMUG000000052046 |                                                                                                                  | 1.022291041 | 1.96E-12    | 3.11E-11    |
| ENSMMUG000000052537 |                                                                                                                  | 1.955998287 | 0.000206661 | 0.000878918 |
| ENSMMUG00000044175  | forkhead box O6 [Source:NCBI gene;Acc:697505]                                                                    | 1.608951118 | 1.00E-15    | 2.28E-14    |
| ENSMMUG00000043675  | Cbp/p300 interacting transactivator with Glu/Asp rich carboxy-terminal domain 4 [Source:NCBI gene;Acc:114672840] | 2.557371309 | 2.01E-34    | 3.20E-32    |
| ENSMMUG00000019536  | potassium voltage-gated channel subfamily Q member 4 [Source:VGNC Symbol;Acc:VGNC:74007]                         | 1.303384184 | 1.88E-15    | 4.16E-14    |
| ENSMMUG00000018664  | collagen type IX alpha 2 chain [Source:VGNC Symbol;Acc:VGNC:71307]                                               | 2.56433402  | 2.96E-29    | 2.74E-27    |
| ENSMMUG00000005992  | zinc metalloproteinase STE24 [Source:VGNC Symbol;Acc:VGNC:78830]                                                 | 2.45624796  | 6.14E-17    | 1.57E-15    |
| ENSMMUG000000052510 | transmembrane and coiled-coil domains 2 [Source:NCBI gene;Acc:693977]                                            | 2.364205195 | 0.013565202 | 0.035163772 |
| ENSMMUG000000032180 | RLF zinc finger [Source:VGNC Symbol;Acc:VGNC:76699]                                                              | 1.840811741 | 1.36E-12    | 2.20E-11    |
| ENSMMUG00000009189  | palmitoyl-protein thioesterase 1 [Source:VGNC Symbol;Acc:VGNC:76386]                                             | 0.379683424 | 0.001082146 | 0.003865179 |
| ENSMMUG000000063318 |                                                                                                                  | 1.388351021 | 0.007751608 | 0.021730877 |
| ENSMMUG00000009562  | microtubule actin crosslinking factor 1 [Source:NCBI gene;Acc:718651]                                            | 1.211614116 | 0.006496575 | 0.018617237 |
| ENSMMUG00000044406  | POU class 3 homeobox 1 [Source:NCBI gene;Acc:718015]                                                             | 0.843772785 | 0.010470652 | 0.02814059  |
| ENSMMUG000000061825 | U6 spliceosomal RNA [Source:RFAM;Acc:RF00026]                                                                    | 0.894177615 | 2.50E-06    | 1.57E-05    |
| ENSMMUG00000023277  | inositol polyphosphate-5-phosphatase B [Source:VGNC Symbol;Acc:VGNC:73750]                                       | 0.515451312 | 0.002116093 | 0.006984984 |
| ENSMMUG00000022040  | mannosidase endo-alpha like [Source:NCBI gene;Acc:716710]                                                        | 0.418224129 | 0.006797033 | 0.019377162 |
| ENSMMUG00000008419  | G protein nucleolar 2 [Source:VGNC Symbol;Acc:VGNC:73037]                                                        | 1.817756313 | 1.53E-05    | 8.35E-05    |
| ENSMMUG00000008418  | dynein axonemal light intermediate chain 1 [Source:VGNC Symbol;Acc:VGNC:71836]                                   | 1.555425279 | 0.010819462 | 0.028926019 |

|                    |                                                                              |   |             |             |             |
|--------------------|------------------------------------------------------------------------------|---|-------------|-------------|-------------|
| ENSMMUG00000059855 | Smad nuclear interacting protein 1 [Source:NCBI gene;Acc:713733]             | - | 1.906943063 | 1.03E-09    | 1.13E-08    |
| ENSMMUG00000010328 | MYST/Esa1 associated factor 6 [Source:VGNC Symbol;Acc:VGNC:74580]            | - | 1.654408045 | 3.53E-05    | 0.000177391 |
| ENSMMUG00000010323 | zinc finger CCCH-type containing 12A [Source:VGNC Symbol;Acc:VGNC:79595]     | - | 1.244828079 | 4.22E-05    | 0.000208046 |
| ENSMMUG00000050060 |                                                                              | - | 0.496923945 | 0.000708612 | 0.002643704 |
| ENSMMUG00000020432 | organic solute carrier partner 1 [Source:VGNC Symbol;Acc:VGNC:75696]         | - | 0.896105372 | 0.003634737 | 0.011229823 |
| ENSMMUG00000017338 | LSM10, U7 small nuclear RNA associated [Source:VGNC Symbol;Acc:VGNC:74307]   | - | 0.994832896 | 0.006573181 | 0.018814953 |
| ENSMMUG00000006252 | argonaute RISC catalytic component 3 [Source:NCBI gene;Acc:712543]           | - | 1.150708103 | 7.48E-10    | 8.38E-09    |
| ENSMMUG00000006251 | argonaute RISC component 1 [Source:VGNC Symbol;Acc:VGNC:81346]               | - | 0.799030548 | 6.95E-05    | 0.000327474 |
| ENSMMUG00000019815 | transcription factor AP-2 epsilon [Source:VGNC Symbol;Acc:VGNC:79878]        | - | 2.070777563 | 3.29E-08    | 2.83E-07    |
| ENSMMUG00000002741 | CUB and Sushi multiple domains 2 [Source:VGNC Symbol;Acc:VGNC:71441]         | - | 3.518296111 | 0.000399384 | 0.001590457 |
| ENSMMUG00000003269 | polyhomeotic homolog 2 [Source:VGNC Symbol;Acc:VGNC:75903]                   | - | 2.684398922 | 0.000139128 | 0.000613596 |
| ENSMMUG00000003268 | alpha 1,3-galactosyltransferase 2 [Source:VGNC Symbol;Acc:VGNC:69550]        | - | 1.149395183 | 0.012376028 | 0.032530396 |
| ENSMMUG00000003267 | zinc finger protein 362 [Source:NCBI gene;Acc:710013]                        | - | 1.213640693 | 3.31E-11    | 4.44E-10    |
| ENSMMUG00000015097 | tripartite motif containing 62 [Source:VGNC Symbol;Acc:VGNC:79513]           | - | 1.030544731 | 2.99E-07    | 2.22E-06    |
| ENSMMUG00000006285 | antizyme inhibitor 2 [Source:VGNC Symbol;Acc:VGNC:70153]                     | - | 1.10064186  | 6.55E-15    | 1.39E-13    |
| ENSMMUG00000006284 | adenylate kinase 2 [Source:VGNC Symbol;Acc:VGNC:69761]                       | - | 1.36659225  | 8.76E-14    | 1.64E-12    |
| ENSMMUG00000044265 | Metazoan signal recognition particle RNA [Source:RFAM;Acc:RF00017]           | - | 1.02241794  | 2.51E-06    | 1.58E-05    |
| ENSMMUG00000054846 | Metazoan signal recognition particle RNA [Source:RFAM;Acc:RF00017]           | - | 1.435302253 | 2.47E-05    | 0.00012879  |
| ENSMMUG00000001264 | BSD domain containing 1 [Source:VGNC Symbol;Acc:VGNC:70384]                  | - | 3.528275103 | 9.45E-06    | 5.33E-05    |
| ENSMMUG00000009948 | histone deacetylase 1 [Source:NCBI gene;Acc:708441]                          | - | 2.050877688 | 9.79E-20    | 3.32E-18    |
| ENSMMUG00000040694 | LCK proto-oncogene, Src family tyrosine kinase [Source:NCBI gene;Acc:717704] | - | 1.776941213 | 4.20E-23    | 2.10E-21    |
| ENSMMUG00000015650 | transmembrane protein 39B [Source:VGNC Symbol;Acc:VGNC:79507]                | - | 0.447280141 | 0.016154149 | 0.040763319 |
| ENSMMUG00000060894 | Metazoan signal recognition particle RNA [Source:RFAM;Acc:RF00017]           | - | 1.116435621 | 3.22E-06    | 1.98E-05    |
| ENSMMUG00000005466 | SPOC domain containing 1 [Source:VGNC Symbol;Acc:VGNC:77997]                 | - | 1.190941361 | 1.65E-08    | 1.50E-07    |
| ENSMMUG00000023401 | adhesion G protein-coupled receptor B2 [Source:VGNC Symbol;Acc:VGNC:69598]   | - | 1.301127603 | 1.49E-11    | 2.08E-10    |
| ENSMMUG00000023398 | collagen type XVI alpha 1 chain [Source:VGNC Symbol;Acc:VGNC:71293]          | - | 1.227220258 | 6.11E-13    | 1.04E-11    |
| ENSMMUG00000023397 | penta-EF-hand domain containing 1 [Source:NCBI gene;Acc:706038]              | - | 0.997577027 | 2.74E-09    | 2.80E-08    |
| ENSMMUG00000023396 | hypocretin receptor 1 [Source:VGNC Symbol;Acc:VGNC:73356]                    | - | 0.986891092 | 9.55E-06    | 5.38E-05    |
| ENSMMUG00000060319 | Metazoan signal recognition particle RNA [Source:RFAM;Acc:RF00017]           | - | 1.111659647 | 4.75E-05    | 0.000232131 |
| ENSMMUG00000013188 | serine incorporator 2 [Source:VGNC Symbol;Acc:VGNC:77294]                    | - | 0.982194348 | 7.88E-10    | 8.79E-09    |
| ENSMMUG00000049574 | antizyme inhibitor 2-like [Source:NCBI gene;Acc:705256]                      | - | 0.696604148 | 3.98E-07    | 2.89E-06    |
| ENSMMUG00000057282 | Y RNA [Source:RFAM;Acc:RF00019]                                              | - | 1.031458489 | 0.000431949 | 0.001707759 |
| ENSMMUG00000064353 | fatty acid binding protein 3 [Source:NCBI gene;Acc:717237]                   | - | 0.511122912 | 0.000725466 | 0.00269708  |

|                    |                                                                                  |             |             |             |
|--------------------|----------------------------------------------------------------------------------|-------------|-------------|-------------|
| ENSMMUG00000019406 | small nuclear ribonucleoprotein U5 subunit 40 [Source:NCBI gene;Acc:705059]      | 0.527576278 | 0.009931236 | 0.026875954 |
| ENSMMUG00000013520 | pumilio RNA binding family member 1 [Source:VGNC Symbol;Acc:VGNC:76479]          | 0.862615918 | 1.45E-11    | 2.04E-10    |
| ENSMMUG00000063979 |                                                                                  | 0.621390733 | 3.11E-09    | 3.17E-08    |
| ENSMMUG00000025533 |                                                                                  | 2.389664405 | 0.0046481   | 0.013948063 |
| ENSMMUG00000008744 | lysosomal protein transmembrane 5 [Source:VGNC Symbol;Acc:VGNC:74162]            | 1.388153658 | 0.019075617 | 0.046882898 |
| ENSMMUG00000057452 |                                                                                  | 1.181284581 | 2.30E-07    | 1.74E-06    |
| ENSMMUG00000059136 |                                                                                  | 1.088831086 | 0.015334106 | 0.038959191 |
| ENSMMUG00000051008 |                                                                                  | 3.467745536 | 0.000196323 | 0.000838801 |
| ENSMMUG00000057173 |                                                                                  | -3.48494634 | 7.16E-05    | 0.000336224 |
| ENSMMUG00000015661 | protein tyrosine phosphatase receptor type U [Source:VGNC Symbol;Acc:VGNC:76624] | 2.901119592 | 2.88E-11    | 3.89E-10    |
| ENSMMUG00000015659 | mitochondrial trans-2-enoyl-CoA reductase [Source:VGNC Symbol;Acc:VGNC:74536]    | 3.690640726 | 0.000706136 | 0.00263579  |
| ENSMMUG00000007110 | serine and arginine rich splicing factor 4 [Source:NCBI gene;Acc:717401]         | 2.564158309 | 0.000135479 | 0.000599566 |
| ENSMMUG00000016893 | solute carrier family 9 member A1 [Source:VGNC Symbol;Acc:VGNC:82241]            | 1.555150869 | 3.28E-08    | 2.83E-07    |
| ENSMMUG00000064416 | Metazoan signal recognition particle RNA [Source:RFAM;Acc:RF00017]               | 0.826573466 | 0.003862624 | 0.011852413 |
| ENSMMUG00000015115 | terminal nucleotidyltransferase 5B [Source:VGNC Symbol;Acc:VGNC:79692]           | 1.142206648 | 1.00E-11    | 1.43E-10    |
| ENSMMUG00000021031 | TMF1 regulated nuclear protein 1 [Source:VGNC Symbol;Acc:VGNC:79946]             | 0.945627822 | 6.39E-10    | 7.23E-09    |
| ENSMMUG00000050286 |                                                                                  | 0.65564302  | 0.001946926 | 0.006502908 |
| ENSMMUG00000058432 | zinc finger DHHC-type palmitoyltransferase 18 [Source:NCBI gene;Acc:719959]      | 2.323504982 | 9.12E-25    | 5.37E-23    |
| ENSMMUG00000012697 | AT-rich interaction domain 1A [Source:VGNC Symbol;Acc:VGNC:69822]                | 1.727953008 | 8.28E-11    | 1.06E-09    |
| ENSMMUG00000056266 | Metazoan signal recognition particle RNA [Source:RFAM;Acc:RF00017]               | 1.894546043 | 1.07E-07    | 8.63E-07    |
| ENSMMUG00000000649 | UBX domain protein 11 [Source:VGNC Symbol;Acc:VGNC:79859]                        | 1.671399447 | 1.68E-06    | 1.10E-05    |
| ENSMMUG00000000644 | centrosomal protein 85 [Source:VGNC Symbol;Acc:VGNC:71096]                       | 1.893202459 | 4.09E-09    | 4.08E-08    |
| ENSMMUG00000011156 | Rh blood group, CcEe antigens [Source:NCBI gene;Acc:613023]                      | 0.595007728 | 0.010561835 | 0.028349686 |
| ENSMMUG00000057953 |                                                                                  | 1.293417012 | 0.000666528 | 0.00250624  |
| ENSMMUG00000002420 | RUNX family transcription factor 3 [Source:VGNC Symbol;Acc:VGNC:76948]           | 1.022140148 | 0.004201256 | 0.012772576 |
| ENSMMUG00000057675 | non-compact myelin associated protein [Source:NCBI gene;Acc:712192]              | 1.199722934 | 0.000220068 | 0.000930068 |
| ENSMMUG00000058954 |                                                                                  | 2.660824884 | 0.002942376 | 0.009341776 |
| ENSMMUG00000053036 |                                                                                  | 1.433463015 | 3.74E-10    | 4.35E-09    |
| ENSMMUG00000049609 |                                                                                  | 1.557606179 | 0.000116189 | 0.000521198 |
| ENSMMUG00000022927 | RCAN family member 3 [Source:VGNC Symbol;Acc:VGNC:76875]                         | 2.021380054 | 1.04E-17    | 2.91E-16    |
| ENSMMUG00000050770 |                                                                                  | -0.80160018 | 0.000356656 | 0.001436179 |
| ENSMMUG00000059931 |                                                                                  | 0.641085525 | 0.000245222 | 0.001025853 |
| ENSMMUG00000004217 | cannabinoid receptor 2 [Source:VGNC Symbol;Acc:VGNC:71281]                       | 0.727514151 | 0.012669273 | 0.033165987 |
| ENSMMUG00000004216 | alpha-L-fucosidase 1 [Source:VGNC Symbol;Acc:VGNC:72826]                         | 0.701254235 | 0.020322464 | 0.049528701 |
| ENSMMUG00000019549 | UDP-galactose-4-epimerase [Source:VGNC Symbol;Acc:VGNC:72868]                    | 3.170061424 | 0.008959786 | 0.02462976  |
| ENSMMUG00000010970 | heterogeneous nuclear ribonucleoprotein R [Source:VGNC Symbol;Acc:VGNC:73499]    | 2.712965568 | 0.007629687 | 0.021429593 |
| ENSMMUG00000045584 | leucine zipper protein 1 [Source:NCBI gene;Acc:718626]                           | 1.803997807 | 1.06E-14    | 2.20E-13    |

|                     |                                                                                        |             |             |             |
|---------------------|----------------------------------------------------------------------------------------|-------------|-------------|-------------|
| ENSMMUG0000009773   | lysine demethylase 1A [Source:VGNC Symbol;Acc:VGNC:73928]                              | -1.90892778 | 2.06E-09    | 2.16E-08    |
| ENSMMUG00000058332  | testis expressed 46 [Source:NCBI gene;Acc:709002]                                      | 2.143724394 | 7.56E-07    | 5.25E-06    |
| ENSMMUG00000041482  | lactamase beta like 1 [Source:NCBI gene;Acc:718590]                                    | 1.271376962 | 0.000280624 | 0.00115443  |
| ENSMMUG00000023382  | EPH receptor B2 [Source:NCBI gene;Acc:718570]                                          | 0.344882826 | 0.003451843 | 0.010727332 |
| ENSMMUG00000002217  | alkaline phosphatase, biomineralization associated [Source:VGNC Symbol;Acc:VGNC:69801] | 1.590023358 | 1.85E-25    | 1.14E-23    |
| ENSMMUG00000004149  | eukaryotic translation initiation factor 4 gamma 3 [Source:NCBI gene;Acc:717555]       | 1.690562764 | 5.95E-27    | 4.51E-25    |
| ENSMMUG00000006891  | aflatoxin B1 aldehyde reductase member 3 [Source:NCBI gene;Acc:715623]                 | -0.63504482 | 0.017553343 | 0.043713866 |
| ENSMMUG00000064473  | MRT4 homolog, ribosome maturation factor [Source:NCBI gene;Acc:702926]                 | 0.928913184 | 0.000154762 | 0.000674616 |
| ENSMMUG00000006688  | ER membrane protein complex subunit 1 [Source:VGNC Symbol;Acc:VGNC:72134]              | 1.447522691 | 2.13E-13    | 3.79E-12    |
| ENSMMUG00000050018  |                                                                                        | 0.552789078 | 0.020558154 | 0.049970012 |
| ENSMMUG00000004754  | intermediate filament family orphan 2 [Source:NCBI gene;Acc:106995162]                 | 1.174501338 | 2.10E-08    | 1.88E-07    |
| ENSMMUG00000023517  | immunoglobulin superfamily member 21 [Source:VGNC Symbol;Acc:VGNC:73668]               | 0.614473114 | 0.010916463 | 0.029164321 |
| ENSMMUG00000032238  | peptidyl arginine deiminase 4 [Source:NCBI gene;Acc:700806]                            | 1.248827639 | 0.006398438 | 0.018385747 |
| ENSMMUG00000051619  | peptidyl arginine deiminase 3 [Source:NCBI gene;Acc:700560]                            | 0.950212051 | 2.10E-11    | 2.89E-10    |
| ENSMMUG00000050983  | peptidyl arginine deiminase 1 [Source:NCBI gene;Acc:700444]                            | 0.666754648 | 1.21E-05    | 6.71E-05    |
| ENSMMUG00000001616  | peptidyl arginine deiminase 2 [Source:VGNC Symbol;Acc:VGNC:75644]                      | 1.15845387  | 2.85E-05    | 0.000146299 |
| ENSMMUG00000018245  | EPH receptor A2 [Source:VGNC Symbol;Acc:VGNC:72235]                                    | 1.326639823 | 7.37E-10    | 8.28E-09    |
| ENSMMUG00000058587  | family with sequence similarity 131 member C [Source:NCBI gene;Acc:703604]             | 1.376682322 | 1.95E-15    | 4.31E-14    |
| ENSMMUG00000018235  | chloride voltage-gated channel Kb [Source:NCBI gene;Acc:703476]                        | 0.925517    | 0.000795389 | 0.002931318 |
| ENSMMUG00000001910  | heat shock protein family B (small) member 7 [Source:NCBI gene;Acc:696704]             | 1.347166613 | 8.64E-05    | 0.000399943 |
| ENSMMUG00000001911  | steroid receptor associated and regulated protein [Source:VGNC Symbol;Acc:VGNC:78008]  | 0.701561161 | 0.001237622 | 0.004356241 |
| ENSMMUG00000008031  | zinc finger and BTB domain containing 17 [Source:VGNC Symbol;Acc:VGNC:78849]           | 1.253222586 | 7.82E-09    | 7.45E-08    |
| ENSMMUG00000002802  | agmatinase [Source:NCBI gene;Acc:713190]                                               | 1.568184554 | 8.93E-05    | 0.000412081 |
| ENSMMUG00000032244  | DnaJ heat shock protein family (Hsp40) member C16 [Source:NCBI gene;Acc:700894]        | 1.850350992 | 1.86E-05    | 9.96E-05    |
| ENSMMUG00000018163  | caspase 9 [Source:NCBI gene;Acc:694544]                                                | 4.580020937 | 1.65E-06    | 1.08E-05    |
| ENSMMUG000000031821 | chymotrypsin-like elastase family member 2B [Source:NCBI gene;Acc:106992406]           | 2.347803025 | 3.83E-05    | 0.000190243 |
| ENSMMUG00000053550  |                                                                                        | -4.6462774  | 2.16E-07    | 1.64E-06    |
| ENSMMUG00000060541  |                                                                                        | 3.621349909 | 1.92E-06    | 1.23E-05    |
| ENSMMUG00000058742  |                                                                                        | 3.178570834 | 0.019996718 | 0.048846513 |
| ENSMMUG00000050246  | EF-hand domain family member D2 [Source:NCBI gene;Acc:694155]                          | 2.192523883 | 0.000412178 | 0.001637559 |
| ENSMMUG00000053235  |                                                                                        | 2.706440324 | 1.95E-06    | 1.26E-05    |
| ENSMMUG00000003987  | forkhead associated phosphopeptide binding domain 1 [Source:NCBI gene;Acc:699900]      | 2.382379897 | 4.16E-08    | 3.52E-07    |
| ENSMMUG00000055233  | PRAME family member 17-like [Source:NCBI gene;Acc:100427847]                           | 1.094568471 | 3.74E-08    | 3.19E-07    |
| ENSMMUG00000054309  | PRAME family member 5 [Source:NCBI gene;Acc:722781]                                    | 1.439944784 | 0.000738429 | 0.002739782 |
| ENSMMUG00000011137  | arylacetamide deacetylase like 4 [Source:VGNC Symbol;Acc:VGNC:81338]                   | 1.625195709 | 0.000144026 | 0.000632297 |
| ENSMMUG00000021449  | vacuolar protein sorting 13 homolog D [Source:NCBI gene;Acc:722775]                    | 1.370332283 | 1.58E-35    | 2.76E-33    |
| ENSMMUG00000037284  | small nucleolar RNA, H/ACA box 59A [Source:HGNC Symbol;Acc:HGNC:32653]                 | 1.602013104 | 0.001004372 | 0.003615253 |

|                    |                                                                                           |             |             |             |
|--------------------|-------------------------------------------------------------------------------------------|-------------|-------------|-------------|
| ENSMMUG00000064242 |                                                                                           | 1.324200824 | 1.30E-10    | 1.62E-09    |
| ENSMMUG00000063313 | Small nucleolar RNA U3 [Source:RFAM;Acc:RF00012]                                          | 0.803889031 | 0.008842142 | 0.024354766 |
| ENSMMUG00000021447 | TNF receptor superfamily member 1B [Source:VGNC Symbol;Acc:VGNC:78590]                    | 5.053901054 | 5.72E-07    | 4.05E-06    |
| ENSMMUG00000023449 | mitofusin 2 [Source:VGNC Symbol;Acc:VGNC:74522]                                           | 2.066286006 | 1.58E-09    | 1.69E-08    |
| ENSMMUG00000032249 | procollagen-lysine,2-oxoglutarate 5-dioxygenase 1 [Source:NCBI gene;Acc:722763]           | 1.812108121 | 1.11E-31    | 1.21E-29    |
| ENSMMUG00000012469 | KIAA2013 [Source:VGNC Symbol;Acc:VGNC:73918]                                              | 1.222650456 | 1.56E-19    | 5.10E-18    |
| ENSMMUG00000062316 | Metazoan signal recognition particle RNA [Source:RFAM;Acc:RF00017]                        | 1.322937466 | 9.64E-14    | 1.80E-12    |
| ENSMMUG00000037413 | U5 spliceosomal RNA [Source:RFAM;Acc:RF00020]                                             | 0.831833973 | 5.88E-06    | 3.45E-05    |
| ENSMMUG00000051669 |                                                                                           | 0.792578154 | 1.58E-07    | 1.24E-06    |
| ENSMMUG00000023668 | F-box protein 6 [Source:VGNC Symbol;Acc:VGNC:72490]                                       | -2.12426171 | 0.015410235 | 0.039099023 |
|                    |                                                                                           | -           |             |             |
| ENSMMUG00000002261 | F-box protein 2 [Source:VGNC Symbol;Acc:VGNC:72486]                                       | 1.909238565 | 0.004971387 | 0.014785499 |
|                    |                                                                                           | -           |             |             |
| ENSMMUG00000049196 | dispatched RND transporter family member 3 [Source:NCBI gene;Acc:722727]                  | 1.280404001 | 2.58E-22    | 1.19E-20    |
|                    |                                                                                           | -           |             |             |
| ENSMMUG00000032252 | UbiA prenyltransferase domain containing 1 [Source:VGNC Symbol;Acc:VGNC:79881]            | 1.554197902 | 3.42E-22    | 1.55E-20    |
|                    |                                                                                           | -           |             |             |
| ENSMMUG00000019325 | mechanistic target of rapamycin kinase [Source:VGNC Symbol;Acc:VGNC:75062]                | 1.920685541 | 5.18E-19    | 1.61E-17    |
|                    |                                                                                           | -           |             |             |
| ENSMMUG00000053062 | U6 spliceosomal RNA [Source:RFAM;Acc:RF00026]                                             | 1.542885633 | 0.007328901 | 0.020655189 |
|                    |                                                                                           | -           |             |             |
| ENSMMUG00000006187 | angiopoietin like 7 [Source:VGNC Symbol;Acc:VGNC:69683]                                   | 1.781938175 | 7.89E-11    | 1.01E-09    |
| ENSMMUG00000058771 | PHD finger protein 13 [Source:NCBI gene;Acc:704846]                                       | -1.49383345 | 8.02E-05    | 0.000373115 |
|                    |                                                                                           | -           |             |             |
| ENSMMUG00000032281 | zinc finger and BTB domain containing 48 [Source:VGNC Symbol;Acc:VGNC:79959]              | 1.181629677 | 6.33E-07    | 4.46E-06    |
|                    |                                                                                           | -           |             |             |
| ENSMMUG00000023676 | espin [Source:NCBI gene;Acc:722532]                                                       | 1.258004306 | 2.54E-10    | 3.04E-09    |
| ENSMMUG00000055126 |                                                                                           | 1.605392864 | 2.22E-06    | 1.41E-05    |
|                    |                                                                                           | -           |             |             |
| ENSMMUG00000054719 |                                                                                           | 2.086591197 | 1.63E-16    | 4.01E-15    |
| ENSMMUG00000032284 | leucine rich repeat containing 47 [Source:VGNC Symbol;Acc:VGNC:74388]                     | 2.838042888 | 0.009523796 | 0.025943771 |
|                    |                                                                                           | -           |             |             |
| ENSMMUG00000003786 | WD repeat containing, antisense to TP73 [Source:VGNC Symbol;Acc:VGNC:78791]               | 1.070920269 | 0.000554301 | 0.002131263 |
|                    |                                                                                           | -           |             |             |
| ENSMMUG00000009358 | multiple epidermal growth factor-like domains protein 6 [Source:NCBI gene;Acc:697150]     | 0.658596902 | 0.01900811  | 0.046755726 |
|                    |                                                                                           | -           |             |             |
| ENSMMUG00000050239 |                                                                                           | 1.169792963 | 0.000241395 | 0.00101127  |
|                    |                                                                                           | -           |             |             |
| ENSMMUG00000010280 | SKI proto-oncogene [Source:VGNC Symbol;Acc:VGNC:77374]                                    | 3.306496888 | 0.000769611 | 0.002844799 |
|                    |                                                                                           | -           |             |             |
| ENSMMUG00000018911 | protein kinase C zeta [Source:VGNC Symbol;Acc:VGNC:82212]                                 | 2.466233322 | 1.10E-05    | 6.16E-05    |
|                    |                                                                                           | -           |             |             |
| ENSMMUG00000019086 | gamma-aminobutyric acid type A receptor delta subunit [Source:VGNC Symbol;Acc:VGNC:72854] | 1.842654006 | 9.39E-05    | 0.000431169 |
|                    |                                                                                           | -           |             |             |
| ENSMMUG00000014075 | cilia and flagella associated protein 74 [Source:NCBI gene;Acc:709689]                    | 1.723230499 | 0.000108831 | 0.000492364 |
|                    |                                                                                           | -           |             |             |
| ENSMMUG00000001896 | G protein subunit beta 1 [Source:VGNC Symbol;Acc:VGNC:73095]                              | 1.389507827 | 0.003962743 | 0.012132014 |
| ENSMMUG00000010879 | NAD kinase [Source:VGNC Symbol;Acc:VGNC:75047]                                            | -1.55731768 | 1.61E-05    | 8.74E-05    |
|                    |                                                                                           | -           |             |             |
| ENSMMUG00000005578 | solute carrier family 35 member E2 [Source:VGNC Symbol;Acc:VGNC:77590]                    | 1.290189585 | 6.40E-06    | 3.73E-05    |
|                    |                                                                                           | -           |             |             |
| ENSMMUG00000001894 | cyclin dependent kinase 11B [Source:NCBI gene;Acc:703046]                                 | 1.680255406 | 6.87E-07    | 4.80E-06    |
|                    |                                                                                           | -           |             |             |
| ENSMMUG00000012961 | mindbomb E3 ubiquitin protein ligase 2 [Source:VGNC Symbol;Acc:VGNC:74627]                | 1.304735795 | 5.35E-10    | 6.12E-09    |



|                     |                                                                                              |   |             |             |             |
|---------------------|----------------------------------------------------------------------------------------------|---|-------------|-------------|-------------|
| ENSMMUG00000048805  |                                                                                              | - | 1.596652519 | 4.65E-11    | 6.14E-10    |
| ENSMMUG00000040063  | fibronectin type III domain containing 10 [Source:NCBI gene;Acc:106996973]                   | - | 1.389296607 | 0.000884616 | 0.00321462  |
| ENSMMUG00000060167  |                                                                                              | - | 1.847766957 | 1.37E-10    | 1.69E-09    |
| ENSMMUG00000001551  | SSU72 homolog, RNA polymerase II CTD phosphatase [Source:VGNC Symbol;Acc:VGNC:77986]         | - | 1.758737891 | 2.99E-14    | 5.85E-13    |
| ENSMMUG000000051354 |                                                                                              | - | -1.27269903 | 0.009533092 | 0.025954792 |
| ENSMMUG00000001549  | ATPase family AAA domain-containing protein 3A-like [Source:NCBI gene;Acc:114674453]         | - | 1.503782036 | 7.08E-26    | 4.54E-24    |
| ENSMMUG000000058426 |                                                                                              | - | 1.232705388 | 0.007648241 | 0.021465446 |
| ENSMMUG000000064596 | ATPase family AAA domain-containing protein 3A-like [Source:NCBI gene;Acc:114674454]         | - | -1.41204744 | 1.84E-05    | 9.87E-05    |
| ENSMMUG000000050086 |                                                                                              | - | 1.394325004 | 0.010324072 | 0.027822277 |
| ENSMMUG00000006904  | cyclin L2 [Source:NCBI gene;Acc:114669744]                                                   | - | 1.306027051 | 0.000277758 | 0.001144843 |
| ENSMMUG000000059208 | aurora kinase A interacting protein 1 [Source:NCBI gene;Acc:706329]                          | - | 1.877759651 | 3.30E-07    | 2.42E-06    |
| ENSMMUG000000007109 | dishevelled segment polarity protein 1 [Source:NCBI gene;Acc:705864]                         | - | 1.078875462 | 0.002129788 | 0.007020396 |
| ENSMMUG000000013862 | ArfGAP with coiled-coil, ankyrin repeat and PH domains 3 [Source:VGNC Symbol;Acc:VGNC:69434] | - | 0.645936184 | 0.008170544 | 0.022737692 |
| ENSMMUG000000032292 | sodium channel epithelial 1 delta subunit [Source:VGNC Symbol;Acc:VGNC:76993]                | - | 1.381704777 | 0.000455958 | 0.001789796 |
| ENSMMUG000000010030 | ubiquitin conjugating enzyme E2 J2 [Source:VGNC Symbol;Acc:VGNC:79189]                       | - | 0.547655182 | 0.013472304 | 0.034959626 |
| ENSMMUG000000019518 | stromal cell derived factor 4 [Source:VGNC Symbol;Acc:VGNC:77092]                            | - | -0.60636051 | 0.015448672 | 0.039176437 |
| ENSMMUG000000056613 |                                                                                              | - | 0.664264278 | 2.37E-05    | 0.000123678 |
| ENSMMUG000000018699 | chromosome 1 C1orf159 homolog [Source:VGNC Symbol;Acc:VGNC:70393]                            | - | -0.75365268 | 0.000691302 | 0.002588891 |
| ENSMMUG000000065097 |                                                                                              | - | 1.743309821 | 0.00028636  | 0.001174424 |
| ENSMMUG000000005947 | sterile alpha motif domain containing 11 [Source:NCBI gene;Acc:100430343]                    | - | 0.753120958 | 0.010015934 | 0.027083968 |
| ENSMMUG000000022562 | interleukin 1 receptor accessory protein [Source:VGNC Symbol;Acc:VGNC:73718]                 | - | 2.156841659 | 0.000284018 | 0.001166434 |
| ENSMMUG000000006596 | CCR4-NOT transcription complex subunit 10 [Source:VGNC Symbol;Acc:VGNC:71327]                | - | 2.305186304 | 5.45E-13    | 9.32E-12    |
| ENSMMUG000000012675 | CKLF like MARVEL transmembrane domain containing 8 [Source:VGNC Symbol;Acc:VGNC:71219]       | - | 3.583076121 | 0.003783018 | 0.011625371 |
| ENSMMUG000000049551 |                                                                                              | - | 1.416097279 | 7.67E-06    | 4.40E-05    |
| ENSMMUG000000031449 | zinc finger CW-type and PWWP domain containing 2 [Source:NCBI gene;Acc:702617]               | - | 1.421923932 | 0.005946569 | 0.017244352 |
| ENSMMUG000000055585 |                                                                                              | - | 2.510754179 | 2.73E-10    | 3.25E-09    |
| ENSMMUG000000000056 | 5-azacytidine induced 2 [Source:VGNC Symbol;Acc:VGNC:70115]                                  | - | 1.380472397 | 0.000170134 | 0.000734443 |
| ENSMMUG000000051896 |                                                                                              | - | 2.393340253 | 0.011060423 | 0.029495788 |
| ENSMMUG000000060958 | leucine rich repeat containing 3B [Source:NCBI gene;Acc:701323]                              | - | 2.138348998 | 0.001032366 | 0.003703431 |
| ENSMMUG000000051809 |                                                                                              | - | 2.431730159 | 0.005198978 | 0.015334298 |
| ENSMMUG000000051975 |                                                                                              | - | 1.828272386 | 1.00E-08    | 9.40E-08    |
| ENSMMUG000000005370 | potassium voltage-gated channel subfamily H member 8 [Source:VGNC Symbol;Acc:VGNC:73855]     | - | 3.032644109 | 0.014563109 | 0.037320011 |

|                    |                                                                                                |   |             |             |             |
|--------------------|------------------------------------------------------------------------------------------------|---|-------------|-------------|-------------|
| ENSMMUG00000054204 |                                                                                                | - | 0.694618894 | 2.50E-05    | 0.000129981 |
| ENSMMUG00000019009 | SATB homeobox 1 [Source:VGNC Symbol;Acc:VGNC:84086]                                            | - | 0.522999674 | 0.006110876 | 0.017672445 |
| ENSMMUG00000020377 | collagen type VI alpha 5 chain [Source:NCBI gene;Acc:719331]                                   | - | 1.463236853 | 4.30E-11    | 5.71E-10    |
| ENSMMUG00000050595 |                                                                                                | - | 2.275274292 | 0.005127288 | 0.015161189 |
| ENSMMUG00000020294 | phosphoinositide-3-kinase regulatory subunit 4 [Source:VGNC Symbol;Acc:VGNC:84060]             | - | 0.948196138 | 0.000479548 | 0.001873471 |
| ENSMMUG00000005137 | ATPase secretory pathway Ca <sup>2+</sup> transporting 1 [Source:VGNC Symbol;Acc:VGNC:70054]   | - | 3.089074801 | 2.03E-16    | 4.95E-15    |
| ENSMMUG00000001154 | U8 snoRNA-decapping enzyme-like [Source:NCBI gene;Acc:717946]                                  | - | 0.839884028 | 3.41E-06    | 2.08E-05    |
| ENSMMUG00000024125 | small nucleolar RNA, H/ACA box 58 [Source:HGNC Symbol;Acc:HGNC:32652]                          | - | 2.508120456 | 0.01862023  | 0.04593878  |
| ENSMMUG00000003277 | copine 4 [Source:VGNC Symbol;Acc:VGNC:71466]                                                   | - | -1.2226976  | 1.36E-07    | 1.08E-06    |
| ENSMMUG00000056585 |                                                                                                | - | -1.24100831 | 0.005714064 | 0.016658064 |
| ENSMMUG00000016004 | acid phosphatase 3 [Source:VGNC Symbol;Acc:VGNC:69385]                                         | - | 1.992500262 | 6.29E-07    | 4.43E-06    |
| ENSMMUG00000054158 | acyl-CoA dehydrogenase family member 11 [Source:NCBI gene;Acc:106997118]                       | - | 2.339085043 | 2.21E-21    | 9.16E-20    |
| ENSMMUG00000019854 | transmembrane protein 108 [Source:VGNC Symbol;Acc:VGNC:79714]                                  | - | 2.529969109 | 4.92E-15    | 1.06E-13    |
| ENSMMUG00000019857 | beaded filament structural protein 2 [Source:VGNC Symbol;Acc:VGNC:70245]                       | - | -2.02906079 | 2.54E-12    | 3.98E-11    |
| ENSMMUG00000057769 |                                                                                                | - | 2.356172897 | 0.00054319  | 0.002094516 |
| ENSMMUG00000000058 | CDV3 homolog [Source:VGNC Symbol;Acc:VGNC:71114]                                               | - | 2.347746267 | 1.19E-11    | 1.69E-10    |
| ENSMMUG00000000059 | DNA topoisomerase II binding protein 1 [Source:VGNC Symbol;Acc:VGNC:79061]                     | - | 2.138019565 | 8.00E-32    | 9.05E-30    |
| ENSMMUG00000053660 | Metazoan signal recognition particle RNA [Source:RFAM;Acc:RF00017]                             | - | 1.689626167 | 1.73E-06    | 1.13E-05    |
| ENSMMUG00000035834 | U6 spliceosomal RNA [Source:RFAM;Acc:RF00026]                                                  | - | 1.963319408 | 0.007232975 | 0.020423653 |
| ENSMMUG00000008916 | transferrin [Source:VGNC Symbol;Acc:VGNC:82716]                                                | - | 1.989687017 | 6.89E-23    | 3.37E-21    |
| ENSMMUG00000008918 | SRP receptor subunit beta [Source:VGNC Symbol;Acc:VGNC:77980]                                  | - | 1.395392871 | 7.35E-09    | 7.05E-08    |
| ENSMMUG00000008919 | RAB6B, member RAS oncogene family [Source:VGNC Symbol;Acc:VGNC:81547]                          | - | -1.43324236 | 9.79E-08    | 7.90E-07    |
| ENSMMUG00000012605 | solute carrier organic anion transporter family member 2A1 [Source:VGNC Symbol;Acc:VGNC:77600] | - | 0.594776216 | 8.04E-06    | 4.60E-05    |
| ENSMMUG00000055637 |                                                                                                | - | 1.688378886 | 0.006919697 | 0.019685231 |
| ENSMMUG00000003263 | stromal antigen 1 [Source:VGNC Symbol;Acc:VGNC:77901]                                          | - | 0.718601684 | 1.72E-06    | 1.12E-05    |
| ENSMMUG00000041198 | muscle RAS oncogene homolog [Source:NCBI gene;Acc:716352]                                      | - | 0.928991752 | 0.000589467 | 0.002247248 |
| ENSMMUG00000007757 | extended synaptotagmin 3 [Source:VGNC Symbol;Acc:VGNC:84182]                                   | - | 0.514005456 | 0.013038016 | 0.033963424 |
| ENSMMUG00000007760 | centrosomal protein 70 [Source:VGNC Symbol;Acc:VGNC:71140]                                     | - | 1.134666912 | 9.66E-15    | 2.02E-13    |
| ENSMMUG00000053063 | forkhead box L2 [Source:NCBI gene;Acc:717906]                                                  | - | 0.81626955  | 7.53E-07    | 5.23E-06    |
| ENSMMUG00000003051 | COPI coat complex subunit beta 2 [Source:VGNC Symbol;Acc:VGNC:71313]                           | - | 1.043089725 | 2.02E-10    | 2.45E-09    |
| ENSMMUG00000003169 | calsyntenin 2 [Source:VGNC Symbol;Acc:VGNC:71197]                                              | - | 3.000661202 | 0.001385274 | 0.004813404 |
| ENSMMUG00000062527 |                                                                                                | - | -1.13009361 | 3.17E-07    | 2.33E-06    |
| ENSMMUG00000022153 | solute carrier family 25 member 36 [Source:VGNC Symbol;Acc:VGNC:84079]                         | - | 1.377390948 | 5.93E-08    | 4.94E-07    |

|                    |                                                                                                      |             |             |             |
|--------------------|------------------------------------------------------------------------------------------------------|-------------|-------------|-------------|
| ENSMMUG00000053344 | splA/ryanodine receptor domain and SOCS box containing 4 [Source:NCBI gene;Acc:715278]               | 1.942420142 | 3.65E-05    | 0.000182693 |
| ENSMMUG00000057297 |                                                                                                      | -1.30208872 | 0.000876335 | 0.003189401 |
| ENSMMUG00000056024 |                                                                                                      | 1.323358111 | 4.64E-17    | 1.21E-15    |
| ENSMMUG00000007387 | G protein-coupled receptor kinase 7 [Source:VGNC Symbol;Acc:VGNC:73182]                              | 1.231707622 | 1.89E-10    | 2.30E-09    |
| ENSMMUG00000052474 |                                                                                                      | 1.172464789 | 8.42E-07    | 5.79E-06    |
| ENSMMUG00000050932 |                                                                                                      | 0.782727346 | 0.001719998 | 0.005822333 |
| ENSMMUG00000060612 | ATPase Na+/K+ transporting subunit beta 3 [Source:NCBI gene;Acc:716682]                              | 0.801463665 | 0.01170127  | 0.030998542 |
| ENSMMUG00000053154 | U6 spliceosomal RNA [Source:RFAM;Acc:RF00026]                                                        | 2.037993987 | 0.008164172 | 0.022724226 |
| ENSMMUG00000011134 | transcription factor Dp-2 [Source:VGNC Symbol;Acc:VGNC:78324]                                        | 0.717510937 | 7.66E-07    | 5.30E-06    |
| ENSMMUG00000012151 | glycerol kinase 5 [Source:VGNC Symbol;Acc:VGNC:73022]                                                | -2.43455373 | 1.44E-07    | 1.14E-06    |
| ENSMMUG00000055990 | plastin 1 [Source:NCBI gene;Acc:714391]                                                              | 0.866622276 | 0.009672735 | 0.026286724 |
| ENSMMUG00000012405 | transient receptor potential cation channel subfamily C member 1 [Source:VGNC Symbol;Acc:VGNC:78651] | 3.326357513 | 2.86E-12    | 4.46E-11    |
| ENSMMUG00000009694 | solute carrier family 9 member A9 [Source:VGNC Symbol;Acc:VGNC:77747]                                | 2.849184163 | 2.43E-05    | 0.000126887 |
| ENSMMUG00000062595 |                                                                                                      | 0.847967213 | 0.000364995 | 0.001466904 |
| ENSMMUG00000021755 | phospholipid scramblase 2 [Source:NCBI gene;Acc:713298]                                              | -1.42430213 | 0.019721306 | 0.048277808 |
| ENSMMUG00000049859 |                                                                                                      | 1.803244317 | 8.64E-12    | 1.25E-10    |
| ENSMMUG00000062175 | carboxypeptidase B1 [Source:NCBI gene;Acc:712639]                                                    | 1.090131992 | 2.84E-08    | 2.49E-07    |
| ENSMMUG00000005519 | carboxypeptidase A3 [Source:VGNC Symbol;Acc:VGNC:71456]                                              | 0.825196928 | 2.05E-05    | 0.000108813 |
| ENSMMUG00000059895 |                                                                                                      | 0.882996638 | 0.000200263 | 0.000854157 |
| ENSMMUG00000005521 | glycogenin 1 [Source:VGNC Symbol;Acc:VGNC:73332]                                                     | 0.920151755 | 2.30E-08    | 2.05E-07    |
| ENSMMUG00000005526 | helicase like transcription factor [Source:VGNC Symbol;Acc:VGNC:73383]                               | 0.601453366 | 0.001409219 | 0.00488516  |
| ENSMMUG00000005529 | ceruloplasmin [Source:VGNC Symbol;Acc:VGNC:71454]                                                    | 0.468126275 | 0.00013945  | 0.000614576 |
| ENSMMUG00000059534 |                                                                                                      | 0.698084369 | 0.002234306 | 0.007310329 |
| ENSMMUG00000047621 | transmembrane 4 L six family member 18 [Source:VGNC Symbol;Acc:VGNC:82713]                           | 0.883287145 | 7.78E-14    | 1.47E-12    |
| ENSMMUG00000031534 | ankyrin repeat and ubiquitin domain containing 1 [Source:VGNC Symbol;Acc:VGNC:84239]                 | 2.357629398 | 5.11E-36    | 9.46E-34    |
| ENSMMUG00000035943 | U6 spliceosomal RNA [Source:RFAM;Acc:RF00026]                                                        | 2.741393946 | 1.52E-14    | 3.11E-13    |
| ENSMMUG00000023335 | ring finger protein 13 [Source:VGNC Symbol;Acc:VGNC:81557]                                           | 1.827112769 | 1.19E-13    | 2.20E-12    |
| ENSMMUG00000059788 |                                                                                                      | 0.710445704 | 4.41E-05    | 0.000216386 |
| ENSMMUG00000048232 | MINDY family member 4B [Source:VGNC Symbol;Acc:VGNC:84153]                                           | 1.317379048 | 3.61E-11    | 4.83E-10    |
| ENSMMUG00000017239 | mediator complex subunit 12L [Source:VGNC Symbol;Acc:VGNC:74515]                                     | 0.458074333 | 0.000622995 | 0.00236292  |
| ENSMMUG00000038998 | purinergic receptor P2Y13 [Source:VGNC Symbol;Acc:VGNC:83950]                                        | 1.368476618 | 9.21E-08    | 7.46E-07    |
| ENSMMUG00000001105 | purinergic receptor P2Y12 [Source:VGNC Symbol;Acc:VGNC:75642]                                        | 1.116999409 | 1.57E-08    | 1.42E-07    |
| ENSMMUG00000057554 | Metazoan signal recognition particle RNA [Source:RFAM;Acc:RF00017]                                   | 1.676557526 | 9.17E-05    | 0.00042199  |
| ENSMMUG00000057501 |                                                                                                      | 1.976017447 | 4.65E-09    | 4.58E-08    |
| ENSMMUG00000031537 |                                                                                                      | 1.835466061 | 0.013954965 | 0.036010462 |
| ENSMMUG00000053217 |                                                                                                      | 3.992811803 | 0.000532017 | 0.002054638 |
| ENSMMUG00000001664 | arylacetamide deacetylase [Source:VGNC Symbol;Acc:VGNC:81172]                                        | 1.801862343 | 0.004260611 | 0.012934465 |
| ENSMMUG00000061194 |                                                                                                      | 1.594721387 | 9.10E-08    | 7.37E-07    |
| ENSMMUG00000061684 |                                                                                                      | 1.620490856 | 2.10E-06    | 1.34E-05    |
| ENSMMUG00000053540 |                                                                                                      | 1.675603032 | 0.002744899 | 0.008784389 |
| ENSMMUG00000031540 | purinergic receptor P2Y1 [Source:VGNC Symbol;Acc:VGNC:75737]                                         | 4.933464966 | 2.25E-06    | 1.43E-05    |
| ENSMMUG00000011347 | DEAH-box helicase 36 [Source:VGNC Symbol;Acc:VGNC:71623]                                             | 1.266382597 | 2.75E-24    | 1.55E-22    |
| ENSMMUG00000051847 |                                                                                                      | 1.520621073 | 0.000331635 | 0.001344859 |
| ENSMMUG00000056924 | G protein-coupled receptor 149 [Source:NCBI gene;Acc:106997054]                                      | 1.206997304 | 0.000179862 | 0.000774266 |
| ENSMMUG00000060572 |                                                                                                      | 0.988694295 | 3.96E-05    | 0.000195792 |

|                    |                                                                                       |             |             |             |
|--------------------|---------------------------------------------------------------------------------------|-------------|-------------|-------------|
| ENSMMUG00000023081 | schwannomin interacting protein 1 [Source:NCBI gene;Acc:703321]                       | -0.55933379 | 0.010729828 | 0.028722627 |
| ENSMMUG00000056116 |                                                                                       | -           |             |             |
| ENSMMUG00000009564 | NMD3 ribosome export adaptor [Source:VGNC Symbol;Acc:VGNC:75242]                      | 1.503948708 | 5.62E-09    | 5.48E-08    |
| ENSMMUG00000063228 |                                                                                       | -           |             |             |
| ENSMMUG00000042979 |                                                                                       | 1.724349333 | 0.000489788 | 0.001909452 |
| ENSMMUG00000054039 |                                                                                       | -           |             |             |
| ENSMMUG00000055530 | Metazoan signal recognition particle RNA [Source:RFAM;Acc:RF00017]                    | 4.436392698 | 1.24E-05    | 6.84E-05    |
| ENSMMUG0000001302  | sucrase-isomaltase [Source:VGNC Symbol;Acc:VGNC:77213]                                | -           |             |             |
| ENSMMUG00000003742 | butyrylcholinesterase [Source:VGNC Symbol;Acc:VGNC:70238]                             | 2.771588456 | 0.000975266 | 0.003521103 |
| ENSMMUG00000023045 | zinc finger B-box domain containing [Source:VGNC Symbol;Acc:VGNC:79592]               | -           |             |             |
| ENSMMUG00000005939 | serpin family I member 1 [Source:VGNC Symbol;Acc:VGNC:77366]                          | 2.685555379 | 0.009766294 | 0.026511832 |
| ENSMMUG00000051641 |                                                                                       | -           |             |             |
| ENSMMUG00000063303 | U6 spliceosomal RNA [Source:RFAM;Acc:RF00026]                                         | 1.524107049 | 0.001794412 | 0.006053488 |
| ENSMMUG00000021875 | myoneurin [Source:VGNC Symbol;Acc:VGNC:74958]                                         | 0.760010666 | 1.53E-08    | 1.39E-07    |
| ENSMMUG00000022199 | polyhomeotic homolog 3 [Source:VGNC Symbol;Acc:VGNC:75804]                            | 0.564430787 | 0.000413539 | 0.001641977 |
| ENSMMUG00000022880 | eukaryotic translation initiation factor 5A2 [Source:VGNC Symbol;Acc:VGNC:72198]      | 1.922479003 | 4.67E-06    | 2.80E-05    |
| ENSMMUG00000040869 | spermatogenesis associated 16 [Source:VGNC Symbol;Acc:VGNC:84073]                     | 1.456727027 | 2.15E-05    | 0.000113174 |
| ENSMMUG00000023078 | zinc finger protein 639 [Source:VGNC Symbol;Acc:VGNC:82561]                           | -           |             |             |
| ENSMMUG00000003594 | ubiquitin specific peptidase 13 [Source:VGNC Symbol;Acc:VGNC:78735]                   | 1.915485098 | 7.59E-12    | 1.10E-10    |
| ENSMMUG00000064088 | U2 spliceosomal RNA [Source:RFAM;Acc:RF00004]                                         | -           |             |             |
| ENSMMUG00000003595 | peroxisomal biogenesis factor 5 like [Source:VGNC Symbol;Acc:VGNC:75889]              | 3.347293918 | 0.004032165 | 0.012321657 |
| ENSMMUG00000055097 |                                                                                       | -           |             |             |
| ENSMMUG00000008070 | YEATS domain containing 2 [Source:VGNC Symbol;Acc:VGNC:79502]                         | 2.716529507 | 0.016430665 | 0.041348508 |
| ENSMMUG00000013661 | presenilin associated rhomboid like [Source:NCBI gene;Acc:704652]                     | -           |             |             |
| ENSMMUG00000005515 | ATP binding cassette subfamily C member 5 [Source:VGNC Symbol;Acc:VGNC:69574]         | 1.253644007 | 1.21E-06    | 8.06E-06    |
| ENSMMUG00000006553 | dishevelled segment polarity protein 3 [Source:VGNC Symbol;Acc:VGNC:72014]            | -           |             |             |
| ENSMMUG00000000800 | proteasome 26S subunit, non-ATPase 2 [Source:VGNC Symbol;Acc:VGNC:84144]              | 1.400908762 | 2.62E-08    | 2.31E-07    |
| ENSMMUG00000007503 | family with sequence similarity 131 member A [Source:VGNC Symbol;Acc:VGNC:72385]      | 0.633866106 | 0.006200762 | 0.017897489 |
| ENSMMUG00000007524 | RNA polymerase II subunit H [Source:VGNC Symbol;Acc:VGNC:76216]                       | 0.781463286 | 2.26E-06    | 1.44E-05    |
| ENSMMUG00000007528 | chordin [Source:VGNC Symbol;Acc:VGNC:71042]                                           | -           |             |             |
| ENSMMUG00000060581 |                                                                                       | 0.814849459 | 2.55E-08    | 2.25E-07    |
| ENSMMUG00000002953 | MAGE family member F1 [Source:VGNC Symbol;Acc:VGNC:74399]                             | -           |             |             |
| ENSMMUG00000023814 | mitogen-activated protein kinase kinase kinase 13 [Source:VGNC Symbol;Acc:VGNC:74494] | 0.723883856 | 0.000331823 | 0.001345252 |
|                    |                                                                                       | -           |             |             |
|                    |                                                                                       | 2.490107182 | 0.000729155 | 0.002709242 |
|                    |                                                                                       | -           |             |             |
|                    |                                                                                       | 1.436514523 | 1.41E-05    | 7.75E-05    |
|                    |                                                                                       | 2.141317238 | 2.11E-49    | 1.74E-46    |
|                    |                                                                                       | -           |             |             |
|                    |                                                                                       | 1.998867039 | 0.000408367 | 0.00162405  |
|                    |                                                                                       | -           |             |             |
|                    |                                                                                       | 1.394594378 | 6.52E-13    | 1.11E-11    |
|                    |                                                                                       | -           |             |             |
|                    |                                                                                       | 1.680145871 | 1.69E-09    | 1.79E-08    |
|                    |                                                                                       | -           |             |             |
|                    |                                                                                       | 0.362862457 | 0.010584186 | 0.028389126 |
|                    |                                                                                       | -           |             |             |
|                    |                                                                                       | 0.516546203 | 0.0003394   | 0.001373719 |
|                    |                                                                                       | -           |             |             |
|                    |                                                                                       | 0.896725227 | 5.43E-06    | 3.21E-05    |
|                    |                                                                                       | 3.064205884 | 5.70E-18    | 1.62E-16    |
|                    |                                                                                       | 2.662888325 | 4.27E-13    | 7.38E-12    |
|                    |                                                                                       | 1.235454023 | 2.15E-06    | 1.37E-05    |
|                    |                                                                                       | -           |             |             |
|                    |                                                                                       | 1.095225947 | 0.000713977 | 0.002660373 |

|                    |                                                                                                            |   |             |             |             |
|--------------------|------------------------------------------------------------------------------------------------------------|---|-------------|-------------|-------------|
| ENSMMUG00000064748 | Metazoan signal recognition particle RNA [Source:RFAM;Acc:RF00017]                                         | - | 1.128980342 | 0.002600836 | 0.008368495 |
| ENSMMUG00000021972 | diacylglycerol kinase gamma [Source:VGNC Symbol;Acc:VGNC:71785]                                            | - | 1.163153288 | 5.24E-11    | 6.88E-10    |
| ENSMMUG00000052418 |                                                                                                            | - | 0.700110187 | 1.95E-07    | 1.50E-06    |
| ENSMMUG00000018909 | fetuin B [Source:VGNC Symbol;Acc:VGNC:72638]                                                               | - | 0.734848086 | 3.51E-07    | 2.56E-06    |
| ENSMMUG00000018910 | histidine rich glycoprotein [Source:VGNC Symbol;Acc:VGNC:73521]                                            | - | 1.857082178 | 5.81E-10    | 6.60E-09    |
| ENSMMUG00000022532 | EPM2A interacting protein 1 [Source:VGNC Symbol;Acc:VGNC:84184]                                            | - | 1.254874333 | 2.85E-06    | 1.78E-05    |
| ENSMMUG00000049937 | Y RNA [Source:RFAM;Acc:RF00019]                                                                            | - | 0.649814541 | 0.014220191 | 0.036533048 |
| ENSMMUG00000054175 |                                                                                                            | - | 1.042264347 | 2.01E-09    | 2.11E-08    |
| ENSMMUG00000021927 | integrin subunit alpha 9 [Source:VGNC Symbol;Acc:VGNC:82165]                                               | - | 0.377940019 | 0.014136706 | 0.036378163 |
| ENSMMUG00000000987 | DLEC1 cilia and flagella associated protein [Source:VGNC Symbol;Acc:VGNC:71808]                            | - | 0.533313188 | 0.002175518 | 0.007144138 |
| ENSMMUG00000004847 | xylulokinase [Source:VGNC Symbol;Acc:VGNC:78815]                                                           | - | 0.984558224 | 6.11E-12    | 9.03E-11    |
| ENSMMUG00000018790 | activin A receptor type 2B [Source:VGNC Symbol;Acc:VGNC:69450]                                             | - | 3.195498985 | 1.40E-49    | 1.22E-46    |
| ENSMMUG00000020150 | xin actin binding repeat containing 1 [Source:VGNC Symbol;Acc:VGNC:78952]                                  | - | 0.752602167 | 2.92E-10    | 3.45E-09    |
| ENSMMUG00000051408 | myelin associated oligodendrocyte basic protein [Source:NCBI gene;Acc:717265]                              | - | 1.925759671 | 2.55E-19    | 8.19E-18    |
| ENSMMUG00000009197 | myelin associated oligodendrocyte basic protein [Source:VGNC Symbol;Acc:VGNC:74908]                        | - | 2.071019288 | 8.31E-33    | 1.10E-30    |
| ENSMMUG00000017701 | myosin VIIA and Rab interacting protein [Source:VGNC Symbol;Acc:VGNC:74992]                                | - | 2.657009325 | 1.05E-17    | 2.95E-16    |
| ENSMMUG00000013330 | ectonucleoside triphosphate diphosphohydrolase 3 [Source:VGNC Symbol;Acc:VGNC:72226]                       | - | 2.84411191  | 6.99E-23    | 3.41E-21    |
| ENSMMUG00000009437 | zinc finger protein 619 [Source:VGNC Symbol;Acc:VGNC:82562]                                                | - | 2.903726486 | 1.50E-07    | 1.18E-06    |
| ENSMMUG00000024178 | U5 spliceosomal RNA [Source:RFAM;Acc:RF00020]                                                              | - | 2.959372832 | 0.001569623 | 0.005359323 |
| ENSMMUG00000050991 |                                                                                                            | - | 0.970925852 | 6.01E-05    | 0.000287109 |
| ENSMMUG00000001074 | unc-51 like kinase 4 [Source:VGNC Symbol;Acc:VGNC:82565]                                                   | - | 0.617348867 | 0.010157241 | 0.027427509 |
| ENSMMUG00000052672 |                                                                                                            | - | 4.032477065 | 0.004684752 | 0.01404952  |
| ENSMMUG00000001075 | trafficking kinesin protein 1 [Source:VGNC Symbol;Acc:VGNC:79830]                                          | - | 0.676963333 | 0.001869259 | 0.006277427 |
| ENSMMUG00000035160 | U4 spliceosomal RNA [Source:RFAM;Acc:RF00015]                                                              | - | 2.3291133   | 0.003400198 | 0.010593475 |
| ENSMMUG00000001077 | cholecystokinin [Source:VGNC Symbol;Acc:VGNC:70716]                                                        | - | 2.864802989 | 0.018174923 | 0.045034938 |
| ENSMMUG00000050275 |                                                                                                            | - | 0.725166299 | 0.020560824 | 0.049970012 |
| ENSMMUG00000021242 | natural killer cell triggering receptor [Source:VGNC Symbol;Acc:VGNC:81486]                                | - | 1.636182966 | 0.013931841 | 0.035969568 |
| ENSMMUG00000021244 | kelch like family member 40 [Source:VGNC Symbol;Acc:VGNC:74165]                                            | - | 2.249281648 | 0.015771245 | 0.039912553 |
| ENSMMUG00000031684 | KRAB box domain containing 1 [Source:NCBI gene;Acc:717189]                                                 | - | 2.883997338 | 1.12E-06    | 7.54E-06    |
| ENSMMUG00000009745 | protein O-linked mannose N-acetylglucosaminyltransferase 2 (beta 1,4-) [Source:VGNC Symbol;Acc:VGNC:84062] | - | 1.523078712 | 0.002007296 | 0.006677479 |
| ENSMMUG00000056798 |                                                                                                            | - | 2.290262248 | 5.33E-07    | 3.79E-06    |
| ENSMMUG00000054286 |                                                                                                            | - | 1.561540271 | 2.94E-05    | 0.000150356 |
| ENSMMUG00000001028 | SNF related kinase [Source:VGNC Symbol;Acc:VGNC:84074]                                                     | - | 0.797232642 | 5.94E-14    | 1.14E-12    |
| ENSMMUG00000040696 | Metazoan signal recognition particle RNA [Source:RFAM;Acc:RF00017]                                         | - | 2.201582938 | 0.002073628 | 0.006868482 |
| ENSMMUG00000017585 | zinc finger protein 197 [Source:VGNC Symbol;Acc:VGNC:78864]                                                | - | 0.731737136 | 0.017065939 | 0.042700839 |
| ENSMMUG00000051589 |                                                                                                            | - | 0.771016233 | 0.000412287 | 0.001637559 |
| ENSMMUG00000019740 | zinc finger DHHC-type palmitoyltransferase 3 [Source:VGNC Symbol;Acc:VGNC:79143]                           | - | 1.297443603 | 0.000525731 | 0.002032881 |
| ENSMMUG00000019130 | exosome component 7 [Source:VGNC Symbol;Acc:VGNC:72383]                                                    | - | 1.056732381 | 0.009507013 | 0.025902813 |
| ENSMMUG00000005742 | CUB domain containing protein 1 [Source:VGNC Symbol;Acc:VGNC:70849]                                        | - | 1.398171847 | 0.000839299 | 0.003072957 |

|                    |                                                                                                   |             |             |             |
|--------------------|---------------------------------------------------------------------------------------------------|-------------|-------------|-------------|
| ENSMMUG00000018020 | leucyl-tRNA synthetase 2, mitochondrial [Source:VGNC Symbol;Acc:VGNC:74063]                       | 0.288025934 | 0.004608999 | 0.01385877  |
| ENSMMUG00000056769 | C-C motif chemokine receptor 1 [Source:VGNC Symbol;Acc:VGNC:70737]                                | 0.994924095 | 5.84E-05    | 0.000279641 |
| ENSMMUG00000004576 | C-C motif chemokine receptor 3 [Source:VGNC Symbol;Acc:VGNC:70738]                                | 3.571917061 | 3.38E-31    | 3.56E-29    |
| ENSMMUG00000062394 | C-C motif chemokine receptor 2 [Source:NCBI gene;Acc:574098]                                      | 0.987104977 | 3.03E-05    | 0.000154458 |
| ENSMMUG00000006454 | kelch like family member 18 [Source:VGNC Symbol;Acc:VGNC:74154]                                   | 0.848181741 | 0.003389839 | 0.010567862 |
| ENSMMUG00000014045 | protein tyrosine phosphatase non-receptor type 23 [Source:VGNC Symbol;Acc:VGNC:76477]             | 0.92523749  | 0.000214193 | 0.000907855 |
| ENSMMUG00000014046 | SREBF chaperone [Source:VGNC Symbol;Acc:VGNC:77140]                                               | 1.603531047 | 6.63E-20    | 2.31E-18    |
| ENSMMUG00000013385 | elongator acetyltransferase complex subunit 6 [Source:VGNC Symbol;Acc:VGNC:72113]                 | 1.426864196 | 8.06E-11    | 1.03E-09    |
| ENSMMUG00000041434 | Metazoan signal recognition particle RNA [Source:RFAM;Acc:RF00017]                                | 0.458941561 | 0.013979522 | 0.036067556 |
| ENSMMUG00000020954 | cell division cycle 25A [Source:VGNC Symbol;Acc:VGNC:70794]                                       | 0.964721255 | 0.0007139   | 0.002660373 |
| ENSMMUG00000064458 |                                                                                                   | 1.698314559 | 1.79E-07    | 1.38E-06    |
| ENSMMUG00000003074 | plexin B1 [Source:VGNC Symbol;Acc:VGNC:76187]                                                     | 3.03665145  | 0.000321111 | 0.001306468 |
| ENSMMUG00000050584 | coiled-coil domain containing 51 [Source:NCBI gene;Acc:710311]                                    | 2.506220137 | 0.000702018 | 0.002623469 |
| ENSMMUG00000010058 | ATR interacting protein [Source:VGNC Symbol;Acc:VGNC:84235]                                       | 1.098940583 | 2.07E-26    | 1.46E-24    |
| ENSMMUG00000043955 | three prime repair exonuclease 1 [Source:VGNC Symbol;Acc:VGNC:82708]                              | 0.936868231 | 7.62E-07    | 5.28E-06    |
| ENSMMUG00000010062 | shisa family member 5 [Source:VGNC Symbol;Acc:VGNC:84082]                                         | 0.921573161 | 4.84E-19    | 1.51E-17    |
| ENSMMUG00000000591 | 6-phosphofructo-2-kinase/fructose-2,6-biphosphatase 4 [Source:VGNC Symbol;Acc:VGNC:75960]         | 1.102389028 | 7.97E-19    | 2.44E-17    |
| ENSMMUG00000059318 | urocortin 2 [Source:NCBI gene;Acc:106996925]                                                      | 2.670853531 | 5.06E-47    | 2.89E-44    |
| ENSMMUG00000014699 |                                                                                                   | 2.118923686 | 1.46E-39    | 3.80E-37    |
| ENSMMUG00000032659 | mml-mir-711 [Source:miRBase;Acc:MI0012553]                                                        | 1.983338407 | 8.12E-06    | 4.64E-05    |
| ENSMMUG00000014707 | cadherin EGF LAG seven-pass G-type receptor 3 [Source:VGNC Symbol;Acc:VGNC:71148]                 | 1.532399523 | 0.001937992 | 0.006476092 |
| ENSMMUG00000064174 |                                                                                                   | 1.574730256 | 0.00049626  | 0.001931637 |
| ENSMMUG00000014720 | NCK interacting protein with SH3 domain [Source:VGNC Symbol;Acc:VGNC:74960]                       | 1.663617731 | 7.82E-09    | 7.45E-08    |
| ENSMMUG00000015418 | solute carrier family 25 member 20 [Source:VGNC Symbol;Acc:VGNC:77473]                            | 1.887326883 | 0.000987514 | 0.003562355 |
| ENSMMUG00000039597 | ariadne RBR E3 ubiquitin protein ligase 2 [Source:NCBI gene;Acc:708356]                           | 1.929583249 | 0.002049398 | 0.006799234 |
| ENSMMUG00000006130 | prolyl 4-hydroxylase, transmembrane [Source:VGNC Symbol;Acc:VGNC:75693]                           | 2.458219892 | 1.56E-05    | 8.49E-05    |
| ENSMMUG00000005660 | glutamine rich 1 [Source:VGNC Symbol;Acc:VGNC:76530]                                              | 1.808491779 | 0.010412728 | 0.028000137 |
| ENSMMUG00000002943 | glutaminyl-tRNA synthetase 1 [Source:VGNC Symbol;Acc:VGNC:76634]                                  | 1.271531524 | 0.001536002 | 0.005264365 |
| ENSMMUG00000002948 | ubiquitin specific peptidase 19 [Source:VGNC Symbol;Acc:VGNC:78739]                               | 1.38285457  | 0.003692942 | 0.011381198 |
| ENSMMUG00000002952 | laminin subunit beta 2 [Source:VGNC Symbol;Acc:VGNC:74229]                                        | 1.556666976 | 7.40E-05    | 0.000346908 |
| ENSMMUG00000002836 | coiled-coil domain containing 71 [Source:VGNC Symbol;Acc:VGNC:70862]                              | 2.036382743 | 0.000230486 | 0.000970632 |
| ENSMMUG00000002833 | kelch domain containing 8B [Source:VGNC Symbol;Acc:VGNC:74142]                                    | 1.613690524 | 0.001794253 | 0.006053488 |
| ENSMMUG00000052238 |                                                                                                   | 1.257912841 | 2.56E-12    | 4.00E-11    |
| ENSMMUG00000014537 | bassoon presynaptic cytomatrix protein [Source:VGNC Symbol;Acc:VGNC:70284]                        | 0.828496224 | 4.94E-06    | 2.94E-05    |
| ENSMMUG00000014540 | acylaminoacyl-peptide hydrolase [Source:VGNC Symbol;Acc:VGNC:69982]                               | 0.980044697 | 6.21E-05    | 0.000296082 |
| ENSMMUG00000014564 | ring finger protein 123 [Source:VGNC Symbol;Acc:VGNC:76790]                                       | 0.738361148 | 7.12E-10    | 8.01E-09    |
| ENSMMUG00000020979 | inka box actin regulator 1 [Source:VGNC Symbol;Acc:VGNC:73692]                                    | 0.558435079 | 0.020286982 | 0.049450352 |
| ENSMMUG00000016476 | TRAF interacting protein [Source:VGNC Symbol;Acc:VGNC:82261]                                      | 0.509392989 | 0.002972295 | 0.009426674 |
| ENSMMUG00000010342 | solute carrier family 38 member 3 [Source:VGNC Symbol;Acc:VGNC:77502]                             | 1.102006554 | 0.008641668 | 0.023882956 |
| ENSMMUG00000056280 | G protein subunit alpha i2 [Source:NCBI gene;Acc:703780]                                          | 1.079684183 | 9.02E-06    | 5.12E-05    |
| ENSMMUG00000020117 | semaphorin 3B [Source:VGNC Symbol;Acc:VGNC:77160]                                                 | -1.3753562  | 2.80E-06    | 1.75E-05    |
| ENSMMUG00000007022 | calcium voltage-gated channel auxiliary subunit alpha2delta 2 [Source:VGNC Symbol;Acc:VGNC:70508] | 1.210647281 | 0.009539317 | 0.025966973 |
| ENSMMUG00000010499 | chromosome 2 C3orf18 homolog [Source:VGNC Symbol;Acc:VGNC:70622]                                  | 0.801241167 | 0.015342866 | 0.038961422 |
| ENSMMUG00000004273 | dedicator of cytokinesis 3 [Source:VGNC Symbol;Acc:VGNC:71967]                                    | 1.804173869 | 1.61E-25    | 9.98E-24    |

|                    |                                                                                                                   |             |             |             |
|--------------------|-------------------------------------------------------------------------------------------------------------------|-------------|-------------|-------------|
| ENSMMUG0000004280  | DDB1 and CUL4 associated factor 1 [Source:VGNC Symbol;Acc:VGNC:71819]                                             | 1.45080839  | 0.000318871 | 0.001298779 |
| ENSMMUG00000017351 | stabilin 1 [Source:VGNC Symbol;Acc:VGNC:77956]                                                                    | 0.945338549 | 4.31E-05    | 0.000212089 |
| ENSMMUG00000050505 | small integral membrane protein 4 [Source:NCBI gene;Acc:696553]                                                   | 1.23268678  | 3.91E-10    | 4.55E-09    |
| ENSMMUG00000033553 |                                                                                                                   | 0.472032203 | 0.019470852 | 0.047743507 |
| ENSMMUG00000012511 | G protein nucleolar 3 [Source:VGNC Symbol;Acc:VGNC:73038]                                                         | 0.40123506  | 0.000354465 | 0.001428454 |
| ENSMMUG00000037073 | small nucleolar RNA, C/D box 19B [Source:HGNC Symbol;Acc:HGNC:33570]                                              | 1.033619642 | 0.002205659 | 0.007230312 |
| ENSMMUG00000012526 | glycosyltransferase 8 domain containing 1 [Source:VGNC Symbol;Acc:VGNC:73001]                                     | 0.891426563 | 2.21E-10    | 2.66E-09    |
| ENSMMUG00000017370 | signal peptidase complex subunit 1 [Source:VGNC Symbol;Acc:VGNC:84072]                                            | 0.865952918 | 0.003889616 | 0.011927833 |
| ENSMMUG00000014527 | Scm like with four mbt domains 1 [Source:VGNC Symbol;Acc:VGNC:77279]                                              | -0.93960453 | 0.00506658  | 0.015021468 |
| ENSMMUG00000019262 | calcium voltage-gated channel subunit alpha1 D [Source:VGNC Symbol;Acc:VGNC:70501]                                | 0.998019981 | 0.002739263 | 0.008773923 |
| ENSMMUG00000019266 | choline dehydrogenase [Source:VGNC Symbol;Acc:VGNC:71086]                                                         | 1.115328196 | 1.54E-07    | 1.20E-06    |
| ENSMMUG00000019267 | interleukin 17 receptor B [Source:VGNC Symbol;Acc:VGNC:73618]                                                     | 1.198274839 | 1.03E-06    | 6.97E-06    |
| ENSMMUG00000019269 | actin related protein 8 [Source:VGNC Symbol;Acc:VGNC:69406]                                                       | 0.977733094 | 0.01055791  | 0.028344282 |
| ENSMMUG00000051778 |                                                                                                                   | 0.477256841 | 0.01901555  | 0.046758515 |
| ENSMMUG00000021620 | ELKS/RAB6-interacting/CAST family member 2 [Source:VGNC Symbol;Acc:VGNC:72164]                                    | 0.644054591 | 0.002043021 | 0.006779594 |
| ENSMMUG00000039085 | adaptor protein, phosphotyrosine interacting with PH domain and leucine zipper 1 [Source:NCBI gene;Acc:100425753] | 2.776269857 | 5.25E-05    | 0.000254095 |
| ENSMMUG00000021008 | ankyrin repeat and SOCS box containing 14 [Source:VGNC Symbol;Acc:VGNC:84237]                                     | 2.738632247 | 0.000481045 | 0.001878691 |
| ENSMMUG00000055244 | U6 spliceosomal RNA [Source:RFAM;Acc:RF00026]                                                                     | -1.50154846 | 6.62E-11    | 8.58E-10    |
| ENSMMUG00000004052 | phosphodiesterase 12 [Source:VGNC Symbol;Acc:VGNC:75863]                                                          | 1.247990312 | 0.006017272 | 0.017428934 |
| ENSMMUG00000018619 | DENN domain containing 6A [Source:VGNC Symbol;Acc:VGNC:71726]                                                     | 1.902367288 | 2.37E-06    | 1.50E-05    |
| ENSMMUG00000000706 | filamin B [Source:VGNC Symbol;Acc:VGNC:72672]                                                                     | 1.188108845 | 7.39E-11    | 9.52E-10    |
| ENSMMUG00000017510 | membrane associated guanylate kinase, WW and PDZ domain containing 1 [Source:VGNC Symbol;Acc:VGNC:74499]          | 2.800897854 | 2.41E-46    | 1.32E-43    |
| ENSMMUG00000057539 |                                                                                                                   | 3.044429243 | 3.98E-18    | 1.15E-16    |
| ENSMMUG00000001529 | solute carrier family 25 member 26 [Source:VGNC Symbol;Acc:VGNC:77530]                                            | 1.666540606 | 3.63E-16    | 8.55E-15    |
| ENSMMUG00000001531 | leucine rich repeats and immunoglobulin like domains 1 [Source:VGNC Symbol;Acc:VGNC:84156]                        | 1.665881274 | 2.72E-18    | 8.02E-17    |
| ENSMMUG00000062338 |                                                                                                                   | 1.292749512 | 8.21E-06    | 4.68E-05    |
| ENSMMUG00000054412 |                                                                                                                   | 1.480823779 | 6.08E-07    | 4.29E-06    |
| ENSMMUG00000057486 |                                                                                                                   | 1.14059008  | 2.07E-07    | 1.58E-06    |
| ENSMMUG00000054043 |                                                                                                                   | 2.265173152 | 0.002609325 | 0.008392351 |
| ENSMMUG00000057543 | MyoD family inhibitor domain containing 2 [Source:HGNC Symbol;Acc:HGNC:53442]                                     | 0.905060781 | 0.000212518 | 0.000901759 |
| ENSMMUG00000009425 | actin, cytoplasmic 2-like [Source:NCBI gene;Acc:705671]                                                           | 0.713728134 | 0.000153897 | 0.000671461 |
| ENSMMUG00000054107 |                                                                                                                   | 1.175043973 | 5.76E-06    | 3.39E-05    |
| ENSMMUG00000001849 | interleukin 5 receptor subunit alpha [Source:VGNC Symbol;Acc:VGNC:73731]                                          | 1.065102828 | 0.001859247 | 0.006249464 |
| ENSMMUG00000017983 | tRNA nucleotidyl transferase 1 [Source:VGNC Symbol;Acc:VGNC:79073]                                                | 2.049303088 | 6.84E-05    | 0.000322676 |
| ENSMMUG00000060798 |                                                                                                                   | 1.252425818 | 1.23E-06    | 8.22E-06    |
| ENSMMUG00000012574 | inositol 1,4,5-trisphosphate receptor type 1 [Source:VGNC Symbol;Acc:VGNC:73804]                                  | 0.431828739 | 0.0167136   | 0.041989274 |

|                    |                                                                                                   |   |             |             |             |
|--------------------|---------------------------------------------------------------------------------------------------|---|-------------|-------------|-------------|
| ENSMMUG00000043287 |                                                                                                   | - | 0.413120148 | 0.015926376 | 0.040270785 |
| ENSMMUG00000057502 |                                                                                                   |   | 3.268367717 | 0.013494071 | 0.035009984 |
| ENSMMUG00000018281 | interleukin 17 receptor E [Source:VGNC Symbol;Acc:VGNC:73623]                                     |   | -0.82621344 | 2.13E-07    | 1.62E-06    |
| ENSMMUG00000018282 | interleukin 17 receptor C [Source:VGNC Symbol;Acc:VGNC:84164]                                     |   | 0.949133834 | 7.58E-07    | 5.26E-06    |
| ENSMMUG00000018285 | cysteine rich with EGF like domains 1 [Source:VGNC Symbol;Acc:VGNC:71407]                         |   | 1.204659107 | 5.96E-11    | 7.77E-10    |
| ENSMMUG00000018289 | proline rich transmembrane protein 3 [Source:VGNC Symbol;Acc:VGNC:76324]                          |   | 0.839082386 | 3.63E-05    | 0.00018195  |
| ENSMMUG00000018290 | ER membrane protein complex subunit 3 [Source:VGNC Symbol;Acc:VGNC:72091]                         |   | 1.169318061 | 3.31E-05    | 0.000167466 |
| ENSMMUG00000019933 | TatD DNase domain containing 2 [Source:NCBI gene;Acc:701390]                                      |   | 1.078257949 | 0.00281701  | 0.008982211 |
| ENSMMUG00000019938 | ATPase plasma membrane Ca <sup>2+</sup> transporting 2 [Source:VGNC Symbol;Acc:VGNC:70181]        |   | 2.518212692 | 0.00490975  | 0.014629614 |
| ENSMMUG00000021806 | vestigial like family member 4 [Source:VGNC Symbol;Acc:VGNC:79755]                                |   | 1.101466898 | 6.13E-05    | 0.000292442 |
| ENSMMUG00000054916 | Metazoan signal recognition particle RNA [Source:RFAM;Acc:RF00017]                                |   | 1.112783267 | 0.003419314 | 0.010641853 |
| ENSMMUG00000007195 | tRNA splicing endonuclease subunit 2 [Source:VGNC Symbol;Acc:VGNC:82707]                          |   | 1.152422758 | 4.45E-05    | 0.00021834  |
| ENSMMUG00000009536 | makorin ring finger protein 2 [Source:VGNC Symbol;Acc:VGNC:74878]                                 |   | 1.456516531 | 8.91E-08    | 7.23E-07    |
| ENSMMUG00000023125 | XPC complex subunit, DNA damage recognition and repair factor [Source:VGNC Symbol;Acc:VGNC:78809] |   | 1.372434046 | 3.28E-06    | 2.02E-05    |
| ENSMMUG00000023124 | transmembrane protein 43 [Source:VGNC Symbol;Acc:VGNC:82711]                                      |   | 1.630778124 | 8.99E-16    | 2.05E-14    |
| ENSMMUG00000057449 |                                                                                                   |   | -1.54812556 | 0.004806683 | 0.014371593 |
| ENSMMUG00000006340 | solute carrier family 6 member 6 [Source:VGNC Symbol;Acc:VGNC:77622]                              |   | 0.917102326 | 2.53E-09    | 2.60E-08    |
| ENSMMUG00000044822 | coiled-coil domain containing 174 [Source:VGNC Symbol;Acc:VGNC:84219]                             |   | 1.107719555 | 4.86E-13    | 8.34E-12    |
| ENSMMUG00000012727 | intraflagellar transport 122 [Source:VGNC Symbol;Acc:VGNC:84167]                                  |   | 2.803190068 | 0.007204974 | 0.020363973 |
| ENSMMUG00000018663 | eukaryotic elongation factor, selenocysteine-tRNA specific [Source:VGNC Symbol;Acc:VGNC:72097]    |   | 2.033785372 | 0.006351783 | 0.018276474 |
| ENSMMUG00000000158 | minichromosome maintenance complex component 2 [Source:VGNC Symbol;Acc:VGNC:74680]                |   | 1.391746302 | 1.51E-13    | 2.75E-12    |
| ENSMMUG00000000756 | transmembrane protein adipocyte associated 1 [Source:VGNC Symbol;Acc:VGNC:79848]                  |   | 0.8375393   | 0.000280289 | 0.001153674 |
| ENSMMUG00000016719 | coiled-coil-helix-coiled-coil-helix domain containing 6 [Source:VGNC Symbol;Acc:VGNC:71119]       |   | 0.459200979 | 0.01435862  | 0.036840541 |
| ENSMMUG00000049548 |                                                                                                   |   | 1.112214037 | 3.27E-07    | 2.40E-06    |
| ENSMMUG00000017125 | oxysterol binding protein like 11 [Source:VGNC Symbol;Acc:VGNC:75631]                             |   | 1.052668152 | 6.29E-07    | 4.43E-06    |
| ENSMMUG00000032031 |                                                                                                   |   | 1.462326083 | 0.00053902  | 0.002079516 |
| ENSMMUG00000061615 |                                                                                                   |   | -1.80827779 | 0.009408165 | 0.025694858 |
| ENSMMUG00000049323 |                                                                                                   |   | 1.154446602 | 0.011453321 | 0.030434108 |
| ENSMMUG00000001949 | coiled-coil domain containing 191 [Source:VGNC Symbol;Acc:VGNC:70901]                             |   | 1.332570556 | 0.000250798 | 0.001046817 |
| ENSMMUG00000001946 | zinc finger DHHC-type palmitoyltransferase 23 [Source:VGNC Symbol;Acc:VGNC:79731]                 |   | 1.258412901 | 0.000258335 | 0.001074341 |
| ENSMMUG00000001943 | GRAM domain containing 1C [Source:VGNC Symbol;Acc:VGNC:73007]                                     |   | 0.984017605 | 3.02E-05    | 0.000154458 |
| ENSMMUG00000052581 | upstream transcription factor family member 3 [Source:NCBI gene;Acc:709660]                       |   | 0.953178506 | 7.32E-08    | 6.01E-07    |
| ENSMMUG00000057363 |                                                                                                   |   | 1.486639424 | 1.31E-05    | 7.20E-05    |
| ENSMMUG00000014874 | GTP binding protein 8 (putative) [Source:VGNC Symbol;Acc:VGNC:84180]                              |   | 1.973633635 | 4.62E-21    | 1.85E-19    |
| ENSMMUG00000014876 | nucleolus and neural progenitor protein [Source:VGNC Symbol;Acc:VGNC:75244]                       |   | 1.900900718 | 2.47E-12    | 3.89E-11    |
| ENSMMUG00000003199 | CD200 receptor 1 [Source:VGNC Symbol;Acc:VGNC:70845]                                              |   | 1.901751419 | 3.79E-07    | 2.75E-06    |
| ENSMMUG00000050558 |                                                                                                   |   | 0.856074983 | 0.000665124 | 0.002501597 |



|                    |                                                                                             |             |             |             |
|--------------------|---------------------------------------------------------------------------------------------|-------------|-------------|-------------|
| ENSMMUG0000000894  | cellular inhibitor of PP2A [Source:VGNC Symbol;Acc:VGNC:71371]                              | 2.467998013 | 0.003119923 | 0.009827625 |
| ENSMMUG00000019977 | myosin heavy chain 15 [Source:VGNC Symbol;Acc:VGNC:84148]                                   | 1.617344951 | 4.35E-08    | 3.67E-07    |
| ENSMMUG00000008791 | CD47 molecule [Source:VGNC Symbol;Acc:VGNC:70767]                                           | 1.970280689 | 2.96E-09    | 3.02E-08    |
| ENSMMUG00000008787 | BBX high mobility group box domain containing [Source:VGNC Symbol;Acc:VGNC:82110]           | 0.637211167 | 1.42E-06    | 9.37E-06    |
| ENSMMUG00000058765 |                                                                                             | 1.467643756 | 7.62E-06    | 4.38E-05    |
| ENSMMUG00000055345 | Y RNA [Source:RFAM;Acc:RF00019]                                                             | 0.955766872 | 1.10E-07    | 8.86E-07    |
| ENSMMUG00000063790 |                                                                                             | 2.063413146 | 0.00109532  | 0.003907528 |
| ENSMMUG00000007565 | Cbl proto-oncogene B [Source:VGNC Symbol;Acc:VGNC:70555]                                    | 1.020836129 | 5.24E-06    | 3.10E-05    |
| ENSMMUG00000026103 | U1 spliceosomal RNA [Source:RFAM;Acc:RF00003]                                               | 1.843242543 | 8.45E-05    | 0.000392178 |
| ENSMMUG00000060744 |                                                                                             | 2.128757882 | 1.69E-10    | 2.07E-09    |
| ENSMMUG00000021859 | zona pellucida like domain containing 1 [Source:VGNC Symbol;Acc:VGNC:79650]                 | 0.515021593 | 0.000378611 | 0.001517514 |
| ENSMMUG00000063181 |                                                                                             | 0.410272919 | 0.010738002 | 0.028739321 |
| ENSMMUG00000059753 |                                                                                             | 0.951955049 | 2.45E-08    | 2.17E-07    |
| ENSMMUG00000021567 | neurexophilin and PC-esterase domain family member 3 [Source:VGNC Symbol;Acc:VGNC:75476]    | 0.725470231 | 1.53E-07    | 1.20E-06    |
| ENSMMUG00000058605 | Metazoan signal recognition particle RNA [Source:RFAM;Acc:RF00017]                          | 0.847225946 | 0.000165244 | 0.00071654  |
| ENSMMUG00000057768 |                                                                                             | 1.445279772 | 5.52E-15    | 1.18E-13    |
| ENSMMUG00000024598 | U6 spliceosomal RNA [Source:RFAM;Acc:RF00026]                                               | 3.956039781 | 3.04E-05    | 0.000155162 |
| ENSMMUG00000038349 | crystallin beta-gamma domain containing 3 [Source:NCBI gene;Acc:698282]                     | 1.091194055 | 3.21E-19    | 1.02E-17    |
| ENSMMUG00000049786 |                                                                                             | 1.181779028 | 0.018920317 | 0.04660089  |
| ENSMMUG00000043727 | zinc finger protein 654 [Source:VGNC Symbol;Acc:VGNC:82560]                                 | 2.023214941 | 5.63E-05    | 0.000270409 |
| ENSMMUG00000047994 | CGG triplet repeat binding protein 1 [Source:VGNC Symbol;Acc:VGNC:84203]                    | 1.946558354 | 8.72E-08    | 7.09E-07    |
| ENSMMUG00000033738 | RNA, U6atac small nuclear 6, pseudogene [Source:HGNC Symbol;Acc:HGNC:46905]                 | 0.945121763 | 1.27E-06    | 8.45E-06    |
| ENSMMUG00000000519 | vestigial like family member 3 [Source:VGNC Symbol;Acc:VGNC:79430]                          | 1.115253198 | 0.00796022  | 0.022227464 |
| ENSMMUG00000050994 |                                                                                             | 1.587587503 | 0.000512267 | 0.001988728 |
| ENSMMUG00000015877 | 1,4-alpha-glucan branching enzyme 1 [Source:VGNC Symbol;Acc:VGNC:72894]                     | 0.698694013 | 7.91E-05    | 0.000368403 |
| ENSMMUG00000055096 |                                                                                             | 0.560853622 | 0.003002174 | 0.009495039 |
| ENSMMUG00000049913 |                                                                                             | 1.254220101 | 0.000672723 | 0.002526973 |
| ENSMMUG00000056687 |                                                                                             | 1.246807631 | 2.47E-05    | 0.000128795 |
| ENSMMUG00000052831 |                                                                                             | 0.450410068 | 0.017193916 | 0.042941357 |
| ENSMMUG00000032295 | zinc finger protein 595 [Source:VGNC Symbol;Acc:VGNC:79655]                                 | -0.84544874 | 0.000491425 | 0.001914827 |
| ENSMMUG00000047256 | zinc finger protein 732 [Source:NCBI gene;Acc:716016]                                       | 1.353171289 | 0.009858141 | 0.026717148 |
| ENSMMUG00000051381 | Metazoan signal recognition particle RNA [Source:RFAM;Acc:RF00017]                          | 1.734654591 | 1.12E-10    | 1.41E-09    |
| ENSMMUG00000039020 | zinc finger protein 141 [Source:NCBI gene;Acc:714265]                                       | 1.717889697 | 2.12E-12    | 3.35E-11    |
| ENSMMUG00000017457 | phosphatidylinositol glycan anchor biosynthesis class G [Source:VGNC Symbol;Acc:VGNC:75865] | 0.600301104 | 0.0176093   | 0.043809078 |

|                    |                                                                                        |             |             |             |
|--------------------|----------------------------------------------------------------------------------------|-------------|-------------|-------------|
| ENSMMUG00000017221 | transmembrane protein 175 [Source:VGNC Symbol;Acc:VGNC:79736]                          | 0.488374792 | 0.018153148 | 0.044996019 |
| ENSMMUG00000065084 |                                                                                        | -0.34779509 | 0.000272646 | 0.00112628  |
| ENSMMUG00000008323 | C-terminal binding protein 1 [Source:VGNC Symbol;Acc:VGNC:71539]                       | 0.579396566 | 5.03E-06    | 2.99E-05    |
| ENSMMUG00000019945 | fibroblast growth factor receptor 3 [Source:VGNC Symbol;Acc:VGNC:72653]                | 1.092048838 | 4.55E-06    | 2.73E-05    |
| ENSMMUG00000032306 | zinc finger FYVE-type containing 28 [Source:NCBI gene;Acc:720600]                      | 1.157911178 | 1.53E-05    | 8.36E-05    |
| ENSMMUG00000008379 | adducin 1 [Source:VGNC Symbol;Acc:VGNC:69528]                                          | 1.604915504 | 5.29E-14    | 1.02E-12    |
| ENSMMUG00000008383 | major facilitator superfamily domain containing 10 [Source:NCBI gene;Acc:720098]       | 1.916043812 | 1.33E-22    | 6.35E-21    |
| ENSMMUG00000008385 | NOP14 nucleolar protein [Source:VGNC Symbol;Acc:VGNC:75194]                            | 1.546475632 | 1.83E-18    | 5.49E-17    |
| ENSMMUG00000008392 | huntingtin [Source:VGNC Symbol;Acc:VGNC:73468]                                         | 0.871253599 | 3.47E-09    | 3.50E-08    |
| ENSMMUG00000006234 | acyl-CoA oxidase 3, pristanoyl [Source:VGNC Symbol;Acc:VGNC:69382]                     | 0.481718334 | 0.000110735 | 0.000499907 |
| ENSMMUG00000030400 | SH3 domain and tetratricopeptide repeats 1 [Source:NCBI gene;Acc:722649]               | 0.747132284 | 4.21E-06    | 2.54E-05    |
| ENSMMUG00000053541 |                                                                                        | 1.417346976 | 0.000712094 | 0.002655356 |
| ENSMMUG00000015099 | janus kinase and microtubule interacting protein 1 [Source:VGNC Symbol;Acc:VGNC:73662] | 0.518929919 | 0.002557565 | 0.008245368 |
| ENSMMUG00000023152 |                                                                                        | 0.949737299 | 0.010016978 | 0.027083968 |
| ENSMMUG00000019563 | collapsin response mediator protein 1 [Source:VGNC Symbol;Acc:VGNC:71494]              | 1.590188038 | 7.65E-20    | 2.64E-18    |
| ENSMMUG00000057703 |                                                                                        | 1.460754271 | 3.64E-08    | 3.11E-07    |
| ENSMMUG00000020861 | EvC ciliary complex subunit 1 [Source:VGNC Symbol;Acc:VGNC:72445]                      | 1.514371038 | 1.41E-12    | 2.28E-11    |
| ENSMMUG00000020860 | EvC ciliary complex subunit 2 [Source:VGNC Symbol;Acc:VGNC:72301]                      | 0.554588152 | 0.002010898 | 0.006687962 |
| ENSMMUG00000016922 | serine/threonine kinase 32B [Source:VGNC Symbol;Acc:VGNC:78114]                        | 0.864136483 | 0.001314365 | 0.004595008 |
| ENSMMUG00000060830 |                                                                                        | 3.558343724 | 0.000877553 | 0.003192863 |
| ENSMMUG00000023242 | transmembrane protein 128 [Source:VGNC Symbol;Acc:VGNC:82257]                          | 0.695686128 | 0.001748907 | 0.005911223 |
| ENSMMUG00000017761 | zinc finger protein 518B [Source:VGNC Symbol;Acc:VGNC:79802]                           | 1.271912805 | 0.012039448 | 0.031769576 |
| ENSMMUG00000049640 |                                                                                        | -0.9049966  | 4.77E-05    | 0.000233059 |
| ENSMMUG00000056982 |                                                                                        | 0.535912734 | 0.0002142   | 0.000907855 |
| ENSMMUG00000061061 |                                                                                        | 3.335161494 | 0.007109199 | 0.020137523 |
| ENSMMUG00000053853 | C1q and TNF related 7 [Source:NCBI gene;Acc:714049]                                    | 0.478140124 | 0.007943949 | 0.022194567 |
| ENSMMUG00000009388 | F-box and leucine rich repeat protein 5 [Source:VGNC Symbol;Acc:VGNC:81408]            | 3.693120621 | 0.000412316 | 0.001637559 |
| ENSMMUG00000061298 |                                                                                        | 3.805620323 | 7.57E-05    | 0.000354141 |
| ENSMMUG00000015298 | CD38 molecule [Source:VGNC Symbol;Acc:VGNC:70762]                                      | 1.276067189 | 0.00223212  | 0.00730736  |
| ENSMMUG00000008162 | fibroblast growth factor binding protein 1 [Source:VGNC Symbol;Acc:VGNC:72536]         | 2.139274278 | 4.87E-27    | 3.72E-25    |
| ENSMMUG00000008163 | fibroblast growth factor binding protein 2 [Source:VGNC Symbol;Acc:VGNC:72599]         | 1.54922462  | 0.008445294 | 0.023417845 |
| ENSMMUG00000044289 |                                                                                        | 1.846896779 | 0.012935469 | 0.033761528 |
| ENSMMUG00000023116 | LIM domain binding 2 [Source:VGNC Symbol;Acc:VGNC:74246]                               | 1.084121682 | 6.42E-08    | 5.33E-07    |
| ENSMMUG00000018070 | non-SMC condensin I complex subunit G [Source:VGNC Symbol;Acc:VGNC:75014]              | 2.298821612 | 0.019999732 | 0.048846513 |
| ENSMMUG00000018073 | ligand dependent nuclear receptor corepressor like [Source:NCBI gene;Acc:715285]       | 1.233362441 | 6.50E-08    | 5.39E-07    |
| ENSMMUG00000057338 |                                                                                        | 0.597181929 | 0.01633241  | 0.041150127 |
| ENSMMUG00000060440 | leucine rich repeat LGI family member 2 [Source:NCBI gene;Acc:693308]                  | 0.657318787 | 1.86E-10    | 2.27E-09    |
| ENSMMUG00000003629 | phosphatidylinositol 4-kinase type 2 beta [Source:NCBI gene;Acc:693561]                | 2.007368466 | 2.33E-05    | 0.000122099 |

|                    |                                                                                        |   |             |             |             |
|--------------------|----------------------------------------------------------------------------------------|---|-------------|-------------|-------------|
| ENSMMUG00000053638 |                                                                                        | - | 0.732710321 | 0.005928706 | 0.017209377 |
| ENSMMUG00000049298 | cholecystinin A receptor [Source:NCBI gene;Acc:694742]                                 |   | 7.193475326 | 3.28E-13    | 5.72E-12    |
| ENSMMUG00000057711 |                                                                                        |   | 0.80892162  | 0.003016837 | 0.009529736 |
| ENSMMUG00000055119 |                                                                                        |   | 2.631333553 | 0.011781892 | 0.031189835 |
| ENSMMUG00000051768 |                                                                                        |   | 2.793078326 | 3.65E-12    | 5.57E-11    |
| ENSMMUG00000060404 |                                                                                        |   | 1.658662022 | 0.00869044  | 0.024004326 |
| ENSMMUG00000049637 |                                                                                        |   | 0.73673111  | 0.005318347 | 0.015649025 |
| ENSMMUG00000057377 |                                                                                        |   | 1.894822333 | 0.012228492 | 0.032190001 |
| ENSMMUG0000000237  | TBC1 domain family member 1 [Source:VGNC Symbol;Acc:VGNC:78103]                        |   | 0.565078536 | 0.001404178 | 0.004871103 |
| ENSMMUG00000050580 |                                                                                        |   | 0.51227272  | 0.011053543 | 0.029488045 |
| ENSMMUG00000055079 |                                                                                        |   | 0.848302232 | 5.91E-10    | 6.70E-09    |
| ENSMMUG00000003363 | Kruppel like factor 3 [Source:VGNC Symbol;Acc:VGNC:73840]                              |   | 2.433638801 | 0.000591412 | 0.002253505 |
| ENSMMUG00000004471 | family with sequence similarity 114 member A1 [Source:VGNC Symbol;Acc:VGNC:72342]      |   | 1.098886578 | 0.004048159 | 0.012357803 |
| ENSMMUG00000002755 | kelch like family member 5 [Source:VGNC Symbol;Acc:VGNC:74188]                         |   | 2.044933107 | 0.000154867 | 0.000674698 |
| ENSMMUG00000050388 | Metazoan signal recognition particle RNA [Source:RFAM;Acc:RF00017]                     |   | 0.736678343 | 0.015951627 | 0.040307144 |
| ENSMMUG00000009324 | replication factor C subunit 1 [Source:NCBI gene;Acc:698987]                           |   | 0.864996257 | 0.000257474 | 0.001071666 |
| ENSMMUG00000008834 | klotho beta [Source:VGNC Symbol;Acc:VGNC:73835]                                        |   | 1.932257109 | 0.001462065 | 0.005043598 |
| ENSMMUG00000001892 | UDP-glucose 6-dehydrogenase [Source:VGNC Symbol;Acc:VGNC:78711]                        |   | 1.349185294 | 1.55E-07    | 1.21E-06    |
| ENSMMUG00000063857 | ras homolog family member H [Source:NCBI gene;Acc:700499]                              |   | 0.354244847 | 0.015203728 | 0.03867432  |
| ENSMMUG00000012036 | RNA binding motif protein 47 [Source:VGNC Symbol;Acc:VGNC:76576]                       |   | 0.640495315 | 2.29E-05    | 0.000120034 |
| ENSMMUG00000012561 | NOP2/Sun RNA methyltransferase family member 7 [Source:VGNC Symbol;Acc:VGNC:75463]     |   | 1.424865824 | 2.95E-13    | 5.15E-12    |
| ENSMMUG00000055441 |                                                                                        |   | 2.160995871 | 6.71E-08    | 5.55E-07    |
| ENSMMUG00000007805 | LIM and calponin homology domains 1 [Source:VGNC Symbol;Acc:VGNC:74155]                |   | -1.14759481 | 0.002479946 | 0.008017648 |
| ENSMMUG00000051296 | paired like homeobox 2B [Source:NCBI gene;Acc:701940]                                  |   | 1.361371641 | 0.000137309 | 0.000606218 |
| ENSMMUG00000053719 | Metazoan signal recognition particle RNA [Source:RFAM;Acc:RF00017]                     |   | 2.739706564 | 0.00606431  | 0.017544618 |
| ENSMMUG00000030349 | glutaredoxin and cysteine rich domain containing 1 [Source:VGNC Symbol;Acc:VGNC:73262] |   | 1.276489539 | 0.016863757 | 0.042302014 |
| ENSMMUG00000018625 | NIPA like domain containing 1 [Source:NCBI gene;Acc:704998]                            |   | -0.97335879 | 6.24E-06    | 3.64E-05    |
| ENSMMUG00000055221 | Metazoan signal recognition particle RNA [Source:RFAM;Acc:RF00017]                     |   | 1.659509044 | 0.000870851 | 0.003173932 |
| ENSMMUG00000006703 | solute carrier family 10 member 4 [Source:VGNC Symbol;Acc:VGNC:77553]                  |   | 1.482205007 | 8.89E-09    | 8.38E-08    |
| ENSMMUG00000006704 | zygote arrest 1 [Source:VGNC Symbol;Acc:VGNC:79251]                                    |   | 1.063055109 | 6.61E-06    | 3.85E-05    |
| ENSMMUG00000006705 | FRY like transcription coactivator [Source:VGNC Symbol;Acc:VGNC:72803]                 |   | 0.871622868 | 0.001873394 | 0.006289421 |
| ENSMMUG00000056196 |                                                                                        |   | 1.153828258 | 0.000563763 | 0.002162041 |
| ENSMMUG00000052435 | Metazoan signal recognition particle RNA [Source:RFAM;Acc:RF00017]                     |   | 1.877591938 | 2.29E-06    | 1.45E-05    |
| ENSMMUG00000014868 | OCIA domain containing 1 [Source:VGNC Symbol;Acc:VGNC:75409]                           |   | 1.436847001 | 4.76E-11    | 6.27E-10    |
| ENSMMUG00000058229 | U6 spliceosomal RNA [Source:RFAM;Acc:RF00026]                                          |   | 3.396065351 | 5.34E-07    | 3.80E-06    |
| ENSMMUG00000008514 | lin-54 DREAM MuvB core complex component [Source:VGNC Symbol;Acc:VGNC:74123]           |   | 1.687360163 | 4.80E-05    | 0.000234131 |
| ENSMMUG00000008510 | THAP domain containing 9 [Source:VGNC Symbol;Acc:VGNC:79379]                           |   | 1.291458135 | 1.98E-05    | 0.000105405 |

|                    |                                                                                      |   |             |             |             |
|--------------------|--------------------------------------------------------------------------------------|---|-------------|-------------|-------------|
| ENSMMUG00000052743 | stearoyl-CoA desaturase 5 [Source:NCBI gene;Acc:694079]                              | - | 0.868087192 | 0.000837882 | 0.00307037  |
| ENSMMUG00000059119 |                                                                                      | - | 2.334146691 | 0.015029086 | 0.038315513 |
| ENSMMUG00000001485 | transmembrane protein 150C [Source:NCBI gene;Acc:694136]                             | - | 1.619874062 | 0.010230359 | 0.027599824 |
| ENSMMUG00000048621 | enolase-phosphatase 1 [Source:NCBI gene;Acc:106998330]                               | - | 2.395680542 | 3.33E-12    | 5.13E-11    |
| ENSMMUG00000060484 | heterogeneous nuclear ribonucleoprotein D [Source:NCBI gene;Acc:694867]              | - | 1.172414746 | 2.28E-05    | 0.000119548 |
| ENSMMUG00000052348 |                                                                                      | - | 1.606140018 | 5.12E-07    | 3.65E-06    |
| ENSMMUG00000021988 | N-alpha-acetyltransferase 11, NatA catalytic subunit [Source:NCBI gene;Acc:696758]   | - | 1.316712585 | 2.14E-12    | 3.38E-11    |
| ENSMMUG00000007366 |                                                                                      | - | 1.0880028   | 1.53E-07    | 1.20E-06    |
| ENSMMUG00000002564 | Fraser extracellular matrix complex subunit 1 [Source:VGNC Symbol;Acc:VGNC:72743]    | - | 2.009739034 | 7.01E-23    | 3.41E-21    |
| ENSMMUG00000045609 | CCR4-NOT transcription complex subunit 6 like [Source:NCBI gene;Acc:697981]          | - | 3.140102799 | 1.04E-38    | 2.34E-36    |
| ENSMMUG00000019901 | septin 11 [Source:VGNC Symbol;Acc:VGNC:77310]                                        | - | 0.538609649 | 0.002090244 | 0.006914639 |
| ENSMMUG00000019904 | cyclin I [Source:VGNC Symbol;Acc:VGNC:70733]                                         | - | 1.539204714 | 0.003081393 | 0.00971451  |
| ENSMMUG00000018186 | sosondawah ankyrin repeat domain family member B [Source:VGNC Symbol;Acc:VGNC:78033] | - | -0.89175768 | 2.23E-11    | 3.05E-10    |
| ENSMMUG00000020919 | shroom family member 3 [Source:VGNC Symbol;Acc:VGNC:77352]                           | - | 2.156890749 | 2.69E-08    | 2.36E-07    |
| ENSMMUG00000020916 | coiled-coil domain containing 158 [Source:NCBI gene;Acc:699735]                      | - | 1.230069546 | 3.86E-17    | 1.02E-15    |
| ENSMMUG00000020913 | scavenger receptor class B member 2 [Source:VGNC Symbol;Acc:VGNC:77026]              | - | 1.117083308 | 0.000168009 | 0.00072662  |
| ENSMMUG00000020910 | nucleoporin 54 [Source:VGNC Symbol;Acc:VGNC:75420]                                   | - | 1.843218131 | 5.53E-08    | 4.63E-07    |
| ENSMMUG00000002153 | G3BP stress granule assembly factor 2 [Source:NCBI gene;Acc:701343]                  | - | 3.158018862 | 0.008367303 | 0.023243527 |
| ENSMMUG00000003833 | Ras association domain family member 6 [Source:VGNC Symbol;Acc:VGNC:76515]           | - | 1.495574613 | 3.93E-05    | 0.000194482 |
| ENSMMUG00000003830 | alpha fetoprotein [Source:VGNC Symbol;Acc:VGNC:69741]                                | - | 1.421059612 | 0.005036072 | 0.014942967 |
| ENSMMUG00000003827 | albumin [Source:VGNC Symbol;Acc:VGNC:69782]                                          | - | 1.591697365 | 1.61E-09    | 1.71E-08    |
| ENSMMUG00000000790 | ankyrin repeat domain 17 [Source:VGNC Symbol;Acc:VGNC:84240]                         | - | 2.301261813 | 4.30E-13    | 7.42E-12    |
| ENSMMUG00000052832 |                                                                                      | - | 1.222801763 | 0.002064603 | 0.006843554 |
| ENSMMUG00000006031 | casein kappa [Source:VGNC Symbol;Acc:VGNC:71522]                                     | - | 1.858124124 | 0.007895882 | 0.02207691  |
| ENSMMUG00000062248 | follicular dendritic cell secreted protein [Source:NCBI gene;Acc:707784]             | - | 0.993051615 | 3.45E-05    | 0.000173845 |
| ENSMMUG00000006029 | odontogenic, ameloblast associated [Source:NCBI gene;Acc:707906]                     | - | 1.001297054 | 0.000328411 | 0.001332879 |
| ENSMMUG00000048823 |                                                                                      | - | 1.149759708 | 3.33E-09    | 3.37E-08    |
| ENSMMUG00000004849 | casein beta [Source:VGNC Symbol;Acc:VGNC:71523]                                      | - | 1.360891696 | 6.84E-09    | 6.58E-08    |
| ENSMMUG00000047324 | casein alpha s1 [Source:HGNC Symbol;Acc:HGNC:2445]                                   | - | 1.768859048 | 0.000432314 | 0.001708581 |
| ENSMMUG00000004667 | sulfotransferase family 1E member 1 [Source:NCBI gene;Acc:708519]                    | - | 1.120687412 | 0.017216037 | 0.042960428 |
| ENSMMUG00000009390 | centromere protein C [Source:VGNC Symbol;Acc:VGNC:71007]                             | - | -0.34980243 | 0.014478482 | 0.037128806 |
| ENSMMUG00000001919 | clock circadian regulator [Source:VGNC Symbol;Acc:VGNC:71262]                        | - | -1.0360796  | 5.28E-09    | 5.17E-08    |
| ENSMMUG00000001918 | transmembrane protein 165 [Source:VGNC Symbol;Acc:VGNC:79875]                        | - | 1.966065565 | 4.94E-09    | 4.85E-08    |
| ENSMMUG00000010113 | steroid 5 alpha-reductase 3 [Source:VGNC Symbol;Acc:VGNC:82246]                      | - | 1.399446828 | 2.30E-07    | 1.74E-06    |
| ENSMMUG00000057204 | Metazoan signal recognition particle RNA [Source:RFAM;Acc:RF00017]                   | - | 1.645890293 | 0.006358248 | 0.018291525 |
| ENSMMUG00000054500 |                                                                                      | - | 1.845912901 | 0.004765877 | 0.014261089 |
| ENSMMUG00000060048 |                                                                                      | - | 0.677329477 | 0.015313601 | 0.0389271   |

|                    |                                                                                                  |   |             |             |             |
|--------------------|--------------------------------------------------------------------------------------------------|---|-------------|-------------|-------------|
| ENSMMUG00000059659 |                                                                                                  | - | 0.967094992 | 0.000471697 | 0.001844743 |
| ENSMMUG00000052882 | RAS like family 11 member B [Source:NCBI gene;Acc:701397]                                        |   | 2.318974789 | 0.00326742  | 0.010244246 |
| ENSMMUG00000018943 | spermatogenesis associated 18 [Source:VGNC Symbol;Acc:VGNC:78013]                                |   | 1.808252808 | 6.99E-07    | 4.88E-06    |
| ENSMMUG00000018939 | leucine rich repeat containing 66 [Source:VGNC Symbol;Acc:VGNC:74415]                            |   | 1.798929169 | 1.35E-13    | 2.46E-12    |
| ENSMMUG00000008579 | defective in cullin neddylation 1 domain containing 4 [Source:VGNC Symbol;Acc:VGNC:71809]        |   | 1.752918107 | 4.46E-07    | 3.21E-06    |
| ENSMMUG00000003726 | protein tyrosine phosphatase non-receptor type 13 [Source:VGNC Symbol;Acc:VGNC:76599]            |   | 1.188422965 | 6.04E-05    | 0.000288704 |
| ENSMMUG00000059657 | chromosome 5 C4orf36 homolog [Source:NCBI gene;Acc:700500]                                       |   | 1.194060104 | 0.001182767 | 0.004186262 |
| ENSMMUG00000014076 | AF4/FMR2 family member 1 [Source:VGNC Symbol;Acc:VGNC:69817]                                     |   | 2.259196747 | 9.13E-06    | 5.16E-05    |
| ENSMMUG00000051677 |                                                                                                  |   | 1.339535416 | 2.42E-11    | 3.30E-10    |
| ENSMMUG00000014080 | kelch like family member 8 [Source:VGNC Symbol;Acc:VGNC:74076]                                   |   | 1.334282688 | 4.29E-05    | 0.000211203 |
| ENSMMUG00000019040 | hydroxysteroid 17-beta dehydrogenase 13 [Source:VGNC Symbol;Acc:VGNC:73417]                      |   | 1.30304659  | 6.28E-12    | 9.25E-11    |
| ENSMMUG00000019041 | hydroxysteroid 17-beta dehydrogenase 11 [Source:VGNC Symbol;Acc:VGNC:73431]                      |   | 0.994822681 | 2.20E-05    | 0.000115948 |
| ENSMMUG00000008795 | polycystin 2, transient receptor potential cation channel [Source:NCBI gene;Acc:702179]          |   | 1.167848353 | 1.24E-06    | 8.26E-06    |
| ENSMMUG00000008797 | ATP binding cassette subfamily G member 2 (Junior blood group) [Source:NCBI gene;Acc:574307]     |   | 1.221549968 | 1.19E-06    | 8.00E-06    |
| ENSMMUG00000028039 | U6 spliceosomal RNA [Source:RFAM;Acc:RF00026]                                                    |   | 2.121513522 | 0.003701039 | 0.011401415 |
| ENSMMUG00000058698 |                                                                                                  |   | -1.00439793 | 0.011805842 | 0.031242084 |
| ENSMMUG00000010138 | HECT and RLD domain containing E3 ubiquitin protein ligase 3 [Source:VGNC Symbol;Acc:VGNC:73365] |   | 0.659941474 | 2.35E-05    | 0.00012301  |
| ENSMMUG00000058544 | nucleosome assembly protein 1 like 5 [Source:NCBI gene;Acc:703223]                               |   | 0.870154608 | 2.61E-07    | 1.96E-06    |
| ENSMMUG00000010141 | family with sequence similarity 13 member A [Source:VGNC Symbol;Acc:VGNC:72299]                  |   | 0.914283404 | 3.78E-07    | 2.75E-06    |
| ENSMMUG00000032793 | U6 spliceosomal RNA [Source:RFAM;Acc:RF00026]                                                    |   | -2.70922892 | 0.000479313 | 0.001873048 |
| ENSMMUG00000057606 | GPRIN family member 3 [Source:NCBI gene;Acc:703567]                                              |   | -2.6738693  | 3.15E-19    | 1.00E-17    |
| ENSMMUG00000049396 | Metazoan signal recognition particle RNA [Source:RFAM;Acc:RF00017]                               |   | 2.738920183 | 2.87E-06    | 1.79E-05    |
| ENSMMUG00000022003 | multimerin 1 [Source:VGNC Symbol;Acc:VGNC:74904]                                                 |   | 1.677189008 | 1.02E-06    | 6.91E-06    |
| ENSMMUG00000056021 |                                                                                                  |   | 1.139453881 | 0.020529936 | 0.049919486 |
| ENSMMUG00000022246 | PDZ and LIM domain 5 [Source:VGNC Symbol;Acc:VGNC:75816]                                         |   | 1.04478326  | 5.57E-06    | 3.28E-05    |
| ENSMMUG00000060760 |                                                                                                  |   | 1.430559254 | 2.14E-08    | 1.91E-07    |
| ENSMMUG00000006702 | bone morphogenetic protein receptor type 1B [Source:VGNC Symbol;Acc:VGNC:70267]                  |   | 1.753143761 | 3.33E-05    | 0.000168126 |
| ENSMMUG00000006309 | unc-5 netrin receptor C [Source:VGNC Symbol;Acc:VGNC:78723]                                      |   | 3.239279278 | 2.91E-06    | 1.81E-05    |
| ENSMMUG00000011702 | tetraspanin 5 [Source:VGNC Symbol;Acc:VGNC:79086]                                                |   | 1.905054142 | 7.00E-09    | 6.73E-08    |
| ENSMMUG00000063972 |                                                                                                  |   | 1.158123304 | 3.73E-06    | 2.27E-05    |
| ENSMMUG00000011066 | eukaryotic translation initiation factor 4E [Source:NCBI gene;Acc:706751]                        |   | 2.117982883 | 0.0019523   | 0.006517922 |
| ENSMMUG00000040764 | alcohol dehydrogenase 1A [Source:NCBI gene;Acc:100424103]                                        |   | 1.350298686 | 4.37E-07    | 3.15E-06    |
| ENSMMUG00000018738 | alcohol dehydrogenase 1B (class I), beta polypeptide [Source:NCBI gene;Acc:707908]               |   | 0.906213116 | 8.02E-08    | 6.54E-07    |
| ENSMMUG00000061366 |                                                                                                  |   | 0.604949008 | 0.001240145 | 0.00436331  |
| ENSMMUG00000016880 | solute carrier family 39 member 8 [Source:VGNC Symbol;Acc:VGNC:77541]                            |   | 2.403900596 | 3.12E-10    | 3.68E-09    |

|                     |                                                                                            |             |             |             |
|---------------------|--------------------------------------------------------------------------------------------|-------------|-------------|-------------|
| ENSMMUG00000037551  | Metazoan signal recognition particle RNA [Source:RFAM;Acc:RF00017]                         | 2.564027706 | 1.53E-11    | 2.13E-10    |
| ENSMMUG0000003736   | nuclear factor kappa B subunit 1 [Source:VGNC Symbol;Acc:VGNC:75339]                       | 2.553960537 | 3.10E-10    | 3.66E-09    |
| ENSMMUG0000003739   | mannosidase beta [Source:VGNC Symbol;Acc:VGNC:74486]                                       | 2.43834061  | 3.53E-23    | 1.79E-21    |
| ENSMMUG00000042419  |                                                                                            | 2.142382859 | 0.000935958 | 0.003386255 |
| ENSMMUG00000011206  | solute carrier family 9 member B1 [Source:NCBI gene;Acc:710949]                            | 0.961201095 | 1.34E-09    | 1.44E-08    |
| ENSMMUG00000011207  |                                                                                            | 0.862105487 | 0.001015289 | 0.003648347 |
| ENSMMUG00000019083  | solute carrier family 9 member B2 [Source:VGNC Symbol;Acc:VGNC:77773]                      | 1.025821369 | 4.12E-06    | 2.49E-05    |
| ENSMMUG00000019085  | 3-hydroxybutyrate dehydrogenase 2 [Source:VGNC Symbol;Acc:VGNC:70161]                      | 1.239538644 | 3.55E-12    | 5.43E-11    |
| ENSMMUG00000019089  | centromere protein E [Source:VGNC Symbol;Acc:VGNC:71008]                                   | 1.19192897  | 2.86E-10    | 3.40E-09    |
| ENSMMUG00000049998  | tachykinin receptor 3 [Source:NCBI gene;Acc:653013]                                        | 1.441007761 | 0.000496111 | 0.001931563 |
| ENSMMUG00000010941  | Rho guanine nucleotide exchange factor 38 [Source:VGNC Symbol;Acc:VGNC:82087]              | 0.506466574 | 0.000182915 | 0.00078627  |
| ENSMMUG00000011722  | integrator complex subunit 12 [Source:VGNC Symbol;Acc:VGNC:73647]                          | 0.509786635 | 0.002370547 | 0.007714552 |
| ENSMMUG00000018811  | glutathione S-transferase C-terminal domain containing [Source:VGNC Symbol;Acc:VGNC:73234] | 0.749037552 | 0.005741904 | 0.016729359 |
| ENSMMUG00000023428  | nephronectin [Source:VGNC Symbol;Acc:VGNC:75266]                                           | 2.255970383 | 0.015337842 | 0.038961422 |
| ENSMMUG00000023256  | lymphoid enhancer binding factor 1 [Source:VGNC Symbol;Acc:VGNC:74251]                     | 0.448872014 | 0.009474942 | 0.025848673 |
| ENSMMUG00000009066  | 60S ribosomal protein L26 [Source:NCBI gene;Acc:696134]                                    | 2.291906157 | 0.001675507 | 0.005688591 |
| ENSMMUG00000060432  |                                                                                            | 1.272973578 | 0.001405364 | 0.004874077 |
| ENSMMUG00000052609  | ribosomal protein L34 [Source:NCBI gene;Acc:696636]                                        | 3.492844739 | 7.13E-15    | 1.51E-13    |
| ENSMMUG00000011902  | oligosaccharyltransferase complex non-catalytic subunit [Source:NCBI gene;Acc:697283]      | 3.659965308 | 2.29E-32    | 2.80E-30    |
| ENSMMUG00000055759  | Metazoan signal recognition particle RNA [Source:RFAM;Acc:RF00017]                         | 2.857076863 | 2.00E-14    | 4.01E-13    |
| ENSMMUG00000010043  | epidermal growth factor [Source:VGNC Symbol;Acc:VGNC:72171]                                | 1.080331627 | 1.60E-07    | 1.25E-06    |
| ENSMMUG00000050694  | ELOVL fatty acid elongase 6 [Source:NCBI gene;Acc:698870]                                  | 0.390198907 | 0.011056669 | 0.029491081 |
| ENSMMUG00000062794  |                                                                                            | 3.214104802 | 2.16E-21    | 8.96E-20    |
| ENSMMUG00000008705  | ubiquitin specific peptidase 53 [Source:VGNC Symbol;Acc:VGNC:79793]                        | 2.620248285 | 0.000567425 | 0.002173835 |
| ENSMMUG00000007305  | phosphodiesterase 5A [Source:VGNC Symbol;Acc:VGNC:75918]                                   | 2.107224686 | 0.015078879 | 0.038429245 |
| ENSMMUG00000054168  | mitotic arrest deficient 2 like 1 [Source:NCBI gene;Acc:708574]                            | 2.211670562 | 0.012341558 | 0.032457049 |
| ENSMMUG00000009816  | exosome component 9 [Source:VGNC Symbol;Acc:VGNC:72477]                                    | 1.247702686 | 0.003300721 | 0.010322583 |
| ENSMMUG00000061098  |                                                                                            | 1.8533901   | 4.29E-26    | 2.86E-24    |
| ENSMMUG00000007422  | spermatogenesis associated 5 [Source:VGNC Symbol;Acc:VGNC:77952]                           | 1.477814817 | 3.08E-12    | 4.78E-11    |
| ENSMMUG00000001848  | sprouty RTK signaling antagonist 1 [Source:VGNC Symbol;Acc:VGNC:77867]                     | 1.348600609 | 4.56E-13    | 7.86E-12    |
| ENSMMUG000000056171 |                                                                                            | 1.247500425 | 0.001453272 | 0.005017932 |
| ENSMMUG000000054312 |                                                                                            | 1.916314005 | 0.002029241 | 0.006738389 |
| ENSMMUG00000011810  | FAT atypical cadherin 4 [Source:VGNC Symbol;Acc:VGNC:72552]                                | 2.831593914 | 1.92E-11    | 2.64E-10    |
| ENSMMUG00000057895  |                                                                                            | 3.234926824 | 0.000192897 | 0.000825112 |
| ENSMMUG00000051329  |                                                                                            | 1.759395012 | 6.62E-07    | 4.65E-06    |
| ENSMMUG00000049109  |                                                                                            | 1.882545791 | 0.002702221 | 0.008660889 |
| ENSMMUG00000010444  | ring finger protein 150 [Source:VGNC Symbol;Acc:VGNC:76805]                                | 2.935987419 | 0.001370858 | 0.004769257 |

|                    |                                                                                    |             |             |             |
|--------------------|------------------------------------------------------------------------------------|-------------|-------------|-------------|
| ENSMMUG00000060157 | zinc finger protein 330 [Source:NCBI gene;Acc:699364]                              | 0.712572931 | 7.42E-06    | 4.27E-05    |
| ENSMMUG00000003697 | inositol polyphosphate-4-phosphatase type II B [Source:VGNC Symbol;Acc:VGNC:73748] | 1.672782698 | 1.60E-11    | 2.23E-10    |
| ENSMMUG00000044429 | glycophorin A (MNS blood group) [Source:NCBI gene;Acc:574101]                      | 0.890037798 | 0.011819087 | 0.031265976 |
| ENSMMUG00000014173 |                                                                                    | -1.96405214 | 1.22E-07    | 9.75E-07    |
| ENSMMUG00000007968 | hedgehog interacting protein [Source:VGNC Symbol;Acc:VGNC:73169]                   | 2.159348634 | 4.90E-16    | 1.14E-14    |
| ENSMMUG00000004432 | anaphase promoting complex subunit 10 [Source:VGNC Symbol;Acc:VGNC:69682]          | 1.125864615 | 0.008331602 | 0.023161842 |
| ENSMMUG00000004433 | ATP binding cassette subfamily E member 1 [Source:VGNC Symbol;Acc:VGNC:69581]      | 1.038507799 | 0.004108688 | 0.012529683 |
| ENSMMUG00000004437 | OTU deubiquitinase 4 [Source:VGNC Symbol;Acc:VGNC:75675]                           | 1.160571435 | 0.001299805 | 0.004552695 |
| ENSMMUG00000005380 | zinc finger protein 827 [Source:NCBI gene;Acc:706018]                              | 0.747075832 | 0.000716751 | 0.002669367 |
| ENSMMUG00000014953 | Rho GTPase activating protein 10 [Source:VGNC Symbol;Acc:VGNC:69914]               | 1.043069675 | 0.005108265 | 0.015111822 |
| ENSMMUG00000014955 | nuclear receptor subfamily 3 group C member 2 [Source:VGNC Symbol;Acc:VGNC:75516]  | 2.707973929 | 5.84E-11    | 7.62E-10    |
| ENSMMUG00000002211 | doublecortin like kinase 2 [Source:VGNC Symbol;Acc:VGNC:71670]                     | 0.784733784 | 0.001220365 | 0.004302902 |
| ENSMMUG00000002212 | LPS responsive beige-like anchor protein [Source:NCBI gene;Acc:693823]             | 1.215782443 | 0.000155616 | 0.000677566 |
| ENSMMUG00000039441 | mab-21 like 2 [Source:NCBI gene;Acc:693948]                                        | 2.379208425 | 1.57E-05    | 8.52E-05    |
| ENSMMUG00000059101 |                                                                                    | 2.714793188 | 2.63E-08    | 2.31E-07    |
| ENSMMUG00000020330 | F-box and WD repeat domain containing 7 [Source:VGNC Symbol;Acc:VGNC:72516]        | 1.946864296 | 0.002234506 | 0.007310329 |
| ENSMMUG00000064587 |                                                                                    | 2.065807151 | 0.000857112 | 0.003130781 |
| ENSMMUG00000063665 |                                                                                    | -1.77138673 | 0.000220418 | 0.000931018 |
| ENSMMUG00000052327 |                                                                                    | 1.852854807 | 7.24E-06    | 4.18E-05    |
| ENSMMUG00000018490 | ADP ribosylation factor interacting protein 1 [Source:VGNC Symbol;Acc:VGNC:69878]  | 2.112434506 | 1.06E-26    | 7.83E-25    |
| ENSMMUG00000018493 | FH2 domain containing 1 [Source:VGNC Symbol;Acc:VGNC:72598]                        | 2.027340096 | 2.17E-09    | 2.26E-08    |
| ENSMMUG00000065105 |                                                                                    | 1.668297712 | 0.000998244 | 0.003597561 |
| ENSMMUG00000039869 |                                                                                    | 0.948418339 | 0.000587404 | 0.00223996  |
| ENSMMUG00000009001 | transmembrane 131 like [Source:VGNC Symbol;Acc:VGNC:79781]                         | 1.361722194 | 2.75E-05    | 0.000141764 |
| ENSMMUG00000057060 |                                                                                    | 1.057109156 | 0.003754619 | 0.011552074 |
| ENSMMUG00000057643 |                                                                                    | 0.815446486 | 1.82E-07    | 1.40E-06    |
| ENSMMUG00000052999 | lecithin retinol acyltransferase [Source:NCBI gene;Acc:698871]                     | 0.600078325 | 1.62E-07    | 1.26E-06    |
| ENSMMUG00000064074 |                                                                                    | 0.828784204 | 6.76E-05    | 0.00031934  |
| ENSMMUG00000021147 | RNA binding motif protein 46 [Source:VGNC Symbol;Acc:VGNC:76555]                   | 0.653109568 | 0.000113754 | 0.000511724 |
| ENSMMUG00000023244 | guanylate cyclase 1 soluble subunit alpha 1 [Source:VGNC Symbol;Acc:VGNC:73327]    | 1.546305376 | 0.005020761 | 0.0149035   |
| ENSMMUG00000022019 | cathepsin O [Source:VGNC Symbol;Acc:VGNC:71561]                                    | 0.712572665 | 1.78E-07    | 1.38E-06    |
| ENSMMUG00000064707 |                                                                                    | 2.519127864 | 2.44E-14    | 4.84E-13    |
| ENSMMUG00000053790 |                                                                                    | 2.004340004 | 9.39E-14    | 1.76E-12    |
| ENSMMUG00000010581 | Rap guanine nucleotide exchange factor 2 [Source:VGNC Symbol;Acc:VGNC:76493]       | 2.05097277  | 2.12E-05    | 0.000111762 |
| ENSMMUG00000053650 |                                                                                    | 3.053311332 | 0.003779244 | 0.011622172 |
| ENSMMUG00000015799 | tolloid like 1 [Source:VGNC Symbol;Acc:VGNC:78369]                                 | -1.1699449  | 1.44E-05    | 7.87E-05    |

|                    |                                                                                                      |             |             |             |
|--------------------|------------------------------------------------------------------------------------------------------|-------------|-------------|-------------|
| ENSMMUG00000045101 |                                                                                                      | 0.677565622 | 0.000593721 | 0.002261721 |
| ENSMMUG00000006851 | SPARC (osteonectin), cwcv and kazal like domains proteoglycan 3 [Source:NCBI gene;Acc:705964]        | 3.956170642 | 1.97E-23    | 1.04E-21    |
| ENSMMUG00000001879 | annexin A10 [Source:VGNC Symbol;Acc:VGNC:69945]                                                      | 1.224497212 | 5.11E-08    | 4.29E-07    |
| ENSMMUG00000001880 | DExD/H-box helicase 60 [Source:VGNC Symbol;Acc:VGNC:71711]                                           | 1.366260358 | 8.42E-23    | 4.07E-21    |
| ENSMMUG00000003634 | DExD/H-box 60 like [Source:VGNC Symbol;Acc:VGNC:71720]                                               | -1.34592002 | 6.19E-06    | 3.61E-05    |
| ENSMMUG00000013730 | WD repeat domain 17 [Source:NCBI gene;Acc:700546]                                                    | 0.626402551 | 4.66E-07    | 3.34E-06    |
|                    |                                                                                                      | -           |             |             |
| ENSMMUG00000064304 |                                                                                                      | 0.601586124 | 5.14E-05    | 0.000249041 |
|                    |                                                                                                      | -           |             |             |
| ENSMMUG00000049670 |                                                                                                      | 4.067583233 | 0.001216322 | 0.004292732 |
|                    |                                                                                                      | -           |             |             |
| ENSMMUG00000015733 | sorbin and SH3 domain containing 2 [Source:VGNC Symbol;Acc:VGNC:77767]                               | 1.221434795 | 0.012495278 | 0.032768342 |
| ENSMMUG00000011633 | kallikrein B1 [Source:VGNC Symbol;Acc:VGNC:74195]                                                    | 1.865288995 | 0.002138114 | 0.007045863 |
| ENSMMUG00000011634 | coagulation factor XI [Source:VGNC Symbol;Acc:VGNC:72460]                                            | 1.610522344 | 0.012411907 | 0.032613144 |
|                    |                                                                                                      | -           |             |             |
| ENSMMUG00000018051 | FAT atypical cadherin 1 [Source:VGNC Symbol;Acc:VGNC:72617]                                          | 0.901922821 | 8.80E-15    | 1.85E-13    |
| ENSMMUG00000050600 |                                                                                                      | 2.326158663 | 0.006298225 | 0.018139964 |
| ENSMMUG00000058448 |                                                                                                      | 0.622772483 | 0.018569641 | 0.045821594 |
| ENSMMUG00000050465 | ZFP42 zinc finger protein [Source:NCBI gene;Acc:707621]                                              | 2.803868801 | 4.76E-26    | 3.14E-24    |
| ENSMMUG00000010967 | tripartite motif family like 2 [Source:VGNC Symbol;Acc:VGNC:79603]                                   | 3.423798528 | 0.000384956 | 0.001537956 |
|                    |                                                                                                      | -           |             |             |
| ENSMMUG00000054799 |                                                                                                      | 2.084057895 | 0.000156103 | 0.000679087 |
|                    |                                                                                                      | -           |             |             |
| ENSMMUG00000064721 |                                                                                                      | 1.948148329 | 0.000263211 | 0.001091637 |
|                    |                                                                                                      | -           |             |             |
| ENSMMUG00000052287 |                                                                                                      | 2.911046796 | 3.71E-07    | 2.70E-06    |
|                    |                                                                                                      | -           |             |             |
| ENSMMUG00000044628 |                                                                                                      | 2.677168598 | 2.79E-07    | 2.08E-06    |
| ENSMMUG00000063077 | S100 calcium binding protein B [Source:NCBI gene;Acc:708117]                                         | 1.538834345 | 0.000795132 | 0.002931099 |
| ENSMMUG00000015797 | disco interacting protein 2 homolog A [Source:VGNC Symbol;Acc:VGNC:71641]                            | 0.973056317 | 3.64E-07    | 2.66E-06    |
| ENSMMUG00000062496 |                                                                                                      | 3.650044665 | 0.001040256 | 0.003726435 |
| ENSMMUG00000000544 | collagen type VI alpha 1 chain [Source:VGNC Symbol;Acc:VGNC:82084]                                   | 2.941314781 | 0.009040015 | 0.024821962 |
| ENSMMUG00000055589 |                                                                                                      | 2.285706042 | 7.45E-11    | 9.60E-10    |
| ENSMMUG00000052777 |                                                                                                      | 2.43275464  | 1.08E-09    | 1.18E-08    |
| ENSMMUG00000004477 | solute carrier family 19 member 1 [Source:VGNC Symbol;Acc:VGNC:77408]                                | 2.090796258 | 3.04E-08    | 2.65E-07    |
| ENSMMUG00000004472 | collagen type XVIII alpha 1 chain [Source:VGNC Symbol;Acc:VGNC:81291]                                | 2.678674234 | 2.63E-05    | 0.000136278 |
|                    |                                                                                                      | -           |             |             |
| ENSMMUG00000010695 | adenosine deaminase RNA specific B1 [Source:VGNC Symbol;Acc:VGNC:69503]                              | 1.872456002 | 1.57E-09    | 1.67E-08    |
| ENSMMUG00000000953 | family with sequence similarity 207 member A [Source:VGNC Symbol;Acc:VGNC:72273]                     | 1.076382414 | 1.79E-07    | 1.39E-06    |
| ENSMMUG00000000951 | integrin subunit beta 2 [Source:VGNC Symbol;Acc:VGNC:73786]                                          | 2.258696184 | 6.44E-45    | 3.29E-42    |
|                    |                                                                                                      | -           |             |             |
| ENSMMUG00000048545 | small ubiquitin like modifier 3 [Source:NCBI gene;Acc:710764]                                        | 0.459279158 | 0.014712452 | 0.037650676 |
| ENSMMUG00000049755 | leucine rich repeat containing 3 [Source:NCBI gene;Acc:712418]                                       | 3.464153409 | 3.50E-10    | 4.08E-09    |
| ENSMMUG00000004175 | transient receptor potential cation channel subfamily M member 2 [Source:VGNC Symbol;Acc:VGNC:78655] | 1.730311363 | 3.53E-09    | 3.56E-08    |
|                    |                                                                                                      | -           |             |             |
| ENSMMUG00000004173 | phosphofructokinase, liver type [Source:VGNC Symbol;Acc:VGNC:81737]                                  | 0.841781752 | 1.75E-06    | 1.14E-05    |
|                    |                                                                                                      | -           |             |             |
| ENSMMUG00000010648 | DNA methyltransferase 3 like [Source:NCBI gene;Acc:722184]                                           | 1.837996441 | 7.74E-13    | 1.30E-11    |
|                    |                                                                                                      | -           |             |             |
| ENSMMUG00000005271 | PWP2 small subunit processome component [Source:NCBI gene;Acc:722216]                                | 0.515412698 | 0.000826258 | 0.003031521 |
|                    |                                                                                                      | -           |             |             |
| ENSMMUG00000005269 | trafficking protein particle complex 10 [Source:NCBI gene;Acc:713177]                                | 0.343447984 | 0.000644292 | 0.002434358 |
| ENSMMUG00000045179 | 1-acylglycerol-3-phosphate O-acyltransferase 3 [Source:NCBI gene;Acc:713301]                         | 0.687770401 | 2.75E-05    | 0.000141773 |



|                    |                                                                                                                                                                |   |             |             |             |
|--------------------|----------------------------------------------------------------------------------------------------------------------------------------------------------------|---|-------------|-------------|-------------|
| ENSMMUG00000012304 | ribosomal RNA processing 1 [Source:VGNC Symbol;Acc:VGNC:77050]                                                                                                 | - | 0.655406866 | 0.003567275 | 0.011046709 |
| ENSMMUG0000000104  | ribosomal RNA processing 1B [Source:VGNC Symbol;Acc:VGNC:77089]                                                                                                | - | 1.498321044 | 3.08E-12    | 4.77E-11    |
| ENSMMUG00000022791 | heat shock transcription factor 2 binding protein [Source:VGNC Symbol;Acc:VGNC:73532]                                                                          | - | 1.809936024 | 1.28E-06    | 8.51E-06    |
| ENSMMUG00000020050 | salt inducible kinase 1 [Source:NCBI gene;Acc:722303]                                                                                                          | - | 1.497646934 | 0.000576555 | 0.002205393 |
| ENSMMUG00000022107 | phosphodiesterase 9A [Source:VGNC Symbol;Acc:VGNC:75925]                                                                                                       | - | -3.66606496 | 0.000138518 | 0.000611374 |
| ENSMMUG00000018081 | ubiquitin associated and SH3 domain containing A [Source:VGNC Symbol;Acc:VGNC:78687]                                                                           | - | 1.638492487 | 3.25E-08    | 2.81E-07    |
| ENSMMUG00000057951 | U6 spliceosomal RNA [Source:RFAM;Acc:RF00026]                                                                                                                  | - | 2.769388502 | 0.000610177 | 0.002318452 |
| ENSMMUG00000018079 | transmembrane serine protease 3 [Source:VGNC Symbol;Acc:VGNC:78576]                                                                                            | - | 1.355702114 | 0.000148294 | 0.000649692 |
| ENSMMUG00000018058 | ATP binding cassette subfamily G member 1 [Source:VGNC Symbol;Acc:VGNC:69584]                                                                                  | - | -2.12971798 | 2.43E-11    | 3.31E-10    |
| ENSMMUG00000018057 | uromodulin like 1 [Source:VGNC Symbol;Acc:VGNC:78717]                                                                                                          | - | 1.354594087 | 1.43E-07    | 1.13E-06    |
| ENSMMUG00000018053 | zinc finger and BTB domain containing 21 [Source:VGNC Symbol;Acc:VGNC:78892]                                                                                   | - | 0.517287894 | 0.004321207 | 0.013094299 |
| ENSMMUG00000015329 | MX dynamin like GTPase 1 [Source:VGNC Symbol;Acc:VGNC:75086]                                                                                                   | - | 1.181427131 | 0.001829183 | 0.00615958  |
| ENSMMUG00000044257 | MX dynamin like GTPase 2 [Source:VGNC Symbol;Acc:VGNC:81723]                                                                                                   | - | 1.775021374 | 3.16E-08    | 2.74E-07    |
| ENSMMUG00000004257 | beta-secretase 2 [Source:VGNC Symbol;Acc:VGNC:70216]                                                                                                           | - | 1.665752679 | 1.34E-08    | 1.23E-07    |
| ENSMMUG00000058004 |                                                                                                                                                                | - | 1.286873368 | 0.001474912 | 0.005080823 |
| ENSMMUG00000010296 | ETS transcription factor ERG [Source:VGNC Symbol;Acc:VGNC:72427]                                                                                               | - | 2.67359813  | 0.018751861 | 0.046232767 |
| ENSMMUG00000056593 |                                                                                                                                                                | - | 3.588011286 | 3.45E-07    | 2.53E-06    |
| ENSMMUG00000049784 |                                                                                                                                                                | - | 0.708287039 | 0.004883253 | 0.014562365 |
| ENSMMUG00000006962 | VPS26 endosomal protein sorting factor C [Source:VGNC Symbol;Acc:VGNC:79850]                                                                                   | - | 0.532057831 | 0.006263045 | 0.01804565  |
| ENSMMUG00000017505 | tetratricopeptide repeat domain 3 [Source:VGNC Symbol;Acc:VGNC:81785]                                                                                          | - | 0.795644078 | 7.93E-13    | 1.33E-11    |
| ENSMMUG00000062048 |                                                                                                                                                                | - | 1.039759143 | 8.58E-18    | 2.42E-16    |
| ENSMMUG00000055002 | U2 spliceosomal RNA [Source:RFAM;Acc:RF00004]                                                                                                                  | - | 1.625137354 | 0.009929858 | 0.026875954 |
| ENSMMUG00000015566 | holocarboxylase synthetase [Source:VGNC Symbol;Acc:VGNC:73477]                                                                                                 | - | 1.019269645 | 0.001479267 | 0.005092278 |
| ENSMMUG00000010336 | DOP1 leucine zipper like protein B [Source:VGNC Symbol;Acc:VGNC:71832]                                                                                         | - | 1.146778376 | 1.34E-19    | 4.45E-18    |
| ENSMMUG00000064897 |                                                                                                                                                                | - | 0.860564015 | 0.012957492 | 0.033801162 |
| ENSMMUG00000053087 | mitochondrial ribosomal protein S6 [Source:NCBI gene;Acc:697852]                                                                                               | - | 2.345735527 | 0.004277967 | 0.012976529 |
| ENSMMUG00000065271 |                                                                                                                                                                | - | 2.282880304 | 0.002141745 | 0.007051971 |
| ENSMMUG00000054417 |                                                                                                                                                                | - | 0.808670946 | 2.06E-05    | 0.000108908 |
| ENSMMUG00000005511 | SON DNA binding protein [Source:VGNC Symbol;Acc:VGNC:77689]                                                                                                    | - | 1.855536574 | 6.93E-10    | 7.81E-09    |
| ENSMMUG00000022702 | phosphoribosylglycinamide formyltransferase, phosphoribosylglycinamide synthetase, phosphoribosylaminoimidazole synthetase [Source:VGNC Symbol;Acc:VGNC:72882] | - | 1.315466903 | 1.03E-06    | 6.95E-06    |
| ENSMMUG00000003956 | interferon alpha and beta receptor subunit 2 [Source:VGNC Symbol;Acc:VGNC:81330]                                                                               | - | 0.566741603 | 1.00E-05    | 5.64E-05    |
| ENSMMUG00000065005 | Metazoan signal recognition particle RNA [Source:RFAM;Acc:RF00017]                                                                                             | - | 2.156734875 | 8.69E-13    | 1.44E-11    |
| ENSMMUG00000052780 |                                                                                                                                                                | - | 1.97325524  | 1.65E-24    | 9.46E-23    |
| ENSMMUG00000051823 |                                                                                                                                                                | - | 4.003723253 | 0.006490425 | 0.018617237 |
| ENSMMUG00000004624 | synaptojanin 1 [Source:VGNC Symbol;Acc:VGNC:78071]                                                                                                             | - | 0.976032758 | 5.75E-07    | 4.07E-06    |
| ENSMMUG00000010304 | cilia and flagella associated protein 298 [Source:NCBI gene;Acc:700721]                                                                                        | - | 0.606265679 | 4.66E-06    | 2.79E-05    |
| ENSMMUG00000048824 | eva-1 homolog C [Source:NCBI gene;Acc:708681]                                                                                                                  | - | 1.442711239 | 1.42E-25    | 8.84E-24    |
| ENSMMUG00000010295 | URB1 ribosome biogenesis homolog [Source:VGNC Symbol;Acc:VGNC:79074]                                                                                           | - | 2.271752402 | 0.000895709 | 0.003253336 |

|                    |                                                                                                                    |             |             |             |
|--------------------|--------------------------------------------------------------------------------------------------------------------|-------------|-------------|-------------|
| ENSMMUG00000059677 | melanocortin 2 receptor accessory protein [Source:NCBI gene;Acc:701330]                                            | 1.547848003 | 0.008142324 | 0.022688965 |
| ENSMMUG00000059707 | MIS18 kinetochore protein A [Source:NCBI gene;Acc:709275]                                                          | 3.052352976 | 1.18E-11    | 1.67E-10    |
| ENSMMUG00000049457 |                                                                                                                    | 0.698043195 | 0.000766604 | 0.002834389 |
| ENSMMUG00000019571 | TIAM Rac1 associated GEF 1 [Source:VGNC Symbol;Acc:VGNC:81886]                                                     | 1.733443152 | 0.008825983 | 0.02432435  |
| ENSMMUG00000064916 |                                                                                                                    | 2.219974179 | 0.008760942 | 0.02417205  |
| ENSMMUG00000056363 |                                                                                                                    | 1.899015642 | 4.45E-05    | 0.000218468 |
| ENSMMUG00000033200 | Small nucleolar RNA U3 [Source:RFAM;Acc:RF00012]                                                                   | 2.590060347 | 0.00472493  | 0.0141557   |
| ENSMMUG00000061208 | MAP3K7 C-terminal like [Source:NCBI gene;Acc:713717]                                                               | 2.154349392 | 1.02E-50    | 1.16E-47    |
| ENSMMUG00000064638 | Y RNA [Source:RFAM;Acc:RF00019]                                                                                    | 2.695291358 | 0.001927151 | 0.006449933 |
| ENSMMUG00000003023 | chaperonin containing TCP1 subunit 8 [Source:VGNC Symbol;Acc:VGNC:70749]                                           | 1.565850487 | 0.009028252 | 0.024794256 |
| ENSMMUG00000015728 | listerin E3 ubiquitin protein ligase 1 [Source:VGNC Symbol;Acc:VGNC:74275]                                         | 1.029558603 | 0.012073431 | 0.031842253 |
| ENSMMUG00000017605 | mitochondrial ribosomal protein L39 [Source:VGNC Symbol;Acc:VGNC:74737]                                            | 0.960376524 | 1.24E-07    | 9.85E-07    |
| ENSMMUG00000018743 | ubiquitin specific peptidase 25 [Source:VGNC Symbol;Acc:VGNC:78744]                                                | 4.838025534 | 1.84E-10    | 2.25E-09    |
| ENSMMUG00000052195 |                                                                                                                    | 3.752426532 | 2.35E-08    | 2.09E-07    |
| ENSMMUG00000060808 |                                                                                                                    | 3.574240915 | 2.43E-09    | 2.52E-08    |
| ENSMMUG00000020090 | ATP-binding cassette transporter 13 [Source:NCBI gene;Acc:574326]                                                  | 0.495951535 | 0.005607109 | 0.016388142 |
| ENSMMUG00000060576 |                                                                                                                    | 2.050963023 | 2.77E-32    | 3.34E-30    |
| ENSMMUG00000057702 |                                                                                                                    | 2.217479812 | 6.41E-38    | 1.36E-35    |
| ENSMMUG00000060168 |                                                                                                                    | 0.743151939 | 0.000705839 | 0.002635384 |
| ENSMMUG00000065108 |                                                                                                                    | 1.398017803 | 0.001290992 | 0.004522893 |
| ENSMMUG00000017056 | Sad1 and UNC84 domain containing 1 [Source:VGNC Symbol;Acc:VGNC:78161]                                             | 3.485589769 | 3.44E-14    | 6.68E-13    |
| ENSMMUG00000007204 | cytochrome P450 family 2 subfamily W member 1 [Source:VGNC Symbol;Acc:VGNC:81300]                                  | 1.508437374 | 0.001803838 | 0.006079755 |
| ENSMMUG00000007206 | chromosome 3 C7orf50 homolog [Source:VGNC Symbol;Acc:VGNC:70609]                                                   | 2.672019525 | 4.60E-05    | 0.000225352 |
| ENSMMUG00000007208 | G protein-coupled receptor 146 [Source:VGNC Symbol;Acc:VGNC:72979]                                                 | 2.030823174 | 7.47E-08    | 6.13E-07    |
| ENSMMUG00000054497 |                                                                                                                    | 1.426184792 | 0.00774524  | 0.021717133 |
| ENSMMUG00000003283 | extracellular leucine rich repeat and fibronectin type III domain containing 1 [Source:VGNC Symbol;Acc:VGNC:72204] | 1.489382049 | 3.67E-18    | 1.07E-16    |
| ENSMMUG00000015529 | eukaryotic translation initiation factor 3 subunit B [Source:VGNC Symbol;Acc:VGNC:72193]                           | 0.646594606 | 0.000176271 | 0.000759472 |
| ENSMMUG00000055562 | Metazoan signal recognition particle RNA [Source:RFAM;Acc:RF00017]                                                 | 1.301594759 | 0.008461871 | 0.023445154 |
| ENSMMUG00000022624 | putative speedy protein E16 [Source:NCBI gene;Acc:718058]                                                          | 1.102254974 | 4.46E-07    | 3.21E-06    |
| ENSMMUG00000015546 | chromosome 3 C7orf26 homolog [Source:VGNC Symbol;Acc:VGNC:70604]                                                   | 0.884685685 | 0.003058098 | 0.009649276 |
| ENSMMUG00000015545 | zinc finger DHHC-type palmitoyltransferase 4 [Source:VGNC Symbol;Acc:VGNC:79144]                                   | 0.583237205 | 0.013344727 | 0.034658897 |
| ENSMMUG00000010292 | diacylglycerol lipase beta [Source:VGNC Symbol;Acc:VGNC:71803]                                                     | 1.768120186 | 0.019951653 | 0.048769246 |
| ENSMMUG00000021075 | Rac family small GTPase 1 [Source:NCBI gene;Acc:717755]                                                            | 1.023981455 | 3.07E-09    | 3.13E-08    |
| ENSMMUG00000003167 | cytohesin 3 [Source:VGNC Symbol;Acc:VGNC:71829]                                                                    | 1.928630165 | 9.72E-19    | 2.97E-17    |
| ENSMMUG00000030422 | radial spoke head 10 homolog B [Source:NCBI gene;Acc:100424218]                                                    | 0.460923202 | 0.000549693 | 0.002117389 |
| ENSMMUG00000007970 | CCZ1 homolog, vacuolar protein trafficking and biogenesis associated [Source:NCBI gene;Acc:718128]                 | 1.841195472 | 3.97E-14    | 7.68E-13    |
| ENSMMUG00000015477 | lemur tyrosine kinase 2 [Source:VGNC Symbol;Acc:VGNC:74309]                                                        | 1.539989563 | 1.43E-13    | 2.61E-12    |
| ENSMMUG00000015479 | tectonin beta-propeller repeat containing 1 [Source:VGNC Symbol;Acc:VGNC:79348]                                    | 1.596625463 | 8.37E-39    | 1.94E-36    |
| ENSMMUG00000013276 | BAR/IMD domain containing adaptor protein 2 like 1 [Source:VGNC Symbol;Acc:VGNC:70109]                             | 0.557745731 | 0.009169422 | 0.025130758 |

|                    |                                                                                                    |   |             |             |             |
|--------------------|----------------------------------------------------------------------------------------------------|---|-------------|-------------|-------------|
| ENSMMUG00000059873 |                                                                                                    | - | 0.693971778 | 0.019381856 | 0.047563491 |
| ENSMMUG00000023318 | transformation/transcription domain associated protein [Source:VGNC Symbol;Acc:VGNC:78657]         |   | 0.822016611 | 1.62E-19    | 5.27E-18    |
| ENSMMUG00000040393 | zinc finger protein 655 [Source:NCBI gene;Acc:718811]                                              |   | 3.418225303 | 2.73E-26    | 1.85E-24    |
| ENSMMUG00000055483 | transmembrane protein 225B [Source:NCBI gene;Acc:718838]                                           |   | 2.130412406 | 0.00246942  | 0.007991334 |
| ENSMMUG00000022728 | zinc finger and SCAN domain containing 25 [Source:VGNC Symbol;Acc:VGNC:79344]                      |   | 2.550932597 | 1.66E-24    | 9.47E-23    |
| ENSMMUG00000022730 | cytochrome P450, family 3, subfamily A, polypeptide 5 [Source:NCBI gene;Acc:678692]                |   | 1.974977326 | 5.89E-29    | 5.29E-27    |
| ENSMMUG00000050824 |                                                                                                    |   | -           |             |             |
|                    |                                                                                                    |   | 1.835132429 | 0.000800846 | 0.002947764 |
| ENSMMUG00000022502 | tripartite motif containing 4 [Source:VGNC Symbol;Acc:VGNC:79021]                                  |   | -           |             |             |
| ENSMMUG00000022504 | alpha-2-glycoprotein 1, zinc-binding [Source:VGNC Symbol;Acc:VGNC:70201]                           |   | 0.775393695 | 0.005084647 | 0.015059978 |
| ENSMMUG00000004021 | zinc finger protein 3 [Source:VGNC Symbol;Acc:VGNC:81889]                                          |   | 1.092733939 | 4.60E-08    | 3.88E-07    |
| ENSMMUG00000013450 | TATA-box binding protein associated factor 6 [Source:VGNC Symbol;Acc:VGNC:78093]                   |   | -           |             |             |
|                    |                                                                                                    |   | 1.428561265 | 0.013786336 | 0.035662195 |
| ENSMMUG00000056451 | Metazoan signal recognition particle RNA [Source:RFAM;Acc:RF00017]                                 |   | 1.0193723   | 0.009719616 | 0.026399617 |
| ENSMMUG00000046663 | Metazoan signal recognition particle RNA [Source:RFAM;Acc:RF00017]                                 |   | -           |             |             |
|                    |                                                                                                    |   | 2.359383403 | 0.019957068 | 0.048774444 |
| ENSMMUG00000048302 | ArfGAP with FG repeats 2 [Source:VGNC Symbol;Acc:VGNC:80329]                                       |   | -           |             |             |
|                    |                                                                                                    |   | 1.108300907 | 1.82E-05    | 9.78E-05    |
| ENSMMUG00000015311 | leucine rich repeats and calponin homology domain containing 4 [Source:VGNC Symbol;Acc:VGNC:74441] |   | -           |             |             |
|                    |                                                                                                    |   | 0.920131929 | 6.01E-07    | 4.25E-06    |
| ENSMMUG00000015309 | F-box protein 24 [Source:VGNC Symbol;Acc:VGNC:72495]                                               |   | -           |             |             |
|                    |                                                                                                    |   | 0.980781939 | 1.26E-08    | 1.16E-07    |
| ENSMMUG00000002947 | procollagen C-endopeptidase enhancer [Source:VGNC Symbol;Acc:VGNC:75782]                           |   | -           |             |             |
| ENSMMUG00000002949 | motile sperm domain containing 3 [Source:VGNC Symbol;Acc:VGNC:74823]                               |   | 1.033399641 | 1.58E-09    | 1.68E-08    |
| ENSMMUG00000002950 | transferrin receptor 2 [Source:VGNC Symbol;Acc:VGNC:81770]                                         |   | -           |             |             |
|                    |                                                                                                    |   | 0.935340503 | 5.00E-11    | 6.57E-10    |
| ENSMMUG00000004080 | G protein subunit beta 2 [Source:VGNC Symbol;Acc:VGNC:81318]                                       |   | 2.427017868 | 1.06E-16    | 2.67E-15    |
| ENSMMUG00000004082 | GRB10 interacting GYF protein 1 [Source:VGNC Symbol;Acc:VGNC:73158]                                |   | 2.478546128 | 3.38E-29    | 3.12E-27    |
| ENSMMUG00000022840 | zonadhesin [Source:VGNC Symbol;Acc:VGNC:81797]                                                     |   | -           |             |             |
| ENSMMUG00000060459 |                                                                                                    |   | 2.194191048 | 0.000633222 | 0.002397418 |
| ENSMMUG00000063570 | Metazoan signal recognition particle RNA [Source:RFAM;Acc:RF00017]                                 |   | -           |             |             |
|                    |                                                                                                    |   | 1.339389226 | 9.62E-05    | 0.000440957 |
| ENSMMUG00000030377 | MLX interacting protein like [Source:VGNC Symbol;Acc:VGNC:81722]                                   |   | -           |             |             |
| ENSMMUG00000011367 | BUD23 rRNA methyltransferase and ribosome maturation factor [Source:VGNC Symbol;Acc:VGNC:70325]    |   | 1.142836857 | 8.25E-05    | 0.000383476 |
| ENSMMUG00000056841 |                                                                                                    |   | 0.728077868 | 3.35E-06    | 2.05E-05    |
| ENSMMUG00000050132 |                                                                                                    |   | -           |             |             |
|                    |                                                                                                    |   | 4.614056882 | 2.28E-05    | 0.000119676 |
| ENSMMUG00000061790 |                                                                                                    |   | -           |             |             |
| ENSMMUG00000056980 |                                                                                                    |   | 2.995586843 | 0.002750433 | 0.008798302 |
| ENSMMUG00000047155 | zinc finger protein 679 [Source:NCBI gene;Acc:106995568]                                           |   | -3.74557861 | 0.000192836 | 0.00082509  |
| ENSMMUG00000059100 |                                                                                                    |   | 1.349099906 | 0.000139819 | 0.000615468 |
| ENSMMUG00000015272 | chaperonin containing TCP1 subunit 6A [Source:NCBI gene;Acc:703326]                                |   | 1.556699989 | 1.91E-08    | 1.72E-07    |
| ENSMMUG00000051107 |                                                                                                    |   | -           |             |             |
| ENSMMUG00000058499 |                                                                                                    |   | 0.773343204 | 0.010883557 | 0.029081649 |
| ENSMMUG00000060184 | SEC61 translocon subunit gamma [Source:NCBI gene;Acc:716898]                                       |   | 2.816973354 | 1.48E-06    | 9.73E-06    |
| ENSMMUG00000001308 | V-set and transmembrane domain containing 2A [Source:VGNC Symbol;Acc:VGNC:79720]                   |   | 3.742049873 | 0.000737973 | 0.002739459 |
|                    |                                                                                                    |   | -           |             |             |
|                    |                                                                                                    |   | 0.607271203 | 0.001339239 | 0.004672059 |
|                    |                                                                                                    |   | 0.465560848 | 0.00095166  | 0.003440546 |
|                    |                                                                                                    |   | -1.4441051  | 0.000169681 | 0.000732994 |
|                    |                                                                                                    |   | 3.682979297 | 0.00048568  | 0.001894933 |
|                    |                                                                                                    |   | 4.570903562 | 7.29E-11    | 9.41E-10    |
|                    |                                                                                                    |   | 2.920351361 | 0.004193253 | 0.012750858 |

|                    |                                                                                                     |             |             |             |
|--------------------|-----------------------------------------------------------------------------------------------------|-------------|-------------|-------------|
| ENSMMUG00000056368 |                                                                                                     | 0.474992834 | 9.93E-05    | 0.000454654 |
| ENSMMUG00000064560 |                                                                                                     | -           | -           | -           |
| ENSMMUG00000019992 | growth factor receptor bound protein 10 [Source:VGNC Symbol;Acc:VGNC:73157]                         | 0.920720612 | 0.001418816 | 0.004913242 |
| ENSMMUG00000019991 | dopa decarboxylase [Source:VGNC Symbol;Acc:VGNC:71755]                                              | -           | -           | -           |
| ENSMMUG00000049620 |                                                                                                     | 1.540344068 | 0.007975303 | 0.022261197 |
| ENSMMUG00000044759 |                                                                                                     | 0.972826514 | 1.11E-11    | 1.57E-10    |
| ENSMMUG00000043922 | spermatogenesis associated 48 [Source:VGNC Symbol;Acc:VGNC:81762]                                   | -           | -           | -           |
| ENSMMUG00000016191 | ATP binding cassette subfamily A member 13 [Source:VGNC Symbol;Acc:VGNC:69402]                      | 0.881347417 | 0.014184142 | 0.036487569 |
| ENSMMUG00000019393 | tensin 3 [Source:VGNC Symbol;Acc:VGNC:79324]                                                        | -1.42114583 | 4.12E-12    | 6.23E-11    |
| ENSMMUG00000050300 |                                                                                                     | -           | -           | -           |
| ENSMMUG00000052540 |                                                                                                     | 1.185129816 | 1.34E-10    | 1.66E-09    |
| ENSMMUG00000000962 | H2A.Z variant histone 2 [Source:VGNC Symbol;Acc:VGNC:81324]                                         | 2.267180806 | 1.95E-05    | 0.000104155 |
| ENSMMUG00000002433 | calcium/calmodulin dependent protein kinase II beta [Source:VGNC Symbol;Acc:VGNC:70524]             | -           | -           | -           |
| ENSMMUG00000002430 | YKT6 v-SNARE homolog [Source:VGNC Symbol;Acc:VGNC:81796]                                            | 2.250593761 | 0.006168726 | 0.017815426 |
| ENSMMUG00000002427 | glucokinase [Source:VGNC Symbol;Acc:VGNC:72901]                                                     | -           | -           | -           |
| ENSMMUG00000002411 | drebrin like [Source:NCBI gene;Acc:720621]                                                          | 1.281108624 | 0.000367213 | 0.001474621 |
| ENSMMUG00000002426 | myosin light chain 7 [Source:VGNC Symbol;Acc:VGNC:75002]                                            | -           | -           | -           |
| ENSMMUG00000002423 | DNA polymerase delta 2, accessory subunit [Source:VGNC Symbol;Acc:VGNC:76203]                       | 1.518194742 | 4.92E-06    | 2.93E-05    |
| ENSMMUG00000002422 | AE binding protein 1 [Source:VGNC Symbol;Acc:VGNC:80328]                                            | -           | -           | -           |
| ENSMMUG00000002421 | DNA polymerase mu [Source:VGNC Symbol;Acc:VGNC:81742]                                               | 1.582805804 | 2.50E-06    | 1.57E-05    |
| ENSMMUG00000064860 | phosphoglycerate mutase 2 [Source:NCBI gene;Acc:720615]                                             | 1.409222466 | 0.001104802 | 0.003938513 |
| ENSMMUG00000019023 | cytochrome c oxidase assembly factor 1 homolog [Source:VGNC Symbol;Acc:VGNC:81290]                  | 1.344061733 | 0.00306882  | 0.009678987 |
| ENSMMUG00000017382 | biliverdin reductase A [Source:VGNC Symbol;Acc:VGNC:70256]                                          | 1.683665126 | 4.72E-20    | 1.66E-18    |
| ENSMMUG00000019022 | serine/threonine kinase 17a [Source:VGNC Symbol;Acc:VGNC:77913]                                     | 2.033206508 | 1.97E-38    | 4.29E-36    |
| ENSMMUG00000019015 | HECT, C2 and WW domain containing E3 ubiquitin protein ligase 1 [Source:VGNC Symbol;Acc:VGNC:73217] | 1.67368644  | 7.86E-19    | 2.41E-17    |
| ENSMMUG00000057956 |                                                                                                     | 1.619254457 | 5.21E-16    | 1.21E-14    |
| ENSMMUG00000035562 | U6 spliceosomal RNA [Source:RFAM;Acc:RF00026]                                                       | 1.686981427 | 5.82E-12    | 8.63E-11    |
| ENSMMUG00000024428 | Y RNA [Source:RFAM;Acc:RF00019]                                                                     | 4.311570649 | 0.001930204 | 0.006458692 |
| ENSMMUG00000053696 | Metazoan signal recognition particle RNA [Source:RFAM;Acc:RF00017]                                  | 4.076184601 | 0.002767728 | 0.008845991 |
| ENSMMUG00000060273 | mitochondrial ribosomal protein L32 [Source:NCBI gene;Acc:701820]                                   | 0.733971688 | 0.000323841 | 0.001317216 |
| ENSMMUG00000022451 | proteasome 20S subunit alpha 2 [Source:NCBI gene;Acc:701683]                                        | 0.747512654 | 2.34E-10    | 2.81E-09    |
| ENSMMUG00000052530 |                                                                                                     | 0.792137281 | 5.05E-09    | 4.95E-08    |
| ENSMMUG00000001702 | succinyl-CoA:glutarate-CoA transferase [Source:VGNC Symbol;Acc:VGNC:81767]                          | 0.65329296  | 6.70E-06    | 3.89E-05    |
| ENSMMUG00000065307 |                                                                                                     | 0.566669349 | 0.004919767 | 0.014656439 |
| ENSMMUG00000050335 |                                                                                                     | -           | -           | -           |
| ENSMMUG00000021186 | anillin actin binding protein [Source:VGNC Symbol;Acc:VGNC:69610]                                   | 2.994305083 | 0.002934456 | 0.009320621 |
| ENSMMUG00000010703 | KIAA0895 [Source:VGNC Symbol;Acc:VGNC:73884]                                                        | 1.997156736 | 2.87E-05    | 0.000147249 |
| ENSMMUG00000010702 | endonuclease/exonuclease/phosphatase family domain containing 1 [Source:VGNC Symbol;Acc:VGNC:72085] | 1.911110414 | 3.63E-05    | 0.000181996 |
| ENSMMUG0000006980  | septin 7 [Source:VGNC Symbol;Acc:VGNC:81759]                                                        | 2.231967637 | 6.06E-17    | 1.56E-15    |
| ENSMMUG0000001350  | HERPUD family member 2 [Source:VGNC Symbol;Acc:VGNC:73216]                                          | 1.927685705 | 4.93E-07    | 3.53E-06    |
| ENSMMUG00000058423 |                                                                                                     | 2.075720079 | 7.69E-08    | 6.30E-07    |
|                    |                                                                                                     | 1.822288767 | 8.14E-09    | 7.73E-08    |
|                    |                                                                                                     | -           | -           | -           |
|                    |                                                                                                     | 1.311702867 | 0.000729285 | 0.002709242 |
|                    |                                                                                                     | 3.602500268 | 0.000202773 | 0.000863869 |
|                    |                                                                                                     | -           | -           | -           |
|                    |                                                                                                     | 1.064332868 | 0.000650092 | 0.002453146 |
|                    |                                                                                                     | -           | -           | -           |
|                    |                                                                                                     | 1.989321367 | 3.11E-05    | 0.000158456 |
|                    |                                                                                                     | -           | -           | -           |
|                    |                                                                                                     | 1.399026446 | 0.003254096 | 0.010213386 |
|                    |                                                                                                     | 1.646001673 | 0.01188291  | 0.031406801 |
|                    |                                                                                                     | 2.870745611 | 1.63E-30    | 1.64E-28    |
|                    |                                                                                                     | 3.434423456 | 3.02E-20    | 1.09E-18    |

|                    |                                                                                                |             |             |             |
|--------------------|------------------------------------------------------------------------------------------------|-------------|-------------|-------------|
| ENSMMUG0000002886  | Bardet-Biedl syndrome 9 [Source:NCBI gene;Acc:708412]                                          | 2.134378194 | 1.08E-24    | 6.32E-23    |
| ENSMMUG00000050858 | Metazoan signal recognition particle RNA [Source:RFAM;Acc:RF00017]                             | -1.23108546 | 3.74E-05    | 0.000186376 |
| ENSMMUG00000011695 | 5'-nucleotidase, cytosolic IIIA [Source:VGNC Symbol;Acc:VGNC:75423]                            | -           | -           | -           |
| ENSMMUG0000001625  | phosphodiesterase 1C [Source:VGNC Symbol;Acc:VGNC:75911]                                       | 0.484287021 | 0.005177292 | 0.015288497 |
| ENSMMUG00000022485 | protein phosphatase 1 regulatory subunit 17 [Source:VGNC Symbol;Acc:VGNC:76270]                | -           | -           | -           |
| ENSMMUG00000022484 | ITPR interacting domain containing 1 [Source:VGNC Symbol;Acc:VGNC:73667]                       | 0.611731802 | 0.004244405 | 0.012895827 |
| ENSMMUG00000055809 |                                                                                                | -           | -           | -           |
| ENSMMUG00000060878 |                                                                                                | 2.969777818 | 5.84E-06    | 3.43E-05    |
| ENSMMUG00000062454 |                                                                                                | -           | -           | -           |
| ENSMMUG00000039009 |                                                                                                | 2.601490714 | 3.84E-12    | 5.85E-11    |
| ENSMMUG00000012529 | pleckstrin homology domain containing A8 [Source:VGNC Symbol;Acc:VGNC:81741]                   | 0.764293976 | 0.013986577 | 0.036073205 |
| ENSMMUG00000050459 |                                                                                                | 2.112283168 | 8.67E-18    | 2.44E-16    |
| ENSMMUG00000032973 | mml-mir-550 [Source:miRBase;Acc:MI0007826]                                                     | 1.976169907 | 1.28E-10    | 1.59E-09    |
| ENSMMUG00000020184 | carboxypeptidase vitellogenic like [Source:VGNC Symbol;Acc:VGNC:71406]                         | 1.714535984 | 2.27E-09    | 2.36E-08    |
| ENSMMUG00000039317 | cAMP responsive element binding protein 5 [Source:VGNC Symbol;Acc:VGNC:81295]                  | -0.43272137 | 0.009315905 | 0.025475729 |
| ENSMMUG00000055193 |                                                                                                | -           | -           | -           |
| ENSMMUG0000000517  | family with sequence similarity 126 member A [Source:VGNC Symbol;Acc:VGNC:72327]               | 1.169590542 | 0.000253547 | 0.001056209 |
| ENSMMUG00000042472 | Metazoan signal recognition particle RNA [Source:RFAM;Acc:RF00017]                             | -           | -           | -           |
| ENSMMUG00000060787 |                                                                                                | 1.281012499 | 5.59E-05    | 0.000268457 |
| ENSMMUG0000007821  | ATP binding cassette subfamily B member 5 [Source:VGNC Symbol;Acc:VGNC:80321]                  | -           | -           | -           |
| ENSMMUG0000006898  | integrin subunit beta 8 [Source:VGNC Symbol;Acc:VGNC:73791]                                    | 1.993257055 | 8.00E-06    | 4.58E-05    |
| ENSMMUG00000011170 | histone deacetylase 9 [Source:VGNC Symbol;Acc:VGNC:73165]                                      | -           | -           | -           |
| ENSMMUG00000052574 |                                                                                                | 2.651639549 | 0.015346659 | 0.038964382 |
| ENSMMUG00000020418 | diacylglycerol kinase beta [Source:VGNC Symbol;Acc:VGNC:71782]                                 | -           | -           | -           |
| ENSMMUG0000008632  | myosin, light chain 6, alkali, smooth muscle and non-muscle-like [Source:NCBI gene;Acc:710137] | 1.149259324 | 0.005271589 | 0.01552068  |
| ENSMMUG0000005159  | transmembrane protein 106B [Source:VGNC Symbol;Acc:VGNC:79355]                                 | 0.7994617   | 0.001803009 | 0.006078342 |
| ENSMMUG00000060770 |                                                                                                | 1.550548756 | 0.020549911 | 0.049959866 |
| ENSMMUG00000012694 | thrombospondin type 1 domain containing 7A [Source:VGNC Symbol;Acc:VGNC:79347]                 | -2.61845033 | 1.64E-20    | 6.18E-19    |
| ENSMMUG00000045513 |                                                                                                | -           | -           | -           |
| ENSMMUG00000008698 | cyclin dependent kinase 6 [Source:VGNC Symbol;Acc:VGNC:70983]                                  | 2.159967251 | 1.17E-15    | 2.63E-14    |
| ENSMMUG00000019802 | family with sequence similarity 133 member B [Source:NCBI gene;Acc:702054]                     | -           | -           | -           |
| ENSMMUG00000040007 | peroxisomal biogenesis factor 1 [Source:VGNC Symbol;Acc:VGNC:81736]                            | 1.983882415 | 0.000384355 | 0.001536383 |
| ENSMMUG00000015685 | zinc finger protein 804B [Source:VGNC Symbol;Acc:VGNC:81890]                                   | -           | -           | -           |
| ENSMMUG00000022697 | STEAP4 metalloredutase [Source:VGNC Symbol;Acc:VGNC:77974]                                     | 1.648216014 | 5.96E-20    | 2.08E-18    |
| ENSMMUG00000022695 | ADAM metallopeptidase domain 22 [Source:VGNC Symbol;Acc:VGNC:69483]                            | -           | -           | -           |
| ENSMMUG00000006766 | RUN domain containing 3B [Source:VGNC Symbol;Acc:VGNC:77129]                                   | 1.377601667 | 3.14E-07    | 2.31E-06    |
| ENSMMUG00000010788 | ATP binding cassette subfamily B member 1 [Source:NCBI gene;Acc:574235]                        | -           | -           | -           |
|                    |                                                                                                | 1.519079435 | 9.68E-05    | 0.00044338  |
|                    |                                                                                                | 0.81362549  | 0.011581068 | 0.030729511 |
|                    |                                                                                                | 0.940800519 | 8.60E-05    | 0.000398644 |
|                    |                                                                                                | -           | -           | -           |
|                    |                                                                                                | 1.766476793 | 0.001361108 | 0.004740542 |
|                    |                                                                                                | 2.360324855 | 1.01E-13    | 1.88E-12    |
|                    |                                                                                                | 3.256583619 | 0.01380264  | 0.035698142 |
|                    |                                                                                                | 2.796458742 | 1.74E-09    | 1.84E-08    |
|                    |                                                                                                | 4.365781379 | 0.000216579 | 0.000916369 |
|                    |                                                                                                | 2.08281431  | 2.40E-49    | 1.84E-46    |
|                    |                                                                                                | -           | -           | -           |
|                    |                                                                                                | 1.216802258 | 9.97E-09    | 9.34E-08    |
|                    |                                                                                                | -0.59553865 | 0.000559275 | 0.002145382 |
|                    |                                                                                                | 1.220821448 | 2.16E-06    | 1.38E-05    |
|                    |                                                                                                | -           | -           | -           |
|                    |                                                                                                | 0.833063962 | 1.69E-06    | 1.10E-05    |

|                     |                                                                                                            |             |             |             |
|---------------------|------------------------------------------------------------------------------------------------------------|-------------|-------------|-------------|
| ENSMMUG0000000480   | KIAA1324 like [Source:VGNC Symbol;Acc:VGNC:73882]                                                          | 3.37808     | 0.000257985 | 0.001073187 |
| ENSMMUG00000007555  | semaphorin 3A [Source:VGNC Symbol;Acc:VGNC:77159]                                                          | 1.945364256 | 0.006534235 | 0.018710698 |
| ENSMMUG00000018652  | hepatocyte growth factor [Source:VGNC Symbol;Acc:VGNC:73373]                                               | 0.397032484 | 0.001921551 | 0.006434095 |
| ENSMMUG000000053516 |                                                                                                            | 1.818646369 | 1.24E-07    | 9.89E-07    |
| ENSMMUG000000042946 | CD36 molecule [Source:VGNC Symbol;Acc:VGNC:80857]                                                          | 0.583879311 | 0.017560023 | 0.043719007 |
| ENSMMUG000000049939 |                                                                                                            | 1.034446213 | 2.22E-13    | 3.94E-12    |
| ENSMMUG00000009006  | round spermatid basic protein 1 like [Source:VGNC Symbol;Acc:VGNC:77097]                                   | -0.97861434 | 1.51E-06    | 9.94E-06    |
| ENSMMUG00000012427  | F-box and leucine rich repeat protein 13 [Source:VGNC Symbol;Acc:VGNC:81312]                               | 0.599732702 | 0.003506234 | 0.010880405 |
| ENSMMUG000000054290 |                                                                                                            | 1.167125572 | 6.35E-06    | 3.71E-05    |
| ENSMMUG00000012066  | origin recognition complex subunit 5 [Source:VGNC Symbol;Acc:VGNC:75717]                                   | 0.458603648 | 0.003211979 | 0.010091876 |
| ENSMMUG000000062666 |                                                                                                            | 0.608641489 | 0.00020226  | 0.000862177 |
| ENSMMUG000000058302 |                                                                                                            | 1.030149063 | 0.000808051 | 0.002970598 |
| ENSMMUG00000022727  | lysine methyltransferase 2E [Source:VGNC Symbol;Acc:VGNC:74073]                                            | 2.587976146 | 0.000382628 | 0.001530305 |
| ENSMMUG00000008189  | cadherin related family member 3 [Source:HGNC Symbol;Acc:HGNC:26308]                                       | 1.534869871 | 2.94E-24    | 1.65E-22    |
| ENSMMUG00000003572  | nicotinamide phosphoribosyltransferase [Source:VGNC Symbol;Acc:VGNC:75056]                                 | 1.403718595 | 1.11E-07    | 8.92E-07    |
| ENSMMUG00000011385  | phosphatidylinositol-4,5-bisphosphate 3-kinase catalytic subunit gamma [Source:VGNC Symbol;Acc:VGNC:75998] | 0.499386505 | 0.000686873 | 0.002576208 |
| ENSMMUG000000062092 |                                                                                                            | 2.856566853 | 0.001017043 | 0.003653765 |
| ENSMMUG000000058817 |                                                                                                            | 2.676361201 | 4.35E-21    | 1.75E-19    |
| ENSMMUG00000002894  | dedicator of cytokinesis 4 [Source:VGNC Symbol;Acc:VGNC:71866]                                             | 1.414790416 | 2.41E-09    | 2.50E-08    |
| ENSMMUG00000008005  | forkhead box P2 [Source:VGNC Symbol;Acc:VGNC:72720]                                                        | 1.933618635 | 0.001198219 | 0.004231863 |
| ENSMMUG00000007097  | testin LIM domain protein [Source:VGNC Symbol;Acc:VGNC:78383]                                              | 0.817507318 | 1.76E-07    | 1.36E-06    |
| ENSMMUG00000011269  | CF transmembrane conductance regulator [Source:VGNC Symbol;Acc:VGNC:71020]                                 | 1.129890481 | 2.80E-07    | 2.09E-06    |
| ENSMMUG00000002434  | inhibitor of growth family member 3 [Source:VGNC Symbol;Acc:VGNC:73595]                                    | 1.504170922 | 5.46E-05    | 0.000263226 |
| ENSMMUG000000054565 |                                                                                                            | 1.026338012 | 0.013263338 | 0.034477705 |
| ENSMMUG00000015240  | glutamate metabotropic receptor 8 [Source:VGNC Symbol;Acc:VGNC:73292]                                      | 0.640859453 | 0.003368878 | 0.010511351 |
| ENSMMUG00000002428  | zinc finger protein 800 [Source:VGNC Symbol;Acc:VGNC:79658]                                                | 1.404243581 | 6.34E-14    | 1.21E-12    |
| ENSMMUG000000046381 | ADP ribosylation factor 5 [Source:VGNC Symbol;Acc:VGNC:80792]                                              | 0.420579304 | 0.012723952 | 0.033286426 |
| ENSMMUG00000015432  | staphylococcal nuclease and tudor domain containing 1 [Source:VGNC Symbol;Acc:VGNC:77798]                  | 0.742794999 | 0.000231475 | 0.000974389 |
| ENSMMUG00000007250  | RNA binding motif protein 28 [Source:VGNC Symbol;Acc:VGNC:76519]                                           | 1.228234409 | 1.22E-05    | 6.77E-05    |
| ENSMMUG000000037001 | U7 small nuclear RNA [Source:RFAM;Acc:RF00066]                                                             | 2.457482579 | 0.003005459 | 0.009503402 |
| ENSMMUG00000009625  | coiled-coil domain containing 136 [Source:VGNC Symbol;Acc:VGNC:70836]                                      | 0.307714241 | 0.004552494 | 0.013709919 |
| ENSMMUG00000018478  | interferon regulatory factor 5 [Source:VGNC Symbol;Acc:VGNC:73763]                                         | 1.288037399 | 4.23E-06    | 2.55E-05    |
| ENSMMUG00000004311  | transportin 3 [Source:VGNC Symbol;Acc:VGNC:79063]                                                          | 0.833039456 | 0.020403976 | 0.049678371 |
| ENSMMUG000000053821 |                                                                                                            | 2.754647652 | 0.005817234 | 0.016922241 |

|                     |                                                                                             |             |             |             |
|---------------------|---------------------------------------------------------------------------------------------|-------------|-------------|-------------|
| ENSMMUG00000012110  | smoothened, frizzled class receptor [Source:VGNC Symbol;Acc:VGNC:77658]                     | 1.778828703 | 2.26E-13    | 4.00E-12    |
| ENSMMUG00000019358  | adenosylhomocysteinase like 2 [Source:VGNC Symbol;Acc:VGNC:80771]                           | 1.956970048 | 0.014711105 | 0.037650676 |
| ENSMMUG00000019359  | striatin interacting protein 2 [Source:VGNC Symbol;Acc:VGNC:78194]                          | -0.34420391 | 0.0024073   | 0.007820429 |
| ENSMMUG00000041919  | nuclear respiratory factor 1 [Source:VGNC Symbol;Acc:VGNC:81731]                            | 1.041623068 | 2.07E-09    | 2.17E-08    |
| ENSMMUG00000017542  | ubiquitin conjugating enzyme E2 H [Source:VGNC Symbol;Acc:VGNC:78696]                       | 0.608994336 | 8.07E-05    | 0.000375449 |
| ENSMMUG00000006155  | zinc finger C3HC-type containing 1 [Source:VGNC Symbol;Acc:VGNC:79827]                      | 1.662801794 | 0.000482791 | 0.001884156 |
| ENSMMUG000000061007 |                                                                                             | -1.16358381 | 0.003709854 | 0.011422106 |
| ENSMMUG00000010060  | serine rich single-pass membrane protein 1 [Source:VGNC Symbol;Acc:VGNC:78014]              | 1.247678638 | 0.000918719 | 0.003327132 |
| ENSMMUG00000009494  | carboxypeptidase A5 [Source:VGNC Symbol;Acc:VGNC:71410]                                     | 1.08911495  | 6.64E-06    | 3.86E-05    |
| ENSMMUG00000009495  | carboxypeptidase A1 [Source:VGNC Symbol;Acc:VGNC:71455]                                     | 0.869301193 | 0.002450673 | 0.00794393  |
| ENSMMUG00000009499  | mesoderm specific transcript [Source:VGNC Symbol;Acc:VGNC:74707]                            | 3.356894211 | 4.42E-28    | 3.61E-26    |
| ENSMMUG00000004801  | COPI coat complex subunit gamma 2 [Source:VGNC Symbol;Acc:VGNC:71315]                       | 3.308782299 | 1.62E-27    | 1.30E-25    |
| ENSMMUG00000001671  | coiled-coil-helix-coiled-coil-helix domain containing 3 [Source:VGNC Symbol;Acc:VGNC:80860] | 1.317209823 | 0.000526406 | 0.002034559 |
| ENSMMUG00000000916  | solute carrier family 35 member B4 [Source:VGNC Symbol;Acc:VGNC:77528]                      | 1.373153921 | 0.005214642 | 0.015365217 |
| ENSMMUG00000013098  | aldo-keto reductase family 1 member B10 [Source:NCBI gene;Acc:713150]                       | 1.281255017 | 0.008946209 | 0.024600832 |
| ENSMMUG00000004598  | bisphosphoglycerate mutase [Source:VGNC Symbol;Acc:VGNC:70275]                              | 4.134664058 | 4.68E-05    | 0.000229381 |
| ENSMMUG000000037485 |                                                                                             | 5.054477537 | 4.61E-07    | 3.31E-06    |
| ENSMMUG000000054821 |                                                                                             | 3.024358707 | 0.000107145 | 0.000486068 |
| ENSMMUG00000006530  | ATP/GTP binding protein like 3 [Source:VGNC Symbol;Acc:VGNC:69723]                          | 1.159070239 | 2.19E-13    | 3.89E-12    |
| ENSMMUG000000050339 | Metazoan signal recognition particle RNA [Source:RFAM;Acc:RF00017]                          | 2.203970241 | 2.99E-14    | 5.85E-13    |
| ENSMMUG000000062419 |                                                                                             | 2.341995368 | 0.00040881  | 0.001625377 |
| ENSMMUG00000002318  | stimulated by retinoic acid 8 [Source:VGNC Symbol;Acc:VGNC:78250]                           | 1.042229506 | 0.008200365 | 0.02281212  |
| ENSMMUG00000016181  | CCR4-NOT transcription complex subunit 4 [Source:VGNC Symbol;Acc:VGNC:71389]                | 0.642137416 | 7.38E-06    | 4.26E-05    |
| ENSMMUG00000016384  | nucleoporin 205 [Source:VGNC Symbol;Acc:VGNC:75432]                                         | 0.746865111 | 0.001189256 | 0.004205212 |
| ENSMMUG00000002995  | tripartite motif containing 24 [Source:VGNC Symbol;Acc:VGNC:78562]                          | 1.041342867 | 1.16E-10    | 1.46E-09    |
| ENSMMUG000000050262 |                                                                                             | 1.434416881 | 0.002160465 | 0.007099424 |
| ENSMMUG00000021676  | SVOP like [Source:VGNC Symbol;Acc:VGNC:78224]                                               | 0.419497469 | 0.005401097 | 0.015861042 |
| ENSMMUG000000052458 |                                                                                             | 0.592786731 | 0.000114136 | 0.000513077 |
| ENSMMUG00000006547  | ATPase H+ transporting V0 subunit a4 [Source:VGNC Symbol;Acc:VGNC:70189]                    | 3.490161642 | 6.62E-05    | 0.00031345  |
| ENSMMUG000000059192 | transmembrane protein 213 [Source:NCBI gene;Acc:710580]                                     | 3.105977567 | 0.016724643 | 0.042009902 |
| ENSMMUG00000006548  | KIAA1549 [Source:VGNC Symbol;Acc:VGNC:73885]                                                | 3.808575385 | 8.46E-09    | 8.01E-08    |
| ENSMMUG00000006770  | putative RNA-binding protein Luc7-like 2 [Source:NCBI gene;Acc:711104]                      | 0.713947039 | 0.01096803  | 0.029286259 |
| ENSMMUG000000052228 | Metazoan signal recognition particle RNA [Source:RFAM;Acc:RF00017]                          | 2.463484838 | 2.80E-06    | 1.74E-05    |
| ENSMMUG00000004224  | poly(ADP-ribose) polymerase family member 12 [Source:VGNC Symbol;Acc:VGNC:81734]            | 1.008740541 | 1.45E-11    | 2.04E-10    |
| ENSMMUG000000056175 |                                                                                             | 0.836283136 | 1.82E-07    | 1.40E-06    |
| ENSMMUG00000008126  | lysine demethylase 7A [Source:VGNC Symbol;Acc:VGNC:73886]                                   | 1.233416594 | 2.52E-21    | 1.03E-19    |
| ENSMMUG00000010420  | makorin ring finger protein 1 [Source:VGNC Symbol;Acc:VGNC:81476]                           | 0.885975338 | 0.000105419 | 0.000478825 |

|                    |                                                                               |   |             |             |             |
|--------------------|-------------------------------------------------------------------------------|---|-------------|-------------|-------------|
| ENSMMUG00000042299 | DENN domain containing 2A [Source:VGNC Symbol;Acc:VGNC:81302]                 | - | 1.738584765 | 0.009106805 | 0.024972988 |
| ENSMMUG00000015282 | aarF domain containing kinase 2 [Source:VGNC Symbol;Acc:VGNC:69473]           | - | 0.580399265 | 9.31E-05    | 0.00042791  |
| ENSMMUG00000015284 | NADH:ubiquinone oxidoreductase subunit B2 [Source:VGNC Symbol;Acc:VGNC:75156] | - | 0.726121014 | 8.92E-10    | 9.83E-09    |
| ENSMMUG00000042793 | B-Raf proto-oncogene, serine/threonine kinase [Source:NCBI gene;Acc:693554]   | - | 0.618994913 | 0.000261517 | 0.001086052 |
| ENSMMUG00000060893 |                                                                               | - | 2.316700084 | 1.45E-07    | 1.15E-06    |
| ENSMMUG00000064529 |                                                                               | - | 1.279349189 | 2.86E-05    | 0.000146542 |
| ENSMMUG00000055369 |                                                                               | - | 0.495477077 | 0.007389674 | 0.020798798 |
| ENSMMUG00000021017 | acylglycerol kinase [Source:VGNC Symbol;Acc:VGNC:69669]                       | - | 1.56538975  | 3.49E-22    | 1.58E-20    |
| ENSMMUG00000042443 | olfactory receptor 9A4 [Source:NCBI gene;Acc:695321]                          | - | 2.110508517 | 0.001141513 | 0.004056706 |
| ENSMMUG00000055710 | taste 2 receptor member 38 [Source:NCBI gene;Acc:695549]                      | - | 2.663952004 | 5.70E-12    | 8.46E-11    |
| ENSMMUG00000016273 | maltase-glucoamylase [Source:VGNC Symbol;Acc:VGNC:74713]                      | - | 3.267990782 | 7.65E-43    | 3.07E-40    |
| ENSMMUG00000019937 | maltase-glucoamylase 2 (putative) [Source:VGNC Symbol;Acc:VGNC:81720]         | - | 2.449734132 | 1.41E-05    | 7.73E-05    |
| ENSMMUG00000056515 |                                                                               | - | 1.186562485 | 0.000539738 | 0.002081747 |
| ENSMMUG00000049575 | T cell receptor beta variable 7-2 [Source:HGNC Symbol;Acc:HGNC:12236]         | - | 1.566752373 | 1.32E-07    | 1.05E-06    |
| ENSMMUG00000051385 |                                                                               | - | 2.443899031 | 1.26E-09    | 1.36E-08    |
| ENSMMUG00000049767 |                                                                               | - | 3.158942937 | 0.0011937   | 0.004217911 |
| ENSMMUG00000048246 |                                                                               | - | 3.312225797 | 0.00024722  | 0.001033337 |
| ENSMMUG00000057494 | T cell receptor beta variable 7-9 [Source:HGNC Symbol;Acc:HGNC:12243]         | - | 2.713401106 | 2.02E-09    | 2.12E-08    |
| ENSMMUG00000055612 | T cell receptor beta variable 12-5 [Source:HGNC Symbol;Acc:HGNC:12187]        | - | 3.176525627 | 0.01500055  | 0.038262497 |
| ENSMMUG00000050269 | T cell receptor beta variable 14 [Source:HGNC Symbol;Acc:HGNC:12189]          | - | 2.855975342 | 3.60E-26    | 2.42E-24    |
| ENSMMUG00000016286 | protease, serine, 1 (trypsin 1) [Source:NCBI gene;Acc:698729]                 | - | 1.969104442 | 1.03E-06    | 6.99E-06    |
| ENSMMUG00000051032 | serine protease 2 [Source:NCBI gene;Acc:698352]                               | - | 2.704892791 | 1.03E-27    | 8.31E-26    |
| ENSMMUG00000052682 |                                                                               | - | 2.904836671 | 3.31E-12    | 5.11E-11    |
| ENSMMUG00000059019 |                                                                               | - | 3.090777764 | 1.02E-19    | 3.44E-18    |
| ENSMMUG00000058459 |                                                                               | - | 3.234198744 | 0.00013969  | 0.000615085 |
| ENSMMUG00000012628 | glutathione S-transferase kappa 1 [Source:VGNC Symbol;Acc:VGNC:73180]         | - | 0.315620176 | 0.009849266 | 0.026707736 |
| ENSMMUG00000043809 | caspase 2 [Source:VGNC Symbol;Acc:VGNC:80804]                                 | - | 1.186255553 | 1.65E-11    | 2.29E-10    |
| ENSMMUG00000012635 | zyxin [Source:VGNC Symbol;Acc:VGNC:78917]                                     | - | 2.203436357 | 4.29E-32    | 5.04E-30    |
| ENSMMUG00000055322 | EPH receptor A1 [Source:NCBI gene;Acc:706295]                                 | - | 2.177915194 | 6.03E-43    | 2.48E-40    |
| ENSMMUG00000058370 | taste receptor type 2 member 62 [Source:NCBI gene;Acc:704388]                 | - | 3.483128502 | 8.51E-05    | 0.000394778 |
| ENSMMUG00000042798 |                                                                               | - | 1.561522232 | 1.63E-11    | 2.27E-10    |
| ENSMMUG00000063823 | U6 spliceosomal RNA [Source:RFAM;Acc:RF00026]                                 | - | 1.810280928 | 0.002917837 | 0.00927777  |
| ENSMMUG00000005136 | TRPM8 channel associated factor 1 [Source:VGNC Symbol;Acc:VGNC:79346]         | - | 0.794663596 | 3.42E-06    | 2.09E-05    |



|                    |                                                                                          |   |             |             |             |
|--------------------|------------------------------------------------------------------------------------------|---|-------------|-------------|-------------|
| ENSMMUG00000049419 |                                                                                          | - | 1.747593014 | 0.010606244 | 0.028432862 |
| ENSMMUG00000019856 | olfactory receptor 2F2-like [Source:NCBI gene;Acc:100428924]                             | - | 1.271811591 | 1.38E-05    | 7.56E-05    |
| ENSMMUG00000059211 |                                                                                          | - | 1.34307846  | 0.01956055  | 0.047915915 |
| ENSMMUG00000017541 | cullin 1 [Source:VGNC Symbol;Acc:VGNC:71565]                                             | - | 3.656301707 | 0.00565168  | 0.016495653 |
| ENSMMUG00000057973 |                                                                                          | - | 1.808366755 | 2.25E-05    | 0.000118018 |
| ENSMMUG00000042048 | protein disulfide isomerase family A member 4 [Source:NCBI gene;Acc:709716]              | - | 0.909555239 | 0.001508945 | 0.005186014 |
| ENSMMUG00000018549 | zinc finger protein 786 [Source:VGNC Symbol;Acc:VGNC:79338]                              | - | 2.678115881 | 1.76E-07    | 1.36E-06    |
| ENSMMUG00000002497 | zinc finger protein 777 [Source:HGNC Symbol;Acc:HGNC:22213]                              | - | 1.208154958 | 2.49E-06    | 1.57E-05    |
| ENSMMUG00000060626 | U6 spliceosomal RNA [Source:RFAM;Acc:RF00026]                                            | - | 1.453159754 | 0.000464801 | 0.001822579 |
| ENSMMUG00000051020 | zinc finger protein 467 [Source:NCBI gene;Acc:712106]                                    | - | -1.70731275 | 2.50E-08    | 2.20E-07    |
| ENSMMUG00000048892 | SCO-spondin [Source:VGNC Symbol;Acc:VGNC:81765]                                          | - | 1.247892943 | 2.08E-09    | 2.18E-08    |
| ENSMMUG00000062384 |                                                                                          | - | 1.090244162 | 0.013851637 | 0.035812375 |
| ENSMMUG00000022633 | replication initiator 1 [Source:VGNC Symbol;Acc:VGNC:76758]                              | - | 2.702410994 | 4.47E-21    | 1.79E-19    |
| ENSMMUG00000022636 | GTPase, IMAP family member 8 [Source:VGNC Symbol;Acc:VGNC:72981]                         | - | 1.538682991 | 1.79E-06    | 1.16E-05    |
| ENSMMUG00000011386 | GTPase, IMAP family member 4 [Source:VGNC Symbol;Acc:VGNC:72982]                         | - | 2.427431855 | 1.69E-34    | 2.79E-32    |
| ENSMMUG00000052830 |                                                                                          | - | 2.638059992 | 4.24E-18    | 1.23E-16    |
| ENSMMUG00000047276 | GTPase, IMAP family member 6 [Source:VGNC Symbol;Acc:VGNC:81315]                         | - | 1.846957108 | 8.61E-13    | 1.43E-11    |
| ENSMMUG00000017008 | GTPase, IMAP family member 2 [Source:VGNC Symbol;Acc:VGNC:72980]                         | - | -3.62833975 | 5.15E-06    | 3.05E-05    |
| ENSMMUG00000049295 | GTPase, IMAP family member 5 [Source:NCBI gene;Acc:713835]                               | - | 1.458103467 | 2.14E-07    | 1.62E-06    |
| ENSMMUG00000008596 | transmembrane protein 176B [Source:VGNC Symbol;Acc:VGNC:79817]                           | - | 0.979618184 | 0.001805152 | 0.0060828   |
| ENSMMUG00000020435 | amine oxidase copper containing 1 [Source:VGNC Symbol;Acc:VGNC:70033]                    | - | 1.782190646 | 8.26E-11    | 1.05E-09    |
| ENSMMUG00000020436 | potassium voltage-gated channel subfamily H member 2 [Source:VGNC Symbol;Acc:VGNC:73980] | - | 1.499463808 | 3.66E-08    | 3.12E-07    |
| ENSMMUG00000054070 | IQ motif containing with AAA domain 1 like [Source:NCBI gene;Acc:714415]                 | - | 3.265634292 | 0.006204926 | 0.017902539 |
| ENSMMUG00000006682 | chondroitin polymerizing factor 2 [Source:VGNC Symbol;Acc:VGNC:71131]                    | - | 2.052843282 | 3.20E-05    | 0.000162339 |
| ENSMMUG00000038898 | Metazoan signal recognition particle RNA [Source:RFAM;Acc:RF00017]                       | - | 0.748247474 | 0.00017475  | 0.000753354 |
| ENSMMUG00000012238 | polypeptide N-acetylgalactosaminyltransferase 11 [Source:VGNC Symbol;Acc:VGNC:72749]     | - | -1.02991095 | 0.000309848 | 0.001264111 |
| ENSMMUG00000007212 | lysine methyltransferase 2C [Source:VGNC Symbol;Acc:VGNC:74043]                          | - | 0.54053632  | 0.002461731 | 0.007972806 |
| ENSMMUG00000062591 | insulin induced gene 1 [Source:NCBI gene;Acc:718513]                                     | - | -0.74833205 | 0.000343123 | 0.001386894 |
| ENSMMUG00000007770 | canopy FGF signaling regulator 1 [Source:VGNC Symbol;Acc:VGNC:71363]                     | - | 1.751570351 | 0.011434734 | 0.030413954 |
| ENSMMUG00000054296 |                                                                                          | - | 1.990145086 | 0.009081793 | 0.024918221 |
| ENSMMUG00000039033 | nucleolar protein with MIF4G domain 1 [Source:VGNC Symbol;Acc:VGNC:81729]                | - | 3.272591741 | 4.13E-05    | 0.000203899 |
| ENSMMUG00000008733 | ubiquitin protein ligase E3C [Source:VGNC Symbol;Acc:VGNC:79049]                         | - | 1.454117574 | 1.68E-10    | 2.06E-09    |
| ENSMMUG00000009611 | vasoactive intestinal peptide receptor 2 [Source:VGNC Symbol;Acc:VGNC:78772]             | - | 0.780981845 | 0.002627904 | 0.008445207 |

|                    |                                                                                                       |             |             |             |
|--------------------|-------------------------------------------------------------------------------------------------------|-------------|-------------|-------------|
| ENSMMUG0000000752  | programmed cell death 6 [Source:NCBI gene;Acc:723043]                                                 | 0.366255032 | 0.016957187 | 0.0424789   |
| ENSMMUG00000003791 | centrosomal protein 72 [Source:VGNC Symbol;Acc:VGNC:71099]                                            | 1.608218031 | 0.001937784 | 0.006476092 |
| ENSMMUG00000052291 |                                                                                                       | 1.970930048 | 6.71E-05    | 0.000317361 |
| ENSMMUG00000061096 | tubulin polymerization promoting protein [Source:NCBI gene;Acc:708834]                                | 1.604523753 | 0.000899597 | 0.003264259 |
| ENSMMUG00000010940 | telomerase reverse transcriptase [Source:VGNC Symbol;Acc:VGNC:78313]                                  | 0.791930163 | 1.90E-09    | 2.00E-08    |
| ENSMMUG00000005198 | solute carrier family 6 member 3 [Source:VGNC Symbol;Acc:VGNC:77619]                                  | 0.580416726 | 0.007897878 | 0.022078329 |
| ENSMMUG00000019205 | ADAM metallopeptidase with thrombospondin type 1 motif 16 [Source:VGNC Symbol;Acc:VGNC:69439]         | 1.220665745 | 0.001050144 | 0.003759025 |
| ENSMMUG00000061176 |                                                                                                       | 0.764953282 | 2.04E-07    | 1.56E-06    |
| ENSMMUG00000002561 | NOP2/Sun RNA methyltransferase 2 [Source:VGNC Symbol;Acc:VGNC:75466]                                  | 2.394938139 | 0.001584128 | 0.005400602 |
| ENSMMUG00000018745 | chromosome 6 C5orf49 homolog [Source:VGNC Symbol;Acc:VGNC:70646]                                      | 1.254812037 | 0.014127231 | 0.036366402 |
| ENSMMUG00000018746 | FAST kinase domains 3 [Source:VGNC Symbol;Acc:VGNC:72588]                                             | 1.995336967 | 9.19E-15    | 1.93E-13    |
| ENSMMUG00000018747 | 5-methyltetrahydrofolate-homocysteine methyltransferase reductase [Source:VGNC Symbol;Acc:VGNC:75079] | 1.915497704 | 2.64E-13    | 4.64E-12    |
| ENSMMUG00000061922 |                                                                                                       | 0.470057465 | 1.98E-07    | 1.52E-06    |
| ENSMMUG00000001130 | ankyrin repeat domain 33B [Source:VGNC Symbol;Acc:VGNC:69758]                                         | -1.67068306 | 0.008547942 | 0.023654782 |
| ENSMMUG00000021942 | ANKH inorganic pyrophosphate transport regulator [Source:VGNC Symbol;Acc:VGNC:69612]                  | -0.92024564 | 3.03E-06    | 1.87E-05    |
| ENSMMUG00000065128 | Metazoan signal recognition particle RNA [Source:RFAM;Acc:RF00017]                                    | 0.963742945 | 1.52E-05    | 8.29E-05    |
| ENSMMUG00000059412 |                                                                                                       | 0.755628637 | 0.001152581 | 0.004092118 |
| ENSMMUG00000062083 |                                                                                                       | 2.370262923 | 3.53E-09    | 3.56E-08    |
| ENSMMUG00000059036 |                                                                                                       | 2.588663737 | 1.29E-05    | 7.14E-05    |
| ENSMMUG00000064602 |                                                                                                       | 1.945350987 | 0.00034417  | 0.001390746 |
| ENSMMUG00000059710 |                                                                                                       | 1.440194672 | 0.000873946 | 0.003184428 |
| ENSMMUG00000049919 |                                                                                                       | 1.575557745 | 0.000867183 | 0.003161336 |
| ENSMMUG00000060891 | histone H3.Y [Source:NCBI gene;Acc:718280]                                                            | 1.918310016 | 0.00010832  | 0.0004902   |
| ENSMMUG00000013954 | PDZ domain containing 2 [Source:VGNC Symbol;Acc:VGNC:75829]                                           | -0.39448173 | 0.005860063 | 0.017026789 |
| ENSMMUG00000055028 |                                                                                                       | 2.165297262 | 0.004099459 | 0.012504109 |
| ENSMMUG00000009574 | solute carrier family 45 member 2 [Source:VGNC Symbol;Acc:VGNC:82240]                                 | 0.681959449 | 0.01517256  | 0.038628166 |
| ENSMMUG00000018739 | sperm flagellar 2 [Source:VGNC Symbol;Acc:VGNC:82243]                                                 | 2.773174711 | 0.000364083 | 0.001463635 |
| ENSMMUG00000015225 | S-phase kinase associated protein 2 [Source:VGNC Symbol;Acc:VGNC:77376]                               | 2.430165252 | 0.015734791 | 0.039833895 |
| ENSMMUG00000006202 | solute carrier family 1 member 3 [Source:VGNC Symbol;Acc:VGNC:77411]                                  | 0.537148334 | 5.93E-07    | 4.19E-06    |
| ENSMMUG00000052836 |                                                                                                       | 0.410043405 | 0.012477482 | 0.032729158 |
| ENSMMUG00000056658 | Metazoan signal recognition particle RNA [Source:RFAM;Acc:RF00017]                                    | 0.714718985 | 0.01276867  | 0.033390827 |
| ENSMMUG00000052974 |                                                                                                       | 0.570345599 | 0.011692549 | 0.030982949 |
| ENSMMUG00000017163 | EGF like, fibronectin type III and laminin G domains [Source:VGNC Symbol;Acc:VGNC:72122]              | 0.803128188 | 1.10E-06    | 7.44E-06    |
| ENSMMUG00000064324 |                                                                                                       | 2.755070488 | 0.000667196 | 0.002508115 |
| ENSMMUG00000004774 | maestro heat like repeat family member 2B [Source:VGNC Symbol;Acc:VGNC:74837]                         | 2.114313639 | 1.58E-07    | 1.23E-06    |
| ENSMMUG00000011878 | poly(A) binding protein interacting protein 1 [Source:VGNC Symbol;Acc:VGNC:84476]                     | 2.370124905 | 1.18E-10    | 1.48E-09    |
| ENSMMUG00000055022 | Metazoan signal recognition particle RNA [Source:RFAM;Acc:RF00017]                                    | 2.694694138 | 0.004632213 | 0.013911647 |

|                    |                                                                                                       |             |             |             |
|--------------------|-------------------------------------------------------------------------------------------------------|-------------|-------------|-------------|
| ENSMMUG00000047162 | fibroblast growth factor 10 [Source:VGNC Symbol;Acc:VGNC:84378]                                       | -1.48624633 | 1.34E-08    | 1.23E-07    |
| ENSMMUG00000059786 | hyperpolarization activated cyclic nucleotide gated potassium channel 1 [Source:NCBI gene;Acc:704286] | 2.760209266 | 0.004729244 | 0.014165763 |
| ENSMMUG00000016149 | embigin [Source:VGNC Symbol;Acc:VGNC:72144]                                                           | 2.200883157 | 0.008890059 | 0.024469112 |
| ENSMMUG00000057857 |                                                                                                       | 1.253862376 | 0.008341424 | 0.02318278  |
| ENSMMUG00000001753 | integrin subunit alpha 1 [Source:VGNC Symbol;Acc:VGNC:73772]                                          | 2.096111526 | 2.14E-26    | 1.49E-24    |
| ENSMMUG00000039101 | pelota mRNA surveillance and ribosome rescue factor [Source:VGNC Symbol;Acc:VGNC:84478]               | 2.311624608 | 4.88E-23    | 2.42E-21    |
| ENSMMUG00000010379 | Mtr4 exosome RNA helicase [Source:VGNC Symbol;Acc:VGNC:74989]                                         | 1.908745404 | 5.11E-10    | 5.86E-09    |
| ENSMMUG00000030099 | phospholipid phosphatase 1 [Source:VGNC Symbol;Acc:VGNC:76226]                                        | 3.499974153 | 2.12E-12    | 3.35E-11    |
| ENSMMUG00000061973 |                                                                                                       | -3.15607049 | 1.12E-35    | 2.00E-33    |
| ENSMMUG00000010466 | solute carrier family 38 member 9 [Source:VGNC Symbol;Acc:VGNC:77574]                                 | 1.561783379 | 1.18E-05    | 6.55E-05    |
| ENSMMUG00000049885 |                                                                                                       | 1.226718409 | 8.97E-06    | 5.10E-05    |
| ENSMMUG00000051661 |                                                                                                       | 1.574505279 | 4.76E-06    | 2.84E-05    |
| ENSMMUG00000005181 | RAB3C, member RAS oncogene family [Source:VGNC Symbol;Acc:VGNC:81541]                                 | -1.31600016 | 0.000551032 | 0.002120345 |
| ENSMMUG00000018379 | DEP domain containing 1B [Source:VGNC Symbol;Acc:VGNC:71705]                                          | 0.833924209 | 0.00073521  | 0.002729887 |
| ENSMMUG00000021812 | ERCC excision repair 8, CSA ubiquitin ligase complex subunit [Source:VGNC Symbol;Acc:VGNC:72425]      | 0.882772183 | 5.28E-13    | 9.04E-12    |
| ENSMMUG00000054780 |                                                                                                       | 0.665600227 | 0.002456474 | 0.007960995 |
| ENSMMUG00000060505 |                                                                                                       | 1.211699525 | 0.000192272 | 0.000822915 |
| ENSMMUG00000021131 | regulator of G protein signaling 7 binding protein [Source:VGNC Symbol;Acc:VGNC:76808]                | 1.473749648 | 0.004188131 | 0.012739252 |
| ENSMMUG00000015041 | CWC27 spliceosome associated cyclophilin [Source:VGNC Symbol;Acc:VGNC:71396]                          | 3.444750767 | 5.64E-08    | 4.71E-07    |
| ENSMMUG00000051169 |                                                                                                       | 2.210462582 | 0.000287849 | 0.001179551 |
| ENSMMUG00000016514 | tripartite motif containing 23 [Source:VGNC Symbol;Acc:VGNC:79962]                                    | 0.432186088 | 2.55E-05    | 0.000132281 |
| ENSMMUG00000053925 | shieldin complex subunit 3 [Source:NCBI gene;Acc:114678803]                                           | 0.54672531  | 0.005471958 | 0.01604055  |
| ENSMMUG00000016519 | trafficking protein particle complex 13 [Source:VGNC Symbol;Acc:VGNC:79549]                           | 0.402167866 | 0.001385259 | 0.004813404 |
| ENSMMUG00000016521 | small glutamine rich tetratricopeptide repeat containing beta [Source:VGNC Symbol;Acc:VGNC:77296]     | 0.479491416 | 2.35E-06    | 1.48E-05    |
| ENSMMUG00000016522 | neurolysin [Source:VGNC Symbol;Acc:VGNC:75183]                                                        | 0.824646393 | 2.25E-10    | 2.72E-09    |
| ENSMMUG00000038355 |                                                                                                       | 3.128494506 | 0.006462574 | 0.018552066 |
| ENSMMUG00000049935 |                                                                                                       | 1.639090982 | 3.44E-12    | 5.27E-11    |
| ENSMMUG00000046550 | coiled-coil domain containing 125 [Source:NCBI gene;Acc:704391]                                       | 1.57916914  | 1.10E-32    | 1.41E-30    |
| ENSMMUG00000006217 | general transcription factor IIH subunit 2 [Source:NCBI gene;Acc:700737]                              | 2.527204046 | 1.65E-09    | 1.75E-08    |
| ENSMMUG00000054237 | Y RNA [Source:RFAM;Acc:RF00019]                                                                       | 1.440319921 | 0.004636044 | 0.013919931 |
| ENSMMUG00000059671 |                                                                                                       | 1.341482624 | 1.61E-16    | 3.96E-15    |
| ENSMMUG00000019996 | ectodermal-neural cortex 1 [Source:VGNC Symbol;Acc:VGNC:72217]                                        | 3.391831727 | 0.00343008  | 0.010670882 |
| ENSMMUG00000064344 | Metazoan signal recognition particle RNA [Source:RFAM;Acc:RF00017]                                    | -3.51967974 | 0.000725704 | 0.002697291 |
| ENSMMUG00000011061 | ankyrin repeat domain 31 [Source:VGNC Symbol;Acc:VGNC:84277]                                          | 1.228831444 | 1.30E-25    | 8.20E-24    |
| ENSMMUG00000006139 | 3-hydroxy-3-methylglutaryl-CoA reductase [Source:VGNC Symbol;Acc:VGNC:73484]                          | 0.744488467 | 3.16E-08    | 2.74E-07    |
| ENSMMUG00000006141 | ceramide transporter 1 [Source:VGNC Symbol;Acc:VGNC:71298]                                            | 0.797993048 | 5.40E-07    | 3.83E-06    |
| ENSMMUG00000019887 | synaptic vesicle glycoprotein 2C [Source:VGNC Symbol;Acc:VGNC:78252]                                  | 0.887327339 | 3.72E-05    | 0.000185746 |

|                    |                                                                                                |             |             |             |
|--------------------|------------------------------------------------------------------------------------------------|-------------|-------------|-------------|
| ENSMMUG00000022982 | IQ motif containing GTPase activating protein 2 [Source:VGNC Symbol;Acc:VGNC:73756]            | 1.314685613 | 0.001937633 | 0.006476092 |
| ENSMMUG00000021357 | zinc finger BED-type containing 3 [Source:VGNC Symbol;Acc:VGNC:79271]                          | 1.564244743 | 0.004445951 | 0.013412012 |
| ENSMMUG00000006792 | arylsulfatase B [Source:VGNC Symbol;Acc:VGNC:70023]                                            | 1.049911312 | 0.012861554 | 0.033592259 |
| ENSMMUG00000006796 | betaine--homocysteine S-methyltransferase 2 [Source:VGNC Symbol;Acc:VGNC:70248]                | 1.374199433 | 3.56E-05    | 0.000178713 |
| ENSMMUG00000046325 | junction mediating and regulatory protein, p53 cofactor [Source:VGNC Symbol;Acc:VGNC:84397]    | 3.018649378 | 0.002140506 | 0.007049456 |
| ENSMMUG00000020731 | terminal nucleotidyltransferase 2 [Source:VGNC Symbol;Acc:VGNC:79637]                          | 1.976871639 | 0.005649156 | 0.016491533 |
| ENSMMUG00000036820 | U7 small nuclear RNA [Source:RFAM;Acc:RF00066]                                                 | 1.510182611 | 9.39E-06    | 5.30E-05    |
| ENSMMUG00000051429 |                                                                                                | -2.93263792 | 2.36E-07    | 1.78E-06    |
| ENSMMUG00000018283 | dihydrofolate reductase [Source:NCBI gene;Acc:711268]                                          | 1.978362159 | 0.00034279  | 0.001386125 |
| ENSMMUG00000018284 | mutS homolog 3 [Source:VGNC Symbol;Acc:VGNC:74932]                                             | 0.912704304 | 2.07E-05    | 0.000109405 |
| ENSMMUG00000054808 | Metazoan signal recognition particle RNA [Source:RFAM;Acc:RF00017]                             | 1.638311763 | 0.012906996 | 0.033705009 |
| ENSMMUG00000039944 | Ras protein specific guanine nucleotide releasing factor 2 [Source:VGNC Symbol;Acc:VGNC:84486] | -1.80164829 | 1.65E-07    | 1.28E-06    |
| ENSMMUG00000006932 | creatine kinase, mitochondrial 2 [Source:VGNC Symbol;Acc:VGNC:71231]                           | 1.129515893 | 0.005294953 | 0.015586374 |
| ENSMMUG00000017583 | single stranded DNA binding protein 2 [Source:NCBI gene;Acc:711752]                            | 1.411892454 | 2.51E-14    | 4.96E-13    |
| ENSMMUG00000003578 | ribosomal protein S23 [Source:NCBI gene;Acc:711914]                                            | 1.620912308 | 0.013992502 | 0.036077569 |
| ENSMMUG00000046560 | transmembrane protein 167A [Source:VGNC Symbol;Acc:VGNC:84513]                                 | 0.972191629 | 0.000142571 | 0.000626654 |
| ENSMMUG00000035653 | small Cajal body-specific RNA 18 [Source:HGNC Symbol;Acc:HGNC:32559]                           | 2.329167947 | 0.013928659 | 0.035969568 |
| ENSMMUG00000064265 | X-ray repair cross complementing 4 [Source:NCBI gene;Acc:712291]                               | 0.559842964 | 0.010278997 | 0.027715915 |
| ENSMMUG00000011513 | versican [Source:VGNC Symbol;Acc:VGNC:79445]                                                   | 3.505384997 | 4.04E-69    | 1.20E-65    |
| ENSMMUG00000061282 | hyaluronan and proteoglycan link protein 1 [Source:NCBI gene;Acc:712501]                       | 4.499460004 | 0.00013173  | 0.000585072 |
| ENSMMUG00000009319 | transmembrane protein 161B [Source:VGNC Symbol;Acc:VGNC:84508]                                 | 1.363082563 | 1.97E-05    | 0.000105026 |
| ENSMMUG00000019836 | myocyte enhancer factor 2C [Source:VGNC Symbol;Acc:VGNC:84438]                                 | 1.514848511 | 4.10E-08    | 3.48E-07    |
| ENSMMUG00000055392 |                                                                                                | 1.498836401 | 2.78E-07    | 2.08E-06    |
| ENSMMUG00000056790 |                                                                                                | 2.781680955 | 0.00028231  | 0.001160061 |
| ENSMMUG00000018972 | RNA polymerase III subunit G [Source:VGNC Symbol;Acc:VGNC:84480]                               | 1.719861406 | 1.81E-05    | 9.71E-05    |
| ENSMMUG00000018974 | LysM domain containing 3 [Source:VGNC Symbol;Acc:VGNC:74373]                                   | 2.205599995 | 2.49E-42    | 9.01E-40    |
| ENSMMUG00000055271 |                                                                                                | 1.960198354 | 3.42E-09    | 3.46E-08    |
| ENSMMUG00000018976 | adhesion G protein-coupled receptor V1 [Source:VGNC Symbol;Acc:VGNC:69625]                     | 1.608149998 | 1.15E-06    | 7.74E-06    |
| ENSMMUG00000001722 | family with sequence similarity 172 member A [Source:VGNC Symbol;Acc:VGNC:72348]               | 0.519128053 | 0.013735464 | 0.035543734 |
| ENSMMUG00000001397 | multiple C2 and transmembrane domain containing 1 [Source:VGNC Symbol;Acc:VGNC:74589]          | 1.759847719 | 1.01E-08    | 9.43E-08    |
| ENSMMUG00000010632 | family with sequence similarity 81 member B [Source:VGNC Symbol;Acc:VGNC:72365]                | 2.743561889 | 0.002209183 | 0.00723998  |
| ENSMMUG00000001209 | arylsulfatase family member K [Source:VGNC Symbol;Acc:VGNC:84280]                              | 1.468797506 | 2.18E-06    | 1.39E-05    |
| ENSMMUG00000001211 | G protein-coupled receptor 150 [Source:VGNC Symbol;Acc:VGNC:72988]                             | 1.196016396 | 0.00582832  | 0.016951164 |

|                    |                                                                                                |   |             |             |             |
|--------------------|------------------------------------------------------------------------------------------------|---|-------------|-------------|-------------|
| ENSMMUG0000001212  | Rieske Fe-S domain containing [Source:VGNC Symbol;Acc:VGNC:84487]                              | - | 0.956975108 | 9.32E-07    | 6.36E-06    |
| ENSMMUG0000001213  | spermatogenesis associated 9 [Source:VGNC Symbol;Acc:VGNC:77976]                               | - | 0.993775994 | 6.62E-05    | 0.00031345  |
| ENSMMUG00000032858 | mml-mir-583 [Source:miRBase;Acc:MI0007850]                                                     | - | 1.40935926  | 0.000432387 | 0.001708581 |
| ENSMMUG0000002063  | endoplasmic reticulum aminopeptidase 1 [Source:VGNC Symbol;Acc:VGNC:72066]                     | - | 0.978532087 | 2.01E-11    | 2.77E-10    |
| ENSMMUG00000011043 | endoplasmic reticulum aminopeptidase 2 [Source:VGNC Symbol;Acc:VGNC:72141]                     | - | 0.951507337 | 2.14E-20    | 7.83E-19    |
| ENSMMUG00000065221 |                                                                                                | - | 0.782052356 | 2.58E-07    | 1.94E-06    |
| ENSMMUG00000018542 | leucyl and cystinyl aminopeptidase [Source:VGNC Symbol;Acc:VGNC:74438]                         | - | 0.774661942 | 1.02E-06    | 6.90E-06    |
| ENSMMUG00000000307 | RIO kinase 2 [Source:VGNC Symbol;Acc:VGNC:76774]                                               | - | 0.506860337 | 2.15E-05    | 0.000113379 |
| ENSMMUG00000054789 | family with sequence similarity 174 member A [Source:NCBI gene;Acc:702300]                     | - | 0.728821034 | 8.54E-06    | 4.86E-05    |
| ENSMMUG00000007773 | solute carrier organic anion transporter family member 4C1 [Source:VGNC Symbol;Acc:VGNC:77764] | - | 3.214044707 | 6.59E-10    | 7.44E-09    |
| ENSMMUG00000007844 | peptidylglycine alpha-amidating monooxygenase [Source:VGNC Symbol;Acc:VGNC:75752]              | - | 0.667547419 | 0.014795298 | 0.037823524 |
| ENSMMUG00000007786 | gypsy retrotransposon integrase 1 [Source:VGNC Symbol;Acc:VGNC:73015]                          | - | 0.298831963 | 0.014023619 | 0.036143598 |
| ENSMMUG00000007787 | diphosphoinositol pentakisphosphate kinase 2 [Source:VGNC Symbol;Acc:VGNC:76128]               | - | -0.7135779  | 0.001314029 | 0.004594918 |
| ENSMMUG00000059227 |                                                                                                | - | 3.44757698  | 0.016028572 | 0.040467097 |
| ENSMMUG00000054898 |                                                                                                | - | 1.877786522 | 0.002684877 | 0.008609021 |
| ENSMMUG00000013183 | F-box and leucine rich repeat protein 17 [Source:VGNC Symbol;Acc:VGNC:82142]                   | - | 1.170150777 | 2.47E-10    | 2.97E-09    |
| ENSMMUG00000003316 | mannosidase alpha class 2A member 1 [Source:VGNC Symbol;Acc:VGNC:81449]                        | - | -0.89024199 | 1.75E-06    | 1.13E-05    |
| ENSMMUG00000038051 | uncharacterized LOC106998885 [Source:NCBI gene;Acc:106998885]                                  | - | 1.512475833 | 3.79E-11    | 5.06E-10    |
| ENSMMUG00000042638 |                                                                                                | - | 2.907870979 | 0.007772034 | 0.021775791 |
| ENSMMUG00000011974 | calcium/calmodulin dependent protein kinase IV [Source:VGNC Symbol;Acc:VGNC:70526]             | - | 3.126623692 | 7.43E-24    | 4.02E-22    |
| ENSMMUG00000063177 | StAR related lipid transfer domain containing 4 [Source:NCBI gene;Acc:706654]                  | - | 2.710404229 | 1.67E-24    | 9.49E-23    |
| ENSMMUG00000002768 | neuronal regeneration related protein [Source:VGNC Symbol;Acc:VGNC:84454]                      | - | 3.028937863 | 0.002428359 | 0.007879469 |
| ENSMMUG00000012192 | erythrocyte membrane protein band 4.1 like 4A [Source:VGNC Symbol;Acc:VGNC:72039]              | - | -1.36015545 | 1.26E-09    | 1.36E-08    |
| ENSMMUG00000055720 |                                                                                                | - | 1.119999588 | 0.019392548 | 0.047567233 |
| ENSMMUG00000056959 |                                                                                                | - | 0.590438909 | 0.00021578  | 0.000913767 |
| ENSMMUG00000000330 | APC regulator of WNT signaling pathway [Source:VGNC Symbol;Acc:VGNC:84282]                     | - | 0.55125838  | 0.008394455 | 0.0232996   |
| ENSMMUG00000042951 | signal recognition particle 19 [Source:NCBI gene;Acc:693829]                                   | - | 1.122361118 | 3.68E-08    | 3.14E-07    |
| ENSMMUG00000020488 | receptor accessory protein 5 [Source:VGNC Symbol;Acc:VGNC:76864]                               | - | 1.04731898  | 1.83E-15    | 4.06E-14    |
| ENSMMUG00000011130 | tripartite motif containing 36 [Source:VGNC Symbol;Acc:VGNC:79023]                             | - | 0.272274394 | 0.020242869 | 0.049367168 |
| ENSMMUG00000005018 | protein geranylgeranyltransferase type I subunit beta [Source:VGNC Symbol;Acc:VGNC:75965]      | - | 3.047508443 | 0.001565572 | 0.00535038  |
| ENSMMUG00000015114 | toll like receptor adaptor molecule 2 [Source:NCBI gene;Acc:100426353]                         | - | 0.546068171 | 2.17E-10    | 2.63E-09    |
| ENSMMUG00000061758 | cysteine dioxygenase type 1 [Source:NCBI gene;Acc:696387]                                      | - | 0.473884409 | 0.000645117 | 0.002436852 |
| ENSMMUG00000060812 | autophagy related 12 [Source:NCBI gene;Acc:696765]                                             | - | 1.344954945 | 1.96E-12    | 3.11E-11    |
| ENSMMUG00000015288 | adaptor related protein complex 3 subunit sigma 1 [Source:VGNC Symbol;Acc:VGNC:69867]          | - | 1.224493028 | 1.27E-06    | 8.48E-06    |
| ENSMMUG00000022192 |                                                                                                | - | 1.108213369 | 0.000252777 | 0.001053888 |
| ENSMMUG00000008738 | COMM domain containing 10 [Source:VGNC Symbol;Acc:VGNC:71374]                                  | - | 1.565143439 | 3.26E-06    | 2.01E-05    |
| ENSMMUG00000037127 | U6 spliceosomal RNA [Source:RFAM;Acc:RF00026]                                                  | - | 1.206624068 | 0.005945309 | 0.017244352 |

|                    |                                                                                       |   |             |             |             |
|--------------------|---------------------------------------------------------------------------------------|---|-------------|-------------|-------------|
| ENSMMUG00000018640 | Dmx like 1 [Source:VGNC Symbol;Acc:VGNC:71935]                                        | - | 1.021632759 | 0.002555232 | 0.008239636 |
| ENSMMUG00000063474 |                                                                                       | - | 0.759802703 | 7.61E-07    | 5.28E-06    |
| ENSMMUG00000059145 |                                                                                       | - | 1.248857598 | 0.001851202 | 0.006223832 |
| ENSMMUG00000063816 | Metazoan signal recognition particle RNA [Source:RFAM;Acc:RF00017]                    | - | 2.162171403 | 0.005128019 | 0.015161189 |
| ENSMMUG00000018764 |                                                                                       | - | 0.863169717 | 0.008585862 | 0.023737609 |
| ENSMMUG00000063354 |                                                                                       | - | 1.194229261 | 0.004942532 | 0.014715469 |
| ENSMMUG00000053794 |                                                                                       | - | -1.5042525  | 1.22E-09    | 1.32E-08    |
| ENSMMUG00000021006 | zinc finger protein 474 [Source:VGNC Symbol;Acc:VGNC:81617]                           | - | 1.230557235 | 0.000441537 | 0.001737789 |
| ENSMMUG00000046428 |                                                                                       | - | 0.774099407 | 0.01297366  | 0.033831437 |
| ENSMMUG00000023598 | sorting nexin 2 [Source:VGNC Symbol;Acc:VGNC:77682]                                   | - | 1.949648208 | 0.001343901 | 0.004686116 |
| ENSMMUG00000066646 | casein kinase 1 gamma 3 [Source:VGNC Symbol;Acc:VGNC:81384]                           | - | 0.542405597 | 0.010167779 | 0.027450968 |
| ENSMMUG00000016683 | phosphorylated adaptor for RNA export [Source:NCBI gene;Acc:702980]                   | - | 1.001083563 | 0.018213767 | 0.045101047 |
| ENSMMUG00000021547 | membrane associated ring-CH-type finger 3 [Source:VGNC Symbol;Acc:VGNC:74605]         | - | 2.258197542 | 0.006133593 | 0.01772777  |
| ENSMMUG00000037806 | chromosome 6 C5orf63 homolog [Source:NCBI gene;Acc:100423212]                         | - | 1.707114642 | 0.004871883 | 0.014543081 |
| ENSMMUG00000018827 | multiple EGF like domains 10 [Source:VGNC Symbol;Acc:VGNC:74617]                      | - | 4.233937945 | 0.001583645 | 0.005400195 |
| ENSMMUG00000063396 |                                                                                       | - | -4.35040039 | 0.008380505 | 0.023266822 |
| ENSMMUG00000011214 | solute carrier family 12 member 2 [Source:VGNC Symbol;Acc:VGNC:77386]                 | - | 2.007415239 | 8.47E-13    | 1.41E-11    |
| ENSMMUG00000010682 | fibrillin 2 [Source:VGNC Symbol;Acc:VGNC:72624]                                       | - | 1.625625699 | 2.80E-10    | 3.33E-09    |
| ENSMMUG00000003312 | chondroitin sulfate synthase 3 [Source:VGNC Symbol;Acc:VGNC:71089]                    | - | 2.020913725 | 0.007226785 | 0.020410059 |
| ENSMMUG00000058082 |                                                                                       | - | 0.380293496 | 0.001634127 | 0.005555912 |
| ENSMMUG00000016909 | meiotic kinetochore factor [Source:NCBI gene;Acc:709179]                              | - | 0.937602406 | 1.17E-10    | 1.47E-09    |
| ENSMMUG00000051989 | interleukin 5 [Source:NCBI gene;Acc:710622]                                           | - | 3.247860237 | 5.43E-05    | 0.000262176 |
| ENSMMUG00000003131 | interleukin 13 [Source:VGNC Symbol;Acc:VGNC:84393]                                    | - | 1.358581968 | 8.36E-09    | 7.92E-08    |
| ENSMMUG00000003133 | interleukin 4 [Source:VGNC Symbol;Acc:VGNC:73729]                                     | - | 1.465184296 | 3.86E-05    | 0.000191667 |
| ENSMMUG00000010313 | kinesin family member 3A [Source:VGNC Symbol;Acc:VGNC:74017]                          | - | 1.853782308 | 2.19E-26    | 1.52E-24    |
| ENSMMUG00000010308 | cyclin I family member 2 [Source:VGNC Symbol;Acc:VGNC:70923]                          | - | 1.705776481 | 7.48E-08    | 6.14E-07    |
| ENSMMUG00000010309 | septin 8 [Source:VGNC Symbol;Acc:VGNC:77248]                                          | - | 1.748127948 | 1.40E-05    | 7.68E-05    |
| ENSMMUG00000039781 | so sondowah ankyrin repeat domain family member A [Source:VGNC Symbol;Acc:VGNC:84498] | - | 1.225356557 | 0.000191784 | 0.000821299 |
| ENSMMUG00000059080 |                                                                                       | - | 1.619621042 | 6.69E-06    | 3.89E-05    |
| ENSMMUG00000015640 | AF4/FMR2 family member 4 [Source:VGNC Symbol;Acc:VGNC:69629]                          | - | 1.479023119 | 9.07E-08    | 7.35E-07    |
| ENSMMUG00000026029 | Y RNA [Source:RFAM;Acc:RF00019]                                                       | - | 1.307250673 | 0.004757594 | 0.014247802 |
| ENSMMUG00000052685 |                                                                                       | - | 0.563993148 | 0.006112899 | 0.017674848 |
| ENSMMUG00000013047 | S-phase kinase associated protein 1 [Source:NCBI gene;Acc:100423634]                  | - | 3.026084455 | 6.08E-52    | 7.51E-49    |
| ENSMMUG00000016641 | ubiquitin conjugating enzyme E2 B [Source:VGNC Symbol;Acc:VGNC:78692]                 | - | 0.874021888 | 0.012085554 | 0.031868559 |

|                     |                                                                                                      |   |             |             |             |
|---------------------|------------------------------------------------------------------------------------------------------|---|-------------|-------------|-------------|
| ENSMMUG00000053384  |                                                                                                      | - | 2.527602802 | 9.39E-48    | 6.05E-45    |
| ENSMMUG00000058096  | CDKN2A interacting protein N-terminal like [Source:NCBI gene;Acc:710774]                             |   | 1.174682276 | 0.002113094 | 0.006977773 |
| ENSMMUG00000004417  | secretion associated Ras related GTPase 1B [Source:VGNC Symbol;Acc:VGNC:76970]                       |   | 1.074814673 | 1.34E-13    | 2.45E-12    |
| ENSMMUG00000012463  | DEAD-box helicase 46 [Source:VGNC Symbol;Acc:VGNC:71663]                                             |   | 1.591866498 | 1.18E-12    | 1.93E-11    |
| ENSMMUG00000054798  |                                                                                                      |   | 0.730976622 | 0.002974264 | 0.009426871 |
| ENSMMUG00000060605  |                                                                                                      |   | 1.055217699 | 3.85E-09    | 3.85E-08    |
| ENSMMUG00000016357  | polycystin 2 like 2, transient receptor potential cation channel [Source:VGNC Symbol;Acc:VGNC:76009] |   | 2.090785352 | 8.99E-05    | 0.000414254 |
| ENSMMUG00000008009  | family with sequence similarity 13 member B [Source:VGNC Symbol;Acc:VGNC:72268]                      |   | 1.985934546 | 3.11E-10    | 3.67E-09    |
| ENSMMUG00000001507  | bromodomain containing 8 [Source:VGNC Symbol;Acc:VGNC:70350]                                         |   | -1.97737799 | 0.017363454 | 0.04328459  |
| ENSMMUG00000009025  | cell division cycle 25C [Source:VGNC Symbol;Acc:VGNC:70796]                                          |   | 0.351062122 | 0.005205237 | 0.015343604 |
| ENSMMUG00000005871  | eukaryotic translation termination factor 1 [Source:VGNC Symbol;Acc:VGNC:84370]                      |   | 0.561829181 | 0.007777581 | 0.021787216 |
| ENSMMUG00000017985  | catenin alpha 1 [Source:VGNC Symbol;Acc:VGNC:84291]                                                  |   | 0.783663953 | 9.43E-08    | 7.62E-07    |
| ENSMMUG00000001941  | CXXC finger protein 5 [Source:VGNC Symbol;Acc:VGNC:71594]                                            |   | 0.789375354 | 3.61E-11    | 4.83E-10    |
| ENSMMUG00000010301  | neuregulin 2 [Source:VGNC Symbol;Acc:VGNC:81487]                                                     |   | 1.00294627  | 0.01684026  | 0.04225737  |
| ENSMMUG00000028372  | Y RNA [Source:RFAM;Acc:RF00019]                                                                      |   | 2.764437781 | 0.000298516 | 0.001220231 |
| ENSMMUG00000019582  | ankyrin repeat and KH domain-containing protein 1 [Source:NCBI gene;Acc:698045]                      |   | 0.574581905 | 2.24E-05    | 0.00011756  |
| ENSMMUG00000001707  | amyloid beta precursor protein binding family B member 3 [Source:VGNC Symbol;Acc:VGNC:69869]         |   | 2.764009555 | 2.03E-59    | 5.01E-56    |
| ENSMMUG00000001725  | solute carrier family 35 member A4 [Source:VGNC Symbol;Acc:VGNC:77532]                               |   | 2.620058528 | 5.41E-30    | 5.25E-28    |
| ENSMMUG00000062326  |                                                                                                      |   | 2.720177225 | 1.19E-30    | 1.21E-28    |
| ENSMMUG00000024537  |                                                                                                      |   | 3.500097511 | 6.03E-09    | 5.85E-08    |
| ENSMMUG00000010007  | CD14 molecule [Source:VGNC Symbol;Acc:VGNC:70751]                                                    |   | 2.971633883 | 7.21E-17    | 1.83E-15    |
| ENSMMUG00000060632  |                                                                                                      |   | 2.62271541  | 2.81E-09    | 2.88E-08    |
| ENSMMUG00000018246  | transmembrane and coiled-coil domains 6 [Source:VGNC Symbol;Acc:VGNC:84507]                          |   | 2.17662103  | 3.16E-39    | 7.80E-37    |
| ENSMMUG00000056796  | NADH:ubiquinone oxidoreductase subunit A2 [Source:NCBI gene;Acc:697736]                              |   | 2.753004233 | 1.16E-07    | 9.29E-07    |
| ENSMMUG00000010008  | IK cytokine [Source:VGNC Symbol;Acc:VGNC:73703]                                                      |   | 0.592810461 | 0.008448955 | 0.023419593 |
| ENSMMUG00000004481  | histidyl-tRNA synthetase 1 [Source:VGNC Symbol;Acc:VGNC:84385]                                       |   | 0.753918388 | 0.018064329 | 0.044798328 |
| ENSMMUG00000004483  | histidyl-tRNA synthetase 2, mitochondrial [Source:VGNC Symbol;Acc:VGNC:73346]                        |   | 0.717697771 | 7.02E-05    | 0.000330797 |
| ENSMMUG00000014571  | protocadherin alpha-C2 [Source:NCBI gene;Acc:698874]                                                 |   | 0.901115734 | 1.31E-15    | 2.93E-14    |
| ENSMMUG00000008710  | protocadherin 1 [Source:VGNC Symbol;Acc:VGNC:75775]                                                  |   | 1.190112607 | 0.001090471 | 0.003891165 |
| ENSMMUG00000006287  | DAP3 binding cell death enhancer 1 [Source:VGNC Symbol;Acc:VGNC:71806]                               |   | 0.634208199 | 7.53E-06    | 4.34E-05    |
| ENSMMUG00000006291  | protocadherin 12 [Source:VGNC Symbol;Acc:VGNC:75776]                                                 |   | 1.012126999 | 1.27E-06    | 8.45E-06    |
| ENSMMUG00000009768  | ring finger protein 14 [Source:VGNC Symbol;Acc:VGNC:84488]                                           |   | 0.731814854 | 3.62E-09    | 3.64E-08    |
| ENSMMUG00000014175  | sprouty RTK signaling antagonist 4 [Source:VGNC Symbol;Acc:VGNC:77925]                               |   | 1.144207941 | 0.000550874 | 0.002120287 |
| ENSMMUG00000060402  |                                                                                                      |   | 0.666691253 | 0.003628019 | 0.011216077 |
| ENSMMUG00000000419  | Rho GTPase activating protein 26 [Source:VGNC Symbol;Acc:VGNC:69846]                                 |   | 2.07334627  | 2.92E-22    | 1.34E-20    |
| ENSMMUG00000050405  |                                                                                                      |   | 2.284383604 | 1.54E-18    | 4.66E-17    |
| ENSMMUG00000000421  | nuclear receptor subfamily 3 group C member 1 [Source:VGNC Symbol;Acc:VGNC:75515]                    |   | 2.227531594 | 2.32E-41    | 7.47E-39    |
| ENSMMUG000000035921 | U7 small nuclear RNA [Source:RFAM;Acc:RF00066]                                                       |   | 1.717802861 | 0.004959825 | 0.014758067 |
| ENSMMUG00000055068  |                                                                                                      |   | -2.82099922 | 0.011023542 | 0.029418595 |
| ENSMMUG00000063348  |                                                                                                      |   | 0.835625936 | 3.62E-06    | 2.21E-05    |

|                     |                                                                                            |   |             |             |             |
|---------------------|--------------------------------------------------------------------------------------------|---|-------------|-------------|-------------|
| ENSMMUG00000019291  | dihydropyrimidinase like 3 [Source:VGNC Symbol;Acc:VGNC:71985]                             | - | 1.081697614 | 0.002552464 | 0.008232931 |
| ENSMMUG00000019820  | SH3 domain and tetratricopeptide repeats 2 [Source:VGNC Symbol;Acc:VGNC:77337]             | - | 1.009560234 | 2.21E-11    | 3.02E-10    |
| ENSMMUG00000056140  | U6 spliceosomal RNA [Source:RFAM;Acc:RF00026]                                              | - | 1.17395549  | 0.007109917 | 0.020137523 |
| ENSMMUG00000064432  |                                                                                            | - | 2.090602559 | 0.016966517 | 0.042487916 |
| ENSMMUG00000062594  |                                                                                            | - | 0.860861861 | 0.003411771 | 0.010622834 |
| ENSMMUG00000001758  | casein kinase 1 alpha 1 [Source:VGNC Symbol;Acc:VGNC:84290]                                | - | 1.349665912 | 0.010385354 | 0.027946798 |
| ENSMMUG00000004749  | PPARG coactivator 1 beta [Source:VGNC Symbol;Acc:VGNC:76134]                               | - | 2.302354704 | 0.000167637 | 0.000725222 |
| ENSMMUG00000011557  | platelet derived growth factor receptor beta [Source:VGNC Symbol;Acc:VGNC:75929]           | - | 0.571852724 | 1.11E-16    | 2.79E-15    |
| ENSMMUG00000011563  | calcium/calmodulin dependent protein kinase II alpha [Source:VGNC Symbol;Acc:VGNC:70523]   | - | 2.586090192 | 0.020142813 | 0.049171674 |
| ENSMMUG00000005414  | N-deacetylase and N-sulfotransferase 1 [Source:VGNC Symbol;Acc:VGNC:75151]                 | - | 1.069781669 | 2.05E-10    | 2.49E-09    |
| ENSMMUG000000051062 |                                                                                            | - | 0.845375452 | 0.000780195 | 0.002882485 |
| ENSMMUG00000020679  | myozenin 3 [Source:VGNC Symbol;Acc:VGNC:74988]                                             | - | 1.532104395 | 1.77E-09    | 1.87E-08    |
| ENSMMUG00000020683  | RNA binding motif protein 22 [Source:VGNC Symbol;Acc:VGNC:76535]                           | - | 2.175961666 | 8.24E-13    | 1.38E-11    |
| ENSMMUG00000019764  | dynactin subunit 4 [Source:VGNC Symbol;Acc:VGNC:71625]                                     | - | 1.820730293 | 1.50E-08    | 1.37E-07    |
| ENSMMUG00000021051  | TNFAIP3 interacting protein 1 [Source:VGNC Symbol;Acc:VGNC:79057]                          | - | 1.170711129 | 1.02E-07    | 8.23E-07    |
| ENSMMUG00000021053  | annexin A6 [Source:VGNC Symbol;Acc:VGNC:69951]                                             | - | 1.135515883 | 1.80E-06    | 1.16E-05    |
| ENSMMUG00000053656  |                                                                                            | - | 0.988681734 | 7.16E-08    | 5.89E-07    |
| ENSMMUG00000003499  | solute carrier family 36 member 1 [Source:VGNC Symbol;Acc:VGNC:77509]                      | - | 1.735887095 | 6.19E-14    | 1.18E-12    |
| ENSMMUG00000003497  | FAT atypical cadherin 2 [Source:VGNC Symbol;Acc:VGNC:72618]                                | - | -1.21642151 | 5.09E-06    | 3.02E-05    |
| ENSMMUG00000053367  | secreted protein acidic and cysteine rich [Source:NCBI gene;Acc:712388]                    | - | 1.650060118 | 2.14E-18    | 6.41E-17    |
| ENSMMUG00000054302  | antioxidant 1 copper chaperone [Source:NCBI gene;Acc:712464]                               | - | 1.254788537 | 9.42E-06    | 5.31E-05    |
| ENSMMUG00000054082  |                                                                                            | - | 0.400860418 | 0.020338112 | 0.049552219 |
| ENSMMUG00000021228  | gem nuclear organelle associated protein 5 [Source:VGNC Symbol;Acc:VGNC:72751]             | - | 0.501191529 | 0.001279255 | 0.004488137 |
| ENSMMUG00000011463  | kinesin family member 4B [Source:NCBI gene;Acc:715082]                                     | - | 1.206962476 | 0.016517444 | 0.041531653 |
| ENSMMUG00000035086  | U2 spliceosomal RNA [Source:RFAM;Acc:RF00004]                                              | - | -2.73230685 | 7.31E-05    | 0.000342891 |
| ENSMMUG00000062861  |                                                                                            | - | 2.040934664 | 4.37E-09    | 4.33E-08    |
| ENSMMUG00000051081  |                                                                                            | - | 0.730363884 | 0.005657389 | 0.01650582  |
| ENSMMUG00000059241  |                                                                                            | - | -2.75978212 | 6.52E-10    | 7.37E-09    |
| ENSMMUG00000011471  | tetratricopeptide repeat domain 1 [Source:VGNC Symbol;Acc:VGNC:78667]                      | - | 0.60366505  | 0.013534378 | 0.035090004 |
| ENSMMUG00000011472  | PWWP domain containing 2A [Source:VGNC Symbol;Acc:VGNC:76564]                              | - | 1.935395607 | 2.73E-07    | 2.04E-06    |
| ENSMMUG00000018044  | gamma-aminobutyric acid type A receptor beta2 subunit [Source:VGNC Symbol;Acc:VGNC:72852]  | - | 1.513083902 | 0.001252008 | 0.004400162 |
| ENSMMUG00000009171  | potassium voltage-gated channel interacting protein 1 [Source:VGNC Symbol;Acc:VGNC:73832]  | - | 0.569999624 | 0.007995088 | 0.022312223 |
| ENSMMUG00000000570  | gamma-aminobutyric acid type A receptor pi subunit [Source:VGNC Symbol;Acc:VGNC:72859]     | - | 0.615614203 | 0.0026485   | 0.00850341  |
| ENSMMUG00000015840  | RAN binding protein 17 [Source:VGNC Symbol;Acc:VGNC:84485]                                 | - | 0.714906585 | 1.12E-07    | 8.97E-07    |
| ENSMMUG00000046970  | Metazoan signal recognition particle RNA [Source:RFAM;Acc:RF00017]                         | - | 0.666517866 | 0.001333061 | 0.004652694 |
| ENSMMUG00000059105  |                                                                                            | - | 0.613133347 | 0.000193984 | 0.000829524 |
| ENSMMUG00000033319  |                                                                                            | - | 3.049165405 | 0.00695622  | 0.019770169 |
| ENSMMUG00000003067  | endoplasmic reticulum-golgi intermediate compartment 1 [Source:VGNC Symbol;Acc:VGNC:82141] | - | 1.382626135 | 1.93E-17    | 5.24E-16    |
| ENSMMUG00000059290  | ATPase H+ transporting V0 subunit e1 [Source:NCBI gene;Acc:703342]                         | - | 0.848634089 | 0.018984891 | 0.046717257 |



|                    |                                                                                                            |             |             |             |
|--------------------|------------------------------------------------------------------------------------------------------------|-------------|-------------|-------------|
| ENSMMUG00000019926 | cytoplasmic polyadenylation element binding protein 4 [Source:VGNC Symbol;Acc:VGNC:71450]                  | 0.715577335 | 4.96E-07    | 3.55E-06    |
| ENSMMUG00000053691 | Metazoan signal recognition particle RNA [Source:RFAM;Acc:RF00017]                                         | 3.002345603 | 2.46E-06    | 1.55E-05    |
| ENSMMUG00000009058 | clathrin light chain B [Source:VGNC Symbol;Acc:VGNC:71267]                                                 | 2.068542544 | 0.003356657 | 0.010480355 |
| ENSMMUG00000009059 | Fas associated factor family member 2 [Source:VGNC Symbol;Acc:VGNC:72332]                                  | 2.179433553 | 0.000109467 | 0.00049509  |
| ENSMMUG00000013283 | cadherin related family member 2 [Source:NCBI gene;Acc:697249]                                             | 2.174421308 | 9.78E-08    | 7.90E-07    |
| ENSMMUG00000000137 | synuclein beta [Source:VGNC Symbol;Acc:VGNC:77670]                                                         | 2.780065728 | 0.009727236 | 0.026415476 |
| ENSMMUG00000002649 | unc-5 netrin receptor A [Source:VGNC Symbol;Acc:VGNC:78721]                                                | 2.137523965 | 9.52E-05    | 0.000436894 |
| ENSMMUG00000002653 | hexokinase 3 [Source:VGNC Symbol;Acc:VGNC:73476]                                                           | 1.347229726 | 2.80E-14    | 5.52E-13    |
| ENSMMUG00000009041 | nuclear receptor binding SET domain protein 1 [Source:VGNC Symbol;Acc:VGNC:75401]                          | 1.344098135 | 2.51E-05    | 0.00013075  |
| ENSMMUG00000009045 | RAB24, member RAS oncogene family [Source:VGNC Symbol;Acc:VGNC:81524]                                      | 1.240722577 | 0.009352842 | 0.025572023 |
| ENSMMUG00000016192 | lectin, mannose binding 2 [Source:VGNC Symbol;Acc:VGNC:74302]                                              | 0.533772836 | 0.002759409 | 0.008825109 |
| ENSMMUG00000019807 | regulator of G protein signaling 14 [Source:VGNC Symbol;Acc:VGNC:76918]                                    | 0.780787861 | 3.54E-09    | 3.57E-08    |
| ENSMMUG00000016911 | DEAD-box helicase 41 [Source:VGNC Symbol;Acc:VGNC:71660]                                                   | 1.165637761 | 5.16E-05    | 0.000249845 |
| ENSMMUG00000063462 |                                                                                                            | 1.132146252 | 0.000425949 | 0.001685835 |
| ENSMMUG00000017607 | NEDD4 binding protein 3 [Source:VGNC Symbol;Acc:VGNC:75053]                                                | 1.246891623 | 4.80E-05    | 0.000234131 |
| ENSMMUG00000004000 | collagen type XXIII alpha 1 chain [Source:HGNC Symbol;Acc:HGNC:22990]                                      | 0.822952316 | 0.000160384 | 0.000696891 |
| ENSMMUG00000004002 | CDC like kinase 4 [Source:VGNC Symbol;Acc:VGNC:71173]                                                      | 1.720596095 | 3.20E-41    | 1.01E-38    |
| ENSMMUG00000041519 | zinc finger protein 354A [Source:VGNC Symbol;Acc:VGNC:84517]                                               | 2.143276453 | 1.71E-05    | 9.22E-05    |
| ENSMMUG00000012370 | calnexin [Source:VGNC Symbol;Acc:VGNC:70527]                                                               | 0.320661653 | 0.003001953 | 0.009495039 |
| ENSMMUG00000049557 |                                                                                                            | 1.696110764 | 0.000353891 | 0.001426531 |
| ENSMMUG00000001728 | mitogen-activated protein kinase 9 [Source:VGNC Symbol;Acc:VGNC:74652]                                     | 1.578581968 | 1.66E-11    | 2.31E-10    |
| ENSMMUG00000047880 | alpha-1,3-mannosyl-glycoprotein 2-beta-N-acetylglucosaminyltransferase [Source:VGNC Symbol;Acc:VGNC:84439] | 0.761760079 | 6.51E-09    | 6.29E-08    |
| ENSMMUG00000042832 | ZFP62 zinc finger protein [Source:VGNC Symbol;Acc:VGNC:84512]                                              | 0.745385923 | 0.000694993 | 0.002600745 |
| ENSMMUG00000054010 |                                                                                                            | 0.385723044 | 0.013886805 | 0.035896553 |
| ENSMMUG00000031833 | butyrophilin like 9 [Source:NCBI gene;Acc:106996463]                                                       | 0.809218428 | 0.000832543 | 0.003051562 |
| ENSMMUG00000062522 |                                                                                                            | 2.039821798 | 2.50E-18    | 7.42E-17    |
| ENSMMUG00000059428 | olfactory receptor 2V2 [Source:NCBI gene;Acc:707790]                                                       | 1.200547622 | 0.00111549  | 0.003974705 |
| ENSMMUG00000061151 |                                                                                                            | 2.112449552 | 9.04E-10    | 9.96E-09    |
| ENSMMUG00000054414 |                                                                                                            | 2.134461242 | 8.45E-13    | 1.41E-11    |
| ENSMMUG00000003598 | tripartite motif containing 7 [Source:VGNC Symbol;Acc:VGNC:79022]                                          | 2.151720533 | 7.11E-20    | 2.47E-18    |
| ENSMMUG00000062960 |                                                                                                            | 2.033165829 | 0.002072952 | 0.006868158 |
| ENSMMUG00000021145 | family with sequence similarity 120B [Source:VGNC Symbol;Acc:VGNC:72311]                                   | 1.546015518 | 6.57E-16    | 1.51E-14    |
| ENSMMUG00000039829 |                                                                                                            | 1.362458818 | 2.06E-05    | 0.000109195 |
| ENSMMUG00000014474 | SPARC related modular calcium binding 2 [Source:VGNC Symbol;Acc:VGNC:83470]                                | 1.661316464 | 8.94E-19    | 2.74E-17    |
| ENSMMUG00000021044 | afadin, adherens junction formation factor [Source:VGNC Symbol;Acc:VGNC:69818]                             | 1.310280804 | 5.67E-21    | 2.25E-19    |
| ENSMMUG00000053990 |                                                                                                            | 1.361940868 | 0.000121533 | 0.000543201 |
| ENSMMUG00000062443 |                                                                                                            | 1.466511538 | 2.89E-10    | 3.43E-09    |
| ENSMMUG00000057859 |                                                                                                            | -3.68261893 | 2.48E-13    | 4.37E-12    |

|                    |                                                                                                         |   |             |             |             |
|--------------------|---------------------------------------------------------------------------------------------------------|---|-------------|-------------|-------------|
| ENSMMUG00000029352 | T-complex protein 10A homolog 2 [Source:NCBI gene;Acc:693619]                                           | - | 2.886519058 | 0.000734458 | 0.002727778 |
| ENSMMUG00000008228 | unc-93 homolog A [Source:VGNC Symbol;Acc:VGNC:78724]                                                    | - | 2.766274828 | 1.14E-07    | 9.14E-07    |
| ENSMMUG00000057983 |                                                                                                         |   | 2.648045725 | 0.00208224  | 0.006889696 |
| ENSMMUG00000054834 |                                                                                                         |   | 0.556744628 | 6.92E-07    | 4.83E-06    |
| ENSMMUG00000020412 | parkin coregulated [Source:VGNC Symbol;Acc:VGNC:75646]                                                  | - | 0.634695034 | 0.019474623 | 0.047744861 |
| ENSMMUG00000057544 |                                                                                                         |   | 0.925404117 | 0.000477146 | 0.001865071 |
| ENSMMUG00000000500 | fibronectin type III domain containing 1 [Source:VGNC Symbol;Acc:VGNC:72546]                            |   | 0.488671835 | 0.001543758 | 0.005287283 |
| ENSMMUG00000011994 | T cell activation RhoGTPase activating protein [Source:VGNC Symbol;Acc:VGNC:78126]                      |   | 0.624551017 | 0.002189699 | 0.007185933 |
| ENSMMUG00000022247 | osteoclastogenesis associated transmembrane protein 1 [Source:VGNC Symbol;Acc:VGNC:75664]               |   | 2.351341226 | 1.60E-21    | 6.79E-20    |
| ENSMMUG00000008184 | methyltransferase like 24 [Source:VGNC Symbol;Acc:VGNC:74552]                                           |   | 1.410090855 | 1.77E-05    | 9.54E-05    |
| ENSMMUG00000021534 | solute carrier family 16 member 10 [Source:NCBI gene;Acc:696132]                                        | - | 1.860708399 | 0.000356672 | 0.001436179 |
| ENSMMUG00000058763 |                                                                                                         |   | 1.005945665 | 0.01243781  | 0.032646501 |
| ENSMMUG00000013782 | laminin subunit alpha 4 [Source:VGNC Symbol;Acc:VGNC:74227]                                             |   | 0.543425756 | 4.76E-05    | 0.0002329   |
| ENSMMUG00000061031 |                                                                                                         |   | 1.786339234 | 8.23E-07    | 5.67E-06    |
| ENSMMUG00000001200 |                                                                                                         |   | 1.414007973 | 0.018629035 | 0.04595286  |
| ENSMMUG00000060903 |                                                                                                         |   | 0.819389951 | 5.68E-05    | 0.000272751 |
| ENSMMUG00000058557 |                                                                                                         |   | 1.982839704 | 7.59E-14    | 1.44E-12    |
| ENSMMUG00000017189 | regulatory factor X6 [Source:VGNC Symbol;Acc:VGNC:76800]                                                |   | 2.443717348 | 2.00E-14    | 4.01E-13    |
| ENSMMUG00000017558 | discoidin, CUB and LCCL domain containing 1 [Source:VGNC Symbol;Acc:VGNC:71689]                         | - | 1.254259467 | 2.75E-05    | 0.000141788 |
| ENSMMUG00000059327 | NUS1 dehydrodolichyl diphosphate synthase subunit [Source:NCBI gene;Acc:715015]                         | - | 1.652135188 | 1.00E-12    | 1.65E-11    |
| ENSMMUG00000053187 |                                                                                                         |   | 1.825460537 | 0.017404365 | 0.043379284 |
| ENSMMUG00000060554 |                                                                                                         |   | 1.493517828 | 0.009360306 | 0.025582996 |
| ENSMMUG00000022354 | solute carrier family 35 member F1 [Source:VGNC Symbol;Acc:VGNC:77548]                                  |   | -1.85911603 | 0.006622186 | 0.018933299 |
| ENSMMUG00000008525 | minichromosome maintenance 9 homologous recombination repair factor [Source:VGNC Symbol;Acc:VGNC:83432] | - | 3.213569929 | 2.71E-06    | 1.69E-05    |
| ENSMMUG00000013302 | family with sequence similarity 184 member A [Source:VGNC Symbol;Acc:VGNC:72308]                        | - | 5.034940905 | 9.69E-11    | 1.23E-09    |
| ENSMMUG00000005225 | gap junction protein alpha 1 [Source:VGNC Symbol;Acc:VGNC:73055]                                        | - | 1.327069867 | 1.91E-10    | 2.33E-09    |
| ENSMMUG00000024966 | U4 spliceosomal RNA [Source:RFAM;Acc:RF00015]                                                           | - | 2.777001719 | 0.000202773 | 0.000863869 |
| ENSMMUG00000061165 |                                                                                                         |   | 1.501321632 | 5.60E-18    | 1.60E-16    |
| ENSMMUG00000051170 |                                                                                                         |   | 1.765032121 | 1.44E-10    | 1.78E-09    |
| ENSMMUG00000060822 |                                                                                                         |   | 1.358723715 | 7.40E-19    | 2.28E-17    |
| ENSMMUG00000007910 | heat shock transcription factor 2 [Source:VGNC Symbol;Acc:VGNC:81077]                                   | - | 0.774783171 | 0.006665868 | 0.019044429 |
| ENSMMUG00000052494 |                                                                                                         |   | 0.704339722 | 0.004041973 | 0.012343999 |
| ENSMMUG00000009725 | triadin [Source:HGNC Symbol;Acc:HGNC:12261]                                                             |   | 0.922058919 | 9.52E-12    | 1.37E-10    |
| ENSMMUG00000065276 |                                                                                                         |   | 0.810761806 | 5.95E-10    | 6.75E-09    |
| ENSMMUG00000003134 | ring finger protein 217 [Source:VGNC Symbol;Acc:VGNC:76801]                                             | - | 1.258474263 | 2.88E-06    | 1.79E-05    |
| ENSMMUG00000062110 | TPD52 like 1 [Source:NCBI gene;Acc:716568]                                                              | - | 1.522745849 | 0.00042295  | 0.001674411 |

|                    |                                                                                        |             |             |             |
|--------------------|----------------------------------------------------------------------------------------|-------------|-------------|-------------|
| ENSMMUG00000060901 |                                                                                        | 1.388852998 | 2.52E-16    | 6.07E-15    |
| ENSMMUG00000015355 | R-spondin 3 [Source:VGNC Symbol;Acc:VGNC:77066]                                        | 1.932072584 | 0.000466376 | 0.001827309 |
| ENSMMUG00000048882 | KIAA0408 ortholog [Source:NCBI gene;Acc:100429459]                                     | 0.720429981 | 3.16E-11    | 4.26E-10    |
| ENSMMUG00000029421 | protein tyrosine phosphatase receptor type K [Source:VGNC Symbol;Acc:VGNC:83453]       | 1.553951475 | 5.98E-05    | 0.000286143 |
| ENSMMUG00000022136 | laminin subunit alpha 2 [Source:VGNC Symbol;Acc:VGNC:74225]                            | 0.636154021 | 7.15E-06    | 4.13E-05    |
| ENSMMUG00000021498 | L3MBTL histone methyl-lysine binding protein 3 [Source:VGNC Symbol;Acc:VGNC:74106]     | 0.839667636 | 4.51E-07    | 3.24E-06    |
| ENSMMUG00000021499 | sterile alpha motif domain containing 3 [Source:VGNC Symbol;Acc:VGNC:77079]            | 0.932271309 | 3.75E-05    | 0.000186995 |
| ENSMMUG00000059338 | Y RNA [Source:RFAM;Acc:RF00019]                                                        | 1.328941277 | 0.002160052 | 0.007099424 |
| ENSMMUG00000065212 |                                                                                        | 1.199923912 | 1.11E-06    | 7.50E-06    |
| ENSMMUG00000059491 |                                                                                        | 1.561149471 | 4.57E-15    | 9.84E-14    |
| ENSMMUG00000017544 | mediator complex subunit 23 [Source:VGNC Symbol;Acc:VGNC:74562]                        | 0.567490781 | 7.93E-07    | 5.48E-06    |
| ENSMMUG00000017549 | ectonucleotide pyrophosphatase/phosphodiesterase 3 [Source:VGNC Symbol;Acc:VGNC:72224] | 0.821918129 | 0.000908266 | 0.003294103 |
| ENSMMUG00000004996 | monooxygenase DBH like 1 [Source:VGNC Symbol;Acc:VGNC:74800]                           | 0.928459064 | 3.78E-08    | 3.22E-07    |
| ENSMMUG00000004988 | trace amine-associated receptor 3 [Source:NCBI gene;Acc:709130]                        | 0.613324059 | 0.018796228 | 0.04632675  |
| ENSMMUG00000004987 | trace amine associated receptor 2 [Source:VGNC Symbol;Acc:VGNC:83475]                  | 0.992231568 | 0.002766527 | 0.008844062 |
| ENSMMUG00000064191 | Metazoan signal recognition particle RNA [Source:RFAM;Acc:RF00017]                     | 1.556463911 | 0.00282468  | 0.009003558 |
| ENSMMUG00000015089 | vanin 1 [Source:VGNC Symbol;Acc:VGNC:83967]                                            | 0.840620171 | 9.52E-07    | 6.47E-06    |
| ENSMMUG00000054573 |                                                                                        | 0.851880246 | 4.72E-06    | 2.82E-05    |
| ENSMMUG00000005745 | EYA transcriptional coactivator and phosphatase 4 [Source:VGNC Symbol;Acc:VGNC:72456]  | 1.82039005  | 1.41E-31    | 1.52E-29    |
| ENSMMUG00000022920 | TATA-box binding protein like 1 [Source:VGNC Symbol;Acc:VGNC:83491]                    | 0.838640869 | 0.001910184 | 0.006398922 |
| ENSMMUG00000022921 | solute carrier family 2 member 12 [Source:VGNC Symbol;Acc:VGNC:77503]                  | 2.917212034 | 2.52E-28    | 2.14E-26    |
| ENSMMUG00000061787 |                                                                                        | 2.521922073 | 0.00071274  | 0.002657098 |
| ENSMMUG00000008140 | serum/glucocorticoid regulated kinase 1 [Source:VGNC Symbol;Acc:VGNC:77195]            | 0.607539826 | 0.004987802 | 0.01482644  |
| ENSMMUG00000027839 | 5S ribosomal RNA [Source:RFAM;Acc:RF00001]                                             | 1.160101129 | 0.006909248 | 0.019663049 |
| ENSMMUG00000018166 | MYB proto-oncogene, transcription factor [Source:VGNC Symbol;Acc:VGNC:75089]           | 0.986029979 | 2.71E-08    | 2.37E-07    |
| ENSMMUG00000009368 | Abelson helper integration site 1 [Source:VGNC Symbol;Acc:VGNC:81010]                  | 1.111075949 | 1.69E-16    | 4.13E-15    |
| ENSMMUG00000044284 | 40S ribosomal protein S11-like [Source:NCBI gene;Acc:706532]                           | 0.796612678 | 0.000874471 | 0.003185556 |
| ENSMMUG00000053936 |                                                                                        | 0.685061205 | 0.001176821 | 0.004169197 |
| ENSMMUG00000016376 | mitogen-activated protein kinase kinase kinase 5 [Source:VGNC Symbol;Acc:VGNC:74495]   | 1.402306137 | 3.16E-07    | 2.33E-06    |
| ENSMMUG00000000122 | heme binding protein 2 [Source:VGNC Symbol;Acc:VGNC:73172]                             | 0.388804432 | 0.013616851 | 0.035285321 |
| ENSMMUG00000000123 | NHS like 1 [Source:VGNC Symbol;Acc:VGNC:75225]                                         | 0.741327094 | 4.56E-08    | 3.85E-07    |
| ENSMMUG00000048283 | mml-mir-3145 [Source:miRBase;Acc:MI0020897]                                            | 1.652329182 | 5.15E-05    | 0.00024982  |
| ENSMMUG00000061250 | ABRA C-terminal like [Source:NCBI gene;Acc:708266]                                     | 1.076768777 | 0.000358279 | 0.001441476 |
| ENSMMUG00000019136 | taxilin beta [Source:VGNC Symbol;Acc:VGNC:79325]                                       | 0.650198752 | 2.82E-11    | 3.82E-10    |
| ENSMMUG00000046765 |                                                                                        | 1.136355592 | 0.000220153 | 0.000930162 |
| ENSMMUG00000059794 |                                                                                        | 1.342211034 | 0.002997919 | 0.009486089 |
| ENSMMUG00000058187 |                                                                                        | 1.419584901 | 1.80E-23    | 9.52E-22    |
| ENSMMUG00000023012 | vesicle trafficking 1 [Source:VGNC Symbol;Acc:VGNC:79296]                              | 2.224354897 | 1.49E-08    | 1.36E-07    |
| ENSMMUG00000044958 | adhesion G protein-coupled receptor G6 [Source:VGNC Symbol;Acc:VGNC:81009]             | 1.743369088 | 4.48E-09    | 4.43E-08    |
| ENSMMUG00000064366 |                                                                                        | 1.462963243 | 0.00013065  | 0.000580969 |
| ENSMMUG00000061117 |                                                                                        | 2.037024359 | 6.96E-15    | 1.48E-13    |

|                    |                                                                                                         |             |             |             |
|--------------------|---------------------------------------------------------------------------------------------------------|-------------|-------------|-------------|
| ENSMMUG0000007998  | HIVEP zinc finger 2 [Source:VGNC Symbol;Acc:VGNC:83427]                                                 | 1.006506437 | 4.20E-09    | 4.17E-08    |
| ENSMMUG0000006430  | androgen induced 1 [Source:VGNC Symbol;Acc:VGNC:69667]                                                  | 1.002856752 | 0.008938255 | 0.024588077 |
| ENSMMUG0000005366  | alpha-L-fucosidase 2 [Source:VGNC Symbol;Acc:VGNC:72827]                                                | 1.478619451 | 0.003274565 | 0.010262424 |
| ENSMMUG0000003750  | PLAG1 like zinc finger 1 [Source:VGNC Symbol;Acc:VGNC:83444]                                            | 1.47689261  | 0.000180431 | 0.000776491 |
| ENSMMUG00000019443 | syntaxin 11 [Source:VGNC Symbol;Acc:VGNC:78041]                                                         | 3.913652586 | 5.16E-05    | 0.000249845 |
| ENSMMUG00000019438 | utrophin [Source:VGNC Symbol;Acc:VGNC:78749]                                                            | 1.030167115 | 2.93E-06    | 1.82E-05    |
| ENSMMUG00000051314 |                                                                                                         | 1.956098758 | 0.003261563 | 0.010232491 |
| ENSMMUG00000023265 | A-kinase anchoring protein 12 [Source:VGNC Symbol;Acc:VGNC:69766]                                       | 1.691621965 | 1.96E-07    | 1.50E-06    |
| ENSMMUG00000059202 | Y RNA [Source:RFAM;Acc:RF00019]                                                                         | 2.431224846 | 0.00626086  | 0.018043063 |
| ENSMMUG00000060839 |                                                                                                         | 3.539750633 | 0.003448216 | 0.010720553 |
| ENSMMUG00000029475 | zinc finger and BTB domain containing 2 [Source:VGNC Symbol;Acc:VGNC:79291]                             | 2.202007906 | 9.52E-07    | 6.47E-06    |
| ENSMMUG00000050174 |                                                                                                         | 3.069590979 | 0.004366387 | 0.013212307 |
| ENSMMUG00000018342 | required for meiotic nuclear division 1 homolog [Source:VGNC Symbol;Acc:VGNC:76797]                     | 1.677062312 | 1.16E-05    | 6.47E-05    |
| ENSMMUG00000060940 | acidic residue methyltransferase 1 [Source:NCBI gene;Acc:704570]                                        | 1.933201133 | 0.000864419 | 0.003152813 |
| ENSMMUG00000018346 | coiled-coil domain containing 170 [Source:VGNC Symbol;Acc:VGNC:70832]                                   | 2.254482251 | 1.39E-06    | 9.20E-06    |
| ENSMMUG00000025949 | U6 spliceosomal RNA [Source:RFAM;Acc:RF00026]                                                           | 2.265815197 | 0.017659903 | 0.043920236 |
| ENSMMUG00000019045 | estrogen receptor 1 [Source:VGNC Symbol;Acc:VGNC:72432]                                                 | -1.65470496 | 4.07E-08    | 3.45E-07    |
| ENSMMUG00000011171 | transcription factor B1, mitochondrial [Source:VGNC Symbol;Acc:VGNC:78398]                              | 0.473625067 | 0.001980142 | 0.006597507 |
| ENSMMUG00000011172 | claudin 20 [Source:VGNC Symbol;Acc:VGNC:71249]                                                          | 0.504527506 | 9.98E-05    | 0.000456781 |
| ENSMMUG00000013483 | prolyl endopeptidase [Source:VGNC Symbol;Acc:VGNC:76396]                                                | 0.755598191 | 0.000264487 | 0.001096546 |
| ENSMMUG00000055978 |                                                                                                         | 0.704706563 | 1.08E-05    | 6.01E-05    |
| ENSMMUG00000057697 |                                                                                                         | 1.802076681 | 4.18E-11    | 5.57E-10    |
| ENSMMUG00000051522 | Metazoan signal recognition particle RNA [Source:RFAM;Acc:RF00017]                                      | 3.175190031 | 6.62E-05    | 0.00031345  |
| ENSMMUG00000051271 |                                                                                                         | 3.216285232 | 1.12E-22    | 5.39E-21    |
| ENSMMUG00000000808 | melanin concentrating hormone receptor 2 [Source:VGNC Symbol;Acc:VGNC:74550]                            | 1.105173101 | 2.74E-19    | 8.79E-18    |
| ENSMMUG00000004061 | cyclin C [Source:VGNC Symbol;Acc:VGNC:70722]                                                            | 0.621746075 | 0.010662032 | 0.028556823 |
| ENSMMUG00000050740 | coenzyme Q3, methyltransferase [Source:NCBI gene;Acc:694215]                                            | 1.518172532 | 0.00256702  | 0.008274052 |
| ENSMMUG00000005923 | failed axon connections homolog, metaxin like GST domain containing [Source:VGNC Symbol;Acc:VGNC:72541] | 2.023296127 | 1.38E-10    | 1.71E-09    |
| ENSMMUG00000037890 |                                                                                                         | 1.475783613 | 3.97E-05    | 0.00019622  |
| ENSMMUG00000009182 | caspase 8 associated protein 2 [Source:VGNC Symbol;Acc:VGNC:70548]                                      | 3.65045527  | 8.31E-05    | 0.000385643 |
| ENSMMUG00000003462 | ankyrin repeat domain 6 [Source:VGNC Symbol;Acc:VGNC:81023]                                             | 0.712949972 | 8.05E-10    | 8.96E-09    |
| ENSMMUG00000064235 |                                                                                                         | 0.571883723 | 0.003795605 | 0.011656415 |
| ENSMMUG00000060841 |                                                                                                         | -1.50898516 | 0.000107939 | 0.000488776 |

|                    |                                                                                                |   |             |             |             |
|--------------------|------------------------------------------------------------------------------------------------|---|-------------|-------------|-------------|
| ENSMMUG0000002824  | akirin 2 [Source:VGNC Symbol;Acc:VGNC:69665]                                                   | - | 1.204324751 | 0.003010288 | 0.009516642 |
| ENSMMUG0000002821  | origin recognition complex subunit 3 [Source:VGNC Symbol;Acc:VGNC:75715]                       | - | 1.376954016 | 9.36E-07    | 6.38E-06    |
| ENSMMUG00000017039 | arginyl-tRNA synthetase 2, mitochondrial [Source:VGNC Symbol;Acc:VGNC:76516]                   | - | 0.806074285 | 7.52E-07    | 5.23E-06    |
| ENSMMUG00000064804 |                                                                                                | - | 1.664697286 | 5.79E-09    | 5.64E-08    |
| ENSMMUG0000005442  | 5'-nucleotidase ecto [Source:VGNC Symbol;Acc:VGNC:75537]                                       | - | 1.476630894 | 4.89E-09    | 4.81E-08    |
| ENSMMUG00000061590 |                                                                                                | - | -2.62763035 | 1.20E-06    | 8.01E-06    |
| ENSMMUG0000004829  | branched chain keto acid dehydrogenase E1 subunit beta [Source:VGNC Symbol;Acc:VGNC:70239]     | - | 3.173366072 | 0.002458035 | 0.007964312 |
| ENSMMUG00000017186 | pleckstrin homology domain interacting protein [Source:VGNC Symbol;Acc:VGNC:75803]             | - | 2.598459761 | 7.99E-14    | 1.51E-12    |
| ENSMMUG0000004491  | SUMO specific peptidase 6 [Source:VGNC Symbol;Acc:VGNC:77287]                                  | - | 0.614241921 | 8.03E-10    | 8.94E-09    |
| ENSMMUG00000046092 | adhesion G protein-coupled receptor B3 [Source:VGNC Symbol;Acc:VGNC:81006]                     | - | 0.467343065 | 0.001891694 | 0.00634025  |
| ENSMMUG00000041338 | eyes shut homolog [Source:HGNC Symbol;Acc:HGNC:21555]                                          | - | 0.673900722 | 1.61E-10    | 1.98E-09    |
| ENSMMUG00000017160 | PHD finger protein 3 [Source:VGNC Symbol;Acc:VGNC:75975]                                       | - | 0.973503536 | 3.22E-07    | 2.37E-06    |
| ENSMMUG00000062339 | endogenous retrovirus group K member 25 Env polyprotein-like [Source:NCBI gene;Acc:114677579]  | - | 0.999649669 | 9.08E-06    | 5.15E-05    |
| ENSMMUG0000002777  | protein tyrosine phosphatase 4A1 [Source:VGNC Symbol;Acc:VGNC:83452]                           | - | 0.979421472 | 3.64E-09    | 3.65E-08    |
| ENSMMUG0000000777  | dystonin [Source:VGNC Symbol;Acc:VGNC:81061]                                                   | - | 1.671975478 | 0.011346869 | 0.03019452  |
| ENSMMUG00000011858 | bone morphogenetic protein 5 [Source:VGNC Symbol;Acc:VGNC:70264]                               | - | 0.9977071   | 5.37E-06    | 3.18E-05    |
| ENSMMUG00000001395 | hypocretin receptor 2 [Source:VGNC Symbol;Acc:VGNC:73357]                                      | - | 2.628359727 | 0.004218837 | 0.012823397 |
| ENSMMUG00000036060 | U6 spliceosomal RNA [Source:RFAM;Acc:RF00026]                                                  | - | 2.59687451  | 0.004606256 | 0.013853695 |
| ENSMMUG00000012784 | tubulointerstitial nephritis antigen [Source:VGNC Symbol;Acc:VGNC:78382]                       | - | 1.669115046 | 0.001873679 | 0.006289421 |
| ENSMMUG00000012781 | muscular LMNA interacting protein [Source:VGNC Symbol;Acc:VGNC:83434]                          | - | 1.784921474 | 2.20E-09    | 2.29E-08    |
| ENSMMUG00000011049 | leucine rich repeat containing 1 [Source:VGNC Symbol;Acc:VGNC:81087]                           | - | 1.322434426 | 0.003902812 | 0.011960881 |
| ENSMMUG00000013718 | translocation associated membrane protein 2 [Source:VGNC Symbol;Acc:VGNC:83515]                | - | 1.454472528 | 4.10E-18    | 1.19E-16    |
| ENSMMUG00000052626 | progesterone and adiponectin receptor family member 8 [Source:NCBI gene;Acc:708418]            | - | 0.637338236 | 1.49E-05    | 8.11E-05    |
| ENSMMUG00000007403 | interleukin 17A [Source:VGNC Symbol;Acc:VGNC:81081]                                            | - | 1.561378068 | 0.004846545 | 0.01447327  |
| ENSMMUG00000026975 | mm1-mir-206 [Source:miRBase;Acc:MI0007667]                                                     | - | 4.46903577  | 0.000314948 | 0.001283857 |
| ENSMMUG00000016993 | PKHD1 ciliary IPT domain containing fibrocystin/polyductin [Source:VGNC Symbol;Acc:VGNC:76010] | - | -2.31820807 | 6.71E-14    | 1.28E-12    |
| ENSMMUG00000038096 | Metazoan signal recognition particle RNA [Source:RFAM;Acc:RF00017]                             | - | 2.843861783 | 0.014361726 | 0.036842138 |
| ENSMMUG00000053984 |                                                                                                | - | 2.872722588 | 6.28E-08    | 5.22E-07    |
| ENSMMUG00000056168 |                                                                                                | - | 3.867570014 | 0.000326683 | 0.001326956 |
| ENSMMUG00000022983 | adhesion G protein-coupled receptor F1 [Source:VGNC Symbol;Acc:VGNC:81007]                     | - | 1.113486882 | 0.000747301 | 0.002767159 |
| ENSMMUG00000023002 | adhesion G protein-coupled receptor F5 [Source:VGNC Symbol;Acc:VGNC:69471]                     | - | 0.787071284 | 6.02E-09    | 5.85E-08    |
| ENSMMUG00000023000 | mephrin A subunit alpha [Source:VGNC Symbol;Acc:VGNC:74704]                                    | - | 0.981165057 | 1.25E-05    | 6.90E-05    |
| ENSMMUG00000042154 | ankyrin repeat domain 66 [Source:VGNC Symbol;Acc:VGNC:81024]                                   | - | 0.924778921 | 1.40E-07    | 1.11E-06    |

|                    |                                                                                              |             |             |             |
|--------------------|----------------------------------------------------------------------------------------------|-------------|-------------|-------------|
| ENSMMUG00000019254 | phospholipase A2 group VII [Source:VGNC Symbol;Acc:VGNC:76158]                               | -1.3877263  | 2.47E-11    | 3.36E-10    |
| ENSMMUG00000019252 | tudor domain containing 6 [Source:VGNC Symbol;Acc:VGNC:79319]                                | 1.476927784 | 1.78E-15    | 3.95E-14    |
| ENSMMUG00000019250 | solute carrier family 25 member 27 [Source:VGNC Symbol;Acc:VGNC:77543]                       | 1.322801299 | 1.65E-13    | 2.99E-12    |
| ENSMMUG00000055199 | cytochrome P450, family 39, subfamily A, polypeptide 1 [Source:NCBI gene;Acc:704242]         | 1.278169758 | 0.002986943 | 0.009463013 |
| ENSMMUG00000019246 | regulator of calcineurin 2 [Source:VGNC Symbol;Acc:VGNC:82092]                               | 2.060991552 | 1.03E-11    | 1.47E-10    |
| ENSMMUG00000042260 | ectonucleotide pyrophosphatase/phosphodiesterase 4 [Source:VGNC Symbol;Acc:VGNC:81066]       | 1.935044991 | 0.012435808 | 0.032646501 |
| ENSMMUG00000003511 | chloride intracellular channel 5 [Source:VGNC Symbol;Acc:VGNC:71171]                         | 1.300067179 | 2.49E-08    | 2.20E-07    |
| ENSMMUG00000052523 |                                                                                              | 2.904197849 | 0.000139592 | 0.000614836 |
| ENSMMUG00000021377 | SPT3 homolog, SAGA and STAGA complex component [Source:VGNC Symbol;Acc:VGNC:78055]           | 2.088430272 | 4.73E-19    | 1.48E-17    |
| ENSMMUG00000014389 | cell division cycle 5 like [Source:VGNC Symbol;Acc:VGNC:70801]                               | 0.766811094 | 0.000441411 | 0.001737757 |
| ENSMMUG00000014388 | spermatogenesis associated serine rich 1 [Source:VGNC Symbol;Acc:VGNC:77975]                 | 0.796103411 | 2.59E-06    | 1.63E-05    |
| ENSMMUG00000054860 |                                                                                              | -1.45849831 | 0.013450311 | 0.034914775 |
| ENSMMUG00000060503 | Metazoan signal recognition particle RNA [Source:RFAM;Acc:RF00017]                           | -1.20126193 | 3.92E-05    | 0.000194196 |
| ENSMMUG00000063288 |                                                                                              | 1.043353409 | 6.45E-08    | 5.34E-07    |
| ENSMMUG00000011670 | protein tyrosine kinase 7 (inactive) [Source:VGNC Symbol;Acc:VGNC:83451]                     | -2.39293402 | 0.004188577 | 0.012739252 |
| ENSMMUG00000013920 | triggering receptor expressed on myeloid cells 2 [Source:VGNC Symbol;Acc:VGNC:79089]         | 0.941396589 | 0.000550045 | 0.002118196 |
| ENSMMUG00000062538 | adenylate cyclase type 10 [Source:NCBI gene;Acc:719662]                                      | 1.735198629 | 2.48E-09    | 2.55E-08    |
| ENSMMUG00000021173 | nuclear transcription factor Y subunit alpha [Source:VGNC Symbol;Acc:VGNC:75344]             | 1.500355109 | 1.49E-24    | 8.58E-23    |
| ENSMMUG00000021171 | apolipoprotein B mRNA editing enzyme catalytic subunit 2 [Source:VGNC Symbol;Acc:VGNC:69986] | 1.144152914 | 4.13E-10    | 4.79E-09    |
| ENSMMUG00000021169 | translocator protein 2 [Source:VGNC Symbol;Acc:VGNC:83960]                                   | 1.073533341 | 3.51E-05    | 0.000176509 |
| ENSMMUG00000021168 | unc-5 family C-terminal like [Source:VGNC Symbol;Acc:VGNC:79314]                             | 1.491134019 | 8.61E-18    | 2.43E-16    |
| ENSMMUG00000013651 | kinesin family member 6 [Source:VGNC Symbol;Acc:VGNC:73873]                                  | 3.872443296 | 0.000501729 | 0.001951387 |
| ENSMMUG00000013648 | potassium two pore domain channel subfamily K member 16 [Source:VGNC Symbol;Acc:VGNC:73827]  | 3.747356749 | 5.89E-06    | 3.45E-05    |
| ENSMMUG00000013644 | potassium two pore domain channel subfamily K member 17 [Source:VGNC Symbol;Acc:VGNC:73828]  | 3.109448361 | 3.45E-26    | 2.33E-24    |
| ENSMMUG00000023381 | dynein axonemal heavy chain 8 [Source:VGNC Symbol;Acc:VGNC:71943]                            | 0.671443918 | 1.10E-09    | 1.20E-08    |
| ENSMMUG00000048502 | Metazoan signal recognition particle RNA [Source:RFAM;Acc:RF00017]                           | 1.073314452 | 0.00010439  | 0.000474734 |
| ENSMMUG00000062055 | glyoxalase I [Source:NCBI gene;Acc:719518]                                                   | 1.201366259 | 2.44E-23    | 1.26E-21    |
| ENSMMUG00000001634 | BTB domain containing 9 [Source:VGNC Symbol;Acc:VGNC:70360]                                  | 2.743208285 | 0.01368364  | 0.035427442 |
| ENSMMUG00000011575 | coiled-coil domain containing 167 [Source:VGNC Symbol;Acc:VGNC:70833]                        | 3.399247291 | 8.99E-09    | 8.47E-08    |
| ENSMMUG00000011573 | cap methyltransferase 1 [Source:VGNC Symbol;Acc:VGNC:71271]                                  | 2.225343142 | 2.04E-08    | 1.83E-07    |
| ENSMMUG00000022008 | TBC1 domain family member 22B [Source:VGNC Symbol;Acc:VGNC:78192]                            | 1.447835237 | 0.002459076 | 0.007965945 |
| ENSMMUG00000063198 |                                                                                              | 4.31470259  | 2.90E-12    | 4.51E-11    |
| ENSMMUG00000059553 |                                                                                              | 0.66191895  | 4.49E-05    | 0.000219954 |
| ENSMMUG00000020558 | serine/threonine kinase 38 [Source:VGNC Symbol;Acc:VGNC:78155]                               | 1.219613431 | 0.003041681 | 0.009603604 |
| ENSMMUG00000014508 | potassium channel tetramerization domain containing 20 [Source:VGNC Symbol;Acc:VGNC:73872]   | 1.285587646 | 3.07E-05    | 0.000156437 |
| ENSMMUG00000055914 |                                                                                              | 2.060227129 | 7.34E-12    | 1.07E-10    |
| ENSMMUG00000015416 | bromodomain and PHD finger containing 3 [Source:VGNC Symbol;Acc:VGNC:70309]                  | 2.274373403 | 2.83E-15    | 6.14E-14    |

|                     |                                                                                               |             |             |             |
|---------------------|-----------------------------------------------------------------------------------------------|-------------|-------------|-------------|
| ENSMMUG0000000869   | small nuclear ribonucleoprotein polypeptide C [Source:NCBI gene;Acc:718654]                   | 4.241174956 | 1.56E-18    | 4.68E-17    |
| ENSMMUG00000007811  | protein kinase C and casein kinase substrate in neurons 1 [Source:VGNC Symbol;Acc:VGNC:75744] | 0.573974245 | 0.000281579 | 0.001157699 |
| ENSMMUG00000004287  | death domain associated protein [Source:VGNC Symbol;Acc:VGNC:71737]                           | -           | -           | -           |
| ENSMMUG00000003875  | TAP binding protein [Source:VGNC Symbol;Acc:VGNC:78098]                                       | 1.788229366 | 1.81E-05    | 9.70E-05    |
| ENSMMUG00000003872  | ral guanine nucleotide dissociation stimulator like 2 [Source:VGNC Symbol;Acc:VGNC:76886]     | -           | -           | -           |
| ENSMMUG00000003871  | prefoldin subunit 6 [Source:VGNC Symbol;Acc:VGNC:75906]                                       | 1.141188993 | 0.000517376 | 0.002003311 |
| ENSMMUG00000003869  | WD repeat domain 46 [Source:VGNC Symbol;Acc:VGNC:78940]                                       | -1.17330447 | 7.08E-05    | 0.000332982 |
| ENSMMUG000000064507 | beta-1,3-galactosyltransferase 4 [Source:NCBI gene;Acc:718178]                                | -1.12553549 | 0.014116745 | 0.036345718 |
| ENSMMUG00000003864  | VPS52 subunit of GARP complex [Source:VGNC Symbol;Acc:VGNC:78551]                             | -           | -           | -           |
| ENSMMUG00000003867  | ribosomal protein S18 [Source:NCBI gene;Acc:706414]                                           | 1.221196718 | 4.31E-05    | 0.000212089 |
| ENSMMUG00000003863  | ring finger protein 1 [Source:VGNC Symbol;Acc:VGNC:83457]                                     | -           | -           | -           |
| ENSMMUG00000003859  | solute carrier family 39 member 7 [Source:VGNC Symbol;Acc:VGNC:77592]                         | 1.053834992 | 0.000702127 | 0.002623469 |
| ENSMMUG00000003858  | retinoid X receptor beta [Source:VGNC Symbol;Acc:VGNC:76952]                                  | -           | -           | -           |
| ENSMMUG00000003850  | collagen type XI alpha 2 chain [Source:VGNC Symbol;Acc:VGNC:71290]                            | 1.457183111 | 1.57E-08    | 1.43E-07    |
| ENSMMUG00000019371  | major histocompatibility complex, class II, DP alpha [Source:NCBI gene;Acc:717992]            | -           | -           | -           |
| ENSMMUG00000023138  | bromodomain containing 2 [Source:VGNC Symbol;Acc:VGNC:83422]                                  | 1.508551607 | 0.000799906 | 0.002945037 |
| ENSMMUG00000022626  | major histocompatibility complex, class II, DM alpha [Source:NCBI gene;Acc:717870]            | -           | -           | -           |
| ENSMMUG00000018461  | notch receptor 4 [Source:VGNC Symbol;Acc:VGNC:75372]                                          | 1.008854456 | 0.002110178 | 0.006972804 |
| ENSMMUG00000018459  | G protein signaling modulator 3 [Source:VGNC Symbol;Acc:VGNC:72938]                           | -           | -           | -           |
| ENSMMUG00000018456  | PBX homeobox 2 [Source:VGNC Symbol;Acc:VGNC:75771]                                            | 1.532894332 | 1.76E-05    | 9.47E-05    |
| ENSMMUG00000018434  | 1-acylglycerol-3-phosphate O-acyltransferase 1 [Source:VGNC Symbol;Acc:VGNC:69745]            | -           | -           | -           |
| ENSMMUG00000006828  | valyl-tRNA synthetase 1 [Source:VGNC Symbol;Acc:VGNC:78755]                                   | 1.467297861 | 1.46E-06    | 9.64E-06    |
| ENSMMUG00000006827  | von Willebrand factor A domain containing 7 [Source:VGNC Symbol;Acc:VGNC:78941]               | -           | -           | -           |
| ENSMMUG00000009702  | mutS homolog 5 [Source:NCBI gene;Acc:715494]                                                  | 1.307880914 | 3.77E-07    | 2.74E-06    |
| ENSMMUG00000058534  |                                                                                               | -           | -           | -           |
| ENSMMUG00000015693  | lymphocyte antigen 6 family member G6C [Source:VGNC Symbol;Acc:VGNC:74285]                    | 1.336999449 | 0.006494682 | 0.018617237 |
| ENSMMUG00000053324  | lymphocyte antigen 6 complex locus protein G6d [Source:NCBI gene;Acc:715304]                  | -           | -           | -           |
| ENSMMUG00000039268  | lymphocyte antigen 6G6e-like [Source:NCBI gene;Acc:100427419]                                 | 2.147424228 | 0.000791844 | 0.002920428 |
| ENSMMUG00000015686  | abhydrolase domain containing 16A [Source:VGNC Symbol;Acc:VGNC:69393]                         | -           | -           | -           |
| ENSMMUG00000054159  | lymphocyte antigen 6 family member G5C [Source:VGNC Symbol;Acc:VGNC:83431]                    | 1.989956655 | 0.000101811 | 0.000464595 |
| ENSMMUG00000005294  | casein kinase 2 beta [Source:NCBI gene;Acc:715807]                                            | -           | -           | -           |
| ENSMMUG00000005293  | G-patch domain and ankyrin repeats 1 [Source:VGNC Symbol;Acc:VGNC:81073]                      | 1.870317079 | 0.00055505  | 0.002133036 |
| ENSMMUG00000005302  | BAG cochaperone 6 [Source:VGNC Symbol;Acc:VGNC:81044]                                         | -           | -           | -           |
| ENSMMUG00000005303  | apolipoprotein M [Source:VGNC Symbol;Acc:VGNC:69825]                                          | 1.522253555 | 0.002912185 | 0.009263772 |
| ENSMMUG00000005297  | proline rich coiled-coil 2A [Source:VGNC Symbol;Acc:VGNC:83448]                               | -           | -           | -           |
| ENSMMUG00000025918  | small nucleolar RNA, H/ACA box 38 [Source:HGNC Symbol;Acc:HGNC:32631]                         | 1.402933307 | 0.000421748 | 0.001670098 |
|                     |                                                                                               | -0.90351721 | 0.016933834 | 0.042434733 |
|                     |                                                                                               | -           | -           | -           |
|                     |                                                                                               | 2.054348981 | 0.003768847 | 0.011593447 |
|                     |                                                                                               | -           | -           | -           |
|                     |                                                                                               | 2.422930877 | 0.000171657 | 0.000740667 |
|                     |                                                                                               | -           | -           | -           |
|                     |                                                                                               | 2.348151785 | 0.000378106 | 0.001515901 |
|                     |                                                                                               | 3.796995815 | 9.48E-14    | 1.77E-12    |
|                     |                                                                                               | 3.592750451 | 4.99E-17    | 1.30E-15    |
|                     |                                                                                               | 2.954192505 | 3.39E-22    | 1.54E-20    |
|                     |                                                                                               | 3.733766808 | 1.36E-05    | 7.50E-05    |
|                     |                                                                                               | 2.966156084 | 5.88E-34    | 8.90E-32    |
|                     |                                                                                               | 3.302939398 | 7.37E-07    | 5.12E-06    |
|                     |                                                                                               | 3.055203882 | 7.57E-13    | 1.27E-11    |
|                     |                                                                                               | 3.401774391 | 2.16E-17    | 5.86E-16    |
|                     |                                                                                               | 3.023213244 | 5.85E-44    | 2.71E-41    |
|                     |                                                                                               | 3.391822357 | 1.33E-14    | 2.74E-13    |
|                     |                                                                                               | 2.76901654  | 3.70E-33    | 5.13E-31    |
|                     |                                                                                               | 3.341157544 | 3.95E-09    | 3.94E-08    |

|                     |                                                                                           |             |             |             |
|---------------------|-------------------------------------------------------------------------------------------|-------------|-------------|-------------|
| ENSMMUG00000049735  | allograft inflammatory factor 1 [Source:NCBI gene;Acc:574115]                             | 2.747946979 | 8.59E-34    | 1.26E-31    |
| ENSMMUG00000008854  | natural cytotoxicity triggering receptor 3 [Source:VGNC Symbol;Acc:VGNC:74990]            | 2.971614028 | 2.38E-32    | 2.90E-30    |
| ENSMMUG00000008853  | leukocyte specific transcript 1 [Source:HGNC Symbol;Acc:HGNC:14189]                       | 2.714324451 | 1.33E-09    | 1.44E-08    |
| ENSMMUG00000008849  | lymphotoxin beta [Source:VGNC Symbol;Acc:VGNC:74454]                                      | 2.316556832 | 3.72E-05    | 0.000185841 |
| ENSMMUG000000045654 | tumor necrosis factor [Source:VGNC Symbol;Acc:VGNC:83501]                                 | 3.009296061 | 1.97E-10    | 2.40E-09    |
| ENSMMUG00000008843  | lymphotoxin alpha [Source:VGNC Symbol;Acc:VGNC:74452]                                     | 2.456878485 | 1.46E-08    | 1.33E-07    |
| ENSMMUG000000062024 | NFKB inhibitor like 1 [Source:NCBI gene;Acc:715283]                                       | 2.27933411  | 0.00051615  | 0.002000653 |
| ENSMMUG000000052422 | ATPase H+ transporting V1 subunit G2 [Source:NCBI gene;Acc:715331]                        | 4.873701961 | 6.12E-06    | 3.58E-05    |
| ENSMMUG00000008839  | DExD-box helicase 39B [Source:VGNC Symbol;Acc:VGNC:71621]                                 | 2.623999861 | 3.67E-13    | 6.38E-12    |
| ENSMMUG000000026474 | Small nucleolar RNA SNORD83 [Source:RFAM;Acc:RF00137]                                     | 4.325567813 | 1.35E-05    | 7.44E-05    |
| ENSMMUG00000008838  | mitochondrial coiled-coil domain 1 [Source:VGNC Symbol;Acc:VGNC:74548]                    | 2.332413179 | 0.002091443 | 0.00691706  |
| ENSMMUG00000006609  | MHC class I polypeptide-related sequence B [Source:NCBI gene;Acc:715141]                  | 2.104588616 | 0.000452166 | 0.001775855 |
| ENSMMUG000000019961 | protein phosphatase 1 regulatory subunit 18 [Source:NCBI gene;Acc:712176]                 | 2.771783532 | 0.005151815 | 0.015225471 |
| ENSMMUG000000053627 |                                                                                           | 1.693560227 | 0.018191838 | 0.045063964 |
| ENSMMUG000000011682 | ribonuclease P/MRP subunit p21 [Source:NCBI gene;Acc:713056]                              | 3.003612729 | 6.13E-05    | 0.000292442 |
|                     |                                                                                           | -           |             |             |
| ENSMMUG000000060527 |                                                                                           | 2.615353236 | 1.42E-12    | 2.29E-11    |
|                     |                                                                                           | -           |             |             |
| ENSMMUG000000023679 | tripartite motif containing 26 [Source:VGNC Symbol;Acc:VGNC:78854]                        | 2.270484267 | 1.36E-12    | 2.21E-11    |
|                     |                                                                                           | -           |             |             |
| ENSMMUG000000002890 | tripartite motif containing 15 [Source:VGNC Symbol;Acc:VGNC:83958]                        | 2.546349844 | 1.19E-17    | 3.32E-16    |
|                     |                                                                                           | -           |             |             |
| ENSMMUG000000012129 | tripartite motif containing 10 [Source:VGNC Symbol;Acc:VGNC:78550]                        | 2.488950773 | 3.35E-22    | 1.52E-20    |
|                     |                                                                                           | -           |             |             |
| ENSMMUG000000058580 | tripartite motif containing 40 [Source:NCBI gene;Acc:100427925]                           | 2.466437328 | 2.05E-09    | 2.14E-08    |
|                     |                                                                                           | -           |             |             |
| ENSMMUG000000062264 |                                                                                           | 2.123887742 | 1.61E-05    | 8.76E-05    |
|                     |                                                                                           | -           |             |             |
| ENSMMUG000000012124 | ring finger protein 39 [Source:VGNC Symbol;Acc:VGNC:83458]                                | 2.676927631 | 3.91E-09    | 3.91E-08    |
|                     |                                                                                           | -           |             |             |
| ENSMMUG000000012122 | protein phosphatase 1 regulatory inhibitor subunit 11 [Source:VGNC Symbol;Acc:VGNC:82209] | 2.531372294 | 6.31E-08    | 5.25E-07    |
|                     |                                                                                           | -           |             |             |
| ENSMMUG000000012120 | zinc ribbon domain containing 1 [Source:VGNC Symbol;Acc:VGNC:78912]                       | 2.774937394 | 5.85E-16    | 1.36E-14    |
|                     |                                                                                           | -           |             |             |
| ENSMMUG000000055272 | putative uncharacterized protein ZNRD1-AS1 [Source:NCBI gene;Acc:712069]                  | 2.881892079 | 8.85E-17    | 2.23E-15    |
|                     |                                                                                           | -           |             |             |
| ENSMMUG000000056544 |                                                                                           | 3.572994557 | 1.15E-08    | 1.07E-07    |
|                     |                                                                                           | -           |             |             |
| ENSMMUG000000037625 |                                                                                           | 2.489280206 | 5.30E-09    | 5.18E-08    |
|                     |                                                                                           | -           |             |             |
| ENSMMUG000000050761 |                                                                                           | 1.763812479 | 0.000841138 | 0.0030785   |
| ENSMMUG000000053561 |                                                                                           | 3.666036004 | 0.000116615 | 0.000522792 |
| ENSMMUG000000029883 | olfactory receptor, family 2, subfamily J, member 3 [Source:NCBI gene;Acc:708943]         | 3.806807367 | 1.40E-05    | 7.67E-05    |
| ENSMMUG000000059442 |                                                                                           | 2.869383458 | 1.80E-07    | 1.39E-06    |
| ENSMMUG000000005415 | olfactory receptor, family 2, subfamily B, member 3 [Source:NCBI gene;Acc:708747]         | 2.792543678 | 5.82E-06    | 3.42E-05    |
| ENSMMUG000000004377 | olfactory receptor, family 2, subfamily W, member 1 [Source:NCBI gene;Acc:708515]         | 3.483478112 | 0.009913622 | 0.026847885 |
| ENSMMUG000000004619 | zinc finger BED-type containing 9 [Source:VGNC Symbol;Acc:VGNC:81608]                     | 0.807778733 | 1.21E-05    | 6.73E-05    |
| ENSMMUG000000004617 | glutathione peroxidase 6 [Source:VGNC Symbol;Acc:VGNC:73154]                              | -1.6267169  | 5.55E-06    | 3.27E-05    |
| ENSMMUG000000060483 |                                                                                           | 0.59195759  | 8.11E-05    | 0.000377363 |
|                     |                                                                                           | -           |             |             |
| ENSMMUG000000012396 | zinc finger and SCAN domain containing 23 [Source:VGNC Symbol;Acc:VGNC:79313]             | 1.830571473 | 1.09E-12    | 1.78E-11    |
|                     |                                                                                           | -           |             |             |
| ENSMMUG000000011675 | zinc finger and SCAN domain containing 12 [Source:VGNC Symbol;Acc:VGNC:78910]             | 1.364177219 | 2.31E-13    | 4.09E-12    |



|                    |                                                                                                       |             |             |             |
|--------------------|-------------------------------------------------------------------------------------------------------|-------------|-------------|-------------|
| ENSMMUG00000017495 | geminin DNA replication inhibitor [Source:VGNC Symbol;Acc:VGNC:72954]                                 | 0.846390064 | 0.018805532 | 0.046341981 |
| ENSMMUG00000058151 | chromosome 4 C6orf62 homolog [Source:NCBI gene;Acc:708218]                                            | 1.934919637 | 5.04E-26    | 3.31E-24    |
| ENSMMUG00000029939 | acyl-CoA thioesterase 13 [Source:VGNC Symbol;Acc:VGNC:69487]                                          | -2.15099011 | 0.00807782  | 0.022530386 |
| ENSMMUG00000051037 |                                                                                                       | 5.005467366 | 1.20E-20    | 4.61E-19    |
| ENSMMUG00000063635 |                                                                                                       | 3.065641365 | 0.012333536 | 0.032441707 |
| ENSMMUG00000054532 |                                                                                                       | 1.508535702 | 4.75E-09    | 4.68E-08    |
| ENSMMUG00000052442 |                                                                                                       | 1.603747251 | 1.24E-10    | 1.54E-09    |
| ENSMMUG00000059595 | Metazoan signal recognition particle RNA [Source:RFAM;Acc:RF00017]                                    | 2.776189244 | 0.004244399 | 0.012895827 |
| ENSMMUG00000014691 | inhibitor of DNA binding 4, HLH protein [Source:VGNC Symbol;Acc:VGNC:73557]                           | 0.676591853 | 3.31E-05    | 0.000167698 |
| ENSMMUG00000047127 |                                                                                                       | 0.858390878 | 0.00288142  | 0.009175748 |
| ENSMMUG00000063576 | Metazoan signal recognition particle RNA [Source:RFAM;Acc:RF00017]                                    | 1.878296966 | 3.11E-05    | 0.000158404 |
| ENSMMUG00000062089 | ring finger protein 144B [Source:NCBI gene;Acc:705099]                                                | 0.927417108 | 0.001979835 | 0.006597507 |
| ENSMMUG00000052891 |                                                                                                       | 2.413768367 | 3.93E-19    | 1.24E-17    |
| ENSMMUG00000020289 | CD83 molecule [Source:VGNC Symbol;Acc:VGNC:70783]                                                     | 2.213382144 | 3.88E-17    | 1.02E-15    |
| ENSMMUG00000044473 |                                                                                                       | 1.796153993 | 3.40E-12    | 5.22E-11    |
| ENSMMUG00000009922 | mitochondrial calcium uniporter regulator 1 [Source:VGNC Symbol;Acc:VGNC:81471]                       | 1.157644786 | 1.31E-09    | 1.41E-08    |
| ENSMMUG00000020122 | RAN binding protein 9 [Source:VGNC Symbol;Acc:VGNC:76475]                                             | 1.233056912 | 1.02E-08    | 9.54E-08    |
| ENSMMUG00000008681 | nucleolar protein 7 [Source:VGNC Symbol;Acc:VGNC:75226]                                               | 1.016685437 | 0.00764643  | 0.021465446 |
| ENSMMUG00000061899 | glucose-fructose oxidoreductase domain containing 1 [Source:NCBI gene;Acc:700607]                     | 0.453085628 | 0.007036035 | 0.019958761 |
| ENSMMUG00000005406 | TBC1 domain family member 7 [Source:NCBI gene;Acc:706015]                                             | 0.775793968 | 0.01534045  | 0.038961422 |
| ENSMMUG00000004347 | androgen dependent TFPI regulating protein [Source:VGNC Symbol;Acc:VGNC:69661]                        | 2.065097659 | 0.002737382 | 0.008769794 |
| ENSMMUG00000058800 |                                                                                                       | 1.663811744 | 2.00E-13    | 3.59E-12    |
| ENSMMUG00000016135 | neural precursor cell expressed, developmentally down-regulated 9 [Source:VGNC Symbol;Acc:VGNC:75304] | 1.502571261 | 8.28E-09    | 7.85E-08    |
| ENSMMUG00000046520 | small integral membrane protein 13 [Source:NCBI gene;Acc:703387]                                      | -1.13490541 | 2.86E-05    | 0.000146904 |
| ENSMMUG00000043161 | endogenous retrovirus group FRD member 1, envelope [Source:VGNC Symbol;Acc:VGNC:81068]                | 1.554000596 | 3.47E-08    | 2.97E-07    |
| ENSMMUG00000005532 | male germ cell associated kinase [Source:VGNC Symbol;Acc:VGNC:74480]                                  | 1.183103826 | 7.76E-10    | 8.68E-09    |
| ENSMMUG00000018788 | transmembrane protein 14B [Source:NCBI gene;Acc:698237]                                               | 1.064285888 | 1.04E-06    | 7.04E-06    |
| ENSMMUG00000018787 | PAK1 interacting protein 1 [Source:VGNC Symbol;Acc:VGNC:75661]                                        | 1.025039878 | 1.91E-06    | 1.23E-05    |
| ENSMMUG00000061586 | chromosome 4 C6orf52 homolog [Source:NCBI gene;Acc:702114]                                            | 0.756345138 | 0.000116487 | 0.000522378 |
| ENSMMUG00000006186 | transcription factor AP-2 alpha [Source:VGNC Symbol;Acc:VGNC:78320]                                   | 1.143146429 | 0.005050207 | 0.014978915 |
| ENSMMUG00000062812 | Metazoan signal recognition particle RNA [Source:RFAM;Acc:RF00017]                                    | 1.042288661 | 0.00296375  | 0.009401585 |
| ENSMMUG00000038560 | eukaryotic translation elongation factor 1 epsilon 1 [Source:NCBI gene;Acc:695426]                    | 1.515151004 | 1.01E-15    | 2.28E-14    |
| ENSMMUG00000044859 |                                                                                                       | -1.48200121 | 0.000487797 | 0.001902692 |

|                     |                                                                                                      |   |             |             |             |
|---------------------|------------------------------------------------------------------------------------------------------|---|-------------|-------------|-------------|
| ENSMMUG00000021600  | bone morphogenetic protein 6 [Source:VGNC Symbol;Acc:VGNC:70265]                                     | - | 0.811433152 | 0.007339451 | 0.020677062 |
| ENSMMUG00000015577  | RIO kinase 1 [Source:VGNC Symbol;Acc:VGNC:76767]                                                     | - | 0.830458553 | 0.016918133 | 0.042402553 |
| ENSMMUG00000007852  | ras responsive element binding protein 1 [Source:VGNC Symbol;Acc:VGNC:76939]                         | - | 2.525669456 | 0.005475401 | 0.0160443   |
| ENSMMUG00000001248  | coagulation factor XIII A chain [Source:VGNC Symbol;Acc:VGNC:72462]                                  | - | 1.962602388 | 0.000661822 | 0.002492334 |
| ENSMMUG000000060973 |                                                                                                      | - | 0.674259494 | 0.001413551 | 0.00489789  |
| ENSMMUG000000055919 |                                                                                                      | - | 1.538570351 | 0.018415001 | 0.045523331 |
| ENSMMUG000000023558 | exocyst complex component 2 [Source:VGNC Symbol;Acc:VGNC:72338]                                      | - | 1.621409242 | 3.89E-05    | 0.000192813 |
| ENSMMUG000000058002 | zinc finger protein 669-like [Source:NCBI gene;Acc:696282]                                           | - | 1.426449158 | 4.88E-22    | 2.19E-20    |
| ENSMMUG000000003013 | NIPA magnesium transporter 1 [Source:VGNC Symbol;Acc:VGNC:75196]                                     | - | 4.231513972 | 0.005447636 | 0.015975567 |
| ENSMMUG000000052887 |                                                                                                      | - | 2.643460259 | 0.00095836  | 0.003463922 |
| ENSMMUG000000051793 | gamma-aminobutyric acid type A receptor beta3 subunit [Source:NCBI gene;Acc:711754]                  | - | 0.814752115 | 1.62E-05    | 8.80E-05    |
| ENSMMUG000000062676 |                                                                                                      | - | 1.309456107 | 7.11E-10    | 8.01E-09    |
| ENSMMUG000000054713 |                                                                                                      | - | 1.801730872 | 5.19E-07    | 3.70E-06    |
| ENSMMUG000000065031 |                                                                                                      | - | 1.827788104 | 2.25E-23    | 1.18E-21    |
| ENSMMUG000000046479 |                                                                                                      | - | 0.564430924 | 0.006611931 | 0.01891127  |
| ENSMMUG000000058972 |                                                                                                      | - | 2.603225203 | 0.007150849 | 0.020230274 |
| ENSMMUG000000019483 | putative golgin subfamily A member 8D [Source:NCBI gene;Acc:100430266]                               | - | 3.175738529 | 0.000577915 | 0.002210024 |
| ENSMMUG000000021656 | golgin subfamily A member 8S [Source:NCBI gene;Acc:722977]                                           | - | 2.839670045 | 0.001533217 | 0.005256035 |
| ENSMMUG000000054315 |                                                                                                      | - | -3.47430429 | 1.85E-09    | 1.95E-08    |
| ENSMMUG000000055117 |                                                                                                      | - | -3.71583141 | 1.14E-10    | 1.42E-09    |
| ENSMMUG000000063268 |                                                                                                      | - | 3.512294662 | 3.45E-13    | 6.00E-12    |
| ENSMMUG000000012838 | OTU deubiquitinase 7A [Source:VGNC Symbol;Acc:VGNC:75660]                                            | - | 1.387032292 | 0.013129216 | 0.034158996 |
| ENSMMUG000000009430 | transient receptor potential cation channel subfamily M member 1 [Source:VGNC Symbol;Acc:VGNC:79964] | - | 0.822994418 | 4.95E-07    | 3.54E-06    |
| ENSMMUG000000009426 | FANCD2 and FANCI associated nuclease 1 [Source:VGNC Symbol;Acc:VGNC:72595]                           | - | 2.392374456 | 0.013192561 | 0.034311764 |
| ENSMMUG000000019339 | amyloid beta precursor protein binding family A member 2 [Source:VGNC Symbol;Acc:VGNC:69977]         | - | -1.20483536 | 0.001862903 | 0.006257497 |
| ENSMMUG000000005270 | ryanodine receptor 3 [Source:NCBI gene;Acc:694996]                                                   | - | 1.078294571 | 1.96E-20    | 7.25E-19    |
| ENSMMUG000000064964 |                                                                                                      | - | 0.408001708 | 0.004500252 | 0.01356754  |
| ENSMMUG000000002337 | aquarius intron-binding spliceosomal factor [Source:VGNC Symbol;Acc:VGNC:69925]                      | - | 0.721277799 | 0.00588254  | 0.017082058 |
| ENSMMUG000000046486 | zinc finger protein 770 [Source:NCBI gene;Acc:697740]                                                | - | 0.868928534 | 0.000141022 | 0.000620397 |
| ENSMMUG000000064307 |                                                                                                      | - | 0.747054224 | 0.014322471 | 0.036760514 |
| ENSMMUG000000061601 |                                                                                                      | - | 0.710684494 | 0.01918242  | 0.047106356 |
| ENSMMUG000000063659 |                                                                                                      | - | 1.722687176 | 4.72E-06    | 2.82E-05    |

|                    |                                                                                              |   |             |             |             |
|--------------------|----------------------------------------------------------------------------------------------|---|-------------|-------------|-------------|
| ENSMMUG00000051611 |                                                                                              | - | 1.639053122 | 0.005805072 | 0.016890174 |
| ENSMMUG00000049006 | Metazoan signal recognition particle RNA [Source:RFAM;Acc:RF00017]                           | - | 2.205563831 | 0.000610858 | 0.002319851 |
| ENSMMUG00000060667 |                                                                                              | - | 1.420654182 | 0.000818668 | 0.003006649 |
| ENSMMUG00000018332 | family with sequence similarity 98 member B [Source:VGNC Symbol;Acc:VGNC:72583]              | - | 1.838748666 | 3.31E-10    | 3.89E-09    |
| ENSMMUG00000018333 | RAS guanyl releasing protein 1 [Source:VGNC Symbol;Acc:VGNC:76671]                           | - | 1.712758174 | 0.016309317 | 0.041107583 |
| ENSMMUG00000055491 |                                                                                              | - | 1.657672016 | 0.001388746 | 0.004820348 |
| ENSMMUG00000016686 | BUB1 mitotic checkpoint serine/threonine kinase B [Source:VGNC Symbol;Acc:VGNC:70293]        | - | 1.026691913 | 1.53E-08    | 1.39E-07    |
| ENSMMUG00000020534 | p21 (RAC1) activated kinase 6 [Source:NCBI gene;Acc:701589]                                  | - | 1.809390415 | 9.55E-16    | 2.17E-14    |
| ENSMMUG00000020539 | coiled-coil domain containing 9B [Source:VGNC Symbol;Acc:VGNC:70920]                         | - | 0.754809292 | 0.003291954 | 0.010297339 |
| ENSMMUG00000012408 | dispatched RND transporter family member 2 [Source:VGNC Symbol;Acc:VGNC:71676]               | - | 1.029755796 | 6.12E-06    | 3.58E-05    |
| ENSMMUG00000058981 | kinetochore localized astrin (SPAG5) binding protein [Source:NCBI gene;Acc:702753]           | - | 0.862072436 | 1.41E-05    | 7.74E-05    |
| ENSMMUG00000001482 | coiled-coil domain containing 32 [Source:VGNC Symbol;Acc:VGNC:70891]                         | - | 1.598986977 | 0.005612611 | 0.016397758 |
| ENSMMUG00000001483 | RNA pseudouridine synthase domain containing 2 [Source:VGNC Symbol;Acc:VGNC:77091]           | - | 1.459511856 | 0.002002903 | 0.006667353 |
| ENSMMUG00000048910 | kinetochore scaffold 1 [Source:VGNC Symbol;Acc:VGNC:84366]                                   | - | -0.7001206  | 0.000839408 | 0.003072957 |
| ENSMMUG00000004579 | RAD51 recombinase [Source:VGNC Symbol;Acc:VGNC:76645]                                        | - | 0.849134502 | 0.001363349 | 0.004746118 |
| ENSMMUG00000000306 | regulator of microtubule dynamics 3 [Source:VGNC Symbol;Acc:VGNC:76821]                      | - | -0.77453383 | 0.009424289 | 0.025734158 |
| ENSMMUG00000062039 | chromosome 7 C15orf62 homolog [Source:NCBI gene;Acc:704353]                                  | - | 1.895100072 | 0.006707139 | 0.019146654 |
| ENSMMUG00000013160 | DnaJ heat shock protein family (Hsp40) member C17 [Source:VGNC Symbol;Acc:VGNC:84335]        | - | 1.825414314 | 4.35E-06    | 2.62E-05    |
| ENSMMUG00000044445 | NADH:ubiquinone oxidoreductase complex assembly factor 1 [Source:VGNC Symbol;Acc:VGNC:84406] | - | 0.451531947 | 0.002803534 | 0.008946934 |
| ENSMMUG00000015482 | RTF1 homolog, Paf1/RNA polymerase II complex component [Source:VGNC Symbol;Acc:VGNC:77119]   | - | 2.913705077 | 0.002931861 | 0.009316371 |
| ENSMMUG00000010168 | MAX dimerization protein MGA [Source:VGNC Symbol;Acc:VGNC:84390]                             | - | 0.424363229 | 0.003783145 | 0.011625371 |
| ENSMMUG00000003839 | mitogen-activated protein kinase binding protein 1 [Source:VGNC Symbol;Acc:VGNC:74613]       | - | 1.050114789 | 1.98E-07    | 1.52E-06    |
| ENSMMUG00000003844 | spectrin beta, non-erythrocytic 5 [Source:VGNC Symbol;Acc:VGNC:77927]                        | - | 0.474766995 | 0.00678163  | 0.019340688 |
| ENSMMUG00000015449 | phospholipase A2 group IVF [Source:VGNC Symbol;Acc:VGNC:76123]                               | - | 0.813787007 | 4.31E-12    | 6.50E-11    |
| ENSMMUG00000014511 | VPS39 subunit of HOPS complex [Source:VGNC Symbol;Acc:VGNC:79257]                            | - | 0.490171476 | 0.000566538 | 0.002170996 |
| ENSMMUG00000001532 | glucosidase alpha, neutral C [Source:NCBI gene;Acc:708126]                                   | - | 1.253849114 | 4.47E-32    | 5.22E-30    |
| ENSMMUG00000001534 | calpain 3 [Source:VGNC Symbol;Acc:VGNC:70533]                                                | - | 1.478468494 | 8.74E-13    | 1.45E-11    |
| ENSMMUG00000063886 | Metazoan signal recognition particle RNA [Source:RFAM;Acc:RF00017]                           | - | 2.210952056 | 0.00337502  | 0.010524036 |
| ENSMMUG00000001547 | zinc finger protein 106 [Source:VGNC Symbol;Acc:VGNC:78831]                                  | - | 1.224789385 | 4.30E-19    | 1.35E-17    |
| ENSMMUG00000064341 | U6 spliceosomal RNA [Source:RFAM;Acc:RF00026]                                                | - | 3.578410576 | 4.37E-05    | 0.000214456 |
| ENSMMUG00000008093 | StAR related lipid transfer domain containing 9 [Source:NCBI gene;Acc:708953]                | - | 1.129611242 | 4.99E-11    | 6.57E-10    |
| ENSMMUG00000015123 | codanin 1 [Source:VGNC Symbol;Acc:VGNC:70788]                                                | - | 0.802771056 | 1.36E-05    | 7.49E-05    |
| ENSMMUG00000010036 | tau tubulin kinase 2 [Source:VGNC Symbol;Acc:VGNC:81598]                                     | - | 0.510753016 | 0.000521466 | 0.002017834 |
| ENSMMUG00000006498 | ubiquitin protein ligase E3 component n-recogin 1 [Source:VGNC Symbol;Acc:VGNC:79051]        | - | 0.433292828 | 0.012971691 | 0.033831437 |
| ENSMMUG00000022251 | transglutaminase 7 [Source:VGNC Symbol;Acc:VGNC:79880]                                       | - | -0.64668284 | 5.10E-05    | 0.000247778 |
| ENSMMUG00000017067 | adenosine deaminase like [Source:VGNC Symbol;Acc:VGNC:69555]                                 | - | -0.60973153 | 3.60E-05    | 0.000180595 |
| ENSMMUG00000017070 | zinc finger and SCAN domain containing 29 [Source:VGNC Symbol;Acc:VGNC:79633]                | - | 0.665715026 | 1.67E-05    | 9.04E-05    |
| ENSMMUG00000017076 | tubulin gamma complex associated protein 4 [Source:VGNC Symbol;Acc:VGNC:79045]               | - | 0.941426174 | 2.94E-07    | 2.18E-06    |
| ENSMMUG00000007255 | microtubule associated protein 1A [Source:VGNC Symbol;Acc:VGNC:74489]                        | - | -1.69507711 | 1.14E-05    | 6.36E-05    |

|                     |                                                                                                               |             |             |             |
|---------------------|---------------------------------------------------------------------------------------------------------------|-------------|-------------|-------------|
| ENSMMUG00000007860  | diphosphoinositol pentakisphosphate kinase 1 [Source:VGNC Symbol;Acc:VGNC:76127]                              | -0.85774307 | 0.001637366 | 0.005565468 |
| ENSMMUG00000007870  | creatine kinase U-type, mitochondrial [Source:NCBI gene;Acc:114669858]                                        | 0.357672836 | 0.003634106 | 0.011229823 |
| ENSMMUG000000021840 | stereocilin [Source:NCBI gene;Acc:106996176]                                                                  | 0.300355939 | 0.011439994 | 0.030420497 |
| ENSMMUG00000001682  | protein disulfide isomerase family A member 3 [Source:VGNC Symbol;Acc:VGNC:75905]                             | 1.690743577 | 0.001217257 | 0.004294296 |
| ENSMMUG000000057376 | inositol hexakisphosphate and diphosphoinositol-pentakisphosphate kinase 1-like [Source:NCBI gene;Acc:717098] | 0.351712979 | 0.01220448  | 0.032147858 |
| ENSMMUG000000016742 | CTD small phosphatase like 2 [Source:VGNC Symbol;Acc:VGNC:71593]                                              | 0.588310037 | 6.91E-08    | 5.71E-07    |
| ENSMMUG000000014288 | eukaryotic translation initiation factor 3 subunit J [Source:VGNC Symbol;Acc:VGNC:72188]                      | 0.782542394 | 7.91E-05    | 0.000368403 |
| ENSMMUG000000014291 | SPG11 vesicle trafficking associated, spatacsin [Source:VGNC Symbol;Acc:VGNC:77856]                           | 1.506502717 | 3.08E-11    | 4.16E-10    |
| ENSMMUG000000001284 | solute carrier family 28 member 2 [Source:VGNC Symbol;Acc:VGNC:77445]                                         | 0.584260056 | 0.003287219 | 0.010289037 |
| ENSMMUG000000005856 | glycine amidinotransferase [Source:VGNC Symbol;Acc:VGNC:72892]                                                | 1.704029035 | 6.17E-15    | 1.31E-13    |
| ENSMMUG000000049265 | Metazoan signal recognition particle RNA [Source:RFAM;Acc:RF00017]                                            | 2.451359391 | 6.62E-09    | 6.38E-08    |
| ENSMMUG000000062254 |                                                                                                               | 2.288880489 | 6.13E-12    | 9.05E-11    |
| ENSMMUG000000016896 | solute carrier family 12 member 1 [Source:VGNC Symbol;Acc:VGNC:77385]                                         | 1.105470844 | 1.07E-08    | 9.96E-08    |
| ENSMMUG000000009833 | SHC adaptor protein 4 [Source:VGNC Symbol;Acc:VGNC:77249]                                                     | 1.804942612 | 0.008569005 | 0.023703614 |
| ENSMMUG000000043893 | Metazoan signal recognition particle RNA [Source:RFAM;Acc:RF00017]                                            | 1.299209694 | 0.019014063 | 0.046758515 |
| ENSMMUG000000009838 | COP9 signalosome subunit 2 [Source:VGNC Symbol;Acc:VGNC:71376]                                                | 1.040577399 | 7.71E-05    | 0.000359807 |
| ENSMMUG000000009839 | galactokinase 2 [Source:VGNC Symbol;Acc:VGNC:72870]                                                           | 1.171563688 | 2.69E-05    | 0.000139012 |
| ENSMMUG000000013496 | DTW domain containing 1 [Source:VGNC Symbol;Acc:VGNC:72017]                                                   | 2.918787784 | 0.010229459 | 0.027599824 |
| ENSMMUG000000056522 |                                                                                                               | 2.225445942 | 1.03E-09    | 1.13E-08    |
| ENSMMUG000000050608 |                                                                                                               | 2.675276838 | 1.05E-33    | 1.52E-31    |
| ENSMMUG00000003684  | ATPase phospholipid transporting 8B4 (putative) [Source:VGNC Symbol;Acc:VGNC:84311]                           | 2.252107158 | 2.17E-25    | 1.33E-23    |
| ENSMMUG000000057283 |                                                                                                               | 2.018446291 | 8.46E-10    | 9.38E-09    |
| ENSMMUG000000002876 | solute carrier family 27 member 2 [Source:VGNC Symbol;Acc:VGNC:77439]                                         | 1.108472105 | 0.000705849 | 0.002635384 |
| ENSMMUG000000002877 | histidine decarboxylase [Source:VGNC Symbol;Acc:VGNC:73360]                                                   | 1.530777056 | 0.006105767 | 0.017661112 |
| ENSMMUG000000002879 | GA binding protein transcription factor subunit beta 1 [Source:VGNC Symbol;Acc:VGNC:72845]                    | 1.101956893 | 5.41E-10    | 6.18E-09    |
| ENSMMUG000000060278 | Metazoan signal recognition particle RNA [Source:RFAM;Acc:RF00017]                                            | 2.161923191 | 2.67E-06    | 1.67E-05    |
| ENSMMUG000000015159 | adaptor related protein complex 4 subunit epsilon 1 [Source:VGNC Symbol;Acc:VGNC:69973]                       | 0.378437392 | 0.008837187 | 0.02434618  |
| ENSMMUG000000000754 | Dmx like 2 [Source:VGNC Symbol;Acc:VGNC:71936]                                                                | 2.766051845 | 2.07E-20    | 7.61E-19    |
| ENSMMUG000000017437 | LysM domain containing 2 [Source:NCBI gene;Acc:694916]                                                        | 1.678522728 | 3.15E-05    | 0.000159811 |
| ENSMMUG000000017432 | tropomodulin 2 [Source:VGNC Symbol;Acc:VGNC:78571]                                                            | 1.526211346 | 3.50E-21    | 1.42E-19    |
| ENSMMUG000000002345 | tropomodulin 3 [Source:VGNC Symbol;Acc:VGNC:78572]                                                            | 1.00445848  | 2.66E-22    | 1.22E-20    |
| ENSMMUG000000017374 | G protein subunit beta 5 [Source:VGNC Symbol;Acc:VGNC:73097]                                                  | 2.813366875 | 1.08E-06    | 7.27E-06    |
| ENSMMUG000000007504 | myosin VC [Source:VGNC Symbol;Acc:VGNC:75117]                                                                 | 4.223289524 | 8.83E-08    | 7.17E-07    |
| ENSMMUG000000007509 | myosin VA [Source:VGNC Symbol;Acc:VGNC:75116]                                                                 | 0.659910346 | 0.000797017 | 0.002935858 |
| ENSMMUG000000048644 |                                                                                                               | 1.612043378 | 0.000157421 | 0.000684421 |

|                     |                                                                                                                |   |             |             |             |
|---------------------|----------------------------------------------------------------------------------------------------------------|---|-------------|-------------|-------------|
| ENSMMUG0000001423   | family with sequence similarity 214 member A [Source:VGNC Symbol;Acc:VGNC:72354]                               | - | 0.857433396 | 1.55E-09    | 1.65E-08    |
| ENSMMUG00000020694  | RAB27A, member RAS oncogene family [Source:VGNC Symbol;Acc:VGNC:81527]                                         | - | 0.605059073 | 0.003211836 | 0.010091876 |
| ENSMMUG00000010798  | cell cycle progression 1 [Source:VGNC Symbol;Acc:VGNC:70844]                                                   | - | 0.779946841 | 2.74E-05    | 0.000141169 |
| ENSMMUG00000010797  | phosphatidylinositol glycan anchor biosynthesis class B [Source:VGNC Symbol;Acc:VGNC:75985]                    | - | 0.635125388 | 0.000115385 | 0.000517905 |
| ENSMMUG00000029638  | chromosome 7 C15orf65 homolog [Source:VGNC Symbol;Acc:VGNC:70689]                                              | - | 1.438788694 | 1.83E-06    | 1.18E-05    |
| ENSMMUG00000000863  | dynein axonemal assembly factor 4 [Source:VGNC Symbol;Acc:VGNC:71881]                                          | - | 2.030042462 | 9.53E-26    | 6.01E-24    |
| ENSMMUG00000024054  | U6 spliceosomal RNA [Source:RFAM;Acc:RF00026]                                                                  | - | 2.266608275 | 0.013993134 | 0.036077569 |
| ENSMMUG00000008718  | zinc finger protein 280D [Source:NCBI gene;Acc:699509]                                                         | - | 2.049139988 | 5.83E-21    | 2.30E-19    |
| ENSMMUG00000004091  | transcription factor 12 [Source:VGNC Symbol;Acc:VGNC:78283]                                                    | - | 1.483399615 | 5.50E-18    | 1.57E-16    |
| ENSMMUG000000063795 |                                                                                                                | - | 1.540536432 | 0.000283752 | 0.001165661 |
| ENSMMUG00000012690  | myocardial zonula adherens protein [Source:NCBI gene;Acc:700247]                                               | - | 2.269853261 | 0.000107288 | 0.00048657  |
| ENSMMUG000000050482 |                                                                                                                | - | 2.117431546 | 0.000226116 | 0.000952915 |
| ENSMMUG000000063524 |                                                                                                                | - | 0.380306551 | 0.002270329 | 0.007416076 |
| ENSMMUG00000012933  | myosin IE [Source:VGNC Symbol;Acc:VGNC:75114]                                                                  | - | 0.661809689 | 5.07E-08    | 4.27E-07    |
| ENSMMUG000000060242 | lactate dehydrogenase A like 6B [Source:NCBI gene;Acc:702403]                                                  | - | 1.036341395 | 0.000270485 | 0.001117662 |
| ENSMMUG000000057663 | U4 spliceosomal RNA [Source:RFAM;Acc:RF00015]                                                                  | - | 1.183302582 | 0.002255384 | 0.007370504 |
| ENSMMUG00000018426  | glucosaminyl (N-acetyl) transferase 3, mucin type [Source:VGNC Symbol;Acc:VGNC:84342]                          | - | 2.375251523 | 0.011878878 | 0.03140174  |
| ENSMMUG00000020348  | BCL2 interacting protein 2 [Source:VGNC Symbol;Acc:VGNC:70272]                                                 | - | 1.742300253 | 3.79E-06    | 2.30E-05    |
| ENSMMUG000000049749 |                                                                                                                | - | -2.16946857 | 5.77E-19    | 1.78E-17    |
| ENSMMUG000000050503 |                                                                                                                | - | 1.672305112 | 0.00014656  | 0.000642663 |
| ENSMMUG00000001362  | vacuolar protein sorting 13 homolog C [Source:VGNC Symbol;Acc:VGNC:79399]                                      | - | 0.625865442 | 0.000628496 | 0.002380741 |
| ENSMMUG000000060717 | C2 calcium dependent domain containing 4A [Source:NCBI gene;Acc:704354]                                        | - | 0.507615524 | 0.001449855 | 0.005007302 |
| ENSMMUG000000063231 | Metazoan signal recognition particle RNA [Source:RFAM;Acc:RF00017]                                             | - | 0.475495343 | 0.003666701 | 0.011307649 |
| ENSMMUG000000060671 |                                                                                                                | - | 0.489554669 | 0.006994885 | 0.019868635 |
| ENSMMUG00000013460  | RAB8B, member RAS oncogene family [Source:VGNC Symbol;Acc:VGNC:81550]                                          | - | 1.219435465 | 1.59E-17    | 4.38E-16    |
| ENSMMUG000000059755 | aph-1 homolog B, gamma-secretase subunit [Source:NCBI gene;Acc:705718]                                         | - | 1.061831802 | 0.001563941 | 0.005346529 |
| ENSMMUG00000012117  | HECT and RLD domain containing E3 ubiquitin protein ligase family member 1 [Source:VGNC Symbol;Acc:VGNC:73364] | - | 0.661923867 | 8.99E-12    | 1.30E-10    |
| ENSMMUG000000049375 |                                                                                                                | - | 0.607017361 | 1.60E-09    | 1.70E-08    |
| ENSMMUG00000001247  | zinc finger protein 609 [Source:VGNC Symbol;Acc:VGNC:79764]                                                    | - | 0.471432029 | 0.012478129 | 0.032729158 |
| ENSMMUG00000013270  | RNA binding protein, mRNA processing factor 2 [Source:VGNC Symbol;Acc:VGNC:76511]                              | - | 1.45065422  | 0.005074807 | 0.015039846 |
| ENSMMUG00000010949  | SPG21 abhydrolase domain containing, maspardin [Source:VGNC Symbol;Acc:VGNC:77970]                             | - | 1.444504925 | 3.91E-16    | 9.21E-15    |
| ENSMMUG00000004028  | kelch repeat and BTB domain containing 13 [Source:VGNC Symbol;Acc:VGNC:73953]                                  | - | 1.827873354 | 0.000103629 | 0.000471562 |
| ENSMMUG000000006297 | programmed cell death 7 [Source:NCBI gene;Acc:708758]                                                          | - | 0.607945974 | 7.43E-05    | 0.000348231 |
| ENSMMUG000000006714 | caseinolytic mitochondrial matrix peptidase chaperone subunit X [Source:VGNC Symbol;Acc:VGNC:84326]            | - | 0.828065193 | 0.005977971 | 0.017328637 |
| ENSMMUG000000021788 | immunoglobulin superfamily DCC subclass member 4 [Source:VGNC Symbol;Acc:VGNC:73388]                           | - | -1.38326795 | 6.79E-06    | 3.94E-05    |
| ENSMMUG00000015450  | 3-hydroxyacyl-CoA dehydratase 3 [Source:VGNC Symbol;Acc:VGNC:73225]                                            | - | 0.692333079 | 0.001540961 | 0.005278921 |
| ENSMMUG000000022056 | DENN domain containing 4A [Source:VGNC Symbol;Acc:VGNC:71697]                                                  | - | 1.209785895 | 1.09E-06    | 7.35E-06    |
| ENSMMUG000000054184 | Metazoan signal recognition particle RNA [Source:RFAM;Acc:RF00017]                                             | - | 1.435914174 | 8.24E-18    | 2.33E-16    |

|                     |                                                                                                    |             |             |             |
|---------------------|----------------------------------------------------------------------------------------------------|-------------|-------------|-------------|
| ENSMMUG00000035748  | U6 spliceosomal RNA [Source:RFAM;Acc:RF00026]                                                      | 1.488038168 | 2.04E-05    | 0.000108467 |
| ENSMMUG00000008006  | RAB11A, member RAS oncogene family [Source:VGNC Symbol;Acc:VGNC:81517]                             | 1.55131563  | 2.70E-20    | 9.80E-19    |
| ENSMMUG00000008007  | multiple EGF like domains 11 [Source:VGNC Symbol;Acc:VGNC:84376]                                   | 1.287631195 | 1.30E-11    | 1.84E-10    |
| ENSMMUG000000052828 |                                                                                                    | 1.538399017 | 1.80E-09    | 1.90E-08    |
| ENSMMUG00000003693  | DIS3 like exosome 3'-5' exoribonuclease [Source:VGNC Symbol;Acc:VGNC:71796]                        | 4.011947419 | 5.69E-05    | 0.000272764 |
| ENSMMUG000000063378 |                                                                                                    | 0.560479156 | 0.00012726  | 0.000566918 |
| ENSMMUG000000041415 | alpha and gamma adaptin binding protein [Source:NCBI gene;Acc:711436]                              | -2.47147486 | 4.17E-05    | 0.000205755 |
| ENSMMUG000000015458 | IQ motif containing H [Source:VGNC Symbol;Acc:VGNC:73655]                                          | 0.583562258 | 0.002645634 | 0.008496048 |
| ENSMMUG00000004026  | integrin subunit alpha 11 [Source:VGNC Symbol;Acc:VGNC:73774]                                      | 0.519374972 | 1.73E-05    | 9.34E-05    |
| ENSMMUG00000006230  | NADPH oxidase 5 [Source:VGNC Symbol;Acc:VGNC:82198]                                                | 0.871960089 | 3.88E-09    | 3.88E-08    |
| ENSMMUG00000007570  | uveal autoantigen with coiled-coil domains and ankyrin repeats [Source:VGNC Symbol;Acc:VGNC:78995] | 0.799559869 | 2.81E-06    | 1.75E-05    |
| ENSMMUG00000006490  | ariadne RBR E3 ubiquitin protein ligase 1 [Source:VGNC Symbol;Acc:VGNC:84308]                      | 0.498781066 | 0.012724258 | 0.033286426 |
| ENSMMUG000000011309 | ADP dependent glucokinase [Source:VGNC Symbol;Acc:VGNC:69692]                                      | 0.517798234 | 8.31E-08    | 6.77E-07    |
| ENSMMUG00000009584  | neogenin 1 [Source:VGNC Symbol;Acc:VGNC:75314]                                                     | 2.780529578 | 0.010319561 | 0.027815176 |
| ENSMMUG000000057906 |                                                                                                    | 0.790252641 | 1.16E-09    | 1.26E-08    |
| ENSMMUG000000059627 |                                                                                                    | 0.650867484 | 0.003125621 | 0.009841392 |
| ENSMMUG000000063495 |                                                                                                    | 1.241745309 | 3.06E-22    | 1.40E-20    |
| ENSMMUG00000001568  | AT-rich interaction domain 3B [Source:VGNC Symbol;Acc:VGNC:69827]                                  | 2.128666407 | 1.50E-19    | 4.93E-18    |
| ENSMMUG000000011069 | CDC like kinase 3 [Source:VGNC Symbol;Acc:VGNC:71260]                                              | 1.039851456 | 0.000253117 | 0.00105501  |
| ENSMMUG000000022481 | cytochrome P450, family 1, subfamily A, polypeptide 1 [Source:NCBI gene;Acc:678694]                | 0.963110534 | 1.78E-10    | 2.18E-09    |
| ENSMMUG000000015267 | C-terminal Src kinase [Source:VGNC Symbol;Acc:VGNC:81380]                                          | 0.914076727 | 2.14E-15    | 4.69E-14    |
| ENSMMUG000000018800 | secretory carrier membrane protein 5 [Source:VGNC Symbol;Acc:VGNC:77136]                           | 0.401860733 | 0.006494247 | 0.018617237 |
| ENSMMUG000000008529 | chromosome 7 C15orf39 homolog [Source:VGNC Symbol;Acc:VGNC:70620]                                  | 1.985091902 | 8.85E-09    | 8.34E-08    |
| ENSMMUG000000061079 | golgin subfamily A member 6C [Source:NCBI gene;Acc:715898]                                         | 1.711039489 | 5.79E-16    | 1.34E-14    |
| ENSMMUG000000016104 | chondroitin sulfate proteoglycan 4 [Source:VGNC Symbol;Acc:VGNC:71525]                             | 0.98697726  | 8.48E-11    | 1.08E-09    |
| ENSMMUG000000061431 | outer dense fiber of sperm tails 3 like 1 [Source:NCBI gene;Acc:706545]                            | 1.009676664 | 6.41E-05    | 0.000304318 |
| ENSMMUG000000053989 |                                                                                                    | 1.136086529 | 7.23E-14    | 1.37E-12    |
| ENSMMUG000000058835 |                                                                                                    | 0.901322276 | 0.000743673 | 0.002756794 |
| ENSMMUG000000011047 | S-phase cyclin A associated protein in the ER [Source:VGNC Symbol;Acc:VGNC:77006]                  | 1.155150597 | 5.06E-05    | 0.00024581  |
| ENSMMUG000000053250 |                                                                                                    | 1.379645064 | 3.33E-06    | 2.04E-05    |
| ENSMMUG000000008213 | reticulocalbin 2 [Source:VGNC Symbol;Acc:VGNC:76887]                                               | 0.843596091 | 0.001425398 | 0.004932023 |
| ENSMMUG000000010171 | proline-serine-threonine phosphatase interacting protein 1 [Source:VGNC Symbol;Acc:VGNC:76459]     | 1.067449883 | 1.83E-09    | 1.93E-08    |
| ENSMMUG000000042378 | pseudopodium enriched atypical kinase 1 [Source:VGNC Symbol;Acc:VGNC:84419]                        | 1.26804401  | 1.90E-20    | 7.04E-19    |
| ENSMMUG000000014207 | WD repeat domain 61 [Source:VGNC Symbol;Acc:VGNC:79843]                                            | 1.063263181 | 0.000439143 | 0.001730663 |
| ENSMMUG000000045680 | iron responsive element binding protein 2 [Source:VGNC Symbol;Acc:VGNC:84360]                      | 1.535845022 | 5.53E-06    | 3.26E-05    |
| ENSMMUG000000059973 |                                                                                                    | 0.658734257 | 0.002951696 | 0.009367354 |
| ENSMMUG00000007541  | cholinergic receptor nicotinic beta 4 subunit [Source:NCBI gene;Acc:106996685]                     | 0.58386306  | 3.71E-06    | 2.26E-05    |
| ENSMMUG000000064497 |                                                                                                    | 1.851640475 | 0.017906741 | 0.044459563 |
| ENSMMUG000000059589 |                                                                                                    | 2.396479933 | 6.39E-09    | 6.18E-08    |
| ENSMMUG000000056992 | zinc finger AN1-type containing 6 [Source:NCBI gene;Acc:717543]                                    | 2.136059528 | 1.81E-14    | 3.67E-13    |
| ENSMMUG000000009361 | fumarylacetoacetate hydrolase [Source:NCBI gene;Acc:712716]                                        | 3.073526513 | 2.45E-33    | 3.43E-31    |

|                    |                                                                                        |   |             |             |             |
|--------------------|----------------------------------------------------------------------------------------|---|-------------|-------------|-------------|
| ENSMMUG00000054825 |                                                                                        | - | 1.001560615 | 0.000383247 | 0.001532369 |
| ENSMMUG0000002038  | cell migration inducing hyaluronidase 1 [Source:VGNC Symbol;Acc:VGNC:71130]            | - | 1.125883542 | 9.68E-07    | 6.57E-06    |
| ENSMMUG0000009409  | mesoderm development LRP chaperone [Source:VGNC Symbol;Acc:VGNC:74507]                 | - | 1.268979775 | 3.33E-05    | 0.000168239 |
| ENSMMUG00000011564 | transmembrane channel like 3 [Source:VGNC Symbol;Acc:VGNC:79360]                       | - | 3.568912988 | 0.0002154   | 0.000912418 |
| ENSMMUG00000057295 |                                                                                        | - | 0.441008831 | 0.003373267 | 0.010522834 |
| ENSMMUG0000003002  |                                                                                        | - | 0.775679978 | 0.000525835 | 0.002032881 |
| ENSMMUG0000009087  | HDGF like 3 [Source:VGNC Symbol;Acc:VGNC:84346]                                        | - | -1.15811071 | 0.000105939 | 0.000481041 |
| ENSMMUG0000009084  | transmembrane 6 superfamily member 1 [Source:VGNC Symbol;Acc:VGNC:78566]               | - | 1.598801416 | 1.04E-11    | 1.49E-10    |
| ENSMMUG00000062559 |                                                                                        | - | 1.296135516 | 0.003661638 | 0.011301164 |
| ENSMMUG0000008297  | homer scaffold protein 2 [Source:VGNC Symbol;Acc:VGNC:73406]                           | - | 0.416052172 | 0.008535442 | 0.023633422 |
| ENSMMUG00000011328 | cytoplasmic polyadenylation element binding protein 1 [Source:NCBI gene;Acc:694357]    | - | 1.095804597 | 1.37E-05    | 7.52E-05    |
| ENSMMUG00000019838 | phosphodiesterase 8A [Source:VGNC Symbol;Acc:VGNC:75924]                               | - | 1.293370515 | 1.82E-10    | 2.22E-09    |
| ENSMMUG00000056737 |                                                                                        | - | -1.75945307 | 2.54E-05    | 0.00013216  |
| ENSMMUG00000049563 |                                                                                        | - | 1.668338824 | 6.34E-09    | 6.14E-08    |
| ENSMMUG00000016772 | solute carrier family 28 member 1 [Source:VGNC Symbol;Acc:VGNC:77444]                  | - | 1.152312328 | 2.70E-23    | 1.40E-21    |
| ENSMMUG00000010432 | zinc finger protein 592 [Source:VGNC Symbol;Acc:VGNC:79762]                            | - | 0.64446806  | 3.33E-09    | 3.37E-08    |
| ENSMMUG00000063195 |                                                                                        | - | 0.545432026 | 7.14E-05    | 0.000335736 |
| ENSMMUG0000001386  | neurotrophic receptor tyrosine kinase 3 [Source:VGNC Symbol;Acc:VGNC:75542]            | - | -1.5129793  | 0.000110978 | 0.000500853 |
| ENSMMUG00000057531 | mitochondrial ribosomal protein S11 [Source:NCBI gene;Acc:697743]                      | - | 0.818939271 | 0.020235138 | 0.049357548 |
| ENSMMUG00000043001 | milk fat globule EGF and factor V/VIII domain containing [Source:NCBI gene;Acc:703501] | - | 1.379991291 | 0.002428662 | 0.007879469 |
| ENSMMUG00000014414 | abhydrolase domain containing 2 [Source:VGNC Symbol;Acc:VGNC:69463]                    | - | 0.814358799 | 0.008870331 | 0.024419345 |
| ENSMMUG00000011155 | FA complementation group I [Source:VGNC Symbol;Acc:VGNC:72575]                         | - | 1.537466567 | 2.78E-19    | 8.87E-18    |
| ENSMMUG00000011160 | DNA polymerase gamma, catalytic subunit [Source:VGNC Symbol;Acc:VGNC:76205]            | - | 0.745929524 | 0.004370935 | 0.013223372 |
| ENSMMUG00000056869 |                                                                                        | - | 0.284457142 | 0.017346716 | 0.043250133 |
| ENSMMUG00000001254 | TOPBP1 interacting checkpoint and replication regulator [Source:NCBI gene;Acc:700248]  | - | 0.853361683 | 0.010784546 | 0.02884307  |
| ENSMMUG00000015394 | WD repeat domain 93 [Source:VGNC Symbol;Acc:VGNC:79642]                                | - | 1.647524088 | 1.32E-49    | 1.22E-46    |
| ENSMMUG00000010586 | mesoderm posterior bHLH transcription factor 1 [Source:VGNC Symbol;Acc:VGNC:74618]     | - | 1.880926214 | 4.11E-07    | 2.97E-06    |
| ENSMMUG00000003584 | mesoderm posterior bHLH transcription factor 2 [Source:VGNC Symbol;Acc:VGNC:74619]     | - | 1.684601972 | 3.92E-40    | 1.10E-37    |
| ENSMMUG00000014983 | alanyl aminopeptidase, membrane [Source:VGNC Symbol;Acc:VGNC:69943]                    | - | 1.711662804 | 3.79E-39    | 9.07E-37    |
| ENSMMUG00000029507 | adaptor related protein complex 3 subunit sigma 2 [Source:NCBI gene;Acc:701217]        | - | 1.536325245 | 4.86E-41    | 1.47E-38    |
| ENSMMUG00000023816 | semaphorin 4B [Source:VGNC Symbol;Acc:VGNC:77165]                                      | - | 2.610002942 | 9.67E-44    | 4.35E-41    |
| ENSMMUG00000004376 | calcium and integrin binding 1 [Source:VGNC Symbol;Acc:VGNC:71189]                     | - | 2.731744554 | 1.38E-40    | 4.00E-38    |
| ENSMMUG00000050794 | zinc finger protein 774 [Source:NCBI gene;Acc:702985]                                  | - | 1.295203502 | 0.000115    | 0.000516336 |
| ENSMMUG00000019526 | BLM RecQ like helicase [Source:VGNC Symbol;Acc:VGNC:70254]                             | - | 1.539739335 | 0.000197164 | 0.000841424 |
| ENSMMUG00000062217 | HD domain containing 3 [Source:NCBI gene;Acc:715621]                                   | - | 1.804948265 | 6.82E-07    | 4.77E-06    |
| ENSMMUG00000005108 | RCC1 domain containing 1 [Source:VGNC Symbol;Acc:VGNC:76876]                           | - | 1.57948416  | 0.000216682 | 0.00091654  |
| ENSMMUG00000063322 |                                                                                        | - | 1.454965539 | 1.20E-16    | 2.97E-15    |
| ENSMMUG00000061958 |                                                                                        | - | 2.132900488 | 0.001156672 | 0.004103696 |
| ENSMMUG00000005220 | synemin [Source:VGNC Symbol;Acc:VGNC:78201]                                            | - | 0.536683399 | 0.000110082 | 0.000497417 |
| ENSMMUG00000005224 | tetratricopeptide repeat domain 23 [Source:VGNC Symbol;Acc:VGNC:79534]                 | - | 0.38324477  | 0.000260309 | 0.001081944 |

|                    |                                                                                             |   |             |             |             |
|--------------------|---------------------------------------------------------------------------------------------|---|-------------|-------------|-------------|
| ENSMMUG00000018122 | myocyte enhancer factor 2A [Source:VGNC Symbol;Acc:VGNC:74698]                              | - | 1.833953176 | 0.005556118 | 0.016258332 |
| ENSMMUG00000009934 | golgin subfamily A member 8B-like [Source:NCBI gene;Acc:100430473]                          | - | -2.56299942 | 0.011330833 | 0.030169165 |
| ENSMMUG00000016504 | ankyrin repeat and SOCS box containing 7 [Source:VGNC Symbol;Acc:VGNC:69851]                | - | 0.929412772 | 0.019631433 | 0.048073672 |
| ENSMMUG00000060063 |                                                                                             | - | 1.018980945 | 2.75E-07    | 2.05E-06    |
| ENSMMUG00000006659 | aldehyde dehydrogenase 1 family member A3 [Source:VGNC Symbol;Acc:VGNC:81353]               | - | 1.404807343 | 6.24E-05    | 0.000297299 |
| ENSMMUG00000001863 | olfactory receptor, family 4, subfamily K, member 17 [Source:NCBI gene;Acc:697616]          | - | 0.869902783 | 0.013926547 | 0.035969568 |
| ENSMMUG00000029455 | olfactory receptor 4Q2 [Source:NCBI gene;Acc:114679271]                                     | - | 2.739415515 | 6.72E-29    | 5.97E-27    |
| ENSMMUG00000053848 |                                                                                             | - | 1.763829504 | 0.011266967 | 0.030014213 |
| ENSMMUG00000045269 |                                                                                             | - | 3.022501303 | 0.007225197 | 0.020409462 |
| ENSMMUG00000058162 |                                                                                             | - | 3.239128892 | 0.000853489 | 0.003119854 |
| ENSMMUG00000016251 | cyclin B1 interacting protein 1 [Source:VGNC Symbol;Acc:VGNC:70827]                         | - | 2.863543216 | 0.00193632  | 0.006476092 |
| ENSMMUG00000016255 | telomerase associated protein 1 [Source:VGNC Symbol;Acc:VGNC:78310]                         | - | 1.201507191 | 3.68E-07    | 2.68E-06    |
| ENSMMUG00000048039 | apurinic/aprimidinic endodeoxyribonuclease 1 [Source:VGNC Symbol;Acc:VGNC:84305]            | - | 1.519312478 | 3.12E-05    | 0.000158814 |
| ENSMMUG00000019126 | purine nucleoside phosphorylase [Source:NCBI gene;Acc:704183]                               | - | 1.295902639 | 3.44E-05    | 0.000173236 |
| ENSMMUG00000056465 | epididymal protein 3A [Source:NCBI gene;Acc:704355]                                         | - | 0.400822858 | 0.001154226 | 0.004095997 |
| ENSMMUG00000001656 | epididymal protein 3B [Source:VGNC Symbol;Acc:VGNC:84336]                                   | - | 0.338910464 | 0.011648952 | 0.030893054 |
| ENSMMUG00000056509 | ribonuclease, RNase A family, 3 [Source:NCBI gene;Acc:100425327]                            | - | 0.592450456 | 1.34E-05    | 7.38E-05    |
| ENSMMUG00000020747 | NDRG family member 2 [Source:VGNC Symbol;Acc:VGNC:74953]                                    | - | 2.616439937 | 0.002996643 | 0.009485639 |
| ENSMMUG00000050445 | ribonuclease A family member 8 [Source:NCBI gene;Acc:716333]                                | - | 3.512814542 | 0.000397619 | 0.001585132 |
| ENSMMUG00000006457 | Rho guanine nucleotide exchange factor 40 [Source:VGNC Symbol;Acc:VGNC:69907]               | - | 4.037803488 | 4.52E-09    | 4.47E-08    |
| ENSMMUG00000014809 | heterogeneous nuclear ribonucleoprotein C [Source:VGNC Symbol;Acc:VGNC:84348]               | - | 3.338837089 | 1.46E-05    | 7.98E-05    |
| ENSMMUG00000021552 | RPGR interacting protein 1 [Source:VGNC Symbol;Acc:VGNC:77007]                              | - | 4.286048258 | 1.45E-20    | 5.49E-19    |
| ENSMMUG00000055229 |                                                                                             | - | 3.587303646 | 3.97E-28    | 3.30E-26    |
| ENSMMUG00000015000 | SPT16 homolog, facilitates chromatin remodeling subunit [Source:VGNC Symbol;Acc:VGNC:78054] | - | -3.06372006 | 9.04E-21    | 3.48E-19    |
| ENSMMUG00000015002 | chromodomain helicase DNA binding protein 8 [Source:VGNC Symbol;Acc:VGNC:71060]             | - | 2.418430406 | 5.97E-11    | 7.78E-10    |
| ENSMMUG00000014992 | RAB2B, member RAS oncogene family [Source:VGNC Symbol;Acc:VGNC:81530]                       | - | 1.997924479 | 0.006989581 | 0.019857373 |
| ENSMMUG00000015004 | TOX high mobility group box family member 4 [Source:NCBI gene;Acc:706950]                   | - | 1.873136966 | 0.000353319 | 0.00142461  |
| ENSMMUG00000014997 | spalt like transcription factor 2 [Source:NCBI gene;Acc:708367]                             | - | 2.024234925 | 1.53E-07    | 1.20E-06    |
| ENSMMUG00000047342 | T cell receptor alpha variable 12-2 [Source:HGNC Symbol;Acc:HGNC:12106]                     | - | 1.378570291 | 0.004413508 | 0.013330413 |
| ENSMMUG00000062974 |                                                                                             | - | 1.912975386 | 5.63E-07    | 4.00E-06    |
| ENSMMUG00000040154 | T cell receptor alpha variable 9-2 [Source:HGNC Symbol;Acc:HGNC:12154]                      | - | 2.569496293 | 8.34E-16    | 1.91E-14    |
| ENSMMUG00000038070 | T cell receptor alpha variable 12-3 [Source:HGNC Symbol;Acc:HGNC:12107]                     | - | 2.683099638 | 1.34E-27    | 1.08E-25    |
| ENSMMUG00000054116 | T cell receptor alpha variable 8-6 [Source:HGNC Symbol;Acc:HGNC:12151]                      | - | 2.795034124 | 2.36E-25    | 1.44E-23    |
| ENSMMUG00000056910 |                                                                                             | - | 1.476495414 | 3.12E-07    | 2.30E-06    |
| ENSMMUG00000056431 |                                                                                             | - | 0.40384208  | 0.000708428 | 0.00264368  |
| ENSMMUG00000057791 |                                                                                             | - | 1.230722632 | 7.60E-05    | 0.000355032 |
| ENSMMUG00000053686 |                                                                                             | - | 3.353433195 | 0.004034009 | 0.012322216 |



|                    |                                                                                             |   |             |             |             |
|--------------------|---------------------------------------------------------------------------------------------|---|-------------|-------------|-------------|
| ENSMMUG00000000413 | solute carrier family 7 member 7 [Source:VGNC Symbol;Acc:VGNC:77631]                        | - | 0.568216095 | 0.018058346 | 0.044790981 |
| ENSMMUG00000014748 | solute carrier family 22 member 17 [Source:VGNC Symbol;Acc:VGNC:77560]                      | - | 2.173066899 | 0.000152896 | 0.000667749 |
| ENSMMUG00000014762 | myosin heavy chain 6 [Source:NCBI gene;Acc:713471]                                          | - | 1.243517001 | 8.24E-09    | 7.83E-08    |
| ENSMMUG00000029420 |                                                                                             | - | 1.209068492 | 0.000251442 | 0.001049207 |
| ENSMMUG00000014766 | neuroguidin [Source:VGNC Symbol;Acc:VGNC:75220]                                             | - | 0.776054465 | 0.000443089 | 0.001742975 |
| ENSMMUG00000045970 | thiamine triphosphatase [Source:NCBI gene;Acc:714403]                                       | - | 0.751299848 | 3.40E-07    | 2.49E-06    |
| ENSMMUG00000014771 | zinc finger homeobox 2 [Source:NCBI gene;Acc:100429448]                                     | - | 1.148213876 | 2.34E-14    | 4.64E-13    |
| ENSMMUG00000004144 | adaptor related protein complex 1 subunit gamma 2 [Source:VGNC Symbol;Acc:VGNC:69959]       | - | 0.648989833 | 5.01E-06    | 2.98E-05    |
| ENSMMUG00000041108 | junctophilin 4 [Source:VGNC Symbol;Acc:VGNC:84363]                                          | - | 0.343047764 | 0.011914089 | 0.031477986 |
| ENSMMUG00000059196 |                                                                                             | - | 0.999367028 | 6.18E-13    | 1.05E-11    |
| ENSMMUG00000050597 |                                                                                             | - | 2.637928694 | 0.00787462  | 0.022021613 |
| ENSMMUG00000012462 | proteasome activator subunit 1 [Source:VGNC Symbol;Acc:VGNC:76455]                          | - | 2.148897118 | 6.19E-09    | 6.00E-08    |
| ENSMMUG00000012473 | proteasome activator subunit 2 [Source:VGNC Symbol;Acc:VGNC:76456]                          | - | 3.062878624 | 1.43E-07    | 1.13E-06    |
| ENSMMUG00000012474 | ring finger protein 31 [Source:NCBI gene;Acc:715239]                                        | - | 2.367988266 | 1.63E-05    | 8.82E-05    |
| ENSMMUG00000040817 | interferon regulatory factor 9 [Source:VGNC Symbol;Acc:VGNC:84361]                          | - | -2.2252276  | 5.47E-05    | 0.000263559 |
| ENSMMUG00000012480 | REC8 meiotic recombination protein [Source:VGNC Symbol;Acc:VGNC:76746]                      | - | 2.913504756 | 7.47E-13    | 1.26E-11    |
| ENSMMUG00000012481 | importin 4 [Source:VGNC Symbol;Acc:VGNC:73630]                                              | - | 2.420550143 | 1.24E-12    | 2.01E-11    |
| ENSMMUG00000012493 | transmembrane 9 superfamily member 1 [Source:NCBI gene;Acc:715472]                          | - | 2.978648234 | 0.002079344 | 0.006883186 |
| ENSMMUG00000012452 | transglutaminase 1 [Source:NCBI gene;Acc:715854]                                            | - | -2.0983613  | 0.007306245 | 0.020600487 |
| ENSMMUG00000010049 | NOP9 nucleolar protein [Source:VGNC Symbol;Acc:VGNC:75216]                                  | - | 2.016352405 | 0.001035356 | 0.003712361 |
| ENSMMUG00000019692 | sec1 family domain containing 1 [Source:VGNC Symbol;Acc:VGNC:77065]                         | - | 0.777808339 | 1.91E-05    | 0.000102039 |
| ENSMMUG00000011515 | striatin 3 [Source:VGNC Symbol;Acc:VGNC:78127]                                              | - | 1.466646063 | 4.08E-05    | 0.000201903 |
| ENSMMUG00000003123 | adaptor related protein complex 4 subunit sigma 1 [Source:VGNC Symbol;Acc:VGNC:84304]       | - | -1.7709731  | 0.016238187 | 0.040947511 |
| ENSMMUG00000003120 | HECT domain E3 ubiquitin protein ligase 1 [Source:VGNC Symbol;Acc:VGNC:73200]               | - | 1.777791464 | 1.94E-08    | 1.75E-07    |
| ENSMMUG00000056906 |                                                                                             | - | 1.14112466  | 3.41E-14    | 6.63E-13    |
| ENSMMUG00000012576 | sorting nexin 6 [Source:NCBI gene;Acc:693626]                                               | - | 1.051491748 | 0.000433379 | 0.001711587 |
| ENSMMUG00000015073 | signal recognition particle 54 [Source:VGNC Symbol;Acc:VGNC:82247]                          | - | 0.558854351 | 0.001781948 | 0.006015544 |
| ENSMMUG00000003530 | protein phosphatase 2 regulatory subunit B"gamma [Source:VGNC Symbol;Acc:VGNC:76279]        | - | 0.651787894 | 6.40E-06    | 3.73E-05    |
| ENSMMUG00000016487 | Ral GTPase activating protein catalytic alpha subunit 1 [Source:VGNC Symbol;Acc:VGNC:76504] | - | 1.063384355 | 0.0021424   | 0.007052561 |
| ENSMMUG00000009648 | paired box 9 [Source:VGNC Symbol;Acc:VGNC:75768]                                            | - | 1.806884771 | 0.018335219 | 0.045371709 |
| ENSMMUG00000056013 | forkhead box A1 [Source:NCBI gene;Acc:697909]                                               | - | 2.620762651 | 0.000238237 | 0.000998883 |
| ENSMMUG00000052465 |                                                                                             | - | 1.253055289 | 0.003063133 | 0.009663105 |
| ENSMMUG00000052781 |                                                                                             | - | 0.585127307 | 3.96E-05    | 0.000195792 |
| ENSMMUG00000017677 | chromosome 7 C14orf28 homolog [Source:VGNC Symbol;Acc:VGNC:70581]                           | - | -0.76652536 | 8.67E-10    | 9.59E-09    |
| ENSMMUG00000016513 | FA complementation group M [Source:VGNC Symbol;Acc:VGNC:72554]                              | - | 3.230774526 | 0.003184767 | 0.010012741 |
| ENSMMUG00000003913 | DNA polymerase epsilon 2, accessory subunit [Source:VGNC Symbol;Acc:VGNC:76204]             | - | 0.796782865 | 0.000235576 | 0.000989404 |

|                     |                                                                                         |             |             |             |
|---------------------|-----------------------------------------------------------------------------------------|-------------|-------------|-------------|
| ENSMMUG0000008214   | nuclear export mediator factor [Source:VGNC Symbol;Acc:VGNC:84407]                      | 1.278489193 | 5.08E-05    | 0.00024683  |
| ENSMMUG00000055903  | Metazoan signal recognition particle RNA [Source:RFAM;Acc:RF00017]                      | 1.663609573 | 0.004335988 | 0.013135532 |
| ENSMMUG00000049543  |                                                                                         | 1.390428066 | 5.86E-06    | 3.44E-05    |
| ENSMMUG00000055012  |                                                                                         | 1.980101051 | 9.28E-06    | 5.24E-05    |
| ENSMMUG00000059134  |                                                                                         | 1.875424611 | 2.09E-07    | 1.59E-06    |
| ENSMMUG00000007464  | SOS Ras/Rho guanine nucleotide exchange factor 2 [Source:VGNC Symbol;Acc:VGNC:77838]    | 0.610699799 | 0.015469012 | 0.039214606 |
| ENSMMUG00000009577  | atlastin GTPase 1 [Source:VGNC Symbol;Acc:VGNC:70049]                                   | 1.113517504 | 3.00E-16    | 7.18E-15    |
| ENSMMUG00000014658  | ninein [Source:VGNC Symbol;Acc:VGNC:75177]                                              | 4.051661295 | 2.00E-44    | 9.59E-42    |
| ENSMMUG00000056844  |                                                                                         | 2.042354419 | 5.74E-06    | 3.38E-05    |
| ENSMMUG00000018274  | FERM domain containing 6 [Source:VGNC Symbol;Acc:VGNC:72747]                            | 0.991188947 | 8.10E-10    | 9.01E-09    |
| ENSMMUG00000018200  | RNA transcription, translation and transport factor [Source:VGNC Symbol;Acc:VGNC:77087] | 2.432763856 | 5.65E-05    | 0.000271132 |
| ENSMMUG00000000023  | prostaglandin E receptor 2 [Source:VGNC Symbol;Acc:VGNC:76468]                          | 1.091507924 | 2.63E-05    | 0.000136178 |
| ENSMMUG00000006997  | thioredoxin domain containing 16 [Source:VGNC Symbol;Acc:VGNC:79214]                    | 1.705807935 | 1.70E-43    | 7.43E-41    |
| ENSMMUG00000010689  | fermitin family member 2 [Source:VGNC Symbol;Acc:VGNC:82144]                            | 0.848460121 | 0.00058391  | 0.002228353 |
| ENSMMUG00000004084  | GTP cyclohydrolase 1 [Source:VGNC Symbol;Acc:VGNC:72900]                                | 0.803364006 | 0.001574461 | 0.005373421 |
| ENSMMUG00000000302  | WD repeat and HMG-box DNA binding protein 1 [Source:VGNC Symbol;Acc:VGNC:79376]         | 2.573351018 | 3.74E-46    | 1.98E-43    |
| ENSMMUG000000054112 |                                                                                         | 0.874805169 | 1.69E-09    | 1.79E-08    |
| ENSMMUG00000003567  | DLG associated protein 5 [Source:VGNC Symbol;Acc:VGNC:71850]                            | 0.764598017 | 1.07E-05    | 6.00E-05    |
| ENSMMUG00000023041  | TATA-box binding protein like 2 [Source:VGNC Symbol;Acc:VGNC:78175]                     | 0.948317855 | 0.000266605 | 0.00110471  |
| ENSMMUG000000061576 |                                                                                         | 1.928859754 | 1.04E-05    | 5.81E-05    |
| ENSMMUG000000053489 |                                                                                         | 1.32066157  | 6.92E-08    | 5.71E-07    |
| ENSMMUG00000059984  | pellino E3 ubiquitin protein ligase family member 2 [Source:NCBI gene;Acc:699169]       | 1.505999971 | 0.001711182 | 0.005797768 |
| ENSMMUG00000018278  | exocyst complex component 5 [Source:VGNC Symbol;Acc:VGNC:72260]                         | 1.612057667 | 0.000580909 | 0.00222033  |
| ENSMMUG00000003508  | actin related protein 10 [Source:VGNC Symbol;Acc:VGNC:69449]                            | 0.59354683  | 2.04E-07    | 1.56E-06    |
| ENSMMUG00000003509  | proteasome 20S subunit alpha 3 [Source:NCBI gene;Acc:700251]                            | 0.44301678  | 0.012231332 | 0.032190001 |
| ENSMMUG00000055678  | translocase of outer mitochondrial membrane 20 like [Source:NCBI gene;Acc:700628]       | 1.467481057 | 0.000280628 | 0.00115443  |
| ENSMMUG00000004854  | leucine rich repeat containing 9 [Source:VGNC Symbol;Acc:VGNC:81443]                    | 1.854026754 | 4.18E-30    | 4.08E-28    |
| ENSMMUG00000002540  | dehydrogenase/reductase 7 [Source:VGNC Symbol;Acc:VGNC:71690]                           | 0.619530449 | 7.23E-07    | 5.03E-06    |
| ENSMMUG00000058852  | SIX homeobox 1 [Source:NCBI gene;Acc:703696]                                            | -0.98607231 | 0.005848075 | 0.017003563 |
| ENSMMUG00000058450  |                                                                                         | 1.871114495 | 3.32E-05    | 0.000167812 |
| ENSMMUG00000001640  | SIX homeobox 4 [Source:NCBI gene;Acc:703798]                                            | 2.049121609 | 7.21E-11    | 9.31E-10    |
| ENSMMUG00000001642  | MNAT1 component of CDK activating kinase [Source:VGNC Symbol;Acc:VGNC:74905]            | 1.442597609 | 9.92E-09    | 9.30E-08    |
| ENSMMUG00000050297  |                                                                                         | 1.502935239 | 1.33E-06    | 8.80E-06    |
| ENSMMUG00000051446  |                                                                                         | 1.227950463 | 0.001186969 | 0.004199411 |
| ENSMMUG00000007264  | transmembrane protein 30B [Source:VGNC Symbol;Acc:VGNC:79656]                           | 1.633483408 | 7.87E-07    | 5.45E-06    |
| ENSMMUG00000002260  | protein kinase C eta [Source:VGNC Symbol;Acc:VGNC:84424]                                | 1.511798249 | 1.54E-29    | 1.47E-27    |
| ENSMMUG00000008203  | ras homolog family member J [Source:VGNC Symbol;Acc:VGNC:76885]                         | 0.757126025 | 0.000521535 | 0.002017834 |

|                     |                                                                                                                                     |   |             |             |             |
|---------------------|-------------------------------------------------------------------------------------------------------------------------------------|---|-------------|-------------|-------------|
| ENSMMUG00000054689  |                                                                                                                                     | - | 1.837124293 | 3.83E-07    | 2.77E-06    |
| ENSMMUG00000001008  | spectrin repeat containing nuclear envelope protein 2 [Source:NCBI gene;Acc:706759]                                                 | - | -1.21898011 | 3.26E-06    | 2.01E-05    |
| ENSMMUG00000001319  | methylenetetrahydrofolate dehydrogenase, cyclohydrolase and formyltetrahydrofolate synthetase 1 [Source:VGNC Symbol;Acc:VGNC:84399] | - | 1.085397451 | 1.45E-09    | 1.55E-08    |
| ENSMMUG00000004748  | zinc finger and BTB domain containing 1 [Source:VGNC Symbol;Acc:VGNC:79238]                                                         | - | 1.477579369 | 2.49E-19    | 8.02E-18    |
| ENSMMUG000000056063 |                                                                                                                                     | - | 3.153791295 | 6.41E-10    | 7.25E-09    |
| ENSMMUG000000053575 | Metazoan signal recognition particle RNA [Source:RFAM;Acc:RF00017]                                                                  | - | 1.298190037 | 0.004817308 | 0.014397557 |
| ENSMMUG000000019172 | spectrin beta, erythrocytic [Source:VGNC Symbol;Acc:VGNC:77870]                                                                     | - | 1.025465509 | 4.69E-05    | 0.000229825 |
| ENSMMUG00000004340  | churchill domain containing 1 [Source:NCBI gene;Acc:100427906]                                                                      | - | 0.5982655   | 9.59E-05    | 0.000439612 |
| ENSMMUG000000021987 | glutathione peroxidase 2 [Source:VGNC Symbol;Acc:VGNC:73152]                                                                        | - | 2.061974242 | 0.007968762 | 0.022247127 |
| ENSMMUG00000004339  | RAB15, member RAS oncogene family [Source:VGNC Symbol;Acc:VGNC:81519]                                                               | - | 0.827524602 | 0.000284281 | 0.001167188 |
| ENSMMUG000000053774 |                                                                                                                                     | - | 1.629467886 | 0.008494611 | 0.023524759 |
| ENSMMUG000000013848 | fucosyltransferase 8 [Source:VGNC Symbol;Acc:VGNC:72829]                                                                            | - | 2.191970213 | 7.74E-11    | 9.92E-10    |
| ENSMMUG000000013907 | ribosomal protein S27a [Source:NCBI gene;Acc:718909]                                                                                | - | 1.814704684 | 0.000162186 | 0.000704515 |
| ENSMMUG000000033490 | mml-mir-625 [Source:miRBase;Acc:MI0007874]                                                                                          | - | 2.890405232 | 0.004762364 | 0.014256329 |
| ENSMMUG00000006768  | coiled-coil domain containing 196 [Source:VGNC Symbol;Acc:VGNC:70828]                                                               | - | 2.780369571 | 7.36E-10    | 8.27E-09    |
| ENSMMUG00000009520  | gephyrin [Source:VGNC Symbol;Acc:VGNC:72948]                                                                                        | - | 2.008200947 | 3.81E-08    | 3.24E-07    |
| ENSMMUG000000021418 | ATPase H+ transporting V1 subunit D [Source:VGNC Symbol;Acc:VGNC:70060]                                                             | - | 1.055334937 | 4.57E-06    | 2.74E-05    |
| ENSMMUG000000021419 | eukaryotic translation initiation factor 2 subunit alpha [Source:VGNC Symbol;Acc:VGNC:72187]                                        | - | 0.588089791 | 0.004718724 | 0.01414282  |
| ENSMMUG000000021327 | phosphatidylinositol glycan anchor biosynthesis class H [Source:VGNC Symbol;Acc:VGNC:75987]                                         | - | 1.421063201 | 8.95E-05    | 0.000412809 |
| ENSMMUG000000015865 | arginase 2 [Source:VGNC Symbol;Acc:VGNC:70005]                                                                                      | - | 2.76982968  | 1.77E-34    | 2.87E-32    |
| ENSMMUG000000015866 | vesicle transport through interaction with t-SNAREs 1B [Source:NCBI gene;Acc:711113]                                                | - | 2.237071205 | 6.20E-34    | 9.28E-32    |
| ENSMMUG000000015868 | retinol dehydrogenase 11 [Source:NCBI gene;Acc:711195]                                                                              | - | 1.006907409 | 1.88E-11    | 2.60E-10    |
| ENSMMUG000000015869 | retinol dehydrogenase 12 [Source:VGNC Symbol;Acc:VGNC:76781]                                                                        | - | 1.014517104 | 0.003608279 | 0.011157375 |
| ENSMMUG000000015871 | zinc finger FYVE-type containing 26 [Source:VGNC Symbol;Acc:VGNC:79283]                                                             | - | 1.370637455 | 8.74E-05    | 0.000404333 |
| ENSMMUG000000050511 |                                                                                                                                     | - | 1.223349876 | 0.001488444 | 0.00512268  |
| ENSMMUG000000015873 | RAD51 paralog B [Source:VGNC Symbol;Acc:VGNC:76647]                                                                                 | - | 1.054900587 | 0.009392479 | 0.025666198 |
| ENSMMUG000000064908 |                                                                                                                                     | - | 1.014280377 | 0.016229459 | 0.040932461 |
| ENSMMUG000000054163 |                                                                                                                                     | - | 2.701470746 | 0.011017374 | 0.029407426 |
| ENSMMUG000000021572 | solute carrier family 39 member 9 [Source:VGNC Symbol;Acc:VGNC:77523]                                                               | - | 0.609463558 | 0.00563311  | 0.016451165 |
| ENSMMUG000000055018 | sushi domain containing 6 [Source:NCBI gene;Acc:712719]                                                                             | - | 1.788584567 | 7.80E-17    | 1.98E-15    |
| ENSMMUG000000022407 | serine and arginine rich splicing factor 5 [Source:NCBI gene;Acc:712867]                                                            | - | 1.478145793 | 9.19E-09    | 8.64E-08    |
| ENSMMUG000000022409 | solute carrier family 10 member 1 [Source:VGNC Symbol;Acc:VGNC:77380]                                                               | - | 1.952998426 | 1.06E-28    | 9.26E-27    |
| ENSMMUG000000045443 |                                                                                                                                     | - | 1.508623245 | 0.012687481 | 0.033207791 |
| ENSMMUG000000011084 | ADAM metalloproteinase domain 21 [Source:NCBI gene;Acc:715640]                                                                      | - | 1.006474619 | 0.00294531  | 0.009349089 |
| ENSMMUG000000059282 |                                                                                                                                     | - | -1.33583777 | 0.004850666 | 0.01448266  |
| ENSMMUG000000052580 | disintegrin and metalloproteinase domain-containing protein 20-like [Source:NCBI gene;Acc:713632]                                   | - | 1.061101026 | 0.001252103 | 0.004400162 |
| ENSMMUG000000019470 | pecanex 1 [Source:VGNC Symbol;Acc:VGNC:75655]                                                                                       | - | 0.762832696 | 4.34E-06    | 2.61E-05    |

|                    |                                                                                                                       |   |             |             |             |
|--------------------|-----------------------------------------------------------------------------------------------------------------------|---|-------------|-------------|-------------|
| ENSMMUG00000060340 |                                                                                                                       | - | 0.778504015 | 0.005582848 | 0.016323666 |
| ENSMMUG00000001820 | regulator of G protein signaling 6 [Source:VGNC Symbol;Acc:VGNC:76691]                                                |   | 3.1777234   | 0.000181715 | 0.000781566 |
| ENSMMUG00000002332 | RNA binding motif protein 25 [Source:VGNC Symbol;Acc:VGNC:76521]                                                      |   | 1.281494822 | 0.000138988 | 0.000613266 |
| ENSMMUG00000010173 | presenilin 1 [Source:VGNC Symbol;Acc:VGNC:76435]                                                                      |   | 1.879448453 | 1.83E-17    | 4.98E-16    |
| ENSMMUG00000037015 | U7 small nuclear RNA [Source:RFAM;Acc:RF00066]                                                                        |   | 1.799106844 | 0.013929102 | 0.035969568 |
| ENSMMUG00000056580 | Metazoan signal recognition particle RNA [Source:RFAM;Acc:RF00017]                                                    |   | 2.88928679  | 6.33E-05    | 0.000301111 |
| ENSMMUG00000000313 | HEAT repeat containing 4 [Source:VGNC Symbol;Acc:VGNC:73176]                                                          |   | 2.030251492 | 2.23E-32    | 2.78E-30    |
| ENSMMUG00000053481 |                                                                                                                       |   | 1.967107021 | 1.79E-12    | 2.86E-11    |
| ENSMMUG00000049894 |                                                                                                                       |   | 2.120140166 | 2.25E-07    | 1.70E-06    |
| ENSMMUG00000006855 | acyl-CoA thioesterase 2 [Source:NCBI gene;Acc:697011]                                                                 |   | 1.961661785 | 5.83E-20    | 2.04E-18    |
| ENSMMUG00000004910 | dynein axonemal light chain 1 [Source:VGNC Symbol;Acc:VGNC:71885]                                                     |   | 1.692376846 | 3.24E-09    | 3.29E-08    |
| ENSMMUG00000034824 | U6 spliceosomal RNA [Source:RFAM;Acc:RF00026]                                                                         |   | 2.071632474 | 0.009807578 | 0.026604423 |
| ENSMMUG00000004911 | PNMA family member 1 [Source:VGNC Symbol;Acc:VGNC:76199]                                                              |   | 1.129521791 | 0.005220975 | 0.015380823 |
| ENSMMUG00000004913 | mitotic deacetylase associated SANT domain protein [Source:VGNC Symbol;Acc:VGNC:72073]                                |   | 0.878483186 | 4.63E-09    | 4.56E-08    |
| ENSMMUG00000011148 | coenzyme Q6, monooxygenase [Source:VGNC Symbol;Acc:VGNC:71239]                                                        |   | 0.352898958 | 0.006380325 | 0.018347919 |
| ENSMMUG00000056376 |                                                                                                                       |   | 2.326081145 | 1.22E-14    | 2.52E-13    |
| ENSMMUG00000004255 | YLP motif containing 1 [Source:VGNC Symbol;Acc:VGNC:79092]                                                            |   | 1.423494663 | 8.76E-06    | 4.98E-05    |
| ENSMMUG00000002909 | placental growth factor [Source:VGNC Symbol;Acc:VGNC:75964]                                                           |   | 0.618150785 | 0.005875114 | 0.017063834 |
| ENSMMUG00000002911 | mutL homolog 3 [Source:VGNC Symbol;Acc:VGNC:82187]                                                                    |   | 1.299697302 | 0.000260609 | 0.001082891 |
| ENSMMUG00000015165 | zinc finger C2HC-type containing 1C [Source:VGNC Symbol;Acc:VGNC:79247]                                               |   | 1.003663229 | 0.00487465  | 0.014548413 |
| ENSMMUG00000015166 | NIMA related kinase 9 [Source:VGNC Symbol;Acc:VGNC:75209]                                                             |   | 1.129761882 | 9.40E-20    | 3.21E-18    |
| ENSMMUG00000015168 | transmembrane p24 trafficking protein 10 [Source:NCBI gene;Acc:701522]                                                |   | 0.928626283 | 0.001031396 | 0.003700848 |
| ENSMMUG00000040100 | Fos proto-oncogene, AP-1 transcription factor subunit [Source:VGNC Symbol;Acc:VGNC:84340]                             |   | -0.70307676 | 2.11E-05    | 0.000111291 |
| ENSMMUG00000003834 | basic leucine zipper ATF-like transcription factor [Source:VGNC Symbol;Acc:VGNC:70229]                                |   | 1.403332891 | 2.47E-07    | 1.86E-06    |
| ENSMMUG00000012065 | tubulin tyrosine ligase like 5 [Source:NCBI gene;Acc:703116]                                                          |   | 2.171729301 | 3.33E-24    | 1.86E-22    |
| ENSMMUG00000012069 | transforming growth factor beta 3 [Source:VGNC Symbol;Acc:VGNC:78335]                                                 |   | 1.087719009 | 6.78E-05    | 0.00032028  |
| ENSMMUG00000008792 | G-patch domain containing 2 like [Source:VGNC Symbol;Acc:VGNC:72973]                                                  |   | 1.293547707 | 2.28E-06    | 1.45E-05    |
| ENSMMUG00000016773 | estrogen related receptor beta [Source:VGNC Symbol;Acc:VGNC:72434]                                                    |   | 0.553706666 | 0.002588483 | 0.008335982 |
| ENSMMUG00000057021 | CLOCK interacting pacemaker [Source:NCBI gene;Acc:704679]                                                             |   | 1.374823542 | 1.91E-07    | 1.47E-06    |
| ENSMMUG00000007561 | zinc finger DHHC-type palmitoyltransferase 22 [Source:NCBI gene;Acc:706468]                                           |   | 1.689924775 | 3.84E-15    | 8.27E-14    |
| ENSMMUG00000001097 | glutathione S-transferase zeta 1 [Source:VGNC Symbol;Acc:VGNC:73304]                                                  |   | 0.417647549 | 0.015140678 | 0.038553616 |
| ENSMMUG00000013551 | VPS33B interacting protein, apical-basolateral polarity regulator, spe-39 homolog [Source:VGNC Symbol;Acc:VGNC:79246] |   | 0.823371875 | 0.002127147 | 0.007013249 |
| ENSMMUG00000023627 | aarF domain containing kinase 1 [Source:VGNC Symbol;Acc:VGNC:69472]                                                   |   | 1.015775066 | 0.005195967 | 0.015328464 |
| ENSMMUG00000019710 | centrosomal protein 128 [Source:VGNC Symbol;Acc:VGNC:71062]                                                           |   | 0.833687348 | 0.005006855 | 0.014866455 |
| ENSMMUG00000019713 | thyroid stimulating hormone receptor [Source:VGNC Symbol;Acc:VGNC:78662]                                              |   | 1.218068299 | 2.07E-05    | 0.000109304 |
| ENSMMUG00000022124 | stonin 2 [Source:VGNC Symbol;Acc:VGNC:78249]                                                                          |   | 1.479969038 | 7.32E-05    | 0.000343385 |
| ENSMMUG00000017261 | galactosylceramidase [Source:VGNC Symbol;Acc:VGNC:72867]                                                              |   | 1.384783658 | 6.91E-26    | 4.46E-24    |
| ENSMMUG00000017260 | G protein-coupled receptor 65 [Source:VGNC Symbol;Acc:VGNC:73140]                                                     |   | 1.575573007 | 1.66E-17    | 4.57E-16    |
| ENSMMUG00000021011 | spermatogenesis associated 7 [Source:VGNC Symbol;Acc:VGNC:77971]                                                      |   | 1.465944841 | 0.007603915 | 0.0213653   |

|                    |                                                                                     |   |             |             |             |
|--------------------|-------------------------------------------------------------------------------------|---|-------------|-------------|-------------|
| ENSMMUG0000004603  | zinc finger CCCH-type containing 14 [Source:VGNC Symbol;Acc:VGNC:79255]             | - | 0.521169707 | 0.000626675 | 0.00237627  |
| ENSMMUG0000004606  | EMAP like 5 [Source:VGNC Symbol;Acc:VGNC:72067]                                     | - | 1.033288276 | 2.76E-08    | 2.42E-07    |
| ENSMMUG0000004460  | tyrosyl-DNA phosphodiesterase 1 [Source:VGNC Symbol;Acc:VGNC:79164]                 | - | 1.185258966 | 2.88E-05    | 0.000147512 |
| ENSMMUG00000020687 | coiled-coil domain containing 88C [Source:VGNC Symbol;Acc:VGNC:84321]               | - | 0.473893482 | 0.000420249 | 0.001665055 |
| ENSMMUG0000008447  | fibulin 5 [Source:VGNC Symbol;Acc:VGNC:72622]                                       | - | 2.160952715 | 3.28E-06    | 2.02E-05    |
| ENSMMUG00000020751 | ataxin 3 [Source:NCBI gene;Acc:720515]                                              | - | 0.922268239 | 0.000168238 | 0.000727395 |
| ENSMMUG0000000699  | cleavage and polyadenylation specific factor 2 [Source:VGNC Symbol;Acc:VGNC:71473]  | - | 0.868331638 | 0.002472433 | 0.00799873  |
| ENSMMUG00000013966 | legumain [Source:VGNC Symbol;Acc:VGNC:74274]                                        | - | 1.159482981 | 6.33E-11    | 8.23E-10    |
| ENSMMUG00000059579 |                                                                                     | - | 0.658148622 | 0.008547413 | 0.023654782 |
| ENSMMUG00000009974 | inositol-tetrakisphosphate 1-kinase [Source:VGNC Symbol;Acc:VGNC:73802]             | - | 1.422547991 | 0.001052197 | 0.003765465 |
| ENSMMUG00000044581 | modulator of apoptosis 1 [Source:VGNC Symbol;Acc:VGNC:84392]                        | - | 1.358163054 | 3.59E-06    | 2.19E-05    |
| ENSMMUG00000061833 | transmembrane protein 251 [Source:NCBI gene;Acc:708131]                             | - | 1.560852782 | 7.69E-06    | 4.41E-05    |
| ENSMMUG00000053729 |                                                                                     | - | 0.645190778 | 0.000221388 | 0.000934581 |
| ENSMMUG00000062301 |                                                                                     | - | 0.795293338 | 0.001975705 | 0.006585683 |
| ENSMMUG00000052453 | serpin family A member 11 [Source:NCBI gene;Acc:701483]                             | - | 3.438808714 | 1.31E-10    | 1.63E-09    |
| ENSMMUG00000012356 | serpin family A member 9 [Source:VGNC Symbol;Acc:VGNC:77241]                        | - | 3.016023684 | 7.37E-20    | 2.55E-18    |
| ENSMMUG00000020586 | serpin family A member 12 [Source:VGNC Symbol;Acc:VGNC:77266]                       | - | 4.173462552 | 0.000180823 | 0.000777954 |
| ENSMMUG00000064358 |                                                                                     | - | 2.882263469 | 0.012546237 | 0.032878723 |
| ENSMMUG00000000681 | calmin [Source:VGNC Symbol;Acc:VGNC:71232]                                          | - | 1.250668619 | 2.58E-12    | 4.03E-11    |
| ENSMMUG00000054267 | glutaredoxin 5 [Source:NCBI gene;Acc:702989]                                        | - | 0.551231939 | 0.00066378  | 0.002498442 |
| ENSMMUG00000003658 | autophagy related 2B [Source:VGNC Symbol;Acc:VGNC:84310]                            | - | 1.209223437 | 0.002149458 | 0.007072657 |
| ENSMMUG00000051277 |                                                                                     | - | 2.405682858 | 0.001891814 | 0.00634025  |
| ENSMMUG00000003261 | BAF chromatin remodeling complex subunit BCL11B [Source:VGNC Symbol;Acc:VGNC:70056] | - | 2.592637487 | 2.28E-42    | 8.67E-40    |
| ENSMMUG00000051552 |                                                                                     | - | 2.173703934 | 4.13E-10    | 4.79E-09    |
| ENSMMUG00000061892 |                                                                                     | - | 2.092369755 | 2.06E-19    | 6.66E-18    |
| ENSMMUG00000049437 | Metazoan signal recognition particle RNA [Source:RFAM;Acc:RF00017]                  | - | 1.925997106 | 1.10E-11    | 1.56E-10    |
| ENSMMUG00000029197 | YY1 transcription factor [Source:NCBI gene;Acc:717370]                              | - | 2.233649203 | 1.19E-16    | 2.97E-15    |
| ENSMMUG00000051100 | Metazoan signal recognition particle RNA [Source:RFAM;Acc:RF00017]                  | - | 3.072275426 | 1.02E-05    | 5.72E-05    |
| ENSMMUG00000013871 | WD repeat domain 25 [Source:VGNC Symbol;Acc:VGNC:78420]                             | - | 2.203500767 | 2.81E-15    | 6.12E-14    |
| ENSMMUG00000005780 | dynein cytoplasmic 1 heavy chain 1 [Source:VGNC Symbol;Acc:VGNC:71951]              | - | 0.36499602  | 0.000134892 | 0.000597148 |
| ENSMMUG00000054990 | heat shock protein 90 alpha family class A member 1 [Source:NCBI gene;Acc:708431]   | - | 0.468080661 | 0.018951572 | 0.046647605 |
| ENSMMUG00000060616 | Metazoan signal recognition particle RNA [Source:RFAM;Acc:RF00017]                  | - | 0.435458616 | 0.009406155 | 0.025694858 |
| ENSMMUG00000007135 | WD repeat domain 20 [Source:VGNC Symbol;Acc:VGNC:79196]                             | - | 0.522160627 | 6.14E-06    | 3.59E-05    |
| ENSMMUG00000007140 | MOK protein kinase [Source:VGNC Symbol;Acc:VGNC:84394]                              | - | 1.879283611 | 1.65E-06    | 1.08E-05    |
| ENSMMUG00000003483 | cyclin dependent kinase 2 interacting protein [Source:VGNC Symbol;Acc:VGNC:71326]   | - | -1.39491588 | 7.49E-11    | 9.64E-10    |
| ENSMMUG00000003484 | tectonin beta-propeller repeat containing 2 [Source:NCBI gene;Acc:708959]           | - | 2.169689865 | 1.48E-16    | 3.66E-15    |
| ENSMMUG00000057818 |                                                                                     | - | 2.120430529 | 0.001453733 | 0.005018358 |

|                    |                                                                                    |             |             |             |
|--------------------|------------------------------------------------------------------------------------|-------------|-------------|-------------|
| ENSMMUG0000005845  | REST corepressor 1 [Source:VGNC Symbol;Acc:VGNC:76752]                             | 1.298210953 | 2.03E-07    | 1.55E-06    |
| ENSMMUG0000008380  | CDC42 binding protein kinase beta [Source:VGNC Symbol;Acc:VGNC:81369]              | 0.635332704 | 0.008424929 | 0.023375435 |
| ENSMMUG00000029186 | exocyst complex component 3 like 4 [Source:VGNC Symbol;Acc:VGNC:72305]             | 2.825685744 | 0.005654028 | 0.016499259 |
| ENSMMUG00000050495 |                                                                                    | 2.399648044 | 8.14E-06    | 4.65E-05    |
| ENSMMUG00000021634 | TNF alpha induced protein 2 [Source:VGNC Symbol;Acc:VGNC:78579]                    | 2.528129411 | 3.53E-39    | 8.59E-37    |
| ENSMMUG00000049145 | creatine kinase B [Source:NCBI gene;Acc:711167]                                    | 0.848628398 | 2.27E-06    | 1.44E-05    |
| ENSMMUG0000007673  | tRNA methyltransferase 61A [Source:VGNC Symbol;Acc:VGNC:79412]                     | 0.602984263 | 0.017856634 | 0.044357433 |
| ENSMMUG00000029181 | X-ray repair cross complementing 3 [Source:NCBI gene;Acc:695788]                   | 0.459973224 | 0.00037657  | 0.001510556 |
| ENSMMUG00000018121 | zinc finger FYVE-type containing 21 [Source:VGNC Symbol;Acc:VGNC:79282]            | 0.653802404 | 8.55E-09    | 8.08E-08    |
| ENSMMUG00000016552 | inverted formin, FH2 and WH2 domain containing [Source:VGNC Symbol;Acc:VGNC:84357] | 2.087839319 | 0.000516999 | 0.002002897 |
|                    |                                                                                    | -           |             |             |
| ENSMMUG00000052518 | SIVA1 apoptosis inducing factor [Source:NCBI gene;Acc:706688]                      | 2.010925903 | 0.000203662 | 0.000867159 |
|                    |                                                                                    | -           |             |             |
| ENSMMUG00000001044 | AKT serine/threonine kinase 1 [Source:VGNC Symbol;Acc:VGNC:69776]                  | 0.844603275 | 0.001798475 | 0.006064434 |
| ENSMMUG00000064694 | AHNAK nucleoprotein 2 [Source:NCBI gene;Acc:707626]                                | 3.217219093 | 0.000173635 | 0.000748766 |
|                    |                                                                                    | -           |             |             |
| ENSMMUG00000007517 | G protein-coupled receptor 132 [Source:VGNC Symbol;Acc:VGNC:84343]                 | 1.570797714 | 0.010587137 | 0.028391906 |
|                    |                                                                                    | -           |             |             |
| ENSMMUG00000065019 | Metazoan signal recognition particle RNA [Source:RFAM;Acc:RF00017]                 | 2.272978641 | 2.76E-06    | 1.72E-05    |
|                    |                                                                                    | -           |             |             |
| ENSMMUG00000022939 | phosphofurin acidic cluster sorting protein 2 [Source:VGNC Symbol;Acc:VGNC:75671]  | 1.068314804 | 0.0021191   | 0.006991379 |
|                    |                                                                                    | -           |             |             |
| ENSMMUG00000007159 | tubulin epsilon and delta complex 1 [Source:VGNC Symbol;Acc:VGNC:79235]            | 1.527981847 | 2.93E-05    | 0.000150339 |
|                    |                                                                                    | -           |             |             |
| ENSMMUG00000015202 |                                                                                    | 3.314870836 | 6.42E-05    | 0.000304972 |
|                    |                                                                                    | -           |             |             |
| ENSMMUG00000040771 |                                                                                    | 1.872190315 | 1.96E-05    | 0.000104705 |
|                    |                                                                                    | -           |             |             |
| ENSMMUG00000045298 | immunoglobulin heavy constant mu [Source:HGNC Symbol;Acc:HGNC:5541]                | 0.487993774 | 0.010479567 | 0.028159447 |
| ENSMMUG00000059525 |                                                                                    | -1.87551475 | 2.14E-06    | 1.37E-05    |
|                    |                                                                                    | -           |             |             |
| ENSMMUG00000055207 |                                                                                    | 5.235582452 | 8.07E-11    | 1.03E-09    |
|                    |                                                                                    | -           |             |             |
| ENSMMUG00000060892 |                                                                                    | 1.791273496 | 2.65E-07    | 1.98E-06    |
|                    |                                                                                    | -           |             |             |
| ENSMMUG00000064429 | immunoglobulin heavy variable 1-45 [Source:HGNC Symbol;Acc:HGNC:5553]              | 3.342884788 | 0.00213894  | 0.007045863 |
|                    |                                                                                    | -           |             |             |
| ENSMMUG00000052929 |                                                                                    | 4.102802409 | 2.44E-08    | 2.16E-07    |
|                    |                                                                                    | -           |             |             |
| ENSMMUG00000052535 |                                                                                    | 4.439949115 | 3.69E-07    | 2.69E-06    |
|                    |                                                                                    | -           |             |             |
| ENSMMUG00000060524 |                                                                                    | 1.952318137 | 0.003649254 | 0.011265288 |
| ENSMMUG00000063346 |                                                                                    | 3.571979427 | 0.000132677 | 0.000588749 |
| ENSMMUG00000053333 | acetylserotonin O-methyltransferase like [Source:NCBI gene;Acc:106995142]          | 4.769041757 | 6.88E-05    | 0.000324217 |
|                    |                                                                                    | -           |             |             |
| ENSMMUG00000007514 | zinc finger BED-type containing 1 [Source:VGNC Symbol;Acc:VGNC:79956]              | 1.094693987 | 0.009292031 | 0.025424506 |
|                    |                                                                                    | -           |             |             |
| ENSMMUG00000004985 | arylsulfatase L [Source:VGNC Symbol;Acc:VGNC:81361]                                | 2.422731729 | 6.28E-05    | 0.000299118 |
|                    |                                                                                    | -           |             |             |
| ENSMMUG00000038289 | Metazoan signal recognition particle RNA [Source:RFAM;Acc:RF00017]                 | 1.304446413 | 0.009013482 | 0.024758277 |
|                    |                                                                                    | -           |             |             |
| ENSMMUG00000000443 | arylsulfatase F [Source:VGNC Symbol;Acc:VGNC:81362]                                | 1.358275255 | 1.37E-09    | 1.47E-08    |
|                    |                                                                                    | -           |             |             |
| ENSMMUG00000017378 | steroid sulfatase [Source:VGNC Symbol;Acc:VGNC:81590]                              | 1.909327739 | 0.000273252 | 0.001128469 |
| ENSMMUG00000008256 | amelogenin X-linked [Source:NCBI gene;Acc:710057]                                  | 0.4333083   | 0.016013831 | 0.040436764 |

|                     |                                                                                             |             |             |             |
|---------------------|---------------------------------------------------------------------------------------------|-------------|-------------|-------------|
| ENSMMUG00000010252  | FERM and PDZ domain containing 4 [Source:VGNC Symbol;Acc:VGNC:72802]                        | 0.663208466 | 0.00434693  | 0.013158803 |
| ENSMMUG00000003482  | glycine receptor alpha 2 [Source:VGNC Symbol;Acc:VGNC:73075]                                | 1.591752869 | 3.50E-08    | 3.00E-07    |
| ENSMMUG00000015737  | phosphatidylinositol glycan anchor biosynthesis class A [Source:VGNC Symbol;Acc:VGNC:75984] | 1.035832363 | 2.50E-08    | 2.21E-07    |
| ENSMMUG00000015738  | vascular endothelial growth factor D [Source:VGNC Symbol;Acc:VGNC:79953]                    | 0.990547767 | 0.017158552 | 0.042867474 |
| ENSMMUG00000015740  | pirin [Source:VGNC Symbol;Acc:VGNC:75893]                                                   | 0.903892563 | 0.000200638 | 0.000855508 |
| ENSMMUG00000004797  | CTP synthase 2 [Source:VGNC Symbol;Acc:VGNC:71550]                                          | 2.426543449 | 6.34E-16    | 1.47E-14    |
| ENSMMUG00000004798  | S100 calcium binding protein G [Source:VGNC Symbol;Acc:VGNC:77016]                          | 3.388934325 | 0.000163004 | 0.000707655 |
| ENSMMUG00000058700  | Metazoan signal recognition particle RNA [Source:RFAM;Acc:RF00017]                          | 4.141688239 | 8.07E-07    | 5.57E-06    |
| ENSMMUG00000019363  | synapse associated protein 1 [Source:VGNC Symbol;Acc:VGNC:78135]                            | 2.754562912 | 3.78E-20    | 1.34E-18    |
| ENSMMUG00000028363  | U7 small nuclear RNA [Source:RFAM;Acc:RF00066]                                              | 2.87442512  | 0.006829834 | 0.019455712 |
| ENSMMUG00000016237  | taxilin gamma [Source:NCBI gene;Acc:713769]                                                 | 3.396831547 | 2.06E-06    | 1.32E-05    |
| ENSMMUG00000016238  | RB binding protein 7, chromatin remodeling factor [Source:VGNC Symbol;Acc:VGNC:76678]       | 2.567328525 | 0.008021114 | 0.022380644 |
| ENSMMUG00000012894  | NHS actin remodeling regulator [Source:VGNC Symbol;Acc:VGNC:75348]                          | 1.840829973 | 4.17E-05    | 0.000205794 |
| ENSMMUG00000020515  | adhesion G protein-coupled receptor G2 [Source:VGNC Symbol;Acc:VGNC:69802]                  | 1.864647066 | 1.61E-06    | 1.05E-05    |
| ENSMMUG00000004744  | SH3 domain containing kinase binding protein 1 [Source:VGNC Symbol;Acc:VGNC:77227]          | 0.276216418 | 0.014245954 | 0.036576784 |
| ENSMMUG00000002134  | ribosomal protein S6 kinase A3 [Source:VGNC Symbol;Acc:VGNC:76929]                          | 1.037736174 | 0.002774701 | 0.008864457 |
| ENSMMUG00000007500  | connector enhancer of kinase suppressor of Ras 2 [Source:VGNC Symbol;Acc:VGNC:71223]        | 0.824661528 | 0.000336097 | 0.001361091 |
| ENSMMUG00000001088  | patched domain containing 1 [Source:VGNC Symbol;Acc:VGNC:76322]                             | 1.610582815 | 8.51E-17    | 2.15E-15    |
| ENSMMUG000000061261 | Metazoan signal recognition particle RNA [Source:RFAM;Acc:RF00017]                          | 1.425101209 | 8.77E-05    | 0.000405623 |
| ENSMMUG000000042317 | putative transcription factor SPT20 homolog-like 2 [Source:NCBI gene;Acc:100429227]         | 1.139409792 | 0.008172296 | 0.022738303 |
| ENSMMUG000000042416 |                                                                                             | 1.898299113 | 0.003645783 | 0.011256915 |
| ENSMMUG00000012819  | pyruvate dehydrogenase kinase 3 [Source:VGNC Symbol;Acc:VGNC:75934]                         | 1.294118112 | 0.002081721 | 0.006889517 |
| ENSMMUG00000012821  | phosphate cytidyltransferase 1, choline, beta [Source:VGNC Symbol;Acc:VGNC:75790]           | 2.378928577 | 0.002106665 | 0.006964297 |
| ENSMMUG00000005959  | glycerol kinase [Source:NCBI gene;Acc:707531]                                               | 0.844943344 | 1.55E-08    | 1.41E-07    |
| ENSMMUG00000005263  | chromosome X CXorf38 homolog [Source:VGNC Symbol;Acc:VGNC:71600]                            | 1.402490888 | 0.003580195 | 0.011084403 |
| ENSMMUG00000005264  | mediator complex subunit 14 [Source:VGNC Symbol;Acc:VGNC:74561]                             | 0.476577802 | 0.008347601 | 0.023195601 |
| ENSMMUG000000063721 |                                                                                             | 0.888297403 | 8.26E-09    | 7.83E-08    |
| ENSMMUG000000055907 |                                                                                             | 0.93228238  | 8.51E-08    | 6.92E-07    |
| ENSMMUG000000057909 |                                                                                             | 2.149798329 | 1.18E-08    | 1.10E-07    |
| ENSMMUG000000057804 |                                                                                             | 1.965433152 | 0.000457599 | 0.001794816 |
| ENSMMUG00000016391  | EF-hand domain containing 2 [Source:VGNC Symbol;Acc:VGNC:72116]                             | 3.152766834 | 0.019192954 | 0.047124422 |
| ENSMMUG00000003505  | FUN14 domain containing 1 [Source:NCBI gene;Acc:709370]                                     | 2.438194984 | 0.000448791 | 0.001764    |
| ENSMMUG00000003897  | solute carrier family 9 member A7 [Source:NCBI gene;Acc:710906]                             | -0.75496538 | 1.38E-05    | 7.57E-05    |
| ENSMMUG000000049666 |                                                                                             | 1.065932116 | 1.14E-08    | 1.06E-07    |
| ENSMMUG00000023018  | RP2 activator of ARL3 GTPase [Source:VGNC Symbol;Acc:VGNC:76720]                            | 0.911035084 | 0.000688176 | 0.00257914  |
| ENSMMUG00000023016  | jade family PHD finger 3 [Source:VGNC Symbol;Acc:VGNC:73640]                                | 1.850470637 | 5.06E-27    | 3.85E-25    |
| ENSMMUG00000019546  | regucalcin [Source:VGNC Symbol;Acc:VGNC:76912]                                              | 2.149339247 | 6.04E-07    | 4.27E-06    |
| ENSMMUG00000017423  | RNA binding motif protein 10 [Source:VGNC Symbol;Acc:VGNC:76680]                            | 1.374744573 | 0.016908064 | 0.042391646 |

|                    |                                                                                             |             |             |             |
|--------------------|---------------------------------------------------------------------------------------------|-------------|-------------|-------------|
| ENSMMUG00000014002 | cyclin dependent kinase 16 [Source:VGNC Symbol;Acc:VGNC:71160]                              | -1.35536201 | 0.000384501 | 0.001536553 |
| ENSMMUG00000016608 | ubiquitin specific peptidase 11 [Source:VGNC Symbol;Acc:VGNC:78734]                         | -1.41340256 | 0.011780365 | 0.031189835 |
| ENSMMUG00000008566 | zinc finger protein 157 [Source:VGNC Symbol;Acc:VGNC:78850]                                 | 1.229631131 | 2.35E-12    | 3.70E-11    |
| ENSMMUG00000010404 | zinc finger protein 41 [Source:VGNC Symbol;Acc:VGNC:78900]                                  | 1.035874633 | 2.63E-05    | 0.000135998 |
| ENSMMUG00000014066 | zinc finger protein 81 [Source:VGNC Symbol;Acc:VGNC:78908]                                  | 1.028178465 | 0.007478455 | 0.021036701 |
| ENSMMUG00000056352 | putative protein SSX9 [Source:NCBI gene;Acc:709251]                                         | 1.990686966 | 0.012330258 | 0.032438838 |
| ENSMMUG00000018894 | FtsJ RNA 2'-O-methyltransferase 1 [Source:VGNC Symbol;Acc:VGNC:72716]                       | 1.787353956 | 0.009623823 | 0.026172986 |
| ENSMMUG00000019768 | suppressor of variegation 3-9 homolog 1 [Source:VGNC Symbol;Acc:VGNC:78061]                 | 0.912153893 | 6.86E-05    | 0.000323485 |
| ENSMMUG00000063882 | U6 spliceosomal RNA [Source:RFAM;Acc:RF00026]                                               | 2.644375971 | 0.019684434 | 0.048195503 |
| ENSMMUG00000016465 | histone deacetylase 6 [Source:VGNC Symbol;Acc:VGNC:73164]                                   | 1.055922332 | 8.87E-21    | 3.43E-19    |
| ENSMMUG00000060865 | Metazoan signal recognition particle RNA [Source:RFAM;Acc:RF00017]                          | 4.216804244 | 0.000114834 | 0.000515899 |
| ENSMMUG00000016469 | proprotein convertase subtilisin/kexin type 1 inhibitor [Source:VGNC Symbol;Acc:VGNC:75639] | 2.560170682 | 7.74E-06    | 4.44E-05    |
| ENSMMUG00000053345 | Pim-2 proto-oncogene, serine/threonine kinase [Source:NCBI gene;Acc:711844]                 | 1.048982342 | 0.000627832 | 0.00237883  |
| ENSMMUG00000004558 | OTU deubiquitinase 5 [Source:VGNC Symbol;Acc:VGNC:75677]                                    | 1.531373193 | 2.50E-22    | 1.16E-20    |
| ENSMMUG00000010617 | coiled-coil domain containing 120 [Source:VGNC Symbol;Acc:VGNC:70664]                       | 0.610953444 | 0.000414656 | 0.001645971 |
| ENSMMUG00000055688 | PRA1 domain family member 2 [Source:HGNC Symbol;Acc:HGNC:28911]                             | 0.561152438 | 0.014519239 | 0.037220451 |
| ENSMMUG00000023024 | prickle planar cell polarity protein 3 [Source:VGNC Symbol;Acc:VGNC:76361]                  | 0.700719311 | 0.001124368 | 0.004002493 |
| ENSMMUG00000023025 | synaptophysin [Source:VGNC Symbol;Acc:VGNC:78072]                                           | 0.968671997 | 6.86E-10    | 7.74E-09    |
| ENSMMUG00000008618 | calcium voltage-gated channel subunit alpha1 F [Source:VGNC Symbol;Acc:VGNC:70503]          | 1.164417631 | 1.70E-21    | 7.13E-20    |
| ENSMMUG00000008623 | coiled-coil domain containing 22 [Source:VGNC Symbol;Acc:VGNC:70899]                        | 1.501864862 | 2.72E-23    | 1.40E-21    |
| ENSMMUG00000008624 | forkhead box P3 [Source:VGNC Symbol;Acc:VGNC:72926]                                         | 1.705996208 | 0.000500004 | 0.001945189 |
| ENSMMUG00000052252 | protein phosphatase 1 regulatory subunit 3F [Source:NCBI gene;Acc:715950]                   | 2.202267896 | 1.94E-31    | 2.06E-29    |
| ENSMMUG00000060311 | G antigen 10-like [Source:NCBI gene;Acc:114674954]                                          | 0.524767017 | 0.00174085  | 0.005886185 |
| ENSMMUG00000041376 | G antigen 10 [Source:NCBI gene;Acc:693330]                                                  | 1.626613503 | 1.23E-15    | 2.75E-14    |
| ENSMMUG00000026584 | Y RNA [Source:RFAM;Acc:RF00019]                                                             | 2.387313289 | 0.000194704 | 0.00083212  |
| ENSMMUG00000056042 | Y RNA [Source:RFAM;Acc:RF00019]                                                             | 2.79178904  | 0.017415277 | 0.043399186 |
| ENSMMUG00000023060 | A-kinase anchoring protein 4 [Source:VGNC Symbol;Acc:VGNC:69770]                            | 2.356642619 | 1.21E-09    | 1.31E-08    |
| ENSMMUG00000045093 | cyclin B3 [Source:NCBI gene;Acc:694534]                                                     | 2.342114338 | 6.25E-24    | 3.42E-22    |
| ENSMMUG00000049267 |                                                                                             | 3.565611725 | 1.13E-16    | 2.82E-15    |
| ENSMMUG00000050420 | centromere protein V-like protein 1 [Source:NCBI gene;Acc:717718]                           | 1.235973137 | 0.007375871 | 0.02076783  |
| ENSMMUG00000020202 | melanoma-associated antigen D4 [Source:NCBI gene;Acc:106996411]                             | -1.95598819 | 2.03E-06    | 1.30E-05    |
| ENSMMUG00000062319 |                                                                                             | 2.763752502 | 0.015706789 | 0.039769793 |
| ENSMMUG00000012073 | X antigen family member 1-like [Source:NCBI gene;Acc:106996044]                             | 0.821044286 | 7.40E-06    | 4.27E-05    |
| ENSMMUG00000046218 | X antigen family member 5 [Source:NCBI gene;Acc:114669729]                                  | 1.828861991 | 3.49E-06    | 2.13E-05    |
| ENSMMUG00000003251 | X antigen family member 3 [Source:NCBI gene;Acc:698267]                                     | 0.67249885  | 0.003311499 | 0.010354106 |
| ENSMMUG00000053262 |                                                                                             | 0.471859634 | 0.014758741 | 0.037743081 |
| ENSMMUG00000020553 | lysine demethylase 5C [Source:VGNC Symbol;Acc:VGNC:73816]                                   | 0.409384877 | 0.013668507 | 0.035410065 |
| ENSMMUG00000020555 | IQ motif and Sec7 domain ArfGEF 2 [Source:VGNC Symbol;Acc:VGNC:73676]                       | 0.471542387 | 0.000611548 | 0.002321878 |
| ENSMMUG00000050146 |                                                                                             | 0.966619131 | 0.017863143 | 0.044366172 |



|                    |                                                                                                 |   |             |             |             |
|--------------------|-------------------------------------------------------------------------------------------------|---|-------------|-------------|-------------|
| ENSMMUG00000047741 | Metazoan signal recognition particle RNA [Source:RFAM;Acc:RF00017]                              | - | 1.051317223 | 2.69E-07    | 2.01E-06    |
| ENSMMUG00000005433 | WNK lysine deficient protein kinase 3 [Source:VGNC Symbol;Acc:VGNC:78962]                       | - | 0.512487105 | 0.003486795 | 0.010825068 |
| ENSMMUG00000008422 | trophinin [Source:NCBI gene;Acc:704512]                                                         | - | 0.635999323 | 0.000745359 | 0.002761347 |
| ENSMMUG00000059922 | family with sequence similarity 104 member B [Source:NCBI gene;Acc:705418]                      | - | 2.579683512 | 2.74E-05    | 0.000141456 |
| ENSMMUG00000051670 |                                                                                                 | - | 2.515824419 | 3.78E-12    | 5.77E-11    |
| ENSMMUG00000054377 |                                                                                                 | - | 1.313699932 | 3.21E-23    | 1.64E-21    |
| ENSMMUG00000063913 | endogenous retrovirus group K member 7 Env polyprotein-like [Source:NCBI gene;Acc:114674933]    | - | 4.257924905 | 3.83E-09    | 3.84E-08    |
| ENSMMUG00000059335 |                                                                                                 | - | 4.823618504 | 6.07E-07    | 4.29E-06    |
| ENSMMUG00000004309 | APC membrane recruitment protein 1 [Source:VGNC Symbol;Acc:VGNC:69716]                          | - | 5.200083771 | 1.93E-07    | 1.48E-06    |
| ENSMMUG00000065109 | ankyrin repeat and SOCS box containing 12 [Source:NCBI gene;Acc:707931]                         | - | 3.658302181 | 0.000808568 | 0.002971763 |
| ENSMMUG00000065001 |                                                                                                 | - | 0.362726284 | 0.007289326 | 0.020563192 |
| ENSMMUG00000061393 | OTU deubiquitinase 6A [Source:NCBI gene;Acc:694498]                                             | - | 1.543983078 | 0.013983147 | 0.036070633 |
| ENSMMUG00000054817 | immunoglobulin binding protein 1 [Source:NCBI gene;Acc:694632]                                  | - | 1.371655528 | 0.001500853 | 0.005161791 |
| ENSMMUG00000013934 | pyrimidinergic receptor P2Y4 [Source:VGNC Symbol;Acc:VGNC:75739]                                | - | 1.651783147 | 0.001518991 | 0.005213292 |
| ENSMMUG00000013935 | arrestin 3 [Source:VGNC Symbol;Acc:VGNC:70020]                                                  | - | 1.354010329 | 0.005431329 | 0.0159372   |
| ENSMMUG00000013937 | RAB41, member RAS oncogene family [Source:VGNC Symbol;Acc:VGNC:81544]                           | - | -2.1418887  | 2.95E-07    | 2.18E-06    |
| ENSMMUG00000061295 | PDZ domain containing 11 [Source:NCBI gene;Acc:695458]                                          | - | 1.389390558 | 1.50E-07    | 1.18E-06    |
| ENSMMUG00000013940 | kinesin family member 4A [Source:NCBI gene;Acc:695574]                                          | - | 1.619831689 | 3.36E-05    | 0.000169761 |
| ENSMMUG00000013943 | glycerophosphodiester phosphodiesterase domain containing 2 [Source:VGNC Symbol;Acc:VGNC:72787] | - | 2.267224104 | 1.17E-07    | 9.36E-07    |
| ENSMMUG00000003049 | testis expressed 11 [Source:VGNC Symbol;Acc:VGNC:78316]                                         | - | -3.35608044 | 3.73E-09    | 3.74E-08    |
| ENSMMUG00000032429 | forkhead box O4 [Source:VGNC Symbol;Acc:VGNC:72712]                                             | - | 1.96555259  | 3.28E-21    | 1.34E-19    |
| ENSMMUG00000032427 | neuroligin 3 [Source:NCBI gene;Acc:574216]                                                      | - | 1.937208462 | 3.59E-14    | 6.96E-13    |
| ENSMMUG00000000669 | gap junction protein beta 1 [Source:VGNC Symbol;Acc:VGNC:73059]                                 | - | 2.497605949 | 6.08E-06    | 3.56E-05    |
| ENSMMUG00000000667 | zinc finger MYM-type containing 3 [Source:VGNC Symbol;Acc:VGNC:78886]                           | - | 2.241133731 | 1.03E-10    | 1.30E-09    |
| ENSMMUG00000056450 |                                                                                                 | - | 1.735622955 | 0.017105985 | 0.042773913 |
| ENSMMUG00000015238 | O-linked N-acetylglucosamine (GlcNAc) transferase [Source:NCBI gene;Acc:698268]                 | - | 2.166191131 | 6.31E-29    | 5.64E-27    |
| ENSMMUG00000011469 | germ cell nuclear acidic peptidase [Source:VGNC Symbol;Acc:VGNC:72724]                          | - | 2.794269414 | 2.28E-05    | 0.00011974  |
| ENSMMUG00000021924 | NHS like 2 [Source:NCBI gene;Acc:702808]                                                        | - | 0.737073415 | 8.71E-12    | 1.26E-10    |
| ENSMMUG00000055786 | peptidylprolyl cis/trans isomerase, NIMA-interacting 4 [Source:NCBI gene;Acc:699273]            | - | 3.295448432 | 0.004337471 | 0.013135532 |
| ENSMMUG00000057710 | DMRT like family C1B [Source:NCBI gene;Acc:704619]                                              | - | -1.55475554 | 0.010333478 | 0.027842565 |
| ENSMMUG00000054132 |                                                                                                 | - | 2.014622239 | 0.014060991 | 0.036221036 |
| ENSMMUG00000063858 |                                                                                                 | - | 0.391349239 | 0.005202726 | 0.01533925  |
| ENSMMUG00000009249 | ring finger protein, LIM domain interacting [Source:NCBI gene;Acc:703471]                       | - | 0.791618972 | 1.13E-10    | 1.42E-09    |

|                    |                                                                                                                                       |             |             |             |
|--------------------|---------------------------------------------------------------------------------------------------------------------------------------|-------------|-------------|-------------|
| ENSMMUG00000053505 | U6 spliceosomal RNA [Source:RFAM;Acc:RF00026]                                                                                         | 1.256246425 | 0.000789416 | 0.002912924 |
| ENSMMUG00000017660 |                                                                                                                                       | 1.900746347 | 1.25E-20    | 4.76E-19    |
| ENSMMUG00000011440 | neurite extension and migration factor [Source:VGNC Symbol;Acc:VGNC:75274]                                                            | 1.896736451 | 3.97E-10    | 4.61E-09    |
| ENSMMUG00000015619 | ATP binding cassette subfamily B member 7 [Source:VGNC Symbol;Acc:VGNC:81340]                                                         | 1.628163822 | 3.37E-11    | 4.52E-10    |
| ENSMMUG00000049351 | MAGE family member E1 [Source:NCBI gene;Acc:705379]                                                                                   | 2.010754376 | 2.18E-14    | 4.33E-13    |
| ENSMMUG00000014407 | magnesium transporter 1 [Source:VGNC Symbol;Acc:VGNC:74386]                                                                           | 1.167777072 | 4.48E-12    | 6.75E-11    |
| ENSMMUG00000027544 | U6 spliceosomal RNA [Source:RFAM;Acc:RF00026]                                                                                         | 0.989378556 | 0.004997175 | 0.014845373 |
| ENSMMUG00000015861 | cytochrome c oxidase subunit VIIb [Source:NCBI gene;Acc:706099]                                                                       | 1.340433876 | 5.38E-13    | 9.20E-12    |
| ENSMMUG00000013387 | cysteinyl leukotriene receptor 1 [Source:VGNC Symbol;Acc:VGNC:71646]                                                                  | 1.704322402 | 8.08E-14    | 1.52E-12    |
| ENSMMUG00000052073 |                                                                                                                                       | 1.535689663 | 2.58E-13    | 4.53E-12    |
| ENSMMUG00000054447 | T-box transcription factor 22 [Source:NCBI gene;Acc:708338]                                                                           | -1.15658465 | 0.003316286 | 0.010366445 |
| ENSMMUG00000008212 | tenomodulin [Source:VGNC Symbol;Acc:VGNC:79087]                                                                                       | 1.372069831 | 0.000235325 | 0.00098865  |
| ENSMMUG00000008210 | sushi repeat containing protein X-linked 2 [Source:NCBI gene;Acc:700756]                                                              | 0.614966919 | 0.01494221  | 0.038146491 |
| ENSMMUG00000013008 | cleavage stimulation factor subunit 2 [Source:VGNC Symbol;Acc:VGNC:71536]                                                             | 1.926237053 | 5.24E-07    | 3.73E-06    |
| ENSMMUG00000004178 | NADPH oxidase 1 [Source:VGNC Symbol;Acc:VGNC:75374]                                                                                   | 2.414045542 | 3.53E-11    | 4.74E-10    |
| ENSMMUG00000065018 | transmembrane protein 35A [Source:NCBI gene;Acc:702205]                                                                               | 1.245717187 | 5.74E-12    | 8.52E-11    |
| ENSMMUG00000007601 | centromere protein I [Source:NCBI gene;Acc:702316]                                                                                    | 0.679201801 | 0.005422294 | 0.015913837 |
| ENSMMUG00000022281 | family with sequence similarity 199, X-linked [Source:NCBI gene;Acc:699523]                                                           | 2.177869335 | 0.000897582 | 0.003257742 |
| ENSMMUG00000006684 | testis expressed 13A [Source:VGNC Symbol;Acc:VGNC:78317]                                                                              | 2.226163201 | 0.007955615 | 0.02221879  |
| ENSMMUG00000013150 | MORC family CW-type zinc finger 4 [Source:VGNC Symbol;Acc:VGNC:74808]                                                                 | 1.666698707 | 1.64E-23    | 8.76E-22    |
| ENSMMUG00000013146 | claudin 2 [Source:HGNC Symbol;Acc:HGNC:2041]                                                                                          | 1.718138443 | 8.47E-22    | 3.73E-20    |
| ENSMMUG00000022293 | FERM and PDZ domain containing 3 [Source:VGNC Symbol;Acc:VGNC:72805]                                                                  | 0.918203458 | 1.42E-09    | 1.53E-08    |
| ENSMMUG00000004674 | phosphoribosyl pyrophosphate synthetase 1 [Source:NCBI gene;Acc:702529]                                                               | 1.340124411 | 7.26E-19    | 2.24E-17    |
| ENSMMUG00000007688 | angiominin [Source:VGNC Symbol;Acc:VGNC:69627]                                                                                        | 4.486819724 | 7.78E-06    | 4.45E-05    |
| ENSMMUG00000006377 | plastin 3 [Source:VGNC Symbol;Acc:VGNC:76181]                                                                                         | 0.902128869 | 0.000776918 | 0.002871092 |
| ENSMMUG00000055906 | angiotensin II receptor type 2 [Source:NCBI gene;Acc:709513]                                                                          | 2.157222867 | 8.25E-07    | 5.68E-06    |
| ENSMMUG00000026243 | U6 spliceosomal RNA [Source:RFAM;Acc:RF00026]                                                                                         | 2.650604455 | 0.000468307 | 0.001832936 |
| ENSMMUG00000057063 | solute carrier family 6 member 14 [Source:NCBI gene;Acc:709598]                                                                       | 2.189764382 | 0.000286329 | 0.001174424 |
| ENSMMUG00000008818 | SWI/SNF related, matrix associated, actin dependent regulator of chromatin, subfamily a, member 1 [Source:VGNC Symbol;Acc:VGNC:77646] | 0.983997875 | 0.009119372 | 0.025002825 |
| ENSMMUG00000059153 |                                                                                                                                       | 0.814057646 | 0.001320086 | 0.004612836 |
| ENSMMUG00000020700 | UTP14A small subunit processome component [Source:NCBI gene;Acc:703510]                                                               | 0.859887539 | 0.00815852  | 0.022721286 |
| ENSMMUG00000008781 | BCL6 corepressor like 1 [Source:VGNC Symbol;Acc:VGNC:70131]                                                                           | 1.070373957 | 1.44E-06    | 9.51E-06    |
| ENSMMUG00000063900 | Metazoan signal recognition particle RNA [Source:RFAM;Acc:RF00017]                                                                    | 3.197923633 | 0.002933698 | 0.009320211 |
| ENSMMUG00000004954 | apoptosis inducing factor mitochondria associated 1 [Source:VGNC Symbol;Acc:VGNC:69820]                                               | 1.243844433 | 1.58E-09    | 1.68E-08    |
| ENSMMUG00000049309 | RAB33A, member RAS oncogene family [Source:NCBI gene;Acc:703002]                                                                      | 1.412053249 | 0.002116219 | 0.006984984 |
| ENSMMUG00000003479 | FERM domain containing 7 [Source:VGNC Symbol;Acc:VGNC:72927]                                                                          | -0.89988654 | 0.006666192 | 0.019044429 |
| ENSMMUG00000025616 |                                                                                                                                       | -2.33338387 | 0.006926091 | 0.019699643 |

|                    |                                                                               |   |             |             |             |
|--------------------|-------------------------------------------------------------------------------|---|-------------|-------------|-------------|
| ENSMMUG0000003456  | glypican 4 [Source:VGNC Symbol;Acc:VGNC:73118]                                | - | 0.424353019 | 0.01147689  | 0.030480352 |
| ENSMMUG00000032341 | coiled-coil domain containing 160 [Source:VGNC Symbol;Acc:VGNC:70926]         | - | 0.632029926 | 3.43E-07    | 2.51E-06    |
| ENSMMUG00000059560 |                                                                               | - | 0.771743874 | 0.002363715 | 0.007695697 |
| ENSMMUG0000000466  | AF4/FMR2 family member 2 [Source:VGNC Symbol;Acc:VGNC:69773]                  | - | 0.582952591 | 1.76E-05    | 9.50E-05    |
| ENSMMUG00000022371 | myotubularin 1 [Source:VGNC Symbol;Acc:VGNC:75071]                            | - | -2.39389413 | 0.014413181 | 0.03696774  |
| ENSMMUG00000016610 | CD99 molecule like 2 [Source:VGNC Symbol;Acc:VGNC:70823]                      | - | 1.939368744 | 8.59E-10    | 9.50E-09    |
| ENSMMUG00000016929 | proline rich and Gla domain 3 [Source:VGNC Symbol;Acc:VGNC:76350]             | - | 2.256459409 | 1.47E-08    | 1.34E-07    |
| ENSMMUG00000063694 | cyclic nucleotide gated channel subunit alpha 2 [Source:NCBI gene;Acc:704486] | - | 1.21623626  | 1.28E-18    | 3.89E-17    |
| ENSMMUG00000062628 |                                                                               | - | 1.483123193 | 1.96E-08    | 1.76E-07    |
| ENSMMUG00000057473 |                                                                               | - | 0.782218645 | 0.002004602 | 0.006671509 |
| ENSMMUG00000040274 | MAGE family member A4 [Source:NCBI gene;Acc:710825]                           | - | 1.489533838 | 5.59E-19    | 1.73E-17    |
| ENSMMUG00000039292 |                                                                               | - | 1.959455501 | 2.37E-17    | 6.41E-16    |
| ENSMMUG00000062063 | melanoma-associated antigen 3 [Source:NCBI gene;Acc:711544]                   | - | 2.207126861 | 1.16E-35    | 2.04E-33    |
| ENSMMUG00000037641 | chondrosarcoma-associated gene 2/3 protein [Source:NCBI gene;Acc:106992305]   | - | 2.278508067 | 0.000549134 | 0.002115786 |
| ENSMMUG00000058013 | melanoma-associated antigen 3 [Source:NCBI gene;Acc:706103]                   | - | 2.081526023 | 1.45E-14    | 2.97E-13    |
| ENSMMUG00000040071 |                                                                               | - | 2.230997416 | 3.51E-06    | 2.14E-05    |
| ENSMMUG00000020743 | centrin 2 [Source:NCBI gene;Acc:693376]                                       | - | 1.479263735 | 0.01425633  | 0.036597086 |
| ENSMMUG00000013176 | NAD(P) dependent steroid dehydrogenase-like [Source:NCBI gene;Acc:693333]     | - | 2.468756761 | 5.97E-12    | 8.83E-11    |
| ENSMMUG00000010897 | PNMA family member 3 [Source:VGNC Symbol;Acc:VGNC:76063]                      | - | 0.835810716 | 6.67E-07    | 4.68E-06    |
| ENSMMUG00000064249 |                                                                               | - | 1.283037297 | 0.015903895 | 0.04022766  |
| ENSMMUG00000041072 |                                                                               | - | 1.160991431 | 0.00359381  | 0.011117271 |
| ENSMMUG00000061278 |                                                                               | - | 1.321451237 | 1.12E-06    | 7.54E-06    |
| ENSMMUG00000010137 | microcephalin 1 [Source:VGNC Symbol;Acc:VGNC:74687]                           | - | 2.545606303 | 1.42E-06    | 9.37E-06    |
| ENSMMUG00000010139 | angiopoietin 2 [Source:VGNC Symbol;Acc:VGNC:69811]                            | - | 3.328935636 | 0.005443228 | 0.015965796 |
| ENSMMUG00000053229 | defensin beta 1 [Source:NCBI gene;Acc:574187]                                 | - | 2.829665234 | 0.013014921 | 0.033921137 |
| ENSMMUG00000058176 | b-defensin2-like [Source:NCBI gene;Acc:100169969]                             | - | 2.914260578 | 6.76E-29    | 5.97E-27    |
| ENSMMUG00000063525 |                                                                               | - | 2.884966585 | 1.58E-16    | 3.88E-15    |
| ENSMMUG00000061302 |                                                                               | - | 2.370376847 | 0.006853574 | 0.019512095 |
| ENSMMUG00000054960 |                                                                               | - | 2.229506364 | 7.73E-13    | 1.30E-11    |
| ENSMMUG00000027220 | microRNA 598 [Source:HGNC Symbol;Acc:HGNC:32854]                              | - | 2.577124616 | 0.007116394 | 0.02015202  |
| ENSMMUG00000010180 | PIN2 (TERF1) interacting telomerase inhibitor 1 [Source:NCBI gene;Acc:701523] | - | 2.413329962 | 9.70E-14    | 1.81E-12    |
| ENSMMUG00000008867 | exoribonuclease 1 [Source:VGNC Symbol;Acc:VGNC:72324]                         | - | -2.47219715 | 2.33E-05    | 0.000121864 |
| ENSMMUG00000055078 | Small nucleolar RNA U3 [Source:RFAM;Acc:RF00012]                              | - | 2.802239545 | 0.014033382 | 0.036156194 |
| ENSMMUG00000007068 | tumor suppressor candidate 3 [Source:VGNC Symbol;Acc:VGNC:84132]              | - | 3.802132223 | 3.51E-07    | 2.56E-06    |
| ENSMMUG00000001873 | CCR4-NOT transcription complex subunit 7 [Source:VGNC Symbol;Acc:VGNC:83990]  | - | 2.521453715 | 0.016220941 | 0.040917938 |
| ENSMMUG00000022303 | solute carrier family 7 member 2 [Source:VGNC Symbol;Acc:VGNC:77629]          | - | 0.762062462 | 4.25E-09    | 4.22E-08    |
| ENSMMUG00000001151 | microtubule associated scaffold protein 1 [Source:VGNC Symbol;Acc:VGNC:84018] | - | 2.03632505  | 4.11E-28    | 3.38E-26    |
| ENSMMUG00000005920 | N-acetyltransferase 1 [Source:VGNC Symbol;Acc:VGNC:75133]                     | - | 3.029765914 | 5.57E-06    | 3.28E-05    |
| ENSMMUG00000011774 | integrator complex subunit 10 [Source:VGNC Symbol;Acc:VGNC:73653]             | - | 1.440869402 | 5.84E-34    | 8.90E-32    |
| ENSMMUG00000023361 | GDNF family receptor alpha 2 [Source:VGNC Symbol;Acc:VGNC:72918]              | - | 0.862634016 | 0.00045174  | 0.001774652 |
| ENSMMUG00000002032 | exportin 7 [Source:VGNC Symbol;Acc:VGNC:78946]                                | - | 1.213808068 | 8.51E-06    | 4.84E-05    |
| ENSMMUG00000063764 |                                                                               | - | 1.831270723 | 0.000457315 | 0.001794176 |

|                    |                                                                                     |             |             |             |
|--------------------|-------------------------------------------------------------------------------------|-------------|-------------|-------------|
| ENSMMUG00000013028 | leucine rich repeat LGI family member 3 [Source:VGNC Symbol;Acc:VGNC:74079]         | 1.261838021 | 0.018193753 | 0.045063964 |
| ENSMMUG00000013029 | surfactant protein C [Source:VGNC Symbol;Acc:VGNC:84113]                            | 2.415544552 | 2.30E-11    | 3.14E-10    |
| ENSMMUG00000013031 | bone morphogenetic protein 1 [Source:VGNC Symbol;Acc:VGNC:70259]                    | 1.115662245 | 1.35E-08    | 1.24E-07    |
| ENSMMUG00000013032 | phytanoyl-CoA 2-hydroxylase interacting protein [Source:VGNC Symbol;Acc:VGNC:75812] | 1.328676588 | 2.32E-09    | 2.40E-08    |
| ENSMMUG00000023226 | RNA polymerase III subunit D [Source:VGNC Symbol;Acc:VGNC:76017]                    | 1.119632292 | 3.81E-12    | 5.80E-11    |
| ENSMMUG00000052651 | Metazoan signal recognition particle RNA [Source:RFAM;Acc:RF00017]                  | 1.319919042 | 1.51E-08    | 1.37E-07    |
| ENSMMUG00000014438 | piwi like RNA-mediated gene silencing 2 [Source:VGNC Symbol;Acc:VGNC:81502]         | 1.169667145 | 5.89E-14    | 1.13E-12    |
| ENSMMUG00000017713 | solute carrier family 39 member 14 [Source:VGNC Symbol;Acc:VGNC:77537]              | 0.696216251 | 0.019629711 | 0.048073672 |
| ENSMMUG00000018345 | phosphatidylethanolamine binding protein 4 [Source:VGNC Symbol;Acc:VGNC:82204]      | 2.457886641 | 2.68E-26    | 1.84E-24    |
| ENSMMUG00000050868 |                                                                                     | 1.568297221 | 0.001422538 | 0.004924345 |
| ENSMMUG00000007540 | Rho related BTB domain containing 2 [Source:VGNC Symbol;Acc:VGNC:76772]             | 1.265134949 | 2.51E-07    | 1.89E-06    |
| ENSMMUG00000048076 | TNF receptor superfamily member 10b [Source:NCBI gene;Acc:716650]                   | 1.509806681 | 1.47E-14    | 3.01E-13    |
| ENSMMUG00000016655 | R3H domain and coiled-coil containing 1 [Source:VGNC Symbol;Acc:VGNC:76551]         | 1.526574689 | 1.28E-07    | 1.02E-06    |
| ENSMMUG00000056749 | Metazoan signal recognition particle RNA [Source:RFAM;Acc:RF00017]                  | 3.445296967 | 1.76E-06    | 1.15E-05    |
| ENSMMUG00000050549 | lysyl oxidase like 2 [Source:NCBI gene;Acc:710151]                                  | 2.633165623 | 3.28E-27    | 2.55E-25    |
| ENSMMUG00000046186 | stanniocalcin 1 [Source:VGNC Symbol;Acc:VGNC:84120]                                 | 2.948967302 | 0.000160048 | 0.000695637 |
| ENSMMUG00000003348 | neurofilament light [Source:VGNC Symbol;Acc:VGNC:75307]                             | 2.122213072 | 1.73E-23    | 9.18E-22    |
| ENSMMUG00000056605 | Metazoan signal recognition particle RNA [Source:RFAM;Acc:RF00017]                  | 2.46873202  | 1.81E-05    | 9.70E-05    |
| ENSMMUG00000008028 | dedicator of cytokinesis 5 [Source:VGNC Symbol;Acc:VGNC:83995]                      | 0.725653372 | 0.00146784  | 0.005058812 |
| ENSMMUG00000059181 |                                                                                     | 1.163211778 | 3.44E-05    | 0.000173236 |
| ENSMMUG00000016019 | PDZ binding kinase [Source:VGNC Symbol;Acc:VGNC:75643]                              | 2.306239829 | 0.005585978 | 0.016329599 |
| ENSMMUG00000022044 | scavenger receptor class A member 5 [Source:VGNC Symbol;Acc:VGNC:77117]             | 1.130650258 | 8.86E-14    | 1.66E-12    |
| ENSMMUG00000005067 | elongator acetyltransferase complex subunit 3 [Source:VGNC Symbol;Acc:VGNC:72080]   | 2.034170302 | 2.01E-10    | 2.45E-09    |
| ENSMMUG00000007480 | F-box protein 16 [Source:NCBI gene;Acc:106999728]                                   | 0.924638084 | 7.59E-05    | 0.00035471  |
| ENSMMUG00000017700 | exostosin like glycosyltransferase 3 [Source:VGNC Symbol;Acc:VGNC:72452]            | 0.780406482 | 0.00066074  | 0.002489526 |
| ENSMMUG00000014981 | homeobox containing 1 [Source:VGNC Symbol;Acc:VGNC:73443]                           | 0.915050198 | 5.48E-07    | 3.89E-06    |
| ENSMMUG00000039515 | kinesin family member 13B [Source:NCBI gene;Acc:100429368]                          | 1.746615272 | 0.000324452 | 0.001318615 |
| ENSMMUG00000000458 | RNA binding protein, mRNA processing factor [Source:VGNC Symbol;Acc:VGNC:76510]     | 0.811024236 | 0.00023604  | 0.000991075 |
| ENSMMUG00000064702 |                                                                                     | 1.784235741 | 0.000839417 | 0.003072957 |
| ENSMMUG00000020819 | protein phosphatase 2 catalytic subunit beta [Source:VGNC Symbol;Acc:VGNC:76373]    | 1.557958483 | 0.000530271 | 0.002048427 |
| ENSMMUG00000061408 |                                                                                     | 2.850041195 | 0.000101775 | 0.000464595 |
| ENSMMUG00000063345 |                                                                                     | 3.228311217 | 8.71E-07    | 5.97E-06    |
| ENSMMUG00000010638 | unc-5 netrin receptor D [Source:VGNC Symbol;Acc:VGNC:79158]                         | 2.183316922 | 0.018450681 | 0.045603932 |
| ENSMMUG00000034978 | U6 spliceosomal RNA [Source:RFAM;Acc:RF00026]                                       | 2.340952609 | 0.003517572 | 0.01090874  |
| ENSMMUG00000001635 | zinc finger protein 703 [Source:VGNC Symbol;Acc:VGNC:79552]                         | 1.00643866  | 5.06E-05    | 0.00024581  |
| ENSMMUG00000051162 |                                                                                     | 1.946199032 | 0.018006792 | 0.044696488 |
| ENSMMUG00000003591 | pleckstrin homology domain containing A2 [Source:VGNC Symbol;Acc:VGNC:76026]        | 2.116374316 | 9.27E-10    | 1.02E-08    |

|                    |                                                                                                  |             |             |             |
|--------------------|--------------------------------------------------------------------------------------------------|-------------|-------------|-------------|
| ENSMMUG0000006037  | HtrA serine peptidase 4 [Source:VGNC Symbol;Acc:VGNC:73447]                                      | 3.14995069  | 0.006952006 | 0.01976198  |
| ENSMMUG00000019304 | indoleamine 2,3-dioxygenase 1 [Source:VGNC Symbol;Acc:VGNC:73580]                                | 3.113225682 | 6.58E-21    | 2.56E-19    |
| ENSMMUG00000000346 | succinate dehydrogenase cytochrome b560 subunit, mitochondrial [Source:NCBI gene;Acc:702309]     | 2.63972011  | 0.005473215 | 0.016041063 |
| ENSMMUG00000019306 | indoleamine 2,3-dioxygenase 2 [Source:VGNC Symbol;Acc:VGNC:84005]                                | 3.349937185 | 4.83E-07    | 3.46E-06    |
| ENSMMUG00000000776 | zinc finger matrin-type 4 [Source:VGNC Symbol;Acc:VGNC:78424]                                    | 1.182248663 | 6.43E-08    | 5.34E-07    |
|                    |                                                                                                  | -           |             |             |
| ENSMMUG00000019082 | secreted frizzled related protein 1 [Source:VGNC Symbol;Acc:VGNC:77185]                          | 0.325957988 | 0.018531162 | 0.045749482 |
|                    |                                                                                                  | -           |             |             |
| ENSMMUG00000014721 | glycerol-3-phosphate acyltransferase 4 [Source:VGNC Symbol;Acc:VGNC:84002]                       | 1.113687713 | 9.36E-05    | 0.000429893 |
|                    |                                                                                                  | -           |             |             |
| ENSMMUG00000010891 | lysine acetyltransferase 6A [Source:VGNC Symbol;Acc:VGNC:73821]                                  | 1.284748174 | 1.91E-06    | 1.23E-05    |
| ENSMMUG00000014431 | adaptor related protein complex 3 subunit mu 2 [Source:VGNC Symbol;Acc:VGNC:69971]               | 0.525646228 | 5.63E-05    | 0.000270409 |
| ENSMMUG00000014432 | plasminogen activator, tissue type [Source:VGNC Symbol;Acc:VGNC:76161]                           | 0.722313199 | 8.14E-09    | 7.73E-08    |
| ENSMMUG00000020185 | voltage dependent anion channel 3 [Source:VGNC Symbol;Acc:VGNC:84135]                            | 1.912323561 | 5.09E-06    | 3.02E-05    |
| ENSMMUG00000020186 | solute carrier family 20 member 2 [Source:VGNC Symbol;Acc:VGNC:77416]                            | 1.335218714 | 0.000427403 | 0.001690237 |
| ENSMMUG00000053488 | small integral membrane protein 19 [Source:NCBI gene;Acc:705371]                                 | 0.930581885 | 5.29E-09    | 5.17E-08    |
| ENSMMUG00000053422 |                                                                                                  | 0.523044333 | 0.000153124 | 0.000668481 |
| ENSMMUG00000062518 |                                                                                                  | 1.724961188 | 0.00038931  | 0.001554515 |
|                    |                                                                                                  | -           |             |             |
| ENSMMUG00000002781 | peroxidase like [Source:VGNC Symbol;Acc:VGNC:84107]                                              | 0.400466959 | 0.006234778 | 0.017978175 |
| ENSMMUG00000065247 | opioid receptor kappa 1 [Source:NCBI gene;Acc:710783]                                            | 2.199896339 | 8.56E-26    | 5.45E-24    |
| ENSMMUG00000025039 | Small nucleolar RNA SNORA73 family [Source:RFAM;Acc:RF00045]                                     | 3.649110687 | 0.001164069 | 0.004127965 |
| ENSMMUG00000005478 | trimethylguanosine synthase 1 [Source:VGNC Symbol;Acc:VGNC:78404]                                | 1.393445485 | 2.20E-07    | 1.67E-06    |
| ENSMMUG00000014149 | LYN proto-oncogene, Src family tyrosine kinase [Source:VGNC Symbol;Acc:VGNC:74464]               | 1.340334778 | 1.37E-24    | 7.91E-23    |
| ENSMMUG00000055121 | Metazoan signal recognition particle RNA [Source:RFAM;Acc:RF00017]                               | 1.761486832 | 3.65E-18    | 1.07E-16    |
|                    |                                                                                                  | -           |             |             |
| ENSMMUG00000039862 | Metazoan signal recognition particle RNA [Source:RFAM;Acc:RF00017]                               | 1.788471508 | 0.001131854 | 0.00402624  |
|                    |                                                                                                  | -           |             |             |
| ENSMMUG00000061268 | PLAG1 zinc finger [Source:NCBI gene;Acc:696149]                                                  | 2.135135795 | 3.39E-12    | 5.22E-11    |
|                    |                                                                                                  | -           |             |             |
| ENSMMUG00000046464 | coiled-coil-helix-coiled-coil-helix domain containing 7 [Source:VGNC Symbol;Acc:VGNC:83989]      | 2.394198805 | 2.04E-15    | 4.49E-14    |
|                    |                                                                                                  | -           |             |             |
| ENSMMUG00000061068 |                                                                                                  | 1.743390501 | 6.41E-09    | 6.19E-08    |
|                    |                                                                                                  | -           |             |             |
| ENSMMUG00000014810 | short chain dehydrogenase/reductase family 16C member 5 [Source:VGNC Symbol;Acc:VGNC:77343]      | 1.899942992 | 1.49E-19    | 4.92E-18    |
|                    |                                                                                                  | -           |             |             |
| ENSMMUG00000052791 |                                                                                                  | 2.476864214 | 6.29E-21    | 2.47E-19    |
|                    |                                                                                                  | -           |             |             |
| ENSMMUG00000006775 | proenkephalin [Source:VGNC Symbol;Acc:VGNC:75941]                                                | 2.222454651 | 1.50E-14    | 3.08E-13    |
|                    |                                                                                                  | -           |             |             |
| ENSMMUG00000006543 | cytochrome P450, family 7, subfamily A, polypeptide 1 [Source:NCBI gene;Acc:698127]              | 3.569834334 | 0.003399746 | 0.010593475 |
| ENSMMUG00000017038 | RAB2A, member RAS oncogene family [Source:VGNC Symbol;Acc:VGNC:81529]                            | 0.547594668 | 0.000636096 | 0.002407684 |
|                    |                                                                                                  | -           |             |             |
| ENSMMUG00000006729 | YTH N6-methyladenosine RNA binding protein 3 [Source:VGNC Symbol;Acc:VGNC:79614]                 | 1.208221884 | 0.001963054 | 0.0065494   |
|                    |                                                                                                  | -           |             |             |
| ENSMMUG00000059575 |                                                                                                  | 2.465484538 | 1.65E-26    | 1.18E-24    |
|                    |                                                                                                  | -           |             |             |
| ENSMMUG00000038661 |                                                                                                  | 2.779353832 | 2.42E-23    | 1.26E-21    |
| ENSMMUG00000049866 |                                                                                                  | 0.801725021 | 1.89E-05    | 0.000100903 |
|                    |                                                                                                  | -           |             |             |
| ENSMMUG00000014424 | ADP ribosylation factor guanine nucleotide exchange factor 1 [Source:VGNC Symbol;Acc:VGNC:69834] | 1.604566552 | 0.004698878 | 0.014089033 |
|                    |                                                                                                  | -           |             |             |
| ENSMMUG00000008783 | solute carrier organic anion transporter family member 5A1 [Source:VGNC Symbol;Acc:VGNC:77736]   | 2.121111982 | 0.017106681 | 0.042773913 |
|                    |                                                                                                  | -           |             |             |
| ENSMMUG00000012513 | lactamase beta 2 [Source:VGNC Symbol;Acc:VGNC:74072]                                             | 1.242748664 | 0.000303515 | 0.001239296 |

|                    |                                                                                                      |   |             |             |             |
|--------------------|------------------------------------------------------------------------------------------------------|---|-------------|-------------|-------------|
| ENSMMUG00000045333 | Metazoan signal recognition particle RNA [Source:RFAM;Acc:RF00017]                                   | - | 0.620442427 | 0.001888772 | 0.006332917 |
| ENSMMUG0000007576  | EYA transcriptional coactivator and phosphatase 1 [Source:VGNC Symbol;Acc:VGNC:72453]                | - | 0.741682462 | 3.92E-11    | 5.23E-10    |
| ENSMMUG00000010748 | transient receptor potential cation channel subfamily A member 1 [Source:VGNC Symbol;Acc:VGNC:78429] | - | -1.04812775 | 0.000218441 | 0.000923457 |
| ENSMMUG00000053156 |                                                                                                      | - | 1.339266553 | 0.000396149 | 0.001580122 |
| ENSMMUG00000019414 | zinc finger homeobox 4 [Source:VGNC Symbol;Acc:VGNC:79902]                                           | - | 0.836426591 | 0.012777265 | 0.033407412 |
| ENSMMUG00000060062 |                                                                                                      | - | 2.073620025 | 0.019499822 | 0.047798738 |
| ENSMMUG00000064054 |                                                                                                      | - | 2.303012556 | 0.000781819 | 0.002887765 |
| ENSMMUG00000000507 | stathmin 2 [Source:VGNC Symbol;Acc:VGNC:78038]                                                       | - | 1.030138721 | 0.003165418 | 0.00995613  |
| ENSMMUG00000007115 | RALY RNA binding protein like [Source:VGNC Symbol;Acc:VGNC:82217]                                    | - | 1.097673735 | 0.001974577 | 0.006583404 |
| ENSMMUG00000028699 |                                                                                                      | - | 1.555585512 | 5.51E-05    | 0.00026523  |
| ENSMMUG00000063555 |                                                                                                      | - | 1.994370865 | 8.23E-05    | 0.00038228  |
| ENSMMUG00000028701 |                                                                                                      | - | 1.557626047 | 1.81E-08    | 1.63E-07    |
| ENSMMUG00000013193 | matrix metalloproteinase 16 [Source:VGNC Symbol;Acc:VGNC:74894]                                      | - | 0.898961533 | 3.15E-08    | 2.73E-07    |
| ENSMMUG00000020010 | cadherin 17 [Source:VGNC Symbol;Acc:VGNC:70810]                                                      | - | 3.589905208 | 0.016110971 | 0.040661282 |
| ENSMMUG00000021112 | epithelial splicing regulatory protein 1 [Source:VGNC Symbol;Acc:VGNC:72358]                         | - | 1.066515329 | 4.72E-08    | 3.98E-07    |
| ENSMMUG00000005356 | integrator complex subunit 8 [Source:VGNC Symbol;Acc:VGNC:73657]                                     | - | 2.47025133  | 7.57E-06    | 4.36E-05    |
| ENSMMUG00000057219 | tumor protein p53 inducible nuclear protein 1 [Source:NCBI gene;Acc:700632]                          | - | 3.861751662 | 7.39E-11    | 9.52E-10    |
| ENSMMUG00000003878 | carboxypeptidase Q [Source:VGNC Symbol;Acc:VGNC:71426]                                               | - | 1.187700143 | 0.002814456 | 0.008975996 |
| ENSMMUG00000055454 |                                                                                                      | - | 0.634598104 | 3.77E-07    | 2.74E-06    |
| ENSMMUG00000060329 |                                                                                                      | - | 0.65390074  | 0.000106512 | 0.000483493 |
| ENSMMUG00000061917 |                                                                                                      | - | 0.679880055 | 0.000148796 | 0.000651698 |
| ENSMMUG00000014210 | metadherin [Source:VGNC Symbol;Acc:VGNC:74859]                                                       | - | 0.618971173 | 9.25E-05    | 0.000425634 |
| ENSMMUG00000008926 | lysosomal protein transmembrane 4 beta [Source:VGNC Symbol;Acc:VGNC:84010]                           | - | 0.585988408 | 6.11E-05    | 0.000291701 |
| ENSMMUG00000060771 |                                                                                                      | - | 0.533947991 | 0.006399768 | 0.018386006 |
| ENSMMUG00000020072 | matrilin 2 [Source:VGNC Symbol;Acc:VGNC:74665]                                                       | - | 0.435462822 | 0.002973697 | 0.009426871 |
| ENSMMUG00000053292 | POP1 homolog, ribonuclease P/MRP subunit [Source:NCBI gene;Acc:705643]                               | - | 0.364185026 | 0.006053915 | 0.017521383 |
| ENSMMUG00000022185 | odd-skipped related transcription factor 2 [Source:VGNC Symbol;Acc:VGNC:84097]                       | - | 1.543549804 | 4.53E-10    | 5.23E-09    |
| ENSMMUG00000022186 | vacuolar protein sorting 13 homolog B [Source:VGNC Symbol;Acc:VGNC:79339]                            | - | 0.472204017 | 0.000585873 | 0.002234696 |
| ENSMMUG00000046389 | Metazoan signal recognition particle RNA [Source:RFAM;Acc:RF00017]                                   | - | 2.997468694 | 0.011234992 | 0.029934588 |
| ENSMMUG00000013742 | regulator of G protein signaling 22 [Source:VGNC Symbol;Acc:VGNC:82221]                              | - | 1.862071895 | 0.002033464 | 0.006749856 |
| ENSMMUG00000064531 | RNA polymerase II subunit K [Source:NCBI gene;Acc:708464]                                            | - | 3.075915434 | 0.005120066 | 0.015143713 |
| ENSMMUG00000004386 | sperm associated antigen 1 [Source:VGNC Symbol;Acc:VGNC:77849]                                       | - | 2.608718736 | 0.0001282   | 0.000570601 |
| ENSMMUG00000061687 |                                                                                                      | - | 2.349461508 | 1.80E-05    | 9.65E-05    |
| ENSMMUG00000004387 | ring finger protein 19A, RBR E3 ubiquitin protein ligase [Source:VGNC Symbol;Acc:VGNC:82224]         | - | 1.786960202 | 1.76E-07    | 1.36E-06    |
| ENSMMUG00000051088 |                                                                                                      | - | -2.21874124 | 1.38E-06    | 9.17E-06    |

|                    |                                                                                          |   |             |             |             |
|--------------------|------------------------------------------------------------------------------------------|---|-------------|-------------|-------------|
| ENSMMUG0000009958  | ankyrin repeat domain 46 [Source:VGNC Symbol;Acc:VGNC:69719]                             | - | 2.448160772 | 5.19E-10    | 5.94E-09    |
| ENSMMUG00000034608 | U6 spliceosomal RNA [Source:RFAM;Acc:RF00026]                                            | - | 1.079200843 | 6.38E-05    | 0.000303268 |
| ENSMMUG00000017786 | poly(A) binding protein cytoplasmic 1 [Source:VGNC Symbol;Acc:VGNC:84098]                | - | 0.313155696 | 0.006206852 | 0.017904614 |
| ENSMMUG00000051999 |                                                                                          | - | 1.360959244 | 8.92E-05    | 0.000411529 |
| ENSMMUG00000001338 | antizyme inhibitor 1 [Source:VGNC Symbol;Acc:VGNC:70080]                                 | - | 4.033712213 | 2.03E-06    | 1.30E-05    |
| ENSMMUG00000040361 | ATPase H+ transporting V1 subunit C1 [Source:NCBI gene;Acc:693840]                       | - | 2.111926316 | 9.19E-05    | 0.000422659 |
| ENSMMUG00000052440 |                                                                                          | - | 4.652006116 | 2.77E-05    | 0.00014269  |
| ENSMMUG00000054357 |                                                                                          | - | 2.960209342 | 0.000610146 | 0.002318452 |
| ENSMMUG00000056520 |                                                                                          | - | 2.760160261 | 0.006699665 | 0.019129001 |
| ENSMMUG00000010744 |                                                                                          | - | 1.881451082 | 0.00215865  | 0.00709798  |
| ENSMMUG00000011359 | eukaryotic translation initiation factor 3 subunit E [Source:VGNC Symbol;Acc:VGNC:83997] | - | 1.053018791 | 5.13E-05    | 0.000248559 |
| ENSMMUG00000003435 | transcriptional repressor GATA binding 1 [Source:VGNC Symbol;Acc:VGNC:78656]             | - | 0.704349233 | 0.001517276 | 0.005208613 |
| ENSMMUG00000001087 |                                                                                          | - | 0.870301403 | 0.013669765 | 0.035410065 |
| ENSMMUG00000056417 |                                                                                          | - | 1.653186257 | 0.006035891 | 0.017476036 |
| ENSMMUG00000002068 | mediator complex subunit 30 [Source:VGNC Symbol;Acc:VGNC:74556]                          | - | 3.080167824 | 0.010405971 | 0.027987042 |
| ENSMMUG00000004846 | sterile alpha motif domain containing 12 [Source:VGNC Symbol;Acc:VGNC:77145]             | - | 0.883184421 | 0.013735748 | 0.035543734 |
| ENSMMUG00000053962 |                                                                                          | - | 1.172935125 | 0.003250314 | 0.010203673 |
| ENSMMUG00000024448 |                                                                                          | - | 2.138119328 | 0.002915331 | 0.009271791 |
| ENSMMUG00000057685 | Small nucleolar RNA SNORD55/SNORD39 [Source:RFAM;Acc:RF00157]                            | - | 1.865961563 | 0.010855024 | 0.029010634 |
| ENSMMUG00000014702 | TATA-box binding protein associated factor 2 [Source:VGNC Symbol;Acc:VGNC:78090]         | - | 0.935673573 | 0.000960568 | 0.003471057 |
| ENSMMUG00000058797 |                                                                                          | - | 0.909519213 | 1.69E-08    | 1.53E-07    |
| ENSMMUG00000052557 |                                                                                          | - | 0.381705647 | 0.000237672 | 0.000997298 |
| ENSMMUG00000021157 | TBC1 domain family member 31 [Source:VGNC Symbol;Acc:VGNC:84121]                         | - | 2.24884845  | 0.003339787 | 0.010433757 |
| ENSMMUG00000020467 | ATPase family AAA domain containing 2 [Source:VGNC Symbol;Acc:VGNC:70154]                | - | 0.324886373 | 0.015766589 | 0.03990758  |
| ENSMMUG00000028923 | WDYHV motif containing 1 [Source:VGNC Symbol;Acc:VGNC:79503]                             | - | 0.38335169  | 0.002159069 | 0.00709798  |
| ENSMMUG00000047542 | U4 spliceosomal RNA [Source:RFAM;Acc:RF00015]                                            | - | 1.592438217 | 0.001280952 | 0.004493025 |
| ENSMMUG00000059929 | Small nucleolar RNA U3 [Source:RFAM;Acc:RF00012]                                         | - | 2.058123067 | 0.002937707 | 0.00932895  |
| ENSMMUG00000016375 | fer-1 like family member 6 [Source:VGNC Symbol;Acc:VGNC:72585]                           | - | -0.47411819 | 0.000165415 | 0.00071707  |
| ENSMMUG00000054755 | transmembrane protein 65 [Source:NCBI gene;Acc:705727]                                   | - | 2.694151081 | 2.80E-16    | 6.71E-15    |
| ENSMMUG00000053001 |                                                                                          | - | 2.618498198 | 0.000991372 | 0.003575402 |
| ENSMMUG00000060708 |                                                                                          | - | 0.85579658  | 0.001648289 | 0.005598748 |
| ENSMMUG00000010440 | adenylate cyclase 8 [Source:VGNC Symbol;Acc:VGNC:69516]                                  | - | 0.949672643 | 1.17E-05    | 6.48E-05    |
| ENSMMUG00000058106 | otoconin 90 [Source:NCBI gene;Acc:100429699]                                             | - | 1.532624994 | 2.13E-24    | 1.20E-22    |

|                     |                                                                                                                                                      |             |             |             |
|---------------------|------------------------------------------------------------------------------------------------------------------------------------------------------|-------------|-------------|-------------|
| ENSMMUG00000012560  | HERV-H LTR-associating 1 [Source:NCBI gene;Acc:100430297]                                                                                            | 1.911490324 | 6.25E-22    | 2.78E-20    |
| ENSMMUG00000055934  |                                                                                                                                                      | 0.64022294  | 0.001515267 | 0.005202918 |
| ENSMMUG00000048066  | trafficking protein particle complex 9 [Source:NCBI gene;Acc:711466]                                                                                 | 1.364154551 | 1.73E-09    | 1.83E-08    |
| ENSMMUG00000062257  |                                                                                                                                                      | -           | -           | -           |
| ENSMMUG00000062257  |                                                                                                                                                      | 1.506388984 | 0.004819643 | 0.014401634 |
| ENSMMUG00000052421  |                                                                                                                                                      | -           | -           | -           |
| ENSMMUG00000052421  |                                                                                                                                                      | 0.952087665 | 0.002422744 | 0.007868878 |
| ENSMMUG00000059617  |                                                                                                                                                      | -           | -           | -           |
| ENSMMUG00000059617  |                                                                                                                                                      | 1.243790527 | 1.93E-08    | 1.74E-07    |
| ENSMMUG00000041901  | Metazoan signal recognition particle RNA [Source:RFAM;Acc:RF00017]                                                                                   | -           | -           | -           |
| ENSMMUG00000041901  |                                                                                                                                                      | 2.383242038 | 0.010397868 | 0.027970321 |
| ENSMMUG00000001432  | t-SNARE domain containing 1 [Source:NCBI gene;Acc:701269]                                                                                            | -           | -           | -           |
| ENSMMUG00000001432  |                                                                                                                                                      | 0.844561214 | 2.32E-07    | 1.75E-06    |
| ENSMMUG00000062642  |                                                                                                                                                      | -           | -           | -           |
| ENSMMUG00000062642  |                                                                                                                                                      | 1.345280034 | 4.53E-09    | 4.47E-08    |
| ENSMMUG00000049486  |                                                                                                                                                      | -           | -           | -           |
| ENSMMUG00000049486  |                                                                                                                                                      | 0.725453082 | 0.014226306 | 0.036538988 |
| ENSMMUG00000000959  | cytochrome P450, family 11, subfamily B, polypeptide 2 [Source:NCBI gene;Acc:695914]                                                                 | -           | -           | -           |
| ENSMMUG00000000959  |                                                                                                                                                      | 0.65825002  | 0.000105089 | 0.000477618 |
| ENSMMUG00000018500  | ZFP41 zinc finger protein [Source:NCBI gene;Acc:106999981]                                                                                           | 0.631280274 | 0.017149869 | 0.042853002 |
| ENSMMUG00000022933  | DNA topoisomerase I mitochondrial [Source:VGNC Symbol;Acc:VGNC:79821]                                                                                | 1.275611712 | 3.84E-17    | 1.01E-15    |
| ENSMMUG00000059932  | Metazoan signal recognition particle RNA [Source:RFAM;Acc:RF00017]                                                                                   | 1.346133351 | 0.000222103 | 0.000937066 |
| ENSMMUG00000010939  |                                                                                                                                                      | -           | -           | -           |
| ENSMMUG00000010939  | rhopilin Rho GTPase binding protein 1 [Source:VGNC Symbol;Acc:VGNC:76779]                                                                            | 0.757329507 | 6.80E-07    | 4.76E-06    |
| ENSMMUG00000001187  | mitogen-activated protein kinase 15 [Source:VGNC Symbol;Acc:VGNC:74570]                                                                              | 1.169077432 | 0.011334099 | 0.030171368 |
| ENSMMUG000000057609 |                                                                                                                                                      | -           | -           | -           |
| ENSMMUG000000057609 |                                                                                                                                                      | 0.553097386 | 0.018392997 | 0.045476517 |
| ENSMMUG00000013552  | scribble planar cell polarity protein [Source:HGNC Symbol;Acc:HGNC:30377]                                                                            | -           | -           | -           |
| ENSMMUG00000013552  |                                                                                                                                                      | 1.187332914 | 2.21E-18    | 6.59E-17    |
| ENSMMUG00000013558  | poly(U) binding splicing factor 60 [Source:VGNC Symbol;Acc:VGNC:84106]                                                                               | -           | -           | -           |
| ENSMMUG00000013558  |                                                                                                                                                      | 0.802735696 | 0.003208512 | 0.010085254 |
| ENSMMUG00000028891  | nuclear receptor binding protein 2 [Source:VGNC Symbol;Acc:VGNC:75437]                                                                               | 1.336959947 | 0.00873515  | 0.024105373 |
| ENSMMUG00000063093  | epiplakin 1 [Source:NCBI gene;Acc:699265]                                                                                                            | 0.457545635 | 2.02E-06    | 1.30E-05    |
| ENSMMUG00000000388  |                                                                                                                                                      | -           | -           | -           |
| ENSMMUG00000000388  | plectin [Source:VGNC Symbol;Acc:VGNC:76173]                                                                                                          | 0.627735949 | 6.08E-05    | 0.00029016  |
| ENSMMUG00000060194  | mml-mir-661 [Source:miRBase;Acc:MI0007902]                                                                                                           | -           | -           | -           |
| ENSMMUG00000060194  |                                                                                                                                                      | 2.076913412 | 0.001478425 | 0.005090559 |
| ENSMMUG00000061025  |                                                                                                                                                      | -           | -           | -           |
| ENSMMUG00000061025  |                                                                                                                                                      | 3.453015588 | 0.002682736 | 0.008604018 |
| ENSMMUG00000052917  |                                                                                                                                                      | -           | -           | -           |
| ENSMMUG00000052917  |                                                                                                                                                      | 0.451572328 | 0.004443254 | 0.013406604 |
| ENSMMUG00000021279  | zinc finger MYND-type containing 11 [Source:VGNC Symbol;Acc:VGNC:79060]                                                                              | 0.571566427 | 2.24E-06    | 1.43E-05    |
| ENSMMUG00000050907  |                                                                                                                                                      | -           | -           | -           |
| ENSMMUG00000050907  |                                                                                                                                                      | 1.177399919 | 3.52E-10    | 4.10E-09    |
| ENSMMUG00000049588  |                                                                                                                                                      | -           | -           | -           |
| ENSMMUG00000049588  |                                                                                                                                                      | 1.269424907 | 0.012001385 | 0.03168041  |
| ENSMMUG00000049879  |                                                                                                                                                      | -           | -           | -           |
| ENSMMUG00000049879  |                                                                                                                                                      | 3.390618872 | 0.017867267 | 0.044368984 |
| ENSMMUG00000053106  |                                                                                                                                                      | -           | -           | -           |
| ENSMMUG00000053106  |                                                                                                                                                      | 2.871898159 | 2.32E-22    | 1.08E-20    |
| ENSMMUG00000023282  | aldo-keto reductase family 1, member C1 (dihydrodiol dehydrogenase 1; 20-alpha (3-alpha)-hydroxysteroid dehydrogenase) [Source:NCBI gene;Acc:711198] | 2.442805423 | 2.14E-20    | 7.83E-19    |
| ENSMMUG00000000958  | aldo-keto reductase family 1, member C2 [Source:NCBI gene;Acc:711360]                                                                                | 2.734714473 | 3.79E-32    | 4.50E-30    |
| ENSMMUG00000063267  |                                                                                                                                                      | -           | -           | -           |
| ENSMMUG00000063267  | aldo-keto reductase family 1 member C15 [Source:NCBI gene;Acc:722496]                                                                                | 1.451446533 | 8.56E-05    | 0.000396751 |
| ENSMMUG00000001290  | ankyrin repeat and SOCS box containing 13 [Source:VGNC Symbol;Acc:VGNC:69865]                                                                        | -3.76542129 | 7.62E-05    | 0.000355776 |
| ENSMMUG00000015141  |                                                                                                                                                      | -           | -           | -           |
| ENSMMUG00000015141  | ankyrin repeat domain 16 [Source:NCBI gene;Acc:720787]                                                                                               | 2.358808067 | 2.99E-07    | 2.22E-06    |



|                    |                                                                                   |             |             |             |
|--------------------|-----------------------------------------------------------------------------------|-------------|-------------|-------------|
| ENSMMUG00000015143 | F-box DNA helicase 1 [Source:NCBI gene;Acc:720797]                                | 2.159281401 | 1.38E-08    | 1.27E-07    |
| ENSMMUG00000056045 |                                                                                   | -2.53568365 | 1.63E-09    | 1.73E-08    |
| ENSMMUG00000015149 | interleukin 15 receptor subunit alpha [Source:VGNC Symbol;Acc:VGNC:73711]         | 2.148078488 | 0.000146119 | 0.000640918 |
| ENSMMUG00000015151 | interleukin 2 receptor subunit alpha [Source:NCBI gene;Acc:574300]                | 2.285317556 | 4.77E-10    | 5.49E-09    |
| ENSMMUG00000054646 |                                                                                   | 3.954959026 | 0.000103377 | 0.000470848 |
| ENSMMUG00000061189 |                                                                                   | 0.654035261 | 5.96E-05    | 0.000285226 |
| ENSMMUG00000052242 |                                                                                   | 0.88271479  | 6.50E-05    | 0.000308291 |
| ENSMMUG00000064980 |                                                                                   | 2.104383893 | 2.23E-06    | 1.42E-05    |
| ENSMMUG00000037449 | CUGBP Elav-like family member 2 [Source:NCBI gene;Acc:714291]                     | 1.032978154 | 1.52E-05    | 8.28E-05    |
| ENSMMUG00000017145 | cell division cycle 123 [Source:VGNC Symbol;Acc:VGNC:70768]                       | -1.07391001 | 6.75E-07    | 4.73E-06    |
| ENSMMUG00000017164 | FERM domain containing 4A [Source:VGNC Symbol;Acc:VGNC:72786]                     | 0.494632321 | 0.018013038 | 0.044701029 |
| ENSMMUG00000017170 | cerebral dopamine neurotrophic factor [Source:VGNC Symbol;Acc:VGNC:71094]         | 0.652306862 | 7.87E-08    | 6.43E-07    |
| ENSMMUG00000017173 | heat shock protein family A (Hsp70) member 14 [Source:NCBI gene;Acc:697257]       | 2.239927589 | 2.30E-07    | 1.74E-06    |
| ENSMMUG00000017174 | suppressor of variegation 3-9 homolog 2 [Source:NCBI gene;Acc:697378]             | 3.457275622 | 0.001689508 | 0.005729567 |
| ENSMMUG00000017176 | DNA cross-link repair 1C [Source:NCBI gene;Acc:697493]                            | -3.65654635 | 0.001371923 | 0.004771485 |
| ENSMMUG00000011661 | integrin subunit alpha 8 [Source:VGNC Symbol;Acc:VGNC:73782]                      | 0.981114345 | 2.02E-07    | 1.55E-06    |
| ENSMMUG00000024234 | U6 spliceosomal RNA [Source:RFAM;Acc:RF00026]                                     | 2.120834085 | 2.86E-06    | 1.78E-05    |
| ENSMMUG00000016069 | cubilin [Source:VGNC Symbol;Acc:VGNC:82132]                                       | 3.779810171 | 1.34E-21    | 5.71E-20    |
| ENSMMUG00000010589 | nebulette [Source:VGNC Symbol;Acc:VGNC:75195]                                     | 0.782852529 | 2.63E-06    | 1.65E-05    |
| ENSMMUG00000038216 | chromosome 9 C10orf113 homolog [Source:NCBI gene;Acc:702996]                      | 1.008852251 | 0.003316843 | 0.010366445 |
| ENSMMUG00000023648 | protein AF-10 [Source:NCBI gene;Acc:709083]                                       | 0.344327441 | 0.018505609 | 0.045709224 |
| ENSMMUG00000002930 | G protein-coupled receptor 158 [Source:NCBI gene;Acc:707065]                      | 0.974456782 | 1.10E-06    | 7.45E-06    |
| ENSMMUG00000058873 |                                                                                   | 1.022614367 | 1.20E-05    | 6.68E-05    |
| ENSMMUG00000037243 | U6 spliceosomal RNA [Source:RFAM;Acc:RF00026]                                     | 1.518366332 | 5.09E-06    | 3.02E-05    |
| ENSMMUG00000016407 | microtubule associated serine/threonine kinase like [Source:NCBI gene;Acc:708134] | 1.177644529 | 0.00658557  | 0.018839507 |
| ENSMMUG00000016410 | acyl-CoA binding domain containing 5 [Source:VGNC Symbol;Acc:VGNC:69509]          | 0.829050098 | 0.00011193  | 0.000504687 |
| ENSMMUG00000051106 |                                                                                   | 0.922723523 | 0.007062392 | 0.020022036 |
| ENSMMUG00000020657 | patched domain containing 3 [Source:VGNC Symbol;Acc:VGNC:76310]                   | 0.896223466 | 6.37E-05    | 0.000303045 |
| ENSMMUG00000058108 | BMP and activin membrane bound inhibitor [Source:NCBI gene;Acc:710152]            | 1.656314001 | 3.34E-05    | 0.000168926 |
| ENSMMUG00000059681 |                                                                                   | 1.536475861 | 0.000435162 | 0.001716799 |
| ENSMMUG00000024540 | 5S ribosomal RNA [Source:RFAM;Acc:RF00001]                                        | 1.363257479 | 0.014199062 | 0.036500436 |
| ENSMMUG00000001374 | supervillin [Source:NCBI gene;Acc:695267]                                         | 1.577781876 | 9.92E-15    | 2.07E-13    |
| ENSMMUG00000050047 | Metazoan signal recognition particle RNA [Source:RFAM;Acc:RF00017]                | 1.058459054 | 1.10E-07    | 8.84E-07    |
| ENSMMUG00000021559 | junctional cadherin 5 associated [Source:VGNC Symbol;Acc:VGNC:73937]              | 1.860008548 | 0.014649235 | 0.037508315 |
| ENSMMUG00000041067 | Metazoan signal recognition particle RNA [Source:RFAM;Acc:RF00017]                | 0.995785822 | 0.014130304 | 0.036367997 |
| ENSMMUG00000040958 | lysozyme-like protein 1 [Source:NCBI gene;Acc:698176]                             | 0.928667604 | 2.45E-05    | 0.000127493 |
| ENSMMUG00000044214 |                                                                                   | 1.148634902 | 3.48E-10    | 4.07E-09    |

|                    |                                                                                          |             |             |             |
|--------------------|------------------------------------------------------------------------------------------|-------------|-------------|-------------|
| ENSMMUG0000007864  | zinc finger protein 438 [Source:NCBI gene;Acc:700170]                                    | 1.726417068 | 0.004398232 | 0.013292396 |
| ENSMMUG00000043648 |                                                                                          | 1.344341784 | 0.003717818 | 0.011443595 |
| ENSMMUG00000057199 |                                                                                          | 0.984037604 | 0.000862092 | 0.003145327 |
| ENSMMUG0000006713  | cyclin Y [Source:VGNC Symbol;Acc:VGNC:70840]                                             | 0.835368264 | 0.000275871 | 0.0011377   |
| ENSMMUG0000007426  | BMS1 ribosome biogenesis factor [Source:HGNC Symbol;Acc:HGNC:23505]                      | -0.60819095 | 0.00841115  | 0.023341572 |
| ENSMMUG00000054392 | zinc finger protein 239 [Source:NCBI gene;Acc:717737]                                    | 0.948433203 | 0.008540569 | 0.023643204 |
| ENSMMUG00000056797 |                                                                                          | 2.513434958 | 0.009646102 | 0.026219152 |
| ENSMMUG00000053760 |                                                                                          | 0.933936339 | 3.44E-05    | 0.000173236 |
| ENSMMUG00000060110 | pleckstrin homology domain-containing family B member 2 [Source:NCBI gene;Acc:720588]    | 1.491554796 | 0.011331237 | 0.030169165 |
| ENSMMUG00000057407 | dorsal root ganglia homeobox [Source:NCBI gene;Acc:719355]                               | -1.40061021 | 0.00180994  | 0.006096163 |
| ENSMMUG00000021308 | chromosome 9 C10orf71 homolog [Source:NCBI gene;Acc:710332]                              | 1.460535808 | 7.57E-07    | 5.26E-06    |
| ENSMMUG00000033001 | U6 spliceosomal RNA [Source:RFAM;Acc:RF00026]                                            | -1.07993269 | 1.29E-06    | 8.59E-06    |
| ENSMMUG00000055918 |                                                                                          | 2.552739385 | 0.000585579 | 0.00223415  |
| ENSMMUG00000058251 |                                                                                          | 1.853530308 | 0.003904758 | 0.011961899 |
| ENSMMUG00000018634 | methionine adenosyltransferase 1A [Source:VGNC Symbol;Acc:VGNC:74663]                    | 0.922679502 | 0.000143343 | 0.000629673 |
| ENSMMUG00000063666 |                                                                                          | 0.726454211 | 0.01312471  | 0.034153265 |
| ENSMMUG00000019780 | annexin A11 [Source:VGNC Symbol;Acc:VGNC:69946]                                          | 0.649567366 | 0.0130877   | 0.034072153 |
| ENSMMUG00000057196 | pulmonary surfactant-associated protein A [Source:NCBI gene;Acc:701715]                  | 2.350549398 | 3.99E-36    | 7.49E-34    |
| ENSMMUG00000051972 | zinc finger CCHC-type containing 24 [Source:NCBI gene;Acc:702083]                        | 3.867687442 | 5.23E-12    | 7.82E-11    |
| ENSMMUG00000049862 |                                                                                          | 1.182224795 | 2.02E-05    | 0.00010726  |
| ENSMMUG00000008790 | zinc finger MIZ-type containing 1 [Source:VGNC Symbol;Acc:VGNC:79036]                    | 0.867929039 | 3.12E-05    | 0.000158814 |
| ENSMMUG00000055601 |                                                                                          | 1.114400077 | 9.70E-24    | 5.23E-22    |
| ENSMMUG00000005514 | RNA polymerase III subunit A [Source:VGNC Symbol;Acc:VGNC:76138]                         | 0.720159607 | 2.20E-06    | 1.40E-05    |
| ENSMMUG00000009128 | discs large MAGUK scaffold protein 5 [Source:VGNC Symbol;Acc:VGNC:71921]                 | 0.643887658 | 9.01E-06    | 5.12E-05    |
| ENSMMUG00000050271 |                                                                                          | 0.600261483 | 0.014990412 | 0.038243216 |
| ENSMMUG00000053916 |                                                                                          | 0.973036593 | 4.63E-11    | 6.12E-10    |
| ENSMMUG00000050841 |                                                                                          | 0.625498121 | 0.003860068 | 0.011847023 |
| ENSMMUG00000021393 | calcium/calmodulin dependent protein kinase II gamma [Source:VGNC Symbol;Acc:VGNC:70525] | 1.932465407 | 3.47E-08    | 2.97E-07    |
| ENSMMUG00000004604 | zinc finger SWIM-type containing 8 [Source:VGNC Symbol;Acc:VGNC:79396]                   | 1.594911872 | 0.004421223 | 0.013348276 |
| ENSMMUG00000061526 | synaptopodin 2 like [Source:NCBI gene;Acc:714736]                                        | 1.384827255 | 1.18E-10    | 1.47E-09    |
| ENSMMUG00000013696 | myozenin 1 [Source:VGNC Symbol;Acc:VGNC:74951]                                           | 1.437593969 | 1.43E-09    | 1.53E-08    |
| ENSMMUG00000020402 | mitochondrial calcium uniporter [Source:VGNC Symbol;Acc:VGNC:74560]                      | 0.984938775 | 0.006577789 | 0.018824509 |
| ENSMMUG00000010431 | DnaJ heat shock protein family (Hsp40) member B12 [Source:NCBI gene;Acc:721891]          | 1.197464068 | 0.010597525 | 0.028414626 |
| ENSMMUG00000055226 | DNA damage inducible transcript 4 [Source:NCBI gene;Acc:715307]                          | 1.786244805 | 0.000801227 | 0.002948435 |
| ENSMMUG00000009479 | activating signal cointegrator 1 complex subunit 1 [Source:VGNC Symbol;Acc:VGNC:69896]   | 1.497589191 | 0.020193845 | 0.049288137 |
| ENSMMUG00000063113 |                                                                                          | 3.102504989 | 0.015908051 | 0.040231309 |
| ENSMMUG00000016652 | cell division cycle and apoptosis regulator 1 [Source:NCBI gene;Acc:693585]              | 0.87904492  | 1.26E-08    | 1.16E-07    |

|                     |                                                                                                                 |             |             |             |
|---------------------|-----------------------------------------------------------------------------------------------------------------|-------------|-------------|-------------|
| ENSMMUG00000023198  | tet methylcytosine dioxygenase 1 [Source:VGNC Symbol;Acc:VGNC:79811]                                            | 0.526178077 | 1.68E-05    | 9.10E-05    |
| ENSMMUG00000030532  | solute carrier family 25 member 16 [Source:NCBI gene;Acc:694145]                                                | 1.004657067 | 1.42E-08    | 1.30E-07    |
| ENSMMUG00000019703  | RUN and FYVE domain containing 2 [Source:VGNC Symbol;Acc:VGNC:77057]                                            | 1.188073095 | 1.24E-20    | 4.74E-19    |
| ENSMMUG00000050104  | Metazoan signal recognition particle RNA [Source:RFAM;Acc:RF00017]                                              | 1.266667683 | 1.71E-08    | 1.54E-07    |
| ENSMMUG00000009792  | heterogeneous nuclear ribonucleoprotein H3 [Source:VGNC Symbol;Acc:VGNC:73497]                                  | 0.715904477 | 0.000101816 | 0.000464595 |
| ENSMMUG00000016902  | catenin alpha 3 [Source:VGNC Symbol;Acc:VGNC:82131]                                                             | 0.546314929 | 0.004265852 | 0.012946629 |
| ENSMMUG00000053199  |                                                                                                                 | 0.576825665 | 0.004137544 | 0.0126099   |
| ENSMMUG00000059754  |                                                                                                                 | 0.836061012 | 0.000596296 | 0.002270365 |
| ENSMMUG00000009794  | protocadherin related 15 [Source:VGNC Symbol;Acc:VGNC:75608]                                                    | 1.017487058 | 1.34E-13    | 2.46E-12    |
|                     |                                                                                                                 | -           |             |             |
| ENSMMUG00000010844  | protein kinase cGMP-dependent 1 [Source:VGNC Symbol;Acc:VGNC:76419]                                             | 1.713780697 | 0.003864545 | 0.011855855 |
| ENSMMUG00000007078  | N-acylsphingosine amidohydrolase 2 [Source:NCBI gene;Acc:703913]                                                | -0.7162777  | 3.08E-10    | 3.64E-09    |
| ENSMMUG00000007081  | sphingomyelin synthase 1 [Source:VGNC Symbol;Acc:VGNC:77341]                                                    | 0.716976098 | 0.002364963 | 0.007698067 |
| ENSMMUG00000006414  | ATPase family AAA domain containing 1 [Source:NCBI gene;Acc:704809]                                             | 0.979516987 | 0.006469325 | 0.018564258 |
| ENSMMUG00000038485  | Metazoan signal recognition particle RNA [Source:RFAM;Acc:RF00017]                                              | 1.284642176 | 0.003016193 | 0.009529736 |
| ENSMMUG00000057042  |                                                                                                                 | 1.004199289 | 0.007055015 | 0.020004947 |
|                     |                                                                                                                 | -           |             |             |
| ENSMMUG00000014343  | lipase family member J [Source:VGNC Symbol;Acc:VGNC:74333]                                                      | 1.428301866 | 5.45E-05    | 0.000262754 |
|                     |                                                                                                                 | -           |             |             |
| ENSMMUG00000000470  | ankyrin repeat domain 22 [Source:VGNC Symbol;Acc:VGNC:69728]                                                    | 1.962192719 | 0.000579325 | 0.002214845 |
|                     |                                                                                                                 | -           |             |             |
| ENSMMUG000000061761 | interferon induced protein with tetratricopeptide repeats 2 [Source:NCBI gene;Acc:695452]                       | 1.031086448 | 0.002074439 | 0.006868482 |
|                     |                                                                                                                 | -           |             |             |
| ENSMMUG000000058942 |                                                                                                                 | 1.263661919 | 0.000783459 | 0.002893102 |
| ENSMMUG00000017533  | interferon induced protein with tetratricopeptide repeats 1 [Source:NCBI gene;Acc:695683]                       | 0.832550657 | 0.000419415 | 0.001662637 |
|                     |                                                                                                                 | -           |             |             |
| ENSMMUG00000059038  | 5-hydroxytryptamine receptor 7 [Source:NCBI gene;Acc:696317]                                                    | 1.427333065 | 9.10E-06    | 5.16E-05    |
|                     |                                                                                                                 | -           |             |             |
| ENSMMUG00000006628  | ribonuclease P/MRP subunit p30 [Source:VGNC Symbol;Acc:VGNC:77040]                                              | 2.204910144 | 0.000269253 | 0.001115369 |
| ENSMMUG00000038018  | polycomb group ring finger 5 [Source:NCBI gene;Acc:697020]                                                      | 2.505076049 | 7.32E-05    | 0.000343385 |
|                     |                                                                                                                 | -           |             |             |
| ENSMMUG00000000238  | HECT domain E3 ubiquitin protein ligase 2 [Source:VGNC Symbol;Acc:VGNC:73246]                                   | 2.229433185 | 7.35E-15    | 1.55E-13    |
|                     |                                                                                                                 | -           |             |             |
| ENSMMUG00000058603  |                                                                                                                 | 2.937449982 | 2.11E-08    | 1.89E-07    |
| ENSMMUG00000059608  | fibroblast growth factor binding protein 3 [Source:NCBI gene;Acc:697881]                                        | 1.336535936 | 2.22E-11    | 3.04E-10    |
| ENSMMUG00000017627  | B-TFIID TATA-box binding protein associated factor 1 [Source:VGNC Symbol;Acc:VGNC:70336]                        | 1.680531246 | 1.78E-34    | 2.87E-32    |
| ENSMMUG00000004816  | membrane associated ring-CH-type finger 5 [Source:VGNC Symbol;Acc:VGNC:74588]                                   | 1.325465087 | 2.62E-10    | 3.13E-09    |
| ENSMMUG00000023266  | kinesin family member 11 [Source:VGNC Symbol;Acc:VGNC:74030]                                                    | 1.014241263 | 0.002173297 | 0.007138426 |
| ENSMMUG00000058935  | Metazoan signal recognition particle RNA [Source:RFAM;Acc:RF00017]                                              | 1.774144279 | 0.00031022  | 0.001265282 |
| ENSMMUG000000049455 | Metazoan signal recognition particle RNA [Source:RFAM;Acc:RF00017]                                              | 2.221642816 | 0.009427248 | 0.025737498 |
| ENSMMUG00000011789  | hematopoietically expressed homeobox [Source:VGNC Symbol;Acc:VGNC:73376]                                        | 3.087640744 | 9.16E-34    | 1.33E-31    |
| ENSMMUG000000049508 |                                                                                                                 | 3.263381247 | 9.86E-13    | 1.63E-11    |
| ENSMMUG00000028000  | Y RNA [Source:RFAM;Acc:RF00019]                                                                                 | 3.650305426 | 1.26E-05    | 6.95E-05    |
| ENSMMUG00000052637  | Metazoan signal recognition particle RNA [Source:RFAM;Acc:RF00017]                                              | 3.423802466 | 3.56E-18    | 1.04E-16    |
| ENSMMUG00000010881  | cytochrome P450, family 26, subfamily A, polypeptide 1 [Source:NCBI gene;Acc:699519]                            | 1.286688577 | 0.002990686 | 0.009472849 |
| ENSMMUG00000006841  | myoferlin [Source:VGNC Symbol;Acc:VGNC:75061]                                                                   | 2.515670136 | 0.002584603 | 0.008325296 |
| ENSMMUG00000014715  | fragile site, folic acid type, rare, fra(10)(q23.3) or fra(10)(q24.2) candidate 1 [Source:NCBI gene;Acc:700389] | 3.129691413 | 3.28E-15    | 7.11E-14    |
|                     |                                                                                                                 | -           |             |             |
| ENSMMUG00000050975  |                                                                                                                 | 1.578359598 | 4.32E-08    | 3.65E-07    |
|                     |                                                                                                                 | -           |             |             |
| ENSMMUG00000008687  | B cell linker [Source:VGNC Symbol;Acc:VGNC:70306]                                                               | 0.662112355 | 9.36E-08    | 7.57E-07    |
| ENSMMUG00000001876  | phosphoinositide-3-kinase adaptor protein 1 [Source:VGNC Symbol;Acc:VGNC:75891]                                 | -1.083358   | 5.02E-07    | 3.59E-06    |

|                    |                                                                                                 |             |             |             |
|--------------------|-------------------------------------------------------------------------------------------------|-------------|-------------|-------------|
| ENSMMUG00000010427 | ligand dependent nuclear receptor corepressor [Source:NCBI gene;Acc:705646]                     | 0.661810116 | 0.000102581 | 0.000467797 |
| ENSMMUG00000010428 | slit guidance ligand 1 [Source:VGNC Symbol;Acc:VGNC:77643]                                      | 0.777911647 | 2.00E-18    | 6.00E-17    |
| ENSMMUG00000019634 | ribosomal RNA processing 12 homolog [Source:VGNC Symbol;Acc:VGNC:77122]                         | 0.408680618 | 0.002021481 | 0.006717677 |
| ENSMMUG00000052662 | Y RNA [Source:RFAM;Acc:RF00019]                                                                 | 1.406813474 | 0.001037412 | 0.003717936 |
| ENSMMUG00000015503 | zinc finger FYVE-type containing 27 [Source:VGNC Symbol;Acc:VGNC:79623]                         | 0.785865422 | 1.45E-12    | 2.34E-11    |
| ENSMMUG00000060995 |                                                                                                 | 2.199767123 | 0.013035592 | 0.033963076 |
| ENSMMUG00000020603 | pyridine nucleotide-disulphide oxidoreductase domain 2 [Source:NCBI gene;Acc:707797]            | 1.074231367 | 4.57E-20    | 1.62E-18    |
| ENSMMUG00000054904 | Metazoan signal recognition particle RNA [Source:RFAM;Acc:RF00017]                              | 1.288353109 | 4.81E-15    | 1.03E-13    |
| ENSMMUG00000020604 | HPS1 biogenesis of lysosomal organelles complex 3 subunit 1 [Source:VGNC Symbol;Acc:VGNC:73515] | 1.031317495 | 3.48E-10    | 4.07E-09    |
| ENSMMUG00000049770 | Metazoan signal recognition particle RNA [Source:RFAM;Acc:RF00017]                              | 1.002644393 | 0.001555468 | 0.005323698 |
| ENSMMUG00000020605 | heparanase 2 (inactive) [Source:NCBI gene;Acc:708795]                                           | 0.73354885  | 0.001085981 | 0.003876208 |
| ENSMMUG00000060230 | Metazoan signal recognition particle RNA [Source:RFAM;Acc:RF00017]                              | 0.92001164  | 0.000640719 | 0.002423945 |
| ENSMMUG00000010357 | cyclin and CBS domain divalent metal cation transport mediator 1 [Source:NCBI gene;Acc:708335]  | 1.369437922 | 1.92E-12    | 3.07E-11    |
| ENSMMUG00000023761 | ectonucleoside triphosphate diphosphohydrolase 7 [Source:VGNC Symbol;Acc:VGNC:72071]            | 1.169510582 | 2.21E-08    | 1.97E-07    |
| ENSMMUG00000063121 |                                                                                                 | 0.934427189 | 0.001229769 | 0.004331942 |
| ENSMMUG00000015117 | X-prolyl aminopeptidase 1 [Source:VGNC Symbol;Acc:VGNC:78810]                                   | 2.082476146 | 1.37E-09    | 1.47E-08    |
| ENSMMUG00000006233 | adducin 3 [Source:VGNC Symbol;Acc:VGNC:69531]                                                   | 1.944304705 | 7.37E-09    | 7.07E-08    |
| ENSMMUG00000063986 |                                                                                                 | 1.531614358 | 0.000568377 | 0.002175795 |
| ENSMMUG00000051414 | Metazoan signal recognition particle RNA [Source:RFAM;Acc:RF00017]                              | 1.150366112 | 0.001237842 | 0.004356241 |
| ENSMMUG00000014350 | MAX interactor 1, dimerization protein [Source:VGNC Symbol;Acc:VGNC:75087]                      | 1.174115572 | 2.15E-09    | 2.24E-08    |
| ENSMMUG00000007775 | survival motor neuron domain containing 1 [Source:NCBI gene;Acc:694761]                         | 1.642578704 | 2.99E-07    | 2.21E-06    |
| ENSMMUG00000057793 | dual specificity phosphatase 5 [Source:NCBI gene;Acc:698178]                                    | 2.413177769 | 0.00499184  | 0.014835468 |
| ENSMMUG00000007982 | structural maintenance of chromosomes 3 [Source:VGNC Symbol;Acc:VGNC:77769]                     | 1.258367419 | 0.00404664  | 0.012355707 |
| ENSMMUG00000017204 | programmed cell death 4 [Source:VGNC Symbol;Acc:VGNC:75794]                                     | -2.74901709 | 0.000139573 | 0.000614836 |
| ENSMMUG00000056056 |                                                                                                 | -3.08385595 | 0.001466404 | 0.005055037 |
| ENSMMUG00000017206 | SHOC2 leucine rich repeat scaffold protein [Source:VGNC Symbol;Acc:VGNC:81569]                  | 3.036496865 | 0.000139145 | 0.000613596 |
| ENSMMUG00000003548 | tectorin beta [Source:VGNC Symbol;Acc:VGNC:78306]                                               | 1.287083142 | 0.001040286 | 0.003726435 |
| ENSMMUG00000054123 | vesicle transport through interaction with t-SNAREs 1A [Source:NCBI gene;Acc:696654]            | 0.957491159 | 2.84E-07    | 2.11E-06    |
| ENSMMUG00000053789 |                                                                                                 | 1.181144192 | 7.81E-07    | 5.41E-06    |
| ENSMMUG00000001217 | caspase 7 [Source:VGNC Symbol;Acc:VGNC:70546]                                                   | 0.981602825 | 5.53E-05    | 0.000266035 |
| ENSMMUG00000055239 |                                                                                                 | 1.016091738 | 2.75E-12    | 4.30E-11    |
| ENSMMUG00000022514 | coiled-coil domain containing 186 [Source:VGNC Symbol;Acc:VGNC:70847]                           | 0.837937334 | 2.59E-08    | 2.28E-07    |
| ENSMMUG00000022524 | actin binding LIM protein 1 [Source:VGNC Symbol;Acc:VGNC:69587]                                 | 0.406578949 | 0.004621645 | 0.013891163 |
| ENSMMUG00000058240 |                                                                                                 | 1.954981396 | 3.08E-08    | 2.68E-07    |
| ENSMMUG00000015414 | family with sequence similarity 160 member B1 [Source:VGNC Symbol;Acc:VGNC:72403]               | 1.351195644 | 3.81E-07    | 2.77E-06    |
| ENSMMUG00000036145 | U6 spliceosomal RNA [Source:RFAM;Acc:RF00026]                                                   | 2.530523867 | 0.020059604 | 0.048984675 |
| ENSMMUG00000016663 | coiled-coil domain containing 172 [Source:VGNC Symbol;Acc:VGNC:70916]                           | 1.037546492 | 0.005669103 | 0.016534079 |

|                    |                                                                                                  |   |             |             |             |
|--------------------|--------------------------------------------------------------------------------------------------|---|-------------|-------------|-------------|
| ENSMMUG00000053348 | PDZ domain containing 8 [Source:NCBI gene;Acc:709084]                                            | - | 0.972983213 | 0.000189336 | 0.00081152  |
| ENSMMUG00000059847 |                                                                                                  | - | 0.719656033 | 0.017215146 | 0.042960428 |
| ENSMMUG00000021610 | regulator of G protein signaling 10 [Source:VGNC Symbol;Acc:VGNC:76915]                          |   | 2.547762222 | 1.83E-38    | 4.05E-36    |
| ENSMMUG00000054942 |                                                                                                  |   | 2.268826967 | 1.10E-10    | 1.39E-09    |
| ENSMMUG00000001472 | TIA1 cytotoxic granule associated RNA binding protein like 1 [Source:VGNC Symbol;Acc:VGNC:78354] |   | 2.344128804 | 2.64E-18    | 7.84E-17    |
| ENSMMUG00000009559 | minichromosome maintenance complex binding protein [Source:VGNC Symbol;Acc:VGNC:74583]           |   | 2.151374021 | 1.22E-11    | 1.73E-10    |
| ENSMMUG00000064321 |                                                                                                  |   | 1.960739809 | 3.25E-14    | 6.33E-13    |
| ENSMMUG00000064557 |                                                                                                  |   | 2.111482015 | 3.47E-24    | 1.93E-22    |
| ENSMMUG00000052711 |                                                                                                  | - | 0.861303526 | 6.96E-06    | 4.03E-05    |
| ENSMMUG00000021594 | arginyltransferase 1 [Source:VGNC Symbol;Acc:VGNC:70168]                                         |   | 2.802968393 | 0.002619701 | 0.008421887 |
| ENSMMUG00000023480 | IKAROS family zinc finger 5 [Source:VGNC Symbol;Acc:VGNC:73590]                                  |   | 1.797174388 | 4.12E-06    | 2.49E-05    |
| ENSMMUG0000000684  | acyl-CoA dehydrogenase short/branched chain [Source:VGNC Symbol;Acc:VGNC:81343]                  |   | 1.573248948 | 0.000787823 | 0.00290777  |
| ENSMMUG00000020346 | carboxypeptidase X, M14 family member 2 [Source:VGNC Symbol;Acc:VGNC:71596]                      |   | 1.526272799 | 2.88E-20    | 1.05E-18    |
| ENSMMUG00000058933 |                                                                                                  | - | 2.514798959 | 8.02E-07    | 5.54E-06    |
| ENSMMUG00000008539 | uroporphyrinogen III synthase [Source:VGNC Symbol;Acc:VGNC:78731]                                |   | 1.225307664 | 8.11E-09    | 7.71E-08    |
| ENSMMUG00000008541 | BRCA2 and CDKN1A interacting protein [Source:NCBI gene;Acc:699437]                               |   | 1.049123856 | 7.79E-08    | 6.38E-07    |
| ENSMMUG00000008542 | DEAH-box helicase 32 (putative) [Source:NCBI gene;Acc:695919]                                    |   | 0.905043682 | 0.00013348  | 0.000591959 |
| ENSMMUG00000035166 | U2 spliceosomal RNA [Source:RFAM;Acc:RF00004]                                                    |   | -1.43372377 | 0.000749159 | 0.002773347 |
| ENSMMUG00000044121 | marker of proliferation Ki-67 [Source:NCBI gene;Acc:697883]                                      |   | -0.6767984  | 0.000320429 | 0.001304049 |
| ENSMMUG00000064746 |                                                                                                  |   | -3.42611819 | 0.014188618 | 0.036492751 |
| ENSMMUG00000059108 |                                                                                                  | - | 1.974577034 | 0.002153549 | 0.007084547 |
| ENSMMUG00000059161 |                                                                                                  | - | 2.021573834 | 0.003157402 | 0.00993513  |
| ENSMMUG00000013653 | lysine demethylase 5A [Source:VGNC Symbol;Acc:VGNC:82169]                                        |   | 0.674577815 | 1.27E-11    | 1.80E-10    |
| ENSMMUG00000013894 | beta-1,4-N-acetyl-galactosaminyltransferase 3 [Source:VGNC Symbol;Acc:VGNC:70121]                |   | -1.24515079 | 0.00163418  | 0.005555912 |
| ENSMMUG00000018650 | WNK lysine deficient protein kinase 1 [Source:VGNC Symbol;Acc:VGNC:78960]                        |   | 0.520176513 | 0.003289345 | 0.010291346 |
| ENSMMUG00000007405 | FKBP prolyl isomerase 4 [Source:VGNC Symbol;Acc:VGNC:72664]                                      |   | -1.35192371 | 0.007694402 | 0.021586829 |
| ENSMMUG00000007411 | integrin alpha FG-GAP repeat containing 2 [Source:VGNC Symbol;Acc:VGNC:73690]                    |   | 1.807797823 | 1.10E-13    | 2.04E-12    |
| ENSMMUG00000007424 | nuclear receptor interacting protein 2 [Source:VGNC Symbol;Acc:VGNC:75448]                       |   | 1.657847124 | 2.86E-14    | 5.62E-13    |
| ENSMMUG00000037675 | testis expressed 52 [Source:NCBI gene;Acc:107000723]                                             |   | 1.431608005 | 1.00E-10    | 1.27E-09    |
| ENSMMUG00000061935 |                                                                                                  |   | 2.43476304  | 6.83E-13    | 1.16E-11    |
| ENSMMUG00000023583 | calcium release activated channel regulator 2A [Source:NCBI gene;Acc:709929]                     |   | 1.133200347 | 0.003691273 | 0.01137842  |
| ENSMMUG00000018273 | poly(ADP-ribose) polymerase family member 11 [Source:NCBI gene;Acc:721828]                       |   | 0.820076288 | 0.015019453 | 0.038297539 |
| ENSMMUG00000057580 |                                                                                                  | - | 1.015392044 | 0.001605794 | 0.005469435 |
| ENSMMUG00000008546 | cyclin D2 [Source:NCBI gene;Acc:710379]                                                          |   | 1.065529556 | 3.86E-05    | 0.000191667 |
| ENSMMUG00000064833 | fibroblast growth factor 23 [Source:NCBI gene;Acc:710643]                                        |   | 0.804368628 | 0.016481613 | 0.041455618 |

|                     |                                                                                            |             |             |             |
|---------------------|--------------------------------------------------------------------------------------------|-------------|-------------|-------------|
| ENSMMUG00000015189  | RAD51 associated protein 1 [Source:VGNC Symbol;Acc:VGNC:76497]                             | -1.17714961 | 8.69E-05    | 0.000402513 |
| ENSMMUG00000020811  | dual specificity tyrosine phosphorylation regulated kinase 4 [Source:NCBI gene;Acc:710999] | 0.773145792 | 0.0006071   | 0.002307947 |
| ENSMMUG00000020812  | A-kinase anchoring protein 3 [Source:VGNC Symbol;Acc:VGNC:69769]                           | -1.43659842 | 9.27E-05    | 0.000426175 |
| ENSMMUG00000020813  | NADH:ubiquinone oxidoreductase subunit A9 [Source:VGNC Symbol;Acc:VGNC:81480]              | -0.93218495 | 1.59E-05    | 8.62E-05    |
| ENSMMUG00000022893  | von Willebrand factor [Source:VGNC Symbol;Acc:VGNC:78778]                                  | 2.967769405 | 4.41E-09    | 4.37E-08    |
| ENSMMUG00000047465  | Metazoan signal recognition particle RNA [Source:RFAM;Acc:RF00017]                         | 4.950593274 | 2.13E-08    | 1.91E-07    |
| ENSMMUG00000004470  | CD9 molecule [Source:VGNC Symbol;Acc:VGNC:70787]                                           | 3.662878216 | 2.14E-08    | 1.91E-07    |
| ENSMMUG00000000375  | pleckstrin homology and RhoGEF domain containing G6 [Source:VGNC Symbol;Acc:VGNC:76110]    | 2.491834176 | 1.83E-36    | 3.52E-34    |
| ENSMMUG00000000377  | TNF receptor superfamily member 1A [Source:VGNC Symbol;Acc:VGNC:78589]                     | 1.143701334 | 0.01775442  | 0.044133097 |
| ENSMMUG000000053013 |                                                                                            | 2.059305705 | 1.75E-13    | 3.16E-12    |
| ENSMMUG00000014265  | TAP binding protein like [Source:NCBI gene;Acc:712626]                                     | 2.648526038 | 7.42E-21    | 2.88E-19    |
| ENSMMUG00000018679  | glyceraldehyde-3-phosphate dehydrogenase [Source:NCBI gene;Acc:574353]                     | 1.760483344 | 1.56E-07    | 1.22E-06    |
| ENSMMUG00000017619  | lysophosphatidic acid receptor 5 [Source:VGNC Symbol;Acc:VGNC:74277]                       | 1.273754495 | 5.79E-15    | 1.24E-13    |
| ENSMMUG00000016983  | acrosin binding protein [Source:VGNC Symbol;Acc:VGNC:69445]                                | 1.391330464 | 1.96E-13    | 3.52E-12    |
| ENSMMUG00000050979  | PILR alpha associated neural protein [Source:NCBI gene;Acc:713548]                         | 1.511100396 | 0.004761075 | 0.014255349 |
| ENSMMUG00000009583  | COP9 signalosome subunit 7A [Source:VGNC Symbol;Acc:VGNC:71185]                            | 1.65673147  | 6.14E-05    | 0.000292861 |
| ENSMMUG00000013202  | CD4 molecule [Source:NCBI gene;Acc:713807]                                                 | 0.493672224 | 0.003510006 | 0.01088983  |
| ENSMMUG00000005189  | prolyl 3-hydroxylase 3 [Source:VGNC Symbol;Acc:VGNC:75650]                                 | 0.401209609 | 0.019846002 | 0.048534994 |
| ENSMMUG00000005192  | ubiquitin specific peptidase 5 [Source:VGNC Symbol;Acc:VGNC:78747]                         | 0.31646786  | 0.015105956 | 0.038471807 |
| ENSMMUG00000009443  | enolase 2 [Source:VGNC Symbol;Acc:VGNC:72219]                                              | 1.902921434 | 0.004177193 | 0.012713634 |
| ENSMMUG00000010201  | atrophin 1 [Source:VGNC Symbol;Acc:VGNC:70157]                                             | 0.966568853 | 6.66E-05    | 0.000315211 |
| ENSMMUG00000010203  | protein tyrosine phosphatase non-receptor type 6 [Source:VGNC Symbol;Acc:VGNC:76607]       | 1.004360998 | 3.63E-05    | 0.00018171  |
| ENSMMUG00000012786  | complement C1s [Source:VGNC Symbol;Acc:VGNC:70297]                                         | 0.747023059 | 1.41E-06    | 9.30E-06    |
| ENSMMUG00000006470  | complement C1r subcomponent [Source:NCBI gene;Acc:722133]                                  | 1.372850956 | 4.38E-17    | 1.14E-15    |
| ENSMMUG00000022109  | CD163 molecule like 1 [Source:VGNC Symbol;Acc:VGNC:70914]                                  | 1.886176972 | 2.26E-21    | 9.35E-20    |
| ENSMMUG00000005150  | CD163 molecule [Source:VGNC Symbol;Acc:VGNC:70752]                                         | 2.130823917 | 3.72E-06    | 2.26E-05    |
| ENSMMUG000000057570 |                                                                                            | 3.537832699 | 1.17E-52    | 1.57E-49    |
| ENSMMUG00000048744  |                                                                                            | 1.794565629 | 5.78E-05    | 0.000276927 |
| ENSMMUG000000057785 |                                                                                            | 7.413054822 | 9.66E-22    | 4.20E-20    |
| ENSMMUG000000061774 | taste 2 receptor member 10 [Source:NCBI gene;Acc:717960]                                   | 1.895789438 | 0.009499509 | 0.02589188  |
| ENSMMUG000000050862 |                                                                                            | 1.411048645 | 1.90E-09    | 2.00E-08    |
| ENSMMUG00000018298  | killer cell lectin like receptor D1 [Source:NCBI gene;Acc:574145]                          | 3.342446733 | 4.47E-06    | 2.69E-05    |
| ENSMMUG00000015305  | C-type lectin domain family 2 member A [Source:VGNC Symbol;Acc:VGNC:71329]                 | 1.873181181 | 0.000101491 | 0.000463537 |
| ENSMMUG000000045446 |                                                                                            | 3.404992271 | 1.17E-05    | 6.51E-05    |
| ENSMMUG000000032892 | U6 spliceosomal RNA [Source:RFAM;Acc:RF00026]                                              | 1.993384908 | 1.22E-06    | 8.12E-06    |
| ENSMMUG000000044047 | killer cell lectin like receptor B1 [Source:NCBI gene;Acc:100430783]                       | 1.216526806 | 2.21E-05    | 0.000116429 |
| ENSMMUG000000056741 | ovostatin-like [Source:NCBI gene;Acc:722294]                                               | 2.884395506 | 8.82E-07    | 6.04E-06    |
| ENSMMUG000000003238 | pregnancy zone protein [Source:NCBI gene;Acc:100430319]                                    | -1.35348341 | 0.005349909 | 0.015726293 |
| ENSMMUG000000022680 | alpha-2-macroglobulin like 1 [Source:VGNC Symbol;Acc:VGNC:69507]                           | 1.762148233 | 1.01E-08    | 9.43E-08    |
| ENSMMUG000000022676 | ribosomal modification protein rimK like family member B [Source:NCBI gene;Acc:722261]     | 2.911075682 | 0.001638428 | 0.005567801 |

|                    |                                                                                                         |             |             |             |
|--------------------|---------------------------------------------------------------------------------------------------------|-------------|-------------|-------------|
| ENSMMUG00000013698 | C-type lectin domain containing 6A [Source:VGNC Symbol;Acc:VGNC:71179]                                  | -1.11861071 | 0.017728453 | 0.044075935 |
| ENSMMUG00000052134 |                                                                                                         | 1.359759265 | 0.000468781 | 0.001834308 |
| ENSMMUG00000060675 |                                                                                                         | 1.291572963 | 1.39E-09    | 1.49E-08    |
| ENSMMUG00000021005 | taste receptor type 2 member 50 [Source:NCBI gene;Acc:693513]                                           | 1.200840472 | 0.000123483 | 0.000551415 |
| ENSMMUG00000056428 | taste receptor type 2 member 20 [Source:NCBI gene;Acc:693643]                                           | 1.176730616 | 0.002122497 | 0.007001031 |
| ENSMMUG00000050696 | taste receptor type 2 member 31-like [Source:NCBI gene;Acc:693892]                                      | 1.227980879 | 6.62E-09    | 6.38E-08    |
| ENSMMUG00000054225 | taste receptor type 2 member 43 [Source:NCBI gene;Acc:694161]                                           | 1.811519819 | 3.92E-06    | 2.38E-05    |
| ENSMMUG00000042870 | Macaca mulatta taste receptor, type 2, member 46 (TAS2R46), mRNA. [Source:RefSeq mRNA;Acc:NM_001080757] | 1.134086928 | 0.001626159 | 0.005532448 |
|                    |                                                                                                         | -           |             |             |
| ENSMMUG00000023317 | LDL receptor related protein 6 [Source:VGNC Symbol;Acc:VGNC:74446]                                      | 0.902318929 | 0.00378256  | 0.011625371 |
|                    |                                                                                                         | -           |             |             |
| ENSMMUG00000019112 | glutamate ionotropic receptor NMDA type subunit 2B [Source:VGNC Symbol;Acc:VGNC:73283]                  | 0.495154788 | 3.52E-05    | 0.000176815 |
| ENSMMUG00000047247 | matrix Gla protein [Source:NCBI gene;Acc:574116]                                                        | 2.965641313 | 0.000206835 | 0.000879405 |
| ENSMMUG00000018030 | endoplasmic reticulum protein 27 [Source:VGNC Symbol;Acc:VGNC:72369]                                    | 1.964592933 | 1.48E-07    | 1.16E-06    |
| ENSMMUG00000053781 | Rho GDP dissociation inhibitor beta [Source:NCBI gene;Acc:702320]                                       | 2.4700581   | 6.26E-07    | 4.41E-06    |
| ENSMMUG00000050529 | phosphodiesterase 6H [Source:NCBI gene;Acc:700447]                                                      | 1.808019691 | 0.009603859 | 0.026126428 |
|                    |                                                                                                         | -           |             |             |
| ENSMMUG00000056014 | potassium inwardly rectifying channel subfamily J member 8 [Source:NCBI gene;Acc:706369]                | 1.360208331 | 0.011995567 | 0.031670689 |
| ENSMMUG00000049682 | Metazoan signal recognition particle RNA [Source:RFAM;Acc:RF00017]                                      | -2.33794212 | 0.001429001 | 0.00494103  |
|                    |                                                                                                         | -           |             |             |
| ENSMMUG00000048030 | ferritin, heavy polypeptide 1-like [Source:NCBI gene;Acc:707011]                                        | 2.135170246 | 0.017843692 | 0.04434014  |
|                    |                                                                                                         | -           |             |             |
| ENSMMUG00000020370 | SRY-box transcription factor 5 [Source:VGNC Symbol;Acc:VGNC:77843]                                      | 2.602289296 | 2.40E-05    | 0.000125048 |
|                    |                                                                                                         | -           |             |             |
| ENSMMUG00000057276 |                                                                                                         | 1.972716388 | 0.00155234  | 0.005314222 |
| ENSMMUG00000049874 |                                                                                                         | -2.24854008 | 0.005000547 | 0.014852415 |
| ENSMMUG00000038076 | Metazoan signal recognition particle RNA [Source:RFAM;Acc:RF00017]                                      | 0.913540247 | 0.005644476 | 0.016481113 |
| ENSMMUG00000060493 |                                                                                                         | 0.711205345 | 6.55E-06    | 3.81E-05    |
| ENSMMUG00000012223 | branched chain amino acid transaminase 1 [Source:VGNC Symbol;Acc:VGNC:70236]                            | 1.028217366 | 4.14E-14    | 8.00E-13    |
|                    |                                                                                                         | -           |             |             |
| ENSMMUG00000053657 |                                                                                                         | 2.288580072 | 0.001180586 | 0.004180536 |
| ENSMMUG00000039562 | basic helix-loop-helix family member e41 [Source:NCBI gene;Acc:709786]                                  | 0.285063822 | 0.009306248 | 0.025458707 |
| ENSMMUG00000018630 | sarcospan [Source:VGNC Symbol;Acc:VGNC:77887]                                                           | 0.404945593 | 0.001612847 | 0.005492198 |
| ENSMMUG00000050627 |                                                                                                         | 0.376164129 | 0.000288885 | 0.001183473 |
| ENSMMUG00000023128 | inositol 1,4,5-trisphosphate receptor type 2 [Source:VGNC Symbol;Acc:VGNC:73805]                        | 0.46179482  | 0.000103534 | 0.000471419 |
| ENSMMUG00000006468 | FGFR1 oncogene partner 2 [Source:VGNC Symbol;Acc:VGNC:72551]                                            | 1.493173048 | 2.46E-09    | 2.54E-08    |
| ENSMMUG00000003217 | transmembrane 7 superfamily member 3 [Source:VGNC Symbol;Acc:VGNC:79371]                                | 1.613281691 | 1.45E-19    | 4.79E-18    |
| ENSMMUG00000023248 | serine/threonine kinase 38 like [Source:VGNC Symbol;Acc:VGNC:78156]                                     | -1.39640294 | 1.92E-06    | 1.23E-05    |
|                    |                                                                                                         | -           |             |             |
| ENSMMUG00000023249 | aryl hydrocarbon receptor nuclear translocator like 2 [Source:NCBI gene;Acc:709547]                     | 0.983885287 | 2.64E-08    | 2.32E-07    |
| ENSMMUG00000021736 | single-pass membrane protein with coiled-coil domains 2 [Source:VGNC Symbol;Acc:VGNC:77808]             | 1.293552839 | 3.40E-12    | 5.23E-11    |
|                    |                                                                                                         | -           |             |             |
| ENSMMUG00000054181 |                                                                                                         | 1.420131848 | 0.012942704 | 0.033768525 |
|                    |                                                                                                         | -           |             |             |
| ENSMMUG00000053437 |                                                                                                         | 0.441119303 | 0.004809969 | 0.014378519 |
|                    |                                                                                                         | -           |             |             |
| ENSMMUG00000001361 | importin 8 [Source:VGNC Symbol;Acc:VGNC:73815]                                                          | 0.774292211 | 0.016892404 | 0.042366709 |
|                    |                                                                                                         | -           |             |             |
| ENSMMUG00000001359 | caprin family member 2 [Source:VGNC Symbol;Acc:VGNC:70599]                                              | 0.848010642 | 0.00099802  | 0.003597561 |
|                    |                                                                                                         | -           |             |             |
| ENSMMUG00000001357 | tetraspanin 11 [Source:VGNC Symbol;Acc:VGNC:79882]                                                      | 1.103863244 | 1.55E-13    | 2.82E-12    |
|                    |                                                                                                         | -           |             |             |
| ENSMMUG00000009155 | SIN3-HDAC complex associated factor [Source:NCBI gene;Acc:694162]                                       | 2.207431186 | 9.37E-07    | 6.39E-06    |

|                    |                                                                                 |   |             |             |             |
|--------------------|---------------------------------------------------------------------------------|---|-------------|-------------|-------------|
| ENSMMUG00000039300 |                                                                                 | - | 1.527978695 | 0.005387232 | 0.015826594 |
| ENSMMUG0000003221  | DENN domain containing 5B [Source:VGNC Symbol;Acc:VGNC:71772]                   | - | 0.968109957 | 0.000277037 | 0.001142192 |
| ENSMMUG00000063112 |                                                                                 | - | 1.849432139 | 3.16E-06    | 1.95E-05    |
| ENSMMUG00000013655 | dynamamin 1 like [Source:VGNC Symbol;Acc:VGNC:71956]                            | - | 1.515999295 | 0.001591384 | 0.005424091 |
| ENSMMUG00000060125 |                                                                                 | - | 2.742723827 | 0.007416712 | 0.020870937 |
| ENSMMUG00000021163 | contactin 1 [Source:VGNC Symbol;Acc:VGNC:71283]                                 | - | 0.454971028 | 2.40E-05    | 0.000125317 |
| ENSMMUG00000056303 |                                                                                 | - | -2.47229055 | 7.61E-06    | 4.37E-05    |
| ENSMMUG00000000205 | transmembrane protein 117 [Source:VGNC Symbol;Acc:VGNC:79488]                   | - | 1.223211354 | 5.12E-17    | 1.33E-15    |
| ENSMMUG00000015962 | AT-rich interaction domain 2 [Source:VGNC Symbol;Acc:VGNC:69858]                | - | 2.191432201 | 1.03E-17    | 2.88E-16    |
| ENSMMUG00000037874 | Metazoan signal recognition particle RNA [Source:RFAM;Acc:RF00017]              | - | 1.511384335 | 0.000237723 | 0.000997298 |
| ENSMMUG00000023791 | SR-related CTD associated factor 11 [Source:VGNC Symbol;Acc:VGNC:77002]         | - | 2.926818835 | 4.13E-06    | 2.49E-05    |
| ENSMMUG00000022359 | solute carrier family 38 member 2 [Source:VGNC Symbol;Acc:VGNC:77469]           | - | 0.796649636 | 0.010349855 | 0.027871499 |
| ENSMMUG00000064730 |                                                                                 | - | 2.845827604 | 3.48E-26    | 2.35E-24    |
| ENSMMUG00000012331 | solute carrier family 38 member 4 [Source:VGNC Symbol;Acc:VGNC:77484]           | - | 0.822807761 | 7.66E-05    | 0.000357686 |
| ENSMMUG00000049514 | solute carrier family 48 member 1 [Source:NCBI gene;Acc:704304]                 | - | 1.249417439 | 7.28E-09    | 6.99E-08    |
| ENSMMUG00000021655 | histone deacetylase 7 [Source:NCBI gene;Acc:718225]                             | - | 1.063600284 | 2.61E-13    | 4.58E-12    |
| ENSMMUG00000006727 | vitamin D receptor [Source:VGNC Symbol;Acc:VGNC:78764]                          | - | 0.66223989  | 6.75E-05    | 0.000318892 |
| ENSMMUG00000011441 | transmembrane protein 106C [Source:VGNC Symbol;Acc:VGNC:79741]                  | - | 2.706526215 | 0.000126887 | 0.000565423 |
| ENSMMUG00000020125 | SUMO specific peptidase 1 [Source:NCBI gene;Acc:707603]                         | - | 1.575175195 | 0.002161028 | 0.007099701 |
| ENSMMUG00000014484 | zinc finger protein 641 [Source:NCBI gene;Acc:708246]                           | - | 2.279038202 | 4.07E-16    | 9.54E-15    |
| ENSMMUG00000003877 | KAT8 regulatory NSL complex subunit 2 [Source:VGNC Symbol;Acc:VGNC:73910]       | - | 1.074996688 | 0.001726832 | 0.005842782 |
| ENSMMUG00000054025 | testis expressed 49 [Source:NCBI gene;Acc:709603]                               | - | 0.460213122 | 0.008803108 | 0.024270326 |
| ENSMMUG00000012769 | limb development membrane protein 1 like [Source:VGNC Symbol;Acc:VGNC:74310]    | - | -0.96996561 | 1.58E-06    | 1.03E-05    |
| ENSMMUG00000021081 | tubulin alpha 1b [Source:NCBI gene;Acc:709643]                                  | - | 0.900131904 | 0.000128393 | 0.00057128  |
| ENSMMUG00000028047 | Y RNA [Source:RFAM;Acc:RF00019]                                                 | - | 1.557600221 | 0.005328651 | 0.015673124 |
| ENSMMUG00000009788 | tubulin alpha-1C chain [Source:NCBI gene;Acc:710110]                            | - | 0.863060538 | 0.002294568 | 0.007488653 |
| ENSMMUG00000031976 | peripherin [Source:NCBI gene;Acc:709827]                                        | - | 0.765810851 | 0.013297949 | 0.034555562 |
| ENSMMUG00000007544 | trophinin associated protein [Source:VGNC Symbol;Acc:VGNC:78650]                | - | 0.912714388 | 0.000213295 | 0.000904796 |
| ENSMMUG00000007546 | complement C1q like 4 [Source:VGNC Symbol;Acc:VGNC:70450]                       | - | 1.284632433 | 5.95E-05    | 0.000284644 |
| ENSMMUG00000007548 | DnaJ heat shock protein family (Hsp40) member C22 [Source:NCBI gene;Acc:710205] | - | 1.109558489 | 0.003084905 | 0.009723517 |
| ENSMMUG00000064430 |                                                                                 | - | 0.941074154 | 4.22E-05    | 0.000207987 |
| ENSMMUG00000049374 |                                                                                 | - | 0.988892777 | 4.87E-08    | 4.10E-07    |
| ENSMMUG00000038256 | aquaporin 2 [Source:NCBI gene;Acc:711719]                                       | - | 1.043057252 | 2.37E-14    | 4.69E-13    |
| ENSMMUG00000021688 | aquaporin 6 [Source:VGNC Symbol;Acc:VGNC:69994]                                 | - | 1.946269939 | 0.011824335 | 0.031274279 |
| ENSMMUG00000021689 | Rac GTPase activating protein 1 [Source:NCBI gene;Acc:711887]                   | - | 0.720524974 | 2.56E-05    | 0.000132941 |
| ENSMMUG00000006529 | acid sensing ion channel subunit 1 [Source:VGNC Symbol;Acc:VGNC:70035]          | - | 1.099327797 | 0.006716535 | 0.0191661   |



|                    |                                                                                                                                       |             |             |             |
|--------------------|---------------------------------------------------------------------------------------------------------------------------------------|-------------|-------------|-------------|
| ENSMMUG00000006531 | SWI/SNF related, matrix associated, actin dependent regulator of chromatin, subfamily d, member 1 [Source:VGNC Symbol;Acc:VGNC:77653] | 0.981241412 | 0.000149212 | 0.000653134 |
| ENSMMUG00000018485 | methyltransferase like 7A [Source:VGNC Symbol;Acc:VGNC:74567]                                                                         | 1.577644709 | 0.000395361 | 0.001577401 |
| ENSMMUG00000027375 | Y RNA [Source:RFAM;Acc:RF00019]                                                                                                       | 1.264985072 | 0.000231603 | 0.00097465  |
| ENSMMUG00000022961 | solute carrier family 11 member 2 [Source:VGNC Symbol;Acc:VGNC:77383]                                                                 | 0.989648778 | 0.001957214 | 0.006531387 |
| ENSMMUG00000012453 | LETM1 domain containing 1 [Source:VGNC Symbol;Acc:VGNC:74109]                                                                         | 0.484864869 | 0.000285314 | 0.001171105 |
| ENSMMUG00000000152 | transcription factor CP2 [Source:VGNC Symbol;Acc:VGNC:78323]                                                                          | 1.800645684 | 0.000262463 | 0.001089371 |
| ENSMMUG00000004982 | activin A receptor like type 1 [Source:VGNC Symbol;Acc:VGNC:69451]                                                                    | 2.456973644 | 0.003590411 | 0.011109075 |
|                    |                                                                                                                                       | -           |             |             |
| ENSMMUG00000022922 | nuclear receptor subfamily 4 group A member 1 [Source:VGNC Symbol;Acc:VGNC:75517]                                                     | 0.301373557 | 0.005945441 | 0.017244352 |
| ENSMMUG00000010000 | keratin 7 [Source:VGNC Symbol;Acc:VGNC:74214]                                                                                         | -0.67994275 | 3.18E-09    | 3.23E-08    |
| ENSMMUG00000064514 | keratin, type II cuticular Hb1 [Source:NCBI gene;Acc:697511]                                                                          | -0.76140753 | 4.63E-06    | 2.77E-05    |
| ENSMMUG00000057841 | keratin 86 [Source:NCBI gene;Acc:697770]                                                                                              | 0.923517386 | 1.81E-05    | 9.71E-05    |
|                    |                                                                                                                                       | -           |             |             |
| ENSMMUG00000018217 | keratin 84 [Source:VGNC Symbol;Acc:VGNC:74220]                                                                                        | 1.155962578 | 0.000583428 | 0.002227086 |
| ENSMMUG00000018219 | keratin 75 [Source:VGNC Symbol;Acc:VGNC:74113]                                                                                        | 1.159027477 | 0.011802189 | 0.031237992 |
| ENSMMUG00000057134 | keratin, type II cytoskeletal 6C [Source:NCBI gene;Acc:100424162]                                                                     | 1.174964748 | 5.70E-06    | 3.36E-05    |
| ENSMMUG00000055016 | keratin, type II cytoskeletal 6A [Source:NCBI gene;Acc:719283]                                                                        | 0.793235938 | 1.40E-12    | 2.27E-11    |
| ENSMMUG00000014400 | keratin 71 [Source:VGNC Symbol;Acc:VGNC:74147]                                                                                        | 0.431114249 | 0.001431067 | 0.004947023 |
| ENSMMUG00000002304 | keratin 73 [Source:VGNC Symbol;Acc:VGNC:74148]                                                                                        | 1.305509661 | 3.14E-05    | 0.000159288 |
| ENSMMUG00000002305 | keratin 2 [Source:VGNC Symbol;Acc:VGNC:74212]                                                                                         | 0.893574519 | 0.013464238 | 0.03494481  |
| ENSMMUG00000016962 | keratin 1 [Source:VGNC Symbol;Acc:VGNC:74206]                                                                                         | 0.77378229  | 0.000185465 | 0.000796076 |
| ENSMMUG00000045353 | keratin, type II cytoskeletal 1b [Source:NCBI gene;Acc:718983]                                                                        | 0.742117487 | 0.007589592 | 0.021329098 |
|                    |                                                                                                                                       | -           |             |             |
| ENSMMUG00000014980 | keratin 76 [Source:VGNC Symbol;Acc:VGNC:74112]                                                                                        | 0.997951335 | 0.000574348 | 0.00219752  |
|                    |                                                                                                                                       | -           |             |             |
| ENSMMUG00000005246 | zinc finger protein 740 [Source:VGNC Symbol;Acc:VGNC:79665]                                                                           | 2.423545168 | 1.75E-11    | 2.43E-10    |
|                    |                                                                                                                                       | -           |             |             |
| ENSMMUG00000052817 | Sp7 transcription factor [Source:NCBI gene;Acc:702575]                                                                                | 1.621434926 | 0.001136123 | 0.004040457 |
| ENSMMUG00000020036 | Sp1 transcription factor [Source:VGNC Symbol;Acc:VGNC:77844]                                                                          | -1.69436394 | 3.49E-10    | 4.07E-09    |
| ENSMMUG00000018492 | TARBP2 subunit of RISC loading complex [Source:VGNC Symbol;Acc:VGNC:78099]                                                            | 2.145975925 | 1.39E-20    | 5.28E-19    |
| ENSMMUG00000022313 | activating transcription factor 7 [Source:NCBI gene;Acc:700403]                                                                       | 2.216343225 | 2.66E-20    | 9.70E-19    |
|                    |                                                                                                                                       | -           |             |             |
| ENSMMUG00000055610 | homeobox C4 [Source:NCBI gene;Acc:100430434]                                                                                          | 2.732844926 | 1.26E-21    | 5.43E-20    |
| ENSMMUG00000000108 | NCK associated protein 1 like [Source:VGNC Symbol;Acc:VGNC:75063]                                                                     | 3.512417843 | 0.000208095 | 0.000883747 |
| ENSMMUG00000052854 | mucin like 1 [Source:NCBI gene;Acc:100423942]                                                                                         | 1.750962671 | 1.75E-17    | 4.79E-16    |
| ENSMMUG00000016203 | thymocyte expressed, positive selection associated 1 [Source:VGNC Symbol;Acc:VGNC:79775]                                              | 0.501259438 | 0.001048693 | 0.003754734 |
| ENSMMUG00000055590 |                                                                                                                                       | -1.12539132 | 2.14E-09    | 2.23E-08    |
| ENSMMUG00000006293 | SAP domain containing ribonucleoprotein [Source:NCBI gene;Acc:709932]                                                                 | 1.109676682 | 3.26E-13    | 5.68E-12    |
| ENSMMUG00000053458 | ORMDL sphingolipid biosynthesis regulator 2 [Source:NCBI gene;Acc:710296]                                                             | 0.953237341 | 1.43E-13    | 2.60E-12    |
| ENSMMUG00000051937 | uncharacterized LOC707807 [Source:NCBI gene;Acc:707807]                                                                               | 0.808231075 | 0.001464219 | 0.005049853 |
| ENSMMUG00000006295 | matrix metalloproteinase 19 [Source:VGNC Symbol;Acc:VGNC:74896]                                                                       | 0.911436973 | 2.04E-06    | 1.31E-05    |
|                    |                                                                                                                                       | -           |             |             |
| ENSMMUG00000064364 | sulfite oxidase [Source:NCBI gene;Acc:711164]                                                                                         | 0.721868833 | 0.020433992 | 0.049727615 |
|                    |                                                                                                                                       | -           |             |             |
| ENSMMUG00000008273 | SWI/SNF related, matrix associated, actin dependent regulator of chromatin subfamily c member 2 [Source:VGNC Symbol;Acc:VGNC:77652]   | 1.391006342 | 0.020285894 | 0.049450352 |
| ENSMMUG00000064075 | ring finger protein 41 [Source:NCBI gene;Acc:711969]                                                                                  | -1.14954407 | 1.54E-05    | 8.39E-05    |
|                    |                                                                                                                                       | -           |             |             |
| ENSMMUG00000054020 | U6 spliceosomal RNA [Source:RFAM;Acc:RF00026]                                                                                         | 1.187076873 | 0.000332963 | 0.001349138 |
|                    |                                                                                                                                       | -           |             |             |
| ENSMMUG00000059663 |                                                                                                                                       | 1.254392665 | 4.81E-10    | 5.53E-09    |
|                    |                                                                                                                                       | -           |             |             |
| ENSMMUG00000031834 | coenzyme Q10A [Source:VGNC Symbol;Acc:VGNC:71356]                                                                                     | 1.271276328 | 0.000113868 | 0.000512026 |

|                    |                                                                                                  |             |             |             |
|--------------------|--------------------------------------------------------------------------------------------------|-------------|-------------|-------------|
| ENSMMUG0000002483  | citrate synthase [Source:VGNC Symbol;Acc:VGNC:71509]                                             | 1.672498753 | 8.74E-07    | 5.99E-06    |
| ENSMMUG00000013482 | poly(A) specific ribonuclease subunit PAN2 [Source:NCBI gene;Acc:712478]                         | 2.387071623 | 0.00018987  | 0.000813571 |
| ENSMMUG00000000803 | signal transducer and activator of transcription 2 [Source:VGNC Symbol;Acc:VGNC:77905]           | 2.454713759 | 6.03E-20    | 2.10E-18    |
| ENSMMUG00000063898 | apolipoprotein F [Source:NCBI gene;Acc:712761]                                                   | 2.807126941 | 9.52E-20    | 3.24E-18    |
| ENSMMUG00000053460 |                                                                                                  | 2.508059284 | 5.36E-17    | 1.38E-15    |
|                    |                                                                                                  | -           |             |             |
| ENSMMUG00000021878 | timeless circadian regulator [Source:VGNC Symbol;Acc:VGNC:78356]                                 | 1.116003436 | 1.08E-07    | 8.68E-07    |
| ENSMMUG00000013766 | prostaglandin E synthase 3 [Source:NCBI gene;Acc:713353]                                         | 1.421787934 | 8.26E-16    | 1.89E-14    |
| ENSMMUG00000004522 | DNA primase subunit 1 [Source:NCBI gene;Acc:710253]                                              | 0.699005261 | 5.52E-10    | 6.29E-09    |
| ENSMMUG00000057617 | hydroxysteroid 17-beta dehydrogenase 6 [Source:NCBI gene;Acc:713549]                             | 0.891928717 | 0.015099613 | 0.038468864 |
|                    |                                                                                                  | -           |             |             |
| ENSMMUG00000043411 | zinc finger and BTB domain containing 39 [Source:NCBI gene;Acc:713914]                           | 1.688417103 | 8.88E-08    | 7.21E-07    |
| ENSMMUG00000021114 | G protein-coupled receptor 182 [Source:VGNC Symbol;Acc:VGNC:72936]                               | -1.1911484  | 1.90E-08    | 1.71E-07    |
|                    |                                                                                                  | -           |             |             |
| ENSMMUG00000013518 | myosin IA [Source:VGNC Symbol;Acc:VGNC:75110]                                                    | 0.622707898 | 5.57E-06    | 3.28E-05    |
|                    |                                                                                                  | -           |             |             |
| ENSMMUG00000021782 | LDL receptor related protein 1 [Source:VGNC Symbol;Acc:VGNC:74442]                               | 0.785071544 | 2.74E-06    | 1.71E-05    |
|                    |                                                                                                  | -           |             |             |
| ENSMMUG00000004233 | leucine rich repeats and immunoglobulin like domains 3 [Source:NCBI gene;Acc:716344]             | 2.424497608 | 7.45E-23    | 3.61E-21    |
|                    |                                                                                                  | -           |             |             |
| ENSMMUG00000055477 |                                                                                                  | 2.290643628 | 1.85E-11    | 2.55E-10    |
| ENSMMUG00000062139 |                                                                                                  | 1.270134846 | 2.21E-05    | 0.000116402 |
| ENSMMUG00000011579 | TAFA chemokine like family member 2 [Source:VGNC Symbol;Acc:VGNC:78189]                          | 0.603839498 | 7.16E-08    | 5.89E-07    |
|                    |                                                                                                  | -           |             |             |
| ENSMMUG00000020533 | chromosome 11 C12orf56 homolog [Source:VGNC Symbol;Acc:VGNC:70409]                               | 4.093629281 | 3.21E-17    | 8.51E-16    |
|                    |                                                                                                  | -           |             |             |
| ENSMMUG00000016887 | WNT inhibitory factor 1 [Source:VGNC Symbol;Acc:VGNC:79110]                                      | 2.966595098 | 0.0124703   | 0.032720196 |
| ENSMMUG00000003669 | methionine sulfoxide reductase B3 [Source:VGNC Symbol;Acc:VGNC:74842]                            | 0.842218812 | 3.19E-08    | 2.76E-07    |
| ENSMMUG00000041729 |                                                                                                  | 1.591893845 | 5.61E-08    | 4.69E-07    |
| ENSMMUG00000052321 |                                                                                                  | 2.281538238 | 0.013931451 | 0.035969568 |
| ENSMMUG00000016621 | transmembrane BAX inhibitor motif containing 4 [Source:NCBI gene;Acc:717825]                     | 4.212583039 | 0.000301263 | 0.001230443 |
| ENSMMUG00000054816 | interleukin 1 receptor associated kinase 3 [Source:NCBI gene;Acc:717845]                         | 3.613607853 | 0.000100193 | 0.000458174 |
|                    |                                                                                                  | -           |             |             |
| ENSMMUG00000016631 | glutamate receptor interacting protein 1 [Source:VGNC Symbol;Acc:VGNC:73195]                     | 1.140158265 | 0.001830798 | 0.006163618 |
| ENSMMUG00000011650 | dual specificity tyrosine phosphorylation regulated kinase 2 [Source:VGNC Symbol;Acc:VGNC:72018] | 2.359354453 | 3.96E-16    | 9.32E-15    |
| ENSMMUG00000059548 |                                                                                                  | 2.153906848 | 0.000356187 | 0.001435005 |
|                    |                                                                                                  | -           |             |             |
| ENSMMUG00000014186 | nucleoporin 107 [Source:VGNC Symbol;Acc:VGNC:75488]                                              | 0.554058573 | 0.008830806 | 0.02433312  |
|                    |                                                                                                  | -           |             |             |
| ENSMMUG00000014187 | solute carrier family 35 member E3 [Source:VGNC Symbol;Acc:VGNC:77542]                           | 0.643051424 | 0.012385234 | 0.032548826 |
|                    |                                                                                                  | -           |             |             |
| ENSMMUG00000055447 | MDM2 proto-oncogene [Source:NCBI gene;Acc:718284]                                                | 1.027487441 | 0.000111039 | 0.000500977 |
| ENSMMUG00000053722 |                                                                                                  | 3.470985062 | 1.16E-12    | 1.90E-11    |
|                    |                                                                                                  | -           |             |             |
| ENSMMUG00000010819 | fibroblast growth factor receptor substrate 2 [Source:VGNC Symbol;Acc:VGNC:72732]                | 1.301988716 | 1.03E-12    | 1.69E-11    |
|                    |                                                                                                  | -           |             |             |
| ENSMMUG00000010820 | chaperonin containing TCP1 subunit 2 [Source:VGNC Symbol;Acc:VGNC:70745]                         | 2.582517348 | 9.18E-15    | 1.93E-13    |
|                    |                                                                                                  | -           |             |             |
| ENSMMUG00000054953 | leucine rich repeat containing 10 [Source:NCBI gene;Acc:114669753]                               | 4.226512381 | 2.90E-07    | 2.15E-06    |
|                    |                                                                                                  | -           |             |             |
| ENSMMUG00000012289 | GLIPR1 like 1 [Source:VGNC Symbol;Acc:VGNC:81412]                                                | 0.912602304 | 0.000135635 | 0.000599956 |
| ENSMMUG00000012290 | GLIPR1 like 2 [Source:VGNC Symbol;Acc:VGNC:81413]                                                | -1.57004101 | 1.93E-06    | 1.24E-05    |
| ENSMMUG00000051874 |                                                                                                  | 0.709908164 | 8.24E-07    | 5.67E-06    |
| ENSMMUG00000015583 | nucleosome assembly protein 1 like 1 [Source:NCBI gene;Acc:719047]                               | 1.416655527 | 4.79E-05    | 0.000233683 |

|                    |                                                                                                 |             |             |             |
|--------------------|-------------------------------------------------------------------------------------------------|-------------|-------------|-------------|
| ENSMMUG00000017864 | oxysterol binding protein like 8 [Source:VGNC Symbol;Acc:VGNC:75630]                            | 1.037452157 | 0.009679123 | 0.026299265 |
| ENSMMUG00000059985 |                                                                                                 | 2.672583673 | 0.011435483 | 0.030413954 |
| ENSMMUG00000005530 | synaptotagmin 1 [Source:VGNC Symbol;Acc:VGNC:78074]                                             | 1.11813261  | 0.00020456  | 0.00087073  |
| ENSMMUG00000050266 |                                                                                                 | -           | -           | -           |
| ENSMMUG00000063005 | coiled-coil domain containing 59 [Source:NCBI gene;Acc:698443]                                  | 1.501249008 | 0.014567674 | 0.037325259 |
| ENSMMUG00000002514 | coiled-coil domain containing 59 [Source:NCBI gene;Acc:698443]                                  | 0.958958724 | 0.008570383 | 0.023703614 |
| ENSMMUG00000002514 | methytransferase like 25 [Source:VGNC Symbol;Acc:VGNC:74591]                                    | -           | -           | -           |
| ENSMMUG00000059068 |                                                                                                 | 1.680201084 | 0.011492552 | 0.03051648  |
| ENSMMUG00000056953 |                                                                                                 | -           | -           | -           |
| ENSMMUG00000038410 |                                                                                                 | 1.084208707 | 0.006252409 | 0.01802551  |
| ENSMMUG00000063190 |                                                                                                 | -           | -           | -           |
| ENSMMUG0000003574  | POC1 centriolar protein B [Source:NCBI gene;Acc:709011]                                         | 2.233041247 | 0.002442566 | 0.007922847 |
| ENSMMUG00000023378 | ATPase plasma membrane Ca <sup>2+</sup> transporting 1 [Source:VGNC Symbol;Acc:VGNC:70180]      | -           | -           | -           |
| ENSMMUG00000055284 |                                                                                                 | 1.873146803 | 2.58E-05    | 0.000133694 |
| ENSMMUG00000064177 |                                                                                                 | 0.688454532 | 0.000514835 | 0.0019966   |
| ENSMMUG00000049117 | CLLU1 antisense RNA 1 [Source:NCBI gene;Acc:100424000]                                          | 0.507459759 | 0.000415501 | 0.001648885 |
| ENSMMUG0000002243  | pleckstrin homology and RhoGEF domain containing G7 [Source:VGNC Symbol;Acc:VGNC:76149]         | 1.208307361 | 0.00988679  | 0.026785002 |
| ENSMMUG0000002244  | early endosome antigen 1 [Source:VGNC Symbol;Acc:VGNC:72161]                                    | -           | -           | -           |
| ENSMMUG00000052496 |                                                                                                 | 2.057965882 | 0.000298847 | 0.001221245 |
| ENSMMUG00000055071 | Y RNA [Source:RFAM;Acc:RF00019]                                                                 | -2.1155203  | 0.002655288 | 0.008523358 |
| ENSMMUG00000018237 | plexin C1 [Source:VGNC Symbol;Acc:VGNC:76190]                                                   | -           | -           | -           |
| ENSMMUG00000018239 | centrosomal protein 83 [Source:VGNC Symbol;Acc:VGNC:70992]                                      | 4.095953088 | 9.26E-05    | 0.000425954 |
| ENSMMUG00000056553 |                                                                                                 | -           | -           | -           |
| ENSMMUG00000060793 |                                                                                                 | 1.027933213 | 2.64E-08    | 2.32E-07    |
| ENSMMUG00000018898 | nuclear receptor subfamily 2 group C member 1 [Source:VGNC Symbol;Acc:VGNC:75508]               | -1.18277455 | 3.41E-08    | 2.93E-07    |
| ENSMMUG00000009303 | coiled-coil domain containing 38 [Source:VGNC Symbol;Acc:VGNC:70880]                            | -           | -           | -           |
| ENSMMUG00000009308 | histidine ammonia-lyase [Source:VGNC Symbol;Acc:VGNC:73344]                                     | 0.978789704 | 4.13E-08    | 3.50E-07    |
| ENSMMUG00000009312 | leukotriene A4 hydrolase [Source:VGNC Symbol;Acc:VGNC:74453]                                    | -           | -           | -           |
| ENSMMUG00000053376 |                                                                                                 | 2.208359223 | 6.05E-05    | 0.000288966 |
| ENSMMUG00000050585 |                                                                                                 | 2.470342626 | 7.13E-55    | 1.06E-51    |
| ENSMMUG00000018145 | ETS transcription factor ELK3 [Source:VGNC Symbol;Acc:VGNC:72210]                               | 2.469077915 | 1.72E-32    | 2.18E-30    |
| ENSMMUG00000053956 | Y RNA [Source:RFAM;Acc:RF00019]                                                                 | -           | -           | -           |
| ENSMMUG00000023719 | thymopoietin [Source:VGNC Symbol;Acc:VGNC:78574]                                                | 1.020119317 | 0.002982534 | 0.009451065 |
| ENSMMUG00000051674 | IKBKB interacting protein [Source:NCBI gene;Acc:693896]                                         | -           | -           | -           |
| ENSMMUG00000022404 | apoptotic peptidase activating factor 1 [Source:VGNC Symbol;Acc:VGNC:69975]                     | 0.447135879 | 0.020202162 | 0.049300324 |
| ENSMMUG00000022406 | ankyrin repeat and sterile alpha motif domain containing 1B [Source:VGNC Symbol;Acc:VGNC:69689] | -           | -           | -           |
| ENSMMUG00000023601 | UHRF1 binding protein 1 like [Source:VGNC Symbol;Acc:VGNC:79774]                                | 1.172995475 | 0.000234268 | 0.000985307 |
| ENSMMUG00000063774 |                                                                                                 | -           | -           | -           |
|                    |                                                                                                 | 1.529145923 | 5.42E-09    | 5.29E-08    |
|                    |                                                                                                 | 1.879877801 | 0.001340214 | 0.004674358 |
|                    |                                                                                                 | 2.498150682 | 4.76E-18    | 1.37E-16    |
|                    |                                                                                                 | 1.376705689 | 7.56E-08    | 6.20E-07    |
|                    |                                                                                                 | 1.086414678 | 0.000223374 | 0.000942162 |
|                    |                                                                                                 | -           | -           | -           |
|                    |                                                                                                 | 0.466962928 | 0.01160384  | 0.030784428 |
|                    |                                                                                                 | -           | -           | -           |
|                    |                                                                                                 | 0.648665561 | 0.009857771 | 0.026717148 |
|                    |                                                                                                 | 1.156861513 | 3.98E-06    | 2.41E-05    |
|                    |                                                                                                 | 0.398456267 | 0.006383847 | 0.018354488 |
|                    |                                                                                                 | 0.726819811 | 1.18E-10    | 1.47E-09    |
|                    |                                                                                                 | 1.591568843 | 3.25E-20    | 1.16E-18    |
|                    |                                                                                                 | 0.564803501 | 0.005088586 | 0.015068635 |
|                    |                                                                                                 | 0.759156293 | 0.012785374 | 0.033422722 |

|                    |                                                                                                                      |             |             |             |
|--------------------|----------------------------------------------------------------------------------------------------------------------|-------------|-------------|-------------|
| ENSMMUG00000061260 | Spi-C transcription factor [Source:NCBI gene;Acc:695809]                                                             | -1.33428214 | 5.63E-12    | 8.39E-11    |
| ENSMMUG00000042077 | DNA damage regulated autophagy modulator 1 [Source:NCBI gene;Acc:697427]                                             | 0.899102756 | 2.10E-14    | 4.20E-13    |
| ENSMMUG00000046478 | WASH complex subunit 3 [Source:NCBI gene;Acc:697824]                                                                 | 2.912783899 | 3.67E-50    | 3.63E-47    |
| ENSMMUG00000061923 |                                                                                                                      | 2.389544245 | 2.92E-09    | 2.99E-08    |
| ENSMMUG0000005504  | nucleoporin 37 [Source:VGNC Symbol;Acc:VGNC:75491]                                                                   | 2.559302748 | 2.14E-14    | 4.28E-13    |
| ENSMMUG0000005506  | PARP1 binding protein [Source:VGNC Symbol;Acc:VGNC:75682]                                                            | 0.701622577 | 0.018923167 | 0.04660089  |
|                    |                                                                                                                      | -           |             |             |
| ENSMMUG00000038958 | Metazoan signal recognition particle RNA [Source:RFAM;Acc:RF00017]                                                   | 2.220173267 | 0.004993694 | 0.014838006 |
|                    |                                                                                                                      | -           |             |             |
| ENSMMUG00000023469 | heat shock protein 90 beta family member 1 [Source:NCBI gene;Acc:699568]                                             | 1.313068038 | 0.000466072 | 0.001826598 |
|                    |                                                                                                                      | -           |             |             |
| ENSMMUG00000021291 | thymine DNA glycosylase [Source:VGNC Symbol;Acc:VGNC:78297]                                                          | 1.372803326 | 0.000239329 | 0.001002895 |
|                    |                                                                                                                      | -           |             |             |
| ENSMMUG00000021292 | glycosyltransferase 8 domain containing 2 [Source:VGNC Symbol;Acc:VGNC:73004]                                        | 0.959963866 | 0.007757784 | 0.021744081 |
|                    |                                                                                                                      | -           |             |             |
| ENSMMUG00000057796 | host cell factor C2 [Source:NCBI gene;Acc:700316]                                                                    | 0.372804006 | 0.012218671 | 0.032179523 |
|                    |                                                                                                                      | -           |             |             |
| ENSMMUG00000022570 | nuclear transcription factor Y subunit beta [Source:NCBI gene;Acc:700451]                                            | 0.938041014 | 0.000131273 | 0.000583309 |
|                    |                                                                                                                      | -           |             |             |
| ENSMMUG00000012091 | thioredoxin reductase 1 [Source:VGNC Symbol;Acc:VGNC:78679]                                                          | 1.036820089 | 2.37E-09    | 2.45E-08    |
| ENSMMUG00000017127 | carbohydrate sulfotransferase 11 [Source:VGNC Symbol;Acc:VGNC:82123]                                                 | 0.907205792 | 0.002311485 | 0.007537231 |
| ENSMMUG00000017129 | solute carrier family 41 member 2 [Source:VGNC Symbol;Acc:VGNC:77585]                                                | 1.342385838 | 4.31E-13    | 7.44E-12    |
|                    |                                                                                                                      | -           |             |             |
| ENSMMUG00000009519 | WASH complex subunit 4 [Source:VGNC Symbol;Acc:VGNC:79783]                                                           | 1.232723273 | 1.21E-05    | 6.71E-05    |
|                    |                                                                                                                      | -           |             |             |
| ENSMMUG00000009524 | adaptor protein, phosphotyrosine interacting with PH domain and leucine zipper 2 [Source:VGNC Symbol;Acc:VGNC:69861] | 1.262585345 | 1.19E-05    | 6.62E-05    |
| ENSMMUG00000005208 | RNA polymerase III subunit B [Source:VGNC Symbol;Acc:VGNC:76143]                                                     | 2.580267861 | 7.48E-17    | 1.90E-15    |
|                    |                                                                                                                      | -           |             |             |
| ENSMMUG00000022118 | regulatory factor X4 [Source:VGNC Symbol;Acc:VGNC:76909]                                                             | 1.411317748 | 2.60E-05    | 0.000134511 |
|                    |                                                                                                                      | -           |             |             |
| ENSMMUG00000022278 | mitochondrial transcription termination factor 2 [Source:VGNC Symbol;Acc:VGNC:74868]                                 | 0.857660756 | 0.017001865 | 0.042569248 |
|                    |                                                                                                                      | -           |             |             |
| ENSMMUG00000021808 | cryptochrome circadian regulator 1 [Source:VGNC Symbol;Acc:VGNC:71499]                                               | 1.114691599 | 3.64E-09    | 3.65E-08    |
|                    |                                                                                                                      | -           |             |             |
| ENSMMUG00000015540 | BTB domain containing 11 [Source:VGNC Symbol;Acc:VGNC:70367]                                                         | 1.578359209 | 0.001465528 | 0.005053192 |
|                    |                                                                                                                      | -           |             |             |
| ENSMMUG00000015544 | PWP1 homolog, endonuclein [Source:NCBI gene;Acc:705262]                                                              | 2.551902908 | 0.001258171 | 0.004418345 |
|                    |                                                                                                                      | -           |             |             |
| ENSMMUG00000015550 | PR/SET domain 4 [Source:VGNC Symbol;Acc:VGNC:76393]                                                                  | 2.384679114 | 7.95E-09    | 7.57E-08    |
| ENSMMUG00000021049 | ret finger protein-like 3 [Source:NCBI gene;Acc:705507]                                                              | -3.4658309  | 1.36E-05    | 7.49E-05    |
| ENSMMUG00000017124 | spliceosome associated factor 3, U4/U6 recycling protein [Source:VGNC Symbol;Acc:VGNC:77029]                         | 2.71775654  | 1.03E-19    | 3.46E-18    |
| ENSMMUG00000017126 | iron-sulfur cluster assembly enzyme [Source:VGNC Symbol;Acc:VGNC:73686]                                              | 2.407482863 | 0.012931223 | 0.033756387 |
| ENSMMUG00000054621 |                                                                                                                      | 3.318090527 | 3.09E-07    | 2.28E-06    |
| ENSMMUG00000006893 | D-amino acid oxidase [Source:VGNC Symbol;Acc:VGNC:71729]                                                             | 1.543232624 | 1.86E-13    | 3.34E-12    |
| ENSMMUG00000015108 | SV2 related protein [Source:VGNC Symbol;Acc:VGNC:78208]                                                              | 1.248922832 | 8.86E-10    | 9.78E-09    |
| ENSMMUG00000056729 | U6 spliceosomal RNA [Source:RFAM;Acc:RF00026]                                                                        | 1.38228274  | 2.03E-13    | 3.63E-12    |
|                    |                                                                                                                      | -           |             |             |
| ENSMMUG00000058267 | glycolipid transfer protein [Source:NCBI gene;Acc:701777]                                                            | 1.337879586 | 0.002391132 | 0.007769606 |
| ENSMMUG00000023032 | intraflagellar transport 81 [Source:VGNC Symbol;Acc:VGNC:73389]                                                      | 1.194967368 | 1.04E-15    | 2.35E-14    |
| ENSMMUG00000001739 | ATPase sarcoplasmic/endoplasmic reticulum Ca2+ transporting 2 [Source:VGNC Symbol;Acc:VGNC:70178]                    | 1.341570946 | 4.86E-27    | 3.72E-25    |
| ENSMMUG00000003297 | coiled-coil domain containing 63 [Source:VGNC Symbol;Acc:VGNC:70879]                                                 | 0.839783385 | 0.000155294 | 0.000676361 |
| ENSMMUG00000002347 | myosin light chain 2 [Source:VGNC Symbol;Acc:VGNC:75103]                                                             | 0.551077569 | 0.013244795 | 0.034435539 |
| ENSMMUG00000008336 | acyl-CoA dehydrogenase family member 10 [Source:NCBI gene;Acc:711080]                                                | 0.999149575 | 2.08E-16    | 5.06E-15    |
| ENSMMUG00000053496 |                                                                                                                      | 0.812507903 | 0.004266364 | 0.012946629 |

|                    |                                                                                 |             |             |             |
|--------------------|---------------------------------------------------------------------------------|-------------|-------------|-------------|
| ENSMMUG00000060754 | Metazoan signal recognition particle RNA [Source:RFAM;Acc:RF00017]              | 1.148968686 | 3.79E-15    | 8.20E-14    |
| ENSMMUG00000060917 |                                                                                 | 1.008251048 | 1.79E-05    | 9.65E-05    |
| ENSMMUG00000043209 | transmembrane protein 116 [Source:NCBI gene;Acc:107001019]                      | 0.751245696 | 2.82E-05    | 0.000144887 |
| ENSMMUG00000005255 | TRAF-type zinc finger domain containing 1 [Source:VGNC Symbol;Acc:VGNC:79459]   | 1.510911272 | 3.35E-12    | 5.16E-11    |
| ENSMMUG00000013253 | protein tyrosine phosphatase non-receptor type 11 [Source:NCBI gene;Acc:712044] | 0.723162191 | 0.00327533  | 0.010262655 |
|                    |                                                                                 | -           |             |             |
| ENSMMUG00000012778 | rabphilin 3A [Source:VGNC Symbol;Acc:VGNC:77033]                                | 1.012270039 | 0.000162856 | 0.000707219 |
| ENSMMUG00000004435 | two pore segment channel 1 [Source:VGNC Symbol;Acc:VGNC:79117]                  | 0.810191615 | 0.003449687 | 0.01072288  |
|                    |                                                                                 | -           |             |             |
| ENSMMUG00000004205 | phospholipase B domain containing 2 [Source:VGNC Symbol;Acc:VGNC:76122]         | 2.909077746 | 3.31E-06    | 2.03E-05    |
|                    |                                                                                 | -           |             |             |
| ENSMMUG00000004208 | serine dehydratase [Source:VGNC Symbol;Acc:VGNC:77148]                          | 2.284501147 | 1.72E-05    | 9.29E-05    |
|                    |                                                                                 | -           |             |             |
| ENSMMUG00000061944 | LIM homeobox 5 [Source:NCBI gene;Acc:713417]                                    | 1.414224048 | 0.000121482 | 0.000543135 |
| ENSMMUG00000051363 |                                                                                 | 1.837073575 | 4.95E-13    | 8.49E-12    |
| ENSMMUG00000054768 |                                                                                 | 0.959312957 | 1.37E-08    | 1.26E-07    |
| ENSMMUG00000057506 |                                                                                 | 0.819019091 | 1.77E-06    | 1.15E-05    |
| ENSMMUG00000052680 |                                                                                 | 0.843637655 | 2.62E-11    | 3.55E-10    |
|                    |                                                                                 | -           |             |             |
| ENSMMUG00000017478 | tescalcin [Source:VGNC Symbol;Acc:VGNC:79571]                                   | 0.740873961 | 8.81E-05    | 0.000407428 |
|                    |                                                                                 | -           |             |             |
| ENSMMUG00000014027 | nitric oxide synthase 1 [Source:VGNC Symbol;Acc:VGNC:75368]                     | 1.598809873 | 2.05E-07    | 1.57E-06    |
|                    |                                                                                 | -           |             |             |
| ENSMMUG00000062615 |                                                                                 | 1.702539655 | 2.12E-06    | 1.36E-05    |
|                    |                                                                                 | -           |             |             |
| ENSMMUG00000005421 | kinase suppressor of ras 2 [Source:VGNC Symbol;Acc:VGNC:74075]                  | 0.976400729 | 0.004613622 | 0.013869858 |
| ENSMMUG00000020629 | SDS3 homolog, SIN3A corepressor complex component [Source:NCBI gene;Acc:696166] | 1.110854141 | 2.00E-12    | 3.17E-11    |
| ENSMMUG00000057515 |                                                                                 | 0.846461517 | 0.019384608 | 0.047563491 |
| ENSMMUG00000053710 |                                                                                 | 0.986958139 | 7.69E-13    | 1.29E-11    |
| ENSMMUG00000011209 | BICD family like cargo adaptor 1 [Source:HGNC Symbol;Acc:HGNC:28095]            | 1.579786003 | 2.12E-15    | 4.67E-14    |
| ENSMMUG00000055209 |                                                                                 | 1.749808829 | 4.32E-17    | 1.13E-15    |
|                    |                                                                                 | -           |             |             |
| ENSMMUG00000063609 | cytochrome c oxidase subunit 6A1, mitochondrial [Source:NCBI gene;Acc:696956]   | 2.636023325 | 0.005351743 | 0.015728568 |
|                    |                                                                                 | -           |             |             |
| ENSMMUG00000046665 | glutamyl-tRNA amidotransferase subunit C [Source:NCBI gene;Acc:702258]          | 2.219800187 | 2.76E-07    | 2.06E-06    |
|                    |                                                                                 | -           |             |             |
| ENSMMUG00000052631 |                                                                                 | 2.976457248 | 0.010635661 | 0.02850142  |
|                    |                                                                                 | -           |             |             |
| ENSMMUG00000049873 |                                                                                 | 3.124569703 | 0.010571566 | 0.028365536 |
| ENSMMUG00000046646 | Y RNA [Source:RFAM;Acc:RF00019]                                                 | 0.5482755   | 0.008381076 | 0.023266822 |
|                    |                                                                                 | -           |             |             |
| ENSMMUG00000004223 | ring finger protein 10 [Source:VGNC Symbol;Acc:VGNC:76702]                      | 0.764651085 | 1.94E-06    | 1.25E-05    |
|                    |                                                                                 | -           |             |             |
| ENSMMUG00000049342 | POP5 homolog, ribonuclease P/MRP subunit [Source:NCBI gene;Acc:697559]          | 1.828291519 | 0.006802451 | 0.01938888  |
|                    |                                                                                 | -           |             |             |
| ENSMMUG00000055513 |                                                                                 | 1.524217532 | 0.006140348 | 0.017740377 |
| ENSMMUG00000058536 |                                                                                 | 2.613061808 | 3.88E-28    | 3.25E-26    |
| ENSMMUG00000002536 | calcium binding protein 1 [Source:VGNC Symbol;Acc:VGNC:70495]                   | 2.233455791 | 3.50E-19    | 1.10E-17    |
|                    |                                                                                 | -           |             |             |
| ENSMMUG00000065224 | unc-119 lipid binding chaperone B [Source:NCBI gene;Acc:698066]                 | 1.360795198 | 0.009640681 | 0.02620922  |
| ENSMMUG00000006435 | HNF1 homeobox A [Source:NCBI gene;Acc:107001057]                                | 0.898459942 | 0.000176078 | 0.000758859 |
| ENSMMUG00000039520 | chromosome 11 C12orf43 homolog [Source:NCBI gene;Acc:698821]                    | 1.239679523 | 6.81E-11    | 8.81E-10    |
|                    |                                                                                 | -           |             |             |
| ENSMMUG00000060614 |                                                                                 | 0.480305383 | 0.008843588 | 0.024354766 |

|                    |                                                                                                     |             |             |             |
|--------------------|-----------------------------------------------------------------------------------------------------|-------------|-------------|-------------|
| ENSMMUG00000021564 | lysine demethylase 2B [Source:VGNC Symbol;Acc:VGNC:81425]                                           | 2.281593959 | 6.35E-12    | 9.33E-11    |
| ENSMMUG00000059782 |                                                                                                     | 3.002394334 | 1.83E-14    | 3.69E-13    |
| ENSMMUG00000038707 | U6 spliceosomal RNA [Source:RFAM;Acc:RF00026]                                                       | 2.979892913 | 0.00877256  | 0.0241986   |
| ENSMMUG00000041124 | MORN repeat containing 3 [Source:NCBI gene;Acc:700317]                                              | 0.739312942 | 0.017568712 | 0.04372288  |
| ENSMMUG00000063813 | Metazoan signal recognition particle RNA [Source:RFAM;Acc:RF00017]                                  | 1.290016608 | 0.008432768 | 0.023392809 |
| ENSMMUG00000012842 | SET domain containing 1B, histone lysine methyltransferase [Source:NCBI gene;Acc:703717]            | 2.428089651 | 7.07E-05    | 0.00033275  |
| ENSMMUG00000016454 | 4-hydroxyphenylpyruvate dioxygenase [Source:VGNC Symbol;Acc:VGNC:73511]                             | 1.257255337 | 2.84E-23    | 1.46E-21    |
|                    |                                                                                                     | -           |             |             |
| ENSMMUG00000046409 | VPS33A core subunit of CORVET and HOPS complexes [Source:NCBI gene;Acc:702257]                      | 0.398316913 | 0.010637788 | 0.028501969 |
|                    |                                                                                                     | -           |             |             |
| ENSMMUG00000013643 | zinc finger CCHC-type containing 8 [Source:VGNC Symbol;Acc:VGNC:79487]                              | 1.309970584 | 0.006277903 | 0.018084947 |
|                    |                                                                                                     | -           |             |             |
| ENSMMUG00000004412 | arginine and serine rich coiled-coil 2 [Source:VGNC Symbol;Acc:VGNC:77139]                          | 1.929277764 | 0.000182177 | 0.000783323 |
| ENSMMUG00000007556 | kinetochore associated 1 [Source:VGNC Symbol;Acc:VGNC:74064]                                        | 0.62997266  | 0.000655193 | 0.002469881 |
| ENSMMUG00000017102 | coiled-coil domain containing 62 [Source:NCBI gene;Acc:707179]                                      | 0.899702177 | 7.50E-05    | 0.000350854 |
| ENSMMUG00000015221 | huntingtin interacting protein 1 related [Source:VGNC Symbol;Acc:VGNC:73412]                        | 0.996593892 | 2.65E-05    | 0.000137202 |
| ENSMMUG00000039447 | VPS37B subunit of ESCRT-I [Source:NCBI gene;Acc:703415]                                             | 1.200009079 | 0.009044321 | 0.024829188 |
|                    |                                                                                                     | -           |             |             |
| ENSMMUG00000005301 | ATP binding cassette subfamily B member 9 [Source:VGNC Symbol;Acc:VGNC:81341]                       | 1.465463677 | 7.37E-13    | 1.24E-11    |
| ENSMMUG00000015926 | 2-oxoglutarate and iron dependent oxygenase domain containing 2 [Source:VGNC Symbol;Acc:VGNC:75462] | 1.885014114 | 2.09E-10    | 2.53E-09    |
| ENSMMUG00000015930 | ADP ribosylation factor like GTPase 6 interacting protein 4 [Source:VGNC Symbol;Acc:VGNC:69860]     | 1.702084819 | 2.84E-05    | 0.000145897 |
| ENSMMUG00000015931 | phosphatidylinositol transfer protein membrane associated 2 [Source:VGNC Symbol;Acc:VGNC:75843]     | 1.614846864 | 8.69E-14    | 1.64E-12    |
|                    |                                                                                                     | -           |             |             |
| ENSMMUG00000019678 | M-phase phosphoprotein 9 [Source:VGNC Symbol;Acc:VGNC:74918]                                        | 0.661403609 | 0.00154799  | 0.005300551 |
|                    |                                                                                                     | -           |             |             |
| ENSMMUG00000031495 | chromosome 11 C12orf65 homolog [Source:NCBI gene;Acc:708974]                                        | 1.476803063 | 0.007676144 | 0.02153968  |
|                    |                                                                                                     | -           |             |             |
| ENSMMUG00000000434 | cyclin dependent kinase 2 associated protein 1 [Source:VGNC Symbol;Acc:VGNC:70944]                  | 1.689636101 | 1.02E-06    | 6.90E-06    |
|                    |                                                                                                     | -           |             |             |
| ENSMMUG00000013514 | lysine methyltransferase 5A [Source:VGNC Symbol;Acc:VGNC:74159]                                     | 0.415699205 | 0.006174237 | 0.01782787  |
| ENSMMUG00000023048 | cytochrome b-c1 complex subunit Rieske, mitochondrial [Source:NCBI gene;Acc:705178]                 | 1.853355607 | 3.59E-09    | 3.61E-08    |
|                    |                                                                                                     | -           |             |             |
| ENSMMUG00000058836 | transmembrane p24 trafficking protein 2 [Source:NCBI gene;Acc:106992483]                            | 1.217407016 | 3.68E-07    | 2.68E-06    |
|                    |                                                                                                     | -           |             |             |
| ENSMMUG00000004592 | general transcription factor IIH subunit 3 [Source:NCBI gene;Acc:106992484]                         | 3.070630648 | 0.013323396 | 0.03461562  |
| ENSMMUG00000064225 | tectonic family member 2 [Source:NCBI gene;Acc:721415]                                              | 0.583337255 | 1.99E-05    | 0.000106031 |
|                    |                                                                                                     | -           |             |             |
| ENSMMUG00000006546 | ATPase H+ transporting V0 subunit a2 [Source:VGNC Symbol;Acc:VGNC:70096]                            | 0.403914746 | 0.000567749 | 0.002174513 |
|                    |                                                                                                     | -           |             |             |
| ENSMMUG00000054430 |                                                                                                     | 1.025661562 | 0.014230074 | 0.036542337 |
|                    |                                                                                                     | -           |             |             |
| ENSMMUG00000006861 | dynein axonemal heavy chain 10 [Source:NCBI gene;Acc:710343]                                        | 0.745311191 | 0.000109896 | 0.000496725 |
| ENSMMUG00000046631 | refilin A [Source:NCBI gene;Acc:706153]                                                             | -2.15654871 | 0.012665479 | 0.033161909 |
| ENSMMUG00000017902 | DEAH-box helicase 37 [Source:VGNC Symbol;Acc:VGNC:71639]                                            | 2.691963446 | 0.012520413 | 0.032828451 |
|                    |                                                                                                     | -           |             |             |
| ENSMMUG00000020804 | transmembrane protein 132B [Source:NCBI gene;Acc:707118]                                            | 0.769651133 | 0.014961705 | 0.038189689 |
|                    |                                                                                                     | -           |             |             |
| ENSMMUG00000050145 | Metazoan signal recognition particle RNA [Source:RFAM;Acc:RF00017]                                  | 3.693576927 | 0.001086018 | 0.003876208 |
|                    |                                                                                                     | -           |             |             |
| ENSMMUG00000020926 | syntaxin 2 [Source:VGNC Symbol;Acc:VGNC:78259]                                                      | 4.361178827 | 7.93E-07    | 5.48E-06    |
|                    |                                                                                                     | -           |             |             |
| ENSMMUG00000058674 |                                                                                                     | 3.595666006 | 0.004406523 | 0.013314738 |
|                    |                                                                                                     | -           |             |             |
| ENSMMUG00000003735 | polypeptide N-acetylgalactosaminyltransferase 9 [Source:NCBI gene;Acc:710382]                       | 0.872188518 | 0.011654429 | 0.030902053 |
| ENSMMUG00000017026 | fibrosin like 1 [Source:NCBI gene;Acc:696295]                                                       | 0.869947273 | 0.000332387 | 0.00134717  |

|                     |                                                                                                |             |             |             |
|---------------------|------------------------------------------------------------------------------------------------|-------------|-------------|-------------|
| ENSMMUG00000015463  | DNA polymerase epsilon, catalytic subunit [Source:NCBI gene;Acc:698023]                        | 0.746180468 | 7.24E-06    | 4.18E-05    |
| ENSMMUG00000015468  | checkpoint with forkhead and ring finger domains [Source:VGNC Symbol;Acc:VGNC:71064]           | 2.059309298 | 0.00036877  | 0.001480469 |
| ENSMMUG00000013867  | zinc finger protein 84 [Source:VGNC Symbol;Acc:VGNC:78909]                                     | 2.472563399 | 0.018457425 | 0.045612999 |
| ENSMMUG00000009615  | IMP U3 small nucleolar ribonucleoprotein 4 [Source:VGNC Symbol;Acc:VGNC:73689]                 | 0.946850871 | 7.00E-06    | 4.05E-05    |
| ENSMMUG00000021159  | tubulin alpha 3e [Source:NCBI gene;Acc:718034]                                                 | 0.966410389 | 0.000395299 | 0.001577401 |
| ENSMMUG00000061826  | family with sequence similarity 168 member B [Source:NCBI gene;Acc:703758]                     | 0.854695243 | 0.000797508 | 0.002936938 |
| ENSMMUG00000023321  | UDP-glucose glycoprotein glucosyltransferase 1 [Source:VGNC Symbol;Acc:VGNC:78981]             | 0.614276438 | 0.002534972 | 0.008181422 |
| ENSMMUG00000049232  | AMMECR1 like [Source:VGNC Symbol;Acc:VGNC:84208]                                               | 4.443617047 | 0.000819606 | 0.003009349 |
| ENSMMUG00000001989  | RNA polymerase II subunit D [Source:VGNC Symbol;Acc:VGNC:76213]                                | 4.836963104 | 1.98E-05    | 0.000105489 |
| ENSMMUG00000027543  | Y RNA [Source:RFAM;Acc:RF00019]                                                                | 4.615892424 | 0.000262456 | 0.001089371 |
| ENSMMUG00000004179  | LIM zinc finger domain containing 2 [Source:VGNC Symbol;Acc:VGNC:74054]                        | 0.495134382 | 0.002232794 | 0.007307952 |
| ENSMMUG00000004177  | myosin VIIB [Source:NCBI gene;Acc:714563]                                                      | 0.754927406 | 4.76E-17    | 1.24E-15    |
| ENSMMUG000000056151 |                                                                                                | 2.261527186 | 0.000167256 | 0.000724206 |
| ENSMMUG00000000376  | bridging integrator 1 [Source:VGNC Symbol;Acc:VGNC:70251]                                      | 2.475777202 | 1.05E-05    | 5.86E-05    |
| ENSMMUG000000021119 | translin [Source:VGNC Symbol;Acc:VGNC:78663]                                                   | 0.550996192 | 0.002973126 | 0.009426871 |
| ENSMMUG00000020928  | nucleolar protein interacting with the FHA domain of MKI67 [Source:VGNC Symbol;Acc:VGNC:75201] | 1.092414772 | 2.60E-05    | 0.000134511 |
| ENSMMUG00000046774  | RAS like proto-oncogene B [Source:NCBI gene;Acc:695852]                                        | 2.174968701 | 5.38E-18    | 1.54E-16    |
| ENSMMUG000000059182 |                                                                                                | 2.258299756 | 1.89E-22    | 8.94E-21    |
| ENSMMUG00000063759  | transmembrane protein 185B [Source:NCBI gene;Acc:695744]                                       | 2.218285714 | 1.60E-20    | 6.05E-19    |
| ENSMMUG000000059504 |                                                                                                | 2.740905142 | 3.07E-16    | 7.30E-15    |
| ENSMMUG000000051751 |                                                                                                | 0.516785762 | 0.015218386 | 0.038704967 |
| ENSMMUG000000005610 | protein tyrosine phosphatase non-receptor type 4 [Source:VGNC Symbol;Acc:VGNC:76605]           | 1.403274758 | 6.10E-06    | 3.57E-05    |
| ENSMMUG00000006446  | transmembrane protein 177 [Source:VGNC Symbol;Acc:VGNC:79686]                                  | 3.367674749 | 1.32E-05    | 7.25E-05    |
| ENSMMUG00000011129  | cilia and flagella associated protein 221 [Source:VGNC Symbol;Acc:VGNC:71153]                  | 2.934199176 | 0.001749052 | 0.005911223 |
| ENSMMUG00000008875  | solute carrier family 35 member F5 [Source:VGNC Symbol;Acc:VGNC:77567]                         | 1.375657055 | 1.82E-11    | 2.52E-10    |
| ENSMMUG00000043114  | U6 spliceosomal RNA [Source:RFAM;Acc:RF00026]                                                  | 0.82703525  | 0.002381538 | 0.007743522 |
| ENSMMUG00000012248  | UBX domain protein 4 [Source:VGNC Symbol;Acc:VGNC:78968]                                       | -1.31390356 | 0.007028994 | 0.019950237 |
| ENSMMUG00000012250  | lactase [Source:VGNC Symbol;Acc:VGNC:74244]                                                    | 1.148235012 | 1.48E-05    | 8.07E-05    |
| ENSMMUG00000017486  | minichromosome maintenance complex component 6 [Source:VGNC Symbol;Acc:VGNC:74685]             | 1.542396423 | 2.65E-09    | 2.72E-08    |
| ENSMMUG00000040854  | aspartyl-tRNA synthetase 1 [Source:VGNC Symbol;Acc:VGNC:84226]                                 | 1.153736632 | 1.88E-05    | 0.000100407 |
| ENSMMUG00000006528  | Rho GTPase activating protein 15 [Source:VGNC Symbol;Acc:VGNC:69874]                           | 0.614847027 | 7.14E-08    | 5.88E-07    |
| ENSMMUG00000016845  | zinc finger E-box binding homeobox 2 [Source:VGNC Symbol;Acc:VGNC:78969]                       | 1.907592692 | 0.006425293 | 0.018452188 |
| ENSMMUG000000051691 |                                                                                                | 1.798389217 | 4.17E-05    | 0.000205758 |
| ENSMMUG000000050074 |                                                                                                | 1.094050503 | 0.002468458 | 0.007991102 |
| ENSMMUG00000008615  | nebulin [Source:NCBI gene;Acc:100430324]                                                       | 0.868739469 | 7.62E-09    | 7.29E-08    |
| ENSMMUG00000010526  | calcium voltage-gated channel auxiliary subunit beta 4 [Source:VGNC Symbol;Acc:VGNC:82116]     | 0.908998985 | 0.00400936  | 0.012259548 |
| ENSMMUG00000014176  | cytohesin 1 interacting protein [Source:VGNC Symbol;Acc:VGNC:71831]                            | 1.209909875 | 3.66E-05    | 0.000183102 |
| ENSMMUG00000011638  | plakophilin 4 [Source:VGNC Symbol;Acc:VGNC:76153]                                              | 1.730514724 | 0.001288685 | 0.00451588  |

|                    |                                                                                                           |   |             |             |             |
|--------------------|-----------------------------------------------------------------------------------------------------------|---|-------------|-------------|-------------|
| ENSMMUG0000006443  |                                                                                                           | - | 2.490587728 | 0.016481197 | 0.041455618 |
| ENSMMUG00000052818 | death associated protein like 1 [Source:NCBI gene;Acc:699071]                                             | - | 2.805155134 | 0.000100095 | 0.00045787  |
| ENSMMUG00000057379 |                                                                                                           | - | 1.220731387 | 0.002790147 | 0.008909964 |
| ENSMMUG0000006180  | tetratricopeptide repeat, ankyrin repeat and coiled-coil containing 1 [Source:VGNC Symbol;Acc:VGNC:78238] | - | 2.123041239 | 4.12E-27    | 3.18E-25    |
| ENSMMUG00000055201 | U6 spliceosomal RNA [Source:RFAM;Acc:RF00026]                                                             | - | 2.982754806 | 0.000910655 | 0.003301152 |
| ENSMMUG00000061606 | Metazoan signal recognition particle RNA [Source:RFAM;Acc:RF00017]                                        | - | 2.079983118 | 6.39E-07    | 4.50E-06    |
| ENSMMUG0000006181  | WD repeat, sterile alpha motif and U-box domain containing 1 [Source:VGNC Symbol;Acc:VGNC:79634]          | - | 1.684093407 | 1.64E-16    | 4.02E-15    |
| ENSMMUG00000063868 | Metazoan signal recognition particle RNA [Source:RFAM;Acc:RF00017]                                        | - | 1.767268829 | 1.74E-07    | 1.35E-06    |
| ENSMMUG0000006182  | bromodomain adjacent to zinc finger domain 2B [Source:NCBI gene;Acc:702780]                               | - | 0.779007117 | 2.95E-08    | 2.58E-07    |
| ENSMMUG00000051450 | phospholipase A2 receptor 1 [Source:NCBI gene;Acc:700191]                                                 | - | 0.961188903 | 3.83E-14    | 7.41E-13    |
| ENSMMUG00000002678 | integrin subunit beta 6 [Source:VGNC Symbol;Acc:VGNC:73789]                                               | - | -1.55319569 | 3.60E-08    | 3.08E-07    |
| ENSMMUG00000055970 |                                                                                                           | - | 0.620957385 | 0.014892736 | 0.038033283 |
| ENSMMUG00000008384 | solute carrier family 4 member 10 [Source:VGNC Symbol;Acc:VGNC:77695]                                     | - | 1.522716052 | 9.52E-16    | 2.17E-14    |
| ENSMMUG00000008387 | dipeptidyl peptidase 4 [Source:VGNC Symbol;Acc:VGNC:71979]                                                | - | 3.093738815 | 5.04E-41    | 1.49E-38    |
| ENSMMUG00000018510 | sodium voltage-gated channel alpha subunit 9 [Source:VGNC Symbol;Acc:VGNC:76990]                          | - | 2.301375718 | 0.001883222 | 0.006318595 |
| ENSMMUG00000013251 | xin actin binding repeat containing 2 [Source:VGNC Symbol;Acc:VGNC:78953]                                 | - | 2.449503259 | 4.81E-05    | 0.000234438 |
| ENSMMUG00000063463 |                                                                                                           | - | 2.193574995 | 9.37E-13    | 1.55E-11    |
| ENSMMUG00000021775 | beta-1,3-galactosyltransferase 1 [Source:VGNC Symbol;Acc:VGNC:70204]                                      | - | 1.644742393 | 1.53E-07    | 1.19E-06    |
| ENSMMUG0000006215  | serine/threonine kinase 39 [Source:VGNC Symbol;Acc:VGNC:81587]                                            | - | 1.628037586 | 2.37E-08    | 2.11E-07    |
| ENSMMUG00000013830 | glucose-6-phosphatase catalytic subunit 2 [Source:NCBI gene;Acc:709062]                                   | - | 1.989095979 | 2.11E-13    | 3.77E-12    |
| ENSMMUG00000013832 | ATP binding cassette subfamily B member 11 [Source:VGNC Symbol;Acc:VGNC:81339]                            | - | 1.964782223 | 6.78E-08    | 5.61E-07    |
| ENSMMUG00000020510 | kelch like family member 41 [Source:VGNC Symbol;Acc:VGNC:74062]                                           | - | 0.521080433 | 0.006854973 | 0.019512332 |
| ENSMMUG00000020511 | FAST kinase domains 1 [Source:VGNC Symbol;Acc:VGNC:72580]                                                 | - | 1.144653444 | 0.005029871 | 0.014927554 |
| ENSMMUG00000031398 | coiled-coil domain containing 173 [Source:NCBI gene;Acc:709886]                                           | - | 1.047052906 | 0.002824919 | 0.009003558 |
| ENSMMUG00000016256 | myosin IIIB [Source:VGNC Symbol;Acc:VGNC:74961]                                                           | - | 2.321120136 | 0.014729645 | 0.03768817  |
| ENSMMUG00000015198 | glutamate decarboxylase 1 [Source:VGNC Symbol;Acc:VGNC:72862]                                             | - | 0.861777774 | 5.30E-05    | 0.000256428 |
| ENSMMUG00000015203 | golgi reassembly stacking protein 2 [Source:VGNC Symbol;Acc:VGNC:72957]                                   | - | 0.845880613 | 0.001619408 | 0.005512008 |
| ENSMMUG00000011189 | tousled like kinase 1 [Source:VGNC Symbol;Acc:VGNC:78367]                                                 | - | 1.103999507 | 1.32E-06    | 8.75E-06    |
| ENSMMUG00000055482 |                                                                                                           | - | 2.201939013 | 0.002598113 | 0.008361547 |
| ENSMMUG00000054176 | methyltransferase like 8 [Source:NCBI gene;Acc:695361]                                                    | - | 1.520329916 | 3.10E-06    | 1.92E-05    |
| ENSMMUG00000023370 | DDB1 and CUL4 associated factor 17 [Source:VGNC Symbol;Acc:VGNC:71709]                                    | - | 2.145424105 | 5.65E-25    | 3.39E-23    |
| ENSMMUG00000007301 | dynein cytoplasmic 1 intermediate chain 2 [Source:VGNC Symbol;Acc:VGNC:71953]                             | - | 0.691553459 | 6.74E-05    | 0.000318665 |
| ENSMMUG00000007310 | solute carrier family 25 member 12 [Source:VGNC Symbol;Acc:VGNC:77430]                                    | - | 0.842989671 | 3.56E-05    | 0.000178713 |
| ENSMMUG00000007313 | histone acetyltransferase 1 [Source:VGNC Symbol;Acc:VGNC:73349]                                           | - | 2.327413188 | 3.07E-07    | 2.26E-06    |
| ENSMMUG00000002370 | integrin subunit alpha 6 [Source:VGNC Symbol;Acc:VGNC:73780]                                              | - | 0.976367909 | 1.59E-06    | 1.04E-05    |



|                    |                                                                                                    |   |             |             |             |
|--------------------|----------------------------------------------------------------------------------------------------|---|-------------|-------------|-------------|
| ENSMMUG00000054462 |                                                                                                    | - | 1.104830423 | 1.00E-05    | 5.64E-05    |
| ENSMMUG00000020792 | Rap guanine nucleotide exchange factor 4 [Source:VGNC Symbol;Acc:VGNC:76490]                       | - | 0.847453824 | 0.001964251 | 0.006551922 |
| ENSMMUG00000049482 |                                                                                                    | - | 0.767668757 | 0.004553024 | 0.013709919 |
| ENSMMUG00000023005 | Sp9 transcription factor [Source:VGNC Symbol;Acc:VGNC:78027]                                       | - | 0.725885844 | 0.010076772 | 0.027225092 |
| ENSMMUG00000023006 | corepressor interacting with RBPJ, 1 [Source:VGNC Symbol;Acc:VGNC:71331]                           | - | 1.631179985 | 6.98E-05    | 0.00032881  |
| ENSMMUG00000021012 | G protein-coupled receptor 155 [Source:VGNC Symbol;Acc:VGNC:72985]                                 | - | 0.585078736 | 1.05E-05    | 5.87E-05    |
| ENSMMUG00000053004 |                                                                                                    | - | 0.641485815 | 0.002033605 | 0.006749856 |
| ENSMMUG00000009593 | WAS/WASL interacting protein family member 1 [Source:VGNC Symbol;Acc:VGNC:78784]                   | - | 1.851420638 | 1.10E-17    | 3.06E-16    |
| ENSMMUG00000033245 | U6 spliceosomal RNA [Source:RFAM;Acc:RF00026]                                                      | - | 0.920558849 | 0.007647698 | 0.021465446 |
| ENSMMUG00000052177 |                                                                                                    | - | 2.410742533 | 0.002698944 | 0.008652257 |
| ENSMMUG00000065344 | homeobox D1 [Source:NCBI gene;Acc:701064]                                                          | - | -1.7410707  | 1.06E-11    | 1.51E-10    |
| ENSMMUG00000008502 | alkylglycerone phosphate synthase [Source:VGNC Symbol;Acc:VGNC:69747]                              | - | 0.383391301 | 0.011656732 | 0.030902634 |
| ENSMMUG00000002183 | oxysterol binding protein like 6 [Source:VGNC Symbol;Acc:VGNC:75627]                               | - | 1.235787431 | 2.41E-06    | 1.52E-05    |
| ENSMMUG00000059250 | U6 spliceosomal RNA [Source:RFAM;Acc:RF00026]                                                      | - | 3.161597886 | 0.006022471 | 0.017440586 |
| ENSMMUG00000002185 | protein activator of interferon induced protein kinase EIF2AK2 [Source:VGNC Symbol;Acc:VGNC:76421] | - | 0.753775849 | 2.20E-06    | 1.40E-05    |
| ENSMMUG00000054264 | pejvakin [Source:NCBI gene;Acc:708668]                                                             | - | 0.836122083 | 1.21E-05    | 6.71E-05    |
| ENSMMUG00000009038 | titin [Source:NCBI gene;Acc:703527]                                                                | - | 1.367529491 | 0.000550619 | 0.002119856 |
| ENSMMUG00000019690 | SEC14 and spectrin domain containing 1 [Source:VGNC Symbol;Acc:VGNC:77267]                         | - | 3.078967048 | 4.15E-19    | 1.30E-17    |
| ENSMMUG00000053406 |                                                                                                    | - | 4.112301632 | 1.64E-07    | 1.28E-06    |
| ENSMMUG00000052229 |                                                                                                    | - | 1.226127834 | 0.006202194 | 0.017898138 |
| ENSMMUG00000014277 | ITPR interacting domain containing 2 [Source:VGNC Symbol;Acc:VGNC:73584]                           | - | 1.796018045 | 1.54E-42    | 6.00E-40    |
| ENSMMUG00000014394 | DnaJ heat shock protein family (Hsp40) member C10 [Source:VGNC Symbol;Acc:VGNC:84229]              | - | 0.860028571 | 3.02E-05    | 0.000154458 |
| ENSMMUG00000014397 | NCK associated protein 1 [Source:VGNC Symbol;Acc:VGNC:75143]                                       | - | 2.572459686 | 6.12E-13    | 1.04E-11    |
| ENSMMUG00000019462 | integrin subunit alpha V [Source:VGNC Symbol;Acc:VGNC:73783]                                       | - | 1.256930429 | 2.36E-13    | 4.16E-12    |
| ENSMMUG00000004022 | zinc finger SWIM-type containing 2 [Source:VGNC Symbol;Acc:VGNC:79908]                             | - | 2.631567268 | 2.36E-19    | 7.62E-18    |
| ENSMMUG00000014314 | ankyrin and armadillo repeat containing [Source:VGNC Symbol;Acc:VGNC:69706]                        | - | 0.754392567 | 0.005870888 | 0.017054902 |
| ENSMMUG00000014318 | PMS1 homolog 1, mismatch repair system component [Source:VGNC Symbol;Acc:VGNC:81506]               | - | 1.780491574 | 0.006788706 | 0.019357144 |
| ENSMMUG00000061305 |                                                                                                    | - | 1.424228255 | 2.22E-07    | 1.69E-06    |
| ENSMMUG00000003260 |                                                                                                    | - | 1.893978955 | 1.35E-19    | 4.47E-18    |
| ENSMMUG00000051366 |                                                                                                    | - | 1.142711562 | 0.000107794 | 0.000488265 |
| ENSMMUG00000059380 |                                                                                                    | - | 0.310549019 | 0.012093434 | 0.031883666 |
| ENSMMUG00000005612 | glutaminase [Source:NCBI gene;Acc:693520]                                                          | - | 1.975594256 | 0.000216019 | 0.000914258 |
| ENSMMUG00000005613 | signal transducer and activator of transcription 1 [Source:VGNC Symbol;Acc:VGNC:77904]             | - | 0.404927907 | 0.013059998 | 0.034008738 |

|                     |                                                                                                            |             |             |             |
|---------------------|------------------------------------------------------------------------------------------------------------|-------------|-------------|-------------|
| ENSMMUG00000001761  | myosin IB [Source:VGNC Symbol;Acc:VGNC:75111]                                                              | 0.519635978 | 0.01974744  | 0.048325832 |
| ENSMMUG000000037175 | U6 spliceosomal RNA [Source:RFAM;Acc:RF00026]                                                              | 1.103887346 | 0.015299395 | 0.038897656 |
| ENSMMUG000000001475 | transmembrane protein with EGF like and two follistatin like domains 2 [Source:VGNC Symbol;Acc:VGNC:78569] | 1.506868965 | 0.005416196 | 0.015899088 |
| ENSMMUG000000061797 | U6 spliceosomal RNA [Source:RFAM;Acc:RF00026]                                                              | 1.856729488 | 3.13E-05    | 0.000158946 |
| ENSMMUG000000061123 | Metazoan signal recognition particle RNA [Source:RFAM;Acc:RF00017]                                         | 2.018360382 | 1.45E-06    | 9.56E-06    |
| ENSMMUG000000005622 | dynein axonemal heavy chain 7 [Source:VGNC Symbol;Acc:VGNC:71859]                                          | 0.741177568 | 0.006832254 | 0.019458867 |
|                     |                                                                                                            | -           |             |             |
| ENSMMUG000000057432 | serine/threonine kinase 17b [Source:NCBI gene;Acc:696908]                                                  | 0.735161114 | 0.017117441 | 0.042793602 |
|                     |                                                                                                            | -           |             |             |
| ENSMMUG000000015970 | coiled-coil domain containing 150 [Source:VGNC Symbol;Acc:VGNC:84222]                                      | 1.359105487 | 3.55E-10    | 4.14E-09    |
|                     |                                                                                                            | -           |             |             |
| ENSMMUG000000008643 | general transcription factor IIIC subunit 3 [Source:VGNC Symbol;Acc:VGNC:73317]                            | 1.810246811 | 1.20E-17    | 3.35E-16    |
|                     |                                                                                                            | -           |             |             |
| ENSMMUG000000043369 | post-GPI attachment to proteins inositol deacylase 1 [Source:NCBI gene;Acc:696475]                         | 1.130265531 | 0.003283395 | 0.010281407 |
|                     |                                                                                                            | -           |             |             |
| ENSMMUG000000016547 | heat shock protein family E (Hsp10) member 1 [Source:NCBI gene;Acc:100425423]                              | 1.691944369 | 0.009834462 | 0.026672472 |
|                     |                                                                                                            | -           |             |             |
| ENSMMUG000000023809 | raftlin family member 2 [Source:VGNC Symbol;Acc:VGNC:76837]                                                | 0.889887549 | 0.006911159 | 0.019664715 |
|                     |                                                                                                            | -           |             |             |
| ENSMMUG000000065120 | glutamate dehydrogenase 1, mitochondrial-like [Source:NCBI gene;Acc:697678]                                | 1.075319421 | 0.009210809 | 0.025224423 |
| ENSMMUG000000023810 | methionyl-tRNA synthetase 2, mitochondrial [Source:VGNC Symbol;Acc:VGNC:74572]                             | -1.18194967 | 1.47E-07    | 1.16E-06    |
|                     |                                                                                                            | -           |             |             |
| ENSMMUG000000023811 | boule homolog, RNA binding protein [Source:VGNC Symbol;Acc:VGNC:70310]                                     | 1.108743884 | 0.000152911 | 0.000667749 |
|                     |                                                                                                            | -           |             |             |
| ENSMMUG000000051936 |                                                                                                            | 3.346226898 | 1.99E-08    | 1.78E-07    |
|                     |                                                                                                            | -           |             |             |
| ENSMMUG000000050082 |                                                                                                            | 0.539747775 | 0.019802184 | 0.048435823 |
|                     |                                                                                                            | -           |             |             |
| ENSMMUG000000047974 | aldehyde oxidase 4 [Source:NCBI gene;Acc:701502]                                                           | 0.758149072 | 3.79E-06    | 2.30E-05    |
| ENSMMUG000000005835 | aldehyde oxidase 2 [Source:NCBI gene;Acc:701613]                                                           | -1.36796616 | 0.010340683 | 0.027856918 |
|                     |                                                                                                            | -           |             |             |
| ENSMMUG000000022202 | basic leucine zipper and W2 domains 1 [Source:VGNC Symbol;Acc:VGNC:84213]                                  | 2.043178324 | 9.60E-15    | 2.01E-13    |
|                     |                                                                                                            | -           |             |             |
| ENSMMUG000000006639 | NGG1 interacting factor 3 like 1 [Source:VGNC Symbol;Acc:VGNC:75166]                                       | 1.858053664 | 0.002427657 | 0.007879469 |
|                     |                                                                                                            | -           |             |             |
| ENSMMUG000000014460 | origin recognition complex subunit 2 [Source:VGNC Symbol;Acc:VGNC:75714]                                   | 2.194881384 | 0.006184875 | 0.017855109 |
|                     |                                                                                                            | -           |             |             |
| ENSMMUG000000053805 | Metazoan signal recognition particle RNA [Source:RFAM;Acc:RF00017]                                         | 3.104413121 | 0.000248163 | 0.001036986 |
|                     |                                                                                                            | -           |             |             |
| ENSMMUG000000012224 | family with sequence similarity 126 member B [Source:VGNC Symbol;Acc:VGNC:72393]                           | 1.846925524 | 5.69E-07    | 4.03E-06    |
|                     |                                                                                                            | -           |             |             |
| ENSMMUG000000012310 | CASP8 and FADD like apoptosis regulator [Source:VGNC Symbol;Acc:VGNC:71019]                                | 2.223821461 | 0.000246618 | 0.001031111 |
|                     |                                                                                                            | -           |             |             |
| ENSMMUG000000031296 | caspase 8 [Source:VGNC Symbol;Acc:VGNC:70547]                                                              | 1.156300243 | 1.99E-06    | 1.28E-05    |
|                     |                                                                                                            | -           |             |             |
| ENSMMUG000000018356 | flagellum associated containing coiled-coil domains 1 [Source:VGNC Symbol;Acc:VGNC:72508]                  | 1.877489217 | 6.70E-06    | 3.89E-05    |
| ENSMMUG000000018144 | C2 calcium-dependent domain-containing protein 6 [Source:NCBI gene;Acc:702140]                             | 2.211807449 | 8.26E-27    | 6.16E-25    |
| ENSMMUG000000018151 | membrane palmitoylated protein 4 [Source:VGNC Symbol;Acc:VGNC:74734]                                       | 1.983194212 | 0.009769871 | 0.026516689 |
| ENSMMUG000000000582 | NOP58 ribonucleoprotein [Source:VGNC Symbol;Acc:VGNC:75284]                                                | 1.302023306 | 4.70E-11    | 6.20E-10    |
| ENSMMUG000000035551 | small nucleolar RNA, C/D box 11B [Source:HGNC Symbol;Acc:HGNC:33571]                                       | 1.418011844 | 0.000759938 | 0.002811146 |
| ENSMMUG000000061021 |                                                                                                            | 1.512176667 | 3.13E-06    | 1.93E-05    |
| ENSMMUG000000038427 | Metazoan signal recognition particle RNA [Source:RFAM;Acc:RF00017]                                         | 2.386463885 | 0.016311301 | 0.041107583 |
|                     |                                                                                                            | -           |             |             |
| ENSMMUG000000000314 | Ras association (RalGDS/AF-6) and pleckstrin homology domains 1 [Source:NCBI gene;Acc:705065]              | 1.791439938 | 0.016911014 | 0.042391875 |

|                    |                                                                                                |             |             |             |
|--------------------|------------------------------------------------------------------------------------------------|-------------|-------------|-------------|
| ENSMMUG00000014814 | par-3 family cell polarity regulator beta [Source:VGNC Symbol;Acc:VGNC:75602]                  | 2.728825251 | 0.018164939 | 0.04501772  |
| ENSMMUG00000059518 |                                                                                                | 1.916178671 | 0.007118279 | 0.020153508 |
| ENSMMUG00000056824 |                                                                                                | 2.910378179 | 1.41E-06    | 9.31E-06    |
| ENSMMUG00000022601 | cAMP responsive element binding protein 1 [Source:VGNC Symbol;Acc:VGNC:71485]                  | 1.761732887 | 2.87E-08    | 2.51E-07    |
| ENSMMUG00000022602 | methyltransferase like 21A [Source:VGNC Symbol;Acc:VGNC:74625]                                 | 1.752279645 | 1.16E-06    | 7.75E-06    |
| ENSMMUG00000020211 | cyclin Y like 1 [Source:VGNC Symbol;Acc:VGNC:84224]                                            | 2.203602044 | 2.70E-16    | 6.48E-15    |
| ENSMMUG00000057651 | frizzled class receptor 5 [Source:NCBI gene;Acc:710796]                                        | -3.88702474 | 1.81E-07    | 1.40E-06    |
| ENSMMUG00000008113 | pleckstrin homology domain containing M3 [Source:NCBI gene;Acc:711125]                         | 2.182667402 | 6.48E-07    | 4.56E-06    |
| ENSMMUG00000056938 | crystallin, gamma C [Source:NCBI gene;Acc:709553]                                              | 3.338312223 | 0.010076082 | 0.027225092 |
| ENSMMUG00000014299 | chromosome 12 C2orf80 homolog [Source:VGNC Symbol;Acc:VGNC:70459]                              | 2.224768457 | 0.003156003 | 0.009932837 |
| ENSMMUG00000016077 | isocitrate dehydrogenase (NADP(+)) 1 [Source:NCBI gene;Acc:710019]                             | 1.483605614 | 0.00227704  | 0.007433084 |
| ENSMMUG00000017524 | phosphoinositide kinase, FYVE-type zinc finger containing [Source:VGNC Symbol;Acc:VGNC:75854]  | 1.917484429 | 1.63E-06    | 1.07E-05    |
| ENSMMUG00000005295 | parathyroid hormone 2 receptor [Source:VGNC Symbol;Acc:VGNC:76592]                             | 1.514962289 | 0.017323583 | 0.043199721 |
| ENSMMUG00000002809 | unc-80 homolog, NALCN channel complex subunit [Source:NCBI gene;Acc:713007]                    | 1.369630562 | 4.21E-08    | 3.57E-07    |
| ENSMMUG00000010513 | ribulose-5-phosphate-3-epimerase [Source:NCBI gene;Acc:711322]                                 | 1.986526583 | 5.29E-09    | 5.17E-08    |
| ENSMMUG00000010515 | KAT8 regulatory NSL complex subunit 1 like [Source:VGNC Symbol;Acc:VGNC:73913]                 | 2.182916173 | 2.72E-09    | 2.79E-08    |
| ENSMMUG00000010508 | carbamoyl-phosphate synthase 1 [Source:VGNC Symbol;Acc:VGNC:71471]                             | 1.975894663 | 0.00040786  | 0.001622469 |
| ENSMMUG00000059604 |                                                                                                | 0.416315049 | 0.016475439 | 0.041454151 |
| ENSMMUG00000061342 |                                                                                                | 2.427379213 | 2.45E-27    | 1.95E-25    |
| ENSMMUG00000000381 | IKAROS family zinc finger 2 [Source:VGNC Symbol;Acc:VGNC:73586]                                | 1.456628776 | 7.27E-25    | 4.33E-23    |
| ENSMMUG00000000382 | sperm associated antigen 16 [Source:VGNC Symbol;Acc:VGNC:77977]                                | 0.602436686 | 0.000107632 | 0.000487832 |
| ENSMMUG00000064880 |                                                                                                | 0.782129483 | 1.77E-05    | 9.56E-05    |
| ENSMMUG00000053721 |                                                                                                | 1.944882321 | 1.20E-09    | 1.30E-08    |
| ENSMMUG00000006744 | serine/threonine kinase 36 [Source:VGNC Symbol;Acc:VGNC:78145]                                 | 3.193186793 | 0.006665194 | 0.019044429 |
| ENSMMUG00000006755 | tubulin tyrosine ligase like 4 [Source:VGNC Symbol;Acc:VGNC:79758]                             | 1.201724922 | 9.31E-07    | 6.35E-06    |
| ENSMMUG00000006758 | cytochrome P450, family 27, subfamily A, polypeptide 1 [Source:NCBI gene;Acc:700192]           | 2.142799296 | 2.21E-05    | 0.000116282 |
| ENSMMUG00000021877 | protein kinase AMP-activated non-catalytic subunit gamma 3 [Source:VGNC Symbol;Acc:VGNC:76406] | 2.274939239 | 3.50E-05    | 0.000176284 |
| ENSMMUG00000052954 | Wnt family member 6 [Source:NCBI gene;Acc:700573]                                              | 2.461051361 | 0.000116775 | 0.000523196 |
| ENSMMUG00000002519 | serine/threonine kinase 11 interacting protein [Source:VGNC Symbol;Acc:VGNC:77963]             | 1.000023075 | 5.45E-12    | 8.13E-11    |
| ENSMMUG00000002520 | solute carrier family 4 member 3 [Source:VGNC Symbol;Acc:VGNC:77604]                           | 1.202946053 | 1.37E-11    | 1.93E-10    |
| ENSMMUG00000061834 |                                                                                                | 1.332690172 | 6.37E-12    | 9.35E-11    |
| ENSMMUG00000046282 |                                                                                                | 1.158119278 | 1.22E-13    | 2.25E-12    |
| ENSMMUG00000051349 |                                                                                                | 2.750448623 | 0.009856411 | 0.026717148 |

|                    |                                                                                                    |             |             |             |
|--------------------|----------------------------------------------------------------------------------------------------|-------------|-------------|-------------|
| ENSMMUG00000018139 | dedicator of cytokinesis 10 [Source:VGNC Symbol;Acc:VGNC:71888]                                    | 0.667061478 | 1.14E-12    | 1.86E-11    |
| ENSMMUG00000051482 |                                                                                                    | -           |             |             |
| ENSMMUG00000054072 |                                                                                                    | 2.130775663 | 1.26E-08    | 1.16E-07    |
| ENSMMUG00000045544 | neuronal tyrosine-phosphorylated phosphoinositide-3-kinase adaptor 2 [Source:NCBI gene;Acc:711209] | 0.842679553 | 7.81E-12    | 1.13E-10    |
| ENSMMUG0000000722  | rhomboid domain containing 1 [Source:VGNC Symbol;Acc:VGNC:76803]                                   | 0.760161707 | 3.43E-07    | 2.51E-06    |
| ENSMMUG00000013233 | collagen type IV alpha 4 chain [Source:VGNC Symbol;Acc:VGNC:71299]                                 | -           |             |             |
| ENSMMUG00000013235 | collagen type IV alpha 3 chain [Source:VGNC Symbol;Acc:VGNC:81375]                                 | 0.526501722 | 0.015950143 | 0.040307144 |
| ENSMMUG0000002103  | delta/notch like EGF repeat containing [Source:VGNC Symbol;Acc:VGNC:71895]                         | 1.121810593 | 7.15E-05    | 0.000335874 |
| ENSMMUG00000022831 | COP9 signalosome subunit 7B [Source:VGNC Symbol;Acc:VGNC:71186]                                    | -1.07917352 | 1.49E-07    | 1.17E-06    |
| ENSMMUG00000015167 | DIS3 like 3'-5' exoribonuclease 2 [Source:VGNC Symbol;Acc:VGNC:71793]                              | -           |             |             |
| ENSMMUG00000016871 | alkaline phosphatase, intestinal [Source:VGNC Symbol;Acc:VGNC:69800]                               | 1.914498654 | 4.15E-09    | 4.13E-08    |
| ENSMMUG00000051779 |                                                                                                    | -           |             |             |
| ENSMMUG00000023359 | S-antigen visual arrestin [Source:VGNC Symbol;Acc:VGNC:76965]                                      | 2.898094889 | 0.010384315 | 0.027946798 |
| ENSMMUG0000005650  | ubiquitin specific peptidase 40 [Source:VGNC Symbol;Acc:VGNC:79226]                                | -           |             |             |
| ENSMMUG00000021216 | UDP glucuronosyltransferase 1 family, polypeptide A1 [Source:NCBI gene;Acc:574210]                 | 1.378810736 | 0.000104651 | 0.000475772 |
| ENSMMUG00000057588 |                                                                                                    | -           |             |             |
| ENSMMUG00000064179 | Metazoan signal recognition particle RNA [Source:RFAM;Acc:RF00017]                                 | 2.449461786 | 3.96E-06    | 2.40E-05    |
| ENSMMUG00000051807 |                                                                                                    | 0.747173595 | 2.82E-05    | 0.000144877 |
| ENSMMUG00000061244 |                                                                                                    | -           |             |             |
| ENSMMUG00000011516 | ADP ribosylation factor like GTPase 4C [Source:VGNC Symbol;Acc:VGNC:70018]                         | 0.799213136 | 0.000498945 | 0.001941578 |
| ENSMMUG00000054449 | Metazoan signal recognition particle RNA [Source:RFAM;Acc:RF00017]                                 | -           |             |             |
| ENSMMUG00000017404 | IQ motif containing with AAA domain 1 [Source:VGNC Symbol;Acc:VGNC:73660]                          | 0.444590383 | 0.011475965 | 0.030480352 |
| ENSMMUG00000060487 | atypical chemokine receptor 3 [Source:NCBI gene;Acc:694428]                                        | -           |             |             |
| ENSMMUG00000061673 |                                                                                                    | 0.985116159 | 9.07E-07    | 6.20E-06    |
| ENSMMUG00000014049 | collagen type VI alpha 3 chain [Source:VGNC Symbol;Acc:VGNC:71303]                                 | 1.846562905 | 0.014821621 | 0.03787776  |
| ENSMMUG00000031293 | anoctamin-9 [Source:NCBI gene;Acc:100425888]                                                       | 2.282414138 | 0.01419278  | 0.036494376 |
| ENSMMUG00000059353 | phosphatidylserine synthase 2 [Source:NCBI gene;Acc:698582]                                        | 1.750089516 | 1.93E-13    | 3.46E-12    |
| ENSMMUG00000056711 | ribonuclease inhibitor-like [Source:NCBI gene;Acc:114672186]                                       | 1.813307928 | 3.03E-05    | 0.000154458 |
| ENSMMUG00000062863 |                                                                                                    | 2.317302464 | 9.08E-06    | 5.14E-05    |
| ENSMMUG00000004622 | NLR family pyrin domain containing 6 [Source:VGNC Symbol;Acc:VGNC:75234]                           | 1.404149433 | 0.000269932 | 0.001116688 |
| ENSMMUG00000004625 | protein-glucosylgalactosylhydroxylysine glucosidase [Source:VGNC Symbol;Acc:VGNC:75870]            | -2.48192491 | 0.0022624   | 0.007391803 |
| ENSMMUG00000057640 | plakophilin-3-like [Source:NCBI gene;Acc:114669833]                                                | -           |             |             |
| ENSMMUG00000002917 | single Ig IL-1-related receptor [Source:NCBI gene;Acc:100425060]                                   | 1.884705542 | 5.21E-06    | 3.09E-05    |
| ENSMMUG00000010783 | ribonuclease inhibitor [Source:NCBI gene;Acc:720791]                                               | 0.530495468 | 0.000522346 | 0.002020448 |
| ENSMMUG00000021661 | leucine rich repeat containing 56 [Source:VGNC Symbol;Acc:VGNC:74356]                              | -           |             |             |
| ENSMMUG00000021664 | lamin tail domain containing 2 [Source:VGNC Symbol;Acc:VGNC:74380]                                 | 1.673564291 | 5.10E-06    | 3.02E-05    |
| ENSMMUG00000004014 | interferon regulatory factor 7 [Source:VGNC Symbol;Acc:VGNC:73765]                                 | 0.694219973 | 3.33E-08    | 2.87E-07    |
| ENSMMUG00000004024 | cadherin related family member 5 [Source:VGNC Symbol;Acc:VGNC:71158]                               | -           |             |             |
|                    |                                                                                                    | 0.680428474 | 6.70E-07    | 4.69E-06    |
|                    |                                                                                                    | -           |             |             |
|                    |                                                                                                    | 0.516427694 | 3.66E-05    | 0.000183134 |
|                    |                                                                                                    | 2.205273241 | 3.24E-14    | 6.33E-13    |
|                    |                                                                                                    | -           |             |             |
|                    |                                                                                                    | 1.737883177 | 0.000858124 | 0.003133704 |
|                    |                                                                                                    | -           |             |             |
|                    |                                                                                                    | 2.311307226 | 0.017197667 | 0.042943494 |
|                    |                                                                                                    | 2.10680162  | 5.70E-22    | 2.55E-20    |
|                    |                                                                                                    | 3.223290088 | 5.78E-15    | 1.24E-13    |
|                    |                                                                                                    | 0.407729015 | 0.019539573 | 0.047872438 |
|                    |                                                                                                    | 1.951580894 | 1.79E-13    | 3.22E-12    |
|                    |                                                                                                    | 2.004497245 | 1.85E-26    | 1.31E-24    |
|                    |                                                                                                    | 1.111458063 | 0.000100304 | 0.000458539 |
|                    |                                                                                                    | 0.862229659 | 0.001026856 | 0.003686341 |

|                      |                                                                                                         |             |             |             |
|----------------------|---------------------------------------------------------------------------------------------------------|-------------|-------------|-------------|
| ENSMMUG00000007510   | transaldolase 1 [Source:VGNC Symbol;Acc:VGNC:78096]                                                     | 0.772038633 | 3.79E-06    | 2.30E-05    |
| ENSMMUG00000007511   | glutamine amidotransferase like class 1 domain containing 1 [Source:VGNC Symbol;Acc:VGNC:82149]         | 0.715716121 | 0.000148274 | 0.000649692 |
| ENSMMUG000000042839  |                                                                                                         | 0.895578369 | 2.06E-06    | 1.32E-05    |
| ENSMMUG000000016715  | p53-induced death domain protein 1 [Source:VGNC Symbol;Acc:VGNC:81498]                                  | 0.859411441 | 2.32E-09    | 2.40E-08    |
| ENSMMUG000000043846  |                                                                                                         | 0.697025967 | 8.37E-07    | 5.75E-06    |
|                      |                                                                                                         | -           |             |             |
| ENSMMUG000000010544  | mucin 5B, oligomeric mucus/gel-forming [Source:VGNC Symbol;Acc:VGNC:75081]                              | 0.683843479 | 0.000725119 | 0.00269647  |
| ENSMMUG000000017450  | MOB kinase activator 2 [Source:NCBI gene;Acc:720951]                                                    | 1.931455803 | 8.74E-07    | 5.99E-06    |
| ENSMMUG000000003874  | interferon induced transmembrane protein 10 [Source:NCBI gene;Acc:721010]                               | 3.654607373 | 2.10E-20    | 7.70E-19    |
|                      |                                                                                                         | -           |             |             |
| ENSMMUG0000000031267 | insulin [Source:NCBI gene;Acc:704534]                                                                   | 0.999491476 | 0.001384298 | 0.004812267 |
| ENSMMUG000000001324  | tetraspanin 32 [Source:VGNC Symbol;Acc:VGNC:78920]                                                      | 1.225829431 | 0.017677754 | 0.043957259 |
|                      |                                                                                                         | -           |             |             |
| ENSMMUG000000004773  | transient receptor potential cation channel subfamily M member 5 [Source:VGNC Symbol;Acc:VGNC:78955]    | 0.844850579 | 0.00107521  | 0.003843181 |
|                      |                                                                                                         | -           |             |             |
| ENSMMUG000000007742  | potassium voltage-gated channel subfamily Q member 1 [Source:VGNC Symbol;Acc:VGNC:82168]                | 1.055654424 | 4.13E-05    | 0.000203841 |
| ENSMMUG000000000511  | cysteinyl-tRNA synthetase 1 [Source:VGNC Symbol;Acc:VGNC:70540]                                         | -1.12010599 | 3.81E-05    | 0.000189382 |
| ENSMMUG000000051131  | MAS related GPR family member G [Source:NCBI gene;Acc:721253]                                           | 0.79159156  | 0.000359843 | 0.001447376 |
| ENSMMUG000000052168  |                                                                                                         | 2.507863546 | 1.05E-14    | 2.18E-13    |
| ENSMMUG000000044640  |                                                                                                         | 2.87015272  | 0.008468618 | 0.023457155 |
| ENSMMUG000000060517  |                                                                                                         | 2.420050777 | 6.48E-16    | 1.50E-14    |
| ENSMMUG000000001777  | testis expressed metallothionein like protein [Source:VGNC Symbol;Acc:VGNC:79965]                       | 0.932523712 | 0.000252135 | 0.00105151  |
|                      |                                                                                                         | -           |             |             |
| ENSMMUG000000042838  | NADH dehydrogenase [ubiquinone] iron-sulfur protein 2, mitochondrial-like [Source:NCBI gene;Acc:721639] | 1.579885053 | 0.000553601 | 0.002129125 |
| ENSMMUG000000014237  | lysine methyltransferase 5B [Source:VGNC Symbol;Acc:VGNC:74110]                                         | 2.291278688 | 1.09E-37    | 2.28E-35    |
| ENSMMUG000000056342  | Metazoan signal recognition particle RNA [Source:RFAM;Acc:RF00017]                                      | 3.288201475 | 1.66E-05    | 8.99E-05    |
| ENSMMUG000000023192  | choline kinase alpha [Source:VGNC Symbol;Acc:VGNC:71039]                                                | 1.372020834 | 4.42E-06    | 2.66E-05    |
| ENSMMUG000000039824  | aminoacylase 3 [Source:NCBI gene;Acc:711083]                                                            | -0.57306801 | 0.000163512 | 0.000709651 |
|                      |                                                                                                         | -           |             |             |
| ENSMMUG000000056105  | T-box transcription factor 10 [Source:NCBI gene;Acc:721689]                                             | 0.731922105 | 1.69E-05    | 9.14E-05    |
|                      |                                                                                                         | -           |             |             |
| ENSMMUG000000042611  | nudix hydrolase 8 [Source:NCBI gene;Acc:721695]                                                         | 2.595640868 | 0.009927022 | 0.026875954 |
| ENSMMUG000000062171  |                                                                                                         | -1.18842276 | 0.020572831 | 0.049982811 |
|                      |                                                                                                         | -           |             |             |
| ENSMMUG000000011821  | phosphatidylinositol transfer protein membrane associated 1 [Source:VGNC Symbol;Acc:VGNC:76007]         | 1.329072432 | 0.012229336 | 0.032190001 |
| ENSMMUG000000011817  | aryl hydrocarbon receptor interacting protein [Source:VGNC Symbol;Acc:VGNC:69759]                       | 1.171875609 | 3.16E-11    | 4.26E-10    |
| ENSMMUG000000005489  | G protein-coupled receptor 152 [Source:VGNC Symbol;Acc:VGNC:72986]                                      | 0.963077911 | 0.003054736 | 0.009642769 |
| ENSMMUG000000053378  |                                                                                                         | 1.323960037 | 2.64E-09    | 2.71E-08    |
| ENSMMUG000000005488  | coronin 1B [Source:VGNC Symbol;Acc:VGNC:71320]                                                          | 1.82831656  | 1.87E-24    | 1.06E-22    |
| ENSMMUG000000005486  | protein tyrosine phosphatase receptor type C associated protein [Source:VGNC Symbol;Acc:VGNC:76613]     | 1.166315349 | 8.18E-11    | 1.05E-09    |
| ENSMMUG000000005483  | ribosomal protein S6 kinase B2 [Source:VGNC Symbol;Acc:VGNC:76934]                                      | 1.166626252 | 1.76E-13    | 3.18E-12    |
| ENSMMUG000000005480  | carnosine synthase 1 [Source:VGNC Symbol;Acc:VGNC:81367]                                                | 1.106938277 | 3.71E-18    | 1.08E-16    |
| ENSMMUG000000017280  | TBC1 domain family member 10C [Source:VGNC Symbol;Acc:VGNC:78203]                                       | 1.176598076 | 1.13E-06    | 7.60E-06    |
| ENSMMUG000000017278  | protein phosphatase 1 catalytic subunit alpha [Source:VGNC Symbol;Acc:VGNC:76366]                       | 0.726049244 | 0.000348826 | 0.001406876 |
| ENSMMUG000000017275  | RAD9 checkpoint clamp component A [Source:VGNC Symbol;Acc:VGNC:76648]                                   | 0.6576904   | 0.003584779 | 0.01109628  |
| ENSMMUG000000004523  | DNA polymerase delta 4, accessory subunit [Source:NCBI gene;Acc:712632]                                 | 1.133396379 | 3.57E-05    | 0.000178949 |
| ENSMMUG000000064122  |                                                                                                         | 1.08166944  | 1.52E-07    | 1.19E-06    |
| ENSMMUG000000015932  | slingshot protein phosphatase 3 [Source:VGNC Symbol;Acc:VGNC:78019]                                     | 0.892995758 | 0.000345727 | 0.001396277 |
| ENSMMUG000000015928  | ankyrin repeat domain 13D [Source:VGNC Symbol;Acc:VGNC:69722]                                           | 1.343329017 | 6.76E-05    | 0.000319321 |
| ENSMMUG000000015925  | G protein-coupled receptor kinase 2 [Source:VGNC Symbol;Acc:VGNC:73253]                                 | 0.934217163 | 1.34E-06    | 8.88E-06    |
| ENSMMUG000000008771  | lysine demethylase 2A [Source:VGNC Symbol;Acc:VGNC:73824]                                               | 0.941904211 | 1.08E-09    | 1.18E-08    |
|                      |                                                                                                         | -           |             |             |
| ENSMMUG000000004529  | chromosome 14 C11orf80 homolog [Source:NCBI gene;Acc:721782]                                            | 0.286605011 | 0.003232424 | 0.010149661 |

|                     |                                                                                                   |   |             |             |             |
|---------------------|---------------------------------------------------------------------------------------------------|---|-------------|-------------|-------------|
| ENSMMUG00000062635  |                                                                                                   | - | 0.747382295 | 3.07E-07    | 2.26E-06    |
| ENSMMUG00000020363  | RNA-binding protein 4 [Source:NCBI gene;Acc:713490]                                               |   | -0.52114961 | 0.009307995 | 0.025458791 |
| ENSMMUG00000003387  | pellino E3 ubiquitin protein ligase family member 3 [Source:VGNC Symbol;Acc:VGNC:75886]           |   | 0.504893015 | 0.020442002 | 0.049738292 |
| ENSMMUG00000015984  | solute carrier family 29 member 2 [Source:VGNC Symbol;Acc:VGNC:77446]                             |   | -0.5511699  | 0.010438554 | 0.028064497 |
| ENSMMUG00000015987  | Ras and Rab interactor 1 [Source:VGNC Symbol;Acc:VGNC:76769]                                      |   | 1.012495095 | 2.08E-07    | 1.58E-06    |
| ENSMMUG00000006950  | cornichon family AMPA receptor auxiliary protein 2 [Source:VGNC Symbol;Acc:VGNC:71366]            |   | -1.55392328 | 3.36E-06    | 2.06E-05    |
| ENSMMUG000000031202 | RAB1B, member RAS oncogene family [Source:NCBI gene;Acc:721852]                                   |   | 1.157213097 | 1.64E-07    | 1.28E-06    |
| ENSMMUG00000022520  | kinesin light chain 2 [Source:VGNC Symbol;Acc:VGNC:73869]                                         |   | 0.930708073 | 6.36E-05    | 0.000302731 |
| ENSMMUG00000022518  | phosphofurin acidic cluster sorting protein 1 [Source:VGNC Symbol;Acc:VGNC:75697]                 |   | 0.650036555 | 0.002590013 | 0.008339101 |
| ENSMMUG00000057179  | cation channel sperm associated 1 [Source:NCBI gene;Acc:721869]                                   |   | 1.613132598 | 0.002028148 | 0.006736269 |
| ENSMMUG00000056794  | cystatin E/M [Source:NCBI gene;Acc:714999]                                                        |   | 2.556158955 | 0.010358564 | 0.027889889 |
| ENSMMUG00000019115  | eukaryotic translation initiation factor 1A domain containing [Source:VGNC Symbol;Acc:VGNC:72127] |   | 0.590900592 | 4.86E-05    | 0.000236719 |
| ENSMMUG00000008652  | coiled-coil domain containing 85B [Source:VGNC Symbol;Acc:VGNC:70853]                             |   | 1.216964652 | 1.55E-09    | 1.66E-08    |
| ENSMMUG00000008651  | FGF1 intracellular binding protein [Source:VGNC Symbol;Acc:VGNC:72663]                            |   | 1.323304554 | 1.45E-10    | 1.79E-09    |
| ENSMMUG00000008649  | cathepsin W [Source:VGNC Symbol;Acc:VGNC:71563]                                                   |   | 1.654095168 | 0.00106872  | 0.003820905 |
| ENSMMUG00000038363  | adaptor related protein complex 5 subunit beta 1 [Source:NCBI gene;Acc:721904]                    |   | 1.837869598 | 2.09E-21    | 8.71E-20    |
| ENSMMUG00000050028  |                                                                                                   |   | 1.783335827 | 1.79E-13    | 3.22E-12    |
| ENSMMUG00000064005  |                                                                                                   |   | 1.467477731 | 5.31E-07    | 3.78E-06    |
| ENSMMUG00000060437  | Metazoan signal recognition particle RNA [Source:RFAM;Acc:RF00017]                                |   | 1.645919344 | 8.14E-06    | 4.65E-05    |
| ENSMMUG00000019837  | ribonuclease H2 subunit C [Source:NCBI gene;Acc:700330]                                           |   | 1.393494061 | 3.81E-13    | 6.62E-12    |
| ENSMMUG00000019839  | lysine acetyltransferase 5 [Source:VGNC Symbol;Acc:VGNC:73955]                                    |   | 1.548936668 | 1.84E-20    | 6.80E-19    |
| ENSMMUG00000061174  |                                                                                                   |   | 0.757142982 | 0.00073856  | 0.002739782 |
| ENSMMUG00000007418  | RELA proto-oncogene, NF-kB subunit [Source:VGNC Symbol;Acc:VGNC:76893]                            |   | 0.328866472 | 0.007244029 | 0.02045097  |
| ENSMMUG00000007416  | signal-induced proliferation-associated 1 [Source:VGNC Symbol;Acc:VGNC:77218]                     |   | 0.669709582 | 0.000275338 | 0.001135817 |
| ENSMMUG00000007402  | potassium two pore domain channel subfamily K member 7 [Source:VGNC Symbol;Acc:VGNC:73996]        |   | 2.07812951  | 2.42E-08    | 2.14E-07    |
| ENSMMUG00000023479  | latent transforming growth factor beta binding protein 3 [Source:VGNC Symbol;Acc:VGNC:74458]      |   | 2.45521734  | 6.27E-24    | 3.42E-22    |
| ENSMMUG00000023477  |                                                                                                   |   | 1.853746389 | 1.28E-26    | 9.29E-25    |
| ENSMMUG00000052424  |                                                                                                   |   | 1.047468297 | 2.32E-06    | 1.46E-05    |
| ENSMMUG00000023300  | FERM domain containing 8 [Source:NCBI gene;Acc:716379]                                            |   | 1.686407614 | 2.37E-08    | 2.11E-07    |
| ENSMMUG00000023297  | solute carrier family 25 member 45 [Source:VGNC Symbol;Acc:VGNC:77576]                            |   | 1.122177875 | 0.004429064 | 0.013369229 |
| ENSMMUG00000056343  |                                                                                                   |   | 1.235110199 | 9.02E-07    | 6.17E-06    |
| ENSMMUG00000012316  | CDC42 effector protein 2 [Source:VGNC Symbol;Acc:VGNC:70750]                                      |   | 2.498757129 | 5.36E-05    | 0.000258846 |
| ENSMMUG00000022031  | DNA polymerase alpha 2, accessory subunit [Source:NCBI gene;Acc:716541]                           |   | 1.361715115 | 7.02E-14    | 1.33E-12    |
| ENSMMUG00000018781  | synoviolin 1 [Source:VGNC Symbol;Acc:VGNC:78183]                                                  |   | 0.690327942 | 0.010662113 | 0.028556823 |
| ENSMMUG00000006568  | basic leucine zipper ATF-like transcription factor 2 [Source:VGNC Symbol;Acc:VGNC:70127]          |   | 1.285866499 | 2.72E-10    | 3.25E-09    |
| ENSMMUG00000031163  | membrane anchored junction protein [Source:VGNC Symbol;Acc:VGNC:74375]                            |   | 2.123776558 | 3.36E-30    | 3.31E-28    |
| ENSMMUG00000003976  | glycoprotein hormone subunit alpha 2 [Source:VGNC Symbol;Acc:VGNC:72961]                          |   | 1.919822995 | 6.17E-21    | 2.43E-19    |
| ENSMMUG00000041101  | protein phosphatase 2 regulatory subunit B'beta [Source:NCBI gene;Acc:722026]                     |   | 2.14914923  | 1.73E-50    | 1.83E-47    |
| ENSMMUG00000003973  | autophagy related 2A [Source:VGNC Symbol;Acc:VGNC:70145]                                          |   | -1.73443839 | 6.25E-07    | 4.41E-06    |
| ENSMMUG00000003972  | EH domain containing 1 [Source:VGNC Symbol;Acc:VGNC:72175]                                        |   | 0.538518926 | 7.84E-05    | 0.000365092 |
| ENSMMUG00000003971  | CDC42 binding protein kinase gamma [Source:VGNC Symbol;Acc:VGNC:70909]                            |   | 0.492972836 | 4.98E-05    | 0.000242201 |
| ENSMMUG00000031160  | menin 1 [Source:NCBI gene;Acc:106995582]                                                          |   | 0.620738114 | 2.14E-08    | 1.91E-07    |
| ENSMMUG00000030597  | mitogen-activated protein kinase kinase kinase kinase 2 [Source:VGNC Symbol;Acc:VGNC:81465]       |   | 0.608028308 | 1.32E-09    | 1.43E-08    |
| ENSMMUG00000007610  | ribosomal protein S6 kinase A4 [Source:VGNC Symbol;Acc:VGNC:76930]                                |   | 1.622633708 | 1.02E-21    | 4.41E-20    |
| ENSMMUG00000007603  | coiled-coil domain containing 88B [Source:NCBI gene;Acc:722080]                                   |   | 0.751939847 | 0.001044752 | 0.003741528 |

|                    |                                                                                            |             |             |             |
|--------------------|--------------------------------------------------------------------------------------------|-------------|-------------|-------------|
| ENSMMUG00000013397 | peroxiredoxin 5 [Source:NCBI gene;Acc:719764]                                              | 1.087394253 | 1.63E-12    | 2.62E-11    |
| ENSMMUG00000060596 | BCL2 associated agonist of cell death [Source:NCBI gene;Acc:717740]                        | 0.761739152 | 0.000565087 | 0.002165997 |
|                    |                                                                                            | -           |             |             |
| ENSMMUG00000012948 | phospholipase C beta 3 [Source:VGNC Symbol;Acc:VGNC:76165]                                 | 0.459584142 | 0.007818871 | 0.021882216 |
| ENSMMUG00000037977 | protein phosphatase 1 regulatory inhibitor subunit 14B [Source:NCBI gene;Acc:722103]       | 1.12476303  | 0.000315399 | 0.001285345 |
| ENSMMUG00000048072 | FKBP prolyl isomerase 2 [Source:NCBI gene;Acc:717805]                                      | 0.567392241 | 0.004249339 | 0.012908171 |
| ENSMMUG00000012944 | vascular endothelial growth factor B [Source:VGNC Symbol;Acc:VGNC:78765]                   | 1.571880694 | 1.54E-22    | 7.34E-21    |
| ENSMMUG00000012942 | DnaJ heat shock protein family (Hsp40) member C4 [Source:NCBI gene;Acc:717847]             | 1.394878871 | 1.07E-05    | 5.97E-05    |
| ENSMMUG00000012941 | nudix hydrolase 22 [Source:VGNC Symbol;Acc:VGNC:75475]                                     | 1.57995276  | 3.65E-23    | 1.85E-21    |
| ENSMMUG00000012940 | tRNA phosphotransferase 1 [Source:VGNC Symbol;Acc:VGNC:79242]                              | 1.055324848 | 1.98E-06    | 1.27E-05    |
|                    |                                                                                            | -           |             |             |
| ENSMMUG00000012939 | fermitin family member 3 [Source:VGNC Symbol;Acc:VGNC:72553]                               | 0.555299743 | 0.000152767 | 0.000667512 |
|                    |                                                                                            | -           |             |             |
| ENSMMUG00000012953 | stress induced phosphoprotein 1 [Source:NCBI gene;Acc:717926]                              | 1.074378403 | 2.54E-12    | 3.98E-11    |
|                    |                                                                                            | -           |             |             |
| ENSMMUG00000056349 |                                                                                            | 2.234652564 | 0.004140629 | 0.012616712 |
| ENSMMUG00000000478 | OTU deubiquitinase, ubiquitin aldehyde binding 1 [Source:NCBI gene;Acc:717989]             | 0.764954688 | 1.72E-10    | 2.11E-09    |
|                    |                                                                                            | -           |             |             |
| ENSMMUG00000018632 | N-alpha-acetyltransferase 40, NatD catalytic subunit [Source:NCBI gene;Acc:722126]         | 2.232721193 | 0.001574706 | 0.005373421 |
| ENSMMUG00000052569 |                                                                                            | 3.498538279 | 4.82E-12    | 7.23E-11    |
| ENSMMUG00000014131 | microtubule affinity regulating kinase 2 [Source:VGNC Symbol;Acc:VGNC:74634]               | 1.09784863  | 3.83E-05    | 0.000190243 |
| ENSMMUG00000059969 |                                                                                            | 0.977996982 | 0.000405107 | 0.001612383 |
| ENSMMUG00000018152 | spindlin interactor and repressor of chromatin binding [Source:VGNC Symbol;Acc:VGNC:77987] | 0.604489625 | 0.001706059 | 0.005783051 |
| ENSMMUG00000005776 | atlastin GTPase 3 [Source:VGNC Symbol;Acc:VGNC:70125]                                      | 1.098578575 | 6.51E-12    | 9.54E-11    |
| ENSMMUG00000005775 | phospholipase A and acyltransferase 3 [Source:VGNC Symbol;Acc:VGNC:76055]                  | 0.422542833 | 0.000253407 | 0.00105592  |
|                    |                                                                                            | -           |             |             |
| ENSMMUG00000045105 | phospholipase A and acyltransferase 4 [Source:NCBI gene;Acc:722189]                        | 1.702271986 | 9.49E-07    | 6.46E-06    |
|                    |                                                                                            | -           |             |             |
| ENSMMUG00000056054 | zinc finger and BTB domain containing 3 [Source:NCBI gene;Acc:722240]                      | 1.024922472 | 8.98E-11    | 1.14E-09    |
| ENSMMUG00000059077 | Metazoan signal recognition particle RNA [Source:RFAM;Acc:RF00017]                         | -0.90340085 | 0.019091604 | 0.046906641 |
|                    |                                                                                            | -           |             |             |
| ENSMMUG00000005761 | UBX domain protein 1 [Source:VGNC Symbol;Acc:VGNC:79135]                                   | 0.949944591 | 4.81E-05    | 0.000234566 |
| ENSMMUG00000013949 | chromosome 14 C11orf98 homolog [Source:NCBI gene;Acc:100429527]                            | -0.64587979 | 0.008367983 | 0.023243527 |
| ENSMMUG00000000327 | fatty acid desaturase 2 [Source:VGNC Symbol;Acc:VGNC:72472]                                | 1.794993321 | 6.91E-15    | 1.47E-13    |
| ENSMMUG00000013798 | fatty acid desaturase 1 [Source:VGNC Symbol;Acc:VGNC:72471]                                | 2.864318843 | 2.77E-15    | 6.04E-14    |
| ENSMMUG00000006655 | myelin regulatory factor [Source:VGNC Symbol;Acc:VGNC:74949]                               | 2.889440398 | 3.11E-06    | 1.92E-05    |
|                    |                                                                                            | -           |             |             |
| ENSMMUG00000049301 | diacylglycerol lipase alpha [Source:NCBI gene;Acc:722350]                                  | 1.568972917 | 0.017835249 | 0.044326586 |
| ENSMMUG00000015280 | cleavage and polyadenylation specific factor 7 [Source:VGNC Symbol;Acc:VGNC:71606]         | 2.205870922 | 0.000806626 | 0.002966097 |
|                    |                                                                                            | -           |             |             |
| ENSMMUG00000042208 | pepsin A-4 [Source:NCBI gene;Acc:694646]                                                   | 1.066075275 | 0.000106605 | 0.000483767 |
| ENSMMUG00000037611 | pepsinogen 4, group I (pepsinogen A) [Source:NCBI gene;Acc:694562]                         | 0.343187148 | 0.014644195 | 0.037501886 |
| ENSMMUG00000015019 | VPS37C subunit of ESCRT-I [Source:VGNC Symbol;Acc:VGNC:79578]                              | 3.303869898 | 0.000320204 | 0.001303852 |
|                    |                                                                                            | -           |             |             |
| ENSMMUG00000044417 | CD6 molecule [Source:NCBI gene;Acc:695183]                                                 | 2.491919584 | 0.00014907  | 0.000652705 |
|                    |                                                                                            | -           |             |             |
| ENSMMUG00000014535 | solute carrier family 15 member 3 [Source:VGNC Symbol;Acc:VGNC:77504]                      | 1.828220599 | 0.000447564 | 0.001759643 |
|                    |                                                                                            | -           |             |             |
| ENSMMUG00000052420 | transmembrane protein 132A [Source:NCBI gene;Acc:695291]                                   | 1.627144631 | 9.85E-06    | 5.54E-05    |
|                    |                                                                                            | -           |             |             |
| ENSMMUG00000014531 | transmembrane protein 109 [Source:VGNC Symbol;Acc:VGNC:79740]                              | 1.929599584 | 3.06E-12    | 4.75E-11    |
| ENSMMUG00000014530 | pre-mRNA processing factor 19 [Source:VGNC Symbol;Acc:VGNC:76281]                          | 1.775951471 | 6.40E-17    | 1.64E-15    |
|                    |                                                                                            | -           |             |             |
| ENSMMUG00000052454 | prostaglandin D2 receptor 2 [Source:NCBI gene;Acc:695853]                                  | 1.160305502 | 3.17E-06    | 1.95E-05    |

|                    |                                                                                       |             |             |             |
|--------------------|---------------------------------------------------------------------------------------|-------------|-------------|-------------|
| ENSMMUG0000000019  | coiled-coil domain containing 86 [Source:VGNC Symbol;Acc:VGNC:70893]                  | 0.531743669 | 0.001515021 | 0.005202918 |
| ENSMMUG00000031100 | membrane-spanning 4-domains subfamily A member 4A-like [Source:NCBI gene;Acc:698152]  | 4.306988416 | 2.79E-17    | 7.47E-16    |
| ENSMMUG00000004821 | membrane spanning 4-domains A14 [Source:NCBI gene;Acc:697083]                         | 2.713887798 | 1.58E-11    | 2.20E-10    |
| ENSMMUG00000061603 |                                                                                       | 3.884097967 | 8.66E-06    | 4.92E-05    |
| ENSMMUG00000059299 | membrane spanning 4-domains A2 [Source:NCBI gene;Acc:697830]                          | 2.540012112 | 3.85E-07    | 2.79E-06    |
| ENSMMUG00000053140 | putative oocyte-secreted protein 1 homolog [Source:NCBI gene;Acc:698403]              | 1.971098148 | 0.001568614 | 0.005357566 |
| ENSMMUG00000017287 | PAT1 homolog 1, processing body mRNA decay factor [Source:VGNC Symbol;Acc:VGNC:75684] | 2.802391907 | 1.49E-15    | 3.33E-14    |
| ENSMMUG00000001745 | oxysterol binding protein [Source:VGNC Symbol;Acc:VGNC:75718]                         | 1.79233505  | 4.99E-18    | 1.43E-16    |
| ENSMMUG00000060712 |                                                                                       | 1.35670438  | 1.35E-11    | 1.91E-10    |
| ENSMMUG00000001083 | glycine N-acyltransferase-like protein 1 [Source:NCBI gene;Acc:701437]                | 0.859239588 | 8.68E-07    | 5.96E-06    |
| ENSMMUG00000011713 | leupaxin [Source:VGNC Symbol;Acc:VGNC:74286]                                          | 0.529727758 | 3.38E-09    | 3.42E-08    |
| ENSMMUG00000011712 | olfactory receptor 5B21 [Source:NCBI gene;Acc:702145]                                 | 1.130125709 | 0.000194395 | 0.000831041 |
| ENSMMUG00000054737 |                                                                                       | -0.99372745 | 1.22E-13    | 2.25E-12    |
| ENSMMUG00000062697 | olfactory receptor 5B12 [Source:NCBI gene;Acc:106993236]                              | 1.509346895 | 0.000263229 | 0.001091637 |
| ENSMMUG00000059848 | olfactory receptor 5B2 [Source:NCBI gene;Acc:100429465]                               | 1.115076712 | 0.001849046 | 0.006217994 |
| ENSMMUG00000060679 | olfactory receptor 5B3 [Source:NCBI gene;Acc:701735]                                  | 2.516232769 | 0.005180818 | 0.0152929   |
| ENSMMUG00000050844 | BTB domain containing 18 [Source:NCBI gene;Acc:703264]                                | 2.557629726 | 9.65E-10    | 1.06E-08    |
| ENSMMUG00000056184 |                                                                                       | 3.888553029 | 1.54E-15    | 3.45E-14    |
| ENSMMUG00000002566 | selenoprotein H [Source:VGNC Symbol;Acc:VGNC:82234]                                   | 3.352692878 | 5.21E-08    | 4.38E-07    |
| ENSMMUG00000040741 | thioredoxin related transmembrane protein 2 [Source:NCBI gene;Acc:100169970]          | 2.083844109 | 1.47E-16    | 3.63E-15    |
| ENSMMUG00000002562 | mediator complex subunit 19 [Source:VGNC Symbol;Acc:VGNC:74615]                       | 1.662697206 | 0.002444071 | 0.007925993 |
| ENSMMUG00000002563 | zinc finger DHHC-type palmitoyltransferase 5 [Source:VGNC Symbol;Acc:VGNC:79145]      | 2.199114216 | 2.17E-06    | 1.38E-05    |
| ENSMMUG00000058453 | cleavage factor polyribonucleotide kinase subunit 1 [Source:NCBI gene;Acc:705071]     | 0.922785973 | 0.000438459 | 0.001728429 |
| ENSMMUG00000012618 | serpin family G member 1 [Source:VGNC Symbol;Acc:VGNC:77223]                          | 0.66780859  | 0.000140527 | 0.000618402 |
| ENSMMUG00000017810 | structure specific recognition protein 1 [Source:VGNC Symbol;Acc:VGNC:77891]          | 1.687582151 | 2.84E-14    | 5.59E-13    |
| ENSMMUG00000010627 | apelin receptor [Source:VGNC Symbol;Acc:VGNC:69939]                                   | 1.373115126 | 6.88E-13    | 1.17E-11    |
| ENSMMUG00000010869 | nucleoporin 160 [Source:VGNC Symbol;Acc:VGNC:75429]                                   | 1.274620528 | 0.00115363  | 0.004094862 |
| ENSMMUG00000040099 | Y RNA [Source:RFAM;Acc:RF00019]                                                       | 1.678202675 | 0.000328023 | 0.001331666 |
| ENSMMUG00000058885 | formin binding protein 4 [Source:NCBI gene;Acc:712633]                                | 1.48216239  | 3.57E-16    | 8.43E-15    |
| ENSMMUG00000043682 | mitochondrial carrier 2 [Source:NCBI gene;Acc:712767]                                 | 2.249159572 | 3.78E-05    | 0.000188243 |
| ENSMMUG00000004286 | protein tyrosine phosphatase mitochondrial 1 [Source:NCBI gene;Acc:713104]            | 1.327985761 | 0.003282786 | 0.010281407 |
| ENSMMUG00000011657 | CUGBP Elav-like family member 1 [Source:VGNC Symbol;Acc:VGNC:71098]                   | 0.415695941 | 0.002462947 | 0.007975001 |
| ENSMMUG00000015611 | proteasome 26S subunit, ATPase 3 [Source:NCBI gene;Acc:713356]                        | 1.484545222 | 2.52E-05    | 0.000131064 |
| ENSMMUG00000015607 | solute carrier family 39 member 13 [Source:VGNC Symbol;Acc:VGNC:77538]                | 0.78056885  | 0.001923751 | 0.006440005 |
| ENSMMUG00000015606 | Spi-1 proto-oncogene [Source:NCBI gene;Acc:712010]                                    | 2.106885181 | 4.06E-12    | 6.15E-11    |
| ENSMMUG00000062208 | Metazoan signal recognition particle RNA [Source:RFAM;Acc:RF00017]                    | 1.807051581 | 1.30E-06    | 8.63E-06    |
| ENSMMUG00000015604 | myosin binding protein C3 [Source:VGNC Symbol;Acc:VGNC:75094]                         | 0.528844686 | 0.007108635 | 0.020137523 |
| ENSMMUG00000015602 | MAP kinase activating death domain [Source:VGNC Symbol;Acc:VGNC:74473]                | 0.374848545 | 0.000347526 | 0.001402398 |
| ENSMMUG00000060750 | Metazoan signal recognition particle RNA [Source:RFAM;Acc:RF00017]                    | 2.557230561 | 3.55E-05    | 0.000178485 |
| ENSMMUG00000003631 | cytoskeleton associated protein 5 [Source:VGNC Symbol;Acc:VGNC:71368]                 | -2.07781469 | 1.77E-07    | 1.37E-06    |



|                    |                                                                                                       |   |             |             |             |
|--------------------|-------------------------------------------------------------------------------------------------------|---|-------------|-------------|-------------|
| ENSMMUG00000019674 | coagulation factor II, thrombin [Source:VGNC Symbol;Acc:VGNC:72464]                                   | - | 1.853687156 | 0.001565789 | 0.00535038  |
| ENSMMUG00000019672 | autophagy related 13 [Source:VGNC Symbol;Acc:VGNC:70148]                                              | - | 2.057930495 | 4.50E-06    | 2.70E-05    |
| ENSMMUG00000021446 | diacylglycerol kinase zeta [Source:VGNC Symbol;Acc:VGNC:71789]                                        | - | 0.567760324 | 4.81E-05    | 0.000234438 |
| ENSMMUG00000002452 | solute carrier family 35 member C1 [Source:VGNC Symbol;Acc:VGNC:77524]                                | - | 1.764575476 | 1.17E-24    | 6.78E-23    |
| ENSMMUG00000049305 | Metazoan signal recognition particle RNA [Source:RFAM;Acc:RF00017]                                    | - | 1.693064659 | 2.41E-08    | 2.14E-07    |
| ENSMMUG00000047219 |                                                                                                       | - | 1.586728252 | 6.14E-13    | 1.04E-11    |
| ENSMMUG00000000874 | carbohydrate sulfotransferase 1 [Source:VGNC Symbol;Acc:VGNC:71055]                                   | - | 1.95384925  | 9.31E-22    | 4.06E-20    |
| ENSMMUG00000050952 |                                                                                                       | - | 1.186308368 | 0.001171355 | 0.004151817 |
| ENSMMUG00000059728 | tumor protein p53 inducible protein 11 [Source:NCBI gene;Acc:715295]                                  | - | 1.477331257 | 0.000795724 | 0.002931822 |
| ENSMMUG00000000368 | tetraspanin 18 [Source:VGNC Symbol;Acc:VGNC:79265]                                                    | - | 1.927041948 | 0.004157902 | 0.012661538 |
| ENSMMUG00000064903 | Metazoan signal recognition particle RNA [Source:RFAM;Acc:RF00017]                                    | - | 2.374135079 | 0.018336118 | 0.045371709 |
| ENSMMUG00000049355 | ALX homeobox 4 [Source:NCBI gene;Acc:715652]                                                          | - | 1.29720914  | 0.002340732 | 0.007627567 |
| ENSMMUG00000017294 | alkB homolog 3, alpha-ketoglutaratedependent dioxygenase [Source:VGNC Symbol;Acc:VGNC:69736]          | - | 0.956319624 | 0.005547243 | 0.016235567 |
| ENSMMUG00000056754 |                                                                                                       | - | 1.123616149 | 0.014194171 | 0.036494376 |
| ENSMMUG00000008827 | apoptosis inhibitor 5 [Source:NCBI gene;Acc:716346]                                                   | - | 0.952713649 | 0.004347893 | 0.013159032 |
| ENSMMUG00000049945 |                                                                                                       | - | 0.515500703 | 0.002006898 | 0.006677479 |
| ENSMMUG00000053160 |                                                                                                       | - | 0.396701834 | 0.002510715 | 0.00810843  |
| ENSMMUG00000004332 | tripartite motif containing 44 [Source:VGNC Symbol;Acc:VGNC:79168]                                    | - | 2.587677544 | 2.20E-14    | 4.37E-13    |
| ENSMMUG00000004331 | four-jointed box kinase 1 [Source:NCBI gene;Acc:717833]                                               | - | 2.135510365 | 0.010130718 | 0.027360872 |
| ENSMMUG00000004330 | peptidase domain containing associated with muscle regeneration 1 [Source:VGNC Symbol;Acc:VGNC:75673] | - | 3.256998163 | 2.05E-08    | 1.84E-07    |
| ENSMMUG00000004329 | solute carrier family 1 member 2 [Source:VGNC Symbol;Acc:VGNC:77410]                                  | - | 1.250364021 | 7.73E-09    | 7.38E-08    |
| ENSMMUG00000004327 | CD44 molecule (Indian blood group) [Source:NCBI gene;Acc:717204]                                      | - | 1.106444992 | 0.000852618 | 0.003117437 |
| ENSMMUG00000002432 | E74 like ETS transcription factor 5 [Source:VGNC Symbol;Acc:VGNC:72209]                               | - | 0.867309832 | 0.000481422 | 0.001879307 |
| ENSMMUG00000002429 | catalase [Source:VGNC Symbol;Acc:VGNC:70552]                                                          | - | 0.940435199 | 3.54E-09    | 3.57E-08    |
| ENSMMUG00000017218 | KIAA1549 like [Source:VGNC Symbol;Acc:VGNC:73902]                                                     | - | 0.529088569 | 0.004901405 | 0.014607683 |
| ENSMMUG00000019988 | homeodomain interacting protein kinase 3 [Source:VGNC Symbol;Acc:VGNC:73472]                          | - | 1.549206469 | 3.36E-10    | 3.94E-09    |
| ENSMMUG00000001536 | glutamine and serine rich 1 [Source:VGNC Symbol;Acc:VGNC:76544]                                       | - | 1.33124002  | 3.85E-23    | 1.94E-21    |
| ENSMMUG00000055352 |                                                                                                       | - | 1.631878377 | 2.55E-39    | 6.41E-37    |
| ENSMMUG00000049850 | proline rich and Gla domain 4 [Source:NCBI gene;Acc:694707]                                           | - | 1.051482932 | 2.02E-09    | 2.11E-08    |
| ENSMMUG00000009026 | eukaryotic translation initiation factor 3 subunit M [Source:VGNC Symbol;Acc:VGNC:72095]              | - | 0.439009776 | 0.006130967 | 0.017723634 |
| ENSMMUG00000060261 |                                                                                                       | - | 0.859231926 | 3.75E-05    | 0.000186995 |
| ENSMMUG00000065337 |                                                                                                       | - | 0.411674982 | 0.000238052 | 0.000998391 |
| ENSMMUG00000049710 | doublecortin domain containing 1 [Source:NCBI gene;Acc:696721]                                        | - | 1.331500639 | 0.013759784 | 0.035599721 |
| ENSMMUG00000006842 | doublecortin domain containing 1 [Source:NCBI gene;Acc:696721]                                        | - | -1.60615169 | 2.71E-18    | 8.02E-17    |
| ENSMMUG00000023119 | lin-7 homolog C, crumbs cell polarity complex component [Source:VGNC Symbol;Acc:VGNC:74070]           | - | 1.841638549 | 0.000515783 | 0.001999755 |
| ENSMMUG00000063557 |                                                                                                       | - | 1.662670896 | 0.0051595   | 0.015245146 |

|                     |                                                                                                              |   |             |             |             |
|---------------------|--------------------------------------------------------------------------------------------------------------|---|-------------|-------------|-------------|
| ENSMMUG00000014614  | lactate dehydrogenase A like 6A [Source:VGNC Symbol;Acc:VGNC:74141]                                          | - | 3.020105262 | 0.00845032  | 0.023419593 |
| ENSMMUG00000014615  | lactate dehydrogenase C [Source:VGNC Symbol;Acc:VGNC:74247]                                                  | - | 0.940997207 | 0.001338684 | 0.00467122  |
| ENSMMUG00000031024  | lactate dehydrogenase A [Source:NCBI gene;Acc:694309]                                                        | - | 1.05426169  | 1.27E-06    | 8.46E-06    |
| ENSMMUG00000006405  | secretion regulating guanine nucleotide exchange factor [Source:VGNC Symbol;Acc:VGNC:77258]                  | - | 1.202676462 | 5.44E-06    | 3.21E-05    |
| ENSMMUG00000006403  | potassium voltage-gated channel subfamily C member 1 [Source:VGNC Symbol;Acc:VGNC:73971]                     | - | 0.736868048 | 2.66E-09    | 2.73E-08    |
| ENSMMUG00000005895  | nucleobindin 2 [Source:VGNC Symbol;Acc:VGNC:75549]                                                           | - | 1.470958968 | 1.95E-05    | 0.000104155 |
| ENSMMUG000000064558 |                                                                                                              | - | 0.978264244 | 0.000916578 | 0.003321001 |
| ENSMMUG00000022548  | phosphatidylinositol-4-phosphate 3-kinase catalytic subunit type 2 alpha [Source:VGNC Symbol;Acc:VGNC:75992] | - | 1.682838517 | 4.31E-10    | 4.99E-09    |
| ENSMMUG00000022547  | ribosomal protein S13 [Source:NCBI gene;Acc:697513]                                                          | - | 1.507205438 | 0.003881398 | 0.011905096 |
| ENSMMUG00000017628  | pleckstrin homology domain containing A7 [Source:VGNC Symbol;Acc:VGNC:76121]                                 | - | 3.958104587 | 2.41E-08    | 2.13E-07    |
| ENSMMUG000000060216 |                                                                                                              | - | 3.871690388 | 0.001581511 | 0.00539416  |
| ENSMMUG000000064582 |                                                                                                              | - | 2.828397259 | 0.001680574 | 0.00570449  |
| ENSMMUG000000055212 |                                                                                                              | - | 3.790733981 | 7.88E-05    | 0.00036715  |
| ENSMMUG00000020246  | INSC spindle orientation adaptor protein [Source:VGNC Symbol;Acc:VGNC:73693]                                 | - | 2.356774732 | 0.017215068 | 0.042960428 |
| ENSMMUG00000021914  | spondin 1 [Source:VGNC Symbol;Acc:VGNC:77862]                                                                | - | 1.182554254 | 1.16E-08    | 1.07E-07    |
| ENSMMUG000000062000 |                                                                                                              | - | 1.069354703 | 0.000747196 | 0.002767159 |
| ENSMMUG00000011990  | fatty acyl-CoA reductase 1 [Source:NCBI gene;Acc:699947]                                                     | - | -0.85551093 | 0.00646462  | 0.018554349 |
| ENSMMUG000000054213 | parathyroid hormone [Source:NCBI gene;Acc:700195]                                                            | - | 2.039076598 | 9.52E-06    | 5.37E-05    |
| ENSMMUG00000009695  | BTB domain containing 10 [Source:VGNC Symbol;Acc:VGNC:70361]                                                 | - | 1.641981449 | 1.78E-05    | 9.57E-05    |
| ENSMMUG00000010875  | TEA domain transcription factor 1 [Source:VGNC Symbol;Acc:VGNC:78301]                                        | - | 0.809039053 | 1.12E-10    | 1.40E-09    |
| ENSMMUG00000020956  | parvin alpha [Source:VGNC Symbol;Acc:VGNC:75605]                                                             | - | 0.800852333 | 0.000516587 | 0.002001825 |
| ENSMMUG000000043504 |                                                                                                              | - | 1.062087802 | 1.16E-08    | 1.07E-07    |
| ENSMMUG000000037426 | U7 small nuclear RNA [Source:RFAM;Acc:RF00066]                                                               | - | 4.296608054 | 0.00023267  | 0.000978865 |
| ENSMMUG00000009204  | switching B cell complex subunit SWAP70 [Source:VGNC Symbol;Acc:VGNC:78142]                                  | - | 0.624880416 | 0.00224728  | 0.007347258 |
| ENSMMUG00000008758  | zinc finger protein 143 [Source:VGNC Symbol;Acc:VGNC:81612]                                                  | - | 1.733895322 | 4.67E-08    | 3.94E-07    |
| ENSMMUG00000023636  | importin 7 [Source:NCBI gene;Acc:704213]                                                                     | - | 1.089436284 | 0.000165504 | 0.00071725  |
| ENSMMUG00000005639  | transmembrane protein 41B [Source:VGNC Symbol;Acc:VGNC:79754]                                                | - | 0.929985578 | 0.01707596  | 0.042718706 |
| ENSMMUG000000058029 | Metazoan signal recognition particle RNA [Source:RFAM;Acc:RF00017]                                           | - | 3.111398915 | 0.020567364 | 0.049977718 |
| ENSMMUG00000021142  | DENN domain containing 5A [Source:VGNC Symbol;Acc:VGNC:71674]                                                | - | 0.701587011 | 0.000855959 | 0.003127339 |
| ENSMMUG00000006692  | signal peptide, CUB domain and EGF like domain containing 2 [Source:VGNC Symbol;Acc:VGNC:77138]              | - | 1.249669967 | 1.07E-07    | 8.59E-07    |
| ENSMMUG00000006689  | nuclear receptor interacting protein 3 [Source:VGNC Symbol;Acc:VGNC:75397]                                   | - | 1.713548623 | 4.67E-13    | 8.03E-12    |
| ENSMMUG00000021830  | DENN domain containing 2B [Source:VGNC Symbol;Acc:VGNC:77898]                                                | - | 0.641675808 | 1.28E-06    | 8.54E-06    |
| ENSMMUG00000021828  | ribosomal protein L27a [Source:NCBI gene;Acc:708863]                                                         | - | 0.465424398 | 0.000128203 | 0.000570601 |
| ENSMMUG00000018471  | serine/threonine kinase 33 [Source:VGNC Symbol;Acc:VGNC:78118]                                               | - | 1.65863807  | 2.00E-05    | 0.000106412 |
| ENSMMUG000000050922 |                                                                                                              | - | 0.977447702 | 0.015082697 | 0.038432369 |
| ENSMMUG000000035632 | U6 spliceosomal RNA [Source:RFAM;Acc:RF00026]                                                                | - | 0.869095444 | 0.001629306 | 0.005541881 |
| ENSMMUG000000050864 |                                                                                                              | - | 1.453406304 | 0.000149958 | 0.000656204 |

|                     |                                                                                                     |   |             |             |             |
|---------------------|-----------------------------------------------------------------------------------------------------|---|-------------|-------------|-------------|
| ENSMMUG00000011068  |                                                                                                     | - | 2.520437795 | 0.01640072  | 0.041308199 |
| ENSMMUG00000041831  | hemoglobin subunit epsilon 1 [Source:NCBI gene;Acc:715414]                                          |   | 0.949044685 | 0.000345915 | 0.001396656 |
| ENSMMUG00000058081  | olfactory receptor 52D1-like [Source:NCBI gene;Acc:106992372]                                       |   | 1.164066956 | 0.013044502 | 0.033974352 |
| ENSMMUG00000001065  | olfactory receptor, family 51, subfamily A, member 4 [Source:NCBI gene;Acc:100425539]               |   | 0.594746569 | 0.009787033 | 0.026553548 |
| ENSMMUG00000049802  | olfactory receptor 51G1 [Source:NCBI gene;Acc:716561]                                               |   | 1.36989514  | 6.02E-08    | 5.01E-07    |
| ENSMMUG00000053270  | olfactory receptor, family 51, subfamily S, member 1 [Source:NCBI gene;Acc:717205]                  |   | 0.992064363 | 0.010346756 | 0.027868216 |
| ENSMMUG00000062162  | olfactory receptor 51F1 [Source:NCBI gene;Acc:106993363]                                            |   | 1.225286177 | 0.010838804 | 0.028972506 |
| ENSMMUG00000030974  | olfactory receptor, family 51, subfamily E, member 2 [Source:NCBI gene;Acc:717504]                  |   | 0.564434716 | 0.006211268 | 0.017913866 |
| ENSMMUG00000057860  | olfactory receptor 51E1 [Source:NCBI gene;Acc:717598]                                               |   | 1.286375809 | 0.000179806 | 0.000774254 |
| ENSMMUG00000022682  | tripartite motif containing 68 [Source:NCBI gene;Acc:717644]                                        |   | 0.614264585 | 1.78E-06    | 1.15E-05    |
| ENSMMUG00000063820  | olfactory receptor, family 52, subfamily M, member 1 [Source:NCBI gene;Acc:717723]                  |   | 4.651434633 | 1.94E-09    | 2.04E-08    |
| ENSMMUG00000003962  | ribonucleotide reductase catalytic subunit M1 [Source:VGNC Symbol;Acc:VGNC:76941]                   |   | 0.915150386 | 0.004419163 | 0.013344773 |
| ENSMMUG00000003958  | stromal interaction molecule 1 [Source:VGNC Symbol;Acc:VGNC:77911]                                  |   | 1.067666201 | 0.000687594 | 0.00257826  |
| ENSMMUG00000003955  | post-GPI attachment to proteins 2 [Source:VGNC Symbol;Acc:VGNC:75823]                               |   | 1.890681256 | 2.43E-28    | 2.07E-26    |
| ENSMMUG00000003950  | nucleoporin 98 and 96 precursor [Source:VGNC Symbol;Acc:VGNC:75563]                                 |   | 1.610504205 | 2.10E-26    | 1.47E-24    |
| ENSMMUG00000037170  | U7 small nuclear RNA [Source:RFAM;Acc:RF00066]                                                      |   | 1.823353075 | 0.014832221 | 0.037898318 |
| ENSMMUG00000003949  | cholinergic receptor nicotinic alpha 10 subunit [Source:NCBI gene;Acc:718133]                       |   | 0.967016262 | 3.72E-05    | 0.000185841 |
| ENSMMUG00000003948  | ADP-ribosyltransferase 1 [Source:VGNC Symbol;Acc:VGNC:70024]                                        |   | -1.54057833 | 0.000513968 | 0.001993761 |
| ENSMMUG00000003946  | ADP-ribosyltransferase 5 [Source:VGNC Symbol;Acc:VGNC:69890]                                        |   | -1.53523663 | 0.00025779  | 0.001072678 |
| ENSMMUG00000007325  | Xrcc1 N-terminal domain containing 1 [Source:NCBI gene;Acc:115945140]                               |   | 2.112502837 | 1.10E-09    | 1.20E-08    |
| ENSMMUG000000059115 |                                                                                                     |   | 1.743353701 | 3.65E-07    | 2.66E-06    |
| ENSMMUG00000007326  | ring finger protein 121 [Source:VGNC Symbol;Acc:VGNC:76788]                                         |   | 2.473510588 | 1.66E-21    | 7.01E-20    |
| ENSMMUG00000007330  | nuclear mitotic apparatus protein 1 [Source:VGNC Symbol;Acc:VGNC:75556]                             |   | 1.577850686 | 3.45E-12    | 5.27E-11    |
| ENSMMUG00000021280  | leucine rich transmembrane and O-methyltransferase domain containing [Source:NCBI gene;Acc:718286]  |   | 2.504887022 | 9.25E-20    | 3.17E-18    |
| ENSMMUG00000021282  | late endosomal/lysosomal adaptor, MAPK and MTOR activator 1 [Source:VGNC Symbol;Acc:VGNC:74129]     |   | 1.940211419 | 7.05E-08    | 5.81E-07    |
| ENSMMUG00000010453  | folate receptor beta [Source:VGNC Symbol;Acc:VGNC:72690]                                            |   | 2.566445511 | 3.14E-27    | 2.46E-25    |
| ENSMMUG00000010451  | inositol polyphosphate phosphatase like 1 [Source:VGNC Symbol;Acc:VGNC:73752]                       |   | 3.124938185 | 1.60E-21    | 6.80E-20    |
| ENSMMUG00000056905  |                                                                                                     |   | 4.795406415 | 2.68E-06    | 1.68E-05    |
| ENSMMUG00000005423  | caseinolytic mitochondrial matrix peptidase chaperone subunit B [Source:VGNC Symbol;Acc:VGNC:71375] |   | 1.117667784 | 2.53E-05    | 0.000131467 |
| ENSMMUG00000015054  | ArfGAP with RhoGAP domain, ankyrin repeat and PH domain 1 [Source:VGNC Symbol;Acc:VGNC:69844]       |   | 1.04271925  | 6.91E-08    | 5.71E-07    |
| ENSMMUG00000039301  | StAR related lipid transfer domain containing 10 [Source:NCBI gene;Acc:718503]                      |   | 1.231495053 | 0.000103707 | 0.000471769 |
| ENSMMUG00000001294  | FCH and double SH3 domains 2 [Source:VGNC Symbol;Acc:VGNC:72593]                                    |   | 1.333766725 | 1.25E-06    | 8.31E-06    |
| ENSMMUG00000003139  | Rho guanine nucleotide exchange factor 17 [Source:VGNC Symbol;Acc:VGNC:69880]                       |   | 1.029449195 | 4.35E-07    | 3.14E-06    |
| ENSMMUG00000003140  | RELT TNF receptor [Source:VGNC Symbol;Acc:VGNC:76728]                                               |   | 1.131037191 | 7.00E-15    | 1.48E-13    |
| ENSMMUG00000003142  | family with sequence similarity 168 member A [Source:VGNC Symbol;Acc:VGNC:72398]                    |   | 0.881296826 | 0.001499095 | 0.005156941 |
| ENSMMUG00000004791  | pleckstrin homology domain containing B1 [Source:VGNC Symbol;Acc:VGNC:76069]                        |   | 1.644659802 | 6.58E-07    | 4.62E-06    |
| ENSMMUG00000030964  | RAB6A, member RAS oncogene family [Source:NCBI gene;Acc:718717]                                     |   | 1.566024289 | 8.99E-21    | 3.47E-19    |

|                    |                                                                                                |             |             |             |
|--------------------|------------------------------------------------------------------------------------------------|-------------|-------------|-------------|
| ENSMMUG00000007382 | proteasomal ATPase associated factor 1 [Source:NCBI gene;Acc:718755]                           | 0.532369173 | 3.17E-06    | 1.95E-05    |
| ENSMMUG00000002605 | uncoupling protein 2 [Source:VGNC Symbol;Acc:VGNC:78709]                                       | -1.89803189 | 0.015320342 | 0.038937561 |
|                    |                                                                                                | -           |             |             |
| ENSMMUG00000010321 | C2 domain containing 3 centriole elongation regulator [Source:VGNC Symbol;Acc:VGNC:70375]      | 0.670782829 | 7.60E-05    | 0.000355056 |
| ENSMMUG00000017398 | protein phosphatase methylesterase 1 [Source:VGNC Symbol;Acc:VGNC:76345]                       | 3.300371549 | 0.005747018 | 0.016740969 |
| ENSMMUG00000017402 | phosphoglucomutase 2 like 1 [Source:VGNC Symbol;Acc:VGNC:75839]                                | 0.77846333  | 7.69E-05    | 0.000358839 |
| ENSMMUG00000013094 | lipoyl(octanoyl) transferase 2 [Source:NCBI gene;Acc:718425]                                   | -0.72623748 | 6.96E-06    | 4.03E-05    |
|                    |                                                                                                | -           |             |             |
| ENSMMUG00000013093 | uncharacterized LOC106993385 [Source:NCBI gene;Acc:106993385]                                  | 0.850588076 | 7.95E-09    | 7.57E-08    |
| ENSMMUG00000021039 | X-ray radiation resistance associated 1 [Source:NCBI gene;Acc:693788]                          | 3.113207029 | 8.18E-25    | 4.84E-23    |
|                    |                                                                                                | -           |             |             |
| ENSMMUG00000010686 | neuraminidase 3 [Source:VGNC Symbol;Acc:VGNC:75318]                                            | 0.602242225 | 0.012817697 | 0.033489509 |
|                    |                                                                                                | -           |             |             |
| ENSMMUG00000064190 |                                                                                                | 0.873859852 | 0.004274391 | 0.012968335 |
|                    |                                                                                                | -           |             |             |
| ENSMMUG00000009126 | solute carrier organic anion transporter family member 2B1 [Source:VGNC Symbol;Acc:VGNC:77603] | 1.017749112 | 1.78E-06    | 1.15E-05    |
|                    |                                                                                                | -           |             |             |
| ENSMMUG00000058539 |                                                                                                | 1.249143647 | 0.001766291 | 0.005966765 |
|                    |                                                                                                | -           |             |             |
| ENSMMUG00000010688 | olfactory receptor, family 2, subfamily AT, member 4 [Source:NCBI gene;Acc:694711]             | 1.166066471 | 0.00202578  | 0.006729911 |
|                    |                                                                                                | -           |             |             |
| ENSMMUG00000045580 | trophoblast glycoprotein like [Source:NCBI gene;Acc:695023]                                    | 1.091518826 | 0.001119517 | 0.003988094 |
|                    |                                                                                                | -           |             |             |
| ENSMMUG00000017529 | arrestin beta 1 [Source:VGNC Symbol;Acc:VGNC:70021]                                            | 0.762413132 | 0.000116163 | 0.000521198 |
| ENSMMUG00000007676 | microtubule associated protein 6 [Source:VGNC Symbol;Acc:VGNC:74640]                           | 0.423604454 | 0.002124806 | 0.007007088 |
| ENSMMUG00000000187 | UV radiation resistance associated [Source:VGNC Symbol;Acc:VGNC:78751]                         | 1.085001028 | 1.23E-05    | 6.78E-05    |
| ENSMMUG00000022401 | EMSY transcriptional repressor, BRCA2 interacting [Source:VGNC Symbol;Acc:VGNC:72065]          | 2.75790389  | 1.04E-26    | 7.73E-25    |
| ENSMMUG00000062043 |                                                                                                | 1.866074228 | 0.002199245 | 0.007212473 |
|                    |                                                                                                | -           |             |             |
| ENSMMUG00000018168 | alkaline ceramidase 3 [Source:VGNC Symbol;Acc:VGNC:69415]                                      | 0.546173969 | 0.000610853 | 0.002319851 |
|                    |                                                                                                | -           |             |             |
| ENSMMUG00000050318 | UDP-GlcNAc:betaGal beta-1,3-N-acetylglucosaminyltransferase 6 [Source:NCBI gene;Acc:697946]    | 0.526766054 | 0.00430705  | 0.013054068 |
|                    |                                                                                                | -           |             |             |
| ENSMMUG00000018174 | calpain 5 [Source:VGNC Symbol;Acc:VGNC:70534]                                                  | 1.001841625 | 0.003232413 | 0.010149661 |
|                    |                                                                                                | -           |             |             |
| ENSMMUG00000055575 | olfactory marker protein [Source:HGNC Symbol;Acc:HGNC:8136]                                    | 1.372957854 | 3.03E-05    | 0.000154684 |
| ENSMMUG00000001387 | p21 (RAC1) activated kinase 1 [Source:NCBI gene;Acc:698585]                                    | 2.026773379 | 2.88E-23    | 1.47E-21    |
|                    |                                                                                                | -           |             |             |
| ENSMMUG00000018944 | aquaporin 11 [Source:VGNC Symbol;Acc:VGNC:69866]                                               | 2.078314917 | 0.000669024 | 0.002514352 |
|                    |                                                                                                | -           |             |             |
| ENSMMUG00000018945 | chloride nucleotide-sensitive channel 1A [Source:VGNC Symbol;Acc:VGNC:71261]                   | 1.638166716 | 2.30E-05    | 0.000120684 |
|                    |                                                                                                | -           |             |             |
| ENSMMUG00000017355 | remodeling and spacing factor 1 [Source:VGNC Symbol;Acc:VGNC:77044]                            | 2.075746695 | 1.31E-16    | 3.26E-15    |
| ENSMMUG00000063047 |                                                                                                | 2.800824806 | 0.010251156 | 0.027650898 |
|                    |                                                                                                | -           |             |             |
| ENSMMUG00000007921 | discs large MAGUK scaffold protein 2 [Source:VGNC Symbol;Acc:VGNC:81388]                       | 1.185885351 | 0.002242199 | 0.007333878 |
|                    |                                                                                                | -           |             |             |
| ENSMMUG00000051202 |                                                                                                | 4.347045258 | 3.77E-06    | 2.29E-05    |
|                    |                                                                                                | -           |             |             |
| ENSMMUG00000060971 |                                                                                                | 1.057983397 | 3.42E-05    | 0.0001724   |
| ENSMMUG00000051769 |                                                                                                | -0.80653737 | 0.002479544 | 0.008017648 |
| ENSMMUG00000050245 |                                                                                                | -1.52988873 | 1.49E-05    | 8.15E-05    |
| ENSMMUG00000050119 |                                                                                                | 1.409182628 | 3.12E-18    | 9.18E-17    |
| ENSMMUG00000054765 | U6 spliceosomal RNA [Source:RFAM;Acc:RF00026]                                                  | 3.005877026 | 0.005315442 | 0.015643582 |
| ENSMMUG00000016540 | transmembrane protein 126B [Source:VGNC Symbol;Acc:VGNC:79893]                                 | -0.46261257 | 0.013094785 | 0.034081373 |

|                    |                                                                                                      |   |             |             |             |
|--------------------|------------------------------------------------------------------------------------------------------|---|-------------|-------------|-------------|
| ENSMMUG00000016543 | CREB/ATF bZIP transcription factor [Source:VGNC Symbol;Acc:VGNC:71538]                               | - | 1.463706852 | 1.98E-07    | 1.52E-06    |
| ENSMMUG00000063415 | coiled-coil domain containing 89 [Source:NCBI gene;Acc:703071]                                       | - | 1.708049919 | 0.002496155 | 0.008066675 |
| ENSMMUG00000012449 | synaptotagmin like 2 [Source:VGNC Symbol;Acc:VGNC:78123]                                             | - | 1.683820913 | 3.66E-05    | 0.000182944 |
| ENSMMUG00000013045 | coiled-coil domain containing 81 [Source:VGNC Symbol;Acc:VGNC:70868]                                 | - | 1.548040257 | 0.000167572 | 0.000725151 |
| ENSMMUG00000013055 | malic enzyme 3 [Source:VGNC Symbol;Acc:VGNC:74695]                                                   | - | 1.928464001 | 1.18E-06    | 7.93E-06    |
| ENSMMUG00000011116 | NADPH oxidase 4 [Source:VGNC Symbol;Acc:VGNC:75376]                                                  | - | 1.422207116 | 8.88E-12    | 1.28E-10    |
| ENSMMUG00000057627 |                                                                                                      | - | 0.886260558 | 5.09E-05    | 0.000247227 |
| ENSMMUG00000011646 | TATA-box binding protein associated factor, RNA polymerase I subunit D [Source:NCBI gene;Acc:696602] | - | 1.619603835 | 0.005542079 | 0.016223654 |
| ENSMMUG00000013601 | chromosome 14 C11orf54 homolog [Source:NCBI gene;Acc:696483]                                         | - | 0.916948661 | 4.97E-06    | 2.96E-05    |
| ENSMMUG00000061600 | V-set and transmembrane domain containing 5 [Source:NCBI gene;Acc:697779]                            | - | -0.73018586 | 0.013379864 | 0.034744071 |
| ENSMMUG00000004112 | MRE11 homolog, double strand break repair nuclease [Source:VGNC Symbol;Acc:VGNC:74926]               | - | 0.641531306 | 1.02E-06    | 6.90E-06    |
| ENSMMUG00000062781 | chromosome 14 C11orf97 homolog [Source:NCBI gene;Acc:106993442]                                      | - | 1.87584743  | 1.95E-15    | 4.30E-14    |
| ENSMMUG00000009394 | sestrin 3 [Source:VGNC Symbol;Acc:VGNC:77291]                                                        | - | 0.872720204 | 8.54E-09    | 8.07E-08    |
| ENSMMUG00000061815 |                                                                                                      | - | 2.309136295 | 6.79E-27    | 5.08E-25    |
| ENSMMUG00000025977 | Y RNA [Source:RFAM;Acc:RF00019]                                                                      | - | 2.740483443 | 0.019962192 | 0.048778928 |
| ENSMMUG00000016737 | contactin 5 [Source:VGNC Symbol;Acc:VGNC:71287]                                                      | - | 3.714341028 | 3.45E-06    | 2.11E-05    |
| ENSMMUG00000064295 |                                                                                                      | - | 2.726821333 | 0.000802999 | 0.002953492 |
| ENSMMUG00000020784 | centrosomal protein 126 [Source:NCBI gene;Acc:701911]                                                | - | 0.766556588 | 7.11E-05    | 0.000334638 |
| ENSMMUG00000003394 | cilia and flagella associated protein 300 [Source:VGNC Symbol;Acc:VGNC:71120]                        | - | 2.236338928 | 1.38E-48    | 9.31E-46    |
| ENSMMUG00000050759 | Metazoan signal recognition particle RNA [Source:RFAM;Acc:RF00017]                                   | - | 2.322444586 | 0.000135648 | 0.000599956 |
| ENSMMUG00000052815 |                                                                                                      | - | -1.96420097 | 0.000337562 | 0.00136665  |
| ENSMMUG00000003400 | baculoviral IAP repeat containing 2 [Source:NCBI gene;Acc:702592]                                    | - | 4.201432377 | 4.79E-23    | 2.38E-21    |
| ENSMMUG00000011015 | matrix metalloproteinase 27 [Source:VGNC Symbol;Acc:VGNC:74749]                                      | - | 0.995554149 | 1.92E-07    | 1.47E-06    |
| ENSMMUG00000018308 | dynein cytoplasmic 2 heavy chain 1 [Source:NCBI gene;Acc:704215]                                     | - | 1.347052489 | 0.00721201  | 0.020376093 |
| ENSMMUG00000057934 |                                                                                                      | - | 2.018859253 | 9.75E-07    | 6.62E-06    |
| ENSMMUG00000013419 | guanylate cyclase 1 soluble subunit alpha 2 [Source:VGNC Symbol;Acc:VGNC:82154]                      | - | 1.197370346 | 0.000565055 | 0.002165997 |
| ENSMMUG00000052457 | Metazoan signal recognition particle RNA [Source:RFAM;Acc:RF00017]                                   | - | -2.24138674 | 0.009482596 | 0.025860656 |
| ENSMMUG00000005440 | ELMO domain containing 1 [Source:VGNC Symbol;Acc:VGNC:72109]                                         | - | 0.996092431 | 0.005097673 | 0.015086508 |
| ENSMMUG00000010358 | solute carrier family 35 member F2 [Source:VGNC Symbol;Acc:VGNC:77565]                               | - | 0.965218859 | 0.018556582 | 0.04579699  |
| ENSMMUG00000052526 | RAB39A, member RAS oncogene family [Source:NCBI gene;Acc:707451]                                     | - | 1.931340817 | 1.16E-26    | 8.49E-25    |
| ENSMMUG00000001800 | cullin 5 [Source:VGNC Symbol;Acc:VGNC:71570]                                                         | - | 2.161837108 | 3.32E-09    | 3.36E-08    |
| ENSMMUG00000004157 | nuclear protein, coactivator of histone transcription [Source:VGNC Symbol;Acc:VGNC:75379]            | - | 2.235662853 | 1.08E-19    | 3.65E-18    |

|                     |                                                                                     |   |             |             |             |
|---------------------|-------------------------------------------------------------------------------------|---|-------------|-------------|-------------|
| ENSMMUG00000004153  | ATM serine/threonine kinase [Source:VGNC Symbol;Acc:VGNC:70173]                     | - | 1.811434467 | 9.23E-06    | 5.22E-05    |
| ENSMMUG00000000797  | exophilin 5 [Source:VGNC Symbol;Acc:VGNC:72412]                                     | - | 1.633438726 | 8.80E-09    | 8.30E-08    |
| ENSMMUG000000052460 |                                                                                     | - | 1.612861072 | 0.000220544 | 0.000931282 |
| ENSMMUG000000062793 |                                                                                     | - | 2.244977921 | 4.81E-10    | 5.53E-09    |
| ENSMMUG000000035318 | U2 spliceosomal RNA [Source:RFAM;Acc:RF00004]                                       | - | 1.932513141 | 0.010288795 | 0.027737289 |
| ENSMMUG000000065306 |                                                                                     | - | 0.945050974 | 8.46E-06    | 4.82E-05    |
| ENSMMUG00000014001  | protein phosphatase 2 scaffold subunit Abeta [Source:VGNC Symbol;Acc:VGNC:76375]    | - | 1.027460368 | 0.000517232 | 0.002003277 |
| ENSMMUG00000014003  | ALG9 alpha-1,2-mannosyltransferase [Source:NCBI gene;Acc:710567]                    | - | 0.601324604 | 0.014739967 | 0.037708074 |
| ENSMMUG00000007080  | 5-hydroxytryptamine receptor 3A [Source:VGNC Symbol;Acc:VGNC:73542]                 | - | 1.260221929 | 0.015105846 | 0.038471807 |
| ENSMMUG00000007085  | zinc finger and BTB domain containing 16 [Source:VGNC Symbol;Acc:VGNC:78845]        | - | 1.979033032 | 0.00164462  | 0.005587563 |
| ENSMMUG00000016128  | SIK family kinase 3 [Source:VGNC Symbol;Acc:VGNC:77330]                             | - | 0.575640707 | 0.000405907 | 0.001615133 |
| ENSMMUG00000002053  | SID1 transmembrane family member 2 [Source:VGNC Symbol;Acc:VGNC:77300]              | - | 0.703411958 | 0.001345896 | 0.004691968 |
| ENSMMUG00000007785  | beta-secretase 1 [Source:VGNC Symbol;Acc:VGNC:70215]                                | - | 2.289361882 | 0.018008194 | 0.044696488 |
| ENSMMUG000000059436 | interleukin 10 receptor subunit alpha [Source:NCBI gene;Acc:704383]                 | - | 2.406694841 | 1.07E-34    | 1.78E-32    |
| ENSMMUG000000053399 | small integral membrane protein 35 [Source:HGNC Symbol;Acc:HGNC:44179]              | - | 0.75864191  | 0.010753132 | 0.02877462  |
| ENSMMUG00000007620  | transmembrane serine protease 4 [Source:VGNC Symbol;Acc:VGNC:78577]                 | - | 2.187867915 | 4.88E-14    | 9.41E-13    |
| ENSMMUG000000063655 | sodium voltage-gated channel beta subunit 4 [Source:NCBI gene;Acc:100430940]        | - | 1.716593085 | 5.63E-09    | 5.49E-08    |
| ENSMMUG000000061384 | sodium voltage-gated channel beta subunit 2 [Source:NCBI gene;Acc:678698]           | - | 0.59948288  | 1.37E-07    | 1.08E-06    |
| ENSMMUG00000006268  | junction adhesion molecule like [Source:VGNC Symbol;Acc:VGNC:73860]                 | - | 1.324320474 | 6.85E-12    | 1.00E-10    |
| ENSMMUG00000017593  | CD3e molecule [Source:VGNC Symbol;Acc:VGNC:70764]                                   | - | 1.308190939 | 3.12E-14    | 6.10E-13    |
| ENSMMUG000000065091 | myelin protein zero like 2 [Source:NCBI gene;Acc:699330]                            | - | -1.21615963 | 5.07E-11    | 6.66E-10    |
| ENSMMUG000000049268 | CD3d molecule [Source:NCBI gene;Acc:699582]                                         | - | 0.736910784 | 0.017526414 | 0.043654134 |
| ENSMMUG000000045160 | ubiquitination factor E4A [Source:NCBI gene;Acc:699836]                             | - | 0.521433509 | 0.000169117 | 0.000730769 |
| ENSMMUG00000005482  | lysine methyltransferase 2A [Source:NCBI gene;Acc:705511]                           | - | 2.673197386 | 2.76E-10    | 3.29E-09    |
| ENSMMUG000000046655 | pleckstrin homology like domain family B member 1 [Source:NCBI gene;Acc:706336]     | - | 2.763992935 | 1.31E-21    | 5.63E-20    |
| ENSMMUG00000002549  | trehalase [Source:NCBI gene;Acc:706449]                                             | - | 2.424672012 | 3.59E-13    | 6.24E-12    |
| ENSMMUG00000009318  | BCL9 like [Source:VGNC Symbol;Acc:VGNC:70113]                                       | - | 1.19133912  | 5.57E-11    | 7.28E-10    |
| ENSMMUG00000005982  | coiled-coil domain containing 84 [Source:NCBI gene;Acc:707400]                      | - | 1.385924219 | 6.92E-08    | 5.71E-07    |
| ENSMMUG000000056381 | forkhead box R1 [Source:NCBI gene;Acc:707285]                                       | - | 2.606888268 | 8.85E-10    | 9.78E-09    |
| ENSMMUG00000016894  | ribosomal protein S25 [Source:NCBI gene;Acc:702593]                                 | - | 2.139338707 | 2.89E-08    | 2.53E-07    |
| ENSMMUG00000016946  | trafficking protein particle complex 4 [Source:VGNC Symbol;Acc:VGNC:79211]          | - | 1.308314492 | 9.06E-06    | 5.14E-05    |
| ENSMMUG00000016890  | solute carrier family 37 member 4 [Source:VGNC Symbol;Acc:VGNC:77591]               | - | 1.961761279 | 3.49E-29    | 3.19E-27    |
| ENSMMUG00000030891  | hypoxia up-regulated 1 [Source:VGNC Symbol;Acc:VGNC:73399]                          | - | 1.518805332 | 7.79E-20    | 2.68E-18    |
| ENSMMUG00000014864  | VPS11 core subunit of CORVET and HOPS complexes [Source:VGNC Symbol;Acc:VGNC:78965] | - | 1.554745228 | 3.38E-16    | 8.00E-15    |
| ENSMMUG000000059341 | Metazoan signal recognition particle RNA [Source:RFAM;Acc:RF00017]                  | - | 2.068022294 | 7.65E-33    | 1.02E-30    |
| ENSMMUG00000014866  | hydroxymethylbilane synthase [Source:VGNC Symbol;Acc:VGNC:73479]                    | - | 1.696504335 | 2.74E-07    | 2.05E-06    |

|                    |                                                                                                |             |             |             |
|--------------------|------------------------------------------------------------------------------------------------|-------------|-------------|-------------|
| ENSMMUG00000044496 | H2A histone family, member X [Source:NCBI gene;Acc:703073]                                     | 1.623083306 | 5.27E-12    | 7.87E-11    |
| ENSMMUG00000014872 | dolichyl-phosphate N-acetylglucosaminophosphotransferase 1 [Source:VGNC Symbol;Acc:VGNC:71971] | 2.074758174 | 3.99E-37    | 7.99E-35    |
| ENSMMUG00000014875 | C2CD2 like [Source:VGNC Symbol;Acc:VGNC:70435]                                                 | 1.947213843 | 6.01E-05    | 0.000287108 |
| ENSMMUG00000014877 | histone H4 transcription factor [Source:VGNC Symbol;Acc:VGNC:73408]                            | 0.735741432 | 0.011444727 | 0.030422173 |
| ENSMMUG00000013799 | ATP binding cassette subfamily G member 4 [Source:VGNC Symbol;Acc:VGNC:69390]                  | 3.890088861 | 3.30E-10    | 3.88E-09    |
| ENSMMUG00000012190 | PDZ domain containing 3 [Source:VGNC Symbol;Acc:VGNC:75832]                                    | 2.428994786 | 0.001021862 | 0.003669301 |
| ENSMMUG00000012191 | coiled-coil domain containing 153 [Source:NCBI gene;Acc:704216]                                | 2.126094474 | 0.000215189 | 0.000911785 |
| ENSMMUG00000008923 | Thy-1 cell surface antigen [Source:VGNC Symbol;Acc:VGNC:78352]                                 | 3.019805909 | 2.56E-10    | 3.06E-09    |
| ENSMMUG00000039397 | tubulin folding cofactor E like [Source:NCBI gene;Acc:706506]                                  | 1.685837726 | 1.61E-19    | 5.24E-18    |
| ENSMMUG00000053625 | sterol-C5-desaturase [Source:NCBI gene;Acc:706827]                                             | 1.787806841 | 7.49E-16    | 1.72E-14    |
| ENSMMUG00000014880 | sortilin related receptor 1 [Source:NCBI gene;Acc:713011]                                      | 1.750554192 | 1.08E-16    | 2.71E-15    |
| ENSMMUG00000054956 |                                                                                                | 3.154820986 | 0.003286072 | 0.010287617 |
| ENSMMUG00000015522 | GRAM domain containing 1B [Source:VGNC Symbol;Acc:VGNC:73028]                                  | 1.532929938 | 4.57E-10    | 5.27E-09    |
| ENSMMUG00000042169 | olfactory receptor 6T1 [Source:NCBI gene;Acc:709477]                                           | 0.615557005 | 0.009488393 | 0.025866337 |
| ENSMMUG00000058858 | olfactory receptor 10G9-like [Source:NCBI gene;Acc:709651]                                     | 1.995508622 | 0.014575223 | 0.03733815  |
| ENSMMUG00000008481 | neurogranin [Source:VGNC Symbol;Acc:VGNC:75528]                                                | 0.833323459 | 0.010454205 | 0.028101478 |
| ENSMMUG00000057600 | V-set and immunoglobulin domain containing 2 [Source:NCBI gene;Acc:712047]                     | -1.02213994 | 0.001562198 | 0.005341802 |
| ENSMMUG00000008486 | endothelial cell adhesion molecule [Source:VGNC Symbol;Acc:VGNC:72290]                         | 1.238839956 | 1.65E-07    | 1.28E-06    |
| ENSMMUG00000065277 | hepatic and glial cell adhesion molecule [Source:NCBI gene;Acc:716321]                         | 1.647963948 | 0.002428493 | 0.007879469 |
| ENSMMUG00000006375 | coiled-coil domain containing 15 [Source:NCBI gene;Acc:716362]                                 | 1.687823049 | 2.88E-08    | 2.51E-07    |
| ENSMMUG00000057529 |                                                                                                | -0.7813701  | 0.000204756 | 0.000871316 |
| ENSMMUG00000010009 | EI24 autophagy associated transmembrane protein [Source:VGNC Symbol;Acc:VGNC:72038]            | 0.624993691 | 0.001846341 | 0.006210304 |
| ENSMMUG00000058923 | Metazoan signal recognition particle RNA [Source:RFAM;Acc:RF00017]                             | 1.573402083 | 0.010017233 | 0.027083968 |
| ENSMMUG00000060925 |                                                                                                | 3.436593019 | 0.001121297 | 0.003993476 |
| ENSMMUG00000038587 | prostate and testis expressed 2 [Source:NCBI gene;Acc:717085]                                  | 4.206278578 | 7.05E-07    | 4.92E-06    |
| ENSMMUG00000060291 | prostate and testis expressed 3 [Source:NCBI gene;Acc:100379154]                               | 2.677165904 | 0.001622454 | 0.005521109 |
| ENSMMUG00000014120 | sc328 [Source:NCBI gene;Acc:574167]                                                            | -3.78237525 | 0.000129519 | 0.000576116 |
| ENSMMUG00000060101 |                                                                                                | 3.273270941 | 0.000127436 | 0.000567531 |
| ENSMMUG00000065066 | V-set and immunoglobulin domain containing 10 like 2 [Source:NCBI gene;Acc:717387]             | -0.70846326 | 3.00E-06    | 1.86E-05    |
| ENSMMUG00000007628 | cell adhesion associated, oncogene regulated [Source:VGNC Symbol;Acc:VGNC:70961]               | 4.066093136 | 4.42E-11    | 5.86E-10    |
| ENSMMUG00000007933 | RNA pseudouridine synthase D4 [Source:VGNC Symbol;Acc:VGNC:77108]                              | 2.302096085 | 0.020235596 | 0.049357548 |
| ENSMMUG00000007935 | family with sequence similarity 118 member B [Source:VGNC Symbol;Acc:VGNC:72360]               | 0.683312939 | 0.003124307 | 0.009839346 |
| ENSMMUG00000006929 | ST3 beta-galactoside alpha-2,3-sialyltransferase 4 [Source:VGNC Symbol;Acc:VGNC:77827]         | 2.088338467 | 6.54E-22    | 2.91E-20    |
| ENSMMUG00000006931 | kirre like nephrin family adhesion molecule 3 [Source:NCBI gene;Acc:714534]                    | 2.379246545 | 1.02E-31    | 1.12E-29    |
| ENSMMUG00000020706 | ETS proto-oncogene 1, transcription factor [Source:VGNC Symbol;Acc:VGNC:72439]                 | 2.374857166 | 4.68E-26    | 3.10E-24    |

|                     |                                                                                                |   |             |             |             |
|---------------------|------------------------------------------------------------------------------------------------|---|-------------|-------------|-------------|
| ENSMMUG00000060836  |                                                                                                | - | 2.851364928 | 9.33E-06    | 5.26E-05    |
| ENSMMUG00000003141  | Fli-1 proto-oncogene, ETS transcription factor [Source:VGNC Symbol;Acc:VGNC:72669]             |   | 0.539228357 | 0.001689192 | 0.005729567 |
| ENSMMUG00000003144  | potassium inwardly rectifying channel subfamily J member 1 [Source:VGNC Symbol;Acc:VGNC:73984] |   | 0.478329254 | 9.19E-05    | 0.000422659 |
| ENSMMUG00000017555  | PR/SET domain 10 [Source:VGNC Symbol;Acc:VGNC:76250]                                           |   | 0.599629181 | 8.99E-07    | 6.15E-06    |
| ENSMMUG00000018029  | amyloid beta precursor like protein 2 [Source:VGNC Symbol;Acc:VGNC:69984]                      |   | 1.291123696 | 2.52E-17    | 6.78E-16    |
| ENSMMUG00000018034  | suppression of tumorigenicity 14 [Source:VGNC Symbol;Acc:VGNC:77897]                           |   | 2.317485691 | 1.42E-56    | 2.63E-53    |
| ENSMMUG00000007107  | acyl-CoA dehydrogenase family member 8 [Source:VGNC Symbol;Acc:VGNC:69593]                     |   | 2.567272003 | 0.002856233 | 0.009101406 |
| ENSMMUG00000002250  | beta-1,3-glucuronyltransferase 1 [Source:VGNC Symbol;Acc:VGNC:70207]                           |   | 2.432555867 | 0.000203312 | 0.000865914 |
| ENSMMUG00000009187  | calcium voltage-gated channel subunit alpha1 B [Source:VGNC Symbol;Acc:VGNC:70499]             |   | 2.020275294 | 0.01989604  | 0.048641325 |
| ENSMMUG00000019611  | arrestin domain containing 1 [Source:VGNC Symbol;Acc:VGNC:69920]                               |   | -1.18672188 | 0.003521891 | 0.010917567 |
| ENSMMUG00000019607  | patatin like phospholipase domain containing 7 [Source:VGNC Symbol;Acc:VGNC:76104]             |   | 0.695940196 | 0.002301315 | 0.007507368 |
| ENSMMUG00000046202  | transmembrane protein 203 [Source:NCBI gene;Acc:706164]                                        |   | -0.57747091 | 4.72E-05    | 0.000231058 |
| ENSMMUG00000001677  | taperin [Source:NCBI gene;Acc:721581]                                                          |   | 0.462358703 | 0.007761586 | 0.021750626 |
| ENSMMUG00000047902  | SS nuclear autoantigen 1 [Source:NCBI gene;Acc:706507]                                         |   | -0.43515787 | 0.017060417 | 0.042694227 |
| ENSMMUG00000001669  | anaphase promoting complex subunit 2 [Source:VGNC Symbol;Acc:VGNC:69641]                       |   | 0.541628431 | 0.000997178 | 0.003595465 |
| ENSMMUG00000001667  | transmembrane protein 210 [Source:VGNC Symbol;Acc:VGNC:79945]                                  |   | 0.76520952  | 1.63E-06    | 1.07E-05    |
| ENSMMUG00000063598  | leucine rich repeat containing 26 [Source:NCBI gene;Acc:706616]                                |   | 1.231693236 | 0.004630988 | 0.013910785 |
| ENSMMUG00000022750  | dipeptidyl peptidase 7 [Source:NCBI gene;Acc:721595]                                           |   | -0.41564617 | 0.00429728  | 0.013032447 |
| ENSMMUG00000021428  | lipocalin 12 [Source:VGNC Symbol;Acc:VGNC:74143]                                               |   | 2.02093368  | 1.74E-20    | 6.51E-19    |
| ENSMMUG00000032142  | complement C8 gamma chain [Source:VGNC Symbol;Acc:VGNC:70481]                                  |   | 2.273640864 | 2.50E-08    | 2.21E-07    |
| ENSMMUG00000011528  | F-box and WD repeat domain containing 5 [Source:VGNC Symbol;Acc:VGNC:72503]                    |   | 1.558652008 | 1.53E-08    | 1.39E-07    |
| ENSMMUG00000011527  | TNF receptor associated factor 2 [Source:VGNC Symbol;Acc:VGNC:78641]                           |   | 1.335935034 | 2.97E-08    | 2.59E-07    |
| ENSMMUG00000005048  | MAM domain containing 4 [Source:VGNC Symbol;Acc:VGNC:74345]                                    |   | 1.228904586 | 5.66E-12    | 8.41E-11    |
| ENSMMUG00000005047  | phosphohistidine phosphatase 1 [Source:NCBI gene;Acc:721674]                                   |   | 1.953802158 | 0.00267533  | 0.008583977 |
| ENSMMUG00000005046  | apical junction component 1 homolog [Source:VGNC Symbol;Acc:VGNC:69768]                        |   | 1.357255405 | 0.011442068 | 0.030420558 |
| ENSMMUG00000005042  | RAB, member RAS oncogene family like 6 [Source:VGNC Symbol;Acc:VGNC:76529]                     |   | -1.26203369 | 5.67E-08    | 4.73E-07    |
| ENSMMUG00000005040  | coiled-coil domain containing 183 [Source:NCBI gene;Acc:709019]                                |   | 1.382602512 | 4.35E-05    | 0.000213732 |
| ENSMMUG00000026981  | EGF like domain multiple 7 [Source:VGNC Symbol;Acc:VGNC:72079]                                 |   | -1.23028957 | 3.81E-07    | 2.77E-06    |
| ENSMMUG00000056009  |                                                                                                |   | 1.300011327 | 3.59E-07    | 2.62E-06    |
| ENSMMUG00000003106  | SEC16 homolog A, endoplasmic reticulum export factor [Source:VGNC Symbol;Acc:VGNC:77326]       |   | 1.784642013 | 5.72E-14    | 1.10E-12    |
| ENSMMUG00000003105  | inositol polyphosphate-5-phosphatase E [Source:VGNC Symbol;Acc:VGNC:73637]                     |   | 1.764026963 | 1.48E-22    | 7.05E-21    |
| ENSMMUG00000003098  | peptidase, mitochondrial processing alpha subunit [Source:VGNC Symbol;Acc:VGNC:76062]          |   | 2.248194128 | 1.92E-29    | 1.81E-27    |
| ENSMMUG00000003081  | G protein signaling modulator 1 [Source:VGNC Symbol;Acc:VGNC:72960]                            |   | 0.734298708 | 0.001512284 | 0.005196286 |
| ENSMMUG00000001409  | coiled-coil domain containing 187 [Source:NCBI gene;Acc:710749]                                |   | 1.839023293 | 3.83E-15    | 8.27E-14    |
| ENSMMUG00000004885  | quiescin sulfhydryl oxidase 2 [Source:VGNC Symbol;Acc:VGNC:76568]                              |   | 1.807063252 | 0.003408487 | 0.010614839 |
| ENSMMUG000000045749 |                                                                                                |   | 1.651124172 | 0.001347578 | 0.004696729 |
| ENSMMUG00000000276  | NACC family member 2 [Source:VGNC Symbol;Acc:VGNC:75013]                                       |   | 2.952181789 | 0.001724895 | 0.005837562 |
| ENSMMUG00000016827  | UBA domain containing 1 [Source:VGNC Symbol;Acc:VGNC:79837]                                    |   | 2.477554599 | 4.97E-07    | 3.55E-06    |
| ENSMMUG00000055942  | spermatogenesis and oogenesis specific basic helix-loop-helix 1 [Source:NCBI gene;Acc:721833]  |   | 1.367108008 | 0.003899926 | 0.011954506 |



|                     |                                                                                 |             |             |             |
|---------------------|---------------------------------------------------------------------------------|-------------|-------------|-------------|
| ENSMMUG00000012147  | collagen type V alpha 1 chain [Source:NCBI gene;Acc:722014]                     | 2.859911385 | 9.61E-20    | 3.27E-18    |
| ENSMMUG00000008183  | retinoid X receptor alpha [Source:VGNC Symbol;Acc:VGNC:76951]                   | 3.591992738 | 0.000113741 | 0.000511724 |
| ENSMMUG000000051925 |                                                                                 | 2.844197766 | 1.30E-19    | 4.33E-18    |
| ENSMMUG000000064229 |                                                                                 | 2.058179474 | 5.67E-08    | 4.73E-07    |
|                     |                                                                                 | -           |             |             |
| ENSMMUG00000005463  | bromodomain containing 3 [Source:VGNC Symbol;Acc:VGNC:70281]                    | 1.001775855 | 1.13E-06    | 7.63E-06    |
|                     |                                                                                 | -           |             |             |
| ENSMMUG00000017214  | vav guanine nucleotide exchange factor 2 [Source:VGNC Symbol;Acc:VGNC:78758]    | 1.137725434 | 0.016727977 | 0.042011159 |
|                     |                                                                                 | -           |             |             |
| ENSMMUG00000017210  | sarcosine dehydrogenase [Source:VGNC Symbol;Acc:VGNC:76971]                     | 2.191678333 | 7.66E-11    | 9.83E-10    |
|                     |                                                                                 | -           |             |             |
| ENSMMUG00000017207  | dopamine beta-hydroxylase [Source:VGNC Symbol;Acc:VGNC:71740]                   | 2.049243004 | 2.11E-06    | 1.34E-05    |
| ENSMMUG00000022348  | surfeit 4 [Source:VGNC Symbol;Acc:VGNC:78060]                                   | 1.030860505 | 1.44E-05    | 7.87E-05    |
| ENSMMUG000000057105 | Metazoan signal recognition particle RNA [Source:RFAM;Acc:RF00017]              | 0.810873119 | 0.008563924 | 0.023694589 |
| ENSMMUG00000022346  | surfeit 2 [Source:VGNC Symbol;Acc:VGNC:78059]                                   | 0.859708894 | 0.004487081 | 0.013533335 |
|                     |                                                                                 | -           |             |             |
| ENSMMUG00000018468  | senataxin [Source:VGNC Symbol;Acc:VGNC:77356]                                   | 0.830136547 | 1.30E-05    | 7.19E-05    |
|                     |                                                                                 | -           |             |             |
| ENSMMUG00000006479  | Rap guanine nucleotide exchange factor 1 [Source:VGNC Symbol;Acc:VGNC:76582]    | 0.469347491 | 1.27E-05    | 7.03E-05    |
|                     |                                                                                 | -           |             |             |
| ENSMMUG000000050752 | Metazoan signal recognition particle RNA [Source:RFAM;Acc:RF00017]              | 1.718206119 | 0.006628681 | 0.018948214 |
|                     |                                                                                 | -           |             |             |
| ENSMMUG000000051984 |                                                                                 | 1.426940868 | 0.013570888 | 0.035172363 |
| ENSMMUG00000009976  | uridine-cytidine kinase 1 [Source:VGNC Symbol;Acc:VGNC:78967]                   | 0.309826282 | 0.007469479 | 0.021015437 |
| ENSMMUG00000009973  | proline rich coiled-coil 2B [Source:VGNC Symbol;Acc:VGNC:76327]                 | 1.469195908 | 0.004374936 | 0.013230079 |
| ENSMMUG000000059098 | Small nucleolar RNA SNORD62 [Source:RFAM;Acc:RF00153]                           | 2.239093183 | 0.010576811 | 0.028374477 |
| ENSMMUG000000021724 | nucleoporin 214 [Source:VGNC Symbol;Acc:VGNC:75560]                             | 0.960153549 | 0.016948803 | 0.04246507  |
| ENSMMUG00000002267  | laminin subunit gamma 3 [Source:NCBI gene;Acc:722430]                           | 3.601371618 | 1.03E-11    | 1.48E-10    |
| ENSMMUG000000036223 |                                                                                 | 3.351473904 | 2.69E-06    | 1.68E-05    |
| ENSMMUG000000059085 | PR/SET domain 12 [Source:NCBI gene;Acc:716040]                                  | -0.95015572 | 0.000324186 | 0.001317894 |
|                     |                                                                                 | -           |             |             |
| ENSMMUG00000008249  | far upstream element binding protein 3 [Source:NCBI gene;Acc:722470]            | 0.774299242 | 0.000255992 | 0.001065796 |
| ENSMMUG00000001522  | argininosuccinate synthase 1 [Source:NCBI gene;Acc:716168]                      | -0.75249359 | 0.001708296 | 0.005789313 |
|                     |                                                                                 | -           |             |             |
| ENSMMUG000000049177 | neuronal calcium sensor 1 [Source:NCBI gene;Acc:722507]                         | 0.446546085 | 0.008940343 | 0.02458926  |
| ENSMMUG00000003797  | ubiquitin specific peptidase 20 [Source:VGNC Symbol;Acc:VGNC:78740]             | 2.269403198 | 5.92E-08    | 4.93E-07    |
|                     |                                                                                 | -           |             |             |
| ENSMMUG00000003793  | torsin family 1 member B [Source:VGNC Symbol;Acc:VGNC:78624]                    | 1.026550845 | 0.011017158 | 0.029407426 |
|                     |                                                                                 | -           |             |             |
| ENSMMUG000000050493 | paired related homeobox 2 [Source:NCBI gene;Acc:716699]                         | 1.606681629 | 0.007322193 | 0.020640204 |
|                     |                                                                                 | -           |             |             |
| ENSMMUG00000009965  | chromosome 15 C9orf50 homolog [Source:VGNC Symbol;Acc:VGNC:70365]               | 3.234742519 | 2.25E-32    | 2.78E-30    |
| ENSMMUG000000049483 |                                                                                 | -2.4266237  | 0.00893683  | 0.024588077 |
|                     |                                                                                 | -           |             |             |
| ENSMMUG000000055560 |                                                                                 | 1.497449648 | 0.008719926 | 0.02407232  |
| ENSMMUG000000051852 | Metazoan signal recognition particle RNA [Source:RFAM;Acc:RF00017]              | 1.222479825 | 0.000292481 | 0.001196882 |
| ENSMMUG00000002515  | protein phosphatase 2 phosphatase activator [Source:VGNC Symbol;Acc:VGNC:76583] | 1.979901106 | 1.13E-14    | 2.35E-13    |
| ENSMMUG00000011767  | carnitine O-acetyltransferase [Source:VGNC Symbol;Acc:VGNC:71483]               | 1.236345978 | 1.87E-09    | 1.97E-08    |
| ENSMMUG000000032030 | dolichyldiphosphatase 1 [Source:VGNC Symbol;Acc:VGNC:71947]                     | 0.992748957 | 1.37E-06    | 9.08E-06    |
| ENSMMUG00000005989  | GLE1 RNA export mediator [Source:VGNC Symbol;Acc:VGNC:73067]                    | 1.557731914 | 1.83E-17    | 4.98E-16    |
|                     |                                                                                 | -           |             |             |
| ENSMMUG00000005987  | outer dense fiber of sperm tails 2 [Source:VGNC Symbol;Acc:VGNC:75580]          | 0.654107178 | 0.001187049 | 0.004199411 |
|                     |                                                                                 | -           |             |             |
| ENSMMUG00000009961  | niban apoptosis regulator 2 [Source:VGNC Symbol;Acc:VGNC:75254]                 | 1.006407138 | 0.002446871 | 0.00793334  |

|                    |                                                                                              |   |             |             |             |
|--------------------|----------------------------------------------------------------------------------------------|---|-------------|-------------|-------------|
| ENSMMUG0000009956  | leucine rich repeat and sterile alpha motif containing 1 [Source:VGNC Symbol;Acc:VGNC:74353] | - | 0.896277451 | 0.000786711 | 0.002904389 |
| ENSMMUG00000060992 | Metazoan signal recognition particle RNA [Source:RFAM;Acc:RF00017]                           | - | 1.365506767 | 0.001532718 | 0.00525554  |
| ENSMMUG00000021760 | zinc finger protein 79 [Source:NCBI gene;Acc:700961]                                         | - | 1.203912408 | 1.98E-08    | 1.77E-07    |
| ENSMMUG00000012167 | solute carrier family 2 member 8 [Source:VGNC Symbol;Acc:VGNC:77470]                         | - | 1.633839886 | 3.07E-05    | 0.000156224 |
| ENSMMUG00000012163 | GTPase activating Rap/RanGAP domain like 3 [Source:VGNC Symbol;Acc:VGNC:72785]               | - | 0.888993089 | 0.0001077   | 0.000487989 |
| ENSMMUG00000023495 | Ral GEF with PH domain and SH3 binding motif 1 [Source:VGNC Symbol;Acc:VGNC:76492]           | - | 0.681142031 | 1.39E-05    | 7.60E-05    |
| ENSMMUG00000054544 | Metazoan signal recognition particle RNA [Source:RFAM;Acc:RF00017]                           | - | 1.838722229 | 0.003468431 | 0.010774366 |
| ENSMMUG00000050175 | zinc finger and BTB domain containing 34 [Source:NCBI gene;Acc:701665]                       | - | 1.001787613 | 0.000251804 | 0.001050422 |
| ENSMMUG00000064247 |                                                                                              | - | 0.562537256 | 0.018380832 | 0.045454016 |
| ENSMMUG00000052476 | zinc finger and BTB domain containing 43 [Source:NCBI gene;Acc:701797]                       | - | 0.945017889 | 3.85E-09    | 3.85E-08    |
| ENSMMUG00000016826 | MAPK associated protein 1 [Source:VGNC Symbol;Acc:VGNC:74531]                                | - | 0.780011573 | 0.002799269 | 0.00893717  |
| ENSMMUG00000003668 | GTPase activating protein and VPS9 domains 1 [Source:VGNC Symbol;Acc:VGNC:72767]             | - | 0.80251403  | 2.29E-07    | 1.73E-06    |
| ENSMMUG00000005215 | Rab9 effector protein with kelch motifs [Source:VGNC Symbol;Acc:VGNC:76495]                  | - | 0.948270914 | 3.00E-05    | 0.000153284 |
| ENSMMUG00000051739 | Metazoan signal recognition particle RNA [Source:RFAM;Acc:RF00017]                           | - | 1.888318461 | 0.010960271 | 0.029270813 |
| ENSMMUG00000061871 |                                                                                              | - | 1.991142104 | 0.002629712 | 0.008448578 |
| ENSMMUG00000011183 | olfactomedin like 2A [Source:VGNC Symbol;Acc:VGNC:75472]                                     | - | -2.28453279 | 7.98E-08    | 6.52E-07    |
| ENSMMUG00000011185 | nuclear receptor subfamily 6 group A member 1 [Source:VGNC Symbol;Acc:VGNC:75522]            | - | 0.687689827 | 0.020469033 | 0.049795893 |
| ENSMMUG00000033102 | mml-mir-181b-2 [Source:miRBase;Acc:MI0007646]                                                | - | 3.226405411 | 9.03E-06    | 5.12E-05    |
| ENSMMUG00000026876 | mml-mir-181a-2 [Source:miRBase;Acc:MI0002808]                                                | - | 3.774029511 | 2.65E-07    | 1.98E-06    |
| ENSMMUG00000014111 | nuclear receptor subfamily 5 group A member 1 [Source:VGNC Symbol;Acc:VGNC:75520]            | - | 0.373781103 | 0.002203132 | 0.007223624 |
| ENSMMUG00000014110 | adhesion G protein-coupled receptor D2 [Source:VGNC Symbol;Acc:VGNC:69462]                   | - | 0.868220423 | 1.05E-13    | 1.95E-12    |
| ENSMMUG00000054736 |                                                                                              | - | 2.865562992 | 2.05E-05    | 0.000108788 |
| ENSMMUG00000063639 |                                                                                              | - | 1.729485022 | 3.00E-07    | 2.22E-06    |
| ENSMMUG00000038944 |                                                                                              | - | 2.618877472 | 1.39E-36    | 2.72E-34    |
| ENSMMUG00000058731 | olfactory receptor 1B1 [Source:NCBI gene;Acc:699905]                                         | - | 0.355520824 | 0.001204208 | 0.004252003 |
| ENSMMUG00000043396 | Metazoan signal recognition particle RNA [Source:RFAM;Acc:RF00017]                           | - | 3.904282006 | 2.81E-07    | 2.09E-06    |
| ENSMMUG00000005595 | RAB14, member RAS oncogene family [Source:NCBI gene;Acc:699837]                              | - | 2.857276373 | 1.95E-12    | 3.11E-11    |
| ENSMMUG00000012668 | centriolin [Source:VGNC Symbol;Acc:VGNC:71204]                                               | - | 2.652185494 | 4.17E-40    | 1.14E-37    |
| ENSMMUG00000058237 |                                                                                              | - | 1.233198868 | 5.42E-10    | 6.18E-09    |
| ENSMMUG00000013105 | astrotactin 2 [Source:VGNC Symbol;Acc:VGNC:70087]                                            | - | 0.694314212 | 0.000439473 | 0.001731503 |
| ENSMMUG00000065273 |                                                                                              | - | 2.445761573 | 5.83E-05    | 0.000279132 |
| ENSMMUG00000013107 | tripartite motif containing 32 [Source:VGNC Symbol;Acc:VGNC:79032]                           | - | 0.854820608 | 6.85E-14    | 1.30E-12    |
| ENSMMUG00000013099 | pappalysin 1 [Source:VGNC Symbol;Acc:VGNC:75756]                                             | - | 1.247892185 | 0.0002871   | 0.001176808 |
| ENSMMUG00000003356 | tenascin C [Source:VGNC Symbol;Acc:VGNC:79960]                                               | - | 1.236264229 | 4.39E-10    | 5.07E-09    |
| ENSMMUG00000041301 | TNF superfamily member 8 [Source:NCBI gene;Acc:702944]                                       | - | 1.677198928 | 1.28E-05    | 7.07E-05    |
| ENSMMUG00000064892 |                                                                                              | - | 2.118708308 | 2.34E-13    | 4.13E-12    |
| ENSMMUG00000062461 | chromosome 15 C9orf43 homolog [Source:NCBI gene;Acc:704968]                                  | - | 2.970850733 | 0.004673113 | 0.014017449 |
| ENSMMUG00000044537 | DNA polymerase epsilon 3, accessory subunit [Source:NCBI gene;Acc:705074]                    | - | -2.84916952 | 2.85E-06    | 1.78E-05    |
| ENSMMUG00000031965 | aminolevulinate dehydratase [Source:VGNC Symbol;Acc:VGNC:69779]                              | - | 1.453362862 | 0.010129127 | 0.027360872 |

|                    |                                                                                                 |   |             |             |             |
|--------------------|-------------------------------------------------------------------------------------------------|---|-------------|-------------|-------------|
| ENSMMUG00000057031 |                                                                                                 | - | 2.432054281 | 1.14E-05    | 6.35E-05    |
| ENSMMUG0000005851  | B-box and SPRY domain containing [Source:VGNC Symbol;Acc:VGNC:70342]                            | - | 2.905449136 | 2.88E-10    | 3.42E-09    |
| ENSMMUG00000011654 | hydroxysteroid dehydrogenase like 2 [Source:VGNC Symbol;Acc:VGNC:73414]                         | - | 2.696818103 | 0.013889037 | 0.035896553 |
| ENSMMUG00000000464 | polypyrimidine tract binding protein 3 [Source:VGNC Symbol;Acc:VGNC:76244]                      | - | 0.678432152 | 0.000371148 | 0.001489209 |
| ENSMMUG00000021097 | sushi domain containing 1 [Source:VGNC Symbol;Acc:VGNC:78207]                                   | - | 1.630601374 | 6.45E-06    | 3.76E-05    |
| ENSMMUG00000000695 | transmembrane protein 245 [Source:VGNC Symbol;Acc:VGNC:78933]                                   | - | 0.887094522 | 5.39E-05    | 0.000260082 |
| ENSMMUG00000060448 | Y RNA [Source:RFAM;Acc:RF00019]                                                                 | - | 1.205052606 | 0.002998065 | 0.009486089 |
| ENSMMUG00000000690 | catenin alpha like 1 [Source:VGNC Symbol;Acc:VGNC:71544]                                        | - | 1.484176733 | 3.18E-06    | 1.96E-05    |
| ENSMMUG00000053648 | actin binding transcription modulator [Source:NCBI gene;Acc:710486]                             | - | -1.64900215 | 2.35E-11    | 3.20E-10    |
| ENSMMUG00000064066 |                                                                                                 | - | 2.002066133 | 7.78E-06    | 4.45E-05    |
| ENSMMUG00000019357 | elongator complex protein 1 [Source:VGNC Symbol;Acc:VGNC:72257]                                 | - | 0.813944327 | 1.06E-05    | 5.93E-05    |
| ENSMMUG00000019355 | actin like 7A [Source:VGNC Symbol;Acc:VGNC:69417]                                               | - | 1.286433921 | 0.000889603 | 0.00323195  |
| ENSMMUG00000019354 | actin like 7B [Source:VGNC Symbol;Acc:VGNC:69421]                                               | - | 1.808118661 | 1.50E-05    | 8.20E-05    |
| ENSMMUG00000023797 | post-GPI attachment to proteins GalNAc transferase 4 [Source:VGNC Symbol;Acc:VGNC:79688]        | - | 1.717531307 | 1.52E-06    | 9.96E-06    |
| ENSMMUG00000009775 | caveolae associated protein 4 [Source:NCBI gene;Acc:714379]                                     | - | 0.938793996 | 5.40E-08    | 4.53E-07    |
| ENSMMUG00000057137 |                                                                                                 | - | 0.942592781 | 0.004501391 | 0.013568218 |
| ENSMMUG00000011410 | nuclear receptor subfamily 4 group A member 3 [Source:VGNC Symbol;Acc:VGNC:75519]               | - | 0.982767816 | 0.009877567 | 0.026764903 |
| ENSMMUG00000010661 | SEC61 translocon subunit beta [Source:NCBI gene;Acc:717815]                                     | - | 0.457408292 | 0.010772027 | 0.028814784 |
| ENSMMUG00000001304 | transforming growth factor beta receptor 1 [Source:VGNC Symbol;Acc:VGNC:78337]                  | - | 0.639063862 | 0.000269455 | 0.001115511 |
| ENSMMUG00000009831 | TBC1 domain family member 2 [Source:VGNC Symbol;Acc:VGNC:78157]                                 | - | 1.850750744 | 1.02E-05    | 5.74E-05    |
| ENSMMUG00000008670 | SH2 domain containing adaptor protein B [Source:VGNC Symbol;Acc:VGNC:82236]                     | - | 0.664939733 | 0.012347274 | 0.03246057  |
| ENSMMUG00000047381 | DDB1 and CUL4 associated factor 10 [Source:NCBI gene;Acc:716256]                                | - | 0.439507638 | 0.014798523 | 0.037825249 |
| ENSMMUG00000017886 | F-box protein 10 [Source:NCBI gene;Acc:718443]                                                  | - | 1.057530034 | 6.50E-06    | 3.79E-05    |
| ENSMMUG00000017892 | RNA polymerase I subunit E [Source:VGNC Symbol;Acc:VGNC:76047]                                  | - | 1.021372967 | 2.29E-06    | 1.45E-05    |
| ENSMMUG00000007421 | zinc finger CCHC-type containing 7 [Source:VGNC Symbol;Acc:VGNC:82088]                          | - | 1.228305603 | 2.88E-13    | 5.03E-12    |
| ENSMMUG00000019639 | paired box 5 [Source:VGNC Symbol;Acc:VGNC:75764]                                                | - | 2.617297439 | 1.05E-08    | 9.82E-08    |
| ENSMMUG00000006135 | glucosamine (UDP-N-acetyl)-2-epimerase/N-acetylmannosamine kinase [Source:NCBI gene;Acc:693525] | - | 0.901924754 | 0.001121585 | 0.003993545 |
| ENSMMUG00000054523 | Metazoan signal recognition particle RNA [Source:RFAM;Acc:RF00017]                              | - | 0.776085665 | 3.43E-09    | 3.47E-08    |
| ENSMMUG00000010213 | GLI pathogenesis related 2 [Source:VGNC Symbol;Acc:VGNC:81414]                                  | - | 4.340308316 | 2.22E-05    | 0.000116769 |
| ENSMMUG00000022613 | reversion inducing cysteine rich protein with kazal motifs [Source:VGNC Symbol;Acc:VGNC:76722]  | - | 2.236075827 | 2.38E-43    | 1.01E-40    |
| ENSMMUG00000059406 | RGP1 homolog, RAB6A GEF complex partner 1 [Source:NCBI gene;Acc:695936]                         | - | 4.355132371 | 1.74E-09    | 1.85E-08    |
| ENSMMUG00000016331 | glucosylceramidase beta 2 [Source:VGNC Symbol;Acc:VGNC:72741]                                   | - | -3.00348933 | 0.000301146 | 0.0012303   |
| ENSMMUG00000016328 | cAMP responsive element binding protein 3 [Source:VGNC Symbol;Acc:VGNC:71486]                   | - | 3.137781612 | 0.009526381 | 0.025946049 |
| ENSMMUG00000031856 | talin 1 [Source:VGNC Symbol;Acc:VGNC:78371]                                                     | - | 0.808239673 | 1.37E-06    | 9.08E-06    |

|                    |                                                                                             |             |             |             |
|--------------------|---------------------------------------------------------------------------------------------|-------------|-------------|-------------|
| ENSMMUG00000016321 | tropomyosin 2 [Source:NCBI gene;Acc:696604]                                                 | 0.408396485 | 0.002111462 | 0.006975493 |
| ENSMMUG00000050822 | carbonic anhydrase 9 [Source:NCBI gene;Acc:696729]                                          | 1.780400036 | 1.26E-21    | 5.43E-20    |
| ENSMMUG00000048375 | Metazoan signal recognition particle RNA [Source:RFAM;Acc:RF00017]                          | 1.937011942 | 3.58E-41    | 1.11E-38    |
| ENSMMUG00000016323 | Rho guanine nucleotide exchange factor 39 [Source:VGNC Symbol;Acc:VGNC:69912]               | 1.964386024 | 2.49E-29    | 2.34E-27    |
| ENSMMUG00000016327 | coiled-coil domain containing 107 [Source:VGNC Symbol;Acc:VGNC:70656]                       | 2.04227652  | 2.63E-27    | 2.08E-25    |
| ENSMMUG00000038988 | RNase MRP [Source:RFAM;Acc:RF00030]                                                         | 2.614131969 | 0.00221569  | 0.007256775 |
|                    |                                                                                             | -           |             |             |
| ENSMMUG00000016316 | testis associated actin remodelling kinase 1 [Source:VGNC Symbol;Acc:VGNC:78314]            | 1.667042275 | 1.59E-07    | 1.24E-06    |
|                    |                                                                                             | -           |             |             |
| ENSMMUG00000049863 |                                                                                             | 3.338875435 | 0.003663595 | 0.01130485  |
|                    |                                                                                             | -           |             |             |
| ENSMMUG00000016314 | family with sequence similarity 166 member B [Source:VGNC Symbol;Acc:VGNC:72421]            | 2.883061008 | 6.30E-27    | 4.74E-25    |
|                    |                                                                                             | -           |             |             |
| ENSMMUG00000016313 | RUN and SH3 domain containing 2 [Source:VGNC Symbol;Acc:VGNC:82230]                         | 1.345323873 | 6.52E-11    | 8.47E-10    |
| ENSMMUG00000059191 | stomatin like 2 [Source:NCBI gene;Acc:698458]                                               | 1.314907983 | 0.005238811 | 0.0154303   |
| ENSMMUG00000011866 | phosphatidylinositol glycan anchor biosynthesis class O [Source:VGNC Symbol;Acc:VGNC:75851] | 1.967511197 | 0.000151637 | 0.000662964 |
| ENSMMUG00000020190 | valosin containing protein [Source:VGNC Symbol;Acc:VGNC:78762]                              | 2.376826027 | 7.51E-20    | 2.59E-18    |
| ENSMMUG00000061896 |                                                                                             | 2.635873084 | 4.04E-28    | 3.35E-26    |
| ENSMMUG00000044048 | Metazoan signal recognition particle RNA [Source:RFAM;Acc:RF00017]                          | 2.30831761  | 2.02E-12    | 3.19E-11    |
| ENSMMUG00000020188 | chromosome 15 C9orf131 homolog [Source:VGNC Symbol;Acc:VGNC:70451]                          | 0.689864553 | 4.07E-06    | 2.46E-05    |
| ENSMMUG00000022895 | DnaJ heat shock protein family (Hsp40) member B5 [Source:NCBI gene;Acc:699081]              | 0.733557676 | 1.08E-12    | 1.77E-11    |
| ENSMMUG00000006927 | PHD finger protein 24 [Source:NCBI gene;Acc:698904]                                         | 0.719568535 | 0.000717604 | 0.002671821 |
|                    |                                                                                             | -           |             |             |
| ENSMMUG00000020780 | ciliary neurotrophic factor receptor [Source:VGNC Symbol;Acc:VGNC:71282]                    | 0.546431607 | 0.006562014 | 0.018786615 |
| ENSMMUG00000031826 | ubiquitin associated protein 1 [Source:VGNC Symbol;Acc:VGNC:78686]                          | 1.085046527 | 0.020358253 | 0.04958333  |
| ENSMMUG00000058149 |                                                                                             | 0.952181788 | 0.002580206 | 0.008314743 |
| ENSMMUG00000017458 | DDB1 and CUL4 associated factor 12 [Source:VGNC Symbol;Acc:VGNC:71678]                      | 1.353938342 | 0.000342839 | 0.001386125 |
| ENSMMUG00000012597 | ubiquitin associated protein 2 [Source:VGNC Symbol;Acc:VGNC:78949]                          | 1.883457427 | 0.000432985 | 0.001710487 |
| ENSMMUG00000056939 |                                                                                             | 1.647182998 | 0.001301243 | 0.004555581 |
| ENSMMUG00000035888 | small nucleolar RNA, C/D box 121A [Source:HGNC Symbol;Acc:HGNC:33560]                       | 2.226502205 | 1.74E-05    | 9.37E-05    |
| ENSMMUG00000053200 | ubiquitin conjugating enzyme E2 R2 [Source:NCBI gene;Acc:701507]                            | 1.296090637 | 9.77E-06    | 5.49E-05    |
| ENSMMUG00000000389 | nucleolar protein 6 [Source:VGNC Symbol;Acc:VGNC:75218]                                     | 1.055214925 | 5.65E-10    | 6.43E-09    |
| ENSMMUG00000003314 | aquaporin 3 (Gill blood group) [Source:NCBI gene;Acc:702721]                                | 1.136363969 | 3.90E-05    | 0.000193227 |
| ENSMMUG00000001545 | aquaporin 7 [Source:NCBI gene;Acc:702836]                                                   | 1.169408321 | 0.002789354 | 0.008909353 |
|                    |                                                                                             | -           |             |             |
| ENSMMUG00000043096 | nuclear transcription factor, X-box binding 1 [Source:NCBI gene;Acc:702945]                 | 0.834528943 | 0.001981259 | 0.006599746 |
|                    |                                                                                             | -           |             |             |
| ENSMMUG00000020149 | charged multivesicular body protein 5 [Source:NCBI gene;Acc:703191]                         | 0.805239711 | 0.000908796 | 0.003295218 |
| ENSMMUG00000020148 | BAG cochaperone 1 [Source:NCBI gene;Acc:702101]                                             | -1.22642889 | 0.001386658 | 0.004814831 |
|                    |                                                                                             | -           |             |             |
| ENSMMUG00000060647 | Metazoan signal recognition particle RNA [Source:RFAM;Acc:RF00017]                          | 1.156288613 | 0.001187413 | 0.0041997   |
| ENSMMUG00000012442 | DExD/H-box helicase 58 [Source:VGNC Symbol;Acc:VGNC:71672]                                  | 0.435025713 | 2.89E-06    | 1.80E-05    |
| ENSMMUG00000008196 | aconitase 1 [Source:VGNC Symbol;Acc:VGNC:69378]                                             | 0.875693509 | 2.02E-06    | 1.30E-05    |
| ENSMMUG00000061225 |                                                                                             | 2.023127225 | 0.004644632 | 0.013940475 |
| ENSMMUG00000062843 | MOB kinase activator 3B [Source:NCBI gene;Acc:706919]                                       | 0.706237867 | 0.000243321 | 0.001018187 |
| ENSMMUG00000006076 | intraflagellar transport 74 [Source:VGNC Symbol;Acc:VGNC:73430]                             | 1.717769694 | 0.001859946 | 0.006250395 |
| ENSMMUG00000006079 | leucine rich repeat containing 19 [Source:VGNC Symbol;Acc:VGNC:74337]                       | 2.585055532 | 3.16E-07    | 2.33E-06    |
|                    |                                                                                             | -           |             |             |
| ENSMMUG00000064752 | phospholipase A2 activating protein [Source:NCBI gene;Acc:707876]                           | 2.786601784 | 5.08E-06    | 3.02E-05    |
|                    |                                                                                             | -           |             |             |
| ENSMMUG00000006073 | caspase activity and apoptosis inhibitor 1 [Source:VGNC Symbol;Acc:VGNC:70634]              | 3.092621103 | 0.000344664 | 0.001392365 |
| ENSMMUG00000050918 |                                                                                             | 0.709254184 | 7.09E-05    | 0.000333522 |

|                     |                                                                                                                                       |             |             |             |
|---------------------|---------------------------------------------------------------------------------------------------------------------------------------|-------------|-------------|-------------|
| ENSMMUG00000054514  | interferon alpha 6 [Source:NCBI gene;Acc:106995851]                                                                                   | 3.119922729 | 0.005991939 | 0.017365734 |
| ENSMMUG00000010959  | kelch like family member 9 [Source:VGNC Symbol;Acc:VGNC:74080]                                                                        | 4.191602307 | 4.23E-05    | 0.000208372 |
| ENSMMUG00000019070  | focadhesin [Source:VGNC Symbol;Acc:VGNC:72556]                                                                                        | 1.337414308 | 9.63E-14    | 1.80E-12    |
| ENSMMUG000000051114 |                                                                                                                                       | 1.276320907 | 0.009992061 | 0.027035625 |
| ENSMMUG00000018396  | HAUS augmin like complex subunit 6 [Source:VGNC Symbol;Acc:VGNC:73237]                                                                | 2.088696029 | 3.03E-09    | 3.09E-08    |
| ENSMMUG00000002224  | PC4 and SFRS1 interacting protein 1 [Source:VGNC Symbol;Acc:VGNC:76437]                                                               | 2.522713407 | 0.004033311 | 0.012322216 |
| ENSMMUG00000013466  | tetratricopeptide repeat domain 39B [Source:VGNC Symbol;Acc:VGNC:79402]                                                               | -0.80421599 | 3.93E-06    | 2.38E-05    |
| ENSMMUG000000055400 | U6 spliceosomal RNA [Source:RFAM;Acc:RF00026]                                                                                         | 1.128972219 | 1.42E-06    | 9.36E-06    |
| ENSMMUG00000002176  | ubiquitin like with PHD and ring finger domains 2 [Source:VGNC Symbol;Acc:VGNC:78714]                                                 | 1.115569258 | 1.24E-18    | 3.76E-17    |
| ENSMMUG000000050923 |                                                                                                                                       | 1.423966773 | 8.40E-10    | 9.31E-09    |
| ENSMMUG00000002175  | TPD52 like 3 [Source:HGNC Symbol;Acc:HGNC:23382]                                                                                      | -0.79485197 | 0.002498731 | 0.008073243 |
| ENSMMUG000000021344 | interleukin 33 [Source:VGNC Symbol;Acc:VGNC:73606]                                                                                    | 0.888569467 | 7.74E-05    | 0.000360809 |
| ENSMMUG000000064013 |                                                                                                                                       | 1.135495636 | 0.001441906 | 0.004982169 |
| ENSMMUG00000005469  | endoplasmic reticulum metalloproteinase 1 [Source:VGNC Symbol;Acc:VGNC:72322]                                                         | 0.628867689 | 9.64E-09    | 9.05E-08    |
| ENSMMUG000000057739 |                                                                                                                                       | 0.456132253 | 0.002746032 | 0.008786119 |
| ENSMMUG000000052972 |                                                                                                                                       | 0.399369665 | 0.006063137 | 0.017544618 |
| ENSMMUG000000060228 |                                                                                                                                       | 0.541610603 | 0.000297911 | 0.001218093 |
| ENSMMUG000000065127 | insulin like 6 [Source:NCBI gene;Acc:693735]                                                                                          | 0.543550513 | 0.000535669 | 0.002068206 |
| ENSMMUG000000057331 | RNA terminal phosphate cyclase like 1 [Source:NCBI gene;Acc:694568]                                                                   | 3.184102702 | 4.90E-42    | 1.73E-39    |
| ENSMMUG000000026950 | microRNA 101-2 [Source:HGNC Symbol;Acc:HGNC:31489]                                                                                    | 3.322693657 | 5.25E-11    | 6.89E-10    |
| ENSMMUG000000026024 | U6 spliceosomal RNA [Source:RFAM;Acc:RF00026]                                                                                         | 1.34278863  | 0.000936773 | 0.003388375 |
| ENSMMUG000000057520 |                                                                                                                                       | 2.656326253 | 0.006515082 | 0.01866306  |
| ENSMMUG000000056693 |                                                                                                                                       | 0.905536946 | 1.94E-19    | 6.31E-18    |
| ENSMMUG00000015093  | very low density lipoprotein receptor [Source:VGNC Symbol;Acc:VGNC:78774]                                                             | 0.400935847 | 0.004836727 | 0.01444686  |
| ENSMMUG000000057073 |                                                                                                                                       | 4.709611135 | 5.11E-09    | 5.01E-08    |
| ENSMMUG00000015279  | SWI/SNF related, matrix associated, actin dependent regulator of chromatin, subfamily a, member 2 [Source:VGNC Symbol;Acc:VGNC:77647] | 1.420390099 | 4.98E-06    | 2.96E-05    |
| ENSMMUG000000055563 |                                                                                                                                       | 0.530250559 | 0.005801621 | 0.016883445 |
| ENSMMUG00000012472  | phosphatidylinositol-4-phosphate 5-kinase type 1 beta [Source:VGNC Symbol;Acc:VGNC:76001]                                             | 1.008052845 | 9.94E-12    | 1.43E-10    |
| ENSMMUG000000027986 | U6 spliceosomal RNA [Source:RFAM;Acc:RF00026]                                                                                         | 2.599185393 | 1.93E-14    | 3.88E-13    |
| ENSMMUG00000003780  | tight junction protein 2 [Source:NCBI gene;Acc:699586]                                                                                | 2.78079975  | 0.018484829 | 0.045673111 |
| ENSMMUG00000011401  | amyloid beta precursor protein binding family A member 1 [Source:VGNC Symbol;Acc:VGNC:69976]                                          | 1.677029666 | 0.000119214 | 0.000533475 |
| ENSMMUG00000015844  | chromosome 15 C9orf135 homolog [Source:VGNC Symbol;Acc:VGNC:70452]                                                                    | 2.406646328 | 0.005740525 | 0.016728628 |
| ENSMMUG000000063917 |                                                                                                                                       | 1.235069592 | 0.015798545 | 0.039974821 |
| ENSMMUG00000012667  | annexin A1 [Source:VGNC Symbol;Acc:VGNC:69944]                                                                                        | 0.621185882 | 3.82E-09    | 3.83E-08    |
| ENSMMUG000000022023 | proprotein convertase subtilisin/kexin type 5 [Source:VGNC Symbol;Acc:VGNC:75787]                                                     | 1.09196817  | 0.000917246 | 0.003322607 |
| ENSMMUG000000056840 |                                                                                                                                       | 1.825167475 | 3.66E-18    | 1.07E-16    |

|                    |                                                                                           |   |             |             |             |
|--------------------|-------------------------------------------------------------------------------------------|---|-------------|-------------|-------------|
| ENSMMUG00000064984 |                                                                                           | - | 2.504246369 | 0.007339083 | 0.020677062 |
| ENSMMUG00000008685 | solute carrier family 28 member 3 [Source:VGNC Symbol;Acc:VGNC:77493]                     | - | 3.410024475 | 0.007565125 | 0.021264368 |
| ENSMMUG00000053862 |                                                                                           | - | 3.572569739 | 0.00396807  | 0.012145815 |
| ENSMMUG00000023117 | neurotrophic receptor tyrosine kinase 2 [Source:VGNC Symbol;Acc:VGNC:75541]               | - | 0.724493262 | 7.79E-09    | 7.44E-08    |
| ENSMMUG00000061650 |                                                                                           | - | 3.135223754 | 0.004507694 | 0.013584454 |
| ENSMMUG00000054687 |                                                                                           | - | 2.576966385 | 0.01935235  | 0.047500058 |
| ENSMMUG00000060761 |                                                                                           | - | 2.137600499 | 1.98E-32    | 2.49E-30    |
| ENSMMUG00000017053 | death associated protein kinase 1 [Source:VGNC Symbol;Acc:VGNC:71732]                     | - | 3.162739335 | 0.00378943  | 0.011639862 |
| ENSMMUG00000054211 |                                                                                           | - | 2.583476995 | 2.66E-08    | 2.33E-07    |
| ENSMMUG00000057499 |                                                                                           | - | 2.604112153 | 6.56E-12    | 9.62E-11    |
| ENSMMUG00000033550 |                                                                                           | - | 3.216047707 | 0.000141375 | 0.000621654 |
| ENSMMUG00000049479 |                                                                                           | - | 3.643244544 | 1.10E-05    | 6.14E-05    |
| ENSMMUG00000053778 |                                                                                           | - | -1.46265711 | 7.03E-07    | 4.90E-06    |
| ENSMMUG00000001748 | spleen associated tyrosine kinase [Source:VGNC Symbol;Acc:VGNC:78063]                     | - | 2.639629025 | 7.93E-10    | 8.84E-09    |
| ENSMMUG00000020009 | receptor tyrosine kinase like orphan receptor 2 [Source:VGNC Symbol;Acc:VGNC:76716]       | - | 1.582147538 | 4.58E-11    | 6.07E-10    |
| ENSMMUG00000060533 |                                                                                           | - | 1.377839881 | 1.38E-16    | 3.43E-15    |
| ENSMMUG00000003006 | serine palmitoyltransferase long chain base subunit 1 [Source:VGNC Symbol;Acc:VGNC:77873] | - | 1.702728194 | 4.11E-11    | 5.47E-10    |
| ENSMMUG00000004629 | nucleolar protein 8 [Source:VGNC Symbol;Acc:VGNC:75237]                                   | - | 0.551629519 | 3.03E-05    | 0.000154458 |
| ENSMMUG00000004630 | centromere protein P [Source:NCBI gene;Acc:100427110]                                     | - | 0.626220133 | 0.014985299 | 0.038236748 |
| ENSMMUG00000061517 | osteomodulin [Source:NCBI gene;Acc:706272]                                                | - | 3.140461193 | 0.004439548 | 0.013398147 |
| ENSMMUG00000009493 | family with sequence similarity 120A [Source:NCBI gene;Acc:717459]                        | - | 1.788798035 | 1.79E-06    | 1.16E-05    |
| ENSMMUG00000002517 | protein tyrosine phosphatase domain containing 1 [Source:VGNC Symbol;Acc:VGNC:76567]      | - | -1.52155221 | 1.80E-06    | 1.16E-05    |
| ENSMMUG00000016712 | contactin associated protein like 3 [Source:NCBI gene;Acc:711939]                         | - | 1.443594442 | 0.003587709 | 0.011103032 |
| ENSMMUG00000060049 |                                                                                           | - | 1.388916123 | 0.000143242 | 0.000629415 |
| ENSMMUG00000050773 |                                                                                           | - | 0.867903373 | 0.000979354 | 0.003534638 |
| ENSMMUG00000005997 | cell division cycle 14B [Source:NCBI gene;Acc:710300]                                     | - | 2.908723623 | 7.08E-06    | 4.10E-05    |
| ENSMMUG00000019423 | zinc finger protein 2 [Source:NCBI gene;Acc:703864]                                       | - | 2.692051955 | 0.002480443 | 0.008017648 |
| ENSMMUG00000060932 | zinc finger protein 383-like [Source:NCBI gene;Acc:106993074]                             | - | 1.741982163 | 1.47E-07    | 1.16E-06    |
| ENSMMUG00000049314 | dual specificity phosphatase 2 [Source:NCBI gene;Acc:718442]                              | - | 3.498351327 | 6.40E-05    | 0.000303876 |
| ENSMMUG00000057143 | transmembrane protein 127 [Source:NCBI gene;Acc:705069]                                   | - | 0.984909166 | 0.003935992 | 0.012052604 |
| ENSMMUG00000015515 | REV1 DNA directed polymerase [Source:NCBI gene;Acc:709475]                                | - | 0.709873363 | 0.000695794 | 0.002603085 |
| ENSMMUG00000058615 |                                                                                           | - | 1.422362505 | 0.000164793 | 0.000714795 |
| ENSMMUG00000057336 |                                                                                           | - | 0.564858033 | 1.69E-07    | 1.31E-06    |
| ENSMMUG00000019682 | mitochondrial ribosomal protein S9 [Source:VGNC Symbol;Acc:VGNC:74762]                    | - | 1.700461898 | 0.000245314 | 0.001025949 |
| ENSMMUG00000001390 | NCK adaptor protein 2 [Source:VGNC Symbol;Acc:VGNC:75142]                                 | - | 1.289812792 | 0.000289164 | 0.001184286 |
| ENSMMUG00000050861 |                                                                                           | - | 1.092241921 | 0.013949893 | 0.036003641 |
| ENSMMUG00000002589 | sulfotransferase 1C3-like [Source:NCBI gene;Acc:114671897]                                | - | 1.301148447 | 8.47E-10    | 9.38E-09    |

|                    |                                                                                   |   |             |             |             |
|--------------------|-----------------------------------------------------------------------------------|---|-------------|-------------|-------------|
| ENSMMUG00000060346 |                                                                                   | - | 3.813161647 | 7.79E-16    | 1.78E-14    |
| ENSMMUG00000010066 | MER proto-oncogene, tyrosine kinase [Source:VGNC Symbol;Acc:VGNC:74706]           | - | 0.662483635 | 0.000269513 | 0.001115511 |
| ENSMMUG00000002231 | transmembrane protein 87B [Source:VGNC Symbol;Acc:VGNC:79557]                     | - | 1.221525353 | 2.57E-07    | 1.93E-06    |
| ENSMMUG00000044163 | zinc finger CCCH-type containing 8 [Source:NCBI gene;Acc:698828]                  | - | 0.867614174 | 2.08E-05    | 0.000109854 |
| ENSMMUG00000016430 | zinc finger CCCH-type containing 6 [Source:VGNC Symbol;Acc:VGNC:79458]            | - | 1.274342921 | 0.002581644 | 0.008317571 |
| ENSMMUG00000059850 | immunoglobulin kappa variable 1-9 [Source:NCBI gene;Acc:106993071]                | - | 1.921604417 | 0.000167335 | 0.000724338 |
| ENSMMUG00000050630 |                                                                                   | - | 1.728177099 | 0.001662601 | 0.005646066 |
| ENSMMUG00000051042 |                                                                                   | - | 0.999696638 | 0.002804165 | 0.008947025 |
| ENSMMUG00000050256 |                                                                                   | - | 1.328481367 | 0.01898617  | 0.046717257 |
| ENSMMUG00000019116 | dynein axonemal heavy chain 6 [Source:NCBI gene;Acc:694115]                       | - | 0.295259586 | 0.012428539 | 0.032645276 |
| ENSMMUG00000000908 | succinate-CoA ligase alpha subunit [Source:VGNC Symbol;Acc:VGNC:78052]            | - | 0.816442383 | 0.005200756 | 0.01533649  |
| ENSMMUG00000046169 |                                                                                   | - | 2.469391706 | 2.49E-11    | 3.38E-10    |
| ENSMMUG00000000293 | catenin alpha 2 [Source:VGNC Symbol;Acc:VGNC:71543]                               | - | 1.804043562 | 2.61E-15    | 5.70E-14    |
| ENSMMUG00000062818 | regenerating islet-derived protein 3-alpha [Source:NCBI gene;Acc:716890]          | - | 2.010068176 | 5.20E-05    | 0.000251857 |
| ENSMMUG00000040046 | lithostathine-1-alpha [Source:NCBI gene;Acc:711810]                               | - | 1.896403515 | 0.00017361  | 0.000748766 |
| ENSMMUG00000049292 | regenerating islet-derived 1 alpha [Source:NCBI gene;Acc:711892]                  | - | 3.482011501 | 0.003017    | 0.009529736 |
| ENSMMUG00000054863 |                                                                                   | - | -1.72463108 | 0.000831376 | 0.003048036 |
| ENSMMUG00000056785 |                                                                                   | - | 0.760705134 | 0.000188512 | 0.000808689 |
| ENSMMUG00000056765 |                                                                                   | - | 0.559849871 | 0.00022208  | 0.000937066 |
| ENSMMUG00000062747 |                                                                                   | - | 0.384810181 | 0.000188859 | 0.000809942 |
| ENSMMUG00000018512 | GC-rich sequence DNA-binding factor 2 [Source:VGNC Symbol;Acc:VGNC:72715]         | - | 0.492499137 | 0.002138804 | 0.007045863 |
| ENSMMUG00000023758 | mitochondrial ribosomal protein L19 [Source:VGNC Symbol;Acc:VGNC:74743]           | - | 0.385961454 | 0.00219773  | 0.0072091   |
| ENSMMUG00000048322 | eva-1 homolog A, regulator of programmed cell death [Source:NCBI gene;Acc:710843] | - | 1.501584436 | 9.61E-05    | 0.000440542 |
| ENSMMUG00000063035 |                                                                                   | - | 2.964495544 | 0.013030661 | 0.033956196 |
| ENSMMUG00000051843 |                                                                                   | - | 1.112248745 | 2.20E-05    | 0.000115691 |
| ENSMMUG00000053587 |                                                                                   | - | 2.294515828 | 0.008160352 | 0.022722123 |
| ENSMMUG00000001845 | DNA polymerase epsilon 4, accessory subunit [Source:VGNC Symbol;Acc:VGNC:76065]   | - | 2.676369204 | 2.75E-13    | 4.82E-12    |
| ENSMMUG00000058044 |                                                                                   | - | 0.920027033 | 3.74E-08    | 3.18E-07    |
| ENSMMUG00000010864 | STAM binding protein [Source:VGNC Symbol;Acc:VGNC:77935]                          | - | 3.3816004   | 0.006422738 | 0.018448422 |
| ENSMMUG00000030805 | TP53RK binding protein [Source:VGNC Symbol;Acc:VGNC:79426]                        | - | 3.240840216 | 0.019091331 | 0.046906641 |
| ENSMMUG00000008396 | methylmalonyl-CoA epimerase [Source:NCBI gene;Acc:704094]                         | - | 1.069423448 | 1.03E-09    | 1.13E-08    |
| ENSMMUG00000002093 | testis expressed 261 [Source:NCBI gene;Acc:703863]                                | - | 1.337387445 | 1.52E-12    | 2.45E-11    |
| ENSMMUG00000055845 | ankyrin repeat domain 53 [Source:NCBI gene;Acc:703757]                            | - | -1.86117898 | 1.51E-11    | 2.11E-10    |

|                    |                                                                                        |   |             |             |             |
|--------------------|----------------------------------------------------------------------------------------|---|-------------|-------------|-------------|
| ENSMMUG00000041775 | Metazoan signal recognition particle RNA [Source:RFAM;Acc:RF00017]                     | - | 1.139539782 | 0.010546639 | 0.028319149 |
| ENSMMUG00000002090 | ATPase H+ transporting V1 subunit B1 [Source:VGNC Symbol;Acc:VGNC:70184]               | - | 1.556172561 | 3.77E-23    | 1.90E-21    |
| ENSMMUG00000061424 | ventral anterior homeobox 2 [Source:NCBI gene;Acc:703531]                              | - | 3.505198842 | 6.52E-32    | 7.44E-30    |
| ENSMMUG00000059700 |                                                                                        | - | 3.582445105 | 3.25E-08    | 2.81E-07    |
| ENSMMUG00000020855 | CD207 molecule [Source:VGNC Symbol;Acc:VGNC:70818]                                     | - | 1.79732221  | 0.009095055 | 0.024949994 |
| ENSMMUG00000020854 | C-type lectin domain family 4 member F [Source:VGNC Symbol;Acc:VGNC:71349]             | - | 4.460283725 | 3.55E-05    | 0.000178485 |
| ENSMMUG00000010592 | adducin 2 [Source:VGNC Symbol;Acc:VGNC:69529]                                          | - | 2.016147223 | 0.000442238 | 0.001740087 |
| ENSMMUG00000063699 |                                                                                        | - | 2.829159457 | 0.008960051 | 0.02462976  |
| ENSMMUG00000064749 |                                                                                        | - | 2.093211144 | 7.68E-06    | 4.40E-05    |
| ENSMMUG00000007868 | AP2 associated kinase 1 [Source:VGNC Symbol;Acc:VGNC:82094]                            | - | 0.997209612 | 0.000207364 | 0.000880897 |
| ENSMMUG00000049539 |                                                                                        | - | 1.236091588 | 5.42E-05    | 0.000261862 |
| ENSMMUG00000062212 | Metazoan signal recognition particle RNA [Source:RFAM;Acc:RF00017]                     | - | 2.828366039 | 0.008863185 | 0.024404203 |
| ENSMMUG00000058336 |                                                                                        | - | 0.926991703 | 0.002993022 | 0.009478222 |
| ENSMMUG00000007552 | aprataxin and PNKP like factor [Source:NCBI gene;Acc:705875]                           | - | 0.847297222 | 0.009212102 | 0.025224423 |
| ENSMMUG00000017209 | C1D nuclear receptor corepressor [Source:NCBI gene;Acc:698450]                         | - | 1.593644119 | 0.000968199 | 0.003497779 |
| ENSMMUG00000057729 |                                                                                        | - | 3.589910611 | 0.016773464 | 0.042111134 |
| ENSMMUG00000047067 | SERTA domain containing 2 [Source:NCBI gene;Acc:696216]                                | - | 0.831113245 | 4.33E-05    | 0.000213049 |
| ENSMMUG00000006503 | aftiphilin [Source:VGNC Symbol;Acc:VGNC:69701]                                         | - | 0.734755911 | 0.001236218 | 0.004352592 |
| ENSMMUG00000059267 | pellino E3 ubiquitin protein ligase 1 [Source:NCBI gene;Acc:696416]                    | - | 1.008872141 | 3.06E-07    | 2.26E-06    |
| ENSMMUG00000008772 | VPS54 subunit of GARP complex [Source:VGNC Symbol;Acc:VGNC:79159]                      | - | 0.424915355 | 0.001448224 | 0.005002832 |
| ENSMMUG00000008770 | UDP-glucose pyrophosphorylase 2 [Source:VGNC Symbol;Acc:VGNC:78712]                    | - | 0.569129383 | 0.000903463 | 0.003277486 |
| ENSMMUG00000060943 |                                                                                        | - | 0.54385881  | 7.70E-06    | 4.41E-05    |
| ENSMMUG00000006163 | malate dehydrogenase 1 [Source:VGNC Symbol;Acc:VGNC:74690]                             | - | 1.188956293 | 1.11E-13    | 2.05E-12    |
| ENSMMUG00000003979 | WD repeat containing planar cell polarity effector [Source:VGNC Symbol;Acc:VGNC:79677] | - | 1.315520059 | 1.82E-05    | 9.74E-05    |
| ENSMMUG00000057986 | transmembrane protein 17 [Source:NCBI gene;Acc:694384]                                 | - | 1.429334571 | 0.000927146 | 0.003355193 |
| ENSMMUG00000063238 |                                                                                        | - | 2.313946264 | 3.16E-06    | 1.95E-05    |
| ENSMMUG00000006941 | exportin 1 [Source:VGNC Symbol;Acc:VGNC:78812]                                         | - | 1.066311423 | 6.46E-07    | 4.54E-06    |
| ENSMMUG00000008098 | ubiquitin specific peptidase 34 [Source:VGNC Symbol;Acc:VGNC:79223]                    | - | 0.626389163 | 3.03E-05    | 0.000154501 |
| ENSMMUG00000005685 | pseudouridine synthase 10 [Source:VGNC Symbol;Acc:VGNC:76547]                          | - | 1.339928671 | 1.05E-08    | 9.77E-08    |
| ENSMMUG00000055963 |                                                                                        | - | 1.794572892 | 1.05E-11    | 1.50E-10    |
| ENSMMUG00000010834 | REL proto-oncogene, NF-kB subunit [Source:VGNC Symbol;Acc:VGNC:76892]                  | - | 0.620486512 | 9.35E-09    | 8.79E-08    |
| ENSMMUG00000049993 |                                                                                        | - | 0.478564788 | 2.71E-07    | 2.03E-06    |
| ENSMMUG00000015888 | coiled-coil domain containing 85A [Source:VGNC Symbol;Acc:VGNC:70905]                  | - | 2.906006426 | 0.016376883 | 0.041255167 |
| ENSMMUG00000007003 | polyribonucleotide nucleotidyltransferase 1 [Source:VGNC Symbol;Acc:VGNC:76095]        | - | 3.197670448 | 2.29E-05    | 0.00011997  |
| ENSMMUG00000007001 | protein phosphatase 4 regulatory subunit 3B [Source:VGNC Symbol;Acc:VGNC:76342]        | - | 3.382284591 | 0.010811312 | 0.028909442 |
| ENSMMUG00000008104 | proteasome activator subunit 4 [Source:VGNC Symbol;Acc:VGNC:76295]                     | - | 0.382808349 | 0.005778754 | 0.016826807 |



|                    |                                                                                             |             |             |             |
|--------------------|---------------------------------------------------------------------------------------------|-------------|-------------|-------------|
| ENSMMUG0000008105  | G protein-coupled receptor 75 [Source:VGNC Symbol;Acc:VGNC:73143]                           | 0.325005319 | 0.01422153  | 0.036533048 |
| ENSMMUG00000062091 |                                                                                             | 3.07281211  | 4.99E-09    | 4.90E-08    |
| ENSMMUG00000065301 |                                                                                             | -           | -           | -           |
| ENSMMUG00000061344 |                                                                                             | 0.740162865 | 0.003479602 | 0.010806807 |
| ENSMMUG00000052169 | potassium two pore domain channel subfamily K member 12 [Source:NCBI gene;Acc:715556]       | 1.436422393 | 0.000919072 | 0.003327599 |
| ENSMMUG00000053577 |                                                                                             | -1.99291284 | 0.003268073 | 0.010244246 |
| ENSMMUG0000000974  | mutS homolog 2 [Source:VGNC Symbol;Acc:VGNC:74931]                                          | -2.31660112 | 6.79E-11    | 8.79E-10    |
| ENSMMUG00000059300 |                                                                                             | -           | -           | -           |
| ENSMMUG00000058455 | sperm-tail PG-rich repeat containing 4 [Source:NCBI gene;Acc:717951]                        | 2.378241459 | 2.44E-10    | 2.94E-09    |
| ENSMMUG0000003310  | tetratricopeptide repeat domain 7A [Source:VGNC Symbol;Acc:VGNC:79202]                      | 0.946802405 | 1.80E-05    | 9.65E-05    |
| ENSMMUG00000048973 | CXXC repeat containing interactor of PDZ3 domain [Source:NCBI gene;Acc:714949]              | 0.649888585 | 0.013509072 | 0.035036644 |
| ENSMMUG00000038319 | Metazoan signal recognition particle RNA [Source:RFAM;Acc:RF00017]                          | 0.302203648 | 0.006581898 | 0.018832636 |
| ENSMMUG00000014425 | protein kinase C epsilon [Source:VGNC Symbol;Acc:VGNC:76412]                                | 0.326158875 | 0.002209585 | 0.00723998  |
| ENSMMUG00000054734 |                                                                                             | -           | -           | -           |
| ENSMMUG00000023752 | SIX homeobox 2 [Source:VGNC Symbol;Acc:VGNC:81570]                                          | 2.231381112 | 0.005395028 | 0.015846359 |
| ENSMMUG00000053683 |                                                                                             | 1.15011877  | 2.63E-06    | 1.65E-05    |
| ENSMMUG00000014824 | SIX homeobox 3 [Source:HGNC Symbol;Acc:HGNC:10889]                                          | -           | -           | -           |
| ENSMMUG00000006312 | calmodulin-lysine N-methyltransferase [Source:VGNC Symbol;Acc:VGNC:70637]                   | 0.946756883 | 6.55E-05    | 0.000310662 |
| ENSMMUG00000006311 | prolyl endopeptidase like [Source:VGNC Symbol;Acc:VGNC:76346]                               | -           | -           | -           |
| ENSMMUG00000051072 |                                                                                             | 1.301281332 | 2.17E-06    | 1.38E-05    |
| ENSMMUG00000019841 | leucine rich pentatricopeptide repeat containing [Source:VGNC Symbol;Acc:VGNC:82177]        | -0.98627905 | 0.000558582 | 0.002143833 |
| ENSMMUG0000008081  | ATP binding cassette subfamily G member 8 [Source:VGNC Symbol;Acc:VGNC:69392]               | -           | -           | -           |
| ENSMMUG0000008080  | ATP binding cassette subfamily G member 5 [Source:VGNC Symbol;Acc:VGNC:69391]               | 1.253274531 | 6.54E-17    | 1.67E-15    |
| ENSMMUG00000062474 | Metazoan signal recognition particle RNA [Source:RFAM;Acc:RF00017]                          | -           | -           | -           |
| ENSMMUG0000008077  | dynein cytoplasmic 2 light intermediate chain 1 [Source:VGNC Symbol;Acc:VGNC:71899]         | 1.812649683 | 0.000642384 | 0.002429006 |
| ENSMMUG00000025150 | Y RNA [Source:RFAM;Acc:RF00019]                                                             | -           | -           | -           |
| ENSMMUG0000000642  | THADA armadillo repeat containing [Source:VGNC Symbol;Acc:VGNC:79185]                       | 0.538134062 | 0.00705238  | 0.0200013   |
| ENSMMUG00000064735 | 3-hydroxyanthranilate 3,4-dioxygenase [Source:NCBI gene;Acc:713101]                         | 0.9693386   | 7.70E-09    | 7.36E-08    |
| ENSMMUG00000063947 | oxoeicosanoid receptor 1 [Source:NCBI gene;Acc:713039]                                      | -           | -           | -           |
| ENSMMUG00000020744 | metastasis associated 1 family member 3 [Source:VGNC Symbol;Acc:VGNC:74814]                 | 0.944930375 | 2.67E-05    | 0.000137978 |
| ENSMMUG00000056008 |                                                                                             | 1.665099946 | 1.07E-11    | 1.52E-10    |
| ENSMMUG00000055395 | Y RNA [Source:RFAM;Acc:RF00019]                                                             | 1.38660698  | 3.07E-21    | 1.25E-19    |
| ENSMMUG00000054310 | potassium voltage-gated channel modifier subfamily G member 3 [Source:NCBI gene;Acc:712838] | 1.781896949 | 9.09E-12    | 1.31E-10    |
| ENSMMUG00000064710 |                                                                                             | 1.34621114  | 1.49E-19    | 4.91E-18    |
| ENSMMUG00000043458 | transmembrane protein 178A [Source:NCBI gene;Acc:714010]                                    | 3.689680804 | 0.000213431 | 0.000905113 |
| ENSMMUG00000056330 |                                                                                             | 0.40039888  | 0.003820623 | 0.011730816 |
| ENSMMUG00000013901 | mitogen-activated protein kinase kinase kinase kinase 3 [Source:VGNC Symbol;Acc:VGNC:81466] | 0.741373383 | 1.45E-07    | 1.14E-06    |
| ENSMMUG00000020575 | SOS Ras/Rac guanine nucleotide exchange factor 1 [Source:VGNC Symbol;Acc:VGNC:77837]        | 1.279703945 | 5.27E-11    | 6.90E-10    |
| ENSMMUG00000060562 |                                                                                             | 1.073431186 | 9.79E-08    | 7.90E-07    |
| ENSMMUG0000002338  | heterogeneous nuclear ribonucleoprotein L like [Source:VGNC Symbol;Acc:VGNC:73441]          | 0.914180405 | 1.39E-13    | 2.53E-12    |
| ENSMMUG00000013944 | regulator of microtubule dynamics 2 [Source:VGNC Symbol;Acc:VGNC:76839]                     | 0.850080261 | 0.005733008 | 0.016710007 |
|                    |                                                                                             | 3.323006902 | 0.009406558 | 0.025694858 |
|                    |                                                                                             | -           | -           | -           |
|                    |                                                                                             | 2.070495462 | 0.002425672 | 0.007876663 |
|                    |                                                                                             | -           | -           | -           |
|                    |                                                                                             | 0.807953922 | 0.000143504 | 0.000630195 |
|                    |                                                                                             | 1.898475258 | 2.78E-06    | 1.73E-05    |
|                    |                                                                                             | 1.333220824 | 2.41E-09    | 2.50E-08    |
|                    |                                                                                             | 0.614501534 | 0.000998511 | 0.003597649 |
|                    |                                                                                             | 1.121500642 | 0.00012456  | 0.000555391 |
|                    |                                                                                             | -0.69955164 | 8.58E-07    | 5.89E-06    |
|                    |                                                                                             | 1.867910055 | 1.63E-28    | 1.41E-26    |

|                    |                                                                                                     |             |             |             |
|--------------------|-----------------------------------------------------------------------------------------------------|-------------|-------------|-------------|
| ENSMMUG00000054398 |                                                                                                     | 1.491177577 | 7.85E-10    | 8.76E-09    |
| ENSMMUG00000016442 | glutaminyl-peptide cyclotransferase [Source:VGNC Symbol;Acc:VGNC:76636]                             | 3.066750396 | 2.77E-10    | 3.30E-09    |
| ENSMMUG00000016438 | protein kinase D3 [Source:VGNC Symbol;Acc:VGNC:76415]                                               | 2.464842659 | 3.03E-20    | 1.09E-18    |
| ENSMMUG00000016434 | NADH:ubiquinone oxidoreductase complex assembly factor 7 [Source:VGNC Symbol;Acc:VGNC:75035]        | 3.017765125 | 3.53E-18    | 1.04E-16    |
| ENSMMUG00000016433 | CCAAT enhancer binding protein zeta [Source:VGNC Symbol;Acc:VGNC:71082]                             | 3.611419952 | 0.00321315  | 0.010093415 |
| ENSMMUG00000001278 | vitrin [Source:VGNC Symbol;Acc:VGNC:78773]                                                          | 0.5477897   | 0.004764731 | 0.014260536 |
|                    |                                                                                                     | -           |             |             |
| ENSMMUG00000049720 |                                                                                                     | 2.715624451 | 0.000489654 | 0.001909433 |
|                    |                                                                                                     | -           |             |             |
| ENSMMUG00000053593 |                                                                                                     | 0.797119421 | 0.000435878 | 0.001719166 |
| ENSMMUG00000021436 | latent transforming growth factor beta binding protein 1 [Source:VGNC Symbol;Acc:VGNC:74456]        | 1.837961896 | 2.50E-14    | 4.94E-13    |
| ENSMMUG00000009372 | tetratricopeptide repeat domain 27 [Source:VGNC Symbol;Acc:VGNC:79565]                              | 2.007791255 | 0.02020714  | 0.049304357 |
|                    |                                                                                                     | -           |             |             |
| ENSMMUG00000021691 | spastin [Source:VGNC Symbol;Acc:VGNC:77857]                                                         | 1.817958932 | 5.61E-08    | 4.69E-07    |
| ENSMMUG00000008288 | sorting nexin 17 [Source:VGNC Symbol;Acc:VGNC:77709]                                                | 3.272607089 | 4.61E-06    | 2.76E-05    |
| ENSMMUG00000058351 |                                                                                                     | 0.410567312 | 0.008669562 | 0.023955582 |
|                    |                                                                                                     | -           |             |             |
| ENSMMUG00000048513 | tudor domain containing 15 [Source:NCBI gene;Acc:703066]                                            | 0.761856513 | 0.000999584 | 0.003600639 |
|                    |                                                                                                     | -           |             |             |
| ENSMMUG00000007692 | apolipoprotein B [Source:VGNC Symbol;Acc:VGNC:69985]                                                | 0.990135726 | 9.78E-07    | 6.64E-06    |
| ENSMMUG00000003355 | lipid droplet associated hydrolase [Source:VGNC Symbol;Acc:VGNC:74130]                              | 1.492236302 | 1.24E-18    | 3.78E-17    |
| ENSMMUG00000050446 | growth differentiation factor 7 [Source:NCBI gene;Acc:702462]                                       | 0.68799141  | 0.001231906 | 0.004338438 |
| ENSMMUG00000022996 | HCLS1 binding protein 3 [Source:VGNC Symbol;Acc:VGNC:82158]                                         | 2.067943674 | 1.35E-33    | 1.92E-31    |
|                    |                                                                                                     | -           |             |             |
| ENSMMUG00000056023 | succinate dehydrogenase complex, subunit D, integral membrane protein [Source:NCBI gene;Acc:711326] | 2.876985186 | 0.013243599 | 0.034435539 |
|                    |                                                                                                     | -           |             |             |
| ENSMMUG00000064216 |                                                                                                     | 1.799365954 | 0.00137096  | 0.004769257 |
|                    |                                                                                                     | -           |             |             |
| ENSMMUG00000012058 | GEN1 Holliday junction 5' flap endonuclease [Source:VGNC Symbol;Acc:VGNC:72790]                     | 2.598996861 | 8.22E-08    | 6.70E-07    |
|                    |                                                                                                     | -           |             |             |
| ENSMMUG00000012056 | structural maintenance of chromosomes 6 [Source:VGNC Symbol;Acc:VGNC:77746]                         | 3.451113346 | 5.06E-12    | 7.58E-11    |
|                    |                                                                                                     | -           |             |             |
| ENSMMUG00000040529 | visinin like 1 [Source:NCBI gene;Acc:699459]                                                        | 4.424654704 | 4.09E-06    | 2.47E-05    |
| ENSMMUG00000052363 | MYCN proto-oncogene, bHLH transcription factor [Source:NCBI gene;Acc:698699]                        | 0.635143136 | 1.86E-05    | 9.94E-05    |
| ENSMMUG00000064240 |                                                                                                     | 0.541514364 | 3.21E-05    | 0.000162728 |
| ENSMMUG00000056755 |                                                                                                     | 1.711763365 | 0.000186594 | 0.000800689 |
| ENSMMUG00000050686 |                                                                                                     | 1.017804429 | 3.82E-05    | 0.000190118 |
| ENSMMUG00000020249 | growth regulating estrogen receptor binding 1 [Source:VGNC Symbol;Acc:VGNC:73227]                   | 0.456752072 | 0.00100866  | 0.003627164 |
| ENSMMUG00000023225 | E2F transcription factor 6 [Source:VGNC Symbol;Acc:VGNC:72027]                                      | 0.809212791 | 7.92E-08    | 6.47E-07    |
| ENSMMUG00000057805 |                                                                                                     | 1.329604619 | 0.001218126 | 0.00429603  |
| ENSMMUG00000059188 |                                                                                                     | 2.325552446 | 4.42E-12    | 6.66E-11    |
| ENSMMUG00000016678 | Rho associated coiled-coil containing protein kinase 2 [Source:VGNC Symbol;Acc:VGNC:76714]          | 2.836270178 | 2.70E-21    | 1.11E-19    |
| ENSMMUG00000060435 | Metazoan signal recognition particle RNA [Source:RFAM;Acc:RF00017]                                  | 3.239721349 | 5.24E-13    | 8.98E-12    |
| ENSMMUG00000033092 | U6 spliceosomal RNA [Source:RFAM;Acc:RF00026]                                                       | 2.914990733 | 0.005931107 | 0.017212979 |
| ENSMMUG00000022785 | solute carrier family 66 member 3 [Source:VGNC Symbol;Acc:VGNC:76334]                               | 2.673389134 | 3.72E-07    | 2.71E-06    |
|                    |                                                                                                     | -           |             |             |
| ENSMMUG00000010320 | ATPase H+ transporting V1 subunit C2 [Source:VGNC Symbol;Acc:VGNC:70091]                            | 1.395431433 | 0.00795557  | 0.02221879  |
|                    |                                                                                                     | -           |             |             |
| ENSMMUG00000010671 | nucleolar protein 10 [Source:VGNC Symbol;Acc:VGNC:75260]                                            | 0.870725171 | 0.019031511 | 0.04678225  |
|                    |                                                                                                     | -           |             |             |
| ENSMMUG00000062012 |                                                                                                     | 3.156243861 | 0.020399183 | 0.049674858 |
| ENSMMUG00000063262 |                                                                                                     | -1.4403179  | 1.21E-09    | 1.31E-08    |
|                    |                                                                                                     | -           |             |             |
| ENSMMUG00000037908 |                                                                                                     | 1.516334901 | 1.73E-06    | 1.13E-05    |

|                    |                                                                                                |             |             |             |
|--------------------|------------------------------------------------------------------------------------------------|-------------|-------------|-------------|
| ENSMMUG00000022879 | EARP complex and GARP complex interacting protein 1 [Source:NCBI gene;Acc:707650]              | 3.062929634 | 8.29E-05    | 0.000385015 |
| ENSMMUG00000009310 | myelin transcription factor 1 like [Source:NCBI gene;Acc:706914]                               | 0.843033055 | 2.37E-06    | 1.50E-05    |
| ENSMMUG00000009662 | thyroid peroxidase [Source:VGNC Symbol;Acc:VGNC:78636]                                         | 0.578023899 | 0.00907524  | 0.024904849 |
| ENSMMUG00000050687 | Metazoan signal recognition particle RNA [Source:RFAM;Acc:RF00017]                             | 1.908440952 | 0.004058544 | 0.012384405 |
| ENSMMUG00000009660 | syntrophin gamma 2 [Source:VGNC Symbol;Acc:VGNC:77694]                                         | 0.397831283 | 0.003443085 | 0.010706845 |
| ENSMMUG00000061533 |                                                                                                | 3.169791276 | 4.32E-39    | 1.02E-36    |
| ENSMMUG00000050543 |                                                                                                | 2.855716114 | 3.17E-16    | 7.53E-15    |
| ENSMMUG00000042598 | transmembrane protein 18 [Source:NCBI gene;Acc:721515]                                         | 3.930132545 | 5.55E-33    | 7.48E-31    |
| ENSMMUG00000038858 |                                                                                                | 1.023672915 | 2.17E-14    | 4.33E-13    |
| ENSMMUG00000063735 |                                                                                                | 1.373917843 | 0.000689639 | 0.002583596 |
| ENSMMUG00000022914 | RAB, member of RAS oncogene family like 2B [Source:NCBI gene;Acc:716615]                       | 0.828302215 | 1.64E-05    | 8.90E-05    |
| ENSMMUG00000005588 | SH3 and multiple ankyrin repeat domains 3 [Source:NCBI gene;Acc:100430318]                     | 0.687433757 | 0.003995919 | 0.01222349  |
| ENSMMUG00000011278 | cysteine rich with EGF like domains 2 [Source:NCBI gene;Acc:720586]                            | 0.469914305 | 7.80E-05    | 0.000363529 |
| ENSMMUG00000000553 | bromodomain containing 1 [Source:VGNC Symbol;Acc:VGNC:70280]                                   | 0.978830406 | 0.008026504 | 0.022391471 |
| ENSMMUG00000055848 |                                                                                                | 0.872185259 | 0.001887361 | 0.006329618 |
| ENSMMUG00000003764 | TBC1 domain family member 22A [Source:VGNC Symbol;Acc:VGNC:82077]                              | 0.754681773 | 8.58E-05    | 0.000397748 |
| ENSMMUG00000056186 |                                                                                                | 1.511310603 | 2.04E-05    | 0.000108467 |
| ENSMMUG00000020993 | cadherin EGF LAG seven-pass G-type receptor 1 [Source:NCBI gene;Acc:718440]                    | 3.282771047 | 3.04E-16    | 7.24E-15    |
| ENSMMUG00000000807 | tRNA 5-methylaminomethyl-2-thiouridylate methyltransferase [Source:VGNC Symbol;Acc:VGNC:79500] | 2.649337019 | 2.94E-07    | 2.18E-06    |
| ENSMMUG00000008136 | G2 and S-phase expressed 1 [Source:VGNC Symbol;Acc:VGNC:73162]                                 | 1.746081445 | 3.91E-06    | 2.37E-05    |
| ENSMMUG00000016262 | tetratricopeptide repeat domain 38 [Source:VGNC Symbol;Acc:VGNC:79574]                         | -2.61222067 | 3.10E-20    | 1.11E-18    |
| ENSMMUG00000027003 | microRNA let-7a-3 [Source:HGNC Symbol;Acc:HGNC:31478]                                          | 1.277094131 | 0.004584744 | 0.013799828 |
| ENSMMUG00000023004 | structural maintenance of chromosomes 1B [Source:VGNC Symbol;Acc:VGNC:77657]                   | 0.613110877 | 1.47E-06    | 9.67E-06    |
| ENSMMUG00000023003 | family with sequence similarity 118 member A [Source:VGNC Symbol;Acc:VGNC:72265]               | 0.620023453 | 4.11E-05    | 0.000202924 |
| ENSMMUG00000031000 | Rho GTPase activating protein 8 [Source:NCBI gene;Acc:716745]                                  | 1.637655148 | 0.000420743 | 0.001666565 |
| ENSMMUG00000058874 | Metazoan signal recognition particle RNA [Source:RFAM;Acc:RF00017]                             | 3.129723024 | 0.002614569 | 0.008407211 |
| ENSMMUG00000065099 |                                                                                                | 1.737669555 | 1.26E-09    | 1.37E-08    |
| ENSMMUG00000005769 | EF-hand calcium binding domain 6 [Source:VGNC Symbol;Acc:VGNC:72092]                           | 0.958520352 | 0.00015136  | 0.00066195  |
| ENSMMUG00000022590 | metallophosphoesterase domain containing 1 [Source:NCBI gene;Acc:715021]                       | 0.926701621 | 0.005524475 | 0.016175315 |
| ENSMMUG00000008106 | solute carrier family 25 member 17 [Source:NCBI gene;Acc:705547]                               | 0.914708446 | 5.48E-05    | 0.000263559 |
| ENSMMUG00000056662 |                                                                                                | 1.197983855 | 6.13E-05    | 0.000292355 |
| ENSMMUG00000012101 | synaptogyrin 1 [Source:VGNC Symbol;Acc:VGNC:78068]                                             | -1.52602506 | 5.44E-08    | 4.56E-07    |
| ENSMMUG00000048395 | chromobox 6 [Source:NCBI gene;Acc:702133]                                                      | 5.791634377 | 1.69E-21    | 7.10E-20    |
| ENSMMUG00000004869 | neuronal pentraxin receptor [Source:NCBI gene;Acc:100428434]                                   | 3.572752533 | 0.00147452  | 0.005080652 |
| ENSMMUG00000004868 | dynein axonemal light chain 4 [Source:VGNC Symbol;Acc:VGNC:71945]                              | 4.20529385  | 3.29E-06    | 2.02E-05    |
| ENSMMUG00000007277 | GTP binding protein 1 [Source:VGNC Symbol;Acc:VGNC:73320]                                      | 1.683365305 | 7.65E-06    | 4.39E-05    |
| ENSMMUG00000021083 | Josephin domain containing 1 [Source:VGNC Symbol;Acc:VGNC:73920]                               | 1.374138927 | 0.000123155 | 0.000550119 |

|                    |                                                                                                              |             |             |             |
|--------------------|--------------------------------------------------------------------------------------------------------------|-------------|-------------|-------------|
| ENSMMUG0000000364  | translocase of outer mitochondrial membrane 22 [Source:NCBI gene;Acc:701286]                                 | 2.010917374 | 0.000169    | 0.000730478 |
| ENSMMUG00000061986 |                                                                                                              | 2.067174093 | 0.000101474 | 0.000463537 |
| ENSMMUG00000017680 | chibby family member 1, beta catenin antagonist [Source:NCBI gene;Acc:100429409]                             | 2.113416159 | 0.000153966 | 0.000671562 |
| ENSMMUG00000012467 | family with sequence similarity 227 member A [Source:VGNC Symbol;Acc:VGNC:72475]                             | 1.747618215 | 1.14E-07    | 9.14E-07    |
| ENSMMUG00000061118 |                                                                                                              | 1.941430227 | 0.000235011 | 0.000987874 |
| ENSMMUG00000049788 |                                                                                                              | -2.2565867  | 1.35E-07    | 1.07E-06    |
| ENSMMUG0000006987  | RNA polymerase II subunit F [Source:NCBI gene;Acc:699566]                                                    | 0.409701377 | 0.000614248 | 0.002330936 |
| ENSMMUG00000019785 | eukaryotic translation initiation factor 3 subunit L [Source:NCBI gene;Acc:699189]                           | 1.490940098 | 0.020087299 | 0.049044228 |
| ENSMMUG00000015258 | glycine C-acetyltransferase [Source:NCBI gene;Acc:698811]                                                    | 2.730385429 | 2.41E-06    | 1.52E-05    |
| ENSMMUG00000005991 | TRIO and F-actin binding protein [Source:NCBI gene;Acc:701241]                                               | 1.133002381 | 2.98E-17    | 7.93E-16    |
| ENSMMUG00000056629 | nucleolar protein 12 [Source:NCBI gene;Acc:698318]                                                           | 1.641130686 | 5.39E-05    | 0.000260082 |
| ENSMMUG00000003007 | caspase recruitment domain family member 10 [Source:VGNC Symbol;Acc:VGNC:70570]                              | 3.661532489 | 1.00E-11    | 1.43E-10    |
| ENSMMUG00000003005 | MFNG O-fucosylpeptide 3-beta-N-acetylglucosaminyltransferase [Source:VGNC Symbol;Acc:VGNC:74712]             | 5.860963863 | 1.87E-08    | 1.69E-07    |
| ENSMMUG00000052785 | extracellular leucine rich repeat and fibronectin type III domain containing 2 [Source:NCBI gene;Acc:697071] | 4.690660426 | 1.19E-07    | 9.46E-07    |
| ENSMMUG00000062922 |                                                                                                              | 0.535885385 | 0.019863484 | 0.048569739 |
| ENSMMUG00000052038 |                                                                                                              | 1.402651973 | 0.017438985 | 0.043443667 |
| ENSMMUG00000000151 | transmembrane serine protease 6 [Source:VGNC Symbol;Acc:VGNC:79038]                                          | 0.55127149  | 5.75E-05    | 0.000275626 |
| ENSMMUG00000058352 |                                                                                                              | 1.47794257  | 6.12E-06    | 3.58E-05    |
| ENSMMUG00000012350 | mercaptopyruvate sulfurtransferase [Source:VGNC Symbol;Acc:VGNC:74922]                                       | 1.355080384 | 2.84E-06    | 1.77E-05    |
| ENSMMUG00000014986 | testis expressed 33 [Source:VGNC Symbol;Acc:VGNC:79727]                                                      | 1.439067885 | 2.15E-13    | 3.82E-12    |
| ENSMMUG00000008160 | neutrophil cytosolic factor 4 [Source:VGNC Symbol;Acc:VGNC:75141]                                            | 2.517917086 | 2.50E-13    | 4.40E-12    |
| ENSMMUG00000055820 |                                                                                                              | 2.757619837 | 7.82E-13    | 1.31E-11    |
| ENSMMUG00000008778 | parvalbumin [Source:VGNC Symbol;Acc:VGNC:76627]                                                              | 2.416400731 | 1.81E-20    | 6.76E-19    |
| ENSMMUG00000006101 | myosin heavy chain 9 [Source:VGNC Symbol;Acc:VGNC:75102]                                                     | 1.247301928 | 8.35E-09    | 7.91E-08    |
| ENSMMUG00000060967 |                                                                                                              | 0.899900493 | 0.000249948 | 0.001043853 |
| ENSMMUG00000014010 | RNA binding fox-1 homolog 2 [Source:VGNC Symbol;Acc:VGNC:76685]                                              | 1.175295767 | 1.04E-15    | 2.36E-14    |
| ENSMMUG00000048463 | apolipoprotein L5 [Source:HGNC Symbol;Acc:HGNC:14869]                                                        | 1.13407194  | 6.30E-12    | 9.28E-11    |
| ENSMMUG00000059824 |                                                                                                              | -2.36679894 | 0.005856972 | 0.017021144 |
| ENSMMUG00000062825 | TIMP metalloproteinase inhibitor 3 [Source:NCBI gene;Acc:574381]                                             | 0.455694812 | 0.010005927 | 0.027068206 |
| ENSMMUG00000051047 | uncharacterized protein C22orf42-like [Source:NCBI gene;Acc:106996637]                                       | 3.153021251 | 0.012993634 | 0.033877564 |
| ENSMMUG00000063383 |                                                                                                              | 2.299909935 | 1.15E-06    | 7.71E-06    |
| ENSMMUG00000020746 | proline rich 14 like [Source:VGNC Symbol;Acc:VGNC:76338]                                                     | 0.993551951 | 0.009455257 | 0.025809213 |
| ENSMMUG00000002182 | phosphatidylserine decarboxylase [Source:VGNC Symbol;Acc:VGNC:76005]                                         | 1.702187097 | 1.54E-05    | 8.36E-05    |
| ENSMMUG00000002181 | SFI1 centrin binding protein [Source:VGNC Symbol;Acc:VGNC:77328]                                             | 1.019634776 | 1.78E-14    | 3.61E-13    |
| ENSMMUG00000015001 | LIM domain kinase 2 [Source:VGNC Symbol;Acc:VGNC:74270]                                                      | 0.76162027  | 0.00055564  | 0.002134753 |
| ENSMMUG00000056777 | Metazoan signal recognition particle RNA [Source:RFAM;Acc:RF00017]                                           | 1.360396945 | 0.003375072 | 0.010524036 |
| ENSMMUG00000004675 | smoothelin [Source:VGNC Symbol;Acc:VGNC:77661]                                                               | 1.747203548 | 2.59E-07    | 1.95E-06    |
| ENSMMUG00000051960 |                                                                                                              | 2.196015493 | 0.004958089 | 0.014758067 |
| ENSMMUG00000056113 |                                                                                                              | 2.259443974 | 0.000651697 | 0.002458577 |

|                    |                                                                                                 |             |             |             |
|--------------------|-------------------------------------------------------------------------------------------------|-------------|-------------|-------------|
| ENSMMUG0000005898  | MORC family CW-type zinc finger 2 [Source:VGNC Symbol;Acc:VGNC:74810]                           | 2.277602494 | 0.001968141 | 0.006563419 |
| ENSMMUG00000045603 | mml-mir-3200 [Source:miRBase;Acc:MI0020871]                                                     | 2.398962226 | 0.004126143 | 0.012580323 |
| ENSMMUG00000019805 | dual specificity phosphatase 18 [Source:VGNC Symbol;Acc:VGNC:71858]                             | 0.826520064 | 1.42E-06    | 9.36E-06    |
| ENSMMUG00000052343 |                                                                                                 | 0.828799772 | 0.005778438 | 0.016826807 |
| ENSMMUG00000021374 | EWS RNA binding protein 1 [Source:VGNC Symbol;Acc:VGNC:72446]                                   | -1.63233862 | 1.33E-11    | 1.87E-10    |
| ENSMMUG00000021373 | rhomboid domain containing 3 [Source:NCBI gene;Acc:714479]                                      | 1.767378794 | 2.53E-12    | 3.97E-11    |
| ENSMMUG00000021372 | EMI domain containing 1 [Source:VGNC Symbol;Acc:VGNC:72063]                                     | 1.254741197 | 2.15E-08    | 1.91E-07    |
| ENSMMUG00000021370 | kringle containing transmembrane protein 1 [Source:VGNC Symbol;Acc:VGNC:74066]                  | -1.70557216 | 1.68E-06    | 1.10E-05    |
| ENSMMUG00000058170 | U6 spliceosomal RNA [Source:RFAM;Acc:RF00026]                                                   | 1.329670389 | 3.61E-06    | 2.20E-05    |
| ENSMMUG0000007215  | X-box binding protein 1 [Source:VGNC Symbol;Acc:VGNC:78806]                                     | 1.900045787 | 5.15E-10    | 5.90E-09    |
| ENSMMUG00000053198 | coiled-coil domain containing 117 [Source:NCBI gene;Acc:713804]                                 | 0.762232958 | 0.007936979 | 0.022179273 |
| ENSMMUG00000020489 | HscB mitochondrial iron-sulfur cluster cochaperone [Source:VGNC Symbol;Acc:VGNC:73454]          | 1.313256988 | 7.59E-13    | 1.28E-11    |
| ENSMMUG00000020486 | checkpoint kinase 2 [Source:VGNC Symbol;Acc:VGNC:70958]                                         | 0.792748512 | 1.91E-09    | 2.00E-08    |
| ENSMMUG0000001058  | tetratricopeptide repeat domain 28 [Source:VGNC Symbol;Acc:VGNC:79785]                          | 3.001694386 | 1.13E-21    | 4.87E-20    |
| ENSMMUG00000042122 | Metazoan signal recognition particle RNA [Source:RFAM;Acc:RF00017]                              | 3.50590905  | 0.001027778 | 0.003688757 |
| ENSMMUG00000023450 | tyrosylprotein sulfotransferase 2 [Source:VGNC Symbol;Acc:VGNC:78639]                           | 1.022377347 | 7.81E-05    | 0.000363924 |
| ENSMMUG00000023446 | tuftelin interacting protein 11 [Source:VGNC Symbol;Acc:VGNC:78399]                             | -1.29368039 | 2.28E-05    | 0.000119702 |
| ENSMMUG00000023443 | SRR1 domain containing [Source:VGNC Symbol;Acc:VGNC:78036]                                      | 1.813959996 | 8.65E-12    | 1.25E-10    |
| ENSMMUG00000023442 | HPS4 biogenesis of lysosomal organelles complex 3 subunit 2 [Source:VGNC Symbol;Acc:VGNC:73396] | 1.637181906 | 0.00751309  | 0.021130121 |
| ENSMMUG00000016052 | seizure related 6 homolog like [Source:VGNC Symbol;Acc:VGNC:77176]                              | 1.848337114 | 1.15E-10    | 1.44E-09    |
| ENSMMUG00000010839 | small G protein signaling modulator 1 [Source:VGNC Symbol;Acc:VGNC:77336]                       | 0.663933976 | 1.17E-07    | 9.36E-07    |
| ENSMMUG00000031048 | transmembrane protein 211 [Source:VGNC Symbol;Acc:VGNC:79935]                                   | 2.058852818 | 0.003456666 | 0.01074007  |
| ENSMMUG00000006853 | crystallin beta B2 [Source:NCBI gene;Acc:100144420]                                             | 2.355814716 | 2.39E-08    | 2.12E-07    |
| ENSMMUG00000044345 | ral-GDS-related protein [Source:NCBI gene;Acc:710293]                                           | 0.536895252 | 0.010611963 | 0.028443054 |
| ENSMMUG00000031051 | aspartate-rich protein 1 [Source:NCBI gene;Acc:107000598]                                       | 0.675210094 | 0.000381731 | 0.001527129 |
| ENSMMUG00000009106 | solute carrier family 2 member 11 [Source:NCBI gene;Acc:699450]                                 | 0.504949876 | 0.00088372  | 0.003212149 |
| ENSMMUG00000023053 | glutathione S-transferase theta 2B [Source:NCBI gene;Acc:700185]                                | 0.285525716 | 0.003486942 | 0.010825068 |
| ENSMMUG00000053799 | glutathione S-transferase theta 1 [Source:NCBI gene;Acc:700314]                                 | 0.456176403 | 0.002112916 | 0.006977773 |
| ENSMMUG00000043974 | ral-GDS-related protein [Source:NCBI gene;Acc:710293]                                           | 1.098759929 | 0.006387951 | 0.018359171 |
| ENSMMUG00000044782 |                                                                                                 | 1.034164686 | 8.30E-11    | 1.06E-09    |
| ENSMMUG00000020999 | gamma-glutamyltransferase 1 [Source:NCBI gene;Acc:707545]                                       | 0.879968191 | 0.000975367 | 0.003521103 |
| ENSMMUG00000000263 | guanylyl cyclase domain containing 1 [Source:VGNC Symbol;Acc:VGNC:73168]                        | 1.173957352 | 0.003970009 | 0.012149243 |
| ENSMMUG00000000262 | beta-ureidopropionase 1 [Source:VGNC Symbol;Acc:VGNC:79029]                                     | 1.140246852 | 0.001189788 | 0.004206091 |

|                    |                                                                                                              |             |             |             |
|--------------------|--------------------------------------------------------------------------------------------------------------|-------------|-------------|-------------|
| ENSMMUG00000051567 |                                                                                                              | -0.6647166  | 0.002477599 | 0.008013696 |
| ENSMMUG00000049542 |                                                                                                              | 2.50709031  | 8.16E-15    | 1.72E-13    |
| ENSMMUG00000023622 | BCR activator of RhoGEF and GTPase [Source:NCBI gene;Acc:709258]                                             | 1.688468015 | 1.13E-09    | 1.23E-08    |
| ENSMMUG00000001776 | G protein subunit alpha z [Source:VGNC Symbol;Acc:VGNC:73094]                                                | 0.698961987 | 1.11E-05    | 6.16E-05    |
| ENSMMUG00000014641 |                                                                                                              | 0.603502534 | 3.02E-07    | 2.23E-06    |
| ENSMMUG00000020092 |                                                                                                              | 0.668123625 | 0.001191076 | 0.004209642 |
| ENSMMUG00000058253 |                                                                                                              | 0.816237215 | 0.017032598 | 0.042639    |
| ENSMMUG00000044861 |                                                                                                              | 0.615592057 | 0.001456753 | 0.005026443 |
|                    |                                                                                                              | -           |             |             |
| ENSMMUG00000054655 | immunoglobulin lambda variable 3-10 [Source:HGNC Symbol;Acc:HGNC:5897]                                       | 0.762784924 | 0.0027744   | 0.008864457 |
| ENSMMUG00000014309 | zinc finger protein 280A [Source:VGNC Symbol;Acc:VGNC:79152]                                                 | 0.708557705 | 0.001129714 | 0.004020326 |
| ENSMMUG00000047452 |                                                                                                              | 3.430629487 | 2.06E-05    | 0.000109304 |
| ENSMMUG00000056950 |                                                                                                              | 1.392397614 | 2.89E-17    | 7.71E-16    |
| ENSMMUG00000061925 |                                                                                                              | 1.01037862  | 0.008673477 | 0.023961936 |
| ENSMMUG00000039205 |                                                                                                              | 2.252373394 | 2.67E-06    | 1.68E-05    |
| ENSMMUG00000060270 |                                                                                                              | 3.409739819 | 5.12E-05    | 0.000248559 |
|                    |                                                                                                              | -           |             |             |
| ENSMMUG00000047978 | ral-GDS-related protein-like [Source:NCBI gene;Acc:106995524]                                                | 0.883136168 | 0.001148147 | 0.004079305 |
|                    |                                                                                                              | -           |             |             |
| ENSMMUG00000047015 | ral-GDS-related protein-like [Source:NCBI gene;Acc:106995524]                                                | 0.984954598 | 2.23E-05    | 0.000117033 |
| ENSMMUG00000018798 | stromal cell derived factor 2 like 1 [Source:NCBI gene;Acc:697928]                                           | 0.816573672 | 6.57E-05    | 0.000311517 |
| ENSMMUG00000052464 |                                                                                                              | 1.515193561 | 0.006494984 | 0.018617237 |
| ENSMMUG00000018531 | peptidylprolyl isomerase like 2 [Source:VGNC Symbol;Acc:VGNC:76239]                                          | 0.604381286 | 0.000254851 | 0.001061341 |
| ENSMMUG00000056022 |                                                                                                              | 0.766367482 | 0.000306208 | 0.001249607 |
| ENSMMUG00000062755 |                                                                                                              | 1.7382144   | 2.00E-08    | 1.80E-07    |
| ENSMMUG00000049130 |                                                                                                              | 3.031179355 | 6.54E-56    | 1.08E-52    |
| ENSMMUG00000063914 |                                                                                                              | 3.164057636 | 5.68E-81    | 2.81E-77    |
| ENSMMUG00000023263 | mediator complex subunit 15 [Source:VGNC Symbol;Acc:VGNC:74511]                                              | 3.132245669 | 8.85E-39    | 2.02E-36    |
| ENSMMUG00000011547 | reticulon 4 receptor [Source:VGNC Symbol;Acc:VGNC:77047]                                                     | 0.622303426 | 0.018641791 | 0.045976677 |
| ENSMMUG00000021904 | cell division cycle 45 [Source:VGNC Symbol;Acc:VGNC:70800]                                                   | 0.696145313 | 0.001720003 | 0.005822333 |
| ENSMMUG00000031106 | ubiquitin recognition factor in ER associated degradation 1 [Source:NCBI gene;Acc:711716]                    | 0.88491006  | 1.18E-07    | 9.41E-07    |
|                    |                                                                                                              | -           |             |             |
| ENSMMUG00000009650 | HIR histone cell cycle regulation defective homolog A ( <i>S. cerevisiae</i> ) [Source:NCBI gene;Acc:719142] | 0.314656213 | 0.002143193 | 0.007053606 |
| ENSMMUG00000005432 | clathrin heavy chain like 1 [Source:VGNC Symbol;Acc:VGNC:71268]                                              | 1.986513143 | 2.80E-18    | 8.26E-17    |
| ENSMMUG00000019925 | DiGeorge syndrome critical region gene 2 [Source:NCBI gene;Acc:100423715]                                    | 1.141323624 | 4.54E-09    | 4.48E-08    |
| ENSMMUG00000014140 | peroxisomal biogenesis factor 26 [Source:NCBI gene;Acc:710470]                                               | -0.84300418 | 0.004149207 | 0.012640251 |
| ENSMMUG00000020801 | microtubule associated monooxygenase, calponin and LIM domain containing 3 [Source:NCBI gene;Acc:710292]     | 0.442409249 | 0.007033971 | 0.019958761 |
| ENSMMUG00000020799 | BH3 interacting domain death agonist [Source:VGNC Symbol;Acc:VGNC:70250]                                     | 2.962568077 | 1.96E-19    | 6.37E-18    |
| ENSMMUG00000021476 | BCL2 like 13 [Source:VGNC Symbol;Acc:VGNC:84544]                                                             | 3.548815379 | 2.85E-17    | 7.61E-16    |
| ENSMMUG00000058916 |                                                                                                              | 3.689672873 | 5.13E-32    | 5.94E-30    |
| ENSMMUG00000021477 | ATPase H+ transporting V1 subunit E1 [Source:NCBI gene;Acc:709739]                                           | 3.837193586 | 2.29E-22    | 1.07E-20    |
|                    |                                                                                                              | -           |             |             |
| ENSMMUG00000031121 | solute carrier family 25 member 18 [Source:VGNC Symbol;Acc:VGNC:77434]                                       | 1.531760901 | 4.37E-09    | 4.33E-08    |
|                    |                                                                                                              | -           |             |             |
| ENSMMUG00000006731 | CECR2 histone acetyl-lysine reader [Source:VGNC Symbol;Acc:VGNC:84530]                                       | 2.622238589 | 7.24E-22    | 3.20E-20    |
| ENSMMUG00000059302 | Metazoan signal recognition particle RNA [Source:RFAM;Acc:RF00017]                                           | 2.44175355  | 5.41E-11    | 7.09E-10    |
| ENSMMUG00000022223 | transmembrane protein 121B [Source:VGNC Symbol;Acc:VGNC:79139]                                               | 0.517385508 | 0.016417609 | 0.041331053 |
| ENSMMUG00000022222 | interleukin 17 receptor A [Source:VGNC Symbol;Acc:VGNC:73712]                                                | 0.558578885 | 0.000970514 | 0.00350529  |
|                    |                                                                                                              | -           |             |             |
| ENSMMUG00000006668 | tubulin alpha-3 chain [Source:NCBI gene;Acc:707215]                                                          | 1.212351137 | 2.82E-05    | 0.000144911 |
|                    |                                                                                                              | -           |             |             |
| ENSMMUG00000054724 |                                                                                                              | 0.936921701 | 0.001036309 | 0.003714882 |

|                    |                                                                                          |             |             |             |
|--------------------|------------------------------------------------------------------------------------------|-------------|-------------|-------------|
| ENSMMUG00000049841 | Metazoan signal recognition particle RNA [Source:RFAM;Acc:RF00017]                       | 1.566255041 | 0.007782114 | 0.021795799 |
| ENSMMUG00000055391 |                                                                                          | 1.190318088 | 0.018843658 | 0.046428218 |
| ENSMMUG00000009953 | ninein like [Source:VGNC Symbol;Acc:VGNC:75273]                                          | 0.772883661 | 0.007181503 | 0.020305374 |
| ENSMMUG00000002397 | GINS complex subunit 1 [Source:VGNC Symbol;Acc:VGNC:73025]                               | 0.976373477 | 0.001407537 | 0.004880471 |
| ENSMMUG00000059374 |                                                                                          | 1.099942589 | 0.014159572 | 0.036430682 |
| ENSMMUG00000009199 | glycogen phosphorylase B [Source:VGNC Symbol;Acc:VGNC:76631]                             | 0.688979719 | 0.019000956 | 0.046745883 |
| ENSMMUG00000053965 |                                                                                          | 0.663983362 | 0.002382436 | 0.007744746 |
| ENSMMUG00000042668 | cilia and flagella associated protein 61 [Source:NCBI gene;Acc:699814]                   | 1.902073655 | 7.11E-12    | 1.04E-10    |
| ENSMMUG00000007709 | crooked neck pre-mRNA splicing factor 1 [Source:VGNC Symbol;Acc:VGNC:71412]              | 1.729271391 | 1.84E-11    | 2.55E-10    |
| ENSMMUG00000007708 | N-alpha-acetyltransferase 20, NatB catalytic subunit [Source:VGNC Symbol;Acc:VGNC:84533] | 1.541724221 | 0.00018307  | 0.000786709 |
| ENSMMUG00000065262 | Metazoan signal recognition particle RNA [Source:RFAM;Acc:RF00017]                       | -2.25838796 | 0.002804976 | 0.008947686 |
| ENSMMUG00000010114 | Ras and Rab interactor 2 [Source:VGNC Symbol;Acc:VGNC:76770]                             | 1.695465579 | 3.24E-10    | 3.81E-09    |
| ENSMMUG00000002321 | solute carrier family 24 member 3 [Source:VGNC Symbol;Acc:VGNC:77426]                    | 1.242600781 | 0.000124749 | 0.000556064 |
| ENSMMUG00000006519 | taspase 1 [Source:VGNC Symbol;Acc:VGNC:78129]                                            | 3.222428945 | 7.48E-05    | 0.000350243 |
| ENSMMUG00000031166 | McKusick-Kaufman syndrome [Source:NCBI gene;Acc:718547]                                  | 3.432532009 | 0.000102878 | 0.000469009 |
| ENSMMUG00000011064 | synaptosome associated protein 25 [Source:VGNC Symbol;Acc:VGNC:77663]                    | 2.393840691 | 9.12E-06    | 5.16E-05    |
| ENSMMUG00000015923 | ankyrin repeat and EF-hand domain containing 1 [Source:VGNC Symbol;Acc:VGNC:69615]       | 0.815568387 | 0.006510137 | 0.018652498 |
| ENSMMUG00000021137 | thioredoxin related transmembrane protein 4 [Source:VGNC Symbol;Acc:VGNC:79484]          | 2.264317208 | 9.42E-07    | 6.42E-06    |
| ENSMMUG00000055897 |                                                                                          | 2.351206529 | 6.31E-26    | 4.12E-24    |
| ENSMMUG00000057687 |                                                                                          | 2.467714917 | 2.92E-29    | 2.73E-27    |
| ENSMMUG00000064554 | leucine rich repeat neuronal 4 [Source:NCBI gene;Acc:718283]                             | 1.119865271 | 0.013522161 | 0.03506446  |
| ENSMMUG00000013722 | chromogranin B [Source:VGNC Symbol;Acc:VGNC:71033]                                       | 0.730051352 | 0.002741157 | 0.008777783 |
| ENSMMUG00000056093 | shieldin complex subunit 1 [Source:NCBI gene;Acc:718152]                                 | 1.678043423 | 1.29E-11    | 1.82E-10    |
| ENSMMUG00000022345 |                                                                                          | 1.309528805 | 5.10E-07    | 3.64E-06    |
| ENSMMUG00000050080 | Metazoan signal recognition particle RNA [Source:RFAM;Acc:RF00017]                       | 1.265948918 | 0.011337481 | 0.030174954 |
| ENSMMUG00000064391 |                                                                                          | 1.799012134 | 4.02E-16    | 9.42E-15    |
| ENSMMUG00000001809 | glycerophosphocholine phosphodiesterase 1 [Source:VGNC Symbol;Acc:VGNC:73017]            | 1.186837365 | 0.004336772 | 0.013135532 |
| ENSMMUG00000065232 |                                                                                          | 2.262569534 | 0.00668926  | 0.019102969 |
| ENSMMUG00000013261 | CDP-diacylglycerol synthase 2 [Source:VGNC Symbol;Acc:VGNC:70995]                        | -1.87184868 | 1.86E-05    | 9.93E-05    |
| ENSMMUG00000020005 | solute carrier family 23 member 2 [Source:NCBI gene;Acc:717939]                          | 0.900581046 | 0.000548312 | 0.002113166 |
| ENSMMUG00000020004 | Ras association domain family member 2 [Source:VGNC Symbol;Acc:VGNC:76674]               | 1.141865049 | 1.86E-10    | 2.27E-09    |
| ENSMMUG00000051480 |                                                                                          | 0.775811155 | 0.012635599 | 0.033095362 |
| ENSMMUG00000020912 | spermine oxidase [Source:NCBI gene;Acc:718761]                                           | 0.830535838 | 0.000237724 | 0.000997298 |
| ENSMMUG00000018922 | cell division cycle 25B [Source:VGNC Symbol;Acc:VGNC:70795]                              | 0.601893154 | 3.86E-08    | 3.28E-07    |
| ENSMMUG00000022070 | sialic acid binding Ig like lectin 1 [Source:VGNC Symbol;Acc:VGNC:77220]                 | 0.641050699 | 5.17E-07    | 3.69E-06    |
| ENSMMUG00000003633 | solute carrier family 4 member 11 [Source:VGNC Symbol;Acc:VGNC:77721]                    | 0.544379499 | 3.01E-08    | 2.62E-07    |
| ENSMMUG00000061481 | inosine triphosphatase [Source:NCBI gene;Acc:717257]                                     | 0.603989098 | 9.15E-09    | 8.61E-08    |
| ENSMMUG00000063520 | DDR GK domain containing 1 [Source:NCBI gene;Acc:717226]                                 | 0.543247925 | 0.003263154 | 0.010235316 |
| ENSMMUG00000010028 | leucine zipper tumor suppressor family member 3 [Source:VGNC Symbol;Acc:VGNC:74403]      | 1.891199285 | 1.66E-15    | 3.71E-14    |

|                     |                                                                                           |             |             |             |
|---------------------|-------------------------------------------------------------------------------------------|-------------|-------------|-------------|
| ENSMMUG00000043281  | U-box domain containing 5 [Source:NCBI gene;Acc:717166]                                   | 1.696530399 | 0.004592657 | 0.01382084  |
| ENSMMUG00000002982  | FAST kinase domains 5 [Source:NCBI gene;Acc:100498658]                                    | 0.852136878 | 3.92E-06    | 2.38E-05    |
| ENSMMUG000000039757 | Metazoan signal recognition particle RNA [Source:RFAM;Acc:RF00017]                        | 2.843745646 | 0.002063708 | 0.006842118 |
| ENSMMUG000000051923 | arginine vasopressin [Source:NCBI gene;Acc:717101]                                        | 1.939786456 | 0.017040069 | 0.042650501 |
| ENSMMUG000000010678 | oxytocin/neurophysin I prepropeptide [Source:VGNC Symbol;Acc:VGNC:75730]                  | 1.885616114 | 1.82E-06    | 1.18E-05    |
| ENSMMUG000000063622 | mitochondrial ribosomal protein S26 [Source:NCBI gene;Acc:717038]                         | 2.447512722 | 3.18E-11    | 4.29E-10    |
| ENSMMUG000000005878 | protein tyrosine phosphatase receptor type A [Source:VGNC Symbol;Acc:VGNC:76610]          | 0.634414882 | 2.01E-06    | 1.29E-05    |
|                     |                                                                                           | -           |             |             |
| ENSMMUG000000005204 | VPS16 core subunit of CORVET and HOPS complexes [Source:VGNC Symbol;Acc:VGNC:78966]       | 1.901926502 | 3.42E-06    | 2.09E-05    |
|                     |                                                                                           | -           |             |             |
| ENSMMUG000000005200 | PC-esterase domain containing 1A [Source:VGNC Symbol;Acc:VGNC:75622]                      | 3.389579789 | 0.001352977 | 0.00471444  |
|                     |                                                                                           | -           |             |             |
| ENSMMUG000000021332 | carboxypeptidase X, M14 family member 1 [Source:VGNC Symbol;Acc:VGNC:71413]               | 2.520230022 | 0.013281769 | 0.034519563 |
|                     |                                                                                           | -           |             |             |
| ENSMMUG000000021331 | EBF family member 4 [Source:VGNC Symbol;Acc:VGNC:71932]                                   | 3.080033255 | 7.11E-07    | 4.95E-06    |
|                     |                                                                                           | -           |             |             |
| ENSMMUG000000061433 |                                                                                           | 1.573110471 | 2.54E-09    | 2.61E-08    |
|                     |                                                                                           | -           |             |             |
| ENSMMUG000000013888 | NOP56 ribonucleoprotein [Source:VGNC Symbol;Acc:VGNC:75181]                               | 1.446620598 | 0.000273963 | 0.001131087 |
|                     |                                                                                           | -           |             |             |
| ENSMMUG000000010050 | small nuclear ribonucleoprotein polypeptides B and B1 [Source:VGNC Symbol;Acc:VGNC:77676] | 1.869390981 | 3.84E-05    | 0.000190407 |
|                     |                                                                                           | -           |             |             |
| ENSMMUG000000063469 | transglutaminase 6 [Source:NCBI gene;Acc:100430348]                                       | 2.710635347 | 0.00694933  | 0.019758161 |
|                     |                                                                                           | -           |             |             |
| ENSMMUG000000018474 | signal regulatory protein alpha [Source:NCBI gene;Acc:717811]                             | 1.976449053 | 3.25E-08    | 2.81E-07    |
|                     |                                                                                           | -           |             |             |
| ENSMMUG000000015994 | NSFL1 cofactor [Source:VGNC Symbol;Acc:VGNC:75407]                                        | 2.477435517 | 0.00901337  | 0.024758277 |
|                     |                                                                                           | -           |             |             |
| ENSMMUG000000018165 | syndecan binding protein 2 [Source:VGNC Symbol;Acc:VGNC:77017]                            | 2.564781003 | 9.50E-05    | 0.000435786 |
|                     |                                                                                           | -           |             |             |
| ENSMMUG000000004711 | transmembrane protein 74B [Source:VGNC Symbol;Acc:VGNC:78990]                             | 2.032966533 | 0.001616503 | 0.005503383 |
|                     |                                                                                           | -           |             |             |
| ENSMMUG000000004709 | proteasome inhibitor subunit 1 [Source:VGNC Symbol;Acc:VGNC:76458]                        | 1.713790917 | 0.000197376 | 0.000842086 |
|                     |                                                                                           | -           |             |             |
| ENSMMUG000000047879 | family with sequence similarity 110 member A [Source:NCBI gene;Acc:717055]                | 1.900966628 | 0.000133614 | 0.000592375 |
| ENSMMUG000000021670 | solute carrier family 52 member 3 [Source:VGNC Symbol;Acc:VGNC:77717]                     | -1.46211251 | 7.06E-09    | 6.79E-08    |
|                     |                                                                                           | -           |             |             |
| ENSMMUG000000056387 | transcription factor 15 [Source:NCBI gene;Acc:716916]                                     | 3.344211317 | 3.84E-29    | 3.49E-27    |
|                     |                                                                                           | -           |             |             |
| ENSMMUG000000031224 | casein kinase 2 alpha 1 [Source:NCBI gene;Acc:714841]                                     | 1.217811963 | 1.23E-08    | 1.14E-07    |
| ENSMMUG000000004461 | TBC1 domain family member 20 [Source:VGNC Symbol;Acc:VGNC:78132]                          | -0.67227849 | 6.99E-06    | 4.05E-05    |
| ENSMMUG000000026836 | Y RNA [Source:RFAM;Acc:RF00019]                                                           | -1.49076019 | 0.00011019  | 0.00049775  |
|                     |                                                                                           | -           |             |             |
| ENSMMUG000000012601 | RANBP2-type and C3HC4-type zinc finger containing 1 [Source:VGNC Symbol;Acc:VGNC:81554]   | 0.972191281 | 1.11E-07    | 8.87E-07    |
|                     |                                                                                           | -           |             |             |
| ENSMMUG000000038935 | zinc finger CCHC-type containing 3 [Source:NCBI gene;Acc:714477]                          | 1.748372238 | 1.78E-05    | 9.56E-05    |
|                     |                                                                                           | -           |             |             |
| ENSMMUG000000017286 | chromosome 10 C20orf96 homolog [Source:VGNC Symbol;Acc:VGNC:70324]                        | 1.221739754 | 0.000377824 | 0.001515179 |
|                     |                                                                                           | -           |             |             |
| ENSMMUG000000050398 | defensin beta 127 [Source:NCBI gene;Acc:714155]                                           | 1.674730564 | 0.018195753 | 0.045063964 |
|                     |                                                                                           | -           |             |             |
| ENSMMUG000000061092 | defensin beta 125 [Source:HGNC Symbol;Acc:HGNC:18105]                                     | 0.564370367 | 0.002742634 | 0.008779034 |
| ENSMMUG000000046141 | defensin beta 123 [Source:NCBI gene;Acc:619504]                                           | 0.522491068 | 0.012843662 | 0.033551437 |
| ENSMMUG000000005116 | defensin beta 124 [Source:VGNC Symbol;Acc:VGNC:71655]                                     | 0.476580701 | 0.017269178 | 0.043085786 |



|                     |                                                                                                                         |             |             |             |
|---------------------|-------------------------------------------------------------------------------------------------------------------------|-------------|-------------|-------------|
| ENSMMUG00000058583  | RRAD and GEM like GTPase 1 [Source:NCBI gene;Acc:713351]                                                                | 1.133208764 | 7.46E-10    | 8.37E-09    |
| ENSMMUG00000005119  | histocompatibility minor 13 [Source:VGNC Symbol;Acc:VGNC:81418]                                                         | 1.942341761 | 0.000465231 | 0.001823785 |
| ENSMMUG000000051112 | p53 and DNA damage regulated 1 [Source:NCBI gene;Acc:712622]                                                            | 2.046508677 | 7.44E-10    | 8.34E-09    |
| ENSMMUG000000061404 | XK related 7 [Source:NCBI gene;Acc:715770]                                                                              | 3.117261879 | 0.007263049 | 0.020496864 |
| ENSMMUG000000031238 | CCM2 like scaffold protein [Source:NCBI gene;Acc:107000439]                                                             | -2.71142588 | 0.001515255 | 0.005202918 |
| ENSMMUG00000000117  | HCK proto-oncogene, Src family tyrosine kinase [Source:VGNC Symbol;Acc:VGNC:73353]                                      | 1.846936732 | 3.50E-08    | 3.00E-07    |
| ENSMMUG000000020671 | BPI fold containing family B member 3 [Source:VGNC Symbol;Acc:VGNC:70320]                                               | -0.52996083 | 0.000110308 | 0.000498134 |
| ENSMMUG000000020676 | BPI fold containing family B member 4 [Source:VGNC Symbol;Acc:VGNC:70321]                                               | 0.581811541 | 0.000439925 | 0.001732365 |
| ENSMMUG000000012912 | itchy E3 ubiquitin protein ligase [Source:VGNC Symbol;Acc:VGNC:73589]                                                   | 0.371702778 | 0.000348795 | 0.001406876 |
| ENSMMUG000000055449 | tumor protein p53 inducible nuclear protein 2 [Source:NCBI gene;Acc:707113]                                             | -2.74754391 | 0.001687908 | 0.005726761 |
| ENSMMUG000000017931 | gamma-glutamyltransferase 7 [Source:VGNC Symbol;Acc:VGNC:72921]                                                         | 1.678271036 | 5.79E-05    | 0.000277212 |
| ENSMMUG000000017932 | acyl-CoA synthetase short chain family member 2 [Source:VGNC Symbol;Acc:VGNC:69410]                                     | 1.835935653 | 0.00543428  | 0.015942705 |
| ENSMMUG000000017940 | glutathione synthetase [Source:VGNC Symbol;Acc:VGNC:73301]                                                              | 1.607405455 | 0.002071073 | 0.006863466 |
| ENSMMUG00000000227  | myosin heavy chain 7B [Source:VGNC Symbol;Acc:VGNC:74965]                                                               | 1.741884152 | 0.003432534 | 0.010676276 |
| ENSMMUG00000000229  | transient receptor potential cation channel subfamily C member 4 associated protein [Source:VGNC Symbol;Acc:VGNC:79014] | 2.308307408 | 7.76E-06    | 4.44E-05    |
| ENSMMUG000000057979 | growth differentiation factor 5 [Source:NCBI gene;Acc:705432]                                                           | 0.830851144 | 1.24E-10    | 1.54E-09    |
| ENSMMUG000000031274 | GDF5 antisense RNA 1 [Source:HGNC Symbol;Acc:HGNC:33435]                                                                | 0.604648212 | 0.009280263 | 0.025396993 |
| ENSMMUG000000010633 | PHD finger protein 20 [Source:VGNC Symbol;Acc:VGNC:75807]                                                               | 0.423759637 | 3.42E-05    | 0.0001724   |
| ENSMMUG000000020690 | erythrocyte membrane protein band 4.1 like 1 [Source:VGNC Symbol;Acc:VGNC:72231]                                        | 1.173616508 | 1.82E-14    | 3.67E-13    |
| ENSMMUG000000020691 | AAR2 splicing factor [Source:VGNC Symbol;Acc:VGNC:69412]                                                                | 0.953800341 | 0.000154802 | 0.000674616 |
| ENSMMUG000000016448 | DLG associated protein 4 [Source:NCBI gene;Acc:702928]                                                                  | 1.563319632 | 1.72E-15    | 3.83E-14    |
| ENSMMUG000000059897 | myosin light chain 9 [Source:NCBI gene;Acc:709784]                                                                      | 1.590891989 | 7.90E-07    | 5.46E-06    |
| ENSMMUG000000008195 | TGFB induced factor homeobox 2 [Source:NCBI gene;Acc:100429616]                                                         | 1.97892918  | 4.30E-33    | 5.90E-31    |
| ENSMMUG000000056945 |                                                                                                                         | 1.96861836  | 6.51E-26    | 4.22E-24    |
| ENSMMUG000000008200 | Src like adaptor 2 [Source:VGNC Symbol;Acc:VGNC:77499]                                                                  | 2.008712239 | 3.19E-09    | 3.24E-08    |
| ENSMMUG000000014380 | maestro heat like repeat family member 8 [Source:VGNC Symbol;Acc:VGNC:74774]                                            | 0.558418899 | 0.007343414 | 0.020684298 |
| ENSMMUG000000010363 | ribophorin II [Source:VGNC Symbol;Acc:VGNC:76925]                                                                       | 1.611832659 | 1.93E-08    | 1.74E-07    |
| ENSMMUG000000031295 | growth hormone releasing hormone [Source:VGNC Symbol;Acc:VGNC:73049]                                                    | 0.59153804  | 0.012126472 | 0.031948051 |
| ENSMMUG000000017224 | catenin beta like 1 [Source:VGNC Symbol;Acc:VGNC:71414]                                                                 | 1.975658386 | 1.20E-14    | 2.47E-13    |
| ENSMMUG000000049410 | Metazoan signal recognition particle RNA [Source:RFAM;Acc:RF00017]                                                      | 1.488411671 | 0.003665392 | 0.011307649 |
| ENSMMUG000000017230 | V-set and transmembrane domain containing 2 like [Source:NCBI gene;Acc:707394]                                          | -1.97905914 | 6.45E-21    | 2.52E-19    |
| ENSMMUG000000020172 | KIAA1755 [Source:VGNC Symbol;Acc:VGNC:73942]                                                                            | 1.068786519 | 1.23E-08    | 1.13E-07    |
| ENSMMUG000000020173 | bactericidal permeability increasing protein [Source:VGNC Symbol;Acc:VGNC:70277]                                        | 0.897555387 | 3.17E-09    | 3.23E-08    |
| ENSMMUG000000006738 | L3MBTL histone methyl-lysine binding protein 1 [Source:NCBI gene;Acc:695694]                                            | 2.941384595 | 6.27E-40    | 1.69E-37    |
| ENSMMUG000000007925 | serum/glucocorticoid regulated kinase 2 [Source:VGNC Symbol;Acc:VGNC:77228]                                             | 3.492636077 | 1.56E-33    | 2.21E-31    |
| ENSMMUG000000000396 | intraflagellar transport 52 [Source:NCBI gene;Acc:694933]                                                               | 2.695638622 | 6.38E-24    | 3.47E-22    |
| ENSMMUG000000018137 | MYB proto-oncogene like 2 [Source:VGNC Symbol;Acc:VGNC:75092]                                                           | 3.094396381 | 2.41E-35    | 4.11E-33    |
| ENSMMUG000000002810 | TOX high mobility group box family member 2 [Source:VGNC Symbol;Acc:VGNC:79007]                                         | 1.901952415 | 7.91E-18    | 2.24E-16    |
| ENSMMUG000000022865 | junctionophilin 2 [Source:NCBI gene;Acc:694158]                                                                         | 2.389118333 | 0.000114464 | 0.000514394 |

|                     |                                                                                                  |             |             |             |
|---------------------|--------------------------------------------------------------------------------------------------|-------------|-------------|-------------|
| ENSMMUG00000045256  | cellular communication network factor 5 [Source:NCBI gene;Acc:717872]                            | 0.89315192  | 0.019446028 | 0.047690523 |
| ENSMMUG00000013212  | serine/threonine kinase 4 [Source:VGNC Symbol;Acc:VGNC:81588]                                    | 0.629512328 | 0.003779753 | 0.011622172 |
| ENSMMUG000000063049 |                                                                                                  | 0.204553776 | 0.006759138 | 0.019280249 |
| ENSMMUG00000003402  | matrilin 4 [Source:NCBI gene;Acc:717652]                                                         | 2.443546768 | 0.009276456 | 0.025391259 |
|                     |                                                                                                  | -           |             |             |
| ENSMMUG00000003409  | dysbindin domain containing 2 [Source:VGNC Symbol;Acc:VGNC:82133]                                | 2.140270425 | 0.016417975 | 0.041331053 |
| ENSMMUG000000039638 | serine peptidase inhibitor, Kunitz type 3 [Source:NCBI gene;Acc:100423908]                       | 0.449850776 | 0.001317377 | 0.004604456 |
| ENSMMUG000000051201 | zinc finger SWIM-type containing 3 [Source:NCBI gene;Acc:708804]                                 | 1.587765475 | 1.33E-11    | 1.87E-10    |
| ENSMMUG000000042855 | zinc finger SWIM-type containing 1 [Source:NCBI gene;Acc:717180]                                 | 1.375652192 | 3.28E-05    | 0.000166053 |
| ENSMMUG000000009957 | spermatogenesis associated 25 [Source:VGNC Symbol;Acc:VGNC:77928]                                | 2.324846106 | 0.000148005 | 0.000648808 |
| ENSMMUG000000058326 | neuralized E3 ubiquitin protein ligase 2 [Source:NCBI gene;Acc:708904]                           | 2.121886658 | 0.000598012 | 0.002275147 |
| ENSMMUG000000009960 | cathepsin A [Source:VGNC Symbol;Acc:VGNC:71617]                                                  | 1.819454044 | 2.35E-16    | 5.68E-15    |
|                     |                                                                                                  | -           |             |             |
| ENSMMUG000000013702 | zinc finger protein 335 [Source:VGNC Symbol;Acc:VGNC:78986]                                      | 1.433320916 | 0.009458211 | 0.025812525 |
| ENSMMUG000000016549 | matrix metalloproteinase 9 [Source:VGNC Symbol;Acc:VGNC:74903]                                   | 2.788575497 | 1.00E-09    | 1.10E-08    |
|                     |                                                                                                  | -           |             |             |
| ENSMMUG000000004479 | cadherin 22 [Source:VGNC Symbol;Acc:VGNC:70940]                                                  | 0.890579882 | 0.004301623 | 0.013040284 |
|                     |                                                                                                  | -           |             |             |
| ENSMMUG000000016927 | solute carrier family 2 member 10 [Source:VGNC Symbol;Acc:VGNC:77465]                            | 2.089875365 | 1.12E-19    | 3.74E-18    |
|                     |                                                                                                  | -           |             |             |
| ENSMMUG000000065008 |                                                                                                  | 2.217935125 | 4.80E-06    | 2.87E-05    |
| ENSMMUG000000015710 | zinc finger MYND-type containing 8 [Source:NCBI gene;Acc:716058]                                 | 0.476558339 | 9.62E-05    | 0.000440701 |
|                     |                                                                                                  | -           |             |             |
| ENSMMUG000000051667 |                                                                                                  | 2.313058989 | 0.019388746 | 0.047565773 |
|                     |                                                                                                  | -           |             |             |
| ENSMMUG000000012020 | nuclear receptor coactivator 3 [Source:VGNC Symbol;Acc:VGNC:75147]                               | 0.574893033 | 0.000582247 | 0.002223151 |
|                     |                                                                                                  | -           |             |             |
| ENSMMUG000000012029 | sulfatase 2 [Source:VGNC Symbol;Acc:VGNC:78179]                                                  | 1.543551521 | 9.08E-10    | 1.00E-08    |
| ENSMMUG000000060780 |                                                                                                  | 1.00222491  | 1.12E-16    | 2.79E-15    |
|                     |                                                                                                  | -           |             |             |
| ENSMMUG000000038447 |                                                                                                  | 0.749143471 | 0.001495766 | 0.005146683 |
|                     |                                                                                                  | -           |             |             |
| ENSMMUG000000057808 |                                                                                                  | 0.866977703 | 0.001140283 | 0.004053307 |
|                     |                                                                                                  | -           |             |             |
| ENSMMUG000000058754 |                                                                                                  | 3.369686473 | 0.001422847 | 0.004924345 |
| ENSMMUG000000019635 | ADP ribosylation factor guanine nucleotide exchange factor 2 [Source:VGNC Symbol;Acc:VGNC:69836] | 0.32236946  | 0.008277976 | 0.023023703 |
|                     |                                                                                                  | -           |             |             |
| ENSMMUG000000023621 | DEAD-box helicase 27 [Source:NCBI gene;Acc:703852]                                               | 3.246307687 | 0.000555025 | 0.002133036 |
| ENSMMUG000000002124 | beta-1,4-galactosyltransferase 5 [Source:VGNC Symbol;Acc:VGNC:70212]                             | 2.214521214 | 8.82E-17    | 2.22E-15    |
| ENSMMUG000000002715 | solute carrier family 9 member A8 [Source:VGNC Symbol;Acc:VGNC:77749]                            | 2.00241943  | 5.83E-42    | 2.01E-39    |
| ENSMMUG000000028471 | U7 small nuclear RNA [Source:RFAM;Acc:RF00066]                                                   | 2.244628617 | 6.16E-11    | 8.02E-10    |
| ENSMMUG000000000740 | spermatogenesis associated 2 [Source:VGNC Symbol;Acc:VGNC:77923]                                 | 2.304777897 | 3.03E-25    | 1.83E-23    |
| ENSMMUG000000000757 | ring finger protein 114 [Source:VGNC Symbol;Acc:VGNC:76725]                                      | 1.882771235 | 4.15E-07    | 3.00E-06    |
| ENSMMUG000000065129 |                                                                                                  | 2.572741579 | 6.66E-06    | 3.87E-05    |
| ENSMMUG000000012228 | ubiquitin conjugating enzyme E2 V1 [Source:NCBI gene;Acc:100425552]                              | 2.765412229 | 2.39E-42    | 8.87E-40    |
| ENSMMUG000000062321 |                                                                                                  | -0.5815813  | 0.002109648 | 0.006972606 |
|                     |                                                                                                  | -           |             |             |
| ENSMMUG000000002761 | activity dependent neuroprotector homeobox [Source:VGNC Symbol;Acc:VGNC:69614]                   | 0.622601891 | 0.000192225 | 0.000822915 |
|                     |                                                                                                  | -           |             |             |
| ENSMMUG000000002759 | dolichyl-phosphate mannosyltransferase subunit 1, catalytic [Source:VGNC Symbol;Acc:VGNC:71975]  | 1.464218773 | 0.007090686 | 0.020098408 |
|                     |                                                                                                  | -           |             |             |
| ENSMMUG000000000918 | ATPase phospholipid transporting 9A (putative) [Source:VGNC Symbol;Acc:VGNC:84529]               | 1.411846888 | 0.009487335 | 0.025866337 |
|                     |                                                                                                  | -           |             |             |
| ENSMMUG000000062664 |                                                                                                  | 1.395910918 | 0.000165606 | 0.000717481 |

|                    |                                                                                              |             |             |             |
|--------------------|----------------------------------------------------------------------------------------------|-------------|-------------|-------------|
| ENSMMUG00000018846 | ZFP64 zinc finger protein [Source:VGNC Symbol;Acc:VGNC:78994]                                | 0.324446118 | 0.001370294 | 0.004769177 |
| ENSMMUG00000050197 |                                                                                              | -1.67261963 | 0.000984038 | 0.003550678 |
| ENSMMUG00000013035 | teashirt zinc finger homeobox 2 [Source:VGNC Symbol;Acc:VGNC:78875]                          | 1.755838382 | 5.30E-08    | 4.45E-07    |
| ENSMMUG00000018358 | zinc finger protein 217 [Source:VGNC Symbol;Acc:VGNC:78874]                                  | 2.093374106 | 5.98E-16    | 1.39E-14    |
| ENSMMUG00000057302 |                                                                                              | 1.973812351 | 5.58E-05    | 0.000268338 |
| ENSMMUG00000052326 | U7 small nuclear RNA [Source:RFAM;Acc:RF00066]                                               | 4.357055263 | 0.000416269 | 0.00165149  |
| ENSMMUG00000000252 | ribonucleic acid export 1 [Source:VGNC Symbol;Acc:VGNC:82216]                                | 0.495927916 | 0.00770659  | 0.021616934 |
| ENSMMUG00000031391 | RNA binding motif protein 38 [Source:VGNC Symbol;Acc:VGNC:76484]                             | 3.496496816 | 6.65E-23    | 3.26E-21    |
| ENSMMUG00000022586 | phosphoenolpyruvate carboxykinase 1 [Source:VGNC Symbol;Acc:VGNC:75779]                      | 3.745766503 | 0.002801815 | 0.008943376 |
| ENSMMUG00000022589 | prostate transmembrane protein, androgen induced 1 [Source:VGNC Symbol;Acc:VGNC:76023]       | 1.237514356 | 1.52E-06    | 9.98E-06    |
| ENSMMUG00000013371 | exportin 4 [Source:VGNC Symbol;Acc:VGNC:79091]                                               | 0.312446689 | 0.012112858 | 0.031923527 |
| ENSMMUG00000004560 | crystallin lambda 1 [Source:VGNC Symbol;Acc:VGNC:71433]                                      | 0.828258171 | 1.49E-05    | 8.15E-05    |
| ENSMMUG00000052705 | gap junction protein alpha 3 [Source:NCBI gene;Acc:704432]                                   | 2.570758214 | 0.011551384 | 0.030656233 |
| ENSMMUG00000020262 | paraspeckle component 1 [Source:VGNC Symbol;Acc:VGNC:76293]                                  | 0.628526313 | 0.013672227 | 0.035410256 |
| ENSMMUG00000016475 | M-phase phosphoprotein 8 [Source:VGNC Symbol;Acc:VGNC:74864]                                 | 1.105291138 | 1.36E-10    | 1.69E-09    |
| ENSMMUG00000007373 | zinc finger DHHC-type palmitoyltransferase 20 [Source:VGNC Symbol;Acc:VGNC:79277]            | 0.470422633 | 0.020265743 | 0.049414826 |
| ENSMMUG00000004237 | TNF receptor superfamily member 19 [Source:VGNC Symbol;Acc:VGNC:78588]                       | 1.308781617 | 2.51E-07    | 1.89E-06    |
| ENSMMUG00000014610 | ring finger protein 17 [Source:NCBI gene;Acc:708198]                                         | 0.738931121 | 9.14E-06    | 5.17E-05    |
| ENSMMUG00000008520 | ATPase phospholipid transporting 8A2 [Source:VGNC Symbol;Acc:VGNC:70062]                     | 0.766384794 | 3.39E-06    | 2.07E-05    |
| ENSMMUG00000057852 |                                                                                              | -1.11228769 | 5.21E-07    | 3.71E-06    |
| ENSMMUG00000005055 | WASP family member 3 [Source:VGNC Symbol;Acc:VGNC:78782]                                     | 1.499989431 | 0.019761641 | 0.048344629 |
| ENSMMUG00000009030 | mitochondrial translational initiation factor 3 [Source:VGNC Symbol;Acc:VGNC:75040]          | 0.752231943 | 2.41E-05    | 0.0001257   |
| ENSMMUG00000062551 |                                                                                              | 0.791318628 | 4.19E-05    | 0.000206384 |
| ENSMMUG00000058786 | ligand of numb-protein X 2 [Source:NCBI gene;Acc:710660]                                     | 0.824659197 | 8.71E-05    | 0.000403074 |
| ENSMMUG00000064615 | pancreatic and duodenal homeobox 1 [Source:NCBI gene;Acc:710936]                             | 1.470561514 | 0.001396431 | 0.004845361 |
| ENSMMUG00000052070 | caudal type homeobox 2 [Source:NCBI gene;Acc:711094]                                         | 1.289245413 | 2.23E-05    | 0.000117393 |
| ENSMMUG00000016138 | ureidoimidazoline (2-oxo-4-hydroxy-4-carboxy-5-) decarboxylase [Source:NCBI gene;Acc:721710] | 1.366414192 | 0.002270922 | 0.007416378 |
| ENSMMUG00000021538 | fms related receptor tyrosine kinase 1 [Source:VGNC Symbol;Acc:VGNC:72678]                   | 0.444068167 | 0.002552597 | 0.008232931 |
| ENSMMUG00000063649 |                                                                                              | 0.509971062 | 0.017623521 | 0.043837103 |
| ENSMMUG00000003771 | ubiquitin like 3 [Source:VGNC Symbol;Acc:VGNC:78701]                                         | 0.854115719 | 0.009123624 | 0.02500986  |
| ENSMMUG00000005572 | arachidonate 5-lipoxygenase activating protein [Source:VGNC Symbol;Acc:VGNC:69799]           | -0.73516332 | 0.006260931 | 0.018043063 |
| ENSMMUG00000013707 | heat shock protein family H (Hsp110) member 1 [Source:NCBI gene;Acc:721956]                  | 1.283713452 | 7.30E-13    | 1.23E-11    |

|                     |                                                                                                |             |             |             |
|---------------------|------------------------------------------------------------------------------------------------|-------------|-------------|-------------|
| ENSMMUG00000013713  | beta 3-glucosyltransferase [Source:NCBI gene;Acc:713498]                                       | 3.399763905 | 9.02E-31    | 9.22E-29    |
| ENSMMUG00000038997  | zygote arrest 1 like [Source:NCBI gene;Acc:100427970]                                          | 2.452733105 | 0.000632756 | 0.002396263 |
| ENSMMUG00000007200  | NEDD4 binding protein 2 like 2 [Source:VGNC Symbol;Acc:VGNC:75031]                             | 2.090104946 | 3.94E-24    | 2.16E-22    |
| ENSMMUG000000055811 |                                                                                                | 2.471449178 | 2.93E-20    | 1.06E-18    |
| ENSMMUG00000007201  | PDS5 cohesin associated factor B [Source:VGNC Symbol;Acc:VGNC:75835]                           | 2.111298357 | 2.09E-28    | 1.79E-26    |
| ENSMMUG00000025050  | Y RNA [Source:RFAM;Acc:RF00019]                                                                | 2.654591911 | 1.18E-07    | 9.45E-07    |
|                     |                                                                                                | -           |             |             |
| ENSMMUG000000051911 |                                                                                                | 1.128227516 | 2.03E-07    | 1.56E-06    |
| ENSMMUG000000058110 |                                                                                                | 1.418011667 | 0.000468221 | 0.001832936 |
| ENSMMUG00000017052  | StAR related lipid transfer domain containing 13 [Source:VGNC Symbol;Acc:VGNC:77962]           | -0.4839231  | 4.44E-07    | 3.20E-06    |
|                     |                                                                                                | -           |             |             |
| ENSMMUG000000055864 |                                                                                                | 1.761441145 | 0.001476136 | 0.005083859 |
| ENSMMUG000000054254 |                                                                                                | -2.14524348 | 0.007791721 | 0.021818585 |
|                     |                                                                                                | -           |             |             |
| ENSMMUG00000019831  | neurobeachin [Source:NCBI gene;Acc:714386]                                                     | 2.362731815 | 9.39E-11    | 1.19E-09    |
| ENSMMUG00000016791  | doublecortin like kinase 1 [Source:VGNC Symbol;Acc:VGNC:71745]                                 | -2.35894492 | 7.88E-12    | 1.14E-10    |
| ENSMMUG000000055861 | Metazoan signal recognition particle RNA [Source:RFAM;Acc:RF00017]                             | -3.09934654 | 0.018022598 | 0.044709879 |
|                     |                                                                                                | -           |             |             |
| ENSMMUG000000060579 |                                                                                                | 2.216386604 | 0.000164134 | 0.000712142 |
|                     |                                                                                                | -           |             |             |
| ENSMMUG000000001172 | spermatogenesis and oogenesis specific basic helix-loop-helix 2 [Source:NCBI gene;Acc:693608]  | 2.161251516 | 3.13E-05    | 0.000158967 |
| ENSMMUG00000003585  | ALG5 dolichyl-phosphate beta-glucosyltransferase [Source:VGNC Symbol;Acc:VGNC:69647]           | 0.966261523 | 4.32E-06    | 2.60E-05    |
| ENSMMUG00000003590  | SPT20 homolog, SAGA complex component [Source:VGNC Symbol;Acc:VGNC:78182]                      | 0.785674072 | 0.019523923 | 0.047841999 |
|                     |                                                                                                | -           |             |             |
| ENSMMUG00000012307  | periostin [Source:VGNC Symbol;Acc:VGNC:76039]                                                  | 1.255174957 | 3.08E-14    | 6.03E-13    |
|                     |                                                                                                | -           |             |             |
| ENSMMUG000000030786 | transient receptor potential cation channel subfamily C member 4 [Source:NCBI gene;Acc:695636] | 0.416222695 | 0.001537331 | 0.005267704 |
|                     |                                                                                                | -           |             |             |
| ENSMMUG00000002113  | NHL repeat containing 3 [Source:VGNC Symbol;Acc:VGNC:75291]                                    | 1.454613052 | 3.49E-10    | 4.07E-09    |
|                     |                                                                                                | -           |             |             |
| ENSMMUG00000002109  | proline and serine rich 1 [Source:VGNC Symbol;Acc:VGNC:76291]                                  | 1.096086349 | 5.65E-12    | 8.41E-11    |
|                     |                                                                                                | -           |             |             |
| ENSMMUG000000055317 |                                                                                                | 1.066451872 | 0.000581241 | 0.002220456 |
|                     |                                                                                                | -           |             |             |
| ENSMMUG000000052676 |                                                                                                | 1.604622308 | 1.42E-23    | 7.61E-22    |
|                     |                                                                                                | -           |             |             |
| ENSMMUG000000050501 |                                                                                                | 1.410447785 | 0.005106385 | 0.015109275 |
| ENSMMUG00000001899  | mitochondrial ribosomal protein S31 [Source:VGNC Symbol;Acc:VGNC:74777]                        | 1.352737719 | 0.012046478 | 0.03178247  |
| ENSMMUG00000007880  | E74 like ETS transcription factor 1 [Source:VGNC Symbol;Acc:VGNC:72205]                        | 0.900376247 | 0.020434261 | 0.049727615 |
|                     |                                                                                                | -           |             |             |
| ENSMMUG00000011590  | N-alpha-acetyltransferase 16, NatA auxiliary subunit [Source:NCBI gene;Acc:698843]             | 0.441304236 | 0.000876386 | 0.003189401 |
|                     |                                                                                                | -           |             |             |
| ENSMMUG00000011593  | regulator of cell cycle [Source:VGNC Symbol;Acc:VGNC:76783]                                    | 0.738690477 | 0.002117822 | 0.006988717 |
| ENSMMUG00000011594  | von Willebrand factor A domain containing 8 [Source:VGNC Symbol;Acc:VGNC:79773]                | 0.462742594 | 3.01E-07    | 2.22E-06    |
| ENSMMUG000000055161 |                                                                                                | -2.5582281  | 2.04E-05    | 0.000108355 |
|                     |                                                                                                | -           |             |             |
| ENSMMUG00000023076  | diacylglycerol kinase eta [Source:VGNC Symbol;Acc:VGNC:71786]                                  | 1.942575113 | 1.10E-10    | 1.39E-09    |
|                     |                                                                                                | -           |             |             |
| ENSMMUG000000055887 |                                                                                                | 1.146800995 | 0.001057858 | 0.003783895 |
|                     |                                                                                                | -           |             |             |
| ENSMMUG00000023083  | A-kinase anchoring protein 11 [Source:VGNC Symbol;Acc:VGNC:69765]                              | 1.935031256 | 7.05E-11    | 9.11E-10    |
|                     |                                                                                                | -           |             |             |
| ENSMMUG000000054971 |                                                                                                | 1.878640597 | 0.003704579 | 0.011409948 |
|                     |                                                                                                | -           |             |             |
| ENSMMUG00000017876  | TNF superfamily member 11 [Source:NCBI gene;Acc:699955]                                        | 1.763523446 | 0.018939314 | 0.046629699 |

|                    |                                                                                                    |             |             |             |
|--------------------|----------------------------------------------------------------------------------------------------|-------------|-------------|-------------|
| ENSMMUG00000014926 | epithelial stromal interaction 1 [Source:VGNC Symbol;Acc:VGNC:72053]                               | 0.787148659 | 0.000493639 | 0.001922445 |
| ENSMMUG00000050436 |                                                                                                    | 3.089389153 | 0.013732508 | 0.035543734 |
| ENSMMUG00000012636 | potassium channel tetramerization domain containing 4 [Source:VGNC Symbol;Acc:VGNC:73892]          | 1.456115379 | 8.35E-06    | 4.76E-05    |
| ENSMMUG00000011986 | chibby family member 2 [Source:VGNC Symbol;Acc:VGNC:78029]                                         | 0.958734881 | 0.001332319 | 0.004651198 |
| ENSMMUG00000017025 | zinc finger CCCH-type containing 13 [Source:VGNC Symbol;Acc:VGNC:79248]                            | 0.718731269 | 2.62E-06    | 1.65E-05    |
| ENSMMUG00000017033 | lymphocyte cytosolic protein 1 [Source:VGNC Symbol;Acc:VGNC:74242]                                 | 0.520189701 | 0.00055583  | 0.002134928 |
| ENSMMUG00000016293 | leucine rich repeats and calponin homology domain containing 1 [Source:VGNC Symbol;Acc:VGNC:74317] | 0.398582935 | 9.85E-06    | 5.54E-05    |
| ENSMMUG00000065094 |                                                                                                    | 1.256688204 | 0.003561591 | 0.011031409 |
| ENSMMUG00000059778 |                                                                                                    | 2.639453736 | 2.54E-11    | 3.44E-10    |
| ENSMMUG00000063377 | cysteinyl leukotriene receptor 2 [Source:NCBI gene;Acc:705450]                                     | 1.592082293 | 1.86E-05    | 9.97E-05    |
| ENSMMUG00000010898 | tripartite motif containing 13 [Source:VGNC Symbol;Acc:VGNC:79972]                                 | 0.660240322 | 2.70E-07    | 2.02E-06    |
| ENSMMUG00000056958 | mml-mir-7194 [Source:miRBase;Acc:MI0023684]                                                        | 0.810877118 | 0.00028007  | 0.001153092 |
| ENSMMUG00000010899 | potassium channel regulator [Source:VGNC Symbol;Acc:VGNC:73859]                                    | 1.346741752 | 0.020338797 | 0.049552219 |
| ENSMMUG00000062619 | transmembrane protein 272 [Source:NCBI gene;Acc:713644]                                            | 0.665899229 | 0.011852703 | 0.031338133 |
| ENSMMUG00000053191 |                                                                                                    | 0.793256781 | 2.91E-06    | 1.81E-05    |
| ENSMMUG00000018720 | cytoskeleton associated protein 2 [Source:VGNC Symbol;Acc:VGNC:71229]                              | 1.58141642  | 3.23E-28    | 2.72E-26    |
| ENSMMUG00000007379 | phosphatidylinositol 3,4,5-trisphosphate 3-phosphatase TPTE2-like [Source:NCBI gene;Acc:694255]    | 1.467480212 | 1.16E-20    | 4.45E-19    |
| ENSMMUG00000053708 | U2 spliceosomal RNA [Source:RFAM;Acc:RF00004]                                                      | 0.988560091 | 0.009604942 | 0.026126428 |
| ENSMMUG00000016401 | SGT1 homolog, MIS12 kinetochore complex assembly cochaperone [Source:NCBI gene;Acc:694046]         | 1.526619321 | 1.37E-25    | 8.58E-24    |
| ENSMMUG00000016404 | chondromodulin [Source:VGNC Symbol;Acc:VGNC:71191]                                                 | 3.236726471 | 2.29E-09    | 2.37E-08    |
| ENSMMUG00000002657 | olfactomedin 4 [Source:VGNC Symbol;Acc:VGNC:75418]                                                 | 1.839614278 | 1.43E-08    | 1.31E-07    |
| ENSMMUG00000053482 | protocadherin 20 [Source:NCBI gene;Acc:696607]                                                     | 0.723734918 | 0.002873347 | 0.009152006 |
| ENSMMUG00000055156 |                                                                                                    | 1.016451142 | 0.015705199 | 0.039769793 |
| ENSMMUG00000002533 | progesterone immunomodulatory binding factor 1 [Source:NCBI gene;Acc:694190]                       | 1.222210575 | 2.85E-06    | 1.78E-05    |
| ENSMMUG00000064642 |                                                                                                    | 1.165337489 | 3.96E-06    | 2.40E-05    |
| ENSMMUG00000059178 |                                                                                                    | 0.991103465 | 0.00013572  | 0.000600006 |
| ENSMMUG00000054675 |                                                                                                    | 1.300971098 | 0.000281342 | 0.001157042 |
| ENSMMUG00000065060 |                                                                                                    | 1.241256435 | 0.000641242 | 0.002425306 |
| ENSMMUG00000046375 |                                                                                                    | 0.924730848 | 0.00401547  | 0.0122757   |
| ENSMMUG00000061846 |                                                                                                    | 0.728670092 | 7.59E-05    | 0.000354838 |
| ENSMMUG00000059231 |                                                                                                    | -0.54949182 | 9.69E-07    | 6.58E-06    |
| ENSMMUG00000056466 |                                                                                                    | 0.799802394 | 3.72E-06    | 2.26E-05    |
| ENSMMUG00000062938 |                                                                                                    | 3.760315965 | 0.004824945 | 0.014414573 |
| ENSMMUG00000054625 |                                                                                                    | 0.855914291 | 4.14E-07    | 2.99E-06    |
| ENSMMUG00000062636 | Metazoan signal recognition particle RNA [Source:RFAM;Acc:RF00017]                                 | -2.48040762 | 0.001938024 | 0.006476092 |
| ENSMMUG00000009018 | 60S ribosomal protein L13a-like [Source:NCBI gene;Acc:698713]                                      | 1.505018924 | 0.00299505  | 0.009482621 |

|                    |                                                                                       |   |             |             |             |
|--------------------|---------------------------------------------------------------------------------------|---|-------------|-------------|-------------|
| ENSMMUG00000054008 |                                                                                       | - | 3.381900708 | 0.007092188 | 0.020098824 |
| ENSMMUG00000060359 |                                                                                       | - | 2.489895143 | 0.005189571 | 0.015312642 |
| ENSMMUG00000021817 | dopachrome tautomerase [Source:VGNC Symbol;Acc:VGNC:71749]                            | - | 0.675955351 | 0.013088945 | 0.034072153 |
| ENSMMUG00000054711 |                                                                                       | - | 1.405459504 | 2.39E-07    | 1.80E-06    |
| ENSMMUG00000009721 | claudin 10 [Source:VGNC Symbol;Acc:VGNC:71243]                                        | - | 1.291183717 | 0.000381164 | 0.001525306 |
| ENSMMUG00000022744 | muscleblind like splicing regulator 2 [Source:VGNC Symbol;Acc:VGNC:74519]             | - | 0.702638406 | 1.69E-05    | 9.13E-05    |
| ENSMMUG00000051235 |                                                                                       | - | 0.898546607 | 0.002300519 | 0.007506423 |
| ENSMMUG00000009890 | FERM, ARH/RhoGEF and pleckstrin domain protein 1 [Source:VGNC Symbol;Acc:VGNC:72614]  | - | 1.037699771 | 3.43E-19    | 1.08E-17    |
| ENSMMUG00000009173 | serine/threonine kinase 24 [Source:VGNC Symbol;Acc:VGNC:81583]                        | - | 0.710739856 | 0.00058194  | 0.002222553 |
| ENSMMUG00000001402 | solute carrier family 15 member 1 [Source:VGNC Symbol;Acc:VGNC:77393]                 | - | 1.773742376 | 0.005902442 | 0.017136495 |
| ENSMMUG00000018657 | dedicator of cytokinesis 9 [Source:VGNC Symbol;Acc:VGNC:71835]                        | - | 0.888269153 | 0.008152189 | 0.022712186 |
| ENSMMUG00000012332 | UBA domain containing 2 [Source:NCBI gene;Acc:703484]                                 | - | 1.336144133 | 8.99E-22    | 3.95E-20    |
| ENSMMUG00000060781 | G protein-coupled receptor 18 [Source:NCBI gene;Acc:698714]                           | - | 1.304911018 | 8.53E-07    | 5.86E-06    |
| ENSMMUG00000012338 | G protein-coupled receptor 183 [Source:VGNC Symbol;Acc:VGNC:73042]                    | - | 1.228829495 | 6.00E-12    | 8.87E-11    |
| ENSMMUG00000019556 | transmembrane 9 superfamily member 2 [Source:VGNC Symbol;Acc:VGNC:78568]              | - | 0.714819897 | 2.35E-15    | 5.15E-14    |
| ENSMMUG00000003558 | citrate lyase beta like [Source:VGNC Symbol;Acc:VGNC:71202]                           | - | 1.739412069 | 0.010383037 | 0.027946798 |
| ENSMMUG00000004493 | propionyl-CoA carboxylase subunit alpha [Source:VGNC Symbol;Acc:VGNC:75773]           | - | -1.39643491 | 1.03E-07    | 8.33E-07    |
| ENSMMUG00000050578 |                                                                                       | - | 1.313379915 | 0.000597566 | 0.002274033 |
| ENSMMUG00000061728 | Metazoan signal recognition particle RNA [Source:RFAM;Acc:RF00017]                    | - | 2.594370976 | 0.019228259 | 0.047203292 |
| ENSMMUG00000002875 | fibroblast growth factor 14 [Source:VGNC Symbol;Acc:VGNC:72645]                       | - | 3.083620482 | 0.017200631 | 0.042943662 |
| ENSMMUG00000052642 | protein O-glucosyltransferase 2 [Source:NCBI gene;Acc:702156]                         | - | 2.114638157 | 8.86E-06    | 5.03E-05    |
| ENSMMUG00000000350 | basic, immunoglobulin-like variable motif containing [Source:NCBI gene;Acc:100426213] | - | -1.19971456 | 1.46E-06    | 9.64E-06    |
| ENSMMUG00000000353 | putative methyltransferase-like protein 21E pseudogene [Source:NCBI gene;Acc:707949]  | - | 1.076609916 | 1.93E-05    | 0.000103103 |
| ENSMMUG00000053838 |                                                                                       | - | 0.338575428 | 0.014201451 | 0.036500436 |
| ENSMMUG00000054803 |                                                                                       | - | 1.017803249 | 0.003071427 | 0.00968515  |
| ENSMMUG00000022282 | collagen type IV alpha 2 chain [Source:NCBI gene;Acc:100429807]                       | - | 4.473476253 | 8.00E-08    | 6.53E-07    |
| ENSMMUG00000022818 | inhibitor of growth family member 1 [Source:VGNC Symbol;Acc:VGNC:73742]               | - | 3.729647666 | 3.32E-05    | 0.000167812 |
| ENSMMUG00000064401 |                                                                                       | - | 2.902010492 | 0.000366149 | 0.001470746 |
| ENSMMUG00000018929 | ankyrin repeat domain 10 [Source:VGNC Symbol;Acc:VGNC:69646]                          | - | 0.743530879 | 1.99E-07    | 1.53E-06    |
| ENSMMUG00000013138 | Rho guanine nucleotide exchange factor 7 [Source:VGNC Symbol;Acc:VGNC:69833]          | - | 1.147391522 | 1.40E-08    | 1.29E-07    |
| ENSMMUG00000056306 |                                                                                       | - | 1.547221067 | 5.71E-14    | 1.10E-12    |
| ENSMMUG00000013625 | ATPase phospholipid transporting 11A [Source:VGNC Symbol;Acc:VGNC:70064]              | - | 0.656104645 | 4.33E-05    | 0.000212858 |
| ENSMMUG00000048566 | MCF.2 cell line derived transforming sequence like [Source:NCBI gene;Acc:713961]      | - | 2.30508896  | 3.38E-36    | 6.42E-34    |
| ENSMMUG00000001036 | coagulation factor VII [Source:VGNC Symbol;Acc:VGNC:72466]                            | - | 2.168721343 | 2.46E-27    | 1.95E-25    |

|                     |                                                                                                        |   |             |             |             |
|---------------------|--------------------------------------------------------------------------------------------------------|---|-------------|-------------|-------------|
| ENSMMUG00000058677  |                                                                                                        | - | 2.057788684 | 0.000685661 | 0.002572313 |
| ENSMMUG00000016740  | defective in cullin neddylation 1 domain containing 2 [Source:VGNC Symbol;Acc:VGNC:71684]              | - | 0.620568357 | 3.73E-12    | 5.70E-11    |
| ENSMMUG00000064494  | Metazoan signal recognition particle RNA [Source:RFAM;Acc:RF00017]                                     | - | 1.965181203 | 0.008446531 | 0.023417845 |
| ENSMMUG00000007423  | transcription factor Dp-1 [Source:NCBI gene;Acc:715345]                                                | - | 1.579269178 | 4.25E-11    | 5.65E-10    |
| ENSMMUG000000051400 |                                                                                                        | - | 0.446084709 | 0.001138307 | 0.004047252 |
| ENSMMUG00000050639  | transmembrane protein 255B [Source:NCBI gene;Acc:715939]                                               | - | 0.427400783 | 0.02042962  | 0.049727615 |
| ENSMMUG00000054800  | chromosome 17 C13orf46 homolog [Source:NCBI gene;Acc:106994405]                                        | - | 0.389379692 | 0.011835918 | 0.031299335 |
| ENSMMUG00000023599  | chromosome alignment maintaining phosphoprotein 1 [Source:VGNC Symbol;Acc:VGNC:71061]                  | - | 0.716114916 | 3.00E-06    | 1.86E-05    |
| ENSMMUG00000038897  | rabphilin 3A like (without C2 domains) [Source:NCBI gene;Acc:106993852]                                | - | 2.197140309 | 0.002531089 | 0.008172449 |
| ENSMMUG00000003042  | VPS53 subunit of GARP complex [Source:VGNC Symbol;Acc:VGNC:79522]                                      | - | 1.069172256 | 0.000627831 | 0.00237883  |
| ENSMMUG00000055344  | TLC domain containing 3A [Source:NCBI gene;Acc:699707]                                                 | - | 1.502312006 | 6.82E-08    | 5.64E-07    |
| ENSMMUG00000030401  | gem nuclear organelle associated protein 4 [Source:VGNC Symbol;Acc:VGNC:72723]                         | - | 0.978654586 | 6.81E-05    | 0.000321272 |
| ENSMMUG00000050361  |                                                                                                        | - | 0.672466148 | 0.014504181 | 0.037188279 |
| ENSMMUG00000011417  | glyoxalase domain containing 4 [Source:VGNC Symbol;Acc:VGNC:72939]                                     | - | 0.705252849 | 0.000242431 | 0.001015035 |
| ENSMMUG00000008130  | ABR activator of RhoGEF and GTPase [Source:VGNC Symbol;Acc:VGNC:69589]                                 | - | 0.729793675 | 3.26E-08    | 2.82E-07    |
| ENSMMUG00000002371  | myosin IC [Source:VGNC Symbol;Acc:VGNC:75112]                                                          | - | 0.87384153  | 8.02E-07    | 5.54E-06    |
| ENSMMUG00000055241  |                                                                                                        | - | 0.537954486 | 0.000366057 | 0.001470746 |
| ENSMMUG00000040268  | phosphatidylinositol transfer protein alpha [Source:NCBI gene;Acc:721228]                              | - | 1.037433246 | 9.71E-06    | 5.46E-05    |
| ENSMMUG00000017561  | solute carrier family 43 member 2 [Source:VGNC Symbol;Acc:VGNC:77554]                                  | - | 1.889802646 | 1.44E-16    | 3.56E-15    |
| ENSMMUG00000039266  | Metazoan signal recognition particle RNA [Source:RFAM;Acc:RF00017]                                     | - | 2.022126802 | 2.38E-07    | 1.80E-06    |
| ENSMMUG00000055528  |                                                                                                        | - | 1.593540767 | 0.001083276 | 0.003868286 |
| ENSMMUG00000002376  | scavenger receptor class F member 1 [Source:VGNC Symbol;Acc:VGNC:77027]                                | - | 2.197144579 | 1.74E-15    | 3.87E-14    |
| ENSMMUG00000002377  | Rab interacting lysosomal protein [Source:VGNC Symbol;Acc:VGNC:76866]                                  | - | 2.211240079 | 2.49E-09    | 2.56E-08    |
| ENSMMUG00000004820  | pre-mRNA processing factor 8 [Source:VGNC Symbol;Acc:VGNC:76275]                                       | - | 1.338298736 | 9.24E-11    | 1.17E-09    |
| ENSMMUG00000002382  | serpin family F member 2 [Source:VGNC Symbol;Acc:VGNC:77372]                                           | - | 1.711546326 | 5.98E-21    | 2.36E-19    |
| ENSMMUG00000048710  | HIC ZBTB transcriptional repressor 1 [Source:NCBI gene;Acc:721284]                                     | - | 1.393005049 | 0.004959124 | 0.014758067 |
| ENSMMUG00000053298  |                                                                                                        | - | 0.714806954 | 4.73E-07    | 3.39E-06    |
| ENSMMUG00000020524  | platelet activating factor acetylhydrolase 1b regulatory subunit 1 [Source:VGNC Symbol;Acc:VGNC:75747] | - | 0.464856446 | 0.008462705 | 0.023445154 |
| ENSMMUG00000062095  |                                                                                                        | - | 0.560149414 | 0.003028378 | 0.009563638 |
| ENSMMUG00000022989  | RAP1 GTPase activating protein 2 [Source:VGNC Symbol;Acc:VGNC:76561]                                   | - | 0.891227065 | 0.00027814  | 0.0011461   |
| ENSMMUG00000061370  |                                                                                                        | - | 2.167356968 | 0.000467903 | 0.001832807 |
| ENSMMUG00000030389  |                                                                                                        | - | 1.463323723 | 0.000443917 | 0.001745767 |
| ENSMMUG00000062583  | olfactory receptor 1A1 [Source:NCBI gene;Acc:721403]                                                   | - | 1.237390774 | 2.45E-09    | 2.53E-08    |
| ENSMMUG00000042407  |                                                                                                        | - | 1.18738086  | 0.003401722 | 0.010595995 |
| ENSMMUG00000055048  |                                                                                                        | - | 1.270438342 | 1.70E-13    | 3.06E-12    |
| ENSMMUG00000008556  | integrin subunit alpha E [Source:NCBI gene;Acc:721483]                                                 | - | 0.433700911 | 0.000426418 | 0.001686792 |
| ENSMMUG00000063482  |                                                                                                        | - | 0.785121504 | 0.018510163 | 0.045712858 |
| ENSMMUG00000057632  |                                                                                                        | - | 3.498498779 | 4.82E-21    | 1.92E-19    |
| ENSMMUG00000019184  | ankyrin repeat and FYVE domain containing 1 [Source:VGNC Symbol;Acc:VGNC:69651]                        | - | 0.354335212 | 0.004128447 | 0.012584761 |
| ENSMMUG00000058966  |                                                                                                        | - | 1.131379438 | 7.50E-06    | 4.32E-05    |
| ENSMMUG00000005080  | ubiquitin conjugating enzyme E2 G1 [Source:VGNC Symbol;Acc:VGNC:78695]                                 | - | 0.797020789 | 2.99E-11    | 4.04E-10    |

|                    |                                                                                        |             |             |             |
|--------------------|----------------------------------------------------------------------------------------|-------------|-------------|-------------|
| ENSMMUG00000060937 | Metazoan signal recognition particle RNA [Source:RFAM;Acc:RF00017]                     | 1.75058748  | 0.001102531 | 0.003932307 |
| ENSMMUG00000030381 | arachidonate 15-lipoxygenase [Source:VGNC Symbol;Acc:VGNC:69796]                       | 1.654473001 | 2.29E-11    | 3.13E-10    |
| ENSMMUG00000017654 | arrestin beta 2 [Source:VGNC Symbol;Acc:VGNC:70022]                                    | 1.406848648 | 0.00029142  | 0.001192867 |
| ENSMMUG00000049649 | proteasome 20S subunit beta 6 [Source:NCBI gene;Acc:710028]                            | 1.638626894 | 2.67E-17    | 7.18E-16    |
| ENSMMUG00000061951 |                                                                                        | 1.834403866 | 2.00E-06    | 1.28E-05    |
| ENSMMUG00000005666 | phospholipase D2 [Source:VGNC Symbol;Acc:VGNC:76172]                                   | 1.33806724  | 2.46E-11    | 3.34E-10    |
| ENSMMUG00000009176 | calmodulin binding transcription activator 2 [Source:VGNC Symbol;Acc:VGNC:70578]       | 1.027936972 | 3.32E-06    | 2.04E-05    |
| ENSMMUG00000011344 | solute carrier family 52 member 1 [Source:VGNC Symbol;Acc:VGNC:77795]                  | 2.592901544 | 0.000398015 | 0.001586179 |
| ENSMMUG00000018648 | zinc finger protein 594 [Source:NCBI gene;Acc:711492]                                  | 0.796573654 | 0.002177229 | 0.007148175 |
| ENSMMUG00000058586 |                                                                                        | 2.143043573 | 6.08E-06    | 3.56E-05    |
| ENSMMUG00000006594 | DEAH-box helicase 33 [Source:VGNC Symbol;Acc:VGNC:71633]                               | 0.317413671 | 0.016684352 | 0.041930001 |
| ENSMMUG00000046195 | MIS12 kinetochore complex component [Source:NCBI gene;Acc:712202]                      | -0.83409918 | 0.000694767 | 0.002600556 |
| ENSMMUG00000030453 | NLR family pyrin domain containing 1 [Source:NCBI gene;Acc:721648]                     | 0.504511429 | 2.31E-05    | 0.000120695 |
| ENSMMUG00000010536 | discs large MAGUK scaffold protein 4 [Source:VGNC Symbol;Acc:VGNC:71920]               | 1.274556465 | 1.88E-14    | 3.79E-13    |
| ENSMMUG00000052091 | dishevelled segment polarity protein 2 [Source:NCBI gene;Acc:714381]                   | 1.224597728 | 0.000826158 | 0.003031521 |
| ENSMMUG00000010543 | PHD finger protein 23 [Source:VGNC Symbol;Acc:VGNC:75877]                              | 1.911836208 | 0.00092608  | 0.003352151 |
| ENSMMUG00000010547 | CTD nuclear envelope phosphatase 1 [Source:VGNC Symbol;Acc:VGNC:71440]                 | 2.248088172 | 0.017577616 | 0.043737592 |
| ENSMMUG00000064650 | SPEM family member 3 [Source:NCBI gene;Acc:106993878]                                  | 1.4588991   | 1.60E-26    | 1.15E-24    |
| ENSMMUG00000009709 | transmembrane protein 102 [Source:NCBI gene;Acc:715461]                                | 0.590294508 | 0.009471829 | 0.025844936 |
| ENSMMUG00000017690 | cholinergic receptor nicotinic beta 1 subunit [Source:VGNC Symbol;Acc:VGNC:71049]      | 0.464014631 | 0.001007436 | 0.003623643 |
| ENSMMUG00000006327 | tumor necrosis factor (ligand) superfamily, member 12 [Source:NCBI gene;Acc:100551506] | 0.291434265 | 0.018365259 | 0.045430657 |
| ENSMMUG00000006332 | SUMO specific peptidase 3 [Source:NCBI gene;Acc:715884]                                | 0.459059803 | 0.016797391 | 0.042156931 |
| ENSMMUG00000013501 | CD68 molecule [Source:VGNC Symbol;Acc:VGNC:82121]                                      | 2.297543724 | 2.60E-07    | 1.95E-06    |
| ENSMMUG00000013503 | mannose-P-dolichol utilization defect 1 [Source:VGNC Symbol;Acc:VGNC:74913]            | -1.50307363 | 4.88E-05    | 0.000237655 |
| ENSMMUG00000013510 | FMR1 autosomal homolog 2 [Source:NCBI gene;Acc:721889]                                 | 0.705605284 | 0.001362621 | 0.004744698 |
| ENSMMUG00000013513 | sex hormone binding globulin [Source:VGNC Symbol;Acc:VGNC:77208]                       | 1.178887005 | 5.46E-06    | 3.23E-05    |
| ENSMMUG00000008639 | tumor protein p53 [Source:VGNC Symbol;Acc:VGNC:78627]                                  | 1.506315955 | 4.36E-09    | 4.32E-08    |
| ENSMMUG00000054769 | Metazoan signal recognition particle RNA [Source:RFAM;Acc:RF00017]                     | -1.79398181 | 0.004784749 | 0.014311784 |
| ENSMMUG00000008637 | WD repeat containing antisense to TP53 [Source:VGNC Symbol;Acc:VGNC:79508]             | 1.012681483 | 4.76E-05    | 0.000232883 |
| ENSMMUG00000048204 | ephrin B3 [Source:NCBI gene;Acc:716257]                                                | 1.425671936 | 1.20E-15    | 2.70E-14    |
| ENSMMUG00000008166 | dynein axonemal heavy chain 2 [Source:VGNC Symbol;Acc:VGNC:71940]                      | 0.485306415 | 0.000123923 | 0.000552716 |
| ENSMMUG00000008173 | lysine demethylase 6B [Source:VGNC Symbol;Acc:VGNC:73923]                              | 1.475047099 | 0.019029035 | 0.04678225  |
| ENSMMUG00000063668 | cytochrome b5 domain containing 1 [Source:NCBI gene;Acc:716429]                        | 1.113740034 | 7.45E-05    | 0.00034886  |
| ENSMMUG00000009995 | arachidonate 15-lipoxygenase type B [Source:VGNC Symbol;Acc:VGNC:69797]                | 1.894893699 | 2.38E-21    | 9.79E-20    |
| ENSMMUG00000065208 |                                                                                        | 1.647904008 | 4.32E-08    | 3.65E-07    |
| ENSMMUG00000020329 | arachidonate 12-lipoxygenase, 12R type [Source:NCBI gene;Acc:721936]                   | -1.29609024 | 0.000596696 | 0.002271305 |
| ENSMMUG00000019850 | arachidonate lipoxygenase 3 [Source:VGNC Symbol;Acc:VGNC:69607]                        | 1.851044132 | 2.22E-40    | 6.34E-38    |
| ENSMMUG00000021798 | period circadian regulator 1 [Source:VGNC Symbol;Acc:VGNC:75942]                       | 0.676051652 | 0.001992349 | 0.006635198 |



|                    |                                                                                                    |             |             |             |
|--------------------|----------------------------------------------------------------------------------------------------|-------------|-------------|-------------|
| ENSMMUG00000021938 | nudE neurodevelopment protein 1 like 1 [Source:VGNC Symbol;Acc:VGNC:74982]                         | 1.013787827 | 3.26E-07    | 2.40E-06    |
| ENSMMUG00000055290 | netrin 1 [Source:NCBI gene;Acc:717645]                                                             | 1.01817913  | 7.77E-07    | 5.38E-06    |
| ENSMMUG00000054855 | Metazoan signal recognition particle RNA [Source:RFAM;Acc:RF00017]                                 | 0.969927998 | 0.005498008 | 0.01610736  |
| ENSMMUG00000009771 | myosin heavy chain 4 [Source:VGNC Symbol;Acc:VGNC:75100]                                           | 0.639057065 | 0.012624594 | 0.033072378 |
| ENSMMUG00000051001 |                                                                                                    | 1.956960934 | 0.00956337  | 0.026022895 |
| ENSMMUG00000055729 |                                                                                                    | 0.876965294 | 2.53E-05    | 0.000131699 |
| ENSMMUG00000060547 | Metazoan signal recognition particle RNA [Source:RFAM;Acc:RF00017]                                 | 1.035505638 | 1.18E-05    | 6.55E-05    |
| ENSMMUG00000060042 |                                                                                                    | 0.889630898 | 0.006138916 | 0.017739698 |
| ENSMMUG00000016723 | zinc finger protein 287 [Source:NCBI gene;Acc:695524]                                              | 1.842946162 | 4.54E-05    | 0.000222568 |
| ENSMMUG00000002523 | nuclear receptor corepressor 1 [Source:VGNC Symbol;Acc:VGNC:81479]                                 | 0.419580179 | 0.012941352 | 0.033768525 |
| ENSMMUG00000059034 |                                                                                                    | 0.302201191 | 0.002714496 | 0.008698353 |
| ENSMMUG00000050263 | TBC1 domain family member 26-like [Source:NCBI gene;Acc:100426631]                                 | 0.973804777 | 0.000842419 | 0.003082425 |
| ENSMMUG00000013345 | folliculin [Source:NCBI gene;Acc:698082]                                                           | 1.620378078 | 0.003560281 | 0.011029657 |
| ENSMMUG00000021091 | COP9 signalosome subunit 3 [Source:VGNC Symbol;Acc:VGNC:71316]                                     | -1.76903321 | 0.00018372  | 0.000789043 |
| ENSMMUG00000038569 | 5',3'-nucleotidase, mitochondrial [Source:NCBI gene;Acc:698591]                                    | 0.831946136 | 0.000155699 | 0.000677727 |
| ENSMMUG00000006491 | mediator complex subunit 9 [Source:VGNC Symbol;Acc:VGNC:74577]                                     | 0.904801924 | 0.000131294 | 0.000583309 |
| ENSMMUG00000006493 | ras related dexamethasone induced 1 [Source:VGNC Symbol;Acc:VGNC:76485]                            | 0.920783978 | 2.26E-09    | 2.35E-08    |
| ENSMMUG00000023375 | sterol regulatory element binding transcription factor 1 [Source:VGNC Symbol;Acc:VGNC:77880]       | 0.533328443 | 0.018022633 | 0.044709879 |
| ENSMMUG00000003349 | target of myb1 like 2 membrane trafficking protein [Source:VGNC Symbol;Acc:VGNC:78617]             | 1.230240318 | 0.014862799 | 0.037963366 |
| ENSMMUG00000002942 | dynein regulatory complex subunit 3 [Source:VGNC Symbol;Acc:VGNC:71906]                            | 1.214954943 | 0.004177582 | 0.012713634 |
| ENSMMUG00000005900 | GID complex subunit 4 homolog [Source:NCBI gene;Acc:699842]                                        | 0.910920604 | 0.004490166 | 0.013539885 |
| ENSMMUG00000021409 | developmentally regulated GTP binding protein 2 [Source:VGNC Symbol;Acc:VGNC:71993]                | 1.140701616 | 0.000224631 | 0.000947193 |
| ENSMMUG00000018344 | myosin XVA [Source:VGNC Symbol;Acc:VGNC:75109]                                                     | 0.793165641 | 3.33E-05    | 0.000168126 |
| ENSMMUG00000056257 |                                                                                                    | 1.156949726 | 9.04E-07    | 6.18E-06    |
| ENSMMUG00000053675 |                                                                                                    | 1.080177408 | 6.83E-06    | 3.96E-05    |
| ENSMMUG00000005323 | phosphoribosyl pyrophosphate synthetase associated protein 2 [Source:VGNC Symbol;Acc:VGNC:76430]   | 0.512165929 | 5.24E-06    | 3.10E-05    |
| ENSMMUG00000000140 | epsin 2 [Source:VGNC Symbol;Acc:VGNC:72070]                                                        | 0.633017897 | 0.014907337 | 0.038064016 |
| ENSMMUG00000008536 | mitogen-activated protein kinase 7 [Source:VGNC Symbol;Acc:VGNC:74648]                             | 1.489039656 | 0.000292729 | 0.001197566 |
| ENSMMUG00000008538 | microfibril associated protein 4 [Source:VGNC Symbol;Acc:VGNC:74710]                               | 1.802598111 | 0.000278681 | 0.001148013 |
| ENSMMUG00000008540 | ring finger protein 112 [Source:VGNC Symbol;Acc:VGNC:76724]                                        | 2.681609625 | 3.39E-17    | 8.97E-16    |
| ENSMMUG00000051286 |                                                                                                    | 1.836243591 | 1.62E-14    | 3.30E-13    |
| ENSMMUG00000030279 | A-kinase anchoring protein 10 [Source:VGNC Symbol;Acc:VGNC:69764]                                  | 1.16375438  | 0.001731741 | 0.005858056 |
| ENSMMUG00000018579 | sperm antigen with calponin homology and coiled-coil domains 1 [Source:VGNC Symbol;Acc:VGNC:78021] | 0.55579288  | 5.21E-05    | 0.000251942 |
| ENSMMUG00000024170 | U6 spliceosomal RNA [Source:RFAM;Acc:RF00026]                                                      | 0.720672954 | 0.001507787 | 0.005183235 |
| ENSMMUG00000050178 |                                                                                                    | 0.540515764 | 5.84E-05    | 0.00027942  |

|                    |                                                                                                         |   |             |             |             |
|--------------------|---------------------------------------------------------------------------------------------------------|---|-------------|-------------|-------------|
| ENSMMUG00000052714 |                                                                                                         | - | 1.509022311 | 0.01478735  | 0.037809724 |
| ENSMMUG00000060502 |                                                                                                         | - | 1.396711933 | 1.11E-07    | 8.87E-07    |
| ENSMMUG00000061335 |                                                                                                         | - | 1.792863514 | 1.13E-10    | 1.42E-09    |
| ENSMMUG00000054233 |                                                                                                         | - | 0.426489054 | 1.69E-05    | 9.12E-05    |
| ENSMMUG00000020226 | WD repeat and SOCS box containing 1 [Source:VGNC Symbol;Acc:VGNC:79186]                                 | - | 1.737473127 | 1.67E-17    | 4.57E-16    |
| ENSMMUG00000054784 |                                                                                                         | - | 1.45903865  | 1.44E-09    | 1.55E-08    |
| ENSMMUG00000061836 |                                                                                                         | - | 1.121674024 | 3.76E-05    | 0.000187134 |
| ENSMMUG00000065113 |                                                                                                         | - | 1.024635141 | 6.28E-05    | 0.000299005 |
| ENSMMUG00000061698 |                                                                                                         | - | 0.860388978 | 7.38E-09    | 7.07E-08    |
| ENSMMUG00000051341 |                                                                                                         | - | 0.721738762 | 0.003785486 | 0.011630154 |
| ENSMMUG00000018719 | nemo like kinase [Source:VGNC Symbol;Acc:VGNC:75277]                                                    | - | 1.744821    | 1.82E-17    | 4.97E-16    |
| ENSMMUG00000063312 |                                                                                                         | - | 1.498743448 | 7.41E-09    | 7.10E-08    |
| ENSMMUG00000054461 | transmembrane protein 97 [Source:NCBI gene;Acc:707879]                                                  | - | 1.756948429 | 0.004581231 | 0.013792053 |
| ENSMMUG00000019145 | TNF alpha induced protein 1 [Source:VGNC Symbol;Acc:VGNC:78578]                                         | - | -1.60688776 | 1.45E-11    | 2.03E-10    |
| ENSMMUG00000019146 | DNA polymerase delta interacting protein 2 [Source:VGNC Symbol;Acc:VGNC:76099]                          | - | 1.555226972 | 5.58E-08    | 4.67E-07    |
| ENSMMUG00000021351 | transmembrane protein 199 [Source:VGNC Symbol;Acc:VGNC:79113]                                           | - | 1.965155082 | 0.000112611 | 0.000507299 |
| ENSMMUG00000019148 | vitronectin [Source:NCBI gene;Acc:708499]                                                               | - | -1.65687825 | 8.15E-10    | 9.05E-09    |
| ENSMMUG00000012240 | phosphatidylinositol glycan anchor biosynthesis class S [Source:VGNC Symbol;Acc:VGNC:75800]             | - | 0.743698113 | 0.000293176 | 0.001199063 |
| ENSMMUG00000006018 | sperm associated antigen 5 [Source:NCBI gene;Acc:709400]                                                | - | 0.945296436 | 5.12E-05    | 0.000248351 |
| ENSMMUG00000004708 | SPT6 homolog, histone chaperone and transcription elongation factor [Source:VGNC Symbol;Acc:VGNC:78057] | - | 0.555608948 | 0.001793945 | 0.006053488 |
| ENSMMUG00000004710 | protein interacting with cyclin A1 [Source:VGNC Symbol;Acc:VGNC:76336]                                  | - | 1.201680387 | 0.000455933 | 0.001789796 |
| ENSMMUG00000007293 | RAB34, member RAS oncogene family [Source:VGNC Symbol;Acc:VGNC:81533]                                   | - | 1.348912768 | 4.30E-10    | 4.97E-09    |
| ENSMMUG00000051743 | TLC domain containing 1 [Source:NCBI gene;Acc:710391]                                                   | - | 1.183499756 | 5.68E-07    | 4.03E-06    |
| ENSMMUG00000021408 | family with sequence similarity 222 member B [Source:VGNC Symbol;Acc:VGNC:72352]                        | - | 1.488303584 | 8.46E-09    | 8.01E-08    |
| ENSMMUG00000012523 | flotillin 2 [Source:NCBI gene;Acc:114669752]                                                            | - | 1.754903502 | 3.05E-16    | 7.26E-15    |
| ENSMMUG00000021553 | dehydrogenase/reductase 13 [Source:VGNC Symbol;Acc:VGNC:81387]                                          | - | 1.778683113 | 2.47E-15    | 5.41E-14    |
| ENSMMUG00000021554 | PHD finger protein 12 [Source:VGNC Symbol;Acc:VGNC:75838]                                               | - | 1.791516437 | 4.15E-17    | 1.09E-15    |
| ENSMMUG00000009938 | myosin XVIII A [Source:VGNC Symbol;Acc:VGNC:75058]                                                      | - | 0.753448358 | 5.09E-09    | 4.98E-08    |
| ENSMMUG00000012856 | nuclear FMR1 interacting protein 2 [Source:VGNC Symbol;Acc:VGNC:75422]                                  | - | 2.265152367 | 3.75E-05    | 0.000186995 |
| ENSMMUG00000019667 | TAO kinase 1 [Source:VGNC Symbol;Acc:VGNC:81591]                                                        | - | 1.77405323  | 7.60E-09    | 7.28E-08    |
| ENSMMUG00000057447 |                                                                                                         | - | 3.90194158  | 0.000281885 | 0.001158636 |
| ENSMMUG00000003866 | tumor protein p53 inducible protein 13 [Source:VGNC Symbol;Acc:VGNC:79474]                              | - | 1.511045072 | 0.011053309 | 0.029488045 |
| ENSMMUG00000014408 | GIT ArfGAP 1 [Source:VGNC Symbol;Acc:VGNC:73053]                                                        | - | 1.695703422 | 2.37E-05    | 0.000123673 |
| ENSMMUG00000014409 | ankyrin repeat domain 13B [Source:VGNC Symbol;Acc:VGNC:69708]                                           | - | 1.153989216 | 5.33E-06    | 3.15E-05    |
| ENSMMUG00000014411 | coronin 6 [Source:NCBI gene;Acc:711818]                                                                 | - | 1.316252411 | 3.32E-10    | 3.89E-09    |
| ENSMMUG00000014413 | slingshot protein phosphatase 2 [Source:VGNC Symbol;Acc:VGNC:78018]                                     | - | 0.980388911 | 8.76E-14    | 1.64E-12    |
| ENSMMUG00000056200 | transmembrane and immunoglobulin domain containing 1 [Source:NCBI gene;Acc:712350]                      | - | 0.740996438 | 0.007353993 | 0.020710162 |
| ENSMMUG00000023698 | golgi SNAP receptor complex member 1 [Source:VGNC Symbol;Acc:VGNC:73110]                                | - | 0.669331233 | 0.000627014 | 0.002376946 |
| ENSMMUG00000059292 |                                                                                                         | - | 1.472213204 | 7.61E-25    | 4.52E-23    |
| ENSMMUG00000011411 | sperm acrosome associated 3 [Source:VGNC Symbol;Acc:VGNC:77930]                                         | - | 2.311634847 | 2.83E-15    | 6.15E-14    |

|                     |                                                                                             |             |             |             |
|---------------------|---------------------------------------------------------------------------------------------|-------------|-------------|-------------|
| ENSMMUG00000011413  | acid sensing ion channel subunit 2 [Source:VGNC Symbol;Acc:VGNC:70241]                      | 0.865785354 | 0.015659597 | 0.039663847 |
| ENSMMUG00000002324  |                                                                                             | 1.339499947 | 3.89E-13    | 6.74E-12    |
|                     |                                                                                             | -           |             |             |
| ENSMMUG00000000288  | C-C motif chemokine ligand 2 [Source:VGNC Symbol;Acc:VGNC:70698]                            | 1.372326291 | 1.16E-05    | 6.47E-05    |
|                     |                                                                                             | -           |             |             |
| ENSMMUG000000009782 | C-C motif chemokine ligand 7 [Source:NCBI gene;Acc:714751]                                  | 0.843932016 | 0.012755744 | 0.033362906 |
| ENSMMUG00000006399  | chaperonin containing TCP1 subunit 6B [Source:VGNC Symbol;Acc:VGNC:70748]                   | 0.493711525 | 2.52E-09    | 2.60E-08    |
| ENSMMUG00000004794  | DNA ligase 3 [Source:VGNC Symbol;Acc:VGNC:74266]                                            | 2.929055347 | 9.35E-13    | 1.55E-11    |
|                     |                                                                                             | -           |             |             |
| ENSMMUG000000005170 | unc-45 myosin chaperone B [Source:VGNC Symbol;Acc:VGNC:78954]                               | 1.288960161 | 1.52E-06    | 9.99E-06    |
| ENSMMUG000000037555 | schlafen family member 11 [Source:NCBI gene;Acc:715511]                                     | 1.762141867 | 0.001733943 | 0.005864168 |
|                     |                                                                                             | -           |             |             |
| ENSMMUG000000031736 |                                                                                             | 1.755331406 | 0.014009853 | 0.036114395 |
|                     |                                                                                             | -           |             |             |
| ENSMMUG000000026432 | small nucleolar RNA, C/D box 7 [Source:HGNC Symbol;Acc:HGNC:32704]                          | 2.415399363 | 0.007615272 | 0.02139316  |
|                     |                                                                                             | -           |             |             |
| ENSMMUG00000006048  | adaptor related protein complex 2 subunit beta 1 [Source:VGNC Symbol;Acc:VGNC:69964]        | 0.845571862 | 4.14E-06    | 2.50E-05    |
|                     |                                                                                             | -           |             |             |
| ENSMMUG000000013142 | growth arrest specific 2 like 2 [Source:VGNC Symbol;Acc:VGNC:72776]                         | 1.002711568 | 0.006445264 | 0.018505957 |
|                     |                                                                                             | -           |             |             |
| ENSMMUG000000022229 | matrix metalloproteinase 28 [Source:VGNC Symbol;Acc:VGNC:74755]                             | 1.080091658 | 0.01017939  | 0.027477313 |
|                     |                                                                                             | -           |             |             |
| ENSMMUG000000022233 | HEAT repeat containing 9 [Source:VGNC Symbol;Acc:VGNC:73243]                                | 1.234680785 | 0.001997177 | 0.006649784 |
|                     |                                                                                             | -           |             |             |
| ENSMMUG000000054829 |                                                                                             | 0.449126418 | 0.017568755 | 0.04372288  |
|                     |                                                                                             | -           |             |             |
| ENSMMUG000000050758 |                                                                                             | 1.529832617 | 0.002358377 | 0.007681688 |
| ENSMMUG000000054472 |                                                                                             | 1.023759539 | 0.000123677 | 0.000551952 |
|                     |                                                                                             | -           |             |             |
| ENSMMUG000000054210 | C-C motif chemokine 4 [Source:NCBI gene;Acc:100426632]                                      | 1.691826548 | 2.44E-17    | 6.59E-16    |
|                     |                                                                                             | -           |             |             |
| ENSMMUG000000058233 | C-C motif chemokine 3-like [Source:NCBI gene;Acc:100426537]                                 | 2.604022769 | 4.89E-06    | 2.92E-05    |
|                     |                                                                                             | -           |             |             |
| ENSMMUG000000061594 |                                                                                             | 2.442083407 | 8.34E-07    | 5.74E-06    |
|                     |                                                                                             | -           |             |             |
| ENSMMUG000000052786 |                                                                                             | 3.265371653 | 8.53E-08    | 6.94E-07    |
|                     |                                                                                             | -           |             |             |
| ENSMMUG00000000620  | dehydrogenase/reductase 11 [Source:VGNC Symbol;Acc:VGNC:71792]                              | 1.959392284 | 7.77E-06    | 4.45E-05    |
|                     |                                                                                             | -           |             |             |
| ENSMMUG00000000618  | gametogenetin binding protein 2 [Source:VGNC Symbol;Acc:VGNC:72746]                         | 1.693472498 | 2.29E-10    | 2.76E-09    |
|                     |                                                                                             | -           |             |             |
| ENSMMUG000000051190 | Metazoan signal recognition particle RNA [Source:RFAM;Acc:RF00017]                          | 2.397992469 | 9.61E-06    | 5.41E-05    |
|                     |                                                                                             | -           |             |             |
| ENSMMUG000000007920 | myosin XIX [Source:VGNC Symbol;Acc:VGNC:75026]                                              | 1.637771945 | 3.35E-07    | 2.46E-06    |
|                     |                                                                                             | -           |             |             |
| ENSMMUG000000007923 | phosphatidylinositol glycan anchor biosynthesis class W [Source:VGNC Symbol;Acc:VGNC:75850] | 1.326531923 | 0.000229572 | 0.000967201 |
|                     |                                                                                             | -           |             |             |
| ENSMMUG000000007918 | zinc finger HIT-type containing 3 [Source:NCBI gene;Acc:574277]                             | 1.838435063 | 0.000601901 | 0.002289354 |
|                     |                                                                                             | -           |             |             |
| ENSMMUG000000007917 | carbonic anhydrase 4 [Source:NCBI gene;Acc:716919]                                          | 0.854518958 | 0.000828824 | 0.003039433 |
|                     |                                                                                             | -           |             |             |
| ENSMMUG000000017113 | ubiquitin specific peptidase 32 [Source:NCBI gene;Acc:716857]                               | 1.529420237 | 2.93E-12    | 4.56E-11    |
|                     |                                                                                             | -           |             |             |
| ENSMMUG000000052977 | putative protein FAM106C [Source:NCBI gene;Acc:106994084]                                   | 1.349598294 | 9.95E-08    | 8.03E-07    |
|                     |                                                                                             | -           |             |             |
| ENSMMUG000000065117 | septin 4 [Source:HGNC Symbol;Acc:HGNC:9165]                                                 | 1.282078294 | 3.93E-10    | 4.56E-09    |

|                     |                                                                                                                   |             |             |             |
|---------------------|-------------------------------------------------------------------------------------------------------------------|-------------|-------------|-------------|
| ENSMMUG0000008423   | septin 4 [Source:NCBI gene;Acc:714724]                                                                            | 0.902121136 | 8.68E-15    | 1.83E-13    |
| ENSMMUG0000002264   | lactoperoxidase [Source:VGNC Symbol;Acc:VGNC:74440]                                                               | 0.44277176  | 0.002859912 | 0.00911117  |
| ENSMMUG00000056064  | serine and arginine rich splicing factor 1 [Source:NCBI gene;Acc:713958]                                          | 0.452444374 | 0.002664047 | 0.008549625 |
| ENSMMUG00000004723  | vascular endothelial zinc finger 1 [Source:NCBI gene;Acc:713848]                                                  | 0.353655216 | 0.003515917 | 0.010905889 |
| ENSMMUG00000012644  | A-kinase anchoring protein 1 [Source:VGNC Symbol;Acc:VGNC:69763]                                                  | 0.635135303 | 0.003629139 | 0.011217201 |
| ENSMMUG00000002269  | serine carboxypeptidase 1 [Source:VGNC Symbol;Acc:VGNC:82232]                                                     | 0.902820323 | 2.76E-05    | 0.000142368 |
| ENSMMUG00000005793  | ankyrin repeat and fibronectin type III domain containing 1 [Source:VGNC Symbol;Acc:VGNC:69712]                   | 0.940996582 | 1.38E-05    | 7.59E-05    |
| ENSMMUG000000059321 |                                                                                                                   | 2.484038693 | 0.000342033 | 0.001383621 |
| ENSMMUG00000006066  | phosphatidylcholine transfer protein [Source:VGNC Symbol;Acc:VGNC:75789]                                          | 2.010199748 | 1.90E-06    | 1.23E-05    |
| ENSMMUG00000006068  | transmembrane protein 100 [Source:VGNC Symbol;Acc:VGNC:79521]                                                     | 0.690335257 | 3.50E-08    | 3.00E-07    |
| ENSMMUG00000022627  | HLF transcription factor, PAR bZIP family member [Source:VGNC Symbol;Acc:VGNC:73478]                              | 1.757805754 | 0.000538469 | 0.002078472 |
| ENSMMUG000000050544 |                                                                                                                   | 2.336723267 | 5.17E-10    | 5.91E-09    |
| ENSMMUG000000049997 |                                                                                                                   | 2.128176791 | 4.26E-12    | 6.44E-11    |
| ENSMMUG000000056602 |                                                                                                                   | 2.306122922 | 4.10E-06    | 2.48E-05    |
| ENSMMUG00000010550  | target of myb1 like 1 membrane trafficking protein [Source:VGNC Symbol;Acc:VGNC:78616]                            | 0.414306434 | 0.01408291  | 0.036271198 |
| ENSMMUG00000013737  | carbonic anhydrase 10 [Source:VGNC Symbol;Acc:VGNC:70486]                                                         | 1.080620364 | 0.003710066 | 0.011422106 |
| ENSMMUG000000062178 | Metazoan signal recognition particle RNA [Source:RFAM;Acc:RF00017]                                                | 1.267963225 | 0.003642124 | 0.011247959 |
| ENSMMUG000000051004 |                                                                                                                   | 0.351989529 | 0.016418155 | 0.041331053 |
| ENSMMUG00000001942  | mbt domain containing 1 [Source:VGNC Symbol;Acc:VGNC:74538]                                                       | 1.802882001 | 4.59E-12    | 6.90E-11    |
| ENSMMUG00000001940  | NME/NM23 nucleoside diphosphate kinase 2 [Source:NCBI gene;Acc:100533957]                                         | 2.127503991 | 5.43E-17    | 1.40E-15    |
| ENSMMUG00000022528  | sperm associated antigen 9 [Source:VGNC Symbol;Acc:VGNC:77920]                                                    | 0.426451574 | 0.00230207  | 0.00750818  |
| ENSMMUG00000022741  | WAP, follistatin/kazal, immunoglobulin, kunitz and netrin domain containing 2 [Source:VGNC Symbol;Acc:VGNC:79900] | 1.775235103 | 2.31E-23    | 1.21E-21    |
| ENSMMUG00000010117  | LUC7 like 3 pre-mRNA splicing factor [Source:VGNC Symbol;Acc:VGNC:74346]                                          | 0.830965844 | 0.017301082 | 0.043156354 |
| ENSMMUG00000003421  | ankyrin repeat domain 40 [Source:VGNC Symbol;Acc:VGNC:69725]                                                      | 0.927228439 | 0.009774666 | 0.02652485  |
| ENSMMUG00000003414  | ATP binding cassette subfamily C member 3 [Source:VGNC Symbol;Acc:VGNC:69572]                                     | 0.508352625 | 0.011730969 | 0.031071669 |
| ENSMMUG00000017256  | calcium voltage-gated channel subunit alpha1 G [Source:VGNC Symbol;Acc:VGNC:70504]                                | 2.277085116 | 7.71E-34    | 1.14E-31    |
| ENSMMUG00000017242  | MYCBP associated protein [Source:VGNC Symbol;Acc:VGNC:74994]                                                      | 1.466581069 | 3.27E-05    | 0.000165583 |
| ENSMMUG00000017234  | leucine rich repeat containing 59 [Source:VGNC Symbol;Acc:VGNC:81436]                                             | 4.072404397 | 2.48E-49    | 1.84E-46    |
| ENSMMUG00000020061  | protein phosphatase 1 regulatory subunit 9B [Source:VGNC Symbol;Acc:VGNC:76372]                                   | 1.478003215 | 2.56E-07    | 1.93E-06    |
| ENSMMUG00000014687  | sterile alpha motif domain containing 14 [Source:VGNC Symbol;Acc:VGNC:77112]                                      | -1.99569945 | 2.70E-05    | 0.000139538 |
| ENSMMUG00000014685  | pyruvate dehydrogenase kinase 2 [Source:VGNC Symbol;Acc:VGNC:75933]                                               | -1.89812774 | 0.017437255 | 0.043443667 |
| ENSMMUG00000000153  | integrin subunit alpha 3 [Source:VGNC Symbol;Acc:VGNC:73777]                                                      | 1.629105194 | 0.012066036 | 0.031828409 |
| ENSMMUG00000015845  | beta-1,4-N-acetyl-galactosaminyltransferase 2 [Source:VGNC Symbol;Acc:VGNC:70120]                                 | 1.464624603 | 0.00100464  | 0.00361534  |
| ENSMMUG00000012178  | calcium binding and coiled-coil domain 2 [Source:VGNC Symbol;Acc:VGNC:70675]                                      | 0.423179222 | 0.008444532 | 0.023417845 |
| ENSMMUG00000021087  | SNF8 subunit of ESCRT-II [Source:VGNC Symbol;Acc:VGNC:77729]                                                      | 0.606375356 | 0.001307684 | 0.004575967 |
| ENSMMUG00000003436  | tubulin tyrosine ligase like 6 [Source:VGNC Symbol;Acc:VGNC:79632]                                                | 1.727559197 | 2.70E-25    | 1.64E-23    |
| ENSMMUG000000060879 | homeobox B13 [Source:NCBI gene;Acc:697572]                                                                        | 1.823870881 | 7.09E-25    | 4.24E-23    |

|                    |                                                                                            |             |             |             |
|--------------------|--------------------------------------------------------------------------------------------|-------------|-------------|-------------|
| ENSMMUG00000055122 |                                                                                            | 1.025391085 | 7.81E-09    | 7.45E-08    |
| ENSMMUG00000052505 | homeobox B9 [Source:NCBI gene;Acc:106994009]                                               | 1.506151594 | 7.59E-18    | 2.16E-16    |
| ENSMMUG00000020868 | homeobox B8 [Source:VGNC Symbol;Acc:VGNC:73505]                                            | 1.495736532 | 3.64E-20    | 1.30E-18    |
| ENSMMUG00000055324 | homeobox B7 [Source:NCBI gene;Acc:697089]                                                  | 1.538224256 | 1.09E-13    | 2.01E-12    |
| ENSMMUG00000062283 | homeobox B6 [Source:NCBI gene;Acc:106994013]                                               | 1.515450137 | 1.89E-22    | 8.94E-21    |
| ENSMMUG00000051420 | homeobox B5 [Source:NCBI gene;Acc:696732]                                                  | 1.585831016 | 2.42E-12    | 3.80E-11    |
| ENSMMUG00000045203 |                                                                                            | 1.39165309  | 3.04E-07    | 2.24E-06    |
| ENSMMUG00000052130 | homeobox B4 [Source:NCBI gene;Acc:106994012]                                               | 1.288492612 | 0.004724155 | 0.0141557   |
| ENSMMUG00000057001 | homeobox B2 [Source:NCBI gene;Acc:106994010]                                               | 1.154016937 | 1.21E-10    | 1.51E-09    |
| ENSMMUG00000057095 |                                                                                            | 3.320385379 | 1.20E-06    | 8.00E-06    |
| ENSMMUG00000050742 | src kinase associated phosphoprotein 1 [Source:NCBI gene;Acc:697043]                       | 0.572730123 | 1.06E-09    | 1.16E-08    |
| ENSMMUG00000019882 | chromobox 1 [Source:NCBI gene;Acc:696673]                                                  | 0.416064761 | 0.012346226 | 0.03246057  |
|                    |                                                                                            | -           |             |             |
| ENSMMUG00000003325 | pyridoxamine 5'-phosphate oxidase [Source:VGNC Symbol;Acc:VGNC:76141]                      | 0.937326727 | 6.47E-08    | 5.36E-07    |
| ENSMMUG00000004765 | Sp2 transcription factor [Source:VGNC Symbol;Acc:VGNC:77845]                               | 1.264440423 | 6.66E-06    | 3.87E-05    |
| ENSMMUG00000021486 | secernin 2 [Source:NCBI gene;Acc:694571]                                                   | 1.484102214 | 1.89E-05    | 0.00010123  |
| ENSMMUG00000057231 | T-box transcription factor 21 [Source:NCBI gene;Acc:694044]                                | 1.400518829 | 5.38E-09    | 5.25E-08    |
|                    |                                                                                            | -           |             |             |
| ENSMMUG00000019760 | karyopherin subunit beta 1 [Source:VGNC Symbol;Acc:VGNC:74203]                             | 0.816954091 | 0.000216865 | 0.000917055 |
|                    |                                                                                            | -           |             |             |
| ENSMMUG00000020528 | G protein-coupled receptor 179 [Source:VGNC Symbol;Acc:VGNC:73043]                         | 1.550788702 | 0.007154175 | 0.020235823 |
| ENSMMUG00000020020 | Rho GTPase activating protein 23 [Source:NCBI gene;Acc:693996]                             | 1.149677772 | 4.17E-05    | 0.000205766 |
| ENSMMUG00000007799 | LIM and SH3 protein 1 [Source:VGNC Symbol;Acc:VGNC:74237]                                  | 1.213672328 | 1.80E-05    | 9.69E-05    |
| ENSMMUG00000050458 |                                                                                            | 0.916159817 | 0.018140536 | 0.044972275 |
| ENSMMUG00000056248 |                                                                                            | 2.906158854 | 2.77E-19    | 8.85E-18    |
| ENSMMUG00000063779 |                                                                                            | 3.077401381 | 2.62E-22    | 1.21E-20    |
|                    |                                                                                            | -           |             |             |
| ENSMMUG00000000289 | calcium voltage-gated channel auxiliary subunit beta 1 [Source:VGNC Symbol;Acc:VGNC:70509] | 0.586433778 | 0.000718902 | 0.002675363 |
|                    |                                                                                            | -           |             |             |
| ENSMMUG00000030060 | F-box and leucine rich repeat protein 20 [Source:VGNC Symbol;Acc:VGNC:81407]               | 0.654277056 | 4.88E-06    | 2.91E-05    |
|                    |                                                                                            | -           |             |             |
| ENSMMUG00000009132 | mediator complex subunit 1 [Source:VGNC Symbol;Acc:VGNC:74724]                             | 0.946221807 | 0.000648662 | 0.002448373 |
|                    |                                                                                            | -           |             |             |
| ENSMMUG00000001404 | neuronal differentiation 2 [Source:VGNC Symbol;Acc:VGNC:75321]                             | 3.010796929 | 0.01056766  | 0.028360188 |
| ENSMMUG00000004587 | gasdermin B [Source:VGNC Symbol;Acc:VGNC:73219]                                            | 2.270441711 | 0.000133395 | 0.000591757 |
| ENSMMUG00000057790 |                                                                                            | 2.046251759 | 0.00600823  | 0.017409544 |
| ENSMMUG00000058758 |                                                                                            | 2.608003094 | 8.07E-06    | 4.61E-05    |
| ENSMMUG00000064026 | Metazoan signal recognition particle RNA [Source:RFAM;Acc:RF00017]                         | 1.078556276 | 3.27E-06    | 2.01E-05    |
| ENSMMUG00000064723 | gasdermin A [Source:NCBI gene;Acc:698841]                                                  | 2.10724872  | 0.002541633 | 0.008201134 |
| ENSMMUG00000002923 | colony stimulating factor 3 [Source:VGNC Symbol;Acc:VGNC:71520]                            | 1.221438773 | 9.90E-10    | 1.09E-08    |
| ENSMMUG00000002926 | mediator complex subunit 24 [Source:NCBI gene;Acc:699536]                                  | 1.43231528  | 3.14E-25    | 1.89E-23    |
| ENSMMUG00000002933 | nuclear receptor subfamily 1 group D member 1 [Source:VGNC Symbol;Acc:VGNC:75502]          | -0.44132296 | 0.012418229 | 0.032623974 |
| ENSMMUG00000045187 | CASC3 exon junction complex subunit [Source:NCBI gene;Acc:699712]                          | 1.255359086 | 2.04E-14    | 4.07E-13    |
| ENSMMUG00000015160 | Rap guanine nucleotide exchange factor like 1 [Source:VGNC Symbol;Acc:VGNC:76501]          | 1.116186814 | 6.35E-09    | 6.15E-08    |
| ENSMMUG00000056646 |                                                                                            | 1.140139439 | 1.07E-06    | 7.26E-06    |
| ENSMMUG00000004750 | WAS/WASL interacting protein family member 2 [Source:NCBI gene;Acc:700279]                 | 0.97345498  | 0.000844836 | 0.003090509 |
|                    |                                                                                            | -           |             |             |
| ENSMMUG00000008941 | DNA topoisomerase II alpha [Source:VGNC Symbol;Acc:VGNC:78620]                             | 0.853590017 | 1.24E-09    | 1.34E-08    |
| ENSMMUG00000009386 | tensin 4 [Source:VGNC Symbol;Acc:VGNC:79432]                                               | 1.344744597 | 0.007525031 | 0.02115969  |
|                    |                                                                                            | -           |             |             |
| ENSMMUG00000001497 | keratin 27 [Source:VGNC Symbol;Acc:VGNC:74169]                                             | 0.491879752 | 0.000879921 | 0.003199909 |
|                    |                                                                                            | -           |             |             |
| ENSMMUG00000043282 |                                                                                            | 0.653641847 | 0.004250797 | 0.012909957 |

|                    |                                                                                               |             |             |             |
|--------------------|-----------------------------------------------------------------------------------------------|-------------|-------------|-------------|
| ENSMMUG00000018644 | keratin 32 [Source:VGNC Symbol;Acc:VGNC:74216]                                                | 0.422793835 | 0.012910325 | 0.033707766 |
| ENSMMUG00000053216 | U2 spliceosomal RNA [Source:RFAM;Acc:RF00004]                                                 | 0.655587045 | 0.006999745 | 0.019878632 |
| ENSMMUG00000018653 | keratin, type I cytoskeletal 19 [Source:NCBI gene;Acc:707129]                                 | 0.652632947 | 0.00713019  | 0.020179525 |
| ENSMMUG00000013048 | junction plakoglobin [Source:VGNC Symbol;Acc:VGNC:73960]                                      | 1.089803767 | 1.91E-05    | 0.000101887 |
| ENSMMUG00000021753 | tetratricopeptide repeat domain 25 [Source:NCBI gene;Acc:708614]                              | 0.685181113 | 3.15E-06    | 1.95E-05    |
| ENSMMUG00000016114 | 2',3'-cyclic nucleotide 3' phosphodiesterase [Source:VGNC Symbol;Acc:VGNC:71279]              | 0.694384772 | 1.90E-06    | 1.22E-05    |
| ENSMMUG00000016118 | DnaJ heat shock protein family (Hsp40) member C7 [Source:NCBI gene;Acc:708729]                | 0.387539    | 0.0067271   | 0.019192554 |
| ENSMMUG00000003894 | zinc finger protein 385C [Source:NCBI gene;Acc:708928]                                        | 0.471919437 | 0.000538802 | 0.002079219 |
| ENSMMUG00000049440 | chromosome 16 C17orf113 homolog [Source:NCBI gene;Acc:106994045]                              | 0.705342754 | 5.61E-16    | 1.31E-14    |
| ENSMMUG00000003437 | signal transducer and activator of transcription 5B [Source:NCBI gene;Acc:709760]             | 2.268935955 | 8.97E-32    | 1.00E-29    |
| ENSMMUG00000052220 |                                                                                               | 0.639264098 | 7.03E-05    | 0.000331308 |
| ENSMMUG00000035823 | U7 small nuclear RNA [Source:RFAM;Acc:RF00066]                                                | 0.711691838 | 0.007005563 | 0.019891346 |
| ENSMMUG00000050793 | N-acetyl-alpha-glucosaminidase [Source:NCBI gene;Acc:707186]                                  | 2.252943727 | 6.42E-30    | 6.14E-28    |
| ENSMMUG00000009884 | hydroxysteroid 17-beta dehydrogenase 1 [Source:VGNC Symbol;Acc:VGNC:73528]                    | 2.378297447 | 9.97E-14    | 1.85E-12    |
| ENSMMUG00000009886 | Coenzyme A synthase [Source:VGNC Symbol;Acc:VGNC:81373]                                       | 2.05342186  | 1.11E-47    | 6.84E-45    |
| ENSMMUG00000009887 | MAX dimerization protein MLX [Source:VGNC Symbol;Acc:VGNC:74726]                              | 2.083903778 | 9.86E-20    | 3.34E-18    |
| ENSMMUG00000009889 | PSMC3 interacting protein [Source:VGNC Symbol;Acc:VGNC:76282]                                 | 1.987983842 | 3.77E-24    | 2.08E-22    |
| ENSMMUG00000016796 | reticulophagy regulator family member 3 [Source:VGNC Symbol;Acc:VGNC:76845]                   | 2.087678792 | 4.31E-38    | 9.27E-36    |
| ENSMMUG00000016797 | tubulin gamma 1 [Source:NCBI gene;Acc:710756]                                                 | 1.988651123 | 1.76E-26    | 1.25E-24    |
| ENSMMUG00000006086 | pleckstrin homology, MyTH4 and FERM domain containing H3 [Source:VGNC Symbol;Acc:VGNC:76113]  | 1.619780875 | 8.61E-11    | 1.09E-09    |
| ENSMMUG00000006090 | C-C motif chemokine receptor 10 [Source:VGNC Symbol;Acc:VGNC:82119]                           | 1.937490953 | 0.000878455 | 0.003195362 |
| ENSMMUG00000006091 | contactin associated protein 1 [Source:VGNC Symbol;Acc:VGNC:71390]                            | 2.191689367 | 9.39E-32    | 1.04E-29    |
| ENSMMUG00000006093 | enhancer of zeste 1 polycomb repressive complex 2 subunit [Source:VGNC Symbol;Acc:VGNC:72457] | 2.131869645 | 6.24E-36    | 1.14E-33    |
| ENSMMUG00000056565 | Metazoan signal recognition particle RNA [Source:RFAM;Acc:RF00017]                            | 2.304595965 | 0.018133395 | 0.044962089 |
| ENSMMUG00000058566 |                                                                                               | 1.701169791 | 1.61E-39    | 4.12E-37    |
| ENSMMUG00000029971 | beclin 1 [Source:VGNC Symbol;Acc:VGNC:70044]                                                  | 0.573411546 | 5.47E-05    | 0.000263559 |
| ENSMMUG00000012685 | proteasome activator subunit 3 [Source:VGNC Symbol;Acc:VGNC:76457]                            | 0.422550771 | 0.000591176 | 0.002253183 |
| ENSMMUG00000014123 | alanyl-tRNA editing protein Aarsd1 [Source:NCBI gene;Acc:712203]                              | 1.134191389 | 7.31E-06    | 4.22E-05    |
| ENSMMUG00000008091 | RUN domain containing 1 [Source:VGNC Symbol;Acc:VGNC:77101]                                   | 1.028363389 | 4.87E-05    | 0.000237302 |
| ENSMMUG00000064920 |                                                                                               | 1.347011964 | 1.94E-22    | 9.11E-21    |
| ENSMMUG00000008090 | ribosomal protein L27 [Source:NCBI gene;Acc:712352]                                           | 1.151087555 | 0.000279132 | 0.00114955  |
| ENSMMUG00000015999 | interferon induced protein 35 [Source:VGNC Symbol;Acc:VGNC:73564]                             | 1.141005547 | 8.26E-06    | 4.71E-05    |
| ENSMMUG00000016001 | vesicle amine transport 1 [Source:VGNC Symbol;Acc:VGNC:79058]                                 | 1.104623059 | 4.82E-11    | 6.34E-10    |
| ENSMMUG00000065269 | Rho family GTPase 2 [Source:NCBI gene;Acc:712559]                                             | 1.070539482 | 1.15E-06    | 7.70E-06    |
| ENSMMUG00000052607 |                                                                                               | 1.339063396 | 5.67E-37    | 1.12E-34    |
| ENSMMUG00000012071 | DEAH-box helicase 8 [Source:VGNC Symbol;Acc:VGNC:71765]                                       | 0.665564806 | 9.41E-08    | 7.61E-07    |
| ENSMMUG00000006808 | homologous recombination factor with OB-fold [Source:VGNC Symbol;Acc:VGNC:70421]              | 2.464796249 | 0.006340922 | 0.018248763 |
| ENSMMUG00000019923 | ataxin 7 like 3 [Source:VGNC Symbol;Acc:VGNC:70128]                                           | 0.581548264 | 0.002057058 | 0.006821594 |
| ENSMMUG00000017100 | solute carrier family 4 member 1 (Diego blood group) [Source:NCBI gene;Acc:100427618]         | 0.482044525 | 0.008790797 | 0.024240893 |
| ENSMMUG00000013983 | RUN domain containing 3A [Source:VGNC Symbol;Acc:VGNC:77032]                                  | 0.629521156 | 1.21E-08    | 1.12E-07    |
| ENSMMUG00000017944 | solute carrier family 25 member 39 [Source:VGNC Symbol;Acc:VGNC:77568]                        | 0.495798004 | 0.000682325 | 0.002561095 |
| ENSMMUG00000023751 | granulin precursor [Source:VGNC Symbol;Acc:VGNC:73293]                                        | 0.449188009 | 0.007802458 | 0.021844525 |
| ENSMMUG00000041006 | family with sequence similarity 171 member A2 [Source:NCBI gene;Acc:712099]                   | 0.552173916 | 3.07E-06    | 1.90E-05    |
| ENSMMUG00000012659 | integrin subunit alpha 2b [Source:VGNC Symbol;Acc:VGNC:73776]                                 | 0.293564039 | 0.003641862 | 0.011247959 |
| ENSMMUG00000012658 | G-patch domain containing 8 [Source:VGNC Symbol;Acc:VGNC:73026]                               | 0.342702286 | 0.000113766 | 0.000511724 |

|                    |                                                                                              |   |             |             |             |
|--------------------|----------------------------------------------------------------------------------------------|---|-------------|-------------|-------------|
| ENSMMUG00000029927 | ADAM metallopeptidase domain 11 [Source:VGNC Symbol;Acc:VGNC:69466]                          | - | 0.863859999 | 0.001358005 | 0.004730847 |
| ENSMMUG00000013115 | glial fibrillary acidic protein [Source:VGNC Symbol;Acc:VGNC:72913]                          | - | 0.919447395 | 0.003894591 | 0.011940622 |
| ENSMMUG00000062273 | dephospho-CoA kinase domain containing [Source:NCBI gene;Acc:715841]                         | - | 1.911933128 | 2.17E-08    | 1.94E-07    |
| ENSMMUG00000060665 |                                                                                              | - | 1.103658362 | 2.34E-05    | 0.000122495 |
| ENSMMUG00000054246 |                                                                                              | - | 1.700133758 | 0.001331852 | 0.004650661 |
| ENSMMUG00000021932 | Rho GTPase activating protein 27 [Source:VGNC Symbol;Acc:VGNC:69935]                         | - | 1.228022414 | 0.005336661 | 0.015690461 |
| ENSMMUG00000008459 | pleckstrin homology and RUN domain containing M1 [Source:NCBI gene;Acc:716464]               | - | 0.849012907 | 0.001080008 | 0.003858472 |
| ENSMMUG00000049983 |                                                                                              | - | 1.280720756 | 0.008698305 | 0.024021576 |
| ENSMMUG00000057840 | leucine-rich repeat-containing protein 37A3 [Source:NCBI gene;Acc:715030]                    | - | 0.806971873 | 0.004543712 | 0.013687437 |
| ENSMMUG00000005548 | N-ethylmaleimide sensitive factor, vesicle fusing ATPase [Source:VGNC Symbol;Acc:VGNC:75536] | - | 1.020492846 | 1.90E-12    | 3.03E-11    |
| ENSMMUG00000057209 |                                                                                              | - | 0.793693975 | 1.04E-05    | 5.82E-05    |
| ENSMMUG00000004122 | microtubule associated protein tau [Source:NCBI gene;Acc:574327]                             | - | 0.76473035  | 1.45E-07    | 1.14E-06    |
| ENSMMUG00000053257 | Y RNA [Source:RFAM;Acc:RF00019]                                                              | - | 1.280660038 | 1.39E-12    | 2.26E-11    |
| ENSMMUG00000003289 | integrin subunit beta 3 [Source:NCBI gene;Acc:717379]                                        | - | 0.952209081 | 1.02E-14    | 2.13E-13    |
| ENSMMUG00000010588 | EF-hand calcium binding domain 13 [Source:HGNC Symbol;Acc:HGNC:26864]                        | - | 0.763273546 | 0.000380493 | 0.001523822 |
| ENSMMUG00000002166 | tousled like kinase 2 [Source:VGNC Symbol;Acc:VGNC:78368]                                    | - | 3.324959825 | 0.000153433 | 0.000669634 |
| ENSMMUG00000002167 | mannose receptor C type 2 [Source:VGNC Symbol;Acc:VGNC:74784]                                | - | 2.003968996 | 0.006833958 | 0.019459983 |
| ENSMMUG00000002168 | membrane associated ring-CH-type finger 10 [Source:VGNC Symbol;Acc:VGNC:74593]               | - | 1.692900704 | 0.005523661 | 0.016175315 |
| ENSMMUG00000015185 | endoplasmic reticulum to nucleus signaling 1 [Source:VGNC Symbol;Acc:VGNC:72429]             | - | 0.412228034 | 0.000156642 | 0.000681233 |
| ENSMMUG00000011809 | platelet and endothelial cell adhesion molecule 1 [Source:VGNC Symbol;Acc:VGNC:75938]        | - | 0.864212254 | 5.49E-06    | 3.24E-05    |
| ENSMMUG00000059400 |                                                                                              | - | 0.732032619 | 0.007160117 | 0.020248768 |
| ENSMMUG00000006317 | mast cell immunoglobulin like receptor 1 [Source:VGNC Symbol;Acc:VGNC:74843]                 | - | 0.871806635 | 0.002923764 | 0.009294625 |
| ENSMMUG00000009463 | DEAD-box helicase 5 [Source:VGNC Symbol;Acc:VGNC:71763]                                      | - | 0.526683019 | 2.97E-05    | 0.000151832 |
| ENSMMUG00000063689 |                                                                                              | - | 0.705310872 | 0.001418976 | 0.004913242 |
| ENSMMUG00000009461 | SMAD specific E3 ubiquitin protein ligase 2 [Source:VGNC Symbol;Acc:VGNC:77727]              | - | 0.838070594 | 1.24E-09    | 1.34E-08    |
| ENSMMUG00000060767 |                                                                                              | - | 3.383221829 | 1.54E-18    | 4.65E-17    |
| ENSMMUG00000060015 | axin 2 [Source:NCBI gene;Acc:718566]                                                         | - | 0.378623478 | 0.003558531 | 0.011026539 |
| ENSMMUG00000051240 |                                                                                              | - | 0.994767757 | 0.00033127  | 0.001343745 |
| ENSMMUG00000018378 | protein kinase C alpha [Source:VGNC Symbol;Acc:VGNC:76409]                                   | - | 1.401534525 | 0.005326554 | 0.015670065 |
| ENSMMUG00000002959 | helicase with zinc finger [Source:VGNC Symbol;Acc:VGNC:73178]                                | - | 3.119937106 | 5.71E-31    | 5.92E-29    |
| ENSMMUG00000057157 |                                                                                              | - | 2.829050117 | 1.72E-20    | 6.42E-19    |
| ENSMMUG00000054673 |                                                                                              | - | 2.231997477 | 0.001951269 | 0.006515945 |
| ENSMMUG00000051322 | somatostatin receptor 2 [Source:NCBI gene;Acc:695526]                                        | - | 1.145857181 | 0.002469608 | 0.007991334 |
| ENSMMUG00000063103 |                                                                                              | - | 0.624429071 | 0.001428957 | 0.00494103  |
| ENSMMUG00000001266 | component of oligomeric golgi complex 1 [Source:VGNC Symbol;Acc:VGNC:71383]                  | - | 1.391201572 | 0.000335817 | 0.00136033  |

|                    |                                                                                        |             |             |             |
|--------------------|----------------------------------------------------------------------------------------|-------------|-------------|-------------|
| ENSMMUG0000001269  | chromosome 16 C17orf80 homolog [Source:VGNC Symbol;Acc:VGNC:70440]                     | 1.162301922 | 7.64E-14    | 1.45E-12    |
| ENSMMUG0000001271  | cleavage and polyadenylation specific factor 4 like [Source:NCBI gene;Acc:698279]      | 1.472438062 | 0.00130331  | 0.004561739 |
| ENSMMUG00000049948 |                                                                                        | -           |             |             |
| ENSMMUG00000064463 |                                                                                        | 1.416012441 | 1.48E-09    | 1.58E-08    |
| ENSMMUG00000049403 |                                                                                        | 1.482392738 | 7.43E-06    | 4.28E-05    |
| ENSMMUG00000064052 | CD300 molecule like family member d [Source:NCBI gene;Acc:703142]                      | 0.876046618 | 4.00E-08    | 3.40E-07    |
| ENSMMUG00000058592 |                                                                                        | 1.943136602 | 7.14E-12    | 1.04E-10    |
| ENSMMUG00000020462 | CD300e molecule [Source:NCBI gene;Acc:114673189]                                       | 2.016795163 | 1.84E-17    | 4.99E-16    |
| ENSMMUG0000005737  | SLC9A3 regulator 1 [Source:VGNC Symbol;Acc:VGNC:77639]                                 | 2.277920851 | 7.82E-10    | 8.74E-09    |
| ENSMMUG0000005738  | N-acetyltransferase 9 (putative) [Source:NCBI gene;Acc:699085]                         | 2.880651237 | 3.72E-08    | 3.17E-07    |
| ENSMMUG0000005744  | glutamate ionotropic receptor NMDA type subunit 2C [Source:VGNC Symbol;Acc:VGNC:73284] | 4.020316411 | 0.000112145 | 0.000505505 |
| ENSMMUG00000023405 | otopetrin 3 [Source:VGNC Symbol;Acc:VGNC:75654]                                        | 0.50665445  | 0.017132263 | 0.042816221 |
| ENSMMUG00000023406 | HID1 domain containing [Source:VGNC Symbol;Acc:VGNC:73394]                             | 0.557271032 | 0.000657276 | 0.002477104 |
| ENSMMUG00000018031 | solute carrier family 25 member 19 [Source:VGNC Symbol;Acc:VGNC:77474]                 | 0.613521933 | 0.000139365 | 0.000614382 |
| ENSMMUG0000004756  | growth factor receptor bound protein 2 [Source:NCBI gene;Acc:702041]                   | -           |             |             |
| ENSMMUG00000058142 |                                                                                        | 1.806050768 | 1.15E-06    | 7.71E-06    |
| ENSMMUG00000034931 | U6 spliceosomal RNA [Source:RFAM;Acc:RF00026]                                          | -           |             |             |
| ENSMMUG00000022120 | transmembrane protein 94 [Source:VGNC Symbol;Acc:VGNC:79760]                           | 0.940665727 | 0.012465829 | 0.032714253 |
| ENSMMUG00000022121 | CASK interacting protein 2 [Source:VGNC Symbol;Acc:VGNC:70577]                         | -           |             |             |
| ENSMMUG00000022123 | tRNA splicing endonuclease subunit 54 [Source:VGNC Symbol;Acc:VGNC:79666]              | 1.667528409 | 3.86E-12    | 5.86E-11    |
| ENSMMUG0000001228  | LLGL scribble cell polarity complex component 2 [Source:NCBI gene;Acc:706973]          | 2.694021111 | 0.004374809 | 0.013230079 |
| ENSMMUG00000064684 |                                                                                        | -           |             |             |
| ENSMMUG00000021636 | SAP30 binding protein [Source:VGNC Symbol;Acc:VGNC:77142]                              | 1.331321145 | 3.11E-17    | 8.25E-16    |
| ENSMMUG00000013646 | unk zinc finger [Source:VGNC Symbol;Acc:VGNC:79803]                                    | -           |             |             |
| ENSMMUG0000002822  | unc-13 homolog D [Source:VGNC Symbol;Acc:VGNC:79375]                                   | 1.664521172 | 1.08E-07    | 8.71E-07    |
| ENSMMUG00000009381 | WW domain binding protein 2 [Source:VGNC Symbol;Acc:VGNC:78786]                        | 1.380372607 | 2.09E-10    | 2.53E-09    |
| ENSMMUG00000009377 | tripartite motif containing 47 [Source:VGNC Symbol;Acc:VGNC:79171]                     | -0.71847342 | 3.25E-06    | 2.00E-05    |
| ENSMMUG00000016774 | tripartite motif containing 65 [Source:NCBI gene;Acc:708355]                           | 0.548326976 | 0.006385879 | 0.018356771 |
| ENSMMUG0000008885  | exocyst complex component 7 [Source:VGNC Symbol;Acc:VGNC:72319]                        | -           |             |             |
| ENSMMUG00000054437 | forkhead box J1 [Source:VGNC Symbol;Acc:VGNC:72701]                                    | 1.296814993 | 0.002643482 | 0.008490978 |
| ENSMMUG0000003533  | ring finger protein 157 [Source:VGNC Symbol;Acc:VGNC:76860]                            | 1.429618257 | 3.45E-10    | 4.04E-09    |
| ENSMMUG00000055131 | UBA like domain containing 2 [Source:NCBI gene;Acc:709614]                             | 1.911238396 | 1.76E-21    | 7.36E-20    |
| ENSMMUG0000003539  | glutamine rich 2 [Source:VGNC Symbol;Acc:VGNC:76534]                                   | 1.734200004 | 1.16E-19    | 3.87E-18    |
| ENSMMUG00000018967 | ubiquitin conjugating enzyme E2 O [Source:VGNC Symbol;Acc:VGNC:79813]                  | 1.734200004 | 1.16E-19    | 3.87E-18    |
| ENSMMUG00000046918 | Metazoan signal recognition particle RNA [Source:RFAM;Acc:RF00017]                     | 2.271014031 | 5.17E-17    | 1.34E-15    |
| ENSMMUG00000054111 |                                                                                        | 2.055859668 | 0.002246968 | 0.007347258 |
| ENSMMUG00000055379 |                                                                                        | 0.48963184  | 2.96E-06    | 1.83E-05    |
| ENSMMUG00000053937 |                                                                                        | 0.523568312 | 3.88E-05    | 0.000192583 |
| ENSMMUG00000011932 | transmembrane channel like 6 [Source:VGNC Symbol;Acc:VGNC:79109]                       | 0.367257031 | 0.018885608 | 0.046523848 |
| ENSMMUG00000011935 | transmembrane channel like 8 [Source:VGNC Symbol;Acc:VGNC:79253]                       | 0.972677597 | 1.21E-08    | 1.12E-07    |
|                    |                                                                                        | -           |             |             |
|                    |                                                                                        | 1.851383422 | 0.010500056 | 0.028199173 |
|                    |                                                                                        | 1.981625818 | 5.25E-08    | 4.41E-07    |
|                    |                                                                                        | 1.367324256 | 4.15E-22    | 1.86E-20    |
|                    |                                                                                        | 2.637138218 | 7.22E-08    | 5.94E-07    |
|                    |                                                                                        | 2.166288993 | 0.000103245 | 0.000470391 |
|                    |                                                                                        | 1.063596361 | 6.16E-08    | 5.12E-07    |
|                    |                                                                                        | 1.241133566 | 4.73E-10    | 5.45E-09    |
|                    |                                                                                        | -           |             |             |
|                    |                                                                                        | 0.865071288 | 0.018376086 | 0.04544986  |
|                    |                                                                                        | -           |             |             |
|                    |                                                                                        | 0.998778346 | 0.000621578 | 0.002358149 |



|                    |                                                                                             |   |             |             |             |
|--------------------|---------------------------------------------------------------------------------------------|---|-------------|-------------|-------------|
| ENSMMUG00000021864 | synaptogyrin 2 [Source:NCBI gene;Acc:709310]                                                | - | 3.293540128 | 0.006373661 | 0.018332311 |
| ENSMMUG00000013767 | baculoviral IAP repeat containing 5 [Source:NCBI gene;Acc:709565]                           | - | 1.058501281 | 0.012433541 | 0.032646501 |
| ENSMMUG00000049183 | transmembrane protein 235 [Source:NCBI gene;Acc:715249]                                     | - | 1.020876206 | 0.01545682  | 0.039190399 |
| ENSMMUG00000059852 |                                                                                             | - | 1.625454765 | 0.008161932 | 0.022722254 |
| ENSMMUG00000008237 | phosphatidylglycerophosphate synthase 1 [Source:VGNC Symbol;Acc:VGNC:75890]                 | - | 0.819572501 | 0.001769997 | 0.005976562 |
| ENSMMUG00000008239 | dynein axonemal heavy chain 17 [Source:NCBI gene;Acc:715774]                                | - | -0.55368298 | 0.009482822 | 0.025860656 |
| ENSMMUG00000049898 |                                                                                             | - | 0.749919658 | 0.010031641 | 0.027113038 |
| ENSMMUG00000051537 |                                                                                             | - | 3.169660561 | 1.17E-09    | 1.27E-08    |
| ENSMMUG00000013313 | cytohesin 1 [Source:VGNC Symbol;Acc:VGNC:71828]                                             | - | 0.568990031 | 0.00418845  | 0.012739252 |
| ENSMMUG00000005355 | TIMP metalloproteinase inhibitor 2 [Source:NCBI gene;Acc:574357]                            | - | 1.77743166  | 0.010670408 | 0.028573881 |
| ENSMMUG00000023027 | endo-beta-N-acetylglucosaminidase [Source:VGNC Symbol;Acc:VGNC:72099]                       | - | 0.676094141 | 0.001281413 | 0.004493581 |
| ENSMMUG00000023028 | RNA binding fox-1 homolog 3 [Source:VGNC Symbol;Acc:VGNC:76550]                             | - | 0.423730547 | 0.011515839 | 0.030572841 |
| ENSMMUG00000061312 |                                                                                             | - | 2.568707799 | 0.015648178 | 0.039648468 |
| ENSMMUG00000058715 |                                                                                             | - | 1.899288416 | 0.000270174 | 0.001116688 |
| ENSMMUG00000016414 | ectonucleotide pyrophosphatase/phosphodiesterase 7 [Source:VGNC Symbol;Acc:VGNC:72090]      | - | 1.810690467 | 0.000260938 | 0.001083952 |
| ENSMMUG00000046417 | chromobox 2 [Source:NCBI gene;Acc:717462]                                                   | - | 3.367920954 | 3.77E-20    | 1.34E-18    |
| ENSMMUG00000016417 | chromobox 8 [Source:NCBI gene;Acc:717514]                                                   | - | 2.109759202 | 7.82E-20    | 2.68E-18    |
| ENSMMUG00000016418 | chromobox 4 [Source:VGNC Symbol;Acc:VGNC:70558]                                             | - | 0.685716182 | 3.21E-05    | 0.000162772 |
| ENSMMUG00000020840 | TBC1 domain family member 16 [Source:VGNC Symbol;Acc:VGNC:78228]                            | - | 0.684535727 | 4.79E-10    | 5.52E-09    |
| ENSMMUG00000064603 | caspase recruitment domain family member 14 [Source:NCBI gene;Acc:712205]                   | - | 0.420338258 | 0.001562143 | 0.005341802 |
| ENSMMUG00000005455 | ring finger protein 213 [Source:VGNC Symbol;Acc:VGNC:76734]                                 | - | 0.974831603 | 2.85E-07    | 2.12E-06    |
| ENSMMUG00000056437 | Metazoan signal recognition particle RNA [Source:RFAM;Acc:RF00017]                          | - | 2.509707902 | 2.31E-07    | 1.75E-06    |
| ENSMMUG00000064563 |                                                                                             | - | 1.173506965 | 3.29E-06    | 2.02E-05    |
| ENSMMUG00000000589 | N-methylpurine DNA glycosylase [Source:VGNC Symbol;Acc:VGNC:74915]                          | - | 1.256538003 | 0.019981685 | 0.048818517 |
| ENSMMUG00000000590 | NPR3 like, GATOR1 complex subunit [Source:VGNC Symbol;Acc:VGNC:75173]                       | - | 1.179752115 | 0.002908668 | 0.009254568 |
| ENSMMUG00000029310 | hemoglobin, alpha 2 [Source:NCBI gene;Acc:693930]                                           | - | 0.644869227 | 0.000107594 | 0.000487806 |
| ENSMMUG00000019566 | hemoglobin subunit alpha 1 [Source:NCBI gene;Acc:701930]                                    | - | 0.937117655 | 3.53E-06    | 2.15E-05    |
| ENSMMUG00000000610 | post-glycosylphosphatidylinositol attachment to proteins 6 [Source:NCBI gene;Acc:722297]    | - | 0.933864526 | 0.001284735 | 0.004504166 |
| ENSMMUG00000029296 | phosphatidylinositol glycan anchor biosynthesis class Q [Source:VGNC Symbol;Acc:VGNC:75798] | - | 0.971036671 | 2.97E-06    | 1.84E-05    |
| ENSMMUG00000038629 | RAB40C, member RAS oncogene family [Source:NCBI gene;Acc:722336]                            | - | 0.421187227 | 0.008968761 | 0.024644567 |
| ENSMMUG00000001986 | WD repeat domain 24 [Source:VGNC Symbol;Acc:VGNC:79289]                                     | - | 0.963862557 | 0.000196902 | 0.000840788 |
| ENSMMUG00000050065 |                                                                                             | - | 1.097663038 | 0.000401328 | 0.001597771 |
| ENSMMUG00000016906 | F-box and leucine rich repeat protein 16 [Source:VGNC Symbol;Acc:VGNC:81405]                | - | 1.226805657 | 8.91E-10    | 9.83E-09    |
| ENSMMUG00000014213 | calcium voltage-gated channel subunit alpha1 H [Source:VGNC Symbol;Acc:VGNC:70505]          | - | -1.90577056 | 0.006928917 | 0.0197039   |
| ENSMMUG00000050892 | mastin-like [Source:NCBI gene;Acc:722432]                                                   | - | -0.34728739 | 0.008773828 | 0.0241986   |
| ENSMMUG00000063740 |                                                                                             | - | 0.419753164 | 0.003161521 | 0.009945981 |

|                    |                                                                                              |             |             |             |
|--------------------|----------------------------------------------------------------------------------------------|-------------|-------------|-------------|
| ENSMMUG00000051011 | Metazoan signal recognition particle RNA [Source:RFAM;Acc:RF00017]                           | 2.718192505 | 0.016528505 | 0.041552421 |
| ENSMMUG00000044277 | ubiquitin conjugating enzyme E2 I [Source:NCBI gene;Acc:722434]                              | 0.714865084 | 0.000802744 | 0.002953285 |
| ENSMMUG00000021415 | BAI1 associated protein 3 [Source:VGNC Symbol;Acc:VGNC:70223]                                | 0.943617276 | 0.001015126 | 0.003648347 |
| ENSMMUG00000012439 | N-acetylglucosamine-1-phosphate transferase subunit gamma [Source:NCBI gene;Acc:722441]      | 0.769182204 | 0.003678315 | 0.011340835 |
| ENSMMUG00000008119 | telomere maintenance 2 [Source:NCBI gene;Acc:701679]                                         | 1.841831056 | 3.27E-12    | 5.06E-11    |
| ENSMMUG00000000044 | intraflagellar transport 140 [Source:VGNC Symbol;Acc:VGNC:73456]                             | 0.712672473 | 0.000378802 | 0.00151787  |
| ENSMMUG00000062198 | transmembrane protein 204 [Source:NCBI gene;Acc:701926]                                      | 1.466847973 | 0.000456346 | 0.001790846 |
| ENSMMUG00000000978 | cramped chromatin regulator homolog 1 [Source:NCBI gene;Acc:722473]                          | 0.833052417 | 5.81E-10    | 6.60E-09    |
| ENSMMUG00000017496 | mitogen-activated protein kinase 8 interacting protein 3 [Source:VGNC Symbol;Acc:VGNC:74651] | 0.377161997 | 0.001247049 | 0.004385521 |
| ENSMMUG00000007936 | methionine sulfoxide reductase B1 [Source:NCBI gene;Acc:693358]                              | 0.514821037 | 0.010266511 | 0.027687281 |
| ENSMMUG00000007937 | ribosomal protein L3 like [Source:VGNC Symbol;Acc:VGNC:76923]                                | 2.291318455 | 0.000594744 | 0.002265036 |
| ENSMMUG00000029265 | zinc finger protein 598 [Source:NCBI gene;Acc:694129]                                        | -0.72923872 | 1.35E-05    | 7.41E-05    |
| ENSMMUG00000002808 | TSC complex subunit 2 [Source:VGNC Symbol;Acc:VGNC:78659]                                    | 0.489557543 | 0.00917897  | 0.025147631 |
| ENSMMUG00000029263 | polycystin 1, transient receptor potential channel interacting [Source:NCBI gene;Acc:694905] | 1.193865622 | 7.49E-12    | 1.09E-10    |
| ENSMMUG00000019223 | TNF receptor associated factor 7 [Source:VGNC Symbol;Acc:VGNC:79252]                         | 0.893073224 | 5.57E-05    | 0.000267994 |
| ENSMMUG00000055128 | phosphoglycolate phosphatase [Source:NCBI gene;Acc:695591]                                   | 0.710454877 | 0.001264515 | 0.004438523 |
| ENSMMUG00000019237 | enoyl-CoA delta isomerase 1 [Source:VGNC Symbol;Acc:VGNC:81391]                              | 0.400695456 | 0.014972671 | 0.0382111   |
| ENSMMUG00000019238 | RNA binding protein with serine rich domain 1 [Source:NCBI gene;Acc:695816]                  | 0.444867962 | 1.60E-06    | 1.04E-05    |
| ENSMMUG00000000001 | cyclin F [Source:VGNC Symbol;Acc:VGNC:70729]                                                 | 0.632086424 | 0.004258509 | 0.012930732 |
| ENSMMUG00000019095 | TBC1 domain family member 24 [Source:NCBI gene;Acc:697106]                                   | 1.148609052 | 2.39E-08    | 2.12E-07    |
| ENSMMUG00000011459 | 3-phosphoinositide dependent protein kinase 1 [Source:NCBI gene;Acc:697523]                  | 0.751093154 | 1.25E-14    | 2.57E-13    |
| ENSMMUG00000061321 | host cell factor C1 regulator 1 [Source:NCBI gene;Acc:700351]                                | 0.709800056 | 0.012570983 | 0.032937753 |
| ENSMMUG00000007666 | THO complex 6 [Source:VGNC Symbol;Acc:VGNC:79703]                                            | 0.714562082 | 0.010486778 | 0.028168614 |
| ENSMMUG00000007667 | BICD family like cargo adaptor 2 [Source:NCBI gene;Acc:700092]                               | 1.053496006 | 0.000705356 | 0.002634869 |
| ENSMMUG00000009487 | zinc finger protein 205 [Source:VGNC Symbol;Acc:VGNC:78869]                                  | 1.011563521 | 1.04E-14    | 2.18E-13    |
| ENSMMUG00000064194 |                                                                                              | 0.90950743  | 0.000513495 | 0.001992483 |
| ENSMMUG00000020970 | zinc finger protein 213 [Source:VGNC Symbol;Acc:VGNC:78872]                                  | 0.872812988 | 1.00E-12    | 1.65E-11    |
| ENSMMUG00000051323 | caspase-14-like [Source:NCBI gene;Acc:702430]                                                | 1.175783459 | 1.18E-09    | 1.28E-08    |
| ENSMMUG00000064961 |                                                                                              | 1.187608393 | 0.000196828 | 0.000840713 |
| ENSMMUG00000017972 | zinc finger protein 200 [Source:VGNC Symbol;Acc:VGNC:78867]                                  | 1.076400374 | 3.12E-09    | 3.17E-08    |
| ENSMMUG00000007569 | clusterin associated protein 1 [Source:VGNC Symbol;Acc:VGNC:71211]                           | 0.602080502 | 0.001835064 | 0.006173775 |
| ENSMMUG00000021866 | deoxyribonuclease 1 [Source:VGNC Symbol;Acc:VGNC:71946]                                      | 0.396054619 | 0.000814975 | 0.002994567 |
| ENSMMUG00000021868 | TNF receptor associated protein 1 [Source:VGNC Symbol;Acc:VGNC:79019]                        | 0.908984258 | 1.02E-10    | 1.29E-09    |
| ENSMMUG00000039943 | adenylate cyclase 9 [Source:NCBI gene;Acc:706789]                                            | 1.73130628  | 3.65E-05    | 0.000182693 |
| ENSMMUG00000061940 |                                                                                              | 3.355963155 | 0.001271421 | 0.004461708 |
| ENSMMUG00000051196 |                                                                                              | 2.209201769 | 0.000134822 | 0.000597017 |

|                    |                                                                                                        |             |             |             |
|--------------------|--------------------------------------------------------------------------------------------------------|-------------|-------------|-------------|
| ENSMMUG00000040803 | sarcalumenin [Source:NCBI gene;Acc:704655]                                                             | -1.99591674 | 4.96E-07    | 3.55E-06    |
| ENSMMUG00000044729 | transcription factor AP-4 [Source:NCBI gene;Acc:707513]                                                | 1.719528807 | 8.16E-06    | 4.65E-05    |
| ENSMMUG00000044344 | vasorin [Source:NCBI gene;Acc:100426861]                                                               | 0.984185526 | 2.71E-06    | 1.70E-05    |
| ENSMMUG00000008134 | DnaJ heat shock protein family (Hsp40) member A3 [Source:NCBI gene;Acc:708783]                         | 0.684070192 | 7.26E-07    | 5.05E-06    |
| ENSMMUG00000020540 | NmrA like redox sensor 1 [Source:VGNC Symbol;Acc:VGNC:75252]                                           | 1.845073296 | 1.76E-12    | 2.82E-11    |
| ENSMMUG00000001888 | mahogunin ring finger 1 [Source:VGNC Symbol;Acc:VGNC:74542]                                            | 1.224849059 | 5.17E-05    | 0.000250373 |
| ENSMMUG00000011001 | ankyrin repeat and sterile alpha motif domain containing 3 [Source:VGNC Symbol;Acc:VGNC:69735]         | 0.54933999  | 0.001388897 | 0.004820348 |
| ENSMMUG00000014311 | chromosome 20 C16orf71 homolog [Source:NCBI gene;Acc:709711]                                           | 0.454782095 | 0.003288603 | 0.010291197 |
| ENSMMUG00000049336 |                                                                                                        | 0.523894465 | 0.016273838 | 0.041030435 |
| ENSMMUG00000014313 | zinc finger protein 500 [Source:VGNC Symbol;Acc:VGNC:79406]                                            | 0.655715146 | 1.44E-05    | 7.87E-05    |
| ENSMMUG00000017945 | septin 12 [Source:VGNC Symbol;Acc:VGNC:82235]                                                          | 0.81211717  | 1.81E-07    | 1.40E-06    |
| ENSMMUG00000049327 |                                                                                                        | 1.188890969 | 0.000105193 | 0.000477944 |
| ENSMMUG00000017946 | rogdi atypical leucine zipper [Source:VGNC Symbol;Acc:VGNC:76862]                                      | 0.952005353 | 5.22E-12    | 7.82E-11    |
| ENSMMUG00000009567 | glyoxylate reductase 1 homolog [Source:NCBI gene;Acc:706933]                                           | 3.300545234 | 7.27E-42    | 2.45E-39    |
| ENSMMUG00000017822 | periplakin [Source:VGNC Symbol;Acc:VGNC:76240]                                                         | 2.605848317 | 1.48E-08    | 1.35E-07    |
| ENSMMUG00000018047 | SEC14 like lipid binding 5 [Source:VGNC Symbol;Acc:VGNC:77327]                                         | 0.552015652 | 0.007383879 | 0.020786432 |
| ENSMMUG00000011499 | N-acetylglucosamine-1-phosphodiester alpha-N-acetylglucosaminidase [Source:VGNC Symbol;Acc:VGNC:74978] | 1.473249013 | 6.43E-05    | 0.000305308 |
| ENSMMUG00000046237 | 4-aminobutyrate aminotransferase [Source:NCBI gene;Acc:714017]                                         | 1.154070964 | 1.27E-10    | 1.58E-09    |
| ENSMMUG00000022714 | phosphomannomutase 2 [Source:VGNC Symbol;Acc:VGNC:76193]                                               | 0.651829671 | 0.000211038 | 0.000895735 |
| ENSMMUG00000047388 | ubiquitin specific peptidase 7 [Source:NCBI gene;Acc:714625]                                           | 0.271706468 | 0.001312446 | 0.004590466 |
| ENSMMUG00000001944 | chromosome 20 C16orf72 homolog [Source:VGNC Symbol;Acc:VGNC:70443]                                     | 1.519241746 | 1.45E-17    | 4.01E-16    |
| ENSMMUG00000010142 | glutamate ionotropic receptor NMDA type subunit 2A [Source:VGNC Symbol;Acc:VGNC:73282]                 | 3.462801904 | 0.001522383 | 0.005223724 |
| ENSMMUG00000005913 | activating transcription factor 7 interacting protein 2 [Source:VGNC Symbol;Acc:VGNC:70103]            | 1.169676114 | 0.000881882 | 0.003206255 |
| ENSMMUG00000060993 | Metazoan signal recognition particle RNA [Source:RFAM;Acc:RF00017]                                     | 1.915177356 | 0.009052091 | 0.024845921 |
| ENSMMUG00000056165 |                                                                                                        | 1.914247053 | 7.65E-06    | 4.39E-05    |
| ENSMMUG00000060713 | epithelial membrane protein 2 [Source:NCBI gene;Acc:710315]                                            | 2.961775867 | 2.47E-12    | 3.88E-11    |
| ENSMMUG00000006515 | C-type lectin domain containing 16A [Source:VGNC Symbol;Acc:VGNC:71369]                                | 0.815913744 | 0.000131168 | 0.0005831   |
| ENSMMUG00000000566 |                                                                                                        | 1.684500765 | 0.00145531  | 0.005022633 |
| ENSMMUG00000008784 | lipopolysaccharide induced TNF factor [Source:NCBI gene;Acc:711743]                                    | 4.234737573 | 6.26E-06    | 3.65E-05    |
| ENSMMUG00000056339 |                                                                                                        | 2.726855872 | 0.000481138 | 0.001878691 |
| ENSMMUG00000062037 | stannin [Source:NCBI gene;Acc:711909]                                                                  | 2.741703914 | 1.37E-17    | 3.78E-16    |
| ENSMMUG00000014240 | thioredoxin domain containing 11 [Source:VGNC Symbol;Acc:VGNC:79678]                                   | 3.334099831 | 7.35E-16    | 1.69E-14    |
| ENSMMUG00000011242 | zinc finger CCCH-type containing 7A [Source:VGNC Symbol;Acc:VGNC:79905]                                | 0.42056533  | 0.011207952 | 0.0298731   |
| ENSMMUG00000019632 | ribosomal L1 domain containing 1 [Source:VGNC Symbol;Acc:VGNC:77096]                                   | 0.739420756 | 3.13E-10    | 3.68E-09    |
| ENSMMUG00000057345 | calcineurin like phosphoesterase domain containing 1 [Source:NCBI gene;Acc:716978]                     | 1.73767332  | 1.52E-18    | 4.60E-17    |
| ENSMMUG00000025991 |                                                                                                        | 2.392881409 | 0.012437097 | 0.032646501 |
| ENSMMUG00000017379 | myocardin related transcription factor B [Source:VGNC Symbol;Acc:VGNC:74865]                           | 1.296503956 | 1.46E-08    | 1.34E-07    |
| ENSMMUG00000062213 | Metazoan signal recognition particle RNA [Source:RFAM;Acc:RF00017]                                     | 0.760237345 | 0.015003164 | 0.038262583 |

|                    |                                                                                                         |   |             |             |             |
|--------------------|---------------------------------------------------------------------------------------------------------|---|-------------|-------------|-------------|
| ENSMMUG00000057747 |                                                                                                         | - | 1.742048564 | 0.000380634 | 0.001523976 |
| ENSMMUG00000064131 |                                                                                                         | - | -2.10840814 | 7.12E-12    | 1.04E-10    |
| ENSMMUG00000027108 | mml-mir-193b [Source:miRBase;Acc:MI0007656]                                                             | - | 3.366705092 | 5.76E-07    | 4.08E-06    |
| ENSMMUG00000052203 |                                                                                                         | - | -2.04614549 | 0.01540743  | 0.039098594 |
| ENSMMUG00000054410 | group 10 secretory phospholipase A2 [Source:NCBI gene;Acc:717517]                                       | - | 0.943048683 | 0.004172082 | 0.012702109 |
| ENSMMUG00000064246 |                                                                                                         | - | 0.80748612  | 0.0037504   | 0.011541489 |
| ENSMMUG00000062791 |                                                                                                         | - | 2.150891895 | 1.51E-07    | 1.18E-06    |
| ENSMMUG00000062623 | Metazoan signal recognition particle RNA [Source:RFAM;Acc:RF00017]                                      | - | 1.137037978 | 2.71E-06    | 1.70E-05    |
| ENSMMUG00000058016 | bMERB domain containing 1 [Source:NCBI gene;Acc:713757]                                                 | - | 1.503470287 | 4.60E-11    | 6.10E-10    |
| ENSMMUG00000010367 | myosin heavy chain 11 [Source:VGNC Symbol;Acc:VGNC:75097]                                               | - | 0.808538993 | 1.44E-08    | 1.31E-07    |
| ENSMMUG00000060748 | U6 spliceosomal RNA [Source:RFAM;Acc:RF00026]                                                           | - | 1.480802049 | 0.017561303 | 0.043719007 |
| ENSMMUG00000017131 | xylosyltransferase 1 [Source:VGNC Symbol;Acc:VGNC:78977]                                                | - | 0.650655516 | 0.018527189 | 0.045747289 |
| ENSMMUG00000013329 | transmembrane channel like 5 [Source:VGNC Symbol;Acc:VGNC:79366]                                        | - | 1.116533726 | 0.006805075 | 0.019392632 |
| ENSMMUG00000002709 | G protein-coupled receptor class C group 5 member B [Source:VGNC Symbol;Acc:VGNC:72934]                 | - | 0.908974695 | 3.43E-08    | 2.95E-07    |
| ENSMMUG00000055853 | G protein-coupled receptor 139 [Source:NCBI gene;Acc:695541]                                            | - | 0.992928123 | 0.015994849 | 0.040395709 |
| ENSMMUG00000016753 | dynein axonemal heavy chain 3 [Source:VGNC Symbol;Acc:VGNC:71941]                                       | - | 0.868510276 | 0.00503797  | 0.014945609 |
| ENSMMUG00000016758 | transmembrane protein 159 [Source:VGNC Symbol;Acc:VGNC:79836]                                           | - | 0.900785639 | 8.44E-07    | 5.80E-06    |
| ENSMMUG00000016759 | zona pellucida glycoprotein 2 [Source:VGNC Symbol;Acc:VGNC:78914]                                       | - | 0.57431529  | 0.009636503 | 0.026202666 |
| ENSMMUG00000062042 | ankyrin repeat and sterile alpha motif domain containing 4B [Source:NCBI gene;Acc:697713]               | - | 1.131611511 | 0.002214474 | 0.007254395 |
| ENSMMUG00000064659 |                                                                                                         | - | 0.707898608 | 0.00071777  | 0.002671821 |
| ENSMMUG00000017725 | eukaryotic elongation factor 2 kinase [Source:VGNC Symbol;Acc:VGNC:72098]                               | - | -0.69213822 | 4.07E-07    | 2.94E-06    |
| ENSMMUG00000002257 | RNA polymerase III subunit E [Source:VGNC Symbol;Acc:VGNC:76142]                                        | - | 0.564119677 | 3.83E-05    | 0.000190352 |
| ENSMMUG00000022035 | cerebellar degeneration related protein 2 [Source:VGNC Symbol;Acc:VGNC:70993]                           | - | 1.044134715 | 0.000266124 | 0.001103023 |
| ENSMMUG00000058042 | heparan sulfate-glucosamine 3-sulfotransferase 2 [Source:NCBI gene;Acc:699722]                          | - | 1.762022935 | 9.83E-21    | 3.78E-19    |
| ENSMMUG00000014271 | protein kinase C beta [Source:VGNC Symbol;Acc:VGNC:76410]                                               | - | 0.571858519 | 2.75E-05    | 0.000141764 |
| ENSMMUG00000054064 |                                                                                                         | - | 1.396649659 | 1.21E-08    | 1.12E-07    |
| ENSMMUG00000013560 | calcium voltage-gated channel auxiliary subunit gamma 3 [Source:VGNC Symbol;Acc:VGNC:70513]             | - | 0.975398866 | 1.82E-11    | 2.52E-10    |
| ENSMMUG00000023891 |                                                                                                         | - | 2.746713233 | 0.004921717 | 0.014656439 |
| ENSMMUG00000057850 |                                                                                                         | - | 1.192798905 | 2.07E-05    | 0.000109541 |
| ENSMMUG00000057160 |                                                                                                         | - | 1.424972499 | 9.89E-06    | 5.55E-05    |
| ENSMMUG00000015908 | RB binding protein 6, ubiquitin ligase [Source:VGNC Symbol;Acc:VGNC:76677]                              | - | 1.180420652 | 7.24E-10    | 8.14E-09    |
| ENSMMUG00000001407 | solute carrier family 5 member 11 [Source:VGNC Symbol;Acc:VGNC:77759]                                   | - | 0.740898529 | 3.29E-12    | 5.08E-11    |
| ENSMMUG00000029176 | Rho GTPase activating protein 17 [Source:NCBI gene;Acc:701988]                                          | - | 0.540663038 | 3.83E-05    | 0.000190243 |
| ENSMMUG00000005942 | leucine carboxyl methyltransferase 1 [Source:VGNC Symbol;Acc:VGNC:74067]                                | - | 0.688177473 | 1.32E-08    | 1.22E-07    |
| ENSMMUG00000015570 | KIAA0556 [Source:VGNC Symbol;Acc:VGNC:73927]                                                            | - | 0.535420594 | 0.006317318 | 0.018187891 |
| ENSMMUG00000015572 | GSG1 like [Source:VGNC Symbol;Acc:VGNC:82152]                                                           | - | 1.402339708 | 7.63E-12    | 1.11E-10    |
| ENSMMUG00000018623 | exportin 6 [Source:NCBI gene;Acc:704332]                                                                | - | 0.906947941 | 0.005405036 | 0.015869469 |
| ENSMMUG00000051475 |                                                                                                         | - | 0.695176016 | 0.015385905 | 0.039050655 |
| ENSMMUG00000023526 | ATPase sarcoplasmic/endoplasmic reticulum Ca <sup>2+</sup> transporting 1 [Source:NCBI gene;Acc:708058] | - | 1.951849553 | 0.006301848 | 0.018146876 |

|                    |                                                                                                      |             |             |             |
|--------------------|------------------------------------------------------------------------------------------------------|-------------|-------------|-------------|
| ENSMMUG0000003303  | Tu translation elongation factor, mitochondrial [Source:VGNC Symbol;Acc:VGNC:78674]                  | 2.134218182 | 2.07E-35    | 3.57E-33    |
| ENSMMUG0000003298  | ataxin 2 like [Source:VGNC Symbol;Acc:VGNC:70159]                                                    | 2.008927612 | 4.71E-33    | 6.41E-31    |
| ENSMMUG00000011798 | eukaryotic translation initiation factor 3 subunit C [Source:NCBI gene;Acc:705696]                   | 2.128817046 | 2.95E-32    | 3.53E-30    |
| ENSMMUG00000000700 | CLN3 lysosomal/endosomal transmembrane protein, battenin [Source:NCBI gene;Acc:705815]               | 1.91125158  | 3.63E-21    | 1.47E-19    |
| ENSMMUG00000011370 | SAGA complex associated factor 29 [Source:NCBI gene;Acc:709124]                                      | 2.767516921 | 0.011770426 | 0.03117061  |
| ENSMMUG00000022330 | sulfotransferase family, cytosolic, 1A, phenol-preferring, member 3 [Source:NCBI gene;Acc:100428398] | 2.482624085 | 0.000270119 | 0.001116688 |
| ENSMMUG00000017758 | mitogen-activated protein kinase 3 [Source:VGNC Symbol;Acc:VGNC:74646]                               | 1.854535231 | 1.02E-22    | 4.89E-21    |
| ENSMMUG00000029164 | glycerophosphodiester phosphodiesterase domain containing 3 [Source:VGNC Symbol;Acc:VGNC:72800]      | 2.826094455 | 8.55E-11    | 1.09E-09    |
| ENSMMUG00000000981 | T-box transcription factor 6 [Source:VGNC Symbol;Acc:VGNC:78276]                                     | 1.704603205 | 1.83E-08    | 1.65E-07    |
| ENSMMUG00000000982 | protein phosphatase 4 catalytic subunit [Source:VGNC Symbol;Acc:VGNC:76384]                          | 1.722741966 | 4.16E-08    | 3.52E-07    |
| ENSMMUG00000000983 | aldolase, fructose-bisphosphate A [Source:NCBI gene;Acc:708406]                                      | 1.258723464 | 4.38E-07    | 3.15E-06    |
| ENSMMUG00000020277 | double C2 domain alpha [Source:VGNC Symbol;Acc:VGNC:71963]                                           | 0.642700357 | 3.93E-07    | 2.85E-06    |
| ENSMMUG00000020274 | TAO kinase 2 [Source:VGNC Symbol;Acc:VGNC:81592]                                                     | 0.456377047 | 0.000327191 | 0.001328652 |
| ENSMMUG00000018992 | aspartate beta-hydroxylase domain containing 1 [Source:VGNC Symbol;Acc:VGNC:70138]                   | 1.471029625 | 0.008110736 | 0.022609438 |
| ENSMMUG00000018986 | seizure related 6 homolog like 2 [Source:VGNC Symbol;Acc:VGNC:81567]                                 | 1.544165894 | 3.83E-09    | 3.84E-08    |
| ENSMMUG00000061749 | PAXIP1 associated glutamate rich protein 1 [Source:NCBI gene;Acc:706839]                             | 0.895874464 | 2.91E-10    | 3.45E-09    |
| ENSMMUG00000019826 | MYC associated zinc finger protein [Source:NCBI gene;Acc:708982]                                     | 0.82232412  | 4.53E-06    | 2.72E-05    |
| ENSMMUG00000009684 | kinesin family member 22 [Source:VGNC Symbol;Acc:VGNC:74033]                                         | 1.820243022 | 1.93E-12    | 3.08E-11    |
| ENSMMUG00000021210 | chromosome 20 C16orf54 homolog [Source:VGNC Symbol;Acc:VGNC:70402]                                   | -1.2277325  | 0.017303283 | 0.043156354 |
| ENSMMUG00000016143 | sialophorin [Source:VGNC Symbol;Acc:VGNC:77861]                                                      | 2.18374603  | 1.17E-26    | 8.49E-25    |
| ENSMMUG00000021844 | CD2 cytoplasmic tail binding protein 2 [Source:NCBI gene;Acc:709961]                                 | 0.486575922 | 0.000715372 | 0.002664899 |
| ENSMMUG00000016879 | zinc finger protein 768 [Source:VGNC Symbol;Acc:VGNC:82280]                                          | 1.996885705 | 0.016961812 | 0.04248331  |
| ENSMMUG00000001121 | zinc finger protein 689 [Source:VGNC Symbol;Acc:VGNC:79480]                                          | 1.762136771 | 8.11E-10    | 9.01E-09    |
| ENSMMUG00000051226 | FAD-linked sulfhydryl oxidase ERV1 [Source:NCBI gene;Acc:106994988]                                  | 1.287447693 | 7.19E-17    | 1.83E-15    |
| ENSMMUG00000010556 | Snf2 related CREBBP activator protein [Source:NCBI gene;Acc:712944]                                  | 0.885959565 | 4.35E-12    | 6.56E-11    |
| ENSMMUG00000047302 | cardiotrophin 1 [Source:NCBI gene;Acc:713850]                                                        | 0.944094359 | 0.007135955 | 0.020191988 |
| ENSMMUG00000003230 | F-box and leucine rich repeat protein 19 [Source:VGNC Symbol;Acc:VGNC:81406]                         | -0.58326879 | 0.00176974  | 0.005976562 |
| ENSMMUG00000003233 | SET domain containing 1A, histone lysine methyltransferase [Source:NCBI gene;Acc:712416]             | 0.799955446 | 5.99E-06    | 3.51E-05    |
| ENSMMUG00000048207 | syntaxin 4 [Source:NCBI gene;Acc:704880]                                                             | 1.123754364 | 4.72E-12    | 7.09E-11    |
| ENSMMUG00000002033 | serine protease 36 [Source:VGNC Symbol;Acc:VGNC:76325]                                               | 1.138769568 | 4.00E-13    | 6.93E-12    |
| ENSMMUG00000016276 | tripartite motif containing 72 [Source:VGNC Symbol;Acc:VGNC:79927]                                   | 0.982965957 | 0.000145992 | 0.000640553 |
| ENSMMUG00000014349 | integrin subunit alpha X [Source:NCBI gene;Acc:100427850]                                            | 2.607144045 | 3.04E-17    | 8.07E-16    |
| ENSMMUG00000000901 | alpha hemoglobin stabilizing protein [Source:VGNC Symbol;Acc:VGNC:69631]                             | 0.693867607 | 0.000416558 | 0.001652194 |
| ENSMMUG00000058907 |                                                                                                      | 2.448512963 | 7.67E-10    | 8.58E-09    |
| ENSMMUG00000055973 | phosphoglycerate mutase 1-like [Source:NCBI gene;Acc:714548]                                         | 2.952457262 | 1.21E-07    | 9.65E-07    |
| ENSMMUG00000008253 | zinc finger protein 267 [Source:NCBI gene;Acc:641441]                                                | 0.872917052 | 6.26E-05    | 0.000298216 |
| ENSMMUG00000048906 | zinc finger protein 91-like [Source:NCBI gene;Acc:716072]                                            | 0.814125196 | 0.018941153 | 0.046629699 |
| ENSMMUG00000003288 | glutamic--pyruvic transaminase 2 [Source:VGNC Symbol;Acc:VGNC:72962]                                 | 1.302848847 | 8.47E-11    | 1.08E-09    |
| ENSMMUG00000019868 | NKD inhibitor of WNT signaling pathway 1 [Source:VGNC Symbol;Acc:VGNC:75198]                         | 1.703630691 | 8.92E-05    | 0.000411529 |
| ENSMMUG00000019869 | sorting nexin 20 [Source:VGNC Symbol;Acc:VGNC:77796]                                                 | 1.576795162 | 8.90E-05    | 0.000411109 |

|                    |                                                                                                    |             |             |             |
|--------------------|----------------------------------------------------------------------------------------------------|-------------|-------------|-------------|
| ENSMMUG00000012209 | CYLD lysine 63 deubiquitinase [Source:VGNC Symbol;Acc:VGNC:71581]                                  | 1.599121318 | 7.14E-13    | 1.21E-11    |
| ENSMMUG00000055889 |                                                                                                    | 1.908352322 | 4.16E-07    | 3.00E-06    |
| ENSMMUG00000064095 |                                                                                                    | 4.378623289 | 3.06E-10    | 3.62E-09    |
| ENSMMUG00000013967 | TOX high mobility group box family member 3 [Source:VGNC Symbol;Acc:VGNC:78612]                    | 2.774404187 | 1.19E-15    | 2.67E-14    |
| ENSMMUG00000050057 |                                                                                                    | 1.39631595  | 1.70E-12    | 2.73E-11    |
| ENSMMUG00000058254 |                                                                                                    | 1.370771309 | 2.27E-09    | 2.36E-08    |
| ENSMMUG00000020583 | FTO alpha-ketoglutarate dependent dioxygenase [Source:VGNC Symbol;Acc:VGNC:72772]                  | 1.071779218 | 8.93E-08    | 7.24E-07    |
| ENSMMUG00000050851 |                                                                                                    | 2.995056028 | 0.018261958 | 0.045212827 |
| ENSMMUG00000054811 |                                                                                                    | 2.659461165 | 0.000645585 | 0.002438    |
| ENSMMUG00000056555 |                                                                                                    | 1.662075476 | 1.66E-14    | 3.38E-13    |
| ENSMMUG00000063965 |                                                                                                    | 0.547118635 | 0.012285613 | 0.032327118 |
| ENSMMUG00000061439 |                                                                                                    | 1.029188125 | 0.004881156 | 0.014561968 |
| ENSMMUG00000023525 | cadherin 5 [Source:VGNC Symbol;Acc:VGNC:70973]                                                     | 0.481542948 | 0.000743758 | 0.002756794 |
| ENSMMUG00000029108 | CKLF like MARVEL transmembrane domain containing 1 [Source:HGNC Symbol;Acc:HGNC:19172]             | 0.491727834 | 0.002892859 | 0.009210198 |
| ENSMMUG00000049484 |                                                                                                    | 0.904027485 | 1.39E-06    | 9.21E-06    |
| ENSMMUG00000020847 | CKLF like MARVEL transmembrane domain containing 3 [Source:VGNC Symbol;Acc:VGNC:71215]             | 1.528046381 | 1.85E-06    | 1.20E-05    |
| ENSMMUG00000049583 | RRAD, Ras related glycolysis inhibitor and calcium channel regulator [Source:NCBI gene;Acc:695086] | 0.303253744 | 0.004805764 | 0.014371593 |
| ENSMMUG00000022825 | carboxylesterase 2 [Source:VGNC Symbol;Acc:VGNC:71012]                                             | 0.351012881 | 0.000189302 | 0.00081152  |
| ENSMMUG00000064237 |                                                                                                    | 1.043203948 | 6.16E-06    | 3.60E-05    |
| ENSMMUG00000054948 |                                                                                                    | 1.239975449 | 0.006822677 | 0.019439059 |
| ENSMMUG00000058815 | core-binding factor subunit beta [Source:NCBI gene;Acc:695767]                                     | 0.942303273 | 0.001181131 | 0.004181468 |
| ENSMMUG00000018102 | chromosome 20 C16orf70 homolog [Source:VGNC Symbol;Acc:VGNC:70438]                                 | 0.895456207 | 0.001567293 | 0.005354286 |
| ENSMMUG00000005906 | heat shock transcription factor 4 [Source:VGNC Symbol;Acc:VGNC:73533]                              | 0.84942013  | 2.31E-05    | 0.000120908 |
| ENSMMUG00000020266 | KIAA0895 like [Source:VGNC Symbol;Acc:VGNC:73952]                                                  | 1.526356035 | 0.002346005 | 0.00764307  |
| ENSMMUG00000020254 | exocyst complex component 3 like 1 [Source:VGNC Symbol;Acc:VGNC:72376]                             | 1.401616709 | 3.43E-12    | 5.27E-11    |
| ENSMMUG00000020258 | E2F transcription factor 4 [Source:VGNC Symbol;Acc:VGNC:72025]                                     | 1.1470692   | 3.59E-08    | 3.07E-07    |
| ENSMMUG00000020259 | engulfment and cell motility 3 [Source:VGNC Symbol;Acc:VGNC:72060]                                 | 1.159512462 | 0.009531198 | 0.025954401 |
| ENSMMUG00000018111 | formin homology 2 domain containing 1 [Source:VGNC Symbol;Acc:VGNC:72523]                          | 1.412596952 | 0.005856769 | 0.017021144 |
| ENSMMUG00000054637 | tubulin polymerization promoting protein family member 3 [Source:NCBI gene;Acc:100429881]          | 1.920057825 | 0.001003317 | 0.00361233  |
| ENSMMUG00000009825 | zinc finger DHHC-type containing 1 [Source:VGNC Symbol;Acc:VGNC:79102]                             | 1.226787821 | 3.02E-15    | 6.56E-14    |
| ENSMMUG00000029105 | ATPase H+ transporting V0 subunit d1 [Source:NCBI gene;Acc:698345]                                 | 0.655835728 | 0.012099394 | 0.03189371  |
| ENSMMUG00000057511 | Metazoan signal recognition particle RNA [Source:RFAM;Acc:RF00017]                                 | 0.681915573 | 0.004629858 | 0.013910785 |
| ENSMMUG00000017105 | RHO family interacting cell polarization regulator 1 [Source:NCBI gene;Acc:699910]                 | 0.451975591 | 2.23E-05    | 0.000117033 |
| ENSMMUG00000009799 | capping protein regulator and myosin 1 linker 2 [Source:VGNC Symbol;Acc:VGNC:70647]                | 2.513649085 | 0.012816405 | 0.033489509 |
| ENSMMUG00000007803 | translin associated factor X interacting protein 1 [Source:VGNC Symbol;Acc:VGNC:79151]             | 0.380916546 | 0.013334259 | 0.034637775 |
| ENSMMUG00000037975 | solute carrier family 7 member 6 [Source:NCBI gene;Acc:702903]                                     | 0.911237631 | 0.00066115  | 0.00249044  |
| ENSMMUG00000059872 |                                                                                                    | 1.480540764 | 0.002609382 | 0.008392351 |
| ENSMMUG00000010393 | cadherin 3 [Source:VGNC Symbol;Acc:VGNC:70971]                                                     | 0.663423473 | 2.80E-10    | 3.33E-09    |
| ENSMMUG00000022177 | transport and golgi organization 6 homolog [Source:NCBI gene;Acc:704499]                           | 1.389798033 | 0.004664162 | 0.01399343  |

|                    |                                                                                             |             |             |             |
|--------------------|---------------------------------------------------------------------------------------------|-------------|-------------|-------------|
| ENSMMUG00000010925 | chromosome transmission fidelity protein 8 homolog [Source:NCBI gene;Acc:114669750]         | 2.557411009 | 0.009178116 | 0.025147631 |
| ENSMMUG00000012039 | cytochrome b5 type B (outer mitochondrial membrane) [Source:NCBI gene;Acc:705093]           | 4.271432149 | 3.12E-06    | 1.93E-05    |
| ENSMMUG00000018255 | nuclear factor of activated T cells 5 [Source:VGNC Symbol;Acc:VGNC:75325]                   | 0.988695396 | 4.28E-10    | 4.96E-09    |
| ENSMMUG00000019684 | NAD(P)H quinone dehydrogenase 1 [Source:NCBI gene;Acc:705635]                               | 0.691052541 | 1.48E-05    | 8.10E-05    |
| ENSMMUG00000000680 | polyamine modulated factor 1 binding protein 1 [Source:VGNC Symbol;Acc:VGNC:76052]          | 1.196463135 | 0.015552256 | 0.039418896 |
| ENSMMUG00000049699 | thioredoxin like 4B [Source:NCBI gene;Acc:706840]                                           | 1.210424103 | 0.000169764 | 0.000733139 |
| ENSMMUG00000023312 | haptoglobin [Source:NCBI gene;Acc:706640]                                                   | 1.288065973 | 0.000316726 | 0.001290398 |
| ENSMMUG00000016716 | zinc finger protein 821 [Source:VGNC Symbol;Acc:VGNC:79679]                                 | 0.633701369 | 0.002050687 | 0.006801987 |
| ENSMMUG00000048077 | ataxin 1 like [Source:NCBI gene;Acc:709805]                                                 | 1.125704559 | 6.37E-09    | 6.17E-08    |
| ENSMMUG00000012007 | PH domain and leucine rich repeat protein phosphatase 2 [Source:VGNC Symbol;Acc:VGNC:81494] | 0.884821602 | 0.000698383 | 0.002611452 |
| ENSMMUG00000052324 | MARVEL domain containing 3 [Source:NCBI gene;Acc:710448]                                    | 1.006970052 | 0.000152505 | 0.000666563 |
| ENSMMUG00000002018 | tyrosine aminotransferase [Source:VGNC Symbol;Acc:VGNC:78100]                               | -0.4785187  | 0.00094098  | 0.003402764 |
| ENSMMUG00000061967 | carbohydrate sulfotransferase 4 [Source:NCBI gene;Acc:708116]                               | 0.896519013 | 0.003117263 | 0.009821331 |
| ENSMMUG00000023147 | pyruvate dehydrogenase phosphatase regulatory subunit [Source:VGNC Symbol;Acc:VGNC:75897]   | 1.580804134 | 0.000530125 | 0.002048399 |
| ENSMMUG00000005751 | adenosine deaminase tRNA specific 1 [Source:VGNC Symbol;Acc:VGNC:69504]                     | 2.183645356 | 0.000100862 | 0.000460951 |
| ENSMMUG00000005754 | lysyl-tRNA synthetase 1 [Source:NCBI gene;Acc:714516]                                       | 1.421754291 | 0.00023916  | 0.001002471 |
| ENSMMUG00000055178 | double homeobox B [Source:NCBI gene;Acc:114674350]                                          | 1.757333793 | 0.009889463 | 0.026787348 |
| ENSMMUG00000003916 | contactin associated protein family member 4 [Source:VGNC Symbol;Acc:VGNC:71209]            | -1.77629751 | 0.000136048 | 0.00060119  |
| ENSMMUG00000053231 |                                                                                             | 0.946180777 | 4.21E-05    | 0.000207529 |
| ENSMMUG00000037756 | MAF bZIP transcription factor [Source:NCBI gene;Acc:106995090]                              | 0.638502567 | 0.000513504 | 0.001992483 |
| ENSMMUG00000005334 | phospholipase C gamma 2 [Source:VGNC Symbol;Acc:VGNC:76170]                                 | 0.858866527 | 1.88E-10    | 2.30E-09    |
| ENSMMUG00000062047 |                                                                                             | 1.000143522 | 0.001593594 | 0.005430378 |
| ENSMMUG00000053215 |                                                                                             | 0.808604317 | 0.00122773  | 0.004326813 |
| ENSMMUG00000057329 |                                                                                             | 2.541006061 | 7.53E-11    | 9.67E-10    |
| ENSMMUG00000011244 | kelch like family member 36 [Source:NCBI gene;Acc:715423]                                   | 3.161654422 | 0.004006534 | 0.012253435 |
| ENSMMUG00000011893 | KIAA0513 [Source:VGNC Symbol;Acc:VGNC:73925]                                                | 1.398300669 | 4.58E-08    | 3.87E-07    |
| ENSMMUG00000011894 | CBY1 interacting BAR domain containing 2 [Source:VGNC Symbol;Acc:VGNC:72335]                | 1.220616227 | 6.64E-07    | 4.66E-06    |
| ENSMMUG00000061995 |                                                                                             | 1.045624284 | 1.04E-12    | 1.71E-11    |
| ENSMMUG00000052120 |                                                                                             | -2.52487217 | 0.000184978 | 0.000794215 |
| ENSMMUG00000020592 | Gse1 coiled-coil protein [Source:VGNC Symbol;Acc:VGNC:73254]                                | 1.271687394 | 0.000144571 | 0.000634504 |
| ENSMMUG00000006763 | cytochrome c oxidase subunit IV isoform 1 [Source:NCBI gene;Acc:693811]                     | 0.89652376  | 4.94E-10    | 5.66E-09    |
| ENSMMUG00000019500 | methenyltetrahydrofolate synthetase domain containing [Source:VGNC Symbol;Acc:VGNC:75023]   | 0.808269415 | 0.000329013 | 0.001334954 |
| ENSMMUG00000060536 |                                                                                             | 1.701858562 | 0.00027436  | 0.001132414 |
| ENSMMUG00000017615 | zinc finger CCHC-type containing 14 [Source:VGNC Symbol;Acc:VGNC:79420]                     | 1.371374195 | 4.94E-29    | 4.47E-27    |
| ENSMMUG00000022867 | kelch domain containing 4 [Source:VGNC Symbol;Acc:VGNC:74122]                               | 0.705551664 | 5.07E-05    | 0.000246579 |
| ENSMMUG00000058437 |                                                                                             | 2.177393404 | 7.84E-29    | 6.88E-27    |
| ENSMMUG00000052851 | solute carrier family 7 member 5 [Source:NCBI gene;Acc:695886]                              | 1.705251029 | 1.63E-11    | 2.26E-10    |

|                    |                                                                                                  |   |             |             |             |
|--------------------|--------------------------------------------------------------------------------------------------|---|-------------|-------------|-------------|
| ENSMMUG00000054935 |                                                                                                  | - | 1.382059216 | 0.002359695 | 0.007684296 |
| ENSMMUG00000008945 | zinc finger protein 407 [Source:NCBI gene;Acc:695303]                                            | - | 1.897366045 | 0.001557303 | 0.00532752  |
| ENSMMUG00000008942 | carnosine dipeptidase 1 [Source:VGNC Symbol;Acc:VGNC:71257]                                      | - | 2.023233602 | 3.62E-05    | 0.000181655 |
| ENSMMUG00000058864 |                                                                                                  | - | 2.257874157 | 0.011173003 | 0.029785301 |
| ENSMMUG00000015702 | divergent protein kinase domain 1C [Source:NCBI gene;Acc:699537]                                 | - | -2.12174843 | 0.002325435 | 0.007581052 |
| ENSMMUG00000020905 | chromosome 18 C18orf63 homolog [Source:VGNC Symbol;Acc:VGNC:70465]                               | - | -2.36766145 | 0.001956286 | 0.00652976  |
| ENSMMUG00000023298 | F-box protein 15 [Source:VGNC Symbol;Acc:VGNC:72504]                                             | - | 2.192180585 | 0.001912376 | 0.00640482  |
| ENSMMUG00000056477 |                                                                                                  | - | 0.533789515 | 0.00180635  | 0.006085456 |
| ENSMMUG00000050516 |                                                                                                  | - | 0.503941346 | 0.002074132 | 0.006868482 |
| ENSMMUG00000060966 |                                                                                                  | - | 2.863087932 | 3.17E-05    | 0.000160843 |
| ENSMMUG00000045074 |                                                                                                  | - | 2.814332451 | 0.018655178 | 0.046002044 |
| ENSMMUG00000047095 | serpin family B member 13 [Source:NCBI gene;Acc:701078]                                          | - | 1.788135723 | 0.011624867 | 0.030834696 |
| ENSMMUG00000057978 |                                                                                                  | - | 1.821257469 | 0.003666789 | 0.011307649 |
| ENSMMUG00000001245 | zinc finger protein 532 [Source:NCBI gene;Acc:701146]                                            | - | 5.004864317 | 1.62E-08    | 1.46E-07    |
| ENSMMUG00000061572 | Metazoan signal recognition particle RNA [Source:RFAM;Acc:RF00017]                               | - | 2.632477663 | 1.15E-06    | 7.73E-06    |
| ENSMMUG00000065131 |                                                                                                  | - | 2.512753038 | 0.004896754 | 0.01459969  |
| ENSMMUG00000058948 |                                                                                                  | - | 0.731808472 | 1.74E-05    | 9.40E-05    |
| ENSMMUG00000055751 |                                                                                                  | - | 1.35282638  | 0.000134254 | 0.000594679 |
| ENSMMUG00000012001 | transcription factor 4 [Source:VGNC Symbol;Acc:VGNC:78288]                                       | - | 0.885277269 | 0.000103568 | 0.000471429 |
| ENSMMUG00000020898 | cap binding complex dependent translation initiation factor [Source:HGNC Symbol;Acc:HGNC:23925]  | - | -1.5925568  | 1.78E-06    | 1.15E-05    |
| ENSMMUG00000007816 | SMAD family member 2 [Source:VGNC Symbol;Acc:VGNC:77810]                                         | - | 3.543594688 | 3.93E-20    | 1.39E-18    |
| ENSMMUG00000053364 |                                                                                                  | - | 1.059090419 | 2.79E-07    | 2.08E-06    |
| ENSMMUG00000058218 |                                                                                                  | - | 0.806304935 | 0.015890914 | 0.04020168  |
| ENSMMUG00000015952 | katanin catalytic subunit A1 like 2 [Source:VGNC Symbol;Acc:VGNC:73904]                          | - | 1.941543666 | 1.29E-05    | 7.13E-05    |
| ENSMMUG00000015951 | elongin A2 [Source:NCBI gene;Acc:702788]                                                         | - | 2.546620636 | 0.015330858 | 0.038957612 |
| ENSMMUG00000044172 | elongin-A3-like [Source:NCBI gene;Acc:106994494]                                                 | - | 1.649777987 | 0.016768248 | 0.042105168 |
| ENSMMUG00000043738 |                                                                                                  | - | 2.188060972 | 7.44E-05    | 0.000348442 |
| ENSMMUG00000004498 | protein inhibitor of activated STAT 2 [Source:VGNC Symbol;Acc:VGNC:75815]                        | - | 1.903197273 | 5.81E-09    | 5.65E-08    |
| ENSMMUG00000002742 | ST8 alpha-N-acetyl-neuraminide alpha-2,8-sialyltransferase 5 [Source:VGNC Symbol;Acc:VGNC:77942] | - | 2.977663197 | 1.01E-32    | 1.32E-30    |
| ENSMMUG00000017246 | lipoygenase homology domains 1 [Source:VGNC Symbol;Acc:VGNC:74368]                               | - | 2.343939401 | 1.65E-20    | 6.19E-19    |
| ENSMMUG00000053435 |                                                                                                  | - | 1.867548976 | 0.000339627 | 0.00137426  |
| ENSMMUG00000017243 | ring finger protein 165 [Source:VGNC Symbol;Acc:VGNC:76877]                                      | - | 0.972535315 | 0.000720749 | 0.002681561 |
| ENSMMUG00000064342 |                                                                                                  | - | 2.164510404 | 0.01565566  | 0.03966065  |
| ENSMMUG00000049194 |                                                                                                  | - | 1.153969456 | 0.012697717 | 0.033228717 |



|                    |                                                                                         |             |             |             |
|--------------------|-----------------------------------------------------------------------------------------|-------------|-------------|-------------|
| ENSMMUG00000006864 | KIAA1328 ortholog [Source:NCBI gene;Acc:709850]                                         | 1.824386902 | 0.013004204 | 0.033899163 |
| ENSMMUG00000018791 | molybdenum cofactor sulfurase [Source:VGNC Symbol;Acc:VGNC:74792]                       | 1.113444099 | 7.62E-06    | 4.38E-05    |
| ENSMMUG00000018784 | solute carrier family 39 member 6 [Source:VGNC Symbol;Acc:VGNC:77508]                   | 0.909901524 | 3.80E-14    | 7.37E-13    |
| ENSMMUG00000018785 | elongator acetyltransferase complex subunit 2 [Source:VGNC Symbol;Acc:VGNC:72069]       | 1.038967816 | 2.10E-09    | 2.20E-08    |
| ENSMMUG00000018777 | regulation of nuclear pre-mRNA domain containing 1A [Source:VGNC Symbol;Acc:VGNC:77103] | 0.750535355 | 0.000710213 | 0.002649009 |
| ENSMMUG00000003302 | dystrobrevin alpha [Source:VGNC Symbol;Acc:VGNC:72007]                                  | 1.395350058 | 8.82E-05    | 0.000407753 |
| ENSMMUG00000017276 | nucleolar protein 4 [Source:VGNC Symbol;Acc:VGNC:75366]                                 | 0.835820822 | 5.75E-05    | 0.000275918 |
| ENSMMUG00000014451 | ASXL transcriptional regulator 3 [Source:VGNC Symbol;Acc:VGNC:70152]                    | 1.026832309 | 1.07E-05    | 5.98E-05    |
| ENSMMUG00000052277 | transthyretin [Source:NCBI gene;Acc:705943]                                             | 1.637001077 | 0.00068486  | 0.002569956 |
| ENSMMUG00000021095 | desmoglein 2 [Source:VGNC Symbol;Acc:VGNC:72002]                                        | 1.892563958 | 0.005090955 | 0.015072643 |
| ENSMMUG00000049366 | Metazoan signal recognition particle RNA [Source:RFAM;Acc:RF00017]                      | 1.786512804 | 0.011813078 | 0.031255656 |
| ENSMMUG00000048746 |                                                                                         | 1.033464841 | 0.001103454 | 0.003934654 |
| ENSMMUG00000060604 |                                                                                         | 0.762683597 | 0.016422667 | 0.041335395 |
| ENSMMUG00000057475 |                                                                                         | 2.030624625 | 9.53E-06    | 5.37E-05    |
| ENSMMUG00000009669 | cutaneous T cell lymphoma-associated antigen 1 [Source:NCBI gene;Acc:106994443]         | 2.024204887 | 1.43E-06    | 9.40E-06    |
| ENSMMUG00000061690 |                                                                                         | -2.15461127 | 0.00039872  | 0.001588241 |
| ENSMMUG00000010944 | GATA binding protein 6 [Source:VGNC Symbol;Acc:VGNC:72891]                              | 1.190285591 | 8.11E-06    | 4.63E-05    |
| ENSMMUG00000064806 |                                                                                         | 1.365907161 | 1.50E-06    | 9.88E-06    |
| ENSMMUG00000004382 | abhydrolase domain containing 3 [Source:VGNC Symbol;Acc:VGNC:69464]                     | 1.641422513 | 0.004921188 | 0.014656439 |
| ENSMMUG00000051922 | small nuclear ribonucleoprotein D1 polypeptide [Source:NCBI gene;Acc:698965]            | 3.140219246 | 0.016090206 | 0.040615787 |
| ENSMMUG00000003974 | GREB1 like retinoic acid receptor coactivator [Source:NCBI gene;Acc:700655]             | -2.09440017 | 0.014756068 | 0.037742754 |
| ENSMMUG00000019892 | myomesin 1 [Source:VGNC Symbol;Acc:VGNC:75123]                                          | 1.646428751 | 8.70E-17    | 2.20E-15    |
| ENSMMUG00000052605 | Metazoan signal recognition particle RNA [Source:RFAM;Acc:RF00017]                      | 2.891520803 | 5.25E-06    | 3.11E-05    |
| ENSMMUG00000005086 | homeobox protein TGIF1 [Source:NCBI gene;Acc:694580]                                    | 1.09105523  | 2.10E-05    | 0.00011103  |
| ENSMMUG00000001471 | DLG associated protein 1 [Source:NCBI gene;Acc:694049]                                  | 0.491164165 | 0.002017439 | 0.006706707 |
| ENSMMUG00000019418 | erythrocyte membrane protein band 4.1 like 3 [Source:VGNC Symbol;Acc:VGNC:72233]        | 2.282227873 | 3.37E-30    | 3.31E-28    |
| ENSMMUG00000016302 | L3MBTL histone methyl-lysine binding protein 4 [Source:VGNC Symbol;Acc:VGNC:74133]      | 0.645687843 | 0.000248591 | 0.00103848  |
| ENSMMUG00000015761 | microtubule crosslinking factor 1 [Source:VGNC Symbol;Acc:VGNC:74852]                   | 0.423308138 | 0.007188302 | 0.020320724 |
| ENSMMUG00000053008 |                                                                                         | 1.687874526 | 1.12E-08    | 1.05E-07    |
| ENSMMUG00000049523 | ankyrin repeat domain 12 [Source:NCBI gene;Acc:114673693]                               | 1.442087332 | 7.18E-07    | 5.00E-06    |
| ENSMMUG00000023717 | MIER family member 2 [Source:VGNC Symbol;Acc:VGNC:74855]                                | 1.747596432 | 2.63E-16    | 6.33E-15    |
| ENSMMUG00000059175 |                                                                                         | 1.979589448 | 2.94E-10    | 3.48E-09    |
| ENSMMUG00000053083 | C2 calcium dependent domain containing 4C [Source:NCBI gene;Acc:100424440]              | 2.143086005 | 3.25E-06    | 2.00E-05    |

|                    |                                                                                                                     |             |             |             |
|--------------------|---------------------------------------------------------------------------------------------------------------------|-------------|-------------|-------------|
| ENSMMUG00000045966 | granzyme M [Source:NCBI gene;Acc:715031]                                                                            | 1.598164409 | 0.000838192 | 0.003070748 |
| ENSMMUG00000012768 | hyperpolarization activated cyclic nucleotide gated potassium and sodium channel 2 [Source:NCBI gene;Acc:100425114] | 1.112424453 | 0.000677529 | 0.002543734 |
| ENSMMUG00000049968 | RNA polymerase mitochondrial [Source:NCBI gene;Acc:100426183]                                                       | 1.271709028 | 3.09E-19    | 9.85E-18    |
| ENSMMUG00000055423 | fibroblast growth factor 22 [Source:NCBI gene;Acc:702727]                                                           | 0.409634749 | 0.002377663 | 0.007736012 |
| ENSMMUG00000008672 | ring finger protein 126 [Source:VGNC Symbol;Acc:VGNC:76791]                                                         | -0.80012517 | 9.82E-05    | 0.000449512 |
| ENSMMUG00000056220 | follistatin like 3 [Source:NCBI gene;Acc:721100]                                                                    | 0.886030266 | 0.013508947 | 0.035036644 |
| ENSMMUG00000016450 | polypyrimidine tract binding protein 1 [Source:VGNC Symbol;Acc:VGNC:76462]                                          | -0.39567465 | 0.016777938 | 0.042115238 |
| ENSMMUG00000028948 | azurocidin 1 [Source:VGNC Symbol;Acc:VGNC:70202]                                                                    | 2.394709832 | 1.31E-07    | 1.04E-06    |
| ENSMMUG00000061589 | proteinase 3 [Source:HGNC Symbol;Acc:HGNC:9495]                                                                     | 2.709654939 | 0.000694599 | 0.002600556 |
| ENSMMUG00000009674 | elastase, neutrophil expressed [Source:VGNC Symbol;Acc:VGNC:72199]                                                  | 2.27379991  | 0.000557634 | 0.002141276 |
| ENSMMUG00000028947 | complement factor D [Source:VGNC Symbol;Acc:VGNC:71115]                                                             | 2.142057297 | 9.83E-24    | 5.28E-22    |
| ENSMMUG00000009682 | R3H domain containing 4 [Source:VGNC Symbol;Acc:VGNC:76554]                                                         | 1.167845499 | 0.000320344 | 0.001304049 |
| ENSMMUG00000002278 | AT-rich interaction domain 3A [Source:VGNC Symbol;Acc:VGNC:69930]                                                   | 1.585196714 | 1.74E-08    | 1.57E-07    |
| ENSMMUG00000058621 |                                                                                                                     | 1.685328636 | 1.72E-16    | 4.20E-15    |
| ENSMMUG00000002638 | WD repeat domain 18 [Source:VGNC Symbol;Acc:VGNC:79103]                                                             | -0.78222082 | 0.005053791 | 0.014986547 |
| ENSMMUG00000048135 | glutamate ionotropic receptor NMDA type subunit 3B [Source:NCBI gene;Acc:721155]                                    | -0.4491836  | 0.002229314 | 0.007299784 |
| ENSMMUG00000013577 | transmembrane protein 259 [Source:NCBI gene;Acc:721161]                                                             | 0.409311266 | 0.002021645 | 0.006717677 |
| ENSMMUG00000015306 | calponin 2 [Source:NCBI gene;Acc:721164]                                                                            | 1.069838583 | 5.73E-11    | 7.48E-10    |
| ENSMMUG00000015303 | ATP binding cassette subfamily A member 7 [Source:VGNC Symbol;Acc:VGNC:69567]                                       | 0.940893037 | 1.19E-06    | 7.99E-06    |
| ENSMMUG00000058856 | Metazoan signal recognition particle RNA [Source:RFAM;Acc:RF00017]                                                  | 1.114664975 | 0.003908152 | 0.011969825 |
| ENSMMUG00000010886 | strawberry notch homolog 2 [Source:VGNC Symbol;Acc:VGNC:77123]                                                      | 1.822064931 | 3.46E-05    | 0.000174299 |
| ENSMMUG00000058928 | Metazoan signal recognition particle RNA [Source:RFAM;Acc:RF00017]                                                  | 2.832862446 | 7.10E-26    | 4.54E-24    |
| ENSMMUG00000022100 | midnolin [Source:VGNC Symbol;Acc:VGNC:82186]                                                                        | 1.872699342 | 5.50E-30    | 5.29E-28    |
| ENSMMUG00000003043 | PWWP domain containing 3A, DNA repair factor [Source:VGNC Symbol;Acc:VGNC:76565]                                    | 1.138224781 | 2.09E-12    | 3.31E-11    |
| ENSMMUG00000003053 | APC regulator of WNT signaling pathway 2 [Source:VGNC Symbol;Acc:VGNC:69888]                                        | 1.166509973 | 2.18E-05    | 0.00011467  |
| ENSMMUG00000009014 | methyl-CpG binding domain protein 3 [Source:VGNC Symbol;Acc:VGNC:81470]                                             | 0.786325865 | 0.00754172  | 0.021202598 |
| ENSMMUG00000016539 | abhydrolase domain containing 17A [Source:VGNC Symbol;Acc:VGNC:69543]                                               | 0.756219294 | 0.000701362 | 0.002621931 |
| ENSMMUG00000013747 | secretory carrier membrane protein 4 [Source:VGNC Symbol;Acc:VGNC:77135]                                            | 0.531804782 | 0.000165889 | 0.000718495 |
| ENSMMUG00000006620 | casein kinase 1 gamma 2 [Source:NCBI gene;Acc:709484]                                                               | 0.783583571 | 0.000653213 | 0.002463043 |
| ENSMMUG00000059725 |                                                                                                                     | 0.864765303 | 0.009929867 | 0.026875954 |
| ENSMMUG00000015660 | IZUMO family member 4 [Source:VGNC Symbol;Acc:VGNC:73665]                                                           | 0.923474883 | 0.017104669 | 0.042773913 |
| ENSMMUG00000015663 | adaptor related protein complex 3 subunit delta 1 [Source:VGNC Symbol;Acc:VGNC:69969]                               | 0.928073218 | 2.10E-07    | 1.60E-06    |
| ENSMMUG00000017949 | ornithine decarboxylase antizyme 1 [Source:NCBI gene;Acc:721477]                                                    | 0.850682096 | 1.55E-14    | 3.17E-13    |
| ENSMMUG00000058241 | leucine rich repeat and Ig domain containing 3 [Source:NCBI gene;Acc:721484]                                        | 1.029409134 | 0.000504224 | 0.001960063 |
| ENSMMUG00000064612 | Metazoan signal recognition particle RNA [Source:RFAM;Acc:RF00017]                                                  | 1.067054517 | 0.000123876 | 0.00055267  |
| ENSMMUG00000000452 | LSM7 homolog, U6 small nuclear RNA and mRNA degradation associated [Source:NCBI gene;Acc:721486]                    | 2.346436014 | 2.68E-06    | 1.68E-05    |
| ENSMMUG00000055417 |                                                                                                                     | 0.683931941 | 1.63E-05    | 8.83E-05    |
| ENSMMUG00000003468 | growth arrest and DNA damage inducible beta [Source:VGNC Symbol;Acc:VGNC:72864]                                     | 0.696077957 | 0.000558807 | 0.00214414  |
| ENSMMUG00000065054 | G protein subunit gamma 7 [Source:NCBI gene;Acc:711335]                                                             | 1.868136246 | 1.35E-14    | 2.77E-13    |
| ENSMMUG00000007268 | thimet oligopeptidase 1 [Source:VGNC Symbol;Acc:VGNC:78347]                                                         | 0.78257858  | 0.000552432 | 0.002125179 |

|                    |                                                                                                  |   |             |             |             |
|--------------------|--------------------------------------------------------------------------------------------------|---|-------------|-------------|-------------|
| ENSMMUG0000007485  | zinc finger protein 555 [Source:VGNC Symbol;Acc:VGNC:79705]                                      | - | 0.999617202 | 1.10E-05    | 6.11E-05    |
| ENSMMUG0000002912  | TLE family member 6, subcortical maternal complex member [Source:VGNC Symbol;Acc:VGNC:79879]     | - | 0.907865566 | 0.000209497 | 0.000889446 |
| ENSMMUG0000002961  | G protein subunit alpha 11 [Source:VGNC Symbol;Acc:VGNC:73085]                                   | - | 1.470496668 | 2.59E-11    | 3.52E-10    |
| ENSMMUG00000017036 | nicalin [Source:VGNC Symbol;Acc:VGNC:75032]                                                      | - | 2.237269373 | 1.35E-17    | 3.75E-16    |
| ENSMMUG00000015513 | CUGBP Elav-like family member 5 [Source:NCBI gene;Acc:721694]                                    | - | 1.970445855 | 1.51E-06    | 9.91E-06    |
| ENSMMUG00000060497 |                                                                                                  | - | 2.402763757 | 1.47E-09    | 1.57E-08    |
| ENSMMUG00000003439 | nuclear factor I C [Source:VGNC Symbol;Acc:VGNC:75336]                                           | - | 1.042787804 | 0.001002429 | 0.003610011 |
| ENSMMUG00000018096 | high mobility group 20B [Source:NCBI gene;Acc:721723]                                            | - | 1.556353833 | 0.00648836  | 0.018615278 |
| ENSMMUG00000028931 | cactin, spliceosome C complex subunit [Source:NCBI gene;Acc:721737]                              | - | 0.739993536 | 0.004342793 | 0.013148963 |
| ENSMMUG00000028930 | tight junction protein 3 [Source:NCBI gene;Acc:721760]                                           | - | -0.49221499 | 0.007035603 | 0.019958761 |
| ENSMMUG00000001917 | megakaryocyte-associated tyrosine kinase [Source:NCBI gene;Acc:100430078]                        | - | 0.765372015 | 0.001832732 | 0.006168728 |
| ENSMMUG00000039195 | ATCAY kinesin light chain interacting caytaxin [Source:NCBI gene;Acc:721783]                     | - | 0.906237036 | 0.001525811 | 0.005234163 |
| ENSMMUG00000056147 |                                                                                                  | - | 1.428117436 | 1.61E-06    | 1.05E-05    |
| ENSMMUG00000022767 | eukaryotic translation elongation factor 2 [Source:NCBI gene;Acc:721806]                         | - | 2.233711934 | 0.00772429  | 0.021662486 |
| ENSMMUG00000019564 | mitogen-activated protein kinase kinase 2 [Source:VGNC Symbol;Acc:VGNC:81453]                    | - | 0.543948109 | 2.56E-05    | 0.000132984 |
| ENSMMUG00000028928 | ankyrin repeat domain 24 [Source:NCBI gene;Acc:721829]                                           | - | 0.517791547 | 6.80E-05    | 0.000321035 |
| ENSMMUG00000010100 | YJU2 splicing factor homolog [Source:NCBI gene;Acc:718892]                                       | - | 0.986456967 | 0.012228603 | 0.032190001 |
| ENSMMUG00000028925 | HDGF like 2 [Source:NCBI gene;Acc:693476]                                                        | - | 3.592375693 | 4.18E-09    | 4.16E-08    |
| ENSMMUG00000022656 | perilipin 4 [Source:NCBI gene;Acc:693610]                                                        | - | 1.807005546 | 0.005074017 | 0.015039846 |
| ENSMMUG00000021716 | dipeptidyl peptidase 9 [Source:NCBI gene;Acc:695587]                                             | - | 0.479905375 | 0.016170174 | 0.040796815 |
| ENSMMUG00000062995 |                                                                                                  | - | 0.94284257  | 3.25E-08    | 2.81E-07    |
| ENSMMUG00000058275 | arrestin domain containing 5 [Source:NCBI gene;Acc:697277]                                       | - | 0.877432799 | 0.000119376 | 0.000534041 |
| ENSMMUG00000012677 | lysine demethylase 4B [Source:VGNC Symbol;Acc:VGNC:73930]                                        | - | 1.103551549 | 4.79E-08    | 4.03E-07    |
| ENSMMUG00000011962 | protein tyrosine phosphatase receptor type 5 [Source:VGNC Symbol;Acc:VGNC:76622]                 | - | 0.784407137 | 0.003266683 | 0.010244219 |
| ENSMMUG00000050702 | fucosyltransferase 5 [Source:HGNC Symbol;Acc:HGNC:4016]                                          | - | 0.655458672 | 3.48E-05    | 0.000174981 |
| ENSMMUG00000016665 | NADH:ubiquinone oxidoreductase subunit A11 [Source:NCBI gene;Acc:697843]                         | - | 1.535294641 | 2.59E-05    | 0.000134395 |
| ENSMMUG00000011963 | vimentin type intermediate filament associated coiled-coil protein [Source:NCBI gene;Acc:697958] | - | 1.165578924 | 6.49E-16    | 1.50E-14    |
| ENSMMUG00000011964 | RAN binding protein 3 [Source:VGNC Symbol;Acc:VGNC:76655]                                        | - | -0.7364733  | 4.83E-06    | 2.88E-05    |
| ENSMMUG00000005697 | MLLT1 super elongation complex subunit [Source:VGNC Symbol;Acc:VGNC:74881]                       | - | 0.888173043 | 0.004712489 | 0.014126989 |
| ENSMMUG00000063389 |                                                                                                  | - | 3.308077794 | 0.004300966 | 0.013040284 |
| ENSMMUG00000005698 | alkaline ceramidase 1 [Source:VGNC Symbol;Acc:VGNC:69460]                                        | - | 2.446167278 | 2.06E-06    | 1.32E-05    |
| ENSMMUG00000016526 | solute carrier family 25 member 41 [Source:VGNC Symbol;Acc:VGNC:77581]                           | - | 2.386317941 | 1.54E-11    | 2.15E-10    |
| ENSMMUG00000019314 | vav guanine nucleotide exchange factor 1 [Source:VGNC Symbol;Acc:VGNC:78757]                     | - | 2.184649176 | 0.000102536 | 0.000467735 |
| ENSMMUG00000001220 | adhesion G protein-coupled receptor E1 [Source:VGNC Symbol;Acc:VGNC:69561]                       | - | 2.217932423 | 6.35E-23    | 3.13E-21    |
| ENSMMUG00000063988 |                                                                                                  | - | 1.954080385 | 2.10E-06    | 1.34E-05    |
| ENSMMUG00000019966 | zinc finger protein 557 [Source:NCBI gene;Acc:100424983]                                         | - | 1.390919727 | 9.03E-22    | 3.95E-20    |
| ENSMMUG00000057682 |                                                                                                  | - | 1.471248779 | 6.86E-22    | 3.04E-20    |
| ENSMMUG00000028907 | insulin receptor [Source:NCBI gene;Acc:706009]                                                   | - | 3.238525648 | 4.86E-21    | 1.93E-19    |
| ENSMMUG00000028906 | Rho/Rac guanine nucleotide exchange factor 18 [Source:NCBI gene;Acc:707510]                      | - | 1.637634975 | 0.000602426 | 0.002290763 |

|                    |                                                                                                      |             |             |             |
|--------------------|------------------------------------------------------------------------------------------------------|-------------|-------------|-------------|
| ENSMMUG00000011389 | mucolipin 1 [Source:VGNC Symbol;Acc:VGNC:74503]                                                      | 2.21366116  | 0.002380976 | 0.007743393 |
| ENSMMUG00000009540 | calmodulin regulated spectrin associated protein family member 3 [Source:VGNC Symbol;Acc:VGNC:70669] | 0.563940096 | 5.44E-05    | 0.00026266  |
| ENSMMUG00000009539 | XPA binding protein 2 [Source:VGNC Symbol;Acc:VGNC:78943]                                            | -0.67196275 | 2.99E-05    | 0.000152971 |
| ENSMMUG00000022463 | C-type lectin CD209L2 [Source:NCBI gene;Acc:574373]                                                  | 1.532493045 | 0.000426369 | 0.001686792 |
| ENSMMUG00000023303 | ecotropic viral integration site 5 like [Source:NCBI gene;Acc:706628]                                | 1.909657972 | 2.63E-37    | 5.35E-35    |
| ENSMMUG00000014032 | proline rich 36 [Source:NCBI gene;Acc:710443]                                                        | 5.711938376 | 4.68E-21    | 1.87E-19    |
| ENSMMUG00000006540 | small nuclear RNA activating complex polypeptide 2 [Source:VGNC Symbol;Acc:VGNC:77666]               | 0.509275018 | 0.001569852 | 0.005359323 |
| ENSMMUG00000010614 | C-C motif chemokine ligand 25 [Source:VGNC Symbol;Acc:VGNC:70700]                                    | 3.321167446 | 0.000230517 | 0.000970632 |
| ENSMMUG00000011178 | ceramide synthase 4 [Source:VGNC Symbol;Acc:VGNC:71077]                                              | 0.418265108 | 0.015933151 | 0.040274603 |
| ENSMMUG00000016695 | CD320 molecule [Source:VGNC Symbol;Acc:VGNC:70763]                                                   | 1.375305034 | 0.000134238 | 0.000594679 |
| ENSMMUG00000064610 | long intergenic non-protein coding RNA 1862 [Source:HGNC Symbol;Acc:HGNC:52681]                      | 0.668176671 | 0.006713923 | 0.019162333 |
| ENSMMUG00000049311 | zinc finger protein 558 [Source:NCBI gene;Acc:712590]                                                | 0.484723215 | 0.000108127 | 0.000489475 |
| ENSMMUG00000019965 | methyl-CpG binding domain protein 3 like 1 [Source:VGNC Symbol;Acc:VGNC:74513]                       | 2.186326807 | 2.78E-05    | 0.000142988 |
| ENSMMUG00000064532 | mucin 16, cell surface associated [Source:NCBI gene;Acc:106996460]                                   | 2.183782562 | 1.60E-31    | 1.72E-29    |
| ENSMMUG00000007875 | F-box and leucine rich repeat protein 12 [Source:VGNC Symbol;Acc:VGNC:72502]                         | 1.146948675 | 2.66E-10    | 3.18E-09    |
| ENSMMUG00000028889 | 60S ribosomal protein L21 [Source:NCBI gene;Acc:711174]                                              | 0.778544065 | 0.008081016 | 0.022535062 |
| ENSMMUG00000037639 | complement C3 [Source:NCBI gene;Acc:714514]                                                          | 0.5674685   | 0.010025283 | 0.027100794 |
| ENSMMUG00000017211 | peter pan homolog (Drosophila) [Source:NCBI gene;Acc:100533472]                                      | 1.734123536 | 0.01598077  | 0.040367028 |
| ENSMMUG00000014897 | ribonucleoprotein, PTB binding 1 [Source:NCBI gene;Acc:715250]                                       | 0.709576574 | 0.000662826 | 0.002495484 |
| ENSMMUG00000003110 | tyrosine kinase 2 [Source:VGNC Symbol;Acc:VGNC:78680]                                                | 0.759396291 | 1.04E-05    | 5.81E-05    |
| ENSMMUG00000003111 | cell division cycle 37 [Source:NCBI gene;Acc:715390]                                                 | 0.450581414 | 0.007266469 | 0.020502612 |
| ENSMMUG00000005218 | kelch like ECH associated protein 1 [Source:VGNC Symbol;Acc:VGNC:73891]                              | 1.390976715 | 0.000823613 | 0.003023311 |
| ENSMMUG00000011951 | KRI1 homolog [Source:VGNC Symbol;Acc:VGNC:74127]                                                     | 1.407903159 | 4.70E-06    | 2.81E-05    |
| ENSMMUG00000016593 | adaptor related protein complex 1 subunit mu 2 [Source:NCBI gene;Acc:720531]                         | 1.671660683 | 0.005801515 | 0.016883445 |
| ENSMMUG00000003744 | solute carrier family 44 member 2 [Source:VGNC Symbol;Acc:VGNC:77498]                                | 0.891197253 | 1.37E-07    | 1.08E-06    |
| ENSMMUG00000014677 | dynamamin 2 [Source:VGNC Symbol;Acc:VGNC:71957]                                                      | 1.081940934 | 6.68E-05    | 0.000316224 |
| ENSMMUG00000055775 | transmembrane p24 trafficking protein 1 [Source:NCBI gene;Acc:713618]                                | 1.337259772 | 8.01E-12    | 1.16E-10    |
| ENSMMUG00000049703 | Metazoan signal recognition particle RNA [Source:RFAM;Acc:RF00017]                                   | 1.799909186 | 2.96E-20    | 1.07E-18    |
| ENSMMUG00000004400 | Yip1 domain family member 2 [Source:VGNC Symbol;Acc:VGNC:79717]                                      | -0.76199361 | 1.45E-05    | 7.91E-05    |
| ENSMMUG00000003611 | low density lipoprotein receptor [Source:VGNC Symbol;Acc:VGNC:74248]                                 | 1.047106865 | 0.001017465 | 0.003654397 |
| ENSMMUG00000003612 | SPC24 component of NDC80 kinetochore complex [Source:VGNC Symbol;Acc:VGNC:78002]                     | 2.197349309 | 4.97E-06    | 2.96E-05    |
| ENSMMUG00000023251 | KN motif and ankyrin repeat domains 2 [Source:VGNC Symbol;Acc:VGNC:73938]                            | 0.525512172 | 0.014031213 | 0.036156194 |
| ENSMMUG00000009334 | dedicator of cytokinesis 6 [Source:VGNC Symbol;Acc:VGNC:71863]                                       | 0.604401803 | 0.000581108 | 0.002220456 |
| ENSMMUG00000043134 | coiled-coil domain containing 159 [Source:NCBI gene;Acc:100424702]                                   | 2.163345985 | 3.46E-10    | 4.05E-09    |
| ENSMMUG00000022207 | phospholipid phosphatase related 2 [Source:NCBI gene;Acc:714388]                                     | 2.259015419 | 1.93E-11    | 2.66E-10    |
| ENSMMUG00000010824 | SWIM-type zinc finger 7 associated protein 1 [Source:VGNC Symbol;Acc:VGNC:78220]                     | 2.813383459 | 6.51E-21    | 2.54E-19    |
| ENSMMUG00000038989 | erythropoietin receptor [Source:NCBI gene;Acc:714546]                                                | 2.696836577 | 4.62E-11    | 6.11E-10    |
| ENSMMUG00000010826 | ral guanine nucleotide dissociation stimulator like 3 [Source:VGNC Symbol;Acc:VGNC:76869]            | 1.6260494   | 2.71E-07    | 2.03E-06    |
| ENSMMUG00000016505 | coiled-coil domain containing 151 [Source:VGNC Symbol;Acc:VGNC:70892]                                | 1.213586219 | 0.016854823 | 0.042286759 |
| ENSMMUG00000002974 | acid phosphatase 5, tartrate resistant [Source:VGNC Symbol;Acc:VGNC:69384]                           | 2.611371925 | 7.24E-05    | 0.000340102 |
| ENSMMUG00000001715 | zinc finger protein 627 [Source:VGNC Symbol;Acc:VGNC:79856]                                          | 1.166726549 | 3.12E-10    | 3.67E-09    |

|                    |                                                                                                  |             |             |             |
|--------------------|--------------------------------------------------------------------------------------------------|-------------|-------------|-------------|
| ENSMMUG00000053329 |                                                                                                  | 1.75173683  | 3.00E-08    | 2.62E-07    |
| ENSMMUG00000012587 | zinc finger protein 69 [Source:NCBI gene;Acc:717030]                                             | 0.750950872 | 0.000433882 | 0.001712514 |
| ENSMMUG00000054946 | zinc finger protein 433 [Source:NCBI gene;Acc:106992362]                                         | 0.875651818 | 0.015282663 | 0.038861779 |
| ENSMMUG00000005236 | zinc finger protein 709 [Source:NCBI gene;Acc:717515]                                            | 1.486465832 | 2.44E-07    | 1.84E-06    |
| ENSMMUG00000058614 |                                                                                                  | 2.145512905 | 0.000109513 | 0.000495145 |
| ENSMMUG00000016860 | zinc finger protein 490 [Source:NCBI gene;Acc:100426568]                                         | 0.971113455 | 0.001502446 | 0.005166072 |
| ENSMMUG00000016862 | zinc finger protein 791 [Source:VGNC Symbol;Acc:VGNC:79639]                                      | 0.866313721 | 0.015177264 | 0.038633509 |
| ENSMMUG00000017971 | nucleus accumbens associated 1 [Source:VGNC Symbol;Acc:VGNC:74996]                               | 1.883817421 | 1.31E-05    | 7.22E-05    |
| ENSMMUG00000057038 |                                                                                                  | 1.386143009 | 0.000419533 | 0.001662661 |
| ENSMMUG00000011427 | syntaxin 10 [Source:VGNC Symbol;Acc:VGNC:78040]                                                  | 2.21488186  | 1.64E-32    | 2.09E-30    |
| ENSMMUG00000003555 | calcium voltage-gated channel subunit alpha1 A [Source:VGNC Symbol;Acc:VGNC:70498]               | 0.468067445 | 0.000119055 | 0.000532926 |
| ENSMMUG00000058941 | Metazoan signal recognition particle RNA [Source:RFAM;Acc:RF00017]                               | 1.467669936 | 0.014843686 | 0.037921078 |
| ENSMMUG00000014137 | adhesion G protein-coupled receptor L1 [Source:VGNC Symbol;Acc:VGNC:69658]                       | 0.360944308 | 0.003318317 | 0.010368868 |
| ENSMMUG00000060000 |                                                                                                  | 1.707099053 | 0.0001971   | 0.000841391 |
| ENSMMUG00000005727 | protein kinase N1 [Source:VGNC Symbol;Acc:VGNC:76014]                                            | -1.61438549 | 2.30E-16    | 5.58E-15    |
| ENSMMUG00000005729 | GIPC PDZ domain containing family member 1 [Source:VGNC Symbol;Acc:VGNC:72932]                   | 1.279829181 | 1.12E-12    | 1.83E-11    |
| ENSMMUG00000017906 | DnaJ heat shock protein family (Hsp40) member B1 [Source:NCBI gene;Acc:718890]                   | 2.060606414 | 2.18E-06    | 1.39E-05    |
| ENSMMUG00000018932 | adhesion G protein-coupled receptor E2 [Source:NCBI gene;Acc:654420]                             | 2.936077665 | 4.22E-26    | 2.82E-24    |
| ENSMMUG00000060289 |                                                                                                  | 3.145402304 | 2.48E-34    | 3.91E-32    |
| ENSMMUG00000053889 | olfactory receptor 7C1 [Source:NCBI gene;Acc:114674087]                                          | 1.527757622 | 3.36E-06    | 2.05E-05    |
| ENSMMUG00000064639 | olfactory receptor 7A10-like [Source:NCBI gene;Acc:114674167]                                    | 1.697506569 | 0.019140396 | 0.047010944 |
| ENSMMUG00000053457 | caspase 14 [Source:NCBI gene;Acc:718049]                                                         | 2.85472606  | 2.12E-16    | 5.15E-15    |
| ENSMMUG00000053220 | olfactory receptor 111 [Source:NCBI gene;Acc:719077]                                             | 1.787855416 | 0.00701423  | 0.019912142 |
| ENSMMUG00000007726 | synapse defective Rho GTPase homolog 1 [Source:NCBI gene;Acc:719089]                             | 3.00171754  | 2.45E-15    | 5.37E-14    |
| ENSMMUG00000007729 | ilvB acetolactate synthase like [Source:VGNC Symbol;Acc:VGNC:73739]                              | 2.413487833 | 1.43E-12    | 2.31E-11    |
| ENSMMUG00000013637 | notch receptor 3 [Source:NCBI gene;Acc:719119]                                                   | 0.832259814 | 0.004023964 | 0.012299132 |
| ENSMMUG00000028863 | WIZ zinc finger [Source:VGNC Symbol;Acc:VGNC:79901]                                              | 0.783481645 | 0.004768211 | 0.014265195 |
| ENSMMUG00000016996 | cytochrome P450, family 4, subfamily F, polypeptide 22 [Source:NCBI gene;Acc:718303]             | 0.760529661 | 4.68E-05    | 0.000229381 |
| ENSMMUG00000010734 | cytochrome P450, family 4, subfamily F, polypeptide 8 [Source:NCBI gene;Acc:718335]              | 0.686132384 | 4.45E-07    | 3.20E-06    |
| ENSMMUG00000056778 |                                                                                                  | 3.282818042 | 0.019743045 | 0.04832305  |
| ENSMMUG00000057552 | hematopoietic SH2 domain containing [Source:NCBI gene;Acc:719440]                                | 3.873544797 | 3.79E-05    | 0.000188857 |
| ENSMMUG00000004283 | calcium and integrin binding family member 3 [Source:VGNC Symbol;Acc:VGNC:71339]                 | 3.128520838 | 5.44E-17    | 1.40E-15    |
| ENSMMUG00000000994 | epidermal growth factor receptor pathway substrate 15 like 1 [Source:VGNC Symbol;Acc:VGNC:72100] | 2.264069335 | 6.99E-07    | 4.88E-06    |
| ENSMMUG00000039774 | Metazoan signal recognition particle RNA [Source:RFAM;Acc:RF00017]                               | 0.834137379 | 4.56E-07    | 3.28E-06    |
| ENSMMUG00000012959 | solute carrier family 35 member E1 [Source:VGNC Symbol;Acc:VGNC:77536]                           | 0.719701033 | 3.39E-05    | 0.000170891 |
| ENSMMUG00000018503 | NACHT and WD repeat domain containing 1 [Source:NCBI gene;Acc:719640]                            | 0.524445933 | 0.0007399   | 0.002743866 |
| ENSMMUG00000057655 |                                                                                                  | 0.873891099 | 1.80E-05    | 9.69E-05    |
| ENSMMUG00000011588 | myosin IXB [Source:HGNC Symbol;Acc:HGNC:7609]                                                    | 1.05174147  | 6.57E-09    | 6.34E-08    |
| ENSMMUG00000013923 | BRISC and BRCA1 A complex member 1 [Source:VGNC Symbol;Acc:VGNC:70126]                           | 0.618599001 | 0.003093282 | 0.009747849 |
| ENSMMUG00000016228 | ankyrin repeat and LEM domain containing 1 [Source:VGNC Symbol;Acc:VGNC:69715]                   | 1.055696984 | 0.011948022 | 0.031556397 |
| ENSMMUG00000016231 | DET1 and DDB1 associated 1 [Source:VGNC Symbol;Acc:VGNC:71774]                                   | 0.942872625 | 0.016902334 | 0.042384445 |

|                     |                                                                                              |             |             |             |
|---------------------|----------------------------------------------------------------------------------------------|-------------|-------------|-------------|
| ENSMMUG00000023403  | GTP binding protein 3, mitochondrial [Source:VGNC Symbol;Acc:VGNC:73170]                     | 2.945475906 | 1.86E-06    | 1.20E-05    |
| ENSMMUG00000000194  | solute carrier family 27 member 1 [Source:VGNC Symbol;Acc:VGNC:77438]                        | 1.010016218 | 6.31E-09    | 6.11E-08    |
| ENSMMUG00000000196  | niban apoptosis regulator 3 [Source:VGNC Symbol;Acc:VGNC:75241]                              | 0.992653987 | 0.00049014  | 0.001910321 |
| ENSMMUG000000059371 |                                                                                              | 1.385967083 | 0.000451451 | 0.001773986 |
| ENSMMUG00000000198  | collagen beta(1-O)galactosyltransferase 1 [Source:NCBI gene;Acc:719980]                      | 1.338430442 | 4.23E-19    | 1.33E-17    |
| ENSMMUG00000015476  | unc-13 homolog A [Source:NCBI gene;Acc:720000]                                               | 1.235924824 | 6.89E-14    | 1.31E-12    |
| ENSMMUG000000057222 | Metazoan signal recognition particle RNA [Source:RFAM;Acc:RF00017]                           | 1.579979465 | 0.011235059 | 0.029934588 |
| ENSMMUG000000038308 | coiled-coil domain containing 124 [Source:NCBI gene;Acc:720072]                              | -0.59723477 | 0.009183057 | 0.02515418  |
|                     |                                                                                              | -           |             |             |
| ENSMMUG00000007398  | potassium calcium-activated channel subfamily N member 1 [Source:VGNC Symbol;Acc:VGNC:74002] | 1.466151613 | 1.30E-07    | 1.03E-06    |
| ENSMMUG00000007401  | arrestin domain containing 2 [Source:VGNC Symbol;Acc:VGNC:69901]                             | 1.468709467 | 1.58E-10    | 1.94E-09    |
| ENSMMUG00000003161  | microtubule associated serine/threonine kinase 3 [Source:VGNC Symbol;Acc:VGNC:74533]         | 0.712057511 | 0.000285664 | 0.001172219 |
|                     |                                                                                              | -           |             |             |
| ENSMMUG000000057067 | MPV17 mitochondrial inner membrane protein like 2 [Source:NCBI gene;Acc:719413]              | 1.546126384 | 0.006164496 | 0.017806678 |
|                     |                                                                                              | -           |             |             |
| ENSMMUG000000011317 | RAB3D, member RAS oncogene family [Source:VGNC Symbol;Acc:VGNC:81542]                        | 1.142200536 | 0.001246041 | 0.004383013 |
|                     |                                                                                              | -           |             |             |
| ENSMMUG000000061452 |                                                                                              | 2.025822586 | 9.34E-05    | 0.000428946 |
|                     |                                                                                              | -           |             |             |
| ENSMMUG000000005028 | phosphodiesterase 4C [Source:NCBI gene;Acc:720171]                                           | 0.998464603 | 4.84E-05    | 0.00023564  |
|                     |                                                                                              | -           |             |             |
| ENSMMUG000000065139 | leucine-rich repeat extensin-like protein 5 [Source:NCBI gene;Acc:721121]                    | 2.997256318 | 0.003597594 | 0.011126658 |
|                     |                                                                                              | -           |             |             |
| ENSMMUG000000016354 | IQ motif containing N [Source:VGNC Symbol;Acc:VGNC:73683]                                    | 1.413337147 | 1.13E-14    | 2.34E-13    |
|                     |                                                                                              | -           |             |             |
| ENSMMUG000000038371 | JunD proto-oncogene, AP-1 transcription factor subunit [Source:NCBI gene;Acc:720182]         | 1.361223156 | 1.98E-05    | 0.000105451 |
| ENSMMUG000000013671 | elongation factor for RNA polymerase II [Source:VGNC Symbol;Acc:VGNC:72088]                  | 1.188133877 | 7.74E-11    | 9.92E-10    |
| ENSMMUG000000016085 | KxDL motif containing 1 [Source:NCBI gene;Acc:720235]                                        | 1.210138573 | 2.22E-13    | 3.94E-12    |
| ENSMMUG000000064485 | ubiquitin A-52 residue ribosomal protein fusion product 1 [Source:NCBI gene;Acc:720243]      | 0.967446019 | 2.11E-07    | 1.61E-06    |
| ENSMMUG000000054512 |                                                                                              | 1.52567234  | 4.26E-07    | 3.07E-06    |
| ENSMMUG000000009988 | transmembrane protein 59 like [Source:VGNC Symbol;Acc:VGNC:78919]                            | 2.204133193 | 3.89E-31    | 4.06E-29    |
| ENSMMUG000000064204 | kelch like family member 26 [Source:NCBI gene;Acc:719583]                                    | 0.914990631 | 0.00112992  | 0.004020326 |
|                     |                                                                                              | -           |             |             |
| ENSMMUG000000006509 | CREB regulated transcription coactivator 1 [Source:VGNC Symbol;Acc:VGNC:71418]               | 1.190843516 | 3.01E-05    | 0.000153813 |
| ENSMMUG000000023286 | UPF1 RNA helicase and ATPase [Source:VGNC Symbol;Acc:VGNC:79971]                             | 2.806384748 | 2.88E-35    | 4.86E-33    |
| ENSMMUG000000050739 |                                                                                              | 2.070279334 | 1.09E-06    | 7.37E-06    |
| ENSMMUG000000019668 | armadillo repeat containing 6 [Source:VGNC Symbol;Acc:VGNC:69899]                            | 0.917035223 | 0.000357328 | 0.001438078 |
|                     |                                                                                              | -           |             |             |
| ENSMMUG000000008578 | hyaluronan and proteoglycan link protein 4 [Source:VGNC Symbol;Acc:VGNC:73261]               | 1.123067792 | 0.00032417  | 0.001317894 |
| ENSMMUG000000008931 | MAU2 sister chromatid cohesion factor [Source:NCBI gene;Acc:720347]                          | 0.640150639 | 2.44E-08    | 2.16E-07    |
|                     |                                                                                              | -           |             |             |
| ENSMMUG000000003164 | GATA zinc finger domain containing 2A [Source:NCBI gene;Acc:720361]                          | 0.616183274 | 0.000370185 | 0.001485748 |
|                     |                                                                                              | -           |             |             |
| ENSMMUG000000011351 | YjeF N-terminal domain containing 3 [Source:NCBI gene;Acc:721218]                            | 0.437440522 | 0.002963442 | 0.009401585 |
|                     |                                                                                              | -           |             |             |
| ENSMMUG000000048108 | PBX homeobox 4 [Source:NCBI gene;Acc:106994668]                                              | 2.369327438 | 0.005246184 | 0.015448951 |
|                     |                                                                                              | -           |             |             |
| ENSMMUG000000053470 | Metazoan signal recognition particle RNA [Source:RFAM;Acc:RF00017]                           | 3.126545855 | 0.001940895 | 0.006484226 |
| ENSMMUG000000054055 | zinc finger protein 93 [Source:NCBI gene;Acc:720434]                                         | 1.252333364 | 3.32E-11    | 4.46E-10    |
|                     |                                                                                              | -           |             |             |
| ENSMMUG000000056683 |                                                                                              | 0.897039432 | 0.000396466 | 0.001580959 |
|                     |                                                                                              | -           |             |             |
| ENSMMUG000000061085 |                                                                                              | 0.795399323 | 1.37E-07    | 1.08E-06    |

|                    |                                                                           |   |             |             |             |
|--------------------|---------------------------------------------------------------------------|---|-------------|-------------|-------------|
| ENSMMUG00000062866 |                                                                           | - | 2.040814197 | 2.40E-07    | 1.81E-06    |
| ENSMMUG00000015533 | zinc finger protein 493 [Source:NCBI gene;Acc:693611]                     | - | 1.176757306 | 0.000325686 | 0.001323267 |
| ENSMMUG00000047027 | zinc finger protein 100-like [Source:NCBI gene;Acc:693860]                | - | 0.983377017 | 0.000722273 | 0.002686558 |
| ENSMMUG00000046906 |                                                                           | - | 0.806162044 | 5.26E-05    | 0.000254177 |
| ENSMMUG00000061186 |                                                                           | - | 0.960537838 | 1.18E-05    | 6.53E-05    |
| ENSMMUG00000040273 | zinc finger protein 257 [Source:NCBI gene;Acc:694388]                     | - | 1.195256747 | 0.000150845 | 0.00065989  |
| ENSMMUG00000063815 | zinc finger protein 208-like [Source:NCBI gene;Acc:721315]                | - | 0.956010442 | 0.001217345 | 0.004294296 |
| ENSMMUG00000060408 |                                                                           | - | 1.503095567 | 1.99E-05    | 0.000105729 |
| ENSMMUG00000037794 | zinc finger protein 724 [Source:NCBI gene;Acc:698907]                     | - | 0.811863718 | 0.01211605  | 0.031926266 |
| ENSMMUG00000003688 | zinc finger protein 91 [Source:HGNC Symbol;Acc:HGNC:13166]                | - | 1.231292667 | 0.000357338 | 0.001438078 |
| ENSMMUG00000003645 | zinc finger protein 726 [Source:HGNC Symbol;Acc:HGNC:32462]               | - | 1.942766559 | 8.46E-05    | 0.000392392 |
| ENSMMUG00000052284 | zinc finger protein 254 [Source:NCBI gene;Acc:114674197]                  | - | 3.839134406 | 0.002741651 | 0.008777783 |
| ENSMMUG00000059910 |                                                                           | - | 0.410209282 | 0.015355579 | 0.038980354 |
| ENSMMUG00000051220 |                                                                           | - | 1.023403918 | 0.013893455 | 0.035901715 |
| ENSMMUG00000058669 |                                                                           | - | 0.879636924 | 0.013383162 | 0.03474655  |
| ENSMMUG00000020668 | cyclin E1 [Source:VGNC Symbol;Acc:VGNC:70727]                             | - | 2.903072577 | 1.24E-44    | 6.12E-42    |
| ENSMMUG00000063586 | zinc finger protein 536 [Source:NCBI gene;Acc:713142]                     | - | 1.890929012 | 2.39E-06    | 1.51E-05    |
| ENSMMUG00000058740 |                                                                           | - | -0.90897203 | 1.97E-07    | 1.51E-06    |
| ENSMMUG00000057215 |                                                                           | - | 0.935291656 | 0.003904736 | 0.011961899 |
| ENSMMUG00000050177 |                                                                           | - | 1.975053141 | 1.18E-08    | 1.09E-07    |
| ENSMMUG00000060455 |                                                                           | - | 1.986684001 | 0.000643848 | 0.002433921 |
| ENSMMUG00000010840 | zinc finger protein 507 [Source:VGNC Symbol;Acc:VGNC:79410]               | - | 0.826486913 | 0.00250323  | 0.008086017 |
| ENSMMUG00000008041 | ankyrin repeat domain 27 [Source:VGNC Symbol;Acc:VGNC:69693]              | - | 0.668811026 | 9.92E-06    | 5.57E-05    |
| ENSMMUG00000015608 | tudor domain containing 12 [Source:VGNC Symbol;Acc:VGNC:82254]            | - | 1.291306265 | 1.56E-06    | 1.03E-05    |
| ENSMMUG00000028800 | solute carrier family 7 member 9 [Source:VGNC Symbol;Acc:VGNC:77633]      | - | 1.455136475 | 6.61E-09    | 6.38E-08    |
| ENSMMUG00000018351 | centrosomal protein 89 [Source:VGNC Symbol;Acc:VGNC:71105]                | - | 0.728134567 | 0.015201686 | 0.03867432  |
| ENSMMUG00000017939 | FA core complex associated protein 24 [Source:VGNC Symbol;Acc:VGNC:72388] | - | 0.858684048 | 0.003361119 | 0.010489352 |
| ENSMMUG00000028798 | rhopilin Rho GTPase binding protein 2 [Source:NCBI gene;Acc:716602]       | - | 0.443110125 | 0.017162109 | 0.042869139 |
| ENSMMUG00000011790 | G-patch domain containing 1 [Source:VGNC Symbol;Acc:VGNC:72996]           | - | 1.030186067 | 0.002254029 | 0.0073677   |
| ENSMMUG00000064983 |                                                                           | - | 0.733233476 | 0.009755323 | 0.026486898 |
| ENSMMUG00000061372 |                                                                           | - | 0.779371035 | 0.010765408 | 0.028802272 |

|                     |                                                                                                |   |             |             |             |
|---------------------|------------------------------------------------------------------------------------------------|---|-------------|-------------|-------------|
| ENSMMUG00000006124  | CCAAT enhancer binding protein alpha [Source:VGNC Symbol;Acc:VGNC:71000]                       | - | 1.174740429 | 0.003397806 | 0.010590472 |
| ENSMMUG000000062413 | CCAAT enhancer binding protein gamma [Source:NCBI gene;Acc:704322]                             | - | 1.245882506 | 5.04E-05    | 0.000245021 |
| ENSMMUG00000006128  | peptidase D [Source:VGNC Symbol;Acc:VGNC:82205]                                                | - | 1.280279333 | 6.55E-06    | 3.81E-05    |
| ENSMMUG000000011319 | potassium channel tetramerization domain containing 15 [Source:VGNC Symbol;Acc:VGNC:73894]     | - | 0.800721095 | 3.06E-05    | 0.000155798 |
| ENSMMUG000000005880 | glucose-6-phosphate isomerase [Source:NCBI gene;Acc:717980]                                    | - | 1.322156312 | 0.006495709 | 0.018617237 |
| ENSMMUG000000015744 | zinc finger protein 302 [Source:NCBI gene;Acc:706279]                                          | - | 2.621761428 | 3.67E-24    | 2.03E-22    |
| ENSMMUG000000006440 | zinc finger protein 599 [Source:VGNC Symbol;Acc:VGNC:79605]                                    | - | 1.97810027  | 0.002676908 | 0.008587183 |
| ENSMMUG000000059543 | zinc finger protein 30 [Source:NCBI gene;Acc:718310]                                           | - | 0.933436447 | 1.66E-13    | 2.99E-12    |
| ENSMMUG000000008313 | zinc finger protein 792 [Source:VGNC Symbol;Acc:VGNC:79456]                                    | - | -0.85438461 | 2.29E-10    | 2.76E-09    |
| ENSMMUG000000001538 | GRAM domain containing 1A [Source:VGNC Symbol;Acc:VGNC:73029]                                  | - | 1.224289509 | 3.62E-17    | 9.55E-16    |
| ENSMMUG000000004843 | sodium voltage-gated channel beta subunit 1 [Source:VGNC Symbol;Acc:VGNC:76983]                | - | 1.175816878 | 1.06E-11    | 1.50E-10    |
| ENSMMUG000000058405 | dermokine [Source:NCBI gene;Acc:718709]                                                        | - | 0.722205646 | 0.010481787 | 0.028160309 |
| ENSMMUG000000018954 | RNA binding motif protein 42 [Source:VGNC Symbol;Acc:VGNC:76553]                               | - | 2.075510331 | 0.015424374 | 0.039128201 |
| ENSMMUG000000055747 | cytochrome c oxidase subunit 6B [Source:NCBI gene;Acc:692062]                                  | - | 1.654663167 | 2.52E-16    | 6.07E-15    |
| ENSMMUG000000065025 |                                                                                                | - | 1.754440318 | 3.45E-21    | 1.40E-19    |
| ENSMMUG000000002381 | lysine methyltransferase 2B [Source:VGNC Symbol;Acc:VGNC:74053]                                | - | 0.983121135 | 5.03E-17    | 1.31E-15    |
| ENSMMUG000000002384 | IGF like family receptor 1 [Source:VGNC Symbol;Acc:VGNC:73434]                                 | - | 1.870644926 | 1.51E-19    | 4.97E-18    |
| ENSMMUG000000048190 | U2 small nuclear RNA auxiliary factor 1 like 4 [Source:NCBI gene;Acc:718865]                   | - | 1.792660336 | 4.32E-06    | 2.60E-05    |
| ENSMMUG000000002386 | lin-37 DREAM MuvB core complex component [Source:NCBI gene;Acc:710495]                         | - | 1.072846122 | 0.012541547 | 0.032872241 |
| ENSMMUG000000019749 | NPHS1 adhesion molecule, nephrin [Source:NCBI gene;Acc:718929]                                 | - | 0.903621267 | 0.000439788 | 0.001732287 |
| ENSMMUG000000019756 | NFKB inhibitor delta [Source:VGNC Symbol;Acc:VGNC:75179]                                       | - | 0.946239875 | 4.56E-06    | 2.74E-05    |
| ENSMMUG000000008004 | transmembrane immune signaling adaptor TYROBP [Source:NCBI gene;Acc:574207]                    | - | 1.089180332 | 8.40E-12    | 1.22E-10    |
| ENSMMUG000000062667 | leucine rich repeat and fibronectin type III domain containing 3 [Source:NCBI gene;Acc:711565] | - | -0.84194567 | 0.001695539 | 0.005748707 |
| ENSMMUG000000062586 |                                                                                                | - | 1.240460561 | 0.008731164 | 0.024098858 |
| ENSMMUG000000053233 |                                                                                                | - | 0.873107975 | 0.004380954 | 0.013245575 |
| ENSMMUG000000051879 | CAP-Gly domain containing linker protein 3 [Source:NCBI gene;Acc:712058]                       | - | 2.296685867 | 1.81E-05    | 9.72E-05    |
| ENSMMUG000000019704 | WD repeat domain 62 [Source:NCBI gene;Acc:719053]                                              | - | 3.776443094 | 0.00013179  | 0.000585165 |
| ENSMMUG000000028785 | zinc finger protein 146 [Source:VGNC Symbol;Acc:VGNC:78846]                                    | - | 2.933762389 | 1.55E-06    | 1.02E-05    |
| ENSMMUG000000057189 |                                                                                                | - | 3.025118273 | 0.001263994 | 0.004437745 |
| ENSMMUG000000060977 | ZFP14 zinc finger protein [Source:NCBI gene;Acc:719135]                                        | - | 1.471524719 | 0.008963544 | 0.024634795 |
| ENSMMUG000000061035 | ZFP82 zinc finger protein [Source:NCBI gene;Acc:719145]                                        | - | 0.967837669 | 1.09E-05    | 6.08E-05    |
| ENSMMUG000000022793 | zinc finger protein 529 [Source:VGNC Symbol;Acc:VGNC:79801]                                    | - | 0.842086529 | 0.000207092 | 0.000880243 |
| ENSMMUG000000063196 |                                                                                                | - | 1.058004788 | 0.007815018 | 0.02187556  |
| ENSMMUG000000016449 | zinc finger protein 382 [Source:VGNC Symbol;Acc:VGNC:79078]                                    | - | 0.815080836 | 0.000512269 | 0.001988728 |
| ENSMMUG000000062165 |                                                                                                | - | 0.741604947 | 0.001286663 | 0.00450986  |
| ENSMMUG000000014214 | zinc finger protein 420 [Source:VGNC Symbol;Acc:VGNC:82277]                                    | - | 0.576935281 | 0.000398096 | 0.001586179 |
| ENSMMUG000000000107 | zinc finger protein 585A [Source:NCBI gene;Acc:100424957]                                      | - | 0.523530874 | 0.000756028 | 0.00279738  |



|                    |                                                                                                     |   |             |             |             |
|--------------------|-----------------------------------------------------------------------------------------------------|---|-------------|-------------|-------------|
| ENSMMUG00000011092 | zinc finger protein 540 [Source:VGNC Symbol;Acc:VGNC:79490]                                         | - | 1.922797404 | 0.007129734 | 0.020179525 |
| ENSMMUG00000006820 | WD repeat domain 87 [Source:NCBI gene;Acc:719441]                                                   | - | 0.288753092 | 0.005711343 | 0.016653404 |
| ENSMMUG00000028771 | Yip1 interacting factor homolog B, membrane trafficking protein [Source:VGNC Symbol;Acc:VGNC:79852] | - | 1.835273721 | 4.91E-10    | 5.64E-09    |
| ENSMMUG00000062296 | potassium two pore domain channel subfamily K member 6 [Source:NCBI gene;Acc:714912]                | - | 4.774375229 | 1.85E-08    | 1.66E-07    |
| ENSMMUG00000056109 | Metazoan signal recognition particle RNA [Source:RFAM;Acc:RF00017]                                  | - | 4.288944607 | 6.40E-06    | 3.73E-05    |
| ENSMMUG00000014273 | cation channel sperm associated auxiliary subunit gamma [Source:VGNC Symbol;Acc:VGNC:70626]         | - | 3.618635888 | 2.80E-13    | 4.90E-12    |
| ENSMMUG00000038221 | proteasome 26S subunit, non-ATPase 8 [Source:NCBI gene;Acc:721897]                                  | - | 0.638228023 | 0.000270151 | 0.001116688 |
| ENSMMUG00000022975 | sprouty related EVH1 domain containing 3 [Source:VGNC Symbol;Acc:VGNC:78030]                        | - | 2.969747519 | 9.78E-14    | 1.82E-12    |
| ENSMMUG00000021630 | mitogen-activated protein kinase kinase kinase 1 [Source:NCBI gene;Acc:694259]                      | - | 1.901747998 | 0.011679898 | 0.030958515 |
| ENSMMUG00000006431 | calpain 12 [Source:VGNC Symbol;Acc:VGNC:70473]                                                      | - | 0.948302755 | 0.007866067 | 0.022005377 |
| ENSMMUG00000028766 | galectin 4 [Source:VGNC Symbol;Acc:VGNC:74257]                                                      | - | 1.045800117 | 0.000224753 | 0.000947439 |
| ENSMMUG00000004877 | heterogeneous nuclear ribonucleoprotein L [Source:VGNC Symbol;Acc:VGNC:81187]                       | - | 0.797509591 | 0.003169299 | 0.009966222 |
| ENSMMUG00000012787 | acid phosphatase 7, tartrate resistant (putative) [Source:NCBI gene;Acc:695532]                     | - | 1.3076313   | 0.000177553 | 0.000764772 |
| ENSMMUG00000005552 | PAF1 homolog, Paf1/RNA polymerase II complex component [Source:VGNC Symbol;Acc:VGNC:81492]          | - | 4.333199605 | 1.09E-08    | 1.02E-07    |
| ENSMMUG00000005554 | mediator complex subunit 29 [Source:VGNC Symbol;Acc:VGNC:74557]                                     | - | 6.151843006 | 2.20E-83    | 3.27E-79    |
| ENSMMUG00000038702 | ZFP36 ring finger protein [Source:NCBI gene;Acc:722000]                                             | - | 6.263417616 | 4.19E-12    | 6.35E-11    |
| ENSMMUG00000019369 | pleckstrin homology and RhoGEF domain containing G2 [Source:VGNC Symbol;Acc:VGNC:76133]             | - | 5.598614979 | 2.68E-17    | 7.19E-16    |
| ENSMMUG00000019093 | delta like canonical Notch ligand 3 [Source:VGNC Symbol;Acc:VGNC:71925]                             | - | 2.911530529 | 0.001005348 | 0.003617009 |
| ENSMMUG00000048215 |                                                                                                     | - | 4.694008631 | 8.98E-36    | 1.62E-33    |
| ENSMMUG00000022726 | dual specificity tyrosine phosphorylation regulated kinase 1B [Source:VGNC Symbol;Acc:VGNC:72016]   | - | 2.295411435 | 5.49E-07    | 3.90E-06    |
| ENSMMUG00000022724 |                                                                                                     | - | 1.726145093 | 0.000275242 | 0.001135736 |
| ENSMMUG00000051261 |                                                                                                     | - | 1.875268527 | 2.65E-09    | 2.72E-08    |
| ENSMMUG00000017188 | proteasome 26S subunit, ATPase 4 [Source:VGNC Symbol;Acc:VGNC:76448]                                | - | 0.79000709  | 0.002533825 | 0.008179499 |
| ENSMMUG00000017191 | zinc finger protein 546 [Source:VGNC Symbol;Acc:VGNC:79732]                                         | - | 0.889522366 | 0.001556166 | 0.005324859 |
| ENSMMUG00000041976 | zinc finger protein 780B [Source:NCBI gene;Acc:701034]                                              | - | 0.800575318 | 2.34E-06    | 1.48E-05    |
| ENSMMUG00000003621 | AKT serine/threonine kinase 2 [Source:VGNC Symbol;Acc:VGNC:69777]                                   | - | 1.222895469 | 7.08E-10    | 7.98E-09    |
| ENSMMUG00000053624 |                                                                                                     | - | 1.225707835 | 1.33E-05    | 7.34E-05    |
| ENSMMUG00000008946 | chromosome 19 C19orf47 homolog [Source:VGNC Symbol;Acc:VGNC:70404]                                  | - | -0.94526901 | 3.46E-08    | 2.97E-07    |
| ENSMMUG00000022625 | periaxin [Source:VGNC Symbol;Acc:VGNC:76248]                                                        | - | 1.773399152 | 7.50E-05    | 0.000350751 |
| ENSMMUG00000051535 |                                                                                                     | - | 1.257945672 | 0.003356901 | 0.010480355 |
| ENSMMUG00000063763 | cytochrome P450 2A13-like [Source:NCBI gene;Acc:114674219]                                          | - | 1.200893675 | 0.000511713 | 0.001987612 |
| ENSMMUG00000057008 |                                                                                                     | - | 0.637977239 | 0.016312753 | 0.041107583 |
| ENSMMUG00000009145 | AXL receptor tyrosine kinase [Source:VGNC Symbol;Acc:VGNC:70200]                                    | - | 0.803156706 | 0.00031278  | 0.001275374 |
| ENSMMUG00000014346 | transmembrane protein 91 [Source:NCBI gene;Acc:100426021]                                           | - | 1.072057426 | 0.005793576 | 0.016866653 |
| ENSMMUG00000059229 | CEA cell adhesion molecule 7 [Source:NCBI gene;Acc:705572]                                          | - | 2.002603177 | 9.09E-26    | 5.76E-24    |
| ENSMMUG00000022305 | Rho guanine nucleotide exchange factor 1 [Source:VGNC Symbol;Acc:VGNC:70012]                        | - | 1.155063362 | 3.55E-07    | 2.60E-06    |
| ENSMMUG00000022309 | ETS repressor factor like [Source:NCBI gene;Acc:722195]                                             | - | -1.14017057 | 0.005334508 | 0.015687241 |

|                    |                                                                                                   |             |             |             |
|--------------------|---------------------------------------------------------------------------------------------------|-------------|-------------|-------------|
| ENSMMUG00000017427 | ATPase Na <sup>+</sup> /K <sup>+</sup> transporting subunit alpha 3 [Source:NCBI gene;Acc:706513] | 1.623621861 | 0.000744168 | 0.002757623 |
| ENSMMUG00000017431 | glutamate ionotropic receptor kainate type subunit 5 [Source:VGNC Symbol;Acc:VGNC:73280]          | 1.138255235 | 0.000215892 | 0.000913982 |
| ENSMMUG00000013376 | POU class 2 homeobox 2 [Source:NCBI gene;Acc:706835]                                              | 1.180454824 | 1.47E-11    | 2.06E-10    |
| ENSMMUG00000012174 | capicua transcriptional repressor [Source:NCBI gene;Acc:707463]                                   | 1.975033636 | 0.006673078 | 0.01906043  |
| ENSMMUG00000050799 |                                                                                                   | 3.864292876 | 5.47E-05    | 0.000263559 |
| ENSMMUG00000055813 | pregnancy-specific beta-1-glycoprotein 5-like [Source:NCBI gene;Acc:114674020]                    | 0.922819652 | 0.000664378 | 0.002500059 |
| ENSMMUG00000064477 | Metazoan signal recognition particle RNA [Source:RFAM;Acc:RF00017]                                | 1.431167143 | 0.015190421 | 0.038660365 |
| ENSMMUG00000019265 | zinc finger protein 575 [Source:VGNC Symbol;Acc:VGNC:79667]                                       | 0.732132882 | 0.005081067 | 0.015052881 |
| ENSMMUG00000004467 | X-ray repair cross complementing 1 [Source:NCBI gene;Acc:711457]                                  | -0.62126163 | 0.001150298 | 0.004084991 |
| ENSMMUG00000004615 | cell adhesion molecule 4 [Source:VGNC Symbol;Acc:VGNC:70681]                                      | 0.339778162 | 0.014607458 | 0.037414267 |
| ENSMMUG00000014543 | SMG9 nonsense mediated mRNA decay factor [Source:VGNC Symbol;Acc:VGNC:77775]                      | 1.512158804 | 0.003518783 | 0.010910212 |
| ENSMMUG00000021474 | zinc finger protein 45 [Source:NCBI gene;Acc:712591]                                              | 1.013759089 | 1.42E-12    | 2.29E-11    |
| ENSMMUG00000064975 | zinc finger protein 221 [Source:NCBI gene;Acc:100423743]                                          | 2.612432207 | 5.63E-10    | 6.41E-09    |
| ENSMMUG00000047704 | zinc finger protein 223 [Source:NCBI gene;Acc:711652]                                             | 1.940115199 | 0.020473972 | 0.049799739 |
| ENSMMUG00000021469 | zinc finger protein 284 [Source:NCBI gene;Acc:713143]                                             | 1.032259993 | 0.01912759  | 0.046987272 |
| ENSMMUG00000012797 | zinc finger protein 233 [Source:VGNC Symbol;Acc:VGNC:79903]                                       | 2.148206083 | 1.61E-21    | 6.80E-20    |
| ENSMMUG00000012801 | zinc finger protein 235 [Source:VGNC Symbol;Acc:VGNC:78825]                                       | 2.205608834 | 8.44E-32    | 9.48E-30    |
| ENSMMUG00000012802 | zinc finger protein 112 [Source:NCBI gene;Acc:713527]                                             | 0.533908513 | 0.002628094 | 0.008445207 |
| ENSMMUG00000003273 | basal cell adhesion molecule (Lutheran blood group) [Source:NCBI gene;Acc:714568]                 | 0.785923669 | 5.62E-06    | 3.31E-05    |
| ENSMMUG00000014303 | translocase of outer mitochondrial membrane 40 [Source:VGNC Symbol;Acc:VGNC:78419]                | 2.918486953 | 0.001166599 | 0.004135945 |
| ENSMMUG00000002472 | CLPTM1 regulator of GABA type A receptor forward trafficking [Source:VGNC Symbol;Acc:VGNC:71265]  | 1.485129262 | 0.001065627 | 0.003810768 |
| ENSMMUG00000014155 | CLK4 associating serine/arginine rich protein [Source:VGNC Symbol;Acc:VGNC:71198]                 | 1.709261101 | 0.000874944 | 0.003186498 |
| ENSMMUG00000022931 | NTPase KAP family P-loop domain containing 1 [Source:VGNC Symbol;Acc:VGNC:75250]                  | 1.348442619 | 1.97E-12    | 3.13E-11    |
| ENSMMUG00000018879 | exocyst complex component 3 like 2 [Source:NCBI gene;Acc:713992]                                  | 0.861087739 | 2.13E-05    | 0.000112617 |
| ENSMMUG00000018672 | microtubule affinity regulating kinase 4 [Source:VGNC Symbol;Acc:VGNC:74508]                      | 0.430535076 | 0.001329047 | 0.004641961 |
| ENSMMUG00000013477 | creatine kinase, M-type [Source:VGNC Symbol;Acc:VGNC:71230]                                       | 3.796175395 | 5.98E-32    | 6.87E-30    |
| ENSMMUG00000014419 | ERCC excision repair 2, TFIIH core complex helicase subunit [Source:VGNC Symbol;Acc:VGNC:72423]   | 0.464190843 | 0.001711578 | 0.005797784 |
| ENSMMUG00000000715 | protein phosphatase 1 regulatory subunit 13 like [Source:NCBI gene;Acc:714389]                    | 0.530049987 | 8.55E-05    | 0.000396342 |
| ENSMMUG00000000717 | CD3e molecule associated protein [Source:NCBI gene;Acc:714440]                                    | -1.5349333  | 5.98E-11    | 7.79E-10    |
| ENSMMUG00000000718 | ERCC excision repair 1, endonuclease non-catalytic subunit [Source:VGNC Symbol;Acc:VGNC:72422]    | 1.108444053 | 1.72E-07    | 1.33E-06    |
| ENSMMUG00000053242 | outer mitochondrial membrane lipid metabolism regulator OPA3 [Source:NCBI gene;Acc:714806]        | 2.376749985 | 0.006051781 | 0.017518624 |
| ENSMMUG00000019031 | G protein-coupled receptor 4 [Source:VGNC Symbol;Acc:VGNC:73136]                                  | 3.006479804 | 0.013805057 | 0.035698168 |
| ENSMMUG00000019032 | EMAP like 2 [Source:NCBI gene;Acc:715009]                                                         | 2.793378218 | 0.012652281 | 0.033133202 |
| ENSMMUG00000006936 | gastric inhibitory polypeptide receptor [Source:VGNC Symbol;Acc:VGNC:73052]                       | 0.747955959 | 2.91E-05    | 0.00014907  |
| ENSMMUG00000032809 | mml-mir-642 [Source:miRBase;Acc:MI0007885]                                                        | 0.695433093 | 0.001933689 | 0.006468893 |
| ENSMMUG00000006937 | small nuclear ribonucleoprotein D2 polypeptide [Source:NCBI gene;Acc:715183]                      | 1.985268649 | 0.001177815 | 0.004171722 |
| ENSMMUG00000006940 | glutaminy-peptide cyclotransferase like [Source:VGNC Symbol;Acc:VGNC:76540]                       | 1.266276445 | 3.65E-05    | 0.000182693 |

|                    |                                                                                                         |   |             |             |             |
|--------------------|---------------------------------------------------------------------------------------------------------|---|-------------|-------------|-------------|
| ENSMMUG00000021360 | F-box protein 46 [Source:VGNC Symbol;Acc:VGNC:72570]                                                    | - | 0.819833843 | 0.002595353 | 0.00835448  |
| ENSMMUG00000049025 | basic helix-loop-helix and HMG-box containing 1 [Source:NCBI gene;Acc:716325]                           | - | 0.627450988 | 0.007211148 | 0.020376093 |
| ENSMMUG00000051573 | SIX homeobox 5 [Source:NCBI gene;Acc:715373]                                                            | - | 0.616968575 | 0.000116657 | 0.000522823 |
| ENSMMUG00000016457 | DM1 protein kinase [Source:NCBI gene;Acc:715328]                                                        | - | 0.967149274 | 0.000855552 | 0.003126623 |
| ENSMMUG00000051115 |                                                                                                         | - | 1.745293763 | 0.000896134 | 0.00325408  |
| ENSMMUG00000017927 | protein kinase D2 [Source:VGNC Symbol;Acc:VGNC:76273]                                                   | - | 1.884239122 | 0.005081235 | 0.015052881 |
| ENSMMUG00000017930 | striatin 4 [Source:VGNC Symbol;Acc:VGNC:78128]                                                          | - | 2.501403977 | 0.004606377 | 0.013853695 |
| ENSMMUG00000011332 | Rho GTPase activating protein 35 [Source:VGNC Symbol;Acc:VGNC:69942]                                    | - | 3.920047098 | 1.37E-56    | 2.63E-53    |
| ENSMMUG00000057361 | Metazoan signal recognition particle RNA [Source:RFAM;Acc:RF00017]                                      | - | 3.37688954  | 6.46E-31    | 6.65E-29    |
| ENSMMUG00000011330 | neuronal PAS domain protein 1 [Source:VGNC Symbol;Acc:VGNC:75377]                                       | - | 1.26665441  | 4.85E-06    | 2.89E-05    |
| ENSMMUG00000057454 | transmembrane protein 160 [Source:NCBI gene;Acc:716996]                                                 | - | 1.554042365 | 2.64E-06    | 1.66E-05    |
| ENSMMUG00000014709 | zinc finger CCCH-type containing 4 [Source:VGNC Symbol;Acc:VGNC:79094]                                  | - | 0.40587636  | 0.012005086 | 0.03168454  |
| ENSMMUG00000009506 | SUMO1 activating enzyme subunit 1 [Source:NCBI gene;Acc:717918]                                         | - | 0.34259136  | 0.003854894 | 0.011833592 |
| ENSMMUG00000055893 |                                                                                                         | - | 1.373356784 | 6.86E-07    | 4.80E-06    |
| ENSMMUG00000012466 | BCL2 binding component 3 [Source:NCBI gene;Acc:717955]                                                  | - | 1.053629393 | 1.60E-07    | 1.25E-06    |
| ENSMMUG00000003075 | coiled-coil domain containing 9 [Source:VGNC Symbol;Acc:VGNC:70851]                                     | - | 1.023858333 | 3.56E-08    | 3.05E-07    |
| ENSMMUG00000014718 | solute carrier family 8 member A2 [Source:VGNC Symbol;Acc:VGNC:77635]                                   | - | 0.344258313 | 0.005561696 | 0.016271444 |
| ENSMMUG00000014727 | NSF attachment protein alpha [Source:VGNC Symbol;Acc:VGNC:75131]                                        | - | 1.186982987 | 2.53E-10    | 3.03E-09    |
| ENSMMUG00000054090 |                                                                                                         | - | 1.018173582 | 0.005178295 | 0.015288497 |
| ENSMMUG00000006857 | epididymal sperm binding protein 1 [Source:VGNC Symbol;Acc:VGNC:72046]                                  | - | 1.048759807 | 0.000738614 | 0.002739782 |
| ENSMMUG00000059158 | Metazoan signal recognition particle RNA [Source:RFAM;Acc:RF00017]                                      | - | 1.682863993 | 0.003526228 | 0.010928726 |
| ENSMMUG00000063571 | Metazoan signal recognition particle RNA [Source:RFAM;Acc:RF00017]                                      | - | 3.024604612 | 0.017855858 | 0.044357433 |
| ENSMMUG00000055107 |                                                                                                         | - | 0.430519364 | 0.001578062 | 0.005383636 |
| ENSMMUG00000042157 | caspase recruitment domain-containing protein 8 [Source:NCBI gene;Acc:718594]                           | - | 0.470847487 | 0.001322959 | 0.004621785 |
| ENSMMUG00000022155 | sulfotransferase family 2B member 1 [Source:NCBI gene;Acc:718739]                                       | - | 0.716406588 | 0.001114047 | 0.003970515 |
| ENSMMUG00000064152 | netrin 5 [Source:NCBI gene;Acc:718157]                                                                  | - | 0.439370065 | 0.012527341 | 0.032840811 |
| ENSMMUG00000055036 | MEF2 activating motif and SAP domain containing transcriptional regulator [Source:NCBI gene;Acc:718823] | - | 0.548715046 | 0.001526131 | 0.005234163 |
| ENSMMUG00000018415 | Ras interacting protein 1 [Source:HGNC Symbol;Acc:HGNC:24716]                                           | - | -0.63396857 | 0.001882377 | 0.006317187 |
| ENSMMUG00000004019 | izumo sperm-egg fusion 1 [Source:VGNC Symbol;Acc:VGNC:73670]                                            | - | 1.059672521 | 0.00013574  | 0.000600006 |
| ENSMMUG00000028736 | hydroxysteroid 17-beta dehydrogenase 14 [Source:NCBI gene;Acc:106994816]                                | - | 1.015671409 | 0.000134122 | 0.00059445  |
| ENSMMUG00000009222 | pleckstrin homology domain containing A4 [Source:VGNC Symbol;Acc:VGNC:76027]                            | - | 1.107771212 | 0.005848629 | 0.017003563 |
| ENSMMUG00000048854 | TUB like protein 2 [Source:NCBI gene;Acc:718915]                                                        | - | 1.480158915 | 0.000154023 | 0.000671616 |
| ENSMMUG00000003904 | nucleobindin 1 [Source:VGNC Symbol;Acc:VGNC:75548]                                                      | - | 2.139671758 | 0.000418381 | 0.001658981 |
| ENSMMUG00000003911 | glycogen synthase 1 [Source:VGNC Symbol;Acc:VGNC:73334]                                                 | - | 1.889812274 | 0.004157165 | 0.012661538 |
| ENSMMUG00000007538 | transient receptor potential cation channel subfamily M member 4 [Source:VGNC Symbol;Acc:VGNC:79105]    | - | 2.965592261 | 3.71E-34    | 5.73E-32    |
| ENSMMUG00000061126 | golgi associated olfactory signaling regulator [Source:NCBI gene;Acc:719194]                            | - | 1.262862027 | 0.005174648 | 0.015283814 |
| ENSMMUG00000022116 | PIH1 domain containing 1 [Source:VGNC Symbol;Acc:VGNC:75868]                                            | - | 1.581674137 | 0.000502373 | 0.001953379 |

|                    |                                                                                   |             |             |             |
|--------------------|-----------------------------------------------------------------------------------|-------------|-------------|-------------|
| ENSMMUG00000051892 | fms related receptor tyrosine kinase 3 ligand [Source:NCBI gene;Acc:719239]       | 1.515452423 | 0.000136092 | 0.000601206 |
| ENSMMUG00000003819 | nitric oxide synthase interacting protein [Source:VGNC Symbol;Acc:VGNC:75207]     | 2.294081051 | 2.74E-14    | 5.40E-13    |
| ENSMMUG00000049747 | proline rich and Gla domain 2 [Source:NCBI gene;Acc:719318]                       | 0.476680168 | 0.001428009 | 0.004939904 |
| ENSMMUG00000012937 | proline rich 12 [Source:NCBI gene;Acc:719344]                                     | 3.686003646 | 9.65E-40    | 2.56E-37    |
| ENSMMUG00000028733 | RAS related [Source:VGNC Symbol;Acc:VGNC:76937]                                   | 3.084293363 | 1.17E-26    | 8.49E-25    |
| ENSMMUG00000012938 | SR-related CTD associated factor 1 [Source:VGNC Symbol;Acc:VGNC:77137]            | 4.012898316 | 1.49E-07    | 1.17E-06    |
| ENSMMUG00000003926 | BCL2 like 12 [Source:NCBI gene;Acc:718981]                                        | 3.989111168 | 0.000132372 | 0.00058757  |
|                    |                                                                                   | -           |             |             |
| ENSMMUG00000003029 | protein arginine methyltransferase 1 [Source:NCBI gene;Acc:719419]                | 1.433547359 | 1.59E-08    | 1.44E-07    |
|                    |                                                                                   | -           |             |             |
| ENSMMUG00000014735 | carnitine palmitoyltransferase 1C [Source:NCBI gene;Acc:719429]                   | 1.645163377 | 1.23E-06    | 8.22E-06    |
| ENSMMUG00000020175 | mediator complex subunit 25 [Source:VGNC Symbol;Acc:VGNC:74607]                   | -1.64594953 | 0.000114981 | 0.000516336 |
| ENSMMUG00000011627 | interleukin 4 induced 1 [Source:VGNC Symbol;Acc:VGNC:73625]                       | 2.955709441 | 1.82E-20    | 6.77E-19    |
| ENSMMUG00000044817 | nucleoporin 62 [Source:NCBI gene;Acc:100426308]                                   | 3.510078655 | 2.70E-82    | 2.00E-78    |
| ENSMMUG00000054473 | activating transcription factor 5 [Source:NCBI gene;Acc:719150]                   | 1.309666077 | 1.55E-10    | 1.91E-09    |
| ENSMMUG00000050456 | Metazoan signal recognition particle RNA [Source:RFAM;Acc:RF00017]                | 1.733117357 | 0.007302123 | 0.020595375 |
| ENSMMUG00000064146 | Metazoan signal recognition particle RNA [Source:RFAM;Acc:RF00017]                | 3.182960904 | 1.20E-19    | 4.02E-18    |
| ENSMMUG00000054052 | sialic acid binding Ig like lectin 11 [Source:NCBI gene;Acc:719127]               | 3.571748087 | 2.20E-09    | 2.29E-08    |
| ENSMMUG00000010837 | VRK serine/threonine kinase 3 [Source:VGNC Symbol;Acc:VGNC:81605]                 | 2.935136464 | 1.05E-11    | 1.50E-10    |
| ENSMMUG00000001427 | myosin heavy chain 14 [Source:VGNC Symbol;Acc:VGNC:75006]                         | 2.131037005 | 1.98E-19    | 6.41E-18    |
|                    |                                                                                   | -           |             |             |
| ENSMMUG00000055885 | napsin-A [Source:NCBI gene;Acc:719235]                                            | 1.069257262 | 0.000290757 | 0.001190484 |
| ENSMMUG00000023418 | nuclear receptor subfamily 1 group H member 2 [Source:VGNC Symbol;Acc:VGNC:75504] | 0.741197889 | 1.10E-05    | 6.14E-05    |
| ENSMMUG00000006718 | ER membrane protein complex subunit 10 [Source:NCBI gene;Acc:719285]              | 2.697215177 | 0.005567773 | 0.016286011 |
| ENSMMUG00000021269 | Josephin domain containing 2 [Source:VGNC Symbol;Acc:VGNC:73919]                  | 3.298264768 | 0.006964425 | 0.019789696 |
| ENSMMUG00000021059 | leucine rich repeat containing 4B [Source:VGNC Symbol;Acc:VGNC:74350]             | 0.610934848 | 9.03E-05    | 0.000416172 |
| ENSMMUG00000056558 |                                                                                   | 0.716203259 | 2.94E-06    | 1.82E-05    |
| ENSMMUG00000056529 | synaptotagmin 3 [Source:NCBI gene;Acc:719650]                                     | 2.283648574 | 0.00025984  | 0.001080299 |
| ENSMMUG00000046099 | chromosome 19 C19orf81 homolog [Source:NCBI gene;Acc:719661]                      | 3.244764979 | 8.07E-08    | 6.59E-07    |
| ENSMMUG00000059087 |                                                                                   | 4.310898689 | 9.51E-09    | 8.93E-08    |
| ENSMMUG00000012841 | kallikrein 3 [Source:NCBI gene;Acc:719444]                                        | 1.435458381 | 3.99E-07    | 2.89E-06    |
|                    |                                                                                   | -           |             |             |
| ENSMMUG00000065035 | kallikrein-2 [Source:NCBI gene;Acc:719436]                                        | 0.735710862 | 0.000243068 | 0.001017415 |
| ENSMMUG00000060764 |                                                                                   | 0.547286736 | 1.42E-06    | 9.37E-06    |
|                    |                                                                                   | -           |             |             |
| ENSMMUG00000028729 | kallikrein related peptidase 4 [Source:NCBI gene;Acc:719422]                      | 0.940007552 | 0.003413021 | 0.010624498 |
|                    |                                                                                   | -           |             |             |
| ENSMMUG00000013597 | kallikrein related peptidase 5 [Source:VGNC Symbol;Acc:VGNC:74191]                | 0.702623961 | 0.004898184 | 0.014601019 |
|                    |                                                                                   | -           |             |             |
| ENSMMUG00000061396 | kallikrein related peptidase 6 [Source:NCBI gene;Acc:719776]                      | 1.032995879 | 0.000112698 | 0.000507527 |
| ENSMMUG00000015445 | kallikrein related peptidase 8 [Source:VGNC Symbol;Acc:VGNC:74194]                | -0.61172925 | 0.014661587 | 0.037533461 |
|                    |                                                                                   | -           |             |             |
| ENSMMUG00000028728 | kallikrein related peptidase 9 [Source:NCBI gene;Acc:100424925]                   | 0.993249958 | 0.007306714 | 0.020600487 |
| ENSMMUG00000059154 | kallikrein related peptidase 10 [Source:NCBI gene;Acc:106994828]                  | -1.73909128 | 0.011970143 | 0.031609192 |
|                    |                                                                                   | -           |             |             |
| ENSMMUG00000064856 | kallikrein related peptidase 14 [Source:NCBI gene;Acc:722692]                     | 1.008237922 | 0.010206114 | 0.027544435 |
|                    |                                                                                   | -           |             |             |
| ENSMMUG00000064898 | cytosolic thiouridylase subunit 1 [Source:NCBI gene;Acc:719536]                   | 0.973211128 | 0.000689714 | 0.002583596 |
|                    |                                                                                   | -           |             |             |
| ENSMMUG00000044243 | sialic acid-binding Ig-like lectin 9 [Source:NCBI gene;Acc:719831]                | 1.142784405 | 0.005165959 | 0.015261189 |
|                    |                                                                                   | -           |             |             |
| ENSMMUG00000047370 | IgLON family member 5 [Source:NCBI gene;Acc:719890]                               | 1.293315846 | 0.000207309 | 0.000880897 |
|                    |                                                                                   | -           |             |             |
| ENSMMUG00000044652 | sialic acid-binding Ig-like lectin 13 [Source:NCBI gene;Acc:719667]               | 0.547349932 | 0.004052324 | 0.012367969 |

|                    |                                                                          |   |             |             |             |
|--------------------|--------------------------------------------------------------------------|---|-------------|-------------|-------------|
| ENSMMUG00000062017 |                                                                          | - | 2.379637277 | 7.43E-05    | 0.000348036 |
| ENSMMUG00000012764 | zinc finger protein 175 [Source:VGNC Symbol;Acc:VGNC:78856]              | - | 0.939428449 | 3.74E-05    | 0.000186376 |
| ENSMMUG00000012761 | sialic acid binding Ig like lectin 5 [Source:NCBI gene;Acc:719730]       | - | -0.52601537 | 1.98E-05    | 0.000105451 |
| ENSMMUG00000013053 | sperm acrosome associated 6 [Source:NCBI gene;Acc:114674203]             | - | 1.579196074 | 1.23E-12    | 2.00E-11    |
| ENSMMUG00000053150 | Metazoan signal recognition particle RNA [Source:RFAM;Acc:RF00017]       | - | 1.134246757 | 0.015933317 | 0.040274603 |
| ENSMMUG00000013049 | formyl peptide receptor 1 [Source:NCBI gene;Acc:719782]                  | - | 0.905890764 | 0.002385557 | 0.007753192 |
| ENSMMUG00000051078 |                                                                          | - | 0.872677584 | 1.78E-05    | 9.58E-05    |
| ENSMMUG00000002310 | zinc finger protein 577 [Source:VGNC Symbol;Acc:VGNC:79733]              | - | 0.696347502 | 5.82E-06    | 3.42E-05    |
| ENSMMUG00000023136 | zinc finger protein 613 [Source:VGNC Symbol;Acc:VGNC:79548]              | - | 0.532024427 | 3.25E-05    | 0.000164792 |
| ENSMMUG00000052090 |                                                                          | - | 0.479958404 | 0.000183438 | 0.000788061 |
| ENSMMUG00000023137 | zinc finger protein 350 [Source:VGNC Symbol;Acc:VGNC:79041]              | - | 1.565501091 | 3.62E-11    | 4.84E-10    |
| ENSMMUG00000003712 | zinc finger protein 615 [Source:VGNC Symbol;Acc:VGNC:79454]              | - | -1.11829946 | 6.71E-05    | 0.000317334 |
| ENSMMUG00000041450 | zinc finger protein 432 [Source:NCBI gene;Acc:100424341]                 | - | 1.670876236 | 4.87E-09    | 4.79E-08    |
| ENSMMUG00000038056 | zinc finger protein 841 [Source:NCBI gene;Acc:720128]                    | - | -1.6717474  | 0.015066773 | 0.038404991 |
| ENSMMUG00000001768 | zinc finger protein 616 [Source:NCBI gene;Acc:719902]                    | - | 0.640774861 | 0.000508227 | 0.001974589 |
| ENSMMUG00000056763 |                                                                          | - | 3.083149396 | 0.003425842 | 0.010659933 |
| ENSMMUG00000033290 | mml-mir-643 [Source:miRBase;Acc:MI0007886]                               | - | 0.781653647 | 0.000572054 | 0.002189306 |
| ENSMMUG00000058137 | zinc finger protein 816 [Source:NCBI gene;Acc:720058]                    | - | 1.773045791 | 6.33E-08    | 5.26E-07    |
| ENSMMUG00000046400 | endogenous retrovirus group V, member 1 [Source:NCBI gene;Acc:100428948] | - | 1.215100942 | 0.01154182  | 0.030636334 |
| ENSMMUG00000064519 |                                                                          | - | 1.656030753 | 8.13E-05    | 0.000378145 |
| ENSMMUG00000058242 | zinc finger protein 160 [Source:NCBI gene;Acc:722722]                    | - | 2.383592768 | 0.011900893 | 0.031448726 |
| ENSMMUG00000057187 |                                                                          | - | 0.751722258 | 4.91E-06    | 2.93E-05    |
| ENSMMUG00000060222 |                                                                          | - | 0.333058044 | 0.013151872 | 0.034211938 |
| ENSMMUG00000007972 | protein kinase C gamma [Source:VGNC Symbol;Acc:VGNC:76413]               | - | 0.528687267 | 0.000647054 | 0.002442925 |
| ENSMMUG00000055976 | CD99 antigen [Source:NCBI gene;Acc:106995376]                            | - | 1.14197823  | 3.57E-05    | 0.000179154 |
| ENSMMUG00000038768 | U6 spliceosomal RNA [Source:RFAM;Acc:RF00026]                            | - | 1.614915042 | 4.87E-05    | 0.000237302 |
| ENSMMUG00000042225 |                                                                          | - | 0.521985593 | 0.001385643 | 0.004813559 |

## SD 2 vs. Baseline

| Ensembl Gene ID    | Description                                                                           | Log2(FC)    | p-value     | FDR         |
|--------------------|---------------------------------------------------------------------------------------|-------------|-------------|-------------|
| ENSMMUG0000000632  | SH3 binding domain protein 5 like [Source:VGNC Symbol;Acc:VGNC:77334]                 | 5.183920678 | 7.52E-20    | 5.52E-18    |
| ENSMMUG00000064799 |                                                                                       | 1.711049402 | 0.001860073 | 0.007745598 |
| ENSMMUG00000049101 | olfactory receptor 2T10 [Source:NCBI gene;Acc:100431025]                              | 0.594080452 | 0.006834955 | 0.023395275 |
|                    |                                                                                       | -           |             |             |
| ENSMMUG00000017368 | olfactory receptor 2G6 [Source:NCBI gene;Acc:694380]                                  | 0.702042117 | 6.64E-05    | 0.000414917 |
| ENSMMUG00000038524 | olfactory receptor 2M4 [Source:NCBI gene;Acc:100424541]                               | 2.04559061  | 2.69E-24    | 2.99E-22    |
| ENSMMUG00000049432 | olfactory receptor 2T33 [Source:NCBI gene;Acc:706331]                                 | 0.874760839 | 5.47E-10    | 1.01E-08    |
| ENSMMUG00000064763 |                                                                                       | 0.693724414 | 0.005780996 | 0.020348267 |
| ENSMMUG0000005949  | olfactory receptor 2B11 [Source:NCBI gene;Acc:709256]                                 | -1.29993007 | 0.005688274 | 0.020065624 |
| ENSMMUG00000052686 |                                                                                       | 1.16405897  | 0.005923475 | 0.020749292 |
|                    |                                                                                       | -           |             |             |
| ENSMMUG00000004566 | zinc finger protein 124 [Source:VGNC Symbol;Acc:VGNC:78836]                           | 3.327315437 | 0.001729649 | 0.007279647 |
|                    |                                                                                       | -           |             |             |
| ENSMMUG00000011380 | consortin, connexin sorting protein [Source:VGNC Symbol;Acc:VGNC:71355]               | 4.720062773 | 3.99E-05    | 0.0002658   |
|                    |                                                                                       | -           |             |             |
| ENSMMUG00000059690 |                                                                                       | 3.435285327 | 0.008241502 | 0.027516471 |
|                    |                                                                                       | -           |             |             |
| ENSMMUG00000000021 | catsper channel auxiliary subunit epsilon [Source:VGNC Symbol;Acc:VGNC:70657]         | 2.945424687 | 0.000882106 | 0.004068247 |
|                    |                                                                                       | -           |             |             |
| ENSMMUG00000063991 |                                                                                       | 1.616382556 | 0.009618613 | 0.031379213 |
| ENSMMUG00000005668 | kynurenine 3-monooxygenase [Source:VGNC Symbol;Acc:VGNC:74197]                        | 1.089881152 | 7.91E-06    | 6.18E-05    |
| ENSMMUG00000005667 | fumarate hydratase [Source:VGNC Symbol;Acc:VGNC:72659]                                | 0.820123226 | 0.000138154 | 0.000796327 |
| ENSMMUG00000064824 | gremlin 2, DAN family BMP antagonist [Source:NCBI gene;Acc:708280]                    | 1.737101626 | 6.39E-06    | 5.09E-05    |
| ENSMMUG00000061845 |                                                                                       | 1.947801872 | 3.66E-07    | 3.93E-06    |
| ENSMMUG00000001060 | ryanodine receptor 2 [Source:VGNC Symbol;Acc:VGNC:76954]                              | 1.432684069 | 7.21E-35    | 2.76E-32    |
|                    |                                                                                       | -           |             |             |
| ENSMMUG00000015132 | galectin 8 [Source:VGNC Symbol;Acc:VGNC:74258]                                        | 0.932771259 | 0.004967085 | 0.017872901 |
| ENSMMUG00000052225 |                                                                                       | 2.604956735 | 0.00450172  | 0.016393164 |
| ENSMMUG00000046785 |                                                                                       | -1.7305501  | 0.000386705 | 0.001967994 |
|                    |                                                                                       | -           |             |             |
| ENSMMUG00000012615 | pecanex 2 [Source:NCBI gene;Acc:712828]                                               | 1.230815593 | 0.00021918  | 0.001201441 |
| ENSMMUG00000063981 | nucleoside-triphosphatase, cancer-related [Source:NCBI gene;Acc:712959]               | 2.453232218 | 1.67E-10    | 3.36E-09    |
|                    |                                                                                       | -           |             |             |
| ENSMMUG00000040055 |                                                                                       | 0.737719895 | 0.000836644 | 0.003886956 |
|                    |                                                                                       | -           |             |             |
| ENSMMUG00000061796 |                                                                                       | 1.207922105 | 6.53E-05    | 0.000408993 |
| ENSMMUG00000012068 | signal induced proliferation associated 1 like 2 [Source:NCBI gene;Acc:100425123]     | 1.597630175 | 0.000492963 | 0.002440804 |
| ENSMMUG00000064226 |                                                                                       | 1.360885497 | 0.005789978 | 0.020370017 |
|                    |                                                                                       | -           |             |             |
| ENSMMUG00000016204 | translin associated factor X [Source:NCBI gene;Acc:713347]                            | 2.731539136 | 0.007443354 | 0.025304967 |
|                    |                                                                                       | -           |             |             |
| ENSMMUG00000005801 | glyceronephosphate O-acyltransferase [Source:VGNC Symbol;Acc:VGNC:73100]              | 1.564660823 | 5.22E-12    | 1.37E-10    |
|                    |                                                                                       | -           |             |             |
| ENSMMUG00000005888 | tetratricopeptide repeat domain 13 [Source:VGNC Symbol;Acc:VGNC:79588]                | 0.466041065 | 0.006382789 | 0.02209205  |
| ENSMMUG00000009508 | TATA-box binding protein associated factor 5 like [Source:VGNC Symbol;Acc:VGNC:78148] | 1.539030577 | 0.003967597 | 0.014747367 |
| ENSMMUG00000005185 | regulator of G protein signaling 4 [Source:VGNC Symbol;Acc:VGNC:76690]                | 2.909444243 | 0.00564514  | 0.019952199 |
| ENSMMUG00000005186 | regulator of G protein signaling 5 [Source:NCBI gene;Acc:693510]                      | 0.770362216 | 0.012507851 | 0.038976769 |
|                    |                                                                                       | -           |             |             |
| ENSMMUG00000023462 | immunoglobulin like domain containing receptor 2 [Source:VGNC Symbol;Acc:VGNC:73619]  | 1.880538726 | 0.001291078 | 0.005637851 |
|                    |                                                                                       | -           |             |             |
| ENSMMUG00000023463 | maelstrom spermatogenic transposon silencer [Source:VGNC Symbol;Acc:VGNC:74362]       | 1.952309665 | 0.003611531 | 0.013640121 |

|                    |                                                                                                        |   |             |             |             |
|--------------------|--------------------------------------------------------------------------------------------------------|---|-------------|-------------|-------------|
| ENSMMUG00000063120 | cellular repressor of E1A stimulated genes 1 [Source:NCBI gene;Acc:701021]                             | - | 0.499265064 | 0.002039366 | 0.008407603 |
| ENSMMUG00000023372 | RCSD domain containing 1 [Source:VGNC Symbol;Acc:VGNC:76850]                                           | - | 0.661381597 | 0.00126773  | 0.005550901 |
| ENSMMUG00000009184 | myelin protein zero like 1 [Source:NCBI gene;Acc:698437]                                               | - | 2.073877945 | 2.93E-08    | 3.88E-07    |
| ENSMMUG00000060218 | chemokine (C motif) ligand 1 [Source:NCBI gene;Acc:574367]                                             | - | 4.98232562  | 6.70E-08    | 8.32E-07    |
| ENSMMUG00000056707 |                                                                                                        | - | 1.657810554 | 0.002098361 | 0.008614517 |
| ENSMMUG00000059777 |                                                                                                        | - | 0.676296382 | 1.48E-05    | 0.000108536 |
| ENSMMUG00000021078 | ATPase Na <sup>+</sup> /K <sup>+</sup> transporting subunit beta 1 [Source:VGNC Symbol;Acc:VGNC:70176] | - | 1.005717704 | 0.003905291 | 0.01454926  |
| ENSMMUG00000021079 | NME/NM23 family member 7 [Source:VGNC Symbol;Acc:VGNC:75221]                                           | - | 1.211340786 | 6.00E-05    | 0.000379955 |
| ENSMMUG00000021080 | basic leucine zipper nuclear factor 1 [Source:VGNC Symbol;Acc:VGNC:70258]                              | - | 1.275320581 | 4.74E-33    | 1.32E-30    |
| ENSMMUG00000000065 | coiled-coil domain containing 181 [Source:VGNC Symbol;Acc:VGNC:70884]                                  | - | 0.689988341 | 2.11E-08    | 2.86E-07    |
| ENSMMUG00000013039 | solute carrier family 19 member 2 [Source:VGNC Symbol;Acc:VGNC:81571]                                  | - | 0.566065915 | 7.32E-06    | 5.78E-05    |
| ENSMMUG00000042510 | coagulation factor V [Source:NCBI gene;Acc:704695]                                                     | - | 0.913152943 | 4.75E-07    | 4.96E-06    |
| ENSMMUG00000013044 | selectin P [Source:VGNC Symbol;Acc:VGNC:77157]                                                         | - | 1.206591521 | 5.55E-07    | 5.71E-06    |
| ENSMMUG00000016579 | selectin L [Source:NCBI gene;Acc:701419]                                                               | - | 2.33408769  | 2.03E-26    | 3.01E-24    |
| ENSMMUG00000016580 | selectin E [Source:VGNC Symbol;Acc:VGNC:77156]                                                         | - | 2.441864301 | 1.13E-31    | 2.73E-29    |
| ENSMMUG00000016582 | chromosome 1 C1orf112 homolog [Source:VGNC Symbol;Acc:VGNC:70385]                                      | - | 1.373552403 | 2.69E-09    | 4.35E-08    |
| ENSMMUG00000059773 | methyltransferase like 11B [Source:NCBI gene;Acc:705503]                                               | - | 1.264920679 | 0.001646783 | 0.006979384 |
| ENSMMUG00000063298 |                                                                                                        | - | 1.014461481 | 0.001067249 | 0.004781077 |
| ENSMMUG00000014674 | golgin, RAB6 interacting [Source:VGNC Symbol;Acc:VGNC:73012]                                           | - | 1.052454039 | 2.18E-08    | 2.95E-07    |
| ENSMMUG00000007279 | phosphatidylinositol glycan anchor biosynthesis class C [Source:VGNC Symbol;Acc:VGNC:75986]            | - | 0.712212069 | 0.000936191 | 0.004283731 |
| ENSMMUG00000065134 | Fas ligand [Source:NCBI gene;Acc:574159]                                                               | - | 4.339549147 | 5.35E-06    | 4.35E-05    |
| ENSMMUG00000000629 | serpin family C member 1 [Source:VGNC Symbol;Acc:VGNC:77360]                                           | - | 0.449763852 | 8.28E-05    | 0.00050528  |
| ENSMMUG00000000630 | ring finger and CCCH-type domains 1 [Source:VGNC Symbol;Acc:VGNC:76861]                                | - | 0.534929885 | 4.07E-06    | 3.40E-05    |
| ENSMMUG00000064770 |                                                                                                        | - | 0.951425015 | 0.003158858 | 0.012154664 |
| ENSMMUG00000000546 | KIAA0040 ortholog [Source:NCBI gene;Acc:100423509]                                                     | - | -0.92251083 | 0.00029036  | 0.001532571 |
| ENSMMUG00000015723 | tenascin R [Source:VGNC Symbol;Acc:VGNC:78609]                                                         | - | 0.893596724 | 0.011346257 | 0.035973946 |
| ENSMMUG00000023216 | astrotactin 1 [Source:VGNC Symbol;Acc:VGNC:70167]                                                      | - | -0.58678464 | 0.000874432 | 0.004039282 |
| ENSMMUG00000022935 | BMP/retinoic acid inducible neural specific 2 [Source:VGNC Symbol;Acc:VGNC:70303]                      | - | 0.639030675 | 0.000853343 | 0.003955689 |
| ENSMMUG00000020320 | protein transport protein Sec16B [Source:NCBI gene;Acc:709635]                                         | - | 0.47265303  | 0.00537906  | 0.019132713 |
| ENSMMUG00000021073 | RAS protein activator like 2 [Source:VGNC Symbol;Acc:VGNC:76670]                                       | - | 2.349096963 | 9.06E-16    | 4.32E-14    |
| ENSMMUG00000056058 | C-type lectin domain containing 20A [Source:HGNC Symbol;Acc:HGNC:34521]                                | - | 2.994345656 | 2.21E-05    | 0.000156356 |
| ENSMMUG00000054486 | testis expressed 35 [Source:NCBI gene;Acc:717255]                                                      | - | 2.311587114 | 0.001115804 | 0.004964934 |
| ENSMMUG00000055256 | family with sequence similarity 163 member A [Source:NCBI gene;Acc:718704]                             | - | 1.185753197 | 8.35E-09    | 1.24E-07    |
| ENSMMUG00000031279 | torsin A interacting protein 2 [Source:NCBI gene;Acc:716654]                                           | - | 1.213282777 | 6.94E-10    | 1.26E-08    |
| ENSMMUG00000053617 | torsin 1A interacting protein 2 [Source:NCBI gene;Acc:716691]                                          | - | 0.463092292 | 0.009915493 | 0.032217597 |
| ENSMMUG00000014873 | torsin 1A interacting protein 1 [Source:VGNC Symbol;Acc:VGNC:79810]                                    | - | 0.460977536 | 0.001219837 | 0.00536896  |
| ENSMMUG00000054568 |                                                                                                        | - | 1.121160441 | 4.10E-06    | 3.42E-05    |
| ENSMMUG00000061785 |                                                                                                        | - | 1.120064891 | 5.44E-19    | 3.75E-17    |
| ENSMMUG00000022884 | glutamate-ammonia ligase [Source:NCBI gene;Acc:715952]                                                 | - | 2.8836619   | 1.70E-07    | 1.97E-06    |
| ENSMMUG00000031291 | regulator of G protein signaling like 1 [Source:NCBI gene;Acc:715693]                                  | - | 1.307077169 | 7.14E-14    | 2.49E-12    |
| ENSMMUG00000005634 | ribonuclease L [Source:VGNC Symbol;Acc:VGNC:82223]                                                     | - | 1.053424566 | 6.46E-09    | 9.80E-08    |

|                    |                                                                                                      |             |             |             |
|--------------------|------------------------------------------------------------------------------------------------------|-------------|-------------|-------------|
| ENSMMUG00000055481 | regulator of G protein signaling 16 [Source:NCBI gene;Acc:715599]                                    | 0.706897883 | 0.000731881 | 0.003449805 |
| ENSMMUG00000008990 | regulator of G protein signaling 8 [Source:NCBI gene;Acc:720353]                                     | 2.553992504 | 0.001685435 | 0.007122435 |
| ENSMMUG00000001479 | laminin subunit gamma 2 [Source:VGNC Symbol;Acc:VGNC:74233]                                          | 1.886600245 | 2.70E-09    | 4.36E-08    |
| ENSMMUG00000001481 | nicotinamide nucleotide adenylyltransferase 2 [Source:VGNC Symbol;Acc:VGNC:75193]                    | 3.398208368 | 5.72E-08    | 7.20E-07    |
| ENSMMUG00000013878 | ring finger protein 2 [Source:NCBI gene;Acc:717024]                                                  | 1.062396609 | 0.000196023 | 0.001085145 |
| ENSMMUG00000016857 | prostaglandin-endoperoxide synthase 2 [Source:VGNC Symbol;Acc:VGNC:76589]                            | 1.022212515 | 1.32E-09    | 2.26E-08    |
| ENSMMUG00000059986 |                                                                                                      | 1.015338042 | 1.56E-05    | 0.000113954 |
| ENSMMUG00000062021 |                                                                                                      | 1.026832918 | 0.000963062 | 0.004385973 |
| ENSMMUG00000022647 | cell division cycle 73 [Source:VGNC Symbol;Acc:VGNC:70766]                                           | 1.067165007 | 1.31E-06    | 1.23E-05    |
| ENSMMUG00000021082 | potassium sodium-activated channel subfamily T member 2 [Source:VGNC Symbol;Acc:VGNC:73857]          | 0.729079785 | 4.28E-08    | 5.50E-07    |
| ENSMMUG00000045497 | complement factor H [Source:NCBI gene;Acc:717346]                                                    | 1.135734228 | 6.34E-05    | 0.000398565 |
| ENSMMUG00000000244 | coagulation factor XIII B chain [Source:VGNC Symbol;Acc:VGNC:72463]                                  | 0.628472069 | 0.001459785 | 0.006269097 |
| ENSMMUG00000000009 | protein tyrosine phosphatase receptor type C [Source:VGNC Symbol;Acc:VGNC:76612]                     | 3.023444452 | 4.35E-14    | 1.62E-12    |
| ENSMMUG00000012218 | calmodulin regulated spectrin associated protein family member 2 [Source:VGNC Symbol;Acc:VGNC:70666] | 0.737470518 | 0.004014258 | 0.014883234 |
| ENSMMUG00000017414 | calcium voltage-gated channel subunit alpha1 S [Source:VGNC Symbol;Acc:VGNC:70507]                   | -1.60348404 | 5.94E-10    | 1.09E-08    |
| ENSMMUG00000064915 | Metazoan signal recognition particle RNA [Source:RFAM;Acc:RF00017]                                   | 1.990308797 | 3.58E-05    | 0.000240295 |
| ENSMMUG00000050920 | Metazoan signal recognition particle RNA [Source:RFAM;Acc:RF00017]                                   | 1.215378646 | 0.003672433 | 0.013834194 |
| ENSMMUG00000021642 | fibromodulin [Source:VGNC Symbol;Acc:VGNC:72686]                                                     | 0.897366575 | 0.015735223 | 0.047068224 |
| ENSMMUG00000055783 |                                                                                                      | -1.83327105 | 2.07E-05    | 0.000146873 |
| ENSMMUG00000064841 | golgi transport 1A [Source:NCBI gene;Acc:700305]                                                     | -2.80726475 | 0.008651632 | 0.028727451 |
| ENSMMUG00000017114 | pleckstrin homology domain containing A6 [Source:VGNC Symbol;Acc:VGNC:76040]                         | -1.48342277 | 5.27E-05    | 0.000339208 |
| ENSMMUG00000063658 | leucine rich repeat neuronal 2 [Source:NCBI gene;Acc:100429709]                                      | 1.28493269  | 0.000432073 | 0.002179406 |
| ENSMMUG00000054201 | U6 spliceosomal RNA [Source:RFAM;Acc:RF00026]                                                        | -1.91671099 | 0.00520953  | 0.018602538 |
| ENSMMUG00000001024 | ETS transcription factor ELK4 [Source:VGNC Symbol;Acc:VGNC:72211]                                    | -1.54053313 | 0.001262    | 0.005534146 |
| ENSMMUG00000004116 | solute carrier family 45 member 3 [Source:VGNC Symbol;Acc:VGNC:77817]                                | 1.528332821 | 0.003208844 | 0.012317657 |
| ENSMMUG00000055835 | nuclear casein kinase and cyclin dependent kinase substrate 1 [Source:NCBI gene;Acc:697298]          | 1.179456665 | 3.76E-07    | 4.02E-06    |
| ENSMMUG00000023570 | interleukin 19 [Source:NCBI gene;Acc:694806]                                                         | 3.742371896 | 0.00089386  | 0.004114644 |
| ENSMMUG00000011221 | Fc fragment of IgA and IgM receptor [Source:VGNC Symbol;Acc:VGNC:72567]                              | 1.084544549 | 0.009155177 | 0.030162714 |
| ENSMMUG00000040888 | complement C3b/C4b receptor 1 like [Source:HGNC Symbol;Acc:HGNC:2335]                                | 0.983259927 | 1.83E-08    | 2.52E-07    |
| ENSMMUG00000051230 |                                                                                                      | 0.695056689 | 0.001220269 | 0.00536896  |
| ENSMMUG00000057560 |                                                                                                      | 0.846364771 | 1.26E-06    | 1.18E-05    |
| ENSMMUG00000064202 |                                                                                                      | 1.122399821 | 0.000177148 | 0.000992751 |
| ENSMMUG00000045482 | G0/G1 switch 2 [Source:NCBI gene;Acc:717581]                                                         | 0.450573241 | 5.14E-07    | 5.32E-06    |
| ENSMMUG00000016099 | hedgehog acyltransferase [Source:NCBI gene;Acc:712333]                                               | 1.315244432 | 0.001264179 | 0.005542029 |
| ENSMMUG00000011914 | prospero homeobox 1 [Source:VGNC Symbol;Acc:VGNC:76427]                                              | 3.244098013 | 3.60E-05    | 0.000241744 |
| ENSMMUG00000015634 | centromere protein F [Source:VGNC Symbol;Acc:VGNC:71009]                                             | -2.17105515 | 0.000299115 | 0.001569761 |
| ENSMMUG00000058133 |                                                                                                      | 1.887606245 | 0.000225634 | 0.001229861 |



|                    |                                                                                              |             |             |             |
|--------------------|----------------------------------------------------------------------------------------------|-------------|-------------|-------------|
| ENSMMUG00000017396 | 3'(2'), 5'-bisphosphate nucleotidase 1 [Source:NCBI gene;Acc:721277]                         | 0.728338606 | 0.01041944  | 0.033525322 |
| ENSMMUG00000007783 | isoleucyl-tRNA synthetase 2, mitochondrial [Source:VGNC Symbol;Acc:VGNC:73458]               | 0.974736505 | 8.90E-13    | 2.61E-11    |
| ENSMMUG00000026897 | mml-mir-215 [Source:miRBase;Acc:MI0003025]                                                   | 1.305962497 | 0.011327861 | 0.035930409 |
| ENSMMUG00000007784 | RAB3 GTPase activating non-catalytic protein subunit 2 [Source:VGNC Symbol;Acc:VGNC:76499]   | 0.378715103 | 0.015350745 | 0.046136124 |
| ENSMMUG00000022288 | microtubule affinity regulating kinase 1 [Source:VGNC Symbol;Acc:VGNC:74658]                 | 2.22378655  | 0.000336654 | 0.001742237 |
| ENSMMUG00000018525 | presenilin 2 [Source:VGNC Symbol;Acc:VGNC:76436]                                             | 0.907935522 | 1.52E-10    | 3.09E-09    |
| ENSMMUG00000008638 | CDC42 binding protein kinase alpha [Source:VGNC Symbol;Acc:VGNC:70799]                       | 0.472349166 | 5.86E-05    | 0.000372483 |
| ENSMMUG00000023096 | obscurin, cytoskeletal calmodulin and titin-interacting RhoGEF [Source:NCBI gene;Acc:694413] | 0.748571746 | 1.48E-12    | 4.19E-11    |
| ENSMMUG00000019513 | U2AF homology motif kinase 1 [Source:VGNC Symbol;Acc:VGNC:79198]                             | 2.008942035 | 0.001400723 | 0.006054727 |
| ENSMMUG00000042262 | nitric oxide synthase 1 adaptor protein [Source:NCBI gene;Acc:720378]                        | 0.991744039 | 0.00060953  | 0.0029421   |
| ENSMMUG00000004790 | spermatogenesis associated 46 [Source:VGNC Symbol;Acc:VGNC:78006]                            | 3.362455509 | 0.015149634 | 0.045634112 |
| ENSMMUG00000023042 | olfactomedin like 2B [Source:VGNC Symbol;Acc:VGNC:75455]                                     | 0.472074233 | 0.000144886 | 0.000832166 |
| ENSMMUG00000004049 | activating transcription factor 6 [Source:VGNC Symbol;Acc:VGNC:70171]                        | 0.370354702 | 0.000577952 | 0.002806175 |
| ENSMMUG00000004042 | Fc receptor like A [Source:VGNC Symbol;Acc:VGNC:72526]                                       | 2.057239677 | 4.62E-06    | 3.80E-05    |
| ENSMMUG00000054686 |                                                                                              | 3.136689124 | 7.56E-24    | 7.79E-22    |
| ENSMMUG00000008251 | cilia and flagella associated protein 126 [Source:VGNC Symbol;Acc:VGNC:71150]                | 2.85443535  | 2.00E-05    | 0.000142637 |
| ENSMMUG00000012411 | succinate dehydrogenase complex subunit C [Source:VGNC Symbol;Acc:VGNC:77147]                | 2.072832034 | 0.004628515 | 0.016791794 |
| ENSMMUG00000018128 | nuclear receptor subfamily 1 group I member 3 [Source:NCBI gene;Acc:574249]                  | 1.112355534 | 0.000441966 | 0.002224673 |
| ENSMMUG00000060496 | translocase of outer mitochondrial membrane 40 like [Source:NCBI gene;Acc:100426891]         | 1.236033472 | 9.74E-05    | 0.000582658 |
| ENSMMUG00000004516 | apolipoprotein A2 [Source:NCBI gene;Acc:719946]                                              | 1.303845284 | 0.002638909 | 0.010395347 |
| ENSMMUG00000004512 | Fc fragment of IgE receptor Ig [Source:VGNC Symbol;Acc:VGNC:72629]                           | 1.569468957 | 3.84E-10    | 7.35E-09    |
| ENSMMUG00000004520 | NADH:ubiquinone oxidoreductase core subunit S2 [Source:NCBI gene;Acc:719935]                 | 1.230007433 | 2.53E-08    | 3.40E-07    |
| ENSMMUG00000050419 | ADAM metallopeptidase with thrombospondin type 1 motif 4 [Source:NCBI gene;Acc:719927]       | 1.416009281 | 1.11E-06    | 1.06E-05    |
| ENSMMUG00000060555 |                                                                                              | 1.364117462 | 6.32E-06    | 5.06E-05    |
| ENSMMUG00000022630 | protoporphyrinogen oxidase [Source:VGNC Symbol;Acc:VGNC:76365]                               | 1.247724069 | 6.38E-06    | 5.09E-05    |
| ENSMMUG00000022631 | ubiquitin specific peptidase 21 [Source:VGNC Symbol;Acc:VGNC:78741]                          | 1.210593004 | 0.000191073 | 0.001061442 |
| ENSMMUG00000022632 | ubiquitin-fold modifier conjugating enzyme 1 [Source:VGNC Symbol;Acc:VGNC:79643]             | 0.852538157 | 0.000678097 | 0.003234086 |
| ENSMMUG00000002007 | kelch domain containing 9 [Source:NCBI gene;Acc:719863]                                      | 0.802272785 | 0.006408398 | 0.022149044 |
| ENSMMUG00000064337 | nectin cell adhesion molecule 4 [Source:NCBI gene;Acc:719843]                                | 0.681834512 | 0.000775745 | 0.003624493 |
| ENSMMUG00000002005 | Rho GTPase activating protein 30 [Source:NCBI gene;Acc:718236]                               | 0.673790898 | 0.000755176 | 0.003544719 |
| ENSMMUG00000002003 | upstream transcription factor 1 [Source:NCBI gene;Acc:719835]                                | 0.743572749 | 9.68E-05    | 0.000579822 |
| ENSMMUG00000011335 | Fc receptor like 6 [Source:VGNC Symbol;Acc:VGNC:72602]                                       | 0.646241805 | 1.09E-08    | 1.59E-07    |
| ENSMMUG00000004492 | absent in melanoma 2 [Source:NCBI gene;Acc:719260]                                           | 1.106692523 | 0.00049229  | 0.002438302 |
| ENSMMUG00000060051 | olfactory receptor 6N1-like [Source:NCBI gene;Acc:719970]                                    | 0.741277515 | 0.002280707 | 0.009230134 |
| ENSMMUG00000010626 | CD1c molecule [Source:VGNC Symbol;Acc:VGNC:70756]                                            | 1.475265489 | 0.002708237 | 0.010614623 |
| ENSMMUG00000003191 | kirre like nephrin family adhesion molecule 1 [Source:VGNC Symbol;Acc:VGNC:73837]            | 1.196718292 | 4.88E-16    | 2.40E-14    |
| ENSMMUG00000050541 |                                                                                              | 0.650995103 | 0.016869909 | 0.049835826 |

|                    |                                                                                                       |             |             |             |
|--------------------|-------------------------------------------------------------------------------------------------------|-------------|-------------|-------------|
| ENSMMUG00000019835 | CD5 molecule like [Source:VGNC Symbol;Acc:VGNC:70774]                                                 | 1.158416134 | 6.30E-07    | 6.37E-06    |
| ENSMMUG00000019833 | Fc receptor like 1 [Source:VGNC Symbol;Acc:VGNC:72528]                                                | 1.164750556 | 1.03E-14    | 4.06E-13    |
| ENSMMUG00000019830 | Fc receptor like 2 [Source:VGNC Symbol;Acc:VGNC:72509]                                                | 1.153656    | 9.29E-08    | 1.12E-06    |
| ENSMMUG00000046969 | Fc receptor like 3 [Source:NCBI gene;Acc:718801]                                                      | 1.264432255 | 6.94E-09    | 1.05E-07    |
| ENSMMUG00000008973 | Fc receptor like 4 [Source:VGNC Symbol;Acc:VGNC:72527]                                                | 1.151166464 | 0.006767524 | 0.023224621 |
|                    |                                                                                                       | -           |             |             |
| ENSMMUG00000008974 | Fc receptor like 5 [Source:NCBI gene;Acc:718771]                                                      | 1.711097499 | 8.74E-12    | 2.20E-10    |
| ENSMMUG00000042886 | ETS variant transcription factor 3 [Source:NCBI gene;Acc:719741]                                      | 0.850900624 | 0.006833961 | 0.023395275 |
| ENSMMUG00000064007 | leucine rich repeat containing 71 [Source:NCBI gene;Acc:718714]                                       | 0.224112581 | 0.014915505 | 0.04505958  |
|                    |                                                                                                       | -           |             |             |
| ENSMMUG00000000037 | interferon stimulated exonuclease gene 20 like 2 [Source:NCBI gene;Acc:718621]                        | 1.087062765 | 0.005133661 | 0.018369293 |
|                    |                                                                                                       | -           |             |             |
| ENSMMUG00000060011 | hyaluronan and proteoglycan link protein 2 [Source:NCBI gene;Acc:718500]                              | 2.231799345 | 0.002044606 | 0.008422341 |
|                    |                                                                                                       | -           |             |             |
| ENSMMUG00000004648 | KH domain containing 4, pre-mRNA splicing factor [Source:VGNC Symbol;Acc:VGNC:73931]                  | 0.850627008 | 5.39E-07    | 5.55E-06    |
|                    |                                                                                                       | -           |             |             |
| ENSMMUG00000009987 | GON-4-like protein [Source:NCBI gene;Acc:719341]                                                      | 0.689168648 | 0.015735817 | 0.047068224 |
| ENSMMUG00000062397 |                                                                                                       | 1.062770273 | 3.28E-07    | 3.56E-06    |
| ENSMMUG00000023146 | ASH1 like histone lysine methyltransferase [Source:NCBI gene;Acc:717778]                              | 1.096075564 | 0.006838276 | 0.023401133 |
|                    |                                                                                                       | -           |             |             |
| ENSMMUG00000023145 | RUN and SH3 domain containing 1 [Source:VGNC Symbol;Acc:VGNC:77036]                                   | 0.858252247 | 0.009441868 | 0.030924165 |
|                    |                                                                                                       | -           |             |             |
| ENSMMUG00000023143 | pyruvate kinase L/R [Source:VGNC Symbol;Acc:VGNC:76011]                                               | 2.182437857 | 0.002789472 | 0.010918296 |
|                    |                                                                                                       | -           |             |             |
| ENSMMUG00000061381 | hyperpolarization activated cyclic nucleotide gated potassium channel 3 [Source:NCBI gene;Acc:717719] | 1.715132485 | 0.003438244 | 0.013080805 |
| ENSMMUG00000023141 | CDC like kinase 2 [Source:VGNC Symbol;Acc:VGNC:71259]                                                 | -1.02836651 | 0.000104516 | 0.00062065  |
| ENSMMUG00000003902 | thrombospondin 3 [Source:VGNC Symbol;Acc:VGNC:78345]                                                  | 1.650910644 | 2.67E-06    | 2.32E-05    |
|                    |                                                                                                       | -           |             |             |
| ENSMMUG00000010978 | S100 calcium binding protein A2 [Source:VGNC Symbol;Acc:VGNC:76956]                                   | 0.803550213 | 5.12E-09    | 7.88E-08    |
|                    |                                                                                                       | -           |             |             |
| ENSMMUG00000010979 | S100 calcium binding protein A4 [Source:VGNC Symbol;Acc:VGNC:76958]                                   | 0.527962844 | 0.005091024 | 0.0182466   |
|                    |                                                                                                       | -           |             |             |
| ENSMMUG00000010980 | S100 calcium binding protein A5 [Source:VGNC Symbol;Acc:VGNC:76959]                                   | 1.095742065 | 0.002554672 | 0.010136873 |
|                    |                                                                                                       | -           |             |             |
| ENSMMUG00000008917 | S100 calcium binding protein A6 [Source:VGNC Symbol;Acc:VGNC:76960]                                   | 0.773910023 | 1.84E-05    | 0.000131591 |
|                    |                                                                                                       | -           |             |             |
| ENSMMUG00000040678 | Metazoan signal recognition particle RNA [Source:RFAM;Acc:RF00017]                                    | 2.155181552 | 0.003439301 | 0.013081402 |
| ENSMMUG00000051645 |                                                                                                       | 3.282140284 | 1.27E-06    | 1.20E-05    |
| ENSMMUG00000061474 |                                                                                                       | 1.771065535 | 2.46E-05    | 0.000171881 |
| ENSMMUG00000036441 |                                                                                                       | 2.841683229 | 0.010448232 | 0.033600545 |
| ENSMMUG00000042618 | involucrin [Source:NCBI gene;Acc:713728]                                                              | 1.815114049 | 1.18E-05    | 8.94E-05    |
| ENSMMUG00000017740 | sperm mitochondria associated cysteine rich protein [Source:VGNC Symbol;Acc:VGNC:77816]               | 2.5524791   | 5.91E-08    | 7.41E-07    |
| ENSMMUG00000055038 |                                                                                                       | 2.553580048 | 4.45E-09    | 6.91E-08    |
| ENSMMUG00000054634 | late cornified envelope protein 1C-like [Source:NCBI gene;Acc:713600]                                 | 2.602533034 | 0.003523995 | 0.013347659 |
| ENSMMUG00000051719 | late cornified envelope 1C [Source:HGNC Symbol;Acc:HGNC:29464]                                        | 2.665963207 | 2.60E-05    | 0.000180273 |
| ENSMMUG00000058472 | late cornified envelope protein 1C [Source:NCBI gene;Acc:107000798]                                   | 1.990828071 | 3.90E-06    | 3.28E-05    |
| ENSMMUG00000056940 | late cornified envelope protein 1C [Source:NCBI gene;Acc:713408]                                      | 2.700482829 | 2.08E-05    | 0.000147386 |
| ENSMMUG00000055266 | late cornified envelope protein 1C-like [Source:NCBI gene;Acc:107000794]                              | 2.688971816 | 8.89E-08    | 1.07E-06    |
| ENSMMUG00000051816 | keratinocyte proline rich protein [Source:NCBI gene;Acc:100424312]                                    | 2.128953349 | 6.59E-08    | 8.19E-07    |
| ENSMMUG00000001966 | chromosome 1 C1orf68 homolog [Source:VGNC Symbol;Acc:VGNC:70436]                                      | 1.799987177 | 0.006658559 | 0.02291017  |
| ENSMMUG00000049843 | late cornified envelope protein 2D [Source:NCBI gene;Acc:100424118]                                   | 3.849368225 | 1.04E-05    | 7.92E-05    |
| ENSMMUG00000062996 |                                                                                                       | 2.63102025  | 2.61E-07    | 2.89E-06    |
| ENSMMUG00000001967 | late cornified envelope 5A [Source:VGNC Symbol;Acc:VGNC:74061]                                        | 2.537882644 | 0.005990007 | 0.020936941 |
| ENSMMUG00000009040 | cornulin [Source:VGNC Symbol;Acc:VGNC:71397]                                                          | 2.517407335 | 2.35E-07    | 2.63E-06    |

|                    |                                                                                     |             |             |             |
|--------------------|-------------------------------------------------------------------------------------|-------------|-------------|-------------|
| ENSMMUG00000056511 |                                                                                     | 2.324057821 | 5.87E-07    | 6.00E-06    |
| ENSMMUG00000059472 | filaggrin family member 2 [Source:HGNC Symbol;Acc:HGNC:33276]                       | 1.853103173 | 1.53E-08    | 2.15E-07    |
|                    |                                                                                     | -           |             |             |
| ENSMMUG00000010067 | MINDY lysine 48 deubiquitinase 1 [Source:VGNC Symbol;Acc:VGNC:74828]                | 2.028230077 | 0.015576972 | 0.046698791 |
| ENSMMUG00000008218 | ADAMTS like 4 [Source:VGNC Symbol;Acc:VGNC:69480]                                   | 1.07508721  | 1.05E-05    | 8.02E-05    |
|                    |                                                                                     | -           |             |             |
| ENSMMUG00000021388 | circadian associated repressor of transcription [Source:VGNC Symbol;Acc:VGNC:71345] | 0.531798248 | 0.014216043 | 0.043356122 |
|                    |                                                                                     | -           |             |             |
| ENSMMUG00000021387 | chromosome 1 C1orf54 homolog [Source:VGNC Symbol;Acc:VGNC:70396]                    | 0.703047939 | 0.007480613 | 0.025407866 |
|                    |                                                                                     | -           |             |             |
| ENSMMUG00000021385 | carbonic anhydrase 14 [Source:VGNC Symbol;Acc:VGNC:70489]                           | 0.440790478 | 0.001916782 | 0.007956672 |
|                    |                                                                                     | -           |             |             |
| ENSMMUG00000007244 | OTU deubiquitinase 7B [Source:VGNC Symbol;Acc:VGNC:75634]                           | 1.101902983 | 2.14E-08    | 2.90E-07    |
|                    |                                                                                     | -           |             |             |
| ENSMMUG00000052282 |                                                                                     | 1.360717906 | 7.43E-09    | 1.11E-07    |
|                    |                                                                                     | -           |             |             |
| ENSMMUG00000007246 | myotubularin related protein 11 [Source:VGNC Symbol;Acc:VGNC:75016]                 | 1.099709032 | 1.47E-08    | 2.08E-07    |
| ENSMMUG00000007256 | splicing factor 3b subunit 4 [Source:VGNC Symbol;Acc:VGNC:77182]                    | -1.28255906 | 3.47E-09    | 5.50E-08    |
|                    |                                                                                     | -           |             |             |
| ENSMMUG00000007257 | synaptic vesicle glycoprotein 2A [Source:VGNC Symbol;Acc:VGNC:78181]                | 1.035907471 | 2.24E-11    | 5.20E-10    |
|                    |                                                                                     | -           |             |             |
| ENSMMUG00000061036 | histone cluster 2, H2ab [Source:NCBI gene;Acc:705170]                               | 1.457098258 | 0.001126874 | 0.005011124 |
|                    |                                                                                     | -           |             |             |
| ENSMMUG00000037540 | histone cluster 2, H2ac [Source:NCBI gene;Acc:705054]                               | 1.384507697 | 0.004233813 | 0.01556968  |
| ENSMMUG00000052382 | histone H4 [Source:NCBI gene;Acc:107000818]                                         | -1.42424592 | 9.29E-15    | 3.73E-13    |
|                    |                                                                                     | -           |             |             |
| ENSMMUG00000054615 |                                                                                     | 1.136293764 | 7.56E-05    | 0.000467389 |
|                    |                                                                                     | -           |             |             |
| ENSMMUG00000051523 | Metazoan signal recognition particle RNA [Source:RFAM;Acc:RF00017]                  | 1.082656899 | 0.002810838 | 0.010990089 |
|                    |                                                                                     | -           |             |             |
| ENSMMUG00000054078 | histone H3 [Source:NCBI gene;Acc:114669830]                                         | 1.097540753 | 8.41E-05    | 0.000512441 |
|                    |                                                                                     | -           |             |             |
| ENSMMUG00000040506 | H2B clustered histone 18 [Source:HGNC Symbol;Acc:HGNC:24700]                        | 0.983165821 | 0.000354946 | 0.001825204 |
|                    |                                                                                     | -           |             |             |
| ENSMMUG00000004362 | Fc fragment of IgG receptor Ia [Source:NCBI gene;Acc:714664]                        | 1.072411782 | 3.97E-06    | 3.32E-05    |
|                    |                                                                                     | -           |             |             |
| ENSMMUG00000062140 |                                                                                     | 1.303918595 | 4.42E-07    | 4.66E-06    |
|                    |                                                                                     | -           |             |             |
| ENSMMUG00000024186 | U1 spliceosomal RNA [Source:RFAM;Acc:RF00003]                                       | 1.681000328 | 0.000100883 | 0.000600794 |
|                    |                                                                                     | -           |             |             |
| ENSMMUG00000036857 | U1 spliceosomal RNA [Source:RFAM;Acc:RF00003]                                       | 1.619839111 | 0.001993044 | 0.008244987 |
|                    |                                                                                     | -           |             |             |
| ENSMMUG00000064626 | U1 spliceosomal RNA [Source:RFAM;Acc:RF00003]                                       | 1.645098309 | 0.000762679 | 0.003576472 |
|                    |                                                                                     | -           |             |             |
| ENSMMUG00000061239 |                                                                                     | 1.415493801 | 3.43E-12    | 9.20E-11    |
|                    |                                                                                     | -           |             |             |
| ENSMMUG00000054590 |                                                                                     | 1.297549494 | 5.96E-09    | 9.09E-08    |
|                    |                                                                                     | -           |             |             |
| ENSMMUG00000054496 | U1 spliceosomal RNA [Source:RFAM;Acc:RF00003]                                       | 1.384076257 | 0.010772532 | 0.034447931 |
|                    |                                                                                     | -           |             |             |
| ENSMMUG00000048493 | neuroblastoma breakpoint family member 6-like protein [Source:NCBI gene;Acc:711999] | 2.764071741 | 0.009479176 | 0.031021789 |
|                    |                                                                                     | -           |             |             |
| ENSMMUG00000041725 | 60S ribosomal protein L6-like [Source:NCBI gene;Acc:710287]                         | 1.912406978 | 0.009952705 | 0.032295193 |
|                    |                                                                                     | -           |             |             |
| ENSMMUG00000049105 | NRAS proto-oncogene, GTPase [Source:NCBI gene;Acc:709089]                           | 1.398108084 | 0.000715899 | 0.003384398 |
| ENSMMUG00000001978 | adenosine monophosphate deaminase 1 [Source:VGNC Symbol;Acc:VGNC:69806]             | -0.68513364 | 1.67E-05    | 0.000120707 |

|                     |                                                                                                              |   |             |             |             |
|---------------------|--------------------------------------------------------------------------------------------------------------|---|-------------|-------------|-------------|
| ENSMMUG00000021535  | homeodomain interacting protein kinase 1 [Source:VGNC Symbol;Acc:VGNC:73420]                                 | - | 0.199488966 | 0.015604394 | 0.046771355 |
| ENSMMUG00000019528  | adaptor related protein complex 4 subunit beta 1 [Source:VGNC Symbol;Acc:VGNC:69972]                         | - | 2.725579808 | 6.24E-79    | 9.06E-75    |
| ENSMMUG00000019527  | DNA cross-link repair 1B [Source:VGNC Symbol;Acc:VGNC:71647]                                                 | - | 1.249162058 | 2.31E-05    | 0.000162733 |
| ENSMMUG00000006786  | protein tyrosine phosphatase non-receptor type 22 [Source:VGNC Symbol;Acc:VGNC:76603]                        | - | 1.167961683 | 4.94E-07    | 5.14E-06    |
| ENSMMUG00000017819  | putative homeodomain transcription factor 1 [Source:VGNC Symbol;Acc:VGNC:75982]                              | - | 1.062095441 | 7.26E-07    | 7.22E-06    |
| ENSMMUG00000017817  | membrane associated guanylate kinase, WW and PDZ domain containing 3 [Source:VGNC Symbol;Acc:VGNC:74400]     | - | 0.507907975 | 0.003193757 | 0.012266222 |
| ENSMMUG00000007766  | suppression of tumorigenicity 7 like [Source:VGNC Symbol;Acc:VGNC:77954]                                     | - | 1.348813123 | 9.08E-09    | 1.34E-07    |
| ENSMMUG00000007765  | Wnt family member 2B [Source:VGNC Symbol;Acc:VGNC:78797]                                                     | - | 1.167163759 | 1.67E-12    | 4.72E-11    |
| ENSMMUG000000037458 | endoplasmic reticulum resident protein 29 [Source:NCBI gene;Acc:720396]                                      | - | 1.787614633 | 0.001332403 | 0.00579394  |
| ENSMMUG00000050825  | potassium voltage-gated channel subfamily D member 3 [Source:NCBI gene;Acc:641437]                           | - | 0.569716516 | 5.02E-06    | 4.10E-05    |
| ENSMMUG00000065322  | ATP synthase peripheral stalk-membrane subunit b [Source:NCBI gene;Acc:704072]                               | - | 0.611927237 | 1.02E-06    | 9.84E-06    |
| ENSMMUG00000016056  | potassium voltage-gated channel subfamily A member 10 [Source:VGNC Symbol;Acc:VGNC:73963]                    | - | 0.498518317 | 0.000510423 | 0.002519531 |
| ENSMMUG00000062177  |                                                                                                              | - | 0.533574065 | 1.04E-05    | 7.96E-05    |
| ENSMMUG00000064173  | prokineticin 1 [Source:NCBI gene;Acc:701766]                                                                 | - | 1.260828833 | 0.000400394 | 0.002030888 |
| ENSMMUG00000022715  | adenosylhomocysteinase like 1 [Source:VGNC Symbol;Acc:VGNC:81350]                                            | - | 0.463858396 | 0.004014388 | 0.014883234 |
| ENSMMUG00000051186  | proteasome 20S subunit alpha 5 [Source:NCBI gene;Acc:698435]                                                 | - | 0.746945996 | 9.41E-13    | 2.74E-11    |
| ENSMMUG00000005812  | sortilin 1 [Source:VGNC Symbol;Acc:VGNC:77836]                                                               | - | 0.363004825 | 3.31E-05    | 0.00022412  |
| ENSMMUG00000008713  | myosin binding protein H like [Source:NCBI gene;Acc:698183]                                                  | - | -1.12628142 | 1.61E-18    | 1.03E-16    |
| ENSMMUG00000015380  | proline and serine rich coiled-coil 1 [Source:VGNC Symbol;Acc:VGNC:76307]                                    | - | 0.883227875 | 1.77E-09    | 2.96E-08    |
| ENSMMUG00000015375  | cadherin EGF LAG seven-pass G-type receptor 2 [Source:VGNC Symbol;Acc:VGNC:71149]                            | - | -0.87139498 | 1.55E-10    | 3.16E-09    |
| ENSMMUG00000021837  | seryl-tRNA synthetase 1 [Source:NCBI gene;Acc:695046]                                                        | - | 0.879207523 | 1.13E-05    | 8.58E-05    |
| ENSMMUG00000017266  | UPF0577 protein KIAA1324 [Source:NCBI gene;Acc:697670]                                                       | - | 1.348248907 | 5.54E-07    | 5.69E-06    |
| ENSMMUG00000010156  | fibronectin type III domain containing 7 [Source:VGNC Symbol;Acc:VGNC:72582]                                 | - | 0.47542484  | 0.006812908 | 0.023336297 |
| ENSMMUG00000042232  | NBPF member 6 [Source:NCBI gene;Acc:698524]                                                                  | - | 0.304806945 | 0.000246842 | 0.001330492 |
| ENSMMUG00000031785  |                                                                                                              | - | 0.951846644 | 0.001492675 | 0.006393344 |
| ENSMMUG00000002789  | solute carrier family 25 (mitochondrial carrier; phosphate carrier), member 24 [Source:NCBI gene;Acc:694803] | - | 1.376492012 | 0.000479245 | 0.002381806 |
| ENSMMUG00000019714  | vav guanine nucleotide exchange factor 3 [Source:VGNC Symbol;Acc:VGNC:78759]                                 | - | 1.500946894 | 0.003112986 | 0.012003576 |
| ENSMMUG00000008197  | netrin G1 [Source:VGNC Symbol;Acc:VGNC:75450]                                                                | - | 2.097310805 | 1.52E-06    | 1.40E-05    |
| ENSMMUG00000060795  |                                                                                                              | - | 1.767187763 | 2.36E-06    | 2.08E-05    |
| ENSMMUG00000061766  |                                                                                                              | - | 1.587072229 | 0.004438644 | 0.016216276 |
| ENSMMUG00000004103  | collagen type XI alpha 1 chain [Source:VGNC Symbol;Acc:VGNC:71289]                                           | - | 1.7937565   | 7.72E-45    | 8.63E-42    |
| ENSMMUG00000060790  |                                                                                                              | - | 3.374574504 | 0.000522502 | 0.00256956  |
| ENSMMUG00000022906  | vascular cell adhesion molecule 1 [Source:VGNC Symbol;Acc:VGNC:78761]                                        | - | 0.476521083 | 0.003341051 | 0.012761128 |
| ENSMMUG00000062643  |                                                                                                              | - | 1.822981731 | 0.011216246 | 0.035616113 |
| ENSMMUG00000055443  | G protein-coupled receptor 88 [Source:NCBI gene;Acc:716520]                                                  | - | 0.61948814  | 7.66E-07    | 7.57E-06    |
| ENSMMUG00000019105  | RNA 3'-terminal phosphate cyclase [Source:VGNC Symbol;Acc:VGNC:77043]                                        | - | 1.979246256 | 2.22E-06    | 1.96E-05    |
| ENSMMUG00000007706  | dihydrolipoamide branched chain transacylase E2 [Source:VGNC Symbol;Acc:VGNC:71744]                          | - | 1.836457226 | 0.001860961 | 0.007747075 |

|                    |                                                                                              |             |             |             |
|--------------------|----------------------------------------------------------------------------------------------|-------------|-------------|-------------|
| ENSMMUG0000000931  | solute carrier family 35 member A3 [Source:VGNC Symbol;Acc:VGNC:77461]                       | 1.968350371 | 1.28E-06    | 1.20E-05    |
| ENSMMUG00000021441 | amylo-alpha-1, 6-glucosidase, 4-alpha-glucanotransferase [Source:VGNC Symbol;Acc:VGNC:69744] | 0.417892166 | 0.006772856 | 0.023227606 |
| ENSMMUG00000038667 |                                                                                              | 1.062436923 | 0.0021725   | 0.008871248 |
| ENSMMUG00000008518 | phospholipid phosphatase related 5 [Source:NCBI gene;Acc:710549]                             | 1.774568889 | 2.22E-24    | 2.48E-22    |
| ENSMMUG00000008515 | sorting nexin 7 [Source:NCBI gene;Acc:716015]                                                | 0.884740137 | 4.28E-08    | 5.50E-07    |
| ENSMMUG00000049494 |                                                                                              | 1.572890796 | 1.93E-07    | 2.20E-06    |
| ENSMMUG00000020726 | dihydropyrimidine dehydrogenase [Source:VGNC Symbol;Acc:VGNC:71982]                          | 1.576897775 | 1.71E-15    | 7.84E-14    |
| ENSMMUG00000049297 |                                                                                              | 1.093513756 | 1.92E-09    | 3.18E-08    |
| ENSMMUG00000050661 |                                                                                              | 0.733726032 | 0.000253037 | 0.001358845 |
| ENSMMUG00000001690 | calponin 3 [Source:VGNC Symbol;Acc:VGNC:71278]                                               | 1.248483325 | 5.16E-10    | 9.59E-09    |
| ENSMMUG00000056548 | coagulation factor III, tissue factor [Source:NCBI gene;Acc:714456]                          | 0.581093937 | 1.00E-06    | 9.68E-06    |
| ENSMMUG00000032677 | microRNA 760 [Source:HGNC Symbol;Acc:HGNC:33666]                                             | 0.622394921 | 0.002419172 | 0.009682681 |
| ENSMMUG00000045959 |                                                                                              | 0.879693885 | 2.92E-05    | 0.000199874 |
| ENSMMUG00000015924 | BCAR3 adaptor protein, NSP family member [Source:VGNC Symbol;Acc:VGNC:70235]                 | 0.807770394 | 2.98E-06    | 2.57E-05    |
| ENSMMUG00000015922 | formin binding protein 1 like [Source:VGNC Symbol;Acc:VGNC:72543]                            | 0.805251008 | 1.58E-08    | 2.20E-07    |
| ENSMMUG00000016812 | coiled-coil domain containing 18 [Source:VGNC Symbol;Acc:VGNC:70913]                         | -0.70987559 | 0.000728017 | 0.003434984 |
| ENSMMUG00000005070 | ecotropic viral integration site 5 [Source:NCBI gene;Acc:706592]                             | 1.783753952 | 2.23E-16    | 1.12E-14    |
| ENSMMUG00000014018 | bromodomain testis associated [Source:VGNC Symbol;Acc:VGNC:70282]                            | 2.309640447 | 6.79E-06    | 5.40E-05    |
| ENSMMUG00000001742 | transforming growth factor beta receptor 3 [Source:VGNC Symbol;Acc:VGNC:78339]               | -2.77788796 | 1.49E-31    | 3.55E-29    |
| ENSMMUG00000051155 | U2 spliceosomal RNA [Source:RFAM;Acc:RF00004]                                                | 4.300439592 | 3.83E-05    | 0.000255695 |
| ENSMMUG00000006819 | helicase for meiosis 1 [Source:NCBI gene;Acc:704516]                                         | 0.756158276 | 0.000221966 | 0.001213055 |
| ENSMMUG00000007635 | zinc finger protein 644 [Source:VGNC Symbol;Acc:VGNC:79789]                                  | 1.366909039 | 0.009237313 | 0.030373855 |
| ENSMMUG00000049678 |                                                                                              | 2.257310028 | 4.01E-11    | 8.96E-10    |
| ENSMMUG00000060600 |                                                                                              | 0.818634893 | 0.000566276 | 0.002754085 |
| ENSMMUG00000053737 | BarH like homeobox 2 [Source:NCBI gene;Acc:696831]                                           | 0.987881951 | 1.45E-08    | 2.05E-07    |
| ENSMMUG00000000663 | guanylate-binding protein 6-like [Source:NCBI gene;Acc:695158]                               | 1.116043142 | 1.29E-05    | 9.62E-05    |
| ENSMMUG00000000662 | guanylate-binding protein 1 [Source:NCBI gene;Acc:694538]                                    | 0.610570824 | 0.000218311 | 0.001197129 |
| ENSMMUG00000037887 | RBMX like 1 [Source:NCBI gene;Acc:100424767]                                                 | 0.821784137 | 5.35E-06    | 4.35E-05    |
| ENSMMUG00000002794 | general transcription factor IIB [Source:VGNC Symbol;Acc:VGNC:73306]                         | 2.121769339 | 1.89E-37    | 9.49E-35    |
| ENSMMUG00000020588 | protein kinase N2 [Source:VGNC Symbol;Acc:VGNC:76015]                                        | 0.632525703 | 2.31E-07    | 2.59E-06    |
| ENSMMUG00000065295 |                                                                                              | 2.236989968 | 1.41E-12    | 3.99E-11    |
| ENSMMUG00000006836 | chloride channel accessory 1 [Source:NCBI gene;Acc:574295]                                   | 1.88692002  | 4.07E-10    | 7.75E-09    |
| ENSMMUG00000001380 | outer dense fiber of sperm tails 2 like [Source:VGNC Symbol;Acc:VGNC:75482]                  | 2.26454911  | 2.42E-05    | 0.000169301 |
| ENSMMUG00000013203 | zinc finger HIT-type containing 6 [Source:VGNC Symbol;Acc:VGNC:79576]                        | 0.779236848 | 0.004422544 | 0.016165581 |
| ENSMMUG00000014573 | dimethylarginine dimethylaminohydrolase 1 [Source:VGNC Symbol;Acc:VGNC:71753]                | 0.699514617 | 1.28E-11    | 3.11E-10    |
| ENSMMUG00000005720 | BCL10 immune signaling adaptor [Source:VGNC Symbol;Acc:VGNC:70240]                           | 0.451606802 | 0.004307891 | 0.015822086 |
| ENSMMUG00000010127 | chitobiase [Source:VGNC Symbol;Acc:VGNC:71540]                                               | 2.770253735 | 4.05E-11    | 9.02E-10    |
| ENSMMUG00000022183 | spermatogenesis associated 1 [Source:NCBI gene;Acc:710462]                                   | 1.832091692 | 6.59E-18    | 3.93E-16    |
| ENSMMUG00000059938 |                                                                                              | -1.21077825 | 0.000530654 | 0.00260278  |
| ENSMMUG00000000404 | uricase [Source:NCBI gene;Acc:714004]                                                        | 1.425538297 | 0.006114777 | 0.021289917 |
| ENSMMUG00000003457 | protein kinase cAMP-activated catalytic subunit beta [Source:NCBI gene;Acc:709728]           | 1.208698077 | 8.30E-25    | 9.97E-23    |

|                     |                                                                                            |   |             |             |             |
|---------------------|--------------------------------------------------------------------------------------------|---|-------------|-------------|-------------|
| ENSMMUG00000057763  |                                                                                            | - | 1.348248024 | 0.000109275 | 0.000644955 |
| ENSMMUG00000050832  |                                                                                            | - | 2.971104451 | 0.002334942 | 0.00940072  |
| ENSMMUG00000023345  | adhesion G protein-coupled receptor L4 [Source:VGNC Symbol;Acc:VGNC:69652]                 | - | 1.022702398 | 0.009027368 | 0.029804871 |
| ENSMMUG00000049326  | GIPC PDZ domain containing family member 2 [Source:NCBI gene;Acc:707432]                   | - | 0.577556135 | 0.00091748  | 0.004207382 |
| ENSMMUG00000050425  | DnaJ heat shock protein family (Hsp40) member B4 [Source:NCBI gene;Acc:707206]             | - | 0.486401602 | 0.001489572 | 0.006381936 |
| ENSMMUG00000017312  | zinc finger RANBP2-type containing 2 [Source:NCBI gene;Acc:703513]                         | - | 0.763648064 | 1.93E-06    | 1.73E-05    |
| ENSMMUG00000017309  | prostaglandin E receptor 3 [Source:VGNC Symbol;Acc:VGNC:76469]                             | - | 0.374329119 | 0.010185257 | 0.032917535 |
| ENSMMUG00000041837  | Metazoan signal recognition particle RNA [Source:RFAM;Acc:RF00017]                         | - | 1.202936784 | 0.006178246 | 0.021470991 |
| ENSMMUG00000056103  | growth arrest and DNA damage inducible alpha [Source:NCBI gene;Acc:701054]                 | - | 1.678361949 | 4.33E-17    | 2.37E-15    |
| ENSMMUG00000003265  | leptin receptor [Source:VGNC Symbol;Acc:VGNC:81429]                                        | - | 0.876377471 | 2.28E-14    | 8.83E-13    |
| ENSMMUG00000017259  | DnaJ heat shock protein family (Hsp40) member C6 [Source:NCBI gene;Acc:698682]             | - | 0.695746574 | 0.011539899 | 0.036421083 |
| ENSMMUG00000053254  | adenylate kinase 4 [Source:NCBI gene;Acc:698560]                                           | - | 0.60136139  | 7.48E-06    | 5.89E-05    |
| ENSMMUG00000053072  |                                                                                            | - | 0.520851295 | 0.01141011  | 0.036136988 |
| ENSMMUG00000018565  | ribonucleoprotein, PTB binding 2 [Source:VGNC Symbol;Acc:VGNC:76536]                       | - | 2.928197826 | 2.34E-07    | 2.62E-06    |
| ENSMMUG00000012538  | ubiquitin conjugating enzyme E2 U [Source:VGNC Symbol;Acc:VGNC:79726]                      | - | 1.463286525 | 1.72E-09    | 2.89E-08    |
| ENSMMUG00000056799  |                                                                                            | - | 1.033629676 | 0.00131486  | 0.005734812 |
| ENSMMUG00000004668  | receptor tyrosine kinase like orphan receptor 1 [Source:VGNC Symbol;Acc:VGNC:76715]        | - | 1.210342797 | 5.99E-06    | 4.82E-05    |
| ENSMMUG000000061816 |                                                                                            | - | 1.321031262 | 5.16E-06    | 4.21E-05    |
| ENSMMUG00000020049  | phosphoglucomutase 1 [Source:NCBI gene;Acc:699401]                                         | - | 0.681505292 | 1.58E-06    | 1.45E-05    |
| ENSMMUG00000020047  | integrin subunit beta 3 binding protein [Source:VGNC Symbol;Acc:VGNC:73787]                | - | -1.15649817 | 1.27E-07    | 1.51E-06    |
| ENSMMUG00000010351  | KN motif and ankyrin repeat domains 4 [Source:VGNC Symbol;Acc:VGNC:73916]                  | - | 0.609211742 | 0.000895215 | 0.004119578 |
| ENSMMUG00000055834  |                                                                                            | - | 1.642409548 | 0.000775084 | 0.003622955 |
| ENSMMUG00000011800  | Myb like, SWIRM and MPN domains 1 [Source:VGNC Symbol;Acc:VGNC:75039]                      | - | 0.643667554 | 4.46E-06    | 3.69E-05    |
| ENSMMUG00000022762  | OMA1 zinc metallopeptidase [Source:VGNC Symbol;Acc:VGNC:75485]                             | - | -2.04588    | 1.08E-12    | 3.12E-11    |
| ENSMMUG000000049840 |                                                                                            | - | 0.438848196 | 0.005687746 | 0.020065624 |
| ENSMMUG00000010406  | protein kinase AMP-activated catalytic subunit alpha 2 [Source:VGNC Symbol;Acc:VGNC:76400] | - | 3.467024737 | 0.000752635 | 0.003533934 |
| ENSMMUG00000002200  | phospholipid phosphatase 3 [Source:NCBI gene;Acc:715993]                                   | - | 1.556721606 | 5.28E-20    | 3.96E-18    |
| ENSMMUG00000059612  |                                                                                            | - | 0.453267962 | 6.82E-05    | 0.000424389 |
| ENSMMUG00000032084  | prolyl-tRNA synthetase 2, mitochondrial [Source:VGNC Symbol;Acc:VGNC:75707]                | - | 0.560112119 | 0.00031422  | 0.001638972 |
| ENSMMUG00000006754  | tetratricopeptide repeat domain 4 [Source:VGNC Symbol;Acc:VGNC:78668]                      | - | 0.788607016 | 0.000121892 | 0.000712485 |
| ENSMMUG00000008828  | BEN domain containing 5 [Source:NCBI gene;Acc:711150]                                      | - | 2.292821921 | 3.43E-15    | 1.49E-13    |
| ENSMMUG00000015371  | microtubule associated serine/threonine kinase 2 [Source:VGNC Symbol;Acc:VGNC:74532]       | - | 1.089162171 | 1.40E-05    | 0.000103634 |
| ENSMMUG00000005986  | Kruppel like factor 17 [Source:NCBI gene;Acc:702810]                                       | - | 1.361825298 | 0.000772534 | 0.003615673 |
| ENSMMUG00000015555  | ST3 beta-galactoside alpha-2,3-sialyltransferase 3 [Source:VGNC Symbol;Acc:VGNC:77828]     | - | 2.474290606 | 2.60E-12    | 7.09E-11    |
| ENSMMUG00000012479  | lysine demethylase 4A [Source:NCBI gene;Acc:701272]                                        | - | 2.332541421 | 0.008790661 | 0.029135851 |
| ENSMMUG00000053498  |                                                                                            | - | 1.665386135 | 4.02E-05    | 0.000267454 |
| ENSMMUG00000059313  | small vasohibin binding protein [Source:NCBI gene;Acc:698308]                              | - | 3.635977736 | 0.007491363 | 0.025426556 |
| ENSMMUG00000016111  | chromosome 1 C1orf50 homolog [Source:VGNC Symbol;Acc:VGNC:70432]                           | - | 2.502655377 | 0.000680296 | 0.003243512 |

|                    |                                                                                                                  |             |             |             |
|--------------------|------------------------------------------------------------------------------------------------------------------|-------------|-------------|-------------|
| ENSMMUG00000022381 | prolyl 3-hydroxylase 1 [Source:VGNC Symbol;Acc:VGNC:75648]                                                       | 2.209647193 | 0.000238559 | 0.001289193 |
| ENSMMUG00000057076 | claudin 19 [Source:NCBI gene;Acc:697807]                                                                         | 4.459521216 | 1.17E-05    | 8.85E-05    |
| ENSMMUG00000013129 | peptidylprolyl isomerase H [Source:NCBI gene;Acc:697669]                                                         | 1.771355103 | 0.001951345 | 0.008086287 |
| ENSMMUG00000013128 | coiled-coil domain containing 30 [Source:VGNC Symbol;Acc:VGNC:70866]                                             | 0.535008661 | 0.00346255  | 0.013149188 |
| ENSMMUG00000014138 | forkhead box J3 [Source:VGNC Symbol;Acc:VGNC:72596]                                                              | 1.696034915 | 4.99E-06    | 4.08E-05    |
| ENSMMUG00000052046 |                                                                                                                  | 0.46182866  | 0.001752469 | 0.007358647 |
| ENSMMUG00000044175 | forkhead box O6 [Source:NCBI gene;Acc:697505]                                                                    | 1.043496692 | 7.61E-06    | 5.96E-05    |
| ENSMMUG00000043675 | Cbp/p300 interacting transactivator with Glu/Asp rich carboxy-terminal domain 4 [Source:NCBI gene;Acc:114672840] | 1.947085905 | 3.50E-17    | 1.94E-15    |
| ENSMMUG00000019536 | potassium voltage-gated channel subfamily Q member 4 [Source:VGNC Symbol;Acc:VGNC:74007]                         | 0.899471093 | 3.92E-07    | 4.17E-06    |
| ENSMMUG00000018664 | collagen type IX alpha 2 chain [Source:VGNC Symbol;Acc:VGNC:71307]                                               | 1.168018519 | 2.31E-06    | 2.04E-05    |
| ENSMMUG00000005992 | zinc metalloproteinase STE24 [Source:VGNC Symbol;Acc:VGNC:78830]                                                 | 1.012026729 | 0.014106345 | 0.043089713 |
| ENSMMUG00000009189 | palmitoyl-protein thioesterase 1 [Source:VGNC Symbol;Acc:VGNC:76386]                                             | 0.492182604 | 1.46E-05    | 0.000107468 |
| ENSMMUG00000009188 | cyclase associated actin cytoskeleton regulatory protein 1 [Source:NCBI gene;Acc:693719]                         | 0.324908743 | 0.002745087 | 0.010752761 |
| ENSMMUG00000058881 | bone morphogenetic protein 8b [Source:NCBI gene;Acc:100427030]                                                   | 1.052316822 | 0.006313409 | 0.02189342  |
| ENSMMUG00000008419 | G protein nucleolar 2 [Source:VGNC Symbol;Acc:VGNC:73037]                                                        | -1.15382911 | 0.00098943  | 0.004487784 |
| ENSMMUG00000059855 | Smad nuclear interacting protein 1 [Source:NCBI gene;Acc:713733]                                                 | 0.990384061 | 9.22E-05    | 0.000555077 |
| ENSMMUG00000010323 | zinc finger CCCH-type containing 12A [Source:VGNC Symbol;Acc:VGNC:79595]                                         | 0.627577482 | 0.002885542 | 0.011251911 |
| ENSMMUG00000017338 | LSM10, U7 small nuclear RNA associated [Source:VGNC Symbol;Acc:VGNC:74307]                                       | 1.170885795 | 0.000566192 | 0.002754085 |
| ENSMMUG00000058709 |                                                                                                                  | 1.127163841 | 0.012009501 | 0.037657919 |
| ENSMMUG00000014622 | thyroid hormone receptor associated protein 3 [Source:NCBI gene;Acc:713033]                                      | 0.468335099 | 0.007529136 | 0.025513893 |
| ENSMMUG00000006252 | argonaute RISC catalytic component 3 [Source:NCBI gene;Acc:712543]                                               | 1.800142327 | 1.81E-19    | 1.29E-17    |
| ENSMMUG00000006251 | argonaute RISC component 1 [Source:VGNC Symbol;Acc:VGNC:81346]                                                   | -1.49838142 | 3.23E-12    | 8.70E-11    |
| ENSMMUG00000019815 | transcription factor AP-2 epsilon [Source:VGNC Symbol;Acc:VGNC:79878]                                            | 2.637670525 | 3.68E-05    | 0.000246583 |
| ENSMMUG00000002741 | CUB and Sushi multiple domains 2 [Source:VGNC Symbol;Acc:VGNC:71441]                                             | 4.557896224 | 2.13E-08    | 2.90E-07    |
| ENSMMUG00000006389 | zinc finger and SCAN domain containing 20 [Source:VGNC Symbol;Acc:VGNC:78895]                                    | 4.799198893 | 2.70E-07    | 2.98E-06    |
| ENSMMUG00000062949 |                                                                                                                  | 4.526453738 | 4.58E-05    | 0.000301179 |
| ENSMMUG00000003269 | polyhomeotic homolog 2 [Source:VGNC Symbol;Acc:VGNC:75903]                                                       | 2.100635229 | 0.016899025 | 0.049860183 |
| ENSMMUG00000003268 | alpha 1,3-galactosyltransferase 2 [Source:VGNC Symbol;Acc:VGNC:69550]                                            | 1.197826976 | 0.006687456 | 0.022993269 |
| ENSMMUG00000003267 | zinc finger protein 362 [Source:NCBI gene;Acc:710013]                                                            | 1.101527781 | 5.54E-07    | 5.69E-06    |
| ENSMMUG00000015097 | tripartite motif containing 62 [Source:VGNC Symbol;Acc:VGNC:79513]                                               | 1.13419023  | 1.66E-08    | 2.31E-07    |
| ENSMMUG00000006285 | antizyme inhibitor 2 [Source:VGNC Symbol;Acc:VGNC:70153]                                                         | 1.228597584 | 7.82E-22    | 7.10E-20    |
| ENSMMUG00000006284 | adenylate kinase 2 [Source:VGNC Symbol;Acc:VGNC:69761]                                                           | 1.238471348 | 6.87E-10    | 1.25E-08    |
| ENSMMUG00000044265 | Metazoan signal recognition particle RNA [Source:RFAM;Acc:RF00017]                                               | 1.042634238 | 6.98E-07    | 7.00E-06    |
| ENSMMUG00000054846 | Metazoan signal recognition particle RNA [Source:RFAM;Acc:RF00017]                                               | 0.99681375  | 0.00370935  | 0.013951571 |
| ENSMMUG00000055316 |                                                                                                                  | 3.392343745 | 0.002080353 | 0.008550212 |
| ENSMMUG00000001264 | BSD domain containing 1 [Source:VGNC Symbol;Acc:VGNC:70384]                                                      | 3.718208506 | 3.55E-06    | 3.01E-05    |
| ENSMMUG00000053323 |                                                                                                                  | 2.870732302 | 0.00311865  | 0.012022228 |
| ENSMMUG00000009951 | MARCKS like 1 [Source:VGNC Symbol;Acc:VGNC:74723]                                                                | -3.58669018 | 0.00175323  | 0.007359717 |
| ENSMMUG00000009948 | histone deacetylase 1 [Source:NCBI gene;Acc:708441]                                                              | 2.496469585 | 5.91E-16    | 2.85E-14    |
| ENSMMUG00000040694 | LCK proto-oncogene, Src family tyrosine kinase [Source:NCBI gene;Acc:717704]                                     | 2.122725576 | 6.32E-22    | 5.78E-20    |

|                    |                                                                                  |   |             |             |             |
|--------------------|----------------------------------------------------------------------------------|---|-------------|-------------|-------------|
| ENSMMUG00000060894 | Metazoan signal recognition particle RNA [Source:RFAM;Acc:RF00017]               | - | 0.660649812 | 0.006866139 | 0.023485425 |
| ENSMMUG00000046901 | protein tyrosine phosphatase 4A2 [Source:NCBI gene;Acc:706489]                   | - | 0.848739548 | 0.000641708 | 0.003075672 |
| ENSMMUG00000005466 | SPOC domain containing 1 [Source:VGNC Symbol;Acc:VGNC:77997]                     | - | 0.911876452 | 4.48E-06    | 3.71E-05    |
| ENSMMUG00000023401 | adhesion G protein-coupled receptor B2 [Source:VGNC Symbol;Acc:VGNC:69598]       | - | 0.583323556 | 0.002974552 | 0.011540183 |
| ENSMMUG00000023398 | collagen type XVI alpha 1 chain [Source:VGNC Symbol;Acc:VGNC:71293]              | - | 0.652516737 | 6.79E-05    | 0.000423202 |
| ENSMMUG00000023397 | penta-EF-hand domain containing 1 [Source:NCBI gene;Acc:706038]                  | - | 0.793018756 | 9.92E-05    | 0.000592297 |
| ENSMMUG00000060319 | Metazoan signal recognition particle RNA [Source:RFAM;Acc:RF00017]               | - | 0.647259331 | 0.015765323 | 0.04714678  |
| ENSMMUG00000013188 | serine incorporator 2 [Source:VGNC Symbol;Acc:VGNC:77294]                        | - | 0.524521359 | 0.004241983 | 0.015595779 |
| ENSMMUG00000049574 | antizyme inhibitor 2-like [Source:NCBI gene;Acc:705256]                          | - | -0.5391386  | 0.000804552 | 0.003748643 |
| ENSMMUG00000012156 | zinc finger CCHC-type containing 17 [Source:VGNC Symbol;Acc:VGNC:79840]          | - | 0.410617195 | 0.008957167 | 0.029591648 |
| ENSMMUG00000064353 | fatty acid binding protein 3 [Source:NCBI gene;Acc:717237]                       | - | 0.590033033 | 0.000489277 | 0.002425034 |
| ENSMMUG00000063979 |                                                                                  | - | -0.71123276 | 2.81E-11    | 6.45E-10    |
| ENSMMUG00000057452 |                                                                                  | - | 0.716132916 | 0.00398478  | 0.014799886 |
| ENSMMUG00000051008 |                                                                                  | - | 2.291488115 | 0.005817157 | 0.020440902 |
| ENSMMUG00000057173 |                                                                                  | - | 2.453075287 | 0.00104301  | 0.004692737 |
| ENSMMUG00000015661 | protein tyrosine phosphatase receptor type U [Source:VGNC Symbol;Acc:VGNC:76624] | - | 1.977963053 | 1.09E-05    | 8.29E-05    |
| ENSMMUG00000007110 | serine and arginine rich splicing factor 4 [Source:NCBI gene;Acc:717401]         | - | 1.697809197 | 0.005787268 | 0.020365412 |
| ENSMMUG00000016893 | solute carrier family 9 member A1 [Source:VGNC Symbol;Acc:VGNC:82241]            | - | 0.853657733 | 2.45E-06    | 2.15E-05    |
| ENSMMUG00000015115 | terminal nucleotidyltransferase 5B [Source:VGNC Symbol;Acc:VGNC:79692]           | - | 0.850747293 | 1.81E-05    | 0.000130153 |
| ENSMMUG00000021031 | TMF1 regulated nuclear protein 1 [Source:VGNC Symbol;Acc:VGNC:79946]             | - | 0.818150795 | 5.78E-06    | 4.67E-05    |
| ENSMMUG00000050286 |                                                                                  | - | 0.578021691 | 0.012770539 | 0.03960856  |
| ENSMMUG00000058432 | zinc finger DHHC-type palmitoyltransferase 18 [Source:NCBI gene;Acc:719959]      | - | 1.437678009 | 6.27E-08    | 7.82E-07    |
| ENSMMUG00000012697 | AT-rich interaction domain 1A [Source:VGNC Symbol;Acc:VGNC:69822]                | - | 2.333545907 | 1.41E-18    | 9.12E-17    |
| ENSMMUG00000056266 | Metazoan signal recognition particle RNA [Source:RFAM;Acc:RF00017]               | - | 1.69394658  | 1.64E-06    | 1.50E-05    |
| ENSMMUG00000000649 | UBX domain protein 11 [Source:VGNC Symbol;Acc:VGNC:79859]                        | - | 2.107176517 | 9.71E-12    | 2.42E-10    |
| ENSMMUG00000000644 | centrosomal protein 85 [Source:VGNC Symbol;Acc:VGNC:71096]                       | - | 2.141381501 | 8.51E-11    | 1.80E-09    |
| ENSMMUG00000032217 | transmembrane protein 50A [Source:VGNC Symbol;Acc:VGNC:79857]                    | - | 0.426728345 | 0.001588458 | 0.006755824 |
| ENSMMUG00000057953 |                                                                                  | - | 0.80821742  | 0.002580447 | 0.010206767 |
| ENSMMUG00000057675 | non-compact myelin associated protein [Source:NCBI gene;Acc:712192]              | - | 0.882617512 | 0.005831092 | 0.020470076 |
| ENSMMUG00000053036 |                                                                                  | - | 1.227532406 | 4.55E-05    | 0.000299136 |
| ENSMMUG00000022927 | RCAN family member 3 [Source:VGNC Symbol;Acc:VGNC:76875]                         | - | 1.008114538 | 0.002559974 | 0.010148445 |
| ENSMMUG00000004463 | grainyhead like transcription factor 3 [Source:VGNC Symbol;Acc:VGNC:73235]       | - | 0.587235085 | 0.006314859 | 0.02189342  |
| ENSMMUG00000050770 |                                                                                  | - | 1.214766852 | 1.99E-08    | 2.72E-07    |
| ENSMMUG00000059931 |                                                                                  | - | 0.531228002 | 0.001066696 | 0.004780072 |
| ENSMMUG00000057438 | Metazoan signal recognition particle RNA [Source:RFAM;Acc:RF00017]               | - | 1.203407407 | 0.002488737 | 0.009922865 |



|                    |                                                                                        |             |             |             |
|--------------------|----------------------------------------------------------------------------------------|-------------|-------------|-------------|
| ENSMMUG00000045584 | leucine zipper protein 1 [Source:NCBI gene;Acc:718626]                                 | 1.844343068 | 4.36E-14    | 1.62E-12    |
| ENSMMUG00000009773 | lysine demethylase 1A [Source:VGNC Symbol;Acc:VGNC:73928]                              | -1.89751663 | 4.60E-14    | 1.69E-12    |
| ENSMMUG00000058332 | testis expressed 46 [Source:NCBI gene;Acc:709002]                                      | 2.478569537 | 6.58E-07    | 6.62E-06    |
| ENSMMUG00000041482 | lactamase beta like 1 [Source:NCBI gene;Acc:718590]                                    | 1.089110603 | 0.000467307 | 0.002332871 |
| ENSMMUG00000023382 | EPH receptor B2 [Source:NCBI gene;Acc:718570]                                          | 0.402070329 | 0.009220396 | 0.030345685 |
| ENSMMUG00000002217 | alkaline phosphatase, biomineralization associated [Source:VGNC Symbol;Acc:VGNC:69801] | 1.48737092  | 2.25E-23    | 2.23E-21    |
| ENSMMUG00000004149 | eukaryotic translation initiation factor 4 gamma 3 [Source:NCBI gene;Acc:717555]       | 1.494647068 | 1.66E-20    | 1.33E-18    |
| ENSMMUG00000002492 | transmembrane and coiled-coil domains 4 [Source:VGNC Symbol;Acc:VGNC:79664]            | 2.21482983  | 0.016225039 | 0.048293078 |
| ENSMMUG00000006688 | ER membrane protein complex subunit 1 [Source:VGNC Symbol;Acc:VGNC:72134]              | 0.834893408 | 1.33E-07    | 1.57E-06    |
| ENSMMUG00000006669 | ubiquitin protein ligase E3 component n-recognin 4 [Source:VGNC Symbol;Acc:VGNC:79845] | 0.504923801 | 0.001813654 | 0.007580532 |
| ENSMMUG00000004754 | intermediate filament family orphan 2 [Source:NCBI gene;Acc:106995162]                 | -0.95403352 | 2.67E-06    | 2.32E-05    |
| ENSMMUG00000064850 | kelch domain containing 7A [Source:NCBI gene;Acc:713771]                               | 0.818124442 | 0.002845731 | 0.011105607 |
| ENSMMUG00000010849 | Rho guanine nucleotide exchange factor 10 like [Source:VGNC Symbol;Acc:VGNC:69908]     | 0.371068864 | 0.004016265 | 0.014886396 |
| ENSMMUG00000022437 | peptidyl arginine deiminase 6 [Source:VGNC Symbol;Acc:VGNC:75657]                      | 2.790303792 | 0.001619787 | 0.006881016 |
| ENSMMUG00000051619 | peptidyl arginine deiminase 3 [Source:NCBI gene;Acc:700560]                            | 0.482635238 | 0.004376882 | 0.016026886 |
| ENSMMUG00000007315 | ciliary rootlet coiled-coil, rootletin [Source:NCBI gene;Acc:710793]                   | 0.51357763  | 0.000221884 | 0.001213055 |
| ENSMMUG00000018245 | EPH receptor A2 [Source:VGNC Symbol;Acc:VGNC:72235]                                    | 0.988855028 | 7.28E-07    | 7.24E-06    |
| ENSMMUG00000058587 | family with sequence similarity 131 member C [Source:NCBI gene;Acc:703604]             | 0.90943284  | 1.42E-05    | 0.000104626 |
| ENSMMUG00000018235 | chloride voltage-gated channel Kb [Source:NCBI gene;Acc:703476]                        | 0.798014398 | 0.006935905 | 0.023712899 |
| ENSMMUG00000001910 | heat shock protein family B (small) member 7 [Source:NCBI gene;Acc:696704]             | 1.159446521 | 0.000785052 | 0.003662485 |
| ENSMMUG00000001911 | steroid receptor associated and regulated protein [Source:VGNC Symbol;Acc:VGNC:78008]  | 0.686387991 | 0.006886276 | 0.023548763 |
| ENSMMUG00000008031 | zinc finger and BTB domain containing 17 [Source:VGNC Symbol;Acc:VGNC:78849]           | 1.167145113 | 2.05E-05    | 0.000145714 |
| ENSMMUG00000002802 | agmatinase [Source:NCBI gene;Acc:713190]                                               | 0.907149258 | 0.005988267 | 0.020936941 |
| ENSMMUG00000032244 | DnaJ heat shock protein family (Hsp40) member C16 [Source:NCBI gene;Acc:700894]        | 1.464714619 | 0.00020394  | 0.001123835 |
| ENSMMUG00000018163 | caspase 9 [Source:NCBI gene;Acc:694544]                                                | 2.522459533 | 0.000877397 | 0.004050403 |
| ENSMMUG00000031821 | chymotrypsin-like elastase family member 2B [Source:NCBI gene;Acc:106992406]           | 1.985851401 | 3.07E-05    | 0.000209346 |
| ENSMMUG00000053550 |                                                                                        | 2.981859179 | 0.000171699 | 0.000964821 |
| ENSMMUG00000060541 |                                                                                        | 1.599770512 | 0.00367366  | 0.013835231 |
| ENSMMUG00000003987 | forkhead associated phosphopeptide binding domain 1 [Source:NCBI gene;Acc:699900]      | 1.397452167 | 2.26E-05    | 0.000159416 |
| ENSMMUG00000053824 | leucine rich repeat containing 38 [Source:NCBI gene;Acc:722785]                        | 0.807576804 | 0.000107366 | 0.000635495 |
| ENSMMUG00000055233 | PRAME family member 17-like [Source:NCBI gene;Acc:100427847]                           | 0.758253515 | 2.05E-06    | 1.83E-05    |
| ENSMMUG00000054309 | PRAME family member 5 [Source:NCBI gene;Acc:722781]                                    | 1.429737927 | 0.003358748 | 0.012818619 |
| ENSMMUG00000057550 |                                                                                        | 0.670390402 | 0.005478933 | 0.01943564  |
| ENSMMUG00000021449 | vacuolar protein sorting 13 homolog D [Source:NCBI gene;Acc:722775]                    | 1.077447632 | 1.97E-20    | 1.56E-18    |
| ENSMMUG00000064242 |                                                                                        | 1.096753698 | 3.09E-06    | 2.66E-05    |
| ENSMMUG00000063313 | Small nucleolar RNA U3 [Source:RFAM;Acc:RF00012]                                       | 0.939365336 | 0.008335995 | 0.027787286 |
| ENSMMUG00000021447 | TNF receptor superfamily member 1B [Source:VGNC Symbol;Acc:VGNC:78590]                 | 4.518816117 | 0.000102123 | 0.000607432 |

|                    |                                                                                         |             |             |             |
|--------------------|-----------------------------------------------------------------------------------------|-------------|-------------|-------------|
| ENSMMUG00000023449 | mitofusin 2 [Source:VGNC Symbol;Acc:VGNC:74522]                                         | 1.492974674 | 2.11E-05    | 0.000149318 |
| ENSMMUG00000032249 | procollagen-lysine,2-oxoglutarate 5-dioxygenase 1 [Source:NCBI gene;Acc:722763]         | 1.19474072  | 3.19E-15    | 1.40E-13    |
| ENSMMUG00000012469 | KIAA2013 [Source:VGNC Symbol;Acc:VGNC:73918]                                            | 0.89933786  | 2.75E-09    | 4.42E-08    |
| ENSMMUG00000062316 | Metazoan signal recognition particle RNA [Source:RFAM;Acc:RF00017]                      | 1.114786139 | 1.36E-09    | 2.33E-08    |
| ENSMMUG00000037413 | U5 spliceosomal RNA [Source:RFAM;Acc:RF00020]                                           | 1.061112791 | 7.91E-09    | 1.18E-07    |
| ENSMMUG00000051669 |                                                                                         | 0.83289674  | 2.87E-07    | 3.15E-06    |
| ENSMMUG00000002261 | F-box protein 2 [Source:VGNC Symbol;Acc:VGNC:72486]                                     | -           |             |             |
| ENSMMUG00000049196 | dispatched RND transporter family member 3 [Source:NCBI gene;Acc:722727]                | 1.879861522 | 0.00377904  | 0.014169693 |
| ENSMMUG00000032252 | UbiA prenyltransferase domain containing 1 [Source:VGNC Symbol;Acc:VGNC:79881]          | -           |             |             |
| ENSMMUG00000019325 | mechanistic target of rapamycin kinase [Source:VGNC Symbol;Acc:VGNC:75062]              | 1.109810132 | 5.92E-15    | 2.47E-13    |
| ENSMMUG00000053062 | U6 spliceosomal RNA [Source:RFAM;Acc:RF00026]                                           | 1.126090759 | 2.26E-16    | 1.13E-14    |
| ENSMMUG00000006187 | angiopoietin like 7 [Source:VGNC Symbol;Acc:VGNC:69683]                                 | -           |             |             |
| ENSMMUG00000062294 |                                                                                         | 1.426589293 | 1.29E-15    | 5.98E-14    |
| ENSMMUG00000058771 | PHD finger protein 13 [Source:NCBI gene;Acc:704846]                                     | -           |             |             |
| ENSMMUG00000032281 | zinc finger and BTB domain containing 48 [Source:VGNC Symbol;Acc:VGNC:79959]            | 2.149327511 | 0.000991719 | 0.004496763 |
| ENSMMUG00000023681 | nucleolar protein 9 [Source:VGNC Symbol;Acc:VGNC:75263]                                 | -           |             |             |
| ENSMMUG00000023678 | pleckstrin homology and RhoGEF domain containing G5 [Source:VGNC Symbol;Acc:VGNC:76130] | 1.194313774 | 2.07E-09    | 3.41E-08    |
| ENSMMUG00000023676 | espin [Source:NCBI gene;Acc:722532]                                                     | 4.096021279 | 5.02E-05    | 0.000325485 |
| ENSMMUG00000016838 | chromodomain helicase DNA binding protein 5 [Source:VGNC Symbol;Acc:VGNC:70959]         | -           |             |             |
| ENSMMUG00000055126 |                                                                                         | 1.165341029 | 0.001780466 | 0.007467579 |
| ENSMMUG00000056383 |                                                                                         | -           |             |             |
| ENSMMUG00000054719 |                                                                                         | 0.846871058 | 0.002279898 | 0.009229428 |
| ENSMMUG00000032284 | leucine rich repeat containing 47 [Source:VGNC Symbol;Acc:VGNC:74388]                   | 0.853360071 | 0.009920858 | 0.03222655  |
| ENSMMUG00000050239 |                                                                                         | 1.107311428 | 4.42E-05    | 0.000291708 |
| ENSMMUG00000014075 | cilia and flagella associated protein 74 [Source:NCBI gene;Acc:709689]                  | -           |             |             |
| ENSMMUG00000010879 | NAD kinase [Source:VGNC Symbol;Acc:VGNC:75047]                                          | 1.318336509 | 4.60E-14    | 1.69E-12    |
| ENSMMUG00000005578 | solute carrier family 35 member E2 [Source:VGNC Symbol;Acc:VGNC:77590]                  | -1.07298184 | 0.002113203 | 0.008663178 |
| ENSMMUG0000001894  | cyclin dependent kinase 11B [Source:NCBI gene;Acc:703046]                               | 1.421902636 | 4.54E-05    | 0.000298676 |
| ENSMMUG00000012961 | mindbomb E3 ubiquitin protein ligase 2 [Source:VGNC Symbol;Acc:VGNC:74627]              | 0.790967036 | 0.012131783 | 0.037975824 |
| ENSMMUG00000048805 |                                                                                         | -           |             |             |
| ENSMMUG00000040063 | fibronectin type III domain containing 10 [Source:NCBI gene;Acc:106996973]              | 0.917892279 | 8.95E-05    | 0.00054158  |
| ENSMMUG00000060167 |                                                                                         | 3.534980101 | 0.00039589  | 0.002010147 |
| ENSMMUG0000001551  | SSU72 homolog, RNA polymerase II CTD phosphatase [Source:VGNC Symbol;Acc:VGNC:77986]    | -           |             |             |
| ENSMMUG00000051354 |                                                                                         | 1.603780875 | 7.18E-08    | 8.86E-07    |
|                    |                                                                                         | -           |             |             |
|                    |                                                                                         | 1.025141874 | 0.009183685 | 0.030238557 |
|                    |                                                                                         | -           |             |             |
|                    |                                                                                         | 0.657126992 | 0.015728475 | 0.047065634 |
|                    |                                                                                         | -           |             |             |
|                    |                                                                                         | 0.931248863 | 0.002308891 | 0.009318252 |
|                    |                                                                                         | -           |             |             |
|                    |                                                                                         | 1.071523306 | 0.000173279 | 0.000972943 |
|                    |                                                                                         | -           |             |             |
|                    |                                                                                         | 0.697600506 | 0.0023025   | 0.009297621 |
|                    |                                                                                         | -           |             |             |
|                    |                                                                                         | 1.002515611 | 1.35E-05    | 0.0001007   |
|                    |                                                                                         | -1.0961752  | 0.004670551 | 0.016918965 |
|                    |                                                                                         | -           |             |             |
|                    |                                                                                         | 0.999794772 | 0.000107005 | 0.000633616 |
|                    |                                                                                         | -           |             |             |
|                    |                                                                                         | 1.010135373 | 4.61E-07    | 4.85E-06    |
|                    |                                                                                         | -           |             |             |
|                    |                                                                                         | 1.408906884 | 0.004096039 | 0.015128078 |

|                     |                                                                                              |   |             |             |             |
|---------------------|----------------------------------------------------------------------------------------------|---|-------------|-------------|-------------|
| ENSMMUG00000001549  | ATPase family AAA domain-containing protein 3A-like [Source:NCBI gene;Acc:114674453]         | - | 0.890824371 | 1.10E-09    | 1.90E-08    |
| ENSMMUG000000064596 | ATPase family AAA domain-containing protein 3A-like [Source:NCBI gene;Acc:114674454]         | - | 1.105869022 | 0.000566837 | 0.002755887 |
| ENSMMUG00000006904  | cyclin L2 [Source:NCBI gene;Acc:114669744]                                                   | - | 0.614920779 | 0.015263461 | 0.045910395 |
| ENSMMUG000000032292 | sodium channel epithelial 1 delta subunit [Source:VGNC Symbol;Acc:VGNC:76993]                | - | 1.270869162 | 0.001584573 | 0.006743247 |
| ENSMMUG000000045769 | tubulin tyrosine ligase like 10 [Source:NCBI gene;Acc:702662]                                | - | 0.466182519 | 3.07E-06    | 2.64E-05    |
| ENSMMUG000000056613 |                                                                                              | - | 0.66122497  | 6.18E-07    | 6.26E-06    |
| ENSMMUG00000000972  | tyrosine kinase non receptor 2 [Source:VGNC Symbol;Acc:VGNC:79192]                           | - | 2.737336207 | 3.45E-09    | 5.49E-08    |
| ENSMMUG000000053601 |                                                                                              | - | 1.794710264 | 0.007568232 | 0.025621655 |
| ENSMMUG000000065323 |                                                                                              | - | 2.828021491 | 0.010810971 | 0.034555648 |
| ENSMMUG000000022562 | interleukin 1 receptor accessory protein [Source:VGNC Symbol;Acc:VGNC:73718]                 | - | 3.205877375 | 6.13E-05    | 0.000387055 |
| ENSMMUG00000006596  | CCR4-NOT transcription complex subunit 10 [Source:VGNC Symbol;Acc:VGNC:71327]                | - | 1.20127459  | 4.10E-08    | 5.30E-07    |
| ENSMMUG000000049551 |                                                                                              | - | 1.453451417 | 1.39E-05    | 0.000103324 |
| ENSMMUG000000055585 |                                                                                              | - | 2.418540418 | 3.10E-13    | 9.70E-12    |
| ENSMMUG000000000056 | 5-azacytidine induced 2 [Source:VGNC Symbol;Acc:VGNC:70115]                                  | - | 0.887826538 | 0.010770332 | 0.034447931 |
| ENSMMUG000000051896 |                                                                                              | - | 3.108348758 | 0.002903146 | 0.011308424 |
| ENSMMUG000000060958 | leucine rich repeat containing 3B [Source:NCBI gene;Acc:701323]                              | - | 1.340063914 | 0.008233866 | 0.027497291 |
| ENSMMUG000000051809 |                                                                                              | - | 1.905199657 | 0.014761141 | 0.04470473  |
| ENSMMUG000000009667 | zinc finger protein 385D [Source:VGNC Symbol;Acc:VGNC:79587]                                 | - | 2.224899808 | 0.005621875 | 0.019903848 |
| ENSMMUG000000051975 |                                                                                              | - | 1.948170236 | 1.61E-09    | 2.72E-08    |
| ENSMMUG000000020761 | ELL associated factor 1 [Source:VGNC Symbol;Acc:VGNC:71874]                                  | - | 3.29018252  | 0.012897139 | 0.039958591 |
| ENSMMUG000000020377 | collagen type VI alpha 5 chain [Source:NCBI gene;Acc:719331]                                 | - | 0.817967605 | 1.30E-05    | 9.72E-05    |
| ENSMMUG000000005137 | ATPase secretory pathway Ca <sup>2+</sup> transporting 1 [Source:VGNC Symbol;Acc:VGNC:70054] | - | 2.807690425 | 2.59E-12    | 7.06E-11    |
| ENSMMUG000000001154 | U8 snoRNA-decapping enzyme-like [Source:NCBI gene;Acc:717946]                                | - | 0.641900156 | 0.002556693 | 0.010140968 |
| ENSMMUG000000024125 | small nucleolar RNA, H/ACA box 58 [Source:HGNC Symbol;Acc:HGNC:32652]                        | - | 4.015143316 | 0.000497708 | 0.002460107 |
| ENSMMUG000000003277 | copine 4 [Source:VGNC Symbol;Acc:VGNC:71466]                                                 | - | 1.374895371 | 1.14E-08    | 1.65E-07    |
| ENSMMUG000000056585 |                                                                                              | - | 1.982805388 | 5.71E-05    | 0.000364289 |
| ENSMMUG000000016004 | acid phosphatase 3 [Source:VGNC Symbol;Acc:VGNC:69385]                                       | - | 1.295250873 | 4.67E-05    | 0.000306327 |
| ENSMMUG000000016005 | DnaJ heat shock protein family (Hsp40) member C13 [Source:VGNC Symbol;Acc:VGNC:84191]        | - | 0.382572623 | 3.89E-09    | 6.08E-08    |
| ENSMMUG000000054158 | acyl-CoA dehydrogenase family member 11 [Source:NCBI gene;Acc:106997118]                     | - | 1.448324212 | 5.71E-12    | 1.49E-10    |
| ENSMMUG000000019854 | transmembrane protein 108 [Source:VGNC Symbol;Acc:VGNC:79714]                                | - | 0.841449743 | 0.000936758 | 0.004284975 |
| ENSMMUG000000019857 | beaded filament structural protein 2 [Source:VGNC Symbol;Acc:VGNC:70245]                     | - | 0.872109689 | 0.000220312 | 0.001206583 |
| ENSMMUG000000000058 | CDV3 homolog [Source:VGNC Symbol;Acc:VGNC:71114]                                             | - | 0.776362505 | 0.006018612 | 0.02102176  |
| ENSMMUG000000000059 | DNA topoisomerase II binding protein 1 [Source:VGNC Symbol;Acc:VGNC:79061]                   | - | 0.747955515 | 4.63E-05    | 0.000304098 |

|                    |                                                                                                      |   |             |             |             |
|--------------------|------------------------------------------------------------------------------------------------------|---|-------------|-------------|-------------|
| ENSMMUG0000008916  | transferrin [Source:VGNC Symbol;Acc:VGNC:82716]                                                      | - | 0.642129151 | 0.000770898 | 0.003609195 |
| ENSMMUG0000008918  | SRP receptor subunit beta [Source:VGNC Symbol;Acc:VGNC:77980]                                        | - | 0.601195027 | 0.006788112 | 0.023273297 |
| ENSMMUG0000007760  | centrosomal protein 70 [Source:VGNC Symbol;Acc:VGNC:71140]                                           | - | 0.501657688 | 0.001078081 | 0.00481977  |
| ENSMMUG0000003051  | COPI coat complex subunit beta 2 [Source:VGNC Symbol;Acc:VGNC:71313]                                 | - | 0.694212648 | 1.91E-05    | 0.00013638  |
| ENSMMUG00000062527 |                                                                                                      | - | 1.606476566 | 3.59E-09    | 5.67E-08    |
| ENSMMUG00000022153 | solute carrier family 25 member 36 [Source:VGNC Symbol;Acc:VGNC:84079]                               | - | 1.904818557 | 4.27E-11    | 9.46E-10    |
| ENSMMUG00000053344 | splA/ryanodine receptor domain and SOCS box containing 4 [Source:NCBI gene;Acc:715278]               | - | 2.091268435 | 8.32E-06    | 6.45E-05    |
| ENSMMUG00000057297 |                                                                                                      | - | 1.665986517 | 0.000493818 | 0.002444204 |
| ENSMMUG00000056024 |                                                                                                      | - | 2.027563254 | 8.25E-24    | 8.44E-22    |
| ENSMMUG00000063351 | Metazoan signal recognition particle RNA [Source:RFAM;Acc:RF00017]                                   | - | 2.626115551 | 1.47E-09    | 2.49E-08    |
| ENSMMUG0000007387  | G protein-coupled receptor kinase 7 [Source:VGNC Symbol;Acc:VGNC:73182]                              | - | 2.537044139 | 4.56E-27    | 7.39E-25    |
| ENSMMUG00000052474 |                                                                                                      | - | 2.75953418  | 2.78E-29    | 6.12E-27    |
| ENSMMUG00000011134 | transcription factor Dp-2 [Source:VGNC Symbol;Acc:VGNC:78324]                                        | - | 0.390590702 | 0.00509025  | 0.0182466   |
| ENSMMUG00000012151 | glycerol kinase 5 [Source:VGNC Symbol;Acc:VGNC:73022]                                                | - | 2.663397759 | 2.83E-06    | 2.44E-05    |
| ENSMMUG00000012405 | transient receptor potential cation channel subfamily C member 1 [Source:VGNC Symbol;Acc:VGNC:78651] | - | 4.109184164 | 1.62E-19    | 1.17E-17    |
| ENSMMUG00000009694 | solute carrier family 9 member A9 [Source:VGNC Symbol;Acc:VGNC:77747]                                | - | 1.969409111 | 0.000357806 | 0.001837312 |
| ENSMMUG00000017055 | divergent protein kinase domain 2A [Source:VGNC Symbol;Acc:VGNC:71781]                               | - | 0.861232467 | 0.00384095  | 0.014357214 |
| ENSMMUG00000049859 |                                                                                                      | - | -1.60907937 | 8.05E-11    | 1.72E-09    |
| ENSMMUG00000062175 | carboxypeptidase B1 [Source:NCBI gene;Acc:712639]                                                    | - | 0.655774765 | 0.003073249 | 0.011872646 |
| ENSMMUG00000005519 | carboxypeptidase A3 [Source:VGNC Symbol;Acc:VGNC:71456]                                              | - | 0.803576286 | 2.62E-05    | 0.000181629 |
| ENSMMUG00000059895 |                                                                                                      | - | 0.801930937 | 0.000514125 | 0.002535224 |
| ENSMMUG00000005521 | glycogenin 1 [Source:VGNC Symbol;Acc:VGNC:73332]                                                     | - | 0.740913661 | 1.74E-06    | 1.58E-05    |
| ENSMMUG00000005526 | helicase like transcription factor [Source:VGNC Symbol;Acc:VGNC:73383]                               | - | 0.625270132 | 0.003340252 | 0.012761128 |
| ENSMMUG00000047621 | transmembrane 4 L six family member 18 [Source:VGNC Symbol;Acc:VGNC:82713]                           | - | 0.538455028 | 1.55E-08    | 2.17E-07    |
| ENSMMUG00000031534 | ankyrin repeat and ubiquitin domain containing 1 [Source:VGNC Symbol;Acc:VGNC:84239]                 | - | 2.155427891 | 7.21E-34    | 2.19E-31    |
| ENSMMUG00000035943 | U6 spliceosomal RNA [Source:RFAM;Acc:RF00026]                                                        | - | 2.483514479 | 3.10E-11    | 7.07E-10    |
| ENSMMUG00000023335 | ring finger protein 13 [Source:VGNC Symbol;Acc:VGNC:81557]                                           | - | 1.370442877 | 7.21E-07    | 7.17E-06    |
| ENSMMUG00000059788 |                                                                                                      | - | 0.562639589 | 5.45E-05    | 0.000350385 |
| ENSMMUG00000048232 | MINDY family member 4B [Source:VGNC Symbol;Acc:VGNC:84153]                                           | - | 0.737470669 | 0.000119488 | 0.000700122 |
| ENSMMUG00000038998 | purinergic receptor P2Y13 [Source:VGNC Symbol;Acc:VGNC:83950]                                        | - | 0.637175121 | 0.003074947 | 0.011872646 |
| ENSMMUG00000001105 | purinergic receptor P2Y12 [Source:VGNC Symbol;Acc:VGNC:75642]                                        | - | 0.406518026 | 0.012524535 | 0.039020395 |
| ENSMMUG00000057501 |                                                                                                      | - | 1.929199575 | 2.50E-08    | 3.35E-07    |
| ENSMMUG00000031537 |                                                                                                      | - | 2.156693835 | 0.016877598 | 0.049835826 |
| ENSMMUG00000061194 |                                                                                                      | - | 1.291782148 | 1.23E-05    | 9.24E-05    |
| ENSMMUG00000061684 |                                                                                                      | - | 1.221811259 | 3.20E-05    | 0.000217656 |
| ENSMMUG00000053540 |                                                                                                      | - | 1.821461223 | 0.0027457   | 0.010752761 |
| ENSMMUG00000031540 | purinergic receptor P2Y1 [Source:VGNC Symbol;Acc:VGNC:75737]                                         | - | 5.074248819 | 2.12E-06    | 1.88E-05    |
| ENSMMUG00000011347 | DEAH-box helicase 36 [Source:VGNC Symbol;Acc:VGNC:71623]                                             | - | 0.853768026 | 4.54E-29    | 9.70E-27    |
| ENSMMUG00000051847 |                                                                                                      | - | 1.002542335 | 0.016337709 | 0.048568769 |
| ENSMMUG00000060572 |                                                                                                      | - | 0.834651987 | 4.49E-05    | 0.000295925 |
| ENSMMUG00000056116 |                                                                                                      | - | 1.564527264 | 1.94E-10    | 3.88E-09    |

|                     |                                                                                                               |             |             |             |
|---------------------|---------------------------------------------------------------------------------------------------------------|-------------|-------------|-------------|
| ENSMMUG00000009564  | NMD3 ribosome export adaptor [Source:VGNC Symbol;Acc:VGNC:75242]                                              | 1.801708474 | 0.001132688 | 0.005029286 |
| ENSMMUG000000063228 |                                                                                                               | 2.027353124 | 0.012249772 | 0.038290689 |
| ENSMMUG000000042979 |                                                                                                               | 1.957337081 | 0.010108861 | 0.03269244  |
| ENSMMUG000000055530 | Metazoan signal recognition particle RNA [Source:RFAM;Acc:RF00017]                                            | 1.307553423 | 0.012111963 | 0.037930118 |
| ENSMMUG00000001302  | sucrase-isomaltase [Source:VGNC Symbol;Acc:VGNC:77213]                                                        | 0.693978772 | 5.68E-09    | 8.71E-08    |
| ENSMMUG000000023045 | zinc finger B-box domain containing [Source:VGNC Symbol;Acc:VGNC:79592]                                       | 1.771006076 | 0.00037244  | 0.001901709 |
| ENSMMUG000000005939 | serpin family I member 1 [Source:VGNC Symbol;Acc:VGNC:77366]                                                  | 0.872032162 | 0.014858854 | 0.044935128 |
| ENSMMUG000000020734 | golgi integral membrane protein 4 [Source:VGNC Symbol;Acc:VGNC:72945]                                         | 0.300068808 | 0.00764691  | 0.025868774 |
| ENSMMUG000000051641 |                                                                                                               | 1.088676722 | 1.15E-05    | 8.70E-05    |
| ENSMMUG000000063303 | U6 spliceosomal RNA [Source:RFAM;Acc:RF00026]                                                                 | 2.685231651 | 0.015786992 | 0.047192165 |
| ENSMMUG000000022199 | polyhomeotic homolog 3 [Source:VGNC Symbol;Acc:VGNC:75804]                                                    | 1.544066528 | 2.21E-11    | 5.17E-10    |
| ENSMMUG000000056664 | U6 spliceosomal RNA [Source:RFAM;Acc:RF00026]                                                                 | 1.745920972 | 0.004024619 | 0.014913557 |
| ENSMMUG000000023289 | phospholipase D1 [Source:VGNC Symbol;Acc:VGNC:76171]                                                          | 2.308120518 | 0.011551155 | 0.036440787 |
| ENSMMUG000000040869 | spermatogenesis associated 16 [Source:VGNC Symbol;Acc:VGNC:84073]                                             | 0.61354614  | 0.003432144 | 0.013066063 |
| ENSMMUG000000045509 | N-acetylated alpha-linked acidic dipeptidase like 2 [Source:VGNC Symbol;Acc:VGNC:83927]                       | 1.359681292 | 0.002948726 | 0.011467531 |
| ENSMMUG000000014426 | potassium calcium-activated channel subfamily M regulatory beta subunit 2 [Source:VGNC Symbol;Acc:VGNC:84158] | 1.445882024 | 0.004738559 | 0.017139693 |
| ENSMMUG000000003216 | zinc finger matrin-type 3 [Source:VGNC Symbol;Acc:VGNC:79831]                                                 | 1.206526623 | 0.010686411 | 0.0342177   |
| ENSMMUG000000003594 | ubiquitin specific peptidase 13 [Source:VGNC Symbol;Acc:VGNC:78735]                                           | 0.782727604 | 1.70E-06    | 1.55E-05    |
| ENSMMUG000000064088 | U2 spliceosomal RNA [Source:RFAM;Acc:RF00004]                                                                 | 0.512150157 | 0.00346424  | 0.01315217  |
| ENSMMUG000000003595 | peroxisomal biogenesis factor 5 like [Source:VGNC Symbol;Acc:VGNC:75889]                                      | 1.427219908 | 0.014138602 | 0.043158794 |
| ENSMMUG000000001456 | MCF.2 cell line derived transforming sequence-like 2 [Source:VGNC Symbol;Acc:VGNC:74624]                      | 3.961844076 | 0.00069253  | 0.003292123 |
| ENSMMUG000000008070 | YEATS domain containing 2 [Source:VGNC Symbol;Acc:VGNC:79502]                                                 | 1.567559291 | 5.52E-35    | 2.17E-32    |
| ENSMMUG000000005515 | ATP binding cassette subfamily C member 5 [Source:VGNC Symbol;Acc:VGNC:69574]                                 | 0.964776111 | 3.22E-09    | 5.13E-08    |
| ENSMMUG000000013846 | 5-hydroxytryptamine receptor 3C [Source:VGNC Symbol;Acc:VGNC:84171]                                           | 0.631136254 | 0.00725663  | 0.024710619 |
| ENSMMUG000000006553 | dishevelled segment polarity protein 3 [Source:VGNC Symbol;Acc:VGNC:72014]                                    | 1.227322264 | 1.88E-05    | 0.000134345 |
| ENSMMUG000000018955 | EEF1A lysine methyltransferase 4 [Source:NCBI gene;Acc:106996971]                                             | 0.300727774 | 0.005913059 | 0.020722793 |
| ENSMMUG000000000800 | proteasome 26S subunit, non-ATPase 2 [Source:VGNC Symbol;Acc:VGNC:84144]                                      | 0.434318004 | 0.000144771 | 0.000831988 |
| ENSMMUG000000010934 | eukaryotic translation initiation factor 4 gamma 1 [Source:VGNC Symbol;Acc:VGNC:72195]                        | 0.431983049 | 0.000296756 | 0.001560897 |
| ENSMMUG000000007503 | family with sequence similarity 131 member A [Source:VGNC Symbol;Acc:VGNC:72385]                              | 0.398728791 | 0.016870773 | 0.049835826 |
| ENSMMUG000000007507 | chloride voltage-gated channel 2 [Source:VGNC Symbol;Acc:VGNC:71235]                                          | 0.332796429 | 0.00101753  | 0.004592313 |
| ENSMMUG000000007524 | RNA polymerase II subunit H [Source:VGNC Symbol;Acc:VGNC:76216]                                               | 0.963509379 | 1.01E-05    | 7.71E-05    |
| ENSMMUG000000007528 | chordin [Source:VGNC Symbol;Acc:VGNC:71042]                                                                   | 2.47920114  | 2.70E-09    | 4.36E-08    |
| ENSMMUG000000060581 |                                                                                                               | 1.963955378 | 3.98E-05    | 0.000265735 |

|                    |                                                                                       |   |             |             |             |
|--------------------|---------------------------------------------------------------------------------------|---|-------------|-------------|-------------|
| ENSMMUG0000000425  | VPS8 subunit of CORVET complex [Source:VGNC Symbol;Acc:VGNC:79779]                    | - | 0.421328829 | 0.005713747 | 0.020145706 |
| ENSMMUG00000021972 | diacylglycerol kinase gamma [Source:VGNC Symbol;Acc:VGNC:71785]                       | - | 1.434984109 | 1.80E-18    | 1.15E-16    |
| ENSMMUG00000052418 |                                                                                       | - | 0.622200816 | 9.88E-06    | 7.56E-05    |
| ENSMMUG00000018909 | fetuin B [Source:VGNC Symbol;Acc:VGNC:72638]                                          | - | 0.508054516 | 0.000325617 | 0.00169295  |
| ENSMMUG00000018910 | histidine rich glycoprotein [Source:VGNC Symbol;Acc:VGNC:73521]                       | - | 1.173695247 | 0.000195663 | 0.001083975 |
| ENSMMUG00000022532 | EPM2A interacting protein 1 [Source:VGNC Symbol;Acc:VGNC:84184]                       | - | 0.713580198 | 0.014534866 | 0.044120558 |
| ENSMMUG00000022533 | mutL homolog 1 [Source:VGNC Symbol;Acc:VGNC:74880]                                    | - | -1.47907793 | 0.009845488 | 0.032011598 |
| ENSMMUG00000022539 | LRR binding FLII interacting protein 2 [Source:VGNC Symbol;Acc:VGNC:74449]            | - | 0.403504193 | 0.001710328 | 0.007219231 |
| ENSMMUG00000054175 |                                                                                       | - | 0.593619607 | 1.61E-07    | 1.88E-06    |
| ENSMMUG00000000987 | DLEC1 cilia and flagella associated protein [Source:VGNC Symbol;Acc:VGNC:71808]       | - | 0.471353589 | 0.008620666 | 0.028650805 |
| ENSMMUG00000004847 | xylulokinase [Source:VGNC Symbol;Acc:VGNC:78815]                                      | - | 0.407234754 | 0.001129252 | 0.00501863  |
| ENSMMUG00000018790 | activin A receptor type 2B [Source:VGNC Symbol;Acc:VGNC:69450]                        | - | 1.946447767 | 7.18E-15    | 2.93E-13    |
| ENSMMUG00000015827 | sodium voltage-gated channel alpha subunit 10 [Source:VGNC Symbol;Acc:VGNC:76980]     | - | 0.206814684 | 0.014065581 | 0.042983258 |
| ENSMMUG00000020150 | xin actin binding repeat containing 1 [Source:VGNC Symbol;Acc:VGNC:78952]             | - | -0.80117474 | 9.32E-08    | 1.12E-06    |
| ENSMMUG00000051711 |                                                                                       | - | 0.339750805 | 0.004861373 | 0.017527227 |
| ENSMMUG00000051408 | myelin associated oligodendrocyte basic protein [Source:NCBI gene;Acc:717265]         | - | 0.818989169 | 5.91E-05    | 0.00037486  |
| ENSMMUG00000009197 | myelin associated oligodendrocyte basic protein [Source:VGNC Symbol;Acc:VGNC:74908]   | - | 1.192080644 | 8.84E-13    | 2.60E-11    |
| ENSMMUG00000017701 | myosin VIIA and Rab interacting protein [Source:VGNC Symbol;Acc:VGNC:74992]           | - | 2.576694266 | 2.02E-10    | 4.02E-09    |
| ENSMMUG00000013330 | ectonucleoside triphosphate diphosphohydrolase 3 [Source:VGNC Symbol;Acc:VGNC:72226]  | - | 1.861162282 | 1.83E-11    | 4.38E-10    |
| ENSMMUG00000009437 | zinc finger protein 619 [Source:VGNC Symbol;Acc:VGNC:82562]                           | - | 2.374194566 | 2.29E-05    | 0.000161038 |
| ENSMMUG00000024178 | U5 spliceosomal RNA [Source:RFAM;Acc:RF00020]                                         | - | 2.678797187 | 0.005588988 | 0.019797055 |
| ENSMMUG00000050991 |                                                                                       | - | 0.551499015 | 0.013042785 | 0.04032927  |
| ENSMMUG00000001074 | unc-51 like kinase 4 [Source:VGNC Symbol;Acc:VGNC:82565]                              | - | 0.526859834 | 0.006402536 | 0.022139313 |
| ENSMMUG00000050275 |                                                                                       | - | 0.598253906 | 0.016238262 | 0.048322541 |
| ENSMMUG00000021242 | natural killer cell triggering receptor [Source:VGNC Symbol;Acc:VGNC:81486]           | - | 2.957852501 | 0.000208707 | 0.001148364 |
| ENSMMUG00000021244 | kelch like family member 40 [Source:VGNC Symbol;Acc:VGNC:74165]                       | - | 3.442174316 | 4.73E-05    | 0.000308784 |
| ENSMMUG00000021246 | hedgehog acyltransferase like [Source:NCBI gene;Acc:717333]                           | - | 1.892940225 | 0.001803051 | 0.007549237 |
| ENSMMUG00000031684 | KRAB box domain containing 1 [Source:NCBI gene;Acc:717189]                            | - | 2.048605724 | 0.005843092 | 0.020505158 |
| ENSMMUG00000056798 |                                                                                       | - | 1.846377603 | 7.82E-05    | 0.000481082 |
| ENSMMUG00000054286 |                                                                                       | - | 1.265112509 | 3.97E-05    | 0.000265287 |
| ENSMMUG00000001028 | SNF related kinase [Source:VGNC Symbol;Acc:VGNC:84074]                                | - | 0.538511092 | 2.13E-06    | 1.89E-05    |
| ENSMMUG00000040696 | Metazoan signal recognition particle RNA [Source:RFAM;Acc:RF00017]                    | - | 2.545042313 | 0.000265752 | 0.001421877 |
| ENSMMUG00000051589 |                                                                                       | - | 0.824959578 | 0.000598761 | 0.002895606 |
| ENSMMUG00000019740 | zinc finger DHHC-type palmitoyltransferase 3 [Source:VGNC Symbol;Acc:VGNC:79143]      | - | 0.782987757 | 0.016505089 | 0.048996219 |
| ENSMMUG00000004576 | C-C motif chemokine receptor 3 [Source:VGNC Symbol;Acc:VGNC:70738]                    | - | 1.076373136 | 0.003916956 | 0.014579316 |
| ENSMMUG00000062394 | C-C motif chemokine receptor 2 [Source:NCBI gene;Acc:574098]                          | - | 1.037885527 | 2.87E-05    | 0.000197076 |
| ENSMMUG00000006454 | kelch like family member 18 [Source:VGNC Symbol;Acc:VGNC:74154]                       | - | 0.715330382 | 0.003764749 | 0.014130688 |
| ENSMMUG00000014045 | protein tyrosine phosphatase non-receptor type 23 [Source:VGNC Symbol;Acc:VGNC:76477] | - | 1.69735252  | 1.55E-10    | 3.16E-09    |
| ENSMMUG00000014046 | SREBF chaperone [Source:VGNC Symbol;Acc:VGNC:77140]                                   | - | 2.312415354 | 4.34E-45    | 5.26E-42    |

|                    |                                                                                                                   |             |             |             |
|--------------------|-------------------------------------------------------------------------------------------------------------------|-------------|-------------|-------------|
| ENSMMUG00000013385 | elongator acetyltransferase complex subunit 6 [Source:VGNC Symbol;Acc:VGNC:72113]                                 | 1.157104289 | 4.75E-14    | 1.73E-12    |
| ENSMMUG00000064458 |                                                                                                                   | -           |             |             |
| ENSMMUG00000003074 | plexin B1 [Source:VGNC Symbol;Acc:VGNC:76187]                                                                     | 1.596992808 | 1.37E-06    | 1.28E-05    |
| ENSMMUG00000010058 | ATR interacting protein [Source:VGNC Symbol;Acc:VGNC:84235]                                                       | 2.400711911 | 0.001801389 | 0.007544452 |
| ENSMMUG00000043955 | three prime repair exonuclease 1 [Source:VGNC Symbol;Acc:VGNC:82708]                                              | 0.798113367 | 4.56E-14    | 1.69E-12    |
| ENSMMUG00000010062 | shisa family member 5 [Source:VGNC Symbol;Acc:VGNC:84082]                                                         | 0.721005635 | 0.000351437 | 0.00180972  |
| ENSMMUG00000000591 | 6-phosphofructo-2-kinase/fructose-2,6-biphosphatase 4 [Source:VGNC Symbol;Acc:VGNC:75960]                         | 0.722788221 | 7.18E-07    | 7.15E-06    |
| ENSMMUG00000059318 | urocortin 2 [Source:NCBI gene;Acc:106996925]                                                                      | 0.730527411 | 1.50E-08    | 2.10E-07    |
| ENSMMUG00000014699 |                                                                                                                   | 2.160982405 | 6.18E-34    | 1.95E-31    |
| ENSMMUG00000032659 | mml-mir-711 [Source:miRBase;Acc:MI0012553]                                                                        | 1.714133404 | 4.84E-57    | 1.76E-53    |
| ENSMMUG00000014707 | cadherin EGF LAG seven-pass G-type receptor 3 [Source:VGNC Symbol;Acc:VGNC:71148]                                 | 1.951187721 | 6.20E-06    | 4.97E-05    |
| ENSMMUG00000064174 |                                                                                                                   | 1.552368587 | 0.002635451 | 0.010388166 |
| ENSMMUG00000014720 | NCK interacting protein with SH3 domain [Source:VGNC Symbol;Acc:VGNC:74960]                                       | 1.597409778 | 0.003070345 | 0.011870912 |
| ENSMMUG00000052238 |                                                                                                                   | 1.79093758  | 1.90E-06    | 1.71E-05    |
| ENSMMUG00000014537 | bassoon presynaptic cytomatrix protein [Source:VGNC Symbol;Acc:VGNC:70284]                                        | 0.709224549 | 0.000279412 | 0.001486753 |
| ENSMMUG00000014540 | acylaminoacyl-peptide hydrolase [Source:VGNC Symbol;Acc:VGNC:69982]                                               | 0.502966646 | 0.00103962  | 0.004678936 |
| ENSMMUG00000014564 | ring finger protein 123 [Source:VGNC Symbol;Acc:VGNC:76790]                                                       | -           |             |             |
| ENSMMUG00000014589 | inositol hexakisphosphate kinase 1 [Source:VGNC Symbol;Acc:VGNC:73621]                                            | 0.767428257 | 0.002642465 | 0.010404528 |
| ENSMMUG00000031794 |                                                                                                                   | -           |             |             |
| ENSMMUG00000020979 | inka box actin regulator 1 [Source:VGNC Symbol;Acc:VGNC:73692]                                                    | 0.602754301 | 2.26E-09    | 3.70E-08    |
| ENSMMUG00000020980 | ubiquitin like modifier activating enzyme 7 [Source:VGNC Symbol;Acc:VGNC:78690]                                   | 1.041686986 | 4.03E-05    | 0.00026821  |
| ENSMMUG00000016476 | TRAF interacting protein [Source:VGNC Symbol;Acc:VGNC:82261]                                                      | 1.316198083 | 1.89E-05    | 0.000135271 |
| ENSMMUG00000016480 | CaM kinase like vesicle associated [Source:VGNC Symbol;Acc:VGNC:70663]                                            | 1.55275752  | 1.93E-13    | 6.21E-12    |
| ENSMMUG00000044412 | Metazoan signal recognition particle RNA [Source:RFAM;Acc:RF00017]                                                | 1.529977418 | 3.77E-09    | 5.93E-08    |
| ENSMMUG0000003353  | macrophage stimulating 1 receptor [Source:VGNC Symbol;Acc:VGNC:74941]                                             | 1.351734802 | 1.44E-10    | 2.95E-09    |
| ENSMMUG00000056280 | G protein subunit alpha i2 [Source:NCBI gene;Acc:703780]                                                          | 1.512892999 | 1.81E-10    | 3.64E-09    |
| ENSMMUG00000020117 | semaphorin 3B [Source:VGNC Symbol;Acc:VGNC:77160]                                                                 | 2.791237906 | 0.009684498 | 0.031572898 |
| ENSMMUG0000004273  | dedicator of cytokinesis 3 [Source:VGNC Symbol;Acc:VGNC:71967]                                                    | 4.658720531 | 5.64E-05    | 0.000360327 |
| ENSMMUG0000004280  | DDB1 and CUL4 associated factor 1 [Source:VGNC Symbol;Acc:VGNC:71819]                                             | -           |             |             |
| ENSMMUG00000017351 | stabilin 1 [Source:VGNC Symbol;Acc:VGNC:77956]                                                                    | 0.734036929 | 2.48E-06    | 2.17E-05    |
| ENSMMUG00000050505 | small integral membrane protein 4 [Source:NCBI gene;Acc:696553]                                                   | -           |             |             |
| ENSMMUG00000012526 | glycosyltransferase 8 domain containing 1 [Source:VGNC Symbol;Acc:VGNC:73001]                                     | 1.176468416 | 3.62E-06    | 3.06E-05    |
| ENSMMUG00000017370 | signal peptidase complex subunit 1 [Source:VGNC Symbol;Acc:VGNC:84072]                                            | 1.308525493 | 6.09E-11    | 1.32E-09    |
| ENSMMUG00000014433 | transketolase [Source:VGNC Symbol;Acc:VGNC:78362]                                                                 | 1.552442617 | 5.79E-05    | 0.000368683 |
| ENSMMUG00000011208 | decapping mRNA 1A [Source:VGNC Symbol;Acc:VGNC:71668]                                                             | -           |             |             |
| ENSMMUG00000019266 | choline dehydrogenase [Source:VGNC Symbol;Acc:VGNC:71086]                                                         | 0.784458658 | 6.54E-07    | 6.59E-06    |
| ENSMMUG00000021620 | ELKS/RAB6-interacting/CAST family member 2 [Source:VGNC Symbol;Acc:VGNC:72164]                                    | 1.317849888 | 2.23E-12    | 6.17E-11    |
| ENSMMUG00000039085 | adaptor protein, phosphotyrosine interacting with PH domain and leucine zipper 1 [Source:NCBI gene;Acc:100425753] | 1.590424205 | 1.03E-15    | 4.87E-14    |
| ENSMMUG00000021008 | ankyrin repeat and SOCS box containing 14 [Source:VGNC Symbol;Acc:VGNC:84237]                                     | 1.411583889 | 0.00016557  | 0.000933991 |
| ENSMMUG00000055244 | U6 spliceosomal RNA [Source:RFAM;Acc:RF00026]                                                                     | 3.411472526 | 0.003868167 | 0.014440588 |
| ENSMMUG00000024983 | U6 spliceosomal RNA [Source:RFAM;Acc:RF00026]                                                                     | -1.238408   | 0.011107918 | 0.035333875 |
| ENSMMUG00000018619 | DENN domain containing 6A [Source:VGNC Symbol;Acc:VGNC:71726]                                                     | -           |             |             |
|                    |                                                                                                                   | 0.937336057 | 2.55E-05    | 0.000177275 |
|                    |                                                                                                                   | -           |             |             |
|                    |                                                                                                                   | 0.641802241 | 1.20E-06    | 1.14E-05    |
|                    |                                                                                                                   | -           |             |             |
|                    |                                                                                                                   | 2.133407129 | 0.000685137 | 0.003263381 |
|                    |                                                                                                                   | -           |             |             |
|                    |                                                                                                                   | 2.479252166 | 0.001155599 | 0.005113832 |
|                    |                                                                                                                   | -           |             |             |
|                    |                                                                                                                   | 1.396773389 | 6.28E-10    | 1.15E-08    |
|                    |                                                                                                                   | -0.43031413 | 0.01294066  | 0.040076347 |
|                    |                                                                                                                   | 2.449640852 | 2.36E-15    | 1.05E-13    |

|                     |                                                                                                          |             |             |             |
|---------------------|----------------------------------------------------------------------------------------------------------|-------------|-------------|-------------|
| ENSMMUG0000000706   | filamin B [Source:VGNC Symbol;Acc:VGNC:72672]                                                            | 1.78356702  | 3.79E-21    | 3.20E-19    |
| ENSMMUG00000017510  | membrane associated guanylate kinase, WW and PDZ domain containing 1 [Source:VGNC Symbol;Acc:VGNC:74499] | 2.239792093 | 1.49E-21    | 1.32E-19    |
| ENSMMUG000000057539 |                                                                                                          | 2.638941141 | 3.44E-12    | 9.20E-11    |
|                     |                                                                                                          | -           |             |             |
| ENSMMUG00000001531  | leucine rich repeats and immunoglobulin like domains 1 [Source:VGNC Symbol;Acc:VGNC:84156]               | 0.617765065 | 0.000175597 | 0.00098444  |
|                     |                                                                                                          | -           |             |             |
| ENSMMUG000000062338 |                                                                                                          | 1.032689962 | 0.000435132 | 0.002194071 |
|                     |                                                                                                          | -           |             |             |
| ENSMMUG000000054412 |                                                                                                          | 0.709101511 | 0.000217563 | 0.001194377 |
| ENSMMUG000000057486 |                                                                                                          | 0.470353576 | 0.000296153 | 0.001559845 |
| ENSMMUG000000055556 |                                                                                                          | 3.899380953 | 0.000685012 | 0.003263381 |
|                     |                                                                                                          | -           |             |             |
| ENSMMUG000000054043 |                                                                                                          | 1.668583468 | 0.01025944  | 0.033120471 |
| ENSMMUG000000057543 | MyoD family inhibitor domain containing 2 [Source:HGNC Symbol;Acc:HGNC:53442]                            | 0.726227162 | 0.000533633 | 0.00261545  |
|                     |                                                                                                          | -           |             |             |
| ENSMMUG00000009425  | actin, cytoplasmic 2-like [Source:NCBI gene;Acc:705671]                                                  | 0.471991652 | 0.015608381 | 0.046773661 |
| ENSMMUG000000056158 |                                                                                                          | 1.536046576 | 7.86E-05    | 0.000482772 |
|                     |                                                                                                          | -           |             |             |
| ENSMMUG000000054107 |                                                                                                          | 0.655982436 | 0.004290039 | 0.015760501 |
|                     |                                                                                                          | -           |             |             |
| ENSMMUG00000001849  | interleukin 5 receptor subunit alpha [Source:VGNC Symbol;Acc:VGNC:73731]                                 | 1.025467026 | 6.18E-07    | 6.26E-06    |
| ENSMMUG00000017983  | tRNA nucleotidyl transferase 1 [Source:VGNC Symbol;Acc:VGNC:79073]                                       | 0.763646403 | 0.005510148 | 0.019536835 |
|                     |                                                                                                          | -           |             |             |
| ENSMMUG000000060798 |                                                                                                          | 1.017288578 | 0.000158958 | 0.000901591 |
| ENSMMUG000000057502 |                                                                                                          | 3.197844238 | 0.016279989 | 0.048426889 |
| ENSMMUG00000018281  | interleukin 17 receptor E [Source:VGNC Symbol;Acc:VGNC:73623]                                            | -0.45822635 | 0.000959108 | 0.004372079 |
|                     |                                                                                                          | -           |             |             |
| ENSMMUG00000018282  | interleukin 17 receptor C [Source:VGNC Symbol;Acc:VGNC:84164]                                            | 0.560473193 | 0.000775911 | 0.003624493 |
|                     |                                                                                                          | -           |             |             |
| ENSMMUG00000018285  | cysteine rich with EGF like domains 1 [Source:VGNC Symbol;Acc:VGNC:71407]                                | 0.678834541 | 4.73E-05    | 0.000309009 |
|                     |                                                                                                          | -           |             |             |
| ENSMMUG00000018289  | proline rich transmembrane protein 3 [Source:VGNC Symbol;Acc:VGNC:76324]                                 | 0.541231384 | 0.001467533 | 0.00629887  |
|                     |                                                                                                          | -           |             |             |
| ENSMMUG00000018290  | ER membrane protein complex subunit 3 [Source:VGNC Symbol;Acc:VGNC:72091]                                | 0.685945222 | 0.003365132 | 0.012836245 |
| ENSMMUG00000019933  | TatD DNase domain containing 2 [Source:NCBI gene;Acc:701390]                                             | 1.126872359 | 0.00055387  | 0.00270279  |
| ENSMMUG00000007195  | tRNA splicing endonuclease subunit 2 [Source:VGNC Symbol;Acc:VGNC:82707]                                 | 0.732092306 | 0.01082768  | 0.034601449 |
|                     |                                                                                                          | -           |             |             |
| ENSMMUG00000009536  | makorin ring finger protein 2 [Source:VGNC Symbol;Acc:VGNC:74878]                                        | 1.297500973 | 4.21E-08    | 5.42E-07    |
|                     |                                                                                                          | -           |             |             |
| ENSMMUG00000023125  | XPC complex subunit, DNA damage recognition and repair factor [Source:VGNC Symbol;Acc:VGNC:78809]        | 0.684325201 | 0.002836969 | 0.011077362 |
|                     |                                                                                                          | -           |             |             |
| ENSMMUG00000023124  | transmembrane protein 43 [Source:VGNC Symbol;Acc:VGNC:82711]                                             | 1.190714789 | 3.60E-11    | 8.14E-10    |
|                     |                                                                                                          | -           |             |             |
| ENSMMUG00000006340  | solute carrier family 6 member 6 [Source:VGNC Symbol;Acc:VGNC:77622]                                     | 0.618980966 | 0.000190675 | 0.001060384 |
| ENSMMUG000000044822 | coiled-coil domain containing 174 [Source:VGNC Symbol;Acc:VGNC:84219]                                    | 1.137491356 | 5.26E-12    | 1.38E-10    |
|                     |                                                                                                          | -           |             |             |
| ENSMMUG00000000158  | minichromosome maintenance complex component 2 [Source:VGNC Symbol;Acc:VGNC:74680]                       | 1.251028495 | 1.81E-16    | 9.22E-15    |
|                     |                                                                                                          | -           |             |             |
| ENSMMUG00000017125  | oxysterol binding protein like 11 [Source:VGNC Symbol;Acc:VGNC:75631]                                    | 1.493607456 | 1.36E-24    | 1.54E-22    |
| ENSMMUG000000055571 |                                                                                                          | 2.333067503 | 0.008280666 | 0.027634537 |
|                     |                                                                                                          | -           |             |             |
| ENSMMUG000000032031 |                                                                                                          | 1.284772417 | 0.000614633 | 0.002963489 |
| ENSMMUG00000001943  | GRAM domain containing 1C [Source:VGNC Symbol;Acc:VGNC:73007]                                            | 0.7890243   | 0.002390347 | 0.009577743 |
|                     |                                                                                                          | -           |             |             |
| ENSMMUG000000052581 | upstream transcription factor family member 3 [Source:NCBI gene;Acc:709660]                              | 0.741618715 | 9.52E-07    | 9.21E-06    |



|                     |                                                                                          |             |             |             |
|---------------------|------------------------------------------------------------------------------------------|-------------|-------------|-------------|
| ENSMMUG00000057363  |                                                                                          | 1.039420262 | 0.005948183 | 0.02082079  |
| ENSMMUG00000014874  | GTP binding protein 8 (putative) [Source:VGNC Symbol;Acc:VGNC:84180]                     | 1.762240016 | 3.58E-16    | 1.77E-14    |
| ENSMMUG00000014876  | nucleolus and neural progenitor protein [Source:VGNC Symbol;Acc:VGNC:75244]              | 1.81805811  | 4.90E-14    | 1.78E-12    |
| ENSMMUG00000003199  | CD200 receptor 1 [Source:VGNC Symbol;Acc:VGNC:70845]                                     | 1.424936853 | 0.00085032  | 0.003944193 |
| ENSMMUG000000050558 |                                                                                          | 0.592794381 | 0.008634929 | 0.028678539 |
| ENSMMUG00000000894  | cellular inhibitor of PP2A [Source:VGNC Symbol;Acc:VGNC:71371]                           | 2.088829729 | 0.001361623 | 0.005906869 |
|                     |                                                                                          | -           |             |             |
| ENSMMUG00000019977  | myosin heavy chain 15 [Source:VGNC Symbol;Acc:VGNC:84148]                                | 1.169663934 | 3.61E-08    | 4.71E-07    |
| ENSMMUG00000019978  | HERV-H LTR-associating 2 [Source:VGNC Symbol;Acc:VGNC:73377]                             | -1.25097096 | 0.002955457 | 0.011490633 |
| ENSMMUG00000008791  | CD47 molecule [Source:VGNC Symbol;Acc:VGNC:70767]                                        | 3.405195342 | 1.14E-28    | 2.27E-26    |
| ENSMMUG00000008787  | BBX high mobility group box domain containing [Source:VGNC Symbol;Acc:VGNC:82110]        | 0.342929935 | 0.000589382 | 0.002854045 |
| ENSMMUG000000055345 | Y RNA [Source:RFAM;Acc:RF00019]                                                          | 0.756539149 | 0.000221751 | 0.001213055 |
|                     |                                                                                          | -           |             |             |
| ENSMMUG00000007565  | Cbl proto-oncogene B [Source:VGNC Symbol;Acc:VGNC:70555]                                 | 0.808743347 | 8.88E-09    | 1.32E-07    |
|                     |                                                                                          | -           |             |             |
| ENSMMUG00000026103  | U1 spliceosomal RNA [Source:RFAM;Acc:RF00003]                                            | 1.637305364 | 0.00107408  | 0.004805757 |
|                     |                                                                                          | -           |             |             |
| ENSMMUG000000060744 |                                                                                          | 2.028866953 | 5.19E-11    | 1.13E-09    |
| ENSMMUG000000063181 |                                                                                          | 0.438774204 | 0.016934657 | 0.04994504  |
|                     |                                                                                          | -           |             |             |
| ENSMMUG000000059753 |                                                                                          | 0.532165981 | 0.000626653 | 0.003011454 |
| ENSMMUG00000021567  | neurexophilin and PC-esterase domain family member 3 [Source:VGNC Symbol;Acc:VGNC:75476] | -0.36000764 | 0.006000674 | 0.020969182 |
| ENSMMUG000000057768 |                                                                                          | -0.82333113 | 7.17E-06    | 5.67E-05    |
| ENSMMUG000000038349 | crystallin beta-gamma domain containing 3 [Source:NCBI gene;Acc:698282]                  | 0.674126808 | 1.88E-07    | 2.15E-06    |
|                     |                                                                                          | -           |             |             |
| ENSMMUG000000043727 | zinc finger protein 654 [Source:VGNC Symbol;Acc:VGNC:82560]                              | 2.379488115 | 6.97E-07    | 6.98E-06    |
|                     |                                                                                          | -           |             |             |
| ENSMMUG000000047994 | CGG triplet repeat binding protein 1 [Source:VGNC Symbol;Acc:VGNC:84203]                 | 1.705485898 | 5.83E-08    | 7.32E-07    |
|                     |                                                                                          | -           |             |             |
| ENSMMUG000000033738 | RNA, U6atac small nuclear 6, pseudogene [Source:HGNC Symbol;Acc:HGNC:46905]              | 0.955248698 | 3.59E-09    | 5.67E-08    |
|                     |                                                                                          | -           |             |             |
| ENSMMUG000000000519 | vestigial like family member 3 [Source:VGNC Symbol;Acc:VGNC:79430]                       | 0.891353606 | 0.006035174 | 0.021069484 |
|                     |                                                                                          | -           |             |             |
| ENSMMUG000000050994 |                                                                                          | 1.433430727 | 0.001727606 | 0.007273155 |
| ENSMMUG00000005096  |                                                                                          | 1.144529051 | 2.27E-08    | 3.08E-07    |
| ENSMMUG000000049913 |                                                                                          | 1.288240432 | 0.00115504  | 0.005113832 |
|                     |                                                                                          | -           |             |             |
| ENSMMUG000000056687 |                                                                                          | 1.721901746 | 2.05E-13    | 6.58E-12    |
| ENSMMUG000000052831 |                                                                                          | 0.821136896 | 2.15E-05    | 0.000152434 |
|                     |                                                                                          | -           |             |             |
| ENSMMUG000000032295 | zinc finger protein 595 [Source:VGNC Symbol;Acc:VGNC:79655]                              | 0.697802448 | 0.013942442 | 0.042660763 |
|                     |                                                                                          | -           |             |             |
| ENSMMUG000000047256 | zinc finger protein 732 [Source:NCBI gene;Acc:716016]                                    | 1.079910452 | 0.012466086 | 0.03887481  |
|                     |                                                                                          | -           |             |             |
| ENSMMUG000000051381 | Metazoan signal recognition particle RNA [Source:RFAM;Acc:RF00017]                       | 1.976551881 | 4.02E-14    | 1.50E-12    |
|                     |                                                                                          | -           |             |             |
| ENSMMUG000000039020 | zinc finger protein 141 [Source:NCBI gene;Acc:714265]                                    | 1.647065303 | 1.96E-17    | 1.10E-15    |
|                     |                                                                                          | -           |             |             |
| ENSMMUG000000065084 |                                                                                          | 0.426035684 | 0.001087287 | 0.004851411 |
|                     |                                                                                          | -           |             |             |
| ENSMMUG00000008323  | C-terminal binding protein 1 [Source:VGNC Symbol;Acc:VGNC:71539]                         | 0.691035171 | 7.13E-09    | 1.07E-07    |
| ENSMMUG00000008357  | macrophage erythroblast attacher [Source:VGNC Symbol;Acc:VGNC:74282]                     | 0.529521574 | 0.009931187 | 0.032246967 |
| ENSMMUG000000032306 | zinc finger FYVE-type containing 28 [Source:NCBI gene;Acc:720600]                        | -0.75193418 | 0.000108808 | 0.000642724 |
| ENSMMUG00000008379  | adducin 1 [Source:VGNC Symbol;Acc:VGNC:69528]                                            | 1.342809881 | 1.82E-08    | 2.51E-07    |

|                    |                                                                                        |             |             |             |
|--------------------|----------------------------------------------------------------------------------------|-------------|-------------|-------------|
| ENSMMUG0000008383  | major facilitator superfamily domain containing 10 [Source:NCBI gene;Acc:720098]       | 1.442792425 | 1.75E-09    | 2.94E-08    |
| ENSMMUG0000008385  | NOP14 nucleolar protein [Source:VGNC Symbol;Acc:VGNC:75194]                            | 1.183366308 | 6.99E-13    | 2.07E-11    |
|                    |                                                                                        | -           |             |             |
| ENSMMUG0000008392  | huntingtin [Source:VGNC Symbol;Acc:VGNC:73468]                                         | 0.679382504 | 1.75E-06    | 1.58E-05    |
| ENSMMUG0000006234  | acyl-CoA oxidase 3, pristanoyl [Source:VGNC Symbol;Acc:VGNC:69382]                     | 0.573384461 | 0.000329918 | 0.001711031 |
|                    |                                                                                        | -           |             |             |
| ENSMMUG00000030400 | SH3 domain and tetratricopeptide repeats 1 [Source:NCBI gene;Acc:722649]               | 0.523543354 | 0.000275246 | 0.001467273 |
|                    |                                                                                        | -           |             |             |
| ENSMMUG00000015099 | janus kinase and microtubule interacting protein 1 [Source:VGNC Symbol;Acc:VGNC:73662] | 0.682782535 | 0.001534436 | 0.006547139 |
| ENSMMUG00000019563 | collapsin response mediator protein 1 [Source:VGNC Symbol;Acc:VGNC:71494]              | 1.18065825  | 6.93E-14    | 2.43E-12    |
| ENSMMUG00000057703 |                                                                                        | 1.148921338 | 7.16E-06    | 5.67E-05    |
| ENSMMUG00000020861 | EvC ciliary complex subunit 1 [Source:VGNC Symbol;Acc:VGNC:72445]                      | 1.052181737 | 2.42E-07    | 2.70E-06    |
| ENSMMUG00000016922 | serine/threonine kinase 32B [Source:VGNC Symbol;Acc:VGNC:78114]                        | 1.006022694 | 0.002335145 | 0.00940072  |
|                    |                                                                                        | -           |             |             |
| ENSMMUG00000060830 |                                                                                        | 2.856043941 | 0.003029182 | 0.01172709  |
|                    |                                                                                        | -           |             |             |
| ENSMMUG00000023394 | zinc finger and BTB domain containing 49 [Source:VGNC Symbol;Acc:VGNC:79207]           | 1.476378671 | 0.005119856 | 0.018327344 |
| ENSMMUG00000023242 | transmembrane protein 128 [Source:VGNC Symbol;Acc:VGNC:82257]                          | -0.70644516 | 0.000244594 | 0.001319927 |
| ENSMMUG00000056982 |                                                                                        | 0.379073573 | 0.001080737 | 0.004828111 |
| ENSMMUG00000061061 |                                                                                        | 3.803612535 | 0.001074001 | 0.004805757 |
| ENSMMUG00000009388 | F-box and leucine rich repeat protein 5 [Source:VGNC Symbol;Acc:VGNC:81408]            | 3.812499086 | 0.000540293 | 0.002642747 |
| ENSMMUG00000061298 |                                                                                        | 3.293296732 | 0.001737871 | 0.007303681 |
| ENSMMUG00000015294 | bone marrow stromal cell antigen 1 [Source:VGNC Symbol;Acc:VGNC:70285]                 | 3.359659505 | 0.00625699  | 0.021713501 |
| ENSMMUG00000015298 | CD38 molecule [Source:VGNC Symbol;Acc:VGNC:70762]                                      | 1.373324039 | 0.000199134 | 0.001100273 |
| ENSMMUG00000008162 | fibroblast growth factor binding protein 1 [Source:VGNC Symbol;Acc:VGNC:72536]         | 1.228233571 | 1.91E-08    | 2.62E-07    |
| ENSMMUG00000023116 | LIM domain binding 2 [Source:VGNC Symbol;Acc:VGNC:74246]                               | -0.77753714 | 1.85E-06    | 1.66E-05    |
|                    |                                                                                        | -           |             |             |
| ENSMMUG00000018073 | ligand dependent nuclear receptor corepressor like [Source:NCBI gene;Acc:715285]       | 0.552358877 | 0.003486575 | 0.013226603 |
| ENSMMUG00000057338 |                                                                                        | -1.09568017 | 3.61E-07    | 3.88E-06    |
|                    |                                                                                        | -           |             |             |
| ENSMMUG00000060440 | leucine rich repeat LGI family member 2 [Source:NCBI gene;Acc:693308]                  | 0.428428657 | 7.80E-05    | 0.00047991  |
| ENSMMUG00000003629 | phosphatidylinositol 4-kinase type 2 beta [Source:NCBI gene;Acc:693561]                | 1.670950958 | 0.001276732 | 0.005585269 |
| ENSMMUG00000049298 | cholecystokinin A receptor [Source:NCBI gene;Acc:694742]                               | 3.819873789 | 0.001623675 | 0.006893504 |
| ENSMMUG00000057711 |                                                                                        | 0.664448611 | 0.014116759 | 0.043112463 |
| ENSMMUG00000009439 | stromal interaction molecule 2 [Source:VGNC Symbol;Acc:VGNC:77965]                     | 1.287979786 | 0.005964522 | 0.020867932 |
|                    |                                                                                        | -           |             |             |
| ENSMMUG00000051768 |                                                                                        | 1.122503992 | 0.000281743 | 0.001497514 |
| ENSMMUG00000055079 |                                                                                        | 0.443753483 | 0.004333245 | 0.015887207 |
| ENSMMUG00000004471 | family with sequence similarity 114 member A1 [Source:VGNC Symbol;Acc:VGNC:72342]      | 1.034902005 | 0.011522636 | 0.036385652 |
|                    |                                                                                        | -           |             |             |
| ENSMMUG00000002755 | kelch like family member 5 [Source:VGNC Symbol;Acc:VGNC:74188]                         | 3.493457254 | 1.82E-06    | 1.64E-05    |
|                    |                                                                                        | -           |             |             |
| ENSMMUG00000002756 | WD repeat domain 19 [Source:VGNC Symbol;Acc:VGNC:79132]                                | 0.361612711 | 0.011572657 | 0.036500697 |
| ENSMMUG00000008834 | klotho beta [Source:VGNC Symbol;Acc:VGNC:73835]                                        | 1.617283901 | 0.009798345 | 0.031901129 |
|                    |                                                                                        | -           |             |             |
| ENSMMUG00000001892 | UDP-glucose 6-dehydrogenase [Source:VGNC Symbol;Acc:VGNC:78711]                        | 0.901169895 | 8.45E-05    | 0.000514294 |
|                    |                                                                                        | -           |             |             |
| ENSMMUG00000036851 | U7 small nuclear RNA [Source:RFAM;Acc:RF00066]                                         | 0.530308285 | 0.01630325  | 0.048476241 |
|                    |                                                                                        | -           |             |             |
| ENSMMUG00000012036 | RNA binding motif protein 47 [Source:VGNC Symbol;Acc:VGNC:76576]                       | 0.816430005 | 1.35E-11    | 3.29E-10    |
|                    |                                                                                        | -           |             |             |
| ENSMMUG00000012561 | NOP2/Sun RNA methyltransferase family member 7 [Source:VGNC Symbol;Acc:VGNC:75463]     | 0.967261032 | 3.69E-09    | 5.81E-08    |
| ENSMMUG00000055441 |                                                                                        | 1.628885361 | 2.45E-05    | 0.000171495 |

|                     |                                                                                           |             |             |             |
|---------------------|-------------------------------------------------------------------------------------------|-------------|-------------|-------------|
| ENSMMUG00000051296  | paired like homeobox 2B [Source:NCBI gene;Acc:701940]                                     | 1.646673279 | 0.000116484 | 0.000684174 |
| ENSMMUG00000018625  | NIPA like domain containing 1 [Source:NCBI gene;Acc:704998]                               | 0.667168739 | 0.015909943 | 0.047501097 |
| ENSMMUG00000018628  | tec protein tyrosine kinase [Source:VGNC Symbol;Acc:VGNC:78305]                           | 0.573483671 | 0.001365129 | 0.005920309 |
| ENSMMUG00000006703  | solute carrier family 10 member 4 [Source:VGNC Symbol;Acc:VGNC:77553]                     | 1.029045196 | 4.27E-05    | 0.000283001 |
| ENSMMUG00000006704  | zygote arrest 1 [Source:VGNC Symbol;Acc:VGNC:79251]                                       | 1.276162498 | 5.91E-08    | 7.41E-07    |
| ENSMMUG00000014868  | OCIA domain containing 1 [Source:VGNC Symbol;Acc:VGNC:75409]                              | 1.559116584 | 9.22E-09    | 1.35E-07    |
| ENSMMUG000000063785 |                                                                                           | 1.274971426 | 0.003011158 | 0.011666631 |
| ENSMMUG00000058229  | U6 spliceosomal RNA [Source:RFAM;Acc:RF00026]                                             | 2.850155999 | 5.35E-06    | 4.35E-05    |
| ENSMMUG00000008514  | lin-54 DREAM MuvB core complex component [Source:VGNC Symbol;Acc:VGNC:74123]              | 1.014055355 | 0.016047232 | 0.047832401 |
| ENSMMUG00000048621  | enolase-phosphatase 1 [Source:NCBI gene;Acc:106998330]                                    | 1.565096037 | 2.18E-07    | 2.46E-06    |
| ENSMMUG00000060484  | heterogeneous nuclear ribonucleoprotein D [Source:NCBI gene;Acc:694867]                   | 0.771522038 | 0.002385996 | 0.009563061 |
| ENSMMUG00000052348  |                                                                                           | 1.314923719 | 9.14E-07    | 8.87E-06    |
| ENSMMUG00000021988  | N-alpha-acetyltransferase 11, NatA catalytic subunit [Source:NCBI gene;Acc:696758]        | 1.273754529 | 7.83E-09    | 1.17E-07    |
| ENSMMUG00000007366  |                                                                                           | 1.159477336 | 2.35E-06    | 2.07E-05    |
| ENSMMUG00000002564  | Fraser extracellular matrix complex subunit 1 [Source:VGNC Symbol;Acc:VGNC:72743]         | 1.104460486 | 6.73E-10    | 1.22E-08    |
| ENSMMUG00000045609  | CCR4-NOT transcription complex subunit 6 like [Source:NCBI gene;Acc:697981]               | 2.178654214 | 1.84E-16    | 9.29E-15    |
| ENSMMUG00000018186  | so sondowah ankyrin repeat domain family member B [Source:VGNC Symbol;Acc:VGNC:78033]     | 0.543925889 | 2.05E-07    | 2.33E-06    |
| ENSMMUG00000020916  | coiled-coil domain containing 158 [Source:NCBI gene;Acc:699735]                           | 0.885044382 | 4.60E-09    | 7.12E-08    |
| ENSMMUG00000020913  | scavenger receptor class B member 2 [Source:VGNC Symbol;Acc:VGNC:77026]                   | 0.930732588 | 0.000368272 | 0.001884398 |
| ENSMMUG00000020910  | nucleoporin 54 [Source:VGNC Symbol;Acc:VGNC:75420]                                        | 1.389146452 | 1.26E-07    | 1.49E-06    |
| ENSMMUG00000017503  | SDA1 domain containing 1 [Source:NCBI gene;Acc:700863]                                    | 2.256825348 | 1.72E-05    | 0.000123888 |
| ENSMMUG00000017501  | N-acyl ethanolamine acid amidase [Source:VGNC Symbol;Acc:VGNC:75068]                      | 2.080474916 | 2.07E-07    | 2.35E-06    |
| ENSMMUG00000015716  | protein phosphatase with EF-hand domain 2 [Source:VGNC Symbol;Acc:VGNC:76233]             | 1.454895555 | 0.007503764 | 0.02545676  |
| ENSMMUG00000003833  | Ras association domain family member 6 [Source:VGNC Symbol;Acc:VGNC:76515]                | 2.38149905  | 4.83E-13    | 1.46E-11    |
| ENSMMUG00000003830  | alpha fetoprotein [Source:VGNC Symbol;Acc:VGNC:69741]                                     | 1.332844847 | 0.001060032 | 0.004757546 |
| ENSMMUG00000003827  | albumin [Source:VGNC Symbol;Acc:VGNC:69782]                                               | 1.151461408 | 3.32E-06    | 2.83E-05    |
| ENSMMUG00000000790  | ankyrin repeat domain 17 [Source:VGNC Symbol;Acc:VGNC:84240]                              | 3.297052449 | 2.09E-33    | 6.08E-31    |
| ENSMMUG00000062248  | follicular dendritic cell secreted protein [Source:NCBI gene;Acc:707784]                  | 0.728828875 | 0.002007229 | 0.008296584 |
| ENSMMUG00000006029  | odontogenic, ameloblast associated [Source:NCBI gene;Acc:707906]                          | 1.278361427 | 1.05E-07    | 1.25E-06    |
| ENSMMUG00000048823  |                                                                                           | 1.052871071 | 6.07E-08    | 7.58E-07    |
| ENSMMUG00000004849  | casein beta [Source:VGNC Symbol;Acc:VGNC:71523]                                           | 1.034584248 | 3.92E-07    | 4.17E-06    |
| ENSMMUG00000047324  | casein alpha s1 [Source:HGNC Symbol;Acc:HGNC:2445]                                        | 2.388205026 | 3.36E-05    | 0.000227328 |
| ENSMMUG00000001919  | clock circadian regulator [Source:VGNC Symbol;Acc:VGNC:71262]                             | 0.996734876 | 1.23E-08    | 1.77E-07    |
| ENSMMUG00000001918  | transmembrane protein 165 [Source:VGNC Symbol;Acc:VGNC:79875]                             | 1.735317784 | 3.53E-07    | 3.81E-06    |
| ENSMMUG00000010113  | steroid 5 alpha-reductase 3 [Source:VGNC Symbol;Acc:VGNC:82246]                           | -1.46736104 | 7.63E-08    | 9.35E-07    |
| ENSMMUG00000052882  | RAS like family 11 member B [Source:NCBI gene;Acc:701397]                                 | 1.980432854 | 0.004622288 | 0.016773389 |
| ENSMMUG00000018943  | spermatogenesis associated 18 [Source:VGNC Symbol;Acc:VGNC:78013]                         | 1.313449602 | 5.65E-06    | 4.57E-05    |
| ENSMMUG00000018939  | leucine rich repeat containing 66 [Source:VGNC Symbol;Acc:VGNC:74415]                     | 0.878825993 | 7.17E-05    | 0.000444463 |
| ENSMMUG00000008579  | defective in cullin neddylation 1 domain containing 4 [Source:VGNC Symbol;Acc:VGNC:71809] | 0.901833004 | 0.006562792 | 0.022596708 |

|                    |                                                                                                                |             |             |             |
|--------------------|----------------------------------------------------------------------------------------------------------------|-------------|-------------|-------------|
| ENSMMUG0000008341  | Rho GTPase activating protein 24 [Source:VGNC Symbol;Acc:VGNC:69904]                                           | 1.123957264 | 9.69E-05    | 0.000580184 |
| ENSMMUG0000003726  | protein tyrosine phosphatase non-receptor type 13 [Source:VGNC Symbol;Acc:VGNC:76599]                          | 0.905127124 | 3.69E-05    | 0.000247181 |
| ENSMMUG00000014076 | AF4/FMR2 family member 1 [Source:VGNC Symbol;Acc:VGNC:69817]                                                   | 2.119988056 | 7.48E-09    | 1.12E-07    |
| ENSMMUG00000051677 |                                                                                                                | 1.194453453 | 2.59E-08    | 3.47E-07    |
| ENSMMUG00000014080 | kelch like family member 8 [Source:VGNC Symbol;Acc:VGNC:74076]                                                 | 0.760468546 | 0.001653405 | 0.007005407 |
| ENSMMUG00000019040 | hydroxysteroid 17-beta dehydrogenase 13 [Source:VGNC Symbol;Acc:VGNC:73417]                                    | 0.710395882 | 2.95E-05    | 0.000201979 |
| ENSMMUG00000019041 | hydroxysteroid 17-beta dehydrogenase 11 [Source:VGNC Symbol;Acc:VGNC:73431]                                    | 0.729743895 | 0.004793881 | 0.01730965  |
| ENSMMUG00000008795 | polycystin 2, transient receptor potential cation channel [Source:NCBI gene;Acc:702179]                        | 1.232966391 | 6.71E-09    | 1.01E-07    |
| ENSMMUG00000008797 | ATP binding cassette subfamily G member 2 (Junior blood group) [Source:NCBI gene;Acc:574307]                   | -1.02677668 | 2.11E-09    | 3.47E-08    |
| ENSMMUG00000028039 | U6 spliceosomal RNA [Source:RFAM;Acc:RF00026]                                                                  | 1.904010295 | 0.007037319 | 0.024020078 |
| ENSMMUG00000010314 | HECT and RLD domain containing E3 ubiquitin protein ligase family member 6 [Source:VGNC Symbol;Acc:VGNC:73238] | 1.942034514 | 1.05E-10    | 2.18E-09    |
| ENSMMUG00000010316 | HECT and RLD domain containing E3 ubiquitin protein ligase 5 [Source:VGNC Symbol;Acc:VGNC:73226]               | 4.055313155 | 1.04E-34    | 3.86E-32    |
| ENSMMUG00000010318 | phosphatidylinositol glycan anchor biosynthesis class Y [Source:NCBI gene;Acc:100426107]                       | 4.574840584 | 2.67E-34    | 9.24E-32    |
| ENSMMUG00000010138 | HECT and RLD domain containing E3 ubiquitin protein ligase 3 [Source:VGNC Symbol;Acc:VGNC:73365]               | 0.768180663 | 1.06E-06    | 1.02E-05    |
| ENSMMUG00000058544 | nucleosome assembly protein 1 like 5 [Source:NCBI gene;Acc:703223]                                             | 0.925129468 | 1.35E-08    | 1.92E-07    |
| ENSMMUG00000010141 | family with sequence similarity 13 member A [Source:VGNC Symbol;Acc:VGNC:72299]                                | 1.023716382 | 1.75E-20    | 1.40E-18    |
| ENSMMUG00000032793 | U6 spliceosomal RNA [Source:RFAM;Acc:RF00026]                                                                  | 1.719161887 | 0.016760396 | 0.049622379 |
| ENSMMUG00000057606 | GPRIN family member 3 [Source:NCBI gene;Acc:703567]                                                            | 1.787527945 | 6.08E-17    | 3.24E-15    |
| ENSMMUG00000049396 | Metazoan signal recognition particle RNA [Source:RFAM;Acc:RF00017]                                             | 1.669589195 | 0.000467646 | 0.002333737 |
| ENSMMUG00000022003 | multimerin 1 [Source:VGNC Symbol;Acc:VGNC:74904]                                                               | 2.672010342 | 3.05E-15    | 1.34E-13    |
| ENSMMUG00000022246 | PDZ and LIM domain 5 [Source:VGNC Symbol;Acc:VGNC:75816]                                                       | 1.290825183 | 1.83E-08    | 2.52E-07    |
| ENSMMUG00000060760 |                                                                                                                | 1.572125298 | 2.45E-09    | 3.99E-08    |
| ENSMMUG00000006702 | bone morphogenetic protein receptor type 1B [Source:VGNC Symbol;Acc:VGNC:70267]                                | 0.978635117 | 0.015946538 | 0.047581039 |
| ENSMMUG00000006309 | unc-5 netrin receptor C [Source:VGNC Symbol;Acc:VGNC:78723]                                                    | -2.58220348 | 7.96E-06    | 6.20E-05    |
| ENSMMUG00000011702 | tetraspanin 5 [Source:VGNC Symbol;Acc:VGNC:79086]                                                              | 1.336280355 | 2.77E-06    | 2.40E-05    |
| ENSMMUG00000063972 |                                                                                                                | 0.833163083 | 0.000159562 | 0.000904663 |
| ENSMMUG00000040764 | alcohol dehydrogenase 1A [Source:NCBI gene;Acc:100424103]                                                      | 0.880497641 | 0.00014912  | 0.000851769 |
| ENSMMUG00000018738 | alcohol dehydrogenase 1B (class I), beta polypeptide [Source:NCBI gene;Acc:707908]                             | 0.700168449 | 0.000290447 | 0.001532571 |
| ENSMMUG00000061366 |                                                                                                                | 0.617376197 | 0.000479594 | 0.002382727 |
| ENSMMUG00000016880 | solute carrier family 39 member 8 [Source:VGNC Symbol;Acc:VGNC:77541]                                          | 2.916957847 | 3.36E-13    | 1.04E-11    |
| ENSMMUG00000037551 | Metazoan signal recognition particle RNA [Source:RFAM;Acc:RF00017]                                             | -2.27895057 | 6.26E-08    | 7.81E-07    |
| ENSMMUG00000003736 | nuclear factor kappa B subunit 1 [Source:VGNC Symbol;Acc:VGNC:75339]                                           | 3.127979639 | 8.08E-12    | 2.04E-10    |
| ENSMMUG00000003739 | mannosidase beta [Source:VGNC Symbol;Acc:VGNC:74486]                                                           | 1.459121637 | 0.000855615 | 0.003961173 |
| ENSMMUG00000011206 | solute carrier family 9 member B1 [Source:NCBI gene;Acc:710949]                                                | 0.696650138 | 5.70E-05    | 0.000363809 |
| ENSMMUG00000019083 | solute carrier family 9 member B2 [Source:VGNC Symbol;Acc:VGNC:77773]                                          | 0.676671875 | 0.015219345 | 0.045823847 |
| ENSMMUG00000019085 | 3-hydroxybutyrate dehydrogenase 2 [Source:VGNC Symbol;Acc:VGNC:70161]                                          | 1.276413571 | 1.63E-16    | 8.33E-15    |
| ENSMMUG00000019089 | centromere protein E [Source:VGNC Symbol;Acc:VGNC:71008]                                                       | 1.326133048 | 2.14E-14    | 8.30E-13    |
| ENSMMUG00000049998 | tachykinin receptor 3 [Source:NCBI gene;Acc:653013]                                                            | 0.839148856 | 0.012253106 | 0.038290689 |

|                    |                                                                                       |   |             |             |             |
|--------------------|---------------------------------------------------------------------------------------|---|-------------|-------------|-------------|
| ENSMMUG00000010941 | Rho guanine nucleotide exchange factor 38 [Source:VGNC Symbol;Acc:VGNC:82087]         | - | 0.418729772 | 0.000243323 | 0.00131396  |
| ENSMMUG00000060432 |                                                                                       | - | 0.841570265 | 0.015931064 | 0.047544628 |
| ENSMMUG00000052609 | ribosomal protein L34 [Source:NCBI gene;Acc:696636]                                   | - | 1.851415166 | 1.35E-06    | 1.26E-05    |
| ENSMMUG00000011902 | oligosaccharyltransferase complex non-catalytic subunit [Source:NCBI gene;Acc:697283] | - | 1.963755811 | 1.76E-09    | 2.94E-08    |
| ENSMMUG00000055759 | Metazoan signal recognition particle RNA [Source:RFAM;Acc:RF00017]                    | - | 1.631003815 | 3.10E-07    | 3.38E-06    |
| ENSMMUG00000062794 |                                                                                       | - | 3.365378096 | 4.05E-26    | 5.77E-24    |
| ENSMMUG00000009816 | exosome component 9 [Source:VGNC Symbol;Acc:VGNC:72477]                               | - | 1.625746618 | 0.000230431 | 0.001252251 |
| ENSMMUG00000061098 |                                                                                       | - | 1.846271043 | 4.59E-35    | 1.85E-32    |
| ENSMMUG00000007422 | spermatogenesis associated 5 [Source:VGNC Symbol;Acc:VGNC:77952]                      | - | 1.562603104 | 2.11E-10    | 4.16E-09    |
| ENSMMUG00000001848 | sprouty RTK signaling antagonist 1 [Source:VGNC Symbol;Acc:VGNC:77867]                | - | 1.27405504  | 9.12E-10    | 1.60E-08    |
| ENSMMUG00000011810 | FAT atypical cadherin 4 [Source:VGNC Symbol;Acc:VGNC:72552]                           | - | -1.45024355 | 0.000748498 | 0.003519052 |
| ENSMMUG00000057895 |                                                                                       | - | 1.792758938 | 0.011046822 | 0.035176231 |
| ENSMMUG00000010444 | ring finger protein 150 [Source:VGNC Symbol;Acc:VGNC:76805]                           | - | 3.077753714 | 0.001402267 | 0.006054727 |
| ENSMMUG00000060157 | zinc finger protein 330 [Source:NCBI gene;Acc:699364]                                 | - | 0.702746992 | 7.10E-05    | 0.000440501 |
| ENSMMUG00000003697 | inositol polyphosphate-4-phosphatase type II B [Source:VGNC Symbol;Acc:VGNC:73748]    | - | 1.241368181 | 2.43E-07    | 2.71E-06    |
| ENSMMUG00000000827 | ubiquitin specific peptidase 38 [Source:VGNC Symbol;Acc:VGNC:79224]                   | - | 2.444190498 | 1.01E-05    | 7.72E-05    |
| ENSMMUG00000044429 | glycophorin A (MNS blood group) [Source:NCBI gene;Acc:574101]                         | - | 2.211029901 | 4.27E-17    | 2.35E-15    |
| ENSMMUG00000014173 |                                                                                       | - | 1.040387498 | 0.001852314 | 0.007719922 |
| ENSMMUG00000007968 | hedgehog interacting protein [Source:VGNC Symbol;Acc:VGNC:73169]                      | - | 1.329791198 | 1.93E-08    | 2.65E-07    |
| ENSMMUG00000005380 | zinc finger protein 827 [Source:NCBI gene;Acc:706018]                                 | - | 1.399200456 | 3.37E-08    | 4.43E-07    |
| ENSMMUG00000014955 | nuclear receptor subfamily 3 group C member 2 [Source:VGNC Symbol;Acc:VGNC:75516]     | - | 1.163084768 | 0.002469734 | 0.009860622 |
| ENSMMUG00000002211 | doublecortin like kinase 2 [Source:VGNC Symbol;Acc:VGNC:71670]                        | - | 1.012959807 | 0.000110352 | 0.000650788 |
| ENSMMUG00000002212 | LPS responsive beige-like anchor protein [Source:NCBI gene;Acc:693823]                | - | 1.263859166 | 0.000763777 | 0.003580465 |
| ENSMMUG00000059101 |                                                                                       | - | 1.854871676 | 6.23E-06    | 4.99E-05    |
| ENSMMUG00000063665 |                                                                                       | - | 1.376345091 | 0.001955028 | 0.008099242 |
| ENSMMUG00000018490 | ADP ribosylation factor interacting protein 1 [Source:VGNC Symbol;Acc:VGNC:69878]     | - | 1.030813958 | 2.82E-08    | 3.75E-07    |
| ENSMMUG00000018493 | FH2 domain containing 1 [Source:VGNC Symbol;Acc:VGNC:72598]                           | - | 0.685454708 | 0.011231217 | 0.035655863 |
| ENSMMUG00000039869 |                                                                                       | - | 0.480260402 | 0.001351078 | 0.005866372 |
| ENSMMUG00000009001 | transmembrane 131 like [Source:VGNC Symbol;Acc:VGNC:79781]                            | - | 0.904889421 | 0.000981434 | 0.004454296 |
| ENSMMUG00000057643 |                                                                                       | - | 0.471795867 | 0.001435956 | 0.00617954  |
| ENSMMUG00000052999 | lecithin retinol acyltransferase [Source:NCBI gene;Acc:698871]                        | - | 0.753322015 | 7.41E-12    | 1.89E-10    |
| ENSMMUG00000064074 |                                                                                       | - | 0.717187597 | 2.45E-05    | 0.000171392 |
| ENSMMUG00000021147 | RNA binding motif protein 46 [Source:VGNC Symbol;Acc:VGNC:76555]                      | - | 0.598793108 | 0.000686444 | 0.003267464 |
| ENSMMUG00000005447 | guanylate cyclase 1 soluble subunit beta 1 [Source:VGNC Symbol;Acc:VGNC:73328]        | - | 0.538573139 | 0.001505911 | 0.006442444 |
| ENSMMUG00000057700 | acid sensing ion channel subunit family member 5 [Source:NCBI gene;Acc:699617]        | - | 0.566330269 | 4.97E-06    | 4.07E-05    |
| ENSMMUG00000022018 | tryptophan 2,3-dioxygenase [Source:VGNC Symbol;Acc:VGNC:78298]                        | - | 0.467147124 | 0.001499091 | 0.006415155 |

|                    |                                                                                                      |             |             |             |
|--------------------|------------------------------------------------------------------------------------------------------|-------------|-------------|-------------|
| ENSMMUG00000064707 |                                                                                                      | 1.888075508 | 2.98E-10    | 5.75E-09    |
| ENSMMUG00000053790 |                                                                                                      | 3.278098565 | 5.69E-33    | 1.56E-30    |
| ENSMMUG00000045101 |                                                                                                      | 0.550778122 | 0.012755851 | 0.039571448 |
| ENSMMUG0000006851  | SPARC (osteonectin), cwcv and kazal like domains proteoglycan 3 [Source:NCBI gene;Acc:705964]        | 4.536340072 | 4.18E-32    | 1.06E-29    |
| ENSMMUG0000001879  | annexin A10 [Source:VGNC Symbol;Acc:VGNC:69945]                                                      | 0.569359608 | 0.009383092 | 0.030769683 |
| ENSMMUG0000001880  | DExD/H-box helicase 60 [Source:VGNC Symbol;Acc:VGNC:71711]                                           | 0.583477427 | 5.61E-05    | 0.000358413 |
| ENSMMUG0000003634  | DExD/H-box 60 like [Source:VGNC Symbol;Acc:VGNC:71720]                                               | -1.16152306 | 2.49E-05    | 0.000173749 |
| ENSMMUG00000013730 | WD repeat domain 17 [Source:NCBI gene;Acc:700546]                                                    | 0.40122529  | 0.000513671 | 0.002533843 |
| ENSMMUG00000064304 |                                                                                                      | -0.36647425 | 0.012896971 | 0.039958591 |
| ENSMMUG00000065183 |                                                                                                      | 4.346353576 | 0.000211982 | 0.001165502 |
|                    |                                                                                                      | -           |             |             |
| ENSMMUG00000058974 |                                                                                                      | 0.965632697 | 0.008595204 | 0.02857925  |
|                    |                                                                                                      | -           |             |             |
| ENSMMUG00000049670 |                                                                                                      | 3.408237567 | 0.005115903 | 0.018317704 |
| ENSMMUG00000011633 | kallikrein B1 [Source:VGNC Symbol;Acc:VGNC:74195]                                                    | 2.470932962 | 2.54E-05    | 0.000176608 |
| ENSMMUG00000011634 | coagulation factor XI [Source:VGNC Symbol;Acc:VGNC:72460]                                            | 2.554529593 | 0.000366491 | 0.001877267 |
|                    |                                                                                                      | -           |             |             |
| ENSMMUG00000018051 | FAT atypical cadherin 1 [Source:VGNC Symbol;Acc:VGNC:72617]                                          | 0.690877682 | 1.65E-07    | 1.92E-06    |
| ENSMMUG00000050600 |                                                                                                      | 2.288480069 | 0.01476645  | 0.044711496 |
| ENSMMUG00000058448 |                                                                                                      | 0.58340838  | 0.011969924 | 0.037558122 |
| ENSMMUG00000050465 | ZFP42 zinc finger protein [Source:NCBI gene;Acc:707621]                                              | 1.781333042 | 9.88E-08    | 1.18E-06    |
|                    |                                                                                                      | -           |             |             |
| ENSMMUG00000054799 |                                                                                                      | 1.576588698 | 0.003806631 | 0.014247422 |
|                    |                                                                                                      | -           |             |             |
| ENSMMUG00000064721 |                                                                                                      | 1.922160385 | 0.001418029 | 0.006113252 |
| ENSMMUG00000052287 |                                                                                                      | -2.16087261 | 2.32E-05    | 0.000163368 |
|                    |                                                                                                      | -           |             |             |
| ENSMMUG00000044628 |                                                                                                      | 1.901026572 | 0.000119695 | 0.000701052 |
|                    |                                                                                                      | -           |             |             |
| ENSMMUG00000012914 | pericentrin [Source:VGNC Symbol;Acc:VGNC:75619]                                                      | 0.435106361 | 0.007712822 | 0.02603234  |
|                    |                                                                                                      | -           |             |             |
| ENSMMUG00000022324 | formimidoyltransferase cyclodeaminase [Source:VGNC Symbol;Acc:VGNC:72825]                            | 1.168387133 | 0.007386476 | 0.025129229 |
| ENSMMUG00000062496 |                                                                                                      | 3.09963699  | 0.011419037 | 0.036155036 |
| ENSMMUG00000000544 | collagen type VI alpha 1 chain [Source:VGNC Symbol;Acc:VGNC:82084]                                   | 2.50631676  | 0.00595668  | 0.020845512 |
| ENSMMUG00000052777 |                                                                                                      | 1.60889575  | 7.49E-06    | 5.89E-05    |
| ENSMMUG00000004477 | solute carrier family 19 member 1 [Source:VGNC Symbol;Acc:VGNC:77408]                                | 0.917991238 | 0.014873649 | 0.044970514 |
|                    |                                                                                                      | -           |             |             |
| ENSMMUG00000010695 | adenosine deaminase RNA specific B1 [Source:VGNC Symbol;Acc:VGNC:69503]                              | 1.465167035 | 9.45E-07    | 9.15E-06    |
| ENSMMUG00000000953 | family with sequence similarity 207 member A [Source:VGNC Symbol;Acc:VGNC:72273]                     | 0.910214701 | 0.000148182 | 0.000847749 |
| ENSMMUG00000000951 | integrin subunit beta 2 [Source:VGNC Symbol;Acc:VGNC:73786]                                          | 2.130753094 | 2.82E-28    | 5.32E-26    |
| ENSMMUG00000046352 | PTTG1 interacting protein [Source:VGNC Symbol;Acc:VGNC:81748]                                        | 0.905469987 | 0.010273741 | 0.033159276 |
| ENSMMUG00000049755 | leucine rich repeat containing 3 [Source:NCBI gene;Acc:712418]                                       | 2.62017454  | 1.08E-06    | 1.03E-05    |
| ENSMMUG00000004175 | transient receptor potential cation channel subfamily M member 2 [Source:VGNC Symbol;Acc:VGNC:78655] | 0.611619612 | 0.015011221 | 0.045310352 |
|                    |                                                                                                      | -           |             |             |
| ENSMMUG00000049578 | cilia and flagella associated protein 410 [Source:NCBI gene;Acc:722168]                              | 0.311680433 | 0.010957678 | 0.034947733 |
|                    |                                                                                                      | -           |             |             |
| ENSMMUG00000004173 | phosphofructokinase, liver type [Source:VGNC Symbol;Acc:VGNC:81737]                                  | 0.707266283 | 4.70E-05    | 0.000307313 |
|                    |                                                                                                      | -           |             |             |
| ENSMMUG00000010648 | DNA methyltransferase 3 like [Source:NCBI gene;Acc:722184]                                           | 1.830604819 | 5.53E-12    | 1.44E-10    |
| ENSMMUG00000045179 | 1-acylglycerol-3-phosphate O-acyltransferase 3 [Source:NCBI gene;Acc:713301]                         | 0.63785221  | 0.000514653 | 0.002536965 |
|                    |                                                                                                      | -           |             |             |
| ENSMMUG00000012304 | ribosomal RNA processing 1 [Source:VGNC Symbol;Acc:VGNC:77050]                                       | 0.648521538 | 0.001368538 | 0.005931554 |
| ENSMMUG00000012303 | cystatin B [Source:VGNC Symbol;Acc:VGNC:71534]                                                       | 1.3002282   | 0.006556355 | 0.022579896 |

|                     |                                                                                                                                                                |   |             |             |             |
|---------------------|----------------------------------------------------------------------------------------------------------------------------------------------------------------|---|-------------|-------------|-------------|
| ENSMMUG00000062457  | pyridoxal kinase [Source:NCBI gene;Acc:713564]                                                                                                                 | - | 0.623068076 | 0.003358106 | 0.012818619 |
| ENSMMUG00000000104  | ribosomal RNA processing 1B [Source:VGNC Symbol;Acc:VGNC:77089]                                                                                                | - | 1.293506259 | 1.14E-13    | 3.84E-12    |
| ENSMMUG00000022791  | heat shock transcription factor 2 binding protein [Source:VGNC Symbol;Acc:VGNC:73532]                                                                          | - | 0.939818908 | 0.01193312  | 0.037458813 |
| ENSMMUG00000020050  | salt inducible kinase 1 [Source:NCBI gene;Acc:722303]                                                                                                          | - | 1.793733845 | 0.000172199 | 0.000967253 |
| ENSMMUG00000022107  | phosphodiesterase 9A [Source:VGNC Symbol;Acc:VGNC:75925]                                                                                                       | - | 2.368473587 | 0.008131836 | 0.0272003   |
| ENSMMUG00000018081  | ubiquitin associated and SH3 domain containing A [Source:VGNC Symbol;Acc:VGNC:78687]                                                                           | - | 1.043939615 | 1.55E-05    | 0.000113096 |
| ENSMMUG00000018079  | transmembrane serine protease 3 [Source:VGNC Symbol;Acc:VGNC:78576]                                                                                            | - | 1.254535986 | 3.12E-07    | 3.40E-06    |
| ENSMMUG00000018058  | ATP binding cassette subfamily G member 1 [Source:VGNC Symbol;Acc:VGNC:69584]                                                                                  | - | 1.740903701 | 1.10E-11    | 2.72E-10    |
| ENSMMUG00000018057  | uromodulin like 1 [Source:VGNC Symbol;Acc:VGNC:78717]                                                                                                          | - | -1.3255404  | 3.77E-06    | 3.18E-05    |
| ENSMMUG00000018053  | zinc finger and BTB domain containing 21 [Source:VGNC Symbol;Acc:VGNC:78892]                                                                                   | - | 0.517937995 | 0.000310102 | 0.001622151 |
| ENSMMUG00000015329  | MX dynamin like GTPase 1 [Source:VGNC Symbol;Acc:VGNC:75086]                                                                                                   | - | 3.499816257 | 5.89E-23    | 5.63E-21    |
| ENSMMUG00000044257  | MX dynamin like GTPase 2 [Source:VGNC Symbol;Acc:VGNC:81723]                                                                                                   | - | 4.166778446 | 1.11E-37    | 6.00E-35    |
| ENSMMUG00000004257  | beta-secretase 2 [Source:VGNC Symbol;Acc:VGNC:70216]                                                                                                           | - | 3.312260182 | 2.65E-32    | 6.89E-30    |
| ENSMMUG00000008498  | proteasome assembly chaperone 1 [Source:VGNC Symbol;Acc:VGNC:76347]                                                                                            | - | 0.398362331 | 0.005777288 | 0.020340139 |
| ENSMMUG000000058004 |                                                                                                                                                                | - | 1.087911484 | 0.013612963 | 0.041828713 |
| ENSMMUG000000056593 |                                                                                                                                                                | - | 2.959946836 | 0.000163587 | 0.000923878 |
| ENSMMUG00000017505  | tetratricopeptide repeat domain 3 [Source:VGNC Symbol;Acc:VGNC:81785]                                                                                          | - | 0.669398536 | 2.93E-08    | 3.88E-07    |
| ENSMMUG00000062048  |                                                                                                                                                                | - | 0.808952337 | 8.98E-10    | 1.59E-08    |
| ENSMMUG00000010336  | DOP1 leucine zipper like protein B [Source:VGNC Symbol;Acc:VGNC:71832]                                                                                         | - | 0.835896479 | 7.75E-07    | 7.64E-06    |
| ENSMMUG00000064897  |                                                                                                                                                                | - | 1.119067811 | 0.002569994 | 0.010182611 |
| ENSMMUG00000001649  | RUNX family transcription factor 1 [Source:VGNC Symbol;Acc:VGNC:76946]                                                                                         | - | 0.443783264 | 0.015675964 | 0.046947044 |
| ENSMMUG000000054417 |                                                                                                                                                                | - | 0.693730557 | 8.82E-06    | 6.80E-05    |
| ENSMMUG00000005511  | SON DNA binding protein [Source:VGNC Symbol;Acc:VGNC:77689]                                                                                                    | - | 1.42692995  | 2.70E-07    | 2.99E-06    |
| ENSMMUG00000022702  | phosphoribosylglycinamide formyltransferase, phosphoribosylglycinamide synthetase, phosphoribosylaminoimidazole synthetase [Source:VGNC Symbol;Acc:VGNC:72882] | - | 0.968933832 | 0.006543521 | 0.022541035 |
| ENSMMUG00000003956  | interferon alpha and beta receptor subunit 2 [Source:VGNC Symbol;Acc:VGNC:81330]                                                                               | - | 0.756581015 | 4.50E-06    | 3.72E-05    |
| ENSMMUG00000065005  | Metazoan signal recognition particle RNA [Source:RFAM;Acc:RF00017]                                                                                             | - | 1.322453794 | 1.29E-06    | 1.21E-05    |
| ENSMMUG000000052780 |                                                                                                                                                                | - | 1.579944161 | 1.86E-17    | 1.05E-15    |
| ENSMMUG00000027541  | Small nucleolar RNA SNORA70 [Source:RFAM;Acc:RF00156]                                                                                                          | - | 2.341020462 | 0.013444304 | 0.041406746 |
| ENSMMUG00000004624  | synaptojanin 1 [Source:VGNC Symbol;Acc:VGNC:78071]                                                                                                             | - | -0.54802112 | 0.000558561 | 0.002723852 |
| ENSMMUG00000010304  | cilia and flagella associated protein 298 [Source:NCBI gene;Acc:700721]                                                                                        | - | 0.510340639 | 6.03E-07    | 6.16E-06    |
| ENSMMUG00000048824  | eva-1 homolog C [Source:NCBI gene;Acc:708681]                                                                                                                  | - | 1.280064746 | 2.09E-18    | 1.32E-16    |
| ENSMMUG00000010295  | URB1 ribosome biogenesis homolog [Source:VGNC Symbol;Acc:VGNC:79074]                                                                                           | - | 1.697381934 | 0.005203624 | 0.018586015 |
| ENSMMUG000000059707 | MIS18 kinetochore protein A [Source:NCBI gene;Acc:709275]                                                                                                      | - | 2.037682515 | 3.66E-07    | 3.93E-06    |
| ENSMMUG00000064916  |                                                                                                                                                                | - | 1.752822524 | 0.010794278 | 0.034509879 |
| ENSMMUG000000056363 |                                                                                                                                                                | - | 2.176306104 | 8.34E-07    | 8.16E-06    |
| ENSMMUG00000004886  | glutamate ionotropic receptor kainate type subunit 1 [Source:VGNC Symbol;Acc:VGNC:73277]                                                                       | - | 3.28301989  | 0.000622108 | 0.002993573 |

|                    |                                                                                                                    |             |             |             |
|--------------------|--------------------------------------------------------------------------------------------------------------------|-------------|-------------|-------------|
| ENSMMUG00000011095 | BTB domain and CNC homolog 1 [Source:VGNC Symbol;Acc:VGNC:70217]                                                   | 2.562498721 | 8.89E-06    | 6.85E-05    |
| ENSMMUG00000033200 | Small nucleolar RNA U3 [Source:RFAM;Acc:RF00012]                                                                   | 3.200848834 | 0.000650788 | 0.003117135 |
| ENSMMUG00000061208 | MAP3K7 C-terminal like [Source:NCBI gene;Acc:713717]                                                               | 1.569707065 | 1.68E-26    | 2.56E-24    |
| ENSMMUG00000003020 | ubiquitin specific peptidase 16 [Source:VGNC Symbol;Acc:VGNC:78738]                                                | 3.313515926 | 0.006095272 | 0.021248672 |
| ENSMMUG00000017605 | mitochondrial ribosomal protein L39 [Source:VGNC Symbol;Acc:VGNC:74737]                                            | 1.501887242 | 4.60E-14    | 1.69E-12    |
| ENSMMUG00000018743 | ubiquitin specific peptidase 25 [Source:VGNC Symbol;Acc:VGNC:78744]                                                | 4.13637004  | 5.24E-07    | 5.42E-06    |
| ENSMMUG00000052195 |                                                                                                                    | 2.682782055 | 0.001810827 | 0.007573069 |
| ENSMMUG00000060808 |                                                                                                                    | 2.92346994  | 4.75E-05    | 0.000310071 |
| ENSMMUG00000058750 | nuclear receptor interacting protein 1 [Source:NCBI gene;Acc:693866]                                               | 1.047037535 | 9.66E-05    | 0.000578635 |
|                    |                                                                                                                    | -           |             |             |
| ENSMMUG00000020090 | ATP-binding cassette transporter 13 [Source:NCBI gene;Acc:574326]                                                  | 0.445427564 | 0.006092545 | 0.02124426  |
| ENSMMUG00000060576 |                                                                                                                    | 1.539963907 | 4.74E-17    | 2.55E-15    |
| ENSMMUG00000057702 |                                                                                                                    | 1.393817571 | 4.26E-18    | 2.60E-16    |
|                    |                                                                                                                    | -           |             |             |
| ENSMMUG00000060168 |                                                                                                                    | 0.581704771 | 0.006116961 | 0.021289917 |
| ENSMMUG00000017056 | Sad1 and UNC84 domain containing 1 [Source:VGNC Symbol;Acc:VGNC:78161]                                             | 2.042517672 | 9.07E-05    | 0.000547712 |
| ENSMMUG00000007206 | chromosome 3 C7orf50 homolog [Source:VGNC Symbol;Acc:VGNC:70609]                                                   | 2.375089032 | 0.000148799 | 0.000850608 |
| ENSMMUG00000003283 | extracellular leucine rich repeat and fibronectin type III domain containing 1 [Source:VGNC Symbol;Acc:VGNC:72204] | 0.860151902 | 1.58E-06    | 1.45E-05    |
|                    |                                                                                                                    | -           |             |             |
| ENSMMUG00000022624 | putative speedy protein E16 [Source:NCBI gene;Acc:718058]                                                          | 1.082669231 | 3.08E-06    | 2.65E-05    |
| ENSMMUG00000021075 | Rac family small GTPase 1 [Source:NCBI gene;Acc:717755]                                                            | 1.050613813 | 3.91E-15    | 1.68E-13    |
| ENSMMUG00000003167 | cytohesin 3 [Source:VGNC Symbol;Acc:VGNC:71829]                                                                    | 1.372732528 | 6.49E-10    | 1.19E-08    |
|                    |                                                                                                                    | -           |             |             |
| ENSMMUG00000030422 | radial spoke head 10 homolog B [Source:NCBI gene;Acc:100424218]                                                    | 0.541301957 | 1.67E-05    | 0.000120638 |
| ENSMMUG00000007970 | CCZ1 homolog, vacuolar protein trafficking and biogenesis associated [Source:NCBI gene;Acc:718128]                 | 1.156596152 | 3.31E-06    | 2.81E-05    |
| ENSMMUG00000015477 | lemur tyrosine kinase 2 [Source:VGNC Symbol;Acc:VGNC:74309]                                                        | 0.698271239 | 4.92E-06    | 4.04E-05    |
| ENSMMUG00000015479 | tectonin beta-propeller repeat containing 1 [Source:VGNC Symbol;Acc:VGNC:79348]                                    | 1.251439647 | 1.91E-25    | 2.50E-23    |
| ENSMMUG00000049558 | brain protein I3 [Source:NCBI gene;Acc:706525]                                                                     | -0.75894613 | 0.00058156  | 0.002821807 |
|                    |                                                                                                                    | -           |             |             |
| ENSMMUG00000013276 | BAR/IMD domain containing adaptor protein 2 like 1 [Source:VGNC Symbol;Acc:VGNC:70109]                             | 0.693793619 | 5.46E-05    | 0.000350935 |
| ENSMMUG00000023318 | transformation/transcription domain associated protein [Source:VGNC Symbol;Acc:VGNC:78657]                         | 0.639269213 | 1.03E-11    | 2.55E-10    |
| ENSMMUG00000040393 | zinc finger protein 655 [Source:NCBI gene;Acc:718811]                                                              | 2.344491663 | 1.18E-13    | 3.96E-12    |
| ENSMMUG00000055483 | transmembrane protein 225B [Source:NCBI gene;Acc:718838]                                                           | 1.99432172  | 0.003879809 | 0.014472872 |
| ENSMMUG00000022728 | zinc finger and SCAN domain containing 25 [Source:VGNC Symbol;Acc:VGNC:79344]                                      | 1.409976231 | 3.21E-07    | 3.49E-06    |
| ENSMMUG00000022730 | cytochrome P450, family 3, subfamily A, polypeptide 5 [Source:NCBI gene;Acc:678692]                                | 0.98304652  | 2.80E-12    | 7.57E-11    |
|                    |                                                                                                                    | -           |             |             |
| ENSMMUG00000050824 |                                                                                                                    | 1.411925187 | 0.009160632 | 0.030169485 |
|                    |                                                                                                                    | -           |             |             |
| ENSMMUG00000022490 | cytochrome P450, family 3, subfamily A, polypeptide 43 [Source:NCBI gene;Acc:709770]                               | 0.549505922 | 3.37E-05    | 0.000227537 |
|                    |                                                                                                                    | -           |             |             |
| ENSMMUG00000063929 | olfactory receptor 2AE1 [Source:NCBI gene;Acc:106997573]                                                           | 0.563922549 | 0.013800776 | 0.04229852  |
| ENSMMUG00000022504 | alpha-2-glycoprotein 1, zinc-binding [Source:VGNC Symbol;Acc:VGNC:70201]                                           | 0.568667456 | 0.0019165   | 0.007956672 |
|                    |                                                                                                                    | -           |             |             |
| ENSMMUG00000004021 | zinc finger protein 3 [Source:VGNC Symbol;Acc:VGNC:81889]                                                          | 1.533619161 | 0.013466931 | 0.04145887  |
| ENSMMUG00000013440 | COP9 signalosome subunit 6 [Source:VGNC Symbol;Acc:VGNC:71286]                                                     | 0.407477751 | 0.011939786 | 0.037471648 |
| ENSMMUG00000013442 | minichromosome maintenance complex component 7 [Source:VGNC Symbol;Acc:VGNC:74686]                                 | 0.458033826 | 0.005315111 | 0.018933049 |
| ENSMMUG00000013447 | adaptor related protein complex 4 subunit mu 1 [Source:VGNC Symbol;Acc:VGNC:69974]                                 | 1.042024996 | 0.000890458 | 0.004101581 |
| ENSMMUG00000013450 | TATA-box binding protein associated factor 6 [Source:VGNC Symbol;Acc:VGNC:78093]                                   | 2.279094251 | 5.69E-08    | 7.17E-07    |
| ENSMMUG00000013452 | canopy FGF signaling regulator 4 [Source:VGNC Symbol;Acc:VGNC:71364]                                               | 1.819164475 | 0.000772779 | 0.003615673 |
|                    |                                                                                                                    | -           |             |             |
| ENSMMUG00000046663 | Metazoan signal recognition particle RNA [Source:RFAM;Acc:RF00017]                                                 | 0.810324243 | 6.33E-05    | 0.000398239 |
|                    |                                                                                                                    | -           |             |             |
| ENSMMUG00000048302 | ArfGAP with FG repeats 2 [Source:VGNC Symbol;Acc:VGNC:80329]                                                       | 0.984757097 | 6.53E-13    | 1.94E-11    |



|                    |                                                                                                    |   |             |             |             |
|--------------------|----------------------------------------------------------------------------------------------------|---|-------------|-------------|-------------|
| ENSMMUG00000015311 | leucine rich repeats and calponin homology domain containing 4 [Source:VGNC Symbol;Acc:VGNC:74441] | - | 0.985504845 | 4.68E-16    | 2.31E-14    |
| ENSMMUG00000015309 | F-box protein 24 [Source:VGNC Symbol;Acc:VGNC:72495]                                               | - | 1.152037079 | 1.21E-15    | 5.68E-14    |
| ENSMMUG00000002947 | procollagen C-endopeptidase enhancer [Source:VGNC Symbol;Acc:VGNC:75782]                           | - | 1.122064868 | 8.17E-18    | 4.77E-16    |
| ENSMMUG00000002949 | motile sperm domain containing 3 [Source:VGNC Symbol;Acc:VGNC:74823]                               | - | 1.828666007 | 2.73E-09    | 4.40E-08    |
| ENSMMUG00000002950 | transferrin receptor 2 [Source:VGNC Symbol;Acc:VGNC:81770]                                         | - | 1.803463348 | 3.12E-16    | 1.55E-14    |
| ENSMMUG00000004082 | GRB10 interacting GYF protein 1 [Source:VGNC Symbol;Acc:VGNC:73158]                                | - | 1.727091192 | 1.10E-05    | 8.37E-05    |
| ENSMMUG00000022840 | zonadhesin [Source:VGNC Symbol;Acc:VGNC:81797]                                                     | - | 1.019732601 | 2.96E-06    | 2.55E-05    |
| ENSMMUG00000052734 |                                                                                                    | - | 2.36817862  | 0.000820933 | 0.003817628 |
| ENSMMUG00000060459 |                                                                                                    | - | 0.414519638 | 0.005425034 | 0.01927266  |
| ENSMMUG00000063570 | Metazoan signal recognition particle RNA [Source:RFAM;Acc:RF00017]                                 | - | -3.52758075 | 0.000866957 | 0.004009848 |
| ENSMMUG00000011367 | BUD23 rRNA methyltransferase and ribosome maturation factor [Source:VGNC Symbol;Acc:VGNC:70325]    | - | 3.067968306 | 0.001807912 | 0.007563057 |
| ENSMMUG00000050132 |                                                                                                    | - | 0.918596358 | 0.000349432 | 0.001801946 |
| ENSMMUG00000056980 |                                                                                                    | - | 2.304754466 | 0.000232987 | 0.00126378  |
| ENSMMUG00000001225 | calneuron 1 [Source:VGNC Symbol;Acc:VGNC:82078]                                                    | - | 1.734915655 | 2.04E-06    | 1.82E-05    |
| ENSMMUG00000052019 |                                                                                                    | - | 1.236854018 | 9.50E-05    | 0.000569678 |
| ENSMMUG00000061002 |                                                                                                    | - | 1.086674775 | 5.93E-05    | 0.000375858 |
| ENSMMUG00000021235 | vitamin K epoxide reductase complex subunit 1 like 1 [Source:VGNC Symbol;Acc:VGNC:79322]           | - | 0.979747368 | 0.005677347 | 0.020041671 |
| ENSMMUG00000049696 |                                                                                                    | - | -0.42900857 | 0.000110844 | 0.000653424 |
| ENSMMUG00000060757 |                                                                                                    | - | 0.356930253 | 0.010503024 | 0.033719626 |
| ENSMMUG00000051107 |                                                                                                    | - | 1.416999367 | 2.24E-05    | 0.000158161 |
| ENSMMUG00000060184 | SEC61 translocon subunit gamma [Source:NCBI gene;Acc:716898]                                       | - | 3.435603128 | 1.84E-06    | 1.66E-05    |
| ENSMMUG00000019992 | growth factor receptor bound protein 10 [Source:VGNC Symbol;Acc:VGNC:73157]                        | - | -1.64564313 | 0.007203903 | 0.024542569 |
| ENSMMUG00000019991 | dopa decarboxylase [Source:VGNC Symbol;Acc:VGNC:71755]                                             | - | 1.083001976 | 3.85E-25    | 4.88E-23    |
| ENSMMUG00000049620 |                                                                                                    | - | 0.825816955 | 0.014882484 | 0.044986689 |
| ENSMMUG00000000505 | fidgetin like 1 [Source:VGNC Symbol;Acc:VGNC:72483]                                                | - | 0.990336895 | 0.004701203 | 0.01701728  |
| ENSMMUG00000000504 | IKAROS family zinc finger 1 [Source:VGNC Symbol;Acc:VGNC:73585]                                    | - | 1.162806343 | 0.003634395 | 0.013719345 |
| ENSMMUG00000044759 |                                                                                                    | - | 1.299129306 | 1.77E-15    | 8.07E-14    |
| ENSMMUG00000043922 | spermatogenesis associated 48 [Source:VGNC Symbol;Acc:VGNC:81762]                                  | - | 0.861165366 | 2.44E-06    | 2.14E-05    |
| ENSMMUG00000016191 | ATP binding cassette subfamily A member 13 [Source:VGNC Symbol;Acc:VGNC:69402]                     | - | 1.534013009 | 0.014424271 | 0.043858111 |
| ENSMMUG00000019393 | tensin 3 [Source:VGNC Symbol;Acc:VGNC:79324]                                                       | - | 1.977736529 | 0.015114243 | 0.045555825 |
| ENSMMUG00000050300 |                                                                                                    | - | 0.816484283 | 0.0088175   | 0.029191529 |
| ENSMMUG00000000962 | H2A.Z variant histone 2 [Source:VGNC Symbol;Acc:VGNC:81324]                                        | - | 0.833510851 | 0.000746067 | 0.003508757 |
| ENSMMUG00000002433 | calcium/calmodulin dependent protein kinase II beta [Source:VGNC Symbol;Acc:VGNC:70524]            | - | 2.112175165 | 7.55E-08    | 9.27E-07    |
| ENSMMUG00000002430 | YKT6 v-SNARE homolog [Source:VGNC Symbol;Acc:VGNC:81796]                                           | - | 2.35817135  | 3.94E-09    | 6.14E-08    |
| ENSMMUG00000002427 | glucokinase [Source:VGNC Symbol;Acc:VGNC:72901]                                                    | - | 1.547504795 | 1.39E-16    | 7.15E-15    |

|                    |                                                                                                     |             |             |             |
|--------------------|-----------------------------------------------------------------------------------------------------|-------------|-------------|-------------|
| ENSMMUG00000002411 | drebrin like [Source:NCBI gene;Acc:720621]                                                          | 1.799234068 | 2.97E-23    | 2.90E-21    |
| ENSMMUG00000002426 | myosin light chain 7 [Source:VGNC Symbol;Acc:VGNC:75002]                                            | 1.586769913 | 1.25E-15    | 5.83E-14    |
| ENSMMUG00000002423 | DNA polymerase delta 2, accessory subunit [Source:VGNC Symbol;Acc:VGNC:76203]                       | 1.591533334 | 4.03E-13    | 1.24E-11    |
| ENSMMUG00000002422 | AE binding protein 1 [Source:VGNC Symbol;Acc:VGNC:80328]                                            | 1.668949354 | 2.73E-10    | 5.29E-09    |
| ENSMMUG00000002421 | DNA polymerase mu [Source:VGNC Symbol;Acc:VGNC:81742]                                               | 3.104434053 | 0.010858791 | 0.034670382 |
| ENSMMUG00000064860 | phosphoglycerate mutase 2 [Source:NCBI gene;Acc:720615]                                             | 2.785823721 | 0.001836385 | 0.007660121 |
| ENSMMUG00000019023 | cytochrome c oxidase assembly factor 1 homolog [Source:VGNC Symbol;Acc:VGNC:81290]                  | 0.57610904  | 0.002559379 | 0.010148445 |
| ENSMMUG00000017382 | biliverdin reductase A [Source:VGNC Symbol;Acc:VGNC:70256]                                          | 0.605661513 | 4.63E-07    | 4.86E-06    |
| ENSMMUG00000019022 | serine/threonine kinase 17a [Source:VGNC Symbol;Acc:VGNC:77913]                                     | 0.674399137 | 4.38E-07    | 4.62E-06    |
| ENSMMUG00000019015 | HECT, C2 and WW domain containing E3 ubiquitin protein ligase 1 [Source:VGNC Symbol;Acc:VGNC:73217] | 0.514189788 | 0.000351714 | 0.001810503 |
| ENSMMUG00000024428 | Y RNA [Source:RFAM;Acc:RF00019]                                                                     | 1.56869783  | 0.01667086  | 0.049417678 |
| ENSMMUG00000060273 | mitochondrial ribosomal protein L32 [Source:NCBI gene;Acc:701820]                                   | 2.114001403 | 1.10E-13    | 3.72E-12    |
| ENSMMUG00000022451 | proteasome 20S subunit alpha 2 [Source:NCBI gene;Acc:701683]                                        | 1.734007916 | 1.73E-06    | 1.57E-05    |
| ENSMMUG00000052530 |                                                                                                     | 1.124354702 | 0.012223599 | 0.038230306 |
| ENSMMUG00000001702 | succinyl-CoA:glutarate-CoA transferase [Source:VGNC Symbol;Acc:VGNC:81767]                          | 1.763749965 | 2.42E-17    | 1.35E-15    |
|                    |                                                                                                     | -           |             |             |
| ENSMMUG00000065307 |                                                                                                     | 0.999748946 | 0.002541144 | 0.010098582 |
| ENSMMUG00000006980 | septin 7 [Source:VGNC Symbol;Acc:VGNC:81759]                                                        | 2.601972521 | 0.001155349 | 0.005113832 |
| ENSMMUG00000001350 | HERPUD family member 2 [Source:VGNC Symbol;Acc:VGNC:73216]                                          | 2.056316704 | 5.26E-12    | 1.38E-10    |
| ENSMMUG00000058423 |                                                                                                     | 2.485389745 | 1.34E-12    | 3.83E-11    |
|                    |                                                                                                     | -           |             |             |
| ENSMMUG00000009865 | probable C-mannosyltransferase DPY19L2 [Source:NCBI gene;Acc:699789]                                | 0.506279935 | 0.0115962   | 0.036559088 |
| ENSMMUG00000002886 | Bardet-Biedl syndrome 9 [Source:NCBI gene;Acc:708412]                                               | 1.751676293 | 1.05E-14    | 4.15E-13    |
|                    |                                                                                                     | -           |             |             |
| ENSMMUG00000050858 | Metazoan signal recognition particle RNA [Source:RFAM;Acc:RF00017]                                  | 0.948523755 | 0.002390977 | 0.009577743 |
|                    |                                                                                                     | -           |             |             |
| ENSMMUG00000022484 | ITPR interacting domain containing 1 [Source:VGNC Symbol;Acc:VGNC:73667]                            | 4.058894996 | 1.60E-06    | 1.47E-05    |
| ENSMMUG00000055809 |                                                                                                     | -3.71139405 | 5.65E-13    | 1.70E-11    |
| ENSMMUG00000062454 |                                                                                                     | 2.228753222 | 1.69E-22    | 1.58E-20    |
| ENSMMUG00000039009 |                                                                                                     | 1.481455821 | 0.000286196 | 0.001516743 |
| ENSMMUG00000012529 | pleckstrin homology domain containing A8 [Source:VGNC Symbol;Acc:VGNC:81741]                        | 0.761320984 | 0.010449753 | 0.033600545 |
|                    |                                                                                                     | -           |             |             |
| ENSMMUG00000032973 | mml-mir-550 [Source:miRBase;Acc:MI0007826]                                                          | 1.070535673 | 0.000519411 | 0.002556504 |
|                    |                                                                                                     | -           |             |             |
| ENSMMUG00000020184 | carboxypeptidase vitellogenic like [Source:VGNC Symbol;Acc:VGNC:71406]                              | 1.494672118 | 1.52E-05    | 0.000111275 |
|                    |                                                                                                     | -           |             |             |
| ENSMMUG00000039317 | cAMP responsive element binding protein 5 [Source:VGNC Symbol;Acc:VGNC:81295]                       | 2.239487331 | 3.20E-05    | 0.000217449 |
|                    |                                                                                                     | -           |             |             |
| ENSMMUG00000055193 |                                                                                                     | 3.057972642 | 0.004277979 | 0.015720168 |
|                    |                                                                                                     | -           |             |             |
| ENSMMUG00000001562 | kelch like family member 7 [Source:VGNC Symbol;Acc:VGNC:74050]                                      | 1.732711108 | 0.010412838 | 0.033522908 |
|                    |                                                                                                     | -           |             |             |
| ENSMMUG00000065311 | translocase of outer mitochondrial membrane 7 [Source:NCBI gene;Acc:705701]                         | 1.611535872 | 0.010508311 | 0.033729148 |
| ENSMMUG00000042472 | Metazoan signal recognition particle RNA [Source:RFAM;Acc:RF00017]                                  | 0.836324942 | 0.000509441 | 0.002515537 |
|                    |                                                                                                     | -           |             |             |
| ENSMMUG00000007821 | ATP binding cassette subfamily B member 5 [Source:VGNC Symbol;Acc:VGNC:80321]                       | 2.536472269 | 6.10E-25    | 7.52E-23    |
|                    |                                                                                                     | -           |             |             |
| ENSMMUG00000006898 | integrin subunit beta 8 [Source:VGNC Symbol;Acc:VGNC:73791]                                         | 2.833659112 | 1.04E-28    | 2.11E-26    |
|                    |                                                                                                     | -           |             |             |
| ENSMMUG00000052574 |                                                                                                     | 1.156337821 | 3.18E-15    | 1.40E-13    |
|                    |                                                                                                     | -           |             |             |
| ENSMMUG00000020418 | diacylglycerol kinase beta [Source:VGNC Symbol;Acc:VGNC:71782]                                      | 0.923185766 | 0.000221872 | 0.001213055 |
|                    |                                                                                                     | -           |             |             |
| ENSMMUG00000008632 | myosin, light chain 6, alkali, smooth muscle and non-muscle-like [Source:NCBI gene;Acc:710137]      | 1.446347632 | 0.000296585 | 0.001560897 |

|                    |                                                                                                            |   |             |             |             |
|--------------------|------------------------------------------------------------------------------------------------------------|---|-------------|-------------|-------------|
| ENSMMUG00000012694 | thrombospondin type 1 domain containing 7A [Source:VGNC Symbol;Acc:VGNC:79347]                             | - | 1.256174153 | 0.005404608 | 0.019214181 |
| ENSMMUG00000041616 | G protein subunit gamma 11 [Source:VGNC Symbol;Acc:VGNC:81319]                                             | - | 2.712597128 | 0.011980104 | 0.037581953 |
| ENSMMUG00000045513 |                                                                                                            | - | 1.815286368 | 8.81E-08    | 1.07E-06    |
| ENSMMUG00000015685 | zinc finger protein 804B [Source:VGNC Symbol;Acc:VGNC:81890]                                               | - | 1.397303065 | 1.31E-13    | 4.34E-12    |
| ENSMMUG00000022697 | STEAP4 metalloredutase [Source:VGNC Symbol;Acc:VGNC:77974]                                                 | - | 1.032587404 | 7.83E-10    | 1.40E-08    |
| ENSMMUG00000006766 | RUN domain containing 3B [Source:VGNC Symbol;Acc:VGNC:77129]                                               | - | 1.739015241 | 1.14E-10    | 2.36E-09    |
| ENSMMUG00000010788 | ATP binding cassette subfamily B member 1 [Source:NCBI gene;Acc:574235]                                    | - | 0.635178083 | 2.75E-05    | 0.000189408 |
| ENSMMUG00000022513 | glutamate metabotropic receptor 3 [Source:VGNC Symbol;Acc:VGNC:73287]                                      | - | 1.036700006 | 0.001280986 | 0.005598823 |
| ENSMMUG00000001979 | semaphorin 3E [Source:VGNC Symbol;Acc:VGNC:77163]                                                          | - | 1.555123845 | 0.002355747 | 0.009470545 |
| ENSMMUG00000018652 | hepatocyte growth factor [Source:VGNC Symbol;Acc:VGNC:73373]                                               | - | 0.395090742 | 0.003513166 | 0.013313199 |
| ENSMMUG00000053516 |                                                                                                            | - | 1.709069846 | 5.12E-09    | 7.88E-08    |
| ENSMMUG00000001801 | membrane associated guanylate kinase, WW and PDZ domain containing 2 [Source:VGNC Symbol;Acc:VGNC:74312]   | - | 0.80899395  | 1.39E-05    | 0.000103322 |
| ENSMMUG00000049939 |                                                                                                            | - | 1.006330339 | 2.05E-17    | 1.15E-15    |
| ENSMMUG00000009006 | round spermatid basic protein 1 like [Source:VGNC Symbol;Acc:VGNC:77097]                                   | - | 0.730913791 | 4.70E-07    | 4.93E-06    |
| ENSMMUG00000012427 | F-box and leucine rich repeat protein 13 [Source:VGNC Symbol;Acc:VGNC:81312]                               | - | 0.578746087 | 0.000161325 | 0.000913235 |
| ENSMMUG00000012066 | origin recognition complex subunit 5 [Source:VGNC Symbol;Acc:VGNC:75717]                                   | - | 0.439112551 | 0.016730509 | 0.049554077 |
| ENSMMUG00000022727 | lysine methyltransferase 2E [Source:VGNC Symbol;Acc:VGNC:74073]                                            | - | 2.849586257 | 0.000267485 | 0.001429044 |
| ENSMMUG00000022732 | SRSF protein kinase 2 [Source:VGNC Symbol;Acc:VGNC:81764]                                                  | - | 0.628723398 | 0.000415889 | 0.00210361  |
| ENSMMUG00000008189 | cadherin related family member 3 [Source:HGNC Symbol;Acc:HGNC:26308]                                       | - | 1.042982798 | 2.42E-10    | 4.72E-09    |
| ENSMMUG00000003572 | nicotinamide phosphoribosyltransferase [Source:VGNC Symbol;Acc:VGNC:75056]                                 | - | 2.154948598 | 1.19E-18    | 7.82E-17    |
| ENSMMUG00000011385 | phosphatidylinositol-4,5-bisphosphate 3-kinase catalytic subunit gamma [Source:VGNC Symbol;Acc:VGNC:75998] | - | -0.36553151 | 0.010416478 | 0.033523211 |
| ENSMMUG00000030218 | B cell receptor associated protein 29 [Source:VGNC Symbol;Acc:VGNC:70119]                                  | - | 0.285954662 | 0.005630303 | 0.019919133 |
| ENSMMUG00000019125 | solute carrier family 26 member 4 [Source:VGNC Symbol;Acc:VGNC:77595]                                      | - | 0.344005789 | 0.00266816  | 0.010485819 |
| ENSMMUG00000015535 | inner mitochondrial membrane peptidase subunit 2 [Source:VGNC Symbol;Acc:VGNC:73596]                       | - | 0.586655901 | 0.008109484 | 0.027138021 |
| ENSMMUG00000062092 |                                                                                                            | - | 4.069166555 | 8.72E-06    | 6.74E-05    |
| ENSMMUG00000058817 |                                                                                                            | - | 3.618111111 | 7.95E-32    | 1.99E-29    |
| ENSMMUG00000002894 | dedicator of cytokinesis 4 [Source:VGNC Symbol;Acc:VGNC:71866]                                             | - | 0.857912195 | 0.001138326 | 0.005048154 |
| ENSMMUG00000011269 | CF transmembrane conductance regulator [Source:VGNC Symbol;Acc:VGNC:71020]                                 | - | 0.787396892 | 0.000133457 | 0.000773548 |
| ENSMMUG00000023310 | tetraspanin 12 [Source:VGNC Symbol;Acc:VGNC:79328]                                                         | - | 2.735808696 | 0.006273282 | 0.021764845 |
| ENSMMUG00000002434 | inhibitor of growth family member 3 [Source:VGNC Symbol;Acc:VGNC:73595]                                    | - | 1.269011964 | 6.38E-05    | 0.000401022 |
| ENSMMUG00000015240 | glutamate metabotropic receptor 8 [Source:VGNC Symbol;Acc:VGNC:73292]                                      | - | 0.747382027 | 0.001328318 | 0.005779633 |
| ENSMMUG00000002428 | zinc finger protein 800 [Source:VGNC Symbol;Acc:VGNC:79658]                                                | - | 0.652248933 | 0.000198781 | 0.001098737 |
| ENSMMUG00000015427 | fascin actin-bundling protein 3 [Source:VGNC Symbol;Acc:VGNC:72821]                                        | - | 0.712364491 | 0.007707769 | 0.026021326 |
| ENSMMUG00000015432 | staphylococcal nuclease and tudor domain containing 1 [Source:VGNC Symbol;Acc:VGNC:77798]                  | - | 0.858080665 | 2.19E-05    | 0.000155055 |
| ENSMMUG00000007250 | RNA binding motif protein 28 [Source:VGNC Symbol;Acc:VGNC:76519]                                           | - | 0.979427324 | 1.72E-05    | 0.000123751 |
| ENSMMUG00000037001 | U7 small nuclear RNA [Source:RFAM;Acc:RF00066]                                                             | - | 2.093413598 | 0.007623794 | 0.025797742 |
| ENSMMUG00000037473 | proline rich transmembrane protein 4 [Source:VGNC Symbol;Acc:VGNC:81746]                                   | - | 0.428690901 | 0.004980658 | 0.01791287  |

|                     |                                                                                             |             |             |             |
|---------------------|---------------------------------------------------------------------------------------------|-------------|-------------|-------------|
| ENSMMUG00000012110  | smoothened, frizzled class receptor [Source:VGNC Symbol;Acc:VGNC:77658]                     | 1.694079149 | 2.53E-11    | 5.82E-10    |
| ENSMMUG00000017542  | ubiquitin conjugating enzyme E2 H [Source:VGNC Symbol;Acc:VGNC:78696]                       | 0.526489972 | 0.009138584 | 0.030131003 |
| ENSMMUG00000006155  | zinc finger C3HC-type containing 1 [Source:VGNC Symbol;Acc:VGNC:79827]                      | 0.991706949 | 0.006447484 | 0.022268254 |
| ENSMMUG00000010060  | serine rich single-pass membrane protein 1 [Source:VGNC Symbol;Acc:VGNC:78014]              | 0.952485199 | 0.002352139 | 0.009458657 |
| ENSMMUG00000009494  | carboxypeptidase A5 [Source:VGNC Symbol;Acc:VGNC:71410]                                     | 0.818317239 | 0.000652465 | 0.003124137 |
| ENSMMUG00000009495  | carboxypeptidase A1 [Source:VGNC Symbol;Acc:VGNC:71455]                                     | 1.126276432 | 5.05E-05    | 0.000327086 |
| ENSMMUG00000009496  | centrosomal protein 41 [Source:VGNC Symbol;Acc:VGNC:70937]                                  | 0.819048496 | 0.001351614 | 0.005866949 |
| ENSMMUG00000009499  | mesoderm specific transcript [Source:VGNC Symbol;Acc:VGNC:74707]                            | 3.692427911 | 1.70E-25    | 2.24E-23    |
| ENSMMUG00000004801  | COPI coat complex subunit gamma 2 [Source:VGNC Symbol;Acc:VGNC:71315]                       | 3.627287638 | 4.24E-27    | 7.01E-25    |
| ENSMMUG00000001671  | coiled-coil-helix-coiled-coil-helix domain containing 3 [Source:VGNC Symbol;Acc:VGNC:80860] | 1.106544362 | 0.002140448 | 0.008760047 |
| ENSMMUG00000000916  | solute carrier family 35 member B4 [Source:VGNC Symbol;Acc:VGNC:77528]                      | 1.447646936 | 0.010447172 | 0.033600545 |
| ENSMMUG00000000917  | aldo-keto reductase family 1 member B [Source:NCBI gene;Acc:705957]                         | 1.342093596 | 0.011927402 | 0.037457041 |
| ENSMMUG00000004598  | bisphosphoglycerate mutase [Source:VGNC Symbol;Acc:VGNC:70275]                              | 2.159041031 | 0.01150098  | 0.036345598 |
| ENSMMUG000000037485 |                                                                                             | 3.647042753 | 7.78E-05    | 0.000479301 |
| ENSMMUG000000054821 |                                                                                             | 2.432122408 | 0.002132362 | 0.008734334 |
| ENSMMUG00000006530  | ATP/GTP binding protein like 3 [Source:VGNC Symbol;Acc:VGNC:69723]                          | 1.227917196 | 6.51E-17    | 3.45E-15    |
| ENSMMUG000000050339 | Metazoan signal recognition particle RNA [Source:RFAM;Acc:RF00017]                          | 2.492103667 | 1.37E-13    | 4.54E-12    |
| ENSMMUG000000062419 |                                                                                             | 2.361358229 | 0.000137315 | 0.000792436 |
| ENSMMUG00000002318  | stimulated by retinoic acid 8 [Source:VGNC Symbol;Acc:VGNC:78250]                           | 0.978869697 | 0.003865153 | 0.014436726 |
| ENSMMUG00000016384  | nucleoporin 205 [Source:VGNC Symbol;Acc:VGNC:75432]                                         | 0.802153338 | 0.000193082 | 0.001071722 |
| ENSMMUG000000064014 |                                                                                             | 2.723491174 | 0.013566363 | 0.041711975 |
| ENSMMUG00000002995  | tripartite motif containing 24 [Source:VGNC Symbol;Acc:VGNC:78562]                          | 0.658043831 | 0.00013369  | 0.000774591 |
| ENSMMUG000000050262 |                                                                                             | 1.363530667 | 0.010592451 | 0.033954237 |
| ENSMMUG000000021676 | SVOP like [Source:VGNC Symbol;Acc:VGNC:78224]                                               | 0.712403516 | 0.000236046 | 0.001277513 |
| ENSMMUG00000006547  | ATPase H+ transporting V0 subunit a4 [Source:VGNC Symbol;Acc:VGNC:70189]                    | 2.508191205 | 0.001198098 | 0.005285811 |
| ENSMMUG00000006548  | KIAA1549 [Source:VGNC Symbol;Acc:VGNC:73885]                                                | -3.15985624 | 2.36E-08    | 3.19E-07    |
| ENSMMUG00000006549  | zinc finger CCCH-type containing, antiviral 1 like [Source:VGNC Symbol;Acc:VGNC:79356]      | 0.612305345 | 0.000459085 | 0.002298457 |
| ENSMMUG00000006550  | zinc finger CCCH-type containing, antiviral 1 [Source:VGNC Symbol;Acc:VGNC:79408]           | 0.456377604 | 0.003830468 | 0.014325576 |
| ENSMMUG00000006770  | putative RNA-binding protein Luc7-like 2 [Source:NCBI gene;Acc:711104]                      | 0.649654959 | 0.008174249 | 0.027317024 |
| ENSMMUG00000004222  | thromboxane A synthase 1 [Source:VGNC Symbol;Acc:VGNC:78278]                                | 1.563580974 | 1.01E-11    | 2.50E-10    |
| ENSMMUG000000052228 | Metazoan signal recognition particle RNA [Source:RFAM;Acc:RF00017]                          | 1.866450835 | 0.00145106  | 0.006235312 |
| ENSMMUG00000004224  | poly(ADP-ribose) polymerase family member 12 [Source:VGNC Symbol;Acc:VGNC:81734]            | 0.968320242 | 2.45E-12    | 6.70E-11    |
| ENSMMUG000000056175 |                                                                                             | 0.696878373 | 2.49E-05    | 0.000173698 |
| ENSMMUG00000008126  | lysine demethylase 7A [Source:VGNC Symbol;Acc:VGNC:73886]                                   | 0.798304116 | 5.33E-08    | 6.76E-07    |
| ENSMMUG000000042299 | DENN domain containing 2A [Source:VGNC Symbol;Acc:VGNC:81302]                               | 2.483014641 | 0.004476618 | 0.016314011 |
| ENSMMUG00000015282  | aarF domain containing kinase 2 [Source:VGNC Symbol;Acc:VGNC:69473]                         | 0.491048554 | 0.000132656 | 0.000769828 |
| ENSMMUG000000060893 |                                                                                             | 1.779762169 | 1.34E-05    | 0.00010002  |
| ENSMMUG000000064529 |                                                                                             | 1.418311071 | 8.79E-11    | 1.86E-09    |

|                    |                                                                           |             |             |             |
|--------------------|---------------------------------------------------------------------------|-------------|-------------|-------------|
| ENSMMUG00000021017 | acylglycerol kinase [Source:VGNC Symbol;Acc:VGNC:69669]                   | 0.950692159 | 1.04E-06    | 1.00E-05    |
| ENSMMUG00000022442 | single stranded DNA binding protein 1 [Source:VGNC Symbol;Acc:VGNC:77886] | 0.626409425 | 5.86E-05    | 0.000372483 |
| ENSMMUG00000055710 | taste 2 receptor member 38 [Source:NCBI gene;Acc:695549]                  | 2.006416512 | 1.74E-06    | 1.57E-05    |
| ENSMMUG00000016273 | maltase-glucoamylase [Source:VGNC Symbol;Acc:VGNC:74713]                  | 2.049662282 | 4.67E-18    | 2.84E-16    |
| ENSMMUG00000019937 | maltase-glucoamylase 2 (putative) [Source:VGNC Symbol;Acc:VGNC:81720]     | 2.126130268 | 0.000634095 | 0.00304219  |
| ENSMMUG00000049575 | T cell receptor beta variable 7-2 [Source:HGNC Symbol;Acc:HGNC:12236]     | 0.978395991 | 0.001076176 | 0.004813651 |
| ENSMMUG00000051385 |                                                                           | 1.114005984 | 0.000623744 | 0.00299946  |
| ENSMMUG00000050984 | T cell receptor beta variable 5-4 [Source:HGNC Symbol;Acc:HGNC:12221]     | 1.310683818 | 0.016643906 | 0.049347839 |
| ENSMMUG00000048246 |                                                                           | 2.679858928 | 0.005644927 | 0.019952199 |
| ENSMMUG00000057494 | T cell receptor beta variable 7-9 [Source:HGNC Symbol;Acc:HGNC:12243]     | 1.870071109 | 1.21E-06    | 1.15E-05    |
| ENSMMUG00000050269 | T cell receptor beta variable 14 [Source:HGNC Symbol;Acc:HGNC:12189]      | 2.080040063 | 3.37E-11    | 7.63E-10    |
| ENSMMUG00000016286 | protease, serine, 1 (trypsin 1) [Source:NCBI gene;Acc:698729]             | 1.414836121 | 8.54E-08    | 1.03E-06    |
| ENSMMUG00000051032 | serine protease 2 [Source:NCBI gene;Acc:698352]                           | 2.382828545 | 1.27E-27    | 2.25E-25    |
| ENSMMUG00000052682 |                                                                           | -2.37345361 | 6.52E-09    | 9.87E-08    |
| ENSMMUG00000059019 |                                                                           | 2.613450187 | 1.14E-13    | 3.84E-12    |
| ENSMMUG00000058459 |                                                                           | 2.290800131 | 0.001401866 | 0.006054727 |
| ENSMMUG00000055756 |                                                                           | 3.620313768 | 0.004108774 | 0.015167406 |
| ENSMMUG00000043809 | caspase 2 [Source:VGNC Symbol;Acc:VGNC:80804]                             | 0.943445855 | 4.70E-07    | 4.93E-06    |
| ENSMMUG00000045428 | Metazoan signal recognition particle RNA [Source:RFAM;Acc:RF00017]        | 1.758703216 | 0.012501438 | 0.038965138 |
| ENSMMUG00000012635 | zyxin [Source:VGNC Symbol;Acc:VGNC:78917]                                 | 1.784071368 | 8.65E-21    | 7.10E-19    |
| ENSMMUG00000055322 | EPH receptor A1 [Source:NCBI gene;Acc:706295]                             | 1.473447153 | 8.55E-21    | 7.06E-19    |
| ENSMMUG00000058370 | taste receptor type 2 member 62 [Source:NCBI gene;Acc:704388]             | 4.019660077 | 9.87E-07    | 9.53E-06    |
| ENSMMUG00000042798 |                                                                           | 1.136083909 | 2.38E-08    | 3.21E-07    |
| ENSMMUG00000063823 | U6 spliceosomal RNA [Source:RFAM;Acc:RF00026]                             | 2.725992714 | 0.000249235 | 0.001341403 |
| ENSMMUG00000046165 | chromosome 3 C7orf33 homolog [Source:NCBI gene;Acc:710503]                | 0.918606806 | 0.007511851 | 0.02547825  |
| ENSMMUG00000017541 | cullin 1 [Source:VGNC Symbol;Acc:VGNC:71565]                              | 3.003887888 | 0.015552366 | 0.046644264 |
| ENSMMUG00000057973 |                                                                           | 1.378850937 | 0.000795843 | 0.003710447 |
| ENSMMUG00000049864 |                                                                           | 1.765261317 | 0.013067704 | 0.040392349 |
| ENSMMUG00000018549 | zinc finger protein 786 [Source:VGNC Symbol;Acc:VGNC:79338]               | 2.600572245 | 2.04E-07    | 2.32E-06    |
| ENSMMUG00000002497 | zinc finger protein 777 [Source:HGNC Symbol;Acc:HGNC:22213]               | -1.09570947 | 3.15E-06    | 2.70E-05    |
| ENSMMUG00000051020 | zinc finger protein 467 [Source:NCBI gene;Acc:712106]                     | 1.116699708 | 5.09E-05    | 0.000329873 |
| ENSMMUG00000048892 | SCO-spondin [Source:VGNC Symbol;Acc:VGNC:81765]                           | 0.890939567 | 0.000223073 | 0.001217727 |
| ENSMMUG00000022633 | replication initiator 1 [Source:VGNC Symbol;Acc:VGNC:76758]               | 1.320293303 | 0.000145591 | 0.000835881 |
| ENSMMUG00000062696 |                                                                           | -0.95632336 | 0.001918639 | 0.007962107 |

|                    |                                                                                                       |   |             |             |             |
|--------------------|-------------------------------------------------------------------------------------------------------|---|-------------|-------------|-------------|
| ENSMMUG00000022636 | GTPase, IMAP family member 8 [Source:VGNC Symbol;Acc:VGNC:72981]                                      | - | 1.221996329 | 7.44E-05    | 0.000460026 |
| ENSMMUG00000011386 | GTPase, IMAP family member 4 [Source:VGNC Symbol;Acc:VGNC:72982]                                      | - | 1.907709772 | 3.00E-24    | 3.31E-22    |
| ENSMMUG00000052830 |                                                                                                       | - | 1.704892727 | 1.61E-08    | 2.24E-07    |
| ENSMMUG00000047276 | GTPase, IMAP family member 6 [Source:VGNC Symbol;Acc:VGNC:81315]                                      | - | 1.083729551 | 5.02E-10    | 9.36E-09    |
| ENSMMUG00000049295 | GTPase, IMAP family member 5 [Source:NCBI gene;Acc:713835]                                            | - | 0.667090224 | 0.002069867 | 0.008514335 |
| ENSMMUG00000020436 | potassium voltage-gated channel subfamily H member 2 [Source:VGNC Symbol;Acc:VGNC:73980]              | - | 0.746005909 | 1.82E-07    | 2.08E-06    |
| ENSMMUG00000006682 | chondroitin polymerizing factor 2 [Source:VGNC Symbol;Acc:VGNC:71131]                                 | - | 1.795620914 | 4.95E-05    | 0.000321577 |
| ENSMMUG00000038898 | Metazoan signal recognition particle RNA [Source:RFAM;Acc:RF00017]                                    | - | 0.525156572 | 0.008633759 | 0.028678539 |
| ENSMMUG00000010943 | protein kinase AMP-activated non-catalytic subunit gamma 2 [Source:VGNC Symbol;Acc:VGNC:81745]        | - | 1.009285899 | 8.01E-05    | 0.000491086 |
| ENSMMUG00000012238 | polypeptide N-acetylgalactosaminyltransferase 11 [Source:VGNC Symbol;Acc:VGNC:72749]                  | - | 0.806796185 | 0.002360777 | 0.009482902 |
| ENSMMUG00000007212 | lysine methyltransferase 2C [Source:VGNC Symbol;Acc:VGNC:74043]                                       | - | 0.414802871 | 0.0089183   | 0.029478245 |
| ENSMMUG00000027964 | 5S ribosomal RNA [Source:RFAM;Acc:RF00001]                                                            | - | 1.500454297 | 0.010456543 | 0.033607511 |
| ENSMMUG00000002878 | X-ray repair cross complementing 2 [Source:VGNC Symbol;Acc:VGNC:78813]                                | - | 0.717023032 | 0.001972494 | 0.008164621 |
| ENSMMUG00000007770 | canopy FGF signaling regulator 1 [Source:VGNC Symbol;Acc:VGNC:71363]                                  | - | 1.770460123 | 0.013903395 | 0.042556848 |
| ENSMMUG00000008733 | ubiquitin protein ligase E3C [Source:VGNC Symbol;Acc:VGNC:79049]                                      | - | -0.78745791 | 3.02E-05    | 0.000206233 |
| ENSMMUG00000009611 | vasoactive intestinal peptide receptor 2 [Source:VGNC Symbol;Acc:VGNC:78772]                          | - | -1.16678054 | 2.72E-05    | 0.000187528 |
| ENSMMUG00000052713 | leucine rich repeat containing 14B [Source:NCBI gene;Acc:723071]                                      | - | 0.456184221 | 0.013759625 | 0.042207989 |
| ENSMMUG00000003791 | centrosomal protein 72 [Source:VGNC Symbol;Acc:VGNC:71099]                                            | - | 1.625994971 | 0.004456801 | 0.016258096 |
| ENSMMUG00000052291 |                                                                                                       | - | 1.660367053 | 0.000469768 | 0.002342717 |
| ENSMMUG00000061096 | tubulin polymerization promoting protein [Source:NCBI gene;Acc:708834]                                | - | 1.699256469 | 0.008741709 | 0.029013292 |
| ENSMMUG00000014738 | bromodomain containing 9 [Source:VGNC Symbol;Acc:VGNC:70386]                                          | - | 3.899518932 | 0.001207993 | 0.005323006 |
| ENSMMUG00000019441 | solute carrier family 12 member 7 [Source:VGNC Symbol;Acc:VGNC:77390]                                 | - | 1.030112786 | 4.86E-05    | 0.00031684  |
| ENSMMUG00000010940 | telomerase reverse transcriptase [Source:VGNC Symbol;Acc:VGNC:78313]                                  | - | 0.924462732 | 1.04E-12    | 3.02E-11    |
| ENSMMUG00000058051 |                                                                                                       | - | 0.636984985 | 0.009297539 | 0.03054351  |
| ENSMMUG00000061176 |                                                                                                       | - | 0.408639086 | 0.000230734 | 0.001253267 |
| ENSMMUG00000002561 | NOP2/Sun RNA methyltransferase 2 [Source:VGNC Symbol;Acc:VGNC:75466]                                  | - | 2.036879537 | 0.004074706 | 0.01506945  |
| ENSMMUG00000018745 | chromosome 6 C5orf49 homolog [Source:VGNC Symbol;Acc:VGNC:70646]                                      | - | 1.171455213 | 0.004329397 | 0.015887207 |
| ENSMMUG00000018746 | FAST kinase domains 3 [Source:VGNC Symbol;Acc:VGNC:72588]                                             | - | -1.2939426  | 9.96E-12    | 2.48E-10    |
| ENSMMUG00000018747 | 5-methyltetrahydrofolate-homocysteine methyltransferase reductase [Source:VGNC Symbol;Acc:VGNC:75079] | - | 1.363451039 | 1.04E-09    | 1.80E-08    |
| ENSMMUG00000061922 |                                                                                                       | - | 0.327952633 | 0.00092861  | 0.004253057 |
| ENSMMUG00000065128 | Metazoan signal recognition particle RNA [Source:RFAM;Acc:RF00017]                                    | - | 0.841403693 | 4.21E-05    | 0.000279431 |
| ENSMMUG00000055028 |                                                                                                       | - | 1.704561074 | 0.007784399 | 0.026208764 |
| ENSMMUG00000009574 | solute carrier family 45 member 2 [Source:VGNC Symbol;Acc:VGNC:82240]                                 | - | 0.669578037 | 0.011575547 | 0.036501894 |
| ENSMMUG00000018739 | sperm flagellar 2 [Source:VGNC Symbol;Acc:VGNC:82243]                                                 | - | 4.324503009 | 1.21E-06    | 1.15E-05    |

|                    |                                                                                                  |   |             |             |             |
|--------------------|--------------------------------------------------------------------------------------------------|---|-------------|-------------|-------------|
| ENSMMUG0000006202  | solute carrier family 1 member 3 [Source:VGNC Symbol;Acc:VGNC:77411]                             | - | 0.306567235 | 0.004448719 | 0.016240832 |
| ENSMMUG00000052836 |                                                                                                  | - | 0.467133556 | 0.002813712 | 0.010998369 |
| ENSMMUG00000018963 | glial cell derived neurotrophic factor [Source:VGNC Symbol;Acc:VGNC:72912]                       | - | 1.435202015 | 0.004984981 | 0.017919355 |
| ENSMMUG00000017163 | EGF like, fibronectin type III and laminin G domains [Source:VGNC Symbol;Acc:VGNC:72122]         | - | 0.508946995 | 0.005804477 | 0.020401277 |
| ENSMMUG00000061318 |                                                                                                  | - | 3.810805387 | 0.000612497 | 0.002954171 |
| ENSMMUG0000004774  | maestro heat like repeat family member 2B [Source:VGNC Symbol;Acc:VGNC:74837]                    | - | 2.514195307 | 1.97E-08    | 2.69E-07    |
| ENSMMUG00000021034 | complement C6 [Source:VGNC Symbol;Acc:VGNC:70477]                                                | - | 0.898759311 | 0.002341889 | 0.009422653 |
| ENSMMUG00000011878 | poly(A) binding protein interacting protein 1 [Source:VGNC Symbol;Acc:VGNC:84476]                | - | 3.562905712 | 1.31E-24    | 1.51E-22    |
| ENSMMUG00000055022 | Metazoan signal recognition particle RNA [Source:RFAM;Acc:RF00017]                               | - | 4.167093575 | 2.36E-06    | 2.08E-05    |
| ENSMMUG00000011734 | nicotinamide nucleotide transhydrogenase [Source:VGNC Symbol;Acc:VGNC:75363]                     | - | 1.202358112 | 0.007730402 | 0.026061422 |
| ENSMMUG00000047162 | fibroblast growth factor 10 [Source:VGNC Symbol;Acc:VGNC:84378]                                  | - | 0.738732544 | 0.002856504 | 0.011141669 |
| ENSMMUG00000016149 | embigin [Source:VGNC Symbol;Acc:VGNC:72144]                                                      | - | 4.108568188 | 8.25E-05    | 0.000504129 |
| ENSMMUG00000001753 | integrin subunit alpha 1 [Source:VGNC Symbol;Acc:VGNC:73772]                                     | - | 1.912506005 | 9.15E-25    | 1.08E-22    |
| ENSMMUG00000039101 | pelota mRNA surveillance and ribosome rescue factor [Source:VGNC Symbol;Acc:VGNC:84478]          | - | 2.098762126 | 1.72E-16    | 8.79E-15    |
| ENSMMUG00000010379 | Mtr4 exosome RNA helicase [Source:VGNC Symbol;Acc:VGNC:74989]                                    | - | 1.553741375 | 2.21E-11    | 5.17E-10    |
| ENSMMUG00000030099 | phospholipid phosphatase 1 [Source:VGNC Symbol;Acc:VGNC:76226]                                   | - | 2.639574851 | 9.26E-12    | 2.32E-10    |
| ENSMMUG00000061973 |                                                                                                  | - | 2.654855604 | 1.35E-27    | 2.37E-25    |
| ENSMMUG00000010466 | solute carrier family 38 member 9 [Source:VGNC Symbol;Acc:VGNC:77574]                            | - | 2.446959474 | 1.18E-16    | 6.10E-15    |
| ENSMMUG00000049885 |                                                                                                  | - | 0.547964427 | 0.008410307 | 0.027990071 |
| ENSMMUG00000051661 |                                                                                                  | - | 1.150172816 | 0.001091654 | 0.004866413 |
| ENSMMUG00000005181 | RAB3C, member RAS oncogene family [Source:VGNC Symbol;Acc:VGNC:81541]                            | - | 1.582966434 | 1.94E-06    | 1.74E-05    |
| ENSMMUG00000021812 | ERCC excision repair 8, CSA ubiquitin ligase complex subunit [Source:VGNC Symbol;Acc:VGNC:72425] | - | 0.848856836 | 1.85E-14    | 7.24E-13    |
| ENSMMUG00000060505 |                                                                                                  | - | 1.169691931 | 0.000853649 | 0.003955786 |
| ENSMMUG00000021131 | regulator of G protein signaling 7 binding protein [Source:VGNC Symbol;Acc:VGNC:76808]           | - | 1.100975931 | 0.002575493 | 0.010196062 |
| ENSMMUG00000015041 | CWC27 spliceosome associated cyclophilin [Source:VGNC Symbol;Acc:VGNC:71396]                     | - | 2.497624917 | 4.26E-06    | 3.54E-05    |
| ENSMMUG00000051169 |                                                                                                  | - | 2.189053856 | 8.35E-05    | 0.000509461 |
| ENSMMUG00000018100 | ADAM metalloproteinase with thrombospondin type 1 motif 6 [Source:VGNC Symbol;Acc:VGNC:69500]    | - | 0.53351718  | 0.010017566 | 0.032491154 |
| ENSMMUG00000016522 | neurolysin [Source:VGNC Symbol;Acc:VGNC:75183]                                                   | - | 0.621555683 | 8.94E-07    | 8.68E-06    |
| ENSMMUG00000049935 |                                                                                                  | - | 1.173807164 | 1.38E-05    | 0.000102208 |
| ENSMMUG00000046550 | coiled-coil domain containing 125 [Source:NCBI gene;Acc:704391]                                  | - | 1.036435786 | 2.70E-10    | 5.23E-09    |
| ENSMMUG00000009158 | MARVEL domain containing 2 [Source:VGNC Symbol;Acc:VGNC:74592]                                   | - | 0.437708603 | 0.003933819 | 0.014629299 |
| ENSMMUG00000040485 | Metazoan signal recognition particle RNA [Source:RFAM;Acc:RF00017]                               | - | 0.653233561 | 0.000250702 | 0.0013478   |
| ENSMMUG00000006217 | general transcription factor IIH subunit 2 [Source:NCBI gene;Acc:700737]                         | - | 0.864454464 | 0.00391737  | 0.014579316 |
| ENSMMUG00000054237 | Y RNA [Source:RFAM;Acc:RF00019]                                                                  | - | 1.691687752 | 0.001155577 | 0.005113832 |

|                    |                                                                                                |             |             |             |
|--------------------|------------------------------------------------------------------------------------------------|-------------|-------------|-------------|
| ENSMMUG00000059671 |                                                                                                | 1.299412961 | 1.57E-08    | 2.20E-07    |
| ENSMMUG00000063792 |                                                                                                | 0.652462554 | 9.10E-06    | 7.00E-05    |
|                    |                                                                                                | -           |             |             |
| ENSMMUG00000064344 | Metazoan signal recognition particle RNA [Source:RFAM;Acc:RF00017]                             | 3.154078756 | 0.003337103 | 0.012756107 |
| ENSMMUG00000011061 | ankyrin repeat domain 31 [Source:VGNC Symbol;Acc:VGNC:84277]                                   | 0.771180063 | 2.56E-07    | 2.85E-06    |
| ENSMMUG00000006139 | 3-hydroxy-3-methylglutaryl-CoA reductase [Source:VGNC Symbol;Acc:VGNC:73484]                   | 0.690274758 | 1.06E-08    | 1.54E-07    |
| ENSMMUG00000006141 | ceramide transporter 1 [Source:VGNC Symbol;Acc:VGNC:71298]                                     | 0.653550896 | 6.94E-06    | 5.51E-05    |
|                    |                                                                                                | -           |             |             |
| ENSMMUG00000019887 | synaptic vesicle glycoprotein 2C [Source:VGNC Symbol;Acc:VGNC:78252]                           | 0.689140318 | 0.011652721 | 0.036713278 |
|                    |                                                                                                | -           |             |             |
| ENSMMUG00000022982 | IQ motif containing GTPase activating protein 2 [Source:VGNC Symbol;Acc:VGNC:73756]            | 1.484648186 | 0.001127417 | 0.005012006 |
|                    |                                                                                                | -           |             |             |
| ENSMMUG00000021354 | corticotropin releasing hormone binding protein [Source:VGNC Symbol;Acc:VGNC:71491]            | 1.613066629 | 0.004486247 | 0.016345006 |
| ENSMMUG00000021357 | zinc finger BED-type containing 3 [Source:VGNC Symbol;Acc:VGNC:79271]                          | 2.145755364 | 0.000107749 | 0.000637246 |
| ENSMMUG00000006792 | arylsulfatase B [Source:VGNC Symbol;Acc:VGNC:70023]                                            | 1.228880406 | 0.004150047 | 0.015296459 |
| ENSMMUG00000036820 | U7 small nuclear RNA [Source:RFAM;Acc:RF00066]                                                 | 0.977869758 | 0.000119277 | 0.000699168 |
|                    |                                                                                                | -           |             |             |
| ENSMMUG00000051429 |                                                                                                | 2.034961558 | 0.000333281 | 0.001726624 |
|                    |                                                                                                | -           |             |             |
| ENSMMUG00000018283 | dihydrofolate reductase [Source:NCBI gene;Acc:711268]                                          | 1.511043913 | 0.003166484 | 0.012177559 |
|                    |                                                                                                | -           |             |             |
| ENSMMUG00000018284 | mutS homolog 3 [Source:VGNC Symbol;Acc:VGNC:74932]                                             | 0.883945442 | 1.37E-06    | 1.28E-05    |
|                    |                                                                                                | -           |             |             |
| ENSMMUG00000039944 | Ras protein specific guanine nucleotide releasing factor 2 [Source:VGNC Symbol;Acc:VGNC:84486] | 1.759849587 | 1.28E-08    | 1.84E-07    |
|                    |                                                                                                | -           |             |             |
| ENSMMUG00000006932 | creatine kinase, mitochondrial 2 [Source:VGNC Symbol;Acc:VGNC:71231]                           | 1.155827364 | 0.00258971  | 0.010235621 |
|                    |                                                                                                | -           |             |             |
| ENSMMUG00000017583 | single stranded DNA binding protein 2 [Source:NCBI gene;Acc:711752]                            | 1.057053536 | 3.55E-08    | 4.64E-07    |
| ENSMMUG00000046560 | transmembrane protein 167A [Source:VGNC Symbol;Acc:VGNC:84513]                                 | 0.891691581 | 0.005770539 | 0.0203213   |
| ENSMMUG00000064265 | X-ray repair cross complementing 4 [Source:NCBI gene;Acc:712291]                               | 0.829814246 | 0.000374504 | 0.001910904 |
| ENSMMUG00000011513 | versican [Source:VGNC Symbol;Acc:VGNC:79445]                                                   | 2.080918382 | 4.75E-20    | 3.62E-18    |
| ENSMMUG00000061282 | hyaluronan and proteoglycan link protein 1 [Source:NCBI gene;Acc:712501]                       | 3.809768072 | 0.00413241  | 0.015243047 |
|                    |                                                                                                | -           |             |             |
| ENSMMUG00000009319 | transmembrane protein 161B [Source:VGNC Symbol;Acc:VGNC:84508]                                 | 1.373262113 | 4.37E-05    | 0.000288739 |
|                    |                                                                                                | -           |             |             |
| ENSMMUG00000019836 | myocyte enhancer factor 2C [Source:VGNC Symbol;Acc:VGNC:84438]                                 | 1.157606862 | 9.05E-05    | 0.000546734 |
|                    |                                                                                                | -           |             |             |
| ENSMMUG00000055392 |                                                                                                | 1.211415308 | 0.000147593 | 0.000845375 |
|                    |                                                                                                | -           |             |             |
| ENSMMUG00000056790 |                                                                                                | 2.958675732 | 0.006027871 | 0.02104904  |
|                    |                                                                                                | -           |             |             |
| ENSMMUG00000018974 | LysM domain containing 3 [Source:VGNC Symbol;Acc:VGNC:74373]                                   | 1.716648979 | 3.13E-34    | 1.06E-31    |
|                    |                                                                                                | -           |             |             |
| ENSMMUG00000055271 |                                                                                                | 1.710969897 | 1.91E-07    | 2.18E-06    |
|                    |                                                                                                | -           |             |             |
| ENSMMUG00000018976 | adhesion G protein-coupled receptor V1 [Source:VGNC Symbol;Acc:VGNC:69625]                     | 1.259469061 | 0.000305778 | 0.001602415 |
| ENSMMUG00000001397 | multiple C2 and transmembrane domain containing 1 [Source:VGNC Symbol;Acc:VGNC:74589]          | 1.557752037 | 6.97E-13    | 2.07E-11    |
| ENSMMUG00000010632 | family with sequence similarity 81 member B [Source:VGNC Symbol;Acc:VGNC:72365]                | 2.650154998 | 0.006773117 | 0.023227606 |
|                    |                                                                                                | -           |             |             |
| ENSMMUG00000001209 | arylsulfatase family member K [Source:VGNC Symbol;Acc:VGNC:84280]                              | 0.872430006 | 0.002277016 | 0.009220775 |
|                    |                                                                                                | -           |             |             |
| ENSMMUG00000001211 | G protein-coupled receptor 150 [Source:VGNC Symbol;Acc:VGNC:72988]                             | 1.061550785 | 0.011021115 | 0.035103846 |
|                    |                                                                                                | -           |             |             |
| ENSMMUG00000001212 | Rieske Fe-S domain containing [Source:VGNC Symbol;Acc:VGNC:84487]                              | 1.046702893 | 8.26E-20    | 6.03E-18    |



|                    |                                                                                                |   |             |             |             |
|--------------------|------------------------------------------------------------------------------------------------|---|-------------|-------------|-------------|
| ENSMMUG0000001213  | spermatogenesis associated 9 [Source:VGNC Symbol;Acc:VGNC:77976]                               | - | 1.250356389 | 1.60E-09    | 2.71E-08    |
| ENSMMUG00000011043 | endoplasmic reticulum aminopeptidase 2 [Source:VGNC Symbol;Acc:VGNC:72141]                     | - | 0.914273205 | 5.27E-21    | 4.40E-19    |
| ENSMMUG00000065221 |                                                                                                | - | 1.069285359 | 5.86E-12    | 1.52E-10    |
| ENSMMUG00000000307 | RIO kinase 2 [Source:VGNC Symbol;Acc:VGNC:76774]                                               | - | 0.350225887 | 2.33E-05    | 0.00016349  |
| ENSMMUG00000054789 | family with sequence similarity 174 member A [Source:NCBI gene;Acc:702300]                     | - | 0.740296991 | 1.30E-06    | 1.22E-05    |
| ENSMMUG00000007773 | solute carrier organic anion transporter family member 4C1 [Source:VGNC Symbol;Acc:VGNC:77764] | - | 2.670159951 | 1.68E-06    | 1.53E-05    |
| ENSMMUG00000029885 | solute carrier organic anion transporter family member 6A1 [Source:VGNC Symbol;Acc:VGNC:77765] | - | 2.578072119 | 0.005549032 | 0.01966511  |
| ENSMMUG00000007787 | diphosphoinositol pentakisphosphate kinase 2 [Source:VGNC Symbol;Acc:VGNC:76128]               | - | 0.546085561 | 0.00370543  | 0.013940434 |
| ENSMMUG00000013183 | F-box and leucine rich repeat protein 17 [Source:VGNC Symbol;Acc:VGNC:82142]                   | - | -0.62006569 | 6.70E-05    | 0.000418157 |
| ENSMMUG00000003316 | mannosidase alpha class 2A member 1 [Source:VGNC Symbol;Acc:VGNC:81449]                        | - | 0.676638214 | 1.35E-08    | 1.92E-07    |
| ENSMMUG00000038051 | uncharacterized LOC106998885 [Source:NCBI gene;Acc:106998885]                                  | - | 1.061711049 | 2.86E-07    | 3.15E-06    |
| ENSMMUG00000011974 | calcium/calmodulin dependent protein kinase IV [Source:VGNC Symbol;Acc:VGNC:70526]             | - | 2.104088315 | 1.40E-13    | 4.62E-12    |
| ENSMMUG00000063177 | StAR related lipid transfer domain containing 4 [Source:NCBI gene;Acc:706654]                  | - | 2.184922297 | 2.57E-39    | 1.49E-36    |
| ENSMMUG00000002768 | neuronal regeneration related protein [Source:VGNC Symbol;Acc:VGNC:84454]                      | - | -2.5712845  | 0.010041224 | 0.032536177 |
| ENSMMUG00000012192 | erythrocyte membrane protein band 4.1 like 4A [Source:VGNC Symbol;Acc:VGNC:72039]              | - | 1.395145911 | 4.26E-11    | 9.45E-10    |
| ENSMMUG00000042951 | signal recognition particle 19 [Source:NCBI gene;Acc:693829]                                   | - | 0.942939848 | 6.20E-06    | 4.97E-05    |
| ENSMMUG00000020488 | receptor accessory protein 5 [Source:VGNC Symbol;Acc:VGNC:76864]                               | - | 0.777519121 | 1.72E-07    | 1.99E-06    |
| ENSMMUG00000005018 | protein geranylgeranyltransferase type I subunit beta [Source:VGNC Symbol;Acc:VGNC:75965]      | - | 2.43301244  | 0.005046073 | 0.018107816 |
| ENSMMUG00000015114 | toll like receptor adaptor molecule 2 [Source:NCBI gene;Acc:100426353]                         | - | 0.563919278 | 1.49E-09    | 2.53E-08    |
| ENSMMUG00000060812 | autophagy related 12 [Source:NCBI gene;Acc:696765]                                             | - | 1.193941908 | 5.96E-12    | 1.54E-10    |
| ENSMMUG00000015288 | adaptor related protein complex 3 subunit sigma 1 [Source:VGNC Symbol;Acc:VGNC:69867]          | - | 0.940740358 | 7.11E-06    | 5.63E-05    |
| ENSMMUG00000022192 |                                                                                                | - | 0.908702737 | 0.001186696 | 0.005241874 |
| ENSMMUG00000037127 | U6 spliceosomal RNA [Source:RFAM;Acc:RF00026]                                                  | - | 1.281259231 | 0.007573127 | 0.025632258 |
| ENSMMUG00000018640 | Dmx like 1 [Source:VGNC Symbol;Acc:VGNC:71935]                                                 | - | 0.649770079 | 0.014394689 | 0.043804813 |
| ENSMMUG00000063474 |                                                                                                | - | 0.577061195 | 1.57E-07    | 1.84E-06    |
| ENSMMUG00000017685 | hydroxysteroid 17-beta dehydrogenase 4 [Source:VGNC Symbol;Acc:VGNC:73530]                     | - | 0.371875249 | 7.43E-06    | 5.85E-05    |
| ENSMMUG00000059145 |                                                                                                | - | 0.966201166 | 0.005825658 | 0.020460017 |
| ENSMMUG00000018764 |                                                                                                | - | 1.211295582 | 0.000665551 | 0.003179464 |
| ENSMMUG00000063354 |                                                                                                | - | 1.415990164 | 0.000922416 | 0.004228687 |
| ENSMMUG00000053794 |                                                                                                | - | 0.598245225 | 0.010028889 | 0.032513371 |
| ENSMMUG00000021006 | zinc finger protein 474 [Source:VGNC Symbol;Acc:VGNC:81617]                                    | - | 1.241329627 | 0.000547802 | 0.002677674 |
| ENSMMUG00000046428 |                                                                                                | - | 0.894561138 | 0.00217535  | 0.008880387 |
| ENSMMUG00000023598 | sorting nexin 2 [Source:VGNC Symbol;Acc:VGNC:77682]                                            | - | 2.051992698 | 0.000288676 | 0.001525992 |
| ENSMMUG00000006646 | casein kinase 1 gamma 3 [Source:VGNC Symbol;Acc:VGNC:81384]                                    | - | -0.49179035 | 0.014069411 | 0.042985924 |
| ENSMMUG00000016683 | phosphorylated adaptor for RNA export [Source:NCBI gene;Acc:702980]                            | - | 1.513677645 | 0.000689294 | 0.003278881 |
| ENSMMUG00000037806 | chromosome 6 C5orf63 homolog [Source:NCBI gene;Acc:100423212]                                  | - | -1.88325838 | 0.007981657 | 0.026747198 |

|                    |                                                                                                      |             |             |             |
|--------------------|------------------------------------------------------------------------------------------------------|-------------|-------------|-------------|
| ENSMMUG00000011214 | solute carrier family 12 member 2 [Source:VGNC Symbol;Acc:VGNC:77386]                                | 1.158538841 | 1.45E-05    | 0.000106655 |
| ENSMMUG00000010682 | fibrillin 2 [Source:VGNC Symbol;Acc:VGNC:72624]                                                      | -1.27220853 | 3.73E-13    | 1.15E-11    |
| ENSMMUG00000058082 |                                                                                                      | 0.43343424  | 0.000297628 | 0.001563821 |
| ENSMMUG00000016909 | meiotic kinetochore factor [Source:NCBI gene;Acc:709179]                                             | 0.790547537 | 2.30E-06    | 2.04E-05    |
| ENSMMUG00000003131 | interleukin 13 [Source:VGNC Symbol;Acc:VGNC:84393]                                                   | 1.681339245 | 1.27E-13    | 4.23E-12    |
| ENSMMUG00000003133 | interleukin 4 [Source:VGNC Symbol;Acc:VGNC:73729]                                                    | 1.924434556 | 4.15E-08    | 5.37E-07    |
| ENSMMUG00000010313 | kinesin family member 3A [Source:VGNC Symbol;Acc:VGNC:74017]                                         | 1.712351938 | 2.36E-22    | 2.20E-20    |
| ENSMMUG00000010308 | cyclin I family member 2 [Source:VGNC Symbol;Acc:VGNC:70923]                                         | 1.522883489 | 6.65E-10    | 1.21E-08    |
| ENSMMUG00000010309 | septin 8 [Source:VGNC Symbol;Acc:VGNC:77248]                                                         | 1.605314216 | 3.28E-06    | 2.80E-05    |
| ENSMMUG00000039781 | sosondowah ankyrin repeat domain family member A [Source:VGNC Symbol;Acc:VGNC:84498]                 | 0.933118756 | 0.002561522 | 0.010151813 |
| ENSMMUG00000010312 | shroom family member 1 [Source:VGNC Symbol;Acc:VGNC:77299]                                           | 0.772662175 | 6.48E-05    | 0.00040619  |
| ENSMMUG00000060221 | growth differentiation factor 9 [Source:NCBI gene;Acc:712792]                                        | 0.902456954 | 8.21E-07    | 8.05E-06    |
| ENSMMUG00000015640 | AF4/FMR2 family member 4 [Source:VGNC Symbol;Acc:VGNC:69629]                                         | 0.835746748 | 4.82E-05    | 0.000314334 |
| ENSMMUG00000026029 | Y RNA [Source:RFAM;Acc:RF00019]                                                                      | 1.298084951 | 0.004000486 | 0.014847696 |
| ENSMMUG00000013047 | S-phase kinase associated protein 1 [Source:NCBI gene;Acc:100423634]                                 | 2.289146658 | 8.84E-32    | 2.18E-29    |
| ENSMMUG00000053384 |                                                                                                      | 1.938495005 | 6.20E-20    | 4.60E-18    |
| ENSMMUG00000004417 | secretion associated Ras related GTPase 1B [Source:VGNC Symbol;Acc:VGNC:76970]                       | 0.754012564 | 4.23E-11    | 9.40E-10    |
| ENSMMUG00000012463 | DEAD-box helicase 46 [Source:VGNC Symbol;Acc:VGNC:71663]                                             | 0.959122046 | 1.01E-06    | 9.77E-06    |
| ENSMMUG00000060605 |                                                                                                      | 0.66389867  | 0.003426514 | 0.013049837 |
| ENSMMUG00000000342 | transient receptor potential cation channel subfamily C member 7 [Source:VGNC Symbol;Acc:VGNC:79280] | 1.546921856 | 0.008696343 | 0.028869317 |
| ENSMMUG00000016357 | polycystin 2 like 2, transient receptor potential cation channel [Source:VGNC Symbol;Acc:VGNC:76009] | 1.983482112 | 0.000412244 | 0.002088082 |
| ENSMMUG00000008009 | family with sequence similarity 13 member B [Source:VGNC Symbol;Acc:VGNC:72268]                      | 1.728026644 | 1.24E-10    | 2.55E-09    |
| ENSMMUG00000005871 | eukaryotic translation termination factor 1 [Source:VGNC Symbol;Acc:VGNC:84370]                      | 0.430642083 | 0.005308612 | 0.018914531 |
| ENSMMUG00000017985 | catenin alpha 1 [Source:VGNC Symbol;Acc:VGNC:84291]                                                  | 0.523334183 | 1.89E-05    | 0.000135196 |
| ENSMMUG00000058902 | leucine rich repeat transmembrane neuronal 2 [Source:NCBI gene;Acc:714713]                           | 0.410923323 | 0.013091352 | 0.040450557 |
| ENSMMUG00000001941 | CXXC finger protein 5 [Source:VGNC Symbol;Acc:VGNC:71594]                                            | 0.647097703 | 1.80E-12    | 5.02E-11    |
| ENSMMUG00000014636 | pleckstrin and Sec7 domain containing 2 [Source:VGNC Symbol;Acc:VGNC:76286]                          | 0.730864214 | 0.002301871 | 0.009297621 |
| ENSMMUG00000028372 | Y RNA [Source:RFAM;Acc:RF00019]                                                                      | 2.918138888 | 0.000435946 | 0.002197415 |
| ENSMMUG00000019582 | ankyrin repeat and KH domain-containing protein 1 [Source:NCBI gene;Acc:698045]                      | 0.316203123 | 0.002494436 | 0.009940135 |
| ENSMMUG00000001707 | amyloid beta precursor protein binding family B member 3 [Source:VGNC Symbol;Acc:VGNC:69869]         | 1.896315944 | 9.64E-26    | 1.30E-23    |
| ENSMMUG00000001725 | solute carrier family 35 member A4 [Source:VGNC Symbol;Acc:VGNC:77532]                               | 1.791623092 | 9.89E-10    | 1.72E-08    |
| ENSMMUG00000062326 |                                                                                                      | 1.925508118 | 1.36E-12    | 3.87E-11    |
| ENSMMUG00000024537 |                                                                                                      | 2.708993706 | 1.39E-06    | 1.30E-05    |
| ENSMMUG00000010007 | CD14 molecule [Source:VGNC Symbol;Acc:VGNC:70751]                                                    | 1.685393516 | 6.99E-07    | 7.00E-06    |
| ENSMMUG00000060632 |                                                                                                      | 1.212193751 | 0.015123931 | 0.045575578 |
| ENSMMUG00000018246 | transmembrane and coiled-coil domains 6 [Source:VGNC Symbol;Acc:VGNC:84507]                          | 1.312650093 | 8.69E-15    | 3.51E-13    |
| ENSMMUG00000056796 | NADH:ubiquinone oxidoreductase subunit A2 [Source:NCBI gene;Acc:697736]                              | 1.652699485 | 0.001088492 | 0.004855295 |
| ENSMMUG00000010008 | IK cytokine [Source:VGNC Symbol;Acc:VGNC:73703]                                                      | 1.424896038 | 5.55E-06    | 4.49E-05    |

|                     |                                                                                            |             |             |             |
|---------------------|--------------------------------------------------------------------------------------------|-------------|-------------|-------------|
| ENSMMUG00000014571  | protocadherin alpha-C2 [Source:NCBI gene;Acc:698874]                                       | 0.429686921 | 0.00047763  | 0.002375405 |
| ENSMMUG00000008710  | protocadherin 1 [Source:VGNC Symbol;Acc:VGNC:75775]                                        | 1.400291146 | 3.20E-06    | 2.74E-05    |
| ENSMMUG00000006287  | DAP3 binding cell death enhancer 1 [Source:VGNC Symbol;Acc:VGNC:71806]                     | 0.591431183 | 7.67E-06    | 6.01E-05    |
| ENSMMUG00000006291  | protocadherin 12 [Source:VGNC Symbol;Acc:VGNC:75776]                                       | 0.943513075 | 1.66E-06    | 1.52E-05    |
| ENSMMUG00000009768  | ring finger protein 14 [Source:VGNC Symbol;Acc:VGNC:84488]                                 | 0.692746345 | 1.27E-08    | 1.83E-07    |
| ENSMMUG00000000419  | Rho GTPase activating protein 26 [Source:VGNC Symbol;Acc:VGNC:69846]                       | 1.689788282 | 4.00E-10    | 7.62E-09    |
| ENSMMUG000000050405 |                                                                                            | 1.726132992 | 2.22E-10    | 4.38E-09    |
| ENSMMUG00000000421  | nuclear receptor subfamily 3 group C member 1 [Source:VGNC Symbol;Acc:VGNC:75515]          | 1.485615596 | 2.25E-13    | 7.16E-12    |
| ENSMMUG000000035921 | U7 small nuclear RNA [Source:RFAM;Acc:RF00066]                                             | 1.497418994 | 0.005247863 | 0.018721027 |
| ENSMMUG000000063348 |                                                                                            | 0.701228899 | 0.000194387 | 0.001078142 |
| ENSMMUG00000019820  | SH3 domain and tetratricopeptide repeats 2 [Source:VGNC Symbol;Acc:VGNC:77337]             | 0.661728269 | 7.94E-06    | 6.20E-05    |
| ENSMMUG000000056140 | U6 spliceosomal RNA [Source:RFAM;Acc:RF00026]                                              | 1.143733643 | 0.004878864 | 0.017581569 |
| ENSMMUG00000017714  | Rho guanine nucleotide exchange factor 37 [Source:VGNC Symbol;Acc:VGNC:69941]              | -0.79243498 | 0.011785839 | 0.037052495 |
| ENSMMUG00000004749  | PPARG coactivator 1 beta [Source:VGNC Symbol;Acc:VGNC:76134]                               | 2.831009667 | 2.30E-05    | 0.000161532 |
| ENSMMUG00000011557  | platelet derived growth factor receptor beta [Source:VGNC Symbol;Acc:VGNC:75929]           | 0.334505584 | 2.31E-08    | 3.13E-07    |
| ENSMMUG00000005414  | N-deacetylase and N-sulfotransferase 1 [Source:VGNC Symbol;Acc:VGNC:75151]                 | -0.89650272 | 1.04E-12    | 3.02E-11    |
| ENSMMUG000000051062 |                                                                                            | 0.697646161 | 0.004788325 | 0.01729818  |
| ENSMMUG00000020679  | myozenin 3 [Source:VGNC Symbol;Acc:VGNC:74988]                                             | 1.485905659 | 4.37E-08    | 5.60E-07    |
| ENSMMUG00000020683  | RNA binding motif protein 22 [Source:VGNC Symbol;Acc:VGNC:76535]                           | 2.174811329 | 9.73E-14    | 3.34E-12    |
| ENSMMUG00000019764  | dynactin subunit 4 [Source:VGNC Symbol;Acc:VGNC:71625]                                     | 1.725692699 | 6.10E-07    | 6.21E-06    |
| ENSMMUG00000021051  | TNFAIP3 interacting protein 1 [Source:VGNC Symbol;Acc:VGNC:79057]                          | 1.087731326 | 2.05E-06    | 1.83E-05    |
| ENSMMUG00000021053  | annexin A6 [Source:VGNC Symbol;Acc:VGNC:69951]                                             | 1.094268975 | 5.14E-07    | 5.32E-06    |
| ENSMMUG000000053656 |                                                                                            | 0.844125997 | 6.02E-06    | 4.84E-05    |
| ENSMMUG00000003499  | solute carrier family 36 member 1 [Source:VGNC Symbol;Acc:VGNC:77509]                      | 0.834793553 | 0.000969746 | 0.004405376 |
| ENSMMUG00000003497  | FAT atypical cadherin 2 [Source:VGNC Symbol;Acc:VGNC:72618]                                | 0.791831866 | 6.05E-07    | 6.17E-06    |
| ENSMMUG000000053367 | secreted protein acidic and cysteine rich [Source:NCBI gene;Acc:712388]                    | 1.246704861 | 1.83E-15    | 8.27E-14    |
| ENSMMUG000000054302 | antioxidant 1 copper chaperone [Source:NCBI gene;Acc:712464]                               | 1.313819136 | 5.93E-06    | 4.78E-05    |
| ENSMMUG000000056369 | SAP30 like [Source:NCBI gene;Acc:714400]                                                   | 3.200117149 | 0.005175469 | 0.018503638 |
| ENSMMUG000000021228 | gem nuclear organelle associated protein 5 [Source:VGNC Symbol;Acc:VGNC:72751]             | 0.609627852 | 0.000104975 | 0.000623123 |
| ENSMMUG000000062861 |                                                                                            | 0.953994463 | 0.000734199 | 0.003457417 |
| ENSMMUG000000059241 |                                                                                            | 5.626830117 | 3.28E-13    | 1.02E-11    |
| ENSMMUG000000050043 | adrenoceptor alpha 1B [Source:NCBI gene;Acc:695106]                                        | 1.014833606 | 0.01143658  | 0.036197161 |
| ENSMMUG00000011472  | PWWP domain containing 2A [Source:VGNC Symbol;Acc:VGNC:76564]                              | 1.146999002 | 0.007898781 | 0.026524503 |
| ENSMMUG00000015840  | RAN binding protein 17 [Source:VGNC Symbol;Acc:VGNC:84485]                                 | 0.480493865 | 0.001012582 | 0.004573301 |
| ENSMMUG00000003067  | endoplasmic reticulum-golgi intermediate compartment 1 [Source:VGNC Symbol;Acc:VGNC:82141] | 0.576480112 | 2.47E-06    | 2.17E-05    |
| ENSMMUG00000019926  | cytoplasmic polyadenylation element binding protein 4 [Source:VGNC Symbol;Acc:VGNC:71450]  | 0.740792795 | 7.85E-06    | 6.13E-05    |
| ENSMMUG000000053691 | Metazoan signal recognition particle RNA [Source:RFAM;Acc:RF00017]                         | 2.022997732 | 0.004497687 | 0.01638258  |
| ENSMMUG00000009059  | Fas associated factor family member 2 [Source:VGNC Symbol;Acc:VGNC:72332]                  | -1.62095802 | 0.000331224 | 0.001717192 |
| ENSMMUG00000013283  | cadherin related family member 2 [Source:NCBI gene;Acc:697249]                             | 2.481973673 | 1.33E-08    | 1.90E-07    |
| ENSMMUG00000013284  | G protein regulated inducer of neurite outgrowth 1 [Source:VGNC Symbol;Acc:VGNC:72998]     | 2.402040368 | 0.002307151 | 0.009313819 |
| ENSMMUG00000000137  | synuclein beta [Source:VGNC Symbol;Acc:VGNC:77670]                                         | 3.713369238 | 0.000327389 | 0.001700342 |

|                     |                                                                                   |   |             |             |             |
|---------------------|-----------------------------------------------------------------------------------|---|-------------|-------------|-------------|
| ENSMMUG0000002649   | unc-5 netrin receptor A [Source:VGNC Symbol;Acc:VGNC:78721]                       | - | 2.278889958 | 0.001009843 | 0.004564703 |
| ENSMMUG0000002653   | hexokinase 3 [Source:VGNC Symbol;Acc:VGNC:73476]                                  | - | 0.979812631 | 2.23E-10    | 4.39E-09    |
| ENSMMUG00000009041  | nuclear receptor binding SET domain protein 1 [Source:VGNC Symbol;Acc:VGNC:75401] | - | 1.012842464 | 0.001695947 | 0.007160612 |
| ENSMMUG00000009045  | RAB24, member RAS oncogene family [Source:VGNC Symbol;Acc:VGNC:81524]             | - | 1.571954101 | 0.000628767 | 0.003019619 |
| ENSMMUG00000016192  | lectin, mannose binding 2 [Source:VGNC Symbol;Acc:VGNC:74302]                     | - | 0.418421234 | 0.012533189 | 0.039038991 |
| ENSMMUG00000019807  | regulator of G protein signaling 14 [Source:VGNC Symbol;Acc:VGNC:76918]           | - | 0.593947942 | 2.56E-07    | 2.84E-06    |
| ENSMMUG00000016911  | DEAD-box helicase 41 [Source:VGNC Symbol;Acc:VGNC:71660]                          | - | 0.612641342 | 0.011275429 | 0.035772788 |
| ENSMMUG00000004002  | CDC like kinase 4 [Source:VGNC Symbol;Acc:VGNC:71173]                             | - | 1.392730482 | 7.09E-25    | 8.59E-23    |
| ENSMMUG00000041519  | zinc finger protein 354A [Source:VGNC Symbol;Acc:VGNC:84517]                      | - | 1.92874639  | 0.000127108 | 0.000739997 |
| ENSMMUG00000049557  |                                                                                   | - | 1.237048182 | 0.005263595 | 0.018767937 |
| ENSMMUG00000001728  | mitogen-activated protein kinase 9 [Source:VGNC Symbol;Acc:VGNC:74652]            | - | 1.215215549 | 8.31E-10    | 1.48E-08    |
| ENSMMUG000000054010 |                                                                                   | - | 0.526229274 | 0.003412347 | 0.012999288 |
| ENSMMUG000000031833 | butyrophilin like 9 [Source:NCBI gene;Acc:106996463]                              | - | 0.692501277 | 0.008221906 | 0.027468782 |
| ENSMMUG000000062522 |                                                                                   | - | 1.444025665 | 3.47E-10    | 6.67E-09    |
| ENSMMUG000000059428 | olfactory receptor 2V2 [Source:NCBI gene;Acc:707790]                              | - | 0.863098076 | 0.013240111 | 0.040838423 |
| ENSMMUG000000061151 |                                                                                   | - | 1.594771943 | 4.55E-08    | 5.82E-07    |
| ENSMMUG000000054414 |                                                                                   | - | 1.859353651 | 1.26E-13    | 4.21E-12    |
| ENSMMUG00000003598  | tripartite motif containing 7 [Source:VGNC Symbol;Acc:VGNC:79022]                 | - | 1.401063891 | 4.50E-13    | 1.38E-11    |
| ENSMMUG000000021145 | family with sequence similarity 120B [Source:VGNC Symbol;Acc:VGNC:72311]          | - | 1.448986181 | 1.32E-18    | 8.60E-17    |
| ENSMMUG000000057577 |                                                                                   | - | 3.231209729 | 0.001568931 | 0.006684511 |
| ENSMMUG000000039829 |                                                                                   | - | 0.962720091 | 0.00039468  | 0.002005406 |
| ENSMMUG00000014474  | SPARC related modular calcium binding 2 [Source:VGNC Symbol;Acc:VGNC:83470]       | - | 0.866590501 | 2.17E-13    | 6.92E-12    |
| ENSMMUG00000021044  | afadin, adherens junction formation factor [Source:VGNC Symbol;Acc:VGNC:69818]    | - | 0.83304979  | 5.55E-08    | 7.01E-07    |
| ENSMMUG000000064719 |                                                                                   | - | 1.392205451 | 0.003021731 | 0.011704478 |
| ENSMMUG000000053990 |                                                                                   | - | 0.996308087 | 0.002514806 | 0.010015817 |
| ENSMMUG000000055611 |                                                                                   | - | 0.669773166 | 0.006341274 | 0.021958813 |
| ENSMMUG000000055168 |                                                                                   | - | 0.613539014 | 0.000285375 | 0.001513496 |
| ENSMMUG000000062443 |                                                                                   | - | 1.394073384 | 4.44E-08    | 5.69E-07    |
| ENSMMUG000000057859 |                                                                                   | - | -2.57714128 | 3.91E-08    | 5.08E-07    |
| ENSMMUG00000029352  | T-complex protein 10A homolog 2 [Source:NCBI gene;Acc:693619]                     | - | 3.455014603 | 0.000459711 | 0.002300453 |
| ENSMMUG00000005680  | tubulin tyrosine ligase like 2 [Source:VGNC Symbol;Acc:VGNC:78421]                | - | 2.500171365 | 0.009115158 | 0.030060584 |
| ENSMMUG00000008228  | unc-93 homolog A [Source:VGNC Symbol;Acc:VGNC:78724]                              | - | 2.474410402 | 5.64E-07    | 5.79E-06    |
| ENSMMUG000000057983 |                                                                                   | - | 3.25035592  | 9.95E-05    | 0.000593623 |
| ENSMMUG000000054834 |                                                                                   | - | 0.513718634 | 7.95E-06    | 6.20E-05    |
| ENSMMUG00000020412  | parkin coregulated [Source:VGNC Symbol;Acc:VGNC:75646]                            | - | 0.553571186 | 0.001000418 | 0.004528086 |
| ENSMMUG00000004181  | PARN like, ribonuclease domain containing 1 [Source:VGNC Symbol;Acc:VGNC:76089]   | - | 1.350109358 | 0.007523677 | 0.025512407 |

|                    |                                                                                                         |   |             |             |             |
|--------------------|---------------------------------------------------------------------------------------------------------|---|-------------|-------------|-------------|
| ENSMMUG00000057544 |                                                                                                         | - | 0.894117154 | 0.000813691 | 0.003788105 |
| ENSMMUG00000000500 | fibronectin type III domain containing 1 [Source:VGNC Symbol;Acc:VGNC:72546]                            |   | 0.363497364 | 0.014828755 | 0.044879489 |
| ENSMMUG00000011994 | T cell activation RhoGTPase activating protein [Source:VGNC Symbol;Acc:VGNC:78126]                      |   | 0.760383888 | 0.000109045 | 0.000643861 |
| ENSMMUG00000022247 | osteoclastogenesis associated transmembrane protein 1 [Source:VGNC Symbol;Acc:VGNC:75664]               |   | 2.018828029 | 2.55E-14    | 9.81E-13    |
| ENSMMUG00000007010 | coiled-coil domain-containing protein 162-like [Source:NCBI gene;Acc:700544]                            |   | 1.691365366 | 0.001021311 | 0.004606516 |
| ENSMMUG00000021534 | solute carrier family 16 member 10 [Source:NCBI gene;Acc:696132]                                        |   | 1.856050594 | 0.000101123 | 0.000601978 |
| ENSMMUG00000013782 | laminin subunit alpha 4 [Source:VGNC Symbol;Acc:VGNC:74227]                                             |   | 0.367338136 | 0.003177436 | 0.012213216 |
| ENSMMUG00000061031 |                                                                                                         |   | 2.902559441 | 4.50E-17    | 2.44E-15    |
| ENSMMUG00000058557 |                                                                                                         |   | 1.566338212 | 3.57E-07    | 3.84E-06    |
| ENSMMUG00000017189 | regulatory factor X6 [Source:VGNC Symbol;Acc:VGNC:76800]                                                |   | 1.953369901 | 6.89E-12    | 1.77E-10    |
| ENSMMUG00000059327 | NUS1 dehydrodolichyl diphosphate synthase subunit [Source:NCBI gene;Acc:715015]                         |   | 0.810219754 | 5.82E-09    | 8.89E-08    |
| ENSMMUG00000008525 | minichromosome maintenance 9 homologous recombination repair factor [Source:VGNC Symbol;Acc:VGNC:83432] |   | 2.628111913 | 2.54E-05    | 0.000176694 |
| ENSMMUG00000013302 | family with sequence similarity 184 member A [Source:VGNC Symbol;Acc:VGNC:72308]                        |   | 3.700903797 | 4.30E-08    | 5.52E-07    |
| ENSMMUG00000005225 | gap junction protein alpha 1 [Source:VGNC Symbol;Acc:VGNC:73055]                                        |   | 0.728076201 | 0.000130669 | 0.000759209 |
| ENSMMUG00000061165 |                                                                                                         |   | 0.588774258 | 1.58E-05    | 0.000115009 |
| ENSMMUG00000051170 |                                                                                                         |   | 0.817997184 | 0.008752283 | 0.029041759 |
| ENSMMUG00000060822 |                                                                                                         |   | 0.783988289 | 2.37E-08    | 3.20E-07    |
| ENSMMUG00000018176 | clavesin 2 [Source:VGNC Symbol;Acc:VGNC:71322]                                                          |   | 0.894344844 | 1.03E-06    | 9.92E-06    |
| ENSMMUG00000009725 | triadin [Source:HGNC Symbol;Acc:HGNC:12261]                                                             |   | 0.8255173   | 1.33E-09    | 2.28E-08    |
| ENSMMUG00000065276 |                                                                                                         |   | 0.551308894 | 0.001020092 | 0.004602445 |
| ENSMMUG00000003134 | ring finger protein 217 [Source:VGNC Symbol;Acc:VGNC:76801]                                             |   | 0.902407725 | 0.000170232 | 0.000957318 |
| ENSMMUG00000062110 | TPD52 like 1 [Source:NCBI gene;Acc:716568]                                                              |   | 0.896947486 | 0.001202236 | 0.005300851 |
| ENSMMUG00000060901 |                                                                                                         |   | 1.465879711 | 1.99E-21    | 1.73E-19    |
| ENSMMUG00000015355 | R-spondin 3 [Source:VGNC Symbol;Acc:VGNC:77066]                                                         |   | 2.054307168 | 0.001188934 | 0.005250162 |
| ENSMMUG00000048882 | KIAA0408 ortholog [Source:NCBI gene;Acc:100429459]                                                      |   | 0.575066584 | 4.01E-06    | 3.35E-05    |
| ENSMMUG00000029421 | protein tyrosine phosphatase receptor type K [Source:VGNC Symbol;Acc:VGNC:83453]                        |   | 1.116712864 | 0.005356405 | 0.019061458 |
| ENSMMUG00000058574 |                                                                                                         |   | 0.943004315 | 1.07E-05    | 8.17E-05    |
| ENSMMUG00000022136 | laminin subunit alpha 2 [Source:VGNC Symbol;Acc:VGNC:74225]                                             |   | 0.474863328 | 8.50E-05    | 0.000517524 |
| ENSMMUG00000021498 | L3MBTL histone methyl-lysine binding protein 3 [Source:VGNC Symbol;Acc:VGNC:74106]                      |   | 1.170097766 | 2.85E-11    | 6.53E-10    |
| ENSMMUG00000021499 | sterile alpha motif domain containing 3 [Source:VGNC Symbol;Acc:VGNC:77079]                             |   | 0.803606133 | 0.000189706 | 0.001056208 |
| ENSMMUG00000059338 | Y RNA [Source:RFAM;Acc:RF00019]                                                                         |   | 1.316529761 | 0.002072376 | 0.008521744 |
| ENSMMUG00000065212 |                                                                                                         |   | 1.197230635 | 1.81E-07    | 2.08E-06    |
| ENSMMUG00000059491 |                                                                                                         |   | 0.696713301 | 0.000162421 | 0.000917733 |
| ENSMMUG00000017549 | ectonucleotide pyrophosphatase/phosphodiesterase 3 [Source:VGNC Symbol;Acc:VGNC:72224]                  |   | 0.890415681 | 9.56E-06    | 7.34E-05    |
| ENSMMUG00000004996 | monooxygenase DBH like 1 [Source:VGNC Symbol;Acc:VGNC:74800]                                            |   | 0.53750627  | 0.003682751 | 0.013862285 |
| ENSMMUG00000004988 | trace amine-associated receptor 3 [Source:NCBI gene;Acc:709130]                                         |   | 0.859304246 | 0.000917379 | 0.004207382 |
| ENSMMUG00000004987 | trace amine associated receptor 2 [Source:VGNC Symbol;Acc:VGNC:83475]                                   |   | 0.819033151 | 0.004041179 | 0.014967292 |

|                     |                                                                                       |   |             |             |             |
|---------------------|---------------------------------------------------------------------------------------|---|-------------|-------------|-------------|
| ENSMMUG00000013236  | solute carrier family 18 member B1 [Source:VGNC Symbol;Acc:VGNC:77549]                | - | 0.621759864 | 0.008796001 | 0.029146903 |
| ENSMMUG00000005745  | EYA transcriptional coactivator and phosphatase 4 [Source:VGNC Symbol;Acc:VGNC:72456] | - | 1.026870452 | 4.60E-09    | 7.12E-08    |
| ENSMMUG00000022921  | solute carrier family 2 member 12 [Source:VGNC Symbol;Acc:VGNC:77503]                 | - | 3.629336473 | 4.78E-40    | 3.66E-37    |
| ENSMMUG000000061787 |                                                                                       | - | 2.287999067 | 0.006359115 | 0.02201535  |
| ENSMMUG000000053927 |                                                                                       | - | 0.642069599 | 0.007028345 | 0.023995079 |
| ENSMMUG00000018166  | MYB proto-oncogene, transcription factor [Source:VGNC Symbol;Acc:VGNC:75089]          | - | 0.938593906 | 8.91E-09    | 1.32E-07    |
| ENSMMUG00000009368  | Abelson helper integration site 1 [Source:VGNC Symbol;Acc:VGNC:81010]                 | - | 0.690146966 | 8.11E-06    | 6.30E-05    |
| ENSMMUG00000044284  | 40S ribosomal protein S11-like [Source:NCBI gene;Acc:706532]                          | - | 0.755158201 | 0.002072841 | 0.008521744 |
| ENSMMUG000000053936 |                                                                                       | - | 0.527967156 | 0.011717423 | 0.03688527  |
| ENSMMUG00000016376  | mitogen-activated protein kinase kinase kinase 5 [Source:VGNC Symbol;Acc:VGNC:74495]  | - | 0.890271641 | 0.001552274 | 0.006617421 |
| ENSMMUG00000048283  | mml-mir-3145 [Source:miRBase;Acc:MI0020897]                                           | - | 1.168292104 | 0.009320983 | 0.03058671  |
| ENSMMUG00000000224  | RALBP1 associated Eps domain containing 1 [Source:VGNC Symbol;Acc:VGNC:76738]         | - | 1.381831793 | 0.012083882 | 0.037858489 |
| ENSMMUG00000019136  | taxilin beta [Source:VGNC Symbol;Acc:VGNC:79325]                                      | - | 0.541933274 | 1.40E-06    | 1.30E-05    |
| ENSMMUG00000046765  |                                                                                       | - | 0.738979189 | 0.012628748 | 0.039252537 |
| ENSMMUG000000058187 |                                                                                       | - | 1.151468791 | 1.16E-14    | 4.56E-13    |
| ENSMMUG00000023012  | vesicle trafficking 1 [Source:VGNC Symbol;Acc:VGNC:79296]                             | - | 1.368038641 | 7.88E-05    | 0.000483301 |
| ENSMMUG00000044958  | adhesion G protein-coupled receptor G6 [Source:VGNC Symbol;Acc:VGNC:81009]            | - | 1.181551298 | 1.03E-09    | 1.80E-08    |
| ENSMMUG00000064366  |                                                                                       | - | 0.919805463 | 0.012401759 | 0.03872087  |
| ENSMMUG00000061117  |                                                                                       | - | 1.113643964 | 3.61E-07    | 3.88E-06    |
| ENSMMUG00000007998  | HIVEP zinc finger 2 [Source:VGNC Symbol;Acc:VGNC:83427]                               | - | 0.616839797 | 0.003355612 | 0.012813377 |
| ENSMMUG00000006430  | androgen induced 1 [Source:VGNC Symbol;Acc:VGNC:69667]                                | - | 0.834082258 | 0.011873367 | 0.037303466 |
| ENSMMUG00000005348  | LTV1 ribosome biogenesis factor [Source:VGNC Symbol;Acc:VGNC:83430]                   | - | 2.478969127 | 0.002439469 | 0.009753181 |
| ENSMMUG00000003750  | PLAG1 like zinc finger 1 [Source:VGNC Symbol;Acc:VGNC:83444]                          | - | 1.772681584 | 2.54E-06    | 2.21E-05    |
| ENSMMUG00000019443  | syntaxin 11 [Source:VGNC Symbol;Acc:VGNC:78041]                                       | - | 3.717963443 | 0.000101813 | 0.000605833 |
| ENSMMUG00000019438  | utrophin [Source:VGNC Symbol;Acc:VGNC:78749]                                          | - | 0.889723518 | 0.002839804 | 0.011085456 |
| ENSMMUG00000023265  | A-kinase anchoring protein 12 [Source:VGNC Symbol;Acc:VGNC:69766]                     | - | 2.167627463 | 1.03E-11    | 2.55E-10    |
| ENSMMUG00000060839  |                                                                                       | - | 3.306930311 | 0.005656335 | 0.019986907 |
| ENSMMUG00000029475  | zinc finger and BTB domain containing 2 [Source:VGNC Symbol;Acc:VGNC:79291]           | - | 2.090996737 | 3.91E-06    | 3.28E-05    |
| ENSMMUG00000018342  | required for meiotic nuclear division 1 homolog [Source:VGNC Symbol;Acc:VGNC:76797]   | - | 2.480412823 | 2.42E-13    | 7.68E-12    |
| ENSMMUG00000060940  | acidic residue methyltransferase 1 [Source:NCBI gene;Acc:704570]                      | - | 1.914933217 | 0.00049997  | 0.002470451 |
| ENSMMUG00000059807  | Metazoan signal recognition particle RNA [Source:RFAM;Acc:RF00017]                    | - | 3.199359398 | 0.005190893 | 0.018549657 |
| ENSMMUG00000018346  | coiled-coil domain containing 170 [Source:VGNC Symbol;Acc:VGNC:70832]                 | - | 2.165343702 | 2.69E-07    | 2.98E-06    |
| ENSMMUG00000025949  | U6 spliceosomal RNA [Source:RFAM;Acc:RF00026]                                         | - | 3.076627053 | 0.002960998 | 0.011506023 |
| ENSMMUG00000019045  | estrogen receptor 1 [Source:VGNC Symbol;Acc:VGNC:72432]                               | - | 1.252534443 | 7.52E-07    | 7.44E-06    |
| ENSMMUG00000013483  | prolyl endopeptidase [Source:VGNC Symbol;Acc:VGNC:76396]                              | - | 0.646679691 | 0.002202715 | 0.008976976 |
| ENSMMUG00000055978  |                                                                                       | - | 0.673146822 | 0.000452566 | 0.002271737 |
| ENSMMUG00000057697  |                                                                                       | - | 1.304101648 | 6.33E-07    | 6.39E-06    |

|                    |                                                                                                         |             |             |             |
|--------------------|---------------------------------------------------------------------------------------------------------|-------------|-------------|-------------|
| ENSMMUG00000051522 | Metazoan signal recognition particle RNA [Source:RFAM;Acc:RF00017]                                      | 2.454432688 | 0.001060835 | 0.004758212 |
| ENSMMUG00000051271 |                                                                                                         | 3.354112294 | 3.75E-21    | 3.18E-19    |
| ENSMMUG00000000808 | melanin concentrating hormone receptor 2 [Source:VGNC Symbol;Acc:VGNC:74550]                            | 1.108107386 | 1.94E-23    | 1.95E-21    |
| ENSMMUG00000050740 | coenzyme Q3, methyltransferase [Source:NCBI gene;Acc:694215]                                            | 1.051031414 | 0.010960997 | 0.03495065  |
| ENSMMUG00000005923 | failed axon connections homolog, metaxin like GST domain containing [Source:VGNC Symbol;Acc:VGNC:72541] | 0.887553122 | 0.007694296 | 0.025987913 |
| ENSMMUG00000037890 |                                                                                                         | 1.091449987 | 0.003070415 | 0.011870912 |
| ENSMMUG00000003464 | midasin AAA ATPase 1 [Source:VGNC Symbol;Acc:VGNC:74530]                                                | 0.257537713 | 0.004768056 | 0.017229241 |
| ENSMMUG00000003462 | ankyrin repeat domain 6 [Source:VGNC Symbol;Acc:VGNC:81023]                                             | 0.519719131 | 2.63E-05    | 0.000182054 |
| ENSMMUG00000060841 |                                                                                                         | -0.96862728 | 0.002852121 | 0.01112756  |
| ENSMMUG00000002824 | akirin 2 [Source:VGNC Symbol;Acc:VGNC:69665]                                                            | 0.717241081 | 0.013726582 | 0.042115519 |
| ENSMMUG00000002821 | origin recognition complex subunit 3 [Source:VGNC Symbol;Acc:VGNC:75715]                                | 0.633452256 | 0.009197847 | 0.03027833  |
| ENSMMUG00000045108 | cilia and flagella associated protein 206 [Source:NCBI gene;Acc:700665]                                 | 3.289681266 | 0.009596325 | 0.03132056  |
| ENSMMUG00000064804 |                                                                                                         | -1.38493253 | 1.58E-07    | 1.84E-06    |
| ENSMMUG00000005442 | 5'-nucleotidase ecto [Source:VGNC Symbol;Acc:VGNC:75537]                                                | 1.532775347 | 7.23E-10    | 1.30E-08    |
| ENSMMUG00000061590 |                                                                                                         | 2.247659464 | 8.55E-05    | 0.000519465 |
| ENSMMUG00000017186 | pleckstrin homology domain interacting protein [Source:VGNC Symbol;Acc:VGNC:75803]                      | -1.86226433 | 2.36E-09    | 3.85E-08    |
| ENSMMUG00000004491 | SUMO specific peptidase 6 [Source:VGNC Symbol;Acc:VGNC:77287]                                           | 0.295048622 | 0.002937125 | 0.011428529 |
| ENSMMUG00000017806 | CD109 molecule [Source:VGNC Symbol;Acc:VGNC:70834]                                                      | 0.668193435 | 4.16E-08    | 5.37E-07    |
| ENSMMUG00000008133 | solute carrier family 17 member 5 [Source:VGNC Symbol;Acc:VGNC:77405]                                   | 0.706919489 | 3.02E-08    | 3.99E-07    |
| ENSMMUG00000053928 |                                                                                                         | 0.586550331 | 0.00390939  | 0.014560801 |
| ENSMMUG00000041338 | eyes shut homolog [Source:HGNC Symbol;Acc:HGNC:21555]                                                   | 0.332215318 | 0.003892512 | 0.01450537  |
| ENSMMUG00000017160 | PHD finger protein 3 [Source:VGNC Symbol;Acc:VGNC:75975]                                                | 0.475952161 | 0.011123823 | 0.035368114 |
| ENSMMUG00000062339 | endogenous retrovirus group K member 25 Env polyprotein-like [Source:NCBI gene;Acc:114677579]           | 0.615404807 | 0.007939491 | 0.026642748 |
| ENSMMUG00000002777 | protein tyrosine phosphatase 4A1 [Source:VGNC Symbol;Acc:VGNC:83452]                                    | 0.379129995 | 0.007730301 | 0.026061422 |
| ENSMMUG00000050075 |                                                                                                         | 3.112874736 | 0.006773187 | 0.023227606 |
| ENSMMUG00000001399 | 3-hydroxymethyl-3-methylglutaryl-CoA lyase like 1 [Source:VGNC Symbol;Acc:VGNC:73429]                   | 0.506645071 | 0.002256453 | 0.009152359 |
| ENSMMUG00000001395 | hypocretin receptor 2 [Source:VGNC Symbol;Acc:VGNC:73357]                                               | 3.181019451 | 0.002275483 | 0.009219259 |
| ENSMMUG00000036060 | U6 spliceosomal RNA [Source:RFAM;Acc:RF00026]                                                           | 3.08320977  | 0.000369638 | 0.001889752 |
| ENSMMUG00000012784 | tubulointerstitial nephritis antigen [Source:VGNC Symbol;Acc:VGNC:78382]                                | 1.854770316 | 0.00127318  | 0.005572853 |
| ENSMMUG00000012781 | muscular LMNA interacting protein [Source:VGNC Symbol;Acc:VGNC:83434]                                   | 2.193480894 | 1.72E-11    | 4.12E-10    |
| ENSMMUG00000011049 | leucine rich repeat containing 1 [Source:VGNC Symbol;Acc:VGNC:81087]                                    | 1.672020069 | 1.14E-06    | 1.09E-05    |
| ENSMMUG00000006422 | ELOVL fatty acid elongase 5 [Source:VGNC Symbol;Acc:VGNC:72083]                                         | 1.196526057 | 0.016479329 | 0.048939736 |
| ENSMMUG00000013718 | translocation associated membrane protein 2 [Source:VGNC Symbol;Acc:VGNC:83515]                         | 0.815946998 | 3.86E-06    | 3.25E-05    |

|                    |                                                                                                |   |             |             |             |
|--------------------|------------------------------------------------------------------------------------------------|---|-------------|-------------|-------------|
| ENSMMUG00000013716 | EF-hand domain containing 1 [Source:VGNC Symbol;Acc:VGNC:72052]                                | - | 0.568857221 | 0.000698933 | 0.003318222 |
| ENSMMUG00000052626 | progesterone and adiponectin receptor family member 8 [Source:NCBI gene;Acc:708418]            | - | 0.616937731 | 4.27E-06    | 3.54E-05    |
| ENSMMUG00000026975 | mml-mir-206 [Source:miRBase;Acc:MI0007667]                                                     | - | 5.348939206 | 1.99E-05    | 0.000142025 |
| ENSMMUG00000016993 | PKHD1 ciliary IPT domain containing fibrocystin/polyductin [Source:VGNC Symbol;Acc:VGNC:76010] | - | 2.454963506 | 4.83E-13    | 1.46E-11    |
| ENSMMUG00000038096 | Metazoan signal recognition particle RNA [Source:RFAM;Acc:RF00017]                             | - | 3.326475478 | 0.01018774  | 0.032918243 |
| ENSMMUG00000053984 |                                                                                                | - | 3.421991607 | 7.64E-11    | 1.63E-09    |
| ENSMMUG00000056168 |                                                                                                | - | 4.298842591 | 1.62E-05    | 0.000117471 |
| ENSMMUG00000055199 | cytochrome P450, family 39, subfamily A, polypeptide 1 [Source:NCBI gene;Acc:704242]           | - | 2.631586218 | 1.71E-10    | 3.45E-09    |
| ENSMMUG00000019246 | regulator of calcineurin 2 [Source:VGNC Symbol;Acc:VGNC:82092]                                 | - | 2.102460491 | 9.08E-10    | 1.60E-08    |
| ENSMMUG00000042260 | ectonucleotide pyrophosphatase/phosphodiesterase 4 [Source:VGNC Symbol;Acc:VGNC:81066]         | - | 2.008611431 | 0.014449706 | 0.043908914 |
| ENSMMUG00000003511 | chloride intracellular channel 5 [Source:VGNC Symbol;Acc:VGNC:71171]                           | - | 0.526299643 | 0.005038355 | 0.01808905  |
| ENSMMUG00000051732 |                                                                                                | - | 2.424970167 | 0.011492085 | 0.036327922 |
| ENSMMUG00000021377 | SPT3 homolog, SAGA and STAGA complex component [Source:VGNC Symbol;Acc:VGNC:78055]             | - | 1.004886269 | 3.25E-07    | 3.53E-06    |
| ENSMMUG00000060503 | Metazoan signal recognition particle RNA [Source:RFAM;Acc:RF00017]                             | - | 0.802882383 | 0.008756088 | 0.029047753 |
| ENSMMUG00000063288 |                                                                                                | - | -0.61786748 | 0.000154112 | 0.000877184 |
| ENSMMUG00000013920 | triggering receptor expressed on myeloid cells 2 [Source:VGNC Symbol;Acc:VGNC:79089]           | - | 1.031837886 | 8.26E-05    | 0.000504573 |
| ENSMMUG00000062538 | adenylate cyclase type 10 [Source:NCBI gene;Acc:719662]                                        | - | 0.972310907 | 0.00011134  | 0.000655546 |
| ENSMMUG00000021173 | nuclear transcription factor Y subunit alpha [Source:VGNC Symbol;Acc:VGNC:75344]               | - | 0.878546667 | 2.22E-12    | 6.15E-11    |
| ENSMMUG00000021169 | translocator protein 2 [Source:VGNC Symbol;Acc:VGNC:83960]                                     | - | 0.778241054 | 6.17E-05    | 0.00038918  |
| ENSMMUG00000021168 | unc-5 family C-terminal like [Source:VGNC Symbol;Acc:VGNC:79314]                               | - | 0.901196247 | 3.28E-12    | 8.83E-11    |
| ENSMMUG00000013651 | kinesin family member 6 [Source:VGNC Symbol;Acc:VGNC:73873]                                    | - | 3.449495401 | 0.000182659 | 0.001019704 |
| ENSMMUG00000013648 | potassium two pore domain channel subfamily K member 16 [Source:VGNC Symbol;Acc:VGNC:73827]    | - | 2.986214934 | 0.002169553 | 0.008869178 |
| ENSMMUG00000013644 | potassium two pore domain channel subfamily K member 17 [Source:VGNC Symbol;Acc:VGNC:73828]    | - | 2.29522587  | 1.07E-11    | 2.65E-10    |
| ENSMMUG00000023381 | dynein axonemal heavy chain 8 [Source:VGNC Symbol;Acc:VGNC:71943]                              | - | 0.570275453 | 1.63E-06    | 1.49E-05    |
| ENSMMUG00000062055 | glyoxalase I [Source:NCBI gene;Acc:719518]                                                     | - | 0.779267563 | 2.19E-10    | 4.32E-09    |
| ENSMMUG00000011575 | coiled-coil domain containing 167 [Source:VGNC Symbol;Acc:VGNC:70833]                          | - | 1.979320188 | 0.000137236 | 0.000792294 |
| ENSMMUG00000011573 | cap methyltransferase 1 [Source:VGNC Symbol;Acc:VGNC:71271]                                    | - | 1.375541276 | 1.41E-05    | 0.00010457  |
| ENSMMUG00000063198 |                                                                                                | - | 4.231768626 | 6.28E-13    | 1.87E-11    |
| ENSMMUG00000055914 |                                                                                                | - | 1.309540592 | 1.20E-06    | 1.13E-05    |
| ENSMMUG00000015416 | bromodomain and PHD finger containing 3 [Source:VGNC Symbol;Acc:VGNC:70309]                    | - | 1.441710167 | 1.00E-08    | 1.47E-07    |
| ENSMMUG00000023823 | Y RNA [Source:RFAM;Acc:RF00019]                                                                | - | 4.295468668 | 0.000781887 | 0.003650062 |
| ENSMMUG00000000869 | small nuclear ribonucleoprotein polypeptide C [Source:NCBI gene;Acc:718654]                    | - | 2.98982407  | 4.70E-09    | 7.26E-08    |
| ENSMMUG00000007811 | protein kinase C and casein kinase substrate in neurons 1 [Source:VGNC Symbol;Acc:VGNC:75744]  | - | 0.422544879 | 0.015926168 | 0.047539776 |
| ENSMMUG00000004287 | death domain associated protein [Source:VGNC Symbol;Acc:VGNC:71737]                            | - | -0.90845433 | 0.000226966 | 0.00123573  |
| ENSMMUG00000003869 | WD repeat domain 46 [Source:VGNC Symbol;Acc:VGNC:78940]                                        | - | 1.077888343 | 0.000153242 | 0.000873204 |
| ENSMMUG00000003864 | VPS52 subunit of GARP complex [Source:VGNC Symbol;Acc:VGNC:78551]                              | - | 0.572306836 | 0.010310183 | 0.033247367 |
| ENSMMUG00000003867 | ribosomal protein S18 [Source:NCBI gene;Acc:706414]                                            | - | 1.115117113 | 0.015351203 | 0.046136124 |



|                    |                                                                                    |   |             |             |             |
|--------------------|------------------------------------------------------------------------------------|---|-------------|-------------|-------------|
| ENSMMUG0000003858  | retinoid X receptor beta [Source:VGNC Symbol;Acc:VGNC:76952]                       | - | 0.738017787 | 0.000703688 | 0.003337522 |
| ENSMMUG0000003850  | collagen type XI alpha 2 chain [Source:VGNC Symbol;Acc:VGNC:71290]                 | - | 0.735665397 | 2.16E-06    | 1.92E-05    |
| ENSMMUG00000019371 | major histocompatibility complex, class II, DP alpha [Source:NCBI gene;Acc:717992] | - | 1.168526086 | 0.004169648 | 0.015357023 |
| ENSMMUG00000023138 | bromodomain containing 2 [Source:VGNC Symbol;Acc:VGNC:83422]                       | - | 1.592424992 | 0.003693155 | 0.013897851 |
| ENSMMUG00000018461 | notch receptor 4 [Source:VGNC Symbol;Acc:VGNC:75372]                               | - | 1.316942551 | 0.000103365 | 0.000614313 |
| ENSMMUG00000018459 | G protein signaling modulator 3 [Source:VGNC Symbol;Acc:VGNC:72938]                | - | 1.054616807 | 0.007477942 | 0.02540473  |
| ENSMMUG00000018456 | PBX homeobox 2 [Source:VGNC Symbol;Acc:VGNC:75771]                                 | - | 1.013872766 | 0.011492888 | 0.036327922 |
| ENSMMUG00000018434 | 1-acylglycerol-3-phosphate O-acyltransferase 1 [Source:VGNC Symbol;Acc:VGNC:69745] | - | 0.917931791 | 0.013851129 | 0.042438875 |
| ENSMMUG00000064499 |                                                                                    | - | 2.258529822 | 0.016641709 | 0.049347839 |
| ENSMMUG00000006828 | valyl-tRNA synthetase 1 [Source:VGNC Symbol;Acc:VGNC:78755]                        | - | 1.875646677 | 0.00215425  | 0.008814054 |
| ENSMMUG00000006827 | von Willebrand factor A domain containing 7 [Source:VGNC Symbol;Acc:VGNC:78941]    | - | 2.566469235 | 0.000998062 | 0.00452129  |
| ENSMMUG00000009702 | mutS homolog 5 [Source:NCBI gene;Acc:715494]                                       | - | 1.503073271 | 0.003669038 | 0.013824987 |
| ENSMMUG00000058534 |                                                                                    | - | 2.992921345 | 3.15E-09    | 5.03E-08    |
| ENSMMUG00000015693 | lymphocyte antigen 6 family member G6C [Source:VGNC Symbol;Acc:VGNC:74285]         | - | 2.557526189 | 2.18E-10    | 4.30E-09    |
| ENSMMUG00000053324 | lymphocyte antigen 6 complex locus protein G6d [Source:NCBI gene;Acc:715304]       | - | 2.352242281 | 6.66E-20    | 4.91E-18    |
| ENSMMUG00000039268 | lymphocyte antigen 6G6e-like [Source:NCBI gene;Acc:100427419]                      | - | 2.613589535 | 0.014885188 | 0.044986689 |
| ENSMMUG00000015686 | abhydrolase domain containing 16A [Source:VGNC Symbol;Acc:VGNC:69393]              | - | 2.232600112 | 5.49E-36    | 2.57E-33    |
| ENSMMUG00000054159 | lymphocyte antigen 6 family member G5C [Source:VGNC Symbol;Acc:VGNC:83431]         | - | 2.575556638 | 0.000328256 | 0.001704233 |
| ENSMMUG00000005294 | casein kinase 2 beta [Source:NCBI gene;Acc:715807]                                 | - | 2.460256122 | 2.22E-11    | 5.17E-10    |
| ENSMMUG00000005293 | G-patch domain and ankyrin repeats 1 [Source:VGNC Symbol;Acc:VGNC:81073]           | - | 2.630445656 | 2.35E-09    | 3.85E-08    |
| ENSMMUG00000005302 | BAG cochaperone 6 [Source:VGNC Symbol;Acc:VGNC:81044]                              | - | 2.369046144 | 2.12E-39    | 1.34E-36    |
| ENSMMUG00000005303 | apolipoprotein M [Source:VGNC Symbol;Acc:VGNC:69825]                               | - | 2.588624531 | 2.44E-07    | 2.72E-06    |
| ENSMMUG00000005297 | proline rich coiled-coil 2A [Source:VGNC Symbol;Acc:VGNC:83448]                    | - | 2.045813591 | 7.22E-30    | 1.61E-27    |
| ENSMMUG00000025918 | small nucleolar RNA, H/ACA box 38 [Source:HGNC Symbol;Acc:HGNC:32631]              | - | 2.44861182  | 6.22E-06    | 4.98E-05    |
| ENSMMUG00000049735 | allograft inflammatory factor 1 [Source:NCBI gene;Acc:574115]                      | - | 2.243355339 | 3.51E-28    | 6.45E-26    |
| ENSMMUG00000008854 | natural cytotoxicity triggering receptor 3 [Source:VGNC Symbol;Acc:VGNC:74990]     | - | 2.447342656 | 1.79E-27    | 3.05E-25    |
| ENSMMUG00000008853 | leukocyte specific transcript 1 [Source:HGNC Symbol;Acc:HGNC:14189]                | - | 1.558505292 | 0.006125298 | 0.021302263 |
| ENSMMUG00000045654 | tumor necrosis factor [Source:VGNC Symbol;Acc:VGNC:83501]                          | - | 1.745231989 | 0.000166942 | 0.000940632 |
| ENSMMUG00000052422 | ATPase H+ transporting V1 subunit G2 [Source:NCBI gene;Acc:715331]                 | - | 4.052199927 | 0.000328375 | 0.001704245 |
| ENSMMUG00000008839 | DExD-box helicase 39B [Source:VGNC Symbol;Acc:VGNC:71621]                          | - | 1.689733886 | 1.30E-05    | 9.67E-05    |
| ENSMMUG00000026474 | Small nucleolar RNA SNORD83 [Source:RFAM;Acc:RF00137]                              | - | 3.05932     | 0.007527419 | 0.025513893 |
| ENSMMUG00000019961 | protein phosphatase 1 regulatory subunit 18 [Source:NCBI gene;Acc:712176]          | - | 3.472513165 | 0.000186123 | 0.001037453 |
| ENSMMUG00000053627 |                                                                                    | - | 2.833216564 | 0.000138903 | 0.000800328 |
| ENSMMUG00000011682 | ribonuclease P/MRP subunit p21 [Source:NCBI gene;Acc:713056]                       | - | 3.368585251 | 1.66E-06    | 1.52E-05    |
| ENSMMUG00000060527 |                                                                                    | - | 1.507164708 | 1.86E-08    | 2.55E-07    |
| ENSMMUG00000023679 | tripartite motif containing 26 [Source:VGNC Symbol;Acc:VGNC:78854]                 | - | 1.408175415 | 3.72E-08    | 4.84E-07    |
| ENSMMUG00000002890 | tripartite motif containing 15 [Source:VGNC Symbol;Acc:VGNC:83958]                 | - | 1.270420024 | 1.48E-08    | 2.08E-07    |
| ENSMMUG00000012129 | tripartite motif containing 10 [Source:VGNC Symbol;Acc:VGNC:78550]                 | - | 1.258718267 | 3.82E-09    | 6.00E-08    |

|                    |                                                                                                       |             |             |             |
|--------------------|-------------------------------------------------------------------------------------------------------|-------------|-------------|-------------|
| ENSMMUG00000058580 | tripartite motif containing 40 [Source:NCBI gene;Acc:100427925]                                       | 1.060395381 | 0.000472811 | 0.002355466 |
| ENSMMUG00000062264 |                                                                                                       | 1.384283365 | 2.78E-05    | 0.000191245 |
| ENSMMUG00000012124 | ring finger protein 39 [Source:VGNC Symbol;Acc:VGNC:83458]                                            | 1.467108455 | 1.16E-06    | 1.10E-05    |
| ENSMMUG00000012120 | zinc ribbon domain containing 1 [Source:VGNC Symbol;Acc:VGNC:78912]                                   | 1.429766935 | 7.15E-07    | 7.13E-06    |
| ENSMMUG00000055272 | putative uncharacterized protein ZNRD1-AS1 [Source:NCBI gene;Acc:712069]                              | 1.047839339 | 0.007657766 | 0.02588859  |
| ENSMMUG00000056544 |                                                                                                       | 1.395991159 | 0.004354416 | 0.015952658 |
| ENSMMUG00000037625 |                                                                                                       | -1.54563748 | 2.07E-06    | 1.84E-05    |
| ENSMMUG00000053561 |                                                                                                       | 3.831668694 | 1.51E-05    | 0.000110658 |
| ENSMMUG00000029883 | olfactory receptor, family 2, subfamily J, member 3 [Source:NCBI gene;Acc:708943]                     | 3.598370291 | 7.43E-05    | 0.000459706 |
| ENSMMUG00000059442 |                                                                                                       | 2.037110464 | 0.001517628 | 0.006488752 |
| ENSMMUG00000005415 | olfactory receptor, family 2, subfamily B, member 3 [Source:NCBI gene;Acc:708747]                     | 1.860029029 | 0.014938783 | 0.045111152 |
| ENSMMUG00000004617 | glutathione peroxidase 6 [Source:VGNC Symbol;Acc:VGNC:73154]                                          | 0.707990985 | 0.012458306 | 0.038864032 |
| ENSMMUG00000012396 | zinc finger and SCAN domain containing 23 [Source:VGNC Symbol;Acc:VGNC:79313]                         | 0.912348361 | 1.91E-06    | 1.72E-05    |
| ENSMMUG00000011675 | zinc finger and SCAN domain containing 12 [Source:VGNC Symbol;Acc:VGNC:78910]                         | 0.963553255 | 8.62E-10    | 1.53E-08    |
| ENSMMUG00000005964 | CMP-N-acetylneuraminic acid hydroxylase [Source:NCBI gene;Acc:574186]                                 | 1.041111898 | 0.000571347 | 0.002776886 |
| ENSMMUG00000049021 | Metazoan signal recognition particle RNA [Source:RFAM;Acc:RF00017]                                    | 2.386192866 | 5.10E-05    | 0.000330209 |
| ENSMMUG00000058151 | chromosome 4 C6orf62 homolog [Source:NCBI gene;Acc:708218]                                            | 1.354009396 | 1.30E-20    | 1.06E-18    |
| ENSMMUG00000051037 |                                                                                                       | 4.297112117 | 1.16E-17    | 6.70E-16    |
| ENSMMUG00000054532 |                                                                                                       | 1.111912506 | 5.22E-05    | 0.000336802 |
| ENSMMUG00000052442 |                                                                                                       | 0.836991837 | 1.69E-07    | 1.95E-06    |
| ENSMMUG00000063576 | Metazoan signal recognition particle RNA [Source:RFAM;Acc:RF00017]                                    | 1.229675309 | 0.000789703 | 0.003683002 |
| ENSMMUG00000052333 |                                                                                                       | 0.613847348 | 0.002229386 | 0.009062805 |
| ENSMMUG00000052891 |                                                                                                       | 1.760737212 | 7.27E-12    | 1.85E-10    |
| ENSMMUG00000020289 | CD83 molecule [Source:VGNC Symbol;Acc:VGNC:70783]                                                     | 1.390333375 | 1.18E-11    | 2.90E-10    |
| ENSMMUG00000044473 |                                                                                                       | 1.182662616 | 7.61E-08    | 9.33E-07    |
| ENSMMUG00000009922 | mitochondrial calcium uniporter regulator 1 [Source:VGNC Symbol;Acc:VGNC:81471]                       | 0.765600134 | 0.000308318 | 0.00161398  |
| ENSMMUG00000020122 | RAN binding protein 9 [Source:VGNC Symbol;Acc:VGNC:76475]                                             | 0.567271851 | 0.004668496 | 0.016915735 |
| ENSMMUG00000008681 | nucleolar protein 7 [Source:VGNC Symbol;Acc:VGNC:75226]                                               | 1.111540108 | 0.004319099 | 0.015855239 |
| ENSMMUG00000020040 | phosphatase and actin regulator 1 [Source:VGNC Symbol;Acc:VGNC:75841]                                 | 1.192187733 | 0.000297884 | 0.001564182 |
| ENSMMUG00000058800 |                                                                                                       | 1.193099664 | 1.47E-10    | 2.99E-09    |
| ENSMMUG00000016135 | neural precursor cell expressed, developmentally down-regulated 9 [Source:VGNC Symbol;Acc:VGNC:75304] | -1.16896525 | 2.71E-07    | 2.99E-06    |
| ENSMMUG00000046520 | small integral membrane protein 13 [Source:NCBI gene;Acc:703387]                                      | 0.613809284 | 0.010321446 | 0.033268928 |
| ENSMMUG00000043161 | endogenous retrovirus group FRD member 1, envelope [Source:VGNC Symbol;Acc:VGNC:81068]                | 1.304945507 | 6.15E-07    | 6.25E-06    |
| ENSMMUG00000063667 |                                                                                                       | 3.016201982 | 0.014393956 | 0.043804813 |

|                    |                                                                                                      |             |             |             |
|--------------------|------------------------------------------------------------------------------------------------------|-------------|-------------|-------------|
| ENSMMUG0000005532  | male germ cell associated kinase [Source:VGNC Symbol;Acc:VGNC:74480]                                 | 0.669647747 | 0.000287624 | 0.001522159 |
| ENSMMUG00000018788 | transmembrane protein 14B [Source:NCBI gene;Acc:698237]                                              | 0.552850124 | 0.006850311 | 0.023436803 |
| ENSMMUG00000018787 | PAK1 interacting protein 1 [Source:VGNC Symbol;Acc:VGNC:75661]                                       | 0.94737254  | 3.92E-08    | 5.08E-07    |
| ENSMMUG00000061586 | chromosome 4 C6orf52 homolog [Source:NCBI gene;Acc:702114]                                           | 0.955552705 | 5.53E-07    | 5.69E-06    |
| ENSMMUG00000038560 | eukaryotic translation elongation factor 1 epsilon 1 [Source:NCBI gene;Acc:695426]                   | -1.29511167 | 2.41E-19    | 1.71E-17    |
| ENSMMUG00000044859 |                                                                                                      | -           | -           | -           |
|                    |                                                                                                      | 1.254817719 | 0.007557074 | 0.025595804 |
| ENSMMUG00000021600 | bone morphogenetic protein 6 [Source:VGNC Symbol;Acc:VGNC:70265]                                     | 0.719662118 | 0.007971807 | 0.026726512 |
| ENSMMUG00000015577 | RIO kinase 1 [Source:VGNC Symbol;Acc:VGNC:76767]                                                     | 0.936621364 | 0.001260643 | 0.005529861 |
| ENSMMUG00000016352 | phenylalanyl-tRNA synthetase 2, mitochondrial [Source:VGNC Symbol;Acc:VGNC:72545]                    | 0.608287314 | 0.01153438  | 0.036411569 |
| ENSMMUG00000060973 |                                                                                                      | 0.517713274 | 0.00266373  | 0.010476906 |
| ENSMMUG00000023558 | exocyst complex component 2 [Source:VGNC Symbol;Acc:VGNC:72338]                                      | 1.138861836 | 0.009093879 | 0.030004023 |
| ENSMMUG00000058002 | zinc finger protein 669-like [Source:NCBI gene;Acc:696282]                                           | 1.266128656 | 4.97E-26    | 6.95E-24    |
| ENSMMUG00000003013 | NIPA magnesium transporter 1 [Source:VGNC Symbol;Acc:VGNC:75196]                                     | 3.571898805 | 0.012482544 | 0.038914593 |
| ENSMMUG00000052887 |                                                                                                      | 1.968758586 | 0.004668091 | 0.016915735 |
| ENSMMUG00000062676 |                                                                                                      | 0.991585758 | 0.000393021 | 0.001997671 |
| ENSMMUG00000054713 |                                                                                                      | -0.98677208 | 0.002578114 | 0.010200881 |
| ENSMMUG00000065031 |                                                                                                      | 1.359976842 | 4.89E-10    | 9.16E-09    |
| ENSMMUG00000023139 | small nuclear ribonucleoprotein polypeptide N [Source:VGNC Symbol;Acc:VGNC:78437]                    | 2.712590626 | 4.85E-09    | 7.47E-08    |
| ENSMMUG00000051503 | nuclear pore associated protein 1 [Source:NCBI gene;Acc:719891]                                      | 2.807570107 | 1.31E-05    | 9.80E-05    |
| ENSMMUG00000019483 | putative golgin subfamily A member 8D [Source:NCBI gene;Acc:100430266]                               | 1.959422724 | 0.013957071 | 0.042696536 |
| ENSMMUG00000021656 | golgin subfamily A member 8S [Source:NCBI gene;Acc:722977]                                           | -2.82820888 | 0.003107343 | 0.011988175 |
| ENSMMUG00000054315 |                                                                                                      | 3.524374917 | 1.99E-09    | 3.29E-08    |
| ENSMMUG00000055117 |                                                                                                      | 2.843431488 | 2.34E-08    | 3.17E-07    |
| ENSMMUG00000063268 |                                                                                                      | 1.744729634 | 4.15E-06    | 3.46E-05    |
| ENSMMUG00000058136 | Metazoan signal recognition particle RNA [Source:RFAM;Acc:RF00017]                                   | 2.395667908 | 0.015688749 | 0.046966092 |
| ENSMMUG00000009430 | transient receptor potential cation channel subfamily M member 1 [Source:VGNC Symbol;Acc:VGNC:79964] | 0.527812003 | 1.47E-06    | 1.36E-05    |
| ENSMMUG00000005270 | ryanodine receptor 3 [Source:NCBI gene;Acc:694996]                                                   | 0.500860139 | 1.19E-06    | 1.13E-05    |
| ENSMMUG00000014227 | cholinergic receptor muscarinic 5 [Source:VGNC Symbol;Acc:VGNC:71044]                                | 3.022022669 | 0.014332247 | 0.043660493 |
| ENSMMUG00000002337 | aquarius intron-binding spliceosomal factor [Source:VGNC Symbol;Acc:VGNC:69925]                      | 0.676038465 | 0.013515226 | 0.041563538 |
| ENSMMUG00000046486 | zinc finger protein 770 [Source:NCBI gene;Acc:697740]                                                | 0.541358688 | 0.015507099 | 0.046540199 |
| ENSMMUG00000063659 |                                                                                                      | 1.345448109 | 0.000169535 | 0.000954136 |
| ENSMMUG00000051611 |                                                                                                      | 1.472364776 | 0.014919872 | 0.045063407 |
| ENSMMUG00000049271 |                                                                                                      | 1.544829406 | 0.009824201 | 0.031970989 |
| ENSMMUG00000060667 |                                                                                                      | 1.396875625 | 0.000494959 | 0.00244902  |
| ENSMMUG00000018332 | family with sequence similarity 98 member B [Source:VGNC Symbol;Acc:VGNC:72583]                      | 1.235237733 | 1.18E-08    | 1.71E-07    |
| ENSMMUG00000006035 | thrombospondin 1 [Source:VGNC Symbol;Acc:VGNC:78344]                                                 | -2.13493814 | 0.004357618 | 0.015960365 |
| ENSMMUG00000016686 | BUB1 mitotic checkpoint serine/threonine kinase B [Source:VGNC Symbol;Acc:VGNC:70293]                | 0.524526302 | 0.007567103 | 0.025621655 |

|                     |                                                                                          |             |             |             |
|---------------------|------------------------------------------------------------------------------------------|-------------|-------------|-------------|
| ENSMMUG00000020534  | p21 (RAC1) activated kinase 6 [Source:NCBI gene;Acc:701589]                              | 2.487448708 | 1.96E-28    | 3.84E-26    |
| ENSMMUG00000020539  | coiled-coil domain containing 9B [Source:VGNC Symbol;Acc:VGNC:70920]                     | 0.659642767 | 0.00129517  | 0.00565402  |
| ENSMMUG00000012408  | dispatched RND transporter family member 2 [Source:VGNC Symbol;Acc:VGNC:71676]           | 0.770299045 | 0.000120303 | 0.000704045 |
| ENSMMUG00000058981  | kinetochore localized astrin (SPAG5) binding protein [Source:NCBI gene;Acc:702753]       | 0.651693969 | 0.000526482 | 0.002586506 |
| ENSMMUG00000043229  | carbohydrate sulfotransferase 14 [Source:NCBI gene;Acc:703115]                           | 1.160476465 | 0.001026737 | 0.004626684 |
| ENSMMUG00000048910  | kinetochore scaffold 1 [Source:VGNC Symbol;Acc:VGNC:84366]                               | 0.626820363 | 0.001423892 | 0.00613489  |
| ENSMMUG00000000306  | regulator of microtubule dynamics 3 [Source:VGNC Symbol;Acc:VGNC:76821]                  | 0.792897404 | 0.003528221 | 0.013360186 |
| ENSMMUG00000013160  | DnaJ heat shock protein family (Hsp40) member C17 [Source:VGNC Symbol;Acc:VGNC:84335]    | 1.590280261 | 0.000111687 | 0.000657324 |
| ENSMMUG00000014541  | delta like canonical Notch ligand 4 [Source:VGNC Symbol;Acc:VGNC:71926]                  | 0.418885973 | 0.007867736 | 0.026432466 |
| ENSMMUG00000010168  | MAX dimerization protein MGA [Source:VGNC Symbol;Acc:VGNC:84390]                         | 0.333879153 | 0.011507766 | 0.036351238 |
| ENSMMUG00000015449  | phospholipase A2 group IVF [Source:VGNC Symbol;Acc:VGNC:76123]                           | 0.572897663 | 9.96E-05    | 0.000594189 |
| ENSMMUG00000001532  | glucosidase alpha, neutral C [Source:NCBI gene;Acc:708126]                               | 0.746078611 | 7.37E-09    | 1.11E-07    |
| ENSMMUG00000001534  | calpain 3 [Source:VGNC Symbol;Acc:VGNC:70533]                                            | 0.67713687  | 0.000284845 | 0.001511236 |
| ENSMMUG00000001547  | zinc finger protein 106 [Source:VGNC Symbol;Acc:VGNC:78831]                              | 1.377892536 | 2.62E-27    | 4.37E-25    |
| ENSMMUG00000064341  | U6 spliceosomal RNA [Source:RFAM;Acc:RF00026]                                            | 3.398004058 | 0.00053069  | 0.00260278  |
| ENSMMUG00000008093  | StAR related lipid transfer domain containing 9 [Source:NCBI gene;Acc:708953]            | 0.967989629 | 6.34E-14    | 2.24E-12    |
| ENSMMUG00000015123  | codanin 1 [Source:VGNC Symbol;Acc:VGNC:70788]                                            | 0.638960924 | 0.000525202 | 0.002581089 |
| ENSMMUG00000010036  | tau tubulin kinase 2 [Source:VGNC Symbol;Acc:VGNC:81598]                                 | -0.52538397 | 0.001044276 | 0.004696978 |
| ENSMMUG00000006498  | ubiquitin protein ligase E3 component n-recognin 1 [Source:VGNC Symbol;Acc:VGNC:79051]   | 0.366648101 | 0.000152844 | 0.000871331 |
| ENSMMUG00000022256  | transglutaminase 5 [Source:VGNC Symbol;Acc:VGNC:78341]                                   | 0.695293193 | 0.004553448 | 0.016552505 |
| ENSMMUG00000022251  | transglutaminase 7 [Source:VGNC Symbol;Acc:VGNC:79880]                                   | 0.466931788 | 1.67E-05    | 0.000120801 |
| ENSMMUG00000055498  | leucine carboxyl methyltransferase 2 [Source:NCBI gene;Acc:710047]                       | 0.767781201 | 0.001630129 | 0.006918886 |
| ENSMMUG00000017067  | adenosine deaminase like [Source:VGNC Symbol;Acc:VGNC:69555]                             | 0.642501847 | 0.000347901 | 0.00179469  |
| ENSMMUG00000017070  | zinc finger and SCAN domain containing 29 [Source:VGNC Symbol;Acc:VGNC:79633]            | 1.144498855 | 2.12E-09    | 3.49E-08    |
| ENSMMUG00000017076  | tubulin gamma complex associated protein 4 [Source:VGNC Symbol;Acc:VGNC:79045]           | 1.277822256 | 9.19E-09    | 1.35E-07    |
| ENSMMUG00000007255  | microtubule associated protein 1A [Source:VGNC Symbol;Acc:VGNC:74489]                    | -1.34318789 | 0.000583526 | 0.00282946  |
| ENSMMUG00000007860  | diphosphoinositol pentakisphosphate kinase 1 [Source:VGNC Symbol;Acc:VGNC:76127]         | 0.665273975 | 0.00944231  | 0.030924165 |
| ENSMMUG00000007870  | creatine kinase U-type, mitochondrial [Source:NCBI gene;Acc:114669858]                   | 0.446207456 | 0.000291525 | 0.001536584 |
| ENSMMUG00000021840  | stereocilin [Source:NCBI gene;Acc:106996176]                                             | 0.647198924 | 4.97E-06    | 4.07E-05    |
| ENSMMUG00000016742  | CTD small phosphatase like 2 [Source:VGNC Symbol;Acc:VGNC:71593]                         | 0.635621596 | 3.66E-07    | 3.93E-06    |
| ENSMMUG00000014288  | eukaryotic translation initiation factor 3 subunit J [Source:VGNC Symbol;Acc:VGNC:72188] | 0.481669159 | 0.002671167 | 0.010494798 |
| ENSMMUG00000014291  | SPG11 vesicle trafficking associated, spatacsin [Source:VGNC Symbol;Acc:VGNC:77856]      | 1.373209504 | 1.11E-10    | 2.31E-09    |
| ENSMMUG00000001284  | solute carrier family 28 member 2 [Source:VGNC Symbol;Acc:VGNC:77445]                    | 0.507828894 | 0.011523667 | 0.036385652 |
| ENSMMUG00000005856  | glycine amidinotransferase [Source:VGNC Symbol;Acc:VGNC:72892]                           | 1.866373593 | 5.23E-16    | 2.56E-14    |
| ENSMMUG000000049265 | Metazoan signal recognition particle RNA [Source:RFAM;Acc:RF00017]                       | 1.706834545 | 1.27E-05    | 9.55E-05    |
| ENSMMUG000000062254 |                                                                                          | 1.718411721 | 3.11E-06    | 2.67E-05    |

|                    |                                                                                                                |             |             |             |
|--------------------|----------------------------------------------------------------------------------------------------------------|-------------|-------------|-------------|
| ENSMMUG00000016896 | solute carrier family 12 member 1 [Source:VGNC Symbol;Acc:VGNC:77385]                                          | 1.039831711 | 4.35E-07    | 4.60E-06    |
| ENSMMUG00000009838 | COP9 signalosome subunit 2 [Source:VGNC Symbol;Acc:VGNC:71376]                                                 | 0.632613344 | 0.002395282 | 0.009592344 |
| ENSMMUG00000009839 | galactokinase 2 [Source:VGNC Symbol;Acc:VGNC:72870]                                                            | 1.013964277 | 0.000119754 | 0.000701115 |
| ENSMMUG00000009840 | family with sequence similarity 227 member B [Source:VGNC Symbol;Acc:VGNC:72370]                               | 1.138253164 | 3.08E-06    | 2.65E-05    |
| ENSMMUG00000013496 | DTW domain containing 1 [Source:VGNC Symbol;Acc:VGNC:72017]                                                    | 3.115338403 | 0.00147491  | 0.006325479 |
| ENSMMUG00000056522 |                                                                                                                | 1.54073356  | 4.01E-05    | 0.000267296 |
| ENSMMUG00000050608 |                                                                                                                | 1.433649437 | 6.47E-09    | 9.81E-08    |
| ENSMMUG00000003684 | ATPase phospholipid transporting 8B4 (putative) [Source:VGNC Symbol;Acc:VGNC:84311]                            | 1.513395115 | 1.28E-11    | 3.13E-10    |
| ENSMMUG00000057283 |                                                                                                                | 1.49646851  | 1.37E-05    | 0.000101616 |
| ENSMMUG00000002879 | GA binding protein transcription factor subunit beta 1 [Source:VGNC Symbol;Acc:VGNC:72845]                     | 0.605575312 | 8.16E-05    | 0.000499651 |
| ENSMMUG00000060278 | Metazoan signal recognition particle RNA [Source:RFAM;Acc:RF00017]                                             | 2.076977741 | 6.38E-06    | 5.09E-05    |
| ENSMMUG00000008575 | transient receptor potential cation channel subfamily M member 7 [Source:VGNC Symbol;Acc:VGNC:79106]           | 0.293251381 | 0.000455416 | 0.002283676 |
| ENSMMUG00000000754 | Dmx like 2 [Source:VGNC Symbol;Acc:VGNC:71936]                                                                 | 2.313545335 | 1.80E-13    | 5.84E-12    |
| ENSMMUG00000017432 | tropomodulin 2 [Source:VGNC Symbol;Acc:VGNC:78571]                                                             | 1.107192375 | 4.91E-10    | 9.19E-09    |
| ENSMMUG00000002345 | tropomodulin 3 [Source:VGNC Symbol;Acc:VGNC:78572]                                                             | 1.017082074 | 7.22E-34    | 2.19E-31    |
| ENSMMUG00000017374 | G protein subunit beta 5 [Source:VGNC Symbol;Acc:VGNC:73097]                                                   | 3.209503131 | 1.22E-06    | 1.16E-05    |
| ENSMMUG00000007504 | myosin VC [Source:VGNC Symbol;Acc:VGNC:75117]                                                                  | 2.188436366 | 0.000125235 | 0.000729969 |
| ENSMMUG00000007509 | myosin VA [Source:VGNC Symbol;Acc:VGNC:75116]                                                                  | 0.654741645 | 0.000235643 | 0.001276283 |
| ENSMMUG00000048644 |                                                                                                                | 1.022119484 | 0.013905553 | 0.042556848 |
| ENSMMUG00000001423 | family with sequence similarity 214 member A [Source:VGNC Symbol;Acc:VGNC:72354]                               | 0.447557838 | 0.000517851 | 0.002550999 |
| ENSMMUG00000010798 | cell cycle progression 1 [Source:VGNC Symbol;Acc:VGNC:70844]                                                   | 0.441962451 | 0.003714035 | 0.013961967 |
| ENSMMUG00000010797 | phosphatidylinositol glycan anchor biosynthesis class B [Source:VGNC Symbol;Acc:VGNC:75985]                    | 0.577314322 | 0.000467312 | 0.002332871 |
| ENSMMUG00000029638 | chromosome 7 C15orf65 homolog [Source:VGNC Symbol;Acc:VGNC:70689]                                              | 0.914801509 | 0.001061418 | 0.004759359 |
| ENSMMUG00000000863 | dynein axonemal assembly factor 4 [Source:VGNC Symbol;Acc:VGNC:71881]                                          | 1.415564555 | 2.09E-14    | 8.15E-13    |
| ENSMMUG00000008112 | NEDD4 E3 ubiquitin protein ligase [Source:VGNC Symbol;Acc:VGNC:75302]                                          | 0.652232947 | 0.004167414 | 0.015352684 |
| ENSMMUG00000008718 | zinc finger protein 280D [Source:NCBI gene;Acc:699509]                                                         | 1.635383974 | 5.48E-16    | 2.65E-14    |
| ENSMMUG00000004091 | transcription factor 12 [Source:VGNC Symbol;Acc:VGNC:78283]                                                    | 0.860888765 | 1.55E-12    | 4.37E-11    |
| ENSMMUG00000063795 |                                                                                                                | 1.426372783 | 0.00422751  | 0.015550435 |
| ENSMMUG00000012690 | myocardial zonula adherens protein [Source:NCBI gene;Acc:700247]                                               | 3.631297568 | 5.46E-06    | 4.43E-05    |
| ENSMMUG00000018426 | glucosaminyl (N-acetyl) transferase 3, mucin type [Source:VGNC Symbol;Acc:VGNC:84342]                          | -2.40681666 | 0.010746669 | 0.034395491 |
| ENSMMUG00000020348 | BCL2 interacting protein 2 [Source:VGNC Symbol;Acc:VGNC:70272]                                                 | 2.296039185 | 1.59E-08    | 2.22E-07    |
| ENSMMUG00000049749 |                                                                                                                | 1.168520417 | 6.12E-09    | 9.32E-08    |
| ENSMMUG00000060717 | C2 calcium dependent domain containing 4A [Source:NCBI gene;Acc:704354]                                        | 0.464563501 | 0.000539809 | 0.002641267 |
| ENSMMUG00000013460 | RAB8B, member RAS oncogene family [Source:VGNC Symbol;Acc:VGNC:81550]                                          | 1.160566678 | 3.96E-14    | 1.49E-12    |
| ENSMMUG00000059755 | aph-1 homolog B, gamma-secretase subunit [Source:NCBI gene;Acc:705718]                                         | 0.928969742 | 0.005420194 | 0.019264881 |
| ENSMMUG00000012117 | HECT and RLD domain containing E3 ubiquitin protein ligase family member 1 [Source:VGNC Symbol;Acc:VGNC:73364] | 0.546922846 | 4.16E-10    | 7.90E-09    |

|                    |                                                                                                    |             |             |             |
|--------------------|----------------------------------------------------------------------------------------------------|-------------|-------------|-------------|
| ENSMMUG00000049375 |                                                                                                    | 0.592464551 | 1.22E-05    | 9.16E-05    |
| ENSMMUG00000018177 | death associated protein kinase 2 [Source:VGNC Symbol;Acc:VGNC:71733]                              | 0.736696735 | 0.000677014 | 0.00322998  |
| ENSMMUG00000013270 | RNA binding protein, mRNA processing factor 2 [Source:VGNC Symbol;Acc:VGNC:76511]                  | 1.253582402 | 0.011711005 | 0.03687305  |
| ENSMMUG00000053704 | Metazoan signal recognition particle RNA [Source:RFAM;Acc:RF00017]                                 | 2.611613688 | 0.016016955 | 0.047751944 |
| ENSMMUG00000010949 | SPG21 abhydrolase domain containing, maspardin [Source:VGNC Symbol;Acc:VGNC:77970]                 | 0.886490805 | 3.87E-07    | 4.12E-06    |
| ENSMMUG00000004028 | kelch repeat and BTB domain containing 13 [Source:VGNC Symbol;Acc:VGNC:73953]                      | 1.758248596 | 7.00E-06    | 5.55E-05    |
| ENSMMUG00000006297 | programmed cell death 7 [Source:NCBI gene;Acc:708758]                                              | 0.407337189 | 0.002019627 | 0.008338348 |
| ENSMMUG00000021788 | immunoglobulin superfamily DCC subclass member 4 [Source:VGNC Symbol;Acc:VGNC:73388]               | 1.165883528 | 0.003123571 | 0.012034815 |
| ENSMMUG00000015450 | 3-hydroxyacyl-CoA dehydratase 3 [Source:VGNC Symbol;Acc:VGNC:73225]                                | 0.401118603 | 0.016833209 | 0.049756885 |
| ENSMMUG00000022056 | DENN domain containing 4A [Source:VGNC Symbol;Acc:VGNC:71697]                                      | 1.006167217 | 6.22E-10    | 1.14E-08    |
| ENSMMUG00000054184 | Metazoan signal recognition particle RNA [Source:RFAM;Acc:RF00017]                                 | 0.769126099 | 3.69E-05    | 0.000247181 |
| ENSMMUG00000035748 | U6 spliceosomal RNA [Source:RFAM;Acc:RF00026]                                                      | 0.962068081 | 0.00659169  | 0.022685464 |
| ENSMMUG00000008006 | RAB11A, member RAS oncogene family [Source:VGNC Symbol;Acc:VGNC:81517]                             | 0.977250631 | 2.00E-11    | 4.75E-10    |
| ENSMMUG00000008007 | multiple EGF like domains 11 [Source:VGNC Symbol;Acc:VGNC:84376]                                   | 1.094626391 | 1.19E-09    | 2.06E-08    |
| ENSMMUG00000052828 |                                                                                                    | 0.850120816 | 0.002573457 | 0.010190779 |
| ENSMMUG00000003693 | DIS3 like exosome 3'-5' exoribonuclease [Source:VGNC Symbol;Acc:VGNC:71796]                        | 4.141151222 | 6.74E-05    | 0.00042037  |
| ENSMMUG00000041415 | alpha and gamma adaptin binding protein [Source:NCBI gene;Acc:711436]                              | 1.239822611 | 0.010250694 | 0.033099587 |
| ENSMMUG00000015458 | IQ motif containing H [Source:VGNC Symbol;Acc:VGNC:73655]                                          | 0.526228596 | 0.005306009 | 0.018909892 |
| ENSMMUG00000004026 | integrin subunit alpha 11 [Source:VGNC Symbol;Acc:VGNC:73774]                                      | 0.480184778 | 4.74E-05    | 0.000309009 |
| ENSMMUG00000006230 | NADPH oxidase 5 [Source:VGNC Symbol;Acc:VGNC:82198]                                                | 0.332082321 | 0.011365903 | 0.036028376 |
| ENSMMUG00000007570 | uveal autoantigen with coiled-coil domains and ankyrin repeats [Source:VGNC Symbol;Acc:VGNC:78995] | 0.787858538 | 0.001000496 | 0.004528086 |
| ENSMMUG00000053647 |                                                                                                    | 0.395757925 | 0.010993831 | 0.035032293 |
| ENSMMUG00000059258 |                                                                                                    | 0.56699681  | 0.006791631 | 0.023274383 |
| ENSMMUG00000013685 | Bardet-Biedl syndrome 4 [Source:NCBI gene;Acc:704508]                                              | 0.523079793 | 0.004639656 | 0.016827657 |
| ENSMMUG00000011309 | ADP dependent glucokinase [Source:VGNC Symbol;Acc:VGNC:69692]                                      | 0.44702587  | 5.13E-05    | 0.000332168 |
| ENSMMUG00000057906 |                                                                                                    | 0.874344453 | 2.39E-15    | 1.06E-13    |
| ENSMMUG00000059627 |                                                                                                    | 0.663694276 | 0.007728824 | 0.026061422 |
| ENSMMUG00000063495 |                                                                                                    | 1.099194224 | 4.32E-15    | 1.83E-13    |
| ENSMMUG00000056086 |                                                                                                    | 1.040296072 | 0.000107715 | 0.000637246 |
| ENSMMUG00000001835 | immunoglobulin superfamily containing leucine rich repeat 2 [Source:VGNC Symbol;Acc:VGNC:73682]    | 0.566193745 | 0.005659163 | 0.019992043 |
| ENSMMUG00000001568 | AT-rich interaction domain 3B [Source:VGNC Symbol;Acc:VGNC:69827]                                  | 1.138551751 | 4.12E-08    | 5.33E-07    |
| ENSMMUG00000022481 | cytochrome P450, family 1, subfamily A, polypeptide 1 [Source:NCBI gene;Acc:678694]                | 0.530448505 | 0.002186679 | 0.008919123 |
| ENSMMUG00000015267 | C-terminal Src kinase [Source:VGNC Symbol;Acc:VGNC:81380]                                          | 0.459666268 | 2.06E-07    | 2.34E-06    |
| ENSMMUG00000008529 | chromosome 7 C15orf39 homolog [Source:VGNC Symbol;Acc:VGNC:70620]                                  | 1.580245155 | 8.28E-06    | 6.43E-05    |
| ENSMMUG00000061079 | golgin subfamily A member 6C [Source:NCBI gene;Acc:715898]                                         | 1.560473933 | 1.15E-24    | 1.34E-22    |
| ENSMMUG00000016104 | chondroitin sulfate proteoglycan 4 [Source:VGNC Symbol;Acc:VGNC:71525]                             | 0.779691104 | 3.58E-06    | 3.03E-05    |
| ENSMMUG00000053989 |                                                                                                    | 1.004436424 | 2.14E-13    | 6.82E-12    |
| ENSMMUG00000058835 |                                                                                                    | 1.1009175   | 3.04E-05    | 0.000207675 |
| ENSMMUG00000050124 | transmembrane protein 266 [Source:NCBI gene;Acc:707482]                                            | 0.393133593 | 0.010355002 | 0.03336969  |
| ENSMMUG00000010171 | proline-serine-threonine phosphatase interacting protein 1 [Source:VGNC Symbol;Acc:VGNC:76459]     | 0.402465433 | 0.0150571   | 0.045428141 |
| ENSMMUG00000042378 | pseudopodium enriched atypical kinase 1 [Source:VGNC Symbol;Acc:VGNC:84419]                        | 0.467218091 | 0.000297008 | 0.001561519 |
| ENSMMUG00000054259 |                                                                                                    | 0.709327815 | 0.015797742 | 0.047204886 |

|                    |                                                                                        |             |             |             |
|--------------------|----------------------------------------------------------------------------------------|-------------|-------------|-------------|
| ENSMMUG00000058749 | golgin subfamily A member 6C [Source:NCBI gene;Acc:716687]                             | 3.016576819 | 0.00670856  | 0.023054927 |
| ENSMMUG00000045680 | iron responsive element binding protein 2 [Source:VGNC Symbol;Acc:VGNC:84360]          | 0.928141694 | 0.005989682 | 0.020936941 |
| ENSMMUG00000059973 |                                                                                        | -0.40702873 | 0.007118415 | 0.024278602 |
| ENSMMUG00000023736 | cholinergic receptor nicotinic alpha 3 subunit [Source:VGNC Symbol;Acc:VGNC:71047]     | 0.418463147 | 0.002554963 | 0.010136873 |
| ENSMMUG00000007541 | cholinergic receptor nicotinic beta 4 subunit [Source:NCBI gene;Acc:106996685]         | 0.379955408 | 0.006401804 | 0.022139313 |
| ENSMMUG00000056992 | zinc finger AN1-type containing 6 [Source:NCBI gene;Acc:717543]                        | 1.03748854  | 0.001532145 | 0.00653928  |
| ENSMMUG00000009361 | fumarylacetoacetate hydrolase [Source:NCBI gene;Acc:712716]                            | 1.785672291 | 1.75E-06    | 1.58E-05    |
| ENSMMUG00000009409 | mesoderm development LRP chaperone [Source:VGNC Symbol;Acc:VGNC:74507]                 | 1.045438475 | 0.001278084 | 0.005587821 |
| ENSMMUG00000011564 | transmembrane channel like 3 [Source:VGNC Symbol;Acc:VGNC:79360]                       | 4.142617541 | 1.03E-05    | 7.83E-05    |
| ENSMMUG00000057295 |                                                                                        | 0.39744596  | 0.007964856 | 0.026709367 |
| ENSMMUG00000003002 |                                                                                        | 0.596107353 | 0.003094527 | 0.011941901 |
| ENSMMUG00000009087 | HDGF like 3 [Source:VGNC Symbol;Acc:VGNC:84346]                                        | 1.243732471 | 3.31E-08    | 4.36E-07    |
| ENSMMUG00000009084 | transmembrane 6 superfamily member 1 [Source:VGNC Symbol;Acc:VGNC:78566]               | 1.145207614 | 2.77E-07    | 3.05E-06    |
| ENSMMUG00000062992 | U7 small nuclear RNA [Source:RFAM;Acc:RF00066]                                         | -1.49694156 | 0.00343347  | 0.013066063 |
| ENSMMUG00000062559 |                                                                                        | 1.089254357 | 0.004748139 | 0.017170074 |
| ENSMMUG00000011328 | cytoplasmic polyadenylation element binding protein 1 [Source:NCBI gene;Acc:694357]    | 1.086180122 | 1.48E-05    | 0.0001087   |
| ENSMMUG00000056767 |                                                                                        | 0.963185246 | 0.002596832 | 0.010260981 |
| ENSMMUG00000019838 | phosphodiesterase 8A [Source:VGNC Symbol;Acc:VGNC:75924]                               | 0.681753143 | 0.000310841 | 0.001624262 |
| ENSMMUG00000056737 |                                                                                        | 1.153745099 | 0.000307317 | 0.001609318 |
| ENSMMUG00000049563 |                                                                                        | 1.318603755 | 1.53E-07    | 1.79E-06    |
| ENSMMUG00000016772 | solute carrier family 28 member 1 [Source:VGNC Symbol;Acc:VGNC:77444]                  | 0.777007868 | 2.43E-09    | 3.97E-08    |
| ENSMMUG00000010432 | zinc finger protein 592 [Source:VGNC Symbol;Acc:VGNC:79762]                            | 0.302248121 | 0.010409657 | 0.033522908 |
| ENSMMUG00000057531 | mitochondrial ribosomal protein S11 [Source:NCBI gene;Acc:697743]                      | 0.559308871 | 0.012966245 | 0.040138481 |
| ENSMMUG00000043001 | milk fat globule EGF and factor V/VIII domain containing [Source:NCBI gene;Acc:703501] | 1.436266007 | 0.000192259 | 0.001067559 |
| ENSMMUG00000014414 | abhydrolase domain containing 2 [Source:VGNC Symbol;Acc:VGNC:69463]                    | 0.807318494 | 0.011790925 | 0.03706047  |
| ENSMMUG00000011155 | FA complementation group I [Source:VGNC Symbol;Acc:VGNC:72575]                         | 1.127485503 | 6.20E-10    | 1.14E-08    |
| ENSMMUG00000011160 | DNA polymerase gamma, catalytic subunit [Source:VGNC Symbol;Acc:VGNC:76205]            | 0.792455974 | 0.002138591 | 0.00875738  |
| ENSMMUG00000022678 | Rh family C glycoprotein [Source:VGNC Symbol;Acc:VGNC:84427]                           | 0.965052744 | 8.18E-05    | 0.000500886 |
| ENSMMUG00000015394 | WD repeat domain 93 [Source:VGNC Symbol;Acc:VGNC:79642]                                | 1.04202138  | 6.68E-26    | 9.16E-24    |
| ENSMMUG00000010586 | mesoderm posterior bHLH transcription factor 1 [Source:VGNC Symbol;Acc:VGNC:74618]     | 1.33763215  | 0.000385902 | 0.001965946 |
| ENSMMUG00000003584 | mesoderm posterior bHLH transcription factor 2 [Source:VGNC Symbol;Acc:VGNC:74619]     | 0.976907323 | 2.45E-18    | 1.52E-16    |
| ENSMMUG00000014983 | alanyl aminopeptidase, membrane [Source:VGNC Symbol;Acc:VGNC:69943]                    | 0.986001304 | 1.10E-18    | 7.26E-17    |
| ENSMMUG00000029507 | adaptor related protein complex 3 subunit sigma 2 [Source:NCBI gene;Acc:701217]        | 0.942503929 | 6.88E-25    | 8.40E-23    |
| ENSMMUG00000023816 | semaphorin 4B [Source:VGNC Symbol;Acc:VGNC:77165]                                      | 1.947205398 | 4.72E-24    | 4.97E-22    |
| ENSMMUG00000004376 | calcium and integrin binding 1 [Source:VGNC Symbol;Acc:VGNC:71189]                     | 2.116071785 | 5.17E-21    | 4.35E-19    |
| ENSMMUG00000050794 | zinc finger protein 774 [Source:NCBI gene;Acc:702985]                                  | 1.383469727 | 0.000228878 | 0.001244745 |
| ENSMMUG00000019526 | BLM RecQ like helicase [Source:VGNC Symbol;Acc:VGNC:70254]                             | 2.59819923  | 2.63E-13    | 8.29E-12    |
| ENSMMUG00000062217 | HD domain containing 3 [Source:NCBI gene;Acc:715621]                                   | 2.665945734 | 1.70E-17    | 9.67E-16    |
| ENSMMUG00000005106 | unc-45 myosin chaperone A [Source:VGNC Symbol;Acc:VGNC:79858]                          | 3.356610186 | 1.18E-05    | 8.93E-05    |
| ENSMMUG00000005108 | RCC1 domain containing 1 [Source:VGNC Symbol;Acc:VGNC:76876]                           | 2.890766512 | 3.70E-14    | 1.40E-12    |

|                    |                                                                                                          |             |             |             |
|--------------------|----------------------------------------------------------------------------------------------------------|-------------|-------------|-------------|
| ENSMMUG0000007534  | protein regulator of cytokinesis 1 [Source:NCBI gene;Acc:710182]                                         | 2.477647752 | 4.21E-06    | 3.50E-05    |
| ENSMMUG0000008399  | synaptic vesicle glycoprotein 2B [Source:VGNC Symbol;Acc:VGNC:78140]                                     | 0.445849208 | 0.006475215 | 0.022332195 |
| ENSMMUG00000063322 |                                                                                                          | 0.934098641 | 2.05E-06    | 1.83E-05    |
| ENSMMUG0000005220  | synemin [Source:VGNC Symbol;Acc:VGNC:78201]                                                              | 0.735121566 | 6.93E-10    | 1.26E-08    |
| ENSMMUG0000005224  | tetratricopeptide repeat domain 23 [Source:VGNC Symbol;Acc:VGNC:79534]                                   | 0.604646032 | 1.43E-05    | 0.000105789 |
| ENSMMUG00000065319 |                                                                                                          | 3.513369967 | 4.34E-05    | 0.000287326 |
| ENSMMUG00000060063 |                                                                                                          | 1.521855628 | 1.29E-12    | 3.69E-11    |
| ENSMMUG0000006659  | aldehyde dehydrogenase 1 family member A3 [Source:VGNC Symbol;Acc:VGNC:81353]                            | 2.011217904 | 1.96E-07    | 2.23E-06    |
| ENSMMUG00000060984 | olfactory receptor, family 4, subfamily K, member 13 [Source:NCBI gene;Acc:700920]                       | 0.519844534 | 0.009935517 | 0.032253821 |
| ENSMMUG00000029455 | olfactory receptor 4Q2 [Source:NCBI gene;Acc:114679271]                                                  | 0.669092643 | 0.000254313 | 0.001364689 |
| ENSMMUG00000045269 |                                                                                                          | 2.921010532 | 0.001723194 | 0.007260891 |
| ENSMMUG00000058162 |                                                                                                          | 2.394677091 | 0.002661374 | 0.010470472 |
| ENSMMUG00000016255 | telomerase associated protein 1 [Source:VGNC Symbol;Acc:VGNC:78310]                                      | 0.99795292  | 5.15E-05    | 0.000333053 |
| ENSMMUG00000048039 | apurinic/apyrimidinic endodeoxyribonuclease 1 [Source:VGNC Symbol;Acc:VGNC:84305]                        | 1.18082956  | 0.016893832 | 0.04985498  |
| ENSMMUG00000019126 | purine nucleoside phosphorylase [Source:NCBI gene;Acc:704183]                                            | 1.165003638 | 0.001468017 | 0.00629887  |
|                    |                                                                                                          | -           |             |             |
| ENSMMUG00000020747 | NDRG family member 2 [Source:VGNC Symbol;Acc:VGNC:74953]                                                 | 2.541764494 | 0.00267746  | 0.01051367  |
|                    |                                                                                                          | -           |             |             |
| ENSMMUG00000050445 | ribonuclease A family member 8 [Source:NCBI gene;Acc:716333]                                             | 2.776054255 | 0.004807121 | 0.017353144 |
|                    |                                                                                                          | -           |             |             |
| ENSMMUG00000006457 | Rho guanine nucleotide exchange factor 40 [Source:VGNC Symbol;Acc:VGNC:69907]                            | 2.948939343 | 1.14E-06    | 1.08E-05    |
|                    |                                                                                                          | -           |             |             |
| ENSMMUG00000014809 | heterogeneous nuclear ribonucleoprotein C [Source:VGNC Symbol;Acc:VGNC:84348]                            | 2.245201623 | 0.000759576 | 0.00356416  |
|                    |                                                                                                          | -           |             |             |
| ENSMMUG00000021552 | RPGR interacting protein 1 [Source:VGNC Symbol;Acc:VGNC:77007]                                           | 2.618931013 | 4.25E-10    | 8.04E-09    |
|                    |                                                                                                          | -           |             |             |
| ENSMMUG00000055229 |                                                                                                          | 2.913457406 | 3.16E-21    | 2.71E-19    |
|                    |                                                                                                          | -           |             |             |
| ENSMMUG00000015000 | SPT16 homolog, facilitates chromatin remodeling subunit [Source:VGNC Symbol;Acc:VGNC:78054]              | 2.149336134 | 1.50E-13    | 4.94E-12    |
|                    |                                                                                                          | -           |             |             |
| ENSMMUG00000015002 | chromodomain helicase DNA binding protein 8 [Source:VGNC Symbol;Acc:VGNC:71060]                          | 2.368462645 | 3.71E-08    | 4.83E-07    |
| ENSMMUG00000015004 | TOX high mobility group box family member 4 [Source:NCBI gene;Acc:706950]                                | -1.68597947 | 0.000184884 | 0.001031732 |
|                    |                                                                                                          | -           |             |             |
| ENSMMUG00000057062 |                                                                                                          | 1.202620844 | 0.004540596 | 0.016509915 |
|                    |                                                                                                          | -           |             |             |
| ENSMMUG00000062974 |                                                                                                          | 1.493355768 | 3.89E-09    | 6.08E-08    |
|                    |                                                                                                          | -           |             |             |
| ENSMMUG00000040154 | T cell receptor alpha variable 9-2 [Source:HGNC Symbol;Acc:HGNC:12154]                                   | 1.443798799 | 4.45E-06    | 3.69E-05    |
|                    |                                                                                                          | -           |             |             |
| ENSMMUG00000038070 | T cell receptor alpha variable 12-3 [Source:HGNC Symbol;Acc:HGNC:12107]                                  | 1.515377199 | 1.14E-11    | 2.80E-10    |
|                    |                                                                                                          | -           |             |             |
| ENSMMUG00000054116 | T cell receptor alpha variable 8-6 [Source:HGNC Symbol;Acc:HGNC:12151]                                   | 1.645820995 | 1.24E-11    | 3.02E-10    |
| ENSMMUG00000056910 |                                                                                                          | -1.86692489 | 1.12E-10    | 2.33E-09    |
| ENSMMUG00000063215 | T cell receptor alpha variable 29/delta variable 5 (gene/pseudogene) [Source:HGNC Symbol;Acc:HGNC:12127] | 0.97901706  | 0.00209837  | 0.008614517 |
| ENSMMUG00000009441 | abhydrolase domain containing 4 [Source:VGNC Symbol;Acc:VGNC:84296]                                      | 2.22323252  | 7.02E-06    | 5.56E-05    |
|                    |                                                                                                          | -           |             |             |
| ENSMMUG00000000413 | solute carrier family 7 member 7 [Source:VGNC Symbol;Acc:VGNC:77631]                                     | 0.718515852 | 0.001000443 | 0.004528086 |
|                    |                                                                                                          | -           |             |             |
| ENSMMUG00000014750 | embryonal Fyn-associated substrate [Source:VGNC Symbol;Acc:VGNC:72056]                                   | 0.810344413 | 0.016883913 | 0.049835826 |
|                    |                                                                                                          | -           |             |             |
| ENSMMUG00000014762 | myosin heavy chain 6 [Source:NCBI gene;Acc:713471]                                                       | 1.152479717 | 7.39E-18    | 4.33E-16    |
| ENSMMUG00000029420 |                                                                                                          | 1.781388733 | 2.28E-07    | 2.56E-06    |
| ENSMMUG00000014766 | neuroguidin [Source:VGNC Symbol;Acc:VGNC:75220]                                                          | 1.318496303 | 8.57E-12    | 2.16E-10    |
| ENSMMUG00000045970 | thiamine triphosphatase [Source:NCBI gene;Acc:714403]                                                    | 1.210087368 | 5.99E-17    | 3.20E-15    |



|                     |                                                                                         |             |             |             |
|---------------------|-----------------------------------------------------------------------------------------|-------------|-------------|-------------|
| ENSMMUG00000014771  | zinc finger homeobox 2 [Source:NCBI gene;Acc:100429448]                                 | 1.398174852 | 1.58E-20    | 1.28E-18    |
| ENSMMUG00000004144  | adaptor related protein complex 1 subunit gamma 2 [Source:VGNC Symbol;Acc:VGNC:69959]   | 0.364746681 | 0.013334009 | 0.041110602 |
| ENSMMUG000000059196 |                                                                                         | 0.507276181 | 3.42E-07    | 3.70E-06    |
| ENSMMUG00000012462  | proteasome activator subunit 1 [Source:VGNC Symbol;Acc:VGNC:76455]                      | -1.77266006 | 9.38E-07    | 9.09E-06    |
|                     |                                                                                         | -           |             |             |
| ENSMMUG00000012473  | proteasome activator subunit 2 [Source:VGNC Symbol;Acc:VGNC:76456]                      | 2.173750848 | 3.56E-05    | 0.000239689 |
|                     |                                                                                         | -           |             |             |
| ENSMMUG00000012474  | ring finger protein 31 [Source:NCBI gene;Acc:715239]                                    | 2.228681302 | 1.48E-05    | 0.000108583 |
|                     |                                                                                         | -           |             |             |
| ENSMMUG00000040817  | interferon regulatory factor 9 [Source:VGNC Symbol;Acc:VGNC:84361]                      | 2.529526773 | 2.21E-05    | 0.000156044 |
|                     |                                                                                         | -           |             |             |
| ENSMMUG00000012480  | REC8 meiotic recombination protein [Source:VGNC Symbol;Acc:VGNC:76746]                  | 2.542172539 | 1.23E-11    | 3.01E-10    |
|                     |                                                                                         | -           |             |             |
| ENSMMUG00000012481  | importin 4 [Source:VGNC Symbol;Acc:VGNC:73630]                                          | 2.057808506 | 6.61E-10    | 1.20E-08    |
|                     |                                                                                         | -           |             |             |
| ENSMMUG00000029407  | TERF1 interacting nuclear factor 2 [Source:VGNC Symbol;Acc:VGNC:78359]                  | 2.477601688 | 0.001517441 | 0.006488752 |
|                     |                                                                                         | -           |             |             |
| ENSMMUG00000012452  | transglutaminase 1 [Source:NCBI gene;Acc:715854]                                        | 2.471282446 | 0.00515482  | 0.018434347 |
|                     |                                                                                         | -           |             |             |
| ENSMMUG00000010049  | NOP9 nucleolar protein [Source:VGNC Symbol;Acc:VGNC:75216]                              | 2.437274349 | 0.000604507 | 0.002920476 |
|                     |                                                                                         | -           |             |             |
| ENSMMUG00000020698  | adenylate cyclase 4 [Source:NCBI gene;Acc:714684]                                       | 2.746741064 | 0.012186921 | 0.038132    |
| ENSMMUG00000019692  | sec1 family domain containing 1 [Source:VGNC Symbol;Acc:VGNC:77065]                     | 0.522094588 | 0.006468121 | 0.022313024 |
|                     |                                                                                         | -           |             |             |
| ENSMMUG00000011515  | striatin 3 [Source:VGNC Symbol;Acc:VGNC:78127]                                          | 1.328478066 | 0.000321102 | 0.001671872 |
|                     |                                                                                         | -           |             |             |
| ENSMMUG00000003120  | HECT domain E3 ubiquitin protein ligase 1 [Source:VGNC Symbol;Acc:VGNC:73200]           | 0.952319214 | 2.19E-05    | 0.000155055 |
| ENSMMUG000000056906 |                                                                                         | 1.295278723 | 2.26E-11    | 5.24E-10    |
|                     |                                                                                         | -           |             |             |
| ENSMMUG00000012576  | sorting nexin 6 [Source:NCBI gene;Acc:693626]                                           | 0.833898349 | 0.003743223 | 0.014060785 |
|                     |                                                                                         | -           |             |             |
| ENSMMUG00000015073  | signal recognition particle 54 [Source:VGNC Symbol;Acc:VGNC:82247]                      | 0.399216863 | 0.008302099 | 0.027693348 |
|                     |                                                                                         | -           |             |             |
| ENSMMUG00000003530  | protein phosphatase 2 regulatory subunit B"gamma [Source:VGNC Symbol;Acc:VGNC:76279]    | 0.368502963 | 0.013770899 | 0.042224754 |
| ENSMMUG000000056013 | forkhead box A1 [Source:NCBI gene;Acc:697909]                                           | 2.38821074  | 0.000862803 | 0.003991906 |
|                     |                                                                                         | -           |             |             |
| ENSMMUG00000017677  | chromosome 7 C14orf28 homolog [Source:VGNC Symbol;Acc:VGNC:70581]                       | 0.501131966 | 8.73E-05    | 0.000529637 |
| ENSMMUG00000003913  | DNA polymerase epsilon 2, accessory subunit [Source:VGNC Symbol;Acc:VGNC:76204]         | 0.627104869 | 0.001078207 | 0.00481977  |
|                     |                                                                                         | -           |             |             |
| ENSMMUG00000003914  | kelch domain containing 1 [Source:VGNC Symbol;Acc:VGNC:74086]                           | 0.677172115 | 0.013993975 | 0.042791422 |
|                     |                                                                                         | -           |             |             |
| ENSMMUG000000055903 | Metazoan signal recognition particle RNA [Source:RFAM;Acc:RF00017]                      | 1.423847923 | 0.014853974 | 0.044929717 |
| ENSMMUG000000049543 |                                                                                         | 1.027014873 | 0.00058736  | 0.002845201 |
| ENSMMUG000000059134 |                                                                                         | 1.393925206 | 0.000356601 | 0.001831769 |
|                     |                                                                                         | -           |             |             |
| ENSMMUG00000007460  | valosin containing protein lysine methyltransferase [Source:VGNC Symbol;Acc:VGNC:81602] | 1.265199601 | 0.007393376 | 0.025146818 |
| ENSMMUG00000009577  | atlastin GTPase 1 [Source:VGNC Symbol;Acc:VGNC:70049]                                   | 0.574589131 | 1.83E-05    | 0.000131154 |
| ENSMMUG00000014658  | ninein [Source:VGNC Symbol;Acc:VGNC:75177]                                              | 2.459027971 | 3.91E-11    | 8.78E-10    |
| ENSMMUG000000056844 |                                                                                         | 1.499242126 | 0.00102644  | 0.004626684 |
| ENSMMUG00000018274  | FERM domain containing 6 [Source:VGNC Symbol;Acc:VGNC:72747]                            | 0.585403576 | 0.002164614 | 0.008851473 |
| ENSMMUG00000018200  | RNA transcription, translation and transport factor [Source:VGNC Symbol;Acc:VGNC:77087] | 2.109144318 | 0.001180497 | 0.005217658 |
| ENSMMUG00000000024  | prostaglandin D2 receptor [Source:VGNC Symbol;Acc:VGNC:76467]                           | 1.123129079 | 5.58E-05    | 0.000357149 |
| ENSMMUG00000000023  | prostaglandin E receptor 2 [Source:VGNC Symbol;Acc:VGNC:76468]                          | 1.248575513 | 1.49E-06    | 1.38E-05    |
| ENSMMUG00000006997  | thioredoxin domain containing 16 [Source:VGNC Symbol;Acc:VGNC:79214]                    | 1.784612227 | 2.37E-28    | 4.59E-26    |

|                    |                                                                                                                                     |             |             |             |
|--------------------|-------------------------------------------------------------------------------------------------------------------------------------|-------------|-------------|-------------|
| ENSMMUG00000010689 | fermitin family member 2 [Source:VGNC Symbol;Acc:VGNC:82144]                                                                        | 0.860321375 | 1.44E-07    | 1.69E-06    |
| ENSMMUG00000052273 | glia maturation factor beta [Source:NCBI gene;Acc:696440]                                                                           | 1.144214193 | 0.005666892 | 0.020014482 |
| ENSMMUG00000010315 | sterile alpha motif domain containing 4A [Source:VGNC Symbol;Acc:VGNC:77085]                                                        | 1.088454338 | 0.014466702 | 0.04394117  |
| ENSMMUG00000004084 | GTP cyclohydrolase 1 [Source:VGNC Symbol;Acc:VGNC:72900]                                                                            | 0.912583306 | 0.000297945 | 0.001564182 |
| ENSMMUG00000000302 | WD repeat and HMG-box DNA binding protein 1 [Source:VGNC Symbol;Acc:VGNC:79376]                                                     | 1.609334083 | 1.94E-18    | 1.23E-16    |
| ENSMMUG00000054112 |                                                                                                                                     | 0.418158022 | 0.003368762 | 0.012846718 |
| ENSMMUG00000003567 | DLG associated protein 5 [Source:VGNC Symbol;Acc:VGNC:71850]                                                                        | 0.422956185 | 0.01421742  | 0.043356122 |
| ENSMMUG00000049334 |                                                                                                                                     | 0.726667259 | 0.001109509 | 0.004939951 |
| ENSMMUG00000023041 | TATA-box binding protein like 2 [Source:VGNC Symbol;Acc:VGNC:78175]                                                                 | 0.635746233 | 0.00544566  | 0.019331762 |
| ENSMMUG00000061576 |                                                                                                                                     | 1.62579604  | 0.000100202 | 0.000596982 |
| ENSMMUG00000053489 |                                                                                                                                     | 1.021599126 | 3.23E-05    | 0.000219382 |
| ENSMMUG00000059984 | pellino E3 ubiquitin protein ligase family member 2 [Source:NCBI gene;Acc:699169]                                                   | 1.260611909 | 0.012406611 | 0.0387277   |
| ENSMMUG00000003508 | actin related protein 10 [Source:VGNC Symbol;Acc:VGNC:69449]                                                                        | 0.40743035  | 0.001372742 | 0.005948003 |
| ENSMMUG00000011965 | coiled-coil domain containing 175 [Source:VGNC Symbol;Acc:VGNC:84317]                                                               | 1.476548796 | 0.000340687 | 0.001759972 |
| ENSMMUG00000011966 | reticulon 1 [Source:NCBI gene;Acc:619184]                                                                                           | 1.317418904 | 0.000251097 | 0.001348928 |
| ENSMMUG00000004854 | leucine rich repeat containing 9 [Source:VGNC Symbol;Acc:VGNC:81443]                                                                | 1.035148896 | 6.12E-07    | 6.22E-06    |
| ENSMMUG00000002540 | dehydrogenase/reductase 7 [Source:VGNC Symbol;Acc:VGNC:71690]                                                                       | 0.525020156 | 1.24E-07    | 1.47E-06    |
| ENSMMUG00000001640 | SIX homeobox 4 [Source:NCBI gene;Acc:703798]                                                                                        | 0.730351859 | 0.010516679 | 0.033748557 |
| ENSMMUG00000001642 | MNAT1 component of CDK activating kinase [Source:VGNC Symbol;Acc:VGNC:74905]                                                        | 0.632066414 | 0.013600028 | 0.041802581 |
| ENSMMUG00000051446 |                                                                                                                                     | 0.651268758 | 0.009289581 | 0.030525008 |
| ENSMMUG00000007264 | transmembrane protein 30B [Source:VGNC Symbol;Acc:VGNC:79656]                                                                       | -0.67563671 | 0.013346926 | 0.041141701 |
| ENSMMUG00000002260 | protein kinase C eta [Source:VGNC Symbol;Acc:VGNC:84424]                                                                            | 1.097006504 | 1.26E-13    | 4.21E-12    |
| ENSMMUG00000008203 | ras homolog family member J [Source:VGNC Symbol;Acc:VGNC:76885]                                                                     | 0.542004157 | 0.007792517 | 0.02622218  |
| ENSMMUG00000001008 | spectrin repeat containing nuclear envelope protein 2 [Source:NCBI gene;Acc:706759]                                                 | -0.75181036 | 0.000372024 | 0.001900252 |
| ENSMMUG00000001319 | methylenetetrahydrofolate dehydrogenase, cyclohydrolase and formyltetrahydrofolate synthetase 1 [Source:VGNC Symbol;Acc:VGNC:84399] | -1.05863189 | 1.68E-12    | 4.73E-11    |
| ENSMMUG00000004748 | zinc finger and BTB domain containing 1 [Source:VGNC Symbol;Acc:VGNC:79238]                                                         | 1.059398938 | 6.30E-09    | 9.58E-08    |
| ENSMMUG00000056063 |                                                                                                                                     | 2.405707482 | 1.04E-05    | 7.91E-05    |
| ENSMMUG00000019172 | spectrin beta, erythrocytic [Source:VGNC Symbol;Acc:VGNC:77870]                                                                     | 0.728811888 | 0.000236661 | 0.001279889 |
| ENSMMUG00000004339 | RAB15, member RAS oncogene family [Source:VGNC Symbol;Acc:VGNC:81519]                                                               | 0.790452239 | 1.63E-06    | 1.49E-05    |
| ENSMMUG00000004341 | MYC associated factor X [Source:VGNC Symbol;Acc:VGNC:74667]                                                                         | 4.372113105 | 0.002956597 | 0.011491994 |
| ENSMMUG00000053774 |                                                                                                                                     | 2.152902055 | 0.002442596 | 0.009762997 |
| ENSMMUG00000013848 | fucosyltransferase 8 [Source:VGNC Symbol;Acc:VGNC:72829]                                                                            | 1.522085085 | 2.25E-10    | 4.42E-09    |
| ENSMMUG00000013907 | ribosomal protein S27a [Source:NCBI gene;Acc:718909]                                                                                | 2.064968834 | 5.60E-05    | 0.000357946 |
| ENSMMUG00000006768 | coiled-coil domain containing 196 [Source:VGNC Symbol;Acc:VGNC:70828]                                                               | 1.474799034 | 5.57E-05    | 0.000356839 |
| ENSMMUG00000009520 | gephyrin [Source:VGNC Symbol;Acc:VGNC:72948]                                                                                        | 1.470760406 | 3.81E-06    | 3.21E-05    |
| ENSMMUG00000021418 | ATPase H+ transporting V1 subunit D [Source:VGNC Symbol;Acc:VGNC:70060]                                                             | 0.780049781 | 1.23E-05    | 9.21E-05    |
| ENSMMUG00000015865 | arginase 2 [Source:VGNC Symbol;Acc:VGNC:70005]                                                                                      | 1.516221631 | 2.16E-06    | 1.92E-05    |
| ENSMMUG00000015866 | vesicle transport through interaction with t-SNAREs 1B [Source:NCBI gene;Acc:711113]                                                | 1.112519901 | 7.10E-07    | 7.10E-06    |

|                     |                                                                                                      |   |             |             |             |
|---------------------|------------------------------------------------------------------------------------------------------|---|-------------|-------------|-------------|
| ENSMMUG00000015869  | retinol dehydrogenase 12 [Source:VGNC Symbol;Acc:VGNC:76781]                                         | - | 0.872876828 | 0.01680176  | 0.049694239 |
| ENSMMUG00000015871  | zinc finger FYVE-type containing 26 [Source:VGNC Symbol;Acc:VGNC:79283]                              | - | 1.100257045 | 0.013788968 | 0.042271241 |
| ENSMMUG00000059398  |                                                                                                      | - | 3.254288714 | 0.007342005 | 0.024983785 |
| ENSMMUG00000010767  | actinin alpha 1 [Source:VGNC Symbol;Acc:VGNC:69423]                                                  | - | 1.119913547 | 0.00786486  | 0.026428911 |
| ENSMMUG00000021572  | solute carrier family 39 member 9 [Source:VGNC Symbol;Acc:VGNC:77523]                                | - | 0.514403224 | 0.013988858 | 0.042784774 |
| ENSMMUG00000003240  | pleckstrin homology and coiled-coil domain containing D1 [Source:VGNC Symbol;Acc:VGNC:76080]         | - | 0.302343685 | 0.009318136 | 0.03058671  |
| ENSMMUG00000055018  | sushi domain containing 6 [Source:NCBI gene;Acc:712719]                                              | - | 1.66042169  | 8.34E-14    | 2.88E-12    |
| ENSMMUG00000022407  | serine and arginine rich splicing factor 5 [Source:NCBI gene;Acc:712867]                             | - | 1.073804514 | 3.51E-05    | 0.000236288 |
| ENSMMUG00000022409  | solute carrier family 10 member 1 [Source:VGNC Symbol;Acc:VGNC:77380]                                | - | 1.356495472 | 9.18E-15    | 3.70E-13    |
| ENSMMUG00000045443  |                                                                                                      | - | 1.565947752 | 0.002422191 | 0.009692097 |
| ENSMMUG00000052692  | disintegrin and metalloproteinase domain-containing protein 20-like [Source:NCBI gene;Acc:114679594] | - | 0.883840951 | 0.002204297 | 0.008980905 |
| ENSMMUG00000019470  | pecanex 1 [Source:VGNC Symbol;Acc:VGNC:75655]                                                        | - | 0.490535932 | 0.00209109  | 0.00858948  |
| ENSMMUG00000001820  | regulator of G protein signaling 6 [Source:VGNC Symbol;Acc:VGNC:76691]                               | - | 2.980073761 | 0.016283854 | 0.048428474 |
| ENSMMUG00000002332  | RNA binding motif protein 25 [Source:VGNC Symbol;Acc:VGNC:76521]                                     | - | 1.779498863 | 1.88E-07    | 2.15E-06    |
| ENSMMUG00000010173  | presenilin 1 [Source:VGNC Symbol;Acc:VGNC:76435]                                                     | - | 1.032175488 | 5.37E-06    | 4.36E-05    |
| ENSMMUG00000056580  | Metazoan signal recognition particle RNA [Source:RFAM;Acc:RF00017]                                   | - | 2.307536552 | 0.004640715 | 0.016827657 |
| ENSMMUG00000000313  | HEAT repeat containing 4 [Source:VGNC Symbol;Acc:VGNC:73176]                                         | - | 1.155673585 | 1.06E-12    | 3.07E-11    |
| ENSMMUG000000053481 |                                                                                                      | - | 1.421296721 | 1.36E-08    | 1.94E-07    |
| ENSMMUG000000049894 |                                                                                                      | - | 1.669957905 | 1.51E-05    | 0.000110489 |
| ENSMMUG00000006855  | acyl-CoA thioesterase 2 [Source:NCBI gene;Acc:697011]                                                | - | 1.412866575 | 3.49E-12    | 9.33E-11    |
| ENSMMUG00000004910  | dynein axonemal light chain 1 [Source:VGNC Symbol;Acc:VGNC:71885]                                    | - | 1.190105837 | 0.000235312 | 0.00127544  |
| ENSMMUG00000004913  | mitotic deacetylase associated SANT domain protein [Source:VGNC Symbol;Acc:VGNC:72073]               | - | 0.744549939 | 1.01E-08    | 1.47E-07    |
| ENSMMUG00000038996  | synapse differentiation inducing 1 like [Source:NCBI gene;Acc:699046]                                | - | 1.222490654 | 0.011764569 | 0.037001631 |
| ENSMMUG00000056376  |                                                                                                      | - | 2.467790905 | 6.69E-14    | 2.35E-12    |
| ENSMMUG00000004255  | YLP motif containing 1 [Source:VGNC Symbol;Acc:VGNC:79092]                                           | - | 1.313228009 | 2.55E-05    | 0.000177334 |
| ENSMMUG00000015166  | NIMA related kinase 9 [Source:VGNC Symbol;Acc:VGNC:75209]                                            | - | 0.900761268 | 5.90E-18    | 3.53E-16    |
| ENSMMUG00000015168  | transmembrane p24 trafficking protein 10 [Source:NCBI gene;Acc:701522]                               | - | 0.981511194 | 3.29E-05    | 0.000222722 |
| ENSMMUG00000040100  | Fos proto-oncogene, AP-1 transcription factor subunit [Source:VGNC Symbol;Acc:VGNC:84340]            | - | 0.669881067 | 3.82E-08    | 4.97E-07    |
| ENSMMUG00000003834  | basic leucine zipper ATF-like transcription factor [Source:VGNC Symbol;Acc:VGNC:70229]               | - | 1.021286707 | 3.33E-05    | 0.00022579  |
| ENSMMUG00000012065  | tubulin tyrosine ligase like 5 [Source:NCBI gene;Acc:703116]                                         | - | 1.326980965 | 2.25E-09    | 3.70E-08    |
| ENSMMUG00000008792  | G-patch domain containing 2 like [Source:VGNC Symbol;Acc:VGNC:72973]                                 | - | 1.151507474 | 8.68E-05    | 0.000526789 |
| ENSMMUG00000016773  | estrogen related receptor beta [Source:VGNC Symbol;Acc:VGNC:72434]                                   | - | 0.591111444 | 0.001449761 | 0.006231573 |
| ENSMMUG00000057021  | CLOCK interacting pacemaker [Source:NCBI gene;Acc:704679]                                            | - | -1.35906711 | 3.44E-05    | 0.000232057 |
| ENSMMUG00000007561  | zinc finger DHHC-type palmitoyltransferase 22 [Source:NCBI gene;Acc:706468]                          | - | 1.507306768 | 3.14E-11    | 7.16E-10    |
| ENSMMUG00000023626  | alkB homolog 1, histone H2A dioxygenase [Source:VGNC Symbol;Acc:VGNC:69630]                          | - | 1.397269411 | 0.002050085 | 0.008440127 |
| ENSMMUG00000019710  | centrosomal protein 128 [Source:VGNC Symbol;Acc:VGNC:71062]                                          | - | 0.950374934 | 0.000737032 | 0.003469635 |
| ENSMMUG00000019713  | thyroid stimulating hormone receptor [Source:VGNC Symbol;Acc:VGNC:78662]                             | - | 0.935627114 | 0.000731569 | 0.003449502 |
| ENSMMUG00000022122  | general transcription factor IIA subunit 1 [Source:VGNC Symbol;Acc:VGNC:73305]                       | - | 1.257736742 | 0.013479955 | 0.041472614 |

|                     |                                                                                       |             |             |             |
|---------------------|---------------------------------------------------------------------------------------|-------------|-------------|-------------|
| ENSMMUG00000022124  | stonin 2 [Source:VGNC Symbol;Acc:VGNC:78249]                                          | 1.251950946 | 0.000665027 | 0.003178009 |
| ENSMMUG00000010016  | SEL1L adaptor subunit of ERAD E3 ubiquitin ligase [Source:VGNC Symbol;Acc:VGNC:77155] | 2.038997913 | 0.013282487 | 0.040960441 |
| ENSMMUG00000017261  | galactosylceramidase [Source:VGNC Symbol;Acc:VGNC:72867]                              | 1.088205236 | 4.57E-12    | 1.21E-10    |
| ENSMMUG00000017260  | G protein-coupled receptor 65 [Source:VGNC Symbol;Acc:VGNC:73140]                     | 0.889147239 | 1.76E-05    | 0.000126344 |
| ENSMMUG00000021011  | spermatogenesis associated 7 [Source:VGNC Symbol;Acc:VGNC:77971]                      | -1.3020927  | 0.008896732 | 0.029420334 |
| ENSMMUG00000004603  | zinc finger CCCH-type containing 14 [Source:VGNC Symbol;Acc:VGNC:79255]               | 0.637186429 | 6.83E-08    | 8.48E-07    |
| ENSMMUG00000004606  | EMAP like 5 [Source:VGNC Symbol;Acc:VGNC:72067]                                       | 0.987738662 | 1.39E-10    | 2.86E-09    |
| ENSMMUG00000004460  | tyrosyl-DNA phosphodiesterase 1 [Source:VGNC Symbol;Acc:VGNC:79164]                   | 0.818514839 | 0.001726478 | 0.007270513 |
| ENSMMUG00000008964  | D-glutamate cyclase [Source:VGNC Symbol;Acc:VGNC:71685]                               | 1.13209611  | 0.001410978 | 0.006086463 |
| ENSMMUG00000008447  | fibulin 5 [Source:VGNC Symbol;Acc:VGNC:72622]                                         | 1.022509928 | 0.000218296 | 0.001197129 |
| ENSMMUG00000000699  | cleavage and polyadenylation specific factor 2 [Source:VGNC Symbol;Acc:VGNC:71473]    | 0.499809715 | 0.007804616 | 0.026250852 |
| ENSMMUG00000009974  | inositol-tetrakisphosphate 1-kinase [Source:VGNC Symbol;Acc:VGNC:73802]               | 1.423436843 | 0.002805466 | 0.010977944 |
| ENSMMUG000000044581 | modulator of apoptosis 1 [Source:VGNC Symbol;Acc:VGNC:84392]                          | 1.209735847 | 2.47E-06    | 2.17E-05    |
| ENSMMUG000000061833 | transmembrane protein 251 [Source:NCBI gene;Acc:708131]                               | 1.451317072 | 7.18E-06    | 5.68E-05    |
| ENSMMUG000000053729 |                                                                                       | 0.366713135 | 0.012253442 | 0.038290689 |
| ENSMMUG000000052453 | serpin family A member 11 [Source:NCBI gene;Acc:701483]                               | 2.36572358  | 7.83E-05    | 0.000481511 |
| ENSMMUG000000012356 | serpin family A member 9 [Source:VGNC Symbol;Acc:VGNC:77241]                          | 1.780902583 | 9.71E-07    | 9.37E-06    |
| ENSMMUG000000020586 | serpin family A member 12 [Source:VGNC Symbol;Acc:VGNC:77266]                         | 4.241214081 | 0.000191012 | 0.001061442 |
| ENSMMUG000000000681 | calmin [Source:VGNC Symbol;Acc:VGNC:71232]                                            | 0.778907476 | 8.12E-10    | 1.45E-08    |
| ENSMMUG000000003658 | autophagy related 2B [Source:VGNC Symbol;Acc:VGNC:84310]                              | 1.082647677 | 0.002572496 | 0.010189749 |
| ENSMMUG000000003261 | BAF chromatin remodeling complex subunit BCL11B [Source:VGNC Symbol;Acc:VGNC:70056]   | 1.527150262 | 2.61E-09    | 4.23E-08    |
| ENSMMUG000000051552 |                                                                                       | 1.392055279 | 1.66E-07    | 1.93E-06    |
| ENSMMUG000000061892 |                                                                                       | 1.364829713 | 1.86E-11    | 4.42E-10    |
| ENSMMUG000000049437 | Metazoan signal recognition particle RNA [Source:RFAM;Acc:RF00017]                    | 1.367734767 | 0.000107989 | 0.000638405 |
| ENSMMUG000000029197 | YY1 transcription factor [Source:NCBI gene;Acc:717370]                                | 1.297535521 | 2.73E-06    | 2.36E-05    |
| ENSMMUG000000013871 | WD repeat domain 25 [Source:VGNC Symbol;Acc:VGNC:78420]                               | 2.737088769 | 1.36E-24    | 1.54E-22    |
| ENSMMUG000000000186 | protein phosphatase 2 regulatory subunit B'gamma [Source:NCBI gene;Acc:718894]        | 0.460107045 | 1.18E-07    | 1.40E-06    |
| ENSMMUG000000005780 | dynein cytoplasmic 1 heavy chain 1 [Source:VGNC Symbol;Acc:VGNC:71951]                | 0.410834819 | 1.22E-05    | 9.16E-05    |
| ENSMMUG000000007140 | MOK protein kinase [Source:VGNC Symbol;Acc:VGNC:84394]                                | 1.674937093 | 1.61E-05    | 0.000116821 |
| ENSMMUG000000003483 | cyclin dependent kinase 2 interacting protein [Source:VGNC Symbol;Acc:VGNC:71326]     | 0.760640387 | 0.015081929 | 0.045477288 |
| ENSMMUG000000003484 | tectonin beta-propeller repeat containing 2 [Source:NCBI gene;Acc:708959]             | 1.446215227 | 9.92E-10    | 1.73E-08    |
| ENSMMUG000000005845 | REST corepressor 1 [Source:VGNC Symbol;Acc:VGNC:76752]                                | 0.74429019  | 0.000466779 | 0.002332612 |
| ENSMMUG000000008380 | CDC42 binding protein kinase beta [Source:VGNC Symbol;Acc:VGNC:81369]                 | 0.625469486 | 0.005106539 | 0.018288682 |
| ENSMMUG000000029186 | exocyst complex component 3 like 4 [Source:VGNC Symbol;Acc:VGNC:72305]                | 3.519775478 | 0.000713223 | 0.003372844 |
| ENSMMUG000000050495 |                                                                                       | 2.639112608 | 1.19E-06    | 1.13E-05    |
| ENSMMUG000000021634 | TNF alpha induced protein 2 [Source:VGNC Symbol;Acc:VGNC:78579]                       | 2.382044005 | 2.17E-23    | 2.16E-21    |
| ENSMMUG000000049145 | creatine kinase B [Source:NCBI gene;Acc:711167]                                       | 0.40004922  | 0.000615464 | 0.002966511 |
| ENSMMUG000000018121 | zinc finger FYVE-type containing 21 [Source:VGNC Symbol;Acc:VGNC:79282]               | 0.317054543 | 0.006406294 | 0.022147039 |
| ENSMMUG000000052518 | SIVA1 apoptosis inducing factor [Source:NCBI gene;Acc:706688]                         | 2.426299621 | 9.20E-05    | 0.000554193 |
| ENSMMUG000000064694 | AHNAK nucleoprotein 2 [Source:NCBI gene;Acc:707626]                                   | 3.069438125 | 0.000108252 | 0.000639701 |

|                    |                                                                                             |             |             |             |
|--------------------|---------------------------------------------------------------------------------------------|-------------|-------------|-------------|
| ENSMMUG0000001273  | clathrin binding box of aftiphilin containing 1 [Source:VGNC Symbol;Acc:VGNC:84325]         | 2.100513517 | 5.94E-10    | 1.09E-08    |
| ENSMMUG00000065019 | Metazoan signal recognition particle RNA [Source:RFAM;Acc:RF00017]                          | 2.129295722 | 1.58E-05    | 0.000115182 |
| ENSMMUG00000022939 | phosphofurin acidic cluster sorting protein 2 [Source:VGNC Symbol;Acc:VGNC:75671]           | 1.061792935 | 0.006493542 | 0.022390091 |
| ENSMMUG00000007159 | tubulin epsilon and delta complex 1 [Source:VGNC Symbol;Acc:VGNC:79235]                     | 1.823708705 | 9.92E-05    | 0.000592297 |
| ENSMMUG00000015202 |                                                                                             | 2.182913429 | 0.001481171 | 0.006349686 |
| ENSMMUG00000040771 |                                                                                             | 1.632820668 | 1.52E-05    | 0.000111622 |
| ENSMMUG00000059525 |                                                                                             | 1.878854791 | 5.71E-05    | 0.000363981 |
| ENSMMUG00000055207 |                                                                                             | 3.775307821 | 2.83E-08    | 3.76E-07    |
| ENSMMUG00000060892 |                                                                                             | 2.650089086 | 1.41E-13    | 4.65E-12    |
| ENSMMUG00000064429 | immunoglobulin heavy variable 1-45 [Source:HGNC Symbol;Acc:HGNC:5553]                       | 3.844042017 | 0.001328226 | 0.005779633 |
| ENSMMUG00000052929 |                                                                                             | -4.14904743 | 2.90E-08    | 3.86E-07    |
| ENSMMUG00000052535 |                                                                                             | 3.188992329 | 0.000461451 | 0.002308365 |
| ENSMMUG00000057719 |                                                                                             | 2.480100028 | 0.005691659 | 0.020072695 |
| ENSMMUG00000063346 |                                                                                             | 3.549773568 | 5.20E-06    | 4.24E-05    |
| ENSMMUG00000038067 |                                                                                             | 1.097650601 | 0.000291188 | 0.001535922 |
| ENSMMUG00000053333 | acetylserotonin O-methyltransferase like [Source:NCBI gene;Acc:106995142]                   | 3.587355775 | 0.005243875 | 0.018711392 |
| ENSMMUG00000000443 | arylsulfatase F [Source:VGNC Symbol;Acc:VGNC:81362]                                         | 0.890534695 | 1.70E-05    | 0.000122939 |
| ENSMMUG00000017378 | steroid sulfatase [Source:VGNC Symbol;Acc:VGNC:81590]                                       | 1.428842969 | 0.004605324 | 0.016716004 |
| ENSMMUG00000010252 | FERM and PDZ domain containing 4 [Source:VGNC Symbol;Acc:VGNC:72802]                        | 0.848590041 | 0.000261808 | 0.001402323 |
| ENSMMUG00000003482 | glycine receptor alpha 2 [Source:VGNC Symbol;Acc:VGNC:73075]                                | 1.054574574 | 0.000204663 | 0.001127117 |
| ENSMMUG00000015737 | phosphatidylinositol glycan anchor biosynthesis class A [Source:VGNC Symbol;Acc:VGNC:75984] | 0.918117124 | 2.53E-06    | 2.21E-05    |
| ENSMMUG00000015740 | pirin [Source:VGNC Symbol;Acc:VGNC:75893]                                                   | 0.676042478 | 0.009144365 | 0.030143227 |
| ENSMMUG00000004797 | CTP synthase 2 [Source:VGNC Symbol;Acc:VGNC:71550]                                          | 1.638543273 | 8.96E-08    | 1.08E-06    |
| ENSMMUG00000058700 | Metazoan signal recognition particle RNA [Source:RFAM;Acc:RF00017]                          | 3.221015467 | 0.000732836 | 0.003452118 |
| ENSMMUG00000019363 | synapse associated protein 1 [Source:VGNC Symbol;Acc:VGNC:78135]                            | 2.279642601 | 2.93E-12    | 7.90E-11    |
| ENSMMUG00000016237 | taxilin gamma [Source:NCBI gene;Acc:713769]                                                 | 3.050655004 | 3.65E-05    | 0.000244717 |
| ENSMMUG00000002134 | ribosomal protein S6 kinase A3 [Source:VGNC Symbol;Acc:VGNC:76929]                          | 0.748779852 | 0.009815662 | 0.031950354 |
| ENSMMUG00000001088 | patched domain containing 1 [Source:VGNC Symbol;Acc:VGNC:76322]                             | 1.464075171 | 3.55E-08    | 4.64E-07    |
| ENSMMUG00000061261 | Metazoan signal recognition particle RNA [Source:RFAM;Acc:RF00017]                          | 1.057516663 | 0.002099876 | 0.008618265 |
| ENSMMUG00000042317 | putative transcription factor SPT20 homolog-like 2 [Source:NCBI gene;Acc:100429227]         | 0.808292807 | 0.005432894 | 0.019295867 |
| ENSMMUG00000012819 | pyruvate dehydrogenase kinase 3 [Source:VGNC Symbol;Acc:VGNC:75934]                         | 1.197232341 | 0.00028035  | 0.001490653 |
| ENSMMUG00000012775 | nuclear receptor subfamily 0 group B member 1 [Source:NCBI gene;Acc:574154]                 | 1.324840958 | 0.010155888 | 0.032837219 |
| ENSMMUG00000005959 | glycerol kinase [Source:NCBI gene;Acc:707531]                                               | 0.457475388 | 0.015222079 | 0.045823847 |
| ENSMMUG00000013220 | cytochrome b-245 beta chain [Source:VGNC Symbol;Acc:VGNC:71576]                             | 0.779954072 | 0.00591878  | 0.020737843 |

|                     |                                                                                             |             |             |             |
|---------------------|---------------------------------------------------------------------------------------------|-------------|-------------|-------------|
| ENSMMUG00000045877  | mitochondrial pyruvate carrier 1 like [Source:NCBI gene;Acc:705293]                         | 2.733795616 | 0.015616776 | 0.046789175 |
| ENSMMUG00000005264  | mediator complex subunit 14 [Source:VGNC Symbol;Acc:VGNC:74561]                             | 0.643993366 | 0.002288202 | 0.009257887 |
| ENSMMUG000000063721 |                                                                                             | -0.7584249  | 7.39E-09    | 1.11E-07    |
| ENSMMUG000000055907 |                                                                                             | 0.627510019 | 0.001805503 | 0.007557329 |
| ENSMMUG000000057909 |                                                                                             | 1.220688986 | 0.002266385 | 0.00919008  |
|                     |                                                                                             | -           |             |             |
| ENSMMUG000000057804 |                                                                                             | 1.826542879 | 0.002038171 | 0.008405358 |
|                     |                                                                                             | -           |             |             |
| ENSMMUG00000003897  | solute carrier family 9 member A7 [Source:NCBI gene;Acc:710906]                             | 0.744163887 | 3.32E-07    | 3.60E-06    |
| ENSMMUG000000049666 |                                                                                             | 0.457292715 | 0.015955539 | 0.047598127 |
| ENSMMUG000000023016 | jade family PHD finger 3 [Source:VGNC Symbol;Acc:VGNC:73640]                                | 1.327259988 | 4.52E-15    | 1.91E-13    |
| ENSMMUG000000019546 | regucalcin [Source:VGNC Symbol;Acc:VGNC:76912]                                              | 1.673726519 | 5.15E-05    | 0.000332637 |
|                     |                                                                                             | -           |             |             |
| ENSMMUG000000017423 | RNA binding motif protein 10 [Source:VGNC Symbol;Acc:VGNC:76680]                            | 1.871288254 | 0.005855837 | 0.020542062 |
|                     |                                                                                             | -           |             |             |
| ENSMMUG000000014002 | cyclin dependent kinase 16 [Source:VGNC Symbol;Acc:VGNC:71160]                              | 1.231535882 | 0.001583642 | 0.006741258 |
|                     |                                                                                             | -           |             |             |
| ENSMMUG000000016608 | ubiquitin specific peptidase 11 [Source:VGNC Symbol;Acc:VGNC:78734]                         | 1.318898325 | 0.010164212 | 0.032856827 |
| ENSMMUG000000008566 | zinc finger protein 157 [Source:VGNC Symbol;Acc:VGNC:78850]                                 | 0.714744366 | 2.05E-06    | 1.83E-05    |
|                     |                                                                                             | -           |             |             |
| ENSMMUG000000010404 | zinc finger protein 41 [Source:VGNC Symbol;Acc:VGNC:78900]                                  | 0.830783419 | 0.000369709 | 0.001889752 |
|                     |                                                                                             | -           |             |             |
| ENSMMUG000000063703 |                                                                                             | 0.856012519 | 0.00253587  | 0.010083136 |
|                     |                                                                                             | -           |             |             |
| ENSMMUG000000019768 | suppressor of variegation 3-9 homolog 1 [Source:VGNC Symbol;Acc:VGNC:78061]                 | 0.756857238 | 0.002064251 | 0.008493635 |
| ENSMMUG000000016465 | histone deacetylase 6 [Source:VGNC Symbol;Acc:VGNC:73164]                                   | 0.954067025 | 5.92E-12    | 1.53E-10    |
| ENSMMUG000000016467 | ES cell expressed Ras [Source:VGNC Symbol;Acc:VGNC:72256]                                   | 1.07292571  | 0.016949852 | 0.049969579 |
| ENSMMUG000000016469 | proprotein convertase subtilisin/kexin type 1 inhibitor [Source:VGNC Symbol;Acc:VGNC:75639] | 1.93579871  | 0.001178338 | 0.0052097   |
| ENSMMUG000000004558 | OTU deubiquitinase 5 [Source:VGNC Symbol;Acc:VGNC:75677]                                    | 0.954840518 | 9.59E-10    | 1.67E-08    |
| ENSMMUG000000004559 | potassium voltage-gated channel subfamily D member 1 [Source:VGNC Symbol;Acc:VGNC:73975]    | -1.41837096 | 0.005625945 | 0.019908559 |
| ENSMMUG000000010617 | coiled-coil domain containing 120 [Source:VGNC Symbol;Acc:VGNC:70664]                       | 0.423059594 | 0.004419785 | 0.016163628 |
| ENSMMUG000000023025 | synaptophysin [Source:VGNC Symbol;Acc:VGNC:78072]                                           | 0.623585688 | 1.77E-06    | 1.60E-05    |
| ENSMMUG000000008618 | calcium voltage-gated channel subunit alpha1 F [Source:VGNC Symbol;Acc:VGNC:70503]          | 1.018774996 | 2.87E-20    | 2.23E-18    |
| ENSMMUG000000008623 | coiled-coil domain containing 22 [Source:VGNC Symbol;Acc:VGNC:70899]                        | 1.127902208 | 4.71E-14    | 1.71E-12    |
| ENSMMUG000000052252 | protein phosphatase 1 regulatory subunit 3F [Source:NCBI gene;Acc:715950]                   | 1.425259964 | 1.38E-23    | 1.40E-21    |
| ENSMMUG000000060311 | G antigen 10-like [Source:NCBI gene;Acc:114674954]                                          | 0.422470811 | 0.010382198 | 0.033449915 |
| ENSMMUG000000041376 | G antigen 10 [Source:NCBI gene;Acc:693330]                                                  | 1.265256048 | 5.35E-10    | 9.94E-09    |
| ENSMMUG000000026584 | Y RNA [Source:RFAM;Acc:RF00019]                                                             | 1.893039048 | 0.008377624 | 0.027900462 |
| ENSMMUG000000056042 | Y RNA [Source:RFAM;Acc:RF00019]                                                             | 2.749588628 | 0.003323134 | 0.012712738 |
| ENSMMUG000000023060 | A-kinase anchoring protein 4 [Source:VGNC Symbol;Acc:VGNC:69770]                            | 2.469120587 | 4.65E-09    | 7.20E-08    |
| ENSMMUG000000045093 | cyclin B3 [Source:NCBI gene;Acc:694534]                                                     | 2.213290869 | 3.36E-15    | 1.47E-13    |
| ENSMMUG000000049267 |                                                                                             | 5.050299395 | 4.51E-25    | 5.65E-23    |
| ENSMMUG000000060192 | bone morphogenetic protein 15 [Source:NCBI gene;Acc:695457]                                 | 3.718997044 | 0.004459929 | 0.016265427 |
|                     |                                                                                             | -           |             |             |
| ENSMMUG000000020202 | melanoma-associated antigen D4 [Source:NCBI gene;Acc:106996411]                             | 1.021990649 | 0.006399931 | 0.022139313 |
| ENSMMUG000000012073 | X antigen family member 1-like [Source:NCBI gene;Acc:106996044]                             | -0.46785563 | 0.015454306 | 0.046417199 |
|                     |                                                                                             | -           |             |             |
| ENSMMUG000000046218 | X antigen family member 5 [Source:NCBI gene;Acc:114669729]                                  | 1.130070149 | 0.000463698 | 0.00231801  |
|                     |                                                                                             | -           |             |             |
| ENSMMUG000000053262 |                                                                                             | 0.644551655 | 0.001290591 | 0.005637417 |
| ENSMMUG000000020555 | IQ motif and Sec7 domain ArfGEF 2 [Source:VGNC Symbol;Acc:VGNC:73676]                       | -0.46199999 | 0.000580501 | 0.002817611 |
|                     |                                                                                             | -           |             |             |
| ENSMMUG000000047741 | Metazoan signal recognition particle RNA [Source:RFAM;Acc:RF00017]                          | 0.877888114 | 0.000125697 | 0.000732365 |

|                    |                                                                                                 |   |             |             |             |
|--------------------|-------------------------------------------------------------------------------------------------|---|-------------|-------------|-------------|
| ENSMMUG0000008422  | trophinin [Source:NCBI gene;Acc:704512]                                                         | - | 0.746466184 | 3.24E-05    | 0.000220083 |
| ENSMMUG00000059922 | family with sequence similarity 104 member B [Source:NCBI gene;Acc:705418]                      | - | 3.973978265 | 5.90E-07    | 6.03E-06    |
| ENSMMUG00000051670 |                                                                                                 | - | -1.40124092 | 5.72E-09    | 8.75E-08    |
| ENSMMUG00000054377 |                                                                                                 | - | 0.770075014 | 1.98E-10    | 3.95E-09    |
| ENSMMUG00000063913 | endogenous retrovirus group K member 7 Env polyprotein-like [Source:NCBI gene;Acc:114674933]    | - | 3.12287277  | 0.000144798 | 0.000831988 |
| ENSMMUG00000059335 |                                                                                                 | - | 5.225182954 | 6.28E-08    | 7.83E-07    |
| ENSMMUG00000004309 | APC membrane recruitment protein 1 [Source:VGNC Symbol;Acc:VGNC:69716]                          | - | 5.639327132 | 1.30E-07    | 1.53E-06    |
| ENSMMUG00000048462 | Metazoan signal recognition particle RNA [Source:RFAM;Acc:RF00017]                              | - | 4.591456196 | 3.69E-05    | 0.000247181 |
| ENSMMUG00000065109 | ankyrin repeat and SOCS box containing 12 [Source:NCBI gene;Acc:707931]                         | - | 3.858513324 | 0.000341385 | 0.001762953 |
| ENSMMUG00000004274 | myotubularin related protein 8 [Source:VGNC Symbol;Acc:VGNC:74974]                              | - | 4.077758049 | 0.000272548 | 0.001453956 |
| ENSMMUG00000065001 |                                                                                                 | - | 0.533701587 | 8.60E-05    | 0.000522341 |
| ENSMMUG00000047336 | praja ring finger ubiquitin ligase 1 [Source:NCBI gene;Acc:695038]                              | - | 0.418247255 | 0.001633072 | 0.006927331 |
| ENSMMUG00000061393 | OTU deubiquitinase 6A [Source:NCBI gene;Acc:694498]                                             | - | 1.684173339 | 0.00975667  | 0.031779679 |
| ENSMMUG00000054817 | immunoglobulin binding protein 1 [Source:NCBI gene;Acc:694632]                                  | - | 1.232613784 | 4.97E-05    | 0.000322979 |
| ENSMMUG00000013934 | pyrimidinergic receptor P2Y4 [Source:VGNC Symbol;Acc:VGNC:75739]                                | - | 1.231058079 | 0.016491835 | 0.048966873 |
| ENSMMUG00000013937 | RAB41, member RAS oncogene family [Source:VGNC Symbol;Acc:VGNC:81544]                           | - | -1.07332758 | 0.002576729 | 0.010198178 |
| ENSMMUG00000013940 | kinesin family member 4A [Source:NCBI gene;Acc:695574]                                          | - | 1.343489704 | 0.000963363 | 0.004385973 |
| ENSMMUG00000013943 | glycerophosphodiester phosphodiesterase domain containing 2 [Source:VGNC Symbol;Acc:VGNC:72787] | - | 1.937646467 | 4.61E-05    | 0.000302628 |
| ENSMMUG00000003049 | testis expressed 11 [Source:VGNC Symbol;Acc:VGNC:78316]                                         | - | 3.105894413 | 1.70E-09    | 2.86E-08    |
| ENSMMUG00000032429 | forkhead box O4 [Source:VGNC Symbol;Acc:VGNC:72712]                                             | - | 1.591107692 | 9.43E-15    | 3.78E-13    |
| ENSMMUG00000032427 | neuroligin 3 [Source:NCBI gene;Acc:574216]                                                      | - | 1.167002406 | 8.98E-09    | 1.33E-07    |
| ENSMMUG00000000669 | gap junction protein beta 1 [Source:VGNC Symbol;Acc:VGNC:73059]                                 | - | 2.137618285 | 2.92E-05    | 0.000199996 |
| ENSMMUG00000000667 | zinc finger MYM-type containing 3 [Source:VGNC Symbol;Acc:VGNC:78886]                           | - | 1.238702572 | 5.55E-05    | 0.000355456 |
| ENSMMUG00000015238 | O-linked N-acetylglucosamine (GlcNAc) transferase [Source:NCBI gene;Acc:698268]                 | - | -1.00736573 | 6.06E-08    | 7.58E-07    |
| ENSMMUG00000011469 | germ cell nuclear acidic peptidase [Source:VGNC Symbol;Acc:VGNC:72724]                          | - | -1.9038939  | 0.000317261 | 0.001654239 |
| ENSMMUG00000054132 |                                                                                                 | - | 2.836263532 | 0.003299527 | 0.012639058 |
| ENSMMUG00000063858 |                                                                                                 | - | 0.387242849 | 0.00163149  | 0.006922641 |
| ENSMMUG00000009249 | ring finger protein, LIM domain interacting [Source:NCBI gene;Acc:703471]                       | - | 0.733347777 | 3.55E-07    | 3.82E-06    |
| ENSMMUG00000053505 | U6 spliceosomal RNA [Source:RFAM;Acc:RF00026]                                                   | - | 1.215238154 | 0.007661337 | 0.025894642 |
| ENSMMUG00000017660 |                                                                                                 | - | 1.336819253 | 2.79E-12    | 7.55E-11    |
| ENSMMUG00000011440 | neurite extension and migration factor [Source:VGNC Symbol;Acc:VGNC:75274]                      | - | 1.364336886 | 1.69E-06    | 1.54E-05    |
| ENSMMUG00000015619 | ATP binding cassette subfamily B member 7 [Source:VGNC Symbol;Acc:VGNC:81340]                   | - | 0.913474859 | 0.000383316 | 0.001954496 |
| ENSMMUG00000049351 | MAGE family member E1 [Source:NCBI gene;Acc:705379]                                             | - | 1.438404222 | 2.27E-15    | 1.01E-13    |
| ENSMMUG00000014407 | magnesium transporter 1 [Source:VGNC Symbol;Acc:VGNC:74386]                                     | - | 0.810272139 | 1.32E-06    | 1.23E-05    |
| ENSMMUG00000015861 | cytochrome c oxidase subunit VIIb [Source:NCBI gene;Acc:706099]                                 | - | 0.839683475 | 1.53E-05    | 0.000112069 |
| ENSMMUG00000013387 | cysteinyl leukotriene receptor 1 [Source:VGNC Symbol;Acc:VGNC:71646]                            | - | 1.426668695 | 2.12E-12    | 5.89E-11    |
| ENSMMUG00000052073 |                                                                                                 | - | 1.313220413 | 1.51E-15    | 6.96E-14    |

|                    |                                                                                         |             |             |             |
|--------------------|-----------------------------------------------------------------------------------------|-------------|-------------|-------------|
| ENSMMUG00000049425 |                                                                                         | 0.663756191 | 0.010950259 | 0.034931735 |
| ENSMMUG00000053430 |                                                                                         | 0.998367558 | 0.000687285 | 0.003270397 |
|                    |                                                                                         | -           |             |             |
| ENSMMUG00000008212 | tenomodulin [Source:VGNC Symbol;Acc:VGNC:79087]                                         | 0.805913222 | 0.00396984  | 0.014751932 |
|                    |                                                                                         | -           |             |             |
| ENSMMUG00000013008 | cleavage stimulation factor subunit 2 [Source:VGNC Symbol;Acc:VGNC:71536]               | 1.103269698 | 0.000135317 | 0.000783085 |
|                    |                                                                                         | -           |             |             |
| ENSMMUG00000004178 | NADPH oxidase 1 [Source:VGNC Symbol;Acc:VGNC:75374]                                     | 1.751852033 | 6.22E-12    | 1.60E-10    |
|                    |                                                                                         | -           |             |             |
| ENSMMUG00000065018 | transmembrane protein 35A [Source:NCBI gene;Acc:702205]                                 | 1.253667285 | 2.68E-06    | 2.33E-05    |
|                    |                                                                                         | -           |             |             |
| ENSMMUG00000007601 | centromere protein I [Source:NCBI gene;Acc:702316]                                      | 0.905911964 | 0.000324712 | 0.001689457 |
| ENSMMUG00000059432 |                                                                                         | 2.178644408 | 0.000254574 | 0.00136559  |
| ENSMMUG00000022281 | family with sequence similarity 199, X-linked [Source:NCBI gene;Acc:699523]             | 2.165524    | 0.005141034 | 0.018389571 |
| ENSMMUG00000013150 | MORC family CW-type zinc finger 4 [Source:VGNC Symbol;Acc:VGNC:74808]                   | 1.469419875 | 4.41E-19    | 3.06E-17    |
| ENSMMUG00000013146 | claudin 2 [Source:HGNC Symbol;Acc:HGNC:2041]                                            | 1.556640053 | 1.82E-21    | 1.59E-19    |
|                    |                                                                                         | -           |             |             |
| ENSMMUG00000022293 | FERM and PDZ domain containing 3 [Source:VGNC Symbol;Acc:VGNC:72805]                    | 0.646180775 | 1.27E-07    | 1.51E-06    |
|                    |                                                                                         | -           |             |             |
| ENSMMUG00000004674 | phosphoribosyl pyrophosphate synthetase 1 [Source:NCBI gene;Acc:702529]                 | 1.031142093 | 3.13E-13    | 9.80E-12    |
| ENSMMUG00000007688 | angiomin 1 [Source:VGNC Symbol;Acc:VGNC:69627]                                          | 4.153800951 | 4.46E-05    | 0.000293916 |
| ENSMMUG00000006377 | plastin 3 [Source:VGNC Symbol;Acc:VGNC:76181]                                           | 0.738923324 | 0.001789916 | 0.007500725 |
| ENSMMUG00000055906 | angiotensin II receptor type 2 [Source:NCBI gene;Acc:709513]                            | 1.968939556 | 8.69E-06    | 6.72E-05    |
| ENSMMUG00000026243 | U6 spliceosomal RNA [Source:RFAM;Acc:RF00026]                                           | 2.2947595   | 0.004557352 | 0.016562557 |
| ENSMMUG00000057063 | solute carrier family 6 member 14 [Source:NCBI gene;Acc:709598]                         | 1.715745667 | 0.004463187 | 0.016273227 |
|                    |                                                                                         | -           |             |             |
| ENSMMUG00000008781 | BCL6 corepressor like 1 [Source:VGNC Symbol;Acc:VGNC:70131]                             | 0.731901457 | 4.93E-07    | 5.14E-06    |
|                    |                                                                                         | -           |             |             |
| ENSMMUG00000063900 | Metazoan signal recognition particle RNA [Source:RFAM;Acc:RF00017]                      | 2.209784968 | 0.016810691 | 0.04971054  |
|                    |                                                                                         | -           |             |             |
| ENSMMUG00000004954 | apoptosis inducing factor mitochondria associated 1 [Source:VGNC Symbol;Acc:VGNC:69820] | 0.695270909 | 0.001434651 | 0.006175756 |
|                    |                                                                                         | -           |             |             |
| ENSMMUG00000003479 | FERM domain containing 7 [Source:VGNC Symbol;Acc:VGNC:72927]                            | 1.137892375 | 0.001402371 | 0.006054727 |
|                    |                                                                                         | -           |             |             |
| ENSMMUG00000048745 | RAP2C, member of RAS oncogene family [Source:NCBI gene;Acc:705986]                      | 0.774977689 | 0.002332196 | 0.009396656 |
|                    |                                                                                         | -           |             |             |
| ENSMMUG00000025616 |                                                                                         | 3.384244608 | 0.000282069 | 0.001498699 |
|                    |                                                                                         | -           |             |             |
| ENSMMUG00000003456 | glypican 4 [Source:VGNC Symbol;Acc:VGNC:73118]                                          | 0.533621436 | 7.11E-07    | 7.10E-06    |
| ENSMMUG00000009622 | glypican 3 [Source:VGNC Symbol;Acc:VGNC:73117]                                          | 0.888446504 | 0.003754531 | 0.014099617 |
| ENSMMUG00000032341 | coiled-coil domain containing 160 [Source:VGNC Symbol;Acc:VGNC:70926]                   | 0.860782304 | 2.16E-09    | 3.55E-08    |
|                    |                                                                                         | -           |             |             |
| ENSMMUG00000016610 | CD99 molecule like 2 [Source:VGNC Symbol;Acc:VGNC:70823]                                | 1.749145592 | 4.61E-08    | 5.89E-07    |
| ENSMMUG00000016929 | proline rich and Gla domain 3 [Source:VGNC Symbol;Acc:VGNC:76350]                       | 1.975180067 | 1.31E-05    | 9.79E-05    |
| ENSMMUG00000040974 | fetal and adult testis expressed 1 [Source:NCBI gene;Acc:704368]                        | 2.883446816 | 0.000847516 | 0.003933695 |
| ENSMMUG00000063694 | cyclic nucleotide gated channel subunit alpha 2 [Source:NCBI gene;Acc:704486]           | 0.973068324 | 9.21E-13    | 2.70E-11    |
| ENSMMUG00000062628 |                                                                                         | 1.132537017 | 0.000381778 | 0.001947334 |
| ENSMMUG00000040274 | MAGE family member A4 [Source:NCBI gene;Acc:710825]                                     | 1.004118861 | 1.73E-07    | 1.99E-06    |
| ENSMMUG00000039292 |                                                                                         | 1.527200038 | 3.60E-10    | 6.90E-09    |
| ENSMMUG00000062063 | melanoma-associated antigen 3 [Source:NCBI gene;Acc:711544]                             | 1.523855033 | 9.19E-14    | 3.17E-12    |
| ENSMMUG00000037641 | chondrosarcoma-associated gene 2/3 protein [Source:NCBI gene;Acc:106992305]             | 2.577120275 | 5.84E-05    | 0.000371466 |
| ENSMMUG00000049656 | melanoma-associated antigen 2 [Source:NCBI gene;Acc:706218]                             | 1.760536416 | 0.001172706 | 0.005186377 |
| ENSMMUG00000058013 | melanoma-associated antigen 3 [Source:NCBI gene;Acc:706103]                             | 1.818484951 | 4.15E-10    | 7.89E-09    |
| ENSMMUG00000040071 |                                                                                         | 2.490887483 | 1.68E-07    | 1.94E-06    |



|                    |                                                                                     |             |             |             |
|--------------------|-------------------------------------------------------------------------------------|-------------|-------------|-------------|
| ENSMMUG00000020743 | centrin 2 [Source:NCBI gene;Acc:693376]                                             | 1.937852999 | 0.001241986 | 0.00545362  |
| ENSMMUG00000013176 | NAD(P) dependent steroid dehydrogenase-like [Source:NCBI gene;Acc:693333]           | 2.221769673 | 8.44E-10    | 1.50E-08    |
| ENSMMUG00000010897 | PNMA family member 3 [Source:VGNC Symbol;Acc:VGNC:76063]                            | 0.450632656 | 0.006045534 | 0.021100582 |
|                    |                                                                                     | -           |             |             |
| ENSMMUG00000064249 |                                                                                     | 1.238837566 | 0.005452943 | 0.01935289  |
| ENSMMUG00000041072 |                                                                                     | -1.07213426 | 0.007648345 | 0.025868774 |
|                    |                                                                                     | -           |             |             |
| ENSMMUG00000061278 |                                                                                     | 1.330726579 | 6.58E-08    | 8.18E-07    |
| ENSMMUG00000010137 | microcephalin 1 [Source:VGNC Symbol;Acc:VGNC:74687]                                 | 2.199143811 | 1.34E-06    | 1.26E-05    |
| ENSMMUG00000058176 | b-defensin2-like [Source:NCBI gene;Acc:100169969]                                   | 2.692502203 | 3.73E-20    | 2.85E-18    |
|                    |                                                                                     | -           |             |             |
| ENSMMUG00000049842 |                                                                                     | 3.115087611 | 0.000120917 | 0.000707065 |
|                    |                                                                                     | -           |             |             |
| ENSMMUG00000052334 | defensin beta 108B [Source:NCBI gene;Acc:696933]                                    | 2.225761752 | 0.009313279 | 0.03058214  |
| ENSMMUG00000029034 | defensin beta 136 [Source:VGNC Symbol;Acc:VGNC:71826]                               | 1.88777615  | 5.01E-06    | 4.10E-05    |
|                    |                                                                                     | -           |             |             |
| ENSMMUG00000019206 | BLK proto-oncogene, Src family tyrosine kinase [Source:VGNC Symbol;Acc:VGNC:70253]  | 0.894055954 | 0.009360721 | 0.030710177 |
| ENSMMUG00000050140 | Metazoan signal recognition particle RNA [Source:RFAM;Acc:RF00017]                  | 2.540630606 | 0.001137253 | 0.005046472 |
| ENSMMUG00000063525 |                                                                                     | 2.693097494 | 1.94E-15    | 8.74E-14    |
| ENSMMUG00000054960 |                                                                                     | 2.18003132  | 2.02E-09    | 3.33E-08    |
| ENSMMUG00000027220 | microRNA 598 [Source:HGNC Symbol;Acc:HGNC:32854]                                    | 2.717294605 | 0.00332095  | 0.012707725 |
| ENSMMUG00000010180 | PIN2 (TERF1) interacting telomerase inhibitor 1 [Source:NCBI gene;Acc:701523]       | 2.400141849 | 8.40E-11    | 1.79E-09    |
|                    |                                                                                     | -           |             |             |
| ENSMMUG00000008867 | exoribonuclease 1 [Source:VGNC Symbol;Acc:VGNC:72324]                               | 2.660982577 | 0.000189835 | 0.001056521 |
| ENSMMUG00000007068 | tumor suppressor candidate 3 [Source:VGNC Symbol;Acc:VGNC:84132]                    | 3.602538335 | 1.82E-06    | 1.64E-05    |
|                    |                                                                                     | -           |             |             |
| ENSMMUG00000022303 | solute carrier family 7 member 2 [Source:VGNC Symbol;Acc:VGNC:77629]                | 0.535509725 | 2.24E-11    | 5.20E-10    |
| ENSMMUG00000001151 | microtubule associated scaffold protein 1 [Source:VGNC Symbol;Acc:VGNC:84018]       | 2.356122106 | 2.40E-32    | 6.46E-30    |
| ENSMMUG00000015487 | pericentriolar material 1 [Source:VGNC Symbol;Acc:VGNC:75781]                       | 4.39177431  | 0.001841069 | 0.007677457 |
| ENSMMUG00000005920 | N-acetyltransferase 1 [Source:VGNC Symbol;Acc:VGNC:75133]                           | 3.209557227 | 5.13E-06    | 4.18E-05    |
| ENSMMUG00000011774 | integrator complex subunit 10 [Source:VGNC Symbol;Acc:VGNC:73653]                   | 1.222807846 | 2.41E-16    | 1.21E-14    |
| ENSMMUG00000002032 | exportin 7 [Source:VGNC Symbol;Acc:VGNC:78946]                                      | -1.02709717 | 4.68E-05    | 0.000306484 |
|                    |                                                                                     | -           |             |             |
| ENSMMUG00000063764 |                                                                                     | 2.038131075 | 0.0008576   | 0.003969096 |
|                    |                                                                                     | -           |             |             |
| ENSMMUG00000013029 | surfactant protein C [Source:VGNC Symbol;Acc:VGNC:84113]                            | 2.209323567 | 7.90E-10    | 1.41E-08    |
|                    |                                                                                     | -           |             |             |
| ENSMMUG00000013031 | bone morphogenetic protein 1 [Source:VGNC Symbol;Acc:VGNC:70259]                    | 0.857324515 | 1.82E-05    | 0.000130928 |
|                    |                                                                                     | -           |             |             |
| ENSMMUG00000013032 | phytanoyl-CoA 2-hydroxylase interacting protein [Source:VGNC Symbol;Acc:VGNC:75812] | 1.125370528 | 3.01E-07    | 3.29E-06    |
|                    |                                                                                     | -           |             |             |
| ENSMMUG00000023226 | RNA polymerase III subunit D [Source:VGNC Symbol;Acc:VGNC:76017]                    | 0.720510335 | 1.80E-05    | 0.000129634 |
|                    |                                                                                     | -           |             |             |
| ENSMMUG00000052651 | Metazoan signal recognition particle RNA [Source:RFAM;Acc:RF00017]                  | 1.030476803 | 1.43E-05    | 0.000105742 |
| ENSMMUG00000014438 | piwi like RNA-mediated gene silencing 2 [Source:VGNC Symbol;Acc:VGNC:81502]         | -0.72529693 | 1.14E-07    | 1.35E-06    |
| ENSMMUG00000017713 | solute carrier family 39 member 14 [Source:VGNC Symbol;Acc:VGNC:77537]              | 0.704295768 | 0.010294402 | 0.033211213 |
| ENSMMUG00000018345 | phosphatidylethanolamine binding protein 4 [Source:VGNC Symbol;Acc:VGNC:82204]      | 1.886127148 | 1.76E-12    | 4.93E-11    |
| ENSMMUG00000050868 |                                                                                     | 1.268417085 | 0.000964406 | 0.004387972 |
| ENSMMUG00000007540 | Rho related BTB domain containing 2 [Source:VGNC Symbol;Acc:VGNC:76772]             | 0.582068157 | 0.004831002 | 0.017432847 |
| ENSMMUG00000048076 | TNF receptor superfamily member 10b [Source:NCBI gene;Acc:716650]                   | 0.651991584 | 0.000955465 | 0.004358202 |
| ENSMMUG00000056749 | Metazoan signal recognition particle RNA [Source:RFAM;Acc:RF00017]                  | 2.415157142 | 0.002514722 | 0.010015817 |
| ENSMMUG00000050549 | lysyl oxidase like 2 [Source:NCBI gene;Acc:710151]                                  | 1.616376105 | 7.70E-08    | 9.43E-07    |
| ENSMMUG00000016658 | ectonucleoside triphosphate diphosphohydrolase 4 [Source:NCBI gene;Acc:717197]      | 1.019811059 | 0.01510987  | 0.045552092 |
| ENSMMUG00000046186 | stanniocalcin 1 [Source:VGNC Symbol;Acc:VGNC:84120]                                 | 2.13530781  | 0.011330054 | 0.035930409 |

|                     |                                                                                                      |             |             |             |
|---------------------|------------------------------------------------------------------------------------------------------|-------------|-------------|-------------|
| ENSMMUG0000003348   | neurofilament light [Source:VGNC Symbol;Acc:VGNC:75307]                                              | 1.961410989 | 6.26E-21    | 5.20E-19    |
| ENSMMUG00000056605  | Metazoan signal recognition particle RNA [Source:RFAM;Acc:RF00017]                                   | 2.243662972 | 4.72E-05    | 0.000308348 |
| ENSMMUG00000059181  |                                                                                                      | 0.932581229 | 0.005798478 | 0.020385122 |
|                     |                                                                                                      | -           |             |             |
| ENSMMUG00000016018  | establishment of sister chromatid cohesion N-acetyltransferase 2 [Source:VGNC Symbol;Acc:VGNC:72374] | 1.995707601 | 0.004086517 | 0.015104423 |
| ENSMMUG00000016019  | PDZ binding kinase [Source:VGNC Symbol;Acc:VGNC:75643]                                               | -3.35392283 | 5.92E-05    | 0.000375156 |
|                     |                                                                                                      | -           |             |             |
| ENSMMUG00000022044  | scavenger receptor class A member 5 [Source:VGNC Symbol;Acc:VGNC:77117]                              | 0.791584693 | 6.30E-07    | 6.37E-06    |
|                     |                                                                                                      | -           |             |             |
| ENSMMUG00000001040  | nuclear GTPase, germinal center associated [Source:VGNC Symbol;Acc:VGNC:75497]                       | 2.814688515 | 0.016748307 | 0.049596686 |
|                     |                                                                                                      | -           |             |             |
| ENSMMUG00000005067  | elongator acetyltransferase complex subunit 3 [Source:VGNC Symbol;Acc:VGNC:72080]                    | 1.827051582 | 2.96E-10    | 5.72E-09    |
| ENSMMUG00000014981  | homeobox containing 1 [Source:VGNC Symbol;Acc:VGNC:73443]                                            | 0.803445367 | 2.53E-05    | 0.000176406 |
|                     |                                                                                                      | -           |             |             |
| ENSMMUG000000061408 |                                                                                                      | 3.949105399 | 8.37E-08    | 1.02E-06    |
|                     |                                                                                                      | -           |             |             |
| ENSMMUG000000063345 |                                                                                                      | 4.955037473 | 6.09E-11    | 1.32E-09    |
| ENSMMUG00000034978  | U6 spliceosomal RNA [Source:RFAM;Acc:RF00026]                                                        | 2.117775537 | 0.003825876 | 0.014312083 |
| ENSMMUG00000001635  | zinc finger protein 703 [Source:VGNC Symbol;Acc:VGNC:79552]                                          | 0.659142515 | 0.002967373 | 0.011521556 |
|                     |                                                                                                      | -           |             |             |
| ENSMMUG000000051162 |                                                                                                      | 2.634877481 | 0.002251593 | 0.009137748 |
| ENSMMUG00000003591  | pleckstrin homology domain containing A2 [Source:VGNC Symbol;Acc:VGNC:76026]                         | 1.483879252 | 0.000130256 | 0.000757715 |
| ENSMMUG00000019304  | indoleamine 2,3-dioxygenase 1 [Source:VGNC Symbol;Acc:VGNC:73580]                                    | 2.603426367 | 1.19E-10    | 2.46E-09    |
| ENSMMUG00000019306  | indoleamine 2,3-dioxygenase 2 [Source:VGNC Symbol;Acc:VGNC:84005]                                    | 2.79078527  | 0.00031189  | 0.001628573 |
| ENSMMUG00000000776  | zinc finger matrin-type 4 [Source:VGNC Symbol;Acc:VGNC:78424]                                        | 1.210846046 | 1.44E-09    | 2.45E-08    |
|                     |                                                                                                      | -           |             |             |
| ENSMMUG00000014721  | glycerol-3-phosphate acyltransferase 4 [Source:VGNC Symbol;Acc:VGNC:84002]                           | 0.810291809 | 0.00121711  | 0.00535993  |
|                     |                                                                                                      | -           |             |             |
| ENSMMUG00000010891  | lysine acetyltransferase 6A [Source:VGNC Symbol;Acc:VGNC:73821]                                      | 0.940611432 | 4.84E-05    | 0.000315678 |
| ENSMMUG00000020185  | voltage dependent anion channel 3 [Source:VGNC Symbol;Acc:VGNC:84135]                                | 1.832092593 | 6.43E-06    | 5.12E-05    |
| ENSMMUG00000020186  | solute carrier family 20 member 2 [Source:VGNC Symbol;Acc:VGNC:77416]                                | 1.221855212 | 0.0023004   | 0.009296892 |
| ENSMMUG00000053488  | small integral membrane protein 19 [Source:NCBI gene;Acc:705371]                                     | 0.784720146 | 3.89E-10    | 7.44E-09    |
| ENSMMUG000000062518 |                                                                                                      | 1.171335956 | 0.000571992 | 0.002779093 |
|                     |                                                                                                      | -           |             |             |
| ENSMMUG00000002781  | peroxidase like [Source:VGNC Symbol;Acc:VGNC:84107]                                                  | 0.527130803 | 0.000225507 | 0.001229632 |
| ENSMMUG000000065247 | opioid receptor kappa 1 [Source:NCBI gene;Acc:710783]                                                | 1.994980654 | 2.64E-28    | 5.04E-26    |
| ENSMMUG00000025039  | Small nucleolar RNA SNORA73 family [Source:RFAM;Acc:RF00045]                                         | 3.297583771 | 0.008166639 | 0.027297867 |
| ENSMMUG00000005478  | trimethylguanosine synthase 1 [Source:VGNC Symbol;Acc:VGNC:78404]                                    | 0.988790728 | 4.10E-05    | 0.000272136 |
| ENSMMUG00000014149  | LYN proto-oncogene, Src family tyrosine kinase [Source:VGNC Symbol;Acc:VGNC:74464]                   | 0.893136998 | 6.04E-15    | 2.51E-13    |
| ENSMMUG00000055121  | Metazoan signal recognition particle RNA [Source:RFAM;Acc:RF00017]                                   | 1.230301131 | 4.65E-06    | 3.82E-05    |
|                     |                                                                                                      | -           |             |             |
| ENSMMUG00000039862  | Metazoan signal recognition particle RNA [Source:RFAM;Acc:RF00017]                                   | 1.433640644 | 0.0035407   | 0.013393484 |
|                     |                                                                                                      | -           |             |             |
| ENSMMUG000000061268 | PLAG1 zinc finger [Source:NCBI gene;Acc:696149]                                                      | 1.374408373 | 9.78E-06    | 7.50E-05    |
|                     |                                                                                                      | -           |             |             |
| ENSMMUG000000046464 | coiled-coil-helix-coiled-coil-helix domain containing 7 [Source:VGNC Symbol;Acc:VGNC:83989]          | 1.306234874 | 1.88E-07    | 2.15E-06    |
|                     |                                                                                                      | -           |             |             |
| ENSMMUG000000061068 |                                                                                                      | 1.129541548 | 0.000193317 | 0.001072613 |
|                     |                                                                                                      | -           |             |             |
| ENSMMUG00000014810  | short chain dehydrogenase/reductase family 16C member 5 [Source:VGNC Symbol;Acc:VGNC:77343]          | 1.049658991 | 3.70E-07    | 3.97E-06    |
| ENSMMUG000000052791 |                                                                                                      | -1.23677277 | 1.55E-08    | 2.17E-07    |
|                     |                                                                                                      | -           |             |             |
| ENSMMUG00000006775  | proenkephalin [Source:VGNC Symbol;Acc:VGNC:75941]                                                    | 1.316878113 | 1.39E-09    | 2.37E-08    |

|                    |                                                                                                      |             |             |             |
|--------------------|------------------------------------------------------------------------------------------------------|-------------|-------------|-------------|
| ENSMMUG0000006543  | cytochrome P450, family 7, subfamily A, polypeptide 1 [Source:NCBI gene;Acc:698127]                  | 3.288815092 | 0.007317376 | 0.024905804 |
| ENSMMUG00000017038 | RAB2A, member RAS oncogene family [Source:VGNC Symbol;Acc:VGNC:81529]                                | 0.604718544 | 1.20E-05    | 9.05E-05    |
| ENSMMUG00000059575 |                                                                                                      | 2.129673651 | 1.38E-27    | 2.39E-25    |
| ENSMMUG00000038661 |                                                                                                      | 2.297887452 | 9.06E-25    | 1.08E-22    |
| ENSMMUG00000049866 |                                                                                                      | 1.183346545 | 4.01E-11    | 8.96E-10    |
| ENSMMUG00000014424 | ADP ribosylation factor guanine nucleotide exchange factor 1 [Source:VGNC Symbol;Acc:VGNC:69834]     | 1.695711051 | 0.008985529 | 0.029673476 |
| ENSMMUG00000045333 | Metazoan signal recognition particle RNA [Source:RFAM;Acc:RF00017]                                   | -0.5878625  | 0.000477897 | 0.00237592  |
| ENSMMUG00000007576 | EYA transcriptional coactivator and phosphatase 1 [Source:VGNC Symbol;Acc:VGNC:72453]                | 0.587971314 | 9.56E-07    | 9.24E-06    |
| ENSMMUG00000010748 | transient receptor potential cation channel subfamily A member 1 [Source:VGNC Symbol;Acc:VGNC:78429] | 0.655317912 | 0.006742566 | 0.023160841 |
| ENSMMUG00000060062 |                                                                                                      | 1.602268114 | 0.010620379 | 0.034021254 |
| ENSMMUG00000046641 |                                                                                                      | 0.491538791 | 0.002367742 | 0.009503402 |
| ENSMMUG00000007115 | RALY RNA binding protein like [Source:VGNC Symbol;Acc:VGNC:82217]                                    | 1.191131378 | 0.002277126 | 0.009220775 |
| ENSMMUG00000028699 |                                                                                                      | 0.951343855 | 0.012089584 | 0.037868194 |
| ENSMMUG00000028701 |                                                                                                      | 1.079705639 | 9.41E-05    | 0.000565287 |
| ENSMMUG00000013193 | matrix metalloproteinase 16 [Source:VGNC Symbol;Acc:VGNC:74894]                                      | 1.00614805  | 1.02E-10    | 2.13E-09    |
| ENSMMUG00000061720 |                                                                                                      | 0.713537807 | 0.013431562 | 0.041376271 |
| ENSMMUG00000021112 | epithelial splicing regulatory protein 1 [Source:VGNC Symbol;Acc:VGNC:72358]                         | 0.801426655 | 2.60E-06    | 2.26E-05    |
| ENSMMUG00000057219 | tumor protein p53 inducible nuclear protein 1 [Source:NCBI gene;Acc:700632]                          | 2.618511963 | 1.09E-05    | 8.31E-05    |
| ENSMMUG00000003878 | carboxypeptidase Q [Source:VGNC Symbol;Acc:VGNC:71426]                                               | 0.929903198 | 0.011629576 | 0.036656362 |
| ENSMMUG00000055454 |                                                                                                      | 0.493985685 | 0.000116322 | 0.000683497 |
| ENSMMUG00000060329 |                                                                                                      | 0.480020929 | 0.002704959 | 0.010607495 |
| ENSMMUG00000061917 |                                                                                                      | 0.795439761 | 2.06E-08    | 2.81E-07    |
| ENSMMUG00000014210 | metadherin [Source:VGNC Symbol;Acc:VGNC:74859]                                                       | 0.667165194 | 2.30E-07    | 2.58E-06    |
| ENSMMUG00000008926 | lysosomal protein transmembrane 4 beta [Source:VGNC Symbol;Acc:VGNC:84010]                           | 0.585549401 | 1.50E-06    | 1.39E-05    |
| ENSMMUG00000060771 |                                                                                                      | 0.801776253 | 2.94E-08    | 3.89E-07    |
| ENSMMUG00000020072 | matrilin 2 [Source:VGNC Symbol;Acc:VGNC:74665]                                                       | 0.467062731 | 0.00133408  | 0.005799497 |
| ENSMMUG00000058389 |                                                                                                      | 0.48520177  | 0.01418214  | 0.043266689 |
| ENSMMUG00000022185 | odd-skipped related transcription factor 2 [Source:VGNC Symbol;Acc:VGNC:84097]                       | 1.352906988 | 1.38E-11    | 3.35E-10    |
| ENSMMUG00000022186 | vacuolar protein sorting 13 homolog B [Source:VGNC Symbol;Acc:VGNC:79339]                            | 0.446271761 | 0.006978245 | 0.023840832 |
| ENSMMUG00000013742 | regulator of G protein signaling 22 [Source:VGNC Symbol;Acc:VGNC:82221]                              | 1.629413963 | 0.007494842 | 0.025432427 |
| ENSMMUG00000004386 | sperm associated antigen 1 [Source:VGNC Symbol;Acc:VGNC:77849]                                       | 1.337958999 | 0.004339257 | 0.015905138 |
| ENSMMUG00000061687 |                                                                                                      | -1.23825833 | 0.001237647 | 0.005438664 |
| ENSMMUG00000004387 | ring finger protein 19A, RBR E3 ubiquitin protein ligase [Source:VGNC Symbol;Acc:VGNC:82224]         | 1.329512783 | 0.000178516 | 0.000998879 |
| ENSMMUG00000051088 |                                                                                                      | 1.078151417 | 0.004136821 | 0.015255447 |
| ENSMMUG00000009958 | ankyrin repeat domain 46 [Source:VGNC Symbol;Acc:VGNC:69719]                                         | -1.75721554 | 5.27E-07    | 5.45E-06    |
| ENSMMUG00000034608 | U6 spliceosomal RNA [Source:RFAM;Acc:RF00026]                                                        | 0.804722894 | 0.004831896 | 0.017432847 |

|                     |                                                                                          |   |             |             |             |
|---------------------|------------------------------------------------------------------------------------------|---|-------------|-------------|-------------|
| ENSMMUG00000051999  |                                                                                          | - | 1.638338681 | 3.21E-05    | 0.000218054 |
| ENSMMUG00000001338  | antizyme inhibitor 1 [Source:VGNC Symbol;Acc:VGNC:70080]                                 | - | 2.828497985 | 0.000185641 | 0.001035162 |
| ENSMMUG000000054357 |                                                                                          | - | 2.565470742 | 0.002382556 | 0.009551906 |
| ENSMMUG000000010744 |                                                                                          | - | 1.399317205 | 0.00881009  | 0.029180288 |
| ENSMMUG000000011359 | eukaryotic translation initiation factor 3 subunit E [Source:VGNC Symbol;Acc:VGNC:83997] | - | 0.801878611 | 0.000326175 | 0.001694643 |
| ENSMMUG00000003435  | transcriptional repressor GATA binding 1 [Source:VGNC Symbol;Acc:VGNC:78656]             | - | 0.472810257 | 0.000969575 | 0.004405376 |
| ENSMMUG00000002068  | mediator complex subunit 30 [Source:VGNC Symbol;Acc:VGNC:74556]                          | - | 3.208801082 | 0.011401322 | 0.036117022 |
| ENSMMUG00000004903  | ectonucleotide pyrophosphatase/phosphodiesterase 2 [Source:VGNC Symbol;Acc:VGNC:72223]   | - | 0.777307307 | 0.000577824 | 0.002806175 |
| ENSMMUG000000014702 | TATA-box binding protein associated factor 2 [Source:VGNC Symbol;Acc:VGNC:78090]         | - | 0.846625987 | 0.000415357 | 0.002101649 |
| ENSMMUG000000058797 |                                                                                          | - | 0.788442459 | 1.73E-05    | 0.000124628 |
| ENSMMUG000000052557 |                                                                                          | - | 0.534161721 | 1.12E-07    | 1.33E-06    |
| ENSMMUG000000021157 | TBC1 domain family member 31 [Source:VGNC Symbol;Acc:VGNC:84121]                         | - | 3.508223027 | 6.03E-06    | 4.84E-05    |
| ENSMMUG000000020467 | ATPase family AAA domain containing 2 [Source:VGNC Symbol;Acc:VGNC:70154]                | - | -0.22434525 | 0.003225417 | 0.01237474  |
| ENSMMUG000000047542 | U4 spliceosomal RNA [Source:RFAM;Acc:RF00015]                                            | - | 1.708502237 | 0.000840882 | 0.003905401 |
| ENSMMUG000000023778 | F-box protein 32 [Source:VGNC Symbol;Acc:VGNC:72517]                                     | - | 1.126623201 | 0.000386746 | 0.001967994 |
| ENSMMUG000000054878 |                                                                                          | - | 1.283986229 | 0.009482603 | 0.031026019 |
| ENSMMUG000000054755 | transmembrane protein 65 [Source:NCBI gene;Acc:705727]                                   | - | 1.042123339 | 0.0033136   | 0.012682938 |
| ENSMMUG000000060708 |                                                                                          | - | 0.877179098 | 0.000623312 | 0.002998374 |
| ENSMMUG000000058106 | otoconin 90 [Source:NCBI gene;Acc:100429699]                                             | - | 0.844190584 | 3.46E-05    | 0.000233429 |
| ENSMMUG000000012560 | HERV-H LTR-associating 1 [Source:NCBI gene;Acc:100430297]                                | - | 0.892296554 | 0.00016395  | 0.000925567 |
| ENSMMUG000000048066 | trafficking protein particle complex 9 [Source:NCBI gene;Acc:711466]                     | - | 1.140772379 | 1.26E-08    | 1.81E-07    |
| ENSMMUG000000053837 |                                                                                          | - | 4.575685734 | 0.000354556 | 0.001823841 |
| ENSMMUG000000052421 |                                                                                          | - | 1.149469355 | 0.000448743 | 0.002255664 |
| ENSMMUG000000059617 |                                                                                          | - | 0.881508476 | 3.48E-05    | 0.000234753 |
| ENSMMUG00000001432  | t-SNARE domain containing 1 [Source:NCBI gene;Acc:701269]                                | - | 0.660728531 | 3.49E-05    | 0.000234871 |
| ENSMMUG000000019877 | adhesion G protein-coupled receptor B1 [Source:VGNC Symbol;Acc:VGNC:69597]               | - | 0.680724367 | 0.011082003 | 0.035274594 |
| ENSMMUG000000062642 |                                                                                          | - | -0.81107241 | 9.42E-05    | 0.000565319 |
| ENSMMUG00000000959  | cytochrome P450, family 11, subfamily B, polypeptide 2 [Source:NCBI gene;Acc:695914]     | - | 0.469787933 | 0.014120078 | 0.043113543 |
| ENSMMUG000000022933 | DNA topoisomerase I mitochondrial [Source:VGNC Symbol;Acc:VGNC:79821]                    | - | 0.862518637 | 1.29E-09    | 2.22E-08    |
| ENSMMUG000000059932 | Metazoan signal recognition particle RNA [Source:RFAM;Acc:RF00017]                       | - | 1.309198913 | 0.002106761 | 0.008644083 |
| ENSMMUG000000010939 | rhopilin Rho GTPase binding protein 1 [Source:VGNC Symbol;Acc:VGNC:76779]                | - | 0.738301214 | 1.29E-06    | 1.21E-05    |
| ENSMMUG000000013552 | scribble planar cell polarity protein [Source:HGNC Symbol;Acc:HGNC:30377]                | - | 1.052458568 | 8.50E-08    | 1.03E-06    |
| ENSMMUG000000013558 | poly(U) binding splicing factor 60 [Source:VGNC Symbol;Acc:VGNC:84106]                   | - | 0.860541212 | 0.002299835 | 0.009296892 |
| ENSMMUG00000000388  | plectin [Source:VGNC Symbol;Acc:VGNC:76173]                                              | - | 0.908784972 | 3.11E-07    | 3.40E-06    |
| ENSMMUG000000060194 | mml-mir-661 [Source:miRBase;Acc:MI0007902]                                               | - | -1.66397521 | 0.011450193 | 0.036232358 |
| ENSMMUG000000021279 | zinc finger MYND-type containing 11 [Source:VGNC Symbol;Acc:VGNC:79060]                  | - | 0.354161893 | 0.000202061 | 0.001114327 |
| ENSMMUG000000050907 |                                                                                          | - | 0.793845622 | 6.31E-05    | 0.000397    |

|                    |                                                                                                                                                      |             |             |             |
|--------------------|------------------------------------------------------------------------------------------------------------------------------------------------------|-------------|-------------|-------------|
| ENSMMUG00000053106 |                                                                                                                                                      | 2.157571462 | 6.33E-11    | 1.37E-09    |
| ENSMMUG00000023282 | aldo-keto reductase family 1, member C1 (dihydrodiol dehydrogenase 1; 20-alpha (3-alpha)-hydroxysteroid dehydrogenase) [Source:NCBI gene;Acc:711198] | 1.248226717 | 8.48E-07    | 8.27E-06    |
| ENSMMUG00000000958 | aldo-keto reductase family 1, member C2 [Source:NCBI gene;Acc:711360]                                                                                | 1.431825275 | 1.14E-12    | 3.28E-11    |
|                    |                                                                                                                                                      | -           |             |             |
| ENSMMUG00000001290 | ankyrin repeat and SOCS box containing 13 [Source:VGNC Symbol;Acc:VGNC:69865]                                                                        | 2.431725824 | 0.004175818 | 0.015375851 |
| ENSMMUG00000015141 | ankyrin repeat domain 16 [Source:NCBI gene;Acc:720787]                                                                                               | -2.34637835 | 1.42E-08    | 2.02E-07    |
|                    |                                                                                                                                                      | -           |             |             |
| ENSMMUG00000015143 | F-box DNA helicase 1 [Source:NCBI gene;Acc:720797]                                                                                                   | 1.652299385 | 3.06E-06    | 2.63E-05    |
|                    |                                                                                                                                                      | -           |             |             |
| ENSMMUG00000056045 |                                                                                                                                                      | 1.971215539 | 1.05E-13    | 3.57E-12    |
| ENSMMUG00000015149 | interleukin 15 receptor subunit alpha [Source:VGNC Symbol;Acc:VGNC:73711]                                                                            | -1.62461423 | 0.002546312 | 0.010113591 |
|                    |                                                                                                                                                      | -           |             |             |
| ENSMMUG00000015151 | interleukin 2 receptor subunit alpha [Source:NCBI gene;Acc:574300]                                                                                   | 1.677336494 | 2.73E-06    | 2.36E-05    |
|                    |                                                                                                                                                      | -           |             |             |
| ENSMMUG00000054646 |                                                                                                                                                      | 2.645161719 | 0.00601545  | 0.021015766 |
|                    |                                                                                                                                                      | -           |             |             |
| ENSMMUG00000010596 | 6-phosphofructo-2-kinase/fructose-2,6-biphosphatase 3 [Source:VGNC Symbol;Acc:VGNC:75959]                                                            | 2.172175488 | 0.014665783 | 0.04446225  |
| ENSMMUG00000061189 |                                                                                                                                                      | 0.426420681 | 0.004792133 | 0.017307638 |
| ENSMMUG00000052242 |                                                                                                                                                      | 0.558163538 | 0.00767354  | 0.025929857 |
|                    |                                                                                                                                                      | -           |             |             |
| ENSMMUG00000064980 |                                                                                                                                                      | 1.348887001 | 0.000446889 | 0.00224712  |
| ENSMMUG00000037449 | CUGBP Elav-like family member 2 [Source:NCBI gene;Acc:714291]                                                                                        | 0.78314403  | 0.00149644  | 0.006405697 |
|                    |                                                                                                                                                      | -           |             |             |
| ENSMMUG00000017145 | cell division cycle 123 [Source:VGNC Symbol;Acc:VGNC:70768]                                                                                          | 1.107957035 | 4.45E-07    | 4.69E-06    |
|                    |                                                                                                                                                      | -           |             |             |
| ENSMMUG00000017170 | cerebral dopamine neurotrophic factor [Source:VGNC Symbol;Acc:VGNC:71094]                                                                            | 0.473839108 | 2.73E-05    | 0.000188604 |
|                    |                                                                                                                                                      | -           |             |             |
| ENSMMUG00000017173 | heat shock protein family A (Hsp70) member 14 [Source:NCBI gene;Acc:697257]                                                                          | 1.718861996 | 1.19E-05    | 9.01E-05    |
| ENSMMUG00000011661 | integrin subunit alpha 8 [Source:VGNC Symbol;Acc:VGNC:73782]                                                                                         | 1.577640942 | 2.38E-11    | 5.52E-10    |
| ENSMMUG00000024234 | U6 spliceosomal RNA [Source:RFAM;Acc:RF00026]                                                                                                        | 2.254692285 | 1.80E-11    | 4.31E-10    |
| ENSMMUG00000016069 | cubilin [Source:VGNC Symbol;Acc:VGNC:82132]                                                                                                          | 2.328402114 | 5.42E-10    | 1.00E-08    |
| ENSMMUG00000010589 | nebullette [Source:VGNC Symbol;Acc:VGNC:75195]                                                                                                       | -0.35600315 | 0.009056213 | 0.029893316 |
| ENSMMUG00000002930 | G protein-coupled receptor 158 [Source:NCBI gene;Acc:707065]                                                                                         | 0.623275522 | 0.001459662 | 0.006269097 |
| ENSMMUG00000058873 |                                                                                                                                                      | 0.65584583  | 0.006117438 | 0.021289917 |
| ENSMMUG00000037243 | U6 spliceosomal RNA [Source:RFAM;Acc:RF00026]                                                                                                        | 1.540568341 | 7.75E-09    | 1.16E-07    |
|                    |                                                                                                                                                      | -           |             |             |
| ENSMMUG00000016410 | acyl-CoA binding domain containing 5 [Source:VGNC Symbol;Acc:VGNC:69509]                                                                             | 0.819509244 | 4.09E-05    | 0.000271556 |
| ENSMMUG00000058108 | BMP and activin membrane bound inhibitor [Source:NCBI gene;Acc:710152]                                                                               | 1.09412066  | 0.004047155 | 0.014985606 |
|                    |                                                                                                                                                      | -           |             |             |
| ENSMMUG00000001374 | supervillin [Source:NCBI gene;Acc:695267]                                                                                                            | 0.938813035 | 3.73E-06    | 3.15E-05    |
| ENSMMUG00000050047 | Metazoan signal recognition particle RNA [Source:RFAM;Acc:RF00017]                                                                                   | 0.703615837 | 0.004182663 | 0.015397156 |
|                    |                                                                                                                                                      | -           |             |             |
| ENSMMUG00000041067 | Metazoan signal recognition particle RNA [Source:RFAM;Acc:RF00017]                                                                                   | 1.219319127 | 7.53E-06    | 5.91E-05    |
|                    |                                                                                                                                                      | -           |             |             |
| ENSMMUG00000040958 | lysozyme-like protein 1 [Source:NCBI gene;Acc:698176]                                                                                                | 1.030340526 | 1.46E-08    | 2.06E-07    |
| ENSMMUG00000044214 |                                                                                                                                                      | -1.24806716 | 1.76E-09    | 2.94E-08    |
| ENSMMUG00000017767 | integrin subunit beta 1 [Source:VGNC Symbol;Acc:VGNC:73784]                                                                                          | 2.248863161 | 0.003818004 | 0.014286311 |
| ENSMMUG00000043648 |                                                                                                                                                      | 1.758366578 | 7.34E-05    | 0.000454353 |
|                    |                                                                                                                                                      | -           |             |             |
| ENSMMUG00000057199 |                                                                                                                                                      | 1.579886894 | 2.17E-05    | 0.000153343 |
|                    |                                                                                                                                                      | -           |             |             |
| ENSMMUG00000006713 | cyclin Y [Source:VGNC Symbol;Acc:VGNC:70840]                                                                                                         | 0.808573636 | 2.06E-07    | 2.33E-06    |
|                    |                                                                                                                                                      | -           |             |             |
| ENSMMUG00000054392 | zinc finger protein 239 [Source:NCBI gene;Acc:717737]                                                                                                | 0.778651368 | 0.013092101 | 0.040450557 |

|                    |                                                                                           |             |             |             |
|--------------------|-------------------------------------------------------------------------------------------|-------------|-------------|-------------|
| ENSMMUG00000056797 |                                                                                           | 2.695768636 | 0.004349521 | 0.015938741 |
| ENSMMUG00000064634 |                                                                                           | -           |             |             |
| ENSMMUG00000021308 | chromosome 9 C10orf71 homolog [Source:NCBI gene;Acc:710332]                               | 0.403299904 | 0.0030501   | 0.011798644 |
| ENSMMUG00000033001 | U6 spliceosomal RNA [Source:RFAM;Acc:RF00026]                                             | -           |             |             |
| ENSMMUG00000017380 | neuregulin 3 [Source:NCBI gene;Acc:699268]                                                | 0.937128608 | 0.00013748  | 0.000793075 |
| ENSMMUG00000055918 |                                                                                           | -0.87638537 | 1.10E-08    | 1.60E-07    |
| ENSMMUG00000040878 |                                                                                           | 2.451214853 | 0.000603699 | 0.002917544 |
|                    |                                                                                           | 3.153242087 | 2.46E-05    | 0.000171881 |
|                    |                                                                                           | 3.426202845 | 0.005683538 | 0.020058652 |
|                    |                                                                                           | -           |             |             |
| ENSMMUG00000058251 |                                                                                           | 1.451637332 | 0.014504415 | 0.044046518 |
| ENSMMUG00000057196 | pulmonary surfactant-associated protein A [Source:NCBI gene;Acc:701715]                   | 1.564643129 | 4.59E-19    | 3.17E-17    |
| ENSMMUG00000051972 | zinc finger CCHC-type containing 24 [Source:NCBI gene;Acc:702083]                         | 2.544640444 | 0.000157545 | 0.000894624 |
| ENSMMUG00000055601 |                                                                                           | 0.849942881 | 1.33E-08    | 1.89E-07    |
| ENSMMUG00000005514 | RNA polymerase III subunit A [Source:VGNC Symbol;Acc:VGNC:76138]                          | 0.562599642 | 0.000958859 | 0.004372079 |
| ENSMMUG00000009128 | discs large MAGUK scaffold protein 5 [Source:VGNC Symbol;Acc:VGNC:71921]                  | 0.654454404 | 1.71E-08    | 2.36E-07    |
|                    |                                                                                           | -           |             |             |
| ENSMMUG00000050271 |                                                                                           | 0.911413231 | 0.00094953  | 0.004333851 |
| ENSMMUG00000053916 |                                                                                           | 0.846127583 | 1.58E-06    | 1.45E-05    |
| ENSMMUG00000050841 |                                                                                           | 0.663957708 | 0.002313499 | 0.009334259 |
|                    |                                                                                           | -           |             |             |
| ENSMMUG00000021393 | calcium/calmodulin dependent protein kinase II gamma [Source:VGNC Symbol;Acc:VGNC:70525]  | 1.410078851 | 3.45E-08    | 4.52E-07    |
| ENSMMUG00000061526 | synaptopodin 2 like [Source:NCBI gene;Acc:714736]                                         | 1.096599373 | 1.63E-07    | 1.90E-06    |
| ENSMMUG00000013696 | myozenin 1 [Source:VGNC Symbol;Acc:VGNC:74951]                                            | 1.123342599 | 9.13E-06    | 7.02E-05    |
|                    |                                                                                           | -           |             |             |
| ENSMMUG00000011282 | DnaJ heat shock protein family (Hsp40) member C9 [Source:NCBI gene;Acc:707599]            | 3.205813435 | 0.015345642 | 0.046136124 |
|                    |                                                                                           | -           |             |             |
| ENSMMUG00000011274 | prolyl 4-hydroxylase subunit alpha 1 [Source:VGNC Symbol;Acc:VGNC:75741]                  | 0.404297076 | 0.003652818 | 0.013778158 |
|                    |                                                                                           | -           |             |             |
| ENSMMUG00000055226 | DNA damage inducible transcript 4 [Source:NCBI gene;Acc:715307]                           | 1.877517446 | 0.000153495 | 0.000874011 |
| ENSMMUG00000000826 | storkhead box 1 [Source:VGNC Symbol;Acc:VGNC:78197]                                       | 2.236229612 | 0.001527497 | 0.00652519  |
| ENSMMUG00000016652 | cell division cycle and apoptosis regulator 1 [Source:NCBI gene;Acc:693585]               | 0.66398777  | 0.000191084 | 0.001061442 |
| ENSMMUG00000023198 | tet methylcytosine dioxygenase 1 [Source:VGNC Symbol;Acc:VGNC:79811]                      | 0.412415485 | 0.004333272 | 0.015887207 |
| ENSMMUG00000030532 | solute carrier family 25 member 16 [Source:NCBI gene;Acc:694145]                          | 0.822538985 | 1.63E-05    | 0.000117991 |
| ENSMMUG00000019703 | RUN and FYVE domain containing 2 [Source:VGNC Symbol;Acc:VGNC:77057]                      | 0.655656823 | 0.000986435 | 0.004475593 |
| ENSMMUG00000050104 | Metazoan signal recognition particle RNA [Source:RFAM;Acc:RF00017]                        | 0.826099493 | 0.000943216 | 0.004313161 |
| ENSMMUG00000009792 | heterogeneous nuclear ribonucleoprotein H3 [Source:VGNC Symbol;Acc:VGNC:73497]            | 0.758795638 | 0.000168844 | 0.000950615 |
| ENSMMUG00000061385 |                                                                                           | 2.207322307 | 0.001831295 | 0.007645475 |
| ENSMMUG00000064928 |                                                                                           | 1.906240284 | 8.21E-05    | 0.000502266 |
|                    |                                                                                           | -           |             |             |
| ENSMMUG00000017727 | jumonji domain containing 1C [Source:VGNC Symbol;Acc:VGNC:73819]                          | 0.938612503 | 0.002706287 | 0.010609841 |
|                    |                                                                                           | -           |             |             |
| ENSMMUG00000039940 |                                                                                           | 1.472936871 | 0.000407176 | 0.002064566 |
| ENSMMUG00000009794 | protocadherin related 15 [Source:VGNC Symbol;Acc:VGNC:75608]                              | 1.4193666   | 2.99E-23    | 2.90E-21    |
|                    |                                                                                           | -           |             |             |
| ENSMMUG00000007077 | APOBEC1 complementation factor [Source:VGNC Symbol;Acc:VGNC:69523]                        | 0.342776071 | 0.007466442 | 0.025371591 |
|                    |                                                                                           | -           |             |             |
| ENSMMUG00000007078 | N-acylsphingosine amidohydrolase 2 [Source:NCBI gene;Acc:703913]                          | 0.571512148 | 1.61E-06    | 1.48E-05    |
| ENSMMUG00000007081 | sphingomyelin synthase 1 [Source:VGNC Symbol;Acc:VGNC:77341]                              | 0.816687392 | 0.003490281 | 0.013233756 |
|                    |                                                                                           | -           |             |             |
| ENSMMUG00000014343 | lipase family member J [Source:VGNC Symbol;Acc:VGNC:74333]                                | 0.818157012 | 0.003888645 | 0.014494675 |
| ENSMMUG00000061761 | interferon induced protein with tetratricopeptide repeats 2 [Source:NCBI gene;Acc:695452] | -1.17044736 | 8.66E-07    | 8.44E-06    |
|                    |                                                                                           | -           |             |             |
| ENSMMUG00000058942 |                                                                                           | 1.454264886 | 9.46E-10    | 1.66E-08    |

|                    |                                                                                                                 |             |             |             |
|--------------------|-----------------------------------------------------------------------------------------------------------------|-------------|-------------|-------------|
| ENSMMUG00000017533 | interferon induced protein with tetratricopeptide repeats 1 [Source:NCBI gene;Acc:695683]                       | 0.937631358 | 0.001006354 | 0.00455035  |
| ENSMMUG00000059038 | 5-hydroxytryptamine receptor 7 [Source:NCBI gene;Acc:696317]                                                    | 1.498047456 | 8.39E-08    | 1.02E-06    |
| ENSMMUG00000000238 | HECT domain E3 ubiquitin protein ligase 2 [Source:VGNC Symbol;Acc:VGNC:73246]                                   | -1.90730969 | 8.80E-13    | 2.59E-11    |
| ENSMMUG00000058603 |                                                                                                                 | 2.514079041 | 1.83E-07    | 2.10E-06    |
| ENSMMUG00000059608 | fibroblast growth factor binding protein 3 [Source:NCBI gene;Acc:697881]                                        | 1.153176867 | 7.95E-06    | 6.20E-05    |
| ENSMMUG00000017627 | B-TFIID TATA-box binding protein associated factor 1 [Source:VGNC Symbol;Acc:VGNC:70336]                        | 1.635204992 | 2.73E-25    | 3.54E-23    |
| ENSMMUG00000004816 | membrane associated ring-CH-type finger 5 [Source:VGNC Symbol;Acc:VGNC:74588]                                   | 1.059846421 | 1.62E-10    | 3.27E-09    |
| ENSMMUG00000011789 | hematopoietically expressed homeobox [Source:VGNC Symbol;Acc:VGNC:73376]                                        | 1.605301056 | 4.98E-14    | 1.80E-12    |
| ENSMMUG00000052637 | Metazoan signal recognition particle RNA [Source:RFAM;Acc:RF00017]                                              | 2.049461655 | 0.000104249 | 0.000619319 |
| ENSMMUG00000014708 | centrosomal protein 55 [Source:VGNC Symbol;Acc:VGNC:70935]                                                      | 0.352050081 | 0.010542148 | 0.033815359 |
| ENSMMUG00000014715 | fragile site, folic acid type, rare, fra(10)(q23.3) or fra(10)(q24.2) candidate 1 [Source:NCBI gene;Acc:700389] | 2.105618992 | 0.000289952 | 0.001531069 |
| ENSMMUG00000050975 |                                                                                                                 | 1.324154537 | 6.31E-07    | 6.38E-06    |
| ENSMMUG00000022658 | ectonucleoside triphosphate diphosphohydrolase 1 [Source:HGNC Symbol;Acc:HGNC:3363]                             | 0.477392538 | 0.003511435 | 0.01331049  |
| ENSMMUG00000001518 | zinc finger protein 518A [Source:VGNC Symbol;Acc:VGNC:79767]                                                    | 0.568599056 | 1.46E-06    | 1.35E-05    |
| ENSMMUG00000008687 | B cell linker [Source:VGNC Symbol;Acc:VGNC:70306]                                                               | 0.759865598 | 7.49E-12    | 1.90E-10    |
| ENSMMUG00000001876 | phosphoinositide-3-kinase adaptor protein 1 [Source:VGNC Symbol;Acc:VGNC:75891]                                 | 0.747647436 | 0.000608626 | 0.002939402 |
| ENSMMUG00000010427 | ligand dependent nuclear receptor corepressor [Source:NCBI gene;Acc:705646]                                     | 0.480896249 | 0.004753367 | 0.017180433 |
| ENSMMUG00000019634 | ribosomal RNA processing 12 homolog [Source:VGNC Symbol;Acc:VGNC:77122]                                         | 0.446299538 | 0.000232756 | 0.001262997 |
| ENSMMUG00000015503 | zinc finger FYVE-type containing 27 [Source:VGNC Symbol;Acc:VGNC:79623]                                         | 0.626914443 | 1.67E-07    | 1.94E-06    |
| ENSMMUG00000060995 |                                                                                                                 | 2.938470585 | 0.001912064 | 0.00794162  |
| ENSMMUG00000020603 | pyridine nucleotide-disulphide oxidoreductase domain 2 [Source:NCBI gene;Acc:707797]                            | 0.975719191 | 4.49E-11    | 9.87E-10    |
| ENSMMUG00000054904 | Metazoan signal recognition particle RNA [Source:RFAM;Acc:RF00017]                                              | 1.263938888 | 2.21E-18    | 1.38E-16    |
| ENSMMUG00000020604 | HPS1 biogenesis of lysosomal organelles complex 3 subunit 1 [Source:VGNC Symbol;Acc:VGNC:73515]                 | 1.18648869  | 5.98E-17    | 3.20E-15    |
| ENSMMUG00000049770 | Metazoan signal recognition particle RNA [Source:RFAM;Acc:RF00017]                                              | 1.566574775 | 1.46E-06    | 1.36E-05    |
| ENSMMUG00000020605 | heparanase 2 (inactive) [Source:NCBI gene;Acc:708795]                                                           | 1.019723209 | 2.61E-08    | 3.49E-07    |
| ENSMMUG00000060230 | Metazoan signal recognition particle RNA [Source:RFAM;Acc:RF00017]                                              | 0.77781916  | 0.006109004 | 0.021281235 |
| ENSMMUG00000010357 | cyclin and CBS domain divalent metal cation transport mediator 1 [Source:NCBI gene;Acc:708335]                  | 1.004454426 | 1.25E-07    | 1.49E-06    |
| ENSMMUG00000010356 | glutamic-oxaloacetic transaminase 1 [Source:VGNC Symbol;Acc:VGNC:73111]                                         | 2.523944198 | 0.002367842 | 0.009503402 |
| ENSMMUG00000063121 |                                                                                                                 | 1.166369785 | 0.00752938  | 0.025513893 |
| ENSMMUG00000003610 | sortilin related VPS10 domain containing receptor 3 [Source:VGNC Symbol;Acc:VGNC:77934]                         | 0.664348169 | 0.008920966 | 0.029480356 |
| ENSMMUG00000058962 |                                                                                                                 | 3.913270976 | 0.001277787 | 0.005587821 |
| ENSMMUG00000015117 | X-prolyl aminopeptidase 1 [Source:VGNC Symbol;Acc:VGNC:78810]                                                   | 1.482302677 | 4.62E-07    | 4.85E-06    |
| ENSMMUG00000006233 | adducin 3 [Source:VGNC Symbol;Acc:VGNC:69531]                                                                   | 1.084924535 | 0.005757107 | 0.020282664 |
| ENSMMUG00000014350 | MAX interactor 1, dimerization protein [Source:VGNC Symbol;Acc:VGNC:75087]                                      | 0.855317389 | 8.23E-05    | 0.000502859 |
| ENSMMUG00000007775 | survival motor neuron domain containing 1 [Source:NCBI gene;Acc:694761]                                         | 1.151106552 | 5.49E-05    | 0.000352652 |
| ENSMMUG00000057793 | dual specificity phosphatase 5 [Source:NCBI gene;Acc:698178]                                                    | 2.410516815 | 0.007489113 | 0.025426341 |
| ENSMMUG00000017204 | programmed cell death 4 [Source:VGNC Symbol;Acc:VGNC:75794]                                                     | 3.507796625 | 4.86E-06    | 3.99E-05    |

|                     |                                                                                                  |             |             |             |             |
|---------------------|--------------------------------------------------------------------------------------------------|-------------|-------------|-------------|-------------|
| ENSMMUG00000056056  |                                                                                                  | -           | 3.818104062 | 0.000118286 | 0.000693914 |
| ENSMMUG00000017206  | SHOC2 leucine rich repeat scaffold protein [Source:VGNC Symbol;Acc:VGNC:81569]                   | -3.35620377 | 1.89E-05    | 0.000135196 |             |
| ENSMMUG00000003548  | tectorin beta [Source:VGNC Symbol;Acc:VGNC:78306]                                                | 1.92423118  | 0.000552628 | 0.002697634 |             |
| ENSMMUG000000053789 |                                                                                                  | -           | 0.783323085 | 0.000321792 | 0.001674862 |
| ENSMMUG00000001217  | caspase 7 [Source:VGNC Symbol;Acc:VGNC:70546]                                                    | -           | 0.786098976 | 0.000194788 | 0.00107954  |
| ENSMMUG000000055239 |                                                                                                  | 0.718375353 | 1.40E-05    | 0.000103659 |             |
| ENSMMUG00000022514  | coiled-coil domain containing 186 [Source:VGNC Symbol;Acc:VGNC:70847]                            | 0.648955923 | 4.30E-11    | 9.50E-10    |             |
| ENSMMUG00000022524  | actin binding LIM protein 1 [Source:VGNC Symbol;Acc:VGNC:69587]                                  | -           | 0.315320182 | 0.016478255 | 0.048939736 |
| ENSMMUG000000058240 |                                                                                                  | -           | 1.325710264 | 5.13E-05    | 0.000332168 |
| ENSMMUG00000015414  | family with sequence similarity 160 member B1 [Source:VGNC Symbol;Acc:VGNC:72403]                | -           | 1.076673054 | 1.57E-05    | 0.000114369 |
| ENSMMUG00000001902  | TruB pseudouridine synthase family member 1 [Source:VGNC Symbol;Acc:VGNC:79005]                  | 1.014931377 | 0.008116245 | 0.027154397 |             |
| ENSMMUG00000020080  | GDNF family receptor alpha 1 [Source:VGNC Symbol;Acc:VGNC:72917]                                 | 2.86710254  | 0.000155879 | 0.000886895 |             |
| ENSMMUG00000021610  | regulator of G protein signaling 10 [Source:VGNC Symbol;Acc:VGNC:76915]                          | 1.862970781 | 3.10E-18    | 1.92E-16    |             |
| ENSMMUG000000054942 |                                                                                                  | 1.274895763 | 0.001298027 | 0.005664789 |             |
| ENSMMUG00000001472  | TIA1 cytotoxic granule associated RNA binding protein like 1 [Source:VGNC Symbol;Acc:VGNC:78354] | 1.432905989 | 4.62E-06    | 3.80E-05    |             |
| ENSMMUG00000009559  | minichromosome maintenance complex binding protein [Source:VGNC Symbol;Acc:VGNC:74583]           | 1.712421812 | 1.92E-08    | 2.63E-07    |             |
| ENSMMUG00000009561  | SEC23 interacting protein [Source:VGNC Symbol;Acc:VGNC:77255]                                    | -           | 1.028873609 | 0.001530018 | 0.006534039 |
| ENSMMUG000000064321 |                                                                                                  | 1.656964839 | 4.70E-08    | 5.99E-07    |             |
| ENSMMUG000000064557 |                                                                                                  | 1.615552813 | 2.72E-15    | 1.20E-13    |             |
| ENSMMUG000000052711 |                                                                                                  | -           | 0.462589735 | 0.007930374 | 0.026618297 |
| ENSMMUG00000000684  | acyl-CoA dehydrogenase short/branched chain [Source:VGNC Symbol;Acc:VGNC:81343]                  | -           | 0.986618855 | 0.015778091 | 0.04717526  |
| ENSMMUG00000020346  | carboxypeptidase X, M14 family member 2 [Source:VGNC Symbol;Acc:VGNC:71596]                      | 0.853992859 | 1.46E-07    | 1.72E-06    |             |
| ENSMMUG000000058933 |                                                                                                  | -1.38164407 | 0.001130916 | 0.005024487 |             |
| ENSMMUG00000008539  | uroporphyrinogen III synthase [Source:VGNC Symbol;Acc:VGNC:78731]                                | -           | 0.705995556 | 0.000122115 | 0.000713498 |
| ENSMMUG00000008541  | BRCA2 and CDKN1A interacting protein [Source:NCBI gene;Acc:699437]                               | -           | 0.701815545 | 0.000133088 | 0.000771718 |
| ENSMMUG00000008542  | DEAH-box helicase 32 (putative) [Source:NCBI gene;Acc:695919]                                    | -           | 0.489822874 | 0.003921482 | 0.014590141 |
| ENSMMUG000000053682 |                                                                                                  | 1.412878513 | 0.003641385 | 0.013740001 |             |
| ENSMMUG00000013653  | lysine demethylase 5A [Source:VGNC Symbol;Acc:VGNC:82169]                                        | 0.456824421 | 5.46E-05    | 0.000350935 |             |
| ENSMMUG00000013894  | beta-1,4-N-acetyl-galactosaminyltransferase 3 [Source:VGNC Symbol;Acc:VGNC:70121]                | -           | 1.495080316 | 5.25E-05    | 0.000338577 |
| ENSMMUG00000007405  | FKBP prolyl isomerase 4 [Source:VGNC Symbol;Acc:VGNC:72664]                                      | -           | 1.557132218 | 0.006799683 | 0.023296487 |
| ENSMMUG00000007411  | integrin alpha FG-GAP repeat containing 2 [Source:VGNC Symbol;Acc:VGNC:73690]                    | -           | 1.813254501 | 5.30E-14    | 1.90E-12    |
| ENSMMUG00000007424  | nuclear receptor interacting protein 2 [Source:VGNC Symbol;Acc:VGNC:75448]                       | -           | 1.705771674 | 2.57E-13    | 8.11E-12    |
| ENSMMUG00000037675  | testis expressed 52 [Source:NCBI gene;Acc:107000723]                                             | -           | 1.190464568 | 3.60E-15    | 1.55E-13    |
| ENSMMUG000000061935 |                                                                                                  | 3.495840831 | 2.84E-26    | 4.13E-24    |             |
| ENSMMUG00000015189  | RAD51 associated protein 1 [Source:VGNC Symbol;Acc:VGNC:76497]                                   | -           | 0.998195181 | 0.000111218 | 0.000655098 |
| ENSMMUG00000020811  | dual specificity tyrosine phosphorylation regulated kinase 4 [Source:NCBI gene;Acc:710999]       | -           | 0.549312469 | 0.005637418 | 0.019939452 |



|                    |                                                                                         |   |             |             |             |
|--------------------|-----------------------------------------------------------------------------------------|---|-------------|-------------|-------------|
| ENSMMUG00000020812 | A-kinase anchoring protein 3 [Source:VGNC Symbol;Acc:VGNC:69769]                        | - | 1.674933549 | 1.28E-05    | 9.59E-05    |
| ENSMMUG00000020813 | NADH:ubiquinone oxidoreductase subunit A9 [Source:VGNC Symbol;Acc:VGNC:81480]           | - | 0.815993126 | 0.000134501 | 0.00077867  |
| ENSMMUG00000022893 | von Willebrand factor [Source:VGNC Symbol;Acc:VGNC:78778]                               | - | 3.381470015 | 1.69E-08    | 2.34E-07    |
| ENSMMUG00000047465 | Metazoan signal recognition particle RNA [Source:RFAM;Acc:RF00017]                      | - | 5.600435207 | 3.39E-10    | 6.52E-09    |
| ENSMMUG00000061974 |                                                                                         | - | 3.964198219 | 0.001670593 | 0.007065876 |
| ENSMMUG00000004470 | CD9 molecule [Source:VGNC Symbol;Acc:VGNC:70787]                                        | - | 3.026282758 | 6.91E-07    | 6.93E-06    |
| ENSMMUG00000000375 | pleckstrin homology and RhoGEF domain containing G6 [Source:VGNC Symbol;Acc:VGNC:76110] | - | 3.061170537 | 4.70E-51    | 1.14E-47    |
| ENSMMUG00000053013 |                                                                                         | - | 1.567404108 | 1.89E-08    | 2.60E-07    |
| ENSMMUG00000014265 | TAP binding protein like [Source:NCBI gene;Acc:712626]                                  | - | 2.051844624 | 5.28E-13    | 1.59E-11    |
| ENSMMUG00000018679 | glyceraldehyde-3-phosphate dehydrogenase [Source:NCBI gene;Acc:574353]                  | - | 1.070603673 | 0.000610804 | 0.002946984 |
| ENSMMUG00000018685 | chromodomain helicase DNA binding protein 4 [Source:VGNC Symbol;Acc:VGNC:71029]         | - | 0.483881738 | 0.006968363 | 0.023812669 |
| ENSMMUG00000017619 | lysophosphatidic acid receptor 5 [Source:VGNC Symbol;Acc:VGNC:74277]                    | - | 0.580402404 | 8.74E-06    | 6.74E-05    |
| ENSMMUG00000016983 | acrosin binding protein [Source:VGNC Symbol;Acc:VGNC:69445]                             | - | 1.754699254 | 9.67E-16    | 4.58E-14    |
| ENSMMUG00000016985 | inhibitor of growth family member 4 [Source:VGNC Symbol;Acc:VGNC:73628]                 | - | 0.449899877 | 0.001012689 | 0.004573301 |
| ENSMMUG00000016990 | zinc finger protein 384 [Source:VGNC Symbol;Acc:VGNC:78610]                             | - | -0.37934563 | 0.004448239 | 0.016240832 |
| ENSMMUG00000050979 | PILR alpha associated neural protein [Source:NCBI gene;Acc:713548]                      | - | 1.540175015 | 0.004523142 | 0.016452619 |
| ENSMMUG00000009583 | COP9 signalosome subunit 7A [Source:VGNC Symbol;Acc:VGNC:71185]                         | - | 1.49415954  | 0.000694005 | 0.003298057 |
| ENSMMUG00000010201 | atrophin 1 [Source:VGNC Symbol;Acc:VGNC:70157]                                          | - | 0.895747329 | 8.38E-05    | 0.000510719 |
| ENSMMUG00000010203 | protein tyrosine phosphatase non-receptor type 6 [Source:VGNC Symbol;Acc:VGNC:76607]    | - | 0.906371592 | 0.000343956 | 0.001774968 |
| ENSMMUG00000010210 | lysophosphatidylcholine acyltransferase 3 [Source:VGNC Symbol;Acc:VGNC:74405]           | - | 2.780581746 | 0.009612109 | 0.031365034 |
| ENSMMUG00000012786 | complement C1s [Source:VGNC Symbol;Acc:VGNC:70297]                                      | - | 0.531793459 | 0.000717503 | 0.003389776 |
| ENSMMUG00000006470 | complement C1r subcomponent [Source:NCBI gene;Acc:722133]                               | - | 0.78286895  | 1.89E-09    | 3.15E-08    |
| ENSMMUG00000022109 | CD163 molecule like 1 [Source:VGNC Symbol;Acc:VGNC:70914]                               | - | 1.152067721 | 1.08E-06    | 1.04E-05    |
| ENSMMUG00000057570 |                                                                                         | - | 2.147872541 | 6.68E-18    | 3.97E-16    |
| ENSMMUG00000048744 |                                                                                         | - | 1.522084138 | 0.001636571 | 0.006940151 |
| ENSMMUG00000057785 |                                                                                         | - | 5.259874854 | 1.66E-07    | 1.93E-06    |
| ENSMMUG00000061774 | taste 2 receptor member 10 [Source:NCBI gene;Acc:717960]                                | - | 3.941122247 | 4.87E-05    | 0.000316868 |
| ENSMMUG00000050862 |                                                                                         | - | 1.023812609 | 0.000287884 | 0.001522916 |
| ENSMMUG00000018298 | killer cell lectin like receptor D1 [Source:NCBI gene;Acc:574145]                       | - | 3.729659926 | 3.61E-08    | 4.71E-07    |
| ENSMMUG00000015305 | C-type lectin domain family 2 member A [Source:VGNC Symbol;Acc:VGNC:71329]              | - | 1.431546661 | 0.003179994 | 0.012217766 |
| ENSMMUG00000045446 |                                                                                         | - | 3.183500887 | 6.44E-05    | 0.000404524 |
| ENSMMUG00000032892 | U6 spliceosomal RNA [Source:RFAM;Acc:RF00026]                                           | - | -1.02010419 | 0.011455101 | 0.03624     |
| ENSMMUG00000044047 | killer cell lectin like receptor B1 [Source:NCBI gene;Acc:100430783]                    | - | 0.927609639 | 0.000872367 | 0.004031023 |
| ENSMMUG00000056741 | ovostatin-like [Source:NCBI gene;Acc:722294]                                            | - | 2.027355229 | 0.000683625 | 0.003258315 |
| ENSMMUG00000003238 | pregnancy zone protein [Source:NCBI gene;Acc:100430319]                                 | - | 0.853034573 | 0.003860524 | 0.014423141 |
| ENSMMUG00000022680 | alpha-2-macroglobulin like 1 [Source:VGNC Symbol;Acc:VGNC:69507]                        | - | 1.127133587 | 0.000628276 | 0.00301826  |
| ENSMMUG00000022676 | ribosomal modification protein rimK like family member B [Source:NCBI gene;Acc:722261]  | - | 3.157322093 | 0.002274633 | 0.009218384 |

|                    |                                                                                                         |             |             |             |
|--------------------|---------------------------------------------------------------------------------------------------------|-------------|-------------|-------------|
| ENSMMUG00000052134 |                                                                                                         | 1.175285002 | 0.002336887 | 0.009405129 |
| ENSMMUG00000060675 |                                                                                                         | 1.127442436 | 1.83E-06    | 1.65E-05    |
| ENSMMUG00000021005 | taste receptor type 2 member 50 [Source:NCBI gene;Acc:693513]                                           | 1.213520733 | 0.000458656 | 0.00229834  |
| ENSMMUG00000056428 | taste receptor type 2 member 20 [Source:NCBI gene;Acc:693643]                                           | 1.113429002 | 0.001833873 | 0.007651841 |
| ENSMMUG00000050696 | taste receptor type 2 member 31-like [Source:NCBI gene;Acc:693892]                                      | 1.247709373 | 8.61E-07    | 8.40E-06    |
| ENSMMUG00000054225 | taste receptor type 2 member 43 [Source:NCBI gene;Acc:694161]                                           | 1.680500902 | 6.08E-05    | 0.000384222 |
| ENSMMUG00000042870 | Macaca mulatta taste receptor, type 2, member 46 (TAS2R46), mRNA. [Source:RefSeq mRNA;Acc:NM_001080757] | 1.282974981 | 3.51E-05    | 0.000236088 |
| ENSMMUG00000055308 | basic salivary proline-rich protein 2-like [Source:NCBI gene;Acc:695018]                                | 3.636484443 | 0.000657343 | 0.003145423 |
| ENSMMUG00000064931 |                                                                                                         | 3.529875333 | 3.78E-09    | 5.94E-08    |
| ENSMMUG00000014370 | ETS variant transcription factor 6 [Source:VGNC Symbol;Acc:VGNC:72444]                                  | -0.75509435 | 0.006164229 | 0.021427404 |
|                    |                                                                                                         | -           |             |             |
| ENSMMUG00000023317 | LDL receptor related protein 6 [Source:VGNC Symbol;Acc:VGNC:74446]                                      | 0.670474318 | 0.009868049 | 0.032070606 |
| ENSMMUG00000047247 | matrix Gla protein [Source:NCBI gene;Acc:574116]                                                        | 2.286453547 | 0.000486968 | 0.002414414 |
| ENSMMUG00000018030 | endoplasmic reticulum protein 27 [Source:VGNC Symbol;Acc:VGNC:72369]                                    | 1.88629792  | 2.01E-08    | 2.74E-07    |
| ENSMMUG00000053781 | Rho GDP dissociation inhibitor beta [Source:NCBI gene;Acc:702320]                                       | 2.450147029 | 5.06E-07    | 5.26E-06    |
| ENSMMUG00000050529 | phosphodiesterase 6H [Source:NCBI gene;Acc:700447]                                                      | 2.277235679 | 0.00039505  | 0.002006586 |
|                    |                                                                                                         | -           |             |             |
| ENSMMUG00000022176 | capping actin protein of muscle Z-line subunit alpha 3 [Source:VGNC Symbol;Acc:VGNC:70618]              | 1.857763516 | 0.010758045 | 0.034416748 |
|                    |                                                                                                         | -           |             |             |
| ENSMMUG00000049682 | Metazoan signal recognition particle RNA [Source:RFAM;Acc:RF00017]                                      | 4.303161312 | 5.32E-07    | 5.49E-06    |
|                    |                                                                                                         | -           |             |             |
| ENSMMUG00000048030 | ferritin, heavy polypeptide 1-like [Source:NCBI gene;Acc:707011]                                        | 1.874303334 | 0.016204457 | 0.048241695 |
| ENSMMUG00000020370 | SRY-box transcription factor 5 [Source:VGNC Symbol;Acc:VGNC:77843]                                      | -2.59373845 | 1.91E-05    | 0.000136105 |
|                    |                                                                                                         | -           |             |             |
| ENSMMUG00000057276 |                                                                                                         | 2.474676406 | 2.85E-05    | 0.000195707 |
| ENSMMUG00000038076 | Metazoan signal recognition particle RNA [Source:RFAM;Acc:RF00017]                                      | 1.161044013 | 0.000440362 | 0.002218136 |
| ENSMMUG00000060493 |                                                                                                         | 0.810256739 | 1.01E-08    | 1.47E-07    |
| ENSMMUG00000012223 | branched chain amino acid transaminase 1 [Source:VGNC Symbol;Acc:VGNC:70236]                            | 0.501304344 | 1.39E-05    | 0.000102819 |
|                    |                                                                                                         | -           |             |             |
| ENSMMUG00000053657 |                                                                                                         | 3.229364845 | 3.62E-05    | 0.000242861 |
| ENSMMUG00000018630 | sarcospan [Source:VGNC Symbol;Acc:VGNC:77887]                                                           | 0.485196423 | 0.000456898 | 0.002290319 |
| ENSMMUG00000060495 |                                                                                                         | 0.473784364 | 0.00384189  | 0.014357214 |
| ENSMMUG00000007050 |                                                                                                         | 0.785457863 | 0.00573064  | 0.02019547  |
| ENSMMUG00000050627 |                                                                                                         | 0.415326007 | 0.000759808 | 0.00356416  |
| ENSMMUG00000023128 | inositol 1,4,5-trisphosphate receptor type 2 [Source:VGNC Symbol;Acc:VGNC:73805]                        | 0.370251218 | 0.002050719 | 0.008440346 |
| ENSMMUG00000006468 | FGFR1 oncogene partner 2 [Source:VGNC Symbol;Acc:VGNC:72551]                                            | 1.693711882 | 5.60E-15    | 2.35E-13    |
| ENSMMUG00000003217 | transmembrane 7 superfamily member 3 [Source:VGNC Symbol;Acc:VGNC:79371]                                | 1.715108924 | 4.18E-18    | 2.57E-16    |
|                    |                                                                                                         | -           |             |             |
| ENSMMUG00000023248 | serine/threonine kinase 38 like [Source:VGNC Symbol;Acc:VGNC:78156]                                     | 0.978593754 | 0.000350282 | 0.00180441  |
|                    |                                                                                                         | -           |             |             |
| ENSMMUG00000023249 | aryl hydrocarbon receptor nuclear translocator like 2 [Source:NCBI gene;Acc:709547]                     | 1.109792268 | 2.73E-09    | 4.40E-08    |
| ENSMMUG00000021736 | single-pass membrane protein with coiled-coil domains 2 [Source:VGNC Symbol;Acc:VGNC:77808]             | 0.81548134  | 1.21E-05    | 9.12E-05    |
|                    |                                                                                                         | -           |             |             |
| ENSMMUG00000001361 | importin 8 [Source:VGNC Symbol;Acc:VGNC:73815]                                                          | 0.719976715 | 0.008164759 | 0.027297863 |
|                    |                                                                                                         | -           |             |             |
| ENSMMUG00000001359 | caprin family member 2 [Source:VGNC Symbol;Acc:VGNC:70599]                                              | 0.513636916 | 0.0102865   | 0.033193086 |
|                    |                                                                                                         | -           |             |             |
| ENSMMUG00000001357 | tetraspanin 11 [Source:VGNC Symbol;Acc:VGNC:79882]                                                      | 1.211352555 | 6.93E-24    | 7.20E-22    |
|                    |                                                                                                         | -           |             |             |
| ENSMMUG00000009155 | SIN3-HDAC complex associated factor [Source:NCBI gene;Acc:694162]                                       | 3.210702158 | 4.23E-10    | 8.03E-09    |
|                    |                                                                                                         | -           |             |             |
| ENSMMUG00000039300 |                                                                                                         | 2.838419065 | 1.73E-06    | 1.57E-05    |
|                    |                                                                                                         | -           |             |             |
| ENSMMUG00000003221 | DENN domain containing 5B [Source:VGNC Symbol;Acc:VGNC:71772]                                           | 1.005909234 | 0.000105489 | 0.00062566  |

|                    |                                                                                                                                       |             |             |             |
|--------------------|---------------------------------------------------------------------------------------------------------------------------------------|-------------|-------------|-------------|
| ENSMMUG00000063112 |                                                                                                                                       | 1.458952669 | 7.84E-05    | 0.000482128 |
| ENSMMUG00000056303 |                                                                                                                                       | -           |             |             |
| ENSMMUG00000000205 | transmembrane protein 117 [Source:VGNC Symbol;Acc:VGNC:79488]                                                                         | 1.521478274 | 0.002301279 | 0.009297621 |
| ENSMMUG00000060215 | Y RNA [Source:RFAM;Acc:RF00019]                                                                                                       | -1.04435489 | 1.54E-18    | 9.92E-17    |
| ENSMMUG00000052030 | developing brain homeobox 2 [Source:NCBI gene;Acc:701170]                                                                             | -           |             |             |
| ENSMMUG00000015962 | AT-rich interaction domain 2 [Source:VGNC Symbol;Acc:VGNC:69858]                                                                      | 0.617746705 | 0.000907796 | 0.004169553 |
| ENSMMUG00000023791 | SR-related CTD associated factor 11 [Source:VGNC Symbol;Acc:VGNC:77002]                                                               | -           |             |             |
| ENSMMUG00000022359 | solute carrier family 38 member 2 [Source:VGNC Symbol;Acc:VGNC:77469]                                                                 | 0.929061657 | 7.80E-08    | 9.53E-07    |
| ENSMMUG00000064730 |                                                                                                                                       | -           |             |             |
| ENSMMUG00000012331 | solute carrier family 38 member 4 [Source:VGNC Symbol;Acc:VGNC:77484]                                                                 | 1.071595298 | 1.04E-05    | 7.93E-05    |
| ENSMMUG00000049514 | solute carrier family 48 member 1 [Source:NCBI gene;Acc:704304]                                                                       | -           |             |             |
| ENSMMUG00000021655 | histone deacetylase 7 [Source:NCBI gene;Acc:718225]                                                                                   | 2.532465461 | 1.28E-05    | 9.61E-05    |
| ENSMMUG00000006727 | vitamin D receptor [Source:VGNC Symbol;Acc:VGNC:78764]                                                                                | -           |             |             |
| ENSMMUG00000020125 | SUMO specific peptidase 1 [Source:NCBI gene;Acc:707603]                                                                               | 0.452633938 | 0.00825969  | 0.027570864 |
| ENSMMUG00000014484 | zinc finger protein 641 [Source:NCBI gene;Acc:708246]                                                                                 | 2.641213669 | 2.03E-20    | 1.60E-18    |
| ENSMMUG00000003877 | KAT8 regulatory NSL complex subunit 2 [Source:VGNC Symbol;Acc:VGNC:73910]                                                             | -           |             |             |
| ENSMMUG00000054025 | testis expressed 49 [Source:NCBI gene;Acc:709603]                                                                                     | 0.504243406 | 0.007781085 | 0.02620798  |
| ENSMMUG00000012769 | limb development membrane protein 1 like [Source:VGNC Symbol;Acc:VGNC:74310]                                                          | 0.550335508 | 0.003922286 | 0.014590141 |
| ENSMMUG00000021081 | tubulin alpha 1b [Source:NCBI gene;Acc:709643]                                                                                        | 0.679402225 | 1.53E-08    | 2.14E-07    |
| ENSMMUG00000028047 | Y RNA [Source:RFAM;Acc:RF00019]                                                                                                       | 0.529865197 | 2.15E-05    | 0.000152434 |
| ENSMMUG00000009788 | tubulin alpha-1C chain [Source:NCBI gene;Acc:710110]                                                                                  | -           |             |             |
| ENSMMUG00000031976 | peripherin [Source:NCBI gene;Acc:709827]                                                                                              | 1.460411681 | 0.006325014 | 0.021918171 |
| ENSMMUG0000007544  | trophinin associated protein [Source:VGNC Symbol;Acc:VGNC:78650]                                                                      | -           |             |             |
| ENSMMUG0000007546  | complement C1q like 4 [Source:VGNC Symbol;Acc:VGNC:70450]                                                                             | 2.191075853 | 6.46E-13    | 1.92E-11    |
| ENSMMUG0000007548  | DnaJ heat shock protein family (Hsp40) member C22 [Source:NCBI gene;Acc:710205]                                                       | -           |             |             |
| ENSMMUG00000064430 |                                                                                                                                       | 1.448572469 | 3.25E-06    | 2.78E-05    |
| ENSMMUG0000003762  | spermatogenesis associated serine rich 2 [Source:VGNC Symbol;Acc:VGNC:77958]                                                          | -           |             |             |
| ENSMMUG00000049374 |                                                                                                                                       | 0.665531896 | 0.001098698 | 0.004893312 |
| ENSMMUG0000005960  | transmembrane BAX inhibitor motif containing 6 [Source:NCBI gene;Acc:677702]                                                          | -           |             |             |
| ENSMMUG00000038256 | aquaporin 2 [Source:NCBI gene;Acc:711719]                                                                                             | 0.540394947 | 0.010206539 | 0.032964331 |
| ENSMMUG00000058855 | aquaporin 5 [Source:NCBI gene;Acc:711804]                                                                                             | -           |             |             |
| ENSMMUG0000006529  | acid sensing ion channel subunit 1 [Source:VGNC Symbol;Acc:VGNC:70035]                                                                | 0.595488857 | 0.004092996 | 0.015120682 |
| ENSMMUG0000006531  | SWI/SNF related, matrix associated, actin dependent regulator of chromatin, subfamily d, member 1 [Source:VGNC Symbol;Acc:VGNC:77653] | -           |             |             |
| ENSMMUG00000018485 | methyltransferase like 7A [Source:VGNC Symbol;Acc:VGNC:74567]                                                                         | 1.429275382 | 0.0145269   | 0.044105586 |
| ENSMMUG00000000152 | transcription factor CP2 [Source:VGNC Symbol;Acc:VGNC:78323]                                                                          | 1.409231286 | 1.98E-09    | 3.29E-08    |
| ENSMMUG00000044229 | POU class 6 homeobox 1 [Source:NCBI gene;Acc:694640]                                                                                  | 1.139541524 | 0.003737769 | 0.014043927 |
| ENSMMUG0000004982  | activin A receptor like type 1 [Source:VGNC Symbol;Acc:VGNC:69451]                                                                    | 0.928201482 | 9.41E-06    | 7.23E-05    |
|                    |                                                                                                                                       | 1.17210075  | 0.000558839 | 0.002724293 |
|                    |                                                                                                                                       | 1.264426013 | 8.90E-05    | 0.000539117 |
|                    |                                                                                                                                       | 0.721288232 | 0.002545337 | 0.01011248  |
|                    |                                                                                                                                       | -           |             |             |
|                    |                                                                                                                                       | 0.397749778 | 0.001196093 | 0.005278566 |
|                    |                                                                                                                                       | 0.678935907 | 0.002928548 | 0.011398207 |
|                    |                                                                                                                                       | 0.211939831 | 0.005064071 | 0.018167916 |
|                    |                                                                                                                                       | 0.998803468 | 2.26E-18    | 1.41E-16    |
|                    |                                                                                                                                       | -           |             |             |
|                    |                                                                                                                                       | 0.909252592 | 0.002693677 | 0.010566104 |
|                    |                                                                                                                                       | -           |             |             |
|                    |                                                                                                                                       | 0.755897947 | 0.008342777 | 0.027797147 |
|                    |                                                                                                                                       | -           |             |             |
|                    |                                                                                                                                       | 0.757151704 | 0.003440574 | 0.01308282  |
|                    |                                                                                                                                       | 1.185850599 | 0.001060835 | 0.004758212 |
|                    |                                                                                                                                       | 2.075126709 | 1.12E-06    | 1.06E-05    |
|                    |                                                                                                                                       | 3.111760524 | 0.014686318 | 0.044515222 |
|                    |                                                                                                                                       | 3.377912282 | 0.000146082 | 0.00083804  |

|                    |                                                                                          |             |             |             |
|--------------------|------------------------------------------------------------------------------------------|-------------|-------------|-------------|
| ENSMMUG00000022922 | nuclear receptor subfamily 4 group A member 1 [Source:VGNC Symbol;Acc:VGNC:75517]        | 0.532458246 | 2.00E-05    | 0.000142247 |
| ENSMMUG00000015392 | autophagy related 101 [Source:VGNC Symbol;Acc:VGNC:70132]                                | 1.714834743 | 0.008327502 | 0.027765345 |
| ENSMMUG00000010000 | keratin 7 [Source:VGNC Symbol;Acc:VGNC:74214]                                            | 0.717574754 | 4.58E-13    | 1.40E-11    |
| ENSMMUG00000064514 | keratin, type II cuticular Hb1 [Source:NCBI gene;Acc:697511]                             | 1.122893936 | 2.03E-11    | 4.81E-10    |
| ENSMMUG00000018216 | keratin, type II cuticular Hb5 [Source:NCBI gene;Acc:698320]                             | 1.237580231 | 0.002481446 | 0.009899227 |
| ENSMMUG00000018217 | keratin 84 [Source:VGNC Symbol;Acc:VGNC:74220]                                           | 1.150555775 | 0.00185705  | 0.007737443 |
| ENSMMUG00000057134 | keratin, type II cytoskeletal 6C [Source:NCBI gene;Acc:100424162]                        | 0.936193218 | 0.002653731 | 0.010446057 |
| ENSMMUG00000055016 | keratin, type II cytoskeletal 6A [Source:NCBI gene;Acc:719283]                           | 0.522589374 | 8.25E-08    | 1.00E-06    |
| ENSMMUG00000014980 | keratin 76 [Source:VGNC Symbol;Acc:VGNC:74112]                                           | 1.481523083 | 7.58E-05    | 0.000468191 |
| ENSMMUG00000005246 | zinc finger protein 740 [Source:VGNC Symbol;Acc:VGNC:79665]                              | 1.720347253 | 7.90E-11    | 1.69E-09    |
| ENSMMUG00000052817 | Sp7 transcription factor [Source:NCBI gene;Acc:702575]                                   | 1.571098209 | 4.91E-07    | 5.12E-06    |
| ENSMMUG00000020036 | Sp1 transcription factor [Source:VGNC Symbol;Acc:VGNC:77844]                             | 1.171625981 | 2.84E-05    | 0.000195132 |
| ENSMMUG00000018492 | TARBP2 subunit of RISC loading complex [Source:VGNC Symbol;Acc:VGNC:78099]               | 1.139487149 | 1.98E-06    | 1.77E-05    |
| ENSMMUG00000022313 | activating transcription factor 7 [Source:NCBI gene;Acc:700403]                          | 1.241661665 | 3.66E-06    | 3.09E-05    |
| ENSMMUG00000055610 | homeobox C4 [Source:NCBI gene;Acc:100430434]                                             | 2.493051674 | 1.15E-18    | 7.58E-17    |
| ENSMMUG00000052854 | mucin like 1 [Source:NCBI gene;Acc:100423942]                                            | 1.186201612 | 5.67E-13    | 1.70E-11    |
| ENSMMUG00000016203 | thymocyte expressed, positive selection associated 1 [Source:VGNC Symbol;Acc:VGNC:79775] | 0.448994335 | 0.005401355 | 0.019207313 |
| ENSMMUG00000057094 | olfactory receptor, family 6, subfamily C, member 4 [Source:NCBI gene;Acc:708807]        | 1.192840564 | 0.012453984 | 0.038858891 |
| ENSMMUG00000055590 |                                                                                          | 0.920288582 | 1.57E-06    | 1.45E-05    |
| ENSMMUG00000006293 | SAP domain containing ribonucleoprotein [Source:NCBI gene;Acc:709932]                    | 0.791861783 | 2.21E-09    | 3.62E-08    |
| ENSMMUG00000053458 | ORMDL sphingolipid biosynthesis regulator 2 [Source:NCBI gene;Acc:710296]                | 0.703524128 | 2.61E-06    | 2.27E-05    |
| ENSMMUG00000051937 | uncharacterized LOC707807 [Source:NCBI gene;Acc:707807]                                  | 0.592218716 | 0.014351375 | 0.043700447 |
| ENSMMUG00000006295 | matrix metalloproteinase 19 [Source:VGNC Symbol;Acc:VGNC:74896]                          | 0.666189619 | 0.000702964 | 0.00333518  |
| ENSMMUG00000064364 | sulfite oxidase [Source:NCBI gene;Acc:711164]                                            | 1.244307058 | 6.54E-06    | 5.20E-05    |
| ENSMMUG00000064075 | ring finger protein 41 [Source:NCBI gene;Acc:711969]                                     | 1.007581727 | 5.73E-05    | 0.000365025 |
| ENSMMUG00000054020 | U6 spliceosomal RNA [Source:RFAM;Acc:RF00026]                                            | 0.957101296 | 0.004505797 | 0.016399793 |
| ENSMMUG00000059663 |                                                                                          | 0.963088737 | 8.33E-07    | 8.16E-06    |
| ENSMMUG00000031834 | coenzyme Q10A [Source:VGNC Symbol;Acc:VGNC:71356]                                        | 0.798895623 | 0.015790567 | 0.047193149 |
| ENSMMUG00000002483 | citrate synthase [Source:VGNC Symbol;Acc:VGNC:71509]                                     | 1.155233838 | 0.000120731 | 0.000706266 |
| ENSMMUG00000013482 | poly(A) specific ribonuclease subunit PAN2 [Source:NCBI gene;Acc:712478]                 | 1.653628253 | 0.016584149 | 0.049220861 |
| ENSMMUG00000000803 | signal transducer and activator of transcription 2 [Source:VGNC Symbol;Acc:VGNC:77905]   | 2.039261786 | 2.55E-09    | 4.15E-08    |
| ENSMMUG00000063898 | apolipoprotein F [Source:NCBI gene;Acc:712761]                                           | 2.398722658 | 5.47E-11    | 1.19E-09    |
| ENSMMUG00000053460 |                                                                                          | 1.874238585 | 8.22E-08    | 1.00E-06    |
| ENSMMUG00000021878 | timeless circadian regulator [Source:VGNC Symbol;Acc:VGNC:78356]                         | 1.137993117 | 1.36E-07    | 1.60E-06    |
| ENSMMUG00000013766 | prostaglandin E synthase 3 [Source:NCBI gene;Acc:713353]                                 | 0.584296183 | 0.001815961 | 0.007585811 |
| ENSMMUG00000004522 | DNA primase subunit 1 [Source:NCBI gene;Acc:710253]                                      | 0.45970185  | 9.18E-05    | 0.000553669 |
| ENSMMUG00000057617 | hydroxysteroid 17-beta dehydrogenase 6 [Source:NCBI gene;Acc:713549]                     | 0.91412929  | 0.010845771 | 0.034644029 |

|                     |                                                                                                  |   |             |             |             |
|---------------------|--------------------------------------------------------------------------------------------------|---|-------------|-------------|-------------|
| ENSMMUG00000043411  | zinc finger and BTB domain containing 39 [Source:NCBI gene;Acc:713914]                           | - | 1.336823425 | 1.26E-05    | 9.43E-05    |
| ENSMMUG00000021114  | G protein-coupled receptor 182 [Source:VGNC Symbol;Acc:VGNC:72936]                               | - | 1.271167268 | 4.29E-08    | 5.51E-07    |
| ENSMMUG00000003203  | tachykinin precursor 3 [Source:VGNC Symbol;Acc:VGNC:78079]                                       | - | 2.079846524 | 0.004154513 | 0.015309039 |
| ENSMMUG00000013518  | myosin IA [Source:VGNC Symbol;Acc:VGNC:75110]                                                    | - | 0.460618022 | 0.00022803  | 0.001241007 |
| ENSMMUG00000021782  | LDL receptor related protein 1 [Source:VGNC Symbol;Acc:VGNC:74442]                               | - | 0.941964217 | 7.08E-11    | 1.52E-09    |
| ENSMMUG00000004233  | leucine rich repeats and immunoglobulin like domains 3 [Source:NCBI gene;Acc:716344]             | - | 1.223819017 | 2.21E-11    | 5.17E-10    |
| ENSMMUG00000055477  |                                                                                                  | - | 1.466926489 | 7.60E-12    | 1.93E-10    |
| ENSMMUG00000001210  | elongation factor 1-alpha 1 [Source:NCBI gene;Acc:100425937]                                     | - | 2.573959491 | 0.015846424 | 0.047330896 |
| ENSMMUG000000063744 |                                                                                                  | - | 4.206345192 | 0.000363568 | 0.001862949 |
| ENSMMUG000000062139 |                                                                                                  | - | 1.856485282 | 6.99E-07    | 7.00E-06    |
| ENSMMUG00000011579  | TAFA chemokine like family member 2 [Source:VGNC Symbol;Acc:VGNC:78189]                          | - | 0.541949648 | 3.61E-06    | 3.05E-05    |
| ENSMMUG00000020533  | chromosome 11 C12orf56 homolog [Source:VGNC Symbol;Acc:VGNC:70409]                               | - | 4.338393208 | 4.21E-15    | 1.80E-13    |
| ENSMMUG00000007658  | TANK binding kinase 1 [Source:VGNC Symbol;Acc:VGNC:78107]                                        | - | 0.256372707 | 0.006076324 | 0.021194755 |
| ENSMMUG00000003669  | methionine sulfoxide reductase B3 [Source:VGNC Symbol;Acc:VGNC:74842]                            | - | 0.816333102 | 2.60E-07    | 2.89E-06    |
| ENSMMUG000000041729 |                                                                                                  | - | 1.18216614  | 1.64E-05    | 0.000118766 |
| ENSMMUG00000011650  | dual specificity tyrosine phosphorylation regulated kinase 2 [Source:VGNC Symbol;Acc:VGNC:72018] | - | 1.431971973 | 1.95E-05    | 0.000139374 |
| ENSMMUG00000055447  | MDM2 proto-oncogene [Source:NCBI gene;Acc:718284]                                                | - | 1.003086826 | 5.74E-13    | 1.72E-11    |
| ENSMMUG00000053722  |                                                                                                  | - | 2.7384487   | 5.56E-06    | 4.50E-05    |
| ENSMMUG00000010819  | fibroblast growth factor receptor substrate 2 [Source:VGNC Symbol;Acc:VGNC:72732]                | - | 1.096388362 | 2.86E-11    | 6.54E-10    |
| ENSMMUG00000010820  | chaperonin containing TCP1 subunit 2 [Source:VGNC Symbol;Acc:VGNC:70745]                         | - | 2.705826013 | 9.79E-14    | 3.35E-12    |
| ENSMMUG00000054953  | leucine rich repeat containing 10 [Source:NCBI gene;Acc:114669753]                               | - | 4.223665419 | 7.46E-07    | 7.40E-06    |
| ENSMMUG00000012290  | GLIPR1 like 2 [Source:VGNC Symbol;Acc:VGNC:81413]                                                | - | -0.79730228 | 0.01180527  | 0.037097538 |
| ENSMMUG00000059985  |                                                                                                  | - | 3.960544376 | 1.63E-05    | 0.000118335 |
| ENSMMUG00000005530  | synaptotagmin 1 [Source:VGNC Symbol;Acc:VGNC:78074]                                              | - | 0.816133155 | 0.004918189 | 0.017710112 |
| ENSMMUG00000017463  |                                                                                                  | - | 2.925508353 | 0.007911311 | 0.026560446 |
| ENSMMUG00000038410  |                                                                                                  | - | 1.319641232 | 0.001609669 | 0.006844037 |
| ENSMMUG00000055284  |                                                                                                  | - | 1.333368546 | 0.013154393 | 0.040625751 |
| ENSMMUG00000058404  |                                                                                                  | - | 0.511804482 | 0.006216919 | 0.021583555 |
| ENSMMUG00000049117  | CLLU1 antisense RNA 1 [Source:NCBI gene;Acc:100424000]                                           | - | 3.812821548 | 0.000370904 | 0.001895197 |
| ENSMMUG00000002243  | pleckstrin homology and RhoGEF domain containing G7 [Source:VGNC Symbol;Acc:VGNC:76149]          | - | 0.908706712 | 2.35E-08    | 3.18E-07    |
| ENSMMUG00000002244  | early endosome antigen 1 [Source:VGNC Symbol;Acc:VGNC:72161]                                     | - | 0.829721689 | 3.26E-06    | 2.78E-05    |
| ENSMMUG00000052496  |                                                                                                  | - | 0.863602407 | 1.82E-13    | 5.89E-12    |
| ENSMMUG00000055071  | Y RNA [Source:RFAM;Acc:RF00019]                                                                  | - | 1.371417761 | 0.011655209 | 0.036713278 |

|                    |                                                                                                                      |             |             |             |
|--------------------|----------------------------------------------------------------------------------------------------------------------|-------------|-------------|-------------|
| ENSMMUG00000018237 | plexin C1 [Source:VGNC Symbol;Acc:VGNC:76190]                                                                        | 1.396371353 | 1.25E-15    | 5.84E-14    |
| ENSMMUG00000018239 | centrosomal protein 83 [Source:VGNC Symbol;Acc:VGNC:70992]                                                           | 1.504416056 | 7.30E-14    | 2.54E-12    |
|                    |                                                                                                                      | -           |             |             |
| ENSMMUG00000018901 | FYVE, RhoGEF and PH domain containing 6 [Source:VGNC Symbol;Acc:VGNC:72548]                                          | 0.657120481 | 0.000349825 | 0.001802924 |
|                    |                                                                                                                      | -           |             |             |
| ENSMMUG00000062006 | methionyl aminopeptidase 2 [Source:NCBI gene;Acc:712400]                                                             | 0.907695549 | 0.000213125 | 0.001170899 |
|                    |                                                                                                                      | -           |             |             |
| ENSMMUG00000009303 | coiled-coil domain containing 38 [Source:VGNC Symbol;Acc:VGNC:70880]                                                 | 1.171552122 | 3.60E-06    | 3.04E-05    |
| ENSMMUG00000009308 | histidine ammonia-lyase [Source:VGNC Symbol;Acc:VGNC:73344]                                                          | 2.879176229 | 1.63E-06    | 1.49E-05    |
| ENSMMUG00000009312 | leukotriene A4 hydrolase [Source:VGNC Symbol;Acc:VGNC:74453]                                                         | 2.330679691 | 9.43E-27    | 1.47E-24    |
| ENSMMUG00000053376 |                                                                                                                      | 2.777464438 | 9.18E-20    | 6.67E-18    |
| ENSMMUG00000050585 |                                                                                                                      | 2.577421906 | 1.63E-14    | 6.39E-13    |
| ENSMMUG00000022404 | apoptotic peptidase activating factor 1 [Source:VGNC Symbol;Acc:VGNC:69975]                                          | 0.424862429 | 4.89E-05    | 0.00031818  |
| ENSMMUG00000022406 | ankyrin repeat and sterile alpha motif domain containing 1B [Source:VGNC Symbol;Acc:VGNC:69689]                      | 1.07834174  | 1.40E-10    | 2.86E-09    |
|                    |                                                                                                                      | -           |             |             |
| ENSMMUG00000061260 | Spi-C transcription factor [Source:NCBI gene;Acc:695809]                                                             | 1.095681357 | 1.21E-09    | 2.08E-08    |
| ENSMMUG00000042077 | DNA damage regulated autophagy modulator 1 [Source:NCBI gene;Acc:697427]                                             | 0.834731509 | 6.04E-13    | 1.81E-11    |
| ENSMMUG00000046478 | WASH complex subunit 3 [Source:NCBI gene;Acc:697824]                                                                 | 2.366892916 | 2.52E-22    | 2.34E-20    |
| ENSMMUG00000061923 |                                                                                                                      | 2.177162703 | 6.84E-06    | 5.44E-05    |
| ENSMMUG00000005504 | nucleoporin 37 [Source:VGNC Symbol;Acc:VGNC:75491]                                                                   | 2.29230438  | 7.03E-08    | 8.69E-07    |
| ENSMMUG00000005506 | PARP1 binding protein [Source:VGNC Symbol;Acc:VGNC:75682]                                                            | 0.627936606 | 0.000166737 | 0.000939842 |
|                    |                                                                                                                      | -           |             |             |
| ENSMMUG00000038958 | Metazoan signal recognition particle RNA [Source:RFAM;Acc:RF00017]                                                   | 2.140546324 | 0.006076889 | 0.021194755 |
|                    |                                                                                                                      | -           |             |             |
| ENSMMUG00000023469 | heat shock protein 90 beta family member 1 [Source:NCBI gene;Acc:699568]                                             | 0.936693424 | 0.01596875  | 0.047627765 |
|                    |                                                                                                                      | -           |             |             |
| ENSMMUG00000021291 | thymine DNA glycosylase [Source:VGNC Symbol;Acc:VGNC:78297]                                                          | 0.998287711 | 0.000134078 | 0.000776531 |
|                    |                                                                                                                      | -           |             |             |
| ENSMMUG00000021292 | glycosyltransferase 8 domain containing 2 [Source:VGNC Symbol;Acc:VGNC:73004]                                        | 1.031607371 | 0.005987137 | 0.020936941 |
|                    |                                                                                                                      | -           |             |             |
| ENSMMUG00000022570 | nuclear transcription factor Y subunit beta [Source:NCBI gene;Acc:700451]                                            | 0.623453853 | 0.000174227 | 0.000977515 |
|                    |                                                                                                                      | -           |             |             |
| ENSMMUG00000012091 | thioredoxin reductase 1 [Source:VGNC Symbol;Acc:VGNC:78679]                                                          | 0.679088211 | 8.39E-06    | 6.50E-05    |
| ENSMMUG00000017127 | carbohydrate sulfotransferase 11 [Source:VGNC Symbol;Acc:VGNC:82123]                                                 | 0.974633704 | 0.000713162 | 0.003372844 |
| ENSMMUG00000017129 | solute carrier family 41 member 2 [Source:VGNC Symbol;Acc:VGNC:77585]                                                | 1.026390801 | 9.13E-09    | 1.35E-07    |
|                    |                                                                                                                      | -           |             |             |
| ENSMMUG00000052372 |                                                                                                                      | 1.256526964 | 0.00084979  | 0.003942995 |
|                    |                                                                                                                      | -           |             |             |
| ENSMMUG00000009519 | WASH complex subunit 4 [Source:VGNC Symbol;Acc:VGNC:79783]                                                           | 1.159007938 | 1.69E-06    | 1.54E-05    |
|                    |                                                                                                                      | -           |             |             |
| ENSMMUG00000009524 | adaptor protein, phosphotyrosine interacting with PH domain and leucine zipper 2 [Source:VGNC Symbol;Acc:VGNC:69861] | 1.032258517 | 3.51E-09    | 5.55E-08    |
| ENSMMUG00000005208 | RNA polymerase III subunit B [Source:VGNC Symbol;Acc:VGNC:76143]                                                     | 2.093808705 | 1.33E-08    | 1.90E-07    |
|                    |                                                                                                                      | -           |             |             |
| ENSMMUG00000022118 | regulatory factor X4 [Source:VGNC Symbol;Acc:VGNC:76909]                                                             | 0.944249428 | 0.012655643 | 0.039310914 |
|                    |                                                                                                                      | -           |             |             |
| ENSMMUG00000022278 | mitochondrial transcription termination factor 2 [Source:VGNC Symbol;Acc:VGNC:74868]                                 | 1.378680416 | 0.00013304  | 0.000771718 |
|                    |                                                                                                                      | -           |             |             |
| ENSMMUG00000021808 | cryptochrome circadian regulator 1 [Source:VGNC Symbol;Acc:VGNC:71499]                                               | 0.467158176 | 0.001386465 | 0.006003884 |
|                    |                                                                                                                      | -           |             |             |
| ENSMMUG00000015540 | BTB domain containing 11 [Source:VGNC Symbol;Acc:VGNC:70367]                                                         | 1.564891869 | 6.30E-05    | 0.00039657  |
|                    |                                                                                                                      | -           |             |             |
| ENSMMUG00000015544 | PWP1 homolog, endonuclein [Source:NCBI gene;Acc:705262]                                                              | 2.131808414 | 0.001832083 | 0.007646567 |
|                    |                                                                                                                      | -           |             |             |
| ENSMMUG00000015550 | PR/SET domain 4 [Source:VGNC Symbol;Acc:VGNC:76393]                                                                  | 1.889866539 | 7.29E-07    | 7.24E-06    |

|                    |                                                                                                   |             |             |             |
|--------------------|---------------------------------------------------------------------------------------------------|-------------|-------------|-------------|
| ENSMMUG00000021049 | ret finger protein-like 3 [Source:NCBI gene;Acc:705507]                                           | 1.997451779 | 0.002667045 | 0.010484271 |
| ENSMMUG00000017124 | spliceosome associated factor 3, U4/U6 recycling protein [Source:VGNC Symbol;Acc:VGNC:77029]      | 1.14517227  | 0.00171936  | 0.007248937 |
| ENSMMUG00000054621 |                                                                                                   | 1.994533324 | 0.005826819 | 0.020460017 |
| ENSMMUG00000006893 | D-amino acid oxidase [Source:VGNC Symbol;Acc:VGNC:71729]                                          | 1.009510857 | 3.02E-07    | 3.30E-06    |
| ENSMMUG00000015108 | SV2 related protein [Source:VGNC Symbol;Acc:VGNC:78208]                                           | 0.539769546 | 0.002039872 | 0.008407603 |
| ENSMMUG00000056729 | U6 spliceosomal RNA [Source:RFAM;Acc:RF00026]                                                     | 0.833128211 | 2.82E-05    | 0.000194489 |
| ENSMMUG00000023032 | intraflagellar transport 81 [Source:VGNC Symbol;Acc:VGNC:73389]                                   | 0.916122777 | 8.35E-07    | 8.16E-06    |
| ENSMMUG00000001739 | ATPase sarcoplasmic/endoplasmic reticulum Ca2+ transporting 2 [Source:VGNC Symbol;Acc:VGNC:70178] | 0.866735367 | 1.17E-08    | 1.69E-07    |
| ENSMMUG00000003297 | coiled-coil domain containing 63 [Source:VGNC Symbol;Acc:VGNC:70879]                              | 0.897165704 | 2.10E-05    | 0.000149035 |
| ENSMMUG00000002347 | myosin light chain 2 [Source:VGNC Symbol;Acc:VGNC:75103]                                          | 0.874514971 | 0.000925981 | 0.004242355 |
| ENSMMUG00000008336 | acyl-CoA dehydrogenase family member 10 [Source:NCBI gene;Acc:711080]                             | 0.760535395 | 1.91E-12    | 5.33E-11    |
| ENSMMUG00000053496 |                                                                                                   | 0.717240651 | 0.002178048 | 0.008887387 |
| ENSMMUG00000060754 | Metazoan signal recognition particle RNA [Source:RFAM;Acc:RF00017]                                | 0.876810756 | 1.33E-08    | 1.89E-07    |
| ENSMMUG00000060917 |                                                                                                   | 0.549141276 | 0.009948266 | 0.032287997 |
| ENSMMUG00000005255 | TRAF-type zinc finger domain containing 1 [Source:VGNC Symbol;Acc:VGNC:79459]                     | 1.041721222 | 2.70E-06    | 2.35E-05    |
| ENSMMUG00000012778 | rabphilin 3A [Source:VGNC Symbol;Acc:VGNC:77033]                                                  | -1.18815322 | 1.11E-06    | 1.06E-05    |
| ENSMMUG00000004435 | two pore segment channel 1 [Source:VGNC Symbol;Acc:VGNC:79117]                                    | 3.071842264 | 2.48E-19    | 1.75E-17    |
| ENSMMUG00000059861 | Metazoan signal recognition particle RNA [Source:RFAM;Acc:RF00017]                                | 3.699980521 | 0.00773922  | 0.026079054 |
| ENSMMUG00000006723 | solute carrier family 8 member B1 [Source:NCBI gene;Acc:714561]                                   | 2.858680446 | 1.28E-22    | 1.22E-20    |
| ENSMMUG00000004205 | phospholipase B domain containing 2 [Source:VGNC Symbol;Acc:VGNC:76122]                           | 2.419147839 | 0.000413492 | 0.002093673 |
| ENSMMUG00000004208 | serine dehydratase [Source:VGNC Symbol;Acc:VGNC:77148]                                            | 2.038570144 | 2.57E-05    | 0.00017858  |
| ENSMMUG00000051363 |                                                                                                   | 1.126044152 | 3.28E-05    | 0.000222273 |
| ENSMMUG00000054768 |                                                                                                   | 0.860064497 | 4.83E-06    | 3.97E-05    |
| ENSMMUG00000057506 |                                                                                                   | 0.664658646 | 4.34E-05    | 0.000287013 |
| ENSMMUG00000052680 |                                                                                                   | 0.653538261 | 5.24E-05    | 0.000338069 |
| ENSMMUG00000017478 | tescalcin [Source:VGNC Symbol;Acc:VGNC:79571]                                                     | 0.673130858 | 0.001089883 | 0.004860008 |
| ENSMMUG00000014027 | nitric oxide synthase 1 [Source:VGNC Symbol;Acc:VGNC:75368]                                       | 1.372834507 | 1.75E-05    | 0.000126042 |
| ENSMMUG00000062615 |                                                                                                   | 1.286852953 | 0.00065664  | 0.003143092 |
| ENSMMUG00000005421 | kinase suppressor of ras 2 [Source:VGNC Symbol;Acc:VGNC:74075]                                    | 1.162873093 | 0.000352738 | 0.001815133 |
| ENSMMUG00000020629 | SDS3 homolog, SIN3A corepressor complex component [Source:NCBI gene;Acc:696166]                   | 0.873484331 | 2.98E-09    | 4.77E-08    |
| ENSMMUG00000053710 |                                                                                                   | 0.831956909 | 7.74E-09    | 1.16E-07    |
| ENSMMUG00000011209 | BICD family like cargo adaptor 1 [Source:HGNC Symbol;Acc:HGNC:28095]                              | 0.945429251 | 8.24E-05    | 0.00050335  |
| ENSMMUG00000055209 |                                                                                                   | 0.876503199 | 2.84E-07    | 3.12E-06    |
| ENSMMUG00000046665 | glutamyl-tRNA amidotransferase subunit C [Source:NCBI gene;Acc:702258]                            | 0.888004082 | 0.014662304 | 0.044460975 |
| ENSMMUG00000004223 | ring finger protein 10 [Source:VGNC Symbol;Acc:VGNC:76702]                                        | 0.766698159 | 2.52E-06    | 2.20E-05    |
| ENSMMUG00000055513 |                                                                                                   | 1.628152245 | 0.008287997 | 0.027652655 |
| ENSMMUG00000058536 |                                                                                                   | 2.062103411 | 2.33E-27    | 3.94E-25    |
| ENSMMUG00000002536 | calcium binding protein 1 [Source:VGNC Symbol;Acc:VGNC:70495]                                     | 1.729531932 | 8.44E-10    | 1.50E-08    |
| ENSMMUG00000039520 | chromosome 11 C12orf43 homolog [Source:NCBI gene;Acc:698821]                                      | 0.544761433 | 0.011125981 | 0.035368114 |
| ENSMMUG00000006441 | 2'-5'-oligoadenylate synthetase like [Source:VGNC Symbol;Acc:VGNC:75572]                          | 0.691756343 | 0.009774442 | 0.031830437 |
| ENSMMUG00000021564 | lysine demethylase 2B [Source:VGNC Symbol;Acc:VGNC:81425]                                         | 4.308539054 | 1.48E-46    | 2.39E-43    |
| ENSMMUG00000059782 |                                                                                                   | 4.982135786 | 9.12E-48    | 1.89E-44    |

|                    |                                                                                                     |             |             |             |
|--------------------|-----------------------------------------------------------------------------------------------------|-------------|-------------|-------------|
| ENSMMUG00000038707 | U6 spliceosomal RNA [Source:RFAM;Acc:RF00026]                                                       | 3.581144635 | 0.003340899 | 0.012761128 |
| ENSMMUG00000041124 | MORN repeat containing 3 [Source:NCBI gene;Acc:700317]                                              | 0.830148744 | 0.001667549 | 0.007057105 |
| ENSMMUG00000063813 | Metazoan signal recognition particle RNA [Source:RFAM;Acc:RF00017]                                  | 1.167251177 | 0.012568442 | 0.039132029 |
| ENSMMUG00000031504 | transmembrane protein 120B [Source:VGNC Symbol;Acc:VGNC:79917]                                      | 0.355104048 | 0.003712626 | 0.013960282 |
| ENSMMUG00000016454 | 4-hydroxyphenylpyruvate dioxygenase [Source:VGNC Symbol;Acc:VGNC:73511]                             | 0.715982215 | 7.30E-07    | 7.24E-06    |
|                    |                                                                                                     | -           |             |             |
| ENSMMUG00000013643 | zinc finger CCHC-type containing 8 [Source:VGNC Symbol;Acc:VGNC:79487]                              | 1.771559427 | 0.001812191 | 0.007576593 |
|                    |                                                                                                     | -           |             |             |
| ENSMMUG00000004412 | arginine and serine rich coiled-coil 2 [Source:VGNC Symbol;Acc:VGNC:77139]                          | 2.856529689 | 0.000271475 | 0.001449294 |
|                    |                                                                                                     | -           |             |             |
| ENSMMUG00000005301 | ATP binding cassette subfamily B member 9 [Source:VGNC Symbol;Acc:VGNC:81341]                       | 1.692743163 | 1.49E-11    | 3.60E-10    |
| ENSMMUG00000015926 | 2-oxoglutarate and iron dependent oxygenase domain containing 2 [Source:VGNC Symbol;Acc:VGNC:75462] | 1.163314176 | 1.37E-07    | 1.61E-06    |
| ENSMMUG00000015930 | ADP ribosylation factor like GTPase 6 interacting protein 4 [Source:VGNC Symbol;Acc:VGNC:69860]     | 1.121627702 | 0.006210658 | 0.021573319 |
| ENSMMUG00000015931 | phosphatidylinositol transfer protein membrane associated 2 [Source:VGNC Symbol;Acc:VGNC:75843]     | 1.15130932  | 2.24E-07    | 2.52E-06    |
| ENSMMUG00000031495 | chromosome 11 C12orf65 homolog [Source:NCBI gene;Acc:708974]                                        | -2.02724584 | 0.000222612 | 0.001216128 |
|                    |                                                                                                     | -           |             |             |
| ENSMMUG00000000434 | cyclin dependent kinase 2 associated protein 1 [Source:VGNC Symbol;Acc:VGNC:70944]                  | 1.292053723 | 0.000198337 | 0.001097119 |
|                    |                                                                                                     | -           |             |             |
| ENSMMUG00000013514 | lysine methyltransferase 5A [Source:VGNC Symbol;Acc:VGNC:74159]                                     | 0.414563915 | 0.009506389 | 0.03108985  |
| ENSMMUG00000023048 | cytochrome b-c1 complex subunit Rieske, mitochondrial [Source:NCBI gene;Acc:705178]                 | 1.692464184 | 1.95E-06    | 1.75E-05    |
|                    |                                                                                                     | -           |             |             |
| ENSMMUG00000058836 | transmembrane p24 trafficking protein 2 [Source:NCBI gene;Acc:106992483]                            | 0.788927625 | 8.52E-05    | 0.000518474 |
| ENSMMUG00000064225 | tectonic family member 2 [Source:NCBI gene;Acc:721415]                                              | 0.416528647 | 0.001742176 | 0.007319657 |
|                    |                                                                                                     | -           |             |             |
| ENSMMUG00000006546 | ATPase H+ transporting V0 subunit a2 [Source:VGNC Symbol;Acc:VGNC:70096]                            | 0.383666472 | 0.000212642 | 0.001168688 |
| ENSMMUG00000006861 | dynein axonemal heavy chain 10 [Source:NCBI gene;Acc:710343]                                        | -0.61144685 | 7.86E-06    | 6.14E-05    |
|                    |                                                                                                     | -           |             |             |
| ENSMMUG00000020804 | transmembrane protein 132B [Source:NCBI gene;Acc:707118]                                            | 1.206732386 | 8.54E-05    | 0.00051901  |
|                    |                                                                                                     | -           |             |             |
| ENSMMUG00000050145 | Metazoan signal recognition particle RNA [Source:RFAM;Acc:RF00017]                                  | 2.962174872 | 0.006953254 | 0.023766625 |
|                    |                                                                                                     | -           |             |             |
| ENSMMUG00000020926 | syntaxin 2 [Source:VGNC Symbol;Acc:VGNC:78259]                                                      | 3.157393883 | 2.55E-06    | 2.22E-05    |
|                    |                                                                                                     | -           |             |             |
| ENSMMUG00000058674 |                                                                                                     | 2.958120997 | 0.012432767 | 0.038801016 |
| ENSMMUG00000017026 | fibrosin like 1 [Source:NCBI gene;Acc:696295]                                                       | 0.441292083 | 0.01349562  | 0.041512024 |
|                    |                                                                                                     | -           |             |             |
| ENSMMUG00000015463 | DNA polymerase epsilon, catalytic subunit [Source:NCBI gene;Acc:698023]                             | 0.511364707 | 0.000618864 | 0.002979937 |
| ENSMMUG00000031451 | golgin A3 [Source:VGNC Symbol;Acc:VGNC:73106]                                                       | 1.269514297 | 0.003074503 | 0.011872646 |
| ENSMMUG00000015468 | checkpoint with forkhead and ring finger domains [Source:VGNC Symbol;Acc:VGNC:71064]                | 3.194487228 | 1.75E-10    | 3.53E-09    |
|                    |                                                                                                     | -           |             |             |
| ENSMMUG00000021159 | tubulin alpha 3e [Source:NCBI gene;Acc:718034]                                                      | 0.770301493 | 0.003715607 | 0.013964265 |
| ENSMMUG00000049232 | AMMECR1 like [Source:VGNC Symbol;Acc:VGNC:84208]                                                    | 7.622445102 | 1.67E-10    | 3.36E-09    |
| ENSMMUG00000001989 | RNA polymerase II subunit D [Source:VGNC Symbol;Acc:VGNC:76213]                                     | 8.421997491 | 5.42E-14    | 1.94E-12    |
| ENSMMUG00000027543 | Y RNA [Source:RFAM;Acc:RF00019]                                                                     | 8.236239924 | 2.35E-13    | 7.45E-12    |
| ENSMMUG00000004177 | myosin VIIB [Source:NCBI gene;Acc:714563]                                                           | 0.315916587 | 0.001248995 | 0.005482076 |
| ENSMMUG00000056151 |                                                                                                     | 1.939099613 | 0.000454863 | 0.002281692 |
| ENSMMUG00000000376 | bridging integrator 1 [Source:VGNC Symbol;Acc:VGNC:70251]                                           | 2.248673543 | 0.000363565 | 0.001862949 |
|                    |                                                                                                     | -           |             |             |
| ENSMMUG00000020928 | nucleolar protein interacting with the FHA domain of MKI67 [Source:VGNC Symbol;Acc:VGNC:75201]      | 0.861238721 | 1.59E-05    | 0.000115972 |
| ENSMMUG00000046774 | RAS like proto-oncogene B [Source:NCBI gene;Acc:695852]                                             | 1.629970128 | 2.59E-10    | 5.03E-09    |
| ENSMMUG00000059182 |                                                                                                     | 1.988051552 | 1.05E-13    | 3.57E-12    |
| ENSMMUG00000063759 | transmembrane protein 185B [Source:NCBI gene;Acc:695744]                                            | 1.790442475 | 4.43E-14    | 1.64E-12    |
| ENSMMUG00000059504 |                                                                                                     | 2.448970386 | 8.99E-10    | 1.59E-08    |



|                    |                                                                                                           |             |             |             |
|--------------------|-----------------------------------------------------------------------------------------------------------|-------------|-------------|-------------|
| ENSMMUG0000005610  | protein tyrosine phosphatase non-receptor type 4 [Source:VGNC Symbol;Acc:VGNC:76605]                      | 0.833453334 | 0.000486908 | 0.002414414 |
| ENSMMUG00000011129 | cilia and flagella associated protein 221 [Source:VGNC Symbol;Acc:VGNC:71153]                             | 2.428864388 | 0.007771943 | 0.026183253 |
| ENSMMUG00000008875 | solute carrier family 35 member F5 [Source:VGNC Symbol;Acc:VGNC:77567]                                    | 1.056913779 | 3.48E-09    | 5.52E-08    |
| ENSMMUG00000043114 | U6 spliceosomal RNA [Source:RFAM;Acc:RF00026]                                                             | 0.652269201 | 0.002464368 | 0.009841901 |
| ENSMMUG00000017486 | minichromosome maintenance complex component 6 [Source:VGNC Symbol;Acc:VGNC:74685]                        | 0.886783717 | 0.000141628 | 0.000815061 |
| ENSMMUG00000040854 | aspartyl-tRNA synthetase 1 [Source:VGNC Symbol;Acc:VGNC:84226]                                            | 0.725578744 | 0.00014723  | 0.000843629 |
| ENSMMUG00000061455 |                                                                                                           | 2.535258781 | 0.001393976 | 0.006029225 |
| ENSMMUG00000006528 | Rho GTPase activating protein 15 [Source:VGNC Symbol;Acc:VGNC:69874]                                      | 0.748648657 | 1.46E-11    | 3.53E-10    |
| ENSMMUG00000016845 | zinc finger E-box binding homeobox 2 [Source:VGNC Symbol;Acc:VGNC:78969]                                  | 1.845074604 | 0.004645505 | 0.016840823 |
| ENSMMUG00000051691 |                                                                                                           | 1.069132703 | 0.000504476 | 0.002491869 |
| ENSMMUG00000008615 | nebulin [Source:NCBI gene;Acc:100430324]                                                                  | 0.930970025 | 5.75E-12    | 1.50E-10    |
| ENSMMUG00000010521 | ADP ribosylation factor like GTPase 5A [Source:VGNC Symbol;Acc:VGNC:70017]                                | 2.380017382 | 6.37E-06    | 5.08E-05    |
| ENSMMUG00000010526 | calcium voltage-gated channel auxiliary subunit beta 4 [Source:VGNC Symbol;Acc:VGNC:82116]                | 1.651980382 | 4.86E-10    | 9.13E-09    |
| ENSMMUG00000010527 | signal transducing adaptor molecule 2 [Source:VGNC Symbol;Acc:VGNC:77903]                                 | 0.204375047 | 0.012591585 | 0.039178911 |
| ENSMMUG00000014176 | cytohesin 1 interacting protein [Source:VGNC Symbol;Acc:VGNC:71831]                                       | -0.65867069 | 0.016078344 | 0.047905489 |
| ENSMMUG00000011637 | coiled-coil domain containing 148 [Source:VGNC Symbol;Acc:VGNC:70856]                                     | 2.09836023  | 0.000709039 | 0.003356331 |
| ENSMMUG00000011638 | plakophilin 4 [Source:VGNC Symbol;Acc:VGNC:76153]                                                         | 1.577042946 | 0.01053203  | 0.033790361 |
| ENSMMUG00000006443 |                                                                                                           | 2.406519826 | 0.016792861 | 0.049688137 |
| ENSMMUG00000052818 | death associated protein like 1 [Source:NCBI gene;Acc:699071]                                             | 2.080258866 | 0.004332745 | 0.015887207 |
| ENSMMUG00000057379 |                                                                                                           | -1.25130618 | 0.000475993 | 0.002368884 |
| ENSMMUG00000006180 | tetratricopeptide repeat, ankyrin repeat and coiled-coil containing 1 [Source:VGNC Symbol;Acc:VGNC:78238] | 1.495530327 | 5.12E-12    | 1.35E-10    |
| ENSMMUG00000061606 | Metazoan signal recognition particle RNA [Source:RFAM;Acc:RF00017]                                        | 1.575041749 | 0.000247215 | 0.001332012 |
| ENSMMUG00000006181 | WD repeat, sterile alpha motif and U-box domain containing 1 [Source:VGNC Symbol;Acc:VGNC:79634]          | 1.151988082 | 4.95E-07    | 5.15E-06    |
| ENSMMUG00000063868 | Metazoan signal recognition particle RNA [Source:RFAM;Acc:RF00017]                                        | 1.424118741 | 0.000160628 | 0.000909995 |
| ENSMMUG00000006182 | bromodomain adjacent to zinc finger domain 2B [Source:NCBI gene;Acc:702780]                               | 0.624272268 | 0.000255683 | 0.001371032 |
| ENSMMUG00000051450 | phospholipase A2 receptor 1 [Source:NCBI gene;Acc:700191]                                                 | 0.545000376 | 5.90E-05    | 0.000374474 |
| ENSMMUG00000002678 | integrin subunit beta 6 [Source:VGNC Symbol;Acc:VGNC:73789]                                               | 1.273441378 | 1.81E-06    | 1.64E-05    |
| ENSMMUG00000038083 | Metazoan signal recognition particle RNA [Source:RFAM;Acc:RF00017]                                        | 0.686535532 | 0.016883599 | 0.049835826 |
| ENSMMUG00000055970 |                                                                                                           | 0.764430216 | 6.36E-06    | 5.08E-05    |
| ENSMMUG00000008384 | solute carrier family 4 member 10 [Source:VGNC Symbol;Acc:VGNC:77695]                                     | 2.926999851 | 7.35E-27    | 1.16E-24    |
| ENSMMUG00000008387 | dipeptidyl peptidase 4 [Source:VGNC Symbol;Acc:VGNC:71979]                                                | 1.771116267 | 2.74E-09    | 4.41E-08    |
| ENSMMUG00000013251 | xin actin binding repeat containing 2 [Source:VGNC Symbol;Acc:VGNC:78953]                                 | 3.211812981 | 4.75E-07    | 4.96E-06    |
| ENSMMUG00000063463 |                                                                                                           | 0.957232915 | 0.004723367 | 0.01709325  |
| ENSMMUG00000021775 | beta-1,3-galactosyltransferase 1 [Source:VGNC Symbol;Acc:VGNC:70204]                                      | -1.20135616 | 0.000175333 | 0.000983339 |
| ENSMMUG00000006215 | serine/threonine kinase 39 [Source:VGNC Symbol;Acc:VGNC:81587]                                            | 0.933777712 | 1.41E-05    | 0.000104563 |
| ENSMMUG00000013830 | glucose-6-phosphatase catalytic subunit 2 [Source:NCBI gene;Acc:709062]                                   | 2.31963463  | 1.08E-12    | 3.12E-11    |
| ENSMMUG00000013832 | ATP binding cassette subfamily B member 11 [Source:VGNC Symbol;Acc:VGNC:81339]                            | 2.225866865 | 1.36E-07    | 1.60E-06    |
| ENSMMUG00000020510 | kelch like family member 41 [Source:VGNC Symbol;Acc:VGNC:74062]                                           | 0.684674535 | 9.64E-05    | 0.000577477 |
| ENSMMUG00000023051 | kelch like family member 23 [Source:NCBI gene;Acc:706609]                                                 | 0.416031764 | 0.000106883 | 0.000633154 |
| ENSMMUG00000015198 | glutamate decarboxylase 1 [Source:VGNC Symbol;Acc:VGNC:72862]                                             | 0.789119718 | 0.000742886 | 0.00349493  |

|                    |                                                                                                    |   |             |             |             |
|--------------------|----------------------------------------------------------------------------------------------------|---|-------------|-------------|-------------|
| ENSMMUG00000015203 | golgi reassembly stacking protein 2 [Source:VGNC Symbol;Acc:VGNC:72957]                            | - | 0.777677253 | 9.98E-05    | 0.000594796 |
| ENSMMUG00000011189 | tousled like kinase 1 [Source:VGNC Symbol;Acc:VGNC:78367]                                          | - | 0.822420719 | 7.60E-05    | 0.000468558 |
| ENSMMUG00000054176 | methyltransferase like 8 [Source:NCBI gene;Acc:695361]                                             | - | 0.927788075 | 0.00028894  | 0.001526834 |
| ENSMMUG00000023370 | DDB1 and CUL4 associated factor 17 [Source:VGNC Symbol;Acc:VGNC:71709]                             | - | 1.153633664 | 1.79E-05    | 0.000128579 |
| ENSMMUG00000007301 | dynein cytoplasmic 1 intermediate chain 2 [Source:VGNC Symbol;Acc:VGNC:71953]                      | - | 0.411437736 | 0.016428268 | 0.048808038 |
| ENSMMUG00000007310 | solute carrier family 25 member 12 [Source:VGNC Symbol;Acc:VGNC:77430]                             | - | 0.678993853 | 0.00013582  | 0.000785368 |
| ENSMMUG00000007313 | histone acetyltransferase 1 [Source:VGNC Symbol;Acc:VGNC:73349]                                    | - | 2.142693008 | 1.04E-09    | 1.80E-08    |
| ENSMMUG00000002370 | integrin subunit alpha 6 [Source:VGNC Symbol;Acc:VGNC:73780]                                       | - | 0.956501655 | 4.74E-07    | 4.96E-06    |
| ENSMMUG00000054462 |                                                                                                    | - | 0.969031705 | 3.92E-06    | 3.29E-05    |
| ENSMMUG00000061038 |                                                                                                    | - | 1.318326063 | 0.010753859 | 0.03441093  |
| ENSMMUG00000020792 | Rap guanine nucleotide exchange factor 4 [Source:VGNC Symbol;Acc:VGNC:76490]                       | - | 1.141596556 | 0.000117248 | 0.000688106 |
| ENSMMUG00000014672 | mitogen-activated protein kinase kinase kinase 20 [Source:NCBI gene;Acc:698274]                    | - | 1.348056665 | 0.001337463 | 0.005810728 |
| ENSMMUG00000049482 |                                                                                                    | - | 0.571908709 | 0.014607168 | 0.044321519 |
| ENSMMUG00000007092 | Obg like ATPase 1 [Source:NCBI gene;Acc:697309]                                                    | - | 0.781239986 | 0.006828697 | 0.023384868 |
| ENSMMUG00000021012 | G protein-coupled receptor 155 [Source:VGNC Symbol;Acc:VGNC:72985]                                 | - | 0.605631474 | 2.75E-07    | 3.03E-06    |
| ENSMMUG00000053004 |                                                                                                    | - | 0.739990442 | 7.06E-05    | 0.000438315 |
| ENSMMUG00000009593 | WAS/WASL interacting protein family member 1 [Source:VGNC Symbol;Acc:VGNC:78784]                   | - | 1.3914573   | 1.53E-11    | 3.68E-10    |
| ENSMMUG00000065344 | homeobox D1 [Source:NCBI gene;Acc:701064]                                                          | - | 0.548305969 | 0.005134102 | 0.018369293 |
| ENSMMUG00000008502 | alkylglycerone phosphate synthase [Source:VGNC Symbol;Acc:VGNC:69747]                              | - | 0.311254356 | 0.012948326 | 0.040091546 |
| ENSMMUG00000002183 | oxysterol binding protein like 6 [Source:VGNC Symbol;Acc:VGNC:75627]                               | - | 1.811583313 | 8.05E-15    | 3.28E-13    |
| ENSMMUG00000002185 | protein activator of interferon induced protein kinase EIF2AK2 [Source:VGNC Symbol;Acc:VGNC:76421] | - | 0.489660963 | 0.000231105 | 0.001254511 |
| ENSMMUG00000054264 | pejvakin [Source:NCBI gene;Acc:708668]                                                             | - | 0.474170049 | 0.004993305 | 0.0179406   |
| ENSMMUG00000009038 | titin [Source:NCBI gene;Acc:703527]                                                                | - | 1.576783889 | 0.000106813 | 0.000632995 |
| ENSMMUG00000019690 | SEC14 and spectrin domain containing 1 [Source:VGNC Symbol;Acc:VGNC:77267]                         | - | 2.543724372 | 3.35E-10    | 6.47E-09    |
| ENSMMUG00000053406 |                                                                                                    | - | 3.418321069 | 0.000266242 | 0.001423971 |
| ENSMMUG00000000300 | integrin subunit alpha 4 [Source:VGNC Symbol;Acc:VGNC:73778]                                       | - | 0.370264498 | 0.016062416 | 0.047867844 |
| ENSMMUG00000014277 | ITPR interacting domain containing 2 [Source:VGNC Symbol;Acc:VGNC:73584]                           | - | 1.452308214 | 1.47E-22    | 1.39E-20    |
| ENSMMUG00000014394 | DnaJ heat shock protein family (Hsp40) member C10 [Source:VGNC Symbol;Acc:VGNC:84229]              | - | 1.044544892 | 1.39E-12    | 3.94E-11    |
| ENSMMUG00000014397 | NCK associated protein 1 [Source:VGNC Symbol;Acc:VGNC:75143]                                       | - | 2.831399289 | 4.41E-17    | 2.41E-15    |
| ENSMMUG00000019462 | integrin subunit alpha V [Source:VGNC Symbol;Acc:VGNC:73783]                                       | - | 0.941571963 | 9.59E-09    | 1.41E-07    |
| ENSMMUG00000010405 | family with sequence similarity 171 member B [Source:VGNC Symbol;Acc:VGNC:72404]                   | - | 0.748864681 | 0.003680223 | 0.013856357 |
| ENSMMUG00000004022 | zinc finger SWIM-type containing 2 [Source:VGNC Symbol;Acc:VGNC:79908]                             | - | 2.043864365 | 1.44E-15    | 6.64E-14    |
| ENSMMUG00000014314 | ankyrin and armadillo repeat containing [Source:VGNC Symbol;Acc:VGNC:69706]                        | - | 0.865453946 | 0.000525011 | 0.002581024 |

|                     |                                                                                                            |             |             |             |
|---------------------|------------------------------------------------------------------------------------------------------------|-------------|-------------|-------------|
| ENSMMUG00000014318  | PMS1 homolog 1, mismatch repair system component [Source:VGNC Symbol;Acc:VGNC:81506]                       | 2.037224664 | 0.002520049 | 0.010033951 |
| ENSMMUG00000061305  |                                                                                                            | -           | -           | -           |
| ENSMMUG00000003260  |                                                                                                            | 1.103909087 | 0.000385967 | 0.001965946 |
| ENSMMUG00000064089  |                                                                                                            | -           | -           | -           |
| ENSMMUG00000007283  | 3-hydroxyisobutyryl-CoA hydrolase [Source:NCBI gene;Acc:713951]                                            | 1.555270895 | 2.39E-12    | 6.59E-11    |
| ENSMMUG00000051366  |                                                                                                            | -           | -           | -           |
| ENSMMUG00000005612  | glutaminase [Source:NCBI gene;Acc:693520]                                                                  | 0.702239189 | 8.06E-05    | 0.000493581 |
| ENSMMUG00000005613  | signal transducer and activator of transcription 1 [Source:VGNC Symbol;Acc:VGNC:77904]                     | -           | -           | -           |
| ENSMMUG00000001761  | myosin IB [Source:VGNC Symbol;Acc:VGNC:75111]                                                              | 0.892948435 | 0.000443191 | 0.002229426 |
| ENSMMUG000000037175 | U6 spliceosomal RNA [Source:RFAM;Acc:RF00026]                                                              | 0.844570499 | 0.00262251  | 0.010351622 |
| ENSMMUG00000001475  | transmembrane protein with EGF like and two follistatin like domains 2 [Source:VGNC Symbol;Acc:VGNC:78569] | 1.910337143 | 0.001214122 | 0.005348393 |
| ENSMMUG00000061797  | U6 spliceosomal RNA [Source:RFAM;Acc:RF00026]                                                              | -           | -           | -           |
| ENSMMUG00000061123  | Metazoan signal recognition particle RNA [Source:RFAM;Acc:RF00017]                                         | 0.386884174 | 0.000244609 | 0.001319927 |
| ENSMMUG00000057432  | serine/threonine kinase 17b [Source:NCBI gene;Acc:696908]                                                  | 1.572147254 | 2.08E-13    | 6.68E-12    |
| ENSMMUG00000015970  | coiled-coil domain containing 150 [Source:VGNC Symbol;Acc:VGNC:84222]                                      | 2.202566074 | 4.10E-09    | 6.37E-08    |
| ENSMMUG00000008643  | general transcription factor IIIC subunit 3 [Source:VGNC Symbol;Acc:VGNC:73317]                            | 2.085260726 | 0.000125067 | 0.000729279 |
| ENSMMUG00000022430  | splicing factor 3b subunit 1 [Source:VGNC Symbol;Acc:VGNC:77179]                                           | 1.268646839 | 0.000582295 | 0.002824433 |
| ENSMMUG00000023809  | raftlin family member 2 [Source:VGNC Symbol;Acc:VGNC:76837]                                                | 1.329603833 | 0.001645536 | 0.006976134 |
| ENSMMUG00000023810  | methionyl-tRNA synthetase 2, mitochondrial [Source:VGNC Symbol;Acc:VGNC:74572]                             | -           | -           | -           |
| ENSMMUG00000023811  | boule homolog, RNA binding protein [Source:VGNC Symbol;Acc:VGNC:70310]                                     | 1.107564583 | 0.00036149  | 0.001854433 |
| ENSMMUG00000051936  |                                                                                                            | -           | -           | -           |
| ENSMMUG00000050082  |                                                                                                            | 1.189407426 | 8.12E-14    | 2.81E-12    |
| ENSMMUG00000047974  | aldehyde oxidase 4 [Source:NCBI gene;Acc:701502]                                                           | -           | -           | -           |
| ENSMMUG00000022202  | basic leucine zipper and W2 domains 1 [Source:VGNC Symbol;Acc:VGNC:84213]                                  | 1.853593412 | 1.24E-18    | 8.11E-17    |
| ENSMMUG00000053805  | Metazoan signal recognition particle RNA [Source:RFAM;Acc:RF00017]                                         | -           | -           | -           |
| ENSMMUG00000012310  | CASP8 and FADD like apoptosis regulator [Source:VGNC Symbol;Acc:VGNC:71019]                                | 1.234448341 | 0.006278799 | 0.021778787 |
| ENSMMUG00000031296  | caspace 8 [Source:VGNC Symbol;Acc:VGNC:70547]                                                              | -           | -           | -           |
| ENSMMUG00000018356  | flagellum associated containing coiled-coil domains 1 [Source:VGNC Symbol;Acc:VGNC:72508]                  | 1.130001827 | 0.010602043 | 0.033977492 |
| ENSMMUG00000018144  | C2 calcium-dependent domain-containing protein 6 [Source:NCBI gene;Acc:702140]                             | 0.690567446 | 0.000361523 | 0.001854433 |
| ENSMMUG00000018151  | membrane palmitoylated protein 4 [Source:VGNC Symbol;Acc:VGNC:74734]                                       | -           | -           | -           |
| ENSMMUG00000000582  | NOP58 ribonucleoprotein [Source:VGNC Symbol;Acc:VGNC:75284]                                                | 0.807670125 | 0.001611037 | 0.006846052 |
| ENSMMUG00000061021  |                                                                                                            | -           | -           | -           |
| ENSMMUG00000059518  |                                                                                                            | 2.124925984 | 1.38E-06    | 1.29E-05    |
|                     |                                                                                                            | -           | -           | -           |
|                     |                                                                                                            | 0.649671525 | 0.006579564 | 0.022649094 |
|                     |                                                                                                            | -           | -           | -           |
|                     |                                                                                                            | 0.786836055 | 1.08E-08    | 1.57E-07    |
|                     |                                                                                                            | -           | -           | -           |
|                     |                                                                                                            | 1.224347806 | 1.45E-09    | 2.47E-08    |
|                     |                                                                                                            | -           | -           | -           |
|                     |                                                                                                            | 2.346344218 | 0.00267814  | 0.01051367  |
|                     |                                                                                                            | -1.5563289  | 0.009263203 | 0.030445213 |
|                     |                                                                                                            | -           | -           | -           |
|                     |                                                                                                            | 0.854296267 | 5.50E-05    | 0.000352857 |
|                     |                                                                                                            | -           | -           | -           |
|                     |                                                                                                            | 1.238799554 | 0.003275141 | 0.012555571 |
|                     |                                                                                                            | 1.665172264 | 5.49E-18    | 3.31E-16    |
|                     |                                                                                                            | 2.781806033 | 3.26E-06    | 2.78E-05    |
|                     |                                                                                                            | 1.0368739   | 2.86E-06    | 2.47E-05    |
|                     |                                                                                                            | 0.891897905 | 0.000286653 | 0.001518616 |
|                     |                                                                                                            | -1.55533517 | 0.011930488 | 0.037458641 |

|                    |                                                                                                    |   |             |             |             |
|--------------------|----------------------------------------------------------------------------------------------------|---|-------------|-------------|-------------|
| ENSMMUG00000056824 |                                                                                                    | - | 2.661258889 | 6.18E-06    | 4.96E-05    |
| ENSMMUG00000022601 | cAMP responsive element binding protein 1 [Source:VGNC Symbol;Acc:VGNC:71485]                      | - | 0.984475936 | 5.56E-05    | 0.000356019 |
| ENSMMUG00000022602 | methyltransferase like 21A [Source:VGNC Symbol;Acc:VGNC:74625]                                     | - | 1.278245028 | 4.62E-06    | 3.80E-05    |
| ENSMMUG00000020211 | cyclin Y like 1 [Source:VGNC Symbol;Acc:VGNC:84224]                                                | - | 1.418138023 | 3.96E-10    | 7.55E-09    |
| ENSMMUG00000057651 | frizzled class receptor 5 [Source:NCBI gene;Acc:710796]                                            | - | 2.018529348 | 0.000312709 | 0.001631674 |
| ENSMMUG00000008113 | pleckstrin homology domain containing M3 [Source:NCBI gene;Acc:711125]                             | - | 1.382491971 | 0.000143663 | 0.00082612  |
| ENSMMUG00000010871 | crystallin gamma B [Source:VGNC Symbol;Acc:VGNC:71507]                                             | - | -3.55626619 | 0.001543525 | 0.006583984 |
| ENSMMUG00000014299 | chromosome 12 C2orf80 homolog [Source:VGNC Symbol;Acc:VGNC:70459]                                  | - | 4.183221927 | 2.92E-05    | 0.000199874 |
| ENSMMUG00000016077 | isocitrate dehydrogenase (NADP(+)) 1 [Source:NCBI gene;Acc:710019]                                 | - | 2.324197006 | 3.20E-06    | 2.73E-05    |
| ENSMMUG00000017524 | phosphoinositide kinase, FYVE-type zinc finger containing [Source:VGNC Symbol;Acc:VGNC:75854]      | - | 2.170618411 | 4.06E-07    | 4.29E-06    |
| ENSMMUG00000005295 | parathyroid hormone 2 receptor [Source:VGNC Symbol;Acc:VGNC:76592]                                 | - | -2.29399058 | 0.001014672 | 0.004580834 |
| ENSMMUG00000002809 | unc-80 homolog, NALCN channel complex subunit [Source:NCBI gene;Acc:713007]                        | - | 1.509019161 | 1.63E-05    | 0.000118335 |
| ENSMMUG00000010508 | carbamoyl-phosphate synthase 1 [Source:VGNC Symbol;Acc:VGNC:71471]                                 | - | 3.634018809 | 6.19E-08    | 7.73E-07    |
| ENSMMUG00000059604 |                                                                                                    | - | 0.43795643  | 0.009575395 | 0.031267092 |
| ENSMMUG00000061342 |                                                                                                    | - | 1.303034998 | 1.62E-08    | 2.25E-07    |
| ENSMMUG00000000381 | IKAROS family zinc finger 2 [Source:VGNC Symbol;Acc:VGNC:73586]                                    | - | 0.762646589 | 2.50E-15    | 1.11E-13    |
| ENSMMUG00000000382 | sperm associated antigen 16 [Source:VGNC Symbol;Acc:VGNC:77977]                                    | - | 0.958665485 | 1.25E-05    | 9.36E-05    |
| ENSMMUG00000064880 |                                                                                                    | - | 0.917102724 | 2.85E-06    | 2.46E-05    |
| ENSMMUG00000053721 |                                                                                                    | - | 1.716967091 | 5.55E-08    | 7.01E-07    |
| ENSMMUG00000006755 | tubulin tyrosine ligase like 4 [Source:VGNC Symbol;Acc:VGNC:79758]                                 | - | 0.668784122 | 0.001862615 | 0.007751743 |
| ENSMMUG00000006758 | cytochrome P450, family 27, subfamily A, polypeptide 1 [Source:NCBI gene;Acc:700192]               | - | 1.280918543 | 0.011751717 | 0.036969207 |
| ENSMMUG00000021877 | protein kinase AMP-activated non-catalytic subunit gamma 3 [Source:VGNC Symbol;Acc:VGNC:76406]     | - | 1.363970785 | 0.01376412  | 0.042212873 |
| ENSMMUG00000052954 | Wnt family member 6 [Source:NCBI gene;Acc:700573]                                                  | - | 1.745654554 | 0.003631657 | 0.013712573 |
| ENSMMUG00000002519 | serine/threonine kinase 11 interacting protein [Source:VGNC Symbol;Acc:VGNC:77963]                 | - | 0.914729368 | 2.39E-11    | 5.54E-10    |
| ENSMMUG00000002520 | solute carrier family 4 member 3 [Source:VGNC Symbol;Acc:VGNC:77604]                               | - | 0.996804091 | 1.94E-07    | 2.21E-06    |
| ENSMMUG00000061834 |                                                                                                    | - | 1.073133958 | 7.07E-10    | 1.28E-08    |
| ENSMMUG00000046282 |                                                                                                    | - | 1.084327504 | 9.49E-16    | 4.51E-14    |
| ENSMMUG00000051349 |                                                                                                    | - | 3.536865572 | 0.002037366 | 0.008404425 |
| ENSMMUG00000058085 | coiled-coil domain containing 195 [Source:HGNC Symbol;Acc:HGNC:53441]                              | - | 2.829401499 | 0.00404976  | 0.014991434 |
| ENSMMUG00000018139 | dedicator of cytokinesis 10 [Source:VGNC Symbol;Acc:VGNC:71888]                                    | - | 0.510811654 | 2.93E-08    | 3.88E-07    |
| ENSMMUG00000051482 |                                                                                                    | - | 2.066833361 | 5.81E-07    | 5.95E-06    |
| ENSMMUG00000054072 |                                                                                                    | - | 1.472269049 | 1.46E-16    | 7.48E-15    |
| ENSMMUG00000045544 | neuronal tyrosine-phosphorylated phosphoinositide-3-kinase adaptor 2 [Source:NCBI gene;Acc:711209] | - | 1.259022307 | 9.49E-12    | 2.37E-10    |
| ENSMMUG00000000722 | rhomoid domain containing 1 [Source:VGNC Symbol;Acc:VGNC:76803]                                    | - | 0.550611605 | 0.013011278 | 0.04026075  |

|                    |                                                                                                   |             |             |             |
|--------------------|---------------------------------------------------------------------------------------------------|-------------|-------------|-------------|
| ENSMMUG00000013233 | collagen type IV alpha 4 chain [Source:VGNC Symbol;Acc:VGNC:71299]                                | 0.652418545 | 0.014797757 | 0.044796957 |
| ENSMMUG00000013235 | collagen type IV alpha 3 chain [Source:VGNC Symbol;Acc:VGNC:81375]                                | 0.829205747 | 5.20E-05    | 0.000335469 |
| ENSMMUG00000002103 | delta/notch like EGF repeat containing [Source:VGNC Symbol;Acc:VGNC:71895]                        | 1.455733035 | 1.80E-08    | 2.49E-07    |
| ENSMMUG00000011777 | UDP-GlcNAc:betaGal beta-1,3-N-acetylglucosaminyltransferase 7 [Source:VGNC Symbol;Acc:VGNC:82108] | 1.909159441 | 0.009442137 | 0.030924165 |
| ENSMMUG00000015167 | DIS3 like 3'-5' exoribonuclease 2 [Source:VGNC Symbol;Acc:VGNC:71793]                             | 1.737934787 | 0.000244859 | 0.001320786 |
| ENSMMUG00000016871 | alkaline phosphatase, intestinal [Source:VGNC Symbol;Acc:VGNC:69800]                              | 2.369142563 | 4.51E-06    | 3.73E-05    |
| ENSMMUG00000051779 |                                                                                                   | 0.575897156 | 0.001997055 | 0.008259227 |
| ENSMMUG00000005650 | ubiquitin specific peptidase 40 [Source:VGNC Symbol;Acc:VGNC:79226]                               | 0.339408792 | 0.003836977 | 0.01434623  |
| ENSMMUG00000021216 | UDP glucuronosyltransferase 1 family, polypeptide A1 [Source:NCBI gene;Acc:574210]                | 0.696989032 | 8.38E-05    | 0.000510719 |
| ENSMMUG00000051807 |                                                                                                   | 1.208821358 | 4.68E-05    | 0.00030642  |
| ENSMMUG00000061244 |                                                                                                   | 1.057042006 | 0.007823731 | 0.026308946 |
| ENSMMUG00000054449 | Metazoan signal recognition particle RNA [Source:RFAM;Acc:RF00017]                                | 1.368016819 | 0.000749093 | 0.003520713 |
| ENSMMUG00000009346 | ArfGAP with GTPase domain, ankyrin repeat and PH domain 1 [Source:VGNC Symbol;Acc:VGNC:84206]     | 0.921022384 | 0.001657387 | 0.00702023  |
| ENSMMUG00000017404 | IQ motif containing with AAA domain 1 [Source:VGNC Symbol;Acc:VGNC:73660]                         | 2.555818718 | 0.002522389 | 0.010037782 |
| ENSMMUG00000060487 | atypical chemokine receptor 3 [Source:NCBI gene;Acc:694428]                                       | 1.186390513 | 0.000516652 | 0.002545957 |
| ENSMMUG00000014049 | collagen type VI alpha 3 chain [Source:VGNC Symbol;Acc:VGNC:71303]                                | 1.066227313 | 0.001769947 | 0.007425605 |
| ENSMMUG00000059353 | phosphatidylserine synthase 2 [Source:NCBI gene;Acc:698582]                                       | 0.676270416 | 6.48E-05    | 0.000406251 |
| ENSMMUG00000056711 | ribonuclease inhibitor-like [Source:NCBI gene;Acc:114672186]                                      | 0.644238937 | 6.32E-07    | 6.38E-06    |
| ENSMMUG00000062863 |                                                                                                   | 1.904072415 | 2.42E-11    | 5.59E-10    |
| ENSMMUG00000004622 | NLR family pyrin domain containing 6 [Source:VGNC Symbol;Acc:VGNC:75234]                          | -1.80320663 | 0.00219102  | 0.008934323 |
| ENSMMUG00000057640 | plakophilin-3-like [Source:NCBI gene;Acc:114669833]                                               | 3.487411138 | 5.12E-43    | 5.32E-40    |
| ENSMMUG00000002917 | single Ig IL-1-related receptor [Source:NCBI gene;Acc:100425060]                                  | 3.734098882 | 1.64E-21    | 1.44E-19    |
| ENSMMUG00000010782 | phosphatidylserine synthase 2 [Source:NCBI gene;Acc:114669774]                                    | 0.580594487 | 0.002807719 | 0.010980847 |
| ENSMMUG00000010783 | ribonuclease inhibitor [Source:NCBI gene;Acc:720791]                                              | 0.597138573 | 0.000264579 | 0.001416641 |
| ENSMMUG00000021661 | leucine rich repeat containing 56 [Source:VGNC Symbol;Acc:VGNC:74356]                             | 1.450852425 | 9.26E-10    | 1.63E-08    |
| ENSMMUG00000021664 | lamin tail domain containing 2 [Source:VGNC Symbol;Acc:VGNC:74380]                                | 1.510142288 | 6.89E-18    | 4.07E-16    |
| ENSMMUG00000054421 | Ras association domain family member 7 [Source:NCBI gene;Acc:699206]                              | -0.31565698 | 0.005576375 | 0.019757192 |
| ENSMMUG00000004024 | cadherin related family member 5 [Source:VGNC Symbol;Acc:VGNC:71158]                              | 1.23527763  | 5.36E-06    | 4.36E-05    |
| ENSMMUG00000016715 | p53-induced death domain protein 1 [Source:VGNC Symbol;Acc:VGNC:81498]                            | 0.605488898 | 8.50E-06    | 6.58E-05    |
| ENSMMUG00000043846 |                                                                                                   | 0.502514888 | 0.001475089 | 0.006325479 |
| ENSMMUG00000010544 | mucin 5B, oligomeric mucus/gel-forming [Source:VGNC Symbol;Acc:VGNC:75081]                        | 0.604708395 | 4.54E-07    | 4.79E-06    |
| ENSMMUG00000017450 | MOB kinase activator 2 [Source:NCBI gene;Acc:720951]                                              | 1.414408004 | 0.000594161 | 0.002874314 |
| ENSMMUG00000003874 | interferon induced transmembrane protein 10 [Source:NCBI gene;Acc:721010]                         | 3.402379356 | 5.86E-18    | 3.52E-16    |
| ENSMMUG00000003912 | tyrosine hydroxylase [Source:VGNC Symbol;Acc:VGNC:78342]                                          | 0.296011582 | 0.014595219 | 0.044294509 |
| ENSMMUG00000007742 | potassium voltage-gated channel subfamily Q member 1 [Source:VGNC Symbol;Acc:VGNC:82168]          | 0.898565698 | 0.000190012 | 0.001057102 |
| ENSMMUG00000051131 | MAS related GPR family member G [Source:NCBI gene;Acc:721253]                                     | 0.782975291 | 0.000496629 | 0.002456445 |
| ENSMMUG00000052168 |                                                                                                   | 3.703915065 | 3.46E-42    | 3.36E-39    |
| ENSMMUG00000060517 |                                                                                                   | 1.664651616 | 6.94E-09    | 1.05E-07    |
| ENSMMUG00000001777 | testis expressed metallothionein like protein [Source:VGNC Symbol;Acc:VGNC:79965]                 | 0.483188213 | 0.005099348 | 0.018271931 |

|                    |                                                                                                      |             |             |             |
|--------------------|------------------------------------------------------------------------------------------------------|-------------|-------------|-------------|
| ENSMMUG00000014237 | lysine methyltransferase 5B [Source:VGNC Symbol;Acc:VGNC:74110]                                      | 2.126806767 | 1.86E-39    | 1.25E-36    |
| ENSMMUG00000056342 | Metazoan signal recognition particle RNA [Source:RFAM;Acc:RF00017]                                   | 2.78786517  | 0.000519496 | 0.002556504 |
| ENSMMUG00000023192 | choline kinase alpha [Source:VGNC Symbol;Acc:VGNC:71039]                                             | 2.118118382 | 8.74E-13    | 2.58E-11    |
| ENSMMUG00000023188 | aldehyde dehydrogenase 3 family member B1 [Source:VGNC Symbol;Acc:VGNC:69789]                        | 0.498053551 | 0.008068679 | 0.027020131 |
|                    |                                                                                                      | -           |             |             |
| ENSMMUG00000056105 | T-box transcription factor 10 [Source:NCBI gene;Acc:721689]                                          | 0.655741917 | 1.17E-05    | 8.83E-05    |
|                    |                                                                                                      | -           |             |             |
| ENSMMUG00000042611 | nudix hydrolase 8 [Source:NCBI gene;Acc:721695]                                                      | 2.659419723 | 0.011086828 | 0.03527551  |
|                    |                                                                                                      | -           |             |             |
| ENSMMUG00000011821 | phosphatidylinositol transfer protein membrane associated 1 [Source:VGNC Symbol;Acc:VGNC:76007]      | 1.336816371 | 0.014406753 | 0.043817065 |
| ENSMMUG00000011817 | aryl hydrocarbon receptor interacting protein [Source:VGNC Symbol;Acc:VGNC:69759]                    | 1.091780158 | 7.27E-10    | 1.31E-08    |
| ENSMMUG00000053378 |                                                                                                      | 0.970233956 | 1.61E-05    | 0.000117074 |
| ENSMMUG00000005488 | coronin 1B [Source:VGNC Symbol;Acc:VGNC:71320]                                                       | 1.637569323 | 9.46E-14    | 3.25E-12    |
| ENSMMUG00000005486 | protein tyrosine phosphatase receptor type C associated protein [Source:VGNC Symbol;Acc:VGNC:76613]  | 0.901410671 | 8.05E-06    | 6.27E-05    |
| ENSMMUG00000005483 | ribosomal protein S6 kinase B2 [Source:VGNC Symbol;Acc:VGNC:76934]                                   | 0.970127836 | 2.66E-09    | 4.31E-08    |
| ENSMMUG00000005480 | carnosine synthase 1 [Source:VGNC Symbol;Acc:VGNC:81367]                                             | 0.760288234 | 5.40E-18    | 3.27E-16    |
| ENSMMUG00000017280 | TBC1 domain family member 10C [Source:VGNC Symbol;Acc:VGNC:78203]                                    | 1.145185916 | 2.33E-05    | 0.00016349  |
| ENSMMUG00000004523 | DNA polymerase delta 4, accessory subunit [Source:NCBI gene;Acc:712632]                              | 0.729631418 | 0.003456692 | 0.013133802 |
| ENSMMUG00000015928 | ankyrin repeat domain 13D [Source:VGNC Symbol;Acc:VGNC:69722]                                        | 1.045345304 | 0.004037659 | 0.014958067 |
| ENSMMUG00000015925 | G protein-coupled receptor kinase 2 [Source:VGNC Symbol;Acc:VGNC:73253]                              | 0.874234467 | 3.91E-06    | 3.29E-05    |
| ENSMMUG00000008771 | lysine demethylase 2A [Source:VGNC Symbol;Acc:VGNC:73824]                                            | 0.672319855 | 8.77E-07    | 8.53E-06    |
|                    |                                                                                                      | -           |             |             |
| ENSMMUG00000004529 | chromosome 14 C11orf80 homolog [Source:NCBI gene;Acc:721782]                                         | 0.409728755 | 0.000706853 | 0.003348166 |
|                    |                                                                                                      | -           |             |             |
| ENSMMUG00000062635 |                                                                                                      | 0.603090573 | 0.000139603 | 0.000804046 |
| ENSMMUG00000010577 | RNA-binding protein 4B [Source:NCBI gene;Acc:713553]                                                 | 0.415209102 | 0.014463973 | 0.04394117  |
| ENSMMUG00000031207 | Bardet-Biedl syndrome 1 [Source:NCBI gene;Acc:720059]                                                | -1.0325822  | 0.012053296 | 0.037778949 |
|                    |                                                                                                      | -           |             |             |
| ENSMMUG00000015987 | Ras and Rab interactor 1 [Source:VGNC Symbol;Acc:VGNC:76769]                                         | 0.722847429 | 0.000111003 | 0.000654094 |
|                    |                                                                                                      | -           |             |             |
| ENSMMUG00000006950 | cornichon family AMPA receptor auxiliary protein 2 [Source:VGNC Symbol;Acc:VGNC:71366]               | 1.147722703 | 0.001798301 | 0.007533687 |
|                    |                                                                                                      | -           |             |             |
| ENSMMUG00000031202 | RAB1B, member RAS oncogene family [Source:NCBI gene;Acc:721852]                                      | 0.974495527 | 3.44E-05    | 0.000232412 |
|                    |                                                                                                      | -           |             |             |
| ENSMMUG00000022520 | kinesin light chain 2 [Source:VGNC Symbol;Acc:VGNC:73869]                                            | 0.917079528 | 0.000148043 | 0.000847287 |
| ENSMMUG00000057179 | cation channel sperm associated 1 [Source:NCBI gene;Acc:721869]                                      | 3.204814012 | 2.69E-14    | 1.03E-12    |
| ENSMMUG00000056794 | cystatin E/M [Source:NCBI gene;Acc:714999]                                                           | 3.724856401 | 0.000310381 | 0.001622442 |
| ENSMMUG00000019115 | eukaryotic translation initiation factor 1A domain containing [Source:VGNC Symbol;Acc:VGNC:72127]    | 0.667401259 | 0.000222973 | 0.001217638 |
|                    |                                                                                                      | -           |             |             |
| ENSMMUG00000008065 | spliceosome associated factor 1, recruiter of U4/U6.U5 tri-snRNP [Source:VGNC Symbol;Acc:VGNC:76972] | 0.378733294 | 0.006398221 | 0.022139313 |
| ENSMMUG00000008652 | coiled-coil domain containing 85B [Source:VGNC Symbol;Acc:VGNC:70853]                                | 1.05934385  | 6.94E-08    | 8.59E-07    |
| ENSMMUG00000008651 | FGF1 intracellular binding protein [Source:VGNC Symbol;Acc:VGNC:72663]                               | 1.118280736 | 7.54E-07    | 7.46E-06    |
| ENSMMUG00000038363 | adaptor related protein complex 5 subunit beta 1 [Source:NCBI gene;Acc:721904]                       | 1.368613694 | 5.82E-19    | 3.99E-17    |
| ENSMMUG00000050028 |                                                                                                      | 1.182101232 | 1.82E-10    | 3.66E-09    |
| ENSMMUG00000064005 |                                                                                                      | 0.955426931 | 0.000993732 | 0.004504485 |
| ENSMMUG00000060437 | Metazoan signal recognition particle RNA [Source:RFAM;Acc:RF00017]                                   | 1.475145255 | 0.00019583  | 0.001084486 |
| ENSMMUG00000019837 | ribonuclease H2 subunit C [Source:NCBI gene;Acc:700330]                                              | 1.014929868 | 1.58E-07    | 1.85E-06    |
| ENSMMUG00000019839 | lysine acetyltransferase 5 [Source:VGNC Symbol;Acc:VGNC:73955]                                       | 1.205723458 | 8.32E-15    | 3.37E-13    |
| ENSMMUG00000061174 |                                                                                                      | 0.586682377 | 0.00450824  | 0.016404576 |
| ENSMMUG00000023479 | latent transforming growth factor beta binding protein 3 [Source:VGNC Symbol;Acc:VGNC:74458]         | 2.193855876 | 9.83E-19    | 6.52E-17    |
| ENSMMUG00000023477 |                                                                                                      | 1.957510032 | 1.49E-38    | 8.34E-36    |
| ENSMMUG00000052424 |                                                                                                      | 0.574365629 | 0.001712464 | 0.007226151 |
| ENSMMUG00000023300 | FERM domain containing 8 [Source:NCBI gene;Acc:716379]                                               | 1.081383335 | 0.000451142 | 0.002266355 |

|                     |                                                                                          |             |             |             |
|---------------------|------------------------------------------------------------------------------------------|-------------|-------------|-------------|
| ENSMMUG00000056343  |                                                                                          | 0.912069276 | 0.000876414 | 0.004047149 |
| ENSMMUG00000012316  | CDC42 effector protein 2 [Source:VGNC Symbol;Acc:VGNC:70750]                             | 2.075217915 | 0.003432978 | 0.013066063 |
| ENSMMUG00000022031  | DNA polymerase alpha 2, accessory subunit [Source:NCBI gene;Acc:716541]                  | 1.005747679 | 8.29E-07    | 8.12E-06    |
| ENSMMUG00000018767  | cell division cycle associated 5 [Source:NCBI gene;Acc:721998]                           | 4.063113816 | 5.76E-07    | 5.90E-06    |
| ENSMMUG00000006568  | basic leucine zipper ATF-like transcription factor 2 [Source:VGNC Symbol;Acc:VGNC:70127] | 1.128910538 | 2.76E-06    | 2.39E-05    |
| ENSMMUG00000031163  | membrane anchored junction protein [Source:VGNC Symbol;Acc:VGNC:74375]                   | 1.469845226 | 4.26E-26    | 6.01E-24    |
| ENSMMUG00000003976  | glycoprotein hormone subunit alpha 2 [Source:VGNC Symbol;Acc:VGNC:72961]                 | 1.229425617 | 4.36E-10    | 8.22E-09    |
| ENSMMUG00000041101  | protein phosphatase 2 regulatory subunit B'beta [Source:NCBI gene;Acc:722026]            | 1.491616087 | 5.82E-31    | 1.34E-28    |
|                     |                                                                                          | -           |             |             |
| ENSMMUG00000003973  | autophagy related 2A [Source:VGNC Symbol;Acc:VGNC:70145]                                 | 1.463695868 | 1.12E-06    | 1.07E-05    |
| ENSMMUG00000003972  | EH domain containing 1 [Source:VGNC Symbol;Acc:VGNC:72175]                               | 0.689243993 | 5.41E-05    | 0.000348157 |
| ENSMMUG000000031160 | menin 1 [Source:NCBI gene;Acc:106995582]                                                 | 0.285573235 | 0.009922683 | 0.03222655  |
| ENSMMUG000000030597 | mitogen-activated protein kinase kinase kinase 2 [Source:VGNC Symbol;Acc:VGNC:81465]     | 0.372408365 | 0.000306769 | 0.001607025 |
| ENSMMUG00000007610  | ribosomal protein S6 kinase A4 [Source:VGNC Symbol;Acc:VGNC:76930]                       | 0.998123799 | 1.72E-19    | 1.23E-17    |
| ENSMMUG00000007603  | coiled-coil domain containing 88B [Source:NCBI gene;Acc:722080]                          | 1.208963856 | 3.38E-07    | 3.65E-06    |
| ENSMMUG00000013397  | peroxiredoxin 5 [Source:NCBI gene;Acc:719764]                                            | 0.962861704 | 1.09E-10    | 2.27E-09    |
|                     |                                                                                          | -           |             |             |
| ENSMMUG00000019647  | tRNA methyltransferase subunit 11-2 [Source:NCBI gene;Acc:717676]                        | 2.099950532 | 0.01692259  | 0.04991958  |
| ENSMMUG00000060596  | BCL2 associated agonist of cell death [Source:NCBI gene;Acc:717740]                      | 1.031555532 | 3.61E-08    | 4.71E-07    |
| ENSMMUG00000012944  | vascular endothelial growth factor B [Source:VGNC Symbol;Acc:VGNC:78765]                 | 1.957994937 | 4.43E-24    | 4.72E-22    |
| ENSMMUG00000012942  | DnaJ heat shock protein family (Hsp40) member C4 [Source:NCBI gene;Acc:717847]           | 0.931735429 | 0.006120284 | 0.021289917 |
| ENSMMUG00000012941  | nudix hydrolase 22 [Source:VGNC Symbol;Acc:VGNC:75475]                                   | 2.026982535 | 4.57E-27    | 7.39E-25    |
|                     |                                                                                          | -           |             |             |
| ENSMMUG00000012939  | fermitin family member 3 [Source:VGNC Symbol;Acc:VGNC:72553]                             | 0.806839901 | 1.33E-06    | 1.25E-05    |
|                     |                                                                                          | -           |             |             |
| ENSMMUG00000012953  | stress induced phosphoprotein 1 [Source:NCBI gene;Acc:717926]                            | 1.109911248 | 3.36E-11    | 7.62E-10    |
|                     |                                                                                          | -           |             |             |
| ENSMMUG00000056349  |                                                                                          | 2.791568692 | 0.000900086 | 0.004138061 |
| ENSMMUG00000000478  | OTU deubiquitinase, ubiquitin aldehyde binding 1 [Source:NCBI gene;Acc:717989]           | 0.727556181 | 4.60E-06    | 3.80E-05    |
| ENSMMUG000000052569 |                                                                                          | 3.818200613 | 4.26E-15    | 1.82E-13    |
| ENSMMUG00000014131  | microtubule affinity regulating kinase 2 [Source:VGNC Symbol;Acc:VGNC:74634]             | 0.925260812 | 0.000284797 | 0.001511236 |
| ENSMMUG00000005776  | atlastin GTPase 3 [Source:VGNC Symbol;Acc:VGNC:70125]                                    | 0.496474464 | 0.000784154 | 0.003659469 |
| ENSMMUG00000005775  | phospholipase A and acyltransferase 3 [Source:VGNC Symbol;Acc:VGNC:76055]                | 0.533204674 | 2.65E-10    | 5.14E-09    |
|                     |                                                                                          | -           |             |             |
| ENSMMUG00000045105  | phospholipase A and acyltransferase 4 [Source:NCBI gene;Acc:722189]                      | 0.845189727 | 0.000552143 | 0.002696174 |
|                     |                                                                                          | -           |             |             |
| ENSMMUG00000056054  | zinc finger and BTB domain containing 3 [Source:NCBI gene;Acc:722240]                    | 0.816122602 | 1.67E-07    | 1.94E-06    |
|                     |                                                                                          | -           |             |             |
| ENSMMUG00000006598  | eukaryotic translation elongation factor 1 gamma [Source:NCBI gene;Acc:722274]           | 0.221925119 | 0.01512729  | 0.045576252 |
|                     |                                                                                          | -           |             |             |
| ENSMMUG000000031123 | secretoglobin family 1A member 1 [Source:VGNC Symbol;Acc:VGNC:77004]                     | 0.667118103 | 1.90E-05    | 0.00013573  |
|                     |                                                                                          | -           |             |             |
| ENSMMUG00000049661  | Metazoan signal recognition particle RNA [Source:RFAM;Acc:RF00017]                       | 0.804040582 | 0.000853908 | 0.003955786 |
| ENSMMUG00000000327  | fatty acid desaturase 2 [Source:VGNC Symbol;Acc:VGNC:72472]                              | 1.526906578 | 2.40E-10    | 4.70E-09    |
| ENSMMUG00000013798  | fatty acid desaturase 1 [Source:VGNC Symbol;Acc:VGNC:72471]                              | 3.305671541 | 9.85E-22    | 8.90E-20    |
| ENSMMUG00000006655  | myelin regulatory factor [Source:VGNC Symbol;Acc:VGNC:74949]                             | 3.38000366  | 2.24E-10    | 4.40E-09    |
| ENSMMUG00000015280  | cleavage and polyadenylation specific factor 7 [Source:VGNC Symbol;Acc:VGNC:71606]       | 2.100237297 | 0.002633468 | 0.010383164 |
| ENSMMUG00000042208  | pepsin A-4 [Source:NCBI gene;Acc:694646]                                                 | -1.18596722 | 3.00E-09    | 4.79E-08    |
| ENSMMUG00000015019  | VPS37C subunit of ESCRT-I [Source:VGNC Symbol;Acc:VGNC:79578]                            | 2.630322278 | 0.011736469 | 0.036929231 |
|                     |                                                                                          | -           |             |             |
| ENSMMUG00000044417  | CD6 molecule [Source:NCBI gene;Acc:695183]                                               | 1.672353639 | 0.004982223 | 0.017914067 |
|                     |                                                                                          | -           |             |             |
| ENSMMUG00000014531  | transmembrane protein 109 [Source:VGNC Symbol;Acc:VGNC:79740]                            | 0.908145181 | 0.004212034 | 0.015501313 |

|                     |                                                                                       |             |             |             |
|---------------------|---------------------------------------------------------------------------------------|-------------|-------------|-------------|
| ENSMMUG00000014530  | pre-mRNA processing factor 19 [Source:VGNC Symbol;Acc:VGNC:76281]                     | 1.776745182 | 1.15E-21    | 1.03E-19    |
| ENSMMUG00000000019  | coiled-coil domain containing 86 [Source:VGNC Symbol;Acc:VGNC:70893]                  | 0.309714008 | 0.015239183 | 0.045862815 |
| ENSMMUG000000031100 | membrane-spanning 4-domains subfamily A member 4A-like [Source:NCBI gene;Acc:698152]  | 2.886148485 | 1.01E-09    | 1.75E-08    |
| ENSMMUG00000004821  | membrane spanning 4-domains A14 [Source:NCBI gene;Acc:697083]                         | 3.641487829 | 5.16E-11    | 1.13E-09    |
| ENSMMUG00000020177  | membrane spanning 4-domains A4A [Source:NCBI gene;Acc:698027]                         | 1.692095617 | 0.000702287 | 0.003333052 |
| ENSMMUG000000061603 |                                                                                       | 3.444348903 | 0.002043156 | 0.008418751 |
| ENSMMUG000000059299 | membrane spanning 4-domains A2 [Source:NCBI gene;Acc:697830]                          | 1.771704454 | 0.001229921 | 0.005408153 |
| ENSMMUG000000053140 | putative oocyte-secreted protein 1 homolog [Source:NCBI gene;Acc:698403]              | 1.932286762 | 0.008318316 | 0.027741076 |
| ENSMMUG000000017287 | PAT1 homolog 1, processing body mRNA decay factor [Source:VGNC Symbol;Acc:VGNC:75684] | 1.933047854 | 5.43E-05    | 0.000349031 |
| ENSMMUG00000001745  | oxysterol binding protein [Source:VGNC Symbol;Acc:VGNC:75718]                         | 1.508288198 | 4.51E-13    | 1.38E-11    |
| ENSMMUG000000060712 |                                                                                       | 1.401881458 | 5.23E-14    | 1.88E-12    |
| ENSMMUG000000045775 | macrophage expressed 1 [Source:NCBI gene;Acc:700274]                                  | 1.643609504 | 0.014753272 | 0.04469021  |
| ENSMMUG00000001083  | glycine N-acyltransferase-like protein 1 [Source:NCBI gene;Acc:701437]                | 1.004539946 | 9.61E-11    | 2.02E-09    |
| ENSMMUG000000011713 | leupaxin [Source:VGNC Symbol;Acc:VGNC:74286]                                          | 0.319890253 | 6.80E-05    | 0.000423775 |
| ENSMMUG000000011712 | olfactory receptor 5B21 [Source:NCBI gene;Acc:702145]                                 | 0.848838057 | 0.003407545 | 0.012987804 |
| ENSMMUG000000054737 |                                                                                       | 0.521485178 | 7.39E-06    | 5.82E-05    |
| ENSMMUG000000050844 | BTB domain containing 18 [Source:NCBI gene;Acc:703264]                                | 2.006506974 | 7.79E-07    | 7.66E-06    |
| ENSMMUG000000056184 |                                                                                       | 2.897632343 | 1.63E-06    | 1.49E-05    |
| ENSMMUG000000002566 | selenoprotein H [Source:VGNC Symbol;Acc:VGNC:82234]                                   | 2.044399145 | 0.015334294 | 0.046113908 |
| ENSMMUG000000040741 | thioredoxin related transmembrane protein 2 [Source:NCBI gene;Acc:100169970]          | 1.978202118 | 4.45E-12    | 1.18E-10    |
| ENSMMUG000000002562 | mediator complex subunit 19 [Source:VGNC Symbol;Acc:VGNC:74615]                       | 2.189182868 | 0.000173377 | 0.000973121 |
| ENSMMUG000000002563 | zinc finger DHHC-type palmitoyltransferase 5 [Source:VGNC Symbol;Acc:VGNC:79145]      | 2.034638297 | 2.56E-06    | 2.23E-05    |
| ENSMMUG000000058453 | cleavage factor polyribonucleotide kinase subunit 1 [Source:NCBI gene;Acc:705071]     | 0.631585372 | 0.009382913 | 0.030769683 |
| ENSMMUG000000010982 | reticulon 4 receptor like 2 [Source:VGNC Symbol;Acc:VGNC:82229]                       | 0.759614977 | 1.28E-05    | 9.61E-05    |
| ENSMMUG000000017810 | structure specific recognition protein 1 [Source:VGNC Symbol;Acc:VGNC:77891]          | 1.545131908 | 1.17E-11    | 2.88E-10    |
| ENSMMUG000000010627 | apelin receptor [Source:VGNC Symbol;Acc:VGNC:69939]                                   | -1.25717363 | 9.26E-10    | 1.63E-08    |
| ENSMMUG000000010869 | nucleoporin 160 [Source:VGNC Symbol;Acc:VGNC:75429]                                   | 1.035543829 | 0.008958715 | 0.029591648 |
| ENSMMUG000000040099 | Y RNA [Source:RFAM;Acc:RF00019]                                                       | 1.548866214 | 0.002474845 | 0.009878315 |
| ENSMMUG000000058885 | formin binding protein 4 [Source:NCBI gene;Acc:712633]                                | 1.311173062 | 2.06E-09    | 3.40E-08    |
| ENSMMUG000000012881 | ATP/GTP binding protein like 2 [Source:NCBI gene;Acc:711126]                          | 2.743079923 | 0.003458392 | 0.013136829 |
| ENSMMUG000000043682 | mitochondrial carrier 2 [Source:NCBI gene;Acc:712767]                                 | 3.090667728 | 5.74E-06    | 4.64E-05    |
| ENSMMUG000000004286 | protein tyrosine phosphatase mitochondrial 1 [Source:NCBI gene;Acc:713104]            | 1.540814726 | 0.000272343 | 0.001453398 |
| ENSMMUG000000015606 | Spi-1 proto-oncogene [Source:NCBI gene;Acc:712010]                                    | 1.088336689 | 0.001283826 | 0.005609552 |
| ENSMMUG000000015604 | myosin binding protein C3 [Source:VGNC Symbol;Acc:VGNC:75094]                         | 0.644229454 | 0.000766708 | 0.003591891 |
| ENSMMUG000000022964 |                                                                                       | 0.387731953 | 7.27E-06    | 5.74E-05    |
| ENSMMUG000000060750 | Metazoan signal recognition particle RNA [Source:RFAM;Acc:RF00017]                    | 2.040041168 | 0.002382335 | 0.009551906 |
| ENSMMUG000000003631 | cytoskeleton associated protein 5 [Source:VGNC Symbol;Acc:VGNC:71368]                 | 1.153328536 | 0.012170245 | 0.038088021 |
| ENSMMUG000000019674 | coagulation factor II, thrombin [Source:VGNC Symbol;Acc:VGNC:72464]                   | 1.448360378 | 0.008480385 | 0.028216837 |
| ENSMMUG000000021446 | diacylglycerol kinase zeta [Source:VGNC Symbol;Acc:VGNC:71789]                        | 0.884605693 | 9.36E-10    | 1.64E-08    |
| ENSMMUG000000002452 | solute carrier family 35 member C1 [Source:VGNC Symbol;Acc:VGNC:77524]                | 1.023034999 | 5.62E-08    | 7.08E-07    |



|                    |                                                                                                              |             |             |             |
|--------------------|--------------------------------------------------------------------------------------------------------------|-------------|-------------|-------------|
| ENSMMUG00000049305 | Metazoan signal recognition particle RNA [Source:RFAM;Acc:RF00017]                                           | 1.220129352 | 7.57E-05    | 0.000467389 |
| ENSMMUG00000047219 |                                                                                                              | 0.794809961 | 0.00107391  | 0.004805757 |
| ENSMMUG00000000874 | carbohydrate sulfotransferase 1 [Source:VGNC Symbol;Acc:VGNC:71055]                                          | 0.827557072 | 6.54E-05    | 0.000409309 |
| ENSMMUG00000050952 |                                                                                                              | -           | -           | -           |
| ENSMMUG00000059728 | tumor protein p53 inducible protein 11 [Source:NCBI gene;Acc:715295]                                         | 1.690102879 | 5.88E-06    | 4.74E-05    |
| ENSMMUG00000000368 | tetraspanin 18 [Source:VGNC Symbol;Acc:VGNC:79265]                                                           | 2.043572333 | 5.97E-05    | 0.00037812  |
| ENSMMUG00000008827 | apoptosis inhibitor 5 [Source:NCBI gene;Acc:716346]                                                          | -           | -           | -           |
| ENSMMUG00000007093 | low density lipoprotein receptor class A domain containing 3 [Source:VGNC Symbol;Acc:VGNC:74137]             | 2.340760791 | 0.00533567  | 0.018996971 |
| ENSMMUG00000051583 |                                                                                                              | -           | -           | -           |
| ENSMMUG00000054427 | Metazoan signal recognition particle RNA [Source:RFAM;Acc:RF00017]                                           | 0.801409318 | 0.003132928 | 0.012067668 |
| ENSMMUG00000004332 | tripartite motif containing 44 [Source:VGNC Symbol;Acc:VGNC:79168]                                           | 0.779659124 | 0.012576626 | 0.039149124 |
| ENSMMUG00000004330 | peptidase domain containing associated with muscle regeneration 1 [Source:VGNC Symbol;Acc:VGNC:75673]        | 0.927190047 | 4.17E-05    | 0.000276525 |
| ENSMMUG00000004329 | solute carrier family 1 member 2 [Source:VGNC Symbol;Acc:VGNC:77410]                                         | 1.352448971 | 0.000342175 | 0.001766405 |
| ENSMMUG00000005927 | ETS homologous factor [Source:VGNC Symbol;Acc:VGNC:72178]                                                    | 2.632968495 | 4.71E-09    | 7.26E-08    |
| ENSMMUG00000002429 | catalase [Source:VGNC Symbol;Acc:VGNC:70552]                                                                 | 3.498080598 | 3.41E-08    | 4.47E-07    |
| ENSMMUG00000055602 | CD59 molecule (CD59 blood group) [Source:NCBI gene;Acc:693402]                                               | -           | -           | -           |
| ENSMMUG00000017218 | KIAA1549 like [Source:VGNC Symbol;Acc:VGNC:73902]                                                            | 0.618633524 | 0.000150362 | 0.00085853  |
| ENSMMUG00000019988 | homeodomain interacting protein kinase 3 [Source:VGNC Symbol;Acc:VGNC:73472]                                 | -           | -           | -           |
| ENSMMUG0000001536  | glutamine and serine rich 1 [Source:VGNC Symbol;Acc:VGNC:76544]                                              | 3.481984862 | 0.000467212 | 0.002332871 |
| ENSMMUG00000055352 |                                                                                                              | -           | -           | -           |
| ENSMMUG00000049850 | proline rich and Gla domain 4 [Source:NCBI gene;Acc:694707]                                                  | 0.641176986 | 8.30E-06    | 6.44E-05    |
| ENSMMUG00000065337 |                                                                                                              | -0.7527669  | 0.000695047 | 0.003301927 |
| ENSMMUG00000006842 | doublecortin domain containing 1 [Source:NCBI gene;Acc:696721]                                               | -           | -           | -           |
| ENSMMUG00000023119 | lin-7 homolog C, crumbs cell polarity complex component [Source:VGNC Symbol;Acc:VGNC:74070]                  | 0.441433661 | 0.010076229 | 0.032623194 |
| ENSMMUG00000014615 | lactate dehydrogenase C [Source:VGNC Symbol;Acc:VGNC:74247]                                                  | 0.878065032 | 0.000171622 | 0.000964758 |
| ENSMMUG00000031024 | lactate dehydrogenase A [Source:NCBI gene;Acc:694309]                                                        | 0.999095227 | 1.18E-16    | 6.10E-15    |
| ENSMMUG00000006405 | secretion regulating guanine nucleotide exchange factor [Source:VGNC Symbol;Acc:VGNC:77258]                  | 1.189464473 | 4.90E-23    | 4.72E-21    |
| ENSMMUG00000006403 | potassium voltage-gated channel subfamily C member 1 [Source:VGNC Symbol;Acc:VGNC:73971]                     | 0.989884036 | 6.22E-10    | 1.14E-08    |
| ENSMMUG00000005895 | nucleobindin 2 [Source:VGNC Symbol;Acc:VGNC:75549]                                                           | -           | -           | -           |
| ENSMMUG00000064558 |                                                                                                              | 0.548240602 | 6.05E-05    | 0.000382449 |
| ENSMMUG00000022548 | phosphatidylinositol-4-phosphate 3-kinase catalytic subunit type 2 alpha [Source:VGNC Symbol;Acc:VGNC:75992] | -           | -           | -           |
| ENSMMUG00000017628 | pleckstrin homology domain containing A7 [Source:VGNC Symbol;Acc:VGNC:76121]                                 | 0.965153751 | 1.14E-12    | 3.28E-11    |
| ENSMMUG00000060216 |                                                                                                              | -1.94680431 | 0.000325321 | 0.00169202  |
| ENSMMUG00000055212 |                                                                                                              | 0.892404663 | 0.0020208   | 0.008340819 |
| ENSMMUG00000021914 | spondin 1 [Source:VGNC Symbol;Acc:VGNC:77862]                                                                | 0.978955563 | 4.17E-06    | 3.47E-05    |
| ENSMMUG00000054213 | parathyroid hormone [Source:NCBI gene;Acc:700195]                                                            | 0.719312233 | 0.013220717 | 0.040787259 |
|                    |                                                                                                              | 0.554777143 | 0.000284821 | 0.001511236 |
|                    |                                                                                                              | -           | -           | -           |
|                    |                                                                                                              | 0.939190447 | 0.000136566 | 0.000788742 |
|                    |                                                                                                              | -           | -           | -           |
|                    |                                                                                                              | 1.097507204 | 0.00013758  | 0.000793335 |
|                    |                                                                                                              | -           | -           | -           |
|                    |                                                                                                              | 0.777371699 | 0.001743449 | 0.00732289  |
|                    |                                                                                                              | -           | -           | -           |
|                    |                                                                                                              | 1.803953874 | 0.00054939  | 0.002683631 |
|                    |                                                                                                              | -           | -           | -           |
|                    |                                                                                                              | 3.638589498 | 0.002888316 | 0.011259709 |
|                    |                                                                                                              | -           | -           | -           |
|                    |                                                                                                              | 2.111199891 | 0.013011282 | 0.04026075  |
|                    |                                                                                                              | -           | -           | -           |
|                    |                                                                                                              | 0.906374687 | 3.06E-07    | 3.34E-06    |
|                    |                                                                                                              | -           | -           | -           |
|                    |                                                                                                              | 1.332881515 | 0.000544595 | 0.002662893 |

|                     |                                                                                                    |   |             |             |             |
|---------------------|----------------------------------------------------------------------------------------------------|---|-------------|-------------|-------------|
| ENSMMUG0000009695   | BTB domain containing 10 [Source:VGNC Symbol;Acc:VGNC:70361]                                       | - | 1.179916226 | 6.46E-06    | 5.14E-05    |
| ENSMMUG00000010875  | TEA domain transcription factor 1 [Source:VGNC Symbol;Acc:VGNC:78301]                              | - | 0.338051459 | 0.000661763 | 0.003163449 |
| ENSMMUG00000020956  | parvin alpha [Source:VGNC Symbol;Acc:VGNC:75605]                                                   | - | 0.511712861 | 0.015061766 | 0.045428141 |
| ENSMMUG00000043504  |                                                                                                    | - | 0.878114777 | 2.42E-10    | 4.72E-09    |
| ENSMMUG00000008758  | zinc finger protein 143 [Source:VGNC Symbol;Acc:VGNC:81612]                                        | - | 1.518796564 | 6.95E-06    | 5.51E-05    |
| ENSMMUG00000023636  | importin 7 [Source:NCBI gene;Acc:704213]                                                           | - | 1.30842639  | 1.32E-08    | 1.89E-07    |
| ENSMMUG000000052166 |                                                                                                    | - | 1.072204015 | 0.007046333 | 0.024045198 |
| ENSMMUG00000005639  | transmembrane protein 41B [Source:VGNC Symbol;Acc:VGNC:79754]                                      | - | 1.115172036 | 7.97E-05    | 0.000489103 |
| ENSMMUG000000058029 | Metazoan signal recognition particle RNA [Source:RFAM;Acc:RF00017]                                 | - | 4.165375348 | 3.40E-05    | 0.000229924 |
| ENSMMUG00000021142  | DENN domain containing 5A [Source:VGNC Symbol;Acc:VGNC:71674]                                      | - | 0.756138215 | 0.001979052 | 0.008189433 |
| ENSMMUG00000006692  | signal peptide, CUB domain and EGF like domain containing 2 [Source:VGNC Symbol;Acc:VGNC:77138]    | - | 1.126455086 | 3.26E-08    | 4.30E-07    |
| ENSMMUG00000006689  | nuclear receptor interacting protein 3 [Source:VGNC Symbol;Acc:VGNC:75397]                         | - | 1.326998249 | 5.13E-07    | 5.32E-06    |
| ENSMMUG00000038288  | TMEM9 domain family member B [Source:NCBI gene;Acc:708447]                                         | - | 0.867057309 | 1.18E-07    | 1.40E-06    |
| ENSMMUG000000051468 | Metazoan signal recognition particle RNA [Source:RFAM;Acc:RF00017]                                 | - | 0.962049805 | 2.17E-07    | 2.45E-06    |
| ENSMMUG00000001995  | chromosome 14 C11orf16 homolog [Source:NCBI gene;Acc:705319]                                       | - | 0.934442183 | 8.08E-06    | 6.28E-05    |
| ENSMMUG00000001994  | A-kinase interacting protein 1 [Source:VGNC Symbol;Acc:VGNC:69600]                                 | - | 0.897019326 | 0.007987488 | 0.026760571 |
| ENSMMUG00000018471  | serine/threonine kinase 33 [Source:VGNC Symbol;Acc:VGNC:78118]                                     | - | 1.269702064 | 0.000527183 | 0.002589073 |
| ENSMMUG000000035632 | U6 spliceosomal RNA [Source:RFAM;Acc:RF00026]                                                      | - | 0.838945819 | 0.007726158 | 0.026061422 |
| ENSMMUG000000050864 |                                                                                                    | - | 1.898958366 | 9.34E-13    | 2.73E-11    |
| ENSMMUG000000041831 | hemoglobin subunit epsilon 1 [Source:NCBI gene;Acc:715414]                                         | - | 0.739479468 | 0.012646626 | 0.039291302 |
| ENSMMUG000000058081 | olfactory receptor 52D1-like [Source:NCBI gene;Acc:106992372]                                      | - | 1.429541479 | 0.002626174 | 0.010360024 |
| ENSMMUG000000049802 | olfactory receptor 51G1 [Source:NCBI gene;Acc:716561]                                              | - | 0.611265473 | 0.012230609 | 0.038244    |
| ENSMMUG000000022682 | tripartite motif containing 68 [Source:NCBI gene;Acc:717644]                                       | - | 0.373109455 | 0.004917937 | 0.017710112 |
| ENSMMUG000000063820 | olfactory receptor, family 52, subfamily M, member 1 [Source:NCBI gene;Acc:717723]                 | - | 3.105705694 | 0.000384243 | 0.001958533 |
| ENSMMUG00000004974  | tripartite motif containing 21 [Source:VGNC Symbol;Acc:VGNC:78556]                                 | - | 1.058335123 | 6.62E-07    | 6.66E-06    |
| ENSMMUG000000003962 | ribonucleotide reductase catalytic subunit M1 [Source:VGNC Symbol;Acc:VGNC:76941]                  | - | 0.739711398 | 0.009390311 | 0.030786413 |
| ENSMMUG000000003955 | post-GPI attachment to proteins 2 [Source:VGNC Symbol;Acc:VGNC:75823]                              | - | 1.416426962 | 2.91E-21    | 2.50E-19    |
| ENSMMUG000000003950 | nucleoporin 98 and 96 precursor [Source:VGNC Symbol;Acc:VGNC:75563]                                | - | 1.207434744 | 5.58E-20    | 4.16E-18    |
| ENSMMUG000000003948 | ADP-ribosyltransferase 1 [Source:VGNC Symbol;Acc:VGNC:70024]                                       | - | 1.073732388 | 0.009230909 | 0.030366535 |
| ENSMMUG000000003946 | ADP-ribosyltransferase 5 [Source:VGNC Symbol;Acc:VGNC:69890]                                       | - | 1.695484956 | 0.001401292 | 0.006054727 |
| ENSMMUG000000007325 | Xrcc1 N-terminal domain containing 1 [Source:NCBI gene;Acc:115945140]                              | - | -1.8466389  | 6.93E-08    | 8.58E-07    |
| ENSMMUG000000059115 |                                                                                                    | - | 2.001716813 | 1.39E-06    | 1.29E-05    |
| ENSMMUG000000007326 | ring finger protein 121 [Source:VGNC Symbol;Acc:VGNC:76788]                                        | - | 2.224929212 | 1.20E-15    | 5.65E-14    |
| ENSMMUG000000007330 | nuclear mitotic apparatus protein 1 [Source:VGNC Symbol;Acc:VGNC:75556]                            | - | 1.651631094 | 9.86E-18    | 5.74E-16    |
| ENSMMUG000000021280 | leucine rich transmembrane and O-methyltransferase domain containing [Source:NCBI gene;Acc:718286] | - | 1.921078712 | 3.70E-11    | 8.32E-10    |
| ENSMMUG000000021282 | late endosomal/lysosomal adaptor, MAPK and MTOR activator 1 [Source:VGNC Symbol;Acc:VGNC:74129]    | - | -1.75261594 | 6.80E-11    | 1.47E-09    |
| ENSMMUG00000010453  | folate receptor beta [Source:VGNC Symbol;Acc:VGNC:72690]                                           | - | -1.81628791 | 6.72E-15    | 2.77E-13    |

|                     |                                                                                                     |             |             |             |
|---------------------|-----------------------------------------------------------------------------------------------------|-------------|-------------|-------------|
| ENSMMUG00000010451  | inositol polyphosphate phosphatase like 1 [Source:VGNC Symbol;Acc:VGNC:73752]                       | 1.993487666 | 2.50E-06    | 2.19E-05    |
| ENSMMUG00000005423  | caseinolytic mitochondrial matrix peptidase chaperone subunit B [Source:VGNC Symbol;Acc:VGNC:71375] | 0.650731661 | 0.010464424 | 0.033625405 |
| ENSMMUG00000015054  | ArfGAP with RhoGAP domain, ankyrin repeat and PH domain 1 [Source:VGNC Symbol;Acc:VGNC:69844]       | 0.435248581 | 0.003534804 | 0.013378143 |
| ENSMMUG00000001294  | FCH and double SH3 domains 2 [Source:VGNC Symbol;Acc:VGNC:72593]                                    | 1.376253213 | 1.01E-07    | 1.21E-06    |
| ENSMMUG00000003139  | Rho guanine nucleotide exchange factor 17 [Source:VGNC Symbol;Acc:VGNC:69880]                       | 0.550371996 | 0.004832797 | 0.017432847 |
| ENSMMUG00000004791  | pleckstrin homology domain containing B1 [Source:VGNC Symbol;Acc:VGNC:76069]                        | 1.647554856 | 2.46E-07    | 2.74E-06    |
| ENSMMUG00000030964  | RAB6A, member RAS oncogene family [Source:NCBI gene;Acc:718717]                                     | 1.214303207 | 3.51E-15    | 1.52E-13    |
| ENSMMUG00000010321  | C2 domain containing 3 centriole elongation regulator [Source:VGNC Symbol;Acc:VGNC:70375]           | 0.608117579 | 2.39E-05    | 0.000167858 |
| ENSMMUG00000017402  | phosphoglucomutase 2 like 1 [Source:VGNC Symbol;Acc:VGNC:75839]                                     | 0.906246643 | 1.51E-06    | 1.40E-05    |
| ENSMMUG000000056316 |                                                                                                     | 0.525315294 | 0.010304042 | 0.033234935 |
| ENSMMUG00000013094  | lipoyl(octanoyl) transferase 2 [Source:NCBI gene;Acc:718425]                                        | 0.941185801 | 5.67E-11    | 1.23E-09    |
| ENSMMUG00000013093  | uncharacterized LOC106993385 [Source:NCBI gene;Acc:106993385]                                       | 0.960598368 | 7.59E-11    | 1.62E-09    |
| ENSMMUG00000021039  | X-ray radiation resistance associated 1 [Source:NCBI gene;Acc:693788]                               | 1.844769147 | 1.36E-12    | 3.87E-11    |
| ENSMMUG00000009126  | solute carrier organic anion transporter family member 2B1 [Source:VGNC Symbol;Acc:VGNC:77603]      | 0.602035351 | 0.000248116 | 0.001336372 |
| ENSMMUG00000047594  |                                                                                                     | 0.446892836 | 0.009081681 | 0.029970578 |
| ENSMMUG00000017529  | arrestin beta 1 [Source:VGNC Symbol;Acc:VGNC:70021]                                                 | 0.634040289 | 0.002013859 | 0.008319258 |
| ENSMMUG00000000187  | UV radiation resistance associated [Source:VGNC Symbol;Acc:VGNC:78751]                              | 0.987919759 | 8.41E-05    | 0.000512441 |
| ENSMMUG00000022401  | EMSY transcriptional repressor, BRCA2 interacting [Source:VGNC Symbol;Acc:VGNC:72065]               | 2.474986008 | 3.27E-20    | 2.51E-18    |
| ENSMMUG00000018168  | alkaline ceramidase 3 [Source:VGNC Symbol;Acc:VGNC:69415]                                           | 0.603150927 | 2.42E-05    | 0.000169301 |
| ENSMMUG00000050318  | UDP-GlcNAc:betaGal beta-1,3-N-acetylglucosaminyltransferase 6 [Source:NCBI gene;Acc:697946]         | 0.595542122 | 0.000883378 | 0.004070396 |
| ENSMMUG00000055575  | olfactory marker protein [Source:HGNC Symbol;Acc:HGNC:8136]                                         | 0.862977153 | 0.006316464 | 0.021893762 |
| ENSMMUG00000001387  | p21 (RAC1) activated kinase 1 [Source:NCBI gene;Acc:698585]                                         | 1.403665794 | 1.59E-10    | 3.23E-09    |
| ENSMMUG00000018945  | chloride nucleotide-sensitive channel 1A [Source:VGNC Symbol;Acc:VGNC:71261]                        | 1.077258144 | 0.001388325 | 0.006010149 |
| ENSMMUG00000017355  | remodeling and spacing factor 1 [Source:VGNC Symbol;Acc:VGNC:77044]                                 | -1.13054072 | 4.40E-05    | 0.000290448 |
| ENSMMUG00000060971  |                                                                                                     | 0.880955725 | 0.001115648 | 0.004964934 |
| ENSMMUG00000051769  |                                                                                                     | 0.715816174 | 6.76E-05    | 0.00042165  |
| ENSMMUG00000050245  |                                                                                                     | 1.457903603 | 0.000146402 | 0.000839276 |
| ENSMMUG00000050119  |                                                                                                     | 0.724026017 | 6.14E-07    | 6.24E-06    |
| ENSMMUG00000016543  | CREB/ATF bZIP transcription factor [Source:VGNC Symbol;Acc:VGNC:71538]                              | 0.847612891 | 0.001005699 | 0.0045488   |
| ENSMMUG00000012449  | synaptotagmin like 2 [Source:VGNC Symbol;Acc:VGNC:78123]                                            | 0.967846186 | 0.002538095 | 0.010089224 |
| ENSMMUG00000013045  | coiled-coil domain containing 81 [Source:VGNC Symbol;Acc:VGNC:70868]                                | 0.918849118 | 0.003167666 | 0.012178883 |
| ENSMMUG00000013055  | malic enzyme 3 [Source:VGNC Symbol;Acc:VGNC:74695]                                                  | 1.019554673 | 0.000157524 | 0.000894624 |
| ENSMMUG00000011116  | NADPH oxidase 4 [Source:VGNC Symbol;Acc:VGNC:75376]                                                 | 1.067343475 | 2.37E-06    | 2.08E-05    |
| ENSMMUG00000060452  | FAT atypical cadherin 3 [Source:NCBI gene;Acc:695935]                                               | 0.562328248 | 0.014140836 | 0.043158794 |

|                    |                                                                                                       |             |             |             |
|--------------------|-------------------------------------------------------------------------------------------------------|-------------|-------------|-------------|
| ENSMMUG00000017741 | solute carrier family 36 member 4 [Source:NCBI gene;Acc:696671]                                       | 0.691044152 | 2.85E-05    | 0.000195798 |
| ENSMMUG00000013601 | chromosome 14 C11orf54 homolog [Source:NCBI gene;Acc:696483]                                          | 0.524549852 | 0.002082718 | 0.008557512 |
| ENSMMUG00000004112 | MRE11 homolog, double strand break repair nuclease [Source:VGNC Symbol;Acc:VGNC:74926]                | 0.351045005 | 0.014316458 | 0.043621536 |
| ENSMMUG00000061391 | ankyrin repeat domain 49 [Source:NCBI gene;Acc:697693]                                                | 1.256509257 | 2.86E-05    | 0.000196418 |
| ENSMMUG00000062781 | chromosome 14 C11orf97 homolog [Source:NCBI gene;Acc:106993442]                                       | 2.559155095 | 3.20E-46    | 4.22E-43    |
| ENSMMUG00000008965 | piwi like RNA-mediated gene silencing 4 [Source:VGNC Symbol;Acc:VGNC:81504]                           | 0.557545779 | 3.62E-05    | 0.000242861 |
| ENSMMUG00000009394 | sestrin 3 [Source:VGNC Symbol;Acc:VGNC:77291]                                                         | 0.550138204 | 0.000291451 | 0.001536584 |
| ENSMMUG00000061815 |                                                                                                       | 1.063346708 | 6.60E-10    | 1.20E-08    |
| ENSMMUG00000016737 | contactin 5 [Source:VGNC Symbol;Acc:VGNC:71287]                                                       | 3.419247517 | 2.46E-05    | 0.000171881 |
| ENSMMUG00000020784 | centrosomal protein 126 [Source:NCBI gene;Acc:701911]                                                 | 0.739909084 | 4.52E-10    | 8.51E-09    |
| ENSMMUG00000003394 | cilia and flagella associated protein 300 [Source:VGNC Symbol;Acc:VGNC:71120]                         | 0.708154996 | 0.007552417 | 0.025585991 |
| ENSMMUG00000057934 |                                                                                                       | 3.02852627  | 2.75E-12    | 7.45E-11    |
| ENSMMUG00000005440 | ELMO domain containing 1 [Source:VGNC Symbol;Acc:VGNC:72109]                                          | 1.254583961 | 0.000903058 | 0.004150411 |
| ENSMMUG00000010358 | solute carrier family 35 member F2 [Source:VGNC Symbol;Acc:VGNC:77565]                                | 1.094224055 | 0.010090704 | 0.032655513 |
| ENSMMUG00000052526 | RAB39A, member RAS oncogene family [Source:NCBI gene;Acc:707451]                                      | 1.803302288 | 2.33E-46    | 3.39E-43    |
| ENSMMUG00000001800 | cullin 5 [Source:VGNC Symbol;Acc:VGNC:71570]                                                          | -1.17524543 | 0.001317183 | 0.005743217 |
| ENSMMUG00000004157 | nuclear protein, coactivator of histone transcription [Source:VGNC Symbol;Acc:VGNC:75379]             | 1.351232608 | 4.90E-10    | 9.18E-09    |
| ENSMMUG00000004153 | ATM serine/threonine kinase [Source:VGNC Symbol;Acc:VGNC:70173]                                       | 1.147708294 | 0.003210655 | 0.012321355 |
| ENSMMUG00000000797 | exophilin 5 [Source:VGNC Symbol;Acc:VGNC:72412]                                                       | 1.372211612 | 1.65E-09    | 2.77E-08    |
| ENSMMUG00000052460 |                                                                                                       | 1.189926846 | 0.00414061  | 0.015265546 |
| ENSMMUG00000062793 |                                                                                                       | 3.106458034 | 2.45E-09    | 3.99E-08    |
| ENSMMUG00000014001 | protein phosphatase 2 scaffold subunit Abeta [Source:VGNC Symbol;Acc:VGNC:76375]                      | 1.220242385 | 0.001267463 | 0.005550901 |
| ENSMMUG00000014334 | dopamine receptor D2 [Source:VGNC Symbol;Acc:VGNC:71989]                                              | 0.765011224 | 0.008629954 | 0.028675119 |
| ENSMMUG00000007085 | zinc finger and BTB domain containing 16 [Source:VGNC Symbol;Acc:VGNC:78845]                          | -1.68576196 | 0.002427516 | 0.009710732 |
| ENSMMUG00000050683 |                                                                                                       | 3.072274686 | 0.010080174 | 0.0326287   |
| ENSMMUG00000051510 |                                                                                                       | 0.464829335 | 1.11E-05    | 8.44E-05    |
| ENSMMUG00000020002 | BUD13 homolog [Source:VGNC Symbol;Acc:VGNC:82112]                                                     | 1.003694083 | 0.000424953 | 0.002147962 |
| ENSMMUG00000060987 |                                                                                                       | 0.931736546 | 4.30E-11    | 9.50E-10    |
| ENSMMUG00000044545 | apolipoprotein A1 [Source:NCBI gene;Acc:696969]                                                       | 1.333177181 | 9.77E-05    | 0.000583945 |
| ENSMMUG00000016128 | SIK family kinase 3 [Source:VGNC Symbol;Acc:VGNC:77330]                                               | 0.690537601 | 7.14E-07    | 7.12E-06    |
| ENSMMUG00000002050 | platelet activating factor acetylhydrolase 1b catalytic subunit 2 [Source:VGNC Symbol;Acc:VGNC:75748] | 0.627749418 | 0.009528655 | 0.03114165  |
| ENSMMUG00000002053 | SID1 transmembrane family member 2 [Source:VGNC Symbol;Acc:VGNC:77300]                                | 0.569396292 | 0.005516336 | 0.019554004 |
| ENSMMUG00000007785 | beta-secretase 1 [Source:VGNC Symbol;Acc:VGNC:70215]                                                  | 3.449885101 | 0.001929169 | 0.008001235 |
| ENSMMUG00000007794 | DS cell adhesion molecule like 1 [Source:NCBI gene;Acc:698212]                                        | 0.550758265 | 0.000698372 | 0.003316637 |
| ENSMMUG00000059436 | interleukin 10 receptor subunit alpha [Source:NCBI gene;Acc:704383]                                   | 1.324034075 | 7.42E-08    | 9.12E-07    |

|                     |                                                                                                |   |             |             |             |
|---------------------|------------------------------------------------------------------------------------------------|---|-------------|-------------|-------------|
| ENSMMUG0000007620   | transmembrane serine protease 4 [Source:VGNC Symbol;Acc:VGNC:78577]                            | - | 1.565877302 | 6.09E-09    | 9.28E-08    |
| ENSMMUG00000063655  | sodium voltage-gated channel beta subunit 4 [Source:NCBI gene;Acc:100430940]                   | - | 0.973769576 | 0.000363125 | 0.001861993 |
| ENSMMUG00000061384  | sodium voltage-gated channel beta subunit 2 [Source:NCBI gene;Acc:678698]                      | - | 0.395749961 | 0.000483002 | 0.002398576 |
| ENSMMUG00000006268  | junction adhesion molecule like [Source:VGNC Symbol;Acc:VGNC:73860]                            | - | 0.756313485 | 5.78E-08    | 7.27E-07    |
| ENSMMUG00000017593  | CD3e molecule [Source:VGNC Symbol;Acc:VGNC:70764]                                              | - | 0.997777073 | 6.07E-14    | 2.16E-12    |
| ENSMMUG00000065091  | myelin protein zero like 2 [Source:NCBI gene;Acc:699330]                                       | - | 0.761567724 | 7.06E-09    | 1.06E-07    |
| ENSMMUG00000005482  | lysine methyltransferase 2A [Source:NCBI gene;Acc:705511]                                      | - | 2.118788298 | 5.48E-06    | 4.45E-05    |
| ENSMMUG000000051519 | tetratricopeptide repeat domain 36 [Source:NCBI gene;Acc:700199]                               | - | 0.316257868 | 0.007995794 | 0.026782226 |
| ENSMMUG00000005492  | transmembrane protein 25 [Source:VGNC Symbol;Acc:VGNC:79553]                                   | - | 0.319462946 | 1.64E-05    | 0.000118934 |
| ENSMMUG00000046655  | pleckstrin homology like domain family B member 1 [Source:NCBI gene;Acc:706336]                | - | 3.440568873 | 1.07E-23    | 1.09E-21    |
| ENSMMUG00000002549  | trehalase [Source:NCBI gene;Acc:706449]                                                        | - | 3.630565339 | 2.53E-39    | 1.49E-36    |
| ENSMMUG00000009318  | BCL9 like [Source:VGNC Symbol;Acc:VGNC:70113]                                                  | - | 0.770943028 | 3.12E-06    | 2.67E-05    |
| ENSMMUG00000056381  | forkhead box R1 [Source:NCBI gene;Acc:707285]                                                  | - | 1.806185531 | 0.000296264 | 0.001559868 |
| ENSMMUG00000016894  | ribosomal protein S25 [Source:NCBI gene;Acc:702593]                                            | - | 1.582347686 | 0.000181282 | 0.001012409 |
| ENSMMUG00000016946  | trafficking protein particle complex 4 [Source:VGNC Symbol;Acc:VGNC:79211]                     | - | 0.890331107 | 0.003598799 | 0.013599101 |
| ENSMMUG00000016890  | solute carrier family 37 member 4 [Source:VGNC Symbol;Acc:VGNC:77591]                          | - | 1.137047149 | 7.14E-09    | 1.07E-07    |
| ENSMMUG00000030891  | hypoxia up-regulated 1 [Source:VGNC Symbol;Acc:VGNC:73399]                                     | - | 0.889870384 | 1.50E-06    | 1.39E-05    |
| ENSMMUG00000014864  | VPS11 core subunit of CORVET and HOPS complexes [Source:VGNC Symbol;Acc:VGNC:78965]            | - | 0.92417187  | 3.61E-05    | 0.000242362 |
| ENSMMUG00000059341  | Metazoan signal recognition particle RNA [Source:RFAM;Acc:RF00017]                             | - | 1.185089931 | 3.55E-11    | 8.03E-10    |
| ENSMMUG00000014866  | hydroxymethylbilane synthase [Source:VGNC Symbol;Acc:VGNC:73479]                               | - | 0.816096834 | 0.01583274  | 0.04729974  |
| ENSMMUG00000044496  | H2A histone family, member X [Source:NCBI gene;Acc:703073]                                     | - | 1.026933047 | 4.61E-05    | 0.000302628 |
| ENSMMUG00000014872  | dolichyl-phosphate N-acetylglucosaminophosphotransferase 1 [Source:VGNC Symbol;Acc:VGNC:71971] | - | 1.101361324 | 3.48E-13    | 1.08E-11    |
| ENSMMUG00000013799  | ATP binding cassette subfamily G member 4 [Source:VGNC Symbol;Acc:VGNC:69390]                  | - | 3.131506137 | 4.19E-08    | 5.40E-07    |
| ENSMMUG00000012191  | coiled-coil domain containing 153 [Source:NCBI gene;Acc:704216]                                | - | 1.820567065 | 0.000289937 | 0.001531069 |
| ENSMMUG00000008923  | Thy-1 cell surface antigen [Source:VGNC Symbol;Acc:VGNC:78352]                                 | - | 2.190225202 | 5.87E-06    | 4.74E-05    |
| ENSMMUG00000039397  | tubulin folding cofactor E like [Source:NCBI gene;Acc:706506]                                  | - | 0.99708979  | 1.82E-06    | 1.64E-05    |
| ENSMMUG00000053625  | sterol-C5-desaturase [Source:NCBI gene;Acc:706827]                                             | - | 0.87924931  | 3.49E-06    | 2.96E-05    |
| ENSMMUG00000014880  | sortilin related receptor 1 [Source:NCBI gene;Acc:713011]                                      | - | 0.891682855 | 6.58E-05    | 0.000411846 |
| ENSMMUG00000054956  |                                                                                                | - | 3.222771487 | 0.004397767 | 0.016095251 |
| ENSMMUG00000015522  | GRAM domain containing 1B [Source:VGNC Symbol;Acc:VGNC:73028]                                  | - | -1.65514111 | 3.41E-13    | 1.06E-11    |
| ENSMMUG00000008474  | transforming growth factor beta regulator 1 [Source:VGNC Symbol;Acc:VGNC:78239]                | - | 1.365504354 | 0.000750707 | 0.003527157 |
| ENSMMUG00000057600  | V-set and immunoglobulin domain containing 2 [Source:NCBI gene;Acc:712047]                     | - | 0.819997532 | 0.000366763 | 0.001877995 |
| ENSMMUG00000008486  | endothelial cell adhesion molecule [Source:VGNC Symbol;Acc:VGNC:72290]                         | - | 0.831314978 | 3.93E-07    | 4.17E-06    |
| ENSMMUG00000065277  | hepatic and glial cell adhesion molecule [Source:NCBI gene;Acc:716321]                         | - | 1.030689717 | 0.010024492 | 0.032506367 |
| ENSMMUG00000006375  | coiled-coil domain containing 15 [Source:NCBI gene;Acc:716362]                                 | - | 1.253722038 | 4.05E-05    | 0.00026978  |
| ENSMMUG00000010009  | EI24 autophagy associated transmembrane protein [Source:VGNC Symbol;Acc:VGNC:72038]            | - | 0.576532335 | 0.002624296 | 0.010355426 |
| ENSMMUG00000038587  | prostate and testis expressed 2 [Source:NCBI gene;Acc:717085]                                  | - | 3.522772809 | 1.69E-05    | 0.000121688 |

|                    |                                                                                          |             |             |             |
|--------------------|------------------------------------------------------------------------------------------|-------------|-------------|-------------|
| ENSMMUG00000060291 | prostate and testis expressed 3 [Source:NCBI gene;Acc:100379154]                         | 2.450208402 | 0.003602283 | 0.01360873  |
| ENSMMUG00000014120 | sc328 [Source:NCBI gene;Acc:574167]                                                      | 2.226647035 | 0.0050784   | 0.018214827 |
| ENSMMUG00000065066 | V-set and immunoglobulin domain containing 10 like 2 [Source:NCBI gene;Acc:717387]       | 0.617611436 | 1.38E-06    | 1.28E-05    |
| ENSMMUG00000007628 | cell adhesion associated, oncogene regulated [Source:VGNC Symbol;Acc:VGNC:70961]         | 2.547984694 | 1.48E-07    | 1.74E-06    |
| ENSMMUG00000007935 | family with sequence similarity 118 member B [Source:VGNC Symbol;Acc:VGNC:72360]         | 0.724019271 | 0.005885359 | 0.020635664 |
| ENSMMUG00000006929 | ST3 beta-galactoside alpha-2,3-sialyltransferase 4 [Source:VGNC Symbol;Acc:VGNC:77827]   | 1.823925316 | 5.67E-15    | 2.37E-13    |
| ENSMMUG00000006931 | kirre like nephrin family adhesion molecule 3 [Source:NCBI gene;Acc:714534]              | 2.231860546 | 2.34E-23    | 2.30E-21    |
| ENSMMUG00000020706 | ETS proto-oncogene 1, transcription factor [Source:VGNC Symbol;Acc:VGNC:72439]           | 1.773514525 | 1.88E-26    | 2.85E-24    |
| ENSMMUG00000051915 |                                                                                          | -3.55351878 | 0.002525566 | 0.010047662 |
| ENSMMUG00000060836 |                                                                                          | 4.123781508 | 7.93E-07    | 7.79E-06    |
| ENSMMUG00000002963 | Rho GTPase activating protein 32 [Source:VGNC Symbol;Acc:VGNC:69855]                     | 2.460107158 | 4.05E-07    | 4.29E-06    |
| ENSMMUG00000032694 | U6 spliceosomal RNA [Source:RFAM;Acc:RF00026]                                            | 2.889962698 | 0.00225395  | 0.009144759 |
| ENSMMUG00000057813 |                                                                                          | 2.96084601  | 1.92E-07    | 2.19E-06    |
| ENSMMUG00000017555 | PR/SET domain 10 [Source:VGNC Symbol;Acc:VGNC:76250]                                     | -0.58474023 | 4.57E-06    | 3.78E-05    |
| ENSMMUG00000018029 | amyloid beta precursor like protein 2 [Source:VGNC Symbol;Acc:VGNC:69984]                | 0.835272449 | 1.18E-05    | 8.92E-05    |
| ENSMMUG00000018034 | suppression of tumorigenicity 14 [Source:VGNC Symbol;Acc:VGNC:77897]                     | 1.59692912  | 5.64E-22    | 5.19E-20    |
| ENSMMUG00000022944 | zinc finger and BTB domain containing 44 [Source:VGNC Symbol;Acc:VGNC:79466]             | 1.349692226 | 0.004589267 | 0.016666044 |
| ENSMMUG00000007107 | acyl-CoA dehydrogenase family member 8 [Source:VGNC Symbol;Acc:VGNC:69593]               | 2.695481961 | 0.001335479 | 0.005803843 |
| ENSMMUG00000002250 | beta-1,3-glucuronyltransferase 1 [Source:VGNC Symbol;Acc:VGNC:70207]                     | 1.941188866 | 0.000751065 | 0.003527702 |
| ENSMMUG00000009187 | calcium voltage-gated channel subunit alpha1 B [Source:VGNC Symbol;Acc:VGNC:70499]       | 2.196513813 | 0.000425859 | 0.002151794 |
| ENSMMUG00000019607 | patatin like phospholipase domain containing 7 [Source:VGNC Symbol;Acc:VGNC:76104]       | 0.801040715 | 0.000143136 | 0.000823415 |
| ENSMMUG00000046202 | transmembrane protein 203 [Source:NCBI gene;Acc:706164]                                  | 0.495475448 | 0.001126843 | 0.005011124 |
| ENSMMUG00000001677 | taperin [Source:NCBI gene;Acc:721581]                                                    | 0.448884261 | 0.006337582 | 0.021951257 |
| ENSMMUG00000001669 | anaphase promoting complex subunit 2 [Source:VGNC Symbol;Acc:VGNC:69641]                 | 0.428348469 | 0.015881953 | 0.047427271 |
| ENSMMUG00000001667 | transmembrane protein 210 [Source:VGNC Symbol;Acc:VGNC:79945]                            | 0.712552271 | 2.83E-05    | 0.00019513  |
| ENSMMUG00000063598 | leucine rich repeat containing 26 [Source:NCBI gene;Acc:706616]                          | 1.094429929 | 0.0167838   | 0.049671436 |
| ENSMMUG00000001661 | glutamate ionotropic receptor NMDA type subunit 1 [Source:VGNC Symbol;Acc:VGNC:73281]    | 0.908378883 | 0.015186279 | 0.045735019 |
| ENSMMUG00000021428 | lipocalin 12 [Source:VGNC Symbol;Acc:VGNC:74143]                                         | 1.128128063 | 9.23E-05    | 0.000555077 |
| ENSMMUG00000011527 | TNF receptor associated factor 2 [Source:VGNC Symbol;Acc:VGNC:78641]                     | 0.675927277 | 0.005325632 | 0.018965879 |
| ENSMMUG00000005048 | MAM domain containing 4 [Source:VGNC Symbol;Acc:VGNC:74345]                              | 0.817508644 | 1.84E-06    | 1.66E-05    |
| ENSMMUG00000005042 | RAB, member RAS oncogene family like 6 [Source:VGNC Symbol;Acc:VGNC:76529]               | 0.854482024 | 3.34E-05    | 0.000225883 |
| ENSMMUG00000005040 | coiled-coil domain containing 183 [Source:NCBI gene;Acc:709019]                          | 1.013671937 | 0.002581005 | 0.010206767 |
| ENSMMUG00000026981 | EGF like domain multiple 7 [Source:VGNC Symbol;Acc:VGNC:72079]                           | 0.737071903 | 0.000219438 | 0.001202403 |
| ENSMMUG00000056009 |                                                                                          | 1.157504339 | 1.47E-08    | 2.07E-07    |
| ENSMMUG00000003106 | SEC16 homolog A, endoplasmic reticulum export factor [Source:VGNC Symbol;Acc:VGNC:77326] | 1.131780026 | 6.96E-08    | 8.61E-07    |
| ENSMMUG00000003105 | inositol polyphosphate-5-phosphatase E [Source:VGNC Symbol;Acc:VGNC:73637]               | 0.97385503  | 6.05E-10    | 1.11E-08    |

|                     |                                                                                               |             |             |             |
|---------------------|-----------------------------------------------------------------------------------------------|-------------|-------------|-------------|
| ENSMMUG00000003098  | peptidase, mitochondrial processing alpha subunit [Source:VGNC Symbol;Acc:VGNC:76062]         | 1.520253073 | 7.73E-14    | 2.68E-12    |
| ENSMMUG00000003081  | G protein signaling modulator 1 [Source:VGNC Symbol;Acc:VGNC:72960]                           | 0.693723199 | 6.13E-05    | 0.000387055 |
| ENSMMUG00000001409  | coiled-coil domain containing 187 [Source:NCBI gene;Acc:710749]                               | 1.617623151 | 1.13E-10    | 2.34E-09    |
| ENSMMUG00000004885  | quiescin sulfhydryl oxidase 2 [Source:VGNC Symbol;Acc:VGNC:76568]                             | 1.647031896 | 0.014700984 | 0.044550387 |
| ENSMMUG000000045749 |                                                                                               | 1.672268349 | 0.00132265  | 0.005760143 |
| ENSMMUG00000000276  | NACC family member 2 [Source:VGNC Symbol;Acc:VGNC:75013]                                      | 3.29989335  | 0.000130559 | 0.000758872 |
| ENSMMUG00000016827  | UBA domain containing 1 [Source:VGNC Symbol;Acc:VGNC:79837]                                   | 2.286962803 | 2.40E-06    | 2.11E-05    |
| ENSMMUG00000021496  | potassium sodium-activated channel subfamily T member 1 [Source:VGNC Symbol;Acc:VGNC:73856]   | 0.809768131 | 0.000178811 | 0.000999762 |
| ENSMMUG00000055942  | spermatogenesis and oogenesis specific basic helix-loop-helix 1 [Source:NCBI gene;Acc:721833] | 1.335859662 | 0.0150141   | 0.045310352 |
| ENSMMUG00000012147  | collagen type V alpha 1 chain [Source:NCBI gene;Acc:722014]                                   | 2.8143977   | 2.37E-10    | 4.63E-09    |
| ENSMMUG00000051925  |                                                                                               | 1.942440223 | 9.33E-10    | 1.64E-08    |
| ENSMMUG00000064229  |                                                                                               | 1.742730076 | 2.59E-06    | 2.26E-05    |
| ENSMMUG00000005463  | bromodomain containing 3 [Source:VGNC Symbol;Acc:VGNC:70281]                                  | 0.917393684 | 8.36E-07    | 8.16E-06    |
| ENSMMUG00000017214  | vav guanine nucleotide exchange factor 2 [Source:VGNC Symbol;Acc:VGNC:78758]                  | 1.439148343 | 0.002965585 | 0.011520766 |
| ENSMMUG00000017210  | sarcosine dehydrogenase [Source:VGNC Symbol;Acc:VGNC:76971]                                   | 2.888958604 | 7.27E-13    | 2.15E-11    |
| ENSMMUG00000017207  | dopamine beta-hydroxylase [Source:VGNC Symbol;Acc:VGNC:71740]                                 | 2.911363732 | 2.40E-08    | 3.23E-07    |
| ENSMMUG00000022348  | surfeit 4 [Source:VGNC Symbol;Acc:VGNC:78060]                                                 | 0.965926793 | 0.00031945  | 0.001663862 |
| ENSMMUG00000057105  | Metazoan signal recognition particle RNA [Source:RFAM;Acc:RF00017]                            | 0.638685249 | 0.016372586 | 0.048652553 |
| ENSMMUG00000050752  | Metazoan signal recognition particle RNA [Source:RFAM;Acc:RF00017]                            | 1.470683958 | 0.004331931 | 0.015887207 |
| ENSMMUG00000051984  |                                                                                               | -1.35619646 | 0.006197873 | 0.021534054 |
| ENSMMUG00000009976  | uridine-cytidine kinase 1 [Source:VGNC Symbol;Acc:VGNC:78967]                                 | 0.962319581 | 3.82E-11    | 8.57E-10    |
| ENSMMUG00000002267  | laminin subunit gamma 3 [Source:NCBI gene;Acc:722430]                                         | 3.154390772 | 9.45E-07    | 9.15E-06    |
| ENSMMUG00000036223  |                                                                                               | 2.642791418 | 0.000534978 | 0.002620276 |
| ENSMMUG00000059085  | PR/SET domain 12 [Source:NCBI gene;Acc:716040]                                                | 1.021645159 | 3.35E-05    | 0.000226441 |
| ENSMMUG00000008249  | far upstream element binding protein 3 [Source:NCBI gene;Acc:722470]                          | -0.79823901 | 0.000156899 | 0.000891998 |
| ENSMMUG00000001522  | argininosuccinate synthase 1 [Source:NCBI gene;Acc:716168]                                    | 0.571726029 | 0.010998627 | 0.035039896 |
| ENSMMUG00000061477  |                                                                                               | 0.435803143 | 0.001266715 | 0.005549799 |
| ENSMMUG00000049177  | neuronal calcium sensor 1 [Source:NCBI gene;Acc:722507]                                       | 0.380924884 | 0.014844815 | 0.044911359 |
| ENSMMUG00000003797  | ubiquitin specific peptidase 20 [Source:VGNC Symbol;Acc:VGNC:78740]                           | 2.318161384 | 1.55E-09    | 2.62E-08    |
| ENSMMUG00000003793  | torsin family 1 member B [Source:VGNC Symbol;Acc:VGNC:78624]                                  | 0.976295723 | 0.016129991 | 0.04803968  |
| ENSMMUG00000009965  | chromosome 15 C9orf50 homolog [Source:VGNC Symbol;Acc:VGNC:70365]                             | 2.151107159 | 2.97E-20    | 2.30E-18    |
| ENSMMUG00000049483  |                                                                                               | -3.18961927 | 0.002924539 | 0.011385652 |
| ENSMMUG00000055560  |                                                                                               | 1.707670321 | 0.000226179 | 0.001232372 |
| ENSMMUG00000051852  | Metazoan signal recognition particle RNA [Source:RFAM;Acc:RF00017]                            | 1.30467687  | 0.000536686 | 0.002626868 |
| ENSMMUG00000011767  | carnitine O-acetyltransferase [Source:VGNC Symbol;Acc:VGNC:71483]                             | 0.656508563 | 0.002333418 | 0.009398973 |
| ENSMMUG00000005989  | GLE1 RNA export mediator [Source:VGNC Symbol;Acc:VGNC:73067]                                  | 1.137372134 | 2.62E-12    | 7.13E-11    |
| ENSMMUG00000005987  | outer dense fiber of sperm tails 2 [Source:VGNC Symbol;Acc:VGNC:75580]                        | 0.601589468 | 0.004876262 | 0.017576548 |

|                    |                                                                                              |             |             |             |
|--------------------|----------------------------------------------------------------------------------------------|-------------|-------------|-------------|
| ENSMMUG00000023495 | Ral GEF with PH domain and SH3 binding motif 1 [Source:VGNC Symbol;Acc:VGNC:76492]           | 0.439386999 | 0.002996085 | 0.011614423 |
| ENSMMUG00000052476 | zinc finger and BTB domain containing 43 [Source:NCBI gene;Acc:701797]                       | 0.718294907 | 0.000160698 | 0.000910036 |
| ENSMMUG00000016826 | MAPK associated protein 1 [Source:VGNC Symbol;Acc:VGNC:74531]                                | 1.194396438 | 6.83E-07    | 6.86E-06    |
| ENSMMUG00000003668 | GTPase activating protein and VPS9 domains 1 [Source:VGNC Symbol;Acc:VGNC:72767]             | 1.152417519 | 1.81E-10    | 3.63E-09    |
| ENSMMUG00000005217 | heat shock protein family A (Hsp70) member 5 [Source:NCBI gene;Acc:703193]                   | 0.70748452  | 0.000453754 | 0.002276915 |
| ENSMMUG00000005215 | Rab9 effector protein with kelch motifs [Source:VGNC Symbol;Acc:VGNC:76495]                  | 1.230201933 | 4.00E-09    | 6.22E-08    |
| ENSMMUG00000020549 | protein phosphatase 6 catalytic subunit [Source:NCBI gene;Acc:703658]                        | 0.985938261 | 0.000711418 | 0.003366496 |
| ENSMMUG00000051739 | Metazoan signal recognition particle RNA [Source:RFAM;Acc:RF00017]                           | 2.007962029 | 0.008096451 | 0.027100648 |
| ENSMMUG00000020633 | suppressor of cancer cell invasion [Source:NCBI gene;Acc:712803]                             | 1.11748197  | 5.97E-06    | 4.81E-05    |
| ENSMMUG00000061871 |                                                                                              | -           | -           | -           |
|                    |                                                                                              | 2.475363088 | 0.000773493 | 0.003617848 |
| ENSMMUG00000011183 | olfactomedin like 2A [Source:VGNC Symbol;Acc:VGNC:75472]                                     | 1.645609279 | 7.71E-06    | 6.04E-05    |
| ENSMMUG00000033102 | mml-mir-181b-2 [Source:miRBase;Acc:MI0007646]                                                | -           | -           | -           |
|                    |                                                                                              | 2.020755604 | 0.001193474 | 0.00526861  |
| ENSMMUG00000026876 | mml-mir-181a-2 [Source:miRBase;Acc:MI0002808]                                                | -           | -           | -           |
|                    |                                                                                              | 2.774723184 | 2.61E-05    | 0.00018093  |
| ENSMMUG00000014110 | adhesion G protein-coupled receptor D2 [Source:VGNC Symbol;Acc:VGNC:69462]                   | 0.702356014 | 3.95E-09    | 6.17E-08    |
| ENSMMUG00000054736 |                                                                                              | 3.47727771  | 6.84E-11    | 1.47E-09    |
| ENSMMUG00000000496 | zinc finger and BTB domain containing 6 [Source:VGNC Symbol;Acc:VGNC:79047]                  | -           | -           | -           |
|                    |                                                                                              | 2.766577916 | 0.007786727 | 0.026208764 |
| ENSMMUG00000063639 |                                                                                              | 1.671893482 | 2.18E-06    | 1.93E-05    |
| ENSMMUG00000038944 |                                                                                              | 2.659417947 | 3.42E-34    | 1.12E-31    |
| ENSMMUG00000058731 | olfactory receptor 1B1 [Source:NCBI gene;Acc:699905]                                         | -           | -           | -           |
|                    |                                                                                              | 0.310128198 | 0.011199002 | 0.035576899 |
| ENSMMUG00000043396 | Metazoan signal recognition particle RNA [Source:RFAM;Acc:RF00017]                           | 5.033292396 | 4.42E-11    | 9.74E-10    |
| ENSMMUG00000005595 | RAB14, member RAS oncogene family [Source:NCBI gene;Acc:699837]                              | 3.75577655  | 2.82E-25    | 3.62E-23    |
| ENSMMUG00000012668 | centriolin [Source:VGNC Symbol;Acc:VGNC:71204]                                               | 2.256636612 | 2.40E-21    | 2.08E-19    |
| ENSMMUG00000058237 |                                                                                              | 0.726620199 | 1.07E-05    | 8.14E-05    |
| ENSMMUG00000013105 | astrotactin 2 [Source:VGNC Symbol;Acc:VGNC:70087]                                            | 0.749053792 | 0.000557828 | 0.002721188 |
| ENSMMUG00000065273 |                                                                                              | -           | -           | -           |
|                    |                                                                                              | 1.157360054 | 0.014028005 | 0.042886458 |
| ENSMMUG00000013107 | tripartite motif containing 32 [Source:VGNC Symbol;Acc:VGNC:79032]                           | 0.57789558  | 1.42E-05    | 0.000104834 |
| ENSMMUG00000013099 | pappalysin 1 [Source:VGNC Symbol;Acc:VGNC:75756]                                             | 1.10990928  | 4.69E-05    | 0.0003068   |
| ENSMMUG00000003356 | tenascin C [Source:VGNC Symbol;Acc:VGNC:79960]                                               | 1.223086375 | 8.75E-09    | 1.30E-07    |
| ENSMMUG00000041301 | TNF superfamily member 8 [Source:NCBI gene;Acc:702944]                                       | -           | -           | -           |
|                    |                                                                                              | 1.083100776 | 0.000585337 | 0.002837293 |
| ENSMMUG00000012892 | TNF superfamily member 15 [Source:VGNC Symbol;Acc:VGNC:78596]                                | 0.420864967 | 7.60E-05    | 0.000468558 |
| ENSMMUG00000064892 |                                                                                              | 1.013922956 | 1.16E-05    | 8.82E-05    |
| ENSMMUG00000062461 | chromosome 15 C9orf43 homolog [Source:NCBI gene;Acc:704968]                                  | -           | -           | -           |
|                    |                                                                                              | 3.657830897 | 0.001787957 | 0.007494674 |
| ENSMMUG00000044537 | DNA polymerase epsilon 3, accessory subunit [Source:NCBI gene;Acc:705074]                    | -           | -           | -           |
|                    |                                                                                              | 3.266618045 | 3.95E-06    | 3.31E-05    |
| ENSMMUG00000031965 | aminolevulinate dehydratase [Source:VGNC Symbol;Acc:VGNC:69779]                              | -           | -           | -           |
|                    |                                                                                              | 1.618414279 | 0.002478507 | 0.009890214 |
| ENSMMUG00000057031 |                                                                                              | -           | -           | -           |
|                    |                                                                                              | 3.669097323 | 2.68E-07    | 2.96E-06    |
| ENSMMUG00000007187 | haloacid dehalogenase like hydrolase domain containing 3 [Source:VGNC Symbol;Acc:VGNC:73250] | -           | -           | -           |
|                    |                                                                                              | 3.882719186 | 3.48E-06    | 2.95E-05    |
| ENSMMUG00000005851 | B-box and SPRY domain containing [Source:VGNC Symbol;Acc:VGNC:70342]                         | -           | -           | -           |
|                    |                                                                                              | 3.343289227 | 2.33E-10    | 4.56E-09    |
| ENSMMUG00000021097 | sushi domain containing 1 [Source:VGNC Symbol;Acc:VGNC:78207]                                | -           | -           | -           |
|                    |                                                                                              | 1.076055345 | 0.001611085 | 0.006846052 |
| ENSMMUG00000000695 | transmembrane protein 245 [Source:VGNC Symbol;Acc:VGNC:78933]                                | 0.635835499 | 0.006419187 | 0.022175788 |



|                    |                                                                                                |   |             |             |             |
|--------------------|------------------------------------------------------------------------------------------------|---|-------------|-------------|-------------|
| ENSMMUG0000000690  | catenin alpha like 1 [Source:VGNC Symbol;Acc:VGNC:71544]                                       | - | 1.481835227 | 1.76E-07    | 2.03E-06    |
| ENSMMUG00000053648 | actin binding transcription modulator [Source:NCBI gene;Acc:710486]                            | - | 1.044231399 | 9.80E-06    | 7.50E-05    |
| ENSMMUG00000064066 |                                                                                                | - | 1.374053951 | 0.000779558 | 0.003640358 |
| ENSMMUG00000019354 | actin like 7B [Source:VGNC Symbol;Acc:VGNC:69421]                                              | - | 1.491717822 | 0.001138166 | 0.005048154 |
| ENSMMUG00000023797 | post-GPI attachment to proteins GalNAc transferase 4 [Source:VGNC Symbol;Acc:VGNC:79688]       | - | 1.302669103 | 0.000562141 | 0.002738552 |
| ENSMMUG00000053976 | bile acid-CoA:amino acid N-acyltransferase [Source:NCBI gene;Acc:100429419]                    | - | 1.604720612 | 2.30E-07    | 2.58E-06    |
| ENSMMUG00000057599 |                                                                                                | - | 1.017668849 | 0.016279511 | 0.048426889 |
| ENSMMUG00000001827 | phospholipid phosphatase related 1 [Source:NCBI gene;Acc:714164]                               | - | 0.922018876 | 0.000765717 | 0.003588404 |
| ENSMMUG00000009775 | caveolae associated protein 4 [Source:NCBI gene;Acc:714379]                                    | - | -0.94643819 | 5.17E-13    | 1.56E-11    |
| ENSMMUG00000057137 |                                                                                                | - | 0.510976096 | 0.008826576 | 0.02921492  |
| ENSMMUG00000011410 | nuclear receptor subfamily 4 group A member 3 [Source:VGNC Symbol;Acc:VGNC:75519]              | - | 1.129256333 | 0.000930192 | 0.004258962 |
| ENSMMUG00000010661 | SEC61 translocon subunit beta [Source:NCBI gene;Acc:717815]                                    | - | 0.576314086 | 0.001062259 | 0.004761658 |
| ENSMMUG00000009831 | TBC1 domain family member 2 [Source:VGNC Symbol;Acc:VGNC:78157]                                | - | 1.326545069 | 0.002008893 | 0.008301102 |
| ENSMMUG00000008670 | SH2 domain containing adaptor protein B [Source:VGNC Symbol;Acc:VGNC:82236]                    | - | 0.435199297 | 0.005624888 | 0.019908559 |
| ENSMMUG00000047381 | DDB1 and CUL4 associated factor 10 [Source:NCBI gene;Acc:716256]                               | - | 0.407109949 | 0.001219957 | 0.00536896  |
| ENSMMUG00000017886 | F-box protein 10 [Source:NCBI gene;Acc:718443]                                                 | - | 0.937831926 | 9.81E-05    | 0.0005866   |
| ENSMMUG00000017892 | RNA polymerase I subunit E [Source:VGNC Symbol;Acc:VGNC:76047]                                 | - | 0.910165735 | 3.09E-05    | 0.000210675 |
| ENSMMUG00000007421 | zinc finger CCHC-type containing 7 [Source:VGNC Symbol;Acc:VGNC:82088]                         | - | 0.620120932 | 4.69E-06    | 3.85E-05    |
| ENSMMUG00000019639 | paired box 5 [Source:VGNC Symbol;Acc:VGNC:75764]                                               | - | 4.038174094 | 2.44E-12    | 6.68E-11    |
| ENSMMUG00000006132 | clathrin light chain A [Source:VGNC Symbol;Acc:VGNC:71266]                                     | - | 0.576017922 | 0.012285765 | 0.038375197 |
| ENSMMUG00000054523 | Metazoan signal recognition particle RNA [Source:RFAM;Acc:RF00017]                             | - | 0.509310982 | 0.003119667 | 0.012022957 |
| ENSMMUG00000010213 | GLI pathogenesis related 2 [Source:VGNC Symbol;Acc:VGNC:81414]                                 | - | 3.343760873 | 0.000798304 | 0.003720727 |
| ENSMMUG00000022613 | reversion inducing cysteine rich protein with kazal motifs [Source:VGNC Symbol;Acc:VGNC:76722] | - | 1.520773705 | 1.25E-30    | 2.84E-28    |
| ENSMMUG00000059406 | RGP1 homolog, RAB6A GEF complex partner 1 [Source:NCBI gene;Acc:695936]                        | - | 2.495936888 | 5.69E-07    | 5.83E-06    |
| ENSMMUG00000016331 | glucosylceramidase beta 2 [Source:VGNC Symbol;Acc:VGNC:72741]                                  | - | 3.903616971 | 5.65E-06    | 4.57E-05    |
| ENSMMUG00000031856 | talin 1 [Source:VGNC Symbol;Acc:VGNC:78371]                                                    | - | 0.634817365 | 4.17E-05    | 0.000276607 |
| ENSMMUG00000050822 | carbonic anhydrase 9 [Source:NCBI gene;Acc:696729]                                             | - | 2.500966819 | 1.89E-39    | 1.25E-36    |
| ENSMMUG00000048375 | Metazoan signal recognition particle RNA [Source:RFAM;Acc:RF00017]                             | - | 2.184318917 | 3.19E-59    | 1.55E-55    |
| ENSMMUG00000016323 | Rho guanine nucleotide exchange factor 39 [Source:VGNC Symbol;Acc:VGNC:69912]                  | - | 2.055070879 | 1.03E-41    | 8.84E-39    |
| ENSMMUG00000016327 | coiled-coil domain containing 107 [Source:VGNC Symbol;Acc:VGNC:70656]                          | - | 2.087715291 | 5.25E-37    | 2.54E-34    |
| ENSMMUG00000038988 | RNase MRP [Source:RFAM;Acc:RF00030]                                                            | - | 3.057455061 | 0.00035521  | 0.001825916 |
| ENSMMUG00000016316 | testis associated actin remodelling kinase 1 [Source:VGNC Symbol;Acc:VGNC:78314]               | - | 1.284119802 | 2.66E-05    | 0.00018379  |
| ENSMMUG00000016314 | family with sequence similarity 166 member B [Source:VGNC Symbol;Acc:VGNC:72421]               | - | 2.728610286 | 4.38E-28    | 7.96E-26    |
| ENSMMUG00000016313 | RUN and SH3 domain containing 2 [Source:VGNC Symbol;Acc:VGNC:82230]                            | - | 1.244127307 | 4.54E-11    | 9.97E-10    |
| ENSMMUG00000059191 | stomatin like 2 [Source:NCBI gene;Acc:698458]                                                  | - | 1.236176527 | 0.016013603 | 0.047751743 |
| ENSMMUG00000011866 | phosphatidylinositol glycan anchor biosynthesis class O [Source:VGNC Symbol;Acc:VGNC:75851]    | - | 1.502245334 | 0.003025877 | 0.011717414 |

|                    |                                                                                            |             |             |             |
|--------------------|--------------------------------------------------------------------------------------------|-------------|-------------|-------------|
| ENSMMUG00000020190 | valosin containing protein [Source:VGNC Symbol;Acc:VGNC:78762]                             | 1.600287725 | 3.86E-07    | 4.11E-06    |
| ENSMMUG00000061896 |                                                                                            | 1.691093202 | 5.36E-10    | 9.94E-09    |
| ENSMMUG00000044048 | Metazoan signal recognition particle RNA [Source:RFAM;Acc:RF00017]                         | 1.715194277 | 7.44E-07    | 7.38E-06    |
| ENSMMUG00000020188 | chromosome 15 C9orf131 homolog [Source:VGNC Symbol;Acc:VGNC:70451]                         | 0.333510376 | 0.011917062 | 0.037432657 |
| ENSMMUG00000022895 | DnaJ heat shock protein family (Hsp40) member B5 [Source:NCBI gene;Acc:699081]             | 0.400985544 | 5.03E-05    | 0.000326376 |
| ENSMMUG00000058149 |                                                                                            | 0.847806479 | 0.00669349  | 0.023008575 |
| ENSMMUG00000017458 | DDB1 and CUL4 associated factor 12 [Source:VGNC Symbol;Acc:VGNC:71678]                     | 0.995436018 | 0.001896805 | 0.007885002 |
| ENSMMUG00000012597 | ubiquitin associated protein 2 [Source:VGNC Symbol;Acc:VGNC:78949]                         | 0.931391115 | 0.007720378 | 0.026051797 |
| ENSMMUG00000035888 | small nucleolar RNA, C/D box 121A [Source:HGNC Symbol;Acc:HGNC:33560]                      | 1.279965163 | 0.008385744 | 0.027914716 |
| ENSMMUG00000053200 | ubiquitin conjugating enzyme E2 R2 [Source:NCBI gene;Acc:701507]                           | 0.644886725 | 0.003248645 | 0.012457281 |
| ENSMMUG00000000389 | nucleolar protein 6 [Source:VGNC Symbol;Acc:VGNC:75218]                                    | 0.843428438 | 1.31E-06    | 1.23E-05    |
| ENSMMUG00000003314 | aquaporin 3 (Gill blood group) [Source:NCBI gene;Acc:702721]                               | 0.824715038 | 0.000186665 | 0.001039677 |
| ENSMMUG00000001545 | aquaporin 7 [Source:NCBI gene;Acc:702836]                                                  | 2.460359405 | 4.60E-13    | 1.40E-11    |
|                    |                                                                                            | -           |             |             |
| ENSMMUG00000002088 | SMU1 DNA replication regulator and spliceosomal factor [Source:VGNC Symbol;Acc:VGNC:77733] | 0.433381526 | 0.007028344 | 0.023995079 |
| ENSMMUG00000012442 | DExD/H-box helicase 58 [Source:VGNC Symbol;Acc:VGNC:71672]                                 | 0.813282747 | 2.41E-12    | 6.62E-11    |
| ENSMMUG00000008196 | aconitase 1 [Source:VGNC Symbol;Acc:VGNC:69378]                                            | 3.063886855 | 3.02E-35    | 1.25E-32    |
| ENSMMUG00000061225 |                                                                                            | 1.932387237 | 0.00542419  | 0.01927266  |
| ENSMMUG00000062843 | MOB kinase activator 3B [Source:NCBI gene;Acc:706919]                                      | 0.795375294 | 7.65E-05    | 0.000471416 |
|                    |                                                                                            | -           |             |             |
| ENSMMUG00000061449 | equatorin [Source:NCBI gene;Acc:707334]                                                    | 1.439877226 | 0.00291786  | 0.011362692 |
| ENSMMUG00000006076 | intraflagellar transport 74 [Source:VGNC Symbol;Acc:VGNC:73430]                            | 1.249973852 | 0.003769408 | 0.01414263  |
| ENSMMUG00000006079 | leucine rich repeat containing 19 [Source:VGNC Symbol;Acc:VGNC:74337]                      | 2.016369763 | 0.000823221 | 0.003827044 |
|                    |                                                                                            | -           |             |             |
| ENSMMUG00000064752 | phospholipase A2 activating protein [Source:NCBI gene;Acc:707876]                          | 1.420994718 | 0.011769733 | 0.037009866 |
| ENSMMUG00000050918 |                                                                                            | 0.532700499 | 0.008095092 | 0.027100648 |
|                    |                                                                                            | -           |             |             |
| ENSMMUG00000054514 | interferon alpha 6 [Source:NCBI gene;Acc:106995851]                                        | 2.825505534 | 0.013852409 | 0.042438875 |
| ENSMMUG00000019070 | focadhesin [Source:VGNC Symbol;Acc:VGNC:72556]                                             | 1.885081806 | 4.16E-24    | 4.48E-22    |
| ENSMMUG00000013997 | perilipin-2 [Source:NCBI gene;Acc:712661]                                                  | 3.415954514 | 0.003032694 | 0.01173756  |
| ENSMMUG00000018396 | HAUS augmin like complex subunit 6 [Source:VGNC Symbol;Acc:VGNC:73237]                     | 3.551532585 | 5.24E-26    | 7.26E-24    |
| ENSMMUG00000063140 | Metazoan signal recognition particle RNA [Source:RFAM;Acc:RF00017]                         | 4.144835082 | 0.000197088 | 0.001090623 |
|                    |                                                                                            | -           |             |             |
| ENSMMUG00000044658 | ADAMTS like 1 [Source:NCBI gene;Acc:712844]                                                | 0.412028375 | 0.01367937  | 0.041988388 |
|                    |                                                                                            | -           |             |             |
| ENSMMUG00000013466 | tetratricopeptide repeat domain 39B [Source:VGNC Symbol;Acc:VGNC:79402]                    | 0.784806802 | 6.91E-12    | 1.77E-10    |
|                    |                                                                                            | -           |             |             |
| ENSMMUG00000052889 | Metazoan signal recognition particle RNA [Source:RFAM;Acc:RF00017]                         | 0.681821751 | 0.006102803 | 0.021269826 |
|                    |                                                                                            | -           |             |             |
| ENSMMUG00000055400 | U6 spliceosomal RNA [Source:RFAM;Acc:RF00026]                                              | 1.137027105 | 2.01E-09    | 3.33E-08    |
| ENSMMUG00000008128 | FRAS1 related extracellular matrix 1 [Source:VGNC Symbol;Acc:VGNC:72768]                   | 0.610482208 | 0.000201622 | 0.001112747 |
|                    |                                                                                            | -           |             |             |
| ENSMMUG00000002176 | ubiquitin like with PHD and ring finger domains 2 [Source:VGNC Symbol;Acc:VGNC:78714]      | 0.932640599 | 4.98E-12    | 1.31E-10    |
|                    |                                                                                            | -           |             |             |
| ENSMMUG00000050923 |                                                                                            | 0.874412619 | 4.95E-05    | 0.000321577 |
|                    |                                                                                            | -           |             |             |
| ENSMMUG00000002175 | TPD52 like 3 [Source:HGNC Symbol;Acc:HGNC:23382]                                           | 0.729001477 | 0.001259056 | 0.005524568 |
|                    |                                                                                            | -           |             |             |
| ENSMMUG00000006197 | plasminogen receptor with a C-terminal lysine [Source:VGNC Symbol;Acc:VGNC:76098]          | 0.923800508 | 8.06E-06    | 6.28E-05    |
| ENSMMUG00000052972 |                                                                                            | 0.414877439 | 0.009156155 | 0.030162714 |
|                    |                                                                                            | -           |             |             |
| ENSMMUG00000065127 | insulin like 6 [Source:NCBI gene;Acc:693735]                                               | 0.460210427 | 1.81E-05    | 0.000130209 |
| ENSMMUG00000057331 | RNA terminal phosphate cyclase like 1 [Source:NCBI gene;Acc:694568]                        | 3.55270555  | 9.90E-42    | 8.84E-39    |
| ENSMMUG00000026950 | microRNA 101-2 [Source:HGNC Symbol;Acc:HGNC:31489]                                         | 3.757300782 | 1.08E-13    | 3.68E-12    |

|                    |                                                                                                                                       |             |             |             |
|--------------------|---------------------------------------------------------------------------------------------------------------------------------------|-------------|-------------|-------------|
| ENSMMUG00000026024 | U6 spliceosomal RNA [Source:RFAM;Acc:RF00026]                                                                                         | 1.343769529 | 0.009829657 | 0.031974428 |
| ENSMMUG00000056693 |                                                                                                                                       | -           |             |             |
| ENSMMUG00000015093 | very low density lipoprotein receptor [Source:VGNC Symbol;Acc:VGNC:78774]                                                             | 0.550739131 | 2.04E-06    | 1.82E-05    |
| ENSMMUG00000057073 |                                                                                                                                       | -           |             |             |
| ENSMMUG00000015279 | SWI/SNF related, matrix associated, actin dependent regulator of chromatin, subfamily a, member 2 [Source:VGNC Symbol;Acc:VGNC:77647] | 0.399439627 | 0.011110625 | 0.035334753 |
| ENSMMUG00000055563 |                                                                                                                                       | -           |             |             |
| ENSMMUG00000059950 |                                                                                                                                       | 2.483013922 | 1.31E-05    | 9.75E-05    |
| ENSMMUG00000012472 | phosphatidylinositol-4-phosphate 5-kinase type 1 beta [Source:VGNC Symbol;Acc:VGNC:76001]                                             | -           |             |             |
| ENSMMUG00000027986 | U6 spliceosomal RNA [Source:RFAM;Acc:RF00026]                                                                                         | 1.247209357 | 4.55E-10    | 8.56E-09    |
| ENSMMUG00000011401 | amyloid beta precursor protein binding family A member 1 [Source:VGNC Symbol;Acc:VGNC:69976]                                          | -0.50160223 | 0.005758173 | 0.020282664 |
| ENSMMUG00000012667 | annexin A1 [Source:VGNC Symbol;Acc:VGNC:69944]                                                                                        | 0.909411871 | 0.009318991 | 0.03058671  |
| ENSMMUG00000056840 |                                                                                                                                       | 0.872825016 | 8.88E-08    | 1.07E-06    |
| ENSMMUG00000008685 | solute carrier family 28 member 3 [Source:VGNC Symbol;Acc:VGNC:77493]                                                                 | 2.391688396 | 6.45E-11    | 1.40E-09    |
| ENSMMUG00000053862 |                                                                                                                                       | -           |             |             |
| ENSMMUG00000023117 | neurotrophic receptor tyrosine kinase 2 [Source:VGNC Symbol;Acc:VGNC:75541]                                                           | 2.616401032 | 1.47E-07    | 1.72E-06    |
| ENSMMUG00000060761 |                                                                                                                                       | 0.5335042   | 5.23E-07    | 5.41E-06    |
| ENSMMUG00000017053 | death associated protein kinase 1 [Source:VGNC Symbol;Acc:VGNC:71732]                                                                 | 1.360641266 | 8.45E-09    | 1.26E-07    |
| ENSMMUG00000054211 |                                                                                                                                       | -           |             |             |
| ENSMMUG00000057499 |                                                                                                                                       | 3.177157013 | 0.011704031 | 0.036859076 |
| ENSMMUG00000033550 |                                                                                                                                       | -           |             |             |
| ENSMMUG00000049479 |                                                                                                                                       | 3.700445959 | 0.004999375 | 0.017957973 |
| ENSMMUG00000053778 |                                                                                                                                       | -0.74009656 | 1.36E-09    | 2.33E-08    |
| ENSMMUG0000007223  | DIRAS family GTPase 2 [Source:VGNC Symbol;Acc:VGNC:71673]                                                                             | 1.764203359 | 2.59E-17    | 1.44E-15    |
| ENSMMUG0000001748  | spleen associated tyrosine kinase [Source:VGNC Symbol;Acc:VGNC:78063]                                                                 | 3.244851023 | 0.003596926 | 0.013595559 |
| ENSMMUG00000020009 | receptor tyrosine kinase like orphan receptor 2 [Source:VGNC Symbol;Acc:VGNC:76716]                                                   | 2.277272126 | 1.29E-05    | 9.66E-05    |
| ENSMMUG00000060533 |                                                                                                                                       | 2.457828696 | 5.10E-10    | 9.49E-09    |
| ENSMMUG0000003006  | serine palmitoyltransferase long chain base subunit 1 [Source:VGNC Symbol;Acc:VGNC:77873]                                             | 2.877443966 | 0.012263649 | 0.03831435  |
| ENSMMUG0000004629  | nucleolar protein 8 [Source:VGNC Symbol;Acc:VGNC:75237]                                                                               | 3.319921305 | 0.000177712 | 0.000995528 |
| ENSMMUG0000004630  | centromere protein P [Source:NCBI gene;Acc:100427110]                                                                                 | -           |             |             |
| ENSMMUG00000009493 | family with sequence similarity 120A [Source:NCBI gene;Acc:717459]                                                                    | 0.801683405 | 0.006499417 | 0.022405033 |
| ENSMMUG0000002517  | protein tyrosine phosphatase domain containing 1 [Source:VGNC Symbol;Acc:VGNC:76567]                                                  | 0.519648079 | 0.004077609 | 0.015075332 |
| ENSMMUG00000060049 |                                                                                                                                       | 1.643562908 | 0.00042807  | 0.002159963 |
| ENSMMUG00000050773 |                                                                                                                                       | 1.118471097 | 2.50E-05    | 0.00017393  |
| ENSMMUG0000005997  | cell division cycle 14B [Source:NCBI gene;Acc:710300]                                                                                 | 0.911229515 | 4.35E-10    | 8.22E-09    |
| ENSMMUG00000019423 | zinc finger protein 2 [Source:NCBI gene;Acc:703864]                                                                                   | 1.18164572  | 3.26E-07    | 3.54E-06    |
| ENSMMUG00000060932 | zinc finger protein 383-like [Source:NCBI gene;Acc:106993074]                                                                         | -           |             |             |
| ENSMMUG00000049314 | dual specificity phosphatase 2 [Source:NCBI gene;Acc:718442]                                                                          | 0.410648832 | 0.003790733 | 0.014202549 |
|                    |                                                                                                                                       | -           |             |             |
|                    |                                                                                                                                       | 0.721981858 | 0.009466019 | 0.030985706 |
|                    |                                                                                                                                       | -           |             |             |
|                    |                                                                                                                                       | 2.013546631 | 4.01E-11    | 8.96E-10    |
|                    |                                                                                                                                       | -           |             |             |
|                    |                                                                                                                                       | 1.173916157 | 4.07E-05    | 0.000270733 |
|                    |                                                                                                                                       | -           |             |             |
|                    |                                                                                                                                       | 0.995551908 | 0.000630618 | 0.003027506 |
|                    |                                                                                                                                       | -           |             |             |
|                    |                                                                                                                                       | 0.805376058 | 0.00120078  | 0.005296037 |
|                    |                                                                                                                                       | 3.260882    | 7.33E-08    | 9.02E-07    |
|                    |                                                                                                                                       | -           |             |             |
|                    |                                                                                                                                       | 3.268646116 | 0.00132131  | 0.005756032 |
|                    |                                                                                                                                       | -           |             |             |
|                    |                                                                                                                                       | 1.420973015 | 3.18E-06    | 2.72E-05    |
|                    |                                                                                                                                       | -           |             |             |
|                    |                                                                                                                                       | 1.895895987 | 0.014407757 | 0.043817065 |

|                    |                                                                                   |             |             |             |
|--------------------|-----------------------------------------------------------------------------------|-------------|-------------|-------------|
| ENSMMUG00000053389 |                                                                                   | -0.85793961 | 6.63E-07    | 6.67E-06    |
| ENSMMUG00000057143 | transmembrane protein 127 [Source:NCBI gene;Acc:705069]                           | 1.564596163 | 1.67E-08    | 2.32E-07    |
| ENSMMUG00000015515 | REV1 DNA directed polymerase [Source:NCBI gene;Acc:709475]                        | 0.525995073 | 0.00097395  | 0.00442309  |
| ENSMMUG00000057336 |                                                                                   | 0.529159708 | 4.79E-07    | 5.00E-06    |
| ENSMMUG00000019682 | mitochondrial ribosomal protein S9 [Source:VGNC Symbol;Acc:VGNC:74762]            | 1.472396415 | 0.009741612 | 0.031737743 |
| ENSMMUG00000001390 | NCK adaptor protein 2 [Source:VGNC Symbol;Acc:VGNC:75142]                         | 1.478182285 | 0.00042606  | 0.002152059 |
| ENSMMUG00000058257 |                                                                                   | 0.844072164 | 0.000912332 | 0.004189062 |
| ENSMMUG00000002589 | sulfotransferase 1C3-like [Source:NCBI gene;Acc:114671897]                        | -0.57634244 | 0.005436443 | 0.019303754 |
| ENSMMUG00000055529 | sulfotransferase family 1C member 4 [Source:NCBI gene;Acc:693903]                 | 3.952829739 | 2.25E-05    | 0.000158826 |
| ENSMMUG00000009156 | LIM zinc finger domain containing 1 [Source:VGNC Symbol;Acc:VGNC:74271]           | -2.3651761  | 0.00063853  | 0.003062456 |
| ENSMMUG00000021019 | E3 SUMO-protein ligase RanBP2 [Source:NCBI gene;Acc:694823]                       | 2.394534873 | 0.001950832 | 0.008086287 |
| ENSMMUG00000060346 |                                                                                   | 2.818838474 | 1.76E-09    | 2.94E-08    |
| ENSMMUG00000002231 | transmembrane protein 87B [Source:VGNC Symbol;Acc:VGNC:79557]                     | 0.838018256 | 0.00013592  | 0.000785635 |
| ENSMMUG00000044163 | zinc finger CCCH-type containing 8 [Source:NCBI gene;Acc:698828]                  | 0.467698849 | 0.000981119 | 0.004454255 |
| ENSMMUG00000016430 | zinc finger CCCH-type containing 6 [Source:VGNC Symbol;Acc:VGNC:79458]            | 1.082092015 | 0.016140884 | 0.048062275 |
| ENSMMUG00000059850 | immunoglobulin kappa variable 1-9 [Source:NCBI gene;Acc:106993071]                | 1.319490091 | 0.004114052 | 0.015183036 |
| ENSMMUG00000051042 |                                                                                   | 0.936907779 | 1.27E-08    | 1.82E-07    |
| ENSMMUG00000061619 |                                                                                   | 0.790962129 | 0.008812833 | 0.029182724 |
| ENSMMUG00000046169 |                                                                                   | 3.32942507  | 3.37E-26    | 4.84E-24    |
| ENSMMUG00000063603 |                                                                                   | 1.828085089 | 0.00510497  | 0.018287569 |
| ENSMMUG00000000293 | catenin alpha 2 [Source:VGNC Symbol;Acc:VGNC:71543]                               | 1.036494761 | 5.03E-06    | 4.11E-05    |
| ENSMMUG00000062818 | regenerating islet-derived protein 3-alpha [Source:NCBI gene;Acc:716890]          | 1.363258577 | 9.21E-05    | 0.000554468 |
| ENSMMUG00000054863 |                                                                                   | 1.669167269 | 0.001689552 | 0.007137757 |
| ENSMMUG00000056785 |                                                                                   | -0.83020039 | 0.00061592  | 0.002966741 |
| ENSMMUG00000056765 |                                                                                   | 0.580892313 | 0.000228106 | 0.001241007 |
| ENSMMUG00000064788 |                                                                                   | 0.738318722 | 0.005720818 | 0.020165743 |
| ENSMMUG00000062747 |                                                                                   | 0.467489872 | 4.05E-06    | 3.38E-05    |
| ENSMMUG00000023758 | mitochondrial ribosomal protein L19 [Source:VGNC Symbol;Acc:VGNC:74743]           | 0.370397399 | 0.008616777 | 0.02864443  |
| ENSMMUG00000048322 | eva-1 homolog A, regulator of programmed cell death [Source:NCBI gene;Acc:710843] | 1.052412444 | 0.000152513 | 0.000869784 |
| ENSMMUG00000051843 |                                                                                   | 0.860784817 | 8.70E-07    | 8.47E-06    |
| ENSMMUG00000001845 | DNA polymerase epsilon 4, accessory subunit [Source:VGNC Symbol;Acc:VGNC:76065]   | 3.24098264  | 3.46E-24    | 3.78E-22    |
| ENSMMUG00000058044 |                                                                                   | 0.846734555 | 2.08E-08    | 2.83E-07    |
| ENSMMUG00000006330 | poly(A) binding protein interacting protein 2B [Source:NCBI gene;Acc:711595]      | 0.508096215 | 6.47E-05    | 0.000406069 |
| ENSMMUG00000059332 | Metazoan signal recognition particle RNA [Source:RFAM;Acc:RF00017]                | 2.848636564 | 8.07E-07    | 7.92E-06    |
| ENSMMUG00000008396 | methylmalonyl-CoA epimerase [Source:NCBI gene;Acc:704094]                         | 0.725866144 | 5.91E-08    | 7.41E-07    |
| ENSMMUG00000052504 | Metazoan signal recognition particle RNA [Source:RFAM;Acc:RF00017]                | 1.339666394 | 0.000960592 | 0.004377467 |

|                    |                                                                                         |             |             |             |
|--------------------|-----------------------------------------------------------------------------------------|-------------|-------------|-------------|
| ENSMMUG0000002093  | testis expressed 261 [Source:NCBI gene;Acc:703863]                                      | 1.427998096 | 7.04E-15    | 2.88E-13    |
| ENSMMUG00000055845 | ankyrin repeat domain 53 [Source:NCBI gene;Acc:703757]                                  | -1.6527324  | 8.37E-11    | 1.78E-09    |
| ENSMMUG00000041775 | Metazoan signal recognition particle RNA [Source:RFAM;Acc:RF00017]                      | 1.454510425 | 0.001724028 | 0.007262298 |
| ENSMMUG0000002090  | ATPase H+ transporting V1 subunit B1 [Source:VGNC Symbol;Acc:VGNC:70184]                | 1.700005775 | 2.78E-20    | 2.17E-18    |
| ENSMMUG00000061424 | ventral anterior homeobox 2 [Source:NCBI gene;Acc:703531]                               | 1.919127024 | 5.33E-07    | 5.49E-06    |
| ENSMMUG00000059700 |                                                                                         | 2.343375442 | 0.002665524 | 0.010481125 |
| ENSMMUG00000020854 | C-type lectin domain family 4 member F [Source:VGNC Symbol;Acc:VGNC:71349]              | 3.333835678 | 0.013133823 | 0.040570843 |
| ENSMMUG00000020852 | folliculogenesis specific bHLH transcription factor [Source:VGNC Symbol;Acc:VGNC:72563] | 3.607181226 | 0.010982566 | 0.035011746 |
| ENSMMUG00000010592 | adducin 2 [Source:VGNC Symbol;Acc:VGNC:69529]                                           | 2.295349195 | 0.001079032 | 0.004821978 |
| ENSMMUG00000063699 |                                                                                         | 3.347961271 | 0.000806024 | 0.003754301 |
| ENSMMUG00000064749 |                                                                                         | 1.977747256 | 6.96E-05    | 0.000432617 |
| ENSMMUG00000007868 | AP2 associated kinase 1 [Source:VGNC Symbol;Acc:VGNC:82094]                             | 0.839214229 | 9.20E-06    | 7.08E-05    |
| ENSMMUG00000049539 |                                                                                         | 1.078622707 | 1.75E-07    | 2.02E-06    |
| ENSMMUG00000058336 |                                                                                         | 0.790102071 | 0.015679156 | 0.046947044 |
| ENSMMUG00000013797 | glutamine--fructose-6-phosphate transaminase 1 [Source:VGNC Symbol;Acc:VGNC:72915]      | 0.293009453 | 0.001135573 | 0.005040558 |
| ENSMMUG00000007552 | aprataxin and PNKP like factor [Source:NCBI gene;Acc:705875]                            | 0.720530874 | 0.010561644 | 0.033870421 |
| ENSMMUG00000017209 | C1D nuclear receptor corepressor [Source:NCBI gene;Acc:698450]                          | 1.918161589 | 2.61E-05    | 0.000180998 |
| ENSMMUG00000057729 |                                                                                         | 3.254561317 | 0.009446108 | 0.030927495 |
| ENSMMUG00000059267 | pellino E3 ubiquitin protein ligase 1 [Source:NCBI gene;Acc:696416]                     | 1.118821494 | 8.88E-12    | 2.23E-10    |
| ENSMMUG00000008772 | VPS54 subunit of GARP complex [Source:VGNC Symbol;Acc:VGNC:79159]                       | 0.52795325  | 3.55E-06    | 3.00E-05    |
| ENSMMUG00000008770 | UDP-glucose pyrophosphorylase 2 [Source:VGNC Symbol;Acc:VGNC:78712]                     | 0.647856527 | 0.000240537 | 0.001299401 |
| ENSMMUG00000060943 |                                                                                         | 0.371869651 | 0.003112539 | 0.012003576 |
| ENSMMUG00000006163 | malate dehydrogenase 1 [Source:VGNC Symbol;Acc:VGNC:74690]                              | -0.67691874 | 4.73E-05    | 0.000308822 |
| ENSMMUG00000063238 |                                                                                         | 1.9113681   | 3.10E-05    | 0.000211315 |
| ENSMMUG00000006941 | exportin 1 [Source:VGNC Symbol;Acc:VGNC:78812]                                          | 1.105186367 | 6.79E-07    | 6.82E-06    |
| ENSMMUG00000008098 | ubiquitin specific peptidase 34 [Source:VGNC Symbol;Acc:VGNC:79223]                     | 0.382186849 | 0.016690999 | 0.049467288 |
| ENSMMUG00000005685 | pseudouridine synthase 10 [Source:VGNC Symbol;Acc:VGNC:76547]                           | 0.911335371 | 0.00199806  | 0.008261033 |
| ENSMMUG00000055963 |                                                                                         | 1.421645985 | 1.03E-08    | 1.50E-07    |
| ENSMMUG00000010834 | REL proto-oncogene, NF-kB subunit [Source:VGNC Symbol;Acc:VGNC:76892]                   | 0.653797828 | 2.63E-06    | 2.29E-05    |
| ENSMMUG00000049993 |                                                                                         | 0.377943933 | 1.20E-05    | 9.01E-05    |
| ENSMMUG00000007003 | polyribonucleotide nucleotidyltransferase 1 [Source:VGNC Symbol;Acc:VGNC:76095]         | 3.757950943 | 9.54E-06    | 7.33E-05    |
| ENSMMUG00000007001 | protein phosphatase 4 regulatory subunit 3B [Source:VGNC Symbol;Acc:VGNC:76342]         | 3.673901439 | 0.000124501 | 0.000726272 |
| ENSMMUG00000007000 | cilia and flagella associated protein 36 [Source:VGNC Symbol;Acc:VGNC:71142]            | 3.889592194 | 0.002209324 | 0.008996344 |
| ENSMMUG00000008104 | proteasome activator subunit 4 [Source:VGNC Symbol;Acc:VGNC:76295]                      | 0.551281824 | 1.10E-05    | 8.37E-05    |
| ENSMMUG00000008105 | G protein-coupled receptor 75 [Source:VGNC Symbol;Acc:VGNC:73143]                       | 0.50178547  | 6.84E-05    | 0.000425964 |
| ENSMMUG00000062091 |                                                                                         | 3.100106637 | 6.38E-12    | 1.64E-10    |
| ENSMMUG00000061344 |                                                                                         | 0.972173721 | 0.006330917 | 0.021933397 |
| ENSMMUG00000052169 | potassium two pore domain channel subfamily K member 12 [Source:NCBI gene;Acc:715556]   | 3.741073252 | 4.34E-05    | 0.000287013 |

|                    |                                                                                              |   |             |             |             |
|--------------------|----------------------------------------------------------------------------------------------|---|-------------|-------------|-------------|
| ENSMMUG00000053577 |                                                                                              | - | 2.944481488 | 5.76E-14    | 2.05E-12    |
| ENSMMUG0000000974  | mutS homolog 2 [Source:VGNC Symbol;Acc:VGNC:74931]                                           | - | 2.707198879 | 2.11E-14    | 8.20E-13    |
| ENSMMUG00000059300 |                                                                                              | - | 0.625560237 | 0.002111859 | 0.00866011  |
| ENSMMUG00000038319 | Metazoan signal recognition particle RNA [Source:RFAM;Acc:RF00017]                           | - | 2.102821593 | 0.005935186 | 0.020785303 |
| ENSMMUG00000014425 | protein kinase C epsilon [Source:VGNC Symbol;Acc:VGNC:76412]                                 | - | 0.757373955 | 0.002218124 | 0.009024594 |
| ENSMMUG00000054734 |                                                                                              | - | 0.933897063 | 5.27E-08    | 6.70E-07    |
| ENSMMUG00000023752 | SIX homeobox 2 [Source:VGNC Symbol;Acc:VGNC:81570]                                           | - | 0.879149301 | 0.000945116 | 0.004320489 |
| ENSMMUG00000053683 |                                                                                              | - | 0.798222378 | 0.000625917 | 0.003008912 |
| ENSMMUG00000014824 | SIX homeobox 3 [Source:HGNC Symbol;Acc:HGNC:10889]                                           | - | 0.975742049 | 5.91E-15    | 2.47E-13    |
| ENSMMUG00000051072 |                                                                                              | - | 1.167108357 | 6.14E-12    | 1.58E-10    |
| ENSMMUG00000019841 | leucine rich pentatricopeptide repeat containing [Source:VGNC Symbol;Acc:VGNC:82177]         | - | -0.46634138 | 0.014174047 | 0.043251075 |
| ENSMMUG00000008081 | ATP binding cassette subfamily G member 8 [Source:VGNC Symbol;Acc:VGNC:69392]                | - | 1.325894028 | 2.94E-07    | 3.23E-06    |
| ENSMMUG00000008080 | ATP binding cassette subfamily G member 5 [Source:VGNC Symbol;Acc:VGNC:69391]                | - | 1.13890663  | 7.58E-10    | 1.36E-08    |
| ENSMMUG00000062474 | Metazoan signal recognition particle RNA [Source:RFAM;Acc:RF00017]                           | - | 1.376558041 | 2.99E-05    | 0.000204422 |
| ENSMMUG00000008077 | dynein cytoplasmic 2 light intermediate chain 1 [Source:VGNC Symbol;Acc:VGNC:71899]          | - | 1.012142043 | 3.81E-12    | 1.02E-10    |
| ENSMMUG00000064735 | 3-hydroxyanthranilate 3,4-dioxygenase [Source:NCBI gene;Acc:713101]                          | - | 0.464079091 | 0.000145823 | 0.000836887 |
| ENSMMUG00000063947 | oxoeicosanoid receptor 1 [Source:NCBI gene;Acc:713039]                                       | - | 0.747402326 | 0.00308323  | 0.011901463 |
| ENSMMUG00000020744 | metastasis associated 1 family member 3 [Source:VGNC Symbol;Acc:VGNC:74814]                  | - | 0.790296995 | 0.00046949  | 0.002342133 |
| ENSMMUG00000056008 |                                                                                              | - | 0.832073011 | 1.02E-09    | 1.78E-08    |
| ENSMMUG00000055395 | Y RNA [Source:RFAM;Acc:RF00019]                                                              | - | 0.913703393 | 0.001843509 | 0.007685427 |
| ENSMMUG00000043458 | transmembrane protein 178A [Source:NCBI gene;Acc:714010]                                     | - | 0.774145251 | 0.000439255 | 0.002213328 |
| ENSMMUG00000056330 |                                                                                              | - | 1.582444862 | 5.26E-05    | 0.000338957 |
| ENSMMUG00000013901 | mitogen-activated protein kinase kinase kinase 3 [Source:VGNC Symbol;Acc:VGNC:81466]         | - | 0.838019595 | 0.00052743  | 0.002589411 |
| ENSMMUG00000020575 | SOS Ras/Rac guanine nucleotide exchange factor 1 [Source:VGNC Symbol;Acc:VGNC:77837]         | - | 0.496274068 | 0.015393478 | 0.046253614 |
| ENSMMUG00000060562 |                                                                                              | - | 0.711996841 | 0.004443703 | 0.016230681 |
| ENSMMUG00000002338 | heterogeneous nuclear ribonucleoprotein L like [Source:VGNC Symbol;Acc:VGNC:73441]           | - | 0.743170319 | 8.80E-11    | 1.86E-09    |
| ENSMMUG00000013944 | regulator of microtubule dynamics 2 [Source:VGNC Symbol;Acc:VGNC:76839]                      | - | 1.253226508 | 1.42E-11    | 3.44E-10    |
| ENSMMUG00000054398 |                                                                                              | - | 1.024360195 | 0.000224319 | 0.001224073 |
| ENSMMUG00000016442 | glutaminyl-peptide cyclotransferase [Source:VGNC Symbol;Acc:VGNC:76636]                      | - | 1.516775079 | 0.002630952 | 0.010376059 |
| ENSMMUG00000016438 | protein kinase D3 [Source:VGNC Symbol;Acc:VGNC:76415]                                        | - | 1.441443071 | 5.18E-07    | 5.36E-06    |
| ENSMMUG00000016434 | NADH:ubiquinone oxidoreductase complex assembly factor 7 [Source:VGNC Symbol;Acc:VGNC:75035] | - | 1.774247956 | 8.90E-07    | 8.65E-06    |
| ENSMMUG00000001278 | vitrin [Source:VGNC Symbol;Acc:VGNC:78773]                                                   | - | 1.178412016 | 7.11E-07    | 7.10E-06    |
| ENSMMUG00000049720 |                                                                                              | - | 1.542025413 | 0.014391959 | 0.043804813 |
| ENSMMUG00000048261 | cysteine rich transmembrane BMP regulator 1 [Source:NCBI gene;Acc:711451]                    | - | 0.292747802 | 0.002233537 | 0.009074604 |
| ENSMMUG00000053593 |                                                                                              | - | 0.776659145 | 0.000113252 | 0.000665998 |
| ENSMMUG00000021436 | latent transforming growth factor beta binding protein 1 [Source:VGNC Symbol;Acc:VGNC:74456] | - | 1.636113567 | 6.48E-14    | 2.29E-12    |
| ENSMMUG00000021691 | spastin [Source:VGNC Symbol;Acc:VGNC:77857]                                                  | - | 1.234166364 | 1.45E-08    | 2.05E-07    |
| ENSMMUG00000058351 |                                                                                              | - | 0.626235608 | 0.000146413 | 0.000839276 |
| ENSMMUG00000048513 | tudor domain containing 15 [Source:NCBI gene;Acc:703066]                                     | - | 0.968148426 | 0.000474685 | 0.002363186 |

|                    |                                                                                                |   |             |             |             |
|--------------------|------------------------------------------------------------------------------------------------|---|-------------|-------------|-------------|
| ENSMMUG0000007692  | apolipoprotein B [Source:VGNC Symbol;Acc:VGNC:69985]                                           | - | 0.872088546 | 4.25E-09    | 6.60E-08    |
| ENSMMUG0000003355  | lipid droplet associated hydrolase [Source:VGNC Symbol;Acc:VGNC:74130]                         | - | 0.621746407 | 0.000310997 | 0.001624492 |
| ENSMMUG00000022996 | HCLS1 binding protein 3 [Source:VGNC Symbol;Acc:VGNC:82158]                                    | - | 1.140915428 | 1.52E-09    | 2.58E-08    |
| ENSMMUG00000064216 |                                                                                                | - | 2.645856597 | 3.57E-05    | 0.000239689 |
| ENSMMUG00000012058 | GEN1 Holliday junction 5' flap endonuclease [Source:VGNC Symbol;Acc:VGNC:72790]                | - | 3.469666748 | 5.72E-09    | 8.75E-08    |
| ENSMMUG00000012056 | structural maintenance of chromosomes 6 [Source:VGNC Symbol;Acc:VGNC:77746]                    | - | 4.937282488 | 4.80E-12    | 1.27E-10    |
| ENSMMUG00000040529 | visinin like 1 [Source:NCBI gene;Acc:699459]                                                   | - | 2.654191692 | 0.002019537 | 0.008338348 |
| ENSMMUG0000004215  | LRAT domain containing 1 [Source:VGNC Symbol;Acc:VGNC:74321]                                   | - | 2.755793416 | 4.27E-05    | 0.000282746 |
| ENSMMUG00000052377 |                                                                                                | - | 0.659872744 | 0.003974723 | 0.014766304 |
| ENSMMUG00000056755 |                                                                                                | - | 1.496044972 | 0.002244997 | 0.009113523 |
| ENSMMUG00000020249 | growth regulating estrogen receptor binding 1 [Source:VGNC Symbol;Acc:VGNC:73227]              | - | 0.379037477 | 0.010941325 | 0.034910897 |
| ENSMMUG00000023225 | E2F transcription factor 6 [Source:VGNC Symbol;Acc:VGNC:72027]                                 | - | 0.441725421 | 0.010470524 | 0.033637571 |
| ENSMMUG00000059188 |                                                                                                | - | 1.177639515 | 0.000355626 | 0.001827405 |
| ENSMMUG00000016678 | Rho associated coiled-coil containing protein kinase 2 [Source:VGNC Symbol;Acc:VGNC:76714]     | - | 1.686708595 | 5.92E-07    | 6.05E-06    |
| ENSMMUG00000022785 | solute carrier family 66 member 3 [Source:VGNC Symbol;Acc:VGNC:76334]                          | - | 1.873251302 | 0.000178103 | 0.000997334 |
| ENSMMUG00000063262 |                                                                                                | - | 1.078261435 | 2.09E-10    | 4.15E-09    |
| ENSMMUG00000052047 |                                                                                                | - | 1.230850236 | 1.68E-06    | 1.53E-05    |
| ENSMMUG00000037908 |                                                                                                | - | 0.818720028 | 0.006454994 | 0.022283602 |
| ENSMMUG00000022879 | EARP complex and GARP complex interacting protein 1 [Source:NCBI gene;Acc:707650]              | - | 2.251019671 | 0.001681811 | 0.007111251 |
| ENSMMUG00000051814 |                                                                                                | - | 0.468148952 | 0.013044523 | 0.04032927  |
| ENSMMUG00000009310 | myelin transcription factor 1 like [Source:NCBI gene;Acc:706914]                               | - | 0.538856297 | 0.006110798 | 0.021282384 |
| ENSMMUG00000050687 | Metazoan signal recognition particle RNA [Source:RFAM;Acc:RF00017]                             | - | 1.529938928 | 0.012610752 | 0.039210956 |
| ENSMMUG00000009660 | syntrophin gamma 2 [Source:VGNC Symbol;Acc:VGNC:77694]                                         | - | 0.630473247 | 0.001734668 | 0.007292358 |
| ENSMMUG00000061533 |                                                                                                | - | 3.044550344 | 1.53E-35    | 6.97E-33    |
| ENSMMUG00000050543 |                                                                                                | - | 2.787508549 | 7.60E-17    | 4.02E-15    |
| ENSMMUG00000042598 | transmembrane protein 18 [Source:NCBI gene;Acc:721515]                                         | - | 4.128440864 | 2.25E-15    | 1.01E-13    |
| ENSMMUG00000038858 |                                                                                                | - | 0.533253945 | 0.000359418 | 0.001844938 |
| ENSMMUG00000063735 |                                                                                                | - | 1.340958477 | 0.000166475 | 0.000938732 |
| ENSMMUG00000022914 | RAB, member of RAS oncogene family like 2B [Source:NCBI gene;Acc:716615]                       | - | 1.375301094 | 8.10E-15    | 3.29E-13    |
| ENSMMUG00000009115 | tubulin tyrosine ligase like 8 [Source:VGNC Symbol;Acc:VGNC:79943]                             | - | -0.32031519 | 0.001970947 | 0.008161648 |
| ENSMMUG00000058324 |                                                                                                | - | 3.026959252 | 0.014341042 | 0.043678131 |
| ENSMMUG00000011278 | cysteine rich with EGF like domains 2 [Source:NCBI gene;Acc:720586]                            | - | 1.00474607  | 3.53E-08    | 4.62E-07    |
| ENSMMUG00000003764 | TBC1 domain family member 22A [Source:VGNC Symbol;Acc:VGNC:82077]                              | - | 0.420931437 | 0.015672796 | 0.046947044 |
| ENSMMUG00000056186 |                                                                                                | - | 1.499412933 | 3.12E-06    | 2.67E-05    |
| ENSMMUG00000020993 | cadherin EGF LAG seven-pass G-type receptor 1 [Source:NCBI gene;Acc:718440]                    | - | 1.767057377 | 8.64E-08    | 1.05E-06    |
| ENSMMUG0000000807  | tRNA 5-methylaminomethyl-2-thiouridylate methyltransferase [Source:VGNC Symbol;Acc:VGNC:79500] | - | 1.631273948 | 0.000831386 | 0.003863764 |
| ENSMMUG00000016262 | tetratricopeptide repeat domain 38 [Source:VGNC Symbol;Acc:VGNC:79574]                         | - | 1.927000163 | 1.10E-10    | 2.29E-09    |
| ENSMMUG00000008955 | ataxin 10 [Source:VGNC Symbol;Acc:VGNC:70046]                                                  | - | 0.543952451 | 0.006119324 | 0.021289917 |

|                    |                                                                                                              |             |             |             |
|--------------------|--------------------------------------------------------------------------------------------------------------|-------------|-------------|-------------|
| ENSMMUG00000023004 | structural maintenance of chromosomes 1B [Source:VGNC Symbol;Acc:VGNC:77657]                                 | 0.531104728 | 2.61E-05    | 0.00018093  |
| ENSMMUG00000023003 | family with sequence similarity 118 member A [Source:VGNC Symbol;Acc:VGNC:72265]                             | 0.607668249 | 0.000220488 | 0.00120679  |
|                    |                                                                                                              | -           |             |             |
| ENSMMUG00000031000 | Rho GTPase activating protein 8 [Source:NCBI gene;Acc:716745]                                                | 3.001643027 | 4.99E-06    | 4.09E-05    |
| ENSMMUG00000058874 | Metazoan signal recognition particle RNA [Source:RFAM;Acc:RF00017]                                           | -3.5712024  | 0.001730503 | 0.007281133 |
|                    |                                                                                                              | -           |             |             |
| ENSMMUG00000065099 |                                                                                                              | 2.833861852 | 2.71E-20    | 2.13E-18    |
| ENSMMUG00000005769 | EF-hand calcium binding domain 6 [Source:VGNC Symbol;Acc:VGNC:72092]                                         | 0.708747655 | 0.002639418 | 0.010395347 |
| ENSMMUG00000008106 | solute carrier family 25 member 17 [Source:NCBI gene;Acc:705547]                                             | 0.595625072 | 0.003886222 | 0.014493077 |
|                    |                                                                                                              | -           |             |             |
| ENSMMUG00000056662 |                                                                                                              | 1.302330658 | 9.63E-08    | 1.15E-06    |
|                    |                                                                                                              | -           |             |             |
| ENSMMUG00000012101 | synaptogyrin 1 [Source:VGNC Symbol;Acc:VGNC:78068]                                                           | 1.473894598 | 4.20E-08    | 5.41E-07    |
| ENSMMUG00000004868 | dynein axonemal light chain 4 [Source:VGNC Symbol;Acc:VGNC:71945]                                            | 3.599647991 | 0.000288545 | 0.001525856 |
|                    |                                                                                                              | -           |             |             |
| ENSMMUG00000021083 | Josephin domain containing 1 [Source:VGNC Symbol;Acc:VGNC:73920]                                             | 1.124788039 | 0.000913216 | 0.004191799 |
|                    |                                                                                                              | -           |             |             |
| ENSMMUG00000000364 | translocase of outer mitochondrial membrane 22 [Source:NCBI gene;Acc:701286]                                 | 1.382488706 | 0.001549599 | 0.006607956 |
|                    |                                                                                                              | -           |             |             |
| ENSMMUG00000061986 |                                                                                                              | 1.774301267 | 0.000158604 | 0.000899932 |
|                    |                                                                                                              | -           |             |             |
| ENSMMUG00000012467 | family with sequence similarity 227 member A [Source:VGNC Symbol;Acc:VGNC:72475]                             | 1.246061732 | 2.39E-05    | 0.00016774  |
|                    |                                                                                                              | -           |             |             |
| ENSMMUG00000061118 |                                                                                                              | 1.373748937 | 0.01264042  | 0.039280415 |
|                    |                                                                                                              | -           |             |             |
| ENSMMUG00000049788 |                                                                                                              | 1.694159269 | 9.78E-06    | 7.50E-05    |
|                    |                                                                                                              | -           |             |             |
| ENSMMUG00000002697 | protein interacting with PRKCA 1 [Source:VGNC Symbol;Acc:VGNC:76013]                                         | 0.255637845 | 0.012072285 | 0.037830311 |
| ENSMMUG00000006987 | RNA polymerase II subunit F [Source:NCBI gene;Acc:699566]                                                    | -0.35197618 | 0.002321027 | 0.009359435 |
|                    |                                                                                                              | -           |             |             |
| ENSMMUG00000019785 | eukaryotic translation initiation factor 3 subunit L [Source:NCBI gene;Acc:699189]                           | 1.344473684 | 0.006669155 | 0.022940635 |
| ENSMMUG00000015258 | glycine C-acetyltransferase [Source:NCBI gene;Acc:698811]                                                    | 2.458703335 | 6.27E-05    | 0.000395025 |
| ENSMMUG00000005991 | TRIO and F-actin binding protein [Source:NCBI gene;Acc:701241]                                               | 0.631402295 | 6.08E-07    | 6.20E-06    |
| ENSMMUG00000056629 | nucleolar protein 12 [Source:NCBI gene;Acc:698318]                                                           | 1.255980758 | 0.002967083 | 0.011521556 |
| ENSMMUG00000003007 | caspase recruitment domain family member 10 [Source:VGNC Symbol;Acc:VGNC:70570]                              | 2.873220307 | 8.64E-06    | 6.68E-05    |
| ENSMMUG00000003005 | MFNG O-fucosylpeptide 3-beta-N-acetylglucosaminyltransferase [Source:VGNC Symbol;Acc:VGNC:74712]             | 5.101331066 | 9.55E-08    | 1.14E-06    |
| ENSMMUG00000052785 | extracellular leucine rich repeat and fibronectin type III domain containing 2 [Source:NCBI gene;Acc:697071] | 3.678010032 | 8.54E-05    | 0.00051901  |
|                    |                                                                                                              | -           |             |             |
| ENSMMUG00000062922 |                                                                                                              | 0.818313322 | 0.00096154  | 0.004380414 |
| ENSMMUG00000000151 | transmembrane serine protease 6 [Source:VGNC Symbol;Acc:VGNC:79038]                                          | 0.644685515 | 0.000483689 | 0.002400612 |
| ENSMMUG00000012350 | mercaptopyruvate sulfurtransferase [Source:VGNC Symbol;Acc:VGNC:74922]                                       | 0.779402502 | 0.003869168 | 0.014440588 |
| ENSMMUG00000012349 | thiosulfate sulfurtransferase [Source:VGNC Symbol;Acc:VGNC:78664]                                            | 1.488320035 | 0.012021049 | 0.037686001 |
| ENSMMUG00000014986 | testis expressed 33 [Source:VGNC Symbol;Acc:VGNC:79727]                                                      | 1.111618142 | 9.15E-09    | 1.35E-07    |
| ENSMMUG00000008160 | neutrophil cytosolic factor 4 [Source:VGNC Symbol;Acc:VGNC:75141]                                            | 1.110544603 | 0.007843972 | 0.026370913 |
| ENSMMUG00000055820 |                                                                                                              | 1.76830359  | 5.84E-06    | 4.71E-05    |
| ENSMMUG00000008778 | parvalbumin [Source:VGNC Symbol;Acc:VGNC:76627]                                                              | 1.104007873 | 5.54E-08    | 7.01E-07    |
| ENSMMUG00000006101 | myosin heavy chain 9 [Source:VGNC Symbol;Acc:VGNC:75102]                                                     | 0.84951979  | 1.51E-05    | 0.000110489 |
| ENSMMUG00000014010 | RNA binding fox-1 homolog 2 [Source:VGNC Symbol;Acc:VGNC:76685]                                              | 0.627439249 | 7.58E-06    | 5.94E-05    |
| ENSMMUG00000048463 | apolipoprotein L5 [Source:HGNC Symbol;Acc:HGNC:14869]                                                        | 0.495598994 | 0.003073693 | 0.011872646 |
|                    |                                                                                                              | -           |             |             |
| ENSMMUG00000059824 |                                                                                                              | 3.488297373 | 0.000738912 | 0.003477362 |
| ENSMMUG00000062825 | TIMP metalloproteinase inhibitor 3 [Source:NCBI gene;Acc:574381]                                             | -0.4581443  | 0.016705194 | 0.049499269 |
|                    |                                                                                                              | -           |             |             |
| ENSMMUG00000006720 | RNA 2',3'-cyclic phosphate and 5'-OH ligase [Source:VGNC Symbol;Acc:VGNC:77111]                              | 0.538989088 | 0.003335217 | 0.01275225  |



|                     |                                                                                                 |             |             |             |
|---------------------|-------------------------------------------------------------------------------------------------|-------------|-------------|-------------|
| ENSMMUG00000056552  |                                                                                                 | 0.912434897 | 8.76E-05    | 0.000531156 |
| ENSMMUG00000002182  | phosphatidylserine decarboxylase [Source:VGNC Symbol;Acc:VGNC:76005]                            | -           | -           | -           |
| ENSMMUG00000002181  | SFI1 centrin binding protein [Source:VGNC Symbol;Acc:VGNC:77328]                                | 1.384647901 | 0.00149338  | 0.006394482 |
| ENSMMUG00000015001  | LIM domain kinase 2 [Source:VGNC Symbol;Acc:VGNC:74270]                                         | 0.804618997 | 5.90E-10    | 1.09E-08    |
| ENSMMUG00000004675  | smoothelin [Source:VGNC Symbol;Acc:VGNC:77661]                                                  | 0.611197863 | 0.003539112 | 0.013390961 |
| ENSMMUG000000056113 |                                                                                                 | -           | -           | -           |
| ENSMMUG00000005898  | MORC family CW-type zinc finger 2 [Source:VGNC Symbol;Acc:VGNC:74810]                           | 1.648085822 | 7.73E-07    | 7.63E-06    |
| ENSMMUG00000019805  | dual specificity phosphatase 18 [Source:VGNC Symbol;Acc:VGNC:71858]                             | 1.709525643 | 0.013211341 | 0.040776534 |
| ENSMMUG00000052343  |                                                                                                 | -           | -           | -           |
| ENSMMUG00000021374  | EWS RNA binding protein 1 [Source:VGNC Symbol;Acc:VGNC:72446]                                   | 1.971427162 | 0.016344953 | 0.048580367 |
| ENSMMUG00000021373  | rhomboid domain containing 3 [Source:NCBI gene;Acc:714479]                                      | 0.532133283 | 0.000850609 | 0.003944274 |
| ENSMMUG00000021372  | EMI domain containing 1 [Source:VGNC Symbol;Acc:VGNC:72063]                                     | 1.014739297 | 0.000254272 | 0.001364689 |
| ENSMMUG00000058170  | U6 spliceosomal RNA [Source:RFAM;Acc:RF00026]                                                   | 0.814321203 | 0.000129173 | 0.000751714 |
| ENSMMUG0000007215   | X-box binding protein 1 [Source:VGNC Symbol;Acc:VGNC:78806]                                     | 0.710439995 | 0.001026051 | 0.00462646  |
| ENSMMUG00000053198  | coiled-coil domain containing 117 [Source:NCBI gene;Acc:713804]                                 | 0.754125939 | 0.000235513 | 0.001276053 |
| ENSMMUG00000020489  | HscB mitochondrial iron-sulfur cluster cochaperone [Source:VGNC Symbol;Acc:VGNC:73454]          | 0.715815612 | 0.009700227 | 0.031617086 |
| ENSMMUG00000020486  | checkpoint kinase 2 [Source:VGNC Symbol;Acc:VGNC:70958]                                         | 1.087184149 | 1.56E-05    | 0.000113954 |
| ENSMMUG0000001058   | tetratricopeptide repeat domain 28 [Source:VGNC Symbol;Acc:VGNC:79785]                          | 0.764029661 | 0.002638697 | 0.010395347 |
| ENSMMUG00000042122  | Metazoan signal recognition particle RNA [Source:RFAM;Acc:RF00017]                              | 0.658054589 | 4.01E-07    | 4.25E-06    |
| ENSMMUG00000023450  | tyrosylprotein sulfotransferase 2 [Source:VGNC Symbol;Acc:VGNC:78639]                           | 0.627739903 | 1.65E-05    | 0.000119226 |
| ENSMMUG00000023446  | tuftelin interacting protein 11 [Source:VGNC Symbol;Acc:VGNC:78399]                             | 3.083275487 | 2.74E-19    | 1.92E-17    |
| ENSMMUG00000023443  | SRR1 domain containing [Source:VGNC Symbol;Acc:VGNC:78036]                                      | 3.693860026 | 0.000732108 | 0.003449805 |
| ENSMMUG00000023442  | HPS4 biogenesis of lysosomal organelles complex 3 subunit 2 [Source:VGNC Symbol;Acc:VGNC:73396] | 1.045085461 | 1.25E-05    | 9.36E-05    |
| ENSMMUG00000016052  | seizure related 6 homolog like [Source:VGNC Symbol;Acc:VGNC:77176]                              | 1.295127863 | 4.46E-06    | 3.69E-05    |
| ENSMMUG00000006853  | crystallin beta B2 [Source:NCBI gene;Acc:100144420]                                             | 1.194507062 | 7.15E-08    | 8.83E-07    |
| ENSMMUG00000039465  |                                                                                                 | 2.339342869 | 0.000560913 | 0.00273349  |
| ENSMMUG00000044345  | ral-GDS-related protein [Source:NCBI gene;Acc:710293]                                           | -1.47250721 | 5.56E-09    | 8.53E-08    |
| ENSMMUG00000031051  | aspartate-rich protein 1 [Source:NCBI gene;Acc:107000598]                                       | 3.046349431 | 7.72E-10    | 1.38E-08    |
| ENSMMUG00000020992  | calcineurin binding protein 1 [Source:NCBI gene;Acc:700566]                                     | 1.559958555 | 0.00748955  | 0.025426341 |
| ENSMMUG00000005980  | glutathione hydrolase 5 proenzyme [Source:NCBI gene;Acc:720345]                                 | 0.761431457 | 0.00042411  | 0.002144449 |
| ENSMMUG0000002288   | glutathione hydrolase 1 proenzyme [Source:NCBI gene;Acc:700936]                                 | 0.576107834 | 0.003661738 | 0.013807298 |
| ENSMMUG00000044782  |                                                                                                 | 0.514054912 | 0.005792363 | 0.020373477 |
| ENSMMUG00000020999  | gamma-glutamyltransferase 1 [Source:NCBI gene;Acc:707545]                                       | 0.335039069 | 0.001857942 | 0.007738942 |
|                     |                                                                                                 | 0.651794276 | 0.009720697 | 0.031676701 |
|                     |                                                                                                 | 0.991363009 | 1.60E-08    | 2.23E-07    |
|                     |                                                                                                 | 0.711408315 | 0.001051328 | 0.004721394 |

|                    |                                                                                                              |             |             |             |
|--------------------|--------------------------------------------------------------------------------------------------------------|-------------|-------------|-------------|
| ENSMMUG0000000262  | beta-ureidopropionase 1 [Source:VGNC Symbol;Acc:VGNC:79029]                                                  | 1.343217533 | 0.000112623 | 0.000662567 |
| ENSMMUG00000051040 |                                                                                                              | 0.915768943 | 0.016084989 | 0.047915468 |
| ENSMMUG00000060794 |                                                                                                              | 0.384219649 | 0.013601583 | 0.041802581 |
| ENSMMUG00000049542 |                                                                                                              | 1.667477399 | 2.71E-07    | 2.99E-06    |
| ENSMMUG00000023622 | BCR activator of RhoGEF and GTPase [Source:NCBI gene;Acc:709258]                                             | 1.501200778 | 7.78E-07    | 7.66E-06    |
| ENSMMUG00000014641 |                                                                                                              | 0.394707626 | 0.000349869 | 0.001802924 |
| ENSMMUG00000020092 |                                                                                                              | 0.602479993 | 0.003154746 | 0.012142055 |
| ENSMMUG00000054655 | immunoglobulin lambda variable 3-10 [Source:HGNC Symbol;Acc:HGNC:5897]                                       | 1.347642249 | 3.69E-06    | 3.11E-05    |
| ENSMMUG00000056950 |                                                                                                              | 1.063228281 | 2.86E-14    | 1.09E-12    |
| ENSMMUG00000047015 | ral-GDS-related protein-like [Source:NCBI gene;Acc:106995524]                                                | 1.026008613 | 0.000140439 | 0.00080854  |
| ENSMMUG00000018798 | stromal cell derived factor 2 like 1 [Source:NCBI gene;Acc:697928]                                           | 0.615583435 | 0.000246324 | 0.001328196 |
| ENSMMUG00000018531 | peptidylprolyl isomerase like 2 [Source:VGNC Symbol;Acc:VGNC:76239]                                          | 0.387794298 | 0.00567556  | 0.020040226 |
| ENSMMUG00000018823 | transmembrane protein 191C [Source:NCBI gene;Acc:697070]                                                     | 1.840898837 | 0.0037959   | 0.014216542 |
| ENSMMUG00000056022 |                                                                                                              | 0.627366404 | 0.000881901 | 0.004068247 |
| ENSMMUG00000062755 |                                                                                                              | 1.27621812  | 0.000165087 | 0.000931626 |
| ENSMMUG00000049130 |                                                                                                              | 2.347658076 | 1.79E-37    | 9.32E-35    |
| ENSMMUG00000063914 |                                                                                                              | 2.487396061 | 5.04E-52    | 1.47E-48    |
| ENSMMUG00000023263 | mediator complex subunit 15 [Source:VGNC Symbol;Acc:VGNC:74511]                                              | 2.422158818 | 9.68E-19    | 6.45E-17    |
| ENSMMUG00000017171 | scavenger receptor class F member 2 [Source:VGNC Symbol;Acc:VGNC:77058]                                      | 0.993601806 | 0.004400361 | 0.016100691 |
| ENSMMUG00000011547 | reticulon 4 receptor [Source:VGNC Symbol;Acc:VGNC:77047]                                                     | 0.548121353 | 0.014450041 | 0.043908914 |
| ENSMMUG00000021904 | cell division cycle 45 [Source:VGNC Symbol;Acc:VGNC:70800]                                                   | 0.758515743 | 0.000102646 | 0.000610292 |
| ENSMMUG00000031106 | ubiquitin recognition factor in ER associated degradation 1 [Source:NCBI gene;Acc:711716]                    | 0.793478967 | 9.53E-10    | 1.67E-08    |
| ENSMMUG00000009650 | HIR histone cell cycle regulation defective homolog A ( <i>S. cerevisiae</i> ) [Source:NCBI gene;Acc:719142] | 0.260864987 | 0.011550077 | 0.036440787 |
| ENSMMUG00000005432 | clathrin heavy chain like 1 [Source:VGNC Symbol;Acc:VGNC:71268]                                              | 1.425895182 | 9.10E-10    | 1.60E-08    |
| ENSMMUG00000019925 | DiGeorge syndrome critical region gene 2 [Source:NCBI gene;Acc:100423715]                                    | 1.216336192 | 1.59E-09    | 2.68E-08    |
| ENSMMUG00000062702 |                                                                                                              | 1.409990486 | 0.001429941 | 0.006157302 |
| ENSMMUG00000020799 | BH3 interacting domain death agonist [Source:VGNC Symbol;Acc:VGNC:70250]                                     | 1.87852032  | 2.51E-07    | 2.79E-06    |
| ENSMMUG00000021476 | BCL2 like 13 [Source:VGNC Symbol;Acc:VGNC:84544]                                                             | 2.539124619 | 2.39E-08    | 3.22E-07    |
| ENSMMUG00000058916 |                                                                                                              | 2.635137871 | 9.95E-15    | 3.95E-13    |
| ENSMMUG00000021477 | ATPase H <sup>+</sup> transporting V1 subunit E1 [Source:NCBI gene;Acc:709739]                               | 2.624318792 | 3.78E-08    | 4.92E-07    |
| ENSMMUG00000031121 | solute carrier family 25 member 18 [Source:VGNC Symbol;Acc:VGNC:77434]                                       | 1.293420743 | 7.55E-06    | 5.92E-05    |
| ENSMMUG00000006731 | CECR2 histone acetyl-lysine reader [Source:VGNC Symbol;Acc:VGNC:84530]                                       | 1.990272837 | 1.29E-13    | 4.28E-12    |
| ENSMMUG00000059302 | Metazoan signal recognition particle RNA [Source:RFAM;Acc:RF00017]                                           | 1.820344824 | 0.000162233 | 0.000917488 |
| ENSMMUG00000049841 | Metazoan signal recognition particle RNA [Source:RFAM;Acc:RF00017]                                           | 2.743442012 | 0.000334763 | 0.001733068 |
| ENSMMUG00000009953 | ninein like [Source:VGNC Symbol;Acc:VGNC:75273]                                                              | 1.694876714 | 1.59E-07    | 1.85E-06    |
| ENSMMUG00000002397 | GINS complex subunit 1 [Source:VGNC Symbol;Acc:VGNC:73025]                                                   | 1.866730761 | 5.73E-10    | 1.06E-08    |
| ENSMMUG00000059374 |                                                                                                              | 2.195973423 | 9.39E-11    | 1.98E-09    |
| ENSMMUG00000009201 | abhydrolase domain containing 12 [Source:VGNC Symbol;Acc:VGNC:69411]                                         | 1.555315463 | 3.80E-07    | 4.06E-06    |
| ENSMMUG00000060399 | Metazoan signal recognition particle RNA [Source:RFAM;Acc:RF00017]                                           | 1.308114519 | 0.001929167 | 0.008001235 |
| ENSMMUG00000009199 | glycogen phosphorylase B [Source:VGNC Symbol;Acc:VGNC:76631]                                                 | 1.671666169 | 8.48E-08    | 1.03E-06    |
| ENSMMUG00000052572 |                                                                                                              | 1.484335571 | 0.003446388 | 0.013098078 |
| ENSMMUG00000058095 | visual system homeobox 1 [Source:NCBI gene;Acc:715973]                                                       | 1.663067587 | 0.004000717 | 0.014847696 |
| ENSMMUG00000052227 |                                                                                                              | 1.454080839 | 0.002682996 | 0.010529889 |
| ENSMMUG00000020597 | acyl-CoA synthetase short chain family member 1 [Source:VGNC Symbol;Acc:VGNC:69416]                          | 1.070332006 | 0.002490534 | 0.00992731  |
| ENSMMUG00000061222 | adipocyte plasma membrane associated protein [Source:NCBI gene;Acc:704948]                                   | 0.99714412  | 0.000914359 | 0.004195721 |

|                    |                                                                                                         |             |             |             |
|--------------------|---------------------------------------------------------------------------------------------------------|-------------|-------------|-------------|
| ENSMMUG00000049391 |                                                                                                         | 2.286780225 | 0.000459154 | 0.002298457 |
| ENSMMUG00000042668 | cilia and flagella associated protein 61 [Source:NCBI gene;Acc:699814]                                  | 0.885796666 | 0.0015314   | 0.006538022 |
| ENSMMUG00000007709 | crooked neck pre-mRNA splicing factor 1 [Source:VGNC Symbol;Acc:VGNC:71412]                             | 1.136208813 | 2.61E-08    | 3.49E-07    |
| ENSMMUG00000010114 | Ras and Rab interactor 2 [Source:VGNC Symbol;Acc:VGNC:76770]                                            | 1.069542201 | 7.25E-05    | 0.000448968 |
| ENSMMUG00000002321 | solute carrier family 24 member 3 [Source:VGNC Symbol;Acc:VGNC:77426]                                   | 1.070760776 | 4.64E-05    | 0.000304623 |
| ENSMMUG00000012354 | NADH:ubiquinone oxidoreductase complex assembly factor 5 [Source:VGNC Symbol;Acc:VGNC:74964]            | 1.036014386 | 0.012467109 | 0.03887481  |
| ENSMMUG00000062485 | ESF1 nucleolar pre-rRNA processing protein homolog [Source:NCBI gene;Acc:694159]                        | 0.941845129 | 0.000233166 | 0.001264282 |
| ENSMMUG00000006519 | taspase 1 [Source:VGNC Symbol;Acc:VGNC:78129]                                                           | 2.380880497 | 0.005260697 | 0.018762207 |
| ENSMMUG00000011064 | synaptosome associated protein 25 [Source:VGNC Symbol;Acc:VGNC:77663]                                   | 3.242505257 | 2.01E-13    | 6.45E-12    |
| ENSMMUG00000015923 | ankyrin repeat and EF-hand domain containing 1 [Source:VGNC Symbol;Acc:VGNC:69615]                      | 0.908284951 | 0.00096909  | 0.004405376 |
| ENSMMUG00000021137 | thioredoxin related transmembrane protein 4 [Source:VGNC Symbol;Acc:VGNC:79484]                         | 1.687862465 | 6.95E-05    | 0.000432152 |
| ENSMMUG00000055897 |                                                                                                         | 1.462306795 | 1.93E-15    | 8.72E-14    |
| ENSMMUG00000057687 |                                                                                                         | 1.699860793 | 4.66E-14    | 1.71E-12    |
| ENSMMUG00000064554 | leucine rich repeat neuronal 4 [Source:NCBI gene;Acc:718283]                                            | 2.283099332 | 2.63E-07    | 2.91E-06    |
| ENSMMUG00000013740 | minichromosome maintenance 8 homologous recombination repair factor [Source:VGNC Symbol;Acc:VGNC:74516] | 2.485315761 | 6.90E-11    | 1.49E-09    |
| ENSMMUG00000056093 | shieldin complex subunit 1 [Source:NCBI gene;Acc:718152]                                                | 0.864323389 | 1.34E-05    | 9.95E-05    |
| ENSMMUG00000064391 |                                                                                                         | 1.147298476 | 2.38E-07    | 2.66E-06    |
| ENSMMUG00000065232 |                                                                                                         | 2.377182181 | 0.003445558 | 0.013098078 |
| ENSMMUG00000013261 | CDP-diacylglycerol synthase 2 [Source:VGNC Symbol;Acc:VGNC:70995]                                       | -1.01761497 | 0.015508064 | 0.046540199 |
| ENSMMUG00000020004 | Ras association domain family member 2 [Source:VGNC Symbol;Acc:VGNC:76674]                              | 0.758118532 | 0.000414996 | 0.002100556 |
| ENSMMUG00000020912 | spermine oxidase [Source:NCBI gene;Acc:718761]                                                          | 0.685277978 | 0.004386871 | 0.016059416 |
| ENSMMUG00000022070 | sialic acid binding Ig like lectin 1 [Source:VGNC Symbol;Acc:VGNC:77220]                                | 0.390070931 | 0.000452041 | 0.002269886 |
| ENSMMUG00000022076 | ADAM metalloproteinase domain 33 [Source:VGNC Symbol;Acc:VGNC:69409]                                    | 0.628911247 | 0.007054091 | 0.024066021 |
| ENSMMUG00000063747 |                                                                                                         | 1.065106561 | 2.21E-05    | 0.000155834 |
| ENSMMUG00000010028 | leucine zipper tumor suppressor family member 3 [Source:VGNC Symbol;Acc:VGNC:74403]                     | 1.534277977 | 6.59E-11    | 1.43E-09    |
| ENSMMUG00000002982 | FAST kinase domains 5 [Source:NCBI gene;Acc:100498658]                                                  | 0.688546108 | 3.78E-05    | 0.000252419 |
| ENSMMUG00000010678 | oxytocin/neurophysin I prepropeptide [Source:VGNC Symbol;Acc:VGNC:75730]                                | 1.171542647 | 0.013176041 | 0.040683965 |
| ENSMMUG00000063622 | mitochondrial ribosomal protein S26 [Source:NCBI gene;Acc:717038]                                       | 2.153466058 | 1.06E-11    | 2.61E-10    |
| ENSMMUG00000005878 | protein tyrosine phosphatase receptor type A [Source:VGNC Symbol;Acc:VGNC:76610]                        | 0.381104427 | 0.001561908 | 0.00665654  |
| ENSMMUG00000005204 | VPS16 core subunit of CORVET and HOPS complexes [Source:VGNC Symbol;Acc:VGNC:78966]                     | 2.151397484 | 4.58E-08    | 5.85E-07    |
| ENSMMUG00000005200 | PC-esterase domain containing 1A [Source:VGNC Symbol;Acc:VGNC:75622]                                    | 3.431744646 | 0.000329461 | 0.001709268 |
| ENSMMUG00000021332 | carboxypeptidase X, M14 family member 1 [Source:VGNC Symbol;Acc:VGNC:71413]                             | 2.878017732 | 0.016871407 | 0.049835826 |
| ENSMMUG00000021331 | EBF family member 4 [Source:VGNC Symbol;Acc:VGNC:71932]                                                 | 3.396271355 | 1.22E-06    | 1.15E-05    |
| ENSMMUG00000061433 |                                                                                                         | -0.83464771 | 6.61E-05    | 0.000413385 |
| ENSMMUG00000013889 | transmembrane channel like 2 [Source:VGNC Symbol;Acc:VGNC:79039]                                        | 2.533693883 | 0.002686895 | 0.010542347 |
| ENSMMUG00000010050 | small nuclear ribonucleoprotein polypeptides B and B1 [Source:VGNC Symbol;Acc:VGNC:77676]               | 2.319566036 | 4.32E-06    | 3.58E-05    |
| ENSMMUG00000018474 | signal regulatory protein alpha [Source:NCBI gene;Acc:717811]                                           | 1.974519444 | 7.79E-12    | 1.97E-10    |

|                    |                                                                                                                         |             |             |             |
|--------------------|-------------------------------------------------------------------------------------------------------------------------|-------------|-------------|-------------|
| ENSMMUG00000015994 | NSFL1 cofactor [Source:VGNC Symbol;Acc:VGNC:75407]                                                                      | 2.831752651 | 0.005084713 | 0.018232972 |
| ENSMMUG00000018165 | syndecan binding protein 2 [Source:VGNC Symbol;Acc:VGNC:77017]                                                          | -1.65539273 | 0.002290571 | 0.009262319 |
| ENSMMUG00000004711 | transmembrane protein 74B [Source:VGNC Symbol;Acc:VGNC:78990]                                                           | 1.668360469 | 0.012582036 | 0.039157579 |
| ENSMMUG00000004709 | proteasome inhibitor subunit 1 [Source:VGNC Symbol;Acc:VGNC:76458]                                                      | 1.461648677 | 0.003279219 | 0.012567889 |
| ENSMMUG00000031223 | R-spondin 4 [Source:VGNC Symbol;Acc:VGNC:77023]                                                                         | 3.301358661 | 0.015241333 | 0.045862815 |
| ENSMMUG00000047879 | family with sequence similarity 110 member A [Source:NCBI gene;Acc:717055]                                              | 1.384153336 | 0.003160471 | 0.012157652 |
| ENSMMUG00000021670 | solute carrier family 52 member 3 [Source:VGNC Symbol;Acc:VGNC:77717]                                                   | 1.910578626 | 6.35E-15    | 2.62E-13    |
| ENSMMUG00000056387 | transcription factor 15 [Source:NCBI gene;Acc:716916]                                                                   | 2.963088724 | 1.77E-13    | 5.74E-12    |
| ENSMMUG00000031224 | casein kinase 2 alpha 1 [Source:NCBI gene;Acc:714841]                                                                   | 1.019871514 | 1.12E-06    | 1.06E-05    |
| ENSMMUG00000004461 | TBC1 domain family member 20 [Source:VGNC Symbol;Acc:VGNC:78132]                                                        | 0.384050502 | 0.000633167 | 0.003038741 |
| ENSMMUG00000026836 | Y RNA [Source:RFAM;Acc:RF00019]                                                                                         | 1.500637568 | 5.23E-05    | 0.00033721  |
| ENSMMUG00000012601 | RANBP2-type and C3HC4-type zinc finger containing 1 [Source:VGNC Symbol;Acc:VGNC:81554]                                 | 0.643728614 | 3.57E-05    | 0.000239689 |
| ENSMMUG00000038935 | zinc finger CCHC-type containing 3 [Source:NCBI gene;Acc:714477]                                                        | 1.070542504 | 0.000620685 | 0.002987716 |
| ENSMMUG00000017286 | chromosome 10 C20orf96 homolog [Source:VGNC Symbol;Acc:VGNC:70324]                                                      | 0.939220084 | 0.008147188 | 0.027245381 |
| ENSMMUG00000061092 | defensin beta 125 [Source:HGNC Symbol;Acc:HGNC:18105]                                                                   | 0.496562228 | 0.0031803   | 0.012217766 |
| ENSMMUG00000005116 | defensin beta 124 [Source:VGNC Symbol;Acc:VGNC:71655]                                                                   | 0.456182378 | 0.016631239 | 0.049330405 |
| ENSMMUG00000058583 | RRAD and GEM like GTPase 1 [Source:NCBI gene;Acc:713351]                                                                | 1.226755178 | 1.69E-12    | 4.74E-11    |
| ENSMMUG00000005119 | histocompatibility minor 13 [Source:VGNC Symbol;Acc:VGNC:81418]                                                         | 2.682874969 | 0.000130509 | 0.000758872 |
| ENSMMUG00000051112 | p53 and DNA damage regulated 1 [Source:NCBI gene;Acc:712622]                                                            | 1.313736898 | 0.000296782 | 0.001560897 |
| ENSMMUG00000000117 | HCK proto-oncogene, Src family tyrosine kinase [Source:VGNC Symbol;Acc:VGNC:73353]                                      | 1.511561917 | 2.86E-05    | 0.000196418 |
| ENSMMUG00000008979 | protein O-fucosyltransferase 1 [Source:VGNC Symbol;Acc:VGNC:76030]                                                      | 0.892848545 | 0.001206004 | 0.005315852 |
| ENSMMUG00000009414 | Sad1 and UNC84 domain containing 5 [Source:VGNC Symbol;Acc:VGNC:78133]                                                  | 1.121159064 | 0.000268379 | 0.001433293 |
| ENSMMUG00000053133 | BPI fold containing family B member 2 [Source:NCBI gene;Acc:710915]                                                     | 0.833421899 | 5.89E-05    | 0.000374254 |
| ENSMMUG00000020671 | BPI fold containing family B member 3 [Source:VGNC Symbol;Acc:VGNC:70320]                                               | -0.37464472 | 0.005597473 | 0.019822283 |
| ENSMMUG00000012912 | itchy E3 ubiquitin protein ligase [Source:VGNC Symbol;Acc:VGNC:73589]                                                   | 0.297798928 | 0.003771844 | 0.014146363 |
| ENSMMUG00000055449 | tumor protein p53 inducible nuclear protein 2 [Source:NCBI gene;Acc:707113]                                             | -2.74952294 | 0.001899032 | 0.007892003 |
| ENSMMUG00000017931 | gamma-glutamyltransferase 7 [Source:VGNC Symbol;Acc:VGNC:72921]                                                         | 1.307557823 | 0.000217823 | 0.001195355 |
| ENSMMUG00000017932 | acyl-CoA synthetase short chain family member 2 [Source:VGNC Symbol;Acc:VGNC:69410]                                     | -2.29466185 | 0.001684497 | 0.007120537 |
| ENSMMUG00000000229 | transient receptor potential cation channel subfamily C member 4 associated protein [Source:VGNC Symbol;Acc:VGNC:79014] | 2.089119732 | 0.000477591 | 0.002375405 |
| ENSMMUG00000057979 | growth differentiation factor 5 [Source:NCBI gene;Acc:705432]                                                           | 0.716550497 | 1.99E-07    | 2.26E-06    |
| ENSMMUG00000031274 | GDF5 antisense RNA 1 [Source:HGNC Symbol;Acc:HGNC:33435]                                                                | 0.644726511 | 0.00848849  | 0.028237342 |
| ENSMMUG00000031284 | RNA binding motif protein 39 [Source:NCBI gene;Acc:704198]                                                              | 2.83677148  | 0.003001519 | 0.011632386 |
| ENSMMUG00000010633 | PHD finger protein 20 [Source:VGNC Symbol;Acc:VGNC:75807]                                                               | 0.477781526 | 1.10E-06    | 1.05E-05    |

|                    |                                                                                                |   |             |             |             |
|--------------------|------------------------------------------------------------------------------------------------|---|-------------|-------------|-------------|
| ENSMMUG00000020690 | erythrocyte membrane protein band 4.1 like 1 [Source:VGNC Symbol;Acc:VGNC:72231]               | - | 0.550032615 | 0.003409085 | 0.012990266 |
| ENSMMUG00000020691 | AAR2 splicing factor [Source:VGNC Symbol;Acc:VGNC:69412]                                       | - | 0.726033716 | 0.000325785 | 0.001693222 |
| ENSMMUG00000016448 | DLG associated protein 4 [Source:NCBI gene;Acc:702928]                                         | - | 1.299609675 | 2.41E-12    | 6.62E-11    |
| ENSMMUG00000059897 | myosin light chain 9 [Source:NCBI gene;Acc:709784]                                             | - | 1.195413211 | 3.91E-05    | 0.000260777 |
| ENSMMUG00000008195 | TGFB induced factor homeobox 2 [Source:NCBI gene;Acc:100429616]                                | - | 1.232195251 | 6.26E-14    | 2.22E-12    |
| ENSMMUG00000056945 |                                                                                                | - | 1.21513177  | 2.60E-13    | 8.19E-12    |
| ENSMMUG00000008200 | Src like adaptor 2 [Source:VGNC Symbol;Acc:VGNC:77499]                                         | - | 1.378627658 | 8.37E-06    | 6.49E-05    |
| ENSMMUG00000014380 | maestro heat like repeat family member 8 [Source:VGNC Symbol;Acc:VGNC:74774]                   | - | 0.680283808 | 0.0006388   | 0.00306274  |
| ENSMMUG00000017224 | catenin beta like 1 [Source:VGNC Symbol;Acc:VGNC:71414]                                        | - | 1.230081334 | 2.31E-07    | 2.59E-06    |
| ENSMMUG00000049410 | Metazoan signal recognition particle RNA [Source:RFAM;Acc:RF00017]                             | - | 1.265147503 | 0.012712147 | 0.039467558 |
| ENSMMUG00000017230 | V-set and transmembrane domain containing 2 like [Source:NCBI gene;Acc:707394]                 | - | 1.441928238 | 1.91E-24    | 2.15E-22    |
| ENSMMUG00000020172 | KIAA1755 [Source:VGNC Symbol;Acc:VGNC:73942]                                                   | - | 0.427520825 | 0.013678489 | 0.041988388 |
| ENSMMUG00000020173 | bactericidal permeability increasing protein [Source:VGNC Symbol;Acc:VGNC:70277]               | - | 0.371055467 | 0.007898319 | 0.026524503 |
| ENSMMUG00000017350 | Ral GTPase activating protein non-catalytic beta subunit [Source:VGNC Symbol;Acc:VGNC:76562]   | - | 0.753008618 | 0.001932198 | 0.008011513 |
| ENSMMUG00000031309 | adipogenin [Source:VGNC Symbol;Acc:VGNC:84540]                                                 | - | 0.537203612 | 0.008805157 | 0.029170594 |
| ENSMMUG00000006738 | L3MBTL histone methyl-lysine binding protein 1 [Source:NCBI gene;Acc:695694]                   | - | 1.877026677 | 4.80E-13    | 1.46E-11    |
| ENSMMUG00000007925 | serum/glucocorticoid regulated kinase 2 [Source:VGNC Symbol;Acc:VGNC:77228]                    | - | 2.755763785 | 1.65E-13    | 5.40E-12    |
| ENSMMUG00000000396 | intraflagellar transport 52 [Source:NCBI gene;Acc:694933]                                      | - | 2.503792158 | 8.95E-19    | 6.02E-17    |
| ENSMMUG00000018137 | MYB proto-oncogene like 2 [Source:VGNC Symbol;Acc:VGNC:75092]                                  | - | 2.304619968 | 3.87E-19    | 2.70E-17    |
| ENSMMUG00000002810 | TOX high mobility group box family member 2 [Source:VGNC Symbol;Acc:VGNC:79007]                | - | 1.23014668  | 9.59E-08    | 1.15E-06    |
| ENSMMUG00000022865 | junctophilin 2 [Source:NCBI gene;Acc:694158]                                                   | - | 4.722690129 | 1.62E-07    | 1.88E-06    |
| ENSMMUG00000006464 | hepatocyte nuclear factor 4 alpha [Source:VGNC Symbol;Acc:VGNC:73492]                          | - | 0.706486868 | 0.002170321 | 0.008869821 |
| ENSMMUG00000063590 |                                                                                                | - | 1.248490399 | 3.21E-07    | 3.49E-06    |
| ENSMMUG00000059766 |                                                                                                | - | 0.343093467 | 0.014266403 | 0.043488299 |
| ENSMMUG00000045256 | cellular communication network factor 5 [Source:NCBI gene;Acc:717872]                          | - | 1.269006181 | 0.002178287 | 0.008887387 |
| ENSMMUG00000003402 | matrilin 4 [Source:NCBI gene;Acc:717652]                                                       | - | 1.715899277 | 0.002378258 | 0.009542573 |
| ENSMMUG00000003806 | epididymal peptidase inhibitor [Source:NCBI gene;Acc:574162]                                   | - | 0.674615994 | 0.015722959 | 0.047058812 |
| ENSMMUG00000021022 | deoxynucleotidyltransferase terminal interacting protein 1 [Source:VGNC Symbol;Acc:VGNC:71845] | - | 1.178262163 | 0.000293182 | 0.001544755 |
| ENSMMUG00000052867 |                                                                                                | - | 1.141640252 | 0.001230998 | 0.005411253 |
| ENSMMUG00000023515 | sorting nexin family member 21 [Source:VGNC Symbol;Acc:VGNC:77716]                             | - | 0.484209197 | 0.006790016 | 0.023274336 |
| ENSMMUG00000051201 | zinc finger SWIM-type containing 3 [Source:NCBI gene;Acc:708804]                               | - | 1.70003497  | 2.17E-11    | 5.10E-10    |
| ENSMMUG00000042855 | zinc finger SWIM-type containing 1 [Source:NCBI gene;Acc:717180]                               | - | 1.230791872 | 0.000272677 | 0.001454111 |
| ENSMMUG00000009957 | spermatogenesis associated 25 [Source:VGNC Symbol;Acc:VGNC:77928]                              | - | 1.714306228 | 0.007950637 | 0.026673992 |
| ENSMMUG00000058326 | neuralized E3 ubiquitin protein ligase 2 [Source:NCBI gene;Acc:708904]                         | - | 3.02978671  | 7.62E-07    | 7.53E-06    |
| ENSMMUG00000009960 | cathepsin A [Source:VGNC Symbol;Acc:VGNC:71617]                                                | - | 1.956660145 | 4.51E-17    | 2.44E-15    |
| ENSMMUG00000013697 | PDX1 C-terminal inhibiting factor 1 [Source:VGNC Symbol;Acc:VGNC:75621]                        | - | 0.365783183 | 0.005492162 | 0.019477813 |
| ENSMMUG00000016549 | matrix metalloproteinase 9 [Source:VGNC Symbol;Acc:VGNC:74903]                                 | - | 3.312425575 | 1.08E-16    | 5.66E-15    |
| ENSMMUG00000016553 | solute carrier family 12 member 5 [Source:VGNC Symbol;Acc:VGNC:77471]                          | - | 4.298376077 | 0.000591443 | 0.002863073 |
| ENSMMUG00000016927 | solute carrier family 2 member 10 [Source:VGNC Symbol;Acc:VGNC:77465]                          | - | 1.550713203 | 5.42E-15    | 2.28E-13    |
| ENSMMUG00000065008 |                                                                                                | - | 0.940957589 | 0.005177603 | 0.018506716 |
| ENSMMUG00000012020 | nuclear receptor coactivator 3 [Source:VGNC Symbol;Acc:VGNC:75147]                             | - | 0.588016999 | 0.000235817 | 0.001276749 |

|                    |                                                                                                  |             |             |             |
|--------------------|--------------------------------------------------------------------------------------------------|-------------|-------------|-------------|
| ENSMMUG00000012029 | sulfatase 2 [Source:VGNC Symbol;Acc:VGNC:78179]                                                  | 1.062104207 | 1.65E-06    | 1.51E-05    |
| ENSMMUG00000060780 |                                                                                                  | 0.461156457 | 0.000181118 | 0.001011882 |
| ENSMMUG00000038447 |                                                                                                  | 0.942076133 | 0.000118677 | 0.000695931 |
| ENSMMUG00000058754 |                                                                                                  | 3.075569288 | 0.002208044 | 0.008993648 |
| ENSMMUG00000019635 | ADP ribosylation factor guanine nucleotide exchange factor 2 [Source:VGNC Symbol;Acc:VGNC:69836] | 0.388443451 | 0.005199103 | 0.018574431 |
| ENSMMUG00000023621 | DEAD-box helicase 27 [Source:NCBI gene;Acc:703852]                                               | 3.186468553 | 0.002522392 | 0.010037782 |
| ENSMMUG00000002124 | beta-1,4-galactosyltransferase 5 [Source:VGNC Symbol;Acc:VGNC:70212]                             | 1.389786487 | 7.86E-07    | 7.73E-06    |
| ENSMMUG00000002715 | solute carrier family 9 member A8 [Source:VGNC Symbol;Acc:VGNC:77749]                            | 1.394501872 | 6.19E-15    | 2.56E-13    |
| ENSMMUG00000028471 | U7 small nuclear RNA [Source:RFAM;Acc:RF00066]                                                   | 1.051217442 | 0.005003063 | 0.017966779 |
| ENSMMUG00000000740 | spermatogenesis associated 2 [Source:VGNC Symbol;Acc:VGNC:77923]                                 | 1.453363262 | 9.84E-09    | 1.44E-07    |
| ENSMMUG00000065129 |                                                                                                  | 1.947894035 | 0.00769415  | 0.025987913 |
| ENSMMUG00000012228 | ubiquitin conjugating enzyme E2 V1 [Source:NCBI gene;Acc:100425552]                              | 1.429337794 | 3.01E-14    | 1.14E-12    |
| ENSMMUG00000002761 | activity dependent neuroprotector homeobox [Source:VGNC Symbol;Acc:VGNC:69614]                   | 0.585706554 | 6.24E-06    | 5.00E-05    |
| ENSMMUG00000002758 | molybdenum cofactor synthesis 3 [Source:VGNC Symbol;Acc:VGNC:74772]                              | -2.16243121 | 0.004099146 | 0.01513571  |
| ENSMMUG00000012657 | nuclear factor of activated T cells 2 [Source:VGNC Symbol;Acc:VGNC:75327]                        | 1.309924201 | 0.00139392  | 0.006029225 |
| ENSMMUG00000018846 | ZFP64 zinc finger protein [Source:VGNC Symbol;Acc:VGNC:78994]                                    | 0.443194269 | 0.000319182 | 0.001663062 |
| ENSMMUG00000013035 | teashirt zinc finger homeobox 2 [Source:VGNC Symbol;Acc:VGNC:78875]                              | 1.020218766 | 0.000122375 | 0.000714443 |
| ENSMMUG00000018358 | zinc finger protein 217 [Source:VGNC Symbol;Acc:VGNC:78874]                                      | 2.097192944 | 6.65E-14    | 2.34E-12    |
| ENSMMUG00000057302 |                                                                                                  | 2.328029166 | 2.28E-05    | 0.000160346 |
| ENSMMUG00000052326 | U7 small nuclear RNA [Source:RFAM;Acc:RF00066]                                                   | 3.057692042 | 0.004726214 | 0.017099297 |
| ENSMMUG00000004074 | bone morphogenetic protein 7 [Source:VGNC Symbol;Acc:VGNC:70266]                                 | 0.859362154 | 0.000883408 | 0.004070396 |
| ENSMMUG00000031391 | RNA binding motif protein 38 [Source:VGNC Symbol;Acc:VGNC:76484]                                 | 3.136922693 | 9.49E-15    | 3.79E-13    |
| ENSMMUG00000022586 | phosphoenolpyruvate carboxykinase 1 [Source:VGNC Symbol;Acc:VGNC:75779]                          | 3.894878029 | 0.001574752 | 0.006705381 |
| ENSMMUG00000022589 | prostate transmembrane protein, androgen induced 1 [Source:VGNC Symbol;Acc:VGNC:76023]           | -0.90967488 | 0.000297661 | 0.001563821 |
| ENSMMUG00000004560 | crystallin lambda 1 [Source:VGNC Symbol;Acc:VGNC:71433]                                          | 0.427406547 | 0.011161643 | 0.035465967 |
| ENSMMUG00000016475 | M-phase phosphoprotein 8 [Source:VGNC Symbol;Acc:VGNC:74864]                                     | 0.691245435 | 7.01E-06    | 5.56E-05    |
| ENSMMUG00000004237 | TNF receptor superfamily member 19 [Source:VGNC Symbol;Acc:VGNC:78588]                           | 1.023092191 | 2.13E-07    | 2.41E-06    |
| ENSMMUG00000014610 | ring finger protein 17 [Source:NCBI gene;Acc:708198]                                             | 0.851578883 | 2.02E-06    | 1.81E-05    |
| ENSMMUG00000018419 | myotubularin related protein 6 [Source:VGNC Symbol;Acc:VGNC:75075]                               | 0.728172321 | 3.08E-06    | 2.65E-05    |
| ENSMMUG00000008520 | ATPase phospholipid transporting 8A2 [Source:VGNC Symbol;Acc:VGNC:70062]                         | 0.366984144 | 0.002889629 | 0.011261807 |
| ENSMMUG00000057852 |                                                                                                  | 0.838574884 | 0.000199242 | 0.001100446 |
| ENSMMUG00000057481 |                                                                                                  | 2.498442607 | 0.003871235 | 0.014444595 |
| ENSMMUG00000058786 | ligand of numb-protein X 2 [Source:NCBI gene;Acc:710660]                                         | 0.552150429 | 0.004009512 | 0.014873564 |
| ENSMMUG00000052070 | caudal type homeobox 2 [Source:NCBI gene;Acc:711094]                                             | 0.643366774 | 0.004678745 | 0.016944424 |
| ENSMMUG00000016138 | ureidoimidazoline (2-oxo-4-hydroxy-4-carboxy-5-) decarboxylase [Source:NCBI gene;Acc:721710]     | 1.562057224 | 0.001147833 | 0.00508721  |

|                    |                                                                                                |   |             |             |             |
|--------------------|------------------------------------------------------------------------------------------------|---|-------------|-------------|-------------|
| ENSMMUG0000003771  | ubiquitin like 3 [Source:VGNC Symbol;Acc:VGNC:78701]                                           | - | 0.912076739 | 0.010064806 | 0.032593469 |
| ENSMMUG0000005365  |                                                                                                | - | 1.489309989 | 7.58E-05    | 0.000468191 |
| ENSMMUG0000005572  | arachidonate 5-lipoxygenase activating protein [Source:VGNC Symbol;Acc:VGNC:69799]             | - | 0.862255866 | 0.00045903  | 0.002298457 |
| ENSMMUG00000013707 | heat shock protein family H (Hsp110) member 1 [Source:NCBI gene;Acc:721956]                    | - | 0.758953933 | 1.59E-06    | 1.46E-05    |
| ENSMMUG00000013713 | beta 3-glucosyltransferase [Source:NCBI gene;Acc:713498]                                       | - | 1.75391169  | 3.16E-07    | 3.44E-06    |
| ENSMMUG00000007192 | FRY microtubule binding protein [Source:NCBI gene;Acc:713688]                                  | - | 1.213007121 | 0.000278807 | 0.001484079 |
| ENSMMUG00000038997 | zygote arrest 1 like [Source:NCBI gene;Acc:100427970]                                          | - | 3.083811167 | 7.99E-07    | 7.85E-06    |
| ENSMMUG00000007197 | BRCA2 DNA repair associated [Source:VGNC Symbol;Acc:VGNC:70279]                                | - | 0.925545761 | 9.00E-06    | 6.93E-05    |
| ENSMMUG00000007198 | NEDD4 binding protein 2 like 1 [Source:VGNC Symbol;Acc:VGNC:75017]                             | - | 1.617908664 | 0.000226881 | 0.00123573  |
| ENSMMUG00000007200 | NEDD4 binding protein 2 like 2 [Source:VGNC Symbol;Acc:VGNC:75031]                             | - | 1.680688468 | 2.73E-14    | 1.04E-12    |
| ENSMMUG00000049600 |                                                                                                | - | 1.22330491  | 0.003911744 | 0.014565835 |
| ENSMMUG00000055811 |                                                                                                | - | 1.766872397 | 2.96E-09    | 4.73E-08    |
| ENSMMUG00000007201 | PDS5 cohesin associated factor B [Source:VGNC Symbol;Acc:VGNC:75835]                           | - | 1.524038845 | 2.18E-11    | 5.13E-10    |
| ENSMMUG00000025050 | Y RNA [Source:RFAM;Acc:RF00019]                                                                | - | 2.189502766 | 5.82E-05    | 0.000370362 |
| ENSMMUG00000058110 |                                                                                                | - | 1.480467975 | 3.41E-07    | 3.69E-06    |
| ENSMMUG00000017052 | StAR related lipid transfer domain containing 13 [Source:VGNC Symbol;Acc:VGNC:77962]           | - | 0.437084265 | 0.000367144 | 0.001879285 |
| ENSMMUG00000054254 |                                                                                                | - | 3.057943898 | 0.001863252 | 0.007752173 |
| ENSMMUG00000019831 | neurobeachin [Source:NCBI gene;Acc:714386]                                                     | - | 2.366985468 | 9.91E-09    | 1.45E-07    |
| ENSMMUG00000016791 | doublecortin like kinase 1 [Source:VGNC Symbol;Acc:VGNC:71745]                                 | - | 2.460870298 | 1.42E-25    | 1.89E-23    |
| ENSMMUG00000060579 |                                                                                                | - | -2.07787144 | 0.00262262  | 0.010351622 |
| ENSMMUG00000001172 | spermatogenesis and oogenesis specific basic helix-loop-helix 2 [Source:NCBI gene;Acc:693608]  | - | 2.102567923 | 3.96E-07    | 4.21E-06    |
| ENSMMUG00000003585 | ALG5 dolichyl-phosphate beta-glucosyltransferase [Source:VGNC Symbol;Acc:VGNC:69647]           | - | 0.908987801 | 3.02E-06    | 2.60E-05    |
| ENSMMUG00000012307 | periostin [Source:VGNC Symbol;Acc:VGNC:76039]                                                  | - | -0.81550373 | 1.68E-09    | 2.82E-08    |
| ENSMMUG00000030786 | transient receptor potential cation channel subfamily C member 4 [Source:NCBI gene;Acc:695636] | - | -0.41080701 | 0.001587378 | 0.006753209 |
| ENSMMUG00000002113 | NHL repeat containing 3 [Source:VGNC Symbol;Acc:VGNC:75291]                                    | - | 1.280508506 | 2.33E-09    | 3.82E-08    |
| ENSMMUG00000002109 | proline and serine rich 1 [Source:VGNC Symbol;Acc:VGNC:76291]                                  | - | 0.846162643 | 1.45E-08    | 2.05E-07    |
| ENSMMUG00000052676 |                                                                                                | - | 1.201806582 | 4.31E-11    | 9.50E-10    |
| ENSMMUG00000011593 | regulator of cell cycle [Source:VGNC Symbol;Acc:VGNC:76783]                                    | - | 0.769181296 | 6.47E-05    | 0.000406069 |
| ENSMMUG00000055161 |                                                                                                | - | -2.11130789 | 0.000224449 | 0.001224321 |
| ENSMMUG00000023076 | diacylglycerol kinase eta [Source:VGNC Symbol;Acc:VGNC:71786]                                  | - | 1.189578288 | 6.77E-05    | 0.000422024 |
| ENSMMUG00000055887 |                                                                                                | - | 1.536807994 | 4.43E-05    | 0.000292514 |
| ENSMMUG00000023083 | A-kinase anchoring protein 11 [Source:VGNC Symbol;Acc:VGNC:69765]                              | - | 1.146502608 | 1.49E-05    | 0.000109106 |
| ENSMMUG00000054971 |                                                                                                | - | 1.492795693 | 0.015251203 | 0.045883017 |
| ENSMMUG00000002330 | ecto-NOX disulfide-thiol exchanger 1 [Source:VGNC Symbol;Acc:VGNC:72110]                       | - | 2.835957844 | 1.22E-17    | 7.05E-16    |
| ENSMMUG00000012636 | potassium channel tetramerization domain containing 4 [Source:VGNC Symbol;Acc:VGNC:73892]      | - | 0.692324343 | 0.013043261 | 0.04032927  |
| ENSMMUG00000011986 | chibby family member 2 [Source:VGNC Symbol;Acc:VGNC:78029]                                     | - | 0.888675692 | 0.000870177 | 0.004023464 |

|                    |                                                                                                 |             |             |             |
|--------------------|-------------------------------------------------------------------------------------------------|-------------|-------------|-------------|
| ENSMMUG00000017025 | zinc finger CCCH-type containing 13 [Source:VGNC Symbol;Acc:VGNC:79248]                         | 0.516450109 | 0.000731287 | 0.003449291 |
| ENSMMUG00000065094 |                                                                                                 | 1.418423798 | 0.000815455 | 0.003793368 |
| ENSMMUG00000059778 |                                                                                                 | 1.944106284 | 1.37E-05    | 0.000101519 |
| ENSMMUG00000063377 | cysteinyl leukotriene receptor 2 [Source:NCBI gene;Acc:705450]                                  | 1.080702309 | 0.003589481 | 0.013570946 |
| ENSMMUG00000023756 | fibronectin type III domain containing 3A [Source:VGNC Symbol;Acc:VGNC:72539]                   | 0.290342215 | 0.005343646 | 0.019020709 |
| ENSMMUG00000010898 | tripartite motif containing 13 [Source:VGNC Symbol;Acc:VGNC:79972]                              | 0.290049949 | 0.012603824 | 0.039204125 |
| ENSMMUG00000016530 | NIMA related kinase 3 [Source:VGNC Symbol;Acc:VGNC:75309]                                       | 1.942960801 | 0.007397797 | 0.02515597  |
| ENSMMUG00000018720 | cytoskeleton associated protein 2 [Source:VGNC Symbol;Acc:VGNC:71229]                           | 0.88464671  | 2.38E-06    | 2.09E-05    |
| ENSMMUG0000007379  | phosphatidylinositol 3,4,5-trisphosphate 3-phosphatase TPTE2-like [Source:NCBI gene;Acc:694255] | 0.812931022 | 5.90E-05    | 0.000374474 |
| ENSMMUG00000016401 | SGT1 homolog, MIS12 kinetochore complex assembly cochaperone [Source:NCBI gene;Acc:694046]      | 0.809215082 | 5.43E-06    | 4.41E-05    |
| ENSMMUG00000016404 | chondromodulin [Source:VGNC Symbol;Acc:VGNC:71191]                                              | 2.192274581 | 0.001806473 | 0.00755921  |
| ENSMMUG00000002657 | olfactomedin 4 [Source:VGNC Symbol;Acc:VGNC:75418]                                              | 1.543976588 | 7.20E-08    | 8.87E-07    |
| ENSMMUG00000055156 |                                                                                                 | 0.770876144 | 0.011145853 | 0.035423538 |
| ENSMMUG00000054675 |                                                                                                 | -0.586572   | 0.014646115 | 0.044430421 |
| ENSMMUG00000021197 | TBC1 domain family member 4 [Source:VGNC Symbol;Acc:VGNC:78166]                                 | 1.454305907 | 0.000198422 | 0.001097171 |
| ENSMMUG00000046375 |                                                                                                 | 1.122066617 | 0.000287417 | 0.001522104 |
| ENSMMUG00000061846 |                                                                                                 | 0.397942989 | 0.007223618 | 0.024603969 |
| ENSMMUG00000056466 |                                                                                                 | 0.382441769 | 0.012714217 | 0.039467558 |
| ENSMMUG00000021459 | MYC binding protein 2 [Source:VGNC Symbol;Acc:VGNC:75011]                                       | 1.020418077 | 4.70E-05    | 0.000307313 |
| ENSMMUG00000054625 |                                                                                                 | -0.5088057  | 0.001358836 | 0.005896537 |
| ENSMMUG00000054008 |                                                                                                 | 3.877674812 | 0.007119741 | 0.024278602 |
| ENSMMUG00000054711 |                                                                                                 | 1.537555617 | 4.80E-11    | 1.05E-09    |
| ENSMMUG00000022744 | muscleblind like splicing regulator 2 [Source:VGNC Symbol;Acc:VGNC:74519]                       | 0.481287073 | 0.000547992 | 0.002677701 |
| ENSMMUG00000009890 | FERM, ARH/RhoGEF and pleckstrin domain protein 1 [Source:VGNC Symbol;Acc:VGNC:72614]            | 1.106808202 | 9.64E-25    | 1.13E-22    |
| ENSMMUG00000009173 | serine/threonine kinase 24 [Source:VGNC Symbol;Acc:VGNC:81583]                                  | 0.638637516 | 0.000204691 | 0.001127117 |
| ENSMMUG00000001402 | solute carrier family 15 member 1 [Source:VGNC Symbol;Acc:VGNC:77393]                           | 2.840112992 | 0.000392377 | 0.001995096 |
| ENSMMUG00000012332 | UBA domain containing 2 [Source:NCBI gene;Acc:703484]                                           | 0.887380007 | 5.00E-10    | 9.35E-09    |
| ENSMMUG00000060781 | G protein-coupled receptor 18 [Source:NCBI gene;Acc:698714]                                     | 0.716215343 | 0.011087143 | 0.03527551  |
| ENSMMUG00000012338 | G protein-coupled receptor 183 [Source:VGNC Symbol;Acc:VGNC:73042]                              | 0.864973913 | 1.54E-06    | 1.43E-05    |
| ENSMMUG00000019556 | transmembrane 9 superfamily member 2 [Source:VGNC Symbol;Acc:VGNC:78568]                        | 0.529652887 | 4.06E-05    | 0.000270086 |
| ENSMMUG00000004493 | propionyl-CoA carboxylase subunit alpha [Source:VGNC Symbol;Acc:VGNC:75773]                     | 1.081111489 | 9.37E-05    | 0.000563371 |
| ENSMMUG00000050578 |                                                                                                 | 1.027374539 | 0.00765059  | 0.025870348 |
| ENSMMUG00000015856 | sodium leak channel, non-selective [Source:VGNC Symbol;Acc:VGNC:74991]                          | 1.201032802 | 0.009866195 | 0.032070606 |
| ENSMMUG00000002875 | fibroblast growth factor 14 [Source:VGNC Symbol;Acc:VGNC:72645]                                 | 3.438800676 | 0.011998449 | 0.037631381 |
| ENSMMUG00000052642 | protein O-glucosyltransferase 2 [Source:NCBI gene;Acc:702156]                                   | 1.779111684 | 5.63E-06    | 4.56E-05    |
| ENSMMUG00000000350 | basic, immunoglobulin-like variable motif containing [Source:NCBI gene;Acc:100426213]           | 0.485534764 | 0.012887679 | 0.03994631  |



|                    |                                                                                           |   |             |             |             |
|--------------------|-------------------------------------------------------------------------------------------|---|-------------|-------------|-------------|
| ENSMMUG0000000353  | putative methyltransferase-like protein 21E pseudogene [Source:NCBI gene;Acc:707949]      | - | 0.532623268 | 0.010411672 | 0.033522908 |
| ENSMMUG00000054803 |                                                                                           |   | 0.876510294 | 0.001318724 | 0.005748213 |
| ENSMMUG00000022282 | collagen type IV alpha 2 chain [Source:NCBI gene;Acc:100429807]                           |   | 4.554277843 | 1.07E-06    | 1.03E-05    |
| ENSMMUG00000022818 | inhibitor of growth family member 1 [Source:VGNC Symbol;Acc:VGNC:73742]                   |   | 3.851974685 | 0.000259522 | 0.001390593 |
| ENSMMUG00000064401 |                                                                                           |   | 3.339996312 | 6.28E-05    | 0.00039603  |
| ENSMMUG00000018929 | ankyrin repeat domain 10 [Source:VGNC Symbol;Acc:VGNC:69646]                              |   | 0.401720817 | 0.001046435 | 0.004704151 |
| ENSMMUG00000013138 | Rho guanine nucleotide exchange factor 7 [Source:VGNC Symbol;Acc:VGNC:69833]              |   | 0.992469149 | 1.43E-08    | 2.03E-07    |
| ENSMMUG00000056306 |                                                                                           |   | 1.259122631 | 3.03E-08    | 3.99E-07    |
| ENSMMUG00000048566 | MCF.2 cell line derived transforming sequence like [Source:NCBI gene;Acc:713961]          |   | 1.292577829 | 1.87E-11    | 4.46E-10    |
| ENSMMUG00000001036 | coagulation factor VII [Source:VGNC Symbol;Acc:VGNC:72466]                                |   | 1.262564017 | 7.37E-11    | 1.58E-09    |
| ENSMMUG00000016740 | defective in cullin neddylation 1 domain containing 2 [Source:VGNC Symbol;Acc:VGNC:71684] |   | -0.38634095 | 2.22E-05    | 0.000156944 |
| ENSMMUG00000007423 | transcription factor Dp-1 [Source:NCBI gene;Acc:715345]                                   |   | 1.803552153 | 3.49E-15    | 1.51E-13    |
| ENSMMUG00000050639 | transmembrane protein 255B [Source:NCBI gene;Acc:715939]                                  |   | 0.515544327 | 0.004947973 | 0.017808538 |
| ENSMMUG00000054800 | chromosome 17 C13orf46 homolog [Source:NCBI gene;Acc:106994405]                           |   | 0.434683982 | 0.007734543 | 0.026069338 |
| ENSMMUG00000023599 | chromosome alignment maintaining phosphoprotein 1 [Source:VGNC Symbol;Acc:VGNC:71061]     |   | 0.950469936 | 6.40E-09    | 9.73E-08    |
| ENSMMUG00000005222 | double C2 domain beta [Source:VGNC Symbol;Acc:VGNC:71964]                                 |   | 2.072551305 | 0.010319094 | 0.033268724 |
| ENSMMUG00000003042 | VPS53 subunit of GARP complex [Source:VGNC Symbol;Acc:VGNC:79522]                         |   | 0.88614668  | 0.004050799 | 0.014991463 |
| ENSMMUG00000055344 | TLC domain containing 3A [Source:NCBI gene;Acc:699707]                                    |   | 1.561634136 | 3.29E-13    | 1.02E-11    |
| ENSMMUG00000030401 | gem nuclear organelle associated protein 4 [Source:VGNC Symbol;Acc:VGNC:72723]            |   | 0.720060315 | 0.001422473 | 0.006130594 |
| ENSMMUG00000011417 | glyoxalase domain containing 4 [Source:VGNC Symbol;Acc:VGNC:72939]                        |   | 0.573308114 | 2.99E-05    | 0.00020424  |
| ENSMMUG00000008130 | ABR activator of RhoGEF and GTPase [Source:VGNC Symbol;Acc:VGNC:69589]                    |   | 0.610518642 | 1.38E-09    | 2.36E-08    |
| ENSMMUG00000002371 | myosin IC [Source:VGNC Symbol;Acc:VGNC:75112]                                             |   | 0.556249227 | 0.000769975 | 0.003606032 |
| ENSMMUG00000055241 |                                                                                           |   | 0.741580245 | 4.15E-06    | 3.46E-05    |
| ENSMMUG00000040268 | phosphatidylinositol transfer protein alpha [Source:NCBI gene;Acc:721228]                 |   | 0.687896051 | 0.002194918 | 0.008947705 |
| ENSMMUG00000017561 | solute carrier family 43 member 2 [Source:VGNC Symbol;Acc:VGNC:77554]                     |   | 0.972655142 | 7.53E-06    | 5.91E-05    |
| ENSMMUG00000039266 | Metazoan signal recognition particle RNA [Source:RFAM;Acc:RF00017]                        |   | 1.461403247 | 0.000267212 | 0.001428139 |
| ENSMMUG00000002376 | scavenger receptor class F member 1 [Source:VGNC Symbol;Acc:VGNC:77027]                   |   | 1.738621902 | 2.89E-09    | 4.63E-08    |
| ENSMMUG00000002377 | Rab interacting lysosomal protein [Source:VGNC Symbol;Acc:VGNC:76866]                     |   | 1.371322591 | 5.19E-05    | 0.000335055 |
| ENSMMUG00000004820 | pre-mRNA processing factor 8 [Source:VGNC Symbol;Acc:VGNC:76275]                          |   | 1.070405671 | 7.12E-09    | 1.07E-07    |
| ENSMMUG00000002380 | WD repeat domain 81 [Source:NCBI gene;Acc:721254]                                         |   | 0.361787581 | 0.005278054 | 0.018814878 |
| ENSMMUG00000002382 | serpin family F member 2 [Source:VGNC Symbol;Acc:VGNC:77372]                              |   | 1.014491357 | 2.74E-05    | 0.000189075 |
| ENSMMUG00000017518 | small G protein signaling modulator 2 [Source:NCBI gene;Acc:703543]                       |   | 0.437417519 | 0.002229051 | 0.009062805 |
| ENSMMUG00000053298 |                                                                                           |   | 0.865534033 | 8.54E-06    | 6.61E-05    |
| ENSMMUG00000020527 | clustered mitochondria homolog [Source:VGNC Symbol;Acc:VGNC:71370]                        |   | 0.672506416 | 0.000201965 | 0.001114217 |
| ENSMMUG00000022989 | RAP1 GTPase activating protein 2 [Source:VGNC Symbol;Acc:VGNC:76561]                      |   | 0.908616933 | 1.47E-05    | 0.000108135 |
| ENSMMUG00000061370 |                                                                                           |   | 1.633090029 | 0.01682958  | 0.049756274 |
| ENSMMUG00000030389 |                                                                                           |   | 1.54218667  | 1.27E-06    | 1.20E-05    |
| ENSMMUG00000062583 | olfactory receptor 1A1 [Source:NCBI gene;Acc:721403]                                      |   | 1.330814575 | 2.07E-11    | 4.91E-10    |
| ENSMMUG00000012825 | olfactory receptor 1A2 [Source:NCBI gene;Acc:100429763]                                   |   | 1.344966261 | 0.002463448 | 0.009840929 |
| ENSMMUG00000042407 |                                                                                           |   | 1.183007051 | 0.000671271 | 0.003204686 |
| ENSMMUG00000055048 |                                                                                           |   | 1.120256308 | 6.96E-12    | 1.78E-10    |

|                    |                                                                                        |             |             |             |
|--------------------|----------------------------------------------------------------------------------------|-------------|-------------|-------------|
| ENSMMUG0000008556  | integrin subunit alpha E [Source:NCBI gene;Acc:721483]                                 | 0.545370501 | 4.99E-05    | 0.000324117 |
| ENSMMUG00000063482 |                                                                                        | -           | -           | -           |
| ENSMMUG00000057632 |                                                                                        | 0.836794353 | 0.00329879  | 0.012639058 |
|                    |                                                                                        | 3.946149061 | 2.52E-26    | 3.70E-24    |
|                    |                                                                                        | -           | -           | -           |
| ENSMMUG00000058966 |                                                                                        | 0.871676119 | 0.000473019 | 0.002355697 |
| ENSMMUG0000005080  | ubiquitin conjugating enzyme E2 G1 [Source:VGNC Symbol;Acc:VGNC:78695]                 | 0.812069969 | 6.32E-08    | 7.86E-07    |
| ENSMMUG00000060937 | Metazoan signal recognition particle RNA [Source:RFAM;Acc:RF00017]                     | 1.561343433 | 0.007704687 | 0.026016966 |
| ENSMMUG00000030381 | arachidonate 15-lipoxygenase [Source:VGNC Symbol;Acc:VGNC:69796]                       | -1.42888285 | 7.34E-08    | 9.03E-07    |
| ENSMMUG00000017654 | arrestin beta 2 [Source:VGNC Symbol;Acc:VGNC:70022]                                    | 1.462974448 | 0.000708913 | 0.003356331 |
| ENSMMUG00000049649 | proteasome 20S subunit beta 6 [Source:NCBI gene;Acc:710028]                            | 1.076723194 | 1.30E-09    | 2.24E-08    |
| ENSMMUG00000061951 |                                                                                        | 1.326339481 | 4.24E-05    | 0.000281041 |
| ENSMMUG0000005666  | phospholipase D2 [Source:VGNC Symbol;Acc:VGNC:76172]                                   | 1.878412135 | 5.54E-14    | 1.98E-12    |
| ENSMMUG00000012040 | enolase 3 [Source:VGNC Symbol;Acc:VGNC:72220]                                          | 2.355630088 | 0.007804649 | 0.026250852 |
| ENSMMUG00000009176 | calmodulin binding transcription activator 2 [Source:VGNC Symbol;Acc:VGNC:70578]       | 0.719830323 | 0.000162266 | 0.000917488 |
| ENSMMUG00000011344 | solute carrier family 52 member 1 [Source:VGNC Symbol;Acc:VGNC:77795]                  | 3.235161186 | 1.09E-06    | 1.04E-05    |
| ENSMMUG00000018648 | zinc finger protein 594 [Source:NCBI gene;Acc:711492]                                  | 0.720101196 | 0.001873477 | 0.007792487 |
|                    |                                                                                        | -           | -           | -           |
| ENSMMUG00000058586 |                                                                                        | 0.998265617 | 0.012671051 | 0.039350368 |
| ENSMMUG00000006592 | complement C1q binding protein [Source:NCBI gene;Acc:711817]                           | -0.46516478 | 0.014040984 | 0.042917111 |
| ENSMMUG00000006594 | DEAH-box helicase 33 [Source:VGNC Symbol;Acc:VGNC:71633]                               | -0.47779755 | 0.000250478 | 0.001347096 |
|                    |                                                                                        | -           | -           | -           |
| ENSMMUG00000006599 | derlin 2 [Source:VGNC Symbol;Acc:VGNC:71654]                                           | 0.444646734 | 0.00088142  | 0.004067684 |
|                    |                                                                                        | -           | -           | -           |
| ENSMMUG00000046195 | MIS12 kinetochore complex component [Source:NCBI gene;Acc:712202]                      | 0.515718119 | 0.003769876 | 0.01414263  |
|                    |                                                                                        | -           | -           | -           |
| ENSMMUG00000043771 | uncharacterized LOC712349 [Source:NCBI gene;Acc:712349]                                | 0.969929261 | 0.004435824 | 0.016210049 |
|                    |                                                                                        | -           | -           | -           |
| ENSMMUG00000030453 | NLR family pyrin domain containing 1 [Source:NCBI gene;Acc:721648]                     | 0.741746963 | 1.90E-08    | 2.61E-07    |
| ENSMMUG00000064520 |                                                                                        | 4.078936156 | 3.23E-07    | 3.51E-06    |
| ENSMMUG00000010536 | discs large MAGUK scaffold protein 4 [Source:VGNC Symbol;Acc:VGNC:71920]               | 0.948690568 | 1.72E-13    | 5.61E-12    |
|                    |                                                                                        | -           | -           | -           |
| ENSMMUG00000052091 | dishevelled segment polarity protein 2 [Source:NCBI gene;Acc:714381]                   | 0.985230804 | 0.00876816  | 0.029081164 |
|                    |                                                                                        | -           | -           | -           |
| ENSMMUG00000010543 | PHD finger protein 23 [Source:VGNC Symbol;Acc:VGNC:75877]                              | 2.856718052 | 1.69E-06    | 1.54E-05    |
| ENSMMUG00000064650 | SPEM family member 3 [Source:NCBI gene;Acc:106993878]                                  | 0.846624699 | 3.58E-14    | 1.35E-12    |
|                    |                                                                                        | -           | -           | -           |
| ENSMMUG00000006327 | tumor necrosis factor (ligand) superfamily, member 12 [Source:NCBI gene;Acc:100551506] | 0.580816847 | 1.23E-08    | 1.77E-07    |
| ENSMMUG00000006332 | SUMO specific peptidase 3 [Source:NCBI gene;Acc:715884]                                | 0.669184687 | 0.000964194 | 0.004387972 |
| ENSMMUG00000013501 | CD68 molecule [Source:VGNC Symbol;Acc:VGNC:82121]                                      | -2.29039372 | 2.01E-07    | 2.28E-06    |
|                    |                                                                                        | -           | -           | -           |
| ENSMMUG00000013503 | mannose-P-dolichol utilization defect 1 [Source:VGNC Symbol;Acc:VGNC:74913]            | 1.618185838 | 1.96E-06    | 1.75E-05    |
|                    |                                                                                        | -           | -           | -           |
| ENSMMUG00000013510 | FMR1 autosomal homolog 2 [Source:NCBI gene;Acc:721889]                                 | 0.582777336 | 0.009442964 | 0.030924165 |
|                    |                                                                                        | -           | -           | -           |
| ENSMMUG00000013513 | sex hormone binding globulin [Source:VGNC Symbol;Acc:VGNC:77208]                       | 1.150539428 | 4.01E-05    | 0.000266995 |
| ENSMMUG00000008639 | tumor protein p53 [Source:VGNC Symbol;Acc:VGNC:78627]                                  | -1.07721681 | 1.00E-06    | 9.68E-06    |
| ENSMMUG00000008637 | WD repeat containing antisense to TP53 [Source:VGNC Symbol;Acc:VGNC:79508]             | 0.807428703 | 0.001155478 | 0.005113832 |
| ENSMMUG00000048204 | ephrin B3 [Source:NCBI gene;Acc:716257]                                                | 1.216863522 | 5.69E-07    | 5.83E-06    |
|                    |                                                                                        | -           | -           | -           |
| ENSMMUG00000008173 | lysine demethylase 6B [Source:VGNC Symbol;Acc:VGNC:73923]                              | 2.048610383 | 0.006750056 | 0.023175618 |
|                    |                                                                                        | -           | -           | -           |
| ENSMMUG00000063668 | cytochrome b5 domain containing 1 [Source:NCBI gene;Acc:716429]                        | 1.335757057 | 1.70E-05    | 0.000122992 |
| ENSMMUG00000009995 | arachidonate 15-lipoxygenase type B [Source:VGNC Symbol;Acc:VGNC:69797]                | 1.182468396 | 1.57E-07    | 1.83E-06    |

|                    |                                                                                                    |             |             |             |
|--------------------|----------------------------------------------------------------------------------------------------|-------------|-------------|-------------|
| ENSMMUG00000065208 |                                                                                                    | 0.920230099 | 0.002243128 | 0.009108477 |
| ENSMMUG00000020329 | arachidonate 12-lipoxygenase, 12R type [Source:NCBI gene;Acc:721936]                               | 0.891241363 | 0.01679891  | 0.049694239 |
| ENSMMUG00000019850 | arachidonate lipoxygenase 3 [Source:VGNC Symbol;Acc:VGNC:69607]                                    | 1.800255751 | 2.00E-35    | 8.79E-33    |
| ENSMMUG00000021798 | period circadian regulator 1 [Source:VGNC Symbol;Acc:VGNC:75942]                                   | 0.484719437 | 0.008580228 | 0.028535982 |
| ENSMMUG00000021938 | nudE neurodevelopment protein 1 like 1 [Source:VGNC Symbol;Acc:VGNC:74982]                         | 0.757570638 | 6.72E-05    | 0.000419255 |
| ENSMMUG00000055290 | netrin 1 [Source:NCBI gene;Acc:717645]                                                             | 1.001507667 | 6.09E-07    | 6.20E-06    |
| ENSMMUG00000051001 |                                                                                                    | 2.514274597 | 0.002049295 | 0.008439264 |
| ENSMMUG00000060042 |                                                                                                    | -0.94551643 | 0.002380035 | 0.009547068 |
| ENSMMUG00000016723 | zinc finger protein 287 [Source:NCBI gene;Acc:695524]                                              | 1.285972883 | 0.000122915 | 0.00071731  |
| ENSMMUG00000064698 |                                                                                                    | 1.184476086 | 0.012612673 | 0.039210956 |
| ENSMMUG00000013345 | folliculin [Source:NCBI gene;Acc:698082]                                                           | 2.245506456 | 0.001302285 | 0.005681667 |
| ENSMMUG00000021091 | COP9 signalosome subunit 3 [Source:VGNC Symbol;Acc:VGNC:71316]                                     | 2.359995305 | 7.50E-06    | 5.90E-05    |
| ENSMMUG00000038569 | 5',3'-nucleotidase, mitochondrial [Source:NCBI gene;Acc:698591]                                    | 0.860625569 | 0.000390171 | 0.001984573 |
| ENSMMUG00000006491 | mediator complex subunit 9 [Source:VGNC Symbol;Acc:VGNC:74577]                                     | 0.885017536 | 0.000337982 | 0.001747865 |
| ENSMMUG00000006493 | ras related dexamethasone induced 1 [Source:VGNC Symbol;Acc:VGNC:76485]                            | -1.03998757 | 1.89E-09    | 3.14E-08    |
| ENSMMUG00000023375 | sterol regulatory element binding transcription factor 1 [Source:VGNC Symbol;Acc:VGNC:77880]       | 0.727339636 | 0.000998033 | 0.00452129  |
| ENSMMUG00000003349 | target of myb1 like 2 membrane trafficking protein [Source:VGNC Symbol;Acc:VGNC:78617]             | -1.59299704 | 0.010031589 | 0.032514873 |
| ENSMMUG00000002942 | dynein regulatory complex subunit 3 [Source:VGNC Symbol;Acc:VGNC:71906]                            | 1.168376274 | 0.010844537 | 0.034644029 |
| ENSMMUG00000005900 | GID complex subunit 4 homolog [Source:NCBI gene;Acc:699842]                                        | 1.119623958 | 0.002231585 | 0.009069207 |
| ENSMMUG00000021409 | developmentally regulated GTP binding protein 2 [Source:VGNC Symbol;Acc:VGNC:71993]                | 1.109732359 | 2.56E-05    | 0.000178178 |
| ENSMMUG00000018344 | myosin XVA [Source:VGNC Symbol;Acc:VGNC:75109]                                                     | 0.726006423 | 5.10E-07    | 5.29E-06    |
| ENSMMUG00000056257 |                                                                                                    | 0.919669208 | 7.85E-05    | 0.000482254 |
| ENSMMUG00000053675 |                                                                                                    | 0.971178888 | 4.15E-06    | 3.46E-05    |
| ENSMMUG00000005323 | phosphoribosyl pyrophosphate synthetase associated protein 2 [Source:VGNC Symbol;Acc:VGNC:76430]   | 0.555274235 | 1.36E-06    | 1.27E-05    |
| ENSMMUG00000051798 | Small nucleolar RNA U3 [Source:RFAM;Acc:RF00012]                                                   | 3.502890223 | 0.001035153 | 0.004663161 |
| ENSMMUG00000000140 | epsin 2 [Source:VGNC Symbol;Acc:VGNC:72070]                                                        | 0.660372344 | 0.010093624 | 0.032657692 |
| ENSMMUG00000008536 | mitogen-activated protein kinase 7 [Source:VGNC Symbol;Acc:VGNC:74648]                             | 1.809632952 | 8.62E-05    | 0.000523237 |
| ENSMMUG00000008538 | microfibril associated protein 4 [Source:VGNC Symbol;Acc:VGNC:74710]                               | 1.399809024 | 0.006456888 | 0.022284847 |
| ENSMMUG00000008540 | ring finger protein 112 [Source:VGNC Symbol;Acc:VGNC:76724]                                        | 1.833604869 | 9.36E-06    | 7.19E-05    |
| ENSMMUG00000051286 |                                                                                                    | 0.945786727 | 0.00283466  | 0.011071321 |
| ENSMMUG00000030279 | A-kinase anchoring protein 10 [Source:VGNC Symbol;Acc:VGNC:69764]                                  | 1.637681434 | 1.45E-06    | 1.35E-05    |
| ENSMMUG00000018579 | sperm antigen with calponin homology and coiled-coil domains 1 [Source:VGNC Symbol;Acc:VGNC:78021] | 0.436508781 | 0.001035775 | 0.004664516 |
| ENSMMUG00000024170 | U6 spliceosomal RNA [Source:RFAM;Acc:RF00026]                                                      | 1.034882357 | 7.29E-06    | 5.76E-05    |
| ENSMMUG00000060502 |                                                                                                    | 1.319539582 | 5.32E-08    | 6.75E-07    |
| ENSMMUG00000061335 |                                                                                                    | 1.290104154 | 1.73E-07    | 1.99E-06    |

|                    |                                                                                                         |             |             |             |
|--------------------|---------------------------------------------------------------------------------------------------------|-------------|-------------|-------------|
| ENSMMUG00000020226 | WD repeat and SOCS box containing 1 [Source:VGNC Symbol;Acc:VGNC:79186]                                 | 0.799070039 | 1.61E-05    | 0.000117074 |
| ENSMMUG00000054784 |                                                                                                         | 0.738590376 | 0.000178791 | 0.000999762 |
| ENSMMUG00000065113 |                                                                                                         | 0.626468177 | 0.009518967 | 0.031116982 |
| ENSMMUG00000061698 |                                                                                                         | 0.424277593 | 0.000374359 | 0.001910837 |
|                    |                                                                                                         | -           |             |             |
| ENSMMUG00000051341 |                                                                                                         | 0.745000411 | 0.00166845  | 0.007058864 |
| ENSMMUG00000018719 | nemo like kinase [Source:VGNC Symbol;Acc:VGNC:75277]                                                    | 1.417126803 | 1.57E-20    | 1.28E-18    |
|                    |                                                                                                         | -           |             |             |
| ENSMMUG00000063312 |                                                                                                         | 0.914501463 | 2.12E-05    | 0.000150081 |
| ENSMMUG00000054461 | transmembrane protein 97 [Source:NCBI gene;Acc:707879]                                                  | -1.18418285 | 0.007975013 | 0.026731098 |
|                    |                                                                                                         | -           |             |             |
| ENSMMUG00000019145 | TNF alpha induced protein 1 [Source:VGNC Symbol;Acc:VGNC:78578]                                         | 1.028088192 | 1.98E-05    | 0.000140948 |
|                    |                                                                                                         | -           |             |             |
| ENSMMUG00000019146 | DNA polymerase delta interacting protein 2 [Source:VGNC Symbol;Acc:VGNC:76099]                          | 0.770112148 | 0.000304591 | 0.001596768 |
|                    |                                                                                                         | -           |             |             |
| ENSMMUG00000019148 | vitronectin [Source:NCBI gene;Acc:708499]                                                               | 1.087130339 | 9.02E-05    | 0.000545336 |
|                    |                                                                                                         | -           |             |             |
| ENSMMUG00000012240 | phosphatidylinositol glycan anchor biosynthesis class S [Source:VGNC Symbol;Acc:VGNC:75800]             | 0.550396502 | 0.006757408 | 0.023195381 |
| ENSMMUG00000053611 | stromal cell derived factor 2 [Source:NCBI gene;Acc:716189]                                             | 2.24623494  | 0.001522279 | 0.006504811 |
|                    |                                                                                                         | -           |             |             |
| ENSMMUG00000004708 | SPT6 homolog, histone chaperone and transcription elongation factor [Source:VGNC Symbol;Acc:VGNC:78057] | 0.529365526 | 0.001084256 | 0.004842345 |
|                    |                                                                                                         | -           |             |             |
| ENSMMUG00000007293 | RAB34, member RAS oncogene family [Source:VGNC Symbol;Acc:VGNC:81533]                                   | 0.586985142 | 0.007176311 | 0.024465768 |
|                    |                                                                                                         | -           |             |             |
| ENSMMUG00000026204 | Small nucleolar RNA SNORD42 [Source:RFAM;Acc:RF00150]                                                   | 0.477291266 | 0.014435105 | 0.043881874 |
|                    |                                                                                                         | -           |             |             |
| ENSMMUG00000051743 | TLC domain containing 1 [Source:NCBI gene;Acc:710391]                                                   | 0.472338098 | 0.0133767   | 0.041216001 |
| ENSMMUG00000021408 | family with sequence similarity 222 member B [Source:VGNC Symbol;Acc:VGNC:72352]                        | 0.735988199 | 1.85E-05    | 0.00013274  |
| ENSMMUG00000012523 | flotillin 2 [Source:NCBI gene;Acc:114669752]                                                            | 0.91540698  | 5.05E-08    | 6.42E-07    |
| ENSMMUG00000021553 | dehydrogenase/reductase 13 [Source:VGNC Symbol;Acc:VGNC:81387]                                          | 0.913297936 | 3.16E-09    | 5.04E-08    |
| ENSMMUG00000021554 | PHD finger protein 12 [Source:VGNC Symbol;Acc:VGNC:75838]                                               | 0.913011793 | 2.70E-08    | 3.60E-07    |
| ENSMMUG00000009938 | myosin XVIII A [Source:VGNC Symbol;Acc:VGNC:75058]                                                      | 0.505030992 | 4.88E-06    | 4.01E-05    |
| ENSMMUG00000019667 | TAO kinase 1 [Source:VGNC Symbol;Acc:VGNC:81591]                                                        | 1.277876132 | 0.000150883 | 0.000861167 |
| ENSMMUG00000057447 |                                                                                                         | 4.528687715 | 7.05E-05    | 0.000437659 |
| ENSMMUG00000014409 | ankyrin repeat domain 13B [Source:VGNC Symbol;Acc:VGNC:69708]                                           | 0.756490967 | 0.001404814 | 0.006063472 |
| ENSMMUG00000014413 | slingshot protein phosphatase 2 [Source:VGNC Symbol;Acc:VGNC:78018]                                     | 0.379184931 | 0.001092993 | 0.004870889 |
|                    |                                                                                                         | -           |             |             |
| ENSMMUG00000060080 | U6 spliceosomal RNA [Source:RFAM;Acc:RF00026]                                                           | 1.013757496 | 0.001784988 | 0.007484389 |
| ENSMMUG00000037644 | carboxypeptidase D [Source:NCBI gene;Acc:712407]                                                        | 0.559540244 | 0.015005451 | 0.045303061 |
|                    |                                                                                                         | -           |             |             |
| ENSMMUG00000023698 | golgi SNAP receptor complex member 1 [Source:VGNC Symbol;Acc:VGNC:73110]                                | 0.635322843 | 3.62E-06    | 3.06E-05    |
| ENSMMUG00000001116 | SUZ12 polycomb repressive complex 2 subunit [Source:VGNC Symbol;Acc:VGNC:78144]                         | 4.023639793 | 0.000114184 | 0.000671207 |
|                    |                                                                                                         | -           |             |             |
| ENSMMUG00000014689 | myosin ID [Source:VGNC Symbol;Acc:VGNC:75113]                                                           | 0.764160688 | 0.001662739 | 0.0070388   |
| ENSMMUG00000059292 |                                                                                                         | 0.669242581 | 6.18E-07    | 6.26E-06    |
| ENSMMUG00000011411 | sperm acrosome associated 3 [Source:VGNC Symbol;Acc:VGNC:77930]                                         | 2.464293199 | 3.19E-18    | 1.96E-16    |
| ENSMMUG00000002324 |                                                                                                         | 0.925223876 | 1.17E-07    | 1.39E-06    |
|                    |                                                                                                         | -           |             |             |
| ENSMMUG00000009782 | C-C motif chemokine ligand 7 [Source:NCBI gene;Acc:714751]                                              | 1.372593037 | 0.000285561 | 0.00151393  |
| ENSMMUG00000006399 | chaperonin containing TCP1 subunit 6B [Source:VGNC Symbol;Acc:VGNC:70748]                               | 0.419706818 | 7.73E-07    | 7.63E-06    |
| ENSMMUG00000004794 | DNA ligase 3 [Source:VGNC Symbol;Acc:VGNC:74266]                                                        | 2.51012255  | 1.67E-09    | 2.81E-08    |
|                    |                                                                                                         | -           |             |             |
| ENSMMUG00000005170 | unc-45 myosin chaperone B [Source:VGNC Symbol;Acc:VGNC:78954]                                           | 1.140185815 | 2.46E-05    | 0.000171972 |
| ENSMMUG00000037555 | schlafen family member 11 [Source:NCBI gene;Acc:715511]                                                 | 1.539859708 | 0.013460572 | 0.041448069 |

|                      |                                                                                                 |   |             |             |             |
|----------------------|-------------------------------------------------------------------------------------------------|---|-------------|-------------|-------------|
| ENSMMUG00000060439   | schlafen family member 12 like [Source:NCBI gene;Acc:106992394]                                 | - | 0.812339046 | 0.00071992  | 0.003400089 |
| ENSMMUG00000031736   |                                                                                                 | - | 2.630630164 | 0.001426159 | 0.006142836 |
| ENSMMUG00000026432   | small nucleolar RNA, C/D box 7 [Source:HGNC Symbol;Acc:HGNC:32704]                              | - | 3.463528319 | 0.000717159 | 0.00338925  |
| ENSMMUG00000006048   | adaptor related protein complex 2 subunit beta 1 [Source:VGNC Symbol;Acc:VGNC:69964]            | - | 0.790107168 | 1.07E-05    | 8.17E-05    |
| ENSMMUG000000050758  |                                                                                                 | - | 1.601332924 | 0.002024012 | 0.008351705 |
| ENSMMUG000000062497  |                                                                                                 | - | 1.274539332 | 0.002290534 | 0.009262319 |
| ENSMMUG000000054472  |                                                                                                 | - | 1.072484118 | 2.96E-05    | 0.000202427 |
| ENSMMUG000000054210  | C-C motif chemokine 4 [Source:NCBI gene;Acc:100426632]                                          | - | 1.242272435 | 1.28E-21    | 1.15E-19    |
| ENSMMUG000000058233  | C-C motif chemokine 3-like [Source:NCBI gene;Acc:100426537]                                     | - | 1.838092854 | 0.001623244 | 0.006893504 |
| ENSMMUG000000061594  |                                                                                                 | - | 1.994181251 | 4.49E-05    | 0.000295925 |
| ENSMMUG000000052786  |                                                                                                 | - | -1.7106908  | 0.000249875 | 0.001344349 |
| ENSMMUG000000000620  | dehydrogenase/reductase 11 [Source:VGNC Symbol;Acc:VGNC:71792]                                  | - | 1.204935816 | 0.000158251 | 0.000898281 |
| ENSMMUG000000000618  | gametogenetin binding protein 2 [Source:VGNC Symbol;Acc:VGNC:72746]                             | - | 1.084800322 | 0.00023643  | 0.001279114 |
| ENSMMUG000000051190  | Metazoan signal recognition particle RNA [Source:RFAM;Acc:RF00017]                              | - | -2.03310578 | 8.81E-05    | 0.000533901 |
| ENSMMUG000000007920  | myosin XIX [Source:VGNC Symbol;Acc:VGNC:75026]                                                  | - | 1.113470587 | 1.33E-07    | 1.57E-06    |
| ENSMMUG000000007923  | phosphatidylinositol glycan anchor biosynthesis class W [Source:VGNC Symbol;Acc:VGNC:75850]     | - | 0.842478423 | 0.000399949 | 0.002029338 |
| ENSMMUG000000053845  |                                                                                                 | - | 0.696034061 | 0.003151166 | 0.012131488 |
| ENSMMUG000000007917  | carbonic anhydrase 4 [Source:NCBI gene;Acc:716919]                                              | - | 0.860013091 | 0.000284518 | 0.00151116  |
| ENSMMUG000000017113  | ubiquitin specific peptidase 32 [Source:NCBI gene;Acc:716857]                                   | - | 1.206103052 | 8.44E-19    | 5.73E-17    |
| ENSMMUG000000052977  | putative protein FAM106C [Source:NCBI gene;Acc:106994084]                                       | - | 1.055528733 | 7.94E-08    | 9.69E-07    |
| ENSMMUG000000065117  | septin 4 [Source:HGNC Symbol;Acc:HGNC:9165]                                                     | - | 1.164364384 | 2.74E-07    | 3.02E-06    |
| ENSMMUG000000008423  | septin 4 [Source:NCBI gene;Acc:714724]                                                          | - | 0.749719377 | 1.22E-10    | 2.51E-09    |
| ENSMMUG000000007004  | ring finger protein 43 [Source:NCBI gene;Acc:710124]                                            | - | 0.761747042 | 0.016617801 | 0.049300606 |
| ENSMMUG000000056064  | serine and arginine rich splicing factor 1 [Source:NCBI gene;Acc:713958]                        | - | 0.429820153 | 0.001409478 | 0.006081799 |
| ENSMMUG000000004723  | vascular endothelial zinc finger 1 [Source:NCBI gene;Acc:713848]                                | - | 0.475676532 | 0.001392837 | 0.006027887 |
| ENSMMUG000000002269  | serine carboxypeptidase 1 [Source:VGNC Symbol;Acc:VGNC:82232]                                   | - | 0.619956079 | 0.000427824 | 0.002159473 |
| ENSMMUG000000049376  |                                                                                                 | - | 1.929881028 | 0.016874848 | 0.049835826 |
| ENSMMUG000000005793  | ankyrin repeat and fibronectin type III domain containing 1 [Source:VGNC Symbol;Acc:VGNC:69712] | - | 1.061730235 | 9.88E-07    | 9.53E-06    |
| ENSMMUG0000000059321 |                                                                                                 | - | 2.215573454 | 0.002456348 | 0.009815263 |
| ENSMMUG000000006066  | phosphatidylcholine transfer protein [Source:VGNC Symbol;Acc:VGNC:75789]                        | - | 2.431223852 | 6.03E-06    | 4.85E-05    |
| ENSMMUG000000006068  | transmembrane protein 100 [Source:VGNC Symbol;Acc:VGNC:79521]                                   | - | 0.379073655 | 0.008900907 | 0.029427448 |
| ENSMMUG000000022627  | HLF transcription factor, PAR bZIP family member [Source:VGNC Symbol;Acc:VGNC:73478]            | - | -1.0389056  | 0.000949248 | 0.004333851 |

|                     |                                                                                                                   |   |             |             |             |
|---------------------|-------------------------------------------------------------------------------------------------------------------|---|-------------|-------------|-------------|
| ENSMMUG00000050544  |                                                                                                                   | - | 1.723469167 | 5.60E-08    | 7.07E-07    |
| ENSMMUG00000049997  |                                                                                                                   | - | 1.434069223 | 1.71E-07    | 1.98E-06    |
| ENSMMUG00000056602  |                                                                                                                   | - | 1.519641942 | 0.002769066 | 0.010841343 |
| ENSMMUG00000010550  | target of myb1 like 1 membrane trafficking protein [Source:VGNC Symbol;Acc:VGNC:78616]                            | - | 0.575884228 | 0.001349218 | 0.005860046 |
| ENSMMUG00000060858  |                                                                                                                   | - | 1.697426483 | 0.000136162 | 0.000786721 |
| ENSMMUG00000063189  |                                                                                                                   | - | 0.424450879 | 0.015425841 | 0.046341279 |
| ENSMMUG00000001942  | mbt domain containing 1 [Source:VGNC Symbol;Acc:VGNC:74538]                                                       | - | -1.37875988 | 3.57E-07    | 3.84E-06    |
| ENSMMUG00000001940  | NME/NM23 nucleoside diphosphate kinase 2 [Source:NCBI gene;Acc:100533957]                                         | - | 1.806216916 | 1.67E-11    | 4.00E-10    |
| ENSMMUG00000022741  | WAP, follistatin/kazal, immunoglobulin, kunitz and netrin domain containing 2 [Source:VGNC Symbol;Acc:VGNC:79900] | - | 0.530905234 | 0.001331819 | 0.005793134 |
| ENSMMUG00000010117  | LUC7 like 3 pre-mRNA splicing factor [Source:VGNC Symbol;Acc:VGNC:74346]                                          | - | 0.823665397 | 0.001221804 | 0.005374087 |
| ENSMMUG00000003421  | ankyrin repeat domain 40 [Source:VGNC Symbol;Acc:VGNC:69725]                                                      | - | 0.993461707 | 0.00523515  | 0.018684847 |
| ENSMMUG00000017256  | calcium voltage-gated channel subunit alpha1 G [Source:VGNC Symbol;Acc:VGNC:70504]                                | - | 1.658199722 | 6.76E-24    | 7.07E-22    |
| ENSMMUG00000017252  | spermatogenesis associated 20 [Source:VGNC Symbol;Acc:VGNC:77993]                                                 | - | 0.944378832 | 0.000148665 | 0.000850175 |
| ENSMMUG00000017242  | MYCBP associated protein [Source:VGNC Symbol;Acc:VGNC:74994]                                                      | - | 1.997739719 | 2.45E-10    | 4.78E-09    |
| ENSMMUG00000017234  | leucine rich repeat containing 59 [Source:VGNC Symbol;Acc:VGNC:81436]                                             | - | 2.828920156 | 8.97E-29    | 1.86E-26    |
| ENSMMUG00000020061  | protein phosphatase 1 regulatory subunit 9B [Source:VGNC Symbol;Acc:VGNC:76372]                                   | - | 1.431612148 | 2.05E-06    | 1.83E-05    |
| ENSMMUG00000014687  | sterile alpha motif domain containing 14 [Source:VGNC Symbol;Acc:VGNC:77112]                                      | - | 1.826234385 | 0.00070487  | 0.003341865 |
| ENSMMUG00000014685  | pyruvate dehydrogenase kinase 2 [Source:VGNC Symbol;Acc:VGNC:75933]                                               | - | 1.428370942 | 0.00718764  | 0.024498644 |
| ENSMMUG00000000153  | integrin subunit alpha 3 [Source:VGNC Symbol;Acc:VGNC:73777]                                                      | - | 1.844731489 | 0.004054912 | 0.015002864 |
| ENSMMUG00000015845  | beta-1,4-N-acetyl-galactosaminyltransferase 2 [Source:VGNC Symbol;Acc:VGNC:70120]                                 | - | 1.417936984 | 0.000814618 | 0.003790687 |
| ENSMMUG00000012178  | calcium binding and coiled-coil domain 2 [Source:VGNC Symbol;Acc:VGNC:70675]                                      | - | 1.854965363 | 1.83E-16    | 9.29E-15    |
| ENSMMUG00000049405  | gastric inhibitory polypeptide [Source:NCBI gene;Acc:698335]                                                      | - | 0.535588425 | 0.003046703 | 0.011788641 |
| ENSMMUG00000021087  | SNF8 subunit of ESCRT-II [Source:VGNC Symbol;Acc:VGNC:77729]                                                      | - | 0.475754064 | 0.00923343  | 0.030367958 |
| ENSMMUG00000003436  | tubulin tyrosine ligase like 6 [Source:VGNC Symbol;Acc:VGNC:79632]                                                | - | 0.997266016 | 8.93E-10    | 1.58E-08    |
| ENSMMUG00000060879  | homeobox B13 [Source:NCBI gene;Acc:697572]                                                                        | - | 0.966851638 | 2.03E-10    | 4.04E-09    |
| ENSMMUG000000055122 |                                                                                                                   | - | 0.807559122 | 1.57E-05    | 0.00011439  |
| ENSMMUG00000052505  | homeobox B9 [Source:NCBI gene;Acc:106994009]                                                                      | - | 1.279450261 | 5.02E-20    | 3.80E-18    |
| ENSMMUG00000020868  | homeobox B8 [Source:VGNC Symbol;Acc:VGNC:73505]                                                                   | - | 1.201580358 | 7.29E-14    | 2.54E-12    |
| ENSMMUG00000055324  | homeobox B7 [Source:NCBI gene;Acc:697089]                                                                         | - | 1.232282414 | 5.52E-08    | 6.99E-07    |
| ENSMMUG00000062283  | homeobox B6 [Source:NCBI gene;Acc:106994013]                                                                      | - | 1.113807448 | 3.68E-11    | 8.29E-10    |
| ENSMMUG00000051420  | homeobox B5 [Source:NCBI gene;Acc:696732]                                                                         | - | 0.966743468 | 2.93E-07    | 3.22E-06    |
| ENSMMUG00000045203  |                                                                                                                   | - | 1.2210986   | 0.000131262 | 0.000762346 |
| ENSMMUG00000057001  | homeobox B2 [Source:NCBI gene;Acc:106994010]                                                                      | - | 0.934287275 | 5.11E-06    | 4.17E-05    |
| ENSMMUG00000057095  |                                                                                                                   | - | 1.925294889 | 0.003663539 | 0.013807848 |
| ENSMMUG00000050742  | src kinase associated phosphoprotein 1 [Source:NCBI gene;Acc:697043]                                              | - | 0.479024478 | 7.72E-07    | 7.63E-06    |
| ENSMMUG00000004760  | CDK5 regulatory subunit associated protein 3 [Source:VGNC Symbol;Acc:VGNC:71015]                                  | - | 0.884257243 | 0.000726334 | 0.003428155 |
| ENSMMUG00000003325  | pyridoxamine 5'-phosphate oxidase [Source:VGNC Symbol;Acc:VGNC:76141]                                             | - | 0.794720514 | 3.24E-06    | 2.76E-05    |

|                    |                                                                                               |             |             |             |
|--------------------|-----------------------------------------------------------------------------------------------|-------------|-------------|-------------|
| ENSMMUG00000021486 | secernin 2 [Source:NCBI gene;Acc:694571]                                                      | 1.060146896 | 0.003361284 | 0.012824932 |
| ENSMMUG00000057231 | T-box transcription factor 21 [Source:NCBI gene;Acc:694044]                                   | 1.586070205 | 9.65E-15    | 3.84E-13    |
| ENSMMUG00000019760 | karyopherin subunit beta 1 [Source:VGNC Symbol;Acc:VGNC:74203]                                | 0.617025834 | 1.43E-06    | 1.33E-05    |
| ENSMMUG00000020528 | G protein-coupled receptor 179 [Source:VGNC Symbol;Acc:VGNC:73043]                            | 1.740853029 | 0.005475739 | 0.019429051 |
| ENSMMUG00000020020 | Rho GTPase activating protein 23 [Source:NCBI gene;Acc:693996]                                | 2.012226262 | 7.27E-11    | 1.56E-09    |
| ENSMMUG00000007799 | LIM and SH3 protein 1 [Source:VGNC Symbol;Acc:VGNC:74237]                                     | 1.213099034 | 9.13E-05    | 0.00055164  |
| ENSMMUG00000056248 |                                                                                               | 4.256031536 | 1.25E-40    | 1.01E-37    |
| ENSMMUG00000063779 |                                                                                               | 4.385789005 | 1.65E-47    | 3.00E-44    |
| ENSMMUG00000000289 | calcium voltage-gated channel auxiliary subunit beta 1 [Source:VGNC Symbol;Acc:VGNC:70509]    | 0.504316487 | 0.000906212 | 0.004163592 |
| ENSMMUG00000030060 | F-box and leucine rich repeat protein 20 [Source:VGNC Symbol;Acc:VGNC:81407]                  | -0.51925571 | 2.00E-05    | 0.000142664 |
| ENSMMUG00000009132 | mediator complex subunit 1 [Source:VGNC Symbol;Acc:VGNC:74724]                                | 0.605976114 | 0.004449834 | 0.016240832 |
| ENSMMUG00000001405 | protein phosphatase 1 regulatory inhibitor subunit 1B [Source:VGNC Symbol;Acc:VGNC:76369]     | 0.339219162 | 0.013667708 | 0.041979183 |
| ENSMMUG00000004587 | gasdermin B [Source:VGNC Symbol;Acc:VGNC:73219]                                               | 1.427583063 | 0.005641311 | 0.019948369 |
| ENSMMUG00000002923 | colony stimulating factor 3 [Source:VGNC Symbol;Acc:VGNC:71520]                               | 0.914702901 | 4.46E-06    | 3.69E-05    |
| ENSMMUG00000002926 | mediator complex subunit 24 [Source:NCBI gene;Acc:699536]                                     | 0.979767781 | 4.99E-14    | 1.80E-12    |
| ENSMMUG00000002933 | nuclear receptor subfamily 1 group D member 1 [Source:VGNC Symbol;Acc:VGNC:75502]             | 0.721319496 | 0.000180331 | 0.001007872 |
| ENSMMUG00000045187 | CASC3 exon junction complex subunit [Source:NCBI gene;Acc:699712]                             | 0.75969054  | 6.90E-06    | 5.48E-05    |
| ENSMMUG00000015160 | Rap guanine nucleotide exchange factor like 1 [Source:VGNC Symbol;Acc:VGNC:76501]             | 0.541198078 | 0.010985069 | 0.035012048 |
| ENSMMUG00000008941 | DNA topoisomerase II alpha [Source:VGNC Symbol;Acc:VGNC:78620]                                | 0.930418468 | 2.16E-11    | 5.08E-10    |
| ENSMMUG00000062362 | keratin 33A [Source:NCBI gene;Acc:705800]                                                     | 0.709567672 | 1.61E-05    | 0.000117137 |
| ENSMMUG00000018644 | keratin 32 [Source:VGNC Symbol;Acc:VGNC:74216]                                                | -0.29725674 | 0.012552318 | 0.039090198 |
| ENSMMUG00000018645 | keratin 35 [Source:VGNC Symbol;Acc:VGNC:74217]                                                | 0.330401285 | 0.009667092 | 0.031523221 |
| ENSMMUG00000040413 | keratin 13 [Source:NCBI gene;Acc:706830]                                                      | -0.58604425 | 0.00883707  | 0.02923634  |
| ENSMMUG00000013048 | junction plakoglobin [Source:VGNC Symbol;Acc:VGNC:73960]                                      | 0.7619969   | 6.14E-05    | 0.000387877 |
| ENSMMUG00000016114 | 2',3'-cyclic nucleotide 3' phosphodiesterase [Source:VGNC Symbol;Acc:VGNC:71279]              | 0.506597956 | 0.000675547 | 0.003224041 |
| ENSMMUG00000003894 | zinc finger protein 385C [Source:NCBI gene;Acc:708928]                                        | 0.521163434 | 0.000185017 | 0.001032076 |
| ENSMMUG00000049440 | chromosome 16 C17orf113 homolog [Source:NCBI gene;Acc:106994045]                              | 0.411273664 | 0.000105445 | 0.000625656 |
| ENSMMUG00000003437 | signal transducer and activator of transcription 5B [Source:NCBI gene;Acc:709760]             | 2.399282729 | 8.49E-19    | 5.74E-17    |
| ENSMMUG00000052220 |                                                                                               | 0.574985024 | 0.004597362 | 0.016691271 |
| ENSMMUG00000050793 | N-acetyl-alpha-glucosaminidase [Source:NCBI gene;Acc:707186]                                  | 1.407844367 | 1.37E-17    | 7.89E-16    |
| ENSMMUG00000009884 | hydroxysteroid 17-beta dehydrogenase 1 [Source:VGNC Symbol;Acc:VGNC:73528]                    | 1.792093993 | 3.97E-06    | 3.32E-05    |
| ENSMMUG00000009886 | Coenzyme A synthase [Source:VGNC Symbol;Acc:VGNC:81373]                                       | 1.318789707 | 2.20E-17    | 1.23E-15    |
| ENSMMUG00000009887 | MAX dimerization protein MLX [Source:VGNC Symbol;Acc:VGNC:74726]                              | 1.2504294   | 3.74E-07    | 4.00E-06    |
| ENSMMUG00000009889 | PSMC3 interacting protein [Source:VGNC Symbol;Acc:VGNC:76282]                                 | 1.153599436 | 8.86E-12    | 2.23E-10    |
| ENSMMUG00000016796 | reticulophagy regulator family member 3 [Source:VGNC Symbol;Acc:VGNC:76845]                   | 1.320857525 | 6.99E-18    | 4.11E-16    |
| ENSMMUG00000016797 | tubulin gamma 1 [Source:NCBI gene;Acc:710756]                                                 | 1.51942237  | 1.77E-13    | 5.74E-12    |
| ENSMMUG00000006086 | pleckstrin homology, MyTH4 and FERM domain containing H3 [Source:VGNC Symbol;Acc:VGNC:76113]  | 1.150546304 | 0.000251077 | 0.001348928 |
| ENSMMUG00000006091 | contactin associated protein 1 [Source:VGNC Symbol;Acc:VGNC:71390]                            | 1.542291515 | 2.85E-13    | 8.94E-12    |
| ENSMMUG00000006093 | enhancer of zeste 1 polycomb repressive complex 2 subunit [Source:VGNC Symbol;Acc:VGNC:72457] | 1.47639167  | 3.83E-12    | 1.02E-10    |
| ENSMMUG00000056565 | Metazoan signal recognition particle RNA [Source:RFAM;Acc:RF00017]                            | 2.489913424 | 0.010003133 | 0.032451584 |
| ENSMMUG00000058566 |                                                                                               | 1.404085559 | 1.33E-15    | 6.15E-14    |
| ENSMMUG00000029971 | beclin 1 [Source:VGNC Symbol;Acc:VGNC:70044]                                                  | 0.440126808 | 0.006049041 | 0.021107755 |
| ENSMMUG00000012685 | proteasome activator subunit 3 [Source:VGNC Symbol;Acc:VGNC:76457]                            | 0.358811935 | 0.009230472 | 0.030366535 |

|                      |                                                                                              |             |             |             |
|----------------------|----------------------------------------------------------------------------------------------|-------------|-------------|-------------|
| ENSMMUG0000001870    | amine oxidase copper containing 2 [Source:VGNC Symbol;Acc:VGNC:69955]                        | 0.496589603 | 0.004265804 | 0.015679393 |
| ENSMMUG00000014123   | alanyl-tRNA editing protein Aarsd1 [Source:NCBI gene;Acc:712203]                             | 1.154663708 | 2.15E-06    | 1.90E-05    |
| ENSMMUG00000008091   | RUN domain containing 1 [Source:VGNC Symbol;Acc:VGNC:77101]                                  | 0.943612763 | 0.000236903 | 0.001280719 |
| ENSMMUG000000064920  |                                                                                              | 1.212336698 | 1.50E-11    | 3.62E-10    |
| ENSMMUG00000008090   | ribosomal protein L27 [Source:NCBI gene;Acc:712352]                                          | 1.17690467  | 0.00033467  | 0.001733068 |
| ENSMMUG00000015999   | interferon induced protein 35 [Source:VGNC Symbol;Acc:VGNC:73564]                            | 0.881929956 | 0.002715765 | 0.010641261 |
| ENSMMUG00000016001   | vesicle amine transport 1 [Source:VGNC Symbol;Acc:VGNC:79058]                                | 1.008868362 | 2.33E-06    | 2.06E-05    |
| ENSMMUG000000065269  | Rho family GTPase 2 [Source:NCBI gene;Acc:712559]                                            | 1.02887784  | 9.83E-06    | 7.52E-05    |
| ENSMMUG000000052607  |                                                                                              | 1.119524633 | 4.73E-25    | 5.88E-23    |
|                      |                                                                                              | -           |             |             |
| ENSMMUG00000019923   | ataxin 7 like 3 [Source:VGNC Symbol;Acc:VGNC:70128]                                          | 0.620157126 | 5.57E-05    | 0.000356839 |
|                      |                                                                                              | -           |             |             |
| ENSMMUG00000017100   | solute carrier family 4 member 1 (Diego blood group) [Source:NCBI gene;Acc:100427618]        | 0.651752854 | 8.71E-07    | 8.47E-06    |
| ENSMMUG00000013983   | RUN domain containing 3A [Source:VGNC Symbol;Acc:VGNC:77032]                                 | 0.267126293 | 0.000510657 | 0.002519831 |
| ENSMMUG000000041006  | family with sequence similarity 171 member A2 [Source:NCBI gene;Acc:712099]                  | 0.331889512 | 0.003531395 | 0.013368721 |
|                      |                                                                                              | -           |             |             |
| ENSMMUG000000029927  | ADAM metalloproteinase domain 11 [Source:VGNC Symbol;Acc:VGNC:69466]                         | 0.553148797 | 0.009566937 | 0.03125271  |
| ENSMMUG000000062273  | dephospho-CoA kinase domain containing [Source:NCBI gene;Acc:715841]                         | 1.063255126 | 0.008223439 | 0.027468782 |
|                      |                                                                                              | -           |             |             |
| ENSMMUG000000060665  |                                                                                              | 0.948867104 | 7.54E-05    | 0.000466402 |
|                      |                                                                                              | -           |             |             |
| ENSMMUG000000054246  |                                                                                              | 2.398182005 | 0.000135629 | 0.000784578 |
|                      |                                                                                              | -           |             |             |
| ENSMMUG000000021932  | Rho GTPase activating protein 27 [Source:VGNC Symbol;Acc:VGNC:69935]                         | 1.571171184 | 0.001003355 | 0.004539613 |
|                      |                                                                                              | -           |             |             |
| ENSMMUG000000008459  | pleckstrin homology and RUN domain containing M1 [Source:NCBI gene;Acc:716464]               | 1.095475216 | 0.000536679 | 0.002626868 |
|                      |                                                                                              | -           |             |             |
| ENSMMUG000000049983  |                                                                                              | 1.183222774 | 0.004835184 | 0.017437128 |
| ENSMMUG000000005548  | N-ethylmaleimide sensitive factor, vesicle fusing ATPase [Source:VGNC Symbol;Acc:VGNC:75536] | 0.665054481 | 3.47E-09    | 5.50E-08    |
|                      |                                                                                              | -           |             |             |
| ENSMMUG0000000057209 |                                                                                              | 0.581488288 | 0.000562945 | 0.002741552 |
| ENSMMUG0000000053257 | Y RNA [Source:RFAM;Acc:RF00019]                                                              | 1.316913022 | 3.37E-10    | 6.49E-09    |
|                      |                                                                                              | -           |             |             |
| ENSMMUG000000063877  | leucine-rich repeat-containing protein 37A2 [Source:NCBI gene;Acc:716147]                    | 0.405652546 | 0.000443217 | 0.002229426 |
| ENSMMUG000000003289  | integrin subunit beta 3 [Source:NCBI gene;Acc:717379]                                        | 0.729507743 | 2.06E-10    | 4.08E-09    |
| ENSMMUG00000010588   | EF-hand calcium binding domain 13 [Source:HGNC Symbol;Acc:HGNC:26864]                        | 0.650993144 | 0.000685978 | 0.003266315 |
| ENSMMUG000000002166  | tousled like kinase 2 [Source:VGNC Symbol;Acc:VGNC:78368]                                    | -2.4101307  | 0.002347105 | 0.009441027 |
|                      |                                                                                              | -           |             |             |
| ENSMMUG000000002168  | membrane associated ring-CH-type finger 10 [Source:VGNC Symbol;Acc:VGNC:74593]               | 1.642892334 | 0.007311726 | 0.024892404 |
|                      |                                                                                              | -           |             |             |
| ENSMMUG000000011809  | platelet and endothelial cell adhesion molecule 1 [Source:VGNC Symbol;Acc:VGNC:75938]        | 0.614048157 | 0.001759826 | 0.007385276 |
| ENSMMUG000000009463  | DEAD-box helicase 5 [Source:VGNC Symbol;Acc:VGNC:71763]                                      | -0.34076527 | 0.009239721 | 0.030374905 |
|                      |                                                                                              | -           |             |             |
| ENSMMUG000000009459  | centrosomal protein 95 [Source:VGNC Symbol;Acc:VGNC:71095]                                   | 0.398985508 | 0.008779116 | 0.029104221 |
|                      |                                                                                              | -           |             |             |
| ENSMMUG000000063689  |                                                                                              | 0.754344226 | 0.002111813 | 0.00866011  |
|                      |                                                                                              | -           |             |             |
| ENSMMUG000000009461  | SMAD specific E3 ubiquitin protein ligase 2 [Source:VGNC Symbol;Acc:VGNC:77727]              | 0.573301873 | 0.000705063 | 0.003341865 |
| ENSMMUG000000060767  |                                                                                              | 2.638848693 | 4.69E-14    | 1.71E-12    |
| ENSMMUG000000002959  | helicase with zinc finger [Source:VGNC Symbol;Acc:VGNC:73178]                                | 2.801933047 | 9.21E-19    | 6.17E-17    |
| ENSMMUG0000000057157 |                                                                                              | 2.530377018 | 7.49E-16    | 3.58E-14    |
| ENSMMUG000000063817  | SRY-box transcription factor 9 [Source:NCBI gene;Acc:574208]                                 | 0.732262564 | 0.000202573 | 0.001116723 |
| ENSMMUG0000000054673 |                                                                                              | 1.828063572 | 0.010414078 | 0.033522908 |
| ENSMMUG000000001269  | chromosome 16 C17orf80 homolog [Source:VGNC Symbol;Acc:VGNC:70440]                           | 0.873618405 | 4.25E-10    | 8.04E-09    |



|                    |                                                                                            |             |             |             |
|--------------------|--------------------------------------------------------------------------------------------|-------------|-------------|-------------|
| ENSMMUG00000049948 |                                                                                            | -1.57505189 | 1.18E-13    | 3.97E-12    |
| ENSMMUG00000064463 |                                                                                            | 1.67817729  | 2.04E-06    | 1.82E-05    |
|                    |                                                                                            | -           |             |             |
| ENSMMUG00000062704 | Metazoan signal recognition particle RNA [Source:RFAM;Acc:RF00017]                         | 1.830637974 | 0.003206824 | 0.012313155 |
| ENSMMUG00000049403 |                                                                                            | 0.56537207  | 0.001096925 | 0.004886916 |
| ENSMMUG00000064052 | CD300 molecule like family member d [Source:NCBI gene;Acc:703142]                          | 1.645637457 | 3.62E-09    | 5.71E-08    |
| ENSMMUG00000058592 |                                                                                            | 1.738238212 | 3.83E-12    | 1.02E-10    |
| ENSMMUG00000020462 | CD300e molecule [Source:NCBI gene;Acc:114673189]                                           | 2.029321404 | 1.68E-08    | 2.33E-07    |
| ENSMMUG00000005737 | SLC9A3 regulator 1 [Source:VGNC Symbol;Acc:VGNC:77639]                                     | 2.476284549 | 5.14E-05    | 0.000332521 |
| ENSMMUG00000005738 | N-acetyltransferase 9 (putative) [Source:NCBI gene;Acc:699085]                             | 3.320351011 | 0.013616278 | 0.041830057 |
| ENSMMUG00000023405 | otopettrin 3 [Source:VGNC Symbol;Acc:VGNC:75654]                                           | 0.486962246 | 0.001086735 | 0.004850434 |
| ENSMMUG00000023406 | HID1 domain containing [Source:VGNC Symbol;Acc:VGNC:73394]                                 | 0.668298128 | 9.14E-05    | 0.00055164  |
|                    |                                                                                            | -           |             |             |
| ENSMMUG00000018031 | solute carrier family 25 member 19 [Source:VGNC Symbol;Acc:VGNC:77474]                     | 1.829808758 | 1.45E-08    | 2.05E-07    |
|                    |                                                                                            | -           |             |             |
| ENSMMUG00000058142 |                                                                                            | 1.044785042 | 2.10E-06    | 1.87E-05    |
|                    |                                                                                            | -           |             |             |
| ENSMMUG00000034931 | U6 spliceosomal RNA [Source:RFAM;Acc:RF00026]                                              | 2.370120014 | 0.007964688 | 0.026709367 |
|                    |                                                                                            | -           |             |             |
| ENSMMUG00000022120 | transmembrane protein 94 [Source:VGNC Symbol;Acc:VGNC:79760]                               | 0.968666837 | 1.01E-08    | 1.47E-07    |
| ENSMMUG00000022121 | CASK interacting protein 2 [Source:VGNC Symbol;Acc:VGNC:70577]                             | -1.18388603 | 3.37E-06    | 2.86E-05    |
|                    |                                                                                            | -           |             |             |
| ENSMMUG00000022123 | tRNA splicing endonuclease subunit 54 [Source:VGNC Symbol;Acc:VGNC:79666]                  | 0.964461262 | 0.000100065 | 0.000596413 |
|                    |                                                                                            | -           |             |             |
| ENSMMUG00000001228 | LLGL scribble cell polarity complex component 2 [Source:NCBI gene;Acc:706973]              | 0.618510638 | 9.40E-05    | 0.00056441  |
|                    |                                                                                            | -           |             |             |
| ENSMMUG00000063604 | small integral membrane protein 5 [Source:NCBI gene;Acc:703547]                            | 1.511927274 | 0.012392371 | 0.03869987  |
|                    |                                                                                            | -           |             |             |
| ENSMMUG00000021636 | SAP30 binding protein [Source:VGNC Symbol;Acc:VGNC:77142]                                  | 1.186820592 | 0.001072483 | 0.004803043 |
| ENSMMUG00000013646 | unk zinc finger [Source:VGNC Symbol;Acc:VGNC:79803]                                        | 0.663068719 | 0.009435699 | 0.030924165 |
| ENSMMUG00000002822 | unc-13 homolog D [Source:VGNC Symbol;Acc:VGNC:79375]                                       | 0.870414795 | 2.62E-05    | 0.000181165 |
| ENSMMUG00000009381 | WW domain binding protein 2 [Source:VGNC Symbol;Acc:VGNC:78786]                            | 0.902557662 | 1.46E-06    | 1.36E-05    |
| ENSMMUG00000009377 | tripartite motif containing 47 [Source:VGNC Symbol;Acc:VGNC:79171]                         | 1.289171146 | 3.49E-08    | 4.57E-07    |
| ENSMMUG00000016774 | tripartite motif containing 65 [Source:NCBI gene;Acc:708355]                               | 1.617128232 | 0.010936557 | 0.034903344 |
| ENSMMUG00000016775 | Fas binding factor 1 [Source:NCBI gene;Acc:708559]                                         | 2.959400629 | 0.011420783 | 0.036155036 |
| ENSMMUG00000003534 | ring finger protein 157 [Source:VGNC Symbol;Acc:VGNC:76860]                                | 0.538519891 | 0.002211143 | 0.009001228 |
| ENSMMUG00000003539 | glutamine rich 2 [Source:VGNC Symbol;Acc:VGNC:76534]                                       | 1.86880467  | 1.91E-08    | 2.62E-07    |
| ENSMMUG00000049537 | phosphoribosyl pyrophosphate synthetase associated protein 1 [Source:NCBI gene;Acc:706625] | 2.116416255 | 0.001413921 | 0.006097352 |
| ENSMMUG00000018011 | sphingosine kinase 1 [Source:VGNC Symbol;Acc:VGNC:77858]                                   | 1.845458206 | 1.57E-05    | 0.000114767 |
| ENSMMUG00000018967 | ubiquitin conjugating enzyme E2 O [Source:VGNC Symbol;Acc:VGNC:79813]                      | 2.762559296 | 1.57E-31    | 3.68E-29    |
| ENSMMUG00000046918 |                                                                                            | 2.371711842 | 1.19E-06    | 1.13E-05    |
| ENSMMUG00000054111 | Metazoan signal recognition particle RNA [Source:RFAM;Acc:RF00017]                         | 1.75201284  | 0.002823838 | 0.011034984 |
| ENSMMUG00000055379 |                                                                                            | 2.549012278 | 9.43E-29    | 1.93E-26    |
| ENSMMUG00000053937 |                                                                                            | 2.562900955 | 3.28E-28    | 6.12E-26    |
|                    |                                                                                            | -           |             |             |
| ENSMMUG00000008237 | phosphatidylglycerophosphate synthase 1 [Source:VGNC Symbol;Acc:VGNC:75890]                | 0.816671878 | 0.003662443 | 0.013807298 |
|                    |                                                                                            | -           |             |             |
| ENSMMUG00000008239 | dynein axonemal heavy chain 17 [Source:NCBI gene;Acc:715774]                               | 0.565448353 | 0.011396787 | 0.036110527 |
|                    |                                                                                            | -           |             |             |
| ENSMMUG00000049898 |                                                                                            | 0.627132496 | 0.001821548 | 0.007606964 |
| ENSMMUG00000051537 |                                                                                            | 2.375259007 | 0.000300924 | 0.001578113 |
| ENSMMUG00000013313 | cytohesin 1 [Source:VGNC Symbol;Acc:VGNC:71828]                                            | 0.356412476 | 0.006418433 | 0.022175788 |
| ENSMMUG00000005355 | TIMP metalloproteinase inhibitor 2 [Source:NCBI gene;Acc:574357]                           | 1.972282026 | 0.010675482 | 0.034190237 |

|                    |                                                                                              |   |             |             |             |
|--------------------|----------------------------------------------------------------------------------------------|---|-------------|-------------|-------------|
| ENSMMUG00000023027 | endo-beta-N-acetylglucosaminidase [Source:VGNC Symbol;Acc:VGNC:72099]                        | - | 0.615641918 | 7.19E-05    | 0.000445441 |
| ENSMMUG00000058715 |                                                                                              |   | 1.81841477  | 0.000660744 | 0.003159618 |
| ENSMMUG00000016414 | ectonucleotide pyrophosphatase/phosphodiesterase 7 [Source:VGNC Symbol;Acc:VGNC:72090]       |   | 1.313598487 | 0.002969059 | 0.011525022 |
| ENSMMUG00000046417 | chromobox 2 [Source:NCBI gene;Acc:717462]                                                    |   | 1.997620235 | 7.74E-10    | 1.39E-08    |
| ENSMMUG00000016417 | chromobox 8 [Source:NCBI gene;Acc:717514]                                                    |   | 1.458379626 | 2.00E-10    | 3.98E-09    |
| ENSMMUG00000020840 | TBC1 domain family member 16 [Source:VGNC Symbol;Acc:VGNC:78228]                             |   | 0.598897049 | 6.33E-05    | 0.000398275 |
| ENSMMUG00000064603 | caspase recruitment domain family member 14 [Source:NCBI gene;Acc:712205]                    |   | 0.446473575 | 0.00144879  | 0.006229242 |
| ENSMMUG00000064563 |                                                                                              |   | -           |             |             |
| ENSMMUG00000000590 | NPR3 like, GATOR1 complex subunit [Source:VGNC Symbol;Acc:VGNC:75173]                        |   | 0.751140422 | 0.003783875 | 0.014184166 |
| ENSMMUG00000000590 |                                                                                              |   | 1.221881335 | 0.002213888 | 0.009009878 |
| ENSMMUG00000029310 | hemoglobin, alpha 2 [Source:NCBI gene;Acc:693930]                                            |   | -           |             |             |
| ENSMMUG00000019566 | hemoglobin subunit alpha 1 [Source:NCBI gene;Acc:701930]                                     |   | 0.620617305 | 2.94E-05    | 0.00020102  |
| ENSMMUG00000029296 | phosphatidylinositol glycan anchor biosynthesis class Q [Source:VGNC Symbol;Acc:VGNC:75798]  |   | -0.52395998 | 0.011048681 | 0.035176231 |
| ENSMMUG00000049219 | STIP1 homology and U-box containing protein 1 [Source:NCBI gene;Acc:697105]                  |   | 0.993314336 | 0.000300893 | 0.001578113 |
| ENSMMUG00000001986 | WD repeat domain 24 [Source:VGNC Symbol;Acc:VGNC:79289]                                      |   | 0.759296401 | 0.004313337 | 0.015838086 |
| ENSMMUG00000001986 |                                                                                              |   | -0.93462424 | 0.000774913 | 0.003622955 |
| ENSMMUG00000050065 |                                                                                              |   | -           |             |             |
| ENSMMUG00000050065 |                                                                                              |   | 1.021881626 | 0.001734675 | 0.007292358 |
| ENSMMUG00000016906 | F-box and leucine rich repeat protein 16 [Source:VGNC Symbol;Acc:VGNC:81405]                 |   | -           |             |             |
| ENSMMUG00000016906 |                                                                                              |   | 0.962854272 | 2.17E-07    | 2.45E-06    |
| ENSMMUG00000050892 | mastin-like [Source:NCBI gene;Acc:722432]                                                    |   | -           |             |             |
| ENSMMUG00000050892 |                                                                                              |   | 0.393386089 | 0.001971215 | 0.008161648 |
| ENSMMUG00000063740 |                                                                                              |   | -           |             |             |
| ENSMMUG00000063740 |                                                                                              |   | 0.493967507 | 7.39E-05    | 0.000457679 |
| ENSMMUG00000044277 | ubiquitin conjugating enzyme E2 I [Source:NCBI gene;Acc:722434]                              |   | -           |             |             |
| ENSMMUG00000021415 | BAI1 associated protein 3 [Source:VGNC Symbol;Acc:VGNC:70223]                                |   | 1.147907823 | 6.53E-07    | 6.58E-06    |
| ENSMMUG00000061546 |                                                                                              |   | 0.797124178 | 0.000969581 | 0.004405376 |
| ENSMMUG00000061546 |                                                                                              |   | -           |             |             |
| ENSMMUG00000061546 |                                                                                              |   | 1.623742506 | 0.001163481 | 0.005147145 |
| ENSMMUG00000008119 | telomere maintenance 2 [Source:NCBI gene;Acc:701679]                                         |   | -           |             |             |
| ENSMMUG00000008119 |                                                                                              |   | 0.803476635 | 0.004453702 | 0.01625087  |
| ENSMMUG00000062198 | transmembrane protein 204 [Source:NCBI gene;Acc:701926]                                      |   | -           |             |             |
| ENSMMUG00000062198 |                                                                                              |   | 1.552781401 | 0.000411299 | 0.002084019 |
| ENSMMUG00000000978 | cramped chromatin regulator homolog 1 [Source:NCBI gene;Acc:722473]                          |   | -           |             |             |
| ENSMMUG00000000978 |                                                                                              |   | 0.623244803 | 6.46E-05    | 0.000405707 |
| ENSMMUG00000029265 | zinc finger protein 598 [Source:NCBI gene;Acc:694129]                                        |   | -           |             |             |
| ENSMMUG00000029265 |                                                                                              |   | 0.913235074 | 3.08E-05    | 0.000210199 |
| ENSMMUG00000029263 | polycystin 1, transient receptor potential channel interacting [Source:NCBI gene;Acc:694905] |   | -           |             |             |
| ENSMMUG00000019223 | TNF receptor associated factor 7 [Source:VGNC Symbol;Acc:VGNC:79252]                         |   | 0.787200019 | 1.38E-05    | 0.000102229 |
| ENSMMUG00000019223 |                                                                                              |   | 0.825538735 | 0.000486264 | 0.002412567 |
| ENSMMUG00000019237 | enoyl-CoA delta isomerase 1 [Source:VGNC Symbol;Acc:VGNC:81391]                              |   | -           |             |             |
| ENSMMUG00000019237 |                                                                                              |   | 0.458939598 | 0.013022356 | 0.04028644  |
| ENSMMUG00000019238 | RNA binding protein with serine rich domain 1 [Source:NCBI gene;Acc:695816]                  |   | -           |             |             |
| ENSMMUG00000019238 |                                                                                              |   | 0.564775908 | 9.45E-08    | 1.14E-06    |
| ENSMMUG00000000001 | cyclin F [Source:VGNC Symbol;Acc:VGNC:70729]                                                 |   | -           |             |             |
| ENSMMUG00000019095 | TBC1 domain family member 24 [Source:NCBI gene;Acc:697106]                                   |   | 0.723536202 | 0.00151907  | 0.006493008 |
| ENSMMUG00000011459 | 3-phosphoinositide dependent protein kinase 1 [Source:NCBI gene;Acc:697523]                  |   | 0.644554242 | 0.00211755  | 0.008678553 |
| ENSMMUG00000009487 | zinc finger protein 205 [Source:VGNC Symbol;Acc:VGNC:78869]                                  |   | 0.426745067 | 1.33E-07    | 1.57E-06    |
| ENSMMUG00000020970 | zinc finger protein 213 [Source:VGNC Symbol;Acc:VGNC:78872]                                  |   | 0.370686507 | 0.01439858  | 0.043807484 |
| ENSMMUG00000051323 | caspase-14-like [Source:NCBI gene;Acc:702430]                                                |   | 0.424986043 | 0.000156266 | 0.000888748 |
| ENSMMUG00000064961 |                                                                                              |   | 0.456458424 | 0.010856609 | 0.034670382 |
| ENSMMUG00000064961 |                                                                                              |   | -           |             |             |
| ENSMMUG00000064961 |                                                                                              |   | 1.022251249 | 0.001242136 | 0.00545362  |

|                     |                                                                                                        |             |             |             |
|---------------------|--------------------------------------------------------------------------------------------------------|-------------|-------------|-------------|
| ENSMMUG00000017972  | zinc finger protein 200 [Source:VGNC Symbol;Acc:VGNC:78867]                                            | 0.760189164 | 4.45E-05    | 0.000293487 |
| ENSMMUG00000017969  | MEFV innate immunity regulator, pyrin [Source:VGNC Symbol;Acc:VGNC:74700]                              | -0.65182614 | 0.006152096 | 0.021390341 |
| ENSMMUG00000040952  | tigger transposable element derived 7 [Source:NCBI gene;Acc:100428553]                                 | 1.259255068 | 0.000615838 | 0.002966741 |
| ENSMMUG00000007568  | zinc finger protein 174 [Source:VGNC Symbol;Acc:VGNC:78855]                                            | 1.122193484 | 0.001131912 | 0.005027378 |
| ENSMMUG00000018711  | N-alpha-acetyltransferase 60, NatF catalytic subunit [Source:NCBI gene;Acc:703207]                     | 0.317286768 | 0.014266747 | 0.043488299 |
| ENSMMUG00000007569  | clusterin associated protein 1 [Source:VGNC Symbol;Acc:VGNC:71211]                                     | 0.425875941 | 0.013211631 | 0.040776534 |
| ENSMMUG00000021866  | deoxyribonuclease 1 [Source:VGNC Symbol;Acc:VGNC:71946]                                                | 0.47516818  | 0.000337732 | 0.001747193 |
| ENSMMUG00000021868  | TNF receptor associated protein 1 [Source:VGNC Symbol;Acc:VGNC:79019]                                  | 0.811188184 | 8.35E-07    | 8.16E-06    |
| ENSMMUG00000039943  | adenylate cyclase 9 [Source:NCBI gene;Acc:706789]                                                      | 1.492589263 | 0.002125777 | 0.008709813 |
| ENSMMUG00000061940  |                                                                                                        | 3.81724337  | 4.87E-05    | 0.000317034 |
| ENSMMUG00000051196  |                                                                                                        | 1.678931127 | 0.00260072  | 0.010270761 |
| ENSMMUG00000040803  | sarcalumenin [Source:NCBI gene;Acc:704655]                                                             | 1.676000956 | 3.29E-06    | 2.80E-05    |
| ENSMMUG00000044729  | transcription factor AP-4 [Source:NCBI gene;Acc:707513]                                                | 1.483560212 | 8.19E-05    | 0.000501036 |
| ENSMMUG00000044344  | vasorin [Source:NCBI gene;Acc:100426861]                                                               | 0.700652945 | 0.000565016 | 0.002749793 |
| ENSMMUG00000020540  | NmrA like redox sensor 1 [Source:VGNC Symbol;Acc:VGNC:75252]                                           | 1.586301163 | 7.73E-08    | 9.45E-07    |
| ENSMMUG00000001888  | mahogunin ring finger 1 [Source:VGNC Symbol;Acc:VGNC:74542]                                            | 0.836129934 | 0.003513981 | 0.013313199 |
| ENSMMUG00000011001  | ankyrin repeat and sterile alpha motif domain containing 3 [Source:VGNC Symbol;Acc:VGNC:69735]         | 0.537100259 | 0.000602899 | 0.002914648 |
| ENSMMUG00000014311  | chromosome 20 C16orf71 homolog [Source:NCBI gene;Acc:709711]                                           | 0.39302741  | 0.007191334 | 0.02450549  |
| ENSMMUG00000014313  | zinc finger protein 500 [Source:VGNC Symbol;Acc:VGNC:79406]                                            | 0.540212797 | 0.000898029 | 0.00412991  |
| ENSMMUG00000017945  | septin 12 [Source:VGNC Symbol;Acc:VGNC:82235]                                                          | 0.659555005 | 1.40E-05    | 0.000103634 |
| ENSMMUG00000017946  | rogdi atypical leucine zipper [Source:VGNC Symbol;Acc:VGNC:76862]                                      | 0.552435808 | 0.000159922 | 0.000906349 |
| ENSMMUG00000009567  | glyoxylate reductase 1 homolog [Source:NCBI gene;Acc:706933]                                           | 2.493022883 | 3.56E-33    | 1.01E-30    |
| ENSMMUG00000017822  | periplakin [Source:VGNC Symbol;Acc:VGNC:76240]                                                         | 3.69130989  | 1.54E-26    | 2.38E-24    |
| ENSMMUG00000011499  | N-acetylglucosamine-1-phosphodiester alpha-N-acetylglucosaminidase [Source:VGNC Symbol;Acc:VGNC:74978] | 0.967073126 | 0.01274396  | 0.039551442 |
| ENSMMUG00000046237  | 4-aminobutyrate aminotransferase [Source:NCBI gene;Acc:714017]                                         | 0.861314035 | 0.000318938 | 0.001662386 |
| ENSMMUG00000001944  | chromosome 20 C16orf72 homolog [Source:VGNC Symbol;Acc:VGNC:70443]                                     | 0.873605585 | 7.24E-10    | 1.30E-08    |
| ENSMMUG00000005913  | activating transcription factor 7 interacting protein 2 [Source:VGNC Symbol;Acc:VGNC:70103]            | 1.113984484 | 0.001046518 | 0.004704151 |
| ENSMMUG000000056165 |                                                                                                        | 2.295793638 | 2.45E-08    | 3.30E-07    |
| ENSMMUG000000052031 |                                                                                                        | 1.298369223 | 1.25E-06    | 1.18E-05    |
| ENSMMUG000000064158 |                                                                                                        | 0.997523661 | 0.01347789  | 0.041472614 |
| ENSMMUG000000060713 | epithelial membrane protein 2 [Source:NCBI gene;Acc:710315]                                            | 2.253565974 | 9.15E-09    | 1.35E-07    |
| ENSMMUG00000006515  | C-type lectin domain containing 16A [Source:VGNC Symbol;Acc:VGNC:71369]                                | 0.608811611 | 0.002435534 | 0.009740125 |
| ENSMMUG00000000566  |                                                                                                        | 2.315028692 | 2.14E-06    | 1.90E-05    |
| ENSMMUG00000008784  | lipopolysaccharide induced TNF factor [Source:NCBI gene;Acc:711743]                                    | 4.118325795 | 1.37E-05    | 0.000101616 |
| ENSMMUG000000056339 |                                                                                                        | 2.218225214 | 0.010913643 | 0.034837862 |
| ENSMMUG000000062037 | stannin [Source:NCBI gene;Acc:711909]                                                                  | 1.924696087 | 3.43E-07    | 3.71E-06    |

|                    |                                                                                                      |             |             |             |
|--------------------|------------------------------------------------------------------------------------------------------|-------------|-------------|-------------|
| ENSMMUG00000014240 | thioredoxin domain containing 11 [Source:VGNC Symbol;Acc:VGNC:79678]                                 | 2.458728661 | 1.26E-07    | 1.49E-06    |
| ENSMMUG00000019632 | ribosomal L1 domain containing 1 [Source:VGNC Symbol;Acc:VGNC:77096]                                 | 0.503182187 | 2.33E-05    | 0.000163368 |
| ENSMMUG00000057345 | calcineurin like phosphoesterase domain containing 1 [Source:NCBI gene;Acc:716978]                   | 1.265482561 | 2.52E-11    | 5.81E-10    |
| ENSMMUG00000017379 | myocardin related transcription factor B [Source:VGNC Symbol;Acc:VGNC:74865]                         | 0.858256539 | 2.68E-05    | 0.000185234 |
| ENSMMUG00000062213 | Metazoan signal recognition particle RNA [Source:RFAM;Acc:RF00017]                                   | 0.823902218 | 0.011651978 | 0.036713278 |
| ENSMMUG00000057747 |                                                                                                      | 1.421231607 | 0.00330346  | 0.012650791 |
| ENSMMUG00000064131 |                                                                                                      | 1.280082624 | 2.23E-07    | 2.50E-06    |
| ENSMMUG00000027108 | mml-mir-193b [Source:miRBase;Acc:MI0007656]                                                          | 1.227927596 | 0.013684935 | 0.041996602 |
| ENSMMUG00000064246 |                                                                                                      | 0.669835201 | 0.003964036 | 0.014737902 |
| ENSMMUG00000002989 | N-terminal asparagine amidase [Source:NCBI gene;Acc:100427569]                                       | 1.111085514 | 0.013671804 | 0.041982894 |
| ENSMMUG00000062791 |                                                                                                      | 2.056382457 | 7.17E-07    | 7.15E-06    |
| ENSMMUG00000062623 | Metazoan signal recognition particle RNA [Source:RFAM;Acc:RF00017]                                   | 0.927499249 | 5.73E-05    | 0.000364995 |
| ENSMMUG00000058016 | bMERB domain containing 1 [Source:NCBI gene;Acc:713757]                                              | 1.149297446 | 3.26E-06    | 2.78E-05    |
| ENSMMUG00000010367 | myosin heavy chain 11 [Source:VGNC Symbol;Acc:VGNC:75097]                                            | 0.521928649 | 2.36E-06    | 2.08E-05    |
| ENSMMUG00000002709 | G protein-coupled receptor class C group 5 member B [Source:VGNC Symbol;Acc:VGNC:72934]              | 0.605167192 | 7.78E-05    | 0.000479232 |
| ENSMMUG00000055853 | G protein-coupled receptor 139 [Source:NCBI gene;Acc:695541]                                         | 1.028441316 | 0.011380613 | 0.03606714  |
| ENSMMUG00000016758 | transmembrane protein 159 [Source:VGNC Symbol;Acc:VGNC:79836]                                        | 0.637942395 | 6.97E-05    | 0.000433085 |
| ENSMMUG00000064659 |                                                                                                      | 0.6131281   | 0.000897579 | 0.004129146 |
| ENSMMUG00000017725 | eukaryotic elongation factor 2 kinase [Source:VGNC Symbol;Acc:VGNC:72098]                            | 0.690553149 | 8.03E-08    | 9.79E-07    |
| ENSMMUG00000002257 | RNA polymerase III subunit E [Source:VGNC Symbol;Acc:VGNC:76142]                                     | 0.551929428 | 2.92E-05    | 0.000199908 |
| ENSMMUG00000013877 | otoancorin [Source:VGNC Symbol;Acc:VGNC:75624]                                                       | 1.186635177 | 9.15E-05    | 0.000551944 |
| ENSMMUG00000058042 | heparan sulfate-glucosamine 3-sulfotransferase 2 [Source:NCBI gene;Acc:699722]                       | 1.015174045 | 4.61E-07    | 4.85E-06    |
| ENSMMUG00000000525 | component of oligomeric golgi complex 7 [Source:VGNC Symbol;Acc:VGNC:71208]                          | 0.890119057 | 0.00231472  | 0.009336596 |
| ENSMMUG00000054064 |                                                                                                      | 1.597313985 | 1.77E-13    | 5.74E-12    |
| ENSMMUG00000013560 | calcium voltage-gated channel auxiliary subunit gamma 3 [Source:VGNC Symbol;Acc:VGNC:70513]          | 0.721619963 | 0.000265337 | 0.001420177 |
| ENSMMUG00000057850 |                                                                                                      | 0.474314437 | 0.016948778 | 0.049969579 |
| ENSMMUG00000015908 | RB binding protein 6, ubiquitin ligase [Source:VGNC Symbol;Acc:VGNC:76677]                           | 0.455881978 | 0.000386776 | 0.001967994 |
| ENSMMUG00000005942 | leucine carboxyl methyltransferase 1 [Source:VGNC Symbol;Acc:VGNC:74067]                             | 0.439119157 | 0.000287637 | 0.001522159 |
| ENSMMUG00000008254 | general transcription factor IIIC subunit 1 [Source:VGNC Symbol;Acc:VGNC:73316]                      | 3.836563063 | 0.003074693 | 0.011872646 |
| ENSMMUG00000015572 | GSG1 like [Source:VGNC Symbol;Acc:VGNC:82152]                                                        | 0.797742128 | 9.90E-05    | 0.000591282 |
| ENSMMUG00000003303 | Tu translation elongation factor, mitochondrial [Source:VGNC Symbol;Acc:VGNC:78674]                  | 1.402896496 | 2.10E-18    | 1.32E-16    |
| ENSMMUG00000003298 | ataxin 2 like [Source:VGNC Symbol;Acc:VGNC:70159]                                                    | 1.373956454 | 2.82E-14    | 1.08E-12    |
| ENSMMUG00000011798 | eukaryotic translation initiation factor 3 subunit C [Source:NCBI gene;Acc:705696]                   | 1.388117996 | 6.77E-16    | 3.25E-14    |
| ENSMMUG00000000700 | CLN3 lysosomal/endosomal transmembrane protein, battenin [Source:NCBI gene;Acc:705815]               | 1.40157735  | 6.53E-12    | 1.68E-10    |
| ENSMMUG00000022330 | sulfotransferase family, cytosolic, 1A, phenol-preferring, member 3 [Source:NCBI gene;Acc:100428398] | 2.321726207 | 0.00132658  | 0.005775528 |
| ENSMMUG00000017758 | mitogen-activated protein kinase 3 [Source:VGNC Symbol;Acc:VGNC:74646]                               | 2.245002475 | 5.51E-29    | 1.16E-26    |
| ENSMMUG00000029164 | glycerophosphodiester phosphodiesterase domain containing 3 [Source:VGNC Symbol;Acc:VGNC:72800]      | 3.327639655 | 2.12E-11    | 4.99E-10    |

|                    |                                                                                          |             |             |             |
|--------------------|------------------------------------------------------------------------------------------|-------------|-------------|-------------|
| ENSMMUG0000000981  | T-box transcription factor 6 [Source:VGNC Symbol;Acc:VGNC:78276]                         | 1.819722995 | 4.06E-09    | 6.31E-08    |
| ENSMMUG0000000982  | protein phosphatase 4 catalytic subunit [Source:VGNC Symbol;Acc:VGNC:76384]              | 1.762335642 | 7.13E-08    | 8.80E-07    |
| ENSMMUG0000000983  | aldolase, fructose-bisphosphate A [Source:NCBI gene;Acc:708406]                          | 1.467984508 | 4.36E-07    | 4.60E-06    |
| ENSMMUG00000059051 |                                                                                          | 1.198024507 | 0.009299414 | 0.03054351  |
| ENSMMUG00000037707 | TLC domain containing 3B [Source:NCBI gene;Acc:708210]                                   | -0.79488597 | 0.015460797 | 0.046427102 |
| ENSMMUG00000020277 | double C2 domain alpha [Source:VGNC Symbol;Acc:VGNC:71963]                               | 0.478919838 | 0.000533945 | 0.002616095 |
| ENSMMUG00000020274 | TAO kinase 2 [Source:VGNC Symbol;Acc:VGNC:81592]                                         | 0.421793192 | 0.001050693 | 0.004720001 |
| ENSMMUG00000018992 | aspartate beta-hydroxylase domain containing 1 [Source:VGNC Symbol;Acc:VGNC:70138]       | 1.812067192 | 0.000267217 | 0.001428139 |
| ENSMMUG00000018986 | seizure related 6 homolog like 2 [Source:VGNC Symbol;Acc:VGNC:81567]                     | 1.176192111 | 1.87E-06    | 1.68E-05    |
| ENSMMUG00000061749 | PAXIP1 associated glutamate rich protein 1 [Source:NCBI gene;Acc:706839]                 | 0.451172124 | 0.000338648 | 0.001750685 |
| ENSMMUG00000019826 | MYC associated zinc finger protein [Source:NCBI gene;Acc:708982]                         | 0.537269757 | 0.005798428 | 0.020385122 |
| ENSMMUG00000009684 | kinesin family member 22 [Source:VGNC Symbol;Acc:VGNC:74033]                             | 1.644821131 | 1.94E-12    | 5.41E-11    |
| ENSMMUG00000016143 | sialophorin [Source:VGNC Symbol;Acc:VGNC:77861]                                          | 1.590784073 | 6.57E-28    | 1.18E-25    |
| ENSMMUG00000021845 | TBC1 domain family member 10B [Source:VGNC Symbol;Acc:VGNC:78202]                        | 0.363627721 | 0.004559421 | 0.016565935 |
| ENSMMUG00000016876 | integrin subunit alpha L [Source:NCBI gene;Acc:711945]                                   | 0.909451422 | 3.25E-05    | 0.000220663 |
| ENSMMUG00000001121 | zinc finger protein 689 [Source:VGNC Symbol;Acc:VGNC:79480]                              | 1.205538521 | 4.35E-05    | 0.000287759 |
| ENSMMUG00000005625 | fibrosin [Source:NCBI gene;Acc:712741]                                                   | 1.842144187 | 0.002268411 | 0.009195729 |
| ENSMMUG00000051226 | FAD-linked sulfhydryl oxidase ERV1 [Source:NCBI gene;Acc:106994988]                      | 1.396264795 | 6.97E-15    | 2.86E-13    |
| ENSMMUG00000010556 | Snf2 related CREBBP activator protein [Source:NCBI gene;Acc:712944]                      | 0.986016473 | 1.35E-10    | 2.77E-09    |
| ENSMMUG00000003230 | F-box and leucine rich repeat protein 19 [Source:VGNC Symbol;Acc:VGNC:81406]             | 0.653087427 | 0.000931919 | 0.004265525 |
| ENSMMUG00000003233 | SET domain containing 1A, histone lysine methyltransferase [Source:NCBI gene;Acc:712416] | 0.909988539 | 2.58E-09    | 4.18E-08    |
| ENSMMUG00000048207 | syntaxin 4 [Source:NCBI gene;Acc:704880]                                                 | 0.568507467 | 1.51E-05    | 0.000110531 |
| ENSMMUG00000002033 | serine protease 36 [Source:VGNC Symbol;Acc:VGNC:76325]                                   | 0.627154709 | 4.94E-07    | 5.14E-06    |
| ENSMMUG00000014349 | integrin subunit alpha X [Source:NCBI gene;Acc:100427850]                                | 2.072634456 | 3.34E-08    | 4.39E-07    |
| ENSMMUG00000000901 | alpha hemoglobin stabilizing protein [Source:VGNC Symbol;Acc:VGNC:69631]                 | 0.343760562 | 0.006511722 | 0.022442129 |
| ENSMMUG00000058907 |                                                                                          | 1.890053574 | 8.77E-05    | 0.000531156 |
| ENSMMUG00000055973 | phosphoglycerate mutase 1-like [Source:NCBI gene;Acc:714548]                             | 2.248958856 | 0.000132504 | 0.000769255 |
| ENSMMUG00000006133 |                                                                                          | 2.601948734 | 0.006464633 | 0.022306282 |
| ENSMMUG00000008253 | zinc finger protein 267 [Source:NCBI gene;Acc:641441]                                    | 1.666095305 | 8.82E-17    | 4.64E-15    |
| ENSMMUG00000003288 | glutamic--pyruvic transaminase 2 [Source:VGNC Symbol;Acc:VGNC:72962]                     | 0.874171415 | 0.000167162 | 0.000941511 |
| ENSMMUG00000051092 |                                                                                          | 0.846601983 | 0.010607615 | 0.033987855 |
| ENSMMUG00000019868 | NKD inhibitor of WNT signaling pathway 1 [Source:VGNC Symbol;Acc:VGNC:75198]             | 1.258625387 | 0.001402085 | 0.006054727 |
| ENSMMUG00000012209 | CYLD lysine 63 deubiquitinase [Source:VGNC Symbol;Acc:VGNC:71581]                        | 0.943690303 | 2.24E-06    | 1.98E-05    |
| ENSMMUG00000055889 |                                                                                          | 1.307759806 | 0.000966021 | 0.004393944 |
| ENSMMUG00000064095 |                                                                                          | 3.609529037 | 1.22E-06    | 1.16E-05    |
| ENSMMUG00000013967 | TOX high mobility group box family member 3 [Source:VGNC Symbol;Acc:VGNC:78612]          | 2.758757539 | 3.99E-14    | 1.50E-12    |
| ENSMMUG00000020580 | RPGRIP1 like [Source:VGNC Symbol;Acc:VGNC:77124]                                         | 1.320868307 | 1.46E-05    | 0.000107456 |
| ENSMMUG00000020583 | FTO alpha-ketoglutarate dependent dioxygenase [Source:VGNC Symbol;Acc:VGNC:72772]        | 0.902697837 | 8.93E-08    | 1.08E-06    |
| ENSMMUG00000001389 | iroquois homeobox 3 [Source:NCBI gene;Acc:704386]                                        | 0.40922102  | 0.011472231 | 0.036278404 |
| ENSMMUG00000054811 |                                                                                          | 3.037786445 | 9.42E-05    | 0.000565319 |
| ENSMMUG00000056555 |                                                                                          | 1.364826914 | 3.01E-11    | 6.88E-10    |

|                    |                                                                                             |             |             |             |
|--------------------|---------------------------------------------------------------------------------------------|-------------|-------------|-------------|
| ENSMMUG00000023525 | cadherin 5 [Source:VGNC Symbol;Acc:VGNC:70973]                                              | -0.50959161 | 0.000332072 | 0.001720976 |
| ENSMMUG00000049484 |                                                                                             | 0.865486424 | 7.39E-10    | 1.33E-08    |
| ENSMMUG00000020847 | CKLF like MARVEL transmembrane domain containing 3 [Source:VGNC Symbol;Acc:VGNC:71215]      | 0.982656282 | 0.002330978 | 0.009394351 |
| ENSMMUG00000022825 | carboxylesterase 2 [Source:VGNC Symbol;Acc:VGNC:71012]                                      | 0.326548718 | 0.000116779 | 0.000685631 |
| ENSMMUG00000064237 |                                                                                             | 1.346782341 | 2.21E-07    | 2.49E-06    |
| ENSMMUG00000054948 |                                                                                             | 1.259367266 | 0.000472475 | 0.002354599 |
| ENSMMUG00000058815 | core-binding factor subunit beta [Source:NCBI gene;Acc:695767]                              | 0.922233773 | 0.000126053 | 0.000734146 |
| ENSMMUG00000018102 | chromosome 20 C16orf70 homolog [Source:VGNC Symbol;Acc:VGNC:70438]                          | 1.148110564 | 3.75E-05    | 0.000250841 |
| ENSMMUG00000005906 | heat shock transcription factor 4 [Source:VGNC Symbol;Acc:VGNC:73533]                       | 0.868594233 | 2.57E-05    | 0.00017862  |
| ENSMMUG00000020268 | nucleolar protein 3 [Source:NCBI gene;Acc:696747]                                           | 0.780789795 | 0.014654693 | 0.044447168 |
| ENSMMUG00000020266 | KIAA0895 like [Source:VGNC Symbol;Acc:VGNC:73952]                                           | 1.278378343 | 0.004881907 | 0.017588172 |
| ENSMMUG00000020254 | exocyst complex component 3 like 1 [Source:VGNC Symbol;Acc:VGNC:72376]                      | 1.092183519 | 9.87E-11    | 2.07E-09    |
| ENSMMUG00000020258 | E2F transcription factor 4 [Source:VGNC Symbol;Acc:VGNC:72025]                              | 0.788005532 | 7.36E-06    | 5.80E-05    |
| ENSMMUG00000020259 | engulfment and cell motility 3 [Source:VGNC Symbol;Acc:VGNC:72060]                          | 1.123599026 | 0.006105638 | 0.021274606 |
| ENSMMUG00000054637 | tubulin polymerization promoting protein family member 3 [Source:NCBI gene;Acc:100429881]   | 1.53881209  | 0.016713013 | 0.049512343 |
| ENSMMUG00000009825 | zinc finger DHHC-type containing 1 [Source:VGNC Symbol;Acc:VGNC:79102]                      | 0.715058631 | 2.02E-05    | 0.000143654 |
| ENSMMUG00000017105 | RHO family interacting cell polarization regulator 1 [Source:NCBI gene;Acc:699910]          | 0.386462477 | 0.000410528 | 0.002080838 |
| ENSMMUG00000007804 | RAN binding protein 10 [Source:VGNC Symbol;Acc:VGNC:76563]                                  | 0.87475     | 0.003246158 | 0.012451027 |
| ENSMMUG00000010393 | cadherin 3 [Source:VGNC Symbol;Acc:VGNC:70971]                                              | 0.363265982 | 0.002970412 | 0.011527198 |
| ENSMMUG00000012039 | cytochrome b5 type B (outer mitochondrial membrane) [Source:NCBI gene;Acc:705093]           | 2.248692584 | 8.34E-06    | 6.46E-05    |
| ENSMMUG00000018255 | nuclear factor of activated T cells 5 [Source:VGNC Symbol;Acc:VGNC:75325]                   | 0.707091069 | 1.22E-05    | 9.19E-05    |
| ENSMMUG00000049699 | thioredoxin like 4B [Source:NCBI gene;Acc:706840]                                           | 1.061181014 | 0.005908404 | 0.02071147  |
| ENSMMUG00000023312 | haptoglobin [Source:NCBI gene;Acc:706640]                                                   | 1.215988346 | 0.000585766 | 0.002838429 |
| ENSMMUG00000009688 | IST1 factor associated with ESCRT-III [Source:VGNC Symbol;Acc:VGNC:73675]                   | 0.695001975 | 0.001441664 | 0.006200436 |
| ENSMMUG00000010878 | adaptor related protein complex 1 subunit gamma 1 [Source:VGNC Symbol;Acc:VGNC:69958]       | 0.912082301 | 2.67E-11    | 6.15E-10    |
| ENSMMUG00000012007 | PH domain and leucine rich repeat protein phosphatase 2 [Source:VGNC Symbol;Acc:VGNC:81494] | 0.666003342 | 0.01347933  | 0.041472614 |
| ENSMMUG00000052324 | MARVEL domain containing 3 [Source:NCBI gene;Acc:710448]                                    | 0.680959409 | 0.00582425  | 0.020460017 |
| ENSMMUG00000061967 | carbohydrate sulfotransferase 4 [Source:NCBI gene;Acc:708116]                               | 0.823068567 | 0.002533814 | 0.010077716 |
| ENSMMUG00000023147 | pyruvate dehydrogenase phosphatase regulatory subunit [Source:VGNC Symbol;Acc:VGNC:75897]   | 1.238319171 | 0.011240723 | 0.035678251 |
| ENSMMUG00000005751 | adenosine deaminase tRNA specific 1 [Source:VGNC Symbol;Acc:VGNC:69504]                     | 1.392240689 | 0.001715104 | 0.007233653 |
| ENSMMUG00000005754 | lysyl-tRNA synthetase 1 [Source:NCBI gene;Acc:714516]                                       | 1.039226587 | 0.002995526 | 0.011614423 |
| ENSMMUG00000045592 |                                                                                             | 1.699148589 | 4.66E-05    | 0.000305377 |
| ENSMMUG00000003916 | contactin associated protein family member 4 [Source:VGNC Symbol;Acc:VGNC:71209]            | 1.473746239 | 0.001572347 | 0.006697103 |
| ENSMMUG00000010610 | WW domain containing oxidoreductase [Source:VGNC Symbol;Acc:VGNC:78805]                     | 0.903241178 | 0.015062505 | 0.045428141 |
| ENSMMUG00000053231 |                                                                                             | 0.681088491 | 0.00060959  | 0.0029421   |
| ENSMMUG00000005334 | phospholipase C gamma 2 [Source:VGNC Symbol;Acc:VGNC:76170]                                 | 0.681269152 | 1.58E-05    | 0.000115009 |
| ENSMMUG00000062047 |                                                                                             | -0.88932336 | 0.003544687 | 0.013405079 |
| ENSMMUG00000057329 |                                                                                             | 1.279740988 | 0.009826863 | 0.031972495 |

|                    |                                                                                                  |   |             |             |             |
|--------------------|--------------------------------------------------------------------------------------------------|---|-------------|-------------|-------------|
| ENSMMUG00000011893 | KIAA0513 [Source:VGNC Symbol;Acc:VGNC:73925]                                                     | - | 1.111560774 | 3.19E-07    | 3.47E-06    |
| ENSMMUG00000011894 | CBY1 interacting BAR domain containing 2 [Source:VGNC Symbol;Acc:VGNC:72335]                     | - | 1.044782924 | 9.47E-05    | 0.000567669 |
| ENSMMUG00000061995 |                                                                                                  |   | 0.938403015 | 3.43E-11    | 7.76E-10    |
| ENSMMUG00000006763 | cytochrome c oxidase subunit IV isoform 1 [Source:NCBI gene;Acc:693811]                          | - | 0.636239057 | 0.000854998 | 0.003959575 |
| ENSMMUG00000060536 |                                                                                                  |   | 1.677869366 | 0.00056454  | 0.002748397 |
| ENSMMUG00000054493 |                                                                                                  |   | 0.669032409 | 2.06E-05    | 0.000146094 |
| ENSMMUG00000017615 | zinc finger CCHC-type containing 14 [Source:VGNC Symbol;Acc:VGNC:79420]                          | - | 1.186192668 | 1.32E-10    | 2.72E-09    |
| ENSMMUG00000022867 | kelch domain containing 4 [Source:VGNC Symbol;Acc:VGNC:74122]                                    | - | 0.544295352 | 0.000312401 | 0.001630654 |
| ENSMMUG00000058437 |                                                                                                  |   | 0.938893456 | 3.43E-06    | 2.91E-05    |
| ENSMMUG00000008945 | zinc finger protein 407 [Source:NCBI gene;Acc:695303]                                            | - | 2.308434595 | 0.001438732 | 0.006189656 |
| ENSMMUG00000008942 | carosine dipeptidase 1 [Source:VGNC Symbol;Acc:VGNC:71257]                                       | - | 2.686067317 | 3.48E-06    | 2.95E-05    |
| ENSMMUG00000051690 |                                                                                                  |   | 2.602182607 | 0.010741815 | 0.03438753  |
| ENSMMUG00000015702 | divergent protein kinase domain 1C [Source:NCBI gene;Acc:699537]                                 | - | 3.404180302 | 0.000162088 | 0.000917193 |
| ENSMMUG00000020905 | chromosome 18 C18orf63 homolog [Source:VGNC Symbol;Acc:VGNC:70465]                               | - | 3.091722348 | 5.66E-05    | 0.000361356 |
| ENSMMUG00000023298 | F-box protein 15 [Source:VGNC Symbol;Acc:VGNC:72504]                                             | - | 1.509621861 | 0.010487001 | 0.033675619 |
| ENSMMUG00000056477 |                                                                                                  |   | 0.945965394 | 4.02E-14    | 1.50E-12    |
| ENSMMUG00000050516 |                                                                                                  |   | 0.961041465 | 2.41E-12    | 6.62E-11    |
| ENSMMUG00000060966 |                                                                                                  |   | -1.54034567 | 0.00745388  | 0.025334827 |
| ENSMMUG00000018275 | docking protein 6 [Source:VGNC Symbol;Acc:VGNC:71915]                                            | - | 0.726551726 | 0.009156501 | 0.030162714 |
| ENSMMUG00000001245 | zinc finger protein 532 [Source:NCBI gene;Acc:701146]                                            | - | 4.689024266 | 2.22E-07    | 2.50E-06    |
| ENSMMUG00000061572 | Metazoan signal recognition particle RNA [Source:RFAM;Acc:RF00017]                               | - | 4.419907428 | 2.77E-08    | 3.69E-07    |
| ENSMMUG00000065131 |                                                                                                  |   | -3.77952974 | 0.000109866 | 0.000648181 |
| ENSMMUG00000012001 | transcription factor 4 [Source:VGNC Symbol;Acc:VGNC:78288]                                       | - | 1.693508596 | 9.98E-15    | 3.95E-13    |
| ENSMMUG00000020898 | cap binding complex dependent translation initiation factor [Source:HGNC Symbol;Acc:HGNC:23925]  | - | -0.94874816 | 0.009561768 | 0.031242845 |
| ENSMMUG00000007816 | SMAD family member 2 [Source:VGNC Symbol;Acc:VGNC:77810]                                         | - | 2.523229574 | 9.37E-13    | 2.73E-11    |
| ENSMMUG00000053364 |                                                                                                  |   | 0.593233008 | 0.009501294 | 0.031080177 |
| ENSMMUG00000015952 | katanin catalytic subunit A1 like 2 [Source:VGNC Symbol;Acc:VGNC:73904]                          | - | 1.891667613 | 2.49E-05    | 0.000173749 |
| ENSMMUG00000043738 |                                                                                                  |   | 2.037938867 | 0.000162436 | 0.000917733 |
| ENSMMUG00000004498 | protein inhibitor of activated STAT 2 [Source:VGNC Symbol;Acc:VGNC:75815]                        | - | 1.728500494 | 8.90E-06    | 6.86E-05    |
| ENSMMUG00000002742 | ST8 alpha-N-acetyl-neuraminide alpha-2,8-sialyltransferase 5 [Source:VGNC Symbol;Acc:VGNC:77942] | - | 2.300057044 | 2.55E-14    | 9.81E-13    |
| ENSMMUG00000017246 | lipoxygenase homology domains 1 [Source:VGNC Symbol;Acc:VGNC:74368]                              | - | 1.677556828 | 1.58E-15    | 7.23E-14    |
| ENSMMUG00000004997 | SET binding protein 1 [Source:NCBI gene;Acc:699652]                                              | - | 1.10840192  | 0.015531522 | 0.046600979 |
| ENSMMUG00000049194 |                                                                                                  |   | 1.584847381 | 0.003887421 | 0.01449383  |
| ENSMMUG00000006866 | CUGBP Elav-like family member 4 [Source:VGNC Symbol;Acc:VGNC:70945]                              | - | 2.492430974 | 0.003327847 | 0.012727416 |
| ENSMMUG00000006864 | KIAA1328 ortholog [Source:NCBI gene;Acc:709850]                                                  | - | 3.187525326 | 0.000721483 | 0.003406365 |

|                    |                                                                                                                     |             |             |             |
|--------------------|---------------------------------------------------------------------------------------------------------------------|-------------|-------------|-------------|
| ENSMMUG00000018784 | solute carrier family 39 member 6 [Source:VGNC Symbol;Acc:VGNC:77508]                                               | 0.365037707 | 0.002673784 | 0.010502244 |
| ENSMMUG00000018785 | elongator acetyltransferase complex subunit 2 [Source:VGNC Symbol;Acc:VGNC:72069]                                   | -0.35230932 | 0.002172501 | 0.008871248 |
| ENSMMUG00000003302 | dystrobrevin alpha [Source:VGNC Symbol;Acc:VGNC:72007]                                                              | 1.601763282 | 1.21E-05    | 9.13E-05    |
| ENSMMUG00000017276 | nucleolar protein 4 [Source:VGNC Symbol;Acc:VGNC:75366]                                                             | -1.04106704 | 2.78E-06    | 2.40E-05    |
| ENSMMUG00000014451 | ASXL transcriptional regulator 3 [Source:VGNC Symbol;Acc:VGNC:70152]                                                | 0.660908571 | 0.000105909 | 0.000627893 |
| ENSMMUG00000052277 | transthyretin [Source:NCBI gene;Acc:705943]                                                                         | 2.591213127 | 8.42E-08    | 1.02E-06    |
| ENSMMUG00000021095 | desmoglein 2 [Source:VGNC Symbol;Acc:VGNC:72002]                                                                    | 2.521223705 | 0.002171525 | 0.008871248 |
| ENSMMUG00000063743 |                                                                                                                     | 0.747312312 | 0.011465479 | 0.036264941 |
| ENSMMUG00000010944 | GATA binding protein 6 [Source:VGNC Symbol;Acc:VGNC:72891]                                                          | 0.674528825 | 0.01150553  | 0.036351238 |
| ENSMMUG00000064806 |                                                                                                                     | -0.87754019 | 0.001266341 | 0.005549799 |
| ENSMMUG00000003974 | GREB1 like retinoic acid receptor coactivator [Source:NCBI gene;Acc:700655]                                         | -2.68122451 | 0.005377976 | 0.019132713 |
| ENSMMUG00000019892 | myomesin 1 [Source:VGNC Symbol;Acc:VGNC:75123]                                                                      | 1.259593467 | 5.33E-16    | 2.60E-14    |
| ENSMMUG00000052605 | Metazoan signal recognition particle RNA [Source:RFAM;Acc:RF00017]                                                  | 3.293959597 | 7.72E-06    | 6.04E-05    |
| ENSMMUG00000005086 | homeobox protein TGIF1 [Source:NCBI gene;Acc:694580]                                                                | 1.534884172 | 2.60E-08    | 3.48E-07    |
| ENSMMUG00000019418 | erythrocyte membrane protein band 4.1 like 3 [Source:VGNC Symbol;Acc:VGNC:72233]                                    | 1.870429611 | 1.58E-34    | 5.73E-32    |
| ENSMMUG00000016302 | L3MBTL histone methyl-lysine binding protein 4 [Source:VGNC Symbol;Acc:VGNC:74133]                                  | 0.340129013 | 0.003995275 | 0.014835074 |
| ENSMMUG00000059721 | Metazoan signal recognition particle RNA [Source:RFAM;Acc:RF00017]                                                  | 0.969807949 | 0.009113822 | 0.030060584 |
| ENSMMUG00000000768 | protein tyrosine phosphatase receptor type M [Source:VGNC Symbol;Acc:VGNC:76619]                                    | 0.432402064 | 0.002806467 | 0.010978905 |
| ENSMMUG00000053008 |                                                                                                                     | 1.305859723 | 1.88E-06    | 1.69E-05    |
| ENSMMUG00000049556 | NADH:ubiquinone oxidoreductase core subunit V2 [Source:NCBI gene;Acc:706067]                                        | 0.679250398 | 0.009588444 | 0.031301867 |
| ENSMMUG00000049523 | ankyrin repeat domain 12 [Source:NCBI gene;Acc:114673693]                                                           | 0.938812869 | 0.000813803 | 0.003788105 |
| ENSMMUG00000023717 | MIER family member 2 [Source:VGNC Symbol;Acc:VGNC:74855]                                                            | 1.138230434 | 9.12E-09    | 1.35E-07    |
| ENSMMUG00000059175 |                                                                                                                     | 3.232664425 | 6.68E-19    | 4.56E-17    |
| ENSMMUG00000053083 | C2 calcium dependent domain containing 4C [Source:NCBI gene;Acc:100424440]                                          | 3.06752983  | 5.04E-10    | 9.39E-09    |
| ENSMMUG00000012768 | hyperpolarization activated cyclic nucleotide gated potassium and sodium channel 2 [Source:NCBI gene;Acc:100425114] | 0.762228802 | 0.010061175 | 0.032588969 |
| ENSMMUG00000049968 | RNA polymerase mitochondrial [Source:NCBI gene;Acc:100426183]                                                       | 0.876282383 | 5.62E-16    | 2.71E-14    |
| ENSMMUG00000055423 | fibroblast growth factor 22 [Source:NCBI gene;Acc:702727]                                                           | 0.379748361 | 0.014735401 | 0.044645377 |
| ENSMMUG00000008672 | ring finger protein 126 [Source:VGNC Symbol;Acc:VGNC:76791]                                                         | 0.645557984 | 0.003390318 | 0.012925533 |
| ENSMMUG00000016450 | polypyrimidine tract binding protein 1 [Source:VGNC Symbol;Acc:VGNC:76462]                                          | 0.405982735 | 0.008338242 | 0.027788405 |
| ENSMMUG00000028948 | azurocidin 1 [Source:VGNC Symbol;Acc:VGNC:70202]                                                                    | 2.368837253 | 4.04E-06    | 3.38E-05    |
| ENSMMUG00000009674 | elastase, neutrophil expressed [Source:VGNC Symbol;Acc:VGNC:72199]                                                  | 1.96661735  | 0.001048272 | 0.004710583 |
| ENSMMUG00000028947 | complement factor D [Source:VGNC Symbol;Acc:VGNC:71115]                                                             | 2.640040881 | 2.47E-32    | 6.52E-30    |
| ENSMMUG00000058621 |                                                                                                                     | 0.892574639 | 6.99E-09    | 1.05E-07    |
| ENSMMUG00000002638 | WD repeat domain 18 [Source:VGNC Symbol;Acc:VGNC:79103]                                                             | 0.982584203 | 1.19E-05    | 9.00E-05    |
| ENSMMUG00000013577 | transmembrane protein 259 [Source:NCBI gene;Acc:721161]                                                             | 0.362068956 | 0.008382194 | 0.027909289 |
| ENSMMUG00000015306 | calponin 2 [Source:NCBI gene;Acc:721164]                                                                            | 0.60668624  | 8.91E-05    | 0.000539508 |
| ENSMMUG00000015303 | ATP binding cassette subfamily A member 7 [Source:VGNC Symbol;Acc:VGNC:69567]                                       | 1.032830944 | 2.92E-09    | 4.68E-08    |



|                     |                                                                                                  |             |             |             |
|---------------------|--------------------------------------------------------------------------------------------------|-------------|-------------|-------------|
| ENSMMUG00000058856  | Metazoan signal recognition particle RNA [Source:RFAM;Acc:RF00017]                               | 1.088016215 | 0.000147897 | 0.00084678  |
| ENSMMUG00000010886  | strawberry notch homolog 2 [Source:VGNC Symbol;Acc:VGNC:77123]                                   | 1.406124488 | 5.52E-05    | 0.000353947 |
| ENSMMUG00000058928  | Metazoan signal recognition particle RNA [Source:RFAM;Acc:RF00017]                               | 1.68665333  | 2.48E-09    | 4.04E-08    |
| ENSMMUG00000022100  | midnolin [Source:VGNC Symbol;Acc:VGNC:82186]                                                     | 1.258158939 | 1.03E-16    | 5.41E-15    |
| ENSMMUG00000003047  | DAZ associated protein 1 [Source:VGNC Symbol;Acc:VGNC:71738]                                     | 0.278234832 | 0.013215466 | 0.040779712 |
| ENSMMUG00000022104  | family with sequence similarity 174 member C [Source:NCBI gene;Acc:706393]                       | 0.735022364 | 2.09E-07    | 2.36E-06    |
|                     |                                                                                                  | -           |             |             |
| ENSMMUG00000003043  | PWWP domain containing 3A, DNA repair factor [Source:VGNC Symbol;Acc:VGNC:76565]                 | 0.834173071 | 3.11E-09    | 4.96E-08    |
|                     |                                                                                                  | -           |             |             |
| ENSMMUG00000009014  | methyl-CpG binding domain protein 3 [Source:VGNC Symbol;Acc:VGNC:81470]                          | 0.722258038 | 0.011206128 | 0.03559176  |
| ENSMMUG00000009017  | transcription factor 3 [Source:VGNC Symbol;Acc:VGNC:78287]                                       | 0.543219532 | 1.66E-06    | 1.52E-05    |
|                     |                                                                                                  | -           |             |             |
| ENSMMUG00000013747  | secretory carrier membrane protein 4 [Source:VGNC Symbol;Acc:VGNC:77135]                         | 0.428777128 | 0.014896911 | 0.045012761 |
| ENSMMUG00000006620  | casein kinase 1 gamma 2 [Source:NCBI gene;Acc:709484]                                            | 0.541221543 | 0.003308105 | 0.01266524  |
| ENSMMUG000000059725 |                                                                                                  | 1.181824861 | 0.000955261 | 0.004358202 |
| ENSMMUG00000017949  | ornithine decarboxylase antizyme 1 [Source:NCBI gene;Acc:721477]                                 | 0.619424633 | 1.42E-08    | 2.02E-07    |
| ENSMMUG00000064612  | Metazoan signal recognition particle RNA [Source:RFAM;Acc:RF00017]                               | 0.757921737 | 0.004972554 | 0.017888149 |
| ENSMMUG00000000452  | LSM7 homolog, U6 small nuclear RNA and mRNA degradation associated [Source:NCBI gene;Acc:721486] | 1.985796669 | 0.00016977  | 0.00095509  |
|                     |                                                                                                  | -           |             |             |
| ENSMMUG000000055417 |                                                                                                  | 0.770346715 | 5.37E-09    | 8.25E-08    |
| ENSMMUG00000065054  | G protein subunit gamma 7 [Source:NCBI gene;Acc:711335]                                          | 1.594519115 | 2.10E-11    | 4.96E-10    |
| ENSMMUG00000007268  | thimet oligopeptidase 1 [Source:VGNC Symbol;Acc:VGNC:78347]                                      | 0.479913722 | 0.004119879 | 0.015200682 |
| ENSMMUG00000007485  | zinc finger protein 555 [Source:VGNC Symbol;Acc:VGNC:79705]                                      | -1.02463731 | 7.86E-05    | 0.000482772 |
|                     |                                                                                                  | -           |             |             |
| ENSMMUG00000002912  | TLE family member 6, subcortical maternal complex member [Source:VGNC Symbol;Acc:VGNC:79879]     | 1.094159414 | 0.000156967 | 0.000892039 |
|                     |                                                                                                  | -           |             |             |
| ENSMMUG00000002961  | G protein subunit alpha 11 [Source:VGNC Symbol;Acc:VGNC:73085]                                   | 0.920199049 | 2.45E-06    | 2.15E-05    |
| ENSMMUG00000017036  | nicalin [Source:VGNC Symbol;Acc:VGNC:75032]                                                      | 2.255079901 | 4.09E-13    | 1.26E-11    |
| ENSMMUG00000015513  | CUGBP Elav-like family member 5 [Source:NCBI gene;Acc:721694]                                    | 1.501974556 | 0.002365072 | 0.009497529 |
| ENSMMUG00000060497  |                                                                                                  | 1.735971104 | 0.000398675 | 0.00202358  |
|                     |                                                                                                  | -           |             |             |
| ENSMMUG00000028930  | tight junction protein 3 [Source:NCBI gene;Acc:721760]                                           | 0.436305174 | 0.00785823  | 0.026412737 |
| ENSMMUG00000044080  | mitochondrial ribosomal protein L54 [Source:NCBI gene;Acc:713878]                                | 0.916780406 | 0.000248371 | 0.001337249 |
| ENSMMUG00000001917  | megakaryocyte-associated tyrosine kinase [Source:NCBI gene;Acc:100430078]                        | 1.179300119 | 1.45E-09    | 2.47E-08    |
|                     |                                                                                                  | -           |             |             |
| ENSMMUG000000056147 |                                                                                                  | 1.027789415 | 0.000153293 | 0.000873204 |
|                     |                                                                                                  | -           |             |             |
| ENSMMUG00000022765  | death associated protein kinase 3 [Source:VGNC Symbol;Acc:VGNC:71734]                            | 1.738298404 | 0.016782542 | 0.049671436 |
|                     |                                                                                                  | -           |             |             |
| ENSMMUG00000022767  | eukaryotic translation elongation factor 2 [Source:NCBI gene;Acc:721806]                         | 2.257268237 | 0.006982324 | 0.023849165 |
|                     |                                                                                                  | -           |             |             |
| ENSMMUG00000019564  | mitogen-activated protein kinase kinase 2 [Source:VGNC Symbol;Acc:VGNC:81453]                    | 0.435927136 | 0.004587762 | 0.016664741 |
| ENSMMUG00000028928  | ankyrin repeat domain 24 [Source:NCBI gene;Acc:721829]                                           | 0.576333319 | 2.64E-05    | 0.000182244 |
| ENSMMUG00000010100  | YJU2 splicing factor homolog [Source:NCBI gene;Acc:718892]                                       | 1.166368197 | 0.001715237 | 0.007233653 |
|                     |                                                                                                  | -           |             |             |
| ENSMMUG00000028925  | HDGF like 2 [Source:NCBI gene;Acc:693476]                                                        | 2.347433091 | 5.61E-05    | 0.000358413 |
|                     |                                                                                                  | -           |             |             |
| ENSMMUG00000022656  | perilipin 4 [Source:NCBI gene;Acc:693610]                                                        | 1.589248082 | 6.57E-05    | 0.000411191 |
|                     |                                                                                                  | -           |             |             |
| ENSMMUG00000021716  | dipeptidyl peptidase 9 [Source:NCBI gene;Acc:695587]                                             | 0.468074284 | 0.009575641 | 0.031267092 |
| ENSMMUG00000062995  |                                                                                                  | 0.486531806 | 0.010453571 | 0.033605389 |
| ENSMMUG00000058275  | arrestin domain containing 5 [Source:NCBI gene;Acc:697277]                                       | 0.652542801 | 0.002582307 | 0.010209138 |
|                     |                                                                                                  | -           |             |             |
| ENSMMUG00000012677  | lysine demethylase 4B [Source:VGNC Symbol;Acc:VGNC:73930]                                        | 0.792609482 | 9.76E-06    | 7.48E-05    |

|                    |                                                                                                      |             |             |             |
|--------------------|------------------------------------------------------------------------------------------------------|-------------|-------------|-------------|
| ENSMMUG00000016665 | NADH:ubiquinone oxidoreductase subunit A11 [Source:NCBI gene;Acc:697843]                             | -1.18249537 | 0.000519382 | 0.002556504 |
| ENSMMUG00000011963 | vimentin type intermediate filament associated coiled-coil protein [Source:NCBI gene;Acc:697958]     | 0.843037094 | 5.50E-06    | 4.46E-05    |
| ENSMMUG00000011964 | RAN binding protein 3 [Source:VGNC Symbol;Acc:VGNC:76655]                                            | 0.488226069 | 0.000882382 | 0.004068247 |
| ENSMMUG00000016526 | solute carrier family 25 member 41 [Source:VGNC Symbol;Acc:VGNC:77581]                               | -2.07748264 | 3.95E-08    | 5.12E-07    |
| ENSMMUG00000019314 | vav guanine nucleotide exchange factor 1 [Source:VGNC Symbol;Acc:VGNC:78757]                         | 2.547634397 | 1.22E-08    | 1.77E-07    |
| ENSMMUG00000001220 | adhesion G protein-coupled receptor E1 [Source:VGNC Symbol;Acc:VGNC:69561]                           | 0.920289361 | 3.01E-07    | 3.30E-06    |
| ENSMMUG00000063988 |                                                                                                      | 1.688211633 | 1.17E-05    | 8.85E-05    |
| ENSMMUG00000019966 | zinc finger protein 557 [Source:NCBI gene;Acc:100424983]                                             | 0.70834772  | 7.70E-09    | 1.15E-07    |
| ENSMMUG00000057682 |                                                                                                      | 0.690863899 | 5.29E-08    | 6.72E-07    |
| ENSMMUG00000028907 | insulin receptor [Source:NCBI gene;Acc:706009]                                                       | 2.493877586 | 8.51E-11    | 1.80E-09    |
| ENSMMUG00000028906 | Rho/Rac guanine nucleotide exchange factor 18 [Source:NCBI gene;Acc:707510]                          | 1.786597798 | 9.34E-05    | 0.000562025 |
| ENSMMUG00000009540 | calmodulin regulated spectrin associated protein family member 3 [Source:VGNC Symbol;Acc:VGNC:70669] | 0.720795048 | 3.72E-07    | 3.99E-06    |
| ENSMMUG00000009539 | XPA binding protein 2 [Source:VGNC Symbol;Acc:VGNC:78943]                                            | 0.733468893 | 5.85E-08    | 7.34E-07    |
| ENSMMUG00000022463 | C-type lectin CD209L2 [Source:NCBI gene;Acc:574373]                                                  | 1.286744541 | 0.000668572 | 0.00319285  |
| ENSMMUG00000023303 | ecotropic viral integration site 5 like [Source:NCBI gene;Acc:706628]                                | 1.578427119 | 2.82E-35    | 1.21E-32    |
| ENSMMUG00000014032 | proline rich 36 [Source:NCBI gene;Acc:710443]                                                        | 2.492118572 | 2.44E-05    | 0.000171194 |
| ENSMMUG00000006544 | ELAV like RNA binding protein 1 [Source:VGNC Symbol;Acc:VGNC:72200]                                  | 2.918411998 | 0.001907772 | 0.007926058 |
| ENSMMUG00000010614 | C-C motif chemokine ligand 25 [Source:VGNC Symbol;Acc:VGNC:70700]                                    | 3.730896486 | 0.000529074 | 0.002596608 |
| ENSMMUG00000061632 | fibrillin 3 [Source:NCBI gene;Acc:709446]                                                            | 0.635995645 | 0.009663651 | 0.031519069 |
| ENSMMUG00000011178 | ceramide synthase 4 [Source:VGNC Symbol;Acc:VGNC:71077]                                              | -0.45852424 | 0.002159144 | 0.008831592 |
| ENSMMUG00000014247 | myosin IF [Source:NCBI gene;Acc:712101]                                                              | 2.089332642 | 0.012866139 | 0.039888048 |
| ENSMMUG00000064610 | long intergenic non-protein coding RNA 1862 [Source:HGNC Symbol;Acc:HGNC:52681]                      | 0.969456153 | 6.28E-06    | 5.02E-05    |
| ENSMMUG00000049311 | zinc finger protein 558 [Source:NCBI gene;Acc:712590]                                                | 0.676274804 | 1.29E-05    | 9.66E-05    |
| ENSMMUG00000019965 | methyl-CpG binding domain protein 3 like 1 [Source:VGNC Symbol;Acc:VGNC:74513]                       | 1.822549314 | 0.001721292 | 0.007254978 |
| ENSMMUG00000064532 | mucin 16, cell surface associated [Source:NCBI gene;Acc:106996460]                                   | 1.408566014 | 5.20E-20    | 3.92E-18    |
| ENSMMUG00000018883 | zinc finger protein 177 [Source:NCBI gene;Acc:709851]                                                | 0.640166807 | 0.001661103 | 0.00703392  |
| ENSMMUG00000007875 | F-box and leucine rich repeat protein 12 [Source:VGNC Symbol;Acc:VGNC:72502]                         | 0.893090143 | 4.51E-06    | 3.73E-05    |
| ENSMMUG00000001219 | mitochondrial ribosomal protein L4 [Source:VGNC Symbol;Acc:VGNC:74750]                               | 1.441259484 | 0.001012628 | 0.004573301 |
| ENSMMUG00000014897 | ribonucleoprotein, PTB binding 1 [Source:NCBI gene;Acc:715250]                                       | 1.344329717 | 5.52E-09    | 8.47E-08    |
| ENSMMUG00000003110 | tyrosine kinase 2 [Source:VGNC Symbol;Acc:VGNC:78680]                                                | 0.486245772 | 0.002554395 | 0.010136873 |
| ENSMMUG00000046883 | autophagy related 4D cysteine peptidase [Source:NCBI gene;Acc:713111]                                | 1.291494405 | 0.000483114 | 0.002398576 |
| ENSMMUG00000011951 | KRI1 homolog [Source:VGNC Symbol;Acc:VGNC:74127]                                                     | 1.028943891 | 0.00030889  | 0.001616392 |
| ENSMMUG00000016593 | adaptor related protein complex 1 subunit mu 2 [Source:NCBI gene;Acc:720531]                         | 2.188302314 | 0.000148995 | 0.000851391 |
| ENSMMUG00000003744 | solute carrier family 44 member 2 [Source:VGNC Symbol;Acc:VGNC:77498]                                | 0.626927774 | 4.23E-06    | 3.51E-05    |
| ENSMMUG00000014677 | dynamamin 2 [Source:VGNC Symbol;Acc:VGNC:71957]                                                      | 0.754037937 | 0.009838646 | 0.031996508 |
| ENSMMUG00000055775 | transmembrane p24 trafficking protein 1 [Source:NCBI gene;Acc:713618]                                | 1.878763186 | 4.51E-17    | 2.44E-15    |
| ENSMMUG00000049703 | Metazoan signal recognition particle RNA [Source:RFAM;Acc:RF00017]                                   | 2.280443918 | 3.86E-25    | 4.88E-23    |
| ENSMMUG00000018981 | chromosome 19 C19orf38 homolog [Source:VGNC Symbol;Acc:VGNC:70457]                                   | 0.555018626 | 0.000278606 | 0.001483553 |
| ENSMMUG00000004400 | Yip1 domain family member 2 [Source:VGNC Symbol;Acc:VGNC:79717]                                      | 0.704545983 | 0.000194565 | 0.001078714 |
| ENSMMUG00000003611 | low density lipoprotein receptor [Source:VGNC Symbol;Acc:VGNC:74248]                                 | 0.868187216 | 0.001037287 | 0.004669879 |
| ENSMMUG00000003612 | SPC24 component of NDC80 kinetochore complex [Source:VGNC Symbol;Acc:VGNC:78002]                     | 1.913174553 | 0.000497144 | 0.002458157 |

|                    |                                                                                           |             |             |             |
|--------------------|-------------------------------------------------------------------------------------------|-------------|-------------|-------------|
| ENSMMUG00000023251 | KN motif and ankyrin repeat domains 2 [Source:VGNC Symbol;Acc:VGNC:73938]                 | 0.923714742 | 0.000276035 | 0.00147094  |
| ENSMMUG00000009334 | dedicator of cytokinesis 6 [Source:VGNC Symbol;Acc:VGNC:71863]                            | 0.381675127 | 0.002829042 | 0.011052348 |
| ENSMMUG00000043134 | coiled-coil domain containing 159 [Source:NCBI gene;Acc:100424702]                        | 1.704923867 | 1.21E-08    | 1.74E-07    |
| ENSMMUG00000022207 | phospholipid phosphatase related 2 [Source:NCBI gene;Acc:714388]                          | 1.543401287 | 3.74E-07    | 4.00E-06    |
| ENSMMUG00000010824 | SWIM-type zinc finger 7 associated protein 1 [Source:VGNC Symbol;Acc:VGNC:78220]          | 1.615615311 | 6.12E-07    | 6.23E-06    |
| ENSMMUG00000038989 | erythropoietin receptor [Source:NCBI gene;Acc:714546]                                     | 1.683055472 | 9.20E-05    | 0.000554212 |
| ENSMMUG00000010826 | ral guanine nucleotide dissociation stimulator like 3 [Source:VGNC Symbol;Acc:VGNC:76869] | 0.867390643 | 0.010101006 | 0.032674304 |
| ENSMMUG00000053329 |                                                                                           | 0.867204195 | 0.013873628 | 0.042477028 |
| ENSMMUG00000012587 | zinc finger protein 69 [Source:NCBI gene;Acc:717030]                                      | 1.648475544 | 1.25E-13    | 4.18E-12    |
| ENSMMUG00000005236 | zinc finger protein 709 [Source:NCBI gene;Acc:717515]                                     | 0.925406814 | 0.004475815 | 0.016314011 |
| ENSMMUG00000058614 |                                                                                           | 2.068297051 | 0.000451182 | 0.002266355 |
| ENSMMUG00000063236 | bestrophin 2 [Source:NCBI gene;Acc:716545]                                                | 0.559451799 | 0.016592124 | 0.049234476 |
| ENSMMUG00000017971 | nucleus accumbens associated 1 [Source:VGNC Symbol;Acc:VGNC:74996]                        | 2.001735301 | 5.08E-06    | 4.14E-05    |
| ENSMMUG00000057038 |                                                                                           | 1.194439363 | 0.004523706 | 0.016452619 |
| ENSMMUG00000011427 | syntaxin 10 [Source:VGNC Symbol;Acc:VGNC:78040]                                           | 1.779624304 | 3.67E-24    | 3.98E-22    |
| ENSMMUG00000003555 | calcium voltage-gated channel subunit alpha1 A [Source:VGNC Symbol;Acc:VGNC:70498]        | 1.077964501 | 1.00E-07    | 1.20E-06    |
| ENSMMUG00000014137 | adhesion G protein-coupled receptor L1 [Source:VGNC Symbol;Acc:VGNC:69658]                | 0.362383741 | 0.008772778 | 0.029089842 |
| ENSMMUG00000060000 |                                                                                           | 1.238315344 | 0.000948444 | 0.004331615 |
| ENSMMUG00000005727 | protein kinase N1 [Source:VGNC Symbol;Acc:VGNC:76014]                                     | 1.560084974 | 1.09E-16    | 5.69E-15    |
| ENSMMUG00000005729 | GIPC PDZ domain containing family member 1 [Source:VGNC Symbol;Acc:VGNC:72932]            | 0.884617837 | 8.23E-07    | 8.07E-06    |
| ENSMMUG00000017906 | DnaJ heat shock protein family (Hsp40) member B1 [Source:NCBI gene;Acc:718890]            | 1.798308455 | 1.56E-06    | 1.44E-05    |
| ENSMMUG00000018932 | adhesion G protein-coupled receptor E2 [Source:NCBI gene;Acc:654420]                      | 1.809786854 | 1.99E-26    | 2.97E-24    |
| ENSMMUG00000060289 |                                                                                           | 1.847034901 | 1.69E-33    | 5.02E-31    |
| ENSMMUG00000053889 | olfactory receptor 7C1 [Source:NCBI gene;Acc:114674087]                                   | 0.992087447 | 0.001733606 | 0.00729208  |
| ENSMMUG00000053457 | caspase 14 [Source:NCBI gene;Acc:718049]                                                  | 1.993820706 | 8.89E-08    | 1.07E-06    |
| ENSMMUG00000007726 | synapse defective Rho GTPase homolog 1 [Source:NCBI gene;Acc:719089]                      | 2.098196183 | 1.13E-06    | 1.07E-05    |
| ENSMMUG00000007729 | ilvB acetolactate synthase like [Source:VGNC Symbol;Acc:VGNC:73739]                       | 1.370209923 | 9.14E-05    | 0.000551696 |
| ENSMMUG00000013637 | notch receptor 3 [Source:NCBI gene;Acc:719119]                                            | 0.514296055 | 0.010190467 | 0.032919736 |
| ENSMMUG00000010734 | cytochrome P450, family 4, subfamily F, polypeptide 8 [Source:NCBI gene;Acc:718335]       | 0.369355249 | 0.002221156 | 0.0090344   |
| ENSMMUG00000004283 | calcium and integrin binding family member 3 [Source:VGNC Symbol;Acc:VGNC:71339]          | 1.866588391 | 7.65E-05    | 0.000471416 |
| ENSMMUG00000039774 | Metazoan signal recognition particle RNA [Source:RFAM;Acc:RF00017]                        | 1.075244975 | 8.36E-10    | 1.49E-08    |
| ENSMMUG00000012959 | solute carrier family 35 member E1 [Source:VGNC Symbol;Acc:VGNC:77536]                    | 1.072740178 | 3.00E-08    | 3.97E-07    |
| ENSMMUG00000042837 | mediator complex subunit 26 [Source:NCBI gene;Acc:100424604]                              | 0.970746835 | 1.46E-05    | 0.00010771  |
| ENSMMUG00000057655 |                                                                                           | 0.838078361 | 3.12E-06    | 2.67E-05    |
| ENSMMUG00000013923 | BRISC and BRCA1 A complex member 1 [Source:VGNC Symbol;Acc:VGNC:70126]                    | 0.650795648 | 0.001058303 | 0.004751252 |
| ENSMMUG00000016228 | ankyrin repeat and LEM domain containing 1 [Source:VGNC Symbol;Acc:VGNC:69715]            | 1.109420678 | 0.012754433 | 0.039571448 |
| ENSMMUG00000023403 | GTP binding protein 3, mitochondrial [Source:VGNC Symbol;Acc:VGNC:73170]                  | 3.124234425 | 1.70E-08    | 2.35E-07    |
| ENSMMUG00000000194 | solute carrier family 27 member 1 [Source:VGNC Symbol;Acc:VGNC:77438]                     | 0.602477227 | 0.000122372 | 0.000714443 |
| ENSMMUG00000000196 | niban apoptosis regulator 3 [Source:VGNC Symbol;Acc:VGNC:75241]                           | 0.741091906 | 0.005217962 | 0.018628073 |
| ENSMMUG00000059371 |                                                                                           | 1.191589279 | 0.00017851  | 0.000998879 |
| ENSMMUG00000000198 | collagen beta(1-O)galactosyltransferase 1 [Source:NCBI gene;Acc:719980]                   | 0.816076333 | 4.62E-08    | 5.90E-07    |
| ENSMMUG00000015476 | unc-13 homolog A [Source:NCBI gene;Acc:720000]                                            | 0.748862737 | 3.84E-09    | 6.02E-08    |

|                    |                                                                                              |             |             |             |
|--------------------|----------------------------------------------------------------------------------------------|-------------|-------------|-------------|
| ENSMMUG00000010996 | Janus kinase 3 [Source:VGNC Symbol;Acc:VGNC:73812]                                           | 0.728940183 | 5.07E-07    | 5.27E-06    |
| ENSMMUG00000038308 | coiled-coil domain containing 124 [Source:NCBI gene;Acc:720072]                              | 0.885671697 | 0.000593772 | 0.002873392 |
| ENSMMUG00000007398 | potassium calcium-activated channel subfamily N member 1 [Source:VGNC Symbol;Acc:VGNC:74002] | 2.203677919 | 1.55E-10    | 3.16E-09    |
| ENSMMUG00000007401 | arrestin domain containing 2 [Source:VGNC Symbol;Acc:VGNC:69901]                             | 1.29372865  | 1.04E-10    | 2.18E-09    |
| ENSMMUG00000003161 | microtubule associated serine/threonine kinase 3 [Source:VGNC Symbol;Acc:VGNC:74533]         | 0.538985949 | 0.001140527 | 0.00505637  |
| ENSMMUG00000011317 | RAB3D, member RAS oncogene family [Source:VGNC Symbol;Acc:VGNC:81542]                        | 0.963717967 | 0.004939248 | 0.017781538 |
| ENSMMUG00000005028 | phosphodiesterase 4C [Source:NCBI gene;Acc:720171]                                           | 0.967321397 | 0.000151699 | 0.000865483 |
| ENSMMUG00000016354 | IQ motif containing N [Source:VGNC Symbol;Acc:VGNC:73683]                                    | -0.88517047 | 6.64E-05    | 0.000414846 |
| ENSMMUG00000038371 | JunD proto-oncogene, AP-1 transcription factor subunit [Source:NCBI gene;Acc:720182]         | 0.794494001 | 0.004074982 | 0.01506945  |
| ENSMMUG00000013671 | elongation factor for RNA polymerase II [Source:VGNC Symbol;Acc:VGNC:72088]                  | 1.086135923 | 4.28E-12    | 1.13E-10    |
| ENSMMUG00000016085 | KxDL motif containing 1 [Source:NCBI gene;Acc:720235]                                        | 0.546634572 | 0.002140414 | 0.008760047 |
| ENSMMUG00000054512 |                                                                                              | 1.144341699 | 0.002356846 | 0.009472346 |
| ENSMMUG00000009988 | transmembrane protein 59 like [Source:VGNC Symbol;Acc:VGNC:78919]                            | 2.040763744 | 8.80E-26    | 1.20E-23    |
| ENSMMUG00000064204 | kelch like family member 26 [Source:NCBI gene;Acc:719583]                                    | 0.701693445 | 0.008870477 | 0.029340186 |
| ENSMMUG00000006509 | CREB regulated transcription coactivator 1 [Source:VGNC Symbol;Acc:VGNC:71418]               | 0.748517361 | 0.003868876 | 0.014440588 |
| ENSMMUG00000056644 |                                                                                              | 0.561470841 | 0.009514777 | 0.031110283 |
| ENSMMUG00000023286 | UPF1 RNA helicase and ATPase [Source:VGNC Symbol;Acc:VGNC:79971]                             | 2.955716173 | 1.08E-39    | 7.87E-37    |
| ENSMMUG00000050739 |                                                                                              | 1.186338382 | 0.004009734 | 0.014873564 |
| ENSMMUG00000019668 | armadillo repeat containing 6 [Source:VGNC Symbol;Acc:VGNC:69899]                            | 0.790990748 | 0.00468392  | 0.016958941 |
| ENSMMUG00000008578 | hyaluronan and proteoglycan link protein 4 [Source:VGNC Symbol;Acc:VGNC:73261]               | 1.228087573 | 2.89E-05    | 0.000198403 |
| ENSMMUG00000008931 | MAU2 sister chromatid cohesion factor [Source:NCBI gene;Acc:720347]                          | 0.434074867 | 1.80E-05    | 0.000129549 |
| ENSMMUG00000003164 | GATA zinc finger domain containing 2A [Source:NCBI gene;Acc:720361]                          | 0.719526666 | 4.73E-07    | 4.95E-06    |
| ENSMMUG00000011351 | YjeF N-terminal domain containing 3 [Source:NCBI gene;Acc:721218]                            | 0.614576373 | 6.15E-05    | 0.000387977 |
| ENSMMUG00000048108 | PBX homeobox 4 [Source:NCBI gene;Acc:106994668]                                              | 2.183536672 | 0.014273275 | 0.043499076 |
| ENSMMUG00000054055 | zinc finger protein 93 [Source:NCBI gene;Acc:720434]                                         | 0.898719627 | 8.75E-11    | 1.85E-09    |
| ENSMMUG00000056683 |                                                                                              | 0.623779714 | 0.012802685 | 0.039699792 |
| ENSMMUG00000061085 |                                                                                              | 0.559195447 | 1.91E-05    | 0.00013651  |
| ENSMMUG00000062866 |                                                                                              | 1.205014896 | 6.96E-05    | 0.000432617 |
| ENSMMUG00000061186 |                                                                                              | 0.799210133 | 1.65E-06    | 1.51E-05    |
| ENSMMUG00000060408 |                                                                                              | 1.037438923 | 0.003488205 | 0.013229333 |
| ENSMMUG00000003688 | zinc finger protein 91 [Source:HGNC Symbol;Acc:HGNC:13166]                                   | 0.927020519 | 0.008836714 | 0.02923634  |
| ENSMMUG00000059910 |                                                                                              | 0.407874786 | 0.006218059 | 0.021583555 |
| ENSMMUG00000020668 | cyclin E1 [Source:VGNC Symbol;Acc:VGNC:70727]                                                | 2.489899799 | 3.68E-29    | 7.99E-27    |
| ENSMMUG00000063586 | zinc finger protein 536 [Source:NCBI gene;Acc:713142]                                        | 1.882450975 | 9.31E-07    | 9.03E-06    |
| ENSMMUG00000058740 |                                                                                              | 0.961130036 | 7.10E-10    | 1.28E-08    |

|                    |                                                                                                     |   |             |             |             |
|--------------------|-----------------------------------------------------------------------------------------------------|---|-------------|-------------|-------------|
| ENSMMUG00000050177 |                                                                                                     | - | 1.431736501 | 1.24E-08    | 1.79E-07    |
| ENSMMUG00000060455 |                                                                                                     | - | 2.630547642 | 6.46E-05    | 0.00040579  |
| ENSMMUG0000008041  | ankyrin repeat domain 27 [Source:VGNC Symbol;Acc:VGNC:69693]                                        |   | 0.373406894 | 0.003641757 | 0.013740001 |
| ENSMMUG00000015608 | tudor domain containing 12 [Source:VGNC Symbol;Acc:VGNC:82254]                                      |   | 0.771056635 | 0.001381119 | 0.005982519 |
| ENSMMUG00000028800 | solute carrier family 7 member 9 [Source:VGNC Symbol;Acc:VGNC:77633]                                |   | -1.03453077 | 7.71E-08    | 9.44E-07    |
| ENSMMUG00000017939 | FA core complex associated protein 24 [Source:VGNC Symbol;Acc:VGNC:72388]                           |   | 0.794229285 | 0.00069175  | 0.003289492 |
| ENSMMUG00000053887 | Small nucleolar RNA U3 [Source:RFAM;Acc:RF00012]                                                    |   | 2.217913045 | 0.014831194 | 0.044879489 |
| ENSMMUG00000064983 |                                                                                                     |   | 0.454501383 | 0.010569728 | 0.033888869 |
| ENSMMUG00000061372 |                                                                                                     |   | 1.197932088 | 0.001319566 | 0.005750157 |
| ENSMMUG00000062413 | CCAAT enhancer binding protein gamma [Source:NCBI gene;Acc:704322]                                  |   | 0.985157085 | 7.78E-06    | 6.08E-05    |
| ENSMMUG00000006128 | peptidase D [Source:VGNC Symbol;Acc:VGNC:82205]                                                     |   | -0.85292634 | 0.000870597 | 0.004024125 |
| ENSMMUG00000015744 | zinc finger protein 302 [Source:NCBI gene;Acc:706279]                                               |   | 1.921883691 | 9.22E-20    | 6.67E-18    |
| ENSMMUG00000059543 | zinc finger protein 30 [Source:NCBI gene;Acc:718310]                                                |   | 0.799541942 | 1.39E-06    | 1.30E-05    |
| ENSMMUG00000008313 | zinc finger protein 792 [Source:VGNC Symbol;Acc:VGNC:79456]                                         |   | 0.697832041 | 3.48E-05    | 0.000234559 |
| ENSMMUG00000001538 | GRAM domain containing 1A [Source:VGNC Symbol;Acc:VGNC:73029]                                       |   | 0.557575033 | 0.000186592 | 0.001039666 |
| ENSMMUG00000055747 | cytochrome c oxidase subunit 6B [Source:NCBI gene;Acc:692062]                                       |   | 1.079985787 | 1.88E-07    | 2.15E-06    |
| ENSMMUG00000065025 |                                                                                                     |   | 1.194608693 | 2.70E-08    | 3.60E-07    |
| ENSMMUG00000002381 | lysine methyltransferase 2B [Source:VGNC Symbol;Acc:VGNC:74053]                                     |   | 0.592775068 | 3.17E-05    | 0.000215852 |
| ENSMMUG00000002384 | IGF like family receptor 1 [Source:VGNC Symbol;Acc:VGNC:73434]                                      |   | 1.445486112 | 4.53E-15    | 1.92E-13    |
| ENSMMUG00000048190 | U2 small nuclear RNA auxiliary factor 1 like 4 [Source:NCBI gene;Acc:718865]                        |   | 1.189423216 | 0.000258199 | 0.00138401  |
| ENSMMUG00000002392 | proline and serine rich 3 [Source:NCBI gene;Acc:710857]                                             |   | 1.050059509 | 0.00651373  | 0.02244373  |
| ENSMMUG00000019749 | NPHS1 adhesion molecule, nephrin [Source:NCBI gene;Acc:718929]                                      |   | 1.006638832 | 0.000214951 | 0.001180485 |
| ENSMMUG00000019756 | NFKB inhibitor delta [Source:VGNC Symbol;Acc:VGNC:75179]                                            |   | 0.781855663 | 0.000210699 | 0.001158882 |
| ENSMMUG00000008004 | transmembrane immune signaling adaptor TYROBP [Source:NCBI gene;Acc:574207]                         |   | -0.50633412 | 0.002656487 | 0.010454075 |
| ENSMMUG00000062667 | leucine rich repeat and fibronectin type III domain containing 3 [Source:NCBI gene;Acc:711565]      |   | 0.736293474 | 0.002398186 | 0.00960133  |
| ENSMMUG00000062586 |                                                                                                     |   | 1.412524161 | 0.00421309  | 0.015501313 |
| ENSMMUG00000053233 |                                                                                                     |   | 0.797164632 | 0.011273207 | 0.035772788 |
| ENSMMUG00000019699 | spectrin repeat containing nuclear envelope family member 4 [Source:VGNC Symbol;Acc:VGNC:78221]     |   | 2.270616471 | 0.004092628 | 0.015120682 |
| ENSMMUG00000051879 | CAP-Gly domain containing linker protein 3 [Source:NCBI gene;Acc:712058]                            |   | 2.086765688 | 0.001237982 | 0.005438664 |
| ENSMMUG00000019704 | WD repeat domain 62 [Source:NCBI gene;Acc:719053]                                                   |   | 3.301922583 | 0.006670569 | 0.022940635 |
| ENSMMUG00000061035 | ZFP82 zinc finger protein [Source:NCBI gene;Acc:719145]                                             |   | -0.9038586  | 1.83E-10    | 3.66E-09    |
| ENSMMUG00000000547 | zinc finger protein 566 [Source:VGNC Symbol;Acc:VGNC:81619]                                         |   | 0.658738801 | 7.53E-06    | 5.91E-05    |
| ENSMMUG00000016449 | zinc finger protein 382 [Source:VGNC Symbol;Acc:VGNC:79078]                                         |   | 0.991083318 | 3.05E-05    | 0.000208029 |
| ENSMMUG00000000107 | zinc finger protein 585A [Source:NCBI gene;Acc:100424957]                                           |   | 0.409205167 | 0.004412457 | 0.016140887 |
| ENSMMUG00000051305 |                                                                                                     |   | 1.194224638 | 6.06E-05    | 0.000382986 |
| ENSMMUG00000028771 | Yip1 interacting factor homolog B, membrane trafficking protein [Source:VGNC Symbol;Acc:VGNC:79852] |   | 1.088915531 | 0.00089148  | 0.004104986 |

|                     |                                                                                                   |             |             |             |
|---------------------|---------------------------------------------------------------------------------------------------|-------------|-------------|-------------|
| ENSMMUG00000062296  | potassium two pore domain channel subfamily K member 6 [Source:NCBI gene;Acc:714912]              | 3.423153597 | 0.000658555 | 0.003150184 |
| ENSMMUG00000014273  | cation channel sperm associated auxiliary subunit gamma [Source:VGNC Symbol;Acc:VGNC:70626]       | 2.220230864 | 1.16E-08    | 1.67E-07    |
| ENSMMUG00000038221  | proteasome 26S subunit, non-ATPase 8 [Source:NCBI gene;Acc:721897]                                | 0.920822083 | 2.77E-06    | 2.40E-05    |
| ENSMMUG00000022973  | gametogenetin [Source:VGNC Symbol;Acc:VGNC:72740]                                                 | 0.535695576 | 0.015556259 | 0.046646316 |
| ENSMMUG00000022975  | sprouty related EVH1 domain containing 3 [Source:VGNC Symbol;Acc:VGNC:78030]                      | 3.990535033 | 1.91E-34    | 6.78E-32    |
| ENSMMUG00000020468  | family with sequence similarity 98 member C [Source:VGNC Symbol;Acc:VGNC:72584]                   | 0.325326461 | 0.015545688 | 0.046633855 |
| ENSMMUG00000028767  | eukaryotic translation initiation factor 3 subunit K [Source:VGNC Symbol;Acc:VGNC:72102]          | 0.856794701 | 0.001467642 | 0.00629887  |
| ENSMMUG00000028766  | galectin 4 [Source:VGNC Symbol;Acc:VGNC:74257]                                                    | 0.832700691 | 0.003787799 | 0.014195212 |
| ENSMMUG00000004877  | heterogeneous nuclear ribonucleoprotein L [Source:VGNC Symbol;Acc:VGNC:81187]                     | 0.958454301 | 5.97E-05    | 0.00037812  |
| ENSMMUG00000012787  | acid phosphatase 7, tartrate resistant (putative) [Source:NCBI gene;Acc:695532]                   | 1.864902989 | 3.09E-05    | 0.000210199 |
| ENSMMUG00000013140  | p21 (RAC1) activated kinase 4 [Source:NCBI gene;Acc:696676]                                       | 2.256643386 | 0.000491433 | 0.002434886 |
| ENSMMUG00000005554  | mediator complex subunit 29 [Source:VGNC Symbol;Acc:VGNC:74557]                                   | 3.462085259 | 5.05E-27    | 8.07E-25    |
| ENSMMUG00000038702  | ZFP36 ring finger protein [Source:NCBI gene;Acc:722000]                                           | 3.872803321 | 0.000230251 | 0.001251742 |
| ENSMMUG00000019369  | pleckstrin homology and RhoGEF domain containing G2 [Source:VGNC Symbol;Acc:VGNC:76133]           | 2.397111328 | 0.005843907 | 0.020505158 |
| ENSMMUG00000048215  |                                                                                                   | 2.368184578 | 5.31E-07    | 5.48E-06    |
| ENSMMUG00000022726  | dual specificity tyrosine phosphorylation regulated kinase 1B [Source:VGNC Symbol;Acc:VGNC:72016] | 2.307667124 | 1.47E-07    | 1.72E-06    |
| ENSMMUG00000022724  |                                                                                                   | -1.39610129 | 9.37E-05    | 0.000563371 |
| ENSMMUG000000051261 |                                                                                                   | 1.587089199 | 4.01E-07    | 4.25E-06    |
| ENSMMUG00000017191  | zinc finger protein 546 [Source:VGNC Symbol;Acc:VGNC:79732]                                       | 0.921512319 | 0.004422497 | 0.016165581 |
| ENSMMUG00000041976  | zinc finger protein 780B [Source:NCBI gene;Acc:701034]                                            | 0.640612468 | 0.000199417 | 0.001100999 |
| ENSMMUG00000003621  | AKT serine/threonine kinase 2 [Source:VGNC Symbol;Acc:VGNC:69777]                                 | 0.977852902 | 1.97E-08    | 2.69E-07    |
| ENSMMUG000000053624 |                                                                                                   | 1.124542179 | 8.02E-05    | 0.000491588 |
| ENSMMUG00000008946  | chromosome 19 C19orf47 homolog [Source:VGNC Symbol;Acc:VGNC:70404]                                | 0.931833534 | 1.40E-11    | 3.39E-10    |
| ENSMMUG00000022625  | periaxin [Source:VGNC Symbol;Acc:VGNC:76248]                                                      | 1.587886208 | 6.45E-07    | 6.51E-06    |
| ENSMMUG00000015603  | biliverdin reductase B [Source:VGNC Symbol;Acc:VGNC:70257]                                        | 1.733252282 | 0.005043548 | 0.018103223 |
| ENSMMUG00000049359  |                                                                                                   | 2.794885037 | 0.001484943 | 0.006363979 |
| ENSMMUG00000063763  | cytochrome P450 2A13-like [Source:NCBI gene;Acc:114674219]                                        | 0.948678224 | 0.001366317 | 0.005923693 |
| ENSMMUG00000009145  | AXL receptor tyrosine kinase [Source:VGNC Symbol;Acc:VGNC:70200]                                  | 0.500317655 | 0.004504378 | 0.016398734 |
| ENSMMUG00000064979  | B9 domain containing 2 [Source:NCBI gene;Acc:704873]                                              | 1.040803614 | 0.013349769 | 0.041141741 |
| ENSMMUG00000013422  | CEA cell adhesion molecule 4 [Source:NCBI gene;Acc:705453]                                        | 1.320247149 | 0.006452998 | 0.022282003 |
| ENSMMUG00000059229  | CEA cell adhesion molecule 7 [Source:NCBI gene;Acc:705572]                                        | 1.283215653 | 1.82E-15    | 8.25E-14    |
| ENSMMUG00000022305  | Rho guanine nucleotide exchange factor 1 [Source:VGNC Symbol;Acc:VGNC:70012]                      | 1.106437257 | 1.76E-07    | 2.02E-06    |
| ENSMMUG00000022309  | ETS repressor factor like [Source:NCBI gene;Acc:722195]                                           | 1.460049218 | 0.000470176 | 0.002343945 |
| ENSMMUG00000017427  | ATPase Na <sup>+</sup> /K <sup>+</sup> transporting subunit alpha 3 [Source:NCBI gene;Acc:706513] | 2.272822781 | 4.64E-05    | 0.000304623 |
| ENSMMUG00000013376  | POU class 2 homeobox 2 [Source:NCBI gene;Acc:706835]                                              | 0.821162286 | 5.78E-06    | 4.67E-05    |
| ENSMMUG00000050799  |                                                                                                   | 3.414608895 | 0.00248492  | 0.009910366 |
| ENSMMUG00000064250  |                                                                                                   | 2.578398391 | 0.000441553 | 0.002223367 |

|                     |                                                                                                  |             |             |             |
|---------------------|--------------------------------------------------------------------------------------------------|-------------|-------------|-------------|
| ENSMMUG00000055813  | pregnancy-specific beta-1-glycoprotein 5-like [Source:NCBI gene;Acc:114674020]                   | 0.669196547 | 0.004751659 | 0.01717853  |
| ENSMMUG00000059128  |                                                                                                  | -2.44910551 | 4.66E-07    | 4.89E-06    |
| ENSMMUG00000061010  | putative pregnancy-specific beta-1-glycoprotein 7 [Source:NCBI gene;Acc:114673986]               | 3.717319434 | 0.00070669  | 0.003348166 |
| ENSMMUG00000021062  | CD177 molecule [Source:VGNC Symbol;Acc:VGNC:70912]                                               | 4.002885531 | 2.44E-16    | 1.22E-14    |
| ENSMMUG00000003568  | testis expressed 101 [Source:VGNC Symbol;Acc:VGNC:79869]                                         | 1.392879497 | 5.34E-08    | 6.76E-07    |
| ENSMMUG00000044157  | pleckstrin homology like domain family B member 3 [Source:NCBI gene;Acc:722281]                  | 0.697945504 | 0.001814342 | 0.007581228 |
|                     |                                                                                                  | -           |             |             |
| ENSMMUG00000019265  | zinc finger protein 575 [Source:VGNC Symbol;Acc:VGNC:79667]                                      | 0.716638302 | 0.004986159 | 0.017919355 |
| ENSMMUG00000004616  | plasminogen activator, urokinase receptor [Source:VGNC Symbol;Acc:VGNC:76163]                    | 1.790086075 | 0.003762586 | 0.014126218 |
| ENSMMUG00000021267  | potassium calcium-activated channel subfamily N member 4 [Source:NCBI gene;Acc:712383]           | 0.647924574 | 0.000427458 | 0.002158375 |
|                     |                                                                                                  | -           |             |             |
| ENSMMUG00000021474  | zinc finger protein 45 [Source:NCBI gene;Acc:712591]                                             | 0.805515703 | 3.86E-07    | 4.11E-06    |
| ENSMMUG00000064975  | zinc finger protein 221 [Source:NCBI gene;Acc:100423743]                                         | -1.1759783  | 0.000462067 | 0.002310654 |
| ENSMMUG00000012797  | zinc finger protein 233 [Source:VGNC Symbol;Acc:VGNC:79903]                                      | 1.853989241 | 1.55E-17    | 8.84E-16    |
| ENSMMUG00000012801  | zinc finger protein 235 [Source:VGNC Symbol;Acc:VGNC:78825]                                      | 1.79981689  | 3.48E-34    | 1.12E-31    |
|                     |                                                                                                  | -           |             |             |
| ENSMMUG00000014301  | nectin cell adhesion molecule 2 [Source:VGNC Symbol;Acc:VGNC:75396]                              | 0.510984881 | 0.000946133 | 0.004323778 |
|                     |                                                                                                  | -           |             |             |
| ENSMMUG00000014303  | translocase of outer mitochondrial membrane 40 [Source:VGNC Symbol;Acc:VGNC:78419]               | 2.289182744 | 0.005874499 | 0.020602556 |
|                     |                                                                                                  | -           |             |             |
| ENSMMUG00000028749  | apolipoprotein C1 [Source:NCBI gene;Acc:106994799]                                               | 1.206199258 | 0.013860021 | 0.042444306 |
|                     |                                                                                                  | -           |             |             |
| ENSMMUG00000002472  | CLPTM1 regulator of GABA type A receptor forward trafficking [Source:VGNC Symbol;Acc:VGNC:71265] | 1.420942009 | 0.000276214 | 0.001471354 |
|                     |                                                                                                  | -           |             |             |
| ENSMMUG00000014155  | CLK4 associating serine/arginine rich protein [Source:VGNC Symbol;Acc:VGNC:71198]                | 1.316257986 | 0.002549595 | 0.010123862 |
| ENSMMUG00000022931  | NTPase KAP family P-loop domain containing 1 [Source:VGNC Symbol;Acc:VGNC:75250]                 | 0.803302089 | 1.69E-06    | 1.54E-05    |
| ENSMMUG00000018879  | exocyst complex component 3 like 2 [Source:NCBI gene;Acc:713992]                                 | 0.541467111 | 0.000220367 | 0.001206583 |
| ENSMMUG00000018672  | microtubule affinity regulating kinase 4 [Source:VGNC Symbol;Acc:VGNC:74508]                     | -0.54505367 | 0.00094786  | 0.004330308 |
| ENSMMUG00000013477  | creatine kinase, M-type [Source:VGNC Symbol;Acc:VGNC:71230]                                      | 3.072123399 | 4.12E-15    | 1.77E-13    |
| ENSMMUG00000000715  | protein phosphatase 1 regulatory subunit 13 like [Source:NCBI gene;Acc:714389]                   | 0.491782423 | 0.001893037 | 0.00787159  |
|                     |                                                                                                  | -           |             |             |
| ENSMMUG00000000717  | CD3e molecule associated protein [Source:NCBI gene;Acc:714440]                                   | 1.449946645 | 2.02E-10    | 4.01E-09    |
|                     |                                                                                                  | -           |             |             |
| ENSMMUG00000000718  | ERCC excision repair 1, endonuclease non-catalytic subunit [Source:VGNC Symbol;Acc:VGNC:72422]   | 0.956363075 | 7.36E-06    | 5.80E-05    |
| ENSMMUG00000006936  | gastric inhibitory polypeptide receptor [Source:VGNC Symbol;Acc:VGNC:73052]                      | 0.798969647 | 2.74E-08    | 3.65E-07    |
| ENSMMUG00000032809  | mml-mir-642 [Source:miRBase;Acc:MI0007885]                                                       | 0.776703218 | 0.00031035  | 0.001622442 |
|                     |                                                                                                  | -           |             |             |
| ENSMMUG00000006937  | small nuclear ribonucleoprotein D2 polypeptide [Source:NCBI gene;Acc:715183]                     | 1.642951377 | 0.003468711 | 0.013165705 |
|                     |                                                                                                  | -           |             |             |
| ENSMMUG000000051573 | SIX homeobox 5 [Source:NCBI gene;Acc:715373]                                                     | 0.408507632 | 0.003145684 | 0.012113593 |
| ENSMMUG00000016457  | DM1 protein kinase [Source:NCBI gene;Acc:715328]                                                 | 0.753541979 | 0.012936151 | 0.04007092  |
|                     |                                                                                                  | -           |             |             |
| ENSMMUG000000051115 |                                                                                                  | 3.001256059 | 3.87E-09    | 6.06E-08    |
| ENSMMUG00000017927  | protein kinase D2 [Source:VGNC Symbol;Acc:VGNC:76273]                                            | 2.655847443 | 2.71E-05    | 0.00018744  |
| ENSMMUG00000017930  | striatin 4 [Source:VGNC Symbol;Acc:VGNC:78128]                                                   | 3.553021728 | 0.000520417 | 0.002560169 |
| ENSMMUG00000011332  | Rho GTPase activating protein 35 [Source:VGNC Symbol;Acc:VGNC:69942]                             | 2.149160349 | 3.74E-10    | 7.17E-09    |
| ENSMMUG00000057361  | Metazoan signal recognition particle RNA [Source:RFAM;Acc:RF00017]                               | 2.105916803 | 4.82E-08    | 6.15E-07    |
| ENSMMUG00000057454  | transmembrane protein 160 [Source:NCBI gene;Acc:716996]                                          | 0.934292775 | 0.012605082 | 0.039204125 |
| ENSMMUG00000055893  |                                                                                                  | 0.896897463 | 0.001693281 | 0.007151429 |
|                     |                                                                                                  | -           |             |             |
| ENSMMUG00000014727  | NSF attachment protein alpha [Source:VGNC Symbol;Acc:VGNC:75131]                                 | 0.615121823 | 0.000369141 | 0.001888178 |
| ENSMMUG00000054090  |                                                                                                  | 1.132409138 | 0.000279699 | 0.001487737 |
|                     |                                                                                                  | -           |             |             |
| ENSMMUG00000006857  | epididymal sperm binding protein 1 [Source:VGNC Symbol;Acc:VGNC:72046]                           | 0.765570622 | 0.006745647 | 0.02316595  |

|                    |                                                                                                         |             |             |             |
|--------------------|---------------------------------------------------------------------------------------------------------|-------------|-------------|-------------|
| ENSMMUG00000042157 | caspase recruitment domain-containing protein 8 [Source:NCBI gene;Acc:718594]                           | 0.420900905 | 0.00127351  | 0.005572853 |
| ENSMMUG00000022155 | sulfotransferase family 2B member 1 [Source:NCBI gene;Acc:718739]                                       | 0.837217919 | 0.001086157 | 0.004849346 |
| ENSMMUG00000055036 | MEF2 activating motif and SAP domain containing transcriptional regulator [Source:NCBI gene;Acc:718823] | 0.463940799 | 0.010475377 | 0.033645726 |
| ENSMMUG00000018415 | Ras interacting protein 1 [Source:HGNC Symbol;Acc:HGNC:24716]                                           | 0.613553367 | 0.000925743 | 0.004242355 |
| ENSMMUG00000004019 | izumo sperm-egg fusion 1 [Source:VGNC Symbol;Acc:VGNC:73670]                                            | 0.755162862 | 0.000208211 | 0.001146065 |
| ENSMMUG00000028736 | hydroxysteroid 17-beta dehydrogenase 14 [Source:NCBI gene;Acc:106994816]                                | 0.982227071 | 4.51E-05    | 0.000297223 |
| ENSMMUG00000048854 | TUB like protein 2 [Source:NCBI gene;Acc:718915]                                                        | 0.934890126 | 0.01172285  | 0.036894366 |
| ENSMMUG00000003904 | nucleobindin 1 [Source:VGNC Symbol;Acc:VGNC:75548]                                                      | 1.732954064 | 0.002987458 | 0.011587159 |
| ENSMMUG00000007538 | transient receptor potential cation channel subfamily M member 4 [Source:VGNC Symbol;Acc:VGNC:79105]    | 1.739557603 | 3.24E-11    | 7.36E-10    |
| ENSMMUG00000022116 | PIH1 domain containing 1 [Source:VGNC Symbol;Acc:VGNC:75868]                                            | 1.329800177 | 0.00380572  | 0.014247422 |
| ENSMMUG00000007551 | ribosomal protein L13a [Source:NCBI gene;Acc:574314]                                                    | 0.57954075  | 0.00835481  | 0.02783086  |
| ENSMMUG00000003819 | nitric oxide synthase interacting protein [Source:VGNC Symbol;Acc:VGNC:75207]                           | 1.883649641 | 9.46E-11    | 1.99E-09    |
| ENSMMUG00000012937 | proline rich 12 [Source:NCBI gene;Acc:719344]                                                           | 2.661672886 | 4.45E-24    | 4.72E-22    |
| ENSMMUG00000028733 | RAS related [Source:VGNC Symbol;Acc:VGNC:76937]                                                         | 2.46176924  | 1.39E-17    | 7.94E-16    |
| ENSMMUG00000012938 | SR-related CTD associated factor 1 [Source:VGNC Symbol;Acc:VGNC:77137]                                  | 3.618072182 | 6.36E-06    | 5.08E-05    |
| ENSMMUG00000003926 | BCL2 like 12 [Source:NCBI gene;Acc:718981]                                                              | 3.653396103 | 0.000643162 | 0.003081622 |
| ENSMMUG00000003029 | protein arginine methyltransferase 1 [Source:NCBI gene;Acc:719419]                                      | 1.468312555 | 1.57E-05    | 0.000114566 |
| ENSMMUG00000014735 | carnitine palmitoyltransferase 1C [Source:NCBI gene;Acc:719429]                                         | 1.674325134 | 3.80E-07    | 4.05E-06    |
| ENSMMUG00000020175 | mediator complex subunit 25 [Source:VGNC Symbol;Acc:VGNC:74607]                                         | -1.98735336 | 1.21E-06    | 1.15E-05    |
| ENSMMUG00000011627 | interleukin 4 induced 1 [Source:VGNC Symbol;Acc:VGNC:73625]                                             | 2.422022389 | 1.21E-10    | 2.50E-09    |
| ENSMMUG00000044817 | nucleoporin 62 [Source:NCBI gene;Acc:100426308]                                                         | 3.05966563  | 7.48E-61    | 5.43E-57    |
| ENSMMUG00000054473 | activating transcription factor 5 [Source:NCBI gene;Acc:719150]                                         | 2.198571115 | 8.65E-12    | 2.18E-10    |
| ENSMMUG00000050456 | Metazoan signal recognition particle RNA [Source:RFAM;Acc:RF00017]                                      | 1.663158771 | 0.003475563 | 0.013188269 |
| ENSMMUG00000064146 | Metazoan signal recognition particle RNA [Source:RFAM;Acc:RF00017]                                      | 3.148051395 | 5.38E-16    | 2.62E-14    |
| ENSMMUG00000054052 | sialic acid binding Ig like lectin 11 [Source:NCBI gene;Acc:719127]                                     | 3.69028618  | 1.45E-09    | 2.47E-08    |
| ENSMMUG00000010837 | VRK serine/threonine kinase 3 [Source:VGNC Symbol;Acc:VGNC:81605]                                       | 2.098902671 | 5.03E-05    | 0.00032599  |
| ENSMMUG00000055885 | napsin-A [Source:NCBI gene;Acc:719235]                                                                  | 0.773531549 | 0.007786682 | 0.026208764 |
| ENSMMUG00000023418 | nuclear receptor subfamily 1 group H member 2 [Source:VGNC Symbol;Acc:VGNC:75504]                       | 0.622991954 | 1.74E-06    | 1.58E-05    |
| ENSMMUG00000021269 | Josephin domain containing 2 [Source:VGNC Symbol;Acc:VGNC:73919]                                        | 3.566930949 | 0.002236373 | 0.009083585 |
| ENSMMUG00000046099 | chromosome 19 C19orf81 homolog [Source:NCBI gene;Acc:719661]                                            | 2.230887379 | 0.002329778 | 0.009392118 |
| ENSMMUG00000059087 |                                                                                                         | 2.940582104 | 0.000339559 | 0.00175477  |
| ENSMMUG00000009357 | SH3 and multiple ankyrin repeat domains 1 [Source:VGNC Symbol;Acc:VGNC:77236]                           | 0.834698329 | 0.006214553 | 0.02158169  |
| ENSMMUG00000012841 | kallikrein 3 [Source:NCBI gene;Acc:719444]                                                              | 0.814032424 | 0.006730094 | 0.023123463 |
| ENSMMUG00000065035 | kallikrein-2 [Source:NCBI gene;Acc:719436]                                                              | 0.702902197 | 0.001185067 | 0.005236267 |
| ENSMMUG00000060764 |                                                                                                         | 0.455326966 | 8.27E-06    | 6.42E-05    |
| ENSMMUG00000013597 | kallikrein related peptidase 5 [Source:VGNC Symbol;Acc:VGNC:74191]                                      | 0.736475564 | 0.003796424 | 0.014216542 |
| ENSMMUG00000061396 | kallikrein related peptidase 6 [Source:NCBI gene;Acc:719776]                                            | 0.552673199 | 0.012131216 | 0.037975824 |
| ENSMMUG00000064856 | kallikrein related peptidase 14 [Source:NCBI gene;Acc:722692]                                           | 1.089748693 | 0.005939413 | 0.020795099 |



|                    |                                                                     |   |             |             |             |
|--------------------|---------------------------------------------------------------------|---|-------------|-------------|-------------|
| ENSMMUG00000044243 | sialic acid-binding Ig-like lectin 9 [Source:NCBI gene;Acc:719831]  | - | 1.373348014 | 0.002945033 | 0.011456232 |
| ENSMMUG00000047370 | IgLON family member 5 [Source:NCBI gene;Acc:719890]                 | - | 0.895074672 | 0.002893894 | 0.011275404 |
| ENSMMUG00000044652 | sialic acid-binding Ig-like lectin 13 [Source:NCBI gene;Acc:719667] | - | 0.738085453 | 0.00023079  | 0.001253267 |
| ENSMMUG00000012764 | zinc finger protein 175 [Source:VGNC Symbol;Acc:VGNC:78856]         | - | 0.655803526 | 0.002598808 | 0.010265996 |
| ENSMMUG00000012761 | sialic acid binding Ig like lectin 5 [Source:NCBI gene;Acc:719730]  | - | 0.788975278 | 1.05E-06    | 1.01E-05    |
| ENSMMUG00000013053 | sperm acrosome associated 6 [Source:NCBI gene;Acc:114674203]        | - | 1.316277229 | 3.94E-06    | 3.30E-05    |
| ENSMMUG00000013049 | formyl peptide receptor 1 [Source:NCBI gene;Acc:719782]             | - | 0.565529699 | 0.013856064 | 0.042441131 |
| ENSMMUG00000051078 |                                                                     | - | 0.518611695 | 0.0122171   | 0.038218202 |
| ENSMMUG00000002310 | zinc finger protein 577 [Source:VGNC Symbol;Acc:VGNC:79733]         | - | 0.849606996 | 1.99E-12    | 5.54E-11    |
| ENSMMUG00000023136 | zinc finger protein 613 [Source:VGNC Symbol;Acc:VGNC:79548]         | - | 0.607089729 | 4.62E-06    | 3.80E-05    |
| ENSMMUG00000052090 |                                                                     | - | 0.659236771 | 3.51E-07    | 3.79E-06    |
| ENSMMUG00000023137 | zinc finger protein 350 [Source:VGNC Symbol;Acc:VGNC:79041]         | - | 1.346521349 | 9.50E-08    | 1.14E-06    |
| ENSMMUG00000003712 | zinc finger protein 615 [Source:VGNC Symbol;Acc:VGNC:79454]         | - | 0.699146538 | 0.010042638 | 0.032536177 |
| ENSMMUG00000041450 | zinc finger protein 432 [Source:NCBI gene;Acc:100424341]            | - | 1.542226997 | 4.09E-11    | 9.10E-10    |
| ENSMMUG00000001768 | zinc finger protein 616 [Source:NCBI gene;Acc:719902]               | - | 0.560713834 | 0.002357966 | 0.009474226 |
| ENSMMUG00000047412 | zinc finger protein 28 [Source:NCBI gene;Acc:100430953]             | - | 1.281148235 | 0.015475021 | 0.046460219 |
| ENSMMUG00000058137 | zinc finger protein 816 [Source:NCBI gene;Acc:720058]               | - | 1.451629863 | 2.56E-07    | 2.84E-06    |
| ENSMMUG00000064519 |                                                                     | - | 1.274007684 | 0.000531204 | 0.002604423 |
| ENSMMUG00000057187 |                                                                     | - | 0.656417906 | 4.24E-06    | 3.52E-05    |
| ENSMMUG00000060222 |                                                                     | - | 0.524263056 | 5.49E-05    | 0.000352428 |
| ENSMMUG00000055976 | CD99 antigen [Source:NCBI gene;Acc:106995376]                       | - | 1.555686146 | 3.97E-06    | 3.32E-05    |
| ENSMMUG00000038768 | U6 spliceosomal RNA [Source:RFAM;Acc:RF00026]                       | - | 1.233464899 | 0.000842414 | 0.003911264 |
| ENSMMUG00000042225 |                                                                     | - | 0.739980993 | 5.74E-05    | 0.00036555  |

## SD 3 vs. Baseline

| Ensembl Gene ID     | Description                                                                           | Log2(FC)    | p-value     | FDR         |
|---------------------|---------------------------------------------------------------------------------------|-------------|-------------|-------------|
| ENSMMUG00000000632  | SH3 binding domain protein 5 like [Source:VGNC Symbol;Acc:VGNC:77334]                 | 3.343599475 | 3.69E-09    | 5.37E-08    |
| ENSMMUG000000049101 | olfactory receptor 2T10 [Source:NCBI gene;Acc:100431025]                              | 0.573831174 | 0.002586152 | 0.010064164 |
| ENSMMUG000000048289 | olfactory receptor 2T5-like [Source:NCBI gene;Acc:707109]                             | 0.686132722 | 0.00605578  | 0.020823983 |
|                     |                                                                                       | -           |             |             |
| ENSMMUG000000017368 | olfactory receptor 2G6 [Source:NCBI gene;Acc:694380]                                  | 0.593613626 | 0.000705621 | 0.003255982 |
| ENSMMUG000000038524 | olfactory receptor 2M4 [Source:NCBI gene;Acc:100424541]                               | 2.239824045 | 4.74E-36    | 1.51E-33    |
| ENSMMUG000000049432 | olfactory receptor 2T33 [Source:NCBI gene;Acc:706331]                                 | 0.960147986 | 1.87E-11    | 3.98E-10    |
| ENSMMUG000000064763 |                                                                                       | 0.915809282 | 0.000294069 | 0.001507763 |
| ENSMMUG000000050041 | olfactory receptor 2L5 [Source:NCBI gene;Acc:697549]                                  | 0.780300535 | 0.014563109 | 0.0439274   |
|                     |                                                                                       | -           |             |             |
| ENSMMUG000000005949 | olfactory receptor 2B11 [Source:NCBI gene;Acc:709256]                                 | 1.885754004 | 0.000530889 | 0.002542574 |
|                     |                                                                                       | -           |             |             |
| ENSMMUG000000004566 | zinc finger protein 124 [Source:VGNC Symbol;Acc:VGNC:78836]                           | 4.311556736 | 8.96E-05    | 0.000517722 |
|                     |                                                                                       | -           |             |             |
| ENSMMUG000000000021 | catsper channel auxiliary subunit epsilon [Source:VGNC Symbol;Acc:VGNC:70657]         | 3.099989041 | 0.000692543 | 0.00320407  |
| ENSMMUG000000064143 | Metazoan signal recognition particle RNA [Source:RFAM;Acc:RF00017]                    | 2.852588937 | 0.009452933 | 0.030522329 |
| ENSMMUG000000005668 | kynurenine 3-monooxygenase [Source:VGNC Symbol;Acc:VGNC:74197]                        | 0.898714638 | 4.48E-07    | 4.38E-06    |
| ENSMMUG000000005667 | fumarate hydratase [Source:VGNC Symbol;Acc:VGNC:72659]                                | 0.630463415 | 4.27E-05    | 0.000267101 |
| ENSMMUG000000064824 | gremlin 2, DAN family BMP antagonist [Source:NCBI gene;Acc:708280]                    | 1.347808692 | 0.000105109 | 0.000597079 |
| ENSMMUG000000061845 |                                                                                       | 1.676062063 | 0.001535774 | 0.006381083 |
| ENSMMUG000000001060 | ryanodine receptor 2 [Source:VGNC Symbol;Acc:VGNC:76954]                              | 1.534198336 | 3.65E-65    | 8.53E-62    |
|                     |                                                                                       | -           |             |             |
| ENSMMUG000000015132 | galectin 8 [Source:VGNC Symbol;Acc:VGNC:74258]                                        | 0.874152266 | 0.012292518 | 0.038038325 |
|                     |                                                                                       | -           |             |             |
| ENSMMUG000000021238 | EDAR associated death domain [Source:VGNC Symbol;Acc:VGNC:72043]                      | 0.569741852 | 0.013322214 | 0.040789827 |
| ENSMMUG000000064750 |                                                                                       | 0.462251979 | 0.011538192 | 0.036124151 |
|                     |                                                                                       | -           |             |             |
| ENSMMUG000000046785 |                                                                                       | 1.102143023 | 0.014646597 | 0.044103334 |
|                     |                                                                                       | -           |             |             |
| ENSMMUG000000012615 | pecanex 2 [Source:NCBI gene;Acc:712828]                                               | 1.558539559 | 5.44E-05    | 0.000332136 |
| ENSMMUG000000063981 | nucleoside-triphosphatase, cancer-related [Source:NCBI gene;Acc:712959]               | 2.850278924 | 2.56E-10    | 4.52E-09    |
|                     |                                                                                       | -           |             |             |
| ENSMMUG000000040055 |                                                                                       | 0.929020086 | 7.07E-06    | 5.34E-05    |
|                     |                                                                                       | -           |             |             |
| ENSMMUG000000061796 |                                                                                       | 1.049076035 | 0.000456244 | 0.002223814 |
| ENSMMUG000000052961 |                                                                                       | 2.018212337 | 3.44E-05    | 0.000219711 |
| ENSMMUG000000064226 |                                                                                       | 1.469629467 | 0.000928679 | 0.004126422 |
|                     |                                                                                       | -           |             |             |
| ENSMMUG000000016204 | translin associated factor X [Source:NCBI gene;Acc:713347]                            | 2.981227919 | 0.00484172  | 0.017263014 |
|                     |                                                                                       | -           |             |             |
| ENSMMUG000000005801 | glyceronephosphate O-acyltransferase [Source:VGNC Symbol;Acc:VGNC:73100]              | 0.984991032 | 4.55E-05    | 0.000282191 |
| ENSMMUG000000009508 | TATA-box binding protein associated factor 5 like [Source:VGNC Symbol;Acc:VGNC:78148] | 2.308684157 | 5.61E-05    | 0.000341011 |
| ENSMMUG000000022094 | ATP binding cassette subfamily B member 10 [Source:NCBI gene;Acc:574117]              | 0.350985506 | 0.002525289 | 0.009853122 |
|                     |                                                                                       | -           |             |             |
| ENSMMUG000000017720 | RAB4A, member RAS oncogene family [Source:VGNC Symbol;Acc:VGNC:81545]                 | 0.484822183 | 0.010891359 | 0.034375317 |
|                     |                                                                                       | -           |             |             |
| ENSMMUG000000062933 |                                                                                       | 0.578721867 | 0.000448955 | 0.00219362  |
| ENSMMUG000000005185 | regulator of G protein signaling 4 [Source:VGNC Symbol;Acc:VGNC:76690]                | 2.748560523 | 0.007637159 | 0.02549295  |
| ENSMMUG000000058513 |                                                                                       | 0.290079373 | 0.0082678   | 0.027311047 |
|                     |                                                                                       | -           |             |             |
| ENSMMUG000000039738 | U6 spliceosomal RNA [Source:RFAM;Acc:RF00026]                                         | 1.865808556 | 0.00464427  | 0.01665216  |

|                    |                                                                                                        |             |             |             |
|--------------------|--------------------------------------------------------------------------------------------------------|-------------|-------------|-------------|
| ENSMMUG0000005585  | transmembrane and coiled-coil domains 1 [Source:VGNC Symbol;Acc:VGNC:79118]                            | -0.57132283 | 0.016040233 | 0.047584555 |
| ENSMMUG00000023462 | immunoglobulin like domain containing receptor 2 [Source:VGNC Symbol;Acc:VGNC:73619]                   | 1.463128609 | 0.005432523 | 0.018992838 |
| ENSMMUG00000023463 | maelstrom spermatogenic transposon silencer [Source:VGNC Symbol;Acc:VGNC:74362]                        | 1.642334672 | 0.012518639 | 0.03861612  |
| ENSMMUG00000063120 | cellular repressor of E1A stimulated genes 1 [Source:NCBI gene;Acc:701021]                             | 0.839485204 | 0.000204721 | 0.001093222 |
| ENSMMUG00000023372 | RCSD domain containing 1 [Source:VGNC Symbol;Acc:VGNC:76850]                                           | 1.012665829 | 1.38E-05    | 9.70E-05    |
| ENSMMUG00000009184 | myelin protein zero like 1 [Source:NCBI gene;Acc:698437]                                               | 1.300689927 | 0.000134976 | 0.000749588 |
| ENSMMUG00000060729 | T-box transcription factor 19 [Source:NCBI gene;Acc:699312]                                            | 0.428054771 | 0.007033679 | 0.023715624 |
| ENSMMUG00000056707 |                                                                                                        | 1.781516748 | 0.004986738 | 0.017671714 |
| ENSMMUG00000059777 |                                                                                                        | 0.905852174 | 2.48E-05    | 0.000163497 |
| ENSMMUG00000021078 | ATPase Na <sup>+</sup> /K <sup>+</sup> transporting subunit beta 1 [Source:VGNC Symbol;Acc:VGNC:70176] | 1.787603949 | 6.20E-06    | 4.75E-05    |
| ENSMMUG00000021080 | basic leucine zipper nuclear factor 1 [Source:VGNC Symbol;Acc:VGNC:70258]                              | 0.808667511 | 1.18E-08    | 1.56E-07    |
| ENSMMUG00000000065 | coiled-coil domain containing 181 [Source:VGNC Symbol;Acc:VGNC:70884]                                  | 0.815705909 | 1.39E-06    | 1.22E-05    |
| ENSMMUG00000013039 | solute carrier family 19 member 2 [Source:VGNC Symbol;Acc:VGNC:81571]                                  | 0.408979341 | 0.003009782 | 0.011437986 |
| ENSMMUG00000042510 | coagulation factor V [Source:NCBI gene;Acc:704695]                                                     | 1.150408811 | 4.19E-18    | 2.17E-16    |
| ENSMMUG00000013044 | selectin P [Source:VGNC Symbol;Acc:VGNC:77157]                                                         | 1.317655232 | 1.12E-10    | 2.12E-09    |
| ENSMMUG00000016579 | selectin L [Source:NCBI gene;Acc:701419]                                                               | 2.640242526 | 1.19E-47    | 8.77E-45    |
| ENSMMUG00000016580 | selectin E [Source:VGNC Symbol;Acc:VGNC:77156]                                                         | 2.662484121 | 2.09E-60    | 4.18E-57    |
| ENSMMUG00000016581 | methyltransferase like 18 [Source:VGNC Symbol;Acc:VGNC:74606]                                          | 1.148320454 | 0.009035975 | 0.029399414 |
| ENSMMUG00000016582 | chromosome 1 C1orf112 homolog [Source:VGNC Symbol;Acc:VGNC:70385]                                      | 1.698466584 | 3.81E-15    | 1.40E-13    |
| ENSMMUG00000010081 | kinesin associated protein 3 [Source:VGNC Symbol;Acc:VGNC:73842]                                       | 0.442956501 | 0.005840316 | 0.020187024 |
| ENSMMUG00000059773 | methyltransferase like 11B [Source:NCBI gene;Acc:705503]                                               | 1.099016073 | 0.000130305 | 0.000726545 |
| ENSMMUG00000063298 |                                                                                                        | -1.05217604 | 0.002486289 | 0.009717178 |
| ENSMMUG00000014674 | golgin, RAB6 interacting [Source:VGNC Symbol;Acc:VGNC:73012]                                           | 1.061174045 | 1.52E-08    | 1.98E-07    |
| ENSMMUG00000007279 | phosphatidylinositol glycan anchor biosynthesis class C [Source:VGNC Symbol;Acc:VGNC:75986]            | 0.664266413 | 0.000341735 | 0.001718232 |
| ENSMMUG00000007280 | SUN domain containing ossification factor [Source:VGNC Symbol;Acc:VGNC:78112]                          | 3.503121217 | 0.002917735 | 0.011151649 |
| ENSMMUG00000022798 | aspartyl-tRNA synthetase 2, mitochondrial [Source:VGNC Symbol;Acc:VGNC:71708]                          | 0.809794228 | 6.67E-05    | 0.000397142 |
| ENSMMUG00000056971 | Metazoan signal recognition particle RNA [Source:RFAM;Acc:RF00017]                                     | 1.748000501 | 2.09E-08    | 2.66E-07    |
| ENSMMUG00000060229 |                                                                                                        | 1.074124174 | 0.009116322 | 0.029612735 |
| ENSMMUG00000000629 | serpin family C member 1 [Source:VGNC Symbol;Acc:VGNC:77360]                                           | 0.862397461 | 8.38E-10    | 1.36E-08    |
| ENSMMUG00000000630 | ring finger and CCCH-type domains 1 [Source:VGNC Symbol;Acc:VGNC:76861]                                | -0.45649521 | 5.70E-05    | 0.000345571 |
| ENSMMUG00000000546 | KIAA0040 ortholog [Source:NCBI gene;Acc:100423509]                                                     | -1.03001686 | 0.000109335 | 0.000618729 |
| ENSMMUG00000023216 | astrotactin 1 [Source:VGNC Symbol;Acc:VGNC:70167]                                                      | 0.392284204 | 0.0143378   | 0.04338778  |
| ENSMMUG00000022935 | BMP/retinoic acid inducible neural specific 2 [Source:VGNC Symbol;Acc:VGNC:70303]                      | 0.916256832 | 9.69E-06    | 7.06E-05    |
| ENSMMUG00000020320 | protein transport protein Sec16B [Source:NCBI gene;Acc:709635]                                         | 0.735199419 | 0.000181987 | 0.000983433 |
| ENSMMUG00000021073 | RAS protein activator like 2 [Source:VGNC Symbol;Acc:VGNC:76670]                                       | 2.140066643 | 6.78E-24    | 6.30E-22    |
| ENSMMUG00000059117 | Metazoan signal recognition particle RNA [Source:RFAM;Acc:RF00017]                                     | 1.244615659 | 0.000287845 | 0.001479747 |
| ENSMMUG00000056058 | C-type lectin domain containing 20A [Source:HGNC Symbol;Acc:HGNC:34521]                                | 1.964536245 | 0.011059433 | 0.034843054 |
| ENSMMUG00000054486 | testis expressed 35 [Source:NCBI gene;Acc:717255]                                                      | 2.208146948 | 0.001124222 | 0.004880793 |
| ENSMMUG00000003770 | NPHS2 stomatin family member, podocin [Source:VGNC Symbol;Acc:VGNC:75167]                              | 0.567994492 | 0.012685993 | 0.039037893 |
| ENSMMUG00000055256 | family with sequence similarity 163 member A [Source:NCBI gene;Acc:718704]                             | 1.086773138 | 2.12E-05    | 0.000142453 |
| ENSMMUG00000031279 | torsin A interacting protein 2 [Source:NCBI gene;Acc:716654]                                           | 1.100251236 | 3.15E-11    | 6.47E-10    |

|                    |                                                                                                      |             |             |             |
|--------------------|------------------------------------------------------------------------------------------------------|-------------|-------------|-------------|
| ENSMMUG00000053617 | torsin 1A interacting protein 2 [Source:NCBI gene;Acc:716691]                                        | 0.504872414 | 0.005067992 | 0.017901372 |
| ENSMMUG00000014873 | torsin 1A interacting protein 1 [Source:VGNC Symbol;Acc:VGNC:79810]                                  | 0.41291784  | 0.007470812 | 0.024985259 |
|                    |                                                                                                      | -           |             |             |
| ENSMMUG00000002135 | centrosomal protein 350 [Source:VGNC Symbol;Acc:VGNC:71084]                                          | 0.400977209 | 0.008277263 | 0.027330363 |
| ENSMMUG00000054568 |                                                                                                      | 1.095286724 | 0.000347374 | 0.001738326 |
| ENSMMUG00000061785 |                                                                                                      | 0.957825041 | 4.17E-13    | 1.14E-11    |
| ENSMMUG00000022884 | glutamate-ammonia ligase [Source:NCBI gene;Acc:715952]                                               | 3.707446721 | 1.08E-15    | 4.19E-14    |
| ENSMMUG00000049444 |                                                                                                      | 1.888284252 | 0.003551564 | 0.013172064 |
| ENSMMUG00000031291 | regulator of G protein signaling like 1 [Source:NCBI gene;Acc:715693]                                | 1.45995333  | 3.69E-29    | 6.08E-27    |
|                    |                                                                                                      | -           |             |             |
| ENSMMUG00000005634 | ribonuclease L [Source:VGNC Symbol;Acc:VGNC:82223]                                                   | 1.089445881 | 1.75E-06    | 1.50E-05    |
|                    |                                                                                                      | -           |             |             |
| ENSMMUG00000055481 | regulator of G protein signaling 16 [Source:NCBI gene;Acc:715599]                                    | 1.244338456 | 7.61E-07    | 7.09E-06    |
|                    |                                                                                                      | -           |             |             |
| ENSMMUG00000001479 | laminin subunit gamma 2 [Source:VGNC Symbol;Acc:VGNC:74233]                                          | 1.917935006 | 1.36E-07    | 1.47E-06    |
| ENSMMUG00000001481 | nicotinamide nucleotide adenylyltransferase 2 [Source:VGNC Symbol;Acc:VGNC:75193]                    | -1.77937384 | 9.68E-05    | 0.000553746 |
|                    |                                                                                                      | -           |             |             |
| ENSMMUG00000013878 | ring finger protein 2 [Source:NCBI gene;Acc:717024]                                                  | 1.011123434 | 0.000637702 | 0.002975871 |
|                    |                                                                                                      | -           |             |             |
| ENSMMUG00000013879 | tRNA methyltransferase 1 like [Source:VGNC Symbol;Acc:VGNC:79048]                                    | 1.510219718 | 0.003100109 | 0.011701974 |
|                    |                                                                                                      | -           |             |             |
| ENSMMUG00000016857 | prostaglandin-endoperoxide synthase 2 [Source:VGNC Symbol;Acc:VGNC:76589]                            | 1.041624195 | 3.96E-08    | 4.76E-07    |
|                    |                                                                                                      | -           |             |             |
| ENSMMUG00000059986 |                                                                                                      | 0.840017501 | 0.001070109 | 0.004683565 |
|                    |                                                                                                      | -           |             |             |
| ENSMMUG00000022647 | cell division cycle 73 [Source:VGNC Symbol;Acc:VGNC:70766]                                           | 0.701951639 | 0.005101586 | 0.017997367 |
| ENSMMUG00000021082 | potassium sodium-activated channel subfamily T member 2 [Source:VGNC Symbol;Acc:VGNC:73857]          | 0.376922871 | 0.014745525 | 0.044325079 |
|                    |                                                                                                      | -           |             |             |
| ENSMMUG00000045497 | complement factor H [Source:NCBI gene;Acc:717346]                                                    | 1.086387304 | 0.000256292 | 0.001339538 |
|                    |                                                                                                      | -           |             |             |
| ENSMMUG00000000009 | protein tyrosine phosphatase receptor type C [Source:VGNC Symbol;Acc:VGNC:76612]                     | 2.796035032 | 4.24E-11    | 8.50E-10    |
| ENSMMUG00000012218 | calmodulin regulated spectrin associated protein family member 2 [Source:VGNC Symbol;Acc:VGNC:70666] | -1.10683842 | 5.67E-05    | 0.00034431  |
|                    |                                                                                                      | -           |             |             |
| ENSMMUG00000063678 | innate immunity activator [Source:NCBI gene;Acc:710962]                                              | 0.316794803 | 9.91E-05    | 0.000565974 |
|                    |                                                                                                      | -           |             |             |
| ENSMMUG00000017414 | calcium voltage-gated channel subunit alpha1 S [Source:VGNC Symbol;Acc:VGNC:70507]                   | 1.001437212 | 7.89E-05    | 0.000461471 |
| ENSMMUG00000064915 | Metazoan signal recognition particle RNA [Source:RFAM;Acc:RF00017]                                   | 1.732533035 | 0.000860593 | 0.003871701 |
| ENSMMUG00000050920 | Metazoan signal recognition particle RNA [Source:RFAM;Acc:RF00017]                                   | 1.317507434 | 0.005530653 | 0.019273448 |
|                    |                                                                                                      | -           |             |             |
| ENSMMUG00000055783 |                                                                                                      | 2.316198371 | 6.52E-05    | 0.000388955 |
|                    |                                                                                                      | -           |             |             |
| ENSMMUG00000017114 | pleckstrin homology domain containing A6 [Source:VGNC Symbol;Acc:VGNC:76040]                         | 0.920277785 | 0.008755227 | 0.028652171 |
| ENSMMUG00000063658 | leucine rich repeat neuronal 2 [Source:NCBI gene;Acc:100429709]                                      | 1.340873464 | 0.000268541 | 0.001394491 |
|                    |                                                                                                      | -           |             |             |
| ENSMMUG00000017508 | neurofascin [Source:VGNC Symbol;Acc:VGNC:75278]                                                      | 0.611614591 | 5.89E-08    | 6.87E-07    |
|                    |                                                                                                      | -           |             |             |
| ENSMMUG00000018797 | contactin 2 [Source:VGNC Symbol;Acc:VGNC:71284]                                                      | 1.668256563 | 0.010578563 | 0.033516309 |
|                    |                                                                                                      | -           |             |             |
| ENSMMUG00000004113 | major facilitator superfamily domain containing 4A [Source:VGNC Symbol;Acc:VGNC:74575]               | 0.722081489 | 3.70E-05    | 0.000234996 |
|                    |                                                                                                      | -           |             |             |
| ENSMMUG00000055835 | nuclear casein kinase and cyclin dependent kinase substrate 1 [Source:NCBI gene;Acc:697298]          | 1.333125502 | 1.22E-07    | 1.33E-06    |
| ENSMMUG00000023570 | interleukin 19 [Source:NCBI gene;Acc:694806]                                                         | 3.077285655 | 0.015161599 | 0.045342526 |
| ENSMMUG00000011221 | Fc fragment of IgA and IgM receptor [Source:VGNC Symbol;Acc:VGNC:72567]                              | 1.447355658 | 0.002400222 | 0.009430741 |
| ENSMMUG00000022171 | YOD1 deubiquitinase [Source:VGNC Symbol;Acc:VGNC:79471]                                              | 0.311794662 | 0.016524768 | 0.04872305  |
| ENSMMUG00000040888 | complement C3b/C4b receptor 1 like [Source:HGNC Symbol;Acc:HGNC:2335]                                | 0.986954239 | 3.83E-09    | 5.57E-08    |

|                    |                                                                                              |             |             |             |
|--------------------|----------------------------------------------------------------------------------------------|-------------|-------------|-------------|
| ENSMMUG00000051230 |                                                                                              | 0.932179979 | 3.86E-07    | 3.83E-06    |
| ENSMMUG00000057560 |                                                                                              | 0.908596923 | 6.73E-08    | 7.78E-07    |
|                    |                                                                                              | -           |             |             |
| ENSMMUG00000064202 |                                                                                              | 1.231688246 | 0.000610681 | 0.002883359 |
|                    |                                                                                              | -           |             |             |
| ENSMMUG00000045482 | GO/G1 switch 2 [Source:NCBI gene;Acc:717581]                                                 | 0.700964031 | 1.76E-07    | 1.86E-06    |
| ENSMMUG00000016099 | hedgehog acyltransferase [Source:NCBI gene;Acc:712333]                                       | 1.788320935 | 2.82E-05    | 0.000183677 |
|                    |                                                                                              | -           |             |             |
| ENSMMUG00000016102 | potassium voltage-gated channel subfamily H member 1 [Source:NCBI gene;Acc:712190]           | 2.281704869 | 0.011654798 | 0.036432286 |
| ENSMMUG00000011914 | prospero homeobox 1 [Source:VGNC Symbol;Acc:VGNC:76427]                                      | 3.348899636 | 6.93E-09    | 9.56E-08    |
|                    |                                                                                              | -           |             |             |
| ENSMMUG00000015634 | centromere protein F [Source:VGNC Symbol;Acc:VGNC:71009]                                     | 2.628460027 | 2.35E-05    | 0.00015589  |
|                    |                                                                                              | -           |             |             |
| ENSMMUG00000058133 |                                                                                              | 2.169690108 | 0.000343129 | 0.001723389 |
|                    |                                                                                              | -           |             |             |
| ENSMMUG00000017396 | 3'(2'), 5'-bisphosphate nucleotidase 1 [Source:NCBI gene;Acc:721277]                         | 1.261736161 | 3.84E-05    | 0.000242418 |
|                    |                                                                                              | -           |             |             |
| ENSMMUG00000007783 | isoleucyl-tRNA synthetase 2, mitochondrial [Source:VGNC Symbol;Acc:VGNC:73458]               | 1.096793912 | 1.00E-17    | 4.89E-16    |
|                    |                                                                                              | -           |             |             |
| ENSMMUG00000026897 | mml-mir-215 [Source:miRBase;Acc:MI0003025]                                                   | 1.356944365 | 0.010163116 | 0.032427163 |
|                    |                                                                                              | -           |             |             |
| ENSMMUG00000027053 | mml-mir-194-1 [Source:miRBase;Acc:MI0003024]                                                 | 1.380862153 | 0.014578853 | 0.043946529 |
|                    |                                                                                              | -           |             |             |
| ENSMMUG00000018525 | presenilin 2 [Source:VGNC Symbol;Acc:VGNC:76436]                                             | 0.974420993 | 1.52E-13    | 4.40E-12    |
|                    |                                                                                              | -           |             |             |
| ENSMMUG00000023096 | obscurin, cytoskeletal calmodulin and titin-interacting RhoGEF [Source:NCBI gene;Acc:694413] | 0.818935752 | 5.85E-09    | 8.19E-08    |
| ENSMMUG00000023042 | olfactomedin like 2B [Source:VGNC Symbol;Acc:VGNC:75455]                                     | 0.452570624 | 0.003167952 | 0.011909969 |
| ENSMMUG00000004042 | Fc receptor like A [Source:VGNC Symbol;Acc:VGNC:72526]                                       | 1.061405913 | 0.00971258  | 0.031181206 |
| ENSMMUG00000054686 |                                                                                              | 2.41587196  | 2.88E-33    | 7.22E-31    |
| ENSMMUG00000008251 | cilia and flagella associated protein 126 [Source:VGNC Symbol;Acc:VGNC:71150]                | 1.708270472 | 0.010551714 | 0.033446358 |
| ENSMMUG00000004516 | apolipoprotein A2 [Source:NCBI gene;Acc:719946]                                              | 1.204669293 | 0.010051672 | 0.032115423 |
| ENSMMUG00000004512 | Fc fragment of IgE receptor Ig [Source:VGNC Symbol;Acc:VGNC:72629]                           | 1.675752121 | 1.63E-06    | 1.41E-05    |
| ENSMMUG00000004520 | NADH:ubiquinone oxidoreductase core subunit S2 [Source:NCBI gene;Acc:719935]                 | 0.944227862 | 0.000319618 | 0.001619807 |
| ENSMMUG00000050419 | ADAM metalloproteinase with thrombospondin type 1 motif 4 [Source:NCBI gene;Acc:719927]      | 1.29438112  | 2.57E-09    | 3.82E-08    |
| ENSMMUG00000060555 |                                                                                              | 1.198438502 | 1.89E-07    | 1.98E-06    |
|                    |                                                                                              | -           |             |             |
| ENSMMUG00000022630 | protoporphyrinogen oxidase [Source:VGNC Symbol;Acc:VGNC:76365]                               | 1.416511079 | 5.09E-06    | 3.97E-05    |
|                    |                                                                                              | -           |             |             |
| ENSMMUG00000022631 | ubiquitin specific peptidase 21 [Source:VGNC Symbol;Acc:VGNC:78741]                          | 1.113156216 | 0.001440128 | 0.006044571 |
|                    |                                                                                              | -           |             |             |
| ENSMMUG00000022632 | ubiquitin-fold modifier conjugating enzyme 1 [Source:VGNC Symbol;Acc:VGNC:79643]             | 0.840140192 | 0.00035867  | 0.001787357 |
|                    |                                                                                              | -           |             |             |
| ENSMMUG00000002005 | Rho GTPase activating protein 30 [Source:NCBI gene;Acc:718236]                               | 0.435837135 | 0.009836586 | 0.031507183 |
|                    |                                                                                              | -           |             |             |
| ENSMMUG00000015812 | CD48 molecule [Source:VGNC Symbol;Acc:VGNC:70769]                                            | 0.502745768 | 0.00350212  | 0.013005887 |
|                    |                                                                                              | -           |             |             |
| ENSMMUG00000011335 | Fc receptor like 6 [Source:VGNC Symbol;Acc:VGNC:72602]                                       | 0.468624156 | 1.31E-05    | 9.21E-05    |
|                    |                                                                                              | -           |             |             |
| ENSMMUG00000004492 | absent in melanoma 2 [Source:NCBI gene;Acc:719260]                                           | 2.743968271 | 7.90E-10    | 1.28E-08    |
| ENSMMUG00000000730 | spectrin alpha, erythrocytic 1 [Source:VGNC Symbol;Acc:VGNC:77868]                           | 0.821756223 | 0.001239241 | 0.005320844 |
| ENSMMUG00000010626 | CD1c molecule [Source:VGNC Symbol;Acc:VGNC:70756]                                            | 1.86743893  | 0.000615467 | 0.002898208 |
|                    |                                                                                              | -           |             |             |
| ENSMMUG00000003191 | kirre like nephrin family adhesion molecule 1 [Source:VGNC Symbol;Acc:VGNC:73837]            | 1.154454323 | 2.35E-14    | 7.77E-13    |
| ENSMMUG00000019835 | CD5 molecule like [Source:VGNC Symbol;Acc:VGNC:70774]                                        | 1.227197384 | 3.03E-07    | 3.06E-06    |
| ENSMMUG00000019833 | Fc receptor like 1 [Source:VGNC Symbol;Acc:VGNC:72528]                                       | 1.445883374 | 6.57E-24    | 6.14E-22    |

|                     |                                                                                         |             |             |             |
|---------------------|-----------------------------------------------------------------------------------------|-------------|-------------|-------------|
| ENSMMUG00000019830  | Fc receptor like 2 [Source:VGNC Symbol;Acc:VGNC:72509]                                  | 0.732436089 | 0.000457433 | 0.002228833 |
| ENSMMUG00000046969  | Fc receptor like 3 [Source:NCBI gene;Acc:718801]                                        | 1.503868409 | 5.99E-17    | 2.74E-15    |
| ENSMMUG00000008974  | Fc receptor like 5 [Source:NCBI gene;Acc:718771]                                        | 2.680380841 | 4.06E-21    | 2.80E-19    |
| ENSMMUG00000060011  | hyaluronan and proteoglycan link protein 2 [Source:NCBI gene;Acc:718500]                | 3.355041228 | 0.000145163 | 0.000801744 |
| ENSMMUG00000016096  | lamin A/C [Source:VGNC Symbol;Acc:VGNC:74427]                                           | 2.013606506 | 1.32E-05    | 9.28E-05    |
| ENSMMUG00000004648  | KH domain containing 4, pre-mRNA splicing factor [Source:VGNC Symbol;Acc:VGNC:73931]    | 0.636684703 | 2.58E-05    | 0.000169333 |
| ENSMMUG00000021312  | synaptotagmin 11 [Source:VGNC Symbol;Acc:VGNC:78167]                                    | 0.527401568 | 0.002276886 | 0.008994021 |
| ENSMMUG00000062397  |                                                                                         | 0.826896313 | 6.46E-05    | 0.00038581  |
| ENSMMUG00000023146  | ASH1 like histone lysine methyltransferase [Source:NCBI gene;Acc:717778]                | 1.623017097 | 0.009431688 | 0.030467764 |
| ENSMMUG00000023145  | RUN and SH3 domain containing 1 [Source:VGNC Symbol;Acc:VGNC:77036]                     | 0.865350619 | 0.015208418 | 0.045443776 |
| ENSMMUG00000023141  | CDC like kinase 2 [Source:VGNC Symbol;Acc:VGNC:71259]                                   | 1.414628489 | 4.55E-06    | 3.60E-05    |
| ENSMMUG00000016093  | adenosine deaminase RNA specific [Source:VGNC Symbol;Acc:VGNC:69502]                    | -2.34709425 | 1.90E-12    | 4.72E-11    |
| ENSMMUG00000010978  | S100 calcium binding protein A2 [Source:VGNC Symbol;Acc:VGNC:76956]                     | 0.958801447 | 8.69E-11    | 1.67E-09    |
| ENSMMUG00000031655  | S100 calcium binding protein A3 [Source:VGNC Symbol;Acc:VGNC:76957]                     | 0.635096931 | 0.00060726  | 0.002871073 |
| ENSMMUG00000008917  | S100 calcium binding protein A6 [Source:VGNC Symbol;Acc:VGNC:76960]                     | -0.8181739  | 6.70E-07    | 6.29E-06    |
| ENSMMUG00000051645  |                                                                                         | 2.400978608 | 0.000276477 | 0.001430112 |
| ENSMMUG00000042618  | involucrin [Source:NCBI gene;Acc:713728]                                                | 1.413065968 | 9.43E-05    | 0.000541528 |
| ENSMMUG00000017740  | sperm mitochondria associated cysteine rich protein [Source:VGNC Symbol;Acc:VGNC:77816] | 2.37709267  | 4.70E-08    | 5.58E-07    |
| ENSMMUG00000055038  |                                                                                         | 1.789443341 | 0.000617485 | 0.002905701 |
| ENSMMUG00000054634  | late cornified envelope protein 1C-like [Source:NCBI gene;Acc:713600]                   | 2.089999248 | 0.01163412  | 0.036375757 |
| ENSMMUG00000058472  | late cornified envelope protein 1C [Source:NCBI gene;Acc:107000798]                     | 1.548560176 | 0.000298718 | 0.001529919 |
| ENSMMUG00000055266  | late cornified envelope protein 1C-like [Source:NCBI gene;Acc:107000794]                | 2.193123043 | 4.11E-05    | 0.000257891 |
| ENSMMUG00000051816  | keratinocyte proline rich protein [Source:NCBI gene;Acc:100424312]                      | 1.458600437 | 0.000227928 | 0.001206127 |
| ENSMMUG00000001966  | chromosome 1 C1orf68 homolog [Source:VGNC Symbol;Acc:VGNC:70436]                        | 1.839836732 | 0.005758724 | 0.019929561 |
| ENSMMUG000000049843 | late cornified envelope protein 2D [Source:NCBI gene;Acc:100424118]                     | 2.927867255 | 0.004151819 | 0.015126257 |
| ENSMMUG00000062996  |                                                                                         | 1.889633872 | 0.000309006 | 0.001572844 |
| ENSMMUG00000001967  | late cornified envelope 5A [Source:VGNC Symbol;Acc:VGNC:74061]                          | 2.66245583  | 0.007429039 | 0.024863345 |
| ENSMMUG00000009040  | cornulin [Source:VGNC Symbol;Acc:VGNC:71397]                                            | 1.933033535 | 5.60E-05    | 0.000340439 |
| ENSMMUG00000056511  |                                                                                         | 1.80556472  | 1.06E-06    | 9.54E-06    |
| ENSMMUG00000059472  | filaggrin family member 2 [Source:HGNC Symbol;Acc:HGNC:33276]                           | 1.232002928 | 4.42E-07    | 4.32E-06    |
| ENSMMUG00000021386  | aph-1 homolog A, gamma-secretase subunit [Source:VGNC Symbol;Acc:VGNC:69924]            | 0.545999408 | 0.00110247  | 0.004801224 |
| ENSMMUG00000021385  | carbonic anhydrase 14 [Source:VGNC Symbol;Acc:VGNC:70489]                               | 0.528646448 | 0.000847587 | 0.003823    |
| ENSMMUG00000013681  | pleckstrin homology domain containing O1 [Source:VGNC Symbol;Acc:VGNC:76101]            | 0.762093037 | 3.82E-05    | 0.000241765 |
| ENSMMUG00000013673  | vacuolar protein sorting 45 homolog [Source:VGNC Symbol;Acc:VGNC:78964]                 | -0.54983127 | 0.000497325 | 0.002399031 |
| ENSMMUG00000007244  | OTU deubiquitinase 7B [Source:VGNC Symbol;Acc:VGNC:75634]                               | 0.881032418 | 2.79E-05    | 0.000181517 |
| ENSMMUG00000052282  |                                                                                         | 0.818492209 | 0.000135807 | 0.000753332 |
| ENSMMUG00000007246  | myotubularin related protein 11 [Source:VGNC Symbol;Acc:VGNC:75016]                     | 0.866539653 | 9.51E-06    | 6.94E-05    |
| ENSMMUG00000007256  | splicing factor 3b subunit 4 [Source:VGNC Symbol;Acc:VGNC:77182]                        | 1.173337979 | 2.62E-08    | 3.26E-07    |

|                    |                                                                                           |   |             |             |             |
|--------------------|-------------------------------------------------------------------------------------------|---|-------------|-------------|-------------|
| ENSMMUG0000007257  | synaptic vesicle glycoprotein 2A [Source:VGNC Symbol;Acc:VGNC:78181]                      | - | 0.904103023 | 1.71E-10    | 3.13E-09    |
| ENSMMUG00000052382 | histone H4 [Source:NCBI gene;Acc:107000818]                                               | - | -0.98976725 | 2.48E-10    | 4.40E-09    |
| ENSMMUG00000054615 |                                                                                           | - | 1.598030154 | 1.39E-07    | 1.50E-06    |
| ENSMMUG00000051523 | Metazoan signal recognition particle RNA [Source:RFAM;Acc:RF00017]                        | - | 1.661977416 | 0.000489869 | 0.002367954 |
| ENSMMUG00000040506 | H2B clustered histone 18 [Source:HGNC Symbol;Acc:HGNC:24700]                              | - | 1.036110365 | 0.000161294 | 0.000881114 |
| ENSMMUG00000004362 | Fc fragment of IgG receptor Ia [Source:NCBI gene;Acc:714664]                              | - | 0.844756502 | 0.000438607 | 0.002146052 |
| ENSMMUG00000062140 |                                                                                           | - | 1.430513747 | 1.76E-06    | 1.50E-05    |
| ENSMMUG00000024186 | U1 spliceosomal RNA [Source:RFAM;Acc:RF00003]                                             | - | 1.579961173 | 0.000807453 | 0.003675079 |
| ENSMMUG00000036857 | U1 spliceosomal RNA [Source:RFAM;Acc:RF00003]                                             | - | 1.423796658 | 0.005165139 | 0.018194108 |
| ENSMMUG00000064626 | U1 spliceosomal RNA [Source:RFAM;Acc:RF00003]                                             | - | 1.210467304 | 0.015532921 | 0.046314725 |
| ENSMMUG00000061239 |                                                                                           | - | 1.288013322 | 1.15E-06    | 1.02E-05    |
| ENSMMUG00000054590 |                                                                                           | - | 1.142587843 | 2.21E-05    | 0.000147963 |
| ENSMMUG00000054496 | U1 spliceosomal RNA [Source:RFAM;Acc:RF00003]                                             | - | 1.764235674 | 0.002262511 | 0.008951257 |
| ENSMMUG00000048493 | neuroblastoma breakpoint family member 6-like protein [Source:NCBI gene;Acc:711999]       | - | 2.640179907 | 0.013787574 | 0.041967258 |
| ENSMMUG00000018375 | notch receptor 2 [Source:NCBI gene;Acc:713798]                                            | - | 0.574468703 | 3.44E-05    | 0.000220178 |
| ENSMMUG00000001978 | adenosine monophosphate deaminase 1 [Source:VGNC Symbol;Acc:VGNC:69806]                   | - | 0.615037916 | 0.003777426 | 0.013910174 |
| ENSMMUG00000019528 | adaptor related protein complex 4 subunit beta 1 [Source:VGNC Symbol;Acc:VGNC:69972]      | - | 2.411960236 | 4.32E-42    | 2.15E-39    |
| ENSMMUG00000019527 | DNA cross-link repair 1B [Source:VGNC Symbol;Acc:VGNC:71647]                              | - | 1.179049911 | 3.17E-05    | 0.000204488 |
| ENSMMUG00000006786 | protein tyrosine phosphatase non-receptor type 22 [Source:VGNC Symbol;Acc:VGNC:76603]     | - | 1.161337085 | 2.65E-09    | 3.92E-08    |
| ENSMMUG00000017819 | putative homeodomain transcription factor 1 [Source:VGNC Symbol;Acc:VGNC:75982]           | - | 0.872113398 | 0.000224775 | 0.001191239 |
| ENSMMUG00000007766 | suppression of tumorigenicity 7 like [Source:VGNC Symbol;Acc:VGNC:77954]                  | - | 0.913654557 | 7.43E-05    | 0.000437114 |
| ENSMMUG00000007765 | Wnt family member 2B [Source:VGNC Symbol;Acc:VGNC:78797]                                  | - | 0.706170553 | 9.13E-06    | 6.70E-05    |
| ENSMMUG00000037458 | endoplasmic reticulum resident protein 29 [Source:NCBI gene;Acc:720396]                   | - | -1.29224899 | 0.011495102 | 0.03600532  |
| ENSMMUG00000050825 | potassium voltage-gated channel subfamily D member 3 [Source:NCBI gene;Acc:641437]        | - | 0.581897406 | 1.32E-05    | 9.32E-05    |
| ENSMMUG00000065322 | ATP synthase peripheral stalk-membrane subunit b [Source:NCBI gene;Acc:704072]            | - | 0.711511708 | 5.87E-06    | 4.53E-05    |
| ENSMMUG00000016056 | potassium voltage-gated channel subfamily A member 10 [Source:VGNC Symbol;Acc:VGNC:73963] | - | 0.542658748 | 0.000151626 | 0.000834149 |
| ENSMMUG00000062177 |                                                                                           | - | 0.370544977 | 0.004147719 | 0.015115245 |
| ENSMMUG00000004614 | potassium voltage-gated channel subfamily C member 4 [Source:VGNC Symbol;Acc:VGNC:73974]  | - | 1.122778232 | 0.001041709 | 0.00456925  |
| ENSMMUG00000021544 | solute carrier family 6 member 17 [Source:VGNC Symbol;Acc:VGNC:77805]                     | - | 1.404952873 | 0.000513533 | 0.002468725 |
| ENSMMUG00000005426 | striatin interacting protein 1 [Source:VGNC Symbol;Acc:VGNC:78217]                        | - | -0.45232785 | 0.003097003 | 0.011696545 |
| ENSMMUG00000022715 | adenosylhomocysteinase like 1 [Source:VGNC Symbol;Acc:VGNC:81350]                         | - | 0.704581362 | 1.15E-05    | 8.26E-05    |
| ENSMMUG00000020851 | glutathione S-transferase mu 5 [Source:NCBI gene;Acc:100426406]                           | - | 0.690438621 | 0.004025557 | 0.014712117 |

|                    |                                                                                                                    |             |             |             |
|--------------------|--------------------------------------------------------------------------------------------------------------------|-------------|-------------|-------------|
| ENSMMUG00000051186 | proteasome 20S subunit alpha 5 [Source:NCBI gene;Acc:698435]                                                       | 0.716615667 | 3.04E-10    | 5.31E-09    |
| ENSMMUG00000008713 | myosin binding protein H like [Source:NCBI gene;Acc:698183]                                                        | 1.005852524 | 7.08E-09    | 9.74E-08    |
| ENSMMUG00000015380 | proline and serine rich coiled-coil 1 [Source:VGNC Symbol;Acc:VGNC:76307]                                          | -1.07765419 | 1.62E-10    | 2.97E-09    |
| ENSMMUG00000015375 | cadherin EGF LAG seven-pass G-type receptor 2 [Source:VGNC Symbol;Acc:VGNC:71149]                                  | 1.002079108 | 5.39E-13    | 1.46E-11    |
| ENSMMUG00000021837 | seryl-tRNA synthetase 1 [Source:NCBI gene;Acc:695046]                                                              | 0.903583689 | 7.34E-09    | 1.00E-07    |
| ENSMMUG00000010156 | fibronectin type III domain containing 7 [Source:VGNC Symbol;Acc:VGNC:72582]                                       | 0.464185149 | 0.009643336 | 0.030973089 |
| ENSMMUG00000031785 |                                                                                                                    | 1.637983349 | 1.21E-10    | 2.27E-09    |
| ENSMMUG00000002789 | solute carrier family 25 (mitochondrial carrier; phosphate carrier), member 24 [Source:NCBI gene;Acc:694803]       | 1.669604217 | 1.17E-06    | 1.04E-05    |
| ENSMMUG00000008197 | netrin G1 [Source:VGNC Symbol;Acc:VGNC:75450]                                                                      | 1.81709034  | 0.00028165  | 0.001452583 |
| ENSMMUG00000060795 |                                                                                                                    | 2.204263791 | 2.22E-10    | 3.97E-09    |
| ENSMMUG00000061766 |                                                                                                                    | 2.173521615 | 6.97E-05    | 0.000412958 |
| ENSMMUG00000004103 | collagen type XI alpha 1 chain [Source:VGNC Symbol;Acc:VGNC:71289]                                                 | 1.752803576 | 5.55E-57    | 8.65E-54    |
| ENSMMUG00000060790 |                                                                                                                    | 2.591062636 | 0.002945683 | 0.011233971 |
| ENSMMUG00000022906 | vascular cell adhesion molecule 1 [Source:VGNC Symbol;Acc:VGNC:78761]                                              | 0.668991436 | 7.31E-06    | 5.51E-05    |
| ENSMMUG00000019106 | cell division cycle 14A [Source:VGNC Symbol;Acc:VGNC:70791]                                                        | 0.458779579 | 0.003008731 | 0.011437093 |
| ENSMMUG00000019105 | RNA 3'-terminal phosphate cyclase [Source:VGNC Symbol;Acc:VGNC:77043]                                              | 2.005092117 | 9.69E-06    | 7.06E-05    |
| ENSMMUG00000007706 | dihydrolipoamide branched chain transacylase E2 [Source:VGNC Symbol;Acc:VGNC:71744]                                | 2.060063666 | 0.006143112 | 0.021076139 |
| ENSMMUG00000000931 | solute carrier family 35 member A3 [Source:VGNC Symbol;Acc:VGNC:77461]                                             | 1.279531129 | 0.004415194 | 0.015946011 |
| ENSMMUG00000038667 |                                                                                                                    | 1.500687894 | 5.84E-05    | 0.00035379  |
| ENSMMUG00000008518 | phospholipid phosphatase related 5 [Source:NCBI gene;Acc:710549]                                                   | 1.227966972 | 5.28E-12    | 1.24E-10    |
| ENSMMUG00000008515 | sorting nexin 7 [Source:NCBI gene;Acc:716015]                                                                      | 0.831017863 | 3.50E-19    | 2.00E-17    |
| ENSMMUG00000049494 |                                                                                                                    | 1.68605598  | 5.39E-07    | 5.17E-06    |
| ENSMMUG00000020726 | dihydropyrimidine dehydrogenase [Source:VGNC Symbol;Acc:VGNC:71982]                                                | 1.932904145 | 4.55E-16    | 1.89E-14    |
| ENSMMUG00000049297 |                                                                                                                    | 0.971821538 | 2.78E-10    | 4.89E-09    |
| ENSMMUG00000050661 |                                                                                                                    | 0.531334061 | 0.005081423 | 0.017935261 |
| ENSMMUG00000001690 | calponin 3 [Source:VGNC Symbol;Acc:VGNC:71278]                                                                     | 0.61236284  | 0.000966226 | 0.004274255 |
| ENSMMUG00000056548 | coagulation factor III, tissue factor [Source:NCBI gene;Acc:714456]                                                | 1.030892764 | 1.09E-19    | 6.48E-18    |
| ENSMMUG00000015924 | BCAR3 adaptor protein, NSP family member [Source:VGNC Symbol;Acc:VGNC:70235]                                       | 0.943360889 | 4.11E-07    | 4.05E-06    |
| ENSMMUG00000015922 | formin binding protein 1 like [Source:VGNC Symbol;Acc:VGNC:72543]                                                  | 0.651693909 | 3.82E-06    | 3.07E-05    |
| ENSMMUG00000016812 | coiled-coil domain containing 18 [Source:VGNC Symbol;Acc:VGNC:70913]                                               | 0.944804581 | 4.04E-05    | 0.000254283 |
| ENSMMUG00000005070 | ecotropic viral integration site 5 [Source:NCBI gene;Acc:706592]                                                   | 2.056870021 | 2.80E-21    | 1.96E-19    |
| ENSMMUG00000024513 | Y RNA [Source:RFAM;Acc:RF00019]                                                                                    | 3.35570914  | 0.014116001 | 0.042818231 |
| ENSMMUG00000029649 | ATP synthase, H+ transporting, mitochondrial Fo complex, subunit C3 (subunit 9)-like [Source:NCBI gene;Acc:706691] | 4.140627814 | 0.00015802  | 0.000865591 |
| ENSMMUG00000014018 | bromodomain testis associated [Source:VGNC Symbol;Acc:VGNC:70282]                                                  | 3.382555621 | 6.53E-07    | 6.17E-06    |
| ENSMMUG00000001742 | transforming growth factor beta receptor 3 [Source:VGNC Symbol;Acc:VGNC:78339]                                     | -3.58063551 | 1.66E-39    | 7.05E-37    |
| ENSMMUG00000051155 | U2 spliceosomal RNA [Source:RFAM;Acc:RF00004]                                                                      | 4.586191118 | 2.59E-05    | 0.000169828 |
| ENSMMUG00000006819 | helicase for meiosis 1 [Source:NCBI gene;Acc:704516]                                                               | 0.640580746 | 0.004320129 | 0.015678358 |
| ENSMMUG00000007635 | zinc finger protein 644 [Source:VGNC Symbol;Acc:VGNC:79789]                                                        | 1.895695867 | 0.000293596 | 0.00150589  |
| ENSMMUG00000049678 |                                                                                                                    | 2.385322428 | 1.70E-16    | 7.32E-15    |
| ENSMMUG00000060600 |                                                                                                                    | -0.76344972 | 0.001077233 | 0.004705932 |



|                    |                                                                                     |   |             |             |             |
|--------------------|-------------------------------------------------------------------------------------|---|-------------|-------------|-------------|
| ENSMMUG0000000663  | guanylate-binding protein 6-like [Source:NCBI gene;Acc:695158]                      | - | 0.867315361 | 0.000842711 | 0.003807133 |
| ENSMMUG0000000662  | guanylate-binding protein 1 [Source:NCBI gene;Acc:694538]                           | - | 0.736267462 | 1.57E-07    | 1.68E-06    |
| ENSMMUG00000037887 | RBMX like 1 [Source:NCBI gene;Acc:100424767]                                        | - | 0.741289351 | 4.29E-09    | 6.19E-08    |
| ENSMMUG00000002794 | general transcription factor IIB [Source:VGNC Symbol;Acc:VGNC:73306]                | - | 1.824019353 | 1.32E-27    | 1.89E-25    |
| ENSMMUG00000020588 | protein kinase N2 [Source:VGNC Symbol;Acc:VGNC:76015]                               | - | 0.688518477 | 4.16E-08    | 4.98E-07    |
| ENSMMUG00000065295 |                                                                                     | - | 2.221687825 | 1.35E-30    | 2.55E-28    |
| ENSMMUG00000060366 |                                                                                     | - | 2.776651841 | 0.016702611 | 0.049123473 |
| ENSMMUG00000016554 | selenoprotein F [Source:NCBI gene;Acc:712469]                                       | - | 0.649178448 | 0.016566422 | 0.048784319 |
| ENSMMUG00000010306 | calcium-activated chloride channel regulator 4 [Source:NCBI gene;Acc:712123]        | - | -1.00169387 | 0.009441636 | 0.030492873 |
| ENSMMUG00000006836 | chloride channel accessory 1 [Source:NCBI gene;Acc:574295]                          | - | 1.439187414 | 5.18E-06    | 4.03E-05    |
| ENSMMUG00000001380 | outer dense fiber of sperm tails 2 like [Source:VGNC Symbol;Acc:VGNC:75482]         | - | 2.034462587 | 0.00032636  | 0.001648016 |
| ENSMMUG00000014573 | dimethylarginine dimethylaminohydrolase 1 [Source:VGNC Symbol;Acc:VGNC:71753]       | - | 0.926941347 | 5.20E-14    | 1.64E-12    |
| ENSMMUG00000005361 | mucolipin 3 [Source:VGNC Symbol;Acc:VGNC:74505]                                     | - | 0.763906224 | 0.000169684 | 0.000922281 |
| ENSMMUG00000010127 | chitobiase [Source:VGNC Symbol;Acc:VGNC:71540]                                      | - | 1.813872112 | 5.47E-08    | 6.40E-07    |
| ENSMMUG00000022183 | spermatogenesis associated 1 [Source:NCBI gene;Acc:710462]                          | - | 1.797212105 | 2.51E-21    | 1.78E-19    |
| ENSMMUG00000059938 |                                                                                     | - | 1.747762355 | 5.26E-05    | 0.000321813 |
| ENSMMUG00000000404 | uricase [Source:NCBI gene;Acc:714004]                                               | - | 1.314758103 | 0.001741636 | 0.007124551 |
| ENSMMUG00000003457 | protein kinase cAMP-activated catalytic subunit beta [Source:NCBI gene;Acc:709728]  | - | 1.014493129 | 1.61E-12    | 4.04E-11    |
| ENSMMUG00000057763 |                                                                                     | - | 1.689729849 | 5.93E-05    | 0.000358257 |
| ENSMMUG00000023345 | adhesion G protein-coupled receptor L4 [Source:VGNC Symbol;Acc:VGNC:69652]          | - | 1.361298683 | 5.88E-05    | 0.00035559  |
| ENSMMUG00000049326 | GIPC PDZ domain containing family member 2 [Source:NCBI gene;Acc:707432]            | - | 0.556258841 | 0.009233924 | 0.029925426 |
| ENSMMUG00000050425 | DnaJ heat shock protein family (Hsp40) member B4 [Source:NCBI gene;Acc:707206]      | - | 0.535843154 | 0.00041191  | 0.002027452 |
| ENSMMUG00000041837 | Metazoan signal recognition particle RNA [Source:RFAM;Acc:RF00017]                  | - | 1.192891886 | 0.007715138 | 0.025722629 |
| ENSMMUG00000056103 | growth arrest and DNA damage inducible alpha [Source:NCBI gene;Acc:701054]          | - | 1.729584467 | 1.53E-31    | 3.29E-29    |
| ENSMMUG00000003265 | leptin receptor [Source:VGNC Symbol;Acc:VGNC:81429]                                 | - | 0.690059679 | 2.10E-12    | 5.19E-11    |
| ENSMMUG00000049908 | Metazoan signal recognition particle RNA [Source:RFAM;Acc:RF00017]                  | - | 2.127152851 | 0.000267337 | 0.001389498 |
| ENSMMUG00000003264 | leptin receptor overlapping transcript [Source:VGNC Symbol;Acc:VGNC:74158]          | - | 0.864430504 | 0.000159522 | 0.000873477 |
| ENSMMUG00000017259 | DnaJ heat shock protein family (Hsp40) member C6 [Source:NCBI gene;Acc:698682]      | - | 1.341805964 | 8.31E-08    | 9.46E-07    |
| ENSMMUG00000053254 | adenylate kinase 4 [Source:NCBI gene;Acc:698560]                                    | - | 0.735703359 | 1.94E-05    | 0.000131878 |
| ENSMMUG00000053072 |                                                                                     | - | 0.800377331 | 8.49E-05    | 0.000492448 |
| ENSMMUG00000018566 | Janus kinase 1 [Source:VGNC Symbol;Acc:VGNC:73810]                                  | - | 0.941512921 | 0.000475434 | 0.002305327 |
| ENSMMUG00000018565 | ribonucleoprotein, PTB binding 2 [Source:VGNC Symbol;Acc:VGNC:76536]                | - | 2.494865186 | 5.11E-06    | 3.98E-05    |
| ENSMMUG00000012538 | ubiquitin conjugating enzyme E2 U [Source:VGNC Symbol;Acc:VGNC:79726]               | - | 0.86928417  | 3.51E-05    | 0.000224118 |
| ENSMMUG00000004668 | receptor tyrosine kinase like orphan receptor 1 [Source:VGNC Symbol;Acc:VGNC:76715] | - | 0.653861501 | 0.009292767 | 0.03008831  |
| ENSMMUG00000020049 | phosphoglucomutase 1 [Source:NCBI gene;Acc:699401]                                  | - | -1.01184368 | 1.96E-16    | 8.38E-15    |
| ENSMMUG00000020047 | integrin subunit beta 3 binding protein [Source:VGNC Symbol;Acc:VGNC:73787]         | - | 1.299619762 | 1.26E-15    | 4.86E-14    |

|                    |                                                                                                                  |             |             |             |
|--------------------|------------------------------------------------------------------------------------------------------------------|-------------|-------------|-------------|
| ENSMMUG00000010351 | KN motif and ankyrin repeat domains 4 [Source:VGNC Symbol;Acc:VGNC:73916]                                        | 0.744859774 | 3.61E-05    | 0.000229716 |
| ENSMMUG00000049952 |                                                                                                                  | 0.481630661 | 0.003070904 | 0.011619882 |
| ENSMMUG00000013840 | nuclear factor I A [Source:VGNC Symbol;Acc:VGNC:75334]                                                           | 0.451479243 | 0.012386499 | 0.038259481 |
| ENSMMUG00000055834 |                                                                                                                  | 1.287350842 | 0.010749675 | 0.034004667 |
| ENSMMUG00000022762 | OMA1 zinc metalloproteinase [Source:VGNC Symbol;Acc:VGNC:75485]                                                  | 2.420285541 | 4.91E-14    | 1.56E-12    |
| ENSMMUG00000010406 | protein kinase AMP-activated catalytic subunit alpha 2 [Source:VGNC Symbol;Acc:VGNC:76400]                       | 3.397415153 | 0.000550609 | 0.002629834 |
| ENSMMUG00000002200 | phospholipid phosphatase 3 [Source:NCBI gene;Acc:715993]                                                         | 1.706209604 | 8.87E-26    | 1.05E-23    |
| ENSMMUG00000059612 |                                                                                                                  | 0.485265154 | 2.55E-09    | 3.80E-08    |
| ENSMMUG00000005740 | ubiquitin specific peptidase 24 [Source:VGNC Symbol;Acc:VGNC:78743]                                              | 0.488556796 | 0.000336991 | 0.001696814 |
| ENSMMUG00000032084 | prolyl-tRNA synthetase 2, mitochondrial [Source:VGNC Symbol;Acc:VGNC:75707]                                      | 0.793346324 | 3.35E-06    | 2.71E-05    |
| ENSMMUG00000006754 | tetratricopeptide repeat domain 4 [Source:VGNC Symbol;Acc:VGNC:78668]                                            | 0.897976974 | 9.93E-06    | 7.21E-05    |
| ENSMMUG00000009114 | maestro heat like repeat family member 7 [Source:NCBI gene;Acc:715310]                                           | 1.381791216 | 1.16E-05    | 8.32E-05    |
| ENSMMUG00000008828 | BEN domain containing 5 [Source:NCBI gene;Acc:711150]                                                            | 1.913247688 | 1.94E-17    | 9.30E-16    |
| ENSMMUG00000015371 | microtubule associated serine/threonine kinase 2 [Source:VGNC Symbol;Acc:VGNC:74532]                             | 0.896240096 | 4.21E-05    | 0.000263677 |
| ENSMMUG00000005986 | Kruppel like factor 17 [Source:NCBI gene;Acc:702810]                                                             | 1.171943395 | 0.007984551 | 0.026482345 |
| ENSMMUG00000015555 | ST3 beta-galactoside alpha-2,3-sialyltransferase 3 [Source:VGNC Symbol;Acc:VGNC:77828]                           | 1.551312987 | 4.77E-06    | 3.75E-05    |
| ENSMMUG00000012479 | lysine demethylase 4A [Source:NCBI gene;Acc:701272]                                                              | 1.893298133 | 0.01420443  | 0.043039915 |
| ENSMMUG00000012477 | protein tyrosine phosphatase receptor type F [Source:VGNC Symbol;Acc:VGNC:76615]                                 | 0.447586836 | 0.000312688 | 0.001589858 |
| ENSMMUG00000016111 | chromosome 1 C1orf50 homolog [Source:VGNC Symbol;Acc:VGNC:70432]                                                 | 1.589649704 | 0.009204028 | 0.029849234 |
| ENSMMUG00000022381 | prolyl 3-hydroxylase 1 [Source:VGNC Symbol;Acc:VGNC:75648]                                                       | 1.984886786 | 0.000671711 | 0.003116944 |
| ENSMMUG00000057076 | claudin 19 [Source:NCBI gene;Acc:697807]                                                                         | 4.16333663  | 0.000353988 | 0.00176591  |
| ENSMMUG00000013129 | peptidylprolyl isomerase H [Source:NCBI gene;Acc:697669]                                                         | 2.039622395 | 4.74E-05    | 0.000292566 |
| ENSMMUG00000013128 | coiled-coil domain containing 30 [Source:VGNC Symbol;Acc:VGNC:70866]                                             | 0.57705398  | 3.22E-07    | 3.24E-06    |
| ENSMMUG00000001034 | zinc finger MYND-type containing 12 [Source:VGNC Symbol;Acc:VGNC:79312]                                          | 0.561510625 | 0.000493981 | 0.002385364 |
| ENSMMUG00000014138 | forkhead box J3 [Source:VGNC Symbol;Acc:VGNC:72596]                                                              | 1.269189916 | 0.0001121   | 0.000632842 |
| ENSMMUG00000052046 |                                                                                                                  | 0.3877727   | 0.010821652 | 0.034186084 |
| ENSMMUG00000044175 | forkhead box O6 [Source:NCBI gene;Acc:697505]                                                                    | 1.231910214 | 8.65E-13    | 2.25E-11    |
| ENSMMUG00000043675 | Cbp/p300 interacting transactivator with Glu/Asp rich carboxy-terminal domain 4 [Source:NCBI gene;Acc:114672840] | 2.114494734 | 7.75E-26    | 9.29E-24    |
| ENSMMUG00000019536 | potassium voltage-gated channel subfamily Q member 4 [Source:VGNC Symbol;Acc:VGNC:74007]                         | 0.881119288 | 6.45E-10    | 1.06E-08    |
| ENSMMUG00000018664 | collagen type IX alpha 2 chain [Source:VGNC Symbol;Acc:VGNC:71307]                                               | 1.931816103 | 7.45E-15    | 2.63E-13    |
| ENSMMUG00000005992 | zinc metalloproteinase STE24 [Source:VGNC Symbol;Acc:VGNC:78830]                                                 | 1.948504122 | 5.90E-07    | 5.62E-06    |
| ENSMMUG00000052510 | transmembrane and coiled-coil domains 2 [Source:NCBI gene;Acc:693977]                                            | 2.458864707 | 0.009542239 | 0.030752274 |
| ENSMMUG00000032180 | RLF zinc finger [Source:VGNC Symbol;Acc:VGNC:76699]                                                              | 1.597100385 | 2.90E-07    | 2.94E-06    |
| ENSMMUG00000009189 | palmitoyl-protein thioesterase 1 [Source:VGNC Symbol;Acc:VGNC:76386]                                             | 0.582290837 | 2.10E-09    | 3.18E-08    |
| ENSMMUG00000009188 | cyclase associated actin cytoskeleton regulatory protein 1 [Source:NCBI gene;Acc:693719]                         | 0.532508062 | 2.71E-07    | 2.77E-06    |
| ENSMMUG00000016220 | tRNA isopentenyltransferase 1 [Source:VGNC Symbol;Acc:VGNC:79239]                                                | 1.517422407 | 0.014897832 | 0.044706247 |
| ENSMMUG00000058881 | bone morphogenetic protein 8b [Source:NCBI gene;Acc:100427030]                                                   | 1.070149237 | 0.002874575 | 0.011001683 |
| ENSMMUG00000052910 |                                                                                                                  | 0.580722629 | 0.015691455 | 0.046727815 |

|                    |                                                                              |             |             |             |
|--------------------|------------------------------------------------------------------------------|-------------|-------------|-------------|
| ENSMMUG00000061825 | U6 spliceosomal RNA [Source:RFAM;Acc:RF00026]                                | 0.538933301 | 0.015051685 | 0.045061865 |
| ENSMMUG00000059855 | Smad nuclear interacting protein 1 [Source:NCBI gene;Acc:713733]             | 0.890464708 | 0.001920565 | 0.007786088 |
| ENSMMUG00000010328 | MYST/Esa1 associated factor 6 [Source:VGNC Symbol;Acc:VGNC:74580]            | 1.135761678 | 0.012566146 | 0.038754137 |
| ENSMMUG00000010323 | zinc finger CCCH-type containing 12A [Source:VGNC Symbol;Acc:VGNC:79595]     | 0.927940411 | 0.001258257 | 0.005387647 |
| ENSMMUG00000006252 | argonaute RISC catalytic component 3 [Source:NCBI gene;Acc:712543]           | 1.967411636 | 9.06E-23    | 7.47E-21    |
| ENSMMUG00000006251 | argonaute RISC component 1 [Source:VGNC Symbol;Acc:VGNC:81346]               | 1.400801898 | 1.97E-10    | 3.56E-09    |
| ENSMMUG00000019815 | transcription factor AP-2 epsilon [Source:VGNC Symbol;Acc:VGNC:79878]        | 1.610512166 | 0.000160126 | 0.000876101 |
| ENSMMUG00000002741 | CUB and Sushi multiple domains 2 [Source:VGNC Symbol;Acc:VGNC:71441]         | 2.887059131 | 0.004866336 | 0.017333155 |
| ENSMMUG00000003267 | zinc finger protein 362 [Source:NCBI gene;Acc:710013]                        | 0.686789466 | 1.25E-05    | 8.86E-05    |
| ENSMMUG00000015097 | tripartite motif containing 62 [Source:VGNC Symbol;Acc:VGNC:79513]           | 0.943970382 | 5.70E-07    | 5.44E-06    |
| ENSMMUG00000006285 | antizyme inhibitor 2 [Source:VGNC Symbol;Acc:VGNC:70153]                     | 1.264812142 | 4.85E-22    | 3.65E-20    |
| ENSMMUG00000006284 | adenylate kinase 2 [Source:VGNC Symbol;Acc:VGNC:69761]                       | 0.637507289 | 2.22E-06    | 1.86E-05    |
| ENSMMUG00000055316 |                                                                              | 3.694635527 | 0.001432219 | 0.006016779 |
| ENSMMUG00000001264 | BSD domain containing 1 [Source:VGNC Symbol;Acc:VGNC:70384]                  | 4.364398473 | 2.32E-07    | 2.40E-06    |
| ENSMMUG00000053323 |                                                                              | 3.069754191 | 0.00293638  | 0.011207637 |
| ENSMMUG00000009951 | MARCKS like 1 [Source:VGNC Symbol;Acc:VGNC:74723]                            | -3.4634967  | 0.003100042 | 0.011701974 |
| ENSMMUG00000009948 | histone deacetylase 1 [Source:NCBI gene;Acc:708441]                          | 2.483076349 | 2.99E-21    | 2.08E-19    |
| ENSMMUG00000040694 | LCK proto-oncogene, Src family tyrosine kinase [Source:NCBI gene;Acc:717704] | 2.086642019 | 2.01E-50    | 2.01E-47    |
| ENSMMUG00000060894 | Metazoan signal recognition particle RNA [Source:RFAM;Acc:RF00017]           | 1.160710343 | 4.05E-06    | 3.24E-05    |
| ENSMMUG00000041790 | Metazoan signal recognition particle RNA [Source:RFAM;Acc:RF00017]           | 0.731916984 | 0.001987339 | 0.00801048  |
| ENSMMUG00000046901 | protein tyrosine phosphatase 4A2 [Source:NCBI gene;Acc:706489]               | 1.172762193 | 1.09E-07    | 1.20E-06    |
| ENSMMUG00000005466 | SPOC domain containing 1 [Source:VGNC Symbol;Acc:VGNC:77997]                 | 0.680500855 | 0.001353842 | 0.005729189 |
| ENSMMUG00000023401 | adhesion G protein-coupled receptor B2 [Source:VGNC Symbol;Acc:VGNC:69598]   | 0.958698505 | 3.21E-05    | 0.000206323 |
| ENSMMUG00000023398 | collagen type XVI alpha 1 chain [Source:VGNC Symbol;Acc:VGNC:71293]          | 0.927635816 | 6.63E-07    | 6.23E-06    |
| ENSMMUG00000023397 | penta-EF-hand domain containing 1 [Source:NCBI gene;Acc:706038]              | 0.642593549 | 0.000108578 | 0.000614939 |
| ENSMMUG00000023396 | hypocretin receptor 1 [Source:VGNC Symbol;Acc:VGNC:73356]                    | 0.565541811 | 0.009043237 | 0.029415006 |
| ENSMMUG00000060319 | Metazoan signal recognition particle RNA [Source:RFAM;Acc:RF00017]           | 1.141149466 | 0.00010322  | 0.000587739 |
| ENSMMUG00000013188 | serine incorporator 2 [Source:VGNC Symbol;Acc:VGNC:77294]                    | 0.684241332 | 0.000167729 | 0.000912716 |
| ENSMMUG00000049574 | antizyme inhibitor 2-like [Source:NCBI gene;Acc:705256]                      | 0.556085239 | 0.00225633  | 0.008935474 |
| ENSMMUG00000012156 | zinc finger CCHC-type containing 17 [Source:VGNC Symbol;Acc:VGNC:79840]      | 1.217510335 | 2.52E-20    | 1.62E-18    |
| ENSMMUG00000064353 | fatty acid binding protein 3 [Source:NCBI gene;Acc:717237]                   | 0.549237388 | 0.001998779 | 0.008054274 |
| ENSMMUG00000013520 | pumilio RNA binding family member 1 [Source:VGNC Symbol;Acc:VGNC:76479]      | 0.360939042 | 0.000268695 | 0.001394491 |

|                    |                                                                                        |   |             |             |             |
|--------------------|----------------------------------------------------------------------------------------|---|-------------|-------------|-------------|
| ENSMMUG00000063979 |                                                                                        | - | 0.732640362 | 1.19E-12    | 3.05E-11    |
| ENSMMUG00000013519 | syndecan 3 [Source:VGNC Symbol;Acc:VGNC:76999]                                         | - | 0.352239877 | 0.003265661 | 0.012232623 |
| ENSMMUG00000057452 |                                                                                        | - | 1.072571948 | 0.000862988 | 0.003877501 |
| ENSMMUG00000057173 |                                                                                        | - | 3.001074757 | 0.000184733 | 0.00099712  |
| ENSMMUG00000015661 | protein tyrosine phosphatase receptor type U [Source:VGNC Symbol;Acc:VGNC:76624]       | - | 1.828227497 | 4.45E-06    | 3.52E-05    |
| ENSMMUG00000007110 | serine and arginine rich splicing factor 4 [Source:NCBI gene;Acc:717401]               | - | 2.233328793 | 0.000800965 | 0.003652662 |
| ENSMMUG00000016893 | solute carrier family 9 member A1 [Source:VGNC Symbol;Acc:VGNC:82241]                  | - | 0.809114429 | 7.46E-06    | 5.61E-05    |
| ENSMMUG00000015115 | terminal nucleotidyltransferase 5B [Source:VGNC Symbol;Acc:VGNC:79692]                 | - | 0.711452848 | 1.36E-05    | 9.55E-05    |
| ENSMMUG00000021031 | TMF1 regulated nuclear protein 1 [Source:VGNC Symbol;Acc:VGNC:79946]                   | - | 0.890833678 | 2.31E-09    | 3.47E-08    |
| ENSMMUG00000058432 | zinc finger DHHC-type palmitoyltransferase 18 [Source:NCBI gene;Acc:719959]            | - | 1.235794207 | 4.18E-08    | 5.00E-07    |
| ENSMMUG00000012697 | AT-rich interaction domain 1A [Source:VGNC Symbol;Acc:VGNC:69822]                      | - | 1.859995941 | 3.16E-12    | 7.61E-11    |
| ENSMMUG00000056266 | Metazoan signal recognition particle RNA [Source:RFAM;Acc:RF00017]                     | - | 1.62841358  | 2.61E-07    | 2.68E-06    |
| ENSMMUG00000000649 | UBX domain protein 11 [Source:VGNC Symbol;Acc:VGNC:79859]                              | - | 1.960326547 | 4.73E-08    | 5.60E-07    |
| ENSMMUG00000000644 | centrosomal protein 85 [Source:VGNC Symbol;Acc:VGNC:71096]                             | - | 2.095582082 | 5.72E-11    | 1.13E-09    |
| ENSMMUG00000032217 | transmembrane protein 50A [Source:VGNC Symbol;Acc:VGNC:79857]                          | - | 0.377547007 | 0.006144139 | 0.021076139 |
| ENSMMUG00000002420 | RUNX family transcription factor 3 [Source:VGNC Symbol;Acc:VGNC:76948]                 | - | 1.118147159 | 0.010207547 | 0.032537587 |
| ENSMMUG00000063165 |                                                                                        | - | 3.223516837 | 0.011690236 | 0.036494251 |
| ENSMMUG00000050770 |                                                                                        | - | 1.009934659 | 4.68E-06    | 3.69E-05    |
| ENSMMUG00000004216 | alpha-L-fucosidase 1 [Source:VGNC Symbol;Acc:VGNC:72826]                               | - | 0.988242522 | 0.001711049 | 0.007021961 |
| ENSMMUG00000045584 | leucine zipper protein 1 [Source:NCBI gene;Acc:718626]                                 | - | 1.540376329 | 3.24E-16    | 1.37E-14    |
| ENSMMUG00000009773 | lysine demethylase 1A [Source:VGNC Symbol;Acc:VGNC:73928]                              | - | 1.942864657 | 1.53E-15    | 5.84E-14    |
| ENSMMUG00000058332 | testis expressed 46 [Source:NCBI gene;Acc:709002]                                      | - | 1.454290439 | 0.000275049 | 0.001423776 |
| ENSMMUG00000041482 | lactamase beta like 1 [Source:NCBI gene;Acc:718590]                                    | - | 0.871377603 | 0.001714818 | 0.007032868 |
| ENSMMUG00000002217 | alkaline phosphatase, biomineralization associated [Source:VGNC Symbol;Acc:VGNC:69801] | - | 1.433437502 | 4.40E-31    | 9.35E-29    |
| ENSMMUG00000004149 | eukaryotic translation initiation factor 4 gamma 3 [Source:NCBI gene;Acc:717555]       | - | 1.251253056 | 1.14E-23    | 1.04E-21    |
| ENSMMUG00000006688 | ER membrane protein complex subunit 1 [Source:VGNC Symbol;Acc:VGNC:72134]              | - | 0.874413026 | 6.62E-09    | 9.18E-08    |
| ENSMMUG00000006669 | ubiquitin protein ligase E3 component n-recogin 4 [Source:VGNC Symbol;Acc:VGNC:79845]  | - | 0.927202428 | 4.42E-10    | 7.48E-09    |
| ENSMMUG00000052628 | Metazoan signal recognition particle RNA [Source:RFAM;Acc:RF00017]                     | - | 2.602004134 | 0.010957191 | 0.034551987 |
| ENSMMUG00000050018 |                                                                                        | - | 0.634049541 | 0.001899583 | 0.007709943 |
| ENSMMUG00000004754 | intermediate filament family orphan 2 [Source:NCBI gene;Acc:106995162]                 | - | 1.049304704 | 1.02E-06    | 9.17E-06    |
| ENSMMUG00000064850 | kelch domain containing 7A [Source:NCBI gene;Acc:713771]                               | - | 0.816437356 | 0.012444471 | 0.038404229 |
| ENSMMUG00000010849 | Rho guanine nucleotide exchange factor 10 like [Source:VGNC Symbol;Acc:VGNC:69908]     | - | 0.524049215 | 8.27E-06    | 6.13E-05    |
| ENSMMUG00000022437 | peptidyl arginine deiminase 6 [Source:VGNC Symbol;Acc:VGNC:75657]                      | - | 4.063253607 | 2.50E-05    | 0.000165047 |
| ENSMMUG00000051619 | peptidyl arginine deiminase 3 [Source:NCBI gene;Acc:700560]                            | - | 0.437142477 | 0.002472481 | 0.009679396 |
| ENSMMUG00000001616 | peptidyl arginine deiminase 2 [Source:VGNC Symbol;Acc:VGNC:75644]                      | - | 1.129484159 | 0.000137466 | 0.00076193  |

|                    |                                                                                       |             |             |             |
|--------------------|---------------------------------------------------------------------------------------|-------------|-------------|-------------|
| ENSMMUG00000018245 | EPH receptor A2 [Source:VGNC Symbol;Acc:VGNC:72235]                                   | 1.562360635 | 1.91E-15    | 7.23E-14    |
| ENSMMUG00000058587 | family with sequence similarity 131 member C [Source:NCBI gene;Acc:703604]            | 1.611396183 | 4.34E-20    | 2.66E-18    |
| ENSMMUG00000018235 | chloride voltage-gated channel Kb [Source:NCBI gene;Acc:703476]                       | 1.382002107 | 1.73E-06    | 1.48E-05    |
| ENSMMUG00000001910 | heat shock protein family B (small) member 7 [Source:NCBI gene;Acc:696704]            | 1.60076285  | 1.23E-06    | 1.09E-05    |
| ENSMMUG00000001911 | steroid receptor associated and regulated protein [Source:VGNC Symbol;Acc:VGNC:78008] | 1.429213871 | 5.52E-09    | 7.79E-08    |
| ENSMMUG00000008031 | zinc finger and BTB domain containing 17 [Source:VGNC Symbol;Acc:VGNC:78849]          | 1.483701842 | 5.35E-17    | 2.47E-15    |
|                    |                                                                                       | -           |             |             |
| ENSMMUG00000002802 | agmatinase [Source:NCBI gene;Acc:713190]                                              | 0.850191686 | 0.011701297 | 0.036512524 |
| ENSMMUG00000032244 | DnaJ heat shock protein family (Hsp40) member C16 [Source:NCBI gene;Acc:700894]       | -0.91298711 | 0.016124435 | 0.047783802 |
|                    |                                                                                       | -           |             |             |
| ENSMMUG00000018163 | caspase 9 [Source:NCBI gene;Acc:694544]                                               | 2.901695265 | 0.000561849 | 0.002676223 |
|                    |                                                                                       | -           |             |             |
| ENSMMUG00000031821 | chymotrypsin-like elastase family member 2B [Source:NCBI gene;Acc:106992406]          | 1.256823169 | 0.009933447 | 0.031788391 |
| ENSMMUG00000053550 |                                                                                       | -2.10096705 | 0.00263024  | 0.010200255 |
|                    |                                                                                       | -           |             |             |
| ENSMMUG00000060541 |                                                                                       | 1.822012441 | 0.001557519 | 0.00645995  |
|                    |                                                                                       | -           |             |             |
| ENSMMUG00000053235 |                                                                                       | 1.516513922 | 0.002489271 | 0.009720705 |
|                    |                                                                                       | -           |             |             |
| ENSMMUG00000003987 | forkhead associated phosphopeptide binding domain 1 [Source:NCBI gene;Acc:699900]     | 1.522963023 | 9.37E-06    | 6.85E-05    |
|                    |                                                                                       | -           |             |             |
| ENSMMUG00000055233 | PRAME family member 17-like [Source:NCBI gene;Acc:100427847]                          | 0.702394263 | 1.13E-05    | 8.14E-05    |
|                    |                                                                                       | -           |             |             |
| ENSMMUG00000054309 | PRAME family member 5 [Source:NCBI gene;Acc:722781]                                   | 1.372804899 | 0.006501217 | 0.02213318  |
| ENSMMUG00000057550 |                                                                                       | -0.89562168 | 0.000690846 | 0.003197731 |
|                    |                                                                                       | -           |             |             |
| ENSMMUG00000057874 | arylacetamide deacetylase like 3 [Source:NCBI gene;Acc:722778]                        | 0.545130891 | 0.003725377 | 0.013762108 |
| ENSMMUG00000021449 | vacuolar protein sorting 13 homolog D [Source:NCBI gene;Acc:722775]                   | 0.992740088 | 5.22E-14    | 1.64E-12    |
| ENSMMUG00000064242 |                                                                                       | 0.876705962 | 0.001312113 | 0.005582453 |
| ENSMMUG00000021447 | TNF receptor superfamily member 1B [Source:VGNC Symbol;Acc:VGNC:78590]                | 4.866520003 | 2.18E-05    | 0.000146558 |
| ENSMMUG00000023449 | mitofusin 2 [Source:VGNC Symbol;Acc:VGNC:74522]                                       | 1.880959527 | 6.53E-07    | 6.17E-06    |
| ENSMMUG00000032249 | procollagen-lysine,2-oxoglutarate 5-dioxygenase 1 [Source:NCBI gene;Acc:722763]       | 1.10503226  | 3.57E-11    | 7.25E-10    |
| ENSMMUG00000012469 | KIAA2013 [Source:VGNC Symbol;Acc:VGNC:73918]                                          | 0.805486751 | 1.20E-11    | 2.65E-10    |
| ENSMMUG00000062316 | Metazoan signal recognition particle RNA [Source:RFAM;Acc:RF00017]                    | 1.028018708 | 1.90E-08    | 2.44E-07    |
| ENSMMUG00000037413 | U5 spliceosomal RNA [Source:RFAM;Acc:RF00020]                                         | 0.843560069 | 0.000324913 | 0.001643078 |
| ENSMMUG00000051669 |                                                                                       | 0.539230114 | 0.000139687 | 0.00077363  |
| ENSMMUG00000055655 | natriuretic peptide B [Source:NCBI gene;Acc:715053]                                   | 0.748415071 | 0.009885748 | 0.031650192 |
|                    |                                                                                       | -           |             |             |
| ENSMMUG00000049196 | dispatched RND transporter family member 3 [Source:NCBI gene;Acc:722727]              | 1.261477899 | 2.52E-14    | 8.30E-13    |
|                    |                                                                                       | -           |             |             |
| ENSMMUG00000032252 | UbiA prenyltransferase domain containing 1 [Source:VGNC Symbol;Acc:VGNC:79881]        | 1.291775684 | 6.19E-12    | 1.43E-10    |
|                    |                                                                                       | -           |             |             |
| ENSMMUG00000019325 | mechanistic target of rapamycin kinase [Source:VGNC Symbol;Acc:VGNC:75062]            | 1.410441552 | 1.10E-10    | 2.09E-09    |
|                    |                                                                                       | -           |             |             |
| ENSMMUG00000053062 | U6 spliceosomal RNA [Source:RFAM;Acc:RF00026]                                         | 2.056280235 | 0.001223902 | 0.005263042 |
|                    |                                                                                       | -           |             |             |
| ENSMMUG00000006187 | angiopoietin like 7 [Source:VGNC Symbol;Acc:VGNC:69683]                               | 1.161948262 | 4.54E-09    | 6.54E-08    |
| ENSMMUG00000062294 |                                                                                       | 3.337053783 | 0.001484086 | 0.006203083 |
|                    |                                                                                       | -           |             |             |
| ENSMMUG00000058771 | PHD finger protein 13 [Source:NCBI gene;Acc:704846]                                   | 0.905683065 | 0.013828243 | 0.042063656 |
|                    |                                                                                       | -           |             |             |
| ENSMMUG00000032281 | zinc finger and BTB domain containing 48 [Source:VGNC Symbol;Acc:VGNC:79959]          | 0.888417575 | 0.000187982 | 0.001012704 |
|                    |                                                                                       | -           |             |             |
| ENSMMUG00000023677 | TNF receptor superfamily member 25 [Source:VGNC Symbol;Acc:VGNC:78584]                | 2.331148448 | 0.008016878 | 0.026564433 |

|                    |                                                                                              |   |             |             |             |
|--------------------|----------------------------------------------------------------------------------------------|---|-------------|-------------|-------------|
| ENSMMUG00000023676 | espin [Source:NCBI gene;Acc:722532]                                                          | - | 1.267627069 | 5.37E-11    | 1.06E-09    |
| ENSMMUG00000054719 |                                                                                              | - | 0.811571585 | 0.000265819 | 0.001384171 |
| ENSMMUG00000032284 | leucine rich repeat containing 47 [Source:VGNC Symbol;Acc:VGNC:74388]                        | - | 2.739885252 | 0.016204305 | 0.047959682 |
| ENSMMUG00000012334 | actin related protein T2 [Source:VGNC Symbol;Acc:VGNC:69522]                                 | - | 1.640320779 | 0.016033871 | 0.047575746 |
| ENSMMUG00000051487 |                                                                                              | - | 3.183640376 | 0.000110482 | 0.000624461 |
| ENSMMUG00000050239 |                                                                                              | - | 1.745467542 | 7.57E-10    | 1.23E-08    |
| ENSMMUG00000001896 | G protein subunit beta 1 [Source:VGNC Symbol;Acc:VGNC:73095]                                 | - | 1.169527528 | 0.012261876 | 0.037957679 |
| ENSMMUG00000010879 | NAD kinase [Source:VGNC Symbol;Acc:VGNC:75047]                                               | - | 1.289882354 | 4.64E-05    | 0.000287054 |
| ENSMMUG00000005578 | solute carrier family 35 member E2 [Source:VGNC Symbol;Acc:VGNC:77590]                       | - | 1.026368808 | 0.001367382 | 0.00578251  |
| ENSMMUG00000001894 | cyclin dependent kinase 11B [Source:NCBI gene;Acc:703046]                                    | - | 1.105765273 | 2.77E-05    | 0.000180525 |
| ENSMMUG00000012961 | mindbomb E3 ubiquitin protein ligase 2 [Source:VGNC Symbol;Acc:VGNC:74627]                   | - | 0.800979635 | 0.000510966 | 0.002460604 |
| ENSMMUG00000048805 |                                                                                              | - | 0.890649175 | 0.000401583 | 0.001982188 |
| ENSMMUG00000060167 |                                                                                              | - | -1.16085683 | 1.43E-05    | 9.97E-05    |
| ENSMMUG00000001551 | SSU72 homolog, RNA polymerase II CTD phosphatase [Source:VGNC Symbol;Acc:VGNC:77986]         | - | 0.886420048 | 8.05E-06    | 5.99E-05    |
| ENSMMUG00000001549 | ATPase family AAA domain-containing protein 3A-like [Source:NCBI gene;Acc:114674453]         | - | 0.812268001 | 9.80E-07    | 8.87E-06    |
| ENSMMUG00000050086 |                                                                                              | - | 1.471287544 | 0.013552706 | 0.041360085 |
| ENSMMUG00000006904 | cyclin L2 [Source:NCBI gene;Acc:114669744]                                                   | - | 0.827251425 | 0.005556569 | 0.019344531 |
| ENSMMUG00000013862 | ArfGAP with coiled-coil, ankyrin repeat and PH domains 3 [Source:VGNC Symbol;Acc:VGNC:69434] | - | 1.188546378 | 1.11E-06    | 9.90E-06    |
| ENSMMUG00000045769 | tubulin tyrosine ligase like 10 [Source:NCBI gene;Acc:702662]                                | - | 0.818364445 | 1.66E-11    | 3.59E-10    |
| ENSMMUG00000056613 |                                                                                              | - | 1.051395783 | 1.16E-14    | 4.02E-13    |
| ENSMMUG00000053601 |                                                                                              | - | 2.21362644  | 0.000558161 | 0.002661372 |
| ENSMMUG00000065323 |                                                                                              | - | 3.476786828 | 0.004742894 | 0.016955653 |
| ENSMMUG00000006596 | CCR4-NOT transcription complex subunit 10 [Source:VGNC Symbol;Acc:VGNC:71327]                | - | 0.839010154 | 0.001151559 | 0.004985584 |
| ENSMMUG00000049551 |                                                                                              | - | 1.32373921  | 0.000571133 | 0.002715835 |
| ENSMMUG00000031449 | zinc finger CW-type and PWWP domain containing 2 [Source:NCBI gene;Acc:702617]               | - | 1.354553502 | 0.005847302 | 0.020196237 |
| ENSMMUG00000055585 |                                                                                              | - | 2.273824682 | 2.64E-11    | 5.49E-10    |
| ENSMMUG00000000056 | 5-azacytidine induced 2 [Source:VGNC Symbol;Acc:VGNC:70115]                                  | - | 1.080769765 | 0.002528557 | 0.009863129 |
| ENSMMUG00000051896 |                                                                                              | - | 2.998932054 | 0.004174001 | 0.015195227 |
| ENSMMUG00000060958 | leucine rich repeat containing 3B [Source:NCBI gene;Acc:701323]                              | - | 1.643904355 | 0.002253696 | 0.008930088 |
| ENSMMUG00000051975 |                                                                                              | - | 2.11799056  | 6.80E-16    | 2.73E-14    |
| ENSMMUG00000054204 |                                                                                              | - | 0.477106198 | 0.008098056 | 0.026814412 |
| ENSMMUG00000020377 | collagen type VI alpha 5 chain [Source:NCBI gene;Acc:719331]                                 | - | 0.723838694 | 0.001680367 | 0.00691223  |

|                     |                                                                                                      |   |             |             |             |
|---------------------|------------------------------------------------------------------------------------------------------|---|-------------|-------------|-------------|
| ENSMMUG00000020294  | phosphoinositide-3-kinase regulatory subunit 4 [Source:VGNC Symbol;Acc:VGNC:84060]                   | - | 0.774133777 | 0.00467203  | 0.016743131 |
| ENSMMUG00000005137  | ATPase secretory pathway Ca <sup>2+</sup> transporting 1 [Source:VGNC Symbol;Acc:VGNC:70054]         | - | 2.712951242 | 1.55E-14    | 5.24E-13    |
| ENSMMUG00000001154  | U8 snoRNA-decapping enzyme-like [Source:NCBI gene;Acc:717946]                                        | - | 0.508787456 | 0.009216793 | 0.029883719 |
| ENSMMUG00000024125  | small nucleolar RNA, H/ACA box 58 [Source:HGNC Symbol;Acc:HGNC:32652]                                | - | 3.457005277 | 0.001616559 | 0.006677174 |
| ENSMMUG00000003277  | copine 4 [Source:VGNC Symbol;Acc:VGNC:71466]                                                         | - | 1.459877384 | 1.08E-07    | 1.19E-06    |
| ENSMMUG00000016004  | acid phosphatase 3 [Source:VGNC Symbol;Acc:VGNC:69385]                                               | - | 1.345850395 | 0.00011609  | 0.000653788 |
| ENSMMUG00000016005  | DnaJ heat shock protein family (Hsp40) member C13 [Source:VGNC Symbol;Acc:VGNC:84191]                | - | 0.606155397 | 1.10E-10    | 2.09E-09    |
| ENSMMUG000000054158 | acyl-CoA dehydrogenase family member 11 [Source:NCBI gene;Acc:106997118]                             | - | 1.160923876 | 1.91E-08    | 2.44E-07    |
| ENSMMUG00000021772  | nephrocystin 3 [Source:NCBI gene;Acc:717622]                                                         | - | 1.320789976 | 8.35E-06    | 6.19E-05    |
| ENSMMUG00000019857  | beaded filament structural protein 2 [Source:VGNC Symbol;Acc:VGNC:70245]                             | - | 0.885841734 | 2.10E-06    | 1.76E-05    |
| ENSMMUG00000000058  | CDV3 homolog [Source:VGNC Symbol;Acc:VGNC:71114]                                                     | - | -1.05631594 | 0.00064275  | 0.002995442 |
| ENSMMUG00000000059  | DNA topoisomerase II binding protein 1 [Source:VGNC Symbol;Acc:VGNC:79061]                           | - | 1.178958759 | 5.82E-09    | 8.16E-08    |
| ENSMMUG00000008916  | transferrin [Source:VGNC Symbol;Acc:VGNC:82716]                                                      | - | 1.101492129 | 6.25E-09    | 8.69E-08    |
| ENSMMUG00000008918  | SRP receptor subunit beta [Source:VGNC Symbol;Acc:VGNC:77980]                                        | - | 1.088934707 | 1.33E-06    | 1.16E-05    |
| ENSMMUG00000008919  | RAB6B, member RAS oncogene family [Source:VGNC Symbol;Acc:VGNC:81547]                                | - | -0.99894154 | 7.54E-06    | 5.66E-05    |
| ENSMMUG00000012605  | solute carrier organic anion transporter family member 2A1 [Source:VGNC Symbol;Acc:VGNC:77600]       | - | 0.486383199 | 0.000685945 | 0.003176687 |
| ENSMMUG00000007757  | extended synaptotagmin 3 [Source:VGNC Symbol;Acc:VGNC:84182]                                         | - | 0.427293418 | 0.015268296 | 0.045603263 |
| ENSMMUG00000007760  | centrosomal protein 70 [Source:VGNC Symbol;Acc:VGNC:71140]                                           | - | 0.432348241 | 0.000557837 | 0.002660733 |
| ENSMMUG00000003051  | COPI coat complex subunit beta 2 [Source:VGNC Symbol;Acc:VGNC:71313]                                 | - | 1.020634044 | 3.10E-11    | 6.37E-10    |
| ENSMMUG000000062527 |                                                                                                      | - | 1.874555716 | 6.08E-19    | 3.41E-17    |
| ENSMMUG00000022153  | solute carrier family 25 member 36 [Source:VGNC Symbol;Acc:VGNC:84079]                               | - | 2.217920552 | 2.89E-21    | 2.02E-19    |
| ENSMMUG000000053344 | splA/ryanodine receptor domain and SOCS box containing 4 [Source:NCBI gene;Acc:715278]               | - | 2.764993726 | 3.03E-09    | 4.46E-08    |
| ENSMMUG000000057297 |                                                                                                      | - | 1.503435765 | 0.001234081 | 0.005301935 |
| ENSMMUG000000056024 |                                                                                                      | - | 1.03103651  | 1.02E-08    | 1.36E-07    |
| ENSMMUG000000063351 | Metazoan signal recognition particle RNA [Source:RFAM;Acc:RF00017]                                   | - | 1.635095865 | 0.000695683 | 0.00321654  |
| ENSMMUG00000007387  | G protein-coupled receptor kinase 7 [Source:VGNC Symbol;Acc:VGNC:73182]                              | - | 1.313525254 | 1.52E-08    | 1.98E-07    |
| ENSMMUG000000052474 |                                                                                                      | - | 1.630657541 | 8.53E-11    | 1.65E-09    |
| ENSMMUG00000011134  | transcription factor Dp-2 [Source:VGNC Symbol;Acc:VGNC:78324]                                        | - | 0.50994674  | 0.001577274 | 0.006538018 |
| ENSMMUG00000012151  | glycerol kinase 5 [Source:VGNC Symbol;Acc:VGNC:73022]                                                | - | 2.063884036 | 1.76E-05    | 0.000120287 |
| ENSMMUG00000012405  | transient receptor potential cation channel subfamily C member 1 [Source:VGNC Symbol;Acc:VGNC:78651] | - | 3.875689495 | 7.00E-25    | 7.38E-23    |
| ENSMMUG00000002775  | U2 snRNP associated SURP domain containing [Source:VGNC Symbol;Acc:VGNC:79889]                       | - | 0.904462154 | 0.001414615 | 0.005955314 |
| ENSMMUG00000009694  | solute carrier family 9 member A9 [Source:VGNC Symbol;Acc:VGNC:77747]                                | - | 2.071228968 | 0.000534024 | 0.00255584  |
| ENSMMUG000000062595 |                                                                                                      | - | 0.936576561 | 0.001944938 | 0.00786217  |

|                    |                                                                                                 |   |             |             |             |
|--------------------|-------------------------------------------------------------------------------------------------|---|-------------|-------------|-------------|
| ENSMMUG00000049859 |                                                                                                 | - | 0.765774391 | 0.002172595 | 0.008665046 |
| ENSMMUG00000062175 | carboxypeptidase B1 [Source:NCBI gene;Acc:712639]                                               |   | 0.636218838 | 0.0040248   | 0.014712117 |
| ENSMMUG00000005519 | carboxypeptidase A3 [Source:VGNC Symbol;Acc:VGNC:71456]                                         |   | 0.634721904 | 0.001929372 | 0.007808251 |
| ENSMMUG00000005521 | glycogenin 1 [Source:VGNC Symbol;Acc:VGNC:73332]                                                |   | 0.847887875 | 2.83E-07    | 2.87E-06    |
| ENSMMUG00000005526 | helicase like transcription factor [Source:VGNC Symbol;Acc:VGNC:73383]                          |   | 0.569497017 | 0.011562037 | 0.036174576 |
| ENSMMUG00000047621 | transmembrane 4 L six family member 18 [Source:VGNC Symbol;Acc:VGNC:82713]                      |   | 0.544981322 | 2.24E-05    | 0.000149717 |
| ENSMMUG00000031534 | ankyrin repeat and ubiquitin domain containing 1 [Source:VGNC Symbol;Acc:VGNC:84239]            |   | 2.193119955 | 1.17E-34    | 3.16E-32    |
| ENSMMUG00000035943 | U6 spliceosomal RNA [Source:RFAM;Acc:RF00026]                                                   |   | 2.79832459  | 7.15E-14    | 2.19E-12    |
| ENSMMUG00000023335 | ring finger protein 13 [Source:VGNC Symbol;Acc:VGNC:81557]                                      |   | 1.469427712 | 2.00E-10    | 3.62E-09    |
| ENSMMUG00000059788 |                                                                                                 |   | 1.0547322   | 1.45E-14    | 4.94E-13    |
| ENSMMUG00000015590 | siah E3 ubiquitin protein ligase 2 [Source:VGNC Symbol;Acc:VGNC:77215]                          |   | 2.079008398 | 1.20E-05    | 8.56E-05    |
| ENSMMUG00000048232 | MINDY family member 4B [Source:VGNC Symbol;Acc:VGNC:84153]                                      |   | 0.863906123 | 0.000114998 | 0.000648224 |
| ENSMMUG00000038998 | purinergic receptor P2Y13 [Source:VGNC Symbol;Acc:VGNC:83950]                                   |   | 0.692527234 | 0.004357284 | 0.01578868  |
| ENSMMUG00000057554 | Metazoan signal recognition particle RNA [Source:RFAM;Acc:RF00017]                              |   | 1.415133924 | 0.003453267 | 0.012847119 |
| ENSMMUG00000057501 |                                                                                                 |   | 1.297333777 | 3.14E-06    | 2.56E-05    |
| ENSMMUG00000061684 |                                                                                                 |   | 0.875553882 | 0.014689443 | 0.044203877 |
| ENSMMUG00000031540 | purinergic receptor P2Y1 [Source:VGNC Symbol;Acc:VGNC:75737]                                    |   | 5.472028101 | 1.92E-08    | 2.45E-07    |
| ENSMMUG00000011347 | DEAH-box helicase 36 [Source:VGNC Symbol;Acc:VGNC:71623]                                        |   | 0.922420268 | 3.55E-23    | 2.99E-21    |
| ENSMMUG00000056924 | G protein-coupled receptor 149 [Source:NCBI gene;Acc:106997054]                                 |   | 1.083214422 | 0.000161697 | 0.000882286 |
| ENSMMUG00000060572 |                                                                                                 |   | 0.942065226 | 4.57E-05    | 0.00028333  |
| ENSMMUG00000056116 |                                                                                                 |   | -1.32435648 | 8.24E-10    | 1.33E-08    |
| ENSMMUG00000009564 | NMD3 ribosome export adaptor [Source:VGNC Symbol;Acc:VGNC:75242]                                |   | 1.632796279 | 0.000299436 | 0.001531921 |
| ENSMMUG00000042979 |                                                                                                 |   | 1.842562188 | 0.012956348 | 0.039791254 |
| ENSMMUG00000001302 | sucrase-isomaltase [Source:VGNC Symbol;Acc:VGNC:77213]                                          |   | 0.661485379 | 2.68E-07    | 2.74E-06    |
| ENSMMUG00000003742 | butyrylcholinesterase [Source:VGNC Symbol;Acc:VGNC:70238]                                       |   | 0.720536976 | 0.000604439 | 0.002859663 |
| ENSMMUG00000023045 | zinc finger B-box domain containing [Source:VGNC Symbol;Acc:VGNC:79592]                         |   | 1.843543989 | 2.66E-05    | 0.000174502 |
| ENSMMUG00000047393 | protein phosphatase 1 regulatory subunit 7-like [Source:NCBI gene;Acc:699349]                   |   | 0.680866435 | 0.005252148 | 0.018458866 |
| ENSMMUG00000020734 | golgi integral membrane protein 4 [Source:VGNC Symbol;Acc:VGNC:72945]                           |   | 0.337106941 | 0.00336203  | 0.012568848 |
| ENSMMUG00000051641 |                                                                                                 |   | 1.259899207 | 1.33E-07    | 1.44E-06    |
| ENSMMUG00000022199 | polyhomeotic homolog 3 [Source:VGNC Symbol;Acc:VGNC:75804]                                      |   | 2.349910366 | 6.60E-16    | 2.67E-14    |
| ENSMMUG00000056664 | U6 spliceosomal RNA [Source:RFAM;Acc:RF00026]                                                   |   | 1.885250188 | 0.000455377 | 0.00222113  |
| ENSMMUG00000022880 | eukaryotic translation initiation factor 5A2 [Source:VGNC Symbol;Acc:VGNC:72198]                |   | 0.668935335 | 0.003884133 | 0.014258427 |
| ENSMMUG00000023289 | phospholipase D1 [Source:VGNC Symbol;Acc:VGNC:76171]                                            |   | 2.510010528 | 0.009466257 | 0.030551253 |
| ENSMMUG00000003594 | ubiquitin specific peptidase 13 [Source:VGNC Symbol;Acc:VGNC:78735]                             |   | 0.706866291 | 2.64E-05    | 0.000172944 |
| ENSMMUG00000064088 | U2 spliceosomal RNA [Source:RFAM;Acc:RF00004]                                                   |   | -0.53187997 | 0.003850985 | 0.014151561 |
| ENSMMUG00000010553 | methylcrotonoyl-CoA carboxylase 1 [Source:VGNC Symbol;Acc:VGNC:74676]                           |   | 0.630110551 | 0.003183248 | 0.011957858 |
| ENSMMUG00000008070 | YEATS domain containing 2 [Source:VGNC Symbol;Acc:VGNC:79502]                                   |   | 1.912629825 | 2.34E-32    | 5.46E-30    |
| ENSMMUG00000005515 | ATP binding cassette subfamily C member 5 [Source:VGNC Symbol;Acc:VGNC:69574]                   |   | 1.001868747 | 2.12E-09    | 3.21E-08    |
| ENSMMUG00000006562 | eukaryotic translation initiation factor 2B subunit epsilon [Source:VGNC Symbol;Acc:VGNC:72186] |   | -0.43244098 | 0.014386244 | 0.043506733 |
| ENSMMUG00000006553 | dishevelled segment polarity protein 3 [Source:VGNC Symbol;Acc:VGNC:72014]                      |   | 0.773308593 | 0.007652974 | 0.025533583 |



|                    |                                                                                              |             |             |             |
|--------------------|----------------------------------------------------------------------------------------------|-------------|-------------|-------------|
| ENSMMUG0000006557  | adaptor related protein complex 2 subunit mu 1 [Source:VGNC Symbol;Acc:VGNC:69965]           | 1.188119098 | 0.016168364 | 0.047883625 |
| ENSMMUG0000006558  | ATP binding cassette subfamily F member 3 [Source:VGNC Symbol;Acc:VGNC:69583]                | 0.415852652 | 0.001168647 | 0.005051769 |
| ENSMMUG00000018955 | EEF1A lysine methyltransferase 4 [Source:NCBI gene;Acc:106996971]                            | 0.429361729 | 0.000154567 | 0.000848667 |
| ENSMMUG00000000800 | proteasome 26S subunit, non-ATPase 2 [Source:VGNC Symbol;Acc:VGNC:84144]                     | 0.569571531 | 1.49E-06    | 1.29E-05    |
| ENSMMUG00000010934 | eukaryotic translation initiation factor 4 gamma 1 [Source:VGNC Symbol;Acc:VGNC:72195]       | 0.571818386 | 2.95E-06    | 2.42E-05    |
| ENSMMUG00000007503 | family with sequence similarity 131 member A [Source:VGNC Symbol;Acc:VGNC:72385]             | 0.489421272 | 0.000556888 | 0.002657107 |
| ENSMMUG00000007507 | chloride voltage-gated channel 2 [Source:VGNC Symbol;Acc:VGNC:71235]                         | 0.608715137 | 7.73E-07    | 7.18E-06    |
| ENSMMUG00000007524 | RNA polymerase II subunit H [Source:VGNC Symbol;Acc:VGNC:76216]                              | 0.989226923 | 1.76E-07    | 1.86E-06    |
| ENSMMUG00000007528 | chordin [Source:VGNC Symbol;Acc:VGNC:71042]                                                  | 2.331755771 | 2.08E-09    | 3.17E-08    |
| ENSMMUG00000060581 |                                                                                              | 1.905666575 | 8.09E-07    | 7.47E-06    |
| ENSMMUG00000002953 | MAGE family member F1 [Source:VGNC Symbol;Acc:VGNC:74399]                                    | 0.997595663 | 0.000634904 | 0.002967751 |
| ENSMMUG00000064748 | Metazoan signal recognition particle RNA [Source:RFAM;Acc:RF00017]                           | 1.514761269 | 0.000631958 | 0.002954966 |
| ENSMMUG00000021972 | diacylglycerol kinase gamma [Source:VGNC Symbol;Acc:VGNC:71785]                              | 1.601861707 | 2.62E-27    | 3.56E-25    |
| ENSMMUG00000052418 |                                                                                              | 0.654530168 | 2.26E-05    | 0.000150837 |
| ENSMMUG00000018909 | fetuin B [Source:VGNC Symbol;Acc:VGNC:72638]                                                 | 0.583099435 | 2.58E-05    | 0.000169374 |
| ENSMMUG00000006816 | tetratricopeptide repeat and ankyrin repeat containing 1 [Source:VGNC Symbol;Acc:VGNC:82709] | -0.56044511 | 0.002225846 | 0.008842222 |
| ENSMMUG00000022539 | LRR binding FLII interacting protein 2 [Source:VGNC Symbol;Acc:VGNC:74449]                   | 0.320500359 | 0.004210312 | 0.015315489 |
| ENSMMUG00000049937 | Y RNA [Source:RFAM;Acc:RF00019]                                                              | 0.810552872 | 0.008600501 | 0.028251308 |
| ENSMMUG00000054175 |                                                                                              | 1.181847388 | 6.80E-18    | 3.39E-16    |
| ENSMMUG00000004847 | xylulokinase [Source:VGNC Symbol;Acc:VGNC:78815]                                             | 0.652100268 | 2.60E-06    | 2.15E-05    |
| ENSMMUG00000018790 | activin A receptor type 2B [Source:VGNC Symbol;Acc:VGNC:69450]                               | 2.07765003  | 2.08E-15    | 7.84E-14    |
| ENSMMUG00000015827 | sodium voltage-gated channel alpha subunit 10 [Source:VGNC Symbol;Acc:VGNC:76980]            | 0.340961702 | 0.001201392 | 0.005177358 |
| ENSMMUG00000020150 | xin actin binding repeat containing 1 [Source:VGNC Symbol;Acc:VGNC:78952]                    | -0.66256815 | 6.25E-12    | 1.45E-10    |
| ENSMMUG00000022963 | solute carrier family 25 member 38 [Source:VGNC Symbol;Acc:VGNC:77571]                       | 1.005250826 | 0.003854109 | 0.014159332 |
| ENSMMUG00000051711 |                                                                                              | 0.384620245 | 0.001302108 | 0.005546616 |
| ENSMMUG00000051408 | myelin associated oligodendrocyte basic protein [Source:NCBI gene;Acc:717265]                | 1.193260563 | 1.30E-06    | 1.14E-05    |
| ENSMMUG00000009197 | myelin associated oligodendrocyte basic protein [Source:VGNC Symbol;Acc:VGNC:74908]          | 1.486980071 | 2.13E-11    | 4.51E-10    |
| ENSMMUG00000017701 | myosin VIIA and Rab interacting protein [Source:VGNC Symbol;Acc:VGNC:74992]                  | 1.870495374 | 2.24E-11    | 4.71E-10    |
| ENSMMUG00000013330 | ectonucleoside triphosphate diphosphohydrolase 3 [Source:VGNC Symbol;Acc:VGNC:72226]         | 1.334720055 | 0.000177766 | 0.000962474 |
| ENSMMUG00000009437 | zinc finger protein 619 [Source:VGNC Symbol;Acc:VGNC:82562]                                  | 1.988704818 | 0.000227672 | 0.001205226 |
| ENSMMUG00000001074 | unc-51 like kinase 4 [Source:VGNC Symbol;Acc:VGNC:82565]                                     | 0.779090856 | 0.001097289 | 0.004783117 |
| ENSMMUG00000035160 | U4 spliceosomal RNA [Source:RFAM;Acc:RF00015]                                                | 2.10721692  | 0.012585275 | 0.038787541 |
| ENSMMUG00000021242 | natural killer cell triggering receptor [Source:VGNC Symbol;Acc:VGNC:81486]                  | 2.938076918 | 0.000301263 | 0.00154014  |
| ENSMMUG00000021243 | zinc finger and BTB domain containing 47 [Source:VGNC Symbol;Acc:VGNC:79645]                 | 2.768942232 | 0.003485305 | 0.012954259 |
| ENSMMUG00000021244 | kelch like family member 40 [Source:VGNC Symbol;Acc:VGNC:74165]                              | 2.958830081 | 0.000231658 | 0.001223096 |
| ENSMMUG00000021246 | hedgehog acyltransferase like [Source:NCBI gene;Acc:717333]                                  | 2.507562351 | 1.12E-05    | 8.04E-05    |
| ENSMMUG00000031684 | KRAB box domain containing 1 [Source:NCBI gene;Acc:717189]                                   | 2.030413599 | 0.006799015 | 0.022979655 |

|                    |                                                                                                              |             |             |             |
|--------------------|--------------------------------------------------------------------------------------------------------------|-------------|-------------|-------------|
| ENSMMUG0000009745  | protein O-linked mannanose N-acetylglucosaminyltransferase 2 (beta 1,4-) [Source:VGNC Symbol;Acc:VGNC:84062] | 1.206253839 | 0.008966891 | 0.029201745 |
| ENSMMUG00000056798 |                                                                                                              | 2.449953233 | 2.03E-09    | 3.10E-08    |
| ENSMMUG00000054286 |                                                                                                              | 1.47684602  | 6.26E-06    | 4.80E-05    |
| ENSMMUG0000001028  | SNF related kinase [Source:VGNC Symbol;Acc:VGNC:84074]                                                       | 0.826487256 | 4.33E-14    | 1.38E-12    |
| ENSMMUG00000040696 | Metazoan signal recognition particle RNA [Source:RFAM;Acc:RF00017]                                           | 2.076879432 | 0.006197737 | 0.021223656 |
|                    |                                                                                                              | -           |             |             |
| ENSMMUG00000051139 | C-type lectin domain family 3 member B [Source:NCBI gene;Acc:106996937]                                      | 1.120473745 | 0.007478    | 0.025003337 |
|                    |                                                                                                              | -           |             |             |
| ENSMMUG00000005742 | CUB domain containing protein 1 [Source:VGNC Symbol;Acc:VGNC:70849]                                          | 1.289396789 | 0.003699084 | 0.013672182 |
|                    |                                                                                                              | -           |             |             |
| ENSMMUG00000056769 | C-C motif chemokine receptor 1 [Source:VGNC Symbol;Acc:VGNC:70737]                                           | 0.784135473 | 0.001701882 | 0.00699048  |
| ENSMMUG00000004576 | C-C motif chemokine receptor 3 [Source:VGNC Symbol;Acc:VGNC:70738]                                           | 1.343306325 | 0.00203567  | 0.008191161 |
| ENSMMUG00000062394 | C-C motif chemokine receptor 2 [Source:NCBI gene;Acc:574098]                                                 | 0.628452976 | 2.47E-06    | 2.05E-05    |
| ENSMMUG00000006454 | kelch like family member 18 [Source:VGNC Symbol;Acc:VGNC:74154]                                              | -1.04067223 | 6.49E-06    | 4.96E-05    |
| ENSMMUG00000014045 | protein tyrosine phosphatase non-receptor type 23 [Source:VGNC Symbol;Acc:VGNC:76477]                        | 1.431139384 | 1.37E-11    | 2.99E-10    |
| ENSMMUG00000014046 | SREBF chaperone [Source:VGNC Symbol;Acc:VGNC:77140]                                                          | 2.434485329 | 2.37E-29    | 4.05E-27    |
| ENSMMUG00000013385 | elongator acetyltransferase complex subunit 6 [Source:VGNC Symbol;Acc:VGNC:72113]                            | 0.91979497  | 8.08E-07    | 7.47E-06    |
|                    |                                                                                                              | -           |             |             |
| ENSMMUG00000020954 | cell division cycle 25A [Source:VGNC Symbol;Acc:VGNC:70794]                                                  | 0.734649843 | 0.004455915 | 0.016063057 |
|                    |                                                                                                              | -           |             |             |
| ENSMMUG00000054936 | Metazoan signal recognition particle RNA [Source:RFAM;Acc:RF00017]                                           | 1.010987817 | 0.004568595 | 0.016427027 |
|                    |                                                                                                              | -           |             |             |
| ENSMMUG00000064458 |                                                                                                              | 1.114169881 | 6.73E-05    | 0.00039963  |
| ENSMMUG00000003074 | plexin B1 [Source:VGNC Symbol;Acc:VGNC:76187]                                                                | 1.926263033 | 0.011459548 | 0.035918023 |
| ENSMMUG00000010058 | ATR interacting protein [Source:VGNC Symbol;Acc:VGNC:84235]                                                  | 0.575672611 | 4.46E-09    | 6.43E-08    |
| ENSMMUG00000043955 | three prime repair exonuclease 1 [Source:VGNC Symbol;Acc:VGNC:82708]                                         | 0.754684532 | 7.59E-06    | 5.69E-05    |
| ENSMMUG00000010062 | shisa family member 5 [Source:VGNC Symbol;Acc:VGNC:84082]                                                    | 0.559751606 | 1.69E-05    | 0.00011637  |
| ENSMMUG00000000591 | 6-phosphofructo-2-kinase/fructose-2,6-biphosphatase 4 [Source:VGNC Symbol;Acc:VGNC:75960]                    | 0.634409156 | 4.34E-07    | 4.25E-06    |
| ENSMMUG00000059318 | urocortin 2 [Source:NCBI gene;Acc:106996925]                                                                 | 2.116321069 | 1.62E-42    | 9.09E-40    |
| ENSMMUG00000014699 |                                                                                                              | 1.775864615 | 4.26E-66    | 1.19E-62    |
| ENSMMUG00000032659 | mml-mir-711 [Source:miRBase;Acc:MI0012553]                                                                   | 2.157499094 | 2.11E-07    | 2.19E-06    |
| ENSMMUG00000031754 | solute carrier family 26 member 6 [Source:VGNC Symbol;Acc:VGNC:77483]                                        | 2.274921443 | 0.011893848 | 0.037022737 |
| ENSMMUG00000014707 | cadherin EGF LAG seven-pass G-type receptor 3 [Source:VGNC Symbol;Acc:VGNC:71148]                            | 2.15569733  | 9.61E-07    | 8.71E-06    |
| ENSMMUG00000064174 |                                                                                                              | 1.755033191 | 0.000887483 | 0.00397531  |
| ENSMMUG00000014720 | NCK interacting protein with SH3 domain [Source:VGNC Symbol;Acc:VGNC:74960]                                  | 1.969580018 | 7.44E-09    | 1.02E-07    |
| ENSMMUG00000047476 | ras homolog family member A [Source:VGNC Symbol;Acc:VGNC:84066]                                              | 0.352042529 | 0.016540455 | 0.048748801 |
| ENSMMUG00000052238 |                                                                                                              | 0.750589529 | 3.57E-05    | 0.000227374 |
| ENSMMUG00000014537 | bassoon presynaptic cytomatrix protein [Source:VGNC Symbol;Acc:VGNC:70284]                                   | 0.392051356 | 0.012386654 | 0.038259481 |
| ENSMMUG00000014564 | ring finger protein 123 [Source:VGNC Symbol;Acc:VGNC:76790]                                                  | -0.80684567 | 5.26E-12    | 1.23E-10    |
| ENSMMUG00000031794 |                                                                                                              | 1.312752902 | 0.00099994  | 0.00441087  |
| ENSMMUG00000020979 | inka box actin regulator 1 [Source:VGNC Symbol;Acc:VGNC:73692]                                               | 1.076351066 | 8.24E-05    | 0.000479492 |
| ENSMMUG00000020980 | ubiquitin like modifier activating enzyme 7 [Source:VGNC Symbol;Acc:VGNC:78690]                              | 1.12286027  | 0.000129752 | 0.000724328 |
| ENSMMUG00000016476 | TRAF interacting protein [Source:VGNC Symbol;Acc:VGNC:82261]                                                 | 1.014527328 | 1.37E-05    | 9.63E-05    |
| ENSMMUG00000016480 | CaM kinase like vesicle associated [Source:VGNC Symbol;Acc:VGNC:70663]                                       | 0.841875653 | 0.006325842 | 0.021614835 |
|                    |                                                                                                              | -           |             |             |
| ENSMMUG00000010342 | solute carrier family 38 member 3 [Source:VGNC Symbol;Acc:VGNC:77502]                                        | 1.224896371 | 0.007847907 | 0.026090847 |
|                    |                                                                                                              | -           |             |             |
| ENSMMUG00000056280 | G protein subunit alpha i2 [Source:NCBI gene;Acc:703780]                                                     | 0.690658671 | 3.82E-05    | 0.000241508 |
|                    |                                                                                                              | -           |             |             |
| ENSMMUG00000020117 | semaphorin 3B [Source:VGNC Symbol;Acc:VGNC:77160]                                                            | 0.834060041 | 0.005576051 | 0.019393096 |
| ENSMMUG00000010495 | MAPK activated protein kinase 3 [Source:VGNC Symbol;Acc:VGNC:74654]                                          | -1.12264881 | 0.006026887 | 0.020739886 |
| ENSMMUG00000004273 | dedicator of cytokinesis 3 [Source:VGNC Symbol;Acc:VGNC:71967]                                               | 1.220026221 | 8.97E-13    | 2.33E-11    |
| ENSMMUG00000004280 | DDB1 and CUL4 associated factor 1 [Source:VGNC Symbol;Acc:VGNC:71819]                                        | 1.557322456 | 0.00151522  | 0.006316269 |

|                    |                                                                                                                   |   |             |             |             |
|--------------------|-------------------------------------------------------------------------------------------------------------------|---|-------------|-------------|-------------|
| ENSMMUG00000017351 | stabilin 1 [Source:VGNC Symbol;Acc:VGNC:77956]                                                                    | - | 1.235978243 | 3.70E-08    | 4.49E-07    |
| ENSMMUG00000050505 | small integral membrane protein 4 [Source:NCBI gene;Acc:696553]                                                   | - | 1.741160313 | 1.97E-20    | 1.29E-18    |
| ENSMMUG00000012511 | G protein nucleolar 3 [Source:VGNC Symbol;Acc:VGNC:73038]                                                         | - | 0.310833174 | 0.004595452 | 0.016498977 |
| ENSMMUG00000012526 | glycosyltransferase 8 domain containing 1 [Source:VGNC Symbol;Acc:VGNC:73001]                                     | - | 1.914157192 | 6.11E-35    | 1.75E-32    |
| ENSMMUG00000017370 | signal peptidase complex subunit 1 [Source:VGNC Symbol;Acc:VGNC:84072]                                            | - | 1.837624574 | 3.37E-10    | 5.80E-09    |
| ENSMMUG00000019262 | calcium voltage-gated channel subunit alpha1 D [Source:VGNC Symbol;Acc:VGNC:70501]                                | - | 1.185734743 | 0.000869214 | 0.003904224 |
| ENSMMUG00000019266 | choline dehydrogenase [Source:VGNC Symbol;Acc:VGNC:71086]                                                         | - | 0.810160187 | 0.000297979 | 0.001526691 |
| ENSMMUG00000019267 | interleukin 17 receptor B [Source:VGNC Symbol;Acc:VGNC:73618]                                                     | - | 0.594909261 | 0.009414126 | 0.030418039 |
| ENSMMUG00000021620 | ELKS/RAB6-interacting/CAST family member 2 [Source:VGNC Symbol;Acc:VGNC:72164]                                    | - | 0.975103735 | 6.13E-11    | 1.20E-09    |
| ENSMMUG00000039085 | adaptor protein, phosphotyrosine interacting with PH domain and leucine zipper 1 [Source:NCBI gene;Acc:100425753] | - | -2.31260487 | 0.000488396 | 0.002362464 |
| ENSMMUG00000021008 | ankyrin repeat and SOCS box containing 14 [Source:VGNC Symbol;Acc:VGNC:84237]                                     | - | 1.976459086 | 0.002811077 | 0.010802888 |
| ENSMMUG00000054683 | dynein axonemal heavy chain 12 [Source:NCBI gene;Acc:703670]                                                      | - | 1.151339686 | 3.84E-07    | 3.83E-06    |
| ENSMMUG00000055244 | U6 spliceosomal RNA [Source:RFAM;Acc:RF00026]                                                                     | - | 1.663223216 | 1.25E-12    | 3.19E-11    |
| ENSMMUG00000004052 | phosphodiesterase 12 [Source:VGNC Symbol;Acc:VGNC:75863]                                                          | - | -1.37747481 | 0.002005622 | 0.00807953  |
| ENSMMUG00000018619 | DENN domain containing 6A [Source:VGNC Symbol;Acc:VGNC:71726]                                                     | - | 2.104107212 | 9.51E-06    | 6.94E-05    |
| ENSMMUG00000000706 | filamin B [Source:VGNC Symbol;Acc:VGNC:72672]                                                                     | - | 1.558970797 | 1.19E-21    | 8.62E-20    |
| ENSMMUG00000017510 | membrane associated guanylate kinase, WW and PDZ domain containing 1 [Source:VGNC Symbol;Acc:VGNC:74499]          | - | 2.177362112 | 9.31E-33    | 2.25E-30    |
| ENSMMUG00000057539 |                                                                                                                   | - | 2.676330451 | 2.51E-14    | 8.27E-13    |
| ENSMMUG00000054412 |                                                                                                                   | - | 0.605471906 | 0.001815299 | 0.007397831 |
| ENSMMUG00000054043 |                                                                                                                   | - | 1.597719573 | 0.014452715 | 0.043631953 |
| ENSMMUG00000009425 | actin, cytoplasmic 2-like [Source:NCBI gene;Acc:705671]                                                           | - | 1.025491767 | 1.01E-08    | 1.35E-07    |
| ENSMMUG00000056158 |                                                                                                                   | - | 1.664803814 | 3.07E-06    | 2.50E-05    |
| ENSMMUG00000054107 |                                                                                                                   | - | 0.957077279 | 9.14E-06    | 6.71E-05    |
| ENSMMUG00000001849 | interleukin 5 receptor subunit alpha [Source:VGNC Symbol;Acc:VGNC:73731]                                          | - | 0.789625348 | 0.000140537 | 0.000778031 |
| ENSMMUG00000017983 | tRNA nucleotidyl transferase 1 [Source:VGNC Symbol;Acc:VGNC:79073]                                                | - | 2.204277432 | 2.02E-06    | 1.70E-05    |
| ENSMMUG00000060798 |                                                                                                                   | - | 1.432879613 | 2.83E-08    | 3.51E-07    |
| ENSMMUG00000012574 | inositol 1,4,5-trisphosphate receptor type 1 [Source:VGNC Symbol;Acc:VGNC:73804]                                  | - | 0.825422461 | 9.24E-06    | 6.77E-05    |
| ENSMMUG00000043287 |                                                                                                                   | - | 0.494145834 | 0.002963322 | 0.01128283  |
| ENSMMUG00000018281 | interleukin 17 receptor E [Source:VGNC Symbol;Acc:VGNC:73623]                                                     | - | 0.776797079 | 5.29E-07    | 5.09E-06    |
| ENSMMUG00000018282 | interleukin 17 receptor C [Source:VGNC Symbol;Acc:VGNC:84164]                                                     | - | -1.01844276 | 2.04E-07    | 2.13E-06    |
| ENSMMUG00000018285 | cysteine rich with EGF like domains 1 [Source:VGNC Symbol;Acc:VGNC:71407]                                         | - | -0.85277896 | 1.77E-07    | 1.87E-06    |
| ENSMMUG00000018289 | proline rich transmembrane protein 3 [Source:VGNC Symbol;Acc:VGNC:76324]                                          | - | 0.864997454 | 2.47E-09    | 3.70E-08    |
| ENSMMUG00000019933 | TatD DNase domain containing 2 [Source:NCBI gene;Acc:701390]                                                      | - | 0.914457623 | 0.010017113 | 0.032019597 |
| ENSMMUG00000021806 | vestigial like family member 4 [Source:VGNC Symbol;Acc:VGNC:79755]                                                | - | 0.867626818 | 6.15E-05    | 0.000370067 |
| ENSMMUG00000009536 | makorin ring finger protein 2 [Source:VGNC Symbol;Acc:VGNC:74878]                                                 | - | 1.329521192 | 6.56E-07    | 6.18E-06    |

|                    |                                                                                                   |   |             |             |             |
|--------------------|---------------------------------------------------------------------------------------------------|---|-------------|-------------|-------------|
| ENSMMUG00000023125 | XPC complex subunit, DNA damage recognition and repair factor [Source:VGNC Symbol;Acc:VGNC:78809] | - | 0.860009979 | 0.000780961 | 0.003568398 |
| ENSMMUG00000023124 | transmembrane protein 43 [Source:VGNC Symbol;Acc:VGNC:82711]                                      | - | 0.939524746 | 2.19E-05    | 0.000146791 |
| ENSMMUG00000006340 | solute carrier family 6 member 6 [Source:VGNC Symbol;Acc:VGNC:77622]                              | - | 0.883318401 | 5.45E-10    | 9.07E-09    |
| ENSMMUG00000044822 | coiled-coil domain containing 174 [Source:VGNC Symbol;Acc:VGNC:84219]                             | - | 0.754393683 | 8.47E-08    | 9.61E-07    |
| ENSMMUG00000000158 | minichromosome maintenance complex component 2 [Source:VGNC Symbol;Acc:VGNC:74680]                | - | 1.466514262 | 4.36E-21    | 2.99E-19    |
| ENSMMUG00000017125 | oxysterol binding protein like 11 [Source:VGNC Symbol;Acc:VGNC:75631]                             | - | 1.693539856 | 2.33E-22    | 1.82E-20    |
| ENSMMUG00000032031 |                                                                                                   | - | 1.007929903 | 0.006568936 | 0.022347452 |
| ENSMMUG00000001949 | coiled-coil domain containing 191 [Source:VGNC Symbol;Acc:VGNC:70901]                             | - | 1.278690764 | 0.002322888 | 0.009155102 |
| ENSMMUG00000001946 | zinc finger DHHC-type palmitoyltransferase 23 [Source:VGNC Symbol;Acc:VGNC:79731]                 | - | 1.082537032 | 0.003039368 | 0.011528553 |
| ENSMMUG00000001943 | GRAM domain containing 1C [Source:VGNC Symbol;Acc:VGNC:73007]                                     | - | 1.218269943 | 8.35E-07    | 7.70E-06    |
| ENSMMUG00000052581 | upstream transcription factor family member 3 [Source:NCBI gene;Acc:709660]                       | - | 1.031793969 | 3.47E-11    | 7.06E-10    |
| ENSMMUG00000057363 |                                                                                                   | - | 1.224430985 | 0.000569983 | 0.002713125 |
| ENSMMUG00000014874 | GTP binding protein 8 (putative) [Source:VGNC Symbol;Acc:VGNC:84180]                              | - | 1.575397007 | 6.17E-13    | 1.64E-11    |
| ENSMMUG00000014876 | nucleolus and neural progenitor protein [Source:VGNC Symbol;Acc:VGNC:75244]                       | - | 1.695576215 | 5.18E-14    | 1.63E-12    |
| ENSMMUG00000003199 | CD200 receptor 1 [Source:VGNC Symbol;Acc:VGNC:70845]                                              | - | 1.009573358 | 0.015643427 | 0.046604585 |
| ENSMMUG00000000894 | cellular inhibitor of PP2A [Source:VGNC Symbol;Acc:VGNC:71371]                                    | - | 2.450965794 | 0.000433668 | 0.00212634  |
| ENSMMUG00000019977 | myosin heavy chain 15 [Source:VGNC Symbol;Acc:VGNC:84148]                                         | - | 1.038854074 | 4.58E-05    | 0.000283733 |
| ENSMMUG00000019978 | HERV-H LTR-associating 2 [Source:VGNC Symbol;Acc:VGNC:73377]                                      | - | 1.360066109 | 0.000832415 | 0.003765469 |
| ENSMMUG00000008791 | CD47 molecule [Source:VGNC Symbol;Acc:VGNC:70767]                                                 | - | 3.480736865 | 3.74E-60    | 6.56E-57    |
| ENSMMUG00000058765 |                                                                                                   | - | 0.792654526 | 0.016470657 | 0.048592541 |
| ENSMMUG00000063790 |                                                                                                   | - | 2.090458647 | 0.003412291 | 0.012712687 |
| ENSMMUG00000007565 | Cbl proto-oncogene B [Source:VGNC Symbol;Acc:VGNC:70555]                                          | - | 1.027317156 | 7.59E-09    | 1.04E-07    |
| ENSMMUG00000026103 | U1 spliceosomal RNA [Source:RFAM;Acc:RF00003]                                                     | - | 2.830021381 | 3.15E-06    | 2.56E-05    |
| ENSMMUG00000060744 |                                                                                                   | - | 1.630121943 | 5.56E-09    | 7.83E-08    |
| ENSMMUG00000063181 |                                                                                                   | - | 0.452480713 | 0.003761949 | 0.013867983 |
| ENSMMUG00000059753 |                                                                                                   | - | 0.573091351 | 0.000449707 | 0.002196184 |
| ENSMMUG00000021567 | neurexophilin and PC-esterase domain family member 3 [Source:VGNC Symbol;Acc:VGNC:75476]          | - | 0.576198968 | 0.000170474 | 0.000925853 |
| ENSMMUG00000057768 |                                                                                                   | - | 0.666108153 | 0.00027502  | 0.001423776 |
| ENSMMUG00000024598 | U6 spliceosomal RNA [Source:RFAM;Acc:RF00026]                                                     | - | 3.017412561 | 0.000612913 | 0.002890977 |
| ENSMMUG00000038349 | crystallin beta-gamma domain containing 3 [Source:NCBI gene;Acc:698282]                           | - | 0.502158412 | 0.000372221 | 0.001846359 |
| ENSMMUG00000049786 |                                                                                                   | - | 1.651997362 | 0.002053762 | 0.008247395 |
| ENSMMUG00000043727 | zinc finger protein 654 [Source:VGNC Symbol;Acc:VGNC:82560]                                       | - | 1.636142474 | 0.000112589 | 0.00063509  |
| ENSMMUG00000047994 | CGG triplet repeat binding protein 1 [Source:VGNC Symbol;Acc:VGNC:84203]                          | - | 1.263136766 | 2.23E-05    | 0.000149183 |
| ENSMMUG00000033738 | RNA, U6atac small nuclear 6, pseudogene [Source:HGNC Symbol;Acc:HGNC:46905]                       | - | 0.565014297 | 0.002622382 | 0.010178152 |

|                    |                                                                                        |             |             |             |
|--------------------|----------------------------------------------------------------------------------------|-------------|-------------|-------------|
| ENSMMUG00000015877 | 1,4-alpha-glucan branching enzyme 1 [Source:VGNC Symbol;Acc:VGNC:72894]                | 0.554540658 | 0.001252604 | 0.005366718 |
| ENSMMUG00000055096 |                                                                                        | 1.069551397 | 1.08E-11    | 2.41E-10    |
| ENSMMUG00000056687 |                                                                                        | -           | -           | -           |
| ENSMMUG00000052831 |                                                                                        | 1.537760007 | 8.61E-08    | 9.76E-07    |
|                    |                                                                                        | 0.93637592  | 3.89E-08    | 4.69E-07    |
| ENSMMUG00000032295 | zinc finger protein 595 [Source:VGNC Symbol;Acc:VGNC:79655]                            | -           | -           | -           |
|                    |                                                                                        | 0.734917625 | 0.001872303 | 0.007610369 |
| ENSMMUG00000051381 | Metazoan signal recognition particle RNA [Source:RFAM;Acc:RF00017]                     | -           | -           | -           |
|                    |                                                                                        | 2.058955351 | 1.44E-08    | 1.88E-07    |
| ENSMMUG00000039020 | zinc finger protein 141 [Source:NCBI gene;Acc:714265]                                  | -           | -           | -           |
|                    |                                                                                        | 1.695713225 | 2.49E-11    | 5.24E-10    |
| ENSMMUG0000003282  | phosphodiesterase 6B [Source:VGNC Symbol;Acc:VGNC:75920]                               | -           | -           | -           |
| ENSMMUG00000008323 | C-terminal binding protein 1 [Source:VGNC Symbol;Acc:VGNC:71539]                       | 1.626996198 | 7.37E-06    | 5.54E-05    |
|                    |                                                                                        | -0.39084898 | 0.000666304 | 0.00309557  |
| ENSMMUG00000046942 | nuclear receptor binding SET domain protein 2 [Source:NCBI gene;Acc:100429321]         | -           | -           | -           |
|                    |                                                                                        | 0.563928264 | 0.001894494 | 0.007693742 |
| ENSMMUG00000032306 | zinc finger FYVE-type containing 28 [Source:NCBI gene;Acc:720600]                      | -           | -           | -           |
| ENSMMUG00000007966 | TNFAIP3 interacting protein 2 [Source:VGNC Symbol;Acc:VGNC:79182]                      | 0.802851936 | 0.005058367 | 0.01787638  |
| ENSMMUG00000008379 | adducin 1 [Source:VGNC Symbol;Acc:VGNC:69528]                                          | 1.76495469  | 0.002799934 | 0.010763012 |
| ENSMMUG00000008383 | major facilitator superfamily domain containing 10 [Source:NCBI gene;Acc:720098]       | 1.351235226 | 3.57E-08    | 4.34E-07    |
| ENSMMUG00000008385 | NOP14 nucleolar protein [Source:VGNC Symbol;Acc:VGNC:75194]                            | 1.561104789 | 2.80E-13    | 7.79E-12    |
|                    |                                                                                        | 1.267014674 | 1.38E-16    | 5.99E-15    |
| ENSMMUG00000008392 | huntingtin [Source:VGNC Symbol;Acc:VGNC:73468]                                         | -           | -           | -           |
|                    |                                                                                        | 0.756897799 | 5.80E-07    | 5.53E-06    |
| ENSMMUG00000008398 | Myb/SANT DNA binding domain containing 1 [Source:VGNC Symbol;Acc:VGNC:74869]           | -           | -           | -           |
| ENSMMUG00000006237 | carboxypeptidase Z [Source:VGNC Symbol;Acc:VGNC:71478]                                 | 0.690314825 | 0.00192449  | 0.007795241 |
| ENSMMUG00000006234 | acyl-CoA oxidase 3, pristanoyl [Source:VGNC Symbol;Acc:VGNC:69382]                     | 3.705265804 | 0.012712859 | 0.039107046 |
|                    |                                                                                        | 0.62842753  | 5.46E-06    | 4.23E-05    |
| ENSMMUG00000030400 | SH3 domain and tetratricopeptide repeats 1 [Source:NCBI gene;Acc:722649]               | -           | -           | -           |
| ENSMMUG00000016999 | KIAA0232 [Source:VGNC Symbol;Acc:VGNC:73922]                                           | 0.559555449 | 9.46E-05    | 0.000542983 |
|                    |                                                                                        | 4.593051039 | 6.23E-06    | 4.77E-05    |
| ENSMMUG00000053541 |                                                                                        | -           | -           | -           |
|                    |                                                                                        | 0.866177573 | 0.004072044 | 0.014858774 |
| ENSMMUG00000015099 | janus kinase and microtubule interacting protein 1 [Source:VGNC Symbol;Acc:VGNC:73662] | -           | -           | -           |
| ENSMMUG00000019563 | collapsin response mediator protein 1 [Source:VGNC Symbol;Acc:VGNC:71494]              | 0.660224542 | 0.00067577  | 0.003133707 |
| ENSMMUG00000057703 |                                                                                        | 1.412968627 | 1.73E-30    | 3.24E-28    |
| ENSMMUG00000020861 | EvC ciliary complex subunit 1 [Source:VGNC Symbol;Acc:VGNC:72445]                      | 1.339678706 | 7.90E-14    | 2.39E-12    |
| ENSMMUG00000020860 | EvC ciliary complex subunit 2 [Source:VGNC Symbol;Acc:VGNC:72301]                      | 1.308363522 | 2.29E-18    | 1.23E-16    |
| ENSMMUG00000016922 | serine/threonine kinase 32B [Source:VGNC Symbol;Acc:VGNC:78114]                        | 0.658388175 | 1.36E-05    | 9.57E-05    |
|                    |                                                                                        | 0.906102425 | 0.001053592 | 0.00461848  |
| ENSMMUG00000060830 |                                                                                        | -           | -           | -           |
|                    |                                                                                        | 2.845269929 | 0.004415486 | 0.015946011 |
| ENSMMUG00000049640 |                                                                                        | -           | -           | -           |
| ENSMMUG00000008162 | fibroblast growth factor binding protein 1 [Source:VGNC Symbol;Acc:VGNC:72536]         | 0.620354273 | 0.008322991 | 0.027455494 |
|                    |                                                                                        | 1.369125512 | 1.86E-06    | 1.57E-05    |
| ENSMMUG00000008164 | prominin 1 [Source:VGNC Symbol;Acc:VGNC:76425]                                         | -           | -           | -           |
|                    |                                                                                        | 0.510078566 | 2.38E-05    | 0.00015772  |
| ENSMMUG00000023116 | LIM domain binding 2 [Source:VGNC Symbol;Acc:VGNC:74246]                               | -           | -           | -           |
|                    |                                                                                        | 0.907401897 | 6.49E-07    | 6.13E-06    |
| ENSMMUG00000018073 | ligand dependent nuclear receptor corepressor like [Source:NCBI gene;Acc:715285]       | -           | -           | -           |
|                    |                                                                                        | 0.557101005 | 0.001813871 | 0.00739416  |
| ENSMMUG00000057338 |                                                                                        | -           | -           | -           |
|                    |                                                                                        | 1.306380968 | 7.52E-12    | 1.72E-10    |
| ENSMMUG00000060440 | leucine rich repeat LGI family member 2 [Source:NCBI gene;Acc:693308]                  | -           | -           | -           |
|                    |                                                                                        | 0.452909535 | 0.001038447 | 0.004556363 |

|                    |                                                                                      |   |             |             |             |
|--------------------|--------------------------------------------------------------------------------------|---|-------------|-------------|-------------|
| ENSMMUG00000020349 | SEL1L family member 3 [Source:VGNC Symbol;Acc:VGNC:77329]                            | - | 0.326630048 | 0.012068171 | 0.037448984 |
| ENSMMUG00000049298 | cholecystinin A receptor [Source:NCBI gene;Acc:694742]                               | - | 4.363343975 | 7.31E-05    | 0.000430525 |
| ENSMMUG00000057711 |                                                                                      | - | 0.822150305 | 0.000821509 | 0.003726958 |
| ENSMMUG00000051768 |                                                                                      | - | 1.198095335 | 0.001928687 | 0.007807729 |
| ENSMMUG00000000237 | TBC1 domain family member 1 [Source:VGNC Symbol;Acc:VGNC:78103]                      | - | 0.500242599 | 0.008775116 | 0.028697167 |
| ENSMMUG00000055079 |                                                                                      | - | 0.484398932 | 0.003265987 | 0.012232623 |
| ENSMMUG00000002755 | kelch like family member 5 [Source:VGNC Symbol;Acc:VGNC:74188]                       | - | 2.979121082 | 2.50E-05    | 0.000164907 |
| ENSMMUG00000002756 | WD repeat domain 19 [Source:VGNC Symbol;Acc:VGNC:79132]                              | - | 0.490813364 | 0.000236919 | 0.001247582 |
| ENSMMUG00000001892 | UDP-glucose 6-dehydrogenase [Source:VGNC Symbol;Acc:VGNC:78711]                      | - | 0.991338798 | 2.64E-06    | 2.18E-05    |
| ENSMMUG00000062569 | Metazoan signal recognition particle RNA [Source:RFAM;Acc:RF00017]                   | - | 0.905359195 | 0.012038628 | 0.037367082 |
| ENSMMUG00000036851 | U7 small nuclear RNA [Source:RFAM;Acc:RF00066]                                       | - | 0.651667311 | 5.56E-05    | 0.000338263 |
| ENSMMUG00000012036 | RNA binding motif protein 47 [Source:VGNC Symbol;Acc:VGNC:76576]                     | - | 0.827292108 | 3.30E-10    | 5.72E-09    |
| ENSMMUG00000012561 | NOP2/Sun RNA methyltransferase family member 7 [Source:VGNC Symbol;Acc:VGNC:75463]   | - | 1.119457261 | 5.91E-09    | 8.27E-08    |
| ENSMMUG00000055441 |                                                                                      | - | 1.843757245 | 0.000288799 | 0.001483997 |
| ENSMMUG00000051296 | paired like homeobox 2B [Source:NCBI gene;Acc:701940]                                | - | 1.196142987 | 0.002586634 | 0.010064164 |
| ENSMMUG00000017733 | ATPase phospholipid transporting 8A1 [Source:VGNC Symbol;Acc:VGNC:70061]             | - | 0.386393205 | 0.006433644 | 0.02192975  |
| ENSMMUG00000018625 | NIPA like domain containing 1 [Source:NCBI gene;Acc:704998]                          | - | 1.146159422 | 4.22E-07    | 4.14E-06    |
| ENSMMUG00000006703 | solute carrier family 10 member 4 [Source:VGNC Symbol;Acc:VGNC:77553]                | - | 0.918333625 | 0.001016534 | 0.00447562  |
| ENSMMUG00000006704 | zygote arrest 1 [Source:VGNC Symbol;Acc:VGNC:79251]                                  | - | 1.319715333 | 1.77E-06    | 1.51E-05    |
| ENSMMUG00000014868 | OCIA domain containing 1 [Source:VGNC Symbol;Acc:VGNC:75409]                         | - | 0.94358744  | 7.31E-07    | 6.82E-06    |
| ENSMMUG00000045266 | Metazoan signal recognition particle RNA [Source:RFAM;Acc:RF00017]                   | - | 2.564735775 | 0.000874704 | 0.003926367 |
| ENSMMUG00000058229 | U6 spliceosomal RNA [Source:RFAM;Acc:RF00026]                                        | - | 2.494382348 | 0.00113049  | 0.004903453 |
| ENSMMUG00000008514 | lin-54 DREAM MuvB core complex component [Source:VGNC Symbol;Acc:VGNC:74123]         | - | 1.179506878 | 0.012943427 | 0.039760281 |
| ENSMMUG00000015777 | heterogeneous nuclear ribonucleoprotein D like [Source:VGNC Symbol;Acc:VGNC:81186]   | - | -0.55847203 | 0.000813303 | 0.003696903 |
| ENSMMUG00000021988 | N-alpha-acetyltransferase 11, NatA catalytic subunit [Source:NCBI gene;Acc:696758]   | - | 1.286789164 | 9.87E-12    | 2.22E-10    |
| ENSMMUG00000007366 |                                                                                      | - | 1.391577668 | 7.88E-14    | 2.39E-12    |
| ENSMMUG00000002564 | Fraser extracellular matrix complex subunit 1 [Source:VGNC Symbol;Acc:VGNC:72743]    | - | 0.860898059 | 2.64E-06    | 2.18E-05    |
| ENSMMUG00000062865 |                                                                                      | - | 0.559090106 | 0.001604538 | 0.006635339 |
| ENSMMUG00000045609 | CCR4-NOT transcription complex subunit 6 like [Source:NCBI gene;Acc:697981]          | - | 1.938494175 | 2.44E-13    | 6.80E-12    |
| ENSMMUG00000019904 | cyclin I [Source:VGNC Symbol;Acc:VGNC:70733]                                         | - | -1.53053726 | 0.004161289 | 0.015156819 |
| ENSMMUG00000018186 | sosondowah ankyrin repeat domain family member B [Source:VGNC Symbol;Acc:VGNC:78033] | - | -0.49805876 | 4.38E-05    | 0.000272736 |
| ENSMMUG00000020919 | shroom family member 3 [Source:VGNC Symbol;Acc:VGNC:77352]                           | - | 1.178289369 | 0.001972665 | 0.007962776 |
| ENSMMUG00000020916 | coiled-coil domain containing 158 [Source:NCBI gene;Acc:699735]                      | - | 1.051301147 | 1.01E-13    | 2.99E-12    |
| ENSMMUG00000020913 | scavenger receptor class B member 2 [Source:VGNC Symbol;Acc:VGNC:77026]              | - | 0.713868016 | 0.000100839 | 0.000574896 |
| ENSMMUG00000020910 | nucleoporin 54 [Source:VGNC Symbol;Acc:VGNC:75420]                                   | - | -0.84271635 | 0.001027877 | 0.00451847  |
| ENSMMUG00000017503 | SDA1 domain containing 1 [Source:NCBI gene;Acc:700863]                               | - | 2.450259692 | 1.24E-06    | 1.10E-05    |
| ENSMMUG00000017501 | N-acylethanolamine acid amidase [Source:VGNC Symbol;Acc:VGNC:75068]                  | - | 2.051660589 | 1.68E-09    | 2.57E-08    |
| ENSMMUG00000015716 | protein phosphatase with EF-hand domain 2 [Source:VGNC Symbol;Acc:VGNC:76233]        | - | 1.515753045 | 0.00386823  | 0.014203766 |

|                    |                                                                                                                |   |             |             |             |
|--------------------|----------------------------------------------------------------------------------------------------------------|---|-------------|-------------|-------------|
| ENSMMUG00000002153 | G3BP stress granule assembly factor 2 [Source:NCBI gene;Acc:701343]                                            | - | 3.064708616 | 0.015023982 | 0.045004208 |
| ENSMMUG00000003833 | Ras association domain family member 6 [Source:VGNC Symbol;Acc:VGNC:76515]                                     | - | 1.786266665 | 3.27E-06    | 2.66E-05    |
| ENSMMUG00000003827 | albumin [Source:VGNC Symbol;Acc:VGNC:69782]                                                                    | - | 0.873371634 | 0.000135025 | 0.000749588 |
| ENSMMUG00000000790 | ankyrin repeat domain 17 [Source:VGNC Symbol;Acc:VGNC:84240]                                                   | - | 2.598491089 | 1.32E-39    | 5.77E-37    |
| ENSMMUG00000006031 | casein kappa [Source:VGNC Symbol;Acc:VGNC:71522]                                                               | - | 1.850072808 | 0.010004025 | 0.031992346 |
| ENSMMUG00000006029 | odontogenic, ameloblast associated [Source:NCBI gene;Acc:707906]                                               | - | 0.827801375 | 6.31E-06    | 4.83E-05    |
| ENSMMUG00000048823 |                                                                                                                | - | 1.160316735 | 8.03E-10    | 1.30E-08    |
| ENSMMUG00000004849 | casein beta [Source:VGNC Symbol;Acc:VGNC:71523]                                                                | - | 1.034314978 | 2.62E-08    | 3.26E-07    |
| ENSMMUG00000047324 | casein alpha s1 [Source:HGNC Symbol;Acc:HGNC:2445]                                                             | - | 2.005630651 | 0.000513171 | 0.002467832 |
| ENSMMUG00000009925 | centrosomal protein 135 [Source:VGNC Symbol;Acc:VGNC:71128]                                                    | - | 0.370191182 | 0.015206033 | 0.045443776 |
| ENSMMUG00000001919 | clock circadian regulator [Source:VGNC Symbol;Acc:VGNC:71262]                                                  | - | 1.237018126 | 2.76E-09    | 4.09E-08    |
| ENSMMUG00000001918 | transmembrane protein 165 [Source:VGNC Symbol;Acc:VGNC:79875]                                                  | - | 1.852272522 | 1.83E-07    | 1.92E-06    |
| ENSMMUG00000010113 | steroid 5 alpha-reductase 3 [Source:VGNC Symbol;Acc:VGNC:82246]                                                | - | 1.523964937 | 4.18E-07    | 4.11E-06    |
| ENSMMUG00000046843 | Metazoan signal recognition particle RNA [Source:RFAM;Acc:RF00017]                                             | - | 0.795041561 | 0.00621705  | 0.021279398 |
| ENSMMUG00000059659 |                                                                                                                | - | -1.33194235 | 5.75E-06    | 4.44E-05    |
| ENSMMUG00000018943 | spermatogenesis associated 18 [Source:VGNC Symbol;Acc:VGNC:78013]                                              | - | 0.644106736 | 0.016097659 | 0.047724624 |
| ENSMMUG00000018939 | leucine rich repeat containing 66 [Source:VGNC Symbol;Acc:VGNC:74415]                                          | - | -0.64389534 | 0.001249609 | 0.005360436 |
| ENSMMUG00000008341 | Rho GTPase activating protein 24 [Source:VGNC Symbol;Acc:VGNC:69904]                                           | - | -0.9399431  | 0.005599081 | 0.019458714 |
| ENSMMUG00000003726 | protein tyrosine phosphatase non-receptor type 13 [Source:VGNC Symbol;Acc:VGNC:76599]                          | - | 0.630764893 | 0.004897976 | 0.017423154 |
| ENSMMUG00000014076 | AF4/FMR2 family member 1 [Source:VGNC Symbol;Acc:VGNC:69817]                                                   | - | 1.071776731 | 0.007261961 | 0.024409032 |
| ENSMMUG00000051677 |                                                                                                                | - | 1.093271109 | 4.12E-15    | 1.50E-13    |
| ENSMMUG00000014080 | kelch like family member 8 [Source:VGNC Symbol;Acc:VGNC:74076]                                                 | - | 0.839732383 | 0.003958153 | 0.014499786 |
| ENSMMUG00000019040 | hydroxysteroid 17-beta dehydrogenase 13 [Source:VGNC Symbol;Acc:VGNC:73417]                                    | - | 1.254474547 | 8.90E-14    | 2.68E-12    |
| ENSMMUG00000019041 | hydroxysteroid 17-beta dehydrogenase 11 [Source:VGNC Symbol;Acc:VGNC:73431]                                    | - | 1.090118986 | 7.22E-05    | 0.000426687 |
| ENSMMUG00000008795 | polycystin 2, transient receptor potential cation channel [Source:NCBI gene;Acc:702179]                        | - | 1.253596111 | 1.03E-09    | 1.63E-08    |
| ENSMMUG00000008797 | ATP binding cassette subfamily G member 2 (Junior blood group) [Source:NCBI gene;Acc:574307]                   | - | 1.325367304 | 6.23E-17    | 2.83E-15    |
| ENSMMUG00000028039 | U6 spliceosomal RNA [Source:RFAM;Acc:RF00026]                                                                  | - | 1.834290264 | 0.009583716 | 0.03085226  |
| ENSMMUG00000010314 | HECT and RLD domain containing E3 ubiquitin protein ligase family member 6 [Source:VGNC Symbol;Acc:VGNC:73238] | - | 0.802930523 | 0.0080132   | 0.026558521 |
| ENSMMUG00000010316 | HECT and RLD domain containing E3 ubiquitin protein ligase 5 [Source:VGNC Symbol;Acc:VGNC:73226]               | - | 2.236623943 | 5.22E-08    | 6.12E-07    |
| ENSMMUG00000010318 | phosphatidylinositol glycan anchor biosynthesis class Y [Source:NCBI gene;Acc:100426107]                       | - | 2.600961999 | 3.34E-12    | 8.02E-11    |
| ENSMMUG00000058698 |                                                                                                                | - | 1.879874648 | 5.62E-05    | 0.000341428 |
| ENSMMUG00000010138 | HECT and RLD domain containing E3 ubiquitin protein ligase 3 [Source:VGNC Symbol;Acc:VGNC:73365]               | - | 0.380618983 | 0.002897206 | 0.011082247 |
| ENSMMUG00000058544 | nucleosome assembly protein 1 like 5 [Source:NCBI gene;Acc:703223]                                             | - | 0.65869106  | 1.46E-06    | 1.27E-05    |
| ENSMMUG00000010141 | family with sequence similarity 13 member A [Source:VGNC Symbol;Acc:VGNC:72299]                                | - | 0.602423415 | 1.54E-06    | 1.34E-05    |
| ENSMMUG00000057606 | GPRIN family member 3 [Source:NCBI gene;Acc:703567]                                                            | - | 1.746407507 | 1.15E-18    | 6.36E-17    |
| ENSMMUG00000049396 | Metazoan signal recognition particle RNA [Source:RFAM;Acc:RF00017]                                             | - | 1.315079851 | 0.002630259 | 0.010200255 |
| ENSMMUG00000022003 | multimerin 1 [Source:VGNC Symbol;Acc:VGNC:74904]                                                               | - | 1.910881321 | 2.57E-15    | 9.57E-14    |

|                    |                                                                                       |             |             |             |
|--------------------|---------------------------------------------------------------------------------------|-------------|-------------|-------------|
| ENSMMUG00000022246 | PDZ and LIM domain 5 [Source:VGNC Symbol;Acc:VGNC:75816]                              | 0.918039634 | 5.52E-05    | 0.00033654  |
| ENSMMUG00000060760 |                                                                                       | 1.450845419 | 1.89E-08    | 2.43E-07    |
| ENSMMUG00000006309 | unc-5 netrin receptor C [Source:VGNC Symbol;Acc:VGNC:78723]                           | -1.99610831 | 0.000972037 | 0.004297251 |
| ENSMMUG00000011702 | tetraspanin 5 [Source:VGNC Symbol;Acc:VGNC:79086]                                     | 1.116487085 | 4.94E-05    | 0.000303631 |
| ENSMMUG00000063972 |                                                                                       | 0.789184049 | 0.000998071 | 0.00440401  |
| ENSMMUG00000040764 | alcohol dehydrogenase 1A [Source:NCBI gene;Acc:100424103]                             | 0.933559498 | 0.000110009 | 0.00062229  |
| ENSMMUG00000018738 | alcohol dehydrogenase 1B (class I), beta polypeptide [Source:NCBI gene;Acc:707908]    | 0.997255619 | 5.18E-08    | 6.09E-07    |
| ENSMMUG00000061366 |                                                                                       | 0.771988096 | 1.19E-07    | 1.31E-06    |
| ENSMMUG00000016880 | solute carrier family 39 member 8 [Source:VGNC Symbol;Acc:VGNC:77541]                 | 3.312930333 | 9.39E-22    | 6.93E-20    |
| ENSMMUG00000037551 | Metazoan signal recognition particle RNA [Source:RFAM;Acc:RF00017]                    | 3.788935479 | 2.00E-23    | 1.75E-21    |
| ENSMMUG00000003736 | nuclear factor kappa B subunit 1 [Source:VGNC Symbol;Acc:VGNC:75339]                  | 3.676192902 | 1.07E-21    | 7.80E-20    |
| ENSMMUG00000003739 | mannosidase beta [Source:VGNC Symbol;Acc:VGNC:74486]                                  | 1.454243808 | 2.29E-05    | 0.000152795 |
| ENSMMUG00000011206 | solute carrier family 9 member B1 [Source:NCBI gene;Acc:710949]                       | 0.419657747 | 0.016184918 | 0.047922529 |
| ENSMMUG00000019083 | solute carrier family 9 member B2 [Source:VGNC Symbol;Acc:VGNC:77773]                 | 0.577263645 | 0.001264263 | 0.00541006  |
| ENSMMUG00000019085 | 3-hydroxybutyrate dehydrogenase 2 [Source:VGNC Symbol;Acc:VGNC:70161]                 | 1.228029753 | 5.61E-26    | 6.85E-24    |
| ENSMMUG00000019089 | centromere protein E [Source:VGNC Symbol;Acc:VGNC:71008]                              | 1.206481689 | 1.63E-24    | 1.62E-22    |
| ENSMMUG00000010941 | Rho guanine nucleotide exchange factor 38 [Source:VGNC Symbol;Acc:VGNC:82087]         | 0.460080344 | 0.000636399 | 0.00297375  |
| ENSMMUG00000009066 | 60S ribosomal protein L26 [Source:NCBI gene;Acc:696134]                               | 1.896408483 | 0.009596028 | 0.0308595   |
| ENSMMUG00000060432 |                                                                                       | -0.99137438 | 0.014289988 | 0.043252428 |
| ENSMMUG00000052609 | ribosomal protein L34 [Source:NCBI gene;Acc:696636]                                   | 2.075175983 | 2.20E-08    | 2.78E-07    |
| ENSMMUG00000011902 | oligosaccharyltransferase complex non-catalytic subunit [Source:NCBI gene;Acc:697283] | 1.629309351 | 7.03E-08    | 8.09E-07    |
| ENSMMUG00000055759 | Metazoan signal recognition particle RNA [Source:RFAM;Acc:RF00017]                    | 1.551380341 | 3.50E-06    | 2.83E-05    |
| ENSMMUG00000017703 | collagen type XXV alpha 1 chain [Source:VGNC Symbol;Acc:VGNC:81374]                   | 2.815829354 | 5.11E-07    | 4.92E-06    |
| ENSMMUG00000010043 | epidermal growth factor [Source:VGNC Symbol;Acc:VGNC:72171]                           | 0.647811464 | 0.014380091 | 0.043506368 |
| ENSMMUG00000062794 |                                                                                       | 2.480275169 | 8.93E-14    | 2.68E-12    |
| ENSMMUG00000008633 | ankyrin 2 [Source:NCBI gene;Acc:702180]                                               | 0.835932852 | 7.50E-05    | 0.000440758 |
| ENSMMUG00000001752 | transmembrane protein 155 [Source:NCBI gene;Acc:707055]                               | 1.96881723  | 0.005503552 | 0.019198852 |
| ENSMMUG00000009816 | exosome component 9 [Source:VGNC Symbol;Acc:VGNC:72477]                               | 2.027878491 | 8.43E-06    | 6.25E-05    |
| ENSMMUG00000061098 |                                                                                       | 1.836225931 | 3.14E-28    | 4.74E-26    |
| ENSMMUG00000007422 | spermatogenesis associated 5 [Source:VGNC Symbol;Acc:VGNC:77952]                      | 1.402887512 | 6.71E-19    | 3.75E-17    |
| ENSMMUG00000001848 | sprouty RTK signaling antagonist 1 [Source:VGNC Symbol;Acc:VGNC:77867]                | 1.176210989 | 6.36E-17    | 2.88E-15    |
| ENSMMUG00000011810 | FAT atypical cadherin 4 [Source:VGNC Symbol;Acc:VGNC:72552]                           | 1.298222595 | 0.000746014 | 0.0034221   |
| ENSMMUG00000051329 |                                                                                       | 1.57137543  | 2.22E-05    | 0.000148427 |
| ENSMMUG00000056698 |                                                                                       | 1.587960391 | 0.005551548 | 0.019331849 |
| ENSMMUG00000015244 | uncoupling protein 1 [Source:VGNC Symbol;Acc:VGNC:78708]                              | 2.304210977 | 0.002377157 | 0.009347974 |
| ENSMMUG00000010444 | ring finger protein 150 [Source:VGNC Symbol;Acc:VGNC:76805]                           | 2.792936    | 0.010209326 | 0.032537587 |
| ENSMMUG00000060157 | zinc finger protein 330 [Source:NCBI gene;Acc:699364]                                 | 0.71465411  | 5.46E-05    | 0.00033288  |
| ENSMMUG00000003697 | inositol polyphosphate-4-phosphatase type II B [Source:VGNC Symbol;Acc:VGNC:73748]    | 0.820424156 | 2.19E-05    | 0.00014684  |
| ENSMMUG00000055522 |                                                                                       | 0.778869383 | 0.006387064 | 0.021797469 |



|                     |                                                                                               |             |             |             |
|---------------------|-----------------------------------------------------------------------------------------------|-------------|-------------|-------------|
| ENSMMUG00000044429  | glycophorin A (MNS blood group) [Source:NCBI gene;Acc:574101]                                 | 2.192104679 | 1.93E-15    | 7.28E-14    |
| ENSMMUG00000014173  |                                                                                               | -1.12513381 | 0.001051057 | 0.004608811 |
| ENSMMUG00000007968  | hedgehog interacting protein [Source:VGNC Symbol;Acc:VGNC:73169]                              | 0.938781934 | 1.11E-05    | 7.95E-05    |
| ENSMMUG00000005380  | zinc finger protein 827 [Source:NCBI gene;Acc:706018]                                         | 1.803538101 | 1.92E-12    | 4.75E-11    |
| ENSMMUG00000014955  | nuclear receptor subfamily 3 group C member 2 [Source:VGNC Symbol;Acc:VGNC:75516]             | 1.025702875 | 0.002959957 | 0.011273361 |
| ENSMMUG00000002211  | doublecortin like kinase 2 [Source:VGNC Symbol;Acc:VGNC:71670]                                | 1.110809626 | 2.73E-06    | 2.25E-05    |
| ENSMMUG000000059101 |                                                                                               | 1.654760072 | 2.06E-05    | 0.000139254 |
| ENSMMUG00000018490  | ADP ribosylation factor interacting protein 1 [Source:VGNC Symbol;Acc:VGNC:69878]             | 0.982157138 | 7.87E-08    | 8.99E-07    |
| ENSMMUG00000039869  |                                                                                               | 0.770648737 | 1.15E-06    | 1.02E-05    |
| ENSMMUG00000009001  | transmembrane 131 like [Source:VGNC Symbol;Acc:VGNC:79781]                                    | 0.910333135 | 0.004959227 | 0.017601429 |
| ENSMMUG00000057643  |                                                                                               | 0.464757687 | 0.00495786  | 0.017601029 |
| ENSMMUG00000052999  | lecithin retinol acyltransferase [Source:NCBI gene;Acc:698871]                                | 0.785932065 | 5.44E-09    | 7.69E-08    |
| ENSMMUG00000064074  |                                                                                               | 0.782876938 | 4.28E-06    | 3.40E-05    |
| ENSMMUG00000021147  | RNA binding motif protein 46 [Source:VGNC Symbol;Acc:VGNC:76555]                              | 0.588248969 | 0.000723312 | 0.003324485 |
| ENSMMUG00000005447  | guanylate cyclase 1 soluble subunit beta 1 [Source:VGNC Symbol;Acc:VGNC:73328]                | 0.525696362 | 0.006137605 | 0.021064032 |
| ENSMMUG00000057700  | acid sensing ion channel subunit family member 5 [Source:NCBI gene;Acc:699617]                | 0.576619724 | 3.94E-05    | 0.000248591 |
| ENSMMUG00000022018  | tryptophan 2,3-dioxygenase [Source:VGNC Symbol;Acc:VGNC:78298]                                | -0.53069103 | 0.001469162 | 0.006151705 |
| ENSMMUG00000064707  |                                                                                               | 1.629419804 | 1.48E-08    | 1.93E-07    |
| ENSMMUG00000053790  |                                                                                               | 2.964170234 | 4.13E-42    | 2.14E-39    |
| ENSMMUG00000010581  | Rap guanine nucleotide exchange factor 2 [Source:VGNC Symbol;Acc:VGNC:76493]                  | 1.504918044 | 0.009602335 | 0.030862606 |
| ENSMMUG00000015799  | tolloid like 1 [Source:VGNC Symbol;Acc:VGNC:78369]                                            | 0.776194929 | 0.010401804 | 0.033045877 |
| ENSMMUG00000006851  | SPARC (osteonectin), cwcv and kazal like domains proteoglycan 3 [Source:NCBI gene;Acc:705964] | 4.50933754  | 6.16E-32    | 1.39E-29    |
| ENSMMUG00000001879  | annexin A10 [Source:VGNC Symbol;Acc:VGNC:69945]                                               | 0.63624317  | 8.20E-05    | 0.00047831  |
| ENSMMUG00000001880  | DExD/H-box helicase 60 [Source:VGNC Symbol;Acc:VGNC:71711]                                    | 0.45612019  | 0.001426452 | 0.005999741 |
| ENSMMUG00000003634  | DExD/H-box 60 like [Source:VGNC Symbol;Acc:VGNC:71720]                                        | 1.612687674 | 3.87E-10    | 6.62E-09    |
| ENSMMUG00000016767  | polypeptide N-acetylgalactosaminyltransferase like 6 [Source:VGNC Symbol;Acc:VGNC:72813]      | 1.142273099 | 0.000342312 | 0.001720515 |
| ENSMMUG00000013730  | WD repeat domain 17 [Source:NCBI gene;Acc:700546]                                             | 0.307416036 | 0.009228786 | 0.029915687 |
| ENSMMUG00000064304  |                                                                                               | 0.391162115 | 0.007240746 | 0.024349395 |
| ENSMMUG00000058974  |                                                                                               | 1.176834953 | 0.000910902 | 0.004062844 |
| ENSMMUG00000049670  |                                                                                               | 3.708488341 | 0.003865836 | 0.014198696 |
| ENSMMUG00000034845  | U4 spliceosomal RNA [Source:RFAM;Acc:RF00015]                                                 | 2.352198207 | 0.014214696 | 0.043061716 |
| ENSMMUG00000011633  | kallikrein B1 [Source:VGNC Symbol;Acc:VGNC:74195]                                             | 2.43703542  | 5.15E-06    | 4.00E-05    |
| ENSMMUG00000011634  | coagulation factor XI [Source:VGNC Symbol;Acc:VGNC:72460]                                     | 2.247450463 | 0.000657036 | 0.003055032 |
| ENSMMUG00000018051  | FAT atypical cadherin 1 [Source:VGNC Symbol;Acc:VGNC:72617]                                   | 0.678384693 | 1.01E-07    | 1.13E-06    |
| ENSMMUG00000058448  |                                                                                               | 0.577116122 | 0.003544388 | 0.013152409 |
| ENSMMUG00000050465  | ZFP42 zinc finger protein [Source:NCBI gene;Acc:707621]                                       | 2.112439075 | 1.11E-12    | 2.84E-11    |
| ENSMMUG00000054799  |                                                                                               | 1.446199596 | 0.007625611 | 0.025460464 |

|                    |                                                                                                      |   |             |             |             |
|--------------------|------------------------------------------------------------------------------------------------------|---|-------------|-------------|-------------|
| ENSMMUG00000064721 |                                                                                                      | - | 2.332412703 | 0.000962987 | 0.00426531  |
| ENSMMUG00000052287 |                                                                                                      | - | 2.120518987 | 0.000138999 | 0.000770126 |
| ENSMMUG00000044628 |                                                                                                      | - | -1.89055488 | 0.000299388 | 0.001531921 |
| ENSMMUG00000015797 | disco interacting protein 2 homolog A [Source:VGNC Symbol;Acc:VGNC:71641]                            |   | 0.679376623 | 2.94E-05    | 0.000190711 |
| ENSMMUG00000052777 |                                                                                                      |   | 1.57192545  | 0.001277137 | 0.005456822 |
| ENSMMUG00000004472 | collagen type XVIII alpha 1 chain [Source:VGNC Symbol;Acc:VGNC:81291]                                |   | 1.765341184 | 0.006494194 | 0.022114638 |
| ENSMMUG00000010695 | adenosine deaminase RNA specific B1 [Source:VGNC Symbol;Acc:VGNC:69503]                              |   | 1.419231962 | 1.16E-05    | 8.32E-05    |
| ENSMMUG00000000953 | family with sequence similarity 207 member A [Source:VGNC Symbol;Acc:VGNC:72273]                     |   | 0.979887192 | 2.70E-05    | 0.000176368 |
| ENSMMUG00000000951 | integrin subunit beta 2 [Source:VGNC Symbol;Acc:VGNC:73786]                                          |   | 1.901950427 | 1.42E-24    | 1.44E-22    |
| ENSMMUG00000049755 | leucine rich repeat containing 3 [Source:NCBI gene;Acc:712418]                                       |   | 2.502629739 | 2.99E-06    | 2.44E-05    |
| ENSMMUG00000004175 | transient receptor potential cation channel subfamily M member 2 [Source:VGNC Symbol;Acc:VGNC:78655] |   | 0.80088537  | 0.011766225 | 0.036682476 |
| ENSMMUG00000004173 | phosphofructokinase, liver type [Source:VGNC Symbol;Acc:VGNC:81737]                                  |   | 0.546247466 | 0.005567036 | 0.019371351 |
| ENSMMUG00000010648 | DNA methyltransferase 3 like [Source:NCBI gene;Acc:722184]                                           |   | 2.239440301 | 1.81E-14    | 6.06E-13    |
| ENSMMUG00000010647 | inducible T cell costimulator ligand [Source:NCBI gene;Acc:722191]                                   |   | 1.267040072 | 0.000736291 | 0.003379709 |
| ENSMMUG00000005272 | glutamine amidotransferase like class 1 domain containing 3A [Source:NCBI gene;Acc:713055]           |   | 0.355563598 | 0.009256598 | 0.029985047 |
| ENSMMUG00000012304 | ribosomal RNA processing 1 [Source:VGNC Symbol;Acc:VGNC:77050]                                       |   | 0.603164256 | 0.004405987 | 0.015919907 |
| ENSMMUG00000062457 | pyridoxal kinase [Source:NCBI gene;Acc:713564]                                                       |   | 0.694995872 | 0.002151388 | 0.008592898 |
| ENSMMUG00000000104 | ribosomal RNA processing 1B [Source:VGNC Symbol;Acc:VGNC:77089]                                      |   | 0.897772198 | 1.74E-09    | 2.66E-08    |
| ENSMMUG00000009288 | PBX/knotted 1 homeobox 1 [Source:VGNC Symbol;Acc:VGNC:76150]                                         |   | -0.86711136 | 0.000935737 | 0.00415511  |
| ENSMMUG00000062729 | WD repeat domain 4 [Source:NCBI gene;Acc:714230]                                                     |   | 0.340216128 | 0.016979191 | 0.049884599 |
| ENSMMUG00000018081 | ubiquitin associated and SH3 domain containing A [Source:VGNC Symbol;Acc:VGNC:78687]                 |   | -0.6164594  | 0.005895142 | 0.020326425 |
| ENSMMUG00000018079 | transmembrane serine protease 3 [Source:VGNC Symbol;Acc:VGNC:78576]                                  |   | 0.712711785 | 0.001615898 | 0.00667641  |
| ENSMMUG00000018058 | ATP binding cassette subfamily G member 1 [Source:VGNC Symbol;Acc:VGNC:69584]                        |   | 1.080854676 | 0.000311127 | 0.001583065 |
| ENSMMUG00000018057 | uromodulin like 1 [Source:VGNC Symbol;Acc:VGNC:78717]                                                |   | 1.117753383 | 7.94E-06    | 5.93E-05    |
| ENSMMUG00000018053 | zinc finger and BTB domain containing 21 [Source:VGNC Symbol;Acc:VGNC:78892]                         |   | 0.565303771 | 0.000100532 | 0.000573773 |
| ENSMMUG00000018043 | receptor interacting serine/threonine kinase 4 [Source:VGNC Symbol;Acc:VGNC:76882]                   |   | 2.865778886 | 0.016554315 | 0.048758908 |
| ENSMMUG00000015329 | MX dynamin like GTPase 1 [Source:VGNC Symbol;Acc:VGNC:75086]                                         |   | 1.616470354 | 3.76E-05    | 0.000238283 |
| ENSMMUG00000044257 | MX dynamin like GTPase 2 [Source:VGNC Symbol;Acc:VGNC:81723]                                         |   | 2.374155435 | 3.27E-14    | 1.06E-12    |
| ENSMMUG00000004257 | beta-secretase 2 [Source:VGNC Symbol;Acc:VGNC:70216]                                                 |   | 1.930784458 | 2.82E-12    | 6.86E-11    |
| ENSMMUG00000008498 | proteasome assembly chaperone 1 [Source:VGNC Symbol;Acc:VGNC:76347]                                  |   | 0.383477233 | 0.013950626 | 0.042374755 |
| ENSMMUG00000010296 | ETS transcription factor ERG [Source:VGNC Symbol;Acc:VGNC:72427]                                     |   | 2.948953512 | 0.005320572 | 0.018657258 |
| ENSMMUG00000056593 |                                                                                                      |   | 2.78174763  | 0.000304634 | 0.001554881 |
| ENSMMUG00000017505 | tetratricopeptide repeat domain 3 [Source:VGNC Symbol;Acc:VGNC:81785]                                |   | 0.526013569 | 4.16E-06    | 3.31E-05    |
| ENSMMUG00000062048 |                                                                                                      |   | 0.707726367 | 1.61E-07    | 1.72E-06    |
| ENSMMUG00000015566 | holocarboxylase synthetase [Source:VGNC Symbol;Acc:VGNC:73477]                                       |   | 0.528548021 | 0.004506818 | 0.016229869 |
| ENSMMUG00000010336 | DOP1 leucine zipper like protein B [Source:VGNC Symbol;Acc:VGNC:71832]                               |   | 0.642565641 | 1.83E-11    | 3.91E-10    |
| ENSMMUG00000054417 |                                                                                                      |   | -1.46798637 | 8.26E-09    | 1.11E-07    |

|                    |                                                                                                                                                                |   |             |             |             |
|--------------------|----------------------------------------------------------------------------------------------------------------------------------------------------------------|---|-------------|-------------|-------------|
| ENSMMUG0000007626  | intersectin 1 [Source:VGNC Symbol;Acc:VGNC:73806]                                                                                                              | - | 1.061376622 | 4.07E-05    | 0.00025562  |
| ENSMMUG0000005511  | SON DNA binding protein [Source:VGNC Symbol;Acc:VGNC:77689]                                                                                                    | - | 1.436419561 | 4.20E-07    | 4.13E-06    |
| ENSMMUG00000022702 | phosphoribosylglycinamide formyltransferase, phosphoribosylglycinamide synthetase, phosphoribosylaminoimidazole synthetase [Source:VGNC Symbol;Acc:VGNC:72882] | - | 0.839131171 | 0.005668341 | 0.019658895 |
| ENSMMUG0000005509  | transmembrane protein 50B [Source:NCBI gene;Acc:699352]                                                                                                        | - | 0.431970451 | 0.000151162 | 0.000831928 |
| ENSMMUG0000005508  | interferon gamma receptor 2 [Source:VGNC Symbol;Acc:VGNC:73569]                                                                                                | - | 0.336029079 | 0.002557197 | 0.009963762 |
| ENSMMUG0000003961  | interferon alpha and beta receptor subunit 1 [Source:VGNC Symbol;Acc:VGNC:73566]                                                                               | - | 0.614380719 | 0.001755288 | 0.00717312  |
| ENSMMUG0000003956  | interferon alpha and beta receptor subunit 2 [Source:VGNC Symbol;Acc:VGNC:81330]                                                                               | - | 0.441256806 | 0.007360317 | 0.024680468 |
| ENSMMUG00000065005 | Metazoan signal recognition particle RNA [Source:RFAM;Acc:RF00017]                                                                                             | - | 0.974188237 | 0.00122433  | 0.005263266 |
| ENSMMUG00000052780 |                                                                                                                                                                | - | 0.91400556  | 1.90E-07    | 1.99E-06    |
| ENSMMUG00000027541 | Small nucleolar RNA SNORA70 [Source:RFAM;Acc:RF00156]                                                                                                          | - | 3.060626222 | 0.000263078 | 0.001371941 |
| ENSMMUG0000004624  | synaptojanin 1 [Source:VGNC Symbol;Acc:VGNC:78071]                                                                                                             | - | -0.69233611 | 3.06E-05    | 0.000198259 |
| ENSMMUG00000010304 | cilia and flagella associated protein 298 [Source:NCBI gene;Acc:700721]                                                                                        | - | 0.752660907 | 1.45E-07    | 1.56E-06    |
| ENSMMUG00000048824 | eva-1 homolog C [Source:NCBI gene;Acc:708681]                                                                                                                  | - | 1.259611216 | 1.95E-18    | 1.06E-16    |
| ENSMMUG00000059707 | MIS18 kinetochore protein A [Source:NCBI gene;Acc:709275]                                                                                                      | - | 1.705062839 | 7.22E-05    | 0.000426687 |
| ENSMMUG00000056363 |                                                                                                                                                                | - | 1.903925906 | 1.77E-05    | 0.000120951 |
| ENSMMUG00000011095 | BTB domain and CNC homolog 1 [Source:VGNC Symbol;Acc:VGNC:70217]                                                                                               | - | 1.539977394 | 0.011937717 | 0.037126325 |
| ENSMMUG00000033200 | Small nucleolar RNA U3 [Source:RFAM;Acc:RF00012]                                                                                                               | - | 2.435571022 | 0.012039112 | 0.037367082 |
| ENSMMUG00000061208 | MAP3K7 C-terminal like [Source:NCBI gene;Acc:713717]                                                                                                           | - | 1.621708883 | 4.41E-24    | 4.17E-22    |
| ENSMMUG00000064638 | Y RNA [Source:RFAM;Acc:RF00019]                                                                                                                                | - | 2.470708566 | 0.004555881 | 0.016385514 |
| ENSMMUG00000017605 | mitochondrial ribosomal protein L39 [Source:VGNC Symbol;Acc:VGNC:74737]                                                                                        | - | 1.161545234 | 6.01E-09    | 8.39E-08    |
| ENSMMUG00000018743 | ubiquitin specific peptidase 25 [Source:VGNC Symbol;Acc:VGNC:78744]                                                                                            | - | 3.237660051 | 0.000352714 | 0.001760809 |
| ENSMMUG00000060576 |                                                                                                                                                                | - | 1.29606748  | 4.96E-07    | 4.79E-06    |
| ENSMMUG00000057702 |                                                                                                                                                                | - | 1.208602813 | 9.47E-07    | 8.60E-06    |
| ENSMMUG00000060168 |                                                                                                                                                                | - | 1.119267921 | 1.78E-05    | 0.000121921 |
| ENSMMUG00000052328 | FAM20C golgi associated secretory pathway kinase [Source:NCBI gene;Acc:695088]                                                                                 | - | -2.07221767 | 2.47E-06    | 2.05E-05    |
| ENSMMUG00000018261 | dynein axonemal assembly factor 5 [Source:VGNC Symbol;Acc:VGNC:71907]                                                                                          | - | 0.706583746 | 0.000611716 | 0.002886304 |
| ENSMMUG00000017056 | Sad1 and UNC84 domain containing 1 [Source:VGNC Symbol;Acc:VGNC:78161]                                                                                         | - | 3.344052302 | 2.92E-09    | 4.31E-08    |
| ENSMMUG00000007206 | chromosome 3 C7orf50 homolog [Source:VGNC Symbol;Acc:VGNC:70609]                                                                                               | - | 2.174763782 | 0.000449793 | 0.002196184 |
| ENSMMUG00000003283 | extracellular leucine rich repeat and fibronectin type III domain containing 1 [Source:VGNC Symbol;Acc:VGNC:72204]                                             | - | 1.132100639 | 1.03E-10    | 1.96E-09    |
| ENSMMUG00000055562 | Metazoan signal recognition particle RNA [Source:RFAM;Acc:RF00017]                                                                                             | - | 1.455777999 | 0.009990846 | 0.031957489 |
| ENSMMUG00000022624 | putative speedy protein E16 [Source:NCBI gene;Acc:718058]                                                                                                      | - | 1.330446331 | 9.51E-09    | 1.28E-07    |
| ENSMMUG00000015546 | chromosome 3 C7orf26 homolog [Source:VGNC Symbol;Acc:VGNC:70604]                                                                                               | - | 0.731539943 | 0.009550066 | 0.030765122 |
| ENSMMUG00000021839 | Grid2 interacting protein [Source:VGNC Symbol;Acc:VGNC:73191]                                                                                                  | - | 0.853315787 | 3.95E-05    | 0.000248847 |
| ENSMMUG00000021075 | Rac family small GTPase 1 [Source:NCBI gene;Acc:717755]                                                                                                        | - | 1.247536142 | 6.69E-16    | 2.69E-14    |
| ENSMMUG00000003167 | cytohesin 3 [Source:VGNC Symbol;Acc:VGNC:71829]                                                                                                                | - | 1.544203099 | 3.46E-14    | 1.12E-12    |
| ENSMMUG00000030422 | radial spoke head 10 homolog B [Source:NCBI gene;Acc:100424218]                                                                                                | - | 0.744750596 | 5.56E-07    | 5.33E-06    |
| ENSMMUG00000007970 | CCZ1 homolog, vacuolar protein trafficking and biogenesis associated [Source:NCBI gene;Acc:718128]                                                             | - | 1.305790309 | 1.16E-07    | 1.28E-06    |
| ENSMMUG00000015477 | lemur tyrosine kinase 2 [Source:VGNC Symbol;Acc:VGNC:74309]                                                                                                    | - | 0.854948938 | 1.48E-07    | 1.58E-06    |
| ENSMMUG00000015479 | tectonin beta-propeller repeat containing 1 [Source:VGNC Symbol;Acc:VGNC:79348]                                                                                | - | 1.073459667 | 1.16E-25    | 1.34E-23    |
| ENSMMUG00000013276 | BAR/IMD domain containing adaptor protein 2 like 1 [Source:VGNC Symbol;Acc:VGNC:70109]                                                                         | - | 0.587784806 | 0.005764251 | 0.01994377  |

|                    |                                                                                                    |             |             |             |
|--------------------|----------------------------------------------------------------------------------------------------|-------------|-------------|-------------|
| ENSMMUG00000023318 | transformation/transcription domain associated protein [Source:VGNC Symbol;Acc:VGNC:78657]         | 0.391225145 | 0.000502211 | 0.002421767 |
| ENSMMUG00000040393 | zinc finger protein 655 [Source:NCBI gene;Acc:718811]                                              | 3.03922841  | 7.45E-12    | 1.71E-10    |
| ENSMMUG00000055483 | transmembrane protein 225B [Source:NCBI gene;Acc:718838]                                           | 2.296411849 | 0.002231183 | 0.008855895 |
| ENSMMUG00000022728 | zinc finger and SCAN domain containing 25 [Source:VGNC Symbol;Acc:VGNC:79344]                      | 1.744818351 | 7.31E-09    | 1.00E-07    |
| ENSMMUG00000022730 | cytochrome P450, family 3, subfamily A, polypeptide 5 [Source:NCBI gene;Acc:678692]                | 0.967655846 | 4.27E-07    | 4.19E-06    |
|                    |                                                                                                    | -           |             |             |
| ENSMMUG00000022490 | cytochrome P450, family 3, subfamily A, polypeptide 43 [Source:NCBI gene;Acc:709770]               | 0.687744837 | 1.33E-07    | 1.44E-06    |
|                    |                                                                                                    | -           |             |             |
| ENSMMUG00000022502 | tripartite motif containing 4 [Source:VGNC Symbol;Acc:VGNC:79021]                                  | 0.697405045 | 0.003458391 | 0.01286052  |
| ENSMMUG00000022504 | alpha-2-glycoprotein 1, zinc-binding [Source:VGNC Symbol;Acc:VGNC:70201]                           | 0.578695846 | 0.000727804 | 0.003344033 |
| ENSMMUG00000013447 | adaptor related protein complex 4 subunit mu 1 [Source:VGNC Symbol;Acc:VGNC:69974]                 | 1.017781924 | 0.000796458 | 0.003635655 |
| ENSMMUG00000013450 | TATA-box binding protein associated factor 6 [Source:VGNC Symbol;Acc:VGNC:78093]                   | 2.395956154 | 1.65E-10    | 3.03E-09    |
|                    |                                                                                                    | -           |             |             |
| ENSMMUG00000046663 | Metazoan signal recognition particle RNA [Source:RFAM;Acc:RF00017]                                 | 1.037766093 | 3.72E-06    | 2.99E-05    |
| ENSMMUG00000048302 | ArfGAP with FG repeats 2 [Source:VGNC Symbol;Acc:VGNC:80329]                                       | -1.13136939 | 3.56E-15    | 1.31E-13    |
| ENSMMUG00000015311 | leucine rich repeats and calponin homology domain containing 4 [Source:VGNC Symbol;Acc:VGNC:74441] | -1.21745993 | 8.29E-21    | 5.56E-19    |
|                    |                                                                                                    | -           |             |             |
| ENSMMUG00000015309 | F-box protein 24 [Source:VGNC Symbol;Acc:VGNC:72495]                                               | 1.107328075 | 3.34E-15    | 1.23E-13    |
|                    |                                                                                                    | -           |             |             |
| ENSMMUG00000002947 | procollagen C-endopeptidase enhancer [Source:VGNC Symbol;Acc:VGNC:75782]                           | 1.132373263 | 7.28E-19    | 4.05E-17    |
| ENSMMUG00000002949 | motile sperm domain containing 3 [Source:VGNC Symbol;Acc:VGNC:74823]                               | 2.156630219 | 6.71E-11    | 1.31E-09    |
| ENSMMUG00000002950 | transferrin receptor 2 [Source:VGNC Symbol;Acc:VGNC:81770]                                         | 2.212937813 | 3.87E-13    | 1.06E-11    |
|                    |                                                                                                    | -           |             |             |
| ENSMMUG00000004080 | G protein subunit beta 2 [Source:VGNC Symbol;Acc:VGNC:81318]                                       | 1.983472351 | 0.0024664   | 0.009659545 |
|                    |                                                                                                    | -           |             |             |
| ENSMMUG00000004082 | GRB10 interacting GYF protein 1 [Source:VGNC Symbol;Acc:VGNC:73158]                                | 0.982655211 | 0.00874842  | 0.028643262 |
| ENSMMUG00000022840 | zonadhesin [Source:VGNC Symbol;Acc:VGNC:81797]                                                     | -0.66515603 | 0.00214169  | 0.008561267 |
| ENSMMUG00000052734 |                                                                                                    | 2.182586035 | 0.011689925 | 0.036494251 |
| ENSMMUG00000060459 |                                                                                                    | 0.527687921 | 6.27E-05    | 0.000376653 |
| ENSMMUG00000010329 | SH2B adaptor protein 2 [Source:VGNC Symbol;Acc:VGNC:77257]                                         | 3.62859814  | 0.009818195 | 0.03145546  |
|                    |                                                                                                    | -           |             |             |
| ENSMMUG00000063570 | Metazoan signal recognition particle RNA [Source:RFAM;Acc:RF00017]                                 | 3.154478916 | 0.001517994 | 0.006325952 |
|                    |                                                                                                    | -           |             |             |
| ENSMMUG00000011367 | BUD23 rRNA methyltransferase and ribosome maturation factor [Source:VGNC Symbol;Acc:VGNC:70325]    | 3.321507898 | 0.000997403 | 0.004402451 |
| ENSMMUG00000056841 |                                                                                                    | 1.305007327 | 0.001219346 | 0.005246668 |
| ENSMMUG00000050132 |                                                                                                    | 1.28080661  | 1.99E-08    | 2.54E-07    |
| ENSMMUG00000056980 |                                                                                                    | 1.831600367 | 0.002790301 | 0.010728927 |
|                    |                                                                                                    | -           |             |             |
| ENSMMUG00000001225 | calneuron 1 [Source:VGNC Symbol;Acc:VGNC:82078]                                                    | 1.390969346 | 0.000170154 | 0.000924472 |
| ENSMMUG00000061002 |                                                                                                    | -0.78536878 | 0.005713684 | 0.019798121 |
|                    |                                                                                                    | -           |             |             |
| ENSMMUG00000021235 | vitamin K epoxide reductase complex subunit 1 like 1 [Source:VGNC Symbol;Acc:VGNC:79322]           | 1.026868897 | 0.004516183 | 0.016259419 |
|                    |                                                                                                    | -           |             |             |
| ENSMMUG00000049696 |                                                                                                    | 0.286157385 | 0.003938427 | 0.014442616 |
|                    |                                                                                                    | -           |             |             |
| ENSMMUG00000051107 |                                                                                                    | 1.251386666 | 0.002953339 | 0.011257046 |
| ENSMMUG00000060184 | SEC61 translocon subunit gamma [Source:NCBI gene;Acc:716898]                                       | 3.98994446  | 8.98E-07    | 8.19E-06    |
| ENSMMUG00000056368 |                                                                                                    | 0.368431946 | 0.001340801 | 0.005682095 |
| ENSMMUG00000019991 | dopa decarboxylase [Source:VGNC Symbol;Acc:VGNC:71755]                                             | 1.069663968 | 3.67E-25    | 3.99E-23    |
|                    |                                                                                                    | -           |             |             |
| ENSMMUG00000049620 |                                                                                                    | 0.834260881 | 0.014171615 | 0.042968335 |
|                    |                                                                                                    | -           |             |             |
| ENSMMUG00000044759 |                                                                                                    | 1.086355331 | 2.75E-10    | 4.86E-09    |

|                    |                                                                                                     |             |             |             |
|--------------------|-----------------------------------------------------------------------------------------------------|-------------|-------------|-------------|
| ENSMMUG00000043922 | spermatogenesis associated 48 [Source:VGNC Symbol;Acc:VGNC:81762]                                   | 0.786574097 | 6.23E-11    | 1.22E-09    |
| ENSMMUG00000019393 | tensin 3 [Source:VGNC Symbol;Acc:VGNC:79324]                                                        | 3.308229035 | 0.000231402 | 0.001222205 |
| ENSMMUG00000050300 |                                                                                                     | 1.405204263 | 0.000166529 | 0.000906961 |
| ENSMMUG00000000962 | H2A.Z variant histone 2 [Source:VGNC Symbol;Acc:VGNC:81324]                                         | 0.704059471 | 0.002515853 | 0.00981904  |
| ENSMMUG00000064180 |                                                                                                     | 0.553030333 | 0.01663505  | 0.048945301 |
| ENSMMUG00000057027 |                                                                                                     | 0.73057842  | 0.016933951 | 0.049782975 |
| ENSMMUG00000002433 | calcium/calmodulin dependent protein kinase II beta [Source:VGNC Symbol;Acc:VGNC:70524]             | 1.422312175 | 0.005212537 | 0.018338036 |
| ENSMMUG00000002430 | YKT6 v-SNARE homolog [Source:VGNC Symbol;Acc:VGNC:81796]                                            | 1.466056067 | 0.002122888 | 0.008500643 |
| ENSMMUG00000002427 | glucokinase [Source:VGNC Symbol;Acc:VGNC:72901]                                                     | 1.484207007 | 2.47E-14    | 8.18E-13    |
| ENSMMUG00000002411 | drebrin like [Source:NCBI gene;Acc:720621]                                                          | 1.637173193 | 4.90E-14    | 1.56E-12    |
| ENSMMUG00000002426 | myosin light chain 7 [Source:VGNC Symbol;Acc:VGNC:75002]                                            | 1.533442178 | 6.42E-21    | 4.37E-19    |
| ENSMMUG00000002423 | DNA polymerase delta 2, accessory subunit [Source:VGNC Symbol;Acc:VGNC:76203]                       | 1.586345646 | 6.73E-15    | 2.39E-13    |
| ENSMMUG00000002422 | AE binding protein 1 [Source:VGNC Symbol;Acc:VGNC:80328]                                            | 1.606612567 | 2.84E-10    | 4.98E-09    |
| ENSMMUG00000019023 | cytochrome c oxidase assembly factor 1 homolog [Source:VGNC Symbol;Acc:VGNC:81290]                  | 0.778828479 | 0.000279744 | 0.00144488  |
| ENSMMUG00000017382 | biliverdin reductase A [Source:VGNC Symbol;Acc:VGNC:70256]                                          | 0.699936055 | 2.07E-09    | 3.16E-08    |
| ENSMMUG00000019022 | serine/threonine kinase 17a [Source:VGNC Symbol;Acc:VGNC:77913]                                     | 0.811931327 | 3.99E-12    | 9.44E-11    |
| ENSMMUG00000019015 | HECT, C2 and WW domain containing E3 ubiquitin protein ligase 1 [Source:VGNC Symbol;Acc:VGNC:73217] | 0.702822718 | 5.84E-09    | 8.18E-08    |
| ENSMMUG00000057956 |                                                                                                     | 0.543353796 | 0.004955087 | 0.017600099 |
| ENSMMUG00000024428 | Y RNA [Source:RFAM;Acc:RF00019]                                                                     | 1.778894752 | 0.001673712 | 0.006890917 |
| ENSMMUG00000053696 | Metazoan signal recognition particle RNA [Source:RFAM;Acc:RF00017]                                  | 1.542391563 | 0.000964112 | 0.004268067 |
| ENSMMUG00000060273 | mitochondrial ribosomal protein L32 [Source:NCBI gene;Acc:701820]                                   | 1.66995427  | 7.07E-08    | 8.12E-07    |
| ENSMMUG00000022451 | proteasome 20S subunit alpha 2 [Source:NCBI gene;Acc:701683]                                        | 1.201248899 | 0.004987852 | 0.017671714 |
| ENSMMUG00000052530 |                                                                                                     | 1.98082166  | 0.000302188 | 0.001544307 |
| ENSMMUG00000001702 | succinyl-CoA:glutarate-CoA transferase [Source:VGNC Symbol;Acc:VGNC:81767]                          | 0.815439045 | 8.69E-05    | 0.000502762 |
| ENSMMUG00000006980 | septin 7 [Source:VGNC Symbol;Acc:VGNC:81759]                                                        | 2.226165635 | 0.001031159 | 0.004530059 |
| ENSMMUG00000001350 | HERPUD family member 2 [Source:VGNC Symbol;Acc:VGNC:73216]                                          | 2.252843067 | 4.54E-26    | 5.64E-24    |
| ENSMMUG00000058423 |                                                                                                     | 2.936621968 | 7.54E-17    | 3.38E-15    |
| ENSMMUG00000002886 | Bardet-Biedl syndrome 9 [Source:NCBI gene;Acc:708412]                                               | 1.361039092 | 1.86E-08    | 2.39E-07    |
| ENSMMUG00000050858 | Metazoan signal recognition particle RNA [Source:RFAM;Acc:RF00017]                                  | 0.891159943 | 0.004044881 | 0.014778888 |
| ENSMMUG00000022484 | ITPR interacting domain containing 1 [Source:VGNC Symbol;Acc:VGNC:73667]                            | 3.022520453 | 1.71E-05    | 0.000117396 |
| ENSMMUG00000055809 |                                                                                                     | 3.063479228 | 3.23E-12    | 7.76E-11    |
| ENSMMUG00000062454 |                                                                                                     | 1.930102653 | 1.07E-28    | 1.68E-26    |
| ENSMMUG00000039009 |                                                                                                     | 1.866734931 | 1.25E-13    | 3.66E-12    |
| ENSMMUG00000032973 | mml-mir-550 [Source:miRBase;Acc:MI0007826]                                                          | 1.501371146 | 3.50E-07    | 3.51E-06    |
| ENSMMUG00000020184 | carboxypeptidase vitellogenic like [Source:VGNC Symbol;Acc:VGNC:71406]                              | 1.547998458 | 7.81E-06    | 5.84E-05    |
| ENSMMUG00000039317 | cAMP responsive element binding protein 5 [Source:VGNC Symbol;Acc:VGNC:81295]                       | 2.613427517 | 3.60E-07    | 3.60E-06    |
| ENSMMUG00000052176 |                                                                                                     | 3.485591893 | 0.008305292 | 0.027403556 |
| ENSMMUG00000065311 | translocase of outer mitochondrial membrane 7 [Source:NCBI gene;Acc:705701]                         | 1.956460059 | 0.004773793 | 0.017046829 |
| ENSMMUG00000042472 | Metazoan signal recognition particle RNA [Source:RFAM;Acc:RF00017]                                  | 0.778646199 | 0.000917273 | 0.004079583 |
| ENSMMUG00000007821 | ATP binding cassette subfamily B member 5 [Source:VGNC Symbol;Acc:VGNC:80321]                       | 2.602410361 | 6.15E-18    | 3.09E-16    |

|                     |                                                                                                            |   |             |             |             |
|---------------------|------------------------------------------------------------------------------------------------------------|---|-------------|-------------|-------------|
| ENSMMUG00000006898  | integrin subunit beta 8 [Source:VGNC Symbol;Acc:VGNC:73791]                                                | - | 2.724232113 | 1.80E-22    | 1.42E-20    |
| ENSMMUG000000052574 |                                                                                                            | - | 1.242479027 | 4.93E-13    | 1.34E-11    |
| ENSMMUG00000012203  | aryl hydrocarbon receptor [Source:NCBI gene;Acc:714254]                                                    | - | 1.224399093 | 3.72E-07    | 3.71E-06    |
| ENSMMUG00000020418  | diacylglycerol kinase beta [Source:VGNC Symbol;Acc:VGNC:71782]                                             | - | 0.771929673 | 0.013771885 | 0.041928602 |
| ENSMMUG00000008632  | myosin, light chain 6, alkali, smooth muscle and non-muscle-like [Source:NCBI gene;Acc:710137]             | - | 1.109727665 | 0.00587847  | 0.020288896 |
| ENSMMUG00000012694  | thrombospondin type 1 domain containing 7A [Source:VGNC Symbol;Acc:VGNC:79347]                             | - | 1.129431413 | 0.013173003 | 0.040341782 |
| ENSMMUG000000041616 | G protein subunit gamma 11 [Source:VGNC Symbol;Acc:VGNC:81319]                                             | - | 2.852528284 | 0.015188239 | 0.045402829 |
| ENSMMUG000000045513 |                                                                                                            | - | 1.815757197 | 2.77E-06    | 2.27E-05    |
| ENSMMUG00000015685  | zinc finger protein 804B [Source:VGNC Symbol;Acc:VGNC:81890]                                               | - | 1.389336082 | 3.08E-19    | 1.77E-17    |
| ENSMMUG00000022697  | STEAP4 metalloredutase [Source:VGNC Symbol;Acc:VGNC:77974]                                                 | - | 1.175129145 | 2.46E-12    | 6.02E-11    |
| ENSMMUG00000022696  | sorcin [Source:VGNC Symbol;Acc:VGNC:81763]                                                                 | - | 0.38771509  | 0.000900819 | 0.004026835 |
| ENSMMUG00000006766  | RUN domain containing 3B [Source:VGNC Symbol;Acc:VGNC:77129]                                               | - | 0.968907752 | 0.000229412 | 0.001213063 |
| ENSMMUG00000010788  | ATP binding cassette subfamily B member 1 [Source:NCBI gene;Acc:574235]                                    | - | 0.860372152 | 7.85E-07    | 7.28E-06    |
| ENSMMUG00000000480  | KIAA1324 like [Source:VGNC Symbol;Acc:VGNC:73882]                                                          | - | 2.55794187  | 0.002612877 | 0.010152501 |
| ENSMMUG00000022513  | glutamate metabotropic receptor 3 [Source:VGNC Symbol;Acc:VGNC:73287]                                      | - | 1.22357661  | 2.09E-05    | 0.000140918 |
| ENSMMUG00000001979  | semaphorin 3E [Source:VGNC Symbol;Acc:VGNC:77163]                                                          | - | 1.631892824 | 0.010416484 | 0.033077527 |
| ENSMMUG00000018652  | hepatocyte growth factor [Source:VGNC Symbol;Acc:VGNC:73373]                                               | - | 0.505036685 | 0.000631269 | 0.002954283 |
| ENSMMUG000000053516 |                                                                                                            | - | 1.26514001  | 8.21E-05    | 0.00047831  |
| ENSMMUG000000064838 | G protein subunit alpha transducin 3 [Source:NCBI gene;Acc:708828]                                         | - | 0.635540085 | 0.002203764 | 0.008769405 |
| ENSMMUG00000001801  | membrane associated guanylate kinase, WW and PDZ domain containing 2 [Source:VGNC Symbol;Acc:VGNC:74312]   | - | 0.558685449 | 0.000769156 | 0.003517896 |
| ENSMMUG000000049939 |                                                                                                            | - | 0.940498023 | 1.15E-09    | 1.81E-08    |
| ENSMMUG00000009006  | round spermatid basic protein 1 like [Source:VGNC Symbol;Acc:VGNC:77097]                                   | - | -1.14320623 | 1.53E-10    | 2.84E-09    |
| ENSMMUG00000012427  | F-box and leucine rich repeat protein 13 [Source:VGNC Symbol;Acc:VGNC:81312]                               | - | 0.606728841 | 5.47E-05    | 0.000333299 |
| ENSMMUG00000022727  | lysine methyltransferase 2E [Source:VGNC Symbol;Acc:VGNC:74073]                                            | - | 2.854253663 | 0.000514816 | 0.002473196 |
| ENSMMUG00000022732  | SRSF protein kinase 2 [Source:VGNC Symbol;Acc:VGNC:81764]                                                  | - | 0.862457366 | 8.94E-07    | 8.17E-06    |
| ENSMMUG00000008189  | cadherin related family member 3 [Source:HGNC Symbol;Acc:HGNC:26308]                                       | - | 1.443664033 | 2.15E-15    | 8.10E-14    |
| ENSMMUG00000019593  | synaptophysin like 1 [Source:VGNC Symbol;Acc:VGNC:78073]                                                   | - | 2.807032589 | 0.007132428 | 0.024025473 |
| ENSMMUG00000003572  | nicotinamide phosphoribosyltransferase [Source:VGNC Symbol;Acc:VGNC:75056]                                 | - | 1.924928982 | 4.62E-20    | 2.80E-18    |
| ENSMMUG00000011385  | phosphatidylinositol-4,5-bisphosphate 3-kinase catalytic subunit gamma [Source:VGNC Symbol;Acc:VGNC:75998] | - | 0.683183412 | 1.50E-05    | 0.000104437 |
| ENSMMUG000000062092 |                                                                                                            | - | 3.735264965 | 2.68E-05    | 0.000175694 |
| ENSMMUG000000058817 |                                                                                                            | - | 3.441632935 | 2.50E-30    | 4.56E-28    |
| ENSMMUG00000002894  | dedicator of cytokinesis 4 [Source:VGNC Symbol;Acc:VGNC:71866]                                             | - | 0.937195401 | 6.71E-05    | 0.000399043 |
| ENSMMUG00000011269  | CF transmembrane conductance regulator [Source:VGNC Symbol;Acc:VGNC:71020]                                 | - | 1.133565611 | 1.02E-09    | 1.62E-08    |
| ENSMMUG00000023310  | tetraspanin 12 [Source:VGNC Symbol;Acc:VGNC:79328]                                                         | - | 2.705594299 | 0.010503347 | 0.033323174 |
| ENSMMUG00000002434  | inhibitor of growth family member 3 [Source:VGNC Symbol;Acc:VGNC:73595]                                    | - | 1.450453274 | 2.35E-05    | 0.000156256 |
| ENSMMUG00000002428  | zinc finger protein 800 [Source:VGNC Symbol;Acc:VGNC:79658]                                                | - | 1.119010082 | 2.62E-07    | 2.68E-06    |
| ENSMMUG00000015432  | staphylococcal nuclease and tudor domain containing 1 [Source:VGNC Symbol;Acc:VGNC:77798]                  | - | 0.667188641 | 0.000624794 | 0.002931241 |

|                    |                                                                                   |   |             |             |             |
|--------------------|-----------------------------------------------------------------------------------|---|-------------|-------------|-------------|
| ENSMMUG0000007250  | RNA binding motif protein 28 [Source:VGNC Symbol;Acc:VGNC:76519]                  | - | 0.795829816 | 0.00028751  | 0.001478999 |
| ENSMMUG00000037473 | proline rich transmembrane protein 4 [Source:VGNC Symbol;Acc:VGNC:81746]          | - | 0.539680388 | 0.002200496 | 0.008758887 |
| ENSMMUG00000018478 | interferon regulatory factor 5 [Source:VGNC Symbol;Acc:VGNC:73763]                | - | 1.599867716 | 1.56E-10    | 2.88E-09    |
| ENSMMUG00000012110 | smoothened, frizzled class receptor [Source:VGNC Symbol;Acc:VGNC:77658]           | - | 1.168267001 | 4.33E-08    | 5.16E-07    |
| ENSMMUG00000017542 | ubiquitin conjugating enzyme E2 H [Source:VGNC Symbol;Acc:VGNC:78696]             | - | 0.650146203 | 0.000214362 | 0.001139502 |
| ENSMMUG00000010060 | serine rich single-pass membrane protein 1 [Source:VGNC Symbol;Acc:VGNC:78014]    | - | 1.663203579 | 1.55E-05    | 0.000107553 |
| ENSMMUG00000009495 | carboxypeptidase A1 [Source:VGNC Symbol;Acc:VGNC:71455]                           | - | 0.960800072 | 0.001488332 | 0.006217121 |
| ENSMMUG00000009499 | mesoderm specific transcript [Source:VGNC Symbol;Acc:VGNC:74707]                  | - | 3.82961002  | 3.46E-38    | 1.28E-35    |
| ENSMMUG00000004801 | COPI coat complex subunit gamma 2 [Source:VGNC Symbol;Acc:VGNC:71315]             | - | 3.999281949 | 5.49E-52    | 6.41E-49    |
| ENSMMUG00000000917 | aldo-keto reductase family 1 member B [Source:NCBI gene;Acc:705957]               | - | 2.064187027 | 3.26E-06    | 2.65E-05    |
| ENSMMUG00000037485 |                                                                                   | - | 3.106135686 | 0.001000801 | 0.004411861 |
| ENSMMUG00000054821 |                                                                                   | - | 2.811169052 | 0.000637417 | 0.002975871 |
| ENSMMUG00000006530 | ATP/GTP binding protein like 3 [Source:VGNC Symbol;Acc:VGNC:69723]                | - | 1.162284681 | 8.29E-18    | 4.09E-16    |
| ENSMMUG00000050339 | Metazoan signal recognition particle RNA [Source:RFAM;Acc:RF00017]                | - | 2.232682376 | 8.82E-11    | 1.69E-09    |
| ENSMMUG00000062419 |                                                                                   | - | 1.5645648   | 0.013684046 | 0.041706451 |
| ENSMMUG00000016384 | nucleoporin 205 [Source:VGNC Symbol;Acc:VGNC:75432]                               | - | 0.734329505 | 0.001069157 | 0.00468086  |
| ENSMMUG00000064014 |                                                                                   | - | 3.020745903 | 0.001747696 | 0.007145174 |
| ENSMMUG00000002995 | tripartite motif containing 24 [Source:VGNC Symbol;Acc:VGNC:78562]                | - | 0.903181066 | 1.34E-06    | 1.17E-05    |
| ENSMMUG00000006547 | ATPase H+ transporting V0 subunit a4 [Source:VGNC Symbol;Acc:VGNC:70189]          | - | 2.963007578 | 0.000152015 | 0.000835961 |
| ENSMMUG00000006548 | KIAA1549 [Source:VGNC Symbol;Acc:VGNC:73885]                                      | - | 2.944429302 | 1.67E-05    | 0.000114793 |
| ENSMMUG00000006550 | zinc finger CCCH-type containing, antiviral 1 [Source:VGNC Symbol;Acc:VGNC:79408] | - | 0.35836322  | 0.002324384 | 0.009156018 |
| ENSMMUG00000002481 | homeodomain interacting protein kinase 2 [Source:VGNC Symbol;Acc:VGNC:73391]      | - | 0.687172779 | 0.009513937 | 0.030676924 |
| ENSMMUG00000004222 | thromboxane A synthase 1 [Source:VGNC Symbol;Acc:VGNC:78278]                      | - | 0.760535281 | 8.89E-07    | 8.12E-06    |
| ENSMMUG00000052228 | Metazoan signal recognition particle RNA [Source:RFAM;Acc:RF00017]                | - | 2.571210639 | 6.08E-06    | 4.68E-05    |
| ENSMMUG00000004224 | poly(ADP-ribose) polymerase family member 12 [Source:VGNC Symbol;Acc:VGNC:81734]  | - | 0.754963357 | 4.23E-06    | 3.37E-05    |
| ENSMMUG00000056175 |                                                                                   | - | 0.781769332 | 1.26E-06    | 1.12E-05    |
| ENSMMUG00000008126 | lysine demethylase 7A [Source:VGNC Symbol;Acc:VGNC:73886]                         | - | 0.748846409 | 3.78E-08    | 4.58E-07    |
| ENSMMUG00000010420 | makorin ring finger protein 1 [Source:VGNC Symbol;Acc:VGNC:81476]                 | - | 0.642440601 | 0.00498481  | 0.017669867 |
| ENSMMUG00000042299 | DENN domain containing 2A [Source:VGNC Symbol;Acc:VGNC:81302]                     | - | 2.655369201 | 0.001534147 | 0.006376212 |
| ENSMMUG00000015282 | aarF domain containing kinase 2 [Source:VGNC Symbol;Acc:VGNC:69473]               | - | 0.524770673 | 0.00034966  | 0.001747365 |
| ENSMMUG00000042793 | B-Raf proto-oncogene, serine/threonine kinase [Source:NCBI gene;Acc:693554]       | - | 0.694198494 | 0.002149047 | 0.008588228 |
| ENSMMUG00000060893 |                                                                                   | - | 1.369532879 | 0.000916327 | 0.004076666 |
| ENSMMUG00000064529 |                                                                                   | - | 1.820334557 | 7.36E-14    | 2.25E-12    |
| ENSMMUG00000021017 | acylglycerol kinase [Source:VGNC Symbol;Acc:VGNC:69669]                           | - | 1.177865345 | 9.25E-20    | 5.49E-18    |
| ENSMMUG00000022442 | single stranded DNA binding protein 1 [Source:VGNC Symbol;Acc:VGNC:77886]         | - | 1.112959541 | 1.32E-09    | 2.06E-08    |
| ENSMMUG00000055710 | taste 2 receptor member 38 [Source:NCBI gene;Acc:695549]                          | - | 1.439234741 | 0.003744918 | 0.013819734 |
| ENSMMUG00000016273 | maltase-glucoamylase [Source:VGNC Symbol;Acc:VGNC:74713]                          | - | 2.060626408 | 1.59E-14    | 5.37E-13    |
| ENSMMUG00000049575 | T cell receptor beta variable 7-2 [Source:HGNC Symbol;Acc:HGNC:12236]             | - | 0.904098839 | 0.00040229  | 0.001984284 |
| ENSMMUG00000050984 | T cell receptor beta variable 5-4 [Source:HGNC Symbol;Acc:HGNC:12221]             | - | 1.555327137 | 0.005416728 | 0.018947062 |

|                    |                                                                                  |   |             |             |             |
|--------------------|----------------------------------------------------------------------------------|---|-------------|-------------|-------------|
| ENSMMUG00000049767 |                                                                                  | - | 3.032917213 | 0.001781525 | 0.007271501 |
| ENSMMUG00000048246 |                                                                                  | - | 2.157217052 | 0.006676322 | 0.022635897 |
| ENSMMUG00000057494 | T cell receptor beta variable 7-9 [Source:HGNC Symbol;Acc:HGNC:12243]            | - | 1.714009951 | 1.02E-07    | 1.14E-06    |
| ENSMMUG00000050269 | T cell receptor beta variable 14 [Source:HGNC Symbol;Acc:HGNC:12189]             | - | 1.790540236 | 1.85E-11    | 3.95E-10    |
| ENSMMUG00000016286 | protease, serine, 1 (trypsin 1) [Source:NCBI gene;Acc:698729]                    | - | 1.088608457 | 2.03E-10    | 3.65E-09    |
| ENSMMUG00000051032 | serine protease 2 [Source:NCBI gene;Acc:698352]                                  | - | -2.04505778 | 1.61E-13    | 4.64E-12    |
| ENSMMUG00000052682 |                                                                                  | - | 3.262881496 | 6.18E-11    | 1.21E-09    |
| ENSMMUG00000059019 |                                                                                  | - | 3.123331932 | 6.09E-20    | 3.65E-18    |
| ENSMMUG00000058459 |                                                                                  | - | 2.133660613 | 0.008532171 | 0.028046562 |
| ENSMMUG00000055756 |                                                                                  | - | 3.175598942 | 0.007148908 | 0.024075202 |
| ENSMMUG00000043809 | caspase 2 [Source:VGNC Symbol;Acc:VGNC:80804]                                    | - | 0.737758432 | 4.18E-06    | 3.33E-05    |
| ENSMMUG00000045428 | Metazoan signal recognition particle RNA [Source:RFAM;Acc:RF00017]               | - | 1.912386843 | 0.01268108  | 0.039031341 |
| ENSMMUG00000012633 | family with sequence similarity 131 member B [Source:VGNC Symbol;Acc:VGNC:72315] | - | 3.443177021 | 0.008347181 | 0.027522342 |
| ENSMMUG00000012635 | zyxin [Source:VGNC Symbol;Acc:VGNC:78917]                                        | - | 2.251828987 | 3.54E-19    | 2.02E-17    |
| ENSMMUG00000055322 | EPH receptor A1 [Source:NCBI gene;Acc:706295]                                    | - | 1.884739218 | 4.24E-18    | 2.18E-16    |
| ENSMMUG00000058370 | taste receptor type 2 member 62 [Source:NCBI gene;Acc:704388]                    | - | 4.661310927 | 4.53E-08    | 5.39E-07    |
| ENSMMUG00000042798 |                                                                                  | - | -0.98064198 | 2.34E-05    | 0.00015549  |
| ENSMMUG00000045869 |                                                                                  | - | 0.909510423 | 0.011745159 | 0.036633089 |
| ENSMMUG00000013955 | TRPM8 channel associated factor 2 [Source:NCBI gene;Acc:707579]                  | - | -0.5671522  | 0.003954585 | 0.0144905   |
| ENSMMUG00000005136 | TRPM8 channel associated factor 1 [Source:VGNC Symbol;Acc:VGNC:79346]            | - | 0.626722993 | 3.83E-05    | 0.000242136 |
| ENSMMUG00000063362 | Metazoan signal recognition particle RNA [Source:RFAM;Acc:RF00017]               | - | 1.708451424 | 0.013689912 | 0.041715263 |
| ENSMMUG00000057973 |                                                                                  | - | 1.186937815 | 0.004488473 | 0.016167958 |
| ENSMMUG00000049864 |                                                                                  | - | 1.899432726 | 0.010785786 | 0.034111204 |
| ENSMMUG00000018549 | zinc finger protein 786 [Source:VGNC Symbol;Acc:VGNC:79338]                      | - | 2.588221789 | 2.19E-08    | 2.76E-07    |
| ENSMMUG00000011788 | zinc finger protein 212 [Source:VGNC Symbol;Acc:VGNC:78418]                      | - | 0.961189115 | 0.005551337 | 0.019331849 |
| ENSMMUG00000002497 | zinc finger protein 777 [Source:HGNC Symbol;Acc:HGNC:22213]                      | - | 0.894659621 | 0.000154391 | 0.00084803  |
| ENSMMUG00000060626 | U6 spliceosomal RNA [Source:RFAM;Acc:RF00026]                                    | - | 1.555668818 | 0.000404849 | 0.001995499 |
| ENSMMUG00000051020 | zinc finger protein 467 [Source:NCBI gene;Acc:712106]                            | - | 1.109343229 | 2.44E-05    | 0.000161605 |
| ENSMMUG00000048892 | SCO-spondin [Source:VGNC Symbol;Acc:VGNC:81765]                                  | - | 0.676146803 | 0.005508474 | 0.019210477 |
| ENSMMUG00000022633 | replication initiator 1 [Source:VGNC Symbol;Acc:VGNC:76758]                      | - | 1.106441846 | 0.00063139  | 0.002954283 |
| ENSMMUG00000062696 |                                                                                  | - | 1.160330649 | 0.001007502 | 0.004437248 |
| ENSMMUG00000022636 | GTPase, IMAP family member 8 [Source:VGNC Symbol;Acc:VGNC:72981]                 | - | 1.380243542 | 1.32E-06    | 1.15E-05    |
| ENSMMUG00000011386 | GTPase, IMAP family member 4 [Source:VGNC Symbol;Acc:VGNC:72982]                 | - | 1.901522749 | 1.69E-22    | 1.34E-20    |



|                     |                                                                                                       |   |             |             |             |
|---------------------|-------------------------------------------------------------------------------------------------------|---|-------------|-------------|-------------|
| ENSMMUG00000052830  |                                                                                                       | - | 2.153640968 | 4.59E-11    | 9.14E-10    |
| ENSMMUG00000047276  | GTPase, IMAP family member 6 [Source:VGNC Symbol;Acc:VGNC:81315]                                      | - | 1.104316144 | 3.93E-08    | 4.73E-07    |
| ENSMMUG00000017008  | GTPase, IMAP family member 2 [Source:VGNC Symbol;Acc:VGNC:72980]                                      | - | 2.561220009 | 0.000230236 | 0.001216964 |
| ENSMMUG00000020435  | amine oxidase copper containing 1 [Source:VGNC Symbol;Acc:VGNC:70033]                                 | - | 1.066296008 | 4.94E-07    | 4.78E-06    |
| ENSMMUG00000020436  | potassium voltage-gated channel subfamily H member 2 [Source:VGNC Symbol;Acc:VGNC:73980]              | - | -0.91674047 | 3.82E-07    | 3.80E-06    |
| ENSMMUG00000006682  | chondroitin polymerizing factor 2 [Source:VGNC Symbol;Acc:VGNC:71131]                                 | - | 1.307444735 | 0.001578049 | 0.006539297 |
| ENSMMUG00000038898  | Metazoan signal recognition particle RNA [Source:RFAM;Acc:RF00017]                                    | - | 0.750906063 | 0.000211875 | 0.00112799  |
| ENSMMUG00000010943  | protein kinase AMP-activated non-catalytic subunit gamma 2 [Source:VGNC Symbol;Acc:VGNC:81745]        | - | 0.756286369 | 0.012803976 | 0.039375035 |
| ENSMMUG00000012238  | polypeptide N-acetylgalactosaminyltransferase 11 [Source:VGNC Symbol;Acc:VGNC:72749]                  | - | 0.579897011 | 0.01138021  | 0.035693288 |
| ENSMMUG00000002878  | X-ray repair cross complementing 2 [Source:VGNC Symbol;Acc:VGNC:78813]                                | - | 0.724674439 | 0.003069146 | 0.011617881 |
| ENSMMUG00000039033  | nucleolar protein with MIF4G domain 1 [Source:VGNC Symbol;Acc:VGNC:81729]                             | - | 2.539249758 | 0.001412079 | 0.005948207 |
| ENSMMUG00000008733  | ubiquitin protein ligase E3C [Source:VGNC Symbol;Acc:VGNC:79049]                                      | - | 0.704826194 | 0.000679731 | 0.003151032 |
| ENSMMUG000000052713 | leucine rich repeat containing 14B [Source:NCBI gene;Acc:723071]                                      | - | 0.572255232 | 0.001428407 | 0.006004364 |
| ENSMMUG000000063025 | coiled-coil domain containing 127 [Source:NCBI gene;Acc:710325]                                       | - | 0.465687948 | 0.001188408 | 0.005124553 |
| ENSMMUG00000000752  | programmed cell death 6 [Source:NCBI gene;Acc:723043]                                                 | - | 0.441798841 | 0.00148552  | 0.006207225 |
| ENSMMUG000000052291 |                                                                                                       | - | 1.523807827 | 0.001388062 | 0.005861123 |
| ENSMMUG000000061096 | tubulin polymerization promoting protein [Source:NCBI gene;Acc:708834]                                | - | 1.216569613 | 0.014987636 | 0.044927665 |
| ENSMMUG000000003194 |                                                                                                       | - | 1.106077623 | 0.00332501  | 0.012443721 |
| ENSMMUG000000014738 | bromodomain containing 9 [Source:VGNC Symbol;Acc:VGNC:70386]                                          | - | 4.250150398 | 0.000134598 | 0.000747807 |
| ENSMMUG000000019441 | solute carrier family 12 member 7 [Source:VGNC Symbol;Acc:VGNC:77390]                                 | - | 1.096759466 | 8.17E-06    | 6.07E-05    |
| ENSMMUG000000010940 | telomerase reverse transcriptase [Source:VGNC Symbol;Acc:VGNC:78313]                                  | - | 1.100571039 | 1.35E-18    | 7.39E-17    |
| ENSMMUG000000061176 |                                                                                                       | - | 0.739709683 | 7.87E-09    | 1.07E-07    |
| ENSMMUG00000002561  | NOP2/Sun RNA methyltransferase 2 [Source:VGNC Symbol;Acc:VGNC:75466]                                  | - | 1.949820057 | 0.004691806 | 0.016801122 |
| ENSMMUG000000018746 | FAST kinase domains 3 [Source:VGNC Symbol;Acc:VGNC:72588]                                             | - | 1.213955854 | 3.66E-07    | 3.66E-06    |
| ENSMMUG000000018747 | 5-methyltetrahydrofolate-homocysteine methyltransferase reductase [Source:VGNC Symbol;Acc:VGNC:75079] | - | 1.372517499 | 4.65E-11    | 9.23E-10    |
| ENSMMUG000000011026 | dynein axonemal heavy chain 5 [Source:VGNC Symbol;Acc:VGNC:71942]                                     | - | 3.143942874 | 0.004374776 | 0.01583161  |
| ENSMMUG000000065128 | Metazoan signal recognition particle RNA [Source:RFAM;Acc:RF00017]                                    | - | 0.846998459 | 0.001140411 | 0.004941898 |
| ENSMMUG000000059412 |                                                                                                       | - | 0.480218643 | 0.014771686 | 0.044384692 |
| ENSMMUG000000062083 |                                                                                                       | - | 1.690089904 | 0.000827148 | 0.003744058 |
| ENSMMUG000000059036 |                                                                                                       | - | 2.127363861 | 0.000620824 | 0.002918474 |
| ENSMMUG000000059710 |                                                                                                       | - | 1.36431862  | 0.003765282 | 0.013876147 |
| ENSMMUG000000013954 | PDZ domain containing 2 [Source:VGNC Symbol;Acc:VGNC:75829]                                           | - | 0.407059061 | 0.001635877 | 0.006750107 |
| ENSMMUG000000009574 | solute carrier family 45 member 2 [Source:VGNC Symbol;Acc:VGNC:82240]                                 | - | 1.059292106 | 0.000264923 | 0.001381048 |
| ENSMMUG000000013467 | alpha-methylacyl-CoA racemase [Source:NCBI gene;Acc:698365]                                           | - | 0.528207786 | 0.002916009 | 0.011148089 |
| ENSMMUG000000018739 | sperm flagellar 2 [Source:VGNC Symbol;Acc:VGNC:82243]                                                 | - | -4.24683806 | 1.13E-06    | 1.01E-05    |

|                    |                                                                                                       |   |             |             |             |
|--------------------|-------------------------------------------------------------------------------------------------------|---|-------------|-------------|-------------|
| ENSMMUG0000006202  | solute carrier family 1 member 3 [Source:VGNC Symbol;Acc:VGNC:77411]                                  | - | 0.410479551 | 0.000131575 | 0.00073188  |
| ENSMMUG00000052836 |                                                                                                       |   | 0.538499214 | 0.00138235  | 0.005840524 |
| ENSMMUG00000018963 | glial cell derived neurotrophic factor [Source:VGNC Symbol;Acc:VGNC:72912]                            |   | -1.30046606 | 0.005335745 | 0.018696439 |
| ENSMMUG00000017163 | EGF like, fibronectin type III and laminin G domains [Source:VGNC Symbol;Acc:VGNC:72122]              |   | 0.500285555 | 0.003688187 | 0.013639093 |
| ENSMMUG00000004774 | maestro heat like repeat family member 2B [Source:VGNC Symbol;Acc:VGNC:74837]                         |   | 1.896217504 | 1.80E-05    | 0.000122876 |
| ENSMMUG00000021034 | complement C6 [Source:VGNC Symbol;Acc:VGNC:70477]                                                     |   | -2.23597167 | 8.80E-12    | 2.00E-10    |
| ENSMMUG00000011878 | poly(A) binding protein interacting protein 1 [Source:VGNC Symbol;Acc:VGNC:84476]                     |   | 3.043602631 | 1.04E-13    | 3.08E-12    |
| ENSMMUG00000055022 | Metazoan signal recognition particle RNA [Source:RFAM;Acc:RF00017]                                    |   | 3.658762362 | 0.000268659 | 0.001394491 |
| ENSMMUG00000047162 | fibroblast growth factor 10 [Source:VGNC Symbol;Acc:VGNC:84378]                                       |   | 0.666242347 | 0.004527849 | 0.016293051 |
| ENSMMUG00000059786 | hyperpolarization activated cyclic nucleotide gated potassium channel 1 [Source:NCBI gene;Acc:704286] |   | 2.737572992 | 0.009059258 | 0.029454118 |
| ENSMMUG00000016149 | embigin [Source:VGNC Symbol;Acc:VGNC:72144]                                                           |   | 2.269442395 | 0.008139878 | 0.026927462 |
| ENSMMUG00000013841 | poly(ADP-ribose) polymerase family member 8 [Source:VGNC Symbol;Acc:VGNC:84477]                       |   | 1.647238141 | 0.002187994 | 0.008714069 |
| ENSMMUG00000001753 | integrin subunit alpha 1 [Source:VGNC Symbol;Acc:VGNC:73772]                                          |   | 1.561776396 | 4.72E-12    | 1.11E-10    |
| ENSMMUG00000039101 | pelota mRNA surveillance and ribosome rescue factor [Source:VGNC Symbol;Acc:VGNC:84478]               |   | 2.006649247 | 4.44E-20    | 2.70E-18    |
| ENSMMUG00000010379 | Mtr4 exosome RNA helicase [Source:VGNC Symbol;Acc:VGNC:74989]                                         |   | -0.91521922 | 6.62E-05    | 0.00039466  |
| ENSMMUG00000030099 | phospholipid phosphatase 1 [Source:VGNC Symbol;Acc:VGNC:76226]                                        |   | 2.197894117 | 2.03E-10    | 3.65E-09    |
| ENSMMUG00000061973 |                                                                                                       |   | 2.420416376 | 5.93E-38    | 2.13E-35    |
| ENSMMUG00000010466 | solute carrier family 38 member 9 [Source:VGNC Symbol;Acc:VGNC:77574]                                 |   | 2.434203365 | 2.20E-13    | 6.18E-12    |
| ENSMMUG00000051661 |                                                                                                       |   | 1.559108777 | 9.17E-06    | 6.72E-05    |
| ENSMMUG00000005181 | RAB3C, member RAS oncogene family [Source:VGNC Symbol;Acc:VGNC:81541]                                 |   | 1.504349099 | 0.000169035 | 0.000919106 |
| ENSMMUG00000021812 | ERCC excision repair 8, CSA ubiquitin ligase complex subunit [Source:VGNC Symbol;Acc:VGNC:72425]      |   | 0.706100995 | 1.21E-10    | 2.27E-09    |
| ENSMMUG00000060505 |                                                                                                       |   | 1.230704824 | 0.001280018 | 0.005466058 |
| ENSMMUG00000021131 | regulator of G protein signaling 7 binding protein [Source:VGNC Symbol;Acc:VGNC:76808]                |   | 1.032159602 | 0.002843353 | 0.01089706  |
| ENSMMUG00000015041 | CWC27 spliceosome associated cyclophilin [Source:VGNC Symbol;Acc:VGNC:71396]                          |   | 1.436510186 | 0.001323072 | 0.005620551 |
| ENSMMUG00000051169 |                                                                                                       |   | 1.971268282 | 0.000238468 | 0.001254796 |
| ENSMMUG00000016522 | neurolysin [Source:VGNC Symbol;Acc:VGNC:75183]                                                        |   | 0.581640641 | 1.40E-05    | 9.80E-05    |
| ENSMMUG00000038355 |                                                                                                       |   | 2.899406678 | 0.01209974  | 0.037522039 |
| ENSMMUG00000049935 |                                                                                                       |   | 1.421820229 | 8.46E-10    | 1.37E-08    |
| ENSMMUG00000046550 | coiled-coil domain containing 125 [Source:NCBI gene;Acc:704391]                                       |   | 1.025362212 | 7.76E-09    | 1.06E-07    |
| ENSMMUG00000009158 | MARVEL domain containing 2 [Source:VGNC Symbol;Acc:VGNC:74592]                                        |   | 0.477685247 | 0.002941864 | 0.011225511 |
| ENSMMUG00000040485 | Metazoan signal recognition particle RNA [Source:RFAM;Acc:RF00017]                                    |   | 0.590421636 | 0.001425646 | 0.005998151 |
| ENSMMUG00000006217 | general transcription factor IIH subunit 2 [Source:NCBI gene;Acc:700737]                              |   | 1.021924301 | 0.000834837 | 0.003775209 |
| ENSMMUG00000054237 | Y RNA [Source:RFAM;Acc:RF00019]                                                                       |   | 2.207673043 | 4.22E-06    | 3.36E-05    |
| ENSMMUG00000059671 |                                                                                                       |   | 1.507798146 | 2.39E-16    | 1.02E-14    |
| ENSMMUG00000063792 |                                                                                                       |   | 0.519377168 | 0.010282489 | 0.032726135 |
| ENSMMUG00000064344 | Metazoan signal recognition particle RNA [Source:RFAM;Acc:RF00017]                                    |   | -4.1431731  | 7.37E-05    | 0.000433792 |
| ENSMMUG00000011061 | ankyrin repeat domain 31 [Source:VGNC Symbol;Acc:VGNC:84277]                                          |   | 0.698529579 | 1.63E-07    | 1.74E-06    |

|                    |                                                                                                |             |             |             |
|--------------------|------------------------------------------------------------------------------------------------|-------------|-------------|-------------|
| ENSMMUG00000006139 | 3-hydroxy-3-methylglutaryl-CoA reductase [Source:VGNC Symbol;Acc:VGNC:73484]                   | 0.688257412 | 1.94E-10    | 3.51E-09    |
| ENSMMUG00000006141 | ceramide transporter 1 [Source:VGNC Symbol;Acc:VGNC:71298]                                     | 0.318740073 | 0.009513824 | 0.030676924 |
| ENSMMUG00000022982 | IQ motif containing GTPase activating protein 2 [Source:VGNC Symbol;Acc:VGNC:73756]            | 1.763531064 | 3.16E-05    | 0.000203752 |
| ENSMMUG00000021358 | angiogenic factor with G-patch and FHA domains 1 [Source:NCBI gene;Acc:707686]                 | 0.839802651 | 0.013488811 | 0.041209934 |
| ENSMMUG00000021357 | zinc finger BED-type containing 3 [Source:VGNC Symbol;Acc:VGNC:79271]                          | 2.28941429  | 6.76E-06    | 5.13E-05    |
| ENSMMUG00000020731 | terminal nucleotidyltransferase 2 [Source:VGNC Symbol;Acc:VGNC:79637]                          | 1.890678804 | 0.012079372 | 0.037475451 |
| ENSMMUG00000003143 | thrombospondin 4 [Source:VGNC Symbol;Acc:VGNC:78346]                                           | 0.99197642  | 0.000787125 | 0.00359539  |
| ENSMMUG00000018283 | dihydrofolate reductase [Source:NCBI gene;Acc:711268]                                          | 1.666127793 | 0.008949503 | 0.029165438 |
| ENSMMUG00000018284 | mutS homolog 3 [Source:VGNC Symbol;Acc:VGNC:74932]                                             | 0.834922551 | 0.000160015 | 0.000875838 |
| ENSMMUG00000039944 | Ras protein specific guanine nucleotide releasing factor 2 [Source:VGNC Symbol;Acc:VGNC:84486] | 2.183737046 | 1.59E-12    | 4.01E-11    |
| ENSMMUG00000006932 | creatine kinase, mitochondrial 2 [Source:VGNC Symbol;Acc:VGNC:71231]                           | 1.172545976 | 0.002488367 | 0.009720546 |
| ENSMMUG00000017583 | single stranded DNA binding protein 2 [Source:NCBI gene;Acc:711752]                            | 0.860717932 | 1.30E-05    | 9.21E-05    |
| ENSMMUG00000046560 | transmembrane protein 167A [Source:VGNC Symbol;Acc:VGNC:84513]                                 | 0.743840616 | 0.007230549 | 0.024321852 |
| ENSMMUG00000064265 | X-ray repair cross complementing 4 [Source:NCBI gene;Acc:712291]                               | 0.827415646 | 0.000353576 | 0.001764483 |
| ENSMMUG00000011513 | versican [Source:VGNC Symbol;Acc:VGNC:79445]                                                   | 2.150448011 | 5.14E-15    | 1.86E-13    |
| ENSMMUG00000061282 | hyaluronan and proteoglycan link protein 1 [Source:NCBI gene;Acc:712501]                       | 3.479853702 | 0.004811105 | 0.017175694 |
| ENSMMUG00000003245 | RAS p21 protein activator 1 [Source:VGNC Symbol;Acc:VGNC:76667]                                | 0.297288753 | 0.006191062 | 0.021205975 |
| ENSMMUG00000003248 | cyclin H [Source:VGNC Symbol;Acc:VGNC:70732]                                                   | 0.304243927 | 0.002436241 | 0.009558871 |
| ENSMMUG00000009319 | transmembrane protein 161B [Source:VGNC Symbol;Acc:VGNC:84508]                                 | 1.371560651 | 4.78E-05    | 0.000295064 |
| ENSMMUG00000019836 | myocyte enhancer factor 2C [Source:VGNC Symbol;Acc:VGNC:84438]                                 | 1.308416895 | 6.56E-06    | 5.00E-05    |
| ENSMMUG00000055392 |                                                                                                | 1.438901107 | 9.80E-06    | 7.12E-05    |
| ENSMMUG00000056790 |                                                                                                | 4.140763081 | 9.55E-06    | 6.96E-05    |
| ENSMMUG00000018972 | RNA polymerase III subunit G [Source:VGNC Symbol;Acc:VGNC:84480]                               | 1.280230086 | 0.000156424 | 0.000857854 |
| ENSMMUG00000018974 | LysM domain containing 3 [Source:VGNC Symbol;Acc:VGNC:74373]                                   | 1.800686894 | 9.88E-32    | 2.20E-29    |
| ENSMMUG00000055271 |                                                                                                | 1.795542034 | 5.98E-10    | 9.87E-09    |
| ENSMMUG00000018976 | adhesion G protein-coupled receptor V1 [Source:VGNC Symbol;Acc:VGNC:69625]                     | 1.295518028 | 0.000194386 | 0.001045198 |
| ENSMMUG00000053899 |                                                                                                | 2.371602089 | 0.003093893 | 0.011691096 |
| ENSMMUG00000001397 | multiple C2 and transmembrane domain containing 1 [Source:VGNC Symbol;Acc:VGNC:74589]          | 1.223342568 | 6.38E-05    | 0.000382304 |
| ENSMMUG00000010632 | family with sequence similarity 81 member B [Source:VGNC Symbol;Acc:VGNC:72365]                | 3.778173449 | 2.46E-05    | 0.000162765 |
| ENSMMUG00000001209 | arylsulfatase family member K [Source:VGNC Symbol;Acc:VGNC:84280]                              | 1.218670622 | 0.000246089 | 0.001291988 |
| ENSMMUG00000001212 | Rieske Fe-S domain containing [Source:VGNC Symbol;Acc:VGNC:84487]                              | 1.219870623 | 7.62E-21    | 5.16E-19    |
| ENSMMUG00000001213 | spermatogenesis associated 9 [Source:VGNC Symbol;Acc:VGNC:77976]                               | 1.580843332 | 2.15E-12    | 5.30E-11    |
| ENSMMUG00000002063 | endoplasmic reticulum aminopeptidase 1 [Source:VGNC Symbol;Acc:VGNC:72066]                     | 0.504924242 | 0.001316017 | 0.005595666 |
| ENSMMUG00000011043 | endoplasmic reticulum aminopeptidase 2 [Source:VGNC Symbol;Acc:VGNC:72141]                     | 0.549701959 | 1.75E-07    | 1.85E-06    |

|                    |                                                                                                |             |             |             |
|--------------------|------------------------------------------------------------------------------------------------|-------------|-------------|-------------|
| ENSMMUG00000065221 |                                                                                                | 0.70793963  | 7.82E-07    | 7.25E-06    |
|                    |                                                                                                | -           |             |             |
| ENSMMUG00000018542 | leucyl and cystinyl aminopeptidase [Source:VGNC Symbol;Acc:VGNC:74438]                         | 0.608198907 | 3.78E-05    | 0.000239403 |
| ENSMMUG00000000307 | RIO kinase 2 [Source:VGNC Symbol;Acc:VGNC:76774]                                               | 0.267340341 | 0.009781908 | 0.03135353  |
| ENSMMUG00000054789 | family with sequence similarity 174 member A [Source:NCBI gene;Acc:702300]                     | 0.688898381 | 2.28E-06    | 1.90E-05    |
| ENSMMUG00000007773 | solute carrier organic anion transporter family member 4C1 [Source:VGNC Symbol;Acc:VGNC:77764] | 2.477272768 | 5.77E-05    | 0.000349324 |
|                    |                                                                                                | -           |             |             |
| ENSMMUG00000007844 | peptidylglycine alpha-amidating monooxygenase [Source:VGNC Symbol;Acc:VGNC:75752]              | 1.047107623 | 0.00033047  | 0.001667573 |
|                    |                                                                                                | -           |             |             |
| ENSMMUG00000057827 |                                                                                                | 0.585880943 | 0.000483812 | 0.002344332 |
|                    |                                                                                                | -           |             |             |
| ENSMMUG00000007786 | gypsy retrotransposon integrase 1 [Source:VGNC Symbol;Acc:VGNC:73015]                          | 0.321670284 | 0.006957869 | 0.023488252 |
|                    |                                                                                                | -           |             |             |
| ENSMMUG00000007787 | diphosphoinositol pentakisphosphate kinase 2 [Source:VGNC Symbol;Acc:VGNC:76128]               | 0.696603176 | 0.000615262 | 0.002898208 |
| ENSMMUG00000059227 |                                                                                                | 3.698121992 | 0.015114227 | 0.045220141 |
|                    |                                                                                                | -           |             |             |
| ENSMMUG00000013183 | F-box and leucine rich repeat protein 17 [Source:VGNC Symbol;Acc:VGNC:82142]                   | 0.571099903 | 0.000850804 | 0.00383258  |
| ENSMMUG00000003316 | mannosidase alpha class 2A member 1 [Source:VGNC Symbol;Acc:VGNC:81449]                        | -1.02501929 | 2.48E-09    | 3.70E-08    |
|                    |                                                                                                | -           |             |             |
| ENSMMUG00000038051 | uncharacterized LOC106998885 [Source:NCBI gene;Acc:106998885]                                  | 1.254688032 | 1.05E-06    | 9.42E-06    |
|                    |                                                                                                | -           |             |             |
| ENSMMUG00000042638 |                                                                                                | 2.940026292 | 0.010569974 | 0.033496665 |
|                    |                                                                                                | -           |             |             |
| ENSMMUG00000011974 | calcium/calmodulin dependent protein kinase IV [Source:VGNC Symbol;Acc:VGNC:70526]             | 2.081089299 | 5.91E-14    | 1.83E-12    |
|                    |                                                                                                | -           |             |             |
| ENSMMUG00000063177 | StAR related lipid transfer domain containing 4 [Source:NCBI gene;Acc:706654]                  | 2.311416311 | 1.24E-30    | 2.39E-28    |
|                    |                                                                                                | -           |             |             |
| ENSMMUG00000012192 | erythrocyte membrane protein band 4.1 like 4A [Source:VGNC Symbol;Acc:VGNC:72039]              | 1.353254337 | 1.28E-09    | 2.01E-08    |
| ENSMMUG00000042951 | signal recognition particle 19 [Source:NCBI gene;Acc:693829]                                   | 0.950503387 | 5.82E-06    | 4.49E-05    |
| ENSMMUG00000020488 | receptor accessory protein 5 [Source:VGNC Symbol;Acc:VGNC:76864]                               | 0.761866163 | 1.01E-08    | 1.34E-07    |
| ENSMMUG00000015114 | toll like receptor adaptor molecule 2 [Source:NCBI gene;Acc:100426353]                         | 0.38372264  | 0.000515823 | 0.002476339 |
| ENSMMUG00000060812 | autophagy related 12 [Source:NCBI gene;Acc:696765]                                             | 1.008257063 | 1.03E-07    | 1.15E-06    |
| ENSMMUG00000015288 | adaptor related protein complex 3 subunit sigma 1 [Source:VGNC Symbol;Acc:VGNC:69867]          | 0.649477605 | 0.00578566  | 0.020012904 |
|                    |                                                                                                | -           |             |             |
| ENSMMUG00000022191 | laeverin [Source:VGNC Symbol;Acc:VGNC:74372]                                                   | 2.571872245 | 0.002992936 | 0.011383224 |
|                    |                                                                                                | -           |             |             |
| ENSMMUG00000022192 |                                                                                                | 1.290987271 | 0.000258058 | 0.001347265 |
|                    |                                                                                                | -           |             |             |
| ENSMMUG00000056563 | ADP ribosylation factor like GTPase 14 effector protein like [Source:NCBI gene;Acc:698168]     | 0.660293194 | 0.006324779 | 0.021614835 |
|                    |                                                                                                | -           |             |             |
| ENSMMUG00000008738 | COMM domain containing 10 [Source:VGNC Symbol;Acc:VGNC:71374]                                  | 0.717955263 | 0.016239003 | 0.048031963 |
|                    |                                                                                                | -           |             |             |
| ENSMMUG00000037127 | U6 spliceosomal RNA [Source:RFAM;Acc:RF00026]                                                  | 1.364219914 | 0.009586829 | 0.0308552   |
|                    |                                                                                                | -           |             |             |
| ENSMMUG00000063474 |                                                                                                | 0.722852087 | 4.69E-08    | 5.57E-07    |
|                    |                                                                                                | -           |             |             |
| ENSMMUG00000017685 | hydroxysteroid 17-beta dehydrogenase 4 [Source:VGNC Symbol;Acc:VGNC:73530]                     | 0.432403228 | 1.20E-06    | 1.07E-05    |
|                    |                                                                                                | -           |             |             |
| ENSMMUG00000059145 |                                                                                                | 0.929928022 | 0.014623157 | 0.04405167  |
|                    |                                                                                                | -           |             |             |
| ENSMMUG00000018764 |                                                                                                | 1.404473113 | 0.000470006 | 0.002282957 |
|                    |                                                                                                | -           |             |             |
| ENSMMUG00000063354 |                                                                                                | 1.306033546 | 0.001390375 | 0.005867356 |
| ENSMMUG00000053794 |                                                                                                | -0.83542487 | 0.000826458 | 0.003742977 |

|                    |                                                                                                      |   |             |             |             |
|--------------------|------------------------------------------------------------------------------------------------------|---|-------------|-------------|-------------|
| ENSMMUG00000021006 | zinc finger protein 474 [Source:VGNC Symbol;Acc:VGNC:81617]                                          | - | 1.219014017 | 0.000729352 | 0.003350051 |
| ENSMMUG00000046428 |                                                                                                      | - | 1.459376282 | 6.04E-07    | 5.74E-06    |
| ENSMMUG00000023598 | sorting nexin 2 [Source:VGNC Symbol;Acc:VGNC:77682]                                                  | - | 2.047614274 | 0.000524493 | 0.002514518 |
| ENSMMUG00000006646 | casein kinase 1 gamma 3 [Source:VGNC Symbol;Acc:VGNC:81384]                                          | - | 0.428891558 | 0.015180872 | 0.045390484 |
| ENSMMUG00000016683 | phosphorylated adaptor for RNA export [Source:NCBI gene;Acc:702980]                                  | - | 1.564158882 | 0.000280962 | 0.001450101 |
| ENSMMUG00000037806 | chromosome 6 C5orf63 homolog [Source:NCBI gene;Acc:100423212]                                        | - | 1.785210832 | 0.007776215 | 0.025883188 |
| ENSMMUG00000011214 | solute carrier family 12 member 2 [Source:VGNC Symbol;Acc:VGNC:77386]                                | - | 1.348073982 | 3.06E-06    | 2.50E-05    |
| ENSMMUG00000010682 | fibrillin 2 [Source:VGNC Symbol;Acc:VGNC:72624]                                                      | - | 1.156529849 | 8.62E-14    | 2.60E-12    |
| ENSMMUG00000058082 |                                                                                                      | - | 0.518583016 | 8.55E-06    | 6.32E-05    |
| ENSMMUG00000016909 | meiotic kinetochore factor [Source:NCBI gene;Acc:709179]                                             | - | 0.89083202  | 2.01E-17    | 9.59E-16    |
| ENSMMUG00000010858 | prolyl 4-hydroxylase subunit alpha 2 [Source:VGNC Symbol;Acc:VGNC:75742]                             | - | 2.582279911 | 3.48E-14    | 1.12E-12    |
| ENSMMUG00000003131 | interleukin 13 [Source:VGNC Symbol;Acc:VGNC:84393]                                                   | - | 1.305374425 | 1.65E-08    | 2.15E-07    |
| ENSMMUG00000003133 | interleukin 4 [Source:VGNC Symbol;Acc:VGNC:73729]                                                    | - | 1.704924666 | 1.64E-08    | 2.14E-07    |
| ENSMMUG00000010313 | kinesin family member 3A [Source:VGNC Symbol;Acc:VGNC:74017]                                         | - | 1.465859109 | 4.23E-20    | 2.60E-18    |
| ENSMMUG00000010308 | cyclin I family member 2 [Source:VGNC Symbol;Acc:VGNC:70923]                                         | - | 1.601620199 | 4.31E-12    | 1.02E-10    |
| ENSMMUG00000010309 | septin 8 [Source:VGNC Symbol;Acc:VGNC:77248]                                                         | - | 1.826726118 | 2.25E-07    | 2.32E-06    |
| ENSMMUG00000039781 | sosondowah ankyrin repeat domain family member A [Source:VGNC Symbol;Acc:VGNC:84498]                 | - | -1.44305984 | 2.09E-05    | 0.000140721 |
| ENSMMUG00000010312 | shroom family member 1 [Source:VGNC Symbol;Acc:VGNC:77299]                                           | - | 1.535256518 | 7.97E-18    | 3.95E-16    |
| ENSMMUG00000060221 | growth differentiation factor 9 [Source:NCBI gene;Acc:712792]                                        | - | 1.232377764 | 6.55E-11    | 1.28E-09    |
| ENSMMUG00000059080 |                                                                                                      | - | 1.011600692 | 0.002926947 | 0.011183807 |
| ENSMMUG00000015640 | AF4/FMR2 family member 4 [Source:VGNC Symbol;Acc:VGNC:69629]                                         | - | 1.105933508 | 2.23E-06    | 1.86E-05    |
| ENSMMUG00000013047 | S-phase kinase associated protein 1 [Source:NCBI gene;Acc:100423634]                                 | - | 1.863278537 | 5.02E-17    | 2.33E-15    |
| ENSMMUG00000052915 |                                                                                                      | - | 0.993779784 | 0.008400558 | 0.027665811 |
| ENSMMUG00000016641 | ubiquitin conjugating enzyme E2 B [Source:VGNC Symbol;Acc:VGNC:78692]                                | - | 0.820192445 | 0.000248368 | 0.00130249  |
| ENSMMUG00000053384 |                                                                                                      | - | 1.630615192 | 3.01E-20    | 1.91E-18    |
| ENSMMUG00000000358 | jade family PHD finger 2 [Source:VGNC Symbol;Acc:VGNC:73641]                                         | - | 0.691172055 | 0.007791761 | 0.02591033  |
| ENSMMUG00000004417 | secretion associated Ras related GTPase 1B [Source:VGNC Symbol;Acc:VGNC:76970]                       | - | 0.500338782 | 0.000115705 | 0.000651883 |
| ENSMMUG00000012463 | DEAD-box helicase 46 [Source:VGNC Symbol;Acc:VGNC:71663]                                             | - | 0.599382039 | 0.000615479 | 0.002898208 |
| ENSMMUG00000005286 | cation channel sperm associated 3 [Source:VGNC Symbol;Acc:VGNC:70592]                                | - | 0.372113254 | 0.009812865 | 0.031445567 |
| ENSMMUG00000052860 | paired like homeodomain 1 [Source:NCBI gene;Acc:711666]                                              | - | 0.418194158 | 0.015460173 | 0.046127235 |
| ENSMMUG00000016357 | polycystin 2 like 2, transient receptor potential cation channel [Source:VGNC Symbol;Acc:VGNC:76009] | - | 1.736893283 | 0.001133723 | 0.004915954 |
| ENSMMUG00000008009 | family with sequence similarity 13 member B [Source:VGNC Symbol;Acc:VGNC:72268]                      | - | 1.042033319 | 6.32E-05    | 0.000379172 |
| ENSMMUG00000013272 | GDNF family receptor alpha 3 [Source:VGNC Symbol;Acc:VGNC:72919]                                     | - | 0.450380648 | 0.001747097 | 0.007144804 |

|                    |                                                                                              |             |             |             |
|--------------------|----------------------------------------------------------------------------------------------|-------------|-------------|-------------|
| ENSMMUG00000055069 | early growth response 1 [Source:NCBI gene;Acc:716786]                                        | 0.365115558 | 0.006509072 | 0.022149167 |
| ENSMMUG00000005871 | eukaryotic translation termination factor 1 [Source:VGNC Symbol;Acc:VGNC:84370]              | 0.456948613 | 0.003369989 | 0.012595245 |
| ENSMMUG00000017985 | catenin alpha 1 [Source:VGNC Symbol;Acc:VGNC:84291]                                          | 0.431091678 | 0.002184896 | 0.008705733 |
| ENSMMUG00000001941 | CXXC finger protein 5 [Source:VGNC Symbol;Acc:VGNC:71594]                                    | 0.718567593 | 5.17E-14    | 1.63E-12    |
| ENSMMUG00000019582 | ankyrin repeat and KH domain-containing protein 1 [Source:NCBI gene;Acc:698045]              | 0.308740207 | 0.004229412 | 0.015376987 |
| ENSMMUG00000001707 | amyloid beta precursor protein binding family B member 3 [Source:VGNC Symbol;Acc:VGNC:69869] | 2.177667135 | 4.87E-31    | 1.02E-28    |
| ENSMMUG00000001725 | solute carrier family 35 member A4 [Source:VGNC Symbol;Acc:VGNC:77532]                       | 2.280864687 | 1.37E-21    | 9.87E-20    |
| ENSMMUG00000062326 |                                                                                              | 2.165692107 | 1.23E-18    | 6.76E-17    |
| ENSMMUG00000024537 |                                                                                              | 2.806347605 | 1.06E-06    | 9.53E-06    |
| ENSMMUG00000010007 | CD14 molecule [Source:VGNC Symbol;Acc:VGNC:70751]                                            | 2.162712417 | 1.16E-11    | 2.57E-10    |
| ENSMMUG00000060632 |                                                                                              | 1.759881557 | 2.70E-05    | 0.000176595 |
| ENSMMUG00000018246 | transmembrane and coiled-coil domains 6 [Source:VGNC Symbol;Acc:VGNC:84507]                  | 1.420250664 | 1.31E-12    | 3.33E-11    |
| ENSMMUG00000056796 | NADH:ubiquinone oxidoreductase subunit A2 [Source:NCBI gene;Acc:697736]                      | 2.181931308 | 4.00E-05    | 0.000251856 |
| ENSMMUG00000010008 | IK cytokine [Source:VGNC Symbol;Acc:VGNC:73703]                                              | 0.80579523  | 0.014192605 | 0.043013378 |
| ENSMMUG00000004483 | histidyl-tRNA synthetase 2, mitochondrial [Source:VGNC Symbol;Acc:VGNC:73346]                | 0.436939478 | 0.003752539 | 0.013836932 |
| ENSMMUG00000014571 | protocadherin alpha-C2 [Source:NCBI gene;Acc:698874]                                         | 0.254586647 | 0.015128442 | 0.045253015 |
| ENSMMUG00000062270 | protocadherin beta 3 [Source:NCBI gene;Acc:700243]                                           | 1.577800833 | 0.004639437 | 0.016639084 |
| ENSMMUG00000008710 | protocadherin 1 [Source:VGNC Symbol;Acc:VGNC:75775]                                          | 0.958538368 | 0.00127713  | 0.005456822 |
| ENSMMUG00000006287 | DAP3 binding cell death enhancer 1 [Source:VGNC Symbol;Acc:VGNC:71806]                       | 0.560803264 | 1.29E-05    | 9.11E-05    |
| ENSMMUG00000006291 | protocadherin 12 [Source:VGNC Symbol;Acc:VGNC:75776]                                         | 0.794610349 | 6.15E-05    | 0.000370111 |
| ENSMMUG00000009768 | ring finger protein 14 [Source:VGNC Symbol;Acc:VGNC:84488]                                   | 0.628117268 | 9.30E-08    | 1.04E-06    |
| ENSMMUG00000000419 | Rho GTPase activating protein 26 [Source:VGNC Symbol;Acc:VGNC:69846]                         | 1.390154438 | 1.58E-09    | 2.44E-08    |
| ENSMMUG00000050405 |                                                                                              | 1.374580078 | 2.94E-10    | 5.15E-09    |
| ENSMMUG00000000421 | nuclear receptor subfamily 3 group C member 1 [Source:VGNC Symbol;Acc:VGNC:75515]            | 1.456828357 | 1.87E-19    | 1.08E-17    |
| ENSMMUG00000063348 |                                                                                              | 0.896668181 | 1.42E-05    | 9.94E-05    |
| ENSMMUG00000019820 | SH3 domain and tetratricopeptide repeats 2 [Source:VGNC Symbol;Acc:VGNC:77337]               | 0.692335049 | 1.88E-06    | 1.59E-05    |
| ENSMMUG00000064432 |                                                                                              | 2.436594279 | 0.009965459 | 0.031883557 |
| ENSMMUG00000017714 | Rho guanine nucleotide exchange factor 37 [Source:VGNC Symbol;Acc:VGNC:69941]                | 1.209340592 | 0.000320876 | 0.001625596 |
| ENSMMUG00000004749 | PPARG coactivator 1 beta [Source:VGNC Symbol;Acc:VGNC:76134]                                 | 3.482181029 | 2.83E-10    | 4.98E-09    |
| ENSMMUG00000011557 | platelet derived growth factor receptor beta [Source:VGNC Symbol;Acc:VGNC:75929]             | 0.31246417  | 9.73E-07    | 8.82E-06    |
| ENSMMUG00000005414 | N-deacetylase and N-sulfotransferase 1 [Source:VGNC Symbol;Acc:VGNC:75151]                   | -0.89453907 | 1.14E-09    | 1.79E-08    |
| ENSMMUG00000051062 |                                                                                              | -0.63248967 | 0.009399372 | 0.030377368 |
| ENSMMUG00000020679 | myozenin 3 [Source:VGNC Symbol;Acc:VGNC:74988]                                               | 1.273923497 | 1.68E-06    | 1.44E-05    |
| ENSMMUG00000020683 | RNA binding motif protein 22 [Source:VGNC Symbol;Acc:VGNC:76535]                             | 2.023521716 | 9.89E-12    | 2.22E-10    |
| ENSMMUG00000019764 | dynactin subunit 4 [Source:VGNC Symbol;Acc:VGNC:71625]                                       | 1.686230376 | 8.27E-09    | 1.12E-07    |
| ENSMMUG00000021051 | TNFAIP3 interacting protein 1 [Source:VGNC Symbol;Acc:VGNC:79057]                            | 0.998733659 | 1.20E-05    | 8.56E-05    |
| ENSMMUG00000021053 | annexin A6 [Source:VGNC Symbol;Acc:VGNC:69951]                                               | 1.618660477 | 4.07E-09    | 5.90E-08    |
| ENSMMUG00000053656 |                                                                                              | 1.038027904 | 6.22E-09    | 8.65E-08    |
| ENSMMUG00000003499 | solute carrier family 36 member 1 [Source:VGNC Symbol;Acc:VGNC:77509]                        | 0.637063045 | 0.013137896 | 0.040269445 |
| ENSMMUG00000003497 | FAT atypical cadherin 2 [Source:VGNC Symbol;Acc:VGNC:72618]                                  | -1.21417571 | 1.65E-13    | 4.73E-12    |
| ENSMMUG00000053367 | secreted protein acidic and cysteine rich [Source:NCBI gene;Acc:712388]                      | 1.36052904  | 6.44E-20    | 3.84E-18    |

|                     |                                                                                            |   |             |             |             |
|---------------------|--------------------------------------------------------------------------------------------|---|-------------|-------------|-------------|
| ENSMMUG00000054302  | antioxidant 1 copper chaperone [Source:NCBI gene;Acc:712464]                               | - | 0.988863752 | 0.00010323  | 0.000587739 |
| ENSMMUG00000056369  | SAP30 like [Source:NCBI gene;Acc:714400]                                                   | - | 3.041087085 | 0.00775614  | 0.025834763 |
| ENSMMUG00000021228  | gem nuclear organelle associated protein 5 [Source:VGNC Symbol;Acc:VGNC:72751]             | - | 0.428900867 | 0.001806459 | 0.007366086 |
| ENSMMUG00000035086  | U2 spliceosomal RNA [Source:RFAM;Acc:RF00004]                                              | - | 1.544901391 | 0.005484467 | 0.019153298 |
| ENSMMUG00000062861  |                                                                                            | - | -0.78589709 | 0.002546423 | 0.009924539 |
| ENSMMUG00000059241  |                                                                                            | - | 4.855807108 | 6.07E-14    | 1.87E-12    |
| ENSMMUG00000015840  | RAN binding protein 17 [Source:VGNC Symbol;Acc:VGNC:84485]                                 | - | 0.58002208  | 1.10E-06    | 9.82E-06    |
| ENSMMUG00000003067  | endoplasmic reticulum-golgi intermediate compartment 1 [Source:VGNC Symbol;Acc:VGNC:82141] | - | 0.813109646 | 1.09E-06    | 9.77E-06    |
| ENSMMUG00000054793  |                                                                                            | - | 2.015366095 | 7.05E-05    | 0.000417302 |
| ENSMMUG00000019926  | cytoplasmic polyadenylation element binding protein 4 [Source:VGNC Symbol;Acc:VGNC:71450]  | - | 0.702748152 | 1.76E-06    | 1.50E-05    |
| ENSMMUG00000009059  | Fas associated factor family member 2 [Source:VGNC Symbol;Acc:VGNC:72332]                  | - | 1.487686335 | 0.000642193 | 0.002993838 |
| ENSMMUG00000013283  | cadherin related family member 2 [Source:NCBI gene;Acc:697249]                             | - | 2.046838371 | 2.09E-07    | 2.17E-06    |
| ENSMMUG00000013284  | G protein regulated inducer of neurite outgrowth 1 [Source:VGNC Symbol;Acc:VGNC:72998]     | - | 2.357973672 | 0.000437186 | 0.002140013 |
| ENSMMUG00000002649  | unc-5 netrin receptor A [Source:VGNC Symbol;Acc:VGNC:78721]                                | - | 2.621000143 | 3.40E-05    | 0.000217357 |
| ENSMMUG00000002653  | hexokinase 3 [Source:VGNC Symbol;Acc:VGNC:73476]                                           | - | 1.116019878 | 7.26E-10    | 1.19E-08    |
| ENSMMUG00000009041  | nuclear receptor binding SET domain protein 1 [Source:VGNC Symbol;Acc:VGNC:75401]          | - | 0.817698662 | 0.016060401 | 0.047634307 |
| ENSMMUG00000009045  | RAB24, member RAS oncogene family [Source:VGNC Symbol;Acc:VGNC:81524]                      | - | -1.35744976 | 0.002749253 | 0.010588514 |
| ENSMMUG00000016192  | lectin, mannose binding 2 [Source:VGNC Symbol;Acc:VGNC:74302]                              | - | 0.398670007 | 0.003681656 | 0.013618534 |
| ENSMMUG00000019807  | regulator of G protein signaling 14 [Source:VGNC Symbol;Acc:VGNC:76918]                    | - | 0.615044579 | 4.06E-06    | 3.24E-05    |
| ENSMMUG00000003146  | PDZ and LIM domain 7 [Source:VGNC Symbol;Acc:VGNC:75848]                                   | - | 0.738071903 | 0.010236153 | 0.032608262 |
| ENSMMUG00000016911  | DEAD-box helicase 41 [Source:VGNC Symbol;Acc:VGNC:71660]                                   | - | 0.704780485 | 0.006778183 | 0.022931354 |
| ENSMMUG00000004002  | CDC like kinase 4 [Source:VGNC Symbol;Acc:VGNC:71173]                                      | - | 1.171440692 | 1.87E-22    | 1.46E-20    |
| ENSMMUG000000041519 | zinc finger protein 354A [Source:VGNC Symbol;Acc:VGNC:84517]                               | - | 2.010531783 | 0.000324323 | 0.001641277 |
| ENSMMUG000000049557 |                                                                                            | - | 1.981256186 | 0.000416808 | 0.002048683 |
| ENSMMUG00000001728  | mitogen-activated protein kinase 9 [Source:VGNC Symbol;Acc:VGNC:74652]                     | - | 1.362299042 | 5.29E-10    | 8.84E-09    |
| ENSMMUG00000061451  | butyrophilin like 8 [Source:NCBI gene;Acc:707591]                                          | - | 0.414804196 | 0.016254066 | 0.048066378 |
| ENSMMUG00000031833  | butyrophilin like 9 [Source:NCBI gene;Acc:106996463]                                       | - | 0.646903041 | 0.009468427 | 0.030551253 |
| ENSMMUG00000062522  |                                                                                            | - | 1.647611647 | 1.18E-10    | 2.22E-09    |
| ENSMMUG00000059428  | olfactory receptor 2V2 [Source:NCBI gene;Acc:707790]                                       | - | 1.539779486 | 9.02E-08    | 1.02E-06    |
| ENSMMUG00000061151  |                                                                                            | - | 1.508222558 | 1.03E-06    | 9.29E-06    |
| ENSMMUG00000054414  |                                                                                            | - | 1.737659908 | 1.68E-11    | 3.62E-10    |
| ENSMMUG00000003598  | tripartite motif containing 7 [Source:VGNC Symbol;Acc:VGNC:79022]                          | - | 1.669686332 | 3.75E-17    | 1.75E-15    |
| ENSMMUG00000003604  | receptor for activated C kinase 1 [Source:VGNC Symbol;Acc:VGNC:76581]                      | - | 2.505248897 | 0.014730462 | 0.044298792 |
| ENSMMUG00000021145  | family with sequence similarity 120B [Source:VGNC Symbol;Acc:VGNC:72311]                   | - | -1.69438149 | 1.19E-22    | 9.72E-21    |
| ENSMMUG00000014474  | SPARC related modular calcium binding 2 [Source:VGNC Symbol;Acc:VGNC:83470]                | - | 0.794243585 | 6.12E-09    | 8.53E-08    |
| ENSMMUG00000021044  | afadin, adherens junction formation factor [Source:VGNC Symbol;Acc:VGNC:69818]             | - | 0.454595678 | 0.000369686 | 0.001835732 |
| ENSMMUG00000062443  |                                                                                            | - | 1.116724366 | 1.44E-07    | 1.55E-06    |

|                    |                                                                                                         |   |             |             |             |
|--------------------|---------------------------------------------------------------------------------------------------------|---|-------------|-------------|-------------|
| ENSMMUG00000057859 |                                                                                                         | - | 2.163759955 | 1.86E-05    | 0.000126506 |
| ENSMMUG00000008228 | unc-93 homolog A [Source:VGNC Symbol;Acc:VGNC:78724]                                                    | - | 2.257837963 | 1.04E-05    | 7.53E-05    |
| ENSMMUG00000057983 |                                                                                                         |   | 2.776813323 | 0.000850273 | 0.00383142  |
| ENSMMUG00000054834 |                                                                                                         |   | 0.337742603 | 0.003169642 | 0.011913131 |
| ENSMMUG00000020412 | parkin coregulated [Source:VGNC Symbol;Acc:VGNC:75646]                                                  | - | 0.870667983 | 1.64E-05    | 0.000112865 |
| ENSMMUG00000057544 |                                                                                                         |   | 1.412660785 | 7.65E-09    | 1.04E-07    |
| ENSMMUG00000000500 | fibronectin type III domain containing 1 [Source:VGNC Symbol;Acc:VGNC:72546]                            |   | 0.557994364 | 0.000194784 | 0.001046935 |
| ENSMMUG00000011994 | T cell activation RhoGTPase activating protein [Source:VGNC Symbol;Acc:VGNC:78126]                      |   | 0.65711443  | 0.003815899 | 0.014037342 |
| ENSMMUG00000022247 | osteoclastogenesis associated transmembrane protein 1 [Source:VGNC Symbol;Acc:VGNC:75664]               |   | 2.150468121 | 6.09E-14    | 1.87E-12    |
| ENSMMUG00000021534 | solute carrier family 16 member 10 [Source:NCBI gene;Acc:696132]                                        | - | 1.707077928 | 0.001731349 | 0.007088188 |
| ENSMMUG00000061031 |                                                                                                         |   | 2.734316446 | 2.70E-26    | 3.47E-24    |
| ENSMMUG00000058557 |                                                                                                         |   | 1.532746334 | 1.05E-06    | 9.42E-06    |
| ENSMMUG00000017189 | regulatory factor X6 [Source:VGNC Symbol;Acc:VGNC:76800]                                                |   | 1.820749335 | 3.49E-10    | 5.99E-09    |
| ENSMMUG00000059327 | NUS1 dehydrodolichyl diphosphate synthase subunit [Source:NCBI gene;Acc:715015]                         | - | 0.793066681 | 9.90E-07    | 8.96E-06    |
| ENSMMUG00000008525 | minichromosome maintenance 9 homologous recombination repair factor [Source:VGNC Symbol;Acc:VGNC:83432] | - | 3.533221789 | 7.86E-06    | 5.87E-05    |
| ENSMMUG00000013302 | family with sequence similarity 184 member A [Source:VGNC Symbol;Acc:VGNC:72308]                        | - | 3.075364778 | 6.19E-08    | 7.20E-07    |
| ENSMMUG00000005225 | gap junction protein alpha 1 [Source:VGNC Symbol;Acc:VGNC:73055]                                        | - | 0.812785678 | 3.36E-05    | 0.000215033 |
| ENSMMUG00000024966 | U4 spliceosomal RNA [Source:RFAM;Acc:RF00015]                                                           | - | 1.824565569 | 0.003272156 | 0.012249185 |
| ENSMMUG00000061165 |                                                                                                         |   | 0.452134429 | 0.000209495 | 0.001116591 |
| ENSMMUG00000060822 |                                                                                                         |   | 0.784806491 | 8.82E-07    | 8.07E-06    |
| ENSMMUG00000065276 |                                                                                                         |   | 0.532434354 | 0.000112167 | 0.000632967 |
| ENSMMUG00000003134 | ring finger protein 217 [Source:VGNC Symbol;Acc:VGNC:76801]                                             | - | 0.955487154 | 0.000107001 | 0.000606251 |
| ENSMMUG00000062110 | TPD52 like 1 [Source:NCBI gene;Acc:716568]                                                              | - | 0.778325318 | 0.015050195 | 0.045061865 |
| ENSMMUG00000015317 | HD domain containing 2 [Source:VGNC Symbol;Acc:VGNC:73209]                                              | - | 1.894210594 | 6.15E-06    | 4.72E-05    |
| ENSMMUG00000060901 |                                                                                                         |   | 1.451729987 | 8.90E-22    | 6.64E-20    |
| ENSMMUG00000048882 | KIAA0408 ortholog [Source:NCBI gene;Acc:100429459]                                                      | - | 0.474749387 | 0.000467291 | 0.002273704 |
| ENSMMUG00000058574 |                                                                                                         |   | 0.53537387  | 0.000148713 | 0.00081909  |
| ENSMMUG00000022136 | laminin subunit alpha 2 [Source:VGNC Symbol;Acc:VGNC:74225]                                             |   | 0.436687242 | 0.000116889 | 0.000657496 |
| ENSMMUG00000021498 | L3MBTL histone methyl-lysine binding protein 3 [Source:VGNC Symbol;Acc:VGNC:74106]                      |   | 0.710644602 | 4.28E-07    | 4.19E-06    |
| ENSMMUG00000021499 | sterile alpha motif domain containing 3 [Source:VGNC Symbol;Acc:VGNC:77079]                             | - | 1.517099926 | 3.45E-08    | 4.20E-07    |
| ENSMMUG00000065212 |                                                                                                         |   | 0.91216883  | 0.000347467 | 0.001738326 |
| ENSMMUG00000059491 |                                                                                                         |   | 0.936186987 | 6.20E-07    | 5.88E-06    |
| ENSMMUG00000017549 | ectonucleotide pyrophosphatase/phosphodiesterase 3 [Source:VGNC Symbol;Acc:VGNC:72224]                  | - | 1.549437767 | 5.13E-10    | 8.58E-09    |
| ENSMMUG00000004996 | monooxygenase DBH like 1 [Source:VGNC Symbol;Acc:VGNC:74800]                                            | - | 0.594834894 | 0.002354829 | 0.009267965 |
| ENSMMUG00000013236 | solute carrier family 18 member B1 [Source:VGNC Symbol;Acc:VGNC:77549]                                  | - | 0.561231336 | 0.010382732 | 0.033000237 |
| ENSMMUG00000005745 | EYA transcriptional coactivator and phosphatase 4 [Source:VGNC Symbol;Acc:VGNC:72456]                   | - | 1.066967996 | 5.90E-13    | 1.58E-11    |
| ENSMMUG00000022921 | solute carrier family 2 member 12 [Source:VGNC Symbol;Acc:VGNC:77503]                                   | - | 4.324428613 | 6.04E-68    | 2.12E-64    |



|                    |                                                                                                         |             |             |             |
|--------------------|---------------------------------------------------------------------------------------------------------|-------------|-------------|-------------|
| ENSMMUG00000038064 | Metazoan signal recognition particle RNA [Source:RFAM;Acc:RF00017]                                      | 3.059942527 | 0.009483511 | 0.030592887 |
| ENSMMUG00000061787 |                                                                                                         | 2.865965904 | 4.08E-05    | 0.000256185 |
| ENSMMUG00000018166 | MYB proto-oncogene, transcription factor [Source:VGNC Symbol;Acc:VGNC:75089]                            | 0.849681935 | 5.44E-07    | 5.22E-06    |
| ENSMMUG00000009368 | Abelson helper integration site 1 [Source:VGNC Symbol;Acc:VGNC:81010]                                   | 0.720255362 | 2.55E-08    | 3.19E-07    |
| ENSMMUG00000044284 | 40S ribosomal protein S11-like [Source:NCBI gene;Acc:706532]                                            | 0.837109709 | 0.000795078 | 0.003630536 |
| ENSMMUG00000053936 |                                                                                                         | 0.743304841 | 0.000680809 | 0.003154987 |
| ENSMMUG00000016376 | mitogen-activated protein kinase kinase kinase 5 [Source:VGNC Symbol;Acc:VGNC:74495]                    | 1.169706565 | 1.20E-05    | 8.56E-05    |
| ENSMMUG00000000123 | NHS like 1 [Source:VGNC Symbol;Acc:VGNC:75225]                                                          | 0.286023779 | 0.007569922 | 0.025286568 |
| ENSMMUG00000019136 | taxilin beta [Source:VGNC Symbol;Acc:VGNC:79325]                                                        | 0.554881764 | 1.05E-05    | 7.60E-05    |
| ENSMMUG00000058187 |                                                                                                         | 1.127239359 | 1.82E-19    | 1.06E-17    |
|                    |                                                                                                         | -           |             |             |
| ENSMMUG00000023012 | vesicle trafficking 1 [Source:VGNC Symbol;Acc:VGNC:79296]                                               | 1.082054699 | 6.97E-05    | 0.000412958 |
|                    |                                                                                                         | -           |             |             |
| ENSMMUG00000044958 | adhesion G protein-coupled receptor G6 [Source:VGNC Symbol;Acc:VGNC:81009]                              | 1.264662232 | 5.63E-09    | 7.91E-08    |
|                    |                                                                                                         | -           |             |             |
| ENSMMUG00000061117 |                                                                                                         | 0.778959327 | 0.000365128 | 0.001815671 |
| ENSMMUG00000006430 | androgen induced 1 [Source:VGNC Symbol;Acc:VGNC:69667]                                                  | 1.088395291 | 0.000280124 | 0.001446312 |
| ENSMMUG00000005348 | LTV1 ribosome biogenesis factor [Source:VGNC Symbol;Acc:VGNC:83430]                                     | 2.096165248 | 0.014051938 | 0.042633128 |
| ENSMMUG00000003750 | PLAG1 like zinc finger 1 [Source:VGNC Symbol;Acc:VGNC:83444]                                            | 1.575529912 | 9.78E-05    | 0.000559514 |
| ENSMMUG00000019443 | syntaxin 11 [Source:VGNC Symbol;Acc:VGNC:78041]                                                         | 3.407798097 | 0.000890225 | 0.003983286 |
|                    |                                                                                                         | -           |             |             |
| ENSMMUG00000023265 | A-kinase anchoring protein 12 [Source:VGNC Symbol;Acc:VGNC:69766]                                       | 2.346331124 | 2.71E-14    | 8.87E-13    |
|                    |                                                                                                         | -           |             |             |
| ENSMMUG00000060839 |                                                                                                         | 2.737391172 | 0.015736134 | 0.046850915 |
|                    |                                                                                                         | -           |             |             |
| ENSMMUG00000029475 | zinc finger and BTB domain containing 2 [Source:VGNC Symbol;Acc:VGNC:79291]                             | 2.317668809 | 1.70E-07    | 1.80E-06    |
|                    |                                                                                                         | -           |             |             |
| ENSMMUG00000050174 |                                                                                                         | 2.647127129 | 0.013154177 | 0.04030173  |
|                    |                                                                                                         | -           |             |             |
| ENSMMUG00000018342 | required for meiotic nuclear division 1 homolog [Source:VGNC Symbol;Acc:VGNC:76797]                     | 2.564829026 | 1.04E-11    | 2.32E-10    |
|                    |                                                                                                         | -           |             |             |
| ENSMMUG00000060940 | acidic residue methyltransferase 1 [Source:NCBI gene;Acc:704570]                                        | 2.854011525 | 7.34E-06    | 5.52E-05    |
|                    |                                                                                                         | -           |             |             |
| ENSMMUG00000018346 | coiled-coil domain containing 170 [Source:VGNC Symbol;Acc:VGNC:70832]                                   | 1.988852645 | 4.25E-05    | 0.000265921 |
|                    |                                                                                                         | -           |             |             |
| ENSMMUG00000019045 | estrogen receptor 1 [Source:VGNC Symbol;Acc:VGNC:72432]                                                 | 0.883957243 | 0.000695799 | 0.00321654  |
|                    |                                                                                                         | -           |             |             |
| ENSMMUG00000019048 | spectrin repeat containing nuclear envelope protein 1 [Source:VGNC Symbol;Acc:VGNC:78143]               | 0.458782381 | 0.01083625  | 0.034224286 |
| ENSMMUG00000013483 | prolyl endopeptidase [Source:VGNC Symbol;Acc:VGNC:76396]                                                | 0.732375396 | 0.000308797 | 0.001572351 |
| ENSMMUG00000055978 |                                                                                                         | 0.554509787 | 0.000938741 | 0.004165636 |
|                    |                                                                                                         | -           |             |             |
| ENSMMUG00000057697 |                                                                                                         | 1.392195363 | 8.74E-06    | 6.44E-05    |
|                    |                                                                                                         | -           |             |             |
| ENSMMUG00000051522 | Metazoan signal recognition particle RNA [Source:RFAM;Acc:RF00017]                                      | 5.015932832 | 2.42E-07    | 2.49E-06    |
|                    |                                                                                                         | -           |             |             |
| ENSMMUG00000051271 |                                                                                                         | 3.395562569 | 1.91E-25    | 2.14E-23    |
| ENSMMUG00000000808 | melanin concentrating hormone receptor 2 [Source:VGNC Symbol;Acc:VGNC:74550]                            | 1.079546758 | 6.62E-16    | 2.67E-14    |
| ENSMMUG00000005929 | ubiquitin specific peptidase 45 [Source:VGNC Symbol;Acc:VGNC:79233]                                     | -0.44739467 | 0.002587936 | 0.010064164 |
|                    |                                                                                                         | -           |             |             |
| ENSMMUG00000005923 | failed axon connections homolog, metaxin like GST domain containing [Source:VGNC Symbol;Acc:VGNC:72541] | 0.989271224 | 2.97E-05    | 0.000192261 |
| ENSMMUG00000009182 | caspase 8 associated protein 2 [Source:VGNC Symbol;Acc:VGNC:70548]                                      | 2.732400046 | 0.015953051 | 0.047366002 |
|                    |                                                                                                         | -           |             |             |
| ENSMMUG00000003464 | midasin AAA ATPase 1 [Source:VGNC Symbol;Acc:VGNC:74530]                                                | 0.436524226 | 1.00E-05    | 7.29E-05    |
|                    |                                                                                                         | -           |             |             |
| ENSMMUG00000003462 | ankyrin repeat domain 6 [Source:VGNC Symbol;Acc:VGNC:81023]                                             | 0.894744026 | 4.19E-10    | 7.13E-09    |

|                    |                                                                                                |   |             |             |             |
|--------------------|------------------------------------------------------------------------------------------------|---|-------------|-------------|-------------|
| ENSMMUG00000060841 |                                                                                                | - | 0.862824795 | 0.008998169 | 0.029296803 |
| ENSMMUG00000002824 | akirin 2 [Source:VGNC Symbol;Acc:VGNC:69665]                                                   | - | 1.090112997 | 0.001411328 | 0.00594683  |
| ENSMMUG00000002821 | origin recognition complex subunit 3 [Source:VGNC Symbol;Acc:VGNC:75715]                       | - | 0.891962086 | 0.001547764 | 0.006423138 |
| ENSMMUG00000017039 | arginyl-tRNA synthetase 2, mitochondrial [Source:VGNC Symbol;Acc:VGNC:76516]                   | - | 0.530428611 | 0.000709831 | 0.003271101 |
| ENSMMUG00000064804 |                                                                                                | - | 1.545569611 | 9.69E-08    | 1.09E-06    |
| ENSMMUG00000005442 | 5'-nucleotidase ecto [Source:VGNC Symbol;Acc:VGNC:75537]                                       | - | 1.414819646 | 4.62E-07    | 4.50E-06    |
| ENSMMUG00000061590 |                                                                                                | - | 2.248342195 | 1.58E-05    | 0.000109006 |
| ENSMMUG00000017186 | pleckstrin homology domain interacting protein [Source:VGNC Symbol;Acc:VGNC:75803]             | - | 1.919594089 | 1.65E-08    | 2.14E-07    |
| ENSMMUG00000019261 | collagen type XII alpha 1 chain [Source:VGNC Symbol;Acc:VGNC:71291]                            | - | 0.349840748 | 0.000279087 | 0.001442018 |
| ENSMMUG00000017806 | CD109 molecule [Source:VGNC Symbol;Acc:VGNC:70834]                                             | - | 0.523322519 | 0.000567869 | 0.00270398  |
| ENSMMUG00000008133 | solute carrier family 17 member 5 [Source:VGNC Symbol;Acc:VGNC:77405]                          | - | 0.421838859 | 0.003348904 | 0.012526456 |
| ENSMMUG00000060308 |                                                                                                | - | 3.865503278 | 0.001135357 | 0.00492152  |
| ENSMMUG00000002777 | protein tyrosine phosphatase 4A1 [Source:VGNC Symbol;Acc:VGNC:83452]                           | - | 0.476745612 | 0.003358485 | 0.012558943 |
| ENSMMUG00000001399 | 3-hydroxymethyl-3-methylglutaryl-CoA lyase like 1 [Source:VGNC Symbol;Acc:VGNC:73429]          | - | 0.370247835 | 0.013053183 | 0.040053564 |
| ENSMMUG00000051828 |                                                                                                | - | 1.868018659 | 0.013815152 | 0.042032953 |
| ENSMMUG00000012784 | tubulointerstitial nephritis antigen [Source:VGNC Symbol;Acc:VGNC:78382]                       | - | 1.278738564 | 0.011837011 | 0.036878563 |
| ENSMMUG00000012781 | muscular LMNA interacting protein [Source:VGNC Symbol;Acc:VGNC:83434]                          | - | 1.832207691 | 5.39E-09    | 7.62E-08    |
| ENSMMUG00000011049 | leucine rich repeat containing 1 [Source:VGNC Symbol;Acc:VGNC:81087]                           | - | 1.391729422 | 8.30E-05    | 0.00048243  |
| ENSMMUG00000017137 | glutathione S-transferase alpha 3 [Source:NCBI gene;Acc:709498]                                | - | 0.314123451 | 0.002215    | 0.008811616 |
| ENSMMUG00000050626 |                                                                                                | - | 0.542106922 | 0.00574018  | 0.01987029  |
| ENSMMUG00000052626 | progesterone and adiponectin receptor family member 8 [Source:NCBI gene;Acc:708418]            | - | 0.734115005 | 1.03E-09    | 1.64E-08    |
| ENSMMUG00000026975 | mml-mir-206 [Source:miRBase;Acc:MI0007667]                                                     | - | 4.689959121 | 6.95E-06    | 5.25E-05    |
| ENSMMUG00000016993 | PKHD1 ciliary IPT domain containing fibrocystin/polyductin [Source:VGNC Symbol;Acc:VGNC:76010] | - | 1.793088921 | 3.80E-08    | 4.59E-07    |
| ENSMMUG00000053984 |                                                                                                | - | 2.540947267 | 9.17E-08    | 1.03E-06    |
| ENSMMUG00000056168 |                                                                                                | - | 3.676106225 | 0.001247576 | 0.005353351 |
| ENSMMUG00000023002 | adhesion G protein-coupled receptor F5 [Source:VGNC Symbol;Acc:VGNC:69471]                     | - | 0.378011634 | 0.000331149 | 0.001670397 |
| ENSMMUG00000042154 | ankyrin repeat domain 66 [Source:VGNC Symbol;Acc:VGNC:81024]                                   | - | 0.583236861 | 0.000266451 | 0.001386168 |
| ENSMMUG00000019254 | phospholipase A2 group VII [Source:VGNC Symbol;Acc:VGNC:76158]                                 | - | 0.708578881 | 0.000463011 | 0.002253723 |
| ENSMMUG00000019252 | tudor domain containing 6 [Source:VGNC Symbol;Acc:VGNC:79319]                                  | - | 0.497022556 | 0.005300466 | 0.018598316 |
| ENSMMUG00000019250 | solute carrier family 25 member 27 [Source:VGNC Symbol;Acc:VGNC:77543]                         | - | 0.747795741 | 1.14E-05    | 8.16E-05    |
| ENSMMUG00000055199 | cytochrome P450, family 39, subfamily A, polypeptide 1 [Source:NCBI gene;Acc:704242]           | - | 1.950967721 | 4.15E-09    | 6.00E-08    |
| ENSMMUG00000019246 | regulator of calcineurin 2 [Source:VGNC Symbol;Acc:VGNC:82092]                                 | - | 1.932462103 | 2.97E-07    | 3.00E-06    |
| ENSMMUG00000003511 | chloride intracellular channel 5 [Source:VGNC Symbol;Acc:VGNC:71171]                           | - | 0.663761123 | 0.00054954  | 0.002625621 |

|                    |                                                                                              |   |             |             |             |
|--------------------|----------------------------------------------------------------------------------------------|---|-------------|-------------|-------------|
| ENSMMUG00000021377 | SPT3 homolog, SAGA and STAGA complex component [Source:VGNC Symbol;Acc:VGNC:78055]           | - | 0.995851977 | 1.04E-06    | 9.35E-06    |
| ENSMMUG00000014389 | cell division cycle 5 like [Source:VGNC Symbol;Acc:VGNC:70801]                               | - | 0.877481138 | 0.001532116 | 0.006369659 |
| ENSMMUG00000014388 | spermatogenesis associated serine rich 1 [Source:VGNC Symbol;Acc:VGNC:77975]                 | - | 0.510868076 | 0.001490692 | 0.006221421 |
| ENSMMUG00000060503 | Metazoan signal recognition particle RNA [Source:RFAM;Acc:RF00017]                           | - | -1.02183119 | 0.000818644 | 0.003716362 |
| ENSMMUG00000063288 |                                                                                              | - | -0.57401683 | 0.00043722  | 0.002140013 |
| ENSMMUG00000013920 | triggering receptor expressed on myeloid cells 2 [Source:VGNC Symbol;Acc:VGNC:79089]         | - | 0.921869098 | 0.000768399 | 0.00351558  |
| ENSMMUG00000062538 | adenylate cyclase type 10 [Source:NCBI gene;Acc:719662]                                      | - | 0.965182323 | 0.000266224 | 0.001385767 |
| ENSMMUG00000021173 | nuclear transcription factor Y subunit alpha [Source:VGNC Symbol;Acc:VGNC:75344]             | - | 0.835796732 | 1.67E-09    | 2.56E-08    |
| ENSMMUG00000021172 | O-acyl-ADP-ribose deacylase 1 [Source:VGNC Symbol;Acc:VGNC:75444]                            | - | 0.373572414 | 0.016634063 | 0.048945301 |
| ENSMMUG00000021171 | apolipoprotein B mRNA editing enzyme catalytic subunit 2 [Source:VGNC Symbol;Acc:VGNC:69986] | - | 0.556707174 | 0.003021111 | 0.011471713 |
| ENSMMUG00000021169 | translocator protein 2 [Source:VGNC Symbol;Acc:VGNC:83960]                                   | - | 0.928226572 | 1.81E-06    | 1.54E-05    |
| ENSMMUG00000021168 | unc-5 family C-terminal like [Source:VGNC Symbol;Acc:VGNC:79314]                             | - | -1.01118102 | 1.52E-11    | 3.29E-10    |
| ENSMMUG00000013651 | kinesin family member 6 [Source:VGNC Symbol;Acc:VGNC:73873]                                  | - | 2.357472009 | 0.015876952 | 0.047160028 |
| ENSMMUG00000013644 | potassium two pore domain channel subfamily K member 17 [Source:VGNC Symbol;Acc:VGNC:73828]  | - | 1.877294157 | 1.48E-11    | 3.22E-10    |
| ENSMMUG00000023381 | dynein axonemal heavy chain 8 [Source:VGNC Symbol;Acc:VGNC:71943]                            | - | 0.481967177 | 1.07E-05    | 7.74E-05    |
| ENSMMUG00000048502 | Metazoan signal recognition particle RNA [Source:RFAM;Acc:RF00017]                           | - | 1.129256243 | 0.000588587 | 0.002791601 |
| ENSMMUG00000062055 | glyoxalase I [Source:NCBI gene;Acc:719518]                                                   | - | 0.683550293 | 7.14E-06    | 5.39E-05    |
| ENSMMUG00000011575 | coiled-coil domain containing 167 [Source:VGNC Symbol;Acc:VGNC:70833]                        | - | -1.40608804 | 0.000887756 | 0.00397531  |
| ENSMMUG00000011573 | cap methyltransferase 1 [Source:VGNC Symbol;Acc:VGNC:71271]                                  | - | 1.022686576 | 0.000435169 | 0.002132952 |
| ENSMMUG00000063198 |                                                                                              | - | 3.845231717 | 5.21E-08    | 6.12E-07    |
| ENSMMUG00000022193 | FYVE, RhoGEF and PH domain containing 2 [Source:VGNC Symbol;Acc:VGNC:72643]                  | - | 1.658882086 | 0.003581599 | 0.013279947 |
| ENSMMUG00000020558 | serine/threonine kinase 38 [Source:VGNC Symbol;Acc:VGNC:78155]                               | - | 1.346728711 | 0.000812109 | 0.003692673 |
| ENSMMUG00000014508 | potassium channel tetramerization domain containing 20 [Source:VGNC Symbol;Acc:VGNC:73872]   | - | 1.359065313 | 9.37E-10    | 1.50E-08    |
| ENSMMUG00000055914 |                                                                                              | - | 1.673016013 | 3.55E-09    | 5.20E-08    |
| ENSMMUG00000015416 | bromodomain and PHD finger containing 3 [Source:VGNC Symbol;Acc:VGNC:70309]                  | - | 1.810173236 | 8.35E-13    | 2.19E-11    |
| ENSMMUG00000023823 | Y RNA [Source:RFAM;Acc:RF00019]                                                              | - | 3.879556476 | 0.00107491  | 0.004701414 |
| ENSMMUG00000000869 | small nuclear ribonucleoprotein polypeptide C [Source:NCBI gene;Acc:718654]                  | - | 3.819855776 | 1.61E-05    | 0.000110886 |
| ENSMMUG00000063472 |                                                                                              | - | 3.563936031 | 0.016942583 | 0.049797912 |
| ENSMMUG00000047729 | inositol 1,4,5-trisphosphate receptor type 3 [Source:NCBI gene;Acc:718040]                   | - | 1.473853294 | 0.010532056 | 0.033391593 |
| ENSMMUG00000004287 | death domain associated protein [Source:VGNC Symbol;Acc:VGNC:71737]                          | - | 1.030526506 | 7.80E-05    | 0.00045664  |
| ENSMMUG00000003876 | zinc finger and BTB domain containing 22 [Source:VGNC Symbol;Acc:VGNC:78893]                 | - | 0.579097978 | 0.013437111 | 0.041069879 |
| ENSMMUG00000003864 | VPS52 subunit of GARP complex [Source:VGNC Symbol;Acc:VGNC:78551]                            | - | 0.668638139 | 0.000474279 | 0.002300526 |
| ENSMMUG00000003850 | collagen type XI alpha 2 chain [Source:VGNC Symbol;Acc:VGNC:71290]                           | - | 0.619172748 | 0.000624607 | 0.002931241 |
| ENSMMUG00000019371 | major histocompatibility complex, class II, DP alpha [Source:NCBI gene;Acc:717992]           | - | 1.143272314 | 0.00530111  | 0.018598316 |
| ENSMMUG00000023138 | bromodomain containing 2 [Source:VGNC Symbol;Acc:VGNC:83422]                                 | - | 1.981712492 | 0.001583965 | 0.006559935 |
| ENSMMUG00000006828 | valyl-tRNA synthetase 1 [Source:VGNC Symbol;Acc:VGNC:78755]                                  | - | 3.265980134 | 2.52E-05    | 0.000166147 |

|                    |                                                                                   |             |             |             |
|--------------------|-----------------------------------------------------------------------------------|-------------|-------------|-------------|
| ENSMMUG0000006827  | von Willebrand factor A domain containing 7 [Source:VGNC Symbol;Acc:VGNC:78941]   | 3.033539341 | 3.04E-05    | 0.00019656  |
| ENSMMUG0000009702  | mutS homolog 5 [Source:NCBI gene;Acc:715494]                                      | 1.993246939 | 0.000274167 | 0.00142026  |
| ENSMMUG00000058534 |                                                                                   | 2.537432041 | 2.41E-07    | 2.48E-06    |
| ENSMMUG00000015693 | lymphocyte antigen 6 family member G6C [Source:VGNC Symbol;Acc:VGNC:74285]        | 1.992986644 | 4.63E-06    | 3.65E-05    |
| ENSMMUG00000053324 | lymphocyte antigen 6 complex locus protein G6d [Source:NCBI gene;Acc:715304]      | 1.574237537 | 1.35E-09    | 2.10E-08    |
| ENSMMUG00000015686 | abhydrolase domain containing 16A [Source:VGNC Symbol;Acc:VGNC:69393]             | 1.767908351 | 2.97E-20    | 1.90E-18    |
| ENSMMUG00000054159 | lymphocyte antigen 6 family member G5C [Source:VGNC Symbol;Acc:VGNC:83431]        | 2.275825805 | 0.001936151 | 0.007828906 |
| ENSMMUG00000005294 | casein kinase 2 beta [Source:NCBI gene;Acc:715807]                                | 1.896266164 | 7.23E-07    | 6.76E-06    |
| ENSMMUG00000005293 | G-patch domain and ankyrin repeats 1 [Source:VGNC Symbol;Acc:VGNC:81073]          | 1.903122903 | 7.47E-06    | 5.61E-05    |
| ENSMMUG00000005302 | BAG cochaperone 6 [Source:VGNC Symbol;Acc:VGNC:81044]                             | 2.09090154  | 1.11E-28    | 1.71E-26    |
| ENSMMUG00000005303 | apolipoprotein M [Source:VGNC Symbol;Acc:VGNC:69825]                              | 1.829595236 | 0.000886052 | 0.00397095  |
| ENSMMUG00000005297 | proline rich coiled-coil 2A [Source:VGNC Symbol;Acc:VGNC:83448]                   | 1.782979644 | 4.21E-18    | 2.17E-16    |
| ENSMMUG00000025918 | small nucleolar RNA, H/ACA box 38 [Source:HGNC Symbol;Acc:HGNC:32631]             | 2.14871073  | 0.000611642 | 0.002886304 |
| ENSMMUG00000049735 | allograft inflammatory factor 1 [Source:NCBI gene;Acc:574115]                     | 1.896109003 | 4.35E-18    | 2.23E-16    |
| ENSMMUG00000008854 | natural cytotoxicity triggering receptor 3 [Source:VGNC Symbol;Acc:VGNC:74990]    | 1.871828405 | 3.25E-14    | 1.06E-12    |
| ENSMMUG00000008839 | DExD-box helicase 39B [Source:VGNC Symbol;Acc:VGNC:71621]                         | 1.244951543 | 0.002746525 | 0.010580912 |
| ENSMMUG00000019961 | protein phosphatase 1 regulatory subunit 18 [Source:NCBI gene;Acc:712176]         | 4.188593435 | 1.38E-06    | 1.20E-05    |
| ENSMMUG00000053627 |                                                                                   | 3.51163748  | 2.60E-08    | 3.25E-07    |
| ENSMMUG00000011682 | ribonuclease P/MRP subunit p21 [Source:NCBI gene;Acc:713056]                      | 4.01209171  | 6.85E-09    | 9.46E-08    |
| ENSMMUG00000060527 |                                                                                   | 0.829007281 | 0.001326676 | 0.005634156 |
| ENSMMUG00000023679 | tripartite motif containing 26 [Source:VGNC Symbol;Acc:VGNC:78854]                | 1.138799652 | 7.25E-05    | 0.000428113 |
| ENSMMUG00000002890 | tripartite motif containing 15 [Source:VGNC Symbol;Acc:VGNC:83958]                | -1.25752265 | 1.01E-07    | 1.13E-06    |
| ENSMMUG00000012129 | tripartite motif containing 10 [Source:VGNC Symbol;Acc:VGNC:78550]                | 1.271331607 | 2.05E-08    | 2.61E-07    |
| ENSMMUG00000058580 | tripartite motif containing 40 [Source:NCBI gene;Acc:100427925]                   | 1.242729091 | 2.03E-07    | 2.12E-06    |
| ENSMMUG00000062264 |                                                                                   | 1.345620519 | 0.000806003 | 0.003669667 |
| ENSMMUG00000012124 | ring finger protein 39 [Source:VGNC Symbol;Acc:VGNC:83458]                        | 1.122800062 | 5.00E-05    | 0.000307084 |
| ENSMMUG00000012120 | zinc ribbon domain containing 1 [Source:VGNC Symbol;Acc:VGNC:78912]               | 1.520461911 | 1.08E-09    | 1.71E-08    |
| ENSMMUG00000055272 | putative uncharacterized protein ZNRD1-AS1 [Source:NCBI gene;Acc:712069]          | -1.05339398 | 9.08E-05    | 0.000523307 |
| ENSMMUG00000056544 |                                                                                   | 1.586330602 | 0.000245843 | 0.001291289 |
| ENSMMUG00000037625 |                                                                                   | 1.443131394 | 0.000717496 | 0.003303169 |
| ENSMMUG00000053561 |                                                                                   | 3.304291058 | 0.005739319 | 0.01987029  |
| ENSMMUG00000029883 | olfactory receptor, family 2, subfamily J, member 3 [Source:NCBI gene;Acc:708943] | 3.586003798 | 0.000473225 | 0.002296206 |
| ENSMMUG00000059442 |                                                                                   | 2.255927858 | 0.002240984 | 0.008887251 |
| ENSMMUG00000004617 | glutathione peroxidase 6 [Source:VGNC Symbol;Acc:VGNC:73154]                      | 0.745881144 | 0.012085128 | 0.037485015 |
| ENSMMUG00000012396 | zinc finger and SCAN domain containing 23 [Source:VGNC Symbol;Acc:VGNC:79313]     | 0.763353752 | 0.000190409 | 0.001024993 |
| ENSMMUG00000011675 | zinc finger and SCAN domain containing 12 [Source:VGNC Symbol;Acc:VGNC:78910]     | 0.689165469 | 9.31E-06    | 6.82E-05    |
| ENSMMUG00000005964 | CMP-N-acetylneuraminic acid hydroxylase [Source:NCBI gene;Acc:574186]             | 0.910767106 | 0.00248022  | 0.009696161 |
| ENSMMUG00000049021 | Metazoan signal recognition particle RNA [Source:RFAM;Acc:RF00017]                | 1.667192851 | 0.01024118  | 0.032612329 |
| ENSMMUG00000058151 | chromosome 4 C6orf62 homolog [Source:NCBI gene;Acc:708218]                        | 1.029651447 | 1.28E-10    | 2.40E-09    |

|                    |                                                                                                       |             |             |             |
|--------------------|-------------------------------------------------------------------------------------------------------|-------------|-------------|-------------|
| ENSMMUG00000051037 |                                                                                                       | 4.611350655 | 8.06E-16    | 3.21E-14    |
| ENSMMUG00000054532 |                                                                                                       | -           |             |             |
| ENSMMUG00000052442 |                                                                                                       | 0.747285372 | 0.001954141 | 0.007894818 |
| ENSMMUG00000014691 | inhibitor of DNA binding 4, HLH protein [Source:VGNC Symbol;Acc:VGNC:73557]                           | -0.77664769 | 0.00014627  | 0.000806753 |
|                    |                                                                                                       | -0.74007047 | 7.57E-05    | 0.000444707 |
|                    |                                                                                                       | -           |             |             |
| ENSMMUG00000063576 | Metazoan signal recognition particle RNA [Source:RFAM;Acc:RF00017]                                    | 1.532910112 | 0.000204654 | 0.001093222 |
| ENSMMUG00000052333 |                                                                                                       | 0.709710656 | 0.001454117 | 0.006095989 |
| ENSMMUG00000049917 | U6 spliceosomal RNA [Source:RFAM;Acc:RF00026]                                                         | 0.739435235 | 0.000627191 | 0.00294052  |
| ENSMMUG00000019763 | DEK proto-oncogene [Source:NCBI gene;Acc:712460]                                                      | 0.540556566 | 0.000938987 | 0.004165636 |
| ENSMMUG00000052891 |                                                                                                       | 1.205726693 | 0.002131595 | 0.008525773 |
|                    |                                                                                                       | -           |             |             |
| ENSMMUG00000020289 | CD83 molecule [Source:VGNC Symbol;Acc:VGNC:70783]                                                     | 1.504230813 | 5.29E-12    | 1.24E-10    |
|                    |                                                                                                       | -           |             |             |
| ENSMMUG00000044473 |                                                                                                       | 0.636657617 | 0.001521987 | 0.006338286 |
| ENSMMUG00000020040 | phosphatase and actin regulator 1 [Source:VGNC Symbol;Acc:VGNC:75841]                                 | 0.773249003 | 0.01476871  | 0.044384692 |
| ENSMMUG00000058800 |                                                                                                       | 1.287555734 | 2.56E-11    | 5.38E-10    |
|                    |                                                                                                       | -           |             |             |
| ENSMMUG00000016135 | neural precursor cell expressed, developmentally down-regulated 9 [Source:VGNC Symbol;Acc:VGNC:75304] | 0.875719419 | 9.16E-05    | 0.000527582 |
|                    |                                                                                                       | -           |             |             |
| ENSMMUG00000046520 | small integral membrane protein 13 [Source:NCBI gene;Acc:703387]                                      | 0.680557578 | 0.007348154 | 0.024651476 |
|                    |                                                                                                       | -           |             |             |
| ENSMMUG00000043161 | endogenous retrovirus group FRD member 1, envelope [Source:VGNC Symbol;Acc:VGNC:81068]                | 1.266202171 | 3.04E-06    | 2.48E-05    |
| ENSMMUG00000005532 | male germ cell associated kinase [Source:VGNC Symbol;Acc:VGNC:74480]                                  | 0.611773061 | 0.005060959 | 0.017881034 |
| ENSMMUG00000018788 | transmembrane protein 14B [Source:NCBI gene;Acc:698237]                                               | 0.564885093 | 0.006184957 | 0.021191247 |
| ENSMMUG00000018787 | PAK1 interacting protein 1 [Source:VGNC Symbol;Acc:VGNC:75661]                                        | 1.052110025 | 1.99E-07    | 2.08E-06    |
| ENSMMUG00000061586 | chromosome 4 C6orf52 homolog [Source:NCBI gene;Acc:702114]                                            | 0.884062078 | 1.01E-06    | 9.12E-06    |
| ENSMMUG00000026665 | Y RNA [Source:RFAM;Acc:RF00019]                                                                       | 1.120082651 | 0.012293353 | 0.038038325 |
|                    |                                                                                                       | -           |             |             |
| ENSMMUG00000006186 | transcription factor AP-2 alpha [Source:VGNC Symbol;Acc:VGNC:78320]                                   | 1.332623016 | 0.002053585 | 0.008247395 |
|                    |                                                                                                       | -           |             |             |
| ENSMMUG00000038560 | eukaryotic translation elongation factor 1 epsilon 1 [Source:NCBI gene;Acc:695426]                    | 1.143576056 | 5.45E-17    | 2.51E-15    |
|                    |                                                                                                       | -           |             |             |
| ENSMMUG00000044859 |                                                                                                       | 1.309427395 | 0.009173986 | 0.029772462 |
|                    |                                                                                                       | -           |             |             |
| ENSMMUG00000015577 | RIO kinase 1 [Source:VGNC Symbol;Acc:VGNC:76767]                                                      | 2.015899123 | 2.22E-09    | 3.36E-08    |
| ENSMMUG00000060973 |                                                                                                       | 0.986478505 | 4.00E-09    | 5.80E-08    |
|                    |                                                                                                       | -           |             |             |
| ENSMMUG00000052268 |                                                                                                       | 2.938147328 | 0.003069546 | 0.011617881 |
|                    |                                                                                                       | -           |             |             |
| ENSMMUG00000023558 | exocyst complex component 2 [Source:VGNC Symbol;Acc:VGNC:72338]                                       | 1.050238042 | 0.014856269 | 0.044600613 |
|                    |                                                                                                       | -           |             |             |
| ENSMMUG00000056560 |                                                                                                       | 0.878510336 | 0.000894424 | 0.004000801 |
| ENSMMUG00000058002 | zinc finger protein 669-like [Source:NCBI gene;Acc:696282]                                            | 0.831639706 | 1.31E-09    | 2.05E-08    |
|                    |                                                                                                       | -           |             |             |
| ENSMMUG00000062676 |                                                                                                       | 1.027587001 | 1.98E-05    | 0.000134638 |
|                    |                                                                                                       | -           |             |             |
| ENSMMUG00000065031 |                                                                                                       | 1.047080295 | 2.37E-09    | 3.56E-08    |
| ENSMMUG00000023139 | small nuclear ribonucleoprotein polypeptide N [Source:VGNC Symbol;Acc:VGNC:78437]                     | 2.507866531 | 1.07E-10    | 2.04E-09    |
| ENSMMUG00000051503 | nuclear pore associated protein 1 [Source:NCBI gene;Acc:719891]                                       | 2.717768488 | 1.33E-06    | 1.16E-05    |
|                    |                                                                                                       | -           |             |             |
| ENSMMUG00000046479 |                                                                                                       | 0.587523055 | 0.005415772 | 0.018947062 |
|                    |                                                                                                       | -           |             |             |
| ENSMMUG00000058972 |                                                                                                       | 2.466875527 | 0.014569154 | 0.043936183 |

|                    |                                                                                                      |             |             |             |
|--------------------|------------------------------------------------------------------------------------------------------|-------------|-------------|-------------|
| ENSMMUG00000021656 | golgin subfamily A member 8S [Source:NCBI gene;Acc:722977]                                           | 3.057333128 | 0.001477125 | 0.006179513 |
| ENSMMUG00000054315 |                                                                                                      | 2.460244622 | 5.11E-07    | 4.92E-06    |
| ENSMMUG00000055117 |                                                                                                      | 2.005477574 | 8.56E-07    | 7.85E-06    |
| ENSMMUG00000063268 |                                                                                                      | 1.845587906 | 2.11E-07    | 2.19E-06    |
| ENSMMUG00000009430 | transient receptor potential cation channel subfamily M member 1 [Source:VGNC Symbol;Acc:VGNC:79964] | 0.575206611 | 2.97E-08    | 3.66E-07    |
| ENSMMUG00000005270 | ryanodine receptor 3 [Source:NCBI gene;Acc:694996]                                                   | 0.62680034  | 1.38E-06    | 1.21E-05    |
| ENSMMUG00000014227 | cholinergic receptor muscarinic 5 [Source:VGNC Symbol;Acc:VGNC:71044]                                | 3.552823086 | 0.000641359 | 0.002990947 |
| ENSMMUG00000002337 | aquarius intron-binding spliceosomal factor [Source:VGNC Symbol;Acc:VGNC:69925]                      | 1.261723757 | 8.10E-05    | 0.00047306  |
| ENSMMUG00000046486 | zinc finger protein 770 [Source:NCBI gene;Acc:697740]                                                | 0.805702757 | 0.002195281 | 0.008740611 |
| ENSMMUG00000009668 | transmembrane and coiled-coil domains 5A [Source:VGNC Symbol;Acc:VGNC:79725]                         | 2.55437665  | 0.000378387 | 0.001874957 |
| ENSMMUG00000018332 | family with sequence similarity 98 member B [Source:VGNC Symbol;Acc:VGNC:72583]                      | 0.893513794 | 1.26E-05    | 8.92E-05    |
| ENSMMUG00000018333 | RAS guanyl releasing protein 1 [Source:VGNC Symbol;Acc:VGNC:76671]                                   | 1.580695294 | 0.012306805 | 0.038054758 |
| ENSMMUG00000057671 |                                                                                                      | 2.882787043 | 0.007398776 | 0.024779803 |
| ENSMMUG00000057460 |                                                                                                      | 1.011416535 | 0.014996253 | 0.044943889 |
| ENSMMUG00000016686 | BUB1 mitotic checkpoint serine/threonine kinase B [Source:VGNC Symbol;Acc:VGNC:70293]                | 0.706604398 | 2.46E-05    | 0.000162474 |
| ENSMMUG00000020534 | p21 (RAC1) activated kinase 6 [Source:NCBI gene;Acc:701589]                                          | 2.743051619 | 8.35E-50    | 7.32E-47    |
| ENSMMUG00000043229 | carbohydrate sulfotransferase 14 [Source:NCBI gene;Acc:703115]                                       | 1.724796842 | 1.80E-05    | 0.000122801 |
| ENSMMUG00000001482 | coiled-coil domain containing 32 [Source:VGNC Symbol;Acc:VGNC:70891]                                 | 1.112941327 | 2.37E-06    | 1.98E-05    |
| ENSMMUG00000001483 | RNA pseudouridine synthase domain containing 2 [Source:VGNC Symbol;Acc:VGNC:77091]                   | 0.929268003 | 0.003142604 | 0.011830534 |
| ENSMMUG00000048910 | kinetochore scaffold 1 [Source:VGNC Symbol;Acc:VGNC:84366]                                           | 0.846395348 | 0.000124183 | 0.00069518  |
| ENSMMUG00000000306 | regulator of microtubule dynamics 3 [Source:VGNC Symbol;Acc:VGNC:76821]                              | 0.724704114 | 0.007000653 | 0.023609948 |
| ENSMMUG00000013160 | DnaJ heat shock protein family (Hsp40) member C17 [Source:VGNC Symbol;Acc:VGNC:84335]                | 1.619175014 | 1.18E-05    | 8.46E-05    |
| ENSMMUG00000013991 | exonuclease 3'-5' domain containing 1 [Source:VGNC Symbol;Acc:VGNC:72390]                            | 0.821207802 | 2.23E-05    | 0.000148955 |
| ENSMMUG00000001532 | glucosidase alpha, neutral C [Source:NCBI gene;Acc:708126]                                           | 0.751054636 | 9.10E-08    | 1.03E-06    |
| ENSMMUG00000001534 | calpain 3 [Source:VGNC Symbol;Acc:VGNC:70533]                                                        | 0.677222923 | 0.000470925 | 0.002286628 |
| ENSMMUG00000063886 | Metazoan signal recognition particle RNA [Source:RFAM;Acc:RF00017]                                   | 2.654750484 | 0.006090185 | 0.020921719 |
| ENSMMUG00000001547 | zinc finger protein 106 [Source:VGNC Symbol;Acc:VGNC:78831]                                          | 1.272323216 | 2.29E-23    | 1.97E-21    |
| ENSMMUG00000064341 | U6 spliceosomal RNA [Source:RFAM;Acc:RF00026]                                                        | 3.846895993 | 1.28E-05    | 9.05E-05    |
| ENSMMUG00000008093 | StAR related lipid transfer domain containing 9 [Source:NCBI gene;Acc:708953]                        | -0.90147626 | 3.84E-09    | 5.57E-08    |
| ENSMMUG00000015123 | codanin 1 [Source:VGNC Symbol;Acc:VGNC:70788]                                                        | 0.524458607 | 0.013070335 | 0.040097419 |
| ENSMMUG00000010036 | tau tubulin kinase 2 [Source:VGNC Symbol;Acc:VGNC:81598]                                             | 0.420864105 | 0.000400066 | 0.001976091 |
| ENSMMUG00000022256 | transglutaminase 5 [Source:VGNC Symbol;Acc:VGNC:78341]                                               | 1.137242792 | 5.85E-05    | 0.000354314 |
| ENSMMUG00000022251 | transglutaminase 7 [Source:VGNC Symbol;Acc:VGNC:79880]                                               | -0.39580922 | 0.004939135 | 0.017547881 |
| ENSMMUG00000055498 | leucine carboxyl methyltransferase 2 [Source:NCBI gene;Acc:710047]                                   | 0.708002859 | 1.69E-05    | 0.000116216 |
| ENSMMUG00000017067 | adenosine deaminase like [Source:VGNC Symbol;Acc:VGNC:69555]                                         | 0.370039028 | 0.006736317 | 0.022806222 |

|                     |                                                                                                               |             |             |             |
|---------------------|---------------------------------------------------------------------------------------------------------------|-------------|-------------|-------------|
| ENSMMUG00000017070  | zinc finger and SCAN domain containing 29 [Source:VGNC Symbol;Acc:VGNC:79633]                                 | 0.702648407 | 1.21E-05    | 8.64E-05    |
| ENSMMUG00000017076  | tubulin gamma complex associated protein 4 [Source:VGNC Symbol;Acc:VGNC:79045]                                | 0.701270034 | 0.000735649 | 0.003377866 |
| ENSMMUG00000007255  | microtubule associated protein 1A [Source:VGNC Symbol;Acc:VGNC:74489]                                         | 1.600019639 | 0.000195064 | 0.001047914 |
| ENSMMUG00000007860  | diphosphoinositol pentakisphosphate kinase 1 [Source:VGNC Symbol;Acc:VGNC:76127]                              | 0.736487444 | 0.011074253 | 0.034874073 |
| ENSMMUG000000057376 | inositol hexakisphosphate and diphosphoinositol-pentakisphosphate kinase 1-like [Source:NCBI gene;Acc:717098] | 0.454220629 | 0.002274112 | 0.008985595 |
| ENSMMUG00000016742  | CTD small phosphatase like 2 [Source:VGNC Symbol;Acc:VGNC:71593]                                              | 0.359195964 | 0.004257203 | 0.015470005 |
| ENSMMUG00000014291  | SPG11 vesicle trafficking associated, spatacin [Source:VGNC Symbol;Acc:VGNC:77856]                            | 0.588404641 | 0.003068971 | 0.011617881 |
| ENSMMUG00000005856  | glycine amidinotransferase [Source:VGNC Symbol;Acc:VGNC:72892]                                                | 1.478143857 | 1.26E-12    | 3.22E-11    |
| ENSMMUG000000049265 | Metazoan signal recognition particle RNA [Source:RFAM;Acc:RF00017]                                            | 1.569569787 | 0.000130089 | 0.000725919 |
| ENSMMUG000000062254 |                                                                                                               | 1.691317977 | 7.91E-06    | 5.90E-05    |
| ENSMMUG00000012144  | semaphorin 6D [Source:VGNC Symbol;Acc:VGNC:77250]                                                             | 2.935675533 | 0.004585773 | 0.016471901 |
| ENSMMUG00000016896  | solute carrier family 12 member 1 [Source:VGNC Symbol;Acc:VGNC:77385]                                         | 1.061589518 | 1.50E-08    | 1.95E-07    |
| ENSMMUG00000009837  | SECIS binding protein 2 like [Source:VGNC Symbol;Acc:VGNC:77325]                                              | 0.691325768 | 1.17E-06    | 1.04E-05    |
| ENSMMUG00000009839  | galactokinase 2 [Source:VGNC Symbol;Acc:VGNC:72870]                                                           | -0.71429227 | 0.002447647 | 0.009600938 |
| ENSMMUG000000049831 |                                                                                                               | 0.693079719 | 0.001449245 | 0.006078843 |
| ENSMMUG000000050608 |                                                                                                               | 1.340774246 | 3.73E-08    | 4.52E-07    |
| ENSMMUG00000003684  | ATPase phospholipid transporting 8B4 (putative) [Source:VGNC Symbol;Acc:VGNC:84311]                           | 1.400610775 | 1.03E-11    | 2.30E-10    |
| ENSMMUG000000057283 |                                                                                                               | 1.414999469 | 1.06E-05    | 7.64E-05    |
| ENSMMUG00000002879  | GA binding protein transcription factor subunit beta 1 [Source:VGNC Symbol;Acc:VGNC:72845]                    | 0.744802842 | 7.62E-05    | 0.000447801 |
| ENSMMUG000000060278 | Metazoan signal recognition particle RNA [Source:RFAM;Acc:RF00017]                                            | 2.824288829 | 4.50E-07    | 4.39E-06    |
| ENSMMUG00000014884  | ubiquitin specific peptidase 8 [Source:VGNC Symbol;Acc:VGNC:78748]                                            | 0.752450645 | 4.49E-09    | 6.47E-08    |
| ENSMMUG00000008575  | transient receptor potential cation channel subfamily M member 7 [Source:VGNC Symbol;Acc:VGNC:79106]          | 0.607431489 | 2.76E-09    | 4.09E-08    |
| ENSMMUG00000000754  | Dmx like 2 [Source:VGNC Symbol;Acc:VGNC:71936]                                                                | 2.164970145 | 7.92E-13    | 2.09E-11    |
| ENSMMUG00000017432  | tropomodulin 2 [Source:VGNC Symbol;Acc:VGNC:78571]                                                            | -0.89053191 | 9.02E-07    | 8.22E-06    |
| ENSMMUG00000002345  | tropomodulin 3 [Source:VGNC Symbol;Acc:VGNC:78572]                                                            | 0.870971121 | 3.13E-26    | 3.91E-24    |
| ENSMMUG000000029652 | mitogen-activated protein kinase 6 [Source:NCBI gene;Acc:694998]                                              | 3.471262147 | 0.007904135 | 0.026246668 |
| ENSMMUG00000017374  | G protein subunit beta 5 [Source:VGNC Symbol;Acc:VGNC:73097]                                                  | 2.672747738 | 4.88E-06    | 3.82E-05    |
| ENSMMUG00000007504  | myosin VC [Source:VGNC Symbol;Acc:VGNC:75117]                                                                 | 2.495692155 | 4.94E-05    | 0.000303695 |
| ENSMMUG00000007509  | myosin VA [Source:VGNC Symbol;Acc:VGNC:75116]                                                                 | 0.733884345 | 5.47E-05    | 0.000333299 |
| ENSMMUG000000048644 |                                                                                                               | 1.187026205 | 0.008844134 | 0.028855581 |
| ENSMMUG00000001423  | family with sequence similarity 214 member A [Source:VGNC Symbol;Acc:VGNC:72354]                              | 0.382460304 | 0.000855046 | 0.003849217 |
| ENSMMUG00000010797  | phosphatidylinositol glycan anchor biosynthesis class B [Source:VGNC Symbol;Acc:VGNC:75985]                   | 0.569137772 | 0.004370182 | 0.015819226 |
| ENSMMUG000000029638 | chromosome 7 C15orf65 homolog [Source:VGNC Symbol;Acc:VGNC:70689]                                             | 0.633151998 | 0.013354015 | 0.040860431 |
| ENSMMUG00000000863  | dynein axonemal assembly factor 4 [Source:VGNC Symbol;Acc:VGNC:71881]                                         | 1.335026856 | 1.29E-10    | 2.41E-09    |
| ENSMMUG00000008718  | zinc finger protein 280D [Source:NCBI gene;Acc:699509]                                                        | 1.668185672 | 9.03E-16    | 3.58E-14    |
| ENSMMUG00000004091  | transcription factor 12 [Source:VGNC Symbol;Acc:VGNC:78283]                                                   | 0.916162084 | 1.37E-08    | 1.79E-07    |

|                    |                                                                                                                |             |             |             |
|--------------------|----------------------------------------------------------------------------------------------------------------|-------------|-------------|-------------|
| ENSMMUG00000012690 | myocardial zonula adherens protein [Source:NCBI gene;Acc:700247]                                               | 2.754359446 | 4.82E-05    | 0.000297013 |
| ENSMMUG00000063524 |                                                                                                                | 0.355374692 | 0.00778574  | 0.025902595 |
| ENSMMUG00000012933 | myosin IE [Source:VGNC Symbol;Acc:VGNC:75114]                                                                  | 0.325900106 | 0.005500266 | 0.019196173 |
| ENSMMUG00000018426 | glucosaminyl (N-acetyl) transferase 3, mucin type [Source:VGNC Symbol;Acc:VGNC:84342]                          | 2.187236595 | 0.016310421 | 0.048161937 |
| ENSMMUG00000020348 | BCL2 interacting protein 2 [Source:VGNC Symbol;Acc:VGNC:70272]                                                 | 2.026551306 | 3.92E-06    | 3.14E-05    |
| ENSMMUG00000049749 |                                                                                                                | 0.628504177 | 0.001981162 | 0.007992473 |
| ENSMMUG00000011503 | talin 2 [Source:VGNC Symbol;Acc:VGNC:78385]                                                                    | 0.941995473 | 0.011890137 | 0.037019404 |
| ENSMMUG00000013460 | RAB8B, member RAS oncogene family [Source:VGNC Symbol;Acc:VGNC:81550]                                          | 0.623999874 | 0.000129662 | 0.000724113 |
| ENSMMUG00000012114 | ubiquitin specific peptidase 3 [Source:VGNC Symbol;Acc:VGNC:78746]                                             | 3.405265682 | 0.012228379 | 0.037862346 |
| ENSMMUG00000012117 | HECT and RLD domain containing E3 ubiquitin protein ligase family member 1 [Source:VGNC Symbol;Acc:VGNC:73364] | 0.472196869 | 1.03E-07    | 1.15E-06    |
| ENSMMUG00000049375 |                                                                                                                | 0.623140245 | 3.99E-05    | 0.000251303 |
| ENSMMUG00000018177 | death associated protein kinase 2 [Source:VGNC Symbol;Acc:VGNC:71733]                                          | 0.983140458 | 0.000201254 | 0.00107635  |
| ENSMMUG00000013270 | RNA binding protein, mRNA processing factor 2 [Source:VGNC Symbol;Acc:VGNC:76511]                              | 1.698121893 | 0.001148969 | 0.004975908 |
| ENSMMUG00000010949 | SPG21 abhydrolase domain containing, maspardin [Source:VGNC Symbol;Acc:VGNC:77970]                             | 0.869694653 | 9.00E-08    | 1.02E-06    |
| ENSMMUG00000005749 | poly(ADP-ribose) polymerase family member 16 [Source:VGNC Symbol;Acc:VGNC:84416]                               | -0.32698077 | 0.011552231 | 0.036160029 |
| ENSMMUG00000015450 | 3-hydroxyacyl-CoA dehydratase 3 [Source:VGNC Symbol;Acc:VGNC:73225]                                            | 0.510291725 | 0.008813281 | 0.028781704 |
| ENSMMUG00000008095 | integrator complex subunit 14 [Source:VGNC Symbol;Acc:VGNC:73650]                                              | 0.521561114 | 9.36E-05    | 0.000537989 |
| ENSMMUG00000022056 | DENN domain containing 4A [Source:VGNC Symbol;Acc:VGNC:71697]                                                  | 0.605178628 | 8.11E-05    | 0.000473147 |
| ENSMMUG00000054184 | Metazoan signal recognition particle RNA [Source:RFAM;Acc:RF00017]                                             | 0.971861569 | 2.39E-15    | 8.92E-14    |
| ENSMMUG00000035748 | U6 spliceosomal RNA [Source:RFAM;Acc:RF00026]                                                                  | 1.297668232 | 8.70E-05    | 0.000503138 |
| ENSMMUG00000008006 | RAB11A, member RAS oncogene family [Source:VGNC Symbol;Acc:VGNC:81517]                                         | 0.753847761 | 2.56E-08    | 3.20E-07    |
| ENSMMUG00000008007 | multiple EGF like domains 11 [Source:VGNC Symbol;Acc:VGNC:84376]                                               | 1.112347679 | 1.31E-09    | 2.05E-08    |
| ENSMMUG00000052828 |                                                                                                                | 1.071520619 | 0.000122634 | 0.00068788  |
| ENSMMUG00000003693 | DIS3 like exosome 3'-5' exoribonuclease [Source:VGNC Symbol;Acc:VGNC:71796]                                    | 3.588001302 | 0.000343323 | 0.001723744 |
| ENSMMUG00000016840 | mitogen-activated protein kinase kinase 1 [Source:VGNC Symbol;Acc:VGNC:81452]                                  | 1.032333542 | 0.000269236 | 0.001396778 |
| ENSMMUG00000015458 | IQ motif containing H [Source:VGNC Symbol;Acc:VGNC:73655]                                                      | 0.489961893 | 0.01100927  | 0.034708405 |
| ENSMMUG00000004026 | integrin subunit alpha 11 [Source:VGNC Symbol;Acc:VGNC:73774]                                                  | 0.544086392 | 7.68E-06    | 5.75E-05    |
| ENSMMUG00000006230 | NADPH oxidase 5 [Source:VGNC Symbol;Acc:VGNC:82198]                                                            | 0.309336689 | 0.011093313 | 0.034918412 |
| ENSMMUG00000007570 | uveal autoantigen with coiled-coil domains and ankyrin repeats [Source:VGNC Symbol;Acc:VGNC:78995]             | 1.180502481 | 1.21E-11    | 2.68E-10    |
| ENSMMUG00000006490 | ariadne RBR E3 ubiquitin protein ligase 1 [Source:VGNC Symbol;Acc:VGNC:84308]                                  | 0.463593351 | 0.015344494 | 0.04582109  |
| ENSMMUG00000059258 |                                                                                                                | 0.703720431 | 6.98E-05    | 0.000413168 |
| ENSMMUG00000057906 |                                                                                                                | 0.919647131 | 1.66E-15    | 6.33E-14    |
| ENSMMUG00000063495 |                                                                                                                | 1.078052796 | 1.29E-16    | 5.62E-15    |
| ENSMMUG00000001568 | AT-rich interaction domain 3B [Source:VGNC Symbol;Acc:VGNC:69827]                                              | 1.099284719 | 2.19E-07    | 2.27E-06    |
| ENSMMUG00000022481 | cytochrome P450, family 1, subfamily A, polypeptide 1 [Source:NCBI gene;Acc:678694]                            | 0.902496257 | 2.62E-11    | 5.46E-10    |
| ENSMMUG00000015267 | C-terminal Src kinase [Source:VGNC Symbol;Acc:VGNC:81380]                                                      | 0.549587827 | 1.19E-07    | 1.31E-06    |
| ENSMMUG00000008529 | chromosome 7 C15orf39 homolog [Source:VGNC Symbol;Acc:VGNC:70620]                                              | 1.643787963 | 9.41E-07    | 8.56E-06    |
| ENSMMUG00000061079 | golgin subfamily A member 6C [Source:NCBI gene;Acc:715898]                                                     | 1.84759412  | 2.69E-29    | 4.55E-27    |
| ENSMMUG00000016104 | chondroitin sulfate proteoglycan 4 [Source:VGNC Symbol;Acc:VGNC:71525]                                         | 0.765347593 | 2.87E-06    | 2.35E-05    |
| ENSMMUG00000053989 |                                                                                                                | 0.793607781 | 7.29E-07    | 6.81E-06    |
| ENSMMUG00000058835 |                                                                                                                | 0.8763964   | 0.004361447 | 0.015799682 |



|                    |                                                                                                |             |             |             |
|--------------------|------------------------------------------------------------------------------------------------|-------------|-------------|-------------|
| ENSMMUG00000050124 | transmembrane protein 266 [Source:NCBI gene;Acc:707482]                                        | 0.425621955 | 0.009565249 | 0.030806955 |
| ENSMMUG00000010171 | proline-serine-threonine phosphatase interacting protein 1 [Source:VGNC Symbol;Acc:VGNC:76459] | 0.560904831 | 7.47E-05    | 0.000439112 |
| ENSMMUG00000042378 | pseudopodium enriched atypical kinase 1 [Source:VGNC Symbol;Acc:VGNC:84419]                    | 0.521727381 | 0.000116814 | 0.000657335 |
| ENSMMUG00000054259 |                                                                                                | 0.962801659 | 0.003828549 | 0.014076492 |
| ENSMMUG00000058749 | golgin subfamily A member 6C [Source:NCBI gene;Acc:716687]                                     | 3.292926282 | 0.004610126 | 0.016542425 |
| ENSMMUG00000014207 | WD repeat domain 61 [Source:VGNC Symbol;Acc:VGNC:79843]                                        | 1.095500649 | 0.00153006  | 0.006362997 |
| ENSMMUG00000045680 | iron responsive element binding protein 2 [Source:VGNC Symbol;Acc:VGNC:84360]                  | 0.989987389 | 0.003848852 | 0.01414743  |
| ENSMMUG00000059973 |                                                                                                | 0.908658405 | 3.96E-07    | 3.92E-06    |
| ENSMMUG00000064497 |                                                                                                | 2.928431852 | 0.002222757 | 0.00883245  |
| ENSMMUG00000056992 | zinc finger AN1-type containing 6 [Source:NCBI gene;Acc:717543]                                | 0.825754045 | 0.007464032 | 0.024968541 |
| ENSMMUG00000009361 | fumarylacetoacetate hydrolase [Source:NCBI gene;Acc:712716]                                    | 1.846145557 | 2.92E-13    | 8.09E-12    |
| ENSMMUG00000054653 | Metazoan signal recognition particle RNA [Source:RFAM;Acc:RF00017]                             | 3.165482907 | 0.000996495 | 0.004399826 |
| ENSMMUG00000054825 |                                                                                                | 0.657032921 | 0.013329666 | 0.040803734 |
| ENSMMUG00000009409 | mesoderm development LRP chaperone [Source:VGNC Symbol;Acc:VGNC:74507]                         | -0.66131561 | 0.011118764 | 0.034990671 |
| ENSMMUG00000011564 | transmembrane channel like 3 [Source:VGNC Symbol;Acc:VGNC:79360]                               | 3.857483435 | 3.38E-05    | 0.000216291 |
| ENSMMUG00000057295 |                                                                                                | 0.376303555 | 0.008616568 | 0.028289755 |
| ENSMMUG00000003002 |                                                                                                | 0.791943111 | 0.001429081 | 0.006005396 |
| ENSMMUG00000009087 | HDGF like 3 [Source:VGNC Symbol;Acc:VGNC:84346]                                                | 1.146099393 | 8.65E-08    | 9.80E-07    |
| ENSMMUG00000009084 | transmembrane 6 superfamily member 1 [Source:VGNC Symbol;Acc:VGNC:78566]                       | 0.843279542 | 0.000110435 | 0.000624447 |
| ENSMMUG00000011328 | cytoplasmic polyadenylation element binding protein 1 [Source:NCBI gene;Acc:694357]            | 1.059774349 | 0.000200684 | 0.00107412  |
| ENSMMUG00000019838 | phosphodiesterase 8A [Source:VGNC Symbol;Acc:VGNC:75924]                                       | 0.857650399 | 2.08E-05    | 0.000140448 |
| ENSMMUG00000056737 |                                                                                                | -1.38446522 | 3.12E-05    | 0.000201617 |
| ENSMMUG00000049563 |                                                                                                | 1.470477743 | 4.71E-09    | 6.73E-08    |
| ENSMMUG00000016772 | solute carrier family 28 member 1 [Source:VGNC Symbol;Acc:VGNC:77444]                          | 0.742291958 | 5.52E-09    | 7.79E-08    |
| ENSMMUG00000010432 | zinc finger protein 592 [Source:VGNC Symbol;Acc:VGNC:79762]                                    | 0.369050899 | 0.000750397 | 0.003438828 |
| ENSMMUG00000063195 |                                                                                                | 0.367233175 | 0.005653105 | 0.019617297 |
| ENSMMUG00000057531 | mitochondrial ribosomal protein S11 [Source:NCBI gene;Acc:697743]                              | 0.970633624 | 0.00022256  | 0.001180394 |
| ENSMMUG00000063799 |                                                                                                | 0.480412056 | 0.002126973 | 0.008512141 |
| ENSMMUG00000011155 | FA complementation group I [Source:VGNC Symbol;Acc:VGNC:72575]                                 | 0.911269754 | 9.60E-08    | 1.08E-06    |
| ENSMMUG00000022678 | Rh family C glycoprotein [Source:VGNC Symbol;Acc:VGNC:84427]                                   | 0.970683174 | 0.000666443 | 0.00309557  |
| ENSMMUG00000015394 | WD repeat domain 93 [Source:VGNC Symbol;Acc:VGNC:79642]                                        | 0.96843294  | 1.98E-17    | 9.46E-16    |
| ENSMMUG00000010586 | mesoderm posterior bHLH transcription factor 1 [Source:VGNC Symbol;Acc:VGNC:74618]             | 1.336902262 | 0.001847743 | 0.007521304 |
| ENSMMUG00000003584 | mesoderm posterior bHLH transcription factor 2 [Source:VGNC Symbol;Acc:VGNC:74619]             | 0.936017623 | 9.22E-15    | 3.22E-13    |
| ENSMMUG00000014983 | alanyl aminopeptidase, membrane [Source:VGNC Symbol;Acc:VGNC:69943]                            | 1.049696574 | 5.84E-14    | 1.82E-12    |
| ENSMMUG00000029507 | adaptor related protein complex 3 subunit sigma 2 [Source:NCBI gene;Acc:701217]                | 0.766639898 | 1.69E-08    | 2.19E-07    |
| ENSMMUG00000023816 | semaphorin 4B [Source:VGNC Symbol;Acc:VGNC:77165]                                              | 2.234473045 | 3.27E-28    | 4.88E-26    |
| ENSMMUG00000004376 | calcium and integrin binding 1 [Source:VGNC Symbol;Acc:VGNC:71189]                             | 2.320130113 | 3.01E-26    | 3.84E-24    |
| ENSMMUG00000050794 | zinc finger protein 774 [Source:NCBI gene;Acc:702985]                                          | 0.908021858 | 0.004367016 | 0.015815772 |

|                    |                                                                                                          |             |             |             |
|--------------------|----------------------------------------------------------------------------------------------------------|-------------|-------------|-------------|
| ENSMMUG00000019526 | BLM RecQ like helicase [Source:VGNC Symbol;Acc:VGNC:70254]                                               | 2.161261369 | 5.12E-12    | 1.20E-10    |
| ENSMMUG00000062217 | HD domain containing 3 [Source:NCBI gene;Acc:715621]                                                     | 2.500176826 | 1.09E-13    | 3.20E-12    |
| ENSMMUG00000005106 | unc-45 myosin chaperone A [Source:VGNC Symbol;Acc:VGNC:79858]                                            | 2.782395154 | 0.000331722 | 0.001672685 |
| ENSMMUG00000005108 | RCC1 domain containing 1 [Source:VGNC Symbol;Acc:VGNC:76876]                                             | 2.661087734 | 2.79E-11    | 5.78E-10    |
| ENSMMUG00000007534 | protein regulator of cytokinesis 1 [Source:NCBI gene;Acc:710182]                                         | 2.408934717 | 4.63E-07    | 4.50E-06    |
| ENSMMUG00000008399 | synaptic vesicle glycoprotein 2B [Source:VGNC Symbol;Acc:VGNC:78140]                                     | 0.806196714 | 5.52E-08    | 6.45E-07    |
| ENSMMUG00000063322 |                                                                                                          | 1.073740807 | 2.16E-08    | 2.73E-07    |
| ENSMMUG00000065319 |                                                                                                          | 4.731127229 | 2.62E-09    | 3.89E-08    |
| ENSMMUG00000060063 |                                                                                                          | 1.216341652 | 2.39E-08    | 3.01E-07    |
| ENSMMUG0000006659  | aldehyde dehydrogenase 1 family member A3 [Source:VGNC Symbol;Acc:VGNC:81353]                            | 2.151728321 | 3.99E-13    | 1.09E-11    |
|                    |                                                                                                          | -           |             |             |
| ENSMMUG00000003034 | olfactory receptor 4K15 [Source:NCBI gene;Acc:698499]                                                    | 0.976929909 | 0.015003317 | 0.044955453 |
| ENSMMUG00000058162 |                                                                                                          | 2.440055661 | 0.007315021 | 0.024563825 |
| ENSMMUG00000016255 | telomerase associated protein 1 [Source:VGNC Symbol;Acc:VGNC:78310]                                      | 0.545274786 | 0.001293155 | 0.005516857 |
| ENSMMUG00000048039 | apurinic/aprimidinic endodeoxyribonuclease 1 [Source:VGNC Symbol;Acc:VGNC:84305]                         | 1.637884048 | 1.67E-05    | 0.000114983 |
| ENSMMUG00000019126 | purine nucleoside phosphorylase [Source:NCBI gene;Acc:704183]                                            | 2.30217164  | 1.25E-11    | 2.76E-10    |
|                    |                                                                                                          | -           |             |             |
| ENSMMUG00000015599 | probable ribonuclease 11 [Source:NCBI gene;Acc:703578]                                                   | 0.290915995 | 0.008825734 | 0.028814549 |
|                    |                                                                                                          | -           |             |             |
| ENSMMUG00000020747 | NDRG family member 2 [Source:VGNC Symbol;Acc:VGNC:74953]                                                 | 2.116591892 | 0.006747357 | 0.022838085 |
|                    |                                                                                                          | -           |             |             |
| ENSMMUG00000050445 | ribonuclease A family member 8 [Source:NCBI gene;Acc:716333]                                             | 3.016151794 | 0.003063242 | 0.011603417 |
|                    |                                                                                                          | -           |             |             |
| ENSMMUG00000006457 | Rho guanine nucleotide exchange factor 40 [Source:VGNC Symbol;Acc:VGNC:69907]                            | 2.822107849 | 1.05E-06    | 9.47E-06    |
|                    |                                                                                                          | -           |             |             |
| ENSMMUG00000014809 | heterogeneous nuclear ribonucleoprotein C [Source:VGNC Symbol;Acc:VGNC:84348]                            | 2.494694231 | 0.000943271 | 0.004183265 |
|                    |                                                                                                          | -           |             |             |
| ENSMMUG00000021552 | RPGR interacting protein 1 [Source:VGNC Symbol;Acc:VGNC:77007]                                           | 2.400800485 | 1.81E-07    | 1.91E-06    |
|                    |                                                                                                          | -           |             |             |
| ENSMMUG00000055229 |                                                                                                          | 2.494120032 | 4.20E-18    | 2.17E-16    |
|                    |                                                                                                          | -           |             |             |
| ENSMMUG00000015000 | SPT16 homolog, facilitates chromatin remodeling subunit [Source:VGNC Symbol;Acc:VGNC:78054]              | 2.344370064 | 1.04E-12    | 2.68E-11    |
|                    |                                                                                                          | -           |             |             |
| ENSMMUG00000015002 | chromodomain helicase DNA binding protein 8 [Source:VGNC Symbol;Acc:VGNC:71060]                          | 2.114255311 | 8.70E-09    | 1.17E-07    |
|                    |                                                                                                          | -           |             |             |
| ENSMMUG00000015004 | TOX high mobility group box family member 4 [Source:NCBI gene;Acc:706950]                                | 1.006073801 | 0.009723047 | 0.031200525 |
|                    |                                                                                                          | -           |             |             |
| ENSMMUG00000062974 |                                                                                                          | 0.918453646 | 0.00040672  | 0.002003314 |
| ENSMMUG00000040154 | T cell receptor alpha variable 9-2 [Source:HGNC Symbol;Acc:HGNC:12154]                                   | -1.52133575 | 1.63E-06    | 1.41E-05    |
|                    |                                                                                                          | -           |             |             |
| ENSMMUG00000038070 | T cell receptor alpha variable 12-3 [Source:HGNC Symbol;Acc:HGNC:12107]                                  | 1.251416493 | 5.26E-09    | 7.46E-08    |
|                    |                                                                                                          | -           |             |             |
| ENSMMUG00000054116 | T cell receptor alpha variable 8-6 [Source:HGNC Symbol;Acc:HGNC:12151]                                   | 1.237346776 | 9.37E-06    | 6.85E-05    |
|                    |                                                                                                          | -           |             |             |
| ENSMMUG00000056910 |                                                                                                          | 1.500973075 | 4.02E-08    | 4.82E-07    |
| ENSMMUG00000063215 | T cell receptor alpha variable 29/delta variable 5 (gene/pseudogene) [Source:HGNC Symbol;Acc:HGNC:12127] | 1.081770124 | 0.000706639 | 0.003258531 |
| ENSMMUG00000009441 | abhydrolase domain containing 4 [Source:VGNC Symbol;Acc:VGNC:84296]                                      | 1.929994223 | 2.76E-05    | 0.00018035  |
|                    |                                                                                                          | -           |             |             |
| ENSMMUG00000000413 | solute carrier family 7 member 7 [Source:VGNC Symbol;Acc:VGNC:77631]                                     | 1.273672328 | 3.96E-10    | 6.76E-09    |
|                    |                                                                                                          | -           |             |             |
| ENSMMUG00000014748 | solute carrier family 22 member 17 [Source:VGNC Symbol;Acc:VGNC:77560]                                   | 1.661836153 | 0.006015275 | 0.020705006 |
|                    |                                                                                                          | -           |             |             |
| ENSMMUG00000014750 | embryonal Fyn-associated substrate [Source:VGNC Symbol;Acc:VGNC:72056]                                   | 0.984366232 | 0.004370226 | 0.015819226 |
|                    |                                                                                                          | -           |             |             |
| ENSMMUG00000014762 | myosin heavy chain 6 [Source:NCBI gene;Acc:713471]                                                       | 0.859234922 | 2.76E-07    | 2.81E-06    |

|                     |                                                                                       |             |             |             |
|---------------------|---------------------------------------------------------------------------------------|-------------|-------------|-------------|
| ENSMMUG00000029420  |                                                                                       | 1.507095626 | 2.34E-05    | 0.000155803 |
| ENSMMUG00000014766  | neuroguidin [Source:VGNC Symbol;Acc:VGNC:75220]                                       | 0.901369838 | 7.00E-07    | 6.56E-06    |
| ENSMMUG00000014771  | zinc finger homeobox 2 [Source:NCBI gene;Acc:100429448]                               | 1.228649292 | 8.94E-15    | 3.14E-13    |
| ENSMMUG000000059196 |                                                                                       | 0.352678649 | 0.000132107 | 0.000734551 |
| ENSMMUG00000012462  | proteasome activator subunit 1 [Source:VGNC Symbol;Acc:VGNC:76455]                    | -           |             |             |
| ENSMMUG00000012473  | proteasome activator subunit 2 [Source:VGNC Symbol;Acc:VGNC:76456]                    | 2.195295228 | 4.84E-08    | 5.72E-07    |
| ENSMMUG00000012474  | ring finger protein 31 [Source:NCBI gene;Acc:715239]                                  | -           |             |             |
| ENSMMUG00000040817  | interferon regulatory factor 9 [Source:VGNC Symbol;Acc:VGNC:84361]                    | 2.238761797 | 1.58E-05    | 0.000109006 |
| ENSMMUG00000012480  | REC8 meiotic recombination protein [Source:VGNC Symbol;Acc:VGNC:76746]                | -           |             |             |
| ENSMMUG00000012481  | importin 4 [Source:VGNC Symbol;Acc:VGNC:73630]                                        | 1.869794516 | 4.56E-05    | 0.000282796 |
| ENSMMUG00000012452  | transglutaminase 1 [Source:NCBI gene;Acc:715854]                                      | -           |             |             |
| ENSMMUG00000010049  | NOP9 nucleolar protein [Source:VGNC Symbol;Acc:VGNC:75216]                            | 1.563682055 | 0.001061256 | 0.004647717 |
| ENSMMUG00000003370  | nuclear factor of activated T cells 4 [Source:VGNC Symbol;Acc:VGNC:75329]             | -1.59911514 | 8.60E-06    | 6.35E-05    |
| ENSMMUG00000019691  | G2/M-phase specific E3 ubiquitin protein ligase [Source:VGNC Symbol;Acc:VGNC:72753]   | -1.63501729 | 4.68E-07    | 4.55E-06    |
| ENSMMUG00000003120  | HECT domain E3 ubiquitin protein ligase 1 [Source:VGNC Symbol;Acc:VGNC:73200]         | -           |             |             |
| ENSMMUG00000011779  | HEAT repeat containing 5A [Source:VGNC Symbol;Acc:VGNC:84347]                         | 2.600597073 | 0.000918133 | 0.004082111 |
| ENSMMUG00000014839  | neuronal PAS domain protein 3 [Source:VGNC Symbol;Acc:VGNC:75213]                     | -           |             |             |
| ENSMMUG00000056906  |                                                                                       | 4.157192775 | 5.12E-06    | 3.99E-05    |
| ENSMMUG00000049364  | serine palmitoyltransferase small subunit A [Source:NCBI gene;Acc:717580]             | -           |             |             |
| ENSMMUG00000012576  | sorting nexin 6 [Source:NCBI gene;Acc:693626]                                         | 2.719481103 | 0.015830791 | 0.04707541  |
| ENSMMUG0000003530   | protein phosphatase 2 regulatory subunit B''gamma [Source:VGNC Symbol;Acc:VGNC:76279] | 0.608264616 | 0.013557994 | 0.041367221 |
| ENSMMUG00000056013  | forkhead box A1 [Source:NCBI gene;Acc:697909]                                         | -           |             |             |
| ENSMMUG00000052781  |                                                                                       | 1.211124754 | 1.23E-06    | 1.09E-05    |
| ENSMMUG00000017677  | chromosome 7 C14orf28 homolog [Source:VGNC Symbol;Acc:VGNC:70581]                     | -           |             |             |
| ENSMMUG00000017678  | kelch like family member 28 [Source:VGNC Symbol;Acc:VGNC:74085]                       | 0.663318689 | 0.000206725 | 0.001103502 |
| ENSMMUG00000008284  | dynein axonemal assembly factor 2 [Source:VGNC Symbol;Acc:VGNC:71868]                 | -           |             |             |
| ENSMMUG00000003914  | kelch domain containing 1 [Source:VGNC Symbol;Acc:VGNC:74086]                         | 0.413667877 | 0.014284582 | 0.043245399 |
| ENSMMUG00000008214  | nuclear export mediator factor [Source:VGNC Symbol;Acc:VGNC:84407]                    | 0.762097772 | 6.16E-08    | 7.17E-07    |
| ENSMMUG00000055903  | Metazoan signal recognition particle RNA [Source:RFAM;Acc:RF00017]                    | -           |             |             |
| ENSMMUG00000049543  |                                                                                       | 0.582627798 | 0.001447039 | 0.00607176  |
| ENSMMUG00000055012  |                                                                                       | -           |             |             |
| ENSMMUG00000059134  |                                                                                       | 1.231291023 | 3.67E-05    | 0.000233487 |
| ENSMMUG00000060227  |                                                                                       | -           |             |             |
|                     |                                                                                       | 0.325269331 | 0.014241111 | 0.043123105 |
|                     |                                                                                       | 2.164862365 | 0.001475151 | 0.006173094 |
|                     |                                                                                       | -           |             |             |
|                     |                                                                                       | 0.523306387 | 0.000603691 | 0.002857089 |
|                     |                                                                                       | -           |             |             |
|                     |                                                                                       | 0.651716093 | 4.24E-06    | 3.37E-05    |
|                     |                                                                                       | -           |             |             |
|                     |                                                                                       | 1.094336594 | 0.000199214 | 0.001067066 |
|                     |                                                                                       | 0.478635879 | 0.013350022 | 0.040857126 |
|                     |                                                                                       | -           |             |             |
|                     |                                                                                       | 0.839765518 | 0.004573252 | 0.016439558 |
|                     |                                                                                       | -           |             |             |
|                     |                                                                                       | 1.260794851 | 8.57E-05    | 0.000496691 |
|                     |                                                                                       | -           |             |             |
|                     |                                                                                       | 1.876292293 | 0.002117248 | 0.008482904 |
|                     |                                                                                       | 1.327222186 | 5.41E-05    | 0.000330344 |
|                     |                                                                                       | 1.791320279 | 0.001290661 | 0.005509443 |
|                     |                                                                                       | 1.709831082 | 3.83E-07    | 3.82E-06    |
|                     |                                                                                       | -           |             |             |
|                     |                                                                                       | 1.335869528 | 0.015636491 | 0.046593819 |

|                     |                                                                                                                                     |             |             |             |
|---------------------|-------------------------------------------------------------------------------------------------------------------------------------|-------------|-------------|-------------|
| ENSMMUG00000007464  | SOS Ras/Rho guanine nucleotide exchange factor 2 [Source:VGNC Symbol;Acc:VGNC:77838]                                                | 0.946590994 | 0.001692774 | 0.006957141 |
| ENSMMUG00000007468  | L-2-hydroxyglutarate dehydrogenase [Source:VGNC Symbol;Acc:VGNC:74090]                                                              | -0.39593095 | 0.002624123 | 0.01018209  |
| ENSMMUG00000009577  | atlastin GTPase 1 [Source:VGNC Symbol;Acc:VGNC:70049]                                                                               | 0.464541503 | 0.00180443  | 0.007359952 |
| ENSMMUG00000014658  | ninein [Source:VGNC Symbol;Acc:VGNC:75177]                                                                                          | 2.575921008 | 1.24E-11    | 2.73E-10    |
| ENSMMUG00000018274  | FERM domain containing 6 [Source:VGNC Symbol;Acc:VGNC:72747]                                                                        | 0.933965606 | 1.51E-12    | 3.81E-11    |
| ENSMMUG00000000024  | prostaglandin D2 receptor [Source:VGNC Symbol;Acc:VGNC:76467]                                                                       | 1.060676286 | 0.000238324 | 0.00125451  |
| ENSMMUG00000000023  | prostaglandin E receptor 2 [Source:VGNC Symbol;Acc:VGNC:76468]                                                                      | 0.748511368 | 0.000762953 | 0.003493519 |
| ENSMMUG00000065036  |                                                                                                                                     | -0.91229989 | 0.015750178 | 0.046882774 |
| ENSMMUG00000006997  | thioredoxin domain containing 16 [Source:VGNC Symbol;Acc:VGNC:79214]                                                                | 0.8280213   | 8.18E-08    | 9.33E-07    |
| ENSMMUG00000010689  | fermitin family member 2 [Source:VGNC Symbol;Acc:VGNC:82144]                                                                        | 0.999033452 | 1.21E-07    | 1.32E-06    |
| ENSMMUG00000000302  | WD repeat and HMG-box DNA binding protein 1 [Source:VGNC Symbol;Acc:VGNC:79376]                                                     | 1.636282875 | 6.70E-26    | 8.10E-24    |
| ENSMMUG000000054112 |                                                                                                                                     | 0.445331726 | 0.001697257 | 0.006973522 |
| ENSMMUG00000003565  | galectin 3 [Source:VGNC Symbol;Acc:VGNC:74255]                                                                                      | 0.797376929 | 0.000903548 | 0.00403775  |
| ENSMMUG00000003567  | DLG associated protein 5 [Source:VGNC Symbol;Acc:VGNC:71850]                                                                        | 0.616558049 | 0.002833316 | 0.010867501 |
| ENSMMUG00000049334  |                                                                                                                                     | -0.51743583 | 0.011555394 | 0.036161858 |
| ENSMMUG00000023041  | TATA-box binding protein like 2 [Source:VGNC Symbol;Acc:VGNC:78175]                                                                 | 0.752422446 | 0.002033571 | 0.008185064 |
| ENSMMUG00000061576  |                                                                                                                                     | 1.96730946  | 1.07E-07    | 1.18E-06    |
| ENSMMUG00000053489  |                                                                                                                                     | 0.690595645 | 0.003778354 | 0.013910174 |
| ENSMMUG00000018278  | exocyst complex component 5 [Source:VGNC Symbol;Acc:VGNC:72260]                                                                     | 1.308342713 | 0.008383242 | 0.027621757 |
| ENSMMUG00000018279  | adaptor related protein complex 5 subunit mu 1 [Source:VGNC Symbol;Acc:VGNC:69868]                                                  | 0.929565018 | 4.01E-10    | 6.85E-09    |
| ENSMMUG00000002121  | armadillo like helical domain containing 4 [Source:VGNC Symbol;Acc:VGNC:82106]                                                      | 1.157016398 | 2.60E-06    | 2.15E-05    |
| ENSMMUG00000003508  | actin related protein 10 [Source:VGNC Symbol;Acc:VGNC:69449]                                                                        | 0.313384674 | 0.006473073 | 0.022048071 |
| ENSMMUG00000011966  | reticulon 1 [Source:NCBI gene;Acc:619184]                                                                                           | 1.054930054 | 0.014777982 | 0.044394096 |
| ENSMMUG00000004854  | leucine rich repeat containing 9 [Source:VGNC Symbol;Acc:VGNC:81443]                                                                | 1.06805519  | 3.86E-07    | 3.83E-06    |
| ENSMMUG00000002540  | dehydrogenase/reductase 7 [Source:VGNC Symbol;Acc:VGNC:71690]                                                                       | 0.639063396 | 1.11E-08    | 1.47E-07    |
| ENSMMUG00000001640  | SIX homeobox 4 [Source:NCBI gene;Acc:703798]                                                                                        | 0.909162523 | 0.000543915 | 0.00259963  |
| ENSMMUG00000001642  | MNAT1 component of CDK activating kinase [Source:VGNC Symbol;Acc:VGNC:74905]                                                        | 0.683283039 | 0.006597176 | 0.022432638 |
| ENSMMUG00000002260  | protein kinase C eta [Source:VGNC Symbol;Acc:VGNC:84424]                                                                            | 1.373170327 | 3.39E-11    | 6.92E-10    |
| ENSMMUG00000008203  | ras homolog family member J [Source:VGNC Symbol;Acc:VGNC:76885]                                                                     | -0.55976431 | 0.005135754 | 0.018095144 |
| ENSMMUG000000054689 |                                                                                                                                     | 0.786193362 | 0.005045856 | 0.017844595 |
| ENSMMUG00000001008  | spectrin repeat containing nuclear envelope protein 2 [Source:NCBI gene;Acc:706759]                                                 | 0.928587631 | 1.54E-06    | 1.34E-05    |
| ENSMMUG00000001319  | methylenetetrahydrofolate dehydrogenase, cyclohydrolase and formyltetrahydrofolate synthetase 1 [Source:VGNC Symbol;Acc:VGNC:84399] | 1.264760184 | 3.11E-16    | 1.31E-14    |
| ENSMMUG00000004748  | zinc finger and BTB domain containing 1 [Source:VGNC Symbol;Acc:VGNC:79238]                                                         | 1.383957556 | 3.48E-14    | 1.12E-12    |
| ENSMMUG00000056063  |                                                                                                                                     | 2.546949416 | 1.50E-05    | 0.000103921 |
| ENSMMUG00000053575  | Metazoan signal recognition particle RNA [Source:RFAM;Acc:RF00017]                                                                  | 1.366691565 | 0.004438661 | 0.016021453 |
| ENSMMUG00000004339  | RAB15, member RAS oncogene family [Source:VGNC Symbol;Acc:VGNC:81519]                                                               | 0.680069299 | 2.06E-05    | 0.000139259 |
| ENSMMUG00000013848  | fucosyltransferase 8 [Source:VGNC Symbol;Acc:VGNC:72829]                                                                            | 1.158367662 | 1.33E-05    | 9.35E-05    |
| ENSMMUG00000013907  | ribosomal protein S27a [Source:NCBI gene;Acc:718909]                                                                                | -1.33684349 | 0.003014646 | 0.011453366 |

|                    |                                                                                                   |   |             |             |             |
|--------------------|---------------------------------------------------------------------------------------------------|---|-------------|-------------|-------------|
| ENSMMUG00000006768 | coiled-coil domain containing 196 [Source:VGNC Symbol;Acc:VGNC:70828]                             | - | 1.647732064 | 5.87E-05    | 0.000354914 |
| ENSMMUG00000009520 | gephyrin [Source:VGNC Symbol;Acc:VGNC:72948]                                                      | - | 1.543696724 | 7.69E-06    | 5.76E-05    |
| ENSMMUG00000021419 | eukaryotic translation initiation factor 2 subunit alpha [Source:VGNC Symbol;Acc:VGNC:72187]      | - | 0.647647811 | 0.014635092 | 0.044078156 |
| ENSMMUG00000021420 | pleckstrin 2 [Source:VGNC Symbol;Acc:VGNC:76071]                                                  | - | 0.839177924 | 3.08E-06    | 2.51E-05    |
| ENSMMUG00000015865 | arginase 2 [Source:VGNC Symbol;Acc:VGNC:70005]                                                    | - | 1.736210811 | 9.09E-10    | 1.46E-08    |
| ENSMMUG00000015866 | vesicle transport through interaction with t-SNAREs 1B [Source:NCBI gene;Acc:711113]              | - | 1.203780127 | 2.48E-09    | 3.70E-08    |
| ENSMMUG00000015871 | zinc finger FYVE-type containing 26 [Source:VGNC Symbol;Acc:VGNC:79283]                           | - | 1.36643708  | 0.001952751 | 0.007891479 |
| ENSMMUG00000050511 |                                                                                                   | - | 1.154693228 | 0.000363003 | 0.001806383 |
| ENSMMUG00000015873 | RAD51 paralog B [Source:VGNC Symbol;Acc:VGNC:76647]                                               | - | 1.282027707 | 0.000106678 | 0.000604668 |
| ENSMMUG00000021572 | solute carrier family 39 member 9 [Source:VGNC Symbol;Acc:VGNC:77523]                             | - | 1.194402219 | 6.29E-09    | 8.74E-08    |
| ENSMMUG00000055018 | sushi domain containing 6 [Source:NCBI gene;Acc:712719]                                           | - | 1.535425332 | 7.69E-17    | 3.42E-15    |
| ENSMMUG00000022407 | serine and arginine rich splicing factor 5 [Source:NCBI gene;Acc:712867]                          | - | 1.197236422 | 4.28E-10    | 7.27E-09    |
| ENSMMUG00000022409 | solute carrier family 10 member 1 [Source:VGNC Symbol;Acc:VGNC:77380]                             | - | 1.457730224 | 1.51E-14    | 5.14E-13    |
| ENSMMUG00000053103 | disintegrin and metalloproteinase domain-containing protein 20-like [Source:NCBI gene;Acc:713573] | - | 0.782268681 | 0.000607981 | 0.002873516 |
| ENSMMUG00000019470 | pecanex 1 [Source:VGNC Symbol;Acc:VGNC:75655]                                                     | - | 0.433672697 | 0.009388611 | 0.030349583 |
| ENSMMUG00000001820 | regulator of G protein signaling 6 [Source:VGNC Symbol;Acc:VGNC:76691]                            | - | 3.322802265 | 0.00129508  | 0.005523391 |
| ENSMMUG00000002332 | RNA binding motif protein 25 [Source:VGNC Symbol;Acc:VGNC:76521]                                  | - | -1.62284063 | 5.31E-07    | 5.10E-06    |
| ENSMMUG00000010173 | presenilin 1 [Source:VGNC Symbol;Acc:VGNC:76435]                                                  | - | 1.372629852 | 2.49E-09    | 3.71E-08    |
| ENSMMUG00000056580 | Metazoan signal recognition particle RNA [Source:RFAM;Acc:RF00017]                                | - | 2.394891216 | 0.011213456 | 0.035241214 |
| ENSMMUG00000000313 | HEAT repeat containing 4 [Source:VGNC Symbol;Acc:VGNC:73176]                                      | - | 1.303652777 | 6.40E-13    | 1.70E-11    |
| ENSMMUG00000053481 |                                                                                                   | - | 1.712927584 | 1.20E-13    | 3.52E-12    |
| ENSMMUG00000049894 |                                                                                                   | - | 2.0810702   | 3.34E-06    | 2.71E-05    |
| ENSMMUG00000006855 | acyl-CoA thioesterase 2 [Source:NCBI gene;Acc:697011]                                             | - | 1.574786906 | 5.23E-16    | 2.15E-14    |
| ENSMMUG00000004910 | dynein axonemal light chain 1 [Source:VGNC Symbol;Acc:VGNC:71885]                                 | - | 1.253346309 | 1.36E-05    | 9.56E-05    |
| ENSMMUG00000004913 | mitotic deacetylase associated SANT domain protein [Source:VGNC Symbol;Acc:VGNC:72073]            | - | 0.81878945  | 3.65E-06    | 2.94E-05    |
| ENSMMUG00000056376 |                                                                                                   | - | 2.122393632 | 6.91E-13    | 1.83E-11    |
| ENSMMUG00000015166 | NIMA related kinase 9 [Source:VGNC Symbol;Acc:VGNC:75209]                                         | - | 0.820739395 | 2.33E-12    | 5.72E-11    |
| ENSMMUG00000015168 | transmembrane p24 trafficking protein 10 [Source:NCBI gene;Acc:701522]                            | - | 1.062130066 | 4.80E-05    | 0.000296044 |
| ENSMMUG00000040100 | Fos proto-oncogene, AP-1 transcription factor subunit [Source:VGNC Symbol;Acc:VGNC:84340]         | - | 0.627770545 | 6.18E-06    | 4.75E-05    |
| ENSMMUG00000003834 | basic leucine zipper ATF-like transcription factor [Source:VGNC Symbol;Acc:VGNC:70229]            | - | 2.035099119 | 1.38E-11    | 3.01E-10    |
| ENSMMUG00000012065 | tubulin tyrosine ligase like 5 [Source:NCBI gene;Acc:703116]                                      | - | 1.630503763 | 3.29E-15    | 1.22E-13    |
| ENSMMUG00000008792 | G-patch domain containing 2 like [Source:VGNC Symbol;Acc:VGNC:72973]                              | - | 0.781354243 | 0.005485249 | 0.019153298 |
| ENSMMUG00000016773 | estrogen related receptor beta [Source:VGNC Symbol;Acc:VGNC:72434]                                | - | 0.66939667  | 0.000429859 | 0.002109139 |
| ENSMMUG00000057021 | CLOCK interacting pacemaker [Source:NCBI gene;Acc:704679]                                         | - | 0.691849719 | 0.013358256 | 0.04086449  |
| ENSMMUG00000007561 | zinc finger DHHC-type palmitoyltransferase 22 [Source:NCBI gene;Acc:706468]                       | - | 0.883520481 | 0.000560787 | 0.002672074 |
| ENSMMUG00000023626 | alkB homolog 1, histone H2A dioxygenase [Source:VGNC Symbol;Acc:VGNC:69630]                       | - | 1.554099419 | 0.001736883 | 0.007107182 |
| ENSMMUG00000019710 | centrosomal protein 128 [Source:VGNC Symbol;Acc:VGNC:71062]                                       | - | 0.701680522 | 0.016091192 | 0.047715541 |
| ENSMMUG00000019713 | thyroid stimulating hormone receptor [Source:VGNC Symbol;Acc:VGNC:78662]                          | - | 1.018774178 | 0.001037518 | 0.004553712 |

|                    |                                                                                               |             |             |             |
|--------------------|-----------------------------------------------------------------------------------------------|-------------|-------------|-------------|
| ENSMMUG00000017261 | galactosylceramidase [Source:VGNC Symbol;Acc:VGNC:72867]                                      | 0.852885203 | 1.66E-07    | 1.76E-06    |
| ENSMMUG00000004603 | zinc finger CCCH-type containing 14 [Source:VGNC Symbol;Acc:VGNC:79255]                       | 0.915595439 | 5.31E-09    | 7.52E-08    |
| ENSMMUG00000004606 | EMAP like 5 [Source:VGNC Symbol;Acc:VGNC:72067]                                               | 1.086895057 | 4.38E-11    | 8.75E-10    |
| ENSMMUG00000010442 | NRDE-2, necessary for RNA interference, domain containing [Source:VGNC Symbol;Acc:VGNC:75440] | 0.365917768 | 0.007563015 | 0.025269518 |
| ENSMMUG00000008964 | D-glutamate cyclase [Source:VGNC Symbol;Acc:VGNC:71685]                                       | 1.138643205 | 0.003376551 | 0.01260584  |
| ENSMMUG00000054889 | G protein-coupled receptor 68 [Source:NCBI gene;Acc:696529]                                   | 0.84006262  | 0.014904412 | 0.044716424 |
| ENSMMUG00000018319 | thyroid hormone receptor interactor 11 [Source:VGNC Symbol;Acc:VGNC:78647]                    | 0.666955108 | 3.47E-05    | 0.000221633 |
| ENSMMUG00000022428 | NADH:ubiquinone oxidoreductase subunit B1 [Source:NCBI gene;Acc:697745]                       | 0.498703345 | 0.013126533 | 0.040243412 |
| ENSMMUG00000013966 | legumain [Source:VGNC Symbol;Acc:VGNC:74274]                                                  | 0.699059228 | 0.003086508 | 0.011666336 |
| ENSMMUG00000009974 | inositol-tetrakisphosphate 1-kinase [Source:VGNC Symbol;Acc:VGNC:73802]                       | 1.36336468  | 0.002813397 | 0.010808841 |
| ENSMMUG00000044581 | modulator of apoptosis 1 [Source:VGNC Symbol;Acc:VGNC:84392]                                  | 1.347033351 | 8.96E-06    | 6.59E-05    |
| ENSMMUG00000061833 | transmembrane protein 251 [Source:NCBI gene;Acc:708131]                                       | 1.606148734 | 8.00E-09    | 1.08E-07    |
| ENSMMUG00000053729 |                                                                                               | 0.573824467 | 0.003813319 | 0.014031533 |
| ENSMMUG00000012400 | ankyrin repeat and SOCS box containing 2 [Source:VGNC Symbol;Acc:VGNC:69840]                  | 1.001867897 | 0.00584728  | 0.020196237 |
| ENSMMUG00000012356 | serpin family A member 9 [Source:VGNC Symbol;Acc:VGNC:77241]                                  | 1.954236235 | 5.35E-08    | 6.26E-07    |
| ENSMMUG00000020586 | serpin family A member 12 [Source:VGNC Symbol;Acc:VGNC:77266]                                 | 3.218723953 | 0.002985367 | 0.011358225 |
| ENSMMUG00000000681 | calmin [Source:VGNC Symbol;Acc:VGNC:71232]                                                    | 0.892466355 | 2.12E-09    | 3.21E-08    |
| ENSMMUG00000003658 | autophagy related 2B [Source:VGNC Symbol;Acc:VGNC:84310]                                      | 0.747249579 | 0.014029013 | 0.042572788 |
| ENSMMUG00000051277 |                                                                                               | 1.852066668 | 0.009883722 | 0.031650192 |
| ENSMMUG00000003261 | BAF chromatin remodeling complex subunit BCL11B [Source:VGNC Symbol;Acc:VGNC:70056]           | 1.344124646 | 3.06E-10    | 5.34E-09    |
| ENSMMUG00000051552 |                                                                                               | 1.015977038 | 0.000608363 | 0.002873838 |
| ENSMMUG00000061892 |                                                                                               | 0.866403201 | 4.10E-06    | 3.28E-05    |
| ENSMMUG00000049437 | Metazoan signal recognition particle RNA [Source:RFAM;Acc:RF00017]                            | 1.085281157 | 4.48E-05    | 0.000278201 |
| ENSMMUG00000029197 | YY1 transcription factor [Source:NCBI gene;Acc:717370]                                        | 0.979113811 | 1.09E-06    | 9.76E-06    |
| ENSMMUG00000051100 | Metazoan signal recognition particle RNA [Source:RFAM;Acc:RF00017]                            | 1.359264513 | 0.013878019 | 0.042203986 |
| ENSMMUG00000013865 | tryptophanyl-tRNA synthetase 1 [Source:VGNC Symbol;Acc:VGNC:78779]                            | 1.161032532 | 0.015576317 | 0.046424375 |
| ENSMMUG00000013871 | WD repeat domain 25 [Source:VGNC Symbol;Acc:VGNC:78420]                                       | 1.819739724 | 6.91E-12    | 1.59E-10    |
| ENSMMUG00000000186 | protein phosphatase 2 regulatory subunit B'gamma [Source:NCBI gene;Acc:718894]                | 0.29260927  | 0.000814389 | 0.003698998 |
| ENSMMUG00000005780 | dynein cytoplasmic 1 heavy chain 1 [Source:VGNC Symbol;Acc:VGNC:71951]                        | 0.342528767 | 8.64E-05    | 0.000500249 |
| ENSMMUG00000007140 | MOK protein kinase [Source:VGNC Symbol;Acc:VGNC:84394]                                        | 2.098772223 | 1.64E-07    | 1.75E-06    |
| ENSMMUG00000003483 | cyclin dependent kinase 2 interacting protein [Source:VGNC Symbol;Acc:VGNC:71326]             | 0.677927683 | 0.000174501 | 0.000945892 |
| ENSMMUG00000003484 | tectonin beta-propeller repeat containing 2 [Source:NCBI gene;Acc:708959]                     | 1.566154102 | 5.59E-10    | 9.29E-09    |
| ENSMMUG00000057818 |                                                                                               | 1.800463997 | 0.0145751   | 0.043944663 |
| ENSMMUG00000005845 | REST corepressor 1 [Source:VGNC Symbol;Acc:VGNC:76752]                                        | 0.58359076  | 0.00468878  | 0.016794577 |
| ENSMMUG00000011751 |                                                                                               | 1.198521841 | 0.004325108 | 0.015692363 |
| ENSMMUG00000029186 | exocyst complex component 3 like 4 [Source:VGNC Symbol;Acc:VGNC:72305]                        | 4.04266091  | 1.07E-05    | 7.70E-05    |
| ENSMMUG00000050495 |                                                                                               | 2.874216724 | 4.00E-08    | 4.80E-07    |

|                    |                                                                                             |             |             |             |
|--------------------|---------------------------------------------------------------------------------------------|-------------|-------------|-------------|
| ENSMMUG00000021634 | TNF alpha induced protein 2 [Source:VGNC Symbol;Acc:VGNC:78579]                             | 2.090216266 | 3.53E-29    | 5.89E-27    |
| ENSMMUG00000003641 | microtubule affinity regulating kinase 3 [Source:VGNC Symbol;Acc:VGNC:74659]                | 0.5171844   | 0.005118637 | 0.01804844  |
| ENSMMUG00000029181 | X-ray repair cross complementing 3 [Source:NCBI gene;Acc:695788]                            | 0.329800129 | 0.004388357 | 0.015868472 |
| ENSMMUG00000018121 | zinc finger FYVE-type containing 21 [Source:VGNC Symbol;Acc:VGNC:79282]                     | 0.323041817 | 0.001719516 | 0.007046397 |
|                    |                                                                                             | -           |             |             |
| ENSMMUG00000052518 | SIVA1 apoptosis inducing factor [Source:NCBI gene;Acc:706688]                               | 1.561961114 | 0.003961144 | 0.014503164 |
| ENSMMUG00000001047 | zinc finger and BTB domain containing 42 [Source:VGNC Symbol;Acc:VGNC:79925]                | 1.725990908 | 0.002270782 | 0.008974964 |
| ENSMMUG00000064694 | AHNAK nucleoprotein 2 [Source:NCBI gene;Acc:707626]                                         | 3.968491585 | 7.63E-06    | 5.72E-05    |
| ENSMMUG00000001273 | clathrin binding box of aftiphilin containing 1 [Source:VGNC Symbol;Acc:VGNC:84325]         | 2.577567035 | 2.24E-23    | 1.94E-21    |
| ENSMMUG00000054161 | Metazoan signal recognition particle RNA [Source:RFAM;Acc:RF00017]                          | 2.116394319 | 0.002083463 | 0.008352318 |
|                    |                                                                                             | -           |             |             |
| ENSMMUG00000065019 | Metazoan signal recognition particle RNA [Source:RFAM;Acc:RF00017]                          | 1.635916371 | 0.000370682 | 0.001840025 |
|                    |                                                                                             | -           |             |             |
| ENSMMUG00000015202 |                                                                                             | 1.537980523 | 0.016297547 | 0.048134057 |
|                    |                                                                                             | -           |             |             |
| ENSMMUG00000040771 |                                                                                             | 2.108657162 | 5.09E-07    | 4.91E-06    |
|                    |                                                                                             | -           |             |             |
| ENSMMUG00000059525 |                                                                                             | 1.906748668 | 8.99E-08    | 1.02E-06    |
|                    |                                                                                             | -           |             |             |
| ENSMMUG00000055207 |                                                                                             | 5.861240959 | 1.74E-11    | 3.74E-10    |
|                    |                                                                                             | -           |             |             |
| ENSMMUG00000060892 |                                                                                             | 3.133005114 | 1.04E-24    | 1.08E-22    |
|                    |                                                                                             | -           |             |             |
| ENSMMUG00000064429 | immunoglobulin heavy variable 1-45 [Source:HGNC Symbol;Acc:HGNC:5553]                       | 3.721425151 | 0.002179844 | 0.008689014 |
|                    |                                                                                             | -           |             |             |
| ENSMMUG00000052929 |                                                                                             | 3.801810627 | 5.71E-05    | 0.000345901 |
|                    |                                                                                             | -           |             |             |
| ENSMMUG00000052535 |                                                                                             | 3.509745449 | 2.21E-05    | 0.000148395 |
|                    |                                                                                             | -           |             |             |
| ENSMMUG00000004955 | short stature homeobox [Source:NCBI gene;Acc:114674875]                                     | 1.090897431 | 0.005451295 | 0.01904897  |
| ENSMMUG00000063346 |                                                                                             | 3.130441535 | 0.000173926 | 0.000943507 |
| ENSMMUG00000038067 |                                                                                             | 1.3058952   | 0.000313308 | 0.001592433 |
| ENSMMUG00000053333 | acetylserotonin O-methyltransferase like [Source:NCBI gene;Acc:106995142]                   | 3.291204291 | 0.004121605 | 0.015029746 |
| ENSMMUG00000004985 | arylsulfatase L [Source:VGNC Symbol;Acc:VGNC:81361]                                         | -1.54814015 | 0.000811604 | 0.003691573 |
|                    |                                                                                             | -           |             |             |
| ENSMMUG00000000443 | arylsulfatase F [Source:VGNC Symbol;Acc:VGNC:81362]                                         | 0.668239973 | 0.003113327 | 0.011739225 |
|                    |                                                                                             | -           |             |             |
| ENSMMUG00000017378 | steroid sulfatase [Source:VGNC Symbol;Acc:VGNC:81590]                                       | 1.664668772 | 0.011244272 | 0.035313277 |
|                    |                                                                                             | -           |             |             |
| ENSMMUG00000010252 | FERM and PDZ domain containing 4 [Source:VGNC Symbol;Acc:VGNC:72802]                        | 1.145025728 | 2.22E-05    | 0.000148425 |
| ENSMMUG00000003482 | glycine receptor alpha 2 [Source:VGNC Symbol;Acc:VGNC:73075]                                | 0.970103534 | 0.000236394 | 0.001245757 |
|                    |                                                                                             | -           |             |             |
| ENSMMUG00000015737 | phosphatidylinositol glycan anchor biosynthesis class A [Source:VGNC Symbol;Acc:VGNC:75984] | 0.974216401 | 7.76E-07    | 7.20E-06    |
| ENSMMUG00000004797 | CTP synthase 2 [Source:VGNC Symbol;Acc:VGNC:71550]                                          | 2.220762928 | 5.77E-13    | 1.55E-11    |
| ENSMMUG00000058700 | Metazoan signal recognition particle RNA [Source:RFAM;Acc:RF00017]                          | 4.055121696 | 1.26E-05    | 8.93E-05    |
| ENSMMUG00000019363 | synapse associated protein 1 [Source:VGNC Symbol;Acc:VGNC:78135]                            | 2.413445735 | 8.46E-16    | 3.36E-14    |
| ENSMMUG00000016237 | taxilin gamma [Source:NCBI gene;Acc:713769]                                                 | 2.34918888  | 0.005920317 | 0.020398183 |
| ENSMMUG00000012894 | NHS actin remodeling regulator [Source:VGNC Symbol;Acc:VGNC:75348]                          | -1.00099735 | 0.004697468 | 0.016817102 |
|                    |                                                                                             | -           |             |             |
| ENSMMUG00000004744 | SH3 domain containing kinase binding protein 1 [Source:VGNC Symbol;Acc:VGNC:77227]          | 0.310492087 | 0.016551001 | 0.048758908 |
| ENSMMUG00000001088 | patched domain containing 1 [Source:VGNC Symbol;Acc:VGNC:76322]                             | 1.189180022 | 7.56E-10    | 1.23E-08    |
|                    |                                                                                             | -           |             |             |
| ENSMMUG00000061261 | Metazoan signal recognition particle RNA [Source:RFAM;Acc:RF00017]                          | 1.607869843 | 8.14E-05    | 0.000475068 |
|                    |                                                                                             | -           |             |             |
| ENSMMUG00000042317 | putative transcription factor SPT20 homolog-like 2 [Source:NCBI gene;Acc:100429227]         | 0.764629556 | 0.015077195 | 0.045128604 |

|                    |                                                                                          |             |             |             |
|--------------------|------------------------------------------------------------------------------------------|-------------|-------------|-------------|
| ENSMMUG00000012819 | pyruvate dehydrogenase kinase 3 [Source:VGNC Symbol;Acc:VGNC:75934]                      | 0.932977112 | 0.006381593 | 0.021789404 |
| ENSMMUG00000012775 | nuclear receptor subfamily 0 group B member 1 [Source:NCBI gene;Acc:574154]              | 1.497991889 | 0.007962547 | 0.026415612 |
| ENSMMUG00000013220 | cytochrome b-245 beta chain [Source:VGNC Symbol;Acc:VGNC:71576]                          | 0.747941634 | 0.017023171 | 0.049992865 |
| ENSMMUG00000013493 | ornithine carbamoyltransferase [Source:VGNC Symbol;Acc:VGNC:75723]                       | 3.389416543 | 0.010178495 | 0.032468843 |
| ENSMMUG00000005264 | mediator complex subunit 14 [Source:VGNC Symbol;Acc:VGNC:74561]                          | 0.559942718 | 0.000160974 | 0.000879711 |
| ENSMMUG00000063721 |                                                                                          | 0.639456842 | 4.41E-06    | 3.50E-05    |
| ENSMMUG00000057909 |                                                                                          | 1.370528041 | 0.000534258 | 0.00255609  |
| ENSMMUG00000057804 |                                                                                          | 1.893538888 | 0.001404179 | 0.005921994 |
| ENSMMUG00000003505 | FUN14 domain containing 1 [Source:NCBI gene;Acc:709370]                                  | 2.435052738 | 0.001175956 | 0.005078667 |
| ENSMMUG00000003897 | solute carrier family 9 member A7 [Source:NCBI gene;Acc:710906]                          | 0.675684802 | 2.71E-06    | 2.23E-05    |
| ENSMMUG00000049666 |                                                                                          | 0.621546391 | 0.000108997 | 0.000617064 |
| ENSMMUG00000023018 | RP2 activator of ARL3 GTPase [Source:VGNC Symbol;Acc:VGNC:76720]                         | 0.553498026 | 0.016540366 | 0.048748801 |
| ENSMMUG00000023016 | jade family PHD finger 3 [Source:VGNC Symbol;Acc:VGNC:73640]                             | 1.391915539 | 1.33E-19    | 7.84E-18    |
| ENSMMUG00000019546 | regucalcin [Source:VGNC Symbol;Acc:VGNC:76912]                                           | 1.130295304 | 0.012392552 | 0.038269271 |
| ENSMMUG00000014002 | cyclin dependent kinase 16 [Source:VGNC Symbol;Acc:VGNC:71160]                           | 1.411495232 | 0.000553162 | 0.002641127 |
| ENSMMUG00000016608 | ubiquitin specific peptidase 11 [Source:VGNC Symbol;Acc:VGNC:78734]                      | 1.880539525 | 0.001851057 | 0.007532609 |
| ENSMMUG00000008566 | zinc finger protein 157 [Source:VGNC Symbol;Acc:VGNC:78850]                              | 1.005412569 | 6.99E-12    | 1.60E-10    |
| ENSMMUG00000010404 | zinc finger protein 41 [Source:VGNC Symbol;Acc:VGNC:78900]                               | 0.514232352 | 0.012816047 | 0.039403515 |
| ENSMMUG00000063703 |                                                                                          | 0.860313413 | 0.003496895 | 0.012989923 |
| ENSMMUG00000019768 | suppressor of variegation 3-9 homolog 1 [Source:VGNC Symbol;Acc:VGNC:78061]              | 0.978724197 | 0.000846965 | 0.003821424 |
| ENSMMUG00000016465 | histone deacetylase 6 [Source:VGNC Symbol;Acc:VGNC:73164]                                | 0.770938835 | 1.13E-11    | 2.51E-10    |
| ENSMMUG00000004558 | OTU deubiquitinase 5 [Source:VGNC Symbol;Acc:VGNC:75677]                                 | 1.120949018 | 1.10E-09    | 1.74E-08    |
| ENSMMUG00000004559 | potassium voltage-gated channel subfamily D member 1 [Source:VGNC Symbol;Acc:VGNC:73975] | -1.39936358 | 0.006899875 | 0.02330931  |
| ENSMMUG00000023025 | synaptophysin [Source:VGNC Symbol;Acc:VGNC:78072]                                        | 0.672183309 | 2.45E-06    | 2.04E-05    |
| ENSMMUG00000008618 | calcium voltage-gated channel subunit alpha1 F [Source:VGNC Symbol;Acc:VGNC:70503]       | 1.047628175 | 4.97E-14    | 1.57E-12    |
| ENSMMUG00000008623 | coiled-coil domain containing 22 [Source:VGNC Symbol;Acc:VGNC:70899]                     | 1.108317206 | 3.33E-14    | 1.08E-12    |
| ENSMMUG00000052252 | protein phosphatase 1 regulatory subunit 3F [Source:NCBI gene;Acc:715950]                | 1.66220133  | 2.39E-20    | 1.56E-18    |
| ENSMMUG00000060311 | G antigen 10-like [Source:NCBI gene;Acc:114674954]                                       | 0.574024029 | 0.000185069 | 0.000997993 |
| ENSMMUG00000041376 | G antigen 10 [Source:NCBI gene;Acc:693330]                                               | 1.471193904 | 2.03E-14    | 6.77E-13    |
| ENSMMUG00000026584 | Y RNA [Source:RFAM;Acc:RF00019]                                                          | 1.740221976 | 0.013624565 | 0.041541659 |
| ENSMMUG00000023060 | A-kinase anchoring protein 4 [Source:VGNC Symbol;Acc:VGNC:69770]                         | 2.233026506 | 3.36E-10    | 5.78E-09    |
| ENSMMUG00000045093 | cyclin B3 [Source:NCBI gene;Acc:694534]                                                  | 2.127824913 | 7.69E-24    | 7.09E-22    |
| ENSMMUG00000049267 |                                                                                          | 4.269726381 | 1.93E-20    | 1.27E-18    |
| ENSMMUG00000020202 | melanoma-associated antigen D4 [Source:NCBI gene;Acc:106996411]                          | 0.707688765 | 0.012027048 | 0.037348646 |
| ENSMMUG00000046218 | X antigen family member 5 [Source:NCBI gene;Acc:114669729]                               | 1.042925986 | 0.002081334 | 0.008346167 |
| ENSMMUG00000002593 | TSPY like 2 [Source:VGNC Symbol;Acc:VGNC:79433]                                          | 0.330915008 | 0.003766142 | 0.013876147 |
| ENSMMUG00000053262 |                                                                                          | -0.76917227 | 7.72E-05    | 0.000452849 |
| ENSMMUG00000020553 | lysine demethylase 5C [Source:VGNC Symbol;Acc:VGNC:73816]                                | 0.546691935 | 0.001963513 | 0.007930397 |



|                    |                                                                                                                     |   |             |             |             |
|--------------------|---------------------------------------------------------------------------------------------------------------------|---|-------------|-------------|-------------|
| ENSMMUG00000020555 | IQ motif and Sec7 domain ArfGEF 2 [Source:VGNC Symbol;Acc:VGNC:73676]                                               | - | 0.610432651 | 9.83E-06    | 7.14E-05    |
| ENSMMUG00000047741 | Metazoan signal recognition particle RNA [Source:RFAM;Acc:RF00017]                                                  | - | 1.067754225 | 8.57E-06    | 6.33E-05    |
| ENSMMUG00000008422 | trophinin [Source:NCBI gene;Acc:704512]                                                                             | - | 0.779469959 | 4.01E-06    | 3.21E-05    |
| ENSMMUG00000059922 | family with sequence similarity 104 member B [Source:NCBI gene;Acc:705418]                                          | - | 2.812155374 | 1.26E-05    | 8.92E-05    |
| ENSMMUG00000042087 | ubiquilin 2 [Source:NCBI gene;Acc:707967]                                                                           | - | 0.479024767 | 0.010213971 | 0.032544994 |
| ENSMMUG00000051670 |                                                                                                                     | - | 1.147760987 | 2.46E-05    | 0.000162657 |
| ENSMMUG00000054377 |                                                                                                                     | - | 1.004860611 | 7.95E-14    | 2.40E-12    |
| ENSMMUG00000063913 | endogenous retrovirus group K member 7 Env polyprotein-like [Source:NCBI gene;Acc:114674933]                        | - | 3.213383545 | 8.09E-05    | 0.000472387 |
| ENSMMUG00000059335 |                                                                                                                     | - | 5.10274641  | 2.16E-07    | 2.24E-06    |
| ENSMMUG0000004309  | APC membrane recruitment protein 1 [Source:VGNC Symbol;Acc:VGNC:69716]                                              | - | 4.981150741 | 4.88E-07    | 4.74E-06    |
| ENSMMUG0000004274  | myotubularin related protein 8 [Source:VGNC Symbol;Acc:VGNC:74974]                                                  | - | 4.053482651 | 0.000366015 | 0.001818789 |
| ENSMMUG00000065001 |                                                                                                                     | - | -0.45746248 | 0.002465403 | 0.009659545 |
| ENSMMUG00000047336 | praja ring finger ubiquitin ligase 1 [Source:NCBI gene;Acc:695038]                                                  | - | 0.492256653 | 0.00225502  | 0.008932808 |
| ENSMMUG00000054817 | immunoglobulin binding protein 1 [Source:NCBI gene;Acc:694632]                                                      | - | 0.863447547 | 0.006615844 | 0.022490661 |
| ENSMMUG00000061295 | PDZ domain containing 11 [Source:NCBI gene;Acc:695458]                                                              | - | -0.80060935 | 0.001036621 | 0.004551201 |
| ENSMMUG00000013940 | kinesin family member 4A [Source:NCBI gene;Acc:695574]                                                              | - | 1.992480607 | 3.02E-06    | 2.47E-05    |
| ENSMMUG00000013943 | glycerophosphodiester phosphodiesterase domain containing 2 [Source:VGNC Symbol;Acc:VGNC:72787]                     | - | 2.027098339 | 1.36E-06    | 1.19E-05    |
| ENSMMUG00000003049 | testis expressed 11 [Source:VGNC Symbol;Acc:VGNC:78316]                                                             | - | 2.742547773 | 7.91E-09    | 1.07E-07    |
| ENSMMUG00000032429 | forkhead box O4 [Source:VGNC Symbol;Acc:VGNC:72712]                                                                 | - | 2.079161262 | 1.88E-25    | 2.13E-23    |
| ENSMMUG00000032427 | neuroligin 3 [Source:NCBI gene;Acc:574216]                                                                          | - | 1.241340669 | 3.09E-17    | 1.45E-15    |
| ENSMMUG00000000669 | gap junction protein beta 1 [Source:VGNC Symbol;Acc:VGNC:73059]                                                     | - | 1.651705463 | 0.000822003 | 0.003727992 |
| ENSMMUG00000000667 | zinc finger MYM-type containing 3 [Source:VGNC Symbol;Acc:VGNC:78886]                                               | - | 1.359823204 | 3.16E-05    | 0.000204032 |
| ENSMMUG00000056450 |                                                                                                                     | - | 1.940860182 | 0.003740581 | 0.013807361 |
| ENSMMUG00000015238 | O-linked N-acetylglucosamine (GlcNAc) transferase [Source:NCBI gene;Acc:698268]                                     | - | 1.134172705 | 4.99E-07    | 4.81E-06    |
| ENSMMUG00000003296 | Cbp/p300 interacting transactivator with Glu/Asp rich carboxy-terminal domain 1 [Source:VGNC Symbol;Acc:VGNC:71227] | - | 0.429949667 | 0.006653293 | 0.022585118 |
| ENSMMUG00000013449 | caudal type homeobox 4 [Source:VGNC Symbol;Acc:VGNC:70997]                                                          | - | 1.394081485 | 0.013515178 | 0.041281494 |
| ENSMMUG00000063858 |                                                                                                                     | - | 0.766509685 | 1.82E-06    | 1.55E-05    |
| ENSMMUG00000037903 | Metazoan signal recognition particle RNA [Source:RFAM;Acc:RF00017]                                                  | - | 0.589926318 | 0.001490159 | 0.00622105  |
| ENSMMUG00000053505 | U6 spliceosomal RNA [Source:RFAM;Acc:RF00026]                                                                       | - | 1.268521725 | 0.004295745 | 0.015601977 |
| ENSMMUG00000017660 |                                                                                                                     | - | 1.320594891 | 4.41E-11    | 8.80E-10    |
| ENSMMUG00000011440 | neurite extension and migration factor [Source:VGNC Symbol;Acc:VGNC:75274]                                          | - | 0.671235949 | 0.004133939 | 0.015068943 |
| ENSMMUG00000015619 | ATP binding cassette subfamily B member 7 [Source:VGNC Symbol;Acc:VGNC:81340]                                       | - | 1.238976217 | 1.09E-06    | 9.76E-06    |
| ENSMMUG00000049351 | MAGE family member E1 [Source:NCBI gene;Acc:705379]                                                                 | - | 1.220924916 | 2.67E-14    | 8.76E-13    |
| ENSMMUG00000014407 | magnesium transporter 1 [Source:VGNC Symbol;Acc:VGNC:74386]                                                         | - | 0.672840671 | 2.63E-05    | 0.000172295 |

|                     |                                                                                                                                       |             |             |             |
|---------------------|---------------------------------------------------------------------------------------------------------------------------------------|-------------|-------------|-------------|
| ENSMMUG00000015861  | cytochrome c oxidase subunit VIIb [Source:NCBI gene;Acc:706099]                                                                       | 0.690009971 | 0.000855978 | 0.003852176 |
| ENSMMUG00000013387  | cysteinyl leukotriene receptor 1 [Source:VGNC Symbol;Acc:VGNC:71646]                                                                  | 1.38178785  | 3.35E-10    | 5.78E-09    |
| ENSMMUG000000052073 |                                                                                                                                       | 1.402815673 | 7.01E-18    | 3.49E-16    |
| ENSMMUG00000000448  |                                                                                                                                       | -           | -           | -           |
| ENSMMUG00000011078  | protocadherin 19 [Source:VGNC Symbol;Acc:VGNC:75601]                                                                                  | 1.412756497 | 0.007230821 | 0.024321852 |
|                     |                                                                                                                                       | 1.489242012 | 0.006506883 | 0.022147092 |
| ENSMMUG00000008212  | tenomodulin [Source:VGNC Symbol;Acc:VGNC:79087]                                                                                       | -           | -           | -           |
|                     |                                                                                                                                       | 1.138596942 | 2.45E-07    | 2.52E-06    |
| ENSMMUG00000013008  | cleavage stimulation factor subunit 2 [Source:VGNC Symbol;Acc:VGNC:71536]                                                             | -           | -           | -           |
|                     |                                                                                                                                       | 1.289189261 | 6.19E-05    | 0.000372469 |
| ENSMMUG00000004178  | NADPH oxidase 1 [Source:VGNC Symbol;Acc:VGNC:75374]                                                                                   | -           | -           | -           |
|                     |                                                                                                                                       | 1.220016464 | 3.03E-08    | 3.72E-07    |
| ENSMMUG00000065018  | transmembrane protein 35A [Source:NCBI gene;Acc:702205]                                                                               | -           | -           | -           |
| ENSMMUG00000059432  |                                                                                                                                       | 0.806252025 | 4.86E-05    | 0.000298871 |
| ENSMMUG00000013150  | MORC family CW-type zinc finger 4 [Source:VGNC Symbol;Acc:VGNC:74808]                                                                 | 2.175059023 | 0.000352393 | 0.00175983  |
| ENSMMUG00000013146  | claudin 2 [Source:HGNC Symbol;Acc:HGNC:2041]                                                                                          | 1.297701527 | 1.54E-10    | 2.85E-09    |
|                     |                                                                                                                                       | 1.3331495   | 3.80E-11    | 7.65E-10    |
| ENSMMUG00000022293  | FERM and PDZ domain containing 3 [Source:VGNC Symbol;Acc:VGNC:72805]                                                                  | -           | -           | -           |
|                     |                                                                                                                                       | 0.926333429 | 1.97E-13    | 5.56E-12    |
| ENSMMUG00000004674  | phosphoribosyl pyrophosphate synthetase 1 [Source:NCBI gene;Acc:702529]                                                               | -           | -           | -           |
| ENSMMUG00000007688  | angiominin [Source:VGNC Symbol;Acc:VGNC:69627]                                                                                        | 0.792158993 | 5.23E-08    | 6.12E-07    |
| ENSMMUG00000055906  | angiotensin II receptor type 2 [Source:NCBI gene;Acc:709513]                                                                          | 3.83074445  | 0.000386234 | 0.001911137 |
| ENSMMUG00000026243  | U6 spliceosomal RNA [Source:RFAM;Acc:RF00026]                                                                                         | 1.786946679 | 5.94E-05    | 0.000358585 |
| ENSMMUG00000008818  | SWI/SNF related, matrix associated, actin dependent regulator of chromatin, subfamily a, member 1 [Source:VGNC Symbol;Acc:VGNC:77646] | 2.123701382 | 0.009744868 | 0.031256241 |
|                     |                                                                                                                                       | -           | -           | -           |
|                     |                                                                                                                                       | 1.187610728 | 0.001969468 | 0.00795216  |
| ENSMMUG00000008781  | BCL6 corepressor like 1 [Source:VGNC Symbol;Acc:VGNC:70131]                                                                           | -           | -           | -           |
|                     |                                                                                                                                       | 0.916444396 | 6.91E-08    | 7.97E-07    |
| ENSMMUG00000008785  | E74 like ETS transcription factor 4 [Source:VGNC Symbol;Acc:VGNC:72208]                                                               | -           | -           | -           |
|                     |                                                                                                                                       | 0.569217148 | 0.002233052 | 0.008860807 |
| ENSMMUG00000004954  | apoptosis inducing factor mitochondria associated 1 [Source:VGNC Symbol;Acc:VGNC:69820]                                               | -           | -           | -           |
|                     |                                                                                                                                       | 0.569935626 | 0.003137794 | 0.011815597 |
| ENSMMUG00000003479  | FERM domain containing 7 [Source:VGNC Symbol;Acc:VGNC:72927]                                                                          | -           | -           | -           |
|                     |                                                                                                                                       | 1.374348578 | 0.0003047   | 0.001554881 |
| ENSMMUG00000048745  | RAP2C, member of RAS oncogene family [Source:NCBI gene;Acc:705986]                                                                    | -           | -           | -           |
|                     |                                                                                                                                       | 0.881841853 | 0.000324621 | 0.001642195 |
| ENSMMUG00000025616  |                                                                                                                                       | -           | -           | -           |
|                     |                                                                                                                                       | 3.687691891 | 0.000118767 | 0.000667256 |
| ENSMMUG00000003456  | glypican 4 [Source:VGNC Symbol;Acc:VGNC:73118]                                                                                        | -0.60879174 | 1.27E-07    | 1.38E-06    |
| ENSMMUG00000009622  | glypican 3 [Source:VGNC Symbol;Acc:VGNC:73117]                                                                                        | 1.517150838 | 2.01E-06    | 1.69E-05    |
| ENSMMUG00000032341  | coiled-coil domain containing 160 [Source:VGNC Symbol;Acc:VGNC:70926]                                                                 | 0.666564248 | 7.07E-09    | 9.74E-08    |
| ENSMMUG00000016610  | CD99 molecule like 2 [Source:VGNC Symbol;Acc:VGNC:70823]                                                                              | -1.09477524 | 3.04E-05    | 0.00019656  |
| ENSMMUG00000016929  | proline rich and Gla domain 3 [Source:VGNC Symbol;Acc:VGNC:76350]                                                                     | 2.866971063 | 3.60E-11    | 7.29E-10    |
| ENSMMUG00000040974  | fetal and adult testis expressed 1 [Source:NCBI gene;Acc:704368]                                                                      | 2.998941049 | 0.001202171 | 0.005179121 |
| ENSMMUG00000063694  | cyclic nucleotide gated channel subunit alpha 2 [Source:NCBI gene;Acc:704486]                                                         | 1.063866647 | 2.16E-11    | 4.57E-10    |
| ENSMMUG00000062628  |                                                                                                                                       | 1.114209053 | 2.51E-06    | 2.08E-05    |
| ENSMMUG00000040274  | MAGE family member A4 [Source:NCBI gene;Acc:710825]                                                                                   | 1.049658633 | 1.70E-10    | 3.12E-09    |
| ENSMMUG00000039292  |                                                                                                                                       | 1.570819151 | 2.08E-10    | 3.73E-09    |
| ENSMMUG00000062063  | melanoma-associated antigen 3 [Source:NCBI gene;Acc:711544]                                                                           | 1.199823185 | 7.79E-09    | 1.06E-07    |
| ENSMMUG00000037641  | chondrosarcoma-associated gene 2/3 protein [Source:NCBI gene;Acc:106992305]                                                           | 2.182714001 | 0.002546324 | 0.009924539 |
| ENSMMUG00000049656  | melanoma-associated antigen 2 [Source:NCBI gene;Acc:706218]                                                                           | 1.584305022 | 0.01177025  | 0.036686866 |
| ENSMMUG00000058013  | melanoma-associated antigen 3 [Source:NCBI gene;Acc:706103]                                                                           | 1.829920686 | 7.73E-14    | 2.35E-12    |
| ENSMMUG00000040071  |                                                                                                                                       | 2.120284537 | 1.49E-05    | 0.000103549 |
| ENSMMUG00000020743  | centrin 2 [Source:NCBI gene;Acc:693376]                                                                                               | 1.599700714 | 0.004481226 | 0.016145998 |

|                    |                                                                                                      |             |             |             |
|--------------------|------------------------------------------------------------------------------------------------------|-------------|-------------|-------------|
| ENSMMUG00000013176 | NAD(P) dependent steroid dehydrogenase-like [Source:NCBI gene;Acc:693333]                            | 1.916086156 | 5.52E-06    | 4.28E-05    |
| ENSMMUG00000064249 |                                                                                                      | -           |             |             |
| ENSMMUG00000055393 |                                                                                                      | 1.127475667 | 0.004467703 | 0.016101413 |
|                    |                                                                                                      | 1.447659108 | 0.01491368  | 0.044734659 |
|                    |                                                                                                      | -           |             |             |
| ENSMMUG00000061278 |                                                                                                      | 0.745838483 | 0.006102013 | 0.020952136 |
| ENSMMUG00000010137 | microcephalin 1 [Source:VGNC Symbol;Acc:VGNC:74687]                                                  | 1.68303935  | 3.97E-05    | 0.000250207 |
| ENSMMUG00000058176 | b-defensin2-like [Source:NCBI gene;Acc:100169969]                                                    | 2.041992965 | 6.28E-15    | 2.24E-13    |
|                    |                                                                                                      | -           |             |             |
| ENSMMUG00000049842 |                                                                                                      | 4.111663206 | 5.44E-06    | 4.22E-05    |
| ENSMMUG00000029034 | defensin beta 136 [Source:VGNC Symbol;Acc:VGNC:71826]                                                | 1.427116423 | 3.97E-07    | 3.92E-06    |
| ENSMMUG00000050140 | Metazoan signal recognition particle RNA [Source:RFAM;Acc:RF00017]                                   | 2.126991658 | 0.004069701 | 0.01485409  |
| ENSMMUG00000063525 |                                                                                                      | 2.535115444 | 4.20E-15    | 1.53E-13    |
| ENSMMUG00000054960 |                                                                                                      | 1.597267896 | 2.98E-07    | 3.01E-06    |
| ENSMMUG00000027220 | microRNA 598 [Source:HGNC Symbol;Acc:HGNC:32854]                                                     | 2.866025006 | 0.005121756 | 0.018054897 |
| ENSMMUG00000010180 | PIN2 (TERF1) interacting telomerase inhibitor 1 [Source:NCBI gene;Acc:701523]                        | 1.673469807 | 6.89E-08    | 7.95E-07    |
|                    |                                                                                                      | -           |             |             |
| ENSMMUG00000008867 | exoribonuclease 1 [Source:VGNC Symbol;Acc:VGNC:72324]                                                | 2.747450647 | 8.33E-07    | 7.68E-06    |
| ENSMMUG00000022303 | solute carrier family 7 member 2 [Source:VGNC Symbol;Acc:VGNC:77629]                                 | -0.7968745  | 2.58E-09    | 3.83E-08    |
| ENSMMUG00000001151 | microtubule associated scaffold protein 1 [Source:VGNC Symbol;Acc:VGNC:84018]                        | 1.953790404 | 5.08E-16    | 2.10E-14    |
| ENSMMUG00000005920 | N-acetyltransferase 1 [Source:VGNC Symbol;Acc:VGNC:75133]                                            | 3.485585252 | 1.92E-07    | 2.01E-06    |
| ENSMMUG00000011774 | integrator complex subunit 10 [Source:VGNC Symbol;Acc:VGNC:73653]                                    | 1.036464767 | 9.29E-14    | 2.77E-12    |
| ENSMMUG00000064162 |                                                                                                      | 0.725759776 | 0.000622949 | 0.002926504 |
|                    |                                                                                                      | -           |             |             |
| ENSMMUG00000002032 | exportin 7 [Source:VGNC Symbol;Acc:VGNC:78946]                                                       | 1.335650739 | 6.56E-07    | 6.18E-06    |
|                    |                                                                                                      | -           |             |             |
| ENSMMUG00000063764 |                                                                                                      | 1.726651052 | 0.001974806 | 0.007969124 |
|                    |                                                                                                      | -           |             |             |
| ENSMMUG00000013029 | surfactant protein C [Source:VGNC Symbol;Acc:VGNC:84113]                                             | 1.306842631 | 3.61E-05    | 0.000229716 |
|                    |                                                                                                      | -           |             |             |
| ENSMMUG00000013031 | bone morphogenetic protein 1 [Source:VGNC Symbol;Acc:VGNC:70259]                                     | 0.749725621 | 0.000249204 | 0.001305413 |
|                    |                                                                                                      | -           |             |             |
| ENSMMUG00000013032 | phytanoyl-CoA 2-hydroxylase interacting protein [Source:VGNC Symbol;Acc:VGNC:75812]                  | 0.899976052 | 0.000240729 | 0.001265746 |
|                    |                                                                                                      | -           |             |             |
| ENSMMUG00000023226 | RNA polymerase III subunit D [Source:VGNC Symbol;Acc:VGNC:76017]                                     | 0.950486339 | 1.81E-09    | 2.77E-08    |
|                    |                                                                                                      | -           |             |             |
| ENSMMUG00000052651 | Metazoan signal recognition particle RNA [Source:RFAM;Acc:RF00017]                                   | 1.131602312 | 2.01E-06    | 1.69E-05    |
|                    |                                                                                                      | -           |             |             |
| ENSMMUG00000014438 | piwi like RNA-mediated gene silencing 2 [Source:VGNC Symbol;Acc:VGNC:81502]                          | 0.713816615 | 3.31E-07    | 3.33E-06    |
| ENSMMUG00000018345 | phosphatidylethanolamine binding protein 4 [Source:VGNC Symbol;Acc:VGNC:82204]                       | 1.780140716 | 2.09E-17    | 9.93E-16    |
| ENSMMUG00000050868 |                                                                                                      | 1.433849985 | 0.002974586 | 0.011322645 |
| ENSMMUG00000007540 | Rho related BTB domain containing 2 [Source:VGNC Symbol;Acc:VGNC:76772]                              | 0.777379198 | 0.001124739 | 0.004881526 |
| ENSMMUG00000048076 | TNF receptor superfamily member 10b [Source:NCBI gene;Acc:716650]                                    | 0.68465832  | 0.001117623 | 0.004861176 |
| ENSMMUG00000050549 | lysyl oxidase like 2 [Source:NCBI gene;Acc:710151]                                                   | 1.565827229 | 6.84E-10    | 1.12E-08    |
| ENSMMUG00000046186 | stanniocalcin 1 [Source:VGNC Symbol;Acc:VGNC:84120]                                                  | 2.026201073 | 0.009191106 | 0.029821119 |
| ENSMMUG00000003348 | neurofilament light [Source:VGNC Symbol;Acc:VGNC:75307]                                              | 2.073799822 | 1.79E-35    | 5.22E-33    |
| ENSMMUG00000056605 | Metazoan signal recognition particle RNA [Source:RFAM;Acc:RF00017]                                   | 2.230333617 | 1.16E-05    | 8.28E-05    |
|                    |                                                                                                      | -           |             |             |
| ENSMMUG00000041905 | protein phosphatase 2 regulatory subunit Balpha [Source:VGNC Symbol;Acc:VGNC:84103]                  | 1.336650998 | 0.008763697 | 0.02866651  |
| ENSMMUG00000059181 |                                                                                                      | 1.034190847 | 0.004957677 | 0.017601029 |
|                    |                                                                                                      | -           |             |             |
| ENSMMUG00000016018 | establishment of sister chromatid cohesion N-acetyltransferase 2 [Source:VGNC Symbol;Acc:VGNC:72374] | 3.652419854 | 7.96E-06    | 5.94E-05    |
|                    |                                                                                                      | -           |             |             |
| ENSMMUG00000016019 | PDZ binding kinase [Source:VGNC Symbol;Acc:VGNC:75643]                                               | 2.389663997 | 0.001291024 | 0.005509443 |

|                    |                                                                                                 |   |             |             |             |
|--------------------|-------------------------------------------------------------------------------------------------|---|-------------|-------------|-------------|
| ENSMMUG00000022044 | scavenger receptor class A member 5 [Source:VGNC Symbol;Acc:VGNC:77117]                         | - | 0.710421697 | 8.30E-05    | 0.00048243  |
| ENSMMUG00000005067 | elongator acetyltransferase complex subunit 3 [Source:VGNC Symbol;Acc:VGNC:72080]               | - | 1.738962009 | 9.13E-08    | 1.03E-06    |
| ENSMMUG00000014981 | homeobox containing 1 [Source:VGNC Symbol;Acc:VGNC:73443]                                       | - | 0.712904474 | 3.65E-05    | 0.000231822 |
| ENSMMUG00000020821 | testis expressed 15, meiosis and synapsis associated [Source:VGNC Symbol;Acc:VGNC:78318]        | - | 1.600773273 | 3.66E-20    | 2.27E-18    |
| ENSMMUG00000061408 |                                                                                                 | - | 3.931403197 | 2.39E-07    | 2.46E-06    |
| ENSMMUG00000063345 |                                                                                                 | - | 4.220459247 | 6.01E-09    | 8.39E-08    |
| ENSMMUG00000057375 |                                                                                                 | - | 3.056040829 | 0.002736567 | 0.010556968 |
| ENSMMUG00000034978 | U6 spliceosomal RNA [Source:RFAM;Acc:RF00026]                                                   | - | 1.955013542 | 0.006911767 | 0.02333824  |
| ENSMMUG00000001635 | zinc finger protein 703 [Source:VGNC Symbol;Acc:VGNC:79552]                                     | - | 0.94119476  | 5.74E-06    | 4.44E-05    |
| ENSMMUG00000061014 |                                                                                                 | - | 2.925881722 | 0.009044962 | 0.029415006 |
| ENSMMUG00000013675 | ASH2 like, histone lysine methyltransferase complex subunit [Source:VGNC Symbol;Acc:VGNC:70032] | - | 0.303709411 | 0.00930042  | 0.030106137 |
| ENSMMUG00000051162 |                                                                                                 | - | 3.938904977 | 7.76E-05    | 0.00045501  |
| ENSMMUG00000003591 | pleckstrin homology domain containing A2 [Source:VGNC Symbol;Acc:VGNC:76026]                    | - | 1.174791638 | 0.000271418 | 0.001407061 |
| ENSMMUG00000019304 | indoleamine 2,3-dioxygenase 1 [Source:VGNC Symbol;Acc:VGNC:73580]                               | - | 2.15637861  | 1.88E-10    | 3.42E-09    |
| ENSMMUG00000019306 | indoleamine 2,3-dioxygenase 2 [Source:VGNC Symbol;Acc:VGNC:84005]                               | - | 2.271782868 | 0.001511    | 0.006300549 |
| ENSMMUG00000000776 | zinc finger matrin-type 4 [Source:VGNC Symbol;Acc:VGNC:78424]                                   | - | 1.167984171 | 2.73E-08    | 3.39E-07    |
| ENSMMUG00000058320 | U6 spliceosomal RNA [Source:RFAM;Acc:RF00026]                                                   | - | 0.471809923 | 0.008650478 | 0.028388873 |
| ENSMMUG00000019082 | secreted frizzled related protein 1 [Source:VGNC Symbol;Acc:VGNC:77185]                         | - | 0.441083605 | 0.004015269 | 0.014682169 |
| ENSMMUG00000014721 | glycerol-3-phosphate acyltransferase 4 [Source:VGNC Symbol;Acc:VGNC:84002]                      | - | -0.87378501 | 0.00145585  | 0.006099608 |
| ENSMMUG00000057151 | Y RNA [Source:RFAM;Acc:RF00019]                                                                 | - | 0.757051143 | 0.007403929 | 0.02479114  |
| ENSMMUG00000014431 | adaptor related protein complex 3 subunit mu 2 [Source:VGNC Symbol;Acc:VGNC:69971]              | - | 0.302236761 | 0.013704031 | 0.041740146 |
| ENSMMUG00000014432 | plasminogen activator, tissue type [Source:VGNC Symbol;Acc:VGNC:76161]                          | - | 0.462398712 | 4.29E-05    | 0.00026815  |
| ENSMMUG00000020185 | voltage dependent anion channel 3 [Source:VGNC Symbol;Acc:VGNC:84135]                           | - | 1.879057813 | 2.64E-06    | 2.18E-05    |
| ENSMMUG00000020186 | solute carrier family 20 member 2 [Source:VGNC Symbol;Acc:VGNC:77416]                           | - | 1.162495656 | 0.002218734 | 0.008818964 |
| ENSMMUG00000053488 | small integral membrane protein 19 [Source:NCBI gene;Acc:705371]                                | - | 0.619581326 | 4.59E-09    | 6.59E-08    |
| ENSMMUG00000015347 | protein kinase, DNA-activated, catalytic subunit [Source:VGNC Symbol;Acc:VGNC:76418]            | - | 0.936776636 | 6.90E-06    | 5.22E-05    |
| ENSMMUG00000002781 | peroxidase like [Source:VGNC Symbol;Acc:VGNC:84107]                                             | - | 0.709960298 | 8.96E-07    | 8.18E-06    |
| ENSMMUG00000065247 | opioid receptor kappa 1 [Source:NCBI gene;Acc:710783]                                           | - | 1.694202396 | 2.43E-19    | 1.41E-17    |
| ENSMMUG00000025039 | Small nucleolar RNA SNORA73 family [Source:RFAM;Acc:RF00045]                                    | - | 2.969527152 | 0.009598883 | 0.0308595   |
| ENSMMUG00000005478 | trimethylguanosine synthase 1 [Source:VGNC Symbol;Acc:VGNC:78404]                               | - | 0.981463735 | 3.51E-05    | 0.00022364  |
| ENSMMUG00000014149 | LYN proto-oncogene, Src family tyrosine kinase [Source:VGNC Symbol;Acc:VGNC:74464]              | - | 0.757878718 | 4.20E-11    | 8.43E-10    |
| ENSMMUG00000055121 | Metazoan signal recognition particle RNA [Source:RFAM;Acc:RF00017]                              | - | 0.787399982 | 0.00580069  | 0.020059946 |
| ENSMMUG00000061268 | PLAG1 zinc finger [Source:NCBI gene;Acc:696149]                                                 | - | 1.110471627 | 0.001793489 | 0.007317458 |
| ENSMMUG00000046464 | coiled-coil-helix-coiled-coil-helix domain containing 7 [Source:VGNC Symbol;Acc:VGNC:83989]     | - | 1.208479231 | 9.15E-07    | 8.33E-06    |
| ENSMMUG00000061068 |                                                                                                 | - | 0.678237981 | 0.010805327 | 0.034154776 |
| ENSMMUG00000014810 | short chain dehydrogenase/reductase family 16C member 5 [Source:VGNC Symbol;Acc:VGNC:77343]     | - | 0.774847006 | 0.000329626 | 0.001663913 |
| ENSMMUG00000052791 |                                                                                                 | - | 0.893975974 | 0.000246567 | 0.001294014 |

|                    |                                                                                                  |   |             |             |             |
|--------------------|--------------------------------------------------------------------------------------------------|---|-------------|-------------|-------------|
| ENSMMUG0000006775  | proenkephalin [Source:VGNC Symbol;Acc:VGNC:75941]                                                | - | 0.962631318 | 8.52E-06    | 6.30E-05    |
| ENSMMUG0000006543  | cytochrome P450, family 7, subfamily A, polypeptide 1 [Source:NCBI gene;Acc:698127]              | - | 3.577685478 | 0.006322203 | 0.021612932 |
| ENSMMUG00000017038 | RAB2A, member RAS oncogene family [Source:VGNC Symbol;Acc:VGNC:81529]                            | - | 0.534288828 | 0.000404015 | 0.001992087 |
| ENSMMUG00000059575 |                                                                                                  | - | 2.278959347 | 4.78E-40    | 2.23E-37    |
| ENSMMUG00000038661 |                                                                                                  | - | 2.354319158 | 1.82E-17    | 8.82E-16    |
| ENSMMUG00000049866 |                                                                                                  | - | 0.451679122 | 0.00991741  | 0.031744315 |
| ENSMMUG00000004411 | 25-hydroxycholesterol 7-alpha-hydroxylase [Source:NCBI gene;Acc:710188]                          | - | 0.830786265 | 5.12E-06    | 3.99E-05    |
| ENSMMUG00000014424 | ADP ribosylation factor guanine nucleotide exchange factor 1 [Source:VGNC Symbol;Acc:VGNC:69834] | - | 2.387888757 | 0.00070124  | 0.003238964 |
| ENSMMUG00000012513 | lactamase beta 2 [Source:VGNC Symbol;Acc:VGNC:74072]                                             | - | 1.095622676 | 0.005306351 | 0.018612045 |
| ENSMMUG00000045333 | Metazoan signal recognition particle RNA [Source:RFAM;Acc:RF00017]                               | - | 0.657993425 | 0.000178497 | 0.000965687 |
| ENSMMUG00000007576 | EYA transcriptional coactivator and phosphatase 1 [Source:VGNC Symbol;Acc:VGNC:72453]            | - | 0.601366252 | 3.21E-07    | 3.23E-06    |
| ENSMMUG00000019414 | zinc finger homeobox 4 [Source:VGNC Symbol;Acc:VGNC:79902]                                       | - | 0.723700251 | 0.013927257 | 0.042328116 |
| ENSMMUG00000046641 |                                                                                                  | - | 0.390066284 | 0.005633065 | 0.019562275 |
| ENSMMUG00000000507 | stathmin 2 [Source:VGNC Symbol;Acc:VGNC:78038]                                                   | - | -0.84651362 | 0.015246305 | 0.045547281 |
| ENSMMUG00000007115 | RALY RNA binding protein like [Source:VGNC Symbol;Acc:VGNC:82217]                                | - | 1.387441284 | 0.000380818 | 0.001886334 |
| ENSMMUG00000063555 |                                                                                                  | - | -1.95480032 | 6.95E-05    | 0.000412022 |
| ENSMMUG00000028701 |                                                                                                  | - | 0.923110392 | 0.001642263 | 0.006770566 |
| ENSMMUG00000061720 |                                                                                                  | - | 0.739661249 | 0.014667845 | 0.044157835 |
| ENSMMUG00000020010 | cadherin 17 [Source:VGNC Symbol;Acc:VGNC:70810]                                                  | - | 3.540340706 | 0.008269465 | 0.027311047 |
| ENSMMUG00000021112 | epithelial splicing regulatory protein 1 [Source:VGNC Symbol;Acc:VGNC:72358]                     | - | 0.472187686 | 0.00800323  | 0.026531748 |
| ENSMMUG00000057219 | tumor protein p53 inducible nuclear protein 1 [Source:NCBI gene;Acc:700632]                      | - | 1.936058312 | 0.004344099 | 0.015749043 |
| ENSMMUG00000062721 | TSPY like 5 [Source:NCBI gene;Acc:702081]                                                        | - | 2.360390702 | 0.008055326 | 0.026685528 |
| ENSMMUG00000055454 |                                                                                                  | - | 0.324529846 | 0.014128974 | 0.042848313 |
| ENSMMUG00000060329 |                                                                                                  | - | 0.555533318 | 0.000253677 | 0.001327357 |
| ENSMMUG00000061917 |                                                                                                  | - | 0.693814954 | 7.20E-06    | 5.43E-05    |
| ENSMMUG00000014210 | metadherin [Source:VGNC Symbol;Acc:VGNC:74859]                                                   | - | 0.70637674  | 4.29E-08    | 5.12E-07    |
| ENSMMUG00000008926 | lysosomal protein transmembrane 4 beta [Source:VGNC Symbol;Acc:VGNC:84010]                       | - | 0.445647312 | 0.001339801 | 0.005679572 |
| ENSMMUG00000060771 |                                                                                                  | - | 0.578563801 | 0.000695927 | 0.00321654  |
| ENSMMUG00000020072 | matrilin 2 [Source:VGNC Symbol;Acc:VGNC:74665]                                                   | - | 0.492794228 | 0.002672533 | 0.010332204 |
| ENSMMUG00000054671 | Metazoan signal recognition particle RNA [Source:RFAM;Acc:RF00017]                               | - | 1.023501236 | 0.011286409 | 0.035422854 |
| ENSMMUG00000058389 |                                                                                                  | - | 0.634930056 | 0.00126884  | 0.005424677 |
| ENSMMUG00000022185 | odd-skipped related transcription factor 2 [Source:VGNC Symbol;Acc:VGNC:84097]                   | - | 1.371310775 | 4.15E-15    | 1.51E-13    |
| ENSMMUG00000022186 | vacuolar protein sorting 13 homolog B [Source:VGNC Symbol;Acc:VGNC:79339]                        | - | 0.463679844 | 0.002152969 | 0.00859655  |
| ENSMMUG00000004386 | sperm associated antigen 1 [Source:VGNC Symbol;Acc:VGNC:77849]                                   | - | 1.395886326 | 0.002985554 | 0.011358225 |
| ENSMMUG00000061687 |                                                                                                  | - | 1.083814258 | 0.003371795 | 0.012597256 |

|                    |                                                                                              |   |             |             |             |
|--------------------|----------------------------------------------------------------------------------------------|---|-------------|-------------|-------------|
| ENSMMUG0000004387  | ring finger protein 19A, RBR E3 ubiquitin protein ligase [Source:VGNC Symbol;Acc:VGNC:82224] | - | 1.362938199 | 1.49E-06    | 1.29E-05    |
| ENSMMUG00000051088 |                                                                                              | - | 1.132676517 | 0.001425331 | 0.005998151 |
| ENSMMUG00000009958 | ankyrin repeat domain 46 [Source:VGNC Symbol;Acc:VGNC:69719]                                 | - | -1.26075431 | 0.000615289 | 0.002898208 |
| ENSMMUG00000034608 | U6 spliceosomal RNA [Source:RFAM;Acc:RF00026]                                                | - | 0.897541251 | 0.000486296 | 0.002354739 |
| ENSMMUG00000051999 |                                                                                              | - | 2.113714784 | 1.48E-07    | 1.58E-06    |
| ENSMMUG00000001338 | antizyme inhibitor 1 [Source:VGNC Symbol;Acc:VGNC:70080]                                     | - | 2.784397902 | 0.000207972 | 0.001109315 |
| ENSMMUG00000054357 |                                                                                              | - | 3.141840379 | 0.00082367  | 0.003733136 |
| ENSMMUG00000056520 |                                                                                              | - | 2.356760351 | 0.014713911 | 0.044268006 |
| ENSMMUG00000010744 |                                                                                              | - | 1.460796978 | 0.011228663 | 0.035281098 |
| ENSMMUG00000054660 | R-spondin 2 [Source:NCBI gene;Acc:697376]                                                    | - | 1.015688073 | 4.12E-06    | 3.29E-05    |
| ENSMMUG00000011359 | eukaryotic translation initiation factor 3 subunit E [Source:VGNC Symbol;Acc:VGNC:83997]     | - | 1.053295582 | 4.32E-05    | 0.000270006 |
| ENSMMUG00000062333 |                                                                                              | - | 0.351041391 | 0.001101839 | 0.004799967 |
| ENSMMUG00000003435 | transcriptional repressor GATA binding 1 [Source:VGNC Symbol;Acc:VGNC:78656]                 | - | 0.607533036 | 1.25E-06    | 1.10E-05    |
| ENSMMUG00000001087 |                                                                                              | - | 0.628521758 | 0.012024846 | 0.037348646 |
| ENSMMUG00000024448 |                                                                                              | - | -1.61636002 | 0.013627015 | 0.041541659 |
| ENSMMUG00000004903 | ectonucleotide pyrophosphatase/phosphodiesterase 2 [Source:VGNC Symbol;Acc:VGNC:72223]       | - | 1.182952254 | 9.70E-10    | 1.55E-08    |
| ENSMMUG00000014702 | TATA-box binding protein associated factor 2 [Source:VGNC Symbol;Acc:VGNC:78090]             | - | 0.933637079 | 4.35E-07    | 4.26E-06    |
| ENSMMUG00000058797 |                                                                                              | - | 0.666614872 | 0.000215892 | 0.001147196 |
| ENSMMUG00000021157 | TBC1 domain family member 31 [Source:VGNC Symbol;Acc:VGNC:84121]                             | - | 4.295139078 | 1.98E-13    | 5.58E-12    |
| ENSMMUG00000020467 | ATPase family AAA domain containing 2 [Source:VGNC Symbol;Acc:VGNC:70154]                    | - | -0.54869817 | 4.20E-05    | 0.000263077 |
| ENSMMUG00000028923 | WDYHV motif containing 1 [Source:VGNC Symbol;Acc:VGNC:79503]                                 | - | 0.267289668 | 0.008350782 | 0.027527742 |
| ENSMMUG00000023778 | F-box protein 32 [Source:VGNC Symbol;Acc:VGNC:72517]                                         | - | 1.148218086 | 0.000326204 | 0.001648016 |
| ENSMMUG00000016375 | fer-1 like family member 6 [Source:VGNC Symbol;Acc:VGNC:72585]                               | - | 0.357930752 | 0.007076058 | 0.023852778 |
| ENSMMUG00000054755 | transmembrane protein 65 [Source:NCBI gene;Acc:705727]                                       | - | 1.772566213 | 1.42E-06    | 1.24E-05    |
| ENSMMUG00000058106 | otoconin 90 [Source:NCBI gene;Acc:100429699]                                                 | - | 0.726158622 | 4.79E-06    | 3.76E-05    |
| ENSMMUG00000012560 | HERV-H LTR-associating 1 [Source:NCBI gene;Acc:100430297]                                    | - | 1.193771393 | 4.80E-11    | 9.51E-10    |
| ENSMMUG00000055934 |                                                                                              | - | 0.583852409 | 0.003485447 | 0.012954259 |
| ENSMMUG00000059464 |                                                                                              | - | -2.95280864 | 0.004314554 | 0.015662176 |
| ENSMMUG00000048066 | trafficking protein particle complex 9 [Source:NCBI gene;Acc:711466]                         | - | 1.281566241 | 1.55E-10    | 2.86E-09    |
| ENSMMUG00000053837 |                                                                                              | - | 3.96284617  | 0.004580158 | 0.016455947 |
| ENSMMUG00000001432 | t-SNARE domain containing 1 [Source:NCBI gene;Acc:701269]                                    | - | 0.504408183 | 0.000435613 | 0.00213438  |
| ENSMMUG00000019877 | adhesion G protein-coupled receptor B1 [Source:VGNC Symbol;Acc:VGNC:69597]                   | - | 0.712229879 | 0.009344372 | 0.030220508 |
| ENSMMUG00000062642 |                                                                                              | - | -0.66182404 | 0.002816476 | 0.010817705 |
| ENSMMUG00000022452 | Jrk helix-turn-helix protein [Source:VGNC Symbol;Acc:VGNC:73957]                             | - | 0.48471078  | 6.01E-05    | 0.00036246  |
| ENSMMUG00000000959 | cytochrome P450, family 11, subfamily B, polypeptide 2 [Source:NCBI gene;Acc:695914]         | - | 0.724121032 | 4.37E-07    | 4.27E-06    |
| ENSMMUG00000064147 | lymphocyte antigen 6 family member L [Source:NCBI gene;Acc:106999990]                        | - | 0.352527412 | 0.00399425  | 0.014612931 |
| ENSMMUG00000022933 | DNA topoisomerase I mitochondrial [Source:VGNC Symbol;Acc:VGNC:79821]                        | - | 0.970614155 | 3.90E-12    | 9.26E-11    |
| ENSMMUG00000059932 | Metazoan signal recognition particle RNA [Source:RFAM;Acc:RF00017]                           | - | 1.573061118 | 2.65E-05    | 0.000173492 |
| ENSMMUG00000010939 | rhopilin Rho GTPase binding protein 1 [Source:VGNC Symbol;Acc:VGNC:76779]                    | - | 0.381730353 | 0.000245163 | 0.001288578 |

|                    |                                                                                                                                                      |             |             |             |
|--------------------|------------------------------------------------------------------------------------------------------------------------------------------------------|-------------|-------------|-------------|
| ENSMMUG00000058733 | zinc finger CCCH-type containing 3 [Source:NCBI gene;Acc:708584]                                                                                     | 0.469679424 | 5.03E-06    | 3.93E-05    |
| ENSMMUG00000001187 | mitogen-activated protein kinase 15 [Source:VGNC Symbol;Acc:VGNC:74570]                                                                              | 1.491033961 | 0.002070398 | 0.008309441 |
|                    |                                                                                                                                                      | -           |             |             |
| ENSMMUG00000013552 | scribble planar cell polarity protein [Source:HGNC Symbol;Acc:HGNC:30377]                                                                            | 1.252625482 | 4.99E-18    | 2.54E-16    |
|                    |                                                                                                                                                      | -           |             |             |
| ENSMMUG00000000388 | plectin [Source:VGNC Symbol;Acc:VGNC:76173]                                                                                                          | 1.081269707 | 3.02E-08    | 3.71E-07    |
|                    |                                                                                                                                                      | -           |             |             |
| ENSMMUG00000050907 |                                                                                                                                                      | 0.868505839 | 1.01E-06    | 9.10E-06    |
| ENSMMUG00000053106 |                                                                                                                                                      | 1.341628967 | 0.000128212 | 0.000716587 |
| ENSMMUG00000064914 |                                                                                                                                                      | 0.990345855 | 0.016549643 | 0.048758908 |
| ENSMMUG00000023282 | aldo-keto reductase family 1, member C1 (dihydrodiol dehydrogenase 1; 20-alpha (3-alpha)-hydroxysteroid dehydrogenase) [Source:NCBI gene;Acc:711198] | 1.588621391 | 2.18E-11    | 4.60E-10    |
| ENSMMUG00000000958 | aldo-keto reductase family 1, member C2 [Source:NCBI gene;Acc:711360]                                                                                | 1.772292807 | 1.79E-13    | 5.08E-12    |
| ENSMMUG00000015141 | ankyrin repeat domain 16 [Source:NCBI gene;Acc:720787]                                                                                               | -1.79208206 | 1.09E-05    | 7.83E-05    |
|                    |                                                                                                                                                      | -           |             |             |
| ENSMMUG00000015143 | F-box DNA helicase 1 [Source:NCBI gene;Acc:720797]                                                                                                   | 1.698535677 | 1.87E-06    | 1.58E-05    |
| ENSMMUG00000056045 |                                                                                                                                                      | -1.67688357 | 6.10E-10    | 1.01E-08    |
|                    |                                                                                                                                                      | -           |             |             |
| ENSMMUG00000015151 | interleukin 2 receptor subunit alpha [Source:NCBI gene;Acc:574300]                                                                                   | 1.296066625 | 7.65E-05    | 0.000449085 |
| ENSMMUG00000054646 |                                                                                                                                                      | -2.28536603 | 0.01569093  | 0.046727815 |
| ENSMMUG00000061189 |                                                                                                                                                      | 0.452007547 | 1.12E-06    | 1.00E-05    |
| ENSMMUG00000052242 |                                                                                                                                                      | 0.610003674 | 0.000213379 | 0.001134703 |
|                    |                                                                                                                                                      | -           |             |             |
| ENSMMUG00000064980 |                                                                                                                                                      | 1.418403699 | 0.001362204 | 0.005762348 |
| ENSMMUG00000037449 | CUGBP Elav-like family member 2 [Source:NCBI gene;Acc:714291]                                                                                        | 0.483565701 | 0.009647024 | 0.030977837 |
|                    |                                                                                                                                                      | -           |             |             |
| ENSMMUG00000017145 | cell division cycle 123 [Source:VGNC Symbol;Acc:VGNC:70768]                                                                                          | 1.123932809 | 8.74E-10    | 1.41E-08    |
|                    |                                                                                                                                                      | -           |             |             |
| ENSMMUG00000017164 | FERM domain containing 4A [Source:VGNC Symbol;Acc:VGNC:72786]                                                                                        | 0.607603877 | 0.005725136 | 0.019828002 |
|                    |                                                                                                                                                      | -           |             |             |
| ENSMMUG00000017170 | cerebral dopamine neurotrophic factor [Source:VGNC Symbol;Acc:VGNC:71094]                                                                            | 0.464872428 | 0.00015089  | 0.000830754 |
|                    |                                                                                                                                                      | -           |             |             |
| ENSMMUG00000017173 | heat shock protein family A (Hsp70) member 14 [Source:NCBI gene;Acc:697257]                                                                          | 1.417278473 | 0.000385121 | 0.0019063   |
|                    |                                                                                                                                                      | -           |             |             |
| ENSMMUG00000017174 | suppressor of variegation 3-9 homolog 2 [Source:NCBI gene;Acc:697378]                                                                                | 2.672635309 | 0.010162608 | 0.032427163 |
| ENSMMUG00000011661 | integrin subunit alpha 8 [Source:VGNC Symbol;Acc:VGNC:73782]                                                                                         | 1.376662388 | 1.02E-15    | 4.01E-14    |
| ENSMMUG00000024234 | U6 spliceosomal RNA [Source:RFAM;Acc:RF00026]                                                                                                        | 1.520428002 | 2.90E-07    | 2.94E-06    |
| ENSMMUG00000016069 | cubilin [Source:VGNC Symbol;Acc:VGNC:82132]                                                                                                          | 1.603071544 | 1.96E-05    | 0.000133356 |
|                    |                                                                                                                                                      | -           |             |             |
| ENSMMUG00000010589 | nebulette [Source:VGNC Symbol;Acc:VGNC:75195]                                                                                                        | 0.621390795 | 2.30E-05    | 0.000152968 |
| ENSMMUG00000053765 |                                                                                                                                                      | 0.593880583 | 0.001478701 | 0.006182416 |
| ENSMMUG00000056500 |                                                                                                                                                      | 0.506699427 | 0.001437965 | 0.0060373   |
| ENSMMUG00000002930 | G protein-coupled receptor 158 [Source:NCBI gene;Acc:707065]                                                                                         | 0.655572673 | 0.000845661 | 0.003817378 |
| ENSMMUG00000037243 | U6 spliceosomal RNA [Source:RFAM;Acc:RF00026]                                                                                                        | 1.396314648 | 4.71E-07    | 4.58E-06    |
|                    |                                                                                                                                                      | -           |             |             |
| ENSMMUG00000016410 | acyl-CoA binding domain containing 5 [Source:VGNC Symbol;Acc:VGNC:69509]                                                                             | 0.441124776 | 0.016343888 | 0.048240441 |
| ENSMMUG00000046971 | RAB18, member RAS oncogene family [Source:NCBI gene;Acc:708843]                                                                                      | -0.87283961 | 0.013048373 | 0.040047567 |
| ENSMMUG00000059681 |                                                                                                                                                      | 1.352128441 | 0.001017508 | 0.004478503 |
|                    |                                                                                                                                                      | -           |             |             |
| ENSMMUG00000001374 | supervillin [Source:NCBI gene;Acc:695267]                                                                                                            | 1.074248857 | 3.88E-05    | 0.000244553 |
|                    |                                                                                                                                                      | -           |             |             |
| ENSMMUG00000041067 | Metazoan signal recognition particle RNA [Source:RFAM;Acc:RF00017]                                                                                   | 1.205761758 | 0.00018487  | 0.000997472 |
|                    |                                                                                                                                                      | -           |             |             |
| ENSMMUG00000040958 | lysozyme-like protein 1 [Source:NCBI gene;Acc:698176]                                                                                                | 0.963021109 | 1.75E-06    | 1.50E-05    |
| ENSMMUG00000044214 |                                                                                                                                                      | -1.08726101 | 2.20E-07    | 2.27E-06    |

|                    |                                                                                          |             |             |             |
|--------------------|------------------------------------------------------------------------------------------|-------------|-------------|-------------|
| ENSMMUG00000015058 | kinesin family member 5B [Source:VGNC Symbol;Acc:VGNC:74020]                             | -0.70375123 | 0.014484698 | 0.043719097 |
| ENSMMUG00000043648 |                                                                                          | 1.813328352 | 0.001307701 | 0.005565369 |
| ENSMMUG00000061710 |                                                                                          | 0.456447689 | 8.62E-06    | 6.36E-05    |
| ENSMMUG00000057199 |                                                                                          | 1.489197855 | 4.50E-05    | 0.000279159 |
| ENSMMUG0000006713  | cyclin Y [Source:VGNC Symbol;Acc:VGNC:70840]                                             | 1.203160245 | 1.41E-09    | 2.18E-08    |
| ENSMMUG00000054392 | zinc finger protein 239 [Source:NCBI gene;Acc:717737]                                    | 0.899425156 | 0.004340937 | 0.015741648 |
| ENSMMUG00000064634 |                                                                                          | 0.656017762 | 4.44E-06    | 3.52E-05    |
| ENSMMUG00000064724 |                                                                                          | -1.55032748 | 0.006625593 | 0.022518268 |
| ENSMMUG00000013836 | WDFY family member 4 [Source:NCBI gene;Acc:719472]                                       | 2.339491848 | 0.006135393 | 0.021061595 |
| ENSMMUG00000033001 | U6 spliceosomal RNA [Source:RFAM;Acc:RF00026]                                            | 1.257773017 | 2.44E-08    | 3.06E-07    |
| ENSMMUG00000017380 | neuregulin 3 [Source:NCBI gene;Acc:699268]                                               | 2.268157789 | 0.000964218 | 0.004268067 |
| ENSMMUG00000055918 |                                                                                          | 2.962997136 | 5.18E-05    | 0.000317737 |
| ENSMMUG00000057196 | pulmonary surfactant-associated protein A [Source:NCBI gene;Acc:701715]                  | 1.574957942 | 5.58E-19    | 3.14E-17    |
| ENSMMUG00000051972 | zinc finger CCHC-type containing 24 [Source:NCBI gene;Acc:702083]                        | 2.323661069 | 9.60E-05    | 0.00054987  |
| ENSMMUG00000055601 |                                                                                          | 0.794895375 | 3.63E-11    | 7.33E-10    |
| ENSMMUG00000053900 |                                                                                          | 1.198018434 | 0.008753829 | 0.028652171 |
| ENSMMUG00000005514 | RNA polymerase III subunit A [Source:VGNC Symbol;Acc:VGNC:76138]                         | 0.843743055 | 4.19E-05    | 0.00026281  |
| ENSMMUG00000009128 | discs large MAGUK scaffold protein 5 [Source:VGNC Symbol;Acc:VGNC:71921]                 | 0.722478477 | 2.20E-09    | 3.32E-08    |
| ENSMMUG00000050271 |                                                                                          | 1.165868977 | 2.33E-05    | 0.00015475  |
| ENSMMUG00000053916 |                                                                                          | 0.801041173 | 8.19E-06    | 6.08E-05    |
| ENSMMUG00000060115 |                                                                                          | 0.621529782 | 0.00172352  | 0.007060744 |
| ENSMMUG00000020823 | vinculin [Source:NCBI gene;Acc:721921]                                                   | 0.834330858 | 1.29E-05    | 9.10E-05    |
| ENSMMUG00000021393 | calcium/calmodulin dependent protein kinase II gamma [Source:VGNC Symbol;Acc:VGNC:70525] | 1.581208763 | 1.89E-10    | 3.43E-09    |
| ENSMMUG00000061526 | synaptopodin 2 like [Source:NCBI gene;Acc:714736]                                        | 1.110323356 | 3.86E-07    | 3.83E-06    |
| ENSMMUG00000013696 | myozenin 1 [Source:VGNC Symbol;Acc:VGNC:74951]                                           | 1.026182047 | 2.25E-05    | 0.000150043 |
| ENSMMUG00000001821 | ubiquitin specific peptidase 54 [Source:NCBI gene;Acc:706859]                            | 0.549242959 | 0.014686676 | 0.044203877 |
| ENSMMUG00000011282 | DnaJ heat shock protein family (Hsp40) member C9 [Source:NCBI gene;Acc:707599]           | 3.488505867 | 0.013550086 | 0.041360085 |
| ENSMMUG00000011276 | nudix hydrolase 13 [Source:VGNC Symbol;Acc:VGNC:75435]                                   | 0.414410523 | 0.000432418 | 0.002120952 |
| ENSMMUG00000011274 | prolyl 4-hydroxylase subunit alpha 1 [Source:VGNC Symbol;Acc:VGNC:75741]                 | -0.77795695 | 1.29E-06    | 1.13E-05    |
| ENSMMUG00000016652 | cell division cycle and apoptosis regulator 1 [Source:NCBI gene;Acc:693585]              | 0.776288803 | 2.22E-05    | 0.000148799 |
| ENSMMUG00000023198 | tet methylcytosine dioxygenase 1 [Source:VGNC Symbol;Acc:VGNC:79811]                     | 0.32940432  | 0.006977832 | 0.023544307 |
| ENSMMUG00000030532 | solute carrier family 25 member 16 [Source:NCBI gene;Acc:694145]                         | 0.739090381 | 1.82E-06    | 1.54E-05    |
| ENSMMUG00000019703 | RUN and FYVE domain containing 2 [Source:VGNC Symbol;Acc:VGNC:77057]                     | 0.600633362 | 2.74E-08    | 3.41E-07    |
| ENSMMUG00000009792 | heterogeneous nuclear ribonucleoprotein H3 [Source:VGNC Symbol;Acc:VGNC:73497]           | 0.627613211 | 0.001540917 | 0.006400558 |
| ENSMMUG00000061385 |                                                                                          | 2.092769924 | 0.00810139  | 0.026819121 |
| ENSMMUG00000016902 | catenin alpha 3 [Source:VGNC Symbol;Acc:VGNC:82131]                                      | 0.569291398 | 0.004819625 | 0.01720173  |
| ENSMMUG00000053199 |                                                                                          | 1.056984595 | 9.31E-11    | 1.78E-09    |
| ENSMMUG00000059754 |                                                                                          | 1.091451317 | 1.09E-05    | 7.83E-05    |
| ENSMMUG00000009794 | protocadherin related 15 [Source:VGNC Symbol;Acc:VGNC:75608]                             | 1.031096575 | 1.74E-11    | 3.73E-10    |
| ENSMMUG00000007077 | APOBEC1 complementation factor [Source:VGNC Symbol;Acc:VGNC:69523]                       | 0.820571884 | 1.33E-07    | 1.44E-06    |
| ENSMMUG00000007078 | N-acylsphingosine amidohydrolase 2 [Source:NCBI gene;Acc:703913]                         | -0.71758555 | 2.42E-09    | 3.63E-08    |



|                    |                                                                                                                 |             |             |             |
|--------------------|-----------------------------------------------------------------------------------------------------------------|-------------|-------------|-------------|
| ENSMMUG0000006411  | 3'-phosphoadenosine 5'-phosphosulfate synthase 2 [Source:VGNC Symbol;Acc:VGNC:75758]                            | 0.657864534 | 0.000705063 | 0.003254478 |
| ENSMMUG0000000470  | ankyrin repeat domain 22 [Source:VGNC Symbol;Acc:VGNC:69728]                                                    | 1.206028492 | 0.009313194 | 0.03014053  |
| ENSMMUG00000061761 | interferon induced protein with tetratricopeptide repeats 2 [Source:NCBI gene;Acc:695452]                       | -1.7012908  | 1.79E-18    | 9.75E-17    |
| ENSMMUG00000058942 |                                                                                                                 | 1.917513602 | 5.71E-17    | 2.61E-15    |
| ENSMMUG00000059038 | 5-hydroxytryptamine receptor 7 [Source:NCBI gene;Acc:696317]                                                    | 1.278739585 | 6.85E-06    | 5.18E-05    |
| ENSMMUG0000000238  | HECT domain E3 ubiquitin protein ligase 2 [Source:VGNC Symbol;Acc:VGNC:73246]                                   | 2.643431309 | 5.33E-19    | 3.01E-17    |
| ENSMMUG00000058603 |                                                                                                                 | 3.345069261 | 7.48E-09    | 1.02E-07    |
| ENSMMUG00000007478 | tankyrase 2 [Source:VGNC Symbol;Acc:VGNC:78983]                                                                 | 0.591602103 | 1.46E-05    | 0.000101335 |
| ENSMMUG00000059608 | fibroblast growth factor binding protein 3 [Source:NCBI gene;Acc:697881]                                        | 0.880811826 | 6.03E-05    | 0.000363244 |
| ENSMMUG00000017627 | B-TFIID TATA-box binding protein associated factor 1 [Source:VGNC Symbol;Acc:VGNC:70336]                        | 1.501067038 | 8.39E-30    | 1.47E-27    |
| ENSMMUG00000004816 | membrane associated ring-CH-type finger 5 [Source:VGNC Symbol;Acc:VGNC:74588]                                   | 1.159886868 | 9.52E-10    | 1.52E-08    |
| ENSMMUG00000058935 | Metazoan signal recognition particle RNA [Source:RFAM;Acc:RF00017]                                              | 1.727172388 | 0.000775303 | 0.003544854 |
| ENSMMUG00000011789 | hematopoietically expressed homeobox [Source:VGNC Symbol;Acc:VGNC:73376]                                        | 1.90092291  | 2.63E-07    | 2.69E-06    |
| ENSMMUG00000052637 | Metazoan signal recognition particle RNA [Source:RFAM;Acc:RF00017]                                              | 2.361758837 | 1.50E-05    | 0.000104404 |
| ENSMMUG00000014715 | fragile site, folic acid type, rare, fra(10)(q23.3) or fra(10)(q24.2) candidate 1 [Source:NCBI gene;Acc:700389] | 1.891937994 | 1.30E-06    | 1.14E-05    |
| ENSMMUG00000050975 |                                                                                                                 | 1.508140696 | 6.24E-07    | 5.90E-06    |
| ENSMMUG00000004818 | sorbin and SH3 domain containing 1 [Source:VGNC Symbol;Acc:VGNC:77702]                                          | 0.323935253 | 0.004208297 | 0.015312131 |
| ENSMMUG00000003103 | tectonic family member 3 [Source:VGNC Symbol;Acc:VGNC:79438]                                                    | 0.556411269 | 0.00222772  | 0.008845527 |
| ENSMMUG00000001518 | zinc finger protein 518A [Source:VGNC Symbol;Acc:VGNC:79767]                                                    | 0.881938378 | 9.14E-15    | 3.20E-13    |
| ENSMMUG00000008687 | B cell linker [Source:VGNC Symbol;Acc:VGNC:70306]                                                               | 0.506355263 | 0.000104189 | 0.000592714 |
| ENSMMUG00000001876 | phosphoinositide-3-kinase adaptor protein 1 [Source:VGNC Symbol;Acc:VGNC:75891]                                 | 0.694555842 | 0.000416252 | 0.002046669 |
| ENSMMUG00000010427 | ligand dependent nuclear receptor corepressor [Source:NCBI gene;Acc:705646]                                     | 0.427784799 | 0.002849474 | 0.010914552 |
| ENSMMUG00000059655 |                                                                                                                 | 1.123034139 | 0.016473575 | 0.048592541 |
| ENSMMUG00000015503 | zinc finger FYVE-type containing 27 [Source:VGNC Symbol;Acc:VGNC:79623]                                         | 0.594048049 | 1.74E-06    | 1.49E-05    |
| ENSMMUG00000018154 | cartilage acidic protein 1 [Source:VGNC Symbol;Acc:VGNC:71408]                                                  | 0.516916317 | 0.001781707 | 0.007271501 |
| ENSMMUG00000052648 |                                                                                                                 | 0.73823792  | 0.003122857 | 0.011771994 |
| ENSMMUG00000020603 | pyridine nucleotide-disulphide oxidoreductase domain 2 [Source:NCBI gene;Acc:707797]                            | 0.669702366 | 4.35E-05    | 0.000271331 |
| ENSMMUG00000054904 | Metazoan signal recognition particle RNA [Source:RFAM;Acc:RF00017]                                              | 0.858062735 | 2.53E-05    | 0.000166815 |
| ENSMMUG00000020604 | HPS1 biogenesis of lysosomal organelles complex 3 subunit 1 [Source:VGNC Symbol;Acc:VGNC:73515]                 | 1.186004774 | 3.74E-11    | 7.54E-10    |
| ENSMMUG00000049770 | Metazoan signal recognition particle RNA [Source:RFAM;Acc:RF00017]                                              | 1.340024285 | 0.000106321 | 0.000602885 |
| ENSMMUG00000020605 | heparanase 2 (inactive) [Source:NCBI gene;Acc:708795]                                                           | 0.718307485 | 0.000334469 | 0.001685931 |
| ENSMMUG00000060230 | Metazoan signal recognition particle RNA [Source:RFAM;Acc:RF00017]                                              | 1.147700983 | 3.12E-06    | 2.54E-05    |
| ENSMMUG00000010357 | cyclin and CBS domain divalent metal cation transport mediator 1 [Source:NCBI gene;Acc:708335]                  | 0.877162571 | 4.95E-07    | 4.78E-06    |
| ENSMMUG00000023761 | ectonucleoside triphosphate diphosphohydrolase 7 [Source:VGNC Symbol;Acc:VGNC:72071]                            | 0.632613968 | 0.002067503 | 0.0083002   |
| ENSMMUG00000063121 |                                                                                                                 | 1.321618486 | 0.009613358 | 0.030890955 |
| ENSMMUG00000052430 |                                                                                                                 | -1.13830928 | 0.00311158  | 0.011735794 |
| ENSMMUG00000015117 | X-prolyl aminopeptidase 1 [Source:VGNC Symbol;Acc:VGNC:78810]                                                   | 1.435857534 | 8.69E-11    | 1.67E-09    |
| ENSMMUG00000006233 | adducin 3 [Source:VGNC Symbol;Acc:VGNC:69531]                                                                   | 1.076103825 | 0.003776142 | 0.013909334 |

|                    |                                                                                                  |             |             |             |
|--------------------|--------------------------------------------------------------------------------------------------|-------------|-------------|-------------|
| ENSMMUG00000051414 | Metazoan signal recognition particle RNA [Source:RFAM;Acc:RF00017]                               | 1.209980656 | 0.005971484 | 0.020562919 |
| ENSMMUG00000014350 | MAX interactor 1, dimerization protein [Source:VGNC Symbol;Acc:VGNC:75087]                       | 1.133018996 | 4.95E-09    | 7.04E-08    |
| ENSMMUG00000007775 | survival motor neuron domain containing 1 [Source:NCBI gene;Acc:694761]                          | 0.915820112 | 0.000814555 | 0.003698998 |
| ENSMMUG00000057793 | dual specificity phosphatase 5 [Source:NCBI gene;Acc:698178]                                     | 3.867924939 | 3.12E-05    | 0.000201717 |
| ENSMMUG00000007982 | structural maintenance of chromosomes 3 [Source:VGNC Symbol;Acc:VGNC:77769]                      | 1.745604371 | 0.00012247  | 0.000687233 |
| ENSMMUG00000019883 | RNA binding motif protein 20 [Source:NCBI gene;Acc:698677]                                       | 1.675100246 | 0.00028923  | 0.001485666 |
| ENSMMUG00000017204 | programmed cell death 4 [Source:VGNC Symbol;Acc:VGNC:75794]                                      | 4.034603702 | 7.08E-08    | 8.14E-07    |
| ENSMMUG00000056056 |                                                                                                  | 4.813750694 | 1.17E-05    | 8.40E-05    |
| ENSMMUG00000017206 | SHOC2 leucine rich repeat scaffold protein [Source:VGNC Symbol;Acc:VGNC:81569]                   | 3.547713829 | 2.72E-06    | 2.24E-05    |
| ENSMMUG00000053789 |                                                                                                  | 0.679156348 | 0.003453871 | 0.012847119 |
| ENSMMUG00000055239 |                                                                                                  | 0.827722222 | 4.89E-09    | 6.97E-08    |
| ENSMMUG00000022514 | coiled-coil domain containing 186 [Source:VGNC Symbol;Acc:VGNC:70847]                            | 0.806522862 | 1.71E-10    | 3.13E-09    |
| ENSMMUG00000022524 | actin binding LIM protein 1 [Source:VGNC Symbol;Acc:VGNC:69587]                                  | 0.399213386 | 0.007313758 | 0.024563825 |
| ENSMMUG00000058240 |                                                                                                  | 1.099046005 | 0.000105913 | 0.000601062 |
| ENSMMUG00000015414 | family with sequence similarity 160 member B1 [Source:VGNC Symbol;Acc:VGNC:72403]                | 0.675068561 | 4.82E-05    | 0.000296993 |
| ENSMMUG00000001902 | TruB pseudouridine synthase family member 1 [Source:VGNC Symbol;Acc:VGNC:79005]                  | 0.745962152 | 0.00925503  | 0.029985047 |
| ENSMMUG00000020080 | GDNF family receptor alpha 1 [Source:VGNC Symbol;Acc:VGNC:72917]                                 | 2.120800736 | 0.005683384 | 0.019697998 |
| ENSMMUG00000053348 | PDZ domain containing 8 [Source:NCBI gene;Acc:709084]                                            | 0.368987666 | 0.016518895 | 0.048715976 |
| ENSMMUG00000021610 | regulator of G protein signaling 10 [Source:VGNC Symbol;Acc:VGNC:76915]                          | 2.13702036  | 1.82E-27    | 2.53E-25    |
| ENSMMUG00000054942 |                                                                                                  | 1.512797962 | 1.83E-07    | 1.93E-06    |
| ENSMMUG00000001472 | TIA1 cytotoxic granule associated RNA binding protein like 1 [Source:VGNC Symbol;Acc:VGNC:78354] | 1.667570859 | 3.46E-18    | 1.84E-16    |
| ENSMMUG00000009559 | minichromosome maintenance complex binding protein [Source:VGNC Symbol;Acc:VGNC:74583]           | 1.828219256 | 1.08E-08    | 1.43E-07    |
| ENSMMUG00000009561 | SEC23 interacting protein [Source:VGNC Symbol;Acc:VGNC:77255]                                    | 0.971224548 | 0.003075133 | 0.011632747 |
| ENSMMUG00000008724 | phospholipid phosphatase 4 [Source:VGNC Symbol;Acc:VGNC:76097]                                   | 0.488442376 | 0.003749788 | 0.013830426 |
| ENSMMUG00000064321 |                                                                                                  | 1.443023542 | 2.32E-07    | 2.40E-06    |
| ENSMMUG00000064557 |                                                                                                  | 1.802624055 | 4.57E-32    | 1.05E-29    |
| ENSMMUG00000052711 |                                                                                                  | 0.824664433 | 1.05E-05    | 7.60E-05    |
| ENSMMUG00000061101 | Metazoan signal recognition particle RNA [Source:RFAM;Acc:RF00017]                               | 0.932126978 | 0.003895093 | 0.014294919 |
| ENSMMUG00000020346 | carboxypeptidase X, M14 family member 2 [Source:VGNC Symbol;Acc:VGNC:71596]                      | 0.808880993 | 8.61E-06    | 6.36E-05    |
| ENSMMUG00000058933 |                                                                                                  | -1.70523343 | 0.000400686 | 0.00197846  |
| ENSMMUG00000008539 | uroporphyrinogen III synthase [Source:VGNC Symbol;Acc:VGNC:78731]                                | 0.978638075 | 8.88E-08    | 1.00E-06    |
| ENSMMUG00000008541 | BRCA2 and CDKN1A interacting protein [Source:NCBI gene;Acc:699437]                               | 0.528125284 | 0.008801755 | 0.028764161 |
| ENSMMUG00000008542 | DEAH-box helicase 32 (putative) [Source:NCBI gene;Acc:695919]                                    | -0.51279368 | 0.011063905 | 0.034849311 |
| ENSMMUG00000035166 | U2 spliceosomal RNA [Source:RFAM;Acc:RF00004]                                                    | 1.951536004 | 0.000160321 | 0.000876826 |
| ENSMMUG00000044121 | marker of proliferation Ki-67 [Source:NCBI gene;Acc:697883]                                      | 0.603478685 | 0.012014522 | 0.037340347 |

|                    |                                                                                            |             |             |             |
|--------------------|--------------------------------------------------------------------------------------------|-------------|-------------|-------------|
| ENSMMUG00000013653 | lysine demethylase 5A [Source:VGNC Symbol;Acc:VGNC:82169]                                  | 0.4686305   | 0.000103942 | 0.00059155  |
| ENSMMUG00000007411 | integrin alpha FG-GAP repeat containing 2 [Source:VGNC Symbol;Acc:VGNC:73690]              | 1.351592715 | 1.15E-11    | 2.56E-10    |
| ENSMMUG00000007424 | nuclear receptor interacting protein 2 [Source:VGNC Symbol;Acc:VGNC:75448]                 | -1.3476957  | 1.31E-11    | 2.87E-10    |
| ENSMMUG00000037675 | testis expressed 52 [Source:NCBI gene;Acc:107000723]                                       | 1.304211829 | 5.07E-17    | 2.35E-15    |
| ENSMMUG00000061935 |                                                                                            | 3.564096401 | 1.24E-36    | 4.22E-34    |
| ENSMMUG00000015189 | RAD51 associated protein 1 [Source:VGNC Symbol;Acc:VGNC:76497]                             | 0.726812866 | 0.008661993 | 0.028413363 |
| ENSMMUG00000020811 | dual specificity tyrosine phosphorylation regulated kinase 4 [Source:NCBI gene;Acc:710999] | 0.650864546 | 0.002498854 | 0.009755409 |
| ENSMMUG00000020812 | A-kinase anchoring protein 3 [Source:VGNC Symbol;Acc:VGNC:69769]                           | -1.71026284 | 6.64E-06    | 5.04E-05    |
| ENSMMUG00000020813 | NADH:ubiquinone oxidoreductase subunit A9 [Source:VGNC Symbol;Acc:VGNC:81480]              | 0.936056247 | 0.000156878 | 0.000860009 |
| ENSMMUG00000022893 | von Willebrand factor [Source:VGNC Symbol;Acc:VGNC:78778]                                  | 3.651060262 | 2.08E-07    | 2.17E-06    |
| ENSMMUG00000047465 | Metazoan signal recognition particle RNA [Source:RFAM;Acc:RF00017]                         | 5.704724179 | 5.17E-09    | 7.34E-08    |
| ENSMMUG00000061974 |                                                                                            | 4.404511776 | 0.00061608  | 0.002900065 |
| ENSMMUG00000004470 | CD9 molecule [Source:VGNC Symbol;Acc:VGNC:70787]                                           | 2.284554791 | 0.000100852 | 0.000574896 |
| ENSMMUG00000000375 | pleckstrin homology and RhoGEF domain containing G6 [Source:VGNC Symbol;Acc:VGNC:76110]    | 3.154916496 | 8.19E-94    | 1.15E-89    |
| ENSMMUG00000053013 |                                                                                            | 1.58873179  | 3.45E-10    | 5.92E-09    |
| ENSMMUG00000014265 | TAP binding protein like [Source:NCBI gene;Acc:712626]                                     | 1.925373142 | 1.06E-13    | 3.14E-12    |
| ENSMMUG00000018685 | chromodomain helicase DNA binding protein 4 [Source:VGNC Symbol;Acc:VGNC:71029]            | 1.094541341 | 3.58E-09    | 5.22E-08    |
| ENSMMUG00000017619 | lysophosphatidic acid receptor 5 [Source:VGNC Symbol;Acc:VGNC:74277]                       | 0.749010111 | 1.53E-05    | 0.000106251 |
| ENSMMUG00000016983 | acrosin binding protein [Source:VGNC Symbol;Acc:VGNC:69445]                                | 1.526339451 | 2.24E-10    | 3.99E-09    |
| ENSMMUG00000050979 | PILR alpha associated neural protein [Source:NCBI gene;Acc:713548]                         | -1.99964264 | 0.00084903  | 0.00382828  |
| ENSMMUG00000010203 | protein tyrosine phosphatase non-receptor type 6 [Source:VGNC Symbol;Acc:VGNC:76607]       | 0.530372856 | 0.008686645 | 0.028474246 |
| ENSMMUG00000012786 | complement C1s [Source:VGNC Symbol;Acc:VGNC:70297]                                         | 0.596609878 | 4.57E-06    | 3.61E-05    |
| ENSMMUG00000006470 | complement C1r subcomponent [Source:NCBI gene;Acc:722133]                                  | 0.934470673 | 9.21E-14    | 2.75E-12    |
| ENSMMUG00000022109 | CD163 molecule like 1 [Source:VGNC Symbol;Acc:VGNC:70914]                                  | 0.909344869 | 2.10E-05    | 0.000141564 |
| ENSMMUG00000057570 |                                                                                            | 2.500147458 | 8.41E-22    | 6.30E-20    |
| ENSMMUG00000057785 |                                                                                            | 5.708652634 | 1.47E-06    | 1.28E-05    |
| ENSMMUG00000061774 | taste 2 receptor member 10 [Source:NCBI gene;Acc:717960]                                   | 3.833969552 | 6.46E-05    | 0.000385998 |
| ENSMMUG00000050862 |                                                                                            | 0.717711964 | 0.00364674  | 0.013500064 |
| ENSMMUG00000018298 | killer cell lectin like receptor D1 [Source:NCBI gene;Acc:574145]                          | 2.61367791  | 0.000651664 | 0.003032952 |
| ENSMMUG00000005832 | C-type lectin domain family 1 member A [Source:VGNC Symbol;Acc:VGNC:71335]                 | 1.367373151 | 0.013161072 | 0.040314048 |
| ENSMMUG00000015305 | C-type lectin domain family 2 member A [Source:VGNC Symbol;Acc:VGNC:71329]                 | -1.57148119 | 0.004977747 | 0.017658219 |
| ENSMMUG00000045446 |                                                                                            | 2.769804937 | 0.000203961 | 0.001089997 |
| ENSMMUG00000032892 | U6 spliceosomal RNA [Source:RFAM;Acc:RF00026]                                              | 1.450904243 | 0.000555163 | 0.002649777 |
| ENSMMUG00000044047 | killer cell lectin like receptor B1 [Source:NCBI gene;Acc:100430783]                       | 0.869791357 | 0.003727717 | 0.013767126 |
| ENSMMUG00000003238 | pregnancy zone protein [Source:NCBI gene;Acc:100430319]                                    | 0.593765894 | 0.002830346 | 0.01085908  |
| ENSMMUG00000022680 | alpha-2-macroglobulin like 1 [Source:VGNC Symbol;Acc:VGNC:69507]                           | 1.371792299 | 0.000345671 | 0.001732434 |
| ENSMMUG00000022676 | ribosomal modification protein rimK like family member B [Source:NCBI gene;Acc:722261]     | 3.376052783 | 0.001111599 | 0.004836474 |

|                     |                                                                                                         |             |             |             |
|---------------------|---------------------------------------------------------------------------------------------------------|-------------|-------------|-------------|
| ENSMMUG00000060675  |                                                                                                         | 0.881345672 | 2.12E-08    | 2.69E-07    |
| ENSMMUG00000021005  | taste receptor type 2 member 50 [Source:NCBI gene;Acc:693513]                                           | 0.780433294 | 0.015477268 | 0.046168418 |
| ENSMMUG00000056428  | taste receptor type 2 member 20 [Source:NCBI gene;Acc:693643]                                           | 1.159605574 | 0.007332586 | 0.024616914 |
| ENSMMUG00000050696  | taste receptor type 2 member 31-like [Source:NCBI gene;Acc:693892]                                      | 1.291877195 | 3.81E-10    | 6.52E-09    |
| ENSMMUG00000054225  | taste receptor type 2 member 43 [Source:NCBI gene;Acc:694161]                                           | 1.805192582 | 2.54E-05    | 0.000167261 |
| ENSMMUG00000042870  | Macaca mulatta taste receptor, type 2, member 46 (TAS2R46), mRNA. [Source:RefSeq mRNA;Acc:NM_001080757] | 0.901592372 | 0.003038699 | 0.011528553 |
|                     |                                                                                                         | -           |             |             |
| ENSMMUG00000023317  | LDL receptor related protein 6 [Source:VGNC Symbol;Acc:VGNC:74446]                                      | 0.770162299 | 0.010207228 | 0.032537587 |
| ENSMMUG00000018030  | endoplasmic reticulum protein 27 [Source:VGNC Symbol;Acc:VGNC:72369]                                    | 1.055681844 | 0.005257721 | 0.018473823 |
| ENSMMUG00000053781  | Rho GDP dissociation inhibitor beta [Source:NCBI gene;Acc:702320]                                       | 2.046813044 | 3.35E-05    | 0.000215018 |
|                     |                                                                                                         | -           |             |             |
| ENSMMUG00000020443  | solute carrier organic anion transporter family member 1B3 [Source:NCBI gene;Acc:574354]                | 0.376419762 | 0.016274471 | 0.048116574 |
| ENSMMUG00000002679  | lactate dehydrogenase B [Source:NCBI gene;Acc:706110]                                                   | 2.222356079 | 0.008172934 | 0.027030437 |
|                     |                                                                                                         | -           |             |             |
| ENSMMUG00000049682  | Metazoan signal recognition particle RNA [Source:RFAM;Acc:RF00017]                                      | 3.723128941 | 4.25E-06    | 3.38E-05    |
|                     |                                                                                                         | -           |             |             |
| ENSMMUG00000048030  | ferritin, heavy polypeptide 1-like [Source:NCBI gene;Acc:707011]                                        | 2.910901733 | 0.001982489 | 0.007995525 |
|                     |                                                                                                         | -           |             |             |
| ENSMMUG00000020370  | SRY-box transcription factor 5 [Source:VGNC Symbol;Acc:VGNC:77843]                                      | 3.735700537 | 2.42E-08    | 3.04E-07    |
|                     |                                                                                                         | -           |             |             |
| ENSMMUG00000057276  |                                                                                                         | 3.086464997 | 7.88E-07    | 7.30E-06    |
| ENSMMUG00000060493  |                                                                                                         | 0.491978499 | 4.79E-05    | 0.000295697 |
| ENSMMUG00000012223  | branched chain amino acid transaminase 1 [Source:VGNC Symbol;Acc:VGNC:70236]                            | 0.379761126 | 0.004198449 | 0.015280263 |
|                     |                                                                                                         | -           |             |             |
| ENSMMUG00000053657  |                                                                                                         | 2.881801224 | 0.000349772 | 0.001747365 |
| ENSMMUG00000018630  | sarcospan [Source:VGNC Symbol;Acc:VGNC:77887]                                                           | 0.455390496 | 0.000336479 | 0.001695454 |
| ENSMMUG00000060495  |                                                                                                         | 0.682202413 | 4.29E-05    | 0.000268371 |
| ENSMMUG00000007050  |                                                                                                         | 0.89855232  | 0.0037487   | 0.013830049 |
| ENSMMUG00000050627  |                                                                                                         | 0.289039193 | 0.012127472 | 0.037591947 |
| ENSMMUG00000006468  | FGFR1 oncogene partner 2 [Source:VGNC Symbol;Acc:VGNC:72551]                                            | 1.573375872 | 5.52E-13    | 1.49E-11    |
| ENSMMUG00000003217  | transmembrane 7 superfamily member 3 [Source:VGNC Symbol;Acc:VGNC:79371]                                | 1.398860896 | 3.11E-14    | 1.01E-12    |
|                     |                                                                                                         | -           |             |             |
| ENSMMUG00000023248  | serine/threonine kinase 38 like [Source:VGNC Symbol;Acc:VGNC:78156]                                     | 1.445926081 | 1.29E-06    | 1.14E-05    |
|                     |                                                                                                         | -           |             |             |
| ENSMMUG00000023249  | aryl hydrocarbon receptor nuclear translocator like 2 [Source:NCBI gene;Acc:709547]                     | 1.294099219 | 1.96E-07    | 2.05E-06    |
| ENSMMUG00000021736  | single-pass membrane protein with coiled-coil domains 2 [Source:VGNC Symbol;Acc:VGNC:77808]             | 1.105598536 | 7.70E-07    | 7.15E-06    |
| ENSMMUG00000053437  |                                                                                                         | 0.63073586  | 4.63E-06    | 3.65E-05    |
| ENSMMUG00000011802  | coiled-coil domain containing 91 [Source:VGNC Symbol;Acc:VGNC:70852]                                    | 0.704513567 | 0.000259272 | 0.001353098 |
|                     |                                                                                                         | -           |             |             |
| ENSMMUG00000015810  | fatty acyl-CoA reductase 2 [Source:VGNC Symbol;Acc:VGNC:81403]                                          | 0.766039798 | 0.000326245 | 0.001648016 |
|                     |                                                                                                         | -           |             |             |
| ENSMMUG00000001357  | tetraspanin 11 [Source:VGNC Symbol;Acc:VGNC:79882]                                                      | 1.413465933 | 3.96E-30    | 7.12E-28    |
|                     |                                                                                                         | -           |             |             |
| ENSMMUG00000009155  | SIN3-HDAC complex associated factor [Source:NCBI gene;Acc:694162]                                       | 4.898290254 | 1.82E-14    | 6.07E-13    |
|                     |                                                                                                         | -           |             |             |
| ENSMMUG000000039300 |                                                                                                         | 3.171330144 | 6.98E-08    | 8.05E-07    |
|                     |                                                                                                         | -           |             |             |
| ENSMMUG00000003221  | DENN domain containing 5B [Source:VGNC Symbol;Acc:VGNC:71772]                                           | 1.537125005 | 1.81E-06    | 1.54E-05    |
| ENSMMUG000000063112 |                                                                                                         | 1.254600186 | 0.002667868 | 0.010320416 |
|                     |                                                                                                         | -           |             |             |
| ENSMMUG00000013655  | dynamitin 1 like [Source:VGNC Symbol;Acc:VGNC:71956]                                                    | 1.305236169 | 0.010821567 | 0.034186084 |
|                     |                                                                                                         | -           |             |             |
| ENSMMUG00000013666  | copine 8 [Source:NCBI gene;Acc:114669741]                                                               | 2.645146384 | 0.005902789 | 0.020347789 |

|                    |                                                                                   |             |             |             |
|--------------------|-----------------------------------------------------------------------------------|-------------|-------------|-------------|
| ENSMMUG00000021163 | contactin 1 [Source:VGNC Symbol;Acc:VGNC:71283]                                   | 0.277025609 | 0.012127645 | 0.037591947 |
| ENSMMUG00000056303 |                                                                                   | -2.36852091 | 0.000102648 | 0.000584898 |
| ENSMMUG00000000205 | transmembrane protein 117 [Source:VGNC Symbol;Acc:VGNC:79488]                     | 0.897359453 | 8.19E-12    | 1.86E-10    |
| ENSMMUG00000060215 | Y RNA [Source:RFAM;Acc:RF00019]                                                   | 0.987507961 | 1.81E-10    | 3.31E-09    |
| ENSMMUG00000052030 | developing brain homeobox 2 [Source:NCBI gene;Acc:701170]                         | 0.763193572 | 1.46E-07    | 1.57E-06    |
| ENSMMUG00000015962 | AT-rich interaction domain 2 [Source:VGNC Symbol;Acc:VGNC:69858]                  | 1.217921453 | 1.32E-09    | 2.05E-08    |
| ENSMMUG00000037874 | Metazoan signal recognition particle RNA [Source:RFAM;Acc:RF00017]                | 1.073765388 | 0.006760948 | 0.022878566 |
| ENSMMUG00000023791 | SR-related CTD associated factor 11 [Source:VGNC Symbol;Acc:VGNC:77002]           | 2.174103403 | 0.000287866 | 0.001479747 |
| ENSMMUG00000022359 | solute carrier family 38 member 2 [Source:VGNC Symbol;Acc:VGNC:77469]             | 1.109783119 | 4.54E-07    | 4.43E-06    |
| ENSMMUG00000064730 |                                                                                   | 2.740620536 | 4.51E-23    | 3.75E-21    |
| ENSMMUG00000012331 | solute carrier family 38 member 4 [Source:VGNC Symbol;Acc:VGNC:77484]             | 0.535791458 | 0.003612877 | 0.01338884  |
| ENSMMUG00000007482 | RNA polymerase II associated protein 3 [Source:VGNC Symbol;Acc:VGNC:76834]        | 0.608675501 | 0.001507384 | 0.006289215 |
| ENSMMUG00000049514 | solute carrier family 48 member 1 [Source:NCBI gene;Acc:704304]                   | 0.865555158 | 3.97E-06    | 3.18E-05    |
| ENSMMUG00000021655 | histone deacetylase 7 [Source:NCBI gene;Acc:718225]                               | 0.931070811 | 8.01E-09    | 1.08E-07    |
| ENSMMUG00000006727 | vitamin D receptor [Source:VGNC Symbol;Acc:VGNC:78764]                            | 0.532925531 | 3.18E-05    | 0.000204814 |
| ENSMMUG00000020125 | SUMO specific peptidase 1 [Source:NCBI gene;Acc:707603]                           | 1.641051246 | 0.001615384 | 0.006676255 |
| ENSMMUG00000055133 |                                                                                   | 1.272286573 | 0.013123769 | 0.040243412 |
| ENSMMUG00000014484 | zinc finger protein 641 [Source:NCBI gene;Acc:708246]                             | 1.726819211 | 2.36E-09    | 3.54E-08    |
| ENSMMUG00000003877 | KAT8 regulatory NSL complex subunit 2 [Source:VGNC Symbol;Acc:VGNC:73910]         | 0.897489919 | 0.002931377 | 0.011194634 |
| ENSMMUG00000012769 | limb development membrane protein 1 like [Source:VGNC Symbol;Acc:VGNC:74310]      | 0.504439719 | 0.013808983 | 0.042023301 |
| ENSMMUG00000021081 | tubulin alpha 1b [Source:NCBI gene;Acc:709643]                                    | 0.705698161 | 0.000666949 | 0.003096896 |
| ENSMMUG00000009788 | tubulin alpha-1C chain [Source:NCBI gene;Acc:710110]                              | 1.015324816 | 0.000185109 | 0.000997993 |
| ENSMMUG00000007544 | trophinin associated protein [Source:VGNC Symbol;Acc:VGNC:78650]                  | 0.696140602 | 0.000505302 | 0.002435835 |
| ENSMMUG00000007548 | DnaJ heat shock protein family (Hsp40) member C22 [Source:NCBI gene;Acc:710205]   | 1.290872451 | 0.000496679 | 0.002396742 |
| ENSMMUG00000064430 |                                                                                   | 0.68289196  | 4.66E-05    | 0.000288566 |
| ENSMMUG00000003762 | spermatogenesis associated serine rich 2 [Source:VGNC Symbol;Acc:VGNC:77958]      | 0.463186127 | 0.005339737 | 0.018701083 |
| ENSMMUG00000049374 |                                                                                   | 0.59855341  | 0.000570967 | 0.002715835 |
| ENSMMUG00000005960 | transmembrane BAX inhibitor motif containing 6 [Source:NCBI gene;Acc:677702]      | 0.372340141 | 1.29E-06    | 1.13E-05    |
| ENSMMUG00000038256 | aquaporin 2 [Source:NCBI gene;Acc:711719]                                         | 1.233839292 | 5.13E-27    | 6.86E-25    |
| ENSMMUG00000006529 | acid sensing ion channel subunit 1 [Source:VGNC Symbol;Acc:VGNC:70035]            | -0.87093922 | 0.007788042 | 0.025904107 |
| ENSMMUG00000000152 | transcription factor CP2 [Source:VGNC Symbol;Acc:VGNC:78323]                      | 2.389522569 | 9.41E-11    | 1.80E-09    |
| ENSMMUG00000004982 | activin A receptor like type 1 [Source:VGNC Symbol;Acc:VGNC:69451]                | 3.285665726 | 0.000248553 | 0.001302973 |
| ENSMMUG00000046877 | activin A receptor type 1B [Source:NCBI gene;Acc:696587]                          | 1.445211956 | 0.013880395 | 0.042203986 |
| ENSMMUG00000022922 | nuclear receptor subfamily 4 group A member 1 [Source:VGNC Symbol;Acc:VGNC:75517] | -0.40592457 | 0.000631354 | 0.002954283 |
| ENSMMUG00000010000 | keratin 7 [Source:VGNC Symbol;Acc:VGNC:74214]                                     | 0.821372224 | 1.32E-15    | 5.12E-14    |
| ENSMMUG00000064514 | keratin, type II cuticular Hb1 [Source:NCBI gene;Acc:697511]                      | 0.854373088 | 1.48E-09    | 2.29E-08    |

|                    |                                                                                            |   |             |             |             |
|--------------------|--------------------------------------------------------------------------------------------|---|-------------|-------------|-------------|
| ENSMMUG00000018217 | keratin 84 [Source:VGNC Symbol;Acc:VGNC:74220]                                             | - | 0.908965846 | 0.00919798  | 0.029836521 |
| ENSMMUG00000057134 | keratin, type II cytoskeletal 6C [Source:NCBI gene;Acc:100424162]                          | - | 0.818827101 | 0.002737298 | 0.010556968 |
| ENSMMUG00000055016 | keratin, type II cytoskeletal 6A [Source:NCBI gene;Acc:719283]                             | - | 0.446995418 | 1.32E-05    | 9.30E-05    |
| ENSMMUG00000005246 | zinc finger protein 740 [Source:VGNC Symbol;Acc:VGNC:79665]                                | - | 1.950787275 | 9.90E-09    | 1.32E-07    |
| ENSMMUG00000052817 | Sp7 transcription factor [Source:NCBI gene;Acc:702575]                                     | - | 1.486481211 | 6.62E-06    | 5.03E-05    |
| ENSMMUG00000020036 | Sp1 transcription factor [Source:VGNC Symbol;Acc:VGNC:77844]                               | - | 1.105124592 | 5.86E-06    | 4.52E-05    |
| ENSMMUG00000006608 | poly(rC) binding protein 2 [Source:NCBI gene;Acc:703175]                                   | - | 0.456955646 | 0.006713572 | 0.022745691 |
| ENSMMUG00000018492 | TARBP2 subunit of RISC loading complex [Source:VGNC Symbol;Acc:VGNC:78099]                 | - | 1.632889761 | 2.38E-13    | 6.67E-12    |
| ENSMMUG00000022313 | activating transcription factor 7 [Source:NCBI gene;Acc:700403]                            | - | 1.651376529 | 1.47E-11    | 3.19E-10    |
| ENSMMUG00000055610 | homeobox C4 [Source:NCBI gene;Acc:100430434]                                               | - | 2.874408667 | 9.74E-35    | 2.73E-32    |
| ENSMMUG00000052854 | mucin like 1 [Source:NCBI gene;Acc:100423942]                                              | - | 1.107375964 | 9.16E-16    | 3.62E-14    |
| ENSMMUG00000016203 | thymocyte expressed, positive selection associated 1 [Source:VGNC Symbol;Acc:VGNC:79775]   | - | 0.444689502 | 0.001544289 | 0.006412565 |
| ENSMMUG00000055590 |                                                                                            | - | 0.852085696 | 1.12E-08    | 1.48E-07    |
| ENSMMUG00000013228 | retinol dehydrogenase 5 [Source:VGNC Symbol;Acc:VGNC:82219]                                | - | 1.758036679 | 0.011092341 | 0.034918412 |
| ENSMMUG00000006293 | SAP domain containing ribonucleoprotein [Source:NCBI gene;Acc:709932]                      | - | 0.801383663 | 7.33E-08    | 8.40E-07    |
| ENSMMUG00000053458 | ORMDL sphingolipid biosynthesis regulator 2 [Source:NCBI gene;Acc:710296]                  | - | 0.560400142 | 0.000136926 | 0.000759238 |
| ENSMMUG00000006295 | matrix metalloproteinase 19 [Source:VGNC Symbol;Acc:VGNC:74896]                            | - | 0.568621642 | 0.006789051 | 0.022957043 |
| ENSMMUG00000011002 | PYM homolog 1, exon junction complex associated factor [Source:VGNC Symbol;Acc:VGNC:76570] | - | 0.714688396 | 7.33E-06    | 5.52E-05    |
| ENSMMUG00000018814 | diacylglycerol kinase alpha [Source:VGNC Symbol;Acc:VGNC:71780]                            | - | 1.120311678 | 1.35E-05    | 9.53E-05    |
| ENSMMUG00000031853 | RAB5B, member RAS oncogene family [Source:VGNC Symbol;Acc:VGNC:81546]                      | - | 0.999519168 | 2.69E-06    | 2.22E-05    |
| ENSMMUG00000064364 | sulfite oxidase [Source:NCBI gene;Acc:711164]                                              | - | 0.917819079 | 0.002040559 | 0.008203772 |
| ENSMMUG00000064075 | ring finger protein 41 [Source:NCBI gene;Acc:711969]                                       | - | 0.683052514 | 0.003548559 | 0.013164404 |
| ENSMMUG00000054020 | U6 spliceosomal RNA [Source:RFAM;Acc:RF00026]                                              | - | 1.261908273 | 0.000300437 | 0.001536481 |
| ENSMMUG00000059663 |                                                                                            | - | 0.967032086 | 9.37E-06    | 6.85E-05    |
| ENSMMUG00000000803 | signal transducer and activator of transcription 2 [Source:VGNC Symbol;Acc:VGNC:77905]     | - | 1.664672037 | 1.64E-07    | 1.75E-06    |
| ENSMMUG00000063898 | apolipoprotein F [Source:NCBI gene;Acc:712761]                                             | - | 2.059927312 | 2.59E-11    | 5.40E-10    |
| ENSMMUG00000053460 |                                                                                            | - | 1.569936514 | 6.00E-07    | 5.72E-06    |
| ENSMMUG00000021878 | timeless circadian regulator [Source:VGNC Symbol;Acc:VGNC:78356]                           | - | 1.148438503 | 1.72E-06    | 1.47E-05    |
| ENSMMUG00000013766 | prostaglandin E synthase 3 [Source:NCBI gene;Acc:713353]                                   | - | 0.801770974 | 1.64E-05    | 0.000112736 |
| ENSMMUG00000004522 | DNA primase subunit 1 [Source:NCBI gene;Acc:710253]                                        | - | 0.392292674 | 0.001544723 | 0.006412565 |
| ENSMMUG00000043411 | zinc finger and BTB domain containing 39 [Source:NCBI gene;Acc:713914]                     | - | 1.440835051 | 3.71E-08    | 4.50E-07    |
| ENSMMUG00000021114 | G protein-coupled receptor 182 [Source:VGNC Symbol;Acc:VGNC:72936]                         | - | 0.692827167 | 0.00031783  | 0.001614245 |
| ENSMMUG00000013518 | myosin IA [Source:VGNC Symbol;Acc:VGNC:75110]                                              | - | 0.403862603 | 0.00438045  | 0.015848051 |
| ENSMMUG00000021782 | LDL receptor related protein 1 [Source:VGNC Symbol;Acc:VGNC:74442]                         | - | 0.905368192 | 1.26E-12    | 3.21E-11    |

|                     |                                                                                                  |   |             |             |             |
|---------------------|--------------------------------------------------------------------------------------------------|---|-------------|-------------|-------------|
| ENSMMUG0000004233   | leucine rich repeats and immunoglobulin like domains 3 [Source:NCBI gene;Acc:716344]             | - | 1.034758275 | 3.35E-09    | 4.91E-08    |
| ENSMMUG00000055477  |                                                                                                  | - | 1.413332132 | 3.94E-10    | 6.74E-09    |
| ENSMMUG00000001210  | elongation factor 1-alpha 1 [Source:NCBI gene;Acc:100425937]                                     | - | 2.861175428 | 0.010460733 | 0.033210517 |
| ENSMMUG000000062139 |                                                                                                  | - | 1.937145071 | 1.53E-07    | 1.64E-06    |
| ENSMMUG00000011579  | TAFA chemokine like family member 2 [Source:VGNC Symbol;Acc:VGNC:78189]                          | - | 0.535364087 | 0.00080597  | 0.003669667 |
| ENSMMUG00000020533  | chromosome 11 C12orf56 homolog [Source:VGNC Symbol;Acc:VGNC:70409]                               | - | 5.208378393 | 1.52E-15    | 5.82E-14    |
| ENSMMUG00000003669  | methionine sulfoxide reductase B3 [Source:VGNC Symbol;Acc:VGNC:74842]                            | - | 0.494064865 | 0.000605517 | 0.0028638   |
| ENSMMUG000000041729 |                                                                                                  | - | 1.101536916 | 0.000221281 | 0.001174055 |
| ENSMMUG00000054816  | interleukin 1 receptor associated kinase 3 [Source:NCBI gene;Acc:717845]                         | - | 2.369432405 | 0.014022222 | 0.042561389 |
| ENSMMUG00000016631  | glutamate receptor interacting protein 1 [Source:VGNC Symbol;Acc:VGNC:73195]                     | - | 0.906061431 | 0.010207674 | 0.032537587 |
| ENSMMUG00000011650  | dual specificity tyrosine phosphorylation regulated kinase 2 [Source:VGNC Symbol;Acc:VGNC:72018] | - | 1.168210246 | 1.44E-05    | 0.000100435 |
| ENSMMUG00000059548  |                                                                                                  | - | 1.709567495 | 0.006385913 | 0.021797469 |
| ENSMMUG00000055447  | MDM2 proto-oncogene [Source:NCBI gene;Acc:718284]                                                | - | 1.502788845 | 3.49E-20    | 2.19E-18    |
| ENSMMUG00000053722  |                                                                                                  | - | 2.193227733 | 0.000439015 | 0.002147298 |
| ENSMMUG00000046235  | YEATS domain containing 4 [Source:NCBI gene;Acc:718376]                                          | - | 2.954476855 | 0.011362214 | 0.035644816 |
| ENSMMUG00000044169  | Metazoan signal recognition particle RNA [Source:RFAM;Acc:RF00017]                               | - | 2.251994503 | 0.016283686 | 0.048133671 |
| ENSMMUG00000010819  | fibroblast growth factor receptor substrate 2 [Source:VGNC Symbol;Acc:VGNC:72732]                | - | 1.047784439 | 6.05E-13    | 1.61E-11    |
| ENSMMUG00000010820  | chaperonin containing TCP1 subunit 2 [Source:VGNC Symbol;Acc:VGNC:70745]                         | - | 2.450974441 | 1.77E-13    | 5.03E-12    |
| ENSMMUG00000054953  | leucine rich repeat containing 10 [Source:NCBI gene;Acc:114669753]                               | - | 2.714386717 | 7.85E-05    | 0.0004598   |
| ENSMMUG00000007727  | TBC1 domain family member 15 [Source:VGNC Symbol;Acc:VGNC:78215]                                 | - | 3.303595888 | 0.006686076 | 0.022663486 |
| ENSMMUG00000012289  | GLIPR1 like 1 [Source:VGNC Symbol;Acc:VGNC:81412]                                                | - | 0.783700812 | 0.000631795 | 0.002954966 |
| ENSMMUG00000012290  | GLIPR1 like 2 [Source:VGNC Symbol;Acc:VGNC:81413]                                                | - | 0.973671179 | 0.008478579 | 0.027903099 |
| ENSMMUG00000017864  | oxysterol binding protein like 8 [Source:VGNC Symbol;Acc:VGNC:75630]                             | - | 1.151636758 | 0.00134238  | 0.005685991 |
| ENSMMUG00000059985  |                                                                                                  | - | 5.042139462 | 1.41E-06    | 1.23E-05    |
| ENSMMUG00000005530  | synaptotagmin 1 [Source:VGNC Symbol;Acc:VGNC:78074]                                              | - | 0.600123608 | 0.014877111 | 0.044653623 |
| ENSMMUG00000062826  |                                                                                                  | - | -3.50375082 | 0.005195678 | 0.018287898 |
| ENSMMUG00000017463  |                                                                                                  | - | 3.562389396 | 0.003239471 | 0.012153787 |
| ENSMMUG00000015862  | centrosomal protein 290 [Source:VGNC Symbol;Acc:VGNC:71126]                                      | - | 0.579260675 | 0.000364338 | 0.001812385 |
| ENSMMUG00000059975  |                                                                                                  | - | 0.369809545 | 0.008199663 | 0.027112445 |
| ENSMMUG00000049117  | CLLU1 antisense RNA 1 [Source:NCBI gene;Acc:100424000]                                           | - | 4.101628315 | 0.000245863 | 0.001291289 |
| ENSMMUG00000002243  | pleckstrin homology and RhoGEF domain containing G7 [Source:VGNC Symbol;Acc:VGNC:76149]          | - | 0.777162363 | 8.40E-07    | 7.73E-06    |
| ENSMMUG00000002244  | early endosome antigen 1 [Source:VGNC Symbol;Acc:VGNC:72161]                                     | - | 0.949168921 | 3.18E-07    | 3.20E-06    |
| ENSMMUG00000052496  |                                                                                                  | - | -0.88098085 | 1.41E-12    | 3.57E-11    |
| ENSMMUG00000055071  | Y RNA [Source:RFAM;Acc:RF00019]                                                                  | - | -1.29220773 | 0.013472703 | 0.041169691 |
| ENSMMUG00000018237  | plexin C1 [Source:VGNC Symbol;Acc:VGNC:76190]                                                    | - | 1.424131724 | 5.44E-16    | 2.23E-14    |
| ENSMMUG00000018239  | centrosomal protein 83 [Source:VGNC Symbol;Acc:VGNC:70992]                                       | - | 1.324752024 | 1.30E-09    | 2.04E-08    |

|                    |                                                                                                                      |             |             |             |
|--------------------|----------------------------------------------------------------------------------------------------------------------|-------------|-------------|-------------|
| ENSMMUG00000018901 | FYVE, RhoGEF and PH domain containing 6 [Source:VGNC Symbol;Acc:VGNC:72548]                                          | 1.720011135 | 6.47E-13    | 1.72E-11    |
| ENSMMUG00000018903 | vezatin, adherens junctions transmembrane protein [Source:VGNC Symbol;Acc:VGNC:79120]                                | -0.68978838 | 1.06E-05    | 7.68E-05    |
| ENSMMUG00000062006 | methionyl aminopeptidase 2 [Source:NCBI gene;Acc:712400]                                                             | -1.15609535 | 8.21E-08    | 9.35E-07    |
| ENSMMUG00000013812 | ubiquitin specific peptidase 44 [Source:VGNC Symbol;Acc:VGNC:79221]                                                  | 1.196570142 | 4.71E-06    | 3.71E-05    |
| ENSMMUG00000009303 | coiled-coil domain containing 38 [Source:VGNC Symbol;Acc:VGNC:70880]                                                 | -1.11438903 | 6.49E-06    | 4.96E-05    |
| ENSMMUG00000009308 | histidine ammonia-lyase [Source:VGNC Symbol;Acc:VGNC:73344]                                                          | 2.814059338 | 1.26E-07    | 1.37E-06    |
| ENSMMUG00000009312 | leukotriene A4 hydrolase [Source:VGNC Symbol;Acc:VGNC:74453]                                                         | 2.779323689 | 1.89E-23    | 1.66E-21    |
| ENSMMUG00000053376 |                                                                                                                      | 2.236107523 | 4.90E-16    | 2.02E-14    |
| ENSMMUG00000050585 |                                                                                                                      | 2.101953654 | 6.04E-13    | 1.61E-11    |
| ENSMMUG00000022404 | apoptotic peptidase activating factor 1 [Source:VGNC Symbol;Acc:VGNC:69975]                                          | 0.53321351  | 2.83E-07    | 2.88E-06    |
| ENSMMUG00000022406 | ankyrin repeat and sterile alpha motif domain containing 1B [Source:VGNC Symbol;Acc:VGNC:69689]                      | 1.132155825 | 4.98E-08    | 5.87E-07    |
| ENSMMUG00000061260 | Spi-C transcription factor [Source:NCBI gene;Acc:695809]                                                             | 0.980694928 | 3.56E-07    | 3.57E-06    |
| ENSMMUG00000042077 | DNA damage regulated autophagy modulator 1 [Source:NCBI gene;Acc:697427]                                             | 0.720625293 | 1.33E-08    | 1.75E-07    |
| ENSMMUG00000046478 | WASH complex subunit 3 [Source:NCBI gene;Acc:697824]                                                                 | 2.063786607 | 1.01E-16    | 4.44E-15    |
| ENSMMUG00000061923 |                                                                                                                      | 1.801714289 | 0.000588659 | 0.002791601 |
| ENSMMUG00000005504 | nucleoporin 37 [Source:VGNC Symbol;Acc:VGNC:75491]                                                                   | 2.035368107 | 1.02E-07    | 1.14E-06    |
| ENSMMUG00000061953 |                                                                                                                      | 2.883522111 | 0.005562289 | 0.019359636 |
| ENSMMUG00000023469 | heat shock protein 90 beta family member 1 [Source:NCBI gene;Acc:699568]                                             | 0.844897826 | 0.005078161 | 0.017928262 |
| ENSMMUG00000021291 | thymine DNA glycosylase [Source:VGNC Symbol;Acc:VGNC:78297]                                                          | 0.784321445 | 0.003243527 | 0.012161492 |
| ENSMMUG00000057796 | host cell factor C2 [Source:NCBI gene;Acc:700316]                                                                    | 0.685092754 | 4.43E-05    | 0.000275302 |
| ENSMMUG00000022570 | nuclear transcription factor Y subunit beta [Source:NCBI gene;Acc:700451]                                            | 0.722713785 | 5.48E-05    | 0.000333875 |
| ENSMMUG00000012091 | thioredoxin reductase 1 [Source:VGNC Symbol;Acc:VGNC:78679]                                                          | 0.568114122 | 1.71E-05    | 0.000117544 |
| ENSMMUG00000017127 | carbohydrate sulfotransferase 11 [Source:VGNC Symbol;Acc:VGNC:82123]                                                 | 0.95607829  | 0.003640543 | 0.01348068  |
| ENSMMUG00000017129 | solute carrier family 41 member 2 [Source:VGNC Symbol;Acc:VGNC:77585]                                                | 1.283731446 | 4.02E-16    | 1.69E-14    |
| ENSMMUG00000009519 | WASH complex subunit 4 [Source:VGNC Symbol;Acc:VGNC:79783]                                                           | 1.078645473 | 9.42E-05    | 0.000541005 |
| ENSMMUG00000009524 | adaptor protein, phosphotyrosine interacting with PH domain and leucine zipper 2 [Source:VGNC Symbol;Acc:VGNC:69861] | 1.235321916 | 1.22E-07    | 1.33E-06    |
| ENSMMUG00000005208 | RNA polymerase III subunit B [Source:VGNC Symbol;Acc:VGNC:76143]                                                     | 2.081918051 | 7.25E-09    | 9.95E-08    |
| ENSMMUG00000021808 | cryptochrome circadian regulator 1 [Source:VGNC Symbol;Acc:VGNC:71499]                                               | 0.562348736 | 0.000486791 | 0.002356322 |
| ENSMMUG00000015544 | PWP1 homolog, endonuclein [Source:NCBI gene;Acc:705262]                                                              | 1.495726843 | 0.014408524 | 0.043555252 |
| ENSMMUG00000015550 | PR/SET domain 4 [Source:VGNC Symbol;Acc:VGNC:76393]                                                                  | 1.299599311 | 9.40E-05    | 0.000539752 |
| ENSMMUG00000057713 | Metazoan signal recognition particle RNA [Source:RFAM;Acc:RF00017]                                                   | -1.6483875  | 0.002385031 | 0.009373681 |
| ENSMMUG00000006893 | D-amino acid oxidase [Source:VGNC Symbol;Acc:VGNC:71729]                                                             | 1.234953641 | 1.44E-17    | 6.96E-16    |
| ENSMMUG00000015108 | SV2 related protein [Source:VGNC Symbol;Acc:VGNC:78208]                                                              | 0.832496833 | 1.26E-07    | 1.37E-06    |
| ENSMMUG00000056729 | U6 spliceosomal RNA [Source:RFAM;Acc:RF00026]                                                                        | 0.89358914  | 1.92E-05    | 0.000130589 |
| ENSMMUG00000039553 | ubiquitin specific peptidase 30 [Source:NCBI gene;Acc:706607]                                                        | 0.978003712 | 6.72E-05    | 0.00039963  |
| ENSMMUG00000006957 | uracil DNA glycosylase [Source:VGNC Symbol;Acc:VGNC:78725]                                                           | 0.772354099 | 0.001086727 | 0.004742971 |
| ENSMMUG00000023032 | intraflagellar transport 81 [Source:VGNC Symbol;Acc:VGNC:73389]                                                      | 0.871076368 | 1.10E-09    | 1.74E-08    |
| ENSMMUG00000001739 | ATPase sarcoplasmic/endoplasmic reticulum Ca2+ transporting 2 [Source:VGNC Symbol;Acc:VGNC:70178]                    | 0.928692337 | 1.86E-11    | 3.96E-10    |
| ENSMMUG00000003297 | coiled-coil domain containing 63 [Source:VGNC Symbol;Acc:VGNC:70879]                                                 | 0.725306645 | 1.36E-05    | 9.53E-05    |
| ENSMMUG00000002347 | myosin light chain 2 [Source:VGNC Symbol;Acc:VGNC:75103]                                                             | 0.69108031  | 0.000803526 | 0.003661958 |



|                     |                                                                                                     |             |             |             |
|---------------------|-----------------------------------------------------------------------------------------------------|-------------|-------------|-------------|
| ENSMMUG0000008336   | acyl-CoA dehydrogenase family member 10 [Source:NCBI gene;Acc:711080]                               | 0.784905231 | 5.32E-14    | 1.66E-12    |
| ENSMMUG00000053496  |                                                                                                     | 0.864000513 | 0.00047317  | 0.002296206 |
| ENSMMUG00000060754  | Metazoan signal recognition particle RNA [Source:RFAM;Acc:RF00017]                                  | 0.875340858 | 1.74E-07    | 1.84E-06    |
| ENSMMUG00000005255  | TRAF-type zinc finger domain containing 1 [Source:VGNC Symbol;Acc:VGNC:79459]                       | 1.015603607 | 4.97E-07    | 4.80E-06    |
| ENSMMUG00000007126  | HECT domain E3 ubiquitin protein ligase 4 [Source:VGNC Symbol;Acc:VGNC:73245]                       | 0.281404311 | 0.013888965 | 0.042220889 |
| ENSMMUG00000012778  | rabphilin 3A [Source:VGNC Symbol;Acc:VGNC:77033]                                                    | 1.939772383 | 1.22E-13    | 3.57E-12    |
| ENSMMUG00000004435  | two pore segment channel 1 [Source:VGNC Symbol;Acc:VGNC:79117]                                      | 1.404945802 | 6.83E-06    | 5.18E-05    |
| ENSMMUG00000006723  | solute carrier family 8 member B1 [Source:NCBI gene;Acc:714561]                                     | 0.961917339 | 0.000765479 | 0.003503363 |
| ENSMMUG00000004205  | phospholipase B domain containing 2 [Source:VGNC Symbol;Acc:VGNC:76122]                             | 2.263369631 | 0.000325498 | 0.001645444 |
| ENSMMUG00000004208  | serine dehydratase [Source:VGNC Symbol;Acc:VGNC:77148]                                              | 1.653991601 | 0.000580976 | 0.002757962 |
| ENSMMUG000000051363 |                                                                                                     | 1.036949982 | 0.000105127 | 0.000597079 |
| ENSMMUG000000054768 |                                                                                                     | 0.82583343  | 1.58E-05    | 0.000109215 |
| ENSMMUG000000057506 |                                                                                                     | 0.556661495 | 0.000321546 | 0.001628399 |
| ENSMMUG000000052680 |                                                                                                     | 0.786644632 | 9.20E-07    | 8.37E-06    |
| ENSMMUG00000017478  | tescalcin [Source:VGNC Symbol;Acc:VGNC:79571]                                                       | 0.717738413 | 0.000690945 | 0.003197731 |
| ENSMMUG00000014027  | nitric oxide synthase 1 [Source:VGNC Symbol;Acc:VGNC:75368]                                         | 1.221662736 | 0.000278099 | 0.001437441 |
| ENSMMUG000000062615 |                                                                                                     | 1.226276372 | 0.000247371 | 0.001297747 |
| ENSMMUG00000020629  | SDS3 homolog, SIN3A corepressor complex component [Source:NCBI gene;Acc:696166]                     | 0.721821541 | 1.60E-06    | 1.38E-05    |
| ENSMMUG000000053710 |                                                                                                     | 0.690774677 | 5.70E-07    | 5.44E-06    |
| ENSMMUG00000011209  | BICD family like cargo adaptor 1 [Source:HGNC Symbol;Acc:HGNC:28095]                                | 0.913507349 | 1.27E-05    | 8.99E-05    |
| ENSMMUG000000055209 |                                                                                                     | 0.869854494 | 2.25E-09    | 3.39E-08    |
| ENSMMUG000000046665 | glutamyl-tRNA amidotransferase subunit C [Source:NCBI gene;Acc:702258]                              | 0.917479081 | 0.010895059 | 0.034379257 |
| ENSMMUG00000020601  | coenzyme Q5, methyltransferase [Source:VGNC Symbol;Acc:VGNC:81376]                                  | 0.506679399 | 9.07E-05    | 0.000523125 |
| ENSMMUG000000046646 | Y RNA [Source:RFAM;Acc:RF00019]                                                                     | 0.763411881 | 7.63E-05    | 0.000448126 |
| ENSMMUG00000004223  | ring finger protein 10 [Source:VGNC Symbol;Acc:VGNC:76702]                                          | 0.929915952 | 2.96E-07    | 3.00E-06    |
| ENSMMUG000000055513 |                                                                                                     | 1.477584124 | 0.015866066 | 0.04713768  |
| ENSMMUG000000058536 |                                                                                                     | 2.292743838 | 2.50E-20    | 1.62E-18    |
| ENSMMUG00000002536  | calcium binding protein 1 [Source:VGNC Symbol;Acc:VGNC:70495]                                       | 1.725370213 | 1.14E-10    | 2.14E-09    |
| ENSMMUG00000021564  | lysine demethylase 2B [Source:VGNC Symbol;Acc:VGNC:81425]                                           | 3.334133218 | 4.12E-20    | 2.55E-18    |
| ENSMMUG000000059782 |                                                                                                     | 4.005267406 | 5.45E-15    | 1.96E-13    |
| ENSMMUG000000057798 |                                                                                                     | 1.645983878 | 0.000849567 | 0.003829471 |
| ENSMMUG00000016454  | 4-hydroxyphenylpyruvate dioxygenase [Source:VGNC Symbol;Acc:VGNC:73511]                             | 0.702083936 | 1.15E-07    | 1.27E-06    |
| ENSMMUG00000013643  | zinc finger CCHC-type containing 8 [Source:VGNC Symbol;Acc:VGNC:79487]                              | 1.899162694 | 0.002637121 | 0.010221211 |
| ENSMMUG00000004412  | arginine and serine rich coiled-coil 2 [Source:VGNC Symbol;Acc:VGNC:77139]                          | 3.235769717 | 4.78E-07    | 4.64E-06    |
| ENSMMUG00000007556  | kinetochore associated 1 [Source:VGNC Symbol;Acc:VGNC:74064]                                        | 0.464222264 | 0.000757218 | 0.003468956 |
| ENSMMUG000000063387 | Metazoan signal recognition particle RNA [Source:RFAM;Acc:RF00017]                                  | 1.848245428 | 0.002960031 | 0.011273361 |
| ENSMMUG00000015221  | huntingtin interacting protein 1 related [Source:VGNC Symbol;Acc:VGNC:73412]                        | 0.662575477 | 0.000484422 | 0.002346475 |
| ENSMMUG00000005301  | ATP binding cassette subfamily B member 9 [Source:VGNC Symbol;Acc:VGNC:81341]                       | -1.39561398 | 3.75E-08    | 4.54E-07    |
| ENSMMUG00000015926  | 2-oxoglutarate and iron dependent oxygenase domain containing 2 [Source:VGNC Symbol;Acc:VGNC:75462] | 1.247523431 | 2.99E-07    | 3.02E-06    |
| ENSMMUG00000015930  | ADP ribosylation factor like GTPase 6 interacting protein 4 [Source:VGNC Symbol;Acc:VGNC:69860]     | 1.507115077 | 0.000828996 | 0.003751212 |
| ENSMMUG00000015931  | phosphatidylinositol transfer protein membrane associated 2 [Source:VGNC Symbol;Acc:VGNC:75843]     | 1.421835054 | 4.96E-10    | 8.31E-09    |

|                    |                                                                                                |             |             |             |
|--------------------|------------------------------------------------------------------------------------------------|-------------|-------------|-------------|
| ENSMMUG00000031495 | chromosome 11 C12orf65 homolog [Source:NCBI gene;Acc:708974]                                   | 1.609255737 | 0.002646202 | 0.010253576 |
| ENSMMUG00000000434 | cyclin dependent kinase 2 associated protein 1 [Source:VGNC Symbol;Acc:VGNC:70944]             | 0.863723991 | 0.007945237 | 0.026364425 |
| ENSMMUG00000013514 | lysine methyltransferase 5A [Source:VGNC Symbol;Acc:VGNC:74159]                                | 0.564146296 | 0.000255881 | 0.001337889 |
| ENSMMUG00000023048 | cytochrome b-c1 complex subunit Rieske, mitochondrial [Source:NCBI gene;Acc:705178]            | 1.200381171 | 0.001122554 | 0.004876571 |
| ENSMMUG00000058836 | transmembrane p24 trafficking protein 2 [Source:NCBI gene;Acc:106992483]                       | 1.077278279 | 3.56E-08    | 4.33E-07    |
| ENSMMUG00000059674 |                                                                                                | 1.717105733 | 0.003676635 | 0.013603549 |
| ENSMMUG00000006546 | ATPase H+ transporting V0 subunit a2 [Source:VGNC Symbol;Acc:VGNC:70096]                       | 0.449010308 | 0.000211099 | 0.001124711 |
| ENSMMUG00000006861 | dynein axonemal heavy chain 10 [Source:NCBI gene;Acc:710343]                                   | 0.704987864 | 1.05E-05    | 7.59E-05    |
| ENSMMUG00000011117 | acetoacetyl-CoA synthetase [Source:NCBI gene;Acc:707015]                                       | 0.593420681 | 0.003055906 | 0.011578754 |
| ENSMMUG00000060158 |                                                                                                | 3.251952335 | 0.005033566 | 0.017815673 |
| ENSMMUG00000050145 | Metazoan signal recognition particle RNA [Source:RFAM;Acc:RF00017]                             | 3.701302589 | 0.002306161 | 0.009094291 |
| ENSMMUG00000020926 | syntaxin 2 [Source:VGNC Symbol;Acc:VGNC:78259]                                                 | 3.344469819 | 6.60E-06    | 5.03E-05    |
| ENSMMUG00000058674 |                                                                                                | 2.838717474 | 0.016963812 | 0.049849862 |
| ENSMMUG00000017026 | fibrosin like 1 [Source:NCBI gene;Acc:696295]                                                  | 0.570905533 | 0.004926413 | 0.017511556 |
| ENSMMUG00000015463 | DNA polymerase epsilon, catalytic subunit [Source:NCBI gene;Acc:698023]                        | 0.558917915 | 0.000674529 | 0.003128983 |
| ENSMMUG00000031451 | golgin A3 [Source:VGNC Symbol;Acc:VGNC:73106]                                                  | 1.135084819 | 2.92E-06    | 2.39E-05    |
| ENSMMUG00000015468 | checkpoint with forkhead and ring finger domains [Source:VGNC Symbol;Acc:VGNC:71064]           | 3.116534279 | 3.76E-25    | 4.06E-23    |
| ENSMMUG00000023321 | UDP-glucose glycoprotein glucosyltransferase 1 [Source:VGNC Symbol;Acc:VGNC:78981]             | 0.532551841 | 0.000415555 | 0.00204396  |
| ENSMMUG00000049232 | AMMECR1 like [Source:VGNC Symbol;Acc:VGNC:84208]                                               | 6.631948114 | 8.86E-12    | 2.01E-10    |
| ENSMMUG00000001989 | RNA polymerase II subunit D [Source:VGNC Symbol;Acc:VGNC:76213]                                | 7.208056848 | 7.32E-15    | 2.59E-13    |
| ENSMMUG00000027543 | Y RNA [Source:RFAM;Acc:RF00019]                                                                | 7.11995716  | 1.26E-08    | 1.66E-07    |
| ENSMMUG00000004177 | myosin VIIB [Source:NCBI gene;Acc:714563]                                                      | 0.330372511 | 0.001628534 | 0.006722678 |
| ENSMMUG00000056151 |                                                                                                | 1.6256449   | 0.011754484 | 0.036654021 |
| ENSMMUG00000000376 | bridging integrator 1 [Source:VGNC Symbol;Acc:VGNC:70251]                                      | 2.207512217 | 0.000258012 | 0.001347265 |
| ENSMMUG00000020928 | nucleolar protein interacting with the FHA domain of MKI67 [Source:VGNC Symbol;Acc:VGNC:75201] | 1.377341755 | 2.62E-08    | 3.26E-07    |
| ENSMMUG00000046774 | RAS like proto-oncogene B [Source:NCBI gene;Acc:695852]                                        | 1.962732536 | 3.32E-13    | 9.17E-12    |
| ENSMMUG00000059182 |                                                                                                | 1.95385831  | 2.95E-16    | 1.25E-14    |
| ENSMMUG00000063759 | transmembrane protein 185B [Source:NCBI gene;Acc:695744]                                       | 1.934548097 | 1.70E-26    | 2.21E-24    |
| ENSMMUG00000059504 |                                                                                                | 2.492368645 | 3.25E-08    | 3.99E-07    |
| ENSMMUG00000051751 |                                                                                                | 0.62937339  | 0.000427615 | 0.002099594 |
| ENSMMUG00000005610 | protein tyrosine phosphatase non-receptor type 4 [Source:VGNC Symbol;Acc:VGNC:76605]           | -0.42575409 | 0.007762507 | 0.025843692 |
| ENSMMUG00000006446 | transmembrane protein 177 [Source:VGNC Symbol;Acc:VGNC:79686]                                  | 2.467174849 | 0.000489702 | 0.002367954 |
| ENSMMUG00000008875 | solute carrier family 35 member F5 [Source:VGNC Symbol;Acc:VGNC:77567]                         | 1.058612276 | 6.56E-07    | 6.18E-06    |
| ENSMMUG00000043114 | U6 spliceosomal RNA [Source:RFAM;Acc:RF00026]                                                  | 0.646457063 | 0.004637088 | 0.016634916 |
| ENSMMUG00000009844 | R3H domain containing 1 [Source:VGNC Symbol;Acc:VGNC:76637]                                    | 0.835102376 | 0.014223522 | 0.043079148 |
| ENSMMUG00000017486 | minichromosome maintenance complex component 6 [Source:VGNC Symbol;Acc:VGNC:74685]             | 0.514496116 | 0.009599168 | 0.0308595   |
| ENSMMUG00000040854 | aspartyl-tRNA synthetase 1 [Source:VGNC Symbol;Acc:VGNC:84226]                                 | 1.244565095 | 9.99E-07    | 9.04E-06    |

|                    |                                                                                                           |             |             |             |
|--------------------|-----------------------------------------------------------------------------------------------------------|-------------|-------------|-------------|
| ENSMMUG00000006528 | Rho GTPase activating protein 15 [Source:VGNC Symbol;Acc:VGNC:69874]                                      | 0.605978235 | 4.36E-10    | 7.39E-09    |
| ENSMMUG00000016845 | zinc finger E-box binding homeobox 2 [Source:VGNC Symbol;Acc:VGNC:78969]                                  | 2.821310056 | 9.17E-05    | 0.000527868 |
| ENSMMUG00000000042 | activin A receptor type 2A [Source:VGNC Symbol;Acc:VGNC:69447]                                            | 1.306132207 | 0.010089142 | 0.032220459 |
| ENSMMUG00000008615 | nebulin [Source:NCBI gene;Acc:100430324]                                                                  | 0.685220605 | 4.61E-06    | 3.64E-05    |
| ENSMMUG00000010521 | ADP ribosylation factor like GTPase 5A [Source:VGNC Symbol;Acc:VGNC:70017]                                | 1.967575462 | 0.000365284 | 0.001815802 |
| ENSMMUG00000010526 | calcium voltage-gated channel auxiliary subunit beta 4 [Source:VGNC Symbol;Acc:VGNC:82116]                | 1.252116338 | 2.05E-05    | 0.000138661 |
| ENSMMUG00000011637 | coiled-coil domain containing 148 [Source:VGNC Symbol;Acc:VGNC:70856]                                     | 1.822728005 | 0.005678973 | 0.019687576 |
| ENSMMUG00000011638 | plakophilin 4 [Source:VGNC Symbol;Acc:VGNC:76153]                                                         | 1.665878134 | 0.005520779 | 0.019248602 |
| ENSMMUG00000052818 | death associated protein like 1 [Source:NCBI gene;Acc:699071]                                             | 1.672562543 | 0.010143712 | 0.032379986 |
| ENSMMUG00000057379 |                                                                                                           | 1.451673905 | 0.000337413 | 0.001698328 |
| ENSMMUG00000006180 | tetratricopeptide repeat, ankyrin repeat and coiled-coil containing 1 [Source:VGNC Symbol;Acc:VGNC:78238] | 1.347972692 | 2.81E-11    | 5.82E-10    |
| ENSMMUG00000055201 | U6 spliceosomal RNA [Source:RFAM;Acc:RF00026]                                                             | 2.571725362 | 0.006163195 | 0.021126006 |
| ENSMMUG00000006181 | WD repeat, sterile alpha motif and U-box domain containing 1 [Source:VGNC Symbol;Acc:VGNC:79634]          | 1.16261593  | 2.38E-08    | 3.00E-07    |
| ENSMMUG00000063868 | Metazoan signal recognition particle RNA [Source:RFAM;Acc:RF00017]                                        | 1.00041683  | 0.003452829 | 0.012847119 |
| ENSMMUG00000006182 | bromodomain adjacent to zinc finger domain 2B [Source:NCBI gene;Acc:702780]                               | 0.553113707 | 1.34E-05    | 9.46E-05    |
| ENSMMUG00000051450 | phospholipase A2 receptor 1 [Source:NCBI gene;Acc:700191]                                                 | 0.602765699 | 2.88E-07    | 2.92E-06    |
| ENSMMUG00000002678 | integrin subunit beta 6 [Source:VGNC Symbol;Acc:VGNC:73789]                                               | 1.549047243 | 7.62E-09    | 1.04E-07    |
| ENSMMUG00000055970 |                                                                                                           | 1.041750498 | 1.81E-07    | 1.91E-06    |
| ENSMMUG00000008384 | solute carrier family 4 member 10 [Source:VGNC Symbol;Acc:VGNC:77695]                                     | 1.674479026 | 1.37E-12    | 3.47E-11    |
| ENSMMUG00000008387 | dipeptidyl peptidase 4 [Source:VGNC Symbol;Acc:VGNC:71979]                                                | 2.123563063 | 1.19E-05    | 8.50E-05    |
| ENSMMUG00000013251 | xin actin binding repeat containing 2 [Source:VGNC Symbol;Acc:VGNC:78953]                                 | 1.842540537 | 0.000125874 | 0.000704079 |
| ENSMMUG00000063463 |                                                                                                           | 1.249015934 | 2.05E-05    | 0.000138922 |
| ENSMMUG00000021775 | beta-1,3-galactosyltransferase 1 [Source:VGNC Symbol;Acc:VGNC:70204]                                      | -0.89873091 | 0.000297044 | 0.001522459 |
| ENSMMUG00000006215 | serine/threonine kinase 39 [Source:VGNC Symbol;Acc:VGNC:81587]                                            | 0.815797229 | 0.000336933 | 0.001696814 |
| ENSMMUG00000013830 | glucose-6-phosphatase catalytic subunit 2 [Source:NCBI gene;Acc:709062]                                   | 2.200419143 | 8.39E-13    | 2.19E-11    |
| ENSMMUG00000013832 | ATP binding cassette subfamily B member 11 [Source:VGNC Symbol;Acc:VGNC:81339]                            | 2.297045267 | 8.52E-11    | 1.65E-09    |
| ENSMMUG00000017143 | LDL receptor related protein 2 [Source:VGNC Symbol;Acc:VGNC:81430]                                        | 1.907707129 | 0.003954409 | 0.0144905   |
| ENSMMUG00000058098 |                                                                                                           | 0.570479582 | 0.000344446 | 0.00172818  |
| ENSMMUG00000020510 | kelch like family member 41 [Source:VGNC Symbol;Acc:VGNC:74062]                                           | 0.987359734 | 4.90E-08    | 5.78E-07    |
| ENSMMUG00000015198 | glutamate decarboxylase 1 [Source:VGNC Symbol;Acc:VGNC:72862]                                             | 0.804096097 | 0.00016334  | 0.000890907 |
| ENSMMUG00000015203 | golgi reassembly stacking protein 2 [Source:VGNC Symbol;Acc:VGNC:72957]                                   | 0.726012667 | 0.001099234 | 0.004790104 |
| ENSMMUG00000011189 | tousled like kinase 1 [Source:VGNC Symbol;Acc:VGNC:78367]                                                 | 0.581567765 | 0.009019455 | 0.029359288 |
| ENSMMUG00000054176 | methyltransferase like 8 [Source:NCBI gene;Acc:695361]                                                    | 0.897396426 | 0.002618011 | 0.010169631 |
| ENSMMUG00000023370 | DDB1 and CUL4 associated factor 17 [Source:VGNC Symbol;Acc:VGNC:71709]                                    | 1.702591275 | 2.61E-12    | 6.38E-11    |
| ENSMMUG00000007301 | dynein cytoplasmic 1 intermediate chain 2 [Source:VGNC Symbol;Acc:VGNC:71953]                             | 0.619620952 | 0.000266913 | 0.001387808 |
| ENSMMUG00000007310 | solute carrier family 25 member 12 [Source:VGNC Symbol;Acc:VGNC:77430]                                    | 1.092262619 | 1.85E-08    | 2.38E-07    |

|                     |                                                                                                    |   |             |             |             |
|---------------------|----------------------------------------------------------------------------------------------------|---|-------------|-------------|-------------|
| ENSMMUG00000058130  | Metazoan signal recognition particle RNA [Source:RFAM;Acc:RF00017]                                 | - | 1.936313849 | 0.01584138  | 0.04707541  |
| ENSMMUG00000007313  | histone acetyltransferase 1 [Source:VGNC Symbol;Acc:VGNC:73349]                                    | - | 1.625639714 | 6.18E-06    | 4.74E-05    |
| ENSMMUG00000002370  | integrin subunit alpha 6 [Source:VGNC Symbol;Acc:VGNC:73780]                                       | - | 1.035666157 | 3.39E-11    | 6.91E-10    |
| ENSMMUG000000054462 |                                                                                                    | - | 1.111568229 | 1.81E-10    | 3.30E-09    |
| ENSMMUG000000061038 |                                                                                                    | - | 2.251080879 | 0.000463023 | 0.002253723 |
| ENSMMUG00000022553  | pyruvate dehydrogenase kinase 1 [Source:VGNC Symbol;Acc:VGNC:75932]                                | - | 3.455151994 | 0.001089042 | 0.004750694 |
| ENSMMUG00000020792  | Rap guanine nucleotide exchange factor 4 [Source:VGNC Symbol;Acc:VGNC:76490]                       | - | 1.550944381 | 2.67E-06    | 2.20E-05    |
| ENSMMUG00000014672  | mitogen-activated protein kinase kinase kinase 20 [Source:NCBI gene;Acc:698274]                    | - | 2.188037589 | 6.23E-05    | 0.000374418 |
| ENSMMUG00000023006  | corepressor interacting with RBPJ, 1 [Source:VGNC Symbol;Acc:VGNC:71331]                           | - | 0.989155399 | 0.001157793 | 0.005011029 |
| ENSMMUG00000021012  | G protein-coupled receptor 155 [Source:VGNC Symbol;Acc:VGNC:72985]                                 | - | 0.4744023   | 3.31E-06    | 2.68E-05    |
| ENSMMUG000000053004 |                                                                                                    | - | 0.724665864 | 6.71E-05    | 0.000399206 |
| ENSMMUG00000009593  | WAS/WASL interacting protein family member 1 [Source:VGNC Symbol;Acc:VGNC:78784]                   | - | 1.573178825 | 6.12E-16    | 2.49E-14    |
| ENSMMUG000000065344 | homeobox D1 [Source:NCBI gene;Acc:701064]                                                          | - | 0.727373664 | 0.000517678 | 0.002483546 |
| ENSMMUG00000008502  | alkylglycerone phosphate synthase [Source:VGNC Symbol;Acc:VGNC:69747]                              | - | 0.285794044 | 0.013534171 | 0.041321505 |
| ENSMMUG00000002183  | oxysterol binding protein like 6 [Source:VGNC Symbol;Acc:VGNC:75627]                               | - | 1.262315845 | 2.43E-07    | 2.50E-06    |
| ENSMMUG00000002185  | protein activator of interferon induced protein kinase EIF2AK2 [Source:VGNC Symbol;Acc:VGNC:76421] | - | 0.664468841 | 2.82E-05    | 0.000183677 |
| ENSMMUG000000054264 | pejvakin [Source:NCBI gene;Acc:708668]                                                             | - | 0.640045245 | 0.000938998 | 0.004165636 |
| ENSMMUG00000009038  | titin [Source:NCBI gene;Acc:703527]                                                                | - | 2.040986796 | 2.41E-05    | 0.00016008  |
| ENSMMUG00000019690  | SEC14 and spectrin domain containing 1 [Source:VGNC Symbol;Acc:VGNC:77267]                         | - | 2.321676634 | 3.73E-12    | 8.88E-11    |
| ENSMMUG000000053406 |                                                                                                    | - | 3.640454794 | 1.88E-05    | 0.000128112 |
| ENSMMUG000000049746 |                                                                                                    | - | -0.37311349 | 0.009162272 | 0.02974133  |
| ENSMMUG00000014277  | ITPR interacting domain containing 2 [Source:VGNC Symbol;Acc:VGNC:73584]                           | - | 1.24771164  | 2.08E-13    | 5.84E-12    |
| ENSMMUG00000014394  | DnaJ heat shock protein family (Hsp40) member C10 [Source:VGNC Symbol;Acc:VGNC:84229]              | - | 1.359520014 | 8.29E-21    | 5.56E-19    |
| ENSMMUG00000014397  | NCK associated protein 1 [Source:VGNC Symbol;Acc:VGNC:75143]                                       | - | 3.011324217 | 4.70E-22    | 3.56E-20    |
| ENSMMUG00000019462  | integrin subunit alpha V [Source:VGNC Symbol;Acc:VGNC:73783]                                       | - | 0.944041824 | 7.14E-06    | 5.39E-05    |
| ENSMMUG00000010405  | family with sequence similarity 171 member B [Source:VGNC Symbol;Acc:VGNC:72404]                   | - | 1.410903882 | 2.02E-06    | 1.70E-05    |
| ENSMMUG00000004022  | zinc finger SWIM-type containing 2 [Source:VGNC Symbol;Acc:VGNC:79908]                             | - | 2.07348911  | 1.49E-19    | 8.73E-18    |
| ENSMMUG00000003506  | solute carrier family 40 member 1 [Source:VGNC Symbol;Acc:VGNC:77384]                              | - | -1.1351855  | 0.01358418  | 0.041438101 |
| ENSMMUG00000014314  | ankyrin and armadillo repeat containing [Source:VGNC Symbol;Acc:VGNC:69706]                        | - | -1.47136973 | 9.86E-15    | 3.44E-13    |
| ENSMMUG000000061305 |                                                                                                    | - | -0.78179117 | 0.002126617 | 0.008512141 |
| ENSMMUG00000003260  |                                                                                                    | - | 1.507598785 | 1.16E-14    | 4.02E-13    |
| ENSMMUG000000064089 |                                                                                                    | - | 1.155799992 | 7.55E-15    | 2.66E-13    |
| ENSMMUG00000014307  | myostatin [Source:VGNC Symbol;Acc:VGNC:74870]                                                      | - | 1.193508849 | 1.04E-11    | 2.32E-10    |

|                    |                                                                                                            |   |             |             |             |
|--------------------|------------------------------------------------------------------------------------------------------------|---|-------------|-------------|-------------|
| ENSMMUG0000007283  | 3-hydroxyisobutyryl-CoA hydrolase [Source:NCBI gene;Acc:713951]                                            | - | 0.729475201 | 0.004830764 | 0.017228334 |
| ENSMMUG0000005612  | glutaminase [Source:NCBI gene;Acc:693520]                                                                  | - | -1.67826988 | 0.007252553 | 0.024383255 |
| ENSMMUG0000005613  | signal transducer and activator of transcription 1 [Source:VGNC Symbol;Acc:VGNC:77904]                     | - | -0.72052741 | 8.33E-08    | 9.48E-07    |
| ENSMMUG0000001761  | myosin IB [Source:VGNC Symbol;Acc:VGNC:75111]                                                              | - | 0.717708336 | 0.001935133 | 0.007827045 |
| ENSMMUG00000037175 | U6 spliceosomal RNA [Source:RFAM;Acc:RF00026]                                                              | - | 1.441696273 | 0.000684924 | 0.003173004 |
| ENSMMUG0000001475  | transmembrane protein with EGF like and two follistatin like domains 2 [Source:VGNC Symbol;Acc:VGNC:78569] | - | 2.638188145 | 3.58E-09    | 5.22E-08    |
| ENSMMUG00000055355 |                                                                                                            | - | 0.441184494 | 0.001508905 | 0.006293687 |
| ENSMMUG00000061797 | U6 spliceosomal RNA [Source:RFAM;Acc:RF00026]                                                              | - | 1.087265372 | 0.006150741 | 0.021093628 |
| ENSMMUG00000061123 | Metazoan signal recognition particle RNA [Source:RFAM;Acc:RF00017]                                         | - | 1.386579193 | 0.005357571 | 0.018758856 |
| ENSMMUG0000005622  | dynein axonemal heavy chain 7 [Source:VGNC Symbol;Acc:VGNC:71859]                                          | - | 1.291508944 | 7.68E-08    | 8.79E-07    |
| ENSMMUG00000057432 | serine/threonine kinase 17b [Source:NCBI gene;Acc:696908]                                                  | - | 0.931503309 | 0.00168696  | 0.006935281 |
| ENSMMUG00000015970 | coiled-coil domain containing 150 [Source:VGNC Symbol;Acc:VGNC:84222]                                      | - | 1.410458178 | 9.92E-22    | 7.29E-20    |
| ENSMMUG00000008643 | general transcription factor IIIC subunit 3 [Source:VGNC Symbol;Acc:VGNC:73317]                            | - | 1.927227271 | 1.90E-17    | 9.16E-16    |
| ENSMMUG00000022430 | splicing factor 3b subunit 1 [Source:VGNC Symbol;Acc:VGNC:77179]                                           | - | 1.322705284 | 0.000319291 | 0.001618735 |
| ENSMMUG00000023810 | methionyl-tRNA synthetase 2, mitochondrial [Source:VGNC Symbol;Acc:VGNC:74572]                             | - | 1.011684671 | 1.32E-07    | 1.44E-06    |
| ENSMMUG00000023811 | boule homolog, RNA binding protein [Source:VGNC Symbol;Acc:VGNC:70310]                                     | - | 1.160441788 | 6.94E-06    | 5.25E-05    |
| ENSMMUG00000012822 | phospholipase C like 1 (inactive) [Source:NCBI gene;Acc:698200]                                            | - | 0.704393288 | 0.002287142 | 0.009029447 |
| ENSMMUG00000051936 |                                                                                                            | - | -2.29236086 | 7.68E-07    | 7.14E-06    |
| ENSMMUG00000050082 |                                                                                                            | - | 0.700683562 | 0.011331427 | 0.035556188 |
| ENSMMUG00000047974 | aldehyde oxidase 4 [Source:NCBI gene;Acc:701502]                                                           | - | 1.034194373 | 1.03E-14    | 3.57E-13    |
| ENSMMUG00000022202 | basic leucine zipper and W2 domains 1 [Source:VGNC Symbol;Acc:VGNC:84213]                                  | - | 1.105292805 | 2.10E-08    | 2.66E-07    |
| ENSMMUG00000031296 | caspase 8 [Source:VGNC Symbol;Acc:VGNC:70547]                                                              | - | 1.462168237 | 8.03E-12    | 1.83E-10    |
| ENSMMUG00000018356 | flagellum associated containing coiled-coil domains 1 [Source:VGNC Symbol;Acc:VGNC:72508]                  | - | 1.361612573 | 0.000888833 | 0.003978328 |
| ENSMMUG00000018144 | C2 calcium-dependent domain-containing protein 6 [Source:NCBI gene;Acc:702140]                             | - | 1.936451111 | 2.02E-25    | 2.25E-23    |
| ENSMMUG00000018151 | membrane palmitoylated protein 4 [Source:VGNC Symbol;Acc:VGNC:74734]                                       | - | 2.668746143 | 1.72E-06    | 1.47E-05    |
| ENSMMUG00000045285 | frizzled class receptor 7 [Source:NCBI gene;Acc:703064]                                                    | - | 0.390211111 | 0.011124844 | 0.035000375 |
| ENSMMUG0000000582  | NOP58 ribonucleoprotein [Source:VGNC Symbol;Acc:VGNC:75284]                                                | - | 1.060914723 | 3.92E-07    | 3.89E-06    |
| ENSMMUG00000061021 |                                                                                                            | - | 1.147053565 | 3.11E-05    | 0.00020109  |
| ENSMMUG00000038427 | Metazoan signal recognition particle RNA [Source:RFAM;Acc:RF00017]                                         | - | 2.65724997  | 0.009780373 | 0.03135353  |
| ENSMMUG00000021152 | family with sequence similarity 117 member B [Source:NCBI gene;Acc:705134]                                 | - | 0.405391154 | 0.009715536 | 0.031183558 |
| ENSMMUG00000056824 |                                                                                                            | - | -1.85887295 | 0.000286918 | 0.001476494 |
| ENSMMUG00000022601 | cAMP responsive element binding protein 1 [Source:VGNC Symbol;Acc:VGNC:71485]                              | - | 0.764186435 | 0.000161421 | 0.000881468 |
| ENSMMUG00000022602 | methyltransferase like 21A [Source:VGNC Symbol;Acc:VGNC:74625]                                             | - | -1.4990445  | 4.42E-09    | 6.37E-08    |
| ENSMMUG00000020211 | cyclin Y like 1 [Source:VGNC Symbol;Acc:VGNC:84224]                                                        | - | 1.770245639 | 2.96E-17    | 1.40E-15    |
| ENSMMUG00000057651 | frizzled class receptor 5 [Source:NCBI gene;Acc:710796]                                                    | - | -1.69162709 | 0.00192353  | 0.007794515 |
| ENSMMUG00000008113 | pleckstrin homology domain containing M3 [Source:NCBI gene;Acc:711125]                                     | - | -2.18827996 | 4.30E-07    | 4.22E-06    |

|                     |                                                                                                    |             |             |             |
|---------------------|----------------------------------------------------------------------------------------------------|-------------|-------------|-------------|
| ENSMMUG00000010871  | crystallin gamma B [Source:VGNC Symbol;Acc:VGNC:71507]                                             | 3.400850237 | 0.002299527 | 0.009070679 |
| ENSMMUG00000016077  | isocitrate dehydrogenase (NADP(+)) 1 [Source:NCBI gene;Acc:710019]                                 | 2.843077656 | 5.08E-06    | 3.96E-05    |
| ENSMMUG00000017524  | phosphoinositide kinase, FYVE-type zinc finger containing [Source:VGNC Symbol;Acc:VGNC:75854]      | 2.925073141 | 4.38E-05    | 0.000272648 |
| ENSMMUG00000005295  | parathyroid hormone 2 receptor [Source:VGNC Symbol;Acc:VGNC:76592]                                 | 2.921942826 | 2.78E-05    | 0.000181099 |
| ENSMMUG00000002809  | unc-80 homolog, NALCN channel complex subunit [Source:NCBI gene;Acc:713007]                        | 1.551563487 | 6.06E-09    | 8.45E-08    |
| ENSMMUG00000010508  | carbamoyl-phosphate synthase 1 [Source:VGNC Symbol;Acc:VGNC:71471]                                 | 3.185653518 | 4.76E-07    | 4.62E-06    |
| ENSMMUG000000059604 |                                                                                                    | 0.501704424 | 0.009744372 | 0.031256241 |
| ENSMMUG000000061342 |                                                                                                    | 1.691111577 | 2.29E-18    | 1.23E-16    |
| ENSMMUG00000000381  | IKAROS family zinc finger 2 [Source:VGNC Symbol;Acc:VGNC:73586]                                    | 0.865254018 | 2.87E-11    | 5.92E-10    |
| ENSMMUG00000000382  | sperm associated antigen 16 [Source:VGNC Symbol;Acc:VGNC:77977]                                    | 0.799266265 | 7.29E-05    | 0.000429672 |
| ENSMMUG000000064880 |                                                                                                    | 0.887592843 | 8.44E-08    | 9.59E-07    |
| ENSMMUG000000053721 |                                                                                                    | 2.005678216 | 2.10E-09    | 3.18E-08    |
| ENSMMUG00000006758  | cytochrome P450, family 27, subfamily A, polypeptide 1 [Source:NCBI gene;Acc:700192]               | 1.842539997 | 6.64E-05    | 0.000395412 |
| ENSMMUG000000021877 | protein kinase AMP-activated non-catalytic subunit gamma 3 [Source:VGNC Symbol;Acc:VGNC:76406]     | 2.02798389  | 6.46E-05    | 0.00038581  |
| ENSMMUG000000052954 | Wnt family member 6 [Source:NCBI gene;Acc:700573]                                                  | 2.636763788 | 2.72E-07    | 2.77E-06    |
| ENSMMUG00000017933  | desmin [Source:VGNC Symbol;Acc:VGNC:71770]                                                         | 0.415126788 | 0.001076618 | 0.004704711 |
| ENSMMUG000000002519 | serine/threonine kinase 11 interacting protein [Source:VGNC Symbol;Acc:VGNC:77963]                 | 0.989200504 | 4.32E-22    | 3.29E-20    |
| ENSMMUG000000002520 | solute carrier family 4 member 3 [Source:VGNC Symbol;Acc:VGNC:77604]                               | 0.916323424 | 2.58E-06    | 2.14E-05    |
| ENSMMUG000000061834 |                                                                                                    | 0.982783967 | 2.05E-05    | 0.000138707 |
| ENSMMUG000000046282 |                                                                                                    | 0.903862405 | 1.79E-11    | 3.84E-10    |
| ENSMMUG000000051349 |                                                                                                    | 2.808822585 | 0.01395984  | 0.042390394 |
| ENSMMUG000000018139 | dedicator of cytokinesis 10 [Source:VGNC Symbol;Acc:VGNC:71888]                                    | 0.378525679 | 0.000276735 | 0.001430919 |
| ENSMMUG000000051482 |                                                                                                    | 2.631622567 | 9.87E-13    | 2.55E-11    |
| ENSMMUG000000054072 |                                                                                                    | 0.640803393 | 5.37E-07    | 5.16E-06    |
| ENSMMUG000000045544 | neuronal tyrosine-phosphorylated phosphoinositide-3-kinase adaptor 2 [Source:NCBI gene;Acc:711209] | 0.516123324 | 0.000315806 | 0.001604548 |
| ENSMMUG000000013233 | collagen type IV alpha 4 chain [Source:VGNC Symbol;Acc:VGNC:71299]                                 | 0.672467462 | 0.0079333   | 0.026331044 |
| ENSMMUG000000013235 | collagen type IV alpha 3 chain [Source:VGNC Symbol;Acc:VGNC:81375]                                 | 0.789502151 | 9.57E-05    | 0.000548595 |
| ENSMMUG000000054830 |                                                                                                    | 1.052842423 | 0.008284681 | 0.02734842  |
| ENSMMUG000000002103 | delta/notch like EGF repeat containing [Source:VGNC Symbol;Acc:VGNC:71895]                         | 1.434108609 | 2.35E-08    | 2.95E-07    |
| ENSMMUG000000011777 | UDP-GlcNAc:betaGal beta-1,3-N-acetylglucosaminyltransferase 7 [Source:VGNC Symbol;Acc:VGNC:82108]  | 2.922905004 | 0.000342513 | 0.001720912 |
| ENSMMUG000000016871 | alkaline phosphatase, intestinal [Source:VGNC Symbol;Acc:VGNC:69800]                               | 2.155081957 | 9.71E-06    | 7.07E-05    |
| ENSMMUG000000051779 |                                                                                                    | 0.517959268 | 0.009598877 | 0.0308595   |
| ENSMMUG000000005646 | diacylglycerol kinase delta [Source:VGNC Symbol;Acc:VGNC:71783]                                    | 0.456857454 | 0.000711796 | 0.003279079 |
| ENSMMUG000000005650 | ubiquitin specific peptidase 40 [Source:VGNC Symbol;Acc:VGNC:79226]                                | 0.320424894 | 0.005361059 | 0.018764628 |

|                    |                                                                                                      |             |             |             |
|--------------------|------------------------------------------------------------------------------------------------------|-------------|-------------|-------------|
| ENSMMUG00000021216 | UDP glucuronosyltransferase 1 family, polypeptide A1 [Source:NCBI gene;Acc:574210]                   | 0.915003887 | 4.90E-07    | 4.75E-06    |
| ENSMMUG00000051807 |                                                                                                      | 1.422144675 | 2.44E-10    | 4.33E-09    |
| ENSMMUG00000061244 |                                                                                                      | 1.095965284 | 0.006711031 | 0.022742577 |
| ENSMMUG00000011516 | ADP ribosylation factor like GTPase 4C [Source:VGNC Symbol;Acc:VGNC:70018]                           | 2.291373758 | 0.000408241 | 0.0020101   |
| ENSMMUG00000054449 | Metazoan signal recognition particle RNA [Source:RFAM;Acc:RF00017]                                   | 1.219102378 | 0.002252251 | 0.008926884 |
| ENSMMUG00000060487 | atypical chemokine receptor 3 [Source:NCBI gene;Acc:694428]                                          | 0.908012836 | 0.008405251 | 0.027674767 |
| ENSMMUG00000014049 | collagen type VI alpha 3 chain [Source:VGNC Symbol;Acc:VGNC:71303]                                   | 1.142617027 | 0.002042948 | 0.008211022 |
| ENSMMUG00000021723 | beta-1,4-N-acetyl-galactosaminyltransferase 4 [Source:NCBI gene;Acc:114669831]                       | 0.472834189 | 0.00138919  | 0.00586412  |
| ENSMMUG00000059353 | phosphatidylserine synthase 2 [Source:NCBI gene;Acc:698582]                                          | -1.06879251 | 8.78E-11    | 1.69E-09    |
| ENSMMUG00000056711 | ribonuclease inhibitor-like [Source:NCBI gene;Acc:114672186]                                         | 0.874536546 | 9.75E-11    | 1.86E-09    |
| ENSMMUG00000062863 |                                                                                                      | 1.460768418 | 2.80E-09    | 4.13E-08    |
| ENSMMUG00000004622 | NLR family pyrin domain containing 6 [Source:VGNC Symbol;Acc:VGNC:75234]                             | 1.746331244 | 0.001387303 | 0.005859685 |
| ENSMMUG00000057640 | plakophilin-3-like [Source:NCBI gene;Acc:114669833]                                                  | 2.520039895 | 5.32E-29    | 8.68E-27    |
| ENSMMUG00000002917 | single Ig IL-1-related receptor [Source:NCBI gene;Acc:100425060]                                     | 3.042149062 | 1.03E-15    | 4.04E-14    |
| ENSMMUG00000010782 | phosphatidylserine synthase 2 [Source:NCBI gene;Acc:114669774]                                       | 0.542306782 | 0.010325816 | 0.032841668 |
| ENSMMUG00000021661 | leucine rich repeat containing 56 [Source:VGNC Symbol;Acc:VGNC:74356]                                | 1.657774445 | 5.80E-09    | 8.14E-08    |
| ENSMMUG00000021664 | lamin tail domain containing 2 [Source:VGNC Symbol;Acc:VGNC:74380]                                   | 1.637600921 | 2.68E-25    | 2.93E-23    |
| ENSMMUG00000004014 | interferon regulatory factor 7 [Source:VGNC Symbol;Acc:VGNC:73765]                                   | 0.756520245 | 0.001923755 | 0.007794515 |
| ENSMMUG00000004024 | cadherin related family member 5 [Source:VGNC Symbol;Acc:VGNC:71158]                                 | 1.298810331 | 5.44E-06    | 4.22E-05    |
| ENSMMUG00000016715 | p53-induced death domain protein 1 [Source:VGNC Symbol;Acc:VGNC:81498]                               | 0.335441423 | 0.01298958  | 0.039884581 |
| ENSMMUG00000043846 |                                                                                                      | 0.605924127 | 0.000225341 | 0.001193789 |
| ENSMMUG00000010544 | mucin 5B, oligomeric mucus/gel-forming [Source:VGNC Symbol;Acc:VGNC:75081]                           | 0.525210227 | 8.53E-06    | 6.31E-05    |
| ENSMMUG00000017450 | MOB kinase activator 2 [Source:NCBI gene;Acc:720951]                                                 | 2.046611607 | 1.61E-07    | 1.71E-06    |
| ENSMMUG00000003874 | interferon induced transmembrane protein 10 [Source:NCBI gene;Acc:721010]                            | 4.031147968 | 1.02E-30    | 2.02E-28    |
| ENSMMUG00000004773 | transient receptor potential cation channel subfamily M member 5 [Source:VGNC Symbol;Acc:VGNC:78955] | 0.728779353 | 0.007527985 | 0.025158469 |
| ENSMMUG00000000511 | cysteinyl-tRNA synthetase 1 [Source:VGNC Symbol;Acc:VGNC:70540]                                      | 0.702666453 | 0.014591023 | 0.043973761 |
| ENSMMUG00000051131 | MAS related GPR family member G [Source:NCBI gene;Acc:721253]                                        | 0.723854354 | 0.000655756 | 0.003050984 |
| ENSMMUG00000019736 | SH3 and multiple ankyrin repeat domains 2 [Source:NCBI gene;Acc:708192]                              | 0.767661814 | 0.004930851 | 0.017522891 |
| ENSMMUG00000052168 |                                                                                                      | 3.710581102 | 3.34E-54    | 4.69E-51    |
| ENSMMUG00000060517 |                                                                                                      | 1.538984106 | 2.67E-07    | 2.72E-06    |
| ENSMMUG00000014237 | lysine methyltransferase 5B [Source:VGNC Symbol;Acc:VGNC:74110]                                      | 1.975432538 | 2.87E-42    | 1.55E-39    |
| ENSMMUG00000056342 | Metazoan signal recognition particle RNA [Source:RFAM;Acc:RF00017]                                   | 2.655579119 | 0.000860971 | 0.003872162 |
| ENSMMUG00000023192 | choline kinase alpha [Source:VGNC Symbol;Acc:VGNC:71039]                                             | 1.931991516 | 4.83E-09    | 6.89E-08    |
| ENSMMUG00000023188 | aldehyde dehydrogenase 3 family member B1 [Source:VGNC Symbol;Acc:VGNC:69789]                        | 0.4622855   | 0.006667588 | 0.02261175  |
| ENSMMUG00000056105 | T-box transcription factor 10 [Source:NCBI gene;Acc:721689]                                          | 0.402567867 | 0.003160306 | 0.011884413 |
| ENSMMUG00000042611 | nudix hydrolase 8 [Source:NCBI gene;Acc:721695]                                                      | 2.519808641 | 0.011662788 | 0.036441016 |
| ENSMMUG00000062171 |                                                                                                      | 2.015763183 | 0.002664509 | 0.010310269 |
| ENSMMUG00000011821 | phosphatidylinositol transfer protein membrane associated 1 [Source:VGNC Symbol;Acc:VGNC:76007]      | 1.423041431 | 0.007916755 | 0.026282353 |
| ENSMMUG00000011817 | aryl hydrocarbon receptor interacting protein [Source:VGNC Symbol;Acc:VGNC:69759]                    | 1.416425352 | 1.46E-16    | 6.33E-15    |
| ENSMMUG00000053378 |                                                                                                      | 1.232080202 | 6.06E-08    | 7.05E-07    |
| ENSMMUG00000005488 | coronin 1B [Source:VGNC Symbol;Acc:VGNC:71320]                                                       | 1.830418589 | 1.15E-18    | 6.36E-17    |

|                    |                                                                                                     |             |             |             |
|--------------------|-----------------------------------------------------------------------------------------------------|-------------|-------------|-------------|
| ENSMMUG0000005486  | protein tyrosine phosphatase receptor type C associated protein [Source:VGNC Symbol;Acc:VGNC:76613] | 1.113309583 | 2.40E-08    | 3.01E-07    |
| ENSMMUG0000005483  | ribosomal protein S6 kinase B2 [Source:VGNC Symbol;Acc:VGNC:76934]                                  | 1.001562535 | 2.22E-08    | 2.79E-07    |
| ENSMMUG0000005480  | carnosine synthase 1 [Source:VGNC Symbol;Acc:VGNC:81367]                                            | 0.982860804 | 2.45E-20    | 1.59E-18    |
| ENSMMUG00000017280 | TBC1 domain family member 10C [Source:VGNC Symbol;Acc:VGNC:78203]                                   | 1.41539076  | 1.64E-06    | 1.41E-05    |
| ENSMMUG00000064122 |                                                                                                     | 0.624209109 | 0.001705495 | 0.007003268 |
| ENSMMUG00000015925 | G protein-coupled receptor kinase 2 [Source:VGNC Symbol;Acc:VGNC:73253]                             | 0.61046215  | 0.002240865 | 0.008887251 |
| ENSMMUG00000008771 | lysine demethylase 2A [Source:VGNC Symbol;Acc:VGNC:73824]                                           | 0.524188174 | 0.000283297 | 0.001460003 |
| ENSMMUG00000062635 |                                                                                                     | -0.39936787 | 0.003817061 | 0.014037936 |
|                    |                                                                                                     | -           |             |             |
| ENSMMUG00000020359 | spectrin beta, non-erythrocytic 2 [Source:VGNC Symbol;Acc:VGNC:77872]                               | 0.556287049 | 0.016357779 | 0.048271283 |
| ENSMMUG00000010577 | RNA-binding protein 4B [Source:NCBI gene;Acc:713553]                                                | 0.641045089 | 7.71E-06    | 5.77E-05    |
|                    |                                                                                                     | -           |             |             |
| ENSMMUG00000002494 | actinin alpha 3 [Source:NCBI gene;Acc:713811]                                                       | 0.597598462 | 0.005648043 | 0.019604581 |
|                    |                                                                                                     | -           |             |             |
| ENSMMUG00000015991 | BRMS1 transcriptional repressor and anoikis regulator [Source:VGNC Symbol;Acc:VGNC:70334]           | 0.941043942 | 0.012417874 | 0.038330585 |
| ENSMMUG00000015987 | Ras and Rab interactor 1 [Source:VGNC Symbol;Acc:VGNC:76769]                                        | -0.6397033  | 0.000608459 | 0.002873838 |
|                    |                                                                                                     | -           |             |             |
| ENSMMUG00000006950 | cornichon family AMPA receptor auxiliary protein 2 [Source:VGNC Symbol;Acc:VGNC:71366]              | 1.203160453 | 0.000763078 | 0.003493519 |
|                    |                                                                                                     | -           |             |             |
| ENSMMUG00000031202 | RAB1B, member RAS oncogene family [Source:NCBI gene;Acc:721852]                                     | 1.015754657 | 2.77E-06    | 2.27E-05    |
|                    |                                                                                                     | -           |             |             |
| ENSMMUG00000022520 | kinesin light chain 2 [Source:VGNC Symbol;Acc:VGNC:73869]                                           | 0.721919413 | 0.002479464 | 0.009695909 |
| ENSMMUG00000057179 | cation channel sperm associated 1 [Source:NCBI gene;Acc:721869]                                     | 3.849344471 | 1.28E-22    | 1.04E-20    |
| ENSMMUG00000056794 | cystatin E/M [Source:NCBI gene;Acc:714999]                                                          | 3.33578042  | 0.000303015 | 0.001547406 |
| ENSMMUG00000019115 | eukaryotic translation initiation factor 1A domain containing [Source:VGNC Symbol;Acc:VGNC:72127]   | 0.590647195 | 0.000146768 | 0.000809012 |
| ENSMMUG00000008652 | coiled-coil domain containing 85B [Source:VGNC Symbol;Acc:VGNC:70853]                               | 0.935454548 | 6.12E-06    | 4.70E-05    |
| ENSMMUG00000008651 | FGF1 intracellular binding protein [Source:VGNC Symbol;Acc:VGNC:72663]                              | 0.561047604 | 0.00135034  | 0.005717336 |
| ENSMMUG00000038363 | adaptor related protein complex 5 subunit beta 1 [Source:NCBI gene;Acc:721904]                      | 1.523589358 | 9.12E-22    | 6.77E-20    |
| ENSMMUG00000050028 |                                                                                                     | 1.334004301 | 5.83E-10    | 9.64E-09    |
| ENSMMUG00000064005 |                                                                                                     | 1.402044333 | 8.24E-06    | 6.11E-05    |
| ENSMMUG00000060437 | Metazoan signal recognition particle RNA [Source:RFAM;Acc:RF00017]                                  | 1.702412838 | 4.64E-06    | 3.65E-05    |
| ENSMMUG00000019837 | ribonuclease H2 subunit C [Source:NCBI gene;Acc:700330]                                             | 0.666621003 | 0.00107447  | 0.004701183 |
| ENSMMUG00000019839 | lysine acetyltransferase 5 [Source:VGNC Symbol;Acc:VGNC:73955]                                      | 0.944033369 | 2.53E-08    | 3.17E-07    |
| ENSMMUG00000007418 | RELA proto-oncogene, NF-kB subunit [Source:VGNC Symbol;Acc:VGNC:76893]                              | 0.353455599 | 0.001872336 | 0.007610369 |
| ENSMMUG00000007416 | signal-induced proliferation-associated 1 [Source:VGNC Symbol;Acc:VGNC:77218]                       | 0.585863706 | 0.002671051 | 0.01032988  |
|                    |                                                                                                     | -           |             |             |
| ENSMMUG00000007406 | pecanex 3 [Source:NCBI gene;Acc:716000]                                                             | 0.299512276 | 0.007374094 | 0.024720755 |
|                    |                                                                                                     | -           |             |             |
| ENSMMUG00000050788 | mitogen-activated protein kinase kinase kinase 11 [Source:NCBI gene;Acc:716038]                     | 0.352885801 | 0.002168861 | 0.008655075 |
| ENSMMUG00000023479 | latent transforming growth factor beta binding protein 3 [Source:VGNC Symbol;Acc:VGNC:74458]        | 1.824404233 | 1.08E-25    | 1.27E-23    |
| ENSMMUG00000023477 |                                                                                                     | 1.670764705 | 8.14E-34    | 2.08E-31    |
| ENSMMUG00000052424 |                                                                                                     | 0.985499882 | 1.08E-06    | 9.71E-06    |
| ENSMMUG00000023300 | FERM domain containing 8 [Source:NCBI gene;Acc:716379]                                              | 1.592768052 | 4.83E-06    | 3.79E-05    |
| ENSMMUG00000023297 | solute carrier family 25 member 45 [Source:VGNC Symbol;Acc:VGNC:77576]                              | 1.444035389 | 0.000637665 | 0.002975871 |
| ENSMMUG00000056343 |                                                                                                     | 1.059269212 | 6.91E-05    | 0.000409852 |
| ENSMMUG00000012316 | CDC42 effector protein 2 [Source:VGNC Symbol;Acc:VGNC:70750]                                        | 2.390313098 | 0.000511707 | 0.002462552 |
| ENSMMUG00000022031 | DNA polymerase alpha 2, accessory subunit [Source:NCBI gene;Acc:716541]                             | 0.863200966 | 1.64E-06    | 1.41E-05    |
|                    |                                                                                                     | -           |             |             |
| ENSMMUG00000013475 | calpain 1 [Source:VGNC Symbol;Acc:VGNC:70529]                                                       | 0.719675735 | 8.11E-06    | 6.03E-05    |
| ENSMMUG00000018767 | cell division cycle associated 5 [Source:NCBI gene;Acc:721998]                                      | 2.531950971 | 0.00482959  | 0.017228334 |
| ENSMMUG00000006568 | basic leucine zipper ATF-like transcription factor 2 [Source:VGNC Symbol;Acc:VGNC:70127]            | 2.064180749 | 2.75E-18    | 1.47E-16    |
| ENSMMUG00000064306 | Metazoan signal recognition particle RNA [Source:RFAM;Acc:RF00017]                                  | 1.043826698 | 0.011034539 | 0.034780252 |
| ENSMMUG00000031163 | membrane anchored junction protein [Source:VGNC Symbol;Acc:VGNC:74375]                              | 1.730071292 | 2.40E-24    | 2.32E-22    |



|                     |                                                                                            |             |             |             |
|---------------------|--------------------------------------------------------------------------------------------|-------------|-------------|-------------|
| ENSMMUG00000003976  | glycoprotein hormone subunit alpha 2 [Source:VGNC Symbol;Acc:VGNC:72961]                   | 1.515646706 | 1.81E-12    | 4.52E-11    |
| ENSMMUG000000041101 | protein phosphatase 2 regulatory subunit B'beta [Source:NCBI gene;Acc:722026]              | 1.660037622 | 1.44E-23    | 1.30E-21    |
|                     |                                                                                            | -           |             |             |
| ENSMMUG00000003973  | autophagy related 2A [Source:VGNC Symbol;Acc:VGNC:70145]                                   | 1.220607833 | 5.05E-07    | 4.87E-06    |
| ENSMMUG00000003972  | EH domain containing 1 [Source:VGNC Symbol;Acc:VGNC:72175]                                 | 0.882224022 | 4.69E-09    | 6.72E-08    |
| ENSMMUG000000031160 | menin 1 [Source:NCBI gene;Acc:106995582]                                                   | 0.538996415 | 6.73E-09    | 9.32E-08    |
| ENSMMUG000000030597 | mitogen-activated protein kinase kinase kinase 2 [Source:VGNC Symbol;Acc:VGNC:81465]       | 0.644807379 | 2.59E-10    | 4.57E-09    |
| ENSMMUG00000007610  | ribosomal protein S6 kinase A4 [Source:VGNC Symbol;Acc:VGNC:76930]                         | 0.975062909 | 1.32E-08    | 1.73E-07    |
| ENSMMUG00000007603  | coiled-coil domain containing 88B [Source:NCBI gene;Acc:722080]                            | 1.00136901  | 3.38E-07    | 3.39E-06    |
| ENSMMUG00000013397  | peroxiredoxin 5 [Source:NCBI gene;Acc:719764]                                              | 0.980646359 | 3.43E-12    | 8.20E-11    |
| ENSMMUG000000060596 | BCL2 associated agonist of cell death [Source:NCBI gene;Acc:717740]                        | 1.041803353 | 2.17E-08    | 2.75E-07    |
|                     |                                                                                            | -           |             |             |
| ENSMMUG00000012948  | phospholipase C beta 3 [Source:VGNC Symbol;Acc:VGNC:76165]                                 | 0.541650004 | 0.001668561 | 0.006873744 |
| ENSMMUG00000012944  | vascular endothelial growth factor B [Source:VGNC Symbol;Acc:VGNC:78765]                   | 1.937519112 | 1.08E-28    | 1.68E-26    |
| ENSMMUG00000012941  | nudix hydrolase 22 [Source:VGNC Symbol;Acc:VGNC:75475]                                     | 2.007051541 | 1.30E-35    | 3.95E-33    |
| ENSMMUG00000012940  | tRNA phosphotransferase 1 [Source:VGNC Symbol;Acc:VGNC:79242]                              | 0.596083367 | 0.002280219 | 0.009004651 |
|                     |                                                                                            | -           |             |             |
| ENSMMUG00000012939  | fermitin family member 3 [Source:VGNC Symbol;Acc:VGNC:72553]                               | 0.396659008 | 0.016290936 | 0.048134057 |
|                     |                                                                                            | -           |             |             |
| ENSMMUG00000012953  | stress induced phosphoprotein 1 [Source:NCBI gene;Acc:717926]                              | 0.778661187 | 2.25E-06    | 1.88E-05    |
| ENSMMUG000000052569 |                                                                                            | 3.922159785 | 5.77E-18    | 2.91E-16    |
| ENSMMUG00000014131  | microtubule affinity regulating kinase 2 [Source:VGNC Symbol;Acc:VGNC:74634]               | 1.596778181 | 5.00E-06    | 3.91E-05    |
| ENSMMUG000000059969 |                                                                                            | 1.217270802 | 0.000117247 | 0.000659245 |
| ENSMMUG00000018152  | spindlin interactor and repressor of chromatin binding [Source:VGNC Symbol;Acc:VGNC:77987] | 0.522778819 | 0.002384249 | 0.009373233 |
| ENSMMUG00000005776  | atlastin GTPase 3 [Source:VGNC Symbol;Acc:VGNC:70125]                                      | 0.759396935 | 6.27E-05    | 0.000376266 |
| ENSMMUG00000005775  | phospholipase A and acyltransferase 3 [Source:VGNC Symbol;Acc:VGNC:76055]                  | 0.372830013 | 0.000156357 | 0.000857821 |
|                     |                                                                                            | -           |             |             |
| ENSMMUG000000056054 | zinc finger and BTB domain containing 3 [Source:NCBI gene;Acc:722240]                      | 1.228828156 | 4.19E-18    | 2.17E-16    |
|                     |                                                                                            | -           |             |             |
| ENSMMUG00000005761  | UBX domain protein 1 [Source:VGNC Symbol;Acc:VGNC:79135]                                   | 0.534732595 | 0.00896345  | 0.029197319 |
|                     |                                                                                            | -           |             |             |
| ENSMMUG00000013949  | chromosome 14 C11orf98 homolog [Source:NCBI gene;Acc:100429527]                            | 0.784575393 | 0.00664203  | 0.022557807 |
|                     |                                                                                            | -           |             |             |
| ENSMMUG00000006598  | eukaryotic translation elongation factor 1 gamma [Source:NCBI gene;Acc:722274]             | 0.210669867 | 0.008394387 | 0.027651983 |
|                     |                                                                                            | -           |             |             |
| ENSMMUG000000031123 | secretoglobin family 1A member 1 [Source:VGNC Symbol;Acc:VGNC:77004]                       | 0.593948929 | 5.69E-05    | 0.000345514 |
|                     |                                                                                            | -           |             |             |
| ENSMMUG000000049661 | Metazoan signal recognition particle RNA [Source:RFAM;Acc:RF00017]                         | 1.526400833 | 4.64E-10    | 7.80E-09    |
| ENSMMUG000000000327 | fatty acid desaturase 2 [Source:VGNC Symbol;Acc:VGNC:72472]                                | 1.46388448  | 1.24E-14    | 4.27E-13    |
| ENSMMUG00000013798  | fatty acid desaturase 1 [Source:VGNC Symbol;Acc:VGNC:72471]                                | 3.893024512 | 2.69E-36    | 8.98E-34    |
| ENSMMUG00000006655  | myelin regulatory factor [Source:VGNC Symbol;Acc:VGNC:74949]                               | 3.754325992 | 1.01E-12    | 2.61E-11    |
| ENSMMUG00000015280  | cleavage and polyadenylation specific factor 7 [Source:VGNC Symbol;Acc:VGNC:71606]         | 2.099368299 | 0.001266221 | 0.005416425 |
|                     |                                                                                            | -           |             |             |
| ENSMMUG000000022372 | cytochrome b561 family member A3 [Source:VGNC Symbol;Acc:VGNC:71458]                       | 1.664289448 | 4.05E-05    | 0.000254429 |
|                     |                                                                                            | -           |             |             |
| ENSMMUG000000042208 | pepsin A-4 [Source:NCBI gene;Acc:694646]                                                   | 1.357324089 | 4.77E-10    | 8.02E-09    |
|                     |                                                                                            | -           |             |             |
| ENSMMUG00000015018  | CD5 molecule [Source:VGNC Symbol;Acc:VGNC:70770]                                           | 1.599555738 | 0.000650974 | 0.003031751 |
|                     |                                                                                            | -           |             |             |
| ENSMMUG000000044417 | CD6 molecule [Source:NCBI gene;Acc:695183]                                                 | 1.855071764 | 0.002754744 | 0.010606746 |
| ENSMMUG00000014530  | pre-mRNA processing factor 19 [Source:VGNC Symbol;Acc:VGNC:76281]                          | 1.61824995  | 4.59E-11    | 9.14E-10    |
| ENSMMUG000000052454 | prostaglandin D2 receptor 2 [Source:NCBI gene;Acc:695853]                                  | -0.84269335 | 0.005892836 | 0.020323474 |
| ENSMMUG000000031100 | membrane-spanning 4-domains subfamily A member 4A-like [Source:NCBI gene;Acc:698152]       | 2.065255556 | 0.006091662 | 0.020921719 |

|                    |                                                                                       |             |             |             |
|--------------------|---------------------------------------------------------------------------------------|-------------|-------------|-------------|
| ENSMMUG0000004821  | membrane spanning 4-domains A14 [Source:NCBI gene;Acc:697083]                         | 5.042639851 | 2.38E-15    | 8.92E-14    |
| ENSMMUG00000020177 | membrane spanning 4-domains A4A [Source:NCBI gene;Acc:698027]                         | 2.223862285 | 2.43E-05    | 0.000161224 |
| ENSMMUG00000017287 | PAT1 homolog 1, processing body mRNA decay factor [Source:VGNC Symbol;Acc:VGNC:75684] | 1.769320238 | 2.18E-09    | 3.30E-08    |
| ENSMMUG00000001745 | oxysterol binding protein [Source:VGNC Symbol;Acc:VGNC:75718]                         | 1.015128033 | 2.64E-08    | 3.28E-07    |
| ENSMMUG00000060712 |                                                                                       | 0.851178997 | 1.99E-08    | 2.54E-07    |
| ENSMMUG00000045775 | macrophage expressed 1 [Source:NCBI gene;Acc:700274]                                  | 2.771332645 | 0.000929808 | 0.004130093 |
| ENSMMUG00000064798 |                                                                                       | 1.747466509 | 0.006206568 | 0.021248705 |
| ENSMMUG00000001083 | glycine N-acyltransferase-like protein 1 [Source:NCBI gene;Acc:701437]                | 0.537938339 | 0.000142564 | 0.000788629 |
| ENSMMUG00000011713 | leupaxin [Source:VGNC Symbol;Acc:VGNC:74286]                                          | -0.41179325 | 0.000286334 | 0.001474032 |
| ENSMMUG00000054737 |                                                                                       | 0.659134442 | 3.81E-08    | 4.60E-07    |
| ENSMMUG00000059848 | olfactory receptor 5B2 [Source:NCBI gene;Acc:100429465]                               | 0.646217403 | 0.00787604  | 0.02617197  |
| ENSMMUG00000050844 | BTB domain containing 18 [Source:NCBI gene;Acc:703264]                                | 1.311804208 | 0.004972653 | 0.017644612 |
| ENSMMUG00000056184 |                                                                                       | 2.97727657  | 1.15E-08    | 1.53E-07    |
| ENSMMUG00000002566 | selenoprotein H [Source:VGNC Symbol;Acc:VGNC:82234]                                   | 2.064804631 | 0.004440747 | 0.016024858 |
| ENSMMUG00000040741 | thioredoxin related transmembrane protein 2 [Source:NCBI gene;Acc:100169970]          | 1.300154106 | 1.41E-06    | 1.23E-05    |
| ENSMMUG00000002563 | zinc finger DHHC-type palmitoyltransferase 5 [Source:VGNC Symbol;Acc:VGNC:79145]      | 1.683543578 | 0.000822641 | 0.00372968  |
| ENSMMUG00000058453 | cleavage factor polyribonucleotide kinase subunit 1 [Source:NCBI gene;Acc:705071]     | 0.624677016 | 0.008704247 | 0.028518611 |
| ENSMMUG00000010601 | solute carrier family 43 member 3 [Source:NCBI gene;Acc:706267]                       | 1.462791506 | 1.57E-06    | 1.35E-05    |
| ENSMMUG00000017810 | structure specific recognition protein 1 [Source:VGNC Symbol;Acc:VGNC:77891]          | 1.097196973 | 2.58E-06    | 2.14E-05    |
| ENSMMUG00000010627 | apelin receptor [Source:VGNC Symbol;Acc:VGNC:69939]                                   | 0.946411703 | 5.00E-06    | 3.91E-05    |
| ENSMMUG00000010869 | nucleoporin 160 [Source:VGNC Symbol;Acc:VGNC:75429]                                   | 0.896591077 | 0.01170805  | 0.036525468 |
| ENSMMUG00000040099 | Y RNA [Source:RFAM;Acc:RF00019]                                                       | 1.660372313 | 0.000707754 | 0.003262603 |
| ENSMMUG00000058885 | formin binding protein 4 [Source:NCBI gene;Acc:712633]                                | 1.141716221 | 3.44E-08    | 4.20E-07    |
| ENSMMUG00000012881 | ATP/GTP binding protein like 2 [Source:NCBI gene;Acc:711126]                          | 2.360891631 | 0.007857504 | 0.026116562 |
| ENSMMUG00000043682 | mitochondrial carrier 2 [Source:NCBI gene;Acc:712767]                                 | 4.770978691 | 2.89E-08    | 3.57E-07    |
| ENSMMUG00000011657 | CUGBP Elav-like family member 1 [Source:VGNC Symbol;Acc:VGNC:71098]                   | -0.50622778 | 7.71E-05    | 0.000452354 |
| ENSMMUG00000015607 | solute carrier family 39 member 13 [Source:VGNC Symbol;Acc:VGNC:77538]                | 0.842989358 | 0.008678259 | 0.028453408 |
| ENSMMUG00000015606 | Spi-1 proto-oncogene [Source:NCBI gene;Acc:712010]                                    | 0.786370271 | 0.014600261 | 0.043992148 |
| ENSMMUG00000062208 | Metazoan signal recognition particle RNA [Source:RFAM;Acc:RF00017]                    | 1.065395965 | 0.004122114 | 0.015029746 |
| ENSMMUG00000015604 | myosin binding protein C3 [Source:VGNC Symbol;Acc:VGNC:75094]                         | 0.943893271 | 6.40E-07    | 6.05E-06    |
| ENSMMUG00000022964 |                                                                                       | 0.256262276 | 0.002260681 | 0.00894765  |
| ENSMMUG00000060750 | Metazoan signal recognition particle RNA [Source:RFAM;Acc:RF00017]                    | 1.984784258 | 0.00304239  | 0.011536895 |
| ENSMMUG00000003631 | cytoskeleton associated protein 5 [Source:VGNC Symbol;Acc:VGNC:71368]                 | 1.263428323 | 0.001410657 | 0.00594579  |
| ENSMMUG00000021446 | diacylglycerol kinase zeta [Source:VGNC Symbol;Acc:VGNC:71789]                        | 0.889471982 | 2.89E-11    | 5.95E-10    |
| ENSMMUG00000002452 | solute carrier family 35 member C1 [Source:VGNC Symbol;Acc:VGNC:77524]                | 0.975774787 | 2.70E-07    | 2.76E-06    |
| ENSMMUG00000049305 | Metazoan signal recognition particle RNA [Source:RFAM;Acc:RF00017]                    | 1.105946547 | 0.000398989 | 0.001971466 |
| ENSMMUG00000047219 |                                                                                       | 1.011068884 | 1.03E-07    | 1.15E-06    |
| ENSMMUG00000000874 | carbohydrate sulfotransferase 1 [Source:VGNC Symbol;Acc:VGNC:71055]                   | 0.752512913 | 0.000203915 | 0.001089997 |
| ENSMMUG00000050952 |                                                                                       | 1.214359451 | 0.000371277 | 0.001842329 |

|                    |                                                                                                       |             |             |             |
|--------------------|-------------------------------------------------------------------------------------------------------|-------------|-------------|-------------|
| ENSMMUG00000059728 | tumor protein p53 inducible protein 11 [Source:NCBI gene;Acc:715295]                                  | 1.239741646 | 0.00532208  | 0.018657883 |
| ENSMMUG00000049355 | ALX homeobox 4 [Source:NCBI gene;Acc:715652]                                                          | 1.521159473 | 0.001477839 | 0.006180655 |
| ENSMMUG00000008827 | apoptosis inhibitor 5 [Source:NCBI gene;Acc:716346]                                                   | 0.827190921 | 0.00524319  | 0.018432001 |
| ENSMMUG00000049945 |                                                                                                       | 0.558428364 | 0.002705664 | 0.010446456 |
| ENSMMUG00000053160 |                                                                                                       | 0.329091979 | 0.002077484 | 0.008333111 |
| ENSMMUG00000051583 |                                                                                                       | 0.863949622 | 0.004050126 | 0.014790345 |
| ENSMMUG00000054427 | Metazoan signal recognition particle RNA [Source:RFAM;Acc:RF00017]                                    | 0.972812564 | 0.015544025 | 0.04633798  |
| ENSMMUG00000004332 | tripartite motif containing 44 [Source:VGNC Symbol;Acc:VGNC:79168]                                    | 2.754312363 | 9.50E-16    | 3.74E-14    |
| ENSMMUG00000004330 | peptidase domain containing associated with muscle regeneration 1 [Source:VGNC Symbol;Acc:VGNC:75673] | 3.218207661 | 8.09E-07    | 7.47E-06    |
| ENSMMUG00000004329 | solute carrier family 1 member 2 [Source:VGNC Symbol;Acc:VGNC:77410]                                  | 0.808434957 | 4.38E-05    | 0.000272648 |
| ENSMMUG00000004327 | CD44 molecule (Indian blood group) [Source:NCBI gene;Acc:717204]                                      | -0.78099319 | 0.008797192 | 0.028755951 |
| ENSMMUG00000002432 | E74 like ETS transcription factor 5 [Source:VGNC Symbol;Acc:VGNC:72209]                               | 0.585403834 | 0.013702361 | 0.041740146 |
| ENSMMUG00000002429 | catalase [Source:VGNC Symbol;Acc:VGNC:70552]                                                          | 0.512704951 | 0.00016405  | 0.000894427 |
| ENSMMUG00000017218 | KIAA1549 like [Source:VGNC Symbol;Acc:VGNC:73902]                                                     | 0.710890047 | 6.33E-05    | 0.000379522 |
| ENSMMUG00000001536 | glutamine and serine rich 1 [Source:VGNC Symbol;Acc:VGNC:76544]                                       | 0.987169443 | 9.11E-12    | 2.06E-10    |
| ENSMMUG00000055352 |                                                                                                       | 1.175750923 | 4.85E-14    | 1.55E-12    |
| ENSMMUG00000049850 | proline rich and Gla domain 4 [Source:NCBI gene;Acc:694707]                                           | 1.043117923 | 1.39E-11    | 3.03E-10    |
| ENSMMUG00000065337 |                                                                                                       | -0.6477491  | 5.01E-06    | 3.92E-05    |
| ENSMMUG00000050093 |                                                                                                       | 0.554932239 | 0.001895802 | 0.007696823 |
| ENSMMUG00000006842 | doublecortin domain containing 1 [Source:NCBI gene;Acc:696721]                                        | -0.93838143 | 8.81E-08    | 9.98E-07    |
| ENSMMUG00000023119 | lin-7 homolog C, crumbs cell polarity complex component [Source:VGNC Symbol;Acc:VGNC:74070]           | 1.233975051 | 0.011044393 | 0.034803487 |
| ENSMMUG00000031024 | lactate dehydrogenase A [Source:NCBI gene;Acc:694309]                                                 | 0.76860493  | 0.000360133 | 0.001793377 |
| ENSMMUG00000006403 | potassium voltage-gated channel subfamily C member 1 [Source:VGNC Symbol;Acc:VGNC:73971]              | 0.449016967 | 0.002647219 | 0.010254685 |
| ENSMMUG00000005895 | nucleobindin 2 [Source:VGNC Symbol;Acc:VGNC:75549]                                                    | 1.410712711 | 1.33E-06    | 1.16E-05    |
| ENSMMUG00000056603 |                                                                                                       | 1.154460637 | 0.013526533 | 0.041307181 |
| ENSMMUG00000064558 |                                                                                                       | 1.133450504 | 9.63E-05    | 0.000551214 |
| ENSMMUG00000017628 | pleckstrin homology domain containing A7 [Source:VGNC Symbol;Acc:VGNC:76121]                          | 2.602649698 | 5.33E-05    | 0.000325617 |
| ENSMMUG00000055212 |                                                                                                       | 3.134015997 | 0.001104292 | 0.004807664 |
| ENSMMUG00000054213 | parathyroid hormone [Source:NCBI gene;Acc:700195]                                                     | 1.103057908 | 0.011683004 | 0.036494251 |
| ENSMMUG00000009695 | BTB domain containing 10 [Source:VGNC Symbol;Acc:VGNC:70361]                                          | 0.959636172 | 7.66E-05    | 0.000449676 |
| ENSMMUG00000010875 | TEA domain transcription factor 1 [Source:VGNC Symbol;Acc:VGNC:78301]                                 | 0.328035159 | 0.008812904 | 0.028781704 |
| ENSMMUG00000020956 | parvin alpha [Source:VGNC Symbol;Acc:VGNC:75605]                                                      | 0.711776791 | 0.000638619 | 0.00297916  |
| ENSMMUG00000043504 |                                                                                                       | 1.006694778 | 9.39E-10    | 1.50E-08    |
| ENSMMUG00000009205 | SET binding factor 2 [Source:VGNC Symbol;Acc:VGNC:77075]                                              | 0.392063936 | 0.01070227  | 0.03386235  |
| ENSMMUG00000008758 | zinc finger protein 143 [Source:VGNC Symbol;Acc:VGNC:81612]                                           | 1.606556334 | 6.84E-06    | 5.18E-05    |
| ENSMMUG00000023636 | importin 7 [Source:NCBI gene;Acc:704213]                                                              | 1.47773316  | 3.22E-09    | 4.72E-08    |

|                    |                                                                                                     |             |             |             |
|--------------------|-----------------------------------------------------------------------------------------------------|-------------|-------------|-------------|
| ENSMMUG0000005639  | transmembrane protein 41B [Source:VGNC Symbol;Acc:VGNC:79754]                                       | 0.955112037 | 0.002695413 | 0.010409743 |
| ENSMMUG00000021142 | DENN domain containing 5A [Source:VGNC Symbol;Acc:VGNC:71674]                                       | 0.537194437 | 0.016330378 | 0.048210713 |
| ENSMMUG00000006692 | signal peptide, CUB domain and EGF like domain containing 2 [Source:VGNC Symbol;Acc:VGNC:77138]     | 1.278950339 | 4.26E-11    | 8.54E-10    |
| ENSMMUG00000006689 | nuclear receptor interacting protein 3 [Source:VGNC Symbol;Acc:VGNC:75397]                          | 1.291426954 | 1.28E-05    | 9.09E-05    |
| ENSMMUG00000038288 | TMEM9 domain family member B [Source:NCBI gene;Acc:708447]                                          | 1.271153397 | 1.30E-13    | 3.78E-12    |
| ENSMMUG00000051468 | Metazoan signal recognition particle RNA [Source:RFAM;Acc:RF00017]                                  | 1.192844125 | 2.15E-11    | 4.56E-10    |
| ENSMMUG00000001997 | achaete-scute family bHLH transcription factor 3 [Source:VGNC Symbol;Acc:VGNC:70031]                | 0.995372048 | 0.00681989  | 0.023044655 |
| ENSMMUG00000001995 | chromosome 14 C11orf16 homolog [Source:NCBI gene;Acc:705319]                                        | 1.112094414 | 4.56E-06    | 3.60E-05    |
| ENSMMUG00000021827 | tripartite motif containing 66 [Source:VGNC Symbol;Acc:VGNC:79766]                                  | 0.370634162 | 0.006398993 | 0.021827554 |
| ENSMMUG00000018471 | serine/threonine kinase 33 [Source:VGNC Symbol;Acc:VGNC:78118]                                      | 1.543465413 | 0.000281081 | 0.001450181 |
| ENSMMUG00000015016 | RIC3 acetylcholine receptor chaperone [Source:VGNC Symbol;Acc:VGNC:76872]                           | 0.642606627 | 0.006047617 | 0.020801013 |
| ENSMMUG00000035632 | U6 spliceosomal RNA [Source:RFAM;Acc:RF00026]                                                       | 0.837306735 | 0.000861913 | 0.003873913 |
| ENSMMUG00000049802 | olfactory receptor 51G1 [Source:NCBI gene;Acc:716561]                                               | 1.139134857 | 5.21E-05    | 0.000319169 |
| ENSMMUG00000022682 | tripartite motif containing 68 [Source:NCBI gene;Acc:717644]                                        | 0.423091802 | 0.000200904 | 0.001074888 |
| ENSMMUG00000063820 | olfactory receptor, family 52, subfamily M, member 1 [Source:NCBI gene;Acc:717723]                  | 2.771120871 | 0.010859227 | 0.034281618 |
| ENSMMUG00000004974 | tripartite motif containing 21 [Source:VGNC Symbol;Acc:VGNC:78556]                                  | 0.708885669 | 0.01258204  | 0.038786095 |
| ENSMMUG00000003955 | post-GPI attachment to proteins 2 [Source:VGNC Symbol;Acc:VGNC:75823]                               | 1.55540674  | 1.31E-24    | 1.33E-22    |
| ENSMMUG00000003950 | nucleoporin 98 and 96 precursor [Source:VGNC Symbol;Acc:VGNC:75563]                                 | 1.432039785 | 1.42E-27    | 2.01E-25    |
| ENSMMUG00000003949 | cholinergic receptor nicotinic alpha 10 subunit [Source:NCBI gene;Acc:718133]                       | 0.670905575 | 0.002823415 | 0.010841388 |
| ENSMMUG00000003948 | ADP-ribosyltransferase 1 [Source:VGNC Symbol;Acc:VGNC:70024]                                        | 1.379147828 | 0.0020771   | 0.008333111 |
| ENSMMUG00000003946 | ADP-ribosyltransferase 5 [Source:VGNC Symbol;Acc:VGNC:69890]                                        | -1.59359656 | 0.000660401 | 0.003069542 |
| ENSMMUG00000007325 | Xrcc1 N-terminal domain containing 1 [Source:NCBI gene;Acc:115945140]                               | 1.925654194 | 1.13E-09    | 1.78E-08    |
| ENSMMUG00000059115 |                                                                                                     | 1.739381446 | 3.83E-06    | 3.08E-05    |
| ENSMMUG00000007326 | ring finger protein 121 [Source:VGNC Symbol;Acc:VGNC:76788]                                         | 1.670578214 | 1.17E-09    | 1.84E-08    |
| ENSMMUG00000007330 | nuclear mitotic apparatus protein 1 [Source:VGNC Symbol;Acc:VGNC:75556]                             | 1.876979342 | 2.22E-25    | 2.45E-23    |
| ENSMMUG00000021280 | leucine rich transmembrane and O-methyltransferase domain containing [Source:NCBI gene;Acc:718286]  | 1.589982197 | 2.11E-10    | 3.78E-09    |
| ENSMMUG00000021282 | late endosomal/lysosomal adaptor, MAPK and MTOR activator 1 [Source:VGNC Symbol;Acc:VGNC:74129]     | 1.628300133 | 7.14E-10    | 1.17E-08    |
| ENSMMUG00000010453 | folate receptor beta [Source:VGNC Symbol;Acc:VGNC:72690]                                            | 1.772026588 | 7.45E-17    | 3.35E-15    |
| ENSMMUG00000010451 | inositol polyphosphate phosphatase like 1 [Source:VGNC Symbol;Acc:VGNC:73752]                       | 2.136139332 | 4.34E-05    | 0.000270761 |
| ENSMMUG00000005423 | caseinolytic mitochondrial matrix peptidase chaperone subunit B [Source:VGNC Symbol;Acc:VGNC:71375] | 0.602034881 | 0.006407579 | 0.021850512 |
| ENSMMUG00000015054 | ArfGAP with RhoGAP domain, ankyrin repeat and PH domain 1 [Source:VGNC Symbol;Acc:VGNC:69844]       | 0.453985676 | 0.006266367 | 0.021437733 |
| ENSMMUG00000001294 | FCH and double SH3 domains 2 [Source:VGNC Symbol;Acc:VGNC:72593]                                    | 1.151050858 | 7.92E-05    | 0.000463192 |
| ENSMMUG00000004791 | pleckstrin homology domain containing B1 [Source:VGNC Symbol;Acc:VGNC:76069]                        | 1.052764881 | 0.001375688 | 0.005814125 |
| ENSMMUG00000030964 | RAB6A, member RAS oncogene family [Source:NCBI gene;Acc:718717]                                     | 1.264702738 | 1.13E-24    | 1.17E-22    |
| ENSMMUG00000010321 | C2 domain containing 3 centriole elongation regulator [Source:VGNC Symbol;Acc:VGNC:70375]           | 1.007459434 | 5.58E-09    | 7.85E-08    |

|                    |                                                                                                 |             |             |             |
|--------------------|-------------------------------------------------------------------------------------------------|-------------|-------------|-------------|
| ENSMMUG00000017402 | phosphoglucosyltransferase 2 like 1 [Source:VGNC Symbol;Acc:VGNC:75839]                         | 0.909770986 | 2.24E-06    | 1.87E-05    |
| ENSMMUG00000056316 |                                                                                                 | 0.645491213 | 0.001125585 | 0.004883686 |
| ENSMMUG00000013094 | lipoyl(octanoyl) transferase 2 [Source:NCBI gene;Acc:718425]                                    | -1.09677607 | 1.61E-13    | 4.63E-12    |
| ENSMMUG00000013093 | uncharacterized LOC106993385 [Source:NCBI gene;Acc:106993385]                                   | 1.166156696 | 9.52E-17    | 4.22E-15    |
| ENSMMUG00000021039 | X-ray radiation resistance associated 1 [Source:NCBI gene;Acc:693788]                           | 2.178520329 | 7.69E-17    | 3.42E-15    |
| ENSMMUG00000064190 |                                                                                                 | 0.820288362 | 0.009317999 | 0.030149122 |
| ENSMMUG00000009126 | solute carrier organic anion transporter family member 2B1 [Source:VGNC Symbol;Acc:VGNC:77603]  | -0.74991242 | 4.47E-05    | 0.000277545 |
| ENSMMUG00000058539 |                                                                                                 | 0.851715525 | 0.005218331 | 0.018353813 |
| ENSMMUG00000047594 |                                                                                                 | 0.965153978 | 3.40E-07    | 3.41E-06    |
| ENSMMUG00000017529 | arrestin beta 1 [Source:VGNC Symbol;Acc:VGNC:70021]                                             | 0.663407053 | 0.000881978 | 0.003953956 |
| ENSMMUG00000000187 | UV radiation resistance associated [Source:VGNC Symbol;Acc:VGNC:78751]                          | 0.642666103 | 0.007990866 | 0.026497023 |
| ENSMMUG00000022401 | EMSY transcriptional repressor, BRCA2 interacting [Source:VGNC Symbol;Acc:VGNC:72065]           | 2.323911619 | 6.13E-25    | 6.52E-23    |
| ENSMMUG00000062043 |                                                                                                 | 1.906311476 | 0.002257316 | 0.008936856 |
| ENSMMUG00000050318 | UDP-GlcNAc:betaGal beta-1,3-N-acetylglucosaminyltransferase 6 [Source:NCBI gene;Acc:697946]     | 0.474614839 | 0.003518321 | 0.013059138 |
| ENSMMUG00000018188 | glycerophosphodiester phosphodiesterase domain containing 4 [Source:VGNC Symbol;Acc:VGNC:72777] | 0.833195108 | 0.011967335 | 0.037210187 |
| ENSMMUG00000001387 | p21 (RAC1) activated kinase 1 [Source:NCBI gene;Acc:698585]                                     | 1.803334695 | 1.91E-23    | 1.68E-21    |
| ENSMMUG00000018945 | chloride nucleotide-sensitive channel 1A [Source:VGNC Symbol;Acc:VGNC:71261]                    | 0.941483233 | 0.004285873 | 0.015570154 |
| ENSMMUG00000017355 | remodeling and spacing factor 1 [Source:VGNC Symbol;Acc:VGNC:77044]                             | 0.984054689 | 2.10E-05    | 0.000141564 |
| ENSMMUG00000051202 |                                                                                                 | 1.792640731 | 0.013427394 | 0.041049128 |
| ENSMMUG00000060971 |                                                                                                 | 0.842716115 | 0.002269133 | 0.008970977 |
| ENSMMUG00000051769 |                                                                                                 | 0.802885042 | 0.000224257 | 0.001188946 |
| ENSMMUG00000050245 |                                                                                                 | 1.920458087 | 1.07E-05    | 7.72E-05    |
| ENSMMUG00000050119 |                                                                                                 | 0.684109587 | 1.24E-06    | 1.10E-05    |
| ENSMMUG00000016540 | transmembrane protein 126B [Source:VGNC Symbol;Acc:VGNC:79893]                                  | 0.516147881 | 0.001329925 | 0.005645537 |
| ENSMMUG00000016543 | CREB/ATF bZIP transcription factor [Source:VGNC Symbol;Acc:VGNC:71538]                          | 0.884996667 | 0.001236677 | 0.005311462 |
| ENSMMUG00000012449 | synaptotagmin like 2 [Source:VGNC Symbol;Acc:VGNC:78123]                                        | 1.520363554 | 2.70E-05    | 0.000176422 |
| ENSMMUG00000013045 | coiled-coil domain containing 81 [Source:VGNC Symbol;Acc:VGNC:70868]                            | 0.892083284 | 0.007512114 | 0.025111413 |
| ENSMMUG00000013055 | malic enzyme 3 [Source:VGNC Symbol;Acc:VGNC:74695]                                              | 0.932152009 | 0.000628722 | 0.002946714 |
| ENSMMUG00000011116 | NADPH oxidase 4 [Source:VGNC Symbol;Acc:VGNC:75376]                                             | 1.360487318 | 9.96E-09    | 1.33E-07    |
| ENSMMUG00000060452 | FAT atypical cadherin 3 [Source:NCBI gene;Acc:695935]                                           | 0.601685405 | 0.011922745 | 0.037087989 |
| ENSMMUG00000057627 |                                                                                                 | 1.029580328 | 0.000220612 | 0.001170948 |
| ENSMMUG00000013601 | chromosome 14 C11orf54 homolog [Source:NCBI gene;Acc:696483]                                    | 0.910360142 | 1.18E-07    | 1.30E-06    |
| ENSMMUG00000061600 | V-set and transmembrane domain containing 5 [Source:NCBI gene;Acc:697779]                       | 0.883270019 | 0.001548186 | 0.006423138 |

|                    |                                                                                           |   |             |             |             |
|--------------------|-------------------------------------------------------------------------------------------|---|-------------|-------------|-------------|
| ENSMMUG0000004112  | MRE11 homolog, double strand break repair nuclease [Source:VGNC Symbol;Acc:VGNC:74926]    | - | 0.384699645 | 0.006996361 | 0.023601148 |
| ENSMMUG00000061391 | ankyrin repeat domain 49 [Source:NCBI gene;Acc:697693]                                    | - | 1.260770939 | 7.30E-05    | 0.000430116 |
| ENSMMUG00000062781 | chromosome 14 C11orf97 homolog [Source:NCBI gene;Acc:106993442]                           | - | 2.291297521 | 7.55E-40    | 3.42E-37    |
| ENSMMUG00000008965 | piwi like RNA-mediated gene silencing 4 [Source:VGNC Symbol;Acc:VGNC:81504]               | - | 1.199235001 | 1.19E-16    | 5.21E-15    |
| ENSMMUG00000009394 | sestrin 3 [Source:VGNC Symbol;Acc:VGNC:77291]                                             | - | -0.67188894 | 6.26E-05    | 0.000376045 |
| ENSMMUG00000061815 |                                                                                           | - | 0.657864748 | 8.65E-05    | 0.000500896 |
| ENSMMUG00000016737 | contactin 5 [Source:VGNC Symbol;Acc:VGNC:71287]                                           | - | 3.733798006 | 6.84E-06    | 5.18E-05    |
| ENSMMUG00000020784 | centrosomal protein 126 [Source:NCBI gene;Acc:701911]                                     | - | 1.331457274 | 2.51E-17    | 1.19E-15    |
| ENSMMUG00000003394 | cilia and flagella associated protein 300 [Source:VGNC Symbol;Acc:VGNC:71120]             | - | 1.495160395 | 3.71E-19    | 2.11E-17    |
| ENSMMUG00000050759 | Metazoan signal recognition particle RNA [Source:RFAM;Acc:RF00017]                        | - | 1.585347613 | 0.004450112 | 0.016049173 |
| ENSMMUG00000057934 |                                                                                           | - | 2.031744583 | 3.40E-13    | 9.34E-12    |
| ENSMMUG00000052526 | RAB39A, member RAS oncogene family [Source:NCBI gene;Acc:707451]                          | - | 1.556435743 | 1.02E-32    | 2.43E-30    |
| ENSMMUG00000001800 | cullin 5 [Source:VGNC Symbol;Acc:VGNC:71570]                                              | - | 1.029406365 | 0.000623878 | 0.002929887 |
| ENSMMUG00000004157 | nuclear protein, coactivator of histone transcription [Source:VGNC Symbol;Acc:VGNC:75379] | - | 1.872085949 | 1.44E-14    | 4.93E-13    |
| ENSMMUG00000004153 | ATM serine/threonine kinase [Source:VGNC Symbol;Acc:VGNC:70173]                           | - | 1.343123643 | 0.00118568  | 0.005115937 |
| ENSMMUG00000000797 | exophilin 5 [Source:VGNC Symbol;Acc:VGNC:72412]                                           | - | 1.140357237 | 9.11E-07    | 8.30E-06    |
| ENSMMUG00000052460 |                                                                                           | - | 1.110501337 | 0.002952358 | 0.011256366 |
| ENSMMUG00000062793 |                                                                                           | - | 4.006269676 | 2.84E-10    | 4.98E-09    |
| ENSMMUG00000021438 | BTG anti-proliferation factor 4 [Source:VGNC Symbol;Acc:VGNC:70305]                       | - | 0.618140052 | 9.80E-05    | 0.000560434 |
| ENSMMUG00000030914 | salt inducible kinase 2 [Source:VGNC Symbol;Acc:VGNC:82237]                               | - | 0.925476766 | 0.007342044 | 0.024636872 |
| ENSMMUG00000014001 | protein phosphatase 2 scaffold subunit Abeta [Source:VGNC Symbol;Acc:VGNC:76375]          | - | 0.953846683 | 0.000799792 | 0.003648496 |
| ENSMMUG00000014334 | dopamine receptor D2 [Source:VGNC Symbol;Acc:VGNC:71989]                                  | - | 1.387485801 | 0.000265074 | 0.001381211 |
| ENSMMUG00000050683 |                                                                                           | - | 2.864097625 | 0.00906119  | 0.029454118 |
| ENSMMUG00000051510 |                                                                                           | - | 0.629434256 | 4.05E-08    | 4.86E-07    |
| ENSMMUG00000020002 | BUD13 homolog [Source:VGNC Symbol;Acc:VGNC:82112]                                         | - | 0.743885481 | 0.010343395 | 0.032890118 |
| ENSMMUG00000057425 | apolipoprotein A5 [Source:NCBI gene;Acc:696484]                                           | - | 1.232574911 | 0.01580759  | 0.047023723 |
| ENSMMUG00000060987 |                                                                                           | - | 0.694129509 | 2.02E-06    | 1.70E-05    |
| ENSMMUG00000016128 | SIK family kinase 3 [Source:VGNC Symbol;Acc:VGNC:77330]                                   | - | 0.67230773  | 4.12E-08    | 4.94E-07    |
| ENSMMUG00000002053 | SID1 transmembrane family member 2 [Source:VGNC Symbol;Acc:VGNC:77300]                    | - | 0.609343031 | 0.004171375 | 0.01518961  |
| ENSMMUG00000007785 | beta-secretase 1 [Source:VGNC Symbol;Acc:VGNC:70215]                                      | - | 3.325954439 | 0.003384139 | 0.012621218 |
| ENSMMUG00000007794 | DS cell adhesion molecule like 1 [Source:NCBI gene;Acc:698212]                            | - | 0.429630486 | 0.00257905  | 0.010040536 |
| ENSMMUG00000059436 | interleukin 10 receptor subunit alpha [Source:NCBI gene;Acc:704383]                       | - | 1.493330486 | 1.30E-14    | 4.46E-13    |
| ENSMMUG00000007620 | transmembrane serine protease 4 [Source:VGNC Symbol;Acc:VGNC:78577]                       | - | -1.38588516 | 2.62E-06    | 2.17E-05    |
| ENSMMUG00000063655 | sodium voltage-gated channel beta subunit 4 [Source:NCBI gene;Acc:100430940]              | - | 0.921518937 | 1.12E-05    | 8.02E-05    |

|                    |                                                                                                |             |             |             |
|--------------------|------------------------------------------------------------------------------------------------|-------------|-------------|-------------|
| ENSMMUG00000061384 | sodium voltage-gated channel beta subunit 2 [Source:NCBI gene;Acc:678698]                      | 0.446769918 | 1.67E-05    | 0.000114839 |
| ENSMMUG00000006268 | junction adhesion molecule like [Source:VGNC Symbol;Acc:VGNC:73860]                            | 0.540191041 | 4.31E-05    | 0.000269535 |
| ENSMMUG00000017593 | CD3e molecule [Source:VGNC Symbol;Acc:VGNC:70764]                                              | 0.977657013 | 7.75E-11    | 1.51E-09    |
| ENSMMUG00000065091 | myelin protein zero like 2 [Source:NCBI gene;Acc:699330]                                       | 0.627283321 | 1.17E-08    | 1.55E-07    |
| ENSMMUG00000005482 | lysine methyltransferase 2A [Source:NCBI gene;Acc:705511]                                      | 1.942035299 | 5.71E-08    | 6.67E-07    |
| ENSMMUG00000046655 | pleckstrin homology like domain family B member 1 [Source:NCBI gene;Acc:706336]                | 3.847464871 | 1.13E-21    | 8.22E-20    |
| ENSMMUG00000002549 | trehalase [Source:NCBI gene;Acc:706449]                                                        | 3.488452139 | 4.45E-42    | 2.15E-39    |
| ENSMMUG00000009318 | BCL9 like [Source:VGNC Symbol;Acc:VGNC:70113]                                                  | 0.922104788 | 4.20E-09    | 6.08E-08    |
| ENSMMUG00000005982 | coiled-coil domain containing 84 [Source:NCBI gene;Acc:707400]                                 | 0.815356041 | 0.000236702 | 0.001246909 |
| ENSMMUG00000056381 | forkhead box R1 [Source:NCBI gene;Acc:707285]                                                  | 2.6197664   | 3.04E-12    | 7.33E-11    |
| ENSMMUG00000016894 | ribosomal protein S25 [Source:NCBI gene;Acc:702593]                                            | 1.583982951 | 0.001330161 | 0.005645537 |
| ENSMMUG00000016946 | trafficking protein particle complex 4 [Source:VGNC Symbol;Acc:VGNC:79211]                     | 1.036230975 | 0.000720411 | 0.003313324 |
| ENSMMUG00000016890 | solute carrier family 37 member 4 [Source:VGNC Symbol;Acc:VGNC:77591]                          | 1.022653408 | 1.24E-11    | 2.73E-10    |
| ENSMMUG00000030891 | hypoxia up-regulated 1 [Source:VGNC Symbol;Acc:VGNC:73399]                                     | 0.913278716 | 7.66E-10    | 1.25E-08    |
| ENSMMUG00000014864 | VPS11 core subunit of CORVET and HOPS complexes [Source:VGNC Symbol;Acc:VGNC:78965]            | 0.658917809 | 8.21E-05    | 0.000478505 |
| ENSMMUG00000059341 | Metazoan signal recognition particle RNA [Source:RFAM;Acc:RF00017]                             | 1.075345578 | 1.31E-10    | 2.45E-09    |
| ENSMMUG00000014866 | hydroxymethylbilane synthase [Source:VGNC Symbol;Acc:VGNC:73479]                               | 0.754783715 | 0.011687052 | 0.036494251 |
| ENSMMUG00000044496 | H2A histone family, member X [Source:NCBI gene;Acc:703073]                                     | 0.7924687   | 0.002827031 | 0.010849332 |
| ENSMMUG00000014872 | dolichyl-phosphate N-acetylglucosaminophosphotransferase 1 [Source:VGNC Symbol;Acc:VGNC:71971] | 1.263387266 | 3.69E-18    | 1.95E-16    |
| ENSMMUG00000013799 | ATP binding cassette subfamily G member 4 [Source:VGNC Symbol;Acc:VGNC:69390]                  | 3.924464658 | 1.02E-09    | 1.63E-08    |
| ENSMMUG00000012191 | coiled-coil domain containing 153 [Source:NCBI gene;Acc:704216]                                | 1.424744289 | 0.008592189 | 0.028230617 |
| ENSMMUG00000008923 | Thy-1 cell surface antigen [Source:VGNC Symbol;Acc:VGNC:78352]                                 | 2.618971572 | 5.68E-10    | 9.42E-09    |
| ENSMMUG00000064895 |                                                                                                | 2.180609325 | 0.000701688 | 0.003239962 |
| ENSMMUG00000022347 | glutamate ionotropic receptor kainate type subunit 4 [Source:VGNC Symbol;Acc:VGNC:73279]       | 1.320919548 | 0.002171454 | 0.008662959 |
| ENSMMUG00000039397 | tubulin folding cofactor E like [Source:NCBI gene;Acc:706506]                                  | 1.014037265 | 3.66E-06    | 2.95E-05    |
| ENSMMUG00000053625 | sterol-C5-desaturase [Source:NCBI gene;Acc:706827]                                             | 1.03685161  | 3.68E-09    | 5.36E-08    |
| ENSMMUG00000014880 | sortilin related receptor 1 [Source:NCBI gene;Acc:713011]                                      | 0.787021639 | 1.52E-06    | 1.32E-05    |
| ENSMMUG00000015522 | GRAM domain containing 1B [Source:VGNC Symbol;Acc:VGNC:73028]                                  | 1.256914285 | 3.14E-09    | 4.61E-08    |
| ENSMMUG00000061604 |                                                                                                | 2.184927483 | 0.012612129 | 0.038844692 |
| ENSMMUG00000008474 | transforming growth factor beta regulator 1 [Source:VGNC Symbol;Acc:VGNC:78239]                | 1.03309261  | 0.00117827  | 0.005087095 |
| ENSMMUG00000057600 | V-set and immunoglobulin domain containing 2 [Source:NCBI gene;Acc:712047]                     | 0.651675935 | 0.016235982 | 0.048031963 |
| ENSMMUG00000008486 | endothelial cell adhesion molecule [Source:VGNC Symbol;Acc:VGNC:72290]                         | 0.799023368 | 2.04E-05    | 0.000138168 |
| ENSMMUG00000057529 |                                                                                                | 0.645477635 | 0.001299948 | 0.005539099 |
| ENSMMUG00000010009 | EI24 autophagy associated transmembrane protein [Source:VGNC Symbol;Acc:VGNC:72038]            | 0.776786614 | 0.000526841 | 0.002524911 |
| ENSMMUG00000060925 |                                                                                                | 2.799584764 | 0.013619242 | 0.041536023 |
| ENSMMUG00000038587 | prostate and testis expressed 2 [Source:NCBI gene;Acc:717085]                                  | 3.004979688 | 0.00025336  | 0.00132619  |
| ENSMMUG00000060291 | prostate and testis expressed 3 [Source:NCBI gene;Acc:100379154]                               | 2.745133908 | 0.003381939 | 0.012617728 |

|                    |                                                                                                |             |             |             |
|--------------------|------------------------------------------------------------------------------------------------|-------------|-------------|-------------|
| ENSMMUG00000014120 | sc328 [Source:NCBI gene;Acc:574167]                                                            | 2.259077198 | 0.007151083 | 0.024076742 |
| ENSMMUG00000065066 | V-set and immunoglobulin domain containing 10 like 2 [Source:NCBI gene;Acc:717387]             | 0.692587039 | 3.50E-06    | 2.83E-05    |
| ENSMMUG00000007628 | cell adhesion associated, oncogene regulated [Source:VGNC Symbol;Acc:VGNC:70961]               | 2.596613406 | 1.27E-07    | 1.38E-06    |
| ENSMMUG00000007938 | SRP receptor subunit alpha [Source:VGNC Symbol;Acc:VGNC:77885]                                 | 0.473476565 | 0.002934315 | 0.011202805 |
| ENSMMUG00000006929 | ST3 beta-galactoside alpha-2,3-sialyltransferase 4 [Source:VGNC Symbol;Acc:VGNC:77827]         | 2.010387208 | 4.83E-26    | 5.94E-24    |
| ENSMMUG00000006931 | kirre like nephrin family adhesion molecule 3 [Source:NCBI gene;Acc:714534]                    | 2.261364021 | 2.39E-37    | 8.38E-35    |
| ENSMMUG00000063056 |                                                                                                | 2.122734912 | 0.014536425 | 0.043858155 |
| ENSMMUG00000020706 | ETS proto-oncogene 1, transcription factor [Source:VGNC Symbol;Acc:VGNC:72439]                 | 1.417580889 | 1.72E-35    | 5.13E-33    |
| ENSMMUG00000060836 |                                                                                                | 3.218479132 | 1.62E-05    | 0.000111751 |
| ENSMMUG00000003144 | potassium inwardly rectifying channel subfamily J member 1 [Source:VGNC Symbol;Acc:VGNC:73984] | 0.309392312 | 0.000824955 | 0.003737754 |
| ENSMMUG00000002963 | Rho GTPase activating protein 32 [Source:VGNC Symbol;Acc:VGNC:69855]                           | 2.107726372 | 7.78E-06    | 5.82E-05    |
| ENSMMUG00000032694 | U6 spliceosomal RNA [Source:RFAM;Acc:RF00026]                                                  | 3.073820717 | 0.001730632 | 0.007087806 |
| ENSMMUG00000057813 |                                                                                                | 2.993625981 | 3.09E-09    | 4.55E-08    |
| ENSMMUG00000017555 | PR/SET domain 10 [Source:VGNC Symbol;Acc:VGNC:76250]                                           | 0.659165292 | 1.93E-05    | 0.000131152 |
| ENSMMUG00000018029 | amyloid beta precursor like protein 2 [Source:VGNC Symbol;Acc:VGNC:69984]                      | 0.837330131 | 1.07E-07    | 1.18E-06    |
| ENSMMUG00000018034 | suppression of tumorigenicity 14 [Source:VGNC Symbol;Acc:VGNC:77897]                           | 1.534530396 | 7.03E-17    | 3.17E-15    |
| ENSMMUG00000002250 | beta-1,3-glucuronyltransferase 1 [Source:VGNC Symbol;Acc:VGNC:70207]                           | 1.962633231 | 0.003241419 | 0.012156839 |
| ENSMMUG00000009187 | calcium voltage-gated channel subunit alpha1 B [Source:VGNC Symbol;Acc:VGNC:70499]             | 2.059872331 | 0.003372324 | 0.012597256 |
| ENSMMUG00000019607 | patatin like phospholipase domain containing 7 [Source:VGNC Symbol;Acc:VGNC:76104]             | 0.812229226 | 2.03E-06    | 1.70E-05    |
| ENSMMUG00000001667 | transmembrane protein 210 [Source:VGNC Symbol;Acc:VGNC:79945]                                  | 0.673405317 | 1.37E-09    | 2.14E-08    |
| ENSMMUG00000021432 | PAXX non-homologous end joining factor [Source:VGNC Symbol;Acc:VGNC:75686]                     | 2.984757789 | 0.011914322 | 0.03707001  |
| ENSMMUG00000021428 | lipocalin 12 [Source:VGNC Symbol;Acc:VGNC:74143]                                               | 1.379884323 | 7.41E-09    | 1.01E-07    |
| ENSMMUG00000011528 | F-box and WD repeat domain containing 5 [Source:VGNC Symbol;Acc:VGNC:72503]                    | 1.620015362 | 1.95E-06    | 1.64E-05    |
| ENSMMUG00000011527 | TNF receptor associated factor 2 [Source:VGNC Symbol;Acc:VGNC:78641]                           | 1.037795384 | 0.000514269 | 0.002471416 |
| ENSMMUG00000005048 | MAM domain containing 4 [Source:VGNC Symbol;Acc:VGNC:74345]                                    | 0.678768579 | 4.70E-05    | 0.000290531 |
| ENSMMUG00000005042 | RAB, member RAS oncogene family like 6 [Source:VGNC Symbol;Acc:VGNC:76529]                     | 0.706489041 | 0.003124739 | 0.01177276  |
| ENSMMUG00000026981 | EGF like domain multiple 7 [Source:VGNC Symbol;Acc:VGNC:72079]                                 | 0.642388267 | 0.000227379 | 0.001204132 |
| ENSMMUG00000056009 |                                                                                                | 1.35464618  | 5.30E-10    | 8.85E-09    |
| ENSMMUG00000017022 | notch receptor 1 [Source:VGNC Symbol;Acc:VGNC:75371]                                           | 2.066936118 | 0.003028465 | 0.011496524 |
| ENSMMUG00000003106 | SEC16 homolog A, endoplasmic reticulum export factor [Source:VGNC Symbol;Acc:VGNC:77326]       | 1.545835066 | 3.37E-12    | 8.07E-11    |
| ENSMMUG00000003105 | inositol polyphosphate-5-phosphatase E [Source:VGNC Symbol;Acc:VGNC:73637]                     | 1.134190363 | 8.12E-13    | 2.13E-11    |
| ENSMMUG00000003098 | peptidase, mitochondrial processing alpha subunit [Source:VGNC Symbol;Acc:VGNC:76062]          | 1.535083891 | 1.96E-27    | 2.69E-25    |
| ENSMMUG00000003081 | G protein signaling modulator 1 [Source:VGNC Symbol;Acc:VGNC:72960]                            | 0.573814412 | 0.000307489 | 0.001566828 |
| ENSMMUG00000001409 | coiled-coil domain containing 187 [Source:NCBI gene;Acc:710749]                                | 1.258061261 | 3.67E-06    | 2.96E-05    |
| ENSMMUG00000004885 | quiescin sulfhydryl oxidase 2 [Source:VGNC Symbol;Acc:VGNC:76568]                              | 2.011005095 | 0.002775132 | 0.010679385 |
| ENSMMUG00000000276 | NACC family member 2 [Source:VGNC Symbol;Acc:VGNC:75013]                                       | 3.579471499 | 1.53E-05    | 0.000106092 |
| ENSMMUG00000016827 | UBA domain containing 1 [Source:VGNC Symbol;Acc:VGNC:79837]                                    | 2.538028619 | 1.49E-09    | 2.31E-08    |
| ENSMMUG00000021496 | potassium sodium-activated channel subfamily T member 1 [Source:VGNC Symbol;Acc:VGNC:73856]    | 1.296948041 | 4.72E-08    | 5.60E-07    |



|                    |                                                                                               |             |             |             |
|--------------------|-----------------------------------------------------------------------------------------------|-------------|-------------|-------------|
| ENSMMUG00000055942 | spermatogenesis and oogenesis specific basic helix-loop-helix 1 [Source:NCBI gene;Acc:721833] | 1.045883129 | 0.001642549 | 0.006770566 |
| ENSMMUG00000012147 | collagen type V alpha 1 chain [Source:NCBI gene;Acc:722014]                                   | 2.494058481 | 6.88E-07    | 6.45E-06    |
| ENSMMUG00000051925 |                                                                                               | 2.335639296 | 4.06E-18    | 2.13E-16    |
| ENSMMUG00000064229 |                                                                                               | 1.872724952 | 1.67E-07    | 1.77E-06    |
| ENSMMUG00000005463 | bromodomain containing 3 [Source:VGNC Symbol;Acc:VGNC:70281]                                  | 0.588780645 | 0.001374729 | 0.005811825 |
| ENSMMUG00000017210 | sarcosine dehydrogenase [Source:VGNC Symbol;Acc:VGNC:76971]                                   | 3.885437984 | 7.50E-14    | 2.29E-12    |
| ENSMMUG00000017207 | dopamine beta-hydroxylase [Source:VGNC Symbol;Acc:VGNC:71740]                                 | 3.353119399 | 3.92E-14    | 1.26E-12    |
| ENSMMUG00000022348 | surfeit 4 [Source:VGNC Symbol;Acc:VGNC:78060]                                                 | 0.941215951 | 3.49E-06    | 2.82E-05    |
| ENSMMUG00000001267 | general transcription factor IIIC subunit 5 [Source:VGNC Symbol;Acc:VGNC:73319]               | 0.573336068 | 0.010242081 | 0.032612329 |
| ENSMMUG00000009918 | TSC complex subunit 1 [Source:VGNC Symbol;Acc:VGNC:78658]                                     | 0.511982164 | 0.004422956 | 0.015968875 |
| ENSMMUG00000018468 | senataxin [Source:VGNC Symbol;Acc:VGNC:77356]                                                 | 0.521980594 | 0.003443794 | 0.012819834 |
| ENSMMUG00000009976 | uridine-cytidine kinase 1 [Source:VGNC Symbol;Acc:VGNC:78967]                                 | 0.4189318   | 0.010662563 | 0.033744328 |
| ENSMMUG00000009973 | proline rich coiled-coil 2B [Source:VGNC Symbol;Acc:VGNC:76327]                               | 1.639333741 | 0.000718572 | 0.003307033 |
| ENSMMUG00000002267 | laminin subunit gamma 3 [Source:NCBI gene;Acc:722430]                                         | 3.334871542 | 9.21E-10    | 1.48E-08    |
| ENSMMUG00000036223 |                                                                                               | 2.830200007 | 0.000146301 | 0.000806753 |
| ENSMMUG00000008249 | far upstream element binding protein 3 [Source:NCBI gene;Acc:722470]                          | 0.676033861 | 0.000820425 | 0.003723244 |
| ENSMMUG00000047733 | hemicentin 2 [Source:NCBI gene;Acc:720622]                                                    | 0.328745964 | 0.002038652 | 0.008198457 |
| ENSMMUG00000061477 |                                                                                               | 0.439058424 | 0.003987534 | 0.014592169 |
| ENSMMUG00000003797 | ubiquitin specific peptidase 20 [Source:VGNC Symbol;Acc:VGNC:78740]                           | 2.527840558 | 3.44E-12    | 8.21E-11    |
| ENSMMUG00000009965 | chromosome 15 C9orf50 homolog [Source:VGNC Symbol;Acc:VGNC:70365]                             | 1.949954802 | 2.55E-13    | 7.10E-12    |
| ENSMMUG00000055560 |                                                                                               | 1.190990303 | 0.003147946 | 0.011844284 |
| ENSMMUG00000051852 | Metazoan signal recognition particle RNA [Source:RFAM;Acc:RF00017]                            | 1.215188645 | 0.000913765 | 0.004068416 |
| ENSMMUG00000011767 | carnitine O-acetyltransferase [Source:VGNC Symbol;Acc:VGNC:71483]                             | 0.979465562 | 6.62E-06    | 5.03E-05    |
| ENSMMUG00000005989 | GLE1 RNA export mediator [Source:VGNC Symbol;Acc:VGNC:73067]                                  | 1.134068159 | 2.74E-12    | 6.67E-11    |
| ENSMMUG00000012163 | GTPase activating Rap/RanGAP domain like 3 [Source:VGNC Symbol;Acc:VGNC:72785]                | -0.4503304  | 0.006185251 | 0.021191247 |
| ENSMMUG00000050175 | zinc finger and BTB domain containing 34 [Source:NCBI gene;Acc:701665]                        | 0.746495875 | 0.01112684  | 0.035000375 |
| ENSMMUG00000052476 | zinc finger and BTB domain containing 43 [Source:NCBI gene;Acc:701797]                        | 0.569580697 | 0.000468337 | 0.002276981 |
| ENSMMUG00000013763 | PBX homeobox 3 [Source:VGNC Symbol;Acc:VGNC:82202]                                            | 0.393718508 | 0.003407796 | 0.012699315 |
| ENSMMUG00000016826 | MAPK associated protein 1 [Source:VGNC Symbol;Acc:VGNC:74531]                                 | 0.662302243 | 0.007781997 | 0.025896285 |
| ENSMMUG00000003668 | GTPase activating protein and VPS9 domains 1 [Source:VGNC Symbol;Acc:VGNC:72767]              | 0.893757918 | 1.27E-10    | 2.39E-09    |
| ENSMMUG00000005217 | heat shock protein family A (Hsp70) member 5 [Source:NCBI gene;Acc:703193]                    | 0.6286686   | 0.003008606 | 0.011437093 |
| ENSMMUG00000005215 | Rab9 effector protein with kelch motifs [Source:VGNC Symbol;Acc:VGNC:76495]                   | 0.887123161 | 9.60E-07    | 8.70E-06    |
| ENSMMUG00000020549 | protein phosphatase 6 catalytic subunit [Source:NCBI gene;Acc:703658]                         | 1.015266153 | 3.41E-05    | 0.0002183   |
| ENSMMUG00000051739 | Metazoan signal recognition particle RNA [Source:RFAM;Acc:RF00017]                            | 1.864931062 | 0.00846359  | 0.02786031  |
| ENSMMUG00000011183 | olfactomedin like 2A [Source:VGNC Symbol;Acc:VGNC:75472]                                      | -1.80615474 | 1.82E-05    | 0.000124213 |
| ENSMMUG00000033102 | mml-mir-181b-2 [Source:miRBase;Acc:MI0007646]                                                 | 2.384203772 | 0.00034566  | 0.001732434 |
| ENSMMUG00000026876 | mml-mir-181a-2 [Source:miRBase;Acc:MI0002808]                                                 | 3.266656698 | 8.89E-06    | 6.54E-05    |
| ENSMMUG00000014111 | nuclear receptor subfamily 5 group A member 1 [Source:VGNC Symbol;Acc:VGNC:75520]             | 0.454243157 | 0.000637275 | 0.002975871 |

|                    |                                                                                              |             |             |             |
|--------------------|----------------------------------------------------------------------------------------------|-------------|-------------|-------------|
| ENSMMUG00000014110 | adhesion G protein-coupled receptor D2 [Source:VGNC Symbol;Acc:VGNC:69462]                   | 0.730590831 | 5.77E-13    | 1.55E-11    |
| ENSMMUG00000054736 |                                                                                              | 3.867903107 | 1.73E-11    | 3.73E-10    |
| ENSMMUG00000000496 | zinc finger and BTB domain containing 6 [Source:VGNC Symbol;Acc:VGNC:79047]                  | -3.46180961 | 0.00235774  | 0.009276822 |
| ENSMMUG00000063639 |                                                                                              | 1.561599098 | 2.30E-07    | 2.37E-06    |
| ENSMMUG00000038944 |                                                                                              | 2.765724961 | 2.84E-47    | 1.99E-44    |
|                    |                                                                                              | -           |             |             |
| ENSMMUG00000058731 | olfactory receptor 1B1 [Source:NCBI gene;Acc:699905]                                         | 0.334845197 | 0.00615663  | 0.021108662 |
| ENSMMUG00000043396 | Metazoan signal recognition particle RNA [Source:RFAM;Acc:RF00017]                           | 3.96962818  | 2.04E-07    | 2.13E-06    |
| ENSMMUG00000005595 | RAB14, member RAS oncogene family [Source:NCBI gene;Acc:699837]                              | 2.89468348  | 5.70E-12    | 1.32E-10    |
| ENSMMUG00000012668 | centriolin [Source:VGNC Symbol;Acc:VGNC:71204]                                               | 2.200447377 | 2.02E-24    | 2.00E-22    |
| ENSMMUG00000058237 |                                                                                              | 0.87322714  | 1.40E-07    | 1.51E-06    |
| ENSMMUG00000013105 | astrotactin 2 [Source:VGNC Symbol;Acc:VGNC:70087]                                            | 0.752347488 | 0.000382065 | 0.001891845 |
| ENSMMUG00000013107 | tripartite motif containing 32 [Source:VGNC Symbol;Acc:VGNC:79032]                           | 0.427568418 | 0.005846688 | 0.020196237 |
| ENSMMUG00000013099 | pappalysin 1 [Source:VGNC Symbol;Acc:VGNC:75756]                                             | 1.817298358 | 9.52E-10    | 1.52E-08    |
| ENSMMUG00000003356 | tenascin C [Source:VGNC Symbol;Acc:VGNC:79960]                                               | 0.73847642  | 0.000468451 | 0.002276981 |
| ENSMMUG00000041301 | TNF superfamily member 8 [Source:NCBI gene;Acc:702944]                                       | -0.64962743 | 0.00958903  | 0.030855201 |
|                    |                                                                                              | -           |             |             |
| ENSMMUG00000062461 | chromosome 15 C9orf43 homolog [Source:NCBI gene;Acc:704968]                                  | 3.537914343 | 0.002413304 | 0.009476829 |
|                    |                                                                                              | -           |             |             |
| ENSMMUG00000044537 | DNA polymerase epsilon 3, accessory subunit [Source:NCBI gene;Acc:705074]                    | 3.118524099 | 1.97E-05    | 0.00013348  |
|                    |                                                                                              | -           |             |             |
| ENSMMUG00000031965 | aminolevulinate dehydratase [Source:VGNC Symbol;Acc:VGNC:69779]                              | 2.104183056 | 6.41E-05    | 0.000383618 |
|                    |                                                                                              | -           |             |             |
| ENSMMUG00000057031 |                                                                                              | 2.709263405 | 1.09E-05    | 7.83E-05    |
|                    |                                                                                              | -           |             |             |
| ENSMMUG00000007187 | haloacid dehalogenase like hydrolase domain containing 3 [Source:VGNC Symbol;Acc:VGNC:73250] | 3.669661904 | 6.60E-06    | 5.03E-05    |
| ENSMMUG00000005851 | B-box and SPRY domain containing [Source:VGNC Symbol;Acc:VGNC:70342]                         | -3.77081983 | 2.36E-11    | 4.95E-10    |
| ENSMMUG00000000464 | polypyrimidine tract binding protein 3 [Source:VGNC Symbol;Acc:VGNC:76244]                   | -0.51893302 | 0.007289232 | 0.024494823 |
|                    |                                                                                              | -           |             |             |
| ENSMMUG00000021097 | sushi domain containing 1 [Source:VGNC Symbol;Acc:VGNC:78207]                                | 1.105711325 | 0.001985249 | 0.008004356 |
| ENSMMUG00000000695 | transmembrane protein 245 [Source:VGNC Symbol;Acc:VGNC:78933]                                | 0.464617705 | 0.000195498 | 0.001049569 |
|                    |                                                                                              | -           |             |             |
| ENSMMUG00000000690 | catenin alpha like 1 [Source:VGNC Symbol;Acc:VGNC:71544]                                     | 0.899761657 | 0.000198227 | 0.001062588 |
|                    |                                                                                              | -           |             |             |
| ENSMMUG00000053648 | actin binding transcription modulator [Source:NCBI gene;Acc:710486]                          | 1.321750722 | 1.16E-06    | 1.03E-05    |
| ENSMMUG00000019354 | actin like 7B [Source:VGNC Symbol;Acc:VGNC:69421]                                            | 1.740259189 | 0.000359561 | 0.001791162 |
| ENSMMUG00000023797 | post-GPI attachment to proteins GalNAc transferase 4 [Source:VGNC Symbol;Acc:VGNC:79688]     | 1.778716321 | 2.42E-05    | 0.000160435 |
| ENSMMUG00000052330 | mitochondrial ribosomal protein L50 [Source:NCBI gene;Acc:713923]                            | 2.496290309 | 0.007300159 | 0.024525667 |
|                    |                                                                                              | -           |             |             |
| ENSMMUG00000009775 | caveolae associated protein 4 [Source:NCBI gene;Acc:714379]                                  | 0.970867145 | 1.30E-11    | 2.84E-10    |
|                    |                                                                                              | -           |             |             |
| ENSMMUG00000057137 |                                                                                              | 0.903194863 | 4.80E-05    | 0.000295861 |
|                    |                                                                                              | -           |             |             |
| ENSMMUG00000011410 | nuclear receptor subfamily 4 group A member 3 [Source:VGNC Symbol;Acc:VGNC:75519]            | 0.910123178 | 0.009100948 | 0.029576499 |
| ENSMMUG00000058899 |                                                                                              | 3.391480499 | 0.00874315  | 0.028632693 |
| ENSMMUG00000010661 | SEC61 translocon subunit beta [Source:NCBI gene;Acc:717815]                                  | -0.78050202 | 3.47E-05    | 0.000221432 |
| ENSMMUG00000010662 | ALG2 alpha-1,3/1,6-mannosyltransferase [Source:VGNC Symbol;Acc:VGNC:69672]                   | 0.949492504 | 0.00099234  | 0.004382897 |
| ENSMMUG00000001304 | transforming growth factor beta receptor 1 [Source:VGNC Symbol;Acc:VGNC:78337]               | 0.487926403 | 0.006635581 | 0.022541366 |
| ENSMMUG00000009831 | TBC1 domain family member 2 [Source:VGNC Symbol;Acc:VGNC:78157]                              | -1.59813596 | 8.98E-05    | 0.000518305 |
|                    |                                                                                              | -           |             |             |
| ENSMMUG00000002853 | coronin 2A [Source:VGNC Symbol;Acc:VGNC:71451]                                               | 0.700963925 | 0.000228033 | 0.001206229 |
|                    |                                                                                              | -           |             |             |
| ENSMMUG00000047381 | DDB1 and CUL4 associated factor 10 [Source:NCBI gene;Acc:716256]                             | 0.723644293 | 2.77E-06    | 2.27E-05    |
| ENSMMUG00000017886 | F-box protein 10 [Source:NCBI gene;Acc:718443]                                               | -0.88261549 | 0.000626349 | 0.002937554 |

|                    |                                                                                                |             |             |             |
|--------------------|------------------------------------------------------------------------------------------------|-------------|-------------|-------------|
| ENSMMUG00000017892 | RNA polymerase I subunit E [Source:VGNC Symbol;Acc:VGNC:76047]                                 | 0.905109982 | 0.000441591 | 0.002159145 |
| ENSMMUG00000007421 | zinc finger CCHC-type containing 7 [Source:VGNC Symbol;Acc:VGNC:82088]                         | 0.389824133 | 0.004387102 | 0.015868026 |
| ENSMMUG00000019639 | paired box 5 [Source:VGNC Symbol;Acc:VGNC:75764]                                               | 4.796790402 | 7.52E-13    | 1.98E-11    |
| ENSMMUG00000010213 | GLI pathogenesis related 2 [Source:VGNC Symbol;Acc:VGNC:81414]                                 | 3.368045875 | 0.001884772 | 0.007656476 |
| ENSMMUG00000022613 | reversion inducing cysteine rich protein with kazal motifs [Source:VGNC Symbol;Acc:VGNC:76722] | 1.525236661 | 3.06E-26    | 3.87E-24    |
| ENSMMUG00000059406 | RGP1 homolog, RAB6A GEF complex partner 1 [Source:NCBI gene;Acc:695936]                        | 2.442777434 | 3.91E-06    | 3.13E-05    |
| ENSMMUG00000016331 | glucosylceramidase beta 2 [Source:VGNC Symbol;Acc:VGNC:72741]                                  | 3.933930908 | 5.15E-06    | 4.00E-05    |
| ENSMMUG00000031856 | talin 1 [Source:VGNC Symbol;Acc:VGNC:78371]                                                    | 0.772889196 | 1.31E-06    | 1.15E-05    |
| ENSMMUG00000050822 | carbonic anhydrase 9 [Source:NCBI gene;Acc:696729]                                             | 2.085389178 | 1.74E-27    | 2.44E-25    |
| ENSMMUG00000048375 | Metazoan signal recognition particle RNA [Source:RFAM;Acc:RF00017]                             | 1.894257334 | 5.14E-30    | 9.12E-28    |
| ENSMMUG00000016323 | Rho guanine nucleotide exchange factor 39 [Source:VGNC Symbol;Acc:VGNC:69912]                  | 1.919219724 | 2.09E-24    | 2.05E-22    |
| ENSMMUG00000016327 | coiled-coil domain containing 107 [Source:VGNC Symbol;Acc:VGNC:70656]                          | 1.951604333 | 3.46E-23    | 2.94E-21    |
| ENSMMUG00000038988 | RNase MRP [Source:RFAM;Acc:RF00030]                                                            | 2.788676988 | 0.001595332 | 0.006605061 |
| ENSMMUG00000016316 | testis associated actin remodelling kinase 1 [Source:VGNC Symbol;Acc:VGNC:78314]               | 1.358245901 | 1.22E-05    | 8.68E-05    |
| ENSMMUG00000016314 | family with sequence similarity 166 member B [Source:VGNC Symbol;Acc:VGNC:72421]               | 3.371339952 | 1.16E-34    | 3.16E-32    |
| ENSMMUG00000016313 | RUN and SH3 domain containing 2 [Source:VGNC Symbol;Acc:VGNC:82230]                            | 0.899345281 | 1.83E-06    | 1.55E-05    |
| ENSMMUG00000020190 | valosin containing protein [Source:VGNC Symbol;Acc:VGNC:78762]                                 | 1.467166083 | 1.46E-07    | 1.57E-06    |
| ENSMMUG00000061896 |                                                                                                | 1.637408853 | 4.63E-09    | 6.64E-08    |
| ENSMMUG00000044048 | Metazoan signal recognition particle RNA [Source:RFAM;Acc:RF00017]                             | 1.52721175  | 9.34E-06    | 6.83E-05    |
| ENSMMUG00000022895 | DnaJ heat shock protein family (Hsp40) member B5 [Source:NCBI gene;Acc:699081]                 | 0.413763504 | 5.11E-05    | 0.000313685 |
| ENSMMUG00000031826 | ubiquitin associated protein 1 [Source:VGNC Symbol;Acc:VGNC:78686]                             | 1.239449622 | 0.007187467 | 0.024193434 |
| ENSMMUG00000058149 |                                                                                                | 1.006497241 | 0.00310814  | 0.011725974 |
| ENSMMUG00000017458 | DDB1 and CUL4 associated factor 12 [Source:VGNC Symbol;Acc:VGNC:71678]                         | 1.125382233 | 0.001187973 | 0.005124254 |
| ENSMMUG00000000389 | nucleolar protein 6 [Source:VGNC Symbol;Acc:VGNC:75218]                                        | 0.834680076 | 9.00E-05    | 0.000519514 |
| ENSMMUG00000003314 | aquaporin 3 (Gill blood group) [Source:NCBI gene;Acc:702721]                                   | 0.999752853 | 2.92E-05    | 0.000189571 |
| ENSMMUG00000001545 | aquaporin 7 [Source:NCBI gene;Acc:702836]                                                      | 2.405557144 | 1.20E-14    | 4.15E-13    |
| ENSMMUG00000038377 |                                                                                                | 0.321342308 | 0.010070363 | 0.032167815 |
| ENSMMUG00000007724 | aprataxin [Source:VGNC Symbol;Acc:VGNC:69838]                                                  | 0.945826792 | 4.70E-09    | 6.72E-08    |
| ENSMMUG00000012442 | DExD/H-box helicase 58 [Source:VGNC Symbol;Acc:VGNC:71672]                                     | 0.274950985 | 0.008492399 | 0.02793288  |
| ENSMMUG00000008196 | aconitase 1 [Source:VGNC Symbol;Acc:VGNC:69378]                                                | 1.381277804 | 1.08E-10    | 2.05E-09    |
| ENSMMUG00000061449 | equatorin [Source:NCBI gene;Acc:707334]                                                        | 1.732832691 | 0.001081481 | 0.004721546 |
| ENSMMUG00000054514 | interferon alpha 6 [Source:NCBI gene;Acc:106995851]                                            | 3.129632689 | 0.010838626 | 0.034224286 |
| ENSMMUG00000010959 | kelch like family member 9 [Source:VGNC Symbol;Acc:VGNC:74080]                                 | 2.636730212 | 0.00349179  | 0.012974396 |
| ENSMMUG00000019070 | focadhesin [Source:VGNC Symbol;Acc:VGNC:72556]                                                 | 2.125847957 | 4.63E-79    | 3.24E-75    |
| ENSMMUG00000018396 | HAUS augmin like complex subunit 6 [Source:VGNC Symbol;Acc:VGNC:73237]                         | 3.795592005 | 1.90E-45    | 1.27E-42    |
| ENSMMUG00000044658 | ADAMTS like 1 [Source:NCBI gene;Acc:712844]                                                    | 0.587208952 | 0.002543451 | 0.009918468 |
| ENSMMUG00000013466 | tetratricopeptide repeat domain 39B [Source:VGNC Symbol;Acc:VGNC:79402]                        | 0.787996444 | 1.70E-12    | 4.24E-11    |

|                    |                                                                                                                                       |   |             |             |             |
|--------------------|---------------------------------------------------------------------------------------------------------------------------------------|---|-------------|-------------|-------------|
| ENSMMUG00000052889 | Metazoan signal recognition particle RNA [Source:RFAM;Acc:RF00017]                                                                    | - | 0.933745306 | 5.97E-06    | 4.59E-05    |
| ENSMMUG00000055400 | U6 spliceosomal RNA [Source:RFAM;Acc:RF00026]                                                                                         | - | 1.167003782 | 2.45E-07    | 2.52E-06    |
| ENSMMUG00000014697 | nuclear factor I B [Source:VGNC Symbol;Acc:VGNC:75335]                                                                                | - | 2.047307965 | 3.24E-05    | 0.000208197 |
| ENSMMUG00000002176 | ubiquitin like with PHD and ring finger domains 2 [Source:VGNC Symbol;Acc:VGNC:78714]                                                 | - | 1.044540371 | 5.30E-12    | 1.24E-10    |
| ENSMMUG00000050923 |                                                                                                                                       | - | 1.161825307 | 6.33E-08    | 7.34E-07    |
| ENSMMUG00000002175 | TPD52 like 3 [Source:HGNC Symbol;Acc:HGNC:23382]                                                                                      | - | 0.658363466 | 0.002954427 | 0.011258133 |
| ENSMMUG00000021344 | interleukin 33 [Source:VGNC Symbol;Acc:VGNC:73606]                                                                                    | - | -0.70531491 | 0.005281677 | 0.018539413 |
| ENSMMUG00000005469 | endoplasmic reticulum metalloproteinase 1 [Source:VGNC Symbol;Acc:VGNC:72322]                                                         | - | 0.293506312 | 0.009336798 | 0.030202981 |
| ENSMMUG00000006197 | plasminogen receptor with a C-terminal lysine [Source:VGNC Symbol;Acc:VGNC:76098]                                                     | - | 1.111868124 | 2.03E-08    | 2.59E-07    |
| ENSMMUG00000047971 | relaxin 2 [Source:NCBI gene;Acc:693473]                                                                                               | - | 0.486588883 | 0.016294639 | 0.048134057 |
| ENSMMUG00000052972 |                                                                                                                                       | - | 0.496885285 | 0.001312578 | 0.005582735 |
| ENSMMUG00000065127 | insulin like 6 [Source:NCBI gene;Acc:693735]                                                                                          | - | 0.384817704 | 0.000573071 | 0.002724125 |
| ENSMMUG00000057331 | RNA terminal phosphate cyclase like 1 [Source:NCBI gene;Acc:694568]                                                                   | - | 2.78284422  | 7.22E-44    | 4.22E-41    |
| ENSMMUG00000026950 | microRNA 101-2 [Source:HGNC Symbol;Acc:HGNC:31489]                                                                                    | - | 3.381653292 | 4.58E-09    | 6.59E-08    |
| ENSMMUG00000057520 |                                                                                                                                       | - | 3.306492743 | 0.000235085 | 0.001239786 |
| ENSMMUG00000058311 |                                                                                                                                       | - | 2.378403371 | 1.11E-10    | 2.09E-09    |
| ENSMMUG00000000802 | regulatory factor X3 [Source:VGNC Symbol;Acc:VGNC:76908]                                                                              | - | 1.719128604 | 2.61E-05    | 0.000171434 |
| ENSMMUG00000056693 |                                                                                                                                       | - | 0.539095308 | 1.20E-07    | 1.31E-06    |
| ENSMMUG00000015093 | very low density lipoprotein receptor [Source:VGNC Symbol;Acc:VGNC:78774]                                                             | - | 0.291865315 | 0.009279284 | 0.030051594 |
| ENSMMUG00000057073 |                                                                                                                                       | - | 2.470363106 | 8.98E-06    | 6.60E-05    |
| ENSMMUG00000015279 | SWI/SNF related, matrix associated, actin dependent regulator of chromatin, subfamily a, member 2 [Source:VGNC Symbol;Acc:VGNC:77647] | - | 1.458664857 | 8.53E-10    | 1.38E-08    |
| ENSMMUG00000012472 | phosphatidylinositol-4-phosphate 5-kinase type 1 beta [Source:VGNC Symbol;Acc:VGNC:76001]                                             | - | 0.704810501 | 1.05E-07    | 1.17E-06    |
| ENSMMUG00000027986 | U6 spliceosomal RNA [Source:RFAM;Acc:RF00026]                                                                                         | - | 2.047814207 | 1.45E-09    | 2.24E-08    |
| ENSMMUG00000003780 | tight junction protein 2 [Source:NCBI gene;Acc:699586]                                                                                | - | 3.393730037 | 0.00222794  | 0.008845527 |
| ENSMMUG00000011401 | amyloid beta precursor protein binding family A member 1 [Source:VGNC Symbol;Acc:VGNC:69976]                                          | - | 2.032285375 | 3.80E-05    | 0.000240881 |
| ENSMMUG00000008346 | structural maintenance of chromosomes 5 [Source:NCBI gene;Acc:702219]                                                                 | - | 2.724634517 | 0.000905259 | 0.004040246 |
| ENSMMUG00000063718 | Kruppel like factor 9 [Source:NCBI gene;Acc:700585]                                                                                   | - | 2.464087695 | 0.001926631 | 0.007801661 |
| ENSMMUG00000012667 | annexin A1 [Source:VGNC Symbol;Acc:VGNC:69944]                                                                                        | - | 0.403998008 | 8.53E-05    | 0.000494352 |
| ENSMMUG00000056840 |                                                                                                                                       | - | 1.75667797  | 1.71E-23    | 1.53E-21    |
| ENSMMUG00000023117 | neurotrophic receptor tyrosine kinase 2 [Source:VGNC Symbol;Acc:VGNC:75541]                                                           | - | 0.758953693 | 1.66E-09    | 2.55E-08    |
| ENSMMUG00000059207 |                                                                                                                                       | - | -2.23717358 | 0.003689828 | 0.013641564 |
| ENSMMUG00000060761 |                                                                                                                                       | - | 1.487410242 | 1.19E-25    | 1.36E-23    |
| ENSMMUG00000054211 |                                                                                                                                       | - | 2.236839797 | 1.74E-05    | 0.000119589 |
| ENSMMUG00000057499 |                                                                                                                                       | - | 2.492245033 | 9.18E-13    | 2.38E-11    |
| ENSMMUG00000033550 |                                                                                                                                       | - | 3.099774086 | 0.000603606 | 0.002857089 |
| ENSMMUG00000049479 |                                                                                                                                       | - | 2.824666871 | 0.002692966 | 0.010403156 |
| ENSMMUG00000053778 |                                                                                                                                       | - | 0.889971854 | 0.001460812 | 0.006118569 |

|                    |                                                                                           |             |             |             |
|--------------------|-------------------------------------------------------------------------------------------|-------------|-------------|-------------|
| ENSMMUG00000007223 | DIRAS family GTPase 2 [Source:VGNC Symbol;Acc:VGNC:71673]                                 | 0.493769944 | 0.000100695 | 0.000574471 |
| ENSMMUG00000001748 | spleen associated tyrosine kinase [Source:VGNC Symbol;Acc:VGNC:78063]                     | 2.50361541  | 4.25E-10    | 7.22E-09    |
| ENSMMUG00000020009 | receptor tyrosine kinase like orphan receptor 2 [Source:VGNC Symbol;Acc:VGNC:76716]       | 0.849317447 | 0.00014084  | 0.000779399 |
| ENSMMUG00000060533 |                                                                                           | 1.133497542 | 1.09E-13    | 3.20E-12    |
| ENSMMUG00000003006 | serine palmitoyltransferase long chain base subunit 1 [Source:VGNC Symbol;Acc:VGNC:77873] | 1.280805259 | 5.61E-10    | 9.31E-09    |
|                    |                                                                                           | -           |             |             |
| ENSMMUG00000009493 | family with sequence similarity 120A [Source:NCBI gene;Acc:717459]                        | 1.544265135 | 1.19E-08    | 1.57E-07    |
|                    |                                                                                           | -           |             |             |
| ENSMMUG00000002517 | protein tyrosine phosphatase domain containing 1 [Source:VGNC Symbol;Acc:VGNC:76567]      | 1.185683215 | 6.82E-05    | 0.000404817 |
|                    |                                                                                           | -           |             |             |
| ENSMMUG00000060049 |                                                                                           | 0.878444507 | 0.004109334 | 0.014990946 |
|                    |                                                                                           | -           |             |             |
| ENSMMUG00000050773 |                                                                                           | 1.116791588 | 5.93E-06    | 4.57E-05    |
| ENSMMUG00000005997 | cell division cycle 14B [Source:NCBI gene;Acc:710300]                                     | 3.125288286 | 5.59E-07    | 5.34E-06    |
|                    |                                                                                           | -           |             |             |
| ENSMMUG00000019423 | zinc finger protein 2 [Source:NCBI gene;Acc:703864]                                       | 2.436639698 | 0.012410333 | 0.038315741 |
|                    |                                                                                           | -           |             |             |
| ENSMMUG00000060932 | zinc finger protein 383-like [Source:NCBI gene;Acc:106993074]                             | 1.253340479 | 3.73E-06    | 3.00E-05    |
|                    |                                                                                           | -           |             |             |
| ENSMMUG00000049314 | dual specificity phosphatase 2 [Source:NCBI gene;Acc:718442]                              | 2.830996238 | 0.001676295 | 0.006899525 |
|                    |                                                                                           | -           |             |             |
| ENSMMUG00000053389 |                                                                                           | 0.870791861 | 3.52E-05    | 0.000224175 |
|                    |                                                                                           | -           |             |             |
| ENSMMUG00000057143 | transmembrane protein 127 [Source:NCBI gene;Acc:705069]                                   | 1.509376312 | 4.55E-10    | 7.68E-09    |
| ENSMMUG00000015515 | REV1 DNA directed polymerase [Source:NCBI gene;Acc:709475]                                | 0.493251103 | 0.002636476 | 0.010221211 |
| ENSMMUG00000057336 |                                                                                           | 0.381034874 | 0.001001108 | 0.004411861 |
|                    |                                                                                           | -           |             |             |
| ENSMMUG00000001390 | NCK adaptor protein 2 [Source:VGNC Symbol;Acc:VGNC:75142]                                 | 1.333132626 | 0.000275688 | 0.001426561 |
| ENSMMUG00000058257 |                                                                                           | 0.82443821  | 4.51E-06    | 3.57E-05    |
|                    |                                                                                           | -           |             |             |
| ENSMMUG00000055529 | sulfotransferase family 1C member 4 [Source:NCBI gene;Acc:693903]                         | 4.251595672 | 9.01E-06    | 6.62E-05    |
| ENSMMUG00000021019 | E3 SUMO-protein ligase RanBP2 [Source:NCBI gene;Acc:694823]                               | 3.081311634 | 0.002136514 | 0.008543012 |
|                    |                                                                                           | -           |             |             |
| ENSMMUG00000060346 |                                                                                           | 2.023924508 | 7.02E-07    | 6.57E-06    |
|                    |                                                                                           | -           |             |             |
| ENSMMUG00000002231 | transmembrane protein 87B [Source:VGNC Symbol;Acc:VGNC:79557]                             | 0.644799432 | 0.002218487 | 0.008818964 |
|                    |                                                                                           | -           |             |             |
| ENSMMUG00000044163 | zinc finger CCCH-type containing 8 [Source:NCBI gene;Acc:698828]                          | 0.509095713 | 0.001731736 | 0.007088188 |
|                    |                                                                                           | -           |             |             |
| ENSMMUG00000059850 | immunoglobulin kappa variable 1-9 [Source:NCBI gene;Acc:106993071]                        | 1.514741913 | 0.000706412 | 0.003258531 |
|                    |                                                                                           | -           |             |             |
| ENSMMUG00000050630 |                                                                                           | 1.971738744 | 0.002575164 | 0.010028192 |
|                    |                                                                                           | -           |             |             |
| ENSMMUG00000051042 |                                                                                           | 1.624578835 | 1.30E-24    | 1.33E-22    |
| ENSMMUG00000046169 |                                                                                           | 3.669103954 | 7.18E-50    | 6.71E-47    |
| ENSMMUG00000025625 | U6 spliceosomal RNA [Source:RFAM;Acc:RF00026]                                             | 1.168102363 | 0.00508729  | 0.017951452 |
| ENSMMUG00000000293 | catenin alpha 2 [Source:VGNC Symbol;Acc:VGNC:71543]                                       | 1.637776857 | 1.31E-13    | 3.81E-12    |
| ENSMMUG00000055639 |                                                                                           | 0.853653445 | 0.002478393 | 0.009694421 |
| ENSMMUG00000000291 | leucine rich repeat transmembrane neuronal 1 [Source:VGNC Symbol;Acc:VGNC:74315]          | 0.870990238 | 8.42E-05    | 0.000488655 |
|                    |                                                                                           | -           |             |             |
| ENSMMUG00000062818 | regenerating islet-derived protein 3-alpha [Source:NCBI gene;Acc:716890]                  | 0.975575864 | 0.001902544 | 0.007719727 |
|                    |                                                                                           | -           |             |             |
| ENSMMUG00000040046 | lithostathine-1-alpha [Source:NCBI gene;Acc:711810]                                       | 1.343124021 | 0.005918235 | 0.020396022 |
|                    |                                                                                           | -           |             |             |
| ENSMMUG00000049292 | regenerating islet-derived 1 alpha [Source:NCBI gene;Acc:711892]                          | 3.122396981 | 0.008956423 | 0.029181209 |

|                    |                                                                                         |   |             |             |             |
|--------------------|-----------------------------------------------------------------------------------------|---|-------------|-------------|-------------|
| ENSMMUG00000054863 |                                                                                         | - | 1.596959439 | 0.001333357 | 0.005657386 |
| ENSMMUG00000056785 |                                                                                         | - | 0.802300764 | 0.000406245 | 0.002001679 |
| ENSMMUG00000056765 |                                                                                         | - | 0.809828137 | 4.30E-07    | 4.22E-06    |
| ENSMMUG00000064788 |                                                                                         | - | 0.727965408 | 0.006783761 | 0.02294469  |
| ENSMMUG00000064821 |                                                                                         | - | 0.979203523 | 1.43E-05    | 9.98E-05    |
| ENSMMUG00000062747 |                                                                                         | - | 0.544353935 | 2.04E-06    | 1.71E-05    |
| ENSMMUG00000023758 | mitochondrial ribosomal protein L19 [Source:VGNC Symbol;Acc:VGNC:74743]                 | - | -0.42366028 | 0.001299596 | 0.005539099 |
| ENSMMUG00000048322 | eva-1 homolog A, regulator of programmed cell death [Source:NCBI gene;Acc:710843]       | - | 1.033825309 | 0.005055812 | 0.017871855 |
| ENSMMUG00000051843 |                                                                                         | - | 0.983693631 | 5.50E-07    | 5.27E-06    |
| ENSMMUG00000053587 |                                                                                         | - | 2.284321901 | 0.014795074 | 0.044435923 |
| ENSMMUG00000001845 | DNA polymerase epsilon 4, accessory subunit [Source:VGNC Symbol;Acc:VGNC:76065]         | - | 2.959796509 | 1.52E-24    | 1.53E-22    |
| ENSMMUG00000011845 | hexokinase 2 [Source:VGNC Symbol;Acc:VGNC:73475]                                        | - | 1.172231216 | 7.37E-06    | 5.54E-05    |
| ENSMMUG00000058044 |                                                                                         | - | 0.867004366 | 1.96E-06    | 1.65E-05    |
| ENSMMUG00000008396 | methylmalonyl-CoA epimerase [Source:NCBI gene;Acc:704094]                               | - | 1.035353086 | 3.41E-11    | 6.93E-10    |
| ENSMMUG00000002096 | N-acetylglucosamine kinase [Source:VGNC Symbol;Acc:VGNC:74977]                          | - | 0.621283583 | 0.000182409 | 0.000985333 |
| ENSMMUG00000002093 | testis expressed 261 [Source:NCBI gene;Acc:703863]                                      | - | 1.436752885 | 6.63E-16    | 2.67E-14    |
| ENSMMUG00000055845 | ankyrin repeat domain 53 [Source:NCBI gene;Acc:703757]                                  | - | 1.383831898 | 1.90E-08    | 2.43E-07    |
| ENSMMUG00000041775 | Metazoan signal recognition particle RNA [Source:RFAM;Acc:RF00017]                      | - | 1.399652227 | 0.006578863 | 0.022375794 |
| ENSMMUG00000002090 | ATPase H+ transporting V1 subunit B1 [Source:VGNC Symbol;Acc:VGNC:70184]                | - | 1.444257588 | 4.03E-16    | 1.69E-14    |
| ENSMMUG00000061424 | ventral anterior homeobox 2 [Source:NCBI gene;Acc:703531]                               | - | 2.414457537 | 8.08E-06    | 6.01E-05    |
| ENSMMUG00000059700 |                                                                                         | - | 2.663170228 | 0.000305832 | 0.00156009  |
| ENSMMUG00000020852 | folliculogenesis specific bHLH transcription factor [Source:VGNC Symbol;Acc:VGNC:72563] | - | 3.679621612 | 0.015421944 | 0.046022968 |
| ENSMMUG00000010592 | adducin 2 [Source:VGNC Symbol;Acc:VGNC:69529]                                           | - | 1.986902294 | 0.000117603 | 0.000660983 |
| ENSMMUG00000063699 |                                                                                         | - | 3.206829906 | 0.000208183 | 0.00111002  |
| ENSMMUG00000064749 |                                                                                         | - | 1.315244904 | 0.006287066 | 0.021503299 |
| ENSMMUG00000007868 | AP2 associated kinase 1 [Source:VGNC Symbol;Acc:VGNC:82094]                             | - | -0.98494309 | 4.09E-07    | 4.03E-06    |
| ENSMMUG00000049539 |                                                                                         | - | 1.307800363 | 4.47E-08    | 5.32E-07    |
| ENSMMUG00000013797 | glutamine--fructose-6-phosphate transaminase 1 [Source:VGNC Symbol;Acc:VGNC:72915]      | - | 0.279176836 | 0.001006115 | 0.004432533 |
| ENSMMUG00000017209 | C1D nuclear receptor corepressor [Source:NCBI gene;Acc:698450]                          | - | 1.588123483 | 0.003270975 | 0.012248032 |
| ENSMMUG00000047067 | SERTA domain containing 2 [Source:NCBI gene;Acc:696216]                                 | - | 0.645060583 | 0.002763674 | 0.010638211 |
| ENSMMUG00000059267 | pellino E3 ubiquitin protein ligase 1 [Source:NCBI gene;Acc:696416]                     | - | 1.209578538 | 7.34E-12    | 1.68E-10    |
| ENSMMUG00000008772 | VPS54 subunit of GARP complex [Source:VGNC Symbol;Acc:VGNC:79159]                       | - | 0.390309879 | 0.000592714 | 0.00280988  |
| ENSMMUG00000008770 | UDP-glucose pyrophosphorylase 2 [Source:VGNC Symbol;Acc:VGNC:78712]                     | - | 0.669910871 | 0.000111663 | 0.000630626 |
| ENSMMUG00000006163 | malate dehydrogenase 1 [Source:VGNC Symbol;Acc:VGNC:74690]                              | - | 0.574388327 | 6.35E-05    | 0.000380601 |
| ENSMMUG00000006941 | exportin 1 [Source:VGNC Symbol;Acc:VGNC:78812]                                          | - | 1.109674452 | 1.11E-10    | 2.09E-09    |
| ENSMMUG00000010834 | REL proto-oncogene, NF-kB subunit [Source:VGNC Symbol;Acc:VGNC:76892]                   | - | 0.340887732 | 0.004051845 | 0.01479277  |

|                    |                                                                                       |   |             |             |             |
|--------------------|---------------------------------------------------------------------------------------|---|-------------|-------------|-------------|
| ENSMMUG0000004993  |                                                                                       | - | 0.401884752 | 7.26E-07    | 6.79E-06    |
| ENSMMUG0000007003  | polyribonucleotide nucleotidyltransferase 1 [Source:VGNC Symbol;Acc:VGNC:76095]       | - | 3.521645141 | 8.87E-06    | 6.53E-05    |
| ENSMMUG0000007001  | protein phosphatase 4 regulatory subunit 3B [Source:VGNC Symbol;Acc:VGNC:76342]       | - | 4.587824947 | 1.63E-05    | 0.000112467 |
| ENSMMUG0000007000  | cilia and flagella associated protein 36 [Source:VGNC Symbol;Acc:VGNC:71142]          | - | 2.854316264 | 0.012301896 | 0.038047968 |
| ENSMMUG00000054164 |                                                                                       | - | 0.631701098 | 0.00081426  | 0.003698998 |
| ENSMMUG0000008104  | proteasome activator subunit 4 [Source:VGNC Symbol;Acc:VGNC:76295]                    | - | 0.334006826 | 0.010013022 | 0.032013819 |
| ENSMMUG0000008105  | G protein-coupled receptor 75 [Source:VGNC Symbol;Acc:VGNC:73143]                     | - | 0.375708032 | 0.005882822 | 0.020298922 |
| ENSMMUG00000062091 |                                                                                       | - | 3.60168096  | 2.95E-12    | 7.14E-11    |
| ENSMMUG00000065301 |                                                                                       | - | 0.903076017 | 8.53E-07    | 7.83E-06    |
| ENSMMUG00000061344 |                                                                                       | - | -1.07613936 | 0.000796813 | 0.00363609  |
| ENSMMUG00000052169 | potassium two pore domain channel subfamily K member 12 [Source:NCBI gene;Acc:715556] | - | -3.6112188  | 5.25E-05    | 0.000321181 |
| ENSMMUG00000053577 |                                                                                       | - | 3.434923537 | 3.23E-13    | 8.92E-12    |
| ENSMMUG0000000974  | mutS homolog 2 [Source:VGNC Symbol;Acc:VGNC:74931]                                    | - | 2.914403491 | 6.15E-15    | 2.21E-13    |
| ENSMMUG00000059300 |                                                                                       | - | 0.570363275 | 0.005639888 | 0.01958112  |
| ENSMMUG00000014425 | protein kinase C epsilon [Source:VGNC Symbol;Acc:VGNC:76412]                          | - | 0.621588903 | 0.004450919 | 0.016049173 |
| ENSMMUG00000054734 |                                                                                       | - | -0.77233174 | 0.000506119 | 0.002438702 |
| ENSMMUG00000023752 | SIX homeobox 2 [Source:VGNC Symbol;Acc:VGNC:81570]                                    | - | 0.977292108 | 0.001096605 | 0.00478162  |
| ENSMMUG00000014824 | SIX homeobox 3 [Source:HGNC Symbol;Acc:HGNC:10889]                                    | - | 0.873020831 | 7.24E-09    | 9.95E-08    |
| ENSMMUG00000006311 | prolyl endopeptidase like [Source:VGNC Symbol;Acc:VGNC:76346]                         | - | 0.898085847 | 4.47E-08    | 5.32E-07    |
| ENSMMUG00000006310 | solute carrier family 3 member 1 [Source:VGNC Symbol;Acc:VGNC:77462]                  | - | 0.951022792 | 0.00042784  | 0.002099964 |
| ENSMMUG00000051072 |                                                                                       | - | 0.936195865 | 1.91E-13    | 5.40E-12    |
| ENSMMUG00000019841 | leucine rich pentatricopeptide repeat containing [Source:VGNC Symbol;Acc:VGNC:82177]  | - | 0.537747436 | 0.015999811 | 0.04748473  |
| ENSMMUG00000008080 | ATP binding cassette subfamily G member 5 [Source:VGNC Symbol;Acc:VGNC:69391]         | - | 1.16930341  | 8.46E-13    | 2.21E-11    |
| ENSMMUG00000062474 | Metazoan signal recognition particle RNA [Source:RFAM;Acc:RF00017]                    | - | 0.987227872 | 0.00152231  | 0.006338286 |
| ENSMMUG00000008077 | dynein cytoplasmic 2 light intermediate chain 1 [Source:VGNC Symbol;Acc:VGNC:71899]   | - | 1.084353455 | 4.15E-10    | 7.07E-09    |
| ENSMMUG00000025150 | Y RNA [Source:RFAM;Acc:RF00019]                                                       | - | 2.924172451 | 0.010800089 | 0.034148738 |
| ENSMMUG00000000642 | THADA armadillo repeat containing [Source:VGNC Symbol;Acc:VGNC:79185]                 | - | 0.34838122  | 0.005503771 | 0.019198852 |
| ENSMMUG00000063947 | oxoeicosanoid receptor 1 [Source:NCBI gene;Acc:713039]                                | - | 0.785889758 | 0.000291461 | 0.00149573  |
| ENSMMUG00000020744 | metastasis associated 1 family member 3 [Source:VGNC Symbol;Acc:VGNC:74814]           | - | 0.729458045 | 0.000183922 | 0.000993124 |
| ENSMMUG00000056008 |                                                                                       | - | 0.708771266 | 8.14E-10    | 1.32E-08    |
| ENSMMUG00000055395 | Y RNA [Source:RFAM;Acc:RF00019]                                                       | - | 0.988803251 | 0.001916169 | 0.007770514 |
| ENSMMUG00000043458 | transmembrane protein 178A [Source:NCBI gene;Acc:714010]                              | - | 1.097543432 | 5.20E-06    | 4.04E-05    |
| ENSMMUG00000056330 |                                                                                       | - | 1.576565574 | 2.71E-05    | 0.000176794 |
| ENSMMUG00000013901 | mitogen-activated protein kinase kinase kinase 3 [Source:VGNC Symbol;Acc:VGNC:81466]  | - | 0.698212403 | 0.004575303 | 0.016442716 |
| ENSMMUG00000020575 | SOS Ras/Rac guanine nucleotide exchange factor 1 [Source:VGNC Symbol;Acc:VGNC:77837]  | - | 0.471109322 | 0.002267085 | 0.008965409 |
| ENSMMUG00000060562 |                                                                                       | - | 0.759134487 | 0.004352088 | 0.015773929 |
| ENSMMUG00000002338 | heterogeneous nuclear ribonucleoprotein L like [Source:VGNC Symbol;Acc:VGNC:73441]    | - | 0.850548768 | 1.49E-06    | 1.30E-05    |
| ENSMMUG00000013944 | regulator of microtubule dynamics 2 [Source:VGNC Symbol;Acc:VGNC:76839]               | - | 1.518764319 | 3.31E-18    | 1.76E-16    |
| ENSMMUG00000016442 | glutaminyl-peptide cyclotransferase [Source:VGNC Symbol;Acc:VGNC:76636]               | - | 2.218434329 | 8.92E-05    | 0.000515494 |

|                     |                                                                                              |             |             |             |
|---------------------|----------------------------------------------------------------------------------------------|-------------|-------------|-------------|
| ENSMMUG00000016438  | protein kinase D3 [Source:VGNC Symbol;Acc:VGNC:76415]                                        | 2.035193196 | 1.35E-10    | 2.52E-09    |
| ENSMMUG00000016434  | NADH:ubiquinone oxidoreductase complex assembly factor 7 [Source:VGNC Symbol;Acc:VGNC:75035] | 2.373884836 | 1.90E-08    | 2.44E-07    |
| ENSMMUG000000053593 |                                                                                              | -           | -           | -           |
| ENSMMUG000000021436 | latent transforming growth factor beta binding protein 1 [Source:VGNC Symbol;Acc:VGNC:74456] | 0.744312328 | 0.002741557 | 0.010564676 |
| ENSMMUG000000055130 |                                                                                              | 1.511028888 | 2.30E-09    | 3.46E-08    |
| ENSMMUG000000021691 | spastin [Source:VGNC Symbol;Acc:VGNC:77857]                                                  | -           | -           | -           |
| ENSMMUG000000058351 |                                                                                              | 0.471119662 | 0.007096601 | 0.023910531 |
| ENSMMUG000000048513 | tudor domain containing 15 [Source:NCBI gene;Acc:703066]                                     | -           | -           | -           |
| ENSMMUG00000007692  | apolipoprotein B [Source:VGNC Symbol;Acc:VGNC:69985]                                         | 0.987513249 | 6.49E-06    | 4.96E-05    |
| ENSMMUG00000003355  | lipid droplet associated hydrolase [Source:VGNC Symbol;Acc:VGNC:74130]                       | 0.48539423  | 0.000629367 | 0.002948749 |
| ENSMMUG000000050446 | growth differentiation factor 7 [Source:NCBI gene;Acc:702462]                                | -           | -           | -           |
| ENSMMUG000000022996 | HCLS1 binding protein 3 [Source:VGNC Symbol;Acc:VGNC:82158]                                  | 0.749897819 | 0.000841308 | 0.00380202  |
| ENSMMUG000000064216 |                                                                                              | -           | -           | -           |
| ENSMMUG000000012058 | GEN1 Holliday junction 5' flap endonuclease [Source:VGNC Symbol;Acc:VGNC:72790]              | 1.121584865 | 2.69E-16    | 1.14E-14    |
| ENSMMUG000000012056 | structural maintenance of chromosomes 6 [Source:VGNC Symbol;Acc:VGNC:77746]                  | 0.631275957 | 0.000879287 | 0.003944413 |
| ENSMMUG000000040529 | visinin like 1 [Source:NCBI gene;Acc:699459]                                                 | 0.600992792 | 0.001855619 | 0.007548983 |
| ENSMMUG000000052363 | MYCN proto-oncogene, bHLH transcription factor [Source:NCBI gene;Acc:698699]                 | 1.416645337 | 1.66E-10    | 3.05E-09    |
| ENSMMUG000000004215 | LRAT domain containing 1 [Source:VGNC Symbol;Acc:VGNC:74321]                                 | -2.87953654 | 1.41E-05    | 9.87E-05    |
| ENSMMUG000000052377 |                                                                                              | -           | -           | -           |
| ENSMMUG000000056755 |                                                                                              | 3.291792004 | 8.57E-09    | 1.15E-07    |
| ENSMMUG000000020249 | growth regulating estrogen receptor binding 1 [Source:VGNC Symbol;Acc:VGNC:73227]            | -           | -           | -           |
| ENSMMUG000000023225 | E2F transcription factor 6 [Source:VGNC Symbol;Acc:VGNC:72027]                               | 5.855492656 | 1.75E-13    | 4.99E-12    |
| ENSMMUG000000059188 |                                                                                              | -           | -           | -           |
| ENSMMUG00000016678  | Rho associated coiled-coil containing protein kinase 2 [Source:VGNC Symbol;Acc:VGNC:76714]   | 3.282479784 | 0.000312272 | 0.001588317 |
| ENSMMUG00000060435  | Metazoan signal recognition particle RNA [Source:RFAM;Acc:RF00017]                           | 0.360074903 | 0.003636747 | 0.013470179 |
| ENSMMUG000000022785 | solute carrier family 66 member 3 [Source:VGNC Symbol;Acc:VGNC:76334]                        | -           | -           | -           |
| ENSMMUG00000064867  | chromosome 13 C2orf50 homolog [Source:NCBI gene;Acc:708351]                                  | 2.192974082 | 0.000302704 | 0.001546382 |
| ENSMMUG00000063262  |                                                                                              | -           | -           | -           |
| ENSMMUG00000052047  |                                                                                              | 1.807919939 | 6.37E-12    | 1.47E-10    |
| ENSMMUG000000022879 | EARP complex and GARP complex interacting protein 1 [Source:NCBI gene;Acc:707650]            | 1.512211649 | 0.002118149 | 0.008484092 |
| ENSMMUG000000051814 |                                                                                              | 0.357341569 | 0.006909468 | 0.023336097 |
| ENSMMUG000000009310 | myelin transcription factor 1 like [Source:NCBI gene;Acc:706914]                             | 0.474161323 | 0.00165725  | 0.006829156 |
| ENSMMUG000000009660 | syntrophin gamma 2 [Source:VGNC Symbol;Acc:VGNC:77694]                                       | 1.962291007 | 8.12E-07    | 7.50E-06    |
| ENSMMUG000000061533 |                                                                                              | 2.474104096 | 4.67E-18    | 2.38E-16    |
| ENSMMUG000000050543 |                                                                                              | 2.28884471  | 9.31E-05    | 0.000535614 |
| ENSMMUG000000042598 | transmembrane protein 18 [Source:NCBI gene;Acc:721515]                                       | 1.441018448 | 0.01165743  | 0.036432391 |
| ENSMMUG000000038858 |                                                                                              | -           | -           | -           |
| ENSMMUG000000022914 | RAB, member of RAS oncogene family like 2B [Source:NCBI gene;Acc:716615]                     | 1.767658214 | 0.002457719 | 0.009635055 |
| ENSMMUG000000009119 | modulator of VRAC current 1 [Source:VGNC Symbol;Acc:VGNC:74787]                              | -           | -           | -           |
| ENSMMUG000000011278 | cysteine rich with EGF like domains 2 [Source:NCBI gene;Acc:720586]                          | 0.936986836 | 7.29E-09    | 1.00E-07    |
|                     |                                                                                              | 1.836555351 | 2.45E-24    | 2.36E-22    |
|                     |                                                                                              | -           | -           | -           |
|                     |                                                                                              | 2.705986638 | 0.000319196 | 0.001618735 |
|                     |                                                                                              | 0.638637379 | 0.001280078 | 0.005466058 |
|                     |                                                                                              | -0.75620651 | 2.10E-05    | 0.00014133  |
|                     |                                                                                              | -           | -           | -           |
|                     |                                                                                              | 0.627038484 | 0.000368925 | 0.001832604 |
|                     |                                                                                              | 2.889590768 | 1.10E-25    | 1.28E-23    |
|                     |                                                                                              | 2.533237677 | 8.02E-13    | 2.11E-11    |
|                     |                                                                                              | 3.128334162 | 1.71E-19    | 1.00E-17    |
|                     |                                                                                              | 0.544811864 | 3.26E-05    | 0.000209117 |
|                     |                                                                                              | 0.687338146 | 0.000805124 | 0.003668049 |
|                     |                                                                                              | 0.263396474 | 0.001023421 | 0.004503115 |
|                     |                                                                                              | 0.537160988 | 8.72E-06    | 6.42E-05    |



|                    |                                                                                                              |             |             |             |
|--------------------|--------------------------------------------------------------------------------------------------------------|-------------|-------------|-------------|
| ENSMMUG00000011273 | ALG12 alpha-1,6-mannosyltransferase [Source:VGNC Symbol;Acc:VGNC:69637]                                      | 0.848210118 | 0.010392419 | 0.033023542 |
| ENSMMUG00000056186 |                                                                                                              | 1.202571577 | 0.001242723 | 0.005334161 |
| ENSMMUG00000020993 | cadherin EGF LAG seven-pass G-type receptor 1 [Source:NCBI gene;Acc:718440]                                  | 1.653496887 | 9.32E-06    | 6.82E-05    |
| ENSMMUG00000016262 | tetratricopeptide repeat domain 38 [Source:VGNC Symbol;Acc:VGNC:79574]                                       | 1.926811533 | 1.68E-11    | 3.62E-10    |
| ENSMMUG00000057898 |                                                                                                              | 0.605480534 | 0.005589196 | 0.019429176 |
| ENSMMUG00000023003 | family with sequence similarity 118 member A [Source:VGNC Symbol;Acc:VGNC:72265]                             | 0.43656187  | 0.005238238 | 0.018419209 |
| ENSMMUG00000031000 | Rho GTPase activating protein 8 [Source:NCBI gene;Acc:716745]                                                | 3.732118182 | 5.45E-07    | 5.23E-06    |
| ENSMMUG00000065099 |                                                                                                              | 2.998270473 | 1.63E-16    | 7.05E-15    |
| ENSMMUG00000064395 |                                                                                                              | 0.686447764 | 6.63E-05    | 0.000395079 |
| ENSMMUG00000005769 | EF-hand calcium binding domain 6 [Source:VGNC Symbol;Acc:VGNC:72092]                                         | 0.830718441 | 6.65E-05    | 0.00039571  |
| ENSMMUG00000008106 | solute carrier family 25 member 17 [Source:NCBI gene;Acc:705547]                                             | 0.718840768 | 0.000436093 | 0.002135986 |
| ENSMMUG00000056662 |                                                                                                              | 1.083065374 | 2.50E-05    | 0.00016468  |
| ENSMMUG00000012101 | synaptogyrin 1 [Source:VGNC Symbol;Acc:VGNC:78068]                                                           | 0.955110587 | 9.62E-05    | 0.000550882 |
| ENSMMUG00000048395 | chromobox 6 [Source:NCBI gene;Acc:702133]                                                                    | 3.814661366 | 0.000445153 | 0.002175801 |
| ENSMMUG00000004868 | dynein axonemal light chain 4 [Source:VGNC Symbol;Acc:VGNC:71945]                                            | 3.356965897 | 0.012622066 | 0.038866761 |
| ENSMMUG00000007277 | GTP binding protein 1 [Source:VGNC Symbol;Acc:VGNC:73320]                                                    | -1.06456534 | 0.010585177 | 0.033529691 |
| ENSMMUG00000012467 | family with sequence similarity 227 member A [Source:VGNC Symbol;Acc:VGNC:72475]                             | 0.876372995 | 0.001434027 | 0.006022571 |
| ENSMMUG00000049788 |                                                                                                              | -1.69189456 | 0.000128374 | 0.000717208 |
| ENSMMUG00000006987 | RNA polymerase II subunit F [Source:NCBI gene;Acc:699566]                                                    | 0.371302112 | 0.00089752  | 0.004013368 |
| ENSMMUG00000019785 | eukaryotic translation initiation factor 3 subunit L [Source:NCBI gene;Acc:699189]                           | 1.352258848 | 0.003124285 | 0.01177276  |
| ENSMMUG00000015258 | glycine C-acetyltransferase [Source:NCBI gene;Acc:698811]                                                    | 2.376563271 | 0.00245096  | 0.009611244 |
| ENSMMUG00000005991 | TRIO and F-actin binding protein [Source:NCBI gene;Acc:701241]                                               | 0.713679404 | 1.83E-06    | 1.56E-05    |
| ENSMMUG00000003005 | MFNG O-fucosylpeptide 3-beta-N-acetylglucosaminyltransferase [Source:VGNC Symbol;Acc:VGNC:74712]             | 4.756211246 | 1.61E-06    | 1.39E-05    |
| ENSMMUG00000052785 | extracellular leucine rich repeat and fibronectin type III domain containing 2 [Source:NCBI gene;Acc:697071] | 3.804705994 | 0.000374578 | 0.001857393 |
| ENSMMUG00000052038 |                                                                                                              | 1.743899123 | 0.009455707 | 0.030524257 |
| ENSMMUG00000000151 | transmembrane serine protease 6 [Source:VGNC Symbol;Acc:VGNC:79038]                                          | 0.520529265 | 3.53E-05    | 0.000224611 |
| ENSMMUG00000058352 |                                                                                                              | 1.325906864 | 8.33E-05    | 0.000483643 |
| ENSMMUG00000012350 | mercaptopyruvate sulfurtransferase [Source:VGNC Symbol;Acc:VGNC:74922]                                       | 0.82377668  | 0.00772032  | 0.025733787 |
| ENSMMUG00000012349 | thiosulfate sulfurtransferase [Source:VGNC Symbol;Acc:VGNC:78664]                                            | 2.144691339 | 0.00285756  | 0.010939549 |
| ENSMMUG00000014986 | testis expressed 33 [Source:VGNC Symbol;Acc:VGNC:79727]                                                      | 1.060167943 | 3.36E-08    | 4.11E-07    |
| ENSMMUG00000008160 | neutrophil cytosolic factor 4 [Source:VGNC Symbol;Acc:VGNC:75141]                                            | 1.563409089 | 0.000392851 | 0.001942508 |
| ENSMMUG00000055820 |                                                                                                              | 1.862526929 | 9.89E-05    | 0.000564873 |
| ENSMMUG00000008778 | parvalbumin [Source:VGNC Symbol;Acc:VGNC:76627]                                                              | 1.164577234 | 1.57E-06    | 1.36E-05    |
| ENSMMUG00000060967 |                                                                                                              | 0.822133193 | 0.000879688 | 0.003944953 |
| ENSMMUG00000001537 | apolipoprotein L2 [Source:VGNC Symbol;Acc:VGNC:69989]                                                        | -0.77797783 | 7.30E-07    | 6.82E-06    |
| ENSMMUG00000014010 | RNA binding fox-1 homolog 2 [Source:VGNC Symbol;Acc:VGNC:76685]                                              | 0.88865185  | 1.53E-14    | 5.19E-13    |
| ENSMMUG00000048463 | apolipoprotein L5 [Source:HGNC Symbol;Acc:HGNC:14869]                                                        | 0.838542777 | 5.01E-08    | 5.90E-07    |
| ENSMMUG00000056010 |                                                                                                              | 2.069340346 | 0.001166217 | 0.005042818 |
| ENSMMUG00000059824 |                                                                                                              | 3.316136345 | 0.001870355 | 0.007606724 |
| ENSMMUG00000012113 | LARGE xylosyl- and glucuronyltransferase 1 [Source:VGNC Symbol;Acc:VGNC:74236]                               | 0.446655635 | 0.014429406 | 0.043587483 |

|                     |                                                                                                 |             |             |             |
|---------------------|-------------------------------------------------------------------------------------------------|-------------|-------------|-------------|
| ENSMMUG00000013626  | solute carrier family 5 member 1 [Source:VGNC Symbol;Acc:VGNC:77609]                            | 0.38084847  | 0.008699834 | 0.028510815 |
| ENSMMUG00000002182  | phosphatidylserine decarboxylase [Source:VGNC Symbol;Acc:VGNC:76005]                            | 2.347555465 | 1.72E-06    | 1.47E-05    |
| ENSMMUG00000002181  | SFI1 centrin binding protein [Source:VGNC Symbol;Acc:VGNC:77328]                                | 0.657277114 | 2.39E-06    | 1.99E-05    |
| ENSMMUG000000037662 | selenoprotein M [Source:NCBI gene;Acc:718290]                                                   | 1.845024381 | 0.004311448 | 0.015654955 |
| ENSMMUG00000004675  | smoothelin [Source:VGNC Symbol;Acc:VGNC:77661]                                                  | 1.882380397 | 4.01E-07    | 3.96E-06    |
| ENSMMUG000000056113 |                                                                                                 | 2.013128976 | 0.000992348 | 0.004382897 |
| ENSMMUG00000005898  | MORC family CW-type zinc finger 2 [Source:VGNC Symbol;Acc:VGNC:74810]                           | 2.127209384 | 0.006627176 | 0.022518268 |
| ENSMMUG00000019805  | dual specificity phosphatase 18 [Source:VGNC Symbol;Acc:VGNC:71858]                             | 0.470022938 | 0.004595665 | 0.016498977 |
| ENSMMUG00000019804  | solute carrier family 35 member E4 [Source:NCBI gene;Acc:716119]                                | -0.52637486 | 0.015837499 | 0.04707541  |
| ENSMMUG00000019803  | transcobalamin 2 [Source:VGNC Symbol;Acc:VGNC:78293]                                            | 0.542626349 | 0.011440375 | 0.035865947 |
| ENSMMUG00000017562  | pescadillo ribosomal biogenesis factor 1 [Source:VGNC Symbol;Acc:VGNC:75944]                    | 0.751829798 | 0.005264448 | 0.018492824 |
| ENSMMUG000000052343 |                                                                                                 | -0.92730691 | 0.002474883 | 0.009686097 |
| ENSMMUG000000046054 | SEC14 like lipid binding 4 [Source:NCBI gene;Acc:715914]                                        | 1.227391607 | 0.006454892 | 0.021996828 |
| ENSMMUG000000021374 | EWS RNA binding protein 1 [Source:VGNC Symbol;Acc:VGNC:72446]                                   | 0.604599801 | 0.015765766 | 0.046919215 |
| ENSMMUG000000058170 | U6 spliceosomal RNA [Source:RFAM;Acc:RF00026]                                                   | 0.679507361 | 0.014730418 | 0.044298792 |
| ENSMMUG00000007215  | X-box binding protein 1 [Source:VGNC Symbol;Acc:VGNC:78806]                                     | 0.797062934 | 0.00822541  | 0.027184757 |
| ENSMMUG000000020486 | checkpoint kinase 2 [Source:VGNC Symbol;Acc:VGNC:70958]                                         | 0.642366653 | 4.83E-06    | 3.79E-05    |
| ENSMMUG00000001058  | tetratricopeptide repeat domain 28 [Source:VGNC Symbol;Acc:VGNC:79785]                          | 2.937961321 | 3.37E-22    | 2.60E-20    |
| ENSMMUG000000023450 | tyrosylprotein sulfotransferase 2 [Source:VGNC Symbol;Acc:VGNC:78639]                           | 0.895417863 | 0.002945377 | 0.011233971 |
| ENSMMUG000000023446 | tuftelin interacting protein 11 [Source:VGNC Symbol;Acc:VGNC:78399]                             | 1.011850133 | 7.48E-07    | 6.97E-06    |
| ENSMMUG000000023443 | SRR1 domain containing [Source:VGNC Symbol;Acc:VGNC:78036]                                      | 0.817929073 | 3.35E-06    | 2.71E-05    |
| ENSMMUG000000023442 | HPS4 biogenesis of lysosomal organelles complex 3 subunit 2 [Source:VGNC Symbol;Acc:VGNC:73396] | -1.5964882  | 0.009543885 | 0.030752274 |
| ENSMMUG000000016052 | seizure related 6 homolog like [Source:VGNC Symbol;Acc:VGNC:77176]                              | 0.988906244 | 3.09E-05    | 0.000199648 |
| ENSMMUG000000010839 | small G protein signaling modulator 1 [Source:VGNC Symbol;Acc:VGNC:77336]                       | 0.312837111 | 0.016779628 | 0.049339636 |
| ENSMMUG00000006853  | crystallin beta B2 [Source:NCBI gene;Acc:100144420]                                             | 3.492826182 | 3.25E-17    | 1.53E-15    |
| ENSMMUG000000044345 | ral-GDS-related protein [Source:NCBI gene;Acc:710293]                                           | 0.695939817 | 0.001227768 | 0.005276429 |
| ENSMMUG000000009106 | solute carrier family 2 member 11 [Source:NCBI gene;Acc:699450]                                 | 0.455140069 | 0.000910145 | 0.004060757 |
| ENSMMUG000000004552 | D-dopachrome tautomerase [Source:NCBI gene;Acc:699933]                                          | 0.411774896 | 0.003737097 | 0.013798132 |
| ENSMMUG000000020992 | calcineurin binding protein 1 [Source:NCBI gene;Acc:700566]                                     | 1.149415905 | 4.71E-09    | 6.73E-08    |
| ENSMMUG000000005980 | glutathione hydrolase 5 proenzyme [Source:NCBI gene;Acc:720345]                                 | 0.624695667 | 2.05E-08    | 2.61E-07    |
| ENSMMUG000000044782 |                                                                                                 | -0.97980983 | 6.44E-10    | 1.06E-08    |
| ENSMMUG000000020999 | gamma-glutamyltransferase 1 [Source:NCBI gene;Acc:707545]                                       | 0.617643203 | 0.004887031 | 0.01739803  |
| ENSMMUG000000000262 | beta-ureidopropionase 1 [Source:VGNC Symbol;Acc:VGNC:79029]                                     | 1.032106654 | 0.005182125 | 0.018249358 |

|                    |                                                                                                              |   |             |             |             |
|--------------------|--------------------------------------------------------------------------------------------------------------|---|-------------|-------------|-------------|
| ENSMMUG00000051567 |                                                                                                              | - | 0.579375173 | 0.010321241 | 0.032834566 |
| ENSMMUG00000051040 |                                                                                                              |   | 1.105116674 | 0.008618258 | 0.028289755 |
| ENSMMUG00000049542 |                                                                                                              |   | 1.716253276 | 4.15E-06    | 3.31E-05    |
| ENSMMUG00000023622 | BCR activator of RhoGEF and GTPase [Source:NCBI gene;Acc:709258]                                             |   | 1.126739114 | 0.000912609 | 0.004066576 |
| ENSMMUG00000014641 |                                                                                                              |   | 0.430904564 | 0.000285708 | 0.001471347 |
| ENSMMUG00000020092 |                                                                                                              |   | 0.637312696 | 0.001076223 | 0.004704451 |
| ENSMMUG00000044861 |                                                                                                              |   | 0.502100115 | 0.005569665 | 0.019375692 |
| ENSMMUG00000054655 | immunoglobulin lambda variable 3-10 [Source:HGNC Symbol;Acc:HGNC:5897]                                       |   | 1.049634549 | 0.00023055  | 0.001218164 |
| ENSMMUG00000056950 |                                                                                                              |   | 1.179544497 | 1.40E-10    | 2.60E-09    |
| ENSMMUG00000060270 |                                                                                                              |   | 2.311866954 | 0.016610391 | 0.04890353  |
| ENSMMUG00000047015 | ral-GDS-related protein-like [Source:NCBI gene;Acc:106995524]                                                |   | 0.996364242 | 0.000122926 | 0.000689239 |
| ENSMMUG00000018798 | stromal cell derived factor 2 like 1 [Source:NCBI gene;Acc:697928]                                           |   | 0.442400424 | 0.016632917 | 0.048945301 |
| ENSMMUG00000064215 | yippee like 1 [Source:NCBI gene;Acc:107000563]                                                               |   | -1.18634688 | 0.000123195 | 0.000690471 |
| ENSMMUG00000018531 | peptidylprolyl isomerase like 2 [Source:VGNC Symbol;Acc:VGNC:76239]                                          |   | 0.397535634 | 0.007889253 | 0.026203457 |
| ENSMMUG00000018823 | transmembrane protein 191C [Source:NCBI gene;Acc:697070]                                                     |   | 2.465040075 | 1.34E-05    | 9.46E-05    |
| ENSMMUG00000056022 |                                                                                                              |   | 0.69351138  | 6.86E-05    | 0.000407102 |
| ENSMMUG00000062755 |                                                                                                              |   | 1.037622243 | 0.002345477 | 0.00923375  |
| ENSMMUG00000061040 |                                                                                                              |   | 1.597708124 | 0.006300303 | 0.02154332  |
| ENSMMUG00000049130 |                                                                                                              |   | 2.247936454 | 1.49E-31    | 3.27E-29    |
| ENSMMUG00000063914 |                                                                                                              |   | 2.307250052 | 1.41E-38    | 5.65E-36    |
| ENSMMUG00000023263 | mediator complex subunit 15 [Source:VGNC Symbol;Acc:VGNC:74511]                                              |   | 2.620648719 | 1.50E-16    | 6.48E-15    |
| ENSMMUG00000017171 | scavenger receptor class F member 2 [Source:VGNC Symbol;Acc:VGNC:77058]                                      |   | 1.071222322 | 0.009526463 | 0.03071025  |
| ENSMMUG00000062236 |                                                                                                              |   | 0.876040191 | 0.016984149 | 0.049888715 |
| ENSMMUG00000011547 | reticulon 4 receptor [Source:VGNC Symbol;Acc:VGNC:77047]                                                     |   | 0.76954622  | 0.001026984 | 0.004515959 |
| ENSMMUG00000021904 | cell division cycle 45 [Source:VGNC Symbol;Acc:VGNC:70800]                                                   |   | 0.676156904 | 0.002597788 | 0.010099467 |
| ENSMMUG00000031106 | ubiquitin recognition factor in ER associated degradation 1 [Source:NCBI gene;Acc:711716]                    |   | 0.93985695  | 1.89E-12    | 4.70E-11    |
| ENSMMUG00000009650 | HIR histone cell cycle regulation defective homolog A ( <i>S. cerevisiae</i> ) [Source:NCBI gene;Acc:719142] |   | 0.257463644 | 0.008659328 | 0.028411267 |
| ENSMMUG00000005432 | clathrin heavy chain like 1 [Source:VGNC Symbol;Acc:VGNC:71268]                                              |   | 1.471297425 | 1.73E-09    | 2.66E-08    |
| ENSMMUG00000019925 | DiGeorge syndrome critical region gene 2 [Source:NCBI gene;Acc:100423715]                                    |   | 1.325640864 | 1.70E-13    | 4.87E-12    |
| ENSMMUG00000062702 |                                                                                                              |   | 1.332490071 | 0.003980294 | 0.014569477 |
| ENSMMUG00000020799 | BH3 interacting domain death agonist [Source:VGNC Symbol;Acc:VGNC:70250]                                     |   | 1.947557794 | 1.75E-08    | 2.26E-07    |
| ENSMMUG00000021476 | BCL2 like 13 [Source:VGNC Symbol;Acc:VGNC:84544]                                                             |   | 2.001463519 | 7.33E-05    | 0.000431427 |
| ENSMMUG00000058916 |                                                                                                              |   | 2.715797605 | 1.93E-13    | 5.45E-12    |
| ENSMMUG00000021477 | ATPase H+ transporting V1 subunit E1 [Source:NCBI gene;Acc:709739]                                           |   | 2.820104656 | 3.60E-11    | 7.29E-10    |
| ENSMMUG00000006731 | CECR2 histone acetyl-lysine reader [Source:VGNC Symbol;Acc:VGNC:84530]                                       |   | 2.051053543 | 6.23E-15    | 2.23E-13    |
| ENSMMUG00000059302 | Metazoan signal recognition particle RNA [Source:RFAM;Acc:RF00017]                                           |   | 2.029852599 | 1.70E-07    | 1.81E-06    |
| ENSMMUG00000022222 | interleukin 17 receptor A [Source:VGNC Symbol;Acc:VGNC:73712]                                                |   | 0.346564262 | 0.004980049 | 0.017661919 |
| ENSMMUG00000009953 | ninein like [Source:VGNC Symbol;Acc:VGNC:75273]                                                              |   | 1.608572128 | 1.28E-08    | 1.68E-07    |
| ENSMMUG00000002397 | GINS complex subunit 1 [Source:VGNC Symbol;Acc:VGNC:73025]                                                   |   | 1.876801177 | 1.41E-12    | 3.57E-11    |
| ENSMMUG00000059374 |                                                                                                              |   | 1.813211946 | 0.000105269 | 0.000597648 |
| ENSMMUG00000059370 | Metazoan signal recognition particle RNA [Source:RFAM;Acc:RF00017]                                           |   | 2.712101038 | 0.015957058 | 0.047367871 |
| ENSMMUG00000009201 | abhydrolase domain containing 12 [Source:VGNC Symbol;Acc:VGNC:69411]                                         |   | 1.680784728 | 2.01E-11    | 4.27E-10    |
| ENSMMUG00000060399 | Metazoan signal recognition particle RNA [Source:RFAM;Acc:RF00017]                                           |   | 1.470329807 | 0.000265151 | 0.001381211 |
| ENSMMUG00000009199 | glycogen phosphorylase B [Source:VGNC Symbol;Acc:VGNC:76631]                                                 |   | 1.765374751 | 2.71E-11    | 5.63E-10    |
| ENSMMUG00000024668 | Y RNA [Source:RFAM;Acc:RF00019]                                                                              |   | 3.205809246 | 0.005328968 | 0.018677361 |

|                    |                                                                                     |             |             |             |
|--------------------|-------------------------------------------------------------------------------------|-------------|-------------|-------------|
| ENSMMUG00000052572 |                                                                                     | 1.477179059 | 0.001412637 | 0.00594877  |
| ENSMMUG00000058095 | visual system homeobox 1 [Source:NCBI gene;Acc:715973]                              | 1.414361394 | 0.005443991 | 0.019028188 |
| ENSMMUG00000052227 |                                                                                     | 1.811499081 | 0.000268486 | 0.001394491 |
| ENSMMUG00000020597 | acyl-CoA synthetase short chain family member 1 [Source:VGNC Symbol;Acc:VGNC:69416] | 1.111987251 | 0.000175576 | 0.000950983 |
| ENSMMUG00000061222 | adipocyte plasma membrane associated protein [Source:NCBI gene;Acc:704948]          | 1.131669271 | 2.08E-05    | 0.000140378 |
| ENSMMUG00000049391 |                                                                                     | 2.497424505 | 6.29E-07    | 5.95E-06    |
|                    |                                                                                     | -           |             |             |
| ENSMMUG00000053965 |                                                                                     | 0.711729449 | 0.004517644 | 0.016260504 |
|                    |                                                                                     | -           |             |             |
| ENSMMUG00000042668 | cilia and flagella associated protein 61 [Source:NCBI gene;Acc:699814]              | 1.055350207 | 6.44E-05    | 0.000385147 |
|                    |                                                                                     | -           |             |             |
| ENSMMUG00000007709 | crooked neck pre-mRNA splicing factor 1 [Source:VGNC Symbol;Acc:VGNC:71412]         | 1.155208468 | 1.01E-11    | 2.28E-10    |
|                    |                                                                                     | -           |             |             |
| ENSMMUG00000010114 | Ras and Rab interactor 2 [Source:VGNC Symbol;Acc:VGNC:76770]                        | 0.698737493 | 0.001252442 | 0.005366718 |
|                    |                                                                                     | -           |             |             |
| ENSMMUG00000002321 | solute carrier family 24 member 3 [Source:VGNC Symbol;Acc:VGNC:77426]               | 1.318646139 | 1.85E-06    | 1.57E-05    |
| ENSMMUG00000002202 | SEL1L2 adaptor subunit of ERAD E3 ligase [Source:VGNC Symbol;Acc:VGNC:77239]        | 0.690646165 | 0.002262869 | 0.008951257 |
| ENSMMUG00000062485 | ESF1 nucleolar pre-rRNA processing protein homolog [Source:NCBI gene;Acc:694159]    | 0.898445184 | 0.000714097 | 0.003288598 |
| ENSMMUG00000011064 | synaptosome associated protein 25 [Source:VGNC Symbol;Acc:VGNC:77663]               | 3.739306564 | 9.60E-17    | 4.25E-15    |
|                    |                                                                                     | -           |             |             |
| ENSMMUG00000015923 | ankyrin repeat and EF-hand domain containing 1 [Source:VGNC Symbol;Acc:VGNC:69615]  | 1.081046969 | 9.24E-05    | 0.000531805 |
| ENSMMUG00000065218 |                                                                                     | 0.444884789 | 0.004606639 | 0.016534145 |
|                    |                                                                                     | -           |             |             |
| ENSMMUG00000021137 | thioredoxin related transmembrane protein 4 [Source:VGNC Symbol;Acc:VGNC:79484]     | 0.949176165 | 0.014974234 | 0.04490669  |
| ENSMMUG00000055897 |                                                                                     | 1.548585188 | 6.62E-10    | 1.09E-08    |
| ENSMMUG00000057687 |                                                                                     | 2.054055248 | 5.35E-20    | 3.23E-18    |
| ENSMMUG00000064554 | leucine rich repeat neuronal 4 [Source:NCBI gene;Acc:718283]                        | 2.293347463 | 2.09E-07    | 2.18E-06    |
| ENSMMUG00000056093 | shieldin complex subunit 1 [Source:NCBI gene;Acc:718152]                            | 1.295806796 | 8.53E-07    | 7.83E-06    |
| ENSMMUG00000022345 |                                                                                     | 0.998531523 | 0.002849119 | 0.010914552 |
| ENSMMUG00000050080 | Metazoan signal recognition particle RNA [Source:RFAM;Acc:RF00017]                  | 1.515082301 | 0.001335564 | 0.00566504  |
| ENSMMUG00000064391 |                                                                                     | 1.388311197 | 3.67E-13    | 1.00E-11    |
|                    |                                                                                     | -           |             |             |
| ENSMMUG00000013261 | CDP-diacylglycerol synthase 2 [Source:VGNC Symbol;Acc:VGNC:70995]                   | 1.011416374 | 0.007734138 | 0.025767598 |
|                    |                                                                                     | -           |             |             |
| ENSMMUG00000020004 | Ras association domain family member 2 [Source:VGNC Symbol;Acc:VGNC:76674]          | 0.670729562 | 0.001822416 | 0.007424677 |
| ENSMMUG00000051480 |                                                                                     | 0.82030407  | 0.001640254 | 0.006765082 |
| ENSMMUG00000017150 | mitochondrial antiviral signaling protein [Source:VGNC Symbol;Acc:VGNC:74609]       | 0.753545062 | 0.008878807 | 0.028955235 |
| ENSMMUG00000018922 | cell division cycle 25B [Source:VGNC Symbol;Acc:VGNC:70795]                         | 0.311181637 | 0.003374149 | 0.012600717 |
| ENSMMUG00000022070 | sialic acid binding Ig like lectin 1 [Source:VGNC Symbol;Acc:VGNC:77220]            | 0.504388081 | 5.04E-05    | 0.00030939  |
| ENSMMUG00000003633 | solute carrier family 4 member 11 [Source:VGNC Symbol;Acc:VGNC:77721]               | 0.379569899 | 1.50E-09    | 2.31E-08    |
| ENSMMUG00000061481 | inosine triphosphatase [Source:NCBI gene;Acc:717257]                                | 0.364060038 | 2.31E-06    | 1.92E-05    |
| ENSMMUG00000010028 | leucine zipper tumor suppressor family member 3 [Source:VGNC Symbol;Acc:VGNC:74403] | 1.663808906 | 1.33E-20    | 8.86E-19    |
| ENSMMUG00000043281 | U-box domain containing 5 [Source:NCBI gene;Acc:717166]                             | 1.651615593 | 0.01376462  | 0.041915583 |
| ENSMMUG00000002982 | FAST kinase domains 5 [Source:NCBI gene;Acc:100498658]                              | 0.54586704  | 0.000904244 | 0.004037858 |
| ENSMMUG00000039757 | Metazoan signal recognition particle RNA [Source:RFAM;Acc:RF00017]                  | 2.640384657 | 0.006342387 | 0.02166081  |
| ENSMMUG00000010678 | oxytocin/neurophysin I prepropeptide [Source:VGNC Symbol;Acc:VGNC:75730]            | 1.549102446 | 2.63E-05    | 0.000172295 |
| ENSMMUG00000063622 | mitochondrial ribosomal protein S26 [Source:NCBI gene;Acc:717038]                   | 2.564591956 | 1.64E-12    | 4.11E-11    |
| ENSMMUG00000005878 | protein tyrosine phosphatase receptor type A [Source:VGNC Symbol;Acc:VGNC:76610]    | 0.553983693 | 1.25E-05    | 8.86E-05    |
|                    |                                                                                     | -           |             |             |
| ENSMMUG00000005204 | VPS16 core subunit of CORVET and HOPS complexes [Source:VGNC Symbol;Acc:VGNC:78966] | 1.783699505 | 1.67E-05    | 0.000115104 |
|                    |                                                                                     | -           |             |             |
| ENSMMUG00000005200 | PC-esterase domain containing 1A [Source:VGNC Symbol;Acc:VGNC:75622]                | 2.441931809 | 0.002217806 | 0.008818964 |

|                    |                                                                                                                         |   |             |             |             |
|--------------------|-------------------------------------------------------------------------------------------------------------------------|---|-------------|-------------|-------------|
| ENSMMUG00000021332 | carboxypeptidase X, M14 family member 1 [Source:VGNC Symbol;Acc:VGNC:71413]                                             | - | 3.702793965 | 0.002840296 | 0.010889529 |
| ENSMMUG00000064862 |                                                                                                                         | - | 3.014797144 | 0.008673382 | 0.028444068 |
| ENSMMUG00000021331 | EBF family member 4 [Source:VGNC Symbol;Acc:VGNC:71932]                                                                 | - | 3.123082919 | 3.83E-06    | 3.07E-05    |
| ENSMMUG00000061433 |                                                                                                                         | - | 0.967608076 | 5.89E-05    | 0.00035589  |
| ENSMMUG00000013888 | NOP56 ribonucleoprotein [Source:VGNC Symbol;Acc:VGNC:75181]                                                             | - | 1.055715851 | 0.005204574 | 0.018314617 |
| ENSMMUG00000010050 | small nuclear ribonucleoprotein polypeptides B and B1 [Source:VGNC Symbol;Acc:VGNC:77676]                               | - | 3.098146487 | 4.77E-08    | 5.63E-07    |
| ENSMMUG00000018474 | signal regulatory protein alpha [Source:NCBI gene;Acc:717811]                                                           | - | 1.712701915 | 8.49E-10    | 1.37E-08    |
| ENSMMUG00000018473 | signal-regulatory protein gamma [Source:NCBI gene;Acc:716034]                                                           | - | 2.856373747 | 0.015393625 | 0.045948234 |
| ENSMMUG00000018165 | syndecan binding protein 2 [Source:VGNC Symbol;Acc:VGNC:77017]                                                          | - | 1.703540198 | 0.004650455 | 0.016670073 |
| ENSMMUG00000018159 | syntaphilin [Source:NCBI gene;Acc:100429237]                                                                            | - | 0.747839589 | 4.22E-05    | 0.000264487 |
| ENSMMUG00000004711 | transmembrane protein 74B [Source:VGNC Symbol;Acc:VGNC:78990]                                                           | - | 1.936781516 | 0.001932726 | 0.007819567 |
| ENSMMUG00000004709 | proteasome inhibitor subunit 1 [Source:VGNC Symbol;Acc:VGNC:76458]                                                      | - | 1.464612105 | 0.005857842 | 0.020222679 |
| ENSMMUG00000021670 | solute carrier family 52 member 3 [Source:VGNC Symbol;Acc:VGNC:77717]                                                   | - | -1.05118954 | 3.45E-05    | 0.000220485 |
| ENSMMUG00000056387 | transcription factor 15 [Source:NCBI gene;Acc:716916]                                                                   | - | 2.619212428 | 1.53E-15    | 5.84E-14    |
| ENSMMUG00000031224 | casein kinase 2 alpha 1 [Source:NCBI gene;Acc:714841]                                                                   | - | 0.830245428 | 0.000174884 | 0.000947604 |
| ENSMMUG00000012601 | RANBP2-type and C3HC4-type zinc finger containing 1 [Source:VGNC Symbol;Acc:VGNC:81554]                                 | - | 0.594977235 | 0.0001857   | 0.001000794 |
| ENSMMUG00000017286 | chromosome 10 C20orf96 homolog [Source:VGNC Symbol;Acc:VGNC:70324]                                                      | - | 0.949908234 | 0.008760079 | 0.028661359 |
| ENSMMUG00000061092 | defensin beta 125 [Source:HGNC Symbol;Acc:HGNC:18105]                                                                   | - | 0.504695514 | 0.003790027 | 0.013949487 |
| ENSMMUG00000046141 | defensin beta 123 [Source:NCBI gene;Acc:619504]                                                                         | - | 0.607537518 | 0.002651393 | 0.010265179 |
| ENSMMUG00000005116 | defensin beta 124 [Source:VGNC Symbol;Acc:VGNC:71655]                                                                   | - | 0.708566556 | 0.000131415 | 0.000731575 |
| ENSMMUG00000058583 | RRAD and GEM like GTPase 1 [Source:NCBI gene;Acc:713351]                                                                | - | 1.021239267 | 2.00E-10    | 3.62E-09    |
| ENSMMUG00000005119 | histocompatibility minor 13 [Source:VGNC Symbol;Acc:VGNC:81418]                                                         | - | -1.3872195  | 0.00833525  | 0.027489466 |
| ENSMMUG00000051112 | p53 and DNA damage regulated 1 [Source:NCBI gene;Acc:712622]                                                            | - | 1.424195793 | 3.93E-07    | 3.89E-06    |
| ENSMMUG00000000117 | HCK proto-oncogene, Src family tyrosine kinase [Source:VGNC Symbol;Acc:VGNC:73353]                                      | - | 0.913906019 | 0.006069053 | 0.020859393 |
| ENSMMUG00000053133 | BPI fold containing family B member 2 [Source:NCBI gene;Acc:710915]                                                     | - | 0.685894636 | 0.002361707 | 0.009289821 |
| ENSMMUG00000020676 | BPI fold containing family B member 4 [Source:VGNC Symbol;Acc:VGNC:70321]                                               | - | 0.509658873 | 0.003082235 | 0.011653323 |
| ENSMMUG00000012912 | itchy E3 ubiquitin protein ligase [Source:VGNC Symbol;Acc:VGNC:73589]                                                   | - | 0.620344232 | 5.40E-10    | 9.00E-09    |
| ENSMMUG00000055449 | tumor protein p53 inducible nuclear protein 2 [Source:NCBI gene;Acc:707113]                                             | - | 1.990524149 | 0.008258212 | 0.027286735 |
| ENSMMUG00000017931 | gamma-glutamyltransferase 7 [Source:VGNC Symbol;Acc:VGNC:72921]                                                         | - | 1.554140217 | 8.08E-05    | 0.000472236 |
| ENSMMUG00000017932 | acyl-CoA synthetase short chain family member 2 [Source:VGNC Symbol;Acc:VGNC:69410]                                     | - | 2.209820595 | 0.00152968  | 0.006362997 |
| ENSMMUG00000000229 | transient receptor potential cation channel subfamily C member 4 associated protein [Source:VGNC Symbol;Acc:VGNC:79014] | - | 2.753414854 | 2.82E-05    | 0.000183443 |
| ENSMMUG00000057979 | growth differentiation factor 5 [Source:NCBI gene;Acc:705432]                                                           | - | 0.80333605  | 3.85E-07    | 3.83E-06    |

|                     |                                                                                                                 |             |             |             |
|---------------------|-----------------------------------------------------------------------------------------------------------------|-------------|-------------|-------------|
| ENSMMUG00000031274  | GDF5 antisense RNA 1 [Source:HGNC Symbol;Acc:HGNC:33435]                                                        | 0.683366136 | 0.002659392 | 0.010293307 |
| ENSMMUG00000031284  | RNA binding motif protein 39 [Source:NCBI gene;Acc:704198]                                                      | 2.902916197 | 0.000657062 | 0.003055032 |
| ENSMMUG00000010633  | PHD finger protein 20 [Source:VGNC Symbol;Acc:VGNC:75807]                                                       | 0.45787917  | 1.07E-05    | 7.70E-05    |
|                     |                                                                                                                 | -           |             |             |
| ENSMMUG00000020690  | erythrocyte membrane protein band 4.1 like 1 [Source:VGNC Symbol;Acc:VGNC:72231]                                | 0.550630946 | 0.000344453 | 0.00172818  |
| ENSMMUG00000020691  | AAR2 splicing factor [Source:VGNC Symbol;Acc:VGNC:69412]                                                        | -0.5337775  | 0.003146332 | 0.01184139  |
| ENSMMUG00000016448  | DLG associated protein 4 [Source:NCBI gene;Acc:702928]                                                          | 1.28781545  | 4.91E-09    | 6.99E-08    |
| ENSMMUG00000059897  | myosin light chain 9 [Source:NCBI gene;Acc:709784]                                                              | 1.191609431 | 0.000594239 | 0.002816159 |
| ENSMMUG00000008195  | TGFB induced factor homeobox 2 [Source:NCBI gene;Acc:100429616]                                                 | 1.634019411 | 1.33E-22    | 1.08E-20    |
| ENSMMUG00000056945  |                                                                                                                 | 1.60095375  | 8.32E-18    | 4.09E-16    |
| ENSMMUG00000008200  | Src like adaptor 2 [Source:VGNC Symbol;Acc:VGNC:77499]                                                          | 1.661596374 | 1.77E-08    | 2.29E-07    |
| ENSMMUG00000010363  | ribophorin II [Source:VGNC Symbol;Acc:VGNC:76925]                                                               | 1.227105099 | 9.48E-05    | 0.000543813 |
| ENSMMUG00000017224  | catenin beta like 1 [Source:VGNC Symbol;Acc:VGNC:71414]                                                         | 1.306888806 | 1.84E-05    | 0.000125272 |
|                     |                                                                                                                 | -           |             |             |
| ENSMMUG00000017230  | V-set and transmembrane domain containing 2 like [Source:NCBI gene;Acc:707394]                                  | 1.225388838 | 5.89E-11    | 1.16E-09    |
| ENSMMUG00000020172  | KIAA1755 [Source:VGNC Symbol;Acc:VGNC:73942]                                                                    | 0.672899636 | 3.07E-05    | 0.00019887  |
| ENSMMUG00000020173  | bactericidal permeability increasing protein [Source:VGNC Symbol;Acc:VGNC:70277]                                | 0.565622518 | 0.000318741 | 0.001617116 |
|                     |                                                                                                                 | -           |             |             |
| ENSMMUG00000031309  | adipogenin [Source:VGNC Symbol;Acc:VGNC:84540]                                                                  | 0.689664255 | 0.005076107 | 0.017925521 |
| ENSMMUG00000006738  | L3MBTL histone methyl-lysine binding protein 1 [Source:NCBI gene;Acc:695694]                                    | 1.902834336 | 5.33E-15    | 1.92E-13    |
| ENSMMUG00000007925  | serum/glucocorticoid regulated kinase 2 [Source:VGNC Symbol;Acc:VGNC:77228]                                     | 2.231681746 | 1.54E-10    | 2.84E-09    |
| ENSMMUG00000000396  | intraflagellar transport 52 [Source:NCBI gene;Acc:694933]                                                       | 2.115520258 | 3.32E-12    | 7.96E-11    |
| ENSMMUG00000018137  | MYB proto-oncogene like 2 [Source:VGNC Symbol;Acc:VGNC:75092]                                                   | 2.254797357 | 1.23E-20    | 8.24E-19    |
| ENSMMUG00000002810  | TOX high mobility group box family member 2 [Source:VGNC Symbol;Acc:VGNC:79007]                                 | 1.335936575 | 5.29E-14    | 1.65E-12    |
|                     |                                                                                                                 | -           |             |             |
| ENSMMUG00000022865  | junctophilin 2 [Source:NCBI gene;Acc:694158]                                                                    | 3.923969682 | 2.31E-06    | 1.92E-05    |
|                     |                                                                                                                 | -           |             |             |
| ENSMMUG00000006464  | hepatocyte nuclear factor 4 alpha [Source:VGNC Symbol;Acc:VGNC:73492]                                           | 0.854412506 | 0.001581517 | 0.006551732 |
| ENSMMUG000000063590 |                                                                                                                 | 0.758651159 | 0.001489544 | 0.006220333 |
| ENSMMUG00000045256  | cellular communication network factor 5 [Source:NCBI gene;Acc:717872]                                           | 1.697969482 | 3.46E-06    | 2.80E-05    |
| ENSMMUG00000013206  | tyrosine 3-monooxygenase/tryptophan 5-monooxygenase activation protein beta [Source:VGNC Symbol;Acc:VGNC:78819] | 1.105430133 | 0.004238901 | 0.015407494 |
|                     |                                                                                                                 | -           |             |             |
| ENSMMUG000000063049 |                                                                                                                 | 0.217209666 | 0.00500257  | 0.017719383 |
| ENSMMUG00000039638  | serine peptidase inhibitor, Kunitz type 3 [Source:NCBI gene;Acc:100423908]                                      | 0.316445375 | 0.014408672 | 0.043555252 |
| ENSMMUG00000021022  | deoxynucleotidyltransferase terminal interacting protein 1 [Source:VGNC Symbol;Acc:VGNC:71845]                  | 0.921440108 | 0.001075193 | 0.004701414 |
| ENSMMUG00000052867  |                                                                                                                 | 1.149581783 | 6.71E-06    | 5.09E-05    |
| ENSMMUG00000051201  | zinc finger SWIM-type containing 3 [Source:NCBI gene;Acc:708804]                                                | 1.215295817 | 1.07E-07    | 1.19E-06    |
| ENSMMUG00000058326  | neuralized E3 ubiquitin protein ligase 2 [Source:NCBI gene;Acc:708904]                                          | 2.230022761 | 0.000600246 | 0.002843666 |
| ENSMMUG00000009960  | cathepsin A [Source:VGNC Symbol;Acc:VGNC:71617]                                                                 | 1.522448447 | 2.57E-14    | 8.44E-13    |
| ENSMMUG00000013697  | PDX1 C-terminal inhibiting factor 1 [Source:VGNC Symbol;Acc:VGNC:75621]                                         | 0.857395139 | 1.48E-09    | 2.30E-08    |
|                     |                                                                                                                 | -           |             |             |
| ENSMMUG00000013702  | zinc finger protein 335 [Source:VGNC Symbol;Acc:VGNC:78986]                                                     | 1.780768722 | 0.00365146  | 0.013513967 |
| ENSMMUG00000016549  | matrix metalloproteinase 9 [Source:VGNC Symbol;Acc:VGNC:74903]                                                  | 3.692483859 | 1.10E-22    | 9.05E-21    |
| ENSMMUG00000016553  | solute carrier family 12 member 5 [Source:VGNC Symbol;Acc:VGNC:77471]                                           | 4.483613695 | 7.24E-05    | 0.000427335 |
|                     |                                                                                                                 | -           |             |             |
| ENSMMUG00000016927  | solute carrier family 2 member 10 [Source:VGNC Symbol;Acc:VGNC:77465]                                           | 1.134075725 | 6.39E-12    | 1.47E-10    |
|                     |                                                                                                                 | -           |             |             |
| ENSMMUG00000065008  |                                                                                                                 | 0.984465377 | 0.000160529 | 0.000877621 |
| ENSMMUG00000015710  | zinc finger MYND-type containing 8 [Source:NCBI gene;Acc:716058]                                                | 0.475532984 | 0.001164548 | 0.005037153 |
|                     |                                                                                                                 | -           |             |             |
| ENSMMUG00000012020  | nuclear receptor coactivator 3 [Source:VGNC Symbol;Acc:VGNC:75147]                                              | 0.639676217 | 1.31E-06    | 1.15E-05    |
|                     |                                                                                                                 | -           |             |             |
| ENSMMUG00000012029  | sulfatase 2 [Source:VGNC Symbol;Acc:VGNC:78179]                                                                 | 1.099525898 | 2.79E-07    | 2.84E-06    |

|                    |                                                                                              |             |             |             |
|--------------------|----------------------------------------------------------------------------------------------|-------------|-------------|-------------|
| ENSMMUG00000060780 |                                                                                              | 0.592933668 | 3.87E-06    | 3.10E-05    |
| ENSMMUG00000055085 |                                                                                              | 0.809797287 | 0.01235461  | 0.038177324 |
|                    |                                                                                              | -           |             |             |
| ENSMMUG00000058754 |                                                                                              | 2.484507965 | 0.011618434 | 0.036334814 |
| ENSMMUG00000021692 | prostaglandin I2 synthase [Source:VGNC Symbol;Acc:VGNC:76587]                                | 0.391341622 | 0.005856053 | 0.02022148  |
| ENSMMUG00000002124 | beta-1,4-galactosyltransferase 5 [Source:VGNC Symbol;Acc:VGNC:70212]                         | 1.366539313 | 6.84E-06    | 5.18E-05    |
| ENSMMUG00000002715 | solute carrier family 9 member A8 [Source:VGNC Symbol;Acc:VGNC:77749]                        | 1.915847302 | 8.74E-31    | 1.78E-28    |
| ENSMMUG00000028471 | U7 small nuclear RNA [Source:RFAM;Acc:RF00066]                                               | 1.33581746  | 3.25E-05    | 0.000208476 |
| ENSMMUG00000000740 | spermatogenesis associated 2 [Source:VGNC Symbol;Acc:VGNC:77923]                             | 1.536947741 | 2.94E-08    | 3.63E-07    |
| ENSMMUG00000000757 | ring finger protein 114 [Source:VGNC Symbol;Acc:VGNC:76725]                                  | 1.104224182 | 0.005009113 | 0.01773808  |
| ENSMMUG00000065129 |                                                                                              | 2.280500092 | 0.001061052 | 0.004647717 |
| ENSMMUG00000012228 | ubiquitin conjugating enzyme E2 V1 [Source:NCBI gene;Acc:100425552]                          | 1.826275083 | 3.56E-22    | 2.73E-20    |
|                    |                                                                                              | -           |             |             |
| ENSMMUG00000062321 |                                                                                              | 0.466321877 | 0.012666536 | 0.038995133 |
|                    |                                                                                              | -           |             |             |
| ENSMMUG00000002761 | activity dependent neuroprotector homeobox [Source:VGNC Symbol;Acc:VGNC:69614]               | 0.439775017 | 0.005924888 | 0.020408917 |
|                    |                                                                                              | -           |             |             |
| ENSMMUG00000018846 | ZFP64 zinc finger protein [Source:VGNC Symbol;Acc:VGNC:78994]                                | 0.520097553 | 1.00E-07    | 1.12E-06    |
|                    |                                                                                              | -           |             |             |
| ENSMMUG00000013035 | teashirt zinc finger homeobox 2 [Source:VGNC Symbol;Acc:VGNC:78875]                          | 0.902682587 | 0.001216616 | 0.005238133 |
|                    |                                                                                              | -           |             |             |
| ENSMMUG00000018358 | zinc finger protein 217 [Source:VGNC Symbol;Acc:VGNC:78874]                                  | 2.427659979 | 1.18E-16    | 5.18E-15    |
| ENSMMUG00000057302 |                                                                                              | -2.34820288 | 1.43E-05    | 1.00E-04    |
| ENSMMUG00000052112 |                                                                                              | 1.261212867 | 5.88E-05    | 0.00035559  |
| ENSMMUG00000004074 | bone morphogenetic protein 7 [Source:VGNC Symbol;Acc:VGNC:70266]                             | 0.924414791 | 0.000157584 | 0.00086354  |
| ENSMMUG00000031391 | RNA binding motif protein 38 [Source:VGNC Symbol;Acc:VGNC:76484]                             | 1.838701864 | 4.34E-05    | 0.000270707 |
| ENSMMUG00000022586 | phosphoenolpyruvate carboxykinase 1 [Source:VGNC Symbol;Acc:VGNC:75779]                      | 3.378164949 | 0.006037967 | 0.020772917 |
|                    |                                                                                              | -           |             |             |
| ENSMMUG00000022589 | prostate transmembrane protein, androgen induced 1 [Source:VGNC Symbol;Acc:VGNC:76023]       | 1.029232407 | 2.84E-05    | 0.000184314 |
| ENSMMUG00000004560 | crystallin lambda 1 [Source:VGNC Symbol;Acc:VGNC:71433]                                      | -0.42883677 | 0.010639432 | 0.033678725 |
|                    |                                                                                              | -           |             |             |
| ENSMMUG00000016475 | M-phase phosphoprotein 8 [Source:VGNC Symbol;Acc:VGNC:74864]                                 | 0.696556984 | 2.01E-05    | 0.00013652  |
|                    |                                                                                              | -           |             |             |
| ENSMMUG00000004237 | TNF receptor superfamily member 19 [Source:VGNC Symbol;Acc:VGNC:78588]                       | 1.113853057 | 3.51E-13    | 9.64E-12    |
|                    |                                                                                              | -           |             |             |
| ENSMMUG00000014610 | ring finger protein 17 [Source:NCBI gene;Acc:708198]                                         | 0.559394806 | 0.001342531 | 0.005685991 |
|                    |                                                                                              | -           |             |             |
| ENSMMUG00000057852 |                                                                                              | 0.741013493 | 0.001686873 | 0.006935281 |
| ENSMMUG00000057481 |                                                                                              | 3.975578033 | 2.80E-07    | 2.85E-06    |
|                    |                                                                                              | -           |             |             |
| ENSMMUG00000058786 | ligand of numb-protein X 2 [Source:NCBI gene;Acc:710660]                                     | 0.758582759 | 0.000213365 | 0.001134703 |
|                    |                                                                                              | -           |             |             |
| ENSMMUG00000052070 | caudal type homeobox 2 [Source:NCBI gene;Acc:711094]                                         | 0.623413943 | 0.014984011 | 0.044926402 |
|                    |                                                                                              | -           |             |             |
| ENSMMUG00000016138 | ureidoimidazoline (2-oxo-4-hydroxy-4-carboxy-5-) decarboxylase [Source:NCBI gene;Acc:721710] | 1.378215846 | 0.003193051 | 0.011991472 |
| ENSMMUG00000063649 |                                                                                              | 0.61103884  | 0.003382303 | 0.012617728 |
|                    |                                                                                              | -           |             |             |
| ENSMMUG00000008658 | microtubule associated scaffold protein 2 [Source:NCBI gene;Acc:721776]                      | 0.656906319 | 3.61E-05    | 0.000229716 |
|                    |                                                                                              | -           |             |             |
| ENSMMUG00000003771 | ubiquitin like 3 [Source:VGNC Symbol;Acc:VGNC:78701]                                         | 1.179596062 | 0.000779224 | 0.003561623 |
|                    |                                                                                              | -           |             |             |
| ENSMMUG00000061779 |                                                                                              | 0.920856679 | 2.46E-05    | 0.000162765 |
|                    |                                                                                              | -           |             |             |
| ENSMMUG00000050015 | Metazoan signal recognition particle RNA [Source:RFAM;Acc:RF00017]                           | 1.329905013 | 0.005338067 | 0.018699902 |

|                    |                                                                                                |   |             |             |             |
|--------------------|------------------------------------------------------------------------------------------------|---|-------------|-------------|-------------|
| ENSMMUG00000013707 | heat shock protein family H (Hsp110) member 1 [Source:NCBI gene;Acc:721956]                    | - | 1.012410233 | 6.14E-10    | 1.01E-08    |
| ENSMMUG00000013713 | beta 3-galactosyltransferase [Source:NCBI gene;Acc:713498]                                     | - | 2.005682287 | 1.08E-07    | 1.19E-06    |
| ENSMMUG00000007192 | FRY microtubule binding protein [Source:NCBI gene;Acc:713688]                                  | - | 1.128354353 | 0.001216251 | 0.005238133 |
| ENSMMUG00000038997 | zygote arrest 1 like [Source:NCBI gene;Acc:100427970]                                          | - | 2.790991128 | 9.60E-05    | 0.000550098 |
| ENSMMUG00000007197 | BRCA2 DNA repair associated [Source:VGNC Symbol;Acc:VGNC:70279]                                | - | 0.960715405 | 3.17E-05    | 0.00020426  |
| ENSMMUG00000007198 | NEDD4 binding protein 2 like 1 [Source:VGNC Symbol;Acc:VGNC:75017]                             | - | 1.533031339 | 0.001185615 | 0.005115937 |
| ENSMMUG00000007200 | NEDD4 binding protein 2 like 2 [Source:VGNC Symbol;Acc:VGNC:75031]                             | - | 2.031810121 | 7.86E-29    | 1.25E-26    |
| ENSMMUG00000049600 |                                                                                                | - | 1.116885549 | 0.007379944 | 0.024734453 |
| ENSMMUG00000055811 |                                                                                                | - | 2.137397895 | 1.40E-15    | 5.40E-14    |
| ENSMMUG00000007201 | PDS5 cohesin associated factor B [Source:VGNC Symbol;Acc:VGNC:75835]                           | - | 1.809353988 | 2.07E-30    | 3.82E-28    |
| ENSMMUG00000025050 | Y RNA [Source:RFAM;Acc:RF00019]                                                                | - | 2.440710254 | 1.36E-05    | 9.57E-05    |
| ENSMMUG00000017048 | klotho [Source:VGNC Symbol;Acc:VGNC:74026]                                                     | - | 0.790398528 | 2.26E-06    | 1.89E-05    |
| ENSMMUG00000063615 |                                                                                                | - | 0.642459171 | 1.00E-06    | 9.07E-06    |
| ENSMMUG00000017052 | StAR related lipid transfer domain containing 13 [Source:VGNC Symbol;Acc:VGNC:77962]           | - | 0.399124285 | 0.00016865  | 0.000917368 |
| ENSMMUG00000019831 | neurobeachin [Source:NCBI gene;Acc:714386]                                                     | - | 2.740881727 | 2.15E-12    | 5.30E-11    |
| ENSMMUG00000016791 | doublecortin like kinase 1 [Source:VGNC Symbol;Acc:VGNC:71745]                                 | - | 2.647892143 | 1.31E-27    | 1.89E-25    |
| ENSMMUG00000060579 |                                                                                                | - | 2.358230548 | 3.73E-06    | 3.00E-05    |
| ENSMMUG00000001172 | spermatogenesis and oogenesis specific basic helix-loop-helix 2 [Source:NCBI gene;Acc:693608]  | - | 2.545104914 | 2.84E-08    | 3.52E-07    |
| ENSMMUG00000003585 | ALG5 dolichyl-phosphate beta-glucosyltransferase [Source:VGNC Symbol;Acc:VGNC:69647]           | - | 0.671292957 | 0.000619036 | 0.002911046 |
| ENSMMUG00000012307 | periostin [Source:VGNC Symbol;Acc:VGNC:76039]                                                  | - | 0.926329328 | 1.41E-10    | 2.62E-09    |
| ENSMMUG00000030786 | transient receptor potential cation channel subfamily C member 4 [Source:NCBI gene;Acc:695636] | - | 0.527102139 | 3.27E-05    | 0.000209889 |
| ENSMMUG00000002113 | NHL repeat containing 3 [Source:VGNC Symbol;Acc:VGNC:75291]                                    | - | -1.57267562 | 2.58E-11    | 5.40E-10    |
| ENSMMUG00000002109 | proline and serine rich 1 [Source:VGNC Symbol;Acc:VGNC:76291]                                  | - | -1.16021162 | 5.49E-10    | 9.13E-09    |
| ENSMMUG00000052676 |                                                                                                | - | 1.106003276 | 1.27E-09    | 1.99E-08    |
| ENSMMUG00000011593 | regulator of cell cycle [Source:VGNC Symbol;Acc:VGNC:76783]                                    | - | -1.09466076 | 1.60E-09    | 2.46E-08    |
| ENSMMUG00000023076 | diacylglycerol kinase eta [Source:VGNC Symbol;Acc:VGNC:71786]                                  | - | 1.016128802 | 3.73E-05    | 0.00023675  |
| ENSMMUG00000055887 |                                                                                                | - | 0.989301888 | 0.003622363 | 0.01342045  |
| ENSMMUG00000023083 | A-kinase anchoring protein 11 [Source:VGNC Symbol;Acc:VGNC:69765]                              | - | 1.496873791 | 1.53E-07    | 1.64E-06    |
| ENSMMUG00000014926 | epithelial stromal interaction 1 [Source:VGNC Symbol;Acc:VGNC:72053]                           | - | 0.591387914 | 0.004684072 | 0.016781997 |
| ENSMMUG00000002330 | ecto-NOX disulfide-thiol exchanger 1 [Source:VGNC Symbol;Acc:VGNC:72110]                       | - | 1.199337486 | 0.000135663 | 0.000752832 |
| ENSMMUG00000050436 |                                                                                                | - | 3.318712201 | 0.003402819 | 0.012687513 |
| ENSMMUG00000011986 | chibby family member 2 [Source:VGNC Symbol;Acc:VGNC:78029]                                     | - | -1.18091294 | 4.12E-05    | 0.00025845  |
| ENSMMUG00000017025 | zinc finger CCCH-type containing 13 [Source:VGNC Symbol;Acc:VGNC:79248]                        | - | 0.881225962 | 6.47E-08    | 7.49E-07    |
| ENSMMUG00000065094 |                                                                                                | - | 1.310755838 | 0.001598424 | 0.00661591  |
| ENSMMUG00000059778 |                                                                                                | - | 1.812017512 | 3.74E-05    | 0.000237257 |
| ENSMMUG00000063377 | cysteinyl leukotriene receptor 2 [Source:NCBI gene;Acc:705450]                                 | - | 0.882094053 | 0.011598699 | 0.036281186 |
| ENSMMUG00000023756 | fibronectin type III domain containing 3A [Source:VGNC Symbol;Acc:VGNC:72539]                  | - | 0.333967924 | 0.002244523 | 0.008898771 |



|                    |                                                                                                 |             |             |             |
|--------------------|-------------------------------------------------------------------------------------------------|-------------|-------------|-------------|
| ENSMMUG00000013476 | PHD finger protein 11 [Source:VGNC Symbol;Acc:VGNC:75814]                                       | -2.08490054 | 0.006964861 | 0.023506195 |
| ENSMMUG00000018720 | cytoskeleton associated protein 2 [Source:VGNC Symbol;Acc:VGNC:71229]                           | 1.1151594   | 4.42E-10    | 7.48E-09    |
| ENSMMUG00000007379 | phosphatidylinositol 3,4,5-trisphosphate 3-phosphatase TPTE2-like [Source:NCBI gene;Acc:694255] | 1.118098176 | 4.95E-10    | 8.30E-09    |
| ENSMMUG00000053708 | U2 spliceosomal RNA [Source:RFAM;Acc:RF00004]                                                   | 0.960030523 | 0.011829025 | 0.03686187  |
| ENSMMUG00000016401 | SGT1 homolog, MIS12 kinetochore complex assembly cochaperone [Source:NCBI gene;Acc:694046]      | 0.952538733 | 3.34E-08    | 4.09E-07    |
| ENSMMUG00000016404 | chondromodulin [Source:VGNC Symbol;Acc:VGNC:71191]                                              | 2.475506131 | 5.19E-05    | 0.000318311 |
|                    |                                                                                                 | -           |             |             |
| ENSMMUG00000002657 | olfactomedin 4 [Source:VGNC Symbol;Acc:VGNC:75418]                                              | 1.055363608 | 0.000153332 | 0.000842877 |
|                    |                                                                                                 | -           |             |             |
| ENSMMUG00000054675 |                                                                                                 | 0.728492612 | 0.002604205 | 0.01012161  |
|                    |                                                                                                 | -           |             |             |
| ENSMMUG00000021197 | TBC1 domain family member 4 [Source:VGNC Symbol;Acc:VGNC:78166]                                 | 1.484689713 | 0.000269678 | 0.001398556 |
| ENSMMUG00000046375 |                                                                                                 | 1.053210056 | 0.003095991 | 0.011695873 |
|                    |                                                                                                 | -           |             |             |
| ENSMMUG00000061846 |                                                                                                 | 0.670474883 | 1.83E-05    | 0.000125072 |
|                    |                                                                                                 | -           |             |             |
| ENSMMUG00000059231 |                                                                                                 | 0.615904694 | 3.07E-08    | 3.77E-07    |
| ENSMMUG00000056466 |                                                                                                 | -0.79139472 | 1.24E-06    | 1.09E-05    |
|                    |                                                                                                 | -           |             |             |
| ENSMMUG00000021459 | MYC binding protein 2 [Source:VGNC Symbol;Acc:VGNC:75011]                                       | 1.514619345 | 3.78E-15    | 1.39E-13    |
|                    |                                                                                                 | -           |             |             |
| ENSMMUG00000054625 |                                                                                                 | 0.645475127 | 8.85E-05    | 0.000511838 |
| ENSMMUG00000049796 |                                                                                                 | 0.829268887 | 0.012601553 | 0.038829175 |
|                    |                                                                                                 | -           |             |             |
| ENSMMUG00000060359 |                                                                                                 | 3.207020282 | 9.11E-05    | 0.000525305 |
|                    |                                                                                                 | -           |             |             |
| ENSMMUG00000021817 | dopachrome tautomerase [Source:VGNC Symbol;Acc:VGNC:71749]                                      | 0.568869987 | 0.002127948 | 0.008513613 |
|                    |                                                                                                 | -           |             |             |
| ENSMMUG00000054711 |                                                                                                 | 1.210263788 | 1.07E-07    | 1.19E-06    |
|                    |                                                                                                 | -           |             |             |
| ENSMMUG00000021807 | ATP binding cassette subfamily C member 4 [Source:VGNC Symbol;Acc:VGNC:69573]                   | 0.773960289 | 0.008065047 | 0.026711422 |
|                    |                                                                                                 | -           |             |             |
| ENSMMUG00000009721 | claudin 10 [Source:VGNC Symbol;Acc:VGNC:71243]                                                  | 0.919991768 | 0.01052522  | 0.033385017 |
| ENSMMUG00000022744 | muscleblind like splicing regulator 2 [Source:VGNC Symbol;Acc:VGNC:74519]                       | 0.655365572 | 3.77E-05    | 0.000238881 |
| ENSMMUG00000009890 | FERM, ARH/RhoGEF and pleckstrin domain protein 1 [Source:VGNC Symbol;Acc:VGNC:72614]            | 1.192085408 | 3.99E-24    | 3.81E-22    |
| ENSMMUG00000009173 | serine/threonine kinase 24 [Source:VGNC Symbol;Acc:VGNC:81583]                                  | 0.591859323 | 2.85E-05    | 0.000185209 |
| ENSMMUG00000001402 | solute carrier family 15 member 1 [Source:VGNC Symbol;Acc:VGNC:77393]                           | -2.35849888 | 0.00114181  | 0.004946433 |
| ENSMMUG00000012332 | UBA domain containing 2 [Source:NCBI gene;Acc:703484]                                           | -0.6243226  | 1.44E-05    | 0.000100636 |
|                    |                                                                                                 | -           |             |             |
| ENSMMUG00000060781 | G protein-coupled receptor 18 [Source:NCBI gene;Acc:698714]                                     | 0.683968048 | 0.004849967 | 0.01728363  |
|                    |                                                                                                 | -           |             |             |
| ENSMMUG00000012338 | G protein-coupled receptor 183 [Source:VGNC Symbol;Acc:VGNC:73042]                              | 0.613091327 | 0.002434961 | 0.009556524 |
|                    |                                                                                                 | -           |             |             |
| ENSMMUG00000004493 | propionyl-CoA carboxylase subunit alpha [Source:VGNC Symbol;Acc:VGNC:75773]                     | 0.625398193 | 0.010120759 | 0.032314071 |
|                    |                                                                                                 | -           |             |             |
| ENSMMUG00000002875 | fibroblast growth factor 14 [Source:VGNC Symbol;Acc:VGNC:72645]                                 | 3.727224589 | 0.012296811 | 0.038040633 |
|                    |                                                                                                 | -           |             |             |
| ENSMMUG00000052642 | protein O-glucosyltransferase 2 [Source:NCBI gene;Acc:702156]                                   | 1.890414435 | 1.83E-05    | 0.000124722 |
|                    |                                                                                                 | -           |             |             |
| ENSMMUG00000000350 | basic, immunoglobulin-like variable motif containing [Source:NCBI gene;Acc:100426213]           | 0.655733919 | 0.014421549 | 0.043575388 |
|                    |                                                                                                 | -           |             |             |
| ENSMMUG00000000353 | putative methyltransferase-like protein 21E pseudogene [Source:NCBI gene;Acc:707949]            | 0.823218592 | 0.000559685 | 0.002667728 |
|                    |                                                                                                 | -           |             |             |
| ENSMMUG00000053838 |                                                                                                 | 0.389926041 | 0.006398363 | 0.021827554 |
| ENSMMUG00000022282 | collagen type IV alpha 2 chain [Source:NCBI gene;Acc:100429807]                                 | 4.03773363  | 4.25E-07    | 4.17E-06    |

|                    |                                                                                                        |             |             |             |
|--------------------|--------------------------------------------------------------------------------------------------------|-------------|-------------|-------------|
| ENSMMUG00000022818 | inhibitor of growth family member 1 [Source:VGNC Symbol;Acc:VGNC:73742]                                | 3.985354432 | 0.000212778 | 0.001132368 |
| ENSMMUG00000064401 |                                                                                                        | 3.074749266 | 0.000211855 | 0.00112799  |
|                    |                                                                                                        | -           |             |             |
| ENSMMUG00000018929 | ankyrin repeat domain 10 [Source:VGNC Symbol;Acc:VGNC:69646]                                           | 0.440627828 | 4.68E-05    | 0.00028967  |
|                    |                                                                                                        | -           |             |             |
| ENSMMUG00000013138 | Rho guanine nucleotide exchange factor 7 [Source:VGNC Symbol;Acc:VGNC:69833]                           | 0.768440642 | 1.65E-06    | 1.42E-05    |
|                    |                                                                                                        | -           |             |             |
| ENSMMUG00000056306 |                                                                                                        | 1.121295792 | 4.53E-08    | 5.39E-07    |
| ENSMMUG00000048566 | MCF.2 cell line derived transforming sequence like [Source:NCBI gene;Acc:713961]                       | 1.542606453 | 1.54E-23    | 1.39E-21    |
| ENSMMUG00000001036 | coagulation factor VII [Source:VGNC Symbol;Acc:VGNC:72466]                                             | 1.606454637 | 1.40E-12    | 3.56E-11    |
|                    |                                                                                                        | -           |             |             |
| ENSMMUG00000016740 | defective in cullin neddylation 1 domain containing 2 [Source:VGNC Symbol;Acc:VGNC:71684]              | 0.516526504 | 3.30E-08    | 4.04E-07    |
| ENSMMUG00000007423 | transcription factor Dp-1 [Source:NCBI gene;Acc:715345]                                                | 1.70249809  | 6.03E-16    | 2.46E-14    |
| ENSMMUG00000051400 |                                                                                                        | -0.3818803  | 0.002466721 | 0.009659545 |
| ENSMMUG00000023599 | chromosome alignment maintaining phosphoprotein 1 [Source:VGNC Symbol;Acc:VGNC:71061]                  | 0.978278477 | 2.04E-11    | 4.33E-10    |
| ENSMMUG00000003042 | VPS53 subunit of GARP complex [Source:VGNC Symbol;Acc:VGNC:79522]                                      | 0.831559613 | 0.000216394 | 0.001149431 |
|                    |                                                                                                        | -           |             |             |
| ENSMMUG00000055344 | TLC domain containing 3A [Source:NCBI gene;Acc:699707]                                                 | 1.448677108 | 2.62E-09    | 3.89E-08    |
|                    |                                                                                                        | -           |             |             |
| ENSMMUG00000030401 | gem nuclear organelle associated protein 4 [Source:VGNC Symbol;Acc:VGNC:72723]                         | 0.785690785 | 0.002740432 | 0.010563243 |
|                    |                                                                                                        | -           |             |             |
| ENSMMUG00000050361 |                                                                                                        | 0.624340751 | 0.011906964 | 0.03705534  |
|                    |                                                                                                        | -           |             |             |
| ENSMMUG00000011417 | glyoxalase domain containing 4 [Source:VGNC Symbol;Acc:VGNC:72939]                                     | 0.576795159 | 0.000913292 | 0.004068326 |
| ENSMMUG00000008130 | ABR activator of RhoGEF and GTPase [Source:VGNC Symbol;Acc:VGNC:69589]                                 | 0.620823565 | 2.30E-09    | 3.47E-08    |
| ENSMMUG00000002371 | myosin IC [Source:VGNC Symbol;Acc:VGNC:75112]                                                          | 0.616280641 | 0.000257414 | 0.0013449   |
| ENSMMUG00000055241 |                                                                                                        | 0.814090724 | 1.61E-08    | 2.09E-07    |
| ENSMMUG00000040268 | phosphatidylinositol transfer protein alpha [Source:NCBI gene;Acc:721228]                              | 0.736910899 | 0.00054237  | 0.002593131 |
| ENSMMUG00000017561 | solute carrier family 43 member 2 [Source:VGNC Symbol;Acc:VGNC:77554]                                  | 1.467833535 | 2.19E-07    | 2.27E-06    |
| ENSMMUG00000039266 | Metazoan signal recognition particle RNA [Source:RFAM;Acc:RF00017]                                     | 1.155192843 | 0.003948996 | 0.014477587 |
| ENSMMUG00000002376 | scavenger receptor class F member 1 [Source:VGNC Symbol;Acc:VGNC:77027]                                | 2.10628113  | 6.29E-18    | 3.15E-16    |
| ENSMMUG00000002377 | Rab interacting lysosomal protein [Source:VGNC Symbol;Acc:VGNC:76866]                                  | 1.828328102 | 6.43E-08    | 7.45E-07    |
| ENSMMUG00000004820 | pre-mRNA processing factor 8 [Source:VGNC Symbol;Acc:VGNC:76275]                                       | 1.275179063 | 2.59E-21    | 1.83E-19    |
|                    |                                                                                                        | -           |             |             |
| ENSMMUG00000002380 | WD repeat domain 81 [Source:NCBI gene;Acc:721254]                                                      | 0.404078426 | 0.000289914 | 0.001488633 |
| ENSMMUG00000002382 | serpin family F member 2 [Source:VGNC Symbol;Acc:VGNC:77372]                                           | 0.582447756 | 0.004340647 | 0.015741648 |
|                    |                                                                                                        | -           |             |             |
| ENSMMUG00000017518 | small G protein signaling modulator 2 [Source:NCBI gene;Acc:703543]                                    | 0.304607181 | 0.014386417 | 0.043506733 |
|                    |                                                                                                        | -           |             |             |
| ENSMMUG00000053298 |                                                                                                        | 0.972500459 | 2.17E-08    | 2.74E-07    |
| ENSMMUG00000020524 | platelet activating factor acetylhydrolase 1b regulatory subunit 1 [Source:VGNC Symbol;Acc:VGNC:75747] | 0.497669798 | 0.003157621 | 0.0118775   |
| ENSMMUG00000020527 | clustered mitochondria homolog [Source:VGNC Symbol;Acc:VGNC:71370]                                     | 0.597501885 | 0.00209613  | 0.008400695 |
| ENSMMUG00000022989 | RAP1 GTPase activating protein 2 [Source:VGNC Symbol;Acc:VGNC:76561]                                   | 0.826175516 | 0.00034633  | 0.00173469  |
| ENSMMUG00000061370 |                                                                                                        | 1.850958546 | 0.006730791 | 0.022793016 |
| ENSMMUG00000030389 |                                                                                                        | 1.098342233 | 0.001089174 | 0.004750694 |
| ENSMMUG00000062583 | olfactory receptor 1A1 [Source:NCBI gene;Acc:721403]                                                   | 1.018316948 | 5.43E-06    | 4.22E-05    |
| ENSMMUG00000012825 | olfactory receptor 1A2 [Source:NCBI gene;Acc:100429763]                                                | 1.40904646  | 0.001599824 | 0.00661975  |
| ENSMMUG00000042407 |                                                                                                        | 1.011002717 | 0.005189589 | 0.018271053 |
| ENSMMUG00000055048 |                                                                                                        | 1.061858807 | 8.08E-11    | 1.57E-09    |
| ENSMMUG00000008556 | integrin subunit alpha E [Source:NCBI gene;Acc:721483]                                                 | 0.610987014 | 0.000195921 | 0.001051034 |
|                    |                                                                                                        | -           |             |             |
| ENSMMUG00000063482 |                                                                                                        | 0.914226437 | 0.000749534 | 0.003435999 |
| ENSMMUG00000057632 |                                                                                                        | 3.552927573 | 6.96E-31    | 1.43E-28    |

|                     |                                                                                        |   |             |             |             |
|---------------------|----------------------------------------------------------------------------------------|---|-------------|-------------|-------------|
| ENSMMUG00000058966  |                                                                                        | - | 0.766014322 | 0.00031847  | 0.001616912 |
| ENSMMUG00000005080  | ubiquitin conjugating enzyme E2 G1 [Source:VGNC Symbol;Acc:VGNC:78695]                 |   | 0.595924926 | 0.001636142 | 0.006750107 |
| ENSMMUG00000030381  | arachidonate 15-lipoxygenase [Source:VGNC Symbol;Acc:VGNC:69796]                       |   | 1.317911708 | 3.82E-08    | 4.61E-07    |
| ENSMMUG00000017654  | arrestin beta 2 [Source:VGNC Symbol;Acc:VGNC:70022]                                    |   | 1.128058366 | 0.001568312 | 0.006502793 |
| ENSMMUG00000049649  | proteasome 20S subunit beta 6 [Source:NCBI gene;Acc:710028]                            |   | 1.319225984 | 1.35E-14    | 4.63E-13    |
| ENSMMUG000000061951 |                                                                                        |   | 1.372395014 | 3.96E-05    | 0.000249533 |
| ENSMMUG00000005666  | phospholipase D2 [Source:VGNC Symbol;Acc:VGNC:76172]                                   |   | 1.86814868  | 4.44E-15    | 1.61E-13    |
| ENSMMUG00000012040  | enolase 3 [Source:VGNC Symbol;Acc:VGNC:72220]                                          |   | 2.941229071 | 0.000192424 | 0.001035045 |
| ENSMMUG00000009176  | calmodulin binding transcription activator 2 [Source:VGNC Symbol;Acc:VGNC:70578]       |   | 1.594133581 | 1.86E-12    | 4.63E-11    |
| ENSMMUG00000011344  | solute carrier family 52 member 1 [Source:VGNC Symbol;Acc:VGNC:77795]                  |   | 4.183037972 | 3.36E-10    | 5.78E-09    |
| ENSMMUG00000018648  | zinc finger protein 594 [Source:NCBI gene;Acc:711492]                                  |   | 0.96921116  | 0.000180846 | 0.000977643 |
| ENSMMUG00000010468  | RPA interacting protein [Source:VGNC Symbol;Acc:VGNC:76854]                            |   | 0.500595438 | 0.01584175  | 0.04707541  |
| ENSMMUG00000006594  | DEAH-box helicase 33 [Source:VGNC Symbol;Acc:VGNC:71633]                               |   | 0.571128652 | 0.000154182 | 0.000847217 |
| ENSMMUG00000006599  | derlin 2 [Source:VGNC Symbol;Acc:VGNC:71654]                                           |   | -0.59558309 | 1.09E-05    | 7.82E-05    |
| ENSMMUG00000046195  | MIS12 kinetochore complex component [Source:NCBI gene;Acc:712202]                      |   | 0.934461116 | 6.98E-07    | 6.54E-06    |
| ENSMMUG00000043771  | uncharacterized LOC712349 [Source:NCBI gene;Acc:712349]                                |   | 0.877862917 | 0.00963073  | 0.030939686 |
| ENSMMUG00000030453  | NLR family pyrin domain containing 1 [Source:NCBI gene;Acc:721648]                     |   | 1.335299504 | 1.53E-20    | 1.01E-18    |
| ENSMMUG00000064520  |                                                                                        |   | 2.552825122 | 0.006660365 | 0.022598186 |
| ENSMMUG00000010536  | discs large MAGUK scaffold protein 4 [Source:VGNC Symbol;Acc:VGNC:71920]               |   | 0.722475475 | 1.49E-07    | 1.60E-06    |
| ENSMMUG00000052091  | dishevelled segment polarity protein 2 [Source:NCBI gene;Acc:714381]                   |   | 1.026551198 | 0.004401569 | 0.015908043 |
| ENSMMUG00000010543  | PHD finger protein 23 [Source:VGNC Symbol;Acc:VGNC:75877]                              |   | 2.567196899 | 9.90E-06    | 7.19E-05    |
| ENSMMUG00000064650  | SPEM family member 3 [Source:NCBI gene;Acc:106993878]                                  |   | 1.052911892 | 3.19E-20    | 2.01E-18    |
| ENSMMUG00000023620  | RNA polymerase II subunit A [Source:NCBI gene;Acc:721865]                              |   | -0.47247231 | 0.009153437 | 0.029719529 |
| ENSMMUG00000006327  | tumor necrosis factor (ligand) superfamily, member 12 [Source:NCBI gene;Acc:100551506] |   | -0.31768315 | 0.010356321 | 0.032923757 |
| ENSMMUG00000006332  | SUMO specific peptidase 3 [Source:NCBI gene;Acc:715884]                                |   | 0.725291923 | 2.38E-05    | 0.000158176 |
| ENSMMUG00000033155  | small nucleolar RNA, H/ACA box 48 [Source:HGNC Symbol;Acc:HGNC:32641]                  |   | -1.21174673 | 0.007340093 | 0.024636218 |
| ENSMMUG00000013501  | CD68 molecule [Source:VGNC Symbol;Acc:VGNC:82121]                                      |   | -2.14102367 | 6.19E-08    | 7.20E-07    |
| ENSMMUG00000013503  | mannose-P-dolichol utilization defect 1 [Source:VGNC Symbol;Acc:VGNC:74913]            |   | 1.292558582 | 0.000511722 | 0.002462552 |
| ENSMMUG00000013510  | FMR1 autosomal homolog 2 [Source:NCBI gene;Acc:721889]                                 |   | 1.111957318 | 1.90E-06    | 1.61E-05    |
| ENSMMUG00000013513  | sex hormone binding globulin [Source:VGNC Symbol;Acc:VGNC:77208]                       |   | 0.896174527 | 0.001427769 | 0.006003482 |
| ENSMMUG00000008639  | tumor protein p53 [Source:VGNC Symbol;Acc:VGNC:78627]                                  |   | 0.740876419 | 0.00203764  | 0.008196736 |
| ENSMMUG00000048204  | ephrin B3 [Source:NCBI gene;Acc:716257]                                                |   | 1.313469203 | 5.72E-10    | 9.47E-09    |
| ENSMMUG00000063668  | cytochrome b5 domain containing 1 [Source:NCBI gene;Acc:716429]                        |   | 1.076457521 | 2.73E-05    | 0.00017837  |
| ENSMMUG00000009995  | arachidonate 15-lipoxygenase type B [Source:VGNC Symbol;Acc:VGNC:69797]                |   | 1.453150105 | 1.50E-13    | 4.35E-12    |
| ENSMMUG00000065208  |                                                                                        |   | 1.571798119 | 1.23E-06    | 1.09E-05    |
| ENSMMUG00000019850  | arachidonate lipoxygenase 3 [Source:VGNC Symbol;Acc:VGNC:69607]                        |   | 1.589938818 | 1.39E-28    | 2.11E-26    |
| ENSMMUG00000023803  | myosin heavy chain 10 [Source:NCBI gene;Acc:721979]                                    |   | 2.443226781 | 6.21E-07    | 5.89E-06    |
| ENSMMUG00000055290  | netrin 1 [Source:NCBI gene;Acc:717645]                                                 |   | 0.919204707 | 1.35E-08    | 1.77E-07    |

|                     |                                                                                                    |   |             |             |             |
|---------------------|----------------------------------------------------------------------------------------------------|---|-------------|-------------|-------------|
| ENSMMUG00000058374  |                                                                                                    | - | 0.887741762 | 0.000911876 | 0.004065892 |
| ENSMMUG00000051001  |                                                                                                    | - | 2.611947424 | 0.002320082 | 0.009146614 |
| ENSMMUG00000016723  | zinc finger protein 287 [Source:NCBI gene;Acc:695524]                                              | - | 1.164781091 | 0.000488378 | 0.002362464 |
| ENSMMUG00000013345  | folliculin [Source:NCBI gene;Acc:698082]                                                           | - | -3.46458752 | 1.58E-06    | 1.36E-05    |
| ENSMMUG00000021091  | COP9 signalosome subunit 3 [Source:VGNC Symbol;Acc:VGNC:71316]                                     | - | 3.197249371 | 5.00E-08    | 5.89E-07    |
| ENSMMUG00000006493  | ras related dexamethasone induced 1 [Source:VGNC Symbol;Acc:VGNC:76485]                            | - | 0.759910508 | 0.000161552 | 0.000881838 |
| ENSMMUG00000023377  | retinoic acid induced 1 [Source:VGNC Symbol;Acc:VGNC:76651]                                        | - | 0.648464836 | 0.002574394 | 0.01002798  |
| ENSMMUG00000023375  | sterol regulatory element binding transcription factor 1 [Source:VGNC Symbol;Acc:VGNC:77880]       | - | -0.56332524 | 0.012515276 | 0.038614239 |
| ENSMMUG00000005900  | GID complex subunit 4 homolog [Source:NCBI gene;Acc:699842]                                        | - | 1.001993445 | 0.003044415 | 0.011541453 |
| ENSMMUG00000021409  | developmentally regulated GTP binding protein 2 [Source:VGNC Symbol;Acc:VGNC:71993]                | - | 0.927267372 | 0.000614253 | 0.002896323 |
| ENSMMUG00000018344  | myosin XVA [Source:VGNC Symbol;Acc:VGNC:75109]                                                     | - | 0.984962411 | 6.39E-09    | 8.86E-08    |
| ENSMMUG000000056257 |                                                                                                    | - | 0.713607612 | 0.000913892 | 0.004068416 |
| ENSMMUG000000053675 |                                                                                                    | - | 0.564653736 | 0.010477873 | 0.033257405 |
| ENSMMUG00000005323  | phosphoribosyl pyrophosphate synthetase associated protein 2 [Source:VGNC Symbol;Acc:VGNC:76430]   | - | 0.619735524 | 2.10E-08    | 2.66E-07    |
| ENSMMUG000000051798 | Small nucleolar RNA U3 [Source:RFAM;Acc:RF00012]                                                   | - | 3.384039924 | 0.001252405 | 0.005366718 |
| ENSMMUG000000051453 |                                                                                                    | - | 1.443426642 | 0.000579478 | 0.002751785 |
| ENSMMUG00000008536  | mitogen-activated protein kinase 7 [Source:VGNC Symbol;Acc:VGNC:74648]                             | - | 2.351901777 | 5.55E-06    | 4.30E-05    |
| ENSMMUG00000008538  | microfibril associated protein 4 [Source:VGNC Symbol;Acc:VGNC:74710]                               | - | 2.499620702 | 2.65E-07    | 2.71E-06    |
| ENSMMUG00000008540  | ring finger protein 112 [Source:VGNC Symbol;Acc:VGNC:76724]                                        | - | 1.674536339 | 2.91E-07    | 2.94E-06    |
| ENSMMUG000000051286 |                                                                                                    | - | 0.775019929 | 0.005129303 | 0.018076957 |
| ENSMMUG000000030279 | A-kinase anchoring protein 10 [Source:VGNC Symbol;Acc:VGNC:69764]                                  | - | 1.374368747 | 8.48E-05    | 0.000492038 |
| ENSMMUG00000018579  | sperm antigen with calponin homology and coiled-coil domains 1 [Source:VGNC Symbol;Acc:VGNC:78021] | - | 0.361520623 | 0.011696395 | 0.036505352 |
| ENSMMUG00000024170  | U6 spliceosomal RNA [Source:RFAM;Acc:RF00026]                                                      | - | 0.825212183 | 0.00048303  | 0.002341353 |
| ENSMMUG000000040830 |                                                                                                    | - | 0.546583203 | 0.014537025 | 0.043858155 |
| ENSMMUG000000060502 |                                                                                                    | - | 1.766470648 | 1.35E-11    | 2.96E-10    |
| ENSMMUG000000061335 |                                                                                                    | - | 1.368918065 | 1.38E-07    | 1.49E-06    |
| ENSMMUG00000020226  | WD repeat and SOCS box containing 1 [Source:VGNC Symbol;Acc:VGNC:79186]                            | - | 1.296522372 | 5.73E-11    | 1.13E-09    |
| ENSMMUG000000054784 |                                                                                                    | - | 1.241746536 | 9.67E-09    | 1.30E-07    |
| ENSMMUG000000061836 |                                                                                                    | - | 1.178738376 | 5.70E-05    | 0.000345571 |
| ENSMMUG000000065113 |                                                                                                    | - | 0.985185309 | 0.000104738 | 0.000595598 |
| ENSMMUG00000018719  | nemo like kinase [Source:VGNC Symbol;Acc:VGNC:75277]                                               | - | 1.325540525 | 2.45E-16    | 1.05E-14    |
| ENSMMUG000000063312 |                                                                                                    | - | 0.814378681 | 0.00049266  | 0.002380484 |
| ENSMMUG00000019145  | TNF alpha induced protein 1 [Source:VGNC Symbol;Acc:VGNC:78578]                                    | - | 0.908706198 | 0.000249833 | 0.00130822  |
| ENSMMUG00000019146  | DNA polymerase delta interacting protein 2 [Source:VGNC Symbol;Acc:VGNC:76099]                     | - | 0.965884482 | 6.62E-06    | 5.03E-05    |
| ENSMMUG00000019148  | vitronectin [Source:NCBI gene;Acc:708499]                                                          | - | 0.770814242 | 0.000719986 | 0.003312455 |
| ENSMMUG00000012240  | phosphatidylinositol glycan anchor biosynthesis class S [Source:VGNC Symbol;Acc:VGNC:75800]        | - | 0.744740937 | 0.000467492 | 0.002273897 |
| ENSMMUG000000053611 | stromal cell derived factor 2 [Source:NCBI gene;Acc:716189]                                        | - | 2.839914773 | 1.07E-05    | 7.70E-05    |

|                     |                                                                                                         |             |             |             |
|---------------------|---------------------------------------------------------------------------------------------------------|-------------|-------------|-------------|
| ENSMMUG00000004708  | SPT6 homolog, histone chaperone and transcription elongation factor [Source:VGNC Symbol;Acc:VGNC:78057] | 0.657309691 | 5.25E-05    | 0.000321337 |
| ENSMMUG00000004710  | protein interacting with cyclin A1 [Source:VGNC Symbol;Acc:VGNC:76336]                                  | 0.753895396 | 0.004003305 | 0.014642241 |
| ENSMMUG00000007293  | RAB34, member RAS oncogene family [Source:VGNC Symbol;Acc:VGNC:81533]                                   | 0.912244779 | 8.07E-06    | 6.00E-05    |
| ENSMMUG00000026204  | Small nucleolar RNA SNORD42 [Source:RFAM;Acc:RF00150]                                                   | 0.448792993 | 0.015918257 | 0.047272705 |
| ENSMMUG000000051743 | TLC domain containing 1 [Source:NCBI gene;Acc:710391]                                                   | 0.650244323 | 0.008612197 | 0.028283102 |
| ENSMMUG00000021408  | family with sequence similarity 222 member B [Source:VGNC Symbol;Acc:VGNC:72352]                        | 1.156348045 | 9.43E-07    | 8.57E-06    |
| ENSMMUG00000012523  | flotillin 2 [Source:NCBI gene;Acc:114669752]                                                            | 1.23490389  | 2.25E-09    | 3.39E-08    |
| ENSMMUG00000021553  | dehydrogenase/reductase 13 [Source:VGNC Symbol;Acc:VGNC:81387]                                          | 1.362864054 | 7.55E-14    | 2.30E-12    |
| ENSMMUG00000021554  | PHD finger protein 12 [Source:VGNC Symbol;Acc:VGNC:75838]                                               | 1.346254421 | 3.34E-10    | 5.78E-09    |
| ENSMMUG00000009938  | myosin XVIII A [Source:VGNC Symbol;Acc:VGNC:75058]                                                      | 0.475614047 | 0.001055    | 0.004623207 |
| ENSMMUG00000019667  | TAO kinase 1 [Source:VGNC Symbol;Acc:VGNC:81591]                                                        | 1.261594184 | 0.000629903 | 0.002950279 |
| ENSMMUG00000057447  |                                                                                                         | 5.092785962 | 7.99E-06    | 5.96E-05    |
| ENSMMUG00000014411  | coronin 6 [Source:NCBI gene;Acc:711818]                                                                 | 0.581059058 | 0.015835551 | 0.04707541  |
| ENSMMUG00000014413  | slingshot protein phosphatase 2 [Source:VGNC Symbol;Acc:VGNC:78018]                                     | 0.476025754 | 7.13E-05    | 0.000421845 |
| ENSMMUG00000060080  | U6 spliceosomal RNA [Source:RFAM;Acc:RF00026]                                                           | 1.488808408 | 8.22E-05    | 0.000478505 |
| ENSMMUG00000023698  | golgi SNAP receptor complex member 1 [Source:VGNC Symbol;Acc:VGNC:73110]                                | 0.855070816 | 1.01E-10    | 1.92E-09    |
| ENSMMUG00000014689  | myosin ID [Source:VGNC Symbol;Acc:VGNC:75113]                                                           | 0.644346107 | 0.005669298 | 0.019658895 |
| ENSMMUG00000059292  |                                                                                                         | 0.938233155 | 8.15E-11    | 1.58E-09    |
| ENSMMUG00000011411  | sperm acrosome associated 3 [Source:VGNC Symbol;Acc:VGNC:77930]                                         | 1.928771878 | 3.37E-11    | 6.89E-10    |
| ENSMMUG00000062784  |                                                                                                         | 0.767161989 | 0.00557814  | 0.01939555  |
| ENSMMUG00000011413  | acid sensing ion channel subunit 2 [Source:VGNC Symbol;Acc:VGNC:70241]                                  | 0.907338168 | 0.001905014 | 0.007727512 |
| ENSMMUG00000060024  |                                                                                                         | 1.141131031 | 5.35E-05    | 0.000327058 |
| ENSMMUG00000000288  | C-C motif chemokine ligand 2 [Source:VGNC Symbol;Acc:VGNC:70698]                                        | 1.481568498 | 1.85E-06    | 1.57E-05    |
| ENSMMUG00000009782  | C-C motif chemokine ligand 7 [Source:NCBI gene;Acc:714751]                                              | 2.415530851 | 4.40E-06    | 3.49E-05    |
| ENSMMUG00000064793  | C-C motif chemokine ligand 11 [Source:NCBI gene;Acc:574218]                                             | 1.772953415 | 0.016156666 | 0.047859089 |
| ENSMMUG00000009785  | C-C motif chemokine ligand 13 [Source:VGNC Symbol;Acc:VGNC:70696]                                       | -2.92532828 | 0.000166542 | 0.000906961 |
| ENSMMUG00000004794  | DNA ligase 3 [Source:VGNC Symbol;Acc:VGNC:74266]                                                        | 2.256340386 | 1.25E-06    | 1.11E-05    |
| ENSMMUG00000005170  | unc-45 myosin chaperone B [Source:VGNC Symbol;Acc:VGNC:78954]                                           | 0.803669796 | 0.001717375 | 0.007039681 |
| ENSMMUG00000037555  | schlafen family member 11 [Source:NCBI gene;Acc:715511]                                                 | 1.85052746  | 0.001299587 | 0.005539099 |
| ENSMMUG00000060439  | schlafen family member 12 like [Source:NCBI gene;Acc:106992394]                                         | -1.0404864  | 4.55E-06    | 3.60E-05    |
| ENSMMUG00000031736  |                                                                                                         | 2.205052674 | 0.003017025 | 0.011459302 |
| ENSMMUG00000026432  | small nucleolar RNA, C/D box 7 [Source:HGNC Symbol;Acc:HGNC:32704]                                      | 3.349619307 | 0.001033032 | 0.004536866 |
| ENSMMUG00000054472  |                                                                                                         | 0.828834197 | 0.003218543 | 0.012080737 |
| ENSMMUG00000054210  | C-C motif chemokine 4 [Source:NCBI gene;Acc:100426632]                                                  | 1.258994193 | 6.07E-14    | 1.87E-12    |
| ENSMMUG00000058233  | C-C motif chemokine 3-like [Source:NCBI gene;Acc:100426537]                                             | 1.468661842 | 0.00476881  | 0.017033372 |

|                     |                                                                                                                   |   |             |             |             |
|---------------------|-------------------------------------------------------------------------------------------------------------------|---|-------------|-------------|-------------|
| ENSMMUG00000061594  |                                                                                                                   | - | 1.391516059 | 0.001322358 | 0.005619281 |
| ENSMMUG0000000618   | gametogenetin binding protein 2 [Source:VGNC Symbol;Acc:VGNC:72746]                                               | - | 0.919480467 | 6.41E-05    | 0.000383421 |
| ENSMMUG00000051190  | Metazoan signal recognition particle RNA [Source:RFAM;Acc:RF00017]                                                | - | 1.703520804 | 0.000420857 | 0.002067864 |
| ENSMMUG00000007920  | myosin XIX [Source:VGNC Symbol;Acc:VGNC:75026]                                                                    | - | 0.856464091 | 2.23E-05    | 0.000149091 |
| ENSMMUG00000007923  | phosphatidylinositol glycan anchor biosynthesis class W [Source:VGNC Symbol;Acc:VGNC:75850]                       | - | 0.973647634 | 5.25E-05    | 0.000321181 |
| ENSMMUG00000053845  |                                                                                                                   | - | 1.107545332 | 3.55E-06    | 2.86E-05    |
| ENSMMUG00000007917  | carbonic anhydrase 4 [Source:NCBI gene;Acc:716919]                                                                | - | 1.257489764 | 9.00E-09    | 1.21E-07    |
| ENSMMUG00000017113  | ubiquitin specific peptidase 32 [Source:NCBI gene;Acc:716857]                                                     | - | 1.177468955 | 1.07E-13    | 3.16E-12    |
| ENSMMUG00000052977  | putative protein FAM106C [Source:NCBI gene;Acc:106994084]                                                         | - | 0.982004289 | 6.63E-08    | 7.67E-07    |
| ENSMMUG00000065117  | septin 4 [Source:HGNC Symbol;Acc:HGNC:9165]                                                                       | - | 0.891359023 | 2.89E-05    | 0.000187314 |
| ENSMMUG00000008423  | septin 4 [Source:NCBI gene;Acc:714724]                                                                            | - | -0.75664915 | 1.83E-13    | 5.20E-12    |
| ENSMMUG00000046171  | myotubularin related protein 4 [Source:NCBI gene;Acc:714621]                                                      | - | 0.675695951 | 3.41E-08    | 4.17E-07    |
| ENSMMUG00000007004  | ring finger protein 43 [Source:NCBI gene;Acc:710124]                                                              | - | 0.880690437 | 0.012027846 | 0.037348646 |
| ENSMMUG00000056064  | serine and arginine rich splicing factor 1 [Source:NCBI gene;Acc:713958]                                          | - | 0.790261367 | 2.95E-08    | 3.64E-07    |
| ENSMMUG00000004723  | vascular endothelial zinc finger 1 [Source:NCBI gene;Acc:713848]                                                  | - | 0.626253926 | 7.57E-06    | 5.68E-05    |
| ENSMMUG00000002269  | serine carboxypeptidase 1 [Source:VGNC Symbol;Acc:VGNC:82232]                                                     | - | 0.588034657 | 0.005497723 | 0.019192077 |
| ENSMMUG000000049376 |                                                                                                                   | - | 2.382258105 | 0.001123023 | 0.004877099 |
| ENSMMUG00000005793  | ankyrin repeat and fibronectin type III domain containing 1 [Source:VGNC Symbol;Acc:VGNC:69712]                   | - | 1.245805281 | 6.60E-07    | 6.21E-06    |
| ENSMMUG00000059321  |                                                                                                                   | - | 2.195888056 | 0.002028512 | 0.008167048 |
| ENSMMUG00000006066  | phosphatidylcholine transfer protein [Source:VGNC Symbol;Acc:VGNC:75789]                                          | - | 2.776124859 | 1.28E-06    | 1.12E-05    |
| ENSMMUG00000050544  |                                                                                                                   | - | 1.228100125 | 1.18E-05    | 8.43E-05    |
| ENSMMUG00000049997  |                                                                                                                   | - | -1.09767422 | 1.25E-07    | 1.37E-06    |
| ENSMMUG00000063189  |                                                                                                                   | - | 0.488269844 | 0.006238255 | 0.021346765 |
| ENSMMUG00000062178  | Metazoan signal recognition particle RNA [Source:RFAM;Acc:RF00017]                                                | - | 1.121926539 | 0.003247253 | 0.012168956 |
| ENSMMUG00000001942  | mbt domain containing 1 [Source:VGNC Symbol;Acc:VGNC:74538]                                                       | - | 1.143635396 | 3.16E-10    | 5.50E-09    |
| ENSMMUG00000001940  | NME/NM23 nucleoside diphosphate kinase 2 [Source:NCBI gene;Acc:100533957]                                         | - | 1.438011724 | 4.45E-10    | 7.52E-09    |
| ENSMMUG00000054539  |                                                                                                                   | - | 0.825208196 | 0.007729462 | 0.025758139 |
| ENSMMUG00000022741  | WAP, follistatin/kazal, immunoglobulin, kunitz and netrin domain containing 2 [Source:VGNC Symbol;Acc:VGNC:79900] | - | 0.7761333   | 1.80E-05    | 0.000122985 |
| ENSMMUG00000010117  | LUC7 like 3 pre-mRNA splicing factor [Source:VGNC Symbol;Acc:VGNC:74346]                                          | - | 0.923869923 | 0.002713104 | 0.010472297 |
| ENSMMUG00000017256  | calcium voltage-gated channel subunit alpha1 G [Source:VGNC Symbol;Acc:VGNC:70504]                                | - | 1.928899085 | 1.30E-27    | 1.89E-25    |
| ENSMMUG00000017252  | spermatogenesis associated 20 [Source:VGNC Symbol;Acc:VGNC:77993]                                                 | - | 1.328777153 | 1.04E-06    | 9.37E-06    |
| ENSMMUG00000017242  | MYCBP associated protein [Source:VGNC Symbol;Acc:VGNC:74994]                                                      | - | 1.433726178 | 4.38E-05    | 0.000272648 |
| ENSMMUG00000017234  | leucine rich repeat containing 59 [Source:VGNC Symbol;Acc:VGNC:81436]                                             | - | 2.961061711 | 9.87E-31    | 1.98E-28    |

|                    |                                                                                   |             |             |             |
|--------------------|-----------------------------------------------------------------------------------|-------------|-------------|-------------|
| ENSMMUG00000020061 | protein phosphatase 1 regulatory subunit 9B [Source:VGNC Symbol;Acc:VGNC:76372]   | 1.268794412 | 8.88E-07    | 8.12E-06    |
| ENSMMUG00000014687 | sterile alpha motif domain containing 14 [Source:VGNC Symbol;Acc:VGNC:77112]      | 1.844557263 | 0.000361434 | 0.001799216 |
| ENSMMUG00000014685 | pyruvate dehydrogenase kinase 2 [Source:VGNC Symbol;Acc:VGNC:75933]               | 1.640438972 | 0.000389006 | 0.001924171 |
| ENSMMUG00000012178 | calcium binding and coiled-coil domain 2 [Source:VGNC Symbol;Acc:VGNC:70675]      | 0.799543344 | 4.73E-06    | 3.72E-05    |
| ENSMMUG00000049405 | gastric inhibitory polypeptide [Source:NCBI gene;Acc:698335]                      | 0.858018444 | 1.66E-05    | 0.000114666 |
| ENSMMUG00000021087 | SNF8 subunit of ESCRT-II [Source:VGNC Symbol;Acc:VGNC:77729]                      | 0.554558047 | 0.004541536 | 0.016338111 |
| ENSMMUG00000003436 | tubulin tyrosine ligase like 6 [Source:VGNC Symbol;Acc:VGNC:79632]                | 1.366177536 | 3.51E-27    | 4.73E-25    |
| ENSMMUG00000060879 | homeobox B13 [Source:NCBI gene;Acc:697572]                                        | 1.271336971 | 2.15E-14    | 7.15E-13    |
| ENSMMUG00000055122 |                                                                                   | 0.566319294 | 0.001400303 | 0.005907475 |
| ENSMMUG00000052505 | homeobox B9 [Source:NCBI gene;Acc:106994009]                                      | 1.399356093 | 2.15E-24    | 2.10E-22    |
| ENSMMUG00000020868 | homeobox B8 [Source:VGNC Symbol;Acc:VGNC:73505]                                   | 1.196176147 | 1.02E-15    | 4.01E-14    |
| ENSMMUG00000055324 | homeobox B7 [Source:NCBI gene;Acc:697089]                                         | 1.280617561 | 2.67E-12    | 6.50E-11    |
| ENSMMUG00000062283 | homeobox B6 [Source:NCBI gene;Acc:106994013]                                      | 1.214009181 | 1.47E-13    | 4.26E-12    |
| ENSMMUG00000051420 | homeobox B5 [Source:NCBI gene;Acc:696732]                                         | 1.17793892  | 4.73E-08    | 5.60E-07    |
| ENSMMUG00000045203 |                                                                                   | 1.165394275 | 0.000172333 | 0.000935227 |
| ENSMMUG00000057001 | homeobox B2 [Source:NCBI gene;Acc:106994010]                                      | 0.880669059 | 4.22E-08    | 5.04E-07    |
| ENSMMUG00000057095 |                                                                                   | 3.407704164 | 9.22E-08    | 1.04E-06    |
| ENSMMUG00000050742 | src kinase associated phosphoprotein 1 [Source:NCBI gene;Acc:697043]              | 0.577181132 | 1.24E-08    | 1.64E-07    |
| ENSMMUG00000004760 | CDK5 regulatory subunit associated protein 3 [Source:VGNC Symbol;Acc:VGNC:71015]  | 0.622034478 | 0.016211863 | 0.047971925 |
| ENSMMUG00000003325 | pyridoxamine 5'-phosphate oxidase [Source:VGNC Symbol;Acc:VGNC:76141]             | 0.959400586 | 3.88E-07    | 3.84E-06    |
| ENSMMUG00000057231 | T-box transcription factor 21 [Source:NCBI gene;Acc:694044]                       | 1.030456054 | 1.44E-06    | 1.26E-05    |
| ENSMMUG00000019760 | karyopherin subunit beta 1 [Source:VGNC Symbol;Acc:VGNC:74203]                    | 0.739331538 | 1.68E-08    | 2.18E-07    |
| ENSMMUG00000020020 | Rho GTPase activating protein 23 [Source:NCBI gene;Acc:693996]                    | 1.970351937 | 1.86E-10    | 3.40E-09    |
| ENSMMUG00000007799 | LIM and SH3 protein 1 [Source:VGNC Symbol;Acc:VGNC:74237]                         | 2.101441816 | 5.80E-14    | 1.81E-12    |
| ENSMMUG00000050458 |                                                                                   | -1.52117005 | 5.39E-12    | 1.25E-10    |
| ENSMMUG00000056248 |                                                                                   | 4.285973311 | 1.40E-53    | 1.78E-50    |
| ENSMMUG00000063779 |                                                                                   | 4.385983159 | 8.95E-69    | 4.18E-65    |
| ENSMMUG00000030060 | F-box and leucine rich repeat protein 20 [Source:VGNC Symbol;Acc:VGNC:81407]      | 0.550165709 | 0.000130603 | 0.00072763  |
| ENSMMUG00000004587 | gasdermin B [Source:VGNC Symbol;Acc:VGNC:73219]                                   | 2.524247138 | 2.09E-05    | 0.000141062 |
| ENSMMUG00000057790 |                                                                                   | 2.930703138 | 0.000131565 | 0.00073188  |
| ENSMMUG00000058758 |                                                                                   | 2.454665133 | 2.49E-05    | 0.000164087 |
| ENSMMUG00000064723 | gasdermin A [Source:NCBI gene;Acc:698841]                                         | 1.564487842 | 0.008211655 | 0.027145694 |
| ENSMMUG00000002923 | colony stimulating factor 3 [Source:VGNC Symbol;Acc:VGNC:71520]                   | 0.8751083   | 7.91E-08    | 9.03E-07    |
| ENSMMUG00000002926 | mediator complex subunit 24 [Source:NCBI gene;Acc:699536]                         | 1.09154254  | 2.59E-11    | 5.40E-10    |
| ENSMMUG00000045187 | CASC3 exon junction complex subunit [Source:NCBI gene;Acc:699712]                 | 0.936148679 | 2.18E-07    | 2.25E-06    |
| ENSMMUG00000015160 | Rap guanine nucleotide exchange factor like 1 [Source:VGNC Symbol;Acc:VGNC:76501] | 0.498222631 | 0.011246459 | 0.035313277 |
| ENSMMUG00000056646 |                                                                                   | 0.717999617 | 0.000807734 | 0.003675162 |
| ENSMMUG00000012486 | retinoic acid receptor alpha [Source:VGNC Symbol;Acc:VGNC:76662]                  | 1.397426896 | 6.57E-06    | 5.01E-05    |
| ENSMMUG00000008941 | DNA topoisomerase II alpha [Source:VGNC Symbol;Acc:VGNC:78620]                    | 1.158622021 | 3.69E-15    | 1.36E-13    |
| ENSMMUG00000009386 | tensin 4 [Source:VGNC Symbol;Acc:VGNC:79432]                                      | 1.198475404 | 0.013968182 | 0.042406541 |
| ENSMMUG00000001497 | keratin 27 [Source:VGNC Symbol;Acc:VGNC:74169]                                    | 0.430643567 | 0.014836931 | 0.044552094 |

|                    |                                                                                               |             |             |             |
|--------------------|-----------------------------------------------------------------------------------------------|-------------|-------------|-------------|
| ENSMMUG00000062362 | keratin 33A [Source:NCBI gene;Acc:705800]                                                     | 0.562386715 | 0.000959022 | 0.00425043  |
| ENSMMUG00000018644 | keratin 32 [Source:VGNC Symbol;Acc:VGNC:74216]                                                | 0.552116094 | 0.000125634 | 0.00070302  |
| ENSMMUG00000016114 | 2',3'-cyclic nucleotide 3' phosphodiesterase [Source:VGNC Symbol;Acc:VGNC:71279]              | 0.377979303 | 0.004822405 | 0.017207274 |
| ENSMMUG00000003437 | signal transducer and activator of transcription 5B [Source:NCBI gene;Acc:709760]             | 1.979224387 | 1.12E-25    | 1.30E-23    |
| ENSMMUG00000052220 |                                                                                               | 0.481333134 | 0.002619758 | 0.010173597 |
| ENSMMUG00000010707 | signal transducer and activator of transcription 3 [Source:VGNC Symbol;Acc:VGNC:77906]        | 0.411721818 | 3.02E-05    | 0.000195999 |
| ENSMMUG00000050793 | N-acetyl-alpha-glucosaminidase [Source:NCBI gene;Acc:707186]                                  | 1.380843963 | 7.05E-11    | 1.37E-09    |
| ENSMMUG00000009884 | hydroxysteroid 17-beta dehydrogenase 1 [Source:VGNC Symbol;Acc:VGNC:73528]                    | 1.8980602   | 1.53E-07    | 1.64E-06    |
| ENSMMUG00000009886 | Coenzyme A synthase [Source:VGNC Symbol;Acc:VGNC:81373]                                       | 1.208601237 | 1.75E-14    | 5.90E-13    |
| ENSMMUG00000009887 | MAX dimerization protein MLX [Source:VGNC Symbol;Acc:VGNC:74726]                              | 1.197739867 | 2.97E-06    | 2.42E-05    |
| ENSMMUG00000009889 | PSMC3 interacting protein [Source:VGNC Symbol;Acc:VGNC:76282]                                 | 1.236144897 | 2.06E-10    | 3.71E-09    |
| ENSMMUG00000016796 | reticulophagy regulator family member 3 [Source:VGNC Symbol;Acc:VGNC:76845]                   | 1.205084699 | 9.57E-13    | 2.48E-11    |
| ENSMMUG00000016797 | tubulin gamma 1 [Source:NCBI gene;Acc:710756]                                                 | 1.484441442 | 2.00E-18    | 1.08E-16    |
| ENSMMUG00000006086 | pleckstrin homology, MyTH4 and FERM domain containing H3 [Source:VGNC Symbol;Acc:VGNC:76113]  | 1.308176824 | 7.26E-05    | 0.000428113 |
| ENSMMUG00000006091 | contactin associated protein 1 [Source:VGNC Symbol;Acc:VGNC:71390]                            | 1.681598104 | 3.06E-15    | 1.14E-13    |
| ENSMMUG00000006093 | enhancer of zeste 1 polycomb repressive complex 2 subunit [Source:VGNC Symbol;Acc:VGNC:72457] | 1.591782609 | 3.38E-13    | 9.30E-12    |
| ENSMMUG00000056565 | Metazoan signal recognition particle RNA [Source:RFAM;Acc:RF00017]                            | 2.466133849 | 0.009753905 | 0.031278072 |
| ENSMMUG00000058566 |                                                                                               | 1.44805562  | 6.88E-16    | 2.75E-14    |
| ENSMMUG00000012685 | proteasome activator subunit 3 [Source:VGNC Symbol;Acc:VGNC:76457]                            | 0.306950529 | 0.006460728 | 0.022011366 |
| ENSMMUG00000001870 | amine oxidase copper containing 2 [Source:VGNC Symbol;Acc:VGNC:69955]                         | 0.479173916 | 0.003175883 | 0.011933388 |
| ENSMMUG00000008087 | glucose-6-phosphatase catalytic subunit [Source:VGNC Symbol;Acc:VGNC:72839]                   | 1.650274505 | 0.005886775 | 0.020307564 |
| ENSMMUG00000014123 | alanyl-tRNA editing protein Aarsd1 [Source:NCBI gene;Acc:712203]                              | 1.171402794 | 4.94E-07    | 4.78E-06    |
| ENSMMUG00000008091 | RUN domain containing 1 [Source:VGNC Symbol;Acc:VGNC:77101]                                   | 1.136358258 | 9.47E-06    | 6.92E-05    |
| ENSMMUG00000064920 |                                                                                               | 1.250678478 | 4.60E-16    | 1.91E-14    |
| ENSMMUG00000008090 | ribosomal protein L27 [Source:NCBI gene;Acc:712352]                                           | 1.076142699 | 0.004399142 | 0.015903368 |
| ENSMMUG00000015999 | interferon induced protein 35 [Source:VGNC Symbol;Acc:VGNC:73564]                             | 1.196025523 | 1.39E-05    | 9.73E-05    |
| ENSMMUG00000016001 | vesicle amine transport 1 [Source:VGNC Symbol;Acc:VGNC:79058]                                 | 1.07198266  | 3.35E-10    | 5.78E-09    |
| ENSMMUG00000065269 | Rho family GTPase 2 [Source:NCBI gene;Acc:712559]                                             | 1.066012999 | 8.71E-07    | 7.98E-06    |
| ENSMMUG00000052607 |                                                                                               | 1.183483444 | 6.86E-27    | 9.08E-25    |
| ENSMMUG00000019923 | ataxin 7 like 3 [Source:VGNC Symbol;Acc:VGNC:70128]                                           | 0.788676264 | 2.23E-06    | 1.87E-05    |
| ENSMMUG00000019924 | upstream binding transcription factor [Source:NCBI gene;Acc:711597]                           | -0.71441102 | 1.40E-05    | 9.81E-05    |
| ENSMMUG00000017100 | solute carrier family 4 member 1 (Diego blood group) [Source:NCBI gene;Acc:100427618]         | 0.739832008 | 5.98E-06    | 4.60E-05    |
| ENSMMUG00000029927 | ADAM metallopeptidase domain 11 [Source:VGNC Symbol;Acc:VGNC:69466]                           | 0.563009502 | 0.013374393 | 0.040904932 |
| ENSMMUG00000062273 | dephospho-CoA kinase domain containing [Source:NCBI gene;Acc:715841]                          | 1.064336211 | 0.005042941 | 0.017844352 |
| ENSMMUG00000060665 |                                                                                               | 1.130891569 | 1.30E-05    | 9.17E-05    |
| ENSMMUG00000054246 |                                                                                               | 1.526963992 | 0.004735235 | 0.016935017 |
| ENSMMUG00000021932 | Rho GTPase activating protein 27 [Source:VGNC Symbol;Acc:VGNC:69935]                          | 1.210733974 | 0.005266448 | 0.018495218 |
| ENSMMUG00000008459 | pleckstrin homology and RUN domain containing M1 [Source:NCBI gene;Acc:716464]                | 0.881703773 | 0.001266524 | 0.005416425 |
| ENSMMUG00000008199 | leucine-rich repeat-containing protein 37A [Source:NCBI gene;Acc:714675]                      | 0.858359263 | 0.009131449 | 0.029655005 |
| ENSMMUG00000005548 | N-ethylmaleimide sensitive factor, vesicle fusing ATPase [Source:VGNC Symbol;Acc:VGNC:75536]  | 0.746909251 | 1.93E-10    | 3.50E-09    |



|                     |                                                                                        |   |             |             |             |
|---------------------|----------------------------------------------------------------------------------------|---|-------------|-------------|-------------|
| ENSMMUG00000057209  |                                                                                        | - | 0.963941899 | 2.77E-08    | 3.43E-07    |
| ENSMMUG00000004108  | corticotropin releasing hormone receptor 1 [Source:VGNC Symbol;Acc:VGNC:81184]         |   | 0.752010417 | 0.000192025 | 0.001033294 |
| ENSMMUG00000004122  | microtubule associated protein tau [Source:NCBI gene;Acc:574327]                       |   | 0.453850625 | 0.004046552 | 0.014781141 |
| ENSMMUG00000004129  | KAT8 regulatory NSL complex subunit 1 [Source:VGNC Symbol;Acc:VGNC:73900]              |   | 0.635554067 | 0.008515198 | 0.027997334 |
| ENSMMUG000000053257 | Y RNA [Source:RFAM;Acc:RF00019]                                                        |   | 1.183711627 | 3.21E-10    | 5.56E-09    |
| ENSMMUG000000063877 | leucine-rich repeat-containing protein 37A2 [Source:NCBI gene;Acc:716147]              |   | 0.300557975 | 0.000904343 | 0.004037858 |
| ENSMMUG00000003289  | integrin subunit beta 3 [Source:NCBI gene;Acc:717379]                                  |   | 0.74106232  | 3.08E-10    | 5.37E-09    |
| ENSMMUG00000010588  | EF-hand calcium binding domain 13 [Source:HGNC Symbol;Acc:HGNC:26864]                  |   | 0.597551253 | 0.001766804 | 0.00721698  |
| ENSMMUG00000002166  | tousled like kinase 2 [Source:VGNC Symbol;Acc:VGNC:78368]                              |   | 2.375799819 | 0.010404696 | 0.033047576 |
| ENSMMUG00000015185  | endoplasmic reticulum to nucleus signaling 1 [Source:VGNC Symbol;Acc:VGNC:72429]       |   | 0.395121422 | 0.000539621 | 0.002580868 |
| ENSMMUG00000017521  | testis expressed 2 [Source:VGNC Symbol;Acc:VGNC:79894]                                 |   | 0.712892536 | 0.002716782 | 0.01048361  |
| ENSMMUG00000016371  | G protein subunit alpha 13 [Source:VGNC Symbol;Acc:VGNC:73087]                         |   | 0.276115956 | 0.002900536 | 0.011091958 |
| ENSMMUG000000060767 |                                                                                        |   | 2.750891471 | 7.70E-11    | 1.50E-09    |
| ENSMMUG000000060015 | axin 2 [Source:NCBI gene;Acc:718566]                                                   |   | 0.407165108 | 0.003422407 | 0.01274699  |
| ENSMMUG00000002959  | helicase with zinc finger [Source:VGNC Symbol;Acc:VGNC:73178]                          |   | 2.628019908 | 1.67E-21    | 1.19E-19    |
| ENSMMUG000000057157 |                                                                                        |   | 1.985029892 | 4.56E-10    | 7.69E-09    |
| ENSMMUG000000063817 | SRY-box transcription factor 9 [Source:NCBI gene;Acc:574208]                           |   | 1.058455512 | 2.85E-12    | 6.93E-11    |
| ENSMMUG000000054673 |                                                                                        |   | 2.113168907 | 0.003081411 | 0.011653323 |
| ENSMMUG00000001269  | chromosome 16 C17orf80 homolog [Source:VGNC Symbol;Acc:VGNC:70440]                     |   | 1.177457004 | 2.66E-13    | 7.40E-12    |
| ENSMMUG00000001271  | cleavage and polyadenylation specific factor 4 like [Source:NCBI gene;Acc:698279]      |   | 1.297930022 | 0.007358153 | 0.024679116 |
| ENSMMUG000000061561 |                                                                                        |   | 3.436231898 | 0.012879926 | 0.039582556 |
| ENSMMUG000000049948 |                                                                                        |   | 1.040986135 | 3.10E-07    | 3.12E-06    |
| ENSMMUG000000064463 |                                                                                        |   | 1.364041305 | 8.29E-05    | 0.000481899 |
| ENSMMUG000000049403 |                                                                                        |   | 0.493602215 | 0.000345497 | 0.001732434 |
| ENSMMUG000000064052 | CD300 molecule like family member d [Source:NCBI gene;Acc:703142]                      |   | 1.532474698 | 3.61E-12    | 8.59E-11    |
| ENSMMUG000000058592 |                                                                                        |   | 1.923723404 | 1.42E-13    | 4.13E-12    |
| ENSMMUG000000020462 | CD300e molecule [Source:NCBI gene;Acc:114673189]                                       |   | 1.905802081 | 7.87E-11    | 1.53E-09    |
| ENSMMUG00000005737  | SLC9A3 regulator 1 [Source:VGNC Symbol;Acc:VGNC:77639]                                 |   | 2.913979118 | 1.21E-07    | 1.33E-06    |
| ENSMMUG00000005738  | N-acetyltransferase 9 (putative) [Source:NCBI gene;Acc:699085]                         |   | 4.328811619 | 0.000178178 | 0.000964335 |
| ENSMMUG00000005744  | glutamate ionotropic receptor NMDA type subunit 2C [Source:VGNC Symbol;Acc:VGNC:73284] |   | 0.43231975  | 0.012714043 | 0.039107046 |
| ENSMMUG000000023405 | otopettrin 3 [Source:VGNC Symbol;Acc:VGNC:75654]                                       |   | 0.421445573 | 0.000986353 | 0.004359163 |
| ENSMMUG000000023406 | HID1 domain containing [Source:VGNC Symbol;Acc:VGNC:73394]                             |   | 0.670249979 | 1.92E-06    | 1.62E-05    |
| ENSMMUG00000018031  | solute carrier family 25 member 19 [Source:VGNC Symbol;Acc:VGNC:77474]                 |   | 0.964642833 | 0.005529063 | 0.019272693 |
| ENSMMUG000000058142 |                                                                                        |   | 0.924950843 | 5.58E-07    | 5.34E-06    |
| ENSMMUG000000022120 | transmembrane protein 94 [Source:VGNC Symbol;Acc:VGNC:79760]                           |   | -0.77910501 | 2.24E-07    | 2.32E-06    |
| ENSMMUG000000022121 | CASK interacting protein 2 [Source:VGNC Symbol;Acc:VGNC:70577]                         |   | 1.055835591 | 1.13E-05    | 8.14E-05    |
| ENSMMUG000000022123 | tRNA splicing endonuclease subunit 54 [Source:VGNC Symbol;Acc:VGNC:79666]              |   | 0.667319681 | 0.000570527 | 0.002714794 |
| ENSMMUG00000001228  | LLGL scribble cell polarity complex component 2 [Source:NCBI gene;Acc:706973]          |   | 0.458461323 | 0.000651292 | 0.003032225 |
| ENSMMUG000000021636 | SAP30 binding protein [Source:VGNC Symbol;Acc:VGNC:77142]                              |   | -1.00169587 | 0.003245394 | 0.012165238 |
| ENSMMUG00000013646  | unk zinc finger [Source:VGNC Symbol;Acc:VGNC:79803]                                    |   | 0.688949028 | 0.002053169 | 0.008247395 |
| ENSMMUG000000002822 | unc-13 homolog D [Source:VGNC Symbol;Acc:VGNC:79375]                                   |   | 0.87709879  | 1.34E-07    | 1.45E-06    |
| ENSMMUG00000009381  | WW domain binding protein 2 [Source:VGNC Symbol;Acc:VGNC:78786]                        |   | 0.949452258 | 3.08E-11    | 6.34E-10    |

|                    |                                                                                              |             |             |             |
|--------------------|----------------------------------------------------------------------------------------------|-------------|-------------|-------------|
| ENSMMUG0000009377  | tripartite motif containing 47 [Source:VGNC Symbol;Acc:VGNC:79171]                           | 1.365259532 | 1.10E-09    | 1.74E-08    |
| ENSMMUG0000008885  | exocyst complex component 7 [Source:VGNC Symbol;Acc:VGNC:72319]                              | 0.339171065 | 0.000282578 | 0.001456837 |
| ENSMMUG00000054437 |                                                                                              | 0.373751544 | 3.70E-05    | 0.00023477  |
| ENSMMUG0000003534  | ring finger protein 157 [Source:VGNC Symbol;Acc:VGNC:76860]                                  | 0.686553732 | 2.44E-05    | 0.000161528 |
| ENSMMUG0000003539  | glutamine rich 2 [Source:VGNC Symbol;Acc:VGNC:76534]                                         | 2.155591964 | 3.14E-10    | 5.46E-09    |
| ENSMMUG00000049537 | phosphoribosyl pyrophosphate synthetase associated protein 1 [Source:NCBI gene;Acc:706625]   | 2.585106049 | 0.000254154 | 0.001329358 |
| ENSMMUG00000018011 | sphingosine kinase 1 [Source:VGNC Symbol;Acc:VGNC:77858]                                     | 1.465593277 | 0.004897809 | 0.017423154 |
| ENSMMUG00000018967 | ubiquitin conjugating enzyme E2 O [Source:VGNC Symbol;Acc:VGNC:79813]                        | 2.084064569 | 1.36E-29    | 2.36E-27    |
| ENSMMUG00000046918 |                                                                                              | 1.973768583 | 7.07E-05    | 0.000418421 |
| ENSMMUG00000055379 |                                                                                              | 1.435280405 | 4.65E-13    | 1.26E-11    |
| ENSMMUG00000053937 |                                                                                              | 1.381353391 | 2.96E-11    | 6.10E-10    |
|                    |                                                                                              | -           |             |             |
| ENSMMUG00000049183 | transmembrane protein 235 [Source:NCBI gene;Acc:715249]                                      | 0.966946444 | 0.010530081 | 0.033391593 |
|                    |                                                                                              | -           |             |             |
| ENSMMUG0000008237  | phosphatidylglycerophosphate synthase 1 [Source:VGNC Symbol;Acc:VGNC:75890]                  | 0.747923855 | 0.002464151 | 0.00965757  |
|                    |                                                                                              | -           |             |             |
| ENSMMUG0000008239  | dynein axonemal heavy chain 17 [Source:NCBI gene;Acc:715774]                                 | 0.668630471 | 0.001253039 | 0.005366941 |
| ENSMMUG00000051537 |                                                                                              | 2.935880804 | 1.24E-07    | 1.35E-06    |
| ENSMMUG00000013313 | cytohesin 1 [Source:VGNC Symbol;Acc:VGNC:71828]                                              | 0.47040339  | 0.00162466  | 0.006708658 |
| ENSMMUG00000005352 | ubiquitin specific peptidase 36 [Source:VGNC Symbol;Acc:VGNC:79219]                          | 0.379734775 | 0.002928644 | 0.011187246 |
| ENSMMUG00000005355 | TIMP metalloproteinase inhibitor 2 [Source:NCBI gene;Acc:574357]                             | 2.731974698 | 7.18E-05    | 0.000424675 |
| ENSMMUG00000046417 | chromobox 2 [Source:NCBI gene;Acc:717462]                                                    | 2.195696401 | 1.71E-08    | 2.21E-07    |
| ENSMMUG00000016417 | chromobox 8 [Source:NCBI gene;Acc:717514]                                                    | 2.089718779 | 6.02E-25    | 6.45E-23    |
| ENSMMUG00000020840 | TBC1 domain family member 16 [Source:VGNC Symbol;Acc:VGNC:78228]                             | 0.40033429  | 0.002857118 | 0.010939549 |
| ENSMMUG00000064603 | caspase recruitment domain family member 14 [Source:NCBI gene;Acc:712205]                    | 0.459705508 | 0.002587989 | 0.010064164 |
|                    |                                                                                              | -           |             |             |
| ENSMMUG00000064563 |                                                                                              | 0.565183805 | 0.012024192 | 0.037348646 |
|                    |                                                                                              | -           |             |             |
| ENSMMUG00000029310 | hemoglobin, alpha 2 [Source:NCBI gene;Acc:693930]                                            | 0.566334048 | 0.000624156 | 0.002930212 |
|                    |                                                                                              | -           |             |             |
| ENSMMUG00000019566 | hemoglobin subunit alpha 1 [Source:NCBI gene;Acc:701930]                                     | 0.550781912 | 0.005108356 | 0.01801672  |
| ENSMMUG00000000596 | LUC7 like [Source:VGNC Symbol;Acc:VGNC:74461]                                                | 0.689964641 | 0.014412228 | 0.04355661  |
| ENSMMUG00000029296 | phosphatidylinositol glycan anchor biosynthesis class Q [Source:VGNC Symbol;Acc:VGNC:75798]  | 0.96428357  | 0.00034736  | 0.001738326 |
| ENSMMUG00000049219 | STIP1 homology and U-box containing protein 1 [Source:NCBI gene;Acc:697105]                  | 0.742250556 | 0.003239739 | 0.012153787 |
|                    |                                                                                              | -           |             |             |
| ENSMMUG00000050065 |                                                                                              | 0.777229198 | 0.007411706 | 0.024811256 |
|                    |                                                                                              | -           |             |             |
| ENSMMUG00000016906 | F-box and leucine rich repeat protein 16 [Source:VGNC Symbol;Acc:VGNC:81405]                 | 0.927991882 | 1.81E-06    | 1.54E-05    |
| ENSMMUG00000000842 | RNA pseudouridine synthase domain containing 1 [Source:NCBI gene;Acc:722393]                 | 2.151797047 | 0.013415881 | 0.041022873 |
|                    |                                                                                              | -           |             |             |
| ENSMMUG00000063740 |                                                                                              | 0.404959638 | 0.004763272 | 0.017022263 |
|                    |                                                                                              | -           |             |             |
| ENSMMUG00000044277 | ubiquitin conjugating enzyme E2 I [Source:NCBI gene;Acc:722434]                              | 0.706013932 | 0.001614443 | 0.00667433  |
| ENSMMUG00000021415 | BAI1 associated protein 3 [Source:VGNC Symbol;Acc:VGNC:70223]                                | 0.924521977 | 0.000621135 | 0.00291896  |
| ENSMMUG00000012439 | N-acetylglucosamine-1-phosphate transferase subunit gamma [Source:NCBI gene;Acc:722441]      | 0.819954843 | 0.005813458 | 0.020099141 |
|                    |                                                                                              | -           |             |             |
| ENSMMUG00000061546 |                                                                                              | 2.097464108 | 0.00052104  | 0.002498819 |
|                    |                                                                                              | -           |             |             |
| ENSMMUG0000008119  | telomere maintenance 2 [Source:NCBI gene;Acc:701679]                                         | 0.696359269 | 0.003511865 | 0.013038625 |
|                    |                                                                                              | -           |             |             |
| ENSMMUG00000029265 | zinc finger protein 598 [Source:NCBI gene;Acc:694129]                                        | 0.762552131 | 1.59E-05    | 0.00010986  |
|                    |                                                                                              | -           |             |             |
| ENSMMUG00000029263 | polycystin 1, transient receptor potential channel interacting [Source:NCBI gene;Acc:694905] | 0.418501588 | 0.015356565 | 0.045847372 |
| ENSMMUG00000019223 | TNF receptor associated factor 7 [Source:VGNC Symbol;Acc:VGNC:79252]                         | 0.889856148 | 6.31E-05    | 0.000378537 |

|                      |                                                                                                |             |             |             |
|----------------------|------------------------------------------------------------------------------------------------|-------------|-------------|-------------|
| ENSMMUG00000019238   | RNA binding protein with serine rich domain 1 [Source:NCBI gene;Acc:695816]                    | -0.43085328 | 6.40E-06    | 4.90E-05    |
| ENSMMUG00000011459   | 3-phosphoinositide dependent protein kinase 1 [Source:NCBI gene;Acc:697523]                    | 0.427320227 | 1.09E-06    | 9.74E-06    |
| ENSMMUG000000061321  | host cell factor C1 regulator 1 [Source:NCBI gene;Acc:700351]                                  | 0.711431406 | 0.013014089 | 0.039951089 |
| ENSMMUG00000009483   | matrix metalloproteinase 25 [Source:VGNC Symbol;Acc:VGNC:74747]                                | 0.489189566 | 0.013100391 | 0.040180836 |
| ENSMMUG00000009484   | zinc finger and SCAN domain-containing protein 10 [Source:NCBI gene;Acc:700600]                | 0.599951324 | 0.012320101 | 0.038079079 |
| ENSMMUG00000009487   | zinc finger protein 205 [Source:VGNC Symbol;Acc:VGNC:78869]                                    | 0.555444408 | 0.000144852 | 0.00080097  |
| ENSMMUG000000064194  |                                                                                                | 0.904258584 | 0.000145083 | 0.000801744 |
| ENSMMUG000000020970  | zinc finger protein 213 [Source:VGNC Symbol;Acc:VGNC:78872]                                    | 0.535442815 | 0.000236133 | 0.001244845 |
| ENSMMUG000000051323  | caspase-14-like [Source:NCBI gene;Acc:702430]                                                  | 0.824078484 | 3.25E-05    | 0.000208476 |
|                      |                                                                                                | -           |             |             |
| ENSMMUG000000017972  | zinc finger protein 200 [Source:VGNC Symbol;Acc:VGNC:78867]                                    | 0.933494795 | 6.86E-07    | 6.44E-06    |
|                      |                                                                                                | -           |             |             |
| ENSMMUG000000007568  | zinc finger protein 174 [Source:VGNC Symbol;Acc:VGNC:78855]                                    | 1.023479525 | 0.010293655 | 0.032754237 |
|                      |                                                                                                | -           |             |             |
| ENSMMUG000000007569  | clusterin associated protein 1 [Source:VGNC Symbol;Acc:VGNC:71211]                             | 0.607121301 | 0.001755555 | 0.00717312  |
| ENSMMUG000000021866  | deoxyribonuclease 1 [Source:VGNC Symbol;Acc:VGNC:71946]                                        | 0.401492824 | 0.000845796 | 0.003817378 |
| ENSMMUG000000021868  | TNF receptor associated protein 1 [Source:VGNC Symbol;Acc:VGNC:79019]                          | 0.677735771 | 9.78E-06    | 7.12E-05    |
| ENSMMUG000000039943  | adenylate cyclase 9 [Source:NCBI gene;Acc:706789]                                              | 1.631469035 | 0.002157935 | 0.008613926 |
|                      |                                                                                                | -           |             |             |
| ENSMMUG0000000051196 |                                                                                                | 1.808006424 | 0.000803006 | 0.003660776 |
|                      |                                                                                                | -           |             |             |
| ENSMMUG000000040803  | sarcalumenin [Source:NCBI gene;Acc:704655]                                                     | 1.306978003 | 0.000174036 | 0.000943741 |
|                      |                                                                                                | -           |             |             |
| ENSMMUG000000044729  | transcription factor AP-4 [Source:NCBI gene;Acc:707513]                                        | 1.088526341 | 0.002875809 | 0.011003401 |
|                      |                                                                                                | -           |             |             |
| ENSMMUG000000044344  | vasorin [Source:NCBI gene;Acc:100426861]                                                       | 1.057649323 | 1.57E-05    | 0.000108604 |
|                      |                                                                                                | -           |             |             |
| ENSMMUG000000020540  | NmrA like redox sensor 1 [Source:VGNC Symbol;Acc:VGNC:75252]                                   | 1.324659518 | 7.28E-08    | 8.36E-07    |
|                      |                                                                                                | -           |             |             |
| ENSMMUG000000001888  | mahogunin ring finger 1 [Source:VGNC Symbol;Acc:VGNC:74542]                                    | 0.911908271 | 0.001171258 | 0.005059935 |
| ENSMMUG000000011001  | ankyrin repeat and sterile alpha motif domain containing 3 [Source:VGNC Symbol;Acc:VGNC:69735] | 0.657257674 | 1.30E-05    | 9.21E-05    |
| ENSMMUG000000014311  | chromosome 20 C16orf71 homolog [Source:NCBI gene;Acc:709711]                                   | 0.597934731 | 0.000130525 | 0.000727485 |
| ENSMMUG000000014313  | zinc finger protein 500 [Source:VGNC Symbol;Acc:VGNC:79406]                                    | 0.828845885 | 3.65E-06    | 2.95E-05    |
| ENSMMUG000000017945  | septin 12 [Source:VGNC Symbol;Acc:VGNC:82235]                                                  | 0.907431746 | 7.87E-05    | 0.000460592 |
| ENSMMUG000000049327  |                                                                                                | 1.162005635 | 0.001258672 | 0.005387775 |
| ENSMMUG000000017946  | rogdi atypical leucine zipper [Source:VGNC Symbol;Acc:VGNC:76862]                              | 0.965303275 | 2.26E-05    | 0.000150779 |
| ENSMMUG000000009567  | glyoxylate reductase 1 homolog [Source:NCBI gene;Acc:706933]                                   | 2.535287563 | 1.06E-24    | 1.10E-22    |
| ENSMMUG000000017822  | periplakin [Source:VGNC Symbol;Acc:VGNC:76240]                                                 | 3.541874    | 1.34E-23    | 1.22E-21    |
|                      |                                                                                                | -           |             |             |
| ENSMMUG000000046237  | 4-aminobutyrate aminotransferase [Source:NCBI gene;Acc:714017]                                 | 1.111104228 | 1.15E-09    | 1.81E-08    |
| ENSMMUG000000001944  | chromosome 20 C16orf72 homolog [Source:VGNC Symbol;Acc:VGNC:70443]                             | 0.98646023  | 3.80E-18    | 1.99E-16    |
| ENSMMUG000000010142  | glutamate ionotropic receptor NMDA type subunit 2A [Source:VGNC Symbol;Acc:VGNC:73282]         | 3.615419523 | 0.000340961 | 0.001714954 |
|                      |                                                                                                | -           |             |             |
| ENSMMUG000000005913  | activating transcription factor 7 interacting protein 2 [Source:VGNC Symbol;Acc:VGNC:70103]    | 1.406846975 | 4.93E-05    | 0.000303226 |
| ENSMMUG000000060993  | Metazoan signal recognition particle RNA [Source:RFAM;Acc:RF00017]                             | -1.70665882 | 0.016700534 | 0.049123473 |
| ENSMMUG000000056165  |                                                                                                | -1.80959346 | 2.77E-06    | 2.27E-05    |
|                      |                                                                                                | -           |             |             |
| ENSMMUG0000000052031 |                                                                                                | 1.997421174 | 1.59E-14    | 5.37E-13    |
|                      |                                                                                                | -           |             |             |
| ENSMMUG000000064158  |                                                                                                | 2.194445113 | 3.50E-08    | 4.27E-07    |
|                      |                                                                                                | -           |             |             |
| ENSMMUG000000060713  | epithelial membrane protein 2 [Source:NCBI gene;Acc:710315]                                    | 2.138270424 | 1.02E-07    | 1.14E-06    |
|                      |                                                                                                | -           |             |             |
| ENSMMUG000000006515  | C-type lectin domain containing 16A [Source:VGNC Symbol;Acc:VGNC:71369]                        | 0.810492362 | 0.000164441 | 0.000896211 |

|                    |                                                                                                         |             |             |             |
|--------------------|---------------------------------------------------------------------------------------------------------|-------------|-------------|-------------|
| ENSMMUG0000000566  |                                                                                                         | 1.159690122 | 0.007386837 | 0.024751639 |
| ENSMMUG00000008784 | lipopolysaccharide induced TNF factor [Source:NCBI gene;Acc:711743]                                     | 3.792522089 | 0.001000722 | 0.004411861 |
| ENSMMUG00000062037 | stannin [Source:NCBI gene;Acc:711909]                                                                   | 2.102462577 | 5.52E-12    | 1.28E-10    |
| ENSMMUG00000014240 | thioredoxin domain containing 11 [Source:VGNC Symbol;Acc:VGNC:79678]                                    | 2.087198252 | 6.01E-10    | 9.92E-09    |
| ENSMMUG00000057345 | calcineurin like phosphoesterase domain containing 1 [Source:NCBI gene;Acc:716978]                      | 0.927654315 | 7.57E-07    | 7.06E-06    |
| ENSMMUG00000017379 | myocardin related transcription factor B [Source:VGNC Symbol;Acc:VGNC:74865]                            | 0.817137169 | 5.76E-05    | 0.00034878  |
| ENSMMUG00000062213 | Metazoan signal recognition particle RNA [Source:RFAM;Acc:RF00017]                                      | 1.134201879 | 0.00152103  | 0.006336722 |
| ENSMMUG00000057747 |                                                                                                         | 1.904030867 | 0.000395527 | 0.00195505  |
| ENSMMUG00000064131 |                                                                                                         | 1.228692775 | 1.50E-06    | 1.30E-05    |
| ENSMMUG00000027108 | mml-mir-193b [Source:miRBase;Acc:MI0007656]                                                             | 1.174389139 | 0.012224371 | 0.037858293 |
| ENSMMUG00000002989 | N-terminal asparagine amidase [Source:NCBI gene;Acc:100427569]                                          | 1.752503194 | 0.001080284 | 0.00471779  |
| ENSMMUG00000062791 |                                                                                                         | 1.798484612 | 1.62E-06    | 1.40E-05    |
| ENSMMUG00000062623 | Metazoan signal recognition particle RNA [Source:RFAM;Acc:RF00017]                                      | 1.105660433 | 1.91E-05    | 0.000130276 |
| ENSMMUG00000058016 | bMERB domain containing 1 [Source:NCBI gene;Acc:713757]                                                 | 1.170849036 | 7.31E-08    | 8.38E-07    |
| ENSMMUG00000010367 | myosin heavy chain 11 [Source:VGNC Symbol;Acc:VGNC:75097]                                               | 0.607039257 | 6.23E-07    | 5.90E-06    |
| ENSMMUG00000060959 |                                                                                                         | 1.010871546 | 0.000195793 | 0.001050748 |
| ENSMMUG00000058281 | ITPRIP like 2 [Source:NCBI gene;Acc:694060]                                                             | 1.789314279 | 3.13E-05    | 0.000201867 |
| ENSMMUG00000053309 |                                                                                                         | 0.342107248 | 0.008827448 | 0.028814549 |
| ENSMMUG00000002709 | G protein-coupled receptor class C group 5 member B [Source:VGNC Symbol;Acc:VGNC:72934]                 | 0.597298626 | 0.003440203 | 0.01280987  |
| ENSMMUG00000016753 | dynein axonemal heavy chain 3 [Source:VGNC Symbol;Acc:VGNC:71941]                                       | 1.217623501 | 1.66E-11    | 3.59E-10    |
| ENSMMUG00000016758 | transmembrane protein 159 [Source:VGNC Symbol;Acc:VGNC:79836]                                           | 0.490594865 | 0.01118783  | 0.035176444 |
| ENSMMUG00000017725 | eukaryotic elongation factor 2 kinase [Source:VGNC Symbol;Acc:VGNC:72098]                               | 0.770055098 | 3.32E-08    | 4.07E-07    |
| ENSMMUG00000002257 | RNA polymerase III subunit E [Source:VGNC Symbol;Acc:VGNC:76142]                                        | 0.571611589 | 9.46E-07    | 8.59E-06    |
| ENSMMUG00000013877 | otoancorin [Source:VGNC Symbol;Acc:VGNC:75624]                                                          | 0.940162324 | 0.012005675 | 0.037321121 |
| ENSMMUG00000058042 | heparan sulfate-glucosamine 3-sulfotransferase 2 [Source:NCBI gene;Acc:699722]                          | 0.813316955 | 5.90E-05    | 0.000356563 |
| ENSMMUG00000054064 |                                                                                                         | 1.776514279 | 5.87E-14    | 1.82E-12    |
| ENSMMUG00000013560 | calcium voltage-gated channel auxiliary subunit gamma 3 [Source:VGNC Symbol;Acc:VGNC:70513]             | 0.800464695 | 0.000197199 | 0.001057487 |
| ENSMMUG00000001407 | solute carrier family 5 member 11 [Source:VGNC Symbol;Acc:VGNC:77759]                                   | 0.365402316 | 0.002673125 | 0.010332204 |
| ENSMMUG00000029176 | Rho GTPase activating protein 17 [Source:NCBI gene;Acc:701988]                                          | 0.893566857 | 9.60E-12    | 2.17E-10    |
| ENSMMUG00000005942 | leucine carboxyl methyltransferase 1 [Source:VGNC Symbol;Acc:VGNC:74067]                                | 0.529553651 | 3.83E-05    | 0.000242136 |
| ENSMMUG00000008254 | general transcription factor IIIC subunit 1 [Source:VGNC Symbol;Acc:VGNC:73316]                         | 3.026509938 | 0.012318303 | 0.038079079 |
| ENSMMUG00000015572 | GSG1 like [Source:VGNC Symbol;Acc:VGNC:82152]                                                           | 0.74456644  | 6.93E-09    | 9.56E-08    |
| ENSMMUG00000018623 | exportin 6 [Source:NCBI gene;Acc:704332]                                                                | 0.922228852 | 0.005277944 | 0.018530948 |
| ENSMMUG00000023526 | ATPase sarcoplasmic/endoplasmic reticulum Ca <sup>2+</sup> transporting 1 [Source:NCBI gene;Acc:708058] | 2.395035369 | 0.002488537 | 0.009720546 |
| ENSMMUG00000003303 | Tu translation elongation factor, mitochondrial [Source:VGNC Symbol;Acc:VGNC:78674]                     | 1.858802178 | 3.44E-38    | 1.28E-35    |

|                    |                                                                                                            |             |             |             |
|--------------------|------------------------------------------------------------------------------------------------------------|-------------|-------------|-------------|
| ENSMMUG00000003298 | ataxin 2 like [Source:VGNC Symbol;Acc:VGNC:70159]                                                          | 1.499571563 | 2.50E-34    | 6.60E-32    |
| ENSMMUG00000011798 | eukaryotic translation initiation factor 3 subunit C [Source:NCBI gene;Acc:705696]                         | 1.629286175 | 4.28E-36    | 1.40E-33    |
| ENSMMUG00000000700 | CLN3 lysosomal/endosomal transmembrane protein, battenin [Source:NCBI gene;Acc:705815]                     | 1.522985832 | 1.74E-21    | 1.24E-19    |
|                    |                                                                                                            | -           |             |             |
| ENSMMUG00000022334 | sulfotransferase 1A1 [Source:NCBI gene;Acc:114669765]                                                      | 2.076533339 | 0.010031212 | 0.032057358 |
| ENSMMUG00000017758 | mitogen-activated protein kinase 3 [Source:VGNC Symbol;Acc:VGNC:74646]                                     | 2.318648181 | 7.75E-45    | 4.73E-42    |
|                    |                                                                                                            | -           |             |             |
| ENSMMUG00000029164 | glycerophosphodiester phosphodiesterase domain containing 3 [Source:VGNC Symbol;Acc:VGNC:72800]            | 3.589251986 | 3.33E-17    | 1.56E-15    |
| ENSMMUG00000000981 | T-box transcription factor 6 [Source:VGNC Symbol;Acc:VGNC:78276]                                           | -1.70089309 | 3.52E-09    | 5.15E-08    |
| ENSMMUG00000000982 | protein phosphatase 4 catalytic subunit [Source:VGNC Symbol;Acc:VGNC:76384]                                | -1.701112   | 1.55E-12    | 3.91E-11    |
| ENSMMUG00000000983 | aldolase, fructose-bisphosphate A [Source:NCBI gene;Acc:708406]                                            | -1.31020559 | 1.00E-07    | 1.12E-06    |
|                    |                                                                                                            | -           |             |             |
| ENSMMUG00000037707 | TLC domain containing 3B [Source:NCBI gene;Acc:708210]                                                     | 1.278011957 | 0.000106095 | 0.000601848 |
|                    |                                                                                                            | -           |             |             |
| ENSMMUG00000020277 | double C2 domain alpha [Source:VGNC Symbol;Acc:VGNC:71963]                                                 | 0.383809673 | 0.000167332 | 0.000910908 |
| ENSMMUG00000018986 | seizure related 6 homolog like 2 [Source:VGNC Symbol;Acc:VGNC:81567]                                       | 1.273138541 | 2.14E-08    | 2.71E-07    |
| ENSMMUG00000061749 | PAXIP1 associated glutamate rich protein 1 [Source:NCBI gene;Acc:706839]                                   | 0.846352136 | 2.20E-12    | 5.41E-11    |
| ENSMMUG00000019826 | MYC associated zinc finger protein [Source:NCBI gene;Acc:708982]                                           | 0.642073061 | 0.000965035 | 0.004270335 |
| ENSMMUG00000009684 | kinesin family member 22 [Source:VGNC Symbol;Acc:VGNC:74033]                                               | 1.407089938 | 1.55E-09    | 2.39E-08    |
| ENSMMUG00000016143 | sialophorin [Source:VGNC Symbol;Acc:VGNC:77861]                                                            | 1.633818963 | 5.41E-18    | 2.74E-16    |
| ENSMMUG00000016876 | integrin subunit alpha L [Source:NCBI gene;Acc:711945]                                                     | 0.714031577 | 9.54E-06    | 6.95E-05    |
| ENSMMUG00000016879 | zinc finger protein 768 [Source:VGNC Symbol;Acc:VGNC:82280]                                                | 2.719785301 | 0.000601106 | 0.002846779 |
|                    |                                                                                                            | -           |             |             |
| ENSMMUG00000001121 | zinc finger protein 689 [Source:VGNC Symbol;Acc:VGNC:79480]                                                | 0.987849945 | 0.000145121 | 0.000801744 |
| ENSMMUG00000005625 | fibrosin [Source:NCBI gene;Acc:712741]                                                                     | 2.047168796 | 0.002423325 | 0.00951352  |
| ENSMMUG00000051226 | FAD-linked sulfhydryl oxidase ERV1 [Source:NCBI gene;Acc:106994988]                                        | 1.195111541 | 2.98E-10    | 5.21E-09    |
| ENSMMUG00000010556 | Snf2 related CREBBP activator protein [Source:NCBI gene;Acc:712944]                                        | 0.948882078 | 6.70E-10    | 1.10E-08    |
| ENSMMUG00000050996 | zinc finger protein 629 [Source:NCBI gene;Acc:713331]                                                      | -0.45377056 | 0.008493603 | 0.02793288  |
| ENSMMUG00000003233 | SET domain containing 1A, histone lysine methyltransferase [Source:NCBI gene;Acc:712416]                   | 0.994164813 | 9.50E-08    | 1.07E-06    |
| ENSMMUG00000037727 | hydroxy-delta-5-steroid dehydrogenase, 3 beta- and steroid delta-isomerase 7 [Source:NCBI gene;Acc:714136] | 0.80982481  | 1.20E-05    | 8.56E-05    |
| ENSMMUG00000048207 | syntaxin 4 [Source:NCBI gene;Acc:704880]                                                                   | 0.649586583 | 3.64E-07    | 3.64E-06    |
| ENSMMUG00000002033 | serine protease 36 [Source:VGNC Symbol;Acc:VGNC:76325]                                                     | 0.698629704 | 1.31E-07    | 1.42E-06    |
| ENSMMUG00000014349 | integrin subunit alpha X [Source:NCBI gene;Acc:100427850]                                                  | 1.656345365 | 4.41E-06    | 3.50E-05    |
| ENSMMUG00000000901 | alpha hemoglobin stabilizing protein [Source:VGNC Symbol;Acc:VGNC:69631]                                   | 0.735537431 | 7.94E-08    | 9.06E-07    |
| ENSMMUG00000058907 |                                                                                                            | 1.630805052 | 0.000577954 | 0.002745476 |
| ENSMMUG00000055973 | phosphoglycerate mutase 1-like [Source:NCBI gene;Acc:714548]                                               | 2.498108729 | 5.97E-05    | 0.000359977 |
| ENSMMUG00000008253 | zinc finger protein 267 [Source:NCBI gene;Acc:641441]                                                      | 1.442709605 | 8.71E-18    | 4.27E-16    |
|                    |                                                                                                            | -           |             |             |
| ENSMMUG00000003288 | glutamic--pyruvic transaminase 2 [Source:VGNC Symbol;Acc:VGNC:72962]                                       | 1.091474842 | 1.28E-06    | 1.13E-05    |
|                    |                                                                                                            | -           |             |             |
| ENSMMUG00000019869 | sorting nexin 20 [Source:VGNC Symbol;Acc:VGNC:77796]                                                       | 0.805204937 | 0.015780343 | 0.04695263  |
|                    |                                                                                                            | -           |             |             |
| ENSMMUG00000012209 | CYLD lysine 63 deubiquitinase [Source:VGNC Symbol;Acc:VGNC:71581]                                          | 0.741718523 | 0.000123949 | 0.000694146 |
|                    |                                                                                                            | -           |             |             |
| ENSMMUG00000055889 |                                                                                                            | 0.885546508 | 0.00542594  | 0.018974552 |
| ENSMMUG00000064095 |                                                                                                            | 3.038809043 | 2.02E-05    | 0.000137183 |
| ENSMMUG00000013967 | TOX high mobility group box family member 3 [Source:VGNC Symbol;Acc:VGNC:78612]                            | 2.041500323 | 3.56E-07    | 3.57E-06    |
|                    |                                                                                                            | -           |             |             |
| ENSMMUG00000043440 | RB transcriptional corepressor like 2 [Source:NCBI gene;Acc:696992]                                        | 0.536618939 | 0.00167771  | 0.006903322 |
| ENSMMUG00000020583 | FTO alpha-ketoglutarate dependent dioxygenase [Source:VGNC Symbol;Acc:VGNC:72772]                          | 0.487779874 | 0.005658211 | 0.019630155 |
| ENSMMUG00000054811 |                                                                                                            | 2.594003098 | 0.000748628 | 0.003432965 |
| ENSMMUG00000056555 |                                                                                                            | 1.555318196 | 1.52E-15    | 5.84E-14    |

|                    |                                                                                                           |   |             |             |             |
|--------------------|-----------------------------------------------------------------------------------------------------------|---|-------------|-------------|-------------|
| ENSMMUG00000023525 | cadherin 5 [Source:VGNC Symbol;Acc:VGNC:70973]                                                            | - | 0.389808419 | 0.009031745 | 0.029392473 |
| ENSMMUG00000049484 |                                                                                                           |   | -0.85950763 | 2.59E-11    | 5.40E-10    |
| ENSMMUG00000020847 | CKLF like MARVEL transmembrane domain containing 3 [Source:VGNC Symbol;Acc:VGNC:71215]                    | - | 1.129576962 | 0.000887875 | 0.00397531  |
| ENSMMUG00000011268 | dynein cytoplasmic 1 light intermediate chain 2 [Source:VGNC Symbol;Acc:VGNC:71954]                       | - | 0.356204836 | 0.001353956 | 0.005729189 |
| ENSMMUG00000054235 |                                                                                                           |   | 0.600113672 | 0.011200236 | 0.035207555 |
| ENSMMUG00000016727 | cadherin 16 [Source:VGNC Symbol;Acc:VGNC:70809]                                                           |   | 0.339707077 | 0.000306941 | 0.001565176 |
| ENSMMUG00000022825 | carboxylesterase 2 [Source:VGNC Symbol;Acc:VGNC:71012]                                                    |   | 0.444550358 | 2.88E-06    | 2.36E-05    |
| ENSMMUG00000064237 |                                                                                                           |   | -1.2160487  | 1.97E-07    | 2.06E-06    |
| ENSMMUG00000054948 |                                                                                                           |   | 1.046691752 | 0.008487583 | 0.027926179 |
| ENSMMUG00000058815 | core-binding factor subunit beta [Source:NCBI gene;Acc:695767]                                            |   | 0.70949688  | 0.011132472 | 0.035010239 |
| ENSMMUG00000018102 | chromosome 20 C16orf70 homolog [Source:VGNC Symbol;Acc:VGNC:70438]                                        |   | 1.234170527 | 0.000207695 | 0.001108258 |
| ENSMMUG00000060314 | TNFRSF1A associated via death domain [Source:NCBI gene;Acc:698160]                                        |   | 1.224381189 | 0.012159308 | 0.037673438 |
| ENSMMUG00000005906 | heat shock transcription factor 4 [Source:VGNC Symbol;Acc:VGNC:73533]                                     |   | 0.749037006 | 3.39E-05    | 0.000217007 |
| ENSMMUG00000020268 | nucleolar protein 3 [Source:NCBI gene;Acc:696747]                                                         |   | 0.889319009 | 0.00321389  | 0.012066502 |
| ENSMMUG00000020266 | KIAA0895 like [Source:VGNC Symbol;Acc:VGNC:73952]                                                         |   | 1.539937808 | 0.000495065 | 0.002389775 |
| ENSMMUG00000020254 | exocyst complex component 3 like 1 [Source:VGNC Symbol;Acc:VGNC:72376]                                    |   | 1.165352464 | 3.20E-11    | 6.55E-10    |
| ENSMMUG00000020258 | E2F transcription factor 4 [Source:VGNC Symbol;Acc:VGNC:72025]                                            |   | 0.932939803 | 5.19E-08    | 6.10E-07    |
| ENSMMUG00000020259 | engulfment and cell motility 3 [Source:VGNC Symbol;Acc:VGNC:72060]                                        |   | 1.190709756 | 0.005044766 | 0.017844595 |
| ENSMMUG00000054637 | tubulin polymerization promoting protein family member 3 [Source:NCBI gene;Acc:100429881]                 |   | 1.680861936 | 0.009372272 | 0.030303752 |
| ENSMMUG00000009825 | zinc finger DHHC-type containing 1 [Source:VGNC Symbol;Acc:VGNC:79102]                                    |   | 0.91952882  | 3.93E-08    | 4.73E-07    |
| ENSMMUG00000017105 | RHO family interacting cell polarization regulator 1 [Source:NCBI gene;Acc:699910]                        |   | -0.52244778 | 6.61E-05    | 0.000394438 |
| ENSMMUG00000007804 | RAN binding protein 10 [Source:VGNC Symbol;Acc:VGNC:76563]                                                |   | 0.980179503 | 3.61E-08    | 4.38E-07    |
| ENSMMUG00000037975 | solute carrier family 7 member 6 [Source:NCBI gene;Acc:702903]                                            |   | -0.70185693 | 0.000871158 | 0.003911703 |
| ENSMMUG00000059872 |                                                                                                           |   | 1.309268714 | 0.007458441 | 0.02495579  |
| ENSMMUG00000010393 | cadherin 3 [Source:VGNC Symbol;Acc:VGNC:70971]                                                            |   | 0.387160344 | 0.00052914  | 0.002535061 |
| ENSMMUG00000011850 | cadherin 1 [Source:VGNC Symbol;Acc:VGNC:70803]                                                            |   | 1.031616928 | 1.81E-07    | 1.91E-06    |
| ENSMMUG00000012039 | cytochrome b5 type B (outer mitochondrial membrane) [Source:NCBI gene;Acc:705093]                         |   | 1.137474491 | 0.010264058 | 0.032674888 |
| ENSMMUG00000018255 | nuclear factor of activated T cells 5 [Source:VGNC Symbol;Acc:VGNC:75325]                                 |   | 0.681201438 | 0.00011501  | 0.000648224 |
| ENSMMUG00000049699 | thioredoxin like 4B [Source:NCBI gene;Acc:706840]                                                         |   | 1.074900184 | 0.006666686 | 0.02261175  |
| ENSMMUG00000023312 | haptoglobin [Source:NCBI gene;Acc:706640]                                                                 |   | 1.189661304 | 0.002019044 | 0.008131263 |
| ENSMMUG00000016717 | polycystin 1 like 3, transient receptor potential channel interacting [Source:VGNC Symbol;Acc:VGNC:75846] |   | 1.190169935 | 9.33E-05    | 0.000536142 |
| ENSMMUG00000009688 | IST1 factor associated with ESCRT-III [Source:VGNC Symbol;Acc:VGNC:73675]                                 |   | -1.00393539 | 1.89E-05    | 0.000128838 |
| ENSMMUG00000010878 | adaptor related protein complex 1 subunit gamma 1 [Source:VGNC Symbol;Acc:VGNC:69958]                     |   | 0.959163709 | 8.94E-09    | 1.20E-07    |
| ENSMMUG00000052324 | MARVEL domain containing 3 [Source:NCBI gene;Acc:710448]                                                  |   | 0.586462129 | 0.000916161 | 0.004076666 |
| ENSMMUG00000002018 | tyrosine aminotransferase [Source:VGNC Symbol;Acc:VGNC:78100]                                             |   | 0.593252376 | 8.03E-06    | 5.98E-05    |
| ENSMMUG00000005751 | adenosine deaminase tRNA specific 1 [Source:VGNC Symbol;Acc:VGNC:69504]                                   |   | 1.646274042 | 0.001322372 | 0.005619281 |
| ENSMMUG00000050837 |                                                                                                           |   | 2.332119629 | 0.002675047 | 0.010336784 |
| ENSMMUG00000003916 | contactin associated protein family member 4 [Source:VGNC Symbol;Acc:VGNC:71209]                          |   | 1.232586222 | 0.012143871 | 0.037633925 |
| ENSMMUG00000010610 | WW domain containing oxidoreductase [Source:VGNC Symbol;Acc:VGNC:78805]                                   |   | 1.48511714  | 1.67E-06    | 1.43E-05    |

|                     |                                                                              |   |             |             |             |
|---------------------|------------------------------------------------------------------------------|---|-------------|-------------|-------------|
| ENSMMUG00000053231  |                                                                              | - | 0.583185619 | 0.002337821 | 0.009206198 |
| ENSMMUG00000037756  | MAF bZIP transcription factor [Source:NCBI gene;Acc:106995090]               |   | 0.549853328 | 0.002478216 | 0.009694421 |
| ENSMMUG00000005334  | phospholipase C gamma 2 [Source:VGNC Symbol;Acc:VGNC:76170]                  |   | -0.60408952 | 2.32E-05    | 0.00015475  |
| ENSMMUG000000062047 |                                                                              |   | 0.909222659 | 0.006649849 | 0.022578894 |
| ENSMMUG000000057329 |                                                                              |   | 1.754835116 | 0.000126424 | 0.000706875 |
| ENSMMUG00000020114  | cadherin 13 [Source:VGNC Symbol;Acc:VGNC:70807]                              |   | 1.566795825 | 0.0008619   | 0.003873913 |
| ENSMMUG00000011893  | KIAA0513 [Source:VGNC Symbol;Acc:VGNC:73925]                                 |   | 0.816526987 | 1.27E-05    | 8.97E-05    |
| ENSMMUG00000011894  | CBY1 interacting BAR domain containing 2 [Source:VGNC Symbol;Acc:VGNC:72335] |   | 0.814848679 | 0.00184135  | 0.007497461 |
| ENSMMUG000000061995 |                                                                              |   | 0.991835816 | 3.01E-09    | 4.44E-08    |
| ENSMMUG00000020592  | Gse1 coiled-coil protein [Source:VGNC Symbol;Acc:VGNC:73254]                 |   | 0.760097992 | 0.005625736 | 0.019541662 |
| ENSMMUG00000006763  | cytochrome c oxidase subunit IV isoform 1 [Source:NCBI gene;Acc:693811]      |   | 0.691694056 | 2.88E-05    | 0.000186897 |
| ENSMMUG000000060536 |                                                                              |   | -2.10005697 | 0.00013326  | 0.00074067  |
| ENSMMUG000000054493 |                                                                              |   | 0.775810587 | 7.40E-08    | 8.48E-07    |
| ENSMMUG00000017615  | zinc finger CCHC-type containing 14 [Source:VGNC Symbol;Acc:VGNC:79420]      |   | 1.156012388 | 3.00E-20    | 1.91E-18    |
| ENSMMUG00000022867  | kelch domain containing 4 [Source:VGNC Symbol;Acc:VGNC:74122]                |   | 0.654146564 | 0.000469856 | 0.002282957 |
| ENSMMUG000000058437 |                                                                              |   | 1.564308906 | 1.61E-10    | 2.97E-09    |
| ENSMMUG000000052851 | solute carrier family 7 member 5 [Source:NCBI gene;Acc:695886]               |   | 0.921452849 | 0.000346369 | 0.00173469  |
| ENSMMUG000000064830 |                                                                              |   | 0.817268838 | 0.000412123 | 0.002027788 |
| ENSMMUG000000054935 |                                                                              |   | 1.164313489 | 0.015026007 | 0.045004208 |
| ENSMMUG00000008945  | zinc finger protein 407 [Source:NCBI gene;Acc:695303]                        |   | 4.147461906 | 1.15E-09    | 1.81E-08    |
| ENSMMUG00000008942  | carnosine dipeptidase 1 [Source:VGNC Symbol;Acc:VGNC:71257]                  |   | 4.630068599 | 6.28E-11    | 1.23E-09    |
| ENSMMUG000000058864 |                                                                              |   | 2.516854955 | 0.011245742 | 0.035313277 |
| ENSMMUG000000051690 |                                                                              |   | -2.78190505 | 0.005534395 | 0.019281694 |
| ENSMMUG00000015702  | divergent protein kinase domain 1C [Source:NCBI gene;Acc:699537]             |   | 4.798825596 | 5.07E-06    | 3.96E-05    |
| ENSMMUG00000020905  | chromosome 18 C18orf63 homolog [Source:VGNC Symbol;Acc:VGNC:70465]           |   | 3.312259372 | 2.75E-06    | 2.26E-05    |
| ENSMMUG000000056477 |                                                                              |   | 0.368650698 | 0.015501561 | 0.046231049 |
| ENSMMUG000000050516 |                                                                              |   | 0.433171309 | 0.004899058 | 0.017423154 |
| ENSMMUG000000060966 |                                                                              |   | 1.868414228 | 0.001834908 | 0.0074734   |
| ENSMMUG00000018275  | docking protein 6 [Source:VGNC Symbol;Acc:VGNC:71915]                        |   | 0.943725254 | 0.00034951  | 0.001747365 |
| ENSMMUG000000057825 |                                                                              |   | 3.015547595 | 5.58E-05    | 0.000339743 |
| ENSMMUG00000001245  | zinc finger protein 532 [Source:NCBI gene;Acc:701146]                        |   | 4.972975639 | 5.09E-08    | 5.98E-07    |
| ENSMMUG000000061572 | Metazoan signal recognition particle RNA [Source:RFAM;Acc:RF00017]           |   | 5.500736193 | 2.11E-10    | 3.77E-09    |
| ENSMMUG000000065131 |                                                                              |   | 3.655513919 | 8.65E-05    | 0.000500673 |
| ENSMMUG00000012001  | transcription factor 4 [Source:VGNC Symbol;Acc:VGNC:78288]                   |   | 0.980486047 | 3.87E-06    | 3.10E-05    |
| ENSMMUG00000007816  | SMAD family member 2 [Source:VGNC Symbol;Acc:VGNC:77810]                     |   | 2.309987188 | 6.35E-12    | 1.47E-10    |

|                     |                                                                                                  |             |             |             |
|---------------------|--------------------------------------------------------------------------------------------------|-------------|-------------|-------------|
| ENSMMUG00000015952  | katanin catalytic subunit A1 like 2 [Source:VGNC Symbol;Acc:VGNC:73904]                          | 1.63838486  | 0.000131353 | 0.000731519 |
| ENSMMUG00000043738  |                                                                                                  | 1.637939679 | 0.001711924 | 0.007023496 |
| ENSMMUG00000004498  | protein inhibitor of activated STAT 2 [Source:VGNC Symbol;Acc:VGNC:75815]                        | 1.434864046 | 0.000356146 | 0.001775413 |
| ENSMMUG00000002742  | ST8 alpha-N-acetyl-neuraminide alpha-2,8-sialyltransferase 5 [Source:VGNC Symbol;Acc:VGNC:77942] | 2.597900118 | 7.20E-29    | 1.16E-26    |
| ENSMMUG00000017246  | lipoygenase homology domains 1 [Source:VGNC Symbol;Acc:VGNC:74368]                               | 1.854909022 | 2.43E-23    | 2.08E-21    |
| ENSMMUG00000017243  | ring finger protein 165 [Source:VGNC Symbol;Acc:VGNC:76877]                                      | 1.170515875 | 0.000147242 | 0.000811304 |
| ENSMMUG00000004997  | SET binding protein 1 [Source:NCBI gene;Acc:699652]                                              | 1.470832643 | 0.001306959 | 0.005564065 |
| ENSMMUG00000049194  |                                                                                                  | 1.915999043 | 0.0027796   | 0.010690712 |
| ENSMMUG00000006866  | CUGBP Elav-like family member 4 [Source:VGNC Symbol;Acc:VGNC:70945]                              | 2.260314679 | 0.005046828 | 0.017844595 |
| ENSMMUG00000006864  | KIAA1328 ortholog [Source:NCBI gene;Acc:709850]                                                  | 2.899731368 | 0.00489062  | 0.017406388 |
| ENSMMUG00000018785  | elongator acetyltransferase complex subunit 2 [Source:VGNC Symbol;Acc:VGNC:72069]                | 0.485450173 | 0.000156138 | 0.000856956 |
| ENSMMUG00000018777  | regulation of nuclear pre-mRNA domain containing 1A [Source:VGNC Symbol;Acc:VGNC:77103]          | 0.498132122 | 0.016154678 | 0.047859089 |
| ENSMMUG00000003302  | dystrobrevin alpha [Source:VGNC Symbol;Acc:VGNC:72007]                                           | 1.469097443 | 6.25E-05    | 0.000375669 |
| ENSMMUG00000017276  | nucleolar protein 4 [Source:VGNC Symbol;Acc:VGNC:75366]                                          | 1.057168409 | 2.65E-06    | 2.19E-05    |
| ENSMMUG00000014451  | ASXL transcriptional regulator 3 [Source:VGNC Symbol;Acc:VGNC:70152]                             | 0.674623428 | 2.14E-05    | 0.000143747 |
| ENSMMUG00000016674  | beta-1,4-galactosyltransferase 6 [Source:VGNC Symbol;Acc:VGNC:70213]                             | 2.279286513 | 0.007879534 | 0.026177376 |
| ENSMMUG00000052277  | transthyretin [Source:NCBI gene;Acc:705943]                                                      | 3.586318256 | 9.76E-10    | 1.56E-08    |
| ENSMMUG00000021095  | desmoglein 2 [Source:VGNC Symbol;Acc:VGNC:72002]                                                 | 3.655427386 | 1.51E-05    | 0.000104837 |
| ENSMMUG00000021094  | desmoglein 3 [Source:VGNC Symbol;Acc:VGNC:72003]                                                 | 3.088921182 | 0.000120778 | 0.00067801  |
| ENSMMUG00000011690  | desmocollin 1 [Source:VGNC Symbol;Acc:VGNC:71996]                                                | 1.235105182 | 0.001472074 | 0.006162058 |
| ENSMMUG000000060604 |                                                                                                  | 1.386188032 | 0.006727266 | 0.022786581 |
| ENSMMUG00000010944  | GATA binding protein 6 [Source:VGNC Symbol;Acc:VGNC:72891]                                       | 0.851086113 | 5.19E-05    | 0.000318318 |
| ENSMMUG00000064806  |                                                                                                  | 0.732899869 | 0.01060238  | 0.033576599 |
| ENSMMUG00000019892  | myomesin 1 [Source:VGNC Symbol;Acc:VGNC:75123]                                                   | 1.246312614 | 9.74E-12    | 2.20E-10    |
| ENSMMUG00000052605  | Metazoan signal recognition particle RNA [Source:RFAM;Acc:RF00017]                               | 2.874336717 | 3.21E-05    | 0.000206323 |
| ENSMMUG00000005086  | homeobox protein TGIF1 [Source:NCBI gene;Acc:694580]                                             | 1.512863967 | 2.30E-10    | 4.09E-09    |
| ENSMMUG00000041530  | Metazoan signal recognition particle RNA [Source:RFAM;Acc:RF00017]                               | 0.431186214 | 0.008370306 | 0.027585617 |
| ENSMMUG00000019418  | erythrocyte membrane protein band 4.1 like 3 [Source:VGNC Symbol;Acc:VGNC:72233]                 | 2.016780134 | 1.12E-30    | 2.18E-28    |
| ENSMMUG00000016302  | L3MBTL histone methyl-lysine binding protein 4 [Source:VGNC Symbol;Acc:VGNC:74133]               | 0.504689683 | 0.000515129 | 0.002473856 |
| ENSMMUG00000000768  | protein tyrosine phosphatase receptor type M [Source:VGNC Symbol;Acc:VGNC:76619]                 | 0.594954773 | 0.000116492 | 0.000655787 |
| ENSMMUG00000015761  | microtubule crosslinking factor 1 [Source:VGNC Symbol;Acc:VGNC:74852]                            | 0.359700097 | 0.011487782 | 0.035998473 |
| ENSMMUG00000053008  |                                                                                                  | 1.505505192 | 1.71E-07    | 1.82E-06    |



|                    |                                                                                                  |             |             |             |
|--------------------|--------------------------------------------------------------------------------------------------|-------------|-------------|-------------|
| ENSMMUG00000049556 | NADH:ubiquinone oxidoreductase core subunit V2 [Source:NCBI gene;Acc:706067]                     | 0.819166834 | 0.008135713 | 0.026920035 |
| ENSMMUG00000049523 | ankyrin repeat domain 12 [Source:NCBI gene;Acc:114673693]                                        | 1.399089566 | 5.69E-06    | 4.40E-05    |
| ENSMMUG00000023717 | MIER family member 2 [Source:VGNC Symbol;Acc:VGNC:74855]                                         | 1.181142727 | 3.13E-09    | 4.61E-08    |
| ENSMMUG00000059175 |                                                                                                  | 3.127645986 | 3.45E-38    | 1.28E-35    |
| ENSMMUG00000053083 | C2 calcium dependent domain containing 4C [Source:NCBI gene;Acc:100424440]                       | 3.186463183 | 1.08E-17    | 5.25E-16    |
| ENSMMUG00000049968 | RNA polymerase mitochondrial [Source:NCBI gene;Acc:100426183]                                    | -0.61623539 | 6.01E-07    | 5.72E-06    |
| ENSMMUG00000055423 | fibroblast growth factor 22 [Source:NCBI gene;Acc:702727]                                        | 0.434011959 | 0.000355223 | 0.00177144  |
| ENSMMUG00000008672 | ring finger protein 126 [Source:VGNC Symbol;Acc:VGNC:76791]                                      | 0.627996513 | 0.004720007 | 0.01688917  |
| ENSMMUG00000028948 | azurocidin 1 [Source:VGNC Symbol;Acc:VGNC:70202]                                                 | 2.960393513 | 1.32E-08    | 1.73E-07    |
| ENSMMUG00000009674 | elastase, neutrophil expressed [Source:VGNC Symbol;Acc:VGNC:72199]                               | 1.50115394  | 0.016101417 | 0.047725675 |
| ENSMMUG00000028947 | complement factor D [Source:VGNC Symbol;Acc:VGNC:71115]                                          | 3.097049108 | 2.17E-49    | 1.69E-46    |
| ENSMMUG00000009677 | mediator complex subunit 16 [Source:VGNC Symbol;Acc:VGNC:74525]                                  | 0.579052448 | 0.004848838 | 0.01728363  |
| ENSMMUG00000002278 | AT-rich interaction domain 3A [Source:VGNC Symbol;Acc:VGNC:69930]                                | 1.112329204 | 0.001190547 | 0.005132198 |
| ENSMMUG00000058621 |                                                                                                  | 1.168878224 | 1.37E-05    | 9.61E-05    |
| ENSMMUG00000002638 | WD repeat domain 18 [Source:VGNC Symbol;Acc:VGNC:79103]                                          | 0.745406139 | 0.001306998 | 0.005564065 |
| ENSMMUG00000015306 | calponin 2 [Source:NCBI gene;Acc:721164]                                                         | 0.993951452 | 2.87E-12    | 6.95E-11    |
| ENSMMUG00000015303 | ATP binding cassette subfamily A member 7 [Source:VGNC Symbol;Acc:VGNC:69567]                    | 1.036100792 | 7.80E-12    | 1.78E-10    |
| ENSMMUG00000058856 | Metazoan signal recognition particle RNA [Source:RFAM;Acc:RF00017]                               | 1.235486391 | 0.000307204 | 0.001565947 |
| ENSMMUG00000015301 | Rho GTPase activating protein 45 [Source:VGNC Symbol;Acc:VGNC:69847]                             | 0.346866136 | 0.002299025 | 0.009070679 |
| ENSMMUG00000010886 | strawberry notch homolog 2 [Source:VGNC Symbol;Acc:VGNC:77123]                                   | 0.896088954 | 8.64E-06    | 6.37E-05    |
| ENSMMUG00000058928 | Metazoan signal recognition particle RNA [Source:RFAM;Acc:RF00017]                               | 2.083803959 | 5.60E-13    | 1.51E-11    |
| ENSMMUG00000022100 | midnolin [Source:VGNC Symbol;Acc:VGNC:82186]                                                     | 1.58296772  | 6.45E-15    | 2.30E-13    |
| ENSMMUG00000003047 | DAZ associated protein 1 [Source:VGNC Symbol;Acc:VGNC:71738]                                     | 0.289437303 | 0.001251276 | 0.005365944 |
| ENSMMUG00000022104 | family with sequence similarity 174 member C [Source:NCBI gene;Acc:706393]                       | 0.548546797 | 3.16E-06    | 2.57E-05    |
| ENSMMUG00000003043 | PWWP domain containing 3A, DNA repair factor [Source:VGNC Symbol;Acc:VGNC:76565]                 | 0.734625717 | 1.47E-05    | 0.000102222 |
| ENSMMUG00000003056 | proprotein convertase subtilisin/kexin type 4 [Source:VGNC Symbol;Acc:VGNC:75786]                | 0.436994027 | 0.000171421 | 0.000930636 |
| ENSMMUG00000009017 | transcription factor 3 [Source:VGNC Symbol;Acc:VGNC:78287]                                       | 0.452504031 | 1.88E-06    | 1.59E-05    |
| ENSMMUG00000006620 | casein kinase 1 gamma 2 [Source:NCBI gene;Acc:709484]                                            | 0.663855581 | 0.003926801 | 0.014403747 |
| ENSMMUG00000059725 |                                                                                                  | 1.103076018 | 0.000375247 | 0.001860053 |
| ENSMMUG00000015663 | adaptor related protein complex 3 subunit delta 1 [Source:VGNC Symbol;Acc:VGNC:69969]            | 0.92918665  | 8.51E-07    | 7.82E-06    |
| ENSMMUG00000017949 | ornithine decarboxylase antizyme 1 [Source:NCBI gene;Acc:721477]                                 | 0.731188689 | 8.28E-13    | 2.17E-11    |
| ENSMMUG00000000452 | LSM7 homolog, U6 small nuclear RNA and mRNA degradation associated [Source:NCBI gene;Acc:721486] | 2.153659838 | 5.95E-05    | 0.000358842 |
| ENSMMUG00000055417 |                                                                                                  | 0.819649011 | 3.51E-07    | 3.52E-06    |
| ENSMMUG00000065054 | G protein subunit gamma 7 [Source:NCBI gene;Acc:711335]                                          | 1.612018488 | 1.19E-15    | 4.64E-14    |
| ENSMMUG00000007268 | thimet oligopeptidase 1 [Source:VGNC Symbol;Acc:VGNC:78347]                                      | 0.611502122 | 0.000644799 | 0.00300399  |
| ENSMMUG00000007485 | zinc finger protein 555 [Source:VGNC Symbol;Acc:VGNC:79705]                                      | 0.875491622 | 0.000111062 | 0.000627486 |
| ENSMMUG00000002912 | TLE family member 6, subcortical maternal complex member [Source:VGNC Symbol;Acc:VGNC:79879]     | 0.669524712 | 0.008735247 | 0.028613494 |
| ENSMMUG00000002961 | G protein subunit alpha 11 [Source:VGNC Symbol;Acc:VGNC:73085]                                   | 0.868664322 | 9.18E-14    | 2.75E-12    |
| ENSMMUG00000017036 | nicalin [Source:VGNC Symbol;Acc:VGNC:75032]                                                      | 2.289597702 | 3.63E-23    | 3.05E-21    |
| ENSMMUG00000015513 | CUGBP Elav-like family member 5 [Source:NCBI gene;Acc:721694]                                    | 1.251531406 | 0.004917163 | 0.017483107 |
| ENSMMUG00000060497 |                                                                                                  | 1.431572269 | 0.002621162 | 0.010176234 |
| ENSMMUG00000003439 | nuclear factor I C [Source:VGNC Symbol;Acc:VGNC:75336]                                           | 0.899010152 | 0.003377319 | 0.01260584  |
| ENSMMUG00000044080 | mitochondrial ribosomal protein L54 [Source:NCBI gene;Acc:713878]                                | 1.143334512 | 4.74E-06    | 3.73E-05    |
| ENSMMUG00000001917 | megakaryocyte-associated tyrosine kinase [Source:NCBI gene;Acc:100430078]                        | 1.094317279 | 1.70E-08    | 2.20E-07    |

|                    |                                                                                                  |             |             |             |
|--------------------|--------------------------------------------------------------------------------------------------|-------------|-------------|-------------|
| ENSMMUG00000054579 | zinc finger RNA binding protein 2 [Source:NCBI gene;Acc:100430166]                               | 1.259568368 | 1.04E-05    | 7.53E-05    |
| ENSMMUG00000022765 | death associated protein kinase 3 [Source:VGNC Symbol;Acc:VGNC:71734]                            | 1.753005806 | 0.013951668 | 0.042374755 |
| ENSMMUG00000022767 | eukaryotic translation elongation factor 2 [Source:NCBI gene;Acc:721806]                         | 2.721541379 | 0.001602739 | 0.006629853 |
| ENSMMUG00000019564 | mitogen-activated protein kinase kinase 2 [Source:VGNC Symbol;Acc:VGNC:81453]                    | 0.431248813 | 0.00051728  | 0.002482486 |
| ENSMMUG00000028928 | ankyrin repeat domain 24 [Source:NCBI gene;Acc:721829]                                           | 0.732225257 | 1.48E-07    | 1.58E-06    |
| ENSMMUG00000028927 | Src homology 2 domain containing transforming protein D [Source:VGNC Symbol;Acc:VGNC:77353]      | 1.052452574 | 0.011414076 | 0.0357915   |
| ENSMMUG00000045860 | transmembrane and immunoglobulin domain containing 2 [Source:NCBI gene;Acc:721840]               | 1.774711992 | 0.003703323 | 0.013684241 |
| ENSMMUG00000028925 | HDGF like 2 [Source:NCBI gene;Acc:693476]                                                        | 2.567895589 | 1.03E-05    | 7.47E-05    |
| ENSMMUG00000022656 | perilipin 4 [Source:NCBI gene;Acc:693610]                                                        | 1.437866991 | 0.000962156 | 0.004262975 |
| ENSMMUG00000062995 |                                                                                                  | 0.819714736 | 8.05E-06    | 5.99E-05    |
| ENSMMUG00000058275 | arrestin domain containing 5 [Source:NCBI gene;Acc:697277]                                       | 0.663163698 | 0.000944399 | 0.004186943 |
| ENSMMUG00000012677 | lysine demethylase 4B [Source:VGNC Symbol;Acc:VGNC:73930]                                        | 0.658027219 | 0.00121745  | 0.005240115 |
| ENSMMUG00000011962 | protein tyrosine phosphatase receptor type S [Source:VGNC Symbol;Acc:VGNC:76622]                 | 1.026469116 | 6.95E-05    | 0.000412022 |
| ENSMMUG00000016665 | NADH:ubiquinone oxidoreductase subunit A11 [Source:NCBI gene;Acc:697843]                         | 1.007177513 | 0.000844699 | 0.003814883 |
| ENSMMUG00000011963 | vimentin type intermediate filament associated coiled-coil protein [Source:NCBI gene;Acc:697958] | -0.69978742 | 1.37E-08    | 1.80E-07    |
| ENSMMUG00000011964 | RAN binding protein 3 [Source:VGNC Symbol;Acc:VGNC:76655]                                        | 0.550714737 | 0.001777472 | 0.007258441 |
| ENSMMUG00000016526 | solute carrier family 25 member 41 [Source:VGNC Symbol;Acc:VGNC:77581]                           | -1.67278806 | 4.32E-05    | 0.000269938 |
| ENSMMUG00000019314 | vav guanine nucleotide exchange factor 1 [Source:VGNC Symbol;Acc:VGNC:78757]                     | 2.571635753 | 9.81E-09    | 1.31E-07    |
| ENSMMUG00000001220 | adhesion G protein-coupled receptor E1 [Source:VGNC Symbol;Acc:VGNC:69561]                       | 1.142554005 | 6.01E-07    | 5.72E-06    |
| ENSMMUG00000063988 |                                                                                                  | 1.747209658 | 2.73E-05    | 0.000178446 |
| ENSMMUG00000019966 | zinc finger protein 557 [Source:NCBI gene;Acc:100424983]                                         | 0.844499225 | 1.37E-10    | 2.55E-09    |
| ENSMMUG00000057682 |                                                                                                  | 0.93581088  | 1.89E-09    | 2.88E-08    |
| ENSMMUG00000028907 | insulin receptor [Source:NCBI gene;Acc:706009]                                                   | 2.258477486 | 9.84E-09    | 1.32E-07    |
| ENSMMUG00000028906 | Rho/Rac guanine nucleotide exchange factor 18 [Source:NCBI gene;Acc:707510]                      | 1.637075    | 0.000284277 | 0.001464519 |
| ENSMMUG00000022463 | C-type lectin CD209L2 [Source:NCBI gene;Acc:574373]                                              | 1.257832202 | 0.008135356 | 0.026920035 |
| ENSMMUG00000023303 | ecotropic viral integration site 5 like [Source:NCBI gene;Acc:706628]                            | 1.655801087 | 5.16E-24    | 4.86E-22    |
| ENSMMUG00000014032 | proline rich 36 [Source:NCBI gene;Acc:710443]                                                    | 2.502060735 | 0.002650219 | 0.010263469 |
| ENSMMUG00000010614 | C-C motif chemokine ligand 25 [Source:VGNC Symbol;Acc:VGNC:70700]                                | 4.120029965 | 4.58E-06    | 3.62E-05    |
| ENSMMUG00000061632 | fibrillin 3 [Source:NCBI gene;Acc:709446]                                                        | 0.987010163 | 5.63E-06    | 4.36E-05    |
| ENSMMUG00000016695 | CD320 molecule [Source:VGNC Symbol;Acc:VGNC:70763]                                               | 0.892141518 | 0.008917012 | 0.029073066 |
| ENSMMUG00000064610 | long intergenic non-protein coding RNA 1862 [Source:HGNC Symbol;Acc:HGNC:52681]                  | 1.162452662 | 2.00E-08    | 2.55E-07    |
| ENSMMUG00000049311 | zinc finger protein 558 [Source:NCBI gene;Acc:712590]                                            | -0.65194245 | 8.18E-07    | 7.54E-06    |
| ENSMMUG00000019965 | methyl-CpG binding domain protein 3 like 1 [Source:VGNC Symbol;Acc:VGNC:74513]                   | 1.810652845 | 0.004702891 | 0.01683222  |
| ENSMMUG00000064532 | mucin 16, cell surface associated [Source:NCBI gene;Acc:106996460]                               | 1.581843583 | 2.95E-22    | 2.29E-20    |
| ENSMMUG00000018883 | zinc finger protein 177 [Source:NCBI gene;Acc:709851]                                            | 0.64546467  | 0.002778164 | 0.010688119 |
| ENSMMUG00000007875 | F-box and leucine rich repeat protein 12 [Source:VGNC Symbol;Acc:VGNC:72502]                     | 0.929991783 | 1.46E-05    | 0.000101622 |
| ENSMMUG00000042707 | angiopoietin like 6 [Source:NCBI gene;Acc:106994633]                                             | 1.657919455 | 5.08E-09    | 7.22E-08    |
| ENSMMUG00000014897 | ribonucleoprotein, PTB binding 1 [Source:NCBI gene;Acc:715250]                                   | 0.700301639 | 0.000928688 | 0.004126422 |
| ENSMMUG00000003110 | tyrosine kinase 2 [Source:VGNC Symbol;Acc:VGNC:78680]                                            | -0.57025484 | 0.00310651  | 0.011722978 |
| ENSMMUG00000046883 | autophagy related 4D cysteine peptidase [Source:NCBI gene;Acc:713111]                            | 0.952215552 | 0.011490917 | 0.036000252 |
| ENSMMUG00000003744 | solute carrier family 44 member 2 [Source:VGNC Symbol;Acc:VGNC:77498]                            | 0.794588642 | 1.66E-08    | 2.15E-07    |
| ENSMMUG00000055775 | transmembrane p24 trafficking protein 1 [Source:NCBI gene;Acc:713618]                            | 2.065106138 | 5.87E-36    | 1.83E-33    |

|                    |                                                                                      |             |             |             |
|--------------------|--------------------------------------------------------------------------------------|-------------|-------------|-------------|
| ENSMMUG00000049703 | Metazoan signal recognition particle RNA [Source:RFAM;Acc:RF00017]                   | 2.304167011 | 5.73E-45    | 3.65E-42    |
| ENSMMUG00000004400 | Yip1 domain family member 2 [Source:VGNC Symbol;Acc:VGNC:79717]                      | 0.596608912 | 0.000299011 | 0.001530863 |
| ENSMMUG00000003611 | low density lipoprotein receptor [Source:VGNC Symbol;Acc:VGNC:74248]                 | 0.965707741 | 0.001669791 | 0.006876792 |
| ENSMMUG00000003612 | SPC24 component of NDC80 kinetochore complex [Source:VGNC Symbol;Acc:VGNC:78002]     | 1.469783783 | 0.006062639 | 0.020842459 |
| ENSMMUG00000023251 | KN motif and ankyrin repeat domains 2 [Source:VGNC Symbol;Acc:VGNC:73938]            | 0.672802425 | 0.00632984  | 0.021623227 |
| ENSMMUG00000043134 | coiled-coil domain containing 159 [Source:NCBI gene;Acc:100424702]                   | 1.372411229 | 0.006074839 | 0.020874163 |
| ENSMMUG00000022207 | phospholipid phosphatase related 2 [Source:NCBI gene;Acc:714388]                     | 1.218383782 | 0.004221035 | 0.015350513 |
| ENSMMUG00000010824 | SWIM-type zinc finger 7 associated protein 1 [Source:VGNC Symbol;Acc:VGNC:78220]     | 1.606543607 | 0.000123306 | 0.000690821 |
| ENSMMUG00000038989 | erythropoietin receptor [Source:NCBI gene;Acc:714546]                                | 1.770917598 | 0.004446624 | 0.016041938 |
| ENSMMUG00000002974 | acid phosphatase 5, tartrate resistant [Source:VGNC Symbol;Acc:VGNC:69384]           | 2.16030554  | 0.014436211 | 0.043591514 |
| ENSMMUG00000001715 | zinc finger protein 627 [Source:VGNC Symbol;Acc:VGNC:79856]                          | 0.606626149 | 0.00096903  | 0.004285307 |
| ENSMMUG00000053329 |                                                                                      | 1.208083626 | 0.000700267 | 0.003235534 |
| ENSMMUG00000012587 | zinc finger protein 69 [Source:NCBI gene;Acc:717030]                                 | 0.788112894 | 0.00768448  | 0.025626508 |
| ENSMMUG00000064114 | zinc finger protein 709 [Source:NCBI gene;Acc:100427466]                             | 0.950301954 | 6.64E-05    | 0.000395412 |
| ENSMMUG00000005236 | zinc finger protein 709 [Source:NCBI gene;Acc:717515]                                | 1.047720224 | 0.000669498 | 0.003107701 |
| ENSMMUG00000058614 |                                                                                      | 2.411651078 | 0.000195115 | 0.001047914 |
| ENSMMUG00000016860 | zinc finger protein 490 [Source:NCBI gene;Acc:100426568]                             | -1.28132603 | 1.44E-05    | 0.000100435 |
| ENSMMUG00000016862 | zinc finger protein 791 [Source:VGNC Symbol;Acc:VGNC:79639]                          | 1.151919522 | 0.001169507 | 0.00505393  |
| ENSMMUG00000005689 | peroxiredoxin 2 [Source:NCBI gene;Acc:716665]                                        | 2.052853586 | 0.016292756 | 0.048134057 |
| ENSMMUG00000008740 | microtubule associated serine/threonine kinase 1 [Source:VGNC Symbol;Acc:VGNC:82182] | 1.043821591 | 0.011881895 | 0.037001958 |
| ENSMMUG00000007043 | glutaryl-CoA dehydrogenase [Source:VGNC Symbol;Acc:VGNC:72898]                       | 0.677930703 | 4.33E-05    | 0.000270402 |
| ENSMMUG00000019292 | nuclear factor I X [Source:VGNC Symbol;Acc:VGNC:75338]                               | 0.278131204 | 0.004726145 | 0.016906821 |
| ENSMMUG00000001167 | tRNA methyltransferase 1 [Source:VGNC Symbol;Acc:VGNC:79562]                         | 0.444976841 | 0.014741352 | 0.044322038 |
| ENSMMUG00000017971 | nucleus accumbens associated 1 [Source:VGNC Symbol;Acc:VGNC:74996]                   | 1.494686303 | 0.00053239  | 0.00254889  |
| ENSMMUG00000057038 |                                                                                      | 1.457799044 | 9.97E-05    | 0.000569095 |
| ENSMMUG00000011427 | syntaxin 10 [Source:VGNC Symbol;Acc:VGNC:78040]                                      | 1.845964634 | 3.54E-34    | 9.20E-32    |
| ENSMMUG00000003555 | calcium voltage-gated channel subunit alpha1 A [Source:VGNC Symbol;Acc:VGNC:70498]   | 0.642170232 | 0.000318727 | 0.001617116 |
| ENSMMUG00000058941 | Metazoan signal recognition particle RNA [Source:RFAM;Acc:RF00017]                   | 2.083349772 | 0.002840612 | 0.010889529 |
| ENSMMUG00000060000 |                                                                                      | 1.734518333 | 2.43E-05    | 0.000161224 |
| ENSMMUG00000005727 | protein kinase N1 [Source:VGNC Symbol;Acc:VGNC:76014]                                | 1.334138172 | 7.34E-11    | 1.43E-09    |
| ENSMMUG00000005729 | GIPC PDZ domain containing family member 1 [Source:VGNC Symbol;Acc:VGNC:72932]       | 0.64918412  | 0.001529848 | 0.006362997 |
| ENSMMUG00000017906 | DnaJ heat shock protein family (Hsp40) member B1 [Source:NCBI gene;Acc:718890]       | 1.946700905 | 2.04E-06    | 1.71E-05    |
| ENSMMUG00000018932 | adhesion G protein-coupled receptor E2 [Source:NCBI gene;Acc:654420]                 | 1.731036225 | 4.49E-23    | 3.74E-21    |
| ENSMMUG00000060289 |                                                                                      | 1.626191072 | 1.55E-22    | 1.24E-20    |
| ENSMMUG00000053889 | olfactory receptor 7C1 [Source:NCBI gene;Acc:114674087]                              | 0.881536302 | 0.008804887 | 0.02876769  |
| ENSMMUG00000064639 | olfactory receptor 7A10-like [Source:NCBI gene;Acc:114674167]                        | 1.98828752  | 0.012576072 | 0.038776222 |
| ENSMMUG00000053457 | caspase 14 [Source:NCBI gene;Acc:718049]                                             | 2.79905263  | 5.53E-13    | 1.49E-11    |
| ENSMMUG00000053220 | olfactory receptor 111 [Source:NCBI gene;Acc:719077]                                 | 2.536539219 | 4.17E-05    | 0.000261813 |
| ENSMMUG00000007726 | synapse defective Rho GTPase homolog 1 [Source:NCBI gene;Acc:719089]                 | 2.069254479 | 2.59E-06    | 2.15E-05    |
| ENSMMUG00000007729 | ilvB acetolactate synthase like [Source:VGNC Symbol;Acc:VGNC:73739]                  | 1.62182144  | 8.41E-07    | 7.74E-06    |
| ENSMMUG00000028863 | WIZ zinc finger [Source:VGNC Symbol;Acc:VGNC:79901]                                  | 0.624264666 | 0.008835904 | 0.02883544  |

|                     |                                                                                                  |             |             |             |
|---------------------|--------------------------------------------------------------------------------------------------|-------------|-------------|-------------|
| ENSMMUG00000016996  | cytochrome P450, family 4, subfamily F, polypeptide 22 [Source:NCBI gene;Acc:718303]             | 0.653255986 | 0.000585304 | 0.002777568 |
| ENSMMUG00000010734  | cytochrome P450, family 4, subfamily F, polypeptide 8 [Source:NCBI gene;Acc:718335]              | 0.284902502 | 0.013147626 | 0.040290462 |
| ENSMMUG000000057552 | hematopoietic SH2 domain containing [Source:NCBI gene;Acc:719440]                                | 3.076996344 | 0.007394814 | 0.02477245  |
| ENSMMUG00000004283  | calcium and integrin binding family member 3 [Source:VGNC Symbol;Acc:VGNC:71339]                 | 2.113415388 | 1.77E-06    | 1.51E-05    |
| ENSMMUG00000000994  | epidermal growth factor receptor pathway substrate 15 like 1 [Source:VGNC Symbol;Acc:VGNC:72100] | 1.852176579 | 0.000912515 | 0.004066576 |
| ENSMMUG000000039774 | Metazoan signal recognition particle RNA [Source:RFAM;Acc:RF00017]                               | 1.248853135 | 2.55E-10    | 4.51E-09    |
| ENSMMUG00000012959  | solute carrier family 35 member E1 [Source:VGNC Symbol;Acc:VGNC:77536]                           | 1.165098306 | 6.60E-08    | 7.64E-07    |
| ENSMMUG00000042837  | mediator complex subunit 26 [Source:NCBI gene;Acc:100424604]                                     | 0.540084998 | 0.015105472 | 0.045203591 |
| ENSMMUG00000018503  | NACHT and WD repeat domain containing 1 [Source:NCBI gene;Acc:719640]                            | 0.52804842  | 0.000450158 | 0.002197201 |
| ENSMMUG000000057655 |                                                                                                  | -           |             |             |
| ENSMMUG00000011588  | myosin IXB [Source:HGNC Symbol;Acc:HGNC:7609]                                                    | 0.860569581 | 3.09E-06    | 2.52E-05    |
| ENSMMUG000000013923 | BRISC and BRCA1 A complex member 1 [Source:VGNC Symbol;Acc:VGNC:70126]                           | 0.555863001 | 0.00764706  | 0.025519924 |
| ENSMMUG000000023403 | GTP binding protein 3, mitochondrial [Source:VGNC Symbol;Acc:VGNC:73170]                         | -           |             |             |
| ENSMMUG00000000194  | solute carrier family 27 member 1 [Source:VGNC Symbol;Acc:VGNC:77438]                            | 0.485476351 | 0.010928518 | 0.034477077 |
| ENSMMUG00000000196  | niban apoptosis regulator 3 [Source:VGNC Symbol;Acc:VGNC:75241]                                  | 3.360317534 | 1.26E-05    | 8.92E-05    |
| ENSMMUG000000059371 | collagen beta(1-O)galactosyltransferase 1 [Source:NCBI gene;Acc:719980]                          | 0.746297902 | 8.05E-05    | 0.000470461 |
| ENSMMUG000000015476 | unc-13 homolog A [Source:NCBI gene;Acc:720000]                                                   | 1.162675818 | 4.98E-05    | 0.000306165 |
| ENSMMUG00000010996  | Janus kinase 3 [Source:VGNC Symbol;Acc:VGNC:73812]                                               | 1.134439551 | 0.002825456 | 0.010846255 |
| ENSMMUG00000038308  | coiled-coil domain containing 124 [Source:NCBI gene;Acc:720072]                                  | 0.846330141 | 3.64E-09    | 5.31E-08    |
| ENSMMUG00000007398  | potassium calcium-activated channel subfamily N member 1 [Source:VGNC Symbol;Acc:VGNC:74002]     | 0.81902298  | 2.63E-08    | 3.27E-07    |
| ENSMMUG00000007401  | arrestin domain containing 2 [Source:VGNC Symbol;Acc:VGNC:69901]                                 | 0.569893633 | 6.09E-07    | 5.79E-06    |
| ENSMMUG00000003161  | microtubule associated serine/threonine kinase 3 [Source:VGNC Symbol;Acc:VGNC:74533]             | -0.85566552 | 0.001121836 | 0.004876473 |
| ENSMMUG00000005028  | phosphodiesterase 4C [Source:NCBI gene;Acc:720171]                                               | -           |             |             |
| ENSMMUG00000016354  | IQ motif containing N [Source:VGNC Symbol;Acc:VGNC:73683]                                        | 2.190590305 | 1.79E-05    | 0.00012273  |
| ENSMMUG00000038371  | JunD proto-oncogene, AP-1 transcription factor subunit [Source:NCBI gene;Acc:720182]             | 1.088847967 | 8.61E-07    | 7.89E-06    |
| ENSMMUG00000013671  | elongation factor for RNA polymerase II [Source:VGNC Symbol;Acc:VGNC:72088]                      | 0.509564754 | 0.000401899 | 0.001983052 |
| ENSMMUG00000016085  | KxDL motif containing 1 [Source:NCBI gene;Acc:720235]                                            | -           |             |             |
| ENSMMUG000000054512 | transmembrane protein 59 like [Source:VGNC Symbol;Acc:VGNC:78919]                                | 1.091367927 | 4.11E-07    | 4.05E-06    |
| ENSMMUG00000009988  | kelch like family member 26 [Source:NCBI gene;Acc:719583]                                        | 0.654454509 | 0.001159349 | 0.005016216 |
| ENSMMUG00000064204  | UPF1 RNA helicase and ATPase [Source:VGNC Symbol;Acc:VGNC:79971]                                 | -           |             |             |
| ENSMMUG00000056644  |                                                                                                  | 0.698742787 | 0.005724663 | 0.019828002 |
| ENSMMUG00000023286  |                                                                                                  | 1.28074619  | 3.69E-18    | 1.95E-16    |
| ENSMMUG00000050739  |                                                                                                  | 0.573348805 | 0.007598244 | 0.025375129 |
| ENSMMUG00000019665  | SURP and G-patch domain containing 2 [Source:VGNC Symbol;Acc:VGNC:78163]                         | 1.396458454 | 0.001121441 | 0.004876271 |
| ENSMMUG00000008578  | hyaluronan and proteoglycan link protein 4 [Source:VGNC Symbol;Acc:VGNC:73261]                   | 2.067535509 | 1.06E-26    | 1.39E-24    |
| ENSMMUG00000008931  | MAU2 sister chromatid cohesion factor [Source:NCBI gene;Acc:720347]                              | 0.981092293 | 0.000826642 | 0.003742977 |
| ENSMMUG00000003164  | GATA zinc finger domain containing 2A [Source:NCBI gene;Acc:720361]                              | 0.578489988 | 0.011500531 | 0.03601428  |
| ENSMMUG00000011351  | YjeF N-terminal domain containing 3 [Source:NCBI gene;Acc:721218]                                | 3.033806028 | 1.84E-50    | 1.99E-47    |
| ENSMMUG00000054055  | zinc finger protein 93 [Source:NCBI gene;Acc:720434]                                             | 1.407005317 | 0.000180641 | 0.000976908 |
| ENSMMUG000000063297 |                                                                                                  | -           |             |             |
| ENSMMUG00000056683  |                                                                                                  | 0.875951292 | 0.001873821 | 0.007614196 |
|                     |                                                                                                  | -           |             |             |
|                     |                                                                                                  | 1.150057346 | 0.000234577 | 0.001237575 |
|                     |                                                                                                  | 0.579941469 | 1.01E-06    | 9.14E-06    |
|                     |                                                                                                  | -           |             |             |
|                     |                                                                                                  | 0.631784351 | 4.59E-05    | 0.000284351 |
|                     |                                                                                                  | -           |             |             |
|                     |                                                                                                  | 0.653100805 | 0.000145956 | 0.000805802 |
|                     |                                                                                                  | 1.136076714 | 4.62E-14    | 1.47E-12    |
|                     |                                                                                                  | 1.325761545 | 0.004743423 | 0.016955653 |
|                     |                                                                                                  | -           |             |             |
|                     |                                                                                                  | 0.550247013 | 0.00893694  | 0.029131266 |

|                    |                                                                                            |   |             |             |             |
|--------------------|--------------------------------------------------------------------------------------------|---|-------------|-------------|-------------|
| ENSMMUG00000061085 |                                                                                            | - | 0.801808941 | 1.06E-07    | 1.18E-06    |
| ENSMMUG00000062866 |                                                                                            | - | 1.109447959 | 0.000130142 | 0.000725927 |
| ENSMMUG00000047027 | zinc finger protein 100-like [Source:NCBI gene;Acc:693860]                                 | - | 1.011384469 | 0.000321873 | 0.001629466 |
| ENSMMUG00000046906 |                                                                                            | - | 0.697401031 | 0.000512938 | 0.002467559 |
| ENSMMUG00000061186 |                                                                                            | - | 0.891320289 | 0.000456189 | 0.002223814 |
| ENSMMUG00000060408 |                                                                                            | - | 0.921945902 | 0.008296993 | 0.027382615 |
| ENSMMUG00000061458 | zinc finger protein 681 [Source:NCBI gene;Acc:698090]                                      | - | 0.986337804 | 6.34E-05    | 0.000379815 |
| ENSMMUG00000059910 |                                                                                            | - | 0.602930305 | 4.72E-05    | 0.000291729 |
| ENSMMUG00000020668 | cyclin E1 [Source:VGNC Symbol;Acc:VGNC:70727]                                              | - | 2.970193799 | 2.30E-39    | 9.50E-37    |
| ENSMMUG00000063586 | zinc finger protein 536 [Source:NCBI gene;Acc:713142]                                      | - | 1.274362708 | 0.001404589 | 0.005921994 |
| ENSMMUG00000058740 |                                                                                            | - | 1.062029493 | 2.17E-10    | 3.88E-09    |
| ENSMMUG00000057215 |                                                                                            | - | 0.963463092 | 0.003898984 | 0.014305455 |
| ENSMMUG00000050177 |                                                                                            | - | 1.616558545 | 3.98E-11    | 8.01E-10    |
| ENSMMUG00000060455 |                                                                                            | - | 3.008574347 | 8.50E-06    | 6.30E-05    |
| ENSMMUG00000008041 | ankyrin repeat domain 27 [Source:VGNC Symbol;Acc:VGNC:69693]                               | - | 0.723024975 | 1.89E-07    | 1.98E-06    |
| ENSMMUG00000015608 | tudor domain containing 12 [Source:VGNC Symbol;Acc:VGNC:82254]                             | - | 0.657782435 | 0.002740051 | 0.010563243 |
| ENSMMUG00000028800 | solute carrier family 7 member 9 [Source:VGNC Symbol;Acc:VGNC:77633]                       | - | 1.212123201 | 6.49E-06    | 4.96E-05    |
| ENSMMUG00000017939 | FA core complex associated protein 24 [Source:VGNC Symbol;Acc:VGNC:72388]                  | - | 1.213995047 | 5.03E-06    | 3.93E-05    |
| ENSMMUG00000028798 | rhopilin Rho GTPase binding protein 2 [Source:NCBI gene;Acc:716602]                        | - | 0.628046376 | 0.003134061 | 0.011804712 |
| ENSMMUG00000011790 | G-patch domain containing 1 [Source:VGNC Symbol;Acc:VGNC:72996]                            | - | 1.003097443 | 0.001030008 | 0.004526419 |
| ENSMMUG00000064983 |                                                                                            | - | 0.810061066 | 3.20E-05    | 0.000205829 |
| ENSMMUG00000061372 |                                                                                            | - | 1.183599216 | 0.001706589 | 0.007005707 |
| ENSMMUG00000062413 | CCAAT enhancer binding protein gamma [Source:NCBI gene;Acc:704322]                         | - | -0.6669669  | 0.001449594 | 0.006078843 |
| ENSMMUG0000006128  | peptidase D [Source:VGNC Symbol;Acc:VGNC:82205]                                            | - | 1.323898561 | 1.18E-07    | 1.30E-06    |
| ENSMMUG00000011319 | potassium channel tetramerization domain containing 15 [Source:VGNC Symbol;Acc:VGNC:73894] | - | 0.551542356 | 0.003329043 | 0.012455489 |
| ENSMMUG00000015744 | zinc finger protein 302 [Source:NCBI gene;Acc:706279]                                      | - | 2.208793789 | 4.47E-21    | 3.06E-19    |
| ENSMMUG00000059543 | zinc finger protein 30 [Source:NCBI gene;Acc:718310]                                       | - | 0.733975016 | 1.68E-07    | 1.79E-06    |
| ENSMMUG00000008313 | zinc finger protein 792 [Source:VGNC Symbol;Acc:VGNC:79456]                                | - | -0.77794648 | 4.39E-08    | 5.24E-07    |
| ENSMMUG00000001538 | GRAM domain containing 1A [Source:VGNC Symbol;Acc:VGNC:73029]                              | - | 0.682473175 | 7.95E-07    | 7.35E-06    |
| ENSMMUG00000004843 | sodium voltage-gated channel beta subunit 1 [Source:VGNC Symbol;Acc:VGNC:76983]            | - | 0.688186884 | 0.000248751 | 0.001303524 |
| ENSMMUG00000055747 | cytochrome c oxidase subunit 6B [Source:NCBI gene;Acc:692062]                              | - | 0.764548231 | 0.00019994  | 0.001070546 |
| ENSMMUG00000065025 |                                                                                            | - | 1.296635488 | 4.64E-12    | 1.09E-10    |
| ENSMMUG00000002381 | lysine methyltransferase 2B [Source:VGNC Symbol;Acc:VGNC:74053]                            | - | 0.662402476 | 1.21E-07    | 1.33E-06    |

|                     |                                                                                                     |             |             |             |
|---------------------|-----------------------------------------------------------------------------------------------------|-------------|-------------|-------------|
| ENSMMUG0000002384   | IGF like family receptor 1 [Source:VGNC Symbol;Acc:VGNC:73434]                                      | 1.807682285 | 6.38E-16    | 2.59E-14    |
| ENSMMUG00000048190  | U2 small nuclear RNA auxiliary factor 1 like 4 [Source:NCBI gene;Acc:718865]                        | 0.950096737 | 0.00145573  | 0.006099608 |
|                     |                                                                                                     | -           |             |             |
| ENSMMUG00000062667  | leucine rich repeat and fibronectin type III domain containing 3 [Source:NCBI gene;Acc:711565]      | 0.822375478 | 0.002292822 | 0.009049321 |
| ENSMMUG00000053233  |                                                                                                     | -1.31463661 | 0.000198702 | 0.00106473  |
|                     |                                                                                                     | -           |             |             |
| ENSMMUG00000061035  | ZFP82 zinc finger protein [Source:NCBI gene;Acc:719145]                                             | 1.060810797 | 1.15E-08    | 1.53E-07    |
|                     |                                                                                                     | -           |             |             |
| ENSMMUG00000000547  | zinc finger protein 566 [Source:VGNC Symbol;Acc:VGNC:81619]                                         | 0.699851204 | 7.63E-07    | 7.10E-06    |
| ENSMMUG00000000107  | zinc finger protein 585A [Source:NCBI gene;Acc:100424957]                                           | 0.401607321 | 0.006408839 | 0.021850512 |
| ENSMMUG00000006820  | WD repeat domain 87 [Source:NCBI gene;Acc:719441]                                                   | 0.323299697 | 0.001108644 | 0.004825113 |
| ENSMMUG00000028771  | Yip1 interacting factor homolog B, membrane trafficking protein [Source:VGNC Symbol;Acc:VGNC:79852] | 1.176032631 | 0.001528909 | 0.006362997 |
| ENSMMUG00000062296  | potassium two pore domain channel subfamily K member 6 [Source:NCBI gene;Acc:714912]                | 3.294002599 | 0.00074128  | 0.003401497 |
| ENSMMUG00000056109  | Metazoan signal recognition particle RNA [Source:RFAM;Acc:RF00017]                                  | 2.724459458 | 0.012179803 | 0.037728602 |
| ENSMMUG00000014273  | cation channel sperm associated auxiliary subunit gamma [Source:VGNC Symbol;Acc:VGNC:70626]         | 2.10641864  | 6.19E-06    | 4.75E-05    |
| ENSMMUG00000038221  | proteasome 26S subunit, non-ATPase 8 [Source:NCBI gene;Acc:721897]                                  | 0.940136693 | 6.60E-06    | 5.03E-05    |
| ENSMMUG00000022973  | gametogenetin [Source:VGNC Symbol;Acc:VGNC:72740]                                                   | 0.630156605 | 2.82E-05    | 0.000183677 |
|                     |                                                                                                     | -           |             |             |
| ENSMMUG00000022975  | sprouty related EVH1 domain containing 3 [Source:VGNC Symbol;Acc:VGNC:78030]                        | 4.082050539 | 6.44E-17    | 2.92E-15    |
| ENSMMUG00000006429  | actinin alpha 4 [Source:VGNC Symbol;Acc:VGNC:69432]                                                 | 1.024030183 | 0.006795933 | 0.022974774 |
| ENSMMUG00000006431  | calpain 12 [Source:VGNC Symbol;Acc:VGNC:70473]                                                      | 0.887370158 | 0.005608076 | 0.019485145 |
| ENSMMUG00000004877  | heterogeneous nuclear ribonucleoprotein L [Source:VGNC Symbol;Acc:VGNC:81187]                       | 1.208464922 | 2.20E-05    | 0.000147831 |
| ENSMMUG00000012787  | acid phosphatase 7, tartrate resistant (putative) [Source:NCBI gene;Acc:695532]                     | 1.434167024 | 0.00133821  | 0.005674544 |
| ENSMMUG00000005554  | mediator complex subunit 29 [Source:VGNC Symbol;Acc:VGNC:74557]                                     | 4.147812847 | 6.83E-09    | 9.45E-08    |
| ENSMMUG00000038702  | ZFP36 ring finger protein [Source:NCBI gene;Acc:722000]                                             | 3.590080861 | 0.001122534 | 0.004876571 |
| ENSMMUG00000019369  | pleckstrin homology and RhoGEF domain containing G2 [Source:VGNC Symbol;Acc:VGNC:76133]             | 2.956845024 | 0.007194559 | 0.024211496 |
| ENSMMUG000000048215 |                                                                                                     | 2.412762571 | 7.78E-09    | 1.06E-07    |
|                     |                                                                                                     | -           |             |             |
| ENSMMUG00000022726  | dual specificity tyrosine phosphorylation regulated kinase 1B [Source:VGNC Symbol;Acc:VGNC:72016]   | 2.126082363 | 6.58E-07    | 6.20E-06    |
|                     |                                                                                                     | -           |             |             |
| ENSMMUG00000022725  | fibrillarin [Source:VGNC Symbol;Acc:VGNC:72619]                                                     | 2.940346839 | 8.34E-05    | 0.00048456  |
|                     |                                                                                                     | -           |             |             |
| ENSMMUG00000022724  |                                                                                                     | 1.395564621 | 0.000577898 | 0.002745476 |
|                     |                                                                                                     | -           |             |             |
| ENSMMUG00000051261  |                                                                                                     | 1.300373194 | 2.14E-05    | 0.00014368  |
|                     |                                                                                                     | -           |             |             |
| ENSMMUG00000017191  | zinc finger protein 546 [Source:VGNC Symbol;Acc:VGNC:79732]                                         | 0.877742827 | 0.00218528  | 0.008705733 |
|                     |                                                                                                     | -           |             |             |
| ENSMMUG00000041976  | zinc finger protein 780B [Source:NCBI gene;Acc:701034]                                              | 0.913355823 | 1.90E-06    | 1.61E-05    |
|                     |                                                                                                     | -           |             |             |
| ENSMMUG00000003621  | AKT serine/threonine kinase 2 [Source:VGNC Symbol;Acc:VGNC:69777]                                   | 1.248205464 | 1.71E-12    | 4.26E-11    |
| ENSMMUG00000053624  |                                                                                                     | -1.04698883 | 0.000450509 | 0.00219815  |
|                     |                                                                                                     | -           |             |             |
| ENSMMUG00000065016  |                                                                                                     | 0.876497597 | 0.011272463 | 0.035387005 |
|                     |                                                                                                     | -           |             |             |
| ENSMMUG00000008946  | chromosome 19 C19orf47 homolog [Source:VGNC Symbol;Acc:VGNC:70404]                                  | 1.069346898 | 2.27E-10    | 4.04E-09    |
|                     |                                                                                                     | -           |             |             |
| ENSMMUG00000022625  | periaxin [Source:VGNC Symbol;Acc:VGNC:76248]                                                        | 1.671707792 | 2.93E-06    | 2.40E-05    |
|                     |                                                                                                     | -           |             |             |
| ENSMMUG00000015603  | biliverdin reductase B [Source:VGNC Symbol;Acc:VGNC:70257]                                          | 1.953571791 | 0.002178922 | 0.008687807 |
| ENSMMUG00000063763  | cytochrome P450 2A13-like [Source:NCBI gene;Acc:114674219]                                          | 0.842717989 | 0.008582086 | 0.028204028 |
| ENSMMUG00000057008  |                                                                                                     | 0.716412268 | 0.005027332 | 0.017798101 |
| ENSMMUG00000014345  | exosome component 5 [Source:VGNC Symbol;Acc:VGNC:72331]                                             | 2.403595235 | 0.009114411 | 0.029612735 |
| ENSMMUG00000013422  | CEA cell adhesion molecule 4 [Source:NCBI gene;Acc:705453]                                          | 1.888822879 | 0.000120538 | 0.000676931 |

|                     |                                                                                                   |             |             |             |
|---------------------|---------------------------------------------------------------------------------------------------|-------------|-------------|-------------|
| ENSMMUG00000059229  | CEA cell adhesion molecule 7 [Source:NCBI gene;Acc:705572]                                        | 1.603369715 | 3.53E-20    | 2.20E-18    |
| ENSMMUG00000022305  | Rho guanine nucleotide exchange factor 1 [Source:VGNC Symbol;Acc:VGNC:70012]                      | 1.805222453 | 1.97E-14    | 6.58E-13    |
| ENSMMUG00000017427  | ATPase Na <sup>+</sup> /K <sup>+</sup> transporting subunit alpha 3 [Source:NCBI gene;Acc:706513] | 1.417507858 | 0.010949401 | 0.034535189 |
| ENSMMUG00000017431  | glutamate ionotropic receptor kainate type subunit 5 [Source:VGNC Symbol;Acc:VGNC:73280]          | -0.74967352 | 0.006657398 | 0.022593584 |
| ENSMMUG00000056518  |                                                                                                   | 0.915115949 | 0.01080687  | 0.034154776 |
| ENSMMUG00000050799  |                                                                                                   | 3.130626085 | 0.003959966 | 0.014502638 |
| ENSMMUG00000064250  |                                                                                                   | 2.811852585 | 0.000272972 | 0.001414594 |
| ENSMMUG00000049459  | pregnancy specific beta-1-glycoprotein 7 (gene/pseudogene) [Source:HGNC Symbol;Acc:HGNC:9524]     | 0.479221052 | 0.004874627 | 0.017358275 |
| ENSMMUG00000021062  | CD177 molecule [Source:VGNC Symbol;Acc:VGNC:70912]                                                | 2.441794696 | 4.98E-06    | 3.90E-05    |
| ENSMMUG00000003568  | testis expressed 101 [Source:VGNC Symbol;Acc:VGNC:79869]                                          | 1.066829094 | 4.51E-05    | 0.000279988 |
| ENSMMUG00000019265  | zinc finger protein 575 [Source:VGNC Symbol;Acc:VGNC:79667]                                       | 1.055506433 | 1.58E-05    | 0.000109328 |
| ENSMMUG00000004467  | X-ray repair cross complementing 1 [Source:NCBI gene;Acc:711457]                                  | 0.897840483 | 5.57E-05    | 0.00033879  |
| ENSMMUG00000004616  | plasminogen activator, urokinase receptor [Source:VGNC Symbol;Acc:VGNC:76163]                     | 2.312720813 | 0.000266498 | 0.001386168 |
| ENSMMUG00000021267  | potassium calcium-activated channel subfamily N member 4 [Source:NCBI gene;Acc:712383]            | 0.808773528 | 1.30E-05    | 9.19E-05    |
| ENSMMUG00000021474  | zinc finger protein 45 [Source:NCBI gene;Acc:712591]                                              | 1.121663967 | 4.59E-12    | 1.08E-10    |
| ENSMMUG00000064975  | zinc finger protein 221 [Source:NCBI gene;Acc:100423743]                                          | 1.091395631 | 0.000840123 | 0.003797889 |
| ENSMMUG00000012797  | zinc finger protein 233 [Source:VGNC Symbol;Acc:VGNC:79903]                                       | 1.42293492  | 4.29E-11    | 8.58E-10    |
| ENSMMUG00000012801  | zinc finger protein 235 [Source:VGNC Symbol;Acc:VGNC:78825]                                       | 1.540582445 | 4.33E-28    | 6.39E-26    |
| ENSMMUG00000012802  | zinc finger protein 112 [Source:NCBI gene;Acc:713527]                                             | 0.613540776 | 0.001221282 | 0.005253385 |
| ENSMMUG00000014301  | nectin cell adhesion molecule 2 [Source:VGNC Symbol;Acc:VGNC:75396]                               | 0.940828963 | 9.91E-09    | 1.32E-07    |
| ENSMMUG00000014305  | apolipoprotein E [Source:HGNC Symbol;Acc:HGNC:613]                                                | -1.31832419 | 0.014179222 | 0.042982109 |
| ENSMMUG00000002472  | CLPTM1 regulator of GABA type A receptor forward trafficking [Source:VGNC Symbol;Acc:VGNC:71265]  | -1.07229252 | 0.003596448 | 0.013331479 |
| ENSMMUG00000014155  | CLK4 associating serine/arginine rich protein [Source:VGNC Symbol;Acc:VGNC:71198]                 | 1.109564726 | 0.014431768 | 0.043587483 |
| ENSMMUG00000022931  | NTPase KAP family P-loop domain containing 1 [Source:VGNC Symbol;Acc:VGNC:75250]                  | 0.955962884 | 5.54E-09    | 7.81E-08    |
| ENSMMUG00000018879  | exocyst complex component 3 like 2 [Source:NCBI gene;Acc:713992]                                  | 1.063627773 | 2.81E-08    | 3.49E-07    |
| ENSMMUG00000013477  | creatine kinase, M-type [Source:VGNC Symbol;Acc:VGNC:71230]                                       | 3.06146054  | 1.83E-22    | 1.44E-20    |
| ENSMMUG00000021891  | kinesin light chain 3 [Source:VGNC Symbol;Acc:VGNC:73870]                                         | 0.676940197 | 0.004767206 | 0.017031983 |
| ENSMMUG00000014419  | ERCC excision repair 2, TFIIH core complex helicase subunit [Source:VGNC Symbol;Acc:VGNC:72423]   | 0.435474523 | 0.000904436 | 0.004037858 |
| ENSMMUG00000000715  | protein phosphatase 1 regulatory subunit 13 like [Source:NCBI gene;Acc:714389]                    | 0.495295738 | 0.000421861 | 0.002072071 |
| ENSMMUG00000000717  | CD3e molecule associated protein [Source:NCBI gene;Acc:714440]                                    | 1.315918819 | 3.07E-08    | 3.77E-07    |
| ENSMMUG00000000718  | ERCC excision repair 1, endonuclease non-catalytic subunit [Source:VGNC Symbol;Acc:VGNC:72422]    | 0.854558529 | 4.75E-05    | 0.000293367 |
| ENSMMUG00000006936  | gastric inhibitory polypeptide receptor [Source:VGNC Symbol;Acc:VGNC:73052]                       | 1.141332665 | 2.03E-10    | 3.65E-09    |
| ENSMMUG000000032809 | mml-mir-642 [Source:miRBase;Acc:MI0007885]                                                        | 1.074341777 | 1.94E-07    | 2.03E-06    |
| ENSMMUG00000006940  | glutaminyl-peptide cyclotransferase like [Source:VGNC Symbol;Acc:VGNC:76540]                      | -0.71755484 | 0.016202057 | 0.047959682 |
| ENSMMUG00000051115  |                                                                                                   | 3.283515062 | 3.20E-10    | 5.56E-09    |
| ENSMMUG00000017927  | protein kinase D2 [Source:VGNC Symbol;Acc:VGNC:76273]                                             | 2.216341928 | 0.00061878  | 0.002910819 |
| ENSMMUG00000017930  | striatin 4 [Source:VGNC Symbol;Acc:VGNC:78128]                                                    | 3.305131446 | 0.000291509 | 0.00149573  |
| ENSMMUG00000011332  | Rho GTPase activating protein 35 [Source:VGNC Symbol;Acc:VGNC:69942]                              | 2.015186313 | 1.93E-05    | 0.000131513 |
| ENSMMUG00000057361  | Metazoan signal recognition particle RNA [Source:RFAM;Acc:RF00017]                                | 2.527429465 | 1.04E-11    | 2.32E-10    |
| ENSMMUG00000014723  | kaptin, actin binding protein [Source:VGNC Symbol;Acc:VGNC:74204]                                 | 0.825731958 | 0.000219145 | 0.001163599 |

|                    |                                                                                                         |             |             |             |
|--------------------|---------------------------------------------------------------------------------------------------------|-------------|-------------|-------------|
| ENSMMUG00000014727 | NSF attachment protein alpha [Source:VGNC Symbol;Acc:VGNC:75131]                                        | 1.025817965 | 5.77E-06    | 4.45E-05    |
| ENSMMUG00000054090 |                                                                                                         | 0.774443411 | 0.001715211 | 0.007032868 |
| ENSMMUG00000049999 | cone-rod homeobox [Source:NCBI gene;Acc:717550]                                                         | 1.069317277 | 8.25E-05    | 0.000479942 |
| ENSMMUG00000006857 | epididymal sperm binding protein 1 [Source:VGNC Symbol;Acc:VGNC:72046]                                  | 1.539209625 | 5.59E-07    | 5.34E-06    |
| ENSMMUG00000014592 | zinc finger SWIM-type containing 9 [Source:VGNC Symbol;Acc:VGNC:79949]                                  | 0.764526203 | 0.011873474 | 0.036983947 |
| ENSMMUG00000017111 | caspase recruitment domain-containing protein 8 [Source:NCBI gene;Acc:718576]                           | 0.654186024 | 0.013934006 | 0.04233945  |
| ENSMMUG00000042157 | caspase recruitment domain-containing protein 8 [Source:NCBI gene;Acc:718594]                           | 0.803506747 | 6.30E-08    | 7.32E-07    |
| ENSMMUG00000001791 | glutamate rich WD repeat containing 1 [Source:VGNC Symbol;Acc:VGNC:73213]                               | 0.692099481 | 0.002151442 | 0.008592898 |
| ENSMMUG00000001793 | cytohesin 2 [Source:NCBI gene;Acc:718682]                                                               | 0.876573373 | 0.000146234 | 0.000806753 |
| ENSMMUG00000022155 | sulfotransferase family 2B member 1 [Source:NCBI gene;Acc:718739]                                       | 0.599554272 | 0.00775881  | 0.025837518 |
| ENSMMUG00000022159 | sphingosine kinase 2 [Source:VGNC Symbol;Acc:VGNC:77960]                                                | 0.799941415 | 0.005475287 | 0.019128041 |
| ENSMMUG00000064152 | netrin 5 [Source:NCBI gene;Acc:718157]                                                                  | 0.806359261 | 2.20E-05    | 0.00014736  |
| ENSMMUG00000019738 | galactoside 2-alpha-L-fucosyltransferase 2 [Source:NCBI gene;Acc:722582]                                | 1.503883506 | 0.005972529 | 0.020562919 |
| ENSMMUG00000055036 | MEF2 activating motif and SAP domain containing transcriptional regulator [Source:NCBI gene;Acc:718823] | 0.919647143 | 0.000492801 | 0.002380484 |
| ENSMMUG00000018415 | Ras interacting protein 1 [Source:HGNC Symbol;Acc:HGNC:24716]                                           | 1.536474577 | 7.92E-09    | 1.07E-07    |
| ENSMMUG00000004019 | izumo sperm-egg fusion 1 [Source:VGNC Symbol;Acc:VGNC:73670]                                            | 0.891067496 | 0.000262718 | 0.001370569 |
| ENSMMUG00000028736 | hydroxysteroid 17-beta dehydrogenase 14 [Source:NCBI gene;Acc:106994816]                                | 1.039855581 | 3.87E-05    | 0.000244553 |
| ENSMMUG00000009222 | pleckstrin homology domain containing A4 [Source:VGNC Symbol;Acc:VGNC:76027]                            | 1.593420731 | 0.000188248 | 0.001013751 |
| ENSMMUG00000048854 | TUB like protein 2 [Source:NCBI gene;Acc:718915]                                                        | 1.017309695 | 0.004858677 | 0.017310271 |
| ENSMMUG00000007538 | transient receptor potential cation channel subfamily M member 4 [Source:VGNC Symbol;Acc:VGNC:79105]    | 2.428073506 | 5.41E-20    | 3.26E-18    |
| ENSMMUG00000022116 | PIH1 domain containing 1 [Source:VGNC Symbol;Acc:VGNC:75868]                                            | 1.450511847 | 0.001026831 | 0.004515959 |
| ENSMMUG00000003819 | nitric oxide synthase interacting protein [Source:VGNC Symbol;Acc:VGNC:75207]                           | 2.039793319 | 4.49E-16    | 1.87E-14    |
| ENSMMUG00000012937 | proline rich 12 [Source:NCBI gene;Acc:719344]                                                           | 2.686001518 | 3.75E-33    | 9.23E-31    |
| ENSMMUG00000028733 | RAS related [Source:VGNC Symbol;Acc:VGNC:76937]                                                         | 2.42965509  | 9.96E-14    | 2.96E-12    |
| ENSMMUG00000012938 | SR-related CTD associated factor 1 [Source:VGNC Symbol;Acc:VGNC:77137]                                  | 3.092263403 | 0.0002322   | 0.001225495 |
| ENSMMUG00000003926 | BCL2 like 12 [Source:NCBI gene;Acc:718981]                                                              | 3.904182613 | 0.000349586 | 0.001747365 |
| ENSMMUG00000003029 | protein arginine methyltransferase 1 [Source:NCBI gene;Acc:719419]                                      | 1.185597997 | 3.68E-07    | 3.67E-06    |
| ENSMMUG00000014735 | carnitine palmitoyltransferase 1C [Source:NCBI gene;Acc:719429]                                         | 1.423349784 | 1.50E-07    | 1.60E-06    |
| ENSMMUG00000020175 | mediator complex subunit 25 [Source:VGNC Symbol;Acc:VGNC:74607]                                         | 1.333457784 | 0.000506244 | 0.002438702 |
| ENSMMUG00000011627 | interleukin 4 induced 1 [Source:VGNC Symbol;Acc:VGNC:73625]                                             | 2.202698376 | 5.02E-11    | 9.94E-10    |
| ENSMMUG00000044817 | nucleoporin 62 [Source:NCBI gene;Acc:100426308]                                                         | 2.826354855 | 1.70E-49    | 1.40E-46    |
| ENSMMUG00000054473 | activating transcription factor 5 [Source:NCBI gene;Acc:719150]                                         | 2.047839348 | 3.08E-20    | 1.95E-18    |
| ENSMMUG00000050456 | Metazoan signal recognition particle RNA [Source:RFAM;Acc:RF00017]                                      | 1.73764087  | 0.008865783 | 0.028919486 |
| ENSMMUG00000064146 | Metazoan signal recognition particle RNA [Source:RFAM;Acc:RF00017]                                      | 3.189099155 | 1.78E-23    | 1.58E-21    |
| ENSMMUG00000054052 | sialic acid binding Ig like lectin 11 [Source:NCBI gene;Acc:719127]                                     | 3.073979031 | 1.38E-07    | 1.49E-06    |
| ENSMMUG00000010837 | VRK serine/threonine kinase 3 [Source:VGNC Symbol;Acc:VGNC:81605]                                       | 2.314443331 | 2.55E-05    | 0.000167601 |



|                    |                                                                                   |             |             |             |
|--------------------|-----------------------------------------------------------------------------------|-------------|-------------|-------------|
| ENSMMUG0000001427  | myosin heavy chain 14 [Source:VGNC Symbol;Acc:VGNC:75006]                         | 0.863565501 | 0.008793983 | 0.028752162 |
| ENSMMUG00000023418 | nuclear receptor subfamily 1 group H member 2 [Source:VGNC Symbol;Acc:VGNC:75504] | 0.697176483 | 1.24E-07    | 1.36E-06    |
| ENSMMUG00000021059 | leucine rich repeat containing 4B [Source:VGNC Symbol;Acc:VGNC:74350]             | 0.427079424 | 0.012889089 | 0.039602037 |
| ENSMMUG00000056558 |                                                                                   | 0.389208789 | 0.007670661 | 0.025586509 |
| ENSMMUG00000046099 | chromosome 19 C19orf81 homolog [Source:NCBI gene;Acc:719661]                      | 2.442776175 | 0.002324426 | 0.009156018 |
| ENSMMUG00000059087 |                                                                                   | 3.150800288 | 0.000239791 | 0.001261285 |
|                    |                                                                                   | -           |             |             |
| ENSMMUG00000009357 | SH3 and multiple ankyrin repeat domains 1 [Source:VGNC Symbol;Acc:VGNC:77236]     | 0.794691134 | 0.009570171 | 0.030815731 |
| ENSMMUG00000012841 | kallikrein 3 [Source:NCBI gene;Acc:719444]                                        | 1.037223617 | 0.000462388 | 0.002252193 |
| ENSMMUG00000065035 | kallikrein-2 [Source:NCBI gene;Acc:719436]                                        | -0.72723088 | 0.003407226 | 0.012699315 |
| ENSMMUG00000060764 |                                                                                   | 0.561110294 | 2.46E-06    | 2.04E-05    |
|                    |                                                                                   | -           |             |             |
| ENSMMUG00000013597 | kallikrein related peptidase 5 [Source:VGNC Symbol;Acc:VGNC:74191]                | 0.540673026 | 0.010485163 | 0.033273013 |
|                    |                                                                                   | -           |             |             |
| ENSMMUG00000061396 | kallikrein related peptidase 6 [Source:NCBI gene;Acc:719776]                      | 0.603259674 | 0.002401219 | 0.009432016 |
|                    |                                                                                   | -           |             |             |
| ENSMMUG00000047370 | IgLON family member 5 [Source:NCBI gene;Acc:719890]                               | 0.675353567 | 0.012835785 | 0.039455547 |
|                    |                                                                                   | -           |             |             |
| ENSMMUG00000044652 | sialic acid-binding Ig-like lectin 13 [Source:NCBI gene;Acc:719667]               | 0.677651585 | 0.000338074 | 0.001701042 |
| ENSMMUG00000012764 | zinc finger protein 175 [Source:VGNC Symbol;Acc:VGNC:78856]                       | -0.68615705 | 0.007090008 | 0.02389406  |
|                    |                                                                                   | -           |             |             |
| ENSMMUG00000012761 | sialic acid binding Ig like lectin 5 [Source:NCBI gene;Acc:719730]                | 0.861686512 | 1.75E-06    | 1.50E-05    |
|                    |                                                                                   | -           |             |             |
| ENSMMUG00000013053 | sperm acrosome associated 6 [Source:NCBI gene;Acc:114674203]                      | 1.204212762 | 2.02E-07    | 2.11E-06    |
|                    |                                                                                   | -           |             |             |
| ENSMMUG00000053150 | Metazoan signal recognition particle RNA [Source:RFAM;Acc:RF00017]                | 1.210071727 | 0.005361896 | 0.018764628 |
|                    |                                                                                   | -           |             |             |
| ENSMMUG00000051078 |                                                                                   | 0.551711429 | 0.010630625 | 0.033658445 |
|                    |                                                                                   | -           |             |             |
| ENSMMUG00000002310 | zinc finger protein 577 [Source:VGNC Symbol;Acc:VGNC:79733]                       | 0.833892352 | 9.05E-08    | 1.02E-06    |
| ENSMMUG00000023136 | zinc finger protein 613 [Source:VGNC Symbol;Acc:VGNC:79548]                       | -0.65586134 | 1.17E-06    | 1.04E-05    |
|                    |                                                                                   | -           |             |             |
| ENSMMUG00000052090 |                                                                                   | 0.632864822 | 5.90E-08    | 6.88E-07    |
|                    |                                                                                   | -           |             |             |
| ENSMMUG00000023137 | zinc finger protein 350 [Source:VGNC Symbol;Acc:VGNC:79041]                       | 1.169191502 | 4.07E-07    | 4.02E-06    |
|                    |                                                                                   | -           |             |             |
| ENSMMUG00000003712 | zinc finger protein 615 [Source:VGNC Symbol;Acc:VGNC:79454]                       | 0.959579535 | 0.000307837 | 0.001568035 |
|                    |                                                                                   | -           |             |             |
| ENSMMUG00000041450 | zinc finger protein 432 [Source:NCBI gene;Acc:100424341]                          | 1.463514473 | 4.88E-10    | 8.20E-09    |
|                    |                                                                                   | -           |             |             |
| ENSMMUG00000001768 | zinc finger protein 616 [Source:NCBI gene;Acc:719902]                             | 0.771813567 | 9.19E-05    | 0.000528917 |
|                    |                                                                                   | -           |             |             |
| ENSMMUG00000020234 | zinc finger protein 480 [Source:NCBI gene;Acc:106994837]                          | 0.415139037 | 0.000854466 | 0.003847841 |
|                    |                                                                                   | -           |             |             |
| ENSMMUG00000033290 | mml-mir-643 [Source:miRBase;Acc:MI0007886]                                        | 1.406940595 | 8.47E-07    | 7.79E-06    |
|                    |                                                                                   | -           |             |             |
| ENSMMUG00000047412 | zinc finger protein 28 [Source:NCBI gene;Acc:100430953]                           | 1.571329198 | 0.004984361 | 0.017669867 |
| ENSMMUG00000058137 | zinc finger protein 816 [Source:NCBI gene;Acc:720058]                             | 0.893039687 | 0.003055864 | 0.011578754 |
|                    |                                                                                   | -           |             |             |
| ENSMMUG00000064519 |                                                                                   | 1.325379175 | 0.000722521 | 0.00332194  |
| ENSMMUG00000057187 |                                                                                   | 0.761726834 | 7.05E-08    | 8.11E-07    |
|                    |                                                                                   | -           |             |             |
| ENSMMUG00000060222 |                                                                                   | 0.517780189 | 0.000104959 | 0.000596609 |
| ENSMMUG00000007972 | protein kinase C gamma [Source:VGNC Symbol;Acc:VGNC:76413]                        | 0.511970998 | 0.012604896 | 0.038830945 |
| ENSMMUG00000055976 | CD99 antigen [Source:NCBI gene;Acc:106995376]                                     | 1.586469536 | 1.10E-08    | 1.47E-07    |

|                  |   |             |             |             |
|------------------|---|-------------|-------------|-------------|
| ENSMUG0000051966 | - | 1.267496434 | 3.95E-07    | 3.91E-06    |
| ENSMUG0000042225 | - | 0.709798225 | 0.000877649 | 0.003938326 |
| ENSMUG0000042267 | - | 2.108111873 | 0.00303021  | 0.011500035 |
| ENSMUG0000061536 | - | 1.787967985 | 1.31E-06    | 1.15E-05    |

### SD 35 vs. Baseline

| Ensembl Gene ID    | Description                                                                                            | Log2(FC)    | p-value     | FDR         |
|--------------------|--------------------------------------------------------------------------------------------------------|-------------|-------------|-------------|
| ENSMMUG00000000632 | SH3 binding domain protein 5 like [Source:VGNC Symbol;Acc:VGNC:77334]                                  | 4.43333743  | 1.43E-13    | 3.64E-11    |
| ENSMMUG00000057389 | LY6/PLAUR domain containing 8 [Source:NCBI gene;Acc:710465]                                            | 1.271092081 | 1.57E-05    | 0.000212857 |
| ENSMMUG00000017368 | olfactory receptor 2G6 [Source:NCBI gene;Acc:694380]                                                   | 1.425326456 | 9.62E-07    | 2.06E-05    |
| ENSMMUG00000038524 | olfactory receptor 2M4 [Source:NCBI gene;Acc:100424541]                                                | 1.861727464 | 7.64E-09    | 3.67E-07    |
| ENSMMUG00000049432 | olfactory receptor 2T33 [Source:NCBI gene;Acc:706331]                                                  | 0.920205495 | 9.39E-05    | 0.000947017 |
| ENSMMUG00000004566 | zinc finger protein 124 [Source:VGNC Symbol;Acc:VGNC:78836]                                            | 4.742714616 | 0.000553951 | 0.004075047 |
| ENSMMUG00000000021 | catsper channel auxiliary subunit epsilon [Source:VGNC Symbol;Acc:VGNC:70657]                          | 3.301550141 | 0.006076311 | 0.027826936 |
| ENSMMUG00000004265 | phospholipase D family member 5 [Source:VGNC Symbol;Acc:VGNC:76120]                                    | 1.794470578 | 0.011027113 | 0.044347133 |
| ENSMMUG00000005668 | kynurenine 3-monooxygenase [Source:VGNC Symbol;Acc:VGNC:74197]                                         | 0.837628433 | 0.000505199 | 0.003761083 |
| ENSMMUG00000064824 | gremlin 2, DAN family BMP antagonist [Source:NCBI gene;Acc:708280]                                     | 1.889273353 | 0.000227927 | 0.001960111 |
| ENSMMUG00000061845 |                                                                                                        | 1.430148638 | 0.003367318 | 0.017462258 |
| ENSMMUG00000001060 | ryanodine receptor 2 [Source:VGNC Symbol;Acc:VGNC:76954]                                               | 0.934050468 | 0.000164632 | 0.001490054 |
| ENSMMUG00000015132 | galectin 8 [Source:VGNC Symbol;Acc:VGNC:74258]                                                         | 2.075691248 | 6.38E-05    | 0.000683483 |
| ENSMMUG00000046785 |                                                                                                        | 1.462248774 | 0.01032193  | 0.042309179 |
| ENSMMUG00000063981 | nucleoside-triphosphatase, cancer-related [Source:NCBI gene;Acc:712959]                                | 3.554698745 | 1.43E-08    | 6.21E-07    |
| ENSMMUG00000012068 | signal induced proliferation associated 1 like 2 [Source:NCBI gene;Acc:100425123]                      | 2.169035295 | 2.03E-05    | 0.0002648   |
| ENSMMUG00000005243 | exocyst complex component 8 [Source:VGNC Symbol;Acc:VGNC:72330]                                        | 1.273569789 | 0.008239255 | 0.035389615 |
| ENSMMUG00000005801 | glyceronephosphate O-acyltransferase [Source:VGNC Symbol;Acc:VGNC:73100]                               | 1.499353419 | 0.000473661 | 0.003542517 |
| ENSMMUG00000009508 | TATA-box binding protein associated factor 5 like [Source:VGNC Symbol;Acc:VGNC:78148]                  | 2.282969736 | 0.000424382 | 0.003256352 |
| ENSMMUG00000022094 | ATP binding cassette subfamily B member 10 [Source:NCBI gene;Acc:574117]                               | 1.778834143 | 4.43E-07    | 1.08E-05    |
| ENSMMUG00000061675 | 5S ribosomal RNA [Source:RFAM;Acc:RF00001]                                                             | 4.950822723 | 0.006241112 | 0.028401645 |
| ENSMMUG00000050099 | 5S ribosomal RNA [Source:RFAM;Acc:RF00001]                                                             | 3.797714807 | 0.000899721 | 0.006053686 |
| ENSMMUG00000017789 | pogo transposable element derived with KRAB domain [Source:VGNC Symbol;Acc:VGNC:76066]                 | 1.954852142 | 1.33E-06    | 2.70E-05    |
| ENSMMUG00000017790 | transcriptional adaptor 1 [Source:VGNC Symbol;Acc:VGNC:78246]                                          | 2.081511822 | 2.14E-05    | 0.000276921 |
| ENSMMUG00000023462 | immunoglobulin like domain containing receptor 2 [Source:VGNC Symbol;Acc:VGNC:73619]                   | 2.551596868 | 0.001333637 | 0.00837532  |
| ENSMMUG00000051788 | dual specificity phosphatase 27, atypical [Source:NCBI gene;Acc:697299]                                | 2.019677977 | 0.01289322  | 0.049907507 |
| ENSMMUG00000009184 | myelin protein zero like 1 [Source:NCBI gene;Acc:698437]                                               | 2.366280834 | 3.36E-16    | 1.68E-13    |
| ENSMMUG00000060218 | chemokine (C motif) ligand 1 [Source:NCBI gene;Acc:574367]                                             | 4.949973435 | 3.43E-06    | 5.98E-05    |
| ENSMMUG00000056707 |                                                                                                        | 1.869906349 | 0.011174482 | 0.044842737 |
| ENSMMUG00000059777 |                                                                                                        | 1.013759285 | 0.000310333 | 0.002505395 |
| ENSMMUG00000021078 | ATPase Na <sup>+</sup> /K <sup>+</sup> transporting subunit beta 1 [Source:VGNC Symbol;Acc:VGNC:70176] | 1.477609543 | 0.001568069 | 0.009597319 |
| ENSMMUG00000021080 | basic leucine zipper nuclear factor 1 [Source:VGNC Symbol;Acc:VGNC:70258]                              | 0.740336065 | 0.001431194 | 0.00887654  |

|                    |                                                                                             |   |             |             |             |
|--------------------|---------------------------------------------------------------------------------------------|---|-------------|-------------|-------------|
| ENSMMUG00000013039 | solute carrier family 19 member 2 [Source:VGNC Symbol;Acc:VGNC:81571]                       | - | 0.683138609 | 5.17E-05    | 0.000574521 |
| ENSMMUG00000042510 | coagulation factor V [Source:NCBI gene;Acc:704695]                                          | - | 0.574455845 | 0.000847929 | 0.005740844 |
| ENSMMUG00000016579 | selectin L [Source:NCBI gene;Acc:701419]                                                    | - | 1.539565168 | 1.22E-05    | 0.000172744 |
| ENSMMUG00000016580 | selectin E [Source:VGNC Symbol;Acc:VGNC:77156]                                              | - | 1.545370818 | 1.17E-07    | 3.44E-06    |
| ENSMMUG00000016582 | chromosome 1 C1orf112 homolog [Source:VGNC Symbol;Acc:VGNC:70385]                           | - | 1.245527055 | 5.24E-05    | 0.000579964 |
| ENSMMUG00000059773 | methyltransferase like 11B [Source:NCBI gene;Acc:705503]                                    | - | 1.061225056 | 0.0024902   | 0.013700315 |
| ENSMMUG00000063298 |                                                                                             | - | -1.15081    | 0.00432618  | 0.021224558 |
| ENSMMUG00000054261 |                                                                                             | - | 2.009116974 | 0.000451598 | 0.003422366 |
| ENSMMUG00000022798 | aspartyl-tRNA synthetase 2, mitochondrial [Source:VGNC Symbol;Acc:VGNC:71708]               | - | 0.79784654  | 0.002066633 | 0.011914079 |
| ENSMMUG00000056971 | Metazoan signal recognition particle RNA [Source:RFAM;Acc:RF00017]                          | - | 1.696441203 | 1.14E-06    | 2.37E-05    |
| ENSMMUG00000022801 | zinc finger and BTB domain containing 37 [Source:VGNC Symbol;Acc:VGNC:79702]                | - | 1.449049087 | 0.006637926 | 0.029811074 |
| ENSMMUG00000000629 | serpin family C member 1 [Source:VGNC Symbol;Acc:VGNC:77360]                                | - | 1.074692828 | 2.70E-05    | 0.000336586 |
| ENSMMUG00000000546 | KIAA0040 ortholog [Source:NCBI gene;Acc:100423509]                                          | - | -1.24496728 | 0.000632961 | 0.004549137 |
| ENSMMUG00000020320 | protein transport protein Sec16B [Source:NCBI gene;Acc:709635]                              | - | 0.787020243 | 0.000913817 | 0.006116886 |
| ENSMMUG00000021073 | RAS protein activator like 2 [Source:VGNC Symbol;Acc:VGNC:76670]                            | - | 1.585196858 | 1.57E-06    | 3.07E-05    |
| ENSMMUG00000055256 | family with sequence similarity 163 member A [Source:NCBI gene;Acc:718704]                  | - | 0.899127628 | 0.003359613 | 0.017443167 |
| ENSMMUG00000031279 | torsin A interacting protein 2 [Source:NCBI gene;Acc:716654]                                | - | 0.927337477 | 0.000133689 | 0.001269163 |
| ENSMMUG00000054568 |                                                                                             | - | 1.073422001 | 0.001718972 | 0.010288517 |
| ENSMMUG00000061785 |                                                                                             | - | 1.296271485 | 2.65E-08    | 1.03E-06    |
| ENSMMUG00000022884 | glutamate-ammonia ligase [Source:NCBI gene;Acc:715952]                                      | - | 2.748949096 | 4.43E-06    | 7.33E-05    |
| ENSMMUG00000049444 |                                                                                             | - | 2.643226912 | 0.002581376 | 0.014100534 |
| ENSMMUG00000031291 | regulator of G protein signaling like 1 [Source:NCBI gene;Acc:715693]                       | - | 1.178533    | 3.22E-08    | 1.20E-06    |
| ENSMMUG00000005634 | ribonuclease L [Source:VGNC Symbol;Acc:VGNC:82223]                                          | - | 0.915129946 | 0.004010174 | 0.020052414 |
| ENSMMUG00000001479 | laminin subunit gamma 2 [Source:VGNC Symbol;Acc:VGNC:74233]                                 | - | 2.849082081 | 1.12E-09    | 7.74E-08    |
| ENSMMUG00000001481 | nicotinamide nucleotide adenylyltransferase 2 [Source:VGNC Symbol;Acc:VGNC:75193]           | - | 2.137839582 | 0.000394189 | 0.003064452 |
| ENSMMUG00000013879 | tRNA methyltransferase 1 like [Source:VGNC Symbol;Acc:VGNC:79048]                           | - | 1.635278074 | 0.001122074 | 0.007260547 |
| ENSMMUG00000009076 | proteoglycan 4 [Source:NCBI gene;Acc:716849]                                                | - | 3.731265204 | 4.14E-07    | 1.02E-05    |
| ENSMMUG00000016857 | prostaglandin-endoperoxide synthase 2 [Source:VGNC Symbol;Acc:VGNC:76589]                   | - | 1.319741373 | 1.70E-07    | 4.80E-06    |
| ENSMMUG00000062021 |                                                                                             | - | 1.641775562 | 0.000298455 | 0.002436724 |
| ENSMMUG00000022647 | cell division cycle 73 [Source:VGNC Symbol;Acc:VGNC:70766]                                  | - | 0.650301483 | 0.01236353  | 0.048448349 |
| ENSMMUG00000056654 | translationally-controlled tumor protein [Source:NCBI gene;Acc:711798]                      | - | 2.221513342 | 0.00196761  | 0.011446075 |
| ENSMMUG00000021082 | potassium sodium-activated channel subfamily T member 2 [Source:VGNC Symbol;Acc:VGNC:73857] | - | 1.233491091 | 2.04E-05    | 0.000265958 |
| ENSMMUG00000045497 | complement factor H [Source:NCBI gene;Acc:717346]                                           | - | 1.201724219 | 0.002426365 | 0.013411517 |
| ENSMMUG00000000243 | complement factor H related 2 [Source:NCBI gene;Acc:106994228]                              | - | 1.658405408 | 0.001410957 | 0.008780338 |

|                    |                                                                                              |             |             |             |
|--------------------|----------------------------------------------------------------------------------------------|-------------|-------------|-------------|
| ENSMMUG0000000009  | protein tyrosine phosphatase receptor type C [Source:VGNC Symbol;Acc:VGNC:76612]             | -2.56386762 | 1.19E-07    | 3.48E-06    |
| ENSMMUG00000052462 | maestro heat-like repeat-containing protein family member 7 [Source:NCBI gene;Acc:100427155] | 0.684340062 | 0.001260825 | 0.007979705 |
| ENSMMUG00000017414 | calcium voltage-gated channel subunit alpha1 S [Source:VGNC Symbol;Acc:VGNC:70507]           | -1.35271968 | 8.92E-06    | 0.000131311 |
| ENSMMUG00000064915 | Metazoan signal recognition particle RNA [Source:RFAM;Acc:RF00017]                           | 2.776079633 | 0.001804437 | 0.010691801 |
| ENSMMUG00000050920 | Metazoan signal recognition particle RNA [Source:RFAM;Acc:RF00017]                           | 2.568508296 | 0.001646295 | 0.009958934 |
| ENSMMUG00000021116 | ATPase plasma membrane Ca <sup>2+</sup> transporting 4 [Source:VGNC Symbol;Acc:VGNC:70183]   | 1.734752908 | 5.51E-07    | 1.30E-05    |
| ENSMMUG00000055783 |                                                                                              | 4.480366643 | 9.98E-07    | 2.11E-05    |
| ENSMMUG00000008460 | SRY-box transcription factor 13 [Source:VGNC Symbol;Acc:VGNC:77839]                          | 3.206833175 | 0.010575861 | 0.042951939 |
| ENSMMUG00000063658 | leucine rich repeat neuronal 2 [Source:NCBI gene;Acc:100429709]                              | 1.478127334 | 0.000304829 | 0.002473242 |
| ENSMMUG00000040888 | complement C3b/C4b receptor 1 like [Source:HGNC Symbol;Acc:HGNC:2335]                        | 0.992001629 | 0.002959872 | 0.015783557 |
| ENSMMUG00000064202 |                                                                                              | 1.086002971 | 0.007551708 | 0.033121069 |
| ENSMMUG00000016099 | hedgehog acyltransferase [Source:NCBI gene;Acc:712333]                                       | 1.737376026 | 0.002346627 | 0.013053991 |
| ENSMMUG00000015634 | centromere protein F [Source:VGNC Symbol;Acc:VGNC:71009]                                     | 1.768445402 | 0.005698311 | 0.02644976  |
| ENSMMUG00000058133 |                                                                                              | 2.101310373 | 0.000438373 | 0.00334006  |
| ENSMMUG00000017396 | 3'(2'), 5'-bisphosphate nucleotidase 1 [Source:NCBI gene;Acc:721277]                         | 1.397232846 | 0.000371628 | 0.002918714 |
| ENSMMUG00000007783 | isoleucyl-tRNA synthetase 2, mitochondrial [Source:VGNC Symbol;Acc:VGNC:73458]               | 1.078398524 | 3.91E-07    | 9.75E-06    |
| ENSMMUG00000007784 | RAB3 GTPase activating non-catalytic protein subunit 2 [Source:VGNC Symbol;Acc:VGNC:76499]   | 0.595822801 | 0.006782683 | 0.030335482 |
| ENSMMUG00000018525 | presenilin 2 [Source:VGNC Symbol;Acc:VGNC:76436]                                             | 0.833168926 | 0.002519921 | 0.013822899 |
| ENSMMUG00000001869 | synaptosome associated protein 47 [Source:VGNC Symbol;Acc:VGNC:77800]                        | 1.27719192  | 0.010576268 | 0.042951939 |
| ENSMMUG00000023096 | obscurin, cytoskeletal calmodulin and titin-interacting RhoGEF [Source:NCBI gene;Acc:694413] | 0.715126508 | 0.006020393 | 0.027619483 |
| ENSMMUG00000019513 | U2AF homology motif kinase 1 [Source:VGNC Symbol;Acc:VGNC:79198]                             | 3.248617473 | 1.48E-05    | 0.0002025   |
| ENSMMUG00000042262 | nitric oxide synthase 1 adaptor protein [Source:NCBI gene;Acc:720378]                        | 1.274873659 | 0.000798167 | 0.005472305 |
| ENSMMUG00000004042 | Fc receptor like A [Source:VGNC Symbol;Acc:VGNC:72526]                                       | 1.578450628 | 0.011781261 | 0.046758341 |
| ENSMMUG00000054686 |                                                                                              | 2.567510144 | 1.70E-17    | 1.10E-14    |
| ENSMMUG00000008251 | cilia and flagella associated protein 126 [Source:VGNC Symbol;Acc:VGNC:71150]                | 2.535586944 | 0.004654362 | 0.022545488 |
| ENSMMUG00000004512 | Fc fragment of IgE receptor Ig [Source:VGNC Symbol;Acc:VGNC:72629]                           | 1.31434115  | 0.001364216 | 0.008530287 |
| ENSMMUG00000004520 | NADH:ubiquinone oxidoreductase core subunit S2 [Source:NCBI gene;Acc:719935]                 | 1.230060276 | 6.47E-06    | 0.000100248 |
| ENSMMUG00000050419 | ADAM metalloproteinase with thrombospondin type 1 motif 4 [Source:NCBI gene;Acc:719927]      | 1.366710899 | 6.66E-09    | 3.27E-07    |
| ENSMMUG00000060555 |                                                                                              | 1.290268485 | 3.72E-06    | 6.38E-05    |
| ENSMMUG00000022630 | protoporphyrinogen oxidase [Source:VGNC Symbol;Acc:VGNC:76365]                               | 1.260784032 | 0.002165111 | 0.012312825 |

|                     |                                                                                         |             |             |             |
|---------------------|-----------------------------------------------------------------------------------------|-------------|-------------|-------------|
| ENSMMUG00000022631  | ubiquitin specific peptidase 21 [Source:VGNC Symbol;Acc:VGNC:78741]                     | -1.47629625 | 0.002033737 | 0.011758157 |
| ENSMMUG00000011335  | Fc receptor like 6 [Source:VGNC Symbol;Acc:VGNC:72602]                                  | 0.839069336 | 0.003102865 | 0.016411495 |
| ENSMMUG00000000730  | spectrin alpha, erythrocytic 1 [Source:VGNC Symbol;Acc:VGNC:77868]                      | 1.121942309 | 0.000723879 | 0.005079495 |
| ENSMMUG000000003191 | kirre like nephrin family adhesion molecule 1 [Source:VGNC Symbol;Acc:VGNC:73837]       | 0.991530078 | 0.000455751 | 0.00344422  |
| ENSMMUG00000019833  | Fc receptor like 1 [Source:VGNC Symbol;Acc:VGNC:72528]                                  | 1.112666735 | 1.25E-05    | 0.000175696 |
| ENSMMUG00000019830  | Fc receptor like 2 [Source:VGNC Symbol;Acc:VGNC:72509]                                  | 0.949290048 | 0.007097457 | 0.031494211 |
| ENSMMUG00000046969  | Fc receptor like 3 [Source:NCBI gene;Acc:718801]                                        | 0.853108904 | 0.001930417 | 0.011284049 |
| ENSMMUG00000042886  | ETS variant transcription factor 3 [Source:NCBI gene;Acc:719741]                        | 1.046121444 | 0.001847693 | 0.010892924 |
| ENSMMUG00000064007  | leucine rich repeat containing 71 [Source:NCBI gene;Acc:718714]                         | 0.578328641 | 0.00728499  | 0.032161773 |
| ENSMMUG00000055304  | insulin receptor related receptor [Source:NCBI gene;Acc:718670]                         | 1.174640515 | 0.011434571 | 0.045647033 |
| ENSMMUG00000000037  | interferon stimulated exonuclease gene 20 like 2 [Source:NCBI gene;Acc:718621]          | 2.114654527 | 0.000530711 | 0.003928528 |
| ENSMMUG00000027037  | chromosome 1 C1orf61 homolog [Source:NCBI gene;Acc:106992893]                           | 2.063343507 | 4.58E-05    | 0.000519278 |
| ENSMMUG00000017966  | lamin A/C [Source:VGNC Symbol;Acc:VGNC:74427]                                           | 1.696824401 | 3.87E-06    | 6.56E-05    |
| ENSMMUG00000016096  | KH domain containing 4, pre-mRNA splicing factor [Source:VGNC Symbol;Acc:VGNC:73931]    | 1.683348905 | 0.001828541 | 0.01081492  |
| ENSMMUG00000004648  | RUN and SH3 domain containing 1 [Source:VGNC Symbol;Acc:VGNC:77036]                     | 0.674010655 | 0.001508853 | 0.009287335 |
| ENSMMUG00000062397  | metaxin-1 [Source:NCBI gene;Acc:717595]                                                 | 1.343505729 | 8.38E-06    | 0.000124139 |
| ENSMMUG00000023145  | thrombospondin 3 [Source:VGNC Symbol;Acc:VGNC:78345]                                    | 1.240484846 | 0.003326445 | 0.017326289 |
| ENSMMUG00000053423  | S100 calcium binding protein A2 [Source:VGNC Symbol;Acc:VGNC:76956]                     | 4.022579987 | 2.38E-08    | 9.53E-07    |
| ENSMMUG00000008506  | S100 calcium binding protein A6 [Source:VGNC Symbol;Acc:VGNC:76960]                     | 2.692325071 | 0.010199825 | 0.041963764 |
| ENSMMUG00000003902  | involucrin [Source:NCBI gene;Acc:713728]                                                | 1.577654029 | 9.24E-10    | 6.61E-08    |
| ENSMMUG00000010978  | sperm mitochondria associated cysteine rich protein [Source:VGNC Symbol;Acc:VGNC:77816] | 0.792722523 | 0.00019397  | 0.001714787 |
| ENSMMUG00000008917  | late cornified envelope protein 1C-like [Source:NCBI gene;Acc:713600]                   | 0.589661268 | 0.011766773 | 0.046715095 |
| ENSMMUG00000051645  | late cornified envelope 1C [Source:HGNC Symbol;Acc:HGNC:29464]                          | 3.791381218 | 3.57E-08    | 1.29E-06    |
| ENSMMUG00000061474  | late cornified envelope protein 1C [Source:NCBI gene;Acc:107000798]                     | 2.602612775 | 5.41E-10    | 4.32E-08    |
| ENSMMUG00000063702  | late cornified envelope protein 1C [Source:NCBI gene;Acc:713408]                        | 2.62124742  | 0.01141682  | 0.045604163 |
| ENSMMUG00000042618  | late cornified envelope protein 1C-like [Source:NCBI gene;Acc:107000794]                | 2.397378783 | 2.07E-08    | 8.48E-07    |
| ENSMMUG00000017740  | keratinocyte proline rich protein [Source:NCBI gene;Acc:100424312]                      | 3.099214299 | 3.62E-10    | 3.07E-08    |
| ENSMMUG00000055038  | late cornified envelope protein 2D [Source:NCBI gene;Acc:100424118]                     | 2.798343939 | 1.48E-08    | 6.41E-07    |
| ENSMMUG00000054634  |                                                                                         | 3.178888919 | 0.000659639 | 0.004700622 |
| ENSMMUG00000051719  |                                                                                         | 2.713058371 | 4.58E-05    | 0.00051945  |
| ENSMMUG00000058472  |                                                                                         | 2.466744157 | 4.96E-09    | 2.55E-07    |
| ENSMMUG00000056940  |                                                                                         | 2.816921597 | 0.000390666 | 0.003044338 |
| ENSMMUG00000055266  |                                                                                         | 3.031271358 | 2.69E-07    | 7.06E-06    |
| ENSMMUG00000051816  |                                                                                         | 2.612809201 | 2.74E-09    | 1.58E-07    |
| ENSMMUG00000049843  |                                                                                         | 3.911836333 | 0.000213553 | 0.001859082 |
| ENSMMUG00000062996  |                                                                                         | 2.695712663 | 7.49E-06    | 0.000113209 |

|                    |                                                                                       |             |             |             |
|--------------------|---------------------------------------------------------------------------------------|-------------|-------------|-------------|
| ENSMMUG0000001967  | late cornified envelope 5A [Source:VGNC Symbol;Acc:VGNC:74061]                        | 3.839915284 | 3.64E-05    | 0.000430568 |
| ENSMMUG00000009040 | cornulin [Source:VGNC Symbol;Acc:VGNC:71397]                                          | 2.440924407 | 1.22E-05    | 0.00017232  |
| ENSMMUG00000056511 |                                                                                       | 2.545918664 | 3.11E-09    | 1.73E-07    |
| ENSMMUG00000059472 | filaggrin family member 2 [Source:HGNC Symbol;Acc:HGNC:33276]                         | 2.048348709 | 4.33E-13    | 9.91E-11    |
| ENSMMUG00000010067 | MINDY lysine 48 deubiquitinase 1 [Source:VGNC Symbol;Acc:VGNC:74828]                  | -           | 0.01230201  | 0.048250886 |
| ENSMMUG00000021385 | carbonic anhydrase 14 [Source:VGNC Symbol;Acc:VGNC:70489]                             | 0.654267391 | 0.00400396  | 0.020030915 |
| ENSMMUG00000052282 |                                                                                       | 0.931641722 | 0.001835264 | 0.010839892 |
| ENSMMUG00000007256 | splicing factor 3b subunit 4 [Source:VGNC Symbol;Acc:VGNC:77182]                      | 0.734011253 | 0.012239139 | 0.048091312 |
| ENSMMUG00000007257 | synaptic vesicle glycoprotein 2A [Source:VGNC Symbol;Acc:VGNC:78181]                  | 0.671029078 | 0.00973447  | 0.040436449 |
| ENSMMUG00000052382 | histone H4 [Source:NCBI gene;Acc:107000818]                                           | 0.666323515 | 0.002678844 | 0.014535271 |
| ENSMMUG00000062140 |                                                                                       | 1.364494858 | 0.000156806 | 0.001435574 |
| ENSMMUG00000024186 | U1 spliceosomal RNA [Source:RFAM;Acc:RF00003]                                         | 3.007757785 | 9.85E-06    | 0.000142145 |
| ENSMMUG00000061239 |                                                                                       | -1.11927092 | 2.58E-05    | 0.000323581 |
| ENSMMUG00000054590 |                                                                                       | 1.175862802 | 0.000103745 | 0.001023751 |
| ENSMMUG00000056076 | U1 spliceosomal RNA [Source:RFAM;Acc:RF00003]                                         | 1.678621927 | 0.000443712 | 0.003372831 |
| ENSMMUG00000056325 | NBPF member 20 [Source:NCBI gene;Acc:708768]                                          | 2.168782287 | 3.96E-06    | 6.66E-05    |
| ENSMMUG00000055722 |                                                                                       | 1.745420663 | 0.000265628 | 0.002210337 |
| ENSMMUG00000044046 |                                                                                       | 1.606406316 | 0.000167725 | 0.001513836 |
| ENSMMUG00000062170 |                                                                                       | 3.725130126 | 0.012416562 | 0.048584802 |
| ENSMMUG00000041725 | 60S ribosomal protein L6-like [Source:NCBI gene;Acc:710287]                           | 2.892840797 | 0.008201877 | 0.035287334 |
| ENSMMUG00000009781 | synaptotagmin 6 [Source:VGNC Symbol;Acc:VGNC:78162]                                   | 0.974413423 | 0.002358009 | 0.013095663 |
| ENSMMUG00000019528 | adaptor related protein complex 4 subunit beta 1 [Source:VGNC Symbol;Acc:VGNC:69972]  | 2.362431216 | 2.34E-10    | 2.11E-08    |
| ENSMMUG00000019527 | DNA cross-link repair 1B [Source:VGNC Symbol;Acc:VGNC:71647]                          | 1.321001234 | 0.004040233 | 0.020171697 |
| ENSMMUG00000006787 | BCL2 like 15 [Source:VGNC Symbol;Acc:VGNC:70162]                                      | 2.467345547 | 0.012153241 | 0.04781157  |
| ENSMMUG00000006786 | protein tyrosine phosphatase non-receptor type 22 [Source:VGNC Symbol;Acc:VGNC:76603] | 1.377393994 | 7.83E-07    | 1.75E-05    |
| ENSMMUG00000017819 | putative homeodomain transcription factor 1 [Source:VGNC Symbol;Acc:VGNC:75982]       | 1.275597123 | 3.78E-06    | 6.47E-05    |
| ENSMMUG00000037458 | endoplasmic reticulum resident protein 29 [Source:NCBI gene;Acc:720396]               | 1.971601484 | 0.004812336 | 0.02315547  |
| ENSMMUG00000014489 | DEAD-box helicase 20 [Source:NCBI gene;Acc:704731]                                    | 1.002688714 | 0.000149277 | 0.001381844 |
| ENSMMUG00000021544 | solute carrier family 6 member 17 [Source:VGNC Symbol;Acc:VGNC:77805]                 | 2.781085918 | 6.08E-06    | 9.54E-05    |
| ENSMMUG00000051186 | proteasome 20S subunit alpha 5 [Source:NCBI gene;Acc:698435]                          | 0.977774423 | 1.27E-05    | 0.000177989 |
| ENSMMUG00000017266 | UPF0577 protein KIAA1324 [Source:NCBI gene;Acc:697670]                                | 1.573011556 | 9.38E-07    | 2.03E-05    |
| ENSMMUG00000042232 | NBPF member 6 [Source:NCBI gene;Acc:698524]                                           | 1.301057469 | 0.000488729 | 0.003644733 |
| ENSMMUG00000031785 |                                                                                       | 1.008235364 | 0.001850303 | 0.010899025 |

|                    |                                                                                                              |             |             |             |
|--------------------|--------------------------------------------------------------------------------------------------------------|-------------|-------------|-------------|
| ENSMMUG0000002789  | solute carrier family 25 (mitochondrial carrier; phosphate carrier), member 24 [Source:NCBI gene;Acc:694803] | 2.541558072 | 2.64E-05    | 0.000330031 |
| ENSMMUG00000008197 | netrin G1 [Source:VGNC Symbol;Acc:VGNC:75450]                                                                | 2.06784088  | 0.001777539 | 0.010556304 |
| ENSMMUG00000004103 | collagen type XI alpha 1 chain [Source:VGNC Symbol;Acc:VGNC:71289]                                           | 1.497177876 | 1.36E-09    | 8.95E-08    |
| ENSMMUG00000060790 |                                                                                                              | -           | -           | -           |
| ENSMMUG00000022906 | vascular cell adhesion molecule 1 [Source:VGNC Symbol;Acc:VGNC:78761]                                        | 4.127266216 | 0.000821514 | 0.00559404  |
| ENSMMUG00000055443 | G protein-coupled receptor 88 [Source:NCBI gene;Acc:716520]                                                  | 0.579525595 | 0.005549526 | 0.025897788 |
| ENSMMUG00000019105 | RNA 3'-terminal phosphate cyclase [Source:VGNC Symbol;Acc:VGNC:77043]                                        | 0.61916109  | 0.010430788 | 0.042540867 |
| ENSMMUG00000007706 | dihydrolipoamide branched chain transacylase E2 [Source:VGNC Symbol;Acc:VGNC:71744]                          | 2.577312722 | 1.44E-05    | 0.000198126 |
| ENSMMUG00000000931 | solute carrier family 35 member A3 [Source:VGNC Symbol;Acc:VGNC:77461]                                       | 3.658151236 | 0.00027395  | 0.002266538 |
| ENSMMUG00000038667 |                                                                                                              | -           | -           | -           |
| ENSMMUG00000008518 | phospholipid phosphatase related 5 [Source:NCBI gene;Acc:710549]                                             | 1.801025929 | 0.000286451 | 0.002352006 |
| ENSMMUG00000008515 | sorting nexin 7 [Source:NCBI gene;Acc:716015]                                                                | 1.968060536 | 0.002442246 | 0.013493565 |
| ENSMMUG00000020726 | dihydropyrimidine dehydrogenase [Source:VGNC Symbol;Acc:VGNC:71982]                                          | 1.391192133 | 2.87E-10    | 2.52E-08    |
| ENSMMUG00000049297 |                                                                                                              | 0.846197531 | 0.00322264  | 0.016907486 |
| ENSMMUG0000001690  | calponin 3 [Source:VGNC Symbol;Acc:VGNC:71278]                                                               | 2.079200153 | 2.04E-08    | 8.44E-07    |
| ENSMMUG00000058244 |                                                                                                              | 0.905485216 | 1.50E-05    | 0.000204082 |
| ENSMMUG00000045959 |                                                                                                              | 0.745252046 | 0.0034703   | 0.017882217 |
| ENSMMUG00000015924 | BCAR3 adaptor protein, NSP family member [Source:VGNC Symbol;Acc:VGNC:70235]                                 | 2.435202975 | 0.007553213 | 0.033121069 |
| ENSMMUG00000015922 | formin binding protein 1 like [Source:VGNC Symbol;Acc:VGNC:72543]                                            | 1.355138771 | 0.000280434 | 0.002311232 |
| ENSMMUG00000016812 | coiled-coil domain containing 18 [Source:VGNC Symbol;Acc:VGNC:70913]                                         | 0.758303979 | 0.00553201  | 0.025843864 |
| ENSMMUG00000051332 |                                                                                                              | 0.637559523 | 0.000341599 | 0.002725663 |
| ENSMMUG0000005070  | ecotropic viral integration site 5 [Source:NCBI gene;Acc:706592]                                             | 1.068624282 | 0.00057556  | 0.004200745 |
| ENSMMUG00000014018 | bromodomain testis associated [Source:VGNC Symbol;Acc:VGNC:70282]                                            | 1.690160594 | 0.010797844 | 0.043600359 |
| ENSMMUG00000001742 | transforming growth factor beta receptor 3 [Source:VGNC Symbol;Acc:VGNC:78339]                               | 1.716381422 | 4.12E-10    | 3.48E-08    |
| ENSMMUG00000051155 | U2 spliceosomal RNA [Source:RFAM;Acc:RF00004]                                                                | 3.645352915 | 1.02E-09    | 7.27E-08    |
| ENSMMUG00000006819 | helicase for meiosis 1 [Source:NCBI gene;Acc:704516]                                                         | 4.499358782 | 5.21E-39    | 6.77E-35    |
| ENSMMUG00000049678 |                                                                                                              | -           | -           | -           |
| ENSMMUG00000060600 |                                                                                                              | 4.626327006 | 0.00035252  | 0.002802488 |
| ENSMMUG00000017707 | leucine rich repeat containing 8 VRAC subunit B [Source:VGNC Symbol;Acc:VGNC:81439]                          | 1.327215001 | 3.43E-05    | 0.000411277 |
| ENSMMUG00000002794 | general transcription factor IIB [Source:VGNC Symbol;Acc:VGNC:73306]                                         | 1.521428503 | 0.000273011 | 0.002260205 |
| ENSMMUG00000020588 | protein kinase N2 [Source:VGNC Symbol;Acc:VGNC:76015]                                                        | 1.625140689 | 0.000271043 | 0.002246776 |
| ENSMMUG00000065295 |                                                                                                              | 1.75047913  | 1.87E-06    | 3.58E-05    |
| ENSMMUG00000000813 | calcium-activated chloride channel regulator 1-like [Source:NCBI gene;Acc:715292]                            | 1.921082378 | 8.03E-06    | 0.000120209 |
| ENSMMUG00000006836 | chloride channel accessory 1 [Source:NCBI gene;Acc:574295]                                                   | 0.804354578 | 5.63E-06    | 9.03E-05    |
|                    |                                                                                                              | 2.107901534 | 4.20E-10    | 3.52E-08    |
|                    |                                                                                                              | 0.965989515 | 0.004221139 | 0.02081101  |
|                    |                                                                                                              | 2.320963019 | 8.11E-07    | 1.80E-05    |



|                     |                                                                                             |             |             |             |
|---------------------|---------------------------------------------------------------------------------------------|-------------|-------------|-------------|
| ENSMMUG0000001380   | outer dense fiber of sperm tails 2 like [Source:VGNC Symbol;Acc:VGNC:75482]                 | 2.783446208 | 0.000104249 | 0.001027945 |
| ENSMMUG00000014573  | dimethylarginine dimethylaminohydrolase 1 [Source:VGNC Symbol;Acc:VGNC:71753]               | 1.686935583 | 9.63E-09    | 4.49E-07    |
| ENSMMUG00000005720  | BCL10 immune signaling adaptor [Source:VGNC Symbol;Acc:VGNC:70240]                          | 0.612542767 | 0.000836508 | 0.005676943 |
| ENSMMUG00000005361  | mucolipin 3 [Source:VGNC Symbol;Acc:VGNC:74505]                                             | 1.347951122 | 5.93E-05    | 0.000639381 |
| ENSMMUG00000063379  |                                                                                             | 0.797740643 | 0.003272916 | 0.017102269 |
| ENSMMUG00000010127  | chitobiase [Source:VGNC Symbol;Acc:VGNC:71540]                                              | 2.164183162 | 2.62E-06    | 4.80E-05    |
| ENSMMUG00000022183  | spermatogenesis associated 1 [Source:NCBI gene;Acc:710462]                                  | 1.260345711 | 3.59E-07    | 9.11E-06    |
| ENSMMUG00000059938  |                                                                                             | 1.619160783 | 0.000461625 | 0.003480516 |
| ENSMMUG00000003457  | protein kinase cAMP-activated catalytic subunit beta [Source:NCBI gene;Acc:709728]          | 1.575269175 | 1.38E-06    | 2.78E-05    |
| ENSMMUG00000016591  | tubulin tyrosine ligase like 7 [Source:VGNC Symbol;Acc:VGNC:79591]                          | 0.621561349 | 0.010366868 | 0.04238651  |
| ENSMMUG000000057763 |                                                                                             | -1.56846433 | 0.000115076 | 0.001116928 |
| ENSMMUG000000050832 |                                                                                             | 2.880952959 | 0.010099712 | 0.041647701 |
| ENSMMUG00000023345  | adhesion G protein-coupled receptor L4 [Source:VGNC Symbol;Acc:VGNC:69652]                  | 2.138940509 | 2.53E-05    | 0.000318566 |
| ENSMMUG000000054277 |                                                                                             | 0.62152942  | 0.007158414 | 0.031697707 |
| ENSMMUG00000020217  | phosphatidylinositol glycan anchor biosynthesis class K [Source:VGNC Symbol;Acc:VGNC:75988] | 0.644392227 | 0.002450556 | 0.013527984 |
| ENSMMUG00000041837  | Metazoan signal recognition particle RNA [Source:RFAM;Acc:RF00017]                          | 1.823291142 | 0.002317974 | 0.012955553 |
| ENSMMUG000000056103 | growth arrest and DNA damage inducible alpha [Source:NCBI gene;Acc:701054]                  | 1.126757328 | 8.79E-08    | 2.70E-06    |
| ENSMMUG000000054553 |                                                                                             | 3.18524155  | 0.004269194 | 0.02099249  |
| ENSMMUG000000053254 | adenylate kinase 4 [Source:NCBI gene;Acc:698560]                                            | 1.390268769 | 0.000791319 | 0.00543969  |
| ENSMMUG000000053072 |                                                                                             | 1.565096276 | 0.000187945 | 0.001669678 |
| ENSMMUG00000018566  | Janus kinase 1 [Source:VGNC Symbol;Acc:VGNC:73810]                                          | 3.004053659 | 1.72E-09    | 1.10E-07    |
| ENSMMUG00000018565  | ribonucleoprotein, PTB binding 2 [Source:VGNC Symbol;Acc:VGNC:76536]                        | 2.989064905 | 2.37E-05    | 0.000300922 |
| ENSMMUG00000012538  | ubiquitin conjugating enzyme E2 U [Source:VGNC Symbol;Acc:VGNC:79726]                       | 0.814826357 | 0.008611825 | 0.036711044 |
| ENSMMUG00000020049  | phosphoglucomutase 1 [Source:NCBI gene;Acc:699401]                                          | 0.824319854 | 8.79E-05    | 0.000899233 |
| ENSMMUG00000010351  | KN motif and ankyrin repeat domains 4 [Source:VGNC Symbol;Acc:VGNC:73916]                   | 0.821744136 | 0.000404695 | 0.003131153 |
| ENSMMUG00000049952  |                                                                                             | 0.832156034 | 0.000471219 | 0.003530345 |
| ENSMMUG000000055834 |                                                                                             | 1.887625132 | 0.000900588 | 0.006056387 |
| ENSMMUG00000022762  | OMA1 zinc metallopeptidase [Source:VGNC Symbol;Acc:VGNC:75485]                              | 1.019219957 | 0.001951919 | 0.011384151 |
| ENSMMUG000000059612 |                                                                                             | 0.268430888 | 0.006812519 | 0.030447981 |
| ENSMMUG000000032084 | prolyl-tRNA synthetase 2, mitochondrial [Source:VGNC Symbol;Acc:VGNC:75707]                 | 0.597138791 | 0.005299788 | 0.024983341 |
| ENSMMUG00000006754  | tetratricopeptide repeat domain 4 [Source:VGNC Symbol;Acc:VGNC:78668]                       | 0.940972824 | 7.70E-05    | 0.00080399  |
| ENSMMUG00000009114  | maestro heat like repeat family member 7 [Source:NCBI gene;Acc:715310]                      | 1.672890421 | 5.98E-09    | 3.02E-07    |
| ENSMMUG00000008828  | BEN domain containing 5 [Source:NCBI gene;Acc:711150]                                       | 1.715546212 | 2.19E-06    | 4.09E-05    |
| ENSMMUG00000005986  | Kruppel like factor 17 [Source:NCBI gene;Acc:702810]                                        | 1.448688132 | 0.007125064 | 0.031595153 |

|                    |                                                                                                                  |             |             |             |
|--------------------|------------------------------------------------------------------------------------------------------------------|-------------|-------------|-------------|
| ENSMMUG00000015555 | ST3 beta-galactoside alpha-2,3-sialyltransferase 3 [Source:VGNC Symbol;Acc:VGNC:77828]                           | 1.84164437  | 0.000435467 | 0.003323756 |
| ENSMMUG00000053498 |                                                                                                                  | 2.352209833 | 1.06E-08    | 4.78E-07    |
| ENSMMUG00000012477 | protein tyrosine phosphatase receptor type F [Source:VGNC Symbol;Acc:VGNC:76615]                                 | -           | -           | -           |
| ENSMMUG00000057076 | claudin 19 [Source:NCBI gene;Acc:697807]                                                                         | 4.150949072 | 0.007450388 | 0.032791793 |
| ENSMMUG00000014138 | forkhead box J3 [Source:VGNC Symbol;Acc:VGNC:72596]                                                              | 2.150062919 | 0.000134335 | 0.001273445 |
| ENSMMUG00000043675 | Cbp/p300 interacting transactivator with Glu/Asp rich carboxy-terminal domain 4 [Source:NCBI gene;Acc:114672840] | 1.41851487  | 6.06E-08    | 1.99E-06    |
| ENSMMUG00000019536 | potassium voltage-gated channel subfamily Q member 4 [Source:VGNC Symbol;Acc:VGNC:74007]                         | 0.646670997 | 0.007636318 | 0.033393226 |
| ENSMMUG00000018664 | collagen type IX alpha 2 chain [Source:VGNC Symbol;Acc:VGNC:71307]                                               | 1.681619186 | 3.34E-12    | 6.21E-10    |
| ENSMMUG00000005992 | zinc metalloproteinase STE24 [Source:VGNC Symbol;Acc:VGNC:78830]                                                 | 1.676532912 | 0.000174608 | 0.001565094 |
| ENSMMUG00000032180 | RLF zinc finger [Source:VGNC Symbol;Acc:VGNC:76699]                                                              | 1.407265825 | 0.008557276 | 0.036538388 |
| ENSMMUG00000009562 | microtubule actin crosslinking factor 1 [Source:NCBI gene;Acc:718651]                                            | 2.294471996 | 2.71E-05    | 0.000336753 |
| ENSMMUG00000008419 | G protein nucleolar 2 [Source:VGNC Symbol;Acc:VGNC:73037]                                                        | 1.544848494 | 0.000845609 | 0.005731106 |
| ENSMMUG00000059855 | Smad nuclear interacting protein 1 [Source:NCBI gene;Acc:713733]                                                 | 1.826483371 | 5.37E-07    | 1.27E-05    |
| ENSMMUG00000010328 | MYST/Esa1 associated factor 6 [Source:VGNC Symbol;Acc:VGNC:74580]                                                | 1.453783233 | 0.003348854 | 0.01740021  |
| ENSMMUG00000006252 | argonaute RISC catalytic component 3 [Source:NCBI gene;Acc:712543]                                               | 2.452725159 | 1.54E-17    | 1.05E-14    |
| ENSMMUG00000006251 | argonaute RISC component 1 [Source:VGNC Symbol;Acc:VGNC:81346]                                                   | 1.819978632 | 1.07E-09    | 7.52E-08    |
| ENSMMUG00000019815 | transcription factor AP-2 epsilon [Source:VGNC Symbol;Acc:VGNC:79878]                                            | 1.987793997 | 5.58E-05    | 0.000610287 |
| ENSMMUG00000003267 | zinc finger protein 362 [Source:NCBI gene;Acc:710013]                                                            | 0.755876364 | 0.000471027 | 0.003530345 |
| ENSMMUG00000015097 | tripartite motif containing 62 [Source:VGNC Symbol;Acc:VGNC:79513]                                               | 0.86244367  | 0.000254165 | 0.002132689 |
| ENSMMUG00000006285 | antizyme inhibitor 2 [Source:VGNC Symbol;Acc:VGNC:70153]                                                         | 1.048746839 | 2.40E-08    | 9.53E-07    |
| ENSMMUG00000006284 | adenylate kinase 2 [Source:VGNC Symbol;Acc:VGNC:69761]                                                           | 0.90686732  | 0.000131271 | 0.001248945 |
| ENSMMUG00000044265 | Metazoan signal recognition particle RNA [Source:RFAM;Acc:RF00017]                                               | 0.928453943 | 9.19E-05    | 0.000932724 |
| ENSMMUG00000001264 | BSD domain containing 1 [Source:VGNC Symbol;Acc:VGNC:70384]                                                      | 5.195487056 | 5.22E-06    | 8.47E-05    |
| ENSMMUG00000053323 |                                                                                                                  | 3.978733537 | 0.002027861 | 0.011737587 |
| ENSMMUG00000009951 | MARCKS like 1 [Source:VGNC Symbol;Acc:VGNC:74723]                                                                | 3.501886092 | 0.008633453 | 0.036779133 |
| ENSMMUG00000009948 | histone deacetylase 1 [Source:NCBI gene;Acc:708441]                                                              | 2.188843146 | 1.39E-10    | 1.40E-08    |
| ENSMMUG00000040694 | LCK proto-oncogene, Src family tyrosine kinase [Source:NCBI gene;Acc:717704]                                     | -1.69198772 | 7.56E-08    | 2.41E-06    |
| ENSMMUG00000015650 | transmembrane protein 39B [Source:VGNC Symbol;Acc:VGNC:79507]                                                    | 0.871639363 | 0.000651844 | 0.00465562  |
| ENSMMUG00000041790 | Metazoan signal recognition particle RNA [Source:RFAM;Acc:RF00017]                                               | 1.474883692 | 0.000275453 | 0.002277526 |
| ENSMMUG00000023401 | adhesion G protein-coupled receptor B2 [Source:VGNC Symbol;Acc:VGNC:69598]                                       | -0.97802223 | 2.76E-05    | 0.000343424 |
| ENSMMUG00000023398 | collagen type XVI alpha 1 chain [Source:VGNC Symbol;Acc:VGNC:71293]                                              | 0.786984546 | 0.001574695 | 0.009628813 |

|                    |                                                                                        |   |             |             |             |
|--------------------|----------------------------------------------------------------------------------------|---|-------------|-------------|-------------|
| ENSMMUG00000023397 | penta-EF-hand domain containing 1 [Source:NCBI gene;Acc:706038]                        | - | 0.541613677 | 0.010689901 | 0.043245054 |
| ENSMMUG00000013188 | serine incorporator 2 [Source:VGNC Symbol;Acc:VGNC:77294]                              | - | 0.701123498 | 0.003672097 | 0.018721791 |
| ENSMMUG00000049574 | antizyme inhibitor 2-like [Source:NCBI gene;Acc:705256]                                | - | 0.857777667 | 5.21E-05    | 0.000578009 |
| ENSMMUG00000063979 |                                                                                        | - | 0.789632786 | 1.81E-06    | 3.48E-05    |
| ENSMMUG00000057452 |                                                                                        | - | 1.384992188 | 2.08E-05    | 0.000270201 |
| ENSMMUG00000015661 | protein tyrosine phosphatase receptor type U [Source:VGNC Symbol;Acc:VGNC:76624]       | - | 1.512517611 | 0.002058261 | 0.011881823 |
| ENSMMUG00000007110 | serine and arginine rich splicing factor 4 [Source:NCBI gene;Acc:717401]               | - | 4.106338512 | 0.000126445 | 0.001210109 |
| ENSMMUG00000016893 | solute carrier family 9 member A1 [Source:VGNC Symbol;Acc:VGNC:82241]                  | - | 1.349052842 | 3.05E-08    | 1.15E-06    |
| ENSMMUG00000021031 | TMF1 regulated nuclear protein 1 [Source:VGNC Symbol;Acc:VGNC:79946]                   | - | 0.780641499 | 0.000136178 | 0.001287158 |
| ENSMMUG00000058432 | zinc finger DHHC-type palmitoyltransferase 18 [Source:NCBI gene;Acc:719959]            | - | 1.783811646 | 7.64E-06    | 0.000115315 |
| ENSMMUG00000000649 | UBX domain protein 11 [Source:VGNC Symbol;Acc:VGNC:79859]                              | - | 1.264218983 | 0.002219115 | 0.012543162 |
| ENSMMUG00000000644 | centrosomal protein 85 [Source:VGNC Symbol;Acc:VGNC:71096]                             | - | 1.49451369  | 7.76E-05    | 0.000808257 |
| ENSMMUG00000057953 |                                                                                        | - | 1.514697927 | 6.80E-05    | 0.000721075 |
| ENSMMUG00000057675 | non-compact myelin associated protein [Source:NCBI gene;Acc:712192]                    | - | 1.459832463 | 0.002118305 | 0.012126175 |
| ENSMMUG00000053036 |                                                                                        | - | -1.00675714 | 0.007899271 | 0.034303147 |
| ENSMMUG00000049609 |                                                                                        | - | 2.773839951 | 1.49E-05    | 0.000203164 |
| ENSMMUG00000022927 | RCAN family member 3 [Source:VGNC Symbol;Acc:VGNC:76875]                               | - | 1.166813895 | 2.94E-06    | 5.25E-05    |
| ENSMMUG00000050770 |                                                                                        | - | 0.954416509 | 0.000441031 | 0.003356375 |
| ENSMMUG00000059931 |                                                                                        | - | 0.698402973 | 0.004940827 | 0.023627373 |
| ENSMMUG00000009773 | lysine demethylase 1A [Source:VGNC Symbol;Acc:VGNC:73928]                              | - | 1.078498564 | 0.000262139 | 0.002182703 |
| ENSMMUG00000041482 | lactamase beta like 1 [Source:NCBI gene;Acc:718590]                                    | - | 0.953866083 | 0.004944354 | 0.023627783 |
| ENSMMUG00000002217 | alkaline phosphatase, biomineralization associated [Source:VGNC Symbol;Acc:VGNC:69801] | - | 2.008322993 | 3.02E-09    | 1.69E-07    |
| ENSMMUG00000004149 | eukaryotic translation initiation factor 4 gamma 3 [Source:NCBI gene;Acc:717555]       | - | 1.834152143 | 2.41E-09    | 1.44E-07    |
| ENSMMUG00000002492 | transmembrane and coiled-coil domains 4 [Source:VGNC Symbol;Acc:VGNC:79664]            | - | 4.105634633 | 1.71E-05    | 0.000228021 |
| ENSMMUG00000050018 |                                                                                        | - | 1.903556752 | 1.08E-06    | 2.26E-05    |
| ENSMMUG00000004754 | intermediate filament family orphan 2 [Source:NCBI gene;Acc:106995162]                 | - | 1.104272826 | 0.000132538 | 0.001260079 |
| ENSMMUG00000032238 | peptidyl arginine deiminase 4 [Source:NCBI gene;Acc:700806]                            | - | 2.16377411  | 0.001968027 | 0.011446075 |
| ENSMMUG00000051619 | peptidyl arginine deiminase 3 [Source:NCBI gene;Acc:700560]                            | - | 1.287867967 | 3.81E-06    | 6.51E-05    |
| ENSMMUG00000007315 | ciliary rootlet coiled-coil, rootletin [Source:NCBI gene;Acc:710793]                   | - | 0.865588609 | 9.89E-05    | 0.000988693 |
| ENSMMUG00000018245 | EPH receptor A2 [Source:VGNC Symbol;Acc:VGNC:72235]                                    | - | 1.494456524 | 1.22E-13    | 3.23E-11    |
| ENSMMUG00000058587 | family with sequence similarity 131 member C [Source:NCBI gene;Acc:703604]             | - | 1.441039385 | 7.51E-09    | 3.62E-07    |
| ENSMMUG00000018235 | chloride voltage-gated channel Kb [Source:NCBI gene;Acc:703476]                        | - | 1.606208316 | 2.08E-06    | 3.91E-05    |
| ENSMMUG00000001910 | heat shock protein family B (small) member 7 [Source:NCBI gene;Acc:696704]             | - | 1.701264433 | 0.000405876 | 0.003135329 |

|                    |                                                                                       |             |             |             |
|--------------------|---------------------------------------------------------------------------------------|-------------|-------------|-------------|
| ENSMMUG0000001911  | steroid receptor associated and regulated protein [Source:VGNC Symbol;Acc:VGNC:78008] | 1.455433132 | 0.000188924 | 0.001674942 |
| ENSMMUG0000008031  | zinc finger and BTB domain containing 17 [Source:VGNC Symbol;Acc:VGNC:78849]          | 1.332725594 | 1.41E-07    | 4.07E-06    |
| ENSMMUG0000002802  | agmatinase [Source:NCBI gene;Acc:713190]                                              | 1.257068039 | 0.007043656 | 0.031298185 |
| ENSMMUG00000032244 | DnaJ heat shock protein family (Hsp40) member C16 [Source:NCBI gene;Acc:700894]       | 1.486957214 | 0.003644432 | 0.018639198 |
| ENSMMUG00000018163 | caspace 9 [Source:NCBI gene;Acc:694544]                                               | 2.526489814 | 0.010634238 | 0.04310031  |
| ENSMMUG00000031821 | chymotrypsin-like elastase family member 2B [Source:NCBI gene;Acc:106992406]          | -2.18357738 | 0.000821213 | 0.00559404  |
| ENSMMUG00000060541 |                                                                                       | 2.944862212 | 0.000691378 | 0.004884338 |
| ENSMMUG0000003987  | forkhead associated phosphopeptide binding domain 1 [Source:NCBI gene;Acc:699900]     | 2.915578903 | 1.79E-07    | 5.03E-06    |
| ENSMMUG00000055233 | PRAME family member 17-like [Source:NCBI gene;Acc:100427847]                          | 0.972554622 | 2.45E-05    | 0.000309736 |
| ENSMMUG00000054309 | PRAME family member 5 [Source:NCBI gene;Acc:722781]                                   | 1.885393747 | 0.001317951 | 0.008284812 |
| ENSMMUG00000021449 | vacuolar protein sorting 13 homolog D [Source:NCBI gene;Acc:722775]                   | 1.089571293 | 3.00E-09    | 1.69E-07    |
| ENSMMUG00000064242 |                                                                                       | 0.921638993 | 0.003232699 | 0.016939761 |
| ENSMMUG00000063313 | Small nucleolar RNA U3 [Source:RFAM;Acc:RF00012]                                      | 1.010596641 | 0.007352512 | 0.032426849 |
| ENSMMUG00000021447 | TNF receptor superfamily member 1B [Source:VGNC Symbol;Acc:VGNC:78590]                | 5.083476179 | 0.000127008 | 0.001212828 |
| ENSMMUG00000032249 | procollagen-lysine,2-oxoglutarate 5-dioxygenase 1 [Source:NCBI gene;Acc:722763]       | 0.844196253 | 0.00088289  | 0.005955847 |
| ENSMMUG00000012469 | KIAA2013 [Source:VGNC Symbol;Acc:VGNC:73918]                                          | 0.472332619 | 0.009771275 | 0.040550478 |
| ENSMMUG00000002261 | F-box protein 2 [Source:VGNC Symbol;Acc:VGNC:72486]                                   | 2.726422798 | 0.002198334 | 0.012447334 |
| ENSMMUG00000049196 | dispatched RND transporter family member 3 [Source:NCBI gene;Acc:722727]              | 0.732250818 | 0.000631322 | 0.004546498 |
| ENSMMUG00000032252 | UbiA prenyltransferase domain containing 1 [Source:VGNC Symbol;Acc:VGNC:79881]        | 1.225168199 | 5.07E-10    | 4.09E-08    |
| ENSMMUG00000019325 | mechanistic target of rapamycin kinase [Source:VGNC Symbol;Acc:VGNC:75062]            | 1.324618851 | 4.75E-06    | 7.81E-05    |
| ENSMMUG00000053062 | U6 spliceosomal RNA [Source:RFAM;Acc:RF00026]                                         | 2.083678031 | 0.008794179 | 0.037292826 |
| ENSMMUG00000006187 | angiopoietin like 7 [Source:VGNC Symbol;Acc:VGNC:69683]                               | 1.202637895 | 6.69E-05    | 0.000713438 |
| ENSMMUG00000032281 | zinc finger and BTB domain containing 48 [Source:VGNC Symbol;Acc:VGNC:79959]          | 0.826017532 | 0.005111554 | 0.024316339 |
| ENSMMUG00000023677 | TNF receptor superfamily member 25 [Source:VGNC Symbol;Acc:VGNC:78584]                | 3.550798385 | 0.004139298 | 0.02053231  |
| ENSMMUG00000023676 | espin [Source:NCBI gene;Acc:722532]                                                   | 0.912220381 | 0.005124228 | 0.024349914 |
| ENSMMUG00000055126 |                                                                                       | 1.477319379 | 0.006174703 | 0.028158551 |
| ENSMMUG00000054719 |                                                                                       | 2.190122041 | 9.78E-09    | 4.54E-07    |
| ENSMMUG00000050239 |                                                                                       | 1.238441171 | 0.000162457 | 0.001473691 |
| ENSMMUG00000018911 | protein kinase C zeta [Source:VGNC Symbol;Acc:VGNC:82212]                             | 2.003789264 | 0.002335201 | 0.01300155  |
| ENSMMUG00000005578 | solute carrier family 35 member E2 [Source:VGNC Symbol;Acc:VGNC:77590]                | 0.995337689 | 0.007598414 | 0.033252009 |

|                     |                                                                                                |             |             |             |
|---------------------|------------------------------------------------------------------------------------------------|-------------|-------------|-------------|
| ENSMMUG00000012961  | mindbomb E3 ubiquitin protein ligase 2 [Source:VGNC Symbol;Acc:VGNC:74627]                     | -0.71492589 | 0.006116816 | 0.027953377 |
| ENSMMUG00000048805  |                                                                                                | 1.442356612 | 3.42E-06    | 5.98E-05    |
| ENSMMUG00000040063  | fibronectin type III domain containing 10 [Source:NCBI gene;Acc:106996973]                     | 1.511366323 | 0.004617472 | 0.022408522 |
| ENSMMUG00000060167  |                                                                                                | 1.105594111 | 0.000216764 | 0.001885773 |
| ENSMMUG00000013862  | ArfGAP with coiled-coil, ankyrin repeat and PH domains 3 [Source:VGNC Symbol;Acc:VGNC:69434]   | 0.721127154 | 0.007160377 | 0.031697707 |
| ENSMMUG00000006596  | CCR4-NOT transcription complex subunit 10 [Source:VGNC Symbol;Acc:VGNC:71327]                  | 1.341909107 | 0.002408804 | 0.013337124 |
| ENSMMUG000000049551 |                                                                                                | 1.306936737 | 0.00222606  | 0.012566029 |
| ENSMMUG000000055585 |                                                                                                | -1.27023554 | 0.000375864 | 0.002948423 |
| ENSMMUG000000051896 |                                                                                                | 3.438570316 | 0.006976888 | 0.03108647  |
| ENSMMUG00000060958  | leucine rich repeat containing 3B [Source:NCBI gene;Acc:701323]                                | 2.287857071 | 0.002061206 | 0.011893545 |
| ENSMMUG000000051975 |                                                                                                | 1.090873861 | 0.001578722 | 0.009639837 |
| ENSMMUG00000019009  | SATB homeobox 1 [Source:VGNC Symbol;Acc:VGNC:84086]                                            | 0.745234537 | 0.008219518 | 0.035328171 |
| ENSMMUG00000020377  | collagen type VI alpha 5 chain [Source:NCBI gene;Acc:719331]                                   | 1.085691967 | 0.003416961 | 0.017663355 |
| ENSMMUG00000005137  | ATPase secretory pathway Ca <sup>2+</sup> transporting 1 [Source:VGNC Symbol;Acc:VGNC:70054]   | 3.806647573 | 5.83E-14    | 1.69E-11    |
| ENSMMUG00000000220  | mitochondrial ribosomal protein L3 [Source:VGNC Symbol;Acc:VGNC:74725]                         | 1.368346551 | 0.006933795 | 0.030915644 |
| ENSMMUG00000003277  | copine 4 [Source:VGNC Symbol;Acc:VGNC:71466]                                                   | 1.877257048 | 7.16E-10    | 5.48E-08    |
| ENSMMUG000000054158 | acyl-CoA dehydrogenase family member 11 [Source:NCBI gene;Acc:106997118]                       | 2.327051542 | 4.17E-07    | 1.03E-05    |
| ENSMMUG00000019854  | transmembrane protein 108 [Source:VGNC Symbol;Acc:VGNC:79714]                                  | 1.363012099 | 0.000148868 | 0.001380025 |
| ENSMMUG00000019857  | beaded filament structural protein 2 [Source:VGNC Symbol;Acc:VGNC:70245]                       | -1.75237996 | 3.86E-09    | 2.08E-07    |
| ENSMMUG000000057769 |                                                                                                | 2.451235578 | 0.002034819 | 0.011758157 |
| ENSMMUG00000000058  | CDV3 homolog [Source:VGNC Symbol;Acc:VGNC:71114]                                               | 2.126842012 | 2.02E-05    | 0.000263849 |
| ENSMMUG00000000059  | DNA topoisomerase II binding protein 1 [Source:VGNC Symbol;Acc:VGNC:79061]                     | -2.32108091 | 4.63E-22    | 8.60E-19    |
| ENSMMUG000000053660 | Metazoan signal recognition particle RNA [Source:RFAM;Acc:RF00017]                             | 2.213120794 | 5.76E-06    | 9.16E-05    |
| ENSMMUG000000008916 | transferrin [Source:VGNC Symbol;Acc:VGNC:82716]                                                | -2.19021042 | 2.06E-14    | 7.07E-12    |
| ENSMMUG000000008918 | SRP receptor subunit beta [Source:VGNC Symbol;Acc:VGNC:77980]                                  | 1.850996459 | 1.56E-07    | 4.46E-06    |
| ENSMMUG000000008919 | RAB6B, member RAS oncogene family [Source:VGNC Symbol;Acc:VGNC:81547]                          | 1.590536012 | 1.18E-05    | 0.000168398 |
| ENSMMUG00000012605  | solute carrier organic anion transporter family member 2A1 [Source:VGNC Symbol;Acc:VGNC:77600] | 1.088132157 | 1.36E-08    | 5.94E-07    |
| ENSMMUG000000003263 | stromal antigen 1 [Source:VGNC Symbol;Acc:VGNC:77901]                                          | 0.50710821  | 0.008126474 | 0.035063566 |
| ENSMMUG000000007760 | centrosomal protein 70 [Source:VGNC Symbol;Acc:VGNC:71140]                                     | 0.681697355 | 0.000539602 | 0.003983013 |
| ENSMMUG000000053063 | forkhead box L2 [Source:NCBI gene;Acc:717906]                                                  | 0.818874638 | 0.001168846 | 0.007522026 |
| ENSMMUG000000056024 |                                                                                                | 1.930164906 | 6.72E-09    | 3.29E-07    |
| ENSMMUG000000063351 | Metazoan signal recognition particle RNA [Source:RFAM;Acc:RF00017]                             | 1.593012906 | 0.008805172 | 0.037327273 |

|                    |                                                                                                         |             |             |             |
|--------------------|---------------------------------------------------------------------------------------------------------|-------------|-------------|-------------|
| ENSMMUG0000007387  | G protein-coupled receptor kinase 7 [Source:VGNC<br>Symbol;Acc:VGNC:73182]                              | 1.861334096 | 1.07E-09    | 7.52E-08    |
| ENSMMUG00000052474 |                                                                                                         | 1.845523228 | 5.90E-06    | 9.35E-05    |
| ENSMMUG0000007927  | ATR serine/threonine kinase [Source:VGNC<br>Symbol;Acc:VGNC:70193]                                      | 2.089707758 | 0.001486502 | 0.009162771 |
| ENSMMUG00000012405 | transient receptor potential cation channel subfamily C member 1<br>[Source:VGNC Symbol;Acc:VGNC:78651] | 2.332870401 | 0.000682496 | 0.004832085 |
| ENSMMUG00000002775 | U2 snRNP associated SURP domain containing [Source:VGNC<br>Symbol;Acc:VGNC:79889]                       | 0.891344675 | 0.000977856 | 0.006474706 |
| ENSMMUG00000009694 | solute carrier family 9 member A9 [Source:VGNC<br>Symbol;Acc:VGNC:77747]                                | 1.563066057 | 0.012791031 | 0.049644925 |
| ENSMMUG00000039078 | phospholipid scramblase family member 5 [Source:VGNC<br>Symbol;Acc:VGNC:84061]                          | 2.150430665 | 0.000191514 | 0.001695597 |
| ENSMMUG00000047621 | transmembrane 4 L six family member 18 [Source:VGNC<br>Symbol;Acc:VGNC:82713]                           | 0.821640623 | 0.000147151 | 0.001368012 |
| ENSMMUG00000031534 | ankyrin repeat and ubiquitin domain containing 1 [Source:VGNC<br>Symbol;Acc:VGNC:84239]                 | 1.496954405 | 6.98E-07    | 1.60E-05    |
| ENSMMUG00000035943 | U6 spliceosomal RNA [Source:RFAM;Acc:RF00026]                                                           | 2.231516629 | 5.30E-07    | 1.26E-05    |
| ENSMMUG00000023335 | ring finger protein 13 [Source:VGNC Symbol;Acc:VGNC:81557]                                              | 0.793794276 | 0.011697523 | 0.046482732 |
| ENSMMUG00000057501 |                                                                                                         | 1.967579153 | 5.50E-06    | 8.86E-05    |
| ENSMMUG00000061194 |                                                                                                         | 3.145429099 | 3.89E-08    | 1.38E-06    |
| ENSMMUG00000061684 |                                                                                                         | 1.178896025 | 0.009168394 | 0.038627838 |
| ENSMMUG00000053540 |                                                                                                         | 1.851910368 | 0.012766752 | 0.049580285 |
| ENSMMUG00000009036 | Rho guanine nucleotide exchange factor 26 [Source:VGNC<br>Symbol;Acc:VGNC:69897]                        | 0.591113931 | 0.011147479 | 0.044748184 |
| ENSMMUG00000011347 | DEAH-box helicase 36 [Source:VGNC Symbol;Acc:VGNC:71623]                                                | 1.01170633  | 3.27E-08    | 1.21E-06    |
| ENSMMUG00000056116 |                                                                                                         | 1.323530317 | 9.61E-07    | 2.06E-05    |
| ENSMMUG00000023045 | zinc finger B-box domain containing [Source:VGNC<br>Symbol;Acc:VGNC:79592]                              | 1.728121266 | 0.003551056 | 0.018211764 |
| ENSMMUG00000051641 |                                                                                                         | 1.322113546 | 6.79E-05    | 0.000720465 |
| ENSMMUG00000022199 | polyhomeotic homolog 3 [Source:VGNC Symbol;Acc:VGNC:75804]                                              | -1.88845721 | 8.13E-11    | 8.81E-09    |
| ENSMMUG00000056664 | U6 spliceosomal RNA [Source:RFAM;Acc:RF00026]                                                           | 2.306876991 | 0.001245477 | 0.007909216 |
| ENSMMUG00000022880 | eukaryotic translation initiation factor 5A2 [Source:VGNC<br>Symbol;Acc:VGNC:72198]                     | 0.908007376 | 0.003038095 | 0.016127945 |
| ENSMMUG00000023289 | phospholipase D1 [Source:VGNC Symbol;Acc:VGNC:76171]                                                    | 3.719410978 | 0.00384751  | 0.019410375 |
| ENSMMUG00000040869 | spermatogenesis associated 16 [Source:VGNC<br>Symbol;Acc:VGNC:84073]                                    | 1.023700124 | 0.004032537 | 0.020141004 |
| ENSMMUG00000003594 | ubiquitin specific peptidase 13 [Source:VGNC<br>Symbol;Acc:VGNC:78735]                                  | 0.636778723 | 0.004189673 | 0.02071897  |
| ENSMMUG00000064088 | U2 spliceosomal RNA [Source:RFAM;Acc:RF00004]                                                           | 0.750904256 | 0.006569002 | 0.029567217 |
| ENSMMUG00000008070 | YEATS domain containing 2 [Source:VGNC<br>Symbol;Acc:VGNC:79502]                                        | 1.941934406 | 1.81E-10    | 1.76E-08    |
| ENSMMUG00000005515 | ATP binding cassette subfamily C member 5 [Source:VGNC<br>Symbol;Acc:VGNC:69574]                        | 0.704124602 | 0.001438418 | 0.008917097 |
| ENSMMUG00000006553 | dishevelled segment polarity protein 3 [Source:VGNC<br>Symbol;Acc:VGNC:72014]                           | 0.991364636 | 0.006470793 | 0.029221284 |
| ENSMMUG00000000800 | proteasome 26S subunit, non-ATPase 2 [Source:VGNC<br>Symbol;Acc:VGNC:84144]                             | 0.414931848 | 0.010251898 | 0.042128338 |
| ENSMMUG00000007503 | family with sequence similarity 131 member A [Source:VGNC<br>Symbol;Acc:VGNC:72385]                     | 0.472964901 | 0.007862813 | 0.034179061 |

|                    |                                                                                           |             |             |             |
|--------------------|-------------------------------------------------------------------------------------------|-------------|-------------|-------------|
| ENSMMUG0000007525  | thrombopoietin [Source:VGNC Symbol;Acc:VGNC:78348]                                        | 1.569090287 | 2.47E-07    | 6.60E-06    |
| ENSMMUG0000007528  | chordin [Source:VGNC Symbol;Acc:VGNC:71042]                                               | 1.458430501 | 0.007990134 | 0.034663005 |
| ENSMMUG0000002953  | MAGE family member F1 [Source:VGNC Symbol;Acc:VGNC:74399]                                 | 0.925828002 | 0.010948562 | 0.044099412 |
| ENSMMUG00000013018 | SUMO specific peptidase 2 [Source:VGNC Symbol;Acc:VGNC:77292]                             | -           | 0.547046754 | 0.000669311 |
| ENSMMUG00000021972 | diacylglycerol kinase gamma [Source:VGNC Symbol;Acc:VGNC:71785]                           | 0.993789762 | 1.39E-06    | 2.79E-05    |
| ENSMMUG00000052418 | histidine rich glycoprotein [Source:VGNC Symbol;Acc:VGNC:73521]                           | 0.868642216 | 1.43E-05    | 0.000197129 |
| ENSMMUG00000018910 |                                                                                           | 1.368723373 | 0.00516756  | 0.024491765 |
| ENSMMUG00000054175 |                                                                                           | 0.404632399 | 0.006442066 | 0.029140288 |
| ENSMMUG00000004847 | xylulokinase [Source:VGNC Symbol;Acc:VGNC:78815]                                          | 0.797542707 | 3.82E-06    | 6.52E-05    |
| ENSMMUG00000018790 | activin A receptor type 2B [Source:VGNC Symbol;Acc:VGNC:69450]                            | 2.696691674 | 6.13E-11    | 7.00E-09    |
| ENSMMUG00000020150 | xin actin binding repeat containing 1 [Source:VGNC Symbol;Acc:VGNC:78952]                 | -           | 0.554313172 | 0.008056435 |
| ENSMMUG00000051408 | myelin associated oligodendrocyte basic protein [Source:NCBI gene;Acc:717265]             | 1.324749096 | 8.66E-05    | 0.000888279 |
| ENSMMUG00000009197 | myelin associated oligodendrocyte basic protein [Source:VGNC Symbol;Acc:VGNC:74908]       | 1.636731547 | 9.99E-07    | 2.11E-05    |
| ENSMMUG00000017701 | myosin VIIA and Rab interacting protein [Source:VGNC Symbol;Acc:VGNC:74992]               | 2.144858119 | 1.15E-07    | 3.39E-06    |
| ENSMMUG00000047891 | Metazoan signal recognition particle RNA [Source:RFAM;Acc:RF00017]                        | 2.047187348 | 0.010820956 | 0.043680123 |
| ENSMMUG00000013330 | ectonucleoside triphosphate diphosphohydrolase 3 [Source:VGNC Symbol;Acc:VGNC:72226]      | 2.133975643 | 3.67E-08    | 1.32E-06    |
| ENSMMUG00000009437 | zinc finger protein 619 [Source:VGNC Symbol;Acc:VGNC:82562]                               | 2.046035243 | 0.003752255 | 0.019031349 |
| ENSMMUG00000050991 |                                                                                           | -           | 1.285529455 | 1.04E-06    |
| ENSMMUG00000052672 |                                                                                           | 5.860535645 | 3.14E-08    | 1.18E-06    |
| ENSMMUG00000021242 | natural killer cell triggering receptor [Source:VGNC Symbol;Acc:VGNC:81486]               | -           | 5.316477645 | 1.38E-05    |
| ENSMMUG00000021243 | zinc finger and BTB domain containing 47 [Source:VGNC Symbol;Acc:VGNC:79645]              | -           | 3.609229299 | 0.003550537 |
| ENSMMUG00000021244 | kelch like family member 40 [Source:VGNC Symbol;Acc:VGNC:74165]                           | -           | 3.389342211 | 0.001582282 |
| ENSMMUG00000021246 | hedgehog acyltransferase like [Source:NCBI gene;Acc:717333]                               | -           | 3.675324857 | 3.17E-05    |
| ENSMMUG00000056798 |                                                                                           | 2.565872837 | 3.90E-06    | 6.58E-05    |
| ENSMMUG00000054286 |                                                                                           | 1.50958841  | 0.000321723 | 0.002582315 |
| ENSMMUG0000001028  | SNF related kinase [Source:VGNC Symbol;Acc:VGNC:84074]                                    | 0.469468905 | 0.000665128 | 0.004727136 |
| ENSMMUG00000019130 | exosome component 7 [Source:VGNC Symbol;Acc:VGNC:72383]                                   | -           | 2.429533247 | 0.00054416  |
| ENSMMUG00000004576 | C-C motif chemokine receptor 3 [Source:VGNC Symbol;Acc:VGNC:70738]                        | 2.974452632 | 3.40E-09    | 1.87E-07    |
| ENSMMUG00000062394 | C-C motif chemokine receptor 2 [Source:NCBI gene;Acc:574098]                              | 1.027547869 | 9.13E-12    | 1.40E-09    |
| ENSMMUG00000014045 | protein tyrosine phosphatase non-receptor type 23 [Source:VGNC Symbol;Acc:VGNC:76477]     | 1.131916195 | 0.00418157  | 0.020702511 |
| ENSMMUG00000014046 | SREBF chaperone [Source:VGNC Symbol;Acc:VGNC:77140]                                       | 1.625207263 | 7.34E-15    | 2.73E-12    |
| ENSMMUG00000064458 |                                                                                           | -1.27604169 | 0.000712954 | 0.005012262 |
| ENSMMUG00000010058 | ATR interacting protein [Source:VGNC Symbol;Acc:VGNC:84235]                               | 0.761007433 | 0.000590452 | 0.004280613 |
| ENSMMUG00000010062 | shisa family member 5 [Source:VGNC Symbol;Acc:VGNC:84082]                                 | 0.530654209 | 0.002980495 | 0.015853727 |
| ENSMMUG00000000591 | 6-phosphofructo-2-kinase/fructose-2,6-biphosphatase 4 [Source:VGNC Symbol;Acc:VGNC:75960] | 0.659196361 | 0.000681888 | 0.004830411 |

|                     |                                                                                                                   |             |             |             |
|---------------------|-------------------------------------------------------------------------------------------------------------------|-------------|-------------|-------------|
| ENSMMUG00000059318  | urocortin 2 [Source:NCBI gene;Acc:106996925]                                                                      | 2.188145558 | 3.65E-09    | 2.00E-07    |
| ENSMMUG00000014699  |                                                                                                                   | 1.35891317  | 2.07E-09    | 1.27E-07    |
| ENSMMUG00000014707  | cadherin EGF LAG seven-pass G-type receptor 3 [Source:VGNC Symbol;Acc:VGNC:71148]                                 | 1.629873041 | 0.00395     | 0.019812457 |
| ENSMMUG00000064174  |                                                                                                                   | 1.818011403 | 0.002760804 | 0.014923945 |
| ENSMMUG00000014720  | NCK interacting protein with SH3 domain [Source:VGNC Symbol;Acc:VGNC:74960]                                       | 2.175659058 | 2.39E-08    | 9.53E-07    |
| ENSMMUG00000006130  | prolyl 4-hydroxylase, transmembrane [Source:VGNC Symbol;Acc:VGNC:75693]                                           | 2.247670603 | 0.001008382 | 0.006637152 |
| ENSMMUG00000005660  | glutamine rich 1 [Source:VGNC Symbol;Acc:VGNC:76530]                                                              | 2.640576097 | 0.003214216 | 0.016870093 |
| ENSMMUG00000014564  | ring finger protein 123 [Source:VGNC Symbol;Acc:VGNC:76790]                                                       | 0.743724937 | 0.000300143 | 0.002444766 |
| ENSMMUG00000020979  | inka box actin regulator 1 [Source:VGNC Symbol;Acc:VGNC:73692]                                                    | 0.757616643 | 0.001928335 | 0.011276944 |
| ENSMMUG00000020980  | ubiquitin like modifier activating enzyme 7 [Source:VGNC Symbol;Acc:VGNC:78690]                                   | 0.644928764 | 0.012597302 | 0.049073031 |
| ENSMMUG00000016476  | TRAF interacting protein [Source:VGNC Symbol;Acc:VGNC:82261]                                                      | 0.675895805 | 3.50E-05    | 0.000417558 |
| ENSMMUG00000004273  | dedicator of cytokinesis 3 [Source:VGNC Symbol;Acc:VGNC:71967]                                                    | 1.112809609 | 0.000117173 | 0.001131365 |
| ENSMMUG00000017351  | stabilin 1 [Source:VGNC Symbol;Acc:VGNC:77956]                                                                    | 0.651555747 | 0.003769946 | 0.019100862 |
| ENSMMUG000000050505 | small integral membrane protein 4 [Source:NCBI gene;Acc:696553]                                                   | 1.070354772 | 0.000114483 | 0.001112028 |
| ENSMMUG00000012526  | glycosyltransferase 8 domain containing 1 [Source:VGNC Symbol;Acc:VGNC:73001]                                     | 1.643761403 | 6.35E-07    | 1.47E-05    |
| ENSMMUG00000017370  | signal peptidase complex subunit 1 [Source:VGNC Symbol;Acc:VGNC:84072]                                            | 1.811226739 | 5.71E-06    | 9.11E-05    |
| ENSMMUG00000007230  | protein kinase C delta [Source:VGNC Symbol;Acc:VGNC:76411]                                                        | 0.746750099 | 0.003799482 | 0.019213087 |
| ENSMMUG00000039085  | adaptor protein, phosphotyrosine interacting with PH domain and leucine zipper 1 [Source:NCBI gene;Acc:100425753] | 3.222301909 | 0.001229877 | 0.007833386 |
| ENSMMUG00000021008  | ankyrin repeat and SOCS box containing 14 [Source:VGNC Symbol;Acc:VGNC:84237]                                     | 4.089212059 | 0.000173402 | 0.001558585 |
| ENSMMUG00000004052  | phosphodiesterase 12 [Source:VGNC Symbol;Acc:VGNC:75863]                                                          | 1.380997786 | 0.004637178 | 0.022485818 |
| ENSMMUG00000018619  | DENN domain containing 6A [Source:VGNC Symbol;Acc:VGNC:71726]                                                     | 2.279587958 | 7.95E-06    | 0.000119189 |
| ENSMMUG00000017510  | membrane associated guanylate kinase, WW and PDZ domain containing 1 [Source:VGNC Symbol;Acc:VGNC:74499]          | 1.94741158  | 2.07E-08    | 8.48E-07    |
| ENSMMUG000000057539 |                                                                                                                   | 2.689569427 | 1.32E-05    | 0.000184461 |
| ENSMMUG000000057486 |                                                                                                                   | 3.039182718 | 1.21E-10    | 1.25E-08    |
| ENSMMUG000000057543 | MyoD family inhibitor domain containing 2 [Source:HGNC Symbol;Acc:HGNC:53442]                                     | 2.034947981 | 2.19E-07    | 6.00E-06    |
| ENSMMUG00000018281  | interleukin 17 receptor E [Source:VGNC Symbol;Acc:VGNC:73623]                                                     | 0.693643365 | 5.73E-05    | 0.000624121 |
| ENSMMUG00000018282  | interleukin 17 receptor C [Source:VGNC Symbol;Acc:VGNC:84164]                                                     | 0.673481339 | 0.000977106 | 0.006474706 |
| ENSMMUG00000018285  | cysteine rich with EGF like domains 1 [Source:VGNC Symbol;Acc:VGNC:71407]                                         | 0.749747412 | 0.003768705 | 0.019100862 |
| ENSMMUG00000018289  | proline rich transmembrane protein 3 [Source:VGNC Symbol;Acc:VGNC:76324]                                          | 0.483034404 | 0.011883596 | 0.047052905 |
| ENSMMUG00000019933  | TatD DNase domain containing 2 [Source:NCBI gene;Acc:701390]                                                      | 1.235744177 | 0.005907206 | 0.027186527 |
| ENSMMUG00000009536  | makorin ring finger protein 2 [Source:VGNC Symbol;Acc:VGNC:74878]                                                 | 2.049797193 | 9.06E-10    | 6.55E-08    |
| ENSMMUG00000023125  | XPC complex subunit, DNA damage recognition and repair factor [Source:VGNC Symbol;Acc:VGNC:78809]                 | 0.913759376 | 0.006727363 | 0.030160662 |
| ENSMMUG00000023124  | transmembrane protein 43 [Source:VGNC Symbol;Acc:VGNC:82711]                                                      | 1.083378135 | 3.26E-06    | 5.76E-05    |



|                     |                                                                                   |             |             |             |
|---------------------|-----------------------------------------------------------------------------------|-------------|-------------|-------------|
| ENSMMUG00000044822  | coiled-coil domain containing 174 [Source:VGNC Symbol;Acc:VGNC:84219]             | 1.428139548 | 1.64E-05    | 0.000220685 |
| ENSMMUG00000017125  | oxysterol binding protein like 11 [Source:VGNC Symbol;Acc:VGNC:75631]             | 1.068088243 | 5.64E-06    | 9.03E-05    |
| ENSMMUG00000003851  | kalirin RhoGEF kinase [Source:VGNC Symbol;Acc:VGNC:84161]                         | 4.108114369 | 0.004218281 | 0.02081101  |
| ENSMMUG000000032031 |                                                                                   | 1.317291714 | 0.004945012 | 0.023627783 |
| ENSMMUG000000049323 |                                                                                   | 1.583466735 | 0.000849243 | 0.005746747 |
| ENSMMUG00000001943  | GRAM domain containing 1C [Source:VGNC Symbol;Acc:VGNC:73007]                     | 0.973008575 | 0.008128298 | 0.035063566 |
| ENSMMUG000000052581 | upstream transcription factor family member 3 [Source:NCBI gene;Acc:709660]       | 0.608449334 | 0.012551391 | 0.048977916 |
| ENSMMUG000000014874 | GTP binding protein 8 (putative) [Source:VGNC Symbol;Acc:VGNC:84180]              | 1.567920753 | 5.90E-08    | 1.96E-06    |
| ENSMMUG000000014876 | nucleolus and neural progenitor protein [Source:VGNC Symbol;Acc:VGNC:75244]       | 1.443410535 | 2.37E-05    | 0.000300566 |
| ENSMMUG00000007843  | CD200 receptor 1 like [Source:VGNC Symbol;Acc:VGNC:84212]                         | 2.465117292 | 0.008636861 | 0.036781603 |
| ENSMMUG00000003061  | coiled-coil domain containing 80 [Source:VGNC Symbol;Acc:VGNC:70917]              | 2.934039358 | 4.02E-08    | 1.41E-06    |
| ENSMMUG000000014236 | solute carrier family 35 member A5 [Source:VGNC Symbol;Acc:VGNC:84077]            | 1.688810352 | 0.006860153 | 0.03063982  |
| ENSMMUG00000000894  | cellular inhibitor of PP2A [Source:VGNC Symbol;Acc:VGNC:71371]                    | 2.366069182 | 0.011188861 | 0.04488659  |
| ENSMMUG000000019977 | myosin heavy chain 15 [Source:VGNC Symbol;Acc:VGNC:84148]                         | 1.464291763 | 9.35E-05    | 0.000945425 |
| ENSMMUG000000008791 | CD47 molecule [Source:VGNC Symbol;Acc:VGNC:70767]                                 | 1.623617639 | 0.002082385 | 0.011967964 |
| ENSMMUG000000008787 | BBX high mobility group box domain containing [Source:VGNC Symbol;Acc:VGNC:82110] | 0.922785436 | 0.001666674 | 0.010063495 |
| ENSMMUG000000055345 | Y RNA [Source:RFAM;Acc:RF00019]                                                   | 0.784269117 | 0.002281562 | 0.012812781 |
| ENSMMUG000000007565 | Cbl proto-oncogene B [Source:VGNC Symbol;Acc:VGNC:70555]                          | 0.602608427 | 0.000582884 | 0.004242301 |
| ENSMMUG000000026103 | U1 spliceosomal RNA [Source:RFAM;Acc:RF00003]                                     | 1.856654265 | 0.002451929 | 0.013529822 |
| ENSMMUG000000060744 |                                                                                   | 1.578740453 | 1.35E-05    | 0.000188378 |
| ENSMMUG000000021859 | zona pellucida like domain containing 1 [Source:VGNC Symbol;Acc:VGNC:79650]       | 1.271273969 | 0.000966919 | 0.006419476 |
| ENSMMUG000000063181 |                                                                                   | 0.512094276 | 0.00986951  | 0.040879886 |
| ENSMMUG000000059753 |                                                                                   | 0.601994681 | 0.005451032 | 0.025557361 |
| ENSMMUG000000057768 |                                                                                   | -1.39189737 | 3.61E-05    | 0.000427365 |
| ENSMMUG000000024598 | U6 spliceosomal RNA [Source:RFAM;Acc:RF00026]                                     | 4.707794128 | 0.000157547 | 0.001439513 |
| ENSMMUG000000038349 | crystallin beta-gamma domain containing 3 [Source:NCBI gene;Acc:698282]           | 1.399206476 | 3.87E-06    | 6.56E-05    |
| ENSMMUG000000033738 | RNA, U6atac small nuclear 6, pseudogene [Source:HGNC Symbol;Acc:HGNC:46905]       | 1.032339671 | 9.16E-05    | 0.000930962 |
| ENSMMUG000000050994 |                                                                                   | 1.940174927 | 0.001764153 | 0.010491345 |
| ENSMMUG000000055096 |                                                                                   | 0.962537413 | 0.000188887 | 0.001674942 |
| ENSMMUG000000049913 |                                                                                   | 1.291621786 | 0.010299861 | 0.042238569 |
| ENSMMUG000000056687 |                                                                                   | 1.657586048 | 1.26E-08    | 5.52E-07    |
| ENSMMUG000000052831 |                                                                                   | 0.665167415 | 0.005820979 | 0.026884819 |

|                     |                                                                                        |             |             |             |
|---------------------|----------------------------------------------------------------------------------------|-------------|-------------|-------------|
| ENSMMUG00000032295  | zinc finger protein 595 [Source:VGNC Symbol;Acc:VGNC:79655]                            | 1.215182271 | 8.35E-05    | 0.000864019 |
| ENSMMUG00000051381  | Metazoan signal recognition particle RNA [Source:RFAM;Acc:RF00017]                     | 1.547486178 | 5.12E-06    | 8.34E-05    |
| ENSMMUG00000039020  | zinc finger protein 141 [Source:NCBI gene;Acc:714265]                                  | 1.459883162 | 8.48E-09    | 4.01E-07    |
| ENSMMUG00000012624  | polycomb group ring finger 3 [Source:VGNC Symbol;Acc:VGNC:75593]                       | 0.924690852 | 0.003198165 | 0.016806197 |
| ENSMMUG00000017221  | transmembrane protein 175 [Source:VGNC Symbol;Acc:VGNC:79736]                          | 0.692000608 | 0.004065119 | 0.020226065 |
| ENSMMUG00000008323  | C-terminal binding protein 1 [Source:VGNC Symbol;Acc:VGNC:71539]                       | 0.634238663 | 0.000661174 | 0.004706746 |
| ENSMMUG00000019945  | fibroblast growth factor receptor 3 [Source:VGNC Symbol;Acc:VGNC:72653]                | 1.089669947 | 0.000200588 | 0.001766315 |
| ENSMMUG00000046942  | nuclear receptor binding SET domain protein 2 [Source:NCBI gene;Acc:100429321]         | 1.511391083 | 5.95E-05    | 0.000640608 |
| ENSMMUG00000008379  | adducin 1 [Source:VGNC Symbol;Acc:VGNC:69528]                                          | 0.741612048 | 0.006024316 | 0.027627736 |
| ENSMMUG00000008385  | NOP14 nucleolar protein [Source:VGNC Symbol;Acc:VGNC:75194]                            | 0.695816562 | 0.004856967 | 0.023309859 |
| ENSMMUG00000008392  | huntingtin [Source:VGNC Symbol;Acc:VGNC:73468]                                         | 0.640836403 | 0.005122652 | 0.024349914 |
| ENSMMUG00000015099  | janus kinase and microtubule interacting protein 1 [Source:VGNC Symbol;Acc:VGNC:73662] | 0.648251219 | 0.004500191 | 0.02191675  |
| ENSMMUG00000019563  | collapsin response mediator protein 1 [Source:VGNC Symbol;Acc:VGNC:71494]              | 1.385005092 | 6.19E-08    | 2.02E-06    |
| ENSMMUG000000057703 |                                                                                        | 1.437904612 | 5.18E-08    | 1.75E-06    |
| ENSMMUG00000020861  | EvC ciliary complex subunit 1 [Source:VGNC Symbol;Acc:VGNC:72445]                      | 1.402865443 | 1.54E-06    | 3.04E-05    |
| ENSMMUG00000023242  | transmembrane protein 128 [Source:VGNC Symbol;Acc:VGNC:82257]                          | 0.773821466 | 0.00616752  | 0.028145534 |
| ENSMMUG00000049640  |                                                                                        | 0.860161555 | 0.002714205 | 0.014702602 |
| ENSMMUG00000015298  | CD38 molecule [Source:VGNC Symbol;Acc:VGNC:70762]                                      | 1.693796345 | 0.000451722 | 0.003422366 |
| ENSMMUG00000008162  | fibroblast growth factor binding protein 1 [Source:VGNC Symbol;Acc:VGNC:72536]         | 1.583836667 | 8.44E-08    | 2.62E-06    |
| ENSMMUG00000008163  | fibroblast growth factor binding protein 2 [Source:VGNC Symbol;Acc:VGNC:72599]         | 1.937825027 | 0.001782241 | 0.010574738 |
| ENSMMUG00000023116  | LIM domain binding 2 [Source:VGNC Symbol;Acc:VGNC:74246]                               | 0.609463946 | 0.005562612 | 0.025949544 |
| ENSMMUG00000053953  | mediator complex subunit 28 [Source:NCBI gene;Acc:722863]                              | 2.072631227 | 0.00222455  | 0.012566029 |
| ENSMMUG00000018073  | ligand dependent nuclear receptor corepressor like [Source:NCBI gene;Acc:715285]       | 0.535257312 | 0.00866311  | 0.036857181 |
| ENSMMUG00000057338  |                                                                                        | 0.808669664 | 0.000150435 | 0.001389604 |
| ENSMMUG00000060440  | leucine rich repeat LGI family member 2 [Source:NCBI gene;Acc:693308]                  | -0.60524807 | 0.002974921 | 0.015831353 |
| ENSMMUG00000049298  | cholecystokinin A receptor [Source:NCBI gene;Acc:694742]                               | 4.852347432 | 0.001063282 | 0.006935327 |
| ENSMMUG00000051768  |                                                                                        | 1.823578288 | 0.000244342 | 0.002074359 |
| ENSMMUG00000060404  |                                                                                        | 5.870143704 | 2.04E-07    | 5.62E-06    |
| ENSMMUG00000050580  |                                                                                        | 0.8929371   | 0.002141803 | 0.012209878 |
| ENSMMUG00000055079  |                                                                                        | 0.548831895 | 0.002954924 | 0.015770102 |
| ENSMMUG00000002755  | kelch like family member 5 [Source:VGNC Symbol;Acc:VGNC:74188]                         | -4.31207065 | 2.49E-05    | 0.000314597 |
| ENSMMUG00000001892  | UDP-glucose 6-dehydrogenase [Source:VGNC Symbol;Acc:VGNC:78711]                        | 0.798739179 | 0.003603101 | 0.018456848 |
| ENSMMUG00000012036  | RNA binding motif protein 47 [Source:VGNC Symbol;Acc:VGNC:76576]                       | 0.424904519 | 0.01016682  | 0.04187133  |

|                     |                                                                                      |   |             |             |             |
|---------------------|--------------------------------------------------------------------------------------|---|-------------|-------------|-------------|
| ENSMMUG00000012561  | NOP2/Sun RNA methyltransferase family member 7 [Source:VGNC Symbol;Acc:VGNC:75463]   | - | 1.334646725 | 1.16E-08    | 5.14E-07    |
| ENSMMUG00000007805  | LIM and calponin homology domains 1 [Source:VGNC Symbol;Acc:VGNC:74155]              | - | 2.227419027 | 4.08E-07    | 1.01E-05    |
| ENSMMUG000000051296 | paired like homeobox 2B [Source:NCBI gene;Acc:701940]                                | - | 2.399480585 | 2.95E-05    | 0.000361604 |
| ENSMMUG00000018625  | NIPA like domain containing 1 [Source:NCBI gene;Acc:704998]                          | - | 0.713900306 | 0.012704079 | 0.04941066  |
| ENSMMUG000000055221 | Metazoan signal recognition particle RNA [Source:RFAM;Acc:RF00017]                   | - | 2.007279172 | 0.004742329 | 0.022903353 |
| ENSMMUG00000006703  | solute carrier family 10 member 4 [Source:VGNC Symbol;Acc:VGNC:77553]                | - | 1.334562687 | 8.48E-05    | 0.000872353 |
| ENSMMUG00000006704  | zygote arrest 1 [Source:VGNC Symbol;Acc:VGNC:79251]                                  | - | 0.999102322 | 0.000632896 | 0.004549137 |
| ENSMMUG00000014868  | OCIA domain containing 1 [Source:VGNC Symbol;Acc:VGNC:75409]                         | - | 1.317880506 | 0.000591808 | 0.004285668 |
| ENSMMUG00000014714  | cell wall biogenesis 43 C-terminal homolog [Source:VGNC Symbol;Acc:VGNC:71583]       | - | 0.579901802 | 0.005757719 | 0.026639949 |
| ENSMMUG000000058229 | U6 spliceosomal RNA [Source:RFAM;Acc:RF00026]                                        | - | 2.321948127 | 0.005360628 | 0.02522443  |
| ENSMMUG000000008514 | lin-54 DREAM MuvB core complex component [Source:VGNC Symbol;Acc:VGNC:74123]         | - | 1.642653364 | 0.000806818 | 0.005514174 |
| ENSMMUG000000052743 | stearoyl-CoA desaturase 5 [Source:NCBI gene;Acc:694079]                              | - | 0.823771693 | 0.002330954 | 0.012983464 |
| ENSMMUG000000048621 | enolase-phosphatase 1 [Source:NCBI gene;Acc:106998330]                               | - | 3.170431751 | 7.65E-08    | 2.43E-06    |
| ENSMMUG000000060484 | heterogeneous nuclear ribonucleoprotein D [Source:NCBI gene;Acc:694867]              | - | 1.301202839 | 1.32E-06    | 2.70E-05    |
| ENSMMUG000000052348 | N-alpha-acetyltransferase 11, NatA catalytic subunit [Source:NCBI gene;Acc:696758]   | - | 1.616519516 | 2.31E-07    | 6.25E-06    |
| ENSMMUG000000021988 | Fraser extracellular matrix complex subunit 1 [Source:VGNC Symbol;Acc:VGNC:72743]    | - | 1.019888459 | 0.000218343 | 0.001897684 |
| ENSMMUG000000007366 |                                                                                      | - | 1.085319556 | 0.000758425 | 0.005255233 |
| ENSMMUG000000002564 |                                                                                      | - | 1.871943267 | 1.13E-05    | 0.000161433 |
| ENSMMUG000000062865 |                                                                                      | - | 1.247183564 | 0.000123041 | 0.001180142 |
| ENSMMUG000000045609 | CCR4-NOT transcription complex subunit 6 like [Source:NCBI gene;Acc:697981]          | - | 2.705038623 | 2.06E-08    | 8.47E-07    |
| ENSMMUG00000018186  | sosondawah ankyrin repeat domain family member B [Source:VGNC Symbol;Acc:VGNC:78033] | - | 0.892805227 | 2.32E-05    | 0.000295888 |
| ENSMMUG000000020919 | shroom family member 3 [Source:VGNC Symbol;Acc:VGNC:77352]                           | - | 2.006906765 | 0.006300559 | 0.028622099 |
| ENSMMUG000000003833 | Ras association domain family member 6 [Source:VGNC Symbol;Acc:VGNC:76515]           | - | 1.631892589 | 0.000267326 | 0.002221628 |
| ENSMMUG000000003830 | alpha fetoprotein [Source:VGNC Symbol;Acc:VGNC:69741]                                | - | 1.561587111 | 0.001134911 | 0.007330775 |
| ENSMMUG000000003827 | albumin [Source:VGNC Symbol;Acc:VGNC:69782]                                          | - | 1.175809394 | 0.002740805 | 0.014828165 |
| ENSMMUG000000000790 | ankyrin repeat domain 17 [Source:VGNC Symbol;Acc:VGNC:84240]                         | - | 1.932099366 | 0.000145259 | 0.001353319 |
| ENSMMUG000000062248 | follicular dendritic cell secreted protein [Source:NCBI gene;Acc:707784]             | - | 2.114328553 | 2.48E-08    | 9.77E-07    |
| ENSMMUG000000006029 | odontogenic, ameloblast associated [Source:NCBI gene;Acc:707906]                     | - | 2.296128742 | 2.62E-08    | 1.02E-06    |
| ENSMMUG000000004849 | casein beta [Source:VGNC Symbol;Acc:VGNC:71523]                                      | - | 0.942668438 | 0.003213346 | 0.016870093 |
| ENSMMUG000000001919 | clock circadian regulator [Source:VGNC Symbol;Acc:VGNC:71262]                        | - | 0.802190836 | 0.000554616 | 0.004077634 |
| ENSMMUG000000001918 | transmembrane protein 165 [Source:VGNC Symbol;Acc:VGNC:79875]                        | - | 1.251426412 | 0.000535556 | 0.003962142 |
| ENSMMUG000000057204 | Metazoan signal recognition particle RNA [Source:RFAM;Acc:RF00017]                   | - | 1.666817515 | 0.007533215 | 0.033068159 |

|                     |                                                                                                  |   |             |             |             |
|---------------------|--------------------------------------------------------------------------------------------------|---|-------------|-------------|-------------|
| ENSMMUG00000018943  | spermatogenesis associated 18 [Source:VGNC Symbol;Acc:VGNC:78013]                                | - | 1.262937957 | 0.005072338 | 0.024156289 |
| ENSMMUG00000018939  | leucine rich repeat containing 66 [Source:VGNC Symbol;Acc:VGNC:74415]                            | - | 1.211538522 | 5.78E-05    | 0.000628586 |
| ENSMMUG00000003726  | protein tyrosine phosphatase non-receptor type 13 [Source:VGNC Symbol;Acc:VGNC:76599]            | - | 0.859220166 | 0.003000957 | 0.015943809 |
| ENSMMUG00000014076  | AF4/FMR2 family member 1 [Source:VGNC Symbol;Acc:VGNC:69817]                                     | - | 1.048530628 | 0.001867676 | 0.010976502 |
| ENSMMUG000000051677 |                                                                                                  | - | 1.125622663 | 1.80E-05    | 0.000238404 |
| ENSMMUG00000019040  | hydroxysteroid 17-beta dehydrogenase 13 [Source:VGNC Symbol;Acc:VGNC:73417]                      | - | 0.727481206 | 0.002055239 | 0.011869644 |
| ENSMMUG00000008795  | polycystin 2, transient receptor potential cation channel [Source:NCBI gene;Acc:702179]          | - | 0.615415081 | 0.010301456 | 0.042238569 |
| ENSMMUG00000010316  | HECT and RLD domain containing E3 ubiquitin protein ligase 5 [Source:VGNC Symbol;Acc:VGNC:73226] | - | 2.703799577 | 1.11E-07    | 3.30E-06    |
| ENSMMUG00000010318  | phosphatidylinositol glycan anchor biosynthesis class Y [Source:NCBI gene;Acc:100426107]         | - | 2.90406696  | 2.65E-06    | 4.84E-05    |
| ENSMMUG000000058544 | nucleosome assembly protein 1 like 5 [Source:NCBI gene;Acc:703223]                               | - | 0.505116265 | 0.007841344 | 0.034108533 |
| ENSMMUG00000012123  | synuclein alpha [Source:VGNC Symbol;Acc:VGNC:77668]                                              | - | 3.541181038 | 4.36E-06    | 7.24E-05    |
| ENSMMUG00000022003  | multimerin 1 [Source:VGNC Symbol;Acc:VGNC:74904]                                                 | - | 2.577808559 | 1.83E-08    | 7.77E-07    |
| ENSMMUG00000022246  | PDZ and LIM domain 5 [Source:VGNC Symbol;Acc:VGNC:75816]                                         | - | 0.989972174 | 0.003398634 | 0.017589588 |
| ENSMMUG000000060760 |                                                                                                  | - | 1.432774986 | 0.00648292  | 0.029252934 |
| ENSMMUG00000006309  | unc-5 netrin receptor C [Source:VGNC Symbol;Acc:VGNC:78723]                                      | - | 4.210663739 | 2.21E-05    | 0.000283752 |
| ENSMMUG00000011702  | tetraspanin 5 [Source:VGNC Symbol;Acc:VGNC:79086]                                                | - | 1.439735567 | 9.23E-05    | 0.000935885 |
| ENSMMUG000000063972 |                                                                                                  | - | 0.754615932 | 0.011960995 | 0.047247365 |
| ENSMMUG00000018738  | alcohol dehydrogenase 1B (class I), beta polypeptide [Source:NCBI gene;Acc:707908]               | - | 0.581993085 | 0.001046054 | 0.006833237 |
| ENSMMUG000000061366 |                                                                                                  | - | 0.527449664 | 0.006550626 | 0.029520941 |
| ENSMMUG00000016880  | solute carrier family 39 member 8 [Source:VGNC Symbol;Acc:VGNC:77541]                            | - | 3.060096684 | 6.62E-14    | 1.87E-11    |
| ENSMMUG000000037551 | Metazoan signal recognition particle RNA [Source:RFAM;Acc:RF00017]                               | - | 3.510366728 | 5.88E-15    | 2.25E-12    |
| ENSMMUG00000003736  | nuclear factor kappa B subunit 1 [Source:VGNC Symbol;Acc:VGNC:75339]                             | - | -3.3573236  | 5.09E-14    | 1.50E-11    |
| ENSMMUG00000003739  | mannosidase beta [Source:VGNC Symbol;Acc:VGNC:74486]                                             | - | 1.372591798 | 0.009441016 | 0.039546447 |
| ENSMMUG00000019085  | 3-hydroxybutyrate dehydrogenase 2 [Source:VGNC Symbol;Acc:VGNC:70161]                            | - | 1.048483701 | 0.000200756 | 0.001766596 |
| ENSMMUG00000019089  | centromere protein E [Source:VGNC Symbol;Acc:VGNC:71008]                                         | - | 0.863050266 | 0.000107762 | 0.001056981 |
| ENSMMUG00000049998  | tachykinin receptor 3 [Source:NCBI gene;Acc:653013]                                              | - | 1.593673602 | 9.44E-06    | 0.00013703  |
| ENSMMUG00000010941  | Rho guanine nucleotide exchange factor 38 [Source:VGNC Symbol;Acc:VGNC:82087]                    | - | 0.459153352 | 0.003748869 | 0.019031288 |
| ENSMMUG00000018811  | glutathione S-transferase C-terminal domain containing [Source:VGNC Symbol;Acc:VGNC:73234]       | - | 1.144189054 | 0.000510018 | 0.003794792 |
| ENSMMUG000000060432 |                                                                                                  | - | 1.327782916 | 0.005169145 | 0.024491765 |
| ENSMMUG000000052609 | ribosomal protein L34 [Source:NCBI gene;Acc:696636]                                              | - | 2.461787954 | 3.66E-06    | 6.31E-05    |
| ENSMMUG00000011902  | oligosaccharyltransferase complex non-catalytic subunit [Source:NCBI gene;Acc:697283]            | - | 2.390627377 | 1.55E-06    | 3.05E-05    |
| ENSMMUG000000055759 | Metazoan signal recognition particle RNA [Source:RFAM;Acc:RF00017]                               | - | 1.999697785 | 1.80E-05    | 0.000238404 |
| ENSMMUG00000005517  | glutamyl aminopeptidase [Source:VGNC Symbol;Acc:VGNC:72221]                                      | - | 3.991156461 | 4.03E-05    | 0.000464276 |

|                    |                                                                                               |             |             |             |
|--------------------|-----------------------------------------------------------------------------------------------|-------------|-------------|-------------|
| ENSMMUG00000062794 |                                                                                               | 2.730768464 | 4.46E-07    | 1.08E-05    |
| ENSMMUG00000008705 | ubiquitin specific peptidase 53 [Source:VGNC Symbol;Acc:VGNC:79793]                           | 3.862013477 | 0.000734566 | 0.005136436 |
| ENSMMUG00000061098 |                                                                                               | 1.527946329 | 2.51E-08    | 9.86E-07    |
| ENSMMUG00000007422 | spermatogenesis associated 5 [Source:VGNC Symbol;Acc:VGNC:77952]                              | 0.97867135  | 0.000308079 | 0.002496498 |
| ENSMMUG00000001848 | sprouty RTK signaling antagonist 1 [Source:VGNC Symbol;Acc:VGNC:77867]                        | 0.649012881 | 0.001840323 | 0.010861092 |
| ENSMMUG00000011810 | FAT atypical cadherin 4 [Source:VGNC Symbol;Acc:VGNC:72552]                                   | 1.718139805 | 5.31E-05    | 0.000586082 |
| ENSMMUG00000051329 |                                                                                               | 1.694357208 | 0.000146787 | 0.001366583 |
| ENSMMUG00000015244 | uncoupling protein 1 [Source:VGNC Symbol;Acc:VGNC:78708]                                      | 3.431931333 | 9.68E-06    | 0.000140146 |
| ENSMMUG00000015246 | TBC1 domain family member 9 [Source:VGNC Symbol;Acc:VGNC:78193]                               | 4.557390298 | 4.37E-06    | 7.24E-05    |
| ENSMMUG00000060157 | zinc finger protein 330 [Source:NCBI gene;Acc:699364]                                         | 0.939347606 | 0.000397648 | 0.003085808 |
| ENSMMUG00000000827 | ubiquitin specific peptidase 38 [Source:VGNC Symbol;Acc:VGNC:79224]                           | 2.054912359 | 0.001869838 | 0.010984243 |
| ENSMMUG00000044429 | glycophorin A (MNS blood group) [Source:NCBI gene;Acc:574101]                                 | 2.087586165 | 1.56E-06    | 3.05E-05    |
| ENSMMUG00000007968 | hedgehog interacting protein [Source:VGNC Symbol;Acc:VGNC:73169]                              | 0.989465166 | 0.003481299 | 0.017910513 |
| ENSMMUG00000005380 | zinc finger protein 827 [Source:NCBI gene;Acc:706018]                                         | 1.316297963 | 1.28E-05    | 0.000179775 |
| ENSMMUG00000014953 | Rho GTPase activating protein 10 [Source:VGNC Symbol;Acc:VGNC:69914]                          | 1.261308058 | 0.007074971 | 0.031415867 |
| ENSMMUG00000014955 | nuclear receptor subfamily 3 group C member 2 [Source:VGNC Symbol;Acc:VGNC:75516]             | 1.914224101 | 7.82E-05    | 0.000814571 |
| ENSMMUG00000002211 | doublecortin like kinase 2 [Source:VGNC Symbol;Acc:VGNC:71670]                                | 0.928922886 | 0.003375851 | 0.01749953  |
| ENSMMUG00000002212 | LPS responsive beige-like anchor protein [Source:NCBI gene;Acc:693823]                        | 1.728358485 | 0.000234473 | 0.002006283 |
| ENSMMUG00000039441 | mab-21 like 2 [Source:NCBI gene;Acc:693948]                                                   | 2.207571932 | 0.001651743 | 0.009987245 |
| ENSMMUG00000059101 |                                                                                               | 2.571312244 | 5.88E-06    | 9.33E-05    |
| ENSMMUG00000052327 |                                                                                               | 1.528388028 | 0.002422312 | 0.013395075 |
| ENSMMUG00000018490 | ADP ribosylation factor interacting protein 1 [Source:VGNC Symbol;Acc:VGNC:69878]             | 0.946663282 | 0.000363329 | 0.002870875 |
| ENSMMUG00000039869 |                                                                                               | -0.5489932  | 0.001954689 | 0.011390094 |
| ENSMMUG00000057643 |                                                                                               | 0.605784845 | 0.012518464 | 0.048908123 |
| ENSMMUG00000052999 | lecithin retinol acyltransferase [Source:NCBI gene;Acc:698871]                                | 0.620722694 | 0.009157755 | 0.038608027 |
| ENSMMUG00000064074 |                                                                                               | 0.732300512 | 0.008315665 | 0.035658931 |
| ENSMMUG00000023244 | guanylate cyclase 1 soluble subunit alpha 1 [Source:VGNC Symbol;Acc:VGNC:73327]               | 1.602649869 | 0.003464391 | 0.017865927 |
| ENSMMUG00000064707 |                                                                                               | 1.120913807 | 0.012904671 | 0.049936969 |
| ENSMMUG00000053790 |                                                                                               | 1.30146221  | 1.02E-08    | 4.67E-07    |
| ENSMMUG00000010581 | Rap guanine nucleotide exchange factor 2 [Source:VGNC Symbol;Acc:VGNC:76493]                  | 2.033135775 | 0.001757341 | 0.010460404 |
| ENSMMUG00000053881 |                                                                                               | 2.202323934 | 0.000255782 | 0.002143489 |
| ENSMMUG00000006851 | SPARC (osteonectin), cwcv and kazal like domains proteoglycan 3 [Source:NCBI gene;Acc:705964] | 1.681439371 | 0.010685464 | 0.043240554 |
| ENSMMUG00000001879 | annexin A10 [Source:VGNC Symbol;Acc:VGNC:69945]                                               | 0.953680675 | 0.000343861 | 0.002740275 |
| ENSMMUG00000001880 | DExD/H-box helicase 60 [Source:VGNC Symbol;Acc:VGNC:71711]                                    | 1.032558612 | 0.000433135 | 0.003309844 |
| ENSMMUG00000003634 | DExD/H-box 60 like [Source:VGNC Symbol;Acc:VGNC:71720]                                        | 0.885898947 | 0.004779357 | 0.023039407 |
| ENSMMUG00000052179 |                                                                                               | 1.617892067 | 0.010378024 | 0.042400013 |
| ENSMMUG00000013730 | WD repeat domain 17 [Source:NCBI gene;Acc:700546]                                             | 0.65931348  | 0.000249968 | 0.002108354 |

|                    |                                                                                                      |             |             |             |
|--------------------|------------------------------------------------------------------------------------------------------|-------------|-------------|-------------|
| ENSMMUG00000013733 | spermatogenesis associated 4 [Source:VGNC Symbol;Acc:VGNC:77938]                                     | 1.669225653 | 7.15E-18    | 5.47E-15    |
| ENSMMUG00000058974 |                                                                                                      | 1.515534501 | 0.002113307 | 0.012113559 |
| ENSMMUG00000011633 | kallikrein B1 [Source:VGNC Symbol;Acc:VGNC:74195]                                                    | 2.135795868 | 0.002144939 | 0.012209878 |
| ENSMMUG00000018051 | FAT atypical cadherin 1 [Source:VGNC Symbol;Acc:VGNC:72617]                                          | 0.707215864 | 0.000371569 | 0.002918714 |
| ENSMMUG00000050600 |                                                                                                      | 3.710801313 | 0.001566363 | 0.009591391 |
| ENSMMUG00000058448 |                                                                                                      | 0.695831389 | 0.012698142 | 0.04941066  |
| ENSMMUG00000050465 | ZFP42 zinc finger protein [Source:NCBI gene;Acc:707621]                                              | 2.54653709  | 7.80E-10    | 5.83E-08    |
| ENSMMUG00000064721 |                                                                                                      | 2.694225473 | 0.001191521 | 0.007630196 |
| ENSMMUG00000052287 |                                                                                                      | 2.451610345 | 0.000762985 | 0.005284019 |
| ENSMMUG00000044628 |                                                                                                      | 2.617964345 | 0.000182087 | 0.00162096  |
| ENSMMUG00000015797 | disco interacting protein 2 homolog A [Source:VGNC Symbol;Acc:VGNC:71641]                            | 0.484111634 | 0.003653323 | 0.018669988 |
| ENSMMUG00000022324 | formimidoyltransferase cyclodeaminase [Source:VGNC Symbol;Acc:VGNC:72825]                            | 2.176772391 | 0.002690708 | 0.014587473 |
| ENSMMUG00000052777 |                                                                                                      | 1.347454792 | 0.009346525 | 0.039213195 |
| ENSMMUG00000010695 | adenosine deaminase RNA specific B1 [Source:VGNC Symbol;Acc:VGNC:69503]                              | 1.140618619 | 0.002259809 | 0.012728917 |
| ENSMMUG00000000951 | integrin subunit beta 2 [Source:VGNC Symbol;Acc:VGNC:73786]                                          | 1.44722932  | 2.65E-07    | 7.01E-06    |
| ENSMMUG00000049755 | leucine rich repeat containing 3 [Source:NCBI gene;Acc:712418]                                       | 3.118719801 | 9.25E-05    | 0.000937817 |
| ENSMMUG00000004175 | transient receptor potential cation channel subfamily M member 2 [Source:VGNC Symbol;Acc:VGNC:78655] | 2.391532535 | 5.09E-05    | 0.000566542 |
| ENSMMUG00000004173 | phosphofructokinase, liver type [Source:VGNC Symbol;Acc:VGNC:81737]                                  | 1.079739485 | 5.77E-06    | 9.17E-05    |
| ENSMMUG00000010648 | DNA methyltransferase 3 like [Source:NCBI gene;Acc:722184]                                           | 2.321462074 | 3.22E-10    | 2.77E-08    |
| ENSMMUG00000010647 | inducible T cell costimulator ligand [Source:NCBI gene;Acc:722191]                                   | 1.814659676 | 0.000138863 | 0.001302131 |
| ENSMMUG00000045179 | 1-acylglycerol-3-phosphate O-acyltransferase 3 [Source:NCBI gene;Acc:713301]                         | 1.576803352 | 1.39E-09    | 8.98E-08    |
| ENSMMUG00000000104 | ribosomal RNA processing 1B [Source:VGNC Symbol;Acc:VGNC:77089]                                      | 1.177943443 | 0.001055049 | 0.006888535 |
| ENSMMUG00000020050 | salt inducible kinase 1 [Source:NCBI gene;Acc:722303]                                                | 2.128906958 | 0.002953112 | 0.015766903 |
| ENSMMUG00000018081 | ubiquitin associated and SH3 domain containing A [Source:VGNC Symbol;Acc:VGNC:78687]                 | 1.140874641 | 0.005472136 | 0.025619365 |
| ENSMMUG00000018079 | transmembrane serine protease 3 [Source:VGNC Symbol;Acc:VGNC:78576]                                  | -1.25206804 | 0.000417961 | 0.003216572 |
| ENSMMUG00000018058 | ATP binding cassette subfamily G member 1 [Source:VGNC Symbol;Acc:VGNC:69584]                        | 2.183111065 | 4.46E-07    | 1.08E-05    |
| ENSMMUG00000018057 | uromodulin like 1 [Source:VGNC Symbol;Acc:VGNC:78717]                                                | 1.491559005 | 2.59E-05    | 0.000325032 |
| ENSMMUG00000018053 | zinc finger and BTB domain containing 21 [Source:VGNC Symbol;Acc:VGNC:78892]                         | 0.824568546 | 0.000633088 | 0.004549137 |
| ENSMMUG00000007030 | C2 calcium dependent domain containing 2 [Source:VGNC Symbol;Acc:VGNC:70298]                         | 2.636003129 | 0.002984524 | 0.015862983 |
| ENSMMUG00000015329 | MX dynamin like GTPase 1 [Source:VGNC Symbol;Acc:VGNC:75086]                                         | 2.53788768  | 1.43E-05    | 0.000197181 |
| ENSMMUG00000044257 | MX dynamin like GTPase 2 [Source:VGNC Symbol;Acc:VGNC:81723]                                         | 3.018969356 | 3.40E-08    | 1.24E-06    |
| ENSMMUG00000004257 | beta-secretase 2 [Source:VGNC Symbol;Acc:VGNC:70216]                                                 | 2.776838407 | 1.33E-15    | 5.98E-13    |

|                    |                                                                                                                                                                         |             |             |             |
|--------------------|-------------------------------------------------------------------------------------------------------------------------------------------------------------------------|-------------|-------------|-------------|
| ENSMMUG00000010296 | ETS transcription factor ERG [Source:VGNC<br>Symbol;Acc:VGNC:72427]                                                                                                     | 3.974139972 | 0.003268748 | 0.01709928  |
| ENSMMUG00000056855 | potassium inwardly rectifying channel subfamily J member 15<br>[Source:NCBI gene;Acc:693427]                                                                            | 2.757661923 | 0.001283335 | 0.008106386 |
| ENSMMUG00000056593 |                                                                                                                                                                         | 3.473031359 | 2.78E-05    | 0.000344757 |
| ENSMMUG00000017505 | tetratricopeptide repeat domain 3 [Source:VGNC<br>Symbol;Acc:VGNC:81785]                                                                                                | 0.676185639 | 3.53E-06    | 6.14E-05    |
| ENSMMUG00000062048 |                                                                                                                                                                         | 0.725436965 | 4.10E-05    | 0.000471215 |
| ENSMMUG00000028022 | Y RNA [Source:RFAM;Acc:RF00019]                                                                                                                                         | 1.012708199 | 0.00201862  | 0.0117032   |
| ENSMMUG00000010336 | DOP1 leucine zipper like protein B [Source:VGNC<br>Symbol;Acc:VGNC:71832]                                                                                               | 0.591164776 | 0.000309236 | 0.002501198 |
| ENSMMUG00000004605 | chloride intracellular channel 6 [Source:VGNC<br>Symbol;Acc:VGNC:71256]                                                                                                 | 0.832181551 | 0.009747962 | 0.040479564 |
| ENSMMUG00000053087 | mitochondrial ribosomal protein S6 [Source:NCBI<br>gene;Acc:697852]                                                                                                     | 3.752304286 | 0.000191149 | 0.001693515 |
| ENSMMUG00000065271 |                                                                                                                                                                         | 3.94737322  | 3.05E-06    | 5.41E-05    |
| ENSMMUG00000003701 | ATP synthase peripheral stalk subunit OSCP [Source:NCBI<br>gene;Acc:698480]                                                                                             | 2.121272668 | 0.000357467 | 0.002834891 |
| ENSMMUG00000003703 | crystallin zeta like 1 [Source:VGNC Symbol;Acc:VGNC:81297]                                                                                                              | 2.559059037 | 7.66E-05    | 0.000801017 |
| ENSMMUG00000005511 | SON DNA binding protein [Source:VGNC Symbol;Acc:VGNC:77689]                                                                                                             | 2.310362653 | 1.06E-07    | 3.17E-06    |
| ENSMMUG00000022702 | phosphoribosylglycinamide formyltransferase,<br>phosphoribosylglycinamide synthetase,<br>phosphoribosylaminoimidazole synthetase [Source:VGNC<br>Symbol;Acc:VGNC:72882] | 1.866357073 | 1.28E-05    | 0.000179304 |
| ENSMMUG00000003956 | interferon alpha and beta receptor subunit 2 [Source:VGNC<br>Symbol;Acc:VGNC:81330]                                                                                     | 0.466622573 | 0.00590246  | 0.0271743   |
| ENSMMUG00000052780 |                                                                                                                                                                         | 1.712409868 | 2.18E-08    | 8.80E-07    |
| ENSMMUG00000048824 | eva-1 homolog C [Source:NCBI gene;Acc:708681]                                                                                                                           | 1.152468894 | 8.32E-07    | 1.84E-05    |
| ENSMMUG00000059707 | MIS18 kinetochore protein A [Source:NCBI gene;Acc:709275]                                                                                                               | -2.58814451 | 2.88E-05    | 0.000355024 |
| ENSMMUG00000056363 |                                                                                                                                                                         | 1.510005372 | 0.01108169  | 0.044524904 |
| ENSMMUG00000061208 | MAP3K7 C-terminal like [Source:NCBI gene;Acc:713717]                                                                                                                    | 1.425740232 | 5.28E-07    | 1.26E-05    |
| ENSMMUG00000017605 | mitochondrial ribosomal protein L39 [Source:VGNC<br>Symbol;Acc:VGNC:74737]                                                                                              | 0.74276579  | 0.004957513 | 0.023670124 |
| ENSMMUG00000060576 |                                                                                                                                                                         | 1.399255343 | 9.28E-06    | 0.000135223 |
| ENSMMUG00000057702 |                                                                                                                                                                         | 0.944161193 | 0.001517669 | 0.009332768 |
| ENSMMUG00000052328 | FAM20C golgi associated secretory pathway kinase [Source:NCBI<br>gene;Acc:695088]                                                                                       | 1.670006088 | 0.001165192 | 0.007502219 |
| ENSMMUG00000017056 | Sad1 and UNC84 domain containing 1 [Source:VGNC<br>Symbol;Acc:VGNC:78161]                                                                                               | 3.618460472 | 1.87E-09    | 1.18E-07    |
| ENSMMUG00000003283 | extracellular leucine rich repeat and fibronectin type III domain<br>containing 1 [Source:VGNC Symbol;Acc:VGNC:72204]                                                   | 1.286188059 | 7.56E-07    | 1.70E-05    |
| ENSMMUG00000021075 | Rac family small GTPase 1 [Source:NCBI gene;Acc:717755]                                                                                                                 | 1.003717893 | 3.36E-07    | 8.60E-06    |
| ENSMMUG00000003167 | cytohesin 3 [Source:VGNC Symbol;Acc:VGNC:71829]                                                                                                                         | 1.172866455 | 9.56E-06    | 0.000138671 |
| ENSMMUG00000030422 | radial spoke head 10 homolog B [Source:NCBI<br>gene;Acc:100424218]                                                                                                      | 0.535679245 | 0.001032994 | 0.006751316 |
| ENSMMUG00000015477 | lemur tyrosine kinase 2 [Source:VGNC Symbol;Acc:VGNC:74309]                                                                                                             | 0.911103954 | 0.002174481 | 0.012350182 |
| ENSMMUG00000015479 | tectonin beta-propeller repeat containing 1 [Source:VGNC<br>Symbol;Acc:VGNC:79348]                                                                                      | 1.15951703  | 6.10E-06    | 9.56E-05    |
| ENSMMUG00000011970 | neuronal pentraxin 2 [Source:VGNC Symbol;Acc:VGNC:75392]                                                                                                                | 2.236004085 | 2.79E-06    | 5.05E-05    |
| ENSMMUG00000023318 | transformation/transcription domain associated protein<br>[Source:VGNC Symbol;Acc:VGNC:78657]                                                                           | 0.684733796 | 1.93E-07    | 5.36E-06    |
| ENSMMUG00000040393 | zinc finger protein 655 [Source:NCBI gene;Acc:718811]                                                                                                                   | 1.952260687 | 0.000425203 | 0.003260727 |
| ENSMMUG00000022728 | zinc finger and SCAN domain containing 25 [Source:VGNC<br>Symbol;Acc:VGNC:79344]                                                                                        | 1.575410005 | 8.84E-06    | 0.000130165 |

|                    |                                                                                                       |             |             |             |
|--------------------|-------------------------------------------------------------------------------------------------------|-------------|-------------|-------------|
| ENSMMUG00000022730 | cytochrome P450, family 3, subfamily A, polypeptide 5<br>[Source:NCBI gene;Acc:678692]                | 1.226729909 | 1.22E-07    | 3.55E-06    |
| ENSMMUG00000022504 | alpha-2-glycoprotein 1, zinc-binding [Source:VGNC<br>Symbol;Acc:VGNC:70201]                           | 0.522707476 | 0.004250132 | 0.020906663 |
| ENSMMUG00000004021 | zinc finger protein 3 [Source:VGNC Symbol;Acc:VGNC:81889]                                             | -2.19187247 | 0.010173403 | 0.041871925 |
| ENSMMUG00000048302 | ArfGAP with FG repeats 2 [Source:VGNC Symbol;Acc:VGNC:80329]                                          | 0.614478162 | 0.000210154 | 0.001835635 |
| ENSMMUG00000015311 | leucine rich repeats and calponin homology domain containing 4<br>[Source:VGNC Symbol;Acc:VGNC:74441] | 0.458887737 | 0.00110511  | 0.007161464 |
| ENSMMUG00000015309 | F-box protein 24 [Source:VGNC Symbol;Acc:VGNC:72495]                                                  | 0.499304904 | 0.005865979 | 0.027054226 |
| ENSMMUG00000002949 | motile sperm domain containing 3 [Source:VGNC<br>Symbol;Acc:VGNC:74823]                               | 1.625638594 | 9.82E-09    | 4.54E-07    |
| ENSMMUG00000002950 | transferrin receptor 2 [Source:VGNC Symbol;Acc:VGNC:81770]                                            | 2.276471218 | 1.25E-08    | 5.52E-07    |
| ENSMMUG00000004082 | GRB10 interacting GYF protein 1 [Source:VGNC<br>Symbol;Acc:VGNC:73158]                                | 1.393266522 | 0.002350358 | 0.01306622  |
| ENSMMUG00000022840 | zonadhesin [Source:VGNC Symbol;Acc:VGNC:81797]                                                        | 0.759245035 | 0.00749448  | 0.032952402 |
| ENSMMUG00000060459 |                                                                                                       | 0.693926171 | 0.002350835 | 0.01306622  |
| ENSMMUG00000063570 | Metazoan signal recognition particle RNA<br>[Source:RFAM;Acc:RF00017]                                 | 3.035190366 | 0.008662408 | 0.036857181 |
| ENSMMUG00000058787 |                                                                                                       | 3.156830491 | 0.007514256 | 0.033028188 |
| ENSMMUG00000011367 | BUD23 rRNA methyltransferase and ribosome maturation factor<br>[Source:VGNC Symbol;Acc:VGNC:70325]    | 3.164666682 | 0.007181049 | 0.031778402 |
| ENSMMUG00000056841 |                                                                                                       | 1.150600754 | 0.009698276 | 0.040337631 |
| ENSMMUG00000058227 | Metazoan signal recognition particle RNA<br>[Source:RFAM;Acc:RF00017]                                 | 1.667813594 | 0.007227855 | 0.031942059 |
| ENSMMUG00000050132 |                                                                                                       | 1.175483583 | 9.38E-05    | 0.00094672  |
| ENSMMUG00000015272 | chaperonin containing TCP1 subunit 6A [Source:NCBI<br>gene;Acc:703326]                                | 0.888541855 | 1.29E-06    | 2.64E-05    |
| ENSMMUG00000058499 |                                                                                                       | 4.426984379 | 0.007517754 | 0.033032403 |
| ENSMMUG00000060184 | SEC61 translocon subunit gamma [Source:NCBI gene;Acc:716898]                                          | 6.273872    | 1.47E-06    | 2.93E-05    |
| ENSMMUG00000019991 | dopa decarboxylase [Source:VGNC Symbol;Acc:VGNC:71755]                                                | 0.722654463 | 0.000235465 | 0.002012125 |
| ENSMMUG00000049620 |                                                                                                       | 1.260010991 | 0.006111071 | 0.027936937 |
| ENSMMUG00000016191 | ATP binding cassette subfamily A member 13 [Source:VGNC<br>Symbol;Acc:VGNC:69402]                     | 3.237062559 | 0.003339928 | 0.017361754 |
| ENSMMUG00000019393 | tensin 3 [Source:VGNC Symbol;Acc:VGNC:79324]                                                          | 4.129781309 | 0.000424319 | 0.003256352 |
| ENSMMUG00000002433 | calcium/calmodulin dependent protein kinase II beta<br>[Source:VGNC Symbol;Acc:VGNC:70524]            | 2.403228275 | 0.000266759 | 0.002218333 |
| ENSMMUG00000002430 | YKT6 v-SNARE homolog [Source:VGNC Symbol;Acc:VGNC:81796]                                              | 2.674139869 | 2.02E-06    | 3.83E-05    |
| ENSMMUG00000002427 | glucokinase [Source:VGNC Symbol;Acc:VGNC:72901]                                                       | 2.294406568 | 1.15E-11    | 1.69E-09    |
| ENSMMUG00000002411 | drebrin like [Source:NCBI gene;Acc:720621]                                                            | 2.59182469  | 3.19E-15    | 1.26E-12    |
| ENSMMUG00000002426 | myosin light chain 7 [Source:VGNC Symbol;Acc:VGNC:75002]                                              | 2.129032741 | 2.41E-11    | 3.10E-09    |
| ENSMMUG00000002423 | DNA polymerase delta 2, accessory subunit [Source:VGNC<br>Symbol;Acc:VGNC:76203]                      | 2.35990867  | 2.71E-11    | 3.39E-09    |
| ENSMMUG00000002422 | AE binding protein 1 [Source:VGNC Symbol;Acc:VGNC:80328]                                              | 2.500391171 | 3.09E-09    | 1.73E-07    |
| ENSMMUG00000019022 | serine/threonine kinase 17a [Source:VGNC<br>Symbol;Acc:VGNC:77913]                                    | 0.446616756 | 0.012010729 | 0.047423054 |
| ENSMMUG00000057956 |                                                                                                       | 0.737333123 | 0.002769885 | 0.014960601 |
| ENSMMUG00000053696 | Metazoan signal recognition particle RNA<br>[Source:RFAM;Acc:RF00017]                                 | 2.1467353   | 5.02E-05    | 0.000559578 |
| ENSMMUG00000060273 | mitochondrial ribosomal protein L32 [Source:NCBI<br>gene;Acc:701820]                                  | 1.966318926 | 2.20E-07    | 6.02E-06    |



|                     |                                                                                  |             |             |             |
|---------------------|----------------------------------------------------------------------------------|-------------|-------------|-------------|
| ENSMMUG00000022451  | proteasome 20S subunit alpha 2 [Source:NCBI gene;Acc:701683]                     | 2.258943674 | 3.68E-07    | 9.30E-06    |
| ENSMMUG00000001702  | succinyl-CoA:glutarate-CoA transferase [Source:VGNC Symbol;Acc:VGNC:81767]       | 1.562088822 | 3.18E-08    | 1.18E-06    |
| ENSMMUG000000065307 |                                                                                  | 1.470354924 | 0.000650023 | 0.004650277 |
| ENSMMUG00000001350  | HERPUD family member 2 [Source:VGNC Symbol;Acc:VGNC:73216]                       | 2.618928083 | 3.54E-10    | 3.03E-08    |
| ENSMMUG000000058423 |                                                                                  | 2.964156604 | 1.13E-07    | 3.32E-06    |
| ENSMMUG00000002886  | Bardet-Biedl syndrome 9 [Source:NCBI gene;Acc:708412]                            | 1.485459231 | 0.000136538 | 0.001289626 |
| ENSMMUG000000011695 | 5'-nucleotidase, cytosolic IIIA [Source:VGNC Symbol;Acc:VGNC:75423]              | -0.50580495 | 0.012053712 | 0.047578325 |
| ENSMMUG000000055809 |                                                                                  | 1.980681804 | 0.000105844 | 0.001042098 |
| ENSMMUG000000062454 |                                                                                  | 2.197567295 | 4.67E-08    | 1.61E-06    |
| ENSMMUG000000039009 |                                                                                  | 1.760644702 | 0.000352828 | 0.002803226 |
| ENSMMUG000000012529 | pleckstrin homology domain containing A8 [Source:VGNC Symbol;Acc:VGNC:81741]     | 1.250093512 | 0.000136744 | 0.001290205 |
| ENSMMUG000000020184 | carboxypeptidase vitellogenic like [Source:VGNC Symbol;Acc:VGNC:71406]           | -2.81271879 | 4.34E-08    | 1.51E-06    |
| ENSMMUG000000039317 | cAMP responsive element binding protein 5 [Source:VGNC Symbol;Acc:VGNC:81295]    | 2.168429387 | 0.001187419 | 0.007611423 |
| ENSMMUG000000000517 | family with sequence similarity 126 member A [Source:VGNC Symbol;Acc:VGNC:72327] | 1.765031299 | 0.000888991 | 0.005993894 |
| ENSMMUG000000042472 | Metazoan signal recognition particle RNA [Source:RFAM;Acc:RF00017]               | 0.77772082  | 0.010724975 | 0.043359972 |
| ENSMMUG000000007821 | ATP binding cassette subfamily B member 5 [Source:VGNC Symbol;Acc:VGNC:80321]    | 2.788878118 | 1.27E-16    | 6.86E-14    |
| ENSMMUG000000006898 | integrin subunit beta 8 [Source:VGNC Symbol;Acc:VGNC:73791]                      | 3.174476585 | 2.70E-20    | 3.51E-17    |
| ENSMMUG000000062260 |                                                                                  | 4.517819765 | 0.007132216 | 0.031616089 |
| ENSMMUG000000052574 |                                                                                  | -1.13067812 | 3.50E-06    | 6.09E-05    |
| ENSMMUG000000012694 | thrombospondin type 1 domain containing 7A [Source:VGNC Symbol;Acc:VGNC:79347]   | 1.478818948 | 0.011826939 | 0.046923153 |
| ENSMMUG000000041616 | G protein subunit gamma 11 [Source:VGNC Symbol;Acc:VGNC:81319]                   | 3.515081197 | 0.010430497 | 0.042540867 |
| ENSMMUG000000045513 |                                                                                  | 2.151331829 | 4.16E-08    | 1.46E-06    |
| ENSMMUG000000019802 | family with sequence similarity 133 member B [Source:NCBI gene;Acc:702054]       | 2.294697621 | 0.000396299 | 0.003079015 |
| ENSMMUG000000015685 | zinc finger protein 804B [Source:VGNC Symbol;Acc:VGNC:81890]                     | 1.654086612 | 2.80E-10    | 2.48E-08    |
| ENSMMUG000000022697 | STEAP4 metalloredutase [Source:VGNC Symbol;Acc:VGNC:77974]                       | 0.759113776 | 0.003897827 | 0.01959611  |
| ENSMMUG000000006766 | RUN domain containing 3B [Source:VGNC Symbol;Acc:VGNC:77129]                     | 1.408446035 | 0.000432079 | 0.003303718 |
| ENSMMUG000000010788 | ATP binding cassette subfamily B member 1 [Source:NCBI gene;Acc:574235]          | 0.581302817 | 0.011901147 | 0.047083121 |
| ENSMMUG000000000480 | KIAA1324 like [Source:VGNC Symbol;Acc:VGNC:73882]                                | 2.723473859 | 0.004746778 | 0.022916329 |
| ENSMMUG000000053516 |                                                                                  | 1.741475483 | 3.95E-05    | 0.000457578 |
| ENSMMUG000000049939 |                                                                                  | 0.997762853 | 1.20E-06    | 2.47E-05    |
| ENSMMUG000000009006 | round spermatid basic protein 1 like [Source:VGNC Symbol;Acc:VGNC:77097]         | 0.717865953 | 0.001683246 | 0.010135322 |
| ENSMMUG000000012427 | F-box and leucine rich repeat protein 13 [Source:VGNC Symbol;Acc:VGNC:81312]     | 0.666433805 | 0.001270017 | 0.00803397  |
| ENSMMUG000000022727 | lysine methyltransferase 2E [Source:VGNC Symbol;Acc:VGNC:74073]                  | 4.477384671 | 0.000129149 | 0.001230561 |

|                    |                                                                                             |             |             |             |
|--------------------|---------------------------------------------------------------------------------------------|-------------|-------------|-------------|
| ENSMMUG00000022732 | SRSF protein kinase 2 [Source:VGNC Symbol;Acc:VGNC:81764]                                   | 0.804261267 | 0.003021747 | 0.016047707 |
| ENSMMUG00000008189 | cadherin related family member 3 [Source:HGNC Symbol;Acc:HGNC:26308]                        | 1.408148164 | 2.19E-06    | 4.09E-05    |
| ENSMMUG00000003572 | nicotinamide phosphoribosyltransferase [Source:VGNC Symbol;Acc:VGNC:75056]                  | 1.072866684 | 0.00158258  | 0.009645286 |
| ENSMMUG00000030218 | B cell receptor associated protein 29 [Source:VGNC Symbol;Acc:VGNC:70119]                   | 0.537038984 | 0.006740244 | 0.030207997 |
| ENSMMUG00000015535 | inner mitochondrial membrane peptidase subunit 2 [Source:VGNC Symbol;Acc:VGNC:73596]        | 0.874320945 | 0.000257375 | 0.002152678 |
| ENSMMUG00000062092 |                                                                                             | 3.403398818 | 0.011131234 | 0.044696766 |
| ENSMMUG00000058817 |                                                                                             | 3.124145574 | 6.46E-11    | 7.24E-09    |
| ENSMMUG0000007097  | testin LIM domain protein [Source:VGNC Symbol;Acc:VGNC:78383]                               | 0.530872564 | 0.008211678 | 0.035317818 |
| ENSMMUG00000011269 | CF transmembrane conductance regulator [Source:VGNC Symbol;Acc:VGNC:71020]                  | 0.906085345 | 0.000341808 | 0.002725663 |
| ENSMMUG00000023308 | potassium voltage-gated channel subfamily D member 2 [Source:VGNC Symbol;Acc:VGNC:73976]    | 1.941652603 | 0.001335861 | 0.008385233 |
| ENSMMUG00000023310 | tetraspanin 12 [Source:VGNC Symbol;Acc:VGNC:79328]                                          | 2.975435343 | 0.001771189 | 0.010523565 |
| ENSMMUG00000002434 | inhibitor of growth family member 3 [Source:VGNC Symbol;Acc:VGNC:73595]                     | -2.66170681 | 1.08E-07    | 3.20E-06    |
| ENSMMUG00000002428 | zinc finger protein 800 [Source:VGNC Symbol;Acc:VGNC:79658]                                 | 1.305295394 | 1.11E-08    | 4.95E-07    |
| ENSMMUG00000007250 | RNA binding motif protein 28 [Source:VGNC Symbol;Acc:VGNC:76519]                            | 0.928970969 | 0.004929012 | 0.023594673 |
| ENSMMUG00000012110 | smoothened, frizzled class receptor [Source:VGNC Symbol;Acc:VGNC:77658]                     | 1.543126414 | 1.89E-07    | 5.28E-06    |
| ENSMMUG00000041919 | nuclear respiratory factor 1 [Source:VGNC Symbol;Acc:VGNC:81731]                            | 2.790494101 | 2.54E-07    | 6.77E-06    |
| ENSMMUG00000009494 | carboxypeptidase A5 [Source:VGNC Symbol;Acc:VGNC:71410]                                     | 0.958146701 | 0.001968665 | 0.011446075 |
| ENSMMUG00000009499 | mesoderm specific transcript [Source:VGNC Symbol;Acc:VGNC:74707]                            | 1.451480389 | 0.003802341 | 0.019220074 |
| ENSMMUG00000004801 | COPI coat complex subunit gamma 2 [Source:VGNC Symbol;Acc:VGNC:71315]                       | 1.593427202 | 0.001589346 | 0.009672924 |
| ENSMMUG00000025903 |                                                                                             | 3.050375783 | 0.010343391 | 0.042357091 |
| ENSMMUG00000001671 | coiled-coil-helix-coiled-coil-helix domain containing 3 [Source:VGNC Symbol;Acc:VGNC:80860] | 1.430670148 | 0.001383089 | 0.008639987 |
| ENSMMUG00000000917 | aldo-keto reductase family 1 member B [Source:NCBI gene;Acc:705957]                         | 1.627931404 | 0.003232391 | 0.016939761 |
| ENSMMUG00000013098 | aldo-keto reductase family 1 member B10 [Source:NCBI gene;Acc:713150]                       | 3.399011646 | 3.31E-06    | 5.83E-05    |
| ENSMMUG00000037485 |                                                                                             | 3.150834268 | 0.005967297 | 0.027433959 |
| ENSMMUG00000054821 |                                                                                             | 2.741940979 | 0.008773613 | 0.037220122 |
| ENSMMUG00000006530 | ATP/GTP binding protein like 3 [Source:VGNC Symbol;Acc:VGNC:69723]                          | 0.967661211 | 1.79E-05    | 0.000237441 |
| ENSMMUG00000050339 | Metazoan signal recognition particle RNA [Source:RFAM;Acc:RF00017]                          | 2.126700287 | 4.65E-09    | 2.42E-07    |
| ENSMMUG00000002995 | tripartite motif containing 24 [Source:VGNC Symbol;Acc:VGNC:78562]                          | 0.720443227 | 0.012914649 | 0.049960715 |
| ENSMMUG00000006547 | ATPase H+ transporting V0 subunit a4 [Source:VGNC Symbol;Acc:VGNC:70189]                    | 3.024860408 | 0.002327104 | 0.012982861 |
| ENSMMUG00000006548 | KIAA1549 [Source:VGNC Symbol;Acc:VGNC:73885]                                                | 1.842268285 | 0.00128904  | 0.008134526 |

|                     |                                                                                  |   |             |             |             |
|---------------------|----------------------------------------------------------------------------------|---|-------------|-------------|-------------|
| ENSMMUG00000013645  | tetratricopeptide repeat domain 26 [Source:VGNC Symbol;Acc:VGNC:79341]           | - | 0.833878605 | 0.010881662 | 0.04385711  |
| ENSMMUG00000004224  | poly(ADP-ribose) polymerase family member 12 [Source:VGNC Symbol;Acc:VGNC:81734] | - | 0.972449212 | 3.42E-05    | 0.000410181 |
| ENSMMUG000000056175 |                                                                                  | - | 0.789553822 | 0.004792318 | 0.023087405 |
| ENSMMUG00000008126  | lysine demethylase 7A [Source:VGNC Symbol;Acc:VGNC:73886]                        | - | 1.088018059 | 8.65E-08    | 2.67E-06    |
| ENSMMUG00000015870  | solute carrier family 37 member 3 [Source:VGNC Symbol;Acc:VGNC:81574]            | - | 1.61761375  | 1.84E-05    | 0.000243341 |
| ENSMMUG00000010420  | makorin ring finger protein 1 [Source:VGNC Symbol;Acc:VGNC:81476]                | - | 0.733229157 | 0.010556204 | 0.042917783 |
| ENSMMUG000000042299 | DENN domain containing 2A [Source:VGNC Symbol;Acc:VGNC:81302]                    | - | 2.755422269 | 0.005195701 | 0.024581771 |
| ENSMMUG000000060893 |                                                                                  | - | 1.634773626 | 0.001343156 | 0.008418836 |
| ENSMMUG000000064529 |                                                                                  | - | 1.022170943 | 0.0001471   | 0.001368012 |
| ENSMMUG000000021017 | acylglycerol kinase [Source:VGNC Symbol;Acc:VGNC:69669]                          | - | 1.110406434 | 1.62E-05    | 0.000218466 |
| ENSMMUG000000042443 | olfactory receptor 9A4 [Source:NCBI gene;Acc:695321]                             | - | 3.281917153 | 7.13E-06    | 0.000108676 |
| ENSMMUG000000055710 | taste 2 receptor member 38 [Source:NCBI gene;Acc:695549]                         | - | 2.307483787 | 0.000149448 | 0.001382449 |
| ENSMMUG000000016273 | maltase-glucoamylase [Source:VGNC Symbol;Acc:VGNC:74713]                         | - | 2.933987394 | 9.39E-13    | 2.04E-10    |
| ENSMMUG000000049575 | T cell receptor beta variable 7-2 [Source:HGNC Symbol;Acc:HGNC:12236]            | - | 1.378176391 | 8.25E-06    | 0.000122561 |
| ENSMMUG000000061255 |                                                                                  | - | 2.259765163 | 0.001672704 | 0.010085855 |
| ENSMMUG000000049767 |                                                                                  | - | 3.187080436 | 0.007093222 | 0.03148616  |
| ENSMMUG000000050269 | T cell receptor beta variable 14 [Source:HGNC Symbol;Acc:HGNC:12189]             | - | 1.538119447 | 1.52E-06    | 3.00E-05    |
| ENSMMUG000000016286 | protease, serine, 1 (trypsin 1) [Source:NCBI gene;Acc:698729]                    | - | 0.960467569 | 0.006245352 | 0.028410999 |
| ENSMMUG000000051032 | serine protease 2 [Source:NCBI gene;Acc:698352]                                  | - | 1.816418137 | 5.26E-05    | 0.000581535 |
| ENSMMUG000000052682 |                                                                                  | - | 1.841286131 | 0.001162709 | 0.007489945 |
| ENSMMUG000000059019 |                                                                                  | - | 1.824820338 | 0.000612167 | 0.004420793 |
| ENSMMUG000000058459 |                                                                                  | - | 3.007971781 | 0.002744168 | 0.014840184 |
| ENSMMUG000000006571 | Kell metallo-endopeptidase [Source:VGNC Symbol;Acc:VGNC:81628]                   | - | 3.479734643 | 5.87E-08    | 1.95E-06    |
| ENSMMUG000000012635 | zyxin [Source:VGNC Symbol;Acc:VGNC:78917]                                        | - | 1.333499261 | 1.23E-09    | 8.32E-08    |
| ENSMMUG000000055322 | EPH receptor A1 [Source:NCBI gene;Acc:706295]                                    | - | 1.349136463 | 1.38E-09    | 8.98E-08    |
| ENSMMUG000000058370 | taste receptor type 2 member 62 [Source:NCBI gene;Acc:704388]                    | - | 2.828195217 | 0.004072323 | 0.020233825 |
| ENSMMUG000000062641 |                                                                                  | - | 1.149016083 | 0.00015904  | 0.001447497 |
| ENSMMUG000000042798 |                                                                                  | - | 1.141396084 | 0.000742516 | 0.005180878 |
| ENSMMUG000000063823 | U6 spliceosomal RNA [Source:RFAM;Acc:RF00026]                                    | - | 1.843091612 | 0.012598405 | 0.049073031 |
| ENSMMUG000000013955 | TRPM8 channel associated factor 2 [Source:NCBI gene;Acc:707579]                  | - | 0.893682713 | 7.94E-05    | 0.000824389 |
| ENSMMUG000000057973 |                                                                                  | - | 2.394288254 | 0.000158132 | 0.001442258 |
| ENSMMUG000000011788 | zinc finger protein 212 [Source:VGNC Symbol;Acc:VGNC:78418]                      | - | 1.098966722 | 0.004587224 | 0.022295008 |
| ENSMMUG000000002497 | zinc finger protein 777 [Source:HGNC Symbol;Acc:HGNC:22213]                      | - | 1.492286594 | 1.10E-05    | 0.000158019 |

|                    |                                                                                                       |             |             |             |
|--------------------|-------------------------------------------------------------------------------------------------------|-------------|-------------|-------------|
| ENSMMUG00000051020 | zinc finger protein 467 [Source:NCBI gene;Acc:712106]                                                 | 1.640909435 | 1.59E-06    | 3.09E-05    |
| ENSMMUG00000048892 | SCO-spondin [Source:VGNC Symbol;Acc:VGNC:81765]                                                       | 0.778722787 | 0.003714829 | 0.018895216 |
| ENSMMUG00000022633 | replication initiator 1 [Source:VGNC Symbol;Acc:VGNC:76758]                                           | 2.117372776 | 3.02E-08    | 1.14E-06    |
| ENSMMUG00000062696 |                                                                                                       | 1.591138884 | 0.000303914 | 0.002469855 |
| ENSMMUG00000022636 | GTPase, IMAP family member 8 [Source:VGNC Symbol;Acc:VGNC:72981]                                      | -1.17065675 | 0.001683025 | 0.010135322 |
| ENSMMUG00000011386 | GTPase, IMAP family member 4 [Source:VGNC Symbol;Acc:VGNC:72982]                                      | 2.030992435 | 8.97E-10    | 6.55E-08    |
| ENSMMUG00000052830 |                                                                                                       | 1.451179842 | 0.000516748 | 0.003836089 |
| ENSMMUG00000047276 | GTPase, IMAP family member 6 [Source:VGNC Symbol;Acc:VGNC:81315]                                      | 0.776187145 | 0.005214709 | 0.024644805 |
| ENSMMUG00000012238 | polypeptide N-acetylgalactosaminyltransferase 11 [Source:VGNC Symbol;Acc:VGNC:72749]                  | 1.222486929 | 0.000364292 | 0.002875541 |
| ENSMMUG00000062591 | insulin induced gene 1 [Source:NCBI gene;Acc:718513]                                                  | 0.883736897 | 0.002418681 | 0.013386114 |
| ENSMMUG00000010940 | telomerase reverse transcriptase [Source:VGNC Symbol;Acc:VGNC:78313]                                  | 0.651107766 | 0.000867897 | 0.005866878 |
| ENSMMUG00000019205 | ADAM metalloproteinase with thrombospondin type 1 motif 16 [Source:VGNC Symbol;Acc:VGNC:69439]        | 1.189703064 | 0.009395375 | 0.039392728 |
| ENSMMUG00000018746 | FAST kinase domains 3 [Source:VGNC Symbol;Acc:VGNC:72588]                                             | 1.210059303 | 0.009014048 | 0.038100979 |
| ENSMMUG00000018747 | 5-methyltetrahydrofolate-homocysteine methyltransferase reductase [Source:VGNC Symbol;Acc:VGNC:75079] | 0.969439943 | 0.001521624 | 0.009352664 |
| ENSMMUG00000061922 |                                                                                                       | 0.703855083 | 4.12E-06    | 6.89E-05    |
| ENSMMUG00000021942 | ANKH inorganic pyrophosphate transport regulator [Source:VGNC Symbol;Acc:VGNC:69612]                  | -0.81756643 | 0.005231502 | 0.024696487 |
| ENSMMUG00000062083 |                                                                                                       | 1.999375574 | 0.001755902 | 0.010456623 |
| ENSMMUG00000059036 |                                                                                                       | 2.586075031 | 0.000173612 | 0.001559389 |
| ENSMMUG00000059710 |                                                                                                       | 1.563895882 | 0.005860353 | 0.02703787  |
| ENSMMUG00000060891 | histone H3.Y [Source:NCBI gene;Acc:718280]                                                            | 2.098260915 | 0.003541393 | 0.018176541 |
| ENSMMUG00000013467 | alpha-methylacyl-CoA racemase [Source:NCBI gene;Acc:698365]                                           | 1.843798178 | 8.67E-05    | 0.000888603 |
| ENSMMUG00000018739 | sperm flagellar 2 [Source:VGNC Symbol;Acc:VGNC:82243]                                                 | 5.439284728 | 4.32E-06    | 7.19E-05    |
| ENSMMUG00000006107 | WD repeat domain 70 [Source:VGNC Symbol;Acc:VGNC:79504]                                               | 1.426402144 | 5.55E-07    | 1.31E-05    |
| ENSMMUG00000004774 | maestro heat like repeat family member 2B [Source:VGNC Symbol;Acc:VGNC:74837]                         | 2.374853867 | 0.00015147  | 0.001398171 |
| ENSMMUG00000011878 | poly(A) binding protein interacting protein 1 [Source:VGNC Symbol;Acc:VGNC:84476]                     | 1.388858544 | 0.000873066 | 0.005895685 |
| ENSMMUG00000011734 | nicotinamide nucleotide transhydrogenase [Source:VGNC Symbol;Acc:VGNC:75363]                          | 1.845223842 | 0.00201714  | 0.0117032   |
| ENSMMUG00000016149 | embigin [Source:VGNC Symbol;Acc:VGNC:72144]                                                           | 3.396957952 | 0.004057237 | 0.020224222 |
| ENSMMUG00000003984 | ISL LIM homeobox 1 [Source:VGNC Symbol;Acc:VGNC:73770]                                                | 3.959457639 | 0.006052504 | 0.027737444 |
| ENSMMUG00000001753 | integrin subunit alpha 1 [Source:VGNC Symbol;Acc:VGNC:73772]                                          | 1.713921894 | 4.20E-08    | 1.46E-06    |
| ENSMMUG00000039101 | pelota mRNA surveillance and ribosome rescue factor [Source:VGNC Symbol;Acc:VGNC:84478]               | 1.976641329 | 4.09E-09    | 2.18E-07    |
| ENSMMUG00000010379 | Mtr4 exosome RNA helicase [Source:VGNC Symbol;Acc:VGNC:74989]                                         | 1.067119012 | 0.000589285 | 0.004274535 |
| ENSMMUG00000030099 | phospholipid phosphatase 1 [Source:VGNC Symbol;Acc:VGNC:76226]                                        | 2.535215212 | 9.66E-08    | 2.92E-06    |
| ENSMMUG00000061973 |                                                                                                       | 2.208136759 | 5.24E-12    | 9.20E-10    |

|                    |                                                                                                  |             |             |             |             |
|--------------------|--------------------------------------------------------------------------------------------------|-------------|-------------|-------------|-------------|
| ENSMMUG00000051661 |                                                                                                  | -           | 1.104150826 | 0.008092744 | 0.034956568 |
| ENSMMUG00000005181 | RAB3C, member RAS oncogene family [Source:VGNC Symbol;Acc:VGNC:81541]                            | -1.29818527 | 0.001692315 | 0.010180503 |             |
| ENSMMUG00000021812 | ERCC excision repair 8, CSA ubiquitin ligase complex subunit [Source:VGNC Symbol;Acc:VGNC:72425] | 0.84511215  | 2.93E-06    | 5.25E-05    |             |
| ENSMMUG00000060505 |                                                                                                  | -           | 1.235901484 | 0.007689271 | 0.033559283 |
| ENSMMUG00000015041 | CWC27 spliceosome associated cyclophilin [Source:VGNC Symbol;Acc:VGNC:71396]                     | 2.882501242 | 9.66E-05    | 0.00096836  |             |
| ENSMMUG00000051169 |                                                                                                  | -           | 1.850210536 | 0.007950486 | 0.034514027 |
| ENSMMUG00000016522 | neurolysin [Source:VGNC Symbol;Acc:VGNC:75183]                                                   | 0.738583093 | 0.000101433 | 0.001007051 |             |
| ENSMMUG00000038355 |                                                                                                  | -           | 3.836058152 | 0.010762326 | 0.043497454 |
| ENSMMUG00000046550 | coiled-coil domain containing 125 [Source:NCBI gene;Acc:704391]                                  | 1.309750215 | 1.13E-05    | 0.000161905 |             |
| ENSMMUG00000006217 | general transcription factor IIH subunit 2 [Source:NCBI gene;Acc:700737]                         | 1.778827211 | 0.000172352 | 0.001550214 |             |
| ENSMMUG00000011061 | ankyrin repeat domain 31 [Source:VGNC Symbol;Acc:VGNC:84277]                                     | 0.696600872 | 0.000103699 | 0.001023751 |             |
| ENSMMUG00000022982 | IQ motif containing GTPase activating protein 2 [Source:VGNC Symbol;Acc:VGNC:73756]              | 2.429788833 | 0.000114486 | 0.001112028 |             |
| ENSMMUG00000006795 | dimethylglycine dehydrogenase [Source:VGNC Symbol;Acc:VGNC:84292]                                | 2.710178771 | 0.001632022 | 0.009890999 |             |
| ENSMMUG00000006796 | betaine--homocysteine S-methyltransferase 2 [Source:VGNC Symbol;Acc:VGNC:70248]                  | 1.088697065 | 0.01174746  | 0.046652662 |             |
| ENSMMUG00000003143 | thrombospondin 4 [Source:VGNC Symbol;Acc:VGNC:78346]                                             | 1.041901278 | 0.007139369 | 0.031637012 |             |
| ENSMMUG00000036820 | U7 small nuclear RNA [Source:RFAM;Acc:RF00066]                                                   | 1.522509934 | 9.17E-06    | 0.000134079 |             |
| ENSMMUG00000039944 | Ras protein specific guanine nucleotide releasing factor 2 [Source:VGNC Symbol;Acc:VGNC:84486]   | 2.845177714 | 6.91E-11    | 7.68E-09    |             |
| ENSMMUG00000017583 | single stranded DNA binding protein 2 [Source:NCBI gene;Acc:711752]                              | 0.975132243 | 0.005534222 | 0.025844917 |             |
| ENSMMUG00000046560 | transmembrane protein 167A [Source:VGNC Symbol;Acc:VGNC:84513]                                   | 0.891303483 | 0.009265966 | 0.038925439 |             |
| ENSMMUG00000064265 | X-ray repair cross complementing 4 [Source:NCBI gene;Acc:712291]                                 | 0.895356765 | 0.000477412 | 0.003568514 |             |
| ENSMMUG00000011513 | versican [Source:VGNC Symbol;Acc:VGNC:79445]                                                     | 3.281916334 | 2.16E-15    | 9.05E-13    |             |
| ENSMMUG00000061282 | hyaluronan and proteoglycan link protein 1 [Source:NCBI gene;Acc:712501]                         | 4.42640472  | 0.006548451 | 0.029520941 |             |
| ENSMMUG00000057003 | U6 spliceosomal RNA [Source:RFAM;Acc:RF00026]                                                    | 0.715934307 | 0.005806627 | 0.026847136 |             |
| ENSMMUG00000009319 | transmembrane protein 161B [Source:VGNC Symbol;Acc:VGNC:84508]                                   | 1.264614896 | 0.001461691 | 0.009035526 |             |
| ENSMMUG00000019836 | myocyte enhancer factor 2C [Source:VGNC Symbol;Acc:VGNC:84438]                                   | 1.459521896 | 0.000587464 | 0.004266083 |             |
| ENSMMUG00000055392 |                                                                                                  | -           | 1.533983124 | 1.45E-05    | 0.000198948 |
| ENSMMUG00000056790 |                                                                                                  | -           | 5.675702763 | 1.86E-12    | 3.65E-10    |
| ENSMMUG00000018974 | LysM domain containing 3 [Source:VGNC Symbol;Acc:VGNC:74373]                                     | 1.436526608 | 3.15E-10    | 2.73E-08    |             |
| ENSMMUG00000001397 | multiple C2 and transmembrane domain containing 1 [Source:VGNC Symbol;Acc:VGNC:74589]            | 2.146635031 | 9.00E-11    | 9.44E-09    |             |
| ENSMMUG00000010632 | family with sequence similarity 81 member B [Source:VGNC Symbol;Acc:VGNC:72365]                  | 3.132354634 | 0.007421851 | 0.032677248 |             |

|                    |                                                                                                |   |             |             |             |
|--------------------|------------------------------------------------------------------------------------------------|---|-------------|-------------|-------------|
| ENSMMUG0000001212  | Rieske Fe-S domain containing [Source:VGNC Symbol;Acc:VGNC:84487]                              | - | 0.544876828 | 0.00400111  | 0.020030189 |
| ENSMMUG0000001213  | spermatogenesis associated 9 [Source:VGNC Symbol;Acc:VGNC:77976]                               | - | 0.935111897 | 0.000574338 | 0.004196542 |
| ENSMMUG0000005314  | elongation factor for RNA polymerase II 2 [Source:VGNC Symbol;Acc:VGNC:84368]                  | - | 1.035040926 | 0.000382766 | 0.002989945 |
| ENSMMUG00000011043 | endoplasmic reticulum aminopeptidase 2 [Source:VGNC Symbol;Acc:VGNC:72141]                     | - | 0.413336912 | 0.003881927 | 0.019546396 |
| ENSMMUG00000054789 | family with sequence similarity 174 member A [Source:NCBI gene;Acc:702300]                     | - | 0.537759278 | 0.000171213 | 0.001542104 |
| ENSMMUG0000007773  | solute carrier organic anion transporter family member 4C1 [Source:VGNC Symbol;Acc:VGNC:77764] | - | 3.459575514 | 2.64E-06    | 4.83E-05    |
| ENSMMUG00000013183 | F-box and leucine rich repeat protein 17 [Source:VGNC Symbol;Acc:VGNC:82142]                   | - | 0.747754132 | 0.002126066 | 0.012154553 |
| ENSMMUG00000038051 | uncharacterized LOC106998885 [Source:NCBI gene;Acc:106998885]                                  | - | 1.651017488 | 2.26E-09    | 1.37E-07    |
| ENSMMUG00000011974 | calcium/calmodulin dependent protein kinase IV [Source:VGNC Symbol;Acc:VGNC:70526]             | - | 1.700601778 | 0.000282537 | 0.002324274 |
| ENSMMUG00000063177 | StAR related lipid transfer domain containing 4 [Source:NCBI gene;Acc:706654]                  | - | 1.489794578 | 3.27E-05    | 0.000395445 |
| ENSMMUG00000012192 | erythrocyte membrane protein band 4.1 like 4A [Source:VGNC Symbol;Acc:VGNC:72039]              | - | 1.539737295 | 1.62E-06    | 3.15E-05    |
| ENSMMUG0000005018  | protein geranylgeranyltransferase type I subunit beta [Source:VGNC Symbol;Acc:VGNC:75965]      | - | 3.325606056 | 0.000157571 | 0.001439513 |
| ENSMMUG00000015114 | toll like receptor adaptor molecule 2 [Source:NCBI gene;Acc:100426353]                         | - | 0.329112778 | 0.003473899 | 0.017893677 |
| ENSMMUG00000060812 | autophagy related 12 [Source:NCBI gene;Acc:696765]                                             | - | 0.989884638 | 6.04E-05    | 0.000650255 |
| ENSMMUG00000022192 |                                                                                                | - | 1.546644395 | 0.001028699 | 0.006726624 |
| ENSMMUG00000037127 | U6 spliceosomal RNA [Source:RFAM;Acc:RF00026]                                                  | - | -1.64939309 | 0.010666458 | 0.043190519 |
| ENSMMUG00000063474 |                                                                                                | - | 0.565615332 | 0.000112348 | 0.001095348 |
| ENSMMUG00000053794 |                                                                                                | - | -1.20067248 | 0.007021962 | 0.031233802 |
| ENSMMUG00000046428 |                                                                                                | - | 1.069456299 | 0.000836745 | 0.005676943 |
| ENSMMUG00000023598 | sorting nexin 2 [Source:VGNC Symbol;Acc:VGNC:77682]                                            | - | 2.178575294 | 0.002476255 | 0.01362936  |
| ENSMMUG00000006646 | casein kinase 1 gamma 3 [Source:VGNC Symbol;Acc:VGNC:81384]                                    | - | 0.919199529 | 0.000299248 | 0.002441669 |
| ENSMMUG00000063396 |                                                                                                | - | 5.335602796 | 0.007035362 | 0.031272016 |
| ENSMMUG00000011214 | solute carrier family 12 member 2 [Source:VGNC Symbol;Acc:VGNC:77386]                          | - | 1.457728528 | 5.64E-05    | 0.000615508 |
| ENSMMUG00000010682 | fibrillin 2 [Source:VGNC Symbol;Acc:VGNC:72624]                                                | - | 0.951805465 | 1.39E-06    | 2.80E-05    |
| ENSMMUG00000016909 | meiotic kinetochore factor [Source:NCBI gene;Acc:709179]                                       | - | 0.916721989 | 7.18E-06    | 0.000109335 |
| ENSMMUG00000010858 | prolyl 4-hydroxylase subunit alpha 2 [Source:VGNC Symbol;Acc:VGNC:75742]                       | - | 4.146803163 | 5.82E-12    | 9.82E-10    |
| ENSMMUG00000051989 | interleukin 5 [Source:NCBI gene;Acc:710622]                                                    | - | 2.827035396 | 0.008563577 | 0.036553292 |
| ENSMMUG00000003131 | interleukin 13 [Source:VGNC Symbol;Acc:VGNC:84393]                                             | - | 0.884600258 | 0.003111733 | 0.016431669 |
| ENSMMUG00000003133 | interleukin 4 [Source:VGNC Symbol;Acc:VGNC:73729]                                              | - | 1.356668974 | 0.00237333  | 0.013163126 |
| ENSMMUG00000010313 | kinesin family member 3A [Source:VGNC Symbol;Acc:VGNC:74017]                                   | - | 1.111151556 | 2.83E-06    | 5.09E-05    |
| ENSMMUG00000010308 | cyclin I family member 2 [Source:VGNC Symbol;Acc:VGNC:70923]                                   | - | 1.285654247 | 1.65E-05    | 0.000221975 |
| ENSMMUG00000010309 | septin 8 [Source:VGNC Symbol;Acc:VGNC:77248]                                                   | - | 1.610493997 | 0.000208426 | 0.001821769 |
| ENSMMUG00000060221 | growth differentiation factor 9 [Source:NCBI gene;Acc:712792]                                  | - | 0.917533799 | 0.000381911 | 0.00298865  |

|                    |                                                                                                      |   |             |             |             |
|--------------------|------------------------------------------------------------------------------------------------------|---|-------------|-------------|-------------|
| ENSMMUG00000015640 | AF4/FMR2 family member 4 [Source:VGNC Symbol;Acc:VGNC:69629]                                         | - | 0.954221149 | 0.000368457 | 0.002898977 |
| ENSMMUG00000013047 | S-phase kinase associated protein 1 [Source:NCBI gene;Acc:100423634]                                 | - | 2.850281338 | 8.87E-25    | 2.38E-21    |
| ENSMMUG00000016641 | ubiquitin conjugating enzyme E2 B [Source:VGNC Symbol;Acc:VGNC:78692]                                | - | 1.052657157 | 0.001809492 | 0.010716871 |
| ENSMMUG00000053384 |                                                                                                      | - | 2.173312776 | 4.62E-20    | 5.46E-17    |
| ENSMMUG00000058096 | CDKN2A interacting protein N-terminal like [Source:NCBI gene;Acc:710774]                             | - | 1.196535191 | 0.000237124 | 0.002022318 |
| ENSMMUG00000012463 | DEAD-box helicase 46 [Source:VGNC Symbol;Acc:VGNC:71663]                                             | - | 1.679649919 | 2.72E-06    | 4.94E-05    |
| ENSMMUG00000060605 |                                                                                                      | - | 0.828952135 | 0.003728518 | 0.018950021 |
| ENSMMUG00000016357 | polycystin 2 like 2, transient receptor potential cation channel [Source:VGNC Symbol;Acc:VGNC:76009] | - | -2.33806641 | 0.001341962 | 0.008417207 |
| ENSMMUG0000008009  | family with sequence similarity 13 member B [Source:VGNC Symbol;Acc:VGNC:72268]                      | - | 2.337971713 | 2.90E-10    | 2.53E-08    |
| ENSMMUG0000001507  | bromodomain containing 8 [Source:VGNC Symbol;Acc:VGNC:70350]                                         | - | 2.860380854 | 0.012480668 | 0.048789772 |
| ENSMMUG00000016741 | matrin 3 [Source:NCBI gene;Acc:100568450]                                                            | - | 1.232422161 | 0.010266991 | 0.042149592 |
| ENSMMUG0000001941  | CXXC finger protein 5 [Source:VGNC Symbol;Acc:VGNC:71594]                                            | - | 0.477127527 | 1.68E-05    | 0.000224902 |
| ENSMMUG00000028372 | Y RNA [Source:RFAM;Acc:RF00019]                                                                      | - | 2.729816251 | 0.005640644 | 0.026219518 |
| ENSMMUG00000003279 | prefoldin subunit 1 [Source:VGNC Symbol;Acc:VGNC:75956]                                              | - | 3.328882704 | 6.58E-10    | 5.10E-08    |
| ENSMMUG00000019582 | ankyrin repeat and KH domain-containing protein 1 [Source:NCBI gene;Acc:698045]                      | - | 0.674868645 | 7.55E-06    | 0.000114014 |
| ENSMMUG0000001707  | amyloid beta precursor protein binding family B member 3 [Source:VGNC Symbol;Acc:VGNC:69869]         | - | 2.389756837 | 6.45E-09    | 3.18E-07    |
| ENSMMUG0000001725  | solute carrier family 35 member A4 [Source:VGNC Symbol;Acc:VGNC:77532]                               | - | 1.81936277  | 3.88E-06    | 6.56E-05    |
| ENSMMUG00000062326 |                                                                                                      | - | 2.146925689 | 1.05E-07    | 3.16E-06    |
| ENSMMUG00000024537 |                                                                                                      | - | 2.881677915 | 0.001249081 | 0.007920792 |
| ENSMMUG00000010007 | CD14 molecule [Source:VGNC Symbol;Acc:VGNC:70751]                                                    | - | 2.1056584   | 9.19E-06    | 0.00013421  |
| ENSMMUG00000060632 |                                                                                                      | - | 1.897808585 | 0.002671802 | 0.014515228 |
| ENSMMUG00000018246 | transmembrane and coiled-coil domains 6 [Source:VGNC Symbol;Acc:VGNC:84507]                          | - | 2.086151504 | 6.51E-07    | 1.51E-05    |
| ENSMMUG00000056796 | NADH:ubiquinone oxidoreductase subunit A2 [Source:NCBI gene;Acc:697736]                              | - | 2.037911154 | 0.001542715 | 0.009459946 |
| ENSMMUG00000008710 | protocadherin 1 [Source:VGNC Symbol;Acc:VGNC:75775]                                                  | - | 2.303695414 | 1.56E-05    | 0.000211482 |
| ENSMMUG00000006287 | DAP3 binding cell death enhancer 1 [Source:VGNC Symbol;Acc:VGNC:71806]                               | - | 0.609355584 | 0.004153399 | 0.02058655  |
| ENSMMUG00000006291 | protocadherin 12 [Source:VGNC Symbol;Acc:VGNC:75776]                                                 | - | 1.024917887 | 0.000137852 | 0.001297323 |
| ENSMMUG00000009768 | ring finger protein 14 [Source:VGNC Symbol;Acc:VGNC:84488]                                           | - | 0.724951812 | 0.00074237  | 0.005180878 |
| ENSMMUG00000009770 | glucosamine-6-phosphate deaminase 1 [Source:VGNC Symbol;Acc:VGNC:73101]                              | - | 0.3461463   | 0.007537539 | 0.033074641 |
| ENSMMUG00000060402 |                                                                                                      | - | 2.295485945 | 2.74E-08    | 1.05E-06    |
| ENSMMUG00000000419 | Rho GTPase activating protein 26 [Source:VGNC Symbol;Acc:VGNC:69846]                                 | - | 1.580122681 | 0.000141873 | 0.001327478 |
| ENSMMUG00000050405 |                                                                                                      | - | 1.928031817 | 2.43E-06    | 4.49E-05    |
| ENSMMUG00000000421 | nuclear receptor subfamily 3 group C member 1 [Source:VGNC Symbol;Acc:VGNC:75515]                    | - | 1.633617244 | 8.56E-07    | 1.88E-05    |
| ENSMMUG00000019820 | SH3 domain and tetratricopeptide repeats 2 [Source:VGNC Symbol;Acc:VGNC:77337]                       | - | 0.934324915 | 0.000931823 | 0.006208649 |

|                    |                                                                                            |             |             |             |
|--------------------|--------------------------------------------------------------------------------------------|-------------|-------------|-------------|
| ENSMMUG00000056140 | U6 spliceosomal RNA [Source:RFAM;Acc:RF00026]                                              | 1.573415911 | 0.000915185 | 0.00612289  |
| ENSMMUG00000063983 |                                                                                            | 2.668993672 | 0.008555567 | 0.036538388 |
| ENSMMUG00000001758 | casein kinase 1 alpha 1 [Source:VGNC Symbol;Acc:VGNC:84290]                                | -2.29066335 | 0.002843222 | 0.015280555 |
| ENSMMUG00000029776 | solute carrier family 26 member 2 [Source:VGNC Symbol;Acc:VGNC:84492]                      | 0.683595205 | 0.005229503 | 0.024696487 |
| ENSMMUG00000011557 | platelet derived growth factor receptor beta [Source:VGNC Symbol;Acc:VGNC:75929]           | 0.6058081   | 0.000461139 | 0.003478872 |
| ENSMMUG00000011563 | calcium/calmodulin dependent protein kinase II alpha [Source:VGNC Symbol;Acc:VGNC:70523]   | 4.081050193 | 0.000147602 | 0.001371222 |
| ENSMMUG00000005414 | N-deacetylase and N-sulfotransferase 1 [Source:VGNC Symbol;Acc:VGNC:75151]                 | 0.787025312 | 0.001026679 | 0.006720173 |
| ENSMMUG00000020679 | myozenin 3 [Source:VGNC Symbol;Acc:VGNC:74988]                                             | 1.419714958 | 1.50E-06    | 2.98E-05    |
| ENSMMUG00000020683 | RNA binding motif protein 22 [Source:VGNC Symbol;Acc:VGNC:76535]                           | 1.699603492 | 2.52E-06    | 4.64E-05    |
| ENSMMUG00000019764 | dynactin subunit 4 [Source:VGNC Symbol;Acc:VGNC:71625]                                     | 1.539570173 | 0.000115199 | 0.001117288 |
| ENSMMUG00000021051 | TNFAIP3 interacting protein 1 [Source:VGNC Symbol;Acc:VGNC:79057]                          | 0.940596223 | 0.000909302 | 0.006092929 |
| ENSMMUG00000021053 | annexin A6 [Source:VGNC Symbol;Acc:VGNC:69951]                                             | 1.175673066 | 2.78E-05    | 0.000344462 |
| ENSMMUG00000003499 | solute carrier family 36 member 1 [Source:VGNC Symbol;Acc:VGNC:77509]                      | 0.912623924 | 0.012840052 | 0.049760942 |
| ENSMMUG00000053367 | secreted protein acidic and cysteine rich [Source:NCBI gene;Acc:712388]                    | 0.703516057 | 0.003704331 | 0.018863953 |
| ENSMMUG00000054302 | antioxidant 1 copper chaperone [Source:NCBI gene;Acc:712464]                               | 1.007518467 | 0.005525019 | 0.02582048  |
| ENSMMUG00000056369 | SAP30 like [Source:NCBI gene;Acc:714400]                                                   | 3.522243734 | 0.011513463 | 0.04589154  |
| ENSMMUG00000050350 |                                                                                            | 3.741554029 | 0.003854365 | 0.019430183 |
| ENSMMUG00000002272 | clathrin interactor 1 [Source:VGNC Symbol;Acc:VGNC:84289]                                  | 1.997401126 | 0.00157864  | 0.009639837 |
| ENSMMUG00000059241 |                                                                                            | 5.024554044 | 4.71E-09    | 2.44E-07    |
| ENSMMUG00000003067 | endoplasmic reticulum-golgi intermediate compartment 1 [Source:VGNC Symbol;Acc:VGNC:82141] | 0.798858194 | 2.48E-05    | 0.000313139 |
| ENSMMUG00000004932 | msh homeobox 2 [Source:VGNC Symbol;Acc:VGNC:84448]                                         | 3.269079033 | 0.000978421 | 0.006474706 |
| ENSMMUG00000059262 |                                                                                            | 1.408170432 | 0.009143321 | 0.038578877 |
| ENSMMUG00000009059 | Fas associated factor family member 2 [Source:VGNC Symbol;Acc:VGNC:72332]                  | 1.518040023 | 0.003418559 | 0.017664593 |
| ENSMMUG00000013283 | cadherin related family member 2 [Source:NCBI gene;Acc:697249]                             | 2.039966598 | 6.13E-07    | 1.43E-05    |
| ENSMMUG00000013284 | G protein regulated inducer of neurite outgrowth 1 [Source:VGNC Symbol;Acc:VGNC:72998]     | 2.229345089 | 0.004239338 | 0.020861456 |
| ENSMMUG00000000137 | synuclein beta [Source:VGNC Symbol;Acc:VGNC:77670]                                         | 3.846255544 | 0.002678723 | 0.014535271 |
| ENSMMUG00000002649 | unc-5 netrin receptor A [Source:VGNC Symbol;Acc:VGNC:78721]                                | 4.430947517 | 2.99E-05    | 0.000365809 |
| ENSMMUG00000002653 | hexokinase 3 [Source:VGNC Symbol;Acc:VGNC:73476]                                           | 0.913891217 | 2.49E-06    | 4.59E-05    |
| ENSMMUG00000009045 | RAB24, member RAS oncogene family [Source:VGNC Symbol;Acc:VGNC:81524]                      | 2.193994554 | 0.000599976 | 0.004342396 |
| ENSMMUG00000016192 | lectin, mannose binding 2 [Source:VGNC Symbol;Acc:VGNC:74302]                              | 0.731541304 | 0.000159279 | 0.001448661 |
| ENSMMUG00000019807 | regulator of G protein signaling 14 [Source:VGNC Symbol;Acc:VGNC:76918]                    | 0.513528782 | 0.001726918 | 0.010321829 |
| ENSMMUG00000016914 | docking protein 3 [Source:VGNC Symbol;Acc:VGNC:71897]                                      | 0.673928461 | 0.004369535 | 0.021388851 |



|                     |                                                                                                         |             |             |             |
|---------------------|---------------------------------------------------------------------------------------------------------|-------------|-------------|-------------|
| ENSMMUG00000016911  | DEAD-box helicase 41 [Source:VGNC Symbol;Acc:VGNC:71660]                                                | 1.175934539 | 0.009327778 | 0.039147168 |
| ENSMMUG00000004002  | CDC like kinase 4 [Source:VGNC Symbol;Acc:VGNC:71173]                                                   | 1.33945157  | 3.61E-06    | 6.24E-05    |
| ENSMMUG00000001728  | mitogen-activated protein kinase 9 [Source:VGNC Symbol;Acc:VGNC:74652]                                  | 0.889750224 | 0.000437321 | 0.003335948 |
| ENSMMUG000000062522 |                                                                                                         | 1.597414375 | 3.85E-07    | 9.64E-06    |
| ENSMMUG000000061151 |                                                                                                         | 1.588884521 | 0.000285477 | 0.002345489 |
| ENSMMUG000000054414 |                                                                                                         | 1.314777031 | 0.000177814 | 0.001589449 |
| ENSMMUG00000003598  | tripartite motif containing 7 [Source:VGNC Symbol;Acc:VGNC:79022]                                       | 1.541344081 | 1.38E-07    | 3.98E-06    |
| ENSMMUG000000021145 | family with sequence similarity 120B [Source:VGNC Symbol;Acc:VGNC:72311]                                | 1.233940974 | 2.79E-05    | 0.000345013 |
| ENSMMUG000000014474 | SPARC related modular calcium binding 2 [Source:VGNC Symbol;Acc:VGNC:83470]                             | 1.008263068 | 8.41E-05    | 0.000868042 |
| ENSMMUG000000021044 | afadin, adherens junction formation factor [Source:VGNC Symbol;Acc:VGNC:69818]                          | 1.34589715  | 7.26E-08    | 2.34E-06    |
| ENSMMUG000000053990 |                                                                                                         | 2.039295143 | 9.16E-07    | 1.99E-05    |
| ENSMMUG000000062443 |                                                                                                         | 1.086168652 | 0.000639716 | 0.00458663  |
| ENSMMUG000000057859 |                                                                                                         | 2.048704515 | 1.82E-05    | 0.000240709 |
| ENSMMUG000000057983 |                                                                                                         | 4.012098275 | 0.000236857 | 0.002021365 |
| ENSMMUG000000054834 |                                                                                                         | 0.40200988  | 0.011651644 | 0.04634149  |
| ENSMMUG000000050418 | superoxide dismutase 2 [Source:NCBI gene;Acc:574097]                                                    | 3.131347055 | 2.40E-08    | 9.53E-07    |
| ENSMMUG000000022247 | osteoclastogenesis associated transmembrane protein 1 [Source:VGNC Symbol;Acc:VGNC:75664]               | 2.373874477 | 1.69E-09    | 1.08E-07    |
| ENSMMUG000000008184 | methyltransferase like 24 [Source:VGNC Symbol;Acc:VGNC:74552]                                           | 1.657727978 | 4.58E-06    | 7.57E-05    |
| ENSMMUG000000021534 | solute carrier family 16 member 10 [Source:NCBI gene;Acc:696132]                                        | 3.094329107 | 8.89E-05    | 0.000908041 |
| ENSMMUG000000061031 |                                                                                                         | 4.800339963 | 2.61E-14    | 8.47E-12    |
| ENSMMUG000000060903 |                                                                                                         | 1.167347224 | 7.81E-08    | 2.46E-06    |
| ENSMMUG000000051427 |                                                                                                         | 1.055372563 | 0.0024674   | 0.013592125 |
| ENSMMUG000000058557 |                                                                                                         | 1.657501987 | 3.40E-05    | 0.000408589 |
| ENSMMUG000000017189 | regulatory factor X6 [Source:VGNC Symbol;Acc:VGNC:76800]                                                | 1.779646902 | 2.55E-05    | 0.000320754 |
| ENSMMUG000000023737 | vestigial like family member 2 [Source:VGNC Symbol;Acc:VGNC:79237]                                      | 0.846948331 | 0.004052663 | 0.020218234 |
| ENSMMUG000000059327 | NUS1 dehydrodolichyl diphosphate synthase subunit [Source:NCBI gene;Acc:715015]                         | 1.227672194 | 2.27E-06    | 4.22E-05    |
| ENSMMUG000000008525 | minichromosome maintenance 9 homologous recombination repair factor [Source:VGNC Symbol;Acc:VGNC:83432] | 2.227816892 | 0.002384353 | 0.013218624 |
| ENSMMUG000000013302 | family with sequence similarity 184 member A [Source:VGNC Symbol;Acc:VGNC:72308]                        | 2.925951183 | 0.000445057 | 0.003381081 |
| ENSMMUG000000060822 |                                                                                                         | -0.87533167 | 0.001231782 | 0.007841685 |
| ENSMMUG000000018176 | clavesin 2 [Source:VGNC Symbol;Acc:VGNC:71322]                                                          | 0.762992502 | 0.00262752  | 0.014316514 |
| ENSMMUG000000009725 | triadin [Source:HGNC Symbol;Acc:HGNC:12261]                                                             | 0.619931478 | 0.004192947 | 0.020727276 |
| ENSMMUG000000015317 | HD domain containing 2 [Source:VGNC Symbol;Acc:VGNC:73209]                                              | 3.438689359 | 2.09E-08    | 8.54E-07    |
| ENSMMUG000000060901 |                                                                                                         | 1.045919786 | 0.000279064 | 0.002301522 |
| ENSMMUG000000015352 | ethylmalonyl-CoA decarboxylase 1 [Source:VGNC Symbol;Acc:VGNC:81063]                                    | 4.028430505 | 1.19E-05    | 0.000169242 |
| ENSMMUG000000048882 | KIAA0408 ortholog [Source:NCBI gene;Acc:100429459]                                                      | 0.490917068 | 0.005745189 | 0.026614337 |
| ENSMMUG000000022136 | laminin subunit alpha 2 [Source:VGNC Symbol;Acc:VGNC:74225]                                             | 0.71504648  | 0.005341992 | 0.02515494  |
| ENSMMUG000000021498 | L3MBTL histone methyl-lysine binding protein 3 [Source:VGNC Symbol;Acc:VGNC:74106]                      | 0.735694888 | 0.001322545 | 0.008309674 |

|                     |                                                                                          |             |             |             |
|---------------------|------------------------------------------------------------------------------------------|-------------|-------------|-------------|
| ENSMMUG00000021499  | sterile alpha motif domain containing 3 [Source:VGNC<br>Symbol;Acc:VGNC:77079]           | -1.40789959 | 8.45E-06    | 0.000124932 |
| ENSMMUG00000017544  | mediator complex subunit 23 [Source:VGNC<br>Symbol;Acc:VGNC:74562]                       | 0.81414296  | 8.26E-05    | 0.000855962 |
| ENSMMUG00000004996  | monooxygenase DBH like 1 [Source:VGNC<br>Symbol;Acc:VGNC:74800]                          | 1.099308559 | 0.000187904 | 0.001669678 |
| ENSMMUG00000004988  | trace amine-associated receptor 3 [Source:NCBI gene;Acc:709130]                          | 0.931362046 | 0.006415589 | 0.029043211 |
| ENSMMUG00000004987  | trace amine associated receptor 2 [Source:VGNC<br>Symbol;Acc:VGNC:83475]                 | 1.167515036 | 0.009457712 | 0.039584662 |
| ENSMMUG00000015088  | trace amine associated receptor 1 [Source:VGNC<br>Symbol;Acc:VGNC:83474]                 | 2.862759628 | 0.009548165 | 0.039866272 |
| ENSMMUG000000054573 |                                                                                          | 1.149646115 | 0.000242202 | 0.002057532 |
| ENSMMUG00000005745  | EYA transcriptional coactivator and phosphatase 4 [Source:VGNC<br>Symbol;Acc:VGNC:72456] | 1.642486117 | 2.57E-07    | 6.83E-06    |
| ENSMMUG00000022921  | solute carrier family 2 member 12 [Source:VGNC<br>Symbol;Acc:VGNC:77503]                 | 1.532998315 | 5.88E-05    | 0.000636258 |
| ENSMMUG000000061787 |                                                                                          | 2.546825348 | 0.003179702 | 0.016729449 |
| ENSMMUG00000018166  | MYB proto-oncogene, transcription factor [Source:VGNC<br>Symbol;Acc:VGNC:75089]          | 0.93926177  | 0.001091388 | 0.007086667 |
| ENSMMUG00000009368  | Abelson helper integration site 1 [Source:VGNC<br>Symbol;Acc:VGNC:81010]                 | 1.394441408 | 9.32E-08    | 2.83E-06    |
| ENSMMUG00000044284  | 40S ribosomal protein S11-like [Source:NCBI gene;Acc:706532]                             | 1.074927835 | 0.004221283 | 0.02081101  |
| ENSMMUG00000016376  | mitogen-activated protein kinase kinase kinase 5 [Source:VGNC<br>Symbol;Acc:VGNC:74495]  | 1.145088674 | 0.00091916  | 0.006143161 |
| ENSMMUG00000019136  | taxilin beta [Source:VGNC Symbol;Acc:VGNC:79325]                                         | 0.407663221 | 0.005619187 | 0.026138464 |
| ENSMMUG000000058187 |                                                                                          | 1.563412134 | 2.67E-06    | 4.85E-05    |
| ENSMMUG00000023012  | vesicle trafficking 1 [Source:VGNC Symbol;Acc:VGNC:79296]                                | 2.095715044 | 0.000105104 | 0.001035589 |
| ENSMMUG00000044958  | adhesion G protein-coupled receptor G6 [Source:VGNC<br>Symbol;Acc:VGNC:81009]            | 1.911191705 | 2.58E-07    | 6.84E-06    |
| ENSMMUG000000061117 |                                                                                          | 1.443633691 | 0.000118116 | 0.001138931 |
| ENSMMUG00000003750  | PLAG1 like zinc finger 1 [Source:VGNC Symbol;Acc:VGNC:83444]                             | 1.669052414 | 3.63E-05    | 0.000429089 |
| ENSMMUG00000023265  | A-kinase anchoring protein 12 [Source:VGNC<br>Symbol;Acc:VGNC:69766]                     | 2.167272867 | 2.89E-07    | 7.49E-06    |
| ENSMMUG000000059202 | Y RNA [Source:RFAM;Acc:RF00019]                                                          | 3.678051262 | 0.002653629 | 0.014428551 |
| ENSMMUG00000029475  | zinc finger and BTB domain containing 2 [Source:VGNC<br>Symbol;Acc:VGNC:79291]           | 2.238360754 | 3.86E-05    | 0.000448967 |
| ENSMMUG00000018342  | required for meiotic nuclear division 1 homolog [Source:VGNC<br>Symbol;Acc:VGNC:76797]   | 2.364281712 | 2.68E-08    | 1.03E-06    |
| ENSMMUG000000060940 | acidic residue methyltransferase 1 [Source:NCBI gene;Acc:704570]                         | 4.383493399 | 1.63E-05    | 0.000219692 |
| ENSMMUG00000018346  | coiled-coil domain containing 170 [Source:VGNC<br>Symbol;Acc:VGNC:70832]                 | 2.339568817 | 0.000179162 | 0.001599304 |
| ENSMMUG00000025949  | U6 spliceosomal RNA [Source:RFAM;Acc:RF00026]                                            | 3.212381595 | 0.010130175 | 0.04174685  |
| ENSMMUG00000019045  | estrogen receptor 1 [Source:VGNC Symbol;Acc:VGNC:72432]                                  | 1.179297512 | 0.000203974 | 0.001786452 |
| ENSMMUG000000057697 |                                                                                          | 1.761869179 | 8.32E-07    | 1.84E-05    |
| ENSMMUG000000051522 | Metazoan signal recognition particle RNA<br>[Source:RFAM;Acc:RF00017]                    | 3.574523937 | 0.000833964 | 0.00566695  |
| ENSMMUG000000051271 |                                                                                          | 3.054486121 | 1.15E-11    | 1.69E-09    |

|                     |                                                                                                         |             |             |             |
|---------------------|---------------------------------------------------------------------------------------------------------|-------------|-------------|-------------|
| ENSMMUG0000000808   | melanin concentrating hormone receptor 2 [Source:VGNC Symbol;Acc:VGNC:74550]                            | 0.467915526 | 0.002230353 | 0.012584805 |
| ENSMMUG00000005925  | PNN interacting serine and arginine rich protein [Source:VGNC Symbol;Acc:VGNC:76090]                    | 2.332673129 | 0.004186324 | 0.020710279 |
| ENSMMUG00000005923  | failed axon connections homolog, metaxin like GST domain containing [Source:VGNC Symbol;Acc:VGNC:72541] | 1.395003803 | 0.001750433 | 0.01044318  |
| ENSMMUG00000009182  | caspase 8 associated protein 2 [Source:VGNC Symbol;Acc:VGNC:70548]                                      | 4.470023174 | 0.000472379 | 0.003536997 |
| ENSMMUG00000003462  | ankyrin repeat domain 6 [Source:VGNC Symbol;Acc:VGNC:81023]                                             | 0.716123555 | 0.001718559 | 0.010288517 |
| ENSMMUG000000064235 |                                                                                                         | 0.621799396 | 0.000428777 | 0.003282329 |
| ENSMMUG000000017039 | arginyl-tRNA synthetase 2, mitochondrial [Source:VGNC Symbol;Acc:VGNC:76516]                            | 0.77463338  | 0.000110732 | 0.001082032 |
| ENSMMUG00000005446  | sorting nexin 14 [Source:VGNC Symbol;Acc:VGNC:77708]                                                    | 1.631026798 | 1.67E-05    | 0.000223476 |
| ENSMMUG000000064804 |                                                                                                         | 0.985608557 | 0.006251714 | 0.028429996 |
| ENSMMUG00000005442  | 5'-nucleotidase ecto [Source:VGNC Symbol;Acc:VGNC:75537]                                                | -0.88424562 | 0.002265399 | 0.012749364 |
| ENSMMUG000000017186 | pleckstrin homology domain interacting protein [Source:VGNC Symbol;Acc:VGNC:75803]                      | 1.895934806 | 3.92E-06    | 6.61E-05    |
| ENSMMUG00000004491  | SUMO specific peptidase 6 [Source:VGNC Symbol;Acc:VGNC:77287]                                           | 0.455188362 | 0.003920183 | 0.019678079 |
| ENSMMUG000000019261 | collagen type XII alpha 1 chain [Source:VGNC Symbol;Acc:VGNC:71291]                                     | -0.3071268  | 0.006347279 | 0.028774036 |
| ENSMMUG000000062339 | endogenous retrovirus group K member 25 Env polyprotein-like [Source:NCBI gene;Acc:114677579]           | 0.774841952 | 0.006096772 | 0.027910812 |
| ENSMMUG00000002777  | protein tyrosine phosphatase 4A1 [Source:VGNC Symbol;Acc:VGNC:83452]                                    | 0.716484903 | 0.006030277 | 0.027645324 |
| ENSMMUG000000011858 | bone morphogenetic protein 5 [Source:VGNC Symbol;Acc:VGNC:70264]                                        | 1.6388639   | 5.28E-05    | 0.000582951 |
| ENSMMUG000000012781 | muscular LMNA interacting protein [Source:VGNC Symbol;Acc:VGNC:83434]                                   | 1.017646102 | 0.004821884 | 0.023184261 |
| ENSMMUG000000011049 | leucine rich repeat containing 1 [Source:VGNC Symbol;Acc:VGNC:81087]                                    | 2.601824569 | 6.24E-08    | 2.03E-06    |
| ENSMMUG000000013718 | translocation associated membrane protein 2 [Source:VGNC Symbol;Acc:VGNC:83515]                         | 1.046649353 | 0.000157762 | 0.001439898 |
| ENSMMUG000000052626 | progesterone and adipoQ receptor family member 8 [Source:NCBI gene;Acc:708418]                          | 0.598110173 | 0.001668111 | 0.010067495 |
| ENSMMUG000000016993 | PKHD1 ciliary IPT domain containing fibrocystin/polyductin [Source:VGNC Symbol;Acc:VGNC:76010]          | 1.978137509 | 2.77E-07    | 7.21E-06    |
| ENSMMUG000000053984 |                                                                                                         | 1.885068486 | 0.009058623 | 0.038264517 |
| ENSMMUG000000019254 | phospholipase A2 group VII [Source:VGNC Symbol;Acc:VGNC:76158]                                          | -0.92822127 | 0.000278271 | 0.002296439 |
| ENSMMUG000000019250 | solute carrier family 25 member 27 [Source:VGNC Symbol;Acc:VGNC:77543]                                  | 0.526268012 | 0.004062912 | 0.020226065 |
| ENSMMUG000000055199 | cytochrome P450, family 39, subfamily A, polypeptide 1 [Source:NCBI gene;Acc:704242]                    | 1.676001077 | 0.000438178 | 0.00334006  |
| ENSMMUG000000019246 | regulator of calcineurin 2 [Source:VGNC Symbol;Acc:VGNC:82092]                                          | 2.467145059 | 2.34E-07    | 6.32E-06    |
| ENSMMUG000000062538 | adenylate cyclase type 10 [Source:NCBI gene;Acc:719662]                                                 | 1.189456579 | 0.001461226 | 0.009035526 |
| ENSMMUG000000021173 | nuclear transcription factor Y subunit alpha [Source:VGNC Symbol;Acc:VGNC:75344]                        | 0.826177397 | 0.001419027 | 0.008822114 |
| ENSMMUG000000021169 | translocator protein 2 [Source:VGNC Symbol;Acc:VGNC:83960]                                              | 1.197485353 | 2.53E-05    | 0.000318566 |
| ENSMMUG000000021168 | unc-5 family C-terminal like [Source:VGNC Symbol;Acc:VGNC:79314]                                        | 1.149577478 | 8.20E-12    | 1.30E-09    |

|                    |                                                                                                |             |             |             |
|--------------------|------------------------------------------------------------------------------------------------|-------------|-------------|-------------|
| ENSMMUG00000013648 | potassium two pore domain channel subfamily K member 16<br>[Source:VGNC Symbol;Acc:VGNC:73827] | 3.324398127 | 0.00610914  | 0.027936937 |
| ENSMMUG00000013644 | potassium two pore domain channel subfamily K member 17<br>[Source:VGNC Symbol;Acc:VGNC:73828] | 2.780249806 | 5.96E-08    | 1.97E-06    |
| ENSMMUG00000023381 | dynein axonemal heavy chain 8 [Source:VGNC<br>Symbol;Acc:VGNC:71943]                           | 0.644411972 | 3.80E-05    | 0.000445262 |
| ENSMMUG00000048502 | Metazoan signal recognition particle RNA<br>[Source:RFAM;Acc:RF00017]                          | 1.274065122 | 0.000402635 | 0.003118925 |
| ENSMMUG00000062055 | glyoxalase I [Source:NCBI gene;Acc:719518]                                                     | 0.962947333 | 1.35E-09    | 8.90E-08    |
| ENSMMUG00000063198 |                                                                                                | 2.904744981 | 0.001299249 | 0.008187029 |
| ENSMMUG00000015416 | bromodomain and PHD finger containing 3 [Source:VGNC<br>Symbol;Acc:VGNC:70309]                 | 0.997304372 | 9.59E-05    | 0.000962154 |
| ENSMMUG00000023823 | Y RNA [Source:RFAM;Acc:RF00019]                                                                | 4.242169476 | 0.009459413 | 0.039584662 |
| ENSMMUG00000000869 | small nuclear ribonucleoprotein polypeptide C [Source:NCBI<br>gene;Acc:718654]                 | 4.956247641 | 1.57E-05    | 0.000212857 |
| ENSMMUG00000063472 |                                                                                                | 5.243707003 | 3.86E-05    | 0.000448967 |
| ENSMMUG00000004287 | death domain associated protein [Source:VGNC<br>Symbol;Acc:VGNC:71737]                         | 1.013165873 | 0.004460262 | 0.021800139 |
| ENSMMUG00000003864 | VPS52 subunit of GARP complex [Source:VGNC<br>Symbol;Acc:VGNC:78551]                           | 0.875088878 | 0.000144313 | 0.001345471 |
| ENSMMUG00000003858 | retinoid X receptor beta [Source:VGNC Symbol;Acc:VGNC:76952]                                   | 0.900741592 | 0.005019351 | 0.023939009 |
| ENSMMUG00000023138 | bromodomain containing 2 [Source:VGNC<br>Symbol;Acc:VGNC:83422]                                | 1.805265584 | 0.009172746 | 0.038633659 |
| ENSMMUG00000022626 | major histocompatibility complex, class II, DM alpha [Source:NCBI<br>gene;Acc:717870]          | 1.730071299 | 0.004880525 | 0.023405643 |
| ENSMMUG00000006828 | valyl-tRNA synthetase 1 [Source:VGNC Symbol;Acc:VGNC:78755]                                    | 2.056836187 | 0.010263471 | 0.042149259 |
| ENSMMUG00000009702 | mutS homolog 5 [Source:NCBI gene;Acc:715494]                                                   | 1.878160771 | 0.006484408 | 0.029252934 |
| ENSMMUG00000058534 |                                                                                                | 3.162866287 | 5.04E-07    | 1.21E-05    |
| ENSMMUG00000015693 | lymphocyte antigen 6 family member G6C [Source:VGNC<br>Symbol;Acc:VGNC:74285]                  | 2.452569104 | 0.000169922 | 0.001532598 |
| ENSMMUG00000053324 | lymphocyte antigen 6 complex locus protein G6d [Source:NCBI<br>gene;Acc:715304]                | 2.436098907 | 3.87E-08    | 1.38E-06    |
| ENSMMUG00000015686 | abhydrolase domain containing 16A [Source:VGNC<br>Symbol;Acc:VGNC:69393]                       | 2.412050414 | 1.99E-10    | 1.90E-08    |
| ENSMMUG00000054159 | lymphocyte antigen 6 family member G5C [Source:VGNC<br>Symbol;Acc:VGNC:83431]                  | 3.044397866 | 0.000320606 | 0.002575543 |
| ENSMMUG00000005294 | casein kinase 2 beta [Source:NCBI gene;Acc:715807]                                             | 2.563048117 | 2.97E-06    | 5.29E-05    |
| ENSMMUG00000005293 | G-patch domain and ankyrin repeats 1 [Source:VGNC<br>Symbol;Acc:VGNC:81073]                    | 2.766144604 | 3.43E-06    | 5.98E-05    |
| ENSMMUG00000005302 | BAG cochaperone 6 [Source:VGNC Symbol;Acc:VGNC:81044]                                          | 2.048739329 | 1.26E-08    | 5.52E-07    |
| ENSMMUG00000005303 | apolipoprotein M [Source:VGNC Symbol;Acc:VGNC:69825]                                           | 2.883297313 | 6.50E-05    | 0.000694869 |
| ENSMMUG00000005297 | proline rich coiled-coil 2A [Source:VGNC Symbol;Acc:VGNC:83448]                                | 2.004872666 | 6.09E-08    | 1.99E-06    |
| ENSMMUG00000025918 | small nucleolar RNA, H/ACA box 38 [Source:HGNC<br>Symbol;Acc:HGNC:32631]                       | 2.750835382 | 1.46E-05    | 0.000199587 |
| ENSMMUG00000049735 | allograft inflammatory factor 1 [Source:NCBI gene;Acc:574115]                                  | 1.829605578 | 7.53E-08    | 2.41E-06    |
| ENSMMUG00000008854 | natural cytotoxicity triggering receptor 3 [Source:VGNC<br>Symbol;Acc:VGNC:74990]              | 2.100014263 | 6.05E-07    | 1.42E-05    |
| ENSMMUG00000052422 | ATPase H+ transporting V1 subunit G2 [Source:NCBI<br>gene;Acc:715331]                          | 4.291982076 | 0.010173073 | 0.041871925 |
| ENSMMUG00000008839 | DExD-box helicase 39B [Source:VGNC Symbol;Acc:VGNC:71621]                                      | 1.791453654 | 0.010438844 | 0.042560378 |
| ENSMMUG00000062264 |                                                                                                | 1.412649257 | 0.010380503 | 0.042400013 |

|                    |                                                                                        |             |             |             |
|--------------------|----------------------------------------------------------------------------------------|-------------|-------------|-------------|
| ENSMMUG00000037625 |                                                                                        | 1.400050062 | 0.001954395 | 0.011390094 |
| ENSMMUG00000053561 |                                                                                        | 4.460056689 | 7.86E-05    | 0.000817053 |
| ENSMMUG00000029883 | olfactory receptor, family 2, subfamily J, member 3 [Source:NCBI gene;Acc:708943]      | 4.095458434 | 9.77E-06    | 0.00014128  |
| ENSMMUG00000059442 |                                                                                        | 3.305726983 | 5.48E-05    | 0.000601309 |
| ENSMMUG00000005415 | olfactory receptor, family 2, subfamily B, member 3 [Source:NCBI gene;Acc:708747]      | 3.067929611 | 0.000211944 | 0.001847552 |
| ENSMMUG00000004377 | olfactory receptor, family 2, subfamily W, member 1 [Source:NCBI gene;Acc:708515]      | 4.19206824  | 0.011589169 | 0.046150867 |
| ENSMMUG00000004617 | glutathione peroxidase 6 [Source:VGNC Symbol;Acc:VGNC:73154]                           | 1.241375556 | 0.002733848 | 0.014796684 |
| ENSMMUG00000060483 |                                                                                        | 1.270663871 | 4.32E-06    | 7.19E-05    |
| ENSMMUG00000012396 | zinc finger and SCAN domain containing 23 [Source:VGNC Symbol;Acc:VGNC:79313]          | 0.819239889 | 0.001448115 | 0.008964393 |
| ENSMMUG00000011675 | zinc finger and SCAN domain containing 12 [Source:VGNC Symbol;Acc:VGNC:78910]          | 1.016727925 | 5.99E-06    | 9.43E-05    |
| ENSMMUG00000005964 | CMP-N-acetylneuraminic acid hydroxylase [Source:NCBI gene;Acc:574186]                  | 1.662625784 | 1.96E-05    | 0.000256983 |
| ENSMMUG00000049021 | Metazoan signal recognition particle RNA [Source:RFAM;Acc:RF00017]                     | 2.334458823 | 0.0001552   | 0.001424509 |
| ENSMMUG00000058151 | chromosome 4 C6orf62 homolog [Source:NCBI gene;Acc:708218]                             | 1.310838693 | 3.35E-06    | 5.88E-05    |
| ENSMMUG00000029939 | acyl-CoA thioesterase 13 [Source:VGNC Symbol;Acc:VGNC:69487]                           | 2.960195044 | 0.006313875 | 0.028662569 |
| ENSMMUG00000051037 |                                                                                        | 2.153247714 | 0.006200266 | 0.028265217 |
| ENSMMUG00000052442 |                                                                                        | 0.742189218 | 0.009186534 | 0.038659351 |
| ENSMMUG00000062089 | ring finger protein 144B [Source:NCBI gene;Acc:705099]                                 | 1.180853632 | 0.005708953 | 0.026461381 |
| ENSMMUG00000052333 |                                                                                        | 0.765856973 | 0.0031251   | 0.016488866 |
| ENSMMUG00000052891 |                                                                                        | 1.72148266  | 0.000995299 | 0.006566364 |
| ENSMMUG00000020289 | CD83 molecule [Source:VGNC Symbol;Acc:VGNC:70783]                                      | 1.739932825 | 4.09E-06    | 6.85E-05    |
| ENSMMUG00000020122 | RAN binding protein 9 [Source:VGNC Symbol;Acc:VGNC:76475]                              | -0.77423923 | 0.002783039 | 0.015012945 |
| ENSMMUG00000004347 | androgen dependent TFPI regulating protein [Source:VGNC Symbol;Acc:VGNC:69661]         | 1.610982871 | 3.84E-05    | 0.000448418 |
| ENSMMUG00000058800 |                                                                                        | 1.101169154 | 0.000484482 | 0.00361513  |
| ENSMMUG00000043161 | endogenous retrovirus group FRD member 1, envelope [Source:VGNC Symbol;Acc:VGNC:81068] | -1.46903795 | 0.000136798 | 0.001290205 |
| ENSMMUG00000049313 | Metazoan signal recognition particle RNA [Source:RFAM;Acc:RF00017]                     | 1.801308678 | 0.003753299 | 0.019031349 |
| ENSMMUG00000050417 |                                                                                        | 1.448676668 | 1.02E-08    | 4.67E-07    |
| ENSMMUG00000018787 | PAK1 interacting protein 1 [Source:VGNC Symbol;Acc:VGNC:75661]                         | 1.252383315 | 1.12E-05    | 0.000159877 |
| ENSMMUG00000061586 | chromosome 4 C6orf52 homolog [Source:NCBI gene;Acc:702114]                             | 0.984539623 | 0.001480703 | 0.009135684 |
| ENSMMUG00000038560 | eukaryotic translation elongation factor 1 epsilon 1 [Source:NCBI gene;Acc:695426]     | 0.997583926 | 0.000366453 | 0.002890292 |
| ENSMMUG00000060973 |                                                                                        | 0.816183794 | 0.003298304 | 0.01722801  |
| ENSMMUG00000055919 |                                                                                        | 2.012964865 | 0.009217587 | 0.038747232 |
| ENSMMUG00000023558 | exocyst complex component 2 [Source:VGNC Symbol;Acc:VGNC:72338]                        | 2.075904883 | 6.74E-05    | 0.000716812 |
| ENSMMUG00000058002 | zinc finger protein 669-like [Source:NCBI gene;Acc:696282]                             | 1.196252383 | 4.10E-05    | 0.000471215 |

|                    |                                                                                     |             |             |             |
|--------------------|-------------------------------------------------------------------------------------|-------------|-------------|-------------|
| ENSMMUG00000065031 |                                                                                     | 0.851460837 | 0.005658004 | 0.026285197 |
| ENSMMUG00000019483 | putative golgin subfamily A member 8D [Source:NCBI gene;Acc:100430266]              | 3.934901767 | 0.001291577 | 0.008146582 |
| ENSMMUG00000055117 |                                                                                     | 2.196230459 | 2.91E-05    | 0.000357438 |
| ENSMMUG00000005270 | ryanodine receptor 3 [Source:NCBI gene;Acc:694996]                                  | 0.482124604 | 0.002403203 | 0.013311777 |
| ENSMMUG00000018332 | family with sequence similarity 98 member B [Source:VGNC Symbol;Acc:VGNC:72583]     | 1.231641423 | 0.000397525 | 0.003085808 |
| ENSMMUG00000020534 | p21 (RAC1) activated kinase 6 [Source:NCBI gene;Acc:701589]                         | 1.323567357 | 2.34E-06    | 4.33E-05    |
| ENSMMUG00000020535 | phospholipase C beta 2 [Source:VGNC Symbol;Acc:VGNC:76164]                          | 1.446353555 | 6.32E-05    | 0.000677179 |
| ENSMMUG00000012408 | dispatched RND transporter family member 2 [Source:VGNC Symbol;Acc:VGNC:71676]      | 1.182238659 | 3.73E-05    | 0.000439546 |
| ENSMMUG00000058981 | kinetochore localized astrin (SPAG5) binding protein [Source:NCBI gene;Acc:702753]  | 0.963976802 | 0.000142179 | 0.001328432 |
| ENSMMUG00000043229 | carbohydrate sulfotransferase 14 [Source:NCBI gene;Acc:703115]                      | 1.200268623 | 0.005708596 | 0.026461381 |
| ENSMMUG00000001482 | coiled-coil domain containing 32 [Source:VGNC Symbol;Acc:VGNC:70891]                | 1.597259444 | 6.57E-06    | 0.000101468 |
| ENSMMUG00000001483 | RNA pseudouridine synthase domain containing 2 [Source:VGNC Symbol;Acc:VGNC:77091]  | 1.620326401 | 0.000201093 | 0.001768367 |
| ENSMMUG00000048910 | kinetochore scaffold 1 [Source:VGNC Symbol;Acc:VGNC:84366]                          | 0.669729682 | 0.002589592 | 0.014139476 |
| ENSMMUG00000010168 | MAX dimerization protein MGA [Source:VGNC Symbol;Acc:VGNC:84390]                    | 0.396344665 | 0.00700743  | 0.031190499 |
| ENSMMUG00000001532 | glucosidase alpha, neutral C [Source:NCBI gene;Acc:708126]                          | 0.739870646 | 0.000109794 | 0.001075286 |
| ENSMMUG00000001534 | calpain 3 [Source:VGNC Symbol;Acc:VGNC:70533]                                       | 0.743183308 | 0.008877997 | 0.037574756 |
| ENSMMUG00000064341 | U6 spliceosomal RNA [Source:RFAM;Acc:RF00026]                                       | 3.146634466 | 0.009512691 | 0.039756446 |
| ENSMMUG00000008093 | StAR related lipid transfer domain containing 9 [Source:NCBI gene;Acc:708953]       | -0.84089493 | 3.55E-05    | 0.000422498 |
| ENSMMUG00000022251 | transglutaminase 7 [Source:VGNC Symbol;Acc:VGNC:79880]                              | 0.661761496 | 0.001408161 | 0.008771333 |
| ENSMMUG00000055498 | leucine carboxyl methyltransferase 2 [Source:NCBI gene;Acc:710047]                  | 0.618512948 | 2.95E-05    | 0.000361604 |
| ENSMMUG00000017067 | adenosine deaminase like [Source:VGNC Symbol;Acc:VGNC:69555]                        | 0.817616181 | 0.000237394 | 0.002023293 |
| ENSMMUG00000017070 | zinc finger and SCAN domain containing 29 [Source:VGNC Symbol;Acc:VGNC:79633]       | 0.890233055 | 0.000287714 | 0.002360892 |
| ENSMMUG00000017076 | tubulin gamma complex associated protein 4 [Source:VGNC Symbol;Acc:VGNC:79045]      | 1.131826057 | 4.67E-05    | 0.000526683 |
| ENSMMUG00000017078 | tumor protein p53 binding protein 1 [Source:VGNC Symbol;Acc:VGNC:78628]             | 0.587618134 | 0.007624149 | 0.033353408 |
| ENSMMUG00000007860 | diphosphoinositol pentakisphosphate kinase 1 [Source:VGNC Symbol;Acc:VGNC:76127]    | 1.229470449 | 0.000908033 | 0.006087567 |
| ENSMMUG00000016742 | CTD small phosphatase like 2 [Source:VGNC Symbol;Acc:VGNC:71593]                    | 0.512677076 | 0.002133074 | 0.012183909 |
| ENSMMUG00000014291 | SPG11 vesicle trafficking associated, spatacsin [Source:VGNC Symbol;Acc:VGNC:77856] | 1.280190475 | 0.000161489 | 0.00146773  |
| ENSMMUG00000005856 | glycine amidinotransferase [Source:VGNC Symbol;Acc:VGNC:72892]                      | 2.018754358 | 7.39E-07    | 1.67E-05    |
| ENSMMUG00000049265 | Metazoan signal recognition particle RNA [Source:RFAM;Acc:RF00017]                  | 1.828547213 | 0.001816534 | 0.01075368  |
| ENSMMUG00000062254 |                                                                                     | 1.866734257 | 3.83E-05    | 0.000448023 |
| ENSMMUG00000013496 | DTW domain containing 1 [Source:VGNC Symbol;Acc:VGNC:72017]                         | 3.558951551 | 0.006658373 | 0.029882262 |
| ENSMMUG00000056522 |                                                                                     | 2.32956842  | 0.000203751 | 0.001785701 |
| ENSMMUG00000050608 |                                                                                     | 2.33142411  | 2.60E-09    | 1.52E-07    |

|                    |                                                                                                                |             |             |             |
|--------------------|----------------------------------------------------------------------------------------------------------------|-------------|-------------|-------------|
| ENSMMUG0000003684  | ATPase phospholipid transporting 8B4 (putative) [Source:VGNC Symbol;Acc:VGNC:84311]                            | 2.1209276   | 4.00E-09    | 2.14E-07    |
| ENSMMUG00000057283 |                                                                                                                | 2.152272977 | 5.89E-06    | 9.34E-05    |
| ENSMMUG0000002879  | GA binding protein transcription factor subunit beta 1 [Source:VGNC Symbol;Acc:VGNC:72845]                     | -0.87599622 | 0.000949891 | 0.006316096 |
| ENSMMUG00000060278 | Metazoan signal recognition particle RNA [Source:RFAM;Acc:RF00017]                                             | -           | -           | -           |
| ENSMMUG0000008575  | transient receptor potential cation channel subfamily M member 7 [Source:VGNC Symbol;Acc:VGNC:79106]           | 1.427241539 | 0.012743279 | 0.04950391  |
| ENSMMUG0000000754  | Dmx like 2 [Source:VGNC Symbol;Acc:VGNC:71936]                                                                 | -0.26917576 | 0.003366059 | 0.017462258 |
| ENSMMUG00000017437 |                                                                                                                | 2.720507446 | 1.78E-10    | 1.74E-08    |
| ENSMMUG00000017432 | LysM domain containing 2 [Source:NCBI gene;Acc:694916]                                                         | -           | -           | -           |
| ENSMMUG0000002345  | tropomodulin 2 [Source:VGNC Symbol;Acc:VGNC:78571]                                                             | 1.253179098 | 0.010992533 | 0.044262814 |
| ENSMMUG00000017374 | tropomodulin 3 [Source:VGNC Symbol;Acc:VGNC:78572]                                                             | 0.602829029 | 0.002204114 | 0.012469205 |
| ENSMMUG00000017374 | G protein subunit beta 5 [Source:VGNC Symbol;Acc:VGNC:73097]                                                   | 0.927707366 | 9.16E-10    | 6.58E-08    |
| ENSMMUG0000007504  | myosin VC [Source:VGNC Symbol;Acc:VGNC:75117]                                                                  | -           | -           | -           |
| ENSMMUG0000001423  | family with sequence similarity 214 member A [Source:VGNC Symbol;Acc:VGNC:72354]                               | 2.768373148 | 0.000152307 | 0.001404901 |
| ENSMMUG00000010798 | cell cycle progression 1 [Source:VGNC Symbol;Acc:VGNC:70844]                                                   | -           | -           | -           |
| ENSMMUG0000000863  | dynein axonemal assembly factor 4 [Source:VGNC Symbol;Acc:VGNC:71881]                                          | 3.740761403 | 0.000115364 | 0.001118048 |
| ENSMMUG00000008718 | zinc finger protein 280D [Source:NCBI gene;Acc:699509]                                                         | -           | -           | -           |
| ENSMMUG00000004091 | transcription factor 12 [Source:VGNC Symbol;Acc:VGNC:78283]                                                    | 0.492348565 | 0.006290939 | 0.028588383 |
| ENSMMUG00000012690 | myocardial zonula adherens protein [Source:NCBI gene;Acc:700247]                                               | 0.612541469 | 0.00089707  | 0.006038974 |
| ENSMMUG00000022200 | SAFB like transcription modulator [Source:VGNC Symbol;Acc:VGNC:77748]                                          | -           | -           | -           |
| ENSMMUG00000063524 |                                                                                                                | 1.733218383 | 7.05E-07    | 1.61E-05    |
| ENSMMUG00000018426 | glucosaminyl (N-acetyl) transferase 3, mucin type [Source:VGNC Symbol;Acc:VGNC:84342]                          | 1.337587158 | 6.15E-06    | 9.61E-05    |
| ENSMMUG00000020348 | BCL2 interacting protein 2 [Source:VGNC Symbol;Acc:VGNC:70272]                                                 | -           | -           | -           |
| ENSMMUG00000060717 | C2 calcium dependent domain containing 4A [Source:NCBI gene;Acc:704354]                                        | 0.882432567 | 0.000126935 | 0.001212828 |
| ENSMMUG00000013460 | RAB8B, member RAS oncogene family [Source:VGNC Symbol;Acc:VGNC:81550]                                          | 4.659497507 | 2.10E-05    | 0.000272409 |
| ENSMMUG00000012117 | HECT and RLD domain containing E3 ubiquitin protein ligase family member 1 [Source:VGNC Symbol;Acc:VGNC:73364] | -           | -           | -           |
| ENSMMUG00000049375 |                                                                                                                | 0.484733908 | 0.003703704 | 0.018863953 |
| ENSMMUG00000018177 | death associated protein kinase 2 [Source:VGNC Symbol;Acc:VGNC:71733]                                          | -           | -           | -           |
| ENSMMUG00000021124 | casein kinase 1 gamma 1 [Source:VGNC Symbol;Acc:VGNC:81383]                                                    | 0.647969305 | 0.000241364 | 0.00205175  |
| ENSMMUG00000006297 | programmed cell death 7 [Source:NCBI gene;Acc:708758]                                                          | -3.90101434 | 0.003119575 | 0.016466394 |
| ENSMMUG00000005749 | poly(ADP-ribose) polymerase family member 16 [Source:VGNC Symbol;Acc:VGNC:84416]                               | -           | -           | -           |
| ENSMMUG00000054184 | Metazoan signal recognition particle RNA [Source:RFAM;Acc:RF00017]                                             | 1.911051731 | 4.37E-05    | 0.000498483 |
| ENSMMUG00000008006 | RAB11A, member RAS oncogene family [Source:VGNC Symbol;Acc:VGNC:81517]                                         | 0.797305711 | 0.005684605 | 0.026395562 |
|                    |                                                                                                                | 1.035050984 | 0.000238446 | 0.002029602 |
|                    |                                                                                                                | 0.336183296 | 0.003413323 | 0.017651561 |
|                    |                                                                                                                | 0.604583713 | 0.000351895 | 0.002799232 |
|                    |                                                                                                                | 1.011135796 | 0.001702669 | 0.010219156 |
|                    |                                                                                                                | 0.486179393 | 0.000382388 | 0.002989945 |
|                    |                                                                                                                | 0.699410781 | 0.002088841 | 0.011987766 |
|                    |                                                                                                                | 1.302971836 | 0.0001339   | 0.001270241 |
|                    |                                                                                                                | 0.925887542 | 0.005310094 | 0.025022856 |
|                    |                                                                                                                | 0.949518543 | 1.63E-05    | 0.000219569 |

|                    |                                                                                                    |             |             |             |
|--------------------|----------------------------------------------------------------------------------------------------|-------------|-------------|-------------|
| ENSMMUG0000008007  | multiple EGF like domains 11 [Source:VGNC Symbol;Acc:VGNC:84376]                                   | 0.793000102 | 0.001246039 | 0.007909216 |
| ENSMMUG0000003693  | DIS3 like exosome 3'-5' exoribonuclease [Source:VGNC Symbol;Acc:VGNC:71796]                        | -3.43501147 | 0.003563774 | 0.018262588 |
| ENSMMUG0000003695  | TIMELESS interacting protein [Source:VGNC Symbol;Acc:VGNC:79873]                                   | 1.401447629 | 0.00383691  | 0.019372223 |
| ENSMMUG00000063378 |                                                                                                    | 0.497311902 | 0.007638386 | 0.033393226 |
| ENSMMUG0000004026  | integrin subunit alpha 11 [Source:VGNC Symbol;Acc:VGNC:73774]                                      | 0.475658419 | 0.004142115 | 0.020538448 |
| ENSMMUG0000006230  | NADPH oxidase 5 [Source:VGNC Symbol;Acc:VGNC:82198]                                                | 0.493941278 | 0.007968064 | 0.034578791 |
| ENSMMUG00000052263 |                                                                                                    | -           | -           | -           |
| ENSMMUG00000052263 | uveal autoantigen with coiled-coil domains and ankyrin repeats [Source:VGNC Symbol;Acc:VGNC:78995] | 1.050933861 | 0.000732961 | 0.005127967 |
| ENSMMUG0000007570  |                                                                                                    | 1.200767594 | 0.002647063 | 0.014410927 |
| ENSMMUG0000006490  | ariadne RBR E3 ubiquitin protein ligase 1 [Source:VGNC Symbol;Acc:VGNC:84308]                      | -           | -           | -           |
| ENSMMUG00000057906 |                                                                                                    | 0.664188422 | 0.01076752  | 0.043504928 |
| ENSMMUG00000063495 |                                                                                                    | 0.56790428  | 0.000138482 | 0.001300429 |
| ENSMMUG0000003231  | coiled-coil domain containing 33 [Source:VGNC Symbol;Acc:VGNC:70876]                               | 0.968210668 | 6.35E-05    | 0.000680784 |
| ENSMMUG00000011071 | enhancer of mRNA decapping 3 [Source:VGNC Symbol;Acc:VGNC:72114]                                   | -           | -           | -           |
| ENSMMUG00000022481 | cytochrome P450, family 1, subfamily A, polypeptide 1 [Source:NCBI gene;Acc:678694]                | 4.149389418 | 0.002561363 | 0.014008869 |
| ENSMMUG00000015267 | C-terminal Src kinase [Source:VGNC Symbol;Acc:VGNC:81380]                                          | 1.047412598 | 0.000379691 | 0.002974857 |
| ENSMMUG00000016104 | chondroitin sulfate proteoglycan 4 [Source:VGNC Symbol;Acc:VGNC:71525]                             | 0.595295672 | 0.004298723 | 0.021113745 |
| ENSMMUG00000053989 |                                                                                                    | 0.935342319 | 0.000144176 | 0.001345164 |
| ENSMMUG00000011047 | S-phase cyclin A associated protein in the ER [Source:VGNC Symbol;Acc:VGNC:77006]                  | 0.66575539  | 0.00076563  | 0.005299515 |
| ENSMMUG00000053250 |                                                                                                    | 0.666099846 | 0.000601529 | 0.004351219 |
| ENSMMUG00000010171 | proline-serine-threonine phosphatase interacting protein 1 [Source:VGNC Symbol;Acc:VGNC:76459]     | -           | -           | -           |
| ENSMMUG00000042378 | pseudopodium enriched atypical kinase 1 [Source:VGNC Symbol;Acc:VGNC:84419]                        | 0.867112531 | 0.002932685 | 0.015681483 |
| ENSMMUG00000058749 | golgin subfamily A member 6C [Source:NCBI gene;Acc:716687]                                         | -           | -           | -           |
| ENSMMUG00000045680 | iron responsive element binding protein 2 [Source:VGNC Symbol;Acc:VGNC:84360]                      | 1.163785713 | 0.002084695 | 0.011970659 |
| ENSMMUG0000007541  | cholinergic receptor nicotinic beta 4 subunit [Source:NCBI gene;Acc:106996685]                     | -           | -           | -           |
| ENSMMUG00000059589 |                                                                                                    | 0.924836638 | 1.56E-06    | 3.06E-05    |
| ENSMMUG00000056992 | zinc finger AN1-type containing 6 [Source:NCBI gene;Acc:717543]                                    | 1.049015854 | 1.62E-05    | 0.0002189   |
| ENSMMUG0000009361  | fumarylacetoacetate hydrolase [Source:NCBI gene;Acc:712716]                                        | -           | -           | -           |
| ENSMMUG00000054653 | Metazoan signal recognition particle RNA [Source:RFAM;Acc:RF00017]                                 | 3.776302579 | 0.008452075 | 0.036172322 |
| ENSMMUG00000011564 | transmembrane channel like 3 [Source:VGNC Symbol;Acc:VGNC:79360]                                   | 1.365287662 | 0.006613359 | 0.02973154  |
| ENSMMUG0000009087  | HDGF like 3 [Source:VGNC Symbol;Acc:VGNC:84346]                                                    | 0.60094553  | 0.012524862 | 0.048918426 |
| ENSMMUG0000009084  | transmembrane 6 superfamily member 1 [Source:VGNC Symbol;Acc:VGNC:78566]                           | 1.850627049 | 0.001582418 | 0.009645286 |
| ENSMMUG00000062559 |                                                                                                    | 1.49958173  | 0.001021144 | 0.006700805 |
| ENSMMUG00000011328 | cytoplasmic polyadenylation element binding protein 1 [Source:NCBI gene;Acc:694357]                | 2.212066329 | 3.91E-07    | 9.75E-06    |
|                    |                                                                                                    | 3.203960101 | 0.012150007 | 0.04781157  |
|                    |                                                                                                    | 3.915053585 | 0.003922859 | 0.019683915 |
|                    |                                                                                                    | -           | -           | -           |
|                    |                                                                                                    | 1.392901234 | 1.43E-06    | 2.88E-05    |
|                    |                                                                                                    | -1.95494954 | 1.78E-07    | 5.01E-06    |
|                    |                                                                                                    | -           | -           | -           |
|                    |                                                                                                    | 1.696161041 | 0.001361017 | 0.008514379 |
|                    |                                                                                                    | 1.07443986  | 0.005804953 | 0.026847136 |



|                    |                                                                                             |             |             |             |
|--------------------|---------------------------------------------------------------------------------------------|-------------|-------------|-------------|
| ENSMMUG00000019838 | phosphodiesterase 8A [Source:VGNC Symbol;Acc:VGNC:75924]                                    | 0.997934893 | 0.000252237 | 0.002117883 |
| ENSMMUG00000056737 |                                                                                             | 1.245702172 | 0.0119626   | 0.047247365 |
| ENSMMUG00000049563 |                                                                                             | 1.716127619 | 8.12E-06    | 0.000121231 |
| ENSMMUG00000016772 | solute carrier family 28 member 1 [Source:VGNC Symbol;Acc:VGNC:77444]                       | 1.020404174 | 9.02E-09    | 4.23E-07    |
| ENSMMUG00000010432 | zinc finger protein 592 [Source:VGNC Symbol;Acc:VGNC:79762]                                 | 0.349021259 | 0.009668568 | 0.040278473 |
| ENSMMUG00000001386 | neurotrophic receptor tyrosine kinase 3 [Source:VGNC Symbol;Acc:VGNC:75542]                 | 1.271839691 | 0.002197466 | 0.012447334 |
| ENSMMUG00000005758 | DET1 partner of COP1 E3 ubiquitin ligase [Source:NCBI gene;Acc:697994]                      | 1.064853033 | 0.001171601 | 0.007532301 |
| ENSMMUG00000014414 | abhydrolase domain containing 2 [Source:VGNC Symbol;Acc:VGNC:69463]                         | 0.987187532 | 0.005355674 | 0.025210239 |
| ENSMMUG00000011155 | FA complementation group I [Source:VGNC Symbol;Acc:VGNC:72575]                              | 0.836062522 | 0.012119449 | 0.047765319 |
| ENSMMUG00000056869 |                                                                                             | 0.654827759 | 1.66E-05    | 0.000221998 |
| ENSMMUG00000022678 | Rh family C glycoprotein [Source:VGNC Symbol;Acc:VGNC:84427]                                | 0.729132833 | 0.010639085 | 0.043106523 |
| ENSMMUG00000015394 | WD repeat domain 93 [Source:VGNC Symbol;Acc:VGNC:79642]                                     | 1.141780851 | 3.35E-08    | 1.23E-06    |
| ENSMMUG00000010586 | mesoderm posterior bHLH transcription factor 1 [Source:VGNC Symbol;Acc:VGNC:74618]          | 1.558516117 | 0.001242893 | 0.007904679 |
| ENSMMUG00000003584 | mesoderm posterior bHLH transcription factor 2 [Source:VGNC Symbol;Acc:VGNC:74619]          | 1.152044553 | 5.11E-08    | 1.74E-06    |
| ENSMMUG00000014983 | alanyl aminopeptidase, membrane [Source:VGNC Symbol;Acc:VGNC:69943]                         | 1.157558639 | 3.28E-08    | 1.21E-06    |
| ENSMMUG00000029507 | adaptor related protein complex 3 subunit sigma 2 [Source:NCBI gene;Acc:701217]             | 1.119888888 | 1.80E-07    | 5.04E-06    |
| ENSMMUG00000023816 | semaphorin 4B [Source:VGNC Symbol;Acc:VGNC:77165]                                           | 2.188001516 | 6.17E-09    | 3.07E-07    |
| ENSMMUG00000004376 | calcium and integrin binding 1 [Source:VGNC Symbol;Acc:VGNC:71189]                          | 2.361343467 | 1.24E-09    | 8.38E-08    |
| ENSMMUG00000029504 | GDP-D-glucose phosphorylase 1 [Source:NCBI gene;Acc:701954]                                 | 0.639613207 | 0.012828665 | 0.049731629 |
| ENSMMUG00000062217 | HD domain containing 3 [Source:NCBI gene;Acc:715621]                                        | 1.610116072 | 0.005203941 | 0.024611802 |
| ENSMMUG00000005108 | RCC1 domain containing 1 [Source:VGNC Symbol;Acc:VGNC:76876]                                | 1.357268236 | 0.012138651 | 0.04781157  |
| ENSMMUG00000063322 |                                                                                             | 1.286263097 | 7.01E-05    | 0.000741762 |
| ENSMMUG00000060063 |                                                                                             | 1.270950777 | 0.000135446 | 0.0012821   |
| ENSMMUG00000006659 | aldehyde dehydrogenase 1 family member A3 [Source:VGNC Symbol;Acc:VGNC:81353]               | 1.182388521 | 0.012692223 | 0.049408877 |
| ENSMMUG00000053848 |                                                                                             | 2.037015721 | 0.008488569 | 0.036304614 |
| ENSMMUG00000058162 |                                                                                             | 2.634240655 | 0.008846307 | 0.037473759 |
| ENSMMUG00000056509 | ribonuclease, RNase A family, 3 [Source:NCBI gene;Acc:100425327]                            | 0.949301336 | 0.000754578 | 0.005239747 |
| ENSMMUG00000006457 | Rho guanine nucleotide exchange factor 40 [Source:VGNC Symbol;Acc:VGNC:69907]               | 2.693356866 | 0.000289272 | 0.002371802 |
| ENSMMUG00000021552 | RPGR interacting protein 1 [Source:VGNC Symbol;Acc:VGNC:77007]                              | 2.763118995 | 1.09E-08    | 4.88E-07    |
| ENSMMUG00000015000 | SPT16 homolog, facilitates chromatin remodeling subunit [Source:VGNC Symbol;Acc:VGNC:78054] | 1.828678944 | 2.20E-05    | 0.0002826   |
| ENSMMUG00000014997 | spalt like transcription factor 2 [Source:NCBI gene;Acc:708367]                             | 1.228618612 | 0.010723674 | 0.043359972 |
| ENSMMUG00000062974 |                                                                                             | 1.666177128 | 6.64E-08    | 2.15E-06    |

|                    |                                                                                             |   |             |             |             |
|--------------------|---------------------------------------------------------------------------------------------|---|-------------|-------------|-------------|
| ENSMMUG00000040154 | T cell receptor alpha variable 9-2 [Source:HGNC Symbol;Acc:HGNC:12154]                      | - | 1.511064614 | 0.003706005 | 0.01886509  |
| ENSMMUG00000038070 | T cell receptor alpha variable 12-3 [Source:HGNC Symbol;Acc:HGNC:12107]                     | - | 1.397763864 | 0.000941846 | 0.006269015 |
| ENSMMUG00000056910 |                                                                                             | - | 0.887201612 | 0.00727894  | 0.032145972 |
| ENSMMUG00000042599 | T cell receptor alpha variable 20 [Source:HGNC Symbol;Acc:HGNC:12117]                       | - | 3.207449017 | 9.73E-08    | 2.94E-06    |
| ENSMMUG00000057791 |                                                                                             | - | 1.552608477 | 0.000871906 | 0.005890912 |
| ENSMMUG00000014748 | solute carrier family 22 member 17 [Source:VGNC Symbol;Acc:VGNC:77560]                      | - | 1.942758504 | 0.006618349 | 0.029743694 |
| ENSMMUG00000014762 | myosin heavy chain 6 [Source:NCBI gene;Acc:713471]                                          | - | 0.662168579 | 0.006781324 | 0.030335482 |
| ENSMMUG00000029420 |                                                                                             | - | 1.883258791 | 0.000557006 | 0.004088272 |
| ENSMMUG00000014766 | neuroguidin [Source:VGNC Symbol;Acc:VGNC:75220]                                             | - | 1.013390729 | 0.003325443 | 0.017326289 |
| ENSMMUG00000045970 | thiamine triphosphatase [Source:NCBI gene;Acc:714403]                                       | - | 1.161236071 | 1.72E-06    | 3.32E-05    |
| ENSMMUG00000014771 | zinc finger homeobox 2 [Source:NCBI gene;Acc:100429448]                                     | - | 1.493378797 | 3.38E-06    | 5.92E-05    |
| ENSMMUG00000059196 |                                                                                             | - | 0.545100046 | 0.009176685 | 0.038637735 |
| ENSMMUG00000012473 | proteasome activator subunit 2 [Source:VGNC Symbol;Acc:VGNC:76456]                          | - | 1.747464844 | 0.011683438 | 0.046440951 |
| ENSMMUG00000040817 | interferon regulatory factor 9 [Source:VGNC Symbol;Acc:VGNC:84361]                          | - | 1.590768412 | 0.012417029 | 0.048584802 |
| ENSMMUG00000003120 | HECT domain E3 ubiquitin protein ligase 1 [Source:VGNC Symbol;Acc:VGNC:73200]               | - | 1.171508302 | 9.08E-05    | 0.000924401 |
| ENSMMUG00000056906 |                                                                                             | - | 0.995799272 | 1.87E-05    | 0.000246738 |
| ENSMMUG00000016487 | Ral GTPase activating protein catalytic alpha subunit 1 [Source:VGNC Symbol;Acc:VGNC:76504] | - | 1.211852867 | 0.009443645 | 0.039546447 |
| ENSMMUG00000052781 |                                                                                             | - | 0.415685651 | 0.002950274 | 0.015758218 |
| ENSMMUG00000003913 | DNA polymerase epsilon 2, accessory subunit [Source:VGNC Symbol;Acc:VGNC:76204]             | - | 2.995830507 | 5.44E-12    | 9.44E-10    |
| ENSMMUG00000055903 | Metazoan signal recognition particle RNA [Source:RFAM;Acc:RF00017]                          | - | -1.92404682 | 0.005603766 | 0.026094731 |
| ENSMMUG00000049543 |                                                                                             | - | 1.596394262 | 0.000186527 | 0.001659354 |
| ENSMMUG00000055012 |                                                                                             | - | 2.002483409 | 0.001669606 | 0.010071845 |
| ENSMMUG00000059134 |                                                                                             | - | 2.096481404 | 2.00E-06    | 3.79E-05    |
| ENSMMUG00000002615 | distal membrane arm assembly complex 2 like [Source:VGNC Symbol;Acc:VGNC:84333]             | - | 1.561482624 | 2.29E-05    | 0.000292187 |
| ENSMMUG00000014658 | ninein [Source:VGNC Symbol;Acc:VGNC:75177]                                                  | - | 3.767602992 | 7.27E-13    | 1.60E-10    |
| ENSMMUG00000056844 |                                                                                             | - | 1.875204288 | 0.00057491  | 0.004198359 |
| ENSMMUG00000018274 | FERM domain containing 6 [Source:VGNC Symbol;Acc:VGNC:72747]                                | - | 0.58746288  | 0.00765961  | 0.033441051 |
| ENSMMUG00000000023 | prostaglandin E receptor 2 [Source:VGNC Symbol;Acc:VGNC:76468]                              | - | 0.997656724 | 0.005600862 | 0.026090547 |
| ENSMMUG00000006997 | thioredoxin domain containing 16 [Source:VGNC Symbol;Acc:VGNC:79214]                        | - | 1.128381035 | 1.74E-07    | 4.90E-06    |
| ENSMMUG00000052273 | glia maturation factor beta [Source:NCBI gene;Acc:696440]                                   | - | 1.600868679 | 0.008217581 | 0.035328171 |
| ENSMMUG00000000302 | WD repeat and HMG-box DNA binding protein 1 [Source:VGNC Symbol;Acc:VGNC:79376]             | - | 1.770314104 | 1.16E-13    | 3.19E-11    |
| ENSMMUG00000054112 |                                                                                             | - | 0.949624781 | 5.87E-05    | 0.000636184 |
| ENSMMUG00000003567 | DLG associated protein 5 [Source:VGNC Symbol;Acc:VGNC:71850]                                | - | 0.912917019 | 0.009704946 | 0.040339574 |
| ENSMMUG00000061576 |                                                                                             | - | 1.997705142 | 3.96E-05    | 0.000458102 |
| ENSMMUG00000053489 |                                                                                             | - | 1.078318506 | 0.011012796 | 0.044303254 |

|                     |                                                                                                                                     |             |             |             |
|---------------------|-------------------------------------------------------------------------------------------------------------------------------------|-------------|-------------|-------------|
| ENSMMUG00000018279  | adaptor related protein complex 5 subunit mu 1 [Source:VGNC Symbol;Acc:VGNC:69868]                                                  | 0.666074759 | 0.000233883 | 0.002002558 |
| ENSMMUG00000011965  | coiled-coil domain containing 175 [Source:VGNC Symbol;Acc:VGNC:84317]                                                               | 1.451460612 | 0.007999978 | 0.034694134 |
| ENSMMUG00000011966  | reticulon 1 [Source:NCBI gene;Acc:619184]                                                                                           | 1.661599976 | 0.005514772 | 0.025791126 |
| ENSMMUG00000004854  | leucine rich repeat containing 9 [Source:VGNC Symbol;Acc:VGNC:81443]                                                                | 1.387715586 | 5.24E-06    | 8.49E-05    |
| ENSMMUG00000002540  | dehydrogenase/reductase 7 [Source:VGNC Symbol;Acc:VGNC:71690]                                                                       | 0.582546001 | 0.000704596 | 0.004966924 |
| ENSMMUG00000002260  | protein kinase C eta [Source:VGNC Symbol;Acc:VGNC:84424]                                                                            | 1.449443037 | 6.43E-10    | 5.01E-08    |
| ENSMMUG00000001319  | methylenetetrahydrofolate dehydrogenase, cyclohydrolase and formyltetrahydrofolate synthetase 1 [Source:VGNC Symbol;Acc:VGNC:84399] | 0.834889799 | 6.92E-05    | 0.000733886 |
| ENSMMUG00000004748  | zinc finger and BTB domain containing 1 [Source:VGNC Symbol;Acc:VGNC:79238]                                                         | 0.55198284  | 0.00706193  | 0.031368667 |
| ENSMMUG00000019170  | pleckstrin homology and RhoGEF domain containing G3 [Source:VGNC Symbol;Acc:VGNC:76082]                                             | 3.750809878 | 4.78E-05    | 0.000537538 |
| ENSMMUG00000019172  | spectrin beta, erythrocytic [Source:VGNC Symbol;Acc:VGNC:77870]                                                                     | 1.315117565 | 5.71E-05    | 0.000622583 |
| ENSMMUG00000006768  | coiled-coil domain containing 196 [Source:VGNC Symbol;Acc:VGNC:70828]                                                               | 1.883208814 | 0.003190299 | 0.016771635 |
| ENSMMUG00000009520  | gephyrin [Source:VGNC Symbol;Acc:VGNC:72948]                                                                                        | 2.345010985 | 6.76E-07    | 1.56E-05    |
| ENSMMUG00000021418  | ATPase H+ transporting V1 subunit D [Source:VGNC Symbol;Acc:VGNC:70060]                                                             | 1.90835143  | 5.55E-05    | 0.000607887 |
| ENSMMUG000000057386 |                                                                                                                                     | 1.983328636 | 0.008621387 | 0.036739766 |
| ENSMMUG00000021327  | phosphatidylinositol glycan anchor biosynthesis class H [Source:VGNC Symbol;Acc:VGNC:75987]                                         | 1.926310904 | 0.00011642  | 0.001124935 |
| ENSMMUG00000015865  | arginase 2 [Source:VGNC Symbol;Acc:VGNC:70005]                                                                                      | 1.983966481 | 2.77E-07    | 7.21E-06    |
| ENSMMUG00000015866  | vesicle transport through interaction with t-SNAREs 1B [Source:NCBI gene;Acc:711113]                                                | 1.894089658 | 2.94E-06    | 5.25E-05    |
| ENSMMUG00000015871  | zinc finger FYVE-type containing 26 [Source:VGNC Symbol;Acc:VGNC:79283]                                                             | 0.888494166 | 0.012409912 | 0.048584802 |
| ENSMMUG000000063892 |                                                                                                                                     | 1.416012398 | 0.003224998 | 0.016913033 |
| ENSMMUG000000060601 |                                                                                                                                     | 1.124063485 | 0.005707882 | 0.026461381 |
| ENSMMUG000000055018 | sushi domain containing 6 [Source:NCBI gene;Acc:712719]                                                                             | 1.218502947 | 0.001028254 | 0.006726624 |
| ENSMMUG00000022407  | serine and arginine rich splicing factor 5 [Source:NCBI gene;Acc:712867]                                                            | 1.067213657 | 0.000222467 | 0.001927648 |
| ENSMMUG00000022409  | solute carrier family 10 member 1 [Source:VGNC Symbol;Acc:VGNC:77380]                                                               | 1.134620089 | 4.88E-05    | 0.000546518 |
| ENSMMUG000000052692 | disintegrin and metalloproteinase domain-containing protein 20-like [Source:NCBI gene;Acc:114679594]                                | 0.923030976 | 0.006589527 | 0.029634645 |
| ENSMMUG00000019470  | pecanex 1 [Source:VGNC Symbol;Acc:VGNC:75655]                                                                                       | 0.643562116 | 0.009591456 | 0.040002287 |
| ENSMMUG00000020067  | signal induced proliferation associated 1 like 1 [Source:VGNC Symbol;Acc:VGNC:77284]                                                | 0.827343206 | 0.000684298 | 0.004842212 |
| ENSMMUG00000002332  | RNA binding motif protein 25 [Source:VGNC Symbol;Acc:VGNC:76521]                                                                    | 1.232676172 | 0.000656908 | 0.004686638 |
| ENSMMUG00000010173  | presenilin 1 [Source:VGNC Symbol;Acc:VGNC:76435]                                                                                    | 1.752800169 | 0.000153951 | 0.001416042 |
| ENSMMUG00000000313  | HEAT repeat containing 4 [Source:VGNC Symbol;Acc:VGNC:73176]                                                                        | 1.421324498 | 2.84E-07    | 7.38E-06    |
| ENSMMUG000000053481 |                                                                                                                                     | 1.446775942 | 2.04E-05    | 0.000265845 |
| ENSMMUG000000049894 |                                                                                                                                     | 1.715355085 | 0.000772057 | 0.005324167 |
| ENSMMUG00000006855  | acyl-CoA thioesterase 2 [Source:NCBI gene;Acc:697011]                                                                               | 1.451275369 | 2.69E-09    | 1.56E-07    |
| ENSMMUG00000004910  | dynein axonemal light chain 1 [Source:VGNC Symbol;Acc:VGNC:71885]                                                                   | 1.436152431 | 0.000106444 | 0.001047214 |

|                     |                                                                                                                                             |             |             |             |
|---------------------|---------------------------------------------------------------------------------------------------------------------------------------------|-------------|-------------|-------------|
| ENSMMUG0000004913   | mitotic deacetylase associated SANT domain protein<br>[Source:VGNC Symbol;Acc:VGNC:72073]                                                   | 0.933574962 | 0.000120278 | 0.001157053 |
| ENSMMUG00000029273  | FAM161 centrosomal protein B [Source:NCBI gene;Acc:697910]<br>vertebrae development associated [Source:VGNC<br>Symbol;Acc:VGNC:79236]       | 0.718271101 | 0.003434679 | 0.017733795 |
| ENSMMUG00000012383  |                                                                                                                                             | 1.414286238 | 0.003999005 | 0.02002736  |
| ENSMMUG00000056376  |                                                                                                                                             | 1.785156278 | 5.71E-06    | 9.11E-05    |
| ENSMMUG00000015166  | NIMA related kinase 9 [Source:VGNC Symbol;Acc:VGNC:75209]<br>transmembrane p24 trafficking protein 10 [Source:NCBI<br>gene;Acc:701522]      | 0.956411398 | 7.26E-10    | 5.49E-08    |
| ENSMMUG00000015168  | Fos proto-oncogene, AP-1 transcription factor subunit<br>[Source:VGNC Symbol;Acc:VGNC:84340]                                                | -0.53099058 | 0.007855509 | 0.034158726 |
| ENSMMUG00000003834  | basic leucine zipper ATF-like transcription factor [Source:VGNC<br>Symbol;Acc:VGNC:70229]                                                   | 1.105990874 | 0.000463001 | 0.003486205 |
| ENSMMUG00000012065  | tubulin tyrosine ligase like 5 [Source:NCBI gene;Acc:703116]<br>estrogen related receptor beta [Source:VGNC<br>Symbol;Acc:VGNC:72434]       | 1.462590309 | 4.14E-09    | 2.20E-07    |
| ENSMMUG00000016773  |                                                                                                                                             | 0.571333839 | 0.012160913 | 0.047827284 |
| ENSMMUG00000057021  | CLOCK interacting pacemaker [Source:NCBI gene;Acc:704679]<br>zinc finger DHHC-type palmitoyltransferase 22 [Source:NCBI<br>gene;Acc:706468] | 1.149887809 | 0.001016346 | 0.006679432 |
| ENSMMUG00000007561  |                                                                                                                                             | -1.5016452  | 2.91E-06    | 5.21E-05    |
| ENSMMUG00000017261  | galactosylceramidase [Source:VGNC Symbol;Acc:VGNC:72867]<br>G protein-coupled receptor 65 [Source:VGNC<br>Symbol;Acc:VGNC:73140]            | 0.781955749 | 0.000457236 | 0.00345343  |
| ENSMMUG00000017260  | zinc finger CCCH-type containing 14 [Source:VGNC<br>Symbol;Acc:VGNC:79255]                                                                  | 1.007719047 | 0.000152577 | 0.001406388 |
| ENSMMUG00000004603  |                                                                                                                                             | 0.473245551 | 0.000826978 | 0.005628296 |
| ENSMMUG00000004606  | EMAP like 5 [Source:VGNC Symbol;Acc:VGNC:72067]<br>tyrosyl-DNA phosphodiesterase 1 [Source:VGNC<br>Symbol;Acc:VGNC:79164]                   | 0.876075988 | 7.50E-07    | 1.69E-05    |
| ENSMMUG00000004460  | protein phosphatase 4 regulatory subunit 3A [Source:VGNC<br>Symbol;Acc:VGNC:76290]                                                          | 1.208003648 | 0.006213585 | 0.028306091 |
| ENSMMUG00000014945  |                                                                                                                                             | 0.643314028 | 0.003480583 | 0.017910513 |
| ENSMMUG00000020751  | ataxin 3 [Source:NCBI gene;Acc:720515]<br>NADH:ubiquinone oxidoreductase subunit B1 [Source:NCBI<br>gene;Acc:697745]                        | 1.099733122 | 0.000581091 | 0.004233991 |
| ENSMMUG00000022428  | cleavage and polyadenylation specific factor 2 [Source:VGNC<br>Symbol;Acc:VGNC:71473]                                                       | 1.47632814  | 0.00025847  | 0.002157673 |
| ENSMMUG00000000699  | ankyrin repeat and SOCS box containing 2 [Source:VGNC<br>Symbol;Acc:VGNC:69840]                                                             | 1.350085374 | 0.000196405 | 0.001731825 |
| ENSMMUG00000012400  |                                                                                                                                             | 1.229077811 | 0.002601345 | 0.01419769  |
| ENSMMUG00000012356  | serpin family A member 9 [Source:VGNC Symbol;Acc:VGNC:77241]<br>serpin family A member 12 [Source:VGNC<br>Symbol;Acc:VGNC:77266]            | 2.062364111 | 8.92E-07    | 1.95E-05    |
| ENSMMUG00000020586  |                                                                                                                                             | 4.200699363 | 0.000557655 | 0.004089886 |
| ENSMMUG00000000681  | calmin [Source:VGNC Symbol;Acc:VGNC:71232]                                                                                                  | 0.784775471 | 4.86E-05    | 0.000544578 |
| ENSMMUG000000051552 |                                                                                                                                             | 2.028751819 | 4.75E-08    | 1.63E-06    |
| ENSMMUG000000061892 |                                                                                                                                             | 1.554728805 | 3.44E-05    | 0.000411806 |
| ENSMMUG000000049437 | Metazoan signal recognition particle RNA<br>[Source:RFAM;Acc:RF00017]                                                                       | 1.048742607 | 0.011275874 | 0.045166006 |
| ENSMMUG000000029197 | YY1 transcription factor [Source:NCBI gene;Acc:717370]                                                                                      | 1.099400838 | 0.000698192 | 0.004927124 |
| ENSMMUG000000059881 | tryptophanyl-tRNA synthetase 1 [Source:NCBI gene;Acc:706855]                                                                                | 1.603776509 | 0.000322239 | 0.002583873 |
| ENSMMUG00000013871  | WD repeat domain 25 [Source:VGNC Symbol;Acc:VGNC:78420]                                                                                     | 2.572842586 | 4.81E-10    | 3.96E-08    |

|                    |                                                                                   |             |             |             |
|--------------------|-----------------------------------------------------------------------------------|-------------|-------------|-------------|
| ENSMMUG00000060616 | Metazoan signal recognition particle RNA [Source:RFAM;Acc:RF00017]                | 0.463356033 | 0.009727317 | 0.040419642 |
| ENSMMUG00000003483 | cyclin dependent kinase 2 interacting protein [Source:VGNC Symbol;Acc:VGNC:71326] | -1.1711606  | 0.000119403 | 0.001149481 |
| ENSMMUG00000003484 | tectonin beta-propeller repeat containing 2 [Source:NCBI gene;Acc:708959]         | 1.569498015 | 0.001306775 | 0.008230469 |
| ENSMMUG00000005845 | REST corepressor 1 [Source:VGNC Symbol;Acc:VGNC:76752]                            | 0.864074478 | 0.003421214 | 0.017671289 |
| ENSMMUG00000011751 |                                                                                   | 1.797482249 | 0.002464358 | 0.013581121 |
| ENSMMUG00000050495 |                                                                                   | 1.845465718 | 0.00806702  | 0.034891805 |
| ENSMMUG00000021634 | TNF alpha induced protein 2 [Source:VGNC Symbol;Acc:VGNC:78579]                   | 1.511880491 | 1.88E-08    | 7.91E-07    |
| ENSMMUG00000049145 | creatine kinase B [Source:NCBI gene;Acc:711167]                                   | 2.067629483 | 1.43E-08    | 6.20E-07    |
| ENSMMUG00000018123 | protein phosphatase 1 regulatory subunit 13B [Source:VGNC Symbol;Acc:VGNC:76259]  | 0.412427818 | 0.000236333 | 0.002018221 |
| ENSMMUG00000052518 | SIVA1 apoptosis inducing factor [Source:NCBI gene;Acc:706688]                     | 1.845827577 | 0.003778356 | 0.019128571 |
| ENSMMUG00000001276 | jagged canonical Notch ligand 2 [Source:VGNC Symbol;Acc:VGNC:73809]               | 1.380664605 | 0.008574234 | 0.036586776 |
| ENSMMUG00000065019 | Metazoan signal recognition particle RNA [Source:RFAM;Acc:RF00017]                | 1.572962679 | 0.00722029  | 0.031919473 |
| ENSMMUG00000022939 | phosphofurin acidic cluster sorting protein 2 [Source:VGNC Symbol;Acc:VGNC:75671] | 1.345941088 | 0.006284998 | 0.02857137  |
| ENSMMUG00000007159 | tubulin epsilon and delta complex 1 [Source:VGNC Symbol;Acc:VGNC:79235]           | 1.824932631 | 4.65E-05    | 0.000525751 |
| ENSMMUG00000015202 |                                                                                   | 2.579747238 | 0.00687791  | 0.030698041 |
| ENSMMUG00000040771 |                                                                                   | -2.0507455  | 0.001211538 | 0.00774313  |
| ENSMMUG00000059525 |                                                                                   | 1.355380028 | 0.004344718 | 0.021299435 |
| ENSMMUG00000055207 |                                                                                   | 2.962752243 | 0.000227794 | 0.001960111 |
| ENSMMUG00000060892 |                                                                                   | 1.868227386 | 1.40E-05    | 0.000194455 |
| ENSMMUG00000052929 |                                                                                   | 3.120341151 | 0.001068413 | 0.006958329 |
| ENSMMUG00000052535 |                                                                                   | 4.590029726 | 1.20E-06    | 2.46E-05    |
| ENSMMUG00000000443 | arylsulfatase F [Source:VGNC Symbol;Acc:VGNC:81362]                               | -0.88962405 | 0.001024989 | 0.006715871 |
| ENSMMUG00000017378 | steroid sulfatase [Source:VGNC Symbol;Acc:VGNC:81590]                             | 1.901979248 | 0.001754278 | 0.010451734 |
| ENSMMUG00000010252 | FERM and PDZ domain containing 4 [Source:VGNC Symbol;Acc:VGNC:72802]              | 0.986284691 | 0.000576535 | 0.004205502 |
| ENSMMUG00000003482 | glycine receptor alpha 2 [Source:VGNC Symbol;Acc:VGNC:73075]                      | 1.281709729 | 0.000901194 | 0.006057329 |
| ENSMMUG00000004797 | CTP synthase 2 [Source:VGNC Symbol;Acc:VGNC:71550]                                | 1.941499999 | 5.15E-05    | 0.000572039 |
| ENSMMUG00000058700 | Metazoan signal recognition particle RNA [Source:RFAM;Acc:RF00017]                | 3.800534814 | 0.000741489 | 0.005179272 |
| ENSMMUG00000019363 | synapse associated protein 1 [Source:VGNC Symbol;Acc:VGNC:78135]                  | 2.103883168 | 5.94E-06    | 9.36E-05    |
| ENSMMUG00000012894 | NHS actin remodeling regulator [Source:VGNC Symbol;Acc:VGNC:75348]                | 3.807540671 | 9.29E-08    | 2.83E-06    |
| ENSMMUG00000005084 | Scm polycomb group protein like 2 [Source:VGNC Symbol;Acc:VGNC:76979]             | 0.852567684 | 0.012217139 | 0.048032661 |
| ENSMMUG00000020515 | adhesion G protein-coupled receptor G2 [Source:VGNC Symbol;Acc:VGNC:69802]        | 2.164430727 | 9.06E-10    | 6.55E-08    |

|                     |                                                                                                 |             |             |             |
|---------------------|-------------------------------------------------------------------------------------------------|-------------|-------------|-------------|
| ENSMMUG0000001088   | patched domain containing 1 [Source:VGNC Symbol;Acc:VGNC:76322]                                 | 0.61379137  | 0.011836002 | 0.04692901  |
| ENSMMUG00000005959  | glycerol kinase [Source:NCBI gene;Acc:707531]                                                   | 0.934850925 | 0.006529473 | 0.029446022 |
| ENSMMUG000000057804 |                                                                                                 | -           | -           | -           |
| ENSMMUG000000049666 |                                                                                                 | 2.590443456 | 0.00112667  | 0.007283036 |
| ENSMMUG000000023016 | jade family PHD finger 3 [Source:VGNC Symbol;Acc:VGNC:73640]                                    | 0.915017579 | 0.00010255  | 0.001015046 |
| ENSMMUG000000019768 | suppressor of variegation 3-9 homolog 1 [Source:VGNC Symbol;Acc:VGNC:78061]                     | 1.36836071  | 1.93E-08    | 8.07E-07    |
| ENSMMUG000000016465 | histone deacetylase 6 [Source:VGNC Symbol;Acc:VGNC:73164]                                       | -           | -           | -           |
| ENSMMUG00000004558  | OTU deubiquitinase 5 [Source:VGNC Symbol;Acc:VGNC:75677]                                        | 0.763029906 | 0.011471931 | 0.045768077 |
| ENSMMUG000000023024 | prickle planar cell polarity protein 3 [Source:VGNC Symbol;Acc:VGNC:76361]                      | 1.032330239 | 8.28E-08    | 2.59E-06    |
| ENSMMUG000000023025 | synaptophysin [Source:VGNC Symbol;Acc:VGNC:78072]                                               | 0.989175929 | 9.18E-06    | 0.000134079 |
| ENSMMUG00000008618  | calcium voltage-gated channel subunit alpha1 F [Source:VGNC Symbol;Acc:VGNC:70503]              | 1.260771036 | 0.000905285 | 0.006075404 |
| ENSMMUG00000008623  | coiled-coil domain containing 22 [Source:VGNC Symbol;Acc:VGNC:70899]                            | 1.091622101 | 0.000710302 | 0.004997633 |
| ENSMMUG000000052252 | protein phosphatase 1 regulatory subunit 3F [Source:NCBI gene;Acc:715950]                       | 1.032944792 | 9.88E-05    | 0.000988444 |
| ENSMMUG000000060311 | G antigen 10-like [Source:NCBI gene;Acc:114674954]                                              | 1.177723322 | 5.95E-08    | 1.97E-06    |
| ENSMMUG000000041376 | G antigen 10 [Source:NCBI gene;Acc:693330]                                                      | 1.869193272 | 2.52E-08    | 9.86E-07    |
| ENSMMUG00000007939  | A-kinase anchoring protein 4 [Source:VGNC Symbol;Acc:VGNC:69770]                                | 1.392742716 | 5.08E-07    | 1.22E-05    |
| ENSMMUG000000023060 | cyclin B3 [Source:NCBI gene;Acc:694534]                                                         | 1.613590032 | 1.51E-07    | 4.33E-06    |
| ENSMMUG000000045093 | melanoma-associated antigen D4 [Source:NCBI gene;Acc:106996411]                                 | 0.774763177 | 0.000902593 | 0.006060466 |
| ENSMMUG000000020202 | X antigen family member 1-like [Source:NCBI gene;Acc:106996044]                                 | 2.00661823  | 2.11E-05    | 0.000273147 |
| ENSMMUG000000012073 | X antigen family member 5 [Source:NCBI gene;Acc:114669729]                                      | 1.911636414 | 1.32E-07    | 3.83E-06    |
| ENSMMUG000000046218 | Metazoan signal recognition particle RNA [Source:RFAM;Acc:RF00017]                              | 3.174845639 | 7.99E-08    | 2.51E-06    |
| ENSMMUG000000047741 | family with sequence similarity 104 member B [Source:NCBI gene;Acc:705418]                      | -           | -           | -           |
| ENSMMUG000000059922 |                                                                                                 | 1.301998338 | 0.002253532 | 0.012699061 |
| ENSMMUG000000051670 |                                                                                                 | -           | -           | -           |
| ENSMMUG000000054377 |                                                                                                 | 1.109262311 | 0.000220787 | 0.001915644 |
| ENSMMUG000000061393 | OTU deubiquitinase 6A [Source:NCBI gene;Acc:694498]                                             | 1.373811238 | 0.001342249 | 0.008417207 |
| ENSMMUG000000054817 | immunoglobulin binding protein 1 [Source:NCBI gene;Acc:694632]                                  | 0.639158401 | 0.004295964 | 0.021108165 |
| ENSMMUG000000013943 | glycerophosphodiester phosphodiesterase domain containing 2 [Source:VGNC Symbol;Acc:VGNC:72787] | 4.663214914 | 1.21E-05    | 0.000171264 |
| ENSMMUG00000003049  | testis expressed 11 [Source:VGNC Symbol;Acc:VGNC:78316]                                         | -           | -           | -           |
| ENSMMUG000000032429 | forkhead box O4 [Source:VGNC Symbol;Acc:VGNC:72712]                                             | 1.945438952 | 2.15E-06    | 4.03E-05    |
| ENSMMUG000000032427 | neuroigin 3 [Source:NCBI gene;Acc:574216]                                                       | 0.911644182 | 3.49E-07    | 8.90E-06    |
| ENSMMUG00000000667  | zinc finger MYM-type containing 3 [Source:VGNC Symbol;Acc:VGNC:78886]                           | -           | -           | -           |
| ENSMMUG000000015238 | O-linked N-acetylglucosamine (GlcNAc) transferase [Source:NCBI gene;Acc:698268]                 | 2.745591816 | 0.005437026 | 0.025510084 |
|                     |                                                                                                 | -           | -           | -           |
|                     |                                                                                                 | 1.061785833 | 0.012133755 | 0.047807217 |
|                     |                                                                                                 | -1.95729846 | 8.38E-05    | 0.000865991 |
|                     |                                                                                                 | -           | -           | -           |
|                     |                                                                                                 | 2.564574172 | 8.20E-06    | 0.000121982 |
|                     |                                                                                                 | 1.601284046 | 2.69E-08    | 1.03E-06    |
|                     |                                                                                                 | -           | -           | -           |
|                     |                                                                                                 | 1.103891333 | 0.008417292 | 0.036038634 |
|                     |                                                                                                 | -           | -           | -           |
|                     |                                                                                                 | 1.382489488 | 0.001251766 | 0.00793009  |
|                     |                                                                                                 | -           | -           | -           |
|                     |                                                                                                 | 1.308315079 | 1.20E-05    | 0.000170759 |

|                    |                                                                               |             |             |             |
|--------------------|-------------------------------------------------------------------------------|-------------|-------------|-------------|
| ENSMMUG00000054148 | Small nucleolar RNA U3 [Source:RFAM;Acc:RF00012]                              | 2.383229589 | 0.004537436 | 0.022069521 |
| ENSMMUG00000054132 |                                                                               | 3.226015565 | 0.005814673 | 0.026865236 |
| ENSMMUG00000009249 | ring finger protein, LIM domain interacting [Source:NCBI gene;Acc:703471]     | 0.461422853 | 0.007572352 | 0.033193802 |
| ENSMMUG00000053505 | U6 spliceosomal RNA [Source:RFAM;Acc:RF00026]                                 | 1.358476727 | 0.004058528 | 0.020224222 |
| ENSMMUG00000017660 |                                                                               | 1.644102962 | 3.10E-06    | 5.50E-05    |
| ENSMMUG00000011440 | neurite extension and migration factor [Source:VGNC Symbol;Acc:VGNC:75274]    | 1.684635465 | 2.31E-06    | 4.28E-05    |
| ENSMMUG00000015619 | ATP binding cassette subfamily B member 7 [Source:VGNC Symbol;Acc:VGNC:81340] | 1.325887104 | 0.0003343   | 0.002673987 |
| ENSMMUG00000049351 | MAGE family member E1 [Source:NCBI gene;Acc:705379]                           | 1.124962783 | 0.003492692 | 0.017943311 |
| ENSMMUG00000014407 | magnesium transporter 1 [Source:VGNC Symbol;Acc:VGNC:74386]                   | 0.779310116 | 0.000406097 | 0.003135329 |
| ENSMMUG00000015861 | cytochrome c oxidase subunit VIIb [Source:NCBI gene;Acc:706099]               | 0.869714092 | 0.002136946 | 0.012195315 |
| ENSMMUG00000056323 | Metazoan signal recognition particle RNA [Source:RFAM;Acc:RF00017]            | 1.366998551 | 0.011654853 | 0.04634149  |
| ENSMMUG00000013387 | cysteinyl leukotriene receptor 1 [Source:VGNC Symbol;Acc:VGNC:71646]          | 0.837513186 | 0.003666156 | 0.018706169 |
| ENSMMUG00000052073 |                                                                               | 0.958400512 | 0.000473066 | 0.003540104 |
| ENSMMUG00000054447 | T-box transcription factor 22 [Source:NCBI gene;Acc:708338]                   | 1.645907017 | 4.86E-05    | 0.000544678 |
| ENSMMUG00000008210 | sushi repeat containing protein X-linked 2 [Source:NCBI gene;Acc:700756]      | 1.132236046 | 0.002853348 | 0.015328643 |
| ENSMMUG00000013008 | cleavage stimulation factor subunit 2 [Source:VGNC Symbol;Acc:VGNC:71536]     | 0.979378131 | 0.012220519 | 0.048032661 |
| ENSMMUG00000065018 | transmembrane protein 35A [Source:NCBI gene;Acc:702205]                       | 0.837394165 | 0.006310927 | 0.028659188 |
| ENSMMUG00000022281 | family with sequence similarity 199, X-linked [Source:NCBI gene;Acc:699523]   | 2.260325263 | 0.005618213 | 0.026138464 |
| ENSMMUG00000060655 |                                                                               | 2.430871125 | 0.003839727 | 0.019378927 |
| ENSMMUG00000013150 | MORC family CW-type zinc finger 4 [Source:VGNC Symbol;Acc:VGNC:74808]         | 1.736678061 | 2.54E-09    | 1.50E-07    |
| ENSMMUG00000013146 | claudin 2 [Source:HGNC Symbol;Acc:HGNC:2041]                                  | 1.900410044 | 7.05E-11    | 7.77E-09    |
| ENSMMUG00000022293 | FERM and PDZ domain containing 3 [Source:VGNC Symbol;Acc:VGNC:72805]          | 0.756239239 | 1.54E-05    | 0.000208856 |
| ENSMMUG00000004674 | phosphoribosyl pyrophosphate synthetase 1 [Source:NCBI gene;Acc:702529]       | 0.859246539 | 0.00033615  | 0.002685485 |
| ENSMMUG00000055906 | angiotensin II receptor type 2 [Source:NCBI gene;Acc:709513]                  | 1.940810883 | 0.000648463 | 0.004641669 |
| ENSMMUG00000008785 | E74 like ETS transcription factor 4 [Source:VGNC Symbol;Acc:VGNC:72208]       | 1.950999396 | 6.16E-06    | 9.62E-05    |
| ENSMMUG00000004198 | heparan sulfate 6-O-sulfotransferase 2 [Source:VGNC Symbol;Acc:VGNC:73422]    | 3.302896496 | 7.24E-10    | 5.49E-08    |
| ENSMMUG00000025616 |                                                                               | 3.414444532 | 0.002968599 | 0.015810646 |
| ENSMMUG00000003456 | glypican 4 [Source:VGNC Symbol;Acc:VGNC:73118]                                | 0.537786135 | 0.000405929 | 0.003135329 |
| ENSMMUG00000007997 | PHD finger protein 6 [Source:VGNC Symbol;Acc:VGNC:75825]                      | 0.791403447 | 0.008929385 | 0.037779955 |
| ENSMMUG00000022371 | myotubularin 1 [Source:VGNC Symbol;Acc:VGNC:75071]                            | 3.487746744 | 0.009523582 | 0.039789178 |
| ENSMMUG00000016610 | CD99 molecule like 2 [Source:VGNC Symbol;Acc:VGNC:70823]                      | 1.092280746 | 0.006316513 | 0.028664537 |
| ENSMMUG00000016929 | proline rich and Gla domain 3 [Source:VGNC Symbol;Acc:VGNC:76350]             | 2.096502346 | 0.001968697 | 0.011446075 |

|                    |                                                                                                                                                               |             |             |             |
|--------------------|---------------------------------------------------------------------------------------------------------------------------------------------------------------|-------------|-------------|-------------|
| ENSMMUG00000063694 | cyclic nucleotide gated channel subunit alpha 2 [Source:NCBI gene;Acc:704486]                                                                                 | 0.602980504 | 0.000635466 | 0.004563707 |
| ENSMMUG00000062628 |                                                                                                                                                               | 1.016008488 | 0.004501565 | 0.02191675  |
| ENSMMUG00000039292 |                                                                                                                                                               | 1.143148412 | 4.37E-05    | 0.000498483 |
| ENSMMUG00000062063 | melanoma-associated antigen 3 [Source:NCBI gene;Acc:711544]<br>chondrosarcoma-associated gene 2/3 protein [Source:NCBI gene;Acc:106992305]                    | 1.259311201 | 4.80E-05    | 0.000538816 |
| ENSMMUG00000037641 |                                                                                                                                                               | 2.162102433 | 0.012721493 | 0.049434042 |
| ENSMMUG00000058013 | melanoma-associated antigen 3 [Source:NCBI gene;Acc:706103]<br>NAD(P) dependent steroid dehydrogenase-like [Source:NCBI gene;Acc:693333]                      | 1.618994405 | 2.28E-05    | 0.000291829 |
| ENSMMUG00000013176 |                                                                                                                                                               | 2.047966094 | 3.24E-05    | 0.000391428 |
| ENSMMUG00000010897 | PNMA family member 3 [Source:VGNC Symbol;Acc:VGNC:76063]                                                                                                      | 0.750868378 | 0.000743039 | 0.005181751 |
| ENSMMUG00000010139 | angiopoietin 2 [Source:VGNC Symbol;Acc:VGNC:69811]                                                                                                            | 5.598357688 | 2.12E-05    | 0.000274196 |
| ENSMMUG00000058176 | b-defensin2-like [Source:NCBI gene;Acc:100169969]                                                                                                             | 2.806200688 | 2.07E-11    | 2.74E-09    |
| ENSMMUG00000049842 |                                                                                                                                                               | 3.443223075 | 0.000930715 | 0.006204449 |
| ENSMMUG00000050140 | Metazoan signal recognition particle RNA [Source:RFAM;Acc:RF00017]                                                                                            | 2.296192463 | 0.009908365 | 0.040988614 |
| ENSMMUG00000063525 |                                                                                                                                                               | 2.931661037 | 8.24E-09    | 3.91E-07    |
| ENSMMUG00000054960 |                                                                                                                                                               | 2.098203076 | 7.22E-05    | 0.000760774 |
| ENSMMUG00000027220 | microRNA 598 [Source:HGNC Symbol;Acc:HGNC:32854]<br>PIN2 (TERF1) interacting telomerase inhibitor 1 [Source:NCBI gene;Acc:701523]                             | 2.884922368 | 0.009936436 | 0.041065549 |
| ENSMMUG00000010180 |                                                                                                                                                               | 2.447302744 | 3.58E-06    | 6.20E-05    |
| ENSMMUG00000008867 | exoribonuclease 1 [Source:VGNC Symbol;Acc:VGNC:72324]<br>tumor suppressor candidate 3 [Source:VGNC Symbol;Acc:VGNC:84132]                                     | 4.333801143 | 8.07E-07    | 1.80E-05    |
| ENSMMUG00000007068 |                                                                                                                                                               | 2.541975754 | 0.009269957 | 0.038929628 |
| ENSMMUG00000022303 | solute carrier family 7 member 2 [Source:VGNC Symbol;Acc:VGNC:77629]<br>microtubule associated scaffold protein 1 [Source:VGNC Symbol;Acc:VGNC:84018]         | 0.706327205 | 5.77E-08    | 1.93E-06    |
| ENSMMUG00000001151 |                                                                                                                                                               | 1.491512583 | 3.87E-08    | 1.38E-06    |
| ENSMMUG00000005920 | N-acetyltransferase 1 [Source:VGNC Symbol;Acc:VGNC:75133]<br>integrator complex subunit 10 [Source:VGNC Symbol;Acc:VGNC:73653]                                | 2.708055202 | 0.006174134 | 0.028158551 |
| ENSMMUG00000011774 |                                                                                                                                                               | 1.648000185 | 1.88E-12    | 3.65E-10    |
| ENSMMUG00000023361 | GDNF family receptor alpha 2 [Source:VGNC Symbol;Acc:VGNC:72918]                                                                                              | 2.556743582 | 3.33E-07    | 8.55E-06    |
| ENSMMUG00000002032 | exportin 7 [Source:VGNC Symbol;Acc:VGNC:78946]                                                                                                                | -1.56098839 | 3.87E-05    | 0.000450153 |
| ENSMMUG00000013029 | surfactant protein C [Source:VGNC Symbol;Acc:VGNC:84113]<br>bone morphogenetic protein 1 [Source:VGNC Symbol;Acc:VGNC:70259]                                  | 1.225917741 | 0.004612624 | 0.022393351 |
| ENSMMUG00000013031 |                                                                                                                                                               | 1.012315174 | 0.001733793 | 0.010353402 |
| ENSMMUG00000023226 | RNA polymerase III subunit D [Source:VGNC Symbol;Acc:VGNC:76017]<br>Metazoan signal recognition particle RNA [Source:RFAM;Acc:RF00017]                        | 0.809233715 | 0.001819839 | 0.010768349 |
| ENSMMUG00000052651 |                                                                                                                                                               | 1.012670513 | 0.00338622  | 0.017546283 |
| ENSMMUG00000014438 | piwi like RNA-mediated gene silencing 2 [Source:VGNC Symbol;Acc:VGNC:81502]<br>phosphatidylethanolamine binding protein 4 [Source:VGNC Symbol;Acc:VGNC:82204] | 1.025920894 | 0.00112313  | 0.007263767 |
| ENSMMUG00000018345 |                                                                                                                                                               | 1.604442637 | 6.01E-08    | 1.98E-06    |
| ENSMMUG00000048076 | TNF receptor superfamily member 10b [Source:NCBI gene;Acc:716650]<br>charged multivesicular body protein 7 [Source:VGNC Symbol;Acc:VGNC:71122]                | 1.002729906 | 0.000738463 | 0.005160911 |
| ENSMMUG00000016653 |                                                                                                                                                               | 1.701158279 | 0.003622859 | 0.01853748  |
| ENSMMUG00000016655 | R3H domain and coiled-coil containing 1 [Source:VGNC Symbol;Acc:VGNC:76551]                                                                                   | 3.622065818 | 4.14E-14    | 1.28E-11    |



|                    |                                                                                                      |             |             |             |
|--------------------|------------------------------------------------------------------------------------------------------|-------------|-------------|-------------|
| ENSMMUG00000056749 | Metazoan signal recognition particle RNA [Source:RFAM;Acc:RF00017]                                   | 3.16498747  | 0.000467235 | 0.003508577 |
| ENSMMUG00000050549 | lysyl oxidase like 2 [Source:NCBI gene;Acc:710151]                                                   | 3.038214207 | 1.20E-11    | 1.74E-09    |
| ENSMMUG00000003348 | neurofilament light [Source:VGNC Symbol;Acc:VGNC:75307]                                              | 1.652158975 | 4.80E-11    | 5.67E-09    |
| ENSMMUG00000056605 | Metazoan signal recognition particle RNA [Source:RFAM;Acc:RF00017]                                   | 2.07695838  | 0.001227972 | 0.007828925 |
| ENSMMUG00000016018 | establishment of sister chromatid cohesion N-acetyltransferase 2 [Source:VGNC Symbol;Acc:VGNC:72374] | -2.85729677 | 0.001407511 | 0.008771333 |
| ENSMMUG00000022044 | scavenger receptor class A member 5 [Source:VGNC Symbol;Acc:VGNC:77117]                              | 0.676426145 | 0.006754143 | 0.030248268 |
| ENSMMUG00000005067 | elongator acetyltransferase complex subunit 3 [Source:VGNC Symbol;Acc:VGNC:72080]                    | 2.134852575 | 5.04E-08    | 1.72E-06    |
| ENSMMUG00000007480 | F-box protein 16 [Source:NCBI gene;Acc:106999728]                                                    | 0.856573672 | 0.012874657 | 0.049865333 |
| ENSMMUG00000064702 |                                                                                                      | -           |             |             |
| ENSMMUG0000000459  | general transcription factor IIE subunit 2 [Source:VGNC Symbol;Acc:VGNC:73308]                       | 2.022362855 | 0.006622706 | 0.029752995 |
| ENSMMUG00000061408 |                                                                                                      | 0.51774849  | 0.000495906 | 0.003696132 |
| ENSMMUG00000063345 |                                                                                                      | -           |             |             |
| ENSMMUG0000000208  | neuregulin 1 [Source:VGNC Symbol;Acc:VGNC:75527]                                                     | 4.956648326 | 3.93E-06    | 6.63E-05    |
| ENSMMUG00000010638 | unc-5 netrin receptor D [Source:VGNC Symbol;Acc:VGNC:79158]                                          | 5.852951636 | 5.52E-08    | 1.85E-06    |
| ENSMMUG00000051162 |                                                                                                      | 3.148562972 | 0.00823901  | 0.035389615 |
| ENSMMUG0000003591  | pleckstrin homology domain containing A2 [Source:VGNC Symbol;Acc:VGNC:76026]                         | 2.967273723 | 0.004792864 | 0.023087405 |
| ENSMMUG00000019304 | indoleamine 2,3-dioxygenase 1 [Source:VGNC Symbol;Acc:VGNC:73580]                                    | 4.152242831 | 0.000795882 | 0.005462031 |
| ENSMMUG00000000776 | zinc finger matrin-type 4 [Source:VGNC Symbol;Acc:VGNC:78424]                                        | 1.785130813 | 9.60E-09    | 4.49E-07    |
| ENSMMUG00000062518 |                                                                                                      | 1.996827458 | 6.06E-06    | 9.51E-05    |
| ENSMMUG00000065247 | opioid receptor kappa 1 [Source:NCBI gene;Acc:710783]                                                | 0.780938376 | 0.009675881 | 0.04029511  |
| ENSMMUG0000005478  | trimethylguanosine synthase 1 [Source:VGNC Symbol;Acc:VGNC:78404]                                    | 1.278482157 | 0.000235458 | 0.002012125 |
| ENSMMUG00000014149 | LYN proto-oncogene, Src family tyrosine kinase [Source:VGNC Symbol;Acc:VGNC:74464]                   | 1.6333561   | 1.06E-08    | 4.78E-07    |
| ENSMMUG00000055121 | Metazoan signal recognition particle RNA [Source:RFAM;Acc:RF00017]                                   | 1.291230468 | 3.30E-05    | 0.000397998 |
| ENSMMUG00000059575 |                                                                                                      | 1.44998795  | 6.67E-06    | 0.000102532 |
| ENSMMUG00000038661 |                                                                                                      | 1.20042219  | 0.002115422 | 0.012120344 |
| ENSMMUG00000049866 |                                                                                                      | -           |             |             |
| ENSMMUG00000014424 | ADP ribosylation factor guanine nucleotide exchange factor 1 [Source:VGNC Symbol;Acc:VGNC:69834]     | 2.080553093 | 2.57E-16    | 1.34E-13    |
| ENSMMUG00000012513 | lactamase beta 2 [Source:VGNC Symbol;Acc:VGNC:74072]                                                 | 1.720954193 | 1.57E-07    | 4.47E-06    |
| ENSMMUG0000007576  | EYA transcriptional coactivator and phosphatase 1 [Source:VGNC Symbol;Acc:VGNC:72453]                | 1.155384395 | 0.000180501 | 0.001609048 |
| ENSMMUG00000013193 | matrix metalloproteinase 16 [Source:VGNC Symbol;Acc:VGNC:74894]                                      | 4.138234046 | 0.000193565 | 0.00171259  |
| ENSMMUG0000003878  | carboxypeptidase Q [Source:VGNC Symbol;Acc:VGNC:71426]                                               | 1.592045192 | 0.002966231 | 0.015804509 |
| ENSMMUG00000055454 |                                                                                                      | -           |             |             |
| ENSMMUG00000060329 |                                                                                                      | 0.536750879 | 0.002199383 | 0.012447858 |
| ENSMMUG00000061917 |                                                                                                      | 1.842737666 | 5.79E-05    | 0.000629035 |
|                    |                                                                                                      | 1.350086168 | 0.002546163 | 0.013937455 |
|                    |                                                                                                      | 0.535952397 | 0.000463719 | 0.003486205 |
|                    |                                                                                                      | 0.61596735  | 0.006431454 | 0.029104903 |
|                    |                                                                                                      | 0.868808399 | 2.02E-05    | 0.000263849 |

|                     |                                                                                          |             |             |             |
|---------------------|------------------------------------------------------------------------------------------|-------------|-------------|-------------|
| ENSMMUG00000014210  | metadherin [Source:VGNC Symbol;Acc:VGNC:74859]                                           | 0.648573988 | 0.001530451 | 0.009389903 |
| ENSMMUG00000053292  | POP1 homolog, ribonuclease P/MRP subunit [Source:NCBI gene;Acc:705643]                   | 0.531164586 | 0.002610012 | 0.014239016 |
| ENSMMUG00000022185  | odd-skipped related transcription factor 2 [Source:VGNC Symbol;Acc:VGNC:84097]           | -           | 7.00E-06    | 0.000106794 |
| ENSMMUG00000004386  | sperm associated antigen 1 [Source:VGNC Symbol;Acc:VGNC:77849]                           | 1.089041802 | -           | -           |
| ENSMMUG000000061687 |                                                                                          | 1.498029322 | 0.011741429 | 0.046642954 |
| ENSMMUG000000051088 |                                                                                          | 1.302081524 | 0.001912721 | 0.011215894 |
| ENSMMUG00000009958  | ankyrin repeat domain 46 [Source:VGNC Symbol;Acc:VGNC:69719]                             | -           | 4.01E-05    | 0.000463221 |
| ENSMMUG000000051999 |                                                                                          | 1.881118007 | -           | -           |
| ENSMMUG000000054357 |                                                                                          | 1.377034158 | 0.000955137 | 0.006344491 |
| ENSMMUG00000011359  | eukaryotic translation initiation factor 3 subunit E [Source:VGNC Symbol;Acc:VGNC:83997] | 2.194714978 | 3.10E-05    | 0.000377976 |
| ENSMMUG00000062333  |                                                                                          | -           | -           | -           |
| ENSMMUG00000024448  |                                                                                          | 3.715209323 | 0.001590861 | 0.009677611 |
| ENSMMUG000000058797 |                                                                                          | 0.788369985 | 0.005658815 | 0.026285197 |
| ENSMMUG00000021157  | TBC1 domain family member 31 [Source:VGNC Symbol;Acc:VGNC:84121]                         | 0.763501277 | 0.000481367 | 0.003596012 |
| ENSMMUG00000028923  | WDYHV motif containing 1 [Source:VGNC Symbol;Acc:VGNC:79503]                             | -           | -           | -           |
| ENSMMUG00000057945  |                                                                                          | 3.720904352 | 0.000727826 | 0.00510131  |
| ENSMMUG00000054878  |                                                                                          | 0.700880188 | 0.005169071 | 0.024491765 |
| ENSMMUG00000054755  | transmembrane protein 65 [Source:NCBI gene;Acc:705727]                                   | 2.398295595 | 0.005506703 | 0.025762656 |
| ENSMMUG00000058106  | otoconin 90 [Source:NCBI gene;Acc:100429699]                                             | 1.131497295 | 0.003109473 | 0.016426402 |
| ENSMMUG00000012560  | HERV-H LTR-associating 1 [Source:NCBI gene;Acc:100430297]                                | -           | -           | -           |
| ENSMMUG00000055934  |                                                                                          | 2.144108946 | 0.006233419 | 0.028376566 |
| ENSMMUG00000052421  |                                                                                          | -           | -           | -           |
| ENSMMUG00000059617  |                                                                                          | 1.815350083 | 0.004922289 | 0.023571169 |
| ENSMMUG0000001432   | t-SNARE domain containing 1 [Source:NCBI gene;Acc:701269]                                | 2.32754626  | 8.77E-07    | 1.92E-05    |
| ENSMMUG00000062642  |                                                                                          | 1.419010076 | 1.94E-06    | 3.69E-05    |
| ENSMMUG00000050257  |                                                                                          | 1.41607271  | 8.05E-08    | 2.52E-06    |
| ENSMMUG00000064147  | lymphocyte antigen 6 family member L [Source:NCBI gene;Acc:106999990]                    | 1.55185228  | 0.000246028 | 0.002084588 |
| ENSMMUG00000061460  |                                                                                          | -1.1074598  | 0.008345794 | 0.035776334 |
| ENSMMUG00000010939  | rhopilin Rho GTPase binding protein 1 [Source:VGNC Symbol;Acc:VGNC:76779]                | -           | -           | -           |
| ENSMMUG00000058733  | zinc finger CCCH-type containing 3 [Source:NCBI gene;Acc:708584]                         | 0.902107699 | 0.000368505 | 0.002898977 |
| ENSMMUG00000057609  |                                                                                          | -           | -           | -           |
| ENSMMUG00000000388  | plectin [Source:VGNC Symbol;Acc:VGNC:76173]                                              | 0.677701786 | 0.008848371 | 0.037473759 |
| ENSMMUG00000021279  | zinc finger MYND-type containing 11 [Source:VGNC Symbol;Acc:VGNC:79060]                  | 1.424244077 | 3.80E-05    | 0.000445221 |
| ENSMMUG00000053106  |                                                                                          | 0.920191046 | 0.010838802 | 0.043721847 |
|                     |                                                                                          | 2.380308309 | 5.58E-07    | 1.31E-05    |
|                     |                                                                                          | 2.339379202 | 1.32E-06    | 2.70E-05    |
|                     |                                                                                          | -           | -           | -           |
|                     |                                                                                          | 0.625665138 | 0.00366965  | 0.018716653 |
|                     |                                                                                          | 0.381200039 | 0.004486976 | 0.021895045 |
|                     |                                                                                          | -0.95218318 | 0.002782926 | 0.015012945 |
|                     |                                                                                          | -0.64557926 | 0.005153984 | 0.024464494 |
|                     |                                                                                          | 0.531079808 | 0.00135706  | 0.008493709 |
|                     |                                                                                          | 1.4593308   | 0.001516755 | 0.009331557 |

|                    |                                                                                                                                                      |             |             |             |
|--------------------|------------------------------------------------------------------------------------------------------------------------------------------------------|-------------|-------------|-------------|
| ENSMMUG00000023282 | aldo-keto reductase family 1, member C1 (dihydrodiol dehydrogenase 1; 20-alpha (3-alpha)-hydroxysteroid dehydrogenase) [Source:NCBI gene;Acc:711198] | 2.069067395 | 2.39E-07    | 6.42E-06    |
| ENSMMUG00000000958 | aldo-keto reductase family 1, member C2 [Source:NCBI gene;Acc:711360]                                                                                | 2.459850959 | 7.12E-08    | 2.30E-06    |
| ENSMMUG00000015151 | interleukin 2 receptor subunit alpha [Source:NCBI gene;Acc:574300]                                                                                   | 1.420062565 | 0.008117418 | 0.035049841 |
| ENSMMUG00000064980 |                                                                                                                                                      | 1.587294284 | 0.004019751 | 0.020092573 |
| ENSMMUG00000037449 | CUGBP Elav-like family member 2 [Source:NCBI gene;Acc:714291]                                                                                        | 1.071231942 | 6.61E-05    | 0.000706303 |
| ENSMMUG00000054583 |                                                                                                                                                      | 0.887792791 | 0.011862229 | 0.04699365  |
| ENSMMUG00000017139 | SEC61 translocon alpha 2 subunit [Source:VGNC Symbol;Acc:VGNC:77260]                                                                                 | 1.458072237 | 0.000690844 | 0.004883219 |
| ENSMMUG00000017145 | cell division cycle 123 [Source:VGNC Symbol;Acc:VGNC:70768]                                                                                          | 0.549706736 | 0.011202402 | 0.044899367 |
| ENSMMUG00000017176 | DNA cross-link repair 1C [Source:NCBI gene;Acc:697493]                                                                                               | 3.699691354 | 0.008119727 | 0.035049841 |
| ENSMMUG00000011661 | integrin subunit alpha 8 [Source:VGNC Symbol;Acc:VGNC:73782]                                                                                         | 0.732555181 | 0.000174175 | 0.00156337  |
| ENSMMUG00000024234 | U6 spliceosomal RNA [Source:RFAM;Acc:RF00026]                                                                                                        | 1.477991884 | 0.00216842  | 0.012326254 |
| ENSMMUG00000023648 | protein AF-10 [Source:NCBI gene;Acc:709083]                                                                                                          | 2.195202307 | 1.16E-05    | 0.000165028 |
| ENSMMUG00000002930 | G protein-coupled receptor 158 [Source:NCBI gene;Acc:707065]                                                                                         | 0.642286848 | 0.012827216 | 0.049731629 |
| ENSMMUG00000037243 | U6 spliceosomal RNA [Source:RFAM;Acc:RF00026]                                                                                                        | 1.433580148 | 0.000846544 | 0.005734451 |
| ENSMMUG00000058108 | BMP and activin membrane bound inhibitor [Source:NCBI gene;Acc:710152]                                                                               | 1.400261165 | 0.005377402 | 0.025294208 |
| ENSMMUG00000024540 | 5S ribosomal RNA [Source:RFAM;Acc:RF00001]                                                                                                           | 1.574147327 | 0.012275009 | 0.048167099 |
| ENSMMUG00000001374 | supervillin [Source:NCBI gene;Acc:695267]                                                                                                            | 0.888247549 | 0.00468662  | 0.022676405 |
| ENSMMUG00000057199 |                                                                                                                                                      | 1.262071819 | 0.002315382 | 0.012952197 |
| ENSMMUG00000054392 | zinc finger protein 239 [Source:NCBI gene;Acc:717737]                                                                                                | 0.975583226 | 0.012269056 | 0.04816521  |
| ENSMMUG00000064724 |                                                                                                                                                      | 2.394580447 | 0.003439625 | 0.017752285 |
| ENSMMUG00000033001 | U6 spliceosomal RNA [Source:RFAM;Acc:RF00026]                                                                                                        | 0.907075584 | 0.00242236  | 0.013395075 |
| ENSMMUG00000017380 | neuregulin 3 [Source:NCBI gene;Acc:699268]                                                                                                           | 2.608856458 | 0.004276887 | 0.021022372 |
| ENSMMUG00000055918 |                                                                                                                                                      | 2.985571714 | 0.000627512 | 0.004521564 |
| ENSMMUG00000057196 | pulmonary surfactant-associated protein A [Source:NCBI gene;Acc:701715]                                                                              | 1.523437375 | 3.95E-07    | 9.84E-06    |
| ENSMMUG00000051972 | zinc finger CCHC-type containing 24 [Source:NCBI gene;Acc:702083]                                                                                    | 3.444662448 | 5.74E-05    | 0.000624547 |
| ENSMMUG00000055601 |                                                                                                                                                      | 2.191246461 | 7.21E-06    | 0.000109738 |
| ENSMMUG00000005514 | RNA polymerase III subunit A [Source:VGNC Symbol;Acc:VGNC:76138]                                                                                     | 0.908019018 | 0.003887828 | 0.019560964 |
| ENSMMUG00000009128 | discs large MAGUK scaffold protein 5 [Source:VGNC Symbol;Acc:VGNC:71921]                                                                             | 0.707752875 | 4.43E-05    | 0.000504689 |
| ENSMMUG00000060115 |                                                                                                                                                      | 0.584793475 | 0.004070999 | 0.020233825 |
| ENSMMUG00000013696 | myozenin 1 [Source:VGNC Symbol;Acc:VGNC:74951]                                                                                                       | 0.93350441  | 0.005750355 | 0.026615343 |
| ENSMMUG00000020402 | mitochondrial calcium uniporter [Source:VGNC Symbol;Acc:VGNC:74560]                                                                                  | 1.674280386 | 0.000769016 | 0.005311645 |
| ENSMMUG00000010431 | DnaJ heat shock protein family (Hsp40) member B12 [Source:NCBI gene;Acc:721891]                                                                      | 1.880509209 | 0.004890482 | 0.023444753 |
| ENSMMUG00000055226 | DNA damage inducible transcript 4 [Source:NCBI gene;Acc:715307]                                                                                      | 3.875581819 | 1.99E-05    | 0.000261182 |

|                    |                                                                                                                 |   |             |             |             |
|--------------------|-----------------------------------------------------------------------------------------------------------------|---|-------------|-------------|-------------|
| ENSMMUG0000009479  | activating signal cointegrator 1 complex subunit 1 [Source:VGNC Symbol;Acc:VGNC:69896]                          | - | 3.367760026 | 0.002688079 | 0.014579298 |
| ENSMMUG00000030532 | solute carrier family 25 member 16 [Source:NCBI gene;Acc:694145]                                                | - | 0.733827293 | 0.001791725 | 0.010626163 |
| ENSMMUG00000050104 | Metazoan signal recognition particle RNA [Source:RFAM;Acc:RF00017]                                              | - | 1.020371527 | 0.00077137  | 0.00532225  |
| ENSMMUG00000053199 |                                                                                                                 | - | 0.773810739 | 0.00379876  | 0.019213087 |
| ENSMMUG00000009794 | protocadherin related 15 [Source:VGNC Symbol;Acc:VGNC:75608]                                                    | - | 0.794580214 | 0.002127116 | 0.012155218 |
| ENSMMUG00000007077 | APOBEC1 complementation factor [Source:VGNC Symbol;Acc:VGNC:69523]                                              | - | 0.523338842 | 0.003139989 | 0.016553991 |
| ENSMMUG00000007078 | N-acylsphingosine amidohydrolase 2 [Source:NCBI gene;Acc:703913]                                                | - | 0.685285331 | 3.18E-05    | 0.000385468 |
| ENSMMUG00000014343 | lipase family member J [Source:VGNC Symbol;Acc:VGNC:74333]                                                      | - | 0.933674817 | 0.00747174  | 0.032874644 |
| ENSMMUG00000061761 | interferon induced protein with tetratricopeptide repeats 2 [Source:NCBI gene;Acc:695452]                       | - | -0.85461126 | 0.001023703 | 0.006712874 |
| ENSMMUG00000058942 |                                                                                                                 | - | -0.99795241 | 0.002448852 | 0.013524316 |
| ENSMMUG00000017533 | interferon induced protein with tetratricopeptide repeats 1 [Source:NCBI gene;Acc:695683]                       | - | 1.243304762 | 0.000132758 | 0.001261251 |
| ENSMMUG00000063840 |                                                                                                                 | - | 1.891923286 | 0.002282781 | 0.012813917 |
| ENSMMUG00000059038 | 5-hydroxytryptamine receptor 7 [Source:NCBI gene;Acc:696317]                                                    | - | 1.158254525 | 0.00232155  | 0.012962258 |
| ENSMMUG00000000238 | HECT domain E3 ubiquitin protein ligase 2 [Source:VGNC Symbol;Acc:VGNC:73246]                                   | - | 2.252235685 | 5.63E-10    | 4.46E-08    |
| ENSMMUG00000058603 |                                                                                                                 | - | 2.447037862 | 4.65E-05    | 0.000525751 |
| ENSMMUG00000017627 | B-TFIID TATA-box binding protein associated factor 1 [Source:VGNC Symbol;Acc:VGNC:70336]                        | - | 0.797107589 | 0.001698121 | 0.010205987 |
| ENSMMUG00000004816 | membrane associated ring-CH-type finger 5 [Source:VGNC Symbol;Acc:VGNC:74588]                                   | - | 0.897902041 | 0.002534831 | 0.013881268 |
| ENSMMUG00000049455 | Metazoan signal recognition particle RNA [Source:RFAM;Acc:RF00017]                                              | - | 2.290517801 | 0.012629735 | 0.049180339 |
| ENSMMUG00000011789 | hematopoietically expressed homeobox [Source:VGNC Symbol;Acc:VGNC:73376]                                        | - | 2.632973525 | 7.13E-07    | 1.62E-05    |
| ENSMMUG00000049508 |                                                                                                                 | - | 2.663972382 | 0.00022283  | 0.001929513 |
| ENSMMUG00000052637 | Metazoan signal recognition particle RNA [Source:RFAM;Acc:RF00017]                                              | - | 2.516974598 | 7.75E-06    | 0.000116798 |
| ENSMMUG00000006841 | myoferlin [Source:VGNC Symbol;Acc:VGNC:75061]                                                                   | - | 4.448295052 | 2.06E-06    | 3.89E-05    |
| ENSMMUG00000014715 | fragile site, folic acid type, rare, fra(10)(q23.3) or fra(10)(q24.2) candidate 1 [Source:NCBI gene;Acc:700389] | - | 3.20944964  | 2.17E-08    | 8.80E-07    |
| ENSMMUG00000050975 |                                                                                                                 | - | 1.305464348 | 0.004502657 | 0.02191675  |
| ENSMMUG00000004818 | sorbin and SH3 domain containing 1 [Source:VGNC Symbol;Acc:VGNC:77702]                                          | - | 0.310840404 | 0.007871394 | 0.034204926 |
| ENSMMUG00000008687 | B cell linker [Source:VGNC Symbol;Acc:VGNC:70306]                                                               | - | 0.502786989 | 0.010615365 | 0.043063311 |
| ENSMMUG00000010427 | ligand dependent nuclear receptor corepressor [Source:NCBI gene;Acc:705646]                                     | - | 0.770798103 | 0.000226731 | 0.001958079 |
| ENSMMUG00000010428 | slit guidance ligand 1 [Source:VGNC Symbol;Acc:VGNC:77643]                                                      | - | 0.767497369 | 0.000425662 | 0.00326232  |
| ENSMMUG00000019634 | ribosomal RNA processing 12 homolog [Source:VGNC Symbol;Acc:VGNC:77122]                                         | - | 0.674266047 | 0.000251139 | 0.002111387 |
| ENSMMUG00000015503 | zinc finger FYVE-type containing 27 [Source:VGNC Symbol;Acc:VGNC:79623]                                         | - | 0.54173568  | 0.005972726 | 0.027448521 |
| ENSMMUG00000020603 | pyridine nucleotide-disulphide oxidoreductase domain 2 [Source:NCBI gene;Acc:707797]                            | - | 1.100834116 | 3.96E-07    | 9.85E-06    |

|                    |                                                                                                     |             |             |             |
|--------------------|-----------------------------------------------------------------------------------------------------|-------------|-------------|-------------|
| ENSMMUG00000054904 | Metazoan signal recognition particle RNA<br>[Source:RFAM;Acc:RF00017]                               | 1.329353674 | 1.07E-07    | 3.19E-06    |
| ENSMMUG00000020604 | HPS1 biogenesis of lysosomal organelles complex 3 subunit 1<br>[Source:VGNC Symbol;Acc:VGNC:73515]  | 1.074524478 | 0.000176045 | 0.001576885 |
| ENSMMUG00000049770 | Metazoan signal recognition particle RNA<br>[Source:RFAM;Acc:RF00017]                               | 1.556332292 | 0.000289409 | 0.002371802 |
| ENSMMUG00000020605 | heparanase 2 (inactive) [Source:NCBI gene;Acc:708795]                                               | 0.786503329 | 0.004672622 | 0.022617088 |
| ENSMMUG00000010357 | cyclin and CBS domain divalent metal cation transport mediator 1<br>[Source:NCBI gene;Acc:708335]   | 0.927833919 | 0.000272188 | 0.00225483  |
| ENSMMUG00000063121 |                                                                                                     | 1.530676408 | 0.000113001 | 0.001100063 |
| ENSMMUG00000015117 | X-prolyl aminopeptidase 1 [Source:VGNC<br>Symbol;Acc:VGNC:78810]                                    | 1.236684432 | 0.000585969 | 0.004257608 |
| ENSMMUG00000006233 | adducin 3 [Source:VGNC Symbol;Acc:VGNC:69531]                                                       | 1.545037519 | 0.003653164 | 0.018669988 |
| ENSMMUG00000063986 |                                                                                                     | 1.774926797 | 0.001089435 | 0.007077517 |
| ENSMMUG00000014350 | MAX interactor 1, dimerization protein [Source:VGNC<br>Symbol;Acc:VGNC:75087]                       | 0.821082217 | 0.001420067 | 0.008824362 |
| ENSMMUG00000007775 | survival motor neuron domain containing 1 [Source:NCBI<br>gene;Acc:694761]                          | 0.973169869 | 0.009603086 | 0.040031326 |
| ENSMMUG00000057793 | dual specificity phosphatase 5 [Source:NCBI gene;Acc:698178]                                        | 4.462408847 | 0.000158552 | 0.001445078 |
| ENSMMUG00000007982 | structural maintenance of chromosomes 3 [Source:VGNC<br>Symbol;Acc:VGNC:77769]                      | 3.049713669 | 2.08E-06    | 3.91E-05    |
| ENSMMUG00000019883 | RNA binding motif protein 20 [Source:NCBI gene;Acc:698677]                                          | 3.163431082 | 1.67E-07    | 4.74E-06    |
| ENSMMUG00000017204 | programmed cell death 4 [Source:VGNC Symbol;Acc:VGNC:75794]                                         | 4.193528621 | 2.76E-08    | 1.05E-06    |
| ENSMMUG00000056056 |                                                                                                     | 3.680368037 | 0.003657708 | 0.018677719 |
| ENSMMUG00000017206 | SHOC2 leucine rich repeat scaffold protein [Source:VGNC<br>Symbol;Acc:VGNC:81569]                   | 4.320917885 | 3.56E-05    | 0.000423728 |
| ENSMMUG00000003548 | tectorin beta [Source:VGNC Symbol;Acc:VGNC:78306]                                                   | 1.996058672 | 1.42E-05    | 0.0001962   |
| ENSMMUG00000054123 | vesicle transport through interaction with t-SNAREs 1A<br>[Source:NCBI gene;Acc:696654]             | 1.276483546 | 0.001194503 | 0.007641761 |
| ENSMMUG00000053789 |                                                                                                     | 1.059971954 | 0.001174042 | 0.00754054  |
| ENSMMUG00000055239 |                                                                                                     | 1.279297682 | 1.48E-07    | 4.26E-06    |
| ENSMMUG00000022514 | coiled-coil domain containing 186 [Source:VGNC<br>Symbol;Acc:VGNC:70847]                            | 0.973207424 | 3.11E-05    | 0.000378015 |
| ENSMMUG00000058240 |                                                                                                     | 1.093872135 | 0.011425701 | 0.045625629 |
| ENSMMUG00000015414 | family with sequence similarity 160 member B1 [Source:VGNC<br>Symbol;Acc:VGNC:72403]                | -1.01763071 | 0.00278799  | 0.015027187 |
| ENSMMUG00000021805 | RAB11 family interacting protein 2 [Source:VGNC<br>Symbol;Acc:VGNC:76560]                           | 1.998871376 | 0.003489357 | 0.017937779 |
| ENSMMUG00000021610 | regulator of G protein signaling 10 [Source:VGNC<br>Symbol;Acc:VGNC:76915]                          | 1.628059568 | 2.38E-08    | 9.53E-07    |
| ENSMMUG00000054942 |                                                                                                     | 1.382858181 | 0.000446143 | 0.003387351 |
| ENSMMUG00000001472 | TIA1 cytotoxic granule associated RNA binding protein like 1<br>[Source:VGNC Symbol;Acc:VGNC:78354] | 1.327465935 | 1.10E-05    | 0.000158019 |
| ENSMMUG00000009558 | inositol polyphosphate-5-phosphatase F [Source:VGNC<br>Symbol;Acc:VGNC:73610]                       | 2.949639409 | 5.93E-05    | 0.000639381 |
| ENSMMUG00000009559 | minichromosome maintenance complex binding protein<br>[Source:VGNC Symbol;Acc:VGNC:74583]           | 2.181157255 | 1.42E-05    | 0.000195812 |
| ENSMMUG00000064321 |                                                                                                     | 0.994458459 | 0.003616776 | 0.018519602 |
| ENSMMUG00000064557 |                                                                                                     | 0.903718829 | 0.000280596 | 0.002311232 |

|                    |                                                                                         |             |             |             |
|--------------------|-----------------------------------------------------------------------------------------|-------------|-------------|-------------|
| ENSMMUG0000009594  | fibroblast growth factor receptor 2 [Source:VGNC Symbol;Acc:VGNC:72652]                 | 2.330232864 | 0.011902914 | 0.047083121 |
| ENSMMUG00000021140 | chromosome 9 C10orf120 homolog [Source:VGNC Symbol;Acc:VGNC:70632]                      | 4.393253139 | 0.008264262 | 0.035461889 |
| ENSMMUG00000023480 | IKAROS family zinc finger 5 [Source:VGNC Symbol;Acc:VGNC:73590]                         | -           | 0.00022723  | 0.001958547 |
| ENSMMUG00000000684 | acyl-CoA dehydrogenase short/branched chain [Source:VGNC Symbol;Acc:VGNC:81343]         | 1.904225407 | 0.001412014 | 0.008782711 |
| ENSMMUG00000020346 | carboxypeptidase X, M14 family member 2 [Source:VGNC Symbol;Acc:VGNC:71596]             | 2.161613361 | 6.27E-22    | 1.02E-18    |
| ENSMMUG00000058933 | -                                                                                       | 1.676807277 | 0.006334078 | 0.028734224 |
| ENSMMUG00000008541 | BRCA2 and CDKN1A interacting protein [Source:NCBI gene;Acc:699437]                      | 0.782637923 | 0.004305116 | 0.021137158 |
| ENSMMUG00000008542 | DEAH-box helicase 32 (putative) [Source:NCBI gene;Acc:695919]                           | 0.845276973 | 0.001144271 | 0.007385801 |
| ENSMMUG00000013653 | lysine demethylase 5A [Source:VGNC Symbol;Acc:VGNC:82169]                               | 0.402339032 | 0.000769915 | 0.005315032 |
| ENSMMUG00000013894 | beta-1,4-N-acetyl-galactosaminyltransferase 3 [Source:VGNC Symbol;Acc:VGNC:70121]       | 1.652779449 | 0.000708412 | 0.004988419 |
| ENSMMUG00000049234 | ninjurin 2 [Source:NCBI gene;Acc:706368]                                                | 2.379132887 | 0.002620097 | 0.014282054 |
| ENSMMUG00000037675 | testis expressed 52 [Source:NCBI gene;Acc:107000723]                                    | 0.852618939 | 5.39E-06    | 8.71E-05    |
| ENSMMUG00000061935 | -                                                                                       | 1.447902493 | 0.002014665 | 0.011697647 |
| ENSMMUG00000008546 | cyclin D2 [Source:NCBI gene;Acc:710379]                                                 | 1.212862077 | 0.002267279 | 0.012754423 |
| ENSMMUG00000015189 | RAD51 associated protein 1 [Source:VGNC Symbol;Acc:VGNC:76497]                          | 0.883190977 | 0.01108501  | 0.044524904 |
| ENSMMUG00000020812 | A-kinase anchoring protein 3 [Source:VGNC Symbol;Acc:VGNC:69769]                        | 1.24186075  | 0.000230069 | 0.001975101 |
| ENSMMUG00000020813 | NADH:ubiquinone oxidoreductase subunit A9 [Source:VGNC Symbol;Acc:VGNC:81480]           | -0.78296035 | 0.006205133 | 0.028277493 |
| ENSMMUG00000022893 | von Willebrand factor [Source:VGNC Symbol;Acc:VGNC:78778]                               | 2.578561915 | 1.26E-05    | 0.000177543 |
| ENSMMUG00000047465 | Metazoan signal recognition particle RNA [Source:RFAM;Acc:RF00017]                      | 3.786271883 | 0.001000777 | 0.006597115 |
| ENSMMUG00000004470 | CD9 molecule [Source:VGNC Symbol;Acc:VGNC:70787]                                        | 3.563340696 | 5.54E-07    | 1.31E-05    |
| ENSMMUG00000000375 | pleckstrin homology and RhoGEF domain containing G6 [Source:VGNC Symbol;Acc:VGNC:76110] | 1.490874547 | 5.24E-06    | 8.49E-05    |
| ENSMMUG00000053013 | -                                                                                       | 1.146686003 | 9.63E-05    | 0.000965604 |
| ENSMMUG00000014265 | TAP binding protein like [Source:NCBI gene;Acc:712626]                                  | 2.212036916 | 1.37E-09    | 8.98E-08    |
| ENSMMUG00000018685 | chromodomain helicase DNA binding protein 4 [Source:VGNC Symbol;Acc:VGNC:71029]         | 1.199036317 | 4.01E-05    | 0.000462784 |
| ENSMMUG00000017619 | lysophosphatidic acid receptor 5 [Source:VGNC Symbol;Acc:VGNC:74277]                    | 1.623750184 | 2.04E-08    | 8.44E-07    |
| ENSMMUG00000016983 | acrosin binding protein [Source:VGNC Symbol;Acc:VGNC:69445]                             | 1.060411134 | 7.55E-05    | 0.000789658 |
| ENSMMUG00000009583 | COP9 signalosome subunit 7A [Source:VGNC Symbol;Acc:VGNC:71185]                         | 1.387002226 | 0.012261633 | 0.048150602 |
| ENSMMUG00000022109 | CD163 molecule like 1 [Source:VGNC Symbol;Acc:VGNC:70914]                               | 1.226042129 | 0.000156138 | 0.001431099 |
| ENSMMUG00000005150 | CD163 molecule [Source:VGNC Symbol;Acc:VGNC:70752]                                      | 3.457983883 | 8.35E-07    | 1.84E-05    |
| ENSMMUG00000057570 | -                                                                                       | 2.53650009  | 2.48E-09    | 1.47E-07    |
| ENSMMUG00000048744 | -                                                                                       | 2.338110498 | 8.33E-05    | 0.000862596 |
| ENSMMUG00000057785 | -                                                                                       | 7.299856596 | 2.86E-08    | 1.08E-06    |
| ENSMMUG00000050862 | -                                                                                       | 1.137551975 | 0.0014904   | 0.009182444 |

|                     |                                                                                                         |   |             |             |             |
|---------------------|---------------------------------------------------------------------------------------------------------|---|-------------|-------------|-------------|
| ENSMMUG00000044047  | killer cell lectin like receptor B1 [Source:NCBI gene;Acc:100430783]                                    | - | 1.326338614 | 0.004065092 | 0.020226065 |
| ENSMMUG00000056741  | ovostatin-like [Source:NCBI gene;Acc:722294]                                                            | - | 1.680445496 | 0.002117072 | 0.012124457 |
| ENSMMUG00000060675  |                                                                                                         | - | 1.16283795  | 2.66E-06    | 4.84E-05    |
| ENSMMUG00000050696  | taste receptor type 2 member 31-like [Source:NCBI gene;Acc:693892]                                      | - | 1.460542301 | 7.43E-07    | 1.67E-05    |
| ENSMMUG00000054225  | taste receptor type 2 member 43 [Source:NCBI gene;Acc:694161]                                           | - | 1.609128014 | 0.003060395 | 0.016226456 |
| ENSMMUG00000042870  | Macaca mulatta taste receptor, type 2, member 46 (TAS2R46), mRNA. [Source:RefSeq mRNA;Acc:NM_001080757] | - | 1.225304299 | 0.000949286 | 0.006315301 |
| ENSMMUG00000064931  |                                                                                                         | - | 3.175843708 | 0.000756359 | 0.005246512 |
| ENSMMUG00000023317  | LDL receptor related protein 6 [Source:VGNC Symbol;Acc:VGNC:74446]                                      | - | -1.11682947 | 0.004106123 | 0.020391079 |
| ENSMMUG00000057433  |                                                                                                         | - | 1.665373646 | 0.003075272 | 0.016292053 |
| ENSMMUG00000027447  | U6 spliceosomal RNA [Source:RFAM;Acc:RF00026]                                                           | - | 1.499157709 | 0.009327543 | 0.039147168 |
| ENSMMUG00000053781  | Rho GDP dissociation inhibitor beta [Source:NCBI gene;Acc:702320]                                       | - | 1.835288789 | 0.004196671 | 0.020731446 |
| ENSMMUG00000057672  |                                                                                                         | - | 1.335967545 | 0.000659952 | 0.004700622 |
| ENSMMUG00000016171  | glycogen synthase 2 [Source:VGNC Symbol;Acc:VGNC:73335]                                                 | - | 1.115945842 | 8.54E-05    | 0.000877715 |
| ENSMMUG00000049682  | Metazoan signal recognition particle RNA [Source:RFAM;Acc:RF00017]                                      | - | 5.785961541 | 1.48E-06    | 2.93E-05    |
| ENSMMUG00000048030  | ferritin, heavy polypeptide 1-like [Source:NCBI gene;Acc:707011]                                        | - | 4.040252293 | 0.001085834 | 0.007057647 |
| ENSMMUG00000020370  | SRY-box transcription factor 5 [Source:VGNC Symbol;Acc:VGNC:77843]                                      | - | 4.541084063 | 4.65E-14    | 1.41E-11    |
| ENSMMUG00000057276  |                                                                                                         | - | -4.81295281 | 2.01E-08    | 8.38E-07    |
| ENSMMUG00000053657  |                                                                                                         | - | -3.22011821 | 0.000995607 | 0.006566364 |
| ENSMMUG00000006468  | FGFR1 oncogene partner 2 [Source:VGNC Symbol;Acc:VGNC:72551]                                            | - | 1.377305899 | 4.66E-05    | 0.000525751 |
| ENSMMUG00000003217  | transmembrane 7 superfamily member 3 [Source:VGNC Symbol;Acc:VGNC:79371]                                | - | 1.312592118 | 6.87E-06    | 0.000105217 |
| ENSMMUG00000004106  | chromosome 11 C12orf71 homolog [Source:VGNC Symbol;Acc:VGNC:70462]                                      | - | 2.553150606 | 0.005320599 | 0.025063277 |
| ENSMMUG00000023248  | serine/threonine kinase 38 like [Source:VGNC Symbol;Acc:VGNC:78156]                                     | - | 1.131600065 | 0.001996361 | 0.011601728 |
| ENSMMUG00000023249  | aryl hydrocarbon receptor nuclear translocator like 2 [Source:NCBI gene;Acc:709547]                     | - | 0.630377236 | 0.006875554 | 0.030698041 |
| ENSMMUG00000021736  | single-pass membrane protein with coiled-coil domains 2 [Source:VGNC Symbol;Acc:VGNC:77808]             | - | 1.349837976 | 9.09E-08    | 2.79E-06    |
| ENSMMUG00000001361  | importin 8 [Source:VGNC Symbol;Acc:VGNC:73815]                                                          | - | 0.951093535 | 0.010549629 | 0.042913203 |
| ENSMMUG00000001357  | tetraspanin 11 [Source:VGNC Symbol;Acc:VGNC:79882]                                                      | - | 1.240081469 | 3.33E-17    | 1.97E-14    |
| ENSMMUG00000009155  | SIN3-HDAC complex associated factor [Source:NCBI gene;Acc:694162]                                       | - | 5.518968207 | 2.05E-09    | 1.27E-07    |
| ENSMMUG000000039300 |                                                                                                         | - | 3.441837964 | 1.76E-05    | 0.000233564 |
| ENSMMUG00000003221  | DENN domain containing 5B [Source:VGNC Symbol;Acc:VGNC:71772]                                           | - | 1.155168215 | 0.001286491 | 0.008122381 |
| ENSMMUG000000063112 |                                                                                                         | - | 2.37551678  | 2.04E-05    | 0.000265958 |
| ENSMMUG000000056303 |                                                                                                         | - | 2.564402049 | 0.000402941 | 0.003119433 |
| ENSMMUG00000000205  | transmembrane protein 117 [Source:VGNC Symbol;Acc:VGNC:79488]                                           | - | 0.752997692 | 0.000708235 | 0.004988419 |

|                    |                                                                                                                                       |             |             |             |
|--------------------|---------------------------------------------------------------------------------------------------------------------------------------|-------------|-------------|-------------|
| ENSMMUG00000015962 | AT-rich interaction domain 2 [Source:VGNC Symbol;Acc:VGNC:69858]                                                                      | 1.151483387 | 0.000909927 | 0.006093982 |
| ENSMMUG00000023791 | SR-related CTD associated factor 11 [Source:VGNC Symbol;Acc:VGNC:77002]                                                               | 2.927659602 | 0.000247026 | 0.002090725 |
| ENSMMUG00000064730 |                                                                                                                                       | 2.554625242 | 1.22E-10    | 1.25E-08    |
| ENSMMUG00000012331 | solute carrier family 38 member 4 [Source:VGNC Symbol;Acc:VGNC:77484]                                                                 | 0.873521962 | 0.000550391 | 0.004051152 |
| ENSMMUG00000049514 | solute carrier family 48 member 1 [Source:NCBI gene;Acc:704304]                                                                       | 0.755314802 | 0.009412775 | 0.039452965 |
| ENSMMUG00000021655 | histone deacetylase 7 [Source:NCBI gene;Acc:718225]                                                                                   | 0.561374204 | 0.002225283 | 0.012566029 |
| ENSMMUG00000006727 | vitamin D receptor [Source:VGNC Symbol;Acc:VGNC:78764]                                                                                | 0.487968511 | 0.004198572 | 0.020731446 |
| ENSMMUG00000014484 | zinc finger protein 641 [Source:NCBI gene;Acc:708246]                                                                                 | 2.675311963 | 4.28E-12    | 7.78E-10    |
| ENSMMUG00000054025 | testis expressed 49 [Source:NCBI gene;Acc:709603]                                                                                     | 0.983346102 | 0.000373701 | 0.002933226 |
| ENSMMUG00000012769 | limb development membrane protein 1 like [Source:VGNC Symbol;Acc:VGNC:74310]                                                          | 0.992512393 | 0.000335791 | 0.002684263 |
| ENSMMUG00000007546 | complement C1q like 4 [Source:VGNC Symbol;Acc:VGNC:70450]                                                                             | 1.022348954 | 0.00462996  | 0.022460745 |
| ENSMMUG00000022495 | pre-mRNA processing factor 40 homolog B [Source:VGNC Symbol;Acc:VGNC:76312]                                                           | 0.610723033 | 0.007790773 | 0.033945322 |
| ENSMMUG00000038256 | aquaporin 2 [Source:NCBI gene;Acc:711719]                                                                                             | 1.176104416 | 3.71E-07    | 9.33E-06    |
| ENSMMUG00000021688 | aquaporin 6 [Source:VGNC Symbol;Acc:VGNC:69994]                                                                                       | 3.224018961 | 0.004474087 | 0.021843082 |
| ENSMMUG00000006531 | SWI/SNF related, matrix associated, actin dependent regulator of chromatin, subfamily d, member 1 [Source:VGNC Symbol;Acc:VGNC:77653] | 0.923647144 | 0.010032567 | 0.041416838 |
| ENSMMUG00000018485 | methyltransferase like 7A [Source:VGNC Symbol;Acc:VGNC:74567]                                                                         | 2.288617491 | 4.33E-07    | 1.06E-05    |
| ENSMMUG00000027375 | Y RNA [Source:RFAM;Acc:RF00019]                                                                                                       | 2.318811417 | 5.55E-07    | 1.31E-05    |
| ENSMMUG00000037566 | HIG1 hypoxia inducible domain family member 1C [Source:NCBI gene;Acc:100427233]                                                       | 1.852108339 | 6.18E-07    | 1.44E-05    |
| ENSMMUG00000022961 | solute carrier family 11 member 2 [Source:VGNC Symbol;Acc:VGNC:77383]                                                                 | 1.989810101 | 9.13E-07    | 1.98E-05    |
| ENSMMUG00000046877 | activin A receptor type 1B [Source:NCBI gene;Acc:696587]                                                                              | 1.791993016 | 0.009167972 | 0.038627838 |
| ENSMMUG00000010000 | keratin 7 [Source:VGNC Symbol;Acc:VGNC:74214]                                                                                         | 0.533396835 | 0.000126825 | 0.001212828 |
| ENSMMUG00000064514 | keratin, type II cuticular Hb1 [Source:NCBI gene;Acc:697511]                                                                          | 0.663091585 | 0.002212614 | 0.012511851 |
| ENSMMUG00000057841 | keratin 86 [Source:NCBI gene;Acc:697770]                                                                                              | 0.76707705  | 0.005082149 | 0.024194152 |
| ENSMMUG00000018217 | keratin 84 [Source:VGNC Symbol;Acc:VGNC:74220]                                                                                        | 1.772479462 | 0.000290561 | 0.002379745 |
| ENSMMUG00000014400 | keratin 71 [Source:VGNC Symbol;Acc:VGNC:74147]                                                                                        | 1.774165034 | 1.39E-05    | 0.000192533 |
| ENSMMUG00000014984 | keratin, type II cytoskeletal 4 [Source:NCBI gene;Acc:700060]                                                                         | 3.031223695 | 9.12E-08    | 2.79E-06    |
| ENSMMUG00000015153 | cysteine sulfinic acid decarboxylase [Source:VGNC Symbol;Acc:VGNC:71439]                                                              | 3.240137747 | 0.006721294 | 0.030143843 |
| ENSMMUG00000005246 | zinc finger protein 740 [Source:VGNC Symbol;Acc:VGNC:79665]                                                                           | 1.386973548 | 0.00066796  | 0.004744668 |
| ENSMMUG00000020036 | Sp1 transcription factor [Source:VGNC Symbol;Acc:VGNC:77844]                                                                          | 1.172473143 | 0.000270335 | 0.002243764 |
| ENSMMUG00000018492 | TARBP2 subunit of RISC loading complex [Source:VGNC Symbol;Acc:VGNC:78099]                                                            | 1.035917547 | 0.000367761 | 0.002898849 |
| ENSMMUG00000022313 | activating transcription factor 7 [Source:NCBI gene;Acc:700403]                                                                       | 0.812565427 | 0.005193738 | 0.024581426 |
| ENSMMUG00000055610 | homeobox C4 [Source:NCBI gene;Acc:100430434]                                                                                          | 2.169007521 | 1.09E-15    | 5.07E-13    |
| ENSMMUG00000052854 | mucin like 1 [Source:NCBI gene;Acc:100423942]                                                                                         | 1.661754362 | 1.45E-05    | 0.00019955  |
| ENSMMUG00000063910 | olfactory receptor 6C1 [Source:NCBI gene;Acc:707644]                                                                                  | 2.355782235 | 1.75E-05    | 0.000232451 |



|                    |                                                                                         |   |             |             |             |
|--------------------|-----------------------------------------------------------------------------------------|---|-------------|-------------|-------------|
| ENSMMUG00000055590 |                                                                                         | - | 0.759138013 | 0.010551778 | 0.042913203 |
| ENSMMUG0000006293  | SAP domain containing ribonucleoprotein [Source:NCBI gene;Acc:709932]                   |   | 1.04548409  | 6.20E-05    | 0.000666015 |
| ENSMMUG00000053458 | ORMDL sphingolipid biosynthesis regulator 2 [Source:NCBI gene;Acc:710296]               |   | 1.071307337 | 5.14E-05    | 0.000571724 |
| ENSMMUG0000006295  | matrix metalloproteinase 19 [Source:VGNC Symbol;Acc:VGNC:74896]                         |   | 0.841479079 | 0.005746045 | 0.026614337 |
| ENSMMUG00000064364 | sulfite oxidase [Source:NCBI gene;Acc:711164]                                           |   | 1.114088452 | 0.004638586 | 0.022485818 |
| ENSMMUG00000020758 | erb-b2 receptor tyrosine kinase 3 [Source:NCBI gene;Acc:711407]                         |   | 3.711920924 | 4.76E-05    | 0.000535544 |
| ENSMMUG00000059663 |                                                                                         |   | -           |             |             |
| ENSMMUG00000002483 | citrate synthase [Source:VGNC Symbol;Acc:VGNC:71509]                                    |   | 1.141430633 | 0.000188284 | 0.001671553 |
| ENSMMUG00000013482 | poly(A) specific ribonuclease subunit PAN2 [Source:NCBI gene;Acc:712478]                |   | 1.590134696 | 3.06E-07    | 7.87E-06    |
| ENSMMUG00000000803 | signal transducer and activator of transcription 2 [Source:VGNC Symbol;Acc:VGNC:77905]  |   | 2.404033287 | 0.00045402  | 0.003433131 |
| ENSMMUG00000063898 | apolipoprotein F [Source:NCBI gene;Acc:712761]                                          |   | 2.38400413  | 2.13E-12    | 4.07E-10    |
| ENSMMUG00000053460 |                                                                                         |   | 2.720547027 | 5.80E-10    | 4.57E-08    |
| ENSMMUG00000013766 | prostaglandin E synthase 3 [Source:NCBI gene;Acc:713353]                                |   | 2.541565363 | 2.24E-12    | 4.22E-10    |
| ENSMMUG00000043411 | zinc finger and BTB domain containing 39 [Source:NCBI gene;Acc:713914]                  |   | 0.916426259 | 0.000587846 | 0.004266475 |
| ENSMMUG00000021114 | G protein-coupled receptor 182 [Source:VGNC Symbol;Acc:VGNC:72936]                      |   | 1.440698317 | 0.00011907  | 0.001147128 |
| ENSMMUG00000004233 | leucine rich repeats and immunoglobulin like domains 3 [Source:NCBI gene;Acc:716344]    |   | 0.952113924 | 0.000920524 | 0.00614835  |
| ENSMMUG00000055477 |                                                                                         |   | -           |             |             |
| ENSMMUG00000062139 |                                                                                         |   | 1.869598024 | 3.79E-09    | 2.06E-07    |
| ENSMMUG00000020533 | chromosome 11 C12orf56 homolog [Source:VGNC Symbol;Acc:VGNC:70409]                      |   | 1.795763444 | 4.87E-07    | 1.18E-05    |
| ENSMMUG0000007658  | TANK binding kinase 1 [Source:VGNC Symbol;Acc:VGNC:78107]                               |   | 1.569076121 | 0.000223292 | 0.001932227 |
| ENSMMUG00000041729 |                                                                                         |   | -           |             |             |
| ENSMMUG00000053722 |                                                                                         |   | 2.157254242 | 7.45E-06    | 0.000112924 |
| ENSMMUG0000002921  | cleavage and polyadenylation specific factor 6 [Source:VGNC Symbol;Acc:VGNC:71401]      |   | -0.36388617 | 0.00153057  | 0.009389903 |
| ENSMMUG00000010819 | fibroblast growth factor receptor substrate 2 [Source:VGNC Symbol;Acc:VGNC:72732]       |   | 1.885163666 | 0.001193867 | 0.007641455 |
| ENSMMUG00000010820 | chaperonin containing TCP1 subunit 2 [Source:VGNC Symbol;Acc:VGNC:70745]                |   | 3.192923486 | 4.39E-06    | 7.27E-05    |
| ENSMMUG00000054953 | leucine rich repeat containing 10 [Source:NCBI gene;Acc:114669753]                      |   | 3.414385663 | 0.011305325 | 0.04527003  |
| ENSMMUG00000015583 | nucleosome assembly protein 1 like 1 [Source:NCBI gene;Acc:719047]                      |   | 1.351258986 | 1.29E-09    | 8.57E-08    |
| ENSMMUG00000017864 | oxysterol binding protein like 8 [Source:VGNC Symbol;Acc:VGNC:75630]                    |   | 2.044561481 | 1.11E-06    | 2.31E-05    |
| ENSMMUG00000059985 |                                                                                         |   | -           |             |             |
| ENSMMUG00000017463 |                                                                                         |   | 3.080739002 | 0.000631791 | 0.004547354 |
| ENSMMUG00000015862 | centrosomal protein 290 [Source:VGNC Symbol;Acc:VGNC:71126]                             |   | 1.493288564 | 0.006360893 | 0.028815663 |
| ENSMMUG00000049117 | CLLU1 antisense RNA 1 [Source:NCBI gene;Acc:100424000]                                  |   | 1.804745578 | 2.26E-05    | 0.000289619 |
| ENSMMUG0000002243  | pleckstrin homology and RhoGEF domain containing G7 [Source:VGNC Symbol;Acc:VGNC:76149] |   | 3.739713696 | 0.002033619 | 0.011758157 |
|                    |                                                                                         |   | -           |             |             |
|                    |                                                                                         |   | 3.997716542 | 0.007340693 | 0.032385702 |
|                    |                                                                                         |   | 0.949656896 | 0.000101597 | 0.001007907 |
|                    |                                                                                         |   | -           |             |             |
|                    |                                                                                         |   | 3.524722108 | 0.004772611 | 0.023015415 |
|                    |                                                                                         |   | -           |             |             |
|                    |                                                                                         |   | 0.907832585 | 2.54E-05    | 0.000318802 |

|                    |                                                                                                               |             |             |             |
|--------------------|---------------------------------------------------------------------------------------------------------------|-------------|-------------|-------------|
| ENSMMUG0000002244  | early endosome antigen 1 [Source:VGNC Symbol;Acc:VGNC:72161]                                                  | 1.080407124 | 0.000562382 | 0.004120758 |
| ENSMMUG00000052496 |                                                                                                               | 0.568300654 | 5.89E-05    | 0.000636258 |
| ENSMMUG00000018237 | plexin C1 [Source:VGNC Symbol;Acc:VGNC:76190]                                                                 | 1.814716231 | 2.24E-07    | 6.10E-06    |
| ENSMMUG00000018239 | centrosomal protein 83 [Source:VGNC Symbol;Acc:VGNC:70992]                                                    | 1.955178463 | 7.85E-07    | 1.75E-05    |
| ENSMMUG00000056553 |                                                                                                               | 1.843102264 | 0.002018422 | 0.0117032   |
| ENSMMUG00000009303 | coiled-coil domain containing 38 [Source:VGNC Symbol;Acc:VGNC:70880]                                          | 1.091380316 | 0.002358146 | 0.013095663 |
| ENSMMUG00000009312 | leukotriene A4 hydrolase [Source:VGNC Symbol;Acc:VGNC:74453]                                                  | 2.397228168 | 1.03E-12    | 2.19E-10    |
| ENSMMUG00000053376 |                                                                                                               | 1.862197717 | 6.36E-09    | 3.15E-07    |
| ENSMMUG00000050585 |                                                                                                               | 1.770097328 | 6.13E-09    | 3.07E-07    |
| ENSMMUG00000022404 | apoptotic peptidase activating factor 1 [Source:VGNC Symbol;Acc:VGNC:69975]                                   | 0.445519049 | 0.003135174 | 0.016535311 |
| ENSMMUG00000022406 | ankyrin repeat and sterile alpha motif domain containing 1B [Source:VGNC Symbol;Acc:VGNC:69689]               | 1.332217084 | 2.86E-09    | 1.63E-07    |
| ENSMMUG00000061260 | Spi-C transcription factor [Source:NCBI gene;Acc:695809]                                                      | 1.024247127 | 0.000400057 | 0.003102649 |
| ENSMMUG00000046478 | WASH complex subunit 3 [Source:NCBI gene;Acc:697824]                                                          | 2.04903435  | 6.14E-06    | 9.61E-05    |
| ENSMMUG00000023469 | heat shock protein 90 beta family member 1 [Source:NCBI gene;Acc:699568]                                      | 1.145699689 | 0.003909328 | 0.019638747 |
| ENSMMUG00000021291 | thymine DNA glycosylase [Source:VGNC Symbol;Acc:VGNC:78297]                                                   | -1.37856901 | 0.000116353 | 0.001124935 |
| ENSMMUG00000022570 | nuclear transcription factor Y subunit beta [Source:NCBI gene;Acc:700451]                                     | 1.094822044 | 0.000122023 | 0.001171241 |
| ENSMMUG00000017127 | carbohydrate sulfotransferase 11 [Source:VGNC Symbol;Acc:VGNC:82123]                                          | 1.005186473 | 0.008640805 | 0.036786352 |
| ENSMMUG00000017129 | solute carrier family 41 member 2 [Source:VGNC Symbol;Acc:VGNC:77585]                                         | 0.789243231 | 4.75E-05    | 0.000534386 |
| ENSMMUG00000061345 | Metazoan signal recognition particle RNA [Source:RFAM;Acc:RF00017]                                            | 1.670149752 | 0.005890719 | 0.027140646 |
| ENSMMUG00000009519 | WASH complex subunit 4 [Source:VGNC Symbol;Acc:VGNC:79783]                                                    | 0.946955942 | 0.000196378 | 0.001731825 |
| ENSMMUG00000005208 | RNA polymerase III subunit B [Source:VGNC Symbol;Acc:VGNC:76143]                                              | 2.495398299 | 1.41E-10    | 1.40E-08    |
| ENSMMUG00000017124 | spliceosome associated factor 3, U4/U6 recycling protein [Source:VGNC Symbol;Acc:VGNC:77029]                  | 2.710861258 | 1.22E-11    | 1.75E-09    |
| ENSMMUG00000054621 |                                                                                                               | 3.64724115  | 2.08E-07    | 5.71E-06    |
| ENSMMUG00000031572 | selectin P ligand [Source:VGNC Symbol;Acc:VGNC:77158]                                                         | 2.942918146 | 0.000360009 | 0.002846368 |
| ENSMMUG00000006893 | D-amino acid oxidase [Source:VGNC Symbol;Acc:VGNC:71729]                                                      | 0.656028349 | 0.000727974 | 0.00510131  |
| ENSMMUG00000056729 | U6 spliceosomal RNA [Source:RFAM;Acc:RF00026]                                                                 | 1.172737657 | 0.000544461 | 0.004012046 |
| ENSMMUG00000023032 | intraflagellar transport 81 [Source:VGNC Symbol;Acc:VGNC:73389]                                               | 0.95608396  | 5.67E-06    | 9.07E-05    |
| ENSMMUG00000001739 | ATPase sarcoplasmic/endoplasmic reticulum Ca <sup>2+</sup> transporting 2 [Source:VGNC Symbol;Acc:VGNC:70178] | 1.100147386 | 2.59E-08    | 1.01E-06    |
| ENSMMUG00000003297 | coiled-coil domain containing 63 [Source:VGNC Symbol;Acc:VGNC:70879]                                          | 0.811494728 | 0.003982377 | 0.019967155 |
| ENSMMUG00000060917 |                                                                                                               | 1.042179335 | 0.003749799 | 0.019031288 |
| ENSMMUG00000043209 | transmembrane protein 116 [Source:NCBI gene;Acc:107001019]                                                    | 1.611883452 | 4.36E-05    | 0.000498483 |
| ENSMMUG00000005255 | TRAF-type zinc finger domain containing 1 [Source:VGNC Symbol;Acc:VGNC:79459]                                 | 1.376985039 | 8.94E-06    | 0.000131319 |
| ENSMMUG00000013253 | protein tyrosine phosphatase non-receptor type 11 [Source:NCBI gene;Acc:712044]                               | 1.674331005 | 0.000106578 | 0.001047732 |
| ENSMMUG00000004435 | two pore segment channel 1 [Source:VGNC Symbol;Acc:VGNC:79117]                                                | 2.327264831 | 1.13E-07    | 3.32E-06    |

|                     |                                                                                                        |             |             |             |
|---------------------|--------------------------------------------------------------------------------------------------------|-------------|-------------|-------------|
| ENSMMUG00000059861  | Metazoan signal recognition particle RNA<br>[Source:RFAM;Acc:RF00017]                                  | 4.328839699 | 0.00558919  | 0.02605484  |
| ENSMMUG00000006723  | solute carrier family 8 member B1 [Source:NCBI gene;Acc:714561]                                        | 2.023481117 | 9.14E-07    | 1.98E-05    |
| ENSMMUG00000004205  | phospholipase B domain containing 2 [Source:VGNC<br>Symbol;Acc:VGNC:76122]                             | 3.017419619 | 0.001014498 | 0.006670655 |
| ENSMMUG00000004208  | serine dehydratase [Source:VGNC Symbol;Acc:VGNC:77148]                                                 | 3.739854961 | 3.84E-06    | 6.54E-05    |
| ENSMMUG000000051363 |                                                                                                        | 1.062016565 | 0.001778322 | 0.010556304 |
| ENSMMUG000000054768 |                                                                                                        | 0.835966836 | 0.000748761 | 0.005216062 |
| ENSMMUG000000057506 |                                                                                                        | 0.77448218  | 0.000831886 | 0.005655784 |
| ENSMMUG000000052680 |                                                                                                        | 0.670373055 | 0.002933496 | 0.015681483 |
| ENSMMUG000000053478 |                                                                                                        | 3.869054318 | 0.009768248 | 0.040550478 |
| ENSMMUG00000014027  | nitric oxide synthase 1 [Source:VGNC Symbol;Acc:VGNC:75368]                                            | 0.939150967 | 0.002899926 | 0.015539444 |
| ENSMMUG000000062615 |                                                                                                        | 1.643364987 | 0.000566267 | 0.004144549 |
| ENSMMUG00000020629  | SDS3 homolog, SIN3A corepressor complex component<br>[Source:NCBI gene;Acc:696166]                     | 0.880644411 | 0.000585948 | 0.004257608 |
| ENSMMUG000000055209 |                                                                                                        | 0.979559197 | 0.000447042 | 0.003392201 |
| ENSMMUG000000051955 | RAB35, member RAS oncogene family [Source:NCBI<br>gene;Acc:698400]                                     | 2.346369174 | 0.005837896 | 0.026943816 |
| ENSMMUG00000009152  | GCN1 activator of EIF2AK4 [Source:VGNC<br>Symbol;Acc:VGNC:72905]                                       | 1.953131137 | 6.66E-06    | 0.000102514 |
| ENSMMUG000000058536 |                                                                                                        | 1.890728244 | 1.41E-10    | 1.40E-08    |
| ENSMMUG00000002536  | calcium binding protein 1 [Source:VGNC Symbol;Acc:VGNC:70495]                                          | 1.462740239 | 5.93E-06    | 9.35E-05    |
| ENSMMUG000000039520 | chromosome 11 C12orf43 homolog [Source:NCBI<br>gene;Acc:698821]                                        | 3.25493947  | 1.75E-08    | 7.44E-07    |
| ENSMMUG000000021564 | lysine demethylase 2B [Source:VGNC Symbol;Acc:VGNC:81425]                                              | 3.436723103 | 3.92E-08    | 1.39E-06    |
| ENSMMUG000000059782 |                                                                                                        | 4.260696374 | 5.66E-12    | 9.68E-10    |
| ENSMMUG00000016454  | 4-hydroxyphenylpyruvate dioxygenase [Source:VGNC<br>Symbol;Acc:VGNC:73511]                             | 0.903130004 | 5.61E-05    | 0.000613399 |
| ENSMMUG00000018037  | diablo IAP-binding mitochondrial protein [Source:NCBI<br>gene;Acc:701896]                              | 1.298871919 | 0.008774173 | 0.037220122 |
| ENSMMUG00000004412  | arginine and serine rich coiled-coil 2 [Source:VGNC<br>Symbol;Acc:VGNC:77139]                          | 2.943470738 | 9.36E-05    | 0.000946074 |
| ENSMMUG00000015221  | huntingtin interacting protein 1 related [Source:VGNC<br>Symbol;Acc:VGNC:73412]                        | 0.68389253  | 0.012712044 | 0.049414563 |
| ENSMMUG00000005301  | ATP binding cassette subfamily B member 9 [Source:VGNC<br>Symbol;Acc:VGNC:81341]                       | 2.397278705 | 4.87E-12    | 8.67E-10    |
| ENSMMUG00000015926  | 2-oxoglutarate and iron dependent oxygenase domain containing<br>2 [Source:VGNC Symbol;Acc:VGNC:75462] | 1.09517111  | 0.000152796 | 0.001406419 |
| ENSMMUG00000015931  | phosphatidylinositol transfer protein membrane associated 2<br>[Source:VGNC Symbol;Acc:VGNC:75843]     | 0.942784944 | 0.003334663 | 0.01734825  |
| ENSMMUG000000059674 |                                                                                                        | 1.600895588 | 0.011400602 | 0.045553374 |
| ENSMMUG000000064225 | tectonic family member 2 [Source:NCBI gene;Acc:721415]                                                 | 1.261169347 | 5.40E-08    | 1.81E-06    |
| ENSMMUG000000046631 | refilin A [Source:NCBI gene;Acc:706153]                                                                | 3.881139065 | 0.002629326 | 0.014320358 |
| ENSMMUG00000017902  | DEAH-box helicase 37 [Source:VGNC Symbol;Acc:VGNC:71639]                                               | 3.471033721 | 0.008587447 | 0.036631136 |
| ENSMMUG00000011117  | acetoacetyl-CoA synthetase [Source:NCBI gene;Acc:707015]                                               | 0.827221661 | 0.001317404 | 0.008284812 |
| ENSMMUG000000050145 | Metazoan signal recognition particle RNA<br>[Source:RFAM;Acc:RF00017]                                  | 3.721414468 | 0.007647509 | 0.033421878 |

|                    |                                                                                                           |             |             |             |
|--------------------|-----------------------------------------------------------------------------------------------------------|-------------|-------------|-------------|
| ENSMMUG0000009789  | zinc finger protein 10 [Source:NCBI gene;Acc:695509]                                                      | 1.275356127 | 4.04E-05    | 0.000465334 |
| ENSMMUG00000061826 | family with sequence similarity 168 member B [Source:NCBI gene;Acc:703758]                                | 1.440491118 | 0.002806586 | 0.015114892 |
| ENSMMUG00000001989 | RNA polymerase II subunit D [Source:VGNC Symbol;Acc:VGNC:76213]                                           | 6.610447318 | 4.85E-08    | 1.66E-06    |
| ENSMMUG00000027543 | Y RNA [Source:RFAM;Acc:RF00019]                                                                           | 6.773194967 | 1.33E-08    | 5.83E-07    |
| ENSMMUG00000004177 | myosin VIIB [Source:NCBI gene;Acc:714563]                                                                 | 0.574030568 | 0.001699448 | 0.010209246 |
| ENSMMUG00000000376 | bridging integrator 1 [Source:VGNC Symbol;Acc:VGNC:70251]                                                 | 2.096255425 | 0.000793925 | 0.005454722 |
| ENSMMUG00000053502 |                                                                                                           | 5.202183825 | 5.64E-05    | 0.000615731 |
| ENSMMUG00000046774 | RAS like proto-oncogene B [Source:NCBI gene;Acc:695852]                                                   | 1.996674149 | 3.90E-06    | 6.58E-05    |
| ENSMMUG00000059182 |                                                                                                           | 2.089806702 | 1.15E-07    | 3.39E-06    |
| ENSMMUG00000063759 | transmembrane protein 185B [Source:NCBI gene;Acc:695744]                                                  | 1.960775447 | 5.40E-09    | 2.75E-07    |
| ENSMMUG00000059504 |                                                                                                           | 2.893176579 | 1.00E-10    | 1.05E-08    |
| ENSMMUG00000006446 | transmembrane protein 177 [Source:VGNC Symbol;Acc:VGNC:79686]                                             | 2.142688092 | 0.009807211 | 0.040673658 |
| ENSMMUG00000039116 | coiled-coil domain containing 93 [Source:VGNC Symbol;Acc:VGNC:84223]                                      | 0.877150283 | 0.000603504 | 0.004363074 |
| ENSMMUG00000008875 | solute carrier family 35 member F5 [Source:VGNC Symbol;Acc:VGNC:77567]                                    | 0.772223338 | 0.009898776 | 0.040961972 |
| ENSMMUG00000012250 | lactase [Source:VGNC Symbol;Acc:VGNC:74244]                                                               | 1.234769993 | 0.001594532 | 0.009695411 |
| ENSMMUG00000017486 | minichromosome maintenance complex component 6 [Source:VGNC Symbol;Acc:VGNC:74685]                        | 0.801958494 | 0.008139267 | 0.035099239 |
| ENSMMUG00000040854 | aspartyl-tRNA synthetase 1 [Source:VGNC Symbol;Acc:VGNC:84226]                                            | 1.008883861 | 0.000194077 | 0.001714787 |
| ENSMMUG00000006528 | Rho GTPase activating protein 15 [Source:VGNC Symbol;Acc:VGNC:69874]                                      | 0.752218016 | 1.14E-06    | 2.36E-05    |
| ENSMMUG00000016845 | zinc finger E-box binding homeobox 2 [Source:VGNC Symbol;Acc:VGNC:78969]                                  | 3.213856596 | 0.000313362 | 0.002525144 |
| ENSMMUG00000051691 |                                                                                                           | 1.180702384 | 0.000340376 | 0.002717574 |
| ENSMMUG00000008615 | nebulin [Source:NCBI gene;Acc:100430324]                                                                  | 0.680973254 | 0.001840523 | 0.010861092 |
| ENSMMUG00000011637 | coiled-coil domain containing 148 [Source:VGNC Symbol;Acc:VGNC:70856]                                     | 2.306111183 | 0.007533519 | 0.033068159 |
| ENSMMUG00000052818 | death associated protein like 1 [Source:NCBI gene;Acc:699071]                                             | 3.903021357 | 0.000309013 | 0.002500949 |
| ENSMMUG00000006180 | tetratricopeptide repeat, ankyrin repeat and coiled-coil containing 1 [Source:VGNC Symbol;Acc:VGNC:78238] | 1.799372983 | 4.35E-09    | 2.30E-07    |
| ENSMMUG00000055201 | U6 spliceosomal RNA [Source:RFAM;Acc:RF00026]                                                             | 2.871981154 | 0.011364787 | 0.045438186 |
| ENSMMUG00000061606 | Metazoan signal recognition particle RNA [Source:RFAM;Acc:RF00017]                                        | 1.871981067 | 0.003998494 | 0.02002736  |
| ENSMMUG00000006181 | WD repeat, sterile alpha motif and U-box domain containing 1 [Source:VGNC Symbol;Acc:VGNC:79634]          | 1.629628276 | 7.61E-07    | 1.71E-05    |
| ENSMMUG00000063868 | Metazoan signal recognition particle RNA [Source:RFAM;Acc:RF00017]                                        | 1.743217739 | 9.94E-05    | 0.000991075 |
| ENSMMUG00000006182 | bromodomain adjacent to zinc finger domain 2B [Source:NCBI gene;Acc:702780]                               | 0.648707665 | 0.000728853 | 0.005104721 |
| ENSMMUG00000051450 | phospholipase A2 receptor 1 [Source:NCBI gene;Acc:700191]                                                 | 0.969476301 | 7.17E-05    | 0.000757054 |
| ENSMMUG00000008384 | solute carrier family 4 member 10 [Source:VGNC Symbol;Acc:VGNC:77695]                                     | 1.923828825 | 3.17E-08    | 1.18E-06    |
| ENSMMUG00000008387 | dipeptidyl peptidase 4 [Source:VGNC Symbol;Acc:VGNC:71979]                                                | 2.824325628 | 6.09E-09    | 3.06E-07    |
| ENSMMUG00000013251 | xin actin binding repeat containing 2 [Source:VGNC Symbol;Acc:VGNC:78953]                                 | 2.579493547 | 0.005890977 | 0.027140646 |
| ENSMMUG00000013830 | glucose-6-phosphatase catalytic subunit 2 [Source:NCBI gene;Acc:709062]                                   | 3.169798784 | 1.96E-11    | 2.62E-09    |

|                     |                                                                                                                                                |             |             |             |
|---------------------|------------------------------------------------------------------------------------------------------------------------------------------------|-------------|-------------|-------------|
| ENSMMUG00000013832  | ATP binding cassette subfamily B member 11 [Source:VGNC<br>Symbol;Acc:VGNC:81339]                                                              | 3.0167513   | 4.49E-09    | 2.35E-07    |
| ENSMMUG00000020510  | kelch like family member 41 [Source:VGNC<br>Symbol;Acc:VGNC:74062]                                                                             | 0.657045307 | 0.002281593 | 0.012812781 |
| ENSMMUG00000015198  | glutamate decarboxylase 1 [Source:VGNC<br>Symbol;Acc:VGNC:72862]                                                                               | 0.981857164 | 0.000636722 | 0.004567679 |
| ENSMMUG00000054176  | methyltransferase like 8 [Source:NCBI gene;Acc:695361]<br>DDB1 and CUL4 associated factor 17 [Source:VGNC<br>Symbol;Acc:VGNC:71709]            | 1.089490831 | 0.003067093 | 0.016255341 |
| ENSMMUG00000023370  | histone acetyltransferase 1 [Source:VGNC<br>Symbol;Acc:VGNC:73349]                                                                             | 1.701610715 | 9.12E-12    | 1.40E-09    |
| ENSMMUG00000007313  | integrin subunit alpha 6 [Source:VGNC Symbol;Acc:VGNC:73780]                                                                                   | 0.960316101 | 0.002343264 | 0.013040862 |
| ENSMMUG00000054462  | Rap guanine nucleotide exchange factor 4 [Source:VGNC<br>Symbol;Acc:VGNC:76490]                                                                | 1.053540214 | 9.10E-06    | 0.000133318 |
| ENSMMUG00000020792  | Sp3 transcription factor [Source:VGNC Symbol;Acc:VGNC:77846]                                                                                   | 0.817561995 | 0.007215093 | 0.031907346 |
| ENSMMUG00000021818  | Sp9 transcription factor [Source:VGNC Symbol;Acc:VGNC:78027]                                                                                   | 2.511601314 | 0.008058615 | 0.034867049 |
| ENSMMUG00000060201  | corepressor interacting with RBPJ, 1 [Source:VGNC<br>Symbol;Acc:VGNC:71331]                                                                    | 3.578718006 | 1.77E-05    | 0.00023503  |
| ENSMMUG00000023005  | G protein-coupled receptor 155 [Source:VGNC<br>Symbol;Acc:VGNC:72985]                                                                          | 1.672712055 | 2.41E-15    | 9.78E-13    |
| ENSMMUG00000063864  | homeobox D1 [Source:NCBI gene;Acc:701064]<br>oxysterol binding protein like 6 [Source:VGNC<br>Symbol;Acc:VGNC:75627]                           | 1.010147272 | 1.62E-05    | 0.000218393 |
| ENSMMUG00000023006  | protein activator of interferon induced protein kinase EIF2AK2<br>[Source:VGNC Symbol;Acc:VGNC:76421]                                          | 1.770920983 | 0.000226904 | 0.001958272 |
| ENSMMUG00000021012  | SEC14 and spectrin domain containing 1 [Source:VGNC<br>Symbol;Acc:VGNC:77267]                                                                  | 0.527511628 | 0.000463684 | 0.003486205 |
| ENSMMUG00000052177  | ITPR interacting domain containing 2 [Source:VGNC<br>Symbol;Acc:VGNC:73584]                                                                    | -2.97143154 | 0.01105906  | 0.044461866 |
| ENSMMUG00000065344  | NCK associated protein 1 [Source:VGNC Symbol;Acc:VGNC:75143]                                                                                   | 0.912734179 | 0.004591442 | 0.022305095 |
| ENSMMUG0000002183   | integrin subunit alpha V [Source:VGNC Symbol;Acc:VGNC:73783]<br>ankyrin and armadillo repeat containing [Source:VGNC<br>Symbol;Acc:VGNC:69706] | 1.188920235 | 0.002142106 | 0.012209878 |
| ENSMMUG0000002185   | transmembrane protein with EGF like and two follistatin like<br>domains 2 [Source:VGNC Symbol;Acc:VGNC:78569]                                  | 0.563307712 | 0.002506203 | 0.013765066 |
| ENSMMUG00000019690  |                                                                                                                                                | 2.857307798 | 2.41E-09    | 1.44E-07    |
| ENSMMUG00000053406  |                                                                                                                                                | 3.958297968 | 0.000293792 | 0.002401668 |
| ENSMMUG00000014277  |                                                                                                                                                | 1.102699169 | 4.90E-07    | 1.18E-05    |
| ENSMMUG00000014397  |                                                                                                                                                | 1.408866117 | 0.0085105   | 0.036373335 |
| ENSMMUG00000019462  |                                                                                                                                                | 1.349180703 | 2.47E-08    | 9.77E-07    |
| ENSMMUG00000014314  |                                                                                                                                                | 0.527249408 | 0.001443887 | 0.008946735 |
| ENSMMUG00000061305  |                                                                                                                                                | -1.44270331 | 4.62E-05    | 0.000523085 |
| ENSMMUG00000003260  |                                                                                                                                                | 1.499646534 | 5.40E-08    | 1.81E-06    |
| ENSMMUG00000051366  |                                                                                                                                                | 1.038055855 | 0.00614103  | 0.028054174 |
| ENSMMUG00000005613  | signal transducer and activator of transcription 1 [Source:VGNC<br>Symbol;Acc:VGNC:77904]                                                      | 0.636514328 | 0.000277332 | 0.002290149 |
| ENSMMUG00000001761  | myosin IB [Source:VGNC Symbol;Acc:VGNC:75111]                                                                                                  | 1.483326284 | 4.89E-07    | 1.18E-05    |
| ENSMMUG000000037175 | U6 spliceosomal RNA [Source:RFAM;Acc:RF00026]                                                                                                  | 1.532604047 | 0.003797466 | 0.019213087 |
| ENSMMUG00000001475  |                                                                                                                                                | 1.827586829 | 0.012143298 | 0.04781157  |

|                    |                                                                                               |             |             |             |
|--------------------|-----------------------------------------------------------------------------------------------|-------------|-------------|-------------|
| ENSMMUG00000061797 | U6 spliceosomal RNA [Source:RFAM;Acc:RF00026]                                                 | 1.496384119 | 0.002111242 | 0.012107058 |
| ENSMMUG00000061123 | Metazoan signal recognition particle RNA [Source:RFAM;Acc:RF00017]                            | 1.529352476 | 0.006754648 | 0.030248268 |
| ENSMMUG00000005622 | dynein axonemal heavy chain 7 [Source:VGNC Symbol;Acc:VGNC:71859]                             | 2.926293214 | 8.73E-10    | 6.45E-08    |
| ENSMMUG00000057432 | serine/threonine kinase 17b [Source:NCBI gene;Acc:696908]                                     | 1.314143643 | 0.002650422 | 0.014422105 |
| ENSMMUG00000015970 | coiled-coil domain containing 150 [Source:VGNC Symbol;Acc:VGNC:84222]                         | 1.049180007 | 1.03E-06    | 2.16E-05    |
| ENSMMUG00000008643 | general transcription factor IIIC subunit 3 [Source:VGNC Symbol;Acc:VGNC:73317]               | 1.429666439 | 2.27E-06    | 4.22E-05    |
| ENSMMUG00000051936 |                                                                                               | 2.384039091 | 2.68E-05    | 0.000334157 |
| ENSMMUG00000008101 | spermatogenesis associated serine rich 2 like [Source:VGNC Symbol;Acc:VGNC:77984]             | 1.894015832 | 0.011193896 | 0.044890539 |
| ENSMMUG00000018144 | C2 calcium-dependent domain-containing protein 6 [Source:NCBI gene;Acc:702140]                | 1.287635667 | 0.000815662 | 0.005568765 |
| ENSMMUG00000018151 | membrane palmitoylated protein 4 [Source:VGNC Symbol;Acc:VGNC:74734]                          | 2.843700373 | 0.00163311  | 0.009892982 |
| ENSMMUG00000000582 | NOP58 ribonucleoprotein [Source:VGNC Symbol;Acc:VGNC:75284]                                   | 1.140666823 | 4.72E-05    | 0.000531557 |
| ENSMMUG00000061021 |                                                                                               | 1.301330582 | 0.000917805 | 0.006137261 |
| ENSMMUG00000056824 |                                                                                               | 1.657023373 | 0.005210917 | 0.024635835 |
| ENSMMUG00000020211 | cyclin Y like 1 [Source:VGNC Symbol;Acc:VGNC:84224]                                           | 2.369609577 | 1.30E-18    | 1.30E-15    |
| ENSMMUG00000057651 | frizzled class receptor 5 [Source:NCBI gene;Acc:710796]                                       | 2.754449342 | 0.000757573 | 0.005252132 |
| ENSMMUG00000008113 | pleckstrin homology domain containing M3 [Source:NCBI gene;Acc:711125]                        | 1.444985663 | 0.006472899 | 0.029221284 |
| ENSMMUG00000010871 | crystallin gamma B [Source:VGNC Symbol;Acc:VGNC:71507]                                        | 3.875814354 | 0.004833696 | 0.023223883 |
| ENSMMUG00000016077 | isocitrate dehydrogenase (NADP(+)) 1 [Source:NCBI gene;Acc:710019]                            | 3.239313803 | 4.87E-06    | 7.97E-05    |
| ENSMMUG00000017524 | phosphoinositide kinase, FYVE-type zinc finger containing [Source:VGNC Symbol;Acc:VGNC:75854] | 4.003226082 | 3.58E-17    | 2.03E-14    |
| ENSMMUG00000005295 | parathyroid hormone 2 receptor [Source:VGNC Symbol;Acc:VGNC:76592]                            | 5.146784276 | 6.44E-06    | 1.00E-04    |
| ENSMMUG00000002809 | unc-80 homolog, NALCN channel complex subunit [Source:NCBI gene;Acc:713007]                   | 1.049051353 | 0.001094786 | 0.007101637 |
| ENSMMUG00000010513 | ribulose-5-phosphate-3-epimerase [Source:NCBI gene;Acc:711322]                                | 2.551928254 | 1.63E-07    | 4.63E-06    |
| ENSMMUG00000010515 | KAT8 regulatory NSL complex subunit 1 like [Source:VGNC Symbol;Acc:VGNC:73913]                | 2.484604255 | 1.11E-06    | 2.31E-05    |
| ENSMMUG00000010508 | carbamoyl-phosphate synthase 1 [Source:VGNC Symbol;Acc:VGNC:71471]                            | 1.687645473 | 0.008829116 | 0.037416581 |
| ENSMMUG00000061342 |                                                                                               | 1.46494038  | 4.41E-08    | 1.52E-06    |
| ENSMMUG00000000381 | IKAROS family zinc finger 2 [Source:VGNC Symbol;Acc:VGNC:73586]                               | 0.848638573 | 0.000308955 | 0.002500949 |
| ENSMMUG00000053721 |                                                                                               | 2.148099077 | 3.43E-07    | 8.78E-06    |
| ENSMMUG00000002519 | serine/threonine kinase 11 interacting protein [Source:VGNC Symbol;Acc:VGNC:77963]            | 0.760773058 | 2.35E-05    | 0.000299291 |
| ENSMMUG00000002520 | solute carrier family 4 member 3 [Source:VGNC Symbol;Acc:VGNC:77604]                          | 0.670886407 | 0.010379189 | 0.042400013 |
| ENSMMUG00000061834 |                                                                                               | 0.723233989 | 0.006397487 | 0.028971349 |

|                    |                                                                                                       |             |             |             |
|--------------------|-------------------------------------------------------------------------------------------------------|-------------|-------------|-------------|
| ENSMMUG00000046282 |                                                                                                       | 0.669943281 | 0.002279996 | 0.012812781 |
| ENSMMUG00000051349 |                                                                                                       | 3.03153485  | 0.004024744 | 0.020109806 |
| ENSMMUG00000018139 | dedicator of cytokinesis 10 [Source:VGNC<br>Symbol;Acc:VGNC:71888]                                    | 1.116866311 | 0.000514186 | 0.003819248 |
| ENSMMUG00000051482 |                                                                                                       | 2.806748792 | 2.85E-09    | 1.63E-07    |
| ENSMMUG00000054072 |                                                                                                       | 1.027198261 | 7.43E-06    | 0.000112824 |
| ENSMMUG00000045544 | neuronal tyrosine-phosphorylated phosphoinositide-3-kinase<br>adaptor 2 [Source:NCBI gene;Acc:711209] | 0.732183787 | 0.002144076 | 0.012209878 |
| ENSMMUG00000013235 | collagen type IV alpha 3 chain [Source:VGNC<br>Symbol;Acc:VGNC:81375]                                 | 0.810600524 | 0.001400893 | 0.008738615 |
| ENSMMUG00000002103 | delta/notch like EGF repeat containing [Source:VGNC<br>Symbol;Acc:VGNC:71895]                         | 1.583689843 | 2.68E-05    | 0.000334157 |
| ENSMMUG00000005646 | diacylglycerol kinase delta [Source:VGNC<br>Symbol;Acc:VGNC:71783]                                    | 1.472688484 | 0.002768261 | 0.014958039 |
| ENSMMUG00000005650 | ubiquitin specific peptidase 40 [Source:VGNC<br>Symbol;Acc:VGNC:79226]                                | 0.763091962 | 0.000162485 | 0.001473691 |
| ENSMMUG00000051807 |                                                                                                       | 1.370306661 | 6.66E-06    | 0.000102514 |
| ENSMMUG00000011516 | ADP ribosylation factor like GTPase 4C [Source:VGNC<br>Symbol;Acc:VGNC:70018]                         | 2.462395225 | 0.003206548 | 0.016843442 |
| ENSMMUG00000054449 | Metazoan signal recognition particle RNA<br>[Source:RFAM;Acc:RF00017]                                 | 1.323511024 | 0.005585467 | 0.026046822 |
| ENSMMUG00000017404 | IQ motif containing with AAA domain 1 [Source:VGNC<br>Symbol;Acc:VGNC:73660]                          | 3.759990344 | 0.00117135  | 0.007532301 |
| ENSMMUG00000061673 |                                                                                                       | 1.00850136  | 0.000939392 | 0.006255881 |
| ENSMMUG00000031293 | anoctamin-9 [Source:NCBI gene;Acc:100425888]                                                          | 0.817860075 | 0.000415205 | 0.003199144 |
| ENSMMUG00000056711 | ribonuclease inhibitor-like [Source:NCBI gene;Acc:114672186]                                          | 1.249998561 | 0.002246642 | 0.012665727 |
| ENSMMUG00000062863 |                                                                                                       | 1.419338834 | 5.59E-06    | 8.98E-05    |
| ENSMMUG00000004622 | NLR family pyrin domain containing 6 [Source:VGNC<br>Symbol;Acc:VGNC:75234]                           | 2.461526216 | 0.002119623 | 0.012128387 |
| ENSMMUG00000049915 | interferon-induced transmembrane protein 3-like [Source:NCBI<br>gene;Acc:720763]                      | 0.858889357 | 0.005440165 | 0.025515608 |
| ENSMMUG00000053491 |                                                                                                       | 2.775879827 | 0.000796249 | 0.005462031 |
| ENSMMUG00000057640 | plakophilin-3-like [Source:NCBI gene;Acc:114669833]                                                   | 2.936472789 | 3.18E-13    | 7.67E-11    |
| ENSMMUG00000002917 | single Ig IL-1-related receptor [Source:NCBI gene;Acc:100425060]                                      | 3.206218153 | 7.98E-12    | 1.28E-09    |
| ENSMMUG00000010782 | phosphatidylserine synthase 2 [Source:NCBI gene;Acc:114669774]                                        | 0.847545453 | 0.001234739 | 0.007856659 |
| ENSMMUG00000021661 | leucine rich repeat containing 56 [Source:VGNC<br>Symbol;Acc:VGNC:74356]                              | 1.194676882 | 0.00029791  | 0.002433806 |
| ENSMMUG00000021664 | lamin tail domain containing 2 [Source:VGNC<br>Symbol;Acc:VGNC:74380]                                 | 2.870274604 | 9.45E-12    | 1.43E-09    |
| ENSMMUG00000054421 | Ras association domain family member 7 [Source:NCBI<br>gene;Acc:699206]                               | 0.662344112 | 0.000138371 | 0.001300332 |
| ENSMMUG00000004014 | interferon regulatory factor 7 [Source:VGNC<br>Symbol;Acc:VGNC:73765]                                 | 2.717545678 | 8.63E-09    | 4.07E-07    |
| ENSMMUG00000004024 | cadherin related family member 5 [Source:VGNC<br>Symbol;Acc:VGNC:71158]                               | 1.997719279 | 3.08E-05    | 0.00037531  |
| ENSMMUG00000007510 | transaldolase 1 [Source:VGNC Symbol;Acc:VGNC:78096]                                                   | 1.127474215 | 0.000967978 | 0.006423226 |
| ENSMMUG00000042839 |                                                                                                       | 1.233797546 | 0.002581043 | 0.014100534 |
| ENSMMUG00000016715 | p53-induced death domain protein 1 [Source:VGNC<br>Symbol;Acc:VGNC:81498]                             | 1.024792291 | 0.000895326 | 0.006030352 |
| ENSMMUG00000031282 | tetraspanin 4 [Source:NCBI gene;Acc:707716]                                                           | 4.203576106 | 0.000304494 | 0.002472069 |
| ENSMMUG00000003874 | interferon induced transmembrane protein 10 [Source:NCBI<br>gene;Acc:721010]                          | 2.050227169 | 1.02E-05    | 0.000147279 |

|                     |                                                                                                   |             |             |             |
|---------------------|---------------------------------------------------------------------------------------------------|-------------|-------------|-------------|
| ENSMMUG00000031267  | insulin [Source:NCBI gene;Acc:704534]                                                             | -1.07129247 | 0.002185576 | 0.012390226 |
| ENSMMUG00000003912  | tyrosine hydroxylase [Source:VGNC Symbol;Acc:VGNC:78342]                                          | 1.034857062 | 0.001858244 | 0.010930945 |
| ENSMMUG00000001324  | tetraspanin 32 [Source:VGNC Symbol;Acc:VGNC:78920]                                                | 2.124732902 | 0.000202336 | 0.001776899 |
| ENSMMUG000000051413 |                                                                                                   | 1.888005483 | 0.012590746 | 0.049073031 |
|                     | cysteinyl-tRNA synthetase 1 [Source:VGNC Symbol;Acc:VGNC:70540]                                   | -           | -           | -           |
| ENSMMUG00000000511  |                                                                                                   | 1.075417533 | 0.001504164 | 0.009262859 |
| ENSMMUG000000052168 |                                                                                                   | 1.351556594 | 0.007409607 | 0.032634387 |
| ENSMMUG000000060517 |                                                                                                   | 1.450182043 | 9.95E-05    | 0.000991246 |
|                     | carnitine palmitoyltransferase 1A [Source:VGNC Symbol;Acc:VGNC:71475]                             | -           | -           | -           |
| ENSMMUG00000001780  |                                                                                                   | 0.399386013 | 0.010831874 | 0.043710628 |
|                     | testis expressed metallothionein like protein [Source:VGNC Symbol;Acc:VGNC:79965]                 | -           | -           | -           |
| ENSMMUG00000001777  |                                                                                                   | 0.550358638 | 0.00285669  | 0.015340258 |
|                     | galanin and GMAP prepropeptide [Source:NCBI gene;Acc:721572]                                      | -           | -           | -           |
| ENSMMUG000000064140 |                                                                                                   | 0.506271398 | 0.010063787 | 0.041525893 |
|                     | lysine methyltransferase 5B [Source:VGNC Symbol;Acc:VGNC:74110]                                   | -           | -           | -           |
| ENSMMUG000000014237 |                                                                                                   | 1.402400552 | 2.40E-07    | 6.45E-06    |
|                     | T-box transcription factor 10 [Source:NCBI gene;Acc:721689]                                       | -           | -           | -           |
| ENSMMUG000000056105 |                                                                                                   | 0.762061637 | 3.83E-05    | 0.000447787 |
|                     | cyclin dependent kinase 2 associated protein 2 [Source:NCBI gene;Acc:711640]                      | -           | -           | -           |
| ENSMMUG000000057395 |                                                                                                   | 2.315652588 | 0.006451726 | 0.029166197 |
|                     | phosphatidylinositol transfer protein membrane associated 1 [Source:VGNC Symbol;Acc:VGNC:76007]   | -           | -           | -           |
| ENSMMUG000000011821 |                                                                                                   | 2.805097724 | 0.000610253 | 0.004409418 |
|                     | aryl hydrocarbon receptor interacting protein [Source:VGNC Symbol;Acc:VGNC:69759]                 | -           | -           | -           |
| ENSMMUG000000011817 |                                                                                                   | 1.288664468 | 4.82E-06    | 7.90E-05    |
| ENSMMUG000000053378 |                                                                                                   | 1.067056564 | 0.000227237 | 0.001958547 |
| ENSMMUG000000005488 | coronin 1B [Source:VGNC Symbol;Acc:VGNC:71320]                                                    | 1.610084298 | 5.04E-06    | 8.22E-05    |
|                     | ribosomal protein S6 kinase B2 [Source:VGNC Symbol;Acc:VGNC:76934]                                | -           | -           | -           |
| ENSMMUG000000005483 |                                                                                                   | 0.927888377 | 0.002515014 | 0.013801803 |
| ENSMMUG000000005480 | carosine synthase 1 [Source:VGNC Symbol;Acc:VGNC:81367]                                           | 0.555936441 | 0.000798674 | 0.005472896 |
|                     | ankyrin repeat domain 13D [Source:VGNC Symbol;Acc:VGNC:69722]                                     | -           | -           | -           |
| ENSMMUG000000015928 |                                                                                                   | 1.426300647 | 0.00102593  | 0.006718653 |
|                     | G protein-coupled receptor kinase 2 [Source:VGNC Symbol;Acc:VGNC:73253]                           | -           | -           | -           |
| ENSMMUG000000015925 |                                                                                                   | 1.038131677 | 0.00281011  | 0.015121347 |
| ENSMMUG000000008771 | lysine demethylase 2A [Source:VGNC Symbol;Acc:VGNC:73824]                                         | 0.661559189 | 0.005150146 | 0.024455201 |
|                     | spectrin beta, non-erythrocytic 2 [Source:VGNC Symbol;Acc:VGNC:77872]                             | -           | -           | -           |
| ENSMMUG000000062635 |                                                                                                   | 0.841014696 | 0.000430216 | 0.003291406 |
|                     | RNA-binding protein 4 [Source:NCBI gene;Acc:713490]                                               | -           | -           | -           |
| ENSMMUG000000020359 |                                                                                                   | 2.537162129 | 3.23E-06    | 5.71E-05    |
|                     |                                                                                                   | -           | -           | -           |
| ENSMMUG000000020363 |                                                                                                   | 0.569692757 | 0.009054407 | 0.038259136 |
|                     |                                                                                                   | -           | -           | -           |
| ENSMMUG000000060650 |                                                                                                   | 0.797148966 | 0.010470588 | 0.042672937 |
|                     | Ras and Rab interactor 1 [Source:VGNC Symbol;Acc:VGNC:76769]                                      | -           | -           | -           |
| ENSMMUG000000015987 |                                                                                                   | 0.970372531 | 0.010345875 | 0.042357091 |
|                     | RAB1B, member RAS oncogene family [Source:NCBI gene;Acc:721852]                                   | -           | -           | -           |
| ENSMMUG000000031202 |                                                                                                   | 1.043474339 | 0.00016459  | 0.001490054 |
|                     | kinesin light chain 2 [Source:VGNC Symbol;Acc:VGNC:73869]                                         | -           | -           | -           |
| ENSMMUG000000022520 |                                                                                                   | 1.215270656 | 0.000224846 | 0.001944377 |
|                     | eukaryotic translation initiation factor 1A domain containing [Source:VGNC Symbol;Acc:VGNC:72127] | -           | -           | -           |
| ENSMMUG000000019115 |                                                                                                   | 0.739843505 | 2.80E-06    | 5.07E-05    |
|                     | coiled-coil domain containing 85B [Source:VGNC Symbol;Acc:VGNC:70853]                             | -           | -           | -           |
| ENSMMUG000000008652 |                                                                                                   | 0.931214499 | 0.000417875 | 0.003216572 |
|                     | FGF1 intracellular binding protein [Source:VGNC Symbol;Acc:VGNC:72663]                            | -           | -           | -           |
| ENSMMUG000000008651 |                                                                                                   | 0.727371688 | 0.008360241 | 0.035814656 |
|                     | adaptor related protein complex 5 subunit beta 1 [Source:NCBI gene;Acc:721904]                    | -           | -           | -           |
| ENSMMUG000000038363 |                                                                                                   | 0.862820952 | 0.000203423 | 0.001784034 |



|                     |                                                                                              |             |             |             |
|---------------------|----------------------------------------------------------------------------------------------|-------------|-------------|-------------|
| ENSMMUG00000019839  | lysine acetyltransferase 5 [Source:VGNC Symbol;Acc:VGNC:73955]                               | 0.824984081 | 0.003320366 | 0.017322372 |
| ENSMMUG00000007416  | signal-induced proliferation-associated 1 [Source:VGNC Symbol;Acc:VGNC:77218]                | 0.777332912 | 0.00699677  | 0.031164382 |
| ENSMMUG00000007406  | pecanex 3 [Source:NCBI gene;Acc:716000]                                                      | 0.454287247 | 0.006101157 | 0.027921058 |
| ENSMMUG000000050788 | mitogen-activated protein kinase kinase kinase 11 [Source:NCBI gene;Acc:716038]              | 0.379144522 | 0.012068118 | 0.047620734 |
| ENSMMUG00000007402  | potassium two pore domain channel subfamily K member 7 [Source:VGNC Symbol;Acc:VGNC:73996]   | 1.479166656 | 0.002363057 | 0.013117338 |
| ENSMMUG00000023479  | latent transforming growth factor beta binding protein 3 [Source:VGNC Symbol;Acc:VGNC:74458] | 2.063564726 | 5.25E-09    | 2.68E-07    |
| ENSMMUG00000023477  |                                                                                              | 1.363483908 | 8.40E-08    | 2.61E-06    |
| ENSMMUG00000023300  | FERM domain containing 8 [Source:NCBI gene;Acc:716379]                                       | 1.138023346 | 0.003084196 | 0.016332679 |
| ENSMMUG00000023297  | solute carrier family 25 member 45 [Source:VGNC Symbol;Acc:VGNC:77576]                       | 1.353436752 | 0.008086536 | 0.034941357 |
| ENSMMUG00000056343  |                                                                                              | 0.905275226 | 0.003105188 | 0.016417035 |
| ENSMMUG00000022031  | DNA polymerase alpha 2, accessory subunit [Source:NCBI gene;Acc:716541]                      | 0.98812932  | 0.000257809 | 0.002154926 |
| ENSMMUG00000013475  | calpain 1 [Source:VGNC Symbol;Acc:VGNC:70529]                                                | 1.17806418  | 0.002935952 | 0.015688165 |
| ENSMMUG00000018781  | synoviolin 1 [Source:VGNC Symbol;Acc:VGNC:78183]                                             | 0.881791317 | 0.005827593 | 0.026905811 |
| ENSMMUG00000018773  | transmembrane 7 superfamily member 2 [Source:NCBI gene;Acc:721985]                           | 2.586408901 | 0.000802681 | 0.005492578 |
| ENSMMUG00000018767  | cell division cycle associated 5 [Source:NCBI gene;Acc:721998]                               | 3.356945834 | 0.000497949 | 0.003709239 |
| ENSMMUG00000006568  | basic leucine zipper ATF-like transcription factor 2 [Source:VGNC Symbol;Acc:VGNC:70127]     | 1.01632337  | 0.000702179 | 0.004952572 |
| ENSMMUG000000031163 | membrane anchored junction protein [Source:VGNC Symbol;Acc:VGNC:74375]                       | 1.32105747  | 1.77E-06    | 3.41E-05    |
| ENSMMUG00000003976  | glycoprotein hormone subunit alpha 2 [Source:VGNC Symbol;Acc:VGNC:72961]                     | 1.01370208  | 0.000199626 | 0.001759038 |
| ENSMMUG000000041101 | protein phosphatase 2 regulatory subunit B'beta [Source:NCBI gene;Acc:722026]                | 1.502498774 | 6.79E-06    | 0.000104161 |
| ENSMMUG00000003973  | autophagy related 2A [Source:VGNC Symbol;Acc:VGNC:70145]                                     | -1.85563041 | 4.96E-08    | 1.69E-06    |
| ENSMMUG00000007610  | ribosomal protein S6 kinase A4 [Source:VGNC Symbol;Acc:VGNC:76930]                           | 0.961702785 | 6.71E-05    | 0.000713913 |
| ENSMMUG00000013397  | peroxiredoxin 5 [Source:NCBI gene;Acc:719764]                                                | 0.500947747 | 0.012548287 | 0.048977916 |
| ENSMMUG00000012944  | vascular endothelial growth factor B [Source:VGNC Symbol;Acc:VGNC:78765]                     | 1.143335019 | 2.51E-05    | 0.000315788 |
| ENSMMUG00000012941  | nudix hydrolase 22 [Source:VGNC Symbol;Acc:VGNC:75475]                                       | 1.129603804 | 9.96E-06    | 0.000143666 |
| ENSMMUG00000000478  | OTU deubiquitinase, ubiquitin aldehyde binding 1 [Source:NCBI gene;Acc:717989]               | 1.465785241 | 4.79E-06    | 7.87E-05    |
| ENSMMUG000000052569 |                                                                                              | 2.04990978  | 0.01036022  | 0.04237265  |
| ENSMMUG00000014131  | microtubule affinity regulating kinase 2 [Source:VGNC Symbol;Acc:VGNC:74634]                 | 0.875044891 | 0.002981564 | 0.015853727 |
| ENSMMUG000000005776 | atlastin GTPase 3 [Source:VGNC Symbol;Acc:VGNC:70125]                                        | 1.032768545 | 2.26E-05    | 0.000289619 |
| ENSMMUG000000005775 | phospholipase A and acyltransferase 3 [Source:VGNC Symbol;Acc:VGNC:76055]                    | 0.591775043 | 0.000115748 | 0.001120941 |
| ENSMMUG000000045105 | phospholipase A and acyltransferase 4 [Source:NCBI gene;Acc:722189]                          | 0.959313176 | 0.000142507 | 0.001330543 |
| ENSMMUG000000056054 | zinc finger and BTB domain containing 3 [Source:NCBI gene;Acc:722240]                        | 0.728573603 | 3.78E-07    | 9.48E-06    |
| ENSMMUG000000039671 | tetratricopeptide repeat domain 9C [Source:NCBI gene;Acc:718583]                             | 1.680992363 | 3.15E-06    | 5.58E-05    |
| ENSMMUG00000013949  | chromosome 14 C11orf98 homolog [Source:NCBI gene;Acc:100429527]                              | 1.168358882 | 0.000990314 | 0.00654473  |

|                    |                                                                                       |             |             |             |
|--------------------|---------------------------------------------------------------------------------------|-------------|-------------|-------------|
| ENSMMUG00000018112 | EMAP like 3 [Source:VGNC Symbol;Acc:VGNC:72120]                                       | 0.992100957 | 0.008737896 | 0.037114657 |
| ENSMMUG00000018110 | metastasis associated 1 family member 2 [Source:VGNC Symbol;Acc:VGNC:74943]           | 1.705113932 | 0.001842159 | 0.010865816 |
| ENSMMUG00000015148 | RAB3A interacting protein like 1 [Source:VGNC Symbol;Acc:VGNC:76638]                  | 2.546812404 | 0.008460552 | 0.03619669  |
| ENSMMUG00000000327 | fatty acid desaturase 2 [Source:VGNC Symbol;Acc:VGNC:72472]                           | 1.519506571 | 7.38E-06    | 0.000112202 |
| ENSMMUG00000013798 | fatty acid desaturase 1 [Source:VGNC Symbol;Acc:VGNC:72471]                           | 1.551025377 | 0.001652772 | 0.009988823 |
| ENSMMUG00000006655 | myelin regulatory factor [Source:VGNC Symbol;Acc:VGNC:74949]                          | 2.602470491 | 0.000951581 | 0.006324101 |
| ENSMMUG00000022373 | transmembrane protein 138 [Source:VGNC Symbol;Acc:VGNC:79644]                         | 3.759986405 | 0.000555969 | 0.004085271 |
| ENSMMUG00000022372 | cytochrome b561 family member A3 [Source:VGNC Symbol;Acc:VGNC:71458]                  | 2.154575665 | 9.34E-05    | 0.000945425 |
| ENSMMUG00000002691 | damage specific DNA binding protein 1 [Source:VGNC Symbol;Acc:VGNC:71754]             | 2.084221785 | 1.83E-05    | 0.000241886 |
| ENSMMUG00000002688 | von Willebrand factor C and EGF domains [Source:VGNC Symbol;Acc:VGNC:79617]           | 1.970117876 | 3.39E-05    | 0.000407367 |
| ENSMMUG00000042208 | pepsin A-4 [Source:NCBI gene;Acc:694646]                                              | 1.458992084 | 3.42E-06    | 5.98E-05    |
| ENSMMUG00000037611 | pepsinogen 4, group I (pepsinogen A) [Source:NCBI gene;Acc:694562]                    | 0.559024058 | 0.00522887  | 0.024696487 |
| ENSMMUG00000015019 | VPS37C subunit of ESCRT-I [Source:VGNC Symbol;Acc:VGNC:79578]                         | 4.06973271  | 0.000152715 | 0.001406419 |
| ENSMMUG00000014530 | pre-mRNA processing factor 19 [Source:VGNC Symbol;Acc:VGNC:76281]                     | 0.742566291 | 0.01035316  | 0.042357091 |
| ENSMMUG00000052454 | prostaglandin D2 receptor 2 [Source:NCBI gene;Acc:695853]                             | -1.16553765 | 0.001694257 | 0.010187475 |
| ENSMMUG00000031100 | membrane-spanning 4-domains subfamily A member 4A-like [Source:NCBI gene;Acc:698152]  | 5.519370396 | 7.39E-12    | 1.22E-09    |
| ENSMMUG00000004821 | membrane spanning 4-domains A14 [Source:NCBI gene;Acc:697083]                         | 4.700991043 | 2.56E-32    | 1.66E-28    |
| ENSMMUG00000061603 |                                                                                       | 4.221285936 | 5.49E-05    | 0.000601842 |
| ENSMMUG00000059299 | membrane spanning 4-domains A2 [Source:NCBI gene;Acc:697830]                          | 4.879086732 | 1.27E-12    | 2.62E-10    |
| ENSMMUG00000013526 | oocyte-secreted protein 2 [Source:NCBI gene;Acc:697943]                               | 3.363223281 | 3.73E-06    | 6.40E-05    |
| ENSMMUG00000053140 | putative oocyte-secreted protein 1 homolog [Source:NCBI gene;Acc:698403]              | 5.193672148 | 8.29E-08    | 2.59E-06    |
| ENSMMUG00000057009 |                                                                                       | 4.345421754 | 0.003750361 | 0.019031288 |
| ENSMMUG00000017287 | PAT1 homolog 1, processing body mRNA decay factor [Source:VGNC Symbol;Acc:VGNC:75684] | 2.060924759 | 3.52E-06    | 6.12E-05    |
| ENSMMUG00000001745 | oxysterol binding protein [Source:VGNC Symbol;Acc:VGNC:75718]                         | 1.01145355  | 0.000164275 | 0.001488889 |
| ENSMMUG00000060712 |                                                                                       | 0.851025348 | 0.00101427  | 0.006670655 |
| ENSMMUG00000001083 | glycine N-acyltransferase-like protein 1 [Source:NCBI gene;Acc:701437]                | 0.985962081 | 2.84E-05    | 0.000350891 |
| ENSMMUG00000054737 |                                                                                       | -0.63388225 | 0.006227797 | 0.028360898 |
| ENSMMUG00000050844 | BTB domain containing 18 [Source:NCBI gene;Acc:703264]                                | 1.412775967 | 0.012111612 | 0.047748901 |
| ENSMMUG00000056184 |                                                                                       | 2.281360531 | 0.000659311 | 0.004700622 |
| ENSMMUG00000058453 | cleavage factor polyribonucleotide kinase subunit 1 [Source:NCBI gene;Acc:705071]     | -1.63232727 | 6.41E-06    | 9.96E-05    |
| ENSMMUG00000010601 | solute carrier family 43 member 3 [Source:NCBI gene;Acc:706267]                       | 3.04812207  | 2.79E-11    | 3.46E-09    |
| ENSMMUG00000017810 | structure specific recognition protein 1 [Source:VGNC Symbol;Acc:VGNC:77891]          | 1.699226706 | 1.09E-08    | 4.88E-07    |
| ENSMMUG00000056994 | Metazoan signal recognition particle RNA [Source:RFAM;Acc:RF00017]                    | 2.672737195 | 0.005626729 | 0.026164191 |
| ENSMMUG00000040099 | Y RNA [Source:RFAM;Acc:RF00019]                                                       | 1.767747899 | 0.003172135 | 0.016709919 |
| ENSMMUG00000058885 | formin binding protein 4 [Source:NCBI gene;Acc:712633]                                | 1.261009056 | 4.08E-07    | 1.01E-05    |

|                    |                                                                                                              |             |             |             |
|--------------------|--------------------------------------------------------------------------------------------------------------|-------------|-------------|-------------|
| ENSMMUG00000043682 | mitochondrial carrier 2 [Source:NCBI gene;Acc:712767]                                                        | 3.351342391 | 0.000233185 | 0.001997895 |
| ENSMMUG00000011657 | CUGBP Elav-like family member 1 [Source:VGNC Symbol;Acc:VGNC:71098]                                          | 0.556606531 | 0.0022952   | 0.012866968 |
| ENSMMUG00000021446 | diacylglycerol kinase zeta [Source:VGNC Symbol;Acc:VGNC:71789]                                               | 0.46741694  | 0.010427288 | 0.042540867 |
| ENSMMUG00000002452 | solute carrier family 35 member C1 [Source:VGNC Symbol;Acc:VGNC:77524]                                       | 1.518165097 | 1.66E-06    | 3.22E-05    |
| ENSMMUG00000049305 | Metazoan signal recognition particle RNA [Source:RFAM;Acc:RF00017]                                           | 1.459481022 | 0.002559682 | 0.014005563 |
| ENSMMUG00000047219 | carbohydrate sulfotransferase 1 [Source:VGNC Symbol;Acc:VGNC:71055]                                          | 1.508419912 | 4.59E-06    | 7.57E-05    |
| ENSMMUG00000000874 |                                                                                                              | 1.307916601 | 6.35E-06    | 9.88E-05    |
| ENSMMUG00000050952 |                                                                                                              | 1.380847054 | 0.001410533 | 0.008780338 |
| ENSMMUG00000059728 | tumor protein p53 inducible protein 11 [Source:NCBI gene;Acc:715295]                                         | 2.784630652 | 7.70E-05    | 0.00080399  |
| ENSMMUG00000004332 | tripartite motif containing 44 [Source:VGNC Symbol;Acc:VGNC:79168]                                           | 3.161470601 | 6.11E-08    | 2.00E-06    |
| ENSMMUG00000004330 | peptidase domain containing associated with muscle regeneration 1 [Source:VGNC Symbol;Acc:VGNC:75673]        | 3.553581175 | 1.93E-06    | 3.68E-05    |
| ENSMMUG00000004329 | solute carrier family 1 member 2 [Source:VGNC Symbol;Acc:VGNC:77410]                                         | 0.932422375 | 0.000201847 | 0.001773801 |
| ENSMMUG00000002432 | E74 like ETS transcription factor 5 [Source:VGNC Symbol;Acc:VGNC:72209]                                      | 0.848301751 | 0.012881596 | 0.049877354 |
| ENSMMUG00000017218 | KIAA1549 like [Source:VGNC Symbol;Acc:VGNC:73902]                                                            | -0.69255661 | 0.008773483 | 0.037220122 |
| ENSMMUG00000019988 | homeodomain interacting protein kinase 3 [Source:VGNC Symbol;Acc:VGNC:73472]                                 | 1.596075988 | 0.000251094 | 0.002111387 |
| ENSMMUG00000001536 | glutamine and serine rich 1 [Source:VGNC Symbol;Acc:VGNC:76544]                                              | 1.017238441 | 0.000304032 | 0.002469855 |
| ENSMMUG00000055352 |                                                                                                              | 1.107395836 | 8.81E-06    | 0.000129892 |
| ENSMMUG00000049850 | proline rich and Gla domain 4 [Source:NCBI gene;Acc:694707]                                                  | 1.170807862 | 2.83E-06    | 5.09E-05    |
| ENSMMUG00000006842 | doublecortin domain containing 1 [Source:NCBI gene;Acc:696721]                                               | 0.966096839 | 9.91E-05    | 0.000989413 |
| ENSMMUG00000016942 | neuron navigator 2 [Source:VGNC Symbol;Acc:VGNC:74968]                                                       | 1.345503392 | 0.012778739 | 0.049612024 |
| ENSMMUG00000014615 | lactate dehydrogenase C [Source:VGNC Symbol;Acc:VGNC:74247]                                                  | 0.993854312 | 0.010515767 | 0.042810752 |
| ENSMMUG00000006405 | secretion regulating guanine nucleotide exchange factor [Source:VGNC Symbol;Acc:VGNC:77258]                  | 1.526756206 | 2.68E-07    | 7.06E-06    |
| ENSMMUG00000006403 | potassium voltage-gated channel subfamily C member 1 [Source:VGNC Symbol;Acc:VGNC:73971]                     | 1.995920023 | 1.58E-05    | 0.000214101 |
| ENSMMUG00000005895 | nucleobindin 2 [Source:VGNC Symbol;Acc:VGNC:75549]                                                           | 1.035607243 | 0.000978723 | 0.006474706 |
| ENSMMUG00000022548 | phosphatidylinositol-4-phosphate 3-kinase catalytic subunit type 2 alpha [Source:VGNC Symbol;Acc:VGNC:75992] | 1.145113503 | 0.001351044 | 0.008460126 |
| ENSMMUG00000020246 | INSC spindle orientation adaptor protein [Source:VGNC Symbol;Acc:VGNC:73693]                                 | 3.298828706 | 0.002074752 | 0.011945206 |
| ENSMMUG00000054213 | parathyroid hormone [Source:NCBI gene;Acc:700195]                                                            | 1.444254005 | 0.003178639 | 0.016729449 |
| ENSMMUG00000010875 | TEA domain transcription factor 1 [Source:VGNC Symbol;Acc:VGNC:78301]                                        | 0.559481047 | 0.000526311 | 0.003898182 |
| ENSMMUG00000043504 |                                                                                                              | 0.624094055 | 0.000299514 | 0.002442304 |
| ENSMMUG00000037426 | U7 small nuclear RNA [Source:RFAM;Acc:RF00066]                                                               | 4.304871071 | 0.007805541 | 0.033998281 |
| ENSMMUG00000008758 | zinc finger protein 143 [Source:VGNC Symbol;Acc:VGNC:81612]                                                  | 1.522352257 | 0.005461903 | 0.02558988  |
| ENSMMUG00000023636 | importin 7 [Source:NCBI gene;Acc:704213]                                                                     | 1.211846732 | 0.005703476 | 0.026461381 |

|                    |                                                                                                    |             |             |             |
|--------------------|----------------------------------------------------------------------------------------------------|-------------|-------------|-------------|
| ENSMMUG0000005639  | transmembrane protein 41B [Source:VGNC Symbol;Acc:VGNC:79754]                                      | 1.353571515 | 0.005540451 | 0.025864719 |
| ENSMMUG0000006692  | signal peptide, CUB domain and EGF like domain containing 2 [Source:VGNC Symbol;Acc:VGNC:77138]    | 1.154473826 | 2.29E-06    | 4.25E-05    |
| ENSMMUG0000006689  | nuclear receptor interacting protein 3 [Source:VGNC Symbol;Acc:VGNC:75397]                         | 1.50421546  | 1.02E-07    | 3.06E-06    |
| ENSMMUG00000038288 | TMEM9 domain family member B [Source:NCBI gene;Acc:708447]                                         | 1.168215392 | 9.95E-07    | 2.11E-05    |
| ENSMMUG00000051468 | Metazoan signal recognition particle RNA [Source:RFAM;Acc:RF00017]                                 | 1.141857016 | 4.23E-06    | 7.07E-05    |
| ENSMMUG00000001997 | achaete-scute family bHLH transcription factor 3 [Source:VGNC Symbol;Acc:VGNC:70031]               | 1.312493134 | 0.005284725 | 0.024921369 |
| ENSMMUG00000001995 | chromosome 14 C11orf16 homolog [Source:NCBI gene;Acc:705319]                                       | -1.15673575 | 3.39E-05    | 0.000407592 |
| ENSMMUG00000001994 | A-kinase interacting protein 1 [Source:VGNC Symbol;Acc:VGNC:69600]                                 | -1.51064207 | 0.001525533 | 0.00936784  |
| ENSMMUG00000050864 |                                                                                                    | -2.23650302 | 1.98E-10    | 1.90E-08    |
| ENSMMUG00000057794 | caveolae associated protein 3 [Source:NCBI gene;Acc:712799]                                        | 2.670583182 | 0.009805516 | 0.040673658 |
| ENSMMUG00000041831 | hemoglobin subunit epsilon 1 [Source:NCBI gene;Acc:715414]                                         | 1.710438598 | 1.62E-05    | 0.000218393 |
| ENSMMUG00000058081 | olfactory receptor 52D1-like [Source:NCBI gene;Acc:106992372]                                      | 2.225548324 | 0.000747187 | 0.005207884 |
| ENSMMUG00000063820 | olfactory receptor, family 52, subfamily M, member 1 [Source:NCBI gene;Acc:717723]                 | 4.373801725 | 3.98E-05    | 0.000460662 |
| ENSMMUG00000004974 | tripartite motif containing 21 [Source:VGNC Symbol;Acc:VGNC:78556]                                 | 0.757535169 | 0.008942576 | 0.037823463 |
| ENSMMUG00000003962 | ribonucleotide reductase catalytic subunit M1 [Source:VGNC Symbol;Acc:VGNC:76941]                  | 1.025204239 | 0.008716598 | 0.037036288 |
| ENSMMUG00000003958 | stromal interaction molecule 1 [Source:VGNC Symbol;Acc:VGNC:77911]                                 | 1.622975438 | 8.47E-05    | 0.000871555 |
| ENSMMUG00000003955 | post-GPI attachment to proteins 2 [Source:VGNC Symbol;Acc:VGNC:75823]                              | 0.955658766 | 0.000317965 | 0.002557485 |
| ENSMMUG00000003950 | nucleoporin 98 and 96 precursor [Source:VGNC Symbol;Acc:VGNC:75563]                                | 0.620576373 | 0.001634671 | 0.009897827 |
| ENSMMUG00000003949 | cholinergic receptor nicotinic alpha 10 subunit [Source:NCBI gene;Acc:718133]                      | 1.368056799 | 2.95E-05    | 0.000361604 |
| ENSMMUG00000003946 | ADP-ribosyltransferase 5 [Source:VGNC Symbol;Acc:VGNC:69890]                                       | -1.75292858 | 0.00147276  | 0.009090993 |
| ENSMMUG00000007325 | Xrcc1 N-terminal domain containing 1 [Source:NCBI gene;Acc:115945140]                              | 2.632357663 | 1.44E-06    | 2.88E-05    |
| ENSMMUG00000059115 |                                                                                                    | 2.577014733 | 2.11E-06    | 3.96E-05    |
| ENSMMUG00000007326 | ring finger protein 121 [Source:VGNC Symbol;Acc:VGNC:76788]                                        | 2.102055475 | 7.81E-10    | 5.83E-08    |
| ENSMMUG00000007330 | nuclear mitotic apparatus protein 1 [Source:VGNC Symbol;Acc:VGNC:75556]                            | -1.81512047 | 8.42E-20    | 9.13E-17    |
| ENSMMUG00000021280 | leucine rich transmembrane and O-methyltransferase domain containing [Source:NCBI gene;Acc:718286] | 1.682004028 | 7.05E-07    | 1.61E-05    |
| ENSMMUG00000021282 | late endosomal/lysosomal adaptor, MAPK and MTOR activator 1 [Source:VGNC Symbol;Acc:VGNC:74129]    | 1.534581629 | 9.03E-07    | 1.97E-05    |
| ENSMMUG00000010453 | folate receptor beta [Source:VGNC Symbol;Acc:VGNC:72690]                                           | 2.146472326 | 3.59E-09    | 1.97E-07    |
| ENSMMUG00000010451 | inositol polyphosphate phosphatase like 1 [Source:VGNC Symbol;Acc:VGNC:73752]                      | 2.829737489 | 1.47E-06    | 2.93E-05    |
| ENSMMUG00000015054 | ArfGAP with RhoGAP domain, ankyrin repeat and PH domain 1 [Source:VGNC Symbol;Acc:VGNC:69844]      | 0.529487632 | 0.003556359 | 0.018231774 |

|                    |                                                                                                |             |             |             |
|--------------------|------------------------------------------------------------------------------------------------|-------------|-------------|-------------|
| ENSMMUG00000030964 | RAB6A, member RAS oncogene family [Source:NCBI gene;Acc:718717]                                | 0.7123469   | 0.000689444 | 0.004875968 |
| ENSMMUG00000021039 | X-ray radiation resistance associated 1 [Source:NCBI gene;Acc:693788]                          | 2.170130914 | 1.26E-09    | 8.43E-08    |
| ENSMMUG00000009126 | solute carrier organic anion transporter family member 2B1 [Source:VGNC Symbol;Acc:VGNC:77603] | -           | -           | -           |
| ENSMMUG00000000187 | UV radiation resistance associated [Source:VGNC Symbol;Acc:VGNC:78751]                         | 0.727704317 | 0.001004403 | 0.00661431  |
| ENSMMUG00000022401 | EMSY transcriptional repressor, BRCA2 interacting [Source:VGNC Symbol;Acc:VGNC:72065]          | 0.919419253 | 0.003396066 | 0.017583292 |
| ENSMMUG00000018168 | alkaline ceramidase 3 [Source:VGNC Symbol;Acc:VGNC:69415]                                      | 2.395566794 | 8.05E-15    | 2.91E-12    |
| ENSMMUG00000018174 | calpain 5 [Source:VGNC Symbol;Acc:VGNC:70534]                                                  | -0.6163569  | 0.00152342  | 0.009359283 |
| ENSMMUG00000001387 | p21 (RAC1) activated kinase 1 [Source:NCBI gene;Acc:698585]                                    | -           | -           | -           |
| ENSMMUG00000018944 | aquaporin 11 [Source:VGNC Symbol;Acc:VGNC:69866]                                               | 0.845630713 | 0.012344537 | 0.04840309  |
| ENSMMUG00000018945 | chloride nucleotide-sensitive channel 1A [Source:VGNC Symbol;Acc:VGNC:71261]                   | 1.736173504 | 1.08E-09    | 7.59E-08    |
| ENSMMUG00000017355 | remodeling and spacing factor 1 [Source:VGNC Symbol;Acc:VGNC:77044]                            | -           | -           | -           |
| ENSMMUG00000060971 |                                                                                                | 1.977909652 | 0.007719619 | 0.033669136 |
| ENSMMUG00000050119 |                                                                                                | 1.118595666 | 0.007256554 | 0.032057998 |
| ENSMMUG00000013045 | coiled-coil domain containing 81 [Source:VGNC Symbol;Acc:VGNC:70868]                           | -           | -           | -           |
| ENSMMUG00000013055 | malic enzyme 3 [Source:VGNC Symbol;Acc:VGNC:74695]                                             | 1.469497875 | 1.55E-06    | 3.05E-05    |
| ENSMMUG00000011116 | NADPH oxidase 4 [Source:VGNC Symbol;Acc:VGNC:75376]                                            | 1.061540622 | 0.007212476 | 0.031906619 |
| ENSMMUG00000013601 | chromosome 14 C11orf54 homolog [Source:NCBI gene;Acc:696483]                                   | 1.446388264 | 1.28E-05    | 0.000179322 |
| ENSMMUG00000062781 | chromosome 14 C11orf97 homolog [Source:NCBI gene;Acc:106993442]                                | -           | -           | -           |
| ENSMMUG00000008965 | piwi like RNA-mediated gene silencing 4 [Source:VGNC Symbol;Acc:VGNC:81504]                    | 1.345920927 | 0.002287822 | 0.012831141 |
| ENSMMUG00000009394 | sestrin 3 [Source:VGNC Symbol;Acc:VGNC:77291]                                                  | 0.976090403 | 0.003089647 | 0.016354885 |
| ENSMMUG00000061815 |                                                                                                | 1.151590091 | 0.001938989 | 0.01132906  |
| ENSMMUG00000003394 | cilia and flagella associated protein 300 [Source:VGNC Symbol;Acc:VGNC:71120]                  | 0.505593795 | 0.007657975 | 0.033441051 |
| ENSMMUG00000003400 | baculoviral IAP repeat containing 2 [Source:NCBI gene;Acc:702592]                              | 1.223888075 | 7.48E-05    | 0.00078631  |
| ENSMMUG00000011015 | matrix metalloproteinase 27 [Source:VGNC Symbol;Acc:VGNC:74749]                                | 2.239662554 | 1.76E-06    | 3.40E-05    |
| ENSMMUG00000004250 | matrix metalloproteinase 12 [Source:VGNC Symbol;Acc:VGNC:74890]                                | -           | -           | -           |
| ENSMMUG00000057934 |                                                                                                | 0.587317574 | 0.011920501 | 0.04713835  |
| ENSMMUG00000052526 | RAB39A, member RAS oncogene family [Source:NCBI gene;Acc:707451]                               | -0.78094942 | 0.000662723 | 0.004715195 |
| ENSMMUG00000001800 | cullin 5 [Source:VGNC Symbol;Acc:VGNC:71570]                                                   | -           | -           | -           |
| ENSMMUG00000004157 | nuclear protein, coactivator of histone transcription [Source:VGNC Symbol;Acc:VGNC:75379]      | 1.125253476 | 0.00025057  | 0.002110695 |
| ENSMMUG00000000797 | exophilin 5 [Source:VGNC Symbol;Acc:VGNC:72412]                                                | 6.314060202 | 1.62E-08    | 6.96E-07    |
|                    |                                                                                                | 0.740880785 | 0.004800561 | 0.023115918 |
|                    |                                                                                                | 1.236476915 | 0.011605193 | 0.046200532 |
|                    |                                                                                                | 2.505724172 | 1.15E-06    | 2.37E-05    |
|                    |                                                                                                | -1.43219788 | 4.40E-05    | 0.000501454 |
|                    |                                                                                                | -           | -           | -           |
|                    |                                                                                                | 1.145428753 | 0.002494176 | 0.013716385 |
|                    |                                                                                                | 1.843654231 | 3.26E-08    | 1.21E-06    |
|                    |                                                                                                | -           | -           | -           |
|                    |                                                                                                | 1.405915793 | 0.000359277 | 0.002844099 |

|                    |                                                                                                |             |             |             |
|--------------------|------------------------------------------------------------------------------------------------|-------------|-------------|-------------|
| ENSMMUG00000062793 |                                                                                                | 3.830561871 | 8.73E-15    | 3.07E-12    |
| ENSMMUG00000021438 | BTG anti-proliferation factor 4 [Source:VGNC Symbol;Acc:VGNC:70305]                            | 0.865317277 | 0.008153056 | 0.035135405 |
| ENSMMUG00000053898 | chromosome 14 C11orf1 homolog [Source:NCBI gene;Acc:100430882]                                 | 1.024484456 | 0.008700639 | 0.036980561 |
| ENSMMUG00000060987 |                                                                                                | 0.67387936  | 0.007659117 | 0.033441051 |
| ENSMMUG00000007785 | beta-secretase 1 [Source:VGNC Symbol;Acc:VGNC:70215]                                           | 3.368286727 | 0.009882682 | 0.040921413 |
| ENSMMUG00000059436 | interleukin 10 receptor subunit alpha [Source:NCBI gene;Acc:704383]                            | 1.771817778 | 2.90E-09    | 1.64E-07    |
| ENSMMUG00000007620 | transmembrane serine protease 4 [Source:VGNC Symbol;Acc:VGNC:78577]                            | 2.248729973 | 1.34E-06    | 2.71E-05    |
| ENSMMUG00000006268 | junction adhesion molecule like [Source:VGNC Symbol;Acc:VGNC:73860]                            | 0.926035737 | 0.000218425 | 0.001897684 |
| ENSMMUG00000017593 | CD3e molecule [Source:VGNC Symbol;Acc:VGNC:70764]                                              | 0.785071379 | 0.000650721 | 0.004652712 |
| ENSMMUG00000065091 | myelin protein zero like 2 [Source:NCBI gene;Acc:699330]                                       | 0.679826896 | 0.002461415 | 0.01357065  |
| ENSMMUG00000045160 | ubiquitination factor E4A [Source:NCBI gene;Acc:699836]                                        | 0.480916676 | 0.005884475 | 0.027129914 |
| ENSMMUG00000046655 | pleckstrin homology like domain family B member 1 [Source:NCBI gene;Acc:706336]                | 4.682084131 | 1.91E-18    | 1.66E-15    |
| ENSMMUG00000002549 | trehalase [Source:NCBI gene;Acc:706449]                                                        | 4.328970327 | 3.67E-24    | 7.95E-21    |
| ENSMMUG00000009316 | C-X-C motif chemokine receptor 5 [Source:VGNC Symbol;Acc:VGNC:71392]                           | 1.902163153 | 2.37E-05    | 0.000300566 |
| ENSMMUG00000056381 | forkhead box R1 [Source:NCBI gene;Acc:707285]                                                  | 1.75268446  | 0.009510007 | 0.039756446 |
| ENSMMUG00000016890 | solute carrier family 37 member 4 [Source:VGNC Symbol;Acc:VGNC:77591]                          | 0.969951658 | 0.004740673 | 0.022903353 |
| ENSMMUG00000030891 | hypoxia up-regulated 1 [Source:VGNC Symbol;Acc:VGNC:73399]                                     | 1.056147232 | 3.33E-06    | 5.86E-05    |
| ENSMMUG00000014864 | VPS11 core subunit of CORVET and HOPS complexes [Source:VGNC Symbol;Acc:VGNC:78965]            | 0.867884756 | 0.000993428 | 0.006558641 |
| ENSMMUG00000059341 | Metazoan signal recognition particle RNA [Source:RFAM;Acc:RF00017]                             | 1.204212336 | 8.42E-07    | 1.85E-05    |
| ENSMMUG00000014866 | hydroxymethylbilane synthase [Source:VGNC Symbol;Acc:VGNC:73479]                               | 1.061257385 | 0.001225415 | 0.007816453 |
| ENSMMUG00000014872 | dolichyl-phosphate N-acetylglucosaminophosphotransferase 1 [Source:VGNC Symbol;Acc:VGNC:71971] | 1.127716297 | 6.98E-06    | 0.000106647 |
| ENSMMUG00000013799 | ATP binding cassette subfamily G member 4 [Source:VGNC Symbol;Acc:VGNC:69390]                  | 4.611111223 | 6.94E-07    | 1.59E-05    |
| ENSMMUG00000012190 | PDZ domain containing 3 [Source:VGNC Symbol;Acc:VGNC:75832]                                    | 2.883463089 | 0.005974686 | 0.027448521 |
| ENSMMUG00000012191 | coiled-coil domain containing 153 [Source:NCBI gene;Acc:704216]                                | 2.239545629 | 0.000581775 | 0.004236599 |
| ENSMMUG00000008923 | Thy-1 cell surface antigen [Source:VGNC Symbol;Acc:VGNC:78352]                                 | 1.877816926 | 0.000230734 | 0.001979503 |
| ENSMMUG00000022347 | glutamate ionotropic receptor kainate type subunit 4 [Source:VGNC Symbol;Acc:VGNC:73279]       | 1.475283973 | 0.004004335 | 0.020030915 |
| ENSMMUG00000039397 | tubulin folding cofactor E like [Source:NCBI gene;Acc:706506]                                  | 1.539838541 | 1.02E-06    | 2.14E-05    |
| ENSMMUG00000053625 | sterol-C5-desaturase [Source:NCBI gene;Acc:706827]                                             | 0.910325895 | 9.48E-05    | 0.000955132 |
| ENSMMUG00000014880 | sortilin related receptor 1 [Source:NCBI gene;Acc:713011]                                      | 0.850168406 | 0.003164578 | 0.016676865 |
| ENSMMUG00000025983 | U8 small nucleolar RNA [Source:RFAM;Acc:RF00096]                                               | 1.107681418 | 0.011489631 | 0.045810589 |
| ENSMMUG00000015522 | GRAM domain containing 1B [Source:VGNC Symbol;Acc:VGNC:73028]                                  | 1.100375938 | 9.78E-06    | 0.00014128  |
| ENSMMUG00000008486 | endothelial cell adhesion molecule [Source:VGNC Symbol;Acc:VGNC:72290]                         | 1.034814506 | 0.003657522 | 0.018677719 |

|                    |                                                                                          |             |             |             |
|--------------------|------------------------------------------------------------------------------------------|-------------|-------------|-------------|
| ENSMMUG00000065277 | hepatic and glial cell adhesion molecule [Source:NCBI gene;Acc:716321]                   | 2.181225111 | 6.29E-06    | 9.81E-05    |
| ENSMMUG0000006375  | coiled-coil domain containing 15 [Source:NCBI gene;Acc:716362]                           | 1.770314326 | 9.99E-07    | 2.11E-05    |
| ENSMMUG00000054773 | STT3 oligosaccharyltransferase complex catalytic subunit A [Source:NCBI gene;Acc:717056] | 1.298628104 | 0.000249447 | 0.002106151 |
| ENSMMUG00000038587 | prostate and testis expressed 2 [Source:NCBI gene;Acc:717085]                            | -3.14574451 | 0.00184843  | 0.010892924 |
| ENSMMUG00000007628 | cell adhesion associated, oncogene regulated [Source:VGNC Symbol;Acc:VGNC:70961]         | 3.931904253 | 1.21E-06    | 2.48E-05    |
| ENSMMUG00000006929 | ST3 beta-galactoside alpha-2,3-sialyltransferase 4 [Source:VGNC Symbol;Acc:VGNC:77827]   | 1.628733713 | 1.13E-09    | 7.81E-08    |
| ENSMMUG00000006931 | kirre like nephrin family adhesion molecule 3 [Source:NCBI gene;Acc:714534]              | 2.253948641 | 3.30E-13    | 7.80E-11    |
| ENSMMUG00000020706 | ETS proto-oncogene 1, transcription factor [Source:VGNC Symbol;Acc:VGNC:72439]           | 1.087519156 | 0.001947594 | 0.011364024 |
| ENSMMUG00000051915 |                                                                                          | 3.463732778 | 0.011196748 | 0.044890539 |
| ENSMMUG00000060836 |                                                                                          | 2.148188956 | 0.003476192 | 0.017898399 |
| ENSMMUG00000017555 | PR/SET domain 10 [Source:VGNC Symbol;Acc:VGNC:76250]                                     | 0.636835532 | 0.003362855 | 0.01745303  |
| ENSMMUG00000018029 | amyloid beta precursor like protein 2 [Source:VGNC Symbol;Acc:VGNC:69984]                | 1.043734537 | 0.000247235 | 0.002090725 |
| ENSMMUG00000018034 | suppression of tumorigenicity 14 [Source:VGNC Symbol;Acc:VGNC:77897]                     | 1.930875853 | 1.93E-17    | 1.19E-14    |
| ENSMMUG00000002250 | beta-1,3-glucuronyltransferase 1 [Source:VGNC Symbol;Acc:VGNC:70207]                     | 4.340040675 | 6.97E-05    | 0.000738159 |
| ENSMMUG00000032151 | sperm-tail PG-rich repeat containing 3 [Source:VGNC Symbol;Acc:VGNC:78260]               | 1.142651092 | 0.009929469 | 0.041062853 |
| ENSMMUG00000001669 | anaphase promoting complex subunit 2 [Source:VGNC Symbol;Acc:VGNC:69641]                 | 0.612546735 | 0.007810412 | 0.03400811  |
| ENSMMUG00000001667 | transmembrane protein 210 [Source:VGNC Symbol;Acc:VGNC:79945]                            | 1.51536758  | 0.000142037 | 0.001328061 |
| ENSMMUG00000063598 | leucine rich repeat containing 26 [Source:NCBI gene;Acc:706616]                          | 1.622310188 | 0.004498024 | 0.02191675  |
| ENSMMUG00000021428 | lipocalin 12 [Source:VGNC Symbol;Acc:VGNC:74143]                                         | 1.293359243 | 4.27E-05    | 0.000490149 |
| ENSMMUG00000011527 | TNF receptor associated factor 2 [Source:VGNC Symbol;Acc:VGNC:78641]                     | 1.171871757 | 0.000239641 | 0.002038437 |
| ENSMMUG00000005048 | MAM domain containing 4 [Source:VGNC Symbol;Acc:VGNC:74345]                              | 0.914472063 | 0.000330401 | 0.002647685 |
| ENSMMUG00000005047 | phosphohistidine phosphatase 1 [Source:NCBI gene;Acc:721674]                             | 2.910110407 | 0.005168402 | 0.024491765 |
| ENSMMUG00000005042 | RAB, member RAS oncogene family like 6 [Source:VGNC Symbol;Acc:VGNC:76529]               | -1.15252941 | 0.001914245 | 0.011219769 |
| ENSMMUG00000005040 | coiled-coil domain containing 183 [Source:NCBI gene;Acc:709019]                          | 1.218189852 | 0.009841038 | 0.040774939 |
| ENSMMUG00000056009 | inositol polyphosphate-5-phosphatase E [Source:VGNC Symbol;Acc:VGNC:73637]               | 0.96697199  | 0.002035031 | 0.011758157 |
| ENSMMUG00000003105 | peptidase, mitochondrial processing alpha subunit [Source:VGNC Symbol;Acc:VGNC:76062]    | 0.744431552 | 0.003303952 | 0.017243658 |
| ENSMMUG00000003098 | coiled-coil domain containing 187 [Source:NCBI gene;Acc:710749]                          | 1.131068011 | 0.000834943 | 0.005670633 |
| ENSMMUG00000001409 | quiescin sulfhydryl oxidase 2 [Source:VGNC Symbol;Acc:VGNC:76568]                        | 1.551334797 | 5.47E-07    | 1.30E-05    |
| ENSMMUG00000004885 |                                                                                          | 2.537306976 | 0.003331678 | 0.017339659 |
| ENSMMUG00000004882 | LIM homeobox 3 [Source:VGNC Symbol;Acc:VGNC:74263]                                       | 4.369678538 | 0.010270034 | 0.042149592 |

|                    |                                                                                               |             |             |             |
|--------------------|-----------------------------------------------------------------------------------------------|-------------|-------------|-------------|
| ENSMMUG00000045749 |                                                                                               | 2.169999837 | 0.004821331 | 0.023184261 |
| ENSMMUG00000016827 | UBA domain containing 1 [Source:VGNC Symbol;Acc:VGNC:79837]                                   | 2.373040937 | 3.58E-05    | 0.000424562 |
| ENSMMUG00000021497 | calmodulin regulated spectrin associated protein 1 [Source:VGNC Symbol;Acc:VGNC:70583]        | 2.130851176 | 4.38E-07    | 1.07E-05    |
| ENSMMUG00000056035 | Metazoan signal recognition particle RNA [Source:RFAM;Acc:RF00017]                            | -           | -           | -           |
| ENSMMUG00000055942 | spermatogenesis and oogenesis specific basic helix-loop-helix 1 [Source:NCBI gene;Acc:721833] | 1.512954764 | 0.002900951 | 0.015539444 |
| ENSMMUG00000012147 | collagen type V alpha 1 chain [Source:NCBI gene;Acc:722014]                                   | 2.447662858 | 9.98E-06    | 0.000143804 |
| ENSMMUG00000008183 | retinoid X receptor alpha [Source:VGNC Symbol;Acc:VGNC:76951]                                 | 3.180659012 | 1.53E-11    | 2.14E-09    |
| ENSMMUG00000051925 |                                                                                               | 3.460097493 | 0.008696444 | 0.036974811 |
|                    |                                                                                               | 1.869077809 | 1.01E-08    | 4.65E-07    |
| ENSMMUG00000017210 | sarcosine dehydrogenase [Source:VGNC Symbol;Acc:VGNC:76971]                                   | -           | -           | -           |
| ENSMMUG00000017207 | dopamine beta-hydroxylase [Source:VGNC Symbol;Acc:VGNC:71740]                                 | 4.431289692 | 2.66E-09    | 1.55E-07    |
| ENSMMUG00000022348 | surfeit 4 [Source:VGNC Symbol;Acc:VGNC:78060]                                                 | 3.941048471 | 1.10E-11    | 1.64E-09    |
| ENSMMUG00000050752 | Metazoan signal recognition particle RNA [Source:RFAM;Acc:RF00017]                            | 0.861602907 | 0.000421541 | 0.003242198 |
| ENSMMUG00000051984 |                                                                                               | -           | -           | -           |
| ENSMMUG00000002267 | laminin subunit gamma 3 [Source:NCBI gene;Acc:722430]                                         | 2.290002975 | 0.002302244 | 0.012895342 |
| ENSMMUG00000036223 |                                                                                               | 2.409485081 | 0.001065375 | 0.006942019 |
| ENSMMUG00000003797 | ubiquitin specific peptidase 20 [Source:VGNC Symbol;Acc:VGNC:78740]                           | 2.985014864 | 6.75E-05    | 0.000717025 |
| ENSMMUG00000056226 |                                                                                               | 2.989039246 | 0.000465508 | 0.00349763  |
| ENSMMUG00000009965 | chromosome 15 C9orf50 homolog [Source:VGNC Symbol;Acc:VGNC:70365]                             | 1.62542807  | 0.001221516 | 0.007799234 |
| ENSMMUG00000049483 |                                                                                               | -           | -           | -           |
| ENSMMUG00000002515 | protein phosphatase 2 phosphatase activator [Source:VGNC Symbol;Acc:VGNC:76583]               | 1.990875892 | 0.004227945 | 0.020815005 |
| ENSMMUG00000005989 | GLE1 RNA export mediator [Source:VGNC Symbol;Acc:VGNC:73067]                                  | 2.229429999 | 6.25E-09    | 3.10E-07    |
| ENSMMUG00000052476 | zinc finger and BTB domain containing 43 [Source:NCBI gene;Acc:701797]                        | 3.195458402 | 0.012598046 | 0.049073031 |
| ENSMMUG00000016826 | MAPK associated protein 1 [Source:VGNC Symbol;Acc:VGNC:74531]                                 | 2.234876342 | 1.76E-18    | 1.64E-15    |
| ENSMMUG00000003668 | GTPase activating protein and VPS9 domains 1 [Source:VGNC Symbol;Acc:VGNC:72767]              | 0.829681196 | 0.002528414 | 0.013851959 |
| ENSMMUG00000005217 | heat shock protein family A (Hsp70) member 5 [Source:NCBI gene;Acc:703193]                    | 1.683197165 | 3.29E-05    | 0.00039752  |
| ENSMMUG00000005215 | Rab9 effector protein with kelch motifs [Source:VGNC Symbol;Acc:VGNC:76495]                   | 1.005680095 | 0.001104498 | 0.00716107  |
| ENSMMUG00000020549 | protein phosphatase 6 catalytic subunit [Source:NCBI gene;Acc:703658]                         | 1.020422652 | 0.000116201 | 0.001124486 |
| ENSMMUG00000061871 |                                                                                               | 0.906531312 | 0.004198332 | 0.020731446 |
| ENSMMUG00000011183 | olfactomedin like 2A [Source:VGNC Symbol;Acc:VGNC:75472]                                      | 1.241269716 | 6.63E-06    | 0.000102351 |
| ENSMMUG00000033102 | mml-mir-181b-2 [Source:miRBase;Acc:MI0007646]                                                 | 0.985311468 | 0.008079379 | 0.034922035 |
| ENSMMUG00000026876 | mml-mir-181a-2 [Source:miRBase;Acc:MI0002808]                                                 | -2.21215906 | 0.009688346 | 0.04031966  |
| ENSMMUG00000063639 |                                                                                               | -           | -           | -           |
| ENSMMUG00000038944 |                                                                                               | 2.187277642 | 4.51E-05    | 0.000512714 |
|                    |                                                                                               | 2.859603301 | 0.001246754 | 0.007909897 |
|                    |                                                                                               | -           | -           | -           |
|                    |                                                                                               | 3.038169068 | 0.000321846 | 0.002582315 |
|                    |                                                                                               | 3.491882921 | 2.27E-11    | 2.96E-09    |
|                    |                                                                                               | 2.135482795 | 1.69E-07    | 4.78E-06    |



|                     |                                                                                                |             |             |             |
|---------------------|------------------------------------------------------------------------------------------------|-------------|-------------|-------------|
| ENSMMUG00000043396  | Metazoan signal recognition particle RNA [Source:RFAM;Acc:RF00017]                             | 2.995589677 | 0.001083117 | 0.007043513 |
| ENSMMUG00000005595  | RAB14, member RAS oncogene family [Source:NCBI gene;Acc:699837]                                | 2.52760445  | 1.87E-08    | 7.91E-07    |
| ENSMMUG00000012668  | centriolin [Source:VGNC Symbol;Acc:VGNC:71204]                                                 | 2.43085084  | 2.54E-11    | 3.23E-09    |
| ENSMMUG000000065273 |                                                                                                | -           |             |             |
| ENSMMUG00000013107  | tripartite motif containing 32 [Source:VGNC Symbol;Acc:VGNC:79032]                             | 1.576154302 | 0.011333769 | 0.045355998 |
| ENSMMUG00000013099  | pappalysin 1 [Source:VGNC Symbol;Acc:VGNC:75756]                                               | 1.204245195 | 0.0001561   | 0.001431099 |
| ENSMMUG00000003356  | tenascin C [Source:VGNC Symbol;Acc:VGNC:79960]                                                 | 1.847360866 | 7.63E-08    | 2.43E-06    |
| ENSMMUG000000041301 |                                                                                                | 1.565803709 | 3.51E-05    | 0.000418303 |
| ENSMMUG000000064892 | TNF superfamily member 8 [Source:NCBI gene;Acc:702944]                                         | -           |             |             |
| ENSMMUG00000044537  | DNA polymerase epsilon 3, accessory subunit [Source:NCBI gene;Acc:705074]                      | 0.971875642 | 0.010296819 | 0.042238569 |
| ENSMMUG00000031965  | aminolevulinatase dehydratase [Source:VGNC Symbol;Acc:VGNC:69779]                              | 2.849650078 | 8.51E-08    | 2.64E-06    |
| ENSMMUG00000057031  |                                                                                                | -2.64976713 | 0.001425714 | 0.008850994 |
| ENSMMUG00000007187  | haloacid dehalogenase like hydrolase domain containing 3 [Source:VGNC Symbol;Acc:VGNC:73250]   | 2.492360041 | 2.42E-05    | 0.000306195 |
| ENSMMUG00000005851  | B-box and SPRY domain containing [Source:VGNC Symbol;Acc:VGNC:70342]                           | 2.594615443 | 0.000382641 | 0.002989945 |
| ENSMMUG00000057503  | Metazoan signal recognition particle RNA [Source:RFAM;Acc:RF00017]                             | -           |             |             |
| ENSMMUG00000000690  | catenin alpha like 1 [Source:VGNC Symbol;Acc:VGNC:71544]                                       | 2.222293263 | 0.003834154 | 0.01936583  |
| ENSMMUG00000053648  | actin binding transcription modulator [Source:NCBI gene;Acc:710486]                            | 3.505043234 | 1.95E-07    | 5.39E-06    |
| ENSMMUG00000019357  | elongator complex protein 1 [Source:VGNC Symbol;Acc:VGNC:72257]                                | 1.414030242 | 0.001740056 | 0.010386034 |
| ENSMMUG00000019355  | actin like 7A [Source:VGNC Symbol;Acc:VGNC:69417]                                              | 1.098072521 | 0.000713865 | 0.005015949 |
| ENSMMUG00000019354  | actin like 7B [Source:VGNC Symbol;Acc:VGNC:69421]                                              | 1.233942814 | 8.47E-05    | 0.000871555 |
| ENSMMUG00000023797  | post-GPI attachment to proteins GalNAc transferase 4 [Source:VGNC Symbol;Acc:VGNC:79688]       | 0.814334346 | 2.53E-06    | 4.65E-05    |
| ENSMMUG00000053976  | bile acid-CoA:amino acid N-acyltransferase [Source:NCBI gene;Acc:100429419]                    | 1.672522222 | 0.000401487 | 0.00311188  |
| ENSMMUG00000057599  |                                                                                                | 2.266930263 | 3.98E-05    | 0.000460577 |
| ENSMMUG00000009831  | TBC1 domain family member 2 [Source:VGNC Symbol;Acc:VGNC:78157]                                | 1.722562651 | 5.84E-05    | 0.000633186 |
| ENSMMUG00000002853  | coronin 2A [Source:VGNC Symbol;Acc:VGNC:71451]                                                 | 1.402130758 | 0.000149025 | 0.001380497 |
| ENSMMUG00000008670  | SH2 domain containing adaptor protein B [Source:VGNC Symbol;Acc:VGNC:82236]                    | 2.218849603 | 0.000137995 | 0.001297732 |
| ENSMMUG00000017886  | F-box protein 10 [Source:NCBI gene;Acc:718443]                                                 | -           |             |             |
| ENSMMUG00000017892  | RNA polymerase I subunit E [Source:VGNC Symbol;Acc:VGNC:76047]                                 | 1.934039519 | 0.000170609 | 0.00153773  |
| ENSMMUG00000007421  | zinc finger CCHC-type containing 7 [Source:VGNC Symbol;Acc:VGNC:82088]                         | 0.650529386 | 0.011928841 | 0.047145711 |
| ENSMMUG00000019639  | paired box 5 [Source:VGNC Symbol;Acc:VGNC:75764]                                               | 0.542716988 | 0.007593891 | 0.0332434   |
| ENSMMUG00000022613  | reversion inducing cysteine rich protein with kazal motifs [Source:VGNC Symbol;Acc:VGNC:76722] | -           |             |             |
| ENSMMUG00000059406  | RGP1 homolog, RAB6A GEF complex partner 1 [Source:NCBI gene;Acc:695936]                        | 1.125857373 | 0.002802156 | 0.015097284 |
|                     |                                                                                                | 1.055984974 | 0.00048432  | 0.00361513  |
|                     |                                                                                                | -           |             |             |
|                     |                                                                                                | 0.886389051 | 0.006167227 | 0.028145534 |
|                     |                                                                                                | -5.29328675 | 1.04E-08    | 4.73E-07    |
|                     |                                                                                                | 1.896822497 | 2.70E-10    | 2.42E-08    |
|                     |                                                                                                | -           |             |             |
|                     |                                                                                                | 3.582672311 | 1.35E-05    | 0.000188247 |

|                    |                                                                                       |   |             |             |             |
|--------------------|---------------------------------------------------------------------------------------|---|-------------|-------------|-------------|
| ENSMMUG00000016331 | glucosylceramidase beta 2 [Source:VGNC Symbol;Acc:VGNC:72741]                         | - | 4.386483641 | 6.29E-05    | 0.000675463 |
| ENSMMUG00000031856 | talin 1 [Source:VGNC Symbol;Acc:VGNC:78371]                                           | - | 0.827924913 | 9.49E-05    | 0.000955132 |
| ENSMMUG00000050822 | carbonic anhydrase 9 [Source:NCBI gene;Acc:696729]                                    | - | 1.386723327 | 0.000254792 | 0.00213657  |
| ENSMMUG00000048375 | Metazoan signal recognition particle RNA [Source:RFAM;Acc:RF00017]                    | - | 1.536210428 | 8.47E-05    | 0.000871555 |
| ENSMMUG00000016323 | Rho guanine nucleotide exchange factor 39 [Source:VGNC Symbol;Acc:VGNC:69912]         | - | 1.572053023 | 5.26E-05    | 0.000581187 |
| ENSMMUG00000016327 | coiled-coil domain containing 107 [Source:VGNC Symbol;Acc:VGNC:70656]                 | - | 1.567397851 | 4.08E-05    | 0.000469644 |
| ENSMMUG00000016314 | family with sequence similarity 166 member B [Source:VGNC Symbol;Acc:VGNC:72421]      | - | 3.344441719 | 1.12E-17    | 8.06E-15    |
| ENSMMUG00000016313 | RUN and SH3 domain containing 2 [Source:VGNC Symbol;Acc:VGNC:82230]                   | - | 1.683284602 | 2.21E-10    | 2.05E-08    |
| ENSMMUG00000020190 | valosin containing protein [Source:VGNC Symbol;Acc:VGNC:78762]                        | - | 1.801519498 | 1.84E-05    | 0.000243032 |
| ENSMMUG00000061896 |                                                                                       | - | 2.690524424 | 1.35E-06    | 2.74E-05    |
| ENSMMUG00000022895 | DnaJ heat shock protein family (Hsp40) member B5 [Source:NCBI gene;Acc:699081]        | - | 0.492040726 | 0.011640122 | 0.046325406 |
| ENSMMUG00000012597 | ubiquitin associated protein 2 [Source:VGNC Symbol;Acc:VGNC:78949]                    | - | 1.806553626 | 0.000167535 | 0.001513168 |
| ENSMMUG00000035888 | small nucleolar RNA, C/D box 121A [Source:HGNC Symbol;Acc:HGNC:33560]                 | - | 1.872390333 | 0.004832499 | 0.023223883 |
| ENSMMUG00000053200 | ubiquitin conjugating enzyme E2 R2 [Source:NCBI gene;Acc:701507]                      | - | 1.559577123 | 5.08E-05    | 0.000565612 |
| ENSMMUG00000000389 | nucleolar protein 6 [Source:VGNC Symbol;Acc:VGNC:75218]                               | - | 0.777816859 | 0.010631843 | 0.04310031  |
| ENSMMUG00000012442 | DExD/H-box helicase 58 [Source:VGNC Symbol;Acc:VGNC:71672]                            | - | 0.500473068 | 0.002280638 | 0.012812781 |
| ENSMMUG00000008196 | aconitase 1 [Source:VGNC Symbol;Acc:VGNC:69378]                                       | - | 2.107984643 | 5.16E-08    | 1.75E-06    |
| ENSMMUG00000062843 | MOB kinase activator 3B [Source:NCBI gene;Acc:706919]                                 | - | 1.149961788 | 6.74E-06    | 0.000103547 |
| ENSMMUG00000064752 | phospholipase A2 activating protein [Source:NCBI gene;Acc:707876]                     | - | -2.92752918 | 0.000386379 | 0.003014544 |
| ENSMMUG00000050918 |                                                                                       | - | 0.864803756 | 0.004809806 | 0.023151866 |
| ENSMMUG00000010959 | kelch like family member 9 [Source:VGNC Symbol;Acc:VGNC:74080]                        | - | 3.022089939 | 0.008073288 | 0.034907308 |
| ENSMMUG00000019070 | focadhesin [Source:VGNC Symbol;Acc:VGNC:72556]                                        | - | 0.812736439 | 0.004155615 | 0.020589686 |
| ENSMMUG00000018396 | HAUS augmin like complex subunit 6 [Source:VGNC Symbol;Acc:VGNC:73237]                | - | 2.12430305  | 3.60E-07    | 9.11E-06    |
| ENSMMUG00000001141 | basonuclin 2 [Source:VGNC Symbol;Acc:VGNC:70448]                                      | - | 2.449569625 | 0.012276944 | 0.048167099 |
| ENSMMUG00000013466 | tetratricopeptide repeat domain 39B [Source:VGNC Symbol;Acc:VGNC:79402]               | - | 0.788874609 | 2.56E-07    | 6.81E-06    |
| ENSMMUG00000055400 | U6 spliceosomal RNA [Source:RFAM;Acc:RF00026]                                         | - | 0.681849192 | 0.00506572  | 0.024133611 |
| ENSMMUG00000008128 | FRAS1 related extracellular matrix 1 [Source:VGNC Symbol;Acc:VGNC:72768]              | - | 0.976426359 | 1.44E-05    | 0.000198126 |
| ENSMMUG00000002176 | ubiquitin like with PHD and ring finger domains 2 [Source:VGNC Symbol;Acc:VGNC:78714] | - | 0.848772896 | 7.31E-07    | 1.65E-05    |
| ENSMMUG00000050923 |                                                                                       | - | 0.987556119 | 0.003773458 | 0.019111212 |
| ENSMMUG00000002175 | TPD52 like 3 [Source:HGNC Symbol;Acc:HGNC:23382]                                      | - | 0.736618644 | 0.008591666 | 0.036637119 |
| ENSMMUG00000021344 | interleukin 33 [Source:VGNC Symbol;Acc:VGNC:73606]                                    | - | 1.024326316 | 0.009704534 | 0.040339574 |
| ENSMMUG00000005469 | endoplasmic reticulum metalloproteinase 1 [Source:VGNC Symbol;Acc:VGNC:72322]         | - | 0.730009566 | 3.18E-05    | 0.000385818 |

|                    |                                                                                                                                       |             |             |             |
|--------------------|---------------------------------------------------------------------------------------------------------------------------------------|-------------|-------------|-------------|
| ENSMMUG00000057331 | RNA terminal phosphate cyclase like 1 [Source:NCBI gene;Acc:694568]                                                                   | 1.82114284  | 9.60E-08    | 2.91E-06    |
| ENSMMUG00000026950 | microRNA 101-2 [Source:HGNC Symbol;Acc:HGNC:31489]                                                                                    | 2.031882355 | 0.004846031 | 0.02327455  |
| ENSMMUG00000056693 |                                                                                                                                       | -           | -           | -           |
| ENSMMUG00000015093 | very low density lipoprotein receptor [Source:VGNC Symbol;Acc:VGNC:78774]                                                             | 0.719440031 | 0.00072408  | 0.005079495 |
| ENSMMUG00000057073 |                                                                                                                                       | 0.474061523 | 0.009156302 | 0.038608027 |
| ENSMMUG00000015279 | SWI/SNF related, matrix associated, actin dependent regulator of chromatin, subfamily a, member 2 [Source:VGNC Symbol;Acc:VGNC:77647] | 4.295653859 | 7.47E-06    | 0.000113037 |
| ENSMMUG00000012472 | phosphatidylinositol-4-phosphate 5-kinase type 1 beta [Source:VGNC Symbol;Acc:VGNC:76001]                                             | -1.0066959  | 0.000226688 | 0.001958079 |
| ENSMMUG00000027986 | U6 spliceosomal RNA [Source:RFAM;Acc:RF00026]                                                                                         | 1.004188596 | 4.80E-06    | 7.87E-05    |
| ENSMMUG00000012667 | annexin A1 [Source:VGNC Symbol;Acc:VGNC:69944]                                                                                        | 2.361262925 | 1.48E-06    | 2.93E-05    |
| ENSMMUG00000019761 | G protein subunit alpha 14 [Source:VGNC Symbol;Acc:VGNC:73088]                                                                        | 1.36216342  | 7.19E-05    | 0.000758938 |
| ENSMMUG00000056840 |                                                                                                                                       | 1.635287492 | 0.010651103 | 0.043141778 |
| ENSMMUG00000064984 |                                                                                                                                       | 0.977378285 | 0.000249545 | 0.002106151 |
| ENSMMUG00000023117 | neurotrophic receptor tyrosine kinase 2 [Source:VGNC Symbol;Acc:VGNC:75541]                                                           | 4.051392567 | 0.003299777 | 0.017228786 |
| ENSMMUG00000060761 |                                                                                                                                       | 0.743951434 | 0.000166283 | 0.001502899 |
| ENSMMUG00000054211 |                                                                                                                                       | 1.554803899 | 9.12E-08    | 2.79E-06    |
| ENSMMUG00000057499 |                                                                                                                                       | 2.1400417   | 0.002618252 | 0.014277984 |
| ENSMMUG00000049479 |                                                                                                                                       | 1.756992292 | 0.000357927 | 0.002836807 |
| ENSMMUG0000001748  | spleen associated tyrosine kinase [Source:VGNC Symbol;Acc:VGNC:78063]                                                                 | 3.03789061  | 0.00266005  | 0.01445742  |
| ENSMMUG00000020009 | receptor tyrosine kinase like orphan receptor 2 [Source:VGNC Symbol;Acc:VGNC:76716]                                                   | 2.048240252 | 0.000101344 | 0.00100694  |
| ENSMMUG00000060533 |                                                                                                                                       | 0.926053028 | 0.005173006 | 0.024501134 |
| ENSMMUG0000003006  | serine palmitoyltransferase long chain base subunit 1 [Source:VGNC Symbol;Acc:VGNC:77873]                                             | 0.810608193 | 0.00232922  | 0.012982861 |
| ENSMMUG0000009493  | family with sequence similarity 120A [Source:NCBI gene;Acc:717459]                                                                    | 1.060546704 | 0.005502426 | 0.025751909 |
| ENSMMUG00000060932 | zinc finger protein 383-like [Source:NCBI gene;Acc:106993074]                                                                         | 2.654824346 | 5.24E-11    | 6.15E-09    |
| ENSMMUG00000049314 | dual specificity phosphatase 2 [Source:NCBI gene;Acc:718442]                                                                          | 0.984077185 | 0.002925977 | 0.015654156 |
| ENSMMUG00000053389 |                                                                                                                                       | 2.909677478 | 0.005466264 | 0.025601091 |
| ENSMMUG00000057143 | transmembrane protein 127 [Source:NCBI gene;Acc:705069]                                                                               | -0.90320659 | 0.000590872 | 0.004281272 |
| ENSMMUG00000057336 |                                                                                                                                       | 1.245524172 | 2.04E-05    | 0.000265958 |
| ENSMMUG0000001390  | NCK adaptor protein 2 [Source:VGNC Symbol;Acc:VGNC:75142]                                                                             | 0.555456956 | 0.000368386 | 0.002898977 |
| ENSMMUG00000055529 | sulfotransferase family 1C member 4 [Source:NCBI gene;Acc:693903]                                                                     | 1.361313977 | 0.003330545 | 0.017339659 |
| ENSMMUG0000009156  | LIM zinc finger domain containing 1 [Source:VGNC Symbol;Acc:VGNC:74271]                                                               | 3.058537218 | 0.003235507 | 0.016947647 |
| ENSMMUG00000060346 |                                                                                                                                       | 2.355276905 | 0.004368563 | 0.021388851 |
| ENSMMUG0000002231  | transmembrane protein 87B [Source:VGNC Symbol;Acc:VGNC:79557]                                                                         | 1.616872679 | 0.003712931 | 0.018892949 |
| ENSMMUG00000051042 |                                                                                                                                       | 0.795314443 | 0.011841976 | 0.04692901  |
|                    |                                                                                                                                       | 1.120377977 | 3.75E-09    | 2.04E-07    |

|                    |                                                                                       |             |             |             |
|--------------------|---------------------------------------------------------------------------------------|-------------|-------------|-------------|
| ENSMMUG0000008056  | threonine synthase like 2 [Source:VGNC Symbol;Acc:VGNC:79519]                         | 2.284859892 | 0.008028181 | 0.034781651 |
| ENSMMUG00000046169 |                                                                                       | 2.056917886 | 9.83E-05    | 0.00098423  |
| ENSMMUG0000000293  | catenin alpha 2 [Source:VGNC Symbol;Acc:VGNC:71543]                                   | 1.134090366 | 7.96E-06    | 0.000119263 |
| ENSMMUG00000051034 |                                                                                       | 2.541096748 | 0.004501959 | 0.02191675  |
| ENSMMUG00000062818 | regenerating islet-derived protein 3-alpha [Source:NCBI gene;Acc:716890]              | 1.406692291 | 0.001875402 | 0.011011956 |
| ENSMMUG00000056785 |                                                                                       | 0.726125473 | 0.010010348 | 0.04134474  |
| ENSMMUG00000062747 |                                                                                       | 0.413627423 | 0.010919394 | 0.04399555  |
| ENSMMUG00000048322 | eva-1 homolog A, regulator of programmed cell death [Source:NCBI gene;Acc:710843]     | 1.601896287 | 0.000137073 | 0.001291863 |
| ENSMMUG00000051843 |                                                                                       | 0.802097888 | 0.000877451 | 0.005922224 |
| ENSMMUG00000001845 | DNA polymerase epsilon 4, accessory subunit [Source:VGNC Symbol;Acc:VGNC:76065]       | 2.14854122  | 0.002020701 | 0.011706566 |
| ENSMMUG00000008396 | methylmalonyl-CoA epimerase [Source:NCBI gene;Acc:704094]                             | 0.866690528 | 0.000102139 | 0.001011745 |
| ENSMMUG00000002096 | N-acetylglucosamine kinase [Source:VGNC Symbol;Acc:VGNC:74977]                        | -0.55936691 | 0.003862817 | 0.019465243 |
| ENSMMUG00000002093 | testis expressed 261 [Source:NCBI gene;Acc:703863]                                    | 0.917458325 | 2.12E-06    | 3.98E-05    |
| ENSMMUG00000055845 | ankyrin repeat domain 53 [Source:NCBI gene;Acc:703757]                                | -1.5202061  | 1.33E-05    | 0.000186191 |
| ENSMMUG00000002090 | ATPase H+ transporting V1 subunit B1 [Source:VGNC Symbol;Acc:VGNC:70184]              | 1.380606237 | 2.56E-06    | 4.69E-05    |
| ENSMMUG00000061424 | ventral anterior homeobox 2 [Source:NCBI gene;Acc:703531]                             | 3.59427637  | 4.24E-11    | 5.06E-09    |
| ENSMMUG00000059700 |                                                                                       | 3.66719166  | 4.97E-06    | 8.12E-05    |
| ENSMMUG00000020854 | C-type lectin domain family 4 member F [Source:VGNC Symbol;Acc:VGNC:71349]            | 4.411794941 | 0.007001476 | 0.031174666 |
| ENSMMUG00000010592 | adducin 2 [Source:VGNC Symbol;Acc:VGNC:69529]                                         | 2.351139753 | 0.00664757  | 0.029844077 |
| ENSMMUG00000063699 |                                                                                       | 3.537059343 | 0.004352378 | 0.021328949 |
| ENSMMUG00000049539 |                                                                                       | 1.187184199 | 9.30E-05    | 0.000941829 |
| ENSMMUG00000047067 | SERTA domain containing 2 [Source:NCBI gene;Acc:696216]                               | 0.604243592 | 0.009944682 | 0.041086573 |
| ENSMMUG00000006503 | aftiphilin [Source:VGNC Symbol;Acc:VGNC:69701]                                        | 0.786482655 | 0.008244075 | 0.035398626 |
| ENSMMUG00000059267 | pellino E3 ubiquitin protein ligase 1 [Source:NCBI gene;Acc:696416]                   | 0.788287782 | 0.000443581 | 0.003372831 |
| ENSMMUG00000013973 | chaperonin containing TCP1 subunit 4 [Source:VGNC Symbol;Acc:VGNC:70747]              | 1.613496282 | 0.010577815 | 0.042951939 |
| ENSMMUG00000057547 |                                                                                       | 0.651336557 | 0.00015459  | 0.001420921 |
| ENSMMUG00000008098 | ubiquitin specific peptidase 34 [Source:VGNC Symbol;Acc:VGNC:79223]                   | 0.880645176 | 0.00064806  | 0.004641334 |
| ENSMMUG00000055963 |                                                                                       | 1.118971805 | 3.77E-05    | 0.000443451 |
| ENSMMUG00000010834 | REL proto-oncogene, NF-kB subunit [Source:VGNC Symbol;Acc:VGNC:76892]                 | 0.472904899 | 0.001349944 | 0.008457311 |
| ENSMMUG00000007003 | polyribonucleotide nucleotidyltransferase 1 [Source:VGNC Symbol;Acc:VGNC:76095]       | 5.105324927 | 6.54E-06    | 0.00010128  |
| ENSMMUG00000007001 | protein phosphatase 4 regulatory subunit 3B [Source:VGNC Symbol;Acc:VGNC:76342]       | 5.213231093 | 0.000124357 | 0.001191881 |
| ENSMMUG00000007000 | cilia and flagella associated protein 36 [Source:VGNC Symbol;Acc:VGNC:71142]          | 3.792208691 | 0.010342184 | 0.042357091 |
| ENSMMUG00000052169 | potassium two pore domain channel subfamily K member 12 [Source:NCBI gene;Acc:715556] | 4.177199985 | 0.000237778 | 0.002025238 |

|                    |                                                                                              |   |             |             |             |
|--------------------|----------------------------------------------------------------------------------------------|---|-------------|-------------|-------------|
| ENSMMUG00000053577 |                                                                                              | - | 2.395339668 | 1.05E-07    | 3.15E-06    |
| ENSMMUG00000000974 | mutS homolog 2 [Source:VGNC Symbol;Acc:VGNC:74931]                                           | - | 2.366430367 | 2.16E-05    | 0.000279169 |
| ENSMMUG00000059300 |                                                                                              | - | 1.096929874 | 0.000776154 | 0.005343919 |
| ENSMMUG00000054734 |                                                                                              | - | 1.018028138 | 0.001629797 | 0.009882115 |
| ENSMMUG00000023752 | SIX homeobox 2 [Source:VGNC Symbol;Acc:VGNC:81570]                                           | - | 1.251036444 | 0.00418519  | 0.020710279 |
| ENSMMUG00000053683 |                                                                                              | - | 1.463540014 | 3.00E-05    | 0.000367305 |
| ENSMMUG00000014824 | SIX homeobox 3 [Source:HGNC Symbol;Acc:HGNC:10889]                                           | - | 1.318710926 | 2.00E-09    | 1.25E-07    |
| ENSMMUG00000051072 |                                                                                              | - | 0.771108863 | 4.98E-05    | 0.000555432 |
| ENSMMUG00000008080 | ATP binding cassette subfamily G member 5 [Source:VGNC Symbol;Acc:VGNC:69391]                | - | 0.555699609 | 0.005748891 | 0.026615343 |
| ENSMMUG00000008077 | dynein cytoplasmic 2 light intermediate chain 1 [Source:VGNC Symbol;Acc:VGNC:71899]          | - | 0.789869422 | 3.85E-06    | 6.54E-05    |
| ENSMMUG00000064735 | 3-hydroxyanthranilate 3,4-dioxygenase [Source:NCBI gene;Acc:713101]                          | - | 0.522912535 | 0.00615517  | 0.028108897 |
| ENSMMUG00000020744 | metastasis associated 1 family member 3 [Source:VGNC Symbol;Acc:VGNC:74814]                  | - | 0.780806652 | 0.002145131 | 0.012209878 |
| ENSMMUG00000056008 |                                                                                              | - | 0.8952842   | 5.05E-06    | 8.23E-05    |
| ENSMMUG00000002338 | heterogeneous nuclear ribonucleoprotein L like [Source:VGNC Symbol;Acc:VGNC:73441]           | - | 0.388086223 | 0.009826936 | 0.040730823 |
| ENSMMUG00000013944 | regulator of microtubule dynamics 2 [Source:VGNC Symbol;Acc:VGNC:76839]                      | - | 1.230534046 | 1.95E-07    | 5.39E-06    |
| ENSMMUG00000054398 |                                                                                              | - | 0.733907321 | 0.010348982 | 0.042357091 |
| ENSMMUG00000016442 | glutaminy-peptide cyclotransferase [Source:VGNC Symbol;Acc:VGNC:76636]                       | - | 2.052798857 | 0.003049923 | 0.016177526 |
| ENSMMUG00000016438 | protein kinase D3 [Source:VGNC Symbol;Acc:VGNC:76415]                                        | - | 2.308749344 | 1.48E-06    | 2.93E-05    |
| ENSMMUG00000016434 | NADH:ubiquinone oxidoreductase complex assembly factor 7 [Source:VGNC Symbol;Acc:VGNC:75035] | - | 2.412753534 | 1.08E-07    | 3.21E-06    |
| ENSMMUG00000037522 | eukaryotic translation initiation factor 2 alpha kinase 2 [Source:NCBI gene;Acc:708912]      | - | 3.294276926 | 1.36E-06    | 2.75E-05    |
| ENSMMUG00000030867 | G-patch domain containing 11 [Source:NCBI gene;Acc:708809]                                   | - | 3.207698115 | 0.010157548 | 0.041846394 |
| ENSMMUG00000049720 |                                                                                              | - | 3.267363437 | 0.001712553 | 0.010264269 |
| ENSMMUG00000021436 | latent transforming growth factor beta binding protein 1 [Source:VGNC Symbol;Acc:VGNC:74456] | - | 1.280148177 | 0.000386902 | 0.003016818 |
| ENSMMUG00000008288 | sorting nexin 17 [Source:VGNC Symbol;Acc:VGNC:77709]                                         | - | 3.13370734  | 0.001135182 | 0.007330775 |
| ENSMMUG00000003355 | lipid droplet associated hydrolase [Source:VGNC Symbol;Acc:VGNC:74130]                       | - | 1.362296989 | 2.48E-06    | 4.57E-05    |
| ENSMMUG00000022996 | HCLS1 binding protein 3 [Source:VGNC Symbol;Acc:VGNC:82158]                                  | - | 1.450358936 | 3.55E-07    | 9.04E-06    |
| ENSMMUG00000064216 |                                                                                              | - | -2.40985925 | 0.000268511 | 0.002230047 |
| ENSMMUG00000012058 | GEN1 Holliday junction 5' flap endonuclease [Source:VGNC Symbol;Acc:VGNC:72790]              | - | 2.937183377 | 1.88E-05    | 0.000246827 |
| ENSMMUG00000012056 | structural maintenance of chromosomes 6 [Source:VGNC Symbol;Acc:VGNC:77746]                  | - | 4.402155692 | 3.43E-08    | 1.25E-06    |
| ENSMMUG00000004215 | LRAT domain containing 1 [Source:VGNC Symbol;Acc:VGNC:74321]                                 | - | 2.761845832 | 0.00122885  | 0.007830685 |
| ENSMMUG00000052377 |                                                                                              | - | 1.49870394  | 0.007591102 | 0.03324238  |
| ENSMMUG00000056755 |                                                                                              | - | 2.251240521 | 0.000982255 | 0.006494768 |
| ENSMMUG00000050686 |                                                                                              | - | 1.248119276 | 0.006350933 | 0.028780568 |
| ENSMMUG00000059188 |                                                                                              | - | 2.176526399 | 6.25E-11    | 7.06E-09    |

|                    |                                                                                               |             |             |             |
|--------------------|-----------------------------------------------------------------------------------------------|-------------|-------------|-------------|
| ENSMMUG00000016678 | Rho associated coiled-coil containing protein kinase 2<br>[Source:VGNC Symbol;Acc:VGNC:76714] | 2.574264657 | 3.70E-08    | 1.33E-06    |
| ENSMMUG00000060435 | Metazoan signal recognition particle RNA<br>[Source:RFAM;Acc:RF00017]                         | 2.697878142 | 0.000107452 | 0.001054734 |
| ENSMMUG00000022785 | solute carrier family 66 member 3 [Source:VGNC<br>Symbol;Acc:VGNC:76334]                      | 1.701868146 | 0.01077652  | 0.043527768 |
| ENSMMUG00000059454 |                                                                                               | 5.127178163 | 5.55E-05    | 0.000607583 |
| ENSMMUG00000021036 | kinase D interacting substrate 220 [Source:VGNC<br>Symbol;Acc:VGNC:73947]                     | 4.799248671 | 5.91E-05    | 0.000637988 |
| ENSMMUG00000063262 |                                                                                               | 0.953850094 | 7.03E-05    | 0.000743552 |
| ENSMMUG00000051814 |                                                                                               | 1.4715232   | 2.58E-09    | 1.52E-07    |
| ENSMMUG00000009662 | thyroid peroxidase [Source:VGNC Symbol;Acc:VGNC:78636]                                        | 0.801269617 | 0.012712681 | 0.049414563 |
| ENSMMUG00000061533 |                                                                                               | 2.155803663 | 3.98E-08    | 1.40E-06    |
| ENSMMUG00000050543 |                                                                                               | 1.648944463 | 0.001587315 | 0.009669609 |
| ENSMMUG00000042598 | transmembrane protein 18 [Source:NCBI gene;Acc:721515]                                        | 3.075837268 | 4.98E-10    | 4.07E-08    |
| ENSMMUG00000005588 | SH3 and multiple ankyrin repeat domains 3 [Source:NCBI<br>gene;Acc:100430318]                 | 0.938744396 | 0.004321663 | 0.021210398 |
| ENSMMUG00000009115 | tubulin tyrosine ligase like 8 [Source:VGNC<br>Symbol;Acc:VGNC:79943]                         | 0.562695697 | 0.000907225 | 0.006085285 |
| ENSMMUG00000011278 | cysteine rich with EGF like domains 2 [Source:NCBI<br>gene;Acc:720586]                        | 0.457858763 | 0.004488097 | 0.021895045 |
| ENSMMUG00000000553 | bromodomain containing 1 [Source:VGNC<br>Symbol;Acc:VGNC:70280]                               | 1.693477509 | 0.000157609 | 0.001439513 |
| ENSMMUG00000003764 | TBC1 domain family member 22A [Source:VGNC<br>Symbol;Acc:VGNC:82077]                          | 0.687914348 | 0.00475784  | 0.02296121  |
| ENSMMUG00000056186 |                                                                                               | 1.179374315 | 0.005257612 | 0.024802504 |
| ENSMMUG00000020993 | cadherin EGF LAG seven-pass G-type receptor 1 [Source:NCBI<br>gene;Acc:718440]                | 1.270166564 | 0.001852135 | 0.010904872 |
| ENSMMUG00000016262 | tetratricopeptide repeat domain 38 [Source:VGNC<br>Symbol;Acc:VGNC:79574]                     | 1.842081199 | 4.93E-05    | 0.000551273 |
| ENSMMUG00000023004 | structural maintenance of chromosomes 1B [Source:VGNC<br>Symbol;Acc:VGNC:77657]               | 0.478720494 | 0.006928377 | 0.030902084 |
| ENSMMUG00000023003 | family with sequence similarity 118 member A [Source:VGNC<br>Symbol;Acc:VGNC:72265]           | 0.636122357 | 0.003323272 | 0.017323636 |
| ENSMMUG00000031000 | Rho GTPase activating protein 8 [Source:NCBI gene;Acc:716745]                                 | 2.846240203 | 0.001554028 | 0.009520346 |
| ENSMMUG00000065099 |                                                                                               | -1.75812363 | 6.34E-06    | 9.87E-05    |
| ENSMMUG00000051681 | retrotransposon Gag like 6 [Source:NCBI gene;Acc:712760]                                      | 2.255963934 | 2.23E-10    | 2.06E-08    |
| ENSMMUG00000064395 |                                                                                               | 1.523132439 | 1.69E-05    | 0.000225581 |
| ENSMMUG00000022590 | metallophosphoesterase domain containing 1 [Source:NCBI<br>gene;Acc:715021]                   | 3.253246705 | 3.03E-11    | 3.72E-09    |
| ENSMMUG00000008106 | solute carrier family 25 member 17 [Source:NCBI<br>gene;Acc:705547]                           | 0.660957947 | 0.003848943 | 0.019410375 |
| ENSMMUG00000056662 |                                                                                               | 1.572222118 | 4.05E-06    | 6.80E-05    |
| ENSMMUG00000012101 | synaptogyrin 1 [Source:VGNC Symbol;Acc:VGNC:78068]                                            | -1.02683742 | 0.000800874 | 0.00548508  |
| ENSMMUG00000048395 | chromobox 6 [Source:NCBI gene;Acc:702133]                                                     | 5.997476033 | 2.58E-06    | 4.73E-05    |
| ENSMMUG00000004869 | neuronal pentraxin receptor [Source:NCBI gene;Acc:100428434]                                  | 4.244821146 | 0.009593044 | 0.040002287 |
| ENSMMUG00000004868 | dynein axonemal light chain 4 [Source:VGNC<br>Symbol;Acc:VGNC:71945]                          | 4.325795697 | 0.000853716 | 0.005774017 |
| ENSMMUG00000007277 | GTP binding protein 1 [Source:VGNC Symbol;Acc:VGNC:73320]                                     | 1.519989901 | 0.003895992 | 0.019594458 |
| ENSMMUG00000061986 |                                                                                               | -1.55155332 | 0.008005582 | 0.034695301 |

|                    |                                                                                                          |             |             |             |
|--------------------|----------------------------------------------------------------------------------------------------------|-------------|-------------|-------------|
| ENSMMUG00000049788 |                                                                                                          | 2.238084747 | 0.000902478 | 0.006060466 |
| ENSMMUG00000015258 | glycine C-acetyltransferase [Source:NCBI gene;Acc:698811]                                                | 3.157749796 | 1.26E-05    | 0.000177101 |
| ENSMMUG00000005991 | TRIO and F-actin binding protein [Source:NCBI gene;Acc:701241]                                           | 0.830758825 | 0.000207454 | 0.001814491 |
| ENSMMUG00000056629 | nucleolar protein 12 [Source:NCBI gene;Acc:698318]                                                       | 1.693854673 | 0.006758532 | 0.030248268 |
| ENSMMUG00000003007 | caspase recruitment domain family member 10 [Source:VGNC Symbol;Acc:VGNC:70570]                          | 3.727029413 | 2.62E-05    | 0.000327332 |
| ENSMMUG00000003005 | MFNG O-fucosylpeptide 3-beta-N-acetylglucosaminyltransferase [Source:VGNC Symbol;Acc:VGNC:74712]         | 6.219616308 | 5.36E-07    | 1.27E-05    |
| ENSMMUG00000014986 | testis expressed 33 [Source:VGNC Symbol;Acc:VGNC:79727]                                                  | 0.722376015 | 0.004228298 | 0.020815005 |
| ENSMMUG00000008160 | neutrophil cytosolic factor 4 [Source:VGNC Symbol;Acc:VGNC:75141]                                        | 2.087098629 | 2.20E-06    | 4.10E-05    |
| ENSMMUG00000055820 |                                                                                                          | 2.166511189 | 0.00038366  | 0.002995131 |
| ENSMMUG00000008778 | parvalbumin [Source:VGNC Symbol;Acc:VGNC:76627]                                                          | 2.099724223 | 2.80E-08    | 1.06E-06    |
| ENSMMUG00000006101 | myosin heavy chain 9 [Source:VGNC Symbol;Acc:VGNC:75102]                                                 | 1.149203352 | 1.67E-05    | 0.000223517 |
| ENSMMUG00000060967 |                                                                                                          | 1.140329562 | 0.002078045 | 0.011958875 |
| ENSMMUG00000014010 | RNA binding fox-1 homolog 2 [Source:VGNC Symbol;Acc:VGNC:76685]                                          | 0.712221475 | 1.51E-06    | 2.99E-05    |
| ENSMMUG00000048463 | apolipoprotein L5 [Source:HGNC Symbol;Acc:HGNC:14869]                                                    | 0.858594026 | 3.94E-05    | 0.000456888 |
| ENSMMUG00000059824 |                                                                                                          | 3.163905854 | 0.010611609 | 0.043062273 |
| ENSMMUG00000021727 | tyrosine 3-monooxygenase/tryptophan 5-monooxygenase activation protein eta [Source:NCBI gene;Acc:717016] | 0.494428871 | 0.000194262 | 0.001715252 |
| ENSMMUG00000002182 | phosphatidylserine decarboxylase [Source:VGNC Symbol;Acc:VGNC:76005]                                     | 1.316600522 | 0.007116265 | 0.031566897 |
| ENSMMUG00000002181 | SFI1 centrin binding protein [Source:VGNC Symbol;Acc:VGNC:77328]                                         | 1.448379037 | 3.84E-05    | 0.000448462 |
| ENSMMUG00000037662 | selenoprotein M [Source:NCBI gene;Acc:718290]                                                            | 1.832126511 | 0.012869557 | 0.04986043  |
| ENSMMUG00000005898 | MORC family CW-type zinc finger 2 [Source:VGNC Symbol;Acc:VGNC:74810]                                    | 2.928763195 | 0.010389494 | 0.042412353 |
| ENSMMUG00000052343 |                                                                                                          | 0.997667519 | 0.008353401 | 0.035797145 |
| ENSMMUG00000021374 | EWS RNA binding protein 1 [Source:VGNC Symbol;Acc:VGNC:72446]                                            | 1.132211721 | 0.001446395 | 0.008958005 |
| ENSMMUG00000021372 | EMI domain containing 1 [Source:VGNC Symbol;Acc:VGNC:72063]                                              | 1.328742541 | 5.16E-06    | 8.38E-05    |
| ENSMMUG00000007215 | X-box binding protein 1 [Source:VGNC Symbol;Acc:VGNC:78806]                                              | 1.398822393 | 0.000312722 | 0.002521553 |
| ENSMMUG00000053198 | coiled-coil domain containing 117 [Source:NCBI gene;Acc:713804]                                          | 1.477878135 | 0.000359885 | 0.002846368 |
| ENSMMUG00000020486 | checkpoint kinase 2 [Source:VGNC Symbol;Acc:VGNC:70958]                                                  | 0.78563097  | 9.38E-05    | 0.000946834 |
| ENSMMUG00000001058 | tetratricopeptide repeat domain 28 [Source:VGNC Symbol;Acc:VGNC:79785]                                   | 2.11868091  | 8.39E-06    | 0.000124139 |
| ENSMMUG00000023442 | HPS4 biogenesis of lysosomal organelles complex 3 subunit 2 [Source:VGNC Symbol;Acc:VGNC:73396]          | 3.664723471 | 0.000303449 | 0.002468207 |
| ENSMMUG00000003334 | myosin XVIIIIB [Source:VGNC Symbol;Acc:VGNC:74985]                                                       | 0.776618039 | 0.00580895  | 0.026848331 |
| ENSMMUG00000023053 |                                                                                                          | 0.533074365 | 0.00025622  | 0.002144398 |
| ENSMMUG00000053799 | glutathione S-transferase theta 1 [Source:NCBI gene;Acc:700314]                                          | 0.766893142 | 0.000355993 | 0.002824923 |
| ENSMMUG00000044782 |                                                                                                          | 0.758506623 | 0.010873191 | 0.043836553 |
| ENSMMUG00000020999 | gamma-glutamyltransferase 1 [Source:NCBI gene;Acc:707545]                                                | 1.010646624 | 0.001386225 | 0.008651266 |
| ENSMMUG00000000264 | small nuclear ribonucleoprotein D3 polypeptide [Source:VGNC Symbol;Acc:VGNC:77678]                       | 5.105848924 | 0.000802813 | 0.005492578 |

|                     |                                                                                                     |             |             |             |
|---------------------|-----------------------------------------------------------------------------------------------------|-------------|-------------|-------------|
| ENSMMUG00000049542  |                                                                                                     | 2.282355577 | 2.18E-09    | 1.33E-07    |
| ENSMMUG00000023622  | BCR activator of RhoGEF and GTPase [Source:NCBI gene;Acc:709258]                                    | 1.710804497 | 1.35E-05    | 0.000188378 |
| ENSMMUG00000001776  | G protein subunit alpha z [Source:VGNC Symbol;Acc:VGNC:73094]                                       | 0.742629276 | 0.000460859 | 0.003478777 |
| ENSMMUG00000014641  |                                                                                                     | 0.475028312 | 0.004221004 | 0.02081101  |
| ENSMMUG000000051343 |                                                                                                     | 3.414120317 | 8.77E-05    | 0.000897449 |
| ENSMMUG000000056950 |                                                                                                     | 1.829358534 | 3.26E-09    | 1.81E-07    |
| ENSMMUG000000039205 |                                                                                                     | 1.956185346 | 0.004941293 | 0.023627373 |
| ENSMMUG00000018798  | stromal cell derived factor 2 like 1 [Source:NCBI gene;Acc:697928]                                  | 0.690141775 | 0.002776574 | 0.014990505 |
| ENSMMUG00000018531  | peptidylprolyl isomerase like 2 [Source:VGNC Symbol;Acc:VGNC:76239]                                 | 0.572525407 | 0.005461744 | 0.02558988  |
| ENSMMUG00000020384  | synaptosome associated protein 29 [Source:VGNC Symbol;Acc:VGNC:77664]                               | -           | -           | -           |
| ENSMMUG000000049130 |                                                                                                     | 0.789488448 | 0.00758177  | 0.033223888 |
| ENSMMUG000000063914 |                                                                                                     | 1.832020106 | 1.37E-07    | 3.98E-06    |
| ENSMMUG000000023263 | mediator complex subunit 15 [Source:VGNC Symbol;Acc:VGNC:74511]                                     | 2.030458549 | 1.98E-09    | 1.24E-07    |
| ENSMMUG00000017171  | scavenger receptor class F member 2 [Source:VGNC Symbol;Acc:VGNC:77058]                             | 1.898509521 | 3.70E-05    | 0.000436281 |
| ENSMMUG000000062236 |                                                                                                     | -           | -           | -           |
| ENSMMUG00000000560  | DiGeorge syndrome critical region gene 6 like [Source:NCBI gene;Acc:693512]                         | 1.267660862 | 0.011000838 | 0.044282544 |
| ENSMMUG00000009650  | HIR histone cell cycle regulation defective homolog A (S. cerevisiae) [Source:NCBI gene;Acc:719142] | 1.972361239 | 8.26E-11    | 8.88E-09    |
| ENSMMUG00000005432  | clathrin heavy chain like 1 [Source:VGNC Symbol;Acc:VGNC:71268]                                     | 1.922337098 | 3.56E-06    | 6.17E-05    |
| ENSMMUG00000020799  | BH3 interacting domain death agonist [Source:VGNC Symbol;Acc:VGNC:70250]                            | -           | -           | -           |
| ENSMMUG00000021476  |                                                                                                     | 0.383594951 | 0.003884224 | 0.019550393 |
| ENSMMUG000000058916 |                                                                                                     | 2.836064589 | 2.11E-11    | 2.77E-09    |
| ENSMMUG00000021477  | ATPase H+ transporting V1 subunit E1 [Source:NCBI gene;Acc:709739]                                  | 2.432353502 | 1.96E-07    | 5.42E-06    |
| ENSMMUG00000059302  | Metazoan signal recognition particle RNA [Source:RFAM;Acc:RF00017]                                  | 2.700877978 | 7.95E-05    | 0.000825429 |
| ENSMMUG00000006668  | tubulin alpha-3 chain [Source:NCBI gene;Acc:707215]                                                 | 2.557055769 | 1.99E-06    | 3.78E-05    |
| ENSMMUG000000054724 |                                                                                                     | 2.772441506 | 3.48E-05    | 0.000415679 |
| ENSMMUG00000009953  | ninein like [Source:VGNC Symbol;Acc:VGNC:75273]                                                     | 1.432460326 | 0.002186342 | 0.012390226 |
| ENSMMUG00000002397  | GINS complex subunit 1 [Source:VGNC Symbol;Acc:VGNC:73025]                                          | -           | -           | -           |
| ENSMMUG000000059374 | abhydrolase domain containing 12 [Source:VGNC Symbol;Acc:VGNC:69411]                                | 0.966888544 | 0.007303715 | 0.032233498 |
| ENSMMUG00000009199  | glycogen phosphorylase B [Source:VGNC Symbol;Acc:VGNC:76631]                                        | 0.947006018 | 0.012927444 | 0.049995342 |
| ENSMMUG00000049391  |                                                                                                     | 1.217179322 | 0.00011413  | 0.00111023  |
| ENSMMUG00000016815  | somatostatin receptor 4 [Source:VGNC Symbol;Acc:VGNC:77895]                                         | 1.419965729 | 4.21E-06    | 7.04E-05    |
| ENSMMUG00000056728  | NK2 homeobox 2 [Source:NCBI gene;Acc:701424]                                                        | 1.505463954 | 0.001094777 | 0.007101637 |
| ENSMMUG00000042668  | cilia and flagella associated protein 61 [Source:NCBI gene;Acc:699814]                              | 1.082648714 | 0.000305605 | 0.002477994 |
| ENSMMUG0000007709   | crooked neck pre-mRNA splicing factor 1 [Source:VGNC Symbol;Acc:VGNC:71412]                         | 1.185806289 | 0.000136166 | 0.001287158 |
| ENSMMUG00000002321  | solute carrier family 24 member 3 [Source:VGNC Symbol;Acc:VGNC:77426]                               | 2.215037158 | 0.000426801 | 0.003269128 |
|                     |                                                                                                     | 0.897982393 | 0.000291972 | 0.002388297 |
|                     |                                                                                                     | -           | -           | -           |
|                     |                                                                                                     | 3.609041106 | 0.008685974 | 0.036942374 |
|                     |                                                                                                     | 1.013504735 | 0.001690611 | 0.010174958 |
|                     |                                                                                                     | -           | -           | -           |
|                     |                                                                                                     | 1.418142644 | 2.87E-05    | 0.000353548 |
|                     |                                                                                                     | -           | -           | -           |
|                     |                                                                                                     | 1.218890823 | 0.000129501 | 0.001233011 |



|                    |                                                                                                         |             |             |             |
|--------------------|---------------------------------------------------------------------------------------------------------|-------------|-------------|-------------|
| ENSMMUG00000031166 | McKusick-Kaufman syndrome [Source:NCBI gene;Acc:718547]                                                 | 3.662443218 | 0.00172885  | 0.010328629 |
| ENSMMUG00000011064 | synaptosome associated protein 25 [Source:VGNC Symbol;Acc:VGNC:77663]                                   | 1.846981739 | 0.008418066 | 0.036038634 |
| ENSMMUG00000015923 | ankyrin repeat and EF-hand domain containing 1 [Source:VGNC Symbol;Acc:VGNC:69615]                      | -           | -           | -           |
| ENSMMUG00000055897 |                                                                                                         | 1.507364829 | 2.34E-05    | 0.000297642 |
| ENSMMUG00000057687 |                                                                                                         | 2.03147723  | 2.34E-10    | 2.11E-08    |
| ENSMMUG00000064554 | leucine rich repeat neuronal 4 [Source:NCBI gene;Acc:718283]                                            | 1.849164745 | 2.17E-08    | 8.80E-07    |
| ENSMMUG00000013740 | minichromosome maintenance 8 homologous recombination repair factor [Source:VGNC Symbol;Acc:VGNC:74516] | 1.285166078 | 0.011527377 | 0.045932923 |
| ENSMMUG00000056093 | shieldin complex subunit 1 [Source:NCBI gene;Acc:718152]                                                | 1.600752162 | 0.004697983 | 0.022722932 |
| ENSMMUG00000064391 |                                                                                                         | 1.354651872 | 5.28E-07    | 1.26E-05    |
| ENSMMUG00000013261 | CDP-diacylglycerol synthase 2 [Source:VGNC Symbol;Acc:VGNC:70995]                                       | 1.342486734 | 9.48E-07    | 2.05E-05    |
| ENSMMUG00000020005 |                                                                                                         | -2.1499831  | 0.00025082  | 0.002111387 |
| ENSMMUG00000020912 | solute carrier family 23 member 2 [Source:NCBI gene;Acc:717939]                                         | -           | -           | -           |
| ENSMMUG00000017150 | mitochondrial antiviral signaling protein [Source:VGNC Symbol;Acc:VGNC:74609]                           | 0.960968274 | 0.000452242 | 0.003423665 |
| ENSMMUG00000022070 | sialic acid binding Ig like lectin 1 [Source:VGNC Symbol;Acc:VGNC:77220]                                | 0.815183005 | 0.012373296 | 0.048458848 |
| ENSMMUG00000063747 |                                                                                                         | 1.007852001 | 0.002731307 | 0.014789083 |
| ENSMMUG00000010028 | leucine zipper tumor suppressor family member 3 [Source:VGNC Symbol;Acc:VGNC:74403]                     | 0.568575536 | 0.003900619 | 0.019602572 |
| ENSMMUG0000002982  | FAST kinase domains 5 [Source:NCBI gene;Acc:100498658]                                                  | -           | -           | -           |
| ENSMMUG00000063622 | mitochondrial ribosomal protein S26 [Source:NCBI gene;Acc:717038]                                       | 0.877400184 | 0.010841378 | 0.043721847 |
| ENSMMUG00000021332 | carboxypeptidase X, M14 family member 1 [Source:VGNC Symbol;Acc:VGNC:71413]                             | 0.867680892 | 0.001453142 | 0.008991231 |
| ENSMMUG00000064862 |                                                                                                         | 0.668199135 | 0.008171413 | 0.035202847 |
| ENSMMUG00000021331 | EBF family member 4 [Source:VGNC Symbol;Acc:VGNC:71932]                                                 | 1.80905133  | 0.000137181 | 0.001291942 |
| ENSMMUG00000010054 | zinc finger protein 343 [Source:NCBI gene;Acc:716613]                                                   | -           | -           | -           |
| ENSMMUG00000010050 | small nuclear ribonucleoprotein polypeptides B and B1 [Source:VGNC Symbol;Acc:VGNC:77676]               | 6.232689201 | 2.18E-06    | 4.08E-05    |
| ENSMMUG00000018474 | signal regulatory protein alpha [Source:NCBI gene;Acc:717811]                                           | 4.599891766 | 0.001860022 | 0.010936458 |
| ENSMMUG00000047879 | family with sequence similarity 110 member A [Source:NCBI gene;Acc:717055]                              | 4.005547586 | 5.42E-05    | 0.000596343 |
| ENSMMUG00000021670 | solute carrier family 52 member 3 [Source:VGNC Symbol;Acc:VGNC:77717]                                   | 4.174714162 | 0.002176364 | 0.012355209 |
| ENSMMUG00000056387 | transcription factor 15 [Source:NCBI gene;Acc:716916]                                                   | 1.244046193 | 0.009892363 | 0.040948464 |
| ENSMMUG00000031224 | casein kinase 2 alpha 1 [Source:NCBI gene;Acc:714841]                                                   | 1.496398377 | 0.001464665 | 0.009049612 |
| ENSMMUG0000004461  | TBC1 domain family member 20 [Source:VGNC Symbol;Acc:VGNC:78132]                                        | 3.408829692 | 0.000103604 | 0.001023751 |
| ENSMMUG00000026836 | Y RNA [Source:RFAM;Acc:RF00019]                                                                         | 1.237237034 | 5.43E-06    | 8.75E-05    |
| ENSMMUG00000012601 | RANBP2-type and C3HC4-type zinc finger containing 1 [Source:VGNC Symbol;Acc:VGNC:81554]                 | 2.287026168 | 1.25E-05    | 0.000176775 |
| ENSMMUG00000012599 | neurensin 2 [Source:VGNC Symbol;Acc:VGNC:75411]                                                         | 0.967844139 | 0.000752802 | 0.005238602 |
|                    |                                                                                                         | 1.028887689 | 6.75E-09    | 3.29E-07    |
|                    |                                                                                                         | -           | -           | -           |
|                    |                                                                                                         | 1.481688833 | 0.004849381 | 0.02328204  |
|                    |                                                                                                         | -           | -           | -           |
|                    |                                                                                                         | 1.098102596 | 0.000678055 | 0.004805876 |
|                    |                                                                                                         | 2.521789078 | 0.000894036 | 0.006024784 |

|                     |                                                                                                                         |             |             |             |
|---------------------|-------------------------------------------------------------------------------------------------------------------------|-------------|-------------|-------------|
| ENSMMUG00000046141  | defensin beta 123 [Source:NCBI gene;Acc:619504]                                                                         | 1.726303389 | 3.03E-05    | 0.000370283 |
| ENSMMUG00000005116  | defensin beta 124 [Source:VGNC Symbol;Acc:VGNC:71655]                                                                   | 1.694482232 | 9.69E-07    | 2.06E-05    |
| ENSMMUG00000058583  | RRAD and GEM like GTPase 1 [Source:NCBI gene;Acc:713351]                                                                | 0.587076726 | 0.001148598 | 0.007402706 |
| ENSMMUG00000051112  | p53 and DNA damage regulated 1 [Source:NCBI gene;Acc:712622]                                                            | 1.169195298 | 0.005119715 | 0.024346256 |
| ENSMMUG00000020669  | BPI fold containing family B member 6 [Source:VGNC Symbol;Acc:VGNC:70327]                                               | 1.161842813 | 9.91E-05    | 0.000989413 |
| ENSMMUG00000063752  | phosphatidylinositol glycan anchor biosynthesis class U [Source:NCBI gene;Acc:707317]                                   | 2.596992488 | 0.009392006 | 0.039391304 |
| ENSMMUG00000017931  | gamma-glutamyltransferase 7 [Source:VGNC Symbol;Acc:VGNC:72921]                                                         | 1.296379195 | 0.004496941 | 0.02191675  |
| ENSMMUG00000017932  | acyl-CoA synthetase short chain family member 2 [Source:VGNC Symbol;Acc:VGNC:69410]                                     | 2.321433587 | 0.006569987 | 0.029567217 |
| ENSMMUG00000000229  | transient receptor potential cation channel subfamily C member 4 associated protein [Source:VGNC Symbol;Acc:VGNC:79014] | -2.23904673 | 0.001173907 | 0.00754054  |
| ENSMMUG00000018208  | eukaryotic translation initiation factor 6 [Source:NCBI gene;Acc:709602]                                                | 1.868486407 | 0.009203546 | 0.038700717 |
| ENSMMUG00000057979  | growth differentiation factor 5 [Source:NCBI gene;Acc:705432]                                                           | 0.734220091 | 5.39E-06    | 8.71E-05    |
| ENSMMUG00000031274  | GDF5 antisense RNA 1 [Source:HGNC Symbol;Acc:HGNC:33435]                                                                | 0.865150738 | 0.003106437 | 0.016417035 |
| ENSMMUG00000031284  | RNA binding motif protein 39 [Source:NCBI gene;Acc:704198]                                                              | 3.797975181 | 7.14E-05    | 0.00075449  |
| ENSMMUG00000010633  | PHD finger protein 20 [Source:VGNC Symbol;Acc:VGNC:75807]                                                               | 0.826377685 | 0.000406564 | 0.003136283 |
| ENSMMUG00000020691  | AAR2 splicing factor [Source:VGNC Symbol;Acc:VGNC:69412]                                                                | 0.864295924 | 0.005018465 | 0.023939009 |
| ENSMMUG00000016448  | DLG associated protein 4 [Source:NCBI gene;Acc:702928]                                                                  | 1.71148512  | 2.86E-06    | 5.13E-05    |
| ENSMMUG00000059897  | myosin light chain 9 [Source:NCBI gene;Acc:709784]                                                                      | 1.439486314 | 0.001468359 | 0.00906813  |
| ENSMMUG00000008195  | TGFB induced factor homeobox 2 [Source:NCBI gene;Acc:100429616]                                                         | 1.561546085 | 3.05E-07    | 7.85E-06    |
| ENSMMUG00000056945  |                                                                                                                         | 1.487464977 | 1.80E-07    | 5.04E-06    |
| ENSMMUG00000017224  | catenin beta like 1 [Source:VGNC Symbol;Acc:VGNC:71414]                                                                 | 1.256842788 | 0.00023176  | 0.001986994 |
| ENSMMUG00000017230  | V-set and transmembrane domain containing 2 like [Source:NCBI gene;Acc:707394]                                          | -1.47934017 | 7.00E-12    | 1.17E-09    |
| ENSMMUG00000018924  | regulation of nuclear pre-mRNA domain containing 1B [Source:VGNC Symbol;Acc:VGNC:77024]                                 | 0.751274006 | 0.010618487 | 0.043063311 |
| ENSMMUG00000020173  | bactericidal permeability increasing protein [Source:VGNC Symbol;Acc:VGNC:70277]                                        | 1.087676962 | 2.41E-05    | 0.000305659 |
| ENSMMUG00000006738  | L3MBTL histone methyl-lysine binding protein 1 [Source:NCBI gene;Acc:695694]                                            | 2.528529696 | 4.39E-09    | 2.30E-07    |
| ENSMMUG00000007925  | serum/glucocorticoid regulated kinase 2 [Source:VGNC Symbol;Acc:VGNC:77228]                                             | 2.222011287 | 4.33E-07    | 1.06E-05    |
| ENSMMUG00000000396  | intraflagellar transport 52 [Source:NCBI gene;Acc:694933]                                                               | 1.656593442 | 1.19E-06    | 2.45E-05    |
| ENSMMUG00000018137  | MYB proto-oncogene like 2 [Source:VGNC Symbol;Acc:VGNC:75092]                                                           | 1.34725041  | 3.24E-05    | 0.000391732 |
| ENSMMUG00000022865  | junctionophilin 2 [Source:NCBI gene;Acc:694158]                                                                         | 4.424116033 | 3.58E-05    | 0.000424562 |
| ENSMMUG00000006464  | hepatocyte nuclear factor 4 alpha [Source:VGNC Symbol;Acc:VGNC:73492]                                                   | 0.763863187 | 0.008003874 | 0.034695301 |
| ENSMMUG000000063590 |                                                                                                                         | 3.591753978 | 8.09E-06    | 0.000120998 |
| ENSMMUG00000003402  | matrilin 4 [Source:NCBI gene;Acc:717652]                                                                                | 3.265828825 | 1.55E-06    | 3.05E-05    |
| ENSMMUG00000051201  | zinc finger SWIM-type containing 3 [Source:NCBI gene;Acc:708804]                                                        | 1.678222321 | 5.85E-11    | 6.78E-09    |
| ENSMMUG00000042855  | zinc finger SWIM-type containing 1 [Source:NCBI gene;Acc:717180]                                                        | 3.046075951 | 2.77E-08    | 1.05E-06    |
| ENSMMUG00000009957  | spermatogenesis associated 25 [Source:VGNC Symbol;Acc:VGNC:77928]                                                       | 3.688753158 | 3.58E-08    | 1.29E-06    |

|                    |                                                                                                 |             |             |             |
|--------------------|-------------------------------------------------------------------------------------------------|-------------|-------------|-------------|
| ENSMMUG0000009960  | cathepsin A [Source:VGNC Symbol;Acc:VGNC:71617]                                                 | 2.835685433 | 2.57E-14    | 8.47E-12    |
| ENSMMUG00000016549 | matrix metalloproteinase 9 [Source:VGNC Symbol;Acc:VGNC:74903]                                  | 1.904189408 | 0.001119679 | 0.007248653 |
| ENSMMUG00000012029 | sulfatase 2 [Source:VGNC Symbol;Acc:VGNC:78179]                                                 | 1.034016753 | 0.001707492 | 0.010238652 |
| ENSMMUG00000038447 |                                                                                                 | 0.869861862 | 0.007475097 | 0.032878292 |
| ENSMMUG00000057808 |                                                                                                 | 1.015671523 | 0.006826506 | 0.030500015 |
| ENSMMUG00000058754 |                                                                                                 | 3.789924042 | 0.002962608 | 0.015791674 |
| ENSMMUG00000002124 | beta-1,4-galactosyltransferase 5 [Source:VGNC Symbol;Acc:VGNC:70212]                            | 1.853144263 | 0.000470602 | 0.003529788 |
| ENSMMUG00000002715 | solute carrier family 9 member A8 [Source:VGNC Symbol;Acc:VGNC:77749]                           | 1.270162754 | 6.69E-07    | 1.55E-05    |
| ENSMMUG00000000740 | spermatogenesis associated 2 [Source:VGNC Symbol;Acc:VGNC:77923]                                | 1.785854812 | 2.61E-09    | 1.52E-07    |
| ENSMMUG00000065129 |                                                                                                 | 2.440679767 | 0.001020251 | 0.006698323 |
| ENSMMUG00000012228 | ubiquitin conjugating enzyme E2 V1 [Source:NCBI gene;Acc:100425552]                             | 2.468177765 | 3.08E-11    | 3.74E-09    |
| ENSMMUG00000002759 | dolichyl-phosphate mannosyltransferase subunit 1, catalytic [Source:VGNC Symbol;Acc:VGNC:71975] | 2.151486665 | 0.006557573 | 0.029531787 |
| ENSMMUG00000000918 | ATPase phospholipid transporting 9A (putative) [Source:VGNC Symbol;Acc:VGNC:84529]              | 1.418086335 | 0.007024788 | 0.031235691 |
| ENSMMUG00000013035 | teashirt zinc finger homeobox 2 [Source:VGNC Symbol;Acc:VGNC:78875]                             | 0.843866315 | 0.011478529 | 0.045780356 |
| ENSMMUG00000018358 | zinc finger protein 217 [Source:VGNC Symbol;Acc:VGNC:78874]                                     | -1.28742436 | 0.000148739 | 0.001379836 |
| ENSMMUG00000057302 |                                                                                                 | 1.971632295 | 0.001760098 | 0.01047202  |
| ENSMMUG00000031391 | RNA binding motif protein 38 [Source:VGNC Symbol;Acc:VGNC:76484]                                | 2.880972461 | 6.77E-08    | 2.19E-06    |
| ENSMMUG00000022589 | prostate transmembrane protein, androgen induced 1 [Source:VGNC Symbol;Acc:VGNC:76023]          | 1.285587782 | 0.000103167 | 0.001020374 |
| ENSMMUG00000004560 | crystallin lambda 1 [Source:VGNC Symbol;Acc:VGNC:71433]                                         | 0.822388611 | 0.00194059  | 0.011333327 |
| ENSMMUG00000016475 | M-phase phosphoprotein 8 [Source:VGNC Symbol;Acc:VGNC:74864]                                    | 0.734906224 | 0.00017219  | 0.001549828 |
| ENSMMUG00000004237 | TNF receptor superfamily member 19 [Source:VGNC Symbol;Acc:VGNC:78588]                          | 1.018517806 | 6.79E-07    | 1.56E-05    |
| ENSMMUG00000008520 | ATPase phospholipid transporting 8A2 [Source:VGNC Symbol;Acc:VGNC:70062]                        | 0.877811067 | 3.94E-05    | 0.000456888 |
| ENSMMUG00000058755 | ribosomal protein L21 [Source:NCBI gene;Acc:710306]                                             | 3.539163103 | 5.03E-10    | 4.09E-08    |
| ENSMMUG00000058608 |                                                                                                 | 2.757020229 | 0.011929612 | 0.047145711 |
| ENSMMUG00000058786 | ligand of numb-protein X 2 [Source:NCBI gene;Acc:710660]                                        | 0.722740365 | 0.00598863  | 0.027499619 |
| ENSMMUG00000008658 | microtubule associated scaffold protein 2 [Source:NCBI gene;Acc:721776]                         | 0.775974232 | 0.00523324  | 0.024696487 |
| ENSMMUG00000050015 | Metazoan signal recognition particle RNA [Source:RFAM;Acc:RF00017]                              | 1.714243378 | 0.005521067 | 0.025811285 |
| ENSMMUG00000013707 | heat shock protein family H (Hsp110) member 1 [Source:NCBI gene;Acc:721956]                     | 1.159427042 | 6.01E-06    | 9.45E-05    |
| ENSMMUG00000013713 | beta 3-glucosyltransferase [Source:NCBI gene;Acc:713498]                                        | 3.226479624 | 1.92E-08    | 8.05E-07    |
| ENSMMUG00000003898 | relaxin family peptide receptor 2 [Source:VGNC Symbol;Acc:VGNC:77039]                           | 1.207945513 | 0.000710489 | 0.004997633 |
| ENSMMUG00000038997 | zygote arrest 1 like [Source:NCBI gene;Acc:100427970]                                           | 2.568158176 | 0.00122313  | 0.007805707 |

|                    |                                                                                                 |             |             |             |
|--------------------|-------------------------------------------------------------------------------------------------|-------------|-------------|-------------|
| ENSMMUG0000007200  | NEDD4 binding protein 2 like 2 [Source:VGNC Symbol;Acc:VGNC:75031]                              | 1.88753993  | 8.36E-16    | 4.03E-13    |
| ENSMMUG00000055811 |                                                                                                 | 1.820731533 | 7.97E-08    | 2.51E-06    |
| ENSMMUG0000007201  | PDS5 cohesin associated factor B [Source:VGNC Symbol;Acc:VGNC:75835]                            | 1.582284521 | 1.14E-12    | 2.40E-10    |
| ENSMMUG00000025050 | Y RNA [Source:RFAM;Acc:RF00019]                                                                 | 1.78275675  | 0.010566775 | 0.042947334 |
| ENSMMUG00000051911 |                                                                                                 | -           | -           | -           |
| ENSMMUG00000058110 |                                                                                                 | 0.897009117 | 0.000779436 | 0.005360839 |
|                    |                                                                                                 | 1.803436665 | 0.001075699 | 0.00699877  |
| ENSMMUG00000019831 | neurobeachin [Source:NCBI gene;Acc:714386]                                                      | -           | -           | -           |
|                    |                                                                                                 | 2.208842622 | 1.33E-06    | 2.70E-05    |
| ENSMMUG00000016791 | doublecortin like kinase 1 [Source:VGNC Symbol;Acc:VGNC:71745]                                  | 2.784244584 | 9.14E-25    | 2.38E-21    |
| ENSMMUG00000060579 |                                                                                                 | -           | -           | -           |
|                    |                                                                                                 | 2.111621163 | 0.000730532 | 0.005113723 |
| ENSMMUG00000001172 | spermatogenesis and oogenesis specific basic helix-loop-helix 2 [Source:NCBI gene;Acc:693608]   | -           | -           | -           |
|                    |                                                                                                 | 2.919829379 | 7.26E-07    | 1.65E-05    |
| ENSMMUG00000012307 | periostin [Source:VGNC Symbol;Acc:VGNC:76039]                                                   | -           | -           | -           |
|                    |                                                                                                 | 0.741044454 | 0.000578134 | 0.004214808 |
| ENSMMUG00000002113 | NHL repeat containing 3 [Source:VGNC Symbol;Acc:VGNC:75291]                                     | -           | -           | -           |
|                    |                                                                                                 | 0.865862111 | 0.000693257 | 0.004894951 |
| ENSMMUG00000002109 | proline and serine rich 1 [Source:VGNC Symbol;Acc:VGNC:76291]                                   | -           | -           | -           |
|                    |                                                                                                 | 0.708404818 | 0.003466921 | 0.017871891 |
| ENSMMUG00000052676 |                                                                                                 | -           | -           | -           |
|                    |                                                                                                 | 1.027629929 | 1.51E-06    | 2.99E-05    |
| ENSMMUG00000017978 | mitochondrial translation release factor 1 [Source:VGNC Symbol;Acc:VGNC:82191]                  | -           | -           | -           |
|                    |                                                                                                 | 0.639070912 | 0.002174528 | 0.012350182 |
| ENSMMUG00000002330 | ecto-NOX disulfide-thiol exchanger 1 [Source:VGNC Symbol;Acc:VGNC:72110]                        | -           | -           | -           |
|                    |                                                                                                 | 2.491886511 | 3.22E-11    | 3.88E-09    |
| ENSMMUG00000012636 | potassium channel tetramerization domain containing 4 [Source:VGNC Symbol;Acc:VGNC:73892]       | -           | -           | -           |
| ENSMMUG00000059778 |                                                                                                 | -1.16673276 | 0.003717463 | 0.018901219 |
|                    |                                                                                                 | 1.914360449 | 0.001753531 | 0.010451734 |
| ENSMMUG00000055718 |                                                                                                 | -           | -           | -           |
| ENSMMUG00000053191 |                                                                                                 | 0.824393604 | 0.008743558 | 0.037126578 |
|                    |                                                                                                 | 0.618349356 | 0.011884422 | 0.047052905 |
| ENSMMUG00000018720 | cytoskeleton associated protein 2 [Source:VGNC Symbol;Acc:VGNC:71229]                           | -           | -           | -           |
|                    |                                                                                                 | 0.948389954 | 1.22E-05    | 0.000172441 |
| ENSMMUG00000007379 | phosphatidylinositol 3,4,5-trisphosphate 3-phosphatase TPTE2-like [Source:NCBI gene;Acc:694255] | -           | -           | -           |
|                    |                                                                                                 | 1.085046268 | 8.69E-06    | 0.000128335 |
| ENSMMUG00000053708 | U2 spliceosomal RNA [Source:RFAM;Acc:RF00004]                                                   | -           | -           | -           |
|                    |                                                                                                 | 1.355413719 | 0.002071183 | 0.011929943 |
| ENSMMUG00000016401 | SGT1 homolog, MIS12 kinetochore complex assembly cochaperone [Source:NCBI gene;Acc:694046]      | -           | -           | -           |
| ENSMMUG00000016404 | chondromodulin [Source:VGNC Symbol;Acc:VGNC:71191]                                              | 0.990205513 | 7.51E-05    | 0.000786932 |
|                    |                                                                                                 | 3.225515713 | 0.000177112 | 0.001584266 |
| ENSMMUG00000002657 |                                                                                                 | -           | -           | -           |
| ENSMMUG00000055156 | olfactomedin 4 [Source:VGNC Symbol;Acc:VGNC:75418]                                              | 1.499733135 | 9.50E-05    | 0.000956    |
| ENSMMUG00000046375 |                                                                                                 | 0.888481118 | 0.000930066 | 0.0062033   |
|                    |                                                                                                 | 1.839321546 | 0.00043875  | 0.003340973 |
| ENSMMUG00000061846 |                                                                                                 | -           | -           | -           |
|                    |                                                                                                 | 0.496058974 | 0.0094442   | 0.039546447 |
| ENSMMUG00000059231 |                                                                                                 | -           | -           | -           |
|                    |                                                                                                 | 0.463949974 | 0.004905347 | 0.023498691 |
| ENSMMUG00000054625 |                                                                                                 | -           | -           | -           |
|                    |                                                                                                 | 0.576808508 | 0.007018931 | 0.031230999 |
| ENSMMUG00000060359 |                                                                                                 | -           | -           | -           |
|                    |                                                                                                 | 3.188290669 | 0.001831688 | 0.010828605 |

|                    |                                                                                         |             |             |             |
|--------------------|-----------------------------------------------------------------------------------------|-------------|-------------|-------------|
| ENSMMUG00000021807 | ATP binding cassette subfamily C member 4 [Source:VGNC Symbol;Acc:VGNC:69573]           | 1.625722277 | 0.000100123 | 0.000996327 |
| ENSMMUG00000009890 | FERM, ARH/RhoGEF and pleckstrin domain protein 1 [Source:VGNC Symbol;Acc:VGNC:72614]    | 0.86696455  | 9.07E-06    | 0.000133146 |
| ENSMMUG00000019556 | transmembrane 9 superfamily member 2 [Source:VGNC Symbol;Acc:VGNC:78568]                | 0.492436418 | 0.010473014 | 0.042672937 |
| ENSMMUG00000052642 | protein O-glucosyltransferase 2 [Source:NCBI gene;Acc:702156]                           | -2.88250113 | 1.35E-06    | 2.74E-05    |
| ENSMMUG00000053838 |                                                                                         | 0.566334574 | 0.001380627 | 0.008628754 |
| ENSMMUG00000055924 |                                                                                         | -2.73482608 | 0.001891523 | 0.011096593 |
| ENSMMUG00000013138 | Rho guanine nucleotide exchange factor 7 [Source:VGNC Symbol;Acc:VGNC:69833]            | 0.762444936 | 0.004222686 | 0.02081101  |
| ENSMMUG00000056306 |                                                                                         | 1.132395706 | 4.83E-05    | 0.000542081 |
| ENSMMUG00000048566 | MCF.2 cell line derived transforming sequence like [Source:NCBI gene;Acc:713961]        | 1.775779607 | 2.18E-09    | 1.33E-07    |
| ENSMMUG00000001036 | coagulation factor VII [Source:VGNC Symbol;Acc:VGNC:72466]                              | 1.619207566 | 2.53E-08    | 9.90E-07    |
| ENSMMUG00000019297 | cullin 4A [Source:VGNC Symbol;Acc:VGNC:71568]                                           | 0.989019649 | 0.008194641 | 0.035267871 |
| ENSMMUG00000009790 | lysosomal associated membrane protein 1 [Source:VGNC Symbol;Acc:VGNC:74234]             | 1.432761513 | 0.005393282 | 0.025332258 |
| ENSMMUG00000007423 | transcription factor Dp-1 [Source:NCBI gene;Acc:715345]                                 | 0.949299982 | 0.005421803 | 0.025457027 |
| ENSMMUG00000054800 | chromosome 17 C13orf46 homolog [Source:NCBI gene;Acc:106994405]                         | 1.479230842 | 1.66E-06    | 3.21E-05    |
| ENSMMUG00000055241 |                                                                                         | 0.79560297  | 0.000767805 | 0.005311645 |
| ENSMMUG00000040268 | phosphatidylinositol transfer protein alpha [Source:NCBI gene;Acc:721228]               | 0.918477051 | 0.00803703  | 0.034808394 |
| ENSMMUG00000017561 | solute carrier family 43 member 2 [Source:VGNC Symbol;Acc:VGNC:77554]                   | 1.202587544 | 0.000300191 | 0.002444766 |
| ENSMMUG00000002376 | scavenger receptor class F member 1 [Source:VGNC Symbol;Acc:VGNC:77027]                 | 1.531299028 | 0.000332309 | 0.002661337 |
| ENSMMUG00000004820 | pre-mRNA processing factor 8 [Source:VGNC Symbol;Acc:VGNC:76275]                        | 0.982108705 | 0.000120921 | 0.001161517 |
| ENSMMUG00000002382 | serpin family F member 2 [Source:VGNC Symbol;Acc:VGNC:77372]                            | 1.373676559 | 4.31E-07    | 1.06E-05    |
| ENSMMUG00000052847 |                                                                                         | 0.894280742 | 0.00208059  | 0.011967964 |
| ENSMMUG00000048710 | HIC ZBTB transcriptional repressor 1 [Source:NCBI gene;Acc:721284]                      | 2.021310024 | 0.000817016 | 0.005575084 |
| ENSMMUG00000030389 |                                                                                         | 1.372116679 | 0.001182847 | 0.007585851 |
| ENSMMUG00000062583 | olfactory receptor 1A1 [Source:NCBI gene;Acc:721403]                                    | 1.237373436 | 8.13E-06    | 0.000121231 |
| ENSMMUG00000055048 |                                                                                         | 0.980864136 | 0.000107237 | 0.001053418 |
| ENSMMUG00000057632 |                                                                                         | 2.603894727 | 2.75E-06    | 4.98E-05    |
| ENSMMUG00000019180 | zinc finger ZZ-type and EF-hand domain containing 1 [Source:VGNC Symbol;Acc:VGNC:79769] | -0.58206186 | 0.001770378 | 0.010523553 |
| ENSMMUG00000005080 | ubiquitin conjugating enzyme E2 G1 [Source:VGNC Symbol;Acc:VGNC:78695]                  | 0.921319756 | 0.001072452 | 0.006981136 |
| ENSMMUG00000030381 | arachidonate 15-lipoxygenase [Source:VGNC Symbol;Acc:VGNC:69796]                        | 1.456399515 | 1.90E-05    | 0.000250128 |
| ENSMMUG00000017654 | arrestin beta 2 [Source:VGNC Symbol;Acc:VGNC:70022]                                     | 1.864242421 | 0.002123676 | 0.012146232 |
| ENSMMUG00000049649 | proteasome 20S subunit beta 6 [Source:NCBI gene;Acc:710028]                             | 0.815676563 | 0.00057176  | 0.004180054 |
| ENSMMUG00000005666 | phospholipase D2 [Source:VGNC Symbol;Acc:VGNC:76172]                                    | 0.801695689 | 3.78E-05    | 0.000443662 |
| ENSMMUG00000002404 | misshapen like kinase 1 [Source:VGNC Symbol;Acc:VGNC:81475]                             | 1.644515739 | 3.62E-06    | 6.24E-05    |
| ENSMMUG00000002409 | cholinergic receptor nicotinic epsilon subunit [Source:VGNC Symbol;Acc:VGNC:71053]      | 1.331812785 | 0.003988793 | 0.019991618 |
| ENSMMUG00000010467 | nucleoporin 88 [Source:VGNC Symbol;Acc:VGNC:75562]                                      | -1.21934943 | 0.003098395 | 0.016394518 |

|                    |                                                                                                  |   |             |             |             |
|--------------------|--------------------------------------------------------------------------------------------------|---|-------------|-------------|-------------|
| ENSMMUG00000046195 | MIS12 kinetochore complex component [Source:NCBI gene;Acc:712202]                                | - | 0.716334309 | 0.001753284 | 0.010451734 |
| ENSMMUG0000003247  | asialoglycoprotein receptor 1 [Source:NCBI gene;Acc:721786]                                      | - | 1.694513958 | 0.004951814 | 0.023651595 |
| ENSMMUG00000010536 | discs large MAGUK scaffold protein 4 [Source:VGNC Symbol;Acc:VGNC:71920]                         | - | 2.424925663 | 1.10E-06    | 2.30E-05    |
| ENSMMUG00000010543 | PHD finger protein 23 [Source:VGNC Symbol;Acc:VGNC:75877]                                        | - | 4.097238491 | 2.62E-05    | 0.000327332 |
| ENSMMUG00000064650 | SPEM family member 3 [Source:NCBI gene;Acc:106993878]                                            | - | 0.730049844 | 8.47E-05    | 0.000871555 |
| ENSMMUG00000009709 | transmembrane protein 102 [Source:NCBI gene;Acc:715461]                                          | - | 1.128480112 | 0.001798332 | 0.010660486 |
| ENSMMUG00000061498 | fibroblast growth factor 11 [Source:NCBI gene;Acc:715564]                                        | - | 1.084421194 | 0.000413404 | 0.003187157 |
| ENSMMUG00000013501 | CD68 molecule [Source:VGNC Symbol;Acc:VGNC:82121]                                                | - | 1.914679431 | 6.58E-05    | 0.000703045 |
| ENSMMUG00000013503 | mannose-P-dolichol utilization defect 1 [Source:VGNC Symbol;Acc:VGNC:74913]                      | - | 1.512530269 | 0.000376336 | 0.002950346 |
| ENSMMUG00000057228 | SRY-box transcription factor 15 [Source:NCBI gene;Acc:106993880]                                 | - | 2.977104383 | 0.00455437  | 0.022143603 |
| ENSMMUG00000013513 | sex hormone binding globulin [Source:VGNC Symbol;Acc:VGNC:77208]                                 | - | 0.820908891 | 0.008500632 | 0.036344253 |
| ENSMMUG00000044486 | ATPase Na <sup>+</sup> /K <sup>+</sup> transporting subunit beta 2 [Source:NCBI gene;Acc:716093] | - | 0.427421529 | 0.01101055  | 0.044303254 |
| ENSMMUG00000008639 | tumor protein p53 [Source:VGNC Symbol;Acc:VGNC:78627]                                            | - | 2.006714258 | 1.34E-10    | 1.36E-08    |
| ENSMMUG00000009995 | arachidonate 15-lipoxygenase type B [Source:VGNC Symbol;Acc:VGNC:69797]                          | - | 0.879908831 | 0.000179696 | 0.001602972 |
| ENSMMUG00000019850 | arachidonate lipoxygenase 3 [Source:VGNC Symbol;Acc:VGNC:69607]                                  | - | 1.211172651 | 9.52E-07    | 2.05E-05    |
| ENSMMUG00000021938 | nudE neurodevelopment protein 1 like 1 [Source:VGNC Symbol;Acc:VGNC:74982]                       | - | 0.708236859 | 0.009537823 | 0.039835879 |
| ENSMMUG00000003424 | coiled-coil domain containing 42 [Source:VGNC Symbol;Acc:VGNC:70872]                             | - | 2.000488212 | 0.003262289 | 0.017074176 |
| ENSMMUG00000051625 |                                                                                                  | - | 2.489535209 | 0.002328516 | 0.012982861 |
| ENSMMUG00000055290 | netrin 1 [Source:NCBI gene;Acc:717645]                                                           | - | 0.761100371 | 0.000227398 | 0.001958637 |
| ENSMMUG00000064405 | myosin-8 [Source:NCBI gene;Acc:717865]                                                           | - | 1.649134882 | 0.000656427 | 0.004685782 |
| ENSMMUG00000009771 | myosin heavy chain 4 [Source:VGNC Symbol;Acc:VGNC:75100]                                         | - | 1.435297317 | 2.47E-05    | 0.000311632 |
| ENSMMUG00000051001 |                                                                                                  | - | 3.292996979 | 0.004071621 | 0.020233825 |
| ENSMMUG00000060547 | Metazoan signal recognition particle RNA [Source:RFAM;Acc:RF00017]                               | - | 0.824374939 | 0.012492558 | 0.048821577 |
| ENSMMUG00000016723 | zinc finger protein 287 [Source:NCBI gene;Acc:695524]                                            | - | 1.504039767 | 0.002007994 | 0.011664124 |
| ENSMMUG00000004896 | centromere protein V [Source:NCBI gene;Acc:700414]                                               | - | 0.604710139 | 0.00753214  | 0.033068159 |
| ENSMMUG00000050252 | CMT1A duplicated region transcript 15 protein-like protein [Source:NCBI gene;Acc:106993910]      | - | 0.56199326  | 0.006553055 | 0.029521659 |
| ENSMMUG00000050263 | TBC1 domain family member 26-like [Source:NCBI gene;Acc:100426631]                               | - | 0.820799725 | 0.011549878 | 0.046008488 |
| ENSMMUG00000013345 | folliculin [Source:NCBI gene;Acc:698082]                                                         | - | 4.557839906 | 9.22E-06    | 0.000134455 |
| ENSMMUG00000021091 | COP9 signalosome subunit 3 [Source:VGNC Symbol;Acc:VGNC:71316]                                   | - | 2.929027755 | 8.94E-07    | 1.95E-05    |
| ENSMMUG00000038569 | 5',3'-nucleotidase, mitochondrial [Source:NCBI gene;Acc:698591]                                  | - | 1.212162109 | 0.000768648 | 0.005311645 |
| ENSMMUG00000062853 |                                                                                                  | - | 1.075198025 | 0.010034173 | 0.041416838 |

|                    |                                                                                                     |   |             |             |             |
|--------------------|-----------------------------------------------------------------------------------------------------|---|-------------|-------------|-------------|
| ENSMMUG0000006491  | mediator complex subunit 9 [Source:VGNC<br>Symbol;Acc:VGNC:74577]                                   | - | 1.302677989 | 3.79E-05    | 0.000444816 |
| ENSMMUG0000006493  | ras related dexamethasone induced 1 [Source:VGNC<br>Symbol;Acc:VGNC:76485]                          | - | 0.730529626 | 0.000795735 | 0.005462031 |
| ENSMMUG0000003349  | target of myb1 like 2 membrane trafficking protein [Source:VGNC<br>Symbol;Acc:VGNC:78617]           | - | 1.977562963 | 0.009064034 | 0.038274942 |
| ENSMMUG0000003657  | ATP synthase mitochondrial F1 complex assembly factor 2<br>[Source:VGNC Symbol;Acc:VGNC:70098]      | - | 2.775530796 | 0.001308368 | 0.008236509 |
| ENSMMUG00000021409 | developmentally regulated GTP binding protein 2 [Source:VGNC<br>Symbol;Acc:VGNC:71993]              | - | 2.448009759 | 2.74E-08    | 1.05E-06    |
| ENSMMUG00000005323 | phosphoribosyl pyrophosphate synthetase associated protein 2<br>[Source:VGNC Symbol;Acc:VGNC:76430] | - | 0.532595064 | 0.002501247 | 0.013743651 |
| ENSMMUG00000008540 | ring finger protein 112 [Source:VGNC Symbol;Acc:VGNC:76724]                                         | - | -2.7211977  | 8.41E-11    | 8.90E-09    |
| ENSMMUG00000051286 |                                                                                                     | - | 1.714181956 | 8.05E-09    | 3.84E-07    |
| ENSMMUG00000030279 | A-kinase anchoring protein 10 [Source:VGNC<br>Symbol;Acc:VGNC:69764]                                | - | 2.203497535 | 6.97E-09    | 3.38E-07    |
| ENSMMUG00000018581 |                                                                                                     | - | 1.665161821 | 0.003173769 | 0.016711755 |
| ENSMMUG00000020226 | WD repeat and SOCS box containing 1 [Source:VGNC<br>Symbol;Acc:VGNC:79186]                          | - | 1.067272373 | 0.000768727 | 0.005311645 |
| ENSMMUG00000054784 |                                                                                                     | - | 0.681239812 | 0.011361575 | 0.045438186 |
| ENSMMUG00000051341 |                                                                                                     | - | 1.109142072 | 0.001024015 | 0.006712874 |
| ENSMMUG00000018719 | nemo like kinase [Source:VGNC Symbol;Acc:VGNC:75277]                                                | - | 1.038036949 | 0.000245977 | 0.002084588 |
| ENSMMUG00000063312 |                                                                                                     | - | 1.049349484 | 0.001296698 | 0.008174919 |
| ENSMMUG0000007293  | RAB34, member RAS oncogene family [Source:VGNC<br>Symbol;Acc:VGNC:81533]                            | - | 0.746594502 | 0.007391047 | 0.03256367  |
| ENSMMUG00000021408 | family with sequence similarity 222 member B [Source:VGNC<br>Symbol;Acc:VGNC:72352]                 | - | 1.352423599 | 9.33E-06    | 0.000135617 |
| ENSMMUG00000012523 | flotillin 2 [Source:NCBI gene;Acc:114669752]                                                        | - | 1.695744449 | 1.63E-08    | 6.97E-07    |
| ENSMMUG00000021553 | dehydrogenase/reductase 13 [Source:VGNC<br>Symbol;Acc:VGNC:81387]                                   | - | 1.727098052 | 6.81E-10    | 5.24E-08    |
| ENSMMUG00000021554 | PHD finger protein 12 [Source:VGNC Symbol;Acc:VGNC:75838]                                           | - | 1.746095035 | 1.62E-10    | 1.59E-08    |
| ENSMMUG00000009938 | myosin XVIII A [Source:VGNC Symbol;Acc:VGNC:75058]                                                  | - | 0.648051141 | 0.003730714 | 0.018953777 |
| ENSMMUG00000012856 | nuclear FMR1 interacting protein 2 [Source:VGNC<br>Symbol;Acc:VGNC:75422]                           | - | 2.146246239 | 0.010352851 | 0.042357091 |
| ENSMMUG00000003866 | tumor protein p53 inducible protein 13 [Source:VGNC<br>Symbol;Acc:VGNC:79474]                       | - | 1.913827714 | 0.011830003 | 0.046923153 |
| ENSMMUG00000059292 |                                                                                                     | - | 1.236980197 | 1.93E-06    | 3.68E-05    |
| ENSMMUG00000011411 | sperm acrosome associated 3 [Source:VGNC<br>Symbol;Acc:VGNC:77930]                                  | - | 1.568928318 | 4.37E-05    | 0.000498483 |
| ENSMMUG00000011413 | acid sensing ion channel subunit 2 [Source:VGNC<br>Symbol;Acc:VGNC:70241]                           | - | 3.002702837 | 5.13E-09    | 2.63E-07    |
| ENSMMUG00000002324 |                                                                                                     | - | 1.426003434 | 8.15E-07    | 1.81E-05    |
| ENSMMUG00000006399 | chaperonin containing TCP1 subunit 6B [Source:VGNC<br>Symbol;Acc:VGNC:70748]                        | - | 0.630404123 | 3.86E-05    | 0.000448967 |
| ENSMMUG00000004794 | DNA ligase 3 [Source:VGNC Symbol;Acc:VGNC:74266]                                                    | - | 4.197214684 | 7.22E-09    | 3.49E-07    |
| ENSMMUG00000005170 | unc-45 myosin chaperone B [Source:VGNC<br>Symbol;Acc:VGNC:78954]                                    | - | 1.131108364 | 0.000775946 | 0.005343919 |
| ENSMMUG00000037555 | schlafen family member 11 [Source:NCBI gene;Acc:715511]                                             | - | 2.03599668  | 0.001721706 | 0.010300141 |
| ENSMMUG00000031736 |                                                                                                     | - | 3.692329061 | 0.001146985 | 0.007399647 |
| ENSMMUG00000026432 | small nucleolar RNA, C/D box 7 [Source:HGNC<br>Symbol;Acc:HGNC:32704]                               | - | 3.793638979 | 0.002471156 | 0.013607051 |

|                    |                                                                                                                   |   |             |             |             |
|--------------------|-------------------------------------------------------------------------------------------------------------------|---|-------------|-------------|-------------|
| ENSMMUG00000050758 |                                                                                                                   | - | 2.017631408 | 0.003272041 | 0.017102269 |
| ENSMMUG00000054210 | C-C motif chemokine 4 [Source:NCBI gene;Acc:100426632]                                                            | - | 1.224102645 | 4.70E-08    | 1.62E-06    |
| ENSMMUG00000061594 |                                                                                                                   | - | -2.37178997 | 0.000178028 | 0.001590267 |
| ENSMMUG00000052786 |                                                                                                                   | - | 3.142994478 | 3.51E-05    | 0.000418921 |
| ENSMMUG00000000620 | dehydrogenase/reductase 11 [Source:VGNC Symbol;Acc:VGNC:71792]                                                    | - | 1.291187487 | 0.002815693 | 0.015145122 |
| ENSMMUG00000000618 | gametogenetin binding protein 2 [Source:VGNC Symbol;Acc:VGNC:72746]                                               | - | 1.501805241 | 4.27E-05    | 0.000490232 |
| ENSMMUG00000051190 | Metazoan signal recognition particle RNA [Source:RFAM;Acc:RF00017]                                                | - | 1.693542715 | 0.00466728  | 0.022599644 |
| ENSMMUG00000007920 | myosin XIX [Source:VGNC Symbol;Acc:VGNC:75026]                                                                    | - | 0.940727556 | 0.001575658 | 0.009630174 |
| ENSMMUG00000007923 | phosphatidylinositol glycan anchor biosynthesis class W [Source:VGNC Symbol;Acc:VGNC:75850]                       | - | -1.35882339 | 9.56E-05    | 0.000960055 |
| ENSMMUG00000017113 | ubiquitin specific peptidase 32 [Source:NCBI gene;Acc:716857]                                                     | - | 0.811524205 | 9.15E-05    | 0.000930144 |
| ENSMMUG00000065117 | septin 4 [Source:HGNC Symbol;Acc:HGNC:9165]                                                                       | - | 0.840810439 | 0.000570965 | 0.004176584 |
| ENSMMUG00000008423 | septin 4 [Source:NCBI gene;Acc:714724]                                                                            | - | 1.005237722 | 1.21E-09    | 8.25E-08    |
| ENSMMUG00000046171 | myotubularin related protein 4 [Source:NCBI gene;Acc:714621]                                                      | - | -0.57246197 | 0.000549863 | 0.004049558 |
| ENSMMUG00000004184 | heat shock transcription factor 5 [Source:VGNC Symbol;Acc:VGNC:73446]                                             | - | 0.803861754 | 0.000519175 | 0.003851902 |
| ENSMMUG00000056064 | serine and arginine rich splicing factor 1 [Source:NCBI gene;Acc:713958]                                          | - | 0.560398341 | 0.001199876 | 0.007672365 |
| ENSMMUG00000004723 | vascular endothelial zinc finger 1 [Source:NCBI gene;Acc:713848]                                                  | - | 0.537326835 | 0.002083474 | 0.011968934 |
| ENSMMUG00000012644 | A-kinase anchoring protein 1 [Source:VGNC Symbol;Acc:VGNC:69763]                                                  | - | -1.27322095 | 3.31E-05    | 0.000398895 |
| ENSMMUG00000002269 | serine carboxypeptidase 1 [Source:VGNC Symbol;Acc:VGNC:82232]                                                     | - | -0.57577381 | 0.010207166 | 0.041971039 |
| ENSMMUG00000006068 | transmembrane protein 100 [Source:VGNC Symbol;Acc:VGNC:79521]                                                     | - | 0.862093185 | 4.66E-05    | 0.000525751 |
| ENSMMUG00000050544 |                                                                                                                   | - | 1.161610045 | 0.007775016 | 0.033888023 |
| ENSMMUG00000056602 |                                                                                                                   | - | 1.884310941 | 0.001384976 | 0.008647623 |
| ENSMMUG00000010550 | target of myb1 like 1 membrane trafficking protein [Source:VGNC Symbol;Acc:VGNC:78616]                            | - | 0.708311196 | 0.001273787 | 0.008053903 |
| ENSMMUG00000062178 | Metazoan signal recognition particle RNA [Source:RFAM;Acc:RF00017]                                                | - | 1.847947091 | 0.000991509 | 0.006549296 |
| ENSMMUG00000001940 | NME/NM23 nucleoside diphosphate kinase 2 [Source:NCBI gene;Acc:100533957]                                         | - | 1.782234231 | 1.53E-05    | 0.000208027 |
| ENSMMUG00000054539 |                                                                                                                   | - | 1.396731509 | 0.006757991 | 0.030248268 |
| ENSMMUG00000022741 | WAP, follistatin/kazal, immunoglobulin, kunitz and netrin domain containing 2 [Source:VGNC Symbol;Acc:VGNC:79900] | - | 1.200150247 | 9.32E-06    | 0.000135587 |
| ENSMMUG00000003414 | ATP binding cassette subfamily C member 3 [Source:VGNC Symbol;Acc:VGNC:69572]                                     | - | 0.973610603 | 3.75E-06    | 6.42E-05    |
| ENSMMUG00000017256 | calcium voltage-gated channel subunit alpha1 G [Source:VGNC Symbol;Acc:VGNC:70504]                                | - | 1.34824918  | 5.52E-09    | 2.79E-07    |
| ENSMMUG00000017252 | spermatogenesis associated 20 [Source:VGNC Symbol;Acc:VGNC:77993]                                                 | - | 1.66963408  | 1.37E-13    | 3.56E-11    |



|                    |                                                                                               |             |             |             |
|--------------------|-----------------------------------------------------------------------------------------------|-------------|-------------|-------------|
| ENSMMUG00000017242 | MYCBP associated protein [Source:VGNC<br>Symbol;Acc:VGNC:74994]                               | 1.911550723 | 2.66E-05    | 0.000332574 |
| ENSMMUG00000017234 | leucine rich repeat containing 59 [Source:VGNC<br>Symbol;Acc:VGNC:81436]                      | 3.858518422 | 2.49E-21    | 3.60E-18    |
| ENSMMUG00000020061 | protein phosphatase 1 regulatory subunit 9B [Source:VGNC<br>Symbol;Acc:VGNC:76372]            | -1.84272432 | 9.67E-07    | 2.06E-05    |
| ENSMMUG00000014687 | sterile alpha motif domain containing 14 [Source:VGNC<br>Symbol;Acc:VGNC:77112]               | 2.302412704 | 0.002867319 | 0.015378291 |
| ENSMMUG00000014685 | pyruvate dehydrogenase kinase 2 [Source:VGNC<br>Symbol;Acc:VGNC:75933]                        | 2.586421211 | 8.93E-05    | 0.000911136 |
| ENSMMUG00000000153 | integrin subunit alpha 3 [Source:VGNC Symbol;Acc:VGNC:73777]                                  | 2.060779292 | 0.009932637 | 0.041062897 |
| ENSMMUG00000012178 | calcium binding and coiled-coil domain 2 [Source:VGNC<br>Symbol;Acc:VGNC:70675]               | 1.06846331  | 0.000247108 | 0.002090725 |
| ENSMMUG00000003436 | tubulin tyrosine ligase like 6 [Source:VGNC<br>Symbol;Acc:VGNC:79632]                         | 1.336861339 | 2.67E-07    | 7.04E-06    |
| ENSMMUG00000060879 | homeobox B13 [Source:NCBI gene;Acc:697572]                                                    | 1.209662463 | 3.00E-07    | 7.73E-06    |
| ENSMMUG00000055122 |                                                                                               | 0.917077638 | 0.000220512 | 0.001914539 |
| ENSMMUG00000052505 | homeobox B9 [Source:NCBI gene;Acc:106994009]                                                  | 1.288656904 | 2.24E-07    | 6.10E-06    |
| ENSMMUG00000020868 | homeobox B8 [Source:VGNC Symbol;Acc:VGNC:73505]                                               | 1.141539699 | 3.86E-05    | 0.000448967 |
| ENSMMUG00000055324 | homeobox B7 [Source:NCBI gene;Acc:697089]                                                     | 1.001527517 | 5.45E-05    | 0.000598163 |
| ENSMMUG00000062283 | homeobox B6 [Source:NCBI gene;Acc:106994013]                                                  | 1.459583252 | 9.67E-07    | 2.06E-05    |
| ENSMMUG00000051420 | homeobox B5 [Source:NCBI gene;Acc:696732]                                                     | 1.473642734 | 5.40E-06    | 8.72E-05    |
| ENSMMUG00000057001 | homeobox B2 [Source:NCBI gene;Acc:106994010]                                                  | 0.989773649 | 3.56E-05    | 0.000423728 |
| ENSMMUG00000050742 | src kinase associated phosphoprotein 1 [Source:NCBI<br>gene;Acc:697043]                       | 0.633020846 | 4.08E-06    | 6.85E-05    |
| ENSMMUG00000003325 | pyridoxamine 5'-phosphate oxidase [Source:VGNC<br>Symbol;Acc:VGNC:76141]                      | 0.790988887 | 0.002972068 | 0.015822645 |
| ENSMMUG00000004765 | Sp2 transcription factor [Source:VGNC Symbol;Acc:VGNC:77845]                                  | 1.153079167 | 1.00E-05    | 0.000144563 |
| ENSMMUG00000021486 | secernin 2 [Source:NCBI gene;Acc:694571]                                                      | 1.532241394 | 0.000975913 | 0.006472574 |
| ENSMMUG00000057231 | T-box transcription factor 21 [Source:NCBI gene;Acc:694044]                                   | 0.956930588 | 0.002893404 | 0.015511796 |
| ENSMMUG00000019762 | TBK1 binding protein 1 [Source:VGNC Symbol;Acc:VGNC:78241]                                    | 1.332235892 | 0.000148741 | 0.001379836 |
| ENSMMUG00000019760 | karyopherin subunit beta 1 [Source:VGNC<br>Symbol;Acc:VGNC:74203]                             | 1.075528901 | 2.33E-10    | 2.11E-08    |
| ENSMMUG00000004917 | plexin domain containing 1 [Source:VGNC<br>Symbol;Acc:VGNC:76087]                             | 4.046903858 | 1.22E-09    | 8.28E-08    |
| ENSMMUG00000050458 |                                                                                               | 3.848658478 | 1.68E-13    | 4.20E-11    |
| ENSMMUG00000056248 |                                                                                               | 2.497279456 | 1.31E-06    | 2.68E-05    |
| ENSMMUG00000063779 |                                                                                               | 2.532440354 | 1.57E-06    | 3.06E-05    |
| ENSMMUG00000000289 | calcium voltage-gated channel auxiliary subunit beta 1<br>[Source:VGNC Symbol;Acc:VGNC:70509] | 0.647853992 | 0.001546742 | 0.009480175 |
| ENSMMUG00000030060 | F-box and leucine rich repeat protein 20 [Source:VGNC<br>Symbol;Acc:VGNC:81407]               | 0.444115885 | 0.005189873 | 0.024572073 |
| ENSMMUG00000009132 | mediator complex subunit 1 [Source:VGNC<br>Symbol;Acc:VGNC:74724]                             | 0.860325344 | 0.003394355 | 0.017581435 |
| ENSMMUG00000004587 | gasdermin B [Source:VGNC Symbol;Acc:VGNC:73219]                                               | 2.233647989 | 0.004109235 | 0.020398743 |
| ENSMMUG00000058758 |                                                                                               | 2.342053514 | 0.001941999 | 0.011336463 |
| ENSMMUG00000064723 | gasdermin A [Source:NCBI gene;Acc:698841]                                                     | 2.622454107 | 0.001181341 | 0.007579931 |
| ENSMMUG00000002923 | colony stimulating factor 3 [Source:VGNC<br>Symbol;Acc:VGNC:71520]                            | 0.469196946 | 0.012353004 | 0.048421692 |
| ENSMMUG00000002926 | mediator complex subunit 24 [Source:NCBI gene;Acc:699536]                                     | 0.59082905  | 0.000615332 | 0.00444118  |
| ENSMMUG00000002931 | thyroid hormone receptor alpha [Source:VGNC<br>Symbol;Acc:VGNC:78349]                         | -0.83742019 | 0.005614684 | 0.026136211 |
| ENSMMUG00000002933 | nuclear receptor subfamily 1 group D member 1 [Source:VGNC<br>Symbol;Acc:VGNC:75502]          | 0.995013477 | 0.000423411 | 0.003252739 |

|                    |                                                                                               |             |             |             |
|--------------------|-----------------------------------------------------------------------------------------------|-------------|-------------|-------------|
| ENSMMUG00000012486 | retinoic acid receptor alpha [Source:VGNC Symbol;Acc:VGNC:76662]                              | 1.441944906 | 0.006800644 | 0.030405353 |
| ENSMMUG00000018653 | keratin, type I cytoskeletal 19 [Source:NCBI gene;Acc:707129]                                 | 1.745373373 | 8.66E-08    | 2.67E-06    |
| ENSMMUG00000063004 | gastrin [Source:NCBI gene;Acc:707564]                                                         | 1.978825097 | 0.001853011 | 0.010905095 |
| ENSMMUG00000013048 | junction plakoglobin [Source:VGNC Symbol;Acc:VGNC:73960]                                      | 0.933116541 | 1.32E-05    | 0.000184461 |
| ENSMMUG00000021753 | tetratricopeptide repeat domain 25 [Source:NCBI gene;Acc:708614]                              | 1.36532697  | 0.001253301 | 0.007935944 |
| ENSMMUG00000016114 | 2',3'-cyclic nucleotide 3' phosphodiesterase [Source:VGNC Symbol;Acc:VGNC:71279]              | 1.630801237 | 0.000118131 | 0.001138931 |
| ENSMMUG00000003894 | zinc finger protein 385C [Source:NCBI gene;Acc:708928]                                        | 0.618927556 | 0.000463597 | 0.003486205 |
| ENSMMUG00000049440 | chromosome 16 C17orf113 homolog [Source:NCBI gene;Acc:106994045]                              | 0.766214598 | 7.94E-06    | 0.000119189 |
| ENSMMUG00000003437 | signal transducer and activator of transcription 5B [Source:NCBI gene;Acc:709760]             | 3.338391746 | 5.79E-18    | 4.70E-15    |
| ENSMMUG00000010705 | signal transducer and activator of transcription 5A [Source:NCBI gene;Acc:574129]             | 0.803164505 | 0.005084638 | 0.024197145 |
| ENSMMUG00000052220 | signal transducer and activator of transcription 3 [Source:VGNC Symbol;Acc:VGNC:77906]        | 0.845708105 | 0.00018095  | 0.001611945 |
| ENSMMUG00000010707 | signal transducer and activator of transcription 3 [Source:VGNC Symbol;Acc:VGNC:77906]        | 0.351589674 | 0.003450238 | 0.0178      |
| ENSMMUG00000050793 | N-acetyl-alpha-glucosaminidase [Source:NCBI gene;Acc:707186]                                  | 2.08518318  | 3.70E-07    | 9.33E-06    |
| ENSMMUG00000009884 | hydroxysteroid 17-beta dehydrogenase 1 [Source:VGNC Symbol;Acc:VGNC:73528]                    | 1.944799383 | 2.88E-05    | 0.000354859 |
| ENSMMUG00000009886 | Coenzyme A synthase [Source:VGNC Symbol;Acc:VGNC:81373]                                       | 1.967910738 | 3.81E-08    | 1.36E-06    |
| ENSMMUG00000009887 | MAX dimerization protein MLX [Source:VGNC Symbol;Acc:VGNC:74726]                              | 1.99742456  | 9.59E-07    | 2.06E-05    |
| ENSMMUG00000009889 | PSMC3 interacting protein [Source:VGNC Symbol;Acc:VGNC:76282]                                 | 1.912773597 | 4.19E-08    | 1.46E-06    |
| ENSMMUG00000016796 | reticulophagy regulator family member 3 [Source:VGNC Symbol;Acc:VGNC:76845]                   | 2.043215369 | 3.94E-08    | 1.39E-06    |
| ENSMMUG00000016797 | tubulin gamma 1 [Source:NCBI gene;Acc:710756]                                                 | 1.692798894 | 4.00E-07    | 9.94E-06    |
| ENSMMUG00000006086 | pleckstrin homology, MyTH4 and FERM domain containing H3 [Source:VGNC Symbol;Acc:VGNC:76113]  | 1.485196568 | 0.002089518 | 0.011987766 |
| ENSMMUG00000006090 | C-C motif chemokine receptor 10 [Source:VGNC Symbol;Acc:VGNC:82119]                           | 1.708712642 | 0.005039597 | 0.024026759 |
| ENSMMUG00000006091 | contactin associated protein 1 [Source:VGNC Symbol;Acc:VGNC:71390]                            | 1.892604096 | 8.35E-11    | 8.90E-09    |
| ENSMMUG00000006093 | enhancer of zeste 1 polycomb repressive complex 2 subunit [Source:VGNC Symbol;Acc:VGNC:72457] | 1.854768579 | 7.73E-08    | 2.45E-06    |
| ENSMMUG00000056565 | Metazoan signal recognition particle RNA [Source:RFAM;Acc:RF00017]                            | 2.746510314 | 0.011448759 | 0.045689648 |
| ENSMMUG00000058566 |                                                                                               | 1.905028605 | 7.96E-10    | 5.92E-08    |
| ENSMMUG00000052607 |                                                                                               | 0.991655897 | 0.00013504  | 0.001279195 |
| ENSMMUG00000019920 | transmembrane and ubiquitin like domain containing 2 [Source:VGNC Symbol;Acc:VGNC:79715]      | 1.458636263 | 0.00595702  | 0.027396394 |
| ENSMMUG00000019924 | upstream binding transcription factor [Source:NCBI gene;Acc:711597]                           | 0.666462002 | 0.000393378 | 0.003061037 |
| ENSMMUG00000013983 | RUN domain containing 3A [Source:VGNC Symbol;Acc:VGNC:77032]                                  | 0.641958122 | 0.000381859 | 0.00298865  |
| ENSMMUG00000041006 | family with sequence similarity 171 member A2 [Source:NCBI gene;Acc:712099]                   | 0.597187928 | 0.002297742 | 0.012875671 |
| ENSMMUG00000062273 | dephospho-CoA kinase domain containing [Source:NCBI gene;Acc:715841]                          | 1.770375031 | 6.70E-05    | 0.000713589 |
| ENSMMUG00000060665 |                                                                                               | 1.780282398 | 9.66E-07    | 2.06E-05    |

|                    |                                                                                              |             |             |             |
|--------------------|----------------------------------------------------------------------------------------------|-------------|-------------|-------------|
| ENSMMUG00000054246 |                                                                                              | 1.998301574 | 0.005384935 | 0.025304582 |
| ENSMMUG00000021932 | Rho GTPase activating protein 27 [Source:VGNC Symbol;Acc:VGNC:69935]                         | 1.349850718 | 0.012828013 | 0.049731629 |
| ENSMMUG00000008459 | pleckstrin homology and RUN domain containing M1 [Source:NCBI gene;Acc:716464]               | 1.308947922 | 8.40E-05    | 0.000867293 |
| ENSMMUG00000008199 | leucine-rich repeat-containing protein 37A [Source:NCBI gene;Acc:714675]                     | 1.299530016 | 0.003532838 | 0.018139792 |
| ENSMMUG00000057840 | leucine-rich repeat-containing protein 37A3 [Source:NCBI gene;Acc:715030]                    | 1.702450744 | 0.000651806 | 0.00465562  |
| ENSMMUG00000005548 | N-ethylmaleimide sensitive factor, vesicle fusing ATPase [Source:VGNC Symbol;Acc:VGNC:75536] | 0.603540227 | 0.000752633 | 0.005238602 |
| ENSMMUG00000057209 |                                                                                              | 0.534026675 | 0.005599512 | 0.026090547 |
| ENSMMUG00000004122 | microtubule associated protein tau [Source:NCBI gene;Acc:574327]                             | 1.470425641 | 7.84E-05    | 0.000815971 |
| ENSMMUG00000063877 | leucine-rich repeat-containing protein 37A2 [Source:NCBI gene;Acc:716147]                    | 0.497371346 | 8.14E-06    | 0.000121256 |
| ENSMMUG00000050181 |                                                                                              | 0.544492989 | 0.004650092 | 0.022533195 |
| ENSMMUG00000003289 | integrin subunit beta 3 [Source:NCBI gene;Acc:717379]                                        | 0.533048107 | 0.000556745 | 0.004088272 |
| ENSMMUG00000002168 | membrane associated ring-CH-type finger 10 [Source:VGNC Symbol;Acc:VGNC:74593]               | 2.209989111 | 0.007153787 | 0.031690105 |
| ENSMMUG00000015185 | endoplasmic reticulum to nucleus signaling 1 [Source:VGNC Symbol;Acc:VGNC:72429]             | 0.520353352 | 0.012701775 | 0.04941066  |
| ENSMMUG00000011809 | platelet and endothelial cell adhesion molecule 1 [Source:VGNC Symbol;Acc:VGNC:75938]        | 1.052237089 | 0.000422279 | 0.00324596  |
| ENSMMUG00000006317 | mast cell immunoglobulin like receptor 1 [Source:VGNC Symbol;Acc:VGNC:74843]                 | 1.170016497 | 0.004470999 | 0.021836206 |
| ENSMMUG00000009459 | centrosomal protein 95 [Source:VGNC Symbol;Acc:VGNC:71095]                                   | 0.837092951 | 0.002023146 | 0.011715513 |
| ENSMMUG00000063689 |                                                                                              | 0.982501471 | 0.011647023 | 0.046338692 |
| ENSMMUG00000009461 | SMAD specific E3 ubiquitin protein ligase 2 [Source:VGNC Symbol;Acc:VGNC:77727]              | 0.810588205 | 0.005385444 | 0.025304582 |
| ENSMMUG00000060767 |                                                                                              | 3.115773188 | 1.63E-09    | 1.05E-07    |
| ENSMMUG00000060015 | axin 2 [Source:NCBI gene;Acc:718566]                                                         | 0.444948655 | 0.003350002 | 0.01740021  |
| ENSMMUG00000002959 | helicase with zinc finger [Source:VGNC Symbol;Acc:VGNC:73178]                                | 2.398664405 | 2.02E-08    | 8.40E-07    |
| ENSMMUG00000057157 |                                                                                              | 2.471073887 | 1.18E-08    | 5.26E-07    |
| ENSMMUG00000063817 | SRY-box transcription factor 9 [Source:NCBI gene;Acc:574208]                                 | 0.351395884 | 0.009678758 | 0.04029511  |
| ENSMMUG00000054673 |                                                                                              | 2.123197518 | 0.006105599 | 0.027931559 |
| ENSMMUG00000001269 | chromosome 16 C17orf80 homolog [Source:VGNC Symbol;Acc:VGNC:70440]                           | 1.04969781  | 3.57E-05    | 0.000423961 |
| ENSMMUG00000049948 |                                                                                              | 1.460700954 | 2.07E-05    | 0.000269259 |
| ENSMMUG00000062704 | Metazoan signal recognition particle RNA [Source:RFAM;Acc:RF00017]                           | 2.521986478 | 0.005053392 | 0.0240837   |
| ENSMMUG00000049403 |                                                                                              | 0.937828613 | 0.000677198 | 0.004802416 |
| ENSMMUG00000064052 | CD300 molecule like family member d [Source:NCBI gene;Acc:703142]                            | 0.918780011 | 0.002320269 | 0.012962258 |
| ENSMMUG00000058592 |                                                                                              | 1.022191062 | 0.00172471  | 0.010313368 |
| ENSMMUG00000020462 | CD300e molecule [Source:NCBI gene;Acc:114673189]                                             | 1.541813996 | 0.000675751 | 0.004794771 |
| ENSMMUG00000005737 | SLC9A3 regulator 1 [Source:VGNC Symbol;Acc:VGNC:77639]                                       | 2.729427924 | 2.17E-05    | 0.000279201 |
| ENSMMUG00000005738 | N-acetyltransferase 9 (putative) [Source:NCBI gene;Acc:699085]                               | 3.792702832 | 0.009190736 | 0.038659351 |

|                    |                                                                                             |             |             |             |             |
|--------------------|---------------------------------------------------------------------------------------------|-------------|-------------|-------------|-------------|
| ENSMMUG00000054593 | USH1 protein network component sans [Source:NCBI gene;Acc:704494]                           | -           | 0.602467282 | 0.004710861 | 0.022776748 |
| ENSMMUG00000063153 | cerebellar degeneration related protein 2 like [Source:NCBI gene;Acc:700082]                | 3.311956036 | 2.83E-06    | 5.09E-05    |             |
| ENSMMUG00000058142 |                                                                                             | -1.32305368 | 2.30E-07    | 6.25E-06    |             |
| ENSMMUG00000022120 | transmembrane protein 94 [Source:VGNC Symbol;Acc:VGNC:79760]                                | -           | 1.218648953 | 2.84E-06    | 5.10E-05    |
| ENSMMUG00000022121 | CASK interacting protein 2 [Source:VGNC Symbol;Acc:VGNC:70577]                              | -           | 1.488171426 | 0.000211767 | 0.001847248 |
| ENSMMUG00000022123 | tRNA splicing endonuclease subunit 54 [Source:VGNC Symbol;Acc:VGNC:79666]                   | -           | 1.014314437 | 0.000277144 | 0.002290047 |
| ENSMMUG00000001228 | LLGL scribble cell polarity complex component 2 [Source:NCBI gene;Acc:706973]               | -           | 0.783935875 | 2.28E-05    | 0.000291161 |
| ENSMMUG00000063604 | small integral membrane protein 5 [Source:NCBI gene;Acc:703547]                             | 1.255204768 | 0.012468023 | 0.048769656 |             |
| ENSMMUG00000013646 | unk zinc finger [Source:VGNC Symbol;Acc:VGNC:79803]                                         | 0.815018206 | 0.006589314 | 0.029634645 |             |
| ENSMMUG00000002822 | unc-13 homolog D [Source:VGNC Symbol;Acc:VGNC:79375]                                        | 1.111215935 | 0.000805774 | 0.005509937 |             |
| ENSMMUG00000009381 | WW domain binding protein 2 [Source:VGNC Symbol;Acc:VGNC:78786]                             | 1.072582388 | 0.000176932 | 0.001583743 |             |
| ENSMMUG00000009377 | tripartite motif containing 47 [Source:VGNC Symbol;Acc:VGNC:79171]                          | 1.461153629 | 0.000557855 | 0.004089886 |             |
| ENSMMUG00000003539 | glutamine rich 2 [Source:VGNC Symbol;Acc:VGNC:76534]                                        | 1.527878852 | 0.000391568 | 0.00304954  |             |
| ENSMMUG00000018967 | ubiquitin conjugating enzyme E2 O [Source:VGNC Symbol;Acc:VGNC:79813]                       | 1.880386146 | 4.31E-12    | 7.78E-10    |             |
| ENSMMUG00000046918 |                                                                                             | 2.009385211 | 0.000977501 | 0.006474706 |             |
| ENSMMUG00000055379 |                                                                                             | 2.267161329 | 2.76E-10    | 2.45E-08    |             |
| ENSMMUG00000053937 |                                                                                             | 2.467468425 | 4.48E-10    | 3.73E-08    |             |
| ENSMMUG00000009504 | C1q and TNF related 1 [Source:VGNC Symbol;Acc:VGNC:70311]                                   | 0.820729486 | 4.31E-05    | 0.000493687 |             |
| ENSMMUG00000023027 | endo-beta-N-acetylglucosaminidase [Source:VGNC Symbol;Acc:VGNC:72099]                       | -           | 0.989337947 | 3.34E-06    | 5.87E-05    |
| ENSMMUG00000046417 | chromobox 2 [Source:NCBI gene;Acc:717462]                                                   | 2.033286435 | 4.31E-06    | 7.18E-05    |             |
| ENSMMUG00000016417 | chromobox 8 [Source:NCBI gene;Acc:717514]                                                   | 0.855275212 | 0.000282338 | 0.002324106 |             |
| ENSMMUG00000005455 | ring finger protein 213 [Source:VGNC Symbol;Acc:VGNC:76734]                                 | 1.285516676 | 1.93E-06    | 3.68E-05    |             |
| ENSMMUG00000056437 | Metazoan signal recognition particle RNA [Source:RFAM;Acc:RF00017]                          | 1.814014376 | 0.004415818 | 0.021599145 |             |
| ENSMMUG00000000588 | rhomboid 5 homolog 1 [Source:NCBI gene;Acc:693423]                                          | 2.151728314 | 6.95E-06    | 0.000106302 |             |
| ENSMMUG00000000590 | NPR3 like, GATOR1 complex subunit [Source:VGNC Symbol;Acc:VGNC:75173]                       | 3.567885581 | 5.89E-11    | 6.78E-09    |             |
| ENSMMUG00000019566 | hemoglobin subunit alpha 1 [Source:NCBI gene;Acc:701930]                                    | -           | 0.707385833 | 0.006062632 | 0.027774074 |
| ENSMMUG00000029296 | phosphatidylinositol glycan anchor biosynthesis class Q [Source:VGNC Symbol;Acc:VGNC:75798] | 1.448384111 | 5.92E-06    | 9.35E-05    |             |
| ENSMMUG00000022010 | ras homolog family member T2 [Source:VGNC Symbol;Acc:VGNC:76796]                            | -           | 2.100351715 | 0.004934067 | 0.023610183 |
| ENSMMUG00000001986 | WD repeat domain 24 [Source:VGNC Symbol;Acc:VGNC:79289]                                     | -           | 1.411031433 | 0.000205761 | 0.001800895 |
| ENSMMUG00000016906 | F-box and leucine rich repeat protein 16 [Source:VGNC Symbol;Acc:VGNC:81405]                | -0.92252264 | 0.001064468 | 0.006939586 |             |
| ENSMMUG00000047001 | mastin-like [Source:NCBI gene;Acc:722431]                                                   | 1.680802717 | 0.005990037 | 0.027499619 |             |
| ENSMMUG00000044277 | ubiquitin conjugating enzyme E2 I [Source:NCBI gene;Acc:722434]                             | -1.55174885 | 5.19E-05    | 0.000576503 |             |
| ENSMMUG00000012440 | unk like zinc finger [Source:NCBI gene;Acc:100429104]                                       | 0.536814502 | 0.008254015 | 0.035429609 |             |
| ENSMMUG00000061546 |                                                                                             | -           | 1.967068351 | 0.002067513 | 0.011914079 |

|                    |                                                                                              |   |             |             |             |
|--------------------|----------------------------------------------------------------------------------------------|---|-------------|-------------|-------------|
| ENSMMUG00000021518 | chloride voltage-gated channel 7 [Source:VGNC Symbol;Acc:VGNC:71241]                         | - | 0.835960602 | 0.002314812 | 0.012952197 |
| ENSMMUG00000008119 | telomere maintenance 2 [Source:NCBI gene;Acc:701679]                                         | - | 1.933665529 | 1.82E-06    | 3.49E-05    |
| ENSMMUG00000018597 | nucleotide binding protein 2 [Source:VGNC Symbol;Acc:VGNC:75547]                             | - | 0.877090964 | 0.004064601 | 0.020226065 |
| ENSMMUG00000007937 | ribosomal protein L3 like [Source:VGNC Symbol;Acc:VGNC:76923]                                | - | 2.651002646 | 0.006954197 | 0.030995987 |
| ENSMMUG00000029265 | zinc finger protein 598 [Source:NCBI gene;Acc:694129]                                        | - | 0.582209523 | 0.003269715 | 0.01709928  |
| ENSMMUG00000029263 | polycystin 1, transient receptor potential channel interacting [Source:NCBI gene;Acc:694905] | - | 0.961966436 | 1.59E-05    | 0.00021458  |
| ENSMMUG00000019223 | TNF receptor associated factor 7 [Source:VGNC Symbol;Acc:VGNC:79252]                         | - | 0.812559605 | 0.0016788   | 0.010117921 |
| ENSMMUG00000019238 | RNA binding protein with serine rich domain 1 [Source:NCBI gene;Acc:695816]                  | - | 0.320879195 | 0.009690855 | 0.04031966  |
| ENSMMUG00000000001 | cyclin F [Source:VGNC Symbol;Acc:VGNC:70729]                                                 | - | 0.672066589 | 0.007589465 | 0.03324238  |
| ENSMMUG00000019095 | TBC1 domain family member 24 [Source:NCBI gene;Acc:697106]                                   | - | 1.25934941  | 0.000364362 | 0.002875541 |
| ENSMMUG00000011459 | 3-phosphoinositide dependent protein kinase 1 [Source:NCBI gene;Acc:697523]                  | - | 0.430159393 | 0.000212286 | 0.001849294 |
| ENSMMUG00000009487 | zinc finger protein 205 [Source:VGNC Symbol;Acc:VGNC:78869]                                  | - | 0.713965817 | 0.001572766 | 0.009621542 |
| ENSMMUG00000020970 | zinc finger protein 213 [Source:VGNC Symbol;Acc:VGNC:78872]                                  | - | 0.73705527  | 0.001923158 | 0.011256628 |
| ENSMMUG00000051323 | caspase-14-like [Source:NCBI gene;Acc:702430]                                                | - | 0.860190575 | 0.012253691 | 0.048133947 |
| ENSMMUG00000017972 | zinc finger protein 200 [Source:VGNC Symbol;Acc:VGNC:78867]                                  | - | 0.622381423 | 0.012373661 | 0.048458848 |
| ENSMMUG00000007568 | zinc finger protein 174 [Source:VGNC Symbol;Acc:VGNC:78855]                                  | - | 1.252652926 | 0.007895702 | 0.034299097 |
| ENSMMUG00000018711 | N-alpha-acetyltransferase 60, NatF catalytic subunit [Source:NCBI gene;Acc:703207]           | - | 0.592944385 | 0.01058174  | 0.042954465 |
| ENSMMUG00000002286 | CREB binding protein [Source:VGNC Symbol;Acc:VGNC:71487]                                     | - | 0.646919445 | 0.001833647 | 0.01083526  |
| ENSMMUG00000039943 | adenylate cyclase 9 [Source:NCBI gene;Acc:706789]                                            | - | 1.991558474 | 0.000463249 | 0.003486205 |
| ENSMMUG00000061940 |                                                                                              | - | 3.743689075 | 0.00404543  | 0.020189893 |
| ENSMMUG00000051196 |                                                                                              | - | 2.515042393 | 0.001606555 | 0.009759388 |
| ENSMMUG00000040803 | sarcalumenin [Source:NCBI gene;Acc:704655]                                                   | - | -1.58981516 | 0.000291529 | 0.002386168 |
| ENSMMUG00000020540 | NmrA like redox sensor 1 [Source:VGNC Symbol;Acc:VGNC:75252]                                 | - | 2.207954162 | 1.12E-09    | 7.74E-08    |
| ENSMMUG00000001888 | mahogunin ring finger 1 [Source:VGNC Symbol;Acc:VGNC:74542]                                  | - | 1.032689833 | 0.003186477 | 0.016758319 |
| ENSMMUG00000014313 | zinc finger protein 500 [Source:VGNC Symbol;Acc:VGNC:79406]                                  | - | 0.588716215 | 0.004169336 | 0.020649805 |
| ENSMMUG00000017945 | septin 12 [Source:VGNC Symbol;Acc:VGNC:82235]                                                | - | 1.355398123 | 3.03E-06    | 5.38E-05    |
| ENSMMUG00000049327 |                                                                                              | - | 1.570601159 | 5.58E-06    | 8.97E-05    |
| ENSMMUG00000017946 | rogdi atypical leucine zipper [Source:VGNC Symbol;Acc:VGNC:76862]                            | - | 1.160918294 | 0.000129077 | 0.001230561 |
| ENSMMUG00000009567 | glyoxylate reductase 1 homolog [Source:NCBI gene;Acc:706933]                                 | - | 2.234835057 | 1.49E-08    | 6.43E-07    |
| ENSMMUG00000046237 | 4-aminobutyrate aminotransferase [Source:NCBI gene;Acc:714017]                               | - | 0.965514293 | 0.000563121 | 0.004123846 |
| ENSMMUG00000047806 | calcium regulated heat stable protein 1 [Source:NCBI gene;Acc:709224]                        | - | 1.998491258 | 1.97E-05    | 0.000258394 |
| ENSMMUG00000061168 | Metazoan signal recognition particle RNA [Source:RFAM;Acc:RF00017]                           | - | 1.050312395 | 0.007706144 | 0.033621641 |
| ENSMMUG00000001944 | chromosome 20 C16orf72 homolog [Source:VGNC Symbol;Acc:VGNC:70443]                           | - | 0.838472745 | 2.67E-06    | 4.85E-05    |

|                    |                                                                                                      |             |             |             |
|--------------------|------------------------------------------------------------------------------------------------------|-------------|-------------|-------------|
| ENSMMUG00000056165 |                                                                                                      | 1.031755539 | 0.011895819 | 0.047083121 |
| ENSMMUG00000060713 | epithelial membrane protein 2 [Source:NCBI gene;Acc:710315]                                          | 1.219225078 | 0.004226804 | 0.020815005 |
| ENSMMUG00000051604 |                                                                                                      | 1.572551978 | 0.00249782  | 0.01373062  |
| ENSMMUG00000062037 | stannin [Source:NCBI gene;Acc:711909]                                                                | 2.186328742 | 3.02E-06    | 5.37E-05    |
| ENSMMUG00000014240 | thioredoxin domain containing 11 [Source:VGNC Symbol;Acc:VGNC:79678]                                 | 2.120945074 | 8.09E-05    | 0.000839277 |
| ENSMMUG00000057345 | calcineurin like phosphoesterase domain containing 1 [Source:NCBI gene;Acc:716978]                   | 0.972151949 | 0.001249956 | 0.007922479 |
| ENSMMUG00000017379 | myocardin related transcription factor B [Source:VGNC Symbol;Acc:VGNC:74865]                         | 1.104493845 | 0.001148161 | 0.007402706 |
| ENSMMUG00000064131 |                                                                                                      | 1.628324918 | 4.33E-05    | 0.000496244 |
| ENSMMUG00000027108 | mml-mir-193b [Source:miRBase;Acc:MI0007656]                                                          | 2.001647475 | 0.003689994 | 0.018805668 |
| ENSMMUG00000064246 |                                                                                                      | 0.753214885 | 0.0014016   | 0.008738835 |
| ENSMMUG00000002991 | RRN3 homolog, RNA polymerase I transcription factor [Source:NCBI gene;Acc:713500]                    | 0.643733473 | 0.007379813 | 0.032525196 |
| ENSMMUG00000062791 |                                                                                                      | 1.231324619 | 0.003881622 | 0.019546396 |
| ENSMMUG00000062623 | Metazoan signal recognition particle RNA [Source:RFAM;Acc:RF00017]                                   | 1.035351042 | 0.000776918 | 0.005346346 |
| ENSMMUG00000010367 | myosin heavy chain 11 [Source:VGNC Symbol;Acc:VGNC:75097]                                            | 1.381793136 | 0.000110609 | 0.001081643 |
| ENSMMUG00000013329 | transmembrane channel like 5 [Source:VGNC Symbol;Acc:VGNC:79366]                                     | 1.660994613 | 0.000348173 | 0.002771318 |
| ENSMMUG00000016753 | dynein axonemal heavy chain 3 [Source:VGNC Symbol;Acc:VGNC:71941]                                    | 1.634379476 | 5.42E-05    | 0.000595884 |
| ENSMMUG00000054064 |                                                                                                      | -1.85873323 | 3.89E-09    | 2.09E-07    |
| ENSMMUG00000013560 | calcium voltage-gated channel auxiliary subunit gamma 3 [Source:VGNC Symbol;Acc:VGNC:70513]          | 0.858295943 | 0.006443754 | 0.029140288 |
| ENSMMUG00000001407 | solute carrier family 5 member 11 [Source:VGNC Symbol;Acc:VGNC:77759]                                | 0.531915566 | 0.00446771  | 0.021828337 |
| ENSMMUG00000029176 | Rho GTPase activating protein 17 [Source:NCBI gene;Acc:701988]                                       | 0.582866426 | 8.91E-05    | 0.000909822 |
| ENSMMUG00000015572 | GSG1 like [Source:VGNC Symbol;Acc:VGNC:82152]                                                        | 0.660879457 | 0.001580424 | 0.009645286 |
| ENSMMUG00000003303 | Tu translation elongation factor, mitochondrial [Source:VGNC Symbol;Acc:VGNC:78674]                  | 1.274987842 | 1.92E-09    | 1.21E-07    |
| ENSMMUG00000003298 | ataxin 2 like [Source:VGNC Symbol;Acc:VGNC:70159]                                                    | 1.129173892 | 7.53E-08    | 2.41E-06    |
| ENSMMUG00000011798 | eukaryotic translation initiation factor 3 subunit C [Source:NCBI gene;Acc:705696]                   | 1.145926341 | 2.33E-07    | 6.31E-06    |
| ENSMMUG00000000700 | CLN3 lysosomal/endosomal transmembrane protein, battenin [Source:NCBI gene;Acc:705815]               | 1.250533095 | 1.80E-11    | 2.48E-09    |
| ENSMMUG00000022330 | sulfotransferase family, cytosolic, 1A, phenol-preferring, member 3 [Source:NCBI gene;Acc:100428398] | -2.23325513 | 0.011084957 | 0.044524904 |
| ENSMMUG00000029164 | glycerophosphodiester phosphodiesterase domain containing 3 [Source:VGNC Symbol;Acc:VGNC:72800]      | 3.787128561 | 1.73E-12    | 3.47E-10    |
| ENSMMUG00000000981 | T-box transcription factor 6 [Source:VGNC Symbol;Acc:VGNC:78276]                                     | 2.211731242 | 9.74E-07    | 2.07E-05    |
| ENSMMUG00000000982 | protein phosphatase 4 catalytic subunit [Source:VGNC Symbol;Acc:VGNC:76384]                          | 2.107786244 | 2.78E-09    | 1.59E-07    |
| ENSMMUG00000000983 | aldolase, fructose-bisphosphate A [Source:NCBI gene;Acc:708406]                                      | 1.657542239 | 3.60E-08    | 1.30E-06    |
| ENSMMUG00000037707 | TLC domain containing 3B [Source:NCBI gene;Acc:708210]                                               | 1.734707551 | 4.48E-05    | 0.000509674 |

|                    |                                                                                        |             |             |             |
|--------------------|----------------------------------------------------------------------------------------|-------------|-------------|-------------|
| ENSMMUG00000018986 | seizure related 6 homolog like 2 [Source:VGNC Symbol;Acc:VGNC:81567]                   | 0.91601671  | 0.010520003 | 0.042810752 |
| ENSMMUG00000061749 | PAXIP1 associated glutamate rich protein 1 [Source:NCBI gene;Acc:706839]               | 0.660476567 | 0.000774543 | 0.005338478 |
| ENSMMUG00000019826 | MYC associated zinc finger protein [Source:NCBI gene;Acc:708982]                       | 0.820656602 | 0.002178605 | 0.012357146 |
| ENSMMUG00000009684 | kinesin family member 22 [Source:VGNC Symbol;Acc:VGNC:74033]                           | 1.525784562 | 0.000468169 | 0.003513565 |
| ENSMMUG00000016143 | sialophorin [Source:VGNC Symbol;Acc:VGNC:77861]                                        | 1.364718486 | 7.54E-05    | 0.000789095 |
| ENSMMUG00000001121 | zinc finger protein 689 [Source:VGNC Symbol;Acc:VGNC:79480]                            | 1.488496008 | 7.50E-05    | 0.000786731 |
| ENSMMUG00000051226 | FAD-linked sulfhydryl oxidase ERV1 [Source:NCBI gene;Acc:106994988]                    | 0.669948784 | 0.009095051 | 0.038393454 |
| ENSMMUG00000010556 | Snf2 related CREBBP activator protein [Source:NCBI gene;Acc:712944]                    | 0.527831181 | 0.012808132 | 0.049696468 |
| ENSMMUG00000003230 | F-box and leucine rich repeat protein 19 [Source:VGNC Symbol;Acc:VGNC:81406]           | 1.139471726 | 0.000154857 | 0.001422366 |
| ENSMMUG00000048207 | syntaxin 4 [Source:NCBI gene;Acc:704880]                                               | 0.43225522  | 0.012596735 | 0.049073031 |
| ENSMMUG00000002033 | serine protease 36 [Source:VGNC Symbol;Acc:VGNC:76325]                                 | 0.876746974 | 0.001312106 | 0.008256049 |
| ENSMMUG00000014349 | integrin subunit alpha X [Source:NCBI gene;Acc:100427850]                              | 1.614080409 | 2.80E-05    | 0.000346404 |
| ENSMMUG00000058907 |                                                                                        | 2.60266342  | 4.61E-07    | 1.11E-05    |
| ENSMMUG00000055973 | phosphoglycerate mutase 1-like [Source:NCBI gene;Acc:714548]                           | 3.154021353 | 9.67E-07    | 2.06E-05    |
| ENSMMUG00000012209 | CYLD lysine 63 deubiquitinase [Source:VGNC Symbol;Acc:VGNC:71581]                      | 1.160541434 | 0.000312449 | 0.00252091  |
| ENSMMUG00000055889 |                                                                                        | 1.246136645 | 0.009555066 | 0.039869486 |
| ENSMMUG00000064095 |                                                                                        | 4.331150754 | 7.36E-05    | 0.000774001 |
| ENSMMUG00000013967 | TOX high mobility group box family member 3 [Source:VGNC Symbol;Acc:VGNC:78612]        | 2.630639111 | 2.42E-07    | 6.48E-06    |
| ENSMMUG00000050057 |                                                                                        | 2.331979842 | 1.50E-12    | 3.04E-10    |
| ENSMMUG00000058254 |                                                                                        | 1.9346621   | 2.92E-07    | 7.55E-06    |
| ENSMMUG00000020580 | RPGRIP1 like [Source:VGNC Symbol;Acc:VGNC:77124]                                       | 2.761901569 | 2.06E-15    | 8.92E-13    |
| ENSMMUG00000020583 | FTO alpha-ketoglutarate dependent dioxygenase [Source:VGNC Symbol;Acc:VGNC:72772]      | 0.824143828 | 0.002153921 | 0.012254547 |
| ENSMMUG00000019902 | autocrine motility factor receptor [Source:VGNC Symbol;Acc:VGNC:69804]                 | 0.706107124 | 0.004118871 | 0.020438778 |
| ENSMMUG00000054811 |                                                                                        | 2.330546663 | 0.011223535 | 0.044970208 |
| ENSMMUG00000056555 |                                                                                        | 1.034122371 | 0.003240492 | 0.016966925 |
| ENSMMUG00000049484 |                                                                                        | 0.470576971 | 0.009144908 | 0.038578877 |
| ENSMMUG00000020847 | CKLF like MARVEL transmembrane domain containing 3 [Source:VGNC Symbol;Acc:VGNC:71215] | 0.985140787 | 0.012545263 | 0.048977916 |
| ENSMMUG00000020254 | exocyst complex component 3 like 1 [Source:VGNC Symbol;Acc:VGNC:72376]                 | 0.91630047  | 0.000920882 | 0.00614835  |
| ENSMMUG00000020258 | E2F transcription factor 4 [Source:VGNC Symbol;Acc:VGNC:72025]                         | 0.680878517 | 0.002957494 | 0.015777347 |
| ENSMMUG00000057511 | Metazoan signal recognition particle RNA [Source:RFAM;Acc:RF00017]                     | 1.014798767 | 0.002521568 | 0.013824262 |
| ENSMMUG00000059872 |                                                                                        | 1.586270629 | 0.010260636 | 0.042149259 |
| ENSMMUG00000010393 | cadherin 3 [Source:VGNC Symbol;Acc:VGNC:70971]                                         | 0.503072677 | 0.000537042 | 0.003968616 |
| ENSMMUG00000011850 | cadherin 1 [Source:VGNC Symbol;Acc:VGNC:70803]                                         | 2.42454899  | 1.20E-07    | 3.50E-06    |
| ENSMMUG00000010922 | hyaluronan synthase 3 [Source:VGNC Symbol;Acc:VGNC:73348]                              | 1.49039905  | 0.002675428 | 0.014528858 |
| ENSMMUG00000049699 | thioredoxin like 4B [Source:NCBI gene;Acc:706840]                                      | 1.671387894 | 0.001003187 | 0.006609648 |
| ENSMMUG00000010878 | adaptor related protein complex 1 subunit gamma 1 [Source:VGNC Symbol;Acc:VGNC:69958]  | 0.550765086 | 0.00228778  | 0.012831141 |

|                    |                                                                                                     |             |             |             |
|--------------------|-----------------------------------------------------------------------------------------------------|-------------|-------------|-------------|
| ENSMMUG00000012007 | PH domain and leucine rich repeat protein phosphatase 2<br>[Source:VGNC Symbol;Acc:VGNC:81494]      | 3.250526128 | 4.65E-10    | 3.85E-08    |
| ENSMMUG00000052324 | MARVEL domain containing 3 [Source:NCBI gene;Acc:710448]                                            | 3.345895858 | 2.07E-10    | 1.95E-08    |
| ENSMMUG00000058147 |                                                                                                     | 1.829910262 | 0.000583361 | 0.004243394 |
| ENSMMUG00000005334 | phospholipase C gamma 2 [Source:VGNC<br>Symbol;Acc:VGNC:76170]                                      | 0.554581809 | 0.002453537 | 0.013532951 |
| ENSMMUG00000057329 |                                                                                                     | 2.19824911  | 0.000111203 | 0.001085812 |
| ENSMMUG00000020114 | cadherin 13 [Source:VGNC Symbol;Acc:VGNC:70807]                                                     | 1.483959006 | 0.005130331 | 0.024370008 |
| ENSMMUG00000011894 | CBY1 interacting BAR domain containing 2 [Source:VGNC<br>Symbol;Acc:VGNC:72335]                     | -1.25973275 | 0.000344062 | 0.002740275 |
| ENSMMUG00000061995 |                                                                                                     | 0.869659529 | 0.000284412 | 0.002338218 |
| ENSMMUG00000060536 |                                                                                                     | 2.777332711 | 0.000368669 | 0.002898977 |
| ENSMMUG00000054493 |                                                                                                     | -0.86599446 | 0.000141536 | 0.001325278 |
| ENSMMUG00000058437 |                                                                                                     | 1.337395699 | 7.76E-06    | 0.000116798 |
| ENSMMUG00000008945 | zinc finger protein 407 [Source:NCBI gene;Acc:695303]                                               | 3.965275779 | 9.96E-07    | 2.11E-05    |
| ENSMMUG00000008942 | carosine dipeptidase 1 [Source:VGNC Symbol;Acc:VGNC:71257]                                          | 4.022866995 | 8.19E-07    | 1.81E-05    |
| ENSMMUG00000058864 |                                                                                                     | 4.007575856 | 0.002867285 | 0.015378291 |
| ENSMMUG00000051690 |                                                                                                     | 4.148401333 | 0.002514425 | 0.013801803 |
| ENSMMUG00000015702 | divergent protein kinase domain 1C [Source:NCBI<br>gene;Acc:699537]                                 | 4.090757659 | 0.000925335 | 0.006174916 |
| ENSMMUG00000020905 | chromosome 18 C18orf63 homolog [Source:VGNC<br>Symbol;Acc:VGNC:70465]                               | 5.003513132 | 5.91E-06    | 9.35E-05    |
| ENSMMUG00000056477 |                                                                                                     | 0.822166444 | 0.002522295 | 0.013824262 |
| ENSMMUG00000050516 |                                                                                                     | 0.784142821 | 0.005898021 | 0.027163479 |
| ENSMMUG00000057978 |                                                                                                     | 2.817789807 | 0.002808665 | 0.015119827 |
| ENSMMUG00000001245 | zinc finger protein 532 [Source:NCBI gene;Acc:701146]                                               | 5.415976058 | 3.58E-06    | 6.20E-05    |
| ENSMMUG00000061572 | Metazoan signal recognition particle RNA<br>[Source:RFAM;Acc:RF00017]                               | 3.972969754 | 1.66E-05    | 0.000221975 |
| ENSMMUG00000065131 |                                                                                                     | 3.854609584 | 0.00081795  | 0.005578534 |
| ENSMMUG00000012001 | transcription factor 4 [Source:VGNC Symbol;Acc:VGNC:78288]                                          | 0.844373655 | 0.004393704 | 0.021499066 |
| ENSMMUG00000020898 | cap binding complex dependent translation initiation factor<br>[Source:HGNC Symbol;Acc:HGNC:23925]  | 1.152837992 | 0.005383684 | 0.025304582 |
| ENSMMUG00000007816 | SMAD family member 2 [Source:VGNC Symbol;Acc:VGNC:77810]                                            | 2.850366503 | 8.41E-12    | 1.32E-09    |
| ENSMMUG00000053364 |                                                                                                     | 0.934478787 | 0.010383211 | 0.042400013 |
| ENSMMUG00000015952 | katanin catalytic subunit A1 like 2 [Source:VGNC<br>Symbol;Acc:VGNC:73904]                          | 2.141408298 | 0.000174522 | 0.001565094 |
| ENSMMUG00000043738 |                                                                                                     | 2.202783321 | 0.000755221 | 0.005241408 |
| ENSMMUG00000004498 | protein inhibitor of activated STAT 2 [Source:VGNC<br>Symbol;Acc:VGNC:75815]                        | 1.597841078 | 0.001215028 | 0.007761617 |
| ENSMMUG00000002742 | ST8 alpha-N-acetyl-neuraminide alpha-2,8-sialyltransferase 5<br>[Source:VGNC Symbol;Acc:VGNC:77942] | 1.891432332 | 1.96E-11    | 2.62E-09    |
| ENSMMUG00000017246 | lipxygenase homology domains 1 [Source:VGNC<br>Symbol;Acc:VGNC:74368]                               | 1.671278883 | 5.24E-10    | 4.21E-08    |
| ENSMMUG00000006864 | KIAA1328 ortholog [Source:NCBI gene;Acc:709850]                                                     | 3.337046902 | 0.004072901 | 0.020233825 |



|                    |                                                                                                                     |   |             |             |             |
|--------------------|---------------------------------------------------------------------------------------------------------------------|---|-------------|-------------|-------------|
| ENSMMUG00000018785 | elongator acetyltransferase complex subunit 2 [Source:VGNC Symbol;Acc:VGNC:72069]                                   | - | 0.556474673 | 0.004055454 | 0.020224222 |
| ENSMMUG00000017276 | nucleolar protein 4 [Source:VGNC Symbol;Acc:VGNC:75366]                                                             | - | 1.067934003 | 0.000315842 | 0.002543558 |
| ENSMMUG00000016674 | beta-1,4-galactosyltransferase 6 [Source:VGNC Symbol;Acc:VGNC:70213]                                                | - | 3.174725128 | 0.004871635 | 0.023371627 |
| ENSMMUG00000052277 | transthyretin [Source:NCBI gene;Acc:705943]                                                                         | - | 2.975074606 | 4.69E-06    | 7.74E-05    |
| ENSMMUG00000021095 | desmoglein 2 [Source:VGNC Symbol;Acc:VGNC:72002]                                                                    | - | 2.609377575 | 0.003412472 | 0.017651561 |
| ENSMMUG00000011690 | desmocollin 1 [Source:VGNC Symbol;Acc:VGNC:71996]                                                                   | - | 2.579686675 | 4.46E-07    | 1.08E-05    |
| ENSMMUG00000060604 |                                                                                                                     | - | 1.36462075  | 0.001623531 | 0.009857909 |
| ENSMMUG00000010944 | GATA binding protein 6 [Source:VGNC Symbol;Acc:VGNC:72891]                                                          | - | 1.006608423 | 0.000229014 | 0.001967345 |
| ENSMMUG00000064806 |                                                                                                                     | - | 1.430592742 | 4.98E-05    | 0.000555432 |
| ENSMMUG00000019892 | myomesin 1 [Source:VGNC Symbol;Acc:VGNC:75123]                                                                      | - | 1.031293105 | 2.18E-05    | 0.000280836 |
| ENSMMUG00000058439 |                                                                                                                     | - | 3.712170743 | 0.002322164 | 0.012962258 |
| ENSMMUG00000019418 | erythrocyte membrane protein band 4.1 like 3 [Source:VGNC Symbol;Acc:VGNC:72233]                                    | - | 1.747897107 | 1.81E-11    | 2.48E-09    |
| ENSMMUG00000053008 |                                                                                                                     | - | 1.254937534 | 0.000128982 | 0.001230561 |
| ENSMMUG00000049523 | ankyrin repeat domain 12 [Source:NCBI gene;Acc:114673693]                                                           | - | 1.587405003 | 0.000210343 | 0.001836058 |
| ENSMMUG00000012768 | hyperpolarization activated cyclic nucleotide gated potassium and sodium channel 2 [Source:NCBI gene;Acc:100425114] | - | 1.016710512 | 0.00201922  | 0.0117032   |
| ENSMMUG00000049968 | RNA polymerase mitochondrial [Source:NCBI gene;Acc:100426183]                                                       | - | 1.097142593 | 1.75E-08    | 7.44E-07    |
| ENSMMUG00000008672 | ring finger protein 126 [Source:VGNC Symbol;Acc:VGNC:76791]                                                         | - | 0.807042775 | 0.003663133 | 0.018698082 |
| ENSMMUG00000028948 | azurocidin 1 [Source:VGNC Symbol;Acc:VGNC:70202]                                                                    | - | 2.280256857 | 0.007758691 | 0.033828205 |
| ENSMMUG00000061589 | proteinase 3 [Source:HGNC Symbol;Acc:HGNC:9495]                                                                     | - | 3.311100002 | 0.004354688 | 0.021332233 |
| ENSMMUG00000009674 | elastase, neutrophil expressed [Source:VGNC Symbol;Acc:VGNC:72199]                                                  | - | 3.166320368 | 0.000451807 | 0.003422366 |
| ENSMMUG00000028947 | complement factor D [Source:VGNC Symbol;Acc:VGNC:71115]                                                             | - | 1.376873203 | 4.37E-09    | 2.30E-07    |
| ENSMMUG00000009682 | R3H domain containing 4 [Source:VGNC Symbol;Acc:VGNC:76554]                                                         | - | 3.156235433 | 5.90E-10    | 4.62E-08    |
| ENSMMUG00000058621 |                                                                                                                     | - | 1.309667554 | 0.00010911  | 0.001069389 |
| ENSMMUG00000002638 | WD repeat domain 18 [Source:VGNC Symbol;Acc:VGNC:79103]                                                             | - | 0.993387832 | 0.001626603 | 0.009871952 |
| ENSMMUG00000013577 | transmembrane protein 259 [Source:NCBI gene;Acc:721161]                                                             | - | 0.443306809 | 0.012102837 | 0.047728775 |
| ENSMMUG00000015306 | calponin 2 [Source:NCBI gene;Acc:721164]                                                                            | - | 0.792190751 | 4.46E-05    | 0.000507314 |
| ENSMMUG00000010886 | strawberry notch homolog 2 [Source:VGNC Symbol;Acc:VGNC:77123]                                                      | - | 3.74821974  | 4.35E-13    | 9.91E-11    |
| ENSMMUG00000058928 | Metazoan signal recognition particle RNA [Source:RFAM;Acc:RF00017]                                                  | - | 2.272732029 | 7.49E-08    | 2.40E-06    |
| ENSMMUG00000022198 | serine/threonine kinase 11 [Source:VGNC Symbol;Acc:VGNC:82249]                                                      | - | 2.206971927 | 6.56E-06    | 0.000101413 |
| ENSMMUG00000015768 | CACN subunit beta associated regulatory protein [Source:VGNC Symbol;Acc:VGNC:70662]                                 | - | 2.548535736 | 7.20E-07    | 1.63E-05    |
| ENSMMUG00000064846 | ATP synthase F1 subunit delta [Source:NCBI gene;Acc:705944]                                                         | - | 0.792678141 | 0.00286441  | 0.015375369 |
| ENSMMUG00000022100 | midnolin [Source:VGNC Symbol;Acc:VGNC:82186]                                                                        | - | 0.81492581  | 0.000165148 | 0.001493681 |
| ENSMMUG00000003043 | PWWP domain containing 3A, DNA repair factor [Source:VGNC Symbol;Acc:VGNC:76565]                                    | - | -0.71604689 | 0.003321934 | 0.017323604 |

|                    |                                                                                                  |             |             |             |
|--------------------|--------------------------------------------------------------------------------------------------|-------------|-------------|-------------|
| ENSMMUG0000003045  | NADH:ubiquinone oxidoreductase core subunit S7 [Source:NCBI gene;Acc:721259]                     | 0.920835538 | 0.005928323 | 0.027274062 |
| ENSMMUG0000003046  | guanidinoacetate N-methyltransferase [Source:VGNC Symbol;Acc:VGNC:72877]                         | 1.159239655 | 0.000139408 | 0.001306297 |
| ENSMMUG0000009014  | methyl-CpG binding domain protein 3 [Source:VGNC Symbol;Acc:VGNC:81470]                          | -           | 0.00164532  | 0.009957668 |
| ENSMMUG00000013747 | secretory carrier membrane protein 4 [Source:VGNC Symbol;Acc:VGNC:77135]                         | -0.55676855 | 0.006343999 | 0.028769193 |
| ENSMMUG00000010984 | MOB kinase activator 3A [Source:NCBI gene;Acc:721441]                                            | 0.444560325 | 0.006886051 | 0.030723837 |
| ENSMMUG00000058897 | PEAK family member 3 [Source:NCBI gene;Acc:717566]                                               | 1.642033944 | 0.002329848 | 0.012982861 |
| ENSMMUG00000058241 | leucine rich repeat and Ig domain containing 3 [Source:NCBI gene;Acc:721484]                     | 2.498209779 | 3.31E-08    | 1.22E-06    |
| ENSMMUG00000064612 | Metazoan signal recognition particle RNA [Source:RFAM;Acc:RF00017]                               | 2.666057036 | 1.87E-09    | 1.18E-07    |
| ENSMMUG00000000452 | LSM7 homolog, U6 small nuclear RNA and mRNA degradation associated [Source:NCBI gene;Acc:721486] | 1.775275266 | 0.007829913 | 0.034070206 |
| ENSMMUG00000065054 | G protein subunit gamma 7 [Source:NCBI gene;Acc:711335]                                          | 1.695242799 | 4.78E-09    | 2.47E-07    |
| ENSMMUG00000007485 | zinc finger protein 555 [Source:VGNC Symbol;Acc:VGNC:79705]                                      | 0.753314604 | 0.008043349 | 0.034824169 |
| ENSMMUG00000002961 | G protein subunit alpha 11 [Source:VGNC Symbol;Acc:VGNC:73085]                                   | 1.105396304 | 3.68E-06    | 6.32E-05    |
| ENSMMUG00000017036 | nicalin [Source:VGNC Symbol;Acc:VGNC:75032]                                                      | 1.446951395 | 8.38E-06    | 0.000124139 |
| ENSMMUG00000060497 |                                                                                                  | 1.974508724 | 0.000643858 | 0.004613784 |
| ENSMMUG00000028930 | tight junction protein 3 [Source:NCBI gene;Acc:721760]                                           | 0.712218271 | 0.003919418 | 0.019678079 |
| ENSMMUG00000028925 | HDGF like 2 [Source:NCBI gene;Acc:693476]                                                        | -2.9387852  | 1.51E-05    | 0.000205663 |
| ENSMMUG00000022656 | perilipin 4 [Source:NCBI gene;Acc:693610]                                                        | 1.357320699 | 0.004715078 | 0.02278867  |
| ENSMMUG00000062995 |                                                                                                  | 0.593270127 | 0.01020217  | 0.041963764 |
| ENSMMUG00000012677 | lysine demethylase 4B [Source:VGNC Symbol;Acc:VGNC:73930]                                        | 1.504391255 | 1.81E-06    | 3.48E-05    |
| ENSMMUG00000054688 |                                                                                                  | 2.326943086 | 1.01E-06    | 2.12E-05    |
| ENSMMUG00000016665 | NADH:ubiquinone oxidoreductase subunit A11 [Source:NCBI gene;Acc:697843]                         | 1.278437655 | 0.004441066 | 0.021714474 |
| ENSMMUG00000016526 | solute carrier family 25 member 41 [Source:VGNC Symbol;Acc:VGNC:77581]                           | -2.45718388 | 1.39E-06    | 2.79E-05    |
| ENSMMUG00000001220 | adhesion G protein-coupled receptor E1 [Source:VGNC Symbol;Acc:VGNC:69561]                       | 0.79944977  | 0.000245299 | 0.002081118 |
| ENSMMUG00000019966 | zinc finger protein 557 [Source:NCBI gene;Acc:100424983]                                         | 0.991956781 | 0.000317702 | 0.002556947 |
| ENSMMUG00000057682 |                                                                                                  | 0.981992572 | 0.000754423 | 0.005239747 |
| ENSMMUG00000028907 | insulin receptor [Source:NCBI gene;Acc:706009]                                                   | 2.062281837 | 0.000250392 | 0.00211056  |
| ENSMMUG00000028906 | Rho/Rac guanine nucleotide exchange factor 18 [Source:NCBI gene;Acc:707510]                      | 2.62522913  | 5.33E-08    | 1.80E-06    |
| ENSMMUG00000023303 | ecotropic viral integration site 5 like [Source:NCBI gene;Acc:706628]                            | 1.271670398 | 9.10E-06    | 0.000133318 |
| ENSMMUG00000014032 | proline rich 36 [Source:NCBI gene;Acc:710443]                                                    | 5.601857263 | 7.09E-07    | 1.62E-05    |
| ENSMMUG00000016695 | CD320 molecule [Source:VGNC Symbol;Acc:VGNC:70763]                                               | 1.206068256 | 0.009190035 | 0.038659351 |
| ENSMMUG00000016821 | ADAM metalloproteinase with thrombospondin type 1 motif 10 [Source:NCBI gene;Acc:708107]         | 1.06664649  | 0.000359285 | 0.002844099 |
| ENSMMUG00000064610 | long intergenic non-protein coding RNA 1862 [Source:HGNC Symbol;Acc:HGNC:52681]                  | 1.235040516 | 0.000510487 | 0.003796108 |
| ENSMMUG00000064532 | mucin 16, cell surface associated [Source:NCBI gene;Acc:106996460]                               | 1.674846031 | 7.78E-09    | 3.72E-07    |

|                    |                                                                                           |             |             |             |
|--------------------|-------------------------------------------------------------------------------------------|-------------|-------------|-------------|
| ENSMMUG0000005695  | zinc finger protein 121 [Source:VGNC Symbol;Acc:VGNC:78835]                               | 0.470347396 | 0.011368589 | 0.04543942  |
| ENSMMUG0000007875  | F-box and leucine rich repeat protein 12 [Source:VGNC Symbol;Acc:VGNC:72502]              | 0.873938467 | 0.00284316  | 0.015280555 |
| ENSMMUG00000011205 | retinol dehydrogenase 8 [Source:VGNC Symbol;Acc:VGNC:76733]                               | 1.056839133 | 0.010071924 | 0.041546289 |
| ENSMMUG00000014897 | ribonucleoprotein, PTB binding 1 [Source:NCBI gene;Acc:715250]                            | 1.164883457 | 3.23E-05    | 0.000391428 |
| ENSMMUG00000011951 | KRI1 homolog [Source:VGNC Symbol;Acc:VGNC:74127]                                          | 2.057419856 | 4.20E-07    | 1.03E-05    |
| ENSMMUG00000003744 | solute carrier family 44 member 2 [Source:VGNC Symbol;Acc:VGNC:77498]                     | 0.485078044 | 0.0092257   | 0.038768807 |
| ENSMMUG00000014673 | interleukin enhancer binding factor 3 [Source:VGNC Symbol;Acc:VGNC:73737]                 | 1.201384331 | 0.001245586 | 0.007909216 |
| ENSMMUG00000055775 | transmembrane p24 trafficking protein 1 [Source:NCBI gene;Acc:713618]                     | 1.424609812 | 0.000261371 | 0.002177699 |
| ENSMMUG00000049703 | Metazoan signal recognition particle RNA [Source:RFAM;Acc:RF00017]                        | 1.913176416 | 1.62E-06    | 3.15E-05    |
| ENSMMUG00000018981 | chromosome 19 C19orf38 homolog [Source:VGNC Symbol;Acc:VGNC:70457]                        | 1.366871229 | 1.32E-09    | 8.78E-08    |
| ENSMMUG00000003612 | SPC24 component of NDC80 kinetochore complex [Source:VGNC Symbol;Acc:VGNC:78002]          | 1.87798723  | 0.004896235 | 0.023463682 |
| ENSMMUG00000043134 | coiled-coil domain containing 159 [Source:NCBI gene;Acc:100424702]                        | 2.07859185  | 1.87E-05    | 0.000245831 |
| ENSMMUG00000022207 | phospholipid phosphatase related 2 [Source:NCBI gene;Acc:714388]                          | 1.949817801 | 1.43E-05    | 0.000197243 |
| ENSMMUG00000010824 | SWIM-type zinc finger 7 associated protein 1 [Source:VGNC Symbol;Acc:VGNC:78220]          | 2.325989764 | 3.45E-05    | 0.000413381 |
| ENSMMUG00000038989 | erythropoietin receptor [Source:NCBI gene;Acc:714546]                                     | 2.30097601  | 0.00026014  | 0.002170227 |
| ENSMMUG00000010826 | ral guanine nucleotide dissociation stimulator like 3 [Source:VGNC Symbol;Acc:VGNC:76869] | 2.2318249   | 5.75E-06    | 9.16E-05    |
| ENSMMUG00000001715 | zinc finger protein 627 [Source:VGNC Symbol;Acc:VGNC:79856]                               | 0.949158837 | 0.000818875 | 0.005581914 |
| ENSMMUG00000053329 |                                                                                           | 1.474336763 | 0.001588896 | 0.009672924 |
| ENSMMUG00000047218 | zinc finger protein 440 [Source:HGNC Symbol;Acc:HGNC:20874]                               | 0.8884831   | 0.002317448 | 0.012955553 |
| ENSMMUG00000064114 | zinc finger protein 709 [Source:NCBI gene;Acc:100427466]                                  | 0.800429202 | 0.005156485 | 0.024467439 |
| ENSMMUG00000058614 |                                                                                           | 1.882982722 | 0.006714502 | 0.03012377  |
| ENSMMUG00000016860 | zinc finger protein 490 [Source:NCBI gene;Acc:100426568]                                  | 1.171403959 | 0.00033294  | 0.002664748 |
| ENSMMUG00000016862 | zinc finger protein 791 [Source:VGNC Symbol;Acc:VGNC:79639]                               | 1.445006063 | 0.001627366 | 0.009871977 |
| ENSMMUG00000063236 | bestrophin 2 [Source:NCBI gene;Acc:716545]                                                | 0.772868766 | 0.011338731 | 0.045361899 |
| ENSMMUG00000019292 | nuclear factor I X [Source:VGNC Symbol;Acc:VGNC:75338]                                    | 0.753244088 | 0.000811733 | 0.005544849 |
| ENSMMUG00000001167 | tRNA methyltransferase 1 [Source:VGNC Symbol;Acc:VGNC:79562]                              | 1.3342553   | 0.000310102 | 0.002505085 |
| ENSMMUG00000011427 | syntaxin 10 [Source:VGNC Symbol;Acc:VGNC:78040]                                           | 1.941979575 | 8.00E-07    | 1.78E-05    |
| ENSMMUG00000003555 | calcium voltage-gated channel subunit alpha1 A [Source:VGNC Symbol;Acc:VGNC:70498]        | 2.275343674 | 6.31E-07    | 1.47E-05    |
| ENSMMUG00000014137 | adhesion G protein-coupled receptor L1 [Source:VGNC Symbol;Acc:VGNC:69658]                | 0.541310999 | 0.000664959 | 0.004727136 |
| ENSMMUG00000005727 | protein kinase N1 [Source:VGNC Symbol;Acc:VGNC:76014]                                     | 0.933875334 | 0.0014823   | 0.0091412   |
| ENSMMUG00000005729 | GIPC PDZ domain containing family member 1 [Source:VGNC Symbol;Acc:VGNC:72932]            | 0.816888961 | 0.000406199 | 0.003135329 |
| ENSMMUG00000018932 | adhesion G protein-coupled receptor E2 [Source:NCBI gene;Acc:654420]                      | 1.233309476 | 5.79E-05    | 0.000629035 |

|                    |                                                                                                  |             |             |             |
|--------------------|--------------------------------------------------------------------------------------------------|-------------|-------------|-------------|
| ENSMMUG00000060289 |                                                                                                  | 1.314659396 | 6.20E-05    | 0.000666015 |
| ENSMMUG00000053889 | olfactory receptor 7C1 [Source:NCBI gene;Acc:114674087]                                          | 1.252396469 | 0.003338125 | 0.017359317 |
| ENSMMUG00000053457 | caspase 14 [Source:NCBI gene;Acc:718049]                                                         | 1.997546898 | 0.000138791 | 0.001302131 |
| ENSMMUG00000007726 | synapse defective Rho GTPase homolog 1 [Source:NCBI gene;Acc:719089]                             | 2.441588657 | 7.37E-05    | 0.000774758 |
| ENSMMUG00000007729 | ilvB acetolactate synthase like [Source:VGNC Symbol;Acc:VGNC:73739]                              | 1.916194226 | 9.93E-05    | 0.000990717 |
| ENSMMUG00000016996 | cytochrome P450, family 4, subfamily F, polypeptide 22 [Source:NCBI gene;Acc:718303]             | 0.810567788 | 0.007822723 | 0.034050311 |
| ENSMMUG00000010734 | cytochrome P450, family 4, subfamily F, polypeptide 8 [Source:NCBI gene;Acc:718335]              | 0.527477896 | 0.002244016 | 0.012656406 |
| ENSMMUG00000039592 |                                                                                                  | 0.446802787 | 0.004764249 | 0.022983612 |
| ENSMMUG00000056778 |                                                                                                  | 6.362063295 | 6.78E-07    | 1.56E-05    |
| ENSMMUG00000004283 | calcium and integrin binding family member 3 [Source:VGNC Symbol;Acc:VGNC:71339]                 | 2.69377578  | 2.13E-07    | 5.86E-06    |
| ENSMMUG00000000994 | epidermal growth factor receptor pathway substrate 15 like 1 [Source:VGNC Symbol;Acc:VGNC:72100] | 1.812779509 | 0.007363417 | 0.032463932 |
| ENSMMUG00000039774 | Metazoan signal recognition particle RNA [Source:RFAM;Acc:RF00017]                               | 1.004290953 | 5.34E-05    | 0.000588643 |
| ENSMMUG00000012959 | solute carrier family 35 member E1 [Source:VGNC Symbol;Acc:VGNC:77536]                           | 0.986423878 | 5.24E-05    | 0.000579964 |
| ENSMMUG00000018503 | NACHT and WD repeat domain containing 1 [Source:NCBI gene;Acc:719640]                            | 0.446041067 | 0.003046645 | 0.016166736 |
| ENSMMUG00000057655 |                                                                                                  | -0.6615575  | 0.010676757 | 0.043218769 |
| ENSMMUG00000011588 | myosin IXB [Source:HGNC Symbol;Acc:HGNC:7609]                                                    | 1.23163241  | 7.75E-05    | 0.00080812  |
| ENSMMUG00000002413 | plasmalemma vesicle associated protein [Source:VGNC Symbol;Acc:VGNC:76021]                       | 4.968494265 | 0.001919237 | 0.011240635 |
| ENSMMUG00000000198 | collagen beta(1-O)galactosyltransferase 1 [Source:NCBI gene;Acc:719980]                          | 0.733749797 | 0.000120825 | 0.001161451 |
| ENSMMUG00000015476 | unc-13 homolog A [Source:NCBI gene;Acc:720000]                                                   | 0.661296246 | 0.012555315 | 0.048978531 |
| ENSMMUG00000010996 | Janus kinase 3 [Source:VGNC Symbol;Acc:VGNC:73812]                                               | 1.003338181 | 0.000112453 | 0.00109555  |
| ENSMMUG00000038308 | coiled-coil domain containing 124 [Source:NCBI gene;Acc:720072]                                  | 1.357584042 | 2.26E-05    | 0.000289619 |
| ENSMMUG00000007398 | potassium calcium-activated channel subfamily N member 1 [Source:VGNC Symbol;Acc:VGNC:74002]     | 2.666033332 | 2.42E-09    | 1.45E-07    |
| ENSMMUG00000007401 | arrestin domain containing 2 [Source:VGNC Symbol;Acc:VGNC:69901]                                 | 1.118182122 | 0.000434258 | 0.00331648  |
| ENSMMUG00000003161 | microtubule associated serine/threonine kinase 3 [Source:VGNC Symbol;Acc:VGNC:74533]             | 0.454847902 | 0.012150153 | 0.04781157  |
| ENSMMUG00000061452 |                                                                                                  | 2.761698099 | 0.000247811 | 0.002094233 |
| ENSMMUG00000005028 | phosphodiesterase 4C [Source:NCBI gene;Acc:720171]                                               | 1.305513253 | 4.80E-06    | 7.87E-05    |
| ENSMMUG00000021182 | single stranded DNA binding protein 4 [Source:VGNC Symbol;Acc:VGNC:81581]                        | 4.271254562 | 3.65E-05    | 0.000431696 |
| ENSMMUG00000013671 | elongation factor for RNA polymerase II [Source:VGNC Symbol;Acc:VGNC:72088]                      | 0.96564236  | 0.001923995 | 0.011256628 |
| ENSMMUG00000009988 | transmembrane protein 59 like [Source:VGNC Symbol;Acc:VGNC:78919]                                | 1.339980887 | 2.95E-05    | 0.000361718 |
| ENSMMUG00000006509 | CREB regulated transcription coactivator 1 [Source:VGNC Symbol;Acc:VGNC:71418]                   | 1.339390095 | 0.000519812 | 0.003854434 |
| ENSMMUG00000023286 | UPF1 RNA helicase and ATPase [Source:VGNC Symbol;Acc:VGNC:79971]                                 | 2.187860052 | 1.92E-07    | 5.35E-06    |
| ENSMMUG00000050739 |                                                                                                  | 1.472618541 | 0.002304981 | 0.012905118 |

|                    |                                                                                |             |             |             |
|--------------------|--------------------------------------------------------------------------------|-------------|-------------|-------------|
| ENSMMUG00000019665 | SURP and G-patch domain containing 2 [Source:VGNC Symbol;Acc:VGNC:78163]       | 2.995819194 | 2.24E-08    | 9.01E-07    |
| ENSMMUG00000019668 | armadillo repeat containing 6 [Source:VGNC Symbol;Acc:VGNC:69899]              | 2.525902674 | 3.69E-07    | 9.32E-06    |
| ENSMMUG00000008578 | hyaluronan and proteoglycan link protein 4 [Source:VGNC Symbol;Acc:VGNC:73261] | 1.178862545 | 0.01048094  | 0.042691861 |
| ENSMMUG00000048108 | PBX homeobox 4 [Source:NCBI gene;Acc:106994668]                                | 3.210622682 | 0.008143643 | 0.035106471 |
| ENSMMUG00000054055 | zinc finger protein 93 [Source:NCBI gene;Acc:720434]                           | 0.751961245 | 7.90E-06    | 0.000118768 |
| ENSMMUG00000061085 |                                                                                | -1.05415873 | 3.72E-05    | 0.000438759 |
| ENSMMUG00000062866 |                                                                                | 1.645099702 | 2.75E-07    | 7.18E-06    |
| ENSMMUG00000015533 | zinc finger protein 493 [Source:NCBI gene;Acc:693611]                          | 1.257067698 | 0.002365682 | 0.013126303 |
| ENSMMUG00000046906 |                                                                                | 0.987029783 | 0.000537839 | 0.003972249 |
| ENSMMUG00000061186 |                                                                                | 1.070066172 | 1.48E-07    | 4.26E-06    |
| ENSMMUG00000040273 | zinc finger protein 257 [Source:NCBI gene;Acc:694388]                          | 1.035319881 | 0.008513027 | 0.036373335 |
| ENSMMUG00000063815 | zinc finger protein 208-like [Source:NCBI gene;Acc:721315]                     | 1.559845261 | 0.000149922 | 0.001385847 |
| ENSMMUG00000060408 |                                                                                | 1.387846446 | 0.004334481 | 0.02125726  |
| ENSMMUG00000003645 | zinc finger protein 726 [Source:HGNC Symbol;Acc:HGNC:32462]                    | 2.295901057 | 0.00170134  | 0.010215893 |
| ENSMMUG00000020668 | cyclin E1 [Source:VGNC Symbol;Acc:VGNC:70727]                                  | 2.7202028   | 1.18E-13    | 3.19E-11    |
| ENSMMUG00000058740 |                                                                                | 0.579979706 | 0.010519757 | 0.042810752 |
| ENSMMUG00000057215 |                                                                                | 1.572162095 | 0.000309808 | 0.002504263 |
| ENSMMUG00000050177 |                                                                                | 1.715211025 | 6.64E-05    | 0.000708903 |
| ENSMMUG00000060455 |                                                                                | -3.07091781 | 0.000221029 | 0.001916466 |
| ENSMMUG00000052666 | programmed cell death 5 [Source:NCBI gene;Acc:702277]                          | 2.358088101 | 0.009827258 | 0.040730823 |
| ENSMMUG00000008041 | ankyrin repeat domain 27 [Source:VGNC Symbol;Acc:VGNC:69693]                   | 0.900812318 | 0.002581178 | 0.014100534 |
| ENSMMUG00000015608 | tudor domain containing 12 [Source:VGNC Symbol;Acc:VGNC:82254]                 | 1.000130521 | 0.009510665 | 0.039756446 |
| ENSMMUG00000028800 | solute carrier family 7 member 9 [Source:VGNC Symbol;Acc:VGNC:77633]           | 1.027797583 | 0.012479399 | 0.048789772 |
| ENSMMUG00000017939 | FA core complex associated protein 24 [Source:VGNC Symbol;Acc:VGNC:72388]      | 0.958560553 | 0.00213469  | 0.012187786 |
| ENSMMUG00000028798 | rhophilin Rho GTPase binding protein 2 [Source:NCBI gene;Acc:716602]           | -0.8395829  | 0.000616932 | 0.004450259 |
| ENSMMUG00000064983 |                                                                                | 0.952043293 | 0.000156847 | 0.001435574 |
| ENSMMUG00000061372 |                                                                                | 1.868654613 | 0.000125346 | 0.001200475 |
| ENSMMUG00000062413 | CCAAT enhancer binding protein gamma [Source:NCBI gene;Acc:704322]             | 0.952395943 | 0.002693175 | 0.014594765 |
| ENSMMUG00000015744 | zinc finger protein 302 [Source:NCBI gene;Acc:706279]                          | 1.537276995 | 3.84E-06    | 6.54E-05    |
| ENSMMUG00000001538 | GRAM domain containing 1A [Source:VGNC Symbol;Acc:VGNC:73029]                  | 0.825548604 | 9.00E-05    | 0.000916911 |

|                    |                                                                                                     |             |             |             |
|--------------------|-----------------------------------------------------------------------------------------------------|-------------|-------------|-------------|
| ENSMMUG0000004843  | sodium voltage-gated channel beta subunit 1 [Source:VGNC Symbol;Acc:VGNC:76983]                     | 0.673636955 | 0.003623118 | 0.01853748  |
| ENSMMUG00000023207 | FXYD domain containing ion transport regulator 5 [Source:VGNC Symbol;Acc:VGNC:82147]                | 0.515990475 | 0.010230316 | 0.042052934 |
| ENSMMUG00000055747 | cytochrome c oxidase subunit 6B [Source:NCBI gene;Acc:692062]                                       | 1.478746947 | 8.66E-05    | 0.000888279 |
| ENSMMUG00000065025 |                                                                                                     | 1.09637469  | 1.22E-05    | 0.000172441 |
| ENSMMUG00000002384 | IGF like family receptor 1 [Source:VGNC Symbol;Acc:VGNC:73434]                                      | 0.894902238 | 2.81E-05    | 0.000346865 |
|                    |                                                                                                     | -           |             |             |
| ENSMMUG00000019756 | NFKB inhibitor delta [Source:VGNC Symbol;Acc:VGNC:75179]                                            | 0.931136773 | 0.000543114 | 0.004006658 |
| ENSMMUG00000008004 | transmembrane immune signaling adaptor TYROBP [Source:NCBI gene;Acc:574207]                         | 0.736953638 | 0.001713628 | 0.01026598  |
|                    |                                                                                                     | -           |             |             |
| ENSMMUG00000061035 | ZFP82 zinc finger protein [Source:NCBI gene;Acc:719145]                                             | 0.656351703 | 0.001919533 | 0.011240635 |
|                    |                                                                                                     | -           |             |             |
| ENSMMUG00000000547 | zinc finger protein 566 [Source:VGNC Symbol;Acc:VGNC:81619]                                         | 0.658122298 | 0.001274752 | 0.008056083 |
|                    |                                                                                                     | -           |             |             |
| ENSMMUG00000022793 | zinc finger protein 529 [Source:VGNC Symbol;Acc:VGNC:79801]                                         | 0.903256569 | 0.002178149 | 0.012357146 |
|                    |                                                                                                     | -           |             |             |
| ENSMMUG00000016449 | zinc finger protein 382 [Source:VGNC Symbol;Acc:VGNC:79078]                                         | 1.434375827 | 7.32E-05    | 0.00077074  |
| ENSMMUG00000028771 | Yip1 interacting factor homolog B, membrane trafficking protein [Source:VGNC Symbol;Acc:VGNC:79852] | 3.22690697  | 8.25E-06    | 0.000122561 |
| ENSMMUG00000014273 | cation channel sperm associated auxiliary subunit gamma [Source:VGNC Symbol;Acc:VGNC:70626]         | 1.911894955 | 0.000112002 | 0.001092797 |
| ENSMMUG00000022975 | sprouty related EVH1 domain containing 3 [Source:VGNC Symbol;Acc:VGNC:78030]                        | 4.166442362 | 7.38E-29    | 3.20E-25    |
| ENSMMUG00000012787 | acid phosphatase 7, tartrate resistant (putative) [Source:NCBI gene;Acc:695532]                     | 1.377358254 | 0.008979484 | 0.03796722  |
| ENSMMUG00000005552 | PAF1 homolog, Paf1/RNA polymerase II complex component [Source:VGNC Symbol;Acc:VGNC:81492]          | 3.581814524 | 0.001426668 | 0.008852695 |
| ENSMMUG00000005554 | mediator complex subunit 29 [Source:VGNC Symbol;Acc:VGNC:74557]                                     | 5.543934292 | 2.16E-10    | 2.02E-08    |
| ENSMMUG00000038702 | ZFP36 ring finger protein [Source:NCBI gene;Acc:722000]                                             | 4.508138612 | 0.000717048 | 0.005035598 |
| ENSMMUG00000019369 | pleckstrin homology and RhoGEF domain containing G2 [Source:VGNC Symbol;Acc:VGNC:76133]             | 4.791022989 | 5.75E-07    | 1.35E-05    |
| ENSMMUG00000019093 | delta like canonical Notch ligand 3 [Source:VGNC Symbol;Acc:VGNC:71925]                             | 3.675628306 | 0.002261517 | 0.012733025 |
| ENSMMUG00000048215 |                                                                                                     | 4.758516885 | 1.50E-11    | 2.12E-09    |
| ENSMMUG00000022726 | dual specificity tyrosine phosphorylation regulated kinase 1B [Source:VGNC Symbol;Acc:VGNC:72016]   | 2.117057117 | 7.50E-05    | 0.000786731 |
|                    |                                                                                                     | -           |             |             |
| ENSMMUG00000022724 |                                                                                                     | 1.217496622 | 0.009503272 | 0.039755405 |
|                    |                                                                                                     | -           |             |             |
| ENSMMUG00000051261 |                                                                                                     | 1.247704289 | 0.001017266 | 0.006682104 |
|                    |                                                                                                     | -           |             |             |
| ENSMMUG00000017191 | zinc finger protein 546 [Source:VGNC Symbol;Acc:VGNC:79732]                                         | 1.463842733 | 0.000624248 | 0.004500535 |
| ENSMMUG00000041976 | zinc finger protein 780B [Source:NCBI gene;Acc:701034]                                              | -1.2375553  | 2.37E-07    | 6.39E-06    |
| ENSMMUG00000003621 | AKT serine/threonine kinase 2 [Source:VGNC Symbol;Acc:VGNC:69777]                                   | 1.061919324 | 0.000202717 | 0.001779036 |
|                    |                                                                                                     | -           |             |             |
| ENSMMUG00000065016 |                                                                                                     | 1.103565637 | 0.009616062 | 0.040072573 |
|                    |                                                                                                     | -           |             |             |
| ENSMMUG00000008946 | chromosome 19 C19orf47 homolog [Source:VGNC Symbol;Acc:VGNC:70404]                                  | 0.967934604 | 0.008292587 | 0.035571696 |
| ENSMMUG00000022625 | periaxin [Source:VGNC Symbol;Acc:VGNC:76248]                                                        | -1.65305992 | 0.00016163  | 0.001467992 |
| ENSMMUG00000059229 | CEA cell adhesion molecule 7 [Source:NCBI gene;Acc:705572]                                          | 1.184725577 | 1.48E-05    | 0.000202342 |
| ENSMMUG00000017431 | glutamate ionotropic receptor kainate type subunit 5 [Source:VGNC Symbol;Acc:VGNC:73280]            | 1.097426931 | 0.002082094 | 0.011967964 |

|                    |                                                                                                  |             |             |             |
|--------------------|--------------------------------------------------------------------------------------------------|-------------|-------------|-------------|
| ENSMMUG00000013376 | POU class 2 homeobox 2 [Source:NCBI gene;Acc:706835]                                             | 1.060953588 | 0.000256142 | 0.002144398 |
| ENSMMUG00000014599 | glycogen synthase kinase 3 alpha [Source:NCBI gene;Acc:707037]                                   | 3.114957241 | 5.83E-05    | 0.000632731 |
| ENSMMUG00000012174 | capicua transcriptional repressor [Source:NCBI gene;Acc:707463]                                  | 3.032586165 | 0.002906987 | 0.015565363 |
| ENSMMUG00000059128 |                                                                                                  | 2.355516642 | 0.000158791 | 0.00144624  |
| ENSMMUG00000019265 | zinc finger protein 575 [Source:VGNC Symbol;Acc:VGNC:79667]                                      | 0.832505944 | 0.00459273  | 0.022305095 |
| ENSMMUG00000064975 | zinc finger protein 221 [Source:NCBI gene;Acc:100423743]                                         | 2.138963714 | 1.18E-05    | 0.000168206 |
| ENSMMUG00000012797 | zinc finger protein 233 [Source:VGNC Symbol;Acc:VGNC:79903]                                      | 1.315726065 | 1.12E-05    | 0.000159877 |
| ENSMMUG00000012801 | zinc finger protein 235 [Source:VGNC Symbol;Acc:VGNC:78825]                                      | 1.359556221 | 6.54E-07    | 1.51E-05    |
| ENSMMUG00000049451 | Cbl proto-oncogene C [Source:NCBI gene;Acc:713112]                                               | 1.364472149 | 9.52E-05    | 0.000956787 |
| ENSMMUG00000003273 | basal cell adhesion molecule (Lutheran blood group) [Source:NCBI gene;Acc:714568]                | -0.62404817 | 0.005433592 | 0.025503173 |
| ENSMMUG00000014303 | translocase of outer mitochondrial membrane 40 [Source:VGNC Symbol;Acc:VGNC:78419]               | 2.823892654 | 0.008867033 | 0.037540571 |
| ENSMMUG00000002472 | CLPTM1 regulator of GABA type A receptor forward trafficking [Source:VGNC Symbol;Acc:VGNC:71265] | 1.392528317 | 0.006456196 | 0.029176262 |
| ENSMMUG00000014155 | CLK4 associating serine/arginine rich protein [Source:VGNC Symbol;Acc:VGNC:71198]                | 2.417929202 | 0.000393515 | 0.003061037 |
| ENSMMUG00000022931 | NTPase KAP family P-loop domain containing 1 [Source:VGNC Symbol;Acc:VGNC:75250]                 | 1.593159474 | 2.69E-07    | 7.06E-06    |
| ENSMMUG00000018879 | exocyst complex component 3 like 2 [Source:NCBI gene;Acc:713992]                                 | 1.144198328 | 0.002651334 | 0.014422105 |
| ENSMMUG00000013477 | creatine kinase, M-type [Source:VGNC Symbol;Acc:VGNC:71230]                                      | 2.499408832 | 1.05E-08    | 4.78E-07    |
| ENSMMUG00000000717 | CD3e molecule associated protein [Source:NCBI gene;Acc:714440]                                   | 1.272526666 | 0.000102045 | 0.001011586 |
| ENSMMUG00000000718 | ERCC excision repair 1, endonuclease non-catalytic subunit [Source:VGNC Symbol;Acc:VGNC:72422]   | 1.015385937 | 0.000318366 | 0.002559124 |
| ENSMMUG00000053242 | outer mitochondrial membrane lipid metabolism regulator OPA3 [Source:NCBI gene;Acc:714806]       | 3.39699913  | 0.000636612 | 0.004567679 |
| ENSMMUG00000006936 | gastric inhibitory polypeptide receptor [Source:VGNC Symbol;Acc:VGNC:73052]                      | 0.808439501 | 0.000536733 | 0.003968588 |
| ENSMMUG00000032809 | mml-mir-642 [Source:miRBase;Acc:MI0007885]                                                       | 0.899619706 | 0.001178079 | 0.007562735 |
| ENSMMUG00000006937 | small nuclear ribonucleoprotein D2 polypeptide [Source:NCBI gene;Acc:715183]                     | 1.766331189 | 0.011309935 | 0.04527455  |
| ENSMMUG00000051573 | SIX homeobox 5 [Source:NCBI gene;Acc:715373]                                                     | 0.571429487 | 0.001957094 | 0.011399001 |
| ENSMMUG00000016457 | DM1 protein kinase [Source:NCBI gene;Acc:715328]                                                 | 3.385811536 | 2.71E-11    | 3.39E-09    |
| ENSMMUG00000005827 | PNMA family member 8A [Source:VGNC Symbol;Acc:VGNC:76111]                                        | 2.462935291 | 0.000270675 | 0.002245156 |
| ENSMMUG00000017921 | calmodulin 3 [Source:NCBI gene;Acc:716584]                                                       | 0.524625493 | 0.003483343 | 0.01791394  |
| ENSMMUG00000051115 |                                                                                                  | 2.990864571 | 1.05E-06    | 2.20E-05    |
| ENSMMUG00000017927 | protein kinase D2 [Source:VGNC Symbol;Acc:VGNC:76273]                                            | 2.529352857 | 1.38E-05    | 0.000191546 |
| ENSMMUG00000011332 | Rho GTPase activating protein 35 [Source:VGNC Symbol;Acc:VGNC:69942]                             | 4.217571176 | 4.08E-14    | 1.28E-11    |
| ENSMMUG00000057361 | Metazoan signal recognition particle RNA [Source:RFAM;Acc:RF00017]                               | 2.45852894  | 2.11E-05    | 0.000273101 |
| ENSMMUG00000011330 | neuronal PAS domain protein 1 [Source:VGNC Symbol;Acc:VGNC:75377]                                | 2.397386411 | 7.99E-11    | 8.74E-09    |
| ENSMMUG00000057454 | transmembrane protein 160 [Source:NCBI gene;Acc:716996]                                          | 2.903644423 | 4.51E-13    | 1.01E-10    |
| ENSMMUG00000009277 | complement component 5a receptor 2 [Source:VGNC Symbol;Acc:VGNC:70690]                           | 1.092972244 | 0.001705573 | 0.010231865 |

|                    |                                                                                                         |             |             |             |
|--------------------|---------------------------------------------------------------------------------------------------------|-------------|-------------|-------------|
| ENSMMUG00000013009 | Meis homeobox 3 [Source:NCBI gene;Acc:718145]                                                           | 0.533033487 | 0.002921008 | 0.015634003 |
| ENSMMUG00000014718 | solute carrier family 8 member A2 [Source:VGNC Symbol;Acc:VGNC:77635]                                   | 0.627015439 | 3.78E-05    | 0.000443662 |
| ENSMMUG00000014723 | kaptin, actin binding protein [Source:VGNC Symbol;Acc:VGNC:74204]                                       | 0.859190572 | 0.00278668  | 0.015026352 |
| ENSMMUG00000014727 | NSF attachment protein alpha [Source:VGNC Symbol;Acc:VGNC:75131]                                        | 0.970664086 | 0.000301457 | 0.002453536 |
| ENSMMUG00000054090 |                                                                                                         | 1.065070216 | 0.006008775 | 0.027575908 |
| ENSMMUG00000006857 | epididymal sperm binding protein 1 [Source:VGNC Symbol;Acc:VGNC:72046]                                  | 1.478394563 | 2.89E-05    | 0.000356117 |
| ENSMMUG00000042157 | caspase recruitment domain-containing protein 8 [Source:NCBI gene;Acc:718594]                           | 0.662105187 | 0.000252018 | 0.002117407 |
| ENSMMUG00000001793 | cytohesin 2 [Source:NCBI gene;Acc:718682]                                                               | 0.856047805 | 0.003828103 | 0.019342776 |
| ENSMMUG00000055036 | MEF2 activating motif and SAP domain containing transcriptional regulator [Source:NCBI gene;Acc:718823] | 0.822872833 | 0.000754509 | 0.005239747 |
| ENSMMUG00000018415 | Ras interacting protein 1 [Source:HGNC Symbol;Acc:HGNC:24716]                                           | 0.812764633 | 0.001245643 | 0.007909216 |
| ENSMMUG00000028736 | hydroxysteroid 17-beta dehydrogenase 14 [Source:NCBI gene;Acc:106994816]                                | 1.184492648 | 0.000845116 | 0.005730753 |
| ENSMMUG00000007538 | transient receptor potential cation channel subfamily M member 4 [Source:VGNC Symbol;Acc:VGNC:79105]    | 2.005051475 | 1.87E-06    | 3.58E-05    |
| ENSMMUG00000022116 | PIH1 domain containing 1 [Source:VGNC Symbol;Acc:VGNC:75868]                                            | 1.894190605 | 0.000258438 | 0.002157673 |
| ENSMMUG00000051892 | fms related receptor tyrosine kinase 3 ligand [Source:NCBI gene;Acc:719239]                             | 2.026350192 | 2.26E-05    | 0.000289619 |
| ENSMMUG00000007551 | ribosomal protein L13a [Source:NCBI gene;Acc:574314]                                                    | 1.617211227 | 3.01E-05    | 0.000368095 |
| ENSMMUG00000049747 | proline rich and Gla domain 2 [Source:NCBI gene;Acc:719318]                                             | 0.986692565 | 0.0049829   | 0.023782604 |
| ENSMMUG00000012937 | proline rich 12 [Source:NCBI gene;Acc:719344]                                                           | 2.478515959 | 7.54E-12    | 1.23E-09    |
| ENSMMUG00000028733 | RAS related [Source:VGNC Symbol;Acc:VGNC:76937]                                                         | 1.853861699 | 9.02E-05    | 0.000918685 |
| ENSMMUG00000012938 | SR-related CTD associated factor 1 [Source:VGNC Symbol;Acc:VGNC:77137]                                  | 3.418923343 | 0.000754238 | 0.005239747 |
| ENSMMUG00000003029 | protein arginine methyltransferase 1 [Source:NCBI gene;Acc:719419]                                      | 1.178798563 | 1.96E-06    | 3.71E-05    |
| ENSMMUG00000014735 | carnitine palmitoyltransferase 1C [Source:NCBI gene;Acc:719429]                                         | 1.615851571 | 1.33E-06    | 2.70E-05    |
| ENSMMUG00000020175 | mediator complex subunit 25 [Source:VGNC Symbol;Acc:VGNC:74607]                                         | 2.213030953 | 2.76E-07    | 7.21E-06    |
| ENSMMUG00000011626 | TBC1 domain family member 17 [Source:VGNC Symbol;Acc:VGNC:78216]                                        | 2.257391367 | 0.003493193 | 0.017943311 |
| ENSMMUG00000011627 | interleukin 4 induced 1 [Source:VGNC Symbol;Acc:VGNC:73625]                                             | 1.533250467 | 0.001424584 | 0.008848204 |
| ENSMMUG00000044817 | nucleoporin 62 [Source:NCBI gene;Acc:100426308]                                                         | 2.336967323 | 9.03E-10    | 6.55E-08    |
| ENSMMUG00000064146 | Metazoan signal recognition particle RNA [Source:RFAM;Acc:RF00017]                                      | 1.680823055 | 0.001662064 | 0.01004032  |
| ENSMMUG00000054052 | sialic acid binding Ig like lectin 11 [Source:NCBI gene;Acc:719127]                                     | 2.256131197 | 0.000524993 | 0.003890634 |
| ENSMMUG00000001427 | myosin heavy chain 14 [Source:VGNC Symbol;Acc:VGNC:75006]                                               | 1.56032963  | 6.24E-05    | 0.00067029  |
| ENSMMUG00000056529 | synaptotagmin 3 [Source:NCBI gene;Acc:719650]                                                           | 1.71142443  | 0.004506699 | 0.021928216 |
| ENSMMUG00000046099 | chromosome 19 C19orf81 homolog [Source:NCBI gene;Acc:719661]                                            | 2.091821012 | 0.009552545 | 0.039869486 |
| ENSMMUG00000059087 |                                                                                                         | 3.844215817 | 0.000453322 | 0.003429848 |
| ENSMMUG00000065035 | kallikrein-2 [Source:NCBI gene;Acc:719436]                                                              | -1.32043834 | 8.76E-05    | 0.000896706 |
| ENSMMUG00000060764 |                                                                                                         | 0.960368257 | 0.0001004   | 0.000998323 |
| ENSMMUG00000013597 | kallikrein related peptidase 5 [Source:VGNC Symbol;Acc:VGNC:74191]                                      | 0.955843311 | 0.000830973 | 0.005652526 |



|                    |                                                                                 |             |             |             |
|--------------------|---------------------------------------------------------------------------------|-------------|-------------|-------------|
| ENSMMUG00000061396 | kallikrein related peptidase 6 [Source:NCBI gene;Acc:719776]                    | 0.897000723 | 0.000511327 | 0.003800181 |
| ENSMMUG00000015445 | kallikrein related peptidase 8 [Source:VGNC Symbol;Acc:VGNC:74194]              | 1.057700877 | 0.000261028 | 0.002176236 |
| ENSMMUG00000064856 | kallikrein related peptidase 14 [Source:NCBI gene;Acc:722692]                   | 1.313315795 | 0.011842304 | 0.04692901  |
| ENSMMUG00000023531 | electron transfer flavoprotein subunit beta [Source:VGNC Symbol;Acc:VGNC:72437] | 0.742879888 | 0.001595405 | 0.009696183 |
| ENSMMUG00000015369 | natural killer cell granule protein 7 [Source:VGNC Symbol;Acc:VGNC:75352]       | 1.004026169 | 0.001062514 | 0.006933794 |
| ENSMMUG00000021111 | sialic acid binding Ig like lectin 10 [Source:VGNC Symbol;Acc:VGNC:77237]       | 1.327995151 | 0.008191295 | 0.035265137 |
| ENSMMUG00000044652 | sialic acid-binding Ig-like lectin 13 [Source:NCBI gene;Acc:719667]             | 2.111250034 | 2.66E-13    | 6.54E-11    |
| ENSMMUG00000062017 |                                                                                 | 2.612107206 | 0.000353568 | 0.002807388 |
| ENSMMUG00000012764 | zinc finger protein 175 [Source:VGNC Symbol;Acc:VGNC:78856]                     | 1.389761498 | 5.39E-05    | 0.000593444 |
| ENSMMUG00000012761 | sialic acid binding Ig like lectin 5 [Source:NCBI gene;Acc:719730]              | 1.259542906 | 2.01E-10    | 1.91E-08    |
| ENSMMUG00000013053 | sperm acrosome associated 6 [Source:NCBI gene;Acc:114674203]                    | 1.816506914 | 2.40E-09    | 1.44E-07    |
| ENSMMUG00000053150 | Metazoan signal recognition particle RNA [Source:RFAM;Acc:RF00017]              | 1.805690799 | 0.002391807 | 0.013254301 |
| ENSMMUG00000013049 | formyl peptide receptor 1 [Source:NCBI gene;Acc:719782]                         | 1.373286758 | 0.000228021 | 0.001960111 |
| ENSMMUG00000051078 |                                                                                 | 0.803018895 | 0.012085976 | 0.047676738 |
| ENSMMUG00000023136 | zinc finger protein 613 [Source:VGNC Symbol;Acc:VGNC:79548]                     | 0.551886831 | 0.002142774 | 0.012209878 |
| ENSMMUG00000052090 |                                                                                 | 0.442547622 | 0.008189239 | 0.035265137 |
| ENSMMUG00000023137 | zinc finger protein 350 [Source:VGNC Symbol;Acc:VGNC:79041]                     | 1.224544197 | 0.00011041  | 0.001080509 |
| ENSMMUG00000041450 | zinc finger protein 432 [Source:NCBI gene;Acc:100424341]                        | 1.702670445 | 0.001116559 | 0.007232053 |
| ENSMMUG00000064519 |                                                                                 | 1.511157121 | 0.00188679  | 0.011073825 |
| ENSMMUG00000057187 |                                                                                 | 1.187424683 | 0.002063895 | 0.01190378  |
| ENSMMUG00000055976 | CD99 antigen [Source:NCBI gene;Acc:106995376]                                   | 2.150344419 | 3.57E-08    | 1.29E-06    |
| ENSMMUG00000061536 |                                                                                 | 3.961630246 | 8.37E-07    | 1.84E-05    |
| ENSMMUG00000061238 |                                                                                 | 2.850198006 | 0.006461674 | 0.029190877 |

### SD 60 vs. Baseline

| Ensembl Gene ID     | Description                                                                                      | Log2(FC)    | p-value     | FDR         |
|---------------------|--------------------------------------------------------------------------------------------------|-------------|-------------|-------------|
| ENSMMUG00000001479  | laminin subunit gamma 2 [Source:VGNC Symbol;Acc:VGNC:74233]                                      | 2.607417244 | 1.45E-08    | 1.76E-05    |
| ENSMMUG00000001481  | nicotinamide nucleotide adenylyltransferase 2 [Source:VGNC Symbol;Acc:VGNC:75193]                | 1.827312214 | 0.000751494 | 0.048369686 |
| ENSMMUG000000055783 |                                                                                                  | 3.066864486 | 1.71E-06    | 0.000956245 |
| ENSMMUG00000000730  | spectrin alpha, erythrocytic 1 [Source:VGNC Symbol;Acc:VGNC:77868]                               | 1.267492291 | 0.000149278 | 0.018352821 |
| ENSMMUG00000000724  | olfactory receptor 6Y1 [Source:NCBI gene;Acc:719071]                                             | 1.344248337 | 0.000447077 | 0.034882763 |
| ENSMMUG000000055304 | insulin receptor related receptor [Source:NCBI gene;Acc:718670]                                  | 1.672963772 | 1.10E-05    | 0.003661513 |
| ENSMMUG000000017819 | putative homeodomain transcription factor 1 [Source:VGNC Symbol;Acc:VGNC:75982]                  | 0.959955513 | 0.000287845 | 0.027628069 |
| ENSMMUG000000031785 |                                                                                                  | 1.257141694 | 0.000690936 | 0.045819538 |
| ENSMMUG000000050998 |                                                                                                  | 1.73786255  | 1.23E-05    | 0.003945213 |
| ENSMMUG000000061766 |                                                                                                  | 2.405799551 | 0.000197322 | 0.021773856 |
| ENSMMUG000000060790 |                                                                                                  | 4.642786371 | 0.000225237 | 0.023927655 |
| ENSMMUG000000020047 | integrin subunit beta 3 binding protein [Source:VGNC Symbol;Acc:VGNC:73787]                      | 1.119673011 | 0.000353119 | 0.030190734 |
| ENSMMUG000000022762 | OMA1 zinc metallopeptidase [Source:VGNC Symbol;Acc:VGNC:75485]                                   | 1.399568493 | 7.21E-05    | 0.012524518 |
| ENSMMUG000000006669 | ubiquitin protein ligase E3 component n-recognin 4 [Source:VGNC Symbol;Acc:VGNC:79845]           | 0.698013133 | 3.42E-05    | 0.007098751 |
| ENSMMUG000000018163 | caspase 9 [Source:NCBI gene;Acc:694544]                                                          | 4.613355777 | 0.000101891 | 0.01492606  |
| ENSMMUG000000003987 | forkhead associated phosphopeptide binding domain 1 [Source:NCBI gene;Acc:699900]                | 1.432136154 | 0.000653323 | 0.044679148 |
| ENSMMUG000000003277 | copine 4 [Source:VGNC Symbol;Acc:VGNC:71466]                                                     | 1.734414531 | 1.34E-07    | 0.000146371 |
| ENSMMUG000000019857 | beaded filament structural protein 2 [Source:VGNC Symbol;Acc:VGNC:70245]                         | 1.080467841 | 9.47E-05    | 0.01492606  |
| ENSMMUG000000000059 | DNA topoisomerase II binding protein 1 [Source:VGNC Symbol;Acc:VGNC:79061]                       | 1.062534154 | 7.24E-06    | 0.002762249 |
| ENSMMUG000000008916 | transferrin [Source:VGNC Symbol;Acc:VGNC:82716]                                                  | 1.185840681 | 2.65E-05    | 0.006579148 |
| ENSMMUG000000052474 |                                                                                                  | 1.604310282 | 0.000788022 | 0.049601594 |
| ENSMMUG000000023289 | phospholipase D1 [Source:VGNC Symbol;Acc:VGNC:76171]                                             | 4.623835616 | 0.000709218 | 0.046748571 |
| ENSMMUG000000021242 | natural killer cell triggering receptor [Source:VGNC Symbol;Acc:VGNC:81486]                      | 4.563065272 | 6.58E-05    | 0.012211301 |
| ENSMMUG000000014046 | SREBF chaperone [Source:VGNC Symbol;Acc:VGNC:77140]                                              | 1.246400615 | 3.05E-07    | 0.000251862 |
| ENSMMUG000000010498 | HemK methyltransferase family member 1 [Source:VGNC Symbol;Acc:VGNC:73228]                       | 1.441391828 | 0.000261094 | 0.026402578 |
| ENSMMUG000000017125 | oxysterol binding protein like 11 [Source:VGNC Symbol;Acc:VGNC:75631]                            | -1.06490637 | 0.000254783 | 0.026300342 |
| ENSMMUG000000051381 | Metazoan signal recognition particle RNA [Source:RFAM;Acc:RF00017]                               | 1.517371993 | 5.70E-05    | 0.010902975 |
| ENSMMUG000000051296 | paired like homeobox 2B [Source:NCBI gene;Acc:701940]                                            | 1.813931508 | 0.000565948 | 0.040474533 |
| ENSMMUG000000010316 | HECT and RLD domain containing E3 ubiquitin protein ligase 5 [Source:VGNC Symbol;Acc:VGNC:73226] | 2.538475358 | 0.000171342 | 0.019944986 |

|                    |                                                                                             |             |             |             |
|--------------------|---------------------------------------------------------------------------------------------|-------------|-------------|-------------|
| ENSMMUG00000010318 | phosphatidylinositol glycan anchor biosynthesis class Y<br>[Source:NCBI gene;Acc:100426107] | 2.935337389 | 0.000106308 | 0.01502534  |
| ENSMMUG00000058698 |                                                                                             | 1.882232008 | 0.000470137 | 0.035936831 |
| ENSMMUG00000057606 | GPRIN family member 3 [Source:NCBI gene;Acc:703567]                                         | 1.006386632 | 0.0004062   | 0.032983359 |
| ENSMMUG00000049396 | Metazoan signal recognition particle RNA<br>[Source:RFAM;Acc:RF00017]                       | 2.541129422 | 0.00036795  | 0.030733639 |
| ENSMMUG00000052609 | ribosomal protein L34 [Source:NCBI gene;Acc:696636]                                         | 1.926524491 | 0.000786461 | 0.049601594 |
| ENSMMUG00000011902 | oligosaccharyltransferase complex non-catalytic subunit<br>[Source:NCBI gene;Acc:697283]    | 1.805083144 | 0.000632364 | 0.043517807 |
| ENSMMUG00000010043 | epidermal growth factor [Source:VGNC<br>Symbol;Acc:VGNC:72171]                              | 1.234536948 | 0.000630783 | 0.043517807 |
| ENSMMUG00000062794 |                                                                                             | 2.67703979  | 0.00030212  | 0.028498238 |
| ENSMMUG00000044429 | glycophorin A (MNS blood group) [Source:NCBI<br>gene;Acc:574101]                            | 1.665866149 | 1.71E-05    | 0.004917538 |
| ENSMMUG00000002212 | LPS responsive beige-like anchor protein [Source:NCBI<br>gene;Acc:693823]                   | 2.387614773 | 2.42E-06    | 0.001259111 |
| ENSMMUG00000039441 | mab-21 like 2 [Source:NCBI gene;Acc:693948]                                                 | 2.382064985 | 0.000479508 | 0.035936831 |
| ENSMMUG00000059101 |                                                                                             | 2.842504743 | 3.28E-05    | 0.007098751 |
| ENSMMUG00000054417 |                                                                                             | 1.014220487 | 5.47E-06    | 0.002304002 |
| ENSMMUG00000059707 | MIS18 kinetochore protein A [Source:NCBI<br>gene;Acc:709275]                                | 1.827405549 | 0.000792563 | 0.049601594 |
| ENSMMUG00000056363 |                                                                                             | 1.800321186 | 0.000263012 | 0.026402578 |
| ENSMMUG00000063570 | Metazoan signal recognition particle RNA<br>[Source:RFAM;Acc:RF00017]                       | 4.798768858 | 0.000310498 | 0.029038165 |
| ENSMMUG00000002427 | glucokinase [Source:VGNC Symbol;Acc:VGNC:72901]                                             | 1.601898564 | 5.78E-05    | 0.010902975 |
| ENSMMUG00000002411 | drebrin like [Source:NCBI gene;Acc:720621]                                                  | 1.413932488 | 0.000358851 | 0.030438362 |
| ENSMMUG00000002426 | myosin light chain 7 [Source:VGNC<br>Symbol;Acc:VGNC:75002]                                 | 1.668075363 | 0.000273173 | 0.026801249 |
| ENSMMUG00000002423 | DNA polymerase delta 2, accessory subunit [Source:VGNC<br>Symbol;Acc:VGNC:76203]            | 1.791056734 | 3.34E-05    | 0.007098751 |
| ENSMMUG00000058817 |                                                                                             | 2.393701793 | 0.000353173 | 0.030190734 |
| ENSMMUG00000009499 | mesoderm specific transcript [Source:VGNC<br>Symbol;Acc:VGNC:74707]                         | 1.88159181  | 0.000477382 | 0.035936831 |
| ENSMMUG00000004801 | COPI coat complex subunit gamma 2 [Source:VGNC<br>Symbol;Acc:VGNC:71315]                    | 2.193566335 | 0.000262231 | 0.026402578 |
| ENSMMUG00000037485 |                                                                                             | -3.9442309  | 0.000742465 | 0.048164247 |
| ENSMMUG00000062419 |                                                                                             | 3.180710033 | 0.000342592 | 0.030190734 |
| ENSMMUG00000006547 | ATPase H+ transporting V0 subunit a4 [Source:VGNC<br>Symbol;Acc:VGNC:70189]                 | 4.775167942 | 6.92E-05    | 0.01239673  |
| ENSMMUG00000006548 | KIAA1549 [Source:VGNC Symbol;Acc:VGNC:73885]                                                | 2.500776495 | 0.000141606 | 0.017809864 |
| ENSMMUG00000059412 |                                                                                             | 0.840819827 | 0.000127172 | 0.016180472 |
| ENSMMUG00000018739 | sperm flagellar 2 [Source:VGNC Symbol;Acc:VGNC:82243]                                       | 3.467622683 | 0.000125461 | 0.016150585 |
| ENSMMUG00000010379 | Mtr4 exosome RNA helicase [Source:VGNC<br>Symbol;Acc:VGNC:74989]                            | 1.175341665 | 0.000459707 | 0.035423303 |
| ENSMMUG00000030099 | phospholipid phosphatase 1 [Source:VGNC<br>Symbol;Acc:VGNC:76226]                           | 2.142759763 | 7.32E-06    | 0.002762249 |

|                    |                                                                                                         |             |             |             |
|--------------------|---------------------------------------------------------------------------------------------------------|-------------|-------------|-------------|
| ENSMMUG00000061973 |                                                                                                         | 2.491265524 | 1.38E-09    | 2.51E-06    |
| ENSMMUG00000051661 |                                                                                                         | 1.532440727 | 0.000684651 | 0.045679585 |
| ENSMMUG00000039944 | Ras protein specific guanine nucleotide releasing factor 2 [Source:VGNC Symbol;Acc:VGNC:84486]          | 3.196143533 | 6.52E-14    | 2.38E-10    |
| ENSMMUG00000056790 |                                                                                                         | 2.462383272 | 0.000348679 | 0.030190734 |
| ENSMMUG00000005314 | elongation factor for RNA polymerase II 2 [Source:VGNC Symbol;Acc:VGNC:84368]                           | 1.085728671 | 3.16E-05    | 0.007098751 |
| ENSMMUG00000013047 | S-phase kinase associated protein 1 [Source:NCBI gene;Acc:100423634]                                    | 1.867584599 | 1.09E-15    | 1.20E-11    |
| ENSMMUG00000053384 |                                                                                                         | -1.62822039 | 2.54E-14    | 1.39E-10    |
| ENSMMUG00000008710 | protocadherin 1 [Source:VGNC Symbol;Acc:VGNC:75775]                                                     | 1.884079778 | 0.000497505 | 0.036619568 |
| ENSMMUG00000002272 | clathrin interactor 1 [Source:VGNC Symbol;Acc:VGNC:84289]                                               | 2.146590882 | 0.000541453 | 0.038977517 |
| ENSMMUG00000057859 |                                                                                                         | 1.835706813 | 0.000793299 | 0.049601594 |
| ENSMMUG00000008228 | unc-93 homolog A [Source:VGNC Symbol;Acc:VGNC:78724]                                                    | 2.166314091 | 0.000198993 | 0.021773856 |
| ENSMMUG00000060903 |                                                                                                         | 1.231647707 | 3.61E-05    | 0.007315287 |
| ENSMMUG00000051427 |                                                                                                         | 1.357785992 | 3.44E-05    | 0.007098751 |
| ENSMMUG00000008525 | minichromosome maintenance 9 homologous recombination repair factor [Source:VGNC Symbol;Acc:VGNC:83432] | 3.056891703 | 0.00010106  | 0.01492606  |
| ENSMMUG00000013302 | family with sequence similarity 184 member A [Source:VGNC Symbol;Acc:VGNC:72308]                        | 2.244753783 | 0.000418967 | 0.033708359 |
| ENSMMUG00000006430 | androgen induced 1 [Source:VGNC Symbol;Acc:VGNC:69667]                                                  | 2.203526362 | 0.00036385  | 0.030624947 |
| ENSMMUG00000011858 | bone morphogenetic protein 5 [Source:VGNC Symbol;Acc:VGNC:70264]                                        | 1.514546734 | 0.000201158 | 0.021792754 |
| ENSMMUG00000016993 | PKHD1 ciliary IPT domain containing fibrocystin/polyductin [Source:VGNC Symbol;Acc:VGNC:76010]          | 2.061836872 | 3.80E-07    | 0.000277358 |
| ENSMMUG00000023381 | dynein axonemal heavy chain 8 [Source:VGNC Symbol;Acc:VGNC:71943]                                       | 0.829374492 | 0.000604494 | 0.042399811 |
| ENSMMUG00000017374 | G protein subunit beta 5 [Source:VGNC Symbol;Acc:VGNC:73097]                                            | 2.356057688 | 0.000336855 | 0.030190734 |
| ENSMMUG00000007504 | myosin VC [Source:VGNC Symbol;Acc:VGNC:75117]                                                           | 2.785340675 | 0.000518223 | 0.037552266 |
| ENSMMUG00000010797 | phosphatidylinositol glycan anchor biosynthesis class B [Source:VGNC Symbol;Acc:VGNC:75985]             | 1.187849006 | 3.37E-06    | 0.001604891 |
| ENSMMUG00000063378 |                                                                                                         | 0.762638711 | 0.000110642 | 0.015133111 |
| ENSMMUG00000052263 |                                                                                                         | 1.214908762 | 2.28E-05    | 0.005801396 |
| ENSMMUG00000006457 | Rho guanine nucleotide exchange factor 40 [Source:VGNC Symbol;Acc:VGNC:69907]                           | 2.331467638 | 0.000164174 | 0.019316029 |
| ENSMMUG00000015000 | SPT16 homolog, facilitates chromatin remodeling subunit [Source:VGNC Symbol;Acc:VGNC:78054]             | 1.575724432 | 8.66E-05    | 0.014363391 |
| ENSMMUG00000012452 | transglutaminase 1 [Source:NCBI gene;Acc:715854]                                                        | -3.78232951 | 0.000474324 | 0.035936831 |
| ENSMMUG00000011779 | HEAT repeat containing 5A [Source:VGNC Symbol;Acc:VGNC:84347]                                           | 0.962324861 | 8.91E-06    | 0.0032482   |
| ENSMMUG00000062649 |                                                                                                         | 0.824320429 | 0.000346653 | 0.030190734 |

|                    |                                                                                                  |             |             |             |
|--------------------|--------------------------------------------------------------------------------------------------|-------------|-------------|-------------|
| ENSMMUG0000004748  | zinc finger and BTB domain containing 1 [Source:VGNC Symbol;Acc:VGNC:79238]                      | 1.149055025 | 0.000344798 | 0.030190734 |
| ENSMMUG00000012894 | NHS actin remodeling regulator [Source:VGNC Symbol;Acc:VGNC:75348]                               | 3.126546373 | 8.01E-07    | 0.000515582 |
| ENSMMUG00000049267 |                                                                                                  | 3.627854985 | 3.23E-05    | 0.007098751 |
| ENSMMUG00000003049 | testis expressed 11 [Source:VGNC Symbol;Acc:VGNC:78316]                                          | 2.051749441 | 2.71E-05    | 0.006579148 |
| ENSMMUG00000009622 | glypican 3 [Source:VGNC Symbol;Acc:VGNC:73117]                                                   | 2.096837976 | 2.18E-05    | 0.005678453 |
| ENSMMUG00000008867 | exoribonuclease 1 [Source:VGNC Symbol;Acc:VGNC:72324]                                            | -3.0126822  | 6.92E-06    | 0.002762249 |
| ENSMMUG00000054357 |                                                                                                  | 4.149634226 | 0.000717746 | 0.047027387 |
| ENSMMUG00000054755 | transmembrane protein 65 [Source:NCBI gene;Acc:705727]                                           | 1.969273741 | 0.00068423  | 0.045679585 |
| ENSMMUG00000059732 |                                                                                                  | 2.212349998 | 0.000269434 | 0.026801249 |
| ENSMMUG00000060115 |                                                                                                  | -0.70024931 | 0.000104292 | 0.015015247 |
| ENSMMUG00000016902 | catenin alpha 3 [Source:VGNC Symbol;Acc:VGNC:82131]                                              | 1.016249282 | 5.19E-06    | 0.002271018 |
| ENSMMUG00000007982 | structural maintenance of chromosomes 3 [Source:VGNC Symbol;Acc:VGNC:77769]                      | 2.280672691 | 0.000160367 | 0.019073229 |
| ENSMMUG00000019883 | RNA binding motif protein 20 [Source:NCBI gene;Acc:698677]                                       | 2.326587204 | 9.97E-05    | 0.01492606  |
| ENSMMUG00000017204 | programmed cell death 4 [Source:VGNC Symbol;Acc:VGNC:75794]                                      | 3.395020921 | 1.41E-05    | 0.004293315 |
| ENSMMUG00000016983 | acrosin binding protein [Source:VGNC Symbol;Acc:VGNC:69445]                                      | 1.209147182 | 1.53E-05    | 0.004519793 |
| ENSMMUG00000056014 | potassium inwardly rectifying channel subfamily J member 8 [Source:NCBI gene;Acc:706369]         | 2.076843638 | 0.000506812 | 0.036970252 |
| ENSMMUG00000001357 | tetraspanin 11 [Source:VGNC Symbol;Acc:VGNC:79882]                                               | 0.903750193 | 0.000122301 | 0.015988885 |
| ENSMMUG00000014484 | zinc finger protein 641 [Source:NCBI gene;Acc:708246]                                            | 1.977877619 | 5.11E-09    | 6.98E-06    |
| ENSMMUG00000006529 | acid sensing ion channel subunit 1 [Source:VGNC Symbol;Acc:VGNC:70035]                           | -1.40336575 | 0.000348893 | 0.030190734 |
| ENSMMUG00000022922 | nuclear receptor subfamily 4 group A member 1 [Source:VGNC Symbol;Acc:VGNC:75517]                | 0.536417557 | 0.000318075 | 0.029494755 |
| ENSMMUG00000055610 | homeobox C4 [Source:NCBI gene;Acc:100430434]                                                     | 1.650791501 | 0.000489518 | 0.036437427 |
| ENSMMUG00000011650 | dual specificity tyrosine phosphorylation regulated kinase 2 [Source:VGNC Symbol;Acc:VGNC:72018] | 1.715832224 | 0.000297307 | 0.028288072 |
| ENSMMUG00000021564 | lysine demethylase 2B [Source:VGNC Symbol;Acc:VGNC:81425]                                        | 2.637819794 | 3.44E-05    | 0.007098751 |
| ENSMMUG00000059782 |                                                                                                  | 3.021181862 | 1.84E-05    | 0.005168888 |
| ENSMMUG00000020926 | syntaxin 2 [Source:VGNC Symbol;Acc:VGNC:78259]                                                   | 3.182035252 | 9.89E-05    | 0.01492606  |
| ENSMMUG00000006528 | Rho GTPase activating protein 15 [Source:VGNC Symbol;Acc:VGNC:69874]                             | 0.649935058 | 1.27E-05    | 0.003963861 |
| ENSMMUG00000002678 | integrin subunit beta 6 [Source:VGNC Symbol;Acc:VGNC:73789]                                      | 1.287153651 | 0.000449504 | 0.034882763 |
| ENSMMUG00000008384 | solute carrier family 4 member 10 [Source:VGNC Symbol;Acc:VGNC:77695]                            | 1.885459502 | 0.000766245 | 0.049030713 |
| ENSMMUG00000054462 |                                                                                                  | 0.887914187 | 0.000424367 | 0.033893593 |
| ENSMMUG00000016077 | isocitrate dehydrogenase (NADP(+)) 1 [Source:NCBI gene;Acc:710019]                               | 2.970510391 | 5.10E-06    | 0.002271018 |

|                     |                                                                                               |   |             |             |             |
|---------------------|-----------------------------------------------------------------------------------------------|---|-------------|-------------|-------------|
| ENSMMUG00000017524  | phosphoinositide kinase, FYVE-type zinc finger containing [Source:VGNC Symbol;Acc:VGNC:75854] | - | 2.971809731 | 7.41E-12    | 2.03E-08    |
| ENSMMUG00000005295  | parathyroid hormone 2 receptor [Source:VGNC Symbol;Acc:VGNC:76592]                            | - | 3.243895173 | 0.000276781 | 0.026801249 |
| ENSMMUG000000057640 | plakophilin-3-like [Source:NCBI gene;Acc:114669833]                                           | - | 2.176529001 | 0.000383587 | 0.03155799  |
| ENSMMUG00000017810  | structure specific recognition protein 1 [Source:VGNC Symbol;Acc:VGNC:77891]                  | - | 1.123820765 | 0.000498658 | 0.036619568 |
| ENSMMUG000000050864 |                                                                                               | - | 1.584748982 | 1.93E-05    | 0.005282795 |
| ENSMMUG000000061815 |                                                                                               | - | 1.743974661 | 3.14E-09    | 4.90E-06    |
| ENSMMUG000000053898 | chromosome 14 C11orf1 homolog [Source:NCBI gene;Acc:100430882]                                | - | 1.66551096  | 0.000108218 | 0.01502534  |
| ENSMMUG00000007628  | cell adhesion associated, oncogene regulated [Source:VGNC Symbol;Acc:VGNC:70961]              | - | 2.051290983 | 0.000102308 | 0.01492606  |
| ENSMMUG00000002250  | beta-1,3-glucuronyltransferase 1 [Source:VGNC Symbol;Acc:VGNC:70207]                          | - | 3.890076963 | 5.53E-05    | 0.010809378 |
| ENSMMUG00000019357  | elongator complex protein 1 [Source:VGNC Symbol;Acc:VGNC:72257]                               | - | 1.009412387 | 1.75E-06    | 0.000956245 |
| ENSMMUG00000019355  | actin like 7A [Source:VGNC Symbol;Acc:VGNC:69417]                                             | - | 1.819890015 | 0.000185705 | 0.021166523 |
| ENSMMUG00000019354  | actin like 7B [Source:VGNC Symbol;Acc:VGNC:69421]                                             | - | 2.676647327 | 7.50E-07    | 0.000512934 |
| ENSMMUG000000058311 |                                                                                               | - | 2.128788248 | 0.000626844 | 0.043517807 |
| ENSMMUG00000000802  | regulatory factor X3 [Source:VGNC Symbol;Acc:VGNC:76908]                                      | - | 3.397269697 | 9.71E-05    | 0.01492606  |
| ENSMMUG00000000291  | leucine rich repeat transmembrane neuronal 1 [Source:VGNC Symbol;Acc:VGNC:74315]              | - | 1.015352518 | 0.000440661 | 0.034688593 |
| ENSMMUG00000007003  | polyribonucleotide nucleotidyltransferase 1 [Source:VGNC Symbol;Acc:VGNC:76095]               | - | 6.332494804 | 2.01E-07    | 0.000199726 |
| ENSMMUG00000007001  | protein phosphatase 4 regulatory subunit 3B [Source:VGNC Symbol;Acc:VGNC:76342]               | - | 5.599090681 | 6.91E-05    | 0.01239673  |
| ENSMMUG000000051814 |                                                                                               | - | 1.098278497 | 0.000122744 | 0.015988885 |
| ENSMMUG00000016262  | tetratricopeptide repeat domain 38 [Source:VGNC Symbol;Acc:VGNC:79574]                        | - | 1.425461212 | 0.000108481 | 0.01502534  |
| ENSMMUG00000023007  | RIB43A domain with coiled-coils 2 [Source:VGNC Symbol;Acc:VGNC:76726]                         | - | 0.84746178  | 0.000671815 | 0.045376517 |
| ENSMMUG000000056387 | transcription factor 15 [Source:NCBI gene;Acc:716916]                                         | - | 2.206352706 | 3.09E-06    | 0.001536576 |
| ENSMMUG000000051201 | zinc finger SWIM-type containing 3 [Source:NCBI gene;Acc:708804]                              | - | 0.895236777 | 0.000192112 | 0.021605388 |
| ENSMMUG000000009960 | cathepsin A [Source:VGNC Symbol;Acc:VGNC:71617]                                               | - | 1.18693474  | 0.00037436  | 0.031032143 |
| ENSMMUG00000018846  | ZFP64 zinc finger protein [Source:VGNC Symbol;Acc:VGNC:78994]                                 | - | 0.611336061 | 0.000406941 | 0.032983359 |
| ENSMMUG00000007200  | NEDD4 binding protein 2 like 2 [Source:VGNC Symbol;Acc:VGNC:75031]                            | - | 1.475200175 | 0.000178907 | 0.020606328 |
| ENSMMUG00000016791  | doublecortin like kinase 1 [Source:VGNC Symbol;Acc:VGNC:71745]                                | - | 1.147802774 | 0.0001141   | 0.01522537  |
| ENSMMUG00000002330  | ecto-NOX disulfide-thiol exchanger 1 [Source:VGNC Symbol;Acc:VGNC:72110]                      | - | 1.966190426 | 0.000221339 | 0.023744    |
| ENSMMUG000000055924 |                                                                                               | - | 3.238648704 | 0.00034741  | 0.030190734 |
| ENSMMUG000000030389 |                                                                                               | - | 1.708429056 | 1.08E-05    | 0.003661513 |
| ENSMMUG000000062583 | olfactory receptor 1A1 [Source:NCBI gene;Acc:721403]                                          | - | 1.287894735 | 0.000112072 | 0.015139464 |
| ENSMMUG000000055048 |                                                                                               | - | 1.581453141 | 3.20E-07    | 0.000251862 |
| ENSMMUG000000055290 | netrin 1 [Source:NCBI gene;Acc:717645]                                                        | - | 1.202603103 | 3.12E-05    | 0.007098751 |

|                    |                                                                           |                  |                  |             |
|--------------------|---------------------------------------------------------------------------|------------------|------------------|-------------|
| ENSMMUG00000021091 | COP9 signalosome subunit 3 [Source:VGNC<br>Symbol;Acc:VGNC:71316]         | -<br>2.496216346 | -<br>4.23E-05    | 0.008419647 |
| ENSMMUG00000008540 | ring finger protein 112 [Source:VGNC<br>Symbol;Acc:VGNC:76724]            | -<br>1.660908983 | -<br>0.000153696 | 0.018685977 |
| ENSMMUG00000012523 | flotillin 2 [Source:NCBI gene;Acc:114669752]                              | 1.553798071      | 9.58E-05         | 0.01492606  |
| ENSMMUG00000021553 | dehydrogenase/reductase 13 [Source:VGNC<br>Symbol;Acc:VGNC:81387]         | 1.693550635      | 2.11E-05         | 0.005623017 |
| ENSMMUG00000021554 | PHD finger protein 12 [Source:VGNC<br>Symbol;Acc:VGNC:75838]              | 1.468605561      | 0.00027574       | 0.026801249 |
| ENSMMUG00000017234 | leucine rich repeat containing 59 [Source:VGNC<br>Symbol;Acc:VGNC:81436]  | -<br>2.669212573 | -<br>4.98E-10    | 1.09E-06    |
| ENSMMUG00000060015 | axin 2 [Source:NCBI gene;Acc:718566]                                      | 0.877364559      | 8.01E-05         | 0.013563735 |
| ENSMMUG00000018967 | ubiquitin conjugating enzyme E2 O [Source:VGNC<br>Symbol;Acc:VGNC:79813]  | 1.713599371      | 0.000429218      | 0.034032666 |
| ENSMMUG00000017758 | mitogen-activated protein kinase 3 [Source:VGNC<br>Symbol;Acc:VGNC:74646] | 0.826677145      | 0.0007439        | 0.048164247 |
| ENSMMUG00000020580 | RPGRIP1 like [Source:VGNC Symbol;Acc:VGNC:77124]                          | 1.644667592      | 8.06E-05         | 0.013563735 |
| ENSMMUG00000008945 | zinc finger protein 407 [Source:NCBI gene;Acc:695303]                     | -<br>3.548006218 | -<br>3.22E-07    | 0.000251862 |
| ENSMMUG00000008942 | carosine dipeptidase 1 [Source:VGNC<br>Symbol;Acc:VGNC:71257]             | -<br>3.202220484 | -<br>1.71E-06    | 0.000956245 |
| ENSMMUG00000015702 | divergent protein kinase domain 1C [Source:NCBI<br>gene;Acc:699537]       | -<br>4.623643951 | -<br>0.000240566 | 0.025069263 |
| ENSMMUG00000020905 | chromosome 18 C18orf63 homolog [Source:VGNC<br>Symbol;Acc:VGNC:70465]     | -<br>2.703171959 | -<br>0.0006676   | 0.045371929 |
| ENSMMUG00000007816 | SMAD family member 2 [Source:VGNC<br>Symbol;Acc:VGNC:77810]               | -<br>1.469370254 | -<br>0.000147029 | 0.018281687 |
| ENSMMUG00000017246 | lipoxxygenase homology domains 1 [Source:VGNC<br>Symbol;Acc:VGNC:74368]   | -<br>1.186447702 | -<br>0.000159464 | 0.019073229 |
| ENSMMUG00000052277 | transthyretin [Source:NCBI gene;Acc:705943]                               | 2.501441232      | 0.000320904      | 0.029506998 |
| ENSMMUG00000049523 | ankyrin repeat domain 12 [Source:NCBI<br>gene;Acc:114673693]              | -<br>1.391652057 | -<br>0.000594344 | 0.041956877 |
| ENSMMUG00000028925 | HDGF like 2 [Source:NCBI gene;Acc:693476]                                 | 2.610463912      | 1.02E-05         | 0.003582661 |
| ENSMMUG00000016526 | solute carrier family 25 member 41 [Source:VGNC<br>Symbol;Acc:VGNC:77581] | -1.9309469       | 7.02E-05         | 0.01239673  |
| ENSMMUG00000016860 | zinc finger protein 490 [Source:NCBI gene;Acc:100426568]                  | 1.244240286      | 9.96E-05         | 0.01492606  |
| ENSMMUG00000018932 | adhesion G protein-coupled receptor E2 [Source:NCBI<br>gene;Acc:654420]   | 1.398276991      | 0.00057311       | 0.040720604 |
| ENSMMUG00000063342 |                                                                           | -<br>1.173922597 | -<br>0.000193505 | 0.021605388 |
| ENSMMUG00000060455 |                                                                           | -<br>2.832283211 | -<br>0.000228931 | 0.024086227 |

## B. Gender difference at baseline SD 1, SD 2 and SD 3

### Baseline

| Ensembl Gene ID     | Description                                                                                             | Log2(FC)    | p-value  | FDR         |
|---------------------|---------------------------------------------------------------------------------------------------------|-------------|----------|-------------|
| ENSMMUG00000048382  |                                                                                                         | 12.40050041 | 6.22E-09 | 4.12E-06    |
| ENSMMUG00000005663  | TATA-box binding protein associated factor 1 [Source:NCBI gene;Acc:698800]                              | 11.47570839 | 8.91E-29 | 2.76E-25    |
| ENSMMUG000000052170 |                                                                                                         | 8.645568873 | 2.52E-14 | 2.12E-11    |
| ENSMMUG00000003251  | X antigen family member 3 [Source:NCBI gene;Acc:698267]                                                 | 0.971707024 | 7.07E-05 | 0.032797505 |
| ENSMMUG00000000443  | arylsulfatase F [Source:VGNC Symbol;Acc:VGNC:81362]                                                     | 0.863165274 | 4.00E-05 | 0.019521922 |
| ENSMMUG000000049497 |                                                                                                         | 0.803836438 | 2.81E-05 | 0.015344826 |
| ENSMMUG000000056331 | cAMP-dependent protein kinase catalytic subunit PRKX [Source:NCBI gene;Acc:106992273]                   | 3.061226405 | 1.93E-40 | 8.98E-37    |
| ENSMMUG000000061238 |                                                                                                         | 3.931793344 | 9.27E-05 | 0.03913001  |
| ENSMMUG000000043715 | eukaryotic translation initiation factor 1A, Y-linked [Source:NCBI gene;Acc:100270695]                  | 5.554280245 | 1.05E-17 | 1.21E-14    |
| ENSMMUG000000049458 |                                                                                                         | 6.139302339 | 8.80E-05 | 0.038890143 |
| ENSMMUG000000011380 | consortin, connexin sorting protein [Source:VGNC Symbol;Acc:VGNC:71355]                                 | 6.592307293 | 3.52E-05 | 0.018162707 |
| ENSMMUG000000061378 |                                                                                                         | 6.869468809 | 7.42E-06 | 0.004305617 |
| ENSMMUG000000046495 | transducin beta like 1 Y-linked [Source:NCBI gene;Acc:100270702]                                        | 8.49958099  | 4.58E-08 | 2.83E-05    |
| ENSMMUG000000045017 | lysine demethylase 5D [Source:NCBI gene;Acc:100270697]                                                  | 8.973945749 | 4.12E-18 | 5.46E-15    |
| ENSMMUG000000038331 | ribosomal protein S4 Y-linked 1 [Source:NCBI gene;Acc:100270700]                                        | 10.32876473 | 1.50E-52 | 1.39E-48    |
| ENSMMUG000000054467 |                                                                                                         | 10.8029957  | 1.22E-13 | 8.69E-11    |
| ENSMMUG000000046378 | zinc finger protein Y-linked [Source:NCBI gene;Acc:100270705]                                           | 10.99460396 | 7.93E-16 | 8.18E-13    |
| ENSMMUG000000038182 | ubiquitously transcribed tetratricopeptide repeat containing, Y-linked [Source:NCBI gene;Acc:100270704] | 11.01699709 | 1.15E-26 | 2.66E-23    |
| ENSMMUG000000049104 | chromosome Y open reading frame 15A [Source:NCBI gene;Acc:100270688]                                    | 11.0911694  | 3.00E-14 | 2.32E-11    |
| ENSMMUG000000038824 | ribosomal protein S4, Y-linked 2 [Source:NCBI gene;Acc:100270701]                                       | 11.46762036 | 4.04E-15 | 3.75E-12    |
| ENSMMUG000000045991 | ubiquitin specific peptidase 9 Y-linked [Source:NCBI gene;Acc:100270703]                                | 12.24304044 | 2.66E-19 | 4.94E-16    |
| ENSMMUG000000043966 | DEAD-box helicase 3 Y-linked [Source:NCBI gene;Acc:100270694]                                           | 13.04159924 | 3.45E-19 | 5.34E-16    |



## SD 1

| Ensembl Gene ID     | Description                                                                                                  | Log2(FC)    | p-value  | FDR         |
|---------------------|--------------------------------------------------------------------------------------------------------------|-------------|----------|-------------|
| ENSMMUG00000048382  |                                                                                                              | 12.72612268 | 5.91E-42 | 4.05E-38    |
| ENSMMUG00000005663  | TATA-box binding protein associated factor 1<br>[Source:NCBI gene;Acc:698800]                                | 10.12731103 | 1.52E-26 | 4.16E-23    |
| ENSMMUG000000052170 |                                                                                                              | 7.126708497 | 6.10E-10 | 5.98E-07    |
| ENSMMUG000000055976 | CD99 antigen [Source:NCBI gene;Acc:106995376]<br>neuronal pentraxin 2 [Source:VGNC<br>Symbol;Acc:VGNC:75392] | 1.079554007 | 4.91E-06 | 0.003957156 |
| ENSMMUG000000011970 |                                                                                                              | 1.082827576 | 7.82E-05 | 0.044727907 |
| ENSMMUG000000063639 |                                                                                                              | 1.10979586  | 4.66E-05 | 0.030455269 |
| ENSMMUG000000062784 |                                                                                                              | 1.422861322 | 7.83E-05 | 0.044727907 |
| ENSMMUG00000006066  | phosphatidylcholine transfer protein [Source:VGNC<br>Symbol;Acc:VGNC:75789]                                  | 1.473638892 | 2.57E-05 | 0.018554447 |
| ENSMMUG000000010647 | inducible T cell costimulator ligand [Source:NCBI<br>gene;Acc:722191]                                        | 1.508937615 | 7.23E-05 | 0.044727907 |
| ENSMMUG000000061536 |                                                                                                              | 2.170144031 | 6.75E-06 | 0.00514005  |
| ENSMMUG000000056331 | cAMP-dependent protein kinase catalytic subunit PRKX<br>[Source:NCBI gene;Acc:106992273]                     | 3.201942881 | 4.14E-14 | 4.74E-11    |
| ENSMMUG000000049458 |                                                                                                              | 5.556814465 | 3.37E-05 | 0.023080342 |
| ENSMMUG000000061378 |                                                                                                              | 6.52454562  | 4.71E-07 | 0.000403565 |
| ENSMMUG000000043715 | eukaryotic translation initiation factor 1A, Y-linked<br>[Source:NCBI gene;Acc:100270695]                    | 6.540783183 | 1.82E-08 | 1.66E-05    |
| ENSMMUG000000049104 | chromosome Y open reading frame 15A [Source:NCBI<br>gene;Acc:100270688]                                      | 9.224300224 | 3.40E-13 | 3.59E-10    |
| ENSMMUG000000038824 | ribosomal protein S4, Y-linked 2 [Source:NCBI<br>gene;Acc:100270701]                                         | 10.4149722  | 2.89E-17 | 3.60E-14    |
| ENSMMUG000000054467 |                                                                                                              | 10.45119843 | 2.55E-18 | 3.50E-15    |
| ENSMMUG000000045991 | ubiquitin specific peptidase 9 Y-linked [Source:NCBI<br>gene;Acc:100270703]                                  | 10.78383632 | 3.53E-27 | 1.21E-23    |
| ENSMMUG000000038182 | ubiquitously transcribed tetratricopeptide repeat<br>containing, Y-linked [Source:NCBI gene;Acc:100270704]   | 10.79383861 | 4.36E-36 | 1.99E-32    |
| ENSMMUG000000038331 | ribosomal protein S4 Y-linked 1 [Source:NCBI<br>gene;Acc:100270700]                                          | 10.82864482 | 1.36E-44 | 1.86E-40    |
| ENSMMUG000000045017 | lysine demethylase 5D [Source:NCBI<br>gene;Acc:100270697]                                                    | 10.85105686 | 1.30E-19 | 1.99E-16    |
| ENSMMUG000000046378 | zinc finger protein Y-linked [Source:NCBI<br>gene;Acc:100270705]                                             | 11.08371724 | 6.55E-24 | 1.28E-20    |
| ENSMMUG000000046495 | transducin beta like 1 Y-linked [Source:NCBI<br>gene;Acc:100270702]                                          | 11.4173515  | 1.53E-20 | 2.63E-17    |
| ENSMMUG000000043966 | DEAD-box helicase 3 Y-linked [Source:NCBI<br>gene;Acc:100270694]                                             | 12.23148136 | 2.76E-24 | 6.30E-21    |

## SD 2

| Ensembl Gene ID     | Description                                                                                                     | Log2(FC)    | p-value     | FDR         |
|---------------------|-----------------------------------------------------------------------------------------------------------------|-------------|-------------|-------------|
| ENSMMUG00000048382  |                                                                                                                 | 11.73134815 | 1.34E-29    | 1.36E-26    |
| ENSMMUG00000005663  | TATA-box binding protein associated factor 1 [Source:NCBI gene;Acc:698800]                                      | 10.41796533 | 1.34E-23    | 6.79E-21    |
| ENSMMUG00000014715  | fragile site, folic acid type, rare, fra(10)(q23.3) or fra(10)(q24.2) candidate 1 [Source:NCBI gene;Acc:700389] | 1.690594055 | 8.88E-05    | 0.00681255  |
| ENSMMUG00000017287  | PAT1 homolog 1, processing body mRNA decay factor [Source:VGNC Symbol;Acc:VGNC:75684]                           | 1.659145662 | 4.50E-06    | 0.000702787 |
| ENSMMUG00000013832  | ATP binding cassette subfamily B member 11 [Source:VGNC Symbol;Acc:VGNC:81339]                                  | 1.402629288 | 4.07E-05    | 0.003671844 |
| ENSMMUG00000008923  | Thy-1 cell surface antigen [Source:VGNC Symbol;Acc:VGNC:78352]                                                  | 1.398134173 | 3.51E-05    | 0.003605558 |
| ENSMMUG000000061424 | ventral anterior homeobox 2 [Source:NCBI gene;Acc:703531]                                                       | 1.309298662 | 0.00023321  | 0.013539526 |
| ENSMMUG000000057361 | Metazoan signal recognition particle RNA [Source:RFAM;Acc:RF00017]                                              | -1.26091157 | 2.25E-06    | 0.000422954 |
| ENSMMUG000000054942 |                                                                                                                 | 1.257318217 | 0.001314802 | 0.042062673 |
| ENSMMUG000000059188 |                                                                                                                 | 1.255538887 | 0.000133577 | 0.009359619 |
| ENSMMUG000000022153 | solute carrier family 25 member 36 [Source:VGNC Symbol;Acc:VGNC:84079]                                          | -1.22766829 | 6.15E-05    | 0.004902027 |
| ENSMMUG000000049678 |                                                                                                                 | 1.197169852 | 8.72E-06    | 0.001181862 |
| ENSMMUG00000003042  | VPS53 subunit of GARP complex [Source:VGNC Symbol;Acc:VGNC:79522]                                               | 1.157008237 | 0.000931032 | 0.033190483 |
| ENSMMUG000000050465 | ZFP42 zinc finger protein [Source:NCBI gene;Acc:707621]                                                         | 1.154996711 | 0.001343273 | 0.042318293 |
| ENSMMUG00000008031  | zinc finger and BTB domain containing 17 [Source:VGNC Symbol;Acc:VGNC:78849]                                    | 1.113424049 | 4.78E-05    | 0.004136455 |
| ENSMMUG00000001350  | HERPUD family member 2 [Source:VGNC Symbol;Acc:VGNC:73216]                                                      | 1.041241187 | 0.001324809 | 0.042062673 |
| ENSMMUG00000001725  | solute carrier family 35 member A4 [Source:VGNC Symbol;Acc:VGNC:77532]                                          | 1.036748234 | 0.000566337 | 0.024948991 |
| ENSMMUG00000014508  | potassium channel tetramerization domain containing 20 [Source:VGNC Symbol;Acc:VGNC:73872]                      | 1.014107024 | 0.000545635 | 0.02476755  |
| ENSMMUG000000020799 | BH3 interacting domain death agonist [Source:VGNC Symbol;Acc:VGNC:70250]                                        | 1.000135184 | 1.52E-05    | 0.001877533 |
| ENSMMUG000000021428 | lipocalin 12 [Source:VGNC Symbol;Acc:VGNC:74143]                                                                | 0.969862718 | 0.001276243 | 0.042062673 |
| ENSMMUG000000045093 | cyclin B3 [Source:NCBI gene;Acc:694534]                                                                         | -0.9599185  | 9.83E-07    | 0.000199718 |
| ENSMMUG000000023370 | DDB1 and CUL4 associated factor 17 [Source:VGNC Symbol;Acc:VGNC:71709]                                          | 0.955887406 | 0.00069232  | 0.027584197 |
| ENSMMUG00000014868  | OCIA domain containing 1 [Source:VGNC Symbol;Acc:VGNC:75409]                                                    | 0.951913041 | 0.00141247  | 0.043486956 |
| ENSMMUG00000007538  | transient receptor potential cation channel subfamily M member 4 [Source:VGNC Symbol;Acc:VGNC:79105]            | 0.947282582 | 0.000244462 | 0.013992863 |
| ENSMMUG000000049548 |                                                                                                                 | -0.94250456 | 0.001506802 | 0.044374236 |
| ENSMMUG000000059182 |                                                                                                                 | 0.930507413 | 0.000548494 | 0.02476755  |
| ENSMMUG00000003317  | lysine demethylase 6A [Source:VGNC Symbol;Acc:VGNC:73820]                                                       | 0.925756819 | 1.34E-05    | 0.001706925 |
| ENSMMUG000000059436 | interleukin 10 receptor subunit alpha [Source:NCBI gene;Acc:704383]                                             | 0.913134161 | 0.000269465 | 0.014798712 |

|                    |                                                                                                    |   |             |             |             |
|--------------------|----------------------------------------------------------------------------------------------------|---|-------------|-------------|-------------|
| ENSMMUG00000062863 |                                                                                                    | - | 0.894367063 | 0.001450398 | 0.04348889  |
| ENSMMUG00000012937 | proline rich 12 [Source:NCBI gene;Acc:719344]                                                      | - | 0.888806613 | 0.000685564 | 0.027584197 |
| ENSMMUG00000000695 | transmembrane protein 245 [Source:VGNC<br>Symbol;Acc:VGNC:78933]                                   | - | 0.886562539 | 0.000570929 | 0.024948991 |
| ENSMMUG00000007366 |                                                                                                    | - | 0.882731137 | 0.000177769 | 0.011232376 |
| ENSMMUG00000009038 | titin [Source:NCBI gene;Acc:703527]                                                                | - | 0.875850201 | 0.001061887 | 0.035962579 |
| ENSMMUG00000019703 | RUN and FYVE domain containing 2 [Source:VGNC<br>Symbol;Acc:VGNC:77057]                            | - | 0.858835056 | 7.77E-07    | 0.000166258 |
| ENSMMUG00000050608 |                                                                                                    | - | 0.845647822 | 0.00145929  | 0.04348889  |
| ENSMMUG00000007201 | PDS5 cohesin associated factor B [Source:VGNC<br>Symbol;Acc:VGNC:75835]                            | - | 0.835566367 | 0.000535739 | 0.024741393 |
| ENSMMUG00000008338 | Wnt family member 9A [Source:VGNC<br>Symbol;Acc:VGNC:78796]                                        | - | -0.82992511 | 0.000132466 | 0.009359619 |
| ENSMMUG00000056840 |                                                                                                    | - | 0.816772139 | 0.001303617 | 0.042062673 |
| ENSMMUG00000003267 | zinc finger protein 362 [Source:NCBI gene;Acc:710013]                                              | - | 0.801912897 | 2.53E-05    | 0.002936506 |
| ENSMMUG00000007379 | phosphatidylinositol 3,4,5-trisphosphate 3-phosphatase<br>TPTE2-like [Source:NCBI gene;Acc:694255] | - | 0.793849892 | 0.000127854 | 0.009278534 |
| ENSMMUG00000020861 | EvC ciliary complex subunit 1 [Source:VGNC<br>Symbol;Acc:VGNC:72445]                               | - | 0.790765904 | 2.47E-05    | 0.002936506 |
| ENSMMUG00000003697 | inositol polyphosphate-4-phosphatase type II B<br>[Source:VGNC Symbol;Acc:VGNC:73748]              | - | 0.783647639 | 0.000673973 | 0.027584197 |
| ENSMMUG00000017561 | solute carrier family 43 member 2 [Source:VGNC<br>Symbol;Acc:VGNC:77554]                           | - | 0.774608471 | 0.00088481  | 0.031821822 |
| ENSMMUG00000058587 | family with sequence similarity 131 member C<br>[Source:NCBI gene;Acc:703604]                      | - | 0.769526708 | 0.000479447 | 0.022923194 |
| ENSMMUG00000065025 |                                                                                                    | - | 0.759846363 | 0.000307176 | 0.016212522 |
| ENSMMUG00000052586 |                                                                                                    | - | 0.754885073 | 4.54E-05    | 0.004009339 |
| ENSMMUG00000021988 | N-alpha-acetyltransferase 11, NatA catalytic subunit<br>[Source:NCBI gene;Acc:696758]              | - | 0.742224604 | 0.000775984 | 0.029205453 |
| ENSMMUG00000046478 | WASH complex subunit 3 [Source:NCBI gene;Acc:697824]                                               | - | 0.737858275 | 0.000413462 | 0.020744557 |
| ENSMMUG00000055741 |                                                                                                    | - | 0.737077739 | 0.000631892 | 0.026204156 |
| ENSMMUG00000007200 | NEDD4 binding protein 2 like 2 [Source:VGNC<br>Symbol;Acc:VGNC:75031]                              | - | -0.7322892  | 0.001558803 | 0.045575349 |
| ENSMMUG00000016361 | apolipoprotein O [Source:NCBI gene;Acc:698137]                                                     | - | 0.729953881 | 0.000684342 | 0.027584197 |
| ENSMMUG00000001848 | sprouty RTK signaling antagonist 1 [Source:VGNC<br>Symbol;Acc:VGNC:77867]                          | - | 0.725219038 | 0.000776129 | 0.029205453 |
| ENSMMUG00000060761 |                                                                                                    | - | 0.724121229 | 0.000397065 | 0.020170922 |
| ENSMMUG00000002923 | colony stimulating factor 3 [Source:VGNC<br>Symbol;Acc:VGNC:71520]                                 | - | 0.724005944 | 0.001451656 | 0.04348889  |
| ENSMMUG00000030532 | solute carrier family 25 member 16 [Source:NCBI<br>gene;Acc:694145]                                | - | -0.72211338 | 0.0001216   | 0.008985165 |
| ENSMMUG00000018274 | FERM domain containing 6 [Source:VGNC<br>Symbol;Acc:VGNC:72747]                                    | - | 0.710363534 | 0.000498974 | 0.023579444 |

|                     |                                                                                                                   |   |             |             |             |
|---------------------|-------------------------------------------------------------------------------------------------------------------|---|-------------|-------------|-------------|
| ENSMMUG00000016401  | SGT1 homolog, MIS12 kinetochore complex assembly cochaperone [Source:NCBI gene;Acc:694046]                        | - | 0.703454447 | 5.40E-05    | 0.004568262 |
| ENSMMUG00000016686  | BUB1 mitotic checkpoint serine/threonine kinase B [Source:VGNC Symbol;Acc:VGNC:70293]                             | - | 0.701789405 | 0.000824772 | 0.030751131 |
| ENSMMUG00000016797  | tubulin gamma 1 [Source:NCBI gene;Acc:710756]                                                                     | - | 0.691326322 | 0.000999259 | 0.034415147 |
| ENSMMUG00000010336  | DOP1 leucine zipper like protein B [Source:VGNC Symbol;Acc:VGNC:71832]                                            | - | 0.689682922 | 5.26E-06    | 0.000791338 |
| ENSMMUG00000019089  | centromere protein E [Source:VGNC Symbol;Acc:VGNC:71008]                                                          | - | 0.688023512 | 2.78E-05    | 0.003056226 |
| ENSMMUG00000003298  | ataxin 2 like [Source:VGNC Symbol;Acc:VGNC:70159]                                                                 | - | 0.670541742 | 0.001030125 | 0.035180072 |
| ENSMMUG00000004273  | dedicator of cytokinesis 3 [Source:VGNC Symbol;Acc:VGNC:71967]                                                    | - | 0.666688091 | 3.64E-05    | 0.003605558 |
| ENSMMUG00000015097  | tripartite motif containing 62 [Source:VGNC Symbol;Acc:VGNC:79513]                                                | - | 0.663818417 | 0.000328437 | 0.017112431 |
| ENSMMUG00000022996  | HCLS1 binding protein 3 [Source:VGNC Symbol;Acc:VGNC:82158]                                                       | - | 0.659500873 | 3.90E-05    | 0.003605558 |
| ENSMMUG00000000302  | WD repeat and HMG-box DNA binding protein 1 [Source:VGNC Symbol;Acc:VGNC:79376]                                   | - | 0.656767746 | 0.000283546 | 0.015162249 |
| ENSMMUG00000018144  | C2 calcium-dependent domain-containing protein 6 [Source:NCBI gene;Acc:702140]                                    | - | 0.634309558 | 0.001466038 | 0.04348889  |
| ENSMMUG00000006180  | tetratricopeptide repeat, ankyrin repeat and coiled-coil containing 1 [Source:VGNC Symbol;Acc:VGNC:78238]         | - | 0.630737435 | 0.001150021 | 0.038460931 |
| ENSMMUG00000006182  | bromodomain adjacent to zinc finger domain 2B [Source:NCBI gene;Acc:702780]                                       | - | -0.62913637 | 3.32E-05    | 0.003555964 |
| ENSMMUG00000022741  | WAP, follistatin/kazal, immunoglobulin, kunitz and netrin domain containing 2 [Source:VGNC Symbol;Acc:VGNC:79900] | - | 0.608836171 | 9.47E-05    | 0.007128621 |
| ENSMMUG00000015108  | SV2 related protein [Source:VGNC Symbol;Acc:VGNC:78208]                                                           | - | 0.585580478 | 0.001733155 | 0.049954203 |
| ENSMMUG00000014431  | adaptor related protein complex 3 subunit mu 2 [Source:VGNC Symbol;Acc:VGNC:69971]                                | - | -0.57522291 | 0.000578156 | 0.024996037 |
| ENSMMUG00000000863  | dynein axonemal assembly factor 4 [Source:VGNC Symbol;Acc:VGNC:71881]                                             | - | 0.567343748 | 0.000253657 | 0.014121425 |
| ENSMMUG00000019261  | collagen type XII alpha 1 chain [Source:VGNC Symbol;Acc:VGNC:71291]                                               | - | 0.562890586 | 0.00044646  | 0.02160017  |
| ENSMMUG000000058187 |                                                                                                                   | - | 0.557491529 | 0.000227378 | 0.013392261 |
| ENSMMUG00000011061  | ankyrin repeat domain 31 [Source:VGNC Symbol;Acc:VGNC:84277]                                                      | - | 0.526355996 | 0.001306838 | 0.042062673 |
| ENSMMUG00000001739  | ATPase sarcoplasmic/endoplasmic reticulum Ca <sup>2+</sup> transporting 2 [Source:VGNC Symbol;Acc:VGNC:70178]     | - | 0.525259105 | 6.37E-05    | 0.004980371 |
| ENSMMUG00000012469  | KIAA2013 [Source:VGNC Symbol;Acc:VGNC:73918]                                                                      | - | 0.524168692 | 0.001408327 | 0.043486956 |
| ENSMMUG00000010428  | slit guidance ligand 1 [Source:VGNC Symbol;Acc:VGNC:77643]                                                        | - | 0.448467481 | 0.000996451 | 0.034415147 |
| ENSMMUG000000064147 | lymphocyte antigen 6 family member L [Source:NCBI gene;Acc:106999990]                                             | - | 0.536461856 | 0.001400082 | 0.043486956 |
| ENSMMUG00000017707  | leucine rich repeat containing 8 VRAC subunit B [Source:VGNC Symbol;Acc:VGNC:81439]                               | - | 0.556648649 | 0.000849004 | 0.031084272 |
| ENSMMUG00000012020  | nuclear receptor coactivator 3 [Source:VGNC Symbol;Acc:VGNC:75147]                                                | - | 0.568527452 | 0.000709394 | 0.027990055 |
| ENSMMUG00000021474  | zinc finger protein 45 [Source:NCBI gene;Acc:712591]                                                              | - | 0.609518627 | 5.65E-05    | 0.00468291  |
| ENSMMUG00000013747  | secretory carrier membrane protein 4 [Source:VGNC Symbol;Acc:VGNC:77135]                                          | - | 0.646221301 | 0.001154585 | 0.038460931 |



|                    |                                                                                                    |             |             |             |
|--------------------|----------------------------------------------------------------------------------------------------|-------------|-------------|-------------|
| ENSMMUG00000017615 | zinc finger CCHC-type containing 14 [Source:VGNC Symbol;Acc:VGNC:79420]                            | 0.673088142 | 0.000587464 | 0.025131079 |
| ENSMMUG00000059543 | zinc finger protein 30 [Source:NCBI gene;Acc:718310]                                               | 0.673579018 | 0.000144715 | 0.009641365 |
| ENSMMUG00000023032 | intraflagellar transport 81 [Source:VGNC Symbol;Acc:VGNC:73389]                                    | 0.751332124 | 0.000201633 | 0.012230373 |
| ENSMMUG00000007551 | ribosomal protein L13a [Source:NCBI gene;Acc:574314]                                               | 0.764179278 | 0.001462608 | 0.04348889  |
| ENSMMUG00000014045 | protein tyrosine phosphatase non-receptor type 23 [Source:VGNC Symbol;Acc:VGNC:76477]              | 0.769313842 | 0.000422794 | 0.020954104 |
| ENSMMUG00000019891 | aldo-keto reductase family 1 member C15 [Source:NCBI gene;Acc:722485]                              | 0.779237323 | 0.000433812 | 0.021241117 |
| ENSMMUG00000011963 | vimentin type intermediate filament associated coiled-coil protein [Source:NCBI gene;Acc:697958]   | 0.792572746 | 7.12E-06    | 0.001033858 |
| ENSMMUG00000009960 | cathepsin A [Source:VGNC Symbol;Acc:VGNC:71617]                                                    | 0.804637474 | 9.98E-06    | 0.001308629 |
| ENSMMUG00000020047 | integrin subunit beta 3 binding protein [Source:VGNC Symbol;Acc:VGNC:73787]                        | 0.810186869 | 0.000873391 | 0.031691607 |
| ENSMMUG00000009615 | IMP U3 small nucleolar ribonucleoprotein 4 [Source:VGNC Symbol;Acc:VGNC:73689]                     | 0.816005368 | 0.000507124 | 0.023689123 |
| ENSMMUG00000046141 | defensin beta 123 [Source:NCBI gene;Acc:619504]                                                    | 0.829245275 | 0.00075787  | 0.029205453 |
| ENSMMUG00000013552 | scribble planar cell polarity protein [Source:HGNC Symbol;Acc:HGNC:30377]                          | 0.837718717 | 3.83E-05    | 0.003605558 |
| ENSMMUG00000058281 | ITPRIP like 2 [Source:NCBI gene;Acc:694060]                                                        | 0.897104656 | 0.000138698 | 0.009553689 |
| ENSMMUG00000064395 |                                                                                                    | 0.898878794 | 0.00027825  | 0.015077464 |
| ENSMMUG00000007570 | uveal autoantigen with coiled-coil domains and ankyrin repeats [Source:VGNC Symbol;Acc:VGNC:78995] | 0.916613344 | 0.000210857 | 0.012601807 |
| ENSMMUG00000022973 | gametogenetin [Source:VGNC Symbol;Acc:VGNC:72740]                                                  | 0.921894235 | 2.46E-06    | 0.000434623 |
| ENSMMUG00000002961 | G protein subunit alpha 11 [Source:VGNC Symbol;Acc:VGNC:73085]                                     | 0.928621656 | 3.86E-05    | 0.003605558 |
| ENSMMUG00000012486 | retinoic acid receptor alpha [Source:VGNC Symbol;Acc:VGNC:76662]                                   | 0.930461565 | 0.001695952 | 0.049231061 |
| ENSMMUG00000023291 | COPI coat complex subunit epsilon [Source:VGNC Symbol;Acc:VGNC:71314]                              | 0.931191172 | 0.000595687 | 0.025217429 |
| ENSMMUG00000061747 |                                                                                                    | 0.942734184 | 0.000248142 | 0.014006231 |
| ENSMMUG00000012007 | PH domain and leucine rich repeat protein phosphatase 2 [Source:VGNC Symbol;Acc:VGNC:81494]        | 0.96532815  | 0.000350173 | 0.018013985 |
| ENSMMUG00000004614 | potassium voltage-gated channel subfamily C member 4 [Source:VGNC Symbol;Acc:VGNC:73974]           | 0.9879738   | 0.000765849 | 0.029205453 |
| ENSMMUG00000031785 |                                                                                                    | 0.989846624 | 5.98E-05    | 0.004861153 |
| ENSMMUG00000015414 | family with sequence similarity 160 member B1 [Source:VGNC Symbol;Acc:VGNC:72403]                  | 1.056809399 | 0.001322065 | 0.042062673 |
| ENSMMUG00000061935 |                                                                                                    | 1.057343572 | 0.000982387 | 0.034415147 |
| ENSMMUG00000063639 |                                                                                                    | 1.064280232 | 0.000560375 | 0.024948991 |
| ENSMMUG00000011413 | acid sensing ion channel subunit 2 [Source:VGNC Symbol;Acc:VGNC:70241]                             | 1.096925961 | 3.24E-07    | 7.32E-05    |
| ENSMMUG00000019668 | armadillo repeat containing 6 [Source:VGNC Symbol;Acc:VGNC:69899]                                  | 1.175119272 | 0.00014365  | 0.009641365 |
| ENSMMUG00000017150 | mitochondrial antiviral signaling protein [Source:VGNC Symbol;Acc:VGNC:74609]                      | 1.218946813 | 0.000171038 | 0.011033314 |
| ENSMMUG00000021022 | deoxynucleotidyltransferase terminal interacting protein 1 [Source:VGNC Symbol;Acc:VGNC:71845]     | 1.234091822 | 2.65E-05    | 0.002986415 |
| ENSMMUG00000003238 | pregnancy zone protein [Source:NCBI gene;Acc:100430319]                                            | 1.244818629 | 0.000161139 | 0.01056239  |
| ENSMMUG00000051291 | Metazoan signal recognition particle RNA [Source:RFAM;Acc:RF00017]                                 | 1.281062765 | 0.000626051 | 0.026204156 |
| ENSMMUG00000051681 | retrotransposon Gag like 6 [Source:NCBI gene;Acc:712760]                                           | 1.322918549 | 8.47E-06    | 0.001181862 |
| ENSMMUG00000055976 | CD99 antigen [Source:NCBI gene;Acc:106995376]                                                      | 1.414516416 | 2.94E-06    | 0.000498225 |

|                    |                                                                                                         |             |             |             |
|--------------------|---------------------------------------------------------------------------------------------------------|-------------|-------------|-------------|
| ENSMMUG00000010647 | inducible T cell costimulator ligand [Source:NCBI gene;Acc:722191]                                      | 1.418964912 | 0.000833032 | 0.030776751 |
| ENSMMUG00000039671 | tetratricopeptide repeat domain 9C [Source:NCBI gene;Acc:718583]                                        | 1.436346887 | 1.03E-08    | 2.62E-06    |
| ENSMMUG00000056220 | follistatin like 3 [Source:NCBI gene;Acc:721100]                                                        | 1.533212181 | 0.000183457 | 0.011296513 |
| ENSMMUG00000064448 |                                                                                                         | 1.551175113 | 0.000179652 | 0.011232376 |
| ENSMMUG00000002652 | zinc finger MIZ-type containing 2 [Source:VGNC Symbol;Acc:VGNC:79350]                                   | 1.571739231 | 0.00097006  | 0.034281074 |
| ENSMMUG00000054447 | T-box transcription factor 22 [Source:NCBI gene;Acc:708338]                                             | 1.611825936 | 3.76E-05    | 0.003605558 |
| ENSMMUG00000052867 |                                                                                                         | 1.612217353 | 4.94E-08    | 1.18E-05    |
| ENSMMUG00000053541 |                                                                                                         | 1.655420904 | 0.00075514  | 0.029205453 |
| ENSMMUG00000006066 | phosphatidylcholine transfer protein [Source:VGNC Symbol;Acc:VGNC:75789]                                | 1.713215271 | 2.29E-06    | 0.000422954 |
| ENSMMUG00000013098 | aldo-keto reductase family 1 member B10 [Source:NCBI gene;Acc:713150]                                   | 1.771530793 | 4.38E-06    | 0.000702787 |
| ENSMMUG00000000590 | NPR3 like, GATOR1 complex subunit [Source:VGNC Symbol;Acc:VGNC:75173]                                   | 1.886115616 | 7.76E-11    | 2.10E-08    |
| ENSMMUG00000056331 | cAMP-dependent protein kinase catalytic subunit PRKX [Source:NCBI gene;Acc:106992273]                   | 3.780075866 | 1.31E-29    | 1.36E-26    |
| ENSMMUG00000043715 | eukaryotic translation initiation factor 1A, Y-linked [Source:NCBI gene;Acc:100270695]                  | 5.288162649 | 3.28E-22    | 1.48E-19    |
| ENSMMUG00000038824 | ribosomal protein S4, Y-linked 2 [Source:NCBI gene;Acc:100270701]                                       | 10.01837482 | 8.32E-18    | 2.82E-15    |
| ENSMMUG00000038182 | ubiquitously transcribed tetratricopeptide repeat containing, Y-linked [Source:NCBI gene;Acc:100270704] | 10.18360717 | 8.06E-62    | 3.28E-58    |
| ENSMMUG00000049104 | chromosome Y open reading frame 15A [Source:NCBI gene;Acc:100270688]                                    | 10.25028893 | 1.10E-17    | 3.45E-15    |
| ENSMMUG00000045017 | lysine demethylase 5D [Source:NCBI gene;Acc:100270697]                                                  | 10.40641836 | 1.83E-19    | 7.43E-17    |
| ENSMMUG00000054467 |                                                                                                         | 10.67725419 | 4.53E-19    | 1.67E-16    |
| ENSMMUG00000046495 | transducin beta like 1 Y-linked [Source:NCBI gene;Acc:100270702]                                        | 10.75945441 | 1.30E-17    | 3.79E-15    |
| ENSMMUG00000045991 | ubiquitin specific peptidase 9 Y-linked [Source:NCBI gene;Acc:100270703]                                | 10.89995319 | 9.04E-39    | 1.84E-35    |
| ENSMMUG00000046378 | zinc finger protein Y-linked [Source:NCBI gene;Acc:100270705]                                           | 11.57468486 | 7.21E-24    | 4.19E-21    |
| ENSMMUG00000043966 | DEAD-box helicase 3 Y-linked [Source:NCBI gene;Acc:100270694]                                           | 12.63365142 | 2.96E-26    | 2.00E-23    |
| ENSMMUG00000038331 | ribosomal protein S4 Y-linked 1 [Source:NCBI gene;Acc:100270700]                                        | 13.02149041 | 2.11E-29    | 1.71E-26    |

## SD 3

| Ensembl Gene ID     | Description                                                                                                | Log2(FC)    | p-value  | FDR         |
|---------------------|------------------------------------------------------------------------------------------------------------|-------------|----------|-------------|
| ENSMMUG00000048382  |                                                                                                            | 12.67716491 | 6.20E-35 | 4.55E-31    |
| ENSMMUG00000005663  | TATA-box binding protein associated factor 1<br>[Source:NCBI gene;Acc:698800]                              | 10.13578971 | 8.33E-26 | 2.04E-22    |
| ENSMMUG000000052170 |                                                                                                            | 7.080370226 | 6.05E-10 | 5.92E-07    |
| ENSMMUG000000063913 | endogenous retrovirus group K member 7 Env<br>polyprotein-like [Source:NCBI gene;Acc:114674933]            | 2.937260013 | 4.43E-05 | 0.036117762 |
| ENSMMUG000000063639 |                                                                                                            | 0.791761162 | 5.05E-05 | 0.037467781 |
| ENSMMUG000000056331 | cAMP-dependent protein kinase catalytic subunit PRKX<br>[Source:NCBI gene;Acc:106992273]                   | 3.432802738 | 5.35E-34 | 2.62E-30    |
| ENSMMUG000000043715 | eukaryotic translation initiation factor 1A, Y-linked<br>[Source:NCBI gene;Acc:100270695]                  | 4.947544777 | 1.77E-12 | 1.86E-09    |
| ENSMMUG000000061238 |                                                                                                            | 5.184881491 | 5.10E-05 | 0.037467781 |
| ENSMMUG000000049458 |                                                                                                            | 5.94431278  | 2.79E-05 | 0.024060449 |
| ENSMMUG000000061378 |                                                                                                            | 6.630399362 | 5.12E-07 | 0.000469584 |
| ENSMMUG000000046495 | transducin beta like 1 Y-linked [Source:NCBI<br>gene;Acc:100270702]                                        | 8.154191346 | 3.29E-17 | 4.40E-14    |
| ENSMMUG000000049104 | chromosome Y open reading frame 15A [Source:NCBI<br>gene;Acc:100270688]                                    | 9.566927405 | 2.12E-15 | 2.40E-12    |
| ENSMMUG000000038824 | ribosomal protein S4, Y-linked 2 [Source:NCBI<br>gene;Acc:100270701]                                       | 9.66619019  | 1.46E-15 | 1.79E-12    |
| ENSMMUG000000054467 |                                                                                                            | 10.38457532 | 5.01E-18 | 7.35E-15    |
| ENSMMUG000000038331 | ribosomal protein S4 Y-linked 1 [Source:NCBI<br>gene;Acc:100270700]                                        | 10.60935258 | 3.80E-46 | 5.58E-42    |
| ENSMMUG000000046378 | zinc finger protein Y-linked [Source:NCBI<br>gene;Acc:100270705]                                           | 10.75695453 | 1.02E-29 | 3.00E-26    |
| ENSMMUG000000045017 | lysine demethylase 5D [Source:NCBI<br>gene;Acc:100270697]                                                  | 11.14527275 | 1.22E-20 | 2.00E-17    |
| ENSMMUG000000038182 | ubiquitously transcribed tetratricopeptide repeat<br>containing, Y-linked [Source:NCBI gene;Acc:100270704] | 11.34050983 | 2.85E-33 | 1.05E-29    |
| ENSMMUG000000043966 | DEAD-box helicase 3 Y-linked [Source:NCBI<br>gene;Acc:100270694]                                           | 12.04650218 | 1.16E-23 | 2.13E-20    |
| ENSMMUG000000045991 | ubiquitin specific peptidase 9 Y-linked [Source:NCBI<br>gene;Acc:100270703]                                | 12.44357154 | 2.39E-25 | 5.01E-22    |

### C. Survivor's group radiation effects

#### SD 1 vs Baseline

| Ensembl Gene ID    | Description                                                                                             | Log2(FC)    | p-value     | FDR         |
|--------------------|---------------------------------------------------------------------------------------------------------|-------------|-------------|-------------|
| ENSMMUG00000057073 |                                                                                                         | 7.043931359 | 2.82E-08    | 6.34E-07    |
| ENSMMUG00000020926 | syntaxin 2 [Source:VGNC Symbol;Acc:VGNC:78259]                                                          | 6.785036445 | 5.77E-07    | 9.83E-06    |
| ENSMMUG00000016331 | glucosylceramidase beta 2 [Source:VGNC Symbol;Acc:VGNC:72741]                                           | 5.866576356 | 6.12E-05    | 0.000598266 |
| ENSMMUG00000058133 |                                                                                                         | -5.49968977 | 6.07E-05    | 0.000595376 |
| ENSMMUG00000055207 |                                                                                                         | 5.486997792 | 1.25E-05    | 0.000151044 |
| ENSMMUG00000018565 | ribonucleoprotein, PTB binding 2 [Source:VGNC Symbol;Acc:VGNC:76536]                                    | 5.326805841 | 9.76E-06    | 0.00012176  |
| ENSMMUG00000005200 | PC-esterase domain containing 1A [Source:VGNC Symbol;Acc:VGNC:75622]                                    | 5.306466191 | 0.002243594 | 0.012184722 |
| ENSMMUG00000013302 | family with sequence similarity 184 member A [Source:VGNC Symbol;Acc:VGNC:72308]                        | 5.304037014 | 1.43E-05    | 0.000168168 |
| ENSMMUG00000001264 | BSD domain containing 1 [Source:VGNC Symbol;Acc:VGNC:70384]                                             | 5.303575845 | 0.000402467 | 0.002949885 |
| ENSMMUG00000052440 |                                                                                                         | 5.243246791 | 0.00275874  | 0.01436109  |
| ENSMMUG00000049720 |                                                                                                         | 5.226864134 | 0.001356067 | 0.008094601 |
| ENSMMUG00000063570 | Metazoan signal recognition particle RNA [Source:RFAM;Acc:RF00017]                                      | 5.154281405 | 0.006740285 | 0.029573719 |
| ENSMMUG00000053550 |                                                                                                         | 5.119052893 | 0.001867675 | 0.010494107 |
| ENSMMUG00000018739 | sperm flagellar 2 [Source:VGNC Symbol;Acc:VGNC:82243]                                                   | 5.067519356 | 0.000464924 | 0.003350978 |
| ENSMMUG00000001245 | zinc finger protein 532 [Source:NCBI gene;Acc:701146]                                                   | 4.903047061 | 0.001011249 | 0.00634329  |
| ENSMMUG00000007003 | polyribonucleotide nucleotidyltransferase 1 [Source:VGNC Symbol;Acc:VGNC:76095]                         | 4.896335417 | 3.23E-05    | 0.000343645 |
| ENSMMUG00000052887 |                                                                                                         | 4.894702149 | 0.000798087 | 0.005266591 |
| ENSMMUG00000038587 | prostate and testis expressed 2 [Source:NCBI gene;Acc:717085]                                           | 4.882762075 | 0.001170548 | 0.007143969 |
| ENSMMUG00000013799 | ATP binding cassette subfamily G member 4 [Source:VGNC Symbol;Acc:VGNC:69390]                           | 4.846850032 | 0.000115682 | 0.001031423 |
| ENSMMUG00000021008 | ankyrin repeat and SOCS box containing 14 [Source:VGNC Symbol;Acc:VGNC:84237]                           | 4.801638521 | 0.001436452 | 0.008480156 |
| ENSMMUG00000063228 |                                                                                                         | -4.79913608 | 0.002035139 | 0.011254038 |
| ENSMMUG00000010067 | MINDY lysine 48 deubiquitinase 1 [Source:VGNC Symbol;Acc:VGNC:74828]                                    | 4.731481605 | 0.001696361 | 0.00972311  |
| ENSMMUG00000008525 | minichromosome maintenance 9 homologous recombination repair factor [Source:VGNC Symbol;Acc:VGNC:83432] | 4.704602183 | 0.002049707 | 0.011317266 |
| ENSMMUG00000007504 | myosin VC [Source:VGNC Symbol;Acc:VGNC:75117]                                                           | -4.64189733 | 0.002683193 | 0.014096521 |
| ENSMMUG00000064344 | Metazoan signal recognition particle RNA [Source:RFAM;Acc:RF00017]                                      | 4.608583332 | 0.001751794 | 0.009972244 |
| ENSMMUG00000017628 | pleckstrin homology domain containing A7 [Source:VGNC Symbol;Acc:VGNC:76121]                            | 4.544786946 | 0.00015344  | 0.001305743 |
| ENSMMUG00000003123 | adaptor related protein complex 4 subunit sigma 1 [Source:VGNC Symbol;Acc:VGNC:84304]                   | 4.508084785 | 0.005433214 | 0.024950408 |



|                    |                                                                                              |   |             |             |             |
|--------------------|----------------------------------------------------------------------------------------------|---|-------------|-------------|-------------|
| ENSMMUG0000007628  | cell adhesion associated, oncogene regulated [Source:VGNC Symbol;Acc:VGNC:70961]             | - | 4.486252439 | 1.20E-05    | 0.000145981 |
| ENSMMUG00000052929 |                                                                                              | - | 4.382239706 | 1.10E-08    | 2.72E-07    |
| ENSMMUG00000017234 | leucine rich repeat containing 59 [Source:VGNC Symbol;Acc:VGNC:81436]                        | - | 4.323522628 | 2.40E-25    | 1.62E-22    |
| ENSMMUG00000021552 | RPGR interacting protein 1 [Source:VGNC Symbol;Acc:VGNC:77007]                               | - | -4.27546277 | 4.91E-11    | 2.02E-09    |
| ENSMMUG00000006547 | ATPase H+ transporting V0 subunit a4 [Source:VGNC Symbol;Acc:VGNC:70189]                     | - | 4.254464232 | 0.001077528 | 0.006677835 |
| ENSMMUG00000020533 | chromosome 11 C12orf56 homolog [Source:VGNC Symbol;Acc:VGNC:70409]                           | - | -4.24894124 | 4.86E-06    | 6.44E-05    |
| ENSMMUG00000054953 | leucine rich repeat containing 10 [Source:NCBI gene;Acc:114669753]                           | - | 4.212856178 | 0.004022328 | 0.019470007 |
| ENSMMUG00000018163 | caspase 9 [Source:NCBI gene;Acc:694544]                                                      | - | 4.191630002 | 0.006641903 | 0.029213047 |
| ENSMMUG00000016019 | PDZ binding kinase [Source:VGNC Symbol;Acc:VGNC:75643]                                       | - | 4.154579671 | 0.003310201 | 0.016632379 |
| ENSMMUG00000038319 | Metazoan signal recognition particle RNA [Source:RFAM;Acc:RF00017]                           | - | 4.150946597 | 0.003780008 | 0.018569005 |
| ENSMMUG00000060346 |                                                                                              | - | 4.093035323 | 3.98E-10    | 1.33E-08    |
| ENSMMUG00000051100 | Metazoan signal recognition particle RNA [Source:RFAM;Acc:RF00017]                           | - | -4.07476891 | 0.003422625 | 0.017102075 |
| ENSMMUG00000007187 | haloacid dehalogenase like hydrolase domain containing 3 [Source:VGNC Symbol;Acc:VGNC:73250] | - | 4.052688955 | 0.003885849 | 0.018944826 |
| ENSMMUG00000012473 | proteasome activator subunit 2 [Source:VGNC Symbol;Acc:VGNC:76456]                           | - | 4.004768833 | 0.000291615 | 0.002237302 |
| ENSMMUG00000062017 |                                                                                              | - | 3.972679421 | 0.002355118 | 0.01269935  |
| ENSMMUG00000021049 | ret finger protein-like 3 [Source:NCBI gene;Acc:705507]                                      | - | 3.963675535 | 0.000248019 | 0.001959733 |
| ENSMMUG00000012056 | structural maintenance of chromosomes 6 [Source:VGNC Symbol;Acc:VGNC:77746]                  | - | 3.929878537 | 4.71E-06    | 6.27E-05    |
| ENSMMUG00000061408 |                                                                                              | - | 3.915396962 | 0.000818686 | 0.00537179  |
| ENSMMUG00000006548 | KIAA1549 [Source:VGNC Symbol;Acc:VGNC:73885]                                                 | - | 3.895666728 | 0.000160929 | 0.001363049 |
| ENSMMUG00000015202 |                                                                                              | - | 3.892320158 | 0.001303465 | 0.007844684 |
| ENSMMUG00000014809 | heterogeneous nuclear ribonucleoprotein C [Source:VGNC Symbol;Acc:VGNC:84348]                | - | 3.875206018 | 0.007775568 | 0.032929136 |
| ENSMMUG00000003049 | testis expressed 11 [Source:VGNC Symbol;Acc:VGNC:78316]                                      | - | 3.873447857 | 0.000246496 | 0.001954828 |
| ENSMMUG00000027108 | mml-mir-193b [Source:miRBase;Acc:MI0007656]                                                  | - | 3.869802203 | 0.000780543 | 0.005173328 |
| ENSMMUG00000033102 | mml-mir-181b-2 [Source:miRBase;Acc:MI0007646]                                                | - | 3.851746192 | 0.007831824 | 0.033128525 |
| ENSMMUG00000055028 |                                                                                              | - | 3.848773137 | 0.010327777 | 0.041108091 |
| ENSMMUG00000056790 |                                                                                              | - | -3.83357624 | 1.85E-08    | 4.42E-07    |
| ENSMMUG00000012452 | transglutaminase 1 [Source:NCBI gene;Acc:715854]                                             | - | 3.832203488 | 0.011706537 | 0.045051171 |
| ENSMMUG00000023138 | bromodomain containing 2 [Source:VGNC Symbol;Acc:VGNC:83422]                                 | - | 3.830189483 | 0.002674664 | 0.014062576 |
| ENSMMUG00000057651 | frizzled class receptor 5 [Source:NCBI gene;Acc:710796]                                      | - | 3.823426671 | 0.003293018 | 0.016569095 |
| ENSMMUG00000051936 |                                                                                              | - | 3.806021938 | 3.13E-05    | 0.000335909 |

|                    |                                                                                                                   |   |             |             |             |
|--------------------|-------------------------------------------------------------------------------------------------------------------|---|-------------|-------------|-------------|
| ENSMMUG00000052605 | Metazoan signal recognition particle RNA [Source:RFAM;Acc:RF00017]                                                | - | 3.800746157 | 0.000101858 | 0.000924145 |
| ENSMMUG00000059707 | MIS18 kinetochore protein A [Source:NCBI gene;Acc:709275]                                                         | - | 3.798793075 | 3.19E-10    | 1.09E-08    |
| ENSMMUG00000057859 |                                                                                                                   | - | 3.778651887 | 4.99E-07    | 8.75E-06    |
| ENSMMUG00000051008 |                                                                                                                   | - | -3.77080511 | 0.010614403 | 0.04196563  |
| ENSMMUG00000015041 | CWC27 spliceosome associated cyclophilin [Source:VGNC Symbol;Acc:VGNC:71396]                                      | - | 3.759733009 | 0.001008189 | 0.006327759 |
| ENSMMUG00000004985 | arylsulfatase L [Source:VGNC Symbol;Acc:VGNC:81361]                                                               | - | 3.749518938 | 0.003169915 | 0.016061597 |
| ENSMMUG00000059406 | RGP1 homolog, RAB6A GEF complex partner 1 [Source:NCBI gene;Acc:695936]                                           | - | 3.727265339 | 0.001012363 | 0.006346604 |
| ENSMMUG00000061572 | Metazoan signal recognition particle RNA [Source:RFAM;Acc:RF00017]                                                | - | 3.695129894 | 0.000712886 | 0.004820656 |
| ENSMMUG00000052535 |                                                                                                                   | - | -3.69337642 | 0.000304708 | 0.002324576 |
| ENSMMUG00000003231 | coiled-coil domain containing 33 [Source:VGNC Symbol;Acc:VGNC:70876]                                              | - | 3.650721006 | 0.008649131 | 0.035885115 |
| ENSMMUG00000060541 |                                                                                                                   | - | 3.632323246 | 0.0047086   | 0.022129399 |
| ENSMMUG00000017008 | GTPase, IMAP family member 2 [Source:VGNC Symbol;Acc:VGNC:72980]                                                  | - | 3.613640379 | 0.004925594 | 0.02297974  |
| ENSMMUG00000015909 | TEA domain transcription factor 3 [Source:VGNC Symbol;Acc:VGNC:78303]                                             | - | -3.59998002 | 0.002874591 | 0.01480763  |
| ENSMMUG00000051169 |                                                                                                                   | - | 3.580115246 | 0.007239789 | 0.031250057 |
| ENSMMUG00000011902 | oligosaccharyltransferase complex non-catalytic subunit [Source:NCBI gene;Acc:697283]                             | - | 3.575152009 | 6.19E-13    | 3.77E-11    |
| ENSMMUG00000049314 | dual specificity phosphatase 2 [Source:NCBI gene;Acc:718442]                                                      | - | -3.55465173 | 0.001418463 | 0.008387668 |
| ENSMMUG00000054168 | mitotic arrest deficient 2 like 1 [Source:NCBI gene;Acc:708574]                                                   | - | 3.533898691 | 0.004874001 | 0.022794243 |
| ENSMMUG00000026876 | mml-mir-181a-2 [Source:miRBase;Acc:MI0002808]                                                                     | - | -3.50664035 | 0.002458095 | 0.013111053 |
| ENSMMUG00000007816 | SMAD family member 2 [Source:VGNC Symbol;Acc:VGNC:77810]                                                          | - | 3.495315924 | 9.64E-12    | 4.66E-10    |
| ENSMMUG00000055229 |                                                                                                                   | - | 3.478748948 | 3.27E-12    | 1.76E-10    |
| ENSMMUG00000041415 | alpha and gamma adaptin binding protein [Source:NCBI gene;Acc:711436]                                             | - | 3.454718882 | 0.001558337 | 0.009066912 |
| ENSMMUG00000052786 |                                                                                                                   | - | 3.430820049 | 0.003257438 | 0.016428224 |
| ENSMMUG00000011129 | cilia and flagella associated protein 221 [Source:VGNC Symbol;Acc:VGNC:71153]                                     | - | 3.417040735 | 0.012640751 | 0.047747229 |
| ENSMMUG00000039085 | adaptor protein, phosphotyrosine interacting with PH domain and leucine zipper 1 [Source:NCBI gene;Acc:100425753] | - | 3.398619008 | 0.001629106 | 0.009412323 |
| ENSMMUG00000017206 | SHOC2 leucine rich repeat scaffold protein [Source:VGNC Symbol;Acc:VGNC:81569]                                    | - | 3.396076196 | 0.002782471 | 0.014462072 |
| ENSMMUG00000056387 | transcription factor 15 [Source:NCBI gene;Acc:716916]                                                             | - | 3.389728871 | 2.88E-14    | 2.35E-12    |
| ENSMMUG00000064752 | phospholipase A2 activating protein [Source:NCBI gene;Acc:707876]                                                 | - | 3.377656443 | 0.000928088 | 0.005917585 |
| ENSMMUG00000051271 |                                                                                                                   | - | 3.352566629 | 7.81E-09    | 1.98E-07    |
| ENSMMUG00000006768 | coiled-coil domain containing 196 [Source:VGNC Symbol;Acc:VGNC:70828]                                             | - | 3.318136243 | 2.61E-05    | 0.000286362 |
| ENSMMUG00000060836 |                                                                                                                   | - | 3.317059456 | 0.003042063 | 0.015544654 |

|                    |                                                                                   |             |             |             |
|--------------------|-----------------------------------------------------------------------------------|-------------|-------------|-------------|
| ENSMMUG00000019639 | paired box 5 [Source:VGNC Symbol;Acc:VGNC:75764]                                  | 3.316674372 | 1.87E-05    | 0.000211738 |
| ENSMMUG00000057031 |                                                                                   | 3.315456576 | 0.00064955  | 0.00445071  |
| ENSMMUG00000011575 | coiled-coil domain containing 167 [Source:VGNC Symbol;Acc:VGNC:70833]             | 3.310343577 | 0.002376227 | 0.012781363 |
| ENSMMUG00000009965 | chromosome 15 C9orf50 homolog [Source:VGNC Symbol;Acc:VGNC:70365]                 | 3.302863381 | 8.02E-12    | 3.95E-10    |
| ENSMMUG00000063268 |                                                                                   | 3.284276534 | 8.03E-05    | 0.000750996 |
| ENSMMUG00000030099 | phospholipid phosphatase 1 [Source:VGNC Symbol;Acc:VGNC:76226]                    | 3.280341401 | 3.90E-06    | 5.30E-05    |
| ENSMMUG00000031821 | chymotrypsin-like elastase family member 2B [Source:NCBI gene;Acc:106992406]      | 3.267802862 | 0.001829027 | 0.010325091 |
| ENSMMUG00000060940 | acidic residue methyltransferase 1 [Source:NCBI gene;Acc:704570]                  | -3.26579096 | 0.002352204 | 0.012696277 |
| ENSMMUG00000006457 | Rho guanine nucleotide exchange factor 40 [Source:VGNC Symbol;Acc:VGNC:69907]     | 3.250967763 | 0.002203683 | 0.012004245 |
| ENSMMUG00000038661 |                                                                                   | 3.238779338 | 1.81E-11    | 8.26E-10    |
| ENSMMUG00000006446 | transmembrane protein 177 [Source:VGNC Symbol;Acc:VGNC:79686]                     | 3.235839027 | 0.006639556 | 0.029213047 |
| ENSMMUG00000027053 | mml-mir-194-1 [Source:miRBase;Acc:MI0003024]                                      | -3.20606527 | 0.003547618 | 0.017588716 |
| ENSMMUG00000010295 | URB1 ribosome biogenesis homolog [Source:VGNC Symbol;Acc:VGNC:79074]              | 3.204449718 | 0.00362293  | 0.017880273 |
| ENSMMUG00000055117 |                                                                                   | 3.204277314 | 0.000594785 | 0.004137232 |
| ENSMMUG00000008228 | unc-93 homolog A [Source:VGNC Symbol;Acc:VGNC:78724]                              | 3.198206798 | 0.000179516 | 0.001493626 |
| ENSMMUG00000065019 | Metazoan signal recognition particle RNA [Source:RFAM;Acc:RF00017]                | -3.19696834 | 0.000741316 | 0.004961182 |
| ENSMMUG00000055864 |                                                                                   | 3.191899905 | 0.005807349 | 0.026234784 |
| ENSMMUG00000045446 |                                                                                   | 3.182784183 | 0.001762533 | 0.010022844 |
| ENSMMUG00000001481 | nicotinamide nucleotide adenylyltransferase 2 [Source:VGNC Symbol;Acc:VGNC:75193] | 3.171658153 | 0.002268801 | 0.012295106 |
| ENSMMUG00000039033 | nucleolar protein with MIF4G domain 1 [Source:VGNC Symbol;Acc:VGNC:81729]         | 3.163300662 | 0.0132929   | 0.049869761 |
| ENSMMUG00000054357 |                                                                                   | 3.161641379 | 0.008753761 | 0.036180656 |
| ENSMMUG00000049396 | Metazoan signal recognition particle RNA [Source:RFAM;Acc:RF00017]                | 3.156438142 | 0.003580454 | 0.017710986 |
| ENSMMUG00000052818 | death associated protein like 1 [Source:NCBI gene;Acc:699071]                     | 3.149958879 | 0.010196677 | 0.040685303 |
| ENSMMUG00000017211 | peter pan homolog (Drosophila) [Source:NCBI gene;Acc:100533472]                   | 3.143403863 | 0.007660269 | 0.032609868 |
| ENSMMUG00000022484 | ITPR interacting domain containing 1 [Source:VGNC Symbol;Acc:VGNC:73667]          | 3.136753343 | 0.004639002 | 0.021906848 |
| ENSMMUG00000022975 | sprouty related EVH1 domain containing 3 [Source:VGNC Symbol;Acc:VGNC:78030]      | 3.134012253 | 7.84E-17    | 1.02E-14    |
| ENSMMUG00000020993 | cadherin EGF LAG seven-pass G-type receptor 1 [Source:NCBI gene;Acc:718440]       | 3.124841458 | 1.41E-07    | 2.73E-06    |
| ENSMMUG00000020370 | SRY-box transcription factor 5 [Source:VGNC Symbol;Acc:VGNC:77843]                | 3.122326671 | 1.62E-09    | 4.86E-08    |
| ENSMMUG00000059241 |                                                                                   | 3.119232293 | 1.74E-05    | 0.000200041 |

|                    |                                                                                                 |   |             |             |             |
|--------------------|-------------------------------------------------------------------------------------------------|---|-------------|-------------|-------------|
| ENSMMUG00000055610 | homeobox C4 [Source:NCBI gene;Acc:100430434]                                                    | - | 3.118279906 | 5.36E-15    | 5.14E-13    |
| ENSMMUG00000053235 |                                                                                                 | - | 3.115399075 | 0.004239678 | 0.020313325 |
| ENSMMUG00000061452 |                                                                                                 | - | 3.114598301 | 0.0002098   | 0.001699894 |
| ENSMMUG00000016262 | tetratricopeptide repeat domain 38 [Source:VGNC Symbol;Acc:VGNC:79574]                          | - | 3.109082667 | 1.95E-11    | 8.77E-10    |
| ENSMMUG00000061973 |                                                                                                 | - | 3.102607018 | 3.52E-17    | 5.04E-15    |
| ENSMMUG00000018911 | protein kinase C zeta [Source:VGNC Symbol;Acc:VGNC:82212]                                       | - | 3.100872206 | 0.004005521 | 0.019421581 |
| ENSMMUG00000008867 | exoribonuclease 1 [Source:VGNC Symbol;Acc:VGNC:72324]                                           | - | 3.099539086 | 9.17E-05    | 0.000840732 |
| ENSMMUG00000050269 | T cell receptor beta variable 14 [Source:HGNC Symbol;Acc:HGNC:12189]                            | - | 3.099399756 | 3.68E-11    | 1.56E-09    |
| ENSMMUG00000012690 | myocardial zonula adherens protein [Source:NCBI gene;Acc:700247]                                | - | 3.097148143 | 0.008123043 | 0.034120561 |
| ENSMMUG00000051385 |                                                                                                 | - | 3.096633228 | 1.20E-06    | 1.86E-05    |
| ENSMMUG00000046655 | pleckstrin homology like domain family B member 1 [Source:NCBI gene;Acc:706336]                 | - | 3.095307143 | 1.29E-13    | 8.88E-12    |
| ENSMMUG00000011974 | calcium/calmodulin dependent protein kinase IV [Source:VGNC Symbol;Acc:VGNC:70526]              | - | 3.091740072 | 2.72E-08    | 6.16E-07    |
| ENSMMUG00000011469 | germ cell nuclear acidic peptidase [Source:VGNC Symbol;Acc:VGNC:72724]                          | - | 3.087501262 | 0.002501504 | 0.013296758 |
| ENSMMUG00000065058 |                                                                                                 | - | 3.082671762 | 0.010751203 | 0.042336527 |
| ENSMMUG00000015000 | SPT16 homolog, facilitates chromatin remodeling subunit [Source:VGNC Symbol;Acc:VGNC:78054]     | - | 3.069138715 | 1.03E-09    | 3.23E-08    |
| ENSMMUG00000029164 | glycerophosphodiester phosphodiesterase domain containing 3 [Source:VGNC Symbol;Acc:VGNC:72800] | - | 3.067318098 | 1.35E-11    | 6.38E-10    |
| ENSMMUG00000062791 |                                                                                                 | - | 3.057127892 | 0.000128521 | 0.001131929 |
| ENSMMUG00000019854 | transmembrane protein 108 [Source:VGNC Symbol;Acc:VGNC:79714]                                   | - | 3.052797576 | 2.23E-06    | 3.22E-05    |
| ENSMMUG00000023791 | SR-related CTD associated factor 11 [Source:VGNC Symbol;Acc:VGNC:77002]                         | - | 3.052442621 | 0.001434639 | 0.008474073 |
| ENSMMUG00000064177 |                                                                                                 | - | -3.03884591 | 0.011172035 | 0.043409846 |
| ENSMMUG00000058603 |                                                                                                 | - | -3.0354446  | 0.000696962 | 0.004730698 |
| ENSMMUG00000013047 | S-phase kinase associated protein 1 [Source:NCBI gene;Acc:100423634]                            | - | 3.029563244 | 7.13E-17    | 9.42E-15    |
| ENSMMUG00000064975 | zinc finger protein 221 [Source:NCBI gene;Acc:100423743]                                        | - | 3.025945296 | 6.29E-06    | 8.13E-05    |
| ENSMMUG00000005851 | B-box and SPRY domain containing [Source:VGNC Symbol;Acc:VGNC:70342]                            | - | 3.021378697 | 1.47E-05    | 0.00017267  |
| ENSMMUG00000008540 | ring finger protein 112 [Source:VGNC Symbol;Acc:VGNC:76724]                                     | - | 3.014846171 | 1.80E-09    | 5.34E-08    |
| ENSMMUG00000044417 | CD6 molecule [Source:NCBI gene;Acc:695183]                                                      | - | 3.013882786 | 0.006211882 | 0.027658576 |
| ENSMMUG00000004821 | membrane spanning 4-domains A14 [Source:NCBI gene;Acc:697083]                                   | - | -3.01254889 | 4.72E-14    | 3.70E-12    |
| ENSMMUG00000037551 | Metazoan signal recognition particle RNA [Source:RFAM;Acc:RF00017]                              | - | -2.96764625 | 2.54E-08    | 5.86E-07    |
| ENSMMUG00000055783 |                                                                                                 | - | 2.962465845 | 0.000380108 | 0.002804762 |
| ENSMMUG00000002167 | mannose receptor C type 2 [Source:VGNC Symbol;Acc:VGNC:74784]                                   | - | 2.959083633 | 0.010336696 | 0.041109891 |

|                     |                                                                                              |             |             |             |
|---------------------|----------------------------------------------------------------------------------------------|-------------|-------------|-------------|
| ENSMMUG00000052609  | ribosomal protein L34 [Source:NCBI gene;Acc:696636]                                          | 2.947383522 | 1.49E-05    | 0.000174339 |
| ENSMMUG00000063345  |                                                                                              | -2.94651448 | 0.002832394 | 0.014652971 |
| ENSMMUG00000015141  | ankyrin repeat domain 16 [Source:NCBI gene;Acc:720787]                                       | 2.936307733 | 0.000136215 | 0.001189058 |
| ENSMMUG00000059019  |                                                                                              | 2.924315916 | 1.53E-08    | 3.72E-07    |
| ENSMMUG00000065008  |                                                                                              | 2.917175065 | 0.00016107  | 0.001363184 |
| ENSMMUG00000012120  | zinc ribbon domain containing 1 [Source:VGNC Symbol;Acc:VGNC:78912]                          | 2.899304811 | 6.18E-08    | 1.29E-06    |
| ENSMMUG00000037458  | endoplasmic reticulum resident protein 29 [Source:NCBI gene;Acc:720396]                      | 2.897568726 | 0.011243648 | 0.043578688 |
| ENSMMUG00000001664  | arylacetamide deacetylase [Source:VGNC Symbol;Acc:VGNC:81172]                                | 2.895798646 | 0.005046708 | 0.023484099 |
| ENSMMUG00000002250  | beta-1,3-glucuronyltransferase 1 [Source:VGNC Symbol;Acc:VGNC:70207]                         | 2.895706978 | 0.009023309 | 0.036970314 |
| ENSMMUG00000001479  | laminin subunit gamma 2 [Source:VGNC Symbol;Acc:VGNC:74233]                                  | 2.873269214 | 8.87E-07    | 1.42E-05    |
| ENSMMUG00000005137  | ATPase secretory pathway Ca <sup>2+</sup> transporting 1 [Source:VGNC Symbol;Acc:VGNC:70054] | 2.863628458 | 3.94E-06    | 5.34E-05    |
| ENSMMUG00000012894  | NHS actin remodeling regulator [Source:VGNC Symbol;Acc:VGNC:75348]                           | 2.862829465 | 0.001281056 | 0.007735608 |
| ENSMMUG000000051670 |                                                                                              | 2.851607942 | 1.29E-05    | 0.000154455 |
| ENSMMUG000000052682 |                                                                                              | -2.84531156 | 1.40E-05    | 0.000165248 |
| ENSMMUG00000002794  | general transcription factor IIB [Source:VGNC Symbol;Acc:VGNC:73306]                         | 2.840942941 | 6.81E-14    | 5.06E-12    |
| ENSMMUG00000010744  |                                                                                              | -2.84015204 | 0.008424726 | 0.03506149  |
| ENSMMUG000000050493 | paired related homeobox 2 [Source:NCBI gene;Acc:716699]                                      | 2.838497481 | 0.010845056 | 0.042551427 |
| ENSMMUG000000055272 | putative uncharacterized protein ZNRD1-AS1 [Source:NCBI gene;Acc:712069]                     | 2.836033983 | 2.28E-06    | 3.29E-05    |
| ENSMMUG00000009702  | mutS homolog 5 [Source:NCBI gene;Acc:715494]                                                 | 2.834500499 | 0.004320495 | 0.020663985 |
| ENSMMUG000000054315 |                                                                                              | 2.831873606 | 0.001480346 | 0.008687207 |
| ENSMMUG000000051032 | serine protease 2 [Source:NCBI gene;Acc:698352]                                              | 2.824026135 | 3.64E-11    | 1.56E-09    |
| ENSMMUG000000059101 |                                                                                              | 2.823783851 | 0.001291225 | 0.007792666 |
| ENSMMUG000000060713 | epithelial membrane protein 2 [Source:NCBI gene;Acc:710315]                                  | 2.816234632 | 0.000265851 | 0.00206597  |
| ENSMMUG000000063177 | StAR related lipid transfer domain containing 4 [Source:NCBI gene;Acc:706654]                | 2.815208572 | 9.26E-14    | 6.66E-12    |
| ENSMMUG00000002561  | NOP2/Sun RNA methyltransferase 2 [Source:VGNC Symbol;Acc:VGNC:75466]                         | 2.814743002 | 0.001874401 | 0.010520924 |
| ENSMMUG00000015151  | interleukin 2 receptor subunit alpha [Source:NCBI gene;Acc:574300]                           | 2.809803053 | 0.000172071 | 0.001437464 |
| ENSMMUG00000016314  | family with sequence similarity 166 member B [Source:VGNC Symbol;Acc:VGNC:72421]             | 2.802922692 | 3.23E-12    | 1.74E-10    |
| ENSMMUG00000006217  | general transcription factor IIH subunit 2 [Source:NCBI gene;Acc:700737]                     | 2.791192661 | 7.83E-05    | 0.000735594 |
| ENSMMUG00000012480  | REC8 meiotic recombination protein [Source:VGNC Symbol;Acc:VGNC:76746]                       | 2.788372106 | 5.46E-07    | 9.38E-06    |



|                    |                                                                                                  |   |             |             |             |
|--------------------|--------------------------------------------------------------------------------------------------|---|-------------|-------------|-------------|
| ENSMMUG00000056303 |                                                                                                  | - | 2.781296508 | 0.011642397 | 0.044867339 |
| ENSMMUG00000039317 | cAMP responsive element binding protein 5 [Source:VGNC Symbol;Acc:VGNC:81295]                    | - | 2.775548469 | 3.16E-05    | 0.000338804 |
| ENSMMUG00000057276 |                                                                                                  | - | 2.770397448 | 4.05E-05    | 0.000418372 |
| ENSMMUG00000000807 | tRNA 5-methylaminomethyl-2-thiouridylate methyltransferase [Source:VGNC Symbol;Acc:VGNC:79500]   | - | 2.767089774 | 0.001342947 | 0.008033212 |
| ENSMMUG00000052830 |                                                                                                  | - | 2.766537061 | 2.43E-06    | 3.48E-05    |
| ENSMMUG00000002549 | trehalase [Source:NCBI gene;Acc:706449]                                                          | - | 2.752374072 | 2.48E-14    | 2.07E-12    |
| ENSMMUG00000017186 | pleckstrin homology domain interacting protein [Source:VGNC Symbol;Acc:VGNC:75803]               | - | 2.751224227 | 0.000146023 | 0.001256446 |
| ENSMMUG00000008945 | zinc finger protein 407 [Source:NCBI gene;Acc:695303]                                            | - | 2.741255567 | 0.000505648 | 0.003606112 |
| ENSMMUG00000028925 | HDGF like 2 [Source:NCBI gene;Acc:693476]                                                        | - | -2.72869278 | 0.00991028  | 0.039806476 |
| ENSMMUG00000004208 | serine dehydratase [Source:VGNC Symbol;Acc:VGNC:77148]                                           | - | 2.721437046 | 0.004318615 | 0.020663985 |
| ENSMMUG00000013029 | surfactant protein C [Source:VGNC Symbol;Acc:VGNC:84113]                                         | - | 2.719210293 | 1.93E-06    | 2.83E-05    |
| ENSMMUG00000054116 | T cell receptor alpha variable 8-6 [Source:HGNC Symbol;Acc:HGNC:12151]                           | - | 2.714207118 | 4.85E-09    | 1.28E-07    |
| ENSMMUG00000053577 |                                                                                                  | - | 2.707618251 | 8.24E-05    | 0.000766922 |
| ENSMMUG00000016880 | solute carrier family 39 member 8 [Source:VGNC Symbol;Acc:VGNC:77541]                            | - | 2.706535126 | 3.13E-14    | 2.53E-12    |
| ENSMMUG00000007821 | ATP binding cassette subfamily B member 5 [Source:VGNC Symbol;Acc:VGNC:80321]                    | - | 2.701636052 | 9.91E-08    | 1.98E-06    |
| ENSMMUG00000040803 | sarcalumenin [Source:NCBI gene;Acc:704655]                                                       | - | 2.700153701 | 0.001266769 | 0.007657871 |
| ENSMMUG00000024186 | U1 spliceosomal RNA [Source:RFAM;Acc:RF00003]                                                    | - | -2.69872807 | 0.001945591 | 0.010825159 |
| ENSMMUG00000001742 | transforming growth factor beta receptor 3 [Source:VGNC Symbol;Acc:VGNC:78339]                   | - | 2.696762636 | 9.98E-22    | 3.38E-19    |
| ENSMMUG00000055809 |                                                                                                  | - | 2.695275374 | 6.73E-05    | 0.000648739 |
| ENSMMUG00000002742 | ST8 alpha-N-acetyl-neuraminide alpha-2,8-sialyltransferase 5 [Source:VGNC Symbol;Acc:VGNC:77942] | - | -2.69290516 | 3.81E-10    | 1.28E-08    |
| ENSMMUG00000000669 | gap junction protein beta 1 [Source:VGNC Symbol;Acc:VGNC:73059]                                  | - | 2.689323368 | 0.009059452 | 0.03707633  |
| ENSMMUG00000061590 |                                                                                                  | - | 2.685671032 | 0.004771455 | 0.022405364 |
| ENSMMUG00000057606 | GPRIN family member 3 [Source:NCBI gene;Acc:703567]                                              | - | 2.684397498 | 1.32E-07    | 2.58E-06    |
| ENSMMUG00000017374 | G protein subunit beta 5 [Source:VGNC Symbol;Acc:VGNC:73097]                                     | - | 2.674631244 | 0.007952748 | 0.03357448  |
| ENSMMUG00000051768 |                                                                                                  | - | 2.673198979 | 0.000764972 | 0.00509026  |
| ENSMMUG00000040154 | T cell receptor alpha variable 9-2 [Source:HGNC Symbol;Acc:HGNC:12154]                           | - | 2.672222818 | 3.02E-07    | 5.54E-06    |
| ENSMMUG00000057494 | T cell receptor beta variable 7-9 [Source:HGNC Symbol;Acc:HGNC:12243]                            | - | 2.665589905 | 8.67E-05    | 0.00079888  |
| ENSMMUG00000003261 | BAF chromatin remodeling complex subunit BCL11B [Source:VGNC Symbol;Acc:VGNC:70056]              | - | 2.664374487 | 6.13E-19    | 1.23E-16    |
| ENSMMUG00000060744 |                                                                                                  | - | 2.660642867 | 6.33E-07    | 1.06E-05    |

|                     |                                                                                                    |   |             |             |             |
|---------------------|----------------------------------------------------------------------------------------------------|---|-------------|-------------|-------------|
| ENSMMUG00000017207  | dopamine beta-hydroxylase [Source:VGNC Symbol;Acc:VGNC:71740]                                      | - | 2.658762593 | 5.21E-08    | 1.12E-06    |
| ENSMMUG00000016526  | solute carrier family 25 member 41 [Source:VGNC Symbol;Acc:VGNC:77581]                             | - | 2.652931048 | 8.44E-07    | 1.36E-05    |
| ENSMMUG00000018510  | sodium voltage-gated channel alpha subunit 9 [Source:VGNC Symbol;Acc:VGNC:76990]                   | - | 2.649986169 | 0.008959561 | 0.036834508 |
| ENSMMUG00000000974  | mutS homolog 2 [Source:VGNC Symbol;Acc:VGNC:74931]                                                 | - | 2.641966371 | 4.41E-07    | 7.85E-06    |
| ENSMMUG00000004711  | transmembrane protein 74B [Source:VGNC Symbol;Acc:VGNC:78990]                                      | - | 2.639569047 | 0.001280641 | 0.007735608 |
| ENSMMUG00000000777  | dystonin [Source:VGNC Symbol;Acc:VGNC:81061]                                                       | - | 2.629934807 | 0.008695832 | 0.035982409 |
| ENSMMUG00000009059  | Fas associated factor family member 2 [Source:VGNC Symbol;Acc:VGNC:72332]                          | - | 2.623113653 | 0.01062852  | 0.041975485 |
| ENSMMUG00000012124  | ring finger protein 39 [Source:VGNC Symbol;Acc:VGNC:83458]                                         | - | 2.617391279 | 0.001359575 | 0.008110285 |
| ENSMMUG000000054246 |                                                                                                    | - | -2.61436474 | 0.005482553 | 0.025134363 |
| ENSMMUG000000053384 |                                                                                                    | - | 2.599777396 | 2.91E-20    | 7.51E-18    |
| ENSMMUG000000054213 | parathyroid hormone [Source:NCBI gene;Acc:700195]                                                  | - | 2.595669138 | 0.004126709 | 0.019886406 |
| ENSMMUG00000010453  | folate receptor beta [Source:VGNC Symbol;Acc:VGNC:72690]                                           | - | -2.58730152 | 5.74E-09    | 1.50E-07    |
| ENSMMUG000000057302 |                                                                                                    | - | 2.584524656 | 0.006625431 | 0.029164279 |
| ENSMMUG000000055759 | Metazoan signal recognition particle RNA [Source:RFAM;Acc:RF00017]                                 | - | 2.582279124 | 4.74E-05    | 0.000480476 |
| ENSMMUG000000055071 | Y RNA [Source:RFAM;Acc:RF00019]                                                                    | - | -2.58017266 | 0.002847665 | 0.01471362  |
| ENSMMUG00000013261  | CDP-diacylglycerol synthase 2 [Source:VGNC Symbol;Acc:VGNC:70995]                                  | - | 2.578605656 | 0.001126719 | 0.006923282 |
| ENSMMUG00000012481  | importin 4 [Source:VGNC Symbol;Acc:VGNC:73630]                                                     | - | 2.578278242 | 2.81E-09    | 7.88E-08    |
| ENSMMUG00000021280  | leucine rich transmembrane and O-methyltransferase domain containing [Source:NCBI gene;Acc:718286] | - | 2.567350647 | 9.04E-07    | 1.44E-05    |
| ENSMMUG00000008113  | pleckstrin homology domain containing M3 [Source:NCBI gene;Acc:711125]                             | - | 2.560143868 | 0.005785467 | 0.026179601 |
| ENSMMUG00000021282  | late endosomal/lysosomal adaptor, MAPK and MTOR activator 1 [Source:VGNC Symbol;Acc:VGNC:74129]    | - | 2.559662424 | 1.78E-05    | 0.000203197 |
| ENSMMUG00000006639  | NGG1 interacting factor 3 like 1 [Source:VGNC Symbol;Acc:VGNC:75166]                               | - | 2.558820198 | 0.009232539 | 0.037615525 |
| ENSMMUG00000019815  | transcription factor AP-2 epsilon [Source:VGNC Symbol;Acc:VGNC:79878]                              | - | 2.549555046 | 3.36E-05    | 0.00035638  |
| ENSMMUG00000009958  | ankyrin repeat domain 46 [Source:VGNC Symbol;Acc:VGNC:69719]                                       | - | 2.547676021 | 0.000640425 | 0.004399314 |
| ENSMMUG00000005246  | zinc finger protein 740 [Source:VGNC Symbol;Acc:VGNC:79665]                                        | - | 2.547546767 | 2.39E-05    | 0.00026389  |
| ENSMMUG00000007313  | histone acetyltransferase 1 [Source:VGNC Symbol;Acc:VGNC:73349]                                    | - | 2.544387956 | 0.002456794 | 0.013110569 |
| ENSMMUG00000015661  | protein tyrosine phosphatase receptor type U [Source:VGNC Symbol;Acc:VGNC:76624]                   | - | 2.540601072 | 2.09E-07    | 3.92E-06    |
| ENSMMUG00000002890  | tripartite motif containing 15 [Source:VGNC Symbol;Acc:VGNC:83958]                                 | - | 2.532234304 | 1.12E-08    | 2.78E-07    |
| ENSMMUG00000019831  | neurobeachin [Source:NCBI gene;Acc:714386]                                                         | - | 2.522627101 | 0.000184527 | 0.001528271 |
| ENSMMUG00000012129  | tripartite motif containing 10 [Source:VGNC Symbol;Acc:VGNC:78550]                                 | - | -2.52207563 | 2.98E-11    | 1.30E-09    |
| ENSMMUG00000040361  | ATPase H+ transporting V1 subunit C1 [Source:NCBI gene;Acc:693840]                                 | - | 2.515576128 | 0.012350054 | 0.046877411 |

|                    |                                                                                           |   |             |             |             |
|--------------------|-------------------------------------------------------------------------------------------|---|-------------|-------------|-------------|
| ENSMMUG00000011386 | GTPase, IMAP family member 4 [Source:VGNC Symbol;Acc:VGNC:72982]                          | - | 2.510670583 | 4.76E-17    | 6.44E-15    |
| ENSMMUG00000052287 |                                                                                           | - | 2.508698858 | 0.01329492  | 0.049869761 |
| ENSMMUG00000016723 | zinc finger protein 287 [Source:NCBI gene;Acc:695524]                                     | - | 2.503714287 | 0.004176646 | 0.020073474 |
| ENSMMUG00000018346 | coiled-coil domain containing 170 [Source:VGNC Symbol;Acc:VGNC:70832]                     | - | 2.483899379 | 0.002242691 | 0.012184722 |
| ENSMMUG00000007326 | ring finger protein 121 [Source:VGNC Symbol;Acc:VGNC:76788]                               | - | 2.479257439 | 1.06E-07    | 2.10E-06    |
| ENSMMUG00000006187 | angiotensin like 7 [Source:VGNC Symbol;Acc:VGNC:69683]                                    | - | 2.477729617 | 2.76E-07    | 5.09E-06    |
| ENSMMUG00000059575 |                                                                                           | - | 2.472018712 | 1.10E-10    | 4.25E-09    |
| ENSMMUG00000007325 | Xrcc1 N-terminal domain containing 1 [Source:NCBI gene;Acc:115945140]                     | - | 2.469129466 | 0.00010713  | 0.000967118 |
| ENSMMUG00000006731 | CECR2 histone acetyl-lysine reader [Source:VGNC Symbol;Acc:VGNC:84530]                    | - | 2.462502443 | 6.77E-07    | 1.12E-05    |
| ENSMMUG00000015143 | F-box DNA helicase 1 [Source:NCBI gene;Acc:720797]                                        | - | 2.460349206 | 3.58E-05    | 0.000375948 |
| ENSMMUG00000004233 | leucine rich repeats and immunoglobulin like domains 3 [Source:NCBI gene;Acc:716344]      | - | 2.457253669 | 3.02E-08    | 6.73E-07    |
| ENSMMUG00000040817 | interferon regulatory factor 9 [Source:VGNC Symbol;Acc:VGNC:84361]                        | - | 2.455267946 | 0.002010912 | 0.01113712  |
| ENSMMUG00000060487 | atypical chemokine receptor 3 [Source:NCBI gene;Acc:694428]                               | - | 2.453114495 | 0.00058466  | 0.00408621  |
| ENSMMUG00000012122 | protein phosphatase 1 regulatory inhibitor subunit 11 [Source:VGNC Symbol;Acc:VGNC:82209] | - | 2.440478636 | 0.002869545 | 0.014795708 |
| ENSMMUG00000013937 | RAB41, member RAS oncogene family [Source:VGNC Symbol;Acc:VGNC:81544]                     | - | -2.43454659 | 0.000812156 | 0.005332173 |
| ENSMMUG00000008419 | G protein nucleolar 2 [Source:VGNC Symbol;Acc:VGNC:73037]                                 | - | 2.434371945 | 0.000561022 | 0.003951597 |
| ENSMMUG00000062793 |                                                                                           | - | 2.432410194 | 2.99E-15    | 3.05E-13    |
| ENSMMUG00000010820 | chaperonin containing TCP1 subunit 2 [Source:VGNC Symbol;Acc:VGNC:70745]                  | - | 2.429079799 | 1.95E-05    | 0.000219931 |
| ENSMMUG00000038070 | T cell receptor alpha variable 12-3 [Source:HGNC Symbol;Acc:HGNC:12107]                   | - | 2.416266677 | 2.68E-08    | 6.11E-07    |
| ENSMMUG00000005949 | olfactory receptor 2B11 [Source:NCBI gene;Acc:709256]                                     | - | 2.407756727 | 0.004864958 | 0.022765482 |
| ENSMMUG00000017204 | programmed cell death 4 [Source:VGNC Symbol;Acc:VGNC:75794]                               | - | 2.403354004 | 4.68E-05    | 0.000475105 |
| ENSMMUG00000037625 |                                                                                           | - | 2.400564878 | 0.002770955 | 0.014410828 |
| ENSMMUG00000062974 |                                                                                           | - | 2.398844059 | 6.16E-08    | 1.29E-06    |
| ENSMMUG00000017246 | lipoygenase homology domains 1 [Source:VGNC Symbol;Acc:VGNC:74368]                        | - | 2.395529302 | 1.96E-07    | 3.68E-06    |
| ENSMMUG00000023235 | SET domain bifurcated histone lysine methyltransferase 1 [Source:NCBI gene;Acc:716141]    | - | 2.395496925 | 0.012154488 | 0.046427914 |
| ENSMMUG00000060278 | Metazoan signal recognition particle RNA [Source:RFAM;Acc:RF00017]                        | - | 2.386424528 | 0.001345258 | 0.008038233 |
| ENSMMUG00000059677 | melanocortin 2 receptor accessory protein [Source:NCBI gene;Acc:701330]                   | - | 2.375831146 | 0.008424484 | 0.03506149  |
| ENSMMUG00000047324 | casein alpha s1 [Source:HGNC Symbol;Acc:HGNC:2445]                                        | - | 2.373721883 | 0.009778339 | 0.039384627 |
| ENSMMUG00000056045 |                                                                                           | - | -2.36562446 | 1.59E-05    | 0.00018381  |



|                    |                                                                                                   |   |             |             |             |
|--------------------|---------------------------------------------------------------------------------------------------|---|-------------|-------------|-------------|
| ENSMMUG00000050979 | PILR alpha associated neural protein [Source:NCBI gene;Acc:713548]                                | - | 2.364759587 | 0.011687503 | 0.045009144 |
| ENSMMUG00000017210 | sarcosine dehydrogenase [Source:VGNC Symbol;Acc:VGNC:76971]                                       | - | 2.358159913 | 7.33E-08    | 1.50E-06    |
| ENSMMUG00000052277 | transthyretin [Source:NCBI gene;Acc:705943]                                                       | - | 2.353474668 | 0.005392767 | 0.024817265 |
| ENSMMUG00000003736 | nuclear factor kappa B subunit 1 [Source:VGNC Symbol;Acc:VGNC:75339]                              | - | 2.346909528 | 1.55E-08    | 3.76E-07    |
| ENSMMUG00000019672 | autophagy related 13 [Source:VGNC Symbol;Acc:VGNC:70148]                                          | - | 2.333898918 | 0.008695336 | 0.035982409 |
| ENSMMUG00000058580 | tripartite motif containing 40 [Source:NCBI gene;Acc:100427925]                                   | - | -2.33382126 | 0.000257402 | 0.002020602 |
| ENSMMUG00000009155 | SIN3-HDAC complex associated factor [Source:NCBI gene;Acc:694162]                                 | - | 2.331304407 | 0.000896811 | 0.005758831 |
| ENSMMUG00000015550 | PR/SET domain 4 [Source:VGNC Symbol;Acc:VGNC:76393]                                               | - | -2.33064876 | 0.002052629 | 0.011327627 |
| ENSMMUG00000020211 | cyclin Y like 1 [Source:VGNC Symbol;Acc:VGNC:84224]                                               | - | 2.327265273 | 7.19E-09    | 1.84E-07    |
| ENSMMUG00000016004 | acid phosphatase 3 [Source:VGNC Symbol;Acc:VGNC:69385]                                            | - | 2.325382337 | 0.000205799 | 0.001673737 |
| ENSMMUG00000052791 |                                                                                                   | - | -2.31545359 | 2.31E-06    | 3.32E-05    |
| ENSMMUG00000011183 | olfactomedin like 2A [Source:VGNC Symbol;Acc:VGNC:75472]                                          | - | 2.310390346 | 0.004180812 | 0.020084586 |
| ENSMMUG00000057501 |                                                                                                   | - | 2.309270428 | 3.22E-06    | 4.47E-05    |
| ENSMMUG00000051429 |                                                                                                   | - | -2.3083737  | 0.009095736 | 0.03719672  |
| ENSMMUG00000061268 | PLAG1 zinc finger [Source:NCBI gene;Acc:696149]                                                   | - | 2.303699932 | 5.57E-05    | 0.00055106  |
| ENSMMUG00000063463 |                                                                                                   | - | 2.300776706 | 0.000168029 | 0.00140887  |
| ENSMMUG00000011810 | FAT atypical cadherin 4 [Source:VGNC Symbol;Acc:VGNC:72552]                                       | - | 2.299989585 | 0.001096687 | 0.006777187 |
| ENSMMUG00000055271 |                                                                                                   | - | 2.297936542 | 0.000264311 | 0.002058434 |
| ENSMMUG00000055284 |                                                                                                   | - | 2.296797977 | 0.01172654  | 0.045111368 |
| ENSMMUG00000055585 |                                                                                                   | - | 2.293740205 | 0.000583732 | 0.004082354 |
| ENSMMUG00000013055 | malic enzyme 3 [Source:VGNC Symbol;Acc:VGNC:74695]                                                | - | 2.290319755 | 0.00059334  | 0.004136201 |
| ENSMMUG00000005204 | VPS16 core subunit of CORVET and HOPS complexes [Source:VGNC Symbol;Acc:VGNC:78966]               | - | -2.28950586 | 0.000136617 | 0.001191313 |
| ENSMMUG00000049788 |                                                                                                   | - | 2.283582505 | 0.00269833  | 0.014151596 |
| ENSMMUG00000029197 | YY1 transcription factor [Source:NCBI gene;Acc:717370]                                            | - | 2.283408827 | 6.12E-07    | 1.03E-05    |
| ENSMMUG00000064131 |                                                                                                   | - | 2.279247116 | 6.42E-06    | 8.27E-05    |
| ENSMMUG00000022726 | dual specificity tyrosine phosphorylation regulated kinase 1B [Source:VGNC Symbol;Acc:VGNC:72016] | - | -2.2744497  | 0.010912015 | 0.042721309 |
| ENSMMUG00000023679 | tripartite motif containing 26 [Source:VGNC Symbol;Acc:VGNC:78854]                                | - | 2.273279279 | 4.46E-07    | 7.91E-06    |
| ENSMMUG00000006898 | integrin subunit beta 8 [Source:VGNC Symbol;Acc:VGNC:73791]                                       | - | 2.271798335 | 4.34E-10    | 1.45E-08    |
| ENSMMUG00000060527 |                                                                                                   | - | 2.271090359 | 0.000547862 | 0.003876544 |
| ENSMMUG00000017396 | 3'(2'), 5'-bisphosphate nucleotidase 1 [Source:NCBI gene;Acc:721277]                              | - | 2.270125736 | 0.00032588  | 0.002466985 |
| ENSMMUG00000017378 | steroid sulfatase [Source:VGNC Symbol;Acc:VGNC:81590]                                             | - | 2.266534298 | 0.002746932 | 0.014320269 |

|                    |                                                                                             |   |             |             |             |
|--------------------|---------------------------------------------------------------------------------------------|---|-------------|-------------|-------------|
| ENSMMUG00000029475 | zinc finger and BTB domain containing 2 [Source:VGNC Symbol;Acc:VGNC:79291]                 | - | 2.265719562 | 0.00094812  | 0.006013457 |
| ENSMMUG00000015002 | chromodomain helicase DNA binding protein 8 [Source:VGNC Symbol;Acc:VGNC:71060]             | - | 2.264835965 | 0.000772063 | 0.00513114  |
| ENSMMUG00000004157 | nuclear protein, coactivator of histone transcription [Source:VGNC Symbol;Acc:VGNC:75379]   | - | 2.255467274 | 4.15E-07    | 7.46E-06    |
| ENSMMUG00000046464 | coiled-coil-helix-coiled-coil-helix domain containing 7 [Source:VGNC Symbol;Acc:VGNC:83989] | - | 2.254161252 | 9.50E-05    | 0.000868097 |
| ENSMMUG00000010050 | small nuclear ribonucleoprotein polypeptides B and B1 [Source:VGNC Symbol;Acc:VGNC:77676]   | - | 2.246868843 | 1.08E-05    | 0.000132936 |
| ENSMMUG00000064066 |                                                                                             | - | 2.239223405 | 0.007997638 | 0.033674926 |
| ENSMMUG00000007620 | transmembrane serine protease 4 [Source:VGNC Symbol;Acc:VGNC:78577]                         | - | 2.235725281 | 4.36E-05    | 0.000445362 |
| ENSMMUG00000058933 |                                                                                             | - | 2.234464907 | 0.010995848 | 0.042909948 |
| ENSMMUG00000051115 |                                                                                             | - | 2.228906068 | 0.001441725 | 0.008506651 |
| ENSMMUG00000051381 | Metazoan signal recognition particle RNA [Source:RFAM;Acc:RF00017]                          | - | -2.2286912  | 7.77E-07    | 1.27E-05    |
| ENSMMUG00000003631 | cytoskeleton associated protein 5 [Source:VGNC Symbol;Acc:VGNC:71368]                       | - | 2.227799815 | 0.003113003 | 0.015810204 |
| ENSMMUG00000056363 |                                                                                             | - | 2.227614261 | 0.007919957 | 0.033462125 |
| ENSMMUG00000063576 | Metazoan signal recognition particle RNA [Source:RFAM;Acc:RF00017]                          | - | 2.226683019 | 0.005999165 | 0.026921689 |
| ENSMMUG00000014484 | zinc finger protein 641 [Source:NCBI gene;Acc:708246]                                       | - | 2.226391766 | 2.40E-05    | 0.000265522 |
| ENSMMUG00000009773 | lysine demethylase 1A [Source:VGNC Symbol;Acc:VGNC:73928]                                   | - | 2.225542722 | 3.75E-10    | 1.27E-08    |
| ENSMMUG00000014687 | sterile alpha motif domain containing 14 [Source:VGNC Symbol;Acc:VGNC:77112]                | - | 2.215526759 | 0.005043546 | 0.023479471 |
| ENSMMUG00000063555 |                                                                                             | - | -2.21111161 | 0.011751868 | 0.045192752 |
| ENSMMUG00000060892 |                                                                                             | - | 2.209599547 | 6.54E-12    | 3.30E-10    |
| ENSMMUG00000050544 |                                                                                             | - | 2.208513679 | 0.00354273  | 0.017572524 |
| ENSMMUG00000053721 |                                                                                             | - | 2.199329902 | 0.001334247 | 0.007998834 |
| ENSMMUG00000018490 | ADP ribosylation factor interacting protein 1 [Source:VGNC Symbol;Acc:VGNC:69878]           | - | 2.193865198 | 1.41E-08    | 3.44E-07    |
| ENSMMUG00000004178 | NADPH oxidase 1 [Source:VGNC Symbol;Acc:VGNC:75374]                                         | - | 2.190466787 | 0.000227354 | 0.001824393 |
| ENSMMUG00000053660 | Metazoan signal recognition particle RNA [Source:RFAM;Acc:RF00017]                          | - | 2.189281136 | 0.00090896  | 0.005809302 |
| ENSMMUG00000001940 | NME/NM23 nucleoside diphosphate kinase 2 [Source:NCBI gene;Acc:100533957]                   | - | 2.185445305 | 1.83E-06    | 2.71E-05    |
| ENSMMUG00000059938 |                                                                                             | - | 2.185184572 | 0.003634424 | 0.01791252  |
| ENSMMUG00000057475 |                                                                                             | - | 2.184462375 | 0.002055935 | 0.011340092 |
| ENSMMUG00000012058 | GEN1 Holliday junction 5' flap endonuclease [Source:VGNC Symbol;Acc:VGNC:72790]             | - | 2.183853069 | 0.006518568 | 0.028728905 |
| ENSMMUG00000003394 | cilia and flagella associated protein 300 [Source:VGNC Symbol;Acc:VGNC:71120]               | - | 2.182344406 | 2.79E-13    | 1.83E-11    |
| ENSMMUG00000060167 |                                                                                             | - | 2.181844447 | 3.35E-06    | 4.63E-05    |

|                    |                                                                                                |             |             |             |
|--------------------|------------------------------------------------------------------------------------------------|-------------|-------------|-------------|
| ENSMMUG00000014955 | nuclear receptor subfamily 3 group C member 2 [Source:VGNC Symbol;Acc:VGNC:75516]              | -2.17267699 | 0.00380965  | 0.018665734 |
| ENSMMUG00000023012 | vesicle trafficking 1 [Source:VGNC Symbol;Acc:VGNC:79296]                                      | 2.167820583 | 0.001984943 | 0.011004547 |
| ENSMMUG00000017524 | phosphoinositide kinase, FYVE-type zinc finger containing [Source:VGNC Symbol;Acc:VGNC:75854]  | 2.167768377 | 2.33E-08    | 5.43E-07    |
| ENSMMUG00000058240 |                                                                                                | 2.153156514 | 0.000657488 | 0.004493731 |
| ENSMMUG00000019857 | beaded filament structural protein 2 [Source:VGNC Symbol;Acc:VGNC:70245]                       | 2.151409924 | 9.44E-06    | 0.000117988 |
| ENSMMUG00000049749 |                                                                                                | 2.148398391 | 1.83E-08    | 4.39E-07    |
| ENSMMUG00000022630 | protoporphyrinogen oxidase [Source:VGNC Symbol;Acc:VGNC:76365]                                 | 2.148391284 | 3.48E-06    | 4.79E-05    |
| ENSMMUG00000053150 | Metazoan signal recognition particle RNA [Source:RFAM;Acc:RF00017]                             | 2.142613924 | 0.003125474 | 0.015843826 |
| ENSMMUG00000004791 | pleckstrin homology domain containing B1 [Source:VGNC Symbol;Acc:VGNC:76069]                   | 2.140785873 | 0.000106875 | 0.000965615 |
| ENSMMUG00000008916 | transferrin [Source:VGNC Symbol;Acc:VGNC:82716]                                                | 2.140133416 | 3.25E-09    | 8.96E-08    |
| ENSMMUG00000062866 |                                                                                                | 2.139341101 | 0.000525202 | 0.003726973 |
| ENSMMUG00000018945 | chloride nucleotide-sensitive channel 1A [Source:VGNC Symbol;Acc:VGNC:71261]                   | -2.13736032 | 0.00579006  | 0.026182304 |
| ENSMMUG00000009669 | cutaneous T cell lymphoma-associated antigen 1 [Source:NCBI gene;Acc:106994443]                | 2.135130661 | 0.005068038 | 0.023542907 |
| ENSMMUG00000051482 |                                                                                                | 2.133960627 | 7.98E-07    | 1.30E-05    |
| ENSMMUG00000003120 | HECT domain E3 ubiquitin protein ligase 1 [Source:VGNC Symbol;Acc:VGNC:73200]                  | 2.133405853 | 0.00026158  | 0.002043306 |
| ENSMMUG00000009695 | BTB domain containing 10 [Source:VGNC Symbol;Acc:VGNC:70361]                                   | 2.130089117 | 0.000568078 | 0.003993502 |
| ENSMMUG00000000009 | protein tyrosine phosphatase receptor type C [Source:VGNC Symbol;Acc:VGNC:76612]               | 2.129660257 | 6.35E-05    | 0.000616581 |
| ENSMMUG00000005801 | glyceronephosphate O-acyltransferase [Source:VGNC Symbol;Acc:VGNC:73100]                       | 2.126233197 | 5.13E-07    | 8.94E-06    |
| ENSMMUG00000030381 | arachidonate 15-lipoxygenase [Source:VGNC Symbol;Acc:VGNC:69796]                               | 2.123813716 | 8.67E-10    | 2.75E-08    |
| ENSMMUG00000061815 |                                                                                                | 2.122667306 | 1.71E-09    | 5.11E-08    |
| ENSMMUG00000062198 | transmembrane protein 204 [Source:NCBI gene;Acc:701926]                                        | 2.117047486 | 0.009926031 | 0.039840197 |
| ENSMMUG00000007766 | suppression of tumorigenicity 7 like [Source:VGNC Symbol;Acc:VGNC:77954]                       | 2.110181027 | 5.41E-07    | 9.34E-06    |
| ENSMMUG00000060841 |                                                                                                | 2.109950608 | 0.008654849 | 0.03588763  |
| ENSMMUG00000062110 | TPD52 like 1 [Source:NCBI gene;Acc:716568]                                                     | 2.108460867 | 0.003852291 | 0.01884908  |
| ENSMMUG00000039944 | Ras protein specific guanine nucleotide releasing factor 2 [Source:VGNC Symbol;Acc:VGNC:84486] | 2.107911309 | 2.41E-07    | 4.48E-06    |
| ENSMMUG00000051112 | p53 and DNA damage regulated 1 [Source:NCBI gene;Acc:712622]                                   | 2.107150585 | 2.01E-05    | 0.000226098 |
| ENSMMUG00000000238 | HECT domain E3 ubiquitin protein ligase 2 [Source:VGNC Symbol;Acc:VGNC:73246]                  | 2.104396133 | 8.84E-07    | 1.42E-05    |
| ENSMMUG00000017230 | V-set and transmembrane domain containing 2 like [Source:NCBI gene;Acc:707394]                 | 2.103884988 | 9.75E-10    | 3.07E-08    |
| ENSMMUG00000061892 |                                                                                                | 2.102309714 | 3.93E-08    | 8.58E-07    |

|                    |                                                                                    |   |             |             |             |
|--------------------|------------------------------------------------------------------------------------|---|-------------|-------------|-------------|
| ENSMMUG00000016610 | CD99 molecule like 2 [Source:VGNC Symbol;Acc:VGNC:70823]                           | - | 2.099800346 | 0.000315467 | 0.002399897 |
| ENSMMUG00000015962 | AT-rich interaction domain 2 [Source:VGNC Symbol;Acc:VGNC:69858]                   | - | 2.099698463 | 2.69E-08    | 6.11E-07    |
| ENSMMUG00000050177 |                                                                                    | - | -2.09741513 | 0.000358257 | 0.00267185  |
| ENSMMUG00000051261 |                                                                                    | - | 2.088191979 | 0.000662798 | 0.004524317 |
| ENSMMUG00000008942 | carosine dipeptidase 1 [Source:VGNC Symbol;Acc:VGNC:71257]                         | - | 2.079637426 | 0.007528569 | 0.032223229 |
| ENSMMUG00000001121 | zinc finger protein 689 [Source:VGNC Symbol;Acc:VGNC:79480]                        | - | 2.076735512 | 0.000115251 | 0.001028434 |
| ENSMMUG00000047994 | CGG triplet repeat binding protein 1 [Source:VGNC Symbol;Acc:VGNC:84203]           | - | 2.075955368 | 0.00061602  | 0.00426412  |
| ENSMMUG00000020706 | ETS proto-oncogene 1, transcription factor [Source:VGNC Symbol;Acc:VGNC:72439]     | - | 2.074901802 | 2.50E-10    | 8.89E-09    |
| ENSMMUG00000015238 | O-linked N-acetylglucosamine (GlcNAc) transferase [Source:NCBI gene;Acc:698268]    | - | 2.073848668 | 4.02E-09    | 1.09E-07    |
| ENSMMUG00000006682 | chondroitin polymerizing factor 2 [Source:VGNC Symbol;Acc:VGNC:71131]              | - | 2.073841427 | 0.003720331 | 0.018310925 |
| ENSMMUG00000009948 | histone deacetylase 1 [Source:NCBI gene;Acc:708441]                                | - | 2.073471345 | 1.37E-06    | 2.10E-05    |
| ENSMMUG00000052435 | Metazoan signal recognition particle RNA [Source:RFAM;Acc:RF00017]                 | - | 2.072171182 | 0.000608207 | 0.004220823 |
| ENSMMUG00000021377 | SPT3 homolog, SAGA and STAGA complex component [Source:VGNC Symbol;Acc:VGNC:78055] | - | 2.071404001 | 3.70E-06    | 5.06E-05    |
| ENSMMUG00000038935 | zinc finger CCHC-type containing 3 [Source:NCBI gene;Acc:714477]                   | - | 2.069160839 | 0.000633169 | 0.004355141 |
| ENSMMUG00000023480 | IKAROS family zinc finger 5 [Source:VGNC Symbol;Acc:VGNC:73590]                    | - | 2.066883761 | 0.001110282 | 0.006845582 |
| ENSMMUG00000008718 | zinc finger protein 280D [Source:NCBI gene;Acc:699509]                             | - | 2.066322533 | 3.31E-08    | 7.34E-07    |
| ENSMMUG00000007968 | hedgehog interacting protein [Source:VGNC Symbol;Acc:VGNC:73169]                   | - | 2.064538449 | 1.63E-05    | 0.000188509 |
| ENSMMUG00000003987 | forkhead associated phosphopeptide binding domain 1 [Source:NCBI gene;Acc:699900]  | - | 2.062875025 | 0.009640069 | 0.038952208 |
| ENSMMUG00000006775 | proenkephalin [Source:VGNC Symbol;Acc:VGNC:75941]                                  | - | 2.061234019 | 1.58E-05    | 0.000182849 |
| ENSMMUG00000018746 | FAST kinase domains 3 [Source:VGNC Symbol;Acc:VGNC:72588]                          | - | 2.060201644 | 2.86E-05    | 0.000308805 |
| ENSMMUG00000016927 | solute carrier family 2 member 10 [Source:VGNC Symbol;Acc:VGNC:77465]              | - | 2.057469433 | 4.96E-07    | 8.72E-06    |
| ENSMMUG00000000667 | zinc finger MYM-type containing 3 [Source:VGNC Symbol;Acc:VGNC:78886]              | - | 2.057292513 | 0.001337697 | 0.008006227 |
| ENSMMUG00000012781 | muscular LMNA interacting protein [Source:VGNC Symbol;Acc:VGNC:83434]              | - | 2.055884894 | 5.46E-05    | 0.000542536 |
| ENSMMUG00000007215 | X-box binding protein 1 [Source:VGNC Symbol;Acc:VGNC:78806]                        | - | 2.050094744 | 1.47E-05    | 0.00017267  |
| ENSMMUG00000001386 | neurotrophic receptor tyrosine kinase 3 [Source:VGNC Symbol;Acc:VGNC:75542]        | - | 2.049179014 | 0.002360161 | 0.012720211 |
| ENSMMUG00000017437 | LysM domain containing 2 [Source:NCBI gene;Acc:694916]                             | - | 2.049006911 | 0.009221284 | 0.037615525 |
| ENSMMUG00000047542 | U4 spliceosomal RNA [Source:RFAM;Acc:RF00015]                                      | - | 2.047093724 | 0.004614885 | 0.021802466 |
| ENSMMUG00000019325 | mechanistic target of rapamycin kinase [Source:VGNC Symbol;Acc:VGNC:75062]         | - | 2.043161228 | 5.39E-07    | 9.33E-06    |
| ENSMMUG00000043411 | zinc finger and BTB domain containing 39 [Source:NCBI gene;Acc:713914]             | - | 2.040727759 | 0.000678999 | 0.00462616  |

|                    |                                                                                        |   |             |             |             |
|--------------------|----------------------------------------------------------------------------------------|---|-------------|-------------|-------------|
| ENSMMUG00000054689 |                                                                                        | - | 2.040643778 | 0.000898898 | 0.005768818 |
| ENSMMUG00000020289 | CD83 molecule [Source:VGNC Symbol;Acc:VGNC:70783]                                      | - | 2.040069459 | 4.71E-06    | 6.27E-05    |
| ENSMMUG00000000620 | dehydrogenase/reductase 11 [Source:VGNC Symbol;Acc:VGNC:71792]                         | - | 2.038959766 | 0.008265272 | 0.034557196 |
| ENSMMUG00000064980 |                                                                                        | - | 2.038768882 | 0.005289315 | 0.024434607 |
| ENSMMUG00000012462 | proteasome activator subunit 1 [Source:VGNC Symbol;Acc:VGNC:76455]                     | - | 2.034433975 | 0.000724953 | 0.004883965 |
| ENSMMUG00000055477 |                                                                                        | - | 2.028309817 | 0.000131544 | 0.001153861 |
| ENSMMUG00000023006 | corepressor interacting with RBPJ, 1 [Source:VGNC Symbol;Acc:VGNC:71331]               | - | 2.022201425 | 0.001954694 | 0.010864646 |
| ENSMMUG00000049997 |                                                                                        | - | 2.015109816 | 0.000141256 | 0.001222224 |
| ENSMMUG00000023076 | diacylglycerol kinase eta [Source:VGNC Symbol;Acc:VGNC:71786]                          | - | 2.011502494 | 0.000147094 | 0.001264659 |
| ENSMMUG00000037908 |                                                                                        | - | 2.004485288 | 0.00010082  | 0.000915491 |
| ENSMMUG00000018358 | zinc finger protein 217 [Source:VGNC Symbol;Acc:VGNC:78874]                            | - | 1.998413976 | 9.83E-06    | 0.000122403 |
| ENSMMUG00000051523 | Metazoan signal recognition particle RNA [Source:RFAM;Acc:RF00017]                     | - | 1.997250738 | 0.001144757 | 0.007016918 |
| ENSMMUG00000001894 | cyclin dependent kinase 11B [Source:NCBI gene;Acc:703046]                              | - | 1.996245915 | 0.00140941  | 0.008352376 |
| ENSMMUG00000051641 |                                                                                        | - | 1.992961604 | 7.12E-05    | 0.000677402 |
| ENSMMUG00000010379 | Mtr4 exosome RNA helicase [Source:VGNC Symbol;Acc:VGNC:74989]                          | - | -1.99277703 | 1.65E-05    | 0.000190951 |
| ENSMMUG00000053344 | splA/ryanodine receptor domain and SOCS box containing 4 [Source:NCBI gene;Acc:715278] | - | 1.991945873 | 0.010861596 | 0.042585475 |
| ENSMMUG00000062021 |                                                                                        | - | 1.991239177 | 0.006412214 | 0.028372545 |
| ENSMMUG00000017114 | pleckstrin homology domain containing A6 [Source:VGNC Symbol;Acc:VGNC:76040]           | - | 1.990811444 | 0.004339015 | 0.020734253 |
| ENSMMUG00000003260 |                                                                                        | - | 1.990515507 | 6.53E-08    | 1.36E-06    |
| ENSMMUG00000007277 | GTP binding protein 1 [Source:VGNC Symbol;Acc:VGNC:73320]                              | - | 1.987091607 | 0.006603037 | 0.02907752  |
| ENSMMUG00000023583 | calcium release activated channel regulator 2A [Source:NCBI gene;Acc:709929]           | - | -1.98558955 | 0.002895314 | 0.014895197 |
| ENSMMUG00000002103 | delta/notch like EGF repeat containing [Source:VGNC Symbol;Acc:VGNC:71895]             | - | 1.979560021 | 9.84E-06    | 0.000122407 |
| ENSMMUG00000061117 |                                                                                        | - | 1.979349811 | 7.36E-05    | 0.000698116 |
| ENSMMUG00000022791 | heat shock transcription factor 2 binding protein [Source:VGNC Symbol;Acc:VGNC:73532]  | - | 1.977034402 | 0.004008738 | 0.019421581 |
| ENSMMUG00000016791 | doublecortin like kinase 1 [Source:VGNC Symbol;Acc:VGNC:71745]                         | - | 1.976573197 | 6.72E-05    | 0.000648403 |
| ENSMMUG00000051552 |                                                                                        | - | -1.97589908 | 0.001878956 | 0.010539308 |
| ENSMMUG00000014531 | transmembrane protein 109 [Source:VGNC Symbol;Acc:VGNC:79740]                          | - | 1.971638966 | 3.79E-05    | 0.000395133 |
| ENSMMUG00000007765 | Wnt family member 2B [Source:VGNC Symbol;Acc:VGNC:78797]                               | - | 1.971215523 | 2.42E-11    | 1.08E-09    |
| ENSMMUG00000045584 | leucine zipper protein 1 [Source:NCBI gene;Acc:718626]                                 | - | 1.964369158 | 7.12E-08    | 1.46E-06    |



|                    |                                                                                                       |   |             |             |             |
|--------------------|-------------------------------------------------------------------------------------------------------|---|-------------|-------------|-------------|
| ENSMMUG0000008119  | telomere maintenance 2 [Source:NCBI gene;Acc:701679]                                                  | - | 1.964091771 | 5.65E-06    | 7.37E-05    |
| ENSMMUG00000018974 | LysM domain containing 3 [Source:VGNC Symbol;Acc:VGNC:74373]                                          | - | 1.963886489 | 3.77E-10    | 1.27E-08    |
| ENSMMUG00000022648 | beta-1,3-galactosyltransferase 2 [Source:VGNC Symbol;Acc:VGNC:70205]                                  | - | 1.963519572 | 0.001885161 | 0.010564897 |
| ENSMMUG00000021091 | COP9 signalosome subunit 3 [Source:VGNC Symbol;Acc:VGNC:71316]                                        | - | 1.960833541 | 0.006052082 | 0.027090405 |
| ENSMMUG00000021373 | rhomboid domain containing 3 [Source:NCBI gene;Acc:714479]                                            | - | 1.958396442 | 6.88E-05    | 0.000660569 |
| ENSMMUG00000014735 | carnitine palmitoyltransferase 1C [Source:NCBI gene;Acc:719429]                                       | - | -1.95328361 | 1.11E-05    | 0.000135214 |
| ENSMMUG00000042798 |                                                                                                       | - | 1.953269063 | 2.10E-06    | 3.04E-05    |
| ENSMMUG00000018747 | 5-methyltetrahydrofolate-homocysteine methyltransferase reductase [Source:VGNC Symbol;Acc:VGNC:75079] | - | 1.950127324 | 7.70E-08    | 1.57E-06    |
| ENSMMUG00000062861 |                                                                                                       | - | 1.944537302 | 6.87E-05    | 0.00065987  |
| ENSMMUG00000059855 | Smad nuclear interacting protein 1 [Source:NCBI gene;Acc:713733]                                      | - | 1.944533735 | 0.000295128 | 0.002261049 |
| ENSMMUG00000000058 | CDV3 homolog [Source:VGNC Symbol;Acc:VGNC:71114]                                                      | - | -1.94440746 | 0.003175829 | 0.016084035 |
| ENSMMUG00000017355 | remodeling and spacing factor 1 [Source:VGNC Symbol;Acc:VGNC:77044]                                   | - | -1.94037589 | 7.64E-05    | 0.000720595 |
| ENSMMUG00000022183 | spermatogenesis associated 1 [Source:NCBI gene;Acc:710462]                                            | - | 1.938011721 | 4.97E-12    | 2.55E-10    |
| ENSMMUG00000052526 | RAB39A, member RAS oncogene family [Source:NCBI gene;Acc:707451]                                      | - | 1.933822186 | 9.06E-11    | 3.54E-09    |
| ENSMMUG00000050864 |                                                                                                       | - | 1.932639231 | 4.19E-05    | 0.000431301 |
| ENSMMUG00000019850 | arachidonate lipoxygenase 3 [Source:VGNC Symbol;Acc:VGNC:69607]                                       | - | 1.924300854 | 5.36E-17    | 7.17E-15    |
| ENSMMUG00000010648 | DNA methyltransferase 3 like [Source:NCBI gene;Acc:722184]                                            | - | 1.924007954 | 0.000124542 | 0.001100457 |
| ENSMMUG00000022636 | GTPase, IMAP family member 8 [Source:VGNC Symbol;Acc:VGNC:72981]                                      | - | 1.923709266 | 0.000247278 | 0.001959383 |
| ENSMMUG00000022202 | basic leucine zipper and W2 domains 1 [Source:VGNC Symbol;Acc:VGNC:84213]                             | - | 1.922871942 | 7.83E-06    | 9.91E-05    |
| ENSMMUG00000026836 | Y RNA [Source:RFAM;Acc:RF00019]                                                                       | - | 1.922548915 | 0.006227549 | 0.027694185 |
| ENSMMUG00000051107 |                                                                                                       | - | 1.919832228 | 0.002405009 | 0.01289137  |
| ENSMMUG00000054916 | Metazoan signal recognition particle RNA [Source:RFAM;Acc:RF00017]                                    | - | 1.916672895 | 0.005633747 | 0.025653795 |
| ENSMMUG0000008009  | family with sequence similarity 13 member B [Source:VGNC Symbol;Acc:VGNC:72268]                       | - | 1.914788819 | 0.000834987 | 0.005455615 |
| ENSMMUG00000013501 | CD68 molecule [Source:VGNC Symbol;Acc:VGNC:82121]                                                     | - | 1.910749147 | 0.008457343 | 0.035170211 |
| ENSMMUG00000058539 |                                                                                                       | - | -1.90419406 | 0.004008099 | 0.019421581 |
| ENSMMUG00000064804 |                                                                                                       | - | 1.893391325 | 0.000238008 | 0.001902832 |
| ENSMMUG00000049437 | Metazoan signal recognition particle RNA [Source:RFAM;Acc:RF00017]                                    | - | 1.892828308 | 4.79E-05    | 0.000484858 |
| ENSMMUG00000059208 | aurora kinase A interacting protein 1 [Source:NCBI gene;Acc:706329]                                   | - | 1.892797322 | 0.005908654 | 0.026603677 |
| ENSMMUG00000004617 | glutathione peroxidase 6 [Source:VGNC Symbol;Acc:VGNC:73154]                                          | - | 1.889951541 | 0.010941032 | 0.042773076 |
| ENSMMUG00000005856 | glycine amidinotransferase [Source:VGNC Symbol;Acc:VGNC:72892]                                        | - | 1.887983983 | 3.30E-07    | 6.00E-06    |

|                     |                                                                                                |   |             |             |             |
|---------------------|------------------------------------------------------------------------------------------------|---|-------------|-------------|-------------|
| ENSMMUG00000016993  | PKHD1 ciliary IPT domain containing fibrocystin/polyductin [Source:VGNC Symbol;Acc:VGNC:76010] | - | 1.886506911 | 0.000204448 | 0.001665255 |
| ENSMMUG00000018474  | signal regulatory protein alpha [Source:NCBI gene;Acc:717811]                                  | - | 1.884585691 | 0.000334463 | 0.002519637 |
| ENSMMUG00000000059  | DNA topoisomerase II binding protein 1 [Source:VGNC Symbol;Acc:VGNC:79061]                     | - | -1.88425417 | 2.35E-10    | 8.42E-09    |
| ENSMMUG000000054719 |                                                                                                | - | 1.883895822 | 2.63E-06    | 3.72E-05    |
| ENSMMUG00000014810  | short chain dehydrogenase/reductase family 16C member 5 [Source:VGNC Symbol;Acc:VGNC:77343]    | - | 1.878946634 | 8.11E-07    | 1.32E-05    |
| ENSMMUG00000020910  | nucleoporin 54 [Source:VGNC Symbol;Acc:VGNC:75420]                                             | - | 1.878868683 | 0.000522353 | 0.003713027 |
| ENSMMUG00000044473  |                                                                                                | - | 1.877318434 | 1.28E-05    | 0.000153973 |
| ENSMMUG00000054210  | C-C motif chemokine 4 [Source:NCBI gene;Acc:100426632]                                         | - | 1.875076815 | 1.56E-12    | 8.76E-11    |
| ENSMMUG00000001551  | SSU72 homolog, RNA polymerase II CTD phosphatase [Source:VGNC Symbol;Acc:VGNC:77986]           | - | 1.873056718 | 2.75E-05    | 0.000298831 |
| ENSMMUG00000010695  | adenosine deaminase RNA specific B1 [Source:VGNC Symbol;Acc:VGNC:69503]                        | - | 1.865409786 | 0.002848192 | 0.01471362  |
| ENSMMUG00000010127  | chitobiase [Source:VGNC Symbol;Acc:VGNC:71540]                                                 | - | 1.865074992 | 0.001207826 | 0.007342523 |
| ENSMMUG00000049351  | MAGE family member E1 [Source:NCBI gene;Acc:705379]                                            | - | 1.857330292 | 2.67E-05    | 0.000292514 |
| ENSMMUG00000010114  | Ras and Rab interactor 2 [Source:VGNC Symbol;Acc:VGNC:76770]                                   | - | -1.85657369 | 3.58E-05    | 0.000375948 |
| ENSMMUG00000065031  |                                                                                                | - | 1.856321923 | 1.25E-11    | 5.99E-10    |
| ENSMMUG00000007411  | integrin alpha FG-GAP repeat containing 2 [Source:VGNC Symbol;Acc:VGNC:73690]                  | - | 1.840401595 | 1.85E-09    | 5.47E-08    |
| ENSMMUG00000012396  | zinc finger and SCAN domain containing 23 [Source:VGNC Symbol;Acc:VGNC:79313]                  | - | 1.838322638 | 5.48E-05    | 0.00054325  |
| ENSMMUG00000013848  | fucosyltransferase 8 [Source:VGNC Symbol;Acc:VGNC:72829]                                       | - | 1.837306787 | 0.000743004 | 0.004968493 |
| ENSMMUG00000040694  | LCK proto-oncogene, Src family tyrosine kinase [Source:NCBI gene;Acc:717704]                   | - | 1.836924569 | 7.70E-15    | 7.01E-13    |
| ENSMMUG00000055678  | translocase of outer mitochondrial membrane 20 like [Source:NCBI gene;Acc:700628]              | - | 1.834772856 | 0.011155941 | 0.043393154 |
| ENSMMUG00000020175  | mediator complex subunit 25 [Source:VGNC Symbol;Acc:VGNC:74607]                                | - | 1.833331437 | 0.002135028 | 0.011693004 |
| ENSMMUG00000019977  | myosin heavy chain 15 [Source:VGNC Symbol;Acc:VGNC:84148]                                      | - | 1.832940945 | 3.39E-05    | 0.000359504 |
| ENSMMUG00000008639  | tumor protein p53 [Source:VGNC Symbol;Acc:VGNC:78627]                                          | - | 1.828342212 | 0.000119414 | 0.001062948 |
| ENSMMUG00000048805  |                                                                                                | - | 1.826821099 | 8.09E-05    | 0.000754557 |
| ENSMMUG00000062615  |                                                                                                | - | -1.8241498  | 0.001790405 | 0.010144068 |
| ENSMMUG00000063659  |                                                                                                | - | 1.823826067 | 0.00869217  | 0.035982409 |
| ENSMMUG00000055845  | ankyrin repeat domain 53 [Source:NCBI gene;Acc:703757]                                         | - | 1.823524844 | 0.000280649 | 0.002168527 |
| ENSMMUG00000002200  | phospholipid phosphatase 3 [Source:NCBI gene;Acc:715993]                                       | - | 1.822760149 | 3.34E-08    | 7.40E-07    |
| ENSMMUG00000019045  | estrogen receptor 1 [Source:VGNC Symbol;Acc:VGNC:72432]                                        | - | 1.822297402 | 0.001548212 | 0.009031654 |
| ENSMMUG00000011214  | solute carrier family 12 member 2 [Source:VGNC Symbol;Acc:VGNC:77386]                          | - | -1.82110288 | 0.000906508 | 0.00579705  |
| ENSMMUG00000003191  | kirre like nephrin family adhesion molecule 1 [Source:VGNC Symbol;Acc:VGNC:73837]              | - | 1.819728195 | 1.33E-06    | 2.04E-05    |

|                    |                                                                                  |   |             |             |             |
|--------------------|----------------------------------------------------------------------------------|---|-------------|-------------|-------------|
| ENSMMUG0000002802  | agmatinase [Source:NCBI gene;Acc:713190]                                         | - | 1.819456867 | 0.011198303 | 0.043465146 |
| ENSMMUG00000064458 |                                                                                  | - | 1.817928857 | 0.001645621 | 0.009502672 |
| ENSMMUG00000023265 | A-kinase anchoring protein 12 [Source:VGNC Symbol;Acc:VGNC:69766]                | - | 1.815400739 | 2.57E-08    | 5.90E-07    |
| ENSMMUG00000012110 | smoothened, frizzled class receptor [Source:VGNC Symbol;Acc:VGNC:77658]          | - | 1.813672271 | 0.000342393 | 0.002572495 |
| ENSMMUG00000015117 | X-prolyl aminopeptidase 1 [Source:VGNC Symbol;Acc:VGNC:78810]                    | - | 1.813238972 | 0.000373612 | 0.002766467 |
| ENSMMUG00000060408 |                                                                                  | - | 1.809775433 | 0.003202603 | 0.01619692  |
| ENSMMUG00000018679 | glyceraldehyde-3-phosphate dehydrogenase [Source:NCBI gene;Acc:574353]           | - | 1.799717816 | 0.005126277 | 0.023779053 |
| ENSMMUG00000021691 | spastin [Source:VGNC Symbol;Acc:VGNC:77857]                                      | - | 1.776047592 | 0.002866685 | 0.014788001 |
| ENSMMUG00000061068 |                                                                                  | - | 1.775057913 | 0.001193291 | 0.007258236 |
| ENSMMUG00000008738 | COMM domain containing 10 [Source:VGNC Symbol;Acc:VGNC:71374]                    | - | 1.771519119 | 0.009380602 | 0.038074209 |
| ENSMMUG00000049295 | GTPase, IMAP family member 5 [Source:NCBI gene;Acc:713835]                       | - | 1.770217002 | 6.06E-05    | 0.000595376 |
| ENSMMUG00000016052 | seizure related 6 homolog like [Source:VGNC Symbol;Acc:VGNC:77176]               | - | 1.767370447 | 0.000213266 | 0.001722826 |
| ENSMMUG00000016911 | DEAD-box helicase 41 [Source:VGNC Symbol;Acc:VGNC:71660]                         | - | 1.763951529 | 0.000134111 | 0.001172581 |
| ENSMMUG00000040771 |                                                                                  | - | 1.761883782 | 0.000945735 | 0.006001846 |
| ENSMMUG00000016893 | solute carrier family 9 member A1 [Source:VGNC Symbol;Acc:VGNC:82241]            | - | 1.760419353 | 0.000135305 | 0.001182065 |
| ENSMMUG00000065099 |                                                                                  | - | 1.760333848 | 0.000163969 | 0.001381238 |
| ENSMMUG00000000690 | catenin alpha like 1 [Source:VGNC Symbol;Acc:VGNC:71544]                         | - | 1.759979884 | 0.00284176  | 0.014694407 |
| ENSMMUG00000046218 | X antigen family member 5 [Source:NCBI gene;Acc:114669729]                       | - | 1.759184511 | 0.000407957 | 0.002988098 |
| ENSMMUG00000058151 | chromosome 4 C6orf62 homolog [Source:NCBI gene;Acc:708218]                       | - | -1.75508828 | 4.10E-06    | 5.53E-05    |
| ENSMMUG00000002894 | dedicator of cytokinesis 4 [Source:VGNC Symbol;Acc:VGNC:71866]                   | - | 1.751859439 | 1.06E-05    | 0.000130425 |
| ENSMMUG00000002657 | olfactomedin 4 [Source:VGNC Symbol;Acc:VGNC:75418]                               | - | 1.750436129 | 0.005922234 | 0.026642674 |
| ENSMMUG00000020435 | amine oxidase copper containing 1 [Source:VGNC Symbol;Acc:VGNC:70033]            | - | 1.749935581 | 5.00E-06    | 6.59E-05    |
| ENSMMUG00000000684 | acyl-CoA dehydrogenase short/branched chain [Source:VGNC Symbol;Acc:VGNC:81343]  | - | 1.748268788 | 0.003226833 | 0.016289041 |
| ENSMMUG00000014018 | bromodomain testis associated [Source:VGNC Symbol;Acc:VGNC:70282]                | - | 1.742399894 | 0.000350006 | 0.002620327 |
| ENSMMUG00000021308 | chromosome 9 C10orf71 homolog [Source:NCBI gene;Acc:710332]                      | - | 1.741267622 | 0.001313657 | 0.007888497 |
| ENSMMUG00000019145 | TNF alpha induced protein 1 [Source:VGNC Symbol;Acc:VGNC:78578]                  | - | 1.740626711 | 8.10E-05    | 0.000754743 |
| ENSMMUG00000022680 | alpha-2-macroglobulin like 1 [Source:VGNC Symbol;Acc:VGNC:69507]                 | - | 1.739439078 | 8.38E-05    | 0.000776544 |
| ENSMMUG00000060932 | zinc finger protein 383-like [Source:NCBI gene;Acc:106993074]                    | - | 1.739376533 | 0.002758056 | 0.01436109  |
| ENSMMUG00000012224 | family with sequence similarity 126 member B [Source:VGNC Symbol;Acc:VGNC:72393] | - | 1.739077576 | 0.008978024 | 0.036895861 |



|                    |                                                                                                         |   |             |             |             |
|--------------------|---------------------------------------------------------------------------------------------------------|---|-------------|-------------|-------------|
| ENSMMUG00000022927 | RCAN family member 3 [Source:VGNC Symbol;Acc:VGNC:76875]                                                | - | 1.739046926 | 0.00014172  | 0.001225263 |
| ENSMMUG00000014474 | SPARC related modular calcium binding 2 [Source:VGNC Symbol;Acc:VGNC:83470]                             | - | 1.735897175 | 1.03E-06    | 1.63E-05    |
| ENSMMUG00000063598 | leucine rich repeat containing 26 [Source:NCBI gene;Acc:706616]                                         | - | 1.734741787 | 0.001173043 | 0.007155167 |
| ENSMMUG00000056737 |                                                                                                         | - | 1.734666525 | 0.010901515 | 0.042695629 |
| ENSMMUG00000060600 |                                                                                                         | - | -1.73289409 | 0.005645988 | 0.025677156 |
| ENSMMUG00000018081 | ubiquitin associated and SH3 domain containing A [Source:VGNC Symbol;Acc:VGNC:78687]                    | - | 1.731262238 | 0.000282919 | 0.002179844 |
| ENSMMUG00000001942 | mbt domain containing 1 [Source:VGNC Symbol;Acc:VGNC:74538]                                             | - | 1.731046932 | 6.35E-05    | 0.000616581 |
| ENSMMUG00000020540 | NmrA like redox sensor 1 [Source:VGNC Symbol;Acc:VGNC:75252]                                            | - | 1.728733076 | 0.00102719  | 0.00642468  |
| ENSMMUG00000022631 | ubiquitin specific peptidase 21 [Source:VGNC Symbol;Acc:VGNC:78741]                                     | - | 1.726449544 | 0.008406691 | 0.035026802 |
| ENSMMUG00000001640 | SIX homeobox 4 [Source:NCBI gene;Acc:703798]                                                            | - | 1.726012012 | 0.006797375 | 0.029800068 |
| ENSMMUG00000021374 | EWS RNA binding protein 1 [Source:VGNC Symbol;Acc:VGNC:72446]                                           | - | 1.720953684 | 0.000126741 | 0.001117155 |
| ENSMMUG00000047276 | GTPase, IMAP family member 6 [Source:VGNC Symbol;Acc:VGNC:81315]                                        | - | 1.718969762 | 8.89E-07    | 1.42E-05    |
| ENSMMUG00000018058 | ATP binding cassette subfamily G member 1 [Source:VGNC Symbol;Acc:VGNC:69584]                           | - | 1.718843678 | 0.000365678 | 0.002722601 |
| ENSMMUG00000039020 | zinc finger protein 141 [Source:NCBI gene;Acc:714265]                                                   | - | 1.713458673 | 1.24E-05    | 0.000149229 |
| ENSMMUG00000018493 | FH2 domain containing 1 [Source:VGNC Symbol;Acc:VGNC:72598]                                             | - | 1.712967186 | 0.008950759 | 0.036834508 |
| ENSMMUG00000018031 | solute carrier family 25 member 19 [Source:VGNC Symbol;Acc:VGNC:77474]                                  | - | 1.712062502 | 0.006189404 | 0.027569823 |
| ENSMMUG00000005067 | elongator acetyltransferase complex subunit 3 [Source:VGNC Symbol;Acc:VGNC:72080]                       | - | 1.711171773 | 0.005303132 | 0.02448799  |
| ENSMMUG00000021186 | anillin actin binding protein [Source:VGNC Symbol;Acc:VGNC:69610]                                       | - | 1.711014236 | 1.00E-05    | 0.000124271 |
| ENSMMUG00000010323 | zinc finger CCCH-type containing 12A [Source:VGNC Symbol;Acc:VGNC:79595]                                | - | 1.709515383 | 0.00219377  | 0.011960298 |
| ENSMMUG00000005923 | failed axon connections homolog, metaxin like GST domain containing [Source:VGNC Symbol;Acc:VGNC:72541] | - | 1.705359721 | 0.002318994 | 0.012542019 |
| ENSMMUG00000023443 | SRR1 domain containing [Source:VGNC Symbol;Acc:VGNC:78036]                                              | - | 1.704472967 | 0.000151558 | 0.001293281 |
| ENSMMUG00000023558 | exocyst complex component 2 [Source:VGNC Symbol;Acc:VGNC:72338]                                         | - | 1.700350098 | 0.004830013 | 0.022641079 |
| ENSMMUG00000032427 | neuroligin 3 [Source:NCBI gene;Acc:574216]                                                              | - | 1.697542878 | 5.47E-05    | 0.00054325  |
| ENSMMUG00000053036 |                                                                                                         | - | 1.696012182 | 6.80E-05    | 0.00065462  |
| ENSMMUG00000008919 | RAB6B, member RAS oncogene family [Source:VGNC Symbol;Acc:VGNC:81547]                                   | - | -1.69255112 | 0.000447723 | 0.003237776 |
| ENSMMUG00000013035 | teashirt zinc finger homeobox 2 [Source:VGNC Symbol;Acc:VGNC:78875]                                     | - | 1.692548843 | 0.004150909 | 0.019976365 |
| ENSMMUG00000013045 | coiled-coil domain containing 81 [Source:VGNC Symbol;Acc:VGNC:70868]                                    | - | 1.690580653 | 0.010937331 | 0.042773076 |
| ENSMMUG00000038051 | uncharacterized LOC106998885 [Source:NCBI gene;Acc:106998885]                                           | - | 1.690460989 | 0.000242157 | 0.00192747  |
| ENSMMUG00000000117 | HCK proto-oncogene, Src family tyrosine kinase [Source:VGNC Symbol;Acc:VGNC:73353]                      | - | 1.687369431 | 0.000951332 | 0.00602831  |

|                    |                                                                                      |   |             |             |             |
|--------------------|--------------------------------------------------------------------------------------|---|-------------|-------------|-------------|
| ENSMMUG00000045105 | phospholipase A and acyltransferase 4 [Source:NCBI gene;Acc:722189]                  | - | 1.685197099 | 0.006844657 | 0.029970964 |
| ENSMMUG00000012463 | DEAD-box helicase 46 [Source:VGNC Symbol;Acc:VGNC:71663]                             | - | 1.684685714 | 2.33E-10    | 8.37E-09    |
| ENSMMUG00000021775 | beta-1,3-galactosyltransferase 1 [Source:VGNC Symbol;Acc:VGNC:70204]                 | - | -1.68156889 | 0.002171905 | 0.011858994 |
| ENSMMUG00000057697 |                                                                                      | - | 1.679304816 | 0.002672987 | 0.014062576 |
| ENSMMUG00000061295 | PDZ domain containing 11 [Source:NCBI gene;Acc:695458]                               | - | 1.677620257 | 0.001293063 | 0.007799417 |
| ENSMMUG00000009493 | family with sequence similarity 120A [Source:NCBI gene;Acc:717459]                   | - | -1.67605633 | 0.004559709 | 0.021588865 |
| ENSMMUG00000032244 | DnaJ heat shock protein family (Hsp40) member C16 [Source:NCBI gene;Acc:700894]      | - | -1.67573742 | 0.003927204 | 0.019094884 |
| ENSMMUG00000002821 | origin recognition complex subunit 3 [Source:VGNC Symbol;Acc:VGNC:75715]             | - | -1.67216375 | 0.000932754 | 0.005936856 |
| ENSMMUG00000007775 | survival motor neuron domain containing 1 [Source:NCBI gene;Acc:694761]              | - | 1.671762435 | 0.00345589  | 0.017229946 |
| ENSMMUG00000055344 | TLC domain containing 3A [Source:NCBI gene;Acc:699707]                               | - | 1.667203378 | 2.01E-05    | 0.000225887 |
| ENSMMUG00000059773 | methyltransferase like 11B [Source:NCBI gene;Acc:705503]                             | - | 1.663885161 | 0.002863669 | 0.014779478 |
| ENSMMUG00000014080 | kelch like family member 8 [Source:VGNC Symbol;Acc:VGNC:74076]                       | - | -1.66252331 | 0.007117014 | 0.030864136 |
| ENSMMUG00000021388 | circadian associated repressor of transcription [Source:VGNC Symbol;Acc:VGNC:71345]  | - | 1.662019233 | 0.000879279 | 0.005669776 |
| ENSMMUG00000009084 | transmembrane 6 superfamily member 1 [Source:VGNC Symbol;Acc:VGNC:78566]             | - | 1.661425089 | 7.53E-05    | 0.000710635 |
| ENSMMUG00000049859 |                                                                                      | - | 1.657171077 | 3.64E-05    | 0.000381405 |
| ENSMMUG00000013718 | translocation associated membrane protein 2 [Source:VGNC Symbol;Acc:VGNC:83515]      | - | 1.649669575 | 1.27E-09    | 3.92E-08    |
| ENSMMUG00000022118 | regulatory factor X4 [Source:VGNC Symbol;Acc:VGNC:76909]                             | - | 1.649134668 | 0.006318548 | 0.028052799 |
| ENSMMUG00000051020 | zinc finger protein 467 [Source:NCBI gene;Acc:712106]                                | - | 1.648587973 | 0.000358368 | 0.00267185  |
| ENSMMUG00000023083 | A-kinase anchoring protein 11 [Source:VGNC Symbol;Acc:VGNC:69765]                    | - | 1.648230123 | 0.002104725 | 0.011569822 |
| ENSMMUG00000065344 | homeobox D1 [Source:NCBI gene;Acc:701064]                                            | - | 1.643158929 | 0.000841993 | 0.005494768 |
| ENSMMUG00000015371 | microtubule associated serine/threonine kinase 2 [Source:VGNC Symbol;Acc:VGNC:74532] | - | 1.641011417 | 6.14E-05    | 0.000600233 |
| ENSMMUG00000001918 | transmembrane protein 165 [Source:VGNC Symbol;Acc:VGNC:79875]                        | - | 1.640791958 | 0.00887316  | 0.036590387 |
| ENSMMUG00000049563 |                                                                                      | - | -1.64011908 | 0.001312442 | 0.007888497 |
| ENSMMUG00000021145 | family with sequence similarity 120B [Source:VGNC Symbol;Acc:VGNC:72311]             | - | 1.637329514 | 5.82E-11    | 2.35E-09    |
| ENSMMUG00000062538 | adenylate cyclase type 10 [Source:NCBI gene;Acc:719662]                              | - | 1.636262469 | 0.002915154 | 0.014980962 |
| ENSMMUG00000051286 |                                                                                      | - | 1.636030522 | 3.58E-06    | 4.91E-05    |
| ENSMMUG00000022632 | ubiquitin-fold modifier conjugating enzyme 1 [Source:VGNC Symbol;Acc:VGNC:79643]     | - | 1.635562626 | 0.000239781 | 0.00191418  |
| ENSMMUG00000055889 |                                                                                      | - | 1.635443996 | 0.009406518 | 0.038150809 |
| ENSMMUG00000020122 | RAN binding protein 9 [Source:VGNC Symbol;Acc:VGNC:76475]                            | - | -1.62579069 | 1.05E-05    | 0.000129646 |
| ENSMMUG00000011573 | cap methyltransferase 1 [Source:VGNC Symbol;Acc:VGNC:71271]                          | - | 1.625502071 | 0.006175567 | 0.027519507 |
| ENSMMUG00000006553 | dishevelled segment polarity protein 3 [Source:VGNC Symbol;Acc:VGNC:72014]           | - | 1.623324473 | 0.003362901 | 0.016858078 |

|                    |                                                                                        |   |             |             |             |
|--------------------|----------------------------------------------------------------------------------------|---|-------------|-------------|-------------|
| ENSMMUG00000020348 | BCL2 interacting protein 2 [Source:VGNC Symbol;Acc:VGNC:70272]                         | - | 1.620686636 | 0.009590075 | 0.03879361  |
| ENSMMUG00000054176 | methyltransferase like 8 [Source:NCBI gene;Acc:695361]                                 | - | 1.618236844 | 0.002505829 | 0.013313216 |
| ENSMMUG00000004675 | smoothelin [Source:VGNC Symbol;Acc:VGNC:77661]                                         | - | 1.617928916 | 6.42E-05    | 0.000621758 |
| ENSMMUG00000007561 | zinc finger DHHC-type palmitoyltransferase 22 [Source:NCBI gene;Acc:706468]            | - | 1.617529565 | 0.000254697 | 0.002003724 |
| ENSMMUG00000008643 | general transcription factor IIIC subunit 3 [Source:VGNC Symbol;Acc:VGNC:73317]        | - | 1.615709551 | 6.08E-05    | 0.000595376 |
| ENSMMUG00000001728 | mitogen-activated protein kinase 9 [Source:VGNC Symbol;Acc:VGNC:74652]                 | - | 1.614915025 | 0.000108179 | 0.000974152 |
| ENSMMUG00000058765 |                                                                                        | - | 1.614361139 | 0.012117128 | 0.04631787  |
| ENSMMUG00000015640 | AF4/FMR2 family member 4 [Source:VGNC Symbol;Acc:VGNC:69629]                           | - | 1.611907173 | 0.003595429 | 0.017762833 |
| ENSMMUG00000005170 | unc-45 myosin chaperone B [Source:VGNC Symbol;Acc:VGNC:78954]                          | - | -1.61183355 | 0.00218449  | 0.011915698 |
| ENSMMUG00000006950 | cornichon family AMPA receptor auxiliary protein 2 [Source:VGNC Symbol;Acc:VGNC:71366] | - | 1.610288289 | 0.011383662 | 0.043979746 |
| ENSMMUG00000009520 | gephyrin [Source:VGNC Symbol;Acc:VGNC:72948]                                           | - | 1.609569757 | 0.0103292   | 0.041108091 |
| ENSMMUG00000058142 |                                                                                        | - | 1.606165318 | 0.00016462  | 0.001385647 |
| ENSMMUG00000010682 | fibrillin 2 [Source:VGNC Symbol;Acc:VGNC:72624]                                        | - | 1.604946076 | 7.45E-06    | 9.49E-05    |
| ENSMMUG00000011702 | tetraspanin 5 [Source:VGNC Symbol;Acc:VGNC:79086]                                      | - | 1.604723038 | 0.001649205 | 0.009518292 |
| ENSMMUG00000009087 | HDGF like 3 [Source:VGNC Symbol;Acc:VGNC:84346]                                        | - | 1.604639663 | 5.17E-05    | 0.00051784  |
| ENSMMUG00000049699 | thioredoxin like 4B [Source:NCBI gene;Acc:706840]                                      | - | 1.604413736 | 0.004968625 | 0.023160548 |
| ENSMMUG00000000982 | protein phosphatase 4 catalytic subunit [Source:VGNC Symbol;Acc:VGNC:76384]            | - | 1.603768509 | 0.000376601 | 0.002784223 |
| ENSMMUG00000023124 | transmembrane protein 43 [Source:VGNC Symbol;Acc:VGNC:82711]                           | - | 1.603337183 | 4.72E-06    | 6.27E-05    |
| ENSMMUG00000020036 | Sp1 transcription factor [Source:VGNC Symbol;Acc:VGNC:77844]                           | - | 1.600444602 | 0.000538751 | 0.003814566 |
| ENSMMUG00000002517 | protein tyrosine phosphatase domain containing 1 [Source:VGNC Symbol;Acc:VGNC:76567]   | - | -1.59708327 | 0.004147022 | 0.019966526 |
| ENSMMUG00000059525 |                                                                                        | - | 1.595222722 | 0.007717695 | 0.032735236 |
| ENSMMUG00000004709 | proteasome inhibitor subunit 1 [Source:VGNC Symbol;Acc:VGNC:76458]                     | - | 1.594924871 | 0.000161698 | 0.001366169 |
| ENSMMUG00000062664 |                                                                                        | - | 1.593371281 | 0.009981428 | 0.040003258 |
| ENSMMUG00000054532 |                                                                                        | - | -1.59325152 | 0.001558441 | 0.009066912 |
| ENSMMUG00000022121 | CASK interacting protein 2 [Source:VGNC Symbol;Acc:VGNC:70577]                         | - | 1.592604633 | 0.001146182 | 0.007018988 |
| ENSMMUG00000000962 | H2A.Z variant histone 2 [Source:VGNC Symbol;Acc:VGNC:81324]                            | - | 1.591613694 | 0.000780878 | 0.005173328 |
| ENSMMUG00000052676 |                                                                                        | - | 1.590072168 | 1.07E-06    | 1.68E-05    |
| ENSMMUG00000023137 | zinc finger protein 350 [Source:VGNC Symbol;Acc:VGNC:79041]                            | - | 1.589783596 | 0.000261614 | 0.002043306 |
| ENSMMUG00000008486 | endothelial cell adhesion molecule [Source:VGNC Symbol;Acc:VGNC:72290]                 | - | 1.589320852 | 5.49E-05    | 0.000543655 |

|                    |                                                                                                              |   |             |             |             |
|--------------------|--------------------------------------------------------------------------------------------------------------|---|-------------|-------------|-------------|
| ENSMMUG00000053778 |                                                                                                              | - | 1.587948661 | 0.004596811 | 0.02172655  |
| ENSMMUG00000008578 | hyaluronan and proteoglycan link protein 4 [Source:VGNC Symbol;Acc:VGNC:73261]                               | - | 1.587393877 | 0.004530113 | 0.021486302 |
| ENSMMUG00000050975 |                                                                                                              | - | 1.585120832 | 0.001978821 | 0.010976227 |
| ENSMMUG00000007256 | splicing factor 3b subunit 4 [Source:VGNC Symbol;Acc:VGNC:77182]                                             | - | 1.582208007 | 6.94E-05    | 0.000663864 |
| ENSMMUG00000032281 | zinc finger and BTB domain containing 48 [Source:VGNC Symbol;Acc:VGNC:79959]                                 | - | 1.581672514 | 0.000278466 | 0.002153195 |
| ENSMMUG00000002434 | inhibitor of growth family member 3 [Source:VGNC Symbol;Acc:VGNC:73595]                                      | - | 1.579165914 | 0.009363614 | 0.038019503 |
| ENSMMUG00000044759 |                                                                                                              | - | 1.573232576 | 2.68E-05    | 0.000292956 |
| ENSMMUG00000052574 |                                                                                                              | - | 1.572941376 | 1.96E-08    | 4.63E-07    |
| ENSMMUG00000049575 | T cell receptor beta variable 7-2 [Source:HGNC Symbol;Acc:HGNC:12236]                                        | - | 1.570274928 | 0.000215314 | 0.001735489 |
| ENSMMUG00000004849 | casein beta [Source:VGNC Symbol;Acc:VGNC:71523]                                                              | - | 1.569313586 | 1.31E-05    | 0.000156562 |
| ENSMMUG00000016354 | IQ motif containing N [Source:VGNC Symbol;Acc:VGNC:73683]                                                    | - | 1.568660971 | 2.41E-07    | 4.48E-06    |
| ENSMMUG00000022548 | phosphatidylinositol-4-phosphate 3-kinase catalytic subunit type 2 alpha [Source:VGNC Symbol;Acc:VGNC:75992] | - | 1.567088112 | 0.000876752 | 0.005662524 |
| ENSMMUG00000009319 | transmembrane protein 161B [Source:VGNC Symbol;Acc:VGNC:84508]                                               | - | 1.565588715 | 0.008699515 | 0.035983903 |
| ENSMMUG00000017486 | minichromosome maintenance complex component 6 [Source:VGNC Symbol;Acc:VGNC:74685]                           | - | 1.565062482 | 0.000632391 | 0.004355141 |
| ENSMMUG00000041450 | zinc finger protein 432 [Source:NCBI gene;Acc:100424341]                                                     | - | 1.562649074 | 0.001710508 | 0.009778329 |
| ENSMMUG00000017432 | tropomodulin 2 [Source:VGNC Symbol;Acc:VGNC:78571]                                                           | - | 1.559261729 | 8.17E-07    | 1.32E-05    |
| ENSMMUG00000002090 | ATPase H+ transporting V1 subunit B1 [Source:VGNC Symbol;Acc:VGNC:70184]                                     | - | 1.558814551 | 1.81E-07    | 3.45E-06    |
| ENSMMUG00000018342 | required for meiotic nuclear division 1 homolog [Source:VGNC Symbol;Acc:VGNC:76797]                          | - | 1.558165229 | 0.00153933  | 0.008994369 |
| ENSMMUG00000052442 |                                                                                                              | - | -1.55389549 | 0.000333665 | 0.00251587  |
| ENSMMUG00000006842 | doublecortin domain containing 1 [Source:NCBI gene;Acc:696721]                                               | - | -1.55345761 | 1.57E-06    | 2.37E-05    |
| ENSMMUG00000009303 | coiled-coil domain containing 38 [Source:VGNC Symbol;Acc:VGNC:70880]                                         | - | 1.552626072 | 0.003538826 | 0.0175612   |
| ENSMMUG00000053008 |                                                                                                              | - | 1.549870878 | 0.010757131 | 0.042344477 |
| ENSMMUG00000007709 | crooked neck pre-mRNA splicing factor 1 [Source:VGNC Symbol;Acc:VGNC:71412]                                  | - | 1.549809439 | 0.000500143 | 0.003576268 |
| ENSMMUG00000059327 | NUS1 dehydrololichyl diphosphate synthase subunit [Source:NCBI gene;Acc:715015]                              | - | 1.548981704 | 2.70E-05    | 0.000294686 |
| ENSMMUG00000012467 | family with sequence similarity 227 member A [Source:VGNC Symbol;Acc:VGNC:72475]                             | - | 1.548415116 | 0.004347082 | 0.020763643 |
| ENSMMUG00000020061 | protein phosphatase 1 regulatory subunit 9B [Source:VGNC Symbol;Acc:VGNC:76372]                              | - | -1.54741373 | 4.93E-06    | 6.52E-05    |
| ENSMMUG00000020418 | diacylglycerol kinase beta [Source:VGNC Symbol;Acc:VGNC:71782]                                               | - | 1.544332925 | 0.006069441 | 0.027147089 |
| ENSMMUG00000016543 | CREB/ATF bZIP transcription factor [Source:VGNC Symbol;Acc:VGNC:71538]                                       | - | 1.542298335 | 0.005748151 | 0.026065184 |
| ENSMMUG00000000797 | exophilin 5 [Source:VGNC Symbol;Acc:VGNC:72412]                                                              | - | 1.541673734 | 0.00059774  | 0.004150845 |



|                     |                                                                                                   |   |             |             |             |
|---------------------|---------------------------------------------------------------------------------------------------|---|-------------|-------------|-------------|
| ENSMMUG00000012101  | synaptogyrin 1 [Source:VGNC Symbol;Acc:VGNC:78068]                                                | - | 1.541135007 | 0.002438826 | 0.013031027 |
| ENSMMUG00000003634  | DExD/H-box 60 like [Source:VGNC Symbol;Acc:VGNC:71720]                                            | - | 1.539391643 | 0.000736744 | 0.004938826 |
| ENSMMUG000000062642 |                                                                                                   | - | 1.538657563 | 0.00030315  | 0.002315954 |
| ENSMMUG00000007424  | nuclear receptor interacting protein 2 [Source:VGNC Symbol;Acc:VGNC:75448]                        | - | 1.535248705 | 6.00E-08    | 1.26E-06    |
| ENSMMUG00000023125  | XPC complex subunit, DNA damage recognition and repair factor [Source:VGNC Symbol;Acc:VGNC:78809] | - | 1.534386996 | 0.004997412 | 0.023284714 |
| ENSMMUG00000047162  | fibroblast growth factor 10 [Source:VGNC Symbol;Acc:VGNC:84378]                                   | - | 1.533390242 | 0.001335759 | 0.007999393 |
| ENSMMUG000000061433 |                                                                                                   | - | 1.530733372 | 0.000741452 | 0.004961182 |
| ENSMMUG00000022153  | solute carrier family 25 member 36 [Source:VGNC Symbol;Acc:VGNC:84079]                            | - | 1.529187593 | 7.42E-07    | 1.22E-05    |
| ENSMMUG00000019892  | myomesin 1 [Source:VGNC Symbol;Acc:VGNC:75123]                                                    | - | 1.528873978 | 1.21E-05    | 0.000146044 |
| ENSMMUG00000000663  | guanylate-binding protein 6-like [Source:NCBI gene;Acc:695158]                                    | - | 1.526368424 | 0.000445166 | 0.003227589 |
| ENSMMUG00000038371  | JunD proto-oncogene, AP-1 transcription factor subunit [Source:NCBI gene;Acc:720182]              | - | 1.525213174 | 0.00145265  | 0.008558636 |
| ENSMMUG000000055392 |                                                                                                   | - | 1.524413984 | 0.002705446 | 0.014172193 |
| ENSMMUG00000003979  | WD repeat containing planar cell polarity effector [Source:VGNC Symbol;Acc:VGNC:79677]            | - | 1.523078663 | 0.005765179 | 0.026109607 |
| ENSMMUG00000021409  | developmentally regulated GTP binding protein 2 [Source:VGNC Symbol;Acc:VGNC:71993]               | - | 1.523044926 | 0.003733105 | 0.01835133  |
| ENSMMUG00000016316  | testis associated actin remodelling kinase 1 [Source:VGNC Symbol;Acc:VGNC:78314]                  | - | 1.522487118 | 0.007486028 | 0.032073807 |
| ENSMMUG00000021051  | TNFAIP3 interacting protein 1 [Source:VGNC Symbol;Acc:VGNC:79057]                                 | - | 1.522232623 | 3.71E-05    | 0.000387819 |
| ENSMMUG00000038560  | eukaryotic translation elongation factor 1 epsilon 1 [Source:NCBI gene;Acc:695426]                | - | 1.521315616 | 1.80E-05    | 0.000205967 |
| ENSMMUG00000020898  | cap binding complex dependent translation initiation factor [Source:HGNC Symbol;Acc:HGNC:23925]   | - | 1.520987252 | 0.004368649 | 0.02084827  |
| ENSMMUG00000000618  | gametogenetin binding protein 2 [Source:VGNC Symbol;Acc:VGNC:72746]                               | - | 1.519753101 | 0.002032129 | 0.011243132 |
| ENSMMUG00000037675  | testis expressed 52 [Source:NCBI gene;Acc:107000723]                                              | - | 1.518421736 | 8.33E-05    | 0.000772692 |
| ENSMMUG000000056147 |                                                                                                   | - | 1.518055083 | 0.001379503 | 0.008206568 |
| ENSMMUG00000004091  | transcription factor 12 [Source:VGNC Symbol;Acc:VGNC:78283]                                       | - | 1.514018271 | 1.76E-07    | 3.37E-06    |
| ENSMMUG000000063655 | sodium voltage-gated channel beta subunit 4 [Source:NCBI gene;Acc:100430940]                      | - | 1.510540697 | 0.000197688 | 0.001617486 |
| ENSMMUG000000058016 | bMERB domain containing 1 [Source:NCBI gene;Acc:713757]                                           | - | -1.51003284 | 0.000767646 | 0.005104915 |
| ENSMMUG00000007398  | potassium calcium-activated channel subfamily N member 1 [Source:VGNC Symbol;Acc:VGNC:74002]      | - | 1.509999285 | 0.001430336 | 0.008453264 |
| ENSMMUG000000053250 |                                                                                                   | - | 1.509481498 | 0.011790766 | 0.045294101 |
| ENSMMUG000000056103 | growth arrest and DNA damage inducible alpha [Source:NCBI gene;Acc:701054]                        | - | 1.505605648 | 1.32E-06    | 2.03E-05    |
| ENSMMUG00000018976  | adhesion G protein-coupled receptor V1 [Source:VGNC Symbol;Acc:VGNC:69625]                        | - | 1.504852139 | 0.012263253 | 0.046694167 |
| ENSMMUG00000018939  | leucine rich repeat containing 66 [Source:VGNC Symbol;Acc:VGNC:74415]                             | - | 1.504728442 | 0.000372865 | 0.002762822 |

|                     |                                                                                            |   |             |             |             |
|---------------------|--------------------------------------------------------------------------------------------|---|-------------|-------------|-------------|
| ENSMMUG00000057600  | V-set and immunoglobulin domain containing 2 [Source:NCBI gene;Acc:712047]                 | - | 1.504629868 | 0.007975008 | 0.033642234 |
| ENSMMUG00000001531  | leucine rich repeats and immunoglobulin like domains 1 [Source:VGNC Symbol;Acc:VGNC:84156] | - | 1.501377611 | 1.28E-05    | 0.000153973 |
| ENSMMUG000000053541 |                                                                                            | - | 1.499225633 | 0.010477945 | 0.041547428 |
| ENSMMUG00000022880  | eukaryotic translation initiation factor 5A2 [Source:VGNC Symbol;Acc:VGNC:72198]           | - | 1.495021877 | 0.001891263 | 0.010582541 |
| ENSMMUG00000046663  | Metazoan signal recognition particle RNA [Source:RFAM;Acc:RF00017]                         | - | 1.493410743 | 0.001665039 | 0.009584147 |
| ENSMMUG000000056116 |                                                                                            | - | 1.493365233 | 0.0010677   | 0.006620719 |
| ENSMMUG00000017583  | single stranded DNA binding protein 2 [Source:NCBI gene;Acc:711752]                        | - | 1.492928189 | 1.34E-05    | 0.000159315 |
| ENSMMUG00000048232  | MINDY family member 4B [Source:VGNC Symbol;Acc:VGNC:84153]                                 | - | 1.492128782 | 5.07E-05    | 0.000510326 |
| ENSMMUG00000019148  | vitronectin [Source:NCBI gene;Acc:708499]                                                  | - | 1.489665955 | 0.002085184 | 0.01149125  |
| ENSMMUG00000005578  | solute carrier family 35 member E2 [Source:VGNC Symbol;Acc:VGNC:77590]                     | - | 1.489190149 | 0.004643667 | 0.021919321 |
| ENSMMUG00000021173  | nuclear transcription factor Y subunit alpha [Source:VGNC Symbol;Acc:VGNC:75344]           | - | -1.48838566 | 1.62E-07    | 3.11E-06    |
| ENSMMUG00000026981  | EGF like domain multiple 7 [Source:VGNC Symbol;Acc:VGNC:72079]                             | - | 1.488234753 | 0.000112028 | 0.001002978 |
| ENSMMUG00000006268  | junction adhesion molecule like [Source:VGNC Symbol;Acc:VGNC:73860]                        | - | 1.487708589 | 3.01E-06    | 4.22E-05    |
| ENSMMUG00000018057  | uromodulin like 1 [Source:VGNC Symbol;Acc:VGNC:78717]                                      | - | -1.48750961 | 0.001214458 | 0.007366305 |
| ENSMMUG00000023312  | haptoglobin [Source:NCBI gene;Acc:706640]                                                  | - | 1.486455685 | 0.007801036 | 0.033024082 |
| ENSMMUG00000042668  | cilia and flagella associated protein 61 [Source:NCBI gene;Acc:699814]                     | - | 1.486239085 | 0.0049998   | 0.023285829 |
| ENSMMUG00000019250  | solute carrier family 25 member 27 [Source:VGNC Symbol;Acc:VGNC:77543]                     | - | 1.485181796 | 2.53E-06    | 3.60E-05    |
| ENSMMUG00000002678  | integrin subunit beta 6 [Source:VGNC Symbol;Acc:VGNC:73789]                                | - | 1.484214459 | 0.005345253 | 0.024640479 |
| ENSMMUG00000015414  | family with sequence similarity 160 member B1 [Source:VGNC Symbol;Acc:VGNC:72403]          | - | -1.48101821 | 0.000417182 | 0.003049484 |
| ENSMMUG00000011894  | CBY1 interacting BAR domain containing 2 [Source:VGNC Symbol;Acc:VGNC:72335]               | - | 1.479760287 | 0.000977298 | 0.006166027 |
| ENSMMUG00000000717  | CD3e molecule associated protein [Source:NCBI gene;Acc:714440]                             | - | 1.479447628 | 0.00015874  | 0.001347672 |
| ENSMMUG00000012209  | CYLD lysine 63 deubiquitinase [Source:VGNC Symbol;Acc:VGNC:71581]                          | - | 1.479059272 | 0.000743575 | 0.004969243 |
| ENSMMUG00000022532  | EPM2A interacting protein 1 [Source:VGNC Symbol;Acc:VGNC:84184]                            | - | 1.478620721 | 0.005443042 | 0.024984946 |
| ENSMMUG00000005727  | protein kinase N1 [Source:VGNC Symbol;Acc:VGNC:76014]                                      | - | 1.474651743 | 9.24E-07    | 1.47E-05    |
| ENSMMUG00000001529  | solute carrier family 25 member 26 [Source:VGNC Symbol;Acc:VGNC:77530]                     | - | 1.473424182 | 2.70E-05    | 0.000295085 |
| ENSMMUG000000063312 |                                                                                            | - | 1.472237315 | 0.003019781 | 0.015447277 |
| ENSMMUG00000017615  | zinc finger CCHC-type containing 14 [Source:VGNC Symbol;Acc:VGNC:79420]                    | - | 1.470425887 | 1.19E-12    | 6.86E-11    |
| ENSMMUG000000053794 |                                                                                            | - | 1.469009901 | 0.002720566 | 0.014230753 |
| ENSMMUG000000062623 | Metazoan signal recognition particle RNA [Source:RFAM;Acc:RF00017]                         | - | 1.467217186 | 0.000830908 | 0.005435522 |

|                    |                                                                                       |   |             |             |             |
|--------------------|---------------------------------------------------------------------------------------|---|-------------|-------------|-------------|
| ENSMMUG0000000443  | arylsulfatase F [Source:VGNC Symbol;Acc:VGNC:81362]                                   | - | 1.464149319 | 1.09E-06    | 1.70E-05    |
| ENSMMUG00000061305 |                                                                                       | - | 1.464105589 | 0.009004413 | 0.036943266 |
| ENSMMUG00000032252 | UbiA prenyltransferase domain containing 1 [Source:VGNC Symbol;Acc:VGNC:79881]        | - | 1.459853434 | 7.70E-06    | 9.78E-05    |
| ENSMMUG00000007920 | myosin XIX [Source:VGNC Symbol;Acc:VGNC:75026]                                        | - | 1.459286869 | 0.011706734 | 0.045051171 |
| ENSMMUG00000000981 | T-box transcription factor 6 [Source:VGNC Symbol;Acc:VGNC:78276]                      | - | 1.458544991 | 0.000760045 | 0.00506993  |
| ENSMMUG00000002113 | NHL repeat containing 3 [Source:VGNC Symbol;Acc:VGNC:75291]                           | - | 1.456645689 | 3.28E-06    | 4.54E-05    |
| ENSMMUG00000063298 |                                                                                       | - | 1.455999263 | 0.010090628 | 0.0403067   |
| ENSMMUG00000014176 | cytohesin 1 interacting protein [Source:VGNC Symbol;Acc:VGNC:71831]                   | - | 1.454808807 | 0.010493246 | 0.041592876 |
| ENSMMUG00000002183 | oxysterol binding protein like 6 [Source:VGNC Symbol;Acc:VGNC:75627]                  | - | 1.453043406 | 0.000297367 | 0.002276594 |
| ENSMMUG00000010627 | apelin receptor [Source:VGNC Symbol;Acc:VGNC:69939]                                   | - | 1.452467627 | 5.07E-05    | 0.000510171 |
| ENSMMUG00000007330 | nuclear mitotic apparatus protein 1 [Source:VGNC Symbol;Acc:VGNC:75556]               | - | 1.450116814 | 0.000264234 | 0.002058434 |
| ENSMMUG00000023401 | adhesion G protein-coupled receptor B2 [Source:VGNC Symbol;Acc:VGNC:69598]            | - | 1.449291895 | 3.85E-05    | 0.000399883 |
| ENSMMUG00000000104 | ribosomal RNA processing 1B [Source:VGNC Symbol;Acc:VGNC:77089]                       | - | 1.442136678 | 3.72E-05    | 0.000387888 |
| ENSMMUG00000018332 | family with sequence similarity 98 member B [Source:VGNC Symbol;Acc:VGNC:72583]       | - | 1.441736287 | 0.001372298 | 0.008168188 |
| ENSMMUG00000013053 | sperm acrosome associated 6 [Source:NCBI gene;Acc:114674203]                          | - | 1.441190503 | 0.000824544 | 0.005406951 |
| ENSMMUG00000012029 | sulfatase 2 [Source:VGNC Symbol;Acc:VGNC:78179]                                       | - | 1.441169768 | 0.00227175  | 0.012304936 |
| ENSMMUG00000023814 | mitogen-activated protein kinase kinase kinase 13 [Source:VGNC Symbol;Acc:VGNC:74494] | - | 1.440315166 | 0.012768115 | 0.048101925 |
| ENSMMUG00000007783 | isoleucyl-tRNA synthetase 2, mitochondrial [Source:VGNC Symbol;Acc:VGNC:73458]        | - | 1.439492073 | 4.54E-06    | 6.07E-05    |
| ENSMMUG00000013513 | sex hormone binding globulin [Source:VGNC Symbol;Acc:VGNC:77208]                      | - | 1.438754002 | 0.000201929 | 0.001648455 |
| ENSMMUG00000062413 | CCAAT enhancer binding protein gamma [Source:NCBI gene;Acc:704322]                    | - | 1.433523113 | 0.005053359 | 0.023492918 |
| ENSMMUG00000062676 |                                                                                       | - | 1.433307411 | 0.000533907 | 0.003782746 |
| ENSMMUG00000065091 | myelin protein zero like 2 [Source:NCBI gene;Acc:699330]                              | - | 1.432363984 | 1.04E-05    | 0.000128309 |
| ENSMMUG00000015522 | GRAM domain containing 1B [Source:VGNC Symbol;Acc:VGNC:73028]                         | - | 1.429054867 | 0.000579117 | 0.004052699 |
| ENSMMUG00000006688 | ER membrane protein complex subunit 1 [Source:VGNC Symbol;Acc:VGNC:72134]             | - | 1.428603716 | 2.34E-05    | 0.000259865 |
| ENSMMUG00000018525 | presenilin 2 [Source:VGNC Symbol;Acc:VGNC:76436]                                      | - | -1.42625129 | 2.80E-06    | 3.95E-05    |
| ENSMMUG00000016313 | RUN and SH3 domain containing 2 [Source:VGNC Symbol;Acc:VGNC:82230]                   | - | 1.422252806 | 9.17E-06    | 0.000114801 |
| ENSMMUG00000053648 | actin binding transcription modulator [Source:NCBI gene;Acc:710486]                   | - | 1.420190566 | 0.001687968 | 0.009685253 |
| ENSMMUG00000001374 | supervillin [Source:NCBI gene;Acc:695267]                                             | - | 1.416507406 | 0.000895296 | 0.00575593  |
| ENSMMUG00000002533 | progesterone immunomodulatory binding factor 1 [Source:NCBI gene;Acc:694190]          | - | 1.416276513 | 0.004241936 | 0.020315158 |

|                    |                                                                                          |   |             |             |             |
|--------------------|------------------------------------------------------------------------------------------|---|-------------|-------------|-------------|
| ENSMMUG00000054107 |                                                                                          | - | 1.414024704 | 0.002783478 | 0.014462072 |
| ENSMMUG00000001294 | FCH and double SH3 domains 2 [Source:VGNC Symbol;Acc:VGNC:72593]                         | - | 1.413973629 | 0.009354409 | 0.037996366 |
| ENSMMUG00000002961 | G protein subunit alpha 11 [Source:VGNC Symbol;Acc:VGNC:73085]                           | - | 1.412750778 | 0.000230268 | 0.001846404 |
| ENSMMUG00000005301 | ATP binding cassette subfamily B member 9 [Source:VGNC Symbol;Acc:VGNC:81341]            | - | 1.410328158 | 2.93E-06    | 4.12E-05    |
| ENSMMUG00000020005 | solute carrier family 23 member 2 [Source:NCBI gene;Acc:717939]                          | - | 1.410195418 | 0.001600098 | 0.009266769 |
| ENSMMUG00000057282 | Y RNA [Source:RFAM;Acc:RF00019]                                                          | - | 1.409952197 | 0.007025628 | 0.030553445 |
| ENSMMUG00000016695 | CD320 molecule [Source:VGNC Symbol;Acc:VGNC:70763]                                       | - | 1.407631701 | 0.008417264 | 0.035057369 |
| ENSMMUG00000054412 |                                                                                          | - | 1.407085983 | 0.003027831 | 0.015479235 |
| ENSMMUG00000012192 | erythrocyte membrane protein band 4.1 like 4A [Source:VGNC Symbol;Acc:VGNC:72039]        | - | 1.406537667 | 0.000923992 | 0.005894941 |
| ENSMMUG00000019267 | interleukin 17 receptor B [Source:VGNC Symbol;Acc:VGNC:73618]                            | - | 1.404605185 | 0.003396804 | 0.017004425 |
| ENSMMUG00000021393 | calcium/calmodulin dependent protein kinase II gamma [Source:VGNC Symbol;Acc:VGNC:70525] | - | 1.402422409 | 0.006903469 | 0.030143201 |
| ENSMMUG00000052091 | dishevelled segment polarity protein 2 [Source:NCBI gene;Acc:714381]                     | - | 1.401862085 | 0.003569816 | 0.017667606 |
| ENSMMUG00000022647 | cell division cycle 73 [Source:VGNC Symbol;Acc:VGNC:70766]                               | - | 1.401457217 | 0.001493092 | 0.008743063 |
| ENSMMUG00000005895 | nucleobindin 2 [Source:VGNC Symbol;Acc:VGNC:75549]                                       | - | 1.397563977 | 0.008995287 | 0.036939325 |
| ENSMMUG00000003029 | protein arginine methyltransferase 1 [Source:NCBI gene;Acc:719419]                       | - | 1.397380786 | 0.000470209 | 0.003386821 |
| ENSMMUG00000054711 |                                                                                          | - | 1.396282338 | 0.002157072 | 0.0118018   |
| ENSMMUG00000062443 |                                                                                          | - | -1.39616589 | 0.001388671 | 0.00825204  |
| ENSMMUG00000063262 |                                                                                          | - | 1.393574391 | 0.001888802 | 0.01057983  |
| ENSMMUG00000017113 | ubiquitin specific peptidase 32 [Source:NCBI gene;Acc:716857]                            | - | -1.39263531 | 0.000120093 | 0.001067445 |
| ENSMMUG00000051843 |                                                                                          | - | 1.389440213 | 0.000708494 | 0.004793951 |
| ENSMMUG00000005442 | 5'-nucleotidase ecto [Source:VGNC Symbol;Acc:VGNC:75537]                                 | - | 1.387518086 | 0.004883705 | 0.022823631 |
| ENSMMUG00000060822 |                                                                                          | - | -1.38665508 | 2.19E-06    | 3.17E-05    |
| ENSMMUG00000050065 |                                                                                          | - | 1.386563963 | 0.005496613 | 0.025188162 |
| ENSMMUG00000006215 | serine/threonine kinase 39 [Source:VGNC Symbol;Acc:VGNC:81587]                           | - | 1.386275771 | 0.010337242 | 0.041109891 |
| ENSMMUG00000011893 | KIAA0513 [Source:VGNC Symbol;Acc:VGNC:73925]                                             | - | 1.385354316 | 0.000354435 | 0.002649825 |
| ENSMMUG00000046237 | 4-aminobutyrate aminotransferase [Source:NCBI gene;Acc:714017]                           | - | 1.383972624 | 1.49E-05    | 0.000173986 |
| ENSMMUG00000000546 | KIAA0040 ortholog [Source:NCBI gene;Acc:100423509]                                       | - | 1.383854293 | 0.006837788 | 0.029954386 |
| ENSMMUG00000064806 |                                                                                          | - | 1.383690078 | 0.005833078 | 0.026307131 |
| ENSMMUG00000001549 | ATPase family AAA domain-containing protein 3A-like [Source:NCBI gene;Acc:114674453]     | - | 1.382142263 | 6.03E-06    | 7.82E-05    |



|                    |                                                                                          |   |             |             |             |
|--------------------|------------------------------------------------------------------------------------------|---|-------------|-------------|-------------|
| ENSMMUG00000044958 | adhesion G protein-coupled receptor G6 [Source:VGNC Symbol;Acc:VGNC:81009]               | - | 1.381837522 | 0.007099244 | 0.030799404 |
| ENSMMUG00000012561 | NOP2/Sun RNA methyltransferase family member 7 [Source:VGNC Symbol;Acc:VGNC:75463]       | - | 1.380573874 | 8.98E-06    | 0.000112828 |
| ENSMMUG00000021053 | annexin A6 [Source:VGNC Symbol;Acc:VGNC:69951]                                           | - | -1.38037409 | 0.002230475 | 0.012135978 |
| ENSMMUG00000021169 | translocator protein 2 [Source:VGNC Symbol;Acc:VGNC:83960]                               | - | 1.373024512 | 0.000978895 | 0.00617251  |
| ENSMMUG00000009922 | mitochondrial calcium uniporter regulator 1 [Source:VGNC Symbol;Acc:VGNC:81471]          | - | 1.369256059 | 5.95E-06    | 7.74E-05    |
| ENSMMUG00000016906 | F-box and leucine rich repeat protein 16 [Source:VGNC Symbol;Acc:VGNC:81405]             | - | 1.368769348 | 0.000495042 | 0.003546821 |
| ENSMMUG00000019254 | phospholipase A2 group VII [Source:VGNC Symbol;Acc:VGNC:76158]                           | - | 1.365304781 | 0.000397321 | 0.002916109 |
| ENSMMUG00000056257 |                                                                                          | - | 1.364736458 | 0.000851948 | 0.005546369 |
| ENSMMUG00000064642 |                                                                                          | - | 1.364089884 | 0.002085461 | 0.01149125  |
| ENSMMUG00000050907 |                                                                                          | - | 1.362903329 | 4.22E-05    | 0.00043306  |
| ENSMMUG00000019462 | integrin subunit alpha V [Source:VGNC Symbol;Acc:VGNC:73783]                             | - | 1.362814892 | 3.18E-05    | 0.000339884 |
| ENSMMUG00000022840 | zonadhesin [Source:VGNC Symbol;Acc:VGNC:81797]                                           | - | 1.362230422 | 0.008091386 | 0.034009568 |
| ENSMMUG00000016857 | prostaglandin-endoperoxide synthase 2 [Source:VGNC Symbol;Acc:VGNC:76589]                | - | 1.361429479 | 0.004378796 | 0.020887493 |
| ENSMMUG00000021670 | solute carrier family 52 member 3 [Source:VGNC Symbol;Acc:VGNC:77717]                    | - | 1.360110158 | 0.001579389 | 0.009164181 |
| ENSMMUG00000062140 |                                                                                          | - | 1.358424307 | 0.007579098 | 0.032413886 |
| ENSMMUG00000052977 | putative protein FAM106C [Source:NCBI gene;Acc:106994084]                                | - | 1.358094548 | 0.001225078 | 0.007422412 |
| ENSMMUG00000005225 | gap junction protein alpha 1 [Source:VGNC Symbol;Acc:VGNC:73055]                         | - | 1.356540487 | 0.000186148 | 0.00153817  |
| ENSMMUG00000012338 | G protein-coupled receptor 183 [Source:VGNC Symbol;Acc:VGNC:73042]                       | - | 1.353242032 | 3.25E-05    | 0.000345478 |
| ENSMMUG00000065018 | transmembrane protein 35A [Source:NCBI gene;Acc:702205]                                  | - | -1.35321336 | 0.000108454 | 0.000975815 |
| ENSMMUG00000057021 | CLOCK interacting pacemaker [Source:NCBI gene;Acc:704679]                                | - | -1.3517295  | 0.004900549 | 0.022882606 |
| ENSMMUG00000044175 | forkhead box O6 [Source:NCBI gene;Acc:697505]                                            | - | 1.350572914 | 5.30E-05    | 0.000528971 |
| ENSMMUG00000004674 | phosphoribosyl pyrophosphate synthetase 1 [Source:NCBI gene;Acc:702529]                  | - | 1.350412956 | 1.21E-05    | 0.000146525 |
| ENSMMUG00000022601 | cAMP responsive element binding protein 1 [Source:VGNC Symbol;Acc:VGNC:71485]            | - | 1.349642546 | 0.001771029 | 0.010060594 |
| ENSMMUG00000022697 | STEAP4 metalloredutase [Source:VGNC Symbol;Acc:VGNC:77974]                               | - | 1.348884703 | 0.000161801 | 0.001366169 |
| ENSMMUG00000052070 | caudal type homeobox 2 [Source:NCBI gene;Acc:711094]                                     | - | 1.348786429 | 0.00736656  | 0.031692593 |
| ENSMMUG00000011359 | eukaryotic translation initiation factor 3 subunit E [Source:VGNC Symbol;Acc:VGNC:83997] | - | -1.34811867 | 0.00387293  | 0.018891677 |
| ENSMMUG00000006703 | solute carrier family 10 member 4 [Source:VGNC Symbol;Acc:VGNC:77553]                    | - | 1.347478591 | 0.008609686 | 0.03574884  |
| ENSMMUG00000002809 | unc-80 homolog, NALCN channel complex subunit [Source:NCBI gene;Acc:713007]              | - | 1.345838421 | 0.005715859 | 0.025962221 |
| ENSMMUG00000059617 |                                                                                          | - | 1.345784343 | 5.12E-05    | 0.000514608 |
| ENSMMUG00000040764 | alcohol dehydrogenase 1A [Source:NCBI gene;Acc:100424103]                                | - | 1.341605672 | 0.001801531 | 0.010196442 |

|                    |                                                                                                       |   |             |             |             |
|--------------------|-------------------------------------------------------------------------------------------------------|---|-------------|-------------|-------------|
| ENSMMUG00000051911 |                                                                                                       | - | 1.341463884 | 0.000390087 | 0.002864956 |
| ENSMMUG00000000511 | cysteinyl-tRNA synthetase 1 [Source:VGNC Symbol;Acc:VGNC:70540]                                       | - | 1.341274128 | 0.005583429 | 0.025499698 |
| ENSMMUG00000012332 | UBA domain containing 2 [Source:NCBI gene;Acc:703484]                                                 | - | 1.339695957 | 1.93E-06    | 2.83E-05    |
| ENSMMUG00000029263 | polycystin 1, transient receptor potential channel interacting [Source:NCBI gene;Acc:694905]          | - | 1.337466951 | 2.76E-05    | 0.000300016 |
| ENSMMUG00000052651 | Metazoan signal recognition particle RNA [Source:RFAM;Acc:RF00017]                                    | - | 1.336072136 | 0.003045392 | 0.01555433  |
| ENSMMUG00000031224 | casein kinase 2 alpha 1 [Source:NCBI gene;Acc:714841]                                                 | - | 1.335754696 | 0.001860967 | 0.010467215 |
| ENSMMUG00000006755 | tubulin tyrosine ligase like 4 [Source:VGNC Symbol;Acc:VGNC:79758]                                    | - | 1.333539501 | 0.002932636 | 0.015056513 |
| ENSMMUG00000013138 | Rho guanine nucleotide exchange factor 7 [Source:VGNC Symbol;Acc:VGNC:69833]                          | - | -1.33038903 | 0.000196823 | 0.001615294 |
| ENSMMUG00000004019 | izumo sperm-egg fusion 1 [Source:VGNC Symbol;Acc:VGNC:73670]                                          | - | -1.33011919 | 0.007393463 | 0.031783089 |
| ENSMMUG00000008237 | phosphatidylglycerophosphate synthase 1 [Source:VGNC Symbol;Acc:VGNC:75890]                           | - | 1.329508286 | 0.005155369 | 0.02388713  |
| ENSMMUG00000016135 | neural precursor cell expressed, developmentally down-regulated 9 [Source:VGNC Symbol;Acc:VGNC:75304] | - | 1.329369196 | 0.002715207 | 0.014209583 |
| ENSMMUG00000008797 | ATP binding cassette subfamily G member 2 (Junior blood group) [Source:NCBI gene;Acc:574307]          | - | -1.32766347 | 0.000798278 | 0.005266591 |
| ENSMMUG00000022602 | methyltransferase like 21A [Source:VGNC Symbol;Acc:VGNC:74625]                                        | - | 1.326849039 | 0.012235768 | 0.046606918 |
| ENSMMUG00000013049 | formyl peptide receptor 1 [Source:NCBI gene;Acc:719782]                                               | - | -1.32619842 | 0.008981297 | 0.036895861 |
| ENSMMUG00000019836 | myocyte enhancer factor 2C [Source:VGNC Symbol;Acc:VGNC:84438]                                        | - | 1.326159422 | 0.002584815 | 0.013679188 |
| ENSMMUG00000057768 |                                                                                                       | - | 1.324538887 | 1.32E-06    | 2.03E-05    |
| ENSMMUG00000005515 | ATP binding cassette subfamily C member 5 [Source:VGNC Symbol;Acc:VGNC:69574]                         | - | 1.324100328 | 6.80E-05    | 0.00065462  |
| ENSMMUG00000058966 |                                                                                                       | - | 1.323640868 | 0.00088908  | 0.00572276  |
| ENSMMUG00000049948 |                                                                                                       | - | 1.323150697 | 0.000722479 | 0.004870327 |
| ENSMMUG00000016983 | acrosin binding protein [Source:VGNC Symbol;Acc:VGNC:69445]                                           | - | 1.322042339 | 0.000588802 | 0.00410985  |
| ENSMMUG00000004237 | TNF receptor superfamily member 19 [Source:VGNC Symbol;Acc:VGNC:78588]                                | - | 1.321158329 | 0.001628462 | 0.009412323 |
| ENSMMUG00000003043 | PWWP domain containing 3A, DNA repair factor [Source:VGNC Symbol;Acc:VGNC:76565]                      | - | 1.320333738 | 1.57E-06    | 2.38E-05    |
| ENSMMUG00000002009 | nitrilase 1 [Source:VGNC Symbol;Acc:VGNC:75351]                                                       | - | 1.317531553 | 0.002742398 | 0.014310406 |
| ENSMMUG00000022641 | ubiquitin C-terminal hydrolase L5 [Source:VGNC Symbol;Acc:VGNC:79197]                                 | - | 1.316852808 | 0.012296196 | 0.046738486 |
| ENSMMUG00000056306 |                                                                                                       | - | 1.316119593 | 0.000282562 | 0.002178646 |
| ENSMMUG00000008918 | SRP receptor subunit beta [Source:VGNC Symbol;Acc:VGNC:77980]                                         | - | 1.314510493 | 0.000442081 | 0.003213039 |
| ENSMMUG00000017593 | CD3e molecule [Source:VGNC Symbol;Acc:VGNC:70764]                                                     | - | 1.313005573 | 5.99E-06    | 7.78E-05    |
| ENSMMUG00000021760 | zinc finger protein 79 [Source:NCBI gene;Acc:700961]                                                  | - | 1.311922185 | 0.000530349 | 0.003759994 |
| ENSMMUG00000023248 | serine/threonine kinase 38 like [Source:VGNC Symbol;Acc:VGNC:78156]                                   | - | 1.310739707 | 0.005408249 | 0.024867388 |
| ENSMMUG00000056553 |                                                                                                       | - | 1.310568972 | 0.011756661 | 0.045195141 |

|                     |                                                                                                                                       |   |             |             |             |
|---------------------|---------------------------------------------------------------------------------------------------------------------------------------|---|-------------|-------------|-------------|
| ENSMMUG00000006491  | mediator complex subunit 9 [Source:VGNC Symbol;Acc:VGNC:74577]                                                                        | - | 1.309781364 | 0.000260951 | 0.002041068 |
| ENSMMUG00000021168  | unc-5 family C-terminal like [Source:VGNC Symbol;Acc:VGNC:79314]                                                                      | - | 1.307767636 | 2.61E-06    | 3.70E-05    |
| ENSMMUG00000018073  | ligand dependent nuclear receptor corepressor like [Source:NCBI gene;Acc:715285]                                                      | - | 1.307172963 | 0.000502831 | 0.003590751 |
| ENSMMUG00000003726  | protein tyrosine phosphatase non-receptor type 13 [Source:VGNC Symbol;Acc:VGNC:76599]                                                 | - | 1.306654812 | 0.001800017 | 0.010193194 |
| ENSMMUG000000052282 |                                                                                                                                       | - | 1.302075732 | 0.000901992 | 0.005778404 |
| ENSMMUG00000017819  | putative homeodomain transcription factor 1 [Source:VGNC Symbol;Acc:VGNC:75982]                                                       | - | 1.299158356 | 0.000342429 | 0.002572495 |
| ENSMMUG00000008974  | Fc receptor like 5 [Source:NCBI gene;Acc:718771]                                                                                      | - | 1.298530509 | 0.003733622 | 0.01835133  |
| ENSMMUG000000055590 |                                                                                                                                       | - | 1.298529237 | 0.000181105 | 0.001501076 |
| ENSMMUG00000007293  | RAB34, member RAS oncogene family [Source:VGNC Symbol;Acc:VGNC:81533]                                                                 | - | -1.29847328 | 0.002252422 | 0.012224693 |
| ENSMMUG00000022120  | transmembrane protein 94 [Source:VGNC Symbol;Acc:VGNC:79760]                                                                          | - | 1.297708781 | 1.99E-05    | 0.000223956 |
| ENSMMUG00000019838  | phosphodiesterase 8A [Source:VGNC Symbol;Acc:VGNC:75924]                                                                              | - | 1.294336784 | 9.87E-05    | 0.000898485 |
| ENSMMUG000000050923 |                                                                                                                                       | - | 1.292464352 | 0.004825689 | 0.022630599 |
| ENSMMUG00000012238  | polypeptide N-acetylgalactosaminyltransferase 11 [Source:VGNC Symbol;Acc:VGNC:72749]                                                  | - | 1.289455512 | 0.012025109 | 0.046014837 |
| ENSMMUG00000020804  | transmembrane protein 132B [Source:NCBI gene;Acc:707118]                                                                              | - | 1.287584703 | 0.008622054 | 0.035786479 |
| ENSMMUG000000061260 | Spi-C transcription factor [Source:NCBI gene;Acc:695809]                                                                              | - | 1.286724964 | 0.000700651 | 0.004749785 |
| ENSMMUG000000053675 |                                                                                                                                       | - | 1.286343592 | 0.000333731 | 0.00251587  |
| ENSMMUG00000019146  | DNA polymerase delta interacting protein 2 [Source:VGNC Symbol;Acc:VGNC:76099]                                                        | - | -1.28613099 | 0.011170314 | 0.043409846 |
| ENSMMUG00000006531  | SWI/SNF related, matrix associated, actin dependent regulator of chromatin, subfamily d, member 1 [Source:VGNC Symbol;Acc:VGNC:77653] | - | 1.285775114 | 0.003329851 | 0.016707863 |
| ENSMMUG000000043161 | endogenous retrovirus group FRD member 1, envelope [Source:VGNC Symbol;Acc:VGNC:81068]                                                | - | 1.284368639 | 0.010013266 | 0.040086368 |
| ENSMMUG000000043809 | caspase 2 [Source:VGNC Symbol;Acc:VGNC:80804]                                                                                         | - | 1.284331386 | 0.000240155 | 0.001915755 |
| ENSMMUG00000012677  | lysine demethylase 4B [Source:VGNC Symbol;Acc:VGNC:73930]                                                                             | - | 1.283271704 | 0.000869599 | 0.00563419  |
| ENSMMUG00000022520  | kinesin light chain 2 [Source:VGNC Symbol;Acc:VGNC:73869]                                                                             | - | 1.282901483 | 0.00392672  | 0.019094884 |
| ENSMMUG000000061834 |                                                                                                                                       | - | -1.28197394 | 0.000140896 | 0.001220087 |
| ENSMMUG000000049968 | RNA polymerase mitochondrial [Source:NCBI gene;Acc:100426183]                                                                         | - | 1.278322287 | 1.09E-06    | 1.71E-05    |
| ENSMMUG00000009038  | titin [Source:NCBI gene;Acc:703527]                                                                                                   | - | 1.278151013 | 0.002996829 | 0.015349713 |
| ENSMMUG000000057143 | transmembrane protein 127 [Source:NCBI gene;Acc:705069]                                                                               | - | -1.27622378 | 0.007679944 | 0.032664637 |
| ENSMMUG000000049196 | dispatched RND transporter family member 3 [Source:NCBI gene;Acc:722727]                                                              | - | 1.274113149 | 1.01E-06    | 1.61E-05    |
| ENSMMUG00000019252  | tudor domain containing 6 [Source:VGNC Symbol;Acc:VGNC:79319]                                                                         | - | 1.273420896 | 0.000243146 | 0.001932505 |
| ENSMMUG00000012408  | dispatched RND transporter family member 2 [Source:VGNC Symbol;Acc:VGNC:71676]                                                        | - | 1.273273711 | 0.000187571 | 0.001546392 |
| ENSMMUG00000005048  | MAM domain containing 4 [Source:VGNC Symbol;Acc:VGNC:74345]                                                                           | - | 1.272897535 | 5.04E-05    | 0.000507922 |

|                    |                                                                                                                                       |   |             |             |             |
|--------------------|---------------------------------------------------------------------------------------------------------------------------------------|---|-------------|-------------|-------------|
| ENSMMUG0000003483  | cyclin dependent kinase 2 interacting protein [Source:VGNC Symbol;Acc:VGNC:71326]                                                     | - | 1.272480752 | 0.001709868 | 0.009778329 |
| ENSMMUG0000004892  | SCO-spondin [Source:VGNC Symbol;Acc:VGNC:81765]                                                                                       | - | 1.271275091 | 0.001102421 | 0.006804858 |
| ENSMMUG00000020436 | potassium voltage-gated channel subfamily H member 2 [Source:VGNC Symbol;Acc:VGNC:73980]                                              | - | 1.270067821 | 0.00110463  | 0.006814613 |
| ENSMMUG00000015279 | SWI/SNF related, matrix associated, actin dependent regulator of chromatin, subfamily a, member 2 [Source:VGNC Symbol;Acc:VGNC:77647] | - | 1.268410413 | 0.008656363 | 0.03588763  |
| ENSMMUG00000022123 | tRNA splicing endonuclease subunit 54 [Source:VGNC Symbol;Acc:VGNC:79666]                                                             | - | 1.267503164 | 0.002590291 | 0.013701477 |
| ENSMMUG00000008733 | ubiquitin protein ligase E3C [Source:VGNC Symbol;Acc:VGNC:79049]                                                                      | - | 1.265920598 | 0.002655555 | 0.013992038 |
| ENSMMUG00000063267 | aldo-keto reductase family 1 member C15 [Source:NCBI gene;Acc:722496]                                                                 | - | 1.265244748 | 0.009006477 | 0.036943266 |
| ENSMMUG00000003850 | collagen type XI alpha 2 chain [Source:VGNC Symbol;Acc:VGNC:71290]                                                                    | - | -1.26447076 | 0.003120451 | 0.015833184 |
| ENSMMUG00000002010 | death effector domain containing [Source:VGNC Symbol;Acc:VGNC:71768]                                                                  | - | 1.264464765 | 0.00032297  | 0.002450098 |
| ENSMMUG00000009519 | WASH complex subunit 4 [Source:VGNC Symbol;Acc:VGNC:79783]                                                                            | - | 1.260865468 | 0.003020154 | 0.015447277 |
| ENSMMUG00000008792 | G-patch domain containing 2 like [Source:VGNC Symbol;Acc:VGNC:72973]                                                                  | - | 1.260046234 | 0.012866839 | 0.048448545 |
| ENSMMUG00000004362 | Fc fragment of IgG receptor Ia [Source:NCBI gene;Acc:714664]                                                                          | - | 1.259194336 | 0.002644129 | 0.013947942 |
| ENSMMUG00000023398 | collagen type XVI alpha 1 chain [Source:VGNC Symbol;Acc:VGNC:71293]                                                                   | - | 1.257386493 | 8.31E-05    | 0.000771837 |
| ENSMMUG00000018791 | molybdenum cofactor sulfurase [Source:VGNC Symbol;Acc:VGNC:74792]                                                                     | - | 1.256986426 | 0.006957147 | 0.030316483 |
| ENSMMUG00000021114 | G protein-coupled receptor 182 [Source:VGNC Symbol;Acc:VGNC:72936]                                                                    | - | 1.256460813 | 0.001926536 | 0.010735684 |
| ENSMMUG00000004329 | solute carrier family 1 member 2 [Source:VGNC Symbol;Acc:VGNC:77410]                                                                  | - | 1.254717306 | 0.00210506  | 0.011569822 |
| ENSMMUG00000004754 | intermediate filament family orphan 2 [Source:NCBI gene;Acc:106995162]                                                                | - | 1.254394307 | 0.001857814 | 0.010460344 |
| ENSMMUG00000055244 | U6 spliceosomal RNA [Source:RFAM;Acc:RF00026]                                                                                         | - | 1.252720477 | 0.002353999 | 0.01269935  |
| ENSMMUG00000004954 | apoptosis inducing factor mitochondria associated 1 [Source:VGNC Symbol;Acc:VGNC:69820]                                               | - | 1.251943685 | 0.001462856 | 0.008607886 |
| ENSMMUG00000010819 | fibroblast growth factor receptor substrate 2 [Source:VGNC Symbol;Acc:VGNC:72732]                                                     | - | 1.248908225 | 2.38E-05    | 0.000263516 |
| ENSMMUG00000013032 | phytanoyl-CoA 2-hydroxylase interacting protein [Source:VGNC Symbol;Acc:VGNC:75812]                                                   | - | 1.245712092 | 0.003124237 | 0.015843826 |
| ENSMMUG00000022185 | odd-skipped related transcription factor 2 [Source:VGNC Symbol;Acc:VGNC:84097]                                                        | - | 1.245289587 | 0.003425234 | 0.017107221 |
| ENSMMUG00000048823 |                                                                                                                                       | - | 1.242851827 | 0.000759708 | 0.00506993  |
| ENSMMUG00000003277 | copine 4 [Source:VGNC Symbol;Acc:VGNC:71466]                                                                                          | - | 1.241338016 | 0.000853488 | 0.00554972  |
| ENSMMUG00000020377 | collagen type VI alpha 5 chain [Source:NCBI gene;Acc:719331]                                                                          | - | -1.23824423 | 0.000346038 | 0.002594204 |
| ENSMMUG00000053789 |                                                                                                                                       | - | 1.237506971 | 0.007272918 | 0.031369001 |
| ENSMMUG00000005042 | RAB, member RAS oncogene family like 6 [Source:VGNC Symbol;Acc:VGNC:76529]                                                            | - | 1.236217915 | 0.004218922 | 0.020240736 |
| ENSMMUG00000000350 | basic, immunoglobulin-like variable motif containing [Source:NCBI gene;Acc:100426213]                                                 | - | 1.235911642 | 0.004119636 | 0.019861154 |
| ENSMMUG00000007250 | RNA binding motif protein 28 [Source:VGNC Symbol;Acc:VGNC:76519]                                                                      | - | 1.234149111 | 0.006324682 | 0.028068528 |



|                    |                                                                                                                      |   |             |             |             |
|--------------------|----------------------------------------------------------------------------------------------------------------------|---|-------------|-------------|-------------|
| ENSMMUG00000007244 | OTU deubiquitinase 7B [Source:VGNC Symbol;Acc:VGNC:75634]                                                            | - | 1.233587258 | 0.00096987  | 0.006122728 |
| ENSMMUG00000002497 | zinc finger protein 777 [Source:HGNC Symbol;Acc:HGNC:22213]                                                          | - | 1.232567005 | 0.009924685 | 0.039840197 |
| ENSMMUG00000009524 | adaptor protein, phosphotyrosine interacting with PH domain and leucine zipper 2 [Source:VGNC Symbol;Acc:VGNC:69861] | - | 1.230613208 | 0.007047968 | 0.030601459 |
| ENSMMUG00000002653 | hexokinase 3 [Source:VGNC Symbol;Acc:VGNC:73476]                                                                     | - | -1.22999081 | 8.14E-05    | 0.000757929 |
| ENSMMUG00000005610 | protein tyrosine phosphatase non-receptor type 4 [Source:VGNC Symbol;Acc:VGNC:76605]                                 | - | 1.229723114 | 0.010544876 | 0.041736442 |
| ENSMMUG00000014824 | SIX homeobox 3 [Source:HGNC Symbol;Acc:HGNC:10889]                                                                   | - | 1.228233644 | 3.28E-05    | 0.000348438 |
| ENSMMUG00000007421 | zinc finger CCHC-type containing 7 [Source:VGNC Symbol;Acc:VGNC:82088]                                               | - | -1.22808371 | 5.07E-07    | 8.86E-06    |
| ENSMMUG00000028800 | solute carrier family 7 member 9 [Source:VGNC Symbol;Acc:VGNC:77633]                                                 | - | -1.2277423  | 0.007345264 | 0.031629081 |
| ENSMMUG00000008541 | BRCA2 and CDKN1A interacting protein [Source:NCBI gene;Acc:699437]                                                   | - | 1.222572546 | 0.000699001 | 0.004741562 |
| ENSMMUG00000011189 | tousled like kinase 1 [Source:VGNC Symbol;Acc:VGNC:78367]                                                            | - | 1.220287873 | 0.004700775 | 0.022102211 |
| ENSMMUG00000059663 |                                                                                                                      | - | 1.216810869 | 0.002439256 | 0.013031027 |
| ENSMMUG00000054064 |                                                                                                                      | - | 1.214707846 | 1.22E-05    | 0.000147593 |
| ENSMMUG00000011675 | zinc finger and SCAN domain containing 12 [Source:VGNC Symbol;Acc:VGNC:78910]                                        | - | 1.214309919 | 0.000761637 | 0.005073654 |
| ENSMMUG00000015970 | coiled-coil domain containing 150 [Source:VGNC Symbol;Acc:VGNC:84222]                                                | - | 1.214235947 | 0.000621846 | 0.00429621  |
| ENSMMUG00000012961 | mindbomb E3 ubiquitin protein ligase 2 [Source:VGNC Symbol;Acc:VGNC:74627]                                           | - | 1.213750531 | 0.002243932 | 0.012184722 |
| ENSMMUG00000003621 | AKT serine/threonine kinase 2 [Source:VGNC Symbol;Acc:VGNC:69777]                                                    | - | 1.213583477 | 0.000235578 | 0.001884795 |
| ENSMMUG00000014762 | myosin heavy chain 6 [Source:NCBI gene;Acc:713471]                                                                   | - | 1.211655359 | 0.000309946 | 0.00236121  |
| ENSMMUG00000014727 | NSF attachment protein alpha [Source:VGNC Symbol;Acc:VGNC:75131]                                                     | - | 1.205891894 | 0.00139116  | 0.008262298 |
| ENSMMUG00000013552 | scribble planar cell polarity protein [Source:HGNC Symbol;Acc:HGNC:30377]                                            | - | 1.203438591 | 1.99E-09    | 5.80E-08    |
| ENSMMUG00000056515 |                                                                                                                      | - | 1.201098626 | 0.002487337 | 0.013234443 |
| ENSMMUG00000012307 | periostin [Source:VGNC Symbol;Acc:VGNC:76039]                                                                        | - | -1.1987432  | 0.000139412 | 0.001208197 |
| ENSMMUG00000002520 | solute carrier family 4 member 3 [Source:VGNC Symbol;Acc:VGNC:77604]                                                 | - | 1.198672556 | 0.000130594 | 0.001146451 |
| ENSMMUG00000002244 | early endosome antigen 1 [Source:VGNC Symbol;Acc:VGNC:72161]                                                         | - | 1.195478845 | 0.002701715 | 0.014159498 |
| ENSMMUG00000022044 | scavenger receptor class A member 5 [Source:VGNC Symbol;Acc:VGNC:77117]                                              | - | 1.189919736 | 5.79E-05    | 0.000571595 |
| ENSMMUG00000064529 |                                                                                                                      | - | 1.189447514 | 0.010166046 | 0.040578029 |
| ENSMMUG00000004606 | EMAP like 5 [Source:VGNC Symbol;Acc:VGNC:72067]                                                                      | - | 1.187800871 | 0.00060992  | 0.004230002 |
| ENSMMUG00000011116 | NADPH oxidase 4 [Source:VGNC Symbol;Acc:VGNC:75376]                                                                  | - | 1.186833815 | 5.91E-05    | 0.000582347 |
| ENSMMUG00000001888 | mahogunin ring finger 1 [Source:VGNC Symbol;Acc:VGNC:74542]                                                          | - | 1.186590954 | 0.012267926 | 0.046694167 |
| ENSMMUG00000001986 | WD repeat domain 24 [Source:VGNC Symbol;Acc:VGNC:79289]                                                              | - | 1.184771717 | 0.009147098 | 0.037350364 |
| ENSMMUG00000015166 | NIMA related kinase 9 [Source:VGNC Symbol;Acc:VGNC:75209]                                                            | - | 1.183707341 | 1.87E-07    | 3.53E-06    |

|                    |                                                                                              |             |             |             |
|--------------------|----------------------------------------------------------------------------------------------|-------------|-------------|-------------|
| ENSMMUG00000023005 | Sp9 transcription factor [Source:VGNC Symbol;Acc:VGNC:78027]                                 | 1.179649088 | 7.79E-05    | 0.000733092 |
| ENSMMUG00000008539 | uroporphyrinogen III synthase [Source:VGNC Symbol;Acc:VGNC:78731]                            | -1.17877254 | 0.001082471 | 0.006700806 |
| ENSMMUG00000058836 | transmembrane p24 trafficking protein 2 [Source:NCBI gene;Acc:106992483]                     | 1.177423262 | 0.000522764 | 0.00371351  |
| ENSMMUG00000063668 | cytochrome b5 domain containing 1 [Source:NCBI gene;Acc:716429]                              | 1.177280108 | 0.012277142 | 0.046698833 |
| ENSMMUG00000021216 | UDP glucuronosyltransferase 1 family, polypeptide A1 [Source:NCBI gene;Acc:574210]           | 1.176606931 | 0.001085139 | 0.006713483 |
| ENSMMUG00000023676 | espin [Source:NCBI gene;Acc:722532]                                                          | 1.176471488 | 2.56E-05    | 0.000281649 |
| ENSMMUG00000004579 | RAD51 recombinase [Source:VGNC Symbol;Acc:VGNC:76645]                                        | -1.17544595 | 0.001930923 | 0.010754593 |
| ENSMMUG00000023226 | RNA polymerase III subunit D [Source:VGNC Symbol;Acc:VGNC:76017]                             | 1.173588268 | 0.000149533 | 0.001280549 |
| ENSMMUG00000000205 | transmembrane protein 117 [Source:VGNC Symbol;Acc:VGNC:79488]                                | 1.173518459 | 3.57E-05    | 0.000375712 |
| ENSMMUG00000021171 | apolipoprotein B mRNA editing enzyme catalytic subunit 2 [Source:VGNC Symbol;Acc:VGNC:69986] | 1.172281042 | 0.002578617 | 0.013653058 |
| ENSMMUG00000017972 | zinc finger protein 200 [Source:VGNC Symbol;Acc:VGNC:78867]                                  | 1.171715694 | 0.000576071 | 0.004036597 |
| ENSMMUG00000014677 | dynamain 2 [Source:VGNC Symbol;Acc:VGNC:71957]                                               | 1.167056592 | 0.007690824 | 0.032685249 |
| ENSMMUG00000006018 | sperm associated antigen 5 [Source:NCBI gene;Acc:709400]                                     | -1.16590565 | 0.007219443 | 0.031233318 |
| ENSMMUG00000062527 |                                                                                              | 1.162329375 | 0.000206528 | 0.001678406 |
| ENSMMUG00000031296 | caspase 8 [Source:VGNC Symbol;Acc:VGNC:70547]                                                | 1.162073993 | 0.001345271 | 0.008038233 |
| ENSMMUG00000007998 | HIVEP zinc finger 2 [Source:VGNC Symbol;Acc:VGNC:83427]                                      | 1.161111067 | 0.000475356 | 0.003417344 |
| ENSMMUG00000005414 | N-deacetylase and N-sulfotransferase 1 [Source:VGNC Symbol;Acc:VGNC:75151]                   | -1.1588294  | 5.27E-05    | 0.000526166 |
| ENSMMUG00000003497 | FAT atypical cadherin 2 [Source:VGNC Symbol;Acc:VGNC:72618]                                  | 1.156950833 | 0.006401846 | 0.028341315 |
| ENSMMUG00000042208 | pepsin A-4 [Source:NCBI gene;Acc:694646]                                                     | 1.156352264 | 0.000286004 | 0.002200484 |
| ENSMMUG00000014350 | MAX interactor 1, dimerization protein [Source:VGNC Symbol;Acc:VGNC:75087]                   | 1.155722105 | 0.000808646 | 0.005318282 |
| ENSMMUG00000020691 | AAR2 splicing factor [Source:VGNC Symbol;Acc:VGNC:69412]                                     | 1.155073111 | 0.013195231 | 0.049598866 |
| ENSMMUG00000064337 | nectin cell adhesion molecule 4 [Source:NCBI gene;Acc:719843]                                | -1.15178815 | 0.00102337  | 0.006404485 |
| ENSMMUG00000021372 | EMI domain containing 1 [Source:VGNC Symbol;Acc:VGNC:72063]                                  | 1.151556605 | 0.012571411 | 0.047584242 |
| ENSMMUG00000064237 |                                                                                              | 1.150706488 | 0.005814657 | 0.026256847 |
| ENSMMUG00000059986 |                                                                                              | 1.149098395 | 1.37E-05    | 0.000162317 |
| ENSMMUG00000052382 | histone H4 [Source:NCBI gene;Acc:107000818]                                                  | 1.148319966 | 0.000439749 | 0.003199326 |
| ENSMMUG00000009536 | makorin ring finger protein 2 [Source:VGNC Symbol;Acc:VGNC:74878]                            | 1.147100427 | 0.012271605 | 0.046694167 |
| ENSMMUG00000007257 | synaptic vesicle glycoprotein 2A [Source:VGNC Symbol;Acc:VGNC:78181]                         | 1.146818293 | 0.00034151  | 0.002569151 |
| ENSMMUG00000014438 | piwi like RNA-mediated gene silencing 2 [Source:VGNC Symbol;Acc:VGNC:81502]                  | 1.145101907 | 7.53E-05    | 0.000710635 |
| ENSMMUG00000050239 |                                                                                              | 1.143808655 | 0.00754271  | 0.032271003 |

|                     |                                                                                              |   |             |             |             |
|---------------------|----------------------------------------------------------------------------------------------|---|-------------|-------------|-------------|
| ENSMMUG0000005233   | PRAME family member 17-like [Source:NCBI gene;Acc:100427847]                                 | - | 1.142969762 | 0.002821984 | 0.014613077 |
| ENSMMUG00000057808  |                                                                                              | - | 1.140575879 | 0.01299483  | 0.04891348  |
| ENSMMUG00000020690  | erythrocyte membrane protein band 4.1 like 1 [Source:VGNC Symbol;Acc:VGNC:72231]             | - | 1.138514402 | 0.000255511 | 0.002008676 |
| ENSMMUG00000002109  | proline and serine rich 1 [Source:VGNC Symbol;Acc:VGNC:76291]                                | - | 1.135930816 | 1.16E-05    | 0.000140833 |
| ENSMMUG00000016896  | solute carrier family 12 member 1 [Source:VGNC Symbol;Acc:VGNC:77385]                        | - | 1.133409581 | 0.000401801 | 0.002946994 |
| ENSMMUG00000009226  | mitogen-activated protein kinase kinase kinase 21 [Source:NCBI gene;Acc:712755]              | - | 1.132439223 | 0.001120821 | 0.006890953 |
| ENSMMUG00000005761  | UBX domain protein 1 [Source:VGNC Symbol;Acc:VGNC:79135]                                     | - | 1.131888745 | 0.009564145 | 0.038713876 |
| ENSMMUG00000008004  | transmembrane immune signaling adaptor TYROBP [Source:NCBI gene;Acc:574207]                  | - | 1.130965331 | 0.000282033 | 0.002177668 |
| ENSMMUG00000023096  | obscurin, cytoskeletal calmodulin and titin-interacting RhoGEF [Source:NCBI gene;Acc:694413] | - | 1.129208344 | 1.55E-06    | 2.35E-05    |
| ENSMMUG00000021808  | cryptochrome circadian regulator 1 [Source:VGNC Symbol;Acc:VGNC:71499]                       | - | 1.128680787 | 0.001118749 | 0.006882115 |
| ENSMMUG00000013183  | F-box and leucine rich repeat protein 17 [Source:VGNC Symbol;Acc:VGNC:82142]                 | - | 1.128063159 | 0.00087026  | 0.005635099 |
| ENSMMUG00000002093  | testis expressed 261 [Source:NCBI gene;Acc:703863]                                           | - | 1.127175614 | 0.000921432 | 0.005882071 |
| ENSMMUG00000013707  | heat shock protein family H (Hsp110) member 1 [Source:NCBI gene;Acc:721956]                  | - | 1.124383573 | 1.81E-05    | 0.000206259 |
| ENSMMUG00000002589  | sulfotransferase 1C3-like [Source:NCBI gene;Acc:114671897]                                   | - | 1.124031251 | 0.007135454 | 0.03091935  |
| ENSMMUG00000008093  | StAR related lipid transfer domain containing 9 [Source:NCBI gene;Acc:708953]                | - | 1.123578541 | 0.000259578 | 0.002031796 |
| ENSMMUG000000065117 | septin 4 [Source:HGNC Symbol;Acc:HGNC:9165]                                                  | - | 1.123491776 | 0.00174497  | 0.009938625 |
| ENSMMUG00000022199  | polyhomeotic homolog 3 [Source:VGNC Symbol;Acc:VGNC:75804]                                   | - | 1.119631258 | 0.000163454 | 0.001377977 |
| ENSMMUG000000043922 | spermatogenesis associated 48 [Source:VGNC Symbol;Acc:VGNC:81762]                            | - | 1.118272005 | 0.000679811 | 0.004628779 |
| ENSMMUG00000012769  | limb development membrane protein 1 like [Source:VGNC Symbol;Acc:VGNC:74310]                 | - | 1.117030619 | 0.004774055 | 0.022407861 |
| ENSMMUG000000063288 |                                                                                              | - | 1.116382636 | 0.000624415 | 0.004311211 |
| ENSMMUG00000018285  | cysteine rich with EGF like domains 1 [Source:VGNC Symbol;Acc:VGNC:71407]                    | - | 1.113898861 | 0.001041825 | 0.00649522  |
| ENSMMUG00000017379  | myocardin related transcription factor B [Source:VGNC Symbol;Acc:VGNC:74865]                 | - | 1.113734969 | 0.002979476 | 0.015268054 |
| ENSMMUG000000063972 |                                                                                              | - | 1.109707486 | 0.010534085 | 0.041724222 |
| ENSMMUG00000018468  | senataxin [Source:VGNC Symbol;Acc:VGNC:77356]                                                | - | 1.109132834 | 0.000783013 | 0.005178497 |
| ENSMMUG000000051743 | TLC domain containing 1 [Source:NCBI gene;Acc:710391]                                        | - | 1.107705172 | 0.012705794 | 0.047942135 |
| ENSMMUG000000044047 | killer cell lectin like receptor B1 [Source:NCBI gene;Acc:100430783]                         | - | 1.107689635 | 0.008085071 | 0.03400061  |
| ENSMMUG000000046282 |                                                                                              | - | 1.105154656 | 0.000211227 | 0.0017089   |
| ENSMMUG00000017886  | F-box protein 10 [Source:NCBI gene;Acc:718443]                                               | - | 1.105151526 | 0.003868952 | 0.01888795  |

|                    |                                                                                                  |   |             |             |             |
|--------------------|--------------------------------------------------------------------------------------------------|---|-------------|-------------|-------------|
| ENSMMUG00000001892 | UDP-glucose 6-dehydrogenase [Source:VGNC Symbol;Acc:VGNC:78711]                                  | - | 1.104639423 | 0.006414668 | 0.028372545 |
| ENSMMUG00000002638 | WD repeat domain 18 [Source:VGNC Symbol;Acc:VGNC:79103]                                          | - | 1.104569854 | 0.00542102  | 0.024910983 |
| ENSMMUG00000006252 | argonaute RISC catalytic component 3 [Source:NCBI gene;Acc:712543]                               | - | 1.104098731 | 4.90E-06    | 6.49E-05    |
| ENSMMUG00000021112 | epithelial splicing regulatory protein 1 [Source:VGNC Symbol;Acc:VGNC:72358]                     | - | 1.103310375 | 0.0009612   | 0.006075078 |
| ENSMMUG00000064473 | MRT4 homolog, ribosome maturation factor [Source:NCBI gene;Acc:702926]                           | - | 1.102641606 | 0.012613125 | 0.047708791 |
| ENSMMUG00000014451 | ASXL transcriptional regulator 3 [Source:VGNC Symbol;Acc:VGNC:70152]                             | - | 1.102509424 | 0.004526466 | 0.021478406 |
| ENSMMUG00000013376 | POU class 2 homeobox 2 [Source:NCBI gene;Acc:706835]                                             | - | 1.101575612 | 0.001216267 | 0.007373149 |
| ENSMMUG00000001919 | clock circadian regulator [Source:VGNC Symbol;Acc:VGNC:71262]                                    | - | 1.098759184 | 2.82E-05    | 0.000304764 |
| ENSMMUG00000009006 | round spermatid basic protein 1 like [Source:VGNC Symbol;Acc:VGNC:77097]                         | - | 1.098115339 | 0.003422491 | 0.017102075 |
| ENSMMUG00000002176 | ubiquitin like with PHD and ring finger domains 2 [Source:VGNC Symbol;Acc:VGNC:78714]            | - | 1.097968651 | 4.22E-05    | 0.00043306  |
| ENSMMUG00000057655 |                                                                                                  | - | 1.097491003 | 0.000174208 | 0.001452802 |
| ENSMMUG00000022056 | DENN domain containing 4A [Source:VGNC Symbol;Acc:VGNC:71697]                                    | - | 1.096773251 | 0.006292736 | 0.02796112  |
| ENSMMUG00000055400 | U6 spliceosomal RNA [Source:RFAM;Acc:RF00026]                                                    | - | 1.096682766 | 0.004021346 | 0.019470007 |
| ENSMMUG00000060798 |                                                                                                  | - | 1.096175677 | 0.012175033 | 0.046476551 |
| ENSMMUG00000015198 | glutamate decarboxylase 1 [Source:VGNC Symbol;Acc:VGNC:72862]                                    | - | 1.093794013 | 0.007699117 | 0.03268984  |
| ENSMMUG00000033001 | U6 spliceosomal RNA [Source:RFAM;Acc:RF00026]                                                    | - | 1.088208777 | 0.002890997 | 0.014885064 |
| ENSMMUG00000000065 | coiled-coil domain containing 181 [Source:VGNC Symbol;Acc:VGNC:70884]                            | - | -1.08798707 | 0.000137261 | 0.001192418 |
| ENSMMUG00000050862 |                                                                                                  | - | 1.086201793 | 0.004549589 | 0.021569233 |
| ENSMMUG00000050991 |                                                                                                  | - | 1.082562516 | 0.000372042 | 0.002758613 |
| ENSMMUG00000038447 |                                                                                                  | - | -1.08141794 | 0.004430782 | 0.021098312 |
| ENSMMUG00000047067 | SERTA domain containing 2 [Source:NCBI gene;Acc:696216]                                          | - | 1.079651492 | 0.004552334 | 0.021572805 |
| ENSMMUG00000011963 | vimentin type intermediate filament associated coiled-coil protein [Source:NCBI gene;Acc:697958] | - | 1.079406314 | 1.02E-06    | 1.61E-05    |
| ENSMMUG00000008946 | chromosome 19 C19orf47 homolog [Source:VGNC Symbol;Acc:VGNC:70404]                               | - | -1.07495413 | 0.001738667 | 0.009923596 |
| ENSMMUG00000031202 | RAB1B, member RAS oncogene family [Source:NCBI gene;Acc:721852]                                  | - | 1.074433565 | 0.011862807 | 0.045538549 |
| ENSMMUG00000003316 | mannosidase alpha class 2A member 1 [Source:VGNC Symbol;Acc:VGNC:81449]                          | - | 1.070783901 | 0.000129915 | 0.001143124 |
| ENSMMUG00000007875 | F-box and leucine rich repeat protein 12 [Source:VGNC Symbol;Acc:VGNC:72502]                     | - | 1.069817657 | 0.002698901 | 0.014151596 |
| ENSMMUG00000009126 | solute carrier organic anion transporter family member 2B1 [Source:VGNC Symbol;Acc:VGNC:77603]   | - | 1.067561079 | 0.000137243 | 0.001192418 |
| ENSMMUG00000020813 | NADH:ubiquinone oxidoreductase subunit A9 [Source:VGNC Symbol;Acc:VGNC:81480]                    | - | 1.065851269 | 0.012640917 | 0.047747229 |
| ENSMMUG00000056280 | G protein subunit alpha i2 [Source:NCBI gene;Acc:703780]                                         | - | 1.064659758 | 0.007230773 | 0.031248597 |



|                     |                                                                                      |   |             |             |             |
|---------------------|--------------------------------------------------------------------------------------|---|-------------|-------------|-------------|
| ENSMMUG00000015619  | ATP binding cassette subfamily B member 7 [Source:VGNC Symbol;Acc:VGNC:81340]        | - | 1.060924199 | 0.004359891 | 0.020815645 |
| ENSMMUG00000015309  | F-box protein 24 [Source:VGNC Symbol;Acc:VGNC:72495]                                 | - | 1.053066813 | 0.000290306 | 0.002228834 |
| ENSMMUG00000021914  | spondin 1 [Source:VGNC Symbol;Acc:VGNC:77862]                                        | - | 1.049558797 | 0.00422511  | 0.020261451 |
| ENSMMUG00000000983  | aldolase, fructose-bisphosphate A [Source:NCBI gene;Acc:708406]                      | - | 1.046014008 | 0.006053447 | 0.027090405 |
| ENSMMUG00000008917  | S100 calcium binding protein A6 [Source:VGNC Symbol;Acc:VGNC:76960]                  | - | 1.045261448 | 0.010264834 | 0.040897003 |
| ENSMMUG00000005463  | bromodomain containing 3 [Source:VGNC Symbol;Acc:VGNC:70281]                         | - | 1.043137299 | 0.00385934  | 0.018866532 |
| ENSMMUG00000001357  | tetraspanin 11 [Source:VGNC Symbol;Acc:VGNC:79882]                                   | - | 1.040639904 | 8.52E-05    | 0.000787383 |
| ENSMMUG00000020047  | integrin subunit beta 3 binding protein [Source:VGNC Symbol;Acc:VGNC:73787]          | - | 1.040442925 | 4.50E-05    | 0.000459119 |
| ENSMMUG00000000158  | minichromosome maintenance complex component 2 [Source:VGNC Symbol;Acc:VGNC:74680]   | - | 1.039072281 | 0.000197458 | 0.00161683  |
| ENSMMUG000000058044 |                                                                                      | - | 1.038797816 | 0.001896277 | 0.010597215 |
| ENSMMUG000000044214 |                                                                                      | - | 1.037031922 | 0.000261821 | 0.002043446 |
| ENSMMUG00000013601  | chromosome 14 C11orf54 homolog [Source:NCBI gene;Acc:696483]                         | - | 1.036273542 | 0.002917736 | 0.014987121 |
| ENSMMUG00000007246  | myotubularin related protein 11 [Source:VGNC Symbol;Acc:VGNC:75016]                  | - | 1.036035475 | 0.008957718 | 0.036834508 |
| ENSMMUG000000031856 | talin 1 [Source:VGNC Symbol;Acc:VGNC:78371]                                          | - | 1.035922372 | 0.001058598 | 0.006571801 |
| ENSMMUG00000021878  | timeless circadian regulator [Source:VGNC Symbol;Acc:VGNC:78356]                     | - | 1.035374292 | 0.001452906 | 0.008558636 |
| ENSMMUG000000049939 |                                                                                      | - | 1.030375238 | 9.03E-05    | 0.000830821 |
| ENSMMUG000000061035 | ZFP82 zinc finger protein [Source:NCBI gene;Acc:719145]                              | - | 1.027450908 | 0.009481075 | 0.038424426 |
| ENSMMUG00000023810  | methionyl-tRNA synthetase 2, mitochondrial [Source:VGNC Symbol;Acc:VGNC:74572]       | - | 1.026359098 | 0.008316307 | 0.034729596 |
| ENSMMUG000000048077 | ataxin 1 like [Source:NCBI gene;Acc:709805]                                          | - | 1.017668925 | 0.007989343 | 0.033674926 |
| ENSMMUG000000059267 | pellino E3 ubiquitin protein ligase 1 [Source:NCBI gene;Acc:696416]                  | - | 1.016154168 | 0.004257448 | 0.020380437 |
| ENSMMUG00000003288  | glutamic--pyruvic transaminase 2 [Source:VGNC Symbol;Acc:VGNC:72962]                 | - | 1.014920148 | 0.007240621 | 0.031250057 |
| ENSMMUG00000002519  | serine/threonine kinase 11 interacting protein [Source:VGNC Symbol;Acc:VGNC:77963]   | - | 1.008587847 | 0.000107316 | 0.000967814 |
| ENSMMUG00000017145  | cell division cycle 123 [Source:VGNC Symbol;Acc:VGNC:70768]                          | - | 1.005175137 | 0.012235122 | 0.046606918 |
| ENSMMUG00000001008  | spectrin repeat containing nuclear envelope protein 2 [Source:NCBI gene;Acc:706759]  | - | 1.003705146 | 0.003530271 | 0.017526778 |
| ENSMMUG00000019841  | leucine rich pentatricopeptide repeat containing [Source:VGNC Symbol;Acc:VGNC:82177] | - | 1.003254793 | 0.006868742 | 0.030052135 |
| ENSMMUG000000053389 |                                                                                      | - | 1.002394841 | 0.006880285 | 0.030081467 |
| ENSMMUG00000008781  | BCL6 corepressor like 1 [Source:VGNC Symbol;Acc:VGNC:70131]                          | - | 1.000641666 | 0.008329739 | 0.034759652 |
| ENSMMUG00000020004  | Ras association domain family member 2 [Source:VGNC Symbol;Acc:VGNC:76674]           | - | -1.00036957 | 0.004096576 | 0.019767574 |
| ENSMMUG00000000681  | calmin [Source:VGNC Symbol;Acc:VGNC:71232]                                           | - | 0.999297153 | 0.001860576 | 0.010467215 |

|                    |                                                                                                |   |             |             |             |
|--------------------|------------------------------------------------------------------------------------------------|---|-------------|-------------|-------------|
| ENSMMUG00000022624 | putative speedy protein E16 [Source:NCBI gene;Acc:718058]                                      | - | 0.998263502 | 0.007384548 | 0.031757368 |
| ENSMMUG00000044163 | zinc finger CCCH-type containing 8 [Source:NCBI gene;Acc:698828]                               | - | 0.996463321 | 0.007360119 | 0.031677463 |
| ENSMMUG00000000718 | ERCC excision repair 1, endonuclease non-catalytic subunit [Source:VGNC Symbol;Acc:VGNC:72422] | - | 0.996265658 | 0.001741941 | 0.009931325 |
| ENSMMUG00000006754 | tetratricopeptide repeat domain 4 [Source:VGNC Symbol;Acc:VGNC:78668]                          | - | 0.995882592 | 0.003630778 | 0.017910846 |
| ENSMMUG00000004648 | KH domain containing 4, pre-mRNA splicing factor [Source:VGNC Symbol;Acc:VGNC:73931]           | - | 0.994475185 | 0.001693782 | 0.00971347  |
| ENSMMUG00000010171 | proline-serine-threonine phosphatase interacting protein 1 [Source:VGNC Symbol;Acc:VGNC:76459] | - | 0.993432398 | 0.002669822 | 0.01405354  |
| ENSMMUG00000004113 | major facilitator superfamily domain containing 4A [Source:VGNC Symbol;Acc:VGNC:74575]         | - | 0.989597463 | 0.003491425 | 0.017381711 |
| ENSMMUG00000023000 | mepirin A subunit alpha [Source:VGNC Symbol;Acc:VGNC:74704]                                    | - | 0.989015141 | 0.011159727 | 0.043393154 |
| ENSMMUG00000003051 | COPI coat complex subunit beta 2 [Source:VGNC Symbol;Acc:VGNC:71313]                           | - | 0.988862491 | 0.000180911 | 0.001500615 |
| ENSMMUG00000003081 | G protein signaling modulator 1 [Source:VGNC Symbol;Acc:VGNC:72960]                            | - | 0.987397178 | 0.002744875 | 0.014316431 |
| ENSMMUG00000002429 | catalase [Source:VGNC Symbol;Acc:VGNC:70552]                                                   | - | 0.986933903 | 0.001618709 | 0.00936224  |
| ENSMMUG00000023397 | penta-EF-hand domain containing 1 [Source:NCBI gene;Acc:706038]                                | - | 0.986192776 | 0.005639974 | 0.025660577 |
| ENSMMUG00000059543 | zinc finger protein 30 [Source:NCBI gene;Acc:718310]                                           | - | 0.983246792 | 1.48E-05    | 0.000173172 |
| ENSMMUG00000061186 |                                                                                                | - | 0.983085765 | 0.010808897 | 0.042486496 |
| ENSMMUG00000016475 | M-phase phosphoprotein 8 [Source:VGNC Symbol;Acc:VGNC:74864]                                   | - | 0.982680937 | 0.003610351 | 0.017826311 |
| ENSMMUG00000058740 |                                                                                                | - | 0.978803214 | 0.002498427 | 0.013286923 |
| ENSMMUG00000002879 | GA binding protein transcription factor subunit beta 1 [Source:VGNC Symbol;Acc:VGNC:72845]     | - | -0.97525296 | 0.004211754 | 0.0202153   |
| ENSMMUG00000055128 | phosphoglycolate phosphatase [Source:NCBI gene;Acc:695591]                                     | - | 0.972319514 | 0.006511327 | 0.028708672 |
| ENSMMUG00000012778 | rabphilin 3A [Source:VGNC Symbol;Acc:VGNC:77033]                                               | - | 0.971336344 | 0.012307032 | 0.046754789 |
| ENSMMUG00000012953 | stress induced phosphoprotein 1 [Source:NCBI gene;Acc:717926]                                  | - | 0.969355085 | 0.00011003  | 0.000986719 |
| ENSMMUG00000017125 | oxysterol binding protein like 11 [Source:VGNC Symbol;Acc:VGNC:75631]                          | - | 0.965897405 | 0.00831933  | 0.034729596 |
| ENSMMUG00000006515 | C-type lectin domain containing 16A [Source:VGNC Symbol;Acc:VGNC:71369]                        | - | 0.963272263 | 0.00719102  | 0.031135218 |
| ENSMMUG00000032295 | zinc finger protein 595 [Source:VGNC Symbol;Acc:VGNC:79655]                                    | - | 0.962744683 | 0.010982385 | 0.042872857 |
| ENSMMUG00000010978 | S100 calcium binding protein A2 [Source:VGNC Symbol;Acc:VGNC:76956]                            | - | 0.959782006 | 0.009897053 | 0.039768091 |
| ENSMMUG00000000662 | guanylate-binding protein 1 [Source:NCBI gene;Acc:694538]                                      | - | -0.95740065 | 0.000953729 | 0.006034898 |
| ENSMMUG00000007692 | apolipoprotein B [Source:VGNC Symbol;Acc:VGNC:69985]                                           | - | 0.955874431 | 0.003873204 | 0.018891677 |
| ENSMMUG00000012091 | thioredoxin reductase 1 [Source:VGNC Symbol;Acc:VGNC:78679]                                    | - | 0.951609116 | 0.001166434 | 0.00712689  |
| ENSMMUG00000040958 | lysozyme-like protein 1 [Source:NCBI gene;Acc:698176]                                          | - | 0.951086725 | 0.001037276 | 0.006478922 |
| ENSMMUG00000005334 | phospholipase C gamma 2 [Source:VGNC Symbol;Acc:VGNC:76170]                                    | - | 0.947213522 | 6.09E-05    | 0.000595836 |

|                     |                                                                                                                                     |             |             |             |
|---------------------|-------------------------------------------------------------------------------------------------------------------------------------|-------------|-------------|-------------|
| ENSMMUG00000056054  | zinc finger and BTB domain containing 3 [Source:NCBI gene;Acc:722240]                                                               | -0.94539914 | 0.000719275 | 0.004857797 |
| ENSMMUG00000008396  | methylmalonyl-CoA epimerase [Source:NCBI gene;Acc:704094]                                                                           | 0.944980414 | 0.00211864  | 0.011614994 |
| ENSMMUG00000019266  | choline dehydrogenase [Source:VGNC Symbol;Acc:VGNC:71086]                                                                           | 0.943759545 | 0.010787173 | 0.042431897 |
| ENSMMUG00000011335  | Fc receptor like 6 [Source:VGNC Symbol;Acc:VGNC:72602]                                                                              | -0.93879102 | 0.001049    | 0.006527179 |
| ENSMMUG00000005466  | SPOC domain containing 1 [Source:VGNC Symbol;Acc:VGNC:77997]                                                                        | -0.93755052 | 0.011136086 | 0.043332333 |
| ENSMMUG00000054462  |                                                                                                                                     | 0.934377922 | 0.003297299 | 0.016582934 |
| ENSMMUG00000002370  | integrin subunit alpha 6 [Source:VGNC Symbol;Acc:VGNC:73780]                                                                        | 0.934167172 | 0.001063232 | 0.006596786 |
| ENSMMUG00000059753  |                                                                                                                                     | 0.933830765 | 0.005963281 | 0.026782847 |
| ENSMMUG00000013031  | bone morphogenetic protein 1 [Source:VGNC Symbol;Acc:VGNC:70259]                                                                    | 0.931218349 | 0.008905174 | 0.036694467 |
| ENSMMUG00000052581  | upstream transcription factor family member 3 [Source:NCBI gene;Acc:709660]                                                         | 0.930162397 | 0.000826511 | 0.005410025 |
| ENSMMUG00000006048  | adaptor related protein complex 2 subunit beta 1 [Source:VGNC Symbol;Acc:VGNC:69964]                                                | 0.928919358 | 0.009053654 | 0.037066605 |
| ENSMMUG00000033738  | RNA, U6atac small nuclear 6, pseudogene [Source:HGNC Symbol;Acc:HGNC:46905]                                                         | 0.926645446 | 0.007664056 | 0.032609868 |
| ENSMMUG00000002777  | protein tyrosine phosphatase 4A1 [Source:VGNC Symbol;Acc:VGNC:83452]                                                                | 0.922628894 | 0.000708143 | 0.004793951 |
| ENSMMUG00000004223  | ring finger protein 10 [Source:VGNC Symbol;Acc:VGNC:76702]                                                                          | 0.919399937 | 0.002166368 | 0.011834726 |
| ENSMMUG000000043504 |                                                                                                                                     | 0.919152547 | 0.006050772 | 0.027090405 |
| ENSMMUG00000004624  | synaptojanin 1 [Source:VGNC Symbol;Acc:VGNC:78071]                                                                                  | 0.918363577 | 0.008141695 | 0.034172407 |
| ENSMMUG00000006163  | malate dehydrogenase 1 [Source:VGNC Symbol;Acc:VGNC:74690]                                                                          | 0.913802416 | 0.005271647 | 0.024373773 |
| ENSMMUG000000061846 |                                                                                                                                     | 0.911327887 | 0.002115772 | 0.011610742 |
| ENSMMUG00000005136  | TRPM8 channel associated factor 1 [Source:VGNC Symbol;Acc:VGNC:79346]                                                               | 0.911073196 | 0.001953152 | 0.010861653 |
| ENSMMUG00000018051  | FAT atypical cadherin 1 [Source:VGNC Symbol;Acc:VGNC:72617]                                                                         | 0.910150802 | 5.06E-05    | 0.000510171 |
| ENSMMUG00000000044  | intraflagellar transport 140 [Source:VGNC Symbol;Acc:VGNC:73456]                                                                    | 0.909912684 | 0.008676122 | 0.035955788 |
| ENSMMUG000000054737 |                                                                                                                                     | -0.90916523 | 0.000120116 | 0.001067445 |
| ENSMMUG00000001319  | methylenetetrahydrofolate dehydrogenase, cyclohydrolase and formyltetrahydrofolate synthetase 1 [Source:VGNC Symbol;Acc:VGNC:84399] | 0.908505493 | 0.006298956 | 0.027977283 |
| ENSMMUG00000011417  | glyoxalase domain containing 4 [Source:VGNC Symbol;Acc:VGNC:72939]                                                                  | 0.905392341 | 0.006916508 | 0.030160865 |
| ENSMMUG00000001432  | t-SNARE domain containing 1 [Source:NCBI gene;Acc:701269]                                                                           | 0.903590012 | 0.000578382 | 0.004050167 |
| ENSMMUG000000063348 |                                                                                                                                     | 0.903038332 | 0.003912366 | 0.019039832 |
| ENSMMUG00000015737  | phosphatidylinositol glycan anchor biosynthesis class A [Source:VGNC Symbol;Acc:VGNC:75984]                                         | 0.902838786 | 0.008155698 | 0.03419544  |
| ENSMMUG00000021474  | zinc finger protein 45 [Source:NCBI gene;Acc:712591]                                                                                | 0.902506278 | 3.42E-05    | 0.000361541 |
| ENSMMUG00000017478  | tescalcin [Source:VGNC Symbol;Acc:VGNC:79571]                                                                                       | 0.901418308 | 0.00809348  | 0.034009568 |
| ENSMMUG000000052496 |                                                                                                                                     | 0.894366354 | 0.001676483 | 0.009634666 |

|                    |                                                                                                    |   |             |             |             |
|--------------------|----------------------------------------------------------------------------------------------------|---|-------------|-------------|-------------|
| ENSMMUG00000015311 | leucine rich repeats and calponin homology domain containing 4 [Source:VGNC Symbol;Acc:VGNC:74441] | - | 0.891294496 | 0.002595879 | 0.01372433  |
| ENSMMUG00000057209 |                                                                                                    | - | 0.891043465 | 0.008049761 | 0.033878424 |
| ENSMMUG00000003325 | pyridoxamine 5'-phosphate oxidase [Source:VGNC Symbol;Acc:VGNC:76141]                              | - | 0.890582035 | 0.010698715 | 0.042160485 |
| ENSMMUG00000018282 | interleukin 17 receptor C [Source:VGNC Symbol;Acc:VGNC:84164]                                      | - | 0.888341835 | 0.003117638 | 0.015826321 |
| ENSMMUG00000001212 | Rieske Fe-S domain containing [Source:VGNC Symbol;Acc:VGNC:84487]                                  | - | 0.887736805 | 0.009622669 | 0.03889641  |
| ENSMMUG00000022251 | transglutaminase 7 [Source:VGNC Symbol;Acc:VGNC:79880]                                             | - | 0.886776418 | 0.001018283 | 0.006376337 |
| ENSMMUG00000058583 | RRAD and GEM like GTPase 1 [Source:NCBI gene;Acc:713351]                                           | - | 0.884837547 | 0.003196016 | 0.016171155 |
| ENSMMUG00000063864 |                                                                                                    | - | -0.88257876 | 0.004570521 | 0.021621159 |
| ENSMMUG00000048302 | ArfGAP with FG repeats 2 [Source:VGNC Symbol;Acc:VGNC:80329]                                       | - | 0.877798733 | 0.006395377 | 0.028335838 |
| ENSMMUG00000009775 | caveolae associated protein 4 [Source:NCBI gene;Acc:714379]                                        | - | 0.872102629 | 0.001727067 | 0.009862583 |
| ENSMMUG00000001978 | adenosine monophosphate deaminase 1 [Source:VGNC Symbol;Acc:VGNC:69806]                            | - | 0.867880079 | 0.003781337 | 0.018569005 |
| ENSMMUG00000062591 | insulin induced gene 1 [Source:NCBI gene;Acc:718513]                                               | - | 0.863035288 | 0.003786234 | 0.018584627 |
| ENSMMUG00000018785 | elongator acetyltransferase complex subunit 2 [Source:VGNC Symbol;Acc:VGNC:72069]                  | - | 0.862913259 | 0.003282262 | 0.01652265  |
| ENSMMUG00000012601 | RANBP2-type and C3HC4-type zinc finger containing 1 [Source:VGNC Symbol;Acc:VGNC:81554]            | - | 0.861152819 | 0.002644611 | 0.013947942 |
| ENSMMUG00000007570 | uveal autoantigen with coiled-coil domains and ankyrin repeats [Source:VGNC Symbol;Acc:VGNC:78995] | - | -0.85973448 | 0.001779109 | 0.010095906 |
| ENSMMUG00000061176 |                                                                                                    | - | 0.854239592 | 0.000132404 | 0.001160466 |
| ENSMMUG00000018186 | sosondowah ankyrin repeat domain family member B [Source:VGNC Symbol;Acc:VGNC:78033]               | - | 0.852849539 | 0.001047669 | 0.006524984 |
| ENSMMUG00000056693 |                                                                                                    | - | 0.851888651 | 0.000109717 | 0.00098473  |
| ENSMMUG00000019470 | pecanex 1 [Source:VGNC Symbol;Acc:VGNC:75655]                                                      | - | 0.851870002 | 0.007986369 | 0.033674926 |
| ENSMMUG00000006340 | solute carrier family 6 member 6 [Source:VGNC Symbol;Acc:VGNC:77622]                               | - | 0.849271474 | 0.000781276 | 0.005173328 |
| ENSMMUG00000018784 | solute carrier family 39 member 6 [Source:VGNC Symbol;Acc:VGNC:77508]                              | - | 0.848302434 | 0.000555145 | 0.003920392 |
| ENSMMUG00000018542 | leucyl and cystinyl aminopeptidase [Source:VGNC Symbol;Acc:VGNC:74438]                             | - | 0.846435543 | 0.003947521 | 0.019176456 |
| ENSMMUG00000018929 | ankyrin repeat domain 10 [Source:VGNC Symbol;Acc:VGNC:69646]                                       | - | 0.844300415 | 0.00087415  | 0.005650159 |
| ENSMMUG00000013625 | ATPase phospholipid transporting 11A [Source:VGNC Symbol;Acc:VGNC:70064]                           | - | -0.84200026 | 0.004660836 | 0.021970904 |
| ENSMMUG00000008313 | zinc finger protein 792 [Source:VGNC Symbol;Acc:VGNC:79456]                                        | - | 0.840952271 | 0.001396757 | 0.008290998 |
| ENSMMUG00000042154 | ankyrin repeat domain 66 [Source:VGNC Symbol;Acc:VGNC:81024]                                       | - | 0.837962548 | 0.00615911  | 0.027468769 |
| ENSMMUG00000023249 | aryl hydrocarbon receptor nuclear translocator like 2 [Source:NCBI gene;Acc:709547]                | - | 0.836576833 | 0.010835086 | 0.042543128 |
| ENSMMUG00000008423 | septin 4 [Source:NCBI gene;Acc:714724]                                                             | - | 0.830544793 | 0.000143169 | 0.001235818 |
| ENSMMUG00000049640 |                                                                                                    | - | 0.828057942 | 0.011394669 | 0.044006578 |



|                    |                                                                                       |   |             |             |             |
|--------------------|---------------------------------------------------------------------------------------|---|-------------|-------------|-------------|
| ENSMMUG0000001423  | family with sequence similarity 214 member A [Source:VGNC Symbol;Acc:VGNC:72354]      | - | 0.827591965 | 0.000877631 | 0.005662524 |
| ENSMMUG00000021385 | carbonic anhydrase 14 [Source:VGNC Symbol;Acc:VGNC:70489]                             | - | 0.819234246 | 0.00930809  | 0.037865018 |
| ENSMMUG00000000978 | cramped chromatin regulator homolog 1 [Source:NCBI gene;Acc:722473]                   | - | -0.81801907 | 0.002176939 | 0.011880492 |
| ENSMMUG00000010788 | ATP binding cassette subfamily B member 1 [Source:NCBI gene;Acc:574235]               | - | 0.816012504 | 0.004395879 | 0.020959751 |
| ENSMMUG00000018738 | alcohol dehydrogenase 1B (class I), beta polypeptide [Source:NCBI gene;Acc:707908]    | - | 0.815853534 | 0.002907847 | 0.0149505   |
| ENSMMUG00000063721 |                                                                                       | - | 0.814665784 | 0.006648661 | 0.029219047 |
| ENSMMUG00000044782 |                                                                                       | - | 0.806576528 | 0.003908317 | 0.01903723  |
| ENSMMUG00000007078 | N-acylsphingosine amidohydrolase 2 [Source:NCBI gene;Acc:703913]                      | - | -0.79937726 | 0.000721012 | 0.004866493 |
| ENSMMUG00000017276 | nucleolar protein 4 [Source:VGNC Symbol;Acc:VGNC:75366]                               | - | 0.792676763 | 0.004843316 | 0.022683806 |
| ENSMMUG00000011964 | RAN binding protein 3 [Source:VGNC Symbol;Acc:VGNC:76655]                             | - | 0.790395083 | 0.00479918  | 0.022516032 |
| ENSMMUG00000062635 |                                                                                       | - | 0.786260174 | 0.002823501 | 0.014613946 |
| ENSMMUG00000006493 | ras related dexamethasone induced 1 [Source:VGNC Symbol;Acc:VGNC:76485]               | - | 0.783684118 | 0.011899987 | 0.045608578 |
| ENSMMUG00000007576 | EYA transcriptional coactivator and phosphatase 1 [Source:VGNC Symbol;Acc:VGNC:72453] | - | 0.783487413 | 0.001301658 | 0.007838168 |
| ENSMMUG00000013093 | uncharacterized LOC106993385 [Source:NCBI gene;Acc:106993385]                         | - | 0.781967075 | 0.003268825 | 0.016477979 |
| ENSMMUG00000046906 |                                                                                       | - | 0.778342827 | 0.012182994 | 0.046486665 |
| ENSMMUG00000001228 | LLGL scribble cell polarity complex component 2 [Source:NCBI gene;Acc:706973]         | - | 0.776970938 | 0.000737423 | 0.004940324 |
| ENSMMUG00000052418 |                                                                                       | - | -0.77427224 | 0.002516603 | 0.013363902 |
| ENSMMUG00000006251 | argonaute RISC component 1 [Source:VGNC Symbol;Acc:VGNC:81346]                        | - | 0.769405664 | 0.006386059 | 0.028317715 |
| ENSMMUG00000061085 |                                                                                       | - | 0.768130751 | 0.008546108 | 0.03551208  |
| ENSMMUG00000048882 | KIAA0408 ortholog [Source:NCBI gene;Acc:100429459]                                    | - | 0.761356146 | 0.000963661 | 0.006087076 |
| ENSMMUG00000008392 | huntingtin [Source:VGNC Symbol;Acc:VGNC:73468]                                        | - | 0.756590255 | 0.013062759 | 0.049135025 |
| ENSMMUG00000056466 |                                                                                       | - | -0.75112126 | 0.011234186 | 0.043557601 |
| ENSMMUG00000008941 | DNA topoisomerase II alpha [Source:VGNC Symbol;Acc:VGNC:78620]                        | - | 0.744950659 | 0.003406384 | 0.017042466 |
| ENSMMUG00000022293 | FERM and PDZ domain containing 3 [Source:VGNC Symbol;Acc:VGNC:72805]                  | - | 0.743732043 | 0.012175801 | 0.046476551 |
| ENSMMUG00000009461 | SMAD specific E3 ubiquitin protein ligase 2 [Source:VGNC Symbol;Acc:VGNC:77727]       | - | -0.74264884 | 0.010083138 | 0.040306508 |
| ENSMMUG00000022714 | phosphomannomutase 2 [Source:VGNC Symbol;Acc:VGNC:76193]                              | - | 0.732496809 | 0.002608456 | 0.013784101 |
| ENSMMUG00000018281 | interleukin 17 receptor E [Source:VGNC Symbol;Acc:VGNC:73623]                         | - | 0.727759331 | 0.008830483 | 0.036442144 |
| ENSMMUG00000007301 | dynein cytoplasmic 1 intermediate chain 2 [Source:VGNC Symbol;Acc:VGNC:71953]         | - | 0.727178338 | 0.010470163 | 0.041531774 |
| ENSMMUG00000056105 | T-box transcription factor 10 [Source:NCBI gene;Acc:721689]                           | - | 0.723282066 | 0.001537521 | 0.008988651 |
| ENSMMUG00000010939 | rhopilin Rho GTPase binding protein 1 [Source:VGNC Symbol;Acc:VGNC:76779]             | - | 0.723034996 | 0.005373105 | 0.024747809 |

|                    |                                                                                           |   |             |             |             |
|--------------------|-------------------------------------------------------------------------------------------|---|-------------|-------------|-------------|
| ENSMMUG00000012587 | zinc finger protein 69 [Source:NCBI gene;Acc:717030]                                      | - | 0.719011766 | 0.009019477 | 0.036970314 |
| ENSMMUG00000023002 | adhesion G protein-coupled receptor F5 [Source:VGNC Symbol;Acc:VGNC:69471]                | - | 0.718287402 | 0.003048871 | 0.015564759 |
| ENSMMUG00000018699 | chromosome 1 C1orf159 homolog [Source:VGNC Symbol;Acc:VGNC:70393]                         | - | 0.705703831 | 0.007859164 | 0.033231197 |
| ENSMMUG00000001941 | CXXC finger protein 5 [Source:VGNC Symbol;Acc:VGNC:71594]                                 | - | 0.703278826 | 0.003007526 | 0.015397228 |
| ENSMMUG00000014691 | inhibitor of DNA binding 4, HLH protein [Source:VGNC Symbol;Acc:VGNC:73557]               | - | 0.702924636 | 0.004518011 | 0.021457085 |
| ENSMMUG00000040100 | Fos proto-oncogene, AP-1 transcription factor subunit [Source:VGNC Symbol;Acc:VGNC:84340] | - | 0.702596694 | 0.007047919 | 0.030601459 |
| ENSMMUG00000001407 | solute carrier family 5 member 11 [Source:VGNC Symbol;Acc:VGNC:77759]                     | - | 0.697736689 | 0.002031075 | 0.011243044 |
| ENSMMUG00000049484 |                                                                                           | - | -0.69662374 | 0.004105899 | 0.019803743 |
| ENSMMUG00000016522 | neurolysin [Source:VGNC Symbol;Acc:VGNC:75183]                                            | - | 0.692518073 | 0.001448458 | 0.008541721 |
| ENSMMUG00000054112 |                                                                                           | - | 0.692468104 | 0.009936578 | 0.039867758 |
| ENSMMUG00000022303 | solute carrier family 7 member 2 [Source:VGNC Symbol;Acc:VGNC:77629]                      | - | -0.69178255 | 0.005579897 | 0.025494314 |
| ENSMMUG00000014564 | ring finger protein 123 [Source:VGNC Symbol;Acc:VGNC:76790]                               | - | 0.691506239 | 0.002260608 | 0.012256839 |
| ENSMMUG00000013188 | serine incorporator 2 [Source:VGNC Symbol;Acc:VGNC:77294]                                 | - | 0.689694913 | 0.007647435 | 0.032583267 |
| ENSMMUG00000003462 | ankyrin repeat domain 6 [Source:VGNC Symbol;Acc:VGNC:81023]                               | - | 0.686741409 | 0.007828345 | 0.033126742 |
| ENSMMUG00000020049 | phosphoglucomutase 1 [Source:NCBI gene;Acc:699401]                                        | - | 0.684842396 | 0.01249968  | 0.047362376 |
| ENSMMUG00000017677 | chromosome 7 C14orf28 homolog [Source:VGNC Symbol;Acc:VGNC:70581]                         | - | 0.681006726 | 0.009244764 | 0.037649821 |
| ENSMMUG00000002947 | procollagen C-endopeptidase enhancer [Source:VGNC Symbol;Acc:VGNC:75782]                  | - | 0.680803841 | 0.011368239 | 0.043935832 |
| ENSMMUG00000039824 | aminoacylase 3 [Source:NCBI gene;Acc:711083]                                              | - | 0.677807136 | 0.00613534  | 0.027396596 |
| ENSMMUG00000008687 | B cell linker [Source:VGNC Symbol;Acc:VGNC:70306]                                         | - | 0.677577344 | 0.008148905 | 0.03418942  |
| ENSMMUG00000010000 | keratin 7 [Source:VGNC Symbol;Acc:VGNC:74214]                                             | - | -0.67141805 | 0.001573669 | 0.00913588  |
| ENSMMUG00000020150 | xin actin binding repeat containing 1 [Source:VGNC Symbol;Acc:VGNC:78952]                 | - | 0.666361493 | 0.005163606 | 0.023915069 |
| ENSMMUG00000017725 | eukaryotic elongation factor 2 kinase [Source:VGNC Symbol;Acc:VGNC:72098]                 | - | 0.664293811 | 0.003522129 | 0.017502399 |
| ENSMMUG00000009106 | solute carrier family 2 member 11 [Source:NCBI gene;Acc:699450]                           | - | 0.664102341 | 0.00069505  | 0.004720676 |
| ENSMMUG00000047974 | aldehyde oxidase 4 [Source:NCBI gene;Acc:701502]                                          | - | -0.66108341 | 0.003518592 | 0.017492842 |
| ENSMMUG00000063474 |                                                                                           | - | 0.653364474 | 0.006913133 | 0.030160865 |
| ENSMMUG00000008323 | C-terminal binding protein 1 [Source:VGNC Symbol;Acc:VGNC:71539]                          | - | 0.649290956 | 0.002108761 | 0.011584285 |
| ENSMMUG00000021782 | LDL receptor related protein 1 [Source:VGNC Symbol;Acc:VGNC:74442]                        | - | 0.625600183 | 0.005924968 | 0.026643908 |
| ENSMMUG00000003263 | stromal antigen 1 [Source:VGNC Symbol;Acc:VGNC:77901]                                     | - | -0.61818652 | 0.01062269  | 0.041975485 |
| ENSMMUG00000017170 | cerebral dopamine neurotrophic factor [Source:VGNC Symbol;Acc:VGNC:71094]                 | - | 0.617313773 | 0.007648781 | 0.032583267 |
| ENSMMUG00000004112 | MRE11 homolog, double strand break repair nuclease [Source:VGNC Symbol;Acc:VGNC:74926]    | - | 0.617109052 | 0.00952935  | 0.038605626 |

|                     |                                                                                                   |   |             |             |             |
|---------------------|---------------------------------------------------------------------------------------------------|---|-------------|-------------|-------------|
| ENSMMUG00000060440  | leucine rich repeat LGI family member 2 [Source:NCBI gene;Acc:693308]                             | - | 0.610667153 | 0.007487737 | 0.032073807 |
| ENSMMUG00000019564  | mitogen-activated protein kinase kinase 2 [Source:VGNC Symbol;Acc:VGNC:81453]                     | - | 0.605859222 | 0.000653449 | 0.0044746   |
| ENSMMUG00000020277  | double C2 domain alpha [Source:VGNC Symbol;Acc:VGNC:71963]                                        | - | 0.599319469 | 0.002204047 | 0.012004245 |
| ENSMMUG00000014610  | ring finger protein 17 [Source:NCBI gene;Acc:708198]                                              | - | 0.585256461 | 0.01086601  | 0.042587369 |
| ENSMMUG00000006202  | solute carrier family 1 member 3 [Source:VGNC Symbol;Acc:VGNC:77411]                              | - | 0.582269578 | 0.003494831 | 0.017390677 |
| ENSMMUG00000011713  | leupaxin [Source:VGNC Symbol;Acc:VGNC:74286]                                                      | - | 0.581164798 | 0.005141481 | 0.023832977 |
| ENSMMUG00000016740  | defective in cullin neddylation 1 domain containing 2 [Source:VGNC Symbol;Acc:VGNC:71684]         | - | 0.580437292 | 0.003802681 | 0.018656902 |
| ENSMMUG00000005469  | endoplasmic reticulum metalloproteinase 1 [Source:VGNC Symbol;Acc:VGNC:72322]                     | - | -0.55442413 | 0.010089639 | 0.0403067   |
| ENSMMUG000000063979 |                                                                                                   | - | 0.524897744 | 0.011176456 | 0.043411454 |
| ENSMMUG00000006399  | chaperonin containing TCP1 subunit 6B [Source:VGNC Symbol;Acc:VGNC:70748]                         | - | 0.48299387  | 0.012619816 | 0.047717441 |
| ENSMMUG00000013858  | ATP binding cassette subfamily A member 4 [Source:VGNC Symbol;Acc:VGNC:69563]                     | - | 0.488368262 | 0.006226469 | 0.027694185 |
| ENSMMUG000000061922 |                                                                                                   | - | 0.488745486 | 0.012543358 | 0.047494653 |
| ENSMMUG00000008166  | dynein axonemal heavy chain 2 [Source:VGNC Symbol;Acc:VGNC:71940]                                 | - | 0.491851909 | 0.011195911 | 0.043465146 |
| ENSMMUG00000017786  | poly(A) binding protein cytoplasmic 1 [Source:VGNC Symbol;Acc:VGNC:84098]                         | - | 0.508531262 | 0.011360344 | 0.043920986 |
| ENSMMUG00000014641  |                                                                                                   | - | 0.510773033 | 0.007345959 | 0.031629081 |
| ENSMMUG00000008885  | exocyst complex component 7 [Source:VGNC Symbol;Acc:VGNC:72319]                                   | - | 0.511873698 | 0.010814444 | 0.042492881 |
| ENSMMUG00000016521  | small glutamine rich tetratricopeptide repeat containing beta [Source:VGNC Symbol;Acc:VGNC:77296] | - | 0.545960994 | 0.004893695 | 0.022860458 |
| ENSMMUG00000003633  | solute carrier family 4 member 11 [Source:VGNC Symbol;Acc:VGNC:77721]                             | - | 0.546341471 | 0.005318858 | 0.024529241 |
| ENSMMUG00000016114  | 2',3'-cyclic nucleotide 3' phosphodiesterase [Source:VGNC Symbol;Acc:VGNC:71279]                  | - | 0.551288613 | 0.008821675 | 0.036419665 |
| ENSMMUG000000031160 | menin 1 [Source:NCBI gene;Acc:106995582]                                                          | - | 0.557750266 | 0.007688504 | 0.032685249 |
| ENSMMUG00000020188  | chromosome 15 C9orf131 homolog [Source:VGNC Symbol;Acc:VGNC:70451]                                | - | 0.562268197 | 0.010641687 | 0.042012171 |
| ENSMMUG000000059612 |                                                                                                   | - | 0.56668008  | 0.003986957 | 0.019342006 |
| ENSMMUG00000013128  | coiled-coil domain containing 30 [Source:VGNC Symbol;Acc:VGNC:70866]                              | - | 0.567833435 | 0.007034308 | 0.030566648 |
| ENSMMUG00000018922  | cell division cycle 25B [Source:VGNC Symbol;Acc:VGNC:70795]                                       | - | 0.568768607 | 0.008287801 | 0.034638019 |
| ENSMMUG00000012667  | annexin A1 [Source:VGNC Symbol;Acc:VGNC:69944]                                                    | - | 0.575315733 | 0.003431782 | 0.017132023 |
| ENSMMUG000000054437 |                                                                                                   | - | 0.577505851 | 0.009232097 | 0.037615525 |
| ENSMMUG00000005323  | phosphoribosyl pyrophosphate synthetase associated protein 2 [Source:VGNC Symbol;Acc:VGNC:76430]  | - | 0.580038935 | 0.01120761  | 0.043485689 |
| ENSMMUG00000010393  | cadherin 3 [Source:VGNC Symbol;Acc:VGNC:70971]                                                    | - | 0.583960508 | 0.009005888 | 0.036943266 |
| ENSMMUG00000004522  | DNA primase subunit 1 [Source:NCBI gene;Acc:710253]                                               | - | 0.584730339 | 0.006670654 | 0.029303812 |
| ENSMMUG00000016742  | CTD small phosphatase like 2 [Source:VGNC Symbol;Acc:VGNC:71593]                                  | - | 0.584864363 | 0.005362417 | 0.024709088 |
| ENSMMUG000000060764 |                                                                                                   | - | 0.584919672 | 0.008353933 | 0.034847193 |
| ENSMMUG00000011594  | von Willebrand factor A domain containing 8 [Source:VGNC Symbol;Acc:VGNC:79773]                   | - | 0.59491971  | 0.001781022 | 0.010096186 |
| ENSMMUG00000000307  | RIO kinase 2 [Source:VGNC Symbol;Acc:VGNC:76774]                                                  | - | 0.599486853 | 0.004076693 | 0.019689172 |
| ENSMMUG00000007382  | proteasomal ATPase associated factor 1 [Source:NCBI gene;Acc:718755]                              | - | 0.600498954 | 0.01057514  | 0.041840938 |
| ENSMMUG00000003508  | actin related protein 10 [Source:VGNC Symbol;Acc:VGNC:69449]                                      | - | 0.601565335 | 0.003311966 | 0.016633533 |
| ENSMMUG00000007135  | WD repeat domain 20 [Source:VGNC Symbol;Acc:VGNC:79196]                                           | - | 0.603092236 | 0.008296578 | 0.03466133  |
| ENSMMUG00000014431  | adaptor related protein complex 3 subunit mu 2 [Source:VGNC Symbol;Acc:VGNC:69971]                | - | 0.603798903 | 0.009053162 | 0.037066605 |
| ENSMMUG00000005220  | synemin [Source:VGNC Symbol;Acc:VGNC:78201]                                                       | - | 0.60772939  | 0.012587188 | 0.047627317 |
| ENSMMUG00000022682  | tripartite motif containing 68 [Source:NCBI gene;Acc:717644]                                      | - | 0.610790054 | 0.005930467 | 0.026646515 |
| ENSMMUG00000015185  | endoplasmic reticulum to nucleus signaling 1 [Source:VGNC Symbol;Acc:VGNC:72429]                  | - | 0.618258453 | 0.007709684 | 0.032714065 |
| ENSMMUG00000020072  | matrilin 2 [Source:VGNC Symbol;Acc:VGNC:74665]                                                    | - | 0.620688269 | 0.01132067  | 0.043814511 |
| ENSMMUG00000011557  | platelet derived growth factor receptor beta [Source:VGNC Symbol;Acc:VGNC:75929]                  | - | 0.622597979 | 0.000266644 | 0.002070648 |
| ENSMMUG000000060483 |                                                                                                   | - | 0.622894559 | 0.00763343  | 0.032559132 |
| ENSMMUG00000021012  | G protein-coupled receptor 155 [Source:VGNC Symbol;Acc:VGNC:72985]                                | - | 0.624201406 | 0.001148478 | 0.007025108 |
| ENSMMUG000000057336 |                                                                                                   | - | 0.626088625 | 0.012695188 | 0.047918804 |



|                    |                                                                                                                |             |             |             |
|--------------------|----------------------------------------------------------------------------------------------------------------|-------------|-------------|-------------|
| ENSMMUG00000061384 | sodium voltage-gated channel beta subunit 2 [Source:NCBI gene;Acc:678698]                                      | 0.628611887 | 0.00818066  | 0.034267429 |
| ENSMMUG00000017239 | mediator complex subunit 12L [Source:VGNC Symbol;Acc:VGNC:74515]                                               | 0.631751509 | 0.008947836 | 0.036834508 |
| ENSMMUG00000061481 | inosine triphosphatase [Source:NCBI gene;Acc:717257]                                                           | 0.633936347 | 0.002305002 | 0.012472572 |
| ENSMMUG00000045160 | ubiquitination factor E4A [Source:NCBI gene;Acc:699836]                                                        | 0.636810196 | 0.012144816 | 0.046407335 |
| ENSMMUG00000060015 | axin 2 [Source:NCBI gene;Acc:718566]                                                                           | 0.640975193 | 0.01045852  | 0.041500788 |
| ENSMMUG00000049375 |                                                                                                                | 0.644186255 | 0.005053051 | 0.023492918 |
| ENSMMUG0000006068  | transmembrane protein 100 [Source:VGNC Symbol;Acc:VGNC:79521]                                                  | 0.653645531 | 0.005193347 | 0.024042534 |
| ENSMMUG0000008772  | VPS54 subunit of GARP complex [Source:VGNC Symbol;Acc:VGNC:79159]                                              | 0.654577735 | 0.009472777 | 0.038405163 |
| ENSMMUG00000022070 | sialic acid binding Ig like lectin 1 [Source:VGNC Symbol;Acc:VGNC:77220]                                       | 0.655255099 | 0.009565791 | 0.038713876 |
| ENSMMUG00000050178 |                                                                                                                | 0.65574295  | 0.013256936 | 0.049778992 |
| ENSMMUG00000052626 | progesterone and adiponectin receptor family member 8 [Source:NCBI gene;Acc:708418]                            | 0.660419296 | 0.009115364 | 0.037248863 |
| ENSMMUG00000012117 | HECT and RLD domain containing E3 ubiquitin protein ligase family member 1 [Source:VGNC Symbol;Acc:VGNC:73364] | 0.663338669 | 0.000611325 | 0.004237035 |
| ENSMMUG00000015114 | toll like receptor adaptor molecule 2 [Source:NCBI gene;Acc:100426353]                                         | 0.664828631 | 0.000614022 | 0.004253008 |
| ENSMMUG00000013730 | WD repeat domain 17 [Source:NCBI gene;Acc:700546]                                                              | 0.669437076 | 0.006434123 | 0.028432739 |
| ENSMMUG00000013983 | RUN domain containing 3A [Source:VGNC Symbol;Acc:VGNC:77032]                                                   | 0.670481455 | 0.000659572 | 0.004505138 |
| ENSMMUG00000050742 | src kinase associated phosphoprotein 1 [Source:NCBI gene;Acc:697043]                                           | 0.671470574 | 0.001972253 | 0.010951007 |
| ENSMMUG00000023361 | GDNF family receptor alpha 2 [Source:VGNC Symbol;Acc:VGNC:72918]                                               | 0.674124966 | 0.007586751 | 0.032433809 |
| ENSMMUG00000019632 | ribosomal L1 domain containing 1 [Source:VGNC Symbol;Acc:VGNC:77096]                                           | 0.677723092 | 0.003591256 | 0.017756309 |
| ENSMMUG00000017544 | mediator complex subunit 23 [Source:VGNC Symbol;Acc:VGNC:74562]                                                | 0.678354101 | 0.005747091 | 0.026065184 |
| ENSMMUG00000008931 | MAU2 sister chromatid cohesion factor [Source:NCBI gene;Acc:720347]                                            | 0.678851049 | 0.002861648 | 0.014776091 |
| ENSMMUG00000012453 | LETM1 domain containing 1 [Source:VGNC Symbol;Acc:VGNC:74109]                                                  | 0.679024561 | 0.010453458 | 0.041495901 |
| ENSMMUG00000022404 | apoptotic peptidase activating factor 1 [Source:VGNC Symbol;Acc:VGNC:69975]                                    | 0.679384449 | 0.003834902 | 0.01877248  |
| ENSMMUG00000063195 |                                                                                                                | 0.679417793 | 0.007234513 | 0.031248597 |
| ENSMMUG00000043846 |                                                                                                                | 0.681209401 | 0.001825883 | 0.010312719 |
| ENSMMUG00000055016 | keratin, type II cytoskeletal 6A [Source:NCBI gene;Acc:719283]                                                 | 0.682816835 | 0.001936055 | 0.01077764  |
| ENSMMUG00000019015 | HECT, C2 and WW domain containing E3 ubiquitin protein ligase 1 [Source:VGNC Symbol;Acc:VGNC:73217]            | 0.684074779 | 0.009108232 | 0.037233767 |
| ENSMMUG00000003669 | methionine sulfoxide reductase B3 [Source:VGNC Symbol;Acc:VGNC:74842]                                          | 0.685279654 | 0.003072738 | 0.015635026 |
| ENSMMUG00000000382 | sperm associated antigen 16 [Source:VGNC Symbol;Acc:VGNC:77977]                                                | 0.687323946 | 0.00748542  | 0.032073807 |
| ENSMMUG00000023406 | HID1 domain containing [Source:VGNC Symbol;Acc:VGNC:73394]                                                     | 0.688506448 | 0.002276114 | 0.012322412 |
| ENSMMUG00000018531 | peptidylprolyl isomerase like 2 [Source:VGNC Symbol;Acc:VGNC:76239]                                            | 0.688762928 | 0.006645322 | 0.029216223 |
| ENSMMUG00000006287 | DAP3 binding cell death enhancer 1 [Source:VGNC Symbol;Acc:VGNC:71806]                                         | 0.690530527 | 0.004183485 | 0.020088517 |
| ENSMMUG00000006540 | small nuclear RNA activating complex polypeptide 2 [Source:VGNC Symbol;Acc:VGNC:77666]                         | 0.691492041 | 0.006896223 | 0.030123702 |
| ENSMMUG00000065221 |                                                                                                                | 0.694194726 | 0.01096463  | 0.042818974 |
| ENSMMUG00000052476 | zinc finger and BTB domain containing 43 [Source:NCBI gene;Acc:701797]                                         | 0.69452086  | 0.003063458 | 0.015609801 |
| ENSMMUG00000018121 | zinc finger FYVE-type containing 21 [Source:VGNC Symbol;Acc:VGNC:79282]                                        | 0.695581473 | 0.001248484 | 0.007555771 |
| ENSMMUG00000005878 | protein tyrosine phosphatase receptor type A [Source:VGNC Symbol;Acc:VGNC:76610]                               | 0.696003944 | 0.009088983 | 0.03718314  |
| ENSMMUG00000010940 | telomerase reverse transcriptase [Source:VGNC Symbol;Acc:VGNC:78313]                                           | 0.69865181  | 0.005773763 | 0.026137558 |
| ENSMMUG00000018650 | WNK lysine deficient protein kinase 1 [Source:VGNC Symbol;Acc:VGNC:78960]                                      | 0.703692873 | 0.010921152 | 0.042741633 |
| ENSMMUG00000008130 | ABR activator of RhoGEF and GTPase [Source:VGNC Symbol;Acc:VGNC:69589]                                         | 0.703955821 | 0.005872558 | 0.026474168 |
| ENSMMUG00000049440 | chromosome 16 C17orf113 homolog [Source:NCBI gene;Acc:106994045]                                               | 0.704121724 | 0.000572588 | 0.004017384 |
| ENSMMUG00000032341 | coiled-coil domain containing 160 [Source:VGNC Symbol;Acc:VGNC:70926]                                          | 0.70528814  | 0.002439279 | 0.013031027 |
| ENSMMUG00000014210 | metadherin [Source:VGNC Symbol;Acc:VGNC:74859]                                                                 | 0.706974187 | 0.007126593 | 0.030893308 |
| ENSMMUG00000010432 | zinc finger protein 592 [Source:VGNC Symbol;Acc:VGNC:79762]                                                    | 0.708040312 | 0.000683431 | 0.004650509 |
| ENSMMUG00000005080 | ubiquitin conjugating enzyme E2 G1 [Source:VGNC Symbol;Acc:VGNC:78695]                                         | 0.708804973 | 0.000324096 | 0.002456915 |
| ENSMMUG00000019115 | eukaryotic translation initiation factor 1A domain containing [Source:VGNC Symbol;Acc:VGNC:72127]              | 0.709122673 | 0.006436727 | 0.028432739 |
| ENSMMUG00000010734 | cytochrome P450, family 4, subfamily F, polypeptide 8 [Source:NCBI gene;Acc:718335]                            | 0.711302968 | 0.007005707 | 0.030491292 |
| ENSMMUG00000000123 | NHS like 1 [Source:VGNC Symbol;Acc:VGNC:75225]                                                                 | 0.712328487 | 0.002463547 | 0.013133664 |
| ENSMMUG00000011459 | 3-phosphoinositide dependent protein kinase 1 [Source:NCBI gene;Acc:697523]                                    | 0.713242859 | 0.000783013 | 0.005178497 |
| ENSMMUG00000008041 | ankyrin repeat domain 27 [Source:VGNC Symbol;Acc:VGNC:69693]                                                   | 0.715850938 | 0.004057166 | 0.01961235  |
| ENSMMUG00000010556 | Snf2 related CREBBP activator protein [Source:NCBI gene;Acc:712944]                                            | 0.715974804 | 0.001356199 | 0.008094601 |
| ENSMMUG00000060717 | C2 calcium dependent domain containing 4A [Source:NCBI gene;Acc:704354]                                        | 0.717623986 | 0.00510621  | 0.023710059 |



|                    |                                                                                                    |             |             |             |
|--------------------|----------------------------------------------------------------------------------------------------|-------------|-------------|-------------|
| ENSMMUG00000054523 | Metazoan signal recognition particle RNA [Source:RFAM;Acc:RF00017]                                 | 0.717848206 | 0.005878711 | 0.026489296 |
| ENSMMUG00000064973 |                                                                                                    | 0.718518655 | 0.004026716 | 0.019473845 |
| ENSMMUG00000055454 |                                                                                                    | 0.718855193 | 0.000444829 | 0.003227589 |
| ENSMMUG00000016410 | acyl-CoA binding domain containing 5 [Source:VGNC Symbol;Acc:VGNC:69509]                           | 0.719698127 | 0.00203696  | 0.011257274 |
| ENSMMUG00000014013 | ATP binding cassette subfamily D member 3 [Source:VGNC Symbol;Acc:VGNC:69579]                      | 0.725038764 | 0.001718454 | 0.009818573 |
| ENSMMUG00000064735 | 3-hydroxyanthranilate 3,4-dioxygenase [Source:NCBI gene;Acc:713101]                                | 0.725887899 | 0.00269406  | 0.014139897 |
| ENSMMUG00000052999 | lecithin retinol acyltransferase [Source:NCBI gene;Acc:698871]                                     | 0.726848122 | 0.001471425 | 0.008644225 |
| ENSMMUG00000008134 | DnaJ heat shock protein family (Hsp40) member A3 [Source:NCBI gene;Acc:708783]                     | 0.72723538  | 0.005609493 | 0.025596728 |
| ENSMMUG00000001028 | SNF related kinase [Source:VGNC Symbol;Acc:VGNC:84074]                                             | 0.729912618 | 0.000298095 | 0.002280557 |
| ENSMMUG00000019556 | transmembrane 9 superfamily member 2 [Source:VGNC Symbol;Acc:VGNC:78568]                           | 0.735231794 | 0.00063319  | 0.004355141 |
| ENSMMUG00000016652 | cell division cycle and apoptosis regulator 1 [Source:NCBI gene;Acc:693585]                        | 0.735328958 | 0.006856528 | 0.030010814 |
| ENSMMUG00000051874 |                                                                                                    | 0.737048279 | 0.001779079 | 0.010095906 |
| ENSMMUG00000021426 | solute carrier family 41 member 1 [Source:VGNC Symbol;Acc:VGNC:77515]                              | 0.741783846 | 0.007695972 | 0.03268984  |
| ENSMMUG00000008926 | lysosomal protein transmembrane 4 beta [Source:VGNC Symbol;Acc:VGNC:84010]                         | 0.742506055 | 0.001907056 | 0.010649038 |
| ENSMMUG00000059105 |                                                                                                    | 0.743148562 | 0.011336646 | 0.043845013 |
| ENSMMUG00000045544 | neuronal tyrosine-phosphorylated phosphoinositide-3-kinase adaptor 2 [Source:NCBI gene;Acc:711209] | 0.743915995 | 0.000871505 | 0.005637057 |
| ENSMMUG00000002540 | dehydrogenase/reductase 7 [Source:VGNC Symbol;Acc:VGNC:71690]                                      | 0.74570973  | 0.000900532 | 0.005774434 |
| ENSMMUG00000054789 | family with sequence similarity 174 member A [Source:NCBI gene;Acc:702300]                         | 0.746503644 | 0.004841607 | 0.022683806 |
| ENSMMUG00000054573 |                                                                                                    | 0.74659833  | 0.010840957 | 0.042550757 |
| ENSMMUG00000061189 |                                                                                                    | 0.750536663 | 0.00118639  | 0.007224376 |
| ENSMMUG00000022895 | DnaJ heat shock protein family (Hsp40) member B5 [Source:NCBI gene;Acc:699081]                     | 0.750618875 | 0.000464108 | 0.003347325 |
| ENSMMUG00000011134 | transcription factor Dp-2 [Source:VGNC Symbol;Acc:VGNC:78324]                                      | 0.751720811 | 0.012067931 | 0.0461461   |
| ENSMMUG00000014511 | VPS39 subunit of HOPS complex [Source:VGNC Symbol;Acc:VGNC:79257]                                  | 0.752798511 | 0.002161775 | 0.01182156  |
| ENSMMUG00000060157 | zinc finger protein 330 [Source:NCBI gene;Acc:699364]                                              | 0.752908207 | 0.007190371 | 0.031135218 |
| ENSMMUG00000005959 | glycerol kinase [Source:NCBI gene;Acc:707531]                                                      | 0.753850403 | 0.011601825 | 0.044742815 |
| ENSMMUG00000006528 | Rho GTPase activating protein 15 [Source:VGNC Symbol;Acc:VGNC:69874]                               | 0.756616697 | 0.001465743 | 0.008618553 |
| ENSMMUG00000009249 | ring finger protein, LIM domain interacting [Source:NCBI gene;Acc:703471]                          | 0.75840958  | 0.000896619 | 0.005758831 |
| ENSMMUG00000022019 | cathepsin O [Source:VGNC Symbol;Acc:VGNC:71561]                                                    | 0.758782683 | 0.001546902 | 0.009028873 |
| ENSMMUG00000013483 | prolyl endopeptidase [Source:VGNC Symbol;Acc:VGNC:76396]                                           | 0.759038315 | 0.012187033 | 0.046486665 |
| ENSMMUG00000053656 |                                                                                                    | 0.761408961 | 0.013328266 | 0.049973678 |
| ENSMMUG00000010203 | protein tyrosine phosphatase non-receptor type 6 [Source:VGNC Symbol;Acc:VGNC:76607]               | 0.761817437 | 0.011267105 | 0.043653988 |
| ENSMMUG00000057187 |                                                                                                    | 0.768341602 | 0.012770344 | 0.048101925 |
| ENSMMUG00000050983 | peptidyl arginine deiminase 1 [Source:NCBI gene;Acc:700444]                                        | 0.768948463 | 0.011102091 | 0.043215578 |
| ENSMMUG00000008253 | zinc finger protein 267 [Source:NCBI gene;Acc:641441]                                              | 0.769808346 | 0.010934701 | 0.042773076 |
| ENSMMUG00000008967 | VANGL planar cell polarity protein 1 [Source:VGNC Symbol;Acc:VGNC:78976]                           | 0.77091607  | 0.000655801 | 0.00448787  |
| ENSMMUG00000003141 | Fli-1 proto-oncogene, ETS transcription factor [Source:VGNC Symbol;Acc:VGNC:72669]                 | 0.771432068 | 0.007440582 | 0.031947612 |
| ENSMMUG00000015284 | NADH:ubiquinone oxidoreductase subunit B2 [Source:VGNC Symbol;Acc:VGNC:75156]                      | 0.771619557 | 0.001142217 | 0.007010559 |
| ENSMMUG00000015503 | zinc finger FYVE-type containing 27 [Source:VGNC Symbol;Acc:VGNC:79623]                            | 0.771965892 | 0.000996178 | 0.006265059 |
| ENSMMUG00000013653 | lysine demethylase 5A [Source:VGNC Symbol;Acc:VGNC:82169]                                          | 0.773212565 | 9.55E-05    | 0.00087202  |
| ENSMMUG00000018909 | fetuin B [Source:VGNC Symbol;Acc:VGNC:72638]                                                       | 0.774242955 | 0.006968038 | 0.030351732 |
| ENSMMUG00000064684 |                                                                                                    | 0.77433218  | 0.007484272 | 0.032073807 |
| ENSMMUG00000057739 |                                                                                                    | 0.775931868 | 0.004410451 | 0.021019979 |
| ENSMMUG00000006403 | potassium voltage-gated channel subfamily C member 1 [Source:VGNC Symbol;Acc:VGNC:73971]           | 0.776554385 | 0.002621041 | 0.013843849 |
| ENSMMUG00000057979 | growth differentiation factor 5 [Source:NCBI gene;Acc:705432]                                      | 0.776732262 | 0.000267888 | 0.002078818 |
| ENSMMUG00000005514 | RNA polymerase III subunit A [Source:VGNC Symbol;Acc:VGNC:76138]                                   | 0.779404762 | 0.002723867 | 0.014234275 |
| ENSMMUG00000053916 |                                                                                                    | 0.783154098 | 0.002665922 | 0.014039832 |
| ENSMMUG00000045101 |                                                                                                    | 0.784999525 | 0.00063374  | 0.004356156 |
| ENSMMUG00000019826 | MYC associated zinc finger protein [Source:NCBI gene;Acc:708982]                                   | 0.787456296 | 0.005517734 | 0.025274254 |
| ENSMMUG00000018139 | dedicator of cytokinesis 10 [Source:VGNC Symbol;Acc:VGNC:71888]                                    | 0.788063301 | 3.81E-05    | 0.000395986 |
| ENSMMUG00000000107 | zinc finger protein 585A [Source:NCBI gene;Acc:100424957]                                          | 0.788421159 | 0.006282828 | 0.027928549 |
| ENSMMUG00000065276 |                                                                                                    | 0.790023787 | 0.001766711 | 0.010041333 |

|                    |                                                                                                          |             |             |             |
|--------------------|----------------------------------------------------------------------------------------------------------|-------------|-------------|-------------|
| ENSMMUG00000019136 | taxilin beta [Source:VGNC Symbol;Acc:VGNC:79325]                                                         | 0.790375252 | 0.000442871 | 0.003215567 |
| ENSMMUG00000000752 | programmed cell death 6 [Source:NCBI gene;Acc:723043]                                                    | 0.79079515  | 0.002630731 | 0.01388826  |
| ENSMMUG00000017039 | arginyl-tRNA synthetase 2, mitochondrial [Source:VGNC Symbol;Acc:VGNC:76516]                             | 0.791348154 | 0.006693335 | 0.029391528 |
| ENSMMUG00000014432 | plasminogen activator, tissue type [Source:VGNC Symbol;Acc:VGNC:76161]                                   | 0.793236765 | 0.00130092  | 0.007838078 |
| ENSMMUG00000021498 | L3MBTL histone methyl-lysine binding protein 3 [Source:VGNC Symbol;Acc:VGNC:74106]                       | 0.793756197 | 0.005621861 | 0.025625618 |
| ENSMMUG00000031106 | ubiquitin recognition factor in ER associated degradation 1 [Source:NCBI gene;Acc:711716]                | 0.794925928 | 0.007015387 | 0.030521161 |
| ENSMMUG00000058241 | leucine rich repeat and Ig domain containing 3 [Source:NCBI gene;Acc:721484]                             | 0.795971754 | 0.001849372 | 0.010423646 |
| ENSMMUG00000019277 | WD repeat domain 33 [Source:VGNC Symbol;Acc:VGNC:79526]                                                  | 0.796098025 | 0.010420413 | 0.041379889 |
| ENSMMUG00000023381 | dynein axonemal heavy chain 8 [Source:VGNC Symbol;Acc:VGNC:71943]                                        | 0.800388248 | 0.000214383 | 0.001729267 |
| ENSMMUG00000015840 | RAN binding protein 17 [Source:VGNC Symbol;Acc:VGNC:84485]                                               | 0.80251897  | 0.000367302 | 0.002730939 |
| ENSMMUG00000015877 | 1,4-alpha-glucan branching enzyme 1 [Source:VGNC Symbol;Acc:VGNC:72894]                                  | 0.805080481 | 0.010899306 | 0.042695629 |
| ENSMMUG00000049145 | creatine kinase B [Source:NCBI gene;Acc:711167]                                                          | 0.806484046 | 0.000450164 | 0.003253256 |
| ENSMMUG00000056175 |                                                                                                          | 0.807924881 | 0.010605838 | 0.041947075 |
| ENSMMUG00000018788 | transmembrane protein 14B [Source:NCBI gene;Acc:698237]                                                  | 0.808348677 | 0.000733913 | 0.004922895 |
| ENSMMUG0000001083  | glycine N-acyltransferase-like protein 1 [Source:NCBI gene;Acc:701437]                                   | 0.808701145 | 0.00582321  | 0.026273566 |
| ENSMMUG00000053063 | forkhead box L2 [Source:NCBI gene;Acc:717906]                                                            | 0.810577747 | 0.002322308 | 0.012553675 |
| ENSMMUG00000060493 |                                                                                                          | 0.813152911 | 0.006330338 | 0.028082128 |
| ENSMMUG00000016384 | nucleoporin 205 [Source:VGNC Symbol;Acc:VGNC:75432]                                                      | 0.813242881 | 0.012225306 | 0.046606918 |
| ENSMMUG00000062177 |                                                                                                          | 0.813272802 | 0.000751757 | 0.005020825 |
| ENSMMUG00000007811 | protein kinase C and casein kinase substrate in neurons 1 [Source:VGNC Symbol;Acc:VGNC:75744]            | 0.814919329 | 0.003060674 | 0.015609801 |
| ENSMMUG00000002371 | myosin IC [Source:VGNC Symbol;Acc:VGNC:75112]                                                            | 0.815978834 | 0.005577835 | 0.025494314 |
| ENSMMUG00000054072 |                                                                                                          | 0.818840335 | 0.000376781 | 0.002784223 |
| ENSMMUG00000010138 | HECT and RLD domain containing E3 ubiquitin protein ligase 3 [Source:VGNC Symbol;Acc:VGNC:73365]         | 0.819146368 | 0.000930025 | 0.005926445 |
| ENSMMUG00000057906 |                                                                                                          | 0.820130933 | 0.001143444 | 0.007014119 |
| ENSMMUG00000052363 | MYCN proto-oncogene, bHLH transcription factor [Source:NCBI gene;Acc:698699]                             | 0.821288796 | 0.002037802 | 0.011257274 |
| ENSMMUG00000008970 | calsequestrin 2 [Source:VGNC Symbol;Acc:VGNC:70549]                                                      | 0.822242495 | 0.002231929 | 0.012137796 |
| ENSMMUG00000006763 | cytochrome c oxidase subunit IV isoform 1 [Source:NCBI gene;Acc:693811]                                  | 0.824937213 | 0.004476338 | 0.021287166 |
| ENSMMUG00000014110 | adhesion G protein-coupled receptor D2 [Source:VGNC Symbol;Acc:VGNC:69462]                               | 0.826106287 | 0.000445421 | 0.003227589 |
| ENSMMUG00000022514 | coiled-coil domain containing 186 [Source:VGNC Symbol;Acc:VGNC:70847]                                    | 0.826913879 | 0.002532725 | 0.013436343 |
| ENSMMUG00000008787 | BBX high mobility group box domain containing [Source:VGNC Symbol;Acc:VGNC:82110]                        | 0.828523246 | 0.000386371 | 0.00283959  |
| ENSMMUG00000010834 | REL proto-oncogene, NF-kB subunit [Source:VGNC Symbol;Acc:VGNC:76892]                                    | 0.828569228 | 0.000249072 | 0.00196662  |
| ENSMMUG00000004177 | myosin VIIB [Source:NCBI gene;Acc:714563]                                                                | 0.830140797 | 2.81E-05    | 0.000303996 |
| ENSMMUG00000010898 | tripartite motif containing 13 [Source:VGNC Symbol;Acc:VGNC:79972]                                       | 0.830476066 | 0.000952998 | 0.006033797 |
| ENSMMUG00000019926 | cytoplasmic polyadenylation element binding protein 4 [Source:VGNC Symbol;Acc:VGNC:71450]                | 0.833708195 | 0.004172676 | 0.020063291 |
| ENSMMUG00000020486 | checkpoint kinase 2 [Source:VGNC Symbol;Acc:VGNC:70958]                                                  | 0.835939349 | 0.000797498 | 0.005266591 |
| ENSMMUG00000021924 | NHS like 2 [Source:NCBI gene;Acc:702808]                                                                 | 0.836180141 | 2.85E-05    | 0.00030856  |
| ENSMMUG00000009938 | myosin XVIII A [Source:VGNC Symbol;Acc:VGNC:75058]                                                       | 0.838109512 | 0.000726553 | 0.004891699 |
| ENSMMUG00000020970 | zinc finger protein 213 [Source:VGNC Symbol;Acc:VGNC:78872]                                              | 0.838150262 | 0.00036896  | 0.00273825  |
| ENSMMUG00000031293 | anoctamin-9 [Source:NCBI gene;Acc:100425888]                                                             | 0.841220693 | 0.00049961  | 0.003574818 |
| ENSMMUG00000010428 | slit guidance ligand 1 [Source:VGNC Symbol;Acc:VGNC:77643]                                               | 0.841601028 | 1.75E-06    | 2.62E-05    |
| ENSMMUG00000006727 | vitamin D receptor [Source:VGNC Symbol;Acc:VGNC:78764]                                                   | 0.843231087 | 0.000503235 | 0.00359127  |
| ENSMMUG00000017817 | membrane associated guanylate kinase, WW and PDZ domain containing 3 [Source:VGNC Symbol;Acc:VGNC:74400] | 0.844086294 | 0.005305778 | 0.024489773 |
| ENSMMUG00000016996 | cytochrome P450, family 4, subfamily F, polypeptide 22 [Source:NCBI gene;Acc:718303]                     | 0.844352843 | 0.010708369 | 0.042183184 |
| ENSMMUG00000008520 | ATPase phospholipid transporting 8A2 [Source:VGNC Symbol;Acc:VGNC:70062]                                 | 0.846097015 | 0.000656309 | 0.004488509 |
| ENSMMUG00000004619 | zinc finger BED-type containing 9 [Source:VGNC Symbol;Acc:VGNC:81608]                                    | 0.84641703  | 0.001967588 | 0.010930711 |
| ENSMMUG00000023495 | Ral GEF with PH domain and SH3 binding motif 1 [Source:VGNC Symbol;Acc:VGNC:76492]                       | 0.849092479 | 0.002819952 | 0.014613077 |
| ENSMMUG00000021812 | ERCC excision repair 8, CSA ubiquitin ligase complex subunit [Source:VGNC Symbol;Acc:VGNC:72425]         | 0.849782293 | 3.68E-05    | 0.000385244 |
| ENSMMUG00000011661 | integrin subunit alpha 8 [Source:VGNC Symbol;Acc:VGNC:73782]                                             | 0.851748471 | 0.001474034 | 0.008654854 |
| ENSMMUG00000051669 |                                                                                                          | 0.851916388 | 0.004657137 | 0.021963764 |
| ENSMMUG00000019668 | armadillo repeat containing 6 [Source:VGNC Symbol;Acc:VGNC:69899]                                        | 0.852201803 | 0.005690294 | 0.025856942 |
| ENSMMUG00000023599 | chromosome alignment maintaining phosphoprotein 1 [Source:VGNC Symbol;Acc:VGNC:71061]                    | 0.852237553 | 0.000985833 | 0.006209027 |



|                    |                                                                                                      |             |             |             |
|--------------------|------------------------------------------------------------------------------------------------------|-------------|-------------|-------------|
| ENSMMUG00000016686 | BUB1 mitotic checkpoint serine/threonine kinase B [Source:VGNC Symbol;Acc:VGNC:70293]                | 0.85315942  | 0.004687368 | 0.022048746 |
| ENSMMUG00000019807 | regulator of G protein signaling 14 [Source:VGNC Symbol;Acc:VGNC:76918]                              | 0.853953425 | 0.002380811 | 0.012793318 |
| ENSMMUG00000015449 | phospholipase A2 group IVF [Source:VGNC Symbol;Acc:VGNC:76123]                                       | 0.854910406 | 0.000325168 | 0.002463316 |
| ENSMMUG00000012933 | myosin IE [Source:VGNC Symbol;Acc:VGNC:75114]                                                        | 0.856753735 | 0.00067232  | 0.004586425 |
| ENSMMUG00000001302 | sucrase-isomaltase [Source:VGNC Symbol;Acc:VGNC:77213]                                               | 0.858695329 | 0.001048045 | 0.006524984 |
| ENSMMUG00000011588 | myosin IXB [Source:HGNC Symbol;Acc:HGNC:7609]                                                        | 0.859772121 | 0.006085543 | 0.027201163 |
| ENSMMUG00000010897 | PNMA family member 3 [Source:VGNC Symbol;Acc:VGNC:76063]                                             | 0.860043371 | 0.003306916 | 0.016623585 |
| ENSMMUG00000053199 |                                                                                                      | 0.860195256 | 0.006881    | 0.030081467 |
| ENSMMUG00000017382 | biliverdin reductase A [Source:VGNC Symbol;Acc:VGNC:70256]                                           | 0.861622741 | 0.000316458 | 0.002405745 |
| ENSMMUG00000010798 | cell cycle progression 1 [Source:VGNC Symbol;Acc:VGNC:70844]                                         | 0.861731404 | 0.008839307 | 0.036464664 |
| ENSMMUG00000051072 |                                                                                                      | 0.861978873 | 0.000209053 | 0.001696379 |
| ENSMMUG00000057560 |                                                                                                      | 0.865364103 | 0.000244065 | 0.001938384 |
| ENSMMUG00000023025 | synaptophysin [Source:VGNC Symbol;Acc:VGNC:78072]                                                    | 0.865799889 | 0.002448135 | 0.013070797 |
| ENSMMUG00000009430 | transient receptor potential cation channel subfamily M member 1 [Source:VGNC Symbol;Acc:VGNC:79964] | 0.866475171 | 0.004326121 | 0.020681763 |
| ENSMMUG00000017505 | tetratricopeptide repeat domain 3 [Source:VGNC Symbol;Acc:VGNC:81785]                                | 0.867699762 | 5.30E-05    | 0.000528971 |
| ENSMMUG00000018879 | exocyst complex component 3 like 2 [Source:NCBI gene;Acc:713992]                                     | 0.86928744  | 0.010354322 | 0.041162706 |
| ENSMMUG00000003668 | GTPase activating protein and VPS9 domains 1 [Source:VGNC Symbol;Acc:VGNC:72767]                     | 0.869944175 | 0.0027977   | 0.014515078 |
| ENSMMUG00000001667 | transmembrane protein 210 [Source:VGNC Symbol;Acc:VGNC:79945]                                        | 0.870368178 | 0.000891689 | 0.005736142 |
| ENSMMUG00000008336 | acyl-CoA dehydrogenase family member 10 [Source:NCBI gene;Acc:711080]                                | 0.870637533 | 0.000150054 | 0.001283991 |
| ENSMMUG00000006182 | bromodomain adjacent to zinc finger domain 2B [Source:NCBI gene;Acc:702780]                          | 0.871623025 | 3.83E-05    | 0.000397958 |
| ENSMMUG00000008196 | aconitase 1 [Source:VGNC Symbol;Acc:VGNC:69378]                                                      | 0.8730128   | 0.000877452 | 0.005662524 |
| ENSMMUG00000022744 | muscleblind like splicing regulator 2 [Source:VGNC Symbol;Acc:VGNC:74519]                            | 0.874202383 | 0.001742772 | 0.009931325 |
| ENSMMUG00000037756 | MAF bZIP transcription factor [Source:NCBI gene;Acc:106995090]                                       | 0.874389492 | 0.00014278  | 0.001233445 |
| ENSMMUG00000020173 | bactericidal permeability increasing protein [Source:VGNC Symbol;Acc:VGNC:70277]                     | 0.875542633 | 0.002418919 | 0.012953111 |
| ENSMMUG00000007097 | testin LIM domain protein [Source:VGNC Symbol;Acc:VGNC:78383]                                        | 0.876092925 | 0.006471952 | 0.028558314 |
| ENSMMUG00000022798 | aspartyl-tRNA synthetase 2, mitochondrial [Source:VGNC Symbol;Acc:VGNC:71708]                        | 0.878634711 | 0.00699982  | 0.030477916 |
| ENSMMUG00000015089 | vanin 1 [Source:VGNC Symbol;Acc:VGNC:83967]                                                          | 0.88026629  | 0.003319655 | 0.016664421 |
| ENSMMUG00000009768 | ring finger protein 14 [Source:VGNC Symbol;Acc:VGNC:84488]                                           | 0.880280273 | 3.79E-05    | 0.000394896 |
| ENSMMUG00000001776 | G protein subunit alpha z [Source:VGNC Symbol;Acc:VGNC:73094]                                        | 0.882598062 | 0.003570053 | 0.017667606 |
| ENSMMUG00000015097 | tripartite motif containing 62 [Source:VGNC Symbol;Acc:VGNC:79513]                                   | 0.885556982 | 0.001705435 | 0.009765183 |
| ENSMMUG00000057506 |                                                                                                      | 0.887652245 | 0.004730212 | 0.022221328 |
| ENSMMUG00000019022 | serine/threonine kinase 17a [Source:VGNC Symbol;Acc:VGNC:77913]                                      | 0.887658194 | 0.000446071 | 0.003230138 |
| ENSMMUG00000060459 |                                                                                                      | 0.891005955 | 8.80E-05    | 0.000810176 |
| ENSMMUG00000000478 | OTU deubiquitinase, ubiquitin aldehyde binding 1 [Source:NCBI gene;Acc:717989]                       | 0.891470905 | 0.000326698 | 0.002471449 |
| ENSMMUG00000021868 | TNF receptor associated protein 1 [Source:VGNC Symbol;Acc:VGNC:79019]                                | 0.891582532 | 0.001550441 | 0.009039791 |
| ENSMMUG00000064612 | Metazoan signal recognition particle RNA [Source:RFAM;Acc:RF00017]                                   | 0.892091132 | 4.03E-05    | 0.000416751 |
| ENSMMUG00000015303 | ATP binding cassette subfamily A member 7 [Source:VGNC Symbol;Acc:VGNC:69567]                        | 0.892821201 | 0.008156652 | 0.03419544  |
| ENSMMUG00000023318 | transformation/transcription domain associated protein [Source:VGNC Symbol;Acc:VGNC:78657]           | 0.893218231 | 1.21E-06    | 1.88E-05    |
| ENSMMUG00000008380 | CDC42 binding protein kinase beta [Source:VGNC Symbol;Acc:VGNC:81369]                                | 0.896720858 | 0.009346509 | 0.037992768 |
| ENSMMUG00000022914 | RAB, member of RAS oncogene family like 2B [Source:NCBI gene;Acc:716615]                             | 0.897018465 | 0.000809058 | 0.005318282 |
| ENSMMUG00000017945 | septin 12 [Source:VGNC Symbol;Acc:VGNC:82235]                                                        | 0.898532835 | 0.003235969 | 0.016327549 |
| ENSMMUG00000057841 | keratin 86 [Source:NCBI gene;Acc:697770]                                                             | 0.901284177 | 0.010502631 | 0.041614853 |
| ENSMMUG00000052680 |                                                                                                      | 0.902296483 | 0.000730841 | 0.004910741 |
| ENSMMUG00000012526 | glycosyltransferase 8 domain containing 1 [Source:VGNC Symbol;Acc:VGNC:73001]                        | 0.902682897 | 0.00012311  | 0.001090848 |
| ENSMMUG00000017946 | rogdi atypical leucine zipper [Source:VGNC Symbol;Acc:VGNC:76862]                                    | 0.903484461 | 0.000850934 | 0.005543092 |
| ENSMMUG00000014288 | eukaryotic translation initiation factor 3 subunit J [Source:VGNC Symbol;Acc:VGNC:72188]             | 0.905873162 | 0.008172542 | 0.034248802 |
| ENSMMUG00000009682 | R3H domain containing 4 [Source:VGNC Symbol;Acc:VGNC:76554]                                          | 0.905921775 | 0.012533474 | 0.047473818 |
| ENSMMUG00000049374 |                                                                                                      | 0.906372346 | 0.006918651 | 0.030160865 |
| ENSMMUG00000014489 | DEAD-box helicase 20 [Source:NCBI gene;Acc:704731]                                                   | 0.906878843 | 0.00024748  | 0.001959383 |
| ENSMMUG00000057486 |                                                                                                      | 0.907546816 | 0.000123152 | 0.001090848 |
| ENSMMUG00000004913 | mitotic deacetylase associated SANT domain protein [Source:VGNC Symbol;Acc:VGNC:72073]               | 0.908557697 | 0.000475394 | 0.003417344 |

|                    |                                                                                             |             |             |             |
|--------------------|---------------------------------------------------------------------------------------------|-------------|-------------|-------------|
| ENSMMUG0000003265  | leptin receptor [Source:VGNC Symbol;Acc:VGNC:81429]                                         | 0.910317658 | 3.47E-05    | 0.000366084 |
| ENSMMUG00000017985 | catenin alpha 1 [Source:VGNC Symbol;Acc:VGNC:84291]                                         | 0.910328953 | 0.00088123  | 0.005678982 |
| ENSMMUG00000005455 | ring finger protein 213 [Source:VGNC Symbol;Acc:VGNC:76734]                                 | 0.910744285 | 0.000717085 | 0.004846031 |
| ENSMMUG00000020583 | FTO alpha-ketoglutarate dependent dioxygenase [Source:VGNC Symbol;Acc:VGNC:72772]           | 0.914289578 | 0.006398564 | 0.028338368 |
| ENSMMUG00000018344 | myosin XVA [Source:VGNC Symbol;Acc:VGNC:75109]                                              | 0.915251206 | 0.005637258 | 0.025659    |
| ENSMMUG00000010141 | family with sequence similarity 13 member A [Source:VGNC Symbol;Acc:VGNC:72299]             | 0.915380792 | 0.001179712 | 0.007191798 |
| ENSMMUG00000056558 |                                                                                             | 0.918539033 | 0.001381544 | 0.008214199 |
| ENSMMUG00000000194 | solute carrier family 27 member 1 [Source:VGNC Symbol;Acc:VGNC:77438]                       | 0.920771867 | 0.005313905 | 0.024516835 |
| ENSMMUG00000053458 | ORMDL sphingolipid biosynthesis regulator 2 [Source:NCBI gene;Acc:710296]                   | 0.921066987 | 0.001321933 | 0.007933793 |
| ENSMMUG00000010367 | myosin heavy chain 11 [Source:VGNC Symbol;Acc:VGNC:75097]                                   | 0.921365877 | 0.000510096 | 0.003633051 |
| ENSMMUG00000000389 | nucleolar protein 6 [Source:VGNC Symbol;Acc:VGNC:75218]                                     | 0.921419489 | 0.003473362 | 0.017307694 |
| ENSMMUG00000006941 | exportin 1 [Source:VGNC Symbol;Acc:VGNC:78812]                                              | 0.923404745 | 0.013266169 | 0.0497964   |
| ENSMMUG00000055379 |                                                                                             | 0.923603196 | 0.00013038  | 0.001145501 |
| ENSMMUG00000052494 |                                                                                             | 0.924273559 | 0.012490919 | 0.047345739 |
| ENSMMUG00000004417 | secretion associated Ras related GTPase 1B [Source:VGNC Symbol;Acc:VGNC:76970]              | 0.927405404 | 5.66E-05    | 0.000559431 |
| ENSMMUG00000062995 |                                                                                             | 0.927805001 | 0.0119021   | 0.045608578 |
| ENSMMUG00000058544 | nucleosome assembly protein 1 like 5 [Source:NCBI gene;Acc:703223]                          | 0.92850597  | 0.000825049 | 0.005406993 |
| ENSMMUG00000012538 | ubiquitin conjugating enzyme E2 U [Source:VGNC Symbol;Acc:VGNC:79726]                       | 0.928651892 | 0.003070546 | 0.015631215 |
| ENSMMUG00000047621 | transmembrane 4 L six family member 18 [Source:VGNC Symbol;Acc:VGNC:82713]                  | 0.928723143 | 0.000125037 | 0.001103932 |
| ENSMMUG00000055079 |                                                                                             | 0.929100606 | 0.000136694 | 0.001191313 |
| ENSMMUG00000013560 | calcium voltage-gated channel auxiliary subunit gamma 3 [Source:VGNC Symbol;Acc:VGNC:70513] | 0.930150021 | 0.002562015 | 0.013585078 |
| ENSMMUG00000009725 | triadin [Source:HGNC Symbol;Acc:HGNC:12261]                                                 | 0.930878425 | 0.000626564 | 0.00432329  |
| ENSMMUG00000062248 | follicular dendritic cell secreted protein [Source:NCBI gene;Acc:707784]                    | 0.930971648 | 0.002397904 | 0.012872393 |
| ENSMMUG00000015663 | adaptor related protein complex 3 subunit delta 1 [Source:VGNC Symbol;Acc:VGNC:69969]       | 0.932151122 | 9.07E-05    | 0.000832842 |
| ENSMMUG00000055907 |                                                                                             | 0.934127784 | 0.000381352 | 0.002810331 |
| ENSMMUG00000052424 |                                                                                             | 0.934432372 | 0.003960484 | 0.019230804 |
| ENSMMUG00000052242 |                                                                                             | 0.935182613 | 0.006416758 | 0.028372545 |
| ENSMMUG00000054123 | vesicle transport through interaction with t-SNAREs 1A [Source:NCBI gene;Acc:696654]        | 0.935338414 | 0.008505667 | 0.035357594 |
| ENSMMUG00000016715 | p53-induced death domain protein 1 [Source:VGNC Symbol;Acc:VGNC:81498]                      | 0.938079789 | 0.000568613 | 0.003994672 |
| ENSMMUG00000058254 |                                                                                             | 0.939445461 | 0.001260587 | 0.007624759 |
| ENSMMUG00000005519 | carboxypeptidase A3 [Source:VGNC Symbol;Acc:VGNC:71456]                                     | 0.939452775 | 0.007276867 | 0.031369001 |
| ENSMMUG00000053488 | small integral membrane protein 19 [Source:NCBI gene;Acc:705371]                            | 0.940410931 | 0.001926346 | 0.010735684 |
| ENSMMUG00000012940 | tRNA phosphotransferase 1 [Source:VGNC Symbol;Acc:VGNC:79242]                               | 0.941072065 | 0.008949313 | 0.036834508 |
| ENSMMUG00000002930 | G protein-coupled receptor 158 [Source:NCBI gene;Acc:707065]                                | 0.941078398 | 0.006086552 | 0.027201163 |
| ENSMMUG00000001690 | calponin 3 [Source:VGNC Symbol;Acc:VGNC:71278]                                              | 0.941641096 | 0.003370837 | 0.016882235 |
| ENSMMUG00000015001 | LIM domain kinase 2 [Source:VGNC Symbol;Acc:VGNC:74270]                                     | 0.946165927 | 0.009122213 | 0.037262794 |
| ENSMMUG00000002181 | SFI1 centrin binding protein [Source:VGNC Symbol;Acc:VGNC:77328]                            | 0.946925108 | 9.31E-05    | 0.000852764 |
| ENSMMUG00000006139 | 3-hydroxy-3-methylglutaryl-CoA reductase [Source:VGNC Symbol;Acc:VGNC:73484]                | 0.947627688 | 5.39E-05    | 0.00053753  |
| ENSMMUG00000022246 | PDZ and LIM domain 5 [Source:VGNC Symbol;Acc:VGNC:75816]                                    | 0.947652896 | 0.013220929 | 0.049678225 |
| ENSMMUG00000002982 | FAST kinase domains 5 [Source:NCBI gene;Acc:100498658]                                      | 0.948774799 | 0.004523436 | 0.021473437 |
| ENSMMUG00000044861 |                                                                                             | 0.948977881 | 0.007232243 | 0.031248597 |
| ENSMMUG00000008771 | lysine demethylase 2A [Source:VGNC Symbol;Acc:VGNC:73824]                                   | 0.948984204 | 0.000151589 | 0.001293281 |
| ENSMMUG00000052324 | MARVEL domain containing 3 [Source:NCBI gene;Acc:710448]                                    | 0.949093559 | 0.007202198 | 0.031171161 |
| ENSMMUG00000003572 | nicotinamide phosphoribosyltransferase [Source:VGNC Symbol;Acc:VGNC:75056]                  | 0.949188029 | 0.003277272 | 0.016512878 |
| ENSMMUG00000005668 | kynurenine 3-monooxygenase [Source:VGNC Symbol;Acc:VGNC:74197]                              | 0.949595019 | 0.007033003 | 0.030566648 |
| ENSMMUG00000003744 | solute carrier family 44 member 2 [Source:VGNC Symbol;Acc:VGNC:77498]                       | 0.949642827 | 0.000646038 | 0.004429447 |
| ENSMMUG00000053710 |                                                                                             | 0.950104266 | 6.16E-05    | 0.000601032 |
| ENSMMUG00000014571 | protocadherin alpha-C2 [Source:NCBI gene;Acc:698874]                                        | 0.95201475  | 1.58E-05    | 0.000182849 |
| ENSMMUG00000016909 | meiotic kinetochore factor [Source:NCBI gene;Acc:709179]                                    | 0.953369845 | 1.76E-06    | 2.63E-05    |
| ENSMMUG00000018255 | nuclear factor of activated T cells 5 [Source:VGNC Symbol;Acc:VGNC:75325]                   | 0.953691257 | 0.002574593 | 0.013638419 |
| ENSMMUG00000017402 | phosphoglucomutase 2 like 1 [Source:VGNC Symbol;Acc:VGNC:75839]                             | 0.95476521  | 0.002466564 | 0.013143278 |



|                     |                                                                                                            |             |             |             |
|---------------------|------------------------------------------------------------------------------------------------------------|-------------|-------------|-------------|
| ENSMMUG00000003297  | coiled-coil domain containing 63 [Source:VGNC Symbol;Acc:VGNC:70879]                                       | 0.955676634 | 0.009223048 | 0.037615525 |
| ENSMMUG00000005532  | male germ cell associated kinase [Source:VGNC Symbol;Acc:VGNC:74480]                                       | 0.956321595 | 6.78E-05    | 0.000653535 |
| ENSMMUG00000023078  | zinc finger protein 639 [Source:VGNC Symbol;Acc:VGNC:82561]                                                | 0.957817283 | 0.002156854 | 0.0118018   |
| ENSMMUG00000006230  | NADPH oxidase 5 [Source:VGNC Symbol;Acc:VGNC:82198]                                                        | 0.960765166 | 0.000242354 | 0.001927622 |
| ENSMMUG00000004224  | poly(ADP-ribose) polymerase family member 12 [Source:VGNC Symbol;Acc:VGNC:81734]                           | 0.960822656 | 1.77E-05    | 0.000203174 |
| ENSMMUG000000060780 |                                                                                                            | 0.961607544 | 5.90E-05    | 0.000582313 |
| ENSMMUG000000055601 |                                                                                                            | 0.965966616 | 6.38E-06    | 8.22E-05    |
| ENSMMUG00000064485  | ubiquitin A-52 residue ribosomal protein fusion product 1 [Source:NCBI gene;Acc:720243]                    | 0.967049297 | 0.006170389 | 0.027507746 |
| ENSMMUG00000020588  | protein kinase N2 [Source:VGNC Symbol;Acc:VGNC:76015]                                                      | 0.968661509 | 2.86E-06    | 4.03E-05    |
| ENSMMUG00000043955  | three prime repair exonuclease 1 [Source:VGNC Symbol;Acc:VGNC:82708]                                       | 0.969716038 | 0.003504866 | 0.017432606 |
| ENSMMUG00000011043  | endoplasmic reticulum aminopeptidase 2 [Source:VGNC Symbol;Acc:VGNC:72141]                                 | 0.970110531 | 1.10E-05    | 0.000134584 |
| ENSMMUG00000020694  | RAB27A, member RAS oncogene family [Source:VGNC Symbol;Acc:VGNC:81527]                                     | 0.971623129 | 0.005376141 | 0.02475127  |
| ENSMMUG00000019357  | elongator complex protein 1 [Source:VGNC Symbol;Acc:VGNC:72257]                                            | 0.971849974 | 0.001037656 | 0.006478922 |
| ENSMMUG00000008770  | UDP-glucose pyrophosphorylase 2 [Source:VGNC Symbol;Acc:VGNC:78712]                                        | 0.972630231 | 0.002727019 | 0.014243873 |
| ENSMMUG00000049952  |                                                                                                            | 0.973726065 | 0.000292219 | 0.002240345 |
| ENSMMUG00000051186  | proteasome 20S subunit alpha 5 [Source:NCBI gene;Acc:698435]                                               | 0.974300271 | 6.61E-06    | 8.49E-05    |
| ENSMMUG00000049403  |                                                                                                            | 0.975713461 | 0.002218879 | 0.012078954 |
| ENSMMUG00000006141  | ceramide transporter 1 [Source:VGNC Symbol;Acc:VGNC:71298]                                                 | 0.977458845 | 0.000212423 | 0.0017173   |
| ENSMMUG00000022348  | surfeit 4 [Source:VGNC Symbol;Acc:VGNC:78060]                                                              | 0.97761846  | 0.00567287  | 0.025788586 |
| ENSMMUG00000013520  | pumilio RNA binding family member 1 [Source:VGNC Symbol;Acc:VGNC:76479]                                    | 0.97867727  | 1.33E-05    | 0.000158954 |
| ENSMMUG00000049666  |                                                                                                            | 0.980031897 | 0.000629349 | 0.004339746 |
| ENSMMUG00000061586  | chromosome 4 C6orf52 homolog [Source:NCBI gene;Acc:702114]                                                 | 0.980252369 | 0.010627673 | 0.041975485 |
| ENSMMUG00000014573  | dimethylarginine dimethylaminohydrolase 1 [Source:VGNC Symbol;Acc:VGNC:71753]                              | 0.980416045 | 5.22E-05    | 0.000522701 |
| ENSMMUG00000020320  | protein transport protein Sec16B [Source:NCBI gene;Acc:709635]                                             | 0.980476718 | 0.002956508 | 0.015164702 |
| ENSMMUG00000022504  | alpha-2-glycoprotein 1, zinc-binding [Source:VGNC Symbol;Acc:VGNC:70201]                                   | 0.980979139 | 0.001708217 | 0.009775546 |
| ENSMMUG00000010826  | ral guanine nucleotide dissociation stimulator like 3 [Source:VGNC Symbol;Acc:VGNC:76869]                  | 0.98128654  | 0.008770266 | 0.036221233 |
| ENSMMUG00000003289  | integrin subunit beta 3 [Source:NCBI gene;Acc:717379]                                                      | 0.981913474 | 4.94E-06    | 6.53E-05    |
| ENSMMUG00000008515  | sorting nexin 7 [Source:NCBI gene;Acc:716015]                                                              | 0.982764882 | 0.000525347 | 0.003726973 |
| ENSMMUG00000021082  | potassium sodium-activated channel subfamily T member 2 [Source:VGNC Symbol;Acc:VGNC:73857]                | 0.985808031 | 0.000197315 | 0.00161683  |
| ENSMMUG00000010875  | TEA domain transcription factor 1 [Source:VGNC Symbol;Acc:VGNC:78301]                                      | 0.986566629 | 2.39E-05    | 0.00026389  |
| ENSMMUG00000007511  | glutamine amidotransferase like class 1 domain containing 1 [Source:VGNC Symbol;Acc:VGNC:82149]            | 0.98789974  | 0.006142166 | 0.027410509 |
| ENSMMUG00000042077  | DNA damage regulated autophagy modulator 1 [Source:NCBI gene;Acc:697427]                                   | 0.988048325 | 5.41E-05    | 0.000538185 |
| ENSMMUG00000004014  | interferon regulatory factor 7 [Source:VGNC Symbol;Acc:VGNC:73765]                                         | 0.991366936 | 0.011227712 | 0.043548085 |
| ENSMMUG00000000695  | transmembrane protein 245 [Source:VGNC Symbol;Acc:VGNC:78933]                                              | 0.9930845   | 0.005611763 | 0.025596728 |
| ENSMMUG00000017605  | mitochondrial ribosomal protein L39 [Source:VGNC Symbol;Acc:VGNC:74737]                                    | 0.993726211 | 0.001872393 | 0.010515104 |
| ENSMMUG00000001075  | trafficking kinesin protein 1 [Source:VGNC Symbol;Acc:VGNC:79830]                                          | 0.99654119  | 0.006916585 | 0.030160865 |
| ENSMMUG00000047880  | alpha-1,3-mannosyl-glycoprotein 2-beta-N-acetylglucosaminyltransferase [Source:VGNC Symbol;Acc:VGNC:84439] | 0.996774648 | 4.59E-05    | 0.000466854 |
| ENSMMUG00000057231  | T-box transcription factor 21 [Source:NCBI gene;Acc:694044]                                                | 1.000117163 | 0.006465163 | 0.028539982 |
| ENSMMUG00000014425  | protein kinase C epsilon [Source:VGNC Symbol;Acc:VGNC:76412]                                               | 1.002362867 | 0.009723844 | 0.039202977 |
| ENSMMUG00000006295  | matrix metalloproteinase 19 [Source:VGNC Symbol;Acc:VGNC:74896]                                            | 1.003272231 | 0.011019511 | 0.042971334 |
| ENSMMUG00000014309  | zinc finger protein 280A [Source:VGNC Symbol;Acc:VGNC:79152]                                               | 1.003566861 | 0.00984453  | 0.039571722 |
| ENSMMUG00000004996  | monooxygenase DBH like 1 [Source:VGNC Symbol;Acc:VGNC:74800]                                               | 1.005344315 | 0.003062166 | 0.015609801 |
| ENSMMUG00000017949  | ornithine decarboxylase antizyme 1 [Source:NCBI gene;Acc:721477]                                           | 1.005478852 | 1.21E-05    | 0.000146344 |
| ENSMMUG00000016465  | histone deacetylase 6 [Source:VGNC Symbol;Acc:VGNC:73164]                                                  | 1.006798558 | 3.03E-06    | 4.24E-05    |
| ENSMMUG00000009176  | calmodulin binding transcription activator 2 [Source:VGNC Symbol;Acc:VGNC:70578]                           | 1.008676415 | 0.001100052 | 0.006794108 |
| ENSMMUG00000051450  | phospholipase A2 receptor 1 [Source:NCBI gene;Acc:700191]                                                  | 1.009071091 | 2.34E-06    | 3.35E-05    |
| ENSMMUG00000001616  | peptidyl arginine deiminase 2 [Source:VGNC Symbol;Acc:VGNC:75644]                                          | 1.009078903 | 0.004142275 | 0.019952539 |
| ENSMMUG00000037887  | RBMX like 1 [Source:NCBI gene;Acc:100424767]                                                               | 1.011900749 | 0.000317906 | 0.002415062 |
| ENSMMUG00000032030  | dolichyldiphosphatase 1 [Source:VGNC Symbol;Acc:VGNC:71947]                                                | 1.012511019 | 0.008769875 | 0.036221233 |
| ENSMMUG00000029296  | phosphatidylinositol glycan anchor biosynthesis class Q [Source:VGNC Symbol;Acc:VGNC:75798]                | 1.014919993 | 0.011662446 | 0.044928618 |
| ENSMMUG00000000756  | transmembrane protein adipocyte associated 1 [Source:VGNC Symbol;Acc:VGNC:79848]                           | 1.01549717  | 0.008383134 | 0.034955539 |

|                    |                                                                                               |             |             |             |
|--------------------|-----------------------------------------------------------------------------------------------|-------------|-------------|-------------|
| ENSMMUG00000021972 | diacylglycerol kinase gamma [Source:VGNC Symbol;Acc:VGNC:71785]                               | 1.017192824 | 0.001780649 | 0.010096186 |
| ENSMMUG00000014413 | slingshot protein phosphatase 2 [Source:VGNC Symbol;Acc:VGNC:78018]                           | 1.019927988 | 0.000112678 | 0.001007133 |
| ENSMMUG00000009890 | FERM, ARH/RhoGEF and pleckstrin domain protein 1 [Source:VGNC Symbol;Acc:VGNC:72614]          | 1.022339534 | 2.32E-06    | 3.33E-05    |
| ENSMMUG00000057643 |                                                                                               | 1.02377576  | 0.000210601 | 0.001705115 |
| ENSMMUG00000015267 | C-terminal Src kinase [Source:VGNC Symbol;Acc:VGNC:81380]                                     | 1.026355552 | 1.05E-05    | 0.000129494 |
| ENSMMUG00000015306 | calponin 2 [Source:NCBI gene;Acc:721164]                                                      | 1.026425733 | 0.000240775 | 0.001919293 |
| ENSMMUG00000009577 | atlastin GTPase 1 [Source:VGNC Symbol;Acc:VGNC:70049]                                         | 1.027239177 | 9.49E-05    | 0.000868075 |
| ENSMMUG00000020956 | parvin alpha [Source:VGNC Symbol;Acc:VGNC:75605]                                              | 1.027908113 | 0.010691575 | 0.042147683 |
| ENSMMUG00000061749 | PAXIP1 associated glutamate rich protein 1 [Source:NCBI gene;Acc:706839]                      | 1.028519034 | 2.82E-06    | 3.98E-05    |
| ENSMMUG00000016758 | transmembrane protein 159 [Source:VGNC Symbol;Acc:VGNC:79836]                                 | 1.029381114 | 0.001185816 | 0.007224376 |
| ENSMMUG00000001715 | zinc finger protein 627 [Source:VGNC Symbol;Acc:VGNC:79856]                                   | 1.029684896 | 0.000806392 | 0.005307194 |
| ENSMMUG00000059196 |                                                                                               | 1.030081806 | 3.47E-07    | 6.29E-06    |
| ENSMMUG00000017188 | proteasome 26S subunit, ATPase 4 [Source:VGNC Symbol;Acc:VGNC:76448]                          | 1.031472659 | 0.006133758 | 0.027396596 |
| ENSMMUG00000053257 | Y RNA [Source:RFAM;Acc:RF00019]                                                               | 1.031771519 | 0.000215657 | 0.001736962 |
| ENSMMUG00000016255 | telomerase associated protein 1 [Source:VGNC Symbol;Acc:VGNC:78310]                           | 1.031930859 | 0.001572128 | 0.009131833 |
| ENSMMUG00000013107 | tripartite motif containing 32 [Source:VGNC Symbol;Acc:VGNC:79032]                            | 1.033613249 | 1.13E-06    | 1.77E-05    |
| ENSMMUG00000038256 | aquaporin 2 [Source:NCBI gene;Acc:711719]                                                     | 1.03363971  | 3.57E-06    | 4.90E-05    |
| ENSMMUG00000004847 | xylulokinase [Source:VGNC Symbol;Acc:VGNC:78815]                                              | 1.033895449 | 1.82E-05    | 0.000207623 |
| ENSMMUG00000060261 |                                                                                               | 1.033918026 | 0.0086806   | 0.035960589 |
| ENSMMUG00000062394 | C-C motif chemokine receptor 2 [Source:NCBI gene;Acc:574098]                                  | 1.035212627 | 0.003101923 | 0.01576132  |
| ENSMMUG00000054175 |                                                                                               | 1.036026716 | 0.001118041 | 0.006881666 |
| ENSMMUG00000002345 | tropomodulin 3 [Source:VGNC Symbol;Acc:VGNC:78572]                                            | 1.038197528 | 4.79E-08    | 1.03E-06    |
| ENSMMUG00000016104 | chondroitin sulfate proteoglycan 4 [Source:VGNC Symbol;Acc:VGNC:71525]                        | 1.039869008 | 0.000780242 | 0.005173328 |
| ENSMMUG00000014409 | ankyrin repeat domain 13B [Source:VGNC Symbol;Acc:VGNC:69708]                                 | 1.040338138 | 0.011898579 | 0.045608578 |
| ENSMMUG00000049548 |                                                                                               | 1.041727413 | 0.001016254 | 0.006367308 |
| ENSMMUG00000006530 | ATP/GTP binding protein like 3 [Source:VGNC Symbol;Acc:VGNC:69723]                            | 1.043049154 | 0.000144831 | 0.001248171 |
| ENSMMUG00000005548 | N-ethylmaleimide sensitive factor, vesicle fusing ATPase [Source:VGNC Symbol;Acc:VGNC:75536]  | 1.044184709 | 0.000169062 | 0.001416431 |
| ENSMMUG00000019172 | spectrin beta, erythrocytic [Source:VGNC Symbol;Acc:VGNC:77870]                               | 1.046200947 | 0.005790898 | 0.026182304 |
| ENSMMUG00000022481 | cytochrome P450, family 1, subfamily A, polypeptide 1 [Source:NCBI gene;Acc:678694]           | 1.048157087 | 0.000555753 | 0.003922134 |
| ENSMMUG00000051619 | peptidyl arginine deiminase 3 [Source:NCBI gene;Acc:700560]                                   | 1.048397578 | 9.14E-05    | 0.000838015 |
| ENSMMUG00000022920 | TATA-box binding protein like 1 [Source:VGNC Symbol;Acc:VGNC:83491]                           | 1.048576387 | 0.01064856  | 0.042020521 |
| ENSMMUG00000006293 | SAP domain containing ribonucleoprotein [Source:NCBI gene;Acc:709932]                         | 1.048727365 | 0.000257233 | 0.002020602 |
| ENSMMUG00000004024 | cadherin related family member 5 [Source:VGNC Symbol;Acc:VGNC:71158]                          | 1.051468475 | 0.007275298 | 0.031369001 |
| ENSMMUG00000010840 | zinc finger protein 507 [Source:VGNC Symbol;Acc:VGNC:79410]                                   | 1.051619898 | 0.011947971 | 0.045768165 |
| ENSMMUG00000015054 | ArfGAP with RhoGAP domain, ankyrin repeat and PH domain 1 [Source:VGNC Symbol;Acc:VGNC:69844] | 1.05165868  | 0.000762008 | 0.005073654 |
| ENSMMUG00000053376 |                                                                                               | 1.051920504 | 0.000776718 | 0.005158914 |
| ENSMMUG00000014897 | ribonucleoprotein, PTB binding 1 [Source:NCBI gene;Acc:715250]                                | 1.055137324 | 0.012050035 | 0.046093935 |
| ENSMMUG00000020172 | KIAA1755 [Source:VGNC Symbol;Acc:VGNC:73942]                                                  | 1.055477718 | 0.001364372 | 0.008134421 |
| ENSMMUG00000020488 | receptor accessory protein 5 [Source:VGNC Symbol;Acc:VGNC:76864]                              | 1.056208458 | 2.11E-06    | 3.06E-05    |
| ENSMMUG00000023761 | ectonucleoside triphosphate diphosphohydrolase 7 [Source:VGNC Symbol;Acc:VGNC:72071]          | 1.056281448 | 0.001684074 | 0.009668028 |
| ENSMMUG00000064026 | Metazoan signal recognition particle RNA [Source:RFAM;Acc:RF00017]                            | 1.056679338 | 0.001916328 | 0.010695302 |
| ENSMMUG00000009794 | protocadherin related 15 [Source:VGNC Symbol;Acc:VGNC:75608]                                  | 1.058774237 | 1.08E-05    | 0.00013272  |
| ENSMMUG00000055239 |                                                                                               | 1.058929012 | 0.00020871  | 0.001694866 |
| ENSMMUG00000055122 |                                                                                               | 1.058954938 | 0.000205371 | 0.001671509 |
| ENSMMUG00000020258 | E2F transcription factor 4 [Source:VGNC Symbol;Acc:VGNC:72025]                                | 1.059358979 | 0.004875313 | 0.022794243 |
| ENSMMUG00000021655 | histone deacetylase 7 [Source:NCBI gene;Acc:718225]                                           | 1.060879353 | 0.000113566 | 0.001014228 |
| ENSMMUG00000018166 | MYB proto-oncogene, transcription factor [Source:VGNC Symbol;Acc:VGNC:75089]                  | 1.061289798 | 0.000354309 | 0.002649825 |
| ENSMMUG00000030279 | A-kinase anchoring protein 10 [Source:VGNC Symbol;Acc:VGNC:69764]                             | 1.063933371 | 0.006216303 | 0.027666891 |
| ENSMMUG00000053989 |                                                                                               | 1.066065723 | 0.00028255  | 0.002178646 |
| ENSMMUG00000014537 | bassoon presynaptic cytomatrix protein [Source:VGNC Symbol;Acc:VGNC:70284]                    | 1.067143307 | 5.14E-05    | 0.000516301 |
| ENSMMUG00000009368 | Abelson helper integration site 1 [Source:VGNC Symbol;Acc:VGNC:81010]                         | 1.06910357  | 2.03E-06    | 2.95E-05    |



|                    |                                                                                                 |             |             |             |
|--------------------|-------------------------------------------------------------------------------------------------|-------------|-------------|-------------|
| ENSMMUG00000038349 | crystallin beta-gamma domain containing 3 [Source:NCBI gene;Acc:698282]                         | 1.070398417 | 1.64E-06    | 2.47E-05    |
| ENSMMUG00000008652 | coiled-coil domain containing 85B [Source:VGNC Symbol;Acc:VGNC:70853]                           | 1.070539855 | 0.000733445 | 0.004922808 |
| ENSMMUG00000015908 | RB binding protein 6, ubiquitin ligase [Source:VGNC Symbol;Acc:VGNC:76677]                      | 1.071316768 | 3.25E-06    | 4.50E-05    |
| ENSMMUG00000010043 | epidermal growth factor [Source:VGNC Symbol;Acc:VGNC:72171]                                     | 1.071502141 | 0.012713381 | 0.047954059 |
| ENSMMUG00000053937 |                                                                                                 | 1.072165433 | 1.37E-05    | 0.000162317 |
| ENSMMUG00000019089 | centromere protein E [Source:VGNC Symbol;Acc:VGNC:71008]                                        | 1.072827755 | 0.000380337 | 0.002804762 |
| ENSMMUG00000000953 | family with sequence similarity 207 member A [Source:VGNC Symbol;Acc:VGNC:72273]                | 1.074498049 | 0.004235499 | 0.020302281 |
| ENSMMUG00000061698 |                                                                                                 | 1.07564115  | 6.57E-05    | 0.000635961 |
| ENSMMUG00000055976 | CD99 antigen [Source:NCBI gene;Acc:106995376]                                                   | 1.076498029 | 0.00056967  | 0.003999507 |
| ENSMMUG00000019991 | dopa decarboxylase [Source:VGNC Symbol;Acc:VGNC:71755]                                          | 1.07676603  | 4.12E-05    | 0.000424815 |
| ENSMMUG00000019945 | fibroblast growth factor receptor 3 [Source:VGNC Symbol;Acc:VGNC:72653]                         | 1.077227509 | 0.006561582 | 0.028906719 |
| ENSMMUG00000020604 | HPS1 biogenesis of lysosomal organelles complex 3 subunit 1 [Source:VGNC Symbol;Acc:VGNC:73515] | 1.077321639 | 3.02E-05    | 0.000325229 |
| ENSMMUG00000005729 | GIPC PDZ domain containing family member 1 [Source:VGNC Symbol;Acc:VGNC:72932]                  | 1.077370754 | 0.002336655 | 0.012618637 |
| ENSMMUG00000061995 |                                                                                                 | 1.077614007 | 0.000139039 | 0.001205931 |
| ENSMMUG00000018274 | FERM domain containing 6 [Source:VGNC Symbol;Acc:VGNC:72747]                                    | 1.079226779 | 1.80E-05    | 0.000205967 |
| ENSMMUG00000038858 |                                                                                                 | 1.080117714 | 1.84E-06    | 2.71E-05    |
| ENSMMUG00000056008 |                                                                                                 | 1.080963197 | 5.48E-07    | 9.41E-06    |
| ENSMMUG00000010466 | solute carrier family 38 member 9 [Source:VGNC Symbol;Acc:VGNC:77574]                           | 1.083056628 | 0.004025463 | 0.019473845 |
| ENSMMUG00000064122 |                                                                                                 | 1.083648882 | 0.001853933 | 0.010443922 |
| ENSMMUG00000002063 | endoplasmic reticulum aminopeptidase 1 [Source:VGNC Symbol;Acc:VGNC:72066]                      | 1.085254857 | 0.000265745 | 0.00206597  |
| ENSMMUG00000002381 | lysine methyltransferase 2B [Source:VGNC Symbol;Acc:VGNC:74053]                                 | 1.08839263  | 3.17E-06    | 4.41E-05    |
| ENSMMUG00000014981 | homeobox containing 1 [Source:VGNC Symbol;Acc:VGNC:73443]                                       | 1.090711746 | 0.000996464 | 0.006265059 |
| ENSMMUG00000041919 | nuclear respiratory factor 1 [Source:VGNC Symbol;Acc:VGNC:81731]                                | 1.091065747 | 2.24E-05    | 0.000248686 |
| ENSMMUG00000014411 | coronin 6 [Source:NCBI gene;Acc:711818]                                                         | 1.094004725 | 0.001760208 | 0.01001488  |
| ENSMMUG00000049850 | proline rich and Gla domain 4 [Source:NCBI gene;Acc:694707]                                     | 1.095069635 | 0.000422453 | 0.003085926 |
| ENSMMUG00000006766 | RUN domain containing 3B [Source:VGNC Symbol;Acc:VGNC:77129]                                    | 1.095879464 | 0.004083235 | 0.019711981 |
| ENSMMUG00000062175 | carboxypeptidase B1 [Source:NCBI gene;Acc:712639]                                               | 1.097400147 | 0.004554372 | 0.021573025 |
| ENSMMUG00000021418 | ATPase H <sup>+</sup> transporting V1 subunit D [Source:VGNC Symbol;Acc:VGNC:70060]             | 1.097612211 | 0.001307652 | 0.007865513 |
| ENSMMUG00000019925 | DiGeorge syndrome critical region gene 2 [Source:NCBI gene;Acc:100423715]                       | 1.099081532 | 0.000862612 | 0.005592265 |
| ENSMMUG00000005480 | carnosine synthase 1 [Source:VGNC Symbol;Acc:VGNC:81367]                                        | 1.100658104 | 5.57E-06    | 7.28E-05    |
| ENSMMUG00000056548 | coagulation factor III, tissue factor [Source:NCBI gene;Acc:714456]                             | 1.102032989 | 2.06E-06    | 3.00E-05    |
| ENSMMUG00000005906 | heat shock transcription factor 4 [Source:VGNC Symbol;Acc:VGNC:73533]                           | 1.103680908 | 0.003094716 | 0.015732079 |
| ENSMMUG00000059777 |                                                                                                 | 1.104743358 | 0.000497402 | 0.003561369 |
| ENSMMUG00000021075 | Rac family small GTPase 1 [Source:NCBI gene;Acc:717755]                                         | 1.105597687 | 2.58E-06    | 3.67E-05    |
| ENSMMUG00000013671 | elongation factor for RNA polymerase II [Source:VGNC Symbol;Acc:VGNC:72088]                     | 1.107227859 | 0.001057908 | 0.00657128  |
| ENSMMUG00000012472 | phosphatidylinositol-4-phosphate 5-kinase type 1 beta [Source:VGNC Symbol;Acc:VGNC:76001]       | 1.107335882 | 1.15E-05    | 0.00014004  |
| ENSMMUG00000008615 | nebulin [Source:NCBI gene;Acc:100430324]                                                        | 1.107925271 | 3.77E-06    | 5.14E-05    |
| ENSMMUG00000058797 |                                                                                                 | 1.109357079 | 0.00024572  | 0.001950099 |
| ENSMMUG00000001547 | zinc finger protein 106 [Source:VGNC Symbol;Acc:VGNC:78831]                                     | 1.110363596 | 3.91E-06    | 5.30E-05    |
| ENSMMUG00000005666 | phospholipase D2 [Source:VGNC Symbol;Acc:VGNC:76172]                                            | 1.11143267  | 0.000117353 | 0.001045462 |
| ENSMMUG00000044822 | coiled-coil domain containing 174 [Source:VGNC Symbol;Acc:VGNC:84219]                           | 1.112292202 | 2.38E-05    | 0.00026366  |
| ENSMMUG00000006568 | basic leucine zipper ATF-like transcription factor 2 [Source:VGNC Symbol;Acc:VGNC:70127]        | 1.112301568 | 0.000838332 | 0.005474169 |
| ENSMMUG00000062048 |                                                                                                 | 1.112800658 | 6.40E-06    | 8.25E-05    |
| ENSMMUG00000006435 | HNF1 homeobox A [Source:NCBI gene;Acc:107001057]                                                | 1.11389514  | 0.009789677 | 0.039409725 |
| ENSMMUG00000000706 | filamin B [Source:VGNC Symbol;Acc:VGNC:72672]                                                   | 1.119270262 | 7.40E-05    | 0.000701123 |
| ENSMMUG00000037449 | CUGBP Elav-like family member 2 [Source:NCBI gene;Acc:714291]                                   | 1.119817287 | 0.003066281 | 0.01561684  |
| ENSMMUG00000018478 | interferon regulatory factor 5 [Source:VGNC Symbol;Acc:VGNC:73763]                              | 1.12128431  | 0.011309449 | 0.043786728 |
| ENSMMUG00000064074 |                                                                                                 | 1.123038261 | 0.001660811 | 0.009564895 |
| ENSMMUG00000003834 | basic leucine zipper ATF-like transcription factor [Source:VGNC Symbol;Acc:VGNC:70229]          | 1.125291546 | 0.002131544 | 0.011679826 |
| ENSMMUG00000018798 | stromal cell derived factor 2 like 1 [Source:NCBI gene;Acc:697928]                              | 1.125908437 | 0.000784333 | 0.005184062 |
| ENSMMUG00000005793 | ankyrin repeat and fibronectin type III domain containing 1 [Source:VGNC Symbol;Acc:VGNC:69712] | 1.127523832 | 0.007612478 | 0.032530955 |

|                    |                                                                                             |             |             |             |
|--------------------|---------------------------------------------------------------------------------------------|-------------|-------------|-------------|
| ENSMMUG0000006285  | antizyme inhibitor 2 [Source:VGNC Symbol;Acc:VGNC:70153]                                    | 1.12764135  | 3.43E-07    | 6.23E-06    |
| ENSMMUG00000065113 |                                                                                             | 1.127856748 | 0.009960958 | 0.03995078  |
| ENSMMUG00000020679 | myozenin 3 [Source:VGNC Symbol;Acc:VGNC:74988]                                              | 1.129702201 | 0.003219598 | 0.016267681 |
| ENSMMUG00000051226 | FAD-linked sulfhydryl oxidase ERV1 [Source:NCBI gene;Acc:106994988]                         | 1.129851878 | 4.38E-05    | 0.000447349 |
| ENSMMUG00000018787 | PAK1 interacting protein 1 [Source:VGNC Symbol;Acc:VGNC:75661]                              | 1.132169677 | 0.007287328 | 0.031401601 |
| ENSMMUG00000054473 | activating transcription factor 5 [Source:NCBI gene;Acc:719150]                             | 1.13278786  | 0.001562871 | 0.009082928 |
| ENSMMUG00000001777 | testis expressed metallothionein like protein [Source:VGNC Symbol;Acc:VGNC:79965]           | 1.133277076 | 0.00380732  | 0.018662761 |
| ENSMMUG00000060572 |                                                                                             | 1.133759204 | 0.007634874 | 0.032559132 |
| ENSMMUG00000060754 | Metazoan signal recognition particle RNA [Source:RFAM;Acc:RF00017]                          | 1.134188866 | 3.65E-05    | 0.000382872 |
| ENSMMUG00000003356 | tenascin C [Source:VGNC Symbol;Acc:VGNC:79960]                                              | 1.135420038 | 0.001079169 | 0.006684181 |
| ENSMMUG00000000629 | serpin family C member 1 [Source:VGNC Symbol;Acc:VGNC:77360]                                | 1.135533928 | 3.70E-07    | 6.68E-06    |
| ENSMMUG00000015797 | disco interacting protein 2 homolog A [Source:VGNC Symbol;Acc:VGNC:71641]                   | 1.136968655 | 3.46E-05    | 0.000365115 |
| ENSMMUG00000014771 | zinc finger homeobox 2 [Source:NCBI gene;Acc:100429448]                                     | 1.137965956 | 1.38E-05    | 0.00016347  |
| ENSMMUG00000006405 | secretion regulating guanine nucleotide exchange factor [Source:VGNC Symbol;Acc:VGNC:77258] | 1.140776631 | 0.009353468 | 0.037996366 |
| ENSMMUG00000013901 | mitogen-activated protein kinase kinase kinase 3 [Source:VGNC Symbol;Acc:VGNC:81466]        | 1.140776947 | 0.009273934 | 0.037740243 |
| ENSMMUG00000003585 | ALG5 dolichyl-phosphate beta-glucosyltransferase [Source:VGNC Symbol;Acc:VGNC:69647]        | 1.146628047 | 0.001034807 | 0.006468588 |
| ENSMMUG00000012466 | BCL2 binding component 3 [Source:NCBI gene;Acc:717955]                                      | 1.147515824 | 0.002096352 | 0.011536382 |
| ENSMMUG00000009487 | zinc finger protein 205 [Source:VGNC Symbol;Acc:VGNC:78869]                                 | 1.149711995 | 1.09E-05    | 0.000133443 |
| ENSMMUG00000015868 | retinol dehydrogenase 11 [Source:NCBI gene;Acc:711195]                                      | 1.150519401 | 1.15E-05    | 0.00014004  |
| ENSMMUG00000013397 | peroxiredoxin 5 [Source:NCBI gene;Acc:719764]                                               | 1.150823141 | 2.19E-05    | 0.00024372  |
| ENSMMUG00000005270 | ryanodine receptor 3 [Source:NCBI gene;Acc:694996]                                          | 1.152475586 | 6.32E-07    | 1.06E-05    |
| ENSMMUG00000054768 |                                                                                             | 1.153641059 | 0.000594629 | 0.004137232 |
| ENSMMUG00000002995 | tripartite motif containing 24 [Source:VGNC Symbol;Acc:VGNC:78562]                          | 1.153847631 | 3.06E-05    | 0.000329007 |
| ENSMMUG00000011858 | bone morphogenetic protein 5 [Source:VGNC Symbol;Acc:VGNC:70264]                            | 1.156051794 | 0.001335817 | 0.007999393 |
| ENSMMUG00000021938 | nudE neurodevelopment protein 1 like 1 [Source:VGNC Symbol;Acc:VGNC:74982]                  | 1.157302232 | 0.001050021 | 0.006529779 |
| ENSMMUG00000013098 | aldo-keto reductase family 1 member B10 [Source:NCBI gene;Acc:713150]                       | 1.158110075 | 0.008183314 | 0.034267429 |
| ENSMMUG00000050057 |                                                                                             | 1.158234781 | 6.54E-07    | 1.09E-05    |
| ENSMMUG00000019085 | 3-hydroxybutyrate dehydrogenase 2 [Source:VGNC Symbol;Acc:VGNC:70161]                       | 1.160428533 | 0.000192347 | 0.001579756 |
| ENSMMUG00000000644 | centrosomal protein 85 [Source:VGNC Symbol;Acc:VGNC:71096]                                  | 1.16085088  | 0.012631114 | 0.047743496 |
| ENSMMUG00000000591 | 6-phosphofructo-2-kinase/fructose-2,6-biphosphatase 4 [Source:VGNC Symbol;Acc:VGNC:75960]   | 1.161539916 | 2.42E-06    | 3.46E-05    |
| ENSMMUG00000049432 | olfactory receptor 2T33 [Source:NCBI gene;Acc:706331]                                       | 1.162648207 | 1.00E-05    | 0.000124271 |
| ENSMMUG00000004816 | membrane associated ring-CH-type finger 5 [Source:VGNC Symbol;Acc:VGNC:74588]               | 1.16394868  | 0.000956523 | 0.006049046 |
| ENSMMUG00000052046 |                                                                                             | 1.166133718 | 7.71E-07    | 1.26E-05    |
| ENSMMUG00000008126 | lysine demethylase 7A [Source:VGNC Symbol;Acc:VGNC:73886]                                   | 1.166302979 | 5.02E-08    | 1.08E-06    |
| ENSMMUG00000057452 |                                                                                             | 1.166839119 | 0.011098476 | 0.043215578 |
| ENSMMUG00000005769 | EF-hand calcium binding domain 6 [Source:VGNC Symbol;Acc:VGNC:72092]                        | 1.171374982 | 0.009649484 | 0.038961187 |
| ENSMMUG00000001943 | GRAM domain containing 1C [Source:VGNC Symbol;Acc:VGNC:73007]                               | 1.17209144  | 0.006750223 | 0.029605331 |
| ENSMMUG00000002953 | MAGE family member F1 [Source:VGNC Symbol;Acc:VGNC:74399]                                   | 1.172886243 | 0.001544984 | 0.009022539 |
| ENSMMUG00000010336 | DOP1 leucine zipper like protein B [Source:VGNC Symbol;Acc:VGNC:71832]                      | 1.173603224 | 7.09E-08    | 1.46E-06    |
| ENSMMUG00000010062 | shisa family member 5 [Source:VGNC Symbol;Acc:VGNC:84082]                                   | 1.173885256 | 1.47E-07    | 2.82E-06    |
| ENSMMUG00000005483 | ribosomal protein S6 kinase B2 [Source:VGNC Symbol;Acc:VGNC:76934]                          | 1.175522242 | 0.000151856 | 0.001293281 |
| ENSMMUG00000050696 | taste receptor type 2 member 31-like [Source:NCBI gene;Acc:693892]                          | 1.178975906 | 0.005625906 | 0.025628863 |
| ENSMMUG00000009318 | BCL9 like [Source:VGNC Symbol;Acc:VGNC:70113]                                               | 1.179427214 | 0.000423616 | 0.003092342 |
| ENSMMUG00000019820 | SH3 domain and tetratricopeptide repeats 2 [Source:VGNC Symbol;Acc:VGNC:77337]              | 1.179658257 | 2.89E-06    | 4.07E-05    |
| ENSMMUG00000030532 | solute carrier family 25 member 16 [Source:NCBI gene;Acc:694145]                            | 1.17987116  | 7.11E-05    | 0.000677402 |
| ENSMMUG00000013048 | junction plakoglobin [Source:VGNC Symbol;Acc:VGNC:73960]                                    | 1.181633197 | 0.004460452 | 0.021220937 |
| ENSMMUG00000001105 | purinergic receptor P2Y12 [Source:VGNC Symbol;Acc:VGNC:75642]                               | 1.183580196 | 0.000355565 | 0.002654607 |
| ENSMMUG00000006101 | myosin heavy chain 9 [Source:VGNC Symbol;Acc:VGNC:75102]                                    | 1.184476016 | 0.000442227 | 0.003213039 |
| ENSMMUG00000002033 | serine protease 36 [Source:VGNC Symbol;Acc:VGNC:76325]                                      | 1.184826491 | 2.07E-05    | 0.000231496 |
| ENSMMUG00000048207 | syntaxin 4 [Source:NCBI gene;Acc:704880]                                                    | 1.18605429  | 4.52E-06    | 6.06E-05    |
| ENSMMUG00000011061 | ankyrin repeat domain 31 [Source:VGNC Symbol;Acc:VGNC:84277]                                | 1.188035038 | 7.04E-07    | 1.16E-05    |



|                     |                                                                                                     |             |             |             |
|---------------------|-----------------------------------------------------------------------------------------------------|-------------|-------------|-------------|
| ENSMMUG0000000649   | UBX domain protein 11 [Source:VGNC Symbol;Acc:VGNC:79859]                                           | 1.188361659 | 0.009324876 | 0.037919062 |
| ENSMMUG00000003139  | Rho guanine nucleotide exchange factor 17 [Source:VGNC Symbol;Acc:VGNC:69880]                       | 1.189950784 | 0.000461905 | 0.003335881 |
| ENSMMUG000000055775 | transmembrane p24 trafficking protein 1 [Source:NCBI gene;Acc:713618]                               | 1.190835655 | 6.32E-05    | 0.000615    |
| ENSMMUG000000039520 | chromosome 11 C12orf43 homolog [Source:NCBI gene;Acc:698821]                                        | 1.191734644 | 6.16E-06    | 7.99E-05    |
| ENSMMUG00000012223  | branched chain amino acid transaminase 1 [Source:VGNC Symbol;Acc:VGNC:70236]                        | 1.192180558 | 1.82E-06    | 2.70E-05    |
| ENSMMUG000000061526 | synaptopodin 2 like [Source:NCBI gene;Acc:714736]                                                   | 1.19343371  | 0.001410297 | 0.008353059 |
| ENSMMUG000000020603 | pyridine nucleotide-disulphide oxidoreductase domain 2 [Source:NCBI gene;Acc:707797]                | 1.194414448 | 2.42E-07    | 4.49E-06    |
| ENSMMUG000000056906 |                                                                                                     | 1.194692279 | 4.52E-05    | 0.000461011 |
| ENSMMUG00000005776  | atlastin GTPase 3 [Source:VGNC Symbol;Acc:VGNC:70125]                                               | 1.194741881 | 5.87E-06    | 7.65E-05    |
| ENSMMUG00000003075  | coiled-coil domain containing 9 [Source:VGNC Symbol;Acc:VGNC:70851]                                 | 1.194803259 | 0.000334751 | 0.002520051 |
| ENSMMUG00000007387  | G protein-coupled receptor kinase 7 [Source:VGNC Symbol;Acc:VGNC:73182]                             | 1.195296275 | 0.000367598 | 0.002731271 |
| ENSMMUG000000049802 | olfactory receptor 51G1 [Source:NCBI gene;Acc:716561]                                               | 1.197094511 | 0.005912827 | 0.026611407 |
| ENSMMUG000000062595 |                                                                                                     | 1.1987705   | 0.010260381 | 0.040894301 |
| ENSMMUG00000005486  | protein tyrosine phosphatase receptor type C associated protein [Source:VGNC Symbol;Acc:VGNC:76613] | 1.198838638 | 0.000343978 | 0.002580551 |
| ENSMMUG000000021080 | basic leucine zipper nuclear factor 1 [Source:VGNC Symbol;Acc:VGNC:70258]                           | 1.199099105 | 1.55E-06    | 2.35E-05    |
| ENSMMUG000000009825 | zinc finger DHHC-type containing 1 [Source:VGNC Symbol;Acc:VGNC:79102]                              | 1.200875131 | 4.23E-05    | 0.000433865 |
| ENSMMUG000000011206 | solute carrier family 9 member B1 [Source:NCBI gene;Acc:710949]                                     | 1.202377908 | 0.000180302 | 0.001497865 |
| ENSMMUG000000015288 | adaptor related protein complex 3 subunit sigma 1 [Source:VGNC Symbol;Acc:VGNC:69867]               | 1.204066113 | 0.007634884 | 0.032559132 |
| ENSMMUG000000054017 | potassium voltage-gated channel subfamily A member 2 [Source:NCBI gene;Acc:702126]                  | 1.20452222  | 0.005562224 | 0.025435026 |
| ENSMMUG000000000808 | melanin concentrating hormone receptor 2 [Source:VGNC Symbol;Acc:VGNC:74550]                        | 1.204950374 | 1.25E-09    | 3.87E-08    |
| ENSMMUG000000000187 | UV radiation resistance associated [Source:VGNC Symbol;Acc:VGNC:78751]                              | 1.206506912 | 0.002692537 | 0.014138754 |
| ENSMMUG000000008618 | calcium voltage-gated channel subunit alpha1 F [Source:VGNC Symbol;Acc:VGNC:70503]                  | 1.207665096 | 3.24E-07    | 5.90E-06    |
| ENSMMUG000000000198 | collagen beta(1-O)galactosyltransferase 1 [Source:NCBI gene;Acc:719980]                             | 1.211027782 | 4.53E-06    | 6.07E-05    |
| ENSMMUG000000020489 | HscB mitochondrial iron-sulfur cluster cochaperone [Source:VGNC Symbol;Acc:VGNC:73454]              | 1.212932506 | 6.23E-06    | 8.06E-05    |
| ENSMMUG000000001532 | glucosidase alpha, neutral C [Source:NCBI gene;Acc:708126]                                          | 1.214533409 | 1.44E-07    | 2.77E-06    |
| ENSMMUG000000015221 | huntingtin interacting protein 1 related [Source:VGNC Symbol;Acc:VGNC:73412]                        | 1.214595354 | 0.001650734 | 0.009522043 |
| ENSMMUG000000008651 | FGF1 intracellular binding protein [Source:VGNC Symbol;Acc:VGNC:72663]                              | 1.216240979 | 0.000126691 | 0.001117155 |
| ENSMMUG000000042472 | Metazoan signal recognition particle RNA [Source:RFAM;Acc:RF00017]                                  | 1.217868582 | 0.004847222 | 0.022692288 |
| ENSMMUG000000003839 | mitogen-activated protein kinase binding protein 1 [Source:VGNC Symbol;Acc:VGNC:74613]              | 1.217999623 | 1.07E-05    | 0.000130888 |
| ENSMMUG000000007540 | Rho related BTB domain containing 2 [Source:VGNC Symbol;Acc:VGNC:76772]                             | 1.21882848  | 0.000857401 | 0.005571823 |
| ENSMMUG000000048204 | ephrin B3 [Source:NCBI gene;Acc:716257]                                                             | 1.218884296 | 3.03E-05    | 0.000325454 |
| ENSMMUG000000015476 | unc-13 homolog A [Source:NCBI gene;Acc:720000]                                                      | 1.219576641 | 1.84E-05    | 0.000209238 |
| ENSMMUG000000007760 | centrosomal protein 70 [Source:VGNC Symbol;Acc:VGNC:71140]                                          | 1.222487854 | 4.65E-10    | 1.54E-08    |
| ENSMMUG000000001269 | chromosome 16 C17orf80 homolog [Source:VGNC Symbol;Acc:VGNC:70440]                                  | 1.222648593 | 1.75E-06    | 2.62E-05    |
| ENSMMUG000000059608 | fibroblast growth factor binding protein 3 [Source:NCBI gene;Acc:697881]                            | 1.223054034 | 0.001482504 | 0.008695161 |
| ENSMMUG000000004820 | pre-mRNA processing factor 8 [Source:VGNC Symbol;Acc:VGNC:76275]                                    | 1.223359128 | 6.94E-05    | 0.000664017 |
| ENSMMUG000000020916 | coiled-coil domain containing 158 [Source:NCBI gene;Acc:699735]                                     | 1.224010497 | 6.69E-06    | 8.56E-05    |
| ENSMMUG000000063495 |                                                                                                     | 1.224719301 | 1.00E-05    | 0.00012454  |
| ENSMMUG000000019095 | TBC1 domain family member 24 [Source:NCBI gene;Acc:697106]                                          | 1.224737114 | 0.000592427 | 0.00413249  |
| ENSMMUG000000000776 | zinc finger matrin-type 4 [Source:VGNC Symbol;Acc:VGNC:78424]                                       | 1.227847706 | 0.001559675 | 0.009069224 |
| ENSMMUG000000015871 | zinc finger FYVE-type containing 26 [Source:VGNC Symbol;Acc:VGNC:79283]                             | 1.228097871 | 0.004672737 | 0.02200859  |
| ENSMMUG000000046969 | Fc receptor like 3 [Source:NCBI gene;Acc:718801]                                                    | 1.228259477 | 0.000379904 | 0.002804762 |
| ENSMMUG000000021031 | TMF1 regulated nuclear protein 1 [Source:VGNC Symbol;Acc:VGNC:79946]                                | 1.229209284 | 4.86E-05    | 0.00049152  |
| ENSMMUG000000055290 | netrin 1 [Source:NCBI gene;Acc:717645]                                                              | 1.230384524 | 0.000643406 | 0.004414199 |
| ENSMMUG000000005991 | TRIO and F-actin binding protein [Source:NCBI gene;Acc:701241]                                      | 1.230576761 | 2.34E-08    | 5.44E-07    |
| ENSMMUG000000059671 |                                                                                                     | 1.23728761  | 2.02E-05    | 0.000226594 |
| ENSMMUG000000062055 | glyoxalase I [Source:NCBI gene;Acc:719518]                                                          | 1.23781851  | 9.87E-08    | 1.98E-06    |
| ENSMMUG000000052184 | inka box actin regulator 2 [Source:NCBI gene;Acc:704844]                                            | 1.239382801 | 0.00348863  | 0.017375781 |
| ENSMMUG000000003140 | RELT TNF receptor [Source:VGNC Symbol;Acc:VGNC:76728]                                               | 1.240456204 | 1.55E-08    | 3.76E-07    |
| ENSMMUG000000004843 | sodium voltage-gated channel beta subunit 1 [Source:VGNC Symbol;Acc:VGNC:76983]                     | 1.241121281 | 1.64E-06    | 2.47E-05    |
| ENSMMUG000000048463 | apolipoprotein L5 [Source:HGNC Symbol;Acc:HGNC:14869]                                               | 1.242561375 | 5.33E-06    | 6.98E-05    |

|                     |                                                                                             |             |             |             |
|---------------------|---------------------------------------------------------------------------------------------|-------------|-------------|-------------|
| ENSMMUG00000019835  | CD5 molecule like [Source:VGNC Symbol;Acc:VGNC:70774]                                       | 1.243786568 | 0.002788555 | 0.014481505 |
| ENSMMUG00000004765  | Sp2 transcription factor [Source:VGNC Symbol;Acc:VGNC:77845]                                | 1.245550685 | 0.00146626  | 0.008618553 |
| ENSMMUG00000013966  | legumain [Source:VGNC Symbol;Acc:VGNC:74274]                                                | 1.245881777 | 4.12E-05    | 0.000425023 |
| ENSMMUG00000015160  | Rap guanine nucleotide exchange factor like 1 [Source:VGNC Symbol;Acc:VGNC:76501]           | 1.24588706  | 1.06E-05    | 0.000130483 |
| ENSMMUG00000008031  | zinc finger and BTB domain containing 17 [Source:VGNC Symbol;Acc:VGNC:78849]                | 1.24647254  | 6.42E-05    | 0.000621758 |
| ENSMMUG00000018967  | ubiquitin conjugating enzyme E2 O [Source:VGNC Symbol;Acc:VGNC:79813]                       | 1.249289799 | 1.74E-06    | 2.61E-05    |
| ENSMMUG00000054055  | zinc finger protein 93 [Source:NCBI gene;Acc:720434]                                        | 1.250567498 | 6.01E-05    | 0.000591515 |
| ENSMMUG00000017129  | solute carrier family 41 member 2 [Source:VGNC Symbol;Acc:VGNC:77585]                       | 1.250890769 | 1.13E-05    | 0.000138045 |
| ENSMMUG00000007544  | trophinin associated protein [Source:VGNC Symbol;Acc:VGNC:78650]                            | 1.252360843 | 0.003868547 | 0.01888795  |
| ENSMMUG00000001536  | glutamine and serine rich 1 [Source:VGNC Symbol;Acc:VGNC:76544]                             | 1.252676352 | 2.38E-07    | 4.43E-06    |
| ENSMMUG00000003534  | ring finger protein 157 [Source:VGNC Symbol;Acc:VGNC:76860]                                 | 1.255556986 | 1.41E-05    | 0.000166459 |
| ENSMMUG00000022931  | NTPase KAP family P-loop domain containing 1 [Source:VGNC Symbol;Acc:VGNC:75250]            | 1.255829685 | 0.00012365  | 0.001094361 |
| ENSMMUG00000016772  | solute carrier family 28 member 1 [Source:VGNC Symbol;Acc:VGNC:77444]                       | 1.256611574 | 6.07E-09    | 1.58E-07    |
| ENSMMUG00000019703  | RUN and FYVE domain containing 2 [Source:VGNC Symbol;Acc:VGNC:77057]                        | 1.256879917 | 3.04E-09    | 8.45E-08    |
| ENSMMUG00000060484  | heterogeneous nuclear ribonucleoprotein D [Source:NCBI gene;Acc:694867]                     | 1.258846777 | 0.003733048 | 0.01835133  |
| ENSMMUG00000007279  | phosphatidylinositol glycan anchor biosynthesis class C [Source:VGNC Symbol;Acc:VGNC:75986] | 1.259448012 | 0.000472303 | 0.003399638 |
| ENSMMUG00000022003  | multimerin 1 [Source:VGNC Symbol;Acc:VGNC:74904]                                            | 1.262124332 | 0.00085305  | 0.00554972  |
| ENSMMUG00000011817  | aryl hydrocarbon receptor interacting protein [Source:VGNC Symbol;Acc:VGNC:69759]           | 1.262846429 | 0.000302894 | 0.00231563  |
| ENSMMUG00000060675  |                                                                                             | 1.262904531 | 0.000276643 | 0.002140625 |
| ENSMMUG00000013460  | RAB8B, member RAS oncogene family [Source:VGNC Symbol;Acc:VGNC:81550]                       | 1.265175674 | 2.16E-06    | 3.13E-05    |
| ENSMMUG00000016376  | mitogen-activated protein kinase kinase kinase 5 [Source:VGNC Symbol;Acc:VGNC:74495]        | 1.265439387 | 0.002471418 | 0.013156202 |
| ENSMMUG000000041729 |                                                                                             | 1.266523678 | 0.006054267 | 0.027090405 |
| ENSMMUG00000009324  | replication factor C subunit 1 [Source:NCBI gene;Acc:698987]                                | 1.266773464 | 8.05E-05    | 0.000751682 |
| ENSMMUG00000015861  | cytochrome c oxidase subunit VIIb [Source:NCBI gene;Acc:706099]                             | 1.266987597 | 7.95E-05    | 0.00074527  |
| ENSMMUG00000049543  |                                                                                             | 1.268529164 | 0.010411994 | 0.041361618 |
| ENSMMUG00000050047  | Metazoan signal recognition particle RNA [Source:RFAM;Acc:RF00017]                          | 1.269711851 | 0.001147619 | 0.007023818 |
| ENSMMUG00000010536  | discs large MAGUK scaffold protein 4 [Source:VGNC Symbol;Acc:VGNC:71920]                    | 1.269860028 | 1.77E-05    | 0.000203174 |
| ENSMMUG00000063694  | cyclic nucleotide gated channel subunit alpha 2 [Source:NCBI gene;Acc:704486]               | 1.270826468 | 1.96E-08    | 4.63E-07    |
| ENSMMUG00000011951  | KRI1 homolog [Source:VGNC Symbol;Acc:VGNC:74127]                                            | 1.272291899 | 0.000328518 | 0.002483483 |
| ENSMMUG00000012469  | KIAA2013 [Source:VGNC Symbol;Acc:VGNC:73918]                                                | 1.272397507 | 4.86E-07    | 8.57E-06    |
| ENSMMUG00000021736  | single-pass membrane protein with coiled-coil domains 2 [Source:VGNC Symbol;Acc:VGNC:77808] | 1.274206675 | 0.000286569 | 0.002203269 |
| ENSMMUG00000055345  | Y RNA [Source:RFAM;Acc:RF00019]                                                             | 1.274256305 | 0.000189769 | 0.001560944 |
| ENSMMUG00000001848  | sprouty RTK signaling antagonist 1 [Source:VGNC Symbol;Acc:VGNC:77867]                      | 1.277395906 | 7.67E-06    | 9.76E-05    |
| ENSMMUG00000016085  | KxDL motif containing 1 [Source:NCBI gene;Acc:720235]                                       | 1.278595683 | 1.93E-05    | 0.000217792 |
| ENSMMUG00000016056  | potassium voltage-gated channel subfamily A member 10 [Source:VGNC Symbol;Acc:VGNC:73963]   | 1.280074703 | 1.97E-05    | 0.000221584 |
| ENSMMUG00000011767  | carnitine O-acetyltransferase [Source:VGNC Symbol;Acc:VGNC:71483]                           | 1.280503001 | 0.000985263 | 0.006209027 |
| ENSMMUG00000017102  | coiled-coil domain containing 62 [Source:NCBI gene;Acc:707179]                              | 1.280542249 | 0.004563156 | 0.02159575  |
| ENSMMUG00000013099  | pappalysin 1 [Source:VGNC Symbol;Acc:VGNC:75756]                                            | 1.28214666  | 0.012312575 | 0.046754789 |
| ENSMMUG00000049862  |                                                                                             | 1.282488536 | 0.006886053 | 0.030091413 |
| ENSMMUG00000014407  | magnesium transporter 1 [Source:VGNC Symbol;Acc:VGNC:74386]                                 | 1.283067536 | 1.88E-06    | 2.77E-05    |
| ENSMMUG00000056971  | Metazoan signal recognition particle RNA [Source:RFAM;Acc:RF00017]                          | 1.283119491 | 0.010025122 | 0.040119004 |
| ENSMMUG00000015925  | G protein-coupled receptor kinase 2 [Source:VGNC Symbol;Acc:VGNC:73253]                     | 1.286879435 | 0.000180773 | 0.001500615 |
| ENSMMUG00000003267  | zinc finger protein 362 [Source:NCBI gene;Acc:710013]                                       | 1.289430187 | 9.13E-06    | 0.000114478 |
| ENSMMUG00000064005  |                                                                                             | 1.290096736 | 0.006008914 | 0.026943114 |
| ENSMMUG00000056343  |                                                                                             | 1.291346736 | 0.000799454 | 0.005269947 |
| ENSMMUG00000057473  |                                                                                             | 1.291567327 | 0.000951575 | 0.00602831  |
| ENSMMUG00000056024  |                                                                                             | 1.292918743 | 3.20E-06    | 4.44E-05    |
| ENSMMUG00000023032  | intraflagellar transport 81 [Source:VGNC Symbol;Acc:VGNC:73389]                             | 1.293408162 | 7.38E-07    | 1.21E-05    |
| ENSMMUG00000055048  |                                                                                             | 1.297441206 | 6.92E-05    | 0.000663483 |
| ENSMMUG00000016454  | 4-hydroxyphenylpyruvate dioxygenase [Source:VGNC Symbol;Acc:VGNC:73511]                     | 1.298130873 | 1.17E-06    | 1.82E-05    |
| ENSMMUG00000042378  | pseudopodium enriched atypical kinase 1 [Source:VGNC Symbol;Acc:VGNC:84419]                 | 1.302699739 | 1.06E-06    | 1.66E-05    |

|                    |                                                                                                               |             |             |             |
|--------------------|---------------------------------------------------------------------------------------------------------------|-------------|-------------|-------------|
| ENSMMUG00000051677 |                                                                                                               | 1.303094526 | 1.62E-05    | 0.00018704  |
| ENSMMUG00000005086 | homeobox protein TGIF1 [Source:NCBI gene;Acc:694580]                                                          | 1.303207552 | 0.000159388 | 0.001352113 |
| ENSMMUG00000002923 | colony stimulating factor 3 [Source:VGNC Symbol;Acc:VGNC:71520]                                               | 1.30414182  | 7.10E-05    | 0.000676709 |
| ENSMMUG00000022933 | DNA topoisomerase I mitochondrial [Source:VGNC Symbol;Acc:VGNC:79821]                                         | 1.30470938  | 5.52E-07    | 9.45E-06    |
| ENSMMUG00000057160 |                                                                                                               | 1.308603219 | 0.005233463 | 0.0242179   |
| ENSMMUG00000049514 | solute carrier family 48 member 1 [Source:NCBI gene;Acc:704304]                                               | 1.309546784 | 0.000386027 | 0.002838987 |
| ENSMMUG00000015108 | SV2 related protein [Source:VGNC Symbol;Acc:VGNC:78208]                                                       | 1.310658914 | 2.64E-05    | 0.000289351 |
| ENSMMUG00000008007 | multiple EGF like domains 11 [Source:VGNC Symbol;Acc:VGNC:84376]                                              | 1.311351648 | 0.000112252 | 0.001004147 |
| ENSMMUG00000018029 | amyloid beta precursor like protein 2 [Source:VGNC Symbol;Acc:VGNC:69984]                                     | 1.312133262 | 9.03E-07    | 1.44E-05    |
| ENSMMUG00000014010 | RNA binding fox-1 homolog 2 [Source:VGNC Symbol;Acc:VGNC:76685]                                               | 1.317869641 | 1.54E-09    | 4.66E-08    |
| ENSMMUG00000051323 | caspase-14-like [Source:NCBI gene;Acc:702430]                                                                 | 1.318496299 | 0.000201887 | 0.001648455 |
| ENSMMUG00000019070 | focadhesin [Source:VGNC Symbol;Acc:VGNC:72556]                                                                | 1.320879953 | 7.47E-06    | 9.51E-05    |
| ENSMMUG00000061194 |                                                                                                               | 1.321891337 | 4.16E-06    | 5.60E-05    |
| ENSMMUG00000031024 | lactate dehydrogenase A [Source:NCBI gene;Acc:694309]                                                         | 1.323813558 | 0.000845658 | 0.005515357 |
| ENSMMUG00000020629 | SDS3 homolog, SIN3A corepressor complex component [Source:NCBI gene;Acc:696166]                               | 1.325616289 | 6.10E-07    | 1.03E-05    |
| ENSMMUG00000010363 | ribophorin II [Source:VGNC Symbol;Acc:VGNC:76925]                                                             | 1.326539723 | 0.012370968 | 0.046940348 |
| ENSMMUG00000055893 |                                                                                                               | 1.326739581 | 0.003936936 | 0.019133613 |
| ENSMMUG00000060063 |                                                                                                               | 1.32912334  | 0.000171114 | 0.001431416 |
| ENSMMUG00000018245 | EPH receptor A2 [Source:VGNC Symbol;Acc:VGNC:72235]                                                           | 1.329484385 | 8.55E-05    | 0.000789812 |
| ENSMMUG00000050686 |                                                                                                               | 1.329828998 | 0.002741283 | 0.014310406 |
| ENSMMUG00000001739 | ATPase sarcoplasmic/endoplasmic reticulum Ca <sup>2+</sup> transporting 2 [Source:VGNC Symbol;Acc:VGNC:70178] | 1.331614115 | 6.88E-09    | 1.77E-07    |
| ENSMMUG00000056009 |                                                                                                               | 1.333136106 | 0.000619169 | 0.004283181 |
| ENSMMUG00000007195 | tRNA splicing endonuclease subunit 2 [Source:VGNC Symbol;Acc:VGNC:82707]                                      | 1.334280056 | 0.001129445 | 0.006936099 |
| ENSMMUG00000065269 | Rho family GTPase 2 [Source:NCBI gene;Acc:712559]                                                             | 1.334330098 | 0.000176602 | 0.001471635 |
| ENSMMUG00000023719 | thymopoietin [Source:VGNC Symbol;Acc:VGNC:78574]                                                              | 1.334574726 | 0.003569761 | 0.017667606 |
| ENSMMUG00000062316 | Metazoan signal recognition particle RNA [Source:RFAM;Acc:RF00017]                                            | 1.335630744 | 2.44E-05    | 0.000269184 |
| ENSMMUG00000017619 | lysophosphatidic acid receptor 5 [Source:VGNC Symbol;Acc:VGNC:74277]                                          | 1.338936401 | 6.09E-12    | 3.10E-10    |
| ENSMMUG00000021486 | secernin 2 [Source:NCBI gene;Acc:694571]                                                                      | 1.343946463 | 0.008565012 | 0.035576983 |
| ENSMMUG00000016001 | vesicle amine transport 1 [Source:VGNC Symbol;Acc:VGNC:79058]                                                 | 1.346298714 | 9.60E-05    | 0.000875436 |
| ENSMMUG00000053378 |                                                                                                               | 1.349158194 | 0.000549765 | 0.00388747  |
| ENSMMUG00000014149 | LYN proto-oncogene, Src family tyrosine kinase [Source:VGNC Symbol;Acc:VGNC:74464]                            | 1.349484762 | 2.76E-08    | 6.23E-07    |
| ENSMMUG00000057001 | homeobox B2 [Source:NCBI gene;Acc:106994010]                                                                  | 1.350382014 | 3.18E-05    | 0.000339911 |
| ENSMMUG00000064204 | kelch like family member 26 [Source:NCBI gene;Acc:719583]                                                     | 1.351027581 | 0.010381916 | 0.041257262 |
| ENSMMUG00000006284 | adenylate kinase 2 [Source:VGNC Symbol;Acc:VGNC:69761]                                                        | 1.351239358 | 7.29E-07    | 1.20E-05    |
| ENSMMUG00000001538 | GRAM domain containing 1A [Source:VGNC Symbol;Acc:VGNC:73029]                                                 | 1.352406103 | 2.81E-10    | 9.79E-09    |
| ENSMMUG00000000757 | ring finger protein 114 [Source:VGNC Symbol;Acc:VGNC:76725]                                                   | 1.352888932 | 0.012490069 | 0.047345739 |
| ENSMMUG00000004558 | OTU deubiquitinase 5 [Source:VGNC Symbol;Acc:VGNC:75677]                                                      | 1.353202617 | 1.86E-07    | 3.53E-06    |
| ENSMMUG00000053072 |                                                                                                               | 1.354454314 | 3.30E-05    | 0.000350362 |
| ENSMMUG00000010058 | ATR interacting protein [Source:VGNC Symbol;Acc:VGNC:84235]                                                   | 1.354873203 | 1.53E-10    | 5.85E-09    |
| ENSMMUG00000002304 | keratin 73 [Source:VGNC Symbol;Acc:VGNC:74148]                                                                | 1.354970098 | 0.012761663 | 0.048101925 |
| ENSMMUG00000057682 |                                                                                                               | 1.356840746 | 3.55E-08    | 7.79E-07    |
| ENSMMUG00000002324 |                                                                                                               | 1.358134823 | 6.62E-06    | 8.49E-05    |
| ENSMMUG00000006692 | signal peptide, CUB domain and EGF like domain containing 2 [Source:VGNC Symbol;Acc:VGNC:77138]               | 1.35891507  | 0.000861434 | 0.005587975 |
| ENSMMUG00000054377 |                                                                                                               | 1.360504294 | 6.83E-10    | 2.20E-08    |
| ENSMMUG00000050505 | small integral membrane protein 4 [Source:NCBI gene;Acc:696553]                                               | 1.366984475 | 0.000366609 | 0.002727661 |
| ENSMMUG00000006291 | protocadherin 12 [Source:VGNC Symbol;Acc:VGNC:75776]                                                          | 1.368001039 | 0.000566878 | 0.003987652 |
| ENSMMUG00000053200 | ubiquitin conjugating enzyme E2 R2 [Source:NCBI gene;Acc:701507]                                              | 1.369909589 | 0.002426545 | 0.012987531 |
| ENSMMUG00000014986 | testis expressed 33 [Source:VGNC Symbol;Acc:VGNC:79727]                                                       | 1.370958114 | 0.000232454 | 0.001861175 |
| ENSMMUG00000001635 | zinc finger protein 703 [Source:VGNC Symbol;Acc:VGNC:79552]                                                   | 1.373193025 | 0.001705504 | 0.009765183 |
| ENSMMUG00000058237 |                                                                                                               | 1.373761161 | 0.000288747 | 0.002218436 |
| ENSMMUG00000016655 | R3H domain and coiled-coil containing 1 [Source:VGNC Symbol;Acc:VGNC:76551]                                   | 1.374505947 | 5.46E-07    | 9.38E-06    |



|                    |                                                                                              |             |             |             |
|--------------------|----------------------------------------------------------------------------------------------|-------------|-------------|-------------|
| ENSMMUG00000053489 |                                                                                              | 1.3768845   | 0.000482893 | 0.003468949 |
| ENSMMUG00000013044 | selectin P [Source:VGNC Symbol;Acc:VGNC:77157]                                               | 1.376954844 | 2.21E-05    | 0.000246165 |
| ENSMMUG00000014674 | golgin, RAB6 interacting [Source:VGNC Symbol;Acc:VGNC:73012]                                 | 1.378186192 | 0.000313253 | 0.002384727 |
| ENSMMUG00000011347 | DEAH-box helicase 36 [Source:VGNC Symbol;Acc:VGNC:71623]                                     | 1.379873215 | 1.09E-09    | 3.40E-08    |
| ENSMMUG00000057134 | keratin, type II cytoskeletal 6C [Source:NCBI gene;Acc:100424162]                            | 1.38485944  | 0.007493226 | 0.032084632 |
| ENSMMUG00000003067 | endoplasmic reticulum-golgi intermediate compartment 1 [Source:VGNC Symbol;Acc:VGNC:82141]   | 1.385078787 | 1.90E-08    | 4.50E-07    |
| ENSMMUG00000058587 | family with sequence similarity 131 member C [Source:NCBI gene;Acc:703604]                   | 1.388773724 | 1.89E-06    | 2.77E-05    |
| ENSMMUG00000052607 |                                                                                              | 1.389301084 | 2.17E-09    | 6.24E-08    |
| ENSMMUG00000054184 | Metazoan signal recognition particle RNA [Source:RFAM;Acc:RF00017]                           | 1.391285482 | 2.20E-07    | 4.11E-06    |
| ENSMMUG00000060901 |                                                                                              | 1.392165919 | 3.55E-06    | 4.87E-05    |
| ENSMMUG00000000582 | NOP58 ribonucleoprotein [Source:VGNC Symbol;Acc:VGNC:75284]                                  | 1.397634184 | 0.000187218 | 0.001544656 |
| ENSMMUG00000022031 | DNA polymerase alpha 2, accessory subunit [Source:NCBI gene;Acc:716541]                      | 1.399200173 | 3.65E-06    | 5.00E-05    |
| ENSMMUG00000020868 | homeobox B8 [Source:VGNC Symbol;Acc:VGNC:73505]                                              | 1.399646001 | 2.40E-07    | 4.46E-06    |
| ENSMMUG00000057703 |                                                                                              | 1.403107166 | 0.00131346  | 0.007888497 |
| ENSMMUG00000060760 |                                                                                              | 1.403285757 | 0.006438245 | 0.028432739 |
| ENSMMUG00000020744 | metastasis associated 1 family member 3 [Source:VGNC Symbol;Acc:VGNC:74814]                  | 1.405409465 | 7.68E-05    | 0.000723423 |
| ENSMMUG00000053254 | adenylate kinase 4 [Source:NCBI gene;Acc:698560]                                             | 1.405533139 | 1.81E-07    | 3.45E-06    |
| ENSMMUG00000013696 | myozenin 1 [Source:VGNC Symbol;Acc:VGNC:74951]                                               | 1.40601938  | 0.000258904 | 0.00202799  |
| ENSMMUG00000054784 |                                                                                              | 1.406438159 | 0.000219225 | 0.001764384 |
| ENSMMUG00000001880 | DExD/H-box helicase 60 [Source:VGNC Symbol;Acc:VGNC:71711]                                   | 1.406919713 | 8.77E-09    | 2.21E-07    |
| ENSMMUG00000002926 | mediator complex subunit 24 [Source:NCBI gene;Acc:699536]                                    | 1.407802664 | 3.26E-09    | 8.96E-08    |
| ENSMMUG00000050661 |                                                                                              | 1.408560751 | 7.05E-05    | 0.000673133 |
| ENSMMUG00000045203 |                                                                                              | 1.409293564 | 0.009566791 | 0.038713876 |
| ENSMMUG00000019839 | lysine acetyltransferase 5 [Source:VGNC Symbol;Acc:VGNC:73955]                               | 1.4101892   | 2.48E-06    | 3.55E-05    |
| ENSMMUG00000005939 | serpin family I member 1 [Source:VGNC Symbol;Acc:VGNC:77366]                                 | 1.412585949 | 0.004912786 | 0.022929862 |
| ENSMMUG00000019966 | zinc finger protein 557 [Source:NCBI gene;Acc:100424983]                                     | 1.413474755 | 2.80E-09    | 7.88E-08    |
| ENSMMUG00000011774 | integrator complex subunit 10 [Source:VGNC Symbol;Acc:VGNC:73653]                            | 1.414217379 | 7.53E-12    | 3.73E-10    |
| ENSMMUG00000011328 | cytoplasmic polyadenylation element binding protein 1 [Source:NCBI gene;Acc:694357]          | 1.41521172  | 0.002871623 | 0.014799379 |
| ENSMMUG00000063947 | oxoeicosanoid receptor 1 [Source:NCBI gene;Acc:713039]                                       | 1.418051884 | 0.000564765 | 0.003975375 |
| ENSMMUG00000051807 |                                                                                              | 1.421645628 | 1.12E-05    | 0.000136365 |
| ENSMMUG00000003827 | albumin [Source:VGNC Symbol;Acc:VGNC:69782]                                                  | 1.421772851 | 0.000691989 | 0.004702831 |
| ENSMMUG00000042951 | signal recognition particle 19 [Source:NCBI gene;Acc:693829]                                 | 1.422539428 | 8.80E-05    | 0.000810176 |
| ENSMMUG00000054904 | Metazoan signal recognition particle RNA [Source:RFAM;Acc:RF00017]                           | 1.424385472 | 1.85E-06    | 2.73E-05    |
| ENSMMUG00000055751 |                                                                                              | 1.424876007 | 0.008433494 | 0.0350845   |
| ENSMMUG00000038998 | purinergic receptor P2Y13 [Source:VGNC Symbol;Acc:VGNC:83950]                                | 1.424914994 | 0.000133581 | 0.001169831 |
| ENSMMUG00000006086 | pleckstrin homology, MyTH4 and FERM domain containing H3 [Source:VGNC Symbol;Acc:VGNC:76113] | 1.425631848 | 0.002820967 | 0.014613077 |
| ENSMMUG00000055126 |                                                                                              | 1.42570181  | 0.003554815 | 0.017616335 |
| ENSMMUG00000049234 | ninjurin 2 [Source:NCBI gene;Acc:706368]                                                     | 1.427219058 | 0.010005195 | 0.040068864 |
| ENSMMUG00000014866 | hydroxymethylbilane synthase [Source:VGNC Symbol;Acc:VGNC:73479]                             | 1.428932677 | 0.008131577 | 0.034143166 |
| ENSMMUG00000001409 | coiled-coil domain containing 187 [Source:NCBI gene;Acc:710749]                              | 1.430462674 | 1.97E-05    | 0.000221584 |
| ENSMMUG00000017261 | galactosylceramidase [Source:VGNC Symbol;Acc:VGNC:72867]                                     | 1.430735148 | 5.00E-10    | 1.64E-08    |
| ENSMMUG00000020346 | carboxypeptidase X, M14 family member 2 [Source:VGNC Symbol;Acc:VGNC:71596]                  | 1.431237272 | 4.16E-08    | 9.04E-07    |
| ENSMMUG00000060812 | autophagy related 12 [Source:NCBI gene;Acc:696765]                                           | 1.433738971 | 7.32E-05    | 0.000695025 |
| ENSMMUG00000060712 |                                                                                              | 1.434976099 | 0.000111445 | 0.000998579 |
| ENSMMUG00000021449 | vacuolar protein sorting 13 homolog D [Source:NCBI gene;Acc:722775]                          | 1.435722483 | 3.93E-11    | 1.66E-09    |
| ENSMMUG00000064920 |                                                                                              | 1.435921626 | 1.84E-06    | 2.71E-05    |
| ENSMMUG00000020861 | EvC ciliary complex subunit 1 [Source:VGNC Symbol;Acc:VGNC:72445]                            | 1.439278629 | 4.54E-05    | 0.000462191 |
| ENSMMUG00000051816 | keratinocyte proline rich protein [Source:NCBI gene;Acc:100424312]                           | 1.439345599 | 0.001975627 | 0.010964123 |
| ENSMMUG00000006470 | complement C1r subcomponent [Source:NCBI gene;Acc:722133]                                    | 1.441150832 | 1.25E-07    | 2.45E-06    |
| ENSMMUG00000019563 | collapsin response mediator protein 1 [Source:VGNC Symbol;Acc:VGNC:71494]                    | 1.441366348 | 8.23E-08    | 1.67E-06    |
| ENSMMUG00000056646 |                                                                                              | 1.442700764 | 0.00010545  | 0.000953538 |

|                    |                                                                                                     |             |             |             |
|--------------------|-----------------------------------------------------------------------------------------------------|-------------|-------------|-------------|
| ENSMMUG00000007366 |                                                                                                     | 1.443103616 | 5.57E-05    | 0.00055106  |
| ENSMMUG00000042510 | coagulation factor V [Source:NCBI gene;Acc:704695]                                                  | 1.447498376 | 3.17E-11    | 1.38E-09    |
| ENSMMUG00000005845 | REST corepressor 1 [Source:VGNC Symbol;Acc:VGNC:76752]                                              | 1.447721814 | 0.000409025 | 0.002991873 |
| ENSMMUG00000019837 | ribonuclease H2 subunit C [Source:NCBI gene;Acc:700330]                                             | 1.447732888 | 6.35E-05    | 0.000616581 |
| ENSMMUG00000007422 | spermatogenesis associated 5 [Source:VGNC Symbol;Acc:VGNC:77952]                                    | 1.449456893 | 1.52E-06    | 2.31E-05    |
| ENSMMUG00000017280 | TBC1 domain family member 10C [Source:VGNC Symbol;Acc:VGNC:78203]                                   | 1.45012096  | 0.001656264 | 0.009543783 |
| ENSMMUG00000013766 | prostaglandin E synthase 3 [Source:NCBI gene;Acc:713353]                                            | 1.450831716 | 1.29E-08    | 3.16E-07    |
| ENSMMUG00000060770 |                                                                                                     | 1.452355607 | 0.00281729  | 0.014609717 |
| ENSMMUG00000057791 |                                                                                                     | 1.455141696 | 0.003407549 | 0.017042466 |
| ENSMMUG00000017810 | structure specific recognition protein 1 [Source:VGNC Symbol;Acc:VGNC:77891]                        | 1.456861795 | 2.80E-05    | 0.000303855 |
| ENSMMUG00000058106 | otoconin 90 [Source:NCBI gene;Acc:100429699]                                                        | 1.458166326 | 3.36E-08    | 7.43E-07    |
| ENSMMUG00000019438 | utrophin [Source:VGNC Symbol;Acc:VGNC:78749]                                                        | 1.458326567 | 0.000596379 | 0.004144046 |
| ENSMMUG00000021988 | N-alpha-acetyltransferase 11, NatA catalytic subunit [Source:NCBI gene;Acc:696758]                  | 1.460632308 | 2.52E-07    | 4.65E-06    |
| ENSMMUG00000056950 |                                                                                                     | 1.463249076 | 6.04E-07    | 1.02E-05    |
| ENSMMUG00000056093 | shieldin complex subunit 1 [Source:NCBI gene;Acc:718152]                                            | 1.463718542 | 0.000166343 | 0.001397979 |
| ENSMMUG00000020254 | exocyst complex component 3 like 1 [Source:VGNC Symbol;Acc:VGNC:72376]                              | 1.463730239 | 7.81E-05    | 0.000734831 |
| ENSMMUG00000002428 | zinc finger protein 800 [Source:VGNC Symbol;Acc:VGNC:79658]                                         | 1.464360008 | 1.12E-07    | 2.21E-06    |
| ENSMMUG00000059292 |                                                                                                     | 1.464776356 | 1.11E-09    | 3.45E-08    |
| ENSMMUG00000057850 |                                                                                                     | 1.465180025 | 0.001213924 | 0.007366305 |
| ENSMMUG00000049297 |                                                                                                     | 1.46637624  | 3.38E-06    | 4.66E-05    |
| ENSMMUG00000019040 | hydroxysteroid 17-beta dehydrogenase 13 [Source:VGNC Symbol;Acc:VGNC:73417]                         | 1.471736541 | 4.05E-07    | 7.29E-06    |
| ENSMMUG00000016922 | serine/threonine kinase 32B [Source:VGNC Symbol;Acc:VGNC:78114]                                     | 1.472081374 | 0.005407179 | 0.024867388 |
| ENSMMUG00000022407 | serine and arginine rich splicing factor 5 [Source:NCBI gene;Acc:712867]                            | 1.473679854 | 0.000104153 | 0.000943381 |
| ENSMMUG00000038067 |                                                                                                     | 1.474689488 | 0.001896797 | 0.010597215 |
| ENSMMUG00000029638 | chromosome 7 C15orf65 homolog [Source:VGNC Symbol;Acc:VGNC:70689]                                   | 1.476900494 | 0.004679491 | 0.022027766 |
| ENSMMUG00000008566 | zinc finger protein 157 [Source:VGNC Symbol;Acc:VGNC:78850]                                         | 1.478132881 | 1.57E-06    | 2.37E-05    |
| ENSMMUG00000052238 |                                                                                                     | 1.480552655 | 8.94E-06    | 0.000112441 |
| ENSMMUG00000058187 |                                                                                                     | 1.48098976  | 6.70E-09    | 1.72E-07    |
| ENSMMUG00000004523 | DNA polymerase delta 4, accessory subunit [Source:NCBI gene;Acc:712632]                             | 1.481326333 | 0.001491724 | 0.008740576 |
| ENSMMUG00000051420 | homeobox B5 [Source:NCBI gene;Acc:696732]                                                           | 1.485193843 | 0.000253735 | 0.001997612 |
| ENSMMUG00000022406 | ankyrin repeat and sterile alpha motif domain containing 1B [Source:VGNC Symbol;Acc:VGNC:69689]     | 1.486037596 | 7.71E-07    | 1.26E-05    |
| ENSMMUG00000005478 | trimethylguanosine synthase 1 [Source:VGNC Symbol;Acc:VGNC:78404]                                   | 1.488664039 | 1.26E-06    | 1.95E-05    |
| ENSMMUG00000052505 | homeobox B9 [Source:NCBI gene;Acc:106994009]                                                        | 1.48969611  | 1.67E-07    | 3.19E-06    |
| ENSMMUG00000003457 | protein kinase cAMP-activated catalytic subunit beta [Source:NCBI gene;Acc:709728]                  | 1.49086962  | 9.38E-10    | 2.97E-08    |
| ENSMMUG00000015924 | BCAR3 adaptor protein, NSP family member [Source:VGNC Symbol;Acc:VGNC:70235]                        | 1.495139642 | 2.03E-05    | 0.000227171 |
| ENSMMUG00000030891 | hypoxia up-regulated 1 [Source:VGNC Symbol;Acc:VGNC:73399]                                          | 1.495629013 | 8.11E-07    | 1.32E-05    |
| ENSMMUG00000055324 | homeobox B7 [Source:NCBI gene;Acc:697089]                                                           | 1.495866056 | 4.89E-05    | 0.000493943 |
| ENSMMUG00000008184 | methyltransferase like 24 [Source:VGNC Symbol;Acc:VGNC:74552]                                       | 1.49687534  | 0.001300058 | 0.007837243 |
| ENSMMUG00000013385 | elongator acetyltransferase complex subunit 6 [Source:VGNC Symbol;Acc:VGNC:72113]                   | 1.497895534 | 3.89E-06    | 5.29E-05    |
| ENSMMUG00000031279 | torsin A interacting protein 2 [Source:NCBI gene;Acc:716654]                                        | 1.498953171 | 3.51E-08    | 7.72E-07    |
| ENSMMUG00000056729 | U6 spliceosomal RNA [Source:RFAM;Acc:RF00026]                                                       | 1.500632449 | 3.30E-06    | 4.56E-05    |
| ENSMMUG00000018623 | exportin 6 [Source:NCBI gene;Acc:704332]                                                            | 1.502599239 | 0.009809631 | 0.039475383 |
| ENSMMUG00000000381 | IKAROS family zinc finger 2 [Source:VGNC Symbol;Acc:VGNC:73586]                                     | 1.505156071 | 4.49E-10    | 1.49E-08    |
| ENSMMUG00000059175 |                                                                                                     | 1.508250282 | 0.000574195 | 0.004026058 |
| ENSMMUG00000008080 | ATP binding cassette subfamily G member 5 [Source:VGNC Symbol;Acc:VGNC:69391]                       | 1.509033302 | 6.20E-09    | 1.62E-07    |
| ENSMMUG00000011527 | TNF receptor associated factor 2 [Source:VGNC Symbol;Acc:VGNC:78641]                                | 1.510071497 | 0.000187806 | 0.001547152 |
| ENSMMUG00000007401 | arrestin domain containing 2 [Source:VGNC Symbol;Acc:VGNC:69901]                                    | 1.511956823 | 0.000185752 | 0.001536067 |
| ENSMMUG00000013646 | unk zinc finger [Source:VGNC Symbol;Acc:VGNC:79803]                                                 | 1.513572255 | 7.38E-05    | 0.000699474 |
| ENSMMUG00000004257 | beta-secretase 2 [Source:VGNC Symbol;Acc:VGNC:70216]                                                | 1.513997753 | 7.17E-06    | 9.18E-05    |
| ENSMMUG00000007423 | transcription factor Dp-1 [Source:NCBI gene;Acc:715345]                                             | 1.514191906 | 9.61E-05    | 0.000875436 |
| ENSMMUG00000005423 | caseinolytic mitochondrial matrix peptidase chaperone subunit B [Source:VGNC Symbol;Acc:VGNC:71375] | 1.518046248 | 0.001403644 | 0.008327314 |

|                    |                                                                                            |             |             |             |
|--------------------|--------------------------------------------------------------------------------------------|-------------|-------------|-------------|
| ENSMMUG00000014046 | SREBF chaperone [Source:VGNC Symbol;Acc:VGNC:77140]                                        | 1.518278555 | 1.91E-08    | 4.54E-07    |
| ENSMMUG00000001879 | annexin A10 [Source:VGNC Symbol;Acc:VGNC:69945]                                            | 1.518537463 | 1.24E-07    | 2.44E-06    |
| ENSMMUG00000049649 | proteasome 20S subunit beta 6 [Source:NCBI gene;Acc:710028]                                | 1.519259782 | 3.76E-08    | 8.23E-07    |
| ENSMMUG00000001944 | chromosome 20 C16orf72 homolog [Source:VGNC Symbol;Acc:VGNC:70443]                         | 1.519456768 | 2.95E-08    | 6.60E-07    |
| ENSMMUG00000003499 | solute carrier family 36 member 1 [Source:VGNC Symbol;Acc:VGNC:77509]                      | 1.522250206 | 0.000190123 | 0.001562673 |
| ENSMMUG00000020020 | Rho GTPase activating protein 23 [Source:NCBI gene;Acc:693996]                             | 1.522671636 | 0.005542574 | 0.025355873 |
| ENSMMUG00000017260 | G protein-coupled receptor 65 [Source:VGNC Symbol;Acc:VGNC:73140]                          | 1.522853397 | 1.18E-06    | 1.83E-05    |
| ENSMMUG00000012944 | vascular endothelial growth factor B [Source:VGNC Symbol;Acc:VGNC:78765]                   | 1.523068636 | 3.99E-09    | 1.08E-07    |
| ENSMMUG00000040274 | MAGE family member A4 [Source:NCBI gene;Acc:710825]                                        | 1.523344022 | 1.20E-06    | 1.86E-05    |
| ENSMMUG00000048824 | eva-1 homolog C [Source:NCBI gene;Acc:708681]                                              | 1.524142082 | 2.99E-09    | 8.33E-08    |
| ENSMMUG00000008189 | cadherin related family member 3 [Source:HGNC Symbol;Acc:HGNC:26308]                       | 1.524976386 | 1.85E-08    | 4.42E-07    |
| ENSMMUG00000012941 | nudix hydrolase 22 [Source:VGNC Symbol;Acc:VGNC:75475]                                     | 1.525319711 | 8.21E-10    | 2.62E-08    |
| ENSMMUG00000060795 |                                                                                            | 1.527408646 | 0.003633152 | 0.01791252  |
| ENSMMUG00000019536 | potassium voltage-gated channel subfamily Q member 4 [Source:VGNC Symbol;Acc:VGNC:74007]   | 1.529252618 | 2.26E-08    | 5.28E-07    |
| ENSMMUG00000015115 | terminal nucleotidyltransferase 5B [Source:VGNC Symbol;Acc:VGNC:79692]                     | 1.529266059 | 1.49E-07    | 2.87E-06    |
| ENSMMUG00000064650 | SPEM family member 3 [Source:NCBI gene;Acc:106993878]                                      | 1.529770843 | 3.21E-09    | 8.89E-08    |
| ENSMMUG00000021408 | family with sequence similarity 222 member B [Source:VGNC Symbol;Acc:VGNC:72352]           | 1.530676993 | 1.39E-05    | 0.000164205 |
| ENSMMUG00000052828 |                                                                                            | 1.533504089 | 0.000850139 | 0.005541251 |
| ENSMMUG00000063735 |                                                                                            | 1.53364574  | 0.010818374 | 0.042492911 |
| ENSMMUG00000053367 | secreted protein acidic and cysteine rich [Source:NCBI gene;Acc:712388]                    | 1.53425501  | 5.57E-08    | 1.18E-06    |
| ENSMMUG00000059181 |                                                                                            | 1.534567313 | 0.0077526   | 0.032857557 |
| ENSMMUG00000015922 | formin binding protein 1 like [Source:VGNC Symbol;Acc:VGNC:72543]                          | 1.536007275 | 4.20E-07    | 7.53E-06    |
| ENSMMUG00000022345 |                                                                                            | 1.537922305 | 0.00149186  | 0.008740576 |
| ENSMMUG00000016401 | SGT1 homolog, MIS12 kinetochore complex assembly cochaperone [Source:NCBI gene;Acc:694046] | 1.538684343 | 1.82E-08    | 4.38E-07    |
| ENSMMUG00000058885 | formin binding protein 4 [Source:NCBI gene;Acc:712633]                                     | 1.539437977 | 1.77E-06    | 2.64E-05    |
| ENSMMUG00000055256 | family with sequence similarity 163 member A [Source:NCBI gene;Acc:718704]                 | 1.541395642 | 6.65E-05    | 0.000642905 |
| ENSMMUG00000049998 | tachykinin receptor 3 [Source:NCBI gene;Acc:653013]                                        | 1.541930205 | 0.00670254  | 0.029420021 |
| ENSMMUG00000023717 | MIER family member 2 [Source:VGNC Symbol;Acc:VGNC:74855]                                   | 1.54224187  | 5.23E-07    | 9.11E-06    |
| ENSMMUG00000062283 | homeobox B6 [Source:NCBI gene;Acc:106994013]                                               | 1.542299196 | 2.06E-08    | 4.83E-07    |
| ENSMMUG00000005236 | zinc finger protein 709 [Source:NCBI gene;Acc:717515]                                      | 1.542566605 | 0.004652188 | 0.02194998  |
| ENSMMUG00000008529 | chromosome 7 C15orf39 homolog [Source:VGNC Symbol;Acc:VGNC:70620]                          | 1.543057473 | 0.001742506 | 0.009931325 |
| ENSMMUG00000062397 |                                                                                            | 1.545290276 | 0.000147569 | 0.00126624  |
| ENSMMUG00000021044 | afadin, adherens junction formation factor [Source:VGNC Symbol;Acc:VGNC:69818]             | 1.546217078 | 9.24E-12    | 4.49E-10    |
| ENSMMUG00000018720 | cytoskeleton associated protein 2 [Source:VGNC Symbol;Acc:VGNC:71229]                      | 1.546280389 | 3.24E-09    | 8.95E-08    |
| ENSMMUG00000002427 | glucokinase [Source:VGNC Symbol;Acc:VGNC:72901]                                            | 1.547567887 | 6.05E-08    | 1.27E-06    |
| ENSMMUG00000060533 |                                                                                            | 1.547855114 | 9.45E-10    | 2.98E-08    |
| ENSMMUG00000050119 |                                                                                            | 1.548022403 | 9.87E-10    | 3.10E-08    |
| ENSMMUG00000008006 | RAB11A, member RAS oncogene family [Source:VGNC Symbol;Acc:VGNC:81517]                     | 1.549952189 | 1.58E-11    | 7.27E-10    |
| ENSMMUG00000045187 | CASC3 exon junction complex subunit [Source:NCBI gene;Acc:699712]                          | 1.55239835  | 5.18E-11    | 2.13E-09    |
| ENSMMUG00000002382 | serpin family F member 2 [Source:VGNC Symbol;Acc:VGNC:77372]                               | 1.552601551 | 2.59E-06    | 3.68E-05    |
| ENSMMUG00000006786 | protein tyrosine phosphatase non-receptor type 22 [Source:VGNC Symbol;Acc:VGNC:76603]      | 1.552758992 | 0.000158046 | 0.001342834 |
| ENSMMUG00000006375 | coiled-coil domain containing 15 [Source:NCBI gene;Acc:716362]                             | 1.554448439 | 0.003906016 | 0.019034579 |
| ENSMMUG00000055352 |                                                                                            | 1.557168364 | 4.35E-11    | 1.81E-09    |
| ENSMMUG00000013283 | cadherin related family member 2 [Source:NCBI gene;Acc:697249]                             | 1.557339718 | 0.009707368 | 0.039151122 |
| ENSMMUG00000003142 | family with sequence similarity 168 member A [Source:VGNC Symbol;Acc:VGNC:72398]           | 1.558827364 | 0.003354307 | 0.016822782 |
| ENSMMUG00000060605 |                                                                                            | 1.559170147 | 8.50E-07    | 1.37E-05    |
| ENSMMUG00000048190 | U2 small nuclear RNA auxiliary factor 1 like 4 [Source:NCBI gene;Acc:718865]               | 1.560151758 | 0.00542233  | 0.024910983 |
| ENSMMUG00000005255 | TRAF-type zinc finger domain containing 1 [Source:VGNC Symbol;Acc:VGNC:79459]              | 1.563270197 | 2.54E-07    | 4.69E-06    |
| ENSMMUG00000007208 | G protein-coupled receptor 146 [Source:VGNC Symbol;Acc:VGNC:72979]                         | 1.563473684 | 0.00747173  | 0.032068642 |
| ENSMMUG00000002217 | alkaline phosphatase, biomineralization associated [Source:VGNC Symbol;Acc:VGNC:69801]     | 1.564169424 | 2.72E-08    | 6.16E-07    |
| ENSMMUG00000054398 |                                                                                            | 1.566206689 | 1.72E-05    | 0.000198367 |



|                    |                                                                                                                    |             |             |             |
|--------------------|--------------------------------------------------------------------------------------------------------------------|-------------|-------------|-------------|
| ENSMMUG0000007546  | complement C1q like 4 [Source:VGNC Symbol;Acc:VGNC:70450]                                                          | 1.567613844 | 0.007478469 | 0.032073807 |
| ENSMMUG0000008875  | solute carrier family 35 member F5 [Source:VGNC Symbol;Acc:VGNC:77567]                                             | 1.568937116 | 0.000162071 | 0.001367375 |
| ENSMMUG00000056555 |                                                                                                                    | 1.570256359 | 2.69E-05    | 0.000294509 |
| ENSMMUG00000010357 | cyclin and CBS domain divalent metal cation transport mediator 1 [Source:NCBI gene;Acc:708335]                     | 1.570270108 | 9.18E-08    | 1.85E-06    |
| ENSMMUG0000008077  | dynein cytoplasmic 2 light intermediate chain 1 [Source:VGNC Symbol;Acc:VGNC:71899]                                | 1.572494774 | 7.22E-12    | 3.59E-10    |
| ENSMMUG00000041376 | G antigen 10 [Source:NCBI gene;Acc:693330]                                                                         | 1.574474884 | 4.05E-06    | 5.48E-05    |
| ENSMMUG00000062217 | HD domain containing 3 [Source:NCBI gene;Acc:715621]                                                               | 1.574667043 | 0.011325848 | 0.043818895 |
| ENSMMUG00000061250 | ABRA C-terminal like [Source:NCBI gene;Acc:708266]                                                                 | 1.574721004 | 0.002380535 | 0.012793318 |
| ENSMMUG00000063322 |                                                                                                                    | 1.575122287 | 6.83E-08    | 1.41E-06    |
| ENSMMUG00000029507 | adaptor related protein complex 3 subunit sigma 2 [Source:NCBI gene;Acc:701217]                                    | 1.577194155 | 1.14E-14    | 1.02E-12    |
| ENSMMUG00000064242 |                                                                                                                    | 1.57865529  | 0.000151801 | 0.001293281 |
| ENSMMUG00000015572 | GSG1 like [Source:VGNC Symbol;Acc:VGNC:82152]                                                                      | 1.580166587 | 1.01E-07    | 2.01E-06    |
| ENSMMUG00000019527 | DNA cross-link repair 1B [Source:VGNC Symbol;Acc:VGNC:71647]                                                       | 1.582023246 | 0.007413581 | 0.0318443   |
| ENSMMUG00000003199 | CD200 receptor 1 [Source:VGNC Symbol;Acc:VGNC:70845]                                                               | 1.583302448 | 0.013119137 | 0.04932996  |
| ENSMMUG00000002423 | DNA polymerase delta 2, accessory subunit [Source:VGNC Symbol;Acc:VGNC:76203]                                      | 1.584915375 | 6.24E-08    | 1.30E-06    |
| ENSMMUG00000018619 | DENN domain containing 6A [Source:VGNC Symbol;Acc:VGNC:71726]                                                      | 1.585065487 | 0.011043811 | 0.043050596 |
| ENSMMUG00000061785 |                                                                                                                    | 1.585542782 | 2.57E-12    | 1.39E-10    |
| ENSMMUG00000008384 | solute carrier family 4 member 10 [Source:VGNC Symbol;Acc:VGNC:77695]                                              | 1.587128417 | 5.34E-08    | 1.14E-06    |
| ENSMMUG00000061031 |                                                                                                                    | 1.59162911  | 0.003813274 | 0.018675044 |
| ENSMMUG00000049305 | Metazoan signal recognition particle RNA [Source:RFAM;Acc:RF00017]                                                 | 1.593905567 | 0.001593436 | 0.009235791 |
| ENSMMUG00000000293 | catenin alpha 2 [Source:VGNC Symbol;Acc:VGNC:71543]                                                                | 1.596878752 | 4.31E-07    | 7.70E-06    |
| ENSMMUG00000021017 | acylglycerol kinase [Source:VGNC Symbol;Acc:VGNC:69669]                                                            | 1.597368273 | 8.48E-12    | 4.16E-10    |
| ENSMMUG00000020534 | p21 (RAC1) activated kinase 6 [Source:NCBI gene;Acc:701589]                                                        | 1.597757484 | 1.56E-05    | 0.000181094 |
| ENSMMUG00000008385 | NOP14 nucleolar protein [Source:VGNC Symbol;Acc:VGNC:75194]                                                        | 1.598417914 | 4.00E-08    | 8.71E-07    |
| ENSMMUG00000061165 |                                                                                                                    | 1.598474445 | 1.66E-09    | 4.99E-08    |
| ENSMMUG00000003131 | interleukin 13 [Source:VGNC Symbol;Acc:VGNC:84393]                                                                 | 1.604278459 | 1.56E-05    | 0.000181094 |
| ENSMMUG00000005530 | synaptotagmin 1 [Source:VGNC Symbol;Acc:VGNC:78074]                                                                | 1.605721535 | 0.000107386 | 0.000967814 |
| ENSMMUG00000017627 | B-TFIID TATA-box binding protein associated factor 1 [Source:VGNC Symbol;Acc:VGNC:70336]                           | 1.606312345 | 1.56E-11    | 7.23E-10    |
| ENSMMUG00000002260 | protein kinase C eta [Source:VGNC Symbol;Acc:VGNC:84424]                                                           | 1.606398312 | 1.52E-13    | 1.04E-11    |
| ENSMMUG00000007379 | phosphatidylinositol 3,4,5-trisphosphate 3-phosphatase TPTE2-like [Source:NCBI gene;Acc:694255]                    | 1.607877784 | 3.03E-08    | 6.73E-07    |
| ENSMMUG00000046550 | coiled-coil domain containing 125 [Source:NCBI gene;Acc:704391]                                                    | 1.610020421 | 2.14E-12    | 1.17E-10    |
| ENSMMUG00000051240 |                                                                                                                    | 1.612240518 | 0.001532433 | 0.008963739 |
| ENSMMUG00000006066 | phosphatidylcholine transfer protein [Source:VGNC Symbol;Acc:VGNC:75789]                                           | 1.614944711 | 0.001518533 | 0.008887232 |
| ENSMMUG00000003283 | extracellular leucine rich repeat and fibronectin type III domain containing 1 [Source:VGNC Symbol;Acc:VGNC:72204] | 1.616217152 | 1.79E-07    | 3.42E-06    |
| ENSMMUG00000002426 | myosin light chain 7 [Source:VGNC Symbol;Acc:VGNC:75002]                                                           | 1.618892968 | 4.33E-07    | 7.74E-06    |
| ENSMMUG00000015611 | proteasome 26S subunit, ATPase 3 [Source:NCBI gene;Acc:713356]                                                     | 1.620782515 | 0.008717125 | 0.036042983 |
| ENSMMUG00000007970 | CCZ1 homolog, vacuolar protein trafficking and biogenesis associated [Source:NCBI gene;Acc:718128]                 | 1.621487567 | 8.51E-05    | 0.000787026 |
| ENSMMUG00000004748 | zinc finger and BTB domain containing 1 [Source:VGNC Symbol;Acc:VGNC:79238]                                        | 1.625103086 | 2.73E-09    | 7.69E-08    |
| ENSMMUG00000028771 | Yip1 interacting factor homolog B, membrane trafficking protein [Source:VGNC Symbol;Acc:VGNC:79852]                | 1.626508969 | 0.000434116 | 0.003162594 |
| ENSMMUG00000011528 | F-box and WD repeat domain containing 5 [Source:VGNC Symbol;Acc:VGNC:72503]                                        | 1.626719111 | 4.34E-05    | 0.000444534 |
| ENSMMUG00000018986 | seizure related 6 homolog like 2 [Source:VGNC Symbol;Acc:VGNC:81567]                                               | 1.626878551 | 0.000492093 | 0.003530362 |
| ENSMMUG00000005989 | GLE1 RNA export mediator [Source:VGNC Symbol;Acc:VGNC:73067]                                                       | 1.628002202 | 6.56E-07    | 1.09E-05    |
| ENSMMUG00000039266 | Metazoan signal recognition particle RNA [Source:RFAM;Acc:RF00017]                                                 | 1.629296853 | 0.00923287  | 0.037615525 |
| ENSMMUG00000062628 |                                                                                                                    | 1.629309713 | 0.000687147 | 0.00467286  |
| ENSMMUG00000058557 |                                                                                                                    | 1.632547739 | 0.000304623 | 0.002324576 |
| ENSMMUG00000045959 |                                                                                                                    | 1.637022402 | 7.85E-05    | 0.000736861 |
| ENSMMUG00000019833 | Fc receptor like 1 [Source:VGNC Symbol;Acc:VGNC:72528]                                                             | 1.637865477 | 2.40E-09    | 6.86E-08    |
| ENSMMUG00000044496 | H2A histone family, member X [Source:NCBI gene;Acc:703073]                                                         | 1.638098702 | 3.94E-05    | 0.000408117 |
| ENSMMUG00000002422 | AE binding protein 1 [Source:VGNC Symbol;Acc:VGNC:80328]                                                           | 1.639534425 | 4.96E-06    | 6.55E-05    |
| ENSMMUG00000001397 | multiple C2 and transmembrane domain containing 1 [Source:VGNC Symbol;Acc:VGNC:74589]                              | 1.639827488 | 0.003442478 | 0.017177507 |
| ENSMMUG00000048066 | trafficking protein particle complex 9 [Source:NCBI gene;Acc:711466]                                               | 1.640043678 | 2.01E-05    | 0.000225887 |

|                    |                                                                                    |             |             |             |
|--------------------|------------------------------------------------------------------------------------|-------------|-------------|-------------|
| ENSMMUG00000058002 | zinc finger protein 669-like [Source:NCBI gene;Acc:696282]                         | 1.640887566 | 1.83E-10    | 6.90E-09    |
| ENSMMUG00000055441 |                                                                                    | 1.641652718 | 0.010946683 | 0.042779731 |
| ENSMMUG00000011155 | FA complementation group I [Source:VGNC Symbol;Acc:VGNC:72575]                     | 1.642282662 | 5.24E-07    | 9.11E-06    |
| ENSMMUG0000001060  | ryanodine receptor 2 [Source:VGNC Symbol;Acc:VGNC:76954]                           | 1.64295803  | 5.54E-10    | 1.81E-08    |
| ENSMMUG00000044048 | Metazoan signal recognition particle RNA [Source:RFAM;Acc:RF00017]                 | 1.643227303 | 0.000446618 | 0.003231938 |
| ENSMMUG00000014868 | OCIA domain containing 1 [Source:VGNC Symbol;Acc:VGNC:75409]                       | 1.643308052 | 5.16E-06    | 6.78E-05    |
| ENSMMUG00000061079 | golgin subfamily A member 6C [Source:NCBI gene;Acc:715898]                         | 1.643721663 | 1.34E-06    | 2.04E-05    |
| ENSMMUG00000004910 | dynein axonemal light chain 1 [Source:VGNC Symbol;Acc:VGNC:71885]                  | 1.643732    | 0.000272813 | 0.002114011 |
| ENSMMUG00000018910 | histidine rich glycoprotein [Source:VGNC Symbol;Acc:VGNC:73521]                    | 1.645623392 | 0.002571572 | 0.013629082 |
| ENSMMUG00000010949 | SPG21 abhydrolase domain containing, maspardin [Source:VGNC Symbol;Acc:VGNC:77970] | 1.645973714 | 2.78E-08    | 6.26E-07    |
| ENSMMUG00000008623 | coiled-coil domain containing 22 [Source:VGNC Symbol;Acc:VGNC:70899]               | 1.646654962 | 1.32E-09    | 4.05E-08    |
| ENSMMUG00000051408 | myelin associated oligodendrocyte basic protein [Source:NCBI gene;Acc:717265]      | 1.649244268 | 4.72E-08    | 1.02E-06    |
| ENSMMUG00000060502 |                                                                                    | 1.649619498 | 6.29E-05    | 0.000612626 |
| ENSMMUG00000001534 | calpain 3 [Source:VGNC Symbol;Acc:VGNC:70533]                                      | 1.653203945 | 4.18E-09    | 1.13E-07    |
| ENSMMUG00000010173 | presenilin 1 [Source:VGNC Symbol;Acc:VGNC:76435]                                   | 1.654305386 | 6.22E-05    | 0.000606342 |
| ENSMMUG00000002278 | AT-rich interaction domain 3A [Source:VGNC Symbol;Acc:VGNC:69930]                  | 1.655873686 | 0.00055429  | 0.00391691  |
| ENSMMUG00000019764 | dynactin subunit 4 [Source:VGNC Symbol;Acc:VGNC:71625]                             | 1.658037296 | 0.001115489 | 0.006869867 |
| ENSMMUG00000005685 | pseudouridine synthase 10 [Source:VGNC Symbol;Acc:VGNC:76547]                      | 1.658985872 | 0.002089933 | 0.01151004  |
| ENSMMUG00000047219 |                                                                                    | 1.660492974 | 3.84E-06    | 5.23E-05    |
| ENSMMUG00000050822 | carbonic anhydrase 9 [Source:NCBI gene;Acc:696729]                                 | 1.662115114 | 8.98E-09    | 2.26E-07    |
| ENSMMUG00000052073 |                                                                                    | 1.666004199 | 5.29E-07    | 9.18E-06    |
| ENSMMUG00000057934 |                                                                                    | 1.666067187 | 0.007637105 | 0.032559132 |
| ENSMMUG00000057283 |                                                                                    | 1.666172409 | 0.000993921 | 0.006256332 |
| ENSMMUG00000015479 | tectonin beta-propeller repeat containing 1 [Source:VGNC Symbol;Acc:VGNC:79348]    | 1.667076304 | 6.00E-15    | 5.65E-13    |
| ENSMMUG00000019126 | purine nucleoside phosphorylase [Source:NCBI gene;Acc:704183]                      | 1.667144704 | 0.010034839 | 0.040143061 |
| ENSMMUG00000003355 | lipid droplet associated hydrolase [Source:VGNC Symbol;Acc:VGNC:74130]             | 1.672939416 | 2.13E-09    | 6.16E-08    |
| ENSMMUG00000013146 | claudin 2 [Source:HGNC Symbol;Acc:HGNC:2041]                                       | 1.673005489 | 4.70E-09    | 1.25E-07    |
| ENSMMUG00000016582 | chromosome 1 C1orf112 homolog [Source:VGNC Symbol;Acc:VGNC:70385]                  | 1.673118445 | 6.81E-05    | 0.000654715 |
| ENSMMUG00000014291 | SPG11 vesicle trafficking associated, spatacin [Source:VGNC Symbol;Acc:VGNC:77856] | 1.675431311 | 1.04E-06    | 1.64E-05    |
| ENSMMUG00000037243 | U6 spliceosomal RNA [Source:RFAM;Acc:RF00026]                                      | 1.676120388 | 0.001411141 | 0.00835349  |
| ENSMMUG00000005432 | clathrin heavy chain like 1 [Source:VGNC Symbol;Acc:VGNC:71268]                    | 1.676444787 | 6.45E-09    | 1.67E-07    |
| ENSMMUG00000048076 | TNF receptor superfamily member 10b [Source:NCBI gene;Acc:716650]                  | 1.681379934 | 1.22E-08    | 3.00E-07    |
| ENSMMUG00000003584 | mesoderm posterior bHLH transcription factor 2 [Source:VGNC Symbol;Acc:VGNC:74619] | 1.681569282 | 2.31E-15    | 2.39E-13    |
| ENSMMUG00000008090 | ribosomal protein L27 [Source:NCBI gene;Acc:712352]                                | 1.684160662 | 0.010002395 | 0.040068864 |
| ENSMMUG00000030964 | RAB6A, member RAS oncogene family [Source:NCBI gene;Acc:718717]                    | 1.684892422 | 2.54E-08    | 5.86E-07    |
| ENSMMUG00000051201 | zinc finger SWIM-type containing 3 [Source:NCBI gene;Acc:708804]                   | 1.686358708 | 2.79E-10    | 9.75E-09    |
| ENSMMUG00000059472 | filaggrin family member 2 [Source:HGNC Symbol;Acc:HGNC:33276]                      | 1.687236914 | 0.000133981 | 0.001172391 |
| ENSMMUG00000062996 |                                                                                    | 1.688511589 | 0.010772252 | 0.042388598 |
| ENSMMUG00000018485 | methyltransferase like 7A [Source:VGNC Symbol;Acc:VGNC:74567]                      | 1.691689517 | 0.010277976 | 0.040934308 |
| ENSMMUG00000007610 | ribosomal protein S6 kinase A4 [Source:VGNC Symbol;Acc:VGNC:76930]                 | 1.693596742 | 2.18E-09    | 6.25E-08    |
| ENSMMUG00000010869 | nucleoporin 160 [Source:VGNC Symbol;Acc:VGNC:75429]                                | 1.69406462  | 4.45E-07    | 7.90E-06    |
| ENSMMUG00000063639 |                                                                                    | 1.694228673 | 0.000169471 | 0.00141876  |
| ENSMMUG00000015394 | WD repeat domain 93 [Source:VGNC Symbol;Acc:VGNC:79642]                            | 1.695584151 | 8.38E-16    | 9.26E-14    |
| ENSMMUG00000006689 | nuclear receptor interacting protein 3 [Source:VGNC Symbol;Acc:VGNC:75397]         | 1.697031422 | 0.000320051 | 0.002429655 |
| ENSMMUG00000019667 | TAO kinase 1 [Source:VGNC Symbol;Acc:VGNC:81591]                                   | 1.697819705 | 0.000761574 | 0.005073654 |
| ENSMMUG00000062781 | chromosome 14 C11orf97 homolog [Source:NCBI gene;Acc:106993442]                    | 1.702087092 | 7.59E-10    | 2.43E-08    |
| ENSMMUG00000058137 | zinc finger protein 816 [Source:NCBI gene;Acc:720058]                              | 1.703930557 | 0.000900839 | 0.005774434 |
| ENSMMUG00000031291 | regulator of G protein signaling like 1 [Source:NCBI gene;Acc:715693]              | 1.704380046 | 1.01E-12    | 6.00E-11    |
| ENSMMUG00000020515 | adhesion G protein-coupled receptor G2 [Source:VGNC Symbol;Acc:VGNC:69802]         | 1.70499342  | 0.001867686 | 0.010494107 |
| ENSMMUG00000009960 | cathepsin A [Source:VGNC Symbol;Acc:VGNC:71617]                                    | 1.705190473 | 5.69E-07    | 9.71E-06    |
| ENSMMUG00000018471 | serine/threonine kinase 33 [Source:VGNC Symbol;Acc:VGNC:78118]                     | 1.706173616 | 0.007700957 | 0.03268984  |



|                    |                                                                                                                   |             |             |             |
|--------------------|-------------------------------------------------------------------------------------------------------------------|-------------|-------------|-------------|
| ENSMMUG00000059491 |                                                                                                                   | 1.707842716 | 5.66E-07    | 9.68E-06    |
| ENSMMUG00000009381 | WW domain binding protein 2 [Source:VGNC Symbol;Acc:VGNC:78786]                                                   | 1.708119064 | 5.06E-09    | 1.33E-07    |
| ENSMMUG00000014864 | VPS11 core subunit of CORVET and HOPS complexes [Source:VGNC Symbol;Acc:VGNC:78965]                               | 1.709830943 | 1.27E-08    | 3.11E-07    |
| ENSMMUG00000058800 |                                                                                                                   | 1.709974122 | 6.34E-07    | 1.06E-05    |
| ENSMMUG00000003697 | inositol polyphosphate-4-phosphatase type II B [Source:VGNC Symbol;Acc:VGNC:73748]                                | 1.710202779 | 8.26E-07    | 1.33E-05    |
| ENSMMUG00000016448 | DLG associated protein 4 [Source:NCBI gene;Acc:702928]                                                            | 1.712752403 | 4.67E-09    | 1.24E-07    |
| ENSMMUG00000003950 | nucleoporin 98 and 96 precursor [Source:VGNC Symbol;Acc:VGNC:75563]                                               | 1.713397128 | 2.77E-10    | 9.74E-09    |
| ENSMMUG00000012697 | AT-rich interaction domain 1A [Source:VGNC Symbol;Acc:VGNC:69822]                                                 | 1.717442085 | 1.74E-05    | 0.00019981  |
| ENSMMUG00000056186 |                                                                                                                   | 1.719411199 | 0.009249622 | 0.037655452 |
| ENSMMUG00000032249 | procollagen-lysine,2-oxoglutarate 5-dioxygenase 1 [Source:NCBI gene;Acc:722763]                                   | 1.719436618 | 6.52E-11    | 2.60E-09    |
| ENSMMUG00000039397 | tubulin folding cofactor E like [Source:NCBI gene;Acc:706506]                                                     | 1.721131152 | 2.56E-08    | 5.90E-07    |
| ENSMMUG00000013150 | MORC family CW-type zinc finger 4 [Source:VGNC Symbol;Acc:VGNC:74808]                                             | 1.721189284 | 3.78E-10    | 1.27E-08    |
| ENSMMUG00000006893 | D-amino acid oxidase [Source:VGNC Symbol;Acc:VGNC:71729]                                                          | 1.722298425 | 2.90E-08    | 6.48E-07    |
| ENSMMUG00000017864 | oxysterol binding protein like 8 [Source:VGNC Symbol;Acc:VGNC:75630]                                              | 1.723154708 | 0.007734563 | 0.032793943 |
| ENSMMUG00000000327 | fatty acid desaturase 2 [Source:VGNC Symbol;Acc:VGNC:72472]                                                       | 1.723477139 | 1.01E-05    | 0.000125541 |
| ENSMMUG00000053083 | C2 calcium dependent domain containing 4C [Source:NCBI gene;Acc:100424440]                                        | 1.726861226 | 0.010216813 | 0.040750639 |
| ENSMMUG00000052348 |                                                                                                                   | 1.728014918 | 0.000221448 | 0.001780955 |
| ENSMMUG00000004149 | eukaryotic translation initiation factor 4 gamma 3 [Source:NCBI gene;Acc:717555]                                  | 1.728498503 | 5.12E-14    | 3.94E-12    |
| ENSMMUG00000008383 | major facilitator superfamily domain containing 10 [Source:NCBI gene;Acc:720098]                                  | 1.729914216 | 2.03E-06    | 2.96E-05    |
| ENSMMUG00000005982 | coiled-coil domain containing 84 [Source:NCBI gene;Acc:707400]                                                    | 1.731351705 | 0.000213458 | 0.001723094 |
| ENSMMUG00000014720 | NCK interacting protein with SH3 domain [Source:VGNC Symbol;Acc:VGNC:74960]                                       | 1.731784527 | 0.004662707 | 0.021970904 |
| ENSMMUG00000010313 | kinesin family member 3A [Source:VGNC Symbol;Acc:VGNC:74017]                                                      | 1.732374768 | 7.17E-10    | 2.30E-08    |
| ENSMMUG00000015477 | lemur tyrosine kinase 2 [Source:VGNC Symbol;Acc:VGNC:74309]                                                       | 1.733830177 | 5.44E-07    | 9.38E-06    |
| ENSMMUG00000023477 |                                                                                                                   | 1.735840031 | 2.89E-13    | 1.88E-11    |
| ENSMMUG00000006997 | thioredoxin domain containing 16 [Source:VGNC Symbol;Acc:VGNC:79214]                                              | 1.736702624 | 1.37E-15    | 1.48E-13    |
| ENSMMUG00000001088 | patched domain containing 1 [Source:VGNC Symbol;Acc:VGNC:76322]                                                   | 1.737512297 | 6.39E-11    | 2.56E-09    |
| ENSMMUG00000004498 | protein inhibitor of activated STAT 2 [Source:VGNC Symbol;Acc:VGNC:75815]                                         | 1.740581588 | 0.001210327 | 0.007353602 |
| ENSMMUG00000017266 | UPF0577 protein KIAA1324 [Source:NCBI gene;Acc:697670]                                                            | 1.741916812 | 0.000408297 | 0.002988569 |
| ENSMMUG00000058042 | heparan sulfate-glucosamine 3-sulfotransferase 2 [Source:NCBI gene;Acc:699722]                                    | 1.742503939 | 2.35E-06    | 3.37E-05    |
| ENSMMUG00000010886 | strawberry notch homolog 2 [Source:VGNC Symbol;Acc:VGNC:77123]                                                    | 1.742898507 | 9.92E-05    | 0.000902409 |
| ENSMMUG00000012529 | pleckstrin homology domain containing A8 [Source:VGNC Symbol;Acc:VGNC:81741]                                      | 1.745460902 | 0.000100604 | 0.000914301 |
| ENSMMUG00000016946 | trafficking protein particle complex 4 [Source:VGNC Symbol;Acc:VGNC:79211]                                        | 1.746202259 | 0.002408668 | 0.012904599 |
| ENSMMUG00000009684 | kinesin family member 22 [Source:VGNC Symbol;Acc:VGNC:74033]                                                      | 1.746256179 | 3.88E-06    | 5.28E-05    |
| ENSMMUG00000014123 | alanyl-tRNA editing protein Aarsd1 [Source:NCBI gene;Acc:712203]                                                  | 1.7511698   | 0.000247759 | 0.001959383 |
| ENSMMUG00000004175 | transient receptor potential cation channel subfamily M member 2 [Source:VGNC Symbol;Acc:VGNC:78655]              | 1.751590643 | 0.000130004 | 0.001143124 |
| ENSMMUG00000006233 | adducin 3 [Source:VGNC Symbol;Acc:VGNC:69531]                                                                     | 1.752955992 | 0.000826473 | 0.005410025 |
| ENSMMUG00000014983 | alanyl aminopeptidase, membrane [Source:VGNC Symbol;Acc:VGNC:69943]                                               | 1.752988574 | 3.06E-16    | 3.52E-14    |
| ENSMMUG00000003105 | inositol polyphosphate-5-phosphatase E [Source:VGNC Symbol;Acc:VGNC:73637]                                        | 1.753604814 | 4.58E-09    | 1.23E-07    |
| ENSMMUG00000010513 | ribulose-5-phosphate-3-epimerase [Source:NCBI gene;Acc:711322]                                                    | 1.754291165 | 0.000331638 | 0.002505322 |
| ENSMMUG00000019988 | homeodomain interacting protein kinase 3 [Source:VGNC Symbol;Acc:VGNC:73472]                                      | 1.756387218 | 1.26E-06    | 1.94E-05    |
| ENSMMUG00000017561 | solute carrier family 43 member 2 [Source:VGNC Symbol;Acc:VGNC:77554]                                             | 1.757386115 | 4.16E-06    | 5.60E-05    |
| ENSMMUG00000022409 | solute carrier family 10 member 1 [Source:VGNC Symbol;Acc:VGNC:77380]                                             | 1.757606038 | 1.95E-09    | 5.70E-08    |
| ENSMMUG00000022741 | WAP, follistatin/kazal, immunoglobulin, kunitz and netrin domain containing 2 [Source:VGNC Symbol;Acc:VGNC:79900] | 1.757620022 | 2.12E-10    | 7.70E-09    |
| ENSMMUG00000014874 | GTP binding protein 8 (putative) [Source:VGNC Symbol;Acc:VGNC:84180]                                              | 1.759355147 | 8.50E-07    | 1.37E-05    |
| ENSMMUG00000058621 |                                                                                                                   | 1.762031828 | 3.11E-07    | 5.69E-06    |
| ENSMMUG00000032180 | RLF zinc finger [Source:VGNC Symbol;Acc:VGNC:76699]                                                               | 1.765504173 | 0.000506968 | 0.003613145 |
| ENSMMUG00000015583 | nucleosome assembly protein 1 like 1 [Source:NCBI gene;Acc:719047]                                                | 1.768542327 | 0.003279265 | 0.016515239 |
| ENSMMUG00000039292 |                                                                                                                   | 1.768622489 | 1.43E-05    | 0.000168413 |
| ENSMMUG00000005511 | SON DNA binding protein [Source:VGNC Symbol;Acc:VGNC:77689]                                                       | 1.770838281 | 6.65E-05    | 0.000642905 |
| ENSMMUG00000053625 | sterol-C5-desaturase [Source:NCBI gene;Acc:706827]                                                                | 1.770904452 | 1.88E-08    | 4.48E-07    |
| ENSMMUG00000020226 | WD repeat and SOCS box containing 1 [Source:VGNC Symbol;Acc:VGNC:79186]                                           | 1.77125255  | 1.59E-12    | 8.85E-11    |

|                    |                                                                                                 |             |             |             |
|--------------------|-------------------------------------------------------------------------------------------------|-------------|-------------|-------------|
| ENSMMUG00000020186 | solute carrier family 20 member 2 [Source:VGNC Symbol;Acc:VGNC:77416]                           | 1.773718998 | 0.002942268 | 0.015098811 |
| ENSMMUG00000065025 |                                                                                                 | 1.776538725 | 3.17E-10    | 1.09E-08    |
| ENSMMUG00000004774 | maestro heat like repeat family member 2B [Source:VGNC Symbol;Acc:VGNC:74837]                   | 1.776827452 | 0.007073388 | 0.030699526 |
| ENSMMUG00000051170 |                                                                                                 | 1.778389185 | 0.000203177 | 0.001657394 |
| ENSMMUG00000008518 | phospholipid phosphatase related 5 [Source:NCBI gene;Acc:710549]                                | 1.780036508 | 4.97E-07    | 8.73E-06    |
| ENSMMUG00000055209 |                                                                                                 | 1.78036649  | 2.70E-08    | 6.14E-07    |
| ENSMMUG00000004273 | dedicator of cytokinesis 3 [Source:VGNC Symbol;Acc:VGNC:71967]                                  | 1.782361411 | 2.79E-10    | 9.75E-09    |
| ENSMMUG00000010515 | KAT8 regulatory NSL complex subunit 1 like [Source:VGNC Symbol;Acc:VGNC:73913]                  | 1.784802306 | 0.002336617 | 0.012618637 |
| ENSMMUG00000003436 | tubulin tyrosine ligase like 6 [Source:VGNC Symbol;Acc:VGNC:79632]                              | 1.785001238 | 4.58E-12    | 2.37E-10    |
| ENSMMUG00000056840 |                                                                                                 | 1.785804487 | 7.56E-08    | 1.54E-06    |
| ENSMMUG00000012841 | kallikrein 3 [Source:NCBI gene;Acc:719444]                                                      | 1.789012574 | 0.000910271 | 0.005814251 |
| ENSMMUG00000006468 | FGFR1 oncogene partner 2 [Source:VGNC Symbol;Acc:VGNC:72551]                                    | 1.79125012  | 0.000180252 | 0.001497865 |
| ENSMMUG00000003976 | glycoprotein hormone subunit alpha 2 [Source:VGNC Symbol;Acc:VGNC:72961]                        | 1.791829441 | 2.56E-09    | 7.27E-08    |
| ENSMMUG00000051329 |                                                                                                 | 1.794355615 | 0.000521685 | 0.003710715 |
| ENSMMUG00000013387 | cysteinyl leukotriene receptor 1 [Source:VGNC Symbol;Acc:VGNC:71646]                            | 1.795201007 | 3.96E-07    | 7.13E-06    |
| ENSMMUG00000010308 | cyclin I family member 2 [Source:VGNC Symbol;Acc:VGNC:70923]                                    | 1.798456967 | 7.87E-06    | 9.95E-05    |
| ENSMMUG00000055747 | cytochrome c oxidase subunit 6B [Source:NCBI gene;Acc:692062]                                   | 1.799762816 | 1.09E-09    | 3.40E-08    |
| ENSMMUG00000059897 | myosin light chain 9 [Source:NCBI gene;Acc:709784]                                              | 1.80030677  | 0.000559097 | 0.003943163 |
| ENSMMUG00000053790 |                                                                                                 | 1.800780471 | 5.26E-08    | 1.12E-06    |
| ENSMMUG00000050868 |                                                                                                 | 1.801342579 | 0.000358842 | 0.002673548 |
| ENSMMUG00000014880 | sortilin related receptor 1 [Source:NCBI gene;Acc:713011]                                       | 1.801546257 | 1.45E-09    | 4.39E-08    |
| ENSMMUG00000004002 | CDC like kinase 4 [Source:VGNC Symbol;Acc:VGNC:71173]                                           | 1.803103979 | 3.73E-13    | 2.35E-11    |
| ENSMMUG00000023300 | FERM domain containing 8 [Source:NCBI gene;Acc:716379]                                          | 1.807832621 | 0.000430582 | 0.003141073 |
| ENSMMUG00000014615 | lactate dehydrogenase C [Source:VGNC Symbol;Acc:VGNC:74247]                                     | 1.808900621 | 0.00023972  | 0.00191418  |
| ENSMMUG00000018719 | nemo like kinase [Source:VGNC Symbol;Acc:VGNC:75277]                                            | 1.808947742 | 6.13E-08    | 1.29E-06    |
| ENSMMUG00000003217 | transmembrane 7 superfamily member 3 [Source:VGNC Symbol;Acc:VGNC:79371]                        | 1.81005754  | 1.20E-07    | 2.36E-06    |
| ENSMMUG00000005488 | coronin 1B [Source:VGNC Symbol;Acc:VGNC:71320]                                                  | 1.811821874 | 4.64E-09    | 1.24E-07    |
| ENSMMUG00000065208 |                                                                                                 | 1.811881211 | 0.000857977 | 0.005572218 |
| ENSMMUG00000015931 | phosphatidylinositol transfer protein membrane associated 2 [Source:VGNC Symbol;Acc:VGNC:75843] | 1.812017775 | 6.26E-07    | 1.05E-05    |
| ENSMMUG00000058592 |                                                                                                 | 1.812525841 | 5.95E-06    | 7.74E-05    |
| ENSMMUG00000009995 | arachidonate 15-lipoxygenase type B [Source:VGNC Symbol;Acc:VGNC:69797]                         | 1.815547432 | 1.34E-09    | 4.10E-08    |
| ENSMMUG00000064391 |                                                                                                 | 1.818403694 | 8.58E-07    | 1.38E-05    |
| ENSMMUG00000013871 | WD repeat domain 25 [Source:VGNC Symbol;Acc:VGNC:78420]                                         | 1.818465068 | 1.90E-07    | 3.59E-06    |
| ENSMMUG00000030389 |                                                                                                 | 1.819477316 | 0.008223491 | 0.034395784 |
| ENSMMUG00000008791 | CD47 molecule [Source:VGNC Symbol;Acc:VGNC:70767]                                               | 1.822848647 | 3.86E-05    | 0.000400623 |
| ENSMMUG00000054512 |                                                                                                 | 1.823240298 | 0.001368808 | 0.008156379 |
| ENSMMUG00000035748 | U6 spliceosomal RNA [Source:RFAM;Acc:RF00026]                                                   | 1.828657077 | 0.003226156 | 0.016289041 |
| ENSMMUG00000065054 | G protein subunit gamma 7 [Source:NCBI gene;Acc:711335]                                         | 1.830658747 | 5.15E-06    | 6.77E-05    |
| ENSMMUG00000012523 | flotillin 2 [Source:NCBI gene;Acc:114669752]                                                    | 1.832164722 | 1.54E-11    | 7.15E-10    |
| ENSMMUG00000002411 | drebrin like [Source:NCBI gene;Acc:720621]                                                      | 1.834313135 | 1.92E-11    | 8.67E-10    |
| ENSMMUG00000009889 | PSMC3 interacting protein [Source:VGNC Symbol;Acc:VGNC:76282]                                   | 1.83488495  | 9.92E-11    | 3.85E-09    |
| ENSMMUG00000020185 | voltage dependent anion channel 3 [Source:VGNC Symbol;Acc:VGNC:84135]                           | 1.841076673 | 0.010793113 | 0.042439852 |
| ENSMMUG00000049935 |                                                                                                 | 1.841791529 | 3.10E-06    | 4.32E-05    |
| ENSMMUG00000013160 | DnaJ heat shock protein family (Hsp40) member C17 [Source:VGNC Symbol;Acc:VGNC:84335]           | 1.842523352 | 0.004516157 | 0.021457085 |
| ENSMMUG00000002384 | IGF like family receptor 1 [Source:VGNC Symbol;Acc:VGNC:73434]                                  | 1.842933122 | 5.65E-08    | 1.20E-06    |
| ENSMMUG00000010586 | mesoderm posterior bHLH transcription factor 1 [Source:VGNC Symbol;Acc:VGNC:74618]              | 1.845919041 | 0.005251918 | 0.024292924 |
| ENSMMUG00000018549 | zinc finger protein 786 [Source:VGNC Symbol;Acc:VGNC:79338]                                     | 1.846904173 | 0.01065156  | 0.042020521 |
| ENSMMUG00000004854 | leucine rich repeat containing 9 [Source:VGNC Symbol;Acc:VGNC:81443]                            | 1.855156241 | 3.55E-17    | 5.04E-15    |
| ENSMMUG00000061098 |                                                                                                 | 1.855423098 | 3.59E-13    | 2.30E-11    |
| ENSMMUG00000063622 | mitochondrial ribosomal protein S26 [Source:NCBI gene;Acc:717038]                               | 1.857170835 | 0.001551761 | 0.009042615 |
| ENSMMUG00000014277 | ITPR interacting domain containing 2 [Source:VGNC Symbol;Acc:VGNC:73584]                        | 1.859079742 | 1.05E-13    | 7.50E-12    |

|                    |                                                                                              |             |             |             |
|--------------------|----------------------------------------------------------------------------------------------|-------------|-------------|-------------|
| ENSMMUG00000018396 | HAUS augmin like complex subunit 6 [Source:VGNC Symbol;Acc:VGNC:73237]                       | 1.860984637 | 0.000284609 | 0.002191309 |
| ENSMMUG00000054686 |                                                                                              | 1.861558292 | 6.32E-06    | 8.16E-05    |
| ENSMMUG00000003797 | ubiquitin specific peptidase 20 [Source:VGNC Symbol;Acc:VGNC:78740]                          | 1.863994874 | 0.0114806   | 0.044306855 |
| ENSMMUG00000038363 | adaptor related protein complex 5 subunit beta 1 [Source:NCBI gene;Acc:721904]               | 1.864087065 | 6.24E-09    | 1.62E-07    |
| ENSMMUG00000020683 | RNA binding motif protein 22 [Source:VGNC Symbol;Acc:VGNC:76535]                             | 1.86454913  | 2.51E-05    | 0.000276102 |
| ENSMMUG00000048744 |                                                                                              | 1.865387784 | 0.004948181 | 0.023075179 |
| ENSMMUG00000019830 | Fc receptor like 2 [Source:VGNC Symbol;Acc:VGNC:72509]                                       | 1.865986711 | 7.96E-05    | 0.000745671 |
| ENSMMUG00000003591 | pleckstrin homology domain containing A2 [Source:VGNC Symbol;Acc:VGNC:76026]                 | 1.866229085 | 1.15E-06    | 1.80E-05    |
| ENSMMUG00000008828 | BEN domain containing 5 [Source:NCBI gene;Acc:711150]                                        | 1.868027925 | 2.02E-05    | 0.000226594 |
| ENSMMUG00000005745 | EYA transcriptional coactivator and phosphatase 4 [Source:VGNC Symbol;Acc:VGNC:72456]        | 1.868499965 | 1.09E-14    | 9.86E-13    |
| ENSMMUG00000064229 |                                                                                              | 1.869044904 | 0.001042065 | 0.00649522  |
| ENSMMUG00000062755 |                                                                                              | 1.870600456 | 0.001811354 | 0.010237856 |
| ENSMMUG00000008081 | ATP binding cassette subfamily G member 8 [Source:VGNC Symbol;Acc:VGNC:69392]                | 1.871246164 | 8.02E-05    | 0.000750501 |
| ENSMMUG00000021554 | PHD finger protein 12 [Source:VGNC Symbol;Acc:VGNC:75838]                                    | 1.87763764  | 6.75E-13    | 4.09E-11    |
| ENSMMUG00000052168 |                                                                                              | 1.87956043  | 6.14E-07    | 1.04E-05    |
| ENSMMUG00000022100 | midnolin [Source:VGNC Symbol;Acc:VGNC:82186]                                                 | 1.88022407  | 3.53E-11    | 1.52E-09    |
| ENSMMUG00000017822 | periplakin [Source:VGNC Symbol;Acc:VGNC:76240]                                               | 1.881068739 | 0.003456168 | 0.017229946 |
| ENSMMUG00000001745 | oxysterol binding protein [Source:VGNC Symbol;Acc:VGNC:75718]                                | 1.883096895 | 9.57E-07    | 1.52E-05    |
| ENSMMUG00000061021 |                                                                                              | 1.883976109 | 0.000185745 | 0.001536067 |
| ENSMMUG00000058566 |                                                                                              | 1.884385478 | 4.75E-14    | 3.70E-12    |
| ENSMMUG00000060879 | homeobox B13 [Source:NCBI gene;Acc:697572]                                                   | 1.887927216 | 6.03E-13    | 3.69E-11    |
| ENSMMUG00000017660 |                                                                                              | 1.88820256  | 1.33E-09    | 4.07E-08    |
| ENSMMUG00000040741 | thioredoxin related transmembrane protein 2 [Source:NCBI gene;Acc:100169970]                 | 1.888622229 | 1.33E-05    | 0.000158407 |
| ENSMMUG00000049703 | Metazoan signal recognition particle RNA [Source:RFAM;Acc:RF00017]                           | 1.888957772 | 1.35E-09    | 4.12E-08    |
| ENSMMUG00000001845 | DNA polymerase epsilon 4, accessory subunit [Source:VGNC Symbol;Acc:VGNC:76065]              | 1.890086323 | 3.90E-05    | 0.000403813 |
| ENSMMUG00000006836 | chloride channel accessory 1 [Source:NCBI gene;Acc:574295]                                   | 1.891066449 | 0.000104883 | 0.000949206 |
| ENSMMUG00000008379 | adducin 1 [Source:VGNC Symbol;Acc:VGNC:69528]                                                | 1.891892743 | 1.31E-07    | 2.57E-06    |
| ENSMMUG00000002886 | Bardet-Biedl syndrome 9 [Source:NCBI gene;Acc:708412]                                        | 1.893338205 | 3.23E-07    | 5.89E-06    |
| ENSMMUG00000064321 |                                                                                              | 1.8935699   | 0.000147567 | 0.00126624  |
| ENSMMUG00000028948 | azurocidin 1 [Source:VGNC Symbol;Acc:VGNC:70202]                                             | 1.897040003 | 0.005119553 | 0.023761834 |
| ENSMMUG00000024234 | U6 spliceosomal RNA [Source:RFAM;Acc:RF00026]                                                | 1.897982804 | 3.56E-05    | 0.000374969 |
| ENSMMUG00000008758 | zinc finger protein 143 [Source:VGNC Symbol;Acc:VGNC:81612]                                  | 1.898669112 | 0.003060094 | 0.015609801 |
| ENSMMUG00000016323 | Rho guanine nucleotide exchange factor 39 [Source:VGNC Symbol;Acc:VGNC:69912]                | 1.901311559 | 6.52E-12    | 3.30E-10    |
| ENSMMUG00000000803 | signal transducer and activator of transcription 2 [Source:VGNC Symbol;Acc:VGNC:77905]       | 1.901486521 | 6.30E-07    | 1.06E-05    |
| ENSMMUG00000048283 | mml-mir-3145 [Source:miRBase;Acc:MI0020897]                                                  | 1.902108329 | 0.011839071 | 0.045463543 |
| ENSMMUG00000008195 | TGFB induced factor homeobox 2 [Source:NCBI gene;Acc:100429616]                              | 1.903906952 | 1.35E-12    | 7.72E-11    |
| ENSMMUG00000057345 | calcineurin like phosphoesterase domain containing 1 [Source:NCBI gene;Acc:716978]           | 1.904043316 | 2.70E-09    | 7.63E-08    |
| ENSMMUG00000055914 |                                                                                              | 1.904084737 | 1.77E-06    | 2.63E-05    |
| ENSMMUG00000010678 | oxytocin/neurophysin I prepropeptide [Source:VGNC Symbol;Acc:VGNC:75730]                     | 1.906430335 | 0.005622828 | 0.025625618 |
| ENSMMUG00000019354 | actin like 7B [Source:VGNC Symbol;Acc:VGNC:69421]                                            | 1.907223397 | 0.011983393 | 0.04587141  |
| ENSMMUG00000052780 |                                                                                              | 1.91115126  | 1.60E-10    | 6.10E-09    |
| ENSMMUG00000021436 | latent transforming growth factor beta binding protein 1 [Source:VGNC Symbol;Acc:VGNC:74456] | 1.911253808 | 6.01E-05    | 0.000591515 |
| ENSMMUG00000017224 | catenin beta like 1 [Source:VGNC Symbol;Acc:VGNC:71414]                                      | 1.913756729 | 4.48E-06    | 6.02E-05    |
| ENSMMUG00000057499 |                                                                                              | 1.916158758 | 0.002969106 | 0.015222115 |
| ENSMMUG00000003006 | serine palmitoyltransferase long chain base subunit 1 [Source:VGNC Symbol;Acc:VGNC:77873]    | 1.916380672 | 6.53E-06    | 8.39E-05    |
| ENSMMUG00000056945 |                                                                                              | 1.916801284 | 4.52E-10    | 1.50E-08    |
| ENSMMUG00000021661 | leucine rich repeat containing 56 [Source:VGNC Symbol;Acc:VGNC:74356]                        | 1.918580291 | 6.08E-05    | 0.000595376 |
| ENSMMUG00000051363 |                                                                                              | 1.919451096 | 3.52E-05    | 0.000371401 |
| ENSMMUG00000001702 | succinyl-CoA:glutarate-CoA transferase [Source:VGNC Symbol;Acc:VGNC:81767]                   | 1.919813819 | 4.35E-05    | 0.000444534 |
| ENSMMUG00000062522 |                                                                                              | 1.921009535 | 3.05E-06    | 4.26E-05    |
| ENSMMUG00000009197 | myelin associated oligodendrocyte basic protein [Source:VGNC Symbol;Acc:VGNC:74908]          | 1.923577344 | 2.48E-11    | 1.10E-09    |



|                    |                                                                                                                                                                |             |             |             |
|--------------------|----------------------------------------------------------------------------------------------------------------------------------------------------------------|-------------|-------------|-------------|
| ENSMMUG00000059341 | Metazoan signal recognition particle RNA [Source:RFAM;Acc:RF00017]                                                                                             | 1.932092276 | 5.78E-11    | 2.35E-09    |
| ENSMMUG00000003167 | cytohesin 3 [Source:VGNC Symbol;Acc:VGNC:71829]                                                                                                                | 1.93322515  | 5.32E-07    | 9.22E-06    |
| ENSMMUG00000022702 | phosphoribosylglycinamide formyltransferase, phosphoribosylglycinamide synthetase, phosphoribosylaminoimidazole synthetase [Source:VGNC Symbol;Acc:VGNC:72882] | 1.93484868  | 1.81E-05    | 0.000206153 |
| ENSMMUG00000054942 |                                                                                                                                                                | 1.942983481 | 0.000148023 | 0.001268621 |
| ENSMMUG00000016327 | coiled-coil domain containing 107 [Source:VGNC Symbol;Acc:VGNC:70656]                                                                                          | 1.944208032 | 1.89E-11    | 8.58E-10    |
| ENSMMUG00000004477 | solute carrier family 19 member 1 [Source:VGNC Symbol;Acc:VGNC:77408]                                                                                          | 1.945977234 | 1.34E-07    | 2.60E-06    |
| ENSMMUG00000050028 |                                                                                                                                                                | 1.95185033  | 8.88E-07    | 1.42E-05    |
| ENSMMUG00000052851 | solute carrier family 7 member 5 [Source:NCBI gene;Acc:695886]                                                                                                 | 1.952078413 | 2.45E-08    | 5.67E-07    |
| ENSMMUG00000048375 | Metazoan signal recognition particle RNA [Source:RFAM;Acc:RF00017]                                                                                             | 1.952955393 | 1.56E-18    | 2.87E-16    |
| ENSMMUG00000009508 | TATA-box binding protein associated factor 5 like [Source:VGNC Symbol;Acc:VGNC:78148]                                                                          | 1.953074184 | 0.002385625 | 0.012812827 |
| ENSMMUG00000003955 | post-GPI attachment to proteins 2 [Source:VGNC Symbol;Acc:VGNC:75823]                                                                                          | 1.955823904 | 5.99E-10    | 1.95E-08    |
| ENSMMUG00000017758 | mitogen-activated protein kinase 3 [Source:VGNC Symbol;Acc:VGNC:74646]                                                                                         | 1.955897051 | 1.56E-08    | 3.77E-07    |
| ENSMMUG00000055963 |                                                                                                                                                                | 1.956500537 | 1.83E-05    | 0.000208383 |
| ENSMMUG00000021664 | lamin tail domain containing 2 [Source:VGNC Symbol;Acc:VGNC:74380]                                                                                             | 1.958452622 | 2.13E-14    | 1.79E-12    |
| ENSMMUG00000018492 | TARBP2 subunit of RISC loading complex [Source:VGNC Symbol;Acc:VGNC:78099]                                                                                     | 1.959424228 | 2.25E-10    | 8.13E-09    |
| ENSMMUG00000013944 | regulator of microtubule dynamics 2 [Source:VGNC Symbol;Acc:VGNC:76839]                                                                                        | 1.95976262  | 1.81E-14    | 1.54E-12    |
| ENSMMUG00000016929 | proline rich and Gla domain 3 [Source:VGNC Symbol;Acc:VGNC:76350]                                                                                              | 1.960743161 | 0.002723317 | 0.014234275 |
| ENSMMUG00000059229 | CEA cell adhesion molecule 7 [Source:NCBI gene;Acc:705572]                                                                                                     | 1.960853121 | 1.58E-11    | 7.26E-10    |
| ENSMMUG00000000790 | ankyrin repeat domain 17 [Source:VGNC Symbol;Acc:VGNC:84240]                                                                                                   | 1.962192424 | 4.05E-08    | 8.82E-07    |
| ENSMMUG00000064052 | CD300 molecule like family member d [Source:NCBI gene;Acc:703142]                                                                                              | 1.962253373 | 5.45E-05    | 0.000541809 |
| ENSMMUG00000005415 | olfactory receptor, family 2, subfamily B, member 3 [Source:NCBI gene;Acc:708747]                                                                              | 1.963616093 | 0.010164432 | 0.040578029 |
| ENSMMUG00000006181 | WD repeat, sterile alpha motif and U-box domain containing 1 [Source:VGNC Symbol;Acc:VGNC:79634]                                                               | 1.964167072 | 2.34E-12    | 1.28E-10    |
| ENSMMUG00000011650 | dual specificity tyrosine phosphorylation regulated kinase 2 [Source:VGNC Symbol;Acc:VGNC:72018]                                                               | 1.964460158 | 1.99E-06    | 2.91E-05    |
| ENSMMUG00000000566 |                                                                                                                                                                | 1.969332264 | 0.011287208 | 0.043716239 |
| ENSMMUG00000017036 | nicalin [Source:VGNC Symbol;Acc:VGNC:75032]                                                                                                                    | 1.969749236 | 1.88E-05    | 0.000212529 |
| ENSMMUG00000001151 | microtubule associated scaffold protein 1 [Source:VGNC Symbol;Acc:VGNC:84018]                                                                                  | 1.974405828 | 2.32E-16    | 2.80E-14    |
| ENSMMUG00000022313 | activating transcription factor 7 [Source:NCBI gene;Acc:700403]                                                                                                | 1.97751638  | 4.12E-11    | 1.73E-09    |
| ENSMMUG00000003750 | PLAG1 like zinc finger 1 [Source:VGNC Symbol;Acc:VGNC:83444]                                                                                                   | 1.977638424 | 0.001807305 | 0.01022378  |
| ENSMMUG00000032429 | forkhead box O4 [Source:VGNC Symbol;Acc:VGNC:72712]                                                                                                            | 1.978142102 | 1.08E-11    | 5.20E-10    |
| ENSMMUG00000064463 |                                                                                                                                                                | 1.978740853 | 0.003216638 | 0.01626031  |
| ENSMMUG00000050132 |                                                                                                                                                                | 1.978806533 | 5.26E-05    | 0.000526027 |
| ENSMMUG00000056376 |                                                                                                                                                                | 1.979101978 | 1.45E-05    | 0.000170789 |
| ENSMMUG00000061951 |                                                                                                                                                                | 1.980219461 | 0.000941363 | 0.005984463 |
| ENSMMUG00000061151 |                                                                                                                                                                | 1.98118113  | 0.000501836 | 0.00358601  |
| ENSMMUG00000021553 | dehydrogenase/reductase 13 [Source:VGNC Symbol;Acc:VGNC:81387]                                                                                                 | 1.982142692 | 1.46E-11    | 6.82E-10    |
| ENSMMUG00000014872 | dolichyl-phosphate N-acetylglucosaminophosphotransferase 1 [Source:VGNC Symbol;Acc:VGNC:71971]                                                                 | 1.984808299 | 7.06E-15    | 6.54E-13    |
| ENSMMUG00000023303 | ecotropic viral integration site 5 like [Source:NCBI gene;Acc:706628]                                                                                          | 1.985176387 | 2.87E-13    | 1.87E-11    |
| ENSMMUG00000012560 | HERV-H LTR-associating 1 [Source:NCBI gene;Acc:100430297]                                                                                                      | 1.987024533 | 1.90E-10    | 7.09E-09    |
| ENSMMUG00000008200 | Src like adaptor 2 [Source:VGNC Symbol;Acc:VGNC:77499]                                                                                                         | 1.988321988 | 0.000887351 | 0.005715027 |
| ENSMMUG00000065005 | Metazoan signal recognition particle RNA [Source:RFAM;Acc:RF00017]                                                                                             | 1.988460825 | 1.68E-05    | 0.000194341 |
| ENSMMUG00000053013 |                                                                                                                                                                | 1.989787559 | 1.40E-06    | 2.14E-05    |
| ENSMMUG00000028947 | complement factor D [Source:VGNC Symbol;Acc:VGNC:71115]                                                                                                        | 1.989823393 | 7.38E-09    | 1.88E-07    |
| ENSMMUG00000049494 |                                                                                                                                                                | 1.989837689 | 0.000811332 | 0.005329991 |
| ENSMMUG00000057640 | plakophilin-3-like [Source:NCBI gene;Acc:114669833]                                                                                                            | 1.990177764 | 2.46E-08    | 5.69E-07    |
| ENSMMUG00000002452 | solute carrier family 35 member C1 [Source:VGNC Symbol;Acc:VGNC:77524]                                                                                         | 1.992092369 | 1.33E-14    | 1.15E-12    |
| ENSMMUG00000055121 | Metazoan signal recognition particle RNA [Source:RFAM;Acc:RF00017]                                                                                             | 1.99312591  | 4.85E-08    | 1.04E-06    |
| ENSMMUG00000020009 | receptor tyrosine kinase like orphan receptor 2 [Source:VGNC Symbol;Acc:VGNC:76716]                                                                            | 1.993775084 | 3.08E-06    | 4.30E-05    |
| ENSMMUG00000049265 | Metazoan signal recognition particle RNA [Source:RFAM;Acc:RF00017]                                                                                             | 1.99464315  | 0.001554714 | 0.009054957 |
| ENSMMUG00000044257 | MX dynamin like GTPase 2 [Source:VGNC Symbol;Acc:VGNC:81723]                                                                                                   | 1.996408811 | 2.07E-08    | 4.83E-07    |
| ENSMMUG00000003421 | ankyrin repeat domain 40 [Source:VGNC Symbol;Acc:VGNC:69725]                                                                                                   | 1.99646641  | 0.00796686  | 0.033620954 |

|                    |                                                                                                     |             |             |             |
|--------------------|-----------------------------------------------------------------------------------------------------|-------------|-------------|-------------|
| ENSMMUG0000002715  | solute carrier family 9 member A8 [Source:VGNC Symbol;Acc:VGNC:77749]                               | 1.999997829 | 1.22E-14    | 1.07E-12    |
| ENSMMUG00000015926 | 2-oxoglutarate and iron dependent oxygenase domain containing 2 [Source:VGNC Symbol;Acc:VGNC:75462] | 2.000462085 | 1.84E-05    | 0.000208383 |
| ENSMMUG00000036820 | U7 small nuclear RNA [Source:RFAM;Acc:RF00066]                                                      | 2.001006847 | 1.05E-05    | 0.000129494 |
| ENSMMUG00000011209 | BICD family like cargo adaptor 1 [Source:HGNC Symbol;Acc:HGNC:28095]                                | 2.004497496 | 2.51E-10    | 8.91E-09    |
| ENSMMUG00000016797 | tubulin gamma 1 [Source:NCBI gene;Acc:710756]                                                       | 2.006802882 | 3.73E-12    | 1.95E-10    |
| ENSMMUG00000001387 | p21 (RAC1) activated kinase 1 [Source:NCBI gene;Acc:698585]                                         | 2.006891191 | 2.45E-09    | 6.97E-08    |
| ENSMMUG00000010028 | leucine zipper tumor suppressor family member 3 [Source:VGNC Symbol;Acc:VGNC:74403]                 | 2.00796659  | 3.39E-09    | 9.29E-08    |
| ENSMMUG00000000313 | HEAT repeat containing 4 [Source:VGNC Symbol;Acc:VGNC:73176]                                        | 2.008054639 | 1.06E-12    | 6.24E-11    |
| ENSMMUG00000055906 | angiotensin II receptor type 2 [Source:NCBI gene;Acc:709513]                                        | 2.00808185  | 0.00576292  | 0.026109607 |
| ENSMMUG00000053516 |                                                                                                     | 2.008532886 | 0.000343932 | 0.002580551 |
| ENSMMUG00000022109 | CD163 molecule like 1 [Source:VGNC Symbol;Acc:VGNC:70914]                                           | 2.009194196 | 2.02E-08    | 4.74E-07    |
| ENSMMUG00000002822 | unc-13 homolog D [Source:VGNC Symbol;Acc:VGNC:79375]                                                | 2.01084065  | 4.94E-13    | 3.09E-11    |
| ENSMMUG00000014876 | nucleolus and neural progenitor protein [Source:VGNC Symbol;Acc:VGNC:75244]                         | 2.011076904 | 8.07E-06    | 0.000101912 |
| ENSMMUG00000003298 | ataxin 2 like [Source:VGNC Symbol;Acc:VGNC:70159]                                                   | 2.011659434 | 3.94E-14    | 3.11E-12    |
| ENSMMUG00000022207 | phospholipid phosphatase related 2 [Source:NCBI gene;Acc:714388]                                    | 2.012181361 | 0.000274405 | 0.002124828 |
| ENSMMUG00000061244 |                                                                                                     | 2.012580131 | 0.007992517 | 0.033674926 |
| ENSMMUG00000053460 |                                                                                                     | 2.012661732 | 1.47E-05    | 0.00017267  |
| ENSMMUG00000017189 | regulatory factor X6 [Source:VGNC Symbol;Acc:VGNC:76800]                                            | 2.016508588 | 7.36E-06    | 9.40E-05    |
| ENSMMUG00000052854 | mucin like 1 [Source:NCBI gene;Acc:100423942]                                                       | 2.017851049 | 1.49E-13    | 1.02E-11    |
| ENSMMUG00000063112 |                                                                                                     | 2.018152661 | 0.009646827 | 0.038961187 |
| ENSMMUG00000011440 | neurite extension and migration factor [Source:VGNC Symbol;Acc:VGNC:75274]                          | 2.019224014 | 9.04E-08    | 1.82E-06    |
| ENSMMUG00000007402 | potassium two pore domain channel subfamily K member 7 [Source:VGNC Symbol;Acc:VGNC:73996]          | 2.020428342 | 5.44E-11    | 2.21E-09    |
| ENSMMUG00000043134 | coiled-coil domain containing 159 [Source:NCBI gene;Acc:100424702]                                  | 2.021562352 | 0.000729747 | 0.004910156 |
| ENSMMUG00000062139 |                                                                                                     | 2.023258194 | 0.000173328 | 0.001446581 |
| ENSMMUG00000010309 | septin 8 [Source:VGNC Symbol;Acc:VGNC:77248]                                                        | 2.026777    | 4.28E-05    | 0.000438794 |
| ENSMMUG00000002564 | Fraser extracellular matrix complex subunit 1 [Source:VGNC Symbol;Acc:VGNC:72743]                   | 2.029309594 | 5.56E-12    | 2.84E-10    |
| ENSMMUG00000063988 |                                                                                                     | 2.029326737 | 0.002648303 | 0.013960616 |
| ENSMMUG00000023016 | jade family PHD finger 3 [Source:VGNC Symbol;Acc:VGNC:73640]                                        | 2.030971975 | 2.86E-11    | 1.26E-09    |
| ENSMMUG00000055018 | sushi domain containing 6 [Source:NCBI gene;Acc:712719]                                             | 2.037191297 | 2.39E-10    | 8.53E-09    |
| ENSMMUG00000003106 | SEC16 homolog A, endoplasmic reticulum export factor [Source:VGNC Symbol;Acc:VGNC:77326]            | 2.039009858 | 2.99E-09    | 8.33E-08    |
| ENSMMUG00000023335 | ring finger protein 13 [Source:VGNC Symbol;Acc:VGNC:81557]                                          | 2.040850083 | 4.89E-07    | 8.62E-06    |
| ENSMMUG00000003482 | glycine receptor alpha 2 [Source:VGNC Symbol;Acc:VGNC:73075]                                        | 2.041414804 | 8.25E-05    | 0.000766922 |
| ENSMMUG00000009040 | cornulin [Source:VGNC Symbol;Acc:VGNC:71397]                                                        | 2.042694877 | 0.008394995 | 0.034991529 |
| ENSMMUG00000002810 | TOX high mobility group box family member 2 [Source:VGNC Symbol;Acc:VGNC:79007]                     | 2.043753033 | 1.18E-09    | 3.65E-08    |
| ENSMMUG00000000700 | CLN3 lysosomal/endosomal transmembrane protein, battenin [Source:NCBI gene;Acc:705815]              | 2.046304906 | 1.75E-13    | 1.18E-11    |
| ENSMMUG00000006855 | acyl-CoA thioesterase 2 [Source:NCBI gene;Acc:697011]                                               | 2.048998463 | 6.15E-08    | 1.29E-06    |
| ENSMMUG00000062273 | dephospho-CoA kinase domain containing [Source:NCBI gene;Acc:715841]                                | 2.057730932 | 0.000157048 | 0.001335403 |
| ENSMMUG00000012065 | tubulin tyrosine ligase like 5 [Source:NCBI gene;Acc:703116]                                        | 2.058911606 | 1.37E-07    | 2.65E-06    |
| ENSMMUG00000009886 | Coenzyme A synthase [Source:VGNC Symbol;Acc:VGNC:81373]                                             | 2.059270753 | 3.06E-17    | 4.54E-15    |
| ENSMMUG00000007729 | ilvB acetolactate synthase like [Source:VGNC Symbol;Acc:VGNC:73739]                                 | 2.059874919 | 0.000172103 | 0.001437464 |
| ENSMMUG00000011878 | poly(A) binding protein interacting protein 1 [Source:VGNC Symbol;Acc:VGNC:84476]                   | 2.061254724 | 3.20E-05    | 0.000340881 |
| ENSMMUG00000000874 | carbohydrate sulfotransferase 1 [Source:VGNC Symbol;Acc:VGNC:71055]                                 | 2.064837404 | 9.29E-11    | 3.62E-09    |
| ENSMMUG00000006929 | ST3 beta-galactoside alpha-2,3-sialyltransferase 4 [Source:VGNC Symbol;Acc:VGNC:77827]              | 2.065319143 | 8.97E-12    | 4.38E-10    |
| ENSMMUG00000009887 | MAX dimerization protein MLX [Source:VGNC Symbol;Acc:VGNC:74726]                                    | 2.065702838 | 3.51E-08    | 7.72E-07    |
| ENSMMUG00000062474 | Metazoan signal recognition particle RNA [Source:RFAM;Acc:RF00017]                                  | 2.06641767  | 0.000160421 | 0.00135981  |
| ENSMMUG00000006758 | cytochrome P450, family 27, subfamily A, polypeptide 1 [Source:NCBI gene;Acc:700192]                | 2.067111806 | 5.19E-06    | 6.80E-05    |
| ENSMMUG00000019246 | regulator of calcineurin 2 [Source:VGNC Symbol;Acc:VGNC:82092]                                      | 2.068426445 | 0.000165239 | 0.001389779 |
| ENSMMUG00000061935 |                                                                                                     | 2.071723715 | 1.46E-06    | 2.22E-05    |
| ENSMMUG00000015930 | ADP ribosylation factor like GTPase 6 interacting protein 4 [Source:VGNC Symbol;Acc:VGNC:69860]     | 2.072876164 | 0.008205454 | 0.034333598 |
| ENSMMUG00000031163 | membrane anchored junction protein [Source:VGNC Symbol;Acc:VGNC:74375]                              | 2.07341359  | 3.68E-10    | 1.25E-08    |
| ENSMMUG00000022247 | osteoclastogenesis associated transmembrane protein 1 [Source:VGNC Symbol;Acc:VGNC:75664]           | 2.074093099 | 1.78E-08    | 4.28E-07    |



|                    |                                                                                                |             |             |             |
|--------------------|------------------------------------------------------------------------------------------------|-------------|-------------|-------------|
| ENSMMUG00000049542 |                                                                                                | 2.075512349 | 0.000109111 | 0.000980909 |
| ENSMMUG00000015685 | zinc finger protein 804B [Source:VGNC Symbol;Acc:VGNC:81890]                                   | 2.07720949  | 6.70E-18    | 1.10E-15    |
| ENSMMUG00000014530 | pre-mRNA processing factor 19 [Source:VGNC Symbol;Acc:VGNC:76281]                              | 2.077545762 | 3.69E-10    | 1.25E-08    |
| ENSMMUG00000000419 | Rho GTPase activating protein 26 [Source:VGNC Symbol;Acc:VGNC:69846]                           | 2.078113372 | 1.72E-09    | 5.13E-08    |
| ENSMMUG00000009593 | WAS/WASL interacting protein family member 1 [Source:VGNC Symbol;Acc:VGNC:78784]               | 2.079286626 | 6.82E-10    | 2.20E-08    |
| ENSMMUG00000011798 | eukaryotic translation initiation factor 3 subunit C [Source:NCBI gene;Acc:705696]             | 2.080005339 | 8.93E-14    | 6.53E-12    |
| ENSMMUG00000017906 | DnaJ heat shock protein family (Hsp40) member B1 [Source:NCBI gene;Acc:718890]                 | 2.083178943 | 0.01301323  | 0.048965724 |
| ENSMMUG00000061208 | MAP3K7 C-terminal like [Source:NCBI gene;Acc:713717]                                           | 2.084226912 | 1.80E-15    | 1.91E-13    |
| ENSMMUG00000016796 | reticulophagy regulator family member 3 [Source:VGNC Symbol;Acc:VGNC:76845]                    | 2.086137682 | 8.47E-17    | 1.09E-14    |
| ENSMMUG00000002515 | protein phosphatase 2 phosphatase activator [Source:VGNC Symbol;Acc:VGNC:76583]                | 2.089020587 | 1.90E-07    | 3.58E-06    |
| ENSMMUG00000001220 | adhesion G protein-coupled receptor E1 [Source:VGNC Symbol;Acc:VGNC:69561]                     | 2.090045044 | 1.73E-09    | 5.15E-08    |
| ENSMMUG00000007201 | PDS5 cohesin associated factor B [Source:VGNC Symbol;Acc:VGNC:75835]                           | 2.092794818 | 2.23E-16    | 2.72E-14    |
| ENSMMUG00000053481 |                                                                                                | 2.095348424 | 1.56E-05    | 0.000181822 |
| ENSMMUG00000060761 |                                                                                                | 2.09808935  | 2.18E-16    | 2.68E-14    |
| ENSMMUG00000007200 | NEDD4 binding protein 2 like 2 [Source:VGNC Symbol;Acc:VGNC:75031]                             | 2.098775782 | 3.29E-13    | 2.12E-11    |
| ENSMMUG00000023244 | guanylate cyclase 1 soluble subunit alpha 1 [Source:VGNC Symbol;Acc:VGNC:73327]                | 2.100297893 | 0.011073738 | 0.043151727 |
| ENSMMUG00000062063 | melanoma-associated antigen 3 [Source:NCBI gene;Acc:711544]                                    | 2.103030795 | 2.13E-09    | 6.16E-08    |
| ENSMMUG00000003303 | Tu translation elongation factor, mitochondrial [Source:VGNC Symbol;Acc:VGNC:78674]            | 2.103953167 | 1.30E-14    | 1.12E-12    |
| ENSMMUG00000032142 | complement C8 gamma chain [Source:VGNC Symbol;Acc:VGNC:70481]                                  | 2.106582486 | 0.000331999 | 0.002506306 |
| ENSMMUG00000015416 | bromodomain and PHD finger containing 3 [Source:VGNC Symbol;Acc:VGNC:70309]                    | 2.107479273 | 5.75E-08    | 1.22E-06    |
| ENSMMUG00000000863 | dynein axonemal assembly factor 4 [Source:VGNC Symbol;Acc:VGNC:71881]                          | 2.107704358 | 5.91E-13    | 3.64E-11    |
| ENSMMUG00000016890 | solute carrier family 37 member 4 [Source:VGNC Symbol;Acc:VGNC:77591]                          | 2.118948294 | 2.13E-10    | 7.72E-09    |
| ENSMMUG00000008070 | YEATS domain containing 2 [Source:VGNC Symbol;Acc:VGNC:79502]                                  | 2.119298256 | 1.36E-15    | 1.48E-13    |
| ENSMMUG00000058437 |                                                                                                | 2.12144036  | 1.15E-12    | 6.68E-11    |
| ENSMMUG00000055322 | EPH receptor A1 [Source:NCBI gene;Acc:706295]                                                  | 2.122647546 | 5.01E-15    | 4.89E-13    |
| ENSMMUG00000028471 | U7 small nuclear RNA [Source:RFAM;Acc:RF00066]                                                 | 2.125473174 | 0.000120393 | 0.001069033 |
| ENSMMUG00000041101 | protein phosphatase 2 regulatory subunit B'beta [Source:NCBI gene;Acc:722026]                  | 2.127057669 | 3.32E-18    | 5.71E-16    |
| ENSMMUG00000001036 | coagulation factor VII [Source:VGNC Symbol;Acc:VGNC:72466]                                     | 2.127946748 | 2.51E-11    | 1.10E-09    |
| ENSMMUG00000017761 | zinc finger protein 518B [Source:VGNC Symbol;Acc:VGNC:79802]                                   | 2.129745403 | 0.001841885 | 0.010386853 |
| ENSMMUG00000013830 | glucose-6-phosphatase catalytic subunit 2 [Source:NCBI gene;Acc:709062]                        | 2.133047005 | 6.54E-07    | 1.09E-05    |
| ENSMMUG00000060273 | mitochondrial ribosomal protein L32 [Source:NCBI gene;Acc:701820]                              | 2.133427984 | 6.74E-08    | 1.40E-06    |
| ENSMMUG00000021428 | lipocalin 12 [Source:VGNC Symbol;Acc:VGNC:74143]                                               | 2.133492902 | 1.77E-08    | 4.27E-07    |
| ENSMMUG00000003598 | tripartite motif containing 7 [Source:VGNC Symbol;Acc:VGNC:79022]                              | 2.14819925  | 5.82E-11    | 2.35E-09    |
| ENSMMUG00000054568 |                                                                                                | 2.14847     | 7.38E-06    | 9.41E-05    |
| ENSMMUG00000019418 | erythrocyte membrane protein band 4.1 like 3 [Source:VGNC Symbol;Acc:VGNC:72233]               | 2.148718135 | 6.43E-11    | 2.57E-09    |
| ENSMMUG00000062208 | Metazoan signal recognition particle RNA [Source:RFAM;Acc:RF00017]                             | 2.149655061 | 0.001891831 | 0.010582541 |
| ENSMMUG00000012797 | zinc finger protein 233 [Source:VGNC Symbol;Acc:VGNC:79903]                                    | 2.149752511 | 1.02E-11    | 4.89E-10    |
| ENSMMUG00000051975 |                                                                                                | 2.153329884 | 0.000179041 | 0.001490813 |
| ENSMMUG00000010837 | VRK serine/threonine kinase 3 [Source:VGNC Symbol;Acc:VGNC:81605]                              | 2.15535329  | 0.000778713 | 0.005168991 |
| ENSMMUG00000050339 | Metazoan signal recognition particle RNA [Source:RFAM;Acc:RF00017]                             | 2.158263567 | 9.53E-05    | 0.000870141 |
| ENSMMUG00000022613 | reversion inducing cysteine rich protein with kazal motifs [Source:VGNC Symbol;Acc:VGNC:76722] | 2.159147542 | 2.52E-14    | 2.08E-12    |
| ENSMMUG00000022730 | cytochrome P450, family 3, subfamily A, polypeptide 5 [Source:NCBI gene;Acc:678692]            | 2.159922846 | 1.16E-12    | 6.73E-11    |
| ENSMMUG00000021877 | protein kinase AMP-activated non-catalytic subunit gamma 3 [Source:VGNC Symbol;Acc:VGNC:76406] | 2.160152028 | 4.70E-05    | 0.00047649  |
| ENSMMUG00000064557 |                                                                                                | 2.162373633 | 9.71E-09    | 2.42E-07    |
| ENSMMUG00000001753 | integrin subunit alpha 1 [Source:VGNC Symbol;Acc:VGNC:73772]                                   | 2.16368904  | 7.80E-11    | 3.07E-09    |
| ENSMMUG00000005737 | SLC9A3 regulator 1 [Source:VGNC Symbol;Acc:VGNC:77639]                                         | 2.164373161 | 0.0039659   | 0.019248474 |
| ENSMMUG00000061335 |                                                                                                | 2.164904536 | 4.81E-06    | 6.39E-05    |
| ENSMMUG00000016417 | chromobox 8 [Source:NCBI gene;Acc:717514]                                                      | 2.165494283 | 4.91E-11    | 2.02E-09    |
| ENSMMUG00000016143 | sialophorin [Source:VGNC Symbol;Acc:VGNC:77861]                                                | 2.165680845 | 8.67E-13    | 5.16E-11    |
| ENSMMUG00000056266 | Metazoan signal recognition particle RNA [Source:RFAM;Acc:RF00017]                             | 2.167899569 | 4.56E-05    | 0.000463706 |
| ENSMMUG00000001427 | myosin heavy chain 14 [Source:VGNC Symbol;Acc:VGNC:75006]                                      | 2.170811791 | 4.64E-07    | 8.22E-06    |

|                    |                                                                                                  |             |             |             |
|--------------------|--------------------------------------------------------------------------------------------------|-------------|-------------|-------------|
| ENSMMUG00000050739 |                                                                                                  | 2.1715953   | 0.001651659 | 0.009522308 |
| ENSMMUG00000046774 | RAS like proto-oncogene B [Source:NCBI gene;Acc:695852]                                          | 2.172455235 | 1.18E-08    | 2.92E-07    |
| ENSMMUG00000054414 |                                                                                                  | 2.175828738 | 4.57E-06    | 6.11E-05    |
| ENSMMUG00000065247 | opioid receptor kappa 1 [Source:NCBI gene;Acc:710783]                                            | 2.177259803 | 3.00E-10    | 1.03E-08    |
| ENSMMUG00000039205 |                                                                                                  | 2.178003254 | 0.005456298 | 0.025035189 |
| ENSMMUG00000058013 | melanoma-associated antigen 3 [Source:NCBI gene;Acc:706103]                                      | 2.180690436 | 1.29E-05    | 0.000154475 |
| ENSMMUG00000011427 | syntaxin 10 [Source:VGNC Symbol;Acc:VGNC:78040]                                                  | 2.183871783 | 1.13E-13    | 7.84E-12    |
| ENSMMUG00000022451 | proteasome 20S subunit alpha 2 [Source:NCBI gene;Acc:701683]                                     | 2.186326246 | 0.003370354 | 0.016882235 |
| ENSMMUG00000003348 | neurofilament light [Source:VGNC Symbol;Acc:VGNC:75307]                                          | 2.187262132 | 1.72E-11    | 7.88E-10    |
| ENSMMUG00000009377 | tripartite motif containing 47 [Source:VGNC Symbol;Acc:VGNC:79171]                               | 2.187440609 | 2.37E-07    | 4.43E-06    |
| ENSMMUG00000060517 |                                                                                                  | 2.188747053 | 5.97E-08    | 1.26E-06    |
| ENSMMUG00000009372 | tetratricopeptide repeat domain 27 [Source:VGNC Symbol;Acc:VGNC:79565]                           | 2.190136216 | 0.012313432 | 0.046754789 |
| ENSMMUG00000060437 | Metazoan signal recognition particle RNA [Source:RFAM;Acc:RF00017]                               | 2.193505091 | 0.006143517 | 0.027410509 |
| ENSMMUG00000023370 | DDB1 and CUL4 associated factor 17 [Source:VGNC Symbol;Acc:VGNC:71709]                           | 2.1943693   | 6.95E-11    | 2.75E-09    |
| ENSMMUG00000022463 | C-type lectin CD209L2 [Source:NCBI gene;Acc:574373]                                              | 2.195040832 | 0.0009343   | 0.005943199 |
| ENSMMUG00000023060 | A-kinase anchoring protein 4 [Source:VGNC Symbol;Acc:VGNC:69770]                                 | 2.201412868 | 0.000487827 | 0.003502071 |
| ENSMMUG00000023479 | latent transforming growth factor beta binding protein 3 [Source:VGNC Symbol;Acc:VGNC:74458]     | 2.205525668 | 7.49E-18    | 1.21E-15    |
| ENSMMUG00000023449 | mitofusin 2 [Source:VGNC Symbol;Acc:VGNC:74522]                                                  | 2.206874825 | 0.000102025 | 0.000924888 |
| ENSMMUG00000021564 | lysine demethylase 2B [Source:VGNC Symbol;Acc:VGNC:81425]                                        | 2.208389675 | 1.81E-06    | 2.69E-05    |
| ENSMMUG00000064532 | mucin 16, cell surface associated [Source:NCBI gene;Acc:106996460]                               | 2.210732483 | 5.83E-15    | 5.54E-13    |
| ENSMMUG00000059134 |                                                                                                  | 2.215562492 | 0.000595016 | 0.004137232 |
| ENSMMUG00000018246 | transmembrane and coiled-coil domains 6 [Source:VGNC Symbol;Acc:VGNC:84507]                      | 2.21771134  | 2.18E-13    | 1.46E-11    |
| ENSMMUG00000008162 | fibroblast growth factor binding protein 1 [Source:VGNC Symbol;Acc:VGNC:72536]                   | 2.21953297  | 4.71E-10    | 1.55E-08    |
| ENSMMUG00000005992 | zinc metalloproteinase STE24 [Source:VGNC Symbol;Acc:VGNC:78830]                                 | 2.221364249 | 3.68E-06    | 5.04E-05    |
| ENSMMUG00000062454 |                                                                                                  | 2.222083183 | 2.06E-09    | 6.00E-08    |
| ENSMMUG00000062863 |                                                                                                  | 2.223756941 | 7.02E-07    | 1.16E-05    |
| ENSMMUG00000014397 | NCK associated protein 1 [Source:VGNC Symbol;Acc:VGNC:75143]                                     | 2.224083885 | 0.000247794 | 0.001959383 |
| ENSMMUG00000061123 | Metazoan signal recognition particle RNA [Source:RFAM;Acc:RF00017]                               | 2.224506278 | 0.004445487 | 0.021159035 |
| ENSMMUG00000014699 |                                                                                                  | 2.225258507 | 8.73E-18    | 1.37E-15    |
| ENSMMUG00000006931 | kirre like nephrin family adhesion molecule 3 [Source:NCBI gene;Acc:714534]                      | 2.229283602 | 2.13E-15    | 2.24E-13    |
| ENSMMUG00000045093 | cyclin B3 [Source:NCBI gene;Acc:694534]                                                          | 2.229952558 | 2.20E-09    | 6.30E-08    |
| ENSMMUG00000020190 | valosin containing protein [Source:VGNC Symbol;Acc:VGNC:78762]                                   | 2.23382986  | 1.02E-07    | 2.03E-06    |
| ENSMMUG00000050793 | N-acetyl-alpha-glucosaminidase [Source:NCBI gene;Acc:707186]                                     | 2.234998976 | 7.09E-13    | 4.27E-11    |
| ENSMMUG00000046918 |                                                                                                  | 2.236163442 | 0.003595854 | 0.017762833 |
| ENSMMUG00000017256 | calcium voltage-gated channel subunit alpha1 G [Source:VGNC Symbol;Acc:VGNC:70504]               | 2.238756036 | 2.17E-15    | 2.26E-13    |
| ENSMMUG00000022996 | HCLS1 binding protein 3 [Source:VGNC Symbol;Acc:VGNC:82158]                                      | 2.240692071 | 3.10E-17    | 4.54E-15    |
| ENSMMUG00000056522 |                                                                                                  | 2.242173089 | 2.88E-05    | 0.000310836 |
| ENSMMUG00000003437 | signal transducer and activator of transcription 5B [Source:NCBI gene;Acc:709760]                | 2.246755186 | 4.98E-14    | 3.86E-12    |
| ENSMMUG00000000931 | solute carrier family 35 member A3 [Source:VGNC Symbol;Acc:VGNC:77461]                           | 2.248708804 | 0.000354727 | 0.002650174 |
| ENSMMUG00000057554 | Metazoan signal recognition particle RNA [Source:RFAM;Acc:RF00017]                               | 2.249226853 | 0.005472373 | 0.025098316 |
| ENSMMUG00000064892 |                                                                                                  | 2.249257901 | 1.11E-06    | 1.73E-05    |
| ENSMMUG00000013798 | fatty acid desaturase 1 [Source:VGNC Symbol;Acc:VGNC:72471]                                      | 2.25331216  | 5.04E-06    | 6.63E-05    |
| ENSMMUG00000018144 | C2 calcium-dependent domain-containing protein 6 [Source:NCBI gene;Acc:702140]                   | 2.254416773 | 2.09E-11    | 9.37E-10    |
| ENSMMUG00000001472 | TIA1 cytotoxic granule associated RNA binding protein like 1 [Source:VGNC Symbol;Acc:VGNC:78354] | 2.254439513 | 4.14E-11    | 1.73E-09    |
| ENSMMUG00000050543 |                                                                                                  | 2.258867629 | 1.17E-06    | 1.82E-05    |
| ENSMMUG00000018034 | suppression of tumorigenicity 14 [Source:VGNC Symbol;Acc:VGNC:77897]                             | 2.262170661 | 4.57E-19    | 9.35E-17    |
| ENSMMUG00000009988 | transmembrane protein 59 like [Source:VGNC Symbol;Acc:VGNC:78919]                                | 2.264048309 | 1.63E-12    | 9.04E-11    |
| ENSMMUG00000045513 |                                                                                                  | 2.264334079 | 4.59E-06    | 6.13E-05    |
| ENSMMUG00000046169 |                                                                                                  | 2.265259205 | 7.98E-05    | 0.00074675  |
| ENSMMUG00000056529 | synaptotagmin 3 [Source:NCBI gene;Acc:719650]                                                    | 2.267054691 | 0.002895715 | 0.014895197 |
| ENSMMUG00000061606 | Metazoan signal recognition particle RNA [Source:RFAM;Acc:RF00017]                               | 2.272115071 | 0.000799759 | 0.005269947 |

|                    |                                                                                                           |             |             |             |
|--------------------|-----------------------------------------------------------------------------------------------------------|-------------|-------------|-------------|
| ENSMMUG00000014237 | lysine methyltransferase 5B [Source:VGNC Symbol;Acc:VGNC:74110]                                           | 2.278765809 | 3.70E-13    | 2.35E-11    |
| ENSMMUG00000009312 | leukotriene A4 hydrolase [Source:VGNC Symbol;Acc:VGNC:74453]                                              | 2.279453707 | 3.81E-07    | 6.88E-06    |
| ENSMMUG00000050844 | BTB domain containing 18 [Source:NCBI gene;Acc:703264]                                                    | 2.280005698 | 0.002707169 | 0.014174365 |
| ENSMMUG00000061684 |                                                                                                           | 2.28017948  | 3.80E-05    | 0.000395755 |
| ENSMMUG00000002943 | glutaminyl-tRNA synthetase 1 [Source:VGNC Symbol;Acc:VGNC:76634]                                          | 2.280319184 | 0.011894616 | 0.045608578 |
| ENSMMUG00000020726 | dihydropyrimidine dehydrogenase [Source:VGNC Symbol;Acc:VGNC:71982]                                       | 2.280883089 | 1.31E-12    | 7.53E-11    |
| ENSMMUG00000002536 | calcium binding protein 1 [Source:VGNC Symbol;Acc:VGNC:70495]                                             | 2.281451524 | 8.09E-09    | 2.04E-07    |
| ENSMMUG00000012801 | zinc finger protein 235 [Source:VGNC Symbol;Acc:VGNC:78825]                                               | 2.283476979 | 2.47E-16    | 2.94E-14    |
| ENSMMUG00000060497 |                                                                                                           | 2.283572579 | 0.006838106 | 0.029954386 |
| ENSMMUG00000000740 | spermatogenesis associated 2 [Source:VGNC Symbol;Acc:VGNC:77923]                                          | 2.284259834 | 7.69E-09    | 1.95E-07    |
| ENSMMUG00000052252 | protein phosphatase 1 regulatory subunit 3F [Source:NCBI gene;Acc:715950]                                 | 2.28487577  | 1.78E-12    | 9.82E-11    |
| ENSMMUG00000057909 |                                                                                                           | 2.28947438  | 0.000201319 | 0.001645954 |
| ENSMMUG00000000951 | integrin subunit beta 2 [Source:VGNC Symbol;Acc:VGNC:73786]                                               | 2.292714701 | 1.85E-18    | 3.28E-16    |
| ENSMMUG00000059182 |                                                                                                           | 2.296638872 | 3.67E-09    | 1.00E-07    |
| ENSMMUG00000060576 |                                                                                                           | 2.298552    | 4.99E-13    | 3.11E-11    |
| ENSMMUG00000008778 | parvalbumin [Source:VGNC Symbol;Acc:VGNC:76627]                                                           | 2.298840415 | 3.63E-12    | 1.91E-10    |
| ENSMMUG00000058817 |                                                                                                           | 2.300138298 | 1.98E-13    | 1.33E-11    |
| ENSMMUG00000006093 | enhancer of zeste 1 polycomb repressive complex 2 subunit [Source:VGNC Symbol;Acc:VGNC:72457]             | 2.301268296 | 1.79E-15    | 1.91E-13    |
| ENSMMUG00000063759 | transmembrane protein 185B [Source:NCBI gene;Acc:695744]                                                  | 2.302957971 | 2.38E-11    | 1.06E-09    |
| ENSMMUG00000049355 | ALX homeobox 4 [Source:NCBI gene;Acc:715652]                                                              | 2.304632865 | 0.001460606 | 0.008599316 |
| ENSMMUG00000013832 | ATP binding cassette subfamily B member 11 [Source:VGNC Symbol;Acc:VGNC:81339]                            | 2.306366795 | 0.000123759 | 0.001094432 |
| ENSMMUG00000004587 | gasdermin B [Source:VGNC Symbol;Acc:VGNC:73219]                                                           | 2.309155147 | 0.00124707  | 0.007551431 |
| ENSMMUG00000057702 |                                                                                                           | 2.311597299 | 3.75E-15    | 3.73E-13    |
| ENSMMUG00000003098 | peptidase, mitochondrial processing alpha subunit [Source:VGNC Symbol;Acc:VGNC:76062]                     | 2.31189603  | 3.60E-12    | 1.91E-10    |
| ENSMMUG00000016099 | hedgehog acyltransferase [Source:NCBI gene;Acc:712333]                                                    | 2.313446782 | 0.000188492 | 0.001551622 |
| ENSMMUG00000048566 | MCF.2 cell line derived transforming sequence like [Source:NCBI gene;Acc:713961]                          | 2.316993175 | 9.15E-14    | 6.65E-12    |
| ENSMMUG00000000375 | pleckstrin homology and RhoGEF domain containing G6 [Source:VGNC Symbol;Acc:VGNC:76110]                   | 2.317635715 | 5.67E-14    | 4.30E-12    |
| ENSMMUG00000012635 | zyxin [Source:VGNC Symbol;Acc:VGNC:78917]                                                                 | 2.328346333 | 1.43E-12    | 8.11E-11    |
| ENSMMUG00000053781 | Rho GDP dissociation inhibitor beta [Source:NCBI gene;Acc:702320]                                         | 2.328679901 | 0.001811684 | 0.010237856 |
| ENSMMUG00000056437 | Metazoan signal recognition particle RNA [Source:RFAM;Acc:RF00017]                                        | 2.329734846 | 0.000262009 | 0.002043446 |
| ENSMMUG00000006180 | tetratricopeptide repeat, ankyrin repeat and coiled-coil containing 1 [Source:VGNC Symbol;Acc:VGNC:78238] | 2.330957992 | 1.29E-21    | 4.23E-19    |
| ENSMMUG00000021634 | TNF alpha induced protein 2 [Source:VGNC Symbol;Acc:VGNC:78579]                                           | 2.33224567  | 7.15E-13    | 4.28E-11    |
| ENSMMUG00000003819 | nitric oxide synthase interacting protein [Source:VGNC Symbol;Acc:VGNC:75207]                             | 2.333727207 | 5.57E-07    | 9.54E-06    |
| ENSMMUG00000004797 | CTP synthase 2 [Source:VGNC Symbol;Acc:VGNC:71550]                                                        | 2.333754145 | 3.24E-06    | 4.49E-05    |
| ENSMMUG00000005070 | ecotropic viral integration site 5 [Source:NCBI gene;Acc:706592]                                          | 2.33646967  | 7.68E-08    | 1.57E-06    |
| ENSMMUG00000062091 |                                                                                                           | 2.34170844  | 0.001165803 | 0.00712689  |
| ENSMMUG00000009559 | minichromosome maintenance complex binding protein [Source:VGNC Symbol;Acc:VGNC:74583]                    | 2.341775073 | 1.77E-05    | 0.000202748 |
| ENSMMUG00000052891 |                                                                                                           | 2.350127589 | 4.22E-07    | 7.56E-06    |
| ENSMMUG00000003484 | tectonin beta-propeller repeat containing 2 [Source:NCBI gene;Acc:708959]                                 | 2.353146704 | 9.79E-08    | 1.96E-06    |
| ENSMMUG00000015866 | vesicle transport through interaction with t-SNAREs 1B [Source:NCBI gene;Acc:711113]                      | 2.360382448 | 4.49E-17    | 6.16E-15    |
| ENSMMUG00000062419 |                                                                                                           | 2.363364817 | 0.011899073 | 0.045608578 |
| ENSMMUG00000052453 | serpin family A member 11 [Source:NCBI gene;Acc:701483]                                                   | 2.363413662 | 0.003910255 | 0.019038107 |
| ENSMMUG00000020462 | CD300e molecule [Source:NCBI gene;Acc:114673189]                                                          | 2.36536413  | 8.29E-05    | 0.000770496 |
| ENSMMUG00000006091 | contactin associated protein 1 [Source:VGNC Symbol;Acc:VGNC:71390]                                        | 2.366149702 | 1.09E-13    | 7.72E-12    |
| ENSMMUG00000014349 | integrin subunit alpha X [Source:NCBI gene;Acc:100427850]                                                 | 2.370464685 | 7.73E-06    | 9.81E-05    |
| ENSMMUG00000039101 | pelota mRNA surveillance and ribosome rescue factor [Source:VGNC Symbol;Acc:VGNC:84478]                   | 2.371283868 | 1.10E-14    | 9.86E-13    |
| ENSMMUG00000004028 | kelch repeat and BTB domain containing 13 [Source:VGNC Symbol;Acc:VGNC:73953]                             | 2.372272145 | 0.004417572 | 0.021044658 |
| ENSMMUG00000003539 | glutamine rich 2 [Source:VGNC Symbol;Acc:VGNC:76534]                                                      | 2.373683203 | 0.000145197 | 0.001250334 |
| ENSMMUG00000011411 | sperm acrosome associated 3 [Source:VGNC Symbol;Acc:VGNC:77930]                                           | 2.376595183 | 5.32E-10    | 1.74E-08    |
| ENSMMUG00000000421 | nuclear receptor subfamily 3 group C member 1 [Source:VGNC Symbol;Acc:VGNC:75515]                         | 2.378570473 | 1.60E-20    | 4.34E-18    |
| ENSMMUG00000014265 | TAP binding protein like [Source:NCBI gene;Acc:712626]                                                    | 2.383572313 | 4.44E-07    | 7.90E-06    |



|                    |                                                                                              |             |             |             |
|--------------------|----------------------------------------------------------------------------------------------|-------------|-------------|-------------|
| ENSMMUG00000004103 | collagen type XI alpha 1 chain [Source:VGNC Symbol;Acc:VGNC:71289]                           | 2.38382419  | 1.16E-22    | 4.48E-20    |
| ENSMMUG00000002377 | Rab interacting lysosomal protein [Source:VGNC Symbol;Acc:VGNC:76866]                        | 2.384164225 | 0.00015168  | 0.001293281 |
| ENSMMUG00000013176 | NAD(P) dependent steroid dehydrogenase-like [Source:NCBI gene;Acc:693333]                    | 2.384600958 | 0.000258286 | 0.002026073 |
| ENSMMUG00000039009 |                                                                                              | 2.385080103 | 1.35E-05    | 0.000160307 |
| ENSMMUG00000001910 | heat shock protein family B (small) member 7 [Source:NCBI gene;Acc:696704]                   | 2.385469039 | 6.03E-05    | 0.000592359 |
| ENSMMUG00000050405 |                                                                                              | 2.386277005 | 8.45E-08    | 1.71E-06    |
| ENSMMUG00000001820 | regulator of G protein signaling 6 [Source:VGNC Symbol;Acc:VGNC:76691]                       | 2.396282945 | 0.009971159 | 0.039976892 |
| ENSMMUG00000005698 | alkaline ceramidase 1 [Source:VGNC Symbol;Acc:VGNC:69460]                                    | 2.398881886 | 0.009670071 | 0.039015224 |
| ENSMMUG00000057196 | pulmonary surfactant-associated protein A [Source:NCBI gene;Acc:701715]                      | 2.400622524 | 1.52E-20    | 4.21E-18    |
| ENSMMUG00000025050 | Y RNA [Source:RFAM;Acc:RF00019]                                                              | 2.403990364 | 0.004578753 | 0.021650648 |
| ENSMMUG00000009184 | myelin protein zero like 1 [Source:NCBI gene;Acc:698437]                                     | 2.405725403 | 0.002371565 | 0.01276788  |
| ENSMMUG00000020919 | shroom family member 3 [Source:VGNC Symbol;Acc:VGNC:77352]                                   | 2.405766658 | 0.000376641 | 0.002784223 |
| ENSMMUG00000017124 | spliceosome associated factor 3, U4/U6 recycling protein [Source:VGNC Symbol;Acc:VGNC:77029] | 2.405781585 | 8.88E-06    | 0.000111833 |
| ENSMMUG00000058432 | zinc finger DHHC-type palmitoyltransferase 18 [Source:NCBI gene;Acc:719959]                  | 2.407067625 | 2.47E-18    | 4.32E-16    |
| ENSMMUG00000061342 |                                                                                              | 2.408545441 | 3.42E-15    | 3.43E-13    |
| ENSMMUG00000006853 | crystallin beta B2 [Source:NCBI gene;Acc:100144420]                                          | 2.408658517 | 0.003660161 | 0.018022966 |
| ENSMMUG00000021610 | regulator of G protein signaling 10 [Source:VGNC Symbol;Acc:VGNC:76915]                      | 2.411544071 | 1.37E-18    | 2.60E-16    |
| ENSMMUG00000002124 | beta-1,4-galactosyltransferase 5 [Source:VGNC Symbol;Acc:VGNC:70212]                         | 2.414727717 | 7.46E-07    | 1.22E-05    |
| ENSMMUG00000055710 | taste 2 receptor member 38 [Source:NCBI gene;Acc:695549]                                     | 2.415018142 | 2.10E-05    | 0.000233782 |
| ENSMMUG00000056992 | zinc finger AN1-type containing 6 [Source:NCBI gene;Acc:717543]                              | 2.422881927 | 7.22E-07    | 1.19E-05    |
| ENSMMUG00000063238 |                                                                                              | 2.423479681 | 0.000136889 | 0.001192058 |
| ENSMMUG00000064824 | gremlin 2, DAN family BMP antagonist [Source:NCBI gene;Acc:708280]                           | 2.427454372 | 1.32E-07    | 2.58E-06    |
| ENSMMUG00000012147 | collagen type V alpha 1 chain [Source:NCBI gene;Acc:722014]                                  | 2.428102395 | 6.27E-09    | 1.62E-07    |
| ENSMMUG00000018345 | phosphatidylethanolamine binding protein 4 [Source:VGNC Symbol;Acc:VGNC:82204]               | 2.433128635 | 3.51E-14    | 2.79E-12    |
| ENSMMUG00000057687 |                                                                                              | 2.433809416 | 4.48E-15    | 4.41E-13    |
| ENSMMUG00000063898 | apolipoprotein F [Source:NCBI gene;Acc:712761]                                               | 2.436030248 | 6.41E-07    | 1.07E-05    |
| ENSMMUG00000055811 |                                                                                              | 2.436886509 | 1.99E-10    | 7.33E-09    |
| ENSMMUG00000005986 | Kruppel like factor 17 [Source:NCBI gene;Acc:702810]                                         | 2.437461655 | 0.000223077 | 0.001792725 |
| ENSMMUG00000059299 | membrane spanning 4-domains A2 [Source:NCBI gene;Acc:697830]                                 | 2.439034254 | 0.003855451 | 0.01885603  |
| ENSMMUG00000014076 | AF4/FMR2 family member 1 [Source:VGNC Symbol;Acc:VGNC:69817]                                 | 2.440296144 | 0.005754332 | 0.026082291 |
| ENSMMUG00000059188 |                                                                                              | 2.442597837 | 9.71E-08    | 1.95E-06    |
| ENSMMUG00000049678 |                                                                                              | 2.447888495 | 4.92E-09    | 1.30E-07    |
| ENSMMUG00000016549 | matrix metalloproteinase 9 [Source:VGNC Symbol;Acc:VGNC:74903]                               | 2.448581323 | 0.002524003 | 0.013396631 |
| ENSMMUG00000056980 |                                                                                              | 2.448862634 | 0.0006307   | 0.004346292 |
| ENSMMUG00000023403 | GTP binding protein 3, mitochondrial [Source:VGNC Symbol;Acc:VGNC:73170]                     | 2.450930818 | 0.001087043 | 0.006721427 |
| ENSMMUG00000031534 | ankyrin repeat and ubiquitin domain containing 1 [Source:VGNC Symbol;Acc:VGNC:84239]         | 2.453548857 | 4.57E-16    | 5.21E-14    |
| ENSMMUG00000022728 | zinc finger and SCAN domain containing 25 [Source:VGNC Symbol;Acc:VGNC:79344]                | 2.456488299 | 8.65E-11    | 3.39E-09    |
| ENSMMUG00000018664 | collagen type IX alpha 2 chain [Source:VGNC Symbol;Acc:VGNC:71307]                           | 2.45759261  | 1.87E-10    | 7.04E-09    |
| ENSMMUG00000001568 | AT-rich interaction domain 3B [Source:VGNC Symbol;Acc:VGNC:69827]                            | 2.458474153 | 1.28E-11    | 6.06E-10    |
| ENSMMUG00000058907 |                                                                                              | 2.459705058 | 0.001214178 | 0.007366305 |
| ENSMMUG00000009564 | NMD3 ribosome export adaptor [Source:VGNC Symbol;Acc:VGNC:75242]                             | 2.460995282 | 3.33E-05    | 0.00035298  |
| ENSMMUG00000056798 |                                                                                              | 2.462397214 | 0.00119101  | 0.007248434 |
| ENSMMUG00000053691 | Metazoan signal recognition particle RNA [Source:RFAM;Acc:RF00017]                           | 2.464530497 | 0.012750444 | 0.048077117 |
| ENSMMUG00000055589 |                                                                                              | 2.465321906 | 7.02E-05    | 0.000670609 |
| ENSMMUG00000060581 |                                                                                              | 2.470886784 | 1.52E-05    | 0.000177328 |
| ENSMMUG00000035888 | small nucleolar RNA, C/D box 121A [Source:HGNC Symbol;Acc:HGNC:33560]                        | 2.471075038 | 0.000730325 | 0.004910741 |
| ENSMMUG00000014408 | GIT ArfGAP 1 [Source:VGNC Symbol;Acc:VGNC:73053]                                             | 2.472054729 | 0.004680875 | 0.022027766 |
| ENSMMUG00000002376 | scavenger receptor class F member 1 [Source:VGNC Symbol;Acc:VGNC:77027]                      | 2.473662038 | 5.07E-07    | 8.86E-06    |
| ENSMMUG00000053984 |                                                                                              | 2.480878196 | 0.011557535 | 0.044587883 |
| ENSMMUG00000058758 |                                                                                              | 2.486414857 | 0.009389494 | 0.038096026 |
| ENSMMUG00000007140 | MOK protein kinase [Source:VGNC Symbol;Acc:VGNC:84394]                                       | 2.488470751 | 0.001611187 | 0.009323712 |

|                     |                                                                                                                  |             |             |             |
|---------------------|------------------------------------------------------------------------------------------------------------------|-------------|-------------|-------------|
| ENSMMUG00000049894  |                                                                                                                  | 2.489010183 | 0.001678479 | 0.009641019 |
| ENSMMUG00000003684  | ATPase phospholipid transporting 8B4 (putative) [Source:VGNC Symbol;Acc:VGNC:84311]                              | 2.492278044 | 1.08E-12    | 6.32E-11    |
| ENSMMUG00000018239  | centrosomal protein 83 [Source:VGNC Symbol;Acc:VGNC:70992]                                                       | 2.493157647 | 5.19E-15    | 5.02E-13    |
| ENSMMUG000000054960 |                                                                                                                  | 2.501760957 | 5.41E-06    | 7.07E-05    |
| ENSMMUG000000061576 |                                                                                                                  | 2.503178542 | 0.001922671 | 0.010725179 |
| ENSMMUG000000055038 |                                                                                                                  | 2.504618205 | 0.001838237 | 0.010371679 |
| ENSMMUG00000015744  | zinc finger protein 302 [Source:NCBI gene;Acc:706279]                                                            | 2.50512321  | 3.51E-11    | 1.52E-09    |
| ENSMMUG000000055897 |                                                                                                                  | 2.50519348  | 1.89E-14    | 1.60E-12    |
| ENSMMUG00000002950  | transferrin receptor 2 [Source:VGNC Symbol;Acc:VGNC:81770]                                                       | 2.519231313 | 6.59E-14    | 4.92E-12    |
| ENSMMUG00000018237  | plexin C1 [Source:VGNC Symbol;Acc:VGNC:76190]                                                                    | 2.520922991 | 2.18E-22    | 7.87E-20    |
| ENSMMUG000000038524 | olfactory receptor 2M4 [Source:NCBI gene;Acc:100424541]                                                          | 2.521794872 | 1.38E-17    | 2.10E-15    |
| ENSMMUG000000050549 | lysyl oxidase like 2 [Source:NCBI gene;Acc:710151]                                                               | 2.522924324 | 2.56E-16    | 3.02E-14    |
| ENSMMUG000000055012 |                                                                                                                  | 2.523633996 | 0.00600818  | 0.026943114 |
| ENSMMUG000000059436 | interleukin 10 receptor subunit alpha [Source:NCBI gene;Acc:704383]                                              | 2.524748753 | 2.83E-22    | 9.90E-20    |
| ENSMMUG000000052777 |                                                                                                                  | 2.525246482 | 7.01E-08    | 1.45E-06    |
| ENSMMUG00000008514  | lin-54 DREAM MuvB core complex component [Source:VGNC Symbol;Acc:VGNC:74123]                                     | 2.526294558 | 0.001371007 | 0.008164991 |
| ENSMMUG000000038944 |                                                                                                                  | 2.530622455 | 2.40E-19    | 5.23E-17    |
| ENSMMUG000000038989 | erythropoietin receptor [Source:NCBI gene;Acc:714546]                                                            | 2.531037822 | 0.000731194 | 0.004910741 |
| ENSMMUG000000048621 | enolase-phosphatase 1 [Source:NCBI gene;Acc:106998330]                                                           | 2.535543052 | 1.39E-11    | 6.55E-10    |
| ENSMMUG00000017287  | PAT1 homolog 1, processing body mRNA decay factor [Source:VGNC Symbol;Acc:VGNC:75684]                            | 2.545980329 | 2.60E-10    | 9.22E-09    |
| ENSMMUG00000004330  | peptidase domain containing associated with muscle regeneration 1 [Source:VGNC Symbol;Acc:VGNC:75673]            | 2.549180108 | 0.01222749  | 0.046606918 |
| ENSMMUG00000016438  | protein kinase D3 [Source:VGNC Symbol;Acc:VGNC:76415]                                                            | 2.557379433 | 7.25E-10    | 2.32E-08    |
| ENSMMUG00000023048  | cytochrome b-c1 complex subunit Rieske, mitochondrial [Source:NCBI gene;Acc:705178]                              | 2.559264538 | 0.000167376 | 0.001404484 |
| ENSMMUG00000004022  | zinc finger SWIM-type containing 2 [Source:VGNC Symbol;Acc:VGNC:79908]                                           | 2.565329861 | 2.00E-10    | 7.33E-09    |
| ENSMMUG000000054158 | acyl-CoA dehydrogenase family member 11 [Source:NCBI gene;Acc:106997118]                                         | 2.565389521 | 3.43E-12    | 1.83E-10    |
| ENSMMUG000000063868 | Metazoan signal recognition particle RNA [Source:RFAM;Acc:RF00017]                                               | 2.578756846 | 2.96E-06    | 4.15E-05    |
| ENSMMUG00000017701  | myosin VIIA and Rab interacting protein [Source:VGNC Symbol;Acc:VGNC:74992]                                      | 2.582751047 | 3.02E-07    | 5.54E-06    |
| ENSMMUG000000059318 | urocortin 2 [Source:NCBI gene;Acc:106996925]                                                                     | 2.58470772  | 2.75E-20    | 7.27E-18    |
| ENSMMUG00000015513  | CUGBP Elav-like family member 5 [Source:NCBI gene;Acc:721694]                                                    | 2.586102815 | 0.000594491 | 0.004137232 |
| ENSMMUG000000056605 | Metazoan signal recognition particle RNA [Source:RFAM;Acc:RF00017]                                               | 2.593657517 | 0.009779807 | 0.039384627 |
| ENSMMUG000000022785 | solute carrier family 66 member 3 [Source:VGNC Symbol;Acc:VGNC:76334]                                            | 2.598453456 | 0.010957947 | 0.04280831  |
| ENSMMUG000000058176 | b-defensin2-like [Source:NCBI gene;Acc:100169969]                                                                | 2.600777689 | 4.88E-12    | 2.52E-10    |
| ENSMMUG000000058536 |                                                                                                                  | 2.604190388 | 1.47E-11    | 6.86E-10    |
| ENSMMUG000000061845 |                                                                                                                  | 2.619046625 | 0.000369043 | 0.00273825  |
| ENSMMUG000000028785 | zinc finger protein 146 [Source:VGNC Symbol;Acc:VGNC:78846]                                                      | 2.623467279 | 0.000432193 | 0.003150703 |
| ENSMMUG000000062254 |                                                                                                                  | 2.625359601 | 2.72E-05    | 0.000296547 |
| ENSMMUG000000057329 |                                                                                                                  | 2.630369302 | 5.15E-05    | 0.000516668 |
| ENSMMUG000000058928 | Metazoan signal recognition particle RNA [Source:RFAM;Acc:RF00017]                                               | 2.631801373 | 2.03E-10    | 7.39E-09    |
| ENSMMUG00000007528  | chordin [Source:VGNC Symbol;Acc:VGNC:71042]                                                                      | 2.636948081 | 1.22E-07    | 2.40E-06    |
| ENSMMUG00000019528  | adaptor related protein complex 4 subunit beta 1 [Source:VGNC Symbol;Acc:VGNC:69972]                             | 2.642449532 | 1.13E-20    | 3.22E-18    |
| ENSMMUG00000004794  | DNA ligase 3 [Source:VGNC Symbol;Acc:VGNC:74266]                                                                 | 2.64768692  | 1.81E-06    | 2.69E-05    |
| ENSMMUG00000006596  | CCR4-NOT transcription complex subunit 10 [Source:VGNC Symbol;Acc:VGNC:71327]                                    | 2.648133064 | 5.60E-13    | 3.47E-11    |
| ENSMMUG000000061896 |                                                                                                                  | 2.64867669  | 2.89E-09    | 8.10E-08    |
| ENSMMUG000000057539 |                                                                                                                  | 2.658401054 | 1.06E-06    | 1.66E-05    |
| ENSMMUG000000000754 | Dmx like 2 [Source:VGNC Symbol;Acc:VGNC:71936]                                                                   | 2.659198274 | 6.71E-11    | 2.66E-09    |
| ENSMMUG000000000302 | WD repeat and HMG-box DNA binding protein 1 [Source:VGNC Symbol;Acc:VGNC:79376]                                  | 2.661058569 | 2.21E-24    | 1.26E-21    |
| ENSMMUG000000009884 | hydroxysteroid 17-beta dehydrogenase 1 [Source:VGNC Symbol;Acc:VGNC:73528]                                       | 2.661693425 | 3.68E-05    | 0.000385244 |
| ENSMMUG000000022633 | replication initiator 1 [Source:VGNC Symbol;Acc:VGNC:76758]                                                      | 2.663610192 | 1.07E-08    | 2.66E-07    |
| ENSMMUG000000061923 |                                                                                                                  | 2.667624732 | 0.000381972 | 0.002812988 |
| ENSMMUG000000043675 | Cbp/p300 interacting transactivator with Glu/Asp rich carboxy-terminal domain 4 [Source:NCBI gene;Acc:114672840] | 2.668407092 | 7.58E-15    | 6.96E-13    |
| ENSMMUG000000052961 |                                                                                                                  | 2.668746467 | 0.004491857 | 0.021351598 |

|                    |                                                                                                                                                      |             |             |             |
|--------------------|------------------------------------------------------------------------------------------------------------------------------------------------------|-------------|-------------|-------------|
| ENSMMUG0000000377  | TNF receptor superfamily member 1A [Source:VGNC Symbol;Acc:VGNC:78589]                                                                               | 2.66995566  | 0.000941891 | 0.005984463 |
| ENSMMUG00000059700 |                                                                                                                                                      | 2.672211167 | 0.0079983   | 0.033674926 |
| ENSMMUG00000054621 |                                                                                                                                                      | 2.675592615 | 0.007396895 | 0.031785231 |
| ENSMMUG00000023282 | aldo-keto reductase family 1, member C1 (dihydrodiol dehydrogenase 1; 20-alpha (3-alpha)-hydroxysteroid dehydrogenase) [Source:NCBI gene;Acc:711198] | 2.678368089 | 9.28E-14    | 6.66E-12    |
| ENSMMUG00000016827 | UBA domain containing 1 [Source:VGNC Symbol;Acc:VGNC:79837]                                                                                          | 2.679909703 | 0.001006568 | 0.006321245 |
| ENSMMUG00000005504 | nucleoporin 37 [Source:VGNC Symbol;Acc:VGNC:75491]                                                                                                   | 2.680020628 | 0.0001516   | 0.001293281 |
| ENSMMUG00000056248 |                                                                                                                                                      | 2.680098739 | 1.76E-10    | 6.66E-09    |
| ENSMMUG00000003739 | mannosidase beta [Source:VGNC Symbol;Acc:VGNC:74486]                                                                                                 | 2.683848332 | 1.11E-13    | 7.78E-12    |
| ENSMMUG00000002949 | motile sperm domain containing 3 [Source:VGNC Symbol;Acc:VGNC:74823]                                                                                 | 2.684764375 | 2.67E-08    | 6.11E-07    |
| ENSMMUG00000054211 |                                                                                                                                                      | 2.689250485 | 0.003652316 | 0.017992516 |
| ENSMMUG00000020668 | cyclin E1 [Source:VGNC Symbol;Acc:VGNC:70727]                                                                                                        | 2.692765055 | 1.07E-18    | 2.06E-16    |
| ENSMMUG00000023816 | semaphorin 4B [Source:VGNC Symbol;Acc:VGNC:77165]                                                                                                    | 2.693075334 | 2.52E-19    | 5.36E-17    |
| ENSMMUG00000052954 | Wnt family member 6 [Source:NCBI gene;Acc:700573]                                                                                                    | 2.694473325 | 0.002439483 | 0.013031027 |
| ENSMMUG00000010824 | SWIM-type zinc finger 7 associated protein 1 [Source:VGNC Symbol;Acc:VGNC:78220]                                                                     | 2.696180209 | 1.34E-08    | 3.27E-07    |
| ENSMMUG00000005356 | integrator complex subunit 8 [Source:VGNC Symbol;Acc:VGNC:73657]                                                                                     | 2.698473582 | 0.007626622 | 0.032559132 |
| ENSMMUG00000052530 |                                                                                                                                                      | 2.70014959  | 0.000800449 | 0.005271286 |
| ENSMMUG00000008160 | neutrophil cytosolic factor 4 [Source:VGNC Symbol;Acc:VGNC:75141]                                                                                    | 2.703537865 | 1.27E-06    | 1.96E-05    |
| ENSMMUG00000023286 | UPF1 RNA helicase and ATPase [Source:VGNC Symbol;Acc:VGNC:79971]                                                                                     | 2.709573144 | 3.87E-11    | 1.64E-09    |
| ENSMMUG00000015865 | arginase 2 [Source:VGNC Symbol;Acc:VGNC:70005]                                                                                                       | 2.710034743 | 1.07E-16    | 1.34E-14    |
| ENSMMUG00000005297 | proline rich coiled-coil 2A [Source:VGNC Symbol;Acc:VGNC:83448]                                                                                      | 2.727349416 | 7.64E-26    | 5.52E-23    |
| ENSMMUG00000062326 |                                                                                                                                                      | 2.733791976 | 1.50E-12    | 8.44E-11    |
| ENSMMUG00000013251 | xin actin binding repeat containing 2 [Source:VGNC Symbol;Acc:VGNC:78953]                                                                            | 2.736006975 | 0.001327038 | 0.007960021 |
| ENSMMUG00000049755 | leucine rich repeat containing 3 [Source:NCBI gene;Acc:712418]                                                                                       | 2.736012015 | 0.000270741 | 0.002099454 |
| ENSMMUG00000015606 | Spi-1 proto-oncogene [Source:NCBI gene;Acc:712010]                                                                                                   | 2.738470363 | 8.15E-07    | 1.32E-05    |
| ENSMMUG00000059589 |                                                                                                                                                      | 2.7390395   | 0.00026492  | 0.002061697 |
| ENSMMUG00000012068 | signal induced proliferation associated 1 like 2 [Source:NCBI gene;Acc:100425123]                                                                    | 2.740004982 | 2.77E-05    | 0.000300289 |
| ENSMMUG00000024537 |                                                                                                                                                      | 2.745433965 | 0.000834393 | 0.005455029 |
| ENSMMUG00000064730 |                                                                                                                                                      | 2.748247269 | 3.98E-09    | 1.08E-07    |
| ENSMMUG00000022401 | EMSY transcriptional repressor, BRCA2 interacting [Source:VGNC Symbol;Acc:VGNC:72065]                                                                | 2.753368574 | 1.97E-10    | 7.32E-09    |
| ENSMMUG00000001725 | solute carrier family 35 member A4 [Source:VGNC Symbol;Acc:VGNC:77532]                                                                               | 2.757164703 | 3.53E-11    | 1.52E-09    |
| ENSMMUG00000049735 | allograft inflammatory factor 1 [Source:NCBI gene;Acc:574115]                                                                                        | 2.758430355 | 7.11E-19    | 1.40E-16    |
| ENSMMUG00000006130 | prolyl 4-hydroxylase, transmembrane [Source:VGNC Symbol;Acc:VGNC:75693]                                                                              | 2.760992588 | 0.005055109 | 0.023492918 |
| ENSMMUG00000001058 | tetratricopeptide repeat domain 28 [Source:VGNC Symbol;Acc:VGNC:79785]                                                                               | 2.76299282  | 3.44E-08    | 7.59E-07    |
| ENSMMUG00000010180 | PIN2 (TERF1) interacting telomerase inhibitor 1 [Source:NCBI gene;Acc:701523]                                                                        | 2.764199743 | 2.43E-09    | 6.93E-08    |
| ENSMMUG00000004801 | COPI coat complex subunit gamma 2 [Source:VGNC Symbol;Acc:VGNC:71315]                                                                                | 2.773023026 | 5.81E-09    | 1.52E-07    |
| ENSMMUG00000064707 |                                                                                                                                                      | 2.778398369 | 7.65E-09    | 1.95E-07    |
| ENSMMUG00000023045 | zinc finger B-box domain containing [Source:VGNC Symbol;Acc:VGNC:79592]                                                                              | 2.778691786 | 0.001669496 | 0.009604699 |
| ENSMMUG00000004283 | calcium and integrin binding family member 3 [Source:VGNC Symbol;Acc:VGNC:71339]                                                                     | 2.783612972 | 2.62E-08    | 6.00E-07    |
| ENSMMUG00000006079 | leucine rich repeat containing 19 [Source:VGNC Symbol;Acc:VGNC:74337]                                                                                | 2.78896906  | 0.012286442 | 0.046717807 |
| ENSMMUG00000012668 | centriolin [Source:VGNC Symbol;Acc:VGNC:71204]                                                                                                       | 2.789111828 | 1.70E-21    | 5.43E-19    |
| ENSMMUG00000016434 | NADH:ubiquinone oxidoreductase complex assembly factor 7 [Source:VGNC Symbol;Acc:VGNC:75035]                                                         | 2.790571548 | 2.06E-06    | 3.00E-05    |
| ENSMMUG00000011472 | PWWP domain containing 2A [Source:VGNC Symbol;Acc:VGNC:76564]                                                                                        | 2.793020077 | 0.000382965 | 0.002818382 |
| ENSMMUG00000013644 | potassium two pore domain channel subfamily K member 17 [Source:VGNC Symbol;Acc:VGNC:73828]                                                          | 2.79398494  | 1.94E-09    | 5.69E-08    |
| ENSMMUG00000016579 | selectin L [Source:NCBI gene;Acc:701419]                                                                                                             | 2.794394483 | 1.02E-19    | 2.40E-17    |
| ENSMMUG00000056707 |                                                                                                                                                      | 2.798492535 | 0.008891012 | 0.036650051 |
| ENSMMUG00000065295 |                                                                                                                                                      | 2.799971766 | 1.33E-26    | 1.11E-23    |
| ENSMMUG00000045654 | tumor necrosis factor [Source:VGNC Symbol;Acc:VGNC:83501]                                                                                            | 2.801047508 | 9.11E-06    | 0.00011436  |
| ENSMMUG00000000958 | aldo-keto reductase family 1, member C2 [Source:NCBI gene;Acc:711360]                                                                                | 2.80176755  | 3.59E-21    | 1.11E-18    |
| ENSMMUG00000002789 | solute carrier family 25 (mitochondrial carrier; phosphate carrier), member 24 [Source:NCBI gene;Acc:694803]                                         | 2.804335267 | 4.64E-09    | 1.24E-07    |
| ENSMMUG00000012228 | ubiquitin conjugating enzyme E2 V1 [Source:NCBI gene;Acc:100425552]                                                                                  | 2.808396566 | 1.44E-23    | 6.77E-21    |
| ENSMMUG00000053106 |                                                                                                                                                      | 2.815006149 | 3.17E-14    | 2.54E-12    |



|                    |                                                                                                          |             |             |             |
|--------------------|----------------------------------------------------------------------------------------------------------|-------------|-------------|-------------|
| ENSMMUG00000022893 | von Willebrand factor [Source:VGNC Symbol;Acc:VGNC:78778]                                                | 2.818653539 | 0.002750249 | 0.014330663 |
| ENSMMUG00000000396 | intraflagellar transport 52 [Source:NCBI gene;Acc:694933]                                                | 2.820055421 | 1.92E-09    | 5.64E-08    |
| ENSMMUG00000063779 |                                                                                                          | 2.823284543 | 6.14E-15    | 5.74E-13    |
| ENSMMUG00000050608 |                                                                                                          | 2.828114138 | 1.28E-17    | 1.97E-15    |
| ENSMMUG00000010137 | microcephalin 1 [Source:VGNC Symbol;Acc:VGNC:74687]                                                      | 2.835008545 | 0.001004067 | 0.006309201 |
| ENSMMUG00000020799 | BH3 interacting domain death agonist [Source:VGNC Symbol;Acc:VGNC:70250]                                 | 2.838079144 | 4.08E-09    | 1.10E-07    |
| ENSMMUG00000019363 | synapse associated protein 1 [Source:VGNC Symbol;Acc:VGNC:78135]                                         | 2.838520301 | 1.05E-07    | 2.08E-06    |
| ENSMMUG00000028733 | RAS related [Source:VGNC Symbol;Acc:VGNC:76937]                                                          | 2.842984551 | 3.65E-11    | 1.56E-09    |
| ENSMMUG00000001350 | HERPUD family member 2 [Source:VGNC Symbol;Acc:VGNC:73216]                                               | 2.844553504 | 3.58E-17    | 5.04E-15    |
| ENSMMUG00000061225 |                                                                                                          | 2.844897636 | 0.012666868 | 0.047828575 |
| ENSMMUG00000013330 | ectonucleoside triphosphate diphosphohydrolase 3 [Source:VGNC Symbol;Acc:VGNC:72226]                     | 2.848527843 | 5.39E-11    | 2.20E-09    |
| ENSMMUG00000059778 |                                                                                                          | 2.848553853 | 0.000231145 | 0.001852067 |
| ENSMMUG00000009361 | fumarylacetoacetate hydrolase [Source:NCBI gene;Acc:712716]                                              | 2.851209348 | 1.11E-13    | 7.78E-12    |
| ENSMMUG00000063383 |                                                                                                          | 2.851345815 | 0.003807283 | 0.018662761 |
| ENSMMUG00000004376 | calcium and integrin binding 1 [Source:VGNC Symbol;Acc:VGNC:71189]                                       | 2.85258837  | 2.01E-16    | 2.51E-14    |
| ENSMMUG00000015555 | ST3 beta-galactoside alpha-2,3-sialyltransferase 3 [Source:VGNC Symbol;Acc:VGNC:77828]                   | 2.85559798  | 2.91E-10    | 1.01E-08    |
| ENSMMUG00000017510 | membrane associated guanylate kinase, WW and PDZ domain containing 1 [Source:VGNC Symbol;Acc:VGNC:74499] | 2.857872275 | 8.95E-27    | 8.08E-24    |
| ENSMMUG00000019802 | family with sequence similarity 133 member B [Source:NCBI gene;Acc:702054]                               | 2.866399092 | 1.36E-10    | 5.26E-09    |
| ENSMMUG00000057157 |                                                                                                          | 2.868051095 | 3.01E-10    | 1.03E-08    |
| ENSMMUG00000059442 |                                                                                                          | 2.872582359 | 0.009171442 | 0.037435657 |
| ENSMMUG00000001707 | amyloid beta precursor protein binding family B member 3 [Source:VGNC Symbol;Acc:VGNC:69869]             | 2.875739284 | 5.01E-26    | 3.88E-23    |
| ENSMMUG00000052569 |                                                                                                          | 2.879882981 | 1.28E-05    | 0.000153973 |
| ENSMMUG00000010007 | CD14 molecule [Source:VGNC Symbol;Acc:VGNC:70751]                                                        | 2.884002193 | 2.81E-07    | 5.17E-06    |
| ENSMMUG00000029455 | olfactory receptor 4Q2 [Source:NCBI gene;Acc:114679271]                                                  | 2.88907436  | 7.69E-18    | 1.23E-15    |
| ENSMMUG00000022921 | solute carrier family 2 member 12 [Source:VGNC Symbol;Acc:VGNC:77503]                                    | 2.896003661 | 1.27E-14    | 1.11E-12    |
| ENSMMUG00000021073 | RAS protein activator like 2 [Source:VGNC Symbol;Acc:VGNC:76670]                                         | 2.898690819 | 6.36E-18    | 1.06E-15    |
| ENSMMUG00000021476 | BCL2 like 13 [Source:VGNC Symbol;Acc:VGNC:84544]                                                         | 2.907067266 | 4.68E-06    | 6.25E-05    |
| ENSMMUG00000004472 | collagen type XVIII alpha 1 chain [Source:VGNC Symbol;Acc:VGNC:81291]                                    | 2.907944153 | 0.000511292 | 0.003639174 |
| ENSMMUG00000051879 | CAP-Gly domain containing linker protein 3 [Source:NCBI gene;Acc:712058]                                 | 2.914819714 | 0.00116953  | 0.007141781 |
| ENSMMUG00000008923 | Thy-1 cell surface antigen [Source:VGNC Symbol;Acc:VGNC:78352]                                           | 2.930599666 | 2.00E-10    | 7.33E-09    |
| ENSMMUG00000005208 | RNA polymerase III subunit B [Source:VGNC Symbol;Acc:VGNC:76143]                                         | 2.931982846 | 7.77E-08    | 1.58E-06    |
| ENSMMUG00000059782 |                                                                                                          | 2.932976904 | 1.46E-09    | 4.41E-08    |
| ENSMMUG00000004470 | CD9 molecule [Source:VGNC Symbol;Acc:VGNC:70787]                                                         | 2.935454184 | 2.73E-05    | 0.00029712  |
| ENSMMUG00000056741 | ovostatin-like [Source:NCBI gene;Acc:722294]                                                             | 2.938164311 | 0.000161569 | 0.001366169 |
| ENSMMUG00000054755 | transmembrane protein 65 [Source:NCBI gene;Acc:705727]                                                   | 2.942248995 | 1.17E-08    | 2.89E-07    |
| ENSMMUG00000053324 | lymphocyte antigen 6 complex locus protein G6d [Source:NCBI gene;Acc:715304]                             | 2.943408    | 9.03E-20    | 2.17E-17    |
| ENSMMUG00000012842 | SET domain containing 1B, histone lysine methyltransferase [Source:NCBI gene;Acc:703717]                 | 2.943944006 | 0.001407997 | 0.008348568 |
| ENSMMUG00000001748 | spleen associated tyrosine kinase [Source:VGNC Symbol;Acc:VGNC:78063]                                    | 2.945936176 | 2.91E-05    | 0.000313669 |
| ENSMMUG00000019546 | regucalcin [Source:VGNC Symbol;Acc:VGNC:76912]                                                           | 2.953271168 | 0.000122044 | 0.001082803 |
| ENSMMUG00000005482 | lysine methyltransferase 2A [Source:NCBI gene;Acc:705511]                                                | 2.961224254 | 1.76E-05    | 0.000202333 |
| ENSMMUG00000006738 | L3MBTL histone methyl-lysine binding protein 1 [Source:NCBI gene;Acc:695694]                             | 2.961297065 | 6.89E-25    | 4.39E-22    |
| ENSMMUG00000056151 |                                                                                                          | 2.967925003 | 0.010852468 | 0.042565091 |
| ENSMMUG00000059504 |                                                                                                          | 2.976609971 | 2.77E-06    | 3.92E-05    |
| ENSMMUG00000050465 | ZFP42 zinc finger protein [Source:NCBI gene;Acc:707621]                                                  | 2.983026504 | 1.53E-10    | 5.85E-09    |
| ENSMMUG00000012356 | serpin family A member 9 [Source:VGNC Symbol;Acc:VGNC:77241]                                             | 2.984384923 | 2.71E-10    | 9.57E-09    |
| ENSMMUG00000016580 | selectin E [Source:VGNC Symbol;Acc:VGNC:77156]                                                           | 3.000069712 | 1.22E-29    | 1.66E-26    |
| ENSMMUG00000016404 | chondromodulin [Source:VGNC Symbol;Acc:VGNC:71191]                                                       | 3.002422741 | 0.000144378 | 0.001245264 |
| ENSMMUG00000018137 | MYB proto-oncogene like 2 [Source:VGNC Symbol;Acc:VGNC:75092]                                            | 3.008306857 | 1.67E-18    | 3.01E-16    |
| ENSMMUG00000002267 | laminin subunit gamma 3 [Source:NCBI gene;Acc:722430]                                                    | 3.010258757 | 0.000493899 | 0.003540975 |
| ENSMMUG00000005302 | BAG cochaperone 6 [Source:VGNC Symbol;Acc:VGNC:81044]                                                    | 3.014477616 | 2.97E-32    | 4.59E-29    |
| ENSMMUG00000014138 | forkhead box J3 [Source:VGNC Symbol;Acc:VGNC:72596]                                                      | 3.015195866 | 7.29E-14    | 5.37E-12    |

|                    |                                                                                                                 |             |             |             |
|--------------------|-----------------------------------------------------------------------------------------------------------------|-------------|-------------|-------------|
| ENSMMUG00000062037 | stannin [Source:NCBI gene;Acc:711909]                                                                           | 3.015786823 | 1.33E-07    | 2.60E-06    |
| ENSMMUG00000057632 |                                                                                                                 | 3.016687533 | 4.77E-07    | 8.44E-06    |
| ENSMMUG00000059302 | Metazoan signal recognition particle RNA [Source:RFAM;Acc:RF00017]                                              | 3.034598802 | 7.22E-05    | 0.000687162 |
| ENSMMUG00000014240 | thioredoxin domain containing 11 [Source:VGNC Symbol;Acc:VGNC:79678]                                            | 3.036975626 | 3.33E-07    | 6.05E-06    |
| ENSMMUG00000018932 | adhesion G protein-coupled receptor E2 [Source:NCBI gene;Acc:654420]                                            | 3.037638541 | 5.04E-16    | 5.69E-14    |
| ENSMMUG00000016678 | Rho associated coiled-coil containing protein kinase 2 [Source:VGNC Symbol;Acc:VGNC:76714]                      | 3.039415661 | 7.40E-23    | 3.21E-20    |
| ENSMMUG00000002433 | calcium/calmodulin dependent protein kinase II beta [Source:VGNC Symbol;Acc:VGNC:70524]                         | 3.052168449 | 0.00019736  | 0.00161683  |
| ENSMMUG00000019304 | indoleamine 2,3-dioxygenase 1 [Source:VGNC Symbol;Acc:VGNC:73580]                                               | 3.054888731 | 7.54E-08    | 1.54E-06    |
| ENSMMUG00000010451 | inositol polyphosphate phosphatase like 1 [Source:VGNC Symbol;Acc:VGNC:73752]                                   | 3.060199507 | 4.77E-08    | 1.03E-06    |
| ENSMMUG00000011627 | interleukin 4 induced 1 [Source:VGNC Symbol;Acc:VGNC:73625]                                                     | 3.064348302 | 7.75E-09    | 1.97E-07    |
| ENSMMUG00000051925 |                                                                                                                 | 3.069320508 | 8.70E-08    | 1.76E-06    |
| ENSMMUG00000009437 | zinc finger protein 619 [Source:VGNC Symbol;Acc:VGNC:82562]                                                     | 3.079368571 | 8.58E-05    | 0.000791594 |
| ENSMMUG00000018790 | activin A receptor type 2B [Source:VGNC Symbol;Acc:VGNC:69450]                                                  | 3.083223398 | 4.31E-21    | 1.26E-18    |
| ENSMMUG00000002959 | helicase with zinc finger [Source:VGNC Symbol;Acc:VGNC:73178]                                                   | 3.083603621 | 3.62E-12    | 1.91E-10    |
| ENSMMUG00000056381 | forkhead box R1 [Source:NCBI gene;Acc:707285]                                                                   | 3.083666725 | 8.55E-06    | 0.000107793 |
| ENSMMUG00000053457 | caspase 14 [Source:NCBI gene;Acc:718049]                                                                        | 3.086855226 | 4.44E-11    | 1.84E-09    |
| ENSMMUG00000057331 | RNA terminal phosphate cyclase like 1 [Source:NCBI gene;Acc:694568]                                             | 3.112759633 | 1.85E-22    | 6.92E-20    |
| ENSMMUG00000016442 | glutaminyl-peptide cyclotransferase [Source:VGNC Symbol;Acc:VGNC:76636]                                         | 3.118174606 | 0.000309682 | 0.00236086  |
| ENSMMUG00000027986 | U6 spliceosomal RNA [Source:RFAM;Acc:RF00026]                                                                   | 3.122861398 | 7.24E-07    | 1.19E-05    |
| ENSMMUG00000013967 | TOX high mobility group box family member 3 [Source:VGNC Symbol;Acc:VGNC:78612]                                 | 3.136400002 | 5.99E-07    | 1.02E-05    |
| ENSMMUG00000063525 |                                                                                                                 | 3.142185371 | 6.71E-08    | 1.39E-06    |
| ENSMMUG00000014715 | fragile site, folic acid type, rare, fra(10)(q23.3) or fra(10)(q24.2) candidate 1 [Source:NCBI gene;Acc:700389] | 3.146155451 | 6.57E-12    | 3.30E-10    |
| ENSMMUG00000008387 | dipeptidyl peptidase 4 [Source:VGNC Symbol;Acc:VGNC:71979]                                                      | 3.14811645  | 7.88E-23    | 3.28E-20    |
| ENSMMUG00000008843 | lymphotoxin alpha [Source:VGNC Symbol;Acc:VGNC:74452]                                                           | 3.150024872 | 7.77E-06    | 9.84E-05    |
| ENSMMUG00000018298 | killer cell lectin like receptor D1 [Source:NCBI gene;Acc:574145]                                               | 3.16155972  | 0.005880805 | 0.026489296 |
| ENSMMUG00000007538 | transient receptor potential cation channel subfamily M member 4 [Source:VGNC Symbol;Acc:VGNC:79105]            | 3.168855631 | 4.20E-19    | 8.76E-17    |
| ENSMMUG00000046478 | WASH complex subunit 3 [Source:NCBI gene;Acc:697824]                                                            | 3.177504673 | 5.65E-18    | 9.56E-16    |
| ENSMMUG00000015693 | lymphocyte antigen 6 family member G6C [Source:VGNC Symbol;Acc:VGNC:74285]                                      | 3.181647824 | 2.01E-10    | 7.34E-09    |
| ENSMMUG00000056063 |                                                                                                                 | 3.184968324 | 0.000871603 | 0.005637057 |
| ENSMMUG00000061533 |                                                                                                                 | 3.193487227 | 3.09E-15    | 3.13E-13    |
| ENSMMUG00000021039 | X-ray radiation resistance associated 1 [Source:NCBI gene;Acc:693788]                                           | 3.197120116 | 4.57E-12    | 2.37E-10    |
| ENSMMUG00000006851 | SPARC (osteonectin), cwcv and kazal like domains proteoglycan 3 [Source:NCBI gene;Acc:705964]                   | 3.199575573 | 1.86E-12    | 1.02E-10    |
| ENSMMUG00000064146 | Metazoan signal recognition particle RNA [Source:RFAM;Acc:RF00017]                                              | 3.207649843 | 1.34E-07    | 2.60E-06    |
| ENSMMUG00000057361 | Metazoan signal recognition particle RNA [Source:RFAM;Acc:RF00017]                                              | 3.213085749 | 3.61E-13    | 2.30E-11    |
| ENSMMUG00000009499 | mesoderm specific transcript [Source:VGNC Symbol;Acc:VGNC:74707]                                                | 3.214391658 | 1.89E-10    | 7.09E-09    |
| ENSMMUG00000008853 | leukocyte specific transcript 1 [Source:HGNC Symbol;Acc:HGNC:14189]                                             | 3.216586015 | 3.17E-05    | 0.000339672 |
| ENSMMUG00000003007 | caspase recruitment domain family member 10 [Source:VGNC Symbol;Acc:VGNC:70570]                                 | 3.217221082 | 1.30E-06    | 2.00E-05    |
| ENSMMUG00000019314 | vav guanine nucleotide exchange factor 1 [Source:VGNC Symbol;Acc:VGNC:78757]                                    | 3.219330086 | 0.002372542 | 0.01276788  |
| ENSMMUG00000062083 |                                                                                                                 | 3.227592919 | 0.000109544 | 0.000983989 |
| ENSMMUG00000045609 | CCR4-NOT transcription complex subunit 6 like [Source:NCBI gene;Acc:697981]                                     | 3.229967239 | 1.04E-22    | 4.19E-20    |
| ENSMMUG00000007773 | solute carrier organic anion transporter family member 4C1 [Source:VGNC Symbol;Acc:VGNC:77764]                  | 3.2328301   | 0.000463815 | 0.003347325 |
| ENSMMUG00000049130 |                                                                                                                 | 3.236882155 | 1.25E-24    | 7.51E-22    |
| ENSMMUG00000046099 | chromosome 19 C19orf81 homolog [Source:NCBI gene;Acc:719661]                                                    | 3.244604948 | 0.002400575 | 0.01287413  |
| ENSMMUG00000046417 | chromobox 2 [Source:NCBI gene;Acc:717462]                                                                       | 3.257336091 | 2.88E-10    | 1.00E-08    |
| ENSMMUG00000060289 |                                                                                                                 | 3.257867766 | 4.37E-20    | 1.10E-17    |
| ENSMMUG00000035943 | U6 spliceosomal RNA [Source:RFAM;Acc:RF00026]                                                                   | 3.266403969 | 2.63E-05    | 0.000289117 |
| ENSMMUG00000008197 | netrin G1 [Source:VGNC Symbol;Acc:VGNC:75450]                                                                   | 3.271106435 | 0.002795792 | 0.014512132 |
| ENSMMUG00000015686 | abhydrolase domain containing 16A [Source:VGNC Symbol;Acc:VGNC:69393]                                           | 3.276547392 | 5.65E-24    | 2.78E-21    |
| ENSMMUG00000011789 | hematopoietically expressed homeobox [Source:VGNC Symbol;Acc:VGNC:73376]                                        | 3.280061971 | 7.35E-16    | 8.20E-14    |
| ENSMMUG00000062794 |                                                                                                                 | 3.280704287 | 2.07E-09    | 6.01E-08    |
| ENSMMUG00000060767 |                                                                                                                 | 3.288277196 | 1.48E-07    | 2.85E-06    |

|                    |                                                                                                      |             |             |             |
|--------------------|------------------------------------------------------------------------------------------------------|-------------|-------------|-------------|
| ENSMMUG00000053722 |                                                                                                      | 3.297594951 | 7.28E-05    | 0.00069208  |
| ENSMMUG0000004332  | tripartite motif containing 44 [Source:VGNC Symbol;Acc:VGNC:79168]                                   | 3.302288399 | 2.35E-05    | 0.000261216 |
| ENSMMUG00000009567 | glyoxylate reductase 1 homolog [Source:NCBI gene;Acc:706933]                                         | 3.31471769  | 2.41E-19    | 5.23E-17    |
| ENSMMUG00000060808 |                                                                                                      | 3.319008497 | 0.00226056  | 0.012256839 |
| ENSMMUG00000008854 | natural cytotoxicity triggering receptor 3 [Source:VGNC Symbol;Acc:VGNC:74990]                       | 3.322620721 | 1.67E-17    | 2.51E-15    |
| ENSMMUG00000064226 |                                                                                                      | 3.324271639 | 0.000203577 | 0.001659402 |
| ENSMMUG00000056593 |                                                                                                      | 3.330188442 | 0.009823192 | 0.039515275 |
| ENSMMUG00000054159 | lymphocyte antigen 6 family member G5C [Source:VGNC Symbol;Acc:VGNC:83431]                           | 3.331402994 | 0.012403074 | 0.047045695 |
| ENSMMUG00000061424 | ventral anterior homeobox 2 [Source:NCBI gene;Acc:703531]                                            | 3.331881206 | 2.69E-14    | 2.21E-12    |
| ENSMMUG00000063914 |                                                                                                      | 3.337493284 | 5.59E-36    | 2.02E-32    |
| ENSMMUG00000013477 | creatine kinase, M-type [Source:VGNC Symbol;Acc:VGNC:71230]                                          | 3.344712781 | 9.25E-17    | 1.18E-14    |
| ENSMMUG00000008839 | DExD-box helicase 39B [Source:VGNC Symbol;Acc:VGNC:71621]                                            | 3.347293649 | 2.52E-06    | 3.60E-05    |
| ENSMMUG00000017056 | Sad1 and UNC84 domain containing 1 [Source:VGNC Symbol;Acc:VGNC:78161]                               | 3.357160606 | 6.18E-10    | 2.01E-08    |
| ENSMMUG00000054486 | testis expressed 35 [Source:NCBI gene;Acc:717255]                                                    | 3.357376294 | 0.00895951  | 0.036834508 |
| ENSMMUG00000040393 | zinc finger protein 655 [Source:NCBI gene;Acc:718811]                                                | 3.377504213 | 1.84E-09    | 5.45E-08    |
| ENSMMUG00000056629 | nucleolar protein 12 [Source:NCBI gene;Acc:698318]                                                   | 3.383155748 | 3.18E-05    | 0.000339884 |
| ENSMMUG00000064095 |                                                                                                      | 3.391426657 | 0.000588242 | 0.004108595 |
| ENSMMUG00000010626 | CD1c molecule [Source:VGNC Symbol;Acc:VGNC:70756]                                                    | 3.394766307 | 0.000147629 | 0.00126624  |
| ENSMMUG00000031391 | RNA binding motif protein 38 [Source:VGNC Symbol;Acc:VGNC:76484]                                     | 3.397904264 | 3.63E-09    | 9.92E-08    |
| ENSMMUG00000060435 | Metazoan signal recognition particle RNA [Source:RFAM;Acc:RF00017]                                   | 3.419776775 | 1.89E-06    | 2.78E-05    |
| ENSMMUG00000007726 | synapse defective Rho GTPase homolog 1 [Source:NCBI gene;Acc:719089]                                 | 3.420068652 | 1.84E-06    | 2.72E-05    |
| ENSMMUG00000013713 | beta 3-glucoyltransferase [Source:NCBI gene;Acc:713498]                                              | 3.452277528 | 2.90E-16    | 3.38E-14    |
| ENSMMUG00000005293 | G-patch domain and ankyrin repeats 1 [Source:VGNC Symbol;Acc:VGNC:81073]                             | 3.453187427 | 9.56E-09    | 2.39E-07    |
| ENSMMUG00000058162 |                                                                                                      | 3.466054676 | 0.000676202 | 0.004610002 |
| ENSMMUG00000004576 | C-C motif chemokine receptor 3 [Source:VGNC Symbol;Acc:VGNC:70738]                                   | 3.468257261 | 3.77E-21    | 1.14E-18    |
| ENSMMUG00000019690 | SEC14 and spectrin domain containing 1 [Source:VGNC Symbol;Acc:VGNC:77267]                           | 3.47036548  | 6.75E-12    | 3.37E-10    |
| ENSMMUG00000046186 | stanniocalcin 1 [Source:VGNC Symbol;Acc:VGNC:84120]                                                  | 3.491191011 | 1.09E-05    | 0.000133443 |
| ENSMMUG00000049267 |                                                                                                      | 3.491523305 | 9.42E-07    | 1.50E-05    |
| ENSMMUG00000016894 | ribosomal protein S25 [Source:NCBI gene;Acc:702593]                                                  | 3.495742555 | 0.000138564 | 0.001202774 |
| ENSMMUG00000016273 | maltase-glucoamylase [Source:VGNC Symbol;Acc:VGNC:74713]                                             | 3.504813317 | 3.51E-28    | 3.45E-25    |
| ENSMMUG00000005294 | casein kinase 2 beta [Source:NCBI gene;Acc:715807]                                                   | 3.515042761 | 9.41E-09    | 2.36E-07    |
| ENSMMUG00000011513 | versican [Source:VGNC Symbol;Acc:VGNC:79445]                                                         | 3.524280302 | 2.90E-43    | 1.57E-39    |
| ENSMMUG00000044817 | nucleoporin 62 [Source:NCBI gene;Acc:100426308]                                                      | 3.531523779 | 2.34E-32    | 4.59E-29    |
| ENSMMUG00000008849 | lymphotoxin beta [Source:VGNC Symbol;Acc:VGNC:74454]                                                 | 3.532861388 | 0.001145196 | 0.007016918 |
| ENSMMUG00000025918 | small nucleolar RNA, H/ACA box 38 [Source:HGNC Symbol;Acc:HGNC:32631]                                | 3.546153806 | 9.07E-05    | 0.000832842 |
| ENSMMUG00000012405 | transient receptor potential cation channel subfamily C member 1 [Source:VGNC Symbol;Acc:VGNC:78651] | 3.547249068 | 4.19E-05    | 0.000431301 |
| ENSMMUG00000063981 | nucleoside-triphosphatase, cancer-related [Source:NCBI gene;Acc:712959]                              | 3.548005004 | 1.64E-10    | 6.24E-09    |
| ENSMMUG00000056749 | Metazoan signal recognition particle RNA [Source:RFAM;Acc:RF00017]                                   | 3.550691356 | 0.009834297 | 0.039545262 |
| ENSMMUG00000031166 | McKusick-Kaufman syndrome [Source:NCBI gene;Acc:718547]                                              | 3.559385778 | 0.007868583 | 0.03325804  |
| ENSMMUG00000007068 | tumor suppressor candidate 3 [Source:VGNC Symbol;Acc:VGNC:84132]                                     | 3.573158621 | 0.005524504 | 0.025294571 |
| ENSMMUG00000005595 | RAB14, member RAS oncogene family [Source:NCBI gene;Acc:699837]                                      | 3.57864301  | 4.22E-09    | 1.13E-07    |
| ENSMMUG00000007206 | chromosome 3 C7orf50 homolog [Source:VGNC Symbol;Acc:VGNC:70609]                                     | 3.58857375  | 0.005729155 | 0.02600081  |
| ENSMMUG00000060632 |                                                                                                      | 3.596886374 | 1.38E-05    | 0.000163657 |
| ENSMMUG00000020156 | CD1d molecule [Source:VGNC Symbol;Acc:VGNC:70757]                                                    | 3.600552943 | 0.00016703  | 0.001402666 |
| ENSMMUG00000026950 | microRNA 101-2 [Source:HGNC Symbol;Acc:HGNC:31489]                                                   | 3.600816264 | 8.48E-05    | 0.000785575 |
| ENSMMUG00000028907 | insulin receptor [Source:NCBI gene;Acc:706009]                                                       | 3.60903092  | 4.09E-17    | 5.69E-15    |
| ENSMMUG00000005997 | cell division cycle 14B [Source:NCBI gene;Acc:710300]                                                | 3.617010805 | 0.003195577 | 0.016171155 |
| ENSMMUG00000057570 |                                                                                                      | 3.617332574 | 1.69E-33    | 4.57E-30    |
| ENSMMUG00000012937 | proline rich 12 [Source:NCBI gene;Acc:719344]                                                        | 3.619862029 | 3.31E-23    | 1.50E-20    |
| ENSMMUG00000022884 | glutamate-ammonia ligase [Source:NCBI gene;Acc:715952]                                               | 3.626344812 | 1.56E-05    | 0.000181094 |
| ENSMMUG00000021477 | ATPase H+ transporting V1 subunit E1 [Source:NCBI gene;Acc:709739]                                   | 3.631672756 | 1.57E-19    | 3.54E-17    |



|                    |                                                                                              |             |             |             |
|--------------------|----------------------------------------------------------------------------------------------|-------------|-------------|-------------|
| ENSMMUG00000023263 | mediator complex subunit 15 [Source:VGNC Symbol;Acc:VGNC:74511]                              | 3.64958754  | 5.93E-20    | 1.46E-17    |
| ENSMMUG00000003874 | interferon induced transmembrane protein 10 [Source:NCBI gene;Acc:721010]                    | 3.657624949 | 5.95E-14    | 4.48E-12    |
| ENSMMUG00000005303 | apolipoprotein M [Source:VGNC Symbol;Acc:VGNC:69825]                                         | 3.669936379 | 3.13E-05    | 0.00033585  |
| ENSMMUG00000054052 | sialic acid binding Ig like lectin 11 [Source:NCBI gene;Acc:719127]                          | 3.676556956 | 0.000251431 | 0.001983793 |
| ENSMMUG00000011332 | Rho GTPase activating protein 35 [Source:VGNC Symbol;Acc:VGNC:69942]                         | 3.681993304 | 2.55E-32    | 4.59E-29    |
| ENSMMUG00000001338 | antizyme inhibitor 1 [Source:VGNC Symbol;Acc:VGNC:70080]                                     | 3.686366495 | 0.00722729  | 0.031248597 |
| ENSMMUG00000002917 | single Ig IL-1-related receptor [Source:NCBI gene;Acc:100425060]                             | 3.695313634 | 2.83E-08    | 6.35E-07    |
| ENSMMUG00000004868 | dynein axonemal light chain 4 [Source:VGNC Symbol;Acc:VGNC:71945]                            | 3.712274769 | 0.01333185  | 0.049973678 |
| ENSMMUG00000022818 | inhibitor of growth family member 1 [Source:VGNC Symbol;Acc:VGNC:73742]                      | 3.72129151  | 0.01109537  | 0.043215578 |
| ENSMMUG00000026474 | Small nucleolar RNA SNORD83 [Source:RFAM;Acc:RF00137]                                        | 3.729783149 | 0.011641259 | 0.044867339 |
| ENSMMUG00000007925 | serum/glucocorticoid regulated kinase 2 [Source:VGNC Symbol;Acc:VGNC:77228]                  | 3.736544012 | 3.33E-24    | 1.72E-21    |
| ENSMMUG00000037641 | chondrosarcoma-associated gene 2/3 protein [Source:NCBI gene;Acc:106992305]                  | 3.746464503 | 0.010679481 | 0.042115331 |
| ENSMMUG00000012316 | CDC42 effector protein 2 [Source:VGNC Symbol;Acc:VGNC:70750]                                 | 3.784265541 | 0.011957644 | 0.045789025 |
| ENSMMUG00000016237 | taxilin gamma [Source:NCBI gene;Acc:713769]                                                  | 3.793202776 | 0.009662281 | 0.038998319 |
| ENSMMUG00000059036 |                                                                                              | 3.798584439 | 0.003864164 | 0.01888159  |
| ENSMMUG00000058916 |                                                                                              | 3.800984772 | 5.37E-14    | 4.09E-12    |
| ENSMMUG00000002566 | selenoprotein H [Source:VGNC Symbol;Acc:VGNC:82234]                                          | 3.831302037 | 0.001892216 | 0.010582541 |
| ENSMMUG00000058326 | neuralized E3 ubiquitin protein ligase 2 [Source:NCBI gene;Acc:708904]                       | 3.845821749 | 0.009020233 | 0.036970314 |
| ENSMMUG00000042598 | transmembrane protein 18 [Source:NCBI gene;Acc:721515]                                       | 3.845944961 | 1.35E-19    | 3.11E-17    |
| ENSMMUG00000036223 |                                                                                              | 3.863131385 | 0.001584808 | 0.009190697 |
| ENSMMUG00000011866 | phosphatidylinositol glycan anchor biosynthesis class O [Source:VGNC Symbol;Acc:VGNC:75851]  | 3.865716916 | 0.002096846 | 0.011536382 |
| ENSMMUG00000058423 |                                                                                              | 3.896456226 | 2.79E-13    | 1.83E-11    |
| ENSMMUG00000031100 | membrane-spanning 4-domains subfamily A member 4A-like [Source:NCBI gene;Acc:698152]         | 3.899182762 | 5.53E-09    | 1.45E-07    |
| ENSMMUG00000047704 | zinc finger protein 223 [Source:NCBI gene;Acc:711652]                                        | 3.903849624 | 0.013235452 | 0.049715552 |
| ENSMMUG00000047452 |                                                                                              | 3.907976752 | 0.008192243 | 0.034291566 |
| ENSMMUG00000055820 |                                                                                              | 3.909890989 | 5.96E-07    | 1.01E-05    |
| ENSMMUG00000026584 | Y RNA [Source:RFAM;Acc:RF00019]                                                              | 3.910423484 | 0.007663092 | 0.032609868 |
| ENSMMUG00000051537 |                                                                                              | 3.921598812 | 0.000224149 | 0.001800007 |
| ENSMMUG00000003023 | chaperonin containing TCP1 subunit 8 [Source:VGNC Symbol;Acc:VGNC:70749]                     | 3.929101324 | 0.006390395 | 0.028325345 |
| ENSMMUG00000052195 |                                                                                              | 3.979897493 | 0.001674431 | 0.009627976 |
| ENSMMUG00000014273 | cation channel sperm associated auxiliary subunit gamma [Source:VGNC Symbol;Acc:VGNC:70626]  | 3.983063242 | 5.96E-08    | 1.26E-06    |
| ENSMMUG00000056058 | C-type lectin domain containing 20A [Source:HGNC Symbol;Acc:HGNC:34521]                      | 3.98440054  | 0.001038565 | 0.00648086  |
| ENSMMUG00000033550 |                                                                                              | 3.986212738 | 0.005822798 | 0.026273566 |
| ENSMMUG00000058229 | U6 spliceosomal RNA [Source:RFAM;Acc:RF00026]                                                | 3.992380193 | 0.001113591 | 0.006862077 |
| ENSMMUG00000004309 | APC membrane recruitment protein 1 [Source:VGNC Symbol;Acc:VGNC:69716]                       | 4.006783179 | 0.007768534 | 0.032912212 |
| ENSMMUG00000001485 | transmembrane protein 150C [Source:NCBI gene;Acc:694136]                                     | 4.028835056 | 0.005531408 | 0.025315479 |
| ENSMMUG00000061589 | proteinase 3 [Source:HGNC Symbol;Acc:HGNC:9495]                                              | 4.039231542 | 0.00805502  | 0.033887393 |
| ENSMMUG00000065129 |                                                                                              | 4.047605024 | 0.004155848 | 0.019991254 |
| ENSMMUG00000052637 | Metazoan signal recognition particle RNA [Source:RFAM;Acc:RF00017]                           | 4.050624553 | 3.95E-06    | 5.35E-05    |
| ENSMMUG00000012938 | SR-related CTD associated factor 1 [Source:VGNC Symbol;Acc:VGNC:77137]                       | 4.056933264 | 0.002110535 | 0.01158815  |
| ENSMMUG00000043396 | Metazoan signal recognition particle RNA [Source:RFAM;Acc:RF00017]                           | 4.065430193 | 0.000860426 | 0.005584775 |
| ENSMMUG00000063198 |                                                                                              | 4.072081215 | 4.99E-05    | 0.000503828 |
| ENSMMUG00000056184 |                                                                                              | 4.077448992 | 3.42E-05    | 0.000361516 |
| ENSMMUG00000047465 | Metazoan signal recognition particle RNA [Source:RFAM;Acc:RF00017]                           | 4.094849623 | 0.001053437 | 0.006547263 |
| ENSMMUG00000008183 | retinoid X receptor alpha [Source:VGNC Symbol;Acc:VGNC:76951]                                | 4.112384559 | 0.011463428 | 0.044256347 |
| ENSMMUG00000063913 | endogenous retrovirus group K member 7 Env polyprotein-like [Source:NCBI gene;Acc:114674933] | 4.113308568 | 0.000186611 | 0.001540821 |
| ENSMMUG00000064694 | AHNAK nucleoprotein 2 [Source:NCBI gene;Acc:707626]                                          | 4.123519618 | 0.005278981 | 0.024397271 |
| ENSMMUG00000060184 | SEC61 translocon subunit gamma [Source:NCBI gene;Acc:716898]                                 | 4.12405559  | 0.00064168  | 0.004405145 |
| ENSMMUG00000059335 |                                                                                              | 4.12774824  | 0.011784862 | 0.045287483 |
| ENSMMUG00000063820 | olfactory receptor, family 52, subfamily M, member 1 [Source:NCBI gene;Acc:717723]           | 4.143531586 | 0.000619589 | 0.004283347 |
| ENSMMUG00000005738 | N-acetyltransferase 9 (putative) [Source:NCBI gene;Acc:699085]                               | 4.161310568 | 0.010542144 | 0.041736442 |

|                    |                                                                                                              |             |             |             |
|--------------------|--------------------------------------------------------------------------------------------------------------|-------------|-------------|-------------|
| ENSMMUG00000062092 |                                                                                                              | 4.173003162 | 0.010050133 | 0.040189403 |
| ENSMMUG00000016069 | cubilin [Source:VGNC Symbol;Acc:VGNC:82132]                                                                  | 4.200684064 | 1.52E-18    | 2.84E-16    |
| ENSMMUG00000052785 | extracellular leucine rich repeat and fibronectin type III domain containing 2 [Source:NCBI gene;Acc:697071] | 4.203086382 | 0.005929752 | 0.026646515 |
| ENSMMUG00000014658 | ninein [Source:VGNC Symbol;Acc:VGNC:75177]                                                                   | 4.207700847 | 3.18E-29    | 3.45E-26    |
| ENSMMUG00000009182 | caspace 8 associated protein 2 [Source:VGNC Symbol;Acc:VGNC:70548]                                           | 4.236239673 | 0.007938922 | 0.03352918  |
| ENSMMUG00000057552 | hematopoietic SH2 domain containing [Source:NCBI gene;Acc:719440]                                            | 4.242190689 | 0.003090203 | 0.015716509 |
| ENSMMUG00000003363 | Kruppel like factor 3 [Source:VGNC Symbol;Acc:VGNC:73840]                                                    | 4.24366298  | 0.00959633  | 0.038804419 |
| ENSMMUG00000003926 | BCL2 like 12 [Source:NCBI gene;Acc:718981]                                                                   | 4.250095604 | 0.007620533 | 0.032552537 |
| ENSMMUG00000037426 | U7 small nuclear RNA [Source:RFAM;Acc:RF00066]                                                               | 4.299138171 | 0.009774456 | 0.039384627 |
| ENSMMUG00000051645 |                                                                                                              | 4.316919383 | 0.002368668 | 0.01275971  |
| ENSMMUG00000056905 |                                                                                                              | 4.32667377  | 0.010243413 | 0.040841697 |
| ENSMMUG00000000480 | KIAA1324 like [Source:VGNC Symbol;Acc:VGNC:73882]                                                            | 4.343218708 | 0.001600492 | 0.009266769 |
| ENSMMUG00000056796 | NADH:ubiquinone oxidoreductase subunit A2 [Source:NCBI gene;Acc:697736]                                      | 4.346849689 | 0.000347113 | 0.002600463 |
| ENSMMUG00000058534 |                                                                                                              | 4.348860337 | 6.32E-07    | 1.06E-05    |
| ENSMMUG00000063346 |                                                                                                              | 4.364703201 | 0.005804583 | 0.026233229 |
| ENSMMUG00000064324 |                                                                                                              | 4.36660222  | 0.002471186 | 0.013156202 |
| ENSMMUG00000051037 |                                                                                                              | 4.415052204 | 2.00E-08    | 4.70E-07    |
| ENSMMUG00000020854 | C-type lectin domain family 4 member F [Source:VGNC Symbol;Acc:VGNC:71349]                                   | 4.424005605 | 0.011006255 | 0.042935096 |
| ENSMMUG00000059087 |                                                                                                              | 4.433324289 | 0.000258583 | 0.002026937 |
| ENSMMUG00000061298 |                                                                                                              | 4.453848244 | 0.006476589 | 0.028567136 |
| ENSMMUG00000015246 | TBC1 domain family member 9 [Source:VGNC Symbol;Acc:VGNC:78193]                                              | 4.461133951 | 0.006049498 | 0.027090405 |
| ENSMMUG00000064401 |                                                                                                              | 4.475616737 | 0.00407652  | 0.019689172 |
| ENSMMUG00000055973 | phosphoglycerate mutase 1-like [Source:NCBI gene;Acc:714548]                                                 | 4.499975061 | 0.000137165 | 0.001192418 |
| ENSMMUG00000003400 | baculoviral IAP repeat containing 2 [Source:NCBI gene;Acc:702592]                                            | 4.517292094 | 2.54E-13    | 1.69E-11    |
| ENSMMUG00000010967 | tripartite motif family like 2 [Source:VGNC Symbol;Acc:VGNC:79603]                                           | 4.521954862 | 0.005988844 | 0.026886511 |
| ENSMMUG00000054816 | interleukin 1 receptor associated kinase 3 [Source:NCBI gene;Acc:717845]                                     | 4.529025524 | 0.002675433 | 0.014062576 |
| ENSMMUG00000053333 | acetylserotonin O-methyltransferase like [Source:NCBI gene;Acc:106995142]                                    | 4.5436491   | 0.005127653 | 0.023779053 |
| ENSMMUG00000035653 | small Cajal body-specific RNA 18 [Source:HGNC Symbol;Acc:HGNC:32559]                                         | 4.553092685 | 0.005727685 | 0.02600081  |
| ENSMMUG00000051972 | zinc finger CCHC-type containing 24 [Source:NCBI gene;Acc:702083]                                            | 4.566591576 | 2.11E-07    | 3.95E-06    |
| ENSMMUG00000004761 | Cbl proto-oncogene [Source:VGNC Symbol;Acc:VGNC:70554]                                                       | 4.576105758 | 0.005604761 | 0.025586336 |
| ENSMMUG00000049508 |                                                                                                              | 4.580996631 | 7.49E-05    | 0.000708886 |
| ENSMMUG00000007688 | angiominin [Source:VGNC Symbol;Acc:VGNC:69627]                                                               | 4.634867096 | 0.002760124 | 0.014361394 |
| ENSMMUG00000000869 | small nuclear ribonucleoprotein polypeptide C [Source:NCBI gene;Acc:718654]                                  | 4.682851073 | 1.93E-10    | 7.17E-09    |
| ENSMMUG00000009957 | spermatogenesis associated 25 [Source:VGNC Symbol;Acc:VGNC:77928]                                            | 4.69122217  | 0.000931709 | 0.005933688 |
| ENSMMUG00000049455 | Metazoan signal recognition particle RNA [Source:RFAM;Acc:RF00017]                                           | 4.695746851 | 0.002008622 | 0.01113013  |
| ENSMMUG00000029883 | olfactory receptor, family 2, subfamily J, member 3 [Source:NCBI gene;Acc:708943]                            | 4.703754409 | 0.000905736 | 0.00579705  |
| ENSMMUG00000026243 | U6 spliceosomal RNA [Source:RFAM;Acc:RF00026]                                                                | 4.769555995 | 0.003526584 | 0.0175165   |
| ENSMMUG00000062296 | potassium two pore domain channel subfamily K member 6 [Source:NCBI gene;Acc:714912]                         | 4.776375531 | 0.000560855 | 0.003951597 |
| ENSMMUG00000048215 |                                                                                                              | 4.799526742 | 3.08E-24    | 1.67E-21    |
| ENSMMUG00000064341 | U6 spliceosomal RNA [Source:RFAM;Acc:RF00026]                                                                | 4.827088806 | 0.002165954 | 0.011834726 |
| ENSMMUG00000008784 | lipopolysaccharide induced TNF factor [Source:NCBI gene;Acc:711743]                                          | 4.85415091  | 0.002400604 | 0.01287413  |
| ENSMMUG00000061603 |                                                                                                              | 4.861370795 | 0.000906118 | 0.00579705  |
| ENSMMUG00000056342 | Metazoan signal recognition particle RNA [Source:RFAM;Acc:RF00017]                                           | 4.861657093 | 0.001413353 | 0.008362016 |
| ENSMMUG00000058700 | Metazoan signal recognition particle RNA [Source:RFAM;Acc:RF00017]                                           | 4.908934513 | 0.000943764 | 0.005992845 |
| ENSMMUG00000016737 | contactin 5 [Source:VGNC Symbol;Acc:VGNC:71287]                                                              | 4.997301739 | 0.000706913 | 0.004789234 |
| ENSMMUG00000005552 | PAF1 homolog, Paf1/RNA polymerase II complex component [Source:VGNC Symbol;Acc:VGNC:81492]                   | 5.039866421 | 0.000252588 | 0.001990499 |
| ENSMMUG00000049479 |                                                                                                              | 5.048129759 | 0.000721531 | 0.004866963 |
| ENSMMUG00000057219 | tumor protein p53 inducible nuclear protein 1 [Source:NCBI gene;Acc:700632]                                  | 5.121056153 | 9.83E-06    | 0.000122403 |
| ENSMMUG00000019704 | WD repeat domain 62 [Source:NCBI gene;Acc:719053]                                                            | 5.146351771 | 0.002116793 | 0.011610742 |
| ENSMMUG00000056109 | Metazoan signal recognition particle RNA [Source:RFAM;Acc:RF00017]                                           | 5.166016441 | 0.001879622 | 0.010539308 |
| ENSMMUG00000028000 | Y RNA [Source:RFAM;Acc:RF00019]                                                                              | 5.230633034 | 0.000209552 | 0.001699157 |



|                    |                                                                                                  |             |             |             |
|--------------------|--------------------------------------------------------------------------------------------------|-------------|-------------|-------------|
| ENSMMUG00000057095 |                                                                                                  | 5.256074651 | 6.94E-05    | 0.000663864 |
| ENSMMUG00000003074 | plexin B1 [Source:VGNC Symbol;Acc:VGNC:76187]                                                    | 5.420705682 | 0.000439394 | 0.003198894 |
| ENSMMUG00000012039 | cytochrome b5 type B (outer mitochondrial membrane) [Source:NCBI gene;Acc:705093]                | 5.422937506 | 9.21E-06    | 0.000115196 |
| ENSMMUG00000018743 | ubiquitin specific peptidase 25 [Source:VGNC Symbol;Acc:VGNC:78744]                              | 5.511563641 | 2.06E-05    | 0.000230752 |
| ENSMMUG00000013651 | kinesin family member 6 [Source:VGNC Symbol;Acc:VGNC:73873]                                      | 5.611398968 | 0.000241076 | 0.001920277 |
| ENSMMUG00000019369 | pleckstrin homology and RhoGEF domain containing G2 [Source:VGNC Symbol;Acc:VGNC:76133]          | 5.678231278 | 1.83E-07    | 3.46E-06    |
| ENSMMUG00000022282 | collagen type IV alpha 2 chain [Source:NCBI gene;Acc:100429807]                                  | 5.698453855 | 7.51E-05    | 0.000709568 |
| ENSMMUG00000014032 | proline rich 36 [Source:NCBI gene;Acc:710443]                                                    | 5.700422061 | 1.74E-29    | 2.10E-26    |
| ENSMMUG00000016191 | ATP binding cassette subfamily A member 13 [Source:VGNC Symbol;Acc:VGNC:69402]                   | 5.706938687 | 2.56E-05    | 0.000281649 |
| ENSMMUG00000048395 | chromobox 6 [Source:NCBI gene;Acc:702133]                                                        | 5.815094333 | 1.05E-07    | 2.08E-06    |
| ENSMMUG00000053406 |                                                                                                  | 5.840747148 | 1.48E-05    | 0.000173273 |
| ENSMMUG00000021447 | TNF receptor superfamily member 1B [Source:VGNC Symbol;Acc:VGNC:78590]                           | 5.886808375 | 0.000252648 | 0.001990499 |
| ENSMMUG00000005554 | mediator complex subunit 29 [Source:VGNC Symbol;Acc:VGNC:74557]                                  | 6.222314149 | 8.88E-77    | 9.62E-73    |
| ENSMMUG00000038702 | ZFP36 ring finger protein [Source:NCBI gene;Acc:722000]                                          | 6.294265209 | 1.74E-06    | 2.61E-05    |
| ENSMMUG00000003005 | MFNG O-fucosylpeptide 3-beta-N-acetylglucosaminyltransferase [Source:VGNC Symbol;Acc:VGNC:74712] | 6.313052179 | 1.90E-06    | 2.78E-05    |
| ENSMMUG00000057785 |                                                                                                  | 6.392274255 | 6.61E-09    | 1.71E-07    |
| ENSMMUG00000049298 | cholecystokinin A receptor [Source:NCBI gene;Acc:694742]                                         | 6.936551288 | 4.54E-08    | 9.83E-07    |

## SD 2 vs. Baseline

| Ensembl Gene ID    | Description                                                                      | Log2(FC)    | p-value     | FDR         |
|--------------------|----------------------------------------------------------------------------------|-------------|-------------|-------------|
| ENSMMUG00000059241 |                                                                                  | 6.914992229 | 3.51E-07    | 1.08E-05    |
| ENSMMUG00000063345 |                                                                                  | 6.009652857 | 1.95E-05    | 0.000373092 |
| ENSMMUG0000007003  | polyribonucleotide nucleotidyltransferase 1 [Source:VGNC Symbol;Acc:VGNC:76095]  | 5.926546819 | 5.12E-05    | 0.000844355 |
| ENSMMUG00000060836 |                                                                                  | 5.680582698 | 0.000388079 | 0.004620294 |
| ENSMMUG00000061408 |                                                                                  | 5.431283254 | 0.000304551 | 0.003777336 |
| ENSMMUG00000002755 | kelch like family member 5 [Source:VGNC Symbol;Acc:VGNC:74188]                   | 4.917727029 | 0.001061741 | 0.010450489 |
| ENSMMUG00000055207 |                                                                                  | 4.872573616 | 0.000154747 | 0.002180917 |
| ENSMMUG00000021332 | carboxypeptidase X, M14 family member 1 [Source:VGNC Symbol;Acc:VGNC:71413]      | 4.857586169 | 0.000360749 | 0.004343775 |
| ENSMMUG00000061572 | Metazoan signal recognition particle RNA [Source:RFAM;Acc:RF00017]               | -4.80034398 | 0.001300792 | 0.012165838 |
| ENSMMUG00000022562 | interleukin 1 receptor accessory protein [Source:VGNC Symbol;Acc:VGNC:73718]     | 4.784400686 | 0.000163991 | 0.002283221 |
| ENSMMUG00000013302 | family with sequence similarity 184 member A [Source:VGNC Symbol;Acc:VGNC:72308] | 4.664868741 | 0.000232383 | 0.003016385 |
| ENSMMUG00000005851 | B-box and SPRY domain containing [Source:VGNC Symbol;Acc:VGNC:70342]             | 4.488159079 | 3.57E-05    | 0.000623755 |
| ENSMMUG00000012056 | structural maintenance of chromosomes 6 [Source:VGNC Symbol;Acc:VGNC:77746]      | 4.467567052 | 3.84E-05    | 0.000659804 |
| ENSMMUG00000019815 | transcription factor AP-2 epsilon [Source:VGNC Symbol;Acc:VGNC:79878]            | 4.363200205 | 5.14E-06    | 0.000120344 |
| ENSMMUG00000007628 | cell adhesion associated, oncogene regulated [Source:VGNC Symbol;Acc:VGNC:70961] | 4.202605729 | 0.000165323 | 0.002291369 |
| ENSMMUG00000052929 |                                                                                  | 4.170399096 | 9.17E-08    | 3.47E-06    |
| ENSMMUG00000045446 |                                                                                  | 4.117102872 | 0.002490422 | 0.020175491 |
| ENSMMUG00000020533 | chromosome 11 C12orf56 homolog [Source:VGNC Symbol;Acc:VGNC:70409]               | 4.069445417 | 3.63E-05    | 0.000633125 |
| ENSMMUG00000004821 | membrane spanning 4-domains A14 [Source:NCBI gene;Acc:697083]                    | 4.014818549 | 9.81E-28    | 1.13E-24    |
| ENSMMUG00000008945 | zinc finger protein 407 [Source:NCBI gene;Acc:695303]                            | 3.936521825 | 0.000681524 | 0.007259335 |
| ENSMMUG00000006547 | ATPase H+ transporting V0 subunit a4 [Source:VGNC Symbol;Acc:VGNC:70189]         | 3.889134156 | 0.005529582 | 0.036902644 |
| ENSMMUG00000026876 | mml-mir-181a-2 [Source:miRBase;Acc:MI0002808]                                    | 3.860215324 | 0.006755061 | 0.042726342 |
| ENSMMUG00000022975 | sprouty related EVH1 domain containing 3 [Source:VGNC Symbol;Acc:VGNC:78030]     | 3.859772161 | 2.19E-25    | 2.02E-22    |
| ENSMMUG00000052605 | Metazoan signal recognition particle RNA [Source:RFAM;Acc:RF00017]               | 3.806132527 | 0.00081245  | 0.00841055  |
| ENSMMUG00000017204 | programmed cell death 4 [Source:VGNC Symbol;Acc:VGNC:75794]                      | -3.80144893 | 1.02E-07    | 3.82E-06    |
| ENSMMUG00000062793 |                                                                                  | 3.756312935 | 1.02E-19    | 3.92E-17    |
| ENSMMUG00000039317 | cAMP responsive element binding protein 5 [Source:VGNC Symbol;Acc:VGNC:81295]    | 3.626168801 | 3.03E-05    | 0.000543994 |
| ENSMMUG00000052535 |                                                                                  | 3.616857536 | 0.00036182  | 0.004347038 |

|                      |                                                                                                 |   |             |             |             |
|----------------------|-------------------------------------------------------------------------------------------------|---|-------------|-------------|-------------|
| ENSMMUG00000055809   |                                                                                                 | - | 3.589727293 | 0.000126039 | 0.001829554 |
| ENSMMUG00000002549   | trehalase [Source:NCBI gene;Acc:706449]                                                         | - | 3.541312703 | 3.05E-15    | 5.29E-13    |
| ENSMMUG000000054315  |                                                                                                 | - | 3.520996534 | 0.00068252  | 0.007261539 |
| ENSMMUG00000012058   | GEN1 Holliday junction 5' flap endonuclease [Source:VGNC Symbol;Acc:VGNC:72790]                 | - | 3.489860378 | 0.00164222  | 0.014532069 |
| ENSMMUG00000018565   | ribonucleoprotein, PTB binding 2 [Source:VGNC Symbol;Acc:VGNC:76536]                            | - | 3.470998617 | 0.0006811   | 0.007259335 |
| ENSMMUG000000056790  |                                                                                                 | - | 3.418293016 | 4.91E-07    | 1.47E-05    |
| ENSMMUG00000019639   | paired box 5 [Source:VGNC Symbol;Acc:VGNC:75764]                                                | - | -3.38204486 | 0.000156531 | 0.002199323 |
| ENSMMUG000000047324  | casein alpha s1 [Source:HGNC Symbol;Acc:HGNC:2445]                                              | - | -3.35760198 | 0.006698089 | 0.042535405 |
| ENSMMUG000000030099  | phospholipid phosphatase 1 [Source:VGNC Symbol;Acc:VGNC:76226]                                  | - | 3.350334588 | 1.71E-06    | 4.40E-05    |
| ENSMMUG000000029164  | glycerophosphodiester phosphodiesterase domain containing 3 [Source:VGNC Symbol;Acc:VGNC:72800] | - | -3.31553424 | 1.74E-09    | 1.11E-07    |
| ENSMMUG000000020926  | syntaxin 2 [Source:VGNC Symbol;Acc:VGNC:78259]                                                  | - | -3.294844   | 0.001667931 | 0.014687159 |
| ENSMMUG000000051115  |                                                                                                 | - | -3.28141809 | 3.00E-06    | 7.53E-05    |
| ENSMMUG000000060346  |                                                                                                 | - | 3.279692045 | 1.97E-06    | 5.05E-05    |
| ENSMMUG000000056387  | transcription factor 15 [Source:NCBI gene;Acc:716916]                                           | - | 3.251089729 | 8.43E-11    | 6.58E-09    |
| ENSMMUG000000015202  |                                                                                                 | - | 3.247464295 | 0.00387877  | 0.028430831 |
| ENSMMUG000000010508  | carbamoyl-phosphate synthase 1 [Source:VGNC Symbol;Acc:VGNC:71471]                              | - | 3.246897519 | 0.000926108 | 0.009365899 |
| ENSMMUG000000057031  |                                                                                                 | - | -3.22729072 | 0.003161364 | 0.024285504 |
| ENSMMUG000000017207  | dopamine beta-hydroxylase [Source:VGNC Symbol;Acc:VGNC:71740]                                   | - | 3.221887574 | 1.51E-07    | 5.29E-06    |
| ENSMMUG000000010543  | PHD finger protein 23 [Source:VGNC Symbol;Acc:VGNC:75877]                                       | - | 3.212130953 | 0.003118274 | 0.024014626 |
| ENSMMUG000000005137  | ATPase secretory pathway Ca <sup>2+</sup> transporting 1 [Source:VGNC Symbol;Acc:VGNC:70054]    | - | -3.20816153 | 5.96E-06    | 0.000133892 |
| ENSMMUG000000058603  |                                                                                                 | - | 3.185061127 | 0.001673266 | 0.014707804 |
| ENSMMUG000000015167  | DIS3 like 3'-5' exoribonuclease 2 [Source:VGNC Symbol;Acc:VGNC:71793]                           | - | 3.181941904 | 0.004497268 | 0.031642472 |
| ENSMMUG000000060892  |                                                                                                 | - | 3.103596114 | 8.14E-30    | 1.10E-26    |
| ENSMMUG000000046655  | pleckstrin homology like domain family B member 1 [Source:NCBI gene;Acc:706336]                 | - | 3.102499793 | 3.40E-10    | 2.41E-08    |
| ENSMMUG000000016880  | solute carrier family 39 member 8 [Source:VGNC Symbol;Acc:VGNC:77541]                           | - | 3.095123785 | 8.03E-13    | 8.91E-11    |
| ENSMMUG000000006548  | KIAA1549 [Source:VGNC Symbol;Acc:VGNC:73885]                                                    | - | -3.06827706 | 0.001754211 | 0.015244577 |
| ENSMMUG0000000052682 |                                                                                                 | - | 3.007849188 | 3.92E-05    | 0.000669851 |
| ENSMMUG0000000051271 |                                                                                                 | - | 3.004891565 | 1.13E-05    | 0.000235951 |
| ENSMMUG000000017234  | leucine rich repeat containing 59 [Source:VGNC Symbol;Acc:VGNC:81436]                           | - | 2.995964321 | 3.29E-15    | 5.51E-13    |
| ENSMMUG000000003736  | nuclear factor kappa B subunit 1 [Source:VGNC Symbol;Acc:VGNC:75339]                            | - | 2.986041407 | 8.06E-09    | 4.24E-07    |
| ENSMMUG0000000055229 |                                                                                                 | - | 2.957600217 | 4.49E-09    | 2.63E-07    |
| ENSMMUG000000017210  | sarcosine dehydrogenase [Source:VGNC Symbol;Acc:VGNC:76971]                                     | - | 2.955856843 | 8.96E-08    | 3.41E-06    |

|                    |                                                                                           |   |             |             |             |
|--------------------|-------------------------------------------------------------------------------------------|---|-------------|-------------|-------------|
| ENSMMUG0000006898  | integrin subunit beta 8 [Source:VGNC Symbol;Acc:VGNC:73791]                               | - | 2.940668265 | 1.45E-12    | 1.52E-10    |
| ENSMMUG00000060278 | Metazoan signal recognition particle RNA [Source:RFAM;Acc:RF00017]                        | - | 2.911655247 | 0.001605837 | 0.014278765 |
| ENSMMUG0000000009  | protein tyrosine phosphatase receptor type C [Source:VGNC Symbol;Acc:VGNC:76612]          | - | 2.903573096 | 7.49E-07    | 2.14E-05    |
| ENSMMUG00000009155 | SIN3-HDAC complex associated factor [Source:NCBI gene;Acc:694162]                         | - | 2.861013098 | 0.000286725 | 0.003604827 |
| ENSMMUG00000010050 | small nuclear ribonucleoprotein polypeptides B and B1 [Source:VGNC Symbol;Acc:VGNC:77676] | - | 2.841825706 | 7.22E-06    | 0.00015901  |
| ENSMMUG00000016314 | family with sequence similarity 166 member B [Source:VGNC Symbol;Acc:VGNC:72421]          | - | -2.83481363 | 3.75E-11    | 3.06E-09    |
| ENSMMUG00000007159 | tubulin epsilon and delta complex 1 [Source:VGNC Symbol;Acc:VGNC:79235]                   | - | 2.811992679 | 3.97E-05    | 0.000677972 |
| ENSMMUG00000011469 | germ cell nuclear acidic peptidase [Source:VGNC Symbol;Acc:VGNC:72724]                    | - | 2.800728604 | 0.003053769 | 0.023586575 |
| ENSMMUG00000015002 | chromodomain helicase DNA binding protein 8 [Source:VGNC Symbol;Acc:VGNC:71060]           | - | 2.760566484 | 0.000759193 | 0.007966364 |
| ENSMMUG00000060744 |                                                                                           | - | 2.760423534 | 1.41E-05    | 0.000283187 |
| ENSMMUG00000057073 |                                                                                           | - | 2.757886211 | 0.001315115 | 0.012268745 |
| ENSMMUG00000000974 | mutS homolog 2 [Source:VGNC Symbol;Acc:VGNC:74931]                                        | - | 2.707681155 | 1.29E-05    | 0.000262303 |
| ENSMMUG00000001742 | transforming growth factor beta receptor 3 [Source:VGNC Symbol;Acc:VGNC:78339]            | - | 2.705315249 | 2.33E-16    | 4.99E-14    |
| ENSMMUG00000014484 | zinc finger protein 641 [Source:NCBI gene;Acc:708246]                                     | - | 2.704577347 | 7.90E-06    | 0.000172316 |
| ENSMMUG00000016093 | adenosine deaminase RNA specific [Source:VGNC Symbol;Acc:VGNC:69502]                      | - | 2.679946655 | 1.15E-14    | 1.77E-12    |
| ENSMMUG00000001481 | nicotinamide nucleotide adenylyltransferase 2 [Source:VGNC Symbol;Acc:VGNC:75193]         | - | 2.661142863 | 0.008097648 | 0.049320088 |
| ENSMMUG00000008867 | exoribonuclease 1 [Source:VGNC Symbol;Acc:VGNC:72324]                                     | - | 2.659746788 | 0.001714357 | 0.014940556 |
| ENSMMUG00000053577 |                                                                                           | - | 2.659445722 | 0.000356787 | 0.004314729 |
| ENSMMUG00000052642 | protein O-glucosyltransferase 2 [Source:NCBI gene;Acc:702156]                             | - | 2.638373141 | 0.001315794 | 0.012268745 |
| ENSMMUG00000007816 | SMAD family member 2 [Source:VGNC Symbol;Acc:VGNC:77810]                                  | - | 2.621015326 | 3.40E-08    | 1.44E-06    |
| ENSMMUG00000060713 | epithelial membrane protein 2 [Source:NCBI gene;Acc:710315]                               | - | 2.614399333 | 0.003005727 | 0.023377712 |
| ENSMMUG00000003049 | testis expressed 11 [Source:VGNC Symbol;Acc:VGNC:78316]                                   | - | 2.596573781 | 0.006504234 | 0.041626195 |
| ENSMMUG00000008228 | unc-93 homolog A [Source:VGNC Symbol;Acc:VGNC:78724]                                      | - | 2.594305799 | 0.001139339 | 0.011014012 |
| ENSMMUG00000000972 | tyrosine kinase non receptor 2 [Source:VGNC Symbol;Acc:VGNC:79192]                        | - | 2.581431515 | 1.64E-05    | 0.00032202  |
| ENSMMUG00000008540 | ring finger protein 112 [Source:VGNC Symbol;Acc:VGNC:76724]                               | - | -2.56931991 | 5.18E-06    | 0.000120689 |
| ENSMMUG00000013501 | CD68 molecule [Source:VGNC Symbol;Acc:VGNC:82121]                                         | - | 2.552724344 | 0.003289014 | 0.025018986 |
| ENSMMUG00000065099 |                                                                                           | - | 2.544842875 | 7.15E-07    | 2.05E-05    |
| ENSMMUG00000057501 |                                                                                           | - | 2.540231119 | 1.16E-05    | 0.000240214 |
| ENSMMUG00000047542 | U4 spliceosomal RNA [Source:RFAM;Acc:RF00015]                                             | - | 2.534925621 | 0.00713823  | 0.044678745 |

|                    |                                                                                                |             |             |             |
|--------------------|------------------------------------------------------------------------------------------------|-------------|-------------|-------------|
| ENSMMUG0000007821  | ATP binding cassette subfamily B member 5 [Source:VGNC Symbol;Acc:VGNC:80321]                  | -           | -           | -           |
| ENSMMUG00000020370 | SRY-box transcription factor 5 [Source:VGNC Symbol;Acc:VGNC:77843]                             | 2.522241474 | 2.63E-07    | 8.41E-06    |
|                    |                                                                                                | -2.51197725 | 2.67E-08    | 1.20E-06    |
|                    |                                                                                                | -           | -           | -           |
| ENSMMUG00000016993 | PKHD1 ciliary IPT domain containing fibrocystin/polyductin [Source:VGNC Symbol;Acc:VGNC:76010] | 2.492354139 | 0.000112341 | 0.001648917 |
| ENSMMUG00000052277 | transthyretin [Source:NCBI gene;Acc:705943]                                                    | -2.48887757 | 0.004703183 | 0.032765629 |
|                    |                                                                                                | -           | -           | -           |
| ENSMMUG00000007398 | potassium calcium-activated channel subfamily N member 1 [Source:VGNC Symbol;Acc:VGNC:74002]   | 2.488105013 | 9.63E-06    | 0.000202883 |
|                    |                                                                                                | -           | -           | -           |
| ENSMMUG00000014018 | bromodomain testis associated [Source:VGNC Symbol;Acc:VGNC:70282]                              | 2.484272657 | 9.32E-06    | 0.000197191 |
| ENSMMUG00000018342 | required for meiotic nuclear division 1 homolog [Source:VGNC Symbol;Acc:VGNC:76797]            | -2.48005459 | 1.29E-05    | 0.000262107 |
|                    |                                                                                                | -           | -           | -           |
| ENSMMUG00000061973 |                                                                                                | 2.478322234 | 1.38E-12    | 1.46E-10    |
|                    |                                                                                                | -           | -           | -           |
| ENSMMUG00000013029 | surfactant protein C [Source:VGNC Symbol;Acc:VGNC:84113]                                       | 2.469403127 | 8.95E-05    | 0.001360628 |
|                    |                                                                                                | -           | -           | -           |
| ENSMMUG00000037551 | Metazoan signal recognition particle RNA [Source:RFAM;Acc:RF00017]                             | 2.464494102 | 1.55E-05    | 0.000305681 |
|                    |                                                                                                | -           | -           | -           |
| ENSMMUG00000059019 |                                                                                                | 2.435258527 | 6.67E-07    | 1.94E-05    |
|                    |                                                                                                | -           | -           | -           |
| ENSMMUG00000017378 | steroid sulfatase [Source:VGNC Symbol;Acc:VGNC:81590]                                          | 2.431687797 | 0.003816584 | 0.028009584 |
|                    |                                                                                                | -           | -           | -           |
| ENSMMUG00000057276 |                                                                                                | 2.422562353 | 0.000583414 | 0.006378415 |
|                    |                                                                                                | -           | -           | -           |
| ENSMMUG00000016526 | solute carrier family 25 member 41 [Source:VGNC Symbol;Acc:VGNC:77581]                         | 2.421301779 | 8.59E-05    | 0.001313113 |
|                    |                                                                                                | -           | -           | -           |
| ENSMMUG00000055117 |                                                                                                | 2.421117476 | 0.004312989 | 0.030626884 |
|                    |                                                                                                | -           | -           | -           |
| ENSMMUG00000012480 | REC8 meiotic recombination protein [Source:VGNC Symbol;Acc:VGNC:76746]                         | 2.419577026 | 8.16E-05    | 0.001255058 |
|                    |                                                                                                | -           | -           | -           |
| ENSMMUG00000010127 | chitobiase [Source:VGNC Symbol;Acc:VGNC:71540]                                                 | 2.419399832 | 0.000547294 | 0.006103643 |
|                    |                                                                                                | -           | -           | -           |
| ENSMMUG00000023265 | A-kinase anchoring protein 12 [Source:VGNC Symbol;Acc:VGNC:69766]                              | 2.387197382 | 1.68E-09    | 1.09E-07    |
|                    |                                                                                                | -           | -           | -           |
| ENSMMUG00000015141 | ankyrin repeat domain 16 [Source:NCBI gene;Acc:720787]                                         | 2.379058912 | 0.001231237 | 0.011689448 |
|                    |                                                                                                | -           | -           | -           |
| ENSMMUG00000055585 |                                                                                                | 2.357049564 | 0.000178832 | 0.002449087 |
|                    |                                                                                                | -           | -           | -           |
| ENSMMUG00000015000 | SPT16 homolog, facilitates chromatin remodeling subunit [Source:VGNC Symbol;Acc:VGNC:78054]    | 2.331943571 | 6.86E-06    | 0.00015136  |
|                    |                                                                                                | -           | -           | -           |
| ENSMMUG00000012781 | muscular LMNA interacting protein [Source:VGNC Symbol;Acc:VGNC:83434]                          | 2.323616266 | 6.34E-05    | 0.001010947 |
|                    |                                                                                                | -           | -           | -           |
| ENSMMUG00000051032 | serine protease 2 [Source:NCBI gene;Acc:698352]                                                | 2.302314165 | 2.58E-08    | 1.18E-06    |
|                    |                                                                                                | -           | -           | -           |
| ENSMMUG00000021091 | COP9 signalosome subunit 3 [Source:VGNC Symbol;Acc:VGNC:71316]                                 | 2.289684307 | 0.005689179 | 0.03761316  |
|                    |                                                                                                | -           | -           | -           |
| ENSMMUG00000001225 | calneuron 1 [Source:VGNC Symbol;Acc:VGNC:82078]                                                | 2.271295909 | 0.000239591 | 0.003092502 |
|                    |                                                                                                | -           | -           | -           |
| ENSMMUG00000056363 |                                                                                                | 2.265762102 | 0.00813449  | 0.049457679 |
|                    |                                                                                                | -           | -           | -           |
| ENSMMUG00000021552 | RPGR interacting protein 1 [Source:VGNC Symbol;Acc:VGNC:77007]                                 | 2.249665848 | 4.35E-05    | 0.000733887 |
| ENSMMUG00000059707 | MIS18 kinetochore protein A [Source:NCBI gene;Acc:709275]                                      | -2.23801973 | 2.42E-05    | 0.000446859 |
|                    |                                                                                                | -           | -           | -           |
| ENSMMUG00000059773 | methyltransferase like 11B [Source:NCBI gene;Acc:705503]                                       | 2.233172377 | 0.000471751 | 0.005440507 |
|                    |                                                                                                | -           | -           | -           |
| ENSMMUG00000014687 | sterile alpha motif domain containing 14 [Source:VGNC Symbol;Acc:VGNC:77112]                   | 2.232319657 | 0.007436047 | 0.046021477 |



|                    |                                                                                                    |   |             |             |             |
|--------------------|----------------------------------------------------------------------------------------------------|---|-------------|-------------|-------------|
| ENSMMUG00000018031 | solute carrier family 25 member 19 [Source:VGNC Symbol;Acc:VGNC:77474]                             | - | 2.231700244 | 0.000514781 | 0.005834398 |
| ENSMMUG00000055610 | homeobox C4 [Source:NCBI gene;Acc:100430434]                                                       | - | 2.218412517 | 1.44E-07    | 5.09E-06    |
| ENSMMUG00000056045 |                                                                                                    | - | 2.211934002 | 2.53E-05    | 0.000462195 |
| ENSMMUG00000010820 | chaperonin containing TCP1 subunit 2 [Source:VGNC Symbol;Acc:VGNC:70745]                           | - | 2.200141759 | 0.000188229 | 0.002539994 |
| ENSMMUG00000005856 | glycine amidinotransferase [Source:VGNC Symbol;Acc:VGNC:72892]                                     | - | 2.172608024 | 1.11E-06    | 3.02E-05    |
| ENSMMUG00000018358 | zinc finger protein 217 [Source:VGNC Symbol;Acc:VGNC:78874]                                        | - | 2.171931881 | 2.22E-05    | 0.000417042 |
| ENSMMUG00000012481 | importin 4 [Source:VGNC Symbol;Acc:VGNC:73630]                                                     | - | 2.170556154 | 2.86E-07    | 9.03E-06    |
| ENSMMUG00000005204 | VPS16 core subunit of CORVET and HOPS complexes [Source:VGNC Symbol;Acc:VGNC:78966]                | - | 2.147562042 | 0.000873066 | 0.008927585 |
| ENSMMUG00000021280 | leucine rich transmembrane and O-methyltransferase domain containing [Source:NCBI gene;Acc:718286] | - | 2.133060785 | 0.000517368 | 0.005856509 |
| ENSMMUG00000050864 |                                                                                                    | - | 2.129748248 | 1.31E-06    | 3.50E-05    |
| ENSMMUG00000063177 | StAR related lipid transfer domain containing 4 [Source:NCBI gene;Acc:706654]                      | - | 2.128880151 | 7.09E-19    | 2.33E-16    |
| ENSMMUG00000016791 | doublecortin like kinase 1 [Source:VGNC Symbol;Acc:VGNC:71745]                                     | - | 2.115499327 | 7.25E-09    | 3.93E-07    |
| ENSMMUG00000016610 | CD99 molecule like 2 [Source:VGNC Symbol;Acc:VGNC:70823]                                           | - | 2.112513121 | 0.000444951 | 0.005183403 |
| ENSMMUG00000003029 | protein arginine methyltransferase 1 [Source:NCBI gene;Acc:719419]                                 | - | 2.111996868 | 2.65E-07    | 8.42E-06    |
| ENSMMUG00000002794 | general transcription factor IIB [Source:VGNC Symbol;Acc:VGNC:73306]                               | - | 2.110755126 | 1.05E-12    | 1.13E-10    |
| ENSMMUG00000051381 | Metazoan signal recognition particle RNA [Source:RFAM;Acc:RF00017]                                 | - | 2.107083095 | 1.78E-05    | 0.00034484  |
| ENSMMUG00000009965 | chromosome 15 C9orf50 homolog [Source:VGNC Symbol;Acc:VGNC:70365]                                  | - | 2.097370971 | 7.72E-06    | 0.000169176 |
| ENSMMUG00000017186 | pleckstrin homology domain interacting protein [Source:VGNC Symbol;Acc:VGNC:75803]                 | - | -2.09117629 | 0.001675518 | 0.014713544 |
| ENSMMUG00000051482 |                                                                                                    | - | 2.080005656 | 0.000256571 | 0.00327039  |
| ENSMMUG00000018474 | signal regulatory protein alpha [Source:NCBI gene;Acc:717811]                                      | - | 2.073273423 | 6.04E-09    | 3.37E-07    |
| ENSMMUG00000021670 | solute carrier family 52 member 3 [Source:VGNC Symbol;Acc:VGNC:77717]                              | - | 2.071751672 | 7.55E-05    | 0.00117156  |
| ENSMMUG00000007313 | histone acetyltransferase 1 [Source:VGNC Symbol;Acc:VGNC:73349]                                    | - | 2.068837687 | 0.00139579  | 0.012819813 |
| ENSMMUG00000009493 | family with sequence similarity 120A [Source:NCBI gene;Acc:717459]                                 | - | 2.065854905 | 0.00019986  | 0.00265031  |
| ENSMMUG00000017524 | phosphoinositide kinase, FYVE-type zinc finger containing [Source:VGNC Symbol;Acc:VGNC:75854]      | - | 2.055523266 | 6.29E-06    | 0.000140124 |
| ENSMMUG00000009948 | histone deacetylase 1 [Source:NCBI gene;Acc:708441]                                                | - | 2.036249189 | 0.000148911 | 0.002124693 |
| ENSMMUG00000038661 |                                                                                                    | - | 2.031097628 | 1.23E-05    | 0.000252435 |
| ENSMMUG00000057859 |                                                                                                    | - | 2.025294262 | 0.002316389 | 0.019050691 |
| ENSMMUG00000002332 | RNA binding motif protein 25 [Source:VGNC Symbol;Acc:VGNC:76521]                                   | - | 2.020875178 | 0.00366549  | 0.027095182 |
| ENSMMUG00000010453 | folate receptor beta [Source:VGNC Symbol;Acc:VGNC:72690]                                           | - | 1.992013735 | 2.36E-05    | 0.000441078 |

|                     |                                                                                                |   |             |             |             |
|---------------------|------------------------------------------------------------------------------------------------|---|-------------|-------------|-------------|
| ENSMMUG0000001479   | laminin subunit gamma 2 [Source:VGNC Symbol;Acc:VGNC:74233]                                    | - | 1.985316185 | 0.00057905  | 0.006372501 |
| ENSMMUG00000020175  | mediator complex subunit 25 [Source:VGNC Symbol;Acc:VGNC:74607]                                | - | 1.979506935 | 0.001236059 | 0.011703143 |
| ENSMMUG00000007326  | ring finger protein 121 [Source:VGNC Symbol;Acc:VGNC:76788]                                    | - | -1.97726082 | 9.52E-05    | 0.001424168 |
| ENSMMUG000000053721 |                                                                                                | - | 1.958235599 | 0.005922243 | 0.038819373 |
| ENSMMUG00000012110  | smoothened, frizzled class receptor [Source:VGNC Symbol;Acc:VGNC:77658]                        | - | 1.952322612 | 9.27E-05    | 0.001399179 |
| ENSMMUG00000022153  | solute carrier family 25 member 36 [Source:VGNC Symbol;Acc:VGNC:84079]                         | - | 1.952068277 | 1.62E-07    | 5.57E-06    |
| ENSMMUG00000000238  | HECT domain E3 ubiquitin protein ligase 2 [Source:VGNC Symbol;Acc:VGNC:73246]                  | - | 1.950139761 | 4.26E-06    | 0.000101949 |
| ENSMMUG00000010648  | DNA methyltransferase 3 like [Source:NCBI gene;Acc:722184]                                     | - | 1.929008889 | 0.001682512 | 0.014746815 |
| ENSMMUG00000013047  | S-phase kinase associated protein 1 [Source:NCBI gene;Acc:100423634]                           | - | 1.923150895 | 1.04E-07    | 3.88E-06    |
| ENSMMUG00000019831  | neurobeachin [Source:NCBI gene;Acc:714386]                                                     | - | -1.92066539 | 0.008134308 | 0.049457679 |
| ENSMMUG00000002657  | olfactomedin 4 [Source:VGNC Symbol;Acc:VGNC:75418]                                             | - | 1.887955922 | 0.004519297 | 0.031729016 |
| ENSMMUG000000059575 |                                                                                                | - | 1.887945265 | 4.79E-08    | 1.94E-06    |
| ENSMMUG000000040694 | LCK proto-oncogene, Src family tyrosine kinase [Source:NCBI gene;Acc:717704]                   | - | 1.880291483 | 9.46E-10    | 6.36E-08    |
| ENSMMUG00000002809  | unc-80 homolog, NALCN channel complex subunit [Source:NCBI gene;Acc:713007]                    | - | 1.876900343 | 0.00187691  | 0.016113061 |
| ENSMMUG00000011974  | calcium/calmodulin dependent protein kinase IV [Source:VGNC Symbol;Acc:VGNC:70526]             | - | 1.851065592 | 0.000136207 | 0.001955555 |
| ENSMMUG00000003260  |                                                                                                | - | 1.850667984 | 5.47E-06    | 0.000125808 |
| ENSMMUG000000053384 |                                                                                                | - | 1.848093647 | 2.19E-09    | 1.36E-07    |
| ENSMMUG00000019850  | arachidonate lipoxygenase 3 [Source:VGNC Symbol;Acc:VGNC:69607]                                | - | -1.84446904 | 1.52E-12    | 1.57E-10    |
| ENSMMUG00000012462  | proteasome activator subunit 1 [Source:VGNC Symbol;Acc:VGNC:76455]                             | - | 1.842714058 | 0.006599176 | 0.042087468 |
| ENSMMUG000000062527 |                                                                                                | - | 1.835934675 | 2.18E-08    | 1.01E-06    |
| ENSMMUG00000011386  | GTPase, IMAP family member 4 [Source:VGNC Symbol;Acc:VGNC:72982]                               | - | 1.835365858 | 7.22E-10    | 4.99E-08    |
| ENSMMUG000000050269 | T cell receptor beta variable 14 [Source:HGNC Symbol;Acc:HGNC:12189]                           | - | 1.821476243 | 3.34E-05    | 0.000591492 |
| ENSMMUG00000007411  | integrin alpha FG-GAP repeat containing 2 [Source:VGNC Symbol;Acc:VGNC:73690]                  | - | 1.820946796 | 9.48E-10    | 6.36E-08    |
| ENSMMUG000000063298 |                                                                                                | - | 1.810708432 | 0.004097534 | 0.029529842 |
| ENSMMUG000000039944 | Ras protein specific guanine nucleotide releasing factor 2 [Source:VGNC Symbol;Acc:VGNC:84486] | - | 1.808493973 | 8.90E-06    | 0.000190043 |
| ENSMMUG000000057606 | GPRIN family member 3 [Source:NCBI gene;Acc:703567]                                            | - | 1.807730579 | 3.42E-06    | 8.47E-05    |
| ENSMMUG00000016983  | acrosin binding protein [Source:VGNC Symbol;Acc:VGNC:69445]                                    | - | 1.807686136 | 0.00010525  | 0.001557264 |
| ENSMMUG00000006682  | chondroitin polymerizing factor 2 [Source:VGNC Symbol;Acc:VGNC:71131]                          | - | 1.807535062 | 0.00436964  | 0.030971509 |
| ENSMMUG000000056116 |                                                                                                | - | 1.805856121 | 7.88E-05    | 0.001216593 |

|                    |                                                                                                  |   |             |             |             |
|--------------------|--------------------------------------------------------------------------------------------------|---|-------------|-------------|-------------|
| ENSMMUG00000014735 | carnitine palmitoyltransferase 1C [Source:NCBI gene;Acc:719429]                                  | - | 1.805654354 | 0.000227883 | 0.002962162 |
| ENSMMUG00000040771 |                                                                                                  | - | -1.80102915 | 0.000909221 | 0.009235717 |
| ENSMMUG00000002742 | ST8 alpha-N-acetyl-neuraminide alpha-2,8-sialyltransferase 5 [Source:VGNC Symbol;Acc:VGNC:77942] | - | 1.788174527 | 0.000584757 | 0.006378415 |
| ENSMMUG00000004791 | pleckstrin homology domain containing B1 [Source:VGNC Symbol;Acc:VGNC:76069]                     | - | 1.780173902 | 0.002113627 | 0.017796627 |
| ENSMMUG00000006252 | argonaute RISC catalytic component 3 [Source:NCBI gene;Acc:712543]                               | - | 1.775488846 | 2.41E-14    | 3.58E-12    |
| ENSMMUG00000064804 |                                                                                                  | - | 1.762225897 | 0.000991489 | 0.009918125 |
| ENSMMUG00000005246 | zinc finger protein 740 [Source:VGNC Symbol;Acc:VGNC:79665]                                      | - | 1.759134092 | 0.000355327 | 0.004302732 |
| ENSMMUG00000055344 | TLC domain containing 3A [Source:NCBI gene;Acc:699707]                                           | - | 1.755136152 | 5.78E-06    | 0.000131005 |
| ENSMMUG00000030381 | arachidonate 15-lipoxygenase [Source:VGNC Symbol;Acc:VGNC:69796]                                 | - | 1.740290797 | 8.96E-06    | 0.000190984 |
| ENSMMUG00000015143 | F-box DNA helicase 1 [Source:NCBI gene;Acc:720797]                                               | - | 1.738476915 | 0.00179615  | 0.01556494  |
| ENSMMUG00000006731 | CECR2 histone acetyl-lysine reader [Source:VGNC Symbol;Acc:VGNC:84530]                           | - | 1.732488559 | 0.000852173 | 0.008723638 |
| ENSMMUG00000016262 | tetratricopeptide repeat domain 38 [Source:VGNC Symbol;Acc:VGNC:79574]                           | - | -1.73246422 | 6.96E-05    | 0.001088622 |
| ENSMMUG00000052830 |                                                                                                  | - | -1.72476423 | 0.004191484 | 0.029972204 |
| ENSMMUG00000009773 | lysine demethylase 1A [Source:VGNC Symbol;Acc:VGNC:73928]                                        | - | 1.722086431 | 3.56E-06    | 8.77E-05    |
| ENSMMUG00000002103 | delta/notch like EGF repeat containing [Source:VGNC Symbol;Acc:VGNC:71895]                       | - | 1.721979406 | 2.40E-05    | 0.000444143 |
| ENSMMUG00000022183 | spermatogenesis associated 1 [Source:NCBI gene;Acc:710462]                                       | - | 1.718495067 | 2.62E-07    | 8.41E-06    |
| ENSMMUG00000022762 | OMA1 zinc metalloproteinase [Source:VGNC Symbol;Acc:VGNC:75485]                                  | - | 1.717661149 | 0.00227615  | 0.018770079 |
| ENSMMUG00000001121 | zinc finger protein 689 [Source:VGNC Symbol;Acc:VGNC:79480]                                      | - | 1.704847699 | 0.002696036 | 0.021556574 |
| ENSMMUG00000020061 | protein phosphatase 1 regulatory subunit 9B [Source:VGNC Symbol;Acc:VGNC:76372]                  | - | -1.70202257 | 5.55E-06    | 0.000126827 |
| ENSMMUG00000057143 | transmembrane protein 127 [Source:NCBI gene;Acc:705069]                                          | - | 1.698560415 | 0.002758385 | 0.021902862 |
| ENSMMUG00000052019 |                                                                                                  | - | 1.695404714 | 0.003028764 | 0.023482487 |
| ENSMMUG00000055477 |                                                                                                  | - | 1.688067129 | 1.30E-05    | 0.000263088 |
| ENSMMUG00000062974 |                                                                                                  | - | 1.684287057 | 6.49E-05    | 0.001030166 |
| ENSMMUG00000007325 | Xrcc1 N-terminal domain containing 1 [Source:NCBI gene;Acc:115945140]                            | - | 1.681275853 | 0.005586926 | 0.037097026 |
| ENSMMUG00000022630 | protoporphyrinogen oxidase [Source:VGNC Symbol;Acc:VGNC:76365]                                   | - | -1.66954713 | 9.84E-05    | 0.001463666 |
| ENSMMUG00000008009 | family with sequence similarity 13 member B [Source:VGNC Symbol;Acc:VGNC:72268]                  | - | 1.665822278 | 0.001569418 | 0.014049956 |
| ENSMMUG00000011410 | nuclear receptor subfamily 4 group A member 3 [Source:VGNC Symbol;Acc:VGNC:75519]                | - | 1.664876008 | 0.001603958 | 0.014278765 |
| ENSMMUG00000020993 | cadherin EGF LAG seven-pass G-type receptor 1 [Source:NCBI gene;Acc:718440]                      | - | 1.664166288 | 0.002699276 | 0.021563745 |
| ENSMMUG00000020910 | nucleoporin 54 [Source:VGNC Symbol;Acc:VGNC:75420]                                               | - | 1.663805713 | 0.001134531 | 0.010979066 |
| ENSMMUG00000057494 | T cell receptor beta variable 7-9 [Source:HGNC Symbol;Acc:HGNC:12243]                            | - | 1.653887253 | 0.004213201 | 0.030080749 |



|                     |                                                                                                 |   |             |             |             |
|---------------------|-------------------------------------------------------------------------------------------------|---|-------------|-------------|-------------|
| ENSMMUG00000050065  |                                                                                                 | - | 1.648463122 | 0.00576485  | 0.038004234 |
| ENSMMUG00000022982  | IQ motif containing GTPase activating protein 2 [Source:VGNC Symbol;Acc:VGNC:73756]             | - | 1.647975037 | 0.007956276 | 0.048749404 |
| ENSMMUG00000015522  | GRAM domain containing 1B [Source:VGNC Symbol;Acc:VGNC:73028]                                   | - | 1.635944894 | 0.001285596 | 0.012053726 |
| ENSMMUG00000045584  | leucine zipper protein 1 [Source:NCBI gene;Acc:718626]                                          | - | 1.631887629 | 1.74E-05    | 0.000339059 |
| ENSMMUG00000010379  | Mtr4 exosome RNA helicase [Source:VGNC Symbol;Acc:VGNC:74989]                                   | - | 1.631675616 | 0.000724156 | 0.007651441 |
| ENSMMUG00000052526  | RAB39A, member RAS oncogene family [Source:NCBI gene;Acc:707451]                                | - | 1.625611086 | 8.16E-11    | 6.42E-09    |
| ENSMMUG00000020540  | NmrA like redox sensor 1 [Source:VGNC Symbol;Acc:VGNC:75252]                                    | - | 1.620390946 | 0.005051179 | 0.034510764 |
| ENSMMUG00000017145  | cell division cycle 123 [Source:VGNC Symbol;Acc:VGNC:70768]                                     | - | -1.62022463 | 0.000147804 | 0.002112173 |
| ENSMMUG000000062140 |                                                                                                 | - | 1.616977672 | 0.00728096  | 0.045244213 |
| ENSMMUG00000020184  | carboxypeptidase vitellogenic like [Source:VGNC Symbol;Acc:VGNC:71406]                          | - | 1.614253866 | 0.00531063  | 0.03598949  |
| ENSMMUG00000021282  | late endosomal/lysosomal adaptor, MAPK and MTOR activator 1 [Source:VGNC Symbol;Acc:VGNC:74129] | - | 1.608692496 | 0.005444232 | 0.036623915 |
| ENSMMUG00000007424  | nuclear receptor interacting protein 2 [Source:VGNC Symbol;Acc:VGNC:75448]                      | - | 1.594958761 | 3.66E-09    | 2.16E-07    |
| ENSMMUG00000011902  | oligosaccharyltransferase complex non-catalytic subunit [Source:NCBI gene;Acc:697283]           | - | 1.587601972 | 0.000494869 | 0.005643471 |
| ENSMMUG00000055845  | ankyrin repeat domain 53 [Source:NCBI gene;Acc:703757]                                          | - | 1.582436173 | 0.001709848 | 0.014915386 |
| ENSMMUG00000049948  |                                                                                                 | - | 1.580396119 | 0.000488606 | 0.005585889 |
| ENSMMUG00000017246  | lipxygenase homology domains 1 [Source:VGNC Symbol;Acc:VGNC:74368]                              | - | 1.580015705 | 3.22E-05    | 0.000571339 |
| ENSMMUG00000008718  | zinc finger protein 280D [Source:NCBI gene;Acc:699509]                                          | - | 1.578673971 | 5.45E-05    | 0.000893231 |
| ENSMMUG00000008974  | Fc receptor like 5 [Source:NCBI gene;Acc:718771]                                                | - | 1.575873653 | 6.40E-08    | 2.50E-06    |
| ENSMMUG00000020706  | ETS proto-oncogene 1, transcription factor [Source:VGNC Symbol;Acc:VGNC:72439]                  | - | 1.575388272 | 8.56E-08    | 3.27E-06    |
| ENSMMUG00000039020  | zinc finger protein 141 [Source:NCBI gene;Acc:714265]                                           | - | 1.562551535 | 5.78E-05    | 0.000934849 |
| ENSMMUG00000060042  |                                                                                                 | - | 1.561369647 | 0.006889296 | 0.043396434 |
| ENSMMUG00000013848  | fucosyltransferase 8 [Source:VGNC Symbol;Acc:VGNC:72829]                                        | - | 1.559042564 | 0.002827904 | 0.022300944 |
| ENSMMUG00000004709  | proteasome inhibitor subunit 1 [Source:VGNC Symbol;Acc:VGNC:76458]                              | - | 1.550712578 | 0.001055837 | 0.01041465  |
| ENSMMUG00000008643  | general transcription factor IIIC subunit 3 [Source:VGNC Symbol;Acc:VGNC:73317]                 | - | 1.546717053 | 0.00052315  | 0.005907423 |
| ENSMMUG00000049859  |                                                                                                 | - | -1.54032373 | 4.67E-05    | 0.000779287 |
| ENSMMUG00000009536  | makorin ring finger protein 2 [Source:VGNC Symbol;Acc:VGNC:74878]                               | - | 1.539732698 | 0.002585244 | 0.020797204 |
| ENSMMUG00000004178  | NADPH oxidase 1 [Source:VGNC Symbol;Acc:VGNC:75374]                                             | - | 1.539310357 | 0.001211647 | 0.011543258 |
| ENSMMUG00000022680  | alpha-2-macroglobulin like 1 [Source:VGNC Symbol;Acc:VGNC:69507]                                | - | -1.53754088 | 0.000604209 | 0.006511171 |
| ENSMMUG00000041450  | zinc finger protein 432 [Source:NCBI gene;Acc:100424341]                                        | - | 1.536887845 | 0.000549416 | 0.006114002 |

|                     |                                                                                           |   |             |             |             |
|---------------------|-------------------------------------------------------------------------------------------|---|-------------|-------------|-------------|
| ENSMMUG00000020804  | transmembrane protein 132B [Source:NCBI gene;Acc:707118]                                  | - | 1.533836782 | 0.006093452 | 0.039715327 |
| ENSMMUG00000000982  | protein phosphatase 4 catalytic subunit [Source:VGNC Symbol;Acc:VGNC:76384]               | - | 1.527300809 | 0.00371511  | 0.027374965 |
| ENSMMUG00000017191  | zinc finger protein 546 [Source:VGNC Symbol;Acc:VGNC:79732]                               | - | 1.519888825 | 0.006164859 | 0.04001072  |
| ENSMMUG00000005801  | glyceronephosphate O-acyltransferase [Source:VGNC Symbol;Acc:VGNC:73100]                  | - | 1.516481947 | 0.00049807  | 0.005672946 |
| ENSMMUG00000016313  | RUN and SH3 domain containing 2 [Source:VGNC Symbol;Acc:VGNC:82230]                       | - | -1.51501756 | 3.37E-05    | 0.000595911 |
| ENSMMUG00000006251  | argonaute RISC component 1 [Source:VGNC Symbol;Acc:VGNC:81346]                            | - | -1.51090434 | 1.41E-06    | 3.75E-05    |
| ENSMMUG00000001940  | NME/NM23 nucleoside diphosphate kinase 2 [Source:NCBI gene;Acc:100533957]                 | - | 1.505737495 | 0.002866196 | 0.022544962 |
| ENSMMUG00000018974  | LysM domain containing 3 [Source:VGNC Symbol;Acc:VGNC:74373]                              | - | 1.501252525 | 4.26E-06    | 0.000101949 |
| ENSMMUG000000054711 |                                                                                           | - | 1.499831322 | 0.001545646 | 0.013891189 |
| ENSMMUG00000000717  | CD3e molecule associated protein [Source:NCBI gene;Acc:714440]                            | - | 1.499339754 | 0.000587084 | 0.006378911 |
| ENSMMUG00000005028  | phosphodiesterase 4C [Source:NCBI gene;Acc:720171]                                        | - | 1.497396762 | 0.003655462 | 0.027064535 |
| ENSMMUG000000064237 |                                                                                           | - | 1.497183111 | 0.002894203 | 0.022661153 |
| ENSMMUG00000002183  | oxysterol binding protein like 6 [Source:VGNC Symbol;Acc:VGNC:75627]                      | - | 1.491574262 | 0.000781606 | 0.008127823 |
| ENSMMUG00000000981  | T-box transcription factor 6 [Source:VGNC Symbol;Acc:VGNC:78276]                          | - | 1.490276227 | 0.00161804  | 0.014373379 |
| ENSMMUG00000012192  | erythrocyte membrane protein band 4.1 like 4A [Source:VGNC Symbol;Acc:VGNC:72039]         | - | 1.488090118 | 0.00154326  | 0.013883307 |
| ENSMMUG00000017414  | calcium voltage-gated channel subunit alpha1 S [Source:VGNC Symbol;Acc:VGNC:70507]        | - | -1.48688178 | 0.004081276 | 0.029458808 |
| ENSMMUG00000004157  | nuclear protein, coactivator of histone transcription [Source:VGNC Symbol;Acc:VGNC:75379] | - | -1.48352413 | 0.001261064 | 0.011878785 |
| ENSMMUG000000062443 |                                                                                           | - | 1.471215088 | 0.003194188 | 0.024467932 |
| ENSMMUG00000018058  | ATP binding cassette subfamily G member 1 [Source:VGNC Symbol;Acc:VGNC:69584]             | - | 1.464847301 | 0.001251607 | 0.011801779 |
| ENSMMUG00000002090  | ATPase H+ transporting V1 subunit B1 [Source:VGNC Symbol;Acc:VGNC:70184]                  | - | 1.461408104 | 8.31E-06    | 0.000179478 |
| ENSMMUG000000050239 |                                                                                           | - | 1.460498298 | 0.002895742 | 0.022661153 |
| ENSMMUG000000038447 |                                                                                           | - | 1.456956517 | 0.000737673 | 0.007785326 |
| ENSMMUG00000011702  | tetraspanin 5 [Source:VGNC Symbol;Acc:VGNC:79086]                                         | - | 1.455221251 | 0.005854632 | 0.038461691 |
| ENSMMUG00000007620  | transmembrane serine protease 4 [Source:VGNC Symbol;Acc:VGNC:78577]                       | - | 1.452366292 | 0.006087524 | 0.039704809 |
| ENSMMUG00000007561  | zinc finger DHHC-type palmitoyltransferase 22 [Source:NCBI gene;Acc:706468]               | - | 1.451123938 | 0.002913036 | 0.022721864 |
| ENSMMUG00000018057  | uromodulin like 1 [Source:VGNC Symbol;Acc:VGNC:78717]                                     | - | 1.448739056 | 0.005775368 | 0.03804632  |
| ENSMMUG00000012101  | synaptogyrin 1 [Source:VGNC Symbol;Acc:VGNC:78068]                                        | - | 1.446544696 | 0.007466982 | 0.046150864 |
| ENSMMUG00000015661  | protein tyrosine phosphatase receptor type U [Source:VGNC Symbol;Acc:VGNC:76624]          | - | 1.445881209 | 0.000689069 | 0.007305878 |
| ENSMMUG000000054116 | T cell receptor alpha variable 8-6 [Source:HGNC Symbol;Acc:HGNC:12151]                    | - | 1.445506423 | 0.00205803  | 0.017472372 |
| ENSMMUG00000016052  | seizure related 6 homolog like [Source:VGNC Symbol;Acc:VGNC:77176]                        | - | 1.443008383 | 0.002191119 | 0.018232252 |

|                    |                                                                                |   |             |             |             |
|--------------------|--------------------------------------------------------------------------------|---|-------------|-------------|-------------|
| ENSMMUG00000054064 |                                                                                | - | 1.440057349 | 1.07E-06    | 2.93E-05    |
| ENSMMUG0000004675  | smoothelin [Source:VGNC Symbol;Acc:VGNC:77661]                                 | - | 1.435545586 | 0.00017136  | 0.002360822 |
| ENSMMUG00000022199 | polyhomeotic homolog 3 [Source:VGNC Symbol;Acc:VGNC:75804]                     | - | 1.429755485 | 0.000354137 | 0.004293967 |
| ENSMMUG00000002200 | phospholipid phosphatase 3 [Source:NCBI gene;Acc:715993]                       | - | 1.420517024 | 5.80E-05    | 0.000937104 |
| ENSMMUG00000016927 | solute carrier family 2 member 10 [Source:VGNC Symbol;Acc:VGNC:77465]          | - | 1.420076929 | 0.00010601  | 0.001563476 |
| ENSMMUG00000058151 | chromosome 4 C6orf62 homolog [Source:NCBI gene;Acc:708218]                     | - | 1.417721186 | 4.51E-05    | 0.000755492 |
| ENSMMUG00000040154 | T cell receptor alpha variable 9-2 [Source:HGNC Symbol;Acc:HGNC:12154]         | - | 1.414647508 | 0.006904931 | 0.043435463 |
| ENSMMUG00000058942 |                                                                                | - | 1.413859908 | 7.44E-05    | 0.001158595 |
| ENSMMUG00000061892 |                                                                                | - | 1.411439624 | 0.000192123 | 0.002577727 |
| ENSMMUG00000000983 | aldolase, fructose-bisphosphate A [Source:NCBI gene;Acc:708406]                | - | 1.407743834 | 0.00198269  | 0.016942148 |
| ENSMMUG00000017125 | oxysterol binding protein like 11 [Source:VGNC Symbol;Acc:VGNC:75631]          | - | 1.407343144 | 1.52E-05    | 0.000299606 |
| ENSMMUG00000023137 | zinc finger protein 350 [Source:VGNC Symbol;Acc:VGNC:79041]                    | - | 1.405975653 | 0.004438807 | 0.031352695 |
| ENSMMUG00000007283 | 3-hydroxyisobutyryl-CoA hydrolase [Source:NCBI gene;Acc:713951]                | - | 1.403641431 | 0.004254399 | 0.030327836 |
| ENSMMUG00000050177 |                                                                                | - | 1.398826531 | 0.004864063 | 0.033581373 |
| ENSMMUG00000005727 | protein kinase N1 [Source:VGNC Symbol;Acc:VGNC:76014]                          | - | 1.398629625 | 5.61E-06    | 0.000127722 |
| ENSMMUG00000061239 |                                                                                | - | 1.390500051 | 2.35E-06    | 5.99E-05    |
| ENSMMUG00000017230 | V-set and transmembrane domain containing 2 like [Source:NCBI gene;Acc:707394] | - | 1.380002621 | 3.04E-06    | 7.61E-05    |
| ENSMMUG00000064529 |                                                                                | - | 1.379698777 | 2.36E-05    | 0.000440717 |
| ENSMMUG00000021145 | family with sequence similarity 120B [Source:VGNC Symbol;Acc:VGNC:72311]       | - | 1.374480915 | 7.72E-08    | 2.97E-06    |
| ENSMMUG00000006187 | angiopoietin like 7 [Source:VGNC Symbol;Acc:VGNC:69683]                        | - | 1.366240413 | 0.002094678 | 0.017695047 |
| ENSMMUG00000056103 | growth arrest and DNA damage inducible alpha [Source:NCBI gene;Acc:701054]     | - | 1.365568497 | 1.52E-06    | 3.96E-05    |
| ENSMMUG00000023679 | tripartite motif containing 26 [Source:VGNC Symbol;Acc:VGNC:78854]             | - | 1.359656932 | 0.000208711 | 0.002747878 |
| ENSMMUG00000003277 | copine 4 [Source:VGNC Symbol;Acc:VGNC:71466]                                   | - | 1.358365099 | 0.000445915 | 0.005188055 |
| ENSMMUG00000056687 |                                                                                | - | 1.357101512 | 0.002412065 | 0.019661854 |
| ENSMMUG00000013513 | sex hormone binding globulin [Source:VGNC Symbol;Acc:VGNC:77208]               | - | -1.35642789 | 0.001667367 | 0.014687159 |
| ENSMMUG00000006704 | zygote arrest 1 [Source:VGNC Symbol;Acc:VGNC:79251]                            | - | 1.354897535 | 0.008169254 | 0.049624847 |
| ENSMMUG00000001213 | spermatogenesis associated 9 [Source:VGNC Symbol;Acc:VGNC:77976]               | - | 1.349290323 | 0.000172298 | 0.002363127 |
| ENSMMUG00000001728 | mitogen-activated protein kinase 9 [Source:VGNC Symbol;Acc:VGNC:74652]         | - | 1.347204163 | 7.45E-05    | 0.001158595 |
| ENSMMUG00000061002 |                                                                                | - | 1.346926991 | 0.00180173  | 0.01559861  |

|                    |                                                                                                                                       |   |             |             |             |
|--------------------|---------------------------------------------------------------------------------------------------------------------------------------|---|-------------|-------------|-------------|
| ENSMMUG00000052382 | histone H4 [Source:NCBI gene;Acc:107000818]                                                                                           | - | 1.345577668 | 0.000187695 | 0.002539994 |
| ENSMMUG00000040764 | alcohol dehydrogenase 1A [Source:NCBI gene;Acc:100424103]                                                                             | - | 1.336108875 | 0.005553834 | 0.037010814 |
| ENSMMUG00000019325 | mechanistic target of rapamycin kinase [Source:VGNC Symbol;Acc:VGNC:75062]                                                            | - | 1.335722505 | 0.001036058 | 0.010252519 |
| ENSMMUG00000005301 | ATP binding cassette subfamily B member 9 [Source:VGNC Symbol;Acc:VGNC:81341]                                                         | - | 1.335678015 | 0.000423134 | 0.004973314 |
| ENSMMUG00000007246 | myotubularin related protein 11 [Source:VGNC Symbol;Acc:VGNC:75016]                                                                   | - | -1.33507482 | 0.000851884 | 0.008723638 |
| ENSMMUG00000008639 | tumor protein p53 [Source:VGNC Symbol;Acc:VGNC:78627]                                                                                 | - | 1.333600281 | 0.004802768 | 0.033283035 |
| ENSMMUG00000010627 | apelin receptor [Source:VGNC Symbol;Acc:VGNC:69939]                                                                                   | - | 1.329399138 | 0.000941669 | 0.009512818 |
| ENSMMUG00000055244 | U6 spliceosomal RNA [Source:RFAM;Acc:RF00026]                                                                                         | - | 1.326352628 | 0.004557438 | 0.031870898 |
| ENSMMUG00000065031 |                                                                                                                                       | - | 1.318233015 | 0.000284782 | 0.003585288 |
| ENSMMUG00000002321 | solute carrier family 24 member 3 [Source:VGNC Symbol;Acc:VGNC:77426]                                                                 | - | 1.315490572 | 0.005503091 | 0.036832686 |
| ENSMMUG00000015279 | SWI/SNF related, matrix associated, actin dependent regulator of chromatin, subfamily a, member 2 [Source:VGNC Symbol;Acc:VGNC:77647] | - | 1.311894507 | 5.65E-05    | 0.000918356 |
| ENSMMUG00000012587 | zinc finger protein 69 [Source:NCBI gene;Acc:717030]                                                                                  | - | 1.309611731 | 1.70E-05    | 0.000332133 |
| ENSMMUG00000002894 | dedicator of cytokinesis 4 [Source:VGNC Symbol;Acc:VGNC:71866]                                                                        | - | 1.309314857 | 0.005331184 | 0.036075652 |
| ENSMMUG00000003634 | DExD/H-box 60 like [Source:VGNC Symbol;Acc:VGNC:71720]                                                                                | - | -1.30689801 | 0.006830854 | 0.043087282 |
| ENSMMUG00000022185 | odd-skipped related transcription factor 2 [Source:VGNC Symbol;Acc:VGNC:84097]                                                        | - | -1.3022078  | 0.001408256 | 0.012908544 |
| ENSMMUG00000056306 |                                                                                                                                       | - | -1.28944627 | 0.001340008 | 0.012456657 |
| ENSMMUG00000000104 | ribosomal RNA processing 1B [Source:VGNC Symbol;Acc:VGNC:77089]                                                                       | - | 1.287823353 | 0.000425957 | 0.005000106 |
| ENSMMUG00000049351 | MAGE family member E1 [Source:NCBI gene;Acc:705379]                                                                                   | - | 1.284425483 | 0.000151253 | 0.002148124 |
| ENSMMUG00000044473 |                                                                                                                                       | - | 1.281556581 | 0.001822703 | 0.015750552 |
| ENSMMUG00000021114 | G protein-coupled receptor 182 [Source:VGNC Symbol;Acc:VGNC:72936]                                                                    | - | 1.280174431 | 0.006216977 | 0.040263786 |
| ENSMMUG00000007330 | nuclear mitotic apparatus protein 1 [Source:VGNC Symbol;Acc:VGNC:75556]                                                               | - | 1.278846045 | 0.000153308 | 0.002167266 |
| ENSMMUG00000003261 | BAF chromatin remodeling complex subunit BCL11B [Source:VGNC Symbol;Acc:VGNC:70056]                                                   | - | 1.276980914 | 0.000470488 | 0.005432753 |
| ENSMMUG00000054210 | C-C motif chemokine 4 [Source:NCBI gene;Acc:100426632]                                                                                | - | 1.276836033 | 1.17E-07    | 4.30E-06    |
| ENSMMUG00000049563 |                                                                                                                                       | - | 1.271582812 | 0.006392349 | 0.040995672 |
| ENSMMUG00000018746 | FAST kinase domains 3 [Source:VGNC Symbol;Acc:VGNC:72588]                                                                             | - | 1.270549283 | 0.003245398 | 0.024765673 |
| ENSMMUG00000065018 | transmembrane protein 35A [Source:NCBI gene;Acc:702205]                                                                               | - | 1.261137712 | 0.002782926 | 0.022059661 |
| ENSMMUG00000002113 | NHL repeat containing 3 [Source:VGNC Symbol;Acc:VGNC:75291]                                                                           | - | 1.259856387 | 2.52E-05    | 0.000461916 |
| ENSMMUG00000023249 | aryl hydrocarbon receptor nuclear translocator like 2 [Source:NCBI gene;Acc:709547]                                                   | - | 1.254955254 | 0.000969306 | 0.009738558 |
| ENSMMUG00000059267 | pellino E3 ubiquitin protein ligase 1 [Source:NCBI gene;Acc:696416]                                                                   | - | -1.25071458 | 0.000588527 | 0.006387044 |
| ENSMMUG00000004233 | leucine rich repeats and immunoglobulin like domains 3 [Source:NCBI gene;Acc:716344]                                                  | - | 1.246439025 | 0.000768629 | 0.00804743  |



|                    |                                                                                       |   |             |             |             |
|--------------------|---------------------------------------------------------------------------------------|---|-------------|-------------|-------------|
| ENSMMUG00000017819 | putative homeodomain transcription factor 1 [Source:VGNC Symbol;Acc:VGNC:75982]       | - | 1.246253879 | 0.002731949 | 0.021730445 |
| ENSMMUG00000021691 | spastin [Source:VGNC Symbol;Acc:VGNC:77857]                                           | - | 1.241904956 | 0.00784791  | 0.048213827 |
| ENSMMUG00000007256 | splicing factor 3b subunit 4 [Source:VGNC Symbol;Acc:VGNC:77182]                      | - | -1.23576112 | 0.003892075 | 0.028472789 |
| ENSMMUG00000017276 | nucleolar protein 4 [Source:VGNC Symbol;Acc:VGNC:75366]                               | - | 1.232287244 | 0.000257279 | 0.003274883 |
| ENSMMUG00000058583 | RRAD and GEM like GTPase 1 [Source:NCBI gene;Acc:713351]                              | - | 1.230639098 | 0.000585563 | 0.006378415 |
| ENSMMUG00000009038 | titin [Source:NCBI gene;Acc:703527]                                                   | - | 1.228566324 | 0.005442736 | 0.036623915 |
| ENSMMUG00000002638 | WD repeat domain 18 [Source:VGNC Symbol;Acc:VGNC:79103]                               | - | 1.225936216 | 0.006582668 | 0.042040455 |
| ENSMMUG00000038560 | eukaryotic translation elongation factor 1 epsilon 1 [Source:NCBI gene;Acc:695426]    | - | 1.225748709 | 0.000194136 | 0.002589319 |
| ENSMMUG00000020289 | CD83 molecule [Source:VGNC Symbol;Acc:VGNC:70783]                                     | - | -1.21933927 | 0.000410896 | 0.004860506 |
| ENSMMUG00000038070 | T cell receptor alpha variable 12-3 [Source:HGNC Symbol;Acc:HGNC:12107]               | - | 1.219009988 | 0.003325245 | 0.025240592 |
| ENSMMUG00000044214 |                                                                                       | - | 1.215726669 | 0.000111468 | 0.001638715 |
| ENSMMUG00000022121 | CASK interacting protein 2 [Source:VGNC Symbol;Acc:VGNC:70577]                        | - | 1.198515798 | 0.003051556 | 0.023586575 |
| ENSMMUG00000054590 |                                                                                       | - | 1.187919613 | 9.52E-06    | 0.00020101  |
| ENSMMUG00000009084 | transmembrane 6 superfamily member 1 [Source:VGNC Symbol;Acc:VGNC:78566]              | - | 1.181996749 | 0.00352026  | 0.026317591 |
| ENSMMUG00000032252 | UbiA prenyltransferase domain containing 1 [Source:VGNC Symbol;Acc:VGNC:79881]        | - | 1.180403111 | 0.000197106 | 0.002625133 |
| ENSMMUG00000037675 | testis expressed 52 [Source:NCBI gene;Acc:107000723]                                  | - | 1.175429209 | 0.001034331 | 0.010246444 |
| ENSMMUG00000049196 | dispatched RND transporter family member 3 [Source:NCBI gene;Acc:722727]              | - | 1.172082285 | 1.84E-05    | 0.000355941 |
| ENSMMUG00000015309 | F-box protein 24 [Source:VGNC Symbol;Acc:VGNC:72495]                                  | - | 1.170744096 | 2.78E-05    | 0.00050193  |
| ENSMMUG00000016906 | F-box and leucine rich repeat protein 16 [Source:VGNC Symbol;Acc:VGNC:81405]          | - | 1.169470355 | 0.00801889  | 0.048937565 |
| ENSMMUG00000017113 | ubiquitin specific peptidase 32 [Source:NCBI gene;Acc:716857]                         | - | -1.16597562 | 4.68E-05    | 0.000779891 |
| ENSMMUG00000003726 | protein tyrosine phosphatase non-receptor type 13 [Source:VGNC Symbol;Acc:VGNC:76599] | - | 1.163470469 | 0.007364855 | 0.045611547 |
| ENSMMUG00000012953 | stress induced phosphoprotein 1 [Source:NCBI gene;Acc:717926]                         | - | 1.159683118 | 9.57E-07    | 2.66E-05    |
| ENSMMUG00000044759 |                                                                                       | - | 1.159288988 | 0.001278766 | 0.01200866  |
| ENSMMUG00000065117 | septin 4 [Source:HGNC Symbol;Acc:HGNC:9165]                                           | - | -1.15858936 | 0.005630532 | 0.037359616 |
| ENSMMUG00000012129 | tripartite motif containing 10 [Source:VGNC Symbol;Acc:VGNC:78550]                    | - | 1.157454859 | 0.001078526 | 0.010581739 |
| ENSMMUG00000021051 | TNFAIP3 interacting protein 1 [Source:VGNC Symbol;Acc:VGNC:79057]                     | - | 1.148811552 | 0.004774398 | 0.033136335 |
| ENSMMUG00000023676 | espin [Source:NCBI gene;Acc:722532]                                                   | - | 1.147979665 | 8.94E-05    | 0.001360628 |
| ENSMMUG00000012778 | rabphilin 3A [Source:VGNC Symbol;Acc:VGNC:77033]                                      | - | 1.141463215 | 5.26E-05    | 0.00086274  |
| ENSMMUG00000022697 | STEAP4 metalloredutase [Source:VGNC Symbol;Acc:VGNC:77974]                            | - | 1.136565704 | 0.000181491 | 0.002478128 |
| ENSMMUG00000015371 | microtubule associated serine/threonine kinase 2 [Source:VGNC Symbol;Acc:VGNC:74532]  | - | 1.135489134 | 0.005584715 | 0.037097026 |

|                     |                                                                              |   |             |             |             |
|---------------------|------------------------------------------------------------------------------|---|-------------|-------------|-------------|
| ENSMMUG00000052977  | putative protein FAM106C [Source:NCBI gene;Acc:106994084]                    | - | 1.130505024 | 0.003091686 | 0.023829801 |
| ENSMMUG00000019892  | myomesin 1 [Source:VGNC Symbol;Acc:VGNC:75123]                               | - | 1.127694849 | 0.001241668 | 0.011744161 |
| ENSMMUG00000001919  | clock circadian regulator [Source:VGNC Symbol;Acc:VGNC:71262]                | - | 1.125563033 | 0.000243512 | 0.003134323 |
| ENSMMUG000000061815 |                                                                              | - | 1.120851794 | 0.000540678 | 0.006053358 |
| ENSMMUG00000012338  | G protein-coupled receptor 183 [Source:VGNC Symbol;Acc:VGNC:73042]           | - | 1.120522343 | 0.001361236 | 0.012615769 |
| ENSMMUG00000005463  | bromodomain containing 3 [Source:VGNC Symbol;Acc:VGNC:70281]                 | - | 1.118389796 | 0.003576845 | 0.026718917 |
| ENSMMUG00000023124  | transmembrane protein 43 [Source:VGNC Symbol;Acc:VGNC:82711]                 | - | 1.112075645 | 0.00485797  | 0.033564486 |
| ENSMMUG00000009519  | WASH complex subunit 4 [Source:VGNC Symbol;Acc:VGNC:79783]                   | - | 1.111570745 | 0.001017131 | 0.010108702 |
| ENSMMUG00000007765  | Wnt family member 2B [Source:VGNC Symbol;Acc:VGNC:78797]                     | - | 1.108731256 | 3.70E-05    | 0.000639776 |
| ENSMMUG00000015117  | X-prolyl aminopeptidase 1 [Source:VGNC Symbol;Acc:VGNC:78810]                | - | 1.107142318 | 0.003963617 | 0.028835708 |
| ENSMMUG00000017615  | zinc finger CCHC-type containing 14 [Source:VGNC Symbol;Acc:VGNC:79420]      | - | -1.10067884 | 6.81E-06    | 0.000150648 |
| ENSMMUG00000004606  | EMAP like 5 [Source:VGNC Symbol;Acc:VGNC:72067]                              | - | 1.097220091 | 0.000976253 | 0.009776343 |
| ENSMMUG00000019977  | myosin heavy chain 15 [Source:VGNC Symbol;Acc:VGNC:84148]                    | - | 1.096687677 | 0.004993697 | 0.034270688 |
| ENSMMUG00000010682  | fibrillin 2 [Source:VGNC Symbol;Acc:VGNC:72624]                              | - | 1.095439967 | 5.66E-06    | 0.000128625 |
| ENSMMUG00000015970  | coiled-coil domain containing 150 [Source:VGNC Symbol;Acc:VGNC:84222]        | - | -1.0951876  | 0.000622632 | 0.006670638 |
| ENSMMUG000000042798 |                                                                              | - | 1.092409793 | 0.003386422 | 0.025503468 |
| ENSMMUG00000017432  | tropomodulin 2 [Source:VGNC Symbol;Acc:VGNC:78571]                           | - | 1.091723024 | 0.001235066 | 0.011703143 |
| ENSMMUG00000022056  | DENN domain containing 4A [Source:VGNC Symbol;Acc:VGNC:71697]                | - | 1.090616824 | 0.001160209 | 0.011192244 |
| ENSMMUG00000004674  | phosphoribosyl pyrophosphate synthetase 1 [Source:NCBI gene;Acc:702529]      | - | 1.090607092 | 0.000896399 | 0.009125619 |
| ENSMMUG000000052676 |                                                                              | - | 1.090381669 | 0.003147283 | 0.024217765 |
| ENSMMUG000000049749 |                                                                              | - | 1.090064334 | 0.00042074  | 0.004951494 |
| ENSMMUG00000007875  | F-box and leucine rich repeat protein 12 [Source:VGNC Symbol;Acc:VGNC:72502] | - | 1.085472676 | 0.00670871  | 0.042550142 |
| ENSMMUG000000053675 |                                                                              | - | 1.084535152 | 0.003354079 | 0.025363671 |
| ENSMMUG00000019462  | integrin subunit alpha V [Source:VGNC Symbol;Acc:VGNC:73783]                 | - | 1.075643165 | 0.002159519 | 0.018083764 |
| ENSMMUG000000061433 |                                                                              | - | 1.072307561 | 0.005283298 | 0.035901143 |
| ENSMMUG000000042208 | pepsin A-4 [Source:NCBI gene;Acc:694646]                                     | - | 1.071630784 | 0.000707119 | 0.007488631 |
| ENSMMUG00000001357  | tetraspanin 11 [Source:VGNC Symbol;Acc:VGNC:79882]                           | - | 1.071160882 | 5.59E-05    | 0.000909846 |
| ENSMMUG000000059986 |                                                                              | - | 1.064148093 | 0.000438344 | 0.005125894 |
| ENSMMUG00000014762  | myosin heavy chain 6 [Source:NCBI gene;Acc:713471]                           | - | 1.056886698 | 5.42E-06    | 0.000125033 |

|                    |                                                                                   |   |             |             |             |
|--------------------|-----------------------------------------------------------------------------------|---|-------------|-------------|-------------|
| ENSMMUG00000017583 | single stranded DNA binding protein 2 [Source:NCBI gene;Acc:711752]               | - | 1.051257236 | 0.006723135 | 0.042612268 |
| ENSMMUG00000055590 |                                                                                   | - | 1.047263454 | 0.006137967 | 0.039864297 |
| ENSMMUG00000004223 | ring finger protein 10 [Source:VGNC Symbol;Acc:VGNC:76702]                        | - | 1.043879838 | 0.000800866 | 0.008299962 |
| ENSMMUG00000020211 | cyclin Y like 1 [Source:VGNC Symbol;Acc:VGNC:84224]                               | - | 1.037678033 | 0.007153552 | 0.04472428  |
| ENSMMUG00000021169 | translocator protein 2 [Source:VGNC Symbol;Acc:VGNC:83960]                        | - | 1.037632242 | 0.00718266  | 0.04479408  |
| ENSMMUG00000043809 | caspase 2 [Source:VGNC Symbol;Acc:VGNC:80804]                                     | - | -1.03559535 | 0.003888328 | 0.028468005 |
| ENSMMUG00000064514 | keratin, type II cuticular Hb1 [Source:NCBI gene;Acc:697511]                      | - | 1.034714045 | 0.000975376 | 0.009776343 |
| ENSMMUG00000040958 | lysozyme-like protein 1 [Source:NCBI gene;Acc:698176]                             | - | 1.034093092 | 0.000301931 | 0.003764832 |
| ENSMMUG00000004237 | TNF receptor superfamily member 19 [Source:VGNC Symbol;Acc:VGNC:78588]            | - | 1.032156893 | 0.000950411 | 0.009579502 |
| ENSMMUG00000051286 |                                                                                   | - | 1.031735554 | 0.000686567 | 0.007287744 |
| ENSMMUG00000021878 | timeless circadian regulator [Source:VGNC Symbol;Acc:VGNC:78356]                  | - | 1.028915271 | 0.002780596 | 0.022059661 |
| ENSMMUG00000002890 | tripartite motif containing 15 [Source:VGNC Symbol;Acc:VGNC:83958]                | - | 1.027274684 | 0.002887675 | 0.02265582  |
| ENSMMUG00000002947 | procollagen C-endopeptidase enhancer [Source:VGNC Symbol;Acc:VGNC:75782]          | - | 1.026008444 | 0.000578635 | 0.006372501 |
| ENSMMUG00000020047 | integrin subunit beta 3 binding protein [Source:VGNC Symbol;Acc:VGNC:73787]       | - | 1.024705324 | 0.001690601 | 0.014789549 |
| ENSMMUG00000005515 | ATP binding cassette subfamily C member 5 [Source:VGNC Symbol;Acc:VGNC:69574]     | - | 1.024156589 | 0.003519542 | 0.026317591 |
| ENSMMUG00000058740 |                                                                                   | - | 1.023745351 | 0.001549976 | 0.01391652  |
| ENSMMUG00000001212 | Rieske Fe-S domain containing [Source:VGNC Symbol;Acc:VGNC:84487]                 | - | 1.012398902 | 0.000172136 | 0.002363127 |
| ENSMMUG00000022202 | basic leucine zipper and W2 domains 1 [Source:VGNC Symbol;Acc:VGNC:84213]         | - | 1.011180546 | 0.002426383 | 0.019761068 |
| ENSMMUG00000006688 | ER membrane protein complex subunit 1 [Source:VGNC Symbol;Acc:VGNC:72134]         | - | 1.008046591 | 0.001633518 | 0.01449688  |
| ENSMMUG00000021914 | spondin 1 [Source:VGNC Symbol;Acc:VGNC:77862]                                     | - | 1.007177333 | 0.003487045 | 0.026132048 |
| ENSMMUG00000052574 |                                                                                   | - | 1.004151124 | 0.000472948 | 0.00544749  |
| ENSMMUG00000046282 |                                                                                   | - | 1.003499294 | 0.000591137 | 0.006407816 |
| ENSMMUG00000061035 | ZFP82 zinc finger protein [Source:NCBI gene;Acc:719145]                           | - | 1.001324641 | 0.001194376 | 0.011426035 |
| ENSMMUG00000013552 | scribble planar cell polarity protein [Source:HGNC Symbol;Acc:HGNC:30377]         | - | -1.00093832 | 5.93E-05    | 0.000955463 |
| ENSMMUG00000059327 | NUS1 dehydrodolichyl diphosphate synthase subunit [Source:NCBI gene;Acc:715015]   | - | 0.997058538 | 0.000586346 | 0.006378415 |
| ENSMMUG00000012761 | sialic acid binding Ig like lectin 5 [Source:NCBI gene;Acc:719730]                | - | 0.996689573 | 0.000509882 | 0.005786    |
| ENSMMUG00000012463 | DEAD-box helicase 46 [Source:VGNC Symbol;Acc:VGNC:71663]                          | - | 0.996012996 | 0.000586    | 0.006378415 |
| ENSMMUG00000002109 | proline and serine rich 1 [Source:VGNC Symbol;Acc:VGNC:76291]                     | - | 0.995275165 | 0.000406652 | 0.004816494 |
| ENSMMUG00000010819 | fibroblast growth factor receptor substrate 2 [Source:VGNC Symbol;Acc:VGNC:72732] | - | 0.994194813 | 0.001603027 | 0.014278765 |

|                    |                                                                                                    |   |             |             |             |
|--------------------|----------------------------------------------------------------------------------------------------|---|-------------|-------------|-------------|
| ENSMMUG00000017593 | CD3e molecule [Source:VGNC Symbol;Acc:VGNC:70764]                                                  | - | 0.992171755 | 0.000160582 | 0.002249369 |
| ENSMMUG0000001995  | chromosome 14 C11orf16 homolog [Source:NCBI gene;Acc:705319]                                       | - | 0.988883674 | 0.002012415 | 0.017132524 |
| ENSMMUG00000016896 | solute carrier family 12 member 1 [Source:VGNC Symbol;Acc:VGNC:77385]                              | - | 0.985620929 | 0.006518402 | 0.041687873 |
| ENSMMUG00000000158 | minichromosome maintenance complex component 2 [Source:VGNC Symbol;Acc:VGNC:74680]                 | - | 0.985437684 | 3.00E-05    | 0.000540864 |
| ENSMMUG00000058142 |                                                                                                    | - | 0.985096099 | 0.007254874 | 0.045143076 |
| ENSMMUG00000055400 | U6 spliceosomal RNA [Source:RFAM;Acc:RF00026]                                                      | - | 0.981923604 | 0.001436426 | 0.013114517 |
| ENSMMUG00000008713 | myosin binding protein H like [Source:NCBI gene;Acc:698183]                                        | - | -0.97735574 | 0.000780317 | 0.008123593 |
| ENSMMUG00000014394 | DnaJ heat shock protein family (Hsp40) member C10 [Source:VGNC Symbol;Acc:VGNC:84229]              | - | 0.975806832 | 0.000308318 | 0.00381561  |
| ENSMMUG00000023443 | SRR1 domain containing [Source:VGNC Symbol;Acc:VGNC:78036]                                         | - | 0.975569544 | 0.007160307 | 0.044736123 |
| ENSMMUG00000003621 | AKT serine/threonine kinase 2 [Source:VGNC Symbol;Acc:VGNC:69777]                                  | - | 0.974127737 | 0.002588326 | 0.020803815 |
| ENSMMUG00000049484 |                                                                                                    | - | 0.970906205 | 0.001098854 | 0.010702014 |
| ENSMMUG00000022044 | scavenger receptor class A member 5 [Source:VGNC Symbol;Acc:VGNC:77117]                            | - | 0.970786401 | 0.004658073 | 0.032500565 |
| ENSMMUG00000063348 |                                                                                                    | - | 0.966008534 | 0.005189774 | 0.035405105 |
| ENSMMUG00000003164 | GATA zinc finger domain containing 2A [Source:NCBI gene;Acc:720361]                                | - | 0.963087308 | 0.003679416 | 0.027176299 |
| ENSMMUG00000014824 | SIX homeobox 3 [Source:HGNC Symbol;Acc:HGNC:10889]                                                 | - | 0.962744294 | 0.000448415 | 0.005203989 |
| ENSMMUG00000002093 | testis expressed 261 [Source:NCBI gene;Acc:703863]                                                 | - | -0.96213506 | 0.002913048 | 0.022721864 |
| ENSMMUG00000022305 | Rho guanine nucleotide exchange factor 1 [Source:VGNC Symbol;Acc:VGNC:70012]                       | - | 0.960434799 | 0.00120041  | 0.011459929 |
| ENSMMUG00000012307 | periostin [Source:VGNC Symbol;Acc:VGNC:76039]                                                      | - | 0.959783513 | 0.002743691 | 0.021805    |
| ENSMMUG00000047276 | GTPase, IMAP family member 6 [Source:VGNC Symbol;Acc:VGNC:81315]                                   | - | 0.958129573 | 0.000152288 | 0.002156168 |
| ENSMMUG00000048302 | ArfGAP with FG repeats 2 [Source:VGNC Symbol;Acc:VGNC:80329]                                       | - | 0.958021947 | 0.000401146 | 0.004763545 |
| ENSMMUG00000008797 | ATP binding cassette subfamily G member 2 (Junior blood group) [Source:NCBI gene;Acc:574307]       | - | 0.956654506 | 0.003597626 | 0.026788088 |
| ENSMMUG00000051468 | Metazoan signal recognition particle RNA [Source:RFAM;Acc:RF00017]                                 | - | 0.955633151 | 0.002095795 | 0.017695047 |
| ENSMMUG00000015311 | leucine rich repeats and calponin homology domain containing 4 [Source:VGNC Symbol;Acc:VGNC:74441] | - | -0.95311262 | 2.40E-05    | 0.000444143 |
| ENSMMUG00000008946 | chromosome 19 C19orf47 homolog [Source:VGNC Symbol;Acc:VGNC:70404]                                 | - | 0.952067693 | 0.003585699 | 0.026741641 |
| ENSMMUG00000011675 | zinc finger and SCAN domain containing 12 [Source:VGNC Symbol;Acc:VGNC:78910]                      | - | 0.949042607 | 0.006693235 | 0.042535405 |
| ENSMMUG00000044175 | forkhead box O6 [Source:NCBI gene;Acc:697505]                                                      | - | 0.947645551 | 0.005317718 | 0.036011007 |
| ENSMMUG00000060439 | schlafen family member 12 like [Source:NCBI gene;Acc:106992394]                                    | - | 0.945691181 | 0.007707176 | 0.047444241 |
| ENSMMUG00000003191 | kirre like nephrin family adhesion molecule 1 [Source:VGNC Symbol;Acc:VGNC:73837]                  | - | 0.940755037 | 0.002396734 | 0.019585266 |
| ENSMMUG00000002653 | hexokinase 3 [Source:VGNC Symbol;Acc:VGNC:73476]                                                   | - | 0.938958177 | 0.00504821  | 0.034510764 |



|                    |                                                                                                                                     |   |             |             |             |
|--------------------|-------------------------------------------------------------------------------------------------------------------------------------|---|-------------|-------------|-------------|
| ENSMMUG0000000205  | transmembrane protein 117 [Source:VGNC Symbol;Acc:VGNC:79488]                                                                       | - | 0.937696469 | 0.000419248 | 0.004940255 |
| ENSMMUG0000005447  | MDM2 proto-oncogene [Source:NCBI gene;Acc:718284]                                                                                   | - | 0.934981486 | 0.000296299 | 0.003709982 |
| ENSMMUG00000002520 | solute carrier family 4 member 3 [Source:VGNC Symbol;Acc:VGNC:77604]                                                                | - | 0.931501172 | 0.004258014 | 0.030330109 |
| ENSMMUG00000010878 | adaptor related protein complex 1 subunit gamma 1 [Source:VGNC Symbol;Acc:VGNC:69958]                                               | - | 0.930247513 | 0.001842852 | 0.015879936 |
| ENSMMUG00000006775 | proenkephalin [Source:VGNC Symbol;Acc:VGNC:75941]                                                                                   | - | -0.9269884  | 0.005686076 | 0.03761316  |
| ENSMMUG00000006842 | doublecortin domain containing 1 [Source:NCBI gene;Acc:696721]                                                                      | - | 0.924044232 | 0.002935198 | 0.022853326 |
| ENSMMUG00000012561 | NOP2/Sun RNA methyltransferase family member 7 [Source:VGNC Symbol;Acc:VGNC:75463]                                                  | - | 0.923734719 | 0.005145217 | 0.035127173 |
| ENSMMUG00000053298 |                                                                                                                                     | - | 0.910258916 | 0.005721465 | 0.03774526  |
| ENSMMUG00000003043 | PWWP domain containing 3A, DNA repair factor [Source:VGNC Symbol;Acc:VGNC:76565]                                                    | - | 0.906129244 | 0.00141103  | 0.012911219 |
| ENSMMUG00000050907 |                                                                                                                                     | - | 0.890389474 | 0.005786318 | 0.038091189 |
| ENSMMUG00000009524 | adaptor protein, phosphotyrosine interacting with PH domain and leucine zipper 2 [Source:VGNC Symbol;Acc:VGNC:69861]                | - | 0.884901761 | 0.006083256 | 0.039704809 |
| ENSMMUG00000001319 | methylenetetrahydrofolate dehydrogenase, cyclohydrolase and formyltetrahydrofolate synthetase 1 [Source:VGNC Symbol;Acc:VGNC:84399] | - | 0.883395308 | 0.005518976 | 0.036867199 |
| ENSMMUG00000002310 | zinc finger protein 577 [Source:VGNC Symbol;Acc:VGNC:79733]                                                                         | - | -0.8816165  | 0.001303329 | 0.012177196 |
| ENSMMUG00000016410 | acyl-CoA binding domain containing 5 [Source:VGNC Symbol;Acc:VGNC:69509]                                                            | - | 0.881209897 | 0.001164903 | 0.0112023   |
| ENSMMUG00000057655 |                                                                                                                                     | - | 0.878557505 | 0.004903725 | 0.033779176 |
| ENSMMUG00000018051 | FAT atypical cadherin 1 [Source:VGNC Symbol;Acc:VGNC:72617]                                                                         | - | 0.877626623 | 0.000207523 | 0.002740078 |
| ENSMMUG00000054462 |                                                                                                                                     | - | 0.877527863 | 0.002611487 | 0.020935117 |
| ENSMMUG00000002176 | ubiquitin like with PHD and ring finger domains 2 [Source:VGNC Symbol;Acc:VGNC:78714]                                               | - | 0.873036439 | 0.004708321 | 0.032776612 |
| ENSMMUG00000051042 |                                                                                                                                     | - | 0.861296866 | 0.006114021 | 0.039764899 |
| ENSMMUG00000049939 |                                                                                                                                     | - | 0.861106492 | 0.00103744  | 0.01025517  |
| ENSMMUG00000014474 | SPARC related modular calcium binding 2 [Source:VGNC Symbol;Acc:VGNC:83470]                                                         | - | 0.854472225 | 0.002565233 | 0.020654277 |
| ENSMMUG00000003316 | mannosidase alpha class 2A member 1 [Source:VGNC Symbol;Acc:VGNC:81449]                                                             | - | 0.852219831 | 0.000232832 | 0.003017963 |
| ENSMMUG00000049968 | RNA polymerase mitochondrial [Source:NCBI gene;Acc:100426183]                                                                       | - | -0.85162615 | 0.001908435 | 0.01635319  |
| ENSMMUG00000000443 | arylsulfatase F [Source:VGNC Symbol;Acc:VGNC:81362]                                                                                 | - | 0.850756378 | 0.004042203 | 0.029245595 |
| ENSMMUG00000008093 | StAR related lipid transfer domain containing 9 [Source:NCBI gene;Acc:708953]                                                       | - | 0.846464546 | 0.00259095  | 0.02080673  |
| ENSMMUG00000012036 | RNA binding motif protein 47 [Source:VGNC Symbol;Acc:VGNC:76576]                                                                    | - | -0.84501057 | 0.001384102 | 0.01274204  |
| ENSMMUG00000018525 | presenilin 2 [Source:VGNC Symbol;Acc:VGNC:76436]                                                                                    | - | 0.836766289 | 0.000359677 | 0.004338283 |
| ENSMMUG00000021168 | unc-5 family C-terminal like [Source:VGNC Symbol;Acc:VGNC:79314]                                                                    | - | 0.835334604 | 0.002411262 | 0.019661854 |
| ENSMMUG00000002519 | serine/threonine kinase 11 interacting protein [Source:VGNC Symbol;Acc:VGNC:77963]                                                  | - | 0.831507446 | 0.00174048  | 0.015139548 |
| ENSMMUG00000005414 | N-deacetylase and N-sulfotransferase 1 [Source:VGNC Symbol;Acc:VGNC:75151]                                                          | - | 0.829105078 | 0.003373774 | 0.025449872 |

|                    |                                                                                              |   |             |             |             |
|--------------------|----------------------------------------------------------------------------------------------|---|-------------|-------------|-------------|
| ENSMMUG00000007783 | isoleucyl-tRNA synthetase 2, mitochondrial [Source:VGNC Symbol;Acc:VGNC:73458]               | - | 0.827815712 | 0.003905984 | 0.028506559 |
| ENSMMUG00000002370 | integrin subunit alpha 6 [Source:VGNC Symbol;Acc:VGNC:73780]                                 | - | 0.826124501 | 0.001458017 | 0.01328528  |
| ENSMMUG00000056054 | zinc finger and BTB domain containing 3 [Source:NCBI gene;Acc:722240]                        | - | 0.822371559 | 0.000580263 | 0.006372501 |
| ENSMMUG00000004091 | transcription factor 12 [Source:VGNC Symbol;Acc:VGNC:78283]                                  | - | 0.820125324 | 0.002056937 | 0.017472372 |
| ENSMMUG00000010939 | rhopilin Rho GTPase binding protein 1 [Source:VGNC Symbol;Acc:VGNC:76779]                    | - | 0.819253906 | 0.001098856 | 0.010702014 |
| ENSMMUG00000015166 | NIMA related kinase 9 [Source:VGNC Symbol;Acc:VGNC:75209]                                    | - | 0.816781948 | 0.001439984 | 0.013133964 |
| ENSMMUG00000023096 | obscurin, cytoskeletal calmodulin and titin-interacting RhoGEF [Source:NCBI gene;Acc:694413] | - | 0.816023058 | 0.000358224 | 0.004326426 |
| ENSMMUG00000006713 | cyclin Y [Source:VGNC Symbol;Acc:VGNC:70840]                                                 | - | 0.815306166 | 0.006701764 | 0.042535405 |
| ENSMMUG00000000065 | coiled-coil domain containing 181 [Source:VGNC Symbol;Acc:VGNC:70884]                        | - | 0.807903832 | 0.006025849 | 0.039442308 |
| ENSMMUG00000017725 | eukaryotic elongation factor 2 kinase [Source:VGNC Symbol;Acc:VGNC:72098]                    | - | 0.806033974 | 0.000779631 | 0.008123593 |
| ENSMMUG00000007565 | Cbl proto-oncogene B [Source:VGNC Symbol;Acc:VGNC:70555]                                     | - | 0.802917551 | 0.006636506 | 0.042266966 |
| ENSMMUG00000003051 | COPI coat complex subunit beta 2 [Source:VGNC Symbol;Acc:VGNC:71313]                         | - | 0.800375447 | 0.000528359 | 0.005938424 |
| ENSMMUG00000060822 |                                                                                              | - | 0.798826703 | 0.004110716 | 0.029578513 |
| ENSMMUG00000013093 | uncharacterized LOC106993385 [Source:NCBI gene;Acc:106993385]                                | - | 0.790953481 | 0.000923693 | 0.009351759 |
| ENSMMUG00000052496 |                                                                                              | - | -0.78920164 | 0.002715033 | 0.021670814 |
| ENSMMUG00000021782 | LDL receptor related protein 1 [Source:VGNC Symbol;Acc:VGNC:74442]                           | - | 0.782629366 | 0.00286526  | 0.022544962 |
| ENSMMUG00000008687 | B cell linker [Source:VGNC Symbol;Acc:VGNC:70306]                                            | - | 0.782424616 | 0.004473405 | 0.031522777 |
| ENSMMUG00000018738 | alcohol dehydrogenase 1B (class I), beta polypeptide [Source:NCBI gene;Acc:707908]           | - | -0.77927894 | 0.005234937 | 0.035660347 |
| ENSMMUG00000007692 | apolipoprotein B [Source:VGNC Symbol;Acc:VGNC:69985]                                         | - | 0.771573199 | 0.004526806 | 0.031729016 |
| ENSMMUG00000059543 | zinc finger protein 30 [Source:NCBI gene;Acc:718310]                                         | - | 0.767756197 | 0.006235565 | 0.040299091 |
| ENSMMUG00000038288 | TMEM9 domain family member B [Source:NCBI gene;Acc:708447]                                   | - | 0.766854016 | 0.006023283 | 0.039442308 |
| ENSMMUG00000008323 | C-terminal binding protein 1 [Source:VGNC Symbol;Acc:VGNC:71539]                             | - | 0.753284254 | 0.001506937 | 0.013623123 |
| ENSMMUG00000052581 | upstream transcription factor family member 3 [Source:NCBI gene;Acc:709660]                  | - | -0.74728813 | 0.004109992 | 0.029578513 |
| ENSMMUG00000015375 | cadherin EGF LAG seven-pass G-type receptor 2 [Source:VGNC Symbol;Acc:VGNC:71149]            | - | 0.745336024 | 0.001677143 | 0.014713774 |
| ENSMMUG00000013094 | lipoyl(octanoyl) transferase 2 [Source:NCBI gene;Acc:718425]                                 | - | 0.744522214 | 0.001007175 | 0.010032547 |
| ENSMMUG00000010788 | ATP binding cassette subfamily B member 1 [Source:NCBI gene;Acc:574235]                      | - | -0.73746732 | 0.00429944  | 0.030577859 |
| ENSMMUG00000005334 | phospholipase C gamma 2 [Source:VGNC Symbol;Acc:VGNC:76170]                                  | - | 0.733882995 | 0.006105621 | 0.039764899 |
| ENSMMUG00000008941 | DNA topoisomerase II alpha [Source:VGNC Symbol;Acc:VGNC:78620]                               | - | 0.730461751 | 0.002533012 | 0.020430599 |
| ENSMMUG00000006340 | solute carrier family 6 member 6 [Source:VGNC Symbol;Acc:VGNC:77622]                         | - | 0.724588481 | 0.003659664 | 0.027073863 |
| ENSMMUG00000002338 | heterogeneous nuclear ribonucleoprotein L like [Source:VGNC Symbol;Acc:VGNC:73441]           | - | 0.716670315 | 0.007265454 | 0.045178358 |

|                     |                                                                                            |             |             |             |
|---------------------|--------------------------------------------------------------------------------------------|-------------|-------------|-------------|
| ENSMMUG00000019238  | RNA binding protein with serine rich domain 1 [Source:NCBI gene;Acc:695816]                | 0.699324543 | 0.00698538  | 0.043851604 |
| ENSMMUG00000000630  | ring finger and CCCH-type domains 1 [Source:VGNC Symbol;Acc:VGNC:76861]                    | 0.690614894 | 0.006074287 | 0.039674708 |
| ENSMMUG00000008423  | septin 4 [Source:NCBI gene;Acc:714724]                                                     | 0.686199854 | 0.00338416  | 0.025503468 |
| ENSMMUG00000010000  | keratin 7 [Source:VGNC Symbol;Acc:VGNC:74214]                                              | -0.68225893 | 0.003638257 | 0.026980561 |
| ENSMMUG00000047974  | aldehyde oxidase 4 [Source:NCBI gene;Acc:701502]                                           | 0.672381735 | 0.002724124 | 0.021706086 |
| ENSMMUG00000020436  | potassium voltage-gated channel subfamily H member 2 [Source:VGNC Symbol;Acc:VGNC:73980]   | 0.667266198 | 0.005708797 | 0.037715766 |
| ENSMMUG00000001228  | LLGL scribble cell polarity complex component 2 [Source:NCBI gene;Acc:706973]              | 0.666726536 | 0.006034676 | 0.039472017 |
| ENSMMUG000000031123 | secretoglobin family 1A member 1 [Source:VGNC Symbol;Acc:VGNC:77004]                       | 0.666067115 | 0.001688198 | 0.014782576 |
| ENSMMUG00000002257  | RNA polymerase III subunit E [Source:VGNC Symbol;Acc:VGNC:76142]                           | 0.664528021 | 0.005474043 | 0.036691637 |
| ENSMMUG00000020784  | centrosomal protein 126 [Source:NCBI gene;Acc:701911]                                      | 0.649577997 | 0.002179001 | 0.018164262 |
| ENSMMUG00000014564  | ring finger protein 123 [Source:VGNC Symbol;Acc:VGNC:76790]                                | 0.648669068 | 0.002726528 | 0.021706086 |
| ENSMMUG00000021474  | zinc finger protein 45 [Source:NCBI gene;Acc:712591]                                       | 0.636362323 | 0.004537299 | 0.031778355 |
| ENSMMUG00000022922  | nuclear receptor subfamily 4 group A member 1 [Source:VGNC Symbol;Acc:VGNC:75517]          | 0.633183443 | 0.001576527 | 0.014099881 |
| ENSMMUG000000052030 | developing brain homeobox 2 [Source:NCBI gene;Acc:701170]                                  | 0.623930748 | 0.006233784 | 0.040299091 |
| ENSMMUG00000001941  | CXXC finger protein 5 [Source:VGNC Symbol;Acc:VGNC:71594]                                  | 0.619908992 | 0.004520751 | 0.031729016 |
| ENSMMUG000000061749 | PAXIP1 associated glutamate rich protein 1 [Source:NCBI gene;Acc:706839]                   | 0.557535872 | 0.006904595 | 0.043435463 |
| ENSMMUG000000056548 | coagulation factor III, tissue factor [Source:NCBI gene;Acc:714456]                        | 0.562604742 | 0.005845513 | 0.038453363 |
| ENSMMUG00000015114  | toll like receptor adaptor molecule 2 [Source:NCBI gene;Acc:100426353]                     | 0.584265614 | 0.007875525 | 0.048311448 |
| ENSMMUG00000014573  | dimethylarginine dimethylaminohydrolase 1 [Source:VGNC Symbol;Acc:VGNC:71753]              | 0.58602053  | 0.007746947 | 0.047625352 |
| ENSMMUG00000023318  | transformation/transcription domain associated protein [Source:VGNC Symbol;Acc:VGNC:78657] | 0.603528395 | 0.00545996  | 0.036623915 |
| ENSMMUG00000008336  | acyl-CoA dehydrogenase family member 10 [Source:NCBI gene;Acc:711080]                      | 0.648683399 | 0.00492834  | 0.033897992 |
| ENSMMUG00000019966  | zinc finger protein 557 [Source:NCBI gene;Acc:100424983]                                   | 0.658318607 | 0.003898253 | 0.02849533  |
| ENSMMUG00000021012  | G protein-coupled receptor 155 [Source:VGNC Symbol;Acc:VGNC:72985]                         | 0.668467595 | 0.001106363 | 0.010740353 |
| ENSMMUG00000023381  | dynein axonemal heavy chain 8 [Source:VGNC Symbol;Acc:VGNC:71943]                          | 0.668601109 | 0.004769901 | 0.033130116 |
| ENSMMUG00000022104  | family with sequence similarity 174 member C [Source:NCBI gene;Acc:706393]                 | 0.670523483 | 0.003978347 | 0.028920006 |
| ENSMMUG00000008133  | solute carrier family 17 member 5 [Source:VGNC Symbol;Acc:VGNC:77405]                      | 0.678313329 | 0.004467421 | 0.031504732 |
| ENSMMUG00000021655  | histone deacetylase 7 [Source:NCBI gene;Acc:718225]                                        | 0.692979007 | 0.006389912 | 0.040995672 |
| ENSMMUG00000006287  | DAP3 binding cell death enhancer 1 [Source:VGNC Symbol;Acc:VGNC:71806]                     | 0.695531694 | 0.007745416 | 0.047625352 |
| ENSMMUG00000005480  | carnosine synthase 1 [Source:VGNC Symbol;Acc:VGNC:81367]                                   | 0.696602409 | 0.00074662  | 0.007852732 |
| ENSMMUG00000017806  | CD109 molecule [Source:VGNC Symbol;Acc:VGNC:70834]                                         | 0.698763399 | 0.002443265 | 0.019863403 |
| ENSMMUG00000003289  | integrin subunit beta 3 [Source:NCBI gene;Acc:717379]                                      | 0.702219964 | 0.001088145 | 0.010630786 |
| ENSMMUG00000005991  | TRIO and F-actin binding protein [Source:NCBI gene;Acc:701241]                             | 0.705461678 | 0.001170841 | 0.011247655 |
| ENSMMUG00000009368  | Abelson helper integration site 1 [Source:VGNC Symbol;Acc:VGNC:81010]                      | 0.711230783 | 0.005369682 | 0.036256189 |
| ENSMMUG00000015922  | formin binding protein 1 like [Source:VGNC Symbol;Acc:VGNC:72543]                          | 0.713670705 | 0.006953224 | 0.043679536 |
| ENSMMUG00000005080  | ubiquitin conjugating enzyme E2 G1 [Source:VGNC Symbol;Acc:VGNC:78695]                     | 0.717013777 | 0.004889101 | 0.033728935 |
| ENSMMUG00000006528  | Rho GTPase activating protein 15 [Source:VGNC Symbol;Acc:VGNC:69874]                       | 0.720374562 | 0.005545686 | 0.036983294 |
| ENSMMUG000000057979 | growth differentiation factor 5 [Source:NCBI gene;Acc:705432]                              | 0.722047103 | 0.004389135 | 0.031071701 |
| ENSMMUG00000017505  | tetratricopeptide repeat domain 3 [Source:VGNC Symbol;Acc:VGNC:81785]                      | 0.726242939 | 0.003812571 | 0.028002467 |
| ENSMMUG000000051186 | proteasome 20S subunit alpha 5 [Source:NCBI gene;Acc:698435]                               | 0.729825511 | 0.002447012 | 0.0198763   |
| ENSMMUG00000019022  | serine/threonine kinase 17a [Source:VGNC Symbol;Acc:VGNC:77913]                            | 0.731099584 | 0.006491593 | 0.041603157 |



|                    |                                                                                                   |             |             |             |
|--------------------|---------------------------------------------------------------------------------------------------|-------------|-------------|-------------|
| ENSMMUG00000038349 | crystallin beta-gamma domain containing 3 [Source:NCBI gene;Acc:698282]                           | 0.731547661 | 0.003370871 | 0.025449872 |
| ENSMMUG00000008772 | VPS54 subunit of GARP complex [Source:VGNC Symbol;Acc:VGNC:79159]                                 | 0.732394301 | 0.006669505 | 0.042418422 |
| ENSMMUG00000062055 | glyoxalase I [Source:NCBI gene;Acc:719518]                                                        | 0.732562465 | 0.007208632 | 0.044885682 |
| ENSMMUG00000054377 |                                                                                                   | 0.735831156 | 0.001269174 | 0.011942953 |
| ENSMMUG00000018029 | amyloid beta precursor like protein 2 [Source:VGNC Symbol;Acc:VGNC:69984]                         | 0.736282379 | 0.006753695 | 0.042726342 |
| ENSMMUG00000058106 | otoconin 90 [Source:NCBI gene;Acc:100429699]                                                      | 0.738846937 | 0.004458715 | 0.031467448 |
| ENSMMUG00000003265 | leptin receptor [Source:VGNC Symbol;Acc:VGNC:81429]                                               | 0.747543256 | 0.001665922 | 0.014687159 |
| ENSMMUG00000010556 | Snf2 related CREBBP activator protein [Source:NCBI gene;Acc:712944]                               | 0.748306699 | 0.005423113 | 0.036536534 |
| ENSMMUG00000017129 | solute carrier family 41 member 2 [Source:VGNC Symbol;Acc:VGNC:77585]                             | 0.751028956 | 0.005561689 | 0.037036343 |
| ENSMMUG00000055601 |                                                                                                   | 0.751797399 | 0.002246363 | 0.018557703 |
| ENSMMUG00000057906 |                                                                                                   | 0.754140839 | 0.001832998 | 0.015824656 |
| ENSMMUG00000001739 | ATPase sarcoplasmic/endoplasmic reticulum Ca2+ transporting 2 [Source:VGNC Symbol;Acc:VGNC:70178] | 0.754521204 | 0.003582074 | 0.026736277 |
| ENSMMUG00000008126 | lysine demethylase 7A [Source:VGNC Symbol;Acc:VGNC:73886]                                         | 0.755911205 | 0.002799286 | 0.022132154 |
| ENSMMUG00000059292 |                                                                                                   | 0.75680785  | 0.004146468 | 0.029765945 |
| ENSMMUG00000064612 | Metazoan signal recognition particle RNA [Source:RFAM;Acc:RF00017]                                | 0.757681684 | 0.001502464 | 0.013609428 |
| ENSMMUG00000017382 | biliverdin reductase A [Source:VGNC Symbol;Acc:VGNC:70256]                                        | 0.758401875 | 0.002168778 | 0.018095436 |
| ENSMMUG00000019820 | SH3 domain and tetratricopeptide repeats 2 [Source:VGNC Symbol;Acc:VGNC:77337]                    | 0.760424372 | 0.003880161 | 0.028430831 |
| ENSMMUG00000006141 | ceramide transporter 1 [Source:VGNC Symbol;Acc:VGNC:71298]                                        | 0.761304705 | 0.004095339 | 0.029529842 |
| ENSMMUG00000000381 | IKAROS family zinc finger 2 [Source:VGNC Symbol;Acc:VGNC:73586]                                   | 0.76151357  | 0.000347143 | 0.004220285 |
| ENSMMUG00000014010 | RNA binding fox-1 homolog 2 [Source:VGNC Symbol;Acc:VGNC:76685]                                   | 0.766212204 | 0.000214485 | 0.002800303 |
| ENSMMUG00000014210 | metadherin [Source:VGNC Symbol;Acc:VGNC:74859]                                                    | 0.76873303  | 0.004132725 | 0.029690452 |
| ENSMMUG00000042510 | coagulation factor V [Source:NCBI gene;Acc:704695]                                                | 0.769779248 | 0.001333922 | 0.01241262  |
| ENSMMUG00000016465 | histone deacetylase 6 [Source:VGNC Symbol;Acc:VGNC:73164]                                         | 0.773930297 | 0.000876774 | 0.008955546 |
| ENSMMUG00000006470 | complement C1r subcomponent [Source:NCBI gene;Acc:722133]                                         | 0.774416994 | 0.001007288 | 0.010032547 |
| ENSMMUG00000012442 | DExD/H-box helicase 58 [Source:VGNC Symbol;Acc:VGNC:71672]                                        | 0.78721508  | 0.001381754 | 0.012741764 |
| ENSMMUG00000010336 | DOP1 leucine zipper like protein B [Source:VGNC Symbol;Acc:VGNC:71832]                            | 0.789133177 | 0.002295358 | 0.018894616 |
| ENSMMUG00000017949 | ornithine decarboxylase antizyme 1 [Source:NCBI gene;Acc:721477]                                  | 0.791527832 | 0.001183457 | 0.011345165 |
| ENSMMUG00000000591 | 6-phosphofructo-2-kinase/fructose-2,6-biphosphatase 4 [Source:VGNC Symbol;Acc:VGNC:75960]         | 0.793879978 | 0.005577441 | 0.037097026 |
| ENSMMUG00000020226 | WD repeat and SOCS box containing 1 [Source:VGNC Symbol;Acc:VGNC:79186]                           | 0.794163291 | 0.003422187 | 0.025709703 |
| ENSMMUG00000054789 | family with sequence similarity 174 member A [Source:NCBI gene;Acc:702300]                        | 0.798214648 | 0.001189251 | 0.011388842 |
| ENSMMUG00000006139 | 3-hydroxy-3-methylglutaryl-CoA reductase [Source:VGNC Symbol;Acc:VGNC:73484]                      | 0.798921581 | 0.001837143 | 0.015845575 |
| ENSMMUG00000005220 | synemin [Source:VGNC Symbol;Acc:VGNC:78201]                                                       | 0.801243818 | 0.000322155 | 0.003976058 |
| ENSMMUG00000042077 | DNA damage regulated autophagy modulator 1 [Source:NCBI gene;Acc:697427]                          | 0.80535118  | 0.004130546 | 0.029690452 |
| ENSMMUG00000021812 | ERCC excision repair 8, CSA ubiquitin ligase complex subunit [Source:VGNC Symbol;Acc:VGNC:72425]  | 0.806476739 | 0.000600197 | 0.006490728 |
| ENSMMUG00000003555 | calcium voltage-gated channel subunit alpha1 A [Source:VGNC Symbol;Acc:VGNC:70498]                | 0.80714125  | 0.002125494 | 0.017880182 |
| ENSMMUG00000049649 | proteasome 20S subunit beta 6 [Source:NCBI gene;Acc:710028]                                       | 0.807168765 | 0.001506035 | 0.013623123 |
| ENSMMUG00000062048 |                                                                                                   | 0.810723524 | 0.004234496 | 0.030209356 |
| ENSMMUG00000016401 | SGT1 homolog, MIS12 kinetochore complex assembly cochaperone [Source:NCBI gene;Acc:694046]        | 0.812703425 | 0.006300977 | 0.040607769 |
| ENSMMUG00000022973 | gametogenetin [Source:VGNC Symbol;Acc:VGNC:72740]                                                 | 0.815132354 | 0.004932866 | 0.033903782 |
| ENSMMUG00000004558 | OTU deubiquitinase 5 [Source:VGNC Symbol;Acc:VGNC:75677]                                          | 0.816057912 | 0.003625894 | 0.026932286 |
| ENSMMUG00000050119 |                                                                                                   | 0.816184121 | 0.000542243 | 0.006063506 |
| ENSMMUG00000011347 | DEAH-box helicase 36 [Source:VGNC Symbol;Acc:VGNC:71623]                                          | 0.816489305 | 0.000165175 | 0.002291369 |
| ENSMMUG00000014149 | LYN proto-oncogene, Src family tyrosine kinase [Source:VGNC Symbol;Acc:VGNC:74464]                | 0.821024203 | 0.000639911 | 0.006831903 |
| ENSMMUG00000001269 | chromosome 16 C17orf80 homolog [Source:VGNC Symbol;Acc:VGNC:70440]                                | 0.822736026 | 0.000946242 | 0.009548535 |
| ENSMMUG00000057560 |                                                                                                   | 0.828860615 | 0.001085866 | 0.010625275 |
| ENSMMUG00000006101 | myosin heavy chain 9 [Source:VGNC Symbol;Acc:VGNC:75102]                                          | 0.83008348  | 0.006496212 | 0.041603787 |
| ENSMMUG00000003584 | mesoderm posterior bHLH transcription factor 2 [Source:VGNC Symbol;Acc:VGNC:74619]                | 0.834345    | 0.000210156 | 0.002762951 |
| ENSMMUG00000020346 | carboxypeptidase X, M14 family member 2 [Source:VGNC Symbol;Acc:VGNC:71596]                       | 0.834927642 | 0.003915722 | 0.028554981 |
| ENSMMUG00000053625 | sterol-C5-desaturase [Source:NCBI gene;Acc:706827]                                                | 0.835823464 | 0.00063186  | 0.006761636 |
| ENSMMUG00000054055 | zinc finger protein 93 [Source:NCBI gene;Acc:720434]                                              | 0.838073397 | 0.000566492 | 0.006281231 |
| ENSMMUG00000018720 | cytoskeleton associated protein 2 [Source:VGNC Symbol;Acc:VGNC:71229]                             | 0.839282069 | 0.005914526 | 0.038796424 |

|                    |                                                                                                  |             |             |             |
|--------------------|--------------------------------------------------------------------------------------------------|-------------|-------------|-------------|
| ENSMMUG00000055209 |                                                                                                  | 0.843662177 | 0.006216753 | 0.040263786 |
| ENSMMUG00000010940 | telomerase reverse transcriptase [Source:VGNC Symbol;Acc:VGNC:78313]                             | 0.84483029  | 0.00206935  | 0.017552282 |
| ENSMMUG00000016772 | solute carrier family 28 member 1 [Source:VGNC Symbol;Acc:VGNC:77444]                            | 0.845472909 | 0.000133776 | 0.001924954 |
| ENSMMUG00000049432 | olfactory receptor 2T33 [Source:NCBI gene;Acc:706331]                                            | 0.847457177 | 0.001105146 | 0.010739867 |
| ENSMMUG00000009976 | uridine-cytidine kinase 1 [Source:VGNC Symbol;Acc:VGNC:78967]                                    | 0.848501887 | 0.000817134 | 0.008440054 |
| ENSMMUG00000012523 | flotillin 2 [Source:NCBI gene;Acc:114669752]                                                     | 0.850306017 | 0.003156743 | 0.024270261 |
| ENSMMUG00000016655 | R3H domain and coiled-coil containing 1 [Source:VGNC Symbol;Acc:VGNC:76551]                      | 0.850536465 | 0.003028113 | 0.023482487 |
| ENSMMUG00000021554 | PHD finger protein 12 [Source:VGNC Symbol;Acc:VGNC:75838]                                        | 0.851217173 | 0.000962723 | 0.009682993 |
| ENSMMUG00000008515 | sorting nexin 7 [Source:NCBI gene;Acc:716015]                                                    | 0.851572559 | 0.001641196 | 0.014532069 |
| ENSMMUG00000053989 |                                                                                                  | 0.852491609 | 0.007446423 | 0.046054726 |
| ENSMMUG00000022933 | DNA topoisomerase I mitochondrial [Source:VGNC Symbol;Acc:VGNC:79821]                            | 0.852887072 | 0.001014226 | 0.010090724 |
| ENSMMUG00000009725 | triadin [Source:HGNC Symbol;Acc:HGNC:12261]                                                      | 0.853235205 | 0.002812985 | 0.022221376 |
| ENSMMUG00000003105 | inositol polyphosphate-5-phosphatase E [Source:VGNC Symbol;Acc:VGNC:73637]                       | 0.853470323 | 0.001967217 | 0.016825553 |
| ENSMMUG00000014983 | alanyl aminopeptidase, membrane [Source:VGNC Symbol;Acc:VGNC:69943]                              | 0.853701162 | 7.96E-05    | 0.001226331 |
| ENSMMUG00000058621 |                                                                                                  | 0.854774735 | 0.004902346 | 0.033779176 |
| ENSMMUG00000029507 | adaptor related protein complex 3 subunit sigma 2 [Source:NCBI gene;Acc:701217]                  | 0.855573687 | 4.02E-05    | 0.000683427 |
| ENSMMUG00000060493 |                                                                                                  | 0.856787114 | 0.001703384 | 0.014873093 |
| ENSMMUG00000000293 | catenin alpha 2 [Source:VGNC Symbol;Acc:VGNC:71543]                                              | 0.860914249 | 0.007086364 | 0.044394697 |
| ENSMMUG00000009381 | WW domain binding protein 2 [Source:VGNC Symbol;Acc:VGNC:78786]                                  | 0.861028186 | 0.003948238 | 0.028746547 |
| ENSMMUG00000010996 | Janus kinase 3 [Source:VGNC Symbol;Acc:VGNC:73812]                                               | 0.862317709 | 4.06E-05    | 0.000687332 |
| ENSMMUG00000016909 | meiotic kinetochore factor [Source:NCBI gene;Acc:709179]                                         | 0.863589948 | 0.000172115 | 0.002363127 |
| ENSMMUG00000064650 | SPEM family member 3 [Source:NCBI gene;Acc:106993878]                                            | 0.864848835 | 0.000325635 | 0.004006446 |
| ENSMMUG00000015303 | ATP binding cassette subfamily A member 7 [Source:VGNC Symbol;Acc:VGNC:69567]                    | 0.86788738  | 0.00401375  | 0.029108388 |
| ENSMMUG00000037887 | RBMX like 1 [Source:NCBI gene;Acc:100424767]                                                     | 0.867989463 | 0.003275824 | 0.024956462 |
| ENSMMUG00000052999 | lecithin retinol acyltransferase [Source:NCBI gene;Acc:698871]                                   | 0.870295348 | 0.000579991 | 0.006372501 |
| ENSMMUG00000009768 | ring finger protein 14 [Source:VGNC Symbol;Acc:VGNC:84488]                                       | 0.872289766 | 0.000486683 | 0.005577768 |
| ENSMMUG00000030532 | solute carrier family 25 member 16 [Source:NCBI gene;Acc:694145]                                 | 0.87233623  | 0.001411353 | 0.012911219 |
| ENSMMUG00000002822 | unc-13 homolog D [Source:VGNC Symbol;Acc:VGNC:79375]                                             | 0.875861888 | 0.001176233 | 0.011287667 |
| ENSMMUG00000020488 | receptor accessory protein 5 [Source:VGNC Symbol;Acc:VGNC:76864]                                 | 0.876494517 | 0.001330115 | 0.012389726 |
| ENSMMUG00000001536 | glutamine and serine rich 1 [Source:VGNC Symbol;Acc:VGNC:76544]                                  | 0.880152036 | 0.000746573 | 0.007852732 |
| ENSMMUG00000003233 | SET domain containing 1A, histone lysine methyltransferase [Source:NCBI gene;Acc:712416]         | 0.892202048 | 0.007141414 | 0.044678745 |
| ENSMMUG00000010138 | HECT and RLD domain containing E3 ubiquitin protein ligase 3 [Source:VGNC Symbol;Acc:VGNC:73365] | 0.896551266 | 0.000613237 | 0.006593009 |
| ENSMMUG00000003834 | basic leucine zipper ATF-like transcription factor [Source:VGNC Symbol;Acc:VGNC:70229]           | 0.899213701 | 0.000299123 | 0.003735178 |
| ENSMMUG00000053257 | Y RNA [Source:RFAM;Acc:RF00019]                                                                  | 0.899245347 | 0.001164844 | 0.0112023   |
| ENSMMUG00000063694 | cyclic nucleotide gated channel subunit alpha 2 [Source:NCBI gene;Acc:704486]                    | 0.899264758 | 0.000160372 | 0.002249369 |
| ENSMMUG00000020916 | coiled-coil domain containing 158 [Source:NCBI gene;Acc:699735]                                  | 0.903107101 | 0.002434507 | 0.0198097   |
| ENSMMUG00000001944 | chromosome 20 C16orf72 homolog [Source:VGNC Symbol;Acc:VGNC:70443]                               | 0.903777537 | 0.000264497 | 0.003362109 |
| ENSMMUG00000065221 |                                                                                                  | 0.904397702 | 0.001646269 | 0.014553906 |
| ENSMMUG00000018176 | clavesin 2 [Source:VGNC Symbol;Acc:VGNC:71322]                                                   | 0.904421017 | 0.002290297 | 0.018869834 |
| ENSMMUG00000005255 | TRAF-type zinc finger domain containing 1 [Source:VGNC Symbol;Acc:VGNC:79459]                    | 0.905808022 | 0.003739978 | 0.027535212 |
| ENSMMUG00000010536 | discs large MAGUK scaffold protein 4 [Source:VGNC Symbol;Acc:VGNC:71920]                         | 0.90584793  | 0.000573145 | 0.006332117 |
| ENSMMUG00000013048 | junction plakoglobin [Source:VGNC Symbol;Acc:VGNC:73960]                                         | 0.905928371 | 0.005402445 | 0.036450664 |
| ENSMMUG00000021446 | diacylglycerol kinase zeta [Source:VGNC Symbol;Acc:VGNC:71789]                                   | 0.908665069 | 0.001700236 | 0.014859705 |
| ENSMMUG00000013397 | peroxiredoxin 5 [Source:NCBI gene;Acc:719764]                                                    | 0.913195059 | 0.003238002 | 0.024729737 |
| ENSMMUG00000032341 | coiled-coil domain containing 160 [Source:VGNC Symbol;Acc:VGNC:70926]                            | 0.916508519 | 4.02E-05    | 0.000683427 |
| ENSMMUG00000007379 | phosphatidylinositol 3,4,5-trisphosphate 3-phosphatase TPTE2-like [Source:NCBI gene;Acc:694255]  | 0.917811571 | 0.004513383 | 0.031729016 |
| ENSMMUG00000007610 | ribosomal protein S6 kinase A4 [Source:VGNC Symbol;Acc:VGNC:76930]                               | 0.920408471 | 0.000117326 | 0.001711176 |
| ENSMMUG00000004913 | mitotic deacetylase associated SANT domain protein [Source:VGNC Symbol;Acc:VGNC:72073]           | 0.9204829   | 0.002168552 | 0.018095436 |
| ENSMMUG00000018245 | EPH receptor A2 [Source:VGNC Symbol;Acc:VGNC:72235]                                              | 0.9213026   | 0.006061712 | 0.039620692 |
| ENSMMUG00000004820 | pre-mRNA processing factor 8 [Source:VGNC Symbol;Acc:VGNC:76275]                                 | 0.923054068 | 0.000304036 | 0.003776035 |
| ENSMMUG00000014880 | sortilin related receptor 1 [Source:NCBI gene;Acc:713011]                                        | 0.924115514 | 0.001377329 | 0.012713702 |



|                    |                                                                                                |             |             |             |
|--------------------|------------------------------------------------------------------------------------------------|-------------|-------------|-------------|
| ENSMMUG0000004224  | poly(ADP-ribose) polymerase family member 12 [Source:VGNC Symbol;Acc:VGNC:81734]               | 0.924193942 | 0.000165117 | 0.002291369 |
| ENSMMUG00000019040 | hydroxysteroid 17-beta dehydrogenase 13 [Source:VGNC Symbol;Acc:VGNC:73417]                    | 0.925200752 | 0.000248183 | 0.003181096 |
| ENSMMUG00000011043 | endoplasmic reticulum aminopeptidase 2 [Source:VGNC Symbol;Acc:VGNC:72141]                     | 0.929953229 | 3.09E-05    | 0.000553317 |
| ENSMMUG00000056008 |                                                                                                | 0.933085097 | 9.53E-05    | 0.001424168 |
| ENSMMUG00000049297 |                                                                                                | 0.937332059 | 0.002788708 | 0.022086469 |
| ENSMMUG00000008566 | zinc finger protein 157 [Source:VGNC Symbol;Acc:VGNC:78850]                                    | 0.938614718 | 0.004439048 | 0.031352695 |
| ENSMMUG00000008618 | calcium voltage-gated channel subunit alpha1 F [Source:VGNC Symbol;Acc:VGNC:70503]             | 0.939653444 | 0.000149982 | 0.002133355 |
| ENSMMUG00000019926 | cytoplasmic polyadenylation element binding protein 4 [Source:VGNC Symbol;Acc:VGNC:71450]      | 0.942963679 | 0.002141198 | 0.017979424 |
| ENSMMUG00000012469 | KIAA2013 [Source:VGNC Symbol;Acc:VGNC:73918]                                                   | 0.943647648 | 0.000303717 | 0.003776035 |
| ENSMMUG00000017312 | zinc finger RANBP2-type containing 2 [Source:NCBI gene;Acc:703513]                             | 0.946408225 | 0.005454938 | 0.036623915 |
| ENSMMUG00000017260 | G protein-coupled receptor 65 [Source:VGNC Symbol;Acc:VGNC:73140]                              | 0.947905873 | 0.002217567 | 0.018363442 |
| ENSMMUG00000008006 | RAB11A, member RAS oncogene family [Source:VGNC Symbol;Acc:VGNC:81517]                         | 0.953109743 | 0.000225721 | 0.00294237  |
| ENSMMUG00000002324 |                                                                                                | 0.953225951 | 0.001358111 | 0.012599493 |
| ENSMMUG00000003297 | coiled-coil domain containing 63 [Source:VGNC Symbol;Acc:VGNC:70879]                           | 0.954047324 | 0.006137879 | 0.039864297 |
| ENSMMUG00000002926 | mediator complex subunit 24 [Source:NCBI gene;Acc:699536]                                      | 0.956465124 | 0.000105906 | 0.001563476 |
| ENSMMUG00000015394 | WD repeat domain 93 [Source:VGNC Symbol;Acc:VGNC:79642]                                        | 0.958873635 | 1.78E-05    | 0.000345094 |
| ENSMMUG00000017402 | phosphoglucomutase 2 like 1 [Source:VGNC Symbol;Acc:VGNC:75839]                                | 0.95971888  | 0.004180946 | 0.029928787 |
| ENSMMUG00000055122 |                                                                                                | 0.96033775  | 0.001466141 | 0.01334609  |
| ENSMMUG00000015572 | GSG1 like [Source:VGNC Symbol;Acc:VGNC:82152]                                                  | 0.960641875 | 0.000346411 | 0.004216958 |
| ENSMMUG00000039397 | tubulin folding cofactor E like [Source:NCBI gene;Acc:706506]                                  | 0.960662059 | 0.001250578 | 0.011801779 |
| ENSMMUG00000010062 | shisa family member 5 [Source:VGNC Symbol;Acc:VGNC:84082]                                      | 0.962167313 | 0.000368601 | 0.004411233 |
| ENSMMUG00000038256 | aquaporin 2 [Source:NCBI gene;Acc:711719]                                                      | 0.965172458 | 5.35E-06    | 0.000123958 |
| ENSMMUG00000008770 | UDP-glucose pyrophosphorylase 2 [Source:VGNC Symbol;Acc:VGNC:78712]                            | 0.965576844 | 0.005458399 | 0.036623915 |
| ENSMMUG00000009889 | PSMC3 interacting protein [Source:VGNC Symbol;Acc:VGNC:76282]                                  | 0.966410727 | 0.000488202 | 0.005585889 |
| ENSMMUG00000023032 | intraflagellar transport 81 [Source:VGNC Symbol;Acc:VGNC:73389]                                | 0.967153257 | 0.000823665 | 0.00847896  |
| ENSMMUG00000030891 | hypoxia up-regulated 1 [Source:VGNC Symbol;Acc:VGNC:73399]                                     | 0.968609705 | 0.004282784 | 0.030482955 |
| ENSMMUG00000044822 | coiled-coil domain containing 174 [Source:VGNC Symbol;Acc:VGNC:84219]                          | 0.969091783 | 0.000526297 | 0.005935673 |
| ENSMMUG00000045187 | CASC3 exon junction complex subunit [Source:NCBI gene;Acc:699712]                              | 0.971068628 | 9.40E-05    | 0.001416429 |
| ENSMMUG00000061917 |                                                                                                | 0.971517607 | 0.000270954 | 0.003434702 |
| ENSMMUG00000018492 | TARBP2 subunit of RISC loading complex [Source:VGNC Symbol;Acc:VGNC:78099]                     | 0.971873379 | 0.00390448  | 0.028506559 |
| ENSMMUG00000062316 | Metazoan signal recognition particle RNA [Source:RFAM;Acc:RF00017]                             | 0.972519376 | 0.006114013 | 0.039764899 |
| ENSMMUG00000002345 | tropomodulin 3 [Source:VGNC Symbol;Acc:VGNC:78572]                                             | 0.973187001 | 1.51E-06    | 3.96E-05    |
| ENSMMUG00000021553 | dehydrogenase/reductase 13 [Source:VGNC Symbol;Acc:VGNC:81387]                                 | 0.973304797 | 0.000582478 | 0.006378415 |
| ENSMMUG00000008189 | cadherin related family member 3 [Source:HGNC Symbol;Acc:HGNC:26308]                           | 0.973604219 | 0.001650137 | 0.014574101 |
| ENSMMUG00000021031 | TMF1 regulated nuclear protein 1 [Source:VGNC Symbol;Acc:VGNC:79946]                           | 0.974792659 | 0.005721065 | 0.03774526  |
| ENSMMUG00000010058 | ATR interacting protein [Source:VGNC Symbol;Acc:VGNC:84235]                                    | 0.976965861 | 6.10E-05    | 0.000979344 |
| ENSMMUG00000010949 | SPG21 abhydrolase domain containing, maspardin [Source:VGNC Symbol;Acc:VGNC:77970]             | 0.980251978 | 0.001084766 | 0.010625275 |
| ENSMMUG00000021017 | acylglycerol kinase [Source:VGNC Symbol;Acc:VGNC:69669]                                        | 0.980409903 | 3.98E-05    | 0.000677972 |
| ENSMMUG00000008652 | coiled-coil domain containing 85B [Source:VGNC Symbol;Acc:VGNC:70853]                          | 0.981430407 | 0.000911293 | 0.009246563 |
| ENSMMUG00000000478 | OTU deubiquitinase, ubiquitin aldehyde binding 1 [Source:NCBI gene;Acc:717989]                 | 0.982476725 | 0.000324088 | 0.003992748 |
| ENSMMUG00000014407 | magnesium transporter 1 [Source:VGNC Symbol;Acc:VGNC:74386]                                    | 0.982974274 | 0.002154953 | 0.018061962 |
| ENSMMUG00000019563 | collapsin response mediator protein 1 [Source:VGNC Symbol;Acc:VGNC:71494]                      | 0.985651509 | 5.91E-06    | 0.000133338 |
| ENSMMUG00000014872 | dolichyl-phosphate N-acetylglucosaminophosphotransferase 1 [Source:VGNC Symbol;Acc:VGNC:71971] | 0.985713666 | 5.11E-05    | 0.000844355 |
| ENSMMUG00000042837 | mediator complex subunit 26 [Source:NCBI gene;Acc:100424604]                                   | 0.98580756  | 0.002100825 | 0.017719018 |
| ENSMMUG00000058544 | nucleosome assembly protein 1 like 5 [Source:NCBI gene;Acc:703223]                             | 0.986757383 | 0.00024545  | 0.00315486  |
| ENSMMUG00000020861 | EvC ciliary complex subunit 1 [Source:VGNC Symbol;Acc:VGNC:72445]                              | 0.987542591 | 0.000716776 | 0.007582176 |
| ENSMMUG00000018166 | MYB proto-oncogene, transcription factor [Source:VGNC Symbol;Acc:VGNC:75089]                   | 0.989758188 | 0.002181535 | 0.018168929 |
| ENSMMUG00000060533 |                                                                                                | 0.993262076 | 4.92E-06    | 0.000115425 |
| ENSMMUG00000008651 | FGF1 intracellular binding protein [Source:VGNC Symbol;Acc:VGNC:72663]                         | 0.994489675 | 0.001669322 | 0.014687159 |
| ENSMMUG00000004854 | leucine rich repeat containing 9 [Source:VGNC Symbol;Acc:VGNC:81443]                           | 0.995569088 | 0.001086427 | 0.010625275 |
| ENSMMUG00000005478 | trimethylguanosine synthase 1 [Source:VGNC Symbol;Acc:VGNC:78404]                              | 0.995768889 | 0.005289791 | 0.035901143 |

|                    |                                                                                                  |             |             |             |
|--------------------|--------------------------------------------------------------------------------------------------|-------------|-------------|-------------|
| ENSMMUG00000019925 | DiGeorge syndrome critical region gene 2 [Source:NCBI gene;Acc:100423715]                        | 0.998562153 | 0.00268817  | 0.021524498 |
| ENSMMUG00000020629 | SDS3 homolog, SIN3A corepressor complex component [Source:NCBI gene;Acc:696166]                  | 1.006025074 | 0.000336077 | 0.004118246 |
| ENSMMUG00000007603 | coiled-coil domain containing 88B [Source:NCBI gene;Acc:722080]                                  | 1.008188981 | 0.003175045 | 0.024370258 |
| ENSMMUG00000063590 |                                                                                                  | 1.010033485 | 0.001857378 | 0.015990134 |
| ENSMMUG00000005483 | ribosomal protein S6 kinase B2 [Source:VGNC Symbol;Acc:VGNC:76934]                               | 1.012990803 | 0.003649089 | 0.027039105 |
| ENSMMUG00000012959 | solute carrier family 35 member E1 [Source:VGNC Symbol;Acc:VGNC:77536]                           | 1.013220851 | 0.00041822  | 0.004934457 |
| ENSMMUG00000019991 | dopa decarboxylase [Source:VGNC Symbol;Acc:VGNC:71755]                                           | 1.021096175 | 5.39E-06    | 0.000124696 |
| ENSMMUG00000020603 | pyridine nucleotide-disulphide oxidoreductase domain 2 [Source:NCBI gene;Acc:707797]             | 1.021731565 | 0.000130639 | 0.001890368 |
| ENSMMUG00000002564 | Fraser extracellular matrix complex subunit 1 [Source:VGNC Symbol;Acc:VGNC:72743]                | 1.021923034 | 0.001373906 | 0.012694836 |
| ENSMMUG00000019988 | homeodomain interacting protein kinase 3 [Source:VGNC Symbol;Acc:VGNC:73472]                     | 1.023641842 | 0.008012567 | 0.048937565 |
| ENSMMUG00000060987 |                                                                                                  | 1.024428024 | 0.003402247 | 0.025601701 |
| ENSMMUG00000040274 | MAGE family member A4 [Source:NCBI gene;Acc:710825]                                              | 1.024959182 | 0.003008018 | 0.023377712 |
| ENSMMUG00000061995 |                                                                                                  | 1.026918592 | 0.000242143 | 0.003121064 |
| ENSMMUG00000014864 | VPS11 core subunit of CORVET and HOPS complexes [Source:VGNC Symbol;Acc:VGNC:78965]              | 1.027383439 | 0.006838963 | 0.04310889  |
| ENSMMUG00000049850 | proline rich and Gla domain 4 [Source:NCBI gene;Acc:694707]                                      | 1.028525398 | 0.00194218  | 0.016626872 |
| ENSMMUG00000050419 | ADAM metalloproteinase with thrombospondin type 1 motif 4 [Source:NCBI gene;Acc:719927]          | 1.029202291 | 0.003045042 | 0.023586266 |
| ENSMMUG00000056945 |                                                                                                  | 1.030731447 | 0.000464848 | 0.005378321 |
| ENSMMUG00000005668 | kynurenine 3-monooxygenase [Source:VGNC Symbol;Acc:VGNC:74197]                                   | 1.032784441 | 0.00374835  | 0.027574789 |
| ENSMMUG00000005667 | fumarate hydratase [Source:VGNC Symbol;Acc:VGNC:72659]                                           | 1.035038574 | 0.002200451 | 0.018276847 |
| ENSMMUG00000053737 | BarH like homeobox 2 [Source:NCBI gene;Acc:696831]                                               | 1.036505529 | 3.90E-05    | 0.000667604 |
| ENSMMUG00000022313 | activating transcription factor 7 [Source:NCBI gene;Acc:700403]                                  | 1.03868848  | 0.000502651 | 0.00571098  |
| ENSMMUG00000059341 | Metazoan signal recognition particle RNA [Source:RFAM;Acc:RF00017]                               | 1.039579126 | 0.002890845 | 0.022661153 |
| ENSMMUG00000015097 | tripartite motif containing 62 [Source:VGNC Symbol;Acc:VGNC:79513]                               | 1.04313737  | 0.001859392 | 0.015992506 |
| ENSMMUG00000023681 | nucleolar protein 9 [Source:VGNC Symbol;Acc:VGNC:75263]                                          | 1.043997852 | 0.004603949 | 0.032147301 |
| ENSMMUG00000001472 | TIA1 cytotoxic granule associated RNA binding protein like 1 [Source:VGNC Symbol;Acc:VGNC:78354] | 1.044115278 | 0.001722465 | 0.014997015 |
| ENSMMUG00000039774 | Metazoan signal recognition particle RNA [Source:RFAM;Acc:RF00017]                               | 1.044184194 | 0.001412989 | 0.012913346 |
| ENSMMUG00000021075 | Rac family small GTPase 1 [Source:NCBI gene;Acc:717755]                                          | 1.044805809 | 2.30E-07    | 7.55E-06    |
| ENSMMUG00000060879 | homeobox B13 [Source:NCBI gene;Acc:697572]                                                       | 1.047065723 | 3.00E-05    | 0.000540464 |
| ENSMMUG00000056477 |                                                                                                  | 1.047200024 | 1.40E-06    | 3.72E-05    |
| ENSMMUG00000019839 | lysine acetyltransferase 5 [Source:VGNC Symbol;Acc:VGNC:73955]                                   | 1.049214386 | 0.000302316 | 0.003764832 |
| ENSMMUG00000000874 | carbohydrate sulfotransferase 1 [Source:VGNC Symbol;Acc:VGNC:71055]                              | 1.04994301  | 0.002463639 | 0.019993709 |
| ENSMMUG00000005745 | EYA transcriptional coactivator and phosphatase 4 [Source:VGNC Symbol;Acc:VGNC:72456]            | 1.056385001 | 1.95E-05    | 0.000373092 |
| ENSMMUG00000008007 | multiple EGF like domains 11 [Source:VGNC Symbol;Acc:VGNC:84376]                                 | 1.058227136 | 0.000571379 | 0.006320195 |
| ENSMMUG00000063322 |                                                                                                  | 1.058789474 | 0.001538603 | 0.013868525 |
| ENSMMUG00000020868 | homeobox B8 [Source:VGNC Symbol;Acc:VGNC:73505]                                                  | 1.060413044 | 6.55E-05    | 0.001034733 |
| ENSMMUG00000017561 | solute carrier family 43 member 2 [Source:VGNC Symbol;Acc:VGNC:77554]                            | 1.061946535 | 0.003601153 | 0.026791762 |
| ENSMMUG00000006893 | D-amino acid oxidase [Source:VGNC Symbol;Acc:VGNC:71729]                                         | 1.061985339 | 9.61E-05    | 0.001433016 |
| ENSMMUG00000021044 | afadin, adherens junction formation factor [Source:VGNC Symbol;Acc:VGNC:69818]                   | 1.064555383 | 8.20E-06    | 0.000177464 |
| ENSMMUG00000064920 |                                                                                                  | 1.066571182 | 0.002217012 | 0.018363442 |
| ENSMMUG00000031279 | torsin A interacting protein 2 [Source:NCBI gene;Acc:716654]                                     | 1.067553639 | 0.003326649 | 0.025240592 |
| ENSMMUG00000055914 |                                                                                                  | 1.069370874 | 0.002074086 | 0.017570819 |
| ENSMMUG00000010141 | family with sequence similarity 13 member A [Source:VGNC Symbol;Acc:VGNC:72299]                  | 1.069585678 | 8.12E-07    | 2.31E-05    |
| ENSMMUG00000001409 | coiled-coil domain containing 187 [Source:NCBI gene;Acc:710749]                                  | 1.069676443 | 0.00418216  | 0.029928787 |
| ENSMMUG00000065025 |                                                                                                  | 1.070659496 | 0.000398313 | 0.004736009 |
| ENSMMUG00000046550 | coiled-coil domain containing 125 [Source:NCBI gene;Acc:704391]                                  | 1.072843624 | 3.74E-05    | 0.000645419 |
| ENSMMUG00000012472 | phosphatidylinositol-4-phosphate 5-kinase type 1 beta [Source:VGNC Symbol;Acc:VGNC:76001]        | 1.073705335 | 5.21E-05    | 0.000856225 |
| ENSMMUG00000063495 |                                                                                                  | 1.073812983 | 0.000563327 | 0.006253678 |
| ENSMMUG00000011278 | cysteine rich with EGF like domains 2 [Source:NCBI gene;Acc:720586]                              | 1.075358907 | 0.000114603 | 0.001676768 |
| ENSMMUG00000023370 | DDB1 and CUL4 associated factor 17 [Source:VGNC Symbol;Acc:VGNC:71709]                           | 1.076715262 | 0.007304484 | 0.045329174 |
| ENSMMUG00000011951 | KRI1 homolog [Source:VGNC Symbol;Acc:VGNC:74127]                                                 | 1.078876528 | 0.00055022  | 0.00611555  |
| ENSMMUG00000023599 | chromosome alignment maintaining phosphoprotein 1 [Source:VGNC Symbol;Acc:VGNC:71061]            | 1.07913612  | 9.22E-05    | 0.001393874 |



|                     |                                                                                                    |             |             |             |
|---------------------|----------------------------------------------------------------------------------------------------|-------------|-------------|-------------|
| ENSMMUG00000008615  | nebulin [Source:NCBI gene;Acc:100430324]                                                           | 1.079611356 | 2.23E-05    | 0.000418022 |
| ENSMMUG000000059671 |                                                                                                    | 1.080661199 | 0.006390905 | 0.040995672 |
| ENSMMUG00000001083  | glycine N-acyltransferase-like protein 1 [Source:NCBI gene;Acc:701437]                             | 1.081060638 | 4.54E-06    | 0.000107664 |
| ENSMMUG000000011817 | aryl hydrocarbon receptor interacting protein [Source:VGNC Symbol;Acc:VGNC:69759]                  | 1.081552899 | 0.002495423 | 0.020198219 |
| ENSMMUG000000000382 | sperm associated antigen 16 [Source:VGNC Symbol;Acc:VGNC:77977]                                    | 1.082650807 | 0.000494609 | 0.005643471 |
| ENSMMUG000000005989 | GLE1 RNA export mediator [Source:VGNC Symbol;Acc:VGNC:73067]                                       | 1.083077073 | 0.00128699  | 0.012053726 |
| ENSMMUG000000006568 | basic leucine zipper ATF-like transcription factor 2 [Source:VGNC Symbol;Acc:VGNC:70127]           | 1.084119122 | 0.005855137 | 0.038461691 |
| ENSMMUG000000020580 | RPGRIP1 like [Source:VGNC Symbol;Acc:VGNC:77124]                                                   | 1.084261063 | 0.006627008 | 0.042235703 |
| ENSMMUG000000006530 | ATP/GTP binding protein like 3 [Source:VGNC Symbol;Acc:VGNC:69723]                                 | 1.084695304 | 3.06E-05    | 0.000549451 |
| ENSMMUG000000003668 | GTPase activating protein and VPS9 domains 1 [Source:VGNC Symbol;Acc:VGNC:72767]                   | 1.085359329 | 0.001142861 | 0.011036462 |
| ENSMMUG000000057953 |                                                                                                    | 1.087279608 | 0.004843518 | 0.033514959 |
| ENSMMUG000000017261 | galactosylceramidase [Source:VGNC Symbol;Acc:VGNC:72867]                                           | 1.088062828 | 2.62E-05    | 0.000477111 |
| ENSMMUG000000009995 | arachidonate 15-lipoxygenase type B [Source:VGNC Symbol;Acc:VGNC:69797]                            | 1.088713915 | 0.000274878 | 0.003474865 |
| ENSMMUG000000001690 | calponin 3 [Source:VGNC Symbol;Acc:VGNC:71278]                                                     | 1.090434744 | 0.002340844 | 0.019234634 |
| ENSMMUG000000056950 |                                                                                                    | 1.091756532 | 5.10E-05    | 0.000844355 |
| ENSMMUG000000050516 |                                                                                                    | 1.092444652 | 1.29E-06    | 3.45E-05    |
| ENSMMUG000000055352 |                                                                                                    | 1.092794908 | 3.20E-05    | 0.000570895 |
| ENSMMUG000000061194 |                                                                                                    | 1.096531347 | 1.18E-05    | 0.000243334 |
| ENSMMUG000000019536 | potassium voltage-gated channel subfamily Q member 4 [Source:VGNC Symbol;Acc:VGNC:74007]           | 1.097135569 | 6.62E-05    | 0.001043246 |
| ENSMMUG000000006029 | odontogenic, ameloblast associated [Source:NCBI gene;Acc:707906]                                   | 1.098984428 | 0.000636577 | 0.006804207 |
| ENSMMUG000000048204 | ephrin B3 [Source:NCBI gene;Acc:716257]                                                            | 1.101216661 | 0.005038141 | 0.034498523 |
| ENSMMUG000000009197 | myelin associated oligodendrocyte basic protein [Source:VGNC Symbol;Acc:VGNC:74908]                | 1.102808686 | 0.000192568 | 0.002579624 |
| ENSMMUG000000022031 | DNA polymerase alpha 2, accessory subunit [Source:NCBI gene;Acc:716541]                            | 1.104185178 | 0.000337485 | 0.00412467  |
| ENSMMUG000000000313 | HEAT repeat containing 4 [Source:VGNC Symbol;Acc:VGNC:73176]                                       | 1.108337656 | 0.000213882 | 0.002799938 |
| ENSMMUG000000051072 |                                                                                                    | 1.108933344 | 1.31E-05    | 0.000264196 |
| ENSMMUG000000008080 | ATP binding cassette subfamily G member 5 [Source:VGNC Symbol;Acc:VGNC:69391]                      | 1.111604129 | 8.52E-05    | 0.001305305 |
| ENSMMUG000000019085 | 3-hydroxybutyrate dehydrogenase 2 [Source:VGNC Symbol;Acc:VGNC:70161]                              | 1.111812238 | 0.000149757 | 0.002133355 |
| ENSMMUG000000008031 | zinc finger and BTB domain containing 17 [Source:VGNC Symbol;Acc:VGNC:78849]                       | 1.112753047 | 0.001029807 | 0.010223641 |
| ENSMMUG000000051226 | FAD-linked sulfhydryl oxidase ERV1 [Source:NCBI gene;Acc:106994988]                                | 1.114859793 | 0.000235092 | 0.003042967 |
| ENSMMUG000000009890 | FERM, ARH/RhoGEF and pleckstrin domain protein 1 [Source:VGNC Symbol;Acc:VGNC:72614]               | 1.117750422 | 5.93E-07    | 1.75E-05    |
| ENSMMUG000000062394 | C-C motif chemokine receptor 2 [Source:NCBI gene;Acc:574098]                                       | 1.119285254 | 0.001213236 | 0.011546442 |
| ENSMMUG000000020605 | heparanase 2 (inactive) [Source:NCBI gene;Acc:708795]                                              | 1.120123198 | 0.002542057 | 0.020485596 |
| ENSMMUG000000061785 |                                                                                                    | 1.120424406 | 1.28E-06    | 3.45E-05    |
| ENSMMUG000000045544 | neuronal tyrosine-phosphorylated phosphoinositide-3-kinase adaptor 2 [Source:NCBI gene;Acc:711209] | 1.129381076 | 0.000188675 | 0.002542285 |
| ENSMMUG000000003436 | tubulin tyrosine ligase like 6 [Source:VGNC Symbol;Acc:VGNC:79632]                                 | 1.129824675 | 1.46E-07    | 5.15E-06    |
| ENSMMUG000000055290 | netrin 1 [Source:NCBI gene;Acc:717645]                                                             | 1.130194674 | 0.002608388 | 0.020928505 |
| ENSMMUG000000002483 | citrate synthase [Source:VGNC Symbol;Acc:VGNC:71509]                                               | 1.131298037 | 0.002475696 | 0.020073859 |
| ENSMMUG000000017660 |                                                                                                    | 1.13217565  | 0.002018198 | 0.017165876 |
| ENSMMUG000000051677 |                                                                                                    | 1.133961096 | 0.000282169 | 0.003557265 |
| ENSMMUG000000015115 | terminal nucleotidyltransferase 5B [Source:VGNC Symbol;Acc:VGNC:79692]                             | 1.142801971 | 0.000519289 | 0.005871024 |
| ENSMMUG000000021449 | vacuolar protein sorting 13 homolog D [Source:NCBI gene;Acc:722775]                                | 1.145526157 | 6.42E-08    | 2.50E-06    |
| ENSMMUG000000011774 | integrator complex subunit 10 [Source:VGNC Symbol;Acc:VGNC:73653]                                  | 1.145968553 | 8.96E-07    | 2.51E-05    |
| ENSMMUG000000055048 |                                                                                                    | 1.146519397 | 0.000751697 | 0.007897108 |
| ENSMMUG000000015416 | bromodomain and PHD finger containing 3 [Source:VGNC Symbol;Acc:VGNC:70309]                        | 1.147329864 | 0.000191396 | 0.002575177 |
| ENSMMUG000000062283 | homeobox B6 [Source:NCBI gene;Acc:106994013]                                                       | 1.14945554  | 6.50E-05    | 0.001030166 |
| ENSMMUG000000013696 | myozenin 1 [Source:VGNC Symbol;Acc:VGNC:74951]                                                     | 1.152333837 | 0.005038071 | 0.034498523 |
| ENSMMUG000000000808 | melanin concentrating hormone receptor 2 [Source:VGNC Symbol;Acc:VGNC:74550]                       | 1.153325856 | 3.04E-08    | 1.33E-06    |
| ENSMMUG000000020254 | exocyst complex component 3 like 1 [Source:VGNC Symbol;Acc:VGNC:72376]                             | 1.156318821 | 0.002166967 | 0.018095436 |
| ENSMMUG000000011155 | FA complementation group I [Source:VGNC Symbol;Acc:VGNC:72575]                                     | 1.157028697 | 0.002793881 | 0.022108415 |
| ENSMMUG000000002260 | protein kinase C eta [Source:VGNC Symbol;Acc:VGNC:84424]                                           | 1.157194733 | 1.51E-06    | 3.96E-05    |
| ENSMMUG000000021972 | diacylglycerol kinase gamma [Source:VGNC Symbol;Acc:VGNC:71785]                                    | 1.15837948  | 0.000439404 | 0.005131765 |



|                    |                                                                                                 |             |             |             |
|--------------------|-------------------------------------------------------------------------------------------------|-------------|-------------|-------------|
| ENSMMUG0000009201  | abhydrolase domain containing 12 [Source:VGNC Symbol;Acc:VGNC:69411]                            | 1.158867075 | 0.006732854 | 0.042644496 |
| ENSMMUG0000008077  | dynein cytoplasmic 2 light intermediate chain 1 [Source:VGNC Symbol;Acc:VGNC:71899]             | 1.159775406 | 1.52E-06    | 3.96E-05    |
| ENSMMUG0000003267  | zinc finger protein 362 [Source:NCBI gene;Acc:710013]                                           | 1.160834461 | 0.000774506 | 0.008090556 |
| ENSMMUG00000032249 | procollagen-lysine,2-oxoglutarate 5-dioxygenase 1 [Source:NCBI gene;Acc:722763]                 | 1.162641052 | 1.19E-05    | 0.000244784 |
| ENSMMUG00000064892 |                                                                                                 | 1.162729412 | 0.000684751 | 0.007276865 |
| ENSMMUG00000048824 | eva-1 homolog C [Source:NCBI gene;Acc:708681]                                                   | 1.165315847 | 0.00011963  | 0.001742021 |
| ENSMMUG00000016001 | vesicle amine transport 1 [Source:VGNC Symbol;Acc:VGNC:79058]                                   | 1.165395387 | 0.007312368 | 0.045347523 |
| ENSMMUG00000046969 | Fc receptor like 3 [Source:NCBI gene;Acc:718801]                                                | 1.16713763  | 0.003326832 | 0.025240592 |
| ENSMMUG00000015931 | phosphatidylinositol transfer protein membrane associated 2 [Source:VGNC Symbol;Acc:VGNC:75843] | 1.167745236 | 0.007879548 | 0.048311448 |
| ENSMMUG00000022730 | cytochrome P450, family 3, subfamily A, polypeptide 5 [Source:NCBI gene;Acc:678692]             | 1.167994721 | 0.000447883 | 0.005203989 |
| ENSMMUG00000053367 | secreted protein acidic and cysteine rich [Source:NCBI gene;Acc:712388]                         | 1.168166768 | 3.64E-05    | 0.000633125 |
| ENSMMUG00000045970 | thiamine triphosphatase [Source:NCBI gene;Acc:714403]                                           | 1.168636368 | 1.89E-05    | 0.000362185 |
| ENSMMUG00000001848 | sprouty RTK signaling antagonist 1 [Source:VGNC Symbol;Acc:VGNC:77867]                          | 1.174678963 | 8.63E-06    | 0.000185159 |
| ENSMMUG00000055747 | cytochrome c oxidase subunit 6B [Source:NCBI gene;Acc:692062]                                   | 1.175171998 | 3.55E-05    | 0.000622981 |
| ENSMMUG00000004748 | zinc finger and BTB domain containing 1 [Source:VGNC Symbol;Acc:VGNC:79238]                     | 1.175673921 | 0.000329215 | 0.004045075 |
| ENSMMUG00000010357 | cyclin and CBS domain divalent metal cation transport mediator 1 [Source:NCBI gene;Acc:708335]  | 1.178067682 | 2.11E-05    | 0.000399244 |
| ENSMMUG00000005432 | clathrin heavy chain like 1 [Source:VGNC Symbol;Acc:VGNC:71268]                                 | 1.18671177  | 5.94E-05    | 0.000955902 |
| ENSMMUG00000052505 | homeobox B9 [Source:NCBI gene;Acc:106994009]                                                    | 1.187615368 | 4.45E-06    | 0.000105738 |
| ENSMMUG00000003106 | SEC16 homolog A, endoplasmic reticulum export factor [Source:VGNC Symbol;Acc:VGNC:77326]        | 1.188788973 | 0.000170463 | 0.002355518 |
| ENSMMUG00000050505 | small integral membrane protein 4 [Source:NCBI gene;Acc:696553]                                 | 1.190672632 | 0.006590977 | 0.042064325 |
| ENSMMUG00000057001 | homeobox B2 [Source:NCBI gene;Acc:106994010]                                                    | 1.190796564 | 0.000345843 | 0.004215617 |
| ENSMMUG00000065269 | Rho family GTPase 2 [Source:NCBI gene;Acc:712559]                                               | 1.19567938  | 0.002271918 | 0.018751987 |
| ENSMMUG00000013671 | elongation factor for RNA polymerase II [Source:VGNC Symbol;Acc:VGNC:72088]                     | 1.195680054 | 6.11E-05    | 0.000979344 |
| ENSMMUG00000008195 | TGFB induced factor homeobox 2 [Source:NCBI gene;Acc:100429616]                                 | 1.195865156 | 3.97E-06    | 9.62E-05    |
| ENSMMUG00000037413 | U5 spliceosomal RNA [Source:RFAM;Acc:RF00020]                                                   | 1.197955172 | 0.003047275 | 0.023586266 |
| ENSMMUG00000062583 | olfactory receptor 1A1 [Source:NCBI gene;Acc:721403]                                            | 1.200166334 | 0.006313365 | 0.040630697 |
| ENSMMUG00000031291 | regulator of G protein signaling like 1 [Source:NCBI gene;Acc:715693]                           | 1.201446624 | 5.55E-06    | 0.000126827 |
| ENSMMUG00000013460 | RAB8B, member RAS oncogene family [Source:VGNC Symbol;Acc:VGNC:81550]                           | 1.203345073 | 0.000103384 | 0.001532115 |
| ENSMMUG00000021498 | L3MBTL histone methyl-lysine binding protein 3 [Source:VGNC Symbol;Acc:VGNC:74106]              | 1.208235236 | 8.37E-06    | 0.000180464 |
| ENSMMUG00000057231 | T-box transcription factor 21 [Source:NCBI gene;Acc:694044]                                     | 1.20984619  | 0.00046519  | 0.005378321 |
| ENSMMUG00000052607 |                                                                                                 | 1.209971381 | 6.38E-07    | 1.86E-05    |
| ENSMMUG00000000803 | signal transducer and activator of transcription 2 [Source:VGNC Symbol;Acc:VGNC:77905]          | 1.210205438 | 0.004030493 | 0.029183815 |
| ENSMMUG00000022996 | HCLS1 binding protein 3 [Source:VGNC Symbol;Acc:VGNC:82158]                                     | 1.211304865 | 6.88E-05    | 0.001078298 |
| ENSMMUG00000058187 |                                                                                                 | 1.212422515 | 5.94E-06    | 0.000133759 |
| ENSMMUG00000022407 | serine and arginine rich splicing factor 5 [Source:NCBI gene;Acc:712867]                        | 1.212797758 | 0.00730026  | 0.045329174 |
| ENSMMUG00000003697 | inositol polyphosphate-4-phosphatase type II B [Source:VGNC Symbol;Acc:VGNC:73748]              | 1.215147099 | 0.002075354 | 0.017570819 |
| ENSMMUG00000056555 |                                                                                                 | 1.21903065  | 0.001482734 | 0.013483795 |
| ENSMMUG00000009377 | tripartite motif containing 47 [Source:VGNC Symbol;Acc:VGNC:79171]                              | 1.219316643 | 0.001992513 | 0.01699453  |
| ENSMMUG00000006786 | protein tyrosine phosphatase non-receptor type 22 [Source:VGNC Symbol;Acc:VGNC:76603]           | 1.221028382 | 0.003922593 | 0.028582441 |
| ENSMMUG00000013385 | elongator acetyltransferase complex subunit 6 [Source:VGNC Symbol;Acc:VGNC:72113]               | 1.221073582 | 5.12E-05    | 0.000844355 |
| ENSMMUG00000059229 | CEA cell adhesion molecule 7 [Source:NCBI gene;Acc:705572]                                      | 1.221824788 | 3.67E-06    | 9.00E-05    |
| ENSMMUG00000002452 | solute carrier family 35 member C1 [Source:VGNC Symbol;Acc:VGNC:77524]                          | 1.227809996 | 5.57E-05    | 0.000909846 |
| ENSMMUG00000003457 | protein kinase cAMP-activated catalytic subunit beta [Source:NCBI gene;Acc:709728]              | 1.22783492  | 3.96E-08    | 1.65E-06    |
| ENSMMUG00000041376 | G antigen 10 [Source:NCBI gene;Acc:693330]                                                      | 1.228718676 | 0.001585892 | 0.01416987  |
| ENSMMUG00000014674 | golgin, RAB6 interacting [Source:VGNC Symbol;Acc:VGNC:73012]                                    | 1.231398515 | 0.000771104 | 0.008064176 |
| ENSMMUG00000051807 |                                                                                                 | 1.233331916 | 0.001006447 | 0.010032547 |
| ENSMMUG00000016796 | reticulophagy regulator family member 3 [Source:VGNC Symbol;Acc:VGNC:76845]                     | 1.238304107 | 1.06E-05    | 0.000221022 |
| ENSMMUG00000001036 | coagulation factor VII [Source:VGNC Symbol;Acc:VGNC:72466]                                      | 1.240765972 | 0.00025618  | 0.003269938 |
| ENSMMUG00000003950 | nucleoporin 98 and 96 precursor [Source:VGNC Symbol;Acc:VGNC:75563]                             | 1.240813494 | 4.63E-06    | 0.000109272 |
| ENSMMUG00000003356 | tenascin C [Source:VGNC Symbol;Acc:VGNC:79960]                                                  | 1.241567147 | 0.000415781 | 0.004911979 |
| ENSMMUG00000064391 |                                                                                                 | 1.243361025 | 0.000205288 | 0.002714468 |

|                     |                                                                                                  |             |             |             |
|---------------------|--------------------------------------------------------------------------------------------------|-------------|-------------|-------------|
| ENSMMUG00000061342  |                                                                                                  | 1.244236122 | 1.54E-05    | 0.000304208 |
| ENSMMUG00000009199  | glycogen phosphorylase B [Source:VGNC Symbol;Acc:VGNC:76631]                                     | 1.244323627 | 0.001287495 | 0.012053726 |
| ENSMMUG00000015479  | tectonin beta-propeller repeat containing 1 [Source:VGNC Symbol;Acc:VGNC:79348]                  | 1.248315703 | 1.20E-06    | 3.25E-05    |
| ENSMMUG00000001547  | zinc finger protein 106 [Source:VGNC Symbol;Acc:VGNC:78831]                                      | 1.249744426 | 3.77E-07    | 1.15E-05    |
| ENSMMUG000000049866 |                                                                                                  | 1.250856619 | 2.39E-05    | 0.000444105 |
| ENSMMUG00000006181  | WD repeat, sterile alpha motif and U-box domain containing 1 [Source:VGNC Symbol;Acc:VGNC:79634] | 1.251089347 | 0.000533486 | 0.005983506 |
| ENSMMUG00000020604  | HPS1 biogenesis of lysosomal organelles complex 3 subunit 1 [Source:VGNC Symbol;Acc:VGNC:73515]  | 1.252095097 | 2.05E-06    | 5.24E-05    |
| ENSMMUG00000018246  | transmembrane and coiled-coil domains 6 [Source:VGNC Symbol;Acc:VGNC:84507]                      | 1.252989682 | 0.000152167 | 0.002156168 |
| ENSMMUG00000008383  | major facilitator superfamily domain containing 10 [Source:NCBI gene;Acc:720098]                 | 1.257346221 | 0.004567331 | 0.03191583  |
| ENSMMUG00000005215  | Rab9 effector protein with kelch motifs [Source:VGNC Symbol;Acc:VGNC:76495]                      | 1.258412421 | 0.002153642 | 0.018061962 |
| ENSMMUG00000016890  | solute carrier family 37 member 4 [Source:VGNC Symbol;Acc:VGNC:77591]                            | 1.260551449 | 0.000584537 | 0.006378415 |
| ENSMMUG00000013944  | regulator of microtubule dynamics 2 [Source:VGNC Symbol;Acc:VGNC:76839]                          | 1.262895234 | 5.67E-08    | 2.27E-06    |
| ENSMMUG00000000776  | zinc finger matrin-type 4 [Source:VGNC Symbol;Acc:VGNC:78424]                                    | 1.266006184 | 0.002164084 | 0.018095436 |
| ENSMMUG00000005964  | CMP-N-acetylneuraminic acid hydroxylase [Source:NCBI gene;Acc:574186]                            | 1.26650101  | 0.002199846 | 0.018276847 |
| ENSMMUG00000011209  | BICD family like cargo adaptor 1 [Source:HGNC Symbol;Acc:HGNC:28095]                             | 1.26841162  | 0.002913376 | 0.022721864 |
| ENSMMUG00000001387  | p21 (RAC1) activated kinase 1 [Source:NCBI gene;Acc:698585]                                      | 1.27259079  | 7.84E-05    | 0.001211973 |
| ENSMMUG00000004273  | dedicator of cytokinesis 3 [Source:VGNC Symbol;Acc:VGNC:71967]                                   | 1.274266846 | 3.67E-05    | 0.000637598 |
| ENSMMUG00000019089  | centromere protein E [Source:VGNC Symbol;Acc:VGNC:71008]                                         | 1.275670049 | 1.51E-05    | 0.000299525 |
| ENSMMUG000000039292 |                                                                                                  | 1.27592973  | 0.003454932 | 0.025913395 |
| ENSMMUG000000048066 | trafficking protein particle complex 9 [Source:NCBI gene;Acc:711466]                             | 1.276734638 | 0.000253577 | 0.003241209 |
| ENSMMUG00000005324  | homeobox B7 [Source:NCBI gene;Acc:697089]                                                        | 1.277205315 | 0.000818203 | 0.008441613 |
| ENSMMUG000000031163 | membrane anchored junction protein [Source:VGNC Symbol;Acc:VGNC:74375]                           | 1.278233014 | 9.76E-06    | 0.000205053 |
| ENSMMUG000000050028 |                                                                                                  | 1.280680646 | 0.00081923  | 0.008442744 |
| ENSMMUG00000019833  | Fc receptor like 1 [Source:VGNC Symbol;Acc:VGNC:72528]                                           | 1.281486146 | 2.62E-05    | 0.000477111 |
| ENSMMUG000000038363 | adaptor related protein complex 5 subunit beta 1 [Source:NCBI gene;Acc:721904]                   | 1.283290811 | 7.34E-06    | 0.000161141 |
| ENSMMUG00000000590  | NPR3 like, GATOR1 complex subunit [Source:VGNC Symbol;Acc:VGNC:75173]                            | 1.289841432 | 0.007014129 | 0.044002067 |
| ENSMMUG000000022100 | midnolin [Source:VGNC Symbol;Acc:VGNC:82186]                                                     | 1.292489789 | 1.85E-07    | 6.25E-06    |
| ENSMMUG000000058002 | zinc finger protein 669-like [Source:NCBI gene;Acc:696282]                                       | 1.293202835 | 2.22E-08    | 1.03E-06    |
| ENSMMUG00000015866  | vesicle transport through interaction with t-SNAREs 1B [Source:NCBI gene;Acc:711113]             | 1.294489228 | 4.38E-05    | 0.000738356 |
| ENSMMUG000000042951 | signal recognition particle 19 [Source:NCBI gene;Acc:693829]                                     | 1.295645909 | 0.001501923 | 0.013609428 |
| ENSMMUG000000008623 | coiled-coil domain containing 22 [Source:VGNC Symbol;Acc:VGNC:70899]                             | 1.296226103 | 2.58E-06    | 6.53E-05    |
| ENSMMUG000000021080 | basic leucine zipper nuclear factor 1 [Source:VGNC Symbol;Acc:VGNC:70258]                        | 1.296255058 | 4.03E-07    | 1.22E-05    |
| ENSMMUG000000057345 | calcineurin like phosphoesterase domain containing 1 [Source:NCBI gene;Acc:716978]               | 1.297816452 | 1.88E-05    | 0.000362185 |
| ENSMMUG000000014766 | neuroguidin [Source:VGNC Symbol;Acc:VGNC:75220]                                                  | 1.299726104 | 0.000528477 | 0.005938424 |
| ENSMMUG000000002810 | TOX high mobility group box family member 2 [Source:VGNC Symbol;Acc:VGNC:79007]                  | 1.300044899 | 9.49E-05    | 0.001424168 |
| ENSMMUG000000051816 | keratinocyte proline rich protein [Source:NCBI gene;Acc:100424312]                               | 1.301776335 | 0.006789251 | 0.042878686 |
| ENSMMUG000000030964 | RAB6A, member RAS oncogene family [Source:NCBI gene;Acc:718717]                                  | 1.306064285 | 3.52E-05    | 0.000618512 |
| ENSMMUG000000008875 | solute carrier family 35 member F5 [Source:VGNC Symbol;Acc:VGNC:77567]                           | 1.306766093 | 0.002212319 | 0.018358855 |
| ENSMMUG000000001278 | vitrin [Source:VGNC Symbol;Acc:VGNC:78773]                                                       | 1.307511963 | 0.001788483 | 0.015513112 |
| ENSMMUG00000019830  | Fc receptor like 2 [Source:VGNC Symbol;Acc:VGNC:72509]                                           | 1.30810856  | 0.000405994 | 0.004814901 |
| ENSMMUG00000006284  | adenylate kinase 2 [Source:VGNC Symbol;Acc:VGNC:69761]                                           | 1.310564852 | 3.96E-06    | 9.62E-05    |
| ENSMMUG000000009684 | kinesin family member 22 [Source:VGNC Symbol;Acc:VGNC:74033]                                     | 1.311086245 | 0.000275833 | 0.003482151 |
| ENSMMUG00000012538  | ubiquitin conjugating enzyme E2 U [Source:VGNC Symbol;Acc:VGNC:79726]                            | 1.315075394 | 0.000463137 | 0.005368073 |
| ENSMMUG000000042472 | Metazoan signal recognition particle RNA [Source:RFAM;Acc:RF00017]                               | 1.315810479 | 0.00430291  | 0.030578901 |
| ENSMMUG000000055121 | Metazoan signal recognition particle RNA [Source:RFAM;Acc:RF00017]                               | 1.316010123 | 0.006276621 | 0.040489178 |
| ENSMMUG00000008385  | NOP14 nucleolar protein [Source:VGNC Symbol;Acc:VGNC:75194]                                      | 1.318857759 | 5.23E-06    | 0.000121497 |
| ENSMMUG000000050696 | taste receptor type 2 member 31-like [Source:NCBI gene;Acc:693892]                               | 1.319663535 | 0.004795786 | 0.033259696 |
| ENSMMUG000000064242 |                                                                                                  | 1.320186599 | 0.006190859 | 0.040151145 |
| ENSMMUG000000064532 | mucin 16, cell surface associated [Source:NCBI gene;Acc:106996460]                               | 1.3241495   | 8.26E-09    | 4.32E-07    |
| ENSMMUG000000011798 | eukaryotic translation initiation factor 3 subunit C [Source:NCBI gene;Acc:705696]               | 1.32427388  | 2.23E-09    | 1.38E-07    |
| ENSMMUG000000021428 | lipocalin 12 [Source:VGNC Symbol;Acc:VGNC:74143]                                                 | 1.329893514 | 0.001132601 | 0.010971926 |



|                    |                                                                                             |             |             |             |
|--------------------|---------------------------------------------------------------------------------------------|-------------|-------------|-------------|
| ENSMMUG00000017266 | UPF0577 protein KIAA1324 [Source:NCBI gene;Acc:697670]                                      | 1.332065432 | 0.002226806 | 0.018412666 |
| ENSMMUG00000022409 | solute carrier family 10 member 1 [Source:VGNC Symbol;Acc:VGNC:77380]                       | 1.334726505 | 2.03E-05    | 0.000386563 |
| ENSMMUG00000056840 |                                                                                             | 1.336320689 | 6.15E-05    | 0.000982008 |
| ENSMMUG00000017224 | catenin beta like 1 [Source:VGNC Symbol;Acc:VGNC:71414]                                     | 1.336860449 | 0.002909375 | 0.022721864 |
| ENSMMUG00000022728 | zinc finger and SCAN domain containing 25 [Source:VGNC Symbol;Acc:VGNC:79344]               | 1.337446988 | 0.003195746 | 0.024467932 |
| ENSMMUG00000001568 | AT-rich interaction domain 3B [Source:VGNC Symbol;Acc:VGNC:69827]                           | 1.339740303 | 3.70E-06    | 9.04E-05    |
| ENSMMUG00000061079 | golgin subfamily A member 6C [Source:NCBI gene;Acc:715898]                                  | 1.341812425 | 8.76E-07    | 2.48E-05    |
| ENSMMUG00000054904 | Metazoan signal recognition particle RNA [Source:RFAM;Acc:RF00017]                          | 1.343061799 | 5.15E-06    | 0.000120344 |
| ENSMMUG00000029296 | phosphatidylinositol glycan anchor biosynthesis class Q [Source:VGNC Symbol;Acc:VGNC:75798] | 1.343381695 | 0.004524253 | 0.031729016 |
| ENSMMUG00000016476 | TRAF interacting protein [Source:VGNC Symbol;Acc:VGNC:82261]                                | 1.343915016 | 3.22E-05    | 0.000571339 |
| ENSMMUG00000006285 | antizyme inhibitor 2 [Source:VGNC Symbol;Acc:VGNC:70153]                                    | 1.345345626 | 8.59E-09    | 4.47E-07    |
| ENSMMUG00000060675 |                                                                                             | 1.34657251  | 4.50E-05    | 0.000755492 |
| ENSMMUG00000058574 |                                                                                             | 1.346774573 | 6.18E-06    | 0.000138066 |
| ENSMMUG00000055096 |                                                                                             | 1.34743469  | 0.000602317 | 0.006506013 |
| ENSMMUG00000006596 | CCR4-NOT transcription complex subunit 10 [Source:VGNC Symbol;Acc:VGNC:71327]               | 1.348486101 | 0.001403248 | 0.012875461 |
| ENSMMUG00000050793 | N-acetyl-alpha-glucosaminidase [Source:NCBI gene;Acc:707186]                                | 1.348507444 | 2.49E-05    | 0.000457214 |
| ENSMMUG00000013044 | selectin P [Source:VGNC Symbol;Acc:VGNC:77157]                                              | 1.348908718 | 8.35E-05    | 0.001280241 |
| ENSMMUG00000060517 |                                                                                             | 1.355738186 | 0.001536949 | 0.013867195 |
| ENSMMUG00000002715 | solute carrier family 9 member A8 [Source:VGNC Symbol;Acc:VGNC:77749]                       | 1.358056    | 1.42E-07    | 5.05E-06    |
| ENSMMUG00000006855 | acyl-CoA thioesterase 2 [Source:NCBI gene;Acc:697011]                                       | 1.358831271 | 0.000162694 | 0.002272035 |
| ENSMMUG00000048566 | MCF.2 cell line derived transforming sequence like [Source:NCBI gene;Acc:713961]            | 1.363883618 | 1.57E-06    | 4.05E-05    |
| ENSMMUG00000002384 | IGF like family receptor 1 [Source:VGNC Symbol;Acc:VGNC:73434]                              | 1.364411823 | 2.03E-05    | 0.000386209 |
| ENSMMUG00000007366 |                                                                                             | 1.366318469 | 0.001394988 | 0.012819813 |
| ENSMMUG00000018034 | suppression of tumorigenicity 14 [Source:VGNC Symbol;Acc:VGNC:77897]                        | 1.367853027 | 2.92E-07    | 9.18E-06    |
| ENSMMUG00000040741 | thioredoxin related transmembrane protein 2 [Source:NCBI gene;Acc:100169970]                | 1.368575725 | 0.004998855 | 0.034280527 |
| ENSMMUG00000009886 | Coenzyme A synthase [Source:VGNC Symbol;Acc:VGNC:81373]                                     | 1.369561702 | 1.99E-07    | 6.68E-06    |
| ENSMMUG00000016480 | CaM kinase like vesicle associated [Source:VGNC Symbol;Acc:VGNC:70663]                      | 1.372002869 | 0.000597305 | 0.006467052 |
| ENSMMUG00000061208 | MAP3K7 C-terminal like [Source:NCBI gene;Acc:713717]                                        | 1.372247671 | 2.21E-07    | 7.29E-06    |
| ENSMMUG00000002426 | myosin light chain 7 [Source:VGNC Symbol;Acc:VGNC:75002]                                    | 1.374625452 | 1.56E-05    | 0.000305786 |
| ENSMMUG00000062397 |                                                                                             | 1.375404138 | 0.000849587 | 0.008716549 |
| ENSMMUG00000003298 | ataxin 2 like [Source:VGNC Symbol;Acc:VGNC:70159]                                           | 1.375984172 | 1.66E-09    | 1.09E-07    |
| ENSMMUG00000064557 |                                                                                             | 1.378712004 | 0.000547822 | 0.006103643 |
| ENSMMUG00000014771 | zinc finger homeobox 2 [Source:NCBI gene;Acc:100429448]                                     | 1.382448486 | 7.38E-08    | 2.86E-06    |
| ENSMMUG00000000863 | dynein axonemal assembly factor 4 [Source:VGNC Symbol;Acc:VGNC:71881]                       | 1.386145274 | 1.23E-07    | 4.45E-06    |
| ENSMMUG00000052252 | protein phosphatase 1 regulatory subunit 3F [Source:NCBI gene;Acc:715950]                   | 1.388832707 | 1.05E-06    | 2.89E-05    |
| ENSMMUG00000003955 | post-GPI attachment to proteins 2 [Source:VGNC Symbol;Acc:VGNC:75823]                       | 1.390040303 | 2.53E-06    | 6.43E-05    |
| ENSMMUG00000018986 | seizure related 6 homolog like 2 [Source:VGNC Symbol;Acc:VGNC:81567]                        | 1.393218911 | 0.007184186 | 0.04479408  |
| ENSMMUG00000004002 | CDC like kinase 4 [Source:VGNC Symbol;Acc:VGNC:71173]                                       | 1.397405957 | 1.31E-07    | 4.71E-06    |
| ENSMMUG00000060812 | autophagy related 12 [Source:NCBI gene;Acc:696765]                                          | 1.40222034  | 0.000213848 | 0.002799938 |
| ENSMMUG00000052854 | mucin like 1 [Source:NCBI gene;Acc:100423942]                                               | 1.402846181 | 2.36E-09    | 1.45E-07    |
| ENSMMUG00000003303 | Tu translation elongation factor, mitochondrial [Source:VGNC Symbol;Acc:VGNC:78674]         | 1.405579472 | 1.26E-10    | 9.38E-09    |
| ENSMMUG00000015685 | zinc finger protein 804B [Source:VGNC Symbol;Acc:VGNC:81890]                                | 1.406618462 | 2.96E-07    | 9.28E-06    |
| ENSMMUG00000007201 | PDS5 cohesin associated factor B [Source:VGNC Symbol;Acc:VGNC:75835]                        | 1.408715666 | 2.91E-07    | 9.16E-06    |
| ENSMMUG00000003598 | tripartite motif containing 7 [Source:VGNC Symbol;Acc:VGNC:79022]                           | 1.410984743 | 1.52E-07    | 5.29E-06    |
| ENSMMUG00000018719 | nemo like kinase [Source:VGNC Symbol;Acc:VGNC:75277]                                        | 1.411467055 | 6.48E-06    | 0.000144005 |
| ENSMMUG00000058110 |                                                                                             | 1.412095321 | 0.003633979 | 0.026970574 |
| ENSMMUG00000055322 | EPH receptor A1 [Source:NCBI gene;Acc:706295]                                               | 1.41717116  | 1.02E-06    | 2.80E-05    |
| ENSMMUG00000012228 | ubiquitin conjugating enzyme E2 V1 [Source:NCBI gene;Acc:100425552]                         | 1.417993775 | 1.42E-07    | 5.05E-06    |
| ENSMMUG00000023016 | jade family PHD finger 3 [Source:VGNC Symbol;Acc:VGNC:73640]                                | 1.419896397 | 1.49E-05    | 0.000296486 |
| ENSMMUG00000059436 | interleukin 10 receptor subunit alpha [Source:NCBI gene;Acc:704383]                         | 1.420902161 | 1.23E-07    | 4.45E-06    |
| ENSMMUG00000056906 |                                                                                             | 1.421678567 | 3.42E-05    | 0.000602207 |

|                    |                                                                                                |             |             |             |
|--------------------|------------------------------------------------------------------------------------------------|-------------|-------------|-------------|
| ENSMMUG00000017605 | mitochondrial ribosomal protein L39 [Source:VGNC Symbol;Acc:VGNC:74737]                        | 1.42240885  | 3.90E-06    | 9.49E-05    |
| ENSMMUG00000052348 |                                                                                                | 1.42270578  | 0.000133006 | 0.001921589 |
| ENSMMUG00000010308 | cyclin I family member 2 [Source:VGNC Symbol;Acc:VGNC:70923]                                   | 1.424478889 | 0.000322301 | 0.003976058 |
| ENSMMUG00000010888 | patched domain containing 1 [Source:VGNC Symbol;Acc:VGNC:76322]                                | 1.430021138 | 5.05E-05    | 0.000839649 |
| ENSMMUG00000023303 | ecotropic viral integration site 5 like [Source:NCBI gene;Acc:706628]                          | 1.431365416 | 1.69E-08    | 8.12E-07    |
| ENSMMUG00000059472 | filaggrin family member 2 [Source:HGNC Symbol;Acc:HGNC:33276]                                  | 1.43144562  | 0.003195219 | 0.024467932 |
| ENSMMUG00000060712 |                                                                                                | 1.43263693  | 4.35E-05    | 0.000733887 |
| ENSMMUG00000041101 | protein phosphatase 2 regulatory subunit B'beta [Source:NCBI gene;Acc:722026]                  | 1.433580757 | 2.41E-10    | 1.74E-08    |
| ENSMMUG00000016143 | sialophorin [Source:VGNC Symbol;Acc:VGNC:77861]                                                | 1.437555846 | 3.07E-08    | 1.34E-06    |
| ENSMMUG00000014045 | protein tyrosine phosphatase non-receptor type 23 [Source:VGNC Symbol;Acc:VGNC:76477]          | 1.438847543 | 3.61E-05    | 0.000631054 |
| ENSMMUG00000020549 | protein phosphatase 6 catalytic subunit [Source:NCBI gene;Acc:703658]                          | 1.442700611 | 0.005674851 | 0.037572416 |
| ENSMMUG00000022613 | reversion inducing cysteine rich protein with kazal motifs [Source:VGNC Symbol;Acc:VGNC:76722] | 1.443371582 | 9.24E-09    | 4.78E-07    |
| ENSMMUG0000001060  | ryanodine receptor 2 [Source:VGNC Symbol;Acc:VGNC:76954]                                       | 1.443737591 | 1.58E-08    | 7.66E-07    |
| ENSMMUG00000011328 | cytoplasmic polyadenylation element binding protein 1 [Source:NCBI gene;Acc:694357]            | 1.446180345 | 0.002513395 | 0.020307965 |
| ENSMMUG00000008379 | adducin 1 [Source:VGNC Symbol;Acc:VGNC:69528]                                                  | 1.446751079 | 0.000366135 | 0.004393141 |
| ENSMMUG00000013150 | MORC family CW-type zinc finger 4 [Source:VGNC Symbol;Acc:VGNC:74808]                          | 1.447451291 | 1.15E-07    | 4.24E-06    |
| ENSMMUG00000021661 | leucine rich repeat containing 56 [Source:VGNC Symbol;Acc:VGNC:74356]                          | 1.448932543 | 0.004199415 | 0.030005603 |
| ENSMMUG00000013146 | claudin 2 [Source:HGNC Symbol;Acc:HGNC:2041]                                                   | 1.451569465 | 1.41E-07    | 5.05E-06    |
| ENSMMUG00000022914 | RAB, member of RAS oncogene family like 2B [Source:NCBI gene;Acc:716615]                       | 1.452209485 | 4.05E-08    | 1.68E-06    |
| ENSMMUG00000058885 | formin binding protein 4 [Source:NCBI gene;Acc:712633]                                         | 1.453720679 | 0.000181321 | 0.002478128 |
| ENSMMUG00000057702 |                                                                                                | 1.453991262 | 2.38E-07    | 7.73E-06    |
| ENSMMUG00000020979 | inka box actin regulator 1 [Source:VGNC Symbol;Acc:VGNC:73692]                                 | 1.454394373 | 0.000380107 | 0.004537126 |
| ENSMMUG00000014874 | GTP binding protein 8 (putative) [Source:VGNC Symbol;Acc:VGNC:84180]                           | 1.459478478 | 0.000170044 | 0.002353251 |
| ENSMMUG00000016417 | chromobox 8 [Source:NCBI gene;Acc:717514]                                                      | 1.461041575 | 2.98E-08    | 1.31E-06    |
| ENSMMUG00000030279 | A-kinase anchoring protein 10 [Source:VGNC Symbol;Acc:VGNC:69764]                              | 1.462551589 | 0.000188037 | 0.002539994 |
| ENSMMUG00000014277 | ITPR interacting domain containing 2 [Source:VGNC Symbol;Acc:VGNC:73584]                       | 1.463198382 | 1.15E-07    | 4.24E-06    |
| ENSMMUG00000003006 | serine palmitoyltransferase long chain base subunit 1 [Source:VGNC Symbol;Acc:VGNC:77873]      | 1.465716154 | 0.001496044 | 0.013578005 |
| ENSMMUG00000002397 | GIN5 complex subunit 1 [Source:VGNC Symbol;Acc:VGNC:73025]                                     | 1.467145346 | 0.001604906 | 0.014278765 |
| ENSMMUG00000011440 | neurite extension and migration factor [Source:VGNC Symbol;Acc:VGNC:75274]                     | 1.46803549  | 1.44E-05    | 0.000288413 |
| ENSMMUG00000012001 | transcription factor 4 [Source:VGNC Symbol;Acc:VGNC:78288]                                     | 1.471809642 | 0.001068591 | 0.010506671 |
| ENSMMUG00000052073 |                                                                                                | 1.472017042 | 1.26E-05    | 0.00025779  |
| ENSMMUG00000012801 | zinc finger protein 235 [Source:VGNC Symbol;Acc:VGNC:78825]                                    | 1.472350987 | 7.31E-09    | 3.93E-07    |
| ENSMMUG00000060901 |                                                                                                | 1.473415305 | 2.65E-08    | 1.20E-06    |
| ENSMMUG00000000327 | fatty acid desaturase 2 [Source:VGNC Symbol;Acc:VGNC:72472]                                    | 1.473777264 | 0.000193607 | 0.002586782 |
| ENSMMUG00000009794 | protocadherin related 15 [Source:VGNC Symbol;Acc:VGNC:75608]                                   | 1.477650658 | 7.73E-09    | 4.09E-07    |
| ENSMMUG00000001745 | oxysterol binding protein [Source:VGNC Symbol;Acc:VGNC:75718]                                  | 1.479300935 | 0.000198362 | 0.002638047 |
| ENSMMUG00000005086 | homeobox protein TGIF1 [Source:NCBI gene;Acc:694580]                                           | 1.479954776 | 1.47E-05    | 0.000292715 |
| ENSMMUG00000012797 | zinc finger protein 233 [Source:VGNC Symbol;Acc:VGNC:79903]                                    | 1.480062997 | 8.19E-05    | 0.001258768 |
| ENSMMUG00000060760 |                                                                                                | 1.481057411 | 0.008092846 | 0.049320088 |
| ENSMMUG00000061816 |                                                                                                | 1.485821536 | 0.002930617 | 0.022836976 |
| ENSMMUG00000018144 | C2 calcium-dependent domain-containing protein 6 [Source:NCBI gene;Acc:702140]                 | 1.487844105 | 3.20E-05    | 0.000570895 |
| ENSMMUG00000037243 | U6 spliceosomal RNA [Source:RFAM;Acc:RF00026]                                                  | 1.492065269 | 0.005349896 | 0.036149116 |
| ENSMMUG00000054072 |                                                                                                | 1.493785236 | 1.26E-06    | 3.39E-05    |
| ENSMMUG00000017627 | B-TFIIID TATA-box binding protein associated factor 1 [Source:VGNC Symbol;Acc:VGNC:70336]      | 1.494084162 | 2.73E-09    | 1.63E-07    |
| ENSMMUG00000001397 | multiple C2 and transmembrane domain containing 1 [Source:VGNC Symbol;Acc:VGNC:74589]          | 1.494478085 | 0.002354386 | 0.019277056 |
| ENSMMUG00000021022 | deoxynucleotidyltransferase terminal interacting protein 1 [Source:VGNC Symbol;Acc:VGNC:71845] | 1.495925995 | 0.002102485 | 0.017719018 |
| ENSMMUG00000008070 | YEATS domain containing 2 [Source:VGNC Symbol;Acc:VGNC:79502]                                  | 1.499501229 | 6.36E-09    | 3.52E-07    |
| ENSMMUG00000017810 | structure specific recognition protein 1 [Source:VGNC Symbol;Acc:VGNC:77891]                   | 1.500432652 | 2.56E-05    | 0.000466866 |
| ENSMMUG00000064052 | CD300 molecule like family member d [Source:NCBI gene;Acc:703142]                              | 1.500435943 | 0.002689685 | 0.021524498 |
| ENSMMUG00000020726 | dihydropyrimidine dehydrogenase [Source:VGNC Symbol;Acc:VGNC:71982]                            | 1.50087436  | 1.54E-06    | 4.00E-05    |
| ENSMMUG00000018237 | plexin C1 [Source:VGNC Symbol;Acc:VGNC:76190]                                                  | 1.502137165 | 3.59E-08    | 1.51E-06    |



|                    |                                                                                                           |             |             |             |
|--------------------|-----------------------------------------------------------------------------------------------------------|-------------|-------------|-------------|
| ENSMMUG00000016438 | protein kinase D3 [Source:VGNC Symbol;Acc:VGNC:76415]                                                     | 1.50448788  | 0.001902569 | 0.016318123 |
| ENSMMUG00000014868 | OCIA domain containing 1 [Source:VGNC Symbol;Acc:VGNC:75409]                                              | 1.506715425 | 0.000951392 | 0.009579502 |
| ENSMMUG00000008218 | ADAMTS like 4 [Source:VGNC Symbol;Acc:VGNC:69480]                                                         | 1.508436379 | 0.003489763 | 0.026132048 |
| ENSMMUG00000000740 | spermatogenesis associated 2 [Source:VGNC Symbol;Acc:VGNC:77923]                                          | 1.509935211 | 0.001278294 | 0.01200866  |
| ENSMMUG00000021988 | N-alpha-acetyltransferase 11, NatA catalytic subunit [Source:NCBI gene;Acc:696758]                        | 1.514403371 | 9.95E-07    | 2.75E-05    |
| ENSMMUG00000000700 | CLN3 lysosomal/endosomal transmembrane protein, battenin [Source:NCBI gene;Acc:705815]                    | 1.515714812 | 1.15E-07    | 4.24E-06    |
| ENSMMUG00000006180 | tetratricopeptide repeat, ankyrin repeat and coiled-coil containing 1 [Source:VGNC Symbol;Acc:VGNC:78238] | 1.515846866 | 8.00E-07    | 2.28E-05    |
| ENSMMUG00000018239 | centrosomal protein 83 [Source:VGNC Symbol;Acc:VGNC:70992]                                                | 1.517964068 | 1.44E-06    | 3.80E-05    |
| ENSMMUG00000058432 | zinc finger DHHC-type palmitoyltransferase 18 [Source:NCBI gene;Acc:719959]                               | 1.51852454  | 1.01E-08    | 5.22E-07    |
| ENSMMUG00000010309 | septin 8 [Source:VGNC Symbol;Acc:VGNC:77248]                                                              | 1.521880766 | 0.006793125 | 0.042878686 |
| ENSMMUG00000021664 | lamin tail domain containing 2 [Source:VGNC Symbol;Acc:VGNC:74380]                                        | 1.522366227 | 1.34E-11    | 1.16E-09    |
| ENSMMUG00000009593 | WAS/WASL interacting protein family member 1 [Source:VGNC Symbol;Acc:VGNC:78784]                          | 1.527755313 | 9.17E-06    | 0.000194353 |
| ENSMMUG00000049234 | ninjurin 2 [Source:NCBI gene;Acc:706368]                                                                  | 1.528240072 | 0.005520265 | 0.036867199 |
| ENSMMUG00000014291 | SPG11 vesicle trafficking associated, spatacsin [Source:VGNC Symbol;Acc:VGNC:77856]                       | 1.530657783 | 3.63E-07    | 1.11E-05    |
| ENSMMUG00000002427 | glucokinase [Source:VGNC Symbol;Acc:VGNC:72901]                                                           | 1.531159969 | 2.63E-07    | 8.41E-06    |
| ENSMMUG00000058137 | zinc finger protein 816 [Source:NCBI gene;Acc:720058]                                                     | 1.533011187 | 0.005580562 | 0.037097026 |
| ENSMMUG00000002423 | DNA polymerase delta 2, accessory subunit [Source:VGNC Symbol;Acc:VGNC:76203]                             | 1.5354594   | 1.08E-06    | 2.96E-05    |
| ENSMMUG00000017256 | calcium voltage-gated channel subunit alpha1 G [Source:VGNC Symbol;Acc:VGNC:70504]                        | 1.535712994 | 2.39E-09    | 1.45E-07    |
| ENSMMUG00000005488 | coronin 1B [Source:VGNC Symbol;Acc:VGNC:71320]                                                            | 1.536078255 | 6.50E-05    | 0.001030166 |
| ENSMMUG00000003484 | tectonin beta-propeller repeat containing 2 [Source:NCBI gene;Acc:708959]                                 | 1.536999741 | 0.000289704 | 0.003633044 |
| ENSMMUG00000058592 |                                                                                                           | 1.542292445 | 0.000798517 | 0.008284955 |
| ENSMMUG00000008253 | zinc finger protein 267 [Source:NCBI gene;Acc:641441]                                                     | 1.544658917 | 3.06E-07    | 9.54E-06    |
| ENSMMUG00000021610 | regulator of G protein signaling 10 [Source:VGNC Symbol;Acc:VGNC:76915]                                   | 1.545640361 | 1.58E-07    | 5.45E-06    |
| ENSMMUG00000013387 | cysteinyl leukotriene receptor 1 [Source:VGNC Symbol;Acc:VGNC:71646]                                      | 1.546109519 | 2.70E-05    | 0.00048871  |
| ENSMMUG00000018485 | methyltransferase like 7A [Source:VGNC Symbol;Acc:VGNC:74567]                                             | 1.546907435 | 0.004424572 | 0.031298492 |
| ENSMMUG00000054158 | acyl-CoA dehydrogenase family member 11 [Source:NCBI gene;Acc:106997118]                                  | 1.547035535 | 9.20E-05    | 0.00139218  |
| ENSMMUG00000057196 | pulmonary surfactant-associated protein A [Source:NCBI gene;Acc:701715]                                   | 1.548873043 | 1.30E-06    | 3.47E-05    |
| ENSMMUG00000011661 | integrin subunit alpha 8 [Source:VGNC Symbol;Acc:VGNC:73782]                                              | 1.550487234 | 8.95E-07    | 2.51E-05    |
| ENSMMUG00000022207 | phospholipid phosphatase related 2 [Source:NCBI gene;Acc:714388]                                          | 1.551431728 | 0.007680429 | 0.047342924 |
| ENSMMUG00000061335 |                                                                                                           | 1.551474662 | 0.001541106 | 0.013877493 |
| ENSMMUG00000003167 | cytohesin 3 [Source:VGNC Symbol;Acc:VGNC:71829]                                                           | 1.552013002 | 0.000154111 | 0.002175279 |
| ENSMMUG00000017189 | regulatory factor X6 [Source:VGNC Symbol;Acc:VGNC:76800]                                                  | 1.552343585 | 7.44E-05    | 0.001158595 |
| ENSMMUG00000010869 | nucleoporin 160 [Source:VGNC Symbol;Acc:VGNC:75429]                                                       | 1.552967671 | 1.28E-05    | 0.000261556 |
| ENSMMUG00000062063 | melanoma-associated antigen 3 [Source:NCBI gene;Acc:711544]                                               | 1.554907164 | 0.000124318 | 0.001807425 |
| ENSMMUG00000032429 | forkhead box O4 [Source:VGNC Symbol;Acc:VGNC:72712]                                                       | 1.555809126 | 4.22E-06    | 0.000101589 |
| ENSMMUG00000007200 | NEDD4 binding protein 2 like 2 [Source:VGNC Symbol;Acc:VGNC:75031]                                        | 1.561350058 | 3.16E-07    | 9.80E-06    |
| ENSMMUG00000000958 | aldo-keto reductase family 1, member C2 [Source:NCBI gene;Acc:711360]                                     | 1.568043128 | 3.42E-08    | 1.44E-06    |
| ENSMMUG00000007423 | transcription factor Dp-1 [Source:NCBI gene;Acc:715345]                                                   | 1.568104446 | 5.58E-05    | 0.000909846 |
| ENSMMUG00000004149 | eukaryotic translation initiation factor 4 gamma 3 [Source:NCBI gene;Acc:717555]                          | 1.568354337 | 3.24E-10    | 2.31E-08    |
| ENSMMUG00000000302 | WD repeat and HMG-box DNA binding protein 1 [Source:VGNC Symbol;Acc:VGNC:79376]                           | 1.56884749  | 2.17E-07    | 7.22E-06    |
| ENSMMUG00000004576 | C-C motif chemokine receptor 3 [Source:VGNC Symbol;Acc:VGNC:70738]                                        | 1.56984877  | 0.00024783  | 0.003181    |
| ENSMMUG00000055976 | CD99 antigen [Source:NCBI gene;Acc:106995376]                                                             | 1.571169059 | 3.22E-05    | 0.000571339 |
| ENSMMUG00000014123 | alanyl-tRNA editing protein Aarsd1 [Source:NCBI gene;Acc:712203]                                          | 1.574470081 | 0.003454465 | 0.025913395 |
| ENSMMUG00000001273 | clathrin binding box of aftiphilin containing 1 [Source:VGNC Symbol;Acc:VGNC:84325]                       | 1.57461663  | 3.07E-07    | 9.54E-06    |
| ENSMMUG00000016797 | tubulin gamma 1 [Source:NCBI gene;Acc:710756]                                                             | 1.575579428 | 1.67E-07    | 5.72E-06    |
| ENSMMUG00000015865 | arginase 2 [Source:VGNC Symbol;Acc:VGNC:70005]                                                            | 1.583110733 | 2.39E-05    | 0.000444105 |
| ENSMMUG00000052780 |                                                                                                           | 1.584826155 | 9.74E-07    | 2.70E-05    |
| ENSMMUG00000046774 | RAS like proto-oncogene B [Source:NCBI gene;Acc:695852]                                                   | 1.586132662 | 1.16E-05    | 0.000240222 |
| ENSMMUG00000020009 | receptor tyrosine kinase like orphan receptor 2 [Source:VGNC Symbol;Acc:VGNC:76716]                       | 1.588144088 | 0.001117887 | 0.010840793 |
| ENSMMUG00000058013 | melanoma-associated antigen 3 [Source:NCBI gene;Acc:706103]                                               | 1.589433423 | 0.00399413  | 0.028988945 |
| ENSMMUG0000004024  | cadherin related family member 5 [Source:VGNC Symbol;Acc:VGNC:71158]                                      | 1.590995136 | 0.000133866 | 0.001924954 |

|                    |                                                                                                                                                      |             |             |             |
|--------------------|------------------------------------------------------------------------------------------------------------------------------------------------------|-------------|-------------|-------------|
| ENSMMUG0000002217  | alkaline phosphatase, biomineralization associated [Source:VGNC Symbol;Acc:VGNC:69801]                                                               | 1.5936914   | 6.43E-09    | 3.54E-07    |
| ENSMMUG0000003098  | peptidase, mitochondrial processing alpha subunit [Source:VGNC Symbol;Acc:VGNC:76062]                                                                | 1.596248535 | 4.27E-07    | 1.29E-05    |
| ENSMMUG00000009414 | Sad1 and UNC84 domain containing 5 [Source:VGNC Symbol;Acc:VGNC:78133]                                                                               | 1.59756512  | 0.001101092 | 0.01071179  |
| ENSMMUG00000007422 | spermatogenesis associated 5 [Source:VGNC Symbol;Acc:VGNC:77952]                                                                                     | 1.598340244 | 5.95E-08    | 2.36E-06    |
| ENSMMUG00000050608 |                                                                                                                                                      | 1.598438478 | 8.73E-06    | 0.000186947 |
| ENSMMUG00000001761 | myosin IB [Source:VGNC Symbol;Acc:VGNC:75111]                                                                                                        | 1.599489726 | 2.35E-07    | 7.68E-06    |
| ENSMMUG00000053013 |                                                                                                                                                      | 1.60460544  | 6.86E-05    | 0.001077562 |
| ENSMMUG00000023282 | aldo-keto reductase family 1, member C1 (dihydrodiol dehydrogenase 1; 20-alpha (3-alpha)-hydroxysteroid dehydrogenase) [Source:NCBI gene;Acc:711198] | 1.605472586 | 6.00E-07    | 1.76E-05    |
| ENSMMUG00000038067 |                                                                                                                                                      | 1.606260005 | 0.002218858 | 0.018363442 |
| ENSMMUG00000022247 | osteoclastogenesis associated transmembrane protein 1 [Source:VGNC Symbol;Acc:VGNC:75664]                                                            | 1.609065687 | 0.000226543 | 0.0029489   |
| ENSMMUG00000002411 | drebrin like [Source:NCBI gene;Acc:720621]                                                                                                           | 1.612020312 | 1.83E-08    | 8.69E-07    |
| ENSMMUG00000020799 | BH3 interacting domain death agonist [Source:VGNC Symbol;Acc:VGNC:70250]                                                                             | 1.612987477 | 0.002398413 | 0.019585266 |
| ENSMMUG00000016448 | DLG associated protein 4 [Source:NCBI gene;Acc:702928]                                                                                               | 1.614159183 | 6.34E-07    | 1.85E-05    |
| ENSMMUG00000012526 | glycosyltransferase 8 domain containing 1 [Source:VGNC Symbol;Acc:VGNC:73001]                                                                        | 1.614615783 | 7.40E-08    | 2.86E-06    |
| ENSMMUG00000060502 |                                                                                                                                                      | 1.615953789 | 0.000155106 | 0.002182626 |
| ENSMMUG00000060795 |                                                                                                                                                      | 1.6190381   | 0.007555852 | 0.046637493 |
| ENSMMUG00000000421 | nuclear receptor subfamily 3 group C member 1 [Source:VGNC Symbol;Acc:VGNC:75515]                                                                    | 1.62248375  | 4.18E-10    | 2.94E-08    |
| ENSMMUG00000005666 | phospholipase D2 [Source:VGNC Symbol;Acc:VGNC:76172]                                                                                                 | 1.622534676 | 3.10E-06    | 7.73E-05    |
| ENSMMUG00000052777 |                                                                                                                                                      | 1.626654181 | 0.002831113 | 0.022307131 |
| ENSMMUG00000011789 | hematopoietically expressed homeobox [Source:VGNC Symbol;Acc:VGNC:73376]                                                                             | 1.627058119 | 0.000434232 | 0.005084268 |
| ENSMMUG00000010313 | kinesin family member 3A [Source:VGNC Symbol;Acc:VGNC:74017]                                                                                         | 1.633878192 | 1.22E-08    | 6.07E-07    |
| ENSMMUG00000050549 | lysyl oxidase like 2 [Source:NCBI gene;Acc:710151]                                                                                                   | 1.638497323 | 3.26E-08    | 1.41E-06    |
| ENSMMUG00000052891 |                                                                                                                                                      | 1.643393098 | 0.00044015  | 0.005133966 |
| ENSMMUG00000065054 | G protein subunit gamma 7 [Source:NCBI gene;Acc:711335]                                                                                              | 1.64376968  | 7.82E-06    | 0.00017092  |
| ENSMMUG00000006093 | enhancer of zeste 1 polycomb repressive complex 2 subunit [Source:VGNC Symbol;Acc:VGNC:72457]                                                        | 1.644236776 | 2.45E-07    | 7.94E-06    |
| ENSMMUG00000010028 | leucine zipper tumor suppressor family member 3 [Source:VGNC Symbol;Acc:VGNC:74403]                                                                  | 1.644565558 | 9.41E-07    | 2.63E-05    |
| ENSMMUG00000055897 |                                                                                                                                                      | 1.646926466 | 3.19E-07    | 9.85E-06    |
| ENSMMUG00000057687 |                                                                                                                                                      | 1.648568864 | 4.46E-07    | 1.34E-05    |
| ENSMMUG00000058928 | Metazoan signal recognition particle RNA [Source:RFAM;Acc:RF00017]                                                                                   | 1.648718671 | 8.96E-05    | 0.001360628 |
| ENSMMUG00000010824 | SWIM-type zinc finger 7 associated protein 1 [Source:VGNC Symbol;Acc:VGNC:78220]                                                                     | 1.651869154 | 0.004364329 | 0.030967554 |
| ENSMMUG00000002536 | calcium binding protein 1 [Source:VGNC Symbol;Acc:VGNC:70495]                                                                                        | 1.653828743 | 0.000200347 | 0.002652947 |
| ENSMMUG00000017036 | nicalin [Source:VGNC Symbol;Acc:VGNC:75032]                                                                                                          | 1.654126335 | 0.001208171 | 0.011522069 |
| ENSMMUG00000003833 | Ras association domain family member 6 [Source:VGNC Symbol;Acc:VGNC:76515]                                                                           | 1.658869425 | 0.003257753 | 0.024839354 |
| ENSMMUG00000002422 | AE binding protein 1 [Source:VGNC Symbol;Acc:VGNC:80328]                                                                                             | 1.661507176 | 3.69E-05    | 0.000639006 |
| ENSMMUG00000054568 |                                                                                                                                                      | 1.661884973 | 0.002526057 | 0.02039237  |
| ENSMMUG00000060576 |                                                                                                                                                      | 1.663037265 | 6.16E-06    | 0.000137998 |
| ENSMMUG00000013713 | beta 3-glucosyltransferase [Source:NCBI gene;Acc:713498]                                                                                             | 1.663194168 | 0.003341359 | 0.025291995 |
| ENSMMUG00000058566 |                                                                                                                                                      | 1.666047034 | 7.65E-09    | 4.07E-07    |
| ENSMMUG00000055775 | transmembrane p24 trafficking protein 1 [Source:NCBI gene;Acc:713618]                                                                                | 1.669760309 | 1.73E-07    | 5.91E-06    |
| ENSMMUG00000004512 | Fc fragment of IgE receptor Ig [Source:VGNC Symbol;Acc:VGNC:72629]                                                                                   | 1.670450357 | 0.005336062 | 0.036082132 |
| ENSMMUG00000064173 | prokineticin 1 [Source:NCBI gene;Acc:701766]                                                                                                         | 1.670627213 | 0.00718     | 0.04479408  |
| ENSMMUG00000009559 | minichromosome maintenance complex binding protein [Source:VGNC Symbol;Acc:VGNC:74583]                                                               | 1.673756108 | 0.003333513 | 0.025270444 |
| ENSMMUG00000000644 | centrosomal protein 85 [Source:VGNC Symbol;Acc:VGNC:71096]                                                                                           | 1.676233387 | 0.000270171 | 0.003429491 |
| ENSMMUG00000057361 | Metazoan signal recognition particle RNA [Source:RFAM;Acc:RF00017]                                                                                   | 1.677691695 | 0.001803958 | 0.015603221 |
| ENSMMUG00000006091 | contactin associated protein 1 [Source:VGNC Symbol;Acc:VGNC:71390]                                                                                   | 1.678675803 | 5.61E-07    | 1.67E-05    |
| ENSMMUG00000017501 | N-acylethanolamine acid amidase [Source:VGNC Symbol;Acc:VGNC:75068]                                                                                  | 1.679031813 | 0.003073999 | 0.02371334  |
| ENSMMUG00000021436 | latent transforming growth factor beta binding protein 1 [Source:VGNC Symbol;Acc:VGNC:74456]                                                         | 1.683769106 | 0.000913354 | 0.009257268 |
| ENSMMUG00000045513 |                                                                                                                                                      | 1.684375979 | 0.002724752 | 0.021706086 |
| ENSMMUG00000002886 | Bardet-Biedl syndrome 9 [Source:NCBI gene;Acc:708412]                                                                                                | 1.690196015 | 1.40E-05    | 0.000281789 |
| ENSMMUG00000016582 | chromosome 1 C1orf112 homolog [Source:VGNC Symbol;Acc:VGNC:70385]                                                                                    | 1.691583023 | 0.000126252 | 0.001829766 |



|                    |                                                                                        |             |             |             |
|--------------------|----------------------------------------------------------------------------------------|-------------|-------------|-------------|
| ENSMMUG00000014897 | ribonucleoprotein, PTB binding 1 [Source:NCBI gene;Acc:715250]                         | 1.691594426 | 0.000146739 | 0.002100217 |
| ENSMMUG00000063622 | mitochondrial ribosomal protein S26 [Source:NCBI gene;Acc:717038]                      | 1.693256161 | 0.003783912 | 0.027814168 |
| ENSMMUG00000018932 | adhesion G protein-coupled receptor E2 [Source:NCBI gene;Acc:654420]                   | 1.694666723 | 9.45E-16    | 1.93E-13    |
| ENSMMUG00000000706 | filamin B [Source:VGNC Symbol;Acc:VGNC:72672]                                          | 1.697836363 | 5.37E-11    | 4.30E-09    |
| ENSMMUG00000004797 | CTP synthase 2 [Source:VGNC Symbol;Acc:VGNC:71550]                                     | 1.7010435   | 0.002873423 | 0.022582501 |
| ENSMMUG00000014876 | nucleolus and neural progenitor protein [Source:VGNC Symbol;Acc:VGNC:75244]            | 1.702502372 | 0.000527079 | 0.005937217 |
| ENSMMUG00000061098 |                                                                                        | 1.704908705 | 2.27E-11    | 1.94E-09    |
| ENSMMUG00000014699 |                                                                                        | 1.708956048 | 1.11E-15    | 2.18E-13    |
| ENSMMUG00000023449 | mitofusin 2 [Source:VGNC Symbol;Acc:VGNC:74522]                                        | 1.709667089 | 0.007981881 | 0.048873754 |
| ENSMMUG00000023335 | ring finger protein 13 [Source:VGNC Symbol;Acc:VGNC:81557]                             | 1.714304376 | 5.72E-05    | 0.000926167 |
| ENSMMUG00000048621 | enolase-phosphatase 1 [Source:NCBI gene;Acc:106998330]                                 | 1.717622519 | 3.41E-08    | 1.44E-06    |
| ENSMMUG00000004103 | collagen type XI alpha 1 chain [Source:VGNC Symbol;Acc:VGNC:71289]                     | 1.718567253 | 6.70E-12    | 6.20E-10    |
| ENSMMUG00000063898 | apolipoprotein F [Source:NCBI gene;Acc:712761]                                         | 1.718829388 | 0.001384553 | 0.01274204  |
| ENSMMUG00000001702 | succinyl-CoA:glutarate-CoA transferase [Source:VGNC Symbol;Acc:VGNC:81767]             | 1.721448494 | 2.01E-08    | 9.38E-07    |
| ENSMMUG00000043134 | coiled-coil domain containing 159 [Source:NCBI gene;Acc:100424702]                     | 1.722118171 | 0.003233804 | 0.024718187 |
| ENSMMUG00000020683 | RNA binding motif protein 22 [Source:VGNC Symbol;Acc:VGNC:76535]                       | 1.722120382 | 1.32E-05    | 0.000265673 |
| ENSMMUG00000004022 | zinc finger SWIM-type containing 2 [Source:VGNC Symbol;Acc:VGNC:79908]                 | 1.724375592 | 6.65E-06    | 0.000147411 |
| ENSMMUG00000062326 |                                                                                        | 1.72702824  | 0.000289759 | 0.003633044 |
| ENSMMUG00000003819 | nitric oxide synthase interacting protein [Source:VGNC Symbol;Acc:VGNC:75207]          | 1.728891889 | 9.64E-05    | 0.001435094 |
| ENSMMUG00000055811 |                                                                                        | 1.730196416 | 5.02E-05    | 0.000835921 |
| ENSMMUG00000060289 |                                                                                        | 1.730222816 | 1.96E-13    | 2.31E-11    |
| ENSMMUG00000021039 | X-ray radiation resistance associated 1 [Source:NCBI gene;Acc:693788]                  | 1.733011597 | 0.000585699 | 0.006378415 |
| ENSMMUG00000006836 | chloride channel accessory 1 [Source:NCBI gene;Acc:574295]                             | 1.733842246 | 0.001356534 | 0.012597557 |
| ENSMMUG00000000649 | UBX domain protein 11 [Source:VGNC Symbol;Acc:VGNC:79859]                              | 1.734330908 | 0.000351652 | 0.004269467 |
| ENSMMUG00000012356 | serpin family A member 9 [Source:VGNC Symbol;Acc:VGNC:77241]                           | 1.737887263 | 8.98E-05    | 0.00136172  |
| ENSMMUG00000004668 | receptor tyrosine kinase like orphan receptor 1 [Source:VGNC Symbol;Acc:VGNC:76715]    | 1.739249319 | 4.67E-06    | 0.000109907 |
| ENSMMUG00000006766 | RUN domain containing 3B [Source:VGNC Symbol;Acc:VGNC:77129]                           | 1.746318944 | 8.89E-07    | 2.51E-05    |
| ENSMMUG00000015744 | zinc finger protein 302 [Source:NCBI gene;Acc:706279]                                  | 1.746844764 | 6.21E-07    | 1.82E-05    |
| ENSMMUG00000006997 | thioredoxin domain containing 16 [Source:VGNC Symbol;Acc:VGNC:79214]                   | 1.747575988 | 2.53E-11    | 2.12E-09    |
| ENSMMUG00000019418 | erythrocyte membrane protein band 4.1 like 3 [Source:VGNC Symbol;Acc:VGNC:72233]       | 1.754542833 | 1.30E-10    | 9.60E-09    |
| ENSMMUG00000060761 |                                                                                        | 1.757914401 | 1.34E-11    | 1.16E-09    |
| ENSMMUG00000005070 | ecotropic viral integration site 5 [Source:NCBI gene;Acc:706592]                       | 1.761878717 | 9.46E-05    | 0.001422604 |
| ENSMMUG00000003568 | testis expressed 101 [Source:VGNC Symbol;Acc:VGNC:79869]                               | 1.762071095 | 0.000160878 | 0.002250092 |
| ENSMMUG00000004222 | thromboxane A synthase 1 [Source:VGNC Symbol;Acc:VGNC:78278]                           | 1.765096257 | 1.17E-06    | 3.19E-05    |
| ENSMMUG00000055963 |                                                                                        | 1.7688957   | 1.51E-05    | 0.000299606 |
| ENSMMUG00000012635 | zyxin [Source:VGNC Symbol;Acc:VGNC:78917]                                              | 1.773694887 | 1.18E-08    | 5.91E-07    |
| ENSMMUG00000003133 | interleukin 4 [Source:VGNC Symbol;Acc:VGNC:73729]                                      | 1.773824766 | 0.00765671  | 0.047228353 |
| ENSMMUG00000003684 | ATPase phospholipid transporting 8B4 (putative) [Source:VGNC Symbol;Acc:VGNC:84311]    | 1.777767694 | 4.34E-06    | 0.000103495 |
| ENSMMUG00000014265 | TAP binding protein like [Source:NCBI gene;Acc:712626]                                 | 1.784735021 | 0.000297068 | 0.003714566 |
| ENSMMUG00000054473 | activating transcription factor 5 [Source:NCBI gene;Acc:719150]                        | 1.786968036 | 2.20E-05    | 0.00041319  |
| ENSMMUG00000061896 |                                                                                        | 1.78744145  | 0.001216918 | 0.011569518 |
| ENSMMUG00000060273 | mitochondrial ribosomal protein L32 [Source:NCBI gene;Acc:701820]                      | 1.788142233 | 6.91E-07    | 1.99E-05    |
| ENSMMUG00000011427 | syntaxin 10 [Source:VGNC Symbol;Acc:VGNC:78040]                                        | 1.791237339 | 5.11E-14    | 7.24E-12    |
| ENSMMUG00000020980 | ubiquitin like modifier activating enzyme 7 [Source:VGNC Symbol;Acc:VGNC:78690]        | 1.79252426  | 3.40E-07    | 1.05E-05    |
| ENSMMUG00000050405 |                                                                                        | 1.794771889 | 0.000182694 | 0.002486604 |
| ENSMMUG00000006929 | ST3 beta-galactoside alpha-2,3-sialyltransferase 4 [Source:VGNC Symbol;Acc:VGNC:77827] | 1.800913207 | 1.04E-08    | 5.30E-07    |
| ENSMMUG00000008518 | phospholipid phosphatase related 5 [Source:NCBI gene;Acc:710549]                       | 1.802103786 | 1.54E-06    | 4.00E-05    |
| ENSMMUG00000023192 | choline kinase alpha [Source:VGNC Symbol;Acc:VGNC:71039]                               | 1.804331752 | 0.004748053 | 0.033003268 |
| ENSMMUG00000008474 | transforming growth factor beta regulator 1 [Source:VGNC Symbol;Acc:VGNC:78239]        | 1.806832534 | 0.004067045 | 0.029402214 |
| ENSMMUG00000061424 | ventral anterior homeobox 2 [Source:NCBI gene;Acc:703531]                              | 1.814587096 | 0.000185915 | 0.002519851 |
| ENSMMUG00000011332 | Rho GTPase activating protein 35 [Source:VGNC Symbol;Acc:VGNC:69942]                   | 1.816962077 | 1.21E-05    | 0.000248232 |



|                    |                                                                                                      |             |             |             |
|--------------------|------------------------------------------------------------------------------------------------------|-------------|-------------|-------------|
| ENSMMUG0000009788  | tubulin alpha-1C chain [Source:NCBI gene;Acc:710110]                                                 | 1.819444524 | 0.000380983 | 0.004541698 |
| ENSMMUG0000000419  | Rho GTPase activating protein 26 [Source:VGNC Symbol;Acc:VGNC:69846]                                 | 1.821101051 | 3.82E-05    | 0.000658809 |
| ENSMMUG00000018790 | activin A receptor type 2B [Source:VGNC Symbol;Acc:VGNC:69450]                                       | 1.821751287 | 1.28E-08    | 6.33E-07    |
| ENSMMUG00000064824 | gremlin 2, DAN family BMP antagonist [Source:NCBI gene;Acc:708280]                                   | 1.826231965 | 0.002352821 | 0.019277056 |
| ENSMMUG00000008387 | dipeptidyl peptidase 4 [Source:VGNC Symbol;Acc:VGNC:71979]                                           | 1.827977824 | 1.35E-08    | 6.60E-07    |
| ENSMMUG00000053481 |                                                                                                      | 1.830494165 | 0.000192146 | 0.002577727 |
| ENSMMUG00000023477 |                                                                                                      | 1.837671339 | 1.68E-13    | 2.03E-11    |
| ENSMMUG00000007538 | transient receptor potential cation channel subfamily M member 4 [Source:VGNC Symbol;Acc:VGNC:79105] | 1.840657605 | 1.34E-08    | 6.60E-07    |
| ENSMMUG00000062863 |                                                                                                      | 1.847371554 | 0.000249398 | 0.00319223  |
| ENSMMUG00000049494 |                                                                                                      | 1.852906505 | 0.006278176 | 0.040489178 |
| ENSMMUG00000004042 | Fc receptor like A [Source:VGNC Symbol;Acc:VGNC:72526]                                               | 1.864578073 | 0.003341852 | 0.025291995 |
| ENSMMUG00000003217 | transmembrane 7 superfamily member 3 [Source:VGNC Symbol;Acc:VGNC:79371]                             | 1.867987741 | 2.02E-07    | 6.75E-06    |
| ENSMMUG00000005297 | proline rich coiled-coil 2A [Source:VGNC Symbol;Acc:VGNC:83448]                                      | 1.871505523 | 2.96E-11    | 2.45E-09    |
| ENSMMUG00000002950 | transferrin receptor 2 [Source:VGNC Symbol;Acc:VGNC:81770]                                           | 1.875286282 | 1.16E-09    | 7.65E-08    |
| ENSMMUG00000012178 | calcium binding and coiled-coil domain 2 [Source:VGNC Symbol;Acc:VGNC:70675]                         | 1.876507578 | 4.56E-08    | 1.87E-06    |
| ENSMMUG00000012944 | vascular endothelial growth factor B [Source:VGNC Symbol;Acc:VGNC:78765]                             | 1.878889505 | 3.45E-11    | 2.84E-09    |
| ENSMMUG00000063759 | transmembrane protein 185B [Source:NCBI gene;Acc:695744]                                             | 1.879897745 | 5.67E-13    | 6.45E-11    |
| ENSMMUG00000051201 | zinc finger SWIM-type containing 3 [Source:NCBI gene;Acc:708804]                                     | 1.880899767 | 1.35E-09    | 8.87E-08    |
| ENSMMUG00000018345 | phosphatidylethanolamine binding protein 4 [Source:VGNC Symbol;Acc:VGNC:82204]                       | 1.881619381 | 5.16E-09    | 2.93E-07    |
| ENSMMUG00000006659 | aldehyde dehydrogenase 1 family member A3 [Source:VGNC Symbol;Acc:VGNC:81353]                        | 1.88320905  | 0.001560738 | 0.013985858 |
| ENSMMUG00000001725 | solute carrier family 35 member A4 [Source:VGNC Symbol;Acc:VGNC:77532]                               | 1.887462114 | 0.000110959 | 0.001633855 |
| ENSMMUG00000010526 | calcium voltage-gated channel auxiliary subunit beta 4 [Source:VGNC Symbol;Acc:VGNC:82116]           | 1.891470032 | 0.004371617 | 0.030971509 |
| ENSMMUG00000056522 |                                                                                                      | 1.902692799 | 0.00105732  | 0.010418107 |
| ENSMMUG00000056266 | Metazoan signal recognition particle RNA [Source:RFAM;Acc:RF00017]                                   | 1.904823205 | 0.002817685 | 0.022239415 |
| ENSMMUG00000053516 |                                                                                                      | 1.90885799  | 0.001864187 | 0.016018782 |
| ENSMMUG00000007528 | chordin [Source:VGNC Symbol;Acc:VGNC:71042]                                                          | 1.90940763  | 0.000185852 | 0.002519851 |
| ENSMMUG00000016678 | Rho associated coiled-coil containing protein kinase 2 [Source:VGNC Symbol;Acc:VGNC:76714]           | 1.912337078 | 1.20E-07    | 4.38E-06    |
| ENSMMUG00000012941 | nudix hydrolase 22 [Source:VGNC Symbol;Acc:VGNC:75475]                                               | 1.916137113 | 6.74E-12    | 6.20E-10    |
| ENSMMUG00000006738 | L3MBTL histone methyl-lysine binding protein 1 [Source:NCBI gene;Acc:695694]                         | 1.917247105 | 3.93E-11    | 3.17E-09    |
| ENSMMUG00000060063 |                                                                                                      | 1.923912634 | 3.29E-08    | 1.41E-06    |
| ENSMMUG00000054414 |                                                                                                      | 1.925163544 | 0.000182021 | 0.002481683 |
| ENSMMUG00000051925 |                                                                                                      | 1.928519724 | 0.002342986 | 0.019235061 |
| ENSMMUG00000019070 | focadhesin [Source:VGNC Symbol;Acc:VGNC:72556]                                                       | 1.929902287 | 2.45E-09    | 1.47E-07    |
| ENSMMUG00000046417 | chromobox 2 [Source:NCBI gene;Acc:717462]                                                            | 1.936246058 | 0.000622163 | 0.006670638 |
| ENSMMUG00000000951 | integrin subunit beta 2 [Source:VGNC Symbol;Acc:VGNC:73786]                                          | 1.944824326 | 2.05E-13    | 2.38E-11    |
| ENSMMUG00000016327 | coiled-coil domain containing 107 [Source:VGNC Symbol;Acc:VGNC:70656]                                | 1.946712259 | 3.12E-15    | 5.32E-13    |
| ENSMMUG00000055018 | sushi domain containing 6 [Source:NCBI gene;Acc:712719]                                              | 1.949883348 | 4.74E-09    | 2.74E-07    |
| ENSMMUG00000059182 |                                                                                                      | 1.954758821 | 3.45E-06    | 8.51E-05    |
| ENSMMUG00000014530 | pre-mRNA processing factor 19 [Source:VGNC Symbol;Acc:VGNC:76281]                                    | 1.955321302 | 1.17E-10    | 8.75E-09    |
| ENSMMUG00000038524 | olfactory receptor 2M4 [Source:NCBI gene;Acc:100424541]                                              | 1.955624945 | 5.68E-14    | 7.80E-12    |
| ENSMMUG00000010466 | solute carrier family 38 member 9 [Source:VGNC Symbol;Acc:VGNC:77574]                                | 1.965039375 | 4.83E-12    | 4.63E-10    |
| ENSMMUG00000002376 | scavenger receptor class F member 1 [Source:VGNC Symbol;Acc:VGNC:77027]                              | 1.965310007 | 0.000485164 | 0.005567285 |
| ENSMMUG00000010451 | inositol polyphosphate phosphatase like 1 [Source:VGNC Symbol;Acc:VGNC:73752]                        | 1.966422261 | 0.008016981 | 0.048937565 |
| ENSMMUG00000059374 |                                                                                                      | 1.970049315 | 0.004854567 | 0.033564486 |
| ENSMMUG00000006468 | FGFR1 oncogene partner 2 [Source:VGNC Symbol;Acc:VGNC:72551]                                         | 1.970758937 | 3.42E-05    | 0.000602207 |
| ENSMMUG00000058536 |                                                                                                      | 1.974741252 | 2.66E-08    | 1.20E-06    |
| ENSMMUG00000020186 | solute carrier family 20 member 2 [Source:VGNC Symbol;Acc:VGNC:77416]                                | 1.975793454 | 0.003055003 | 0.023586575 |
| ENSMMUG00000050868 |                                                                                                      | 1.976383063 | 5.02E-08    | 2.02E-06    |
| ENSMMUG00000013330 | ectonucleoside triphosphate diphosphohydrolase 3 [Source:VGNC Symbol;Acc:VGNC:72226]                 | 1.976936673 | 2.97E-06    | 7.47E-05    |
| ENSMMUG00000016323 | Rho guanine nucleotide exchange factor 39 [Source:VGNC Symbol;Acc:VGNC:69912]                        | 1.977829535 | 1.00E-17    | 2.72E-15    |
| ENSMMUG00000014237 | lysine methyltransferase 5B [Source:VGNC Symbol;Acc:VGNC:74110]                                      | 1.977949588 | 1.72E-12    | 1.74E-10    |

|                    |                                                                                                                  |             |             |             |
|--------------------|------------------------------------------------------------------------------------------------------------------|-------------|-------------|-------------|
| ENSMMUG00000061684 |                                                                                                                  | 1.985245679 | 0.002080866 | 0.017601296 |
| ENSMMUG00000001707 | amyloid beta precursor protein binding family B member 3 [Source:VGNC Symbol;Acc:VGNC:69869]                     | 1.985631302 | 8.66E-11    | 6.70E-09    |
| ENSMMUG00000050585 |                                                                                                                  | 1.986988281 | 2.90E-08    | 1.28E-06    |
| ENSMMUG00000014715 | fragile site, folic acid type, rare, fra(10)(q23.3) or fra(10)(q24.2) candidate 1 [Source:NCBI gene;Acc:700389]  | 1.988767247 | 0.000113511 | 0.00166344  |
| ENSMMUG00000009960 | cathepsin A [Source:VGNC Symbol;Acc:VGNC:71617]                                                                  | 1.993133825 | 2.62E-08    | 1.19E-06    |
| ENSMMUG00000003131 | interleukin 13 [Source:VGNC Symbol;Acc:VGNC:84393]                                                               | 1.994290261 | 2.70E-06    | 6.83E-05    |
| ENSMMUG00000023816 | semaphorin 4B [Source:VGNC Symbol;Acc:VGNC:77165]                                                                | 1.996722732 | 3.13E-12    | 3.10E-10    |
| ENSMMUG00000029034 | defensin beta 136 [Source:VGNC Symbol;Acc:VGNC:71826]                                                            | 2.002708006 | 0.00054433  | 0.006079454 |
| ENSMMUG00000003572 | nicotinamide phosphoribosyltransferase [Source:VGNC Symbol;Acc:VGNC:75056]                                       | 2.004524565 | 4.22E-08    | 1.74E-06    |
| ENSMMUG00000009988 | transmembrane protein 59 like [Source:VGNC Symbol;Acc:VGNC:78919]                                                | 2.005774736 | 4.80E-12    | 4.63E-10    |
| ENSMMUG00000053106 |                                                                                                                  | 2.00640944  | 5.49E-06    | 0.00012591  |
| ENSMMUG00000065247 | opioid receptor kappa 1 [Source:NCBI gene;Acc:710783]                                                            | 2.008033591 | 1.63E-08    | 7.86E-07    |
| ENSMMUG00000056376 |                                                                                                                  | 2.009137018 | 1.46E-05    | 0.000290691 |
| ENSMMUG00000003348 | neurofilament light [Source:VGNC Symbol;Acc:VGNC:75307]                                                          | 2.018427651 | 1.06E-10    | 8.04E-09    |
| ENSMMUG00000049021 | Metazoan signal recognition particle RNA [Source:RFAM;Acc:RF00017]                                               | 2.019815908 | 0.001758218 | 0.015264979 |
| ENSMMUG00000043675 | Cbp/p300 interacting transactivator with Glu/Asp rich carboxy-terminal domain 4 [Source:NCBI gene;Acc:114672840] | 2.028582971 | 1.85E-08    | 8.73E-07    |
| ENSMMUG00000020462 | CD300e molecule [Source:NCBI gene;Acc:114673189]                                                                 | 2.035846965 | 0.000834262 | 0.008578452 |
| ENSMMUG00000064707 |                                                                                                                  | 2.037809997 | 1.27E-05    | 0.000259657 |
| ENSMMUG00000011513 | versican [Source:VGNC Symbol;Acc:VGNC:79445]                                                                     | 2.044935364 | 5.94E-15    | 9.59E-13    |
| ENSMMUG00000050465 | ZFP42 zinc finger protein [Source:NCBI gene;Acc:707621]                                                          | 2.049122997 | 6.38E-05    | 0.001016009 |
| ENSMMUG00000053324 | lymphocyte antigen 6 complex locus protein G6d [Source:NCBI gene;Acc:715304]                                     | 2.049302843 | 2.71E-08    | 1.21E-06    |
| ENSMMUG00000063868 | Metazoan signal recognition particle RNA [Source:RFAM;Acc:RF00017]                                               | 2.057393594 | 0.003715238 | 0.027374965 |
| ENSMMUG00000017056 | Sad1 and UNC84 domain containing 1 [Source:VGNC Symbol;Acc:VGNC:78161]                                           | 2.060059175 | 0.001368956 | 0.012661811 |
| ENSMMUG00000001475 | transmembrane protein with EGF like and two follistatin like domains 2 [Source:VGNC Symbol;Acc:VGNC:78569]       | 2.061125413 | 0.003373571 | 0.025449872 |
| ENSMMUG00000012787 | acid phosphatase 7, tartrate resistant (putative) [Source:NCBI gene;Acc:695532]                                  | 2.061842751 | 0.004684019 | 0.032656838 |
| ENSMMUG00000064463 |                                                                                                                  | 2.062286596 | 0.006319337 | 0.040640715 |
| ENSMMUG00000008923 | Thy-1 cell surface antigen [Source:VGNC Symbol;Acc:VGNC:78352]                                                   | 2.066250509 | 5.77E-08    | 2.30E-06    |
| ENSMMUG00000001350 | HERPUD family member 2 [Source:VGNC Symbol;Acc:VGNC:73216]                                                       | 2.06840522  | 5.43E-09    | 3.07E-07    |
| ENSMMUG00000049735 | allograft inflammatory factor 1 [Source:NCBI gene;Acc:574115]                                                    | 2.072504958 | 5.06E-09    | 2.90E-07    |
| ENSMMUG00000001753 | integrin subunit alpha 1 [Source:VGNC Symbol;Acc:VGNC:73772]                                                     | 2.077676792 | 1.10E-08    | 5.56E-07    |
| ENSMMUG00000028948 | azurocidin 1 [Source:VGNC Symbol;Acc:VGNC:70202]                                                                 | 2.085568918 | 0.004175395 | 0.029926918 |
| ENSMMUG00000015693 | lymphocyte antigen 6 family member G6C [Source:VGNC Symbol;Acc:VGNC:74285]                                       | 2.087778349 | 0.000568435 | 0.006295199 |
| ENSMMUG00000031534 | ankyrin repeat and ubiquitin domain containing 1 [Source:VGNC Symbol;Acc:VGNC:84239]                             | 2.090472667 | 5.91E-12    | 5.55E-10    |
| ENSMMUG00000058176 | b-defensin2-like [Source:NCBI gene;Acc:100169969]                                                                | 2.091082861 | 7.57E-09    | 4.05E-07    |
| ENSMMUG00000009564 | NMD3 ribosome export adaptor [Source:VGNC Symbol;Acc:VGNC:75242]                                                 | 2.092433912 | 0.001200056 | 0.011459929 |
| ENSMMUG00000056024 |                                                                                                                  | 2.093156543 | 2.19E-10    | 1.59E-08    |
| ENSMMUG00000014240 | thioredoxin domain containing 11 [Source:VGNC Symbol;Acc:VGNC:79678]                                             | 2.098284075 | 0.001004224 | 0.010032547 |
| ENSMMUG00000001151 | microtubule associated scaffold protein 1 [Source:VGNC Symbol;Acc:VGNC:84018]                                    | 2.099148413 | 1.36E-15    | 2.56E-13    |
| ENSMMUG00000028733 | RAS related [Source:VGNC Symbol;Acc:VGNC:76937]                                                                  | 2.099546421 | 1.01E-05    | 0.000210853 |
| ENSMMUG00000062996 |                                                                                                                  | 2.102781314 | 0.006380482 | 0.040995672 |
| ENSMMUG00000009441 | abhydrolase domain containing 4 [Source:VGNC Symbol;Acc:VGNC:84296]                                              | 2.108675695 | 2.70E-05    | 0.00048871  |
| ENSMMUG00000045093 | cyclin B3 [Source:NCBI gene;Acc:694534]                                                                          | 2.112476966 | 1.56E-07    | 5.42E-06    |
| ENSMMUG00000013644 | potassium two pore domain channel subfamily K member 17 [Source:VGNC Symbol;Acc:VGNC:73828]                      | 2.11512895  | 1.74E-05    | 0.000338412 |
| ENSMMUG00000010314 | HECT and RLD domain containing E3 ubiquitin protein ligase family member 6 [Source:VGNC Symbol;Acc:VGNC:73238]   | 2.118773498 | 1.15E-08    | 5.77E-07    |
| ENSMMUG00000037175 | U6 spliceosomal RNA [Source:RFAM;Acc:RF00026]                                                                    | 2.119036743 | 0.001985542 | 0.016950781 |
| ENSMMUG00000016579 | selectin L [Source:NCBI gene;Acc:701419]                                                                         | 2.120872976 | 3.78E-17    | 9.41E-15    |
| ENSMMUG00000012697 | AT-rich interaction domain 1A [Source:VGNC Symbol;Acc:VGNC:69822]                                                | 2.122922988 | 6.29E-08    | 2.47E-06    |
| ENSMMUG00000017758 | mitogen-activated protein kinase 3 [Source:VGNC Symbol;Acc:VGNC:74646]                                           | 2.131653726 | 8.43E-08    | 3.23E-06    |
| ENSMMUG00000039009 |                                                                                                                  | 2.133016105 | 0.000361077 | 0.004343775 |
| ENSMMUG00000023479 | latent transforming growth factor beta binding protein 3 [Source:VGNC Symbol;Acc:VGNC:74458]                     | 2.133475984 | 1.90E-15    | 3.50E-13    |
| ENSMMUG00000019363 | synapse associated protein 1 [Source:VGNC Symbol;Acc:VGNC:78135]                                                 | 2.13376449  | 0.000429457 | 0.005034763 |



|                    |                                                                                             |             |             |             |
|--------------------|---------------------------------------------------------------------------------------------|-------------|-------------|-------------|
| ENSMMUG00000059318 | urocortin 2 [Source:NCBI gene;Acc:106996925]                                                | 2.133771068 | 9.66E-15    | 1.51E-12    |
| ENSMMUG00000001545 | aquaporin 7 [Source:NCBI gene;Acc:702836]                                                   | 2.13895866  | 0.000170944 | 0.002358623 |
| ENSMMUG00000040393 | zinc finger protein 655 [Source:NCBI gene;Acc:718811]                                       | 2.140729384 | 0.001033537 | 0.010246444 |
| ENSMMUG00000024234 | U6 spliceosomal RNA [Source:RFAM;Acc:RF00026]                                               | 2.141537956 | 9.54E-10    | 6.36E-08    |
| ENSMMUG00000014273 | cation channel sperm associated auxiliary subunit gamma [Source:VGNC Symbol;Acc:VGNC:70626] | 2.147405186 | 0.00677904  | 0.042848564 |
| ENSMMUG00000004794 | DNA ligase 3 [Source:VGNC Symbol;Acc:VGNC:74266]                                            | 2.154647912 | 0.000308466 | 0.00381561  |
| ENSMMUG00000020668 | cyclin E1 [Source:VGNC Symbol;Acc:VGNC:70727]                                               | 2.163850851 | 9.97E-14    | 1.27E-11    |
| ENSMMUG00000057539 |                                                                                             | 2.164091777 | 0.001364132 | 0.01262989  |
| ENSMMUG00000021634 | TNF alpha induced protein 2 [Source:VGNC Symbol;Acc:VGNC:78579]                             | 2.165967112 | 9.88E-08    | 3.73E-06    |
| ENSMMUG00000020185 | voltage dependent anion channel 3 [Source:VGNC Symbol;Acc:VGNC:84135]                       | 2.168826303 | 0.003597748 | 0.026788088 |
| ENSMMUG00000002949 | motile sperm domain containing 3 [Source:VGNC Symbol;Acc:VGNC:74823]                        | 2.170036518 | 5.78E-07    | 1.71E-05    |
| ENSMMUG00000048375 | Metazoan signal recognition particle RNA [Source:RFAM;Acc:RF00017]                          | 2.174861231 | 1.66E-22    | 8.98E-20    |
| ENSMMUG00000018137 | MYB proto-oncogene like 2 [Source:VGNC Symbol;Acc:VGNC:75092]                               | 2.183514033 | 3.84E-12    | 3.76E-10    |
| ENSMMUG00000003539 | glutamine rich 2 [Source:VGNC Symbol;Acc:VGNC:76534]                                        | 2.184367555 | 0.000817003 | 0.008440054 |
| ENSMMUG00000022451 | proteasome 20S subunit alpha 2 [Source:NCBI gene;Acc:701683]                                | 2.186710602 | 0.004078791 | 0.029458808 |
| ENSMMUG00000014138 | forkhead box J3 [Source:VGNC Symbol;Acc:VGNC:72596]                                         | 2.19145867  | 2.62E-07    | 8.41E-06    |
| ENSMMUG00000012147 | collagen type V alpha 1 chain [Source:NCBI gene;Acc:722014]                                 | 2.196726959 | 0.004836684 | 0.033492853 |
| ENSMMUG00000006931 | kirre like nephrin family adhesion molecule 3 [Source:NCBI gene;Acc:714534]                 | 2.201529919 | 8.63E-14    | 1.14E-11    |
| ENSMMUG00000005482 | lysine methyltransferase 2A [Source:NCBI gene;Acc:705511]                                   | 2.202331908 | 0.005478616 | 0.036695566 |
| ENSMMUG00000009312 | leukotriene A4 hydrolase [Source:VGNC Symbol;Acc:VGNC:74453]                                | 2.202796511 | 5.76E-09    | 3.23E-07    |
| ENSMMUG00000011411 | sperm acrosome associated 3 [Source:VGNC Symbol;Acc:VGNC:77930]                             | 2.204798497 | 2.20E-07    | 7.27E-06    |
| ENSMMUG00000002430 | YKT6 v-SNARE homolog [Source:VGNC Symbol;Acc:VGNC:81796]                                    | 2.210323293 | 0.00201074  | 0.017132524 |
| ENSMMUG00000005302 | BAG cochaperone 6 [Source:VGNC Symbol;Acc:VGNC:81044]                                       | 2.210969788 | 5.53E-17    | 1.34E-14    |
| ENSMMUG00000004376 | calcium and integrin binding 1 [Source:VGNC Symbol;Acc:VGNC:71189]                          | 2.211766512 | 1.61E-11    | 1.38E-09    |
| ENSMMUG00000019246 | regulator of calcineurin 2 [Source:VGNC Symbol;Acc:VGNC:82092]                              | 2.212158162 | 0.00021311  | 0.002797787 |
| ENSMMUG00000057570 |                                                                                             | 2.214861162 | 1.13E-16    | 2.53E-14    |
| ENSMMUG00000039101 | pelota mRNA surveillance and ribosome rescue factor [Source:VGNC Symbol;Acc:VGNC:84478]     | 2.22869861  | 1.91E-13    | 2.28E-11    |
| ENSMMUG00000056381 | forkhead box R1 [Source:NCBI gene;Acc:707285]                                               | 2.233889152 | 0.005045303 | 0.034510764 |
| ENSMMUG00000007534 | protein regulator of cytokinesis 1 [Source:NCBI gene;Acc:710182]                            | 2.236285677 | 0.002137475 | 0.017964552 |
| ENSMMUG00000018549 | zinc finger protein 786 [Source:VGNC Symbol;Acc:VGNC:79338]                                 | 2.240590815 | 0.000604201 | 0.006511171 |
| ENSMMUG00000053376 |                                                                                             | 2.246073817 | 6.24E-11    | 4.95E-09    |
| ENSMMUG00000049678 |                                                                                             | 2.246461653 | 0.000479694 | 0.005518276 |
| ENSMMUG00000028947 | complement factor D [Source:VGNC Symbol;Acc:VGNC:71115]                                     | 2.247397542 | 9.38E-15    | 1.49E-12    |
| ENSMMUG00000062091 |                                                                                             | 2.250959653 | 0.003604092 | 0.026791969 |
| ENSMMUG00000065295 |                                                                                             | 2.251095538 | 5.25E-13    | 6.04E-11    |
| ENSMMUG00000014076 | AF4/FMR2 family member 1 [Source:VGNC Symbol;Acc:VGNC:69817]                                | 2.266500865 | 0.001516714 | 0.013698053 |
| ENSMMUG00000053457 | caspase 14 [Source:NCBI gene;Acc:718049]                                                    | 2.268697737 | 4.26E-06    | 0.000101949 |
| ENSMMUG00000014046 | SREBF chaperone [Source:VGNC Symbol;Acc:VGNC:77140]                                         | 2.269628461 | 1.49E-16    | 3.27E-14    |
| ENSMMUG00000009184 | myelin protein zero like 1 [Source:NCBI gene;Acc:698437]                                    | 2.276978926 | 0.005288695 | 0.035901143 |
| ENSMMUG00000008828 | BEN domain containing 5 [Source:NCBI gene;Acc:711150]                                       | 2.286284987 | 1.84E-07    | 6.22E-06    |
| ENSMMUG00000016273 | maltase-glucoamylase [Source:VGNC Symbol;Acc:VGNC:74713]                                    | 2.289771215 | 7.35E-17    | 1.73E-14    |
| ENSMMUG00000000754 | Dmx like 2 [Source:VGNC Symbol;Acc:VGNC:71936]                                              | 2.29046875  | 0.00057988  | 0.006372501 |
| ENSMMUG00000045609 | CCR4-NOT transcription complex subunit 6 like [Source:NCBI gene;Acc:697981]                 | 2.290906051 | 1.61E-12    | 1.65E-10    |
| ENSMMUG00000015555 | ST3 beta-galactoside alpha-2,3-sialyltransferase 3 [Source:VGNC Symbol;Acc:VGNC:77828]      | 2.293127316 | 0.002352615 | 0.019277056 |
| ENSMMUG00000031100 | membrane-spanning 4-domains subfamily A member 4A-like [Source:NCBI gene;Acc:698152]        | 2.294333974 | 0.004541678 | 0.031784835 |
| ENSMMUG00000049703 | Metazoan signal recognition particle RNA [Source:RFAM;Acc:RF00017]                          | 2.303163741 | 9.02E-11    | 6.92E-09    |
| ENSMMUG00000021073 | RAS protein activator like 2 [Source:VGNC Symbol;Acc:VGNC:76670]                            | 2.305589043 | 2.58E-12    | 2.58E-10    |
| ENSMMUG00000064554 | leucine rich repeat neuronal 4 [Source:NCBI gene;Acc:718283]                                | 2.307738367 | 0.000367589 | 0.004404845 |
| ENSMMUG00000022003 | multimerin 1 [Source:VGNC Symbol;Acc:VGNC:74904]                                            | 2.313088677 | 4.76E-09    | 2.74E-07    |
| ENSMMUG00000003437 | signal transducer and activator of transcription 5B [Source:NCBI gene;Acc:709760]           | 2.313620675 | 1.12E-11    | 1.01E-09    |
| ENSMMUG00000018619 | DENN domain containing 6A [Source:VGNC Symbol;Acc:VGNC:71726]                               | 2.315336299 | 2.39E-05    | 0.000444105 |

|                    |                                                                                                          |             |             |             |
|--------------------|----------------------------------------------------------------------------------------------------------|-------------|-------------|-------------|
| ENSMMUG0000009040  | cornulin [Source:VGNC Symbol;Acc:VGNC:71397]                                                             | 2.320293232 | 0.0015589   | 0.013982998 |
| ENSMMUG00000062037 | stannin [Source:NCBI gene;Acc:711909]                                                                    | 2.320377841 | 0.000163825 | 0.002283221 |
| ENSMMUG00000016580 | selectin E [Source:VGNC Symbol;Acc:VGNC:77156]                                                           | 2.322786014 | 8.23E-19    | 2.61E-16    |
| ENSMMUG00000051975 |                                                                                                          | 2.324791114 | 3.86E-05    | 0.000662003 |
| ENSMMUG00000020534 | p21 (RAC1) activated kinase 6 [Source:NCBI gene;Acc:701589]                                              | 2.329540279 | 1.22E-11    | 1.09E-09    |
| ENSMMUG00000049130 |                                                                                                          | 2.330497661 | 6.97E-16    | 1.46E-13    |
| ENSMMUG00000015686 | abhydrolase domain containing 16A [Source:VGNC Symbol;Acc:VGNC:69393]                                    | 2.335947589 | 1.98E-09    | 1.25E-07    |
| ENSMMUG00000020020 | Rho GTPase activating protein 23 [Source:NCBI gene;Acc:693996]                                           | 2.338909102 | 6.55E-05    | 0.001034733 |
| ENSMMUG00000055199 | cytochrome P450, family 39, subfamily A, polypeptide 1 [Source:NCBI gene;Acc:704242]                     | 2.343634707 | 0.000793887 | 0.008246213 |
| ENSMMUG00000061923 |                                                                                                          | 2.350024641 | 0.006920399 | 0.04350303  |
| ENSMMUG00000050543 |                                                                                                          | 2.354819011 | 3.33E-08    | 1.42E-06    |
| ENSMMUG00000044429 | glycophorin A (MNS blood group) [Source:NCBI gene;Acc:574101]                                            | 2.357282471 | 7.36E-07    | 2.11E-05    |
| ENSMMUG00000017510 | membrane associated guanylate kinase, WW and PDZ domain containing 1 [Source:VGNC Symbol;Acc:VGNC:74499] | 2.36740643  | 3.14E-18    | 9.03E-16    |
| ENSMMUG00000005504 | nucleoporin 37 [Source:VGNC Symbol;Acc:VGNC:75491]                                                       | 2.367966396 | 0.00801472  | 0.048937565 |
| ENSMMUG00000006066 | phosphatidylcholine transfer protein [Source:VGNC Symbol;Acc:VGNC:75789]                                 | 2.371843611 | 0.004151605 | 0.029779598 |
| ENSMMUG00000012668 | centriolin [Source:VGNC Symbol;Acc:VGNC:71204]                                                           | 2.378102445 | 3.04E-15    | 5.29E-13    |
| ENSMMUG00000007140 | MOK protein kinase [Source:VGNC Symbol;Acc:VGNC:84394]                                                   | 2.382977788 | 0.007339368 | 0.045484313 |
| ENSMMUG00000060767 |                                                                                                          | 2.383945565 | 0.000877753 | 0.008955611 |
| ENSMMUG00000005208 | RNA polymerase III subunit B [Source:VGNC Symbol;Acc:VGNC:76143]                                         | 2.384679125 | 0.000501278 | 0.00570243  |
| ENSMMUG00000003007 | caspase recruitment domain family member 10 [Source:VGNC Symbol;Acc:VGNC:70570]                          | 2.391558668 | 0.002503909 | 0.020249101 |
| ENSMMUG00000062454 |                                                                                                          | 2.392187098 | 7.27E-10    | 4.99E-08    |
| ENSMMUG00000012937 | proline rich 12 [Source:NCBI gene;Acc:719344]                                                            | 2.393486481 | 1.43E-17    | 3.75E-15    |
| ENSMMUG00000050822 | carbonic anhydrase 9 [Source:NCBI gene;Acc:696729]                                                       | 2.415501897 | 1.69E-18    | 5.03E-16    |
| ENSMMUG00000025625 | U6 spliceosomal RNA [Source:RFAM;Acc:RF00026]                                                            | 2.419496085 | 0.007198587 | 0.044853481 |
| ENSMMUG00000063981 | nucleoside-triphosphatase, cancer-related [Source:NCBI gene;Acc:712959]                                  | 2.42363077  | 0.000343931 | 0.004197871 |
| ENSMMUG00000009567 | glyoxylate reductase 1 homolog [Source:NCBI gene;Acc:706933]                                             | 2.426087087 | 1.02E-13    | 1.29E-11    |
| ENSMMUG00000063914 |                                                                                                          | 2.431449636 | 1.02E-21    | 5.19E-19    |
| ENSMMUG00000004774 | maestro heat like repeat family member 2B [Source:VGNC Symbol;Acc:VGNC:74837]                            | 2.435320919 | 0.000533789 | 0.005983506 |
| ENSMMUG00000050339 | Metazoan signal recognition particle RNA [Source:RFAM;Acc:RF00017]                                       | 2.441857596 | 7.69E-05    | 0.001191545 |
| ENSMMUG00000005294 | casein kinase 2 beta [Source:NCBI gene;Acc:715807]                                                       | 2.443519486 | 0.001589008 | 0.014183938 |
| ENSMMUG00000062781 | chromosome 14 C11orf97 homolog [Source:NCBI gene;Acc:106993442]                                          | 2.453366152 | 1.09E-19    | 4.00E-17    |
| ENSMMUG00000023060 | A-kinase anchoring protein 4 [Source:VGNC Symbol;Acc:VGNC:69770]                                         | 2.453400757 | 0.000971817 | 0.009753141 |
| ENSMMUG00000021477 | ATPase H+ transporting V1 subunit E1 [Source:NCBI gene;Acc:709739]                                       | 2.453965468 | 1.48E-07    | 5.20E-06    |
| ENSMMUG00000019528 | adaptor related protein complex 4 subunit beta 1 [Source:VGNC Symbol;Acc:VGNC:69972]                     | 2.457206817 | 1.86E-24    | 1.43E-21    |
| ENSMMUG00000014032 | proline rich 36 [Source:NCBI gene;Acc:710443]                                                            | 2.486208591 | 0.000336512 | 0.004118246 |
| ENSMMUG00000057157 |                                                                                                          | 2.492137614 | 6.26E-08    | 2.47E-06    |
| ENSMMUG00000016069 | cubilin [Source:VGNC Symbol;Acc:VGNC:82132]                                                              | 2.505966203 | 2.03E-05    | 0.000386209 |
| ENSMMUG00000019526 | BLM RecQ like helicase [Source:VGNC Symbol;Acc:VGNC:70254]                                               | 2.510814077 | 1.18E-07    | 4.33E-06    |
| ENSMMUG00000007387 | G protein-coupled receptor kinase 7 [Source:VGNC Symbol;Acc:VGNC:73182]                                  | 2.512436584 | 1.32E-11    | 1.16E-09    |
| ENSMMUG00000013450 | TATA-box binding protein associated factor 6 [Source:VGNC Symbol;Acc:VGNC:78093]                         | 2.524198113 | 0.000379516 | 0.004535951 |
| ENSMMUG00000013871 | WD repeat domain 25 [Source:VGNC Symbol;Acc:VGNC:78420]                                                  | 2.524852104 | 6.88E-13    | 7.72E-11    |
| ENSMMUG00000013477 | creatine kinase, M-type [Source:VGNC Symbol;Acc:VGNC:71230]                                              | 2.526899184 | 4.51E-09    | 2.63E-07    |
| ENSMMUG00000055379 |                                                                                                          | 2.529044784 | 1.04E-13    | 1.30E-11    |
| ENSMMUG00000038944 |                                                                                                          | 2.531782792 | 1.48E-23    | 9.74E-21    |
| ENSMMUG00000019304 | indoleamine 2,3-dioxygenase 1 [Source:VGNC Symbol;Acc:VGNC:73580]                                        | 2.534352023 | 5.66E-05    | 0.000918789 |
| ENSMMUG00000058916 |                                                                                                          | 2.535333854 | 8.44E-06    | 0.000181458 |
| ENSMMUG00000022884 | glutamate-ammonia ligase [Source:NCBI gene;Acc:715952]                                                   | 2.537201259 | 0.008136361 | 0.049457679 |
| ENSMMUG00000023403 | GTP binding protein 3, mitochondrial [Source:VGNC Symbol;Acc:VGNC:73170]                                 | 2.552668446 | 0.000182922 | 0.002486604 |
| ENSMMUG00000062217 | HD domain containing 3 [Source:NCBI gene;Acc:715621]                                                     | 2.561938201 | 4.36E-07    | 1.31E-05    |
| ENSMMUG00000005293 | G-patch domain and ankyrin repeats 1 [Source:VGNC Symbol;Acc:VGNC:81073]                                 | 2.563097475 | 0.000889064 | 0.009060967 |
| ENSMMUG00000059504 |                                                                                                          | 2.573687104 | 0.00062038  | 0.006662029 |



|                     |                                                                                                         |             |             |             |
|---------------------|---------------------------------------------------------------------------------------------------------|-------------|-------------|-------------|
| ENSMMUG00000046478  | WASH complex subunit 3 [Source:NCBI gene;Acc:697824]                                                    | 2.579934489 | 2.74E-09    | 1.63E-07    |
| ENSMMUG00000023048  | cytochrome b-c1 complex subunit Rieske, mitochondrial [Source:NCBI gene;Acc:705178]                     | 2.580921732 | 0.001072668 | 0.010535498 |
| ENSMMUG00000001338  | antizyme inhibitor 1 [Source:VGNC Symbol;Acc:VGNC:70080]                                                | 2.58795269  | 0.006572435 | 0.042004248 |
| ENSMMUG000000048215 |                                                                                                         | 2.58837451  | 4.44E-05    | 0.000747616 |
| ENSMMUG00000013830  | glucose-6-phosphatase catalytic subunit 2 [Source:NCBI gene;Acc:709062]                                 | 2.596675088 | 1.80E-07    | 6.13E-06    |
| ENSMMUG00000022401  | EMSY transcriptional repressor, BRCA2 interacting [Source:VGNC Symbol;Acc:VGNC:72065]                   | 2.597162285 | 6.80E-09    | 3.72E-07    |
| ENSMMUG00000010521  | ADP ribosylation factor like GTPase 5A [Source:VGNC Symbol;Acc:VGNC:70017]                              | 2.601746793 | 0.007524379 | 0.0464744   |
| ENSMMUG000000063351 | Metazoan signal recognition particle RNA [Source:RFAM;Acc:RF00017]                                      | 2.60907232  | 0.003289468 | 0.025018986 |
| ENSMMUG000000055038 |                                                                                                         | 2.611238779 | 0.002381228 | 0.019479506 |
| ENSMMUG000000064730 |                                                                                                         | 2.611602168 | 2.78E-07    | 8.83E-06    |
| ENSMMUG00000017701  | myosin VIIA and Rab interacting protein [Source:VGNC Symbol;Acc:VGNC:74992]                             | 2.621741315 | 2.87E-06    | 7.23E-05    |
| ENSMMUG00000010137  | microcephalin 1 [Source:VGNC Symbol;Acc:VGNC:74687]                                                     | 2.628734838 | 0.005661232 | 0.037536255 |
| ENSMMUG000000057179 | cation channel sperm associated 1 [Source:NCBI gene;Acc:721869]                                         | 2.631940926 | 5.20E-05    | 0.000856225 |
| ENSMMUG000000023139 | small nuclear ribonucleoprotein polypeptide N [Source:VGNC Symbol;Acc:VGNC:78437]                       | 2.639241864 | 0.000193664 | 0.002586782 |
| ENSMMUG000000053937 |                                                                                                         | 2.639745056 | 1.20E-15    | 2.31E-13    |
| ENSMMUG000000028907 | insulin receptor [Source:NCBI gene;Acc:706009]                                                          | 2.642317791 | 1.42E-08    | 6.90E-07    |
| ENSMMUG00000001845  | DNA polymerase epsilon 4, accessory subunit [Source:VGNC Symbol;Acc:VGNC:76065]                         | 2.651089653 | 1.03E-08    | 5.26E-07    |
| ENSMMUG00000000931  | solute carrier family 35 member A3 [Source:VGNC Symbol;Acc:VGNC:77461]                                  | 2.659024872 | 6.12E-05    | 0.000979344 |
| ENSMMUG00000004332  | tripartite motif containing 44 [Source:VGNC Symbol;Acc:VGNC:79168]                                      | 2.661349837 | 0.005902212 | 0.038743263 |
| ENSMMUG00000014658  | ninein [Source:VGNC Symbol;Acc:VGNC:75177]                                                              | 2.661373527 | 7.28E-09    | 3.93E-07    |
| ENSMMUG000000062139 |                                                                                                         | 2.668079876 | 8.03E-06    | 0.00017469  |
| ENSMMUG00000013798  | fatty acid desaturase 1 [Source:VGNC Symbol;Acc:VGNC:72471]                                             | 2.687324301 | 2.44E-08    | 1.12E-06    |
| ENSMMUG00000001058  | tetratricopeptide repeat domain 28 [Source:VGNC Symbol;Acc:VGNC:79785]                                  | 2.691708389 | 1.60E-07    | 5.52E-06    |
| ENSMMUG00000013832  | ATP binding cassette subfamily B member 11 [Source:VGNC Symbol;Acc:VGNC:81339]                          | 2.697063326 | 2.17E-05    | 0.00040989  |
| ENSMMUG000000054960 |                                                                                                         | 2.701404485 | 2.10E-05    | 0.000397168 |
| ENSMMUG00000000396  | intraflagellar transport 52 [Source:NCBI gene;Acc:694933]                                               | 2.714110915 | 1.02E-07    | 3.82E-06    |
| ENSMMUG000000000566 |                                                                                                         | 2.721978163 | 0.00019929  | 0.002646564 |
| ENSMMUG000000008854 | natural cytotoxicity triggering receptor 3 [Source:VGNC Symbol;Acc:VGNC:74990]                          | 2.731269778 | 2.07E-09    | 1.31E-07    |
| ENSMMUG00000018967  | ubiquitin conjugating enzyme E2 O [Source:VGNC Symbol;Acc:VGNC:79813]                                   | 2.747455669 | 2.91E-15    | 5.26E-13    |
| ENSMMUG00000013740  | minichromosome maintenance 8 homologous recombination repair factor [Source:VGNC Symbol;Acc:VGNC:74516] | 2.764591633 | 1.86E-08    | 8.75E-07    |
| ENSMMUG00000014397  | NCK associated protein 1 [Source:VGNC Symbol;Acc:VGNC:75143]                                            | 2.767883405 | 1.77E-05    | 0.000343257 |
| ENSMMUG000000064931 |                                                                                                         | 2.809722948 | 0.000208565 | 0.002747878 |
| ENSMMUG000000055820 |                                                                                                         | 2.812658676 | 0.004966228 | 0.034107611 |
| ENSMMUG000000007773 | solute carrier organic anion transporter family member 4C1 [Source:VGNC Symbol;Acc:VGNC:77764]          | 2.818988971 | 0.0040281   | 0.029183815 |
| ENSMMUG00000002959  | helicase with zinc finger [Source:VGNC Symbol;Acc:VGNC:73178]                                           | 2.828520876 | 8.94E-05    | 0.001360628 |
| ENSMMUG00000000375  | pleckstrin homology and RhoGEF domain containing G6 [Source:VGNC Symbol;Acc:VGNC:76110]                 | 2.868611949 | 5.81E-21    | 2.55E-18    |
| ENSMMUG00000004801  | COPI coat complex subunit gamma 2 [Source:VGNC Symbol;Acc:VGNC:71315]                                   | 2.871596405 | 4.57E-08    | 1.87E-06    |
| ENSMMUG000000052474 |                                                                                                         | 2.872639746 | 5.71E-12    | 5.42E-10    |
| ENSMMUG000000002267 | laminin subunit gamma 3 [Source:NCBI gene;Acc:722430]                                                   | 2.878215139 | 0.002879586 | 0.022611632 |
| ENSMMUG00000023310  | tetraspanin 12 [Source:VGNC Symbol;Acc:VGNC:79328]                                                      | 2.895529626 | 0.006226523 | 0.040297253 |
| ENSMMUG000000056629 | nucleolar protein 12 [Source:NCBI gene;Acc:698318]                                                      | 2.907904355 | 0.003010169 | 0.023377712 |
| ENSMMUG00000010180  | PIN2 (TERF1) interacting telomerase inhibitor 1 [Source:NCBI gene;Acc:701523]                           | 2.908881631 | 4.87E-08    | 1.97E-06    |
| ENSMMUG000000053790 |                                                                                                         | 2.915102144 | 3.29E-17    | 8.42E-15    |
| ENSMMUG00000011627  | interleukin 4 induced 1 [Source:VGNC Symbol;Acc:VGNC:73625]                                             | 2.932425425 | 5.38E-07    | 1.60E-05    |
| ENSMMUG000000044817 | nucleoporin 62 [Source:NCBI gene;Acc:100426308]                                                         | 2.9426294   | 4.99E-21    | 2.29E-18    |
| ENSMMUG00000016549  | matrix metalloproteinase 9 [Source:VGNC Symbol;Acc:VGNC:74903]                                          | 2.943038677 | 0.000214519 | 0.002800303 |
| ENSMMUG000000061031 |                                                                                                         | 2.950825913 | 2.89E-08    | 1.28E-06    |
| ENSMMUG00000011064  | synaptosome associated protein 25 [Source:VGNC Symbol;Acc:VGNC:77663]                                   | 2.956739158 | 0.001098925 | 0.010702014 |
| ENSMMUG00000023286  | UPF1 RNA helicase and ATPase [Source:VGNC Symbol;Acc:VGNC:79971]                                        | 2.978760181 | 8.76E-13    | 9.60E-11    |
| ENSMMUG00000012039  | cytochrome b5 type B (outer mitochondrial membrane) [Source:NCBI gene;Acc:705093]                       | 2.982524891 | 0.000117153 | 0.001711176 |
| ENSMMUG00000027986  | U6 spliceosomal RNA [Source:RFAM;Acc:RF00026]                                                           | 2.98728842  | 7.13E-05    | 0.001113269 |

|                    |                                                                                      |             |             |             |
|--------------------|--------------------------------------------------------------------------------------|-------------|-------------|-------------|
| ENSMMUG00000058423 |                                                                                      | 3.002945422 | 1.95E-06    | 5.02E-05    |
| ENSMMUG00000000790 | ankyrin repeat domain 17 [Source:VGNC Symbol;Acc:VGNC:84240]                         | 3.007264011 | 3.41E-20    | 1.43E-17    |
| ENSMMUG00000015468 | checkpoint with forkhead and ring finger domains [Source:VGNC Symbol;Acc:VGNC:71064] | 3.014455038 | 1.14E-05    | 0.000237998 |
| ENSMMUG00000064146 | Metazoan signal recognition particle RNA [Source:RFAM;Acc:RF00017]                   | 3.018242816 | 9.44E-07    | 2.63E-05    |
| ENSMMUG00000002330 | ecto-NOX disulfide-thiol exchanger 1 [Source:VGNC Symbol;Acc:VGNC:72110]             | 3.021625754 | 4.67E-08    | 1.90E-06    |
| ENSMMUG00000011878 | poly(A) binding protein interacting protein 1 [Source:VGNC Symbol;Acc:VGNC:84476]    | 3.022237098 | 5.84E-06    | 0.00013214  |
| ENSMMUG00000052569 |                                                                                      | 3.034246184 | 3.87E-06    | 9.44E-05    |
| ENSMMUG00000053984 |                                                                                      | 3.047925552 | 0.001246083 | 0.011773821 |
| ENSMMUG00000019690 | SEC14 and spectrin domain containing 1 [Source:VGNC Symbol;Acc:VGNC:77267]           | 3.049055542 | 4.09E-07    | 1.24E-05    |
| ENSMMUG00000046186 | stanniocalcin 1 [Source:VGNC Symbol;Acc:VGNC:84120]                                  | 3.054584671 | 0.000484642 | 0.005567285 |
| ENSMMUG00000008791 | CD47 molecule [Source:VGNC Symbol;Acc:VGNC:70767]                                    | 3.069490506 | 8.95E-17    | 2.06E-14    |
| ENSMMUG00000009187 | calcium voltage-gated channel subunit alpha1 B [Source:VGNC Symbol;Acc:VGNC:70499]   | 3.069532381 | 0.006661402 | 0.042396183 |
| ENSMMUG00000063525 |                                                                                      | 3.085468227 | 2.06E-07    | 6.87E-06    |
| ENSMMUG00000046169 |                                                                                      | 3.091138729 | 5.91E-10    | 4.12E-08    |
| ENSMMUG00000005108 | RCC1 domain containing 1 [Source:VGNC Symbol;Acc:VGNC:76876]                         | 3.091998593 | 3.12E-08    | 1.36E-06    |
| ENSMMUG00000023263 | mediator complex subunit 15 [Source:VGNC Symbol;Acc:VGNC:74511]                      | 3.104864776 | 2.30E-11    | 1.94E-09    |
| ENSMMUG00000008384 | solute carrier family 4 member 10 [Source:VGNC Symbol;Acc:VGNC:77695]                | 3.112246522 | 1.07E-15    | 2.15E-13    |
| ENSMMUG00000053083 | C2 calcium dependent domain containing 4C [Source:NCBI gene;Acc:100424440]           | 3.119611305 | 4.55E-06    | 0.00010775  |
| ENSMMUG00000057934 |                                                                                      | 3.120911293 | 2.04E-10    | 1.49E-08    |
| ENSMMUG00000058817 |                                                                                      | 3.121606238 | 2.69E-19    | 9.18E-17    |
| ENSMMUG00000059332 | Metazoan signal recognition particle RNA [Source:RFAM;Acc:RF00017]                   | 3.140448982 | 0.005414532 | 0.036505449 |
| ENSMMUG00000035943 | U6 spliceosomal RNA [Source:RFAM;Acc:RF00026]                                        | 3.140613887 | 0.000335767 | 0.004118246 |
| ENSMMUG00000006853 | crystallin beta B2 [Source:NCBI gene;Acc:100144420]                                  | 3.163645402 | 0.000273097 | 0.003457101 |
| ENSMMUG00000006723 | solute carrier family 8 member B1 [Source:NCBI gene;Acc:714561]                      | 3.177306149 | 9.37E-14    | 1.21E-11    |
| ENSMMUG00000007925 | serum/glucocorticoid regulated kinase 2 [Source:VGNC Symbol;Acc:VGNC:77228]          | 3.178377463 | 3.10E-14    | 4.53E-12    |
| ENSMMUG00000031391 | RNA binding motif protein 38 [Source:VGNC Symbol;Acc:VGNC:76484]                     | 3.205239643 | 2.33E-07    | 7.65E-06    |
| ENSMMUG00000022893 | von Willebrand factor [Source:VGNC Symbol;Acc:VGNC:78778]                            | 3.206146298 | 0.00369237  | 0.027250103 |
| ENSMMUG00000008197 | netrin G1 [Source:VGNC Symbol;Acc:VGNC:75450]                                        | 3.233801732 | 0.005512701 | 0.036867199 |
| ENSMMUG00000008196 | aconitase 1 [Source:VGNC Symbol;Acc:VGNC:69378]                                      | 3.233862071 | 1.03E-24    | 8.65E-22    |
| ENSMMUG00000022921 | solute carrier family 2 member 12 [Source:VGNC Symbol;Acc:VGNC:77503]                | 3.23441164  | 4.03E-24    | 2.86E-21    |
| ENSMMUG00000004435 | two pore segment channel 1 [Source:VGNC Symbol;Acc:VGNC:79117]                       | 3.24885933  | 3.43E-15    | 5.64E-13    |
| ENSMMUG00000061533 |                                                                                      | 3.252164361 | 4.15E-18    | 1.16E-15    |
| ENSMMUG00000054686 |                                                                                      | 3.262056102 | 2.51E-21    | 1.22E-18    |
| ENSMMUG00000021062 | CD177 molecule [Source:VGNC Symbol;Acc:VGNC:70912]                                   | 3.267320366 | 8.06E-06    | 0.000174937 |
| ENSMMUG00000051972 | zinc finger CCHC-type containing 24 [Source:NCBI gene;Acc:702083]                    | 3.278695649 | 0.001232073 | 0.011689448 |
| ENSMMUG00000013967 | TOX high mobility group box family member 3 [Source:VGNC Symbol;Acc:VGNC:78612]      | 3.294726643 | 3.35E-06    | 8.30E-05    |
| ENSMMUG00000059175 |                                                                                      | 3.328713063 | 1.12E-10    | 8.46E-09    |
| ENSMMUG00000057632 |                                                                                      | 3.335910979 | 1.78E-08    | 8.50E-07    |
| ENSMMUG00000061935 |                                                                                      | 3.365286999 | 6.23E-14    | 8.30E-12    |
| ENSMMUG00000000869 | small nuclear ribonucleoprotein polypeptide C [Source:NCBI gene;Acc:718654]          | 3.372827768 | 6.66E-05    | 0.001048172 |
| ENSMMUG00000017822 | periplakin [Source:VGNC Symbol;Acc:VGNC:76240]                                       | 3.378593133 | 2.09E-09    | 1.31E-07    |
| ENSMMUG00000052168 |                                                                                      | 3.382204544 | 1.12E-18    | 3.42E-16    |
| ENSMMUG00000004257 | beta-secretase 2 [Source:VGNC Symbol;Acc:VGNC:70216]                                 | 3.394935217 | 8.34E-20    | 3.34E-17    |
| ENSMMUG00000058534 |                                                                                      | 3.399360982 | 0.001044631 | 0.010315167 |
| ENSMMUG00000005106 | unc-45 myosin chaperone A [Source:VGNC Symbol;Acc:VGNC:79858]                        | 3.409393488 | 0.005225121 | 0.035619841 |
| ENSMMUG00000010592 | adducin 2 [Source:VGNC Symbol;Acc:VGNC:69529]                                        | 3.418060337 | 0.007999612 | 0.048937565 |
| ENSMMUG00000009499 | mesoderm specific transcript [Source:VGNC Symbol;Acc:VGNC:74707]                     | 3.449664786 | 0.000744378 | 0.007847095 |
| ENSMMUG00000003874 | interferon induced transmembrane protein 10 [Source:NCBI gene;Acc:721010]            | 3.461280156 | 3.42E-14    | 4.92E-12    |
| ENSMMUG00000021157 | TBC1 domain family member 31 [Source:VGNC Symbol;Acc:VGNC:84121]                     | 3.467459344 | 0.001162687 | 0.0112023   |
| ENSMMUG00000019314 | vav guanine nucleotide exchange factor 1 [Source:VGNC Symbol;Acc:VGNC:78757]         | 3.509818673 | 0.000236202 | 0.00305305  |
| ENSMMUG00000057640 | plakophilin-3-like [Source:NCBI gene;Acc:114669833]                                  | 3.516696759 | 4.07E-23    | 2.34E-20    |

|                    |                                                                                                      |             |             |             |
|--------------------|------------------------------------------------------------------------------------------------------|-------------|-------------|-------------|
| ENSMMUG0000006851  | SPARC (osteonectin), cwcv and kazal like domains proteoglycan 3 [Source:NCBI gene;Acc:705964]        | 3.551654443 | 1.97E-14    | 2.97E-12    |
| ENSMMUG00000018396 | HAUS augmin like complex subunit 6 [Source:VGNC Symbol;Acc:VGNC:73237]                               | 3.572114215 | 5.23E-14    | 7.30E-12    |
| ENSMMUG00000062794 |                                                                                                      | 3.613884726 | 6.18E-14    | 8.30E-12    |
| ENSMMUG00000057331 | RNA terminal phosphate cyclase like 1 [Source:NCBI gene;Acc:694568]                                  | 3.63196792  | 8.34E-30    | 1.10E-26    |
| ENSMMUG00000005997 | cell division cycle 14B [Source:NCBI gene;Acc:710300]                                                | 3.638910317 | 0.007039784 | 0.044132926 |
| ENSMMUG00000005554 | mediator complex subunit 29 [Source:VGNC Symbol;Acc:VGNC:74557]                                      | 3.654861229 | 3.44E-23    | 2.11E-20    |
| ENSMMUG00000002433 | calcium/calmodulin dependent protein kinase II beta [Source:VGNC Symbol;Acc:VGNC:70524]              | 3.686066614 | 4.12E-06    | 9.96E-05    |
| ENSMMUG00000056058 | C-type lectin domain containing 20A [Source:HGNC Symbol;Acc:HGNC:34521]                              | 3.702619767 | 0.005669085 | 0.037561258 |
| ENSMMUG00000051037 |                                                                                                      | 3.760606452 | 8.99E-06    | 0.000191133 |
| ENSMMUG00000015329 | MX dynamin like GTPase 1 [Source:VGNC Symbol;Acc:VGNC:75086]                                         | 3.764369696 | 8.43E-12    | 7.68E-10    |
| ENSMMUG00000006841 | myoferlin [Source:VGNC Symbol;Acc:VGNC:75061]                                                        | 3.772453942 | 0.008064993 | 0.049186304 |
| ENSMMUG00000054052 | sialic acid binding Ig like lectin 11 [Source:NCBI gene;Acc:719127]                                  | 3.797161046 | 4.57E-05    | 0.00076419  |
| ENSMMUG00000055556 |                                                                                                      | 3.858775907 | 0.005456559 | 0.036623915 |
| ENSMMUG00000013251 | xin actin binding repeat containing 2 [Source:VGNC Symbol;Acc:VGNC:78953]                            | 3.878318757 | 3.27E-06    | 8.12E-05    |
| ENSMMUG00000057785 |                                                                                                      | 3.893477968 | 0.004913723 | 0.03382273  |
| ENSMMUG00000050495 |                                                                                                      | 3.933602434 | 0.003223559 | 0.024660363 |
| ENSMMUG00000002917 | single Ig IL-1-related receptor [Source:NCBI gene;Acc:100425060]                                     | 3.973456387 | 7.32E-10    | 4.99E-08    |
| ENSMMUG00000056248 |                                                                                                      | 4.000732964 | 1.64E-25    | 1.68E-22    |
| ENSMMUG00000026950 | microRNA 101-2 [Source:HGNC Symbol;Acc:HGNC:31489]                                                   | 4.042384874 | 1.21E-05    | 0.000248765 |
| ENSMMUG00000063779 |                                                                                                      | 4.091662074 | 4.67E-33    | 1.08E-29    |
| ENSMMUG00000018767 | cell division cycle associated 5 [Source:NCBI gene;Acc:721998]                                       | 4.108220112 | 0.001488596 | 0.013523739 |
| ENSMMUG00000063198 |                                                                                                      | 4.125443057 | 9.52E-05    | 0.001424168 |
| ENSMMUG00000012938 | SR-related CTD associated factor 1 [Source:VGNC Symbol;Acc:VGNC:77137]                               | 4.140241275 | 0.001639782 | 0.014532069 |
| ENSMMUG00000042598 | transmembrane protein 18 [Source:NCBI gene;Acc:721515]                                               | 4.177153999 | 1.50E-06    | 3.96E-05    |
| ENSMMUG00000004309 | APC membrane recruitment protein 1 [Source:VGNC Symbol;Acc:VGNC:69716]                               | 4.182886715 | 0.00787197  | 0.048311448 |
| ENSMMUG00000053655 |                                                                                                      | 4.261294478 | 0.005239061 | 0.03566204  |
| ENSMMUG00000011914 | prospero homeobox 1 [Source:VGNC Symbol;Acc:VGNC:76427]                                              | 4.276334366 | 0.007685599 | 0.047343083 |
| ENSMMUG00000051645 |                                                                                                      | 4.290120014 | 0.006308861 | 0.040630127 |
| ENSMMUG00000059985 |                                                                                                      | 4.316955531 | 0.004732741 | 0.032921702 |
| ENSMMUG00000018743 | ubiquitin specific peptidase 25 [Source:VGNC Symbol;Acc:VGNC:78744]                                  | 4.336799809 | 0.006253022 | 0.04038355  |
| ENSMMUG00000060218 | chemokine (C motif) ligand 1 [Source:NCBI gene;Acc:574367]                                           | 4.36828248  | 0.004495322 | 0.031642472 |
| ENSMMUG00000015487 | pericentriolar material 1 [Source:VGNC Symbol;Acc:VGNC:75781]                                        | 4.368664273 | 0.005300109 | 0.035944661 |
| ENSMMUG00000005595 | RAB14, member RAS oncogene family [Source:NCBI gene;Acc:699837]                                      | 4.374762983 | 1.34E-19    | 4.74E-17    |
| ENSMMUG00000020586 | serpin family A member 12 [Source:VGNC Symbol;Acc:VGNC:77266]                                        | 4.380751555 | 0.005246129 | 0.03568376  |
| ENSMMUG00000021564 | lysine demethylase 2B [Source:VGNC Symbol;Acc:VGNC:81425]                                            | 4.402371883 | 3.04E-37    | 1.40E-33    |
| ENSMMUG00000012405 | transient receptor potential cation channel subfamily C member 1 [Source:VGNC Symbol;Acc:VGNC:78651] | 4.435367696 | 3.63E-08    | 1.52E-06    |
| ENSMMUG00000029883 | olfactory receptor, family 2, subfamily J, member 3 [Source:NCBI gene;Acc:708943]                    | 4.468248652 | 0.003985968 | 0.028952535 |
| ENSMMUG00000010316 | HECT and RLD domain containing E3 ubiquitin protein ligase 5 [Source:VGNC Symbol;Acc:VGNC:73226]     | 4.524872124 | 1.04E-33    | 3.18E-30    |
| ENSMMUG00000044257 | MX dynamin like GTPase 2 [Source:VGNC Symbol;Acc:VGNC:81723]                                         | 4.635646685 | 1.62E-13    | 1.99E-11    |
| ENSMMUG00000010614 | C-C motif chemokine ligand 25 [Source:VGNC Symbol;Acc:VGNC:70700]                                    | 4.676042508 | 0.003420074 | 0.025709703 |
| ENSMMUG00000058326 | neuralized E3 ubiquitin protein ligase 2 [Source:NCBI gene;Acc:708904]                               | 4.791346039 | 0.000842943 | 0.008658037 |
| ENSMMUG00000047465 | Metazoan signal recognition particle RNA [Source:RFAM;Acc:RF00017]                                   | 4.823938931 | 0.000137199 | 0.001966736 |
| ENSMMUG00000053837 |                                                                                                      | 4.975055594 | 2.48E-05    | 0.000456049 |
| ENSMMUG00000059782 |                                                                                                      | 5.014097502 | 1.05E-39    | 9.67E-36    |
| ENSMMUG00000043396 | Metazoan signal recognition particle RNA [Source:RFAM;Acc:RF00017]                                   | 5.031302203 | 2.08E-05    | 0.00039397  |
| ENSMMUG00000049267 |                                                                                                      | 5.041737179 | 1.33E-12    | 1.43E-10    |
| ENSMMUG00000010318 | phosphatidylinositol glycan anchor biosynthesis class Y [Source:NCBI gene;Acc:100426107]             | 5.103026628 | 1.24E-30    | 2.29E-27    |
| ENSMMUG00000003005 | MFNG O-fucosylpeptide 3-beta-N-acetylglucosaminyltransferase [Source:VGNC Symbol;Acc:VGNC:74712]     | 5.238273751 | 0.000776279 | 0.008099887 |
| ENSMMUG00000001456 | MCF.2 cell line derived transforming sequence-like 2 [Source:VGNC Symbol;Acc:VGNC:74624]             | 5.349083309 | 0.00089776  | 0.009129372 |
| ENSMMUG00000062092 |                                                                                                      | 5.406880206 | 0.000610518 | 0.006571459 |
| ENSMMUG00000061318 |                                                                                                      | 5.426232096 | 0.00076002  | 0.007966364 |



|                    |                                                                       |             |             |             |
|--------------------|-----------------------------------------------------------------------|-------------|-------------|-------------|
| ENSMMUG0000000632  | SH3 binding domain protein 5 like [Source:VGNC Symbol;Acc:VGNC:77334] | 5.43969974  | 2.37E-09    | 1.45E-07    |
| ENSMMUG0000002741  | CUB and Sushi multiple domains 2 [Source:VGNC Symbol;Acc:VGNC:71441]  | 5.746462263 | 9.94E-05    | 0.001475155 |
| ENSMMUG00000049232 | AMMECR1 like [Source:VGNC Symbol;Acc:VGNC:84208]                      | 6.590690361 | 6.88E-07    | 1.99E-05    |
| ENSMMUG00000027543 | Y RNA [Source:RFAM;Acc:RF00019]                                       | 7.364343034 | 0.000133625 | 0.001924954 |
| ENSMMUG0000001989  | RNA polymerase II subunit D [Source:VGNC Symbol;Acc:VGNC:76213]       | 7.967203885 | 1.73E-09    | 1.11E-07    |

### SD 3 vs. Baseline

| Ensembl Gene ID    | Description                                                                               | Log2(FC)    | p-value     | FDR         |
|--------------------|-------------------------------------------------------------------------------------------|-------------|-------------|-------------|
| ENSMMUG00000046655 | pleckstrin homology like domain family B member 1 [Source:NCBI gene;Acc:706336]           | 6.449193999 | 4.90E-08    | 1.55E-06    |
| ENSMMUG00000052929 |                                                                                           | 5.834163027 | 6.21E-06    | 0.000108815 |
| ENSMMUG00000004821 | membrane spanning 4-domains A14 [Source:NCBI gene;Acc:697083]                             | 5.790721134 | 2.49E-24    | 1.35E-21    |
| ENSMMUG00000012056 | structural maintenance of chromosomes 6 [Source:VGNC Symbol;Acc:VGNC:77746]               | 5.601716063 | 8.13E-05    | 0.000978024 |
| ENSMMUG00000005851 | B-box and SPRY domain containing [Source:VGNC Symbol;Acc:VGNC:70342]                      | 5.560970685 | 8.06E-05    | 0.000971159 |
| ENSMMUG00000052277 | transthyretin [Source:NCBI gene;Acc:705943]                                               | 5.433581726 | 0.000278839 | 0.002785656 |
| ENSMMUG00000055207 |                                                                                           | 5.399841318 | 0.000314727 | 0.003083641 |
| ENSMMUG00000056790 |                                                                                           | 5.372464792 | 1.65E-06    | 3.44E-05    |
| ENSMMUG00000061408 |                                                                                           | 5.135492005 | 0.001602836 | 0.011983737 |
| ENSMMUG00000010050 | small nuclear ribonucleoprotein polypeptides B and B1 [Source:VGNC Symbol;Acc:VGNC:77676] | 5.017337943 | 8.26E-06    | 0.000138651 |
| ENSMMUG00000053577 |                                                                                           | 4.902490613 | 0.000229374 | 0.002382101 |
| ENSMMUG00000019639 | paired box 5 [Source:VGNC Symbol;Acc:VGNC:75764]                                          | -4.87050721 | 0.000406892 | 0.003829958 |
| ENSMMUG00000062793 |                                                                                           | 4.851109976 | 1.98E-14    | 2.17E-12    |
| ENSMMUG00000063345 |                                                                                           | 4.831028668 | 0.00064616  | 0.005632797 |
| ENSMMUG00000020533 | chromosome 11 C12orf56 homolog [Source:VGNC Symbol;Acc:VGNC:70409]                        | 4.800173593 | 0.000296985 | 0.002948845 |
| ENSMMUG00000009155 | SIN3-HDAC complex associated factor [Source:NCBI gene;Acc:694162]                         | 4.795147371 | 0.000251747 | 0.002581516 |
| ENSMMUG00000059241 |                                                                                           | 4.759821885 | 0.000299049 | 0.00296211  |
| ENSMMUG00000017378 | steroid sulfatase [Source:VGNC Symbol;Acc:VGNC:81590]                                     | 4.492846391 | 0.000958567 | 0.007820297 |
| ENSMMUG00000020370 | SRY-box transcription factor 5 [Source:VGNC Symbol;Acc:VGNC:77843]                        | 4.349631516 | 3.13E-09    | 1.26E-07    |
| ENSMMUG00000022975 | sprouty related EVH1 domain containing 3 [Source:VGNC Symbol;Acc:VGNC:78030]              | 4.202708582 | 3.63E-19    | 8.95E-17    |
| ENSMMUG00000003736 | nuclear factor kappa B subunit 1 [Source:VGNC Symbol;Acc:VGNC:75339]                      | -4.19801426 | 1.87E-08    | 6.57E-07    |
| ENSMMUG00000060278 | Metazoan signal recognition particle RNA [Source:RFAM;Acc:RF00017]                        | 4.186258941 | 0.002392494 | 0.016452438 |
| ENSMMUG00000008945 | zinc finger protein 407 [Source:NCBI gene;Acc:695303]                                     | 4.172725184 | 0.003398142 | 0.021683126 |
| ENSMMUG00000017210 | sarcosine dehydrogenase [Source:VGNC Symbol;Acc:VGNC:76971]                               | 4.154126594 | 2.65E-06    | 5.23E-05    |
| ENSMMUG00000014018 | bromodomain testis associated [Source:VGNC Symbol;Acc:VGNC:70282]                         | 4.090129376 | 1.38E-05    | 0.000213524 |
| ENSMMUG00000012058 | GEN1 Holliday junction 5' flap endonuclease [Source:VGNC Symbol;Acc:VGNC:72790]           | 4.026926331 | 0.006167939 | 0.034349766 |
| ENSMMUG00000021332 | carboxypeptidase X, M14 family member 1 [Source:VGNC Symbol;Acc:VGNC:71413]               | 4.026024054 | 0.006365654 | 0.03516225  |
| ENSMMUG00000017204 | programmed cell death 4 [Source:VGNC Symbol;Acc:VGNC:75794]                               | 4.023090205 | 1.70E-05    | 0.000254479 |

|                    |                                                                                                 |             |             |             |
|--------------------|-------------------------------------------------------------------------------------------------|-------------|-------------|-------------|
| ENSMMUG00000051271 |                                                                                                 | -3.97865133 | 1.66E-05    | 0.000249246 |
| ENSMMUG00000008942 | carnosine dipeptidase 1 [Source:VGNC Symbol;Acc:VGNC:71257]                                     | -           |             |             |
| ENSMMUG00000007003 | polyribonucleotide nucleotidyltransferase 1 [Source:VGNC Symbol;Acc:VGNC:76095]                 | 3.952034088 | 0.005571719 | 0.031768162 |
| ENSMMUG00000008867 | exoribonuclease 1 [Source:VGNC Symbol;Acc:VGNC:72324]                                           | -3.94298864 | 0.004290991 | 0.026189842 |
| ENSMMUG00000016880 | solute carrier family 39 member 8 [Source:VGNC Symbol;Acc:VGNC:77541]                           | -           |             |             |
| ENSMMUG00000004711 | transmembrane protein 74B [Source:VGNC Symbol;Acc:VGNC:78990]                                   | 3.908669538 | 0.00295943  | 0.019447684 |
| ENSMMUG00000013302 | family with sequence similarity 184 member A [Source:VGNC Symbol;Acc:VGNC:72308]                | -           |             |             |
| ENSMMUG00000057073 |                                                                                                 | 3.713729454 | 8.09E-14    | 7.93E-12    |
| ENSMMUG00000029164 | glycerophosphodiester phosphodiesterase domain containing 3 [Source:VGNC Symbol;Acc:VGNC:72800] | -           |             |             |
| ENSMMUG00000037551 | Metazoan signal recognition particle RNA [Source:RFAM;Acc:RF00017]                              | 3.697391399 | 0.005164759 | 0.030206034 |
| ENSMMUG00000057276 |                                                                                                 | -3.66751686 | 0.005551934 | 0.031699013 |
| ENSMMUG00000018565 | ribonucleoprotein, PTB binding 2 [Source:VGNC Symbol;Acc:VGNC:76536]                            | -3.62951223 | 0.003783455 | 0.023659671 |
| ENSMMUG00000002549 | trehalase [Source:NCBI gene;Acc:706449]                                                         | -           |             |             |
| ENSMMUG00000037625 |                                                                                                 | 3.622424458 | 2.06E-07    | 5.35E-06    |
| ENSMMUG00000021091 | COP9 signalosome subunit 3 [Source:VGNC Symbol;Acc:VGNC:71316]                                  | -3.5928043  | 4.98E-06    | 9.06E-05    |
| ENSMMUG00000012462 | proteasome activator subunit 1 [Source:VGNC Symbol;Acc:VGNC:76455]                              | -           |             |             |
| ENSMMUG00000060892 |                                                                                                 | 3.570467927 | 0.001056573 | 0.008525888 |
| ENSMMUG00000055783 |                                                                                                 | -3.53771724 | 0.005660237 | 0.03213783  |
| ENSMMUG00000055809 |                                                                                                 | -           |             |             |
| ENSMMUG0000001742  | transforming growth factor beta receptor 3 [Source:VGNC Symbol;Acc:VGNC:78339]                  | 3.485423332 | 2.04E-10    | 1.04E-08    |
| ENSMMUG00000016314 | family with sequence similarity 166 member B [Source:VGNC Symbol;Acc:VGNC:72421]                | -           |             |             |
| ENSMMUG00000052535 |                                                                                                 | 3.451481955 | 0.001908472 | 0.013747389 |
| ENSMMUG00000039317 | cAMP responsive element binding protein 5 [Source:VGNC Symbol;Acc:VGNC:81295]                   | -           |             |             |
| ENSMMUG00000059019 |                                                                                                 | 3.440531549 | 0.005928222 | 0.03331096  |
| ENSMMUG0000000238  | HECT domain E3 ubiquitin protein ligase 2 [Source:VGNC Symbol;Acc:VGNC:73246]                   | -           |             |             |
| ENSMMUG00000014687 | sterile alpha motif domain containing 14 [Source:VGNC Symbol;Acc:VGNC:77112]                    | 3.412109694 | 0.002104097 | 0.014897004 |
| ENSMMUG00000017524 | phosphoinositide kinase, FYVE-type zinc finger containing [Source:VGNC Symbol;Acc:VGNC:75854]   | -           |             |             |
| ENSMMUG00000038661 |                                                                                                 | 3.344279182 | 7.13E-28    | 5.28E-25    |
| ENSMMUG00000018358 | zinc finger protein 217 [Source:VGNC Symbol;Acc:VGNC:78874]                                     | -3.32148203 | 0.007030831 | 0.038007238 |
| ENSMMUG00000006898 | integrin subunit beta 8 [Source:VGNC Symbol;Acc:VGNC:73791]                                     | -           |             |             |
| ENSMMUG00000001479 | laminin subunit gamma 2 [Source:VGNC Symbol;Acc:VGNC:74233]                                     | 3.316293739 | 0.003414386 | 0.021735675 |
|                    |                                                                                                 | -           |             |             |
|                    |                                                                                                 | 3.316077673 | 2.51E-18    | 5.10E-16    |
|                    |                                                                                                 | -           |             |             |
|                    |                                                                                                 | 3.293592059 | 5.47E-09    | 2.10E-07    |
|                    |                                                                                                 | -           |             |             |
|                    |                                                                                                 | 3.285979155 | 0.005419833 | 0.031276366 |
|                    |                                                                                                 | -           |             |             |
|                    |                                                                                                 | 3.265244023 | 0.000847955 | 0.007073817 |
|                    |                                                                                                 | -           |             |             |
|                    |                                                                                                 | 3.264970483 | 3.45E-07    | 8.54E-06    |
|                    |                                                                                                 | -           |             |             |
|                    |                                                                                                 | 3.138504138 | 2.61E-07    | 6.59E-06    |
|                    |                                                                                                 | -           |             |             |
|                    |                                                                                                 | 3.119470509 | 0.006676278 | 0.036629551 |
|                    |                                                                                                 | -           |             |             |
|                    |                                                                                                 | 3.095483555 | 0.0057134   | 0.032417074 |
|                    |                                                                                                 | -           |             |             |
|                    |                                                                                                 | 3.091707635 | 6.03E-06    | 0.000106277 |
|                    |                                                                                                 | -           |             |             |
|                    |                                                                                                 | 3.087085744 | 2.08E-05    | 0.000298337 |
|                    |                                                                                                 | -           |             |             |
|                    |                                                                                                 | 3.067518681 | 2.35E-09    | 9.71E-08    |
|                    |                                                                                                 | -           |             |             |
|                    |                                                                                                 | 3.000223061 | 0.000256923 | 0.002624678 |

|                    |                                                                                                |   |             |             |             |
|--------------------|------------------------------------------------------------------------------------------------|---|-------------|-------------|-------------|
| ENSMMUG00000010858 | prolyl 4-hydroxylase subunit alpha 2 [Source:VGNC Symbol;Acc:VGNC:75742]                       | - | 2.988899896 | 9.20E-12    | 6.15E-10    |
| ENSMMUG00000017234 | leucine rich repeat containing 59 [Source:VGNC Symbol;Acc:VGNC:81436]                          | - | 2.968880929 | 9.59E-11    | 5.18E-09    |
| ENSMMUG00000018342 | required for meiotic nuclear division 1 homolog [Source:VGNC Symbol;Acc:VGNC:76797]            | - | 2.967883832 | 0.000101373 | 0.001184192 |
| ENSMMUG00000051381 | Metazoan signal recognition particle RNA [Source:RFAM;Acc:RF00017]                             | - | 2.945737672 | 2.08E-05    | 0.000298337 |
| ENSMMUG00000006768 | coiled-coil domain containing 196 [Source:VGNC Symbol;Acc:VGNC:70828]                          | - | 2.862538887 | 0.004897183 | 0.028998447 |
| ENSMMUG00000064158 |                                                                                                | - | 2.854275515 | 0.008215221 | 0.043153761 |
| ENSMMUG00000051115 |                                                                                                | - | 2.845844052 | 0.000501693 | 0.004543695 |
| ENSMMUG00000016093 | adenosine deaminase RNA specific [Source:VGNC Symbol;Acc:VGNC:69502]                           | - | 2.842777322 | 5.14E-12    | 3.58E-10    |
| ENSMMUG00000000974 | mutS homolog 2 [Source:VGNC Symbol;Acc:VGNC:74931]                                             | - | 2.741189188 | 0.000264914 | 0.002676092 |
| ENSMMUG00000017703 | collagen type XXV alpha 1 chain [Source:VGNC Symbol;Acc:VGNC:81374]                            | - | 2.718191389 | 5.92E-08    | 1.82E-06    |
| ENSMMUG00000022199 | polyhomeotic homolog 3 [Source:VGNC Symbol;Acc:VGNC:75804]                                     | - | 2.704140041 | 1.91E-07    | 4.99E-06    |
| ENSMMUG00000015577 | RIO kinase 1 [Source:VGNC Symbol;Acc:VGNC:76767]                                               | - | 2.687797808 | 0.000278073 | 0.002785656 |
| ENSMMUG00000017186 | pleckstrin homology domain interacting protein [Source:VGNC Symbol;Acc:VGNC:75803]             | - | 2.665131013 | 0.002426419 | 0.016622032 |
| ENSMMUG00000004492 | absent in melanoma 2 [Source:NCBI gene;Acc:719260]                                             | - | 2.662293195 | 1.64E-19    | 4.32E-17    |
| ENSMMUG00000005246 | zinc finger protein 740 [Source:VGNC Symbol;Acc:VGNC:79665]                                    | - | 2.659444519 | 6.66E-05    | 0.000818727 |
| ENSMMUG00000015000 | SPT16 homolog, facilitates chromatin remodeling subunit [Source:VGNC Symbol;Acc:VGNC:78054]    | - | 2.642510779 | 8.19E-05    | 0.000983645 |
| ENSMMUG00000023265 | A-kinase anchoring protein 12 [Source:VGNC Symbol;Acc:VGNC:69766]                              | - | 2.622602249 | 5.14E-09    | 2.00E-07    |
| ENSMMUG00000060845 | F-box protein 48 [Source:NCBI gene;Acc:699202]                                                 | - | 2.606696064 | 0.005527068 | 0.031686497 |
| ENSMMUG00000008974 | Fc receptor like 5 [Source:NCBI gene;Acc:718771]                                               | - | 2.595275638 | 1.61E-23    | 7.72E-21    |
| ENSMMUG00000017207 | dopamine beta-hydroxylase [Source:VGNC Symbol;Acc:VGNC:71740]                                  | - | 2.571461269 | 0.000111915 | 0.001292498 |
| ENSMMUG00000039944 | Ras protein specific guanine nucleotide releasing factor 2 [Source:VGNC Symbol;Acc:VGNC:84486] | - | 2.565520408 | 1.27E-06    | 2.73E-05    |
| ENSMMUG00000052328 | FAM20C golgi associated secretory pathway kinase [Source:NCBI gene;Acc:695088]                 | - | -2.55129554 | 1.14E-05    | 0.000180382 |
| ENSMMUG00000061973 |                                                                                                | - | 2.515103826 | 2.64E-12    | 1.94E-10    |
| ENSMMUG00000052682 |                                                                                                | - | 2.487026108 | 0.004663845 | 0.027921345 |
| ENSMMUG00000005204 | VPS16 core subunit of CORVET and HOPS complexes [Source:VGNC Symbol;Acc:VGNC:78966]            | - | 2.472897069 | 0.00531757  | 0.030935842 |
| ENSMMUG00000056387 | transcription factor 15 [Source:NCBI gene;Acc:716916]                                          | - | 2.451706252 | 5.64E-07    | 1.32E-05    |
| ENSMMUG00000015141 | ankyrin repeat domain 16 [Source:NCBI gene;Acc:720787]                                         | - | 2.433749374 | 0.009205929 | 0.047052526 |
| ENSMMUG00000053721 |                                                                                                | - | 2.414762031 | 0.008672169 | 0.044887986 |
| ENSMMUG00000022762 | OMA1 zinc metalloproteinase [Source:VGNC Symbol;Acc:VGNC:75485]                                | - | 2.409322281 | 0.003439003 | 0.021812457 |

|                    |                                                                                                  |             |             |             |             |
|--------------------|--------------------------------------------------------------------------------------------------|-------------|-------------|-------------|-------------|
| ENSMMUG00000056045 |                                                                                                  | -           | 2.400482347 | 0.000273788 | 0.002748683 |
| ENSMMUG00000015143 | F-box DNA helicase 1 [Source:NCBI gene;Acc:720797]                                               | -2.39770461 | -           | 0.00060832  | 0.005360323 |
| ENSMMUG00000009948 | histone deacetylase 1 [Source:NCBI gene;Acc:708441]                                              | -           | 2.396870892 | 0.000143113 | 0.001609427 |
| ENSMMUG00000030099 | phospholipid phosphatase 1 [Source:VGNC Symbol;Acc:VGNC:76226]                                   | -           | 2.378561899 | 0.000869189 | 0.007206655 |
| ENSMMUG00000055229 |                                                                                                  | -           | 2.360558697 | 7.55E-06    | 0.000129078 |
| ENSMMUG00000015018 | CD5 molecule [Source:VGNC Symbol;Acc:VGNC:70770]                                                 | -           | 2.335061932 | 0.004965665 | 0.029233872 |
| ENSMMUG00000038051 | uncharacterized LOC106998885 [Source:NCBI gene;Acc:106998885]                                    | -           | 2.313328265 | 0.000221246 | 0.002309467 |
| ENSMMUG00000022153 | solute carrier family 25 member 36 [Source:VGNC Symbol;Acc:VGNC:84079]                           | -           | 2.310502585 | 1.77E-09    | 7.60E-08    |
| ENSMMUG00000057697 |                                                                                                  | -           | 2.308643159 | 0.00641688  | 0.035421175 |
| ENSMMUG00000062527 |                                                                                                  | -           | 2.305751364 | 6.76E-17    | 1.02E-14    |
| ENSMMUG00000007816 | SMAD family member 2 [Source:VGNC Symbol;Acc:VGNC:77810]                                         | -           | 2.300017261 | 5.44E-06    | 9.75E-05    |
| ENSMMUG00000051032 | serine protease 2 [Source:NCBI gene;Acc:698352]                                                  | -           | 2.298687887 | 2.66E-06    | 5.23E-05    |
| ENSMMUG00000015317 | HD domain containing 2 [Source:VGNC Symbol;Acc:VGNC:73209]                                       | -           | 2.295484745 | 1.19E-06    | 2.59E-05    |
| ENSMMUG00000065099 |                                                                                                  | -           | 2.291331323 | 0.000264028 | 0.002670458 |
| ENSMMUG00000063177 | StAR related lipid transfer domain containing 4 [Source:NCBI gene;Acc:706654]                    | -           | 2.289750197 | 6.39E-22    | 2.36E-19    |
| ENSMMUG00000055610 | homeobox C4 [Source:NCBI gene;Acc:100430434]                                                     | -           | 2.279883027 | 2.44E-06    | 4.89E-05    |
| ENSMMUG00000057494 | T cell receptor beta variable 7-9 [Source:HGNC Symbol;Acc:HGNC:12243]                            | -           | 2.271138396 | 4.28E-05    | 0.00055583  |
| ENSMMUG00000018901 | FYVE, RhoGEF and PH domain containing 6 [Source:VGNC Symbol;Acc:VGNC:72548]                      | -2.26748892 | -           | 3.82E-08    | 1.24E-06    |
| ENSMMUG00000060167 |                                                                                                  | -           | 2.263931238 | 0.000327018 | 0.003177306 |
| ENSMMUG00000059575 |                                                                                                  | -           | 2.263628878 | 1.05E-08    | 3.87E-07    |
| ENSMMUG00000007398 | potassium calcium-activated channel subfamily N member 1 [Source:VGNC Symbol;Acc:VGNC:74002]     | -           | 2.238125447 | 0.001693746 | 0.012491376 |
| ENSMMUG00000002742 | ST8 alpha-N-acetyl-neuraminide alpha-2,8-sialyltransferase 5 [Source:VGNC Symbol;Acc:VGNC:77942] | -           | 2.234555836 | 6.15E-05    | 0.000766596 |
| ENSMMUG00000032973 | mml-mir-550 [Source:miRBase;Acc:MI0007826]                                                       | -           | 2.228292394 | 0.007816802 | 0.041327532 |
| ENSMMUG00000016791 | doublecortin like kinase 1 [Source:VGNC Symbol;Acc:VGNC:71745]                                   | -           | 2.210496938 | 3.50E-06    | 6.66E-05    |
| ENSMMUG00000050269 | T cell receptor beta variable 14 [Source:HGNC Symbol;Acc:HGNC:12189]                             | -2.20927233 | -           | 4.68E-06    | 8.56E-05    |
| ENSMMUG00000053233 |                                                                                                  | -           | 2.204173594 | 0.004855098 | 0.028795597 |
| ENSMMUG00000039020 | zinc finger protein 141 [Source:NCBI gene;Acc:714265]                                            | -2.20339326 | -           | 1.11E-05    | 0.000176836 |
| ENSMMUG00000007326 | ring finger protein 121 [Source:VGNC Symbol;Acc:VGNC:76788]                                      | -           | 2.198760309 | 6.58E-05    | 0.000811332 |
| ENSMMUG00000023803 | myosin heavy chain 10 [Source:NCBI gene;Acc:721979]                                              | -           | 2.196956599 | 9.75E-09    | 3.64E-07    |
| ENSMMUG00000022256 | transglutaminase 5 [Source:VGNC Symbol;Acc:VGNC:78341]                                           | -2.19233779 | -           | 0.001168695 | 0.009274383 |



|                     |                                                                                              |             |             |             |
|---------------------|----------------------------------------------------------------------------------------------|-------------|-------------|-------------|
| ENSMMUG00000010648  | DNA methyltransferase 3 like [Source:NCBI gene;Acc:722184]                                   | 2.172119185 | 0.003046998 | 0.019894673 |
| ENSMMUG00000002794  | general transcription factor IIB [Source:VGNC Symbol;Acc:VGNC:73306]                         | -2.1704264  | 9.72E-20    | 2.73E-17    |
| ENSMMUG00000000009  | protein tyrosine phosphatase receptor type C [Source:VGNC Symbol;Acc:VGNC:76612]             | 2.150911083 | 0.000658285 | 0.005726235 |
| ENSMMUG000000060744 |                                                                                              | 2.133159362 | 0.003053292 | 0.019903848 |
| ENSMMUG00000012778  | rabphilin 3A [Source:VGNC Symbol;Acc:VGNC:77033]                                             | 2.132401955 | 1.09E-22    | 4.66E-20    |
| ENSMMUG00000007821  | ATP binding cassette subfamily B member 5 [Source:VGNC Symbol;Acc:VGNC:80321]                | 2.124015147 | 5.84E-05    | 0.000734036 |
| ENSMMUG00000010820  | chaperonin containing TCP1 subunit 2 [Source:VGNC Symbol;Acc:VGNC:70745]                     | 2.115951118 | 0.002593427 | 0.017494351 |
| ENSMMUG00000015590  | siah E3 ubiquitin protein ligase 2 [Source:VGNC Symbol;Acc:VGNC:77215]                       | 2.096516455 | 0.000142055 | 0.001601068 |
| ENSMMUG000000051482 |                                                                                              | 2.095546342 | 0.000247955 | 0.002549055 |
| ENSMMUG00000014697  | nuclear factor I B [Source:VGNC Symbol;Acc:VGNC:75335]                                       | 2.086306624 | 1.82E-06    | 3.78E-05    |
| ENSMMUG00000021034  | complement C6 [Source:VGNC Symbol;Acc:VGNC:70477]                                            | 2.079495725 | 9.61E-11    | 5.18E-09    |
| ENSMMUG00000062623  | Metazoan signal recognition particle RNA [Source:RFAM;Acc:RF00017]                           | 2.077451008 | 0.001594873 | 0.011943514 |
| ENSMMUG00000011386  | GTPase, IMAP family member 4 [Source:VGNC Symbol;Acc:VGNC:72982]                             | 2.076627217 | 1.40E-09    | 6.18E-08    |
| ENSMMUG00000014484  | zinc finger protein 641 [Source:NCBI gene;Acc:708246]                                        | -2.07530272 | 0.00258737  | 0.017481086 |
| ENSMMUG00000021499  | sterile alpha motif domain containing 3 [Source:VGNC Symbol;Acc:VGNC:77079]                  | 2.066112657 | 0.005430809 | 0.031276366 |
| ENSMMUG00000022630  | protoporphyrinogen oxidase [Source:VGNC Symbol;Acc:VGNC:76365]                               | 2.048182741 | 0.000231293 | 0.002398965 |
| ENSMMUG00000009773  | lysine demethylase 1A [Source:VGNC Symbol;Acc:VGNC:73928]                                    | 2.041564556 | 1.67E-05    | 0.000250564 |
| ENSMMUG00000022680  | alpha-2-macroglobulin like 1 [Source:VGNC Symbol;Acc:VGNC:69507]                             | 2.033311632 | 0.001016913 | 0.008239592 |
| ENSMMUG00000061536  |                                                                                              | 2.031908837 | 0.006533091 | 0.036038227 |
| ENSMMUG00000005137  | ATPase secretory pathway Ca <sup>2+</sup> transporting 1 [Source:VGNC Symbol;Acc:VGNC:70054] | -2.02070095 | 0.003014181 | 0.019712017 |
| ENSMMUG00000017125  | oxysterol binding protein like 11 [Source:VGNC Symbol;Acc:VGNC:75631]                        | 2.013321902 | 1.23E-07    | 3.36E-06    |
| ENSMMUG000000055392 |                                                                                              | 2.006034886 | 0.005902099 | 0.033232983 |
| ENSMMUG000000058942 |                                                                                              | 1.986441741 | 1.56E-06    | 3.29E-05    |
| ENSMMUG00000019325  | mechanistic target of rapamycin kinase [Source:VGNC Symbol;Acc:VGNC:75062]                   | 1.973599144 | 0.00014883  | 0.00165769  |
| ENSMMUG00000006252  | argonaute RISC catalytic component 3 [Source:NCBI gene;Acc:712543]                           | 1.972723372 | 1.74E-18    | 3.64E-16    |
| ENSMMUG000000050975 |                                                                                              | -1.96905193 | 0.00663115  | 0.036455653 |
| ENSMMUG000000040771 |                                                                                              | 1.962915214 | 0.002966027 | 0.019475316 |
| ENSMMUG00000014735  | carnitine palmitoyltransferase 1C [Source:NCBI gene;Acc:719429]                              | -1.95830583 | 0.000418646 | 0.003914802 |
| ENSMMUG000000033001 | U6 spliceosomal RNA [Source:RFAM;Acc:RF00026]                                                | -1.95607071 | 4.91E-05    | 0.000626704 |
| ENSMMUG00000016262  | tetratricopeptide repeat domain 38 [Source:VGNC Symbol;Acc:VGNC:79574]                       | 1.942656654 | 0.000346977 | 0.00333935  |
| ENSMMUG00000017246  | lipoygenase homology domains 1 [Source:VGNC Symbol;Acc:VGNC:74368]                           | 1.933402416 | 1.72E-05    | 0.000255321 |

|                    |                                                                                                                                       |   |             |             |             |
|--------------------|---------------------------------------------------------------------------------------------------------------------------------------|---|-------------|-------------|-------------|
| ENSMMUG00000022372 | cytochrome b561 family member A3 [Source:VGNC Symbol;Acc:VGNC:71458]                                                                  | - | 1.927503285 | 1.78E-08    | 6.30E-07    |
| ENSMMUG00000022183 | spermatogenesis associated 1 [Source:NCBI gene;Acc:710462]                                                                            | - | 1.918205873 | 2.12E-08    | 7.31E-07    |
| ENSMMUG00000050239 |                                                                                                                                       | - | 1.914117335 | 0.003158053 | 0.020374695 |
| ENSMMUG00000007330 | nuclear mitotic apparatus protein 1 [Source:VGNC Symbol;Acc:VGNC:75556]                                                               | - | 1.913665473 | 5.32E-09    | 2.06E-07    |
| ENSMMUG00000012192 | erythrocyte membrane protein band 4.1 like 4A [Source:VGNC Symbol;Acc:VGNC:72039]                                                     | - | 1.913490951 | 0.001916858 | 0.01378715  |
| ENSMMUG00000011974 | calcium/calmodulin dependent protein kinase IV [Source:VGNC Symbol;Acc:VGNC:70526]                                                    | - | 1.909339481 | 0.000832576 | 0.006974105 |
| ENSMMUG00000057606 | GPRIN family member 3 [Source:NCBI gene;Acc:703567]                                                                                   | - | 1.892745155 | 2.08E-05    | 0.000298337 |
| ENSMMUG00000040694 | LCK proto-oncogene, Src family tyrosine kinase [Source:NCBI gene;Acc:717704]                                                          | - | 1.892118689 | 1.49E-17    | 2.70E-15    |
| ENSMMUG00000021053 | annexin A6 [Source:VGNC Symbol;Acc:VGNC:69951]                                                                                        | - | -1.88968787 | 0.004577373 | 0.027545432 |
| ENSMMUG00000052377 |                                                                                                                                       | - | 1.884413712 | 1.81E-10    | 9.32E-09    |
| ENSMMUG00000059525 |                                                                                                                                       | - | 1.878843221 | 0.000785375 | 0.006640215 |
| ENSMMUG00000018474 | signal regulatory protein alpha [Source:NCBI gene;Acc:717811]                                                                         | - | 1.877853437 | 1.42E-06    | 3.02E-05    |
| ENSMMUG00000055344 | TLC domain containing 3A [Source:NCBI gene;Acc:699707]                                                                                | - | 1.877491661 | 2.20E-05    | 0.000311943 |
| ENSMMUG00000054064 |                                                                                                                                       | - | 1.871472305 | 2.18E-07    | 5.61E-06    |
| ENSMMUG00000051042 |                                                                                                                                       | - | 1.865795514 | 3.56E-06    | 6.76E-05    |
| ENSMMUG00000064131 |                                                                                                                                       | - | 1.859799447 | 0.001023376 | 0.008282635 |
| ENSMMUG00000004675 | smoothelin [Source:VGNC Symbol;Acc:VGNC:77661]                                                                                        | - | 1.850930865 | 2.92E-05    | 0.000395461 |
| ENSMMUG00000052031 |                                                                                                                                       | - | 1.848904715 | 0.007034747 | 0.038007238 |
| ENSMMUG00000002113 | NHL repeat containing 3 [Source:VGNC Symbol;Acc:VGNC:75291]                                                                           | - | 1.847356994 | 8.98E-08    | 2.56E-06    |
| ENSMMUG00000004157 | nuclear protein, coactivator of histone transcription [Source:VGNC Symbol;Acc:VGNC:75379]                                             | - | 1.846884828 | 0.00145694  | 0.011096733 |
| ENSMMUG00000060346 |                                                                                                                                       | - | 1.844496654 | 0.004917583 | 0.02904965  |
| ENSMMUG00000016004 | acid phosphatase 3 [Source:VGNC Symbol;Acc:VGNC:69385]                                                                                | - | 1.835070593 | 0.005997539 | 0.03363083  |
| ENSMMUG00000006704 | zygote arrest 1 [Source:VGNC Symbol;Acc:VGNC:79251]                                                                                   | - | 1.827257592 | 0.005429023 | 0.031276366 |
| ENSMMUG00000012781 | muscular LMNA interacting protein [Source:VGNC Symbol;Acc:VGNC:83434]                                                                 | - | 1.826171805 | 0.007675302 | 0.040764714 |
| ENSMMUG00000010312 | shroom family member 1 [Source:VGNC Symbol;Acc:VGNC:77299]                                                                            | - | 1.813886291 | 4.25E-07    | 1.03E-05    |
| ENSMMUG00000003282 | phosphodiesterase 6B [Source:VGNC Symbol;Acc:VGNC:75920]                                                                              | - | 1.813865009 | 0.003262967 | 0.020918961 |
| ENSMMUG00000010647 | inducible T cell costimulator ligand [Source:NCBI gene;Acc:722191]                                                                    | - | 1.807740988 | 0.001835096 | 0.013340491 |
| ENSMMUG00000015279 | SWI/SNF related, matrix associated, actin dependent regulator of chromatin, subfamily a, member 2 [Source:VGNC Symbol;Acc:VGNC:77647] | - | 1.803017247 | 1.27E-05    | 0.000198194 |
| ENSMMUG00000064804 |                                                                                                                                       | - | 1.801383971 | 0.005130015 | 0.030070971 |



|                    |                                                                                          |   |             |             |             |
|--------------------|------------------------------------------------------------------------------------------|---|-------------|-------------|-------------|
| ENSMMUG00000049661 | Metazoan signal recognition particle RNA [Source:RFAM;Acc:RF00017]                       | - | 1.799524827 | 0.000600893 | 0.005306369 |
| ENSMMUG00000002200 | phospholipid phosphatase 3 [Source:NCBI gene;Acc:715993]                                 | - | 1.799436542 | 5.94E-06    | 0.0001049   |
| ENSMMUG00000022305 | Rho guanine nucleotide exchange factor 1 [Source:VGNC Symbol;Acc:VGNC:70012]             | - | 1.797577989 | 1.94E-09    | 8.26E-08    |
| ENSMMUG00000023248 | serine/threonine kinase 38 like [Source:VGNC Symbol;Acc:VGNC:78156]                      | - | -1.7927897  | 0.008723773 | 0.045045213 |
| ENSMMUG00000040154 | T cell receptor alpha variable 9-2 [Source:HGNC Symbol;Acc:HGNC:12154]                   | - | 1.784066219 | 0.004086334 | 0.025132021 |
| ENSMMUG00000054417 |                                                                                          | - | 1.781226612 | 8.48E-10    | 3.95E-08    |
| ENSMMUG00000008540 | ring finger protein 112 [Source:VGNC Symbol;Acc:VGNC:76724]                              | - | 1.777681022 | 0.002213726 | 0.01555147  |
| ENSMMUG00000055845 | ankyrin repeat domain 53 [Source:NCBI gene;Acc:703757]                                   | - | 1.769713866 | 0.004920102 | 0.02904965  |
| ENSMMUG00000012129 | tripartite motif containing 10 [Source:VGNC Symbol;Acc:VGNC:78550]                       | - | 1.761556569 | 1.50E-06    | 3.18E-05    |
| ENSMMUG00000006731 | CECR2 histone acetyl-lysine reader [Source:VGNC Symbol;Acc:VGNC:84530]                   | - | 1.753487313 | 0.001881646 | 0.013606008 |
| ENSMMUG00000022602 | methyltransferase like 21A [Source:VGNC Symbol;Acc:VGNC:74625]                           | - | -1.75194102 | 0.000470333 | 0.004327065 |
| ENSMMUG00000016860 | zinc finger protein 490 [Source:NCBI gene;Acc:100426568]                                 | - | 1.745062221 | 0.006701165 | 0.036707927 |
| ENSMMUG00000053384 |                                                                                          | - | 1.740769457 | 2.96E-08    | 9.92E-07    |
| ENSMMUG00000000717 | CD3e molecule associated protein [Source:NCBI gene;Acc:714440]                           | - | -1.74015446 | 0.001146593 | 0.009134596 |
| ENSMMUG00000003634 | DExD/H-box 60 like [Source:VGNC Symbol;Acc:VGNC:71720]                                   | - | 1.733515989 | 0.001983494 | 0.014166321 |
| ENSMMUG00000010453 | folate receptor beta [Source:VGNC Symbol;Acc:VGNC:72690]                                 | - | 1.729585524 | 0.000833614 | 0.006975624 |
| ENSMMUG00000059707 | MIS18 kinetochore protein A [Source:NCBI gene;Acc:709275]                                | - | 1.727404189 | 0.007949698 | 0.04197564  |
| ENSMMUG00000017230 | V-set and transmembrane domain containing 2 like [Source:NCBI gene;Acc:707394]           | - | 1.727279724 | 7.50E-07    | 1.70E-05    |
| ENSMMUG00000002894 | dedicator of cytokinesis 4 [Source:VGNC Symbol;Acc:VGNC:71866]                           | - | 1.700962696 | 0.001723448 | 0.012653121 |
| ENSMMUG00000064529 |                                                                                          | - | 1.698252519 | 4.84E-06    | 8.83E-05    |
| ENSMMUG00000060168 |                                                                                          | - | -1.69322201 | 0.002899125 | 0.019190793 |
| ENSMMUG00000001374 | supervillin [Source:NCBI gene;Acc:695267]                                                | - | 1.690008805 | 0.005792735 | 0.032802457 |
| ENSMMUG00000051641 |                                                                                          | - | 1.686208483 | 0.005273967 | 0.030737752 |
| ENSMMUG00000008718 | zinc finger protein 280D [Source:NCBI gene;Acc:699509]                                   | - | 1.684543131 | 0.000209101 | 0.002196773 |
| ENSMMUG00000055477 |                                                                                          | - | 1.681622178 | 0.000190458 | 0.002032382 |
| ENSMMUG00000021145 | family with sequence similarity 120B [Source:VGNC Symbol;Acc:VGNC:72311]                 | - | 1.677116144 | 4.91E-09    | 1.92E-07    |
| ENSMMUG00000005622 | dynein axonemal heavy chain 7 [Source:VGNC Symbol;Acc:VGNC:71859]                        | - | 1.675157853 | 1.51E-07    | 4.04E-06    |
| ENSMMUG00000018566 | Janus kinase 1 [Source:VGNC Symbol;Acc:VGNC:73810]                                       | - | 1.668945738 | 4.54E-10    | 2.19E-08    |
| ENSMMUG00000020821 | testis expressed 15, meiosis and synapsis associated [Source:VGNC Symbol;Acc:VGNC:78318] | - | 1.662457199 | 1.69E-08    | 6.02E-07    |
| ENSMMUG00000014314 | ankyrin and armadillo repeat containing [Source:VGNC Symbol;Acc:VGNC:69706]              | - | 1.660678525 | 2.89E-07    | 7.24E-06    |

|                     |                                                                                  |   |             |             |             |
|---------------------|----------------------------------------------------------------------------------|---|-------------|-------------|-------------|
| ENSMMUG00000050458  |                                                                                  | - | 1.656311268 | 2.52E-07    | 6.39E-06    |
| ENSMMUG00000056103  | growth arrest and DNA damage inducible alpha [Source:NCBI gene;Acc:701054]       | - | 1.654790944 | 4.47E-12    | 3.16E-10    |
| ENSMMUG00000009006  | round spermatid basic protein 1 like [Source:VGNC Symbol;Acc:VGNC:77097]         | - | 1.651076769 | 0.000111831 | 0.001292498 |
| ENSMMUG00000045584  | leucine zipper protein 1 [Source:NCBI gene;Acc:718626]                           | - | 1.644893806 | 1.39E-05    | 0.000214681 |
| ENSMMUG00000000981  | T-box transcription factor 6 [Source:VGNC Symbol;Acc:VGNC:78276]                 | - | 1.636855075 | 0.002120091 | 0.014997201 |
| ENSMMUG000000057501 |                                                                                  | - | 1.631024505 | 0.004942313 | 0.029138535 |
| ENSMMUG00000015970  | coiled-coil domain containing 150 [Source:VGNC Symbol;Acc:VGNC:84222]            | - | 1.624926841 | 3.47E-05    | 0.000458725 |
| ENSMMUG00000020061  | protein phosphatase 1 regulatory subunit 9B [Source:VGNC Symbol;Acc:VGNC:76372]  | - | 1.622944944 | 4.36E-05    | 0.000564842 |
| ENSMMUG00000016983  | acrosin binding protein [Source:VGNC Symbol;Acc:VGNC:69445]                      | - | 1.620597234 | 0.003806419 | 0.023766765 |
| ENSMMUG000000031296 | caspase 8 [Source:VGNC Symbol;Acc:VGNC:70547]                                    | - | 1.619019499 | 2.34E-06    | 4.72E-05    |
| ENSMMUG000000052526 | RAB39A, member RAS oncogene family [Source:NCBI gene;Acc:707451]                 | - | 1.617499436 | 1.51E-09    | 6.59E-08    |
| ENSMMUG000000052651 | Metazoan signal recognition particle RNA [Source:RFAM;Acc:RF00017]               | - | 1.616811765 | 0.002754745 | 0.018399617 |
| ENSMMUG00000017351  | stabilin 1 [Source:VGNC Symbol;Acc:VGNC:77956]                                   | - | 1.616737108 | 1.23E-05    | 0.000193364 |
| ENSMMUG00000017259  | DnaJ heat shock protein family (Hsp40) member C6 [Source:NCBI gene;Acc:698682]   | - | 1.614035645 | 0.006125166 | 0.034205146 |
| ENSMMUG00000003277  | copine 4 [Source:VGNC Symbol;Acc:VGNC:71466]                                     | - | 1.610790019 | 0.000859097 | 0.007144812 |
| ENSMMUG00000003029  | protein arginine methyltransferase 1 [Source:NCBI gene;Acc:719419]               | - | 1.610765406 | 7.51E-05    | 0.000910038 |
| ENSMMUG00000000059  | DNA topoisomerase II binding protein 1 [Source:VGNC Symbol;Acc:VGNC:79061]       | - | 1.604163753 | 1.87E-06    | 3.87E-05    |
| ENSMMUG000000055244 | U6 spliceosomal RNA [Source:RFAM;Acc:RF00026]                                    | - | 1.602026847 | 0.004837384 | 0.028727921 |
| ENSMMUG00000002321  | solute carrier family 24 member 3 [Source:VGNC Symbol;Acc:VGNC:77426]            | - | 1.600231386 | 0.004707194 | 0.02809822  |
| ENSMMUG00000040854  | aspartyl-tRNA synthetase 1 [Source:VGNC Symbol;Acc:VGNC:84226]                   | - | 1.590181118 | 0.00534471  | 0.031038963 |
| ENSMMUG00000012110  | smoothed, frizzled class receptor [Source:VGNC Symbol;Acc:VGNC:77658]            | - | 1.590001091 | 0.006714082 | 0.036737942 |
| ENSMMUG00000008643  | general transcription factor IIIC subunit 3 [Source:VGNC Symbol;Acc:VGNC:73317]  | - | 1.586366912 | 0.002565558 | 0.017363901 |
| ENSMMUG000000005634 | ribonuclease L [Source:VGNC Symbol;Acc:VGNC:82223]                               | - | 1.586070701 | 0.001112347 | 0.008914107 |
| ENSMMUG000000028800 | solute carrier family 7 member 9 [Source:VGNC Symbol;Acc:VGNC:77633]             | - | 1.584883608 | 0.002551431 | 0.017311456 |
| ENSMMUG00000015661  | protein tyrosine phosphatase receptor type U [Source:VGNC Symbol;Acc:VGNC:76624] | - | -1.58467028 | 0.001585557 | 0.011887295 |
| ENSMMUG000000050177 |                                                                                  | - | -1.58322339 | 0.007095809 | 0.038159895 |
| ENSMMUG00000016753  | dynein axonemal heavy chain 3 [Source:VGNC Symbol;Acc:VGNC:71941]                | - | 1.581243488 | 5.33E-07    | 1.25E-05    |
| ENSMMUG00000001357  | tetraspanin 11 [Source:VGNC Symbol;Acc:VGNC:79882]                               | - | 1.579051654 | 9.29E-08    | 2.62E-06    |
| ENSMMUG00000004709  | proteasome inhibitor subunit 1 [Source:VGNC Symbol;Acc:VGNC:76458]               | - | 1.577939774 | 0.003547972 | 0.022410849 |

|                     |                                                                                                |   |             |             |             |
|---------------------|------------------------------------------------------------------------------------------------|---|-------------|-------------|-------------|
| ENSMMUG00000022359  | solute carrier family 38 member 2 [Source:VGNC Symbol;Acc:VGNC:77469]                          | - | 1.574161105 | 0.000458765 | 0.004234994 |
| ENSMMUG00000031853  | RAB5B, member RAS oncogene family [Source:VGNC Symbol;Acc:VGNC:81546]                          | - | 1.567945656 | 0.003111229 | 0.020088525 |
| ENSMMUG00000021459  | MYC binding protein 2 [Source:VGNC Symbol;Acc:VGNC:75011]                                      | - | -1.5637753  | 0.000213458 | 0.002236772 |
| ENSMMUG00000002103  | delta/notch like EGF repeat containing [Source:VGNC Symbol;Acc:VGNC:71895]                     | - | 1.559041219 | 0.000742285 | 0.0063351   |
| ENSMMUG00000042208  | pepsin A-4 [Source:NCBI gene;Acc:694646]                                                       | - | 1.558133815 | 2.27E-05    | 0.000319983 |
| ENSMMUG00000020289  | CD83 molecule [Source:VGNC Symbol;Acc:VGNC:70783]                                              | - | 1.555856389 | 0.000177985 | 0.001924509 |
| ENSMMUG00000049196  | dispatched RND transporter family member 3 [Source:NCBI gene;Acc:722727]                       | - | 1.554468107 | 5.62E-08    | 1.75E-06    |
| ENSMMUG00000023401  | adhesion G protein-coupled receptor B2 [Source:VGNC Symbol;Acc:VGNC:69598]                     | - | 1.554092847 | 0.004091231 | 0.025140228 |
| ENSMMUG00000008797  | ATP binding cassette subfamily G member 2 (Junior blood group) [Source:NCBI gene;Acc:574307]   | - | 1.549134576 | 3.88E-06    | 7.25E-05    |
| ENSMMUG00000003394  | cilia and flagella associated protein 300 [Source:VGNC Symbol;Acc:VGNC:71120]                  | - | -1.54750828 | 3.75E-05    | 0.00049163  |
| ENSMMUG00000006713  | cyclin Y [Source:VGNC Symbol;Acc:VGNC:70840]                                                   | - | 1.539087105 | 1.17E-05    | 0.000185949 |
| ENSMMUG000000059267 | pellino E3 ubiquitin protein ligase 1 [Source:NCBI gene;Acc:696416]                            | - | -1.5384908  | 0.000867488 | 0.007199888 |
| ENSMMUG00000042707  | angiopoietin like 6 [Source:NCBI gene;Acc:106994633]                                           | - | 1.536288155 | 1.63E-06    | 3.41E-05    |
| ENSMMUG00000005301  | ATP binding cassette subfamily B member 9 [Source:VGNC Symbol;Acc:VGNC:81341]                  | - | 1.532451389 | 0.000173485 | 0.001880843 |
| ENSMMUG00000019462  | integrin subunit alpha V [Source:VGNC Symbol;Acc:VGNC:73783]                                   | - | 1.530842905 | 0.000654158 | 0.00569642  |
| ENSMMUG00000061761  | interferon induced protein with tetratricopeptide repeats 2 [Source:NCBI gene;Acc:695452]      | - | 1.527474833 | 8.61E-06    | 0.000143061 |
| ENSMMUG00000020928  | nucleolar protein interacting with the FHA domain of MKI67 [Source:VGNC Symbol;Acc:VGNC:75201] | - | 1.527023091 | 0.002213151 | 0.01555147  |
| ENSMMUG00000054210  | C-C motif chemokine 4 [Source:NCBI gene;Acc:100426632]                                         | - | 1.525711357 | 1.49E-08    | 5.38E-07    |
| ENSMMUG00000018974  | LysM domain containing 3 [Source:VGNC Symbol;Acc:VGNC:74373]                                   | - | 1.518657996 | 3.73E-05    | 0.000490573 |
| ENSMMUG00000041450  | zinc finger protein 432 [Source:NCBI gene;Acc:100424341]                                       | - | 1.517210863 | 0.002645027 | 0.017798187 |
| ENSMMUG00000008965  | piwi like RNA-mediated gene silencing 4 [Source:VGNC Symbol;Acc:VGNC:81504]                    | - | 1.506453339 | 1.15E-10    | 6.10E-09    |
| ENSMMUG00000012481  | importin 4 [Source:VGNC Symbol;Acc:VGNC:73630]                                                 | - | 1.506227022 | 0.002090882 | 0.01481633  |
| ENSMMUG00000015522  | GRAM domain containing 1B [Source:VGNC Symbol;Acc:VGNC:73028]                                  | - | 1.503191243 | 0.007339391 | 0.039262367 |
| ENSMMUG00000062006  | methionyl aminopeptidase 2 [Source:NCBI gene;Acc:712400]                                       | - | 1.502927002 | 0.000675709 | 0.005859021 |
| ENSMMUG00000062974  |                                                                                                | - | 1.501313414 | 0.000905967 | 0.007465972 |
| ENSMMUG00000012120  | zinc ribbon domain containing 1 [Source:VGNC Symbol;Acc:VGNC:78912]                            | - | 1.500280997 | 0.001144101 | 0.009123676 |
| ENSMMUG00000012203  | aryl hydrocarbon receptor [Source:NCBI gene;Acc:714254]                                        | - | 1.499835055 | 1.88E-05    | 0.000274537 |
| ENSMMUG00000030381  | arachidonate 15-lipoxygenase [Source:VGNC Symbol;Acc:VGNC:69796]                               | - | 1.495401822 | 0.000321712 | 0.003136978 |
| ENSMMUG00000032252  | UbiA prenyltransferase domain containing 1 [Source:VGNC Symbol;Acc:VGNC:79881]                 | - | 1.493585335 | 0.000892255 | 0.007372018 |

|                    |                                                                                                                      |   |             |             |             |
|--------------------|----------------------------------------------------------------------------------------------------------------------|---|-------------|-------------|-------------|
| ENSMMUG00000064237 |                                                                                                                      | - | 1.492710438 | 0.008556216 | 0.044437546 |
| ENSMMUG0000005856  | glycine amidinotransferase [Source:VGNC Symbol;Acc:VGNC:72892]                                                       | - | 1.492227586 | 0.001476274 | 0.011212521 |
| ENSMMUG00000054683 | dynein axonemal heavy chain 12 [Source:NCBI gene;Acc:703670]                                                         | - | 1.491896801 | 0.000457596 | 0.004229    |
| ENSMMUG00000009524 | adaptor protein, phosphotyrosine interacting with PH domain and leucine zipper 2 [Source:VGNC Symbol;Acc:VGNC:69861] | - | 1.488923558 | 1.48E-05    | 0.000225027 |
| ENSMMUG00000010601 | solute carrier family 43 member 3 [Source:NCBI gene;Acc:706267]                                                      | - | 1.483423751 | 0.00613693  | 0.034223895 |
| ENSMMUG00000046237 | 4-aminobutyrate aminotransferase [Source:NCBI gene;Acc:714017]                                                       | - | 1.474556726 | 0.000433645 | 0.004030521 |
| ENSMMUG00000054711 |                                                                                                                      | - | 1.473857341 | 0.00828396  | 0.04337492  |
| ENSMMUG00000002890 | tripartite motif containing 15 [Source:VGNC Symbol;Acc:VGNC:83958]                                                   | - | 1.473010504 | 2.36E-06    | 4.74E-05    |
| ENSMMUG00000046901 | protein tyrosine phosphatase 4A2 [Source:NCBI gene;Acc:706489]                                                       | - | 1.472879915 | 0.00131503  | 0.010245906 |
| ENSMMUG00000020211 | cyclin Y like 1 [Source:VGNC Symbol;Acc:VGNC:84224]                                                                  | - | 1.470886322 | 0.001441847 | 0.011002362 |
| ENSMMUG00000000413 | solute carrier family 7 member 7 [Source:VGNC Symbol;Acc:VGNC:77631]                                                 | - | 1.470113033 | 0.000103004 | 0.001199795 |
| ENSMMUG00000002109 | proline and serine rich 1 [Source:VGNC Symbol;Acc:VGNC:76291]                                                        | - | 1.463589591 | 8.90E-07    | 1.97E-05    |
| ENSMMUG00000014307 | myostatin [Source:VGNC Symbol;Acc:VGNC:74870]                                                                        | - | 1.462630868 | 0.000590895 | 0.005236212 |
| ENSMMUG00000003316 | mannosidase alpha class 2A member 1 [Source:VGNC Symbol;Acc:VGNC:81449]                                              | - | 1.457809709 | 5.57E-07    | 1.30E-05    |
| ENSMMUG00000002121 | armadillo like helical domain containing 4 [Source:VGNC Symbol;Acc:VGNC:82106]                                       | - | -1.45612719 | 0.000170761 | 0.001858736 |
| ENSMMUG00000022185 | odd-skipped related transcription factor 2 [Source:VGNC Symbol;Acc:VGNC:84097]                                       | - | 1.453922346 | 0.001473737 | 0.011203707 |
| ENSMMUG00000008795 | polycystin 2, transient receptor potential cation channel [Source:NCBI gene;Acc:702179]                              | - | 1.450716779 | 0.004860167 | 0.028800205 |
| ENSMMUG00000017549 | ectonucleotide pyrophosphatase/phosphodiesterase 3 [Source:VGNC Symbol;Acc:VGNC:72224]                               | - | 1.448730305 | 7.44E-08    | 2.20E-06    |
| ENSMMUG00000014394 | DnaJ heat shock protein family (Hsp40) member C10 [Source:VGNC Symbol;Acc:VGNC:84229]                                | - | 1.446967743 | 1.91E-06    | 3.93E-05    |
| ENSMMUG00000057544 |                                                                                                                      | - | 1.442545713 | 0.000557684 | 0.00497334  |
| ENSMMUG00000001213 | spermatogenesis associated 9 [Source:VGNC Symbol;Acc:VGNC:77976]                                                     | - | -1.4416286  | 0.000492034 | 0.004471143 |
| ENSMMUG00000004849 | casein beta [Source:VGNC Symbol;Acc:VGNC:71523]                                                                      | - | 1.436735029 | 0.002461375 | 0.016798421 |
| ENSMMUG00000001728 | mitogen-activated protein kinase 9 [Source:VGNC Symbol;Acc:VGNC:74652]                                               | - | 1.432490706 | 0.000239429 | 0.002477043 |
| ENSMMUG00000012218 | calmodulin regulated spectrin associated protein family member 2 [Source:VGNC Symbol;Acc:VGNC:70666]                 | - | 1.428607025 | 0.00401826  | 0.024822967 |
| ENSMMUG00000001919 | clock circadian regulator [Source:VGNC Symbol;Acc:VGNC:71262]                                                        | - | 1.427773503 | 1.84E-05    | 0.000269419 |
| ENSMMUG00000049999 | cone-rod homeobox [Source:NCBI gene;Acc:717550]                                                                      | - | 1.427174967 | 0.001554214 | 0.011684592 |
| ENSMMUG00000065128 | Metazoan signal recognition particle RNA [Source:RFAM;Acc:RF00017]                                                   | - | 1.419767152 | 0.001906341 | 0.013747389 |
| ENSMMUG00000019850 | arachidonate lipoxygenase 3 [Source:VGNC Symbol;Acc:VGNC:69607]                                                      | - | 1.419129786 | 4.90E-09    | 1.92E-07    |
| ENSMMUG00000017113 | ubiquitin specific peptidase 32 [Source:NCBI gene;Acc:716857]                                                        | - | 1.415352889 | 4.65E-06    | 8.53E-05    |



|                     |                                                                                                                                     |   |             |             |             |
|---------------------|-------------------------------------------------------------------------------------------------------------------------------------|---|-------------|-------------|-------------|
| ENSMMUG00000013552  | scribble planar cell polarity protein [Source:HGNC Symbol;Acc:HGNC:30377]                                                           | - | 1.414449195 | 2.00E-13    | 1.79E-11    |
| ENSMMUG00000003621  | AKT serine/threonine kinase 2 [Source:VGNC Symbol;Acc:VGNC:69777]                                                                   | - | 1.410750782 | 1.49E-05    | 0.000226117 |
| ENSMMUG00000009965  | chromosome 15 C9orf50 homolog [Source:VGNC Symbol;Acc:VGNC:70365]                                                                   | - | 1.410367902 | 0.008242044 | 0.04321861  |
| ENSMMUG00000006251  | argonaute RISC component 1 [Source:VGNC Symbol;Acc:VGNC:81346]                                                                      | - | 1.397880683 | 2.27E-05    | 0.000319983 |
| ENSMMUG00000008916  | transferrin [Source:VGNC Symbol;Acc:VGNC:82716]                                                                                     | - | 1.393953533 | 0.000940385 | 0.007695093 |
| ENSMMUG00000013812  | ubiquitin specific peptidase 44 [Source:VGNC Symbol;Acc:VGNC:79221]                                                                 | - | 1.393336937 | 0.000179719 | 0.0019396   |
| ENSMMUG00000023811  | boule homolog, RNA binding protein [Source:VGNC Symbol;Acc:VGNC:70310]                                                              | - | 1.391321526 | 0.008910088 | 0.045828134 |
| ENSMMUG00000009038  | titin [Source:NCBI gene;Acc:703527]                                                                                                 | - | 1.391200196 | 0.007339345 | 0.039262367 |
| ENSMMUG00000005895  | nucleobindin 2 [Source:VGNC Symbol;Acc:VGNC:75549]                                                                                  | - | -1.38561674 | 0.005369892 | 0.031140785 |
| ENSMMUG00000004606  | EMAP like 5 [Source:VGNC Symbol;Acc:VGNC:72067]                                                                                     | - | 1.383471554 | 0.000152708 | 0.001687037 |
| ENSMMUG00000019892  | myomesin 1 [Source:VGNC Symbol;Acc:VGNC:75123]                                                                                      | - | 1.381482863 | 0.000732619 | 0.006259164 |
| ENSMMUG00000055447  | MDM2 proto-oncogene [Source:NCBI gene;Acc:718284]                                                                                   | - | 1.380806139 | 6.48E-07    | 1.50E-05    |
| ENSMMUG00000022697  | STEAP4 metalloredutase [Source:VGNC Symbol;Acc:VGNC:77974]                                                                          | - | 1.379145881 | 3.28E-05    | 0.000435589 |
| ENSMMUG00000001319  | methylenetetrahydrofolate dehydrogenase, cyclohydrolase and formyltetrahydrofolate synthetase 1 [Source:VGNC Symbol;Acc:VGNC:84399] | - | 1.375699665 | 0.000150373 | 0.001672174 |
| ENSMMUG00000015311  | leucine rich repeats and calponin homology domain containing 4 [Source:VGNC Symbol;Acc:VGNC:74441]                                  | - | 1.374908682 | 3.69E-08    | 1.21E-06    |
| ENSMMUG000000042798 |                                                                                                                                     | - | 1.372603019 | 0.001952583 | 0.013994658 |
| ENSMMUG00000030453  | NLR family pyrin domain containing 1 [Source:NCBI gene;Acc:721648]                                                                  | - | 1.368508476 | 2.89E-06    | 5.62E-05    |
| ENSMMUG00000038070  | T cell receptor alpha variable 12-3 [Source:HGNC Symbol;Acc:HGNC:12107]                                                             | - | 1.368422846 | 0.002301099 | 0.016026987 |
| ENSMMUG00000023679  | tripartite motif containing 26 [Source:VGNC Symbol;Acc:VGNC:78854]                                                                  | - | 1.363928552 | 0.003425416 | 0.021788857 |
| ENSMMUG00000056116  |                                                                                                                                     | - | -1.36154051 | 0.005319354 | 0.030935842 |
| ENSMMUG00000058836  | transmembrane p24 trafficking protein 2 [Source:NCBI gene;Acc:106992483]                                                            | - | 1.361228424 | 0.002669299 | 0.017887596 |
| ENSMMUG00000023676  | espin [Source:NCBI gene;Acc:722532]                                                                                                 | - | 1.356152881 | 1.36E-05    | 0.000210886 |
| ENSMMUG00000011116  | NADPH oxidase 4 [Source:VGNC Symbol;Acc:VGNC:75376]                                                                                 | - | 1.354783348 | 9.77E-06    | 0.000158522 |
| ENSMMUG00000052574  |                                                                                                                                     | - | 1.354449348 | 0.000140228 | 0.00158355  |
| ENSMMUG00000021051  | TNFAIP3 interacting protein 1 [Source:VGNC Symbol;Acc:VGNC:79057]                                                                   | - | 1.350342206 | 0.004074559 | 0.025094601 |
| ENSMMUG00000018747  | 5-methyltetrahydrofolate-homocysteine methyltransferase reductase [Source:VGNC Symbol;Acc:VGNC:75079]                               | - | 1.346963126 | 0.001354726 | 0.010425499 |
| ENSMMUG00000056054  | zinc finger and BTB domain containing 3 [Source:NCBI gene;Acc:722240]                                                               | - | 1.346642227 | 2.79E-07    | 7.02E-06    |
| ENSMMUG00000064114  | zinc finger protein 709 [Source:NCBI gene;Acc:100427466]                                                                            | - | 1.346351862 | 0.004440896 | 0.026983413 |
| ENSMMUG00000000982  | protein phosphatase 4 catalytic subunit [Source:VGNC Symbol;Acc:VGNC:76384]                                                         | - | 1.345159475 | 0.00591019  | 0.033255538 |

|                    |                                                                                                    |   |             |             |             |
|--------------------|----------------------------------------------------------------------------------------------------|---|-------------|-------------|-------------|
| ENSMMUG00000017379 | myocardin related transcription factor B [Source:VGNC Symbol;Acc:VGNC:74865]                       | - | 1.344745392 | 0.006354265 | 0.03514703  |
| ENSMMUG00000046195 | MIS12 kinetochore complex component [Source:NCBI gene;Acc:712202]                                  | - | 1.343135367 | 0.009350954 | 0.047614426 |
| ENSMMUG00000021393 | calcium/calmodulin dependent protein kinase II gamma [Source:VGNC Symbol;Acc:VGNC:70525]           | - | 1.340302448 | 0.009701692 | 0.049093334 |
| ENSMMUG00000013047 | S-phase kinase associated protein 1 [Source:NCBI gene;Acc:100423634]                               | - | 1.338988446 | 0.000320409 | 0.003128019 |
| ENSMMUG00000018415 | Ras interacting protein 1 [Source:HGNC Symbol;Acc:HGNC:24716]                                      | - | 1.335753408 | 0.003932921 | 0.024438272 |
| ENSMMUG00000018738 | alcohol dehydrogenase 1B (class I), beta polypeptide [Source:NCBI gene;Acc:707908]                 | - | 1.331386633 | 6.12E-06    | 0.000107425 |
| ENSMMUG00000051966 |                                                                                                    | - | -1.33070324 | 0.005938641 | 0.033346496 |
| ENSMMUG00000002090 | ATPase H+ transporting V1 subunit B1 [Source:VGNC Symbol;Acc:VGNC:70184]                           | - | 1.321936756 | 0.000254913 | 0.002607412 |
| ENSMMUG00000021474 | zinc finger protein 45 [Source:NCBI gene;Acc:712591]                                               | - | 1.319618765 | 1.94E-11    | 1.20E-09    |
| ENSMMUG00000008781 | BCL6 corepressor like 1 [Source:VGNC Symbol;Acc:VGNC:70131]                                        | - | 1.319357672 | 0.001892851 | 0.013674886 |
| ENSMMUG00000007310 | solute carrier family 25 member 12 [Source:VGNC Symbol;Acc:VGNC:77430]                             | - | 1.316072775 | 0.00233499  | 0.016193774 |
| ENSMMUG00000065301 |                                                                                                    | - | 1.314402349 | 0.004959877 | 0.029220925 |
| ENSMMUG00000003497 | FAT atypical cadherin 2 [Source:VGNC Symbol;Acc:VGNC:72618]                                        | - | 1.311778672 | 1.23E-06    | 2.66E-05    |
| ENSMMUG00000006310 | solute carrier family 3 member 1 [Source:VGNC Symbol;Acc:VGNC:77462]                               | - | 1.306625184 | 0.005484575 | 0.03151405  |
| ENSMMUG00000064089 |                                                                                                    | - | 1.302186697 | 0.000278635 | 0.002785656 |
| ENSMMUG00000002176 | ubiquitin like with PHD and ring finger domains 2 [Source:VGNC Symbol;Acc:VGNC:78714]              | - | 1.302181655 | 0.000411041 | 0.003860091 |
| ENSMMUG00000004467 | X-ray repair cross complementing 1 [Source:NCBI gene;Acc:711457]                                   | - | 1.301135178 | 0.004606649 | 0.027680689 |
| ENSMMUG00000060439 | schlafen family member 12 like [Source:NCBI gene;Acc:106992394]                                    | - | 1.298901481 | 0.001524108 | 0.011511401 |
| ENSMMUG00000047594 |                                                                                                    | - | -1.29452846 | 0.004787123 | 0.028470965 |
| ENSMMUG00000023249 | aryl hydrocarbon receptor nuclear translocator like 2 [Source:NCBI gene;Acc:709547]                | - | 1.293854678 | 0.008803854 | 0.045396441 |
| ENSMMUG00000020706 | ETS proto-oncogene 1, transcription factor [Source:VGNC Symbol;Acc:VGNC:72439]                     | - | 1.292740755 | 1.05E-08    | 3.87E-07    |
| ENSMMUG00000053541 |                                                                                                    | - | 1.290967401 | 0.003866958 | 0.024089341 |
| ENSMMUG00000054719 |                                                                                                    | - | 1.289483416 | 0.00910895  | 0.046586101 |
| ENSMMUG00000018814 | diacylglycerol kinase alpha [Source:VGNC Symbol;Acc:VGNC:71780]                                    | - | 1.280915234 | 1.20E-06    | 2.61E-05    |
| ENSMMUG00000015238 | O-linked N-acetylglucosamine (GlcNAc) transferase [Source:NCBI gene;Acc:698268]                    | - | 1.277819766 | 0.001657553 | 0.01232493  |
| ENSMMUG00000020784 | centrosomal protein 126 [Source:NCBI gene;Acc:701911]                                              | - | 1.274513279 | 3.85E-09    | 1.54E-07    |
| ENSMMUG00000012156 | zinc finger CCHC-type containing 17 [Source:VGNC Symbol;Acc:VGNC:79840]                            | - | 1.274256745 | 1.89E-06    | 3.90E-05    |
| ENSMMUG00000007570 | uveal autoantigen with coiled-coil domains and ankyrin repeats [Source:VGNC Symbol;Acc:VGNC:78995] | - | 1.273853507 | 3.20E-06    | 6.11E-05    |
| ENSMMUG00000021878 | timeless circadian regulator [Source:VGNC Symbol;Acc:VGNC:78356]                                   | - | 1.268464308 | 0.000502726 | 0.004547998 |

|                     |                                                                                           |   |             |             |             |
|---------------------|-------------------------------------------------------------------------------------------|---|-------------|-------------|-------------|
| ENSMMUG00000013093  | uncharacterized LOC106993385 [Source:NCBI gene;Acc:106993385]                             | - | 1.268253944 | 1.40E-09    | 6.18E-08    |
| ENSMMUG00000058151  | chromosome 4 C6orf62 homolog [Source:NCBI gene;Acc:708218]                                | - | 1.265286445 | 0.001534443 | 0.011567995 |
| ENSMMUG00000061035  | ZFP82 zinc finger protein [Source:NCBI gene;Acc:719145]                                   | - | 1.262293443 | 0.000380284 | 0.003617141 |
| ENSMMUG00000010321  | C2 domain containing 3 centriole elongation regulator [Source:VGNC Symbol;Acc:VGNC:70375] | - | -1.26146963 | 6.81E-05    | 0.000832999 |
| ENSMMUG00000012486  | retinoic acid receptor alpha [Source:VGNC Symbol;Acc:VGNC:76662]                          | - | 1.260613545 | 0.003905074 | 0.024289621 |
| ENSMMUG00000021169  | translocator protein 2 [Source:VGNC Symbol;Acc:VGNC:83960]                                | - | 1.258865366 | 0.006343356 | 0.03511054  |
| ENSMMUG00000003051  | COPI coat complex subunit beta 2 [Source:VGNC Symbol;Acc:VGNC:71313]                      | - | 1.258507003 | 3.98E-08    | 1.29E-06    |
| ENSMMUG00000008919  | RAB6B, member RAS oncogene family [Source:VGNC Symbol;Acc:VGNC:81547]                     | - | 1.255804361 | 0.008296146 | 0.043410811 |
| ENSMMUG00000007709  | crooked neck pre-mRNA splicing factor 1 [Source:VGNC Symbol;Acc:VGNC:71412]               | - | 1.255145215 | 0.001326831 | 0.010298437 |
| ENSMMUG00000049997  |                                                                                           | - | 1.254398427 | 0.007426252 | 0.039613053 |
| ENSMMUG00000007411  | integrin alpha FG-GAP repeat containing 2 [Source:VGNC Symbol;Acc:VGNC:73690]             | - | 1.254342009 | 9.38E-06    | 0.000152772 |
| ENSMMUG00000008946  | chromosome 19 C19orf47 homolog [Source:VGNC Symbol;Acc:VGNC:70404]                        | - | 1.253973496 | 0.000908762 | 0.007481439 |
| ENSMMUG00000021216  | UDP glucuronosyltransferase 1 family, polypeptide A1 [Source:NCBI gene;Acc:574210]        | - | 1.253349889 | 0.002817054 | 0.018738935 |
| ENSMMUG00000005515  | ATP binding cassette subfamily C member 5 [Source:VGNC Symbol;Acc:VGNC:69574]             | - | 1.251881982 | 0.001754277 | 0.012856274 |
| ENSMMUG000000058740 |                                                                                           | - | 1.246818095 | 0.000722855 | 0.006208321 |
| ENSMMUG00000020047  | integrin subunit beta 3 binding protein [Source:VGNC Symbol;Acc:VGNC:73787]               | - | 1.246117968 | 1.99E-05    | 0.00028884  |
| ENSMMUG00000003261  | BAF chromatin remodeling complex subunit BCL11B [Source:VGNC Symbol;Acc:VGNC:70056]       | - | 1.245867134 | 0.00015415  | 0.00169836  |
| ENSMMUG00000014350  | MAX interactor 1, dimerization protein [Source:VGNC Symbol;Acc:VGNC:75087]                | - | 1.245778184 | 0.006637198 | 0.036464284 |
| ENSMMUG00000008918  | SRP receptor subunit beta [Source:VGNC Symbol;Acc:VGNC:77980]                             | - | 1.245546436 | 0.00501988  | 0.029510373 |
| ENSMMUG00000007424  | nuclear receptor interacting protein 2 [Source:VGNC Symbol;Acc:VGNC:75448]                | - | 1.242646072 | 7.40E-06    | 0.000126882 |
| ENSMMUG00000013601  | chromosome 14 C11orf54 homolog [Source:NCBI gene;Acc:696483]                              | - | 1.239318186 | 0.000180887 | 0.00194683  |
| ENSMMUG00000007875  | F-box and leucine rich repeat protein 12 [Source:VGNC Symbol;Acc:VGNC:72502]              | - | 1.238444285 | 0.006903589 | 0.037522711 |
| ENSMMUG00000001212  | Rieske Fe-S domain containing [Source:VGNC Symbol;Acc:VGNC:84487]                         | - | 1.232334939 | 7.74E-06    | 0.000131557 |
| ENSMMUG00000000158  | minichromosome maintenance complex component 2 [Source:VGNC Symbol;Acc:VGNC:74680]        | - | 1.225505252 | 1.27E-07    | 3.45E-06    |
| ENSMMUG00000015604  | myosin binding protein C3 [Source:VGNC Symbol;Acc:VGNC:75094]                             | - | -1.22464689 | 0.003072039 | 0.019978068 |
| ENSMMUG00000010819  | fibroblast growth factor receptor substrate 2 [Source:VGNC Symbol;Acc:VGNC:72732]         | - | 1.223330807 | 0.000812589 | 0.006841881 |
| ENSMMUG00000008396  | methylmalonyl-CoA epimerase [Source:NCBI gene;Acc:704094]                                 | - | 1.221313673 | 2.05E-05    | 0.000296741 |
| ENSMMUG00000011850  | cadherin 1 [Source:VGNC Symbol;Acc:VGNC:70803]                                            | - | 1.221266209 | 0.000375902 | 0.003583835 |
| ENSMMUG00000055400  | U6 spliceosomal RNA [Source:RFAM;Acc:RF00026]                                             | - | 1.217212383 | 0.000593946 | 0.005250714 |



|                    |                                                                                             |             |             |             |
|--------------------|---------------------------------------------------------------------------------------------|-------------|-------------|-------------|
| ENSMMUG00000049351 | MAGE family member E1 [Source:NCBI gene;Acc:705379]                                         | -1.21441396 | 0.000192462 | 0.002051086 |
| ENSMMUG00000057209 |                                                                                             | 1.214118986 | 0.004631044 | 0.027774712 |
| ENSMMUG00000037675 | testis expressed 52 [Source:NCBI gene;Acc:107000723]                                        | 1.212366966 | 0.003435573 | 0.021812457 |
| ENSMMUG00000055970 |                                                                                             | 1.210474915 | 0.007177501 | 0.038548291 |
| ENSMMUG00000007692 | apolipoprotein B [Source:VGNC Symbol;Acc:VGNC:69985]                                        | 1.209189436 | 1.35E-06    | 2.89E-05    |
| ENSMMUG00000021572 | solute carrier family 39 member 9 [Source:VGNC Symbol;Acc:VGNC:77523]                       | 1.208786289 | 0.00010171  | 0.001186425 |
| ENSMMUG00000052581 | upstream transcription factor family member 3 [Source:NCBI gene;Acc:709660]                 | 1.206425698 | 8.68E-06    | 0.000143913 |
| ENSMMUG00000004233 | leucine rich repeats and immunoglobulin like domains 3 [Source:NCBI gene;Acc:716344]        | 1.204704152 | 0.000709982 | 0.006123594 |
| ENSMMUG00000017583 | single stranded DNA binding protein 2 [Source:NCBI gene;Acc:711752]                         | 1.203293855 | 0.006313581 | 0.034993314 |
| ENSMMUG00000019857 | beaded filament structural protein 2 [Source:VGNC Symbol;Acc:VGNC:70245]                    | 1.200335085 | 0.008248799 | 0.04321861  |
| ENSMMUG00000002338 | heterogeneous nuclear ribonucleoprotein L like [Source:VGNC Symbol;Acc:VGNC:73441]          | 1.198718754 | 7.57E-05    | 0.000916404 |
| ENSMMUG00000038560 | eukaryotic translation elongation factor 1 epsilon 1 [Source:NCBI gene;Acc:695426]          | 1.196669056 | 0.00041879  | 0.003914802 |
| ENSMMUG00000017276 | nucleolar protein 4 [Source:VGNC Symbol;Acc:VGNC:75366]                                     | 1.196526281 | 0.001101687 | 0.008854824 |
| ENSMMUG00000021496 | potassium sodium-activated channel subfamily T member 1 [Source:VGNC Symbol;Acc:VGNC:73856] | 1.193964608 | 0.004426506 | 0.026916066 |
| ENSMMUG00000022624 | putative speedy protein E16 [Source:NCBI gene;Acc:718058]                                   | 1.192416413 | 0.008877845 | 0.045748995 |
| ENSMMUG00000007565 | Cbl proto-oncogene B [Source:VGNC Symbol;Acc:VGNC:70555]                                    | 1.191815156 | 0.001268674 | 0.009932251 |
| ENSMMUG00000002653 | hexokinase 3 [Source:VGNC Symbol;Acc:VGNC:73476]                                            | 1.191404608 | 0.002896663 | 0.019190096 |
| ENSMMUG00000017615 | zinc finger CCHC-type containing 14 [Source:VGNC Symbol;Acc:VGNC:79420]                     | 1.189554156 | 1.27E-08    | 4.63E-07    |
| ENSMMUG00000018525 | presenilin 2 [Source:VGNC Symbol;Acc:VGNC:76436]                                            | 1.187042418 | 1.60E-07    | 4.25E-06    |
| ENSMMUG00000018490 | ADP ribosylation factor interacting protein 1 [Source:VGNC Symbol;Acc:VGNC:69878]           | 1.181082474 | 0.004003012 | 0.024747552 |
| ENSMMUG00000049939 |                                                                                             | 1.176777578 | 4.54E-05    | 0.000584663 |
| ENSMMUG00000009425 | actin, cytoplasmic 2-like [Source:NCBI gene;Acc:705671]                                     | 1.176341242 | 0.006776368 | 0.037028986 |
| ENSMMUG00000005727 | protein kinase N1 [Source:VGNC Symbol;Acc:VGNC:76014]                                       | 1.176230614 | 2.89E-05    | 0.000393522 |
| ENSMMUG00000020049 | phosphoglucomutase 1 [Source:NCBI gene;Acc:699401]                                          | 1.175271617 | 5.46E-08    | 1.71E-06    |
| ENSMMUG00000023226 | RNA polymerase III subunit D [Source:VGNC Symbol;Acc:VGNC:76017]                            | 1.169725246 | 0.000970461 | 0.00790149  |
| ENSMMUG00000058580 | tripartite motif containing 40 [Source:NCBI gene;Acc:100427925]                             | 1.168609593 | 0.003233345 | 0.020794545 |
| ENSMMUG00000047276 | GTPase, IMAP family member 6 [Source:VGNC Symbol;Acc:VGNC:81315]                            | 1.165274318 | 5.06E-07    | 1.21E-05    |
| ENSMMUG00000020412 | parkin coregulated [Source:VGNC Symbol;Acc:VGNC:75646]                                      | 1.161025694 | 0.00687885  | 0.037463275 |
| ENSMMUG00000032427 | neuroligin 3 [Source:NCBI gene;Acc:574216]                                                  | 1.160637798 | 8.23E-05    | 0.000987322 |

|                    |                                                                                          |   |             |             |             |
|--------------------|------------------------------------------------------------------------------------------|---|-------------|-------------|-------------|
| ENSMMUG00000061239 |                                                                                          | - | 1.157108546 | 0.005963615 | 0.03346365  |
| ENSMMUG00000010788 | ATP binding cassette subfamily B member 1 [Source:NCBI gene;Acc:574235]                  | - | 1.156975979 | 3.75E-05    | 0.00049163  |
| ENSMMUG00000006842 | doublecortin domain containing 1 [Source:NCBI gene;Acc:696721]                           | - | -1.15554195 | 0.000717301 | 0.006173638 |
| ENSMMUG00000017025 | zinc finger CCCH-type containing 13 [Source:VGNC Symbol;Acc:VGNC:79248]                  | - | -1.15524263 | 0.002990962 | 0.019607417 |
| ENSMMUG00000063348 |                                                                                          | - | 1.150830551 | 0.004183273 | 0.02565907  |
| ENSMMUG00000015962 | AT-rich interaction domain 2 [Source:VGNC Symbol;Acc:VGNC:69858]                         | - | 1.150643323 | 0.000258417 | 0.002636627 |
| ENSMMUG00000013094 | lipoyl(octanoyl) transferase 2 [Source:NCBI gene;Acc:718425]                             | - | 1.149463208 | 5.54E-08    | 1.73E-06    |
| ENSMMUG00000022202 | basic leucine zipper and W2 domains 1 [Source:VGNC Symbol;Acc:VGNC:84213]                | - | 1.145422918 | 0.00172026  | 0.012652464 |
| ENSMMUG00000058142 |                                                                                          | - | 1.144988169 | 0.001161189 | 0.009232815 |
| ENSMMUG00000020436 | potassium voltage-gated channel subfamily H member 2 [Source:VGNC Symbol;Acc:VGNC:73980] | - | 1.143462199 | 2.45E-06    | 4.89E-05    |
| ENSMMUG00000010304 | cilia and flagella associated protein 298 [Source:NCBI gene;Acc:700721]                  | - | 1.142929143 | 2.88E-05    | 0.00039345  |
| ENSMMUG00000048232 | MINDY family member 4B [Source:VGNC Symbol;Acc:VGNC:84153]                               | - | 1.142752643 | 0.007406922 | 0.039571628 |
| ENSMMUG00000012561 | NOP2/Sun RNA methyltransferase family member 7 [Source:VGNC Symbol;Acc:VGNC:75463]       | - | 1.141837653 | 0.002589313 | 0.017481086 |
| ENSMMUG00000007077 | APOBEC1 complementation factor [Source:VGNC Symbol;Acc:VGNC:69523]                       | - | 1.135837672 | 0.000750824 | 0.006394573 |
| ENSMMUG00000012761 | sialic acid binding Ig like lectin 5 [Source:NCBI gene;Acc:719730]                       | - | 1.133957779 | 0.000427798 | 0.003989841 |
| ENSMMUG00000044759 |                                                                                          | - | 1.133476039 | 0.002997316 | 0.019631675 |
| ENSMMUG00000053298 |                                                                                          | - | 1.127532629 | 0.001487571 | 0.011266792 |
| ENSMMUG00000022044 | scavenger receptor class A member 5 [Source:VGNC Symbol;Acc:VGNC:77117]                  | - | 1.125615882 | 0.005090044 | 0.029858167 |
| ENSMMUG00000054462 |                                                                                          | - | 1.125061418 | 0.000314229 | 0.003083641 |
| ENSMMUG00000000388 | plectin [Source:VGNC Symbol;Acc:VGNC:76173]                                              | - | 1.124972378 | 0.003706762 | 0.023305372 |
| ENSMMUG00000017593 | CD3e molecule [Source:VGNC Symbol;Acc:VGNC:70764]                                        | - | 1.122779742 | 4.78E-05    | 0.000611371 |
| ENSMMUG00000049945 |                                                                                          | - | 1.122365812 | 0.004670149 | 0.02793854  |
| ENSMMUG00000003043 | PWWP domain containing 3A, DNA repair factor [Source:VGNC Symbol;Acc:VGNC:76565]         | - | 1.120843347 | 0.000396565 | 0.003754454 |
| ENSMMUG00000003260 |                                                                                          | - | 1.119140626 | 0.003618994 | 0.022771133 |
| ENSMMUG00000050418 | superoxide dismutase 2 [Source:NCBI gene;Acc:574097]                                     | - | -1.11848053 | 0.000524157 | 0.004710469 |
| ENSMMUG00000044175 | forkhead box O6 [Source:NCBI gene;Acc:697505]                                            | - | 1.113615831 | 0.003254228 | 0.020879374 |
| ENSMMUG00000060215 | Y RNA [Source:RFAM;Acc:RF00019]                                                          | - | 1.112174432 | 0.001782036 | 0.013024538 |
| ENSMMUG00000058583 | RRAD and GEM like GTPase 1 [Source:NCBI gene;Acc:713351]                                 | - | 1.110318101 | 0.003721763 | 0.023381631 |
| ENSMMUG00000016313 | RUN and SH3 domain containing 2 [Source:VGNC Symbol;Acc:VGNC:82230]                      | - | 1.109839905 | 0.005579905 | 0.031770338 |

|                     |                                                                                          |   |             |             |             |
|---------------------|------------------------------------------------------------------------------------------|---|-------------|-------------|-------------|
| ENSMMUG00000038288  | TMEM9 domain family member B [Source:NCBI gene;Acc:708447]                               | - | 1.109402213 | 0.000386829 | 0.003675104 |
| ENSMMUG00000017972  | zinc finger protein 200 [Source:VGNC Symbol;Acc:VGNC:78867]                              | - | 1.105855897 | 0.007280977 | 0.039042781 |
| ENSMMUG00000059327  | NUS1 dehydrodolichyl diphosphate synthase subunit [Source:NCBI gene;Acc:715015]          | - | 1.103246537 | 0.000548117 | 0.00489876  |
| ENSMMUG00000010682  | fibrillin 2 [Source:VGNC Symbol;Acc:VGNC:72624]                                          | - | 1.100510393 | 2.70E-05    | 0.000372976 |
| ENSMMUG00000007783  | isoleucyl-tRNA synthetase 2, mitochondrial [Source:VGNC Symbol;Acc:VGNC:73458]           | - | 1.098783337 | 0.000143577 | 0.001612419 |
| ENSMMUG00000021420  | pleckstrin 2 [Source:VGNC Symbol;Acc:VGNC:76071]                                         | - | 1.096657851 | 0.000302377 | 0.00299067  |
| ENSMMUG00000018685  | chromodomain helicase DNA binding protein 4 [Source:VGNC Symbol;Acc:VGNC:71029]          | - | 1.095874638 | 7.30E-07    | 1.66E-05    |
| ENSMMUG00000021168  | unc-5 family C-terminal like [Source:VGNC Symbol;Acc:VGNC:79314]                         | - | 1.095488435 | 0.000286334 | 0.002857026 |
| ENSMMUG00000055590  |                                                                                          | - | 1.095430393 | 0.00316231  | 0.020386008 |
| ENSMMUG00000004603  | zinc finger CCCH-type containing 14 [Source:VGNC Symbol;Acc:VGNC:79255]                  | - | -1.09534618 | 0.000272623 | 0.002740365 |
| ENSMMUG00000004091  | transcription factor 12 [Source:VGNC Symbol;Acc:VGNC:78283]                              | - | 1.093713242 | 0.000314664 | 0.003083641 |
| ENSMMUG00000016896  | solute carrier family 12 member 1 [Source:VGNC Symbol;Acc:VGNC:77385]                    | - | 1.091972668 | 0.001874101 | 0.013563496 |
| ENSMMUG00000016927  | solute carrier family 2 member 10 [Source:VGNC Symbol;Acc:VGNC:77465]                    | - | 1.091927251 | 0.001774513 | 0.012981211 |
| ENSMMUG00000004614  | potassium voltage-gated channel subfamily C member 4 [Source:VGNC Symbol;Acc:VGNC:73974] | - | 1.088368519 | 0.003408281 | 0.021713788 |
| ENSMMUG00000015117  | X-prolyl aminopeptidase 1 [Source:VGNC Symbol;Acc:VGNC:78810]                            | - | 1.088301009 | 0.001432639 | 0.010942354 |
| ENSMMUG00000015309  | F-box protein 24 [Source:VGNC Symbol;Acc:VGNC:72495]                                     | - | 1.088260278 | 7.65E-05    | 0.000922557 |
| ENSMMUG000000043809 | caspase 2 [Source:VGNC Symbol;Acc:VGNC:80804]                                            | - | 1.085267473 | 0.007736303 | 0.040938669 |
| ENSMMUG00000008941  | DNA topoisomerase II alpha [Source:VGNC Symbol;Acc:VGNC:78620]                           | - | 1.084725768 | 8.60E-06    | 0.000143061 |
| ENSMMUG000000041976 | zinc finger protein 780B [Source:NCBI gene;Acc:701034]                                   | - | 1.083445903 | 0.001120399 | 0.0089698   |
| ENSMMUG000000061085 |                                                                                          | - | 1.083315405 | 0.000821719 | 0.006897353 |
| ENSMMUG00000020992  | calcineurin binding protein 1 [Source:NCBI gene;Acc:700566]                              | - | 1.082991945 | 2.17E-05    | 0.00030817  |
| ENSMMUG000000051286 |                                                                                          | - | -1.08162121 | 0.001351806 | 0.010419168 |
| ENSMMUG00000012036  | RNA binding motif protein 47 [Source:VGNC Symbol;Acc:VGNC:76576]                         | - | -1.07796213 | 0.000160511 | 0.001761298 |
| ENSMMUG000000048302 | ArfGAP with FG repeats 2 [Source:VGNC Symbol;Acc:VGNC:80329]                             | - | 1.077921431 | 0.000295361 | 0.002936958 |
| ENSMMUG00000000104  | ribosomal RNA processing 1B [Source:VGNC Symbol;Acc:VGNC:77089]                          | - | 1.077813033 | 0.004210772 | 0.025777524 |
| ENSMMUG00000008313  | zinc finger protein 792 [Source:VGNC Symbol;Acc:VGNC:79456]                              | - | 1.073299507 | 0.000157807 | 0.001733963 |
| ENSMMUG00000002370  | integrin subunit alpha 6 [Source:VGNC Symbol;Acc:VGNC:73780]                             | - | 1.070992207 | 1.73E-05    | 0.000256939 |
| ENSMMUG00000008713  | myosin binding protein H like [Source:NCBI gene;Acc:698183]                              | - | 1.070773506 | 0.000469972 | 0.004327065 |
| ENSMMUG00000011593  | regulator of cell cycle [Source:VGNC Symbol;Acc:VGNC:76783]                              | - | 1.067895528 | 0.002600129 | 0.017525042 |

|                    |                                                                                        |   |             |             |             |
|--------------------|----------------------------------------------------------------------------------------|---|-------------|-------------|-------------|
| ENSMMUG00000019665 | SURP and G-patch domain containing 2 [Source:VGNC Symbol;Acc:VGNC:78163]               | - | 1.065821602 | 1.12E-07    | 3.08E-06    |
| ENSMMUG00000006669 | ubiquitin protein ligase E3 component n-recognin 4 [Source:VGNC Symbol;Acc:VGNC:79845] | - | 1.065573873 | 0.000121168 | 0.001385602 |
| ENSMMUG00000019265 | zinc finger protein 575 [Source:VGNC Symbol;Acc:VGNC:79667]                            | - | 1.064754392 | 0.00890293  | 0.045820261 |
| ENSMMUG00000011893 | KIAA0513 [Source:VGNC Symbol;Acc:VGNC:73925]                                           | - | 1.064486266 | 0.008243866 | 0.04321861  |
| ENSMMUG00000014884 | ubiquitin specific peptidase 8 [Source:VGNC Symbol;Acc:VGNC:78748]                     | - | 1.059936927 | 2.52E-05    | 0.000350931 |
| ENSMMUG00000010878 | adaptor related protein complex 1 subunit gamma 1 [Source:VGNC Symbol;Acc:VGNC:69958]  | - | 1.059845602 | 0.002903085 | 0.019201397 |
| ENSMMUG00000001549 | ATPase family AAA domain-containing protein 3A-like [Source:NCBI gene;Acc:114674453]   | - | 1.057687912 | 0.009747194 | 0.049231793 |
| ENSMMUG00000017725 | eukaryotic elongation factor 2 kinase [Source:VGNC Symbol;Acc:VGNC:72098]              | - | 1.057588577 | 4.08E-05    | 0.00053095  |
| ENSMMUG00000021782 | LDL receptor related protein 1 [Source:VGNC Symbol;Acc:VGNC:74442]                     | - | 1.057393234 | 9.73E-05    | 0.001140142 |
| ENSMMUG00000018282 | interleukin 17 receptor C [Source:VGNC Symbol;Acc:VGNC:84164]                          | - | -1.05522291 | 0.00081258  | 0.006841881 |
| ENSMMUG00000029176 | Rho GTPase activating protein 17 [Source:NCBI gene;Acc:701988]                         | - | 1.054795574 | 8.99E-06    | 0.00014817  |
| ENSMMUG00000059973 |                                                                                        | - | 1.054354202 | 0.001141248 | 0.009109847 |
| ENSMMUG00000059353 | phosphatidylserine synthase 2 [Source:NCBI gene;Acc:698582]                            | - | 1.054323249 | 0.00016995  | 0.001852389 |
| ENSMMUG00000062784 |                                                                                        | - | 1.052679872 | 0.000563385 | 0.005018687 |
| ENSMMUG00000015347 | protein kinase, DNA-activated, catalytic subunit [Source:VGNC Symbol;Acc:VGNC:76418]   | - | 1.049423521 | 5.29E-07    | 1.25E-05    |
| ENSMMUG00000043504 |                                                                                        | - | 1.049359563 | 0.002892282 | 0.019190096 |
| ENSMMUG00000010978 | S100 calcium binding protein A2 [Source:VGNC Symbol;Acc:VGNC:76956]                    | - | 1.048535361 | 0.004471413 | 0.027098676 |
| ENSMMUG00000014691 | inhibitor of DNA binding 4, HLH protein [Source:VGNC Symbol;Acc:VGNC:73557]            | - | 1.046591986 | 3.49E-05    | 0.000460369 |
| ENSMMUG00000047974 | aldehyde oxidase 4 [Source:NCBI gene;Acc:701502]                                       | - | -1.04527774 | 6.77E-06    | 0.000118251 |
| ENSMMUG00000018051 | FAT atypical cadherin 1 [Source:VGNC Symbol;Acc:VGNC:72617]                            | - | 1.044246636 | 1.07E-05    | 0.00017202  |
| ENSMMUG00000037975 | solute carrier family 7 member 6 [Source:NCBI gene;Acc:702903]                         | - | 1.043367816 | 0.000783086 | 0.00662774  |
| ENSMMUG00000042157 | caspase recruitment domain-containing protein 8 [Source:NCBI gene;Acc:718594]          | - | 1.036326972 | 0.000572644 | 0.005091326 |
| ENSMMUG00000006688 | ER membrane protein complex subunit 1 [Source:VGNC Symbol;Acc:VGNC:72134]              | - | -1.03324873 | 0.001838111 | 0.013350494 |
| ENSMMUG00000018279 | adaptor related protein complex 5 subunit mu 1 [Source:VGNC Symbol;Acc:VGNC:69868]     | - | 1.030960762 | 0.002298612 | 0.016023375 |
| ENSMMUG00000051468 | Metazoan signal recognition particle RNA [Source:RFAM;Acc:RF00017]                     | - | 1.029060265 | 0.001323182 | 0.010279909 |
| ENSMMUG00000006340 | solute carrier family 6 member 6 [Source:VGNC Symbol;Acc:VGNC:77622]                   | - | 1.028624531 | 6.73E-05    | 0.000825507 |
| ENSMMUG00000014474 | SPARC related modular calcium binding 2 [Source:VGNC Symbol;Acc:VGNC:83470]            | - | 1.026797143 | 0.001139531 | 0.009105067 |
| ENSMMUG00000016893 | solute carrier family 9 member A1 [Source:VGNC Symbol;Acc:VGNC:82241]                  | - | 1.026685936 | 0.002560857 | 0.017360947 |
| ENSMMUG00000002520 | solute carrier family 4 member 3 [Source:VGNC Symbol;Acc:VGNC:77604]                   | - | 1.026402784 | 0.00133274  | 0.010321967 |



|                    |                                                                                              |   |             |             |             |
|--------------------|----------------------------------------------------------------------------------------------|---|-------------|-------------|-------------|
| ENSMMUG0000008093  | StAR related lipid transfer domain containing 9 [Source:NCBI gene;Acc:708953]                | - | 1.023809745 | 0.000683638 | 0.005921465 |
| ENSMMUG00000059543 | zinc finger protein 30 [Source:NCBI gene;Acc:718310]                                         | - | 1.023640703 | 8.51E-05    | 0.001014119 |
| ENSMMUG00000061892 |                                                                                              | - | 1.022902895 | 0.004242001 | 0.025949191 |
| ENSMMUG00000022303 | solute carrier family 7 member 2 [Source:VGNC Symbol;Acc:VGNC:77629]                         | - | 1.022227309 | 9.26E-06    | 0.000151158 |
| ENSMMUG00000003462 | ankyrin repeat domain 6 [Source:VGNC Symbol;Acc:VGNC:81023]                                  | - | 1.021041674 | 0.002407842 | 0.016530057 |
| ENSMMUG00000011274 | prolyl 4-hydroxylase subunit alpha 1 [Source:VGNC Symbol;Acc:VGNC:75741]                     | - | 1.020858924 | 0.004746562 | 0.028312461 |
| ENSMMUG00000004237 | TNF receptor superfamily member 19 [Source:VGNC Symbol;Acc:VGNC:78588]                       | - | 1.017214026 | 0.003780332 | 0.023658311 |
| ENSMMUG00000008785 | E74 like ETS transcription factor 4 [Source:VGNC Symbol;Acc:VGNC:72208]                      | - | 1.015625727 | 9.43E-10    | 4.29E-08    |
| ENSMMUG00000021620 | ELKS/RAB6-interacting/CAST family member 2 [Source:VGNC Symbol;Acc:VGNC:72164]               | - | 1.012958427 | 0.000860393 | 0.007148287 |
| ENSMMUG00000016641 | ubiquitin conjugating enzyme E2 B [Source:VGNC Symbol;Acc:VGNC:78692]                        | - | 1.008764381 | 0.000252891 | 0.002589984 |
| ENSMMUG00000006311 | prolyl endopeptidase like [Source:VGNC Symbol;Acc:VGNC:76346]                                | - | 1.004108098 | 7.09E-05    | 0.000865533 |
| ENSMMUG00000000065 | coiled-coil domain containing 181 [Source:VGNC Symbol;Acc:VGNC:70884]                        | - | 1.003932778 | 0.004463461 | 0.027080101 |
| ENSMMUG00000001537 | apolipoprotein L2 [Source:VGNC Symbol;Acc:VGNC:69989]                                        | - | 0.998427859 | 0.001508498 | 0.011404073 |
| ENSMMUG00000015166 | NIMA related kinase 9 [Source:VGNC Symbol;Acc:VGNC:75209]                                    | - | -0.99772489 | 0.000616623 | 0.00540425  |
| ENSMMUG00000003191 | kirre like nephrin family adhesion molecule 1 [Source:VGNC Symbol;Acc:VGNC:73837]            | - | 0.994617409 | 0.003494679 | 0.022122558 |
| ENSMMUG00000040958 | lysozyme-like protein 1 [Source:NCBI gene;Acc:698176]                                        | - | 0.992480144 | 0.004061429 | 0.025051634 |
| ENSMMUG00000000205 | transmembrane protein 117 [Source:VGNC Symbol;Acc:VGNC:79488]                                | - | 0.989727511 | 0.000270809 | 0.00272887  |
| ENSMMUG00000057796 | host cell factor C2 [Source:NCBI gene;Acc:700316]                                            | - | 0.986284792 | 4.48E-07    | 1.08E-05    |
| ENSMMUG00000020510 | kelch like family member 41 [Source:VGNC Symbol;Acc:VGNC:74062]                              | - | 0.986083569 | 0.001721804 | 0.012652464 |
| ENSMMUG00000023005 | Sp9 transcription factor [Source:VGNC Symbol;Acc:VGNC:78027]                                 | - | 0.985533373 | 0.002154221 | 0.015225409 |
| ENSMMUG00000019760 | karyopherin subunit beta 1 [Source:VGNC Symbol;Acc:VGNC:74203]                               | - | 0.977036664 | 0.00015536  | 0.001709378 |
| ENSMMUG00000002947 | procollagen C-endopeptidase enhancer [Source:VGNC Symbol;Acc:VGNC:75782]                     | - | 0.975357172 | 0.002030143 | 0.014461438 |
| ENSMMUG00000023096 | obscurin, cytoskeletal calmodulin and titin-interacting RhoGEF [Source:NCBI gene;Acc:694413] | - | -0.97479285 | 0.000195205 | 0.002072173 |
| ENSMMUG00000061834 |                                                                                              | - | 0.974379535 | 0.007081873 | 0.038116607 |
| ENSMMUG00000052781 |                                                                                              | - | 0.973267603 | 0.000509925 | 0.004602888 |
| ENSMMUG00000065031 |                                                                                              | - | 0.972434816 | 0.001222092 | 0.009651089 |
| ENSMMUG00000001518 | zinc finger protein 518A [Source:VGNC Symbol;Acc:VGNC:79767]                                 | - | 0.971410481 | 2.05E-05    | 0.00029645  |
| ENSMMUG00000060822 |                                                                                              | - | 0.969588884 | 0.000153947 | 0.00169836  |
| ENSMMUG00000021173 | nuclear transcription factor Y subunit alpha [Source:VGNC Symbol;Acc:VGNC:75344]             | - | 0.966861892 | 0.004284826 | 0.026189842 |

|                    |                                                                                                |   |             |             |             |
|--------------------|------------------------------------------------------------------------------------------------|---|-------------|-------------|-------------|
| ENSMMUG00000057655 |                                                                                                | - | 0.966724774 | 0.005377791 | 0.031142227 |
| ENSMMUG00000023698 | golgi SNAP receptor complex member 1 [Source:VGNC Symbol;Acc:VGNC:73110]                       | - | 0.964945206 | 0.001503441 | 0.011376409 |
| ENSMMUG00000022590 | metallophosphoesterase domain containing 1 [Source:NCBI gene;Acc:715021]                       | - | -0.96423547 | 0.001305604 | 0.010182211 |
| ENSMMUG00000056466 |                                                                                                | - | 0.963095387 | 0.008405301 | 0.043841103 |
| ENSMMUG00000001942 | mbt domain containing 1 [Source:VGNC Symbol;Acc:VGNC:74538]                                    | - | 0.962001676 | 0.007642532 | 0.040617162 |
| ENSMMUG00000011779 | HEAT repeat containing 5A [Source:VGNC Symbol;Acc:VGNC:84347]                                  | - | 0.959646421 | 0.004481174 | 0.02712693  |
| ENSMMUG00000014301 | nectin cell adhesion molecule 2 [Source:VGNC Symbol;Acc:VGNC:75396]                            | - | 0.957240227 | 3.85E-06    | 7.21E-05    |
| ENSMMUG00000044214 |                                                                                                | - | 0.955277672 | 0.009844739 | 0.049601404 |
| ENSMMUG00000002519 | serine/threonine kinase 11 interacting protein [Source:VGNC Symbol;Acc:VGNC:77963]             | - | 0.954629216 | 2.85E-05    | 0.000389297 |
| ENSMMUG00000006861 | dynein axonemal heavy chain 10 [Source:NCBI gene;Acc:710343]                                   | - | 0.951511544 | 0.002339702 | 0.016206703 |
| ENSMMUG00000019250 | solute carrier family 25 member 27 [Source:VGNC Symbol;Acc:VGNC:77543]                         | - | 0.950082806 | 0.008964286 | 0.046048716 |
| ENSMMUG00000020359 | spectrin beta, non-erythrocytic 2 [Source:VGNC Symbol;Acc:VGNC:77872]                          | - | 0.948025973 | 0.003050094 | 0.019898929 |
| ENSMMUG00000049484 |                                                                                                | - | -0.94623568 | 0.00351871  | 0.022243276 |
| ENSMMUG00000013707 | heat shock protein family H (Hsp110) member 1 [Source:NCBI gene;Acc:721956]                    | - | 0.945936192 | 9.25E-05    | 0.001087086 |
| ENSMMUG00000009126 | solute carrier organic anion transporter family member 2B1 [Source:VGNC Symbol;Acc:VGNC:77603] | - | 0.945587767 | 0.002315409 | 0.016099109 |
| ENSMMUG00000004674 | phosphoribosyl pyrophosphate synthetase 1 [Source:NCBI gene;Acc:702529]                        | - | 0.945295744 | 0.009084814 | 0.046521106 |
| ENSMMUG00000057827 |                                                                                                | - | 0.945258335 | 0.004909881 | 0.02904965  |
| ENSMMUG00000009775 | caveolae associated protein 4 [Source:NCBI gene;Acc:714379]                                    | - | 0.944286941 | 0.004802498 | 0.02854156  |
| ENSMMUG00000012307 | periostin [Source:VGNC Symbol;Acc:VGNC:76039]                                                  | - | 0.941308202 | 0.008715662 | 0.045045213 |
| ENSMMUG00000005136 | TRPM8 channel associated factor 1 [Source:VGNC Symbol;Acc:VGNC:79346]                          | - | 0.939495982 | 0.001768639 | 0.012949875 |
| ENSMMUG00000065337 |                                                                                                | - | 0.934446063 | 0.006122413 | 0.034205146 |
| ENSMMUG00000000681 | calmin [Source:VGNC Symbol;Acc:VGNC:71232]                                                     | - | 0.932445281 | 0.001677834 | 0.012407743 |
| ENSMMUG00000016286 | protease, serine, 1 (trypsin 1) [Source:NCBI gene;Acc:698729]                                  | - | 0.930351235 | 0.002208797 | 0.015543669 |
| ENSMMUG00000014564 | ring finger protein 123 [Source:VGNC Symbol;Acc:VGNC:76790]                                    | - | 0.928389216 | 5.89E-06    | 0.000104329 |
| ENSMMUG00000019082 | secreted frizzled related protein 1 [Source:VGNC Symbol;Acc:VGNC:77185]                        | - | 0.925174563 | 0.007489193 | 0.039884612 |
| ENSMMUG00000014438 | piwi like RNA-mediated gene silencing 2 [Source:VGNC Symbol;Acc:VGNC:81502]                    | - | 0.922706835 | 0.004524173 | 0.02728579  |
| ENSMMUG00000018289 | proline rich transmembrane protein 3 [Source:VGNC Symbol;Acc:VGNC:76324]                       | - | 0.922394362 | 0.001849014 | 0.013417709 |
| ENSMMUG00000059986 |                                                                                                | - | 0.922206754 | 0.003089411 | 0.020056691 |
| ENSMMUG00000010000 | keratin 7 [Source:VGNC Symbol;Acc:VGNC:74214]                                                  | - | 0.917242979 | 2.27E-05    | 0.000320428 |

|                     |                                                                                                            |             |             |             |
|---------------------|------------------------------------------------------------------------------------------------------------|-------------|-------------|-------------|
| ENSMMUG00000015375  | cadherin EGF LAG seven-pass G-type receptor 2 [Source:VGNC Symbol;Acc:VGNC:71149]                          | -0.91573525 | 3.04E-06    | 5.86E-05    |
| ENSMMUG00000056064  | serine and arginine rich splicing factor 1 [Source:NCBI gene;Acc:713958]                                   | 0.913813342 | 9.09E-07    | 2.00E-05    |
| ENSMMUG00000022906  | vascular cell adhesion molecule 1 [Source:VGNC Symbol;Acc:VGNC:78761]                                      | 0.912185544 | 0.007429272 | 0.039613053 |
| ENSMMUG00000045482  | GO/G1 switch 2 [Source:NCBI gene;Acc:717581]                                                               | -0.91010994 | 6.08E-05    | 0.000760345 |
| ENSMMUG00000043922  | spermatogenesis associated 48 [Source:VGNC Symbol;Acc:VGNC:81762]                                          | 0.909755414 | 0.004404905 | 0.026804733 |
| ENSMMUG00000009660  | syntrophin gamma 2 [Source:VGNC Symbol;Acc:VGNC:77694]                                                     | 0.902927785 | 0.006587637 | 0.036265407 |
| ENSMMUG00000015380  | proline and serine rich coiled-coil 1 [Source:VGNC Symbol;Acc:VGNC:76307]                                  | 0.901209149 | 0.001256879 | 0.009868382 |
| ENSMMUG00000007078  | N-acylsphingosine amidohydrolase 2 [Source:NCBI gene;Acc:703913]                                           | 0.897958014 | 0.000725355 | 0.006212272 |
| ENSMMUG000000061176 |                                                                                                            | 0.897589902 | 0.000333622 | 0.003237609 |
| ENSMMUG00000014824  | SIX homeobox 3 [Source:HGNC Symbol;Acc:HGNC:10889]                                                         | 0.896930201 | 0.004914735 | 0.02904965  |
| ENSMMUG00000047381  | DDB1 and CUL4 associated factor 10 [Source:NCBI gene;Acc:716256]                                           | 0.896882889 | 0.007291881 | 0.039059536 |
| ENSMMUG00000030422  | radial spoke head 10 homolog B [Source:NCBI gene;Acc:100424218]                                            | 0.894480414 | 0.002655329 | 0.017838029 |
| ENSMMUG000000052496 |                                                                                                            | 0.889884208 | 0.000992585 | 0.008057457 |
| ENSMMUG000000050018 |                                                                                                            | 0.887912136 | 0.001909641 | 0.013747389 |
| ENSMMUG000000052418 |                                                                                                            | -0.88687747 | 0.001253106 | 0.009857768 |
| ENSMMUG00000011385  | phosphatidylinositol-4,5-bisphosphate 3-kinase catalytic subunit gamma [Source:VGNC Symbol;Acc:VGNC:75998] | 0.886110863 | 0.001228766 | 0.009694389 |
| ENSMMUG00000017432  | tropomodulin 2 [Source:VGNC Symbol;Acc:VGNC:78571]                                                         | 0.883195408 | 0.009584913 | 0.048593003 |
| ENSMMUG00000005414  | N-deacetylase and N-sulfotransferase 1 [Source:VGNC Symbol;Acc:VGNC:75151]                                 | 0.881060928 | 0.00450237  | 0.027194584 |
| ENSMMUG00000001941  | CXXC finger protein 5 [Source:VGNC Symbol;Acc:VGNC:71594]                                                  | 0.879614782 | 1.45E-05    | 0.000222585 |
| ENSMMUG00000040100  | Fos proto-oncogene, AP-1 transcription factor subunit [Source:VGNC Symbol;Acc:VGNC:84340]                  | 0.877149024 | 0.007042324 | 0.03801645  |
| ENSMMUG00000064514  | keratin, type II cuticular Hb1 [Source:NCBI gene;Acc:697511]                                               | 0.876694042 | 0.002181003 | 0.015374655 |
| ENSMMUG000000052324 | MARVEL domain containing 3 [Source:NCBI gene;Acc:710448]                                                   | 0.876146509 | 0.000360858 | 0.003452535 |
| ENSMMUG000000063979 |                                                                                                            | 0.874105216 | 4.76E-05    | 0.000610755 |
| ENSMMUG00000018542  | leucyl and cystinyl aminopeptidase [Source:VGNC Symbol;Acc:VGNC:74438]                                     | -0.87218727 | 0.000341355 | 0.003300849 |
| ENSMMUG00000018319  | thyroid hormone receptor interactor 11 [Source:VGNC Symbol;Acc:VGNC:78647]                                 | 0.871948243 | 0.004023812 | 0.024838424 |
| ENSMMUG00000002096  | N-acetylglucosamine kinase [Source:VGNC Symbol;Acc:VGNC:74977]                                             | 0.869255937 | 0.005269844 | 0.030735725 |
| ENSMMUG00000002961  | G protein subunit alpha 11 [Source:VGNC Symbol;Acc:VGNC:73085]                                             | 0.861514271 | 0.002410086 | 0.016531523 |
| ENSMMUG00000009837  | SECIS binding protein 2 like [Source:VGNC Symbol;Acc:VGNC:77325]                                           | 0.859527293 | 0.000946927 | 0.007740839 |
| ENSMMUG000000064395 |                                                                                                            | 0.853019519 | 0.002565438 | 0.017363901 |
| ENSMMUG00000020377  | collagen type VI alpha 5 chain [Source:NCBI gene;Acc:719331]                                               | 0.850059183 | 0.007007124 | 0.037933514 |



|                     |                                                                                                         |   |             |             |             |
|---------------------|---------------------------------------------------------------------------------------------------------|---|-------------|-------------|-------------|
| ENSMMUG0000000962   | H2A.Z variant histone 2 [Source:VGNC Symbol;Acc:VGNC:81324]                                             | - | 0.848265543 | 0.002607072 | 0.017557301 |
| ENSMMUG00000004013  | chromosome 6 C5orf24 homolog [Source:VGNC Symbol;Acc:VGNC:70645]                                        | - | 0.845863358 | 0.001260089 | 0.009884047 |
| ENSMMUG00000002310  | zinc finger protein 577 [Source:VGNC Symbol;Acc:VGNC:79733]                                             | - | 0.845379192 | 0.00163792  | 0.012190074 |
| ENSMMUG00000007724  | aprataxin [Source:VGNC Symbol;Acc:VGNC:69838]                                                           | - | 0.845105312 | 0.000474195 | 0.004356349 |
| ENSMMUG00000013991  | exonuclease 3'-5' domain containing 1 [Source:VGNC Symbol;Acc:VGNC:72390]                               | - | 0.841948821 | 0.001526812 | 0.011521134 |
| ENSMMUG00000011963  | vimentin type intermediate filament associated coiled-coil protein [Source:NCBI gene;Acc:697958]        | - | 0.832308548 | 8.94E-05    | 0.001054527 |
| ENSMMUG00000007257  | synaptic vesicle glycoprotein 2A [Source:VGNC Symbol;Acc:VGNC:78181]                                    | - | 0.829831407 | 0.008730396 | 0.045046187 |
| ENSMMUG00000012091  | thioredoxin reductase 1 [Source:VGNC Symbol;Acc:VGNC:78679]                                             | - | 0.826671501 | 0.004575649 | 0.027545432 |
| ENSMMUG00000022293  | FERM and PDZ domain containing 3 [Source:VGNC Symbol;Acc:VGNC:72805]                                    | - | 0.826474439 | 0.009905928 | 0.049786461 |
| ENSMMUG00000018903  | vezatin, adherens junctions transmembrane protein [Source:VGNC Symbol;Acc:VGNC:79120]                   | - | -0.82134149 | 0.009807147 | 0.049442593 |
| ENSMMUG00000002777  | protein tyrosine phosphatase 4A1 [Source:VGNC Symbol;Acc:VGNC:83452]                                    | - | 0.814611923 | 0.009858029 | 0.049606967 |
| ENSMMUG00000013466  | tetratricopeptide repeat domain 39B [Source:VGNC Symbol;Acc:VGNC:79402]                                 | - | 0.808070827 | 0.00141131  | 0.010809867 |
| ENSMMUG00000018644  | keratin 32 [Source:VGNC Symbol;Acc:VGNC:74216]                                                          | - | 0.807117103 | 0.007690518 | 0.040818902 |
| ENSMMUG00000007478  | tankyrase 2 [Source:VGNC Symbol;Acc:VGNC:78983]                                                         | - | 0.800220135 | 6.75E-05    | 0.000826996 |
| ENSMMUG000000063615 |                                                                                                         | - | 0.793333323 | 0.000112339 | 0.001295561 |
| ENSMMUG000000046282 |                                                                                                         | - | 0.790964441 | 0.009694352 | 0.0490867   |
| ENSMMUG000000063655 | sodium voltage-gated channel beta subunit 4 [Source:NCBI gene;Acc:100430940]                            | - | 0.785433162 | 0.000486073 | 0.004431812 |
| ENSMMUG000000054737 |                                                                                                         | - | 0.785426722 | 0.001054897 | 0.008520804 |
| ENSMMUG00000023117  | neurotrophic receptor tyrosine kinase 2 [Source:VGNC Symbol;Acc:VGNC:75541]                             | - | 0.784308155 | 0.005409942 | 0.031261709 |
| ENSMMUG00000018375  | notch receptor 2 [Source:NCBI gene;Acc:713798]                                                          | - | 0.776619437 | 0.003446291 | 0.021836343 |
| ENSMMUG000000063474 |                                                                                                         | - | 0.776154215 | 0.001785722 | 0.013039772 |
| ENSMMUG00000013475  | calpain 1 [Source:VGNC Symbol;Acc:VGNC:70529]                                                           | - | 0.773219446 | 0.000620801 | 0.005435011 |
| ENSMMUG000000051510 |                                                                                                         | - | 0.771965767 | 0.005874992 | 0.03317211  |
| ENSMMUG00000017048  | klotho [Source:VGNC Symbol;Acc:VGNC:74026]                                                              | - | 0.765948212 | 0.00306971  | 0.019978068 |
| ENSMMUG000000056711 | ribonuclease inhibitor-like [Source:NCBI gene;Acc:114672186]                                            | - | 0.764927888 | 0.000213316 | 0.002236772 |
| ENSMMUG00000008423  | septin 4 [Source:NCBI gene;Acc:714724]                                                                  | - | 0.754617017 | 0.001033005 | 0.00835226  |
| ENSMMUG00000022251  | transglutaminase 7 [Source:VGNC Symbol;Acc:VGNC:79880]                                                  | - | 0.749925923 | 0.004661676 | 0.027921345 |
| ENSMMUG00000004708  | SPT6 homolog, histone chaperone and transcription elongation factor [Source:VGNC Symbol;Acc:VGNC:78057] | - | 0.734637483 | 0.00618192  | 0.034404098 |
| ENSMMUG000000064634 |                                                                                                         | - | 0.729551909 | 0.00463253  | 0.027774712 |

|                     |                                                                                                      |   |             |             |             |
|---------------------|------------------------------------------------------------------------------------------------------|---|-------------|-------------|-------------|
| ENSMMUG00000012912  | itchy E3 ubiquitin protein ligase [Source:VGNC Symbol;Acc:VGNC:73589]                                | - | 0.726759761 | 0.007034121 | 0.038007238 |
| ENSMMUG00000008575  | transient receptor potential cation channel subfamily M member 7 [Source:VGNC Symbol;Acc:VGNC:79106] | - | 0.726619814 | 0.000414796 | 0.003890867 |
| ENSMMUG00000012953  | stress induced phosphoprotein 1 [Source:NCBI gene;Acc:717926]                                        | - | 0.721715688 | 0.001947895 | 0.013979756 |
| ENSMMUG00000002257  | RNA polymerase III subunit E [Source:VGNC Symbol;Acc:VGNC:76142]                                     | - | 0.718333949 | 0.003366928 | 0.021534584 |
| ENSMMUG00000016005  | DnaJ heat shock protein family (Hsp40) member C13 [Source:VGNC Symbol;Acc:VGNC:84191]                | - | 0.716575291 | 0.00015057  | 0.001672174 |
| ENSMMUG00000049749  |                                                                                                      | - | 0.716573862 | 0.008616543 | 0.044656838 |
| ENSMMUG00000012020  | nuclear receptor coactivator 3 [Source:VGNC Symbol;Acc:VGNC:75147]                                   | - | 0.716468833 | 0.003378261 | 0.021590109 |
| ENSMMUG00000007507  | chloride voltage-gated channel 2 [Source:VGNC Symbol;Acc:VGNC:71235]                                 | - | 0.713737486 | 0.000614104 | 0.005387969 |
| ENSMMUG00000049311  | zinc finger protein 558 [Source:NCBI gene;Acc:712590]                                                | - | 0.710595969 | 0.006987551 | 0.037877926 |
| ENSMMUG00000014762  | myosin heavy chain 6 [Source:NCBI gene;Acc:713471]                                                   | - | 0.707725457 | 0.001422586 | 0.010877423 |
| ENSMMUG00000016522  | neurolysin [Source:VGNC Symbol;Acc:VGNC:75183]                                                       | - | 0.692704562 | 0.004175231 | 0.025637055 |
| ENSMMUG00000020467  | ATPase family AAA domain containing 2 [Source:VGNC Symbol;Acc:VGNC:70154]                            | - | 0.687183945 | 0.002190324 | 0.015427002 |
| ENSMMUG00000006546  | ATPase H+ transporting V0 subunit a2 [Source:VGNC Symbol;Acc:VGNC:70096]                             | - | 0.680183575 | 0.009036435 | 0.046302487 |
| ENSMMUG00000018186  | sosondawah ankyrin repeat domain family member B [Source:VGNC Symbol;Acc:VGNC:78033]                 | - | 0.679852787 | 0.003439842 | 0.021812457 |
| ENSMMUG00000009106  | solute carrier family 2 member 11 [Source:NCBI gene;Acc:699450]                                      | - | -0.67969154 | 0.001865172 | 0.013510882 |
| ENSMMUG00000005740  | ubiquitin specific peptidase 24 [Source:VGNC Symbol;Acc:VGNC:78743]                                  | - | 0.673161392 | 0.002468369 | 0.016832045 |
| ENSMMUG00000020150  | xin actin binding repeat containing 1 [Source:VGNC Symbol;Acc:VGNC:78952]                            | - | 0.669867243 | 0.003737774 | 0.023464113 |
| ENSMMUG000000056693 |                                                                                                      | - | 0.661714027 | 0.006866513 | 0.037422507 |
| ENSMMUG00000031123  | secretoglobin family 1A member 1 [Source:VGNC Symbol;Acc:VGNC:77004]                                 | - | 0.655111356 | 0.000263155 | 0.002664936 |
| ENSMMUG00000015862  | centrosomal protein 290 [Source:VGNC Symbol;Acc:VGNC:71126]                                          | - | 0.653601604 | 0.008938129 | 0.045943338 |
| ENSMMUG00000023361  | GDNF family receptor alpha 2 [Source:VGNC Symbol;Acc:VGNC:72918]                                     | - | 0.646896585 | 0.005596841 | 0.031844497 |
| ENSMMUG00000009188  | cyclase associated actin cytoskeleton regulatory protein 1 [Source:NCBI gene;Acc:693719]             | - | 0.635808968 | 0.008068614 | 0.042465839 |
| ENSMMUG00000018846  | ZFP64 zinc finger protein [Source:VGNC Symbol;Acc:VGNC:78994]                                        | - | 0.630769283 | 0.005422891 | 0.031276366 |
| ENSMMUG00000010707  | signal transducer and activator of transcription 3 [Source:VGNC Symbol;Acc:VGNC:77906]               | - | 0.630677801 | 0.003430589 | 0.021804725 |
| ENSMMUG00000012786  | complement C1s [Source:VGNC Symbol;Acc:VGNC:70297]                                                   | - | 0.624484942 | 0.00592003  | 0.033287901 |
| ENSMMUG00000005980  | glutathione hydrolase 5 proenzyme [Source:NCBI gene;Acc:720345]                                      | - | 0.624451034 | 0.000788884 | 0.006656058 |
| ENSMMUG00000008164  | prominin 1 [Source:VGNC Symbol;Acc:VGNC:76425]                                                       | - | 0.621991832 | 0.004598838 | 0.027654165 |
| ENSMMUG00000003238  | pregnancy zone protein [Source:NCBI gene;Acc:100430319]                                              | - | 0.621564788 | 0.008181617 | 0.043004988 |
| ENSMMUG00000021827  | tripartite motif containing 66 [Source:VGNC Symbol;Acc:VGNC:79766]                                   | - | 0.619564979 | 0.002870133 | 0.019060868 |

|                    |                                                                                                      |             |             |             |
|--------------------|------------------------------------------------------------------------------------------------------|-------------|-------------|-------------|
| ENSMMUG0000005929  | ubiquitin specific peptidase 45 [Source:VGNC Symbol;Acc:VGNC:79233]                                  | 0.608042583 | 0.008396055 | 0.04382095  |
| ENSMMUG00000019564 | mitogen-activated protein kinase kinase 2 [Source:VGNC Symbol;Acc:VGNC:81453]                        | 0.597751877 | 0.002495109 | 0.01698292  |
| ENSMMUG00000001407 | solute carrier family 5 member 11 [Source:VGNC Symbol;Acc:VGNC:77759]                                | 0.594078749 | 0.009581559 | 0.048593003 |
| ENSMMUG00000011713 | leupaxin [Source:VGNC Symbol;Acc:VGNC:74286]                                                         | 0.592034018 | 0.00394583  | 0.024487004 |
| ENSMMUG00000022922 | nuclear receptor subfamily 4 group A member 1 [Source:VGNC Symbol;Acc:VGNC:75517]                    | 0.559096652 | 0.002496752 | 0.01698292  |
| ENSMMUG00000059535 |                                                                                                      | 0.535562661 | 0.009101875 | 0.046579175 |
| ENSMMUG00000059612 |                                                                                                      | 0.460010776 | 0.008623212 | 0.044662972 |
| ENSMMUG00000021012 | G protein-coupled receptor 155 [Source:VGNC Symbol;Acc:VGNC:72985]                                   | 0.476879699 | 0.009033937 | 0.046302487 |
| ENSMMUG00000031160 | menin 1 [Source:NCBI gene;Acc:106995582]                                                             | 0.488262148 | 0.006551687 | 0.036091905 |
| ENSMMUG00000010336 | DOP1 leucine zipper like protein B [Source:VGNC Symbol;Acc:VGNC:71832]                               | 0.501235256 | 0.004974982 | 0.02926756  |
| ENSMMUG00000003265 | leptin receptor [Source:VGNC Symbol;Acc:VGNC:81429]                                                  | 0.556394954 | 0.003845281 | 0.023991016 |
| ENSMMUG00000010996 | Janus kinase 3 [Source:VGNC Symbol;Acc:VGNC:73812]                                                   | 0.561300432 | 0.001362806 | 0.01046789  |
| ENSMMUG00000030597 | mitogen-activated protein kinase kinase kinase 2 [Source:VGNC Symbol;Acc:VGNC:81465]                 | 0.573419247 | 0.005374587 | 0.031142227 |
| ENSMMUG00000022973 | gametogenetin [Source:VGNC Symbol;Acc:VGNC:72740]                                                    | 0.577574032 | 0.005139972 | 0.030094991 |
| ENSMMUG00000013128 | coiled-coil domain containing 30 [Source:VGNC Symbol;Acc:VGNC:70866]                                 | 0.59127651  | 0.003401433 | 0.021687133 |
| ENSMMUG00000001532 | glucosidase alpha, neutral C [Source:NCBI gene;Acc:708126]                                           | 0.595133007 | 0.00900267  | 0.046216733 |
| ENSMMUG00000029507 | adaptor related protein complex 3 subunit sigma 2 [Source:NCBI gene;Acc:701217]                      | 0.598907424 | 0.00267417  | 0.017890793 |
| ENSMMUG00000016465 | histone deacetylase 6 [Source:VGNC Symbol;Acc:VGNC:73164]                                            | 0.603924299 | 0.005141505 | 0.030094991 |
| ENSMMUG00000009430 | transient receptor potential cation channel subfamily M member 1 [Source:VGNC Symbol;Acc:VGNC:79964] | 0.605310942 | 0.002157515 | 0.015235462 |
| ENSMMUG00000019703 | RUN and FYVE domain containing 2 [Source:VGNC Symbol;Acc:VGNC:77057]                                 | 0.614861668 | 0.001680522 | 0.012416341 |
| ENSMMUG00000060764 |                                                                                                      | 0.619909378 | 0.007730191 | 0.040938669 |
| ENSMMUG00000001028 | SNF related kinase [Source:VGNC Symbol;Acc:VGNC:84074]                                               | 0.619984697 | 0.000294146 | 0.002931378 |
| ENSMMUG00000020588 | protein kinase N2 [Source:VGNC Symbol;Acc:VGNC:76015]                                                | 0.624423605 | 0.005539327 | 0.031694451 |
| ENSMMUG00000003289 | integrin subunit beta 3 [Source:NCBI gene;Acc:717379]                                                | 0.624588287 | 0.002071051 | 0.014691109 |
| ENSMMUG00000055601 |                                                                                                      | 0.625486994 | 0.006540535 | 0.036054865 |
| ENSMMUG00000008126 | lysine demethylase 7A [Source:VGNC Symbol;Acc:VGNC:73886]                                            | 0.638963955 | 0.002374388 | 0.016383279 |
| ENSMMUG00000008615 | nebulin [Source:NCBI gene;Acc:100430324]                                                             | 0.643805103 | 0.007000254 | 0.037921537 |
| ENSMMUG00000057560 |                                                                                                      | 0.6447889   | 0.006731637 | 0.036809258 |
| ENSMMUG00000019820 | SH3 domain and tetratricopeptide repeats 2 [Source:VGNC Symbol;Acc:VGNC:77337]                       | 0.647161221 | 0.006986984 | 0.037877926 |
| ENSMMUG00000015267 | C-terminal Src kinase [Source:VGNC Symbol;Acc:VGNC:81380]                                            | 0.647807888 | 0.003578208 | 0.022561497 |
| ENSMMUG00000021498 | L3MBTL histone methyl-lysine binding protein 3 [Source:VGNC Symbol;Acc:VGNC:74106]                   | 0.64794139  | 0.005886056 | 0.03321155  |
| ENSMMUG00000060459 |                                                                                                      | 0.650585034 | 0.00305885  | 0.019924124 |
| ENSMMUG00000005270 | ryanodine receptor 3 [Source:NCBI gene;Acc:694996]                                                   | 0.658426486 | 0.000547053 | 0.004894621 |
| ENSMMUG00000008336 | acyl-CoA dehydrogenase family member 10 [Source:NCBI gene;Acc:711080]                                | 0.658712313 | 0.000818901 | 0.0068808   |
| ENSMMUG00000037756 | MAF bZIP transcription factor [Source:NCBI gene;Acc:106995090]                                       | 0.660616302 | 0.003243245 | 0.020841753 |
| ENSMMUG00000002540 | dehydrogenase/reductase 7 [Source:VGNC Symbol;Acc:VGNC:71690]                                        | 0.666410746 | 0.001605339 | 0.01199144  |
| ENSMMUG00000015840 | RAN binding protein 17 [Source:VGNC Symbol;Acc:VGNC:84485]                                           | 0.668149808 | 0.009456206 | 0.048060193 |
| ENSMMUG00000017382 | biliverdin reductase A [Source:VGNC Symbol;Acc:VGNC:70256]                                           | 0.67184012  | 0.005522051 | 0.031684667 |
| ENSMMUG00000053437 |                                                                                                      | 0.67514322  | 0.003093535 | 0.020056691 |
| ENSMMUG00000014880 | sortilin related receptor 1 [Source:NCBI gene;Acc:713011]                                            | 0.678421311 | 0.001672056 | 0.012376256 |
| ENSMMUG00000018503 | NACHT and WD repeat domain containing 1 [Source:NCBI gene;Acc:719640]                                | 0.681905998 | 0.002040325 | 0.014521266 |
| ENSMMUG00000006029 | odontogenic, ameloblast associated [Source:NCBI gene;Acc:707906]                                     | 0.685982138 | 0.008480401 | 0.04414797  |
| ENSMMUG00000010367 | myosin heavy chain 11 [Source:VGNC Symbol;Acc:VGNC:75097]                                            | 0.691713337 | 0.008892594 | 0.045796018 |
| ENSMMUG00000053710 |                                                                                                      | 0.6987867   | 0.006190561 | 0.034428654 |
| ENSMMUG00000017261 | galactosylceramidase [Source:VGNC Symbol;Acc:VGNC:72867]                                             | 0.70144658  | 0.004773578 | 0.028411166 |
| ENSMMUG00000005323 | phosphoribosyl pyrophosphate synthetase associated protein 2 [Source:VGNC Symbol;Acc:VGNC:76430]     | 0.703512129 | 0.00398999  | 0.024685789 |



|                    |                                                                                                               |             |             |             |
|--------------------|---------------------------------------------------------------------------------------------------------------|-------------|-------------|-------------|
| ENSMMUG00000032341 | coiled-coil domain containing 160 [Source:VGNC Symbol;Acc:VGNC:70926]                                         | 0.704255799 | 0.00084302  | 0.007047095 |
| ENSMMUG00000056008 |                                                                                                               | 0.705200461 | 0.00057279  | 0.005091326 |
| ENSMMUG00000013697 | PDX1 C-terminal inhibiting factor 1 [Source:VGNC Symbol;Acc:VGNC:75621]                                       | 0.711194815 | 0.005530356 | 0.031686497 |
| ENSMMUG00000028928 | ankyrin repeat domain 24 [Source:NCBI gene;Acc:721829]                                                        | 0.71282148  | 0.004074217 | 0.025094601 |
| ENSMMUG00000001667 | transmembrane protein 210 [Source:VGNC Symbol;Acc:VGNC:79945]                                                 | 0.714030135 | 0.001422802 | 0.010877423 |
| ENSMMUG00000009768 | ring finger protein 14 [Source:VGNC Symbol;Acc:VGNC:84488]                                                    | 0.714804769 | 0.003076778 | 0.019992917 |
| ENSMMUG00000002033 | serine protease 36 [Source:VGNC Symbol;Acc:VGNC:76325]                                                        | 0.715515695 | 0.00901335  | 0.046242407 |
| ENSMMUG00000010058 | ATR interacting protein [Source:VGNC Symbol;Acc:VGNC:84235]                                                   | 0.718186413 | 0.003110048 | 0.020088525 |
| ENSMMUG00000021044 | afadin, adherens junction formation factor [Source:VGNC Symbol;Acc:VGNC:69818]                                | 0.722967158 | 0.002895114 | 0.019190096 |
| ENSMMUG00000005080 | ubiquitin conjugating enzyme E2 G1 [Source:VGNC Symbol;Acc:VGNC:78695]                                        | 0.730704847 | 0.006269883 | 0.034798491 |
| ENSMMUG00000001538 | GRAM domain containing 1A [Source:VGNC Symbol;Acc:VGNC:73029]                                                 | 0.734039781 | 0.000767633 | 0.00651049  |
| ENSMMUG00000052999 | lecithin retinol acyltransferase [Source:NCBI gene;Acc:698871]                                                | 0.741833331 | 0.006241839 | 0.034666478 |
| ENSMMUG00000031106 | ubiquitin recognition factor in ER associated degradation 1 [Source:NCBI gene;Acc:711716]                     | 0.74232772  | 0.002958556 | 0.019447684 |
| ENSMMUG00000009368 | Abelson helper integration site 1 [Source:VGNC Symbol;Acc:VGNC:81010]                                         | 0.743192638 | 0.003976302 | 0.024638548 |
| ENSMMUG00000052626 | progesterone and adiponectin receptor family member 8 [Source:NCBI gene;Acc:708418]                           | 0.745431334 | 0.003887486 | 0.02419871  |
| ENSMMUG00000020488 | receptor accessory protein 5 [Source:VGNC Symbol;Acc:VGNC:76864]                                              | 0.746197201 | 0.002342826 | 0.016206703 |
| ENSMMUG00000006139 | 3-hydroxy-3-methylglutaryl-CoA reductase [Source:VGNC Symbol;Acc:VGNC:73484]                                  | 0.74923327  | 0.003284395 | 0.021039767 |
| ENSMMUG00000051230 |                                                                                                               | 0.750815228 | 0.009423372 | 0.047953185 |
| ENSMMUG00000010556 | Snf2 related CREBBP activator protein [Source:NCBI gene;Acc:712944]                                           | 0.752306334 | 0.00200434  | 0.014302658 |
| ENSMMUG00000016772 | solute carrier family 28 member 1 [Source:VGNC Symbol;Acc:VGNC:77444]                                         | 0.75248459  | 8.45E-05    | 0.001008568 |
| ENSMMUG00000000901 | alpha hemoglobin stabilizing protein [Source:VGNC Symbol;Acc:VGNC:69631]                                      | 0.752614464 | 0.004402335 | 0.026804733 |
| ENSMMUG00000051186 | proteasome 20S subunit alpha 5 [Source:NCBI gene;Acc:698435]                                                  | 0.754876567 | 0.003761883 | 0.023560962 |
| ENSMMUG00000000198 | collagen beta(1-O)galactosyltransferase 1 [Source:NCBI gene;Acc:719980]                                       | 0.756190735 | 0.004929785 | 0.02908573  |
| ENSMMUG00000048207 | syntaxin 4 [Source:NCBI gene;Acc:704880]                                                                      | 0.757274288 | 0.008457204 | 0.044055378 |
| ENSMMUG00000014149 | LYN proto-oncogene, Src family tyrosine kinase [Source:VGNC Symbol;Acc:VGNC:74464]                            | 0.765468012 | 0.000431088 | 0.004015929 |
| ENSMMUG00000037473 | proline rich transmembrane protein 4 [Source:VGNC Symbol;Acc:VGNC:81746]                                      | 0.768830106 | 0.004686146 | 0.028013659 |
| ENSMMUG00000008041 | ankyrin repeat domain 27 [Source:VGNC Symbol;Acc:VGNC:69693]                                                  | 0.76972098  | 0.001344544 | 0.010386411 |
| ENSMMUG00000042077 | DNA damage regulated autophagy modulator 1 [Source:NCBI gene;Acc:697427]                                      | 0.770112679 | 0.009851934 | 0.049606954 |
| ENSMMUG00000015108 | SV2 related protein [Source:VGNC Symbol;Acc:VGNC:78208]                                                       | 0.77872639  | 0.004303521 | 0.026246642 |
| ENSMMUG00000050119 |                                                                                                               | 0.779961251 | 0.001352623 | 0.010419168 |
| ENSMMUG00000019966 | zinc finger protein 557 [Source:NCBI gene;Acc:100424983]                                                      | 0.782448647 | 0.001069457 | 0.008617629 |
| ENSMMUG00000005548 | N-ethylmaleimide sensitive factor, vesicle fusing ATPase [Source:VGNC Symbol;Acc:VGNC:75536]                  | 0.784721376 | 0.005171605 | 0.030206034 |
| ENSMMUG00000054184 | Metazoan signal recognition particle RNA [Source:RFAM;Acc:RF00017]                                            | 0.790954229 | 0.000466041 | 0.004297288 |
| ENSMMUG00000030532 | solute carrier family 25 member 16 [Source:NCBI gene;Acc:694145]                                              | 0.795106959 | 0.00395145  | 0.024503201 |
| ENSMMUG00000052424 |                                                                                                               | 0.795264641 | 0.005534046 | 0.031686497 |
| ENSMMUG00000021446 | diacylglycerol kinase zeta [Source:VGNC Symbol;Acc:VGNC:71789]                                                | 0.806779947 | 0.002273028 | 0.015872211 |
| ENSMMUG00000012469 | KIAA2013 [Source:VGNC Symbol;Acc:VGNC:73918]                                                                  | 0.808815815 | 0.000481992 | 0.004404462 |
| ENSMMUG00000000629 | serpin family C member 1 [Source:VGNC Symbol;Acc:VGNC:77360]                                                  | 0.81070323  | 0.002999485 | 0.019631675 |
| ENSMMUG00000055209 |                                                                                                               | 0.814511469 | 0.005804888 | 0.032844613 |
| ENSMMUG00000019839 | lysine acetyltransferase 5 [Source:VGNC Symbol;Acc:VGNC:73955]                                                | 0.81822824  | 0.007983042 | 0.042124389 |
| ENSMMUG00000001739 | ATPase sarcoplasmic/endoplasmic reticulum Ca <sup>2+</sup> transporting 2 [Source:VGNC Symbol;Acc:VGNC:70178] | 0.825325931 | 0.00069575  | 0.006007208 |
| ENSMMUG00000056024 |                                                                                                               | 0.828033381 | 0.003804369 | 0.023766765 |
| ENSMMUG00000019015 | HECT, C2 and WW domain containing E3 ubiquitin protein ligase 1 [Source:VGNC Symbol;Acc:VGNC:73217]           | 0.829132219 | 0.000326667 | 0.003177306 |
| ENSMMUG00000017949 | ornithine decarboxylase antizyme 1 [Source:NCBI gene;Acc:721477]                                              | 0.829239839 | 0.000345031 | 0.003328482 |
| ENSMMUG00000058002 | zinc finger protein 669-like [Source:NCBI gene;Acc:696282]                                                    | 0.829972461 | 0.000475994 | 0.004359443 |
| ENSMMUG00000015797 | disco interacting protein 2 homolog A [Source:VGNC Symbol;Acc:VGNC:71641]                                     | 0.832804692 | 6.17E-05    | 0.000768755 |
| ENSMMUG00000055239 |                                                                                                               | 0.833961795 | 0.00833846  | 0.043548262 |
| ENSMMUG00000048076 | TNF receptor superfamily member 10b [Source:NCBI gene;Acc:716650]                                             | 0.837440921 | 0.006866768 | 0.037422507 |
| ENSMMUG00000002345 | tropomodulin 3 [Source:VGNC Symbol;Acc:VGNC:78572]                                                            | 0.839363703 | 1.50E-05    | 0.000228509 |
| ENSMMUG00000037887 | RBMX like 1 [Source:NCBI gene;Acc:100424767]                                                                  | 0.840167815 | 0.001321354 | 0.010275895 |
| ENSMMUG00000005991 | TRIO and F-actin binding protein [Source:NCBI gene;Acc:701241]                                                | 0.84254105  | 0.000207848 | 0.002192093 |

|                     |                                                                                                                   |             |             |             |
|---------------------|-------------------------------------------------------------------------------------------------------------------|-------------|-------------|-------------|
| ENSMMUG0000002381   | lysine methyltransferase 2B [Source:VGNC Symbol;Acc:VGNC:74053]                                                   | 0.846703796 | 0.000509593 | 0.004602888 |
| ENSMMUG00000008652  | coiled-coil domain containing 85B [Source:VGNC Symbol;Acc:VGNC:70853]                                             | 0.848110569 | 0.005439899 | 0.031300359 |
| ENSMMUG00000016909  | meiotic kinetochore factor [Source:NCBI gene;Acc:709179]                                                          | 0.854494647 | 7.35E-06    | 0.000126317 |
| ENSMMUG00000015476  | unc-13 homolog A [Source:NCBI gene;Acc:720000]                                                                    | 0.856594073 | 0.000763845 | 0.006485116 |
| ENSMMUG00000003584  | mesoderm posterior bHLH transcription factor 2 [Source:VGNC Symbol;Acc:VGNC:74619]                                | 0.857155027 | 6.65E-05    | 0.000818727 |
| ENSMMUG00000006293  | SAP domain containing ribonucleoprotein [Source:NCBI gene;Acc:709932]                                             | 0.857435002 | 0.006297958 | 0.0349305   |
| ENSMMUG00000015572  | GSG1 like [Source:VGNC Symbol;Acc:VGNC:82152]                                                                     | 0.864121437 | 0.00085261  | 0.007105373 |
| ENSMMUG00000022514  | coiled-coil domain containing 186 [Source:VGNC Symbol;Acc:VGNC:70847]                                             | 0.86484766  | 0.000377159 | 0.003591609 |
| ENSMMUG00000015877  | 1,4-alpha-glucan branching enzyme 1 [Source:VGNC Symbol;Acc:VGNC:72894]                                           | 0.865552359 | 0.007083079 | 0.038116607 |
| ENSMMUG00000015306  | calponin 2 [Source:NCBI gene;Acc:721164]                                                                          | 0.868015851 | 0.000223445 | 0.002329435 |
| ENSMMUG00000004843  | sodium voltage-gated channel beta subunit 1 [Source:VGNC Symbol;Acc:VGNC:76983]                                   | 0.868307861 | 0.000856909 | 0.007133897 |
| ENSMMUG00000017619  | lysophosphatidic acid receptor 5 [Source:VGNC Symbol;Acc:VGNC:74277]                                              | 0.869501113 | 0.000179857 | 0.0019396   |
| ENSMMUG000000049432 | olfactory receptor 2T33 [Source:NCBI gene;Acc:706331]                                                             | 0.872132056 | 0.000442808 | 0.004103482 |
| ENSMMUG00000001536  | glutamine and serine rich 1 [Source:VGNC Symbol;Acc:VGNC:76544]                                                   | 0.874260363 | 0.000592083 | 0.005239931 |
| ENSMMUG000000060555 |                                                                                                                   | 0.877295273 | 0.008147337 | 0.042852465 |
| ENSMMUG00000003355  | lipid droplet associated hydrolase [Source:VGNC Symbol;Acc:VGNC:74130]                                            | 0.882333599 | 0.002348677 | 0.01621962  |
| ENSMMUG00000011347  | DEAH-box helicase 36 [Source:VGNC Symbol;Acc:VGNC:71623]                                                          | 0.882569113 | 1.46E-05    | 0.000223177 |
| ENSMMUG00000000382  | sperm associated antigen 16 [Source:VGNC Symbol;Acc:VGNC:77977]                                                   | 0.883937837 | 0.009454935 | 0.048060193 |
| ENSMMUG00000014573  | dimethylarginine dimethylaminohydrolase 1 [Source:VGNC Symbol;Acc:VGNC:71753]                                     | 0.886315496 | 1.77E-05    | 0.00026056  |
| ENSMMUG000000059292 |                                                                                                                   | 0.887824754 | 0.000574336 | 0.005099499 |
| ENSMMUG000000057345 | calcineurin like phosphoesterase domain containing 1 [Source:NCBI gene;Acc:716978]                                | 0.891384149 | 0.006037003 | 0.033805557 |
| ENSMMUG00000019022  | serine/threonine kinase 17a [Source:VGNC Symbol;Acc:VGNC:77913]                                                   | 0.891849855 | 0.000147113 | 0.001645323 |
| ENSMMUG00000005255  | TRAF-type zinc finger domain containing 1 [Source:VGNC Symbol;Acc:VGNC:79459]                                     | 0.892032334 | 0.002460595 | 0.016798421 |
| ENSMMUG000000059788 |                                                                                                                   | 0.893115596 | 1.63E-05    | 0.000245192 |
| ENSMMUG00000003067  | endoplasmic reticulum-golgi intermediate compartment 1 [Source:VGNC Symbol;Acc:VGNC:82141]                        | 0.894225253 | 0.000104125 | 0.001209391 |
| ENSMMUG00000010357  | cyclin and CBS domain divalent metal cation transport mediator 1 [Source:NCBI gene;Acc:708335]                    | 0.895111266 | 0.000270358 | 0.002727697 |
| ENSMMUG000000061749 | PAXIP1 associated glutamate rich protein 1 [Source:NCBI gene;Acc:706839]                                          | 0.897027022 | 7.21E-06    | 0.0001244   |
| ENSMMUG000000051226 | FAD-linked sulfhydryl oxidase ERV1 [Source:NCBI gene;Acc:106994988]                                               | 0.899753864 | 0.002916862 | 0.019261228 |
| ENSMMUG00000006620  | casein kinase 1 gamma 2 [Source:NCBI gene;Acc:709484]                                                             | 0.900666246 | 0.009310879 | 0.047440035 |
| ENSMMUG000000051072 |                                                                                                                   | 0.900741343 | 0.000110352 | 0.001278071 |
| ENSMMUG00000020629  | SDS3 homolog, SIN3A corepressor complex component [Source:NCBI gene;Acc:696166]                                   | 0.902037574 | 0.001478245 | 0.01121703  |
| ENSMMUG00000019926  | cytoplasmic polyadenylation element binding protein 4 [Source:VGNC Symbol;Acc:VGNC:71450]                         | 0.903406563 | 0.009726538 | 0.049188493 |
| ENSMMUG00000003457  | protein kinase cAMP-activated catalytic subunit beta [Source:NCBI gene;Acc:709728]                                | 0.904204817 | 8.64E-05    | 0.00102505  |
| ENSMMUG00000006470  | complement C1r subcomponent [Source:NCBI gene;Acc:722133]                                                         | 0.904702409 | 1.21E-05    | 0.000191439 |
| ENSMMUG00000016401  | SGT1 homolog, MIS12 kinetochore complex assembly cochaperone [Source:NCBI gene;Acc:694046]                        | 0.90774239  | 0.000523487 | 0.00470965  |
| ENSMMUG00000010949  | SPG21 abhydrolase domain containing, maspardin [Source:VGNC Symbol;Acc:VGNC:77970]                                | 0.911369787 | 0.004453955 | 0.027042581 |
| ENSMMUG00000005514  | RNA polymerase III subunit A [Source:VGNC Symbol;Acc:VGNC:76138]                                                  | 0.914827269 | 0.004288403 | 0.026189842 |
| ENSMMUG00000005478  | trimethylguanosine synthase 1 [Source:VGNC Symbol;Acc:VGNC:78404]                                                 | 0.916777526 | 0.007346414 | 0.039274134 |
| ENSMMUG00000008515  | sorting nexin 7 [Source:NCBI gene;Acc:716015]                                                                     | 0.918232305 | 4.44E-05    | 0.00057426  |
| ENSMMUG00000008399  | synaptic vesicle glycoprotein 2B [Source:VGNC Symbol;Acc:VGNC:78140]                                              | 0.91970762  | 0.002653182 | 0.017838029 |
| ENSMMUG00000003233  | SET domain containing 1A, histone lysine methyltransferase [Source:NCBI gene;Acc:712416]                          | 0.919738711 | 0.005555698 | 0.031699013 |
| ENSMMUG000000061366 |                                                                                                                   | 0.919793245 | 0.007489999 | 0.039884612 |
| ENSMMUG00000008007  | multiple EGF like domains 11 [Source:VGNC Symbol;Acc:VGNC:84376]                                                  | 0.920226809 | 0.003034758 | 0.019830658 |
| ENSMMUG000000030891 | hypoxia up-regulated 1 [Source:VGNC Symbol;Acc:VGNC:73399]                                                        | 0.920240463 | 0.00557911  | 0.031770338 |
| ENSMMUG000000045769 | tubulin tyrosine ligase like 10 [Source:NCBI gene;Acc:702662]                                                     | 0.920355752 | 0.0001887   | 0.002016272 |
| ENSMMUG00000007540  | Rho related BTB domain containing 2 [Source:VGNC Symbol;Acc:VGNC:76772]                                           | 0.920842927 | 0.001908992 | 0.013747389 |
| ENSMMUG000000053257 | Y RNA [Source:RFAM;Acc:RF00019]                                                                                   | 0.923270553 | 0.002271557 | 0.015872211 |
| ENSMMUG00000022741  | WAP, follistatin/kazal, immunoglobulin, kunitz and netrin domain containing 2 [Source:VGNC Symbol;Acc:VGNC:79900] | 0.927449813 | 0.002391658 | 0.016452438 |
| ENSMMUG000000059341 | Metazoan signal recognition particle RNA [Source:RFAM;Acc:RF00017]                                                | 0.928636412 | 0.009288511 | 0.047385375 |
| ENSMMUG000000057001 | homeobox B2 [Source:NCBI gene;Acc:106994010]                                                                      | 0.930528114 | 0.006088052 | 0.034067985 |
| ENSMMUG000000061785 |                                                                                                                   | 0.931048251 | 1.18E-05    | 0.000186762 |



|                    |                                                                                           |             |             |             |
|--------------------|-------------------------------------------------------------------------------------------|-------------|-------------|-------------|
| ENSMMUG00000015303 | ATP binding cassette subfamily A member 7 [Source:VGNC Symbol;Acc:VGNC:69567]             | 0.932600716 | 0.000251469 | 0.002581516 |
| ENSMMUG00000000381 | IKAROS family zinc finger 2 [Source:VGNC Symbol;Acc:VGNC:73586]                           | 0.934220884 | 3.50E-05    | 0.000460747 |
| ENSMMUG00000009825 | zinc finger DHHC-type containing 1 [Source:VGNC Symbol;Acc:VGNC:79102]                    | 0.934327987 | 0.006783505 | 0.037043123 |
| ENSMMUG00000021449 | vacuolar protein sorting 13 homolog D [Source:NCBI gene;Acc:722775]                       | 0.938255977 | 8.77E-07    | 1.95E-05    |
| ENSMMUG00000055747 | cytochrome c oxidase subunit 6B [Source:NCBI gene;Acc:692062]                             | 0.938671576 | 0.000602824 | 0.005317651 |
| ENSMMUG00000048463 | apolipoprotein L5 [Source:HGNC Symbol;Acc:HGNC:14869]                                     | 0.940315907 | 0.000513885 | 0.004633501 |
| ENSMMUG00000015394 | WD repeat domain 93 [Source:VGNC Symbol;Acc:VGNC:79642]                                   | 0.941894178 | 7.75E-06    | 0.000131557 |
| ENSMMUG00000008077 | dynein cytoplasmic 2 light intermediate chain 1 [Source:VGNC Symbol;Acc:VGNC:71899]       | 0.94984254  | 2.68E-05    | 0.000371146 |
| ENSMMUG00000022031 | DNA polymerase alpha 2, accessory subunit [Source:NCBI gene;Acc:716541]                   | 0.953988642 | 0.001687039 | 0.012453196 |
| ENSMMUG00000013385 | elongator acetyltransferase complex subunit 6 [Source:VGNC Symbol;Acc:VGNC:72113]         | 0.954310696 | 0.002529451 | 0.017176636 |
| ENSMMUG00000018274 | FERM domain containing 6 [Source:VGNC Symbol;Acc:VGNC:72747]                              | 0.956137934 | 4.36E-06    | 8.03E-05    |
| ENSMMUG00000005480 | carnosine synthase 1 [Source:VGNC Symbol;Acc:VGNC:81367]                                  | 0.956966021 | 4.62E-07    | 1.11E-05    |
| ENSMMUG00000057682 |                                                                                           | 0.960209011 | 0.000488179 | 0.004446036 |
| ENSMMUG00000004074 | bone morphogenetic protein 7 [Source:VGNC Symbol;Acc:VGNC:70266]                          | 0.962548014 | 0.005393922 | 0.031191271 |
| ENSMMUG00000012472 | phosphatidylinositol-4-phosphate 5-kinase type 1 beta [Source:VGNC Symbol;Acc:VGNC:76001] | 0.964183702 | 0.000181006 | 0.00194683  |
| ENSMMUG00000053072 |                                                                                           | 0.964661497 | 0.009231763 | 0.047154963 |
| ENSMMUG00000020916 | coiled-coil domain containing 158 [Source:NCBI gene;Acc:699735]                           | 0.968846484 | 0.000325063 | 0.003165862 |
| ENSMMUG00000053625 | sterol-C5-desaturase [Source:NCBI gene;Acc:706827]                                        | 0.969407185 | 1.44E-07    | 3.85E-06    |
| ENSMMUG00000000808 | melanin concentrating hormone receptor 2 [Source:VGNC Symbol;Acc:VGNC:74550]              | 0.971232399 | 3.58E-06    | 6.77E-05    |
| ENSMMUG00000003534 | ring finger protein 157 [Source:VGNC Symbol;Acc:VGNC:76860]                               | 0.974932393 | 0.000892755 | 0.007372018 |
| ENSMMUG00000005668 | kynurenine 3-monooxygenase [Source:VGNC Symbol;Acc:VGNC:74197]                            | 0.975100843 | 0.00162056  | 0.012082968 |
| ENSMMUG00000010886 | strawberry notch homolog 2 [Source:VGNC Symbol;Acc:VGNC:77123]                            | 0.979315768 | 0.001448968 | 0.011046344 |
| ENSMMUG00000057906 |                                                                                           | 0.981760053 | 1.92E-05    | 0.000280271 |
| ENSMMUG00000056548 | coagulation factor III, tissue factor [Source:NCBI gene;Acc:714456]                       | 0.982158212 | 1.73E-07    | 4.59E-06    |
| ENSMMUG00000011774 | integrator complex subunit 10 [Source:VGNC Symbol;Acc:VGNC:73653]                         | 0.983359909 | 1.53E-05    | 0.000232155 |
| ENSMMUG00000005432 | clathrin heavy chain like 1 [Source:VGNC Symbol;Acc:VGNC:71268]                           | 0.985019052 | 0.001185417 | 0.009379656 |
| ENSMMUG00000001616 | peptidyl arginine deiminase 2 [Source:VGNC Symbol;Acc:VGNC:75644]                         | 0.987593843 | 0.003207291 | 0.020659626 |
| ENSMMUG00000020320 | protein transport protein Sec16B [Source:NCBI gene;Acc:709635]                            | 0.989301141 | 0.001700846 | 0.012532384 |
| ENSMMUG00000052238 |                                                                                           | 0.990459006 | 0.007536436 | 0.040105661 |
| ENSMMUG00000009794 | protocadherin related 15 [Source:VGNC Symbol;Acc:VGNC:75608]                              | 0.990713251 | 6.42E-05    | 0.000795624 |
| ENSMMUG00000022933 | DNA topoisomerase I mitochondrial [Source:VGNC Symbol;Acc:VGNC:79821]                     | 0.99875669  | 1.86E-06    | 3.86E-05    |
| ENSMMUG00000051677 |                                                                                           | 1.00668185  | 0.000150746 | 0.001672174 |
| ENSMMUG00000018720 | cytoskeleton associated protein 2 [Source:VGNC Symbol;Acc:VGNC:71229]                     | 1.008642963 | 8.81E-06    | 0.000145521 |
| ENSMMUG00000063817 | SRY-box transcription factor 9 [Source:NCBI gene;Acc:574208]                              | 1.008889423 | 2.08E-05    | 0.000298337 |
| ENSMMUG00000062316 | Metazoan signal recognition particle RNA [Source:RFAM;Acc:RF00017]                        | 1.012261915 | 0.002924773 | 0.019297817 |
| ENSMMUG00000010940 | telomerase reverse transcriptase [Source:VGNC Symbol;Acc:VGNC:78313]                      | 1.018000422 | 8.90E-05    | 0.001051866 |
| ENSMMUG00000063495 |                                                                                           | 1.018145805 | 0.001540034 | 0.011599404 |
| ENSMMUG00000019085 | 3-hydroxybutyrate dehydrogenase 2 [Source:VGNC Symbol;Acc:VGNC:70161]                     | 1.01852482  | 0.000214631 | 0.002246173 |
| ENSMMUG00000014983 | alanyl aminopeptidase, membrane [Source:VGNC Symbol;Acc:VGNC:69943]                       | 1.019350197 | 1.33E-06    | 2.84E-05    |
| ENSMMUG00000014313 | zinc finger protein 500 [Source:VGNC Symbol;Acc:VGNC:79406]                               | 1.021074739 | 0.001948787 | 0.013979756 |
| ENSMMUG00000022931 | NTPase KAP family P-loop domain containing 1 [Source:VGNC Symbol;Acc:VGNC:75250]          | 1.023482701 | 0.002936582 | 0.019328741 |
| ENSMMUG00000005483 | ribosomal protein S6 kinase B2 [Source:VGNC Symbol;Acc:VGNC:76934]                        | 1.025642497 | 0.002906255 | 0.019206762 |
| ENSMMUG00000009381 | WW domain binding protein 2 [Source:VGNC Symbol;Acc:VGNC:78786]                           | 1.027958224 | 0.000354505 | 0.003403751 |
| ENSMMUG00000023032 | intraflagellar transport 81 [Source:VGNC Symbol;Acc:VGNC:73389]                           | 1.028092458 | 0.000119852 | 0.001372483 |
| ENSMMUG00000061514 | mucin-3A-like [Source:NCBI gene;Acc:100428559]                                            | 1.031024823 | 0.00612977  | 0.034207395 |
| ENSMMUG00000004108 | corticotropin releasing hormone receptor 1 [Source:VGNC Symbol;Acc:VGNC:81184]            | 1.033037124 | 0.000485272 | 0.004429468 |
| ENSMMUG00000023599 | chromosome alignment maintaining phosphoprotein 1 [Source:VGNC Symbol;Acc:VGNC:71061]     | 1.033094456 | 1.08E-05    | 0.000172297 |
| ENSMMUG00000021031 | TMF1 regulated nuclear protein 1 [Source:VGNC Symbol;Acc:VGNC:79946]                      | 1.035167534 | 0.00418512  | 0.02565907  |
| ENSMMUG00000004903 | ectonucleotide pyrophosphatase/phosphodiesterase 2 [Source:VGNC Symbol;Acc:VGNC:72223]    | 1.036220694 | 0.006362301 | 0.03516225  |
| ENSMMUG00000064650 | SPEM family member 3 [Source:NCBI gene;Acc:106993878]                                     | 1.036449768 | 8.44E-07    | 1.88E-05    |
| ENSMMUG00000009318 | BCL9 like [Source:VGNC Symbol;Acc:VGNC:70113]                                             | 1.041044061 | 0.000389183 | 0.003693156 |

|                     |                                                                                                 |             |             |             |
|---------------------|-------------------------------------------------------------------------------------------------|-------------|-------------|-------------|
| ENSMMUG00000004149  | eukaryotic translation initiation factor 4 gamma 3 [Source:NCBI gene;Acc:717555]                | 1.041745043 | 1.31E-07    | 3.55E-06    |
| ENSMMUG000000059671 |                                                                                                 | 1.042089427 | 0.000546609 | 0.004894621 |
| ENSMMUG00000001944  | chromosome 20 C16orf72 homolog [Source:VGNC Symbol;Acc:VGNC:70443]                              | 1.043040538 | 1.65E-05    | 0.000248402 |
| ENSMMUG000000019089 | centromere protein E [Source:VGNC Symbol;Acc:VGNC:71008]                                        | 1.048612389 | 2.51E-05    | 0.000350186 |
| ENSMMUG000000007387 | G protein-coupled receptor kinase 7 [Source:VGNC Symbol;Acc:VGNC:73182]                         | 1.050041931 | 0.004691552 | 0.028025397 |
| ENSMMUG000000022481 | cytochrome P450, family 1, subfamily A, polypeptide 1 [Source:NCBI gene;Acc:678694]             | 1.052251165 | 0.001983363 | 0.014166321 |
| ENSMMUG000000013397 | peroxiredoxin 5 [Source:NCBI gene;Acc:719764]                                                   | 1.056271341 | 0.000406545 | 0.003829958 |
| ENSMMUG000000017150 | mitochondrial antiviral signaling protein [Source:VGNC Symbol;Acc:VGNC:74609]                   | 1.058382799 | 0.007078256 | 0.038116607 |
| ENSMMUG000000046550 | coiled-coil domain containing 125 [Source:NCBI gene;Acc:704391]                                 | 1.05914965  | 5.58E-05    | 0.000702517 |
| ENSMMUG000000020868 | homeobox B8 [Source:VGNC Symbol;Acc:VGNC:73505]                                                 | 1.061928054 | 2.66E-05    | 0.000369505 |
| ENSMMUG000000017129 | solute carrier family 41 member 2 [Source:VGNC Symbol;Acc:VGNC:77585]                           | 1.062014772 | 0.000103353 | 0.001202143 |
| ENSMMUG000000001848 | sprouty RTK signaling antagonist 1 [Source:VGNC Symbol;Acc:VGNC:77867]                          | 1.065375628 | 1.22E-06    | 2.64E-05    |
| ENSMMUG000000004273 | dedicator of cytokinesis 3 [Source:VGNC Symbol;Acc:VGNC:71967]                                  | 1.075842263 | 2.96E-05    | 0.000398731 |
| ENSMMUG000000015663 | adaptor related protein complex 3 subunit delta 1 [Source:VGNC Symbol;Acc:VGNC:69969]           | 1.080077754 | 1.60E-06    | 3.37E-05    |
| ENSMMUG000000017946 | rogdi atypical leucine zipper [Source:VGNC Symbol;Acc:VGNC:76862]                               | 1.080409611 | 0.005736315 | 0.032524425 |
| ENSMMUG000000017660 |                                                                                                 | 1.082025611 | 0.005659556 | 0.03213783  |
| ENSMMUG000000006530 | ATP/GTP binding protein like 3 [Source:VGNC Symbol;Acc:VGNC:69723]                              | 1.082963523 | 3.02E-05    | 0.000405073 |
| ENSMMUG000000019991 | dopa decarboxylase [Source:VGNC Symbol;Acc:VGNC:71755]                                          | 1.085135852 | 3.32E-07    | 8.24E-06    |
| ENSMMUG000000049850 | proline rich and Gla domain 4 [Source:NCBI gene;Acc:694707]                                     | 1.085213609 | 0.001334169 | 0.010321967 |
| ENSMMUG000000060973 |                                                                                                 | 1.08814287  | 0.003387166 | 0.021630043 |
| ENSMMUG000000009889 | PSMC3 interacting protein [Source:VGNC Symbol;Acc:VGNC:76282]                                   | 1.089420406 | 0.000169421 | 0.001849099 |
| ENSMMUG000000052607 |                                                                                                 | 1.09000075  | 6.99E-06    | 0.000121037 |
| ENSMMUG000000061995 |                                                                                                 | 1.093147256 | 0.000475955 | 0.004359443 |
| ENSMMUG000000013966 | legumain [Source:VGNC Symbol;Acc:VGNC:74274]                                                    | 1.093267769 | 0.00704579  | 0.03801645  |
| ENSMMUG000000015477 | lemur tyrosine kinase 2 [Source:VGNC Symbol;Acc:VGNC:74309]                                     | 1.093453713 | 0.000392136 | 0.003716849 |
| ENSMMUG000000002452 | solute carrier family 35 member C1 [Source:VGNC Symbol;Acc:VGNC:77524]                          | 1.094824285 | 0.00201098  | 0.014337477 |
| ENSMMUG000000058187 |                                                                                                 | 1.097657657 | 2.24E-06    | 4.55E-05    |
| ENSMMUG000000017945 | septin 12 [Source:VGNC Symbol;Acc:VGNC:82235]                                                   | 1.099235146 | 0.008230515 | 0.043206223 |
| ENSMMUG000000002822 | unc-13 homolog D [Source:VGNC Symbol;Acc:VGNC:79375]                                            | 1.100637102 | 0.000127155 | 0.001443931 |
| ENSMMUG000000002923 | colony stimulating factor 3 [Source:VGNC Symbol;Acc:VGNC:71520]                                 | 1.102441634 | 0.001304718 | 0.010182211 |
| ENSMMUG000000000874 | carbohydrate sulfotransferase 1 [Source:VGNC Symbol;Acc:VGNC:71055]                             | 1.102909237 | 0.005219907 | 0.030466297 |
| ENSMMUG000000054377 |                                                                                                 | 1.104529293 | 7.18E-09    | 2.75E-07    |
| ENSMMUG000000009199 | glycogen phosphorylase B [Source:VGNC Symbol;Acc:VGNC:76631]                                    | 1.107903864 | 0.002758978 | 0.018412783 |
| ENSMMUG000000031279 | torsin A interacting protein 2 [Source:NCBI gene;Acc:716654]                                    | 1.108434864 | 0.000901431 | 0.007436123 |
| ENSMMUG000000012797 | zinc finger protein 233 [Source:VGNC Symbol;Acc:VGNC:79903]                                     | 1.11596873  | 0.006019776 | 0.03373229  |
| ENSMMUG000000005776 | atlastin GTPase 3 [Source:VGNC Symbol;Acc:VGNC:70125]                                           | 1.116852905 | 0.000496741 | 0.004503856 |
| ENSMMUG000000009886 | Coenzyme A synthase [Source:VGNC Symbol;Acc:VGNC:81373]                                         | 1.117502596 | 4.63E-05    | 0.000596023 |
| ENSMMUG000000007379 | phosphatidylinositol 3,4,5-trisphosphate 3-phosphatase TPTE2-like [Source:NCBI gene;Acc:694255] | 1.118320785 | 0.0001157   | 0.001330549 |
| ENSMMUG000000005745 | EYA transcriptional coactivator and phosphatase 4 [Source:VGNC Symbol;Acc:VGNC:72456]           | 1.119994259 | 3.02E-05    | 0.00040466  |
| ENSMMUG000000018344 | myosin XVA [Source:VGNC Symbol;Acc:VGNC:75109]                                                  | 1.122268968 | 0.000374384 | 0.003573542 |
| ENSMMUG000000038256 | aquaporin 2 [Source:NCBI gene;Acc:711719]                                                       | 1.127456174 | 3.18E-10    | 1.59E-08    |
| ENSMMUG000000014010 | RNA binding fox-1 homolog 2 [Source:VGNC Symbol;Acc:VGNC:76685]                                 | 1.127968976 | 4.82E-09    | 1.91E-07    |
| ENSMMUG000000042510 | coagulation factor V [Source:NCBI gene;Acc:704695]                                              | 1.130233202 | 7.61E-08    | 2.25E-06    |
| ENSMMUG000000017810 | structure specific recognition protein 1 [Source:VGNC Symbol;Acc:VGNC:77891]                    | 1.130248777 | 0.002665559 | 0.017877253 |
| ENSMMUG000000055352 |                                                                                                 | 1.130742135 | 2.37E-05    | 0.000333858 |
| ENSMMUG000000006936 | gastric inhibitory polypeptide receptor [Source:VGNC Symbol;Acc:VGNC:73052]                     | 1.133048626 | 0.000315769 | 0.003089809 |
| ENSMMUG000000005215 | Rab9 effector protein with kelch motifs [Source:VGNC Symbol;Acc:VGNC:76495]                     | 1.133747941 | 0.006889483 | 0.037496102 |
| ENSMMUG000000015479 | tectonin beta-propeller repeat containing 1 [Source:VGNC Symbol;Acc:VGNC:79348]                 | 1.134888508 | 8.53E-08    | 2.45E-06    |
| ENSMMUG000000008196 | aconitase 1 [Source:VGNC Symbol;Acc:VGNC:69378]                                                 | 1.136106489 | 7.76E-06    | 0.000131557 |
| ENSMMUG000000055048 |                                                                                                 | 1.137563966 | 0.001171743 | 0.009289517 |
| ENSMMUG000000001220 | adhesion G protein-coupled receptor E1 [Source:VGNC Symbol;Acc:VGNC:69561]                      | 1.138083707 | 0.004496079 | 0.027194584 |



|                    |                                                                                                  |             |             |             |
|--------------------|--------------------------------------------------------------------------------------------------|-------------|-------------|-------------|
| ENSMMUG0000004558  | OTU deubiquitinase 5 [Source:VGNC Symbol;Acc:VGNC:75677]                                         | 1.138913263 | 2.08E-05    | 0.000298337 |
| ENSMMUG00000047219 |                                                                                                  | 1.139377237 | 0.009481672 | 0.048159559 |
| ENSMMUG00000054175 |                                                                                                  | 1.140759905 | 3.15E-06    | 6.05E-05    |
| ENSMMUG00000023717 | MIER family member 2 [Source:VGNC Symbol;Acc:VGNC:74855]                                         | 1.146852248 | 0.001256363 | 0.009868382 |
| ENSMMUG00000056613 |                                                                                                  | 1.146865127 | 9.43E-06    | 0.000153188 |
| ENSMMUG00000006181 | WD repeat, sterile alpha motif and U-box domain containing 1 [Source:VGNC Symbol;Acc:VGNC:79634] | 1.146871643 | 0.002709653 | 0.018113296 |
| ENSMMUG00000001088 | patched domain containing 1 [Source:VGNC Symbol;Acc:VGNC:76322]                                  | 1.147379143 | 1.43E-06    | 3.04E-05    |
| ENSMMUG00000063322 |                                                                                                  | 1.14757191  | 0.000406374 | 0.003829958 |
| ENSMMUG00000014277 | ITPR interacting domain containing 2 [Source:VGNC Symbol;Acc:VGNC:73584]                         | 1.147808169 | 1.38E-05    | 0.000213814 |
| ENSMMUG00000021408 | family with sequence similarity 222 member B [Source:VGNC Symbol;Acc:VGNC:72352]                 | 1.148109676 | 0.000822598 | 0.006897626 |
| ENSMMUG00000008623 | coiled-coil domain containing 22 [Source:VGNC Symbol;Acc:VGNC:70899]                             | 1.151663437 | 7.41E-05    | 0.000899111 |
| ENSMMUG00000003105 | inositol polyphosphate-5-phosphatase E [Source:VGNC Symbol;Acc:VGNC:73637]                       | 1.152215528 | 1.77E-05    | 0.00026056  |
| ENSMMUG00000008770 | UDP-glucose pyrophosphorylase 2 [Source:VGNC Symbol;Acc:VGNC:78712]                              | 1.153271899 | 0.001716803 | 0.012638525 |
| ENSMMUG00000007610 | ribosomal protein S6 kinase A4 [Source:VGNC Symbol;Acc:VGNC:76930]                               | 1.153728088 | 4.42E-07    | 1.07E-05    |
| ENSMMUG00000020604 | HPS1 biogenesis of lysosomal organelles complex 3 subunit 1 [Source:VGNC Symbol;Acc:VGNC:73515]  | 1.157110862 | 1.81E-05    | 0.000266685 |
| ENSMMUG00000058237 |                                                                                                  | 1.157283676 | 0.002674089 | 0.017890793 |
| ENSMMUG00000014771 | zinc finger homeobox 2 [Source:NCBI gene;Acc:100429448]                                          | 1.159053092 | 8.94E-07    | 1.97E-05    |
| ENSMMUG00000059491 |                                                                                                  | 1.159137895 | 0.001670057 | 0.012376256 |
| ENSMMUG00000002428 | zinc finger protein 800 [Source:VGNC Symbol;Acc:VGNC:79658]                                      | 1.159278183 | 4.51E-05    | 0.000581647 |
| ENSMMUG00000018879 | exocyst complex component 3 like 2 [Source:NCBI gene;Acc:713992]                                 | 1.159703069 | 7.38E-05    | 0.000898527 |
| ENSMMUG00000019536 | potassium voltage-gated channel subfamily Q member 4 [Source:VGNC Symbol;Acc:VGNC:74007]         | 1.161903965 | 2.11E-06    | 4.31E-05    |
| ENSMMUG00000021736 | single-pass membrane protein with coiled-coil domains 2 [Source:VGNC Symbol;Acc:VGNC:77808]      | 1.164345619 | 0.006899652 | 0.037522711 |
| ENSMMUG00000060533 |                                                                                                  | 1.165758699 | 1.18E-08    | 4.30E-07    |
| ENSMMUG00000008618 | calcium voltage-gated channel subunit alpha1 F [Source:VGNC Symbol;Acc:VGNC:70503]               | 1.166428345 | 2.92E-06    | 5.66E-05    |
| ENSMMUG00000012959 | solute carrier family 35 member E1 [Source:VGNC Symbol;Acc:VGNC:77536]                           | 1.171610733 | 7.41E-05    | 0.000899111 |
| ENSMMUG00000053324 | lymphocyte antigen 6 complex locus protein G6d [Source:NCBI gene;Acc:715304]                     | 1.175384884 | 0.007738223 | 0.040938669 |
| ENSMMUG00000009890 | FERM, ARH/RhoGEF and pleckstrin domain protein 1 [Source:VGNC Symbol;Acc:VGNC:72614]             | 1.177044273 | 2.59E-09    | 1.06E-07    |
| ENSMMUG00000001635 | zinc finger protein 703 [Source:VGNC Symbol;Acc:VGNC:79552]                                      | 1.17710341  | 0.009739707 | 0.049224515 |
| ENSMMUG00000004002 | CDC like kinase 4 [Source:VGNC Symbol;Acc:VGNC:71173]                                            | 1.177665269 | 5.18E-07    | 1.23E-05    |
| ENSMMUG00000021655 | histone deacetylase 7 [Source:NCBI gene;Acc:718225]                                              | 1.178465211 | 6.93E-07    | 1.59E-05    |
| ENSMMUG00000004435 | two pore segment channel 1 [Source:VGNC Symbol;Acc:VGNC:79117]                                   | 1.184175522 | 9.04E-06    | 0.000148523 |
| ENSMMUG00000013671 | elongation factor for RNA polymerase II [Source:VGNC Symbol;Acc:VGNC:72088]                      | 1.18467119  | 0.000125118 | 0.00142477  |
| ENSMMUG00000055290 | netrin 1 [Source:NCBI gene;Acc:717645]                                                           | 1.184946522 | 0.002247364 | 0.015760585 |
| ENSMMUG00000014045 | protein tyrosine phosphatase non-receptor type 23 [Source:VGNC Symbol;Acc:VGNC:76477]            | 1.186359658 | 0.000145178 | 0.001625912 |
| ENSMMUG00000063694 | cyclic nucleotide gated channel subunit alpha 2 [Source:NCBI gene;Acc:704486]                    | 1.186977187 | 7.86E-08    | 2.30E-06    |
| ENSMMUG00000014674 | golgin, RAB6 interacting [Source:VGNC Symbol;Acc:VGNC:73012]                                     | 1.187357519 | 0.002495638 | 0.01698292  |
| ENSMMUG00000019925 | DiGeorge syndrome critical region gene 2 [Source:NCBI gene;Acc:100423715]                        | 1.188790191 | 8.95E-05    | 0.001054533 |
| ENSMMUG00000020254 | exocyst complex component 3 like 1 [Source:VGNC Symbol;Acc:VGNC:72376]                           | 1.194330171 | 0.003580134 | 0.022561497 |
| ENSMMUG00000051408 | myelin associated oligodendrocyte basic protein [Source:NCBI gene;Acc:717265]                    | 1.19462562  | 0.000336137 | 0.003254254 |
| ENSMMUG00000005989 | GLE1 RNA export mediator [Source:VGNC Symbol;Acc:VGNC:73067]                                     | 1.197683365 | 0.000343856 | 0.003321089 |
| ENSMMUG00000055324 | homeobox B7 [Source:NCBI gene;Acc:697089]                                                        | 1.199546653 | 0.001360359 | 0.010458964 |
| ENSMMUG00000021017 | acylglycerol kinase [Source:VGNC Symbol;Acc:VGNC:69669]                                          | 1.201158147 | 9.69E-12    | 6.42E-10    |
| ENSMMUG00000017605 | mitochondrial ribosomal protein L39 [Source:VGNC Symbol;Acc:VGNC:74737]                          | 1.205444827 | 0.000182251 | 0.001957638 |
| ENSMMUG00000008566 | zinc finger protein 157 [Source:VGNC Symbol;Acc:VGNC:78850]                                      | 1.205866251 | 0.000171819 | 0.001865268 |
| ENSMMUG00000065025 |                                                                                                  | 1.20593643  | 0.000295427 | 0.002936958 |
| ENSMMUG00000042951 | signal recognition particle 19 [Source:NCBI gene;Acc:693829]                                     | 1.206512321 | 0.00232355  | 0.016141933 |
| ENSMMUG00000059777 |                                                                                                  | 1.20825363  | 0.000242736 | 0.002508065 |
| ENSMMUG00000007422 | spermatogenesis associated 5 [Source:VGNC Symbol;Acc:VGNC:77952]                                 | 1.209899458 | 7.91E-06    | 0.000133967 |
| ENSMMUG00000008080 | ATP binding cassette subfamily G member 5 [Source:VGNC Symbol;Acc:VGNC:69391]                    | 1.211697711 | 7.06E-06    | 0.000122081 |
| ENSMMUG00000014872 | dolichyl-phosphate N-acetylglucosaminophosphotransferase 1 [Source:VGNC Symbol;Acc:VGNC:71971]   | 1.213763864 | 2.58E-06    | 5.13E-05    |
| ENSMMUG00000052854 | mucin like 1 [Source:NCBI gene;Acc:100423942]                                                    | 1.215619187 | 1.04E-07    | 2.90E-06    |

|                     |                                                                                                                    |             |             |             |
|---------------------|--------------------------------------------------------------------------------------------------------------------|-------------|-------------|-------------|
| ENSMMUG0000004854   | leucine rich repeat containing 9 [Source:VGNC Symbol;Acc:VGNC:81443]                                               | 1.2159849   | 1.32E-05    | 0.000205546 |
| ENSMMUG00000039397  | tubulin folding cofactor E like [Source:NCBI gene;Acc:706506]                                                      | 1.216002862 | 0.000490494 | 0.004462124 |
| ENSMMUG00000003283  | extracellular leucine rich repeat and fibronectin type III domain containing 1 [Source:VGNC Symbol;Acc:VGNC:72204] | 1.218777771 | 0.000642963 | 0.005610935 |
| ENSMMUG00000016796  | reticulophagy regulator family member 3 [Source:VGNC Symbol;Acc:VGNC:76845]                                        | 1.219055239 | 1.59E-05    | 0.000240692 |
| ENSMMUG00000032809  | mml-mir-642 [Source:miRBase;Acc:MI0007885]                                                                         | 1.223533713 | 0.006167265 | 0.034349766 |
| ENSMMUG00000062397  |                                                                                                                    | 1.224405602 | 0.007728781 | 0.040938669 |
| ENSMMUG00000005486  | protein tyrosine phosphatase receptor type C associated protein [Source:VGNC Symbol;Acc:VGNC:76613]                | 1.225464944 | 0.002173117 | 0.01533234  |
| ENSMMUG00000014874  | GTP binding protein 8 (putative) [Source:VGNC Symbol;Acc:VGNC:84180]                                               | 1.229193248 | 0.004473179 | 0.027098676 |
| ENSMMUG00000062283  | homeobox B6 [Source:NCBI gene;Acc:106994013]                                                                       | 1.233369628 | 2.39E-05    | 0.000336166 |
| ENSMMUG00000006786  | protein tyrosine phosphatase non-receptor type 22 [Source:VGNC Symbol;Acc:VGNC:76603]                              | 1.233791063 | 0.003855071 | 0.02403368  |
| ENSMMUG00000002426  | myosin light chain 7 [Source:VGNC Symbol;Acc:VGNC:75002]                                                           | 1.235256665 | 0.000202247 | 0.002141343 |
| ENSMMUG00000056009  |                                                                                                                    | 1.235457739 | 0.001017046 | 0.008239592 |
| ENSMMUG00000032249  | procollagen-lysine,2-oxoglutarate 5-dioxygenase 1 [Source:NCBI gene;Acc:722763]                                    | 1.240030448 | 2.16E-05    | 0.000307962 |
| ENSMMUG00000006285  | antizyme inhibitor 2 [Source:VGNC Symbol;Acc:VGNC:70153]                                                           | 1.247225173 | 8.88E-09    | 3.35E-07    |
| ENSMMUG00000020956  | parvin alpha [Source:VGNC Symbol;Acc:VGNC:75605]                                                                   | 1.247226446 | 0.003934976 | 0.024438272 |
| ENSMMUG00000054055  | zinc finger protein 93 [Source:NCBI gene;Acc:720434]                                                               | 1.249298223 | 8.18E-08    | 2.39E-06    |
| ENSMMUG00000004820  | pre-mRNA processing factor 8 [Source:VGNC Symbol;Acc:VGNC:76275]                                                   | 1.250422514 | 2.23E-07    | 5.69E-06    |
| ENSMMUG00000002926  | mediator complex subunit 24 [Source:NCBI gene;Acc:699536]                                                          | 1.252744983 | 2.42E-07    | 6.17E-06    |
| ENSMMUG00000000582  | NOP58 ribonucleoprotein [Source:VGNC Symbol;Acc:VGNC:75284]                                                        | 1.255489848 | 0.003985597 | 0.024677362 |
| ENSMMUG00000053937  |                                                                                                                    | 1.256722078 | 7.77E-07    | 1.75E-05    |
| ENSMMUG00000051420  | homeobox B5 [Source:NCBI gene;Acc:696732]                                                                          | 1.25751914  | 0.005384333 | 0.031157954 |
| ENSMMUG00000004816  | membrane associated ring-CH-type finger 5 [Source:VGNC Symbol;Acc:VGNC:74588]                                      | 1.258029527 | 0.001346662 | 0.010392908 |
| ENSMMUG00000001547  | zinc finger protein 106 [Source:VGNC Symbol;Acc:VGNC:78831]                                                        | 1.259109722 | 7.90E-09    | 3.00E-07    |
| ENSMMUG000000045187 | CASC3 exon junction complex subunit [Source:NCBI gene;Acc:699712]                                                  | 1.262130511 | 9.34E-08    | 2.62E-06    |
| ENSMMUG00000058432  | zinc finger DHHC-type palmitoyltransferase 18 [Source:NCBI gene;Acc:719959]                                        | 1.26462066  | 5.24E-06    | 9.48E-05    |
| ENSMMUG00000016890  | solute carrier family 37 member 4 [Source:VGNC Symbol;Acc:VGNC:77591]                                              | 1.264753546 | 0.000313735 | 0.003083641 |
| ENSMMUG00000013146  | claudin 2 [Source:HGNC Symbol;Acc:HGNC:2041]                                                                       | 1.267538145 | 2.10E-05    | 0.000300299 |
| ENSMMUG00000039774  | Metazoan signal recognition particle RNA [Source:RFAM;Acc:RF00017]                                                 | 1.269130792 | 0.000227608 | 0.002366861 |
| ENSMMUG00000054784  |                                                                                                                    | 1.26921974  | 0.003600026 | 0.022669308 |
| ENSMMUG00000007970  | CCZ1 homolog, vacuolar protein trafficking and biogenesis associated [Source:NCBI gene;Acc:718128]                 | 1.269837059 | 0.005431685 | 0.031276366 |
| ENSMMUG00000065269  | Rho family GTPase 2 [Source:NCBI gene;Acc:712559]                                                                  | 1.270255839 | 0.002987638 | 0.019601408 |
| ENSMMUG00000023636  | importin 7 [Source:NCBI gene;Acc:704213]                                                                           | 1.271640797 | 0.008724675 | 0.045045213 |
| ENSMMUG00000012523  | flotillin 2 [Source:NCBI gene;Acc:114669752]                                                                       | 1.273397284 | 0.000123478 | 0.001410043 |
| ENSMMUG00000051323  | caspase-14-like [Source:NCBI gene;Acc:702430]                                                                      | 1.273517278 | 0.000917297 | 0.007536459 |
| ENSMMUG00000054158  | acyl-CoA dehydrogenase family member 11 [Source:NCBI gene;Acc:106997118]                                           | 1.27438677  | 0.004359523 | 0.026568292 |
| ENSMMUG00000019563  | collapsin response mediator protein 1 [Source:VGNC Symbol;Acc:VGNC:71494]                                          | 1.276336285 | 6.17E-12    | 4.25E-10    |
| ENSMMUG00000060063  |                                                                                                                    | 1.279421889 | 0.000991803 | 0.008057457 |
| ENSMMUG00000040274  | MAGE family member A4 [Source:NCBI gene;Acc:710825]                                                                | 1.28236375  | 1.75E-05    | 0.000259494 |
| ENSMMUG00000013871  | WD repeat domain 25 [Source:VGNC Symbol;Acc:VGNC:78420]                                                            | 1.284237138 | 0.000591019 | 0.005236212 |
| ENSMMUG00000022730  | cytochrome P450, family 3, subfamily A, polypeptide 5 [Source:NCBI gene;Acc:678692]                                | 1.284514821 | 0.00096598  | 0.007872886 |
| ENSMMUG00000051807  |                                                                                                                    | 1.28536511  | 0.000675366 | 0.005859021 |
| ENSMMUG00000030279  | A-kinase anchoring protein 10 [Source:VGNC Symbol;Acc:VGNC:69764]                                                  | 1.286878214 | 0.001263212 | 0.00989901  |
| ENSMMUG00000011209  | BICD family like cargo adaptor 1 [Source:HGNC Symbol;Acc:HGNC:28095]                                               | 1.28871615  | 0.002390371 | 0.016452438 |
| ENSMMUG00000055379  |                                                                                                                    | 1.289136896 | 1.12E-06    | 2.45E-05    |
| ENSMMUG00000018239  | centrosomal protein 83 [Source:VGNC Symbol;Acc:VGNC:70992]                                                         | 1.290264275 | 2.98E-05    | 0.000401134 |
| ENSMMUG00000000419  | Rho GTPase activating protein 26 [Source:VGNC Symbol;Acc:VGNC:69846]                                               | 1.291965893 | 0.005548918 | 0.031699013 |
| ENSMMUG00000010313  | kinesin family member 3A [Source:VGNC Symbol;Acc:VGNC:74017]                                                       | 1.292478197 | 2.73E-07    | 6.88E-06    |
| ENSMMUG00000020861  | EvC ciliary complex subunit 1 [Source:VGNC Symbol;Acc:VGNC:72445]                                                  | 1.298398843 | 3.14E-07    | 7.81E-06    |
| ENSMMUG00000063639  |                                                                                                                    | 1.299749211 | 0.001955901 | 0.01400498  |
| ENSMMUG00000048824  | eva-1 homolog C [Source:NCBI gene;Acc:708681]                                                                      | 1.301062102 | 1.38E-05    | 0.000213524 |
| ENSMMUG00000006893  | D-amino acid oxidase [Source:VGNC Symbol;Acc:VGNC:71729]                                                           | 1.302192833 | 4.64E-08    | 1.48E-06    |



|                    |                                                                                                           |             |             |             |
|--------------------|-----------------------------------------------------------------------------------------------------------|-------------|-------------|-------------|
| ENSMMUG00000019040 | hydroxysteroid 17-beta dehydrogenase 13 [Source:VGNC Symbol;Acc:VGNC:73417]                               | 1.305101211 | 1.63E-09    | 7.08E-08    |
| ENSMMUG00000051201 | zinc finger SWIM-type containing 3 [Source:NCBI gene;Acc:708804]                                          | 1.30519873  | 4.57E-06    | 8.40E-05    |
| ENSMMUG00000018719 | nemo like kinase [Source:VGNC Symbol;Acc:VGNC:75277]                                                      | 1.308947455 | 0.000116362 | 0.001336276 |
| ENSMMUG00000056950 |                                                                                                           | 1.309933284 | 3.22E-05    | 0.000429748 |
| ENSMMUG00000055096 |                                                                                                           | 1.310281588 | 0.001334044 | 0.010321967 |
| ENSMMUG00000046969 | Fc receptor like 3 [Source:NCBI gene;Acc:718801]                                                          | 1.311117692 | 0.001795374 | 0.013086781 |
| ENSMMUG00000001269 | chromosome 16 C17orf80 homolog [Source:VGNC Symbol;Acc:VGNC:70440]                                        | 1.312520273 | 1.12E-09    | 5.06E-08    |
| ENSMMUG00000006180 | tetratricopeptide repeat, ankyrin repeat and coiled-coil containing 1 [Source:VGNC Symbol;Acc:VGNC:78238] | 1.314002777 | 4.12E-06    | 7.64E-05    |
| ENSMMUG00000058621 |                                                                                                           | 1.315780617 | 0.002071407 | 0.014691109 |
| ENSMMUG00000013044 | selectin P [Source:VGNC Symbol;Acc:VGNC:77157]                                                            | 1.31779469  | 0.000244981 | 0.002521665 |
| ENSMMUG00000030964 | RAB6A, member RAS oncogene family [Source:NCBI gene;Acc:718717]                                           | 1.31860429  | 3.07E-05    | 0.000410969 |
| ENSMMUG00000021075 | Rac family small GTPase 1 [Source:NCBI gene;Acc:717755]                                                   | 1.319566013 | 2.52E-12    | 1.88E-10    |
| ENSMMUG00000064920 |                                                                                                           | 1.319829116 | 0.00048087  | 0.004399147 |
| ENSMMUG00000022313 | activating transcription factor 7 [Source:NCBI gene;Acc:700403]                                           | 1.320390732 | 2.79E-06    | 5.44E-05    |
| ENSMMUG00000017189 | regulatory factor X6 [Source:VGNC Symbol;Acc:VGNC:76800]                                                  | 1.321944995 | 0.001635945 | 0.012186517 |
| ENSMMUG00000052851 | solute carrier family 7 member 5 [Source:NCBI gene;Acc:695886]                                            | 1.322048963 | 0.0004323   | 0.004022617 |
| ENSMMUG00000049802 | olfactory receptor 51G1 [Source:NCBI gene;Acc:716561]                                                     | 1.325171404 | 0.00785629  | 0.041509355 |
| ENSMMUG00000049649 | proteasome 20S subunit beta 6 [Source:NCBI gene;Acc:710028]                                               | 1.326790551 | 9.40E-10    | 4.29E-08    |
| ENSMMUG00000014508 | potassium channel tetramerization domain containing 20 [Source:VGNC Symbol;Acc:VGNC:73872]                | 1.326961786 | 0.000313237 | 0.003083641 |
| ENSMMUG00000050793 | N-acetyl-alpha-glucosaminidase [Source:NCBI gene;Acc:707186]                                              | 1.329041773 | 0.000184498 | 0.001973956 |
| ENSMMUG00000060901 |                                                                                                           | 1.329263556 | 3.10E-08    | 1.03E-06    |
| ENSMMUG00000053199 |                                                                                                           | 1.332128719 | 6.36E-05    | 0.000789282 |
| ENSMMUG00000010869 | nucleoporin 160 [Source:VGNC Symbol;Acc:VGNC:75429]                                                       | 1.334900017 | 0.000165159 | 0.001807424 |
| ENSMMUG00000007423 | transcription factor Dp-1 [Source:NCBI gene;Acc:715345]                                                   | 1.337080874 | 0.001666619 | 0.012369747 |
| ENSMMUG00000000706 | filamin B [Source:VGNC Symbol;Acc:VGNC:72672]                                                             | 1.341679179 | 1.80E-07    | 4.71E-06    |
| ENSMMUG00000060572 |                                                                                                           | 1.347598177 | 0.003251773 | 0.020879374 |
| ENSMMUG00000041376 | G antigen 10 [Source:NCBI gene;Acc:693330]                                                                | 1.348805065 | 0.000272591 | 0.002740365 |
| ENSMMUG00000019764 | dynactin subunit 4 [Source:VGNC Symbol;Acc:VGNC:71625]                                                    | 1.348894068 | 0.009285956 | 0.047385375 |
| ENSMMUG00000056093 | shieldin complex subunit 1 [Source:NCBI gene;Acc:718152]                                                  | 1.350208924 | 0.002571251 | 0.01738798  |
| ENSMMUG00000057703 |                                                                                                           | 1.350384971 | 0.001957463 | 0.01400498  |
| ENSMMUG00000052505 | homeobox B9 [Source:NCBI gene;Acc:106994009]                                                              | 1.358973125 | 6.61E-08    | 2.01E-06    |
| ENSMMUG00000002217 | alkaline phosphatase, biomineralization associated [Source:VGNC Symbol;Acc:VGNC:69801]                    | 1.359844259 | 4.75E-08    | 1.51E-06    |
| ENSMMUG00000000863 | dynein axonemal assembly factor 4 [Source:VGNC Symbol;Acc:VGNC:71881]                                     | 1.361837188 | 5.12E-07    | 1.21E-05    |
| ENSMMUG00000012801 | zinc finger protein 235 [Source:VGNC Symbol;Acc:VGNC:78825]                                               | 1.362647891 | 7.63E-07    | 1.73E-05    |
| ENSMMUG00000021972 | diacylglycerol kinase gamma [Source:VGNC Symbol;Acc:VGNC:71785]                                           | 1.363040662 | 6.09E-05    | 0.000760345 |
| ENSMMUG00000013387 | cysteinyl leukotriene receptor 1 [Source:VGNC Symbol;Acc:VGNC:71646]                                      | 1.364438256 | 0.000233441 | 0.002418163 |
| ENSMMUG00000001568 | AT-rich interaction domain 3B [Source:VGNC Symbol;Acc:VGNC:69827]                                         | 1.3660937   | 1.76E-05    | 0.00026056  |
| ENSMMUG00000017627 | B-TFIIID TATA-box binding protein associated factor 1 [Source:VGNC Symbol;Acc:VGNC:70336]                 | 1.366202539 | 6.80E-11    | 3.81E-09    |
| ENSMMUG00000008189 | cadherin related family member 3 [Source:HGNC Symbol;Acc:HGNC:26308]                                      | 1.369668288 | 2.79E-05    | 0.000384081 |
| ENSMMUG00000001753 | integrin subunit alpha 1 [Source:VGNC Symbol;Acc:VGNC:73772]                                              | 1.372447642 | 0.001367008 | 0.010490271 |
| ENSMMUG00000012560 | HERV-H LTR-associating 1 [Source:NCBI gene;Acc:100430297]                                                 | 1.373890678 | 1.43E-05    | 0.000219098 |
| ENSMMUG00000060879 | homeobox B13 [Source:NCBI gene;Acc:697572]                                                                | 1.374507347 | 2.13E-07    | 5.51E-06    |
| ENSMMUG00000018034 | suppression of tumorigenicity 14 [Source:VGNC Symbol;Acc:VGNC:77897]                                      | 1.374610489 | 2.26E-08    | 7.75E-07    |
| ENSMMUG00000060517 |                                                                                                           | 1.376105225 | 0.001577314 | 0.011836397 |
| ENSMMUG00000020226 | WD repeat and SOCS box containing 1 [Source:VGNC Symbol;Acc:VGNC:79186]                                   | 1.377158584 | 7.16E-08    | 2.15E-06    |
| ENSMMUG00000013944 | regulator of microtubule dynamics 2 [Source:VGNC Symbol;Acc:VGNC:76839]                                   | 1.384068117 | 2.06E-09    | 8.66E-08    |
| ENSMMUG00000000313 | HEAT repeat containing 4 [Source:VGNC Symbol;Acc:VGNC:73176]                                              | 1.384444235 | 3.26E-06    | 6.21E-05    |
| ENSMMUG00000021988 | N-alpha-acetyltransferase 11, NatA catalytic subunit [Source:NCBI gene;Acc:696758]                        | 1.384677377 | 7.20E-08    | 2.16E-06    |
| ENSMMUG00000057702 |                                                                                                           | 1.386460542 | 0.000335557 | 0.003252511 |
| ENSMMUG00000015866 | vesicle transport through interaction with t-SNAREs 1B [Source:NCBI gene;Acc:711113]                      | 1.396158633 | 1.28E-05    | 0.000200189 |
| ENSMMUG00000021554 | PHD finger protein 12 [Source:VGNC Symbol;Acc:VGNC:75838]                                                 | 1.396601249 | 5.69E-06    | 0.000101318 |

|                     |                                                                                                |             |             |             |
|---------------------|------------------------------------------------------------------------------------------------|-------------|-------------|-------------|
| ENSMMUG00000003739  | mannosidase beta [Source:VGNC Symbol;Acc:VGNC:74486]                                           | 1.39834537  | 0.008491212 | 0.044176007 |
| ENSMMUG00000011661  | integrin subunit alpha 8 [Source:VGNC Symbol;Acc:VGNC:73782]                                   | 1.401526732 | 1.40E-10    | 7.31E-09    |
| ENSMMUG00000008385  | NOP14 nucleolar protein [Source:VGNC Symbol;Acc:VGNC:75194]                                    | 1.404445404 | 8.07E-09    | 3.06E-07    |
| ENSMMUG00000011817  | aryl hydrocarbon receptor interacting protein [Source:VGNC Symbol;Acc:VGNC:69759]              | 1.404727115 | 0.000260226 | 0.002651765 |
| ENSMMUG000000052891 |                                                                                                | 1.407801302 | 0.009786933 | 0.049371256 |
| ENSMMUG000000061208 | MAP3K7 C-terminal like [Source:NCBI gene;Acc:713717]                                           | 1.409411266 | 1.94E-08    | 6.75E-07    |
| ENSMMUG000000052073 |                                                                                                | 1.410277451 | 2.84E-05    | 0.000388751 |
| ENSMMUG00000022409  | solute carrier family 10 member 1 [Source:VGNC Symbol;Acc:VGNC:77380]                          | 1.411103365 | 2.19E-06    | 4.45E-05    |
| ENSMMUG00000013150  | MORC family CW-type zinc finger 4 [Source:VGNC Symbol;Acc:VGNC:74808]                          | 1.413274083 | 1.45E-06    | 3.08E-05    |
| ENSMMUG000000051329 |                                                                                                | 1.415494725 | 0.009558695 | 0.04852051  |
| ENSMMUG000000011767 | carnitine O-acetyltransferase [Source:VGNC Symbol;Acc:VGNC:71483]                              | 1.415576058 | 0.001863308 | 0.013509401 |
| ENSMMUG00000002427  | glucokinase [Source:VGNC Symbol;Acc:VGNC:72901]                                                | 1.416091162 | 4.87E-05    | 0.00062191  |
| ENSMMUG00000022613  | reversion inducing cysteine rich protein with kazal motifs [Source:VGNC Symbol;Acc:VGNC:76722] | 1.416893926 | 3.26E-08    | 1.08E-06    |
| ENSMMUG00000003976  | glycoprotein hormone subunit alpha 2 [Source:VGNC Symbol;Acc:VGNC:72961]                       | 1.421713415 | 2.08E-05    | 0.000298337 |
| ENSMMUG00000000196  | niban apoptosis regulator 3 [Source:VGNC Symbol;Acc:VGNC:75241]                                | 1.423155736 | 0.005356906 | 0.03108762  |
| ENSMMUG000000053378 |                                                                                                | 1.426036057 | 0.001236859 | 0.009739364 |
| ENSMMUG00000008253  | zinc finger protein 267 [Source:NCBI gene;Acc:641441]                                          | 1.427575514 | 2.87E-06    | 5.59E-05    |
| ENSMMUG000000048204 | ephrin B3 [Source:NCBI gene;Acc:716257]                                                        | 1.42778033  | 2.68E-06    | 5.25E-05    |
| ENSMMUG000000048066 | trafficking protein particle complex 9 [Source:NCBI gene;Acc:711466]                           | 1.429610841 | 6.44E-05    | 0.000795624 |
| ENSMMUG000000053367 | secreted protein acidic and cysteine rich [Source:NCBI gene;Acc:712388]                        | 1.436524131 | 2.62E-08    | 8.82E-07    |
| ENSMMUG00000018246  | transmembrane and coiled-coil domains 6 [Source:VGNC Symbol;Acc:VGNC:84507]                    | 1.4365877   | 6.70E-05    | 0.000822449 |
| ENSMMUG00000003436  | tubulin tyrosine ligase like 6 [Source:VGNC Symbol;Acc:VGNC:79632]                             | 1.438345911 | 2.28E-11    | 1.37E-09    |
| ENSMMUG000000060761 |                                                                                                | 1.438639048 | 1.19E-13    | 1.10E-11    |
| ENSMMUG00000018237  | plexin C1 [Source:VGNC Symbol;Acc:VGNC:76190]                                                  | 1.441061223 | 5.13E-08    | 1.62E-06    |
| ENSMMUG00000012065  | tubulin tyrosine ligase like 5 [Source:NCBI gene;Acc:703116]                                   | 1.442055446 | 0.000726367 | 0.006212272 |
| ENSMMUG00000024234  | U6 spliceosomal RNA [Source:RFAM;Acc:RF00026]                                                  | 1.452448818 | 6.84E-11    | 3.81E-09    |
| ENSMMUG00000008162  | fibroblast growth factor binding protein 1 [Source:VGNC Symbol;Acc:VGNC:72536]                 | 1.462329745 | 0.005290944 | 0.03081464  |
| ENSMMUG00000004748  | zinc finger and BTB domain containing 1 [Source:VGNC Symbol;Acc:VGNC:79238]                    | 1.462767412 | 1.59E-05    | 0.00024083  |
| ENSMMUG000000065054 | G protein subunit gamma 7 [Source:NCBI gene;Acc:711335]                                        | 1.467848702 | 6.22E-05    | 0.000773395 |
| ENSMMUG00000005086  | homeobox protein TGIF1 [Source:NCBI gene;Acc:694580]                                           | 1.469673539 | 1.07E-05    | 0.000172213 |
| ENSMMUG00000019833  | Fc receptor like 1 [Source:VGNC Symbol;Acc:VGNC:72528]                                         | 1.472612148 | 3.49E-08    | 1.15E-06    |
| ENSMMUG000000054942 |                                                                                                | 1.472694652 | 0.008557857 | 0.044437546 |
| ENSMMUG00000009995  | arachidonate 15-lipoxygenase type B [Source:VGNC Symbol;Acc:VGNC:69797]                        | 1.472743594 | 6.45E-07    | 1.50E-05    |
| ENSMMUG000000050585 |                                                                                                | 1.473242228 | 0.000126597 | 0.001439598 |
| ENSMMUG00000023016  | jade family PHD finger 3 [Source:VGNC Symbol;Acc:VGNC:73640]                                   | 1.473596141 | 9.18E-06    | 0.000150128 |
| ENSMMUG00000009377  | tripartite motif containing 47 [Source:VGNC Symbol;Acc:VGNC:79171]                             | 1.473962873 | 0.000243664 | 0.002514468 |
| ENSMMUG000000050696 | taste receptor type 2 member 31-like [Source:NCBI gene;Acc:693892]                             | 1.476895914 | 0.002267803 | 0.015872211 |
| ENSMMUG00000022407  | serine and arginine rich splicing factor 5 [Source:NCBI gene;Acc:712867]                       | 1.477319366 | 0.000723917 | 0.006210887 |
| ENSMMUG00000002411  | drebrin like [Source:NCBI gene;Acc:720621]                                                     | 1.477708069 | 2.21E-05    | 0.000313047 |
| ENSMMUG00000001943  | GRAM domain containing 1C [Source:VGNC Symbol;Acc:VGNC:73007]                                  | 1.478788495 | 0.002763354 | 0.018426884 |
| ENSMMUG000000064391 |                                                                                                | 1.484374956 | 7.70E-06    | 0.000131405 |
| ENSMMUG000000050405 |                                                                                                | 1.485421469 | 0.004499321 | 0.027194584 |
| ENSMMUG000000058885 | formin binding protein 4 [Source:NCBI gene;Acc:712633]                                         | 1.487073829 | 0.00062227  | 0.005442022 |
| ENSMMUG00000002260  | protein kinase C eta [Source:VGNC Symbol;Acc:VGNC:84424]                                       | 1.487493339 | 7.24E-08    | 2.16E-06    |
| ENSMMUG00000003131  | interleukin 13 [Source:VGNC Symbol;Acc:VGNC:84393]                                             | 1.487909833 | 0.002314189 | 0.016099109 |
| ENSMMUG000000031291 | regulator of G protein signaling like 1 [Source:NCBI gene;Acc:715693]                          | 1.488411725 | 3.63E-10    | 1.79E-08    |
| ENSMMUG00000021664  | lamin tail domain containing 2 [Source:VGNC Symbol;Acc:VGNC:74380]                             | 1.489242435 | 2.37E-13    | 2.07E-11    |
| ENSMMUG00000002423  | DNA polymerase delta 2, accessory subunit [Source:VGNC Symbol;Acc:VGNC:76203]                  | 1.491468951 | 6.79E-06    | 0.000118303 |
| ENSMMUG00000000293  | catenin alpha 2 [Source:VGNC Symbol;Acc:VGNC:71543]                                            | 1.49161978  | 4.24E-06    | 7.85E-05    |
| ENSMMUG00000001060  | ryanodine receptor 2 [Source:VGNC Symbol;Acc:VGNC:76954]                                       | 1.495488826 | 1.09E-12    | 8.73E-11    |
| ENSMMUG00000003950  | nucleoporin 98 and 96 precursor [Source:VGNC Symbol;Acc:VGNC:75563]                            | 1.49581931  | 5.71E-10    | 2.71E-08    |



|                     |                                                                                                  |             |             |             |
|---------------------|--------------------------------------------------------------------------------------------------|-------------|-------------|-------------|
| ENSMMUG00000010008  | IK cytokine [Source:VGNC Symbol;Acc:VGNC:73703]                                                  | 1.49583505  | 0.005601606 | 0.031849356 |
| ENSMMUG00000058176  | b-defensin2-like [Source:NCBI gene;Acc:100169969]                                                | 1.499273914 | 2.54E-05    | 0.000352754 |
| ENSMMUG00000003098  | peptidase, mitochondrial processing alpha subunit [Source:VGNC Symbol;Acc:VGNC:76062]            | 1.500735387 | 9.21E-12    | 6.15E-10    |
| ENSMMUG00000005793  | ankyrin repeat and fibronectin type III domain containing 1 [Source:VGNC Symbol;Acc:VGNC:69712]  | 1.501839896 | 0.007056852 | 0.038050919 |
| ENSMMUG000000031785 |                                                                                                  | 1.510742982 | 6.97E-07    | 1.60E-05    |
| ENSMMUG00000018986  | seizure related 6 homolog like 2 [Source:VGNC Symbol;Acc:VGNC:81567]                             | 1.512356686 | 0.005554779 | 0.031699013 |
| ENSMMUG00000021553  | dehydrogenase/reductase 13 [Source:VGNC Symbol;Acc:VGNC:81387]                                   | 1.5129374   | 2.93E-07    | 7.32E-06    |
| ENSMMUG00000011962  | protein tyrosine phosphatase receptor type S [Source:VGNC Symbol;Acc:VGNC:76622]                 | 1.51479042  | 0.002523663 | 0.017151638 |
| ENSMMUG00000015685  | zinc finger protein 804B [Source:VGNC Symbol;Acc:VGNC:81890]                                     | 1.51493768  | 1.69E-08    | 6.02E-07    |
| ENSMMUG00000005297  | proline rich coiled-coil 2A [Source:VGNC Symbol;Acc:VGNC:83448]                                  | 1.516542952 | 5.36E-07    | 1.26E-05    |
| ENSMMUG00000060273  | mitochondrial ribosomal protein L32 [Source:NCBI gene;Acc:701820]                                | 1.527107957 | 0.000208799 | 0.00219644  |
| ENSMMUG00000009593  | WAS/WASL interacting protein family member 1 [Source:VGNC Symbol;Acc:VGNC:78784]                 | 1.529077259 | 1.06E-05    | 0.000170513 |
| ENSMMUG00000056945  |                                                                                                  | 1.52961334  | 4.69E-07    | 1.12E-05    |
| ENSMMUG00000059229  | CEA cell adhesion molecule 7 [Source:NCBI gene;Acc:705572]                                       | 1.533119874 | 9.76E-10    | 4.41E-08    |
| ENSMMUG00000018492  | TARBP2 subunit of RISC loading complex [Source:VGNC Symbol;Acc:VGNC:78099]                       | 1.534372687 | 5.10E-07    | 1.21E-05    |
| ENSMMUG00000021022  | deoxynucleotidyltransferase terminal interacting protein 1 [Source:VGNC Symbol;Acc:VGNC:71845]   | 1.534431051 | 0.000262366 | 0.00266025  |
| ENSMMUG00000038363  | adaptor related protein complex 5 subunit beta 1 [Source:NCBI gene;Acc:721904]                   | 1.535079403 | 2.34E-09    | 9.70E-08    |
| ENSMMUG00000023477  |                                                                                                  | 1.536715031 | 9.78E-11    | 5.24E-09    |
| ENSMMUG00000023370  | DDB1 and CUL4 associated factor 17 [Source:VGNC Symbol;Acc:VGNC:71709]                           | 1.538072498 | 5.44E-05    | 0.000688578 |
| ENSMMUG00000016448  | DLG associated protein 4 [Source:NCBI gene;Acc:702928]                                           | 1.538992802 | 8.42E-06    | 0.000140889 |
| ENSMMUG00000009960  | cathepsin A [Source:VGNC Symbol;Acc:VGNC:71617]                                                  | 1.540095472 | 7.23E-06    | 0.00012443  |
| ENSMMUG00000023335  | ring finger protein 13 [Source:VGNC Symbol;Acc:VGNC:81557]                                       | 1.545780395 | 0.000909846 | 0.007482791 |
| ENSMMUG00000050549  | lysyl oxidase like 2 [Source:NCBI gene;Acc:710151]                                               | 1.54592352  | 1.78E-07    | 4.69E-06    |
| ENSMMUG00000008031  | zinc finger and BTB domain containing 17 [Source:VGNC Symbol;Acc:VGNC:78849]                     | 1.546294065 | 1.11E-06    | 2.44E-05    |
| ENSMMUG00000064532  | mucin 16, cell surface associated [Source:NCBI gene;Acc:106996460]                               | 1.547011255 | 1.94E-11    | 1.20E-09    |
| ENSMMUG00000052867  |                                                                                                  | 1.547590359 | 0.000217395 | 0.002272185 |
| ENSMMUG00000008384  | solute carrier family 4 member 10 [Source:VGNC Symbol;Acc:VGNC:77695]                            | 1.548412324 | 3.85E-06    | 7.21E-05    |
| ENSMMUG00000058437  |                                                                                                  | 1.551964974 | 2.13E-05    | 0.000304116 |
| ENSMMUG00000012697  | AT-rich interaction domain 1A [Source:VGNC Symbol;Acc:VGNC:69822]                                | 1.553498542 | 0.000183844 | 0.001969553 |
| ENSMMUG00000008383  | major facilitator superfamily domain containing 10 [Source:NCBI gene;Acc:720098]                 | 1.553816502 | 0.000202879 | 0.002145249 |
| ENSMMUG00000008379  | adducin 1 [Source:VGNC Symbol;Acc:VGNC:69528]                                                    | 1.554365056 | 0.000124705 | 0.001422058 |
| ENSMMUG00000057274  | hemoglobin subunit mu [Source:NCBI gene;Acc:694058]                                              | 1.556900054 | 0.007120357 | 0.038266634 |
| ENSMMUG00000003217  | transmembrane 7 superfamily member 3 [Source:VGNC Symbol;Acc:VGNC:79371]                         | 1.557237098 | 8.66E-05    | 0.001025956 |
| ENSMMUG00000050608  |                                                                                                  | 1.557764608 | 2.04E-05    | 0.00029645  |
| ENSMMUG00000001472  | TIA1 cytotoxic granule associated RNA binding protein like 1 [Source:VGNC Symbol;Acc:VGNC:78354] | 1.5640182   | 2.30E-08    | 7.85E-07    |
| ENSMMUG00000011798  | eukaryotic translation initiation factor 3 subunit C [Source:NCBI gene;Acc:705696]               | 1.56753916  | 5.12E-16    | 6.73E-14    |
| ENSMMUG00000060576  |                                                                                                  | 1.568589601 | 0.000873418 | 0.007234354 |
| ENSMMUG00000003298  | ataxin 2 like [Source:VGNC Symbol;Acc:VGNC:70159]                                                | 1.571744086 | 9.14E-16    | 1.18E-13    |
| ENSMMUG00000018478  | interferon regulatory factor 5 [Source:VGNC Symbol;Acc:VGNC:73763]                               | 1.57615348  | 0.000192937 | 0.002053455 |
| ENSMMUG00000016797  | tubulin gamma 1 [Source:NCBI gene;Acc:710756]                                                    | 1.577168918 | 4.49E-08    | 1.44E-06    |
| ENSMMUG00000021415  | BAI1 associated protein 3 [Source:VGNC Symbol;Acc:VGNC:70223]                                    | 1.578027387 | 0.002271012 | 0.015872211 |
| ENSMMUG00000064005  |                                                                                                  | 1.578931513 | 0.008327258 | 0.043519597 |
| ENSMMUG00000014123  | alanyl-tRNA editing protein Aarsd1 [Source:NCBI gene;Acc:712203]                                 | 1.584221291 | 0.006111472 | 0.03417555  |
| ENSMMUG00000010028  | leucine zipper tumor suppressor family member 3 [Source:VGNC Symbol;Acc:VGNC:74403]              | 1.585466709 | 1.62E-06    | 3.40E-05    |
| ENSMMUG00000023479  | latent transforming growth factor beta binding protein 3 [Source:VGNC Symbol;Acc:VGNC:74458]     | 1.587176915 | 4.69E-17    | 7.49E-15    |
| ENSMMUG00000005666  | phospholipase D2 [Source:VGNC Symbol;Acc:VGNC:76172]                                             | 1.58886322  | 3.46E-05    | 0.000458521 |
| ENSMMUG00000003484  | tectonin beta-propeller repeat containing 2 [Source:NCBI gene;Acc:708959]                        | 1.598269903 | 0.000816012 | 0.006863603 |
| ENSMMUG00000009361  | fumarylacetoacetate hydrolase [Source:NCBI gene;Acc:712716]                                      | 1.598659205 | 0.002068123 | 0.014691109 |
| ENSMMUG00000055976  | CD99 antigen [Source:NCBI gene;Acc:106995376]                                                    | 1.599035902 | 1.03E-08    | 3.85E-07    |
| ENSMMUG00000022345  |                                                                                                  | 1.599273543 | 0.00698034  | 0.037877926 |
| ENSMMUG00000009788  | tubulin alpha-1C chain [Source:NCBI gene;Acc:710110]                                             | 1.604951509 | 0.005895978 | 0.033232983 |

|                    |                                                                                           |             |             |             |
|--------------------|-------------------------------------------------------------------------------------------|-------------|-------------|-------------|
| ENSMMUG0000001911  | steroid receptor associated and regulated protein [Source:VGNC Symbol;Acc:VGNC:78008]     | 1.605712632 | 0.000117079 | 0.001342618 |
| ENSMMUG00000059436 | interleukin 10 receptor subunit alpha [Source:NCBI gene;Acc:704383]                       | 1.606823736 | 1.76E-09    | 7.58E-08    |
| ENSMMUG00000003598 | tripartite motif containing 7 [Source:VGNC Symbol;Acc:VGNC:79022]                         | 1.608161452 | 4.41E-10    | 2.15E-08    |
| ENSMMUG00000010308 | cyclin I family member 2 [Source:VGNC Symbol;Acc:VGNC:70923]                              | 1.608790303 | 2.80E-05    | 0.000384081 |
| ENSMMUG00000000421 | nuclear receptor subfamily 3 group C member 1 [Source:VGNC Symbol;Acc:VGNC:75515]         | 1.609551189 | 2.11E-11    | 1.28E-09    |
| ENSMMUG00000007366 |                                                                                           | 1.610319163 | 2.92E-05    | 0.000395461 |
| ENSMMUG00000056555 |                                                                                           | 1.611227999 | 5.55E-06    | 9.93E-05    |
| ENSMMUG00000003955 | post-GPI attachment to proteins 2 [Source:VGNC Symbol;Acc:VGNC:75823]                     | 1.612169379 | 2.20E-07    | 5.64E-06    |
| ENSMMUG00000064557 |                                                                                           | 1.616362566 | 8.26E-06    | 0.000138651 |
| ENSMMUG00000017287 | PAT1 homolog 1, processing body mRNA decay factor [Source:VGNC Symbol;Acc:VGNC:75684]     | 1.619207274 | 1.04E-05    | 0.000168936 |
| ENSMMUG00000056971 | Metazoan signal recognition particle RNA [Source:RFAM;Acc:RF00017]                        | 1.621239818 | 0.008031803 | 0.042326821 |
| ENSMMUG00000002810 | TOX high mobility group box family member 2 [Source:VGNC Symbol;Acc:VGNC:79007]           | 1.621654833 | 5.84E-08    | 1.81E-06    |
| ENSMMUG00000048566 | MCF.2 cell line derived transforming sequence like [Source:NCBI gene;Acc:713961]          | 1.623667287 | 5.35E-09    | 2.07E-07    |
| ENSMMUG00000054473 | activating transcription factor 5 [Source:NCBI gene;Acc:719150]                           | 1.624346467 | 2.76E-05    | 0.000380256 |
| ENSMMUG00000021428 | lipocalin 12 [Source:VGNC Symbol;Acc:VGNC:74143]                                          | 1.626854441 | 0.000194005 | 0.002062123 |
| ENSMMUG00000060289 |                                                                                           | 1.629825121 | 2.58E-14    | 2.72E-12    |
| ENSMMUG00000019041 | hydroxysteroid 17-beta dehydrogenase 11 [Source:VGNC Symbol;Acc:VGNC:73431]               | 1.631040353 | 0.005047342 | 0.029650402 |
| ENSMMUG00000063121 |                                                                                           | 1.632402487 | 0.008567141 | 0.04445492  |
| ENSMMUG00000016143 | sialophorin [Source:VGNC Symbol;Acc:VGNC:77861]                                           | 1.632458102 | 2.45E-09    | 1.01E-07    |
| ENSMMUG00000049935 |                                                                                           | 1.633224937 | 0.000297541 | 0.002950768 |
| ENSMMUG00000058566 |                                                                                           | 1.633414186 | 2.18E-08    | 7.48E-07    |
| ENSMMUG00000003572 | nicotinamide phosphoribosyltransferase [Source:VGNC Symbol;Acc:VGNC:75056]                | 1.634669573 | 6.81E-08    | 2.05E-06    |
| ENSMMUG00000006855 | acyl-CoA thioesterase 2 [Source:NCBI gene;Acc:697011]                                     | 1.636613777 | 6.95E-06    | 0.000120733 |
| ENSMMUG00000000700 | CLN3 lysosomal/endosomal transmembrane protein, battenin [Source:NCBI gene;Acc:705815]    | 1.637367747 | 2.00E-11    | 1.22E-09    |
| ENSMMUG00000018275 | docking protein 6 [Source:VGNC Symbol;Acc:VGNC:71915]                                     | 1.637899471 | 0.002341741 | 0.016206703 |
| ENSMMUG00000008195 | TGFB induced factor homeobox 2 [Source:NCBI gene;Acc:100429616]                           | 1.639241536 | 1.32E-10    | 6.96E-09    |
| ENSMMUG00000022003 | multimerin 1 [Source:VGNC Symbol;Acc:VGNC:74904]                                          | 1.640274668 | 8.99E-08    | 2.56E-06    |
| ENSMMUG00000003006 | serine palmitoyltransferase long chain base subunit 1 [Source:VGNC Symbol;Acc:VGNC:77873] | 1.646378214 | 0.000747931 | 0.006376597 |
| ENSMMUG00000022996 | HCLS1 binding protein 3 [Source:VGNC Symbol;Acc:VGNC:82158]                               | 1.655772416 | 7.44E-08    | 2.20E-06    |
| ENSMMUG00000020683 | RNA binding motif protein 22 [Source:VGNC Symbol;Acc:VGNC:76535]                          | 1.65723485  | 8.43E-05    | 0.001007812 |
| ENSMMUG00000017280 | TBC1 domain family member 10C [Source:VGNC Symbol;Acc:VGNC:78203]                         | 1.658722016 | 0.002780129 | 0.018508855 |
| ENSMMUG00000004257 | beta-secretase 2 [Source:VGNC Symbol;Acc:VGNC:70216]                                      | 1.66405902  | 4.04E-07    | 9.84E-06    |
| ENSMMUG00000004024 | cadherin related family member 5 [Source:VGNC Symbol;Acc:VGNC:71158]                      | 1.665307318 | 0.000726149 | 0.006212272 |
| ENSMMUG00000003684 | ATPase phospholipid transporting 8B4 (putative) [Source:VGNC Symbol;Acc:VGNC:84311]       | 1.667467236 | 6.44E-05    | 0.000795624 |
| ENSMMUG00000031163 | membrane anchored junction protein [Source:VGNC Symbol;Acc:VGNC:74375]                    | 1.669636406 | 1.56E-08    | 5.61E-07    |
| ENSMMUG00000004103 | collagen type XI alpha 1 chain [Source:VGNC Symbol;Acc:VGNC:71289]                        | 1.669892884 | 1.86E-16    | 2.61E-14    |
| ENSMMUG00000052047 |                                                                                           | 1.670096802 | 3.89E-06    | 7.25E-05    |
| ENSMMUG00000057196 | pulmonary surfactant-associated protein A [Source:NCBI gene;Acc:701715]                   | 1.671825692 | 2.10E-08    | 7.29E-07    |
| ENSMMUG00000013099 | pappalysin 1 [Source:VGNC Symbol;Acc:VGNC:75756]                                          | 1.673617665 | 0.000302667 | 0.00299067  |
| ENSMMUG00000006758 | cytochrome P450, family 27, subfamily A, polypeptide 1 [Source:NCBI gene;Acc:700192]      | 1.678145791 | 1.42E-05    | 0.000218424 |
| ENSMMUG00000050505 | small integral membrane protein 4 [Source:NCBI gene;Acc:696553]                           | 1.682822998 | 0.000147376 | 0.001646003 |
| ENSMMUG00000038067 |                                                                                           | 1.682947116 | 0.003333005 | 0.021334377 |
| ENSMMUG00000056840 |                                                                                           | 1.6857607   | 1.76E-07    | 4.65E-06    |
| ENSMMUG00000001397 | multiple C2 and transmembrane domain containing 1 [Source:VGNC Symbol;Acc:VGNC:74589]     | 1.685761894 | 0.002780193 | 0.018508855 |
| ENSMMUG00000000302 | WD repeat and HMG-box DNA binding protein 1 [Source:VGNC Symbol;Acc:VGNC:79376]           | 1.692469574 | 1.22E-09    | 5.41E-08    |
| ENSMMUG00000063898 | apolipoprotein F [Source:NCBI gene;Acc:712761]                                            | 1.693863126 | 0.00285278  | 0.01896109  |
| ENSMMUG00000053376 |                                                                                           | 1.699549173 | 2.30E-06    | 4.65E-05    |
| ENSMMUG00000003167 | cytohesin 3 [Source:VGNC Symbol;Acc:VGNC:71829]                                           | 1.700734628 | 5.86E-05    | 0.000735687 |
| ENSMMUG00000017983 | tRNA nucleotidyl transferase 1 [Source:VGNC Symbol;Acc:VGNC:79073]                        | 1.708949693 | 0.004762522 | 0.028366096 |
| ENSMMUG00000018664 | collagen type IX alpha 2 chain [Source:VGNC Symbol;Acc:VGNC:71307]                        | 1.710290716 | 0.000278575 | 0.002785656 |
| ENSMMUG00000041101 | protein phosphatase 2 regulatory subunit B'beta [Source:NCBI gene;Acc:722026]             | 1.71096499  | 1.84E-11    | 1.15E-09    |



|                     |                                                                                             |             |             |             |
|---------------------|---------------------------------------------------------------------------------------------|-------------|-------------|-------------|
| ENSMMUG00000050028  |                                                                                             | 1.716449553 | 3.59E-06    | 6.79E-05    |
| ENSMMUG00000000327  | fatty acid desaturase 2 [Source:VGNC Symbol;Acc:VGNC:72472]                                 | 1.720526129 | 8.27E-07    | 1.85E-05    |
| ENSMMUG00000004877  | heterogeneous nuclear ribonucleoprotein L [Source:VGNC Symbol;Acc:VGNC:81187]               | 1.721285676 | 0.001123605 | 0.008986631 |
| ENSMMUG000000062863 |                                                                                             | 1.722219046 | 0.001232947 | 0.009717958 |
| ENSMMUG00000018932  | adhesion G protein-coupled receptor E2 [Source:NCBI gene;Acc:654420]                        | 1.722310419 | 9.11E-18    | 1.77E-15    |
| ENSMMUG00000009197  | myelin associated oligodendrocyte basic protein [Source:VGNC Symbol;Acc:VGNC:74908]         | 1.722477815 | 3.58E-07    | 8.83E-06    |
| ENSMMUG00000014265  | TAP binding protein like [Source:NCBI gene;Acc:712626]                                      | 1.726474599 | 0.001219056 | 0.009636461 |
| ENSMMUG00000009564  | NMD3 ribosome export adaptor [Source:VGNC Symbol;Acc:VGNC:75242]                            | 1.729177721 | 0.005869691 | 0.03317211  |
| ENSMMUG00000007201  | PDS5 cohesin associated factor B [Source:VGNC Symbol;Acc:VGNC:75835]                        | 1.729348852 | 1.85E-17    | 3.15E-15    |
| ENSMMUG000000055914 |                                                                                             | 1.730070847 | 4.35E-06    | 8.03E-05    |
| ENSMMUG000000061079 | golgin subfamily A member 6C [Source:NCBI gene;Acc:715898]                                  | 1.730254164 | 1.33E-11    | 8.76E-10    |
| ENSMMUG000000021634 | TNF alpha induced protein 2 [Source:VGNC Symbol;Acc:VGNC:78579]                             | 1.733318051 | 7.27E-07    | 1.66E-05    |
| ENSMMUG000000065208 |                                                                                             | 1.733904001 | 0.005339113 | 0.03102859  |
| ENSMMUG000000056376 |                                                                                             | 1.734620099 | 0.000417203 | 0.003908937 |
| ENSMMUG00000018345  | phosphatidylethanolamine binding protein 4 [Source:VGNC Symbol;Acc:VGNC:82204]              | 1.740597065 | 1.64E-09    | 7.11E-08    |
| ENSMMUG000000053013 |                                                                                             | 1.746613379 | 1.06E-05    | 0.00017082  |
| ENSMMUG000000022247 | osteoclastogenesis associated transmembrane protein 1 [Source:VGNC Symbol;Acc:VGNC:75664]   | 1.747303287 | 3.01E-05    | 0.000404377 |
| ENSMMUG000000006468 | FGFR1 oncogene partner 2 [Source:VGNC Symbol;Acc:VGNC:72551]                                | 1.750776763 | 0.001162657 | 0.009235466 |
| ENSMMUG000000014699 |                                                                                             | 1.752639848 | 4.15E-21    | 1.41E-18    |
| ENSMMUG000000021661 | leucine rich repeat containing 56 [Source:VGNC Symbol;Acc:VGNC:74356]                       | 1.753760268 | 0.001609703 | 0.012013014 |
| ENSMMUG000000064707 |                                                                                             | 1.754568676 | 0.000539165 | 0.00484     |
| ENSMMUG000000045513 |                                                                                             | 1.756287453 | 0.00930107  | 0.047419731 |
| ENSMMUG000000023303 | ecotropic viral integration site 5 like [Source:NCBI gene;Acc:706628]                       | 1.765341038 | 3.07E-11    | 1.78E-09    |
| ENSMMUG000000000951 | integrin subunit beta 2 [Source:VGNC Symbol;Acc:VGNC:73786]                                 | 1.770136187 | 4.52E-13    | 3.72E-11    |
| ENSMMUG000000011411 | sperm acrosome associated 3 [Source:VGNC Symbol;Acc:VGNC:77930]                             | 1.772200066 | 0.000451886 | 0.004180976 |
| ENSMMUG000000009176 | calmodulin binding transcription activator 2 [Source:VGNC Symbol;Acc:VGNC:70578]            | 1.774040836 | 2.36E-08    | 8.01E-07    |
| ENSMMUG000000065247 | opioid receptor kappa 1 [Source:NCBI gene;Acc:710783]                                       | 1.778920201 | 2.01E-06    | 4.11E-05    |
| ENSMMUG000000017224 | catenin beta like 1 [Source:VGNC Symbol;Acc:VGNC:71414]                                     | 1.780779125 | 0.000409483 | 0.003849893 |
| ENSMMUG000000014237 | lysine methyltransferase 5B [Source:VGNC Symbol;Acc:VGNC:74110]                             | 1.784928443 | 4.91E-13    | 4.00E-11    |
| ENSMMUG000000012228 | ubiquitin conjugating enzyme E2 V1 [Source:NCBI gene;Acc:100425552]                         | 1.788366537 | 2.91E-12    | 2.10E-10    |
| ENSMMUG000000001036 | coagulation factor VII [Source:VGNC Symbol;Acc:VGNC:72466]                                  | 1.793406622 | 3.74E-07    | 9.16E-06    |
| ENSMMUG000000002422 | AE binding protein 1 [Source:VGNC Symbol;Acc:VGNC:80328]                                    | 1.795176161 | 1.61E-05    | 0.000243335 |
| ENSMMUG000000061098 |                                                                                             | 1.796227718 | 4.21E-13    | 3.50E-11    |
| ENSMMUG000000061342 |                                                                                             | 1.796717193 | 6.12E-10    | 2.88E-08    |
| ENSMMUG000000018235 | chloride voltage-gated channel Kb [Source:NCBI gene;Acc:703476]                             | 1.797093561 | 5.51E-05    | 0.000695773 |
| ENSMMUG000000004576 | C-C motif chemokine receptor 3 [Source:VGNC Symbol;Acc:VGNC:70738]                          | 1.797304119 | 0.003097716 | 0.020064922 |
| ENSMMUG000000013644 | potassium two pore domain channel subfamily K member 17 [Source:VGNC Symbol;Acc:VGNC:73828] | 1.797495316 | 0.000926772 | 0.007598973 |
| ENSMMUG000000000644 | centrosomal protein 85 [Source:VGNC Symbol;Acc:VGNC:71096]                                  | 1.801156053 | 0.000309068 | 0.00304653  |
| ENSMMUG000000011427 | syntaxin 10 [Source:VGNC Symbol;Acc:VGNC:78040]                                             | 1.80337099  | 3.83E-14    | 3.90E-12    |
| ENSMMUG000000018245 | EPH receptor A2 [Source:VGNC Symbol;Acc:VGNC:72235]                                         | 1.805016475 | 4.09E-09    | 1.62E-07    |
| ENSMMUG000000001387 | p21 (RAC1) activated kinase 1 [Source:NCBI gene;Acc:698585]                                 | 1.807882597 | 1.37E-10    | 7.18E-09    |
| ENSMMUG000000003106 | SEC16 homolog A, endoplasmic reticulum export factor [Source:VGNC Symbol;Acc:VGNC:77326]    | 1.809606066 | 1.63E-08    | 5.83E-07    |
| ENSMMUG000000022100 | midnolin [Source:VGNC Symbol;Acc:VGNC:82186]                                                | 1.810671496 | 1.68E-11    | 1.06E-09    |
| ENSMMUG000000015416 | bromodomain and PHD finger containing 3 [Source:VGNC Symbol;Acc:VGNC:70309]                 | 1.815928132 | 6.49E-08    | 1.98E-06    |
| ENSMMUG000000008828 | BEN domain containing 5 [Source:NCBI gene;Acc:711150]                                       | 1.816920893 | 8.76E-07    | 1.95E-05    |
| ENSMMUG000000023300 | FERM domain containing 8 [Source:NCBI gene;Acc:716379]                                      | 1.818645048 | 0.008041033 | 0.042348054 |
| ENSMMUG000000001151 | microtubule associated scaffold protein 1 [Source:VGNC Symbol;Acc:VGNC:84018]               | 1.820817991 | 4.19E-10    | 2.05E-08    |
| ENSMMUG000000008854 | natural cytotoxicity triggering receptor 3 [Source:VGNC Symbol;Acc:VGNC:74990]              | 1.822461442 | 0.00167112  | 0.012376256 |
| ENSMMUG000000015865 | arginase 2 [Source:VGNC Symbol;Acc:VGNC:70005]                                              | 1.826309609 | 5.15E-06    | 9.37E-05    |
| ENSMMUG000000055897 |                                                                                             | 1.831683941 | 1.31E-06    | 2.82E-05    |
| ENSMMUG000000064052 | CD300 molecule like family member d [Source:NCBI gene;Acc:703142]                           | 1.835245168 | 0.000346499 | 0.003338688 |



|                    |                                                                                                                 |             |             |             |
|--------------------|-----------------------------------------------------------------------------------------------------------------|-------------|-------------|-------------|
| ENSMMUG00000058587 | family with sequence similarity 131 member C [Source:NCBI gene;Acc:703604]                                      | 1.837129369 | 4.82E-10    | 2.31E-08    |
| ENSMMUG00000055018 | sushi domain containing 6 [Source:NCBI gene;Acc:712719]                                                         | 1.840404523 | 1.30E-07    | 3.53E-06    |
| ENSMMUG00000050132 |                                                                                                                 | 1.840867925 | 0.000675081 | 0.005859021 |
| ENSMMUG00000014240 | thioredoxin domain containing 11 [Source:VGNC Symbol;Acc:VGNC:79678]                                            | 1.841911622 | 0.006659114 | 0.036560017 |
| ENSMMUG00000061335 |                                                                                                                 | 1.844969292 | 0.000612632 | 0.005380855 |
| ENSMMUG00000018619 | DENN domain containing 6A [Source:VGNC Symbol;Acc:VGNC:71726]                                                   | 1.847574789 | 0.004570379 | 0.027544063 |
| ENSMMUG00000007200 | NEDD4 binding protein 2 like 2 [Source:VGNC Symbol;Acc:VGNC:75031]                                              | 1.850365299 | 3.14E-11    | 1.81E-09    |
| ENSMMUG00000021610 | regulator of G protein signaling 10 [Source:VGNC Symbol;Acc:VGNC:76915]                                         | 1.860308342 | 3.03E-10    | 1.52E-08    |
| ENSMMUG00000057157 |                                                                                                                 | 1.862070262 | 0.000879675 | 0.007278773 |
| ENSMMUG00000010180 | PIN2 (TERF1) interacting telomerase inhibitor 1 [Source:NCBI gene;Acc:701523]                                   | 1.865627477 | 0.005171485 | 0.030206034 |
| ENSMMUG00000000740 | spermatogenesis associated 2 [Source:VGNC Symbol;Acc:VGNC:77923]                                                | 1.866319823 | 0.000182983 | 0.001962911 |
| ENSMMUG00000015931 | phosphatidylinositol transfer protein membrane associated 2 [Source:VGNC Symbol;Acc:VGNC:75843]                 | 1.866545042 | 1.71E-05    | 0.000254479 |
| ENSMMUG00000017561 | solute carrier family 43 member 2 [Source:VGNC Symbol;Acc:VGNC:77554]                                           | 1.866617436 | 7.89E-07    | 1.78E-05    |
| ENSMMUG00000018967 | ubiquitin conjugating enzyme E2 O [Source:VGNC Symbol;Acc:VGNC:79813]                                           | 1.867834983 | 2.74E-09    | 1.12E-07    |
| ENSMMUG00000052252 | protein phosphatase 1 regulatory subunit 3F [Source:NCBI gene;Acc:715950]                                       | 1.871082506 | 5.73E-10    | 2.71E-08    |
| ENSMMUG00000014131 | microtubule affinity regulating kinase 2 [Source:VGNC Symbol;Acc:VGNC:74634]                                    | 1.875326216 | 0.001081639 | 0.008702278 |
| ENSMMUG00000008070 | YEATS domain containing 2 [Source:VGNC Symbol;Acc:VGNC:79502]                                                   | 1.876384904 | 1.27E-12    | 9.91E-11    |
| ENSMMUG00000050868 |                                                                                                                 | 1.876610542 | 8.29E-08    | 2.40E-06    |
| ENSMMUG00000049735 | allograft inflammatory factor 1 [Source:NCBI gene;Acc:574115]                                                   | 1.880523173 | 9.27E-07    | 2.03E-05    |
| ENSMMUG00000003303 | Tu translation elongation factor, mitochondrial [Source:VGNC Symbol;Acc:VGNC:78674]                             | 1.881164902 | 2.22E-17    | 3.70E-15    |
| ENSMMUG00000045093 | cyclin B3 [Source:NCBI gene;Acc:694534]                                                                         | 1.882237108 | 2.17E-07    | 5.58E-06    |
| ENSMMUG00000019418 | erythrocyte membrane protein band 4.1 like 3 [Source:VGNC Symbol;Acc:VGNC:72233]                                | 1.885477032 | 3.30E-13    | 2.79E-11    |
| ENSMMUG00000013206 | tyrosine 3-monooxygenase/tryptophan 5-monooxygenase activation protein beta [Source:VGNC Symbol;Acc:VGNC:78819] | 1.887662696 | 0.00461624  | 0.027717863 |
| ENSMMUG00000014715 | fragile site, folic acid type, rare, fra(10)(q23.3) or fra(10)(q24.2) candidate 1 [Source:NCBI gene;Acc:700389] | 1.889902167 | 0.000355836 | 0.003412508 |
| ENSMMUG00000021877 | protein kinase AMP-activated non-catalytic subunit gamma 3 [Source:VGNC Symbol;Acc:VGNC:76406]                  | 1.89388648  | 1.13E-05    | 0.000180173 |
| ENSMMUG00000058311 |                                                                                                                 | 1.894018741 | 0.000549372 | 0.004904594 |
| ENSMMUG00000017701 | myosin VIIA and Rab interacting protein [Source:VGNC Symbol;Acc:VGNC:74992]                                     | 1.896324921 | 0.000261679 | 0.00266025  |
| ENSMMUG00000014530 | pre-mRNA processing factor 19 [Source:VGNC Symbol;Acc:VGNC:76281]                                               | 1.911571617 | 3.69E-07    | 9.08E-06    |
| ENSMMUG00000055811 |                                                                                                                 | 1.917850558 | 5.08E-05    | 0.000647345 |
| ENSMMUG00000005302 | BAG cochaperone 6 [Source:VGNC Symbol;Acc:VGNC:81044]                                                           | 1.920127775 | 2.64E-14    | 2.76E-12    |
| ENSMMUG00000049494 |                                                                                                                 | 1.920544889 | 0.008572123 | 0.04445492  |
| ENSMMUG00000010470 | zinc finger with KRAB and SCAN domains 2 [Source:VGNC Symbol;Acc:VGNC:79529]                                    | 1.925596967 | 0.000138108 | 0.001561767 |
| ENSMMUG00000020462 | CD300e molecule [Source:NCBI gene;Acc:114673189]                                                                | 1.925866162 | 0.004086809 | 0.025132021 |
| ENSMMUG00000017370 | signal peptidase complex subunit 1 [Source:VGNC Symbol;Acc:VGNC:84072]                                          | 1.92610483  | 0.002453291 | 0.016771365 |
| ENSMMUG00000017256 | calcium voltage-gated channel subunit alpha1 G [Source:VGNC Symbol;Acc:VGNC:70504]                              | 1.931274132 | 6.78E-17    | 1.02E-14    |
| ENSMMUG00000006093 | enhancer of zeste 1 polycomb repressive complex 2 subunit [Source:VGNC Symbol;Acc:VGNC:72457]                   | 1.932012886 | 8.30E-08    | 2.40E-06    |
| ENSMMUG00000005488 | coronin 1B [Source:VGNC Symbol;Acc:VGNC:71320]                                                                  | 1.932524607 | 7.82E-08    | 2.30E-06    |
| ENSMMUG00000000649 | UBX domain protein 11 [Source:VGNC Symbol;Acc:VGNC:79859]                                                       | 1.93423328  | 0.000196953 | 0.002088011 |
| ENSMMUG00000055775 | transmembrane p24 trafficking protein 1 [Source:NCBI gene;Acc:713618]                                           | 1.935429817 | 3.94E-16    | 5.25E-14    |
| ENSMMUG00000020799 | BH3 interacting domain death agonist [Source:VGNC Symbol;Acc:VGNC:70250]                                        | 1.937864627 | 0.000687805 | 0.005944915 |
| ENSMMUG00000002715 | solute carrier family 9 member A8 [Source:VGNC Symbol;Acc:VGNC:77749]                                           | 1.940627486 | 1.67E-17    | 2.95E-15    |
| ENSMMUG00000016327 | coiled-coil domain containing 107 [Source:VGNC Symbol;Acc:VGNC:70656]                                           | 1.941499239 | 1.03E-18    | 2.26E-16    |
| ENSMMUG00000015686 | abhydrolase domain containing 16A [Source:VGNC Symbol;Acc:VGNC:69393]                                           | 1.942836294 | 5.81E-06    | 0.000103049 |
| ENSMMUG00000012944 | vascular endothelial growth factor B [Source:VGNC Symbol;Acc:VGNC:78765]                                        | 1.949646483 | 1.44E-17    | 2.67E-15    |
| ENSMMUG00000016323 | Rho guanine nucleotide exchange factor 39 [Source:VGNC Symbol;Acc:VGNC:69912]                                   | 1.954620959 | 1.80E-23    | 8.13E-21    |
| ENSMMUG00000016582 | chromosome 1 C1orf112 homolog [Source:VGNC Symbol;Acc:VGNC:70385]                                               | 1.955297127 | 4.31E-05    | 0.000558628 |
| ENSMMUG00000050543 |                                                                                                                 | 1.959654344 | 4.04E-05    | 0.000526531 |
| ENSMMUG00000017036 | nicalin [Source:VGNC Symbol;Acc:VGNC:75032]                                                                     | 1.963307531 | 0.000244152 | 0.002516312 |
| ENSMMUG00000061896 |                                                                                                                 | 1.966976373 | 0.001469951 | 0.011185365 |
| ENSMMUG00000048375 | Metazoan signal recognition particle RNA [Source:RFAM;Acc:RF00017]                                              | 1.967144044 | 2.22E-26    | 1.50E-23    |
| ENSMMUG00000010309 | septin 8 [Source:VGNC Symbol;Acc:VGNC:77248]                                                                    | 1.970147907 | 0.0009495   | 0.00775409  |

|                    |                                                                                                                                                      |             |             |             |
|--------------------|------------------------------------------------------------------------------------------------------------------------------------------------------|-------------|-------------|-------------|
| ENSMMUG0000002384  | IGF like family receptor 1 [Source:VGNC Symbol;Acc:VGNC:73434]                                                                                       | 1.971294755 | 6.35E-11    | 3.59E-09    |
| ENSMMUG0000003437  | signal transducer and activator of transcription 5B [Source:NCBI gene;Acc:709760]                                                                    | 1.972403247 | 1.58E-12    | 1.21E-10    |
| ENSMMUG00000050339 | Metazoan signal recognition particle RNA [Source:RFAM;Acc:RF00017]                                                                                   | 1.974410884 | 0.005872004 | 0.03317211  |
| ENSMMUG00000009441 | abhydrolase domain containing 4 [Source:VGNC Symbol;Acc:VGNC:84296]                                                                                  | 1.976096902 | 8.39E-05    | 0.001004702 |
| ENSMMUG00000022728 | zinc finger and SCAN domain containing 25 [Source:VGNC Symbol;Acc:VGNC:79344]                                                                        | 1.980045933 | 1.10E-05    | 0.000175288 |
| ENSMMUG00000062454 |                                                                                                                                                      | 1.990159673 | 1.94E-08    | 6.75E-07    |
| ENSMMUG00000020726 | dihydropyrimidine dehydrogenase [Source:VGNC Symbol;Acc:VGNC:71982]                                                                                  | 1.997507315 | 9.07E-10    | 4.17E-08    |
| ENSMMUG00000003819 | nitric oxide synthase interacting protein [Source:VGNC Symbol;Acc:VGNC:75207]                                                                        | 2.00210345  | 3.00E-06    | 5.80E-05    |
| ENSMMUG00000022401 | EMSY transcriptional repressor, BRCA2 interacting [Source:VGNC Symbol;Acc:VGNC:72065]                                                                | 2.003462626 | 3.26E-05    | 0.000433581 |
| ENSMMUG00000000958 | aldo-keto reductase family 1, member C2 [Source:NCBI gene;Acc:711360]                                                                                | 2.006304125 | 8.52E-11    | 4.65E-09    |
| ENSMMUG00000011528 | F-box and WD repeat domain containing 5 [Source:VGNC Symbol;Acc:VGNC:72503]                                                                          | 2.009271583 | 9.18E-06    | 0.000150128 |
| ENSMMUG00000004022 | zinc finger SWIM-type containing 2 [Source:VGNC Symbol;Acc:VGNC:79908]                                                                               | 2.009821743 | 9.63E-09    | 3.61E-07    |
| ENSMMUG00000059318 | urocortin 2 [Source:NCBI gene;Acc:106996925]                                                                                                         | 2.010807564 | 4.51E-12    | 3.17E-10    |
| ENSMMUG00000003834 | basic leucine zipper ATF-like transcription factor [Source:VGNC Symbol;Acc:VGNC:70229]                                                               | 2.010906478 | 2.21E-10    | 1.12E-08    |
| ENSMMUG00000057934 |                                                                                                                                                      | 2.012474665 | 0.000307757 | 0.003037282 |
| ENSMMUG00000046478 | WASH complex subunit 3 [Source:NCBI gene;Acc:697824]                                                                                                 | 2.014455894 | 0.000112727 | 0.001298194 |
| ENSMMUG00000000754 | Dmx like 2 [Source:VGNC Symbol;Acc:VGNC:71936]                                                                                                       | 2.015392198 | 0.001107329 | 0.008891394 |
| ENSMMUG00000006091 | contactin associated protein 1 [Source:VGNC Symbol;Acc:VGNC:71390]                                                                                   | 2.019898613 | 4.16E-08    | 1.34E-06    |
| ENSMMUG00000023282 | aldo-keto reductase family 1, member C1 (dihydrodiol dehydrogenase 1; 20-alpha (3-alpha)-hydroxysteroid dehydrogenase) [Source:NCBI gene;Acc:711198] | 2.026155041 | 2.01E-09    | 8.51E-08    |
| ENSMMUG00000051975 |                                                                                                                                                      | 2.02814595  | 0.00084677  | 0.007071177 |
| ENSMMUG00000002789 | solute carrier family 25 (mitochondrial carrier; phosphate carrier), member 24 [Source:NCBI gene;Acc:694803]                                         | 2.028265727 | 0.001298719 | 0.010147954 |
| ENSMMUG00000012941 | nudix hydrolase 22 [Source:VGNC Symbol;Acc:VGNC:75475]                                                                                               | 2.032365762 | 7.69E-25    | 4.47E-22    |
| ENSMMUG00000016438 | protein kinase D3 [Source:VGNC Symbol;Acc:VGNC:76415]                                                                                                | 2.037710453 | 2.85E-05    | 0.000389297 |
| ENSMMUG00000007528 | chordin [Source:VGNC Symbol;Acc:VGNC:71042]                                                                                                          | 2.041983609 | 0.000148633 | 0.00165769  |
| ENSMMUG00000013129 | peptidylprolyl isomerase H [Source:NCBI gene;Acc:697669]                                                                                             | 2.050972099 | 0.002348068 | 0.01621962  |
| ENSMMUG00000010137 | microcephalin 1 [Source:VGNC Symbol;Acc:VGNC:74687]                                                                                                  | 2.056600304 | 0.000362656 | 0.003465665 |
| ENSMMUG00000059182 |                                                                                                                                                      | 2.058279082 | 5.58E-06    | 9.95E-05    |
| ENSMMUG00000006738 | L3MBTL histone methyl-lysine binding protein 1 [Source:NCBI gene;Acc:695694]                                                                         | 2.058698258 | 8.54E-10    | 3.95E-08    |
| ENSMMUG00000014138 | forkhead box J3 [Source:VGNC Symbol;Acc:VGNC:72596]                                                                                                  | 2.060047184 | 8.03E-06    | 0.000135344 |
| ENSMMUG00000038524 | olfactory receptor 2M4 [Source:NCBI gene;Acc:100424541]                                                                                              | 2.061110259 | 1.86E-17    | 3.15E-15    |
| ENSMMUG00000065295 |                                                                                                                                                      | 2.0624122   | 1.28E-13    | 1.18E-11    |
| ENSMMUG00000012526 | glycosyltransferase 8 domain containing 1 [Source:VGNC Symbol;Acc:VGNC:73001]                                                                        | 2.062739809 | 2.25E-22    | 8.71E-20    |
| ENSMMUG00000058592 |                                                                                                                                                      | 2.06772969  | 5.27E-06    | 9.52E-05    |
| ENSMMUG00000057499 |                                                                                                                                                      | 2.06813856  | 0.004204815 | 0.025760424 |
| ENSMMUG00000032142 | complement C8 gamma chain [Source:VGNC Symbol;Acc:VGNC:70481]                                                                                        | 2.070812748 | 0.003093982 | 0.020056691 |
| ENSMMUG00000063759 | transmembrane protein 185B [Source:NCBI gene;Acc:695744]                                                                                             | 2.075290378 | 9.18E-14    | 8.81E-12    |
| ENSMMUG00000039101 | pelota mRNA surveillance and ribosome rescue factor [Source:VGNC Symbol;Acc:VGNC:84478]                                                              | 2.080936183 | 2.60E-08    | 8.78E-07    |
| ENSMMUG00000013830 | glucose-6-phosphatase catalytic subunit 2 [Source:NCBI gene;Acc:709062]                                                                              | 2.082256129 | 3.91E-05    | 0.000511413 |
| ENSMMUG00000013713 | beta 3-glycosyltransferase [Source:NCBI gene;Acc:713498]                                                                                             | 2.082970346 | 0.000152001 | 0.001681506 |
| ENSMMUG00000018144 | C2 calcium-dependent domain-containing protein 6 [Source:NCBI gene;Acc:702140]                                                                       | 2.084073133 | 1.48E-10    | 7.65E-09    |
| ENSMMUG00000062326 |                                                                                                                                                      | 2.084077266 | 8.78E-06    | 0.000145254 |
| ENSMMUG00000054414 |                                                                                                                                                      | 2.08724311  | 8.67E-05    | 0.001026457 |
| ENSMMUG00000019246 | regulator of calcineurin 2 [Source:VGNC Symbol;Acc:VGNC:82092]                                                                                       | 2.089326559 | 0.001110914 | 0.00891139  |
| ENSMMUG00000046774 | RAS like proto-oncogene B [Source:NCBI gene;Acc:695852]                                                                                              | 2.090430839 | 1.25E-07    | 3.41E-06    |
| ENSMMUG00000021073 | RAS protein activator like 2 [Source:VGNC Symbol;Acc:VGNC:76670]                                                                                     | 2.090812342 | 1.29E-15    | 1.64E-13    |
| ENSMMUG00000020020 | Rho GTPase activating protein 23 [Source:NCBI gene;Acc:693996]                                                                                       | 2.093697301 | 0.00632165  | 0.035014201 |
| ENSMMUG00000045609 | CCR4-NOT transcription complex subunit 6 like [Source:NCBI gene;Acc:697981]                                                                          | 2.094202744 | 7.74E-11    | 4.26E-09    |
| ENSMMUG00000053481 |                                                                                                                                                      | 2.095244979 | 1.82E-05    | 0.000267735 |
| ENSMMUG00000055322 | EPH receptor A1 [Source:NCBI gene;Acc:706295]                                                                                                        | 2.095398995 | 1.09E-13    | 1.02E-11    |
| ENSMMUG00000018790 | activin A receptor type 2B [Source:VGNC Symbol;Acc:VGNC:69450]                                                                                       | 2.096876682 | 2.11E-09    | 8.79E-08    |



|                    |                                                                                                                  |             |             |             |
|--------------------|------------------------------------------------------------------------------------------------------------------|-------------|-------------|-------------|
| ENSMMUG00000052777 |                                                                                                                  | 2.098217975 | 0.000972047 | 0.007906496 |
| ENSMMUG00000004794 | DNA ligase 3 [Source:VGNC Symbol;Acc:VGNC:74266]                                                                 | 2.104379195 | 0.002930239 | 0.019318225 |
| ENSMMUG00000009988 | transmembrane protein 59 like [Source:VGNC Symbol;Acc:VGNC:78919]                                                | 2.104637122 | 1.42E-12    | 1.10E-10    |
| ENSMMUG00000010824 | SWIM-type zinc finger 7 associated protein 1 [Source:VGNC Symbol;Acc:VGNC:78220]                                 | 2.10688107  | 0.000427417 | 0.003989841 |
| ENSMMUG00000003348 | neurofilament light [Source:VGNC Symbol;Acc:VGNC:75307]                                                          | 2.109749816 | 9.23E-13    | 7.44E-11    |
| ENSMMUG00000060795 |                                                                                                                  | 2.111695681 | 0.000612083 | 0.005380855 |
| ENSMMUG00000057687 |                                                                                                                  | 2.111848332 | 8.23E-12    | 5.59E-10    |
| ENSMMUG00000006929 | ST3 beta-galactoside alpha-2,3-sialyltransferase 4 [Source:VGNC Symbol;Acc:VGNC:77827]                           | 2.114123688 | 2.68E-11    | 1.59E-09    |
| ENSMMUG00000017758 | mitogen-activated protein kinase 3 [Source:VGNC Symbol;Acc:VGNC:74646]                                           | 2.115151045 | 8.30E-08    | 2.40E-06    |
| ENSMMUG00000012356 | serpin family A member 9 [Source:VGNC Symbol;Acc:VGNC:77241]                                                     | 2.123753616 | 3.68E-06    | 6.94E-05    |
| ENSMMUG00000019526 | BLM RecQ like helicase [Source:VGNC Symbol;Acc:VGNC:70254]                                                       | 2.127865503 | 2.35E-06    | 4.73E-05    |
| ENSMMUG00000006568 | basic leucine zipper ATF-like transcription factor 2 [Source:VGNC Symbol;Acc:VGNC:70127]                         | 2.130502031 | 4.44E-10    | 2.15E-08    |
| ENSMMUG00000049678 |                                                                                                                  | 2.133272989 | 2.55E-11    | 1.53E-09    |
| ENSMMUG00000015744 | zinc finger protein 302 [Source:NCBI gene;Acc:706279]                                                            | 2.136834556 | 3.43E-10    | 1.70E-08    |
| ENSMMUG00000005482 | lysine methyltransferase 2A [Source:NCBI gene;Acc:705511]                                                        | 2.141457068 | 0.007721596 | 0.040938669 |
| ENSMMUG00000050822 | carbonic anhydrase 9 [Source:NCBI gene;Acc:696729]                                                               | 2.143427936 | 7.54E-19    | 1.71E-16    |
| ENSMMUG00000009559 | minichromosome maintenance complex binding protein [Source:VGNC Symbol;Acc:VGNC:74583]                           | 2.143615946 | 0.000443007 | 0.004103482 |
| ENSMMUG00000054686 |                                                                                                                  | 2.159637377 | 1.67E-12    | 1.27E-10    |
| ENSMMUG00000002536 | calcium binding protein 1 [Source:VGNC Symbol;Acc:VGNC:70495]                                                    | 2.164927343 | 6.12E-07    | 1.42E-05    |
| ENSMMUG00000019528 | adaptor related protein complex 4 subunit beta 1 [Source:VGNC Symbol;Acc:VGNC:69972]                             | 2.180652477 | 9.00E-21    | 2.82E-18    |
| ENSMMUG00000010466 | solute carrier family 38 member 9 [Source:VGNC Symbol;Acc:VGNC:77574]                                            | 2.182418083 | 3.74E-09    | 1.50E-07    |
| ENSMMUG00000019070 | focadhesin [Source:VGNC Symbol;Acc:VGNC:72556]                                                                   | 2.183567808 | 2.82E-19    | 7.16E-17    |
| ENSMMUG00000018137 | MYB proto-oncogene like 2 [Source:VGNC Symbol;Acc:VGNC:75092]                                                    | 2.186390394 | 2.09E-13    | 1.85E-11    |
| ENSMMUG00000010316 | HECT and RLD domain containing E3 ubiquitin protein ligase 5 [Source:VGNC Symbol;Acc:VGNC:73226]                 | 2.189655981 | 4.62E-11    | 2.63E-09    |
| ENSMMUG00000006931 | kirre like nephrin family adhesion molecule 3 [Source:NCBI gene;Acc:714534]                                      | 2.190184762 | 1.34E-16    | 1.94E-14    |
| ENSMMUG00000054568 |                                                                                                                  | 2.19330436  | 8.53E-05    | 0.001015379 |
| ENSMMUG00000016417 | chromobox 8 [Source:NCBI gene;Acc:717514]                                                                        | 2.197049963 | 5.90E-19    | 1.41E-16    |
| ENSMMUG00000060502 |                                                                                                                  | 2.202216941 | 1.40E-07    | 3.75E-06    |
| ENSMMUG00000023139 | small nuclear ribonucleoprotein polypeptide N [Source:VGNC Symbol;Acc:VGNC:78437]                                | 2.203005195 | 0.003108634 | 0.020088525 |
| ENSMMUG00000054512 |                                                                                                                  | 2.207362716 | 0.00182177  | 0.013255455 |
| ENSMMUG00000058928 | Metazoan signal recognition particle RNA [Source:RFAM;Acc:RF00017]                                               | 2.20831513  | 9.65E-08    | 2.69E-06    |
| ENSMMUG00000011332 | Rho GTPase activating protein 35 [Source:VGNC Symbol;Acc:VGNC:69942]                                             | 2.211582413 | 0.00052329  | 0.00470965  |
| ENSMMUG00000004283 | calcium and integrin binding family member 3 [Source:VGNC Symbol;Acc:VGNC:71339]                                 | 2.219762416 | 0.001321403 | 0.010275895 |
| ENSMMUG00000032429 | forkhead box O4 [Source:VGNC Symbol;Acc:VGNC:72712]                                                              | 2.221216375 | 9.20E-14    | 8.81E-12    |
| ENSMMUG00000059188 |                                                                                                                  | 2.222174125 | 5.32E-06    | 9.57E-05    |
| ENSMMUG00000001350 | HERPUD family member 2 [Source:VGNC Symbol;Acc:VGNC:73216]                                                       | 2.222699314 | 2.83E-11    | 1.66E-09    |
| ENSMMUG00000001545 | aquaporin 7 [Source:NCBI gene;Acc:702836]                                                                        | 2.23207244  | 0.000171455 | 0.001863797 |
| ENSMMUG00000043675 | Cbp/p300 interacting transactivator with Glu/Asp rich carboxy-terminal domain 4 [Source:NCBI gene;Acc:114672840] | 2.234221826 | 1.45E-11    | 9.35E-10    |
| ENSMMUG00000001273 | clathrin binding box of aftiphilin containing 1 [Source:VGNC Symbol;Acc:VGNC:84325]                              | 2.238806917 | 2.62E-13    | 2.27E-11    |
| ENSMMUG00000006659 | aldehyde dehydrogenase 1 family member A3 [Source:VGNC Symbol;Acc:VGNC:81353]                                    | 2.242420423 | 0.000107505 | 0.001246871 |
| ENSMMUG00000012668 | centriolin [Source:VGNC Symbol;Acc:VGNC:71204]                                                                   | 2.244942687 | 7.76E-15    | 8.90E-13    |
| ENSMMUG00000007799 | LIM and SH3 protein 1 [Source:VGNC Symbol;Acc:VGNC:74237]                                                        | 2.247644924 | 9.09E-05    | 0.001069397 |
| ENSMMUG00000017510 | membrane associated guanylate kinase, WW and PDZ domain containing 1 [Source:VGNC Symbol;Acc:VGNC:74499]         | 2.252627512 | 1.33E-18    | 2.84E-16    |
| ENSMMUG00000054755 | transmembrane protein 65 [Source:NCBI gene;Acc:705727]                                                           | 2.254473687 | 0.000541429 | 0.004854972 |
| ENSMMUG00000063988 |                                                                                                                  | 2.259707114 | 0.004755464 | 0.028344794 |
| ENSMMUG00000023146 | ASH1 like histone lysine methyltransferase [Source:NCBI gene;Acc:717778]                                         | 2.261756462 | 6.02E-05    | 0.000754526 |
| ENSMMUG00000001707 | amyloid beta precursor protein binding family B member 3 [Source:VGNC Symbol;Acc:VGNC:69869]                     | 2.269664759 | 4.06E-13    | 3.41E-11    |
| ENSMMUG00000031534 | ankyrin repeat and ubiquitin domain containing 1 [Source:VGNC Symbol;Acc:VGNC:84239]                             | 2.270517285 | 1.76E-14    | 1.96E-12    |
| ENSMMUG00000011878 | poly(A) binding protein interacting protein 1 [Source:VGNC Symbol;Acc:VGNC:84476]                                | 2.275250013 | 0.002249502 | 0.015761998 |
| ENSMMUG00000028733 | RAS related [Source:VGNC Symbol;Acc:VGNC:76937]                                                                  | 2.283563362 | 1.89E-05    | 0.000276228 |
| ENSMMUG00000021039 | X-ray radiation resistance associated 1 [Source:NCBI gene;Acc:693788]                                            | 2.285206131 | 8.43E-06    | 0.000140889 |

|                     |                                                                                                            |             |             |             |
|---------------------|------------------------------------------------------------------------------------------------------------|-------------|-------------|-------------|
| ENSMMUG00000049703  | Metazoan signal recognition particle RNA [Source:RFAM;Acc:RF00017]                                         | 2.287269694 | 2.59E-15    | 3.20E-13    |
| ENSMMUG00000060000  |                                                                                                            | 2.296120939 | 0.006688736 | 0.036673194 |
| ENSMMUG00000057329  |                                                                                                            | 2.296159397 | 0.006607383 | 0.036349536 |
| ENSMMUG00000005070  | ecotropic viral integration site 5 [Source:NCBI gene;Acc:706592]                                           | 2.304932785 | 1.77E-07    | 4.65E-06    |
| ENSMMUG00000011513  | versican [Source:VGNC Symbol;Acc:VGNC:79445]                                                               | 2.313905395 | 2.57E-15    | 3.20E-13    |
| ENSMMUG00000020185  | voltage dependent anion channel 3 [Source:VGNC Symbol;Acc:VGNC:84135]                                      | 2.319195474 | 0.002387064 | 0.016452438 |
| ENSMMUG00000019304  | indoleamine 2,3-dioxygenase 1 [Source:VGNC Symbol;Acc:VGNC:73580]                                          | 2.319909111 | 0.000442505 | 0.004103482 |
| ENSMMUG00000004797  | CTP synthase 2 [Source:VGNC Symbol;Acc:VGNC:71550]                                                         | 2.32386095  | 1.24E-05    | 0.000194914 |
| ENSMMUG00000014046  | SREBF chaperone [Source:VGNC Symbol;Acc:VGNC:77140]                                                        | 2.326749711 | 2.88E-13    | 2.47E-11    |
| ENSMMUG00000013450  | TATA-box binding protein associated factor 6 [Source:VGNC Symbol;Acc:VGNC:78093]                           | 2.329090878 | 0.002658991 | 0.017847904 |
| ENSMMUG00000007534  | protein regulator of cytokinesis 1 [Source:NCBI gene;Acc:710182]                                           | 2.33379025  | 3.09E-12    | 2.20E-10    |
| ENSMMUG00000016273  | maltase-glucoamylase [Source:VGNC Symbol;Acc:VGNC:74713]                                                   | 2.334579868 | 3.16E-14    | 3.26E-12    |
| ENSMMUG00000013832  | ATP binding cassette subfamily B member 11 [Source:VGNC Symbol;Acc:VGNC:81339]                             | 2.336648587 | 0.000208134 | 0.002192277 |
| ENSMMUG00000012349  | thiosulfate sulfurtransferase [Source:VGNC Symbol;Acc:VGNC:78664]                                          | 2.339977818 | 0.004855853 | 0.028795597 |
| ENSMMUG00000023449  | mitofusin 2 [Source:VGNC Symbol;Acc:VGNC:74522]                                                            | 2.34190039  | 0.000610799 | 0.005376351 |
| ENSMMUG00000023816  | semaphorin 4B [Source:VGNC Symbol;Acc:VGNC:77165]                                                          | 2.343957061 | 1.46E-16    | 2.09E-14    |
| ENSMMUG00000000790  | ankyrin repeat domain 17 [Source:VGNC Symbol;Acc:VGNC:84240]                                               | 2.344800403 | 4.28E-48    | 1.16E-44    |
| ENSMMUG00000000842  | RNA pseudouridine synthase domain containing 1 [Source:NCBI gene;Acc:722393]                               | 2.349772056 | 0.002427364 | 0.016622032 |
| ENSMMUG00000003797  | ubiquitin specific peptidase 20 [Source:VGNC Symbol;Acc:VGNC:78740]                                        | 2.364236334 | 0.000918661 | 0.00754006  |
| ENSMMUG000000062781 | chromosome 14 C11orf97 homolog [Source:NCBI gene;Acc:106993442]                                            | 2.364277677 | 8.52E-31    | 8.67E-28    |
| ENSMMUG00000004376  | calcium and integrin binding 1 [Source:VGNC Symbol;Acc:VGNC:71189]                                         | 2.386542016 | 6.75E-12    | 4.62E-10    |
| ENSMMUG000000049130 |                                                                                                            | 2.389013522 | 6.76E-15    | 7.87E-13    |
| ENSMMUG00000017906  | DnaJ heat shock protein family (Hsp40) member B1 [Source:NCBI gene;Acc:718890]                             | 2.390172842 | 0.009889715 | 0.049735677 |
| ENSMMUG00000007925  | serum/glucocorticoid regulated kinase 2 [Source:VGNC Symbol;Acc:VGNC:77228]                                | 2.39073036  | 6.30E-08    | 1.93E-06    |
| ENSMMUG00000057640  | plakophilin-3-like [Source:NCBI gene;Acc:114669833]                                                        | 2.39098514  | 2.56E-12    | 1.90E-10    |
| ENSMMUG00000009884  | hydroxysteroid 17-beta dehydrogenase 1 [Source:VGNC Symbol;Acc:VGNC:73528]                                 | 2.39141919  | 0.003110746 | 0.020088525 |
| ENSMMUG00000001475  | transmembrane protein with EGF like and two follistatin like domains 2 [Source:VGNC Symbol;Acc:VGNC:78569] | 2.391531291 | 0.000474586 | 0.004356349 |
| ENSMMUG00000000396  | intraflagellar transport 52 [Source:NCBI gene;Acc:694933]                                                  | 2.397290652 | 3.08E-05    | 0.000411515 |
| ENSMMUG00000005208  | RNA polymerase III subunit B [Source:VGNC Symbol;Acc:VGNC:76143]                                           | 2.397728139 | 0.001662282 | 0.012348811 |
| ENSMMUG00000064554  | leucine rich repeat neuronal 4 [Source:NCBI gene;Acc:718283]                                               | 2.405371774 | 0.002230378 | 0.015654945 |
| ENSMMUG00000014273  | cation channel sperm associated auxiliary subunit gamma [Source:VGNC Symbol;Acc:VGNC:70626]                | 2.408149919 | 0.008721112 | 0.045045213 |
| ENSMMUG00000062254  |                                                                                                            | 2.410035917 | 0.003566617 | 0.022511159 |
| ENSMMUG00000063914  |                                                                                                            | 2.411881158 | 1.23E-17    | 2.33E-15    |
| ENSMMUG00000046417  | chromobox 2 [Source:NCBI gene;Acc:717462]                                                                  | 2.415695381 | 9.93E-05    | 0.001161133 |
| ENSMMUG00000057539  |                                                                                                            | 2.420659584 | 0.000636697 | 0.005562215 |
| ENSMMUG00000062037  | stannin [Source:NCBI gene;Acc:711909]                                                                      | 2.422992548 | 0.000357226 | 0.003421809 |
| ENSMMUG00000063622  | mitochondrial ribosomal protein S26 [Source:NCBI gene;Acc:717038]                                          | 2.428831248 | 4.03E-05    | 0.000526297 |
| ENSMMUG00000044429  | glycophorin A (MNS blood group) [Source:NCBI gene;Acc:574101]                                              | 2.445576937 | 9.05E-06    | 0.000148523 |
| ENSMMUG00000044257  | MX dynamin like GTPase 2 [Source:VGNC Symbol;Acc:VGNC:81723]                                               | 2.446964383 | 3.51E-15    | 4.15E-13    |
| ENSMMUG00000061031  |                                                                                                            | 2.47018254  | 2.60E-06    | 5.15E-05    |
| ENSMMUG00000064730  |                                                                                                            | 2.471083384 | 1.05E-05    | 0.000169911 |
| ENSMMUG00000016579  | selectin L [Source:NCBI gene;Acc:701419]                                                                   | 2.477867986 | 4.54E-26    | 2.84E-23    |
| ENSMMUG00000039009  |                                                                                                            | 2.478727682 | 2.47E-05    | 0.000345624 |
| ENSMMUG00000028948  | azurocidin 1 [Source:VGNC Symbol;Acc:VGNC:70202]                                                           | 2.480620156 | 0.001595989 | 0.011943514 |
| ENSMMUG00000011789  | hematopoietically expressed homeobox [Source:VGNC Symbol;Acc:VGNC:73376]                                   | 2.494209334 | 8.18E-07    | 1.83E-05    |
| ENSMMUG00000023297  | solute carrier family 25 member 45 [Source:VGNC Symbol;Acc:VGNC:77576]                                     | 2.497379302 | 0.006965674 | 0.037834903 |
| ENSMMUG00000010007  | CD14 molecule [Source:VGNC Symbol;Acc:VGNC:70751]                                                          | 2.508201542 | 0.000262332 | 0.00266025  |
| ENSMMUG00000002950  | transferrin receptor 2 [Source:VGNC Symbol;Acc:VGNC:81770]                                                 | 2.513160511 | 5.21E-05    | 0.000662398 |
| ENSMMUG00000001725  | solute carrier family 35 member A4 [Source:VGNC Symbol;Acc:VGNC:77532]                                     | 2.51962111  | 4.30E-08    | 1.38E-06    |
| ENSMMUG00000002959  | helicase with zinc finger [Source:VGNC Symbol;Acc:VGNC:73178]                                              | 2.520458859 | 1.09E-08    | 4.00E-07    |
| ENSMMUG00000001058  | tetratricopeptide repeat domain 28 [Source:VGNC Symbol;Acc:VGNC:79785]                                     | 2.520836751 | 3.85E-06    | 7.21E-05    |



|                    |                                                                                                      |             |             |             |
|--------------------|------------------------------------------------------------------------------------------------------|-------------|-------------|-------------|
| ENSMMUG0000002376  | scavenger receptor class F member 1 [Source:VGNC Symbol;Acc:VGNC:77027]                              | 2.527113325 | 3.19E-06    | 6.11E-05    |
| ENSMMUG00000058536 |                                                                                                      | 2.530115594 | 2.80E-11    | 1.65E-09    |
| ENSMMUG00000050465 | ZFP42 zinc finger protein [Source:NCBI gene;Acc:707621]                                              | 2.531447484 | 3.82E-07    | 9.34E-06    |
| ENSMMUG00000008387 | dipeptidyl peptidase 4 [Source:VGNC Symbol;Acc:VGNC:71979]                                           | 2.533335323 | 0.003221335 | 0.020733683 |
| ENSMMUG00000051925 |                                                                                                      | 2.542253295 | 0.000144502 | 0.001620573 |
| ENSMMUG00000009508 | TATA-box binding protein associated factor 5 like [Source:VGNC Symbol;Acc:VGNC:78148]                | 2.545821501 | 0.002063631 | 0.014674309 |
| ENSMMUG00000010318 | phosphatidylinositol glycan anchor biosynthesis class Y [Source:NCBI gene;Acc:100426107]             | 2.549957198 | 1.10E-07    | 3.03E-06    |
| ENSMMUG00000015244 | uncoupling protein 1 [Source:VGNC Symbol;Acc:VGNC:78708]                                             | 2.55625199  | 0.001919225 | 0.013791994 |
| ENSMMUG00000013422 | CEA cell adhesion molecule 4 [Source:NCBI gene;Acc:705453]                                           | 2.559402087 | 0.002326685 | 0.016149934 |
| ENSMMUG00000028907 | insulin receptor [Source:NCBI gene;Acc:706009]                                                       | 2.559637599 | 5.76E-06    | 0.0001024   |
| ENSMMUG00000057361 | Metazoan signal recognition particle RNA [Source:RFAM;Acc:RF00017]                                   | 2.561734591 | 8.49E-06    | 0.000141709 |
| ENSMMUG00000020534 | p21 (RAC1) activated kinase 6 [Source:NCBI gene;Acc:701589]                                          | 2.565669935 | 6.20E-17    | 9.71E-15    |
| ENSMMUG00000001845 | DNA polymerase epsilon 4, accessory subunit [Source:VGNC Symbol;Acc:VGNC:76065]                      | 2.570549916 | 1.32E-07    | 3.57E-06    |
| ENSMMUG00000053790 |                                                                                                      | 2.589305229 | 1.10E-12    | 8.73E-11    |
| ENSMMUG00000019363 | synapse associated protein 1 [Source:VGNC Symbol;Acc:VGNC:78135]                                     | 2.599792002 | 2.93E-05    | 0.000396612 |
| ENSMMUG00000001820 | regulator of G protein signaling 6 [Source:VGNC Symbol;Acc:VGNC:76691]                               | 2.607184522 | 0.008327626 | 0.043519597 |
| ENSMMUG00000011627 | interleukin 4 induced 1 [Source:VGNC Symbol;Acc:VGNC:73625]                                          | 2.608068782 | 2.42E-05    | 0.000339547 |
| ENSMMUG00000028947 | complement factor D [Source:VGNC Symbol;Acc:VGNC:71115]                                              | 2.608559119 | 2.23E-21    | 7.89E-19    |
| ENSMMUG00000057331 | RNA terminal phosphate cyclase like 1 [Source:NCBI gene;Acc:694568]                                  | 2.608595036 | 4.03E-18    | 8.01E-16    |
| ENSMMUG00000003539 | glutamine rich 2 [Source:VGNC Symbol;Acc:VGNC:76534]                                                 | 2.608801511 | 7.36E-05    | 0.000897671 |
| ENSMMUG00000060435 | Metazoan signal recognition particle RNA [Source:RFAM;Acc:RF00017]                                   | 2.610035125 | 0.007420506 | 0.039613053 |
| ENSMMUG00000013967 | TOX high mobility group box family member 3 [Source:VGNC Symbol;Acc:VGNC:78612]                      | 2.618989121 | 0.002292104 | 0.015991694 |
| ENSMMUG00000052954 | Wnt family member 6 [Source:NCBI gene;Acc:700573]                                                    | 2.619985564 | 0.008441823 | 0.044003405 |
| ENSMMUG00000002949 | motile sperm domain containing 3 [Source:VGNC Symbol;Acc:VGNC:74823]                                 | 2.631130469 | 4.09E-07    | 9.95E-06    |
| ENSMMUG00000005504 | nucleoporin 37 [Source:VGNC Symbol;Acc:VGNC:75491]                                                   | 2.642949991 | 0.002401605 | 0.016501155 |
| ENSMMUG00000057570 |                                                                                                      | 2.64567135  | 8.22E-17    | 1.22E-14    |
| ENSMMUG00000010451 | inositol polyphosphate phosphatase like 1 [Source:VGNC Symbol;Acc:VGNC:73752]                        | 2.646931265 | 0.001546312 | 0.011635923 |
| ENSMMUG00000019126 | purine nucleoside phosphorylase [Source:NCBI gene;Acc:704183]                                        | 2.647043495 | 0.000787008 | 0.006647115 |
| ENSMMUG00000007538 | transient receptor potential cation channel subfamily M member 4 [Source:VGNC Symbol;Acc:VGNC:79105] | 2.650045398 | 4.57E-14    | 4.60E-12    |
| ENSMMUG00000000553 | bromodomain containing 1 [Source:VGNC Symbol;Acc:VGNC:70280]                                         | 2.657868901 | 0.004521324 | 0.02728579  |
| ENSMMUG00000009567 | glyoxylate reductase 1 homolog [Source:NCBI gene;Acc:706933]                                         | 2.658397016 | 3.38E-15    | 4.04E-13    |
| ENSMMUG00000004587 | gasdermin B [Source:VGNC Symbol;Acc:VGNC:73219]                                                      | 2.659312471 | 0.006838249 | 0.03731704  |
| ENSMMUG00000012937 | proline rich 12 [Source:NCBI gene;Acc:719344]                                                        | 2.662617958 | 6.57E-19    | 1.53E-16    |
| ENSMMUG00000016678 | Rho associated coiled-coil containing protein kinase 2 [Source:VGNC Symbol;Acc:VGNC:76714]           | 2.673782899 | 1.16E-14    | 1.31E-12    |
| ENSMMUG00000016580 | selectin E [Source:VGNC Symbol;Acc:VGNC:77156]                                                       | 2.678672009 | 3.75E-31    | 4.36E-28    |
| ENSMMUG00000061424 | ventral anterior homeobox 2 [Source:NCBI gene;Acc:703531]                                            | 2.680886158 | 2.55E-06    | 5.07E-05    |
| ENSMMUG00000012635 | zyxin [Source:VGNC Symbol;Acc:VGNC:78917]                                                            | 2.684757685 | 2.21E-16    | 3.04E-14    |
| ENSMMUG00000001910 | heat shock protein family B (small) member 7 [Source:NCBI gene;Acc:696704]                           | 2.691847643 | 2.46E-05    | 0.000344174 |
| ENSMMUG00000021477 | ATPase H+ transporting V1 subunit E1 [Source:NCBI gene;Acc:709739]                                   | 2.710846163 | 1.05E-07    | 2.90E-06    |
| ENSMMUG00000062217 | HD domain containing 3 [Source:NCBI gene;Acc:715621]                                                 | 2.711075953 | 9.19E-08    | 2.61E-06    |
| ENSMMUG00000009312 | leukotriene A4 hydrolase [Source:VGNC Symbol;Acc:VGNC:74453]                                         | 2.715224738 | 2.14E-14    | 2.33E-12    |
| ENSMMUG00000013477 | creatine kinase, M-type [Source:VGNC Symbol;Acc:VGNC:71230]                                          | 2.715565348 | 7.24E-11    | 4.01E-09    |
| ENSMMUG00000018823 | transmembrane protein 191C [Source:NCBI gene;Acc:697070]                                             | 2.717841017 | 0.005443541 | 0.031300359 |
| ENSMMUG00000027986 | U6 spliceosomal RNA [Source:RFAM;Acc:RF00026]                                                        | 2.726037511 | 0.000772019 | 0.006540876 |
| ENSMMUG00000020668 | cyclin E1 [Source:VGNC Symbol;Acc:VGNC:70727]                                                        | 2.750479459 | 2.60E-16    | 3.53E-14    |
| ENSMMUG00000049355 | ALX homeobox 4 [Source:NCBI gene;Acc:715652]                                                         | 2.752353126 | 0.000752509 | 0.006402227 |
| ENSMMUG00000038944 |                                                                                                      | 2.75613941  | 6.19E-38    | 8.40E-35    |
| ENSMMUG00000019690 | SEC14 and spectrin domain containing 1 [Source:VGNC Symbol;Acc:VGNC:77267]                           | 2.757500187 | 6.05E-06    | 0.000106464 |
| ENSMMUG00000044817 | nucleoporin 62 [Source:NCBI gene;Acc:100426308]                                                      | 2.761508639 | 6.50E-20    | 1.89E-17    |
| ENSMMUG00000058916 |                                                                                                      | 2.770088354 | 2.70E-05    | 0.000372976 |
| ENSMMUG00000008923 | Thy-1 cell surface antigen [Source:VGNC Symbol;Acc:VGNC:78352]                                       | 2.798189644 | 9.36E-14    | 8.86E-12    |

|                     |                                                                                               |             |             |             |
|---------------------|-----------------------------------------------------------------------------------------------|-------------|-------------|-------------|
| ENSMMUG0000000603   | Rho GDP dissociation inhibitor gamma [Source:VGNC Symbol;Acc:VGNC:70011]                      | 2.798256005 | 0.000714029 | 0.006151985 |
| ENSMMUG00000005108  | RCC1 domain containing 1 [Source:VGNC Symbol;Acc:VGNC:76876]                                  | 2.802087659 | 2.72E-06    | 5.32E-05    |
| ENSMMUG000000062139 |                                                                                               | 2.80696731  | 8.00E-06    | 0.000135204 |
| ENSMMUG000000056798 |                                                                                               | 2.820787732 | 0.000932476 | 0.007638049 |
| ENSMMUG000000060767 |                                                                                               | 2.830383253 | 0.000227616 | 0.002366861 |
| ENSMMUG00000002267  | laminin subunit gamma 3 [Source:NCBI gene;Acc:722430]                                         | 2.834623419 | 0.006704088 | 0.036707927 |
| ENSMMUG000000061576 |                                                                                               | 2.837271827 | 0.001568273 | 0.01177941  |
| ENSMMUG000000062794 |                                                                                               | 2.853736363 | 6.76E-07    | 1.56E-05    |
| ENSMMUG00000006066  | phosphatidylcholine transfer protein [Source:VGNC Symbol;Acc:VGNC:75789]                      | 2.854690274 | 0.001334934 | 0.010321967 |
| ENSMMUG000000055820 |                                                                                               | 2.882248023 | 0.007567119 | 0.040242642 |
| ENSMMUG00000001748  | spleen associated tyrosine kinase [Source:VGNC Symbol;Acc:VGNC:78063]                         | 2.88251829  | 0.000165896 | 0.001813058 |
| ENSMMUG000000052569 |                                                                                               | 2.886796558 | 5.45E-05    | 0.000689164 |
| ENSMMUG000000014032 | proline rich 36 [Source:NCBI gene;Acc:710443]                                                 | 2.919104361 | 0.000495462 | 0.004497267 |
| ENSMMUG000000049894 |                                                                                               | 2.937491029 | 0.001379104 | 0.01057313  |
| ENSMMUG000000016929 | proline rich and Gla domain 3 [Source:VGNC Symbol;Acc:VGNC:76350]                             | 2.939037758 | 1.31E-05    | 0.000204017 |
| ENSMMUG00000000375  | pleckstrin homology and RhoGEF domain containing G6 [Source:VGNC Symbol;Acc:VGNC:76110]       | 2.94046386  | 1.80E-43    | 3.66E-40    |
| ENSMMUG000000063525 |                                                                                               | 2.958259225 | 5.21E-06    | 9.45E-05    |
| ENSMMUG000000005920 | N-acetyltransferase 1 [Source:VGNC Symbol;Acc:VGNC:75133]                                     | 2.961810619 | 0.009674506 | 0.049016692 |
| ENSMMUG000000060632 |                                                                                               | 2.982755572 | 0.003496897 | 0.022122558 |
| ENSMMUG000000014658 | ninein [Source:VGNC Symbol;Acc:VGNC:75177]                                                    | 2.999137057 | 2.89E-09    | 1.17E-07    |
| ENSMMUG000000061533 |                                                                                               | 3.006218476 | 5.97E-14    | 5.93E-12    |
| ENSMMUG000000057825 |                                                                                               | 3.009512415 | 0.003755731 | 0.023544537 |
| ENSMMUG00000006655  | myelin regulatory factor [Source:VGNC Symbol;Acc:VGNC:74949]                                  | 3.027500869 | 0.001150048 | 0.009153171 |
| ENSMMUG000000014397 | NCK associated protein 1 [Source:VGNC Symbol;Acc:VGNC:75143]                                  | 3.032284382 | 2.64E-06    | 5.22E-05    |
| ENSMMUG000000023286 | UPF1 RNA helicase and ATPase [Source:VGNC Symbol;Acc:VGNC:79971]                              | 3.040294117 | 1.41E-13    | 1.28E-11    |
| ENSMMUG000000053083 | C2 calcium dependent domain containing 4C [Source:NCBI gene;Acc:100424440]                    | 3.050971287 | 4.03E-06    | 7.49E-05    |
| ENSMMUG000000018151 | membrane palmitoylated protein 4 [Source:VGNC Symbol;Acc:VGNC:74734]                          | 3.051352102 | 0.005898546 | 0.033232983 |
| ENSMMUG000000059504 |                                                                                               | 3.06880747  | 0.000261866 | 0.00266025  |
| ENSMMUG000000042598 | transmembrane protein 18 [Source:NCBI gene;Acc:721515]                                        | 3.072305848 | 7.70E-10    | 3.60E-08    |
| ENSMMUG000000007726 | synapse defective Rho GTPase homolog 1 [Source:NCBI gene;Acc:719089]                          | 3.084823705 | 0.000349211 | 0.003356875 |
| ENSMMUG000000054052 | sialic acid binding Ig like lectin 11 [Source:NCBI gene;Acc:719127]                           | 3.094106523 | 5.28E-06    | 9.52E-05    |
| ENSMMUG000000021564 | lysine demethylase 2B [Source:VGNC Symbol;Acc:VGNC:81425]                                     | 3.094562279 | 1.53E-20    | 4.61E-18    |
| ENSMMUG000000059175 |                                                                                               | 3.114757421 | 1.93E-12    | 1.46E-10    |
| ENSMMUG00000000632  | SH3 binding domain protein 5 like [Source:VGNC Symbol;Acc:VGNC:77334]                         | 3.116516144 | 1.52E-11    | 9.73E-10    |
| ENSMMUG000000005595 | RAB14, member RAS oncogene family [Source:NCBI gene;Acc:699837]                               | 3.1183989   | 1.87E-08    | 6.57E-07    |
| ENSMMUG000000046186 | stanniocalcin 1 [Source:VGNC Symbol;Acc:VGNC:84120]                                           | 3.127543747 | 0.000405993 | 0.003829958 |
| ENSMMUG000000023403 | GTP binding protein 3, mitochondrial [Source:VGNC Symbol;Acc:VGNC:73170]                      | 3.13561103  | 3.47E-05    | 0.000458725 |
| ENSMMUG000000062083 |                                                                                               | 3.143427967 | 0.001806143 | 0.013153506 |
| ENSMMUG000000062091 |                                                                                               | 3.14845463  | 2.96E-05    | 0.000398731 |
| ENSMMUG000000058817 |                                                                                               | 3.148776244 | 1.02E-19    | 2.78E-17    |
| ENSMMUG000000015468 | checkpoint with forkhead and ring finger domains [Source:VGNC Symbol;Acc:VGNC:71064]          | 3.152419582 | 1.41E-05    | 0.000216273 |
| ENSMMUG000000000894 | cellular inhibitor of PP2A [Source:VGNC Symbol;Acc:VGNC:71371]                                | 3.166294803 | 0.008549882 | 0.044437546 |
| ENSMMUG000000053457 | caspase 14 [Source:NCBI gene;Acc:718049]                                                      | 3.191192061 | 2.31E-10    | 1.17E-08    |
| ENSMMUG000000063981 | nucleoside-triphosphatase, cancer-related [Source:NCBI gene;Acc:712959]                       | 3.215838482 | 3.01E-06    | 5.82E-05    |
| ENSMMUG000000064146 | Metazoan signal recognition particle RNA [Source:RFAM;Acc:RF00017]                            | 3.242007985 | 8.95E-08    | 2.56E-06    |
| ENSMMUG000000013798 | fatty acid desaturase 1 [Source:VGNC Symbol;Acc:VGNC:72471]                                   | 3.251924635 | 3.67E-11    | 2.10E-09    |
| ENSMMUG000000004801 | COPI coat complex subunit gamma 2 [Source:VGNC Symbol;Acc:VGNC:71315]                         | 3.262271599 | 1.39E-11    | 9.07E-10    |
| ENSMMUG000000008197 | netrin G1 [Source:VGNC Symbol;Acc:VGNC:75450]                                                 | 3.266883487 | 0.009754283 | 0.049237059 |
| ENSMMUG00000006851  | SPARC (osteonectin), cwcv and kazal like domains proteoglycan 3 [Source:NCBI gene;Acc:705964] | 3.273266856 | 1.62E-11    | 1.03E-09    |
| ENSMMUG000000002917 | single Ig IL-1-related receptor [Source:NCBI gene;Acc:100425060]                              | 3.277338817 | 5.21E-05    | 0.000662398 |
| ENSMMUG000000002433 | calcium/calmodulin dependent protein kinase II beta [Source:VGNC Symbol;Acc:VGNC:70524]       | 3.27790398  | 0.001070059 | 0.008617629 |

|                    |                                                                                                      |             |             |             |
|--------------------|------------------------------------------------------------------------------------------------------|-------------|-------------|-------------|
| ENSMMUG00000052530 |                                                                                                      | 3.292625289 | 0.000758686 | 0.006448038 |
| ENSMMUG00000017822 | periplakin [Source:VGNC Symbol;Acc:VGNC:76240]                                                       | 3.318344829 | 6.75E-08    | 2.04E-06    |
| ENSMMUG00000008791 | CD47 molecule [Source:VGNC Symbol;Acc:VGNC:70767]                                                    | 3.319970868 | 7.45E-30    | 6.06E-27    |
| ENSMMUG00000057179 | cation channel sperm associated 1 [Source:NCBI gene;Acc:721869]                                      | 3.351141823 | 9.36E-08    | 2.62E-06    |
| ENSMMUG00000009499 | mesoderm specific transcript [Source:VGNC Symbol;Acc:VGNC:74707]                                     | 3.356453427 | 2.02E-09    | 8.51E-08    |
| ENSMMUG00000004749 | PPARG coactivator 1 beta [Source:VGNC Symbol;Acc:VGNC:76134]                                         | 3.365471115 | 0.000129913 | 0.001471145 |
| ENSMMUG00000057632 |                                                                                                      | 3.36634539  | 1.14E-09    | 5.10E-08    |
| ENSMMUG00000022884 | glutamate-ammonia ligase [Source:NCBI gene;Acc:715952]                                               | 3.371407427 | 2.31E-14    | 2.47E-12    |
| ENSMMUG00000016894 | ribosomal protein S25 [Source:NCBI gene;Acc:702593]                                                  | 3.39403036  | 0.002935921 | 0.019328741 |
| ENSMMUG00000056381 | forkhead box R1 [Source:NCBI gene;Acc:707285]                                                        | 3.460820342 | 1.84E-06    | 3.83E-05    |
| ENSMMUG00000046169 |                                                                                                      | 3.462317659 | 2.83E-15    | 3.44E-13    |
| ENSMMUG00000056184 |                                                                                                      | 3.470976539 | 0.003756369 | 0.023544537 |
| ENSMMUG00000004332 | tripartite motif containing 44 [Source:VGNC Symbol;Acc:VGNC:79168]                                   | 3.487594912 | 0.000151535 | 0.001678633 |
| ENSMMUG00000053627 |                                                                                                      | 3.514774015 | 0.005793409 | 0.032802457 |
| ENSMMUG00000011682 | ribonuclease P/MRP subunit p21 [Source:NCBI gene;Acc:713056]                                         | 3.527570683 | 0.002444568 | 0.016725777 |
| ENSMMUG00000061935 |                                                                                                      | 3.53151657  | 1.14E-22    | 4.66E-20    |
| ENSMMUG00000023263 | mediator complex subunit 15 [Source:VGNC Symbol;Acc:VGNC:74511]                                      | 3.534098084 | 2.74E-12    | 2.00E-10    |
| ENSMMUG00000006853 | crystallin beta B2 [Source:NCBI gene;Acc:100144420]                                                  | 3.537499203 | 4.69E-05    | 0.000602036 |
| ENSMMUG00000040393 | zinc finger protein 655 [Source:NCBI gene;Acc:718811]                                                | 3.541703696 | 3.41E-08    | 1.12E-06    |
| ENSMMUG00000058423 |                                                                                                      | 3.54980377  | 9.29E-08    | 2.62E-06    |
| ENSMMUG00000059782 |                                                                                                      | 3.550608356 | 2.95E-17    | 4.80E-15    |
| ENSMMUG00000011064 | synaptosome associated protein 25 [Source:VGNC Symbol;Acc:VGNC:77663]                                | 3.613841737 | 5.54E-05    | 0.000697828 |
| ENSMMUG00000052168 |                                                                                                      | 3.628831513 | 1.39E-30    | 1.26E-27    |
| ENSMMUG00000017056 | Sad1 and UNC84 domain containing 1 [Source:VGNC Symbol;Acc:VGNC:78161]                               | 3.665228684 | 3.35E-08    | 1.11E-06    |
| ENSMMUG00000016549 | matrix metalloproteinase 9 [Source:VGNC Symbol;Acc:VGNC:74903]                                       | 3.680256274 | 1.90E-06    | 3.90E-05    |
| ENSMMUG00000035943 | U6 spliceosomal RNA [Source:RFAM;Acc:RF00026]                                                        | 3.695899738 | 2.90E-05    | 0.000394435 |
| ENSMMUG00000018396 | HAUS augmin like complex subunit 6 [Source:VGNC Symbol;Acc:VGNC:73237]                               | 3.759151866 | 7.80E-21    | 2.54E-18    |
| ENSMMUG00000012039 | cytochrome b5 type B (outer mitochondrial membrane) [Source:NCBI gene;Acc:705093]                    | 3.782489936 | 0.000142173 | 0.001601068 |
| ENSMMUG00000026950 | microRNA 101-2 [Source:HGNC Symbol;Acc:HGNC:31489]                                                   | 3.789707388 | 0.000316115 | 0.003089809 |
| ENSMMUG00000022893 | von Willebrand factor [Source:VGNC Symbol;Acc:VGNC:78778]                                            | 3.794532631 | 0.001297958 | 0.010147954 |
| ENSMMUG00000059036 |                                                                                                      | 3.811212372 | 0.007274539 | 0.039042781 |
| ENSMMUG00000050495 |                                                                                                      | 3.820241317 | 0.007283958 | 0.039042781 |
| ENSMMUG00000056796 | NADH:ubiquinone oxidoreductase subunit A2 [Source:NCBI gene;Acc:697736]                              | 3.883764605 | 0.005065503 | 0.029735636 |
| ENSMMUG00000047729 | inositol 1,4,5-trisphosphate receptor type 3 [Source:NCBI gene;Acc:718040]                           | 3.94879664  | 0.00549557  | 0.03155496  |
| ENSMMUG00000019314 | vav guanine nucleotide exchange factor 1 [Source:VGNC Symbol;Acc:VGNC:78757]                         | 3.966750555 | 9.63E-05    | 0.001130137 |
| ENSMMUG00000003874 | interferon induced transmembrane protein 10 [Source:NCBI gene;Acc:721010]                            | 4.021363662 | 9.88E-24    | 5.03E-21    |
| ENSMMUG00000022921 | solute carrier family 2 member 12 [Source:VGNC Symbol;Acc:VGNC:77503]                                | 4.026247874 | 4.77E-49    | 1.94E-45    |
| ENSMMUG00000011344 | solute carrier family 52 member 1 [Source:VGNC Symbol;Acc:VGNC:77795]                                | 4.062741775 | 1.83E-05    | 0.000267735 |
| ENSMMUG00000056248 |                                                                                                      | 4.079287175 | 2.00E-40    | 3.26E-37    |
| ENSMMUG00000021157 | TBC1 domain family member 31 [Source:VGNC Symbol;Acc:VGNC:84121]                                     | 4.084855389 | 6.85E-06    | 0.000119233 |
| ENSMMUG00000060184 | SEC61 translocon subunit gamma [Source:NCBI gene;Acc:716898]                                         | 4.084910214 | 0.006214704 | 0.034539328 |
| ENSMMUG00000063779 |                                                                                                      | 4.113001043 | 2.14E-77    | 1.74E-73    |
| ENSMMUG00000049267 |                                                                                                      | 4.187211089 | 2.01E-07    | 5.22E-06    |
| ENSMMUG00000057481 |                                                                                                      | 4.218812746 | 0.001792544 | 0.013077863 |
| ENSMMUG00000012405 | transient receptor potential cation channel subfamily C member 1 [Source:VGNC Symbol;Acc:VGNC:78651] | 4.371818344 | 5.14E-08    | 1.62E-06    |
| ENSMMUG00000053837 |                                                                                                      | 4.383975187 | 0.001741277 | 0.012772501 |
| ENSMMUG00000051037 |                                                                                                      | 4.459381937 | 6.17E-08    | 1.90E-06    |
| ENSMMUG00000055973 | phosphoglycerate mutase 1-like [Source:NCBI gene;Acc:714548]                                         | 4.473954721 | 0.000719578 | 0.0061867   |
| ENSMMUG00000063198 |                                                                                                      | 4.527913088 | 5.22E-05    | 0.000662495 |
| ENSMMUG00000063886 | Metazoan signal recognition particle RNA [Source:RFAM;Acc:RF00017]                                   | 4.661059075 | 0.007999946 | 0.042186245 |
| ENSMMUG00000000869 | small nuclear ribonucleoprotein polypeptide C [Source:NCBI gene;Acc:718654]                          | 4.664165093 | 2.42E-06    | 4.85E-05    |



|                    |                                                                           |             |             |             |
|--------------------|---------------------------------------------------------------------------|-------------|-------------|-------------|
| ENSMMUG00000048395 | chromobox 6 [Source:NCBI gene;Acc:702133]                                 | 4.675341514 | 0.001479973 | 0.011219684 |
| ENSMMUG00000010614 | C-C motif chemokine ligand 25 [Source:VGNC Symbol;Acc:VGNC:70700]         | 5.010986036 | 0.001182802 | 0.009368071 |
| ENSMMUG00000064694 | AHNAK nucleoprotein 2 [Source:NCBI gene;Acc:707626]                       | 5.282462545 | 0.000404066 | 0.003821026 |
| ENSMMUG00000047465 | Metazoan signal recognition particle RNA [Source:RFAM;Acc:RF00017]        | 5.299539659 | 7.59E-05    | 0.000916708 |
| ENSMMUG00000057785 |                                                                           | 5.381304949 | 0.000128759 | 0.001460109 |
| ENSMMUG00000049232 | AMMECR1 like [Source:VGNC Symbol;Acc:VGNC:84208]                          | 5.39061464  | 0.0002039   | 0.00215325  |
| ENSMMUG00000059985 |                                                                           | 5.679598057 | 0.00017555  | 0.001900702 |
| ENSMMUG00000057095 |                                                                           | 5.706724691 | 4.08E-05    | 0.00053095  |
| ENSMMUG00000021447 | TNF receptor superfamily member 1B [Source:VGNC Symbol;Acc:VGNC:78590]    | 5.84943077  | 0.000685444 | 0.0059308   |
| ENSMMUG00000019961 | protein phosphatase 1 regulatory subunit 18 [Source:NCBI gene;Acc:712176] | 5.85851321  | 0.000164982 | 0.001807424 |
| ENSMMUG00000065319 |                                                                           | 6.089370695 | 8.56E-05    | 0.001017076 |
| ENSMMUG00000027543 | Y RNA [Source:RFAM;Acc:RF00019]                                           | 6.409359652 | 1.22E-05    | 0.000192483 |
| ENSMMUG00000001989 | RNA polymerase II subunit D [Source:VGNC Symbol;Acc:VGNC:76213]           | 6.948945341 | 7.41E-07    | 1.69E-05    |

## D. Non-survivor's group radiation effects

### SD 1 vs. Baseline

| Ensembl Gene ID     | Description                                                                      | Log2(FC)    | p-value     | FDR         |
|---------------------|----------------------------------------------------------------------------------|-------------|-------------|-------------|
| ENSMMUG00000018827  | multiple EGF like domains 10 [Source:VGNC Symbol;Acc:VGNC:74617]                 | 5.894331584 | 1.46E-07    | 2.12E-06    |
| ENSMMUG00000037485  |                                                                                  | 5.565793962 | 1.87E-05    | 0.000167878 |
| ENSMMUG00000007001  | protein phosphatase 4 regulatory subunit 3B [Source:VGNC Symbol;Acc:VGNC:76342]  | 5.397906846 | 0.000150613 | 0.001027295 |
| ENSMMUG00000052326  | U7 small nuclear RNA [Source:RFAM;Acc:RF00066]                                   | 5.259983671 | 0.000795866 | 0.004324485 |
| ENSMMUG00000059406  | RGP1 homolog, RAB6A GEF complex partner 1 [Source:NCBI gene;Acc:695936]          | 5.148274879 | 2.63E-05    | 0.000226987 |
| ENSMMUG00000006457  | Rho guanine nucleotide exchange factor 40 [Source:VGNC Symbol;Acc:VGNC:69907]    | 5.131863552 | 2.46E-05    | 0.000213989 |
| ENSMMUG000000049690 |                                                                                  | -5.03428935 | 0.000220487 | 0.001432351 |
| ENSMMUG00000001245  | zinc finger protein 532 [Source:NCBI gene;Acc:701146]                            | 5.005558693 | 0.000104974 | 0.000753205 |
| ENSMMUG00000052535  |                                                                                  | 5.005327358 | 1.25E-08    | 2.21E-07    |
| ENSMMUG00000055207  |                                                                                  | 4.956421457 | 1.52E-05    | 0.000140611 |
| ENSMMUG00000018163  | caspase 9 [Source:NCBI gene;Acc:694544]                                          | 4.877536375 | 0.000406194 | 0.002408359 |
| ENSMMUG00000023621  | DEAD-box helicase 27 [Source:NCBI gene;Acc:703852]                               | 4.872559424 | 0.000705247 | 0.003901079 |
| ENSMMUG00000063609  | cytochrome c oxidase subunit 6A1, mitochondrial [Source:NCBI gene;Acc:696956]    | 4.824209411 | 0.001124274 | 0.005740945 |
| ENSMMUG00000060359  |                                                                                  | 4.803807541 | 0.001265104 | 0.006333766 |
| ENSMMUG00000003595  | peroxisomal biogenesis factor 5 like [Source:VGNC Symbol;Acc:VGNC:75889]         | 4.798135455 | 0.000704508 | 0.003898744 |
| ENSMMUG00000054315  |                                                                                  | 4.796094336 | 1.58E-05    | 0.000144484 |
| ENSMMUG00000013302  | family with sequence similarity 184 member A [Source:VGNC Symbol;Acc:VGNC:72308] | 4.764368808 | 5.81E-05    | 0.00045653  |
| ENSMMUG00000057173  |                                                                                  | 4.752411849 | 0.002838068 | 0.01248933  |
| ENSMMUG00000050676  | leucine rich repeat containing 75A [Source:NCBI gene;Acc:699649]                 | 4.562306268 | 0.003770226 | 0.015951753 |
| ENSMMUG00000064587  |                                                                                  | 4.546120889 | 0.000492515 | 0.002863532 |
| ENSMMUG00000055117  |                                                                                  | 4.544548876 | 6.92E-06    | 6.90E-05    |
| ENSMMUG00000002768  | neuronal regeneration related protein [Source:VGNC Symbol;Acc:VGNC:84454]        | 4.501618158 | 0.00603592  | 0.023439965 |
| ENSMMUG00000051202  |                                                                                  | 4.492507156 | 0.000996067 | 0.005209644 |
| ENSMMUG00000028925  | HDGF like 2 [Source:NCBI gene;Acc:693476]                                        | 4.469804717 | 7.80E-06    | 7.66E-05    |
| ENSMMUG00000060830  |                                                                                  | 4.461002473 | 0.002982484 | 0.013031537 |

|                    |                                                                                   |   |             |             |             |
|--------------------|-----------------------------------------------------------------------------------|---|-------------|-------------|-------------|
| ENSMMUG0000009431  | HEN methyltransferase 1 [Source:VGNC Symbol;Acc:VGNC:73241]                       | - | 4.449106572 | 0.001406521 | 0.006926103 |
| ENSMMUG00000050186 | Metazoan signal recognition particle RNA [Source:RFAM;Acc:RF00017]                | - | 4.448561763 | 0.003449686 | 0.014778701 |
| ENSMMUG00000051277 |                                                                                   | - | -4.38954195 | 0.0039012   | 0.016426738 |
| ENSMMUG00000017176 | DNA cross-link repair 1C [Source:NCBI gene;Acc:697493]                            | - | 4.347239093 | 0.006545711 | 0.025118119 |
| ENSMMUG00000001404 | neuronal differentiation 2 [Source:VGNC Symbol;Acc:VGNC:75321]                    | - | 4.331768717 | 0.012413574 | 0.042043328 |
| ENSMMUG00000056544 |                                                                                   | - | 4.323286126 | 1.43E-06    | 1.69E-05    |
| ENSMMUG00000058459 |                                                                                   | - | 4.318039062 | 0.001218557 | 0.006144677 |
| ENSMMUG00000063396 |                                                                                   | - | 4.314983327 | 0.008153714 | 0.029996198 |
| ENSMMUG00000054953 | leucine rich repeat containing 10 [Source:NCBI gene;Acc:114669753]                | - | 4.305201786 | 0.001112964 | 0.005692652 |
| ENSMMUG00000058242 | zinc finger protein 160 [Source:NCBI gene;Acc:722722]                             | - | 4.302932086 | 0.005941457 | 0.023183001 |
| ENSMMUG00000006309 | unc-5 netrin receptor C [Source:VGNC Symbol;Acc:VGNC:78723]                       | - | 4.289898607 | 3.54E-05    | 0.000294835 |
| ENSMMUG00000021552 | RPGR interacting protein 1 [Source:VGNC Symbol;Acc:VGNC:77007]                    | - | 4.277017775 | 3.69E-09    | 7.12E-08    |
| ENSMMUG00000010959 | kelch like family member 9 [Source:VGNC Symbol;Acc:VGNC:74080]                    | - | 4.272433465 | 0.00121099  | 0.006112642 |
| ENSMMUG00000051522 | Metazoan signal recognition particle RNA [Source:RFAM;Acc:RF00017]                | - | 4.254714178 | 0.001657129 | 0.007937558 |
| ENSMMUG00000052609 | ribosomal protein L34 [Source:NCBI gene;Acc:696636]                               | - | 4.234131103 | 2.59E-08    | 4.33E-07    |
| ENSMMUG00000060995 |                                                                                   | - | 4.181087337 | 0.008462571 | 0.030956386 |
| ENSMMUG00000022879 | EARP complex and GARP complex interacting protein 1 [Source:NCBI gene;Acc:707650] | - | 4.161325647 | 0.002134783 | 0.00983088  |
| ENSMMUG00000033490 | mml-mir-625 [Source:miRBase;Acc:MI0007874]                                        | - | 4.148305797 | 0.012904524 | 0.043454659 |
| ENSMMUG00000053550 |                                                                                   | - | 4.123406946 | 0.003327059 | 0.014318234 |
| ENSMMUG00000055529 | sulfotransferase family 1C member 4 [Source:NCBI gene;Acc:693903]                 | - | 4.105402945 | 0.01064352  | 0.037164632 |
| ENSMMUG00000026876 | mml-mir-181a-2 [Source:miRBase;Acc:MI0002808]                                     | - | 4.101609702 | 0.000623571 | 0.003502512 |
| ENSMMUG00000004598 | bisphosphoglycerate mutase [Source:VGNC Symbol;Acc:VGNC:70275]                    | - | 4.100323908 | 0.002999208 | 0.013099954 |
| ENSMMUG00000021315 | molybdenum cofactor synthesis 1 [Source:NCBI gene;Acc:719625]                     | - | 4.072169188 | 0.012542756 | 0.04239907  |
| ENSMMUG00000056824 |                                                                                   | - | 4.038910591 | 0.000293282 | 0.00182594  |
| ENSMMUG00000050174 |                                                                                   | - | -4.03406648 | 0.01524828  | 0.049752219 |
| ENSMMUG00000045446 |                                                                                   | - | 3.978510662 | 0.005681589 | 0.022382181 |
| ENSMMUG00000000021 | catsper channel auxiliary subunit epsilon [Source:VGNC Symbol;Acc:VGNC:70657]     | - | 3.977121391 | 0.009112575 | 0.032835727 |
| ENSMMUG00000030099 | phospholipid phosphatase 1 [Source:VGNC Symbol;Acc:VGNC:76226]                    | - | 3.976941842 | 1.89E-07    | 2.70E-06    |
| ENSMMUG00000022727 | lysine methyltransferase 2E [Source:VGNC Symbol;Acc:VGNC:74073]                   | - | 3.965149875 | 0.004692922 | 0.019074306 |

|                     |                                                                                       |   |             |             |             |
|---------------------|---------------------------------------------------------------------------------------|---|-------------|-------------|-------------|
| ENSMMUG00000049117  | CLU1 antisense RNA 1 [Source:NCBI gene;Acc:100424000]                                 | - | 3.957954586 | 0.008884224 | 0.032173245 |
| ENSMMUG00000001481  | nicotinamide nucleotide adenylyltransferase 2 [Source:VGNC Symbol;Acc:VGNC:75193]     | - | 3.956634311 | 0.000177561 | 0.001191916 |
| ENSMMUG000000057651 | frizzled class receptor 5 [Source:NCBI gene;Acc:710796]                               | - | 3.908112144 | 0.001129367 | 0.005757384 |
| ENSMMUG000000021875 | myoneurin [Source:VGNC Symbol;Acc:VGNC:74958]                                         | - | 3.895219255 | 0.008774379 | 0.031841127 |
| ENSMMUG000000052457 | Metazoan signal recognition particle RNA [Source:RFAM;Acc:RF00017]                    | - | 3.884063202 | 0.005733494 | 0.022536098 |
| ENSMMUG000000020533 | chromosome 11 C12orf56 homolog [Source:VGNC Symbol;Acc:VGNC:70409]                    | - | 3.879561758 | 9.37E-09    | 1.69E-07    |
| ENSMMUG000000051429 |                                                                                       | - | -3.85177958 | 8.52E-05    | 0.000633679 |
| ENSMMUG000000024448 |                                                                                       | - | 3.829181412 | 0.006434425 | 0.024737415 |
| ENSMMUG000000057228 | SRY-box transcription factor 15 [Source:NCBI gene;Acc:106993880]                      | - | 3.813359258 | 0.006963892 | 0.026337994 |
| ENSMMUG00000007504  | myosin VC [Source:VGNC Symbol;Acc:VGNC:75117]                                         | - | 3.802364816 | 0.000309008 | 0.001911026 |
| ENSMMUG000000017234 | leucine rich repeat containing 59 [Source:VGNC Symbol;Acc:VGNC:81436]                 | - | -3.77774754 | 2.32E-20    | 2.66E-18    |
| ENSMMUG000000060101 |                                                                                       | - | 3.762550367 | 0.002302887 | 0.01047937  |
| ENSMMUG000000050534 |                                                                                       | - | 3.749091788 | 0.013680991 | 0.045520589 |
| ENSMMUG000000011902 | oligosaccharyltransferase complex non-catalytic subunit [Source:NCBI gene;Acc:697283] | - | 3.746666759 | 5.17E-16    | 3.03E-14    |
| ENSMMUG000000063268 |                                                                                       | - | 3.733528662 | 5.82E-06    | 5.89E-05    |
| ENSMMUG00000006548  | KIAA1549 [Source:VGNC Symbol;Acc:VGNC:73885]                                          | - | 3.725649583 | 0.000223483 | 0.001447226 |
| ENSMMUG000000025616 |                                                                                       | - | 3.725340819 | 0.009545989 | 0.034048099 |
| ENSMMUG000000023488 | lysine acetyltransferase 6B [Source:VGNC Symbol;Acc:VGNC:73846]                       | - | 3.707359403 | 0.012665623 | 0.042767356 |
| ENSMMUG000000020993 | cadherin EGF LAG seven-pass G-type receptor 1 [Source:NCBI gene;Acc:718440]           | - | 3.706084786 | 4.16E-07    | 5.51E-06    |
| ENSMMUG000000055229 |                                                                                       | - | 3.693010092 | 3.41E-13    | 1.32E-11    |
| ENSMMUG00000007816  | SMAD family member 2 [Source:VGNC Symbol;Acc:VGNC:77810]                              | - | 3.677893823 | 2.28E-12    | 7.64E-11    |
| ENSMMUG000000054821 |                                                                                       | - | 3.636304265 | 0.000973091 | 0.005117786 |
| ENSMMUG000000049366 | Metazoan signal recognition particle RNA [Source:RFAM;Acc:RF00017]                    | - | 3.635894661 | 0.014923171 | 0.048899147 |
| ENSMMUG000000057859 |                                                                                       | - | 3.622770556 | 3.99E-05    | 0.000327393 |
| ENSMMUG000000039033 | nucleolar protein with MIF4G domain 1 [Source:VGNC Symbol;Acc:VGNC:81729]             | - | 3.621972078 | 0.012758249 | 0.043010823 |
| ENSMMUG00000007628  | cell adhesion associated, oncogene regulated [Source:VGNC Symbol;Acc:VGNC:70961]      | - | 3.610282685 | 0.000149679 | 0.001022627 |
| ENSMMUG000000020731 | terminal nucleotidyltransferase 2 [Source:VGNC Symbol;Acc:VGNC:79637]                 | - | 3.609949057 | 0.001942347 | 0.009086195 |
| ENSMMUG000000017008 | GTPase, IMAP family member 2 [Source:VGNC Symbol;Acc:VGNC:72980]                      | - | 3.604679013 | 0.005294373 | 0.02114137  |
| ENSMMUG000000038587 | prostate and testis expressed 2 [Source:NCBI gene;Acc:717085]                         | - | 3.579318984 | 0.003521472 | 0.015026084 |

|                    |                                                                                                  |             |             |             |
|--------------------|--------------------------------------------------------------------------------------------------|-------------|-------------|-------------|
| ENSMMUG0000006446  | transmembrane protein 177 [Source:VGNC Symbol;Acc:VGNC:79686]                                    | -3.5780047  | 0.010322876 | 0.036313242 |
| ENSMMUG00000015661 | protein tyrosine phosphatase receptor type U [Source:VGNC Symbol;Acc:VGNC:76624]                 | 3.565218385 | 1.09E-07    | 1.62E-06    |
| ENSMMUG00000060541 |                                                                                                  | 3.551630357 | 0.004027494 | 0.016860329 |
| ENSMMUG00000063345 |                                                                                                  | 3.53254865  | 1.19E-05    | 0.000112154 |
| ENSMMUG00000044537 | DNA polymerase epsilon 3, accessory subunit [Source:NCBI gene;Acc:705074]                        | 3.532527919 | 0.0001874   | 0.001251809 |
| ENSMMUG00000055161 |                                                                                                  | 3.496789374 | 0.001250726 | 0.006279689 |
| ENSMMUG00000001219 | mitochondrial ribosomal protein L4 [Source:VGNC Symbol;Acc:VGNC:74750]                           | 3.442972371 | 0.000749018 | 0.00409597  |
| ENSMMUG00000060346 |                                                                                                  | 3.436654547 | 7.97E-07    | 9.89E-06    |
| ENSMMUG00000065232 |                                                                                                  | 3.416994653 | 0.006817503 | 0.025950427 |
| ENSMMUG00000014213 | calcium voltage-gated channel subunit alpha1 H [Source:VGNC Symbol;Acc:VGNC:70505]               | 3.407085013 | 0.000530023 | 0.003048439 |
| ENSMMUG00000051155 | U2 spliceosomal RNA [Source:RFAM;Acc:RF00004]                                                    | 3.405638146 | 0.0032915   | 0.014200009 |
| ENSMMUG00000007110 | serine and arginine rich splicing factor 4 [Source:NCBI gene;Acc:717401]                         | 3.386466109 | 0.008962859 | 0.032381687 |
| ENSMMUG00000011575 | coiled-coil domain containing 167 [Source:VGNC Symbol;Acc:VGNC:70833]                            | 3.375893699 | 0.000422612 | 0.002493675 |
| ENSMMUG00000012058 | GEN1 Holliday junction 5' flap endonuclease [Source:VGNC Symbol;Acc:VGNC:72790]                  | 3.367082844 | 0.000182978 | 0.001225607 |
| ENSMMUG00000005137 | ATPase secretory pathway Ca <sup>2+</sup> transporting 1 [Source:VGNC Symbol;Acc:VGNC:70054]     | 3.362250678 | 1.09E-08    | 1.94E-07    |
| ENSMMUG00000015544 | PWP1 homolog, endonuclein [Source:NCBI gene;Acc:705262]                                          | 3.360778159 | 0.005329597 | 0.021233736 |
| ENSMMUG00000001172 | spermatogenesis and oogenesis specific basic helix-loop-helix 2 [Source:NCBI gene;Acc:693608]    | 3.349693381 | 8.33E-06    | 8.14E-05    |
| ENSMMUG00000017628 | pleckstrin homology domain containing A7 [Source:VGNC Symbol;Acc:VGNC:76121]                     | 3.333479061 | 0.001547129 | 0.00749833  |
| ENSMMUG00000001479 | laminin subunit gamma 2 [Source:VGNC Symbol;Acc:VGNC:74233]                                      | 3.321011008 | 1.11E-07    | 1.64E-06    |
| ENSMMUG00000041043 | Metazoan signal recognition particle RNA [Source:RFAM;Acc:RF00017]                               | 3.319664363 | 0.014374748 | 0.047418149 |
| ENSMMUG00000013799 | ATP binding cassette subfamily G member 4 [Source:VGNC Symbol;Acc:VGNC:69390]                    | 3.295260025 | 0.000252254 | 0.001597638 |
| ENSMMUG00000024598 | U6 spliceosomal RNA [Source:RFAM;Acc:RF00026]                                                    | 3.294990213 | 0.003275975 | 0.01414296  |
| ENSMMUG00000056387 | transcription factor 15 [Source:NCBI gene;Acc:716916]                                            | -3.27965885 | 9.81E-15    | 4.82E-13    |
| ENSMMUG00000020926 | syntaxin 2 [Source:VGNC Symbol;Acc:VGNC:78259]                                                   | 3.277396796 | 0.001658506 | 0.007941058 |
| ENSMMUG00000059019 |                                                                                                  | 3.267017732 | 4.01E-13    | 1.52E-11    |
| ENSMMUG00000063884 |                                                                                                  | 3.263881901 | 0.010129654 | 0.035766614 |
| ENSMMUG00000002742 | ST8 alpha-N-acetyl-neuraminide alpha-2,8-sialyltransferase 5 [Source:VGNC Symbol;Acc:VGNC:77942] | 3.263508631 | 1.50E-12    | 5.19E-11    |
| ENSMMUG00000057951 | U6 spliceosomal RNA [Source:RFAM;Acc:RF00026]                                                    | -3.25483612 | 0.007094553 | 0.026715427 |
| ENSMMUG00000009694 | solute carrier family 9 member A9 [Source:VGNC Symbol;Acc:VGNC:77747]                            | 3.239542964 | 0.003350962 | 0.014411012 |



|                    |                                                                                             |   |             |             |             |
|--------------------|---------------------------------------------------------------------------------------------|---|-------------|-------------|-------------|
| ENSMMUG00000052287 |                                                                                             | - | 3.238331033 | 0.000642939 | 0.003595533 |
| ENSMMUG00000019714 | vav guanine nucleotide exchange factor 3 [Source:VGNC Symbol;Acc:VGNC:78759]                | - | 3.235527282 | 0.004976967 | 0.02006294  |
| ENSMMUG00000061973 |                                                                                             | - | 3.217970509 | 9.87E-22    | 1.43E-19    |
| ENSMMUG00000012480 | REC8 meiotic recombination protein [Source:VGNC Symbol;Acc:VGNC:76746]                      | - | -3.21061627 | 2.99E-05    | 0.000254492 |
| ENSMMUG00000057895 |                                                                                             | - | 3.192222271 | 0.012292285 | 0.041724518 |
| ENSMMUG00000059128 |                                                                                             | - | 3.190822427 | 0.000396822 | 0.002359622 |
| ENSMMUG00000021917 | leucine rich repeat containing 7 [Source:NCBI gene;Acc:702347]                              | - | 3.178954367 | 0.009458155 | 0.033793657 |
| ENSMMUG00000011974 | calcium/calmodulin dependent protein kinase IV [Source:VGNC Symbol;Acc:VGNC:70526]          | - | 3.175757107 | 6.08E-15    | 3.09E-13    |
| ENSMMUG00000051088 |                                                                                             | - | 3.162435958 | 1.98E-05    | 0.000176355 |
| ENSMMUG00000011810 | FAT atypical cadherin 4 [Source:VGNC Symbol;Acc:VGNC:72552]                                 | - | -3.14554201 | 1.11E-13    | 4.53E-12    |
| ENSMMUG00000009965 | chromosome 15 C9orf50 homolog [Source:VGNC Symbol;Acc:VGNC:70365]                           | - | 3.135406825 | 4.57E-13    | 1.71E-11    |
| ENSMMUG00000022676 | ribosomal modification protein rimK like family member B [Source:NCBI gene;Acc:722261]      | - | 3.128031386 | 0.010060091 | 0.035541414 |
| ENSMMUG00000013008 | cleavage stimulation factor subunit 2 [Source:VGNC Symbol;Acc:VGNC:71536]                   | - | 3.128018081 | 1.20E-05    | 0.00011287  |
| ENSMMUG00000015041 | CWC27 spliceosome associated cyclophilin [Source:VGNC Symbol;Acc:VGNC:71396]                | - | 3.111654987 | 0.000359128 | 0.002164806 |
| ENSMMUG00000017374 | G protein subunit beta 5 [Source:VGNC Symbol;Acc:VGNC:73097]                                | - | 3.108619409 | 0.00238318  | 0.010776918 |
| ENSMMUG00000055759 | Metazoan signal recognition particle RNA [Source:RFAM;Acc:RF00017]                          | - | 3.107060908 | 2.69E-09    | 5.31E-08    |
| ENSMMUG00000021331 | EBF family member 4 [Source:VGNC Symbol;Acc:VGNC:71932]                                     | - | 3.104576379 | 0.000270459 | 0.001696027 |
| ENSMMUG00000002166 | tousled like kinase 2 [Source:VGNC Symbol;Acc:VGNC:78368]                                   | - | -3.10207953 | 0.010028756 | 0.035451091 |
| ENSMMUG00000004566 | zinc finger protein 124 [Source:VGNC Symbol;Acc:VGNC:78836]                                 | - | 3.093486823 | 0.004821211 | 0.01951828  |
| ENSMMUG00000052786 |                                                                                             | - | 3.081851247 | 0.000486816 | 0.002839798 |
| ENSMMUG00000014955 | nuclear receptor subfamily 3 group C member 2 [Source:VGNC Symbol;Acc:VGNC:75516]           | - | 3.077833419 | 2.00E-06    | 2.29E-05    |
| ENSMMUG00000013501 | CD68 molecule [Source:VGNC Symbol;Acc:VGNC:82121]                                           | - | 3.076479894 | 0.000181286 | 0.001215595 |
| ENSMMUG00000015000 | SPT16 homolog, facilitates chromatin remodeling subunit [Source:VGNC Symbol;Acc:VGNC:78054] | - | 3.072105913 | 6.84E-09    | 1.26E-07    |
| ENSMMUG00000023462 | immunoglobulin like domain containing receptor 2 [Source:VGNC Symbol;Acc:VGNC:73619]        | - | 3.055520898 | 0.002714083 | 0.012024828 |
| ENSMMUG00000014535 | solute carrier family 15 member 3 [Source:VGNC Symbol;Acc:VGNC:77504]                       | - | -3.0494438  | 0.002577653 | 0.011495622 |
| ENSMMUG00000051271 |                                                                                             | - | 3.048690781 | 3.05E-12    | 9.80E-11    |
| ENSMMUG00000016314 | family with sequence similarity 166 member B [Source:VGNC Symbol;Acc:VGNC:72421]            | - | 3.041144734 | 5.78E-14    | 2.53E-12    |
| ENSMMUG00000060713 | epithelial membrane protein 2 [Source:NCBI gene;Acc:710315]                                 | - | 3.032873764 | 2.90E-05    | 0.000247662 |
| ENSMMUG00000004205 | phospholipase B domain containing 2 [Source:VGNC Symbol;Acc:VGNC:76122]                     | - | 3.020474125 | 0.00102408  | 0.005324436 |
| ENSMMUG00000046665 | glutamyl-tRNA amidotransferase subunit C [Source:NCBI gene;Acc:702258]                      | - | 3.019204548 | 0.000349062 | 0.002118676 |

|                     |                                                                                             |   |             |             |             |
|---------------------|---------------------------------------------------------------------------------------------|---|-------------|-------------|-------------|
| ENSMMUG00000016871  | alkaline phosphatase, intestinal [Source:VGNC Symbol;Acc:VGNC:69800]                        | - | 3.013225758 | 0.000295899 | 0.001837743 |
| ENSMMUG00000012056  | structural maintenance of chromosomes 6 [Source:VGNC Symbol;Acc:VGNC:77746]                 | - | 3.001668064 | 3.61E-05    | 0.0003      |
| ENSMMUG00000003049  | testis expressed 11 [Source:VGNC Symbol;Acc:VGNC:78316]                                     | - | -2.99771492 | 0.000570644 | 0.003247124 |
| ENSMMUG000000052682 |                                                                                             | - | 2.991695578 | 7.86E-06    | 7.72E-05    |
| ENSMMUG00000026897  | mml-mir-215 [Source:miRBase;Acc:MI0003025]                                                  | - | 2.969873046 | 0.003792567 | 0.01603524  |
| ENSMMUG00000061687  |                                                                                             | - | 2.969220486 | 3.83E-06    | 4.06E-05    |
| ENSMMUG00000013047  | S-phase kinase associated protein 1 [Source:NCBI gene;Acc:100423634]                        | - | 2.967968386 | 3.64E-19    | 3.34E-17    |
| ENSMMUG00000017931  | gamma-glutamyltransferase 7 [Source:VGNC Symbol;Acc:VGNC:72921]                             | - | 2.950932031 | 7.30E-07    | 9.17E-06    |
| ENSMMUG00000052463  | Metazoan signal recognition particle RNA [Source:RFAM;Acc:RF00017]                          | - | 2.943727439 | 0.014000224 | 0.046345363 |
| ENSMMUG00000057073  |                                                                                             | - | 2.943584152 | 0.004249203 | 0.017595815 |
| ENSMMUG00000027108  | mml-mir-193b [Source:miRBase;Acc:MI0007656]                                                 | - | 2.937596785 | 0.007784069 | 0.028922004 |
| ENSMMUG00000038070  | T cell receptor alpha variable 12-3 [Source:HGNC Symbol;Acc:HGNC:12107]                     | - | 2.932050973 | 1.06E-14    | 5.19E-13    |
| ENSMMUG00000055783  |                                                                                             | - | 2.929845923 | 0.000648377 | 0.003622367 |
| ENSMMUG00000015004  | TOX high mobility group box family member 4 [Source:NCBI gene;Acc:706950]                   | - | 2.904573072 | 8.27E-05    | 0.000617833 |
| ENSMMUG00000042416  |                                                                                             | - | 2.900943857 | 0.009063359 | 0.032687133 |
| ENSMMUG00000010049  | NOP9 nucleolar protein [Source:VGNC Symbol;Acc:VGNC:75216]                                  | - | 2.895247446 | 0.01229988  | 0.041738772 |
| ENSMMUG00000004386  | sperm associated antigen 1 [Source:VGNC Symbol;Acc:VGNC:77849]                              | - | 2.881887549 | 0.001130076 | 0.005758606 |
| ENSMMUG00000014809  | heterogeneous nuclear ribonucleoprotein C [Source:VGNC Symbol;Acc:VGNC:84348]               | - | 2.878291132 | 0.011065433 | 0.038332931 |
| ENSMMUG00000016791  | doublecortin like kinase 1 [Source:VGNC Symbol;Acc:VGNC:71745]                              | - | 2.872946588 | 2.40E-16    | 1.45E-14    |
| ENSMMUG00000055272  | putative uncharacterized protein ZNRD1-AS1 [Source:NCBI gene;Acc:712069]                    | - | 2.871465479 | 3.80E-08    | 6.17E-07    |
| ENSMMUG00000043682  | mitochondrial carrier 2 [Source:NCBI gene;Acc:712767]                                       | - | 2.858436647 | 0.002623619 | 0.011658979 |
| ENSMMUG00000054116  | T cell receptor alpha variable 8-6 [Source:HGNC Symbol;Acc:HGNC:12151]                      | - | 2.847720177 | 3.31E-10    | 7.61E-09    |
| ENSMMUG00000060527  |                                                                                             | - | 2.847210451 | 1.43E-08    | 2.51E-07    |
| ENSMMUG00000022975  | sprouty related EVH1 domain containing 3 [Source:VGNC Symbol;Acc:VGNC:78030]                | - | 2.832775843 | 0.000612066 | 0.003446132 |
| ENSMMUG00000000496  | zinc finger and BTB domain containing 6 [Source:VGNC Symbol;Acc:VGNC:79047]                 | - | -2.83173363 | 0.014712194 | 0.048332728 |
| ENSMMUG00000018165  | syndecan binding protein 2 [Source:VGNC Symbol;Acc:VGNC:77017]                              | - | 2.814805143 | 0.01188827  | 0.040566    |
| ENSMMUG00000058603  |                                                                                             | - | 2.812742918 | 0.001240093 | 0.006231389 |
| ENSMMUG00000023119  | lin-7 homolog C, crumbs cell polarity complex component [Source:VGNC Symbol;Acc:VGNC:74070] | - | 2.811123956 | 0.008088149 | 0.029793486 |
| ENSMMUG00000057494  | T cell receptor beta variable 7-9 [Source:HGNC Symbol;Acc:HGNC:12243]                       | - | 2.810722723 | 2.13E-08    | 3.62E-07    |



|                     |                                                                                       |   |             |             |             |
|---------------------|---------------------------------------------------------------------------------------|---|-------------|-------------|-------------|
| ENSMMUG00000023298  | F-box protein 15 [Source:VGNC Symbol;Acc:VGNC:72504]                                  | - | 2.802767151 | 0.013864155 | 0.04598066  |
| ENSMMUG00000005851  | B-box and SPRY domain containing [Source:VGNC Symbol;Acc:VGNC:70342]                  | - | 2.790484086 | 0.000642989 | 0.003595533 |
| ENSMMUG00000008705  | ubiquitin specific peptidase 53 [Source:VGNC Symbol;Acc:VGNC:79793]                   | - | 2.787063786 | 0.014272215 | 0.047193918 |
| ENSMMUG00000001264  | BSD domain containing 1 [Source:VGNC Symbol;Acc:VGNC:70384]                           | - | 2.781446638 | 0.001510235 | 0.007357233 |
| ENSMMUG000000051768 |                                                                                       | - | 2.777488509 | 1.25E-05    | 0.000116837 |
| ENSMMUG00000022484  | ITPR interacting domain containing 1 [Source:VGNC Symbol;Acc:VGNC:73667]              | - | 2.767497428 | 0.010963549 | 0.03803358  |
| ENSMMUG000000056045 |                                                                                       | - | 2.763385051 | 5.35E-05    | 0.000424605 |
| ENSMMUG00000023791  | SR-related CTD associated factor 11 [Source:VGNC Symbol;Acc:VGNC:77002]               | - | 2.762999243 | 0.00403032  | 0.016866417 |
| ENSMMUG00000006937  | small nuclear ribonucleoprotein D2 polypeptide [Source:NCBI gene;Acc:715183]          | - | 2.760677769 | 0.003463104 | 0.014825849 |
| ENSMMUG00000011573  | cap methyltransferase 1 [Source:VGNC Symbol;Acc:VGNC:71271]                           | - | 2.759525636 | 2.29E-10    | 5.47E-09    |
| ENSMMUG000000060966 |                                                                                       | - | 2.755550039 | 0.009670581 | 0.034430746 |
| ENSMMUG00000006731  | CECR2 histone acetyl-lysine reader [Source:VGNC Symbol;Acc:VGNC:84530]                | - | 2.748660097 | 1.49E-09    | 3.09E-08    |
| ENSMMUG000000051936 |                                                                                       | - | 2.743350452 | 0.003556798 | 0.015147816 |
| ENSMMUG000000065257 |                                                                                       | - | 2.742613773 | 0.002120877 | 0.009788848 |
| ENSMMUG000000055637 |                                                                                       | - | 2.730951516 | 0.010427554 | 0.036576789 |
| ENSMMUG00000006214  | olfactory receptor family 11 subfamily L member 1 [Source:HGNC Symbol;Acc:HGNC:14998] | - | 2.726164015 | 0.010529308 | 0.036870577 |
| ENSMMUG00000018058  | ATP binding cassette subfamily G member 1 [Source:VGNC Symbol;Acc:VGNC:69584]         | - | 2.725130508 | 7.68E-11    | 1.94E-09    |
| ENSMMUG00000013661  | presenilin associated rhomboid like [Source:NCBI gene;Acc:704652]                     | - | 2.719762254 | 0.006062029 | 0.023519063 |
| ENSMMUG00000020706  | ETS proto-oncogene 1, transcription factor [Source:VGNC Symbol;Acc:VGNC:72439]        | - | 2.708712763 | 3.09E-27    | 8.44E-25    |
| ENSMMUG00000024966  | U4 spliceosomal RNA [Source:RFAM;Acc:RF00015]                                         | - | 2.703657532 | 0.01513813  | 0.049484776 |
| ENSMMUG00000014173  |                                                                                       | - | 2.696824374 | 1.04E-05    | 9.93E-05    |
| ENSMMUG00000002794  | general transcription factor IIB [Source:VGNC Symbol;Acc:VGNC:73306]                  | - | 2.687584902 | 1.11E-28    | 3.42E-26    |
| ENSMMUG000000046785 |                                                                                       | - | 2.684036769 | 0.005766287 | 0.022629645 |
| ENSMMUG00000000972  | tyrosine kinase non receptor 2 [Source:VGNC Symbol;Acc:VGNC:79192]                    | - | 2.677991614 | 2.06E-06    | 2.35E-05    |
| ENSMMUG000000061688 | Metazoan signal recognition particle RNA [Source:RFAM;Acc:RF00017]                    | - | 2.677121695 | 0.00837354  | 0.030667216 |
| ENSMMUG000000033102 | mml-mir-181b-2 [Source:miRBase;Acc:MI0007646]                                         | - | 2.673945371 | 0.013546534 | 0.045156609 |
| ENSMMUG000000058933 |                                                                                       | - | 2.671960201 | 0.00115267  | 0.00585917  |
| ENSMMUG000000055585 |                                                                                       | - | 2.664917818 | 7.75E-07    | 9.66E-06    |

|                    |                                                                                                                         |             |             |             |             |
|--------------------|-------------------------------------------------------------------------------------------------------------------------|-------------|-------------|-------------|-------------|
| ENSMMUG00000061590 |                                                                                                                         | -           | 2.664122793 | 0.005255646 | 0.021014037 |
| ENSMMUG00000055477 |                                                                                                                         | -2.6640387  | -           | 3.60E-12    | 1.14E-10    |
| ENSMMUG00000012124 | ring finger protein 39 [Source:VGNC Symbol;Acc:VGNC:83458]                                                              | -           | 2.659474789 | 1.29E-07    | 1.89E-06    |
| ENSMMUG00000060062 |                                                                                                                         | -           | 2.654459915 | 0.009891289 | 0.035093569 |
| ENSMMUG00000003987 | forkhead associated phosphopeptide binding domain 1 [Source:NCBI gene;Acc:699900]                                       | -           | 2.649579228 | 5.38E-05    | 0.000426789 |
| ENSMMUG00000010820 | chaperonin containing TCP1 subunit 2 [Source:VGNC Symbol;Acc:VGNC:70745]                                                | -2.6495119  | -           | 8.66E-09    | 1.57E-07    |
| ENSMMUG00000052791 |                                                                                                                         | -2.64576416 | -           | 1.67E-11    | 4.62E-10    |
| ENSMMUG00000012120 | zinc ribbon domain containing 1 [Source:VGNC Symbol;Acc:VGNC:78912]                                                     | -           | 2.641874523 | 9.80E-10    | 2.10E-08    |
| ENSMMUG00000060893 |                                                                                                                         | -           | 2.640852331 | 0.000587265 | 0.003324772 |
| ENSMMUG00000057606 | GPRIN family member 3 [Source:NCBI gene;Acc:703567]                                                                     | -           | 2.639720864 | 1.68E-14    | 7.84E-13    |
| ENSMMUG00000039441 | mab-21 like 2 [Source:NCBI gene;Acc:693948]                                                                             | -2.63944429 | -           | 0.004162537 | 0.017301907 |
| ENSMMUG00000003736 | nuclear factor kappa B subunit 1 [Source:VGNC Symbol;Acc:VGNC:75339]                                                    | -           | 2.632480646 | 1.49E-06    | 1.75E-05    |
| ENSMMUG00000021137 | thioredoxin related transmembrane protein 4 [Source:VGNC Symbol;Acc:VGNC:79484]                                         | -           | 2.631442179 | 0.002098185 | 0.009713293 |
| ENSMMUG00000016993 | PKHD1 ciliary IPT domain containing fibrocystin/polyductin [Source:VGNC Symbol;Acc:VGNC:76010]                          | -           | 2.630024389 | 2.71E-07    | 3.74E-06    |
| ENSMMUG00000000058 | CDV3 homolog [Source:VGNC Symbol;Acc:VGNC:71114]                                                                        | -           | 2.627475982 | 8.90E-07    | 1.10E-05    |
| ENSMMUG00000001800 | cullin 5 [Source:VGNC Symbol;Acc:VGNC:71570]                                                                            | -           | 2.625434774 | 1.98E-06    | 2.26E-05    |
| ENSMMUG00000012151 | glycerol kinase 5 [Source:VGNC Symbol;Acc:VGNC:73022]                                                                   | -2.62232418 | -           | 0.000626238 | 0.003511444 |
| ENSMMUG00000000229 | transient receptor potential cation channel subfamily C member 4 associated protein [Source:VGNC Symbol;Acc:VGNC:79014] | -           | 2.614362934 | 0.000451687 | 0.002647439 |
| ENSMMUG00000029164 | glycerophosphodiester phosphodiesterase domain containing 3 [Source:VGNC Symbol;Acc:VGNC:72800]                         | -           | 2.613772875 | 0.014810747 | 0.048595538 |
| ENSMMUG00000031736 |                                                                                                                         | -           | 2.613586756 | 0.005966137 | 0.023239083 |
| ENSMMUG00000015702 | divergent protein kinase domain 1C [Source:NCBI gene;Acc:699537]                                                        | -           | 2.605906184 | 0.008044331 | 0.029664827 |
| ENSMMUG00000004178 | NADPH oxidase 1 [Source:VGNC Symbol;Acc:VGNC:75374]                                                                     | -           | 2.605047418 | 6.96E-08    | 1.07E-06    |
| ENSMMUG00000062704 | Metazoan signal recognition particle RNA [Source:RFAM;Acc:RF00017]                                                      | -2.60338978 | -           | 0.01523131  | 0.049732207 |
| ENSMMUG00000021393 | calcium/calmodulin dependent protein kinase II gamma [Source:VGNC Symbol;Acc:VGNC:70525]                                | -           | 2.599592493 | 3.94E-09    | 7.56E-08    |
| ENSMMUG00000064721 |                                                                                                                         | -           | 2.599575269 | 0.007231625 | 0.027140122 |
| ENSMMUG00000063586 | zinc finger protein 536 [Source:NCBI gene;Acc:713142]                                                                   | -           | 2.592930963 | 0.000195328 | 0.001294221 |
| ENSMMUG00000059101 |                                                                                                                         | -           | 2.589105302 | 0.000801718 | 0.004350514 |
| ENSMMUG00000044628 |                                                                                                                         | -           | 2.589072827 | 2.80E-05    | 0.00024014  |
| ENSMMUG00000063177 | StAR related lipid transfer domain containing 4 [Source:NCBI gene;Acc:706654]                                           | -           | 2.585283674 | 6.11E-15    | 3.09E-13    |
| ENSMMUG00000053565 |                                                                                                                         | -           | 2.579090827 | 0.00441146  | 0.01812099  |
| ENSMMUG00000050269 | T cell receptor beta variable 14 [Source:HGNC Symbol;Acc:HGNC:12189]                                                    | -           | 2.578048257 | 7.10E-16    | 4.08E-14    |

|                     |                                                                                                         |   |             |             |             |
|---------------------|---------------------------------------------------------------------------------------------------------|---|-------------|-------------|-------------|
| ENSMMUG0000000227   | myosin heavy chain 7B [Source:VGNC Symbol;Acc:VGNC:74965]                                               | - | 2.576300844 | 0.004914431 | 0.01983687  |
| ENSMMUG00000008525  | minichromosome maintenance 9 homologous recombination repair factor [Source:VGNC Symbol;Acc:VGNC:83432] | - | 2.571798228 | 0.002084553 | 0.009664745 |
| ENSMMUG00000058580  | tripartite motif containing 40 [Source:NCBI gene;Acc:100427925]                                         | - | 2.570170607 | 1.93E-10    | 4.63E-09    |
| ENSMMUG00000018283  | dihydrofolate reductase [Source:NCBI gene;Acc:711268]                                                   | - | 2.568097775 | 0.010362561 | 0.036379708 |
| ENSMMUG00000021507  | chromosome 2 C3orf38 homolog [Source:VGNC Symbol;Acc:VGNC:70654]                                        | - | 2.563976934 | 0.002067246 | 0.009595363 |
| ENSMMUG00000018972  | RNA polymerase III subunit G [Source:VGNC Symbol;Acc:VGNC:84480]                                        | - | 2.562482597 | 1.92E-05    | 0.000171812 |
| ENSMMUG00000017680  | chibby family member 1, beta catenin antagonist [Source:NCBI gene;Acc:100429409]                        | - | 2.560996781 | 0.005698428 | 0.022426093 |
| ENSMMUG00000001896  | G protein subunit beta 1 [Source:VGNC Symbol;Acc:VGNC:73095]                                            | - | 2.559764055 | 0.008210259 | 0.030166946 |
| ENSMMUG00000012122  | protein phosphatase 1 regulatory inhibitor subunit 11 [Source:VGNC Symbol;Acc:VGNC:82209]               | - | 2.553077676 | 0.001045377 | 0.005409106 |
| ENSMMUG00000015002  | chromodomain helicase DNA binding protein 8 [Source:VGNC Symbol;Acc:VGNC:71060]                         | - | 2.548291287 | 5.39E-05    | 0.000427079 |
| ENSMMUG00000002890  | tripartite motif containing 15 [Source:VGNC Symbol;Acc:VGNC:83958]                                      | - | 2.544462891 | 9.17E-14    | 3.83E-12    |
| ENSMMUG000000051032 | serine protease 2 [Source:NCBI gene;Acc:698352]                                                         | - | 2.542242288 | 2.92E-12    | 9.48E-11    |
| ENSMMUG00000013943  | glycerophosphodiester phosphodiesterase domain containing 2 [Source:VGNC Symbol;Acc:VGNC:72787]         | - | 2.536805511 | 0.000245469 | 0.001561625 |
| ENSMMUG00000004821  | membrane spanning 4-domains A14 [Source:NCBI gene;Acc:697083]                                           | - | 2.534207145 | 0.000235029 | 0.001510059 |
| ENSMMUG00000018565  | ribonucleoprotein, PTB binding 2 [Source:VGNC Symbol;Acc:VGNC:76536]                                    | - | 2.528718522 | 0.005118211 | 0.020591796 |
| ENSMMUG000000061815 |                                                                                                         | - | 2.519324582 | 8.46E-13    | 3.08E-11    |
| ENSMMUG00000013848  | fucosyltransferase 8 [Source:VGNC Symbol;Acc:VGNC:72829]                                                | - | 2.517020768 | 1.31E-06    | 1.56E-05    |
| ENSMMUG00000010453  | folate receptor beta [Source:VGNC Symbol;Acc:VGNC:72690]                                                | - | 2.514726925 | 6.42E-10    | 1.43E-08    |
| ENSMMUG000000052815 |                                                                                                         | - | 2.513663974 | 0.003548888 | 0.015124612 |
| ENSMMUG00000014685  | pyruvate dehydrogenase kinase 2 [Source:VGNC Symbol;Acc:VGNC:75933]                                     | - | 2.510801352 | 3.18E-05    | 0.000269011 |
| ENSMMUG00000007821  | ATP binding cassette subfamily B member 5 [Source:VGNC Symbol;Acc:VGNC:80321]                           | - | 2.508355871 | 1.09E-09    | 2.32E-08    |
| ENSMMUG000000059518 |                                                                                                         | - | 2.506863926 | 0.010701893 | 0.03732604  |
| ENSMMUG000000056602 |                                                                                                         | - | 2.504385679 | 0.00154435  | 0.007496686 |
| ENSMMUG00000003261  | BAF chromatin remodeling complex subunit BCL11B [Source:VGNC Symbol;Acc:VGNC:70056]                     | - | 2.501087546 | 4.20E-15    | 2.22E-13    |
| ENSMMUG000000055809 |                                                                                                         | - | 2.493355961 | 8.92E-05    | 0.000656598 |
| ENSMMUG00000000807  | tRNA 5-methylaminomethyl-2-thiouridylate methyltransferase [Source:VGNC Symbol;Acc:VGNC:79500]          | - | 2.488807012 | 0.000739867 | 0.004051186 |
| ENSMMUG000000062264 |                                                                                                         | - | 2.488399761 | 0.000307524 | 0.00190321  |
| ENSMMUG000000039515 | kinesin family member 13B [Source:NCBI gene;Acc:100429368]                                              | - | 2.475063915 | 0.002497502 | 0.01119096  |

|                     |                                                                                                         |             |             |             |
|---------------------|---------------------------------------------------------------------------------------------------------|-------------|-------------|-------------|
| ENSMMUG00000001742  | transforming growth factor beta receptor 3 [Source:VGNC Symbol;Acc:VGNC:78339]                          | 2.472091713 | 2.35E-10    | 5.55E-09    |
| ENSMMUG000000037625 |                                                                                                         | 2.465088128 | 2.49E-06    | 2.77E-05    |
| ENSMMUG000000022656 | perilipin 4 [Source:NCBI gene;Acc:693610]                                                               | 2.463937327 | 0.005971617 | 0.023249015 |
| ENSMMUG000000017173 | heat shock protein family A (Hsp70) member 14 [Source:NCBI gene;Acc:697257]                             | 2.462459079 | 0.000517282 | 0.002986336 |
| ENSMMUG000000046464 | coiled-coil-helix-coiled-coil-helix domain containing 7 [Source:VGNC Symbol;Acc:VGNC:83989]             | 2.462309627 | 6.56E-07    | 8.31E-06    |
| ENSMMUG000000004287 | death domain associated protein [Source:VGNC Symbol;Acc:VGNC:71737]                                     | 2.461408105 | 3.61E-06    | 3.87E-05    |
| ENSMMUG000000052830 |                                                                                                         | 2.457541864 | 8.85E-08    | 1.34E-06    |
| ENSMMUG000000017186 | pleckstrin homology domain interacting protein [Source:VGNC Symbol;Acc:VGNC:75803]                      | 2.456905539 | 4.21E-06    | 4.44E-05    |
| ENSMMUG000000045966 | granzyme M [Source:NCBI gene;Acc:715031]                                                                | 2.456444829 | 0.000357813 | 0.002159608 |
| ENSMMUG000000057763 |                                                                                                         | 2.455992795 | 0.000130438 | 0.000905771 |
| ENSMMUG000000016357 | polycystin 2 like 2, transient receptor potential cation channel [Source:VGNC Symbol;Acc:VGNC:76009]    | 2.455625169 | 0.015258675 | 0.049759717 |
| ENSMMUG000000008447 | fibulin 5 [Source:VGNC Symbol;Acc:VGNC:72622]                                                           | 2.453925842 | 2.18E-05    | 0.000192398 |
| ENSMMUG000000005923 | failed axon connections homolog, metaxin like GST domain containing [Source:VGNC Symbol;Acc:VGNC:72541] | 2.450208923 | 9.20E-07    | 1.13E-05    |
| ENSMMUG000000053384 |                                                                                                         | 2.442631886 | 8.45E-19    | 7.11E-17    |
| ENSMMUG000000007326 | ring finger protein 121 [Source:VGNC Symbol;Acc:VGNC:76788]                                             | 2.440655162 | 4.77E-11    | 1.24E-09    |
| ENSMMUG000000059241 |                                                                                                         | 2.438299414 | 0.000541295 | 0.003108906 |
| ENSMMUG000000012129 | tripartite motif containing 10 [Source:VGNC Symbol;Acc:VGNC:78550]                                      | 2.435648319 | 3.04E-12    | 9.79E-11    |
| ENSMMUG000000055610 | homeobox C4 [Source:NCBI gene;Acc:100430434]                                                            | 2.434997867 | 7.69E-11    | 1.94E-09    |
| ENSMMUG000000059575 |                                                                                                         | 2.429064086 | 1.37E-15    | 7.61E-14    |
| ENSMMUG000000015117 | X-prolyl aminopeptidase 1 [Source:VGNC Symbol;Acc:VGNC:78810]                                           | 2.427075347 | 9.74E-13    | 3.50E-11    |
| ENSMMUG000000059922 | family with sequence similarity 104 member B [Source:NCBI gene;Acc:705418]                              | 2.416997277 | 0.001392534 | 0.006868235 |
| ENSMMUG000000040154 | T cell receptor alpha variable 9-2 [Source:HGNC Symbol;Acc:HGNC:12154]                                  | 2.415056716 | 1.85E-06    | 2.12E-05    |
| ENSMMUG000000010508 | carbamoyl-phosphate synthase 1 [Source:VGNC Symbol;Acc:VGNC:71471]                                      | 2.414944742 | 0.008807195 | 0.031941351 |
| ENSMMUG000000012474 | ring finger protein 31 [Source:NCBI gene;Acc:715239]                                                    | 2.412010628 | 0.003204227 | 0.013867306 |
| ENSMMUG000000018974 | LysM domain containing 3 [Source:VGNC Symbol;Acc:VGNC:74373]                                            | 2.409241505 | 3.70E-18    | 2.92E-16    |
| ENSMMUG000000046655 | pleckstrin homology like domain family B member 1 [Source:NCBI gene;Acc:706336]                         | 2.395419105 | 2.43E-07    | 3.37E-06    |
| ENSMMUG000000050544 |                                                                                                         | 2.393198838 | 2.62E-06    | 2.90E-05    |
| ENSMMUG000000038661 |                                                                                                         | 2.391301844 | 2.60E-10    | 6.10E-09    |

|                     |                                                                                                    |   |             |             |             |
|---------------------|----------------------------------------------------------------------------------------------------|---|-------------|-------------|-------------|
| ENSMMUG0000000059   | DNA topoisomerase II binding protein 1 [Source:VGNC Symbol;Acc:VGNC:79061]                         | - | 2.390497523 | 6.76E-16    | 3.90E-14    |
| ENSMMUG00000011469  | germ cell nuclear acidic peptidase [Source:VGNC Symbol;Acc:VGNC:72724]                             | - | 2.389729834 | 0.014562999 | 0.04792338  |
| ENSMMUG00000058586  |                                                                                                    | - | 2.387669676 | 0.003157262 | 0.013683325 |
| ENSMMUG00000054312  |                                                                                                    | - | 2.387223524 | 0.009443156 | 0.033769516 |
| ENSMMUG00000022562  | interleukin 1 receptor accessory protein [Source:VGNC Symbol;Acc:VGNC:73718]                       | - | 2.384152931 | 0.007694298 | 0.028623068 |
| ENSMMUG00000020289  | CD83 molecule [Source:VGNC Symbol;Acc:VGNC:70783]                                                  | - | 2.382667663 | 6.82E-15    | 3.38E-13    |
| ENSMMUG00000021280  | leucine rich transmembrane and O-methyltransferase domain containing [Source:NCBI gene;Acc:718286] | - | 2.381018068 | 1.79E-07    | 2.56E-06    |
| ENSMMUG00000049396  | Metazoan signal recognition particle RNA [Source:RFAM;Acc:RF00017]                                 | - | 2.369164125 | 0.006966148 | 0.026337994 |
| ENSMMUG00000020370  | SRY-box transcription factor 5 [Source:VGNC Symbol;Acc:VGNC:77843]                                 | - | 2.366004979 | 0.005620733 | 0.022196763 |
| ENSMMUG00000014027  | nitric oxide synthase 1 [Source:VGNC Symbol;Acc:VGNC:75368]                                        | - | 2.362398189 | 2.17E-06    | 2.45E-05    |
| ENSMMUG00000014997  | spalt like transcription factor 2 [Source:NCBI gene;Acc:708367]                                    | - | 2.359423778 | 6.54E-09    | 1.21E-07    |
| ENSMMUG00000004233  | leucine rich repeats and immunoglobulin like domains 3 [Source:NCBI gene;Acc:716344]               | - | 2.358393407 | 4.41E-15    | 2.32E-13    |
| ENSMMUG00000008540  | ring finger protein 112 [Source:VGNC Symbol;Acc:VGNC:76724]                                        | - | 2.358325023 | 8.01E-07    | 9.93E-06    |
| ENSMMUG00000051552  |                                                                                                    | - | 2.358170831 | 1.02E-06    | 1.24E-05    |
| ENSMMUG00000015550  | PR/SET domain 4 [Source:VGNC Symbol;Acc:VGNC:76393]                                                | - | 2.355492464 | 1.26E-05    | 0.000117784 |
| ENSMMUG00000012310  | CASP8 and FADD like apoptosis regulator [Source:VGNC Symbol;Acc:VGNC:71019]                        | - | -2.35481292 | 0.010302895 | 0.036272208 |
| ENSMMUG00000006768  | coiled-coil domain containing 196 [Source:VGNC Symbol;Acc:VGNC:70828]                              | - | 2.354505044 | 0.000407646 | 0.002414694 |
| ENSMMUG00000000667  | zinc finger MYM-type containing 3 [Source:VGNC Symbol;Acc:VGNC:78886]                              | - | 2.346390956 | 1.78E-06    | 2.05E-05    |
| ENSMMUG00000032892  | U6 spliceosomal RNA [Source:RFAM;Acc:RF00026]                                                      | - | 2.346265524 | 6.08E-05    | 0.000473866 |
| ENSMMUG00000058233  | C-C motif chemokine 3-like [Source:NCBI gene;Acc:100426537]                                        | - | 2.344620524 | 0.005967175 | 0.023239083 |
| ENSMMUG00000006775  | proenkephalin [Source:VGNC Symbol;Acc:VGNC:75941]                                                  | - | 2.341308125 | 2.90E-17    | 2.06E-15    |
| ENSMMUG00000000238  | HECT domain E3 ubiquitin protein ligase 2 [Source:VGNC Symbol;Acc:VGNC:73246]                      | - | -2.34125947 | 5.79E-08    | 9.09E-07    |
| ENSMMUG000000061594 |                                                                                                    | - | 2.331737772 | 0.001065979 | 0.005495782 |
| ENSMMUG00000023083  | A-kinase anchoring protein 11 [Source:VGNC Symbol;Acc:VGNC:69765]                                  | - | 2.330632818 | 4.30E-06    | 4.52E-05    |
| ENSMMUG00000055530  | Metazoan signal recognition particle RNA [Source:RFAM;Acc:RF00017]                                 | - | 2.326339697 | 0.005736365 | 0.022540172 |
| ENSMMUG00000037551  | Metazoan signal recognition particle RNA [Source:RFAM;Acc:RF00017]                                 | - | -2.32214663 | 1.31E-09    | 2.75E-08    |
| ENSMMUG00000013907  | ribosomal protein S27a [Source:NCBI gene;Acc:718909]                                               | - | 2.320372884 | 0.001017568 | 0.005298876 |
| ENSMMUG00000015962  | AT-rich interaction domain 2 [Source:VGNC Symbol;Acc:VGNC:69858]                                   | - | 2.318773094 | 1.87E-12    | 6.37E-11    |
| ENSMMUG00000011702  | tetraspanin 5 [Source:VGNC Symbol;Acc:VGNC:79086]                                                  | - | 2.317721159 | 1.79E-05    | 0.000161674 |



|                    |                                                                                   |   |             |             |             |
|--------------------|-----------------------------------------------------------------------------------|---|-------------|-------------|-------------|
| ENSMMUG00000011386 | GTPase, IMAP family member 4 [Source:VGNC Symbol;Acc:VGNC:72982]                  | - | 2.317181206 | 1.65E-15    | 9.05E-14    |
| ENSMMUG00000026103 | U1 spliceosomal RNA [Source:RFAM;Acc:RF00003]                                     | - | 2.315932402 | 0.005248562 | 0.020996908 |
| ENSMMUG00000007751 | solute carrier family 22 member 18 [Source:NCBI gene;Acc:721230]                  | - | 2.310316692 | 0.002453154 | 0.011032462 |
| ENSMMUG00000005067 | elongator acetyltransferase complex subunit 3 [Source:VGNC Symbol;Acc:VGNC:72080] | - | 2.308627282 | 9.04E-07    | 1.11E-05    |
| ENSMMUG00000023012 | vesicle trafficking 1 [Source:VGNC Symbol;Acc:VGNC:79296]                         | - | 2.307310389 | 0.000356266 | 0.002153895 |
| ENSMMUG00000020202 | melanoma-associated antigen D4 [Source:NCBI gene;Acc:106996411]                   | - | 2.307208856 | 6.58E-06    | 6.59E-05    |
| ENSMMUG00000006702 | bone morphogenetic protein receptor type 1B [Source:VGNC Symbol;Acc:VGNC:70267]   | - | -2.30631745 | 0.000891232 | 0.004752334 |
| ENSMMUG00000008228 | unc-93 homolog A [Source:VGNC Symbol;Acc:VGNC:78724]                              | - | 2.300980984 | 0.001185939 | 0.006008398 |
| ENSMMUG00000016286 | protease, serine, 1 (trypsin 1) [Source:NCBI gene;Acc:698729]                     | - | -2.29405422 | 5.40E-11    | 1.40E-09    |
| ENSMMUG00000053235 |                                                                                   | - | 2.292911411 | 0.007491468 | 0.027978618 |
| ENSMMUG00000014484 | zinc finger protein 641 [Source:NCBI gene;Acc:708246]                             | - | 2.291074515 | 5.62E-07    | 7.23E-06    |
| ENSMMUG00000009520 | gephyrin [Source:VGNC Symbol;Acc:VGNC:72948]                                      | - | 2.287268751 | 2.05E-06    | 2.34E-05    |
| ENSMMUG00000058332 | testis expressed 46 [Source:NCBI gene;Acc:709002]                                 | - | -2.28514956 | 0.001732744 | 0.008239432 |
| ENSMMUG00000012462 | proteasome activator subunit 1 [Source:VGNC Symbol;Acc:VGNC:76455]                | - | 2.279500132 | 0.000798226 | 0.004335395 |
| ENSMMUG00000022602 | methyltransferase like 21A [Source:VGNC Symbol;Acc:VGNC:74625]                    | - | 2.277569373 | 2.47E-07    | 3.43E-06    |
| ENSMMUG00000064249 |                                                                                   | - | 2.276367844 | 0.0008741   | 0.004675179 |
| ENSMMUG00000051190 | Metazoan signal recognition particle RNA [Source:RFAM;Acc:RF00017]                | - | 2.271684751 | 0.004704729 | 0.019115975 |
| ENSMMUG00000055889 |                                                                                   | - | 2.271155216 | 0.001615629 | 0.00778123  |
| ENSMMUG00000018332 | family with sequence similarity 98 member B [Source:VGNC Symbol;Acc:VGNC:72583]   | - | 2.269220095 | 7.19E-09    | 1.32E-07    |
| ENSMMUG00000005246 | zinc finger protein 740 [Source:VGNC Symbol;Acc:VGNC:79665]                       | - | 2.267165156 | 3.19E-06    | 3.46E-05    |
| ENSMMUG00000017246 | lipoygenase homology domains 1 [Source:VGNC Symbol;Acc:VGNC:74368]                | - | 2.266417552 | 3.36E-14    | 1.52E-12    |
| ENSMMUG00000022927 | RCAN family member 3 [Source:VGNC Symbol;Acc:VGNC:76875]                          | - | 2.265540631 | 2.88E-11    | 7.69E-10    |
| ENSMMUG00000009958 | ankyrin repeat domain 46 [Source:VGNC Symbol;Acc:VGNC:69719]                      | - | 2.258597123 | 0.00027552  | 0.00172249  |
| ENSMMUG00000062638 | methyltransferase like 3 [Source:NCBI gene;Acc:706852]                            | - | 2.257429626 | 0.007976677 | 0.029486457 |
| ENSMMUG00000007968 | hedgehog interacting protein [Source:VGNC Symbol;Acc:VGNC:73169]                  | - | 2.255548863 | 5.85E-08    | 9.17E-07    |
| ENSMMUG00000003394 | cilia and flagella associated protein 300 [Source:VGNC Symbol;Acc:VGNC:71120]     | - | 2.253512153 | 2.31E-18    | 1.84E-16    |
| ENSMMUG00000049788 |                                                                                   | - | 2.250791036 | 0.001221119 | 0.006153661 |
| ENSMMUG00000049997 |                                                                                   | - | -2.24803294 | 3.25E-10    | 7.50E-09    |
| ENSMMUG00000023679 | tripartite motif containing 26 [Source:VGNC Symbol;Acc:VGNC:78854]                | - | 2.246828488 | 1.10E-08    | 1.97E-07    |
| ENSMMUG00000042668 | cilia and flagella associated protein 61 [Source:NCBI gene;Acc:699814]            | - | 2.244448135 | 1.39E-06    | 1.65E-05    |

|                    |                                                                                                      |             |             |             |
|--------------------|------------------------------------------------------------------------------------------------------|-------------|-------------|-------------|
| ENSMMUG00000004157 | nuclear protein, coactivator of histone transcription [Source:VGNC Symbol;Acc:VGNC:75379]            | -           | -           | -           |
|                    |                                                                                                      | 2.241369249 | 3.48E-07    | 4.70E-06    |
| ENSMMUG00000002649 | unc-5 netrin receptor A [Source:VGNC Symbol;Acc:VGNC:78721]                                          | -           | -           | -           |
|                    |                                                                                                      | 2.239179569 | 0.008180865 | 0.030087078 |
| ENSMMUG00000002514 | methyltransferase like 25 [Source:VGNC Symbol;Acc:VGNC:74591]                                        | -           | -           | -           |
|                    |                                                                                                      | -2.23892172 | 0.002457329 | 0.011046932 |
| ENSMMUG00000018493 | FH2 domain containing 1 [Source:VGNC Symbol;Acc:VGNC:72598]                                          | -           | -           | -           |
|                    |                                                                                                      | 2.236752365 | 5.09E-07    | 6.60E-06    |
| ENSMMUG00000022601 | cAMP responsive element binding protein 1 [Source:VGNC Symbol;Acc:VGNC:71485]                        | -           | -           | -           |
|                    |                                                                                                      | 2.234670148 | 1.05E-11    | 3.04E-10    |
| ENSMMUG00000013503 | mannose-P-dolichol utilization defect 1 [Source:VGNC Symbol;Acc:VGNC:74913]                          | -           | -           | -           |
|                    |                                                                                                      | 2.234359314 | 0.000497418 | 0.002886886 |
| ENSMMUG00000056303 |                                                                                                      | -           | -           | -           |
|                    |                                                                                                      | 2.226901876 | 0.000648134 | 0.003622367 |
| ENSMMUG00000022726 | dual specificity tyrosine phosphorylation regulated kinase 1B [Source:VGNC Symbol;Acc:VGNC:72016]    | -           | -           | -           |
|                    |                                                                                                      | 2.226253362 | 0.001425949 | 0.007010535 |
| ENSMMUG00000000669 | gap junction protein beta 1 [Source:VGNC Symbol;Acc:VGNC:73059]                                      | -           | -           | -           |
|                    |                                                                                                      | 2.225055577 | 0.011956234 | 0.040741356 |
| ENSMMUG00000011646 | TATA-box binding protein associated factor, RNA polymerase I subunit D [Source:NCBI gene;Acc:696602] | -           | -           | -           |
|                    |                                                                                                      | 2.224550522 | 0.015234054 | 0.049732207 |
| ENSMMUG00000054719 |                                                                                                      | -           | -           | -           |
|                    |                                                                                                      | 2.223836107 | 2.07E-07    | 2.94E-06    |
| ENSMMUG00000002200 | phospholipid phosphatase 3 [Source:NCBI gene;Acc:715993]                                             | -           | -           | -           |
|                    |                                                                                                      | 2.223729922 | 6.60E-15    | 3.30E-13    |
| ENSMMUG00000060455 |                                                                                                      | -           | -           | -           |
|                    |                                                                                                      | 2.223296436 | 0.009279587 | 0.033291127 |
| ENSMMUG00000019831 | neurobeachin [Source:NCBI gene;Acc:714386]                                                           | -           | -           | -           |
|                    |                                                                                                      | 2.223057661 | 7.29E-05    | 0.000554575 |
| ENSMMUG00000062818 | regenerating islet-derived protein 3-alpha [Source:NCBI gene;Acc:716890]                             | -           | -           | -           |
|                    |                                                                                                      | 2.222733481 | 0.002100796 | 0.009718059 |
| ENSMMUG00000012481 | importin 4 [Source:VGNC Symbol;Acc:VGNC:73630]                                                       | -           | -           | -           |
|                    |                                                                                                      | 2.222549723 | 2.48E-05    | 0.000215092 |
| ENSMMUG00000006217 | general transcription factor IIH subunit 2 [Source:NCBI gene;Acc:700737]                             | -           | -           | -           |
|                    |                                                                                                      | 2.219649235 | 0.001293793 | 0.006451119 |
| ENSMMUG00000007003 | polyribonucleotide nucleotidyltransferase 1 [Source:VGNC Symbol;Acc:VGNC:76095]                      | -           | -           | -           |
|                    |                                                                                                      | 2.213475171 | 0.008538206 | 0.031140383 |
| ENSMMUG00000017355 | remodeling and spacing factor 1 [Source:VGNC Symbol;Acc:VGNC:77044]                                  | -           | -           | -           |
|                    |                                                                                                      | 2.213237746 | 3.71E-07    | 4.99E-06    |
| ENSMMUG00000001640 | SIX homeobox 4 [Source:NCBI gene;Acc:703798]                                                         | -           | -           | -           |
|                    |                                                                                                      | 2.211788368 | 7.76E-07    | 9.66E-06    |
| ENSMMUG00000001918 | transmembrane protein 165 [Source:VGNC Symbol;Acc:VGNC:79875]                                        | -           | -           | -           |
|                    |                                                                                                      | 2.208819075 | 4.17E-05    | 0.000340461 |
| ENSMMUG00000015238 | O-linked N-acetylglucosamine (GlcNAc) transferase [Source:NCBI gene;Acc:698268]                      | -           | -           | -           |
|                    |                                                                                                      | -2.20859884 | 1.16E-12    | 4.07E-11    |
| ENSMMUG00000052327 |                                                                                                      | -           | -           | -           |
|                    |                                                                                                      | 2.206820154 | 0.000924629 | 0.004904883 |
| ENSMMUG00000012473 | proteasome activator subunit 2 [Source:VGNC Symbol;Acc:VGNC:76456]                                   | -           | -           | -           |
|                    |                                                                                                      | 2.205737828 | 0.006727572 | 0.025703634 |
| ENSMMUG00000049749 |                                                                                                      | -           | -           | -           |
|                    |                                                                                                      | 2.201249572 | 1.23E-16    | 7.98E-15    |
| ENSMMUG00000051670 |                                                                                                      | -           | -           | -           |
|                    |                                                                                                      | 2.199384363 | 4.48E-06    | 4.67E-05    |
| ENSMMUG00000022724 |                                                                                                      | -           | -           | -           |
|                    |                                                                                                      | 2.196787306 | 0.000325122 | 0.001994048 |
| ENSMMUG00000064975 | zinc finger protein 221 [Source:NCBI gene;Acc:100423743]                                             | -           | -           | -           |
|                    |                                                                                                      | 2.195155148 | 0.001306869 | 0.006511036 |
| ENSMMUG00000013655 | dynamamin 1 like [Source:VGNC Symbol;Acc:VGNC:71956]                                                 | -           | -           | -           |
|                    |                                                                                                      | 2.194522634 | 0.007192394 | 0.027009383 |



|                     |                                                                                    |             |             |             |
|---------------------|------------------------------------------------------------------------------------|-------------|-------------|-------------|
| ENSMMUG00000061036  | histone cluster 2, H2ab [Source:NCBI gene;Acc:705170]                              | 2.193116916 | 0.012148532 | 0.041327872 |
| ENSMMUG00000016880  | solute carrier family 39 member 8 [Source:VGNC Symbol;Acc:VGNC:77541]              | 2.188307829 | 1.69E-05    | 0.000153836 |
| ENSMMUG00000000117  | HCK proto-oncogene, Src family tyrosine kinase [Source:VGNC Symbol;Acc:VGNC:73353] | 2.181223788 | 5.67E-06    | 5.76E-05    |
| ENSMMUG000000052537 |                                                                                    | -2.18047806 | 0.000665511 | 0.003701266 |
| ENSMMUG00000029197  | YY1 transcription factor [Source:NCBI gene;Acc:717370]                             | 2.171729386 | 1.82E-08    | 3.13E-07    |
| ENSMMUG00000005751  | adenosine deaminase tRNA specific 1 [Source:VGNC Symbol;Acc:VGNC:69504]            | 2.170361468 | 0.008202526 | 0.030157716 |
| ENSMMUG00000060579  |                                                                                    | -2.16828851 | 0.00871911  | 0.031687337 |
| ENSMMUG00000013851  | lipoic acid synthetase [Source:VGNC Symbol;Acc:VGNC:74057]                         | 2.167632052 | 0.009625612 | 0.034282353 |
| ENSMMUG00000064980  |                                                                                    | -2.16497668 | 0.007101854 | 0.026734727 |
| ENSMMUG00000060536  |                                                                                    | 2.164495381 | 0.002311644 | 0.010507549 |
| ENSMMUG00000010703  | KIAA0895 [Source:VGNC Symbol;Acc:VGNC:73884]                                       | -2.15135336 | 0.003442248 | 0.014764397 |
| ENSMMUG00000018358  | zinc finger protein 217 [Source:VGNC Symbol;Acc:VGNC:78874]                        | 2.150142762 | 3.75E-07    | 5.03E-06    |
| ENSMMUG00000050630  |                                                                                    | 2.149633433 | 0.005249654 | 0.020996908 |
| ENSMMUG00000022202  | basic leucine zipper and W2 domains 1 [Source:VGNC Symbol;Acc:VGNC:84213]          | 2.149069692 | 7.82E-12    | 2.32E-10    |
| ENSMMUG00000049351  | MAGE family member E1 [Source:NCBI gene;Acc:705379]                                | 2.147950803 | 2.84E-16    | 1.70E-14    |
| ENSMMUG00000009831  | TBC1 domain family member 2 [Source:VGNC Symbol;Acc:VGNC:78157]                    | 2.147838651 | 1.60E-07    | 2.30E-06    |
| ENSMMUG00000044729  | transcription factor AP-4 [Source:NCBI gene;Acc:707513]                            | 2.147732808 | 0.000254734 | 0.001608085 |
| ENSMMUG00000052460  |                                                                                    | 2.144619994 | 0.000293404 | 0.00182594  |
| ENSMMUG00000064202  |                                                                                    | 2.141108274 | 0.000215667 | 0.001407737 |
| ENSMMUG00000008867  | exoribonuclease 1 [Source:VGNC Symbol;Acc:VGNC:72324]                              | 2.140710635 | 0.003533994 | 0.015066361 |
| ENSMMUG00000007620  | transmembrane serine protease 4 [Source:VGNC Symbol;Acc:VGNC:78577]                | 2.138602235 | 2.61E-07    | 3.61E-06    |
| ENSMMUG00000061118  |                                                                                    | 2.138557384 | 0.013405854 | 0.044786993 |
| ENSMMUG00000011214  | solute carrier family 12 member 2 [Source:VGNC Symbol;Acc:VGNC:77386]              | 2.136518093 | 5.87E-06    | 5.94E-05    |
| ENSMMUG00000032427  | neuroligin 3 [Source:NCBI gene;Acc:574216]                                         | 2.136100471 | 4.63E-15    | 2.41E-13    |
| ENSMMUG00000016526  | solute carrier family 25 member 41 [Source:VGNC Symbol;Acc:VGNC:77581]             | 2.132825491 | 0.000357175 | 0.002158328 |
| ENSMMUG00000012449  | synaptotagmin like 2 [Source:VGNC Symbol;Acc:VGNC:78123]                           | -2.1309671  | 0.006795459 | 0.025922716 |
| ENSMMUG00000018943  | spermatogenesis associated 18 [Source:VGNC Symbol;Acc:VGNC:78013]                  | 2.126652882 | 3.33E-05    | 0.000279832 |
| ENSMMUG00000044958  | adhesion G protein-coupled receptor G6 [Source:VGNC Symbol;Acc:VGNC:81009]         | 2.124572362 | 5.85E-09    | 1.09E-07    |
| ENSMMUG00000019639  | paired box 5 [Source:VGNC Symbol;Acc:VGNC:75764]                                   | 2.121728917 | 0.000133683 | 0.000925686 |
| ENSMMUG00000062861  |                                                                                    | 2.120376076 | 3.34E-06    | 3.60E-05    |

|                     |                                                                                  |   |             |             |             |
|---------------------|----------------------------------------------------------------------------------|---|-------------|-------------|-------------|
| ENSMMUG00000021097  | sushi domain containing 1 [Source:VGNC Symbol;Acc:VGNC:78207]                    | - | 2.118925692 | 0.000366653 | 0.002204891 |
| ENSMMUG00000062793  |                                                                                  | - | 2.116964609 | 1.31E-05    | 0.000122507 |
| ENSMMUG00000000974  | mutS homolog 2 [Source:VGNC Symbol;Acc:VGNC:74931]                               | - | 2.116243897 | 0.00037385  | 0.002241458 |
| ENSMMUG00000010543  | PHD finger protein 23 [Source:VGNC Symbol;Acc:VGNC:75877]                        | - | 2.113360423 | 0.006120447 | 0.023700823 |
| ENSMMUG00000002549  | trehalase [Source:NCBI gene;Acc:706449]                                          | - | 2.109696486 | 5.46E-05    | 0.000432269 |
| ENSMMUG00000029475  | zinc finger and BTB domain containing 2 [Source:VGNC Symbol;Acc:VGNC:79291]      | - | 2.106935597 | 0.000354942 | 0.002148003 |
| ENSMMUG00000019854  | transmembrane protein 108 [Source:VGNC Symbol;Acc:VGNC:79714]                    | - | 2.105227637 | 1.19E-05    | 0.000112027 |
| ENSMMUG00000007313  | histone acetyltransferase 1 [Source:VGNC Symbol;Acc:VGNC:73349]                  | - | 2.101427111 | 8.54E-05    | 0.00063475  |
| ENSMMUG000000037806 | chromosome 6 C5orf63 homolog [Source:NCBI gene;Acc:100423212]                    | - | 2.101096321 | 0.012367005 | 0.0419087   |
| ENSMMUG00000012467  | family with sequence similarity 227 member A [Source:VGNC Symbol;Acc:VGNC:72475] | - | 2.100503549 | 9.62E-05    | 0.000700821 |
| ENSMMUG00000058450  |                                                                                  | - | 2.098048059 | 0.005885168 | 0.022988424 |
| ENSMMUG00000018939  | leucine rich repeat containing 66 [Source:VGNC Symbol;Acc:VGNC:74415]            | - | 2.094002694 | 5.44E-13    | 2.02E-11    |
| ENSMMUG00000016927  | solute carrier family 2 member 10 [Source:VGNC Symbol;Acc:VGNC:77465]            | - | 2.093047615 | 1.42E-14    | 6.79E-13    |
| ENSMMUG00000016262  | tetratricopeptide repeat domain 38 [Source:VGNC Symbol;Acc:VGNC:79574]           | - | 2.092134812 | 5.91E-07    | 7.57E-06    |
| ENSMMUG00000012167  | solute carrier family 2 member 8 [Source:VGNC Symbol;Acc:VGNC:77470]             | - | 2.090368678 | 0.002681823 | 0.011891158 |
| ENSMMUG00000061117  |                                                                                  | - | 2.089352172 | 3.68E-06    | 3.92E-05    |
| ENSMMUG00000059525  |                                                                                  | - | 2.087520404 | 4.58E-07    | 6.00E-06    |
| ENSMMUG00000041837  | Metazoan signal recognition particle RNA [Source:RFAM;Acc:RF00017]               | - | -2.08400978 | 0.009840744 | 0.034947295 |
| ENSMMUG00000000009  | protein tyrosine phosphatase receptor type C [Source:VGNC Symbol;Acc:VGNC:76612] | - | 2.083889993 | 9.84E-05    | 0.000712832 |
| ENSMMUG00000020211  | cyclin Y like 1 [Source:VGNC Symbol;Acc:VGNC:84224]                              | - | 2.082456075 | 3.36E-07    | 4.57E-06    |
| ENSMMUG00000060524  |                                                                                  | - | 2.082334712 | 0.005771973 | 0.022636669 |
| ENSMMUG00000011515  | striatin 3 [Source:VGNC Symbol;Acc:VGNC:78127]                                   | - | 2.080644879 | 0.001981633 | 0.009239853 |
| ENSMMUG00000018444  | dual specificity phosphatase 23 [Source:VGNC Symbol;Acc:VGNC:71880]              | - | 2.079812397 | 0.004407409 | 0.01811149  |
| ENSMMUG00000051482  |                                                                                  | - | 2.079341072 | 2.25E-05    | 0.000198115 |
| ENSMMUG00000059938  |                                                                                  | - | 2.079018724 | 0.000239892 | 0.001533691 |
| ENSMMUG00000018474  | signal regulatory protein alpha [Source:NCBI gene;Acc:717811]                    | - | 2.075974317 | 4.62E-08    | 7.40E-07    |
| ENSMMUG00000059707  | MIS18 kinetochore protein A [Source:NCBI gene;Acc:709275]                        | - | 2.074066898 | 0.000562187 | 0.00320791  |
| ENSMMUG00000061892  |                                                                                  | - | 2.074017362 | 6.52E-11    | 1.67E-09    |
| ENSMMUG00000038410  |                                                                                  | - | 2.073991266 | 0.004188331 | 0.017386037 |

|                    |                                                                                    |   |             |             |             |
|--------------------|------------------------------------------------------------------------------------|---|-------------|-------------|-------------|
| ENSMMUG00000055560 |                                                                                    | - | 2.073199885 | 0.008927032 | 0.032299719 |
| ENSMMUG00000052642 | protein O-glucosyltransferase 2 [Source:NCBI gene;Acc:702156]                      | - | 2.072610254 | 0.000337537 | 0.002057873 |
| ENSMMUG00000016845 | zinc finger E-box binding homeobox 2 [Source:VGNC Symbol;Acc:VGNC:78969]           | - | 2.071821943 | 0.005811369 | 0.022762121 |
| ENSMMUG00000011183 | olfactomedin like 2A [Source:VGNC Symbol;Acc:VGNC:75472]                           | - | 2.068477699 | 0.002109862 | 0.009752654 |
| ENSMMUG00000059145 |                                                                                    | - | -2.06620604 | 0.003795325 | 0.016041382 |
| ENSMMUG00000007255 | microtubule associated protein 1A [Source:VGNC Symbol;Acc:VGNC:74489]              | - | -2.06567819 | 0.00213416  | 0.00983088  |
| ENSMMUG00000009155 | SIN3-HDAC complex associated factor [Source:NCBI gene;Acc:694162]                  | - | -2.06109642 | 0.000436284 | 0.002565727 |
| ENSMMUG00000051286 |                                                                                    | - | 2.059567537 | 8.76E-10    | 1.90E-08    |
| ENSMMUG00000058151 | chromosome 4 C6orf62 homolog [Source:NCBI gene;Acc:708218]                         | - | 2.059559051 | 2.20E-14    | 1.01E-12    |
| ENSMMUG00000056165 |                                                                                    | - | 2.059085868 | 0.004052603 | 0.016930248 |
| ENSMMUG00000018346 | coiled-coil domain containing 170 [Source:VGNC Symbol;Acc:VGNC:70832]              | - | 2.058049656 | 0.001741227 | 0.008269483 |
| ENSMMUG00000002182 | phosphatidylserine decarboxylase [Source:VGNC Symbol;Acc:VGNC:76005]               | - | 2.057516808 | 0.00258836  | 0.011530821 |
| ENSMMUG00000013029 | surfactant protein C [Source:VGNC Symbol;Acc:VGNC:84113]                           | - | 2.053253604 | 0.000362505 | 0.002183025 |
| ENSMMUG00000005366 | alpha-L-fucosidase 2 [Source:VGNC Symbol;Acc:VGNC:72827]                           | - | 2.050238027 | 7.93E-06    | 7.78E-05    |
| ENSMMUG00000022625 | periaxin [Source:VGNC Symbol;Acc:VGNC:76248]                                       | - | 2.046959239 | 0.000170323 | 0.001145257 |
| ENSMMUG00000008718 | zinc finger protein 280D [Source:NCBI gene;Acc:699509]                             | - | -2.0468479  | 6.13E-09    | 1.14E-07    |
| ENSMMUG00000021377 | SPT3 homolog, SAGA and STAGA complex component [Source:VGNC Symbol;Acc:VGNC:78055] | - | 2.045515697 | 1.59E-07    | 2.30E-06    |
| ENSMMUG00000051112 | p53 and DNA damage regulated 1 [Source:NCBI gene;Acc:712622]                       | - | 2.042053559 | 0.001195163 | 0.006047653 |
| ENSMMUG00000065273 |                                                                                    | - | 2.040874378 | 0.013698154 | 0.045531306 |
| ENSMMUG00000006898 | integrin subunit beta 8 [Source:VGNC Symbol;Acc:VGNC:73791]                        | - | 2.032870581 | 3.75E-07    | 5.03E-06    |
| ENSMMUG00000006682 | chondroitin polymerizing factor 2 [Source:VGNC Symbol;Acc:VGNC:71131]              | - | 2.032482043 | 0.002449867 | 0.011021713 |
| ENSMMUG00000063463 |                                                                                    | - | -2.03209981 | 3.34E-05    | 0.000280618 |
| ENSMMUG00000017210 | sarcosine dehydrogenase [Source:VGNC Symbol;Acc:VGNC:76971]                        | - | 2.027988734 | 4.43E-05    | 0.000357911 |
| ENSMMUG00000040046 | lithostathine-1-alpha [Source:NCBI gene;Acc:711810]                                | - | 2.025390938 | 0.011630696 | 0.039830839 |
| ENSMMUG00000032244 | DnaJ heat shock protein family (Hsp40) member C16 [Source:NCBI gene;Acc:700894]    | - | 2.024138308 | 0.00629438  | 0.024286482 |
| ENSMMUG00000000663 | guanylate-binding protein 6-like [Source:NCBI gene;Acc:695158]                     | - | -2.01852376 | 2.98E-07    | 4.09E-06    |
| ENSMMUG00000049437 | Metazoan signal recognition particle RNA [Source:RFAM;Acc:RF00017]                 | - | 2.018316911 | 8.02E-05    | 0.000600106 |
| ENSMMUG00000021370 | kringle containing transmembrane protein 1 [Source:VGNC Symbol;Acc:VGNC:74066]     | - | -2.01810213 | 0.000187666 | 0.001252909 |
| ENSMMUG00000011137 | arylacetamide deacetylase like 4 [Source:VGNC Symbol;Acc:VGNC:81338]               | - | 2.016938138 | 0.006843819 | 0.026010322 |
| ENSMMUG00000018490 | ADP ribosylation factor interacting protein 1 [Source:VGNC Symbol;Acc:VGNC:69878]  | - | 2.011425316 | 3.72E-11    | 9.82E-10    |
| ENSMMUG00000051296 | paired like homeobox 2B [Source:NCBI gene;Acc:701940]                              | - | 2.010428379 | 0.000713241 | 0.003942681 |

|                    |                                                                                          |   |             |             |             |
|--------------------|------------------------------------------------------------------------------------------|---|-------------|-------------|-------------|
| ENSMMUG0000008009  | family with sequence similarity 13 member B [Source:VGNC Symbol;Acc:VGNC:72268]          | - | 2.009344755 | 6.88E-06    | 6.87E-05    |
| ENSMMUG00000047276 | GTPase, IMAP family member 6 [Source:VGNC Symbol;Acc:VGNC:81315]                         | - | 2.007940473 | 4.06E-12    | 1.26E-10    |
| ENSMMUG00000015619 | ATP binding cassette subfamily B member 7 [Source:VGNC Symbol;Acc:VGNC:81340]            | - | 2.003528937 | 5.31E-14    | 2.34E-12    |
| ENSMMUG00000031965 | aminolevulinate dehydratase [Source:VGNC Symbol;Acc:VGNC:69779]                          | - | 1.999331114 | 0.009785238 | 0.034780325 |
| ENSMMUG00000022183 | spermatogenesis associated 1 [Source:NCBI gene;Acc:710462]                               | - | 1.998739036 | 1.83E-10    | 4.39E-09    |
| ENSMMUG00000004559 | potassium voltage-gated channel subfamily D member 1 [Source:VGNC Symbol;Acc:VGNC:73975] | - | 1.996169651 | 0.013291458 | 0.044477351 |
| ENSMMUG00000019371 | major histocompatibility complex, class II, DP alpha [Source:NCBI gene;Acc:717992]       | - | 1.995187531 | 0.006965189 | 0.026337994 |
| ENSMMUG00000003973 | autophagy related 2A [Source:VGNC Symbol;Acc:VGNC:70145]                                 | - | 1.994871006 | 0.00013141  | 0.000911489 |
| ENSMMUG00000063655 | sodium voltage-gated channel beta subunit 4 [Source:NCBI gene;Acc:100430940]             | - | 1.990618839 | 2.97E-10    | 6.91E-09    |
| ENSMMUG00000053577 |                                                                                          | - | 1.989747986 | 1.72E-05    | 0.000156159 |
| ENSMMUG00000001940 | NME/NM23 nucleoside diphosphate kinase 2 [Source:NCBI gene;Acc:100533957]                | - | 1.987729253 | 1.60E-06    | 1.86E-05    |
| ENSMMUG00000016052 | seizure related 6 homolog like [Source:VGNC Symbol;Acc:VGNC:77176]                       | - | 1.984293155 | 7.33E-06    | 7.26E-05    |
| ENSMMUG00000019868 | NKD inhibitor of WNT signaling pathway 1 [Source:VGNC Symbol;Acc:VGNC:75198]             | - | 1.983138756 | 0.003189851 | 0.013819688 |
| ENSMMUG00000049859 |                                                                                          | - | 1.979827796 | 1.35E-10    | 3.31E-09    |
| ENSMMUG00000052518 | SIVA1 apoptosis inducing factor [Source:NCBI gene;Acc:706688]                            | - | 1.976591431 | 0.011286534 | 0.038901512 |
| ENSMMUG00000041301 | TNF superfamily member 8 [Source:NCBI gene;Acc:702944]                                   | - | 1.973992549 | 5.62E-07    | 7.23E-06    |
| ENSMMUG00000040771 |                                                                                          | - | 1.973868925 | 0.004049616 | 0.016924117 |
| ENSMMUG00000061096 | tubulin polymerization promoting protein [Source:NCBI gene;Acc:708834]                   | - | 1.972471572 | 0.005587538 | 0.022083031 |
| ENSMMUG00000006155 | zinc finger C3HC-type containing 1 [Source:VGNC Symbol;Acc:VGNC:79827]                   | - | 1.969853946 | 0.005335147 | 0.02124896  |
| ENSMMUG00000009948 | histone deacetylase 1 [Source:NCBI gene;Acc:708441]                                      | - | 1.965197364 | 4.52E-08    | 7.24E-07    |
| ENSMMUG00000010320 | ATPase H+ transporting V1 subunit C2 [Source:VGNC Symbol;Acc:VGNC:70091]                 | - | 1.957280498 | 0.010673387 | 0.037258337 |
| ENSMMUG00000009984 | prodynorphin [Source:VGNC Symbol;Acc:VGNC:75937]                                         | - | 1.951828889 | 0.000113015 | 0.00080293  |
| ENSMMUG00000004709 | proteasome inhibitor subunit 1 [Source:VGNC Symbol;Acc:VGNC:76458]                       | - | 1.950878127 | 0.007999343 | 0.029534373 |
| ENSMMUG00000055845 | ankyrin repeat domain 53 [Source:NCBI gene;Acc:703757]                                   | - | 1.949707568 | 2.22E-06    | 2.50E-05    |
| ENSMMUG00000064749 |                                                                                          | - | 1.947707008 | 0.008244237 | 0.030256768 |
| ENSMMUG00000012290 | GLIPR1 like 2 [Source:VGNC Symbol;Acc:VGNC:81413]                                        | - | 1.944796493 | 0.001016337 | 0.005296368 |
| ENSMMUG00000050994 |                                                                                          | - | 1.938818829 | 0.00895548  | 0.032381687 |
| ENSMMUG00000020540 | NmrA like redox sensor 1 [Source:VGNC Symbol;Acc:VGNC:75252]                             | - | 1.938146786 | 7.07E-06    | 7.04E-05    |

|                    |                                                                                              |   |             |             |             |
|--------------------|----------------------------------------------------------------------------------------------|---|-------------|-------------|-------------|
| ENSMMUG00000018461 | notch receptor 4 [Source:VGNC Symbol;Acc:VGNC:75372]                                         | - | 1.937989288 | 7.41E-05    | 0.00056297  |
| ENSMMUG00000014155 | CLK4 associating serine/arginine rich protein [Source:VGNC Symbol;Acc:VGNC:71198]            | - | 1.937914468 | 0.013375515 | 0.044709941 |
| ENSMMUG00000022124 | stonin 2 [Source:VGNC Symbol;Acc:VGNC:78249]                                                 | - | 1.937823185 | 0.002288883 | 0.010419502 |
| ENSMMUG00000052382 | histone H4 [Source:NCBI gene;Acc:107000818]                                                  | - | 1.937264446 | 1.07E-12    | 3.78E-11    |
| ENSMMUG00000009493 | family with sequence similarity 120A [Source:NCBI gene;Acc:717459]                           | - | 1.936796069 | 1.69E-05    | 0.000153525 |
| ENSMMUG00000018031 | solute carrier family 25 member 19 [Source:VGNC Symbol;Acc:VGNC:77474]                       | - | 1.936011507 | 6.62E-05    | 0.00051019  |
| ENSMMUG00000060765 |                                                                                              | - | 1.935107435 | 0.004294104 | 0.017728866 |
| ENSMMUG00000008136 | G2 and S-phase expressed 1 [Source:VGNC Symbol;Acc:VGNC:73162]                               | - | 1.934567937 | 0.002089601 | 0.009680848 |
| ENSMMUG00000010127 | chitobiase [Source:VGNC Symbol;Acc:VGNC:71540]                                               | - | 1.934384905 | 0.000348798 | 0.002118119 |
| ENSMMUG00000000364 | translocase of outer mitochondrial membrane 22 [Source:NCBI gene;Acc:701286]                 | - | 1.933597176 | 0.008476105 | 0.030981252 |
| ENSMMUG00000064131 |                                                                                              | - | 1.931793382 | 3.88E-05    | 0.000318889 |
| ENSMMUG00000018745 | chromosome 6 C5orf49 homolog [Source:VGNC Symbol;Acc:VGNC:70646]                             | - | 1.929402269 | 0.015128826 | 0.049467518 |
| ENSMMUG00000062866 |                                                                                              | - | 1.929378112 | 0.000394391 | 0.002346305 |
| ENSMMUG00000019992 | growth factor receptor bound protein 10 [Source:VGNC Symbol;Acc:VGNC:73157]                  | - | 1.929108753 | 0.00854515  | 0.031147225 |
| ENSMMUG00000054713 |                                                                                              | - | 1.929078541 | 0.001478723 | 0.007232383 |
| ENSMMUG00000058133 |                                                                                              | - | 1.928159961 | 0.007447881 | 0.027841213 |
| ENSMMUG00000004387 | ring finger protein 19A, RBR E3 ubiquitin protein ligase [Source:VGNC Symbol;Acc:VGNC:82224] | - | 1.922956992 | 3.10E-06    | 3.37E-05    |
| ENSMMUG00000061268 | PLAG1 zinc finger [Source:NCBI gene;Acc:696149]                                              | - | 1.921452205 | 9.76E-05    | 0.000709732 |
| ENSMMUG00000004208 | serine dehydratase [Source:VGNC Symbol;Acc:VGNC:77148]                                       | - | 1.917750894 | 0.007625115 | 0.028391486 |
| ENSMMUG00000008643 | general transcription factor IIIC subunit 3 [Source:VGNC Symbol;Acc:VGNC:73317]              | - | 1.917622109 | 2.42E-08    | 4.09E-07    |
| ENSMMUG00000050503 |                                                                                              | - | 1.911441964 | 0.007084012 | 0.026683909 |
| ENSMMUG00000052526 | RAB39A, member RAS oncogene family [Source:NCBI gene;Acc:707451]                             | - | -1.90794833 | 8.05E-14    | 3.39E-12    |
| ENSMMUG00000054935 |                                                                                              | - | 1.905453347 | 0.00967288  | 0.034430746 |
| ENSMMUG00000005312 | glutaredoxin [Source:VGNC Symbol;Acc:VGNC:84383]                                             | - | 1.905411777 | 0.013114896 | 0.044030372 |
| ENSMMUG00000054078 | histone H3 [Source:NCBI gene;Acc:114669830]                                                  | - | 1.902590876 | 0.0003396   | 0.002067374 |
| ENSMMUG00000008942 | carnosine dipeptidase 1 [Source:VGNC Symbol;Acc:VGNC:71257]                                  | - | 1.901972806 | 0.001733559 | 0.008239432 |
| ENSMMUG00000015141 | ankyrin repeat domain 16 [Source:NCBI gene;Acc:720787]                                       | - | 1.900384116 | 0.002458628 | 0.011046932 |
| ENSMMUG00000019857 | beaded filament structural protein 2 [Source:VGNC Symbol;Acc:VGNC:70245]                     | - | 1.899536584 | 9.11E-06    | 8.84E-05    |
| ENSMMUG00000010879 | NAD kinase [Source:VGNC Symbol;Acc:VGNC:75047]                                               | - | 1.898204104 | 0.000527105 | 0.003034493 |



|                    |                                                                                                  |   |             |             |             |
|--------------------|--------------------------------------------------------------------------------------------------|---|-------------|-------------|-------------|
| ENSMMUG00000065108 |                                                                                                  | - | 1.896855807 | 0.0103562   | 0.036368015 |
| ENSMMUG00000057986 | transmembrane protein 17 [Source:NCBI gene;Acc:694384]                                           | - | 1.896461307 | 0.001690104 | 0.008082907 |
| ENSMMUG00000020348 | BCL2 interacting protein 2 [Source:VGNC Symbol;Acc:VGNC:70272]                                   | - | 1.893713314 | 0.005929139 | 0.023142281 |
| ENSMMUG00000046218 | X antigen family member 5 [Source:NCBI gene;Acc:114669729]                                       | - | 1.893520665 | 0.00474808  | 0.01927198  |
| ENSMMUG00000014810 | short chain dehydrogenase/reductase family 16C member 5 [Source:VGNC Symbol;Acc:VGNC:77343]      | - | 1.892070748 | 3.75E-14    | 1.68E-12    |
| ENSMMUG00000062882 |                                                                                                  | - | -1.88834694 | 0.003890636 | 0.016393491 |
| ENSMMUG00000023443 | SRR1 domain containing [Source:VGNC Symbol;Acc:VGNC:78036]                                       | - | 1.886517535 | 5.44E-09    | 1.02E-07    |
| ENSMMUG00000000434 | cyclin dependent kinase 2 associated protein 1 [Source:VGNC Symbol;Acc:VGNC:70944]               | - | 1.886293378 | 0.001193076 | 0.006039577 |
| ENSMMUG00000018746 | FAST kinase domains 3 [Source:VGNC Symbol;Acc:VGNC:72588]                                        | - | 1.885006028 | 3.37E-08    | 5.52E-07    |
| ENSMMUG00000031821 | chymotrypsin-like elastase family member 2B [Source:NCBI gene;Acc:106992406]                     | - | 1.884538878 | 0.007316248 | 0.027415856 |
| ENSMMUG00000013937 | RAB41, member RAS oncogene family [Source:VGNC Symbol;Acc:VGNC:81544]                            | - | 1.884360994 | 0.007114576 | 0.026774418 |
| ENSMMUG00000000981 | T-box transcription factor 6 [Source:VGNC Symbol;Acc:VGNC:78276]                                 | - | 1.883754692 | 1.96E-05    | 0.000174653 |
| ENSMMUG00000018216 | keratin, type II cuticular Hb5 [Source:NCBI gene;Acc:698320]                                     | - | 1.880799694 | 0.00697553  | 0.026348381 |
| ENSMMUG00000003631 | cytoskeleton associated protein 5 [Source:VGNC Symbol;Acc:VGNC:71368]                            | - | 1.880221355 | 0.003690047 | 0.015661038 |
| ENSMMUG00000002472 | CLPTM1 regulator of GABA type A receptor forward trafficking [Source:VGNC Symbol;Acc:VGNC:71265] | - | 1.879686024 | 0.009266736 | 0.03327416  |
| ENSMMUG00000007709 | crooked neck pre-mRNA splicing factor 1 [Source:VGNC Symbol;Acc:VGNC:71412]                      | - | 1.878206555 | 3.83E-10    | 8.74E-09    |
| ENSMMUG00000015143 | F-box DNA helicase 1 [Source:NCBI gene;Acc:720797]                                               | - | 1.877902118 | 0.00011142  | 0.000793434 |
| ENSMMUG00000022627 | HLF transcription factor, PAR bZIP family member [Source:VGNC Symbol;Acc:VGNC:73478]             | - | 1.877285394 | 0.000241173 | 0.001540675 |
| ENSMMUG00000014049 | collagen type VI alpha 3 chain [Source:VGNC Symbol;Acc:VGNC:71303]                               | - | 1.876668127 | 0.006621588 | 0.025366042 |
| ENSMMUG00000057697 |                                                                                                  | - | 1.874051686 | 5.08E-05    | 0.000405684 |
| ENSMMUG00000008113 | pleckstrin homology domain containing M3 [Source:NCBI gene;Acc:711125]                           | - | 1.873680473 | 0.000922387 | 0.004897215 |
| ENSMMUG00000007766 | suppression of tumorigenicity 7 like [Source:VGNC Symbol;Acc:VGNC:77954]                         | - | -1.87304489 | 3.31E-06    | 3.57E-05    |
| ENSMMUG00000014531 | transmembrane protein 109 [Source:VGNC Symbol;Acc:VGNC:79740]                                    | - | 1.872374683 | 5.00E-08    | 7.91E-07    |
| ENSMMUG00000057475 |                                                                                                  | - | 1.869331674 | 0.001524537 | 0.0074154   |
| ENSMMUG00000012224 | family with sequence similarity 126 member B [Source:VGNC Symbol;Acc:VGNC:72393]                 | - | -1.86823969 | 0.001191225 | 0.006032691 |
| ENSMMUG00000044175 | forkhead box O6 [Source:NCBI gene;Acc:697505]                                                    | - | 1.866755764 | 4.18E-09    | 7.98E-08    |
| ENSMMUG00000020036 | Sp1 transcription factor [Source:VGNC Symbol;Acc:VGNC:77844]                                     | - | 1.865285678 | 0.000104454 | 0.000750346 |
| ENSMMUG00000057860 | olfactory receptor 51E1 [Source:NCBI gene;Acc:717598]                                            | - | 1.861628905 | 0.001124135 | 0.005740945 |
| ENSMMUG00000000618 | gametogenetin binding protein 2 [Source:VGNC Symbol;Acc:VGNC:72746]                              | - | 1.859189859 | 1.54E-05    | 0.000141368 |

|                    |                                                                                                       |   |             |             |             |
|--------------------|-------------------------------------------------------------------------------------------------------|---|-------------|-------------|-------------|
| ENSMMUG0000002657  | olfactomedin 4 [Source:VGNC Symbol;Acc:VGNC:75418]                                                    | - | 1.856764404 | 8.85E-05    | 0.00065318  |
| ENSMMUG00000051385 |                                                                                                       | - | 1.856552107 | 0.003155673 | 0.013681262 |
| ENSMMUG00000018747 | 5-methyltetrahydrofolate-homocysteine methyltransferase reductase [Source:VGNC Symbol;Acc:VGNC:75079] | - | 1.854973011 | 2.01E-06    | 2.29E-05    |
| ENSMMUG00000053008 |                                                                                                       | - | 1.853718906 | 4.83E-05    | 0.000387648 |
| ENSMMUG00000038768 | U6 spliceosomal RNA [Source:RFAM;Acc:RF00026]                                                         | - | 1.852756807 | 0.000374904 | 0.002245588 |
| ENSMMUG0000000620  | dehydrogenase/reductase 11 [Source:VGNC Symbol;Acc:VGNC:71792]                                        | - | 1.852085531 | 0.001957219 | 0.009145    |
| ENSMMUG00000053344 | splA/ryanodine receptor domain and SOCS box containing 4 [Source:NCBI gene;Acc:715278]                | - | -1.85060684 | 0.001396971 | 0.006887354 |
| ENSMMUG00000008579 | defective in cullin neddylation 1 domain containing 4 [Source:VGNC Symbol;Acc:VGNC:71809]             | - | 1.850301425 | 0.000986382 | 0.005174247 |
| ENSMMUG00000059794 |                                                                                                       | - | 1.849478605 | 0.001256292 | 0.006302485 |
| ENSMMUG00000015151 | interleukin 2 receptor subunit alpha [Source:NCBI gene;Acc:574300]                                    | - | -1.84790357 | 0.000487967 | 0.00284516  |
| ENSMMUG00000053648 | actin binding transcription modulator [Source:NCBI gene;Acc:710486]                                   | - | 1.845733924 | 3.55E-05    | 0.000295513 |
| ENSMMUG00000052420 | transmembrane protein 132A [Source:NCBI gene;Acc:695291]                                              | - | 1.844712346 | 0.000490861 | 0.002857968 |
| ENSMMUG00000002103 | delta/notch like EGF repeat containing [Source:VGNC Symbol;Acc:VGNC:71895]                            | - | 1.843448947 | 0.000321415 | 0.001974271 |
| ENSMMUG00000017230 | V-set and transmembrane domain containing 2 like [Source:NCBI gene;Acc:707394]                        | - | 1.839488641 | 3.94E-11    | 1.04E-09    |
| ENSMMUG00000003511 | chloride intracellular channel 5 [Source:VGNC Symbol;Acc:VGNC:71171]                                  | - | 1.838049546 | 2.75E-07    | 3.79E-06    |
| ENSMMUG00000001942 | mbt domain containing 1 [Source:VGNC Symbol;Acc:VGNC:74538]                                           | - | 1.837193215 | 4.04E-11    | 1.06E-09    |
| ENSMMUG00000021691 | spastin [Source:VGNC Symbol;Acc:VGNC:77857]                                                           | - | 1.836788032 | 1.27E-05    | 0.000118664 |
| ENSMMUG00000001529 | solute carrier family 25 member 26 [Source:VGNC Symbol;Acc:VGNC:77530]                                | - | 1.835575772 | 4.24E-13    | 1.60E-11    |
| ENSMMUG00000008916 | transferrin [Source:VGNC Symbol;Acc:VGNC:82716]                                                       | - | 1.831281862 | 4.04E-08    | 6.53E-07    |
| ENSMMUG00000054447 | T-box transcription factor 22 [Source:NCBI gene;Acc:708338]                                           | - | 1.831097872 | 0.000154489 | 0.001050238 |
| ENSMMUG00000023076 | diacylglycerol kinase eta [Source:VGNC Symbol;Acc:VGNC:71786]                                         | - | 1.829470772 | 2.13E-06    | 2.41E-05    |
| ENSMMUG00000022185 | odd-skipped related transcription factor 2 [Source:VGNC Symbol;Acc:VGNC:84097]                        | - | 1.826871737 | 1.90E-08    | 3.25E-07    |
| ENSMMUG00000008632 | myosin, light chain 6, alkali, smooth muscle and non-muscle-like [Source:NCBI gene;Acc:710137]        | - | 1.826590289 | 0.001552657 | 0.007510313 |
| ENSMMUG00000004675 | smoothelin [Source:VGNC Symbol;Acc:VGNC:77661]                                                        | - | 1.825663886 | 0.000252215 | 0.001597638 |
| ENSMMUG00000013035 | teashirt zinc finger homeobox 2 [Source:VGNC Symbol;Acc:VGNC:78875]                                   | - | 1.823486073 | 0.000161518 | 0.001091379 |
| ENSMMUG00000004412 | arginine and serine rich coiled-coil 2 [Source:VGNC Symbol;Acc:VGNC:77139]                            | - | 1.823050868 | 0.004676927 | 0.019021875 |
| ENSMMUG00000050177 |                                                                                                       | - | 1.820731195 | 5.58E-05    | 0.000440383 |
| ENSMMUG00000018795 | kynurenine aminotransferase 3 [Source:VGNC Symbol;Acc:VGNC:74177]                                     | - | 1.820223075 | 0.000449931 | 0.002639666 |
| ENSMMUG00000019146 | DNA polymerase delta interacting protein 2 [Source:VGNC Symbol;Acc:VGNC:76099]                        | - | 1.817727197 | 0.000127191 | 0.000888745 |



|                      |                                                                                            |   |             |             |             |
|----------------------|--------------------------------------------------------------------------------------------|---|-------------|-------------|-------------|
| ENSMMUG00000031121   | solute carrier family 25 member 18 [Source:VGNC Symbol;Acc:VGNC:77434]                     | - | 1.816725523 | 9.19E-06    | 8.90E-05    |
| ENSMMUG00000019148   | vitronectin [Source:NCBI gene;Acc:708499]                                                  | - | 1.814393247 | 5.24E-07    | 6.78E-06    |
| ENSMMUG00000001209   | arylsulfatase family member K [Source:VGNC Symbol;Acc:VGNC:84280]                          | - | 1.813444104 | 0.000700196 | 0.003878046 |
| ENSMMUG00000001531   | leucine rich repeats and immunoglobulin like domains 1 [Source:VGNC Symbol;Acc:VGNC:84156] | - | 1.812453693 | 3.26E-15    | 1.74E-13    |
| ENSMMUG000000047994  | CGG triplet repeat binding protein 1 [Source:VGNC Symbol;Acc:VGNC:84203]                   | - | 1.809795536 | 0.000849728 | 0.004564686 |
| ENSMMUG000000061344  |                                                                                            | - | 1.809576709 | 0.000834984 | 0.004507154 |
| ENSMMUG000000043161  | endogenous retrovirus group FRD member 1, envelope [Source:VGNC Symbol;Acc:VGNC:81068]     | - | 1.809221838 | 0.000254042 | 0.001605364 |
| ENSMMUG000000020435  | amine oxidase copper containing 1 [Source:VGNC Symbol;Acc:VGNC:70033]                      | - | 1.809126633 | 0.000126319 | 0.000884163 |
| ENSMMUG000000009669  | cutaneous T cell lymphoma-associated antigen 1 [Source:NCBI gene;Acc:106994443]            | - | 1.806791641 | 0.003957057 | 0.016622072 |
| ENSMMUG000000062538  | adenylate cyclase type 10 [Source:NCBI gene;Acc:719662]                                    | - | 1.806453995 | 2.43E-05    | 0.00021195  |
| ENSMMUG000000016316  | testis associated actin remodelling kinase 1 [Source:VGNC Symbol;Acc:VGNC:78314]           | - | 1.804216181 | 0.001386731 | 0.006845107 |
| ENSMMUG000000057973  |                                                                                            | - | 1.803127157 | 0.000964166 | 0.005077364 |
| ENSMMUG000000018356  | flagellum associated containing coiled-coil domains 1 [Source:VGNC Symbol;Acc:VGNC:72508]  | - | 1.800617102 | 0.001906634 | 0.008948364 |
| ENSMMUG000000014687  | sterile alpha motif domain containing 14 [Source:VGNC Symbol;Acc:VGNC:77112]               | - | 1.798401782 | 1.96E-05    | 0.000174619 |
| ENSMMUG000000010379  | Mtr4 exosome RNA helicase [Source:VGNC Symbol;Acc:VGNC:74989]                              | - | 1.796668829 | 0.001728709 | 0.008229342 |
| ENSMMUG000000005801  | glyceronephosphate O-acyltransferase [Source:VGNC Symbol;Acc:VGNC:73100]                   | - | 1.796437071 | 2.19E-06    | 2.47E-05    |
| ENSMMUG000000006215  | serine/threonine kinase 39 [Source:VGNC Symbol;Acc:VGNC:81587]                             | - | 1.792580016 | 7.91E-07    | 9.83E-06    |
| ENSMMUG0000000065031 |                                                                                            | - | 1.791995727 | 1.93E-09    | 3.91E-08    |
| ENSMMUG0000000051641 |                                                                                            | - | 1.785254993 | 5.59E-06    | 5.70E-05    |
| ENSMMUG000000013894  | beta-1,4-N-acetyl-galactosaminyltransferase 3 [Source:VGNC Symbol;Acc:VGNC:70121]          | - | -1.78520901 | 0.002164914 | 0.009928714 |
| ENSMMUG000000020436  | potassium voltage-gated channel subfamily H member 2 [Source:VGNC Symbol;Acc:VGNC:73980]   | - | 1.781860281 | 1.83E-10    | 4.39E-09    |
| ENSMMUG000000020812  | A-kinase anchoring protein 3 [Source:VGNC Symbol;Acc:VGNC:69769]                           | - | 1.779903323 | 0.003055267 | 0.013302264 |
| ENSMMUG0000000051661 |                                                                                            | - | 1.778629915 | 0.000806018 | 0.004371919 |
| ENSMMUG0000000056910 |                                                                                            | - | 1.778566958 | 2.47E-05    | 0.000214756 |
| ENSMMUG000000019672  | autophagy related 13 [Source:VGNC Symbol;Acc:VGNC:70148]                                   | - | -1.7768423  | 0.014000515 | 0.046345363 |
| ENSMMUG0000000065105 |                                                                                            | - | 1.776781114 | 0.010272932 | 0.036211581 |
| ENSMMUG000000020910  | nucleoporin 54 [Source:VGNC Symbol;Acc:VGNC:75420]                                         | - | 1.776401778 | 0.00025243  | 0.001597638 |
| ENSMMUG000000028701  |                                                                                            | - | 1.775202264 | 0.000352049 | 0.002134701 |
| ENSMMUG000000000982  | protein phosphatase 4 catalytic subunit [Source:VGNC Symbol;Acc:VGNC:76384]                | - | 1.774211301 | 8.07E-05    | 0.000603525 |

|                    |                                                                                               |             |             |             |
|--------------------|-----------------------------------------------------------------------------------------------|-------------|-------------|-------------|
| ENSMMUG00000019325 | mechanistic target of rapamycin kinase [Source:VGNC Symbol;Acc:VGNC:75062]                    | -1.76978759 | 8.39E-09    | 1.53E-07    |
| ENSMMUG00000017524 | phosphoinositide kinase, FYVE-type zinc finger containing [Source:VGNC Symbol;Acc:VGNC:75854] | 1.766564709 | 0.000589442 | 0.003332625 |
| ENSMMUG00000019850 | arachidonate lipoxygenase 3 [Source:VGNC Symbol;Acc:VGNC:69607]                               | 1.765695209 | 2.37E-12    | 7.90E-11    |
| ENSMMUG00000003864 | VPS52 subunit of GARP complex [Source:VGNC Symbol;Acc:VGNC:78551]                             | 1.765647592 | 2.23E-09    | 4.47E-08    |
| ENSMMUG00000007708 | N-alpha-acetyltransferase 20, NatB catalytic subunit [Source:VGNC Symbol;Acc:VGNC:84533]      | 1.762670253 | 0.013224404 | 0.044337465 |
| ENSMMUG00000024186 | U1 spliceosomal RNA [Source:RFAM;Acc:RF00003]                                                 | 1.762608596 | 0.008856813 | 0.032083435 |
| ENSMMUG00000052479 |                                                                                               | 1.762242949 | 0.005650493 | 0.022288255 |
| ENSMMUG00000065344 | homeobox D1 [Source:NCBI gene;Acc:701064]                                                     | 1.761841694 | 5.54E-06    | 5.65E-05    |
| ENSMMUG00000007411 | integrin alpha FG-GAP repeat containing 2 [Source:VGNC Symbol;Acc:VGNC:73690]                 | 1.759693564 | 5.09E-07    | 6.59E-06    |
| ENSMMUG00000065008 |                                                                                               | 1.759626872 | 0.000555626 | 0.003176372 |
| ENSMMUG00000002652 | zinc finger MIZ-type containing 2 [Source:VGNC Symbol;Acc:VGNC:79350]                         | 1.757117993 | 2.97E-05    | 0.000252876 |
| ENSMMUG00000012396 | zinc finger and SCAN domain containing 23 [Source:VGNC Symbol;Acc:VGNC:79313]                 | 1.756625734 | 0.000101547 | 0.00073246  |
| ENSMMUG00000059855 | Smad nuclear interacting protein 1 [Source:NCBI gene;Acc:713733]                              | 1.755197053 | 0.002803848 | 0.012356433 |
| ENSMMUG00000005727 | protein kinase N1 [Source:VGNC Symbol;Acc:VGNC:76014]                                         | 1.754743709 | 4.38E-10    | 9.94E-09    |
| ENSMMUG00000016610 | CD99 molecule like 2 [Source:VGNC Symbol;Acc:VGNC:70823]                                      | 1.754596676 | 0.000286339 | 0.001786491 |
| ENSMMUG00000022121 | CASK interacting protein 2 [Source:VGNC Symbol;Acc:VGNC:70577]                                | 1.753615049 | 5.59E-10    | 1.25E-08    |
| ENSMMUG00000056103 | growth arrest and DNA damage inducible alpha [Source:NCBI gene;Acc:701054]                    | 1.753228368 | 8.06E-12    | 2.38E-10    |
| ENSMMUG00000003260 |                                                                                               | -1.75299029 | 1.74E-07    | 2.49E-06    |
| ENSMMUG00000010695 | adenosine deaminase RNA specific B1 [Source:VGNC Symbol;Acc:VGNC:69503]                       | 1.750521113 | 0.000232959 | 0.001498328 |
| ENSMMUG00000057407 | dorsal root ganglia homeobox [Source:NCBI gene;Acc:719355]                                    | 1.747036803 | 0.011476268 | 0.039389781 |
| ENSMMUG00000059327 | NUS1 dehydrolipichyl diphosphate synthase subunit [Source:NCBI gene;Acc:715015]               | 1.744420511 | 8.95E-08    | 1.35E-06    |
| ENSMMUG00000007325 | Xrcc1 N-terminal domain containing 1 [Source:NCBI gene;Acc:115945140]                         | 1.743635377 | 0.000566189 | 0.003226256 |
| ENSMMUG00000012110 | smoothed, frizzled class receptor [Source:VGNC Symbol;Acc:VGNC:77658]                         | 1.742402134 | 9.16E-06    | 8.88E-05    |
| ENSMMUG00000007920 | myosin XIX [Source:VGNC Symbol;Acc:VGNC:75026]                                                | 1.740666786 | 4.42E-08    | 7.09E-07    |
| ENSMMUG00000007264 | transmembrane protein 30B [Source:VGNC Symbol;Acc:VGNC:79656]                                 | 1.740383486 | 1.69E-05    | 0.000153873 |
| ENSMMUG00000043727 | zinc finger protein 654 [Source:VGNC Symbol;Acc:VGNC:82560]                                   | 1.739365595 | 0.015337572 | 0.04999048  |
| ENSMMUG00000059115 |                                                                                               | 1.738777441 | 0.000963756 | 0.005077364 |
| ENSMMUG00000055244 | U6 spliceosomal RNA [Source:RFAM;Acc:RF00026]                                                 | 1.736558339 | 7.29E-06    | 7.22E-05    |
| ENSMMUG00000022680 | alpha-2-macroglobulin like 1 [Source:VGNC Symbol;Acc:VGNC:69507]                              | 1.736437606 | 3.27E-05    | 0.000274917 |

|                    |                                                                                                              |             |             |             |
|--------------------|--------------------------------------------------------------------------------------------------------------|-------------|-------------|-------------|
| ENSMMUG00000055097 |                                                                                                              | -1.73636762 | 0.002587909 | 0.011530821 |
| ENSMMUG00000056687 |                                                                                                              | 1.735143601 | 5.13E-06    | 5.29E-05    |
| ENSMMUG00000056306 |                                                                                                              | 1.732974478 | 8.45E-08    | 1.29E-06    |
| ENSMMUG00000019105 | RNA 3'-terminal phosphate cyclase [Source:VGNC Symbol;Acc:VGNC:77043]                                        | 1.732619708 | 0.004916675 | 0.019839414 |
| ENSMMUG00000050297 |                                                                                                              | 1.732295476 | 1.08E-08    | 1.93E-07    |
| ENSMMUG00000007783 | isoleucyl-tRNA synthetase 2, mitochondrial [Source:VGNC Symbol;Acc:VGNC:73458]                               | 1.731453613 | 8.17E-12    | 2.40E-10    |
| ENSMMUG00000041450 | zinc finger protein 432 [Source:NCBI gene;Acc:100424341]                                                     | 1.728380244 | 1.84E-08    | 3.17E-07    |
| ENSMMUG00000064596 | ATPase family AAA domain-containing protein 3A-like [Source:NCBI gene;Acc:114674454]                         | 1.728118987 | 0.002963162 | 0.012960933 |
| ENSMMUG00000055575 | olfactory marker protein [Source:HGNC Symbol;Acc:HGNC:8136]                                                  | 1.728020722 | 0.001012872 | 0.005281801 |
| ENSMMUG00000020117 | semaphorin 3B [Source:VGNC Symbol;Acc:VGNC:77160]                                                            | 1.725202835 | 3.54E-05    | 0.000294813 |
| ENSMMUG00000022548 | phosphatidylinositol-4-phosphate 3-kinase catalytic subunit type 2 alpha [Source:VGNC Symbol;Acc:VGNC:75992] | 1.724938352 | 7.42E-05    | 0.00056297  |
| ENSMMUG00000007424 | nuclear receptor interacting protein 2 [Source:VGNC Symbol;Acc:VGNC:75448]                                   | 1.724546077 | 1.69E-08    | 2.92E-07    |
| ENSMMUG00000007215 | X-box binding protein 1 [Source:VGNC Symbol;Acc:VGNC:78806]                                                  | 1.722709112 | 9.95E-05    | 0.000719612 |
| ENSMMUG00000054309 | PRAME family member 5 [Source:NCBI gene;Acc:722781]                                                          | 1.721541463 | 0.014499926 | 0.047779784 |
| ENSMMUG00000009536 | makorin ring finger protein 2 [Source:VGNC Symbol;Acc:VGNC:74878]                                            | 1.721294096 | 8.02E-05    | 0.000599987 |
| ENSMMUG00000056737 |                                                                                                              | 1.716716955 | 0.00114212  | 0.005807942 |
| ENSMMUG00000018342 | required for meiotic nuclear division 1 homolog [Source:VGNC Symbol;Acc:VGNC:76797]                          | 1.714233988 | 0.000730044 | 0.004005789 |
| ENSMMUG00000019892 | myomesin 1 [Source:VGNC Symbol;Acc:VGNC:75123]                                                               | 1.711877611 | 3.61E-07    | 4.86E-06    |
| ENSMMUG00000045105 | phospholipase A and acyltransferase 4 [Source:NCBI gene;Acc:722189]                                          | 1.711387296 | 6.44E-07    | 8.17E-06    |
| ENSMMUG00000059208 | aurora kinase A interacting protein 1 [Source:NCBI gene;Acc:706329]                                          | 1.711303196 | 0.001621924 | 0.00780543  |
| ENSMMUG00000063267 | aldo-keto reductase family 1 member C15 [Source:NCBI gene;Acc:722496]                                        | 1.710674028 | 0.001935142 | 0.009064341 |
| ENSMMUG00000060932 | zinc finger protein 383-like [Source:NCBI gene;Acc:106993074]                                                | -1.70974229 | 0.001049377 | 0.005425375 |
| ENSMMUG00000007765 | Wnt family member 2B [Source:VGNC Symbol;Acc:VGNC:78797]                                                     | 1.709400659 | 9.05E-17    | 5.98E-15    |
| ENSMMUG00000008119 | telomere maintenance 2 [Source:NCBI gene;Acc:701679]                                                         | 1.708708959 | 3.53E-05    | 0.000294315 |
| ENSMMUG00000050862 |                                                                                                              | 1.708652263 | 4.75E-07    | 6.20E-06    |
| ENSMMUG00000040694 | LCK proto-oncogene, Src family tyrosine kinase [Source:NCBI gene;Acc:717704]                                 | 1.707886613 | 3.19E-10    | 7.38E-09    |
| ENSMMUG00000058142 |                                                                                                              | 1.706731523 | 8.02E-10    | 1.75E-08    |
| ENSMMUG00000053889 | olfactory receptor 7C1 [Source:NCBI gene;Acc:114674087]                                                      | -1.70416289 | 0.000294963 | 0.001832856 |
| ENSMMUG00000044473 |                                                                                                              | -1.70320607 | 3.54E-05    | 0.000294813 |
| ENSMMUG00000000158 | minichromosome maintenance complex component 2 [Source:VGNC Symbol;Acc:VGNC:74680]                           | 1.702742328 | 1.27E-11    | 3.61E-10    |

|                    |                                                                                                       |   |             |             |             |
|--------------------|-------------------------------------------------------------------------------------------------------|---|-------------|-------------|-------------|
| ENSMMUG0000003858  | retinoid X receptor beta [Source:VGNC Symbol;Acc:VGNC:76952]                                          | - | 1.701423701 | 7.04E-05    | 0.000539173 |
| ENSMMUG00000016135 | neural precursor cell expressed, developmentally down-regulated 9 [Source:VGNC Symbol;Acc:VGNC:75304] | - | 1.701149141 | 0.000656104 | 0.003660544 |
| ENSMMUG00000044859 |                                                                                                       | - | 1.700785114 | 0.013330856 | 0.04458491  |
| ENSMMUG00000058240 |                                                                                                       | - | 1.700727694 | 0.000844711 | 0.004541707 |
| ENSMMUG00000053721 |                                                                                                       | - | 1.700704339 | 0.000316567 | 0.001952295 |
| ENSMMUG00000010648 | DNA methyltransferase 3 like [Source:NCBI gene;Acc:722184]                                            | - | 1.696709721 | 6.16E-05    | 0.000478878 |
| ENSMMUG0000007561  | zinc finger DHHC-type palmitoyltransferase 22 [Source:NCBI gene;Acc:706468]                           | - | 1.695235154 | 4.52E-07    | 5.93E-06    |
| ENSMMUG00000017207 | dopamine beta-hydroxylase [Source:VGNC Symbol;Acc:VGNC:71740]                                         | - | 1.695216723 | 0.001536603 | 0.007462025 |
| ENSMMUG00000001374 | supervillin [Source:NCBI gene;Acc:695267]                                                             | - | -1.69501143 | 1.01E-06    | 1.23E-05    |
| ENSMMUG00000052574 |                                                                                                       | - | 1.693127081 | 4.10E-08    | 6.62E-07    |
| ENSMMUG00000012513 | lactamase beta 2 [Source:VGNC Symbol;Acc:VGNC:74072]                                                  | - | 1.691305934 | 0.0029493   | 0.012914088 |
| ENSMMUG00000006553 | dishevelled segment polarity protein 3 [Source:VGNC Symbol;Acc:VGNC:72014]                            | - | 1.689134034 | 0.00015041  | 0.001026483 |
| ENSMMUG00000051020 | zinc finger protein 467 [Source:NCBI gene;Acc:712106]                                                 | - | -1.68822286 | 0.000199133 | 0.001313057 |
| ENSMMUG00000018679 | glyceraldehyde-3-phosphate dehydrogenase [Source:NCBI gene;Acc:574353]                                | - | 1.683258921 | 0.000208846 | 0.00136611  |
| ENSMMUG00000039020 | zinc finger protein 141 [Source:NCBI gene;Acc:714265]                                                 | - | 1.682892986 | 4.34E-07    | 5.71E-06    |
| ENSMMUG00000021168 | unc-5 family C-terminal like [Source:VGNC Symbol;Acc:VGNC:79314]                                      | - | 1.680765513 | 2.10E-08    | 3.58E-07    |
| ENSMMUG00000065099 |                                                                                                       | - | -1.68002394 | 2.29E-05    | 0.000200879 |
| ENSMMUG00000028800 | solute carrier family 7 member 9 [Source:VGNC Symbol;Acc:VGNC:77633]                                  | - | -1.67952223 | 1.42E-06    | 1.68E-05    |
| ENSMMUG00000064615 | pancreatic and duodenal homeobox 1 [Source:NCBI gene;Acc:710936]                                      | - | 1.678404299 | 0.011589965 | 0.039713483 |
| ENSMMUG00000055271 |                                                                                                       | - | 1.677964199 | 0.000946647 | 0.005008569 |
| ENSMMUG00000002321 | solute carrier family 24 member 3 [Source:VGNC Symbol;Acc:VGNC:77426]                                 | - | 1.672582028 | 9.86E-05    | 0.00071393  |
| ENSMMUG00000051261 |                                                                                                       | - | 1.671311787 | 0.001550703 | 0.007506769 |
| ENSMMUG00000004153 | ATM serine/threonine kinase [Source:VGNC Symbol;Acc:VGNC:70173]                                       | - | 1.670267146 | 0.004599183 | 0.018761553 |
| ENSMMUG00000062338 |                                                                                                       | - | 1.669427215 | 0.001198074 | 0.006054996 |
| ENSMMUG00000018976 | adhesion G protein-coupled receptor V1 [Source:VGNC Symbol;Acc:VGNC:69625]                            | - | 1.668657857 | 0.004682542 | 0.019038411 |
| ENSMMUG00000021534 | solute carrier family 16 member 10 [Source:NCBI gene;Acc:696132]                                      | - | 1.665869525 | 0.01075007  | 0.037451563 |
| ENSMMUG00000011401 | amyloid beta precursor protein binding family A member 1 [Source:VGNC Symbol;Acc:VGNC:69976]          | - | 1.664957608 | 0.002725735 | 0.012049062 |
| ENSMMUG00000000797 | exophilin 5 [Source:VGNC Symbol;Acc:VGNC:72412]                                                       | - | -1.66381237 | 9.34E-05    | 0.000684038 |
| ENSMMUG00000052817 | Sp7 transcription factor [Source:NCBI gene;Acc:702575]                                                | - | 1.662288573 | 0.00902155  | 0.032565015 |
| ENSMMUG00000007109 | dishevelled segment polarity protein 1 [Source:NCBI gene;Acc:705864]                                  | - | 1.662262653 | 0.000653019 | 0.003644987 |

|                     |                                                                                             |   |             |             |             |
|---------------------|---------------------------------------------------------------------------------------------|---|-------------|-------------|-------------|
| ENSMMUG00000061068  |                                                                                             | - | 1.661995644 | 2.43E-05    | 0.000211866 |
| ENSMMUG00000021932  | Rho GTPase activating protein 27 [Source:VGNC Symbol;Acc:VGNC:69935]                        | - | 1.661206728 | 0.00379116  | 0.016034807 |
| ENSMMUG00000007330  | nuclear mitotic apparatus protein 1 [Source:VGNC Symbol;Acc:VGNC:75556]                     | - | 1.658494923 | 1.06E-12    | 3.75E-11    |
| ENSMMUG000000054615 |                                                                                             | - | 1.653695864 | 0.000658392 | 0.003668181 |
| ENSMMUG00000012209  | CYLD lysine 63 deubiquitinase [Source:VGNC Symbol;Acc:VGNC:71581]                           | - | 1.653068657 | 1.34E-05    | 0.00012452  |
| ENSMMUG00000013053  | sperm acrosome associated 6 [Source:NCBI gene;Acc:114674203]                                | - | 1.649479782 | 7.37E-06    | 7.28E-05    |
| ENSMMUG00000022791  | heat shock transcription factor 2 binding protein [Source:VGNC Symbol;Acc:VGNC:73532]       | - | 1.649145131 | 0.011371942 | 0.039130052 |
| ENSMMUG00000049786  |                                                                                             | - | 1.642797731 | 0.009019733 | 0.032565015 |
| ENSMMUG00000020377  | collagen type VI alpha 5 chain [Source:NCBI gene;Acc:719331]                                | - | 1.641918761 | 1.53E-08    | 2.67E-07    |
| ENSMMUG00000002678  | integrin subunit beta 6 [Source:VGNC Symbol;Acc:VGNC:73789]                                 | - | 1.641396436 | 0.000212868 | 0.001390203 |
| ENSMMUG00000016631  | glutamate receptor interacting protein 1 [Source:VGNC Symbol;Acc:VGNC:73195]                | - | -1.63883279 | 0.011683532 | 0.039967241 |
| ENSMMUG00000017113  | ubiquitin specific peptidase 32 [Source:NCBI gene;Acc:716857]                               | - | 1.637245857 | 4.27E-09    | 8.16E-08    |
| ENSMMUG00000001642  | MNAT1 component of CDK activating kinase [Source:VGNC Symbol;Acc:VGNC:74905]                | - | 1.635901864 | 0.000145571 | 0.000999559 |
| ENSMMUG00000001892  | UDP-glucose 6-dehydrogenase [Source:VGNC Symbol;Acc:VGNC:78711]                             | - | -1.63545813 | 1.23E-08    | 2.18E-07    |
| ENSMMUG00000021327  | phosphatidylinositol glycan anchor biosynthesis class H [Source:VGNC Symbol;Acc:VGNC:75987] | - | 1.635133993 | 0.005879499 | 0.022977716 |
| ENSMMUG00000008733  | ubiquitin protein ligase E3C [Source:VGNC Symbol;Acc:VGNC:79049]                            | - | 1.635077491 | 3.27E-05    | 0.000274917 |
| ENSMMUG00000016004  | acid phosphatase 3 [Source:VGNC Symbol;Acc:VGNC:69385]                                      | - | 1.634700586 | 0.001349957 | 0.00669315  |
| ENSMMUG000000052676 |                                                                                             | - | 1.633850539 | 4.95E-08    | 7.85E-07    |
| ENSMMUG000000059068 |                                                                                             | - | 1.633393011 | 0.012423432 | 0.042065124 |
| ENSMMUG00000005181  | RAB3C, member RAS oncogene family [Source:VGNC Symbol;Acc:VGNC:81541]                       | - | 1.632832159 | 0.005683696 | 0.02238331  |
| ENSMMUG000000049563 |                                                                                             | - | 1.632748379 | 3.22E-07    | 4.38E-06    |
| ENSMMUG00000016857  | prostaglandin-endoperoxide synthase 2 [Source:VGNC Symbol;Acc:VGNC:76589]                   | - | 1.631117393 | 2.30E-08    | 3.90E-07    |
| ENSMMUG000000052435 | Metazoan signal recognition particle RNA [Source:RFAM;Acc:RF00017]                          | - | 1.630493822 | 0.005573645 | 0.022048816 |
| ENSMMUG00000014018  | bromodomain testis associated [Source:VGNC Symbol;Acc:VGNC:70282]                           | - | 1.630481263 | 0.001570793 | 0.007583116 |
| ENSMMUG00000006842  | doublecortin domain containing 1 [Source:NCBI gene;Acc:696721]                              | - | 1.630338734 | 1.19E-08    | 2.12E-07    |
| ENSMMUG000000045584 | leucine zipper protein 1 [Source:NCBI gene;Acc:718626]                                      | - | 1.629376479 | 9.09E-07    | 1.12E-05    |
| ENSMMUG000000063659 |                                                                                             | - | 1.628180713 | 0.006573526 | 0.025209115 |
| ENSMMUG00000010682  | fibrillin 2 [Source:VGNC Symbol;Acc:VGNC:72624]                                             | - | 1.625098608 | 5.34E-06    | 5.47E-05    |
| ENSMMUG00000023124  | transmembrane protein 43 [Source:VGNC Symbol;Acc:VGNC:82711]                                | - | 1.624314973 | 4.33E-06    | 4.54E-05    |



|                     |                                                                                      |   |             |             |             |
|---------------------|--------------------------------------------------------------------------------------|---|-------------|-------------|-------------|
| ENSMMUG00000019740  | zinc finger DHHC-type palmitoyltransferase 3 [Source:VGNC Symbol;Acc:VGNC:79143]     | - | 1.623603759 | 0.015090339 | 0.04936794  |
| ENSMMUG00000003859  | solute carrier family 39 member 7 [Source:VGNC Symbol;Acc:VGNC:77592]                | - | 1.618178461 | 0.000728186 | 0.004000647 |
| ENSMMUG000000052442 |                                                                                      | - | 1.617984833 | 8.06E-10    | 1.76E-08    |
| ENSMMUG000000049523 | ankyrin repeat domain 12 [Source:NCBI gene;Acc:114673693]                            | - | 1.616600788 | 0.001482796 | 0.007246539 |
| ENSMMUG000000057501 |                                                                                      | - | 1.610831734 | 0.002601483 | 0.011576694 |
| ENSMMUG000000061433 |                                                                                      | - | 1.610660804 | 3.99E-07    | 5.30E-06    |
| ENSMMUG000000021091 | COP9 signalosome subunit 3 [Source:VGNC Symbol;Acc:VGNC:71316]                       | - | 1.610544062 | 0.002367395 | 0.01072527  |
| ENSMMUG000000032252 | UbiA prenyltransferase domain containing 1 [Source:VGNC Symbol;Acc:VGNC:79881]       | - | 1.609663702 | 1.52E-11    | 4.26E-10    |
| ENSMMUG000000060600 |                                                                                      | - | 1.608481959 | 5.88E-05    | 0.00046154  |
| ENSMMUG000000007159 | tubulin epsilon and delta complex 1 [Source:VGNC Symbol;Acc:VGNC:79235]              | - | 1.608139813 | 0.000477483 | 0.002791981 |
| ENSMMUG000000054689 |                                                                                      | - | 1.607160972 | 0.00173118  | 0.008237683 |
| ENSMMUG000000059038 | 5-hydroxytryptamine receptor 7 [Source:NCBI gene;Acc:696317]                         | - | 1.604965587 | 0.000138416 | 0.000956306 |
| ENSMMUG000000021670 | solute carrier family 52 member 3 [Source:VGNC Symbol;Acc:VGNC:77717]                | - | 1.604487732 | 0.000189602 | 0.001263774 |
| ENSMMUG000000005040 | coiled-coil domain containing 183 [Source:NCBI gene;Acc:709019]                      | - | 1.603507132 | 0.003524938 | 0.015032967 |
| ENSMMUG000000015522 | GRAM domain containing 1B [Source:VGNC Symbol;Acc:VGNC:73028]                        | - | 1.601991973 | 0.000247176 | 0.001570049 |
| ENSMMUG000000060505 |                                                                                      | - | -1.59983304 | 0.001742339 | 0.008271566 |
| ENSMMUG000000019252 | tudor domain containing 6 [Source:VGNC Symbol;Acc:VGNC:79319]                        | - | 1.599696424 | 1.47E-07    | 2.13E-06    |
| ENSMMUG000000062615 |                                                                                      | - | 1.597355318 | 0.007891456 | 0.029247387 |
| ENSMMUG000000009773 | lysine demethylase 1A [Source:VGNC Symbol;Acc:VGNC:73928]                            | - | 1.595411408 | 0.001858336 | 0.008754622 |
| ENSMMUG000000023265 | A-kinase anchoring protein 12 [Source:VGNC Symbol;Acc:VGNC:69766]                    | - | -1.59431359 | 0.000578348 | 0.003284879 |
| ENSMMUG000000021388 | circadian associated repressor of transcription [Source:VGNC Symbol;Acc:VGNC:71345]  | - | 1.593893913 | 3.65E-05    | 0.000302836 |
| ENSMMUG000000005610 | protein tyrosine phosphatase non-receptor type 4 [Source:VGNC Symbol;Acc:VGNC:76605] | - | 1.590246238 | 8.49E-07    | 1.05E-05    |
| ENSMMUG000000001551 | SSU72 homolog, RNA polymerase II CTD phosphatase [Source:VGNC Symbol;Acc:VGNC:77986] | - | 1.589514404 | 1.71E-05    | 0.00015503  |
| ENSMMUG000000003238 | pregnancy zone protein [Source:NCBI gene;Acc:100430319]                              | - | 1.589446558 | 1.25E-06    | 1.49E-05    |
| ENSMMUG000000058302 |                                                                                      | - | 1.585924144 | 0.001377477 | 0.006807626 |
| ENSMMUG000000010328 | MYST/Esa1 associated factor 6 [Source:VGNC Symbol;Acc:VGNC:74580]                    | - | 1.583492395 | 0.014454563 | 0.047648718 |
| ENSMMUG000000011116 | NADPH oxidase 4 [Source:VGNC Symbol;Acc:VGNC:75376]                                  | - | 1.582241503 | 4.56E-09    | 8.64E-08    |
| ENSMMUG000000019836 | myocyte enhancer factor 2C [Source:VGNC Symbol;Acc:VGNC:84438]                       | - | -1.58171295 | 0.000388289 | 0.002316727 |
| ENSMMUG000000058942 |                                                                                      | - | -1.57717362 | 2.99E-06    | 3.25E-05    |
| ENSMMUG000000010113 | steroid 5 alpha-reductase 3 [Source:VGNC Symbol;Acc:VGNC:82246]                      | - | 1.577030156 | 1.44E-06    | 1.69E-05    |

|                    |                                                                                                                                       |   |             |             |             |
|--------------------|---------------------------------------------------------------------------------------------------------------------------------------|---|-------------|-------------|-------------|
| ENSMMUG00000064458 |                                                                                                                                       | - | 1.576163108 | 0.001120378 | 0.005728191 |
| ENSMMUG00000012029 | sulfatase 2 [Source:VGNC Symbol;Acc:VGNC:78179]                                                                                       | - | 1.576055996 | 1.97E-06    | 2.26E-05    |
| ENSMMUG00000017558 | discoidin, CUB and LCCL domain containing 1 [Source:VGNC Symbol;Acc:VGNC:71689]                                                       | - | 1.575953528 | 0.0020007   | 0.009318152 |
| ENSMMUG00000013055 | malic enzyme 3 [Source:VGNC Symbol;Acc:VGNC:74695]                                                                                    | - | 1.571314105 | 0.000769111 | 0.004190221 |
| ENSMMUG00000000717 | CD3e molecule associated protein [Source:NCBI gene;Acc:714440]                                                                        | - | -1.56997217 | 0.00019349  | 0.001284811 |
| ENSMMUG00000021775 | beta-1,3-galactosyltransferase 1 [Source:VGNC Symbol;Acc:VGNC:70204]                                                                  | - | -1.56964108 | 0.000225343 | 0.001456967 |
| ENSMMUG00000015132 | galectin 8 [Source:VGNC Symbol;Acc:VGNC:74258]                                                                                        | - | 1.568253352 | 0.005902027 | 0.023043778 |
| ENSMMUG00000006703 | solute carrier family 10 member 4 [Source:VGNC Symbol;Acc:VGNC:77553]                                                                 | - | -1.56784731 | 0.000246441 | 0.001566709 |
| ENSMMUG00000052540 |                                                                                                                                       | - | 1.566767456 | 0.001218837 | 0.006144677 |
| ENSMMUG00000019815 | transcription factor AP-2 epsilon [Source:VGNC Symbol;Acc:VGNC:79878]                                                                 | - | 1.565744482 | 0.004842388 | 0.019578219 |
| ENSMMUG00000020148 | BAG cochaperone 1 [Source:NCBI gene;Acc:702101]                                                                                       | - | 1.563930302 | 0.014890834 | 0.048819215 |
| ENSMMUG00000050975 |                                                                                                                                       | - | 1.563717685 | 0.001039306 | 0.005389918 |
| ENSMMUG00000060744 |                                                                                                                                       | - | 1.562892836 | 0.005290113 | 0.021131224 |
| ENSMMUG00000049575 | T cell receptor beta variable 7-2 [Source:HGNC Symbol;Acc:HGNC:12236]                                                                 | - | 1.560575894 | 0.00085131  | 0.004569193 |
| ENSMMUG00000052229 |                                                                                                                                       | - | 1.558695246 | 0.000563007 | 0.003211098 |
| ENSMMUG00000007775 | survival motor neuron domain containing 1 [Source:NCBI gene;Acc:694761]                                                               | - | 1.558613854 | 0.001605183 | 0.007736984 |
| ENSMMUG00000015279 | SWI/SNF related, matrix associated, actin dependent regulator of chromatin, subfamily a, member 2 [Source:VGNC Symbol;Acc:VGNC:77647] | - | 1.557491019 | 1.60E-05    | 0.00014637  |
| ENSMMUG00000000962 | H2A.Z variant histone 2 [Source:VGNC Symbol;Acc:VGNC:81324]                                                                           | - | 1.557071542 | 0.000107604 | 0.000769829 |
| ENSMMUG00000023137 | zinc finger protein 350 [Source:VGNC Symbol;Acc:VGNC:79041]                                                                           | - | 1.556281204 | 2.58E-05    | 0.00022261  |
| ENSMMUG00000059657 | chromosome 5 C4orf36 homolog [Source:NCBI gene;Acc:700500]                                                                            | - | -1.55572395 | 0.005761745 | 0.022625432 |
| ENSMMUG00000001549 | ATPase family AAA domain-containing protein 3A-like [Source:NCBI gene;Acc:114674453]                                                  | - | -1.55471455 | 3.29E-10    | 7.59E-09    |
| ENSMMUG00000061761 | interferon induced protein with tetratricopeptide repeats 2 [Source:NCBI gene;Acc:695452]                                             | - | 1.553759455 | 8.71E-08    | 1.32E-06    |
| ENSMMUG00000020898 | cap binding complex dependent translation initiation factor [Source:HGNC Symbol;Acc:HGNC:23925]                                       | - | 1.553414101 | 0.001959058 | 0.009145    |
| ENSMMUG00000021373 | rhomboid domain containing 3 [Source:NCBI gene;Acc:714479]                                                                            | - | 1.553361892 | 2.71E-05    | 0.000232558 |
| ENSMMUG00000000104 | ribosomal RNA processing 1B [Source:VGNC Symbol;Acc:VGNC:77089]                                                                       | - | 1.553326029 | 5.46E-06    | 5.58E-05    |
| ENSMMUG00000014474 | SPARC related modular calcium binding 2 [Source:VGNC Symbol;Acc:VGNC:83470]                                                           | - | 1.552669179 | 4.47E-12    | 1.37E-10    |
| ENSMMUG00000065307 |                                                                                                                                       | - | -1.5516662  | 0.001155923 | 0.005873273 |
| ENSMMUG00000023248 | serine/threonine kinase 38 like [Source:VGNC Symbol;Acc:VGNC:78156]                                                                   | - | 1.547714301 | 0.001863745 | 0.008773376 |
| ENSMMUG00000002318 | stimulated by retinoic acid 8 [Source:VGNC Symbol;Acc:VGNC:78250]                                                                     | - | 1.547568021 | 0.008388262 | 0.030702836 |
| ENSMMUG00000061278 |                                                                                                                                       | - | 1.547143038 | 0.000201718 | 0.001323716 |
| ENSMMUG00000062443 |                                                                                                                                       | - | 1.546401171 | 2.07E-05    | 0.000183268 |



|                    |                                                                                      |   |             |             |             |
|--------------------|--------------------------------------------------------------------------------------|---|-------------|-------------|-------------|
| ENSMMUG00000057768 |                                                                                      | - | 1.545913236 | 7.75E-07    | 9.66E-06    |
| ENSMMUG00000059080 |                                                                                      | - | 1.544905231 | 0.004115677 | 0.017153541 |
| ENSMMUG00000049885 |                                                                                      | - | 1.544782724 | 6.21E-05    | 0.00048209  |
| ENSMMUG00000054412 |                                                                                      | - | 1.543595652 | 2.66E-05    | 0.000229094 |
| ENSMMUG00000016077 | isocitrate dehydrogenase (NADP(+)) 1 [Source:NCBI gene;Acc:710019]                   | - | 1.543264109 | 0.009947901 | 0.035236211 |
| ENSMMUG00000023558 | exocyst complex component 2 [Source:VGNC Symbol;Acc:VGNC:72338]                      | - | 1.542304514 | 0.010891373 | 0.037836594 |
| ENSMMUG00000003877 | KAT8 regulatory NSL complex subunit 2 [Source:VGNC Symbol;Acc:VGNC:73910]            | - | 1.541716889 | 0.003990136 | 0.01673477  |
| ENSMMUG00000060167 |                                                                                      | - | 1.540450849 | 0.000407655 | 0.002414694 |
| ENSMMUG00000062021 |                                                                                      | - | 1.540407655 | 0.003310709 | 0.014262853 |
| ENSMMUG00000058170 | U6 spliceosomal RNA [Source:RFAM;Acc:RF00026]                                        | - | 1.539555141 | 0.006014214 | 0.023385229 |
| ENSMMUG00000016581 | methyltransferase like 18 [Source:VGNC Symbol;Acc:VGNC:74606]                        | - | 1.539194251 | 0.003798183 | 0.016047943 |
| ENSMMUG00000003288 | glutamic--pyruvic transaminase 2 [Source:VGNC Symbol;Acc:VGNC:72962]                 | - | 1.533774652 | 1.23E-06    | 1.48E-05    |
| ENSMMUG00000049539 |                                                                                      | - | 1.532219498 | 9.60E-05    | 0.000700425 |
| ENSMMUG00000013940 | kinesin family member 4A [Source:NCBI gene;Acc:695574]                               | - | 1.531572273 | 0.005885979 | 0.022988424 |
| ENSMMUG00000003053 | APC regulator of WNT signaling pathway 2 [Source:VGNC Symbol;Acc:VGNC:69888]         | - | 1.530617101 | 0.001717395 | 0.008184762 |
| ENSMMUG00000054210 | C-C motif chemokine 4 [Source:NCBI gene;Acc:100426632]                               | - | 1.529972374 | 7.58E-10    | 1.66E-08    |
| ENSMMUG00000010891 | lysine acetyltransferase 6A [Source:VGNC Symbol;Acc:VGNC:73821]                      | - | 1.528969447 | 0.000191095 | 0.001272344 |
| ENSMMUG00000003191 | kirre like nephrin family adhesion molecule 1 [Source:VGNC Symbol;Acc:VGNC:73837]    | - | 1.528938305 | 3.85E-08    | 6.23E-07    |
| ENSMMUG00000018640 | Dmx like 1 [Source:VGNC Symbol;Acc:VGNC:71935]                                       | - | 1.528533787 | 0.003367475 | 0.014476962 |
| ENSMMUG00000008212 | tenomodulin [Source:VGNC Symbol;Acc:VGNC:79087]                                      | - | -1.52826415 | 0.000398437 | 0.002366935 |
| ENSMMUG00000005204 | VPS16 core subunit of CORVET and HOPS complexes [Source:VGNC Symbol;Acc:VGNC:78966]  | - | 1.528248757 | 0.010638447 | 0.037157475 |
| ENSMMUG00000002090 | ATPase H+ transporting V1 subunit B1 [Source:VGNC Symbol;Acc:VGNC:70184]             | - | 1.527691535 | 3.60E-09    | 6.96E-08    |
| ENSMMUG00000008710 | protocadherin 1 [Source:VGNC Symbol;Acc:VGNC:75775]                                  | - | 1.527667983 | 0.001549575 | 0.007504264 |
| ENSMMUG00000003483 | cyclin dependent kinase 2 interacting protein [Source:VGNC Symbol;Acc:VGNC:71326]    | - | 1.526598721 | 2.41E-05    | 0.000210997 |
| ENSMMUG00000021374 | EWS RNA binding protein 1 [Source:VGNC Symbol;Acc:VGNC:72446]                        | - | -1.52505233 | 0.000100131 | 0.000723096 |
| ENSMMUG00000054064 |                                                                                      | - | 1.524532893 | 9.83E-05    | 0.000712832 |
| ENSMMUG00000062974 |                                                                                      | - | 1.523530799 | 0.005164927 | 0.020739013 |
| ENSMMUG00000018081 | ubiquitin associated and SH3 domain containing A [Source:VGNC Symbol;Acc:VGNC:78687] | - | -1.523474   | 1.95E-05    | 0.000173999 |
| ENSMMUG00000018525 | presenilin 2 [Source:VGNC Symbol;Acc:VGNC:76436]                                     | - | 1.522910826 | 2.60E-10    | 6.10E-09    |

|                     |                                                                                                |   |             |             |             |
|---------------------|------------------------------------------------------------------------------------------------|---|-------------|-------------|-------------|
| ENSMMUG00000010114  | Ras and Rab interactor 2 [Source:VGNC Symbol;Acc:VGNC:76770]                                   | - | 1.521752952 | 0.000106866 | 0.000765884 |
| ENSMMUG00000003134  | ring finger protein 217 [Source:VGNC Symbol;Acc:VGNC:76801]                                    | - | -1.52013538 | 0.000377739 | 0.002259264 |
| ENSMMUG000000053624 |                                                                                                | - | 1.516935174 | 0.000589466 | 0.003332625 |
| ENSMMUG00000017486  | minichromosome maintenance complex component 6 [Source:VGNC Symbol;Acc:VGNC:74685]             | - | 1.516634502 | 0.00031828  | 0.001961247 |
| ENSMMUG000000053794 |                                                                                                | - | 1.513880456 | 0.000533544 | 0.003067251 |
| ENSMMUG00000001728  | mitogen-activated protein kinase 9 [Source:VGNC Symbol;Acc:VGNC:74652]                         | - | 1.513354036 | 1.00E-06    | 1.22E-05    |
| ENSMMUG00000009084  | transmembrane 6 superfamily member 1 [Source:VGNC Symbol;Acc:VGNC:78566]                       | - | 1.507971233 | 2.29E-07    | 3.21E-06    |
| ENSMMUG00000002093  | testis expressed 261 [Source:NCBI gene;Acc:703863]                                             | - | 1.507758252 | 1.36E-07    | 1.98E-06    |
| ENSMMUG000000045680 | iron responsive element binding protein 2 [Source:VGNC Symbol;Acc:VGNC:84360]                  | - | 1.506077457 | 0.007033015 | 0.026526757 |
| ENSMMUG000000015167 | DIS3 like 3'-5' exoribonuclease 2 [Source:VGNC Symbol;Acc:VGNC:71793]                          | - | 1.505773234 | 0.013838175 | 0.04593168  |
| ENSMMUG00000006950  | cornichon family AMPA receptor auxiliary protein 2 [Source:VGNC Symbol;Acc:VGNC:71366]         | - | 1.504729377 | 0.011138321 | 0.0384878   |
| ENSMMUG000000015970 | coiled-coil domain containing 150 [Source:VGNC Symbol;Acc:VGNC:84222]                          | - | 1.503498668 | 2.88E-06    | 3.15E-05    |
| ENSMMUG000000005856 | glycine amidinotransferase [Source:VGNC Symbol;Acc:VGNC:72892]                                 | - | 1.502874186 | 1.85E-05    | 0.000166529 |
| ENSMMUG000000005895 | nucleobindin 2 [Source:VGNC Symbol;Acc:VGNC:75549]                                             | - | 1.501939243 | 0.000985531 | 0.005172142 |
| ENSMMUG000000008918 | SRP receptor subunit beta [Source:VGNC Symbol;Acc:VGNC:77980]                                  | - | 1.501932625 | 7.63E-05    | 0.000575397 |
| ENSMMUG000000040273 | zinc finger protein 257 [Source:NCBI gene;Acc:694388]                                          | - | 1.501278151 | 0.001340831 | 0.006658646 |
| ENSMMUG000000040506 | H2B clustered histone 18 [Source:HGNC Symbol;Acc:HGNC:24700]                                   | - | -1.50022047 | 0.002026524 | 0.009420575 |
| ENSMMUG000000062047 |                                                                                                | - | 1.498613511 | 0.006228711 | 0.024089707 |
| ENSMMUG000000050923 |                                                                                                | - | 1.498133643 | 3.68E-05    | 0.000304671 |
| ENSMMUG000000003869 | WD repeat domain 46 [Source:VGNC Symbol;Acc:VGNC:78940]                                        | - | 1.497927693 | 0.004049323 | 0.016924117 |
| ENSMMUG000000021173 | nuclear transcription factor Y subunit alpha [Source:VGNC Symbol;Acc:VGNC:75344]               | - | 1.496123074 | 6.00E-08    | 9.36E-07    |
| ENSMMUG000000020175 | mediator complex subunit 25 [Source:VGNC Symbol;Acc:VGNC:74607]                                | - | 1.495438983 | 0.005228213 | 0.020958894 |
| ENSMMUG000000062791 |                                                                                                | - | 1.494958044 | 0.009746178 | 0.034681609 |
| ENSMMUG000000062140 |                                                                                                | - | 1.494183241 | 0.001519607 | 0.007399957 |
| ENSMMUG000000039944 | Ras protein specific guanine nucleotide releasing factor 2 [Source:VGNC Symbol;Acc:VGNC:84486] | - | 1.492725665 | 0.003990693 | 0.01673477  |
| ENSMMUG000000014343 | lipase family member J [Source:VGNC Symbol;Acc:VGNC:74333]                                     | - | 1.492370384 | 0.000592326 | 0.003345718 |
| ENSMMUG00000009001  | transmembrane 131 like [Source:VGNC Symbol;Acc:VGNC:79781]                                     | - | 1.491985162 | 0.005513069 | 0.021858431 |
| ENSMMUG000000019262 | calcium voltage-gated channel subunit alpha1 D [Source:VGNC Symbol;Acc:VGNC:70501]             | - | 1.491850477 | 0.00924185  | 0.033223625 |
| ENSMMUG000000017379 | myocardin related transcription factor B [Source:VGNC Symbol;Acc:VGNC:74865]                   | - | 1.491236415 | 9.83E-05    | 0.000712832 |

|                    |                                                                                                 |   |             |             |             |
|--------------------|-------------------------------------------------------------------------------------------------|---|-------------|-------------|-------------|
| ENSMMUG0000002961  | G protein subunit alpha 11 [Source:VGNC Symbol;Acc:VGNC:73085]                                  | - | 1.490306468 | 2.82E-09    | 5.51E-08    |
| ENSMMUG0000005442  | 5'-nucleotidase ecto [Source:VGNC Symbol;Acc:VGNC:75537]                                        | - | 1.489677398 | 0.000140938 | 0.000971546 |
| ENSMMUG0000005515  | ATP binding cassette subfamily C member 5 [Source:VGNC Symbol;Acc:VGNC:69574]                   | - | 1.488759376 | 2.01E-06    | 2.29E-05    |
| ENSMMUG00000012636 | potassium channel tetramerization domain containing 4 [Source:VGNC Symbol;Acc:VGNC:73892]       | - | 1.486310319 | 0.00344892  | 0.014778701 |
| ENSMMUG00000012463 | DEAD-box helicase 46 [Source:VGNC Symbol;Acc:VGNC:71663]                                        | - | 1.485043359 | 3.66E-05    | 0.000303363 |
| ENSMMUG00000011675 | zinc finger and SCAN domain containing 12 [Source:VGNC Symbol;Acc:VGNC:78910]                   | - | 1.483407802 | 1.57E-07    | 2.27E-06    |
| ENSMMUG00000031398 | coiled-coil domain containing 173 [Source:NCBI gene;Acc:709886]                                 | - | 1.482360634 | 0.006722143 | 0.025698868 |
| ENSMMUG00000049948 |                                                                                                 | - | 1.481406069 | 0.000306239 | 0.001896216 |
| ENSMMUG00000011269 | CF transmembrane conductance regulator [Source:VGNC Symbol;Acc:VGNC:71020]                      | - | 1.481293127 | 1.71E-06    | 1.98E-05    |
| ENSMMUG00000016925 | laminin subunit beta 3 [Source:VGNC Symbol;Acc:VGNC:74230]                                      | - | 1.480732297 | 7.22E-07    | 9.08E-06    |
| ENSMMUG00000005301 | ATP binding cassette subfamily B member 9 [Source:VGNC Symbol;Acc:VGNC:81341]                   | - | 1.479575628 | 6.23E-06    | 6.26E-05    |
| ENSMMUG00000050245 |                                                                                                 | - | 1.478477197 | 0.006806232 | 0.025940884 |
| ENSMMUG00000000681 | calmin [Source:VGNC Symbol;Acc:VGNC:71232]                                                      | - | 1.475827143 | 5.43E-11    | 1.41E-09    |
| ENSMMUG00000038560 | eukaryotic translation elongation factor 1 epsilon 1 [Source:NCBI gene;Acc:695426]              | - | 1.475743699 | 1.45E-09    | 3.01E-08    |
| ENSMMUG00000056116 |                                                                                                 | - | 1.475350476 | 3.07E-05    | 0.000260895 |
| ENSMMUG00000020184 | carboxypeptidase vitellogenic like [Source:VGNC Symbol;Acc:VGNC:71406]                          | - | 1.475194552 | 0.009171692 | 0.033019704 |
| ENSMMUG00000021083 | Josephin domain containing 1 [Source:VGNC Symbol;Acc:VGNC:73920]                                | - | 1.473354944 | 0.00232406  | 0.010552281 |
| ENSMMUG00000023446 | tuftelin interacting protein 11 [Source:VGNC Symbol;Acc:VGNC:78399]                             | - | -1.47310989 | 1.38E-05    | 0.000128189 |
| ENSMMUG00000063312 |                                                                                                 | - | 1.472312632 | 5.79E-05    | 0.000454766 |
| ENSMMUG00000020592 | Gse1 coiled-coil protein [Source:VGNC Symbol;Acc:VGNC:73254]                                    | - | 1.470169863 | 0.002271714 | 0.010356688 |
| ENSMMUG00000017396 | 3'(2'), 5'-bisphosphate nucleotidase 1 [Source:NCBI gene;Acc:721277]                            | - | 1.470016659 | 0.005945309 | 0.023190668 |
| ENSMMUG00000023141 | CDC like kinase 2 [Source:VGNC Symbol;Acc:VGNC:71259]                                           | - | 1.469350894 | 0.004223497 | 0.017513835 |
| ENSMMUG00000001008 | spectrin repeat containing nuclear envelope protein 2 [Source:NCBI gene;Acc:706759]             | - | 1.468892729 | 2.88E-05    | 0.00024631  |
| ENSMMUG00000002653 | hexokinase 3 [Source:VGNC Symbol;Acc:VGNC:73476]                                                | - | 1.468132697 | 6.06E-06    | 6.11E-05    |
| ENSMMUG00000051115 |                                                                                                 | - | 1.467699608 | 0.011825987 | 0.04037589  |
| ENSMMUG00000020847 | CKLF like MARVEL transmembrane domain containing 3 [Source:VGNC Symbol;Acc:VGNC:71215]          | - | -1.46645612 | 0.002597026 | 0.011565236 |
| ENSMMUG00000022123 | tRNA splicing endonuclease subunit 54 [Source:VGNC Symbol;Acc:VGNC:79666]                       | - | 1.466238554 | 1.40E-05    | 0.000129983 |
| ENSMMUG00000012781 | muscular LMNA interacting protein [Source:VGNC Symbol;Acc:VGNC:83434]                           | - | 1.466158983 | 0.001716147 | 0.008181986 |
| ENSMMUG00000021282 | late endosomal/lysosomal adaptor, MAPK and MTOR activator 1 [Source:VGNC Symbol;Acc:VGNC:74129] | - | 1.465382699 | 0.00175622  | 0.008321395 |

|                    |                                                                                      |   |             |             |             |
|--------------------|--------------------------------------------------------------------------------------|---|-------------|-------------|-------------|
| ENSMMUG00000019145 | TNF alpha induced protein 1 [Source:VGNC Symbol;Acc:VGNC:78578]                      | - | 1.465313849 | 0.000391333 | 0.002330366 |
| ENSMMUG00000004432 | anaphase promoting complex subunit 10 [Source:VGNC Symbol;Acc:VGNC:69682]            | - | 1.463870105 | 0.014953405 | 0.048959058 |
| ENSMMUG00000016983 | acrosin binding protein [Source:VGNC Symbol;Acc:VGNC:69445]                          | - | 1.463676478 | 1.41E-05    | 0.000130806 |
| ENSMMUG00000006509 | CREB regulated transcription coactivator 1 [Source:VGNC Symbol;Acc:VGNC:71418]       | - | 1.463445654 | 0.00181213  | 0.008559914 |
| ENSMMUG00000004052 | phosphodiesterase 12 [Source:VGNC Symbol;Acc:VGNC:75863]                             | - | -1.46330176 | 0.00488748  | 0.019741052 |
| ENSMMUG00000012101 | synaptogyrin 1 [Source:VGNC Symbol;Acc:VGNC:78068]                                   | - | 1.462313688 | 0.00062379  | 0.003502512 |
| ENSMMUG00000064013 |                                                                                      | - | 1.461955845 | 0.014951048 | 0.048959058 |
| ENSMMUG00000021695 | Morf4 family associated protein 1 [Source:NCBI gene;Acc:710771]                      | - | 1.461850316 | 0.011807392 | 0.040323607 |
| ENSMMUG00000065117 | septin 4 [Source:HGNC Symbol;Acc:HGNC:9165]                                          | - | 1.460695262 | 9.16E-05    | 0.000673212 |
| ENSMMUG00000001121 | zinc finger protein 689 [Source:VGNC Symbol;Acc:VGNC:79480]                          | - | 1.460542705 | 0.00152182  | 0.007407797 |
| ENSMMUG00000017432 | tropomodulin 2 [Source:VGNC Symbol;Acc:VGNC:78571]                                   | - | 1.460110562 | 8.14E-12    | 2.40E-10    |
| ENSMMUG00000050300 |                                                                                      | - | -1.45995282 | 0.007129026 | 0.026820586 |
| ENSMMUG00000019045 | estrogen receptor 1 [Source:VGNC Symbol;Acc:VGNC:72432]                              | - | 1.459450356 | 0.000229431 | 0.001480282 |
| ENSMMUG00000004493 | propionyl-CoA carboxylase subunit alpha [Source:VGNC Symbol;Acc:VGNC:75773]          | - | 1.458520372 | 5.07E-05    | 0.000404895 |
| ENSMMUG00000058016 | bMERB domain containing 1 [Source:NCBI gene;Acc:713757]                              | - | 1.457881319 | 0.000241372 | 0.001541144 |
| ENSMMUG00000019977 | myosin heavy chain 15 [Source:VGNC Symbol;Acc:VGNC:84148]                            | - | 1.456381594 | 3.79E-07    | 5.07E-06    |
| ENSMMUG00000006688 | ER membrane protein complex subunit 1 [Source:VGNC Symbol;Acc:VGNC:72134]            | - | 1.451566303 | 1.61E-06    | 1.87E-05    |
| ENSMMUG00000003688 | zinc finger protein 91 [Source:HGNC Symbol;Acc:HGNC:13166]                           | - | 1.450587887 | 0.007383047 | 0.027632471 |
| ENSMMUG00000063262 |                                                                                      | - | 1.450181558 | 1.41E-08    | 2.46E-07    |
| ENSMMUG00000040803 | sarcalumenin [Source:NCBI gene;Acc:704655]                                           | - | 1.450063124 | 0.010975465 | 0.038062987 |
| ENSMMUG00000009303 | coiled-coil domain containing 38 [Source:VGNC Symbol;Acc:VGNC:70880]                 | - | 1.447639647 | 0.000515007 | 0.002977398 |
| ENSMMUG00000015608 | tudor domain containing 12 [Source:VGNC Symbol;Acc:VGNC:82254]                       | - | 1.447531084 | 0.00123797  | 0.006223267 |
| ENSMMUG00000003029 | protein arginine methyltransferase 1 [Source:NCBI gene;Acc:719419]                   | - | 1.445255278 | 1.11E-06    | 1.34E-05    |
| ENSMMUG00000006163 | malate dehydrogenase 1 [Source:VGNC Symbol;Acc:VGNC:74690]                           | - | 1.444679937 | 3.72E-08    | 6.04E-07    |
| ENSMMUG00000021145 | family with sequence similarity 120B [Source:VGNC Symbol;Acc:VGNC:72311]             | - | 1.444347524 | 5.90E-07    | 7.56E-06    |
| ENSMMUG00000016695 | CD320 molecule [Source:VGNC Symbol;Acc:VGNC:70763]                                   | - | 1.443140806 | 0.01053525  | 0.036880876 |
| ENSMMUG00000054302 | antioxidant 1 copper chaperone [Source:NCBI gene;Acc:712464]                         | - | -1.44263778 | 0.001332727 | 0.006623758 |
| ENSMMUG00000002517 | protein tyrosine phosphatase domain containing 1 [Source:VGNC Symbol;Acc:VGNC:76567] | - | 1.442395184 | 0.010764828 | 0.037481728 |
| ENSMMUG00000004710 | protein interacting with cyclin A1 [Source:VGNC Symbol;Acc:VGNC:76336]               | - | 1.441464603 | 0.001630115 | 0.007835646 |



|                    |                                                                                      |   |             |             |             |
|--------------------|--------------------------------------------------------------------------------------|---|-------------|-------------|-------------|
| ENSMMUG0000005634  | ribonuclease L [Source:VGNC Symbol;Acc:VGNC:82223]                                   | - | 1.440444989 | 3.81E-05    | 0.000313898 |
| ENSMMUG0000003120  | HECT domain E3 ubiquitin protein ligase 1 [Source:VGNC Symbol;Acc:VGNC:73200]        | - | -1.43781301 | 0.000682153 | 0.003785257 |
| ENSMMUG00000047342 | T cell receptor alpha variable 12-2 [Source:HGNC Symbol;Acc:HGNC:12106]              | - | 1.437490614 | 0.002428158 | 0.010948087 |
| ENSMMUG00000008214 | nuclear export mediator factor [Source:VGNC Symbol;Acc:VGNC:84407]                   | - | 1.437008713 | 0.001257741 | 0.006304605 |
| ENSMMUG00000007257 | synaptic vesicle glycoprotein 2A [Source:VGNC Symbol;Acc:VGNC:78181]                 | - | 1.435909978 | 2.67E-11    | 7.20E-10    |
| ENSMMUG00000012561 | NOP2/Sun RNA methyltransferase family member 7 [Source:VGNC Symbol;Acc:VGNC:75463]   | - | 1.433850639 | 5.73E-06    | 5.82E-05    |
| ENSMMUG00000004091 | transcription factor 12 [Source:VGNC Symbol;Acc:VGNC:78283]                          | - | 1.430131862 | 6.25E-09    | 1.16E-07    |
| ENSMMUG00000008974 | Fc receptor like 5 [Source:NCBI gene;Acc:718771]                                     | - | 1.429926572 | 0.000115564 | 0.000818672 |
| ENSMMUG00000022305 | Rho guanine nucleotide exchange factor 1 [Source:VGNC Symbol;Acc:VGNC:70012]         | - | -1.42822347 | 3.47E-07    | 4.69E-06    |
| ENSMMUG00000060781 | G protein-coupled receptor 18 [Source:NCBI gene;Acc:698714]                          | - | 1.427013061 | 0.002248727 | 0.010259504 |
| ENSMMUG00000002113 | NHL repeat containing 3 [Source:VGNC Symbol;Acc:VGNC:75291]                          | - | 1.423868876 | 1.02E-06    | 1.24E-05    |
| ENSMMUG00000002231 | transmembrane protein 87B [Source:VGNC Symbol;Acc:VGNC:79557]                        | - | 1.417653608 | 0.000146707 | 0.001005113 |
| ENSMMUG00000064563 |                                                                                      | - | 1.417620778 | 0.000658667 | 0.003668181 |
| ENSMMUG00000022643 | Ro60, Y RNA binding protein [Source:NCBI gene;Acc:715194]                            | - | 1.416757651 | 0.005354259 | 0.021304369 |
| ENSMMUG00000000983 | aldolase, fructose-bisphosphate A [Source:NCBI gene;Acc:708406]                      | - | 1.416378766 | 0.000508097 | 0.002942989 |
| ENSMMUG00000000262 | beta-ureidopropionase 1 [Source:VGNC Symbol;Acc:VGNC:79029]                          | - | -1.41577277 | 0.013699029 | 0.045531306 |
| ENSMMUG00000014735 | carnitine palmitoyltransferase 1C [Source:NCBI gene;Acc:719429]                      | - | 1.415118624 | 0.001072066 | 0.005522533 |
| ENSMMUG00000058583 | RRAD and GEM like GTPase 1 [Source:NCBI gene;Acc:713351]                             | - | 1.414976121 | 5.61E-06    | 5.71E-05    |
| ENSMMUG00000021788 | immunoglobulin superfamily DCC subclass member 4 [Source:VGNC Symbol;Acc:VGNC:73388] | - | -1.41481658 | 0.003212537 | 0.013893489 |
| ENSMMUG00000011893 | KIAA0513 [Source:VGNC Symbol;Acc:VGNC:73925]                                         | - | 1.414688633 | 0.000267599 | 0.001678949 |
| ENSMMUG00000064804 |                                                                                      | - | 1.413600776 | 0.000925219 | 0.004905896 |
| ENSMMUG00000054176 | methyltransferase like 8 [Source:NCBI gene;Acc:695361]                               | - | -1.41244274 | 0.007867886 | 0.029180501 |
| ENSMMUG00000003712 | zinc finger protein 615 [Source:VGNC Symbol;Acc:VGNC:79454]                          | - | 1.411644198 | 0.002223431 | 0.01015918  |
| ENSMMUG00000020913 | scavenger receptor class B member 2 [Source:VGNC Symbol;Acc:VGNC:77026]              | - | 1.410616445 | 1.95E-07    | 2.78E-06    |
| ENSMMUG00000047162 | fibroblast growth factor 10 [Source:VGNC Symbol;Acc:VGNC:84378]                      | - | 1.410510164 | 3.87E-05    | 0.000317793 |
| ENSMMUG00000019713 | thyroid stimulating hormone receptor [Source:VGNC Symbol;Acc:VGNC:78662]             | - | 1.410088825 | 0.002487394 | 0.011153796 |
| ENSMMUG00000001894 | cyclin dependent kinase 11B [Source:NCBI gene;Acc:703046]                            | - | 1.409440135 | 0.000636536 | 0.003564311 |
| ENSMMUG00000020061 | protein phosphatase 1 regulatory subunit 9B [Source:VGNC Symbol;Acc:VGNC:76372]      | - | 1.408940449 | 0.000336746 | 0.002055978 |
| ENSMMUG00000046765 |                                                                                      | - | 1.407384875 | 0.002121945 | 0.009790101 |
| ENSMMUG00000051446 |                                                                                      | - | 1.406071197 | 0.001177628 | 0.005968755 |

|                    |                                                                                              |   |             |             |             |
|--------------------|----------------------------------------------------------------------------------------------|---|-------------|-------------|-------------|
| ENSMMUG0000002332  | RNA binding motif protein 25 [Source:VGNC Symbol;Acc:VGNC:76521]                             | - | 1.402320773 | 0.014343582 | 0.04735347  |
| ENSMMUG00000016399 | ral guanine nucleotide dissociation stimulator like 1 [Source:VGNC Symbol;Acc:VGNC:76868]    | - | 1.401190938 | 0.013968239 | 0.046275909 |
| ENSMMUG00000053778 |                                                                                              | - | 1.400229865 | 0.008518984 | 0.031097959 |
| ENSMMUG00000055392 |                                                                                              | - | 1.399248681 | 0.000732482 | 0.004017375 |
| ENSMMUG00000009038 | titin [Source:NCBI gene;Acc:703527]                                                          | - | 1.397871486 | 0.00374137  | 0.015840573 |
| ENSMMUG00000040764 | alcohol dehydrogenase 1A [Source:NCBI gene;Acc:100424103]                                    | - | 1.396365651 | 0.002740543 | 0.012090458 |
| ENSMMUG00000013707 | heat shock protein family H (Hsp110) member 1 [Source:NCBI gene;Acc:721956]                  | - | 1.396263534 | 1.49E-07    | 2.15E-06    |
| ENSMMUG00000040854 | aspartyl-tRNA synthetase 1 [Source:VGNC Symbol;Acc:VGNC:84226]                               | - | 1.395480687 | 0.000241933 | 0.001543923 |
| ENSMMUG00000002809 | unc-80 homolog, NALCN channel complex subunit [Source:NCBI gene;Acc:713007]                  | - | 1.388435841 | 0.000724254 | 0.003984696 |
| ENSMMUG00000009782 | C-C motif chemokine ligand 7 [Source:NCBI gene;Acc:714751]                                   | - | 1.388205883 | 0.005727183 | 0.022518492 |
| ENSMMUG00000007398 | potassium calcium-activated channel subfamily N member 1 [Source:VGNC Symbol;Acc:VGNC:74002] | - | 1.385254631 | 0.000328065 | 0.002010094 |
| ENSMMUG00000004617 | glutathione peroxidase 6 [Source:VGNC Symbol;Acc:VGNC:73154]                                 | - | 1.383842928 | 0.012328474 | 0.041812714 |
| ENSMMUG00000002243 | pleckstrin homology and RhoGEF domain containing G7 [Source:VGNC Symbol;Acc:VGNC:76149]      | - | 1.381899251 | 1.29E-05    | 0.000120674 |
| ENSMMUG00000018079 | transmembrane serine protease 3 [Source:VGNC Symbol;Acc:VGNC:78576]                          | - | 1.379973247 | 0.002108223 | 0.009748749 |
| ENSMMUG00000051366 |                                                                                              | - | 1.379705201 | 0.004003442 | 0.016776782 |
| ENSMMUG00000051999 |                                                                                              | - | 1.379519152 | 0.007420259 | 0.027754839 |
| ENSMMUG00000019254 | phospholipase A2 group VII [Source:VGNC Symbol;Acc:VGNC:76158]                               | - | 1.379117518 | 2.36E-06    | 2.63E-05    |
| ENSMMUG00000009961 | niban apoptosis regulator 2 [Source:VGNC Symbol;Acc:VGNC:75254]                              | - | 1.378523106 | 0.00012657  | 0.000885413 |
| ENSMMUG00000007923 | phosphatidylinositol glycan anchor biosynthesis class W [Source:VGNC Symbol;Acc:VGNC:75850]  | - | 1.377694228 | 0.001132718 | 0.005767289 |
| ENSMMUG00000010688 | olfactory receptor, family 2, subfamily AT, member 4 [Source:NCBI gene;Acc:694711]           | - | 1.375816847 | 0.011302622 | 0.038935125 |
| ENSMMUG00000000288 | C-C motif chemokine ligand 2 [Source:VGNC Symbol;Acc:VGNC:70698]                             | - | 1.374057993 | 0.005153692 | 0.020700664 |
| ENSMMUG00000059848 | olfactory receptor 5B2 [Source:NCBI gene;Acc:100429465]                                      | - | 1.373381279 | 0.000200767 | 0.001319625 |
| ENSMMUG00000002589 | sulfotransferase 1C3-like [Source:NCBI gene;Acc:114671897]                                   | - | -1.36905399 | 1.25E-05    | 0.000117273 |
| ENSMMUG00000002434 | inhibitor of growth family member 3 [Source:VGNC Symbol;Acc:VGNC:73595]                      | - | 1.368659641 | 0.002732078 | 0.012067441 |
| ENSMMUG00000006857 | epididymal sperm binding protein 1 [Source:VGNC Symbol;Acc:VGNC:72046]                       | - | 1.367457691 | 0.008896123 | 0.032206846 |
| ENSMMUG00000060798 |                                                                                              | - | 1.365910834 | 0.000767168 | 0.004187059 |
| ENSMMUG00000015738 | vascular endothelial growth factor D [Source:VGNC Symbol;Acc:VGNC:79953]                     | - | 1.365332242 | 0.009283292 | 0.0332947   |
| ENSMMUG00000005466 | SPOC domain containing 1 [Source:VGNC Symbol;Acc:VGNC:77997]                                 | - | 1.363577551 | 0.000160286 | 0.001083651 |
| ENSMMUG00000062697 | olfactory receptor 5B12 [Source:NCBI gene;Acc:106993236]                                     | - | 1.363195565 | 0.010331525 | 0.036314211 |

|                    |                                                                                   |   |             |             |             |
|--------------------|-----------------------------------------------------------------------------------|---|-------------|-------------|-------------|
| ENSMMUG00000016665 | NADH:ubiquinone oxidoreductase subunit A11 [Source:NCBI gene;Acc:697843]          | - | 1.362666149 | 0.002173841 | 0.009962222 |
| ENSMMUG00000048322 | eva-1 homolog A, regulator of programmed cell death [Source:NCBI gene;Acc:710843] | - | 1.361227199 | 0.002148137 | 0.00987388  |
| ENSMMUG00000011712 | olfactory receptor 5B21 [Source:NCBI gene;Acc:702145]                             | - | 1.360833029 | 0.012303381 | 0.041739127 |
| ENSMMUG00000048805 |                                                                                   | - | 1.360244665 | 0.000719373 | 0.00396316  |
| ENSMMUG00000016543 | CREB/ATF bZIP transcription factor [Source:VGNC Symbol;Acc:VGNC:71538]            | - | 1.359588961 | 0.003652767 | 0.015513532 |
| ENSMMUG00000035632 | U6 spliceosomal RNA [Source:RFAM;Acc:RF00026]                                     | - | 1.358690486 | 0.000564052 | 0.003215565 |
| ENSMMUG00000054711 |                                                                                   | - | 1.355834777 | 0.000124766 | 0.000874286 |
| ENSMMUG00000052454 | prostaglandin D2 receptor 2 [Source:NCBI gene;Acc:695853]                         | - | 1.355498523 | 0.002120634 | 0.009788848 |
| ENSMMUG00000065060 |                                                                                   | - | 1.354918304 | 0.00023893  | 0.001528872 |
| ENSMMUG00000054532 |                                                                                   | - | 1.353698335 | 0.000132548 | 0.000918348 |
| ENSMMUG00000031497 |                                                                                   | - | 1.353442749 | 7.62E-05    | 0.000575397 |
| ENSMMUG00000007524 | RNA polymerase II subunit H [Source:VGNC Symbol;Acc:VGNC:76216]                   | - | 1.353056443 | 2.53E-05    | 0.000219243 |
| ENSMMUG00000016893 | solute carrier family 9 member A1 [Source:VGNC Symbol;Acc:VGNC:82241]             | - | 1.348510306 | 4.66E-06    | 4.84E-05    |
| ENSMMUG00000061834 |                                                                                   | - | 1.347323133 | 2.42E-06    | 2.70E-05    |
| ENSMMUG00000022199 | polyhomeotic homolog 3 [Source:VGNC Symbol;Acc:VGNC:75804]                        | - | 1.345990787 | 0.00212883  | 0.009810818 |
| ENSMMUG00000064529 |                                                                                   | - | 1.343635626 | 0.000266959 | 0.001675786 |
| ENSMMUG00000022120 | transmembrane protein 94 [Source:VGNC Symbol;Acc:VGNC:79760]                      | - | 1.343324202 | 1.66E-08    | 2.88E-07    |
| ENSMMUG00000008738 | COMM domain containing 10 [Source:VGNC Symbol;Acc:VGNC:71374]                     | - | 1.342713435 | 0.00684266  | 0.026010322 |
| ENSMMUG00000043411 | zinc finger and BTB domain containing 39 [Source:NCBI gene;Acc:713914]            | - | 1.342059077 | 0.002958911 | 0.012946949 |
| ENSMMUG00000057021 | CLOCK interacting pacemaker [Source:NCBI gene;Acc:704679]                         | - | 1.339323764 | 0.002287777 | 0.010419502 |
| ENSMMUG00000016812 | coiled-coil domain containing 18 [Source:VGNC Symbol;Acc:VGNC:70913]              | - | 1.339175823 | 0.000529999 | 0.003048439 |
| ENSMMUG00000015799 | tolloid like 1 [Source:VGNC Symbol;Acc:VGNC:78369]                                | - | 1.336049566 | 0.005444335 | 0.021618424 |
| ENSMMUG00000002269 | serine carboxypeptidase 1 [Source:VGNC Symbol;Acc:VGNC:82232]                     | - | 1.334304301 | 1.44E-05    | 0.000132943 |
| ENSMMUG00000022056 | DENN domain containing 4A [Source:VGNC Symbol;Acc:VGNC:71697]                     | - | 1.334020546 | 1.81E-05    | 0.000163659 |
| ENSMMUG00000003850 | collagen type XI alpha 2 chain [Source:VGNC Symbol;Acc:VGNC:71290]                | - | 1.334000978 | 0.000173469 | 0.001165089 |
| ENSMMUG00000064806 |                                                                                   | - | -1.33381488 | 0.004749396 | 0.01927198  |
| ENSMMUG00000002911 | mutL homolog 3 [Source:VGNC Symbol;Acc:VGNC:82187]                                | - | 1.332929456 | 0.007011321 | 0.02647266  |
| ENSMMUG00000018456 | PBX homeobox 2 [Source:VGNC Symbol;Acc:VGNC:75771]                                | - | 1.329890314 | 0.008568216 | 0.031212787 |
| ENSMMUG00000011338 | SLAM family member 8 [Source:VGNC Symbol;Acc:VGNC:77545]                          | - | -1.32963753 | 0.000126806 | 0.00088656  |



|                    |                                                                                                        |   |             |             |             |
|--------------------|--------------------------------------------------------------------------------------------------------|---|-------------|-------------|-------------|
| ENSMMUG00000051523 | Metazoan signal recognition particle RNA [Source:RFAM;Acc:RF00017]                                     | - | 1.328157589 | 0.013478553 | 0.044980965 |
| ENSMMUG00000022589 | prostate transmembrane protein, androgen induced 1 [Source:VGNC Symbol;Acc:VGNC:76023]                 | - | 1.327563073 | 0.000511873 | 0.002960675 |
| ENSMMUG00000003872 | ral guanine nucleotide dissociation stimulator like 2 [Source:VGNC Symbol;Acc:VGNC:76886]              | - | 1.326781861 | 0.00084205  | 0.004531365 |
| ENSMMUG00000004460 | tyrosyl-DNA phosphodiesterase 1 [Source:VGNC Symbol;Acc:VGNC:79164]                                    | - | 1.326506975 | 0.004038599 | 0.016895311 |
| ENSMMUG00000037675 | testis expressed 52 [Source:NCBI gene;Acc:107000723]                                                   | - | 1.325245317 | 6.91E-05    | 0.000530472 |
| ENSMMUG00000021078 | ATPase Na <sup>+</sup> /K <sup>+</sup> transporting subunit beta 1 [Source:VGNC Symbol;Acc:VGNC:70176] | - | 1.325144277 | 0.014292244 | 0.047224604 |
| ENSMMUG00000013032 | phytanoyl-CoA 2-hydroxylase interacting protein [Source:VGNC Symbol;Acc:VGNC:75812]                    | - | 1.324083212 | 0.000386356 | 0.002307437 |
| ENSMMUG00000007293 | RAB34, member RAS oncogene family [Source:VGNC Symbol;Acc:VGNC:81533]                                  | - | 1.322393921 | 1.95E-05    | 0.000173999 |
| ENSMMUG00000005225 | gap junction protein alpha 1 [Source:VGNC Symbol;Acc:VGNC:73055]                                       | - | 1.321770695 | 0.000999216 | 0.005219544 |
| ENSMMUG00000061260 | Spi-C transcription factor [Source:NCBI gene;Acc:695809]                                               | - | 1.321434404 | 6.15E-05    | 0.000478874 |
| ENSMMUG00000016723 | zinc finger protein 287 [Source:NCBI gene;Acc:695524]                                                  | - | 1.321227293 | 0.014538678 | 0.047868978 |
| ENSMMUG00000047127 |                                                                                                        | - | 1.319674231 | 0.005366917 | 0.021347825 |
| ENSMMUG00000048710 | HIC ZBTB transcriptional repressor 1 [Source:NCBI gene;Acc:721284]                                     | - | 1.318129297 | 0.002580936 | 0.011506087 |
| ENSMMUG00000004433 | ATP binding cassette subfamily E member 1 [Source:VGNC Symbol;Acc:VGNC:69581]                          | - | 1.317290623 | 0.000117473 | 0.000829802 |
| ENSMMUG00000010819 | fibroblast growth factor receptor substrate 2 [Source:VGNC Symbol;Acc:VGNC:72732]                      | - | 1.316208318 | 1.26E-05    | 0.000118198 |
| ENSMMUG00000023810 | methionyl-tRNA synthetase 2, mitochondrial [Source:VGNC Symbol;Acc:VGNC:74572]                         | - | 1.315902169 | 3.56E-06    | 3.82E-05    |
| ENSMMUG00000052977 | putative protein FAM106C [Source:NCBI gene;Acc:106994084]                                              | - | -1.31581567 | 0.000236539 | 0.001517383 |
| ENSMMUG00000059773 | methyltransferase like 11B [Source:NCBI gene;Acc:705503]                                               | - | 1.314994785 | 0.003932826 | 0.016537244 |
| ENSMMUG00000022163 | solute carrier family 1 member 5 [Source:VGNC Symbol;Acc:VGNC:77413]                                   | - | 1.314315862 | 0.003104295 | 0.013491827 |
| ENSMMUG00000015640 | AF4/FMR2 family member 4 [Source:VGNC Symbol;Acc:VGNC:69629]                                           | - | 1.313868777 | 0.000107239 | 0.000768111 |
| ENSMMUG00000060822 |                                                                                                        | - | 1.312107972 | 3.78E-12    | 1.18E-10    |
| ENSMMUG00000004674 | phosphoribosyl pyrophosphate synthetase 1 [Source:NCBI gene;Acc:702529]                                | - | 1.310633827 | 5.56E-07    | 7.18E-06    |
| ENSMMUG00000055344 | TLC domain containing 3A [Source:NCBI gene;Acc:699707]                                                 | - | 1.310389246 | 0.001749261 | 0.008294818 |
| ENSMMUG00000054675 |                                                                                                        | - | 1.310115498 | 0.000294654 | 0.001831862 |
| ENSMMUG00000056147 |                                                                                                        | - | 1.308366741 | 9.42E-05    | 0.000688622 |
| ENSMMUG00000012192 | erythrocyte membrane protein band 4.1 like 4A [Source:VGNC Symbol;Acc:VGNC:72039]                      | - | 1.306070141 | 0.000650436 | 0.003632216 |
| ENSMMUG00000009839 | galactokinase 2 [Source:VGNC Symbol;Acc:VGNC:72870]                                                    | - | 1.305460445 | 0.002118924 | 0.009788848 |
| ENSMMUG00000018290 | ER membrane protein complex subunit 3 [Source:VGNC Symbol;Acc:VGNC:72091]                              | - | -1.30481953 | 0.010709623 | 0.037336193 |
| ENSMMUG00000052282 |                                                                                                        | - | 1.304291943 | 0.000892448 | 0.004756756 |

|                     |                                                                                      |             |             |             |
|---------------------|--------------------------------------------------------------------------------------|-------------|-------------|-------------|
| ENSMMUG00000005754  | lysyl-tRNA synthetase 1 [Source:NCBI gene;Acc:714516]                                | -1.30307496 | 0.006811188 | 0.025942459 |
| ENSMMUG000000021914 | spondin 1 [Source:VGNC Symbol;Acc:VGNC:77862]                                        | 1.302691299 | 1.57E-05    | 0.000143589 |
| ENSMMUG000000012961 | mindbomb E3 ubiquitin protein ligase 2 [Source:VGNC Symbol;Acc:VGNC:74627]           | 1.302688942 | 1.38E-05    | 0.000128081 |
| ENSMMUG000000004648 | KH domain containing 4, pre-mRNA splicing factor [Source:VGNC Symbol;Acc:VGNC:73931] | 1.302379341 | 2.13E-07    | 3.00E-06    |
| ENSMMUG000000007244 | OTU deubiquitinase 7B [Source:VGNC Symbol;Acc:VGNC:75634]                            | 1.302146619 | 4.05E-05    | 0.000331519 |
| ENSMMUG000000007246 | myotubularin related protein 11 [Source:VGNC Symbol;Acc:VGNC:75016]                  | 1.301788802 | 3.84E-05    | 0.000316085 |
| ENSMMUG000000058336 |                                                                                      | -1.3017846  | 0.004762115 | 0.01931084  |
| ENSMMUG000000008792 | G-patch domain containing 2 like [Source:VGNC Symbol;Acc:VGNC:72973]                 | 1.301574786 | 0.007282453 | 0.027305867 |
| ENSMMUG000000017892 | RNA polymerase I subunit E [Source:VGNC Symbol;Acc:VGNC:76047]                       | 1.300783863 | 9.81E-05    | 0.000711963 |
| ENSMMUG000000038051 | uncharacterized LOC106998885 [Source:NCBI gene;Acc:106998885]                        | 1.297346479 | 0.000107436 | 0.000769074 |
| ENSMMUG000000019266 | choline dehydrogenase [Source:VGNC Symbol;Acc:VGNC:71086]                            | 1.296058681 | 0.000464756 | 0.002718853 |
| ENSMMUG000000012332 | UBA domain containing 2 [Source:NCBI gene;Acc:703484]                                | 1.295044546 | 2.43E-07    | 3.37E-06    |
| ENSMMUG000000010627 | apelin receptor [Source:VGNC Symbol;Acc:VGNC:69939]                                  | 1.294339743 | 1.79E-05    | 0.000161955 |
| ENSMMUG000000023676 | espin [Source:NCBI gene;Acc:722532]                                                  | 1.292820894 | 7.39E-06    | 7.29E-05    |
| ENSMMUG000000050858 | Metazoan signal recognition particle RNA [Source:RFAM;Acc:RF00017]                   | 1.292079677 | 0.006945641 | 0.026299713 |
| ENSMMUG000000052651 | Metazoan signal recognition particle RNA [Source:RFAM;Acc:RF00017]                   | 1.292067606 | 0.000121045 | 0.000852588 |
| ENSMMUG000000060871 | prefoldin subunit 2 [Source:NCBI gene;Acc:719886]                                    | 1.289588323 | 0.010085895 | 0.035622336 |
| ENSMMUG000000003369 | calcium/calmodulin dependent protein kinase IG [Source:VGNC Symbol;Acc:VGNC:70521]   | 1.289015374 | 0.000985161 | 0.005172142 |
| ENSMMUG000000044782 |                                                                                      | 1.288948844 | 2.84E-06    | 3.11E-05    |
| ENSMMUG000000013031 | bone morphogenetic protein 1 [Source:VGNC Symbol;Acc:VGNC:70259]                     | 1.288063413 | 4.38E-06    | 4.59E-05    |
| ENSMMUG000000007256 | splicing factor 3b subunit 4 [Source:VGNC Symbol;Acc:VGNC:77182]                     | 1.287736023 | 0.000301626 | 0.001870479 |
| ENSMMUG000000009695 | BTB domain containing 10 [Source:VGNC Symbol;Acc:VGNC:70361]                         | 1.285570908 | 0.001766994 | 0.008369217 |
| ENSMMUG000000017593 | CD3e molecule [Source:VGNC Symbol;Acc:VGNC:70764]                                    | 1.285557208 | 1.94E-08    | 3.33E-07    |
| ENSMMUG000000006796 | betaine--homocysteine S-methyltransferase 2 [Source:VGNC Symbol;Acc:VGNC:70248]      | 1.283839767 | 0.01138495  | 0.039163845 |
| ENSMMUG000000013419 | guanylate cyclase 1 soluble subunit alpha 2 [Source:VGNC Symbol;Acc:VGNC:82154]      | 1.281091408 | 0.004260178 | 0.017630251 |
| ENSMMUG000000054462 |                                                                                      | 1.279292051 | 0.0010236   | 0.005324192 |
| ENSMMUG000000010404 | zinc finger protein 41 [Source:VGNC Symbol;Acc:VGNC:78900]                           | 1.277366644 | 0.000950829 | 0.005020564 |
| ENSMMUG000000007868 | AP2 associated kinase 1 [Source:VGNC Symbol;Acc:VGNC:82094]                          | 1.276576202 | 0.000504541 | 0.002925147 |
| ENSMMUG000000003958 | stromal interaction molecule 1 [Source:VGNC Symbol;Acc:VGNC:77911]                   | 1.276189096 | 0.005771696 | 0.022636669 |

|                    |                                                                                                                      |   |             |             |             |
|--------------------|----------------------------------------------------------------------------------------------------------------------|---|-------------|-------------|-------------|
| ENSMMUG00000061305 |                                                                                                                      | - | 1.275453837 | 0.00272046  | 0.012040752 |
| ENSMMUG00000053541 |                                                                                                                      | - | 1.274455378 | 0.00865007  | 0.031464341 |
| ENSMMUG00000055835 | nuclear casein kinase and cyclin dependent kinase substrate 1 [Source:NCBI gene;Acc:697298]                          | - | 1.274399872 | 0.000555998 | 0.003177019 |
| ENSMMUG00000017583 | single stranded DNA binding protein 2 [Source:NCBI gene;Acc:711752]                                                  | - | 1.273961104 | 7.56E-05    | 0.000572145 |
| ENSMMUG00000012307 | periostin [Source:VGNC Symbol;Acc:VGNC:76039]                                                                        | - | 1.273480358 | 3.76E-06    | 4.00E-05    |
| ENSMMUG00000051381 | Metazoan signal recognition particle RNA [Source:RFAM;Acc:RF00017]                                                   | - | 1.271520485 | 0.001602509 | 0.007727123 |
| ENSMMUG00000014762 | myosin heavy chain 6 [Source:NCBI gene;Acc:713471]                                                                   | - | -1.26843695 | 2.54E-06    | 2.81E-05    |
| ENSMMUG00000044047 | killer cell lectin like receptor B1 [Source:NCBI gene;Acc:100430783]                                                 | - | -1.26782647 | 0.001281728 | 0.006406555 |
| ENSMMUG00000049196 | dispatched RND transporter family member 3 [Source:NCBI gene;Acc:722727]                                             | - | 1.267237175 | 1.08E-09    | 2.31E-08    |
| ENSMMUG00000016313 | RUN and SH3 domain containing 2 [Source:VGNC Symbol;Acc:VGNC:82230]                                                  | - | 1.265779914 | 0.000386842 | 0.002309213 |
| ENSMMUG00000059663 |                                                                                                                      | - | 1.265149129 | 0.00011736  | 0.000829481 |
| ENSMMUG00000023469 | heat shock protein 90 beta family member 1 [Source:NCBI gene;Acc:699568]                                             | - | 1.264604132 | 0.006392785 | 0.024615828 |
| ENSMMUG00000021372 | EMI domain containing 1 [Source:VGNC Symbol;Acc:VGNC:72063]                                                          | - | -1.26305512 | 0.000166014 | 0.001119299 |
| ENSMMUG00000017922 | prostaglandin I2 receptor [Source:VGNC Symbol;Acc:VGNC:76586]                                                        | - | 1.262894422 | 0.001439349 | 0.007065111 |
| ENSMMUG00000058836 | transmembrane p24 trafficking protein 2 [Source:NCBI gene;Acc:106992483]                                             | - | 1.259975321 | 0.003443945 | 0.014764397 |
| ENSMMUG00000051743 | TLC domain containing 1 [Source:NCBI gene;Acc:710391]                                                                | - | -1.25949547 | 0.000594032 | 0.003353813 |
| ENSMMUG00000003497 | FAT atypical cadherin 2 [Source:VGNC Symbol;Acc:VGNC:72618]                                                          | - | 1.258986551 | 3.83E-06    | 4.06E-05    |
| ENSMMUG00000006128 | peptidase D [Source:VGNC Symbol;Acc:VGNC:82205]                                                                      | - | 1.258513017 | 0.006106781 | 0.023662815 |
| ENSMMUG00000060503 | Metazoan signal recognition particle RNA [Source:RFAM;Acc:RF00017]                                                   | - | 1.258356093 | 0.006280524 | 0.024251937 |
| ENSMMUG00000009524 | adaptor protein, phosphotyrosine interacting with PH domain and leucine zipper 2 [Source:VGNC Symbol;Acc:VGNC:69861] | - | 1.258083206 | 4.24E-06    | 4.46E-05    |
| ENSMMUG00000004237 | TNF receptor superfamily member 19 [Source:VGNC Symbol;Acc:VGNC:78588]                                               | - | 1.257602171 | 4.18E-05    | 0.000340769 |
| ENSMMUG00000039829 |                                                                                                                      | - | 1.257568213 | 0.006259047 | 0.024191807 |
| ENSMMUG00000002010 | death effector domain containing [Source:VGNC Symbol;Acc:VGNC:71768]                                                 | - | 1.257230938 | 7.63E-05    | 0.000575397 |
| ENSMMUG00000049968 | RNA polymerase mitochondrial [Source:NCBI gene;Acc:100426183]                                                        | - | 1.255919398 | 5.28E-07    | 6.82E-06    |
| ENSMMUG00000022983 | adhesion G protein-coupled receptor F1 [Source:VGNC Symbol;Acc:VGNC:81007]                                           | - | 1.255904911 | 0.004466736 | 0.018312427 |
| ENSMMUG00000006904 | cyclin L2 [Source:NCBI gene;Acc:114669744]                                                                           | - | 1.255754495 | 0.010898315 | 0.037850011 |
| ENSMMUG00000019838 | phosphodiesterase 8A [Source:VGNC Symbol;Acc:VGNC:75924]                                                             | - | 1.255601566 | 0.000129619 | 0.000900593 |
| ENSMMUG00000000443 | arylsulfatase F [Source:VGNC Symbol;Acc:VGNC:81362]                                                                  | - | 1.254013324 | 7.66E-06    | 7.54E-05    |
| ENSMMUG00000009409 | mesoderm development LRP chaperone [Source:VGNC Symbol;Acc:VGNC:74507]                                               | - | 1.251515351 | 0.00958871  | 0.034176385 |
| ENSMMUG00000006668 | tubulin alpha-3 chain [Source:NCBI gene;Acc:707215]                                                                  | - | 1.251058954 | 0.011435855 | 0.039262895 |

|                    |                                                                                                  |   |             |             |             |
|--------------------|--------------------------------------------------------------------------------------------------|---|-------------|-------------|-------------|
| ENSMMUG0000000205  | transmembrane protein 117 [Source:VGNC Symbol;Acc:VGNC:79488]                                    | - | 1.250954364 | 7.53E-09    | 1.38E-07    |
| ENSMMUG00000022880 | eukaryotic translation initiation factor 5A2 [Source:VGNC Symbol;Acc:VGNC:72198]                 | - | 1.250344166 | 0.00100626  | 0.005254011 |
| ENSMMUG00000017615 | zinc finger CCHC-type containing 14 [Source:VGNC Symbol;Acc:VGNC:79420]                          | - | 1.250257829 | 9.45E-10    | 2.04E-08    |
| ENSMMUG00000022153 | solute carrier family 25 member 36 [Source:VGNC Symbol;Acc:VGNC:84079]                           | - | 1.250109661 | 3.04E-05    | 0.000258902 |
| ENSMMUG00000044759 |                                                                                                  | - | 1.249963364 | 1.15E-06    | 1.39E-05    |
| ENSMMUG00000018785 | elongator acetyltransferase complex subunit 2 [Source:VGNC Symbol;Acc:VGNC:72069]                | - | 1.249517669 | 4.23E-07    | 5.58E-06    |
| ENSMMUG00000006187 | angiopoietin like 7 [Source:VGNC Symbol;Acc:VGNC:69683]                                          | - | 1.247354896 | 7.82E-05    | 0.000586785 |
| ENSMMUG00000001359 | caprin family member 2 [Source:VGNC Symbol;Acc:VGNC:70599]                                       | - | 1.246723809 | 0.000143344 | 0.000987024 |
| ENSMMUG00000032973 | mml-mir-550 [Source:miRBase;Acc:MI0007826]                                                       | - | 1.246542442 | 0.010305309 | 0.036272208 |
| ENSMMUG00000013376 | POU class 2 homeobox 2 [Source:NCBI gene;Acc:706835]                                             | - | -1.24645614 | 4.68E-06    | 4.86E-05    |
| ENSMMUG00000063972 |                                                                                                  | - | 1.245703464 | 0.000787575 | 0.004283222 |
| ENSMMUG00000001294 | FCH and double SH3 domains 2 [Source:VGNC Symbol;Acc:VGNC:72593]                                 | - | 1.243075678 | 0.004143199 | 0.017250697 |
| ENSMMUG00000014824 | SIX homeobox 3 [Source:HGNC Symbol;Acc:HGNC:10889]                                               | - | 1.242876421 | 6.30E-10    | 1.41E-08    |
| ENSMMUG00000005042 | RAB, member RAS oncogene family like 6 [Source:VGNC Symbol;Acc:VGNC:76529]                       | - | 1.241678377 | 0.000489131 | 0.00284944  |
| ENSMMUG00000007485 | zinc finger protein 555 [Source:VGNC Symbol;Acc:VGNC:79705]                                      | - | 1.240715149 | 0.001171666 | 0.005943435 |
| ENSMMUG00000047741 | Metazoan signal recognition particle RNA [Source:RFAM;Acc:RF00017]                               | - | 1.239896672 | 9.74E-05    | 0.000708518 |
| ENSMMUG00000011015 | matrix metalloproteinase 27 [Source:VGNC Symbol;Acc:VGNC:74749]                                  | - | 1.236687704 | 0.000196453 | 0.001298172 |
| ENSMMUG00000011963 | vimentin type intermediate filament associated coiled-coil protein [Source:NCBI gene;Acc:697958] | - | 1.236416217 | 5.03E-07    | 6.54E-06    |
| ENSMMUG00000043922 | spermatogenesis associated 48 [Source:VGNC Symbol;Acc:VGNC:81762]                                | - | 1.236327634 | 4.07E-06    | 4.29E-05    |
| ENSMMUG00000023752 | SIX homeobox 2 [Source:VGNC Symbol;Acc:VGNC:81570]                                               | - | -1.2348217  | 0.001017871 | 0.005298876 |
| ENSMMUG00000060665 |                                                                                                  | - | 1.234504283 | 0.004551641 | 0.018592297 |
| ENSMMUG00000021291 | thymine DNA glycosylase [Source:VGNC Symbol;Acc:VGNC:78297]                                      | - | 1.232727968 | 0.009193317 | 0.03307818  |
| ENSMMUG00000053250 |                                                                                                  | - | 1.231526028 | 0.009312593 | 0.033360852 |
| ENSMMUG00000022647 | cell division cycle 73 [Source:VGNC Symbol;Acc:VGNC:70766]                                       | - | 1.231313708 | 0.000856848 | 0.004592898 |
| ENSMMUG00000013718 | translocation associated membrane protein 2 [Source:VGNC Symbol;Acc:VGNC:83515]                  | - | -1.22972156 | 1.56E-06    | 1.82E-05    |
| ENSMMUG00000016354 | IQ motif containing N [Source:VGNC Symbol;Acc:VGNC:73683]                                        | - | 1.228479153 | 1.99E-05    | 0.000177268 |
| ENSMMUG00000013888 | NOP56 ribonucleoprotein [Source:VGNC Symbol;Acc:VGNC:75181]                                      | - | 1.228143272 | 0.008418084 | 0.030802821 |
| ENSMMUG00000007250 | RNA binding motif protein 28 [Source:VGNC Symbol;Acc:VGNC:76519]                                 | - | 1.226947752 | 0.01257302  | 0.042489687 |
| ENSMMUG00000054825 |                                                                                                  | - | 1.226064756 | 0.005824655 | 0.022792369 |



|                     |                                                                                                                                     |   |             |             |             |
|---------------------|-------------------------------------------------------------------------------------------------------------------------------------|---|-------------|-------------|-------------|
| ENSMMUG0000000690   | catenin alpha like 1 [Source:VGNC Symbol;Acc:VGNC:71544]                                                                            | - | 1.225428217 | 0.002726234 | 0.012049062 |
| ENSMMUG00000014350  | MAX interactor 1, dimerization protein [Source:VGNC Symbol;Acc:VGNC:75087]                                                          | - | 1.222991571 | 0.000963346 | 0.005077364 |
| ENSMMUG00000022630  | protoporphyrinogen oxidase [Source:VGNC Symbol;Acc:VGNC:76365]                                                                      | - | -1.22094678 | 0.001229129 | 0.006183882 |
| ENSMMUG00000018057  | uromodulin like 1 [Source:VGNC Symbol;Acc:VGNC:78717]                                                                               | - | 1.219822638 | 0.00562188  | 0.022196763 |
| ENSMMUG00000048892  | SCO-spondin [Source:VGNC Symbol;Acc:VGNC:81765]                                                                                     | - | 1.218152335 | 0.001104037 | 0.005654049 |
| ENSMMUG00000007875  | F-box and leucine rich repeat protein 12 [Source:VGNC Symbol;Acc:VGNC:72502]                                                        | - | 1.217932588 | 5.37E-05    | 0.000425941 |
| ENSMMUG00000018285  | cysteine rich with EGF like domains 1 [Source:VGNC Symbol;Acc:VGNC:71407]                                                           | - | 1.216016404 | 2.88E-06    | 3.15E-05    |
| ENSMMUG00000004329  | solute carrier family 1 member 2 [Source:VGNC Symbol;Acc:VGNC:77410]                                                                | - | 1.215733185 | 0.000361965 | 0.002180836 |
| ENSMMUG00000004437  | OTU deubiquitinase 4 [Source:VGNC Symbol;Acc:VGNC:75675]                                                                            | - | -1.21486813 | 0.000346842 | 0.002107284 |
| ENSMMUG00000003621  | AKT serine/threonine kinase 2 [Source:VGNC Symbol;Acc:VGNC:69777]                                                                   | - | 1.214858969 | 1.82E-06    | 2.10E-05    |
| ENSMMUG000000056196 |                                                                                                                                     | - | 1.214445034 | 0.000630495 | 0.003533702 |
| ENSMMUG000000044214 |                                                                                                                                     | - | 1.214419129 | 4.73E-05    | 0.000379979 |
| ENSMMUG00000008539  | uroporphyrinogen III synthase [Source:VGNC Symbol;Acc:VGNC:78731]                                                                   | - | 1.214399057 | 2.79E-05    | 0.000239629 |
| ENSMMUG00000020928  | nucleolar protein interacting with the FHA domain of MKI67 [Source:VGNC Symbol;Acc:VGNC:75201]                                      | - | 1.214379409 | 0.000999234 | 0.005219544 |
| ENSMMUG00000007421  | zinc finger CCHC-type containing 7 [Source:VGNC Symbol;Acc:VGNC:82088]                                                              | - | 1.213135675 | 0.00012394  | 0.000870483 |
| ENSMMUG000000032306 | zinc finger FYVE-type containing 28 [Source:NCBI gene;Acc:720600]                                                                   | - | 1.210572237 | 0.00702471  | 0.026509277 |
| ENSMMUG000000064337 | nectin cell adhesion molecule 4 [Source:NCBI gene;Acc:719843]                                                                       | - | 1.210445588 | 8.47E-05    | 0.000630578 |
| ENSMMUG00000020690  | erythrocyte membrane protein band 4.1 like 1 [Source:VGNC Symbol;Acc:VGNC:72231]                                                    | - | 1.210421563 | 2.62E-05    | 0.000226572 |
| ENSMMUG00000020004  | Ras association domain family member 2 [Source:VGNC Symbol;Acc:VGNC:76674]                                                          | - | 1.209131339 | 1.14E-05    | 0.000107841 |
| ENSMMUG00000010944  | GATA binding protein 6 [Source:VGNC Symbol;Acc:VGNC:72891]                                                                          | - | 1.208416934 | 0.001702129 | 0.008131253 |
| ENSMMUG00000001319  | methylenetetrahydrofolate dehydrogenase, cyclohydrolase and formyltetrahydrofolate synthetase 1 [Source:VGNC Symbol;Acc:VGNC:84399] | - | 1.207937035 | 4.85E-07    | 6.33E-06    |
| ENSMMUG00000004760  | CDK5 regulatory subunit associated protein 3 [Source:VGNC Symbol;Acc:VGNC:71015]                                                    | - | 1.206026215 | 0.007286966 | 0.027314456 |
| ENSMMUG00000010978  | S100 calcium binding protein A2 [Source:VGNC Symbol;Acc:VGNC:76956]                                                                 | - | 1.205491346 | 1.92E-05    | 0.000172072 |
| ENSMMUG00000022631  | ubiquitin specific peptidase 21 [Source:VGNC Symbol;Acc:VGNC:78741]                                                                 | - | 1.204629239 | 0.004444429 | 0.018239224 |
| ENSMMUG00000008546  | cyclin D2 [Source:NCBI gene;Acc:710379]                                                                                             | - | 1.204327887 | 0.002916435 | 0.012783846 |
| ENSMMUG00000008155  | POU class 2 homeobox 1 [Source:VGNC Symbol;Acc:VGNC:76223]                                                                          | - | 1.204208962 | 0.001436857 | 0.007055699 |
| ENSMMUG000000060547 | Metazoan signal recognition particle RNA [Source:RFAM;Acc:RF00017]                                                                  | - | -1.20295914 | 0.002718851 | 0.012037968 |
| ENSMMUG000000052070 | caudal type homeobox 2 [Source:NCBI gene;Acc:711094]                                                                                | - | -1.20295631 | 0.006375695 | 0.024565411 |
| ENSMMUG000000064507 | beta-1,3-galactosyltransferase 4 [Source:NCBI gene;Acc:718178]                                                                      | - | 1.202461645 | 0.013173357 | 0.04419043  |
| ENSMMUG00000015414  | family with sequence similarity 160 member B1 [Source:VGNC Symbol;Acc:VGNC:72403]                                                   | - | 1.202274721 | 0.000950271 | 0.005020564 |

|                    |                                                                                   |   |             |             |             |
|--------------------|-----------------------------------------------------------------------------------|---|-------------|-------------|-------------|
| ENSMMUG00000023811 | boule homolog, RNA binding protein [Source:VGNC Symbol;Acc:VGNC:70310]            | - | 1.202154019 | 0.000746568 | 0.004085516 |
| ENSMMUG00000063482 |                                                                                   | - | 1.201981525 | 0.010608464 | 0.037084367 |
| ENSMMUG00000009310 | myelin transcription factor 1 like [Source:NCBI gene;Acc:706914]                  | - | 1.201577288 | 0.000244635 | 0.001557125 |
| ENSMMUG00000055885 | napsin-A [Source:NCBI gene;Acc:719235]                                            | - | 1.200184661 | 0.008830083 | 0.031996034 |
| ENSMMUG00000013183 | F-box and leucine rich repeat protein 17 [Source:VGNC Symbol;Acc:VGNC:82142]      | - | 1.198793457 | 0.000104776 | 0.000752222 |
| ENSMMUG00000014140 | peroxisomal biogenesis factor 26 [Source:NCBI gene;Acc:710470]                    | - | 1.196477334 | 0.014456274 | 0.047648718 |
| ENSMMUG00000062676 |                                                                                   | - | 1.196099801 | 0.001866809 | 0.008784435 |
| ENSMMUG00000012576 | sorting nexin 6 [Source:NCBI gene;Acc:693626]                                     | - | 1.195224518 | 0.009193164 | 0.03307818  |
| ENSMMUG00000021878 | timeless circadian regulator [Source:VGNC Symbol;Acc:VGNC:78356]                  | - | 1.195209427 | 0.000186186 | 0.001244381 |
| ENSMMUG00000015189 | RAD51 associated protein 1 [Source:VGNC Symbol;Acc:VGNC:76497]                    | - | -1.1951405  | 0.002795808 | 0.01232542  |
| ENSMMUG00000002947 | procollagen C-endopeptidase enhancer [Source:VGNC Symbol;Acc:VGNC:75782]          | - | 1.193622938 | 6.10E-08    | 9.48E-07    |
| ENSMMUG00000053760 |                                                                                   | - | 1.193261333 | 0.00185527  | 0.008743531 |
| ENSMMUG00000046282 |                                                                                   | - | 1.193043059 | 7.62E-08    | 1.16E-06    |
| ENSMMUG00000018625 | NIPA like domain containing 1 [Source:NCBI gene;Acc:704998]                       | - | 1.192068089 | 0.000227272 | 0.001467895 |
| ENSMMUG00000011047 | S-phase cyclin A associated protein in the ER [Source:VGNC Symbol;Acc:VGNC:77006] | - | 1.190392016 | 0.000881071 | 0.00470632  |
| ENSMMUG00000002520 | solute carrier family 4 member 3 [Source:VGNC Symbol;Acc:VGNC:77604]              | - | 1.189691402 | 1.40E-07    | 2.03E-06    |
| ENSMMUG00000021385 | carbonic anhydrase 14 [Source:VGNC Symbol;Acc:VGNC:70489]                         | - | 1.189084347 | 7.74E-06    | 7.61E-05    |
| ENSMMUG00000022624 | putative speedy protein E16 [Source:NCBI gene;Acc:718058]                         | - | 1.188439053 | 0.000687417 | 0.003811024 |
| ENSMMUG00000043504 |                                                                                   | - | 1.187631114 | 5.11E-05    | 0.000407746 |
| ENSMMUG00000008639 | tumor protein p53 [Source:VGNC Symbol;Acc:VGNC:78627]                             | - | 1.186753717 | 0.000820013 | 0.004438035 |
| ENSMMUG00000006704 | zygote arrest 1 [Source:VGNC Symbol;Acc:VGNC:79251]                               | - | 1.186068934 | 0.002476804 | 0.01111442  |
| ENSMMUG00000063747 |                                                                                   | - | 1.185043377 | 0.006803325 | 0.025940884 |
| ENSMMUG00000007565 | Cbl proto-oncogene B [Source:VGNC Symbol;Acc:VGNC:70555]                          | - | 1.185007338 | 2.88E-05    | 0.000246155 |
| ENSMMUG00000009519 | WASH complex subunit 4 [Source:VGNC Symbol;Acc:VGNC:79783]                        | - | 1.184150295 | 0.000997454 | 0.005214675 |
| ENSMMUG00000002497 | zinc finger protein 777 [Source:HGNC Symbol;Acc:HGNC:22213]                       | - | 1.183988465 | 0.001885845 | 0.008867221 |
| ENSMMUG00000018657 | dedicator of cytokinesis 9 [Source:VGNC Symbol;Acc:VGNC:71835]                    | - | 1.183780565 | 0.000254618 | 0.001608085 |
| ENSMMUG00000014438 | piwi like RNA-mediated gene silencing 2 [Source:VGNC Symbol;Acc:VGNC:81502]       | - | 1.183226197 | 9.73E-06    | 9.38E-05    |
| ENSMMUG00000023396 | hypocretin receptor 1 [Source:VGNC Symbol;Acc:VGNC:73356]                         | - | 1.180821231 | 0.000339363 | 0.002066951 |
| ENSMMUG00000021308 | chromosome 9 C10orf71 homolog [Source:NCBI gene;Acc:710332]                       | - | 1.180588155 | 0.001356611 | 0.00672343  |

|                     |                                                                                                   |             |             |             |
|---------------------|---------------------------------------------------------------------------------------------------|-------------|-------------|-------------|
| ENSMMUG00000002879  | GA binding protein transcription factor subunit beta 1 [Source:VGNC Symbol;Acc:VGNC:72845]        | 1.180565651 | 7.00E-07    | 8.85E-06    |
| ENSMMUG00000002032  | exportin 7 [Source:VGNC Symbol;Acc:VGNC:78946]                                                    | 1.180539696 | 0.005821104 | 0.022785731 |
| ENSMMUG00000001213  | spermatogenesis associated 9 [Source:VGNC Symbol;Acc:VGNC:77976]                                  | 1.180498912 | 0.001278926 | 0.006397752 |
| ENSMMUG00000000353  | putative methyltransferase-like protein 21E pseudogene [Source:NCBI gene;Acc:707949]              | 1.179930735 | 0.000986774 | 0.005174247 |
| ENSMMUG00000005888  | tetratricopeptide repeat domain 13 [Source:VGNC Symbol;Acc:VGNC:79588]                            | 1.179423182 | 4.41E-05    | 0.000356853 |
| ENSMMUG00000015168  | transmembrane p24 trafficking protein 10 [Source:NCBI gene;Acc:701522]                            | -1.17928388 | 0.00195269  | 0.009129141 |
| ENSMMUG00000000718  | ERCC excision repair 1, endonuclease non-catalytic subunit [Source:VGNC Symbol;Acc:VGNC:72422]    | -1.17892887 | 0.001282799 | 0.006409304 |
| ENSMMUG000000053454 | Ras like without CAAX 1 [Source:NCBI gene;Acc:717985]                                             | 1.178662376 | 0.002161053 | 0.00991841  |
| ENSMMUG00000023125  | XPC complex subunit, DNA damage recognition and repair factor [Source:VGNC Symbol;Acc:VGNC:78809] | 1.176273354 | 0.005318838 | 0.021211497 |
| ENSMMUG00000004954  | apoptosis inducing factor mitochondria associated 1 [Source:VGNC Symbol;Acc:VGNC:69820]           | 1.175707189 | 9.97E-05    | 0.000720593 |
| ENSMMUG00000008919  | RAB6B, member RAS oncogene family [Source:VGNC Symbol;Acc:VGNC:81547]                             | 1.175620947 | 0.000754222 | 0.004120062 |
| ENSMMUG00000008795  | polycystin 2, transient receptor potential cation channel [Source:NCBI gene;Acc:702179]           | 1.175278926 | 0.000100373 | 0.000724417 |
| ENSMMUG00000022762  | OMA1 zinc metallopeptidase [Source:VGNC Symbol;Acc:VGNC:75485]                                    | 1.174721275 | 0.003424795 | 0.01469768  |
| ENSMMUG00000031202  | RAB1B, member RAS oncogene family [Source:NCBI gene;Acc:721852]                                   | 1.173779238 | 0.001702198 | 0.008131253 |
| ENSMMUG00000022632  | ubiquitin-fold modifier conjugating enzyme 1 [Source:VGNC Symbol;Acc:VGNC:79643]                  | 1.171981116 | 0.006823545 | 0.025965385 |
| ENSMMUG00000016475  | M-phase phosphoprotein 8 [Source:VGNC Symbol;Acc:VGNC:74864]                                      | 1.171854517 | 2.30E-06    | 2.58E-05    |
| ENSMMUG00000005048  | MAM domain containing 4 [Source:VGNC Symbol;Acc:VGNC:74345]                                       | 1.171077163 | 2.01E-05    | 0.000178329 |
| ENSMMUG00000006252  | argonaute RISC catalytic component 3 [Source:NCBI gene;Acc:712543]                                | 1.170467457 | 1.55E-05    | 0.000142202 |
| ENSMMUG00000003277  | copine 4 [Source:VGNC Symbol;Acc:VGNC:71466]                                                      | -1.17027115 | 0.000728456 | 0.004000647 |
| ENSMMUG00000023398  | collagen type XVI alpha 1 chain [Source:VGNC Symbol;Acc:VGNC:71293]                               | 1.168960337 | 1.58E-05    | 0.000144505 |
| ENSMMUG00000009838  | COP9 signalosome subunit 2 [Source:VGNC Symbol;Acc:VGNC:71376]                                    | 1.168422771 | 0.006807696 | 0.025940884 |
| ENSMMUG00000009615  | IMP U3 small nucleolar ribonucleoprotein 4 [Source:VGNC Symbol;Acc:VGNC:73689]                    | -1.16817974 | 3.67E-06    | 3.91E-05    |
| ENSMMUG00000013188  | serine incorporator 2 [Source:VGNC Symbol;Acc:VGNC:77294]                                         | 1.168033969 | 5.83E-09    | 1.09E-07    |
| ENSMMUG00000056220  | follistatin like 3 [Source:NCBI gene;Acc:721100]                                                  | 1.167741947 | 0.000319164 | 0.001964366 |
| ENSMMUG00000056769  | C-C motif chemokine receptor 1 [Source:VGNC Symbol;Acc:VGNC:70737]                                | 1.165694833 | 0.000941609 | 0.0049842   |
| ENSMMUG00000057852  |                                                                                                   | 1.164318413 | 0.004617857 | 0.018818993 |
| ENSMMUG00000005365  | peroxisomal biogenesis factor 3 [Source:VGNC Symbol;Acc:VGNC:75951]                               | 1.162557554 | 0.000246523 | 0.001566709 |
| ENSMMUG00000021344  | interleukin 33 [Source:VGNC Symbol;Acc:VGNC:73606]                                                | 1.161094857 | 0.002094484 | 0.009699814 |
| ENSMMUG00000049484  |                                                                                                   | 1.160579919 | 0.000266952 | 0.001675786 |
| ENSMMUG00000004849  | casein beta [Source:VGNC Symbol;Acc:VGNC:71523]                                                   | 1.160527562 | 0.005554301 | 0.022000618 |



|                     |                                                                                             |             |             |             |
|---------------------|---------------------------------------------------------------------------------------------|-------------|-------------|-------------|
| ENSMMUG00000015566  | holocarboxylase synthetase [Source:VGNC Symbol;Acc:VGNC:73477]                              | 1.160503544 | 1.00E-05    | 9.61E-05    |
| ENSMMUG00000019856  | olfactory receptor 2F2-like [Source:NCBI gene;Acc:100428924]                                | 1.159445058 | 0.004511707 | 0.018453707 |
| ENSMMUG00000002038  | cell migration inducing hyaluronidase 1 [Source:VGNC Symbol;Acc:VGNC:71130]                 | 1.158498203 | 0.001313529 | 0.006541565 |
| ENSMMUG00000004362  | Fc fragment of IgG receptor Ia [Source:NCBI gene;Acc:714664]                                | 1.158454042 | 0.000417987 | 0.002468753 |
| ENSMMUG00000019566  | hemoglobin subunit alpha 1 [Source:NCBI gene;Acc:701930]                                    | -1.15791677 | 0.001102753 | 0.005649828 |
| ENSMMUG00000006705  | FRY like transcription coactivator [Source:VGNC Symbol;Acc:VGNC:72803]                      | 1.156162665 | 9.37E-05    | 0.000685965 |
| ENSMMUG00000013552  | scribble planar cell polarity protein [Source:HGNC Symbol;Acc:HGNC:30377]                   | 1.155745004 | 1.47E-06    | 1.73E-05    |
| ENSMMUG00000020418  | diacylglycerol kinase beta [Source:VGNC Symbol;Acc:VGNC:71782]                              | 1.155077557 | 0.005143393 | 0.02066605  |
| ENSMMUG00000012953  | stress induced phosphoprotein 1 [Source:NCBI gene;Acc:717926]                               | 1.154692437 | 1.18E-06    | 1.42E-05    |
| ENSMMUG00000015737  | phosphatidylinositol glycan anchor biosynthesis class A [Source:VGNC Symbol;Acc:VGNC:75984] | 1.154367131 | 8.61E-05    | 0.00063926  |
| ENSMMUG00000042798  |                                                                                             | 1.153265559 | 0.000273813 | 0.001712689 |
| ENSMMUG00000008396  | methylmalonyl-CoA epimerase [Source:NCBI gene;Acc:704094]                                   | 1.152433295 | 7.64E-07    | 9.56E-06    |
| ENSMMUG00000053036  |                                                                                             | 1.151719291 | 0.000412847 | 0.00244074  |
| ENSMMUG00000006454  | kelch like family member 18 [Source:VGNC Symbol;Acc:VGNC:74154]                             | -1.15143964 | 0.004776557 | 0.01935734  |
| ENSMMUG00000012250  | lactase [Source:VGNC Symbol;Acc:VGNC:74244]                                                 | -1.15140661 | 0.010562212 | 0.036964735 |
| ENSMMUG00000001386  | neurotrophic receptor tyrosine kinase 3 [Source:VGNC Symbol;Acc:VGNC:75542]                 | 1.151176736 | 0.010437245 | 0.036600335 |
| ENSMMUG000000065128 | Metazoan signal recognition particle RNA [Source:RFAM;Acc:RF00017]                          | 1.150913396 | 0.000614284 | 0.003455451 |
| ENSMMUG00000003634  | DExD/H-box 60 like [Source:VGNC Symbol;Acc:VGNC:71720]                                      | 1.149195386 | 0.011948246 | 0.040725429 |
| ENSMMUG00000008917  | S100 calcium binding protein A6 [Source:VGNC Symbol;Acc:VGNC:76960]                         | 1.148430525 | 0.000137661 | 0.000951629 |
| ENSMMUG00000023116  | LIM domain binding 2 [Source:VGNC Symbol;Acc:VGNC:74246]                                    | 1.147888194 | 0.000120855 | 0.000851739 |
| ENSMMUG00000045497  | complement factor H [Source:NCBI gene;Acc:717346]                                           | -1.14681225 | 0.014979557 | 0.049031621 |
| ENSMMUG00000015987  | Ras and Rab interactor 1 [Source:VGNC Symbol;Acc:VGNC:76769]                                | 1.145410865 | 0.000662937 | 0.003690287 |
| ENSMMUG00000002007  | kelch domain containing 9 [Source:NCBI gene;Acc:719863]                                     | 1.144767957 | 0.009781487 | 0.034777047 |
| ENSMMUG00000001357  | tetraspanin 11 [Source:VGNC Symbol;Acc:VGNC:79882]                                          | 1.144284257 | 2.71E-06    | 2.98E-05    |
| ENSMMUG000000059153 |                                                                                             | 1.144214587 | 0.004376944 | 0.017998334 |
| ENSMMUG00000000350  | basic, immunoglobulin-like variable motif containing [Source:NCBI gene;Acc:100426213]       | 1.144199338 | 0.000451387 | 0.002646946 |
| ENSMMUG00000014727  | NSF attachment protein alpha [Source:VGNC Symbol;Acc:VGNC:75131]                            | 1.143725166 | 0.000607714 | 0.003423197 |
| ENSMMUG00000059986  |                                                                                             | 1.142476791 | 0.002061597 | 0.009572756 |
| ENSMMUG00000055400  | U6 spliceosomal RNA [Source:RFAM;Acc:RF00026]                                               | 1.142414868 | 0.000378965 | 0.002265496 |
| ENSMMUG00000006268  | junction adhesion molecule like [Source:VGNC Symbol;Acc:VGNC:73860]                         | 1.142298885 | 8.91E-05    | 0.000656432 |

|                    |                                                                                                |   |             |             |             |
|--------------------|------------------------------------------------------------------------------------------------|---|-------------|-------------|-------------|
| ENSMMUG00000049295 | GTPase, IMAP family member 5 [Source:NCBI gene;Acc:713835]                                     | - | 1.142030131 | 0.000195788 | 0.001296492 |
| ENSMMUG00000020954 | cell division cycle 25A [Source:VGNC Symbol;Acc:VGNC:70794]                                    | - | 1.141726161 | 0.000574704 | 0.003267198 |
| ENSMMUG00000018073 | ligand dependent nuclear receptor corepressor like [Source:NCBI gene;Acc:715285]               | - | 1.141703192 | 0.001128803 | 0.005756894 |
| ENSMMUG00000001876 | phosphoinositide-3-kinase adaptor protein 1 [Source:VGNC Symbol;Acc:VGNC:75891]                | - | 1.141379406 | 0.001368861 | 0.00677049  |
| ENSMMUG00000062339 | endogenous retrovirus group K member 25 Env polyprotein-like [Source:NCBI gene;Acc:114677579]  | - | 1.139520442 | 0.003687045 | 0.015653701 |
| ENSMMUG00000008781 | BCL6 corepressor like 1 [Source:VGNC Symbol;Acc:VGNC:70131]                                    | - | 1.139347019 | 0.000411228 | 0.002432341 |
| ENSMMUG00000013233 | collagen type IV alpha 4 chain [Source:VGNC Symbol;Acc:VGNC:71299]                             | - | 1.139002503 | 0.004041749 | 0.016902733 |
| ENSMMUG00000013235 | collagen type IV alpha 3 chain [Source:VGNC Symbol;Acc:VGNC:81375]                             | - | -1.13867993 | 0.000509961 | 0.002952395 |
| ENSMMUG00000023401 | adhesion G protein-coupled receptor B2 [Source:VGNC Symbol;Acc:VGNC:69598]                     | - | 1.137724235 | 0.000209498 | 0.001369652 |
| ENSMMUG00000017145 | cell division cycle 123 [Source:VGNC Symbol;Acc:VGNC:70768]                                    | - | 1.137189492 | 0.00032476  | 0.001992823 |
| ENSMMUG00000019250 | solute carrier family 25 member 27 [Source:VGNC Symbol;Acc:VGNC:77543]                         | - | 1.136766556 | 4.64E-05    | 0.000373451 |
| ENSMMUG00000019462 | integrin subunit alpha V [Source:VGNC Symbol;Acc:VGNC:73783]                                   | - | 1.135805973 | 7.09E-05    | 0.000542253 |
| ENSMMUG00000056962 |                                                                                                | - | 1.134385477 | 0.002630002 | 0.011682455 |
| ENSMMUG00000059617 |                                                                                                | - | 1.133826351 | 0.001673987 | 0.008008945 |
| ENSMMUG00000031296 | caspase 8 [Source:VGNC Symbol;Acc:VGNC:70547]                                                  | - | 1.133338659 | 0.001293609 | 0.006451119 |
| ENSMMUG00000065018 | transmembrane protein 35A [Source:NCBI gene;Acc:702205]                                        | - | -1.13311914 | 0.000110294 | 0.000786327 |
| ENSMMUG00000048077 | ataxin 1 like [Source:NCBI gene;Acc:709805]                                                    | - | 1.130439096 | 0.000523556 | 0.003018304 |
| ENSMMUG00000059400 |                                                                                                | - | 1.128534868 | 0.00010306  | 0.000742066 |
| ENSMMUG00000022636 | GTPase, IMAP family member 8 [Source:VGNC Symbol;Acc:VGNC:72981]                               | - | 1.128335313 | 0.011120624 | 0.038457031 |
| ENSMMUG00000062642 |                                                                                                | - | 1.127710014 | 0.002163075 | 0.009923985 |
| ENSMMUG00000005028 | phosphodiesterase 4C [Source:NCBI gene;Acc:720171]                                             | - | 1.127420873 | 0.001442192 | 0.007076238 |
| ENSMMUG00000010171 | proline-serine-threonine phosphatase interacting protein 1 [Source:VGNC Symbol;Acc:VGNC:76459] | - | 1.125221109 | 1.11E-05    | 0.000105498 |
| ENSMMUG00000061779 |                                                                                                | - | 1.122624585 | 0.000401628 | 0.002384737 |
| ENSMMUG00000048232 | MINDY family member 4B [Source:VGNC Symbol;Acc:VGNC:84153]                                     | - | 1.119112292 | 6.64E-05    | 0.000511452 |
| ENSMMUG00000033290 | mml-mir-643 [Source:miRBase;Acc:MI0007886]                                                     | - | 1.117156983 | 0.000521997 | 0.003012145 |
| ENSMMUG00000015371 | microtubule associated serine/threonine kinase 2 [Source:VGNC Symbol;Acc:VGNC:74532]           | - | 1.115149002 | 0.002221849 | 0.010155727 |
| ENSMMUG00000017125 | oxysterol binding protein like 11 [Source:VGNC Symbol;Acc:VGNC:75631]                          | - | -1.11261342 | 2.67E-05    | 0.000229612 |
| ENSMMUG00000002244 | early endosome antigen 1 [Source:VGNC Symbol;Acc:VGNC:72161]                                   | - | 1.111661046 | 0.000151748 | 0.001033889 |
| ENSMMUG00000030381 | arachidonate 15-lipoxygenase [Source:VGNC Symbol;Acc:VGNC:69796]                               | - | 1.111001271 | 0.001045646 | 0.005409106 |

|                    |                                                                                              |   |             |             |             |
|--------------------|----------------------------------------------------------------------------------------------|---|-------------|-------------|-------------|
| ENSMMUG00000021474 | zinc finger protein 45 [Source:NCBI gene;Acc:712591]                                         | - | 1.110833012 | 3.23E-06    | 3.50E-05    |
| ENSMMUG00000029927 | ADAM metalloproteinase domain 11 [Source:VGNC Symbol;Acc:VGNC:69466]                         | - | 1.110438303 | 0.005311262 | 0.02119504  |
| ENSMMUG00000057627 |                                                                                              | - | 1.109696532 | 0.001859216 | 0.008755412 |
| ENSMMUG00000011335 | Fc receptor like 6 [Source:VGNC Symbol;Acc:VGNC:72602]                                       | - | 1.107960281 | 1.26E-07    | 1.84E-06    |
| ENSMMUG00000002003 | upstream transcription factor 1 [Source:NCBI gene;Acc:719835]                                | - | 1.107493456 | 0.00012848  | 0.000895719 |
| ENSMMUG00000012091 | thioredoxin reductase 1 [Source:VGNC Symbol;Acc:VGNC:78679]                                  | - | 1.106581242 | 7.71E-05    | 0.000580502 |
| ENSMMUG00000057531 | mitochondrial ribosomal protein S11 [Source:NCBI gene;Acc:697743]                            | - | 1.106348527 | 0.013303129 | 0.044504289 |
| ENSMMUG00000053789 |                                                                                              | - | -1.10603263 | 0.000190471 | 0.001268875 |
| ENSMMUG00000054817 | immunoglobulin binding protein 1 [Source:NCBI gene;Acc:694632]                               | - | 1.105800766 | 0.010329598 | 0.036314211 |
| ENSMMUG00000021171 | apolipoprotein B mRNA editing enzyme catalytic subunit 2 [Source:VGNC Symbol;Acc:VGNC:69986] | - | 1.103239731 | 0.000676805 | 0.003762362 |
| ENSMMUG00000004560 | crystallin lambda 1 [Source:VGNC Symbol;Acc:VGNC:71433]                                      | - | 1.102969862 | 0.001126146 | 0.005745728 |
| ENSMMUG00000061295 | PDZ domain containing 11 [Source:NCBI gene;Acc:695458]                                       | - | 1.102623204 | 0.007531167 | 0.028101266 |
| ENSMMUG00000008093 | StAR related lipid transfer domain containing 9 [Source:NCBI gene;Acc:708953]                | - | -1.1021606  | 9.50E-07    | 1.17E-05    |
| ENSMMUG00000047370 | IgLON family member 5 [Source:NCBI gene;Acc:719890]                                          | - | 1.098605097 | 0.014328983 | 0.047317981 |
| ENSMMUG00000023249 | aryl hydrocarbon receptor nuclear translocator like 2 [Source:NCBI gene;Acc:709547]          | - | 1.098517108 | 0.000259798 | 0.001635852 |
| ENSMMUG00000010405 | family with sequence similarity 171 member B [Source:VGNC Symbol;Acc:VGNC:72404]             | - | 1.098384329 | 0.003848575 | 0.016249687 |
| ENSMMUG00000003949 | cholinergic receptor nicotinic alpha 10 subunit [Source:NCBI gene;Acc:718133]                | - | 1.097471214 | 0.003996779 | 0.016754573 |
| ENSMMUG00000008797 | ATP binding cassette subfamily G member 2 (Junior blood group) [Source:NCBI gene;Acc:574307] | - | 1.097046981 | 0.000239955 | 0.001533691 |
| ENSMMUG00000018898 | nuclear receptor subfamily 2 group C member 1 [Source:VGNC Symbol;Acc:VGNC:75508]            | - | 1.094144839 | 0.015297191 | 0.049872088 |
| ENSMMUG00000021114 | G protein-coupled receptor 182 [Source:VGNC Symbol;Acc:VGNC:72936]                           | - | -1.09402518 | 0.00122906  | 0.006183882 |
| ENSMMUG00000018777 | regulation of nuclear pre-mRNA domain containing 1A [Source:VGNC Symbol;Acc:VGNC:77103]      | - | 1.093934662 | 0.000316129 | 0.001950572 |
| ENSMMUG00000012338 | G protein-coupled receptor 183 [Source:VGNC Symbol;Acc:VGNC:73042]                           | - | -1.09195478 | 0.000167401 | 0.001127411 |
| ENSMMUG00000012601 | RANBP2-type and C3HC4-type zinc finger containing 1 [Source:VGNC Symbol;Acc:VGNC:81554]      | - | 1.091304117 | 5.61E-05    | 0.000442747 |
| ENSMMUG00000008213 | reticulocalbin 2 [Source:VGNC Symbol;Acc:VGNC:76887]                                         | - | 1.090303989 | 0.011091191 | 0.038400516 |
| ENSMMUG00000007742 | potassium voltage-gated channel subfamily Q member 1 [Source:VGNC Symbol;Acc:VGNC:82168]     | - | 1.088708978 | 0.005656281 | 0.022303928 |
| ENSMMUG00000020294 | phosphoinositide-3-kinase regulatory subunit 4 [Source:VGNC Symbol;Acc:VGNC:84060]           | - | 1.088033797 | 0.006732326 | 0.025713804 |
| ENSMMUG00000063703 |                                                                                              | - | -1.0865202  | 0.011638134 | 0.039838311 |
| ENSMMUG00000062527 |                                                                                              | - | 1.086370512 | 3.34E-06    | 3.60E-05    |
| ENSMMUG00000056054 | zinc finger and BTB domain containing 3 [Source:NCBI gene;Acc:722240]                        | - | 1.086310976 | 1.38E-06    | 1.64E-05    |
| ENSMMUG00000060971 |                                                                                              | - | 1.086040479 | 0.013413666 | 0.044800914 |

|                    |                                                                                         |   |             |             |             |
|--------------------|-----------------------------------------------------------------------------------------|---|-------------|-------------|-------------|
| ENSMMUG00000022044 | scavenger receptor class A member 5 [Source:VGNC Symbol;Acc:VGNC:77117]                 | - | 1.085787865 | 9.25E-05    | 0.000679297 |
| ENSMMUG00000014702 | TATA-box binding protein associated factor 2 [Source:VGNC Symbol;Acc:VGNC:78090]        | - | 1.084936103 | 0.00034402  | 0.002091171 |
| ENSMMUG00000055447 | MDM2 proto-oncogene [Source:NCBI gene;Acc:718284]                                       | - | -1.08467283 | 0.000157407 | 0.001066535 |
| ENSMMUG00000060894 | Metazoan signal recognition particle RNA [Source:RFAM;Acc:RF00017]                      | - | 1.083812632 | 0.002697676 | 0.011957135 |
| ENSMMUG00000002709 | G protein-coupled receptor class C group 5 member B [Source:VGNC Symbol;Acc:VGNC:72934] | - | 1.082167721 | 9.50E-05    | 0.000693881 |
| ENSMMUG00000056280 | G protein subunit alpha i2 [Source:NCBI gene;Acc:703780]                                | - | 1.081925671 | 0.002359834 | 0.010701308 |
| ENSMMUG00000006561 | tRNA selenocysteine 1 associated protein 1 [Source:VGNC Symbol;Acc:VGNC:79885]          | - | 1.081223169 | 0.007976769 | 0.029486457 |
| ENSMMUG00000031224 | casein kinase 2 alpha 1 [Source:NCBI gene;Acc:714841]                                   | - | 1.080745827 | 0.002193962 | 0.010043198 |
| ENSMMUG00000064075 | ring finger protein 41 [Source:NCBI gene;Acc:711969]                                    | - | 1.080397287 | 0.006414325 | 0.024667857 |
| ENSMMUG00000000662 | guanylate-binding protein 1 [Source:NCBI gene;Acc:694538]                               | - | 1.080064716 | 4.22E-06    | 4.44E-05    |
| ENSMMUG00000062413 | CCAAT enhancer binding protein gamma [Source:NCBI gene;Acc:704322]                      | - | 1.079784154 | 0.002022388 | 0.009404907 |
| ENSMMUG00000003051 | COPI coat complex subunit beta 2 [Source:VGNC Symbol;Acc:VGNC:71313]                    | - | 1.079526317 | 1.97E-05    | 0.000174923 |
| ENSMMUG00000015577 | RIO kinase 1 [Source:VGNC Symbol;Acc:VGNC:76767]                                        | - | 1.077809616 | 0.008746231 | 0.031767119 |
| ENSMMUG00000015203 | golgi reassembly stacking protein 2 [Source:VGNC Symbol;Acc:VGNC:72957]                 | - | 1.077651973 | 0.009307785 | 0.033353347 |
| ENSMMUG00000002176 | ubiquitin like with PHD and ring finger domains 2 [Source:VGNC Symbol;Acc:VGNC:78714]   | - | 1.076964332 | 2.26E-06    | 2.54E-05    |
| ENSMMUG00000021760 | zinc finger protein 79 [Source:NCBI gene;Acc:700961]                                    | - | 1.075430869 | 0.000243128 | 0.001549139 |
| ENSMMUG00000054625 |                                                                                         | - | 1.074942135 | 0.00015072  | 0.001027457 |
| ENSMMUG00000028863 | WIZ zinc finger [Source:VGNC Symbol;Acc:VGNC:79901]                                     | - | 1.074872175 | 0.01325191  | 0.044386703 |
| ENSMMUG00000004754 | intermediate filament family orphan 2 [Source:NCBI gene;Acc:106995162]                  | - | 1.073300436 | 0.00192678  | 0.009035502 |
| ENSMMUG00000061396 | kallikrein related peptidase 6 [Source:NCBI gene;Acc:719776]                            | - | 1.072149333 | 0.005979325 | 0.023271653 |
| ENSMMUG00000001849 | interleukin 5 receptor subunit alpha [Source:VGNC Symbol;Acc:VGNC:73731]                | - | 1.072022287 | 0.009605274 | 0.034219832 |
| ENSMMUG00000054112 |                                                                                         | - | 1.070381981 | 2.65E-06    | 2.93E-05    |
| ENSMMUG00000003468 | growth arrest and DNA damage inducible beta [Source:VGNC Symbol;Acc:VGNC:72864]         | - | 1.069916375 | 0.00142308  | 0.006999229 |
| ENSMMUG00000014540 | acylaminoacyl-peptide hydrolase [Source:VGNC Symbol;Acc:VGNC:69982]                     | - | 1.069203221 | 0.006786817 | 0.025897784 |
| ENSMMUG00000048823 |                                                                                         | - | 1.068024005 | 0.002374466 | 0.010749378 |
| ENSMMUG00000021806 | vestigial like family member 4 [Source:VGNC Symbol;Acc:VGNC:79755]                      | - | 1.067867614 | 0.003804416 | 0.016068756 |
| ENSMMUG00000021808 | cryptochrome circadian regulator 1 [Source:VGNC Symbol;Acc:VGNC:71499]                  | - | 1.067701729 | 0.000140382 | 0.000968805 |
| ENSMMUG00000060319 | Metazoan signal recognition particle RNA [Source:RFAM;Acc:RF00017]                      | - | 1.066175084 | 0.008085186 | 0.029793486 |
| ENSMMUG00000022293 | FERM and PDZ domain containing 3 [Source:VGNC Symbol;Acc:VGNC:72805]                    | - | 1.065058462 | 7.23E-06    | 7.17E-05    |



|                    |                                                                                                      |   |             |             |             |
|--------------------|------------------------------------------------------------------------------------------------------|---|-------------|-------------|-------------|
| ENSMMUG00000017076 | tubulin gamma complex associated protein 4 [Source:VGNC Symbol;Acc:VGNC:79045]                       | - | 1.063811955 | 0.001201554 | 0.006068862 |
| ENSMMUG00000016906 | F-box and leucine rich repeat protein 16 [Source:VGNC Symbol;Acc:VGNC:81405]                         | - | 1.062213648 | 0.002970477 | 0.012988307 |
| ENSMMUG00000054737 |                                                                                                      | - | 1.061633519 | 5.05E-06    | 5.21E-05    |
| ENSMMUG00000000244 | coagulation factor XIII B chain [Source:VGNC Symbol;Acc:VGNC:72463]                                  | - | -1.06124896 | 0.00249739  | 0.01119096  |
| ENSMMUG00000008542 | DEAH-box helicase 32 (putative) [Source:NCBI gene;Acc:695919]                                        | - | 1.059490607 | 0.002288293 | 0.010419502 |
| ENSMMUG00000016896 | solute carrier family 12 member 1 [Source:VGNC Symbol;Acc:VGNC:77385]                                | - | 1.056590553 | 1.78E-05    | 0.000161352 |
| ENSMMUG00000015166 | NIMA related kinase 9 [Source:VGNC Symbol;Acc:VGNC:75209]                                            | - | 1.056145793 | 1.38E-06    | 1.64E-05    |
| ENSMMUG00000015311 | leucine rich repeats and calponin homology domain containing 4 [Source:VGNC Symbol;Acc:VGNC:74441]   | - | 1.055953927 | 2.08E-06    | 2.36E-05    |
| ENSMMUG00000022697 | STEAP4 metalloredutase [Source:VGNC Symbol;Acc:VGNC:77974]                                           | - | 1.055891279 | 8.56E-05    | 0.000636038 |
| ENSMMUG00000010748 | transient receptor potential cation channel subfamily A member 1 [Source:VGNC Symbol;Acc:VGNC:78429] | - | -1.05573745 | 0.012633803 | 0.042683364 |
| ENSMMUG00000052496 |                                                                                                      | - | 1.054660335 | 0.000217005 | 0.001414592 |
| ENSMMUG00000043809 | caspase 2 [Source:VGNC Symbol;Acc:VGNC:80804]                                                        | - | 1.054355997 | 2.00E-05    | 0.000177444 |
| ENSMMUG00000002894 | dedicator of cytokinesis 4 [Source:VGNC Symbol;Acc:VGNC:71866]                                       | - | 1.053679552 | 0.00757127  | 0.0282252   |
| ENSMMUG00000033001 | U6 spliceosomal RNA [Source:RFAM;Acc:RF00026]                                                        | - | 1.053412177 | 0.002406284 | 0.010861416 |
| ENSMMUG00000011986 | chibby family member 2 [Source:VGNC Symbol;Acc:VGNC:78029]                                           | - | 1.052464707 | 0.014714919 | 0.048332728 |
| ENSMMUG00000017333 | CD244 molecule [Source:VGNC Symbol;Acc:VGNC:70821]                                                   | - | -1.04817522 | 0.004548388 | 0.01859027  |
| ENSMMUG00000062667 | leucine rich repeat and fibronectin type III domain containing 3 [Source:NCBI gene;Acc:711565]       | - | 1.046771641 | 0.005644777 | 0.022280011 |
| ENSMMUG00000003221 | DENN domain containing 5B [Source:VGNC Symbol;Acc:VGNC:71772]                                        | - | 1.044975635 | 0.004811203 | 0.019484183 |
| ENSMMUG00000008459 | pleckstrin homology and RUN domain containing M1 [Source:NCBI gene;Acc:716464]                       | - | 1.042620435 | 0.011212785 | 0.038690719 |
| ENSMMUG00000064448 |                                                                                                      | - | 1.041828787 | 0.005318021 | 0.021211497 |
| ENSMMUG00000020049 | phosphoglucomutase 1 [Source:NCBI gene;Acc:699401]                                                   | - | 1.041687127 | 7.05E-09    | 1.30E-07    |
| ENSMMUG00000006755 | tubulin tyrosine ligase like 4 [Source:VGNC Symbol;Acc:VGNC:79758]                                   | - | 1.041679937 | 0.006975643 | 0.026348381 |
| ENSMMUG00000009394 | sestrin 3 [Source:VGNC Symbol;Acc:VGNC:77291]                                                        | - | 1.041538893 | 6.58E-06    | 6.59E-05    |
| ENSMMUG00000018634 | methionine adenosyltransferase 1A [Source:VGNC Symbol;Acc:VGNC:74663]                                | - | 1.040032223 | 0.003964515 | 0.016636344 |
| ENSMMUG00000023096 | obscurin, cytoskeletal calmodulin and titin-interacting RhoGEF [Source:NCBI gene;Acc:694413]         | - | 1.039728798 | 6.50E-07    | 8.25E-06    |
| ENSMMUG00000002912 | TLE family member 6, subcortical maternal complex member [Source:VGNC Symbol;Acc:VGNC:79879]         | - | -1.03815363 | 0.010355038 | 0.036368015 |
| ENSMMUG00000030401 | gem nuclear organelle associated protein 4 [Source:VGNC Symbol;Acc:VGNC:72723]                       | - | -1.03727163 | 0.009453396 | 0.033788964 |
| ENSMMUG00000012778 | rabphilin 3A [Source:VGNC Symbol;Acc:VGNC:77033]                                                     | - | 1.036094066 | 0.00126015  | 0.006314107 |
| ENSMMUG00000002109 | proline and serine rich 1 [Source:VGNC Symbol;Acc:VGNC:76291]                                        | - | 1.036017695 | 1.34E-05    | 0.000124963 |
| ENSMMUG00000002183 | oxysterol binding protein like 6 [Source:VGNC Symbol;Acc:VGNC:75627]                                 | - | 1.035175891 | 0.002321808 | 0.010549119 |

|                      |                                                                                              |   |             |             |             |
|----------------------|----------------------------------------------------------------------------------------------|---|-------------|-------------|-------------|
| ENSMMUG00000023226   | RNA polymerase III subunit D [Source:VGNC Symbol;Acc:VGNC:76017]                             | - | 1.034204122 | 8.15E-05    | 0.000608884 |
| ENSMMUG00000006493   | ras related dexamethasone induced 1 [Source:VGNC Symbol;Acc:VGNC:76485]                      | - | 1.033732361 | 5.66E-05    | 0.000445337 |
| ENSMMUG000000057215  |                                                                                              | - | 1.033550436 | 0.014932825 | 0.048917738 |
| ENSMMUG000000055233  | PRAME family member 17-like [Source:NCBI gene;Acc:100427847]                                 | - | 1.032652947 | 0.000585376 | 0.003318659 |
| ENSMMUG000000065301  |                                                                                              | - | 1.031787205 | 0.002155147 | 0.009894998 |
| ENSMMUG000000053482  | protocadherin 20 [Source:NCBI gene;Acc:696607]                                               | - | 1.030678739 | 0.00943729  | 0.033758363 |
| ENSMMUG00000008004   | transmembrane immune signaling adaptor TYROBP [Source:NCBI gene;Acc:574207]                  | - | 1.029341548 | 0.000122634 | 0.000862295 |
| ENSMMUG000000049640  |                                                                                              | - | 1.027456541 | 0.003012155 | 0.013147159 |
| ENSMMUG000000053231  |                                                                                              | - | 1.025942598 | 0.009972838 | 0.03530419  |
| ENSMMUG000000029263  | polycystin 1, transient receptor potential channel interacting [Source:NCBI gene;Acc:694905] | - | 1.022932944 | 5.05E-05    | 0.000403647 |
| ENSMMUG000000049939  |                                                                                              | - | 1.022685094 | 3.70E-05    | 0.000306277 |
| ENSMMUG000000022570  | nuclear transcription factor Y subunit beta [Source:NCBI gene;Acc:700451]                    | - | 1.020663579 | 0.00087665  | 0.004686781 |
| ENSMMUG000000046520  | small integral membrane protein 13 [Source:NCBI gene;Acc:703387]                             | - | 1.018565659 | 0.012775218 | 0.043054622 |
| ENSMMUG000000042154  | ankyrin repeat domain 66 [Source:VGNC Symbol;Acc:VGNC:81024]                                 | - | 1.018565353 | 4.27E-05    | 0.000346543 |
| ENSMMUG000000010440  | adenylate cyclase 8 [Source:VGNC Symbol;Acc:VGNC:69516]                                      | - | 1.018447473 | 0.004519023 | 0.018477481 |
| ENSMMUG000000038569  | 5',3'-nucleotidase, mitochondrial [Source:NCBI gene;Acc:698591]                              | - | 1.017872069 | 0.007350497 | 0.027519024 |
| ENSMMUG000000002533  | progesterone immunomodulatory binding factor 1 [Source:NCBI gene;Acc:694190]                 | - | 1.016959407 | 0.012488485 | 0.042250474 |
| ENSMMUG000000065322  | ATP synthase peripheral stalk-membrane subunit b [Source:NCBI gene;Acc:704072]               | - | 1.015246449 | 8.87E-05    | 0.000653813 |
| ENSMMUG000000022715  | adenosylhomocysteinase like 1 [Source:VGNC Symbol;Acc:VGNC:81350]                            | - | -1.01464095 | 0.000118969 | 0.000839409 |
| ENSMMUG000000018282  | interleukin 17 receptor C [Source:VGNC Symbol;Acc:VGNC:84164]                                | - | 1.013044597 | 0.0010342   | 0.005368604 |
| ENSMMUG000000019756  | NFKB inhibitor delta [Source:VGNC Symbol;Acc:VGNC:75179]                                     | - | 1.012868762 | 0.004726294 | 0.019197252 |
| ENSMMUG000000001212  | Rieske Fe-S domain containing [Source:VGNC Symbol;Acc:VGNC:84487]                            | - | 1.011156147 | 1.56E-05    | 0.000143525 |
| ENSMMUG000000001065  | olfactory receptor, family 51, subfamily A, member 4 [Source:NCBI gene;Acc:100425539]        | - | 1.009118475 | 0.007919964 | 0.029320567 |
| ENSMMUG000000017886  | F-box protein 10 [Source:NCBI gene;Acc:718443]                                               | - | 1.008127296 | 0.008040684 | 0.02966028  |
| ENSMMUG000000007692  | apolipoprotein B [Source:VGNC Symbol;Acc:VGNC:69985]                                         | - | 1.008010215 | 7.29E-05    | 0.000554575 |
| ENSMMUG000000002370  | integrin subunit alpha 6 [Source:VGNC Symbol;Acc:VGNC:73780]                                 | - | 1.007140965 | 0.001095461 | 0.005621842 |
| ENSMMUG0000000054290 |                                                                                              | - | 1.005347199 | 0.013531355 | 0.045120425 |
| ENSMMUG0000000057544 |                                                                                              | - | 1.005027343 | 0.0114955   | 0.039444775 |
| ENSMMUG000000007310  | solute carrier family 25 member 12 [Source:VGNC Symbol;Acc:VGNC:77430]                       | - | 1.004264509 | 0.001391551 | 0.00686614  |

|                    |                                                                                            |             |             |             |
|--------------------|--------------------------------------------------------------------------------------------|-------------|-------------|-------------|
| ENSMMUG0000009775  | caveolae associated protein 4 [Source:NCBI gene;Acc:714379]                                | 1.004179053 | 0.001628241 | 0.007829698 |
| ENSMMUG00000011319 | potassium channel tetramerization domain containing 15 [Source:VGNC Symbol;Acc:VGNC:73894] | -1.00416455 | 0.001549326 | 0.007504264 |
| ENSMMUG00000008713 | myosin binding protein H like [Source:NCBI gene;Acc:698183]                                | 1.003319305 | 4.26E-07    | 5.62E-06    |
| ENSMMUG00000015309 | F-box protein 24 [Source:VGNC Symbol;Acc:VGNC:72495]                                       | 1.000172269 | 0.000131557 | 0.000911995 |
| ENSMMUG00000002777 | protein tyrosine phosphatase 4A1 [Source:VGNC Symbol;Acc:VGNC:83452]                       | 0.999802456 | 0.000336892 | 0.002055978 |
| ENSMMUG00000021837 | seryl-tRNA synthetase 1 [Source:NCBI gene;Acc:695046]                                      | 0.999025261 | 4.91E-06    | 5.08E-05    |
| ENSMMUG00000058605 | Metazoan signal recognition particle RNA [Source:RFAM;Acc:RF00017]                         | 0.995715808 | 0.002576758 | 0.011495622 |
| ENSMMUG00000065091 | myelin protein zero like 2 [Source:NCBI gene;Acc:699330]                                   | 0.994425517 | 3.64E-06    | 3.89E-05    |
| ENSMMUG00000056662 |                                                                                            | -0.99353231 | 0.013620709 | 0.045344564 |
| ENSMMUG00000003876 | zinc finger and BTB domain containing 22 [Source:VGNC Symbol;Acc:VGNC:78893]               | 0.993116528 | 0.00087035  | 0.004657152 |
| ENSMMUG00000019267 | interleukin 17 receptor B [Source:VGNC Symbol;Acc:VGNC:73618]                              | 0.986943614 | 0.007240167 | 0.027163888 |
| ENSMMUG00000059100 |                                                                                            | 0.986850593 | 0.000386088 | 0.002306956 |
| ENSMMUG00000020047 | integrin subunit beta 3 binding protein [Source:VGNC Symbol;Acc:VGNC:73787]                | -0.98676505 | 0.000633965 | 0.003551535 |
| ENSMMUG00000051793 | gamma-aminobutyric acid type A receptor beta3 subunit [Source:NCBI gene;Acc:711754]        | 0.985370904 | 0.002842189 | 0.012502985 |
| ENSMMUG00000021112 | epithelial splicing regulatory protein 1 [Source:VGNC Symbol;Acc:VGNC:72358]               | 0.984492008 | 0.003129533 | 0.013587102 |
| ENSMMUG00000058786 | ligand of numb-protein X 2 [Source:NCBI gene;Acc:710660]                                   | 0.984360297 | 0.00231058  | 0.010506599 |
| ENSMMUG00000023397 | penta-EF-hand domain containing 1 [Source:NCBI gene;Acc:706038]                            | 0.982626406 | 0.001021227 | 0.005314097 |
| ENSMMUG00000058981 | kinetochore localized astrin (SPAG5) binding protein [Source:NCBI gene;Acc:702753]         | 0.982264154 | 0.004358768 | 0.017947609 |
| ENSMMUG00000004624 | synaptojanin 1 [Source:VGNC Symbol;Acc:VGNC:78071]                                         | 0.982058112 | 0.000935902 | 0.004958264 |
| ENSMMUG00000006340 | solute carrier family 6 member 6 [Source:VGNC Symbol;Acc:VGNC:77622]                       | 0.981669268 | 0.000243699 | 0.001551971 |
| ENSMMUG00000011809 | platelet and endothelial cell adhesion molecule 1 [Source:VGNC Symbol;Acc:VGNC:75938]      | -0.97983685 | 6.01E-05    | 0.000469472 |
| ENSMMUG00000002009 | nitrilase 1 [Source:VGNC Symbol;Acc:VGNC:75351]                                            | 0.979304476 | 0.003588676 | 0.015262427 |
| ENSMMUG00000012764 | zinc finger protein 175 [Source:VGNC Symbol;Acc:VGNC:78856]                                | 0.978777922 | 0.013015017 | 0.043778757 |
| ENSMMUG00000026981 | EGF like domain multiple 7 [Source:VGNC Symbol;Acc:VGNC:72079]                             | 0.978085187 | 0.007995545 | 0.029529221 |
| ENSMMUG00000050907 |                                                                                            | 0.977542581 | 6.30E-05    | 0.000487492 |
| ENSMMUG00000042208 | pepsin A-4 [Source:NCBI gene;Acc:694646]                                                   | 0.975926575 | 0.011307366 | 0.038940555 |
| ENSMMUG00000017549 | ectonucleotide pyrophosphatase/phosphodiesterase 3 [Source:VGNC Symbol;Acc:VGNC:72224]     | 0.975791539 | 0.001853873 | 0.008740297 |
| ENSMMUG00000018738 | alcohol dehydrogenase 1B (class I), beta polypeptide [Source:NCBI gene;Acc:707908]         | 0.975459319 | 0.000199911 | 0.001316778 |
| ENSMMUG00000063288 |                                                                                            | 0.974200245 | 0.004247145 | 0.017594087 |
| ENSMMUG00000014677 | dynamin 2 [Source:VGNC Symbol;Acc:VGNC:71957]                                              | 0.973184541 | 0.003697785 | 0.015677639 |



|                    |                                                                                                |             |             |             |
|--------------------|------------------------------------------------------------------------------------------------|-------------|-------------|-------------|
| ENSMMUG0000002519  | serine/threonine kinase 11 interacting protein [Source:VGNC Symbol;Acc:VGNC:77963]             | 0.972447372 | 1.25E-06    | 1.49E-05    |
| ENSMMUG0000001919  | clock circadian regulator [Source:VGNC Symbol;Acc:VGNC:71262]                                  | 0.971914837 | 0.002514694 | 0.011255682 |
| ENSMMUG00000059267 | pellino E3 ubiquitin protein ligase 1 [Source:NCBI gene;Acc:696416]                            | 0.970961185 | 0.001725697 | 0.00822114  |
| ENSMMUG00000015123 | codanin 1 [Source:VGNC Symbol;Acc:VGNC:70788]                                                  | 0.970474483 | 0.000368363 | 0.002213958 |
| ENSMMUG00000020811 | dual specificity tyrosine phosphorylation regulated kinase 4 [Source:NCBI gene;Acc:710999]     | 0.970400074 | 0.004597346 | 0.018760286 |
| ENSMMUG00000008392 | huntingtin [Source:VGNC Symbol;Acc:VGNC:73468]                                                 | 0.969897967 | 4.12E-05    | 0.000336367 |
| ENSMMUG00000051042 |                                                                                                | 0.965716083 | 0.001064422 | 0.005490057 |
| ENSMMUG00000017972 | zinc finger protein 200 [Source:VGNC Symbol;Acc:VGNC:78867]                                    | 0.963956586 | 0.000542652 | 0.003115242 |
| ENSMMUG00000005414 | N-deacetylase and N-sulfotransferase 1 [Source:VGNC Symbol;Acc:VGNC:75151]                     | 0.961919583 | 0.000306165 | 0.001896216 |
| ENSMMUG00000017414 | calcium voltage-gated channel subunit alpha1 S [Source:VGNC Symbol;Acc:VGNC:70507]             | 0.961615971 | 0.003210419 | 0.013889214 |
| ENSMMUG00000055481 | regulator of G protein signaling 16 [Source:NCBI gene;Acc:715599]                              | 0.961323016 | 0.00847693  | 0.030981252 |
| ENSMMUG00000052711 |                                                                                                | 0.959918571 | 0.001650295 | 0.007915863 |
| ENSMMUG00000003325 | pyridoxamine 5'-phosphate oxidase [Source:VGNC Symbol;Acc:VGNC:76141]                          | -0.95950829 | 0.001707418 | 0.008146689 |
| ENSMMUG00000064642 |                                                                                                | 0.959322766 | 0.009494124 | 0.033902462 |
| ENSMMUG00000017160 | PHD finger protein 3 [Source:VGNC Symbol;Acc:VGNC:75975]                                       | 0.957420379 | 0.003067454 | 0.013350595 |
| ENSMMUG00000011593 | regulator of cell cycle [Source:VGNC Symbol;Acc:VGNC:76783]                                    | 0.957280948 | 0.000318497 | 0.001961247 |
| ENSMMUG00000018784 | solute carrier family 39 member 6 [Source:VGNC Symbol;Acc:VGNC:77508]                          | 0.956284061 | 2.33E-05    | 0.000204791 |
| ENSMMUG00000014394 | DnaJ heat shock protein family (Hsp40) member C10 [Source:VGNC Symbol;Acc:VGNC:84229]          | 0.956017143 | 0.000492308 | 0.002863532 |
| ENSMMUG00000013138 | Rho guanine nucleotide exchange factor 7 [Source:VGNC Symbol;Acc:VGNC:69833]                   | 0.955477614 | 0.000713895 | 0.00394305  |
| ENSMMUG00000052581 | upstream transcription factor family member 3 [Source:NCBI gene;Acc:709660]                    | 0.955342546 | 0.000626001 | 0.003511444 |
| ENSMMUG00000009956 | leucine rich repeat and sterile alpha motif containing 1 [Source:VGNC Symbol;Acc:VGNC:74353]   | 0.954912282 | 0.0054455   | 0.021618424 |
| ENSMMUG00000033738 | RNA, U6atac small nuclear 6, pseudogene [Source:HGNC Symbol;Acc:HGNC:46905]                    | 0.953743225 | 0.001280766 | 0.006404352 |
| ENSMMUG00000001074 | unc-51 like kinase 4 [Source:VGNC Symbol;Acc:VGNC:82565]                                       | 0.953625627 | 0.00746268  | 0.027888051 |
| ENSMMUG00000017351 | stabilin 1 [Source:VGNC Symbol;Acc:VGNC:77956]                                                 | 0.953329381 | 0.001263236 | 0.006326991 |
| ENSMMUG00000005463 | bromodomain containing 3 [Source:VGNC Symbol;Acc:VGNC:70281]                                   | 0.951572167 | 0.001958192 | 0.009145    |
| ENSMMUG00000017163 | EGF like, fibronectin type III and laminin G domains [Source:VGNC Symbol;Acc:VGNC:72122]       | 0.951323732 | 0.000375311 | 0.002246933 |
| ENSMMUG00000009126 | solute carrier organic anion transporter family member 2B1 [Source:VGNC Symbol;Acc:VGNC:77603] | 0.951314192 | 0.001314724 | 0.006542217 |
| ENSMMUG00000063721 |                                                                                                | 0.950775972 | 7.17E-06    | 7.12E-05    |
| ENSMMUG00000021942 | ANKH inorganic pyrophosphate transport regulator [Source:VGNC Symbol;Acc:VGNC:69612]           | 0.950307922 | 0.003016649 | 0.013162097 |

|                    |                                                                                      |             |             |             |
|--------------------|--------------------------------------------------------------------------------------|-------------|-------------|-------------|
| ENSMMUG0000008941  | DNA topoisomerase II alpha [Source:VGNC Symbol;Acc:VGNC:78620]                       | -0.95024963 | 4.57E-06    | 4.76E-05    |
| ENSMMUG00000052743 | stearoyl-CoA desaturase 5 [Source:NCBI gene;Acc:694079]                              | 0.950117733 | 0.007795634 | 0.028947472 |
| ENSMMUG00000020912 | spermine oxidase [Source:NCBI gene;Acc:718761]                                       | 0.949937703 | 0.004277087 | 0.01769427  |
| ENSMMUG00000037975 | solute carrier family 7 member 6 [Source:NCBI gene;Acc:702903]                       | 0.949609468 | 0.011588171 | 0.039713483 |
| ENSMMUG00000023450 | tyrosylprotein sulfotransferase 2 [Source:VGNC Symbol;Acc:VGNC:78639]                | 0.949490651 | 0.011086854 | 0.038396314 |
| ENSMMUG00000012677 | lysine demethylase 4B [Source:VGNC Symbol;Acc:VGNC:73930]                            | 0.949453607 | 0.005779122 | 0.022657477 |
| ENSMMUG00000008423 | septin 4 [Source:NCBI gene;Acc:714724]                                               | -0.94776155 | 1.13E-05    | 0.000106817 |
| ENSMMUG00000053348 | PDZ domain containing 8 [Source:NCBI gene;Acc:709084]                                | 0.947301414 | 0.005194609 | 0.020850914 |
| ENSMMUG00000056693 |                                                                                      | 0.945644504 | 1.97E-07    | 2.80E-06    |
| ENSMMUG00000048302 | ArfGAP with FG repeats 2 [Source:VGNC Symbol;Acc:VGNC:80329]                         | 0.945528866 | 0.000124116 | 0.000870722 |
| ENSMMUG00000056257 |                                                                                      | 0.945468383 | 0.011236239 | 0.03874989  |
| ENSMMUG00000018791 | molybdenum cofactor sulfurase [Source:VGNC Symbol;Acc:VGNC:74792]                    | 0.944962186 | 0.013566736 | 0.045189365 |
| ENSMMUG00000056785 |                                                                                      | 0.944883688 | 0.005234085 | 0.020966594 |
| ENSMMUG00000044344 | vasorin [Source:NCBI gene;Acc:100426861]                                             | 0.944018596 | 0.008550385 | 0.031157067 |
| ENSMMUG00000061967 | carbohydrate sulfotransferase 4 [Source:NCBI gene;Acc:708116]                        | 0.942854007 | 0.000921629 | 0.004895308 |
| ENSMMUG00000011189 | tousled like kinase 1 [Source:VGNC Symbol;Acc:VGNC:78367]                            | 0.942313849 | 0.006078849 | 0.023576879 |
| ENSMMUG00000017070 | zinc finger and SCAN domain containing 29 [Source:VGNC Symbol;Acc:VGNC:79633]        | 0.940929512 | 0.000729428 | 0.004004197 |
| ENSMMUG00000021782 | LDL receptor related protein 1 [Source:VGNC Symbol;Acc:VGNC:74442]                   | 0.938395103 | 0.001942765 | 0.009086195 |
| ENSMMUG00000016522 | neurolysin [Source:VGNC Symbol;Acc:VGNC:75183]                                       | 0.937292341 | 9.07E-05    | 0.00066706  |
| ENSMMUG00000010589 | nebulette [Source:VGNC Symbol;Acc:VGNC:75195]                                        | 0.936172015 | 0.000165754 | 0.001118154 |
| ENSMMUG00000058948 |                                                                                      | 0.934937385 | 0.000938142 | 0.004967991 |
| ENSMMUG00000019887 | synaptic vesicle glycoprotein 2C [Source:VGNC Symbol;Acc:VGNC:78252]                 | 0.933067819 | 0.003940735 | 0.016564835 |
| ENSMMUG00000007500 | connector enhancer of kinase suppressor of Ras 2 [Source:VGNC Symbol;Acc:VGNC:71223] | 0.932408979 | 0.007012853 | 0.02647266  |
| ENSMMUG00000054107 |                                                                                      | 0.932343572 | 0.013889994 | 0.04605393  |
| ENSMMUG00000014451 | ASXL transcriptional regulator 3 [Source:VGNC Symbol;Acc:VGNC:70152]                 | 0.932018777 | 0.002867803 | 0.012597629 |
| ENSMMUG00000002175 | TPD52 like 3 [Source:HGNC Symbol;Acc:HGNC:23382]                                     | 0.931575708 | 0.005675486 | 0.022365307 |
| ENSMMUG00000018284 | mutS homolog 3 [Source:VGNC Symbol;Acc:VGNC:74932]                                   | 0.931107336 | 0.000391009 | 0.002329567 |
| ENSMMUG00000003043 | PWWP domain containing 3A, DNA repair factor [Source:VGNC Symbol;Acc:VGNC:76565]     | 0.931096345 | 0.000229092 | 0.001478872 |
| ENSMMUG00000055590 |                                                                                      | 0.928678256 | 0.000220117 | 0.001430699 |

|                     |                                                                                      |             |             |             |
|---------------------|--------------------------------------------------------------------------------------|-------------|-------------|-------------|
| ENSMMUG00000051078  |                                                                                      | -0.92644635 | 0.010615269 | 0.037087058 |
| ENSMMUG00000012331  | solute carrier family 38 member 4 [Source:VGNC Symbol;Acc:VGNC:77484]                | -0.92476154 | 0.012187182 | 0.041424958 |
|                     |                                                                                      | -           |             |             |
| ENSMMUG00000018281  | interleukin 17 receptor E [Source:VGNC Symbol;Acc:VGNC:73623]                        | 0.924131781 | 0.000900885 | 0.004799643 |
| ENSMMUG00000015463  | DNA polymerase epsilon, catalytic subunit [Source:NCBI gene;Acc:698023]              | -0.9236601  | 0.001828065 | 0.008628551 |
|                     |                                                                                      | -           |             |             |
| ENSMMUG00000001978  | adenosine monophosphate deaminase 1 [Source:VGNC Symbol;Acc:VGNC:69806]              | 0.923144739 | 0.000337304 | 0.002057472 |
|                     |                                                                                      | -           |             |             |
| ENSMMUG00000029265  | zinc finger protein 598 [Source:NCBI gene;Acc:694129]                                | 0.923099789 | 0.0020174   | 0.009388814 |
|                     |                                                                                      | -           |             |             |
| ENSMMUG00000061186  |                                                                                      | 0.919024546 | 0.000799772 | 0.004341873 |
|                     |                                                                                      | -           |             |             |
| ENSMMUG00000018289  | proline rich transmembrane protein 3 [Source:VGNC Symbol;Acc:VGNC:76324]             | 0.918798396 | 0.00023673  | 0.001517746 |
|                     |                                                                                      | -           |             |             |
| ENSMMUG00000064237  |                                                                                      | 0.917412742 | 0.006843024 | 0.026010322 |
| ENSMMUG00000047015  | ral-GDS-related protein-like [Source:NCBI gene;Acc:106995524]                        | -0.916126   | 0.010778255 | 0.03750723  |
| ENSMMUG00000018186  | sosondowah ankyrin repeat domain family member B [Source:VGNC Symbol;Acc:VGNC:78033] | -0.91361188 | 5.80E-07    | 7.45E-06    |
|                     |                                                                                      | -           |             |             |
| ENSMMUG00000014610  | ring finger protein 17 [Source:NCBI gene;Acc:708198]                                 | 0.912842092 | 1.60E-05    | 0.00014644  |
|                     |                                                                                      | -           |             |             |
| ENSMMUG00000023117  | neurotrophic receptor tyrosine kinase 2 [Source:VGNC Symbol;Acc:VGNC:75541]          | 0.912126155 | 4.05E-06    | 4.28E-05    |
|                     |                                                                                      | -           |             |             |
| ENSMMUG00000012073  | X antigen family member 1-like [Source:NCBI gene;Acc:106996044]                      | 0.911979939 | 0.004250425 | 0.017595815 |
|                     |                                                                                      | -           |             |             |
| ENSMMUG00000012786  | complement C1s [Source:VGNC Symbol;Acc:VGNC:70297]                                   | 0.910839665 | 2.94E-06    | 3.21E-05    |
|                     |                                                                                      | -           |             |             |
| ENSMMUG00000046237  | 4-aminobutyrate aminotransferase [Source:NCBI gene;Acc:714017]                       | 0.908713093 | 0.001462256 | 0.007157542 |
|                     |                                                                                      | -           |             |             |
| ENSMMUG00000009922  | mitochondrial calcium uniporter regulator 1 [Source:VGNC Symbol;Acc:VGNC:81471]      | 0.904804622 | 0.000569058 | 0.0032396   |
|                     |                                                                                      | -           |             |             |
| ENSMMUG00000013920  | triggering receptor expressed on myeloid cells 2 [Source:VGNC Symbol;Acc:VGNC:79089] | 0.903601439 | 0.012719996 | 0.042927367 |
|                     |                                                                                      | -           |             |             |
| ENSMMUG00000000464  | polypyrimidine tract binding protein 3 [Source:VGNC Symbol;Acc:VGNC:76244]           | 0.903464973 | 0.000857677 | 0.004595339 |
|                     |                                                                                      | -           |             |             |
| ENSMMUG00000013093  | uncharacterized LOC106993385 [Source:NCBI gene;Acc:106993385]                        | 0.902796299 | 2.66E-06    | 2.93E-05    |
|                     |                                                                                      | -           |             |             |
| ENSMMUG00000008672  | ring finger protein 126 [Source:VGNC Symbol;Acc:VGNC:76791]                          | 0.900898268 | 0.008949386 | 0.032371073 |
|                     |                                                                                      | -           |             |             |
| ENSMMUG00000009030  | mitochondrial translational initiation factor 3 [Source:VGNC Symbol;Acc:VGNC:75040]  | 0.899397587 | 0.000159935 | 0.001082672 |
|                     |                                                                                      | -           |             |             |
| ENSMMUG00000003594  | ubiquitin specific peptidase 13 [Source:VGNC Symbol;Acc:VGNC:78735]                  | 0.897917379 | 0.000154841 | 0.001052046 |
|                     |                                                                                      | -           |             |             |
| ENSMMUG00000006754  | tetratricopeptide repeat domain 4 [Source:VGNC Symbol;Acc:VGNC:78668]                | 0.896926132 | 0.007859116 | 0.029156775 |
|                     |                                                                                      | -           |             |             |
| ENSMMUG000000059753 |                                                                                      | 0.894916309 | 0.002804949 | 0.012356858 |
|                     |                                                                                      | -           |             |             |
| ENSMMUG00000017276  | nucleolar protein 4 [Source:VGNC Symbol;Acc:VGNC:75366]                              | 0.892650594 | 0.015253375 | 0.049755635 |
|                     |                                                                                      | -           |             |             |
| ENSMMUG00000009461  | SMAD specific E3 ubiquitin protein ligase 2 [Source:VGNC Symbol;Acc:VGNC:77727]      | 0.892645182 | 3.72E-05    | 0.00030755  |
|                     |                                                                                      | -           |             |             |
| ENSMMUG00000040958  | lysozyme-like protein 1 [Source:NCBI gene;Acc:698176]                                | 0.885184606 | 0.011100324 | 0.038410497 |
|                     |                                                                                      | -           |             |             |
| ENSMMUG00000002429  | catalase [Source:VGNC Symbol;Acc:VGNC:70552]                                         | 0.884590626 | 0.001271485 | 0.006363119 |
|                     |                                                                                      | -           |             |             |
| ENSMMUG00000061035  | ZFP82 zinc finger protein [Source:NCBI gene;Acc:719145]                              | 0.883413131 | 0.000456675 | 0.002675404 |

|                    |                                                                                      |   |             |             |             |
|--------------------|--------------------------------------------------------------------------------------|---|-------------|-------------|-------------|
| ENSMMUG00000014926 | epithelial stromal interaction 1 [Source:VGNC Symbol;Acc:VGNC:72053]                 | - | 0.882233068 | 0.003041442 | 0.013251457 |
| ENSMMUG00000065306 |                                                                                      | - | 0.881783902 | 0.009247763 | 0.033226233 |
| ENSMMUG00000055970 |                                                                                      | - | 0.880788507 | 0.002623768 | 0.011658979 |
| ENSMMUG00000018051 | FAT atypical cadherin 1 [Source:VGNC Symbol;Acc:VGNC:72617]                          | - | 0.879551777 | 5.48E-07    | 7.08E-06    |
| ENSMMUG00000021053 | annexin A6 [Source:VGNC Symbol;Acc:VGNC:69951]                                       | - | -0.87781781 | 0.011910514 | 0.040619348 |
| ENSMMUG00000020784 | centrosomal protein 126 [Source:NCBI gene;Acc:701911]                                | - | 0.876006712 | 0.000990074 | 0.005186221 |
| ENSMMUG00000043458 | transmembrane protein 178A [Source:NCBI gene;Acc:714010]                             | - | 0.875946641 | 0.011937999 | 0.040701787 |
| ENSMMUG00000019805 | dual specificity phosphatase 18 [Source:VGNC Symbol;Acc:VGNC:71858]                  | - | 0.875352814 | 0.001106775 | 0.005665711 |
| ENSMMUG00000007426 | BMS1 ribosome biogenesis factor [Source:HGNC Symbol;Acc:HGNC:23505]                  | - | 0.875261491 | 0.001754825 | 0.008317991 |
| ENSMMUG00000008486 | endothelial cell adhesion molecule [Source:VGNC Symbol;Acc:VGNC:72290]               | - | -0.87391181 | 0.004628872 | 0.018851381 |
| ENSMMUG00000019841 | leucine rich pentatricopeptide repeat containing [Source:VGNC Symbol;Acc:VGNC:82177] | - | -0.87254068 | 0.009247982 | 0.033226233 |
| ENSMMUG00000013094 | lipoyl(octanoyl) transferase 2 [Source:NCBI gene;Acc:718425]                         | - | 0.872434803 | 6.80E-05    | 0.000522244 |
| ENSMMUG00000064983 |                                                                                      | - | -0.87227995 | 0.011880883 | 0.040552051 |
| ENSMMUG00000059543 | zinc finger protein 30 [Source:NCBI gene;Acc:718310]                                 | - | 0.871627351 | 9.42E-05    | 0.000688622 |
| ENSMMUG00000041976 | zinc finger protein 780B [Source:NCBI gene;Acc:701034]                               | - | 0.871385108 | 0.000553634 | 0.003166455 |
| ENSMMUG00000001423 | family with sequence similarity 214 member A [Source:VGNC Symbol;Acc:VGNC:72354]     | - | -0.86934268 | 0.000421708 | 0.002489534 |
| ENSMMUG00000054734 |                                                                                      | - | 0.869037413 | 0.010591071 | 0.037044637 |
| ENSMMUG00000004483 | histidyl-tRNA synthetase 2, mitochondrial [Source:VGNC Symbol;Acc:VGNC:73346]        | - | 0.868814345 | 0.005521942 | 0.021886549 |
| ENSMMUG00000023027 | endo-beta-N-acetylglucosaminidase [Source:VGNC Symbol;Acc:VGNC:72099]                | - | 0.868248031 | 0.011405531 | 0.039212694 |
| ENSMMUG00000019518 | stromal cell derived factor 4 [Source:VGNC Symbol;Acc:VGNC:77092]                    | - | 0.860788431 | 0.00926165  | 0.033265618 |
| ENSMMUG00000004173 | phosphofructokinase, liver type [Source:VGNC Symbol;Acc:VGNC:81737]                  | - | 0.859627954 | 0.002018941 | 0.009392429 |
| ENSMMUG00000007910 | heat shock transcription factor 2 [Source:VGNC Symbol;Acc:VGNC:81077]                | - | 0.859464621 | 0.00578244  | 0.022663256 |
| ENSMMUG00000054590 |                                                                                      | - | 0.859150033 | 0.011110002 | 0.038433166 |
| ENSMMUG00000004606 | EMAP like 5 [Source:VGNC Symbol;Acc:VGNC:72067]                                      | - | 0.858636556 | 0.000355182 | 0.002148398 |
| ENSMMUG00000057137 |                                                                                      | - | -0.85775448 | 0.013857386 | 0.045970614 |
| ENSMMUG00000000065 | coiled-coil domain containing 181 [Source:VGNC Symbol;Acc:VGNC:70884]                | - | -0.85705847 | 0.000921314 | 0.004895308 |
| ENSMMUG00000002338 | heterogeneous nuclear ribonucleoprotein L like [Source:VGNC Symbol;Acc:VGNC:73441]   | - | 0.857017224 | 0.00023314  | 0.001498703 |
| ENSMMUG00000001941 | CXXC finger protein 5 [Source:VGNC Symbol;Acc:VGNC:71594]                            | - | 0.856859771 | 3.46E-06    | 3.72E-05    |
| ENSMMUG00000012289 | GLIPR1 like 1 [Source:VGNC Symbol;Acc:VGNC:81412]                                    | - | 0.856395706 | 0.010841059 | 0.037715102 |
| ENSMMUG00000008313 | zinc finger protein 792 [Source:VGNC Symbol;Acc:VGNC:79456]                          | - | 0.856188736 | 5.34E-05    | 0.000424595 |
| ENSMMUG00000046906 |                                                                                      | - | 0.852588221 | 0.010170667 | 0.035880502 |



|                    |                                                                                                    |   |             |             |             |
|--------------------|----------------------------------------------------------------------------------------------------|---|-------------|-------------|-------------|
| ENSMMUG00000062551 |                                                                                                    | - | 0.852394504 | 0.006651498 | 0.025460468 |
| ENSMMUG00000003110 | tyrosine kinase 2 [Source:VGNC Symbol;Acc:VGNC:78680]                                              | - | 0.852355532 | 0.002176473 | 0.009970565 |
| ENSMMUG00000013466 | tetratricopeptide repeat domain 39B [Source:VGNC Symbol;Acc:VGNC:79402]                            | - | 0.852029268 | 8.68E-05    | 0.000643249 |
| ENSMMUG00000022359 | solute carrier family 38 member 2 [Source:VGNC Symbol;Acc:VGNC:77469]                              | - | 0.849590092 | 0.012679025 | 0.042800849 |
| ENSMMUG00000016539 | abhydrolase domain containing 17A [Source:VGNC Symbol;Acc:VGNC:69543]                              | - | 0.848899304 | 0.010183231 | 0.035914518 |
| ENSMMUG00000010544 | mucin 5B, oligomeric mucus/gel-forming [Source:VGNC Symbol;Acc:VGNC:75081]                         | - | 0.847530967 | 0.000335687 | 0.002051682 |
| ENSMMUG00000039869 |                                                                                                    | - | 0.845514104 | 0.010847122 | 0.037720469 |
| ENSMMUG00000014314 | ankyrin and armadillo repeat containing [Source:VGNC Symbol;Acc:VGNC:69706]                        | - | 0.845141191 | 0.001098173 | 0.005631058 |
| ENSMMUG00000023002 | adhesion G protein-coupled receptor F5 [Source:VGNC Symbol;Acc:VGNC:69471]                         | - | 0.844998956 | 6.00E-05    | 0.000468791 |
| ENSMMUG00000062457 | pyridoxal kinase [Source:NCBI gene;Acc:713564]                                                     | - | 0.844750086 | 0.013289217 | 0.044477351 |
| ENSMMUG00000047974 | aldehyde oxidase 4 [Source:NCBI gene;Acc:701502]                                                   | - | 0.842825034 | 0.003486539 | 0.014895046 |
| ENSMMUG00000017700 | exostosin like glycosyltransferase 3 [Source:VGNC Symbol;Acc:VGNC:72452]                           | - | 0.841887354 | 0.013107761 | 0.044018439 |
| ENSMMUG00000022906 | vascular cell adhesion molecule 1 [Source:VGNC Symbol;Acc:VGNC:78761]                              | - | 0.841604826 | 0.000251488 | 0.001594961 |
| ENSMMUG00000012163 | GTPase activating Rap/RanGAP domain like 3 [Source:VGNC Symbol;Acc:VGNC:72785]                     | - | 0.840742789 | 0.010321535 | 0.036313242 |
| ENSMMUG00000056466 |                                                                                                    | - | 0.840274621 | 0.005818019 | 0.022780908 |
| ENSMMUG00000063474 |                                                                                                    | - | 0.840097628 | 0.001201823 | 0.006068862 |
| ENSMMUG00000002005 | Rho GTPase activating protein 30 [Source:NCBI gene;Acc:718236]                                     | - | -0.83976544 | 0.000951242 | 0.005020564 |
| ENSMMUG00000064514 | keratin, type II cuticular Hb1 [Source:NCBI gene;Acc:697511]                                       | - | 0.839189655 | 0.000144981 | 0.000997183 |
| ENSMMUG0000009006  | round spermatid basic protein 1 like [Source:VGNC Symbol;Acc:VGNC:77097]                           | - | 0.839039823 | 0.001851142 | 0.00873077  |
| ENSMMUG00000057338 |                                                                                                    | - | 0.837311606 | 0.006634831 | 0.025404582 |
| ENSMMUG00000004113 | major facilitator superfamily domain containing 4A [Source:VGNC Symbol;Acc:VGNC:74575]             | - | 0.836970342 | 0.001623798 | 0.007811392 |
| ENSMMUG00000063666 |                                                                                                    | - | 0.836494213 | 0.013011756 | 0.043778757 |
| ENSMMUG00000000978 | cramped chromatin regulator homolog 1 [Source:NCBI gene;Acc:722473]                                | - | 0.836411519 | 0.000223605 | 0.001447254 |
| ENSMMUG00000005942 | leucine carboxyl methyltransferase 1 [Source:VGNC Symbol;Acc:VGNC:74067]                           | - | 0.833105338 | 7.90E-05    | 0.00059293  |
| ENSMMUG00000020122 | RAN binding protein 9 [Source:VGNC Symbol;Acc:VGNC:76475]                                          | - | 0.827608357 | 0.007166477 | 0.026920285 |
| ENSMMUG00000007998 | HIVEP zinc finger 2 [Source:VGNC Symbol;Acc:VGNC:83427]                                            | - | 0.826876077 | 0.003469389 | 0.014842414 |
| ENSMMUG00000002185 | protein activator of interferon induced protein kinase EIF2AK2 [Source:VGNC Symbol;Acc:VGNC:76421] | - | 0.824810912 | 0.001710019 | 0.008155934 |
| ENSMMUG00000010788 | ATP binding cassette subfamily B member 1 [Source:NCBI gene;Acc:574235]                            | - | 0.824616441 | 0.000589763 | 0.003332769 |
| ENSMMUG00000058740 |                                                                                                    | - | 0.823080633 | 0.001404371 | 0.006918288 |

|                    |                                                                                          |   |             |             |             |
|--------------------|------------------------------------------------------------------------------------------|---|-------------|-------------|-------------|
| ENSMMUG00000020150 | xin actin binding repeat containing 1 [Source:VGNC Symbol;Acc:VGNC:78952]                | - | 0.814535228 | 3.55E-05    | 0.000295513 |
| ENSMMUG00000003263 | stromal antigen 1 [Source:VGNC Symbol;Acc:VGNC:77901]                                    | - | 0.813202463 | 0.000370467 | 0.002223343 |
| ENSMMUG00000019760 | karyopherin subunit beta 1 [Source:VGNC Symbol;Acc:VGNC:74203]                           | - | 0.811897672 | 0.000430276 | 0.002531606 |
| ENSMMUG00000022303 | solute carrier family 7 member 2 [Source:VGNC Symbol;Acc:VGNC:77629]                     | - | 0.810172186 | 9.93E-06    | 9.55E-05    |
| ENSMMUG00000018415 | Ras interacting protein 1 [Source:HGNC Symbol;Acc:HGNC:24716]                            | - | 0.805528887 | 0.012008347 | 0.040907591 |
| ENSMMUG00000053298 |                                                                                          | - | -0.804858   | 0.00218343  | 0.009998708 |
| ENSMMUG00000021567 | neurexophilin and PC-esterase domain family member 3 [Source:VGNC Symbol;Acc:VGNC:75476] | - | -0.80067882 | 2.67E-06    | 2.94E-05    |
| ENSMMUG00000061085 |                                                                                          | - | 0.799173806 | 0.000963441 | 0.005077364 |
| ENSMMUG00000054417 |                                                                                          | - | 0.798808264 | 0.000358284 | 0.002160777 |
| ENSMMUG00000021051 | TNFAIP3 interacting protein 1 [Source:VGNC Symbol;Acc:VGNC:79057]                        | - | 0.798603866 | 0.011423419 | 0.039243782 |
| ENSMMUG00000016716 | zinc finger protein 821 [Source:VGNC Symbol;Acc:VGNC:79679]                              | - | 0.796682014 | 0.01349359  | 0.045018923 |
| ENSMMUG00000014388 | spermatogenesis associated serine rich 1 [Source:VGNC Symbol;Acc:VGNC:77975]             | - | 0.796359023 | 0.00208909  | 0.009680848 |
| ENSMMUG00000006251 | argonaute RISC component 1 [Source:VGNC Symbol;Acc:VGNC:81346]                           | - | -0.79378109 | 0.005237901 | 0.020970372 |
| ENSMMUG00000064880 |                                                                                          | - | 0.792812137 | 0.004023225 | 0.016848199 |
| ENSMMUG00000017025 | zinc finger CCCH-type containing 13 [Source:VGNC Symbol;Acc:VGNC:79248]                  | - | 0.791139866 | 0.001545732 | 0.00749747  |
| ENSMMUG00000008098 | ubiquitin specific peptidase 34 [Source:VGNC Symbol;Acc:VGNC:79223]                      | - | 0.790149517 | 0.002330901 | 0.010579433 |
| ENSMMUG00000010689 | fermitin family member 2 [Source:VGNC Symbol;Acc:VGNC:82144]                             | - | 0.788666748 | 0.002674826 | 0.011871981 |
| ENSMMUG00000009539 | XPA binding protein 2 [Source:VGNC Symbol;Acc:VGNC:78943]                                | - | 0.788470464 | 0.000270749 | 0.001696982 |
| ENSMMUG00000013601 | chromosome 14 C11orf54 homolog [Source:NCBI gene;Acc:696483]                             | - | 0.786678552 | 0.001508593 | 0.007355066 |
| ENSMMUG00000006713 | cyclin Y [Source:VGNC Symbol;Acc:VGNC:70840]                                             | - | 0.786339991 | 0.007961561 | 0.029456817 |
| ENSMMUG00000008946 | chromosome 19 C19orf47 homolog [Source:VGNC Symbol;Acc:VGNC:70404]                       | - | 0.785592318 | 0.000721632 | 0.003973827 |
| ENSMMUG00000002494 | actinin alpha 3 [Source:NCBI gene;Acc:713811]                                            | - | 0.784644875 | 0.005704501 | 0.022436486 |
| ENSMMUG00000021216 | UDP glucuronosyltransferase 1 family, polypeptide A1 [Source:NCBI gene;Acc:574210]       | - | 0.784515232 | 0.002377733 | 0.010757486 |
| ENSMMUG00000003273 | basal cell adhesion molecule (Lutheran blood group) [Source:NCBI gene;Acc:714568]        | - | 0.780211844 | 0.004188435 | 0.017386037 |
| ENSMMUG00000058044 |                                                                                          | - | 0.779866672 | 0.002221835 | 0.010155727 |
| ENSMMUG00000017677 | chromosome 7 C14orf28 homolog [Source:VGNC Symbol;Acc:VGNC:70581]                        | - | -0.77948169 | 0.000548666 | 0.003143893 |
| ENSMMUG00000055417 |                                                                                          | - | -0.7773429  | 0.004153677 | 0.017276768 |
| ENSMMUG00000049326 | GIPC PDZ domain containing family member 2 [Source:NCBI gene;Acc:707432]                 | - | 0.776293828 | 0.006876075 | 0.026084519 |
| ENSMMUG00000001432 | t-SNARE domain containing 1 [Source:NCBI gene;Acc:701269]                                | - | 0.776198361 | 0.004205344 | 0.017444441 |
| ENSMMUG00000010939 | rhopilin Rho GTPase binding protein 1 [Source:VGNC Symbol;Acc:VGNC:76779]                | - | 0.775395917 | 0.000739965 | 0.004051186 |

|                     |                                                                                      |   |             |             |             |
|---------------------|--------------------------------------------------------------------------------------|---|-------------|-------------|-------------|
| ENSMMUG00000021572  | solute carrier family 39 member 9 [Source:VGNC Symbol;Acc:VGNC:77523]                | - | 0.774326813 | 0.007813507 | 0.028996323 |
| ENSMMUG00000004400  | Yip1 domain family member 2 [Source:VGNC Symbol;Acc:VGNC:79717]                      | - | -0.77049017 | 0.009911524 | 0.035137739 |
| ENSMMUG00000030400  | SH3 domain and tetratricopeptide repeats 1 [Source:NCBI gene;Acc:722649]             | - | 0.769464599 | 0.003522101 | 0.015026084 |
| ENSMMUG000000056765 |                                                                                      | - | -0.76816026 | 0.001101356 | 0.005645025 |
| ENSMMUG000000063348 |                                                                                      | - | 0.767600124 | 0.013507829 | 0.045054201 |
| ENSMMUG00000005334  | phospholipase C gamma 2 [Source:VGNC Symbol;Acc:VGNC:76170]                          | - | 0.766496165 | 0.002268963 | 0.010347989 |
| ENSMMUG00000014564  | ring finger protein 123 [Source:VGNC Symbol;Acc:VGNC:76790]                          | - | 0.765588944 | 0.000102446 | 0.000738083 |
| ENSMMUG00000008422  | trophinin [Source:NCBI gene;Acc:704512]                                              | - | 0.763931641 | 0.010775398 | 0.03750723  |
| ENSMMUG00000001407  | solute carrier family 5 member 11 [Source:VGNC Symbol;Acc:VGNC:77759]                | - | 0.763042679 | 2.43E-05    | 0.000211866 |
| ENSMMUG000000065066 | V-set and immunoglobulin domain containing 10 like 2 [Source:NCBI gene;Acc:717387]   | - | 0.759879252 | 0.003068679 | 0.013351197 |
| ENSMMUG000000064353 | fatty acid binding protein 3 [Source:NCBI gene;Acc:717237]                           | - | 0.758129599 | 0.002900434 | 0.012722784 |
| ENSMMUG000000059353 | phosphatidylserine synthase 2 [Source:NCBI gene;Acc:698582]                          | - | 0.755459998 | 0.001111777 | 0.005688945 |
| ENSMMUG000000054264 | pejvakin [Source:NCBI gene;Acc:708668]                                               | - | 0.751640156 | 0.014550585 | 0.047895351 |
| ENSMMUG00000003567  | DLG associated protein 5 [Source:VGNC Symbol;Acc:VGNC:71850]                         | - | 0.750415709 | 0.007426226 | 0.027768707 |
| ENSMMUG00000003961  | interferon alpha and beta receptor subunit 1 [Source:VGNC Symbol;Acc:VGNC:73566]     | - | -0.7499958  | 0.012508062 | 0.042305061 |
| ENSMMUG000000041338 | eyes shut homolog [Source:HGNC Symbol;Acc:HGNC:21555]                                | - | 0.746737045 | 0.000108705 | 0.000776349 |
| ENSMMUG00000001362  | vacuolar protein sorting 13 homolog C [Source:VGNC Symbol;Acc:VGNC:79399]            | - | 0.744681917 | 0.003570348 | 0.015200257 |
| ENSMMUG000000004629 | nucleolar protein 8 [Source:VGNC Symbol;Acc:VGNC:75237]                              | - | 0.743499583 | 0.000127811 | 0.000892571 |
| ENSMMUG000000049574 | antizyme inhibitor 2-like [Source:NCBI gene;Acc:705256]                              | - | 0.740445702 | 0.000364677 | 0.002195028 |
| ENSMMUG000000004461 | TBC1 domain family member 20 [Source:VGNC Symbol;Acc:VGNC:78132]                     | - | 0.739281302 | 0.005697799 | 0.022426093 |
| ENSMMUG000000008502 | alkylglycerone phosphate synthase [Source:VGNC Symbol;Acc:VGNC:69747]                | - | 0.738534175 | 0.001041294 | 0.005397953 |
| ENSMMUG000000001768 | zinc finger protein 616 [Source:NCBI gene;Acc:719902]                                | - | 0.732984715 | 0.006972043 | 0.026348381 |
| ENSMMUG000000003530 | protein phosphatase 2 regulatory subunit B'gamma [Source:VGNC Symbol;Acc:VGNC:76279] | - | 0.729954765 | 0.002170402 | 0.009950172 |
| ENSMMUG00000018279  | adaptor related protein complex 5 subunit mu 1 [Source:VGNC Symbol;Acc:VGNC:69868]   | - | 0.724338248 | 0.003852063 | 0.016258829 |
| ENSMMUG000000061092 | defensin beta 125 [Source:HGNC Symbol;Acc:HGNC:18105]                                | - | 0.723044044 | 0.008542443 | 0.031146595 |
| ENSMMUG00000017033  | lymphocyte cytosolic protein 1 [Source:VGNC Symbol;Acc:VGNC:74242]                   | - | 0.722039527 | 0.000251481 | 0.001594961 |
| ENSMMUG00000023216  | astrotactin 1 [Source:VGNC Symbol;Acc:VGNC:70167]                                    | - | 0.721539522 | 0.005135023 | 0.020645917 |
| ENSMMUG000000044163 | zinc finger CCCH-type containing 8 [Source:NCBI gene;Acc:698828]                     | - | 0.719900374 | 0.006775598 | 0.02587104  |
| ENSMMUG000000020510 | kelch like family member 41 [Source:VGNC Symbol;Acc:VGNC:74062]                      | - | 0.719851913 | 0.011396228 | 0.039191674 |



|                    |                                                                                                      |   |             |             |             |
|--------------------|------------------------------------------------------------------------------------------------------|---|-------------|-------------|-------------|
| ENSMMUG00000012939 | fermitin family member 3 [Source:VGNC Symbol;Acc:VGNC:72553]                                         | - | 0.718362453 | 0.003076201 | 0.013379189 |
| ENSMMUG00000023277 | inositol polyphosphate-5-phosphatase B [Source:VGNC Symbol;Acc:VGNC:73750]                           | - | 0.718031957 | 0.011212248 | 0.038690719 |
| ENSMMUG00000065127 | insulin like 6 [Source:NCBI gene;Acc:693735]                                                         | - | 0.717345766 | 0.000221267 | 0.001435901 |
| ENSMMUG00000010321 | C2 domain containing 3 centriole elongation regulator [Source:VGNC Symbol;Acc:VGNC:70375]            | - | 0.716510441 | 0.000588128 | 0.00332812  |
| ENSMMUG00000056105 | T-box transcription factor 10 [Source:NCBI gene;Acc:721689]                                          | - | 0.715902996 | 0.012660415 | 0.042761516 |
| ENSMMUG00000021620 | ELKS/RAB6-interacting/CAST family member 2 [Source:VGNC Symbol;Acc:VGNC:72164]                       | - | 0.715853733 | 0.003634792 | 0.015442525 |
| ENSMMUG00000018512 | GC-rich sequence DNA-binding factor 2 [Source:VGNC Symbol;Acc:VGNC:72715]                            | - | 0.713012786 | 0.012099325 | 0.041171872 |
| ENSMMUG00000005740 | ubiquitin specific peptidase 24 [Source:VGNC Symbol;Acc:VGNC:78743]                                  | - | 0.712168677 | 0.001247419 | 0.006265641 |
| ENSMMUG00000000388 | plectin [Source:VGNC Symbol;Acc:VGNC:76173]                                                          | - | -0.71170938 | 0.010680392 | 0.037272203 |
| ENSMMUG00000010839 | small G protein signaling modulator 1 [Source:VGNC Symbol;Acc:VGNC:77336]                            | - | 0.711124167 | 0.0026122   | 0.011620176 |
| ENSMMUG00000003316 | mannosidase alpha class 2A member 1 [Source:VGNC Symbol;Acc:VGNC:81449]                              | - | 0.710021923 | 0.005029073 | 0.020259696 |
| ENSMMUG00000054701 |                                                                                                      | - | 0.709453929 | 0.007078079 | 0.026669732 |
| ENSMMUG00000006861 | dynein axonemal heavy chain 10 [Source:NCBI gene;Acc:710343]                                         | - | 0.709046846 | 0.003960344 | 0.016628022 |
| ENSMMUG00000017725 | eukaryotic elongation factor 2 kinase [Source:VGNC Symbol;Acc:VGNC:72098]                            | - | 0.708336191 | 0.00428442  | 0.017695322 |
| ENSMMUG00000007570 | uveal autoantigen with coiled-coil domains and ankyrin repeats [Source:VGNC Symbol;Acc:VGNC:78995]   | - | 0.708116993 | 0.001890255 | 0.008881163 |
| ENSMMUG00000063979 |                                                                                                      | - | 0.706341885 | 0.000286744 | 0.001788113 |
| ENSMMUG00000003462 | ankyrin repeat domain 6 [Source:VGNC Symbol;Acc:VGNC:81023]                                          | - | 0.704599065 | 0.001135886 | 0.005781023 |
| ENSMMUG00000015450 | 3-hydroxyacyl-CoA dehydratase 3 [Source:VGNC Symbol;Acc:VGNC:73225]                                  | - | -0.70117112 | 0.011771032 | 0.040221784 |
| ENSMMUG00000018168 | alkaline ceramidase 3 [Source:VGNC Symbol;Acc:VGNC:69415]                                            | - | 0.700216889 | 0.00437398  | 0.017992164 |
| ENSMMUG00000012605 | solute carrier organic anion transporter family member 2A1 [Source:VGNC Symbol;Acc:VGNC:77600]       | - | 0.699338596 | 0.001995376 | 0.009296881 |
| ENSMMUG00000006311 | prolyl endopeptidase like [Source:VGNC Symbol;Acc:VGNC:76346]                                        | - | 0.699069825 | 0.004105285 | 0.017116029 |
| ENSMMUG00000013518 | myosin IA [Source:VGNC Symbol;Acc:VGNC:75110]                                                        | - | 0.698341189 | 0.002120706 | 0.009788848 |
| ENSMMUG00000017529 | arrestin beta 1 [Source:VGNC Symbol;Acc:VGNC:70021]                                                  | - | 0.694559216 | 0.01272838  | 0.042943871 |
| ENSMMUG00000009540 | calmodulin regulated spectrin associated protein family member 3 [Source:VGNC Symbol;Acc:VGNC:70669] | - | 0.692912744 | 7.19E-05    | 0.000548156 |
| ENSMMUG00000010427 | ligand dependent nuclear receptor corepressor [Source:NCBI gene;Acc:705646]                          | - | 0.692833635 | 0.012183384 | 0.041423507 |
| ENSMMUG00000002310 | zinc finger protein 577 [Source:VGNC Symbol;Acc:VGNC:79733]                                          | - | 0.690744867 | 0.001486813 | 0.007263281 |
| ENSMMUG00000007576 | EYA transcriptional coactivator and phosphatase 1 [Source:VGNC Symbol;Acc:VGNC:72453]                | - | 0.688841311 | 0.001044586 | 0.005408173 |
| ENSMMUG00000011964 | RAN binding protein 3 [Source:VGNC Symbol;Acc:VGNC:76655]                                            | - | 0.687419798 | 0.008088916 | 0.029793486 |
| ENSMMUG00000004112 | MRE11 homolog, double strand break repair nuclease [Source:VGNC Symbol;Acc:VGNC:74926]               | - | 0.684269788 | 0.006722043 | 0.025698868 |

|                    |                                                                                                 |   |             |             |             |
|--------------------|-------------------------------------------------------------------------------------------------|---|-------------|-------------|-------------|
| ENSMMUG0000004491  | SUMO specific peptidase 6 [Source:VGNC Symbol;Acc:VGNC:77287]                                   | - | 0.682623416 | 0.000546957 | 0.003135562 |
| ENSMMUG00000018542 | leucyl and cystinyl aminopeptidase [Source:VGNC Symbol;Acc:VGNC:74438]                          | - | 0.679024616 | 0.000486801 | 0.002839798 |
| ENSMMUG00000021441 | amylase, alpha-1, 6-glucosidase, 4-alpha-glucanotransferase [Source:VGNC Symbol;Acc:VGNC:69744] | - | 0.678285986 | 0.000195882 | 0.001296492 |
| ENSMMUG00000060440 | leucine rich repeat LGI family member 2 [Source:NCBI gene;Acc:693308]                           | - | 0.678017242 | 0.000318369 | 0.001961247 |
| ENSMMUG00000005650 | ubiquitin specific peptidase 40 [Source:VGNC Symbol;Acc:VGNC:79226]                             | - | 0.676999077 | 0.009497381 | 0.033904242 |
| ENSMMUG00000062635 |                                                                                                 | - | 0.675588422 | 0.004282257 | 0.017695322 |
| ENSMMUG00000012071 | DEAH-box helicase 8 [Source:VGNC Symbol;Acc:VGNC:71765]                                         | - | 0.674625244 | 0.00369505  | 0.015671448 |
| ENSMMUG00000029310 | hemoglobin, alpha 2 [Source:NCBI gene;Acc:693930]                                               | - | 0.674068499 | 0.010295463 | 0.036258318 |
| ENSMMUG00000020277 | double C2 domain alpha [Source:VGNC Symbol;Acc:VGNC:71963]                                      | - | 0.673489438 | 0.005750084 | 0.02258686  |
| ENSMMUG00000010000 | keratin 7 [Source:VGNC Symbol;Acc:VGNC:74214]                                                   | - | 0.672080773 | 0.001016527 | 0.005296368 |
| ENSMMUG00000048882 | KIAA0408 ortholog [Source:NCBI gene;Acc:100429459]                                              | - | 0.671144585 | 0.001158887 | 0.005885902 |
| ENSMMUG00000012020 | nuclear receptor coactivator 3 [Source:VGNC Symbol;Acc:VGNC:75147]                              | - | 0.670816714 | 0.003491456 | 0.01491087  |
| ENSMMUG00000017170 | cerebral dopamine neurotrophic factor [Source:VGNC Symbol;Acc:VGNC:71094]                       | - | 0.669533262 | 0.004381398 | 0.018010625 |
| ENSMMUG00000003897 | solute carrier family 9 member A7 [Source:NCBI gene;Acc:710906]                                 | - | 0.664935912 | 0.008961408 | 0.032381687 |
| ENSMMUG00000021228 | gem nuclear organelle associated protein 5 [Source:VGNC Symbol;Acc:VGNC:72751]                  | - | 0.664627247 | 0.005649322 | 0.022288255 |
| ENSMMUG00000064089 |                                                                                                 | - | 0.663092004 | 0.010444571 | 0.036605139 |
| ENSMMUG00000005136 | TRPM8 channel associated factor 1 [Source:VGNC Symbol;Acc:VGNC:79346]                           | - | 0.663070171 | 0.008534433 | 0.031140383 |
| ENSMMUG00000061176 |                                                                                                 | - | 0.662563801 | 0.008512344 | 0.031082952 |
| ENSMMUG00000054164 |                                                                                                 | - | 0.662194096 | 0.014650804 | 0.048147869 |
| ENSMMUG00000005469 | endoplasmic reticulum metalloproteinase 1 [Source:VGNC Symbol;Acc:VGNC:72322]                   | - | 0.660473619 | 0.001063633 | 0.005488293 |
| ENSMMUG00000002781 | peroxidase like [Source:VGNC Symbol;Acc:VGNC:84107]                                             | - | 0.658851941 | 0.006491808 | 0.024934628 |
| ENSMMUG00000017555 | PR/SET domain 10 [Source:VGNC Symbol;Acc:VGNC:76250]                                            | - | 0.657020767 | 0.004185219 | 0.01738443  |
| ENSMMUG00000054204 |                                                                                                 | - | 0.654049528 | 0.008227866 | 0.030214728 |
| ENSMMUG00000050825 | potassium voltage-gated channel subfamily D member 3 [Source:NCBI gene;Acc:641437]              | - | 0.649044134 | 0.005340668 | 0.021264061 |
| ENSMMUG00000004184 | heat shock transcription factor 5 [Source:VGNC Symbol;Acc:VGNC:73446]                           | - | 0.648848599 | 0.009994525 | 0.035360594 |
| ENSMMUG00000001228 | LLGL scribble cell polarity complex component 2 [Source:NCBI gene;Acc:706973]                   | - | 0.647494973 | 0.009984033 | 0.035333644 |
| ENSMMUG00000019470 | pecanex 1 [Source:VGNC Symbol;Acc:VGNC:75655]                                                   | - | 0.646728871 | 0.004633702 | 0.018864801 |
| ENSMMUG00000012036 | RNA binding motif protein 47 [Source:VGNC Symbol;Acc:VGNC:76576]                                | - | 0.645731226 | 0.005046751 | 0.020317594 |
| ENSMMUG00000056711 | ribonuclease inhibitor-like [Source:NCBI gene;Acc:114672186]                                    | - | -0.64432771 | 0.000605062 | 0.003409817 |

|                    |                                                                                                |   |             |             |             |
|--------------------|------------------------------------------------------------------------------------------------|---|-------------|-------------|-------------|
| ENSMMUG0000008687  | B cell linker [Source:VGNC Symbol;Acc:VGNC:70306]                                              | - | 0.640723172 | 0.002441514 | 0.010992179 |
| ENSMMUG00000050425 | DnaJ heat shock protein family (Hsp40) member B4 [Source:NCBI gene;Acc:707206]                 | - | 0.638746727 | 0.008296684 | 0.03043108  |
| ENSMMUG00000016740 | defective in cullin neddylation 1 domain containing 2 [Source:VGNC Symbol;Acc:VGNC:71684]      | - | -0.63721582 | 0.000328407 | 0.002011186 |
| ENSMMUG00000006479 | Rap guanine nucleotide exchange factor 1 [Source:VGNC Symbol;Acc:VGNC:76582]                   | - | 0.633490061 | 0.001088504 | 0.005593146 |
| ENSMMUG00000019582 | ankyrin repeat and KH domain-containing protein 1 [Source:NCBI gene;Acc:698045]                | - | 0.627210519 | 0.001376475 | 0.00680541  |
| ENSMMUG00000018929 | ankyrin repeat domain 10 [Source:VGNC Symbol;Acc:VGNC:69646]                                   | - | 0.625984787 | 0.010365449 | 0.036379708 |
| ENSMMUG00000053737 | BarH like homeobox 2 [Source:NCBI gene;Acc:696831]                                             | - | 0.618856336 | 0.001732917 | 0.008239432 |
| ENSMMUG00000005613 | signal transducer and activator of transcription 1 [Source:VGNC Symbol;Acc:VGNC:77904]         | - | 0.615762509 | 0.000715021 | 0.003945064 |
| ENSMMUG00000007078 | N-acylsphingosine amidohydrolase 2 [Source:NCBI gene;Acc:703913]                               | - | 0.614130711 | 0.000657514 | 0.003665081 |
| ENSMMUG00000013039 | solute carrier family 19 member 2 [Source:VGNC Symbol;Acc:VGNC:81571]                          | - | -0.60811587 | 0.010158748 | 0.035848743 |
| ENSMMUG00000052418 |                                                                                                | - | 0.608066572 | 0.004156624 | 0.017283177 |
| ENSMMUG00000016540 | transmembrane protein 126B [Source:VGNC Symbol;Acc:VGNC:79893]                                 | - | 0.607561205 | 0.013125479 | 0.044053867 |
| ENSMMUG00000013954 | PDZ domain containing 2 [Source:VGNC Symbol;Acc:VGNC:75829]                                    | - | 0.601142652 | 0.012758723 | 0.043010823 |
| ENSMMUG00000030786 | transient receptor potential cation channel subfamily C member 4 [Source:NCBI gene;Acc:695636] | - | 0.595447135 | 0.007895438 | 0.029247387 |
| ENSMMUG00000052090 |                                                                                                | - | 0.594513735 | 0.004343983 | 0.017892725 |
| ENSMMUG00000059910 |                                                                                                | - | 0.593429908 | 0.004563222 | 0.018633409 |
| ENSMMUG00000004223 | ring finger protein 10 [Source:VGNC Symbol;Acc:VGNC:76702]                                     | - | 0.592152708 | 0.014773669 | 0.048499776 |
| ENSMMUG00000014301 | nectin cell adhesion molecule 2 [Source:VGNC Symbol;Acc:VGNC:75396]                            | - | 0.591230461 | 0.014839619 | 0.048677279 |
| ENSMMUG00000013782 | laminin subunit alpha 4 [Source:VGNC Symbol;Acc:VGNC:74227]                                    | - | 0.584571174 | 0.01132016  | 0.038973694 |
| ENSMMUG00000030060 | F-box and leucine rich repeat protein 20 [Source:VGNC Symbol;Acc:VGNC:81407]                   | - | 0.584014344 | 0.012272388 | 0.041679999 |
| ENSMMUG00000010878 | adaptor related protein complex 1 subunit gamma 1 [Source:VGNC Symbol;Acc:VGNC:69958]          | - | 0.583129144 | 0.003155235 | 0.013681262 |
| ENSMMUG00000020671 | BPI fold containing family B member 3 [Source:VGNC Symbol;Acc:VGNC:70320]                      | - | 0.582256286 | 0.007775168 | 0.02889767  |
| ENSMMUG00000009459 | centrosomal protein 95 [Source:VGNC Symbol;Acc:VGNC:71095]                                     | - | 0.581832428 | 0.013039383 | 0.043836721 |
| ENSMMUG00000010304 | cilia and flagella associated protein 298 [Source:NCBI gene;Acc:700721]                        | - | 0.579356259 | 0.001802338 | 0.008516929 |
| ENSMMUG00000009463 | DEAD-box helicase 5 [Source:VGNC Symbol;Acc:VGNC:71763]                                        | - | 0.573480043 | 0.002430315 | 0.010953794 |
| ENSMMUG00000002257 | RNA polymerase III subunit E [Source:VGNC Symbol;Acc:VGNC:76142]                               | - | 0.563265825 | 0.012930878 | 0.043531476 |
| ENSMMUG00000004603 | zinc finger CCCH-type containing 14 [Source:VGNC Symbol;Acc:VGNC:79255]                        | - | 0.561352157 | 0.006041374 | 0.023453737 |
| ENSMMUG00000029176 | Rho GTPase activating protein 17 [Source:NCBI gene;Acc:701988]                                 | - | -0.56133295 | 0.007993235 | 0.029529221 |
| ENSMMUG00000003435 | transcriptional repressor GATA binding 1 [Source:VGNC Symbol;Acc:VGNC:78656]                   | - | 0.558544488 | 0.008230875 | 0.030216753 |

|                     |                                                                                                |             |             |             |
|---------------------|------------------------------------------------------------------------------------------------|-------------|-------------|-------------|
| ENSMMUG00000010941  | Rho guanine nucleotide exchange factor 38 [Source:VGNC Symbol;Acc:VGNC:82087]                  | 0.540127065 | 0.008536925 | 0.031140383 |
| ENSMMUG00000019891  | aldo-keto reductase family 1 member C15 [Source:NCBI gene;Acc:722485]                          | 0.539235002 | 0.014857524 | 0.048723008 |
| ENSMMUG00000052781  |                                                                                                | 0.537473788 | 0.009472957 | 0.03383671  |
| ENSMMUG00000017052  | StAR related lipid transfer domain containing 13 [Source:VGNC Symbol;Acc:VGNC:77962]           | 0.534943999 | 0.003202499 | 0.013864713 |
| ENSMMUG00000059231  |                                                                                                | 0.522566675 | 0.013337264 | 0.044594209 |
| ENSMMUG00000049311  | zinc finger protein 558 [Source:NCBI gene;Acc:712590]                                          | 0.517214328 | 0.004307123 | 0.017770678 |
| ENSMMUG00000018375  | notch receptor 2 [Source:NCBI gene;Acc:713798]                                                 | 0.515843144 | 0.004319784 | 0.017804985 |
| ENSMMUG00000015375  | cadherin EGF LAG seven-pass G-type receptor 2 [Source:VGNC Symbol;Acc:VGNC:71149]              | 0.515453131 | 0.005535032 | 0.02193136  |
| ENSMMUG00000015602  | MAP kinase activating death domain [Source:VGNC Symbol;Acc:VGNC:74473]                         | 0.501004569 | 0.013689319 | 0.045531306 |
| ENSMMUG00000049993  |                                                                                                | 0.472766504 | 0.006610206 | 0.025341871 |
| ENSMMUG00000005269  | trafficking protein particle complex 10 [Source:NCBI gene;Acc:713177]                          | 0.464769241 | 0.012341129 | 0.041844089 |
| ENSMMUG00000011713  | leupaxin [Source:VGNC Symbol;Acc:VGNC:74286]                                                   | 0.463422803 | 0.003309989 | 0.014262853 |
| ENSMMUG00000021163  | contactin 1 [Source:VGNC Symbol;Acc:VGNC:71283]                                                | 0.459001159 | 0.01029129  | 0.036256174 |
| ENSMMUG00000010633  | PHD finger protein 20 [Source:VGNC Symbol;Acc:VGNC:75807]                                      | 0.400191705 | 0.015217171 | 0.049729925 |
| ENSMMUG00000022825  | carboxylesterase 2 [Source:VGNC Symbol;Acc:VGNC:71012]                                         | 0.413498842 | 0.015226793 | 0.049732207 |
| ENSMMUG00000000307  | RIO kinase 2 [Source:VGNC Symbol;Acc:VGNC:76774]                                               | 0.422158483 | 0.010004345 | 0.035374971 |
| ENSMMUG00000015114  | toll like receptor adaptor molecule 2 [Source:NCBI gene;Acc:100426353]                         | 0.428917075 | 0.003309401 | 0.014262853 |
| ENSMMUG00000063093  | epiplakin 1 [Source:NCBI gene;Acc:699265]                                                      | 0.434439664 | 0.014014828 | 0.04638025  |
| ENSMMUG00000010834  | REL proto-oncogene, NF-kB subunit [Source:VGNC Symbol;Acc:VGNC:76892]                          | 0.440484811 | 0.01163936  | 0.039838311 |
| ENSMMUG00000006727  | vitamin D receptor [Source:VGNC Symbol;Acc:VGNC:78764]                                         | 0.457295851 | 0.010042204 | 0.035488421 |
| ENSMMUG00000014013  | ATP binding cassette subfamily D member 3 [Source:VGNC Symbol;Acc:VGNC:69579]                  | 0.466725822 | 0.010273353 | 0.036211581 |
| ENSMMUG00000005780  | dynein cytoplasmic 1 heavy chain 1 [Source:VGNC Symbol;Acc:VGNC:71951]                         | 0.467424074 | 0.006657183 | 0.025474294 |
| ENSMMUG00000011309  | ADP dependent glucokinase [Source:VGNC Symbol;Acc:VGNC:69692]                                  | 0.46993185  | 0.009930613 | 0.035185115 |
| ENSMMUG00000008885  | exocyst complex component 7 [Source:VGNC Symbol;Acc:VGNC:72319]                                | 0.473459764 | 0.003473993 | 0.014851774 |
| ENSMMUG00000003144  | potassium inwardly rectifying channel subfamily J member 1 [Source:VGNC Symbol;Acc:VGNC:73984] | 0.476766113 | 0.00716597  | 0.026920285 |
| ENSMMUG00000008556  | integrin subunit alpha E [Source:NCBI gene;Acc:721483]                                         | 0.479068102 | 0.014504313 | 0.047781429 |
| ENSMMUG000000061922 |                                                                                                | 0.480177363 | 0.006403781 | 0.024635016 |
| ENSMMUG000000064240 |                                                                                                | 0.48027551  | 0.008113716 | 0.029872324 |
| ENSMMUG00000012511  | G protein nucleolar 3 [Source:VGNC Symbol;Acc:VGNC:73038]                                      | 0.482218205 | 0.011544528 | 0.039590903 |
| ENSMMUG00000010898  | tripartite motif containing 13 [Source:VGNC Symbol;Acc:VGNC:79972]                             | 0.482859395 | 0.005471006 | 0.021712668 |
| ENSMMUG000000050516 |                                                                                                | 0.483907941 | 0.014104793 | 0.046665412 |
| ENSMMUG00000012933  | myosin IE [Source:VGNC Symbol;Acc:VGNC:75114]                                                  | 0.49095069  | 0.014326377 | 0.047317981 |
| ENSMMUG00000007382  | proteasomal ATPase associated factor 1 [Source:NCBI gene;Acc:718755]                           | 0.49301017  | 0.011630524 | 0.039830839 |
| ENSMMUG00000018503  | NACHT and WD repeat domain containing 1 [Source:NCBI gene;Acc:719640]                          | 0.493077907 | 0.005347879 | 0.021285874 |
| ENSMMUG00000006528  | Rho GTPase activating protein 15 [Source:VGNC Symbol;Acc:VGNC:69874]                           | 0.493446279 | 0.008975704 | 0.032418566 |
| ENSMMUG00000052363  | MYCN proto-oncogene, bHLH transcription factor [Source:NCBI gene;Acc:698699]                   | 0.498880587 | 0.01391479  | 0.046123701 |
| ENSMMUG000000060764 |                                                                                                | 0.49923836  | 0.004193368 | 0.017400637 |
| ENSMMUG00000023128  | inositol 1,4,5-trisphosphate receptor type 2 [Source:VGNC Symbol;Acc:VGNC:73805]               | 0.503968069 | 0.005991737 | 0.023312579 |
| ENSMMUG000000050742 | src kinase associated phosphoprotein 1 [Source:NCBI gene;Acc:697043]                           | 0.50776099  | 0.003913465 | 0.016472739 |
| ENSMMUG000000052999 | lecithin retinol acyltransferase [Source:NCBI gene;Acc:698871]                                 | 0.516657786 | 0.013449174 | 0.044907307 |
| ENSMMUG000000055107 |                                                                                                | 0.518819495 | 0.004776732 | 0.01935734  |



|                    |                                                                                                            |             |             |             |
|--------------------|------------------------------------------------------------------------------------------------------------|-------------|-------------|-------------|
| ENSMMUG0000006399  | chaperonin containing TCP1 subunit 6B [Source:VGNC Symbol;Acc:VGNC:70748]                                  | 0.520467664 | 0.000715446 | 0.003945064 |
| ENSMMUG00000011278 | cysteine rich with EGF like domains 2 [Source:NCBI gene;Acc:720586]                                        | 0.522476875 | 0.004499695 | 0.018416835 |
| ENSMMUG00000046092 | adhesion G protein-coupled receptor B3 [Source:VGNC Symbol;Acc:VGNC:81006]                                 | 0.523216983 | 0.002459068 | 0.011046932 |
| ENSMMUG0000004026  | integrin subunit alpha 11 [Source:VGNC Symbol;Acc:VGNC:73774]                                              | 0.526986546 | 0.013245512 | 0.044384019 |
| ENSMMUG00000042232 | NBPF member 6 [Source:NCBI gene;Acc:698524]                                                                | 0.528623976 | 0.009119472 | 0.032850947 |
| ENSMMUG00000019136 | taxilin beta [Source:VGNC Symbol;Acc:VGNC:79325]                                                           | 0.529375836 | 0.003576789 | 0.01521714  |
| ENSMMUG00000054233 |                                                                                                            | 0.534114019 | 0.00139972  | 0.006898137 |
| ENSMMUG00000011557 | platelet derived growth factor receptor beta [Source:VGNC Symbol;Acc:VGNC:75929]                           | 0.535569639 | 0.000200387 | 0.001319206 |
| ENSMMUG00000017817 | membrane associated guanylate kinase, WW and PDZ domain containing 3 [Source:VGNC Symbol;Acc:VGNC:74400]   | 0.535944944 | 0.014985021 | 0.049036447 |
| ENSMMUG00000056477 |                                                                                                            | 0.537374377 | 0.007565877 | 0.028213652 |
| ENSMMUG00000003971 | CDC42 binding protein kinase gamma [Source:VGNC Symbol;Acc:VGNC:70909]                                     | 0.538212733 | 0.008480051 | 0.030983444 |
| ENSMMUG00000021866 | deoxyribonuclease 1 [Source:VGNC Symbol;Acc:VGNC:71946]                                                    | 0.540040443 | 0.00929599  | 0.033330518 |
| ENSMMUG00000057336 |                                                                                                            | 0.541810306 | 0.004644376 | 0.018901994 |
| ENSMMUG00000006139 | 3-hydroxy-3-methylglutaryl-CoA reductase [Source:VGNC Symbol;Acc:VGNC:73484]                               | 0.547572687 | 0.013756713 | 0.045706305 |
| ENSMMUG00000054834 |                                                                                                            | 0.548222984 | 0.001343725 | 0.006670327 |
| ENSMMUG00000021012 | G protein-coupled receptor 155 [Source:VGNC Symbol;Acc:VGNC:72985]                                         | 0.557619478 | 0.011541361 | 0.039590903 |
| ENSMMUG00000021279 | zinc finger MYND-type containing 11 [Source:VGNC Symbol;Acc:VGNC:79060]                                    | 0.559842024 | 0.006017265 | 0.02338969  |
| ENSMMUG00000008970 | calsequestrin 2 [Source:VGNC Symbol;Acc:VGNC:70549]                                                        | 0.561493752 | 0.01174489  | 0.040143614 |
| ENSMMUG00000003633 | solute carrier family 4 member 11 [Source:VGNC Symbol;Acc:VGNC:77721]                                      | 0.56235665  | 0.001061166 | 0.005480165 |
| ENSMMUG00000062177 |                                                                                                            | 0.565413036 | 0.009761028 | 0.034724399 |
| ENSMMUG00000018139 | dedicator of cytokinesis 10 [Source:VGNC Symbol;Acc:VGNC:71888]                                            | 0.568918465 | 0.001608719 | 0.007750985 |
| ENSMMUG00000003972 | EH domain containing 1 [Source:VGNC Symbol;Acc:VGNC:72175]                                                 | 0.570213912 | 0.015096304 | 0.049374315 |
| ENSMMUG00000023381 | dynein axonemal heavy chain 8 [Source:VGNC Symbol;Acc:VGNC:71943]                                          | 0.571049753 | 0.003005068 | 0.013120886 |
| ENSMMUG00000049375 |                                                                                                            | 0.571052314 | 0.000807059 | 0.004375631 |
| ENSMMUG00000055454 |                                                                                                            | 0.572485925 | 0.011230564 | 0.038741191 |
| ENSMMUG00000060943 |                                                                                                            | 0.572763596 | 0.004950167 | 0.019966835 |
| ENSMMUG00000005878 | protein tyrosine phosphatase receptor type A [Source:VGNC Symbol;Acc:VGNC:76610]                           | 0.574104206 | 0.005957451 | 0.023230656 |
| ENSMMUG00000032341 | coiled-coil domain containing 160 [Source:VGNC Symbol;Acc:VGNC:70926]                                      | 0.574251166 | 0.002235143 | 0.010205106 |
| ENSMMUG00000003555 | calcium voltage-gated channel subunit alpha1 A [Source:VGNC Symbol;Acc:VGNC:70498]                         | 0.58506615  | 0.000483314 | 0.002823392 |
| ENSMMUG00000031293 | anoctamin-9 [Source:NCBI gene;Acc:100425888]                                                               | 0.585112144 | 0.006283182 | 0.024254581 |
| ENSMMUG00000047880 | alpha-1,3-mannosyl-glycoprotein 2-beta-N-acetylglucosaminyltransferase [Source:VGNC Symbol;Acc:VGNC:84439] | 0.586962711 | 0.009567715 | 0.034115689 |
| ENSMMUG00000061384 | sodium voltage-gated channel beta subunit 2 [Source:NCBI gene;Acc:678698]                                  | 0.5889521   | 0.000750313 | 0.004100535 |
| ENSMMUG00000029181 | X-ray repair cross complementing 3 [Source:NCBI gene;Acc:695788]                                           | 0.59038974  | 0.002485552 | 0.011149606 |
| ENSMMUG00000002909 | placental growth factor [Source:VGNC Symbol;Acc:VGNC:75964]                                                | 0.59260402  | 0.003080231 | 0.013391979 |
| ENSMMUG00000061481 | inosine triphosphatase [Source:NCBI gene;Acc:717257]                                                       | 0.593206994 | 0.001136931 | 0.005783949 |
| ENSMMUG00000023599 | chromosome alignment maintaining phosphoprotein 1 [Source:VGNC Symbol;Acc:VGNC:71061]                      | 0.593343202 | 0.004489266 | 0.018380271 |
| ENSMMUG00000013653 | lysine demethylase 5A [Source:VGNC Symbol;Acc:VGNC:82169]                                                  | 0.593842941 | 0.000595436 | 0.003360192 |
| ENSMMUG00000061673 |                                                                                                            | 0.594368664 | 0.008387381 | 0.030702836 |
| ENSMMUG00000014271 | protein kinase C beta [Source:VGNC Symbol;Acc:VGNC:76410]                                                  | 0.594908753 | 0.012194065 | 0.041436896 |
| ENSMMUG00000013730 | WD repeat domain 17 [Source:NCBI gene;Acc:700546]                                                          | 0.595697697 | 0.000284903 | 0.001778435 |
| ENSMMUG00000052917 |                                                                                                            | 0.599221384 | 0.011351103 | 0.039069282 |
| ENSMMUG00000010432 | zinc finger protein 592 [Source:VGNC Symbol;Acc:VGNC:79762]                                                | 0.599300144 | 0.00055248  | 0.003161325 |
| ENSMMUG00000007541 | cholinergic receptor nicotinic beta 4 subunit [Source:NCBI gene;Acc:106996685]                             | 0.599576555 | 0.00304339  | 0.013255249 |
| ENSMMUG00000003508 | actin related protein 10 [Source:VGNC Symbol;Acc:VGNC:69449]                                               | 0.600214814 | 0.006339827 | 0.024442539 |
| ENSMMUG00000006287 | DAP3 binding cell death enhancer 1 [Source:VGNC Symbol;Acc:VGNC:71806]                                     | 0.600525806 | 0.013470371 | 0.04496587  |
| ENSMMUG00000022682 | tripartite motif containing 68 [Source:NCBI gene;Acc:717644]                                               | 0.604530239 | 0.002363762 | 0.010712759 |
| ENSMMUG00000064225 | tectonic family member 2 [Source:NCBI gene;Acc:721415]                                                     | 0.60653653  | 0.004366813 | 0.017974717 |
| ENSMMUG00000013983 | RUN domain containing 3A [Source:VGNC Symbol;Acc:VGNC:77032]                                               | 0.606722984 | 0.00298013  | 0.01302588  |
| ENSMMUG00000016742 | CTD small phosphatase like 2 [Source:VGNC Symbol;Acc:VGNC:71593]                                           | 0.608097862 | 0.00215414  | 0.009894071 |
| ENSMMUG00000011579 | TAFA chemokine like family member 2 [Source:VGNC Symbol;Acc:VGNC:78189]                                    | 0.610596595 | 0.001359917 | 0.006734384 |
| ENSMMUG00000021446 | diacylglycerol kinase zeta [Source:VGNC Symbol;Acc:VGNC:71789]                                             | 0.61076101  | 0.002735021 | 0.012070428 |

|                     |                                                                                                                |             |             |             |
|---------------------|----------------------------------------------------------------------------------------------------------------|-------------|-------------|-------------|
| ENSMMUG0000008931   | MAU2 sister chromatid cohesion factor [Source:NCBI gene;Acc:720347]                                            | 0.612583196 | 0.00025269  | 0.001597639 |
| ENSMMUG0000009768   | ring finger protein 14 [Source:VGNC Symbol;Acc:VGNC:84488]                                                     | 0.615596534 | 0.006295397 | 0.024286482 |
| ENSMMUG0000007212   | lysine methyltransferase 2C [Source:VGNC Symbol;Acc:VGNC:74043]                                                | 0.62370053  | 0.009825534 | 0.034903363 |
| ENSMMUG00000018121  | zinc finger FYVE-type containing 21 [Source:VGNC Symbol;Acc:VGNC:79282]                                        | 0.62828142  | 0.003197103 | 0.013846226 |
| ENSMMUG00000022070  | sialic acid binding Ig like lectin 1 [Source:VGNC Symbol;Acc:VGNC:77220]                                       | 0.629911837 | 0.002924266 | 0.012813602 |
| ENSMMUG00000015877  | 1,4-alpha-glucan branching enzyme 1 [Source:VGNC Symbol;Acc:VGNC:72894]                                        | 0.630244582 | 0.006403105 | 0.024635016 |
| ENSMMUG00000008041  | ankyrin repeat domain 27 [Source:VGNC Symbol;Acc:VGNC:69693]                                                   | 0.630542213 | 0.003135014 | 0.013606093 |
| ENSMMUG00000006141  | ceramide transporter 1 [Source:VGNC Symbol;Acc:VGNC:71298]                                                     | 0.630678614 | 0.005562794 | 0.022020065 |
| ENSMMUG00000060493  |                                                                                                                | 0.631692632 | 0.00051549  | 0.002978793 |
| ENSMMUG00000014313  | zinc finger protein 500 [Source:VGNC Symbol;Acc:VGNC:79406]                                                    | 0.637170909 | 0.008352532 | 0.030608518 |
| ENSMMUG00000041006  | family with sequence similarity 171 member A2 [Source:NCBI gene;Acc:712099]                                    | 0.638440848 | 0.000917315 | 0.004878721 |
| ENSMMUG00000017382  | biliverdin reductase A [Source:VGNC Symbol;Acc:VGNC:70256]                                                     | 0.638711378 | 0.000441738 | 0.002595315 |
| ENSMMUG00000008134  | DnaJ heat shock protein family (Hsp40) member A3 [Source:NCBI gene;Acc:708783]                                 | 0.639016149 | 0.006450555 | 0.024791675 |
| ENSMMUG00000052626  | progesterone and adipoQ receptor family member 8 [Source:NCBI gene;Acc:708418]                                 | 0.639555478 | 0.007320285 | 0.027422621 |
| ENSMMUG00000019015  | HECT, C2 and WW domain containing E3 ubiquitin protein ligase 1 [Source:VGNC Symbol;Acc:VGNC:73217]            | 0.647165264 | 0.002425711 | 0.01094107  |
| ENSMMUG00000019926  | cytoplasmic polyadenylation element binding protein 4 [Source:VGNC Symbol;Acc:VGNC:71450]                      | 0.650247677 | 0.005221752 | 0.020939823 |
| ENSMMUG00000015840  | RAN binding protein 17 [Source:VGNC Symbol;Acc:VGNC:84485]                                                     | 0.650637231 | 0.006867253 | 0.026075194 |
| ENSMMUG00000009173  | serine/threonine kinase 24 [Source:VGNC Symbol;Acc:VGNC:81583]                                                 | 0.652086431 | 0.005857194 | 0.022897828 |
| ENSMMUG00000021924  | NHS like 2 [Source:NCBI gene;Acc:702808]                                                                       | 0.652468082 | 0.001074049 | 0.005528113 |
| ENSMMUG00000016418  | chromobox 4 [Source:VGNC Symbol;Acc:VGNC:70558]                                                                | 0.65294548  | 0.003763656 | 0.015929441 |
| ENSMMUG00000018922  | cell division cycle 25B [Source:VGNC Symbol;Acc:VGNC:70795]                                                    | 0.65322621  | 0.00032316  | 0.001983994 |
| ENSMMUG00000008615  | nebulin [Source:NCBI gene;Acc:100430324]                                                                       | 0.654513415 | 0.006831928 | 0.025989239 |
| ENSMMUG00000060616  | Metazoan signal recognition particle RNA [Source:RFAM;Acc:RF00017]                                             | 0.654663085 | 0.00914406  | 0.032929867 |
| ENSMMUG00000003956  | interferon alpha and beta receptor subunit 2 [Source:VGNC Symbol;Acc:VGNC:81330]                               | 0.655771238 | 0.000392443 | 0.002335841 |
| ENSMMUG00000018579  | sperm antigen with calponin homology and coiled-coil domains 1 [Source:VGNC Symbol;Acc:VGNC:78021]             | 0.656064231 | 0.002947223 | 0.012909591 |
| ENSMMUG00000021830  | DENN domain containing 2B [Source:VGNC Symbol;Acc:VGNC:77898]                                                  | 0.657059253 | 0.00254046  | 0.011362735 |
| ENSMMUG00000000901  | alpha hemoglobin stabilizing protein [Source:VGNC Symbol;Acc:VGNC:69631]                                       | 0.657980235 | 0.000834414 | 0.004506054 |
| ENSMMUG000000061698 |                                                                                                                | 0.660350936 | 0.002825699 | 0.012443806 |
| ENSMMUG00000007556  | kinetochore associated 1 [Source:VGNC Symbol;Acc:VGNC:74064]                                                   | 0.662005221 | 0.005556343 | 0.022001614 |
| ENSMMUG000000057643 |                                                                                                                | 0.662370355 | 0.002397118 | 0.010831977 |
| ENSMMUG00000018344  | myosin XVA [Source:VGNC Symbol;Acc:VGNC:75109]                                                                 | 0.66540448  | 0.011673285 | 0.039943303 |
| ENSMMUG00000013107  | tripartite motif containing 32 [Source:VGNC Symbol;Acc:VGNC:79032]                                             | 0.665939613 | 0.000369575 | 0.002219075 |
| ENSMMUG00000001667  | transmembrane protein 210 [Source:VGNC Symbol;Acc:VGNC:79945]                                                  | 0.666098169 | 0.003026804 | 0.013192358 |
| ENSMMUG00000017985  | catenin alpha 1 [Source:VGNC Symbol;Acc:VGNC:84291]                                                            | 0.666291098 | 0.004327455 | 0.017830624 |
| ENSMMUG00000004144  | adaptor related protein complex 1 subunit gamma 2 [Source:VGNC Symbol;Acc:VGNC:69959]                          | 0.666440748 | 0.000463704 | 0.002715285 |
| ENSMMUG00000001302  | sucrase-isomaltase [Source:VGNC Symbol;Acc:VGNC:77213]                                                         | 0.66652711  | 0.003865176 | 0.016307163 |
| ENSMMUG00000010875  | TEA domain transcription factor 1 [Source:VGNC Symbol;Acc:VGNC:78301]                                          | 0.667151009 | 0.000883375 | 0.004716512 |
| ENSMMUG00000000151  | transmembrane serine protease 6 [Source:VGNC Symbol;Acc:VGNC:79038]                                            | 0.667904691 | 0.000579101 | 0.003286119 |
| ENSMMUG00000000478  | OTU deubiquitinase, ubiquitin aldehyde binding 1 [Source:NCBI gene;Acc:717989]                                 | 0.668352742 | 0.000166342 | 0.001120891 |
| ENSMMUG00000014432  | plasminogen activator, tissue type [Source:VGNC Symbol;Acc:VGNC:76161]                                         | 0.669751252 | 7.15E-05    | 0.00054637  |
| ENSMMUG00000028928  | ankyrin repeat domain 24 [Source:NCBI gene;Acc:721829]                                                         | 0.671388466 | 0.001634754 | 0.007854873 |
| ENSMMUG000000064750 |                                                                                                                | 0.672651638 | 0.012946544 | 0.04357228  |
| ENSMMUG00000012667  | annexin A1 [Source:VGNC Symbol;Acc:VGNC:69944]                                                                 | 0.675244242 | 0.000524956 | 0.003024957 |
| ENSMMUG000000064973 |                                                                                                                | 0.678370464 | 0.000272849 | 0.001708463 |
| ENSMMUG00000016476  | TRAF interacting protein [Source:VGNC Symbol;Acc:VGNC:82261]                                                   | 0.678525941 | 0.005197079 | 0.020850914 |
| ENSMMUG000000060157 | zinc finger protein 330 [Source:NCBI gene;Acc:699364]                                                          | 0.679676441 | 0.012084915 | 0.041145622 |
| ENSMMUG00000012117  | HECT and RLD domain containing E3 ubiquitin protein ligase family member 1 [Source:VGNC Symbol;Acc:VGNC:73364] | 0.680069191 | 0.000191317 | 0.001273131 |
| ENSMMUG000000051874 |                                                                                                                | 0.680255585 | 0.003876523 | 0.016345228 |
| ENSMMUG00000014288  | eukaryotic translation initiation factor 3 subunit J [Source:VGNC Symbol;Acc:VGNC:72188]                       | 0.682684004 | 0.004760098 | 0.019309032 |
| ENSMMUG00000000959  | cytochrome P450, family 11, subfamily B, polypeptide 2 [Source:NCBI gene;Acc:695914]                           | 0.683517686 | 0.008587623 | 0.031274213 |
| ENSMMUG00000023004  | structural maintenance of chromosomes 1B [Source:VGNC Symbol;Acc:VGNC:77657]                                   | 0.683558055 | 0.002421466 | 0.010925931 |



|                     |                                                                                                 |             |             |             |
|---------------------|-------------------------------------------------------------------------------------------------|-------------|-------------|-------------|
| ENSMMUG00000050418  | superoxide dismutase 2 [Source:NCBI gene;Acc:574097]                                            | 0.683637358 | 0.003379373 | 0.014517955 |
| ENSMMUG00000006403  | potassium voltage-gated channel subfamily C member 1 [Source:VGNC Symbol;Acc:VGNC:73971]        | 0.684371965 | 0.000990323 | 0.005186221 |
| ENSMMUG00000015284  | NADH:ubiquinone oxidoreductase subunit B2 [Source:VGNC Symbol;Acc:VGNC:75156]                   | 0.686517595 | 0.000912821 | 0.00486113  |
| ENSMMUG00000005241  |                                                                                                 | 0.686609398 | 0.004119206 | 0.017162426 |
| ENSMMUG00000010734  | cytochrome P450, family 4, subfamily F, polypeptide 8 [Source:NCBI gene;Acc:718335]             | 0.687602813 | 0.002246666 | 0.010253908 |
| ENSMMUG00000022019  | cathepsin O [Source:VGNC Symbol;Acc:VGNC:71561]                                                 | 0.690097243 | 0.002127604 | 0.009808845 |
| ENSMMUG00000011134  | transcription factor Dp-2 [Source:VGNC Symbol;Acc:VGNC:78324]                                   | 0.690345932 | 0.000538584 | 0.003094783 |
| ENSMMUG00000009938  | myosin XVIIIa [Source:VGNC Symbol;Acc:VGNC:75058]                                               | 0.691858892 | 0.000124089 | 0.000870722 |
| ENSMMUG00000004177  | myosin VIIB [Source:NCBI gene;Acc:714563]                                                       | 0.694759881 | 6.10E-06    | 6.14E-05    |
| ENSMMUG00000018152  | spindlin interactor and repressor of chromatin binding [Source:VGNC Symbol;Acc:VGNC:77987]      | 0.696038586 | 0.003918911 | 0.016490016 |
| ENSMMUG00000008520  | ATPase phospholipid transporting 8A2 [Source:VGNC Symbol;Acc:VGNC:70062]                        | 0.696343517 | 0.007504488 | 0.028018732 |
| ENSMMUG00000004931  | spectrin repeat containing nuclear envelope family member 3 [Source:VGNC Symbol;Acc:VGNC:78176] | 0.697953099 | 0.007071691 | 0.026653834 |
| ENSMMUG00000023405  | otopetritin 3 [Source:VGNC Symbol;Acc:VGNC:75654]                                               | 0.701078363 | 0.008212399 | 0.030166946 |
| ENSMMUG00000022136  | laminin subunit alpha 2 [Source:VGNC Symbol;Acc:VGNC:74225]                                     | 0.703181775 | 0.000231285 | 0.001489897 |
| ENSMMUG00000003161  | microtubule associated serine/threonine kinase 3 [Source:VGNC Symbol;Acc:VGNC:74533]            | 0.70330381  | 0.010991195 | 0.038090687 |
| ENSMMUG00000019556  | transmembrane 9 superfamily member 2 [Source:VGNC Symbol;Acc:VGNC:78568]                        | 0.704121876 | 2.48E-05    | 0.000215381 |
| ENSMMUG00000031160  | menin 1 [Source:NCBI gene;Acc:106995582]                                                        | 0.704299723 | 4.89E-05    | 0.000391445 |
| ENSMMUG00000018909  | fetuin B [Source:VGNC Symbol;Acc:VGNC:72638]                                                    | 0.70592842  | 0.000715298 | 0.003945064 |
| ENSMMUG000000061917 |                                                                                                 | 0.706717235 | 0.007903014 | 0.029266629 |
| ENSMMUG00000022094  | ATP binding cassette subfamily B member 10 [Source:NCBI gene;Acc:574117]                        | 0.707316593 | 1.04E-05    | 9.93E-05    |
| ENSMMUG000000049440 | chromosome 16 C17orf113 homolog [Source:NCBI gene;Acc:106994045]                                | 0.708114503 | 5.42E-06    | 5.55E-05    |
| ENSMMUG00000019022  | serine/threonine kinase 17a [Source:VGNC Symbol;Acc:VGNC:77913]                                 | 0.708533697 | 0.000559642 | 0.003196356 |
| ENSMMUG00000005667  | fumarate hydratase [Source:VGNC Symbol;Acc:VGNC:72659]                                          | 0.709349403 | 0.005320792 | 0.021212408 |
| ENSMMUG00000019684  | NAD(P)H quinone dehydrogenase 1 [Source:NCBI gene;Acc:705635]                                   | 0.709830921 | 0.006495904 | 0.024942566 |
| ENSMMUG00000001304  | transforming growth factor beta receptor 1 [Source:VGNC Symbol;Acc:VGNC:78337]                  | 0.71049809  | 0.012046235 | 0.041025289 |
| ENSMMUG00000006182  | bromodomain adjacent to zinc finger domain 2B [Source:NCBI gene;Acc:702780]                     | 0.71157242  | 0.003443076 | 0.014764397 |
| ENSMMUG00000021689  | Rac GTPase activating protein 1 [Source:NCBI gene;Acc:711887]                                   | 0.712911931 | 0.006725997 | 0.025703634 |
| ENSMMUG00000038221  | proteasome 26S subunit, non-ATPase 8 [Source:NCBI gene;Acc:721897]                              | 0.713783524 | 0.006012415 | 0.023385229 |
| ENSMMUG00000005744  | glutamate ionotropic receptor NMDA type subunit 2C [Source:VGNC Symbol;Acc:VGNC:73284]          | 0.714723986 | 0.005197885 | 0.020850914 |
| ENSMMUG00000014981  | homeobox containing 1 [Source:VGNC Symbol;Acc:VGNC:73443]                                       | 0.714991789 | 0.010443416 | 0.036605139 |
| ENSMMUG000000056959 |                                                                                                 | 0.715569466 | 0.005844618 | 0.022855934 |
| ENSMMUG00000010367  | myosin heavy chain 11 [Source:VGNC Symbol;Acc:VGNC:75097]                                       | 0.715840359 | 0.000836403 | 0.004508619 |
| ENSMMUG00000021267  | potassium calcium-activated channel subfamily N member 4 [Source:NCBI gene;Acc:712383]          | 0.717683792 | 0.008591522 | 0.031279146 |
| ENSMMUG00000003297  | coiled-coil domain containing 63 [Source:VGNC Symbol;Acc:VGNC:70879]                            | 0.718663022 | 0.010882205 | 0.037815431 |
| ENSMMUG00000014489  | DEAD-box helicase 20 [Source:NCBI gene;Acc:704731]                                              | 0.719822214 | 4.99E-05    | 0.000398963 |
| ENSMMUG00000014641  |                                                                                                 | 0.720375707 | 0.000119042 | 0.000839438 |
| ENSMMUG00000009128  | discs large MAGUK scaffold protein 5 [Source:VGNC Symbol;Acc:VGNC:71921]                        | 0.721234736 | 0.000994002 | 0.005201056 |
| ENSMMUG00000007510  | transaldolase 1 [Source:VGNC Symbol;Acc:VGNC:78096]                                             | 0.721250135 | 0.010938199 | 0.037977797 |
| ENSMMUG00000019807  | regulator of G protein signaling 14 [Source:VGNC Symbol;Acc:VGNC:76918]                         | 0.72169397  | 0.00031563  | 0.001948473 |
| ENSMMUG000000059553 |                                                                                                 | 0.721866714 | 0.003471515 | 0.014846341 |
| ENSMMUG00000017945  | septin 12 [Source:VGNC Symbol;Acc:VGNC:82235]                                                   | 0.722102799 | 0.001461513 | 0.007156754 |
| ENSMMUG00000017505  | tetratricopeptide repeat domain 3 [Source:VGNC Symbol;Acc:VGNC:81785]                           | 0.722122216 | 0.000335862 | 0.002051732 |
| ENSMMUG00000003534  | ring finger protein 157 [Source:VGNC Symbol;Acc:VGNC:76860]                                     | 0.722204906 | 0.001222075 | 0.006155954 |
| ENSMMUG00000001777  | testis expressed metallothionein like protein [Source:VGNC Symbol;Acc:VGNC:79965]               | 0.724036448 | 0.003866168 | 0.016307163 |
| ENSMMUG00000021031  | TMF1 regulated nuclear protein 1 [Source:VGNC Symbol;Acc:VGNC:79946]                            | 0.724717867 | 0.001775197 | 0.008404834 |
| ENSMMUG00000006297  | programmed cell death 7 [Source:NCBI gene;Acc:708758]                                           | 0.726453326 | 0.000146085 | 0.001002251 |
| ENSMMUG00000022895  | DnaJ heat shock protein family (Hsp40) member B5 [Source:NCBI gene;Acc:699081]                  | 0.728107259 | 1.09E-06    | 1.32E-05    |
| ENSMMUG00000017949  | ornithine decarboxylase antizyme 1 [Source:NCBI gene;Acc:721477]                                | 0.728782904 | 3.33E-05    | 0.000280032 |
| ENSMMUG00000042793  | B-Raf proto-oncogene, serine/threonine kinase [Source:NCBI gene;Acc:693554]                     | 0.729673784 | 0.0073429   | 0.027498958 |
| ENSMMUG000000043846 |                                                                                                 | 0.730056434 | 0.002896753 | 0.01271117  |
| ENSMMUG000000060605 |                                                                                                 | 0.732206004 | 0.004603981 | 0.018774894 |



|                    |                                                                                                    |             |             |             |
|--------------------|----------------------------------------------------------------------------------------------------|-------------|-------------|-------------|
| ENSMMUG00000057187 |                                                                                                    | 0.734009016 | 0.003961179 | 0.016628022 |
| ENSMMUG00000054789 | family with sequence similarity 174 member A [Source:NCBI gene;Acc:702300]                         | 0.734615813 | 0.001255797 | 0.006302485 |
| ENSMMUG00000006068 | transmembrane protein 100 [Source:VGNC Symbol;Acc:VGNC:79521]                                      | 0.735483343 | 0.000793166 | 0.004311721 |
| ENSMMUG00000003668 | GTPase activating protein and VPS9 domains 1 [Source:VGNC Symbol;Acc:VGNC:72767]                   | 0.735938214 | 0.001348795 | 0.006690087 |
| ENSMMUG00000010428 | slit guidance ligand 1 [Source:VGNC Symbol;Acc:VGNC:77643]                                         | 0.736155154 | 4.52E-05    | 0.000364726 |
| ENSMMUG00000016962 | keratin 1 [Source:VGNC Symbol;Acc:VGNC:74206]                                                      | 0.737855112 | 0.014572761 | 0.047929837 |
| ENSMMUG00000010062 | shisa family member 5 [Source:VGNC Symbol;Acc:VGNC:84082]                                          | 0.738355707 | 3.51E-05    | 0.000293257 |
| ENSMMUG00000014873 | torsin 1A interacting protein 1 [Source:VGNC Symbol;Acc:VGNC:79810]                                | 0.739513367 | 0.00464597  | 0.018902223 |
| ENSMMUG00000030597 | mitogen-activated protein kinase kinase kinase kinase 2 [Source:VGNC Symbol;Acc:VGNC:81465]        | 0.742079209 | 1.85E-05    | 0.000166462 |
| ENSMMUG00000010798 | cell cycle progression 1 [Source:VGNC Symbol;Acc:VGNC:70844]                                       | 0.743660801 | 0.004608061 | 0.018785298 |
| ENSMMUG00000020575 | SOS Ras/Rac guanine nucleotide exchange factor 1 [Source:VGNC Symbol;Acc:VGNC:77837]               | 0.744076809 | 0.005589481 | 0.022083031 |
| ENSMMUG00000016876 | integrin subunit alpha L [Source:NCBI gene;Acc:711945]                                             | 0.744303333 | 0.006387989 | 0.02460507  |
| ENSMMUG00000051669 |                                                                                                    | 0.744538484 | 0.00022308  | 0.001445378 |
| ENSMMUG00000010393 | cadherin 3 [Source:VGNC Symbol;Acc:VGNC:70971]                                                     | 0.746736291 | 0.000145529 | 0.000999559 |
| ENSMMUG00000056509 | ribonuclease, RNase A family, 3 [Source:NCBI gene;Acc:100425327]                                   | 0.747031462 | 0.000834286 | 0.004506054 |
| ENSMMUG00000058797 |                                                                                                    | 0.747323261 | 0.008826138 | 0.031991171 |
| ENSMMUG00000050686 |                                                                                                    | 0.74975671  | 0.014192962 | 0.046944481 |
| ENSMMUG00000003251 | X antigen family member 3 [Source:NCBI gene;Acc:698267]                                            | 0.75126012  | 0.012443227 | 0.042115618 |
| ENSMMUG00000037413 | U5 spliceosomal RNA [Source:RFAM;Acc:RF00020]                                                      | 0.751353496 | 0.003576374 | 0.01521714  |
| ENSMMUG00000007366 |                                                                                                    | 0.756039603 | 0.004227031 | 0.017522575 |
| ENSMMUG00000022914 | RAB, member of RAS oncogene family like 2B [Source:NCBI gene;Acc:716615]                           | 0.75682098  | 0.004484658 | 0.018376264 |
| ENSMMUG00000019692 | sec1 family domain containing 1 [Source:VGNC Symbol;Acc:VGNC:77065]                                | 0.757125887 | 0.00428454  | 0.017695322 |
| ENSMMUG00000023318 | transformation/transcription domain associated protein [Source:VGNC Symbol;Acc:VGNC:78657]         | 0.757805478 | 3.76E-05    | 0.000310269 |
| ENSMMUG00000057906 |                                                                                                    | 0.760381477 | 1.77E-05    | 0.000160258 |
| ENSMMUG00000015515 | REV1 DNA directed polymerase [Source:NCBI gene;Acc:709475]                                         | 0.760413793 | 0.00767038  | 0.02854273  |
| ENSMMUG00000013520 | pumilio RNA binding family member 1 [Source:VGNC Symbol;Acc:VGNC:76479]                            | 0.7604567   | 0.000193186 | 0.001283487 |
| ENSMMUG00000010897 | PNMA family member 3 [Source:VGNC Symbol;Acc:VGNC:76063]                                           | 0.760479668 | 0.004310852 | 0.017780094 |
| ENSMMUG00000061749 | PAXIP1 associated glutamate rich protein 1 [Source:NCBI gene;Acc:706839]                           | 0.761005375 | 1.96E-05    | 0.000174923 |
| ENSMMUG00000013115 | glial fibrillary acidic protein [Source:VGNC Symbol;Acc:VGNC:72913]                                | 0.761239314 | 0.013253535 | 0.044386703 |
| ENSMMUG00000009792 | heterogeneous nuclear ribonucleoprotein H3 [Source:VGNC Symbol;Acc:VGNC:73497]                     | 0.765215697 | 0.004151337 | 0.017272878 |
| ENSMMUG00000020486 | checkpoint kinase 2 [Source:VGNC Symbol;Acc:VGNC:70958]                                            | 0.76606871  | 0.000863    | 0.004619829 |
| ENSMMUG00000059788 |                                                                                                    | 0.768610351 | 0.000586277 | 0.003320707 |
| ENSMMUG00000008130 | ABR activator of RhoGEF and GTPase [Source:VGNC Symbol;Acc:VGNC:69589]                             | 0.770950281 | 0.000219532 | 0.001427656 |
| ENSMMUG00000020840 | TBC1 domain family member 16 [Source:VGNC Symbol;Acc:VGNC:78228]                                   | 0.771964406 | 0.000146573 | 0.001004756 |
| ENSMMUG00000056008 |                                                                                                    | 0.772814662 | 0.000261866 | 0.001646341 |
| ENSMMUG00000022867 | kelch domain containing 4 [Source:VGNC Symbol;Acc:VGNC:74122]                                      | 0.775171326 | 0.003417502 | 0.014671506 |
| ENSMMUG00000050702 | fucosyltransferase 5 [Source:HGNC Symbol;Acc:HGNC:4016]                                            | 0.77776931  | 0.000272859 | 0.001708463 |
| ENSMMUG00000013128 | coiled-coil domain containing 30 [Source:VGNC Symbol;Acc:VGNC:70866]                               | 0.777819425 | 0.005231467 | 0.020965101 |
| ENSMMUG00000064735 | 3-hydroxyanthranilate 3,4-dioxygenase [Source:NCBI gene;Acc:713101]                                | 0.779493276 | 0.001886896 | 0.008868772 |
| ENSMMUG00000023418 | nuclear receptor subfamily 1 group H member 2 [Source:VGNC Symbol;Acc:VGNC:75504]                  | 0.782863817 | 0.000677749 | 0.003764217 |
| ENSMMUG00000020744 | metastasis associated 1 family member 3 [Source:VGNC Symbol;Acc:VGNC:74814]                        | 0.783366046 | 0.00508545  | 0.020466688 |
| ENSMMUG00000000123 | NHS like 1 [Source:VGNC Symbol;Acc:VGNC:75225]                                                     | 0.785222203 | 0.000138664 | 0.000957481 |
| ENSMMUG00000000695 | transmembrane protein 245 [Source:VGNC Symbol;Acc:VGNC:78933]                                      | 0.785421491 | 0.004318473 | 0.017804985 |
| ENSMMUG00000015449 | phospholipase A2 group IVF [Source:VGNC Symbol;Acc:VGNC:76123]                                     | 0.786479345 | 5.17E-05    | 0.00041235  |
| ENSMMUG00000004619 | zinc finger BED-type containing 9 [Source:VGNC Symbol;Acc:VGNC:81608]                              | 0.786541011 | 0.010003578 | 0.035374971 |
| ENSMMUG00000055978 |                                                                                                    | 0.787834061 | 0.001257048 | 0.006303702 |
| ENSMMUG00000031295 | growth hormone releasing hormone [Source:VGNC Symbol;Acc:VGNC:73049]                               | 0.788365133 | 0.014568288 | 0.047927951 |
| ENSMMUG00000045544 | neuronal tyrosine-phosphorylated phosphoinositide-3-kinase adaptor 2 [Source:NCBI gene;Acc:711209] | 0.789145351 | 0.001937887 | 0.009070287 |
| ENSMMUG00000013483 | prolyl endopeptidase [Source:VGNC Symbol;Acc:VGNC:76396]                                           | 0.789179358 | 0.001197491 | 0.006054996 |
| ENSMMUG00000022404 | apoptotic peptidase activating factor 1 [Source:VGNC Symbol;Acc:VGNC:69975]                        | 0.790691204 | 1.38E-06    | 1.64E-05    |
| ENSMMUG00000011206 | solute carrier family 9 member B1 [Source:NCBI gene;Acc:710949]                                    | 0.79082401  | 0.002473711 | 0.011104597 |

|                     |                                                                                                      |             |             |             |
|---------------------|------------------------------------------------------------------------------------------------------|-------------|-------------|-------------|
| ENSMMUG00000015503  | zinc finger FYVE-type containing 27 [Source:VGNC Symbol;Acc:VGNC:79623]                              | 0.790970414 | 3.40E-05    | 0.000285237 |
| ENSMMUG00000016715  | p53-induced death domain protein 1 [Source:VGNC Symbol;Acc:VGNC:81498]                               | 0.791159763 | 0.000426594 | 0.002513551 |
| ENSMMUG00000002982  | FAST kinase domains 5 [Source:NCBI gene;Acc:100498658]                                               | 0.792078028 | 0.010690913 | 0.037298329 |
| ENSMMUG00000010617  | coiled-coil domain containing 120 [Source:VGNC Symbol;Acc:VGNC:70664]                                | 0.79225465  | 0.001564769 | 0.007559977 |
| ENSMMUG000000049403 |                                                                                                      | 0.793125493 | 0.00019384  | 0.001285745 |
| ENSMMUG00000019632  | ribosomal L1 domain containing 1 [Source:VGNC Symbol;Acc:VGNC:77096]                                 | 0.793350684 | 0.000195052 | 0.001293085 |
| ENSMMUG00000015797  | disco interacting protein 2 homolog A [Source:VGNC Symbol;Acc:VGNC:71641]                            | 0.795572398 | 0.001284725 | 0.006416318 |
| ENSMMUG00000009430  | transient receptor potential cation channel subfamily M member 1 [Source:VGNC Symbol;Acc:VGNC:79964] | 0.796840972 | 1.21E-06    | 1.44E-05    |
| ENSMMUG00000057506  |                                                                                                      | 0.797689065 | 0.002141887 | 0.009848834 |
| ENSMMUG00000014214  | zinc finger protein 420 [Source:VGNC Symbol;Acc:VGNC:82277]                                          | 0.800760184 | 0.002598645 | 0.011568251 |
| ENSMMUG00000003585  | ALG5 dolichyl-phosphate beta-glucosyltransferase [Source:VGNC Symbol;Acc:VGNC:69647]                 | 0.802586879 | 0.014531302 | 0.047857511 |
| ENSMMUG00000052680  |                                                                                                      | 0.80396135  | 0.000193836 | 0.001285745 |
| ENSMMUG00000011459  | 3-phosphoinositide dependent protein kinase 1 [Source:NCBI gene;Acc:697523]                          | 0.806108862 | 1.22E-07    | 1.79E-06    |
| ENSMMUG00000006230  | NADPH oxidase 5 [Source:VGNC Symbol;Acc:VGNC:82198]                                                  | 0.806917509 | 9.34E-05    | 0.000684038 |
| ENSMMUG00000020320  | protein transport protein Sec16B [Source:NCBI gene;Acc:709635]                                       | 0.810352048 | 0.000103454 | 0.000743707 |
| ENSMMUG00000054523  | Metazoan signal recognition particle RNA [Source:RFAM;Acc:RF00017]                                   | 0.810439669 | 0.000284146 | 0.001774615 |
| ENSMMUG00000007097  | testin LIM domain protein [Source:VGNC Symbol;Acc:VGNC:78383]                                        | 0.811149488 | 0.001546717 | 0.00749833  |
| ENSMMUG00000060063  |                                                                                                      | 0.811880874 | 0.003692901 | 0.015667743 |
| ENSMMUG00000055079  |                                                                                                      | 0.81306125  | 0.000206249 | 0.001351281 |
| ENSMMUG00000004522  | DNA primase subunit 1 [Source:NCBI gene;Acc:710253]                                                  | 0.818500079 | 3.80E-06    | 4.04E-05    |
| ENSMMUG00000009249  | ring finger protein, LIM domain interacting [Source:NCBI gene;Acc:703471]                            | 0.818689982 | 0.000226428 | 0.001463213 |
| ENSMMUG00000019438  | utrophin [Source:VGNC Symbol;Acc:VGNC:78749]                                                         | 0.819646427 | 0.002003784 | 0.009328979 |
| ENSMMUG00000008967  | VANGL planar cell polarity protein 1 [Source:VGNC Symbol;Acc:VGNC:78976]                             | 0.82000785  | 9.62E-05    | 0.000700821 |
| ENSMMUG00000015089  | vanin 1 [Source:VGNC Symbol;Acc:VGNC:83967]                                                          | 0.820174561 | 0.001552076 | 0.007510313 |
| ENSMMUG00000053063  | forkhead box L2 [Source:NCBI gene;Acc:717906]                                                        | 0.822626189 | 0.003302881 | 0.014244108 |
| ENSMMUG00000013105  | astrotactin 2 [Source:VGNC Symbol;Acc:VGNC:70087]                                                    | 0.822888823 | 0.012512119 | 0.042307139 |
| ENSMMUG00000005947  | sterile alpha motif domain containing 11 [Source:NCBI gene;Acc:100430343]                            | 0.823787485 | 0.009954838 | 0.035250622 |
| ENSMMUG00000015267  | C-terminal Src kinase [Source:VGNC Symbol;Acc:VGNC:81380]                                            | 0.825306215 | 2.30E-06    | 2.58E-05    |
| ENSMMUG00000058544  | nucleosome assembly protein 1 like 5 [Source:NCBI gene;Acc:703223]                                   | 0.825871147 | 0.00164141  | 0.007880689 |
| ENSMMUG00000020188  | chromosome 15 C9orf131 homolog [Source:VGNC Symbol;Acc:VGNC:70451]                                   | 0.826720749 | 0.001927527 | 0.009035557 |
| ENSMMUG00000016758  | transmembrane protein 159 [Source:VGNC Symbol;Acc:VGNC:79836]                                        | 0.828273049 | 0.004826973 | 0.019535174 |
| ENSMMUG00000017039  | arginyl-tRNA synthetase 2, mitochondrial [Source:VGNC Symbol;Acc:VGNC:76516]                         | 0.832870117 | 0.002721802 | 0.012042358 |
| ENSMMUG00000055290  | netrin 1 [Source:NCBI gene;Acc:717645]                                                               | 0.833204362 | 0.005433776 | 0.021585824 |
| ENSMMUG00000003233  | SET domain containing 1A, histone lysine methyltransferase [Source:NCBI gene;Acc:712416]             | 0.834217686 | 0.000153592 | 0.001045295 |
| ENSMMUG00000015115  | terminal nucleotidyltransferase 5B [Source:VGNC Symbol;Acc:VGNC:79692]                               | 0.834506645 | 0.00012905  | 0.000897655 |
| ENSMMUG00000056613  |                                                                                                      | 0.835427218 | 0.00049644  | 0.002883624 |
| ENSMMUG00000021753  | tetratricopeptide repeat domain 25 [Source:NCBI gene;Acc:708614]                                     | 0.836408612 | 0.000329509 | 0.002015928 |
| ENSMMUG00000042077  | DNA damage regulated autophagy modulator 1 [Source:NCBI gene;Acc:697427]                             | 0.837279657 | 0.000128992 | 0.000897655 |
| ENSMMUG00000003744  | solute carrier family 44 member 2 [Source:VGNC Symbol;Acc:VGNC:77498]                                | 0.837308566 | 8.80E-05    | 0.000650232 |
| ENSMMUG00000045970  | thiamine triphosphatase [Source:NCBI gene;Acc:714403]                                                | 0.838931013 | 5.23E-06    | 5.37E-05    |
| ENSMMUG00000000237  | TBC1 domain family member 1 [Source:VGNC Symbol;Acc:VGNC:78103]                                      | 0.841572868 | 0.002125938 | 0.00980484  |
| ENSMMUG00000054768  |                                                                                                      | 0.842014549 | 0.002861016 | 0.012576805 |
| ENSMMUG00000007268  | thimet oligopeptidase 1 [Source:VGNC Symbol;Acc:VGNC:78347]                                          | 0.844929757 | 0.002859398 | 0.012574189 |
| ENSMMUG00000006295  | matrix metalloproteinase 19 [Source:VGNC Symbol;Acc:VGNC:74896]                                      | 0.845437409 | 0.003734984 | 0.015818985 |
| ENSMMUG00000047621  | transmembrane 4 L six family member 18 [Source:VGNC Symbol;Acc:VGNC:82713]                           | 0.845525111 | 4.65E-07    | 6.09E-06    |
| ENSMMUG00000051619  | peptidyl arginine deiminase 3 [Source:NCBI gene;Acc:700560]                                          | 0.846996048 | 9.10E-06    | 8.83E-05    |
| ENSMMUG00000061825  | U6 spliceosomal RNA [Source:RFAM;Acc:RF00026]                                                        | 0.847937888 | 0.005700034 | 0.022426093 |
| ENSMMUG00000065276  |                                                                                                      | 0.849760035 | 0.000320334 | 0.001970581 |
| ENSMMUG00000031024  | lactate dehydrogenase A [Source:NCBI gene;Acc:694309]                                                | 0.84984042  | 0.00666523  | 0.025497149 |
| ENSMMUG00000038898  | Metazoan signal recognition particle RNA [Source:RFAM;Acc:RF00017]                                   | 0.849977235 | 0.004072432 | 0.016996354 |
| ENSMMUG00000012223  | branched chain amino acid transaminase 1 [Source:VGNC Symbol;Acc:VGNC:70236]                         | 0.851455099 | 5.02E-06    | 5.19E-05    |



|                    |                                                                                                 |             |             |             |
|--------------------|-------------------------------------------------------------------------------------------------|-------------|-------------|-------------|
| ENSMMUG00000056175 |                                                                                                 | 0.851625869 | 0.000971532 | 0.005111775 |
| ENSMMUG00000019820 | SH3 domain and tetratricopeptide repeats 2 [Source:VGNC Symbol;Acc:VGNC:77337]                  | 0.851839192 | 0.000230766 | 0.001487333 |
| ENSMMUG00000018653 | keratin, type I cytoskeletal 19 [Source:NCBI gene;Acc:707129]                                   | 0.85372825  | 0.014909382 | 0.048866992 |
| ENSMMUG00000030532 | solute carrier family 25 member 16 [Source:NCBI gene;Acc:694145]                                | 0.854414047 | 0.00039087  | 0.002329567 |
| ENSMMUG00000019826 | MYC associated zinc finger protein [Source:NCBI gene;Acc:708982]                                | 0.856311985 | 0.001666064 | 0.007974139 |
| ENSMMUG00000004996 | monooxygenase DBH like 1 [Source:VGNC Symbol;Acc:VGNC:74800]                                    | 0.85889007  | 0.000501057 | 0.002906321 |
| ENSMMUG00000015868 | retinol dehydrogenase 11 [Source:NCBI gene;Acc:711195]                                          | 0.85890025  | 0.000110259 | 0.000786327 |
| ENSMMUG00000011858 | bone morphogenetic protein 5 [Source:VGNC Symbol;Acc:VGNC:70264]                                | 0.85997156  | 0.002576207 | 0.011495622 |
| ENSMMUG00000018879 | exocyst complex component 3 like 2 [Source:NCBI gene;Acc:713992]                                | 0.860581456 | 0.0009661   | 0.00508537  |
| ENSMMUG00000050918 |                                                                                                 | 0.86679175  | 0.00312594  | 0.013576302 |
| ENSMMUG00000052242 |                                                                                                 | 0.867061829 | 0.006808664 | 0.025940884 |
| ENSMMUG00000022514 | coiled-coil domain containing 186 [Source:VGNC Symbol;Acc:VGNC:70847]                           | 0.867087378 | 4.55E-05    | 0.000366797 |
| ENSMMUG00000014571 | protocadherin alpha-C2 [Source:NCBI gene;Acc:698874]                                            | 0.867758363 | 1.20E-06    | 1.44E-05    |
| ENSMMUG00000016114 | 2',3'-cyclic nucleotide 3' phosphodiesterase [Source:VGNC Symbol;Acc:VGNC:71279]                | 0.870082106 | 7.99E-05    | 0.000598225 |
| ENSMMUG00000003075 | coiled-coil domain containing 9 [Source:VGNC Symbol;Acc:VGNC:70851]                             | 0.872288659 | 0.002216624 | 0.010139384 |
| ENSMMUG00000001917 | megakaryocyte-associated tyrosine kinase [Source:NCBI gene;Acc:100430078]                       | 0.877847635 | 0.004304825 | 0.017767159 |
| ENSMMUG00000005793 | ankyrin repeat and fibronectin type III domain containing 1 [Source:VGNC Symbol;Acc:VGNC:69712] | 0.880138645 | 0.010499081 | 0.03678569  |
| ENSMMUG00000054072 |                                                                                                 | 0.88127678  | 5.62E-05    | 0.000443206 |
| ENSMMUG00000010058 | ATR interacting protein [Source:VGNC Symbol;Acc:VGNC:84235]                                     | 0.88256761  | 3.03E-07    | 4.15E-06    |
| ENSMMUG00000010940 | telomerase reverse transcriptase [Source:VGNC Symbol;Acc:VGNC:78313]                            | 0.882847487 | 4.03E-05    | 0.000330273 |
| ENSMMUG00000032677 | microRNA 760 [Source:HGNC Symbol;Acc:HGNC:33666]                                                | 0.882882731 | 0.003554375 | 0.015142747 |
| ENSMMUG00000050018 |                                                                                                 | 0.883212681 | 0.004842333 | 0.019578219 |
| ENSMMUG00000065221 |                                                                                                 | 0.883383568 | 5.94E-05    | 0.000465686 |
| ENSMMUG00000020979 | inka box actin regulator 1 [Source:VGNC Symbol;Acc:VGNC:73692]                                  | 0.883572149 | 0.007791198 | 0.028939745 |
| ENSMMUG00000056548 | coagulation factor III, tissue factor [Source:NCBI gene;Acc:714456]                             | 0.884561188 | 3.11E-05    | 0.000264094 |
| ENSMMUG00000065269 | Rho family GTPase 2 [Source:NCBI gene;Acc:712559]                                               | 0.885167492 | 0.010714946 | 0.037339781 |
| ENSMMUG00000012526 | glycosyltransferase 8 domain containing 1 [Source:VGNC Symbol;Acc:VGNC:73001]                   | 0.885636561 | 7.53E-05    | 0.000570941 |
| ENSMMUG00000002381 | lysine methyltransferase 2B [Source:VGNC Symbol;Acc:VGNC:74053]                                 | 0.886349787 | 6.17E-07    | 7.88E-06    |
| ENSMMUG00000011328 | cytoplasmic polyadenylation element binding protein 1 [Source:NCBI gene;Acc:694357]             | 0.888040874 | 0.006102791 | 0.023654811 |
| ENSMMUG00000021938 | nudE neurodevelopment protein 1 like 1 [Source:VGNC Symbol;Acc:VGNC:74982]                      | 0.888154897 | 0.000497472 | 0.002886886 |
| ENSMMUG00000019991 | dopa decarboxylase [Source:VGNC Symbol;Acc:VGNC:71755]                                          | 0.889979835 | 5.74E-06    | 5.82E-05    |
| ENSMMUG00000064610 | long intergenic non-protein coding RNA 1862 [Source:HGNC Symbol;Acc:HGNC:52681]                 | 0.8904013   | 0.006566468 | 0.025189905 |
| ENSMMUG00000064763 |                                                                                                 | 0.890430383 | 0.012348043 | 0.041855982 |
| ENSMMUG00000001028 | SNF related kinase [Source:VGNC Symbol;Acc:VGNC:84074]                                          | 0.890474962 | 5.94E-08    | 9.28E-07    |
| ENSMMUG00000065113 |                                                                                                 | 0.892201841 | 0.009333751 | 0.033426903 |
| ENSMMUG00000059754 |                                                                                                 | 0.892561328 | 0.00693622  | 0.026272135 |
| ENSMMUG00000043955 | three prime repair exonuclease 1 [Source:VGNC Symbol;Acc:VGNC:82708]                            | 0.893226071 | 0.000189448 | 0.001263433 |
| ENSMMUG00000051186 | proteasome 20S subunit alpha 5 [Source:NCBI gene;Acc:698435]                                    | 0.898408518 | 0.000232797 | 0.001498067 |
| ENSMMUG00000057979 | growth differentiation factor 5 [Source:NCBI gene;Acc:705432]                                   | 0.899148777 | 9.67E-05    | 0.00070341  |
| ENSMMUG00000008196 | aconitase 1 [Source:VGNC Symbol;Acc:VGNC:69378]                                                 | 0.899636651 | 0.002863491 | 0.012583187 |
| ENSMMUG00000052046 |                                                                                                 | 0.904475394 | 0.000321263 | 0.001974271 |
| ENSMMUG00000004913 | mitotic deacetylase associated SANT domain protein [Source:VGNC Symbol;Acc:VGNC:72073]          | 0.90492346  | 0.000202568 | 0.001327875 |
| ENSMMUG00000049145 | creatine kinase B [Source:NCBI gene;Acc:711167]                                                 | 0.905343209 | 0.003150286 | 0.013667551 |
| ENSMMUG00000001879 | annexin A10 [Source:VGNC Symbol;Acc:VGNC:69945]                                                 | 0.905464904 | 0.007471778 | 0.027913563 |
| ENSMMUG00000007603 | coiled-coil domain containing 88B [Source:NCBI gene;Acc:722080]                                 | 0.905740798 | 0.005235252 | 0.020966594 |
| ENSMMUG00000005080 | ubiquitin conjugating enzyme E2 G1 [Source:VGNC Symbol;Acc:VGNC:78695]                          | 0.906596632 | 1.20E-06    | 1.44E-05    |
| ENSMMUG00000004122 | microtubule associated protein tau [Source:NCBI gene;Acc:574327]                                | 0.908105841 | 0.000199242 | 0.001313076 |
| ENSMMUG00000021498 | L3MBTL histone methyl-lysine binding protein 3 [Source:VGNC Symbol;Acc:VGNC:74106]              | 0.909566457 | 4.52E-06    | 4.72E-05    |
| ENSMMUG00000043114 | U6 spliceosomal RNA [Source:RFAM;Acc:RF00026]                                                   | 0.911063503 | 0.011258411 | 0.038815463 |
| ENSMMUG00000016001 | vesicle amine transport 1 [Source:VGNC Symbol;Acc:VGNC:79058]                                   | 0.912193231 | 0.001422304 | 0.006998215 |
| ENSMMUG00000005086 | homeobox protein TGIF1 [Source:NCBI gene;Acc:694580]                                            | 0.912278242 | 0.01170936  | 0.040033309 |

|                    |                                                                                                  |             |             |             |
|--------------------|--------------------------------------------------------------------------------------------------|-------------|-------------|-------------|
| ENSMMUG00000021868 | TNF receptor associated protein 1 [Source:VGNC Symbol;Acc:VGNC:79019]                            | 0.913707878 | 5.56E-05    | 0.00043984  |
| ENSMMUG00000064485 | ubiquitin A-52 residue ribosomal protein fusion product 1 [Source:NCBI gene;Acc:720243]          | 0.914099366 | 0.003485083 | 0.014894002 |
| ENSMMUG00000053617 | torsin 1A interacting protein 2 [Source:NCBI gene;Acc:716691]                                    | 0.914112967 | 4.27E-05    | 0.000346271 |
| ENSMMUG00000002063 | endoplasmic reticulum aminopeptidase 1 [Source:VGNC Symbol;Acc:VGNC:72066]                       | 0.915307195 | 0.000143902 | 0.000990314 |
| ENSMMUG00000056646 |                                                                                                  | 0.915386781 | 0.013274068 | 0.044443357 |
| ENSMMUG00000018274 | FERM domain containing 6 [Source:VGNC Symbol;Acc:VGNC:72747]                                     | 0.915470886 | 0.000160246 | 0.001083651 |
| ENSMMUG00000045179 | 1-acylglycerol-3-phosphate O-acyltransferase 3 [Source:NCBI gene;Acc:713301]                     | 0.91552689  | 0.000403398 | 0.002394091 |
| ENSMMUG00000042951 | signal recognition particle 19 [Source:NCBI gene;Acc:693829]                                     | 0.91576677  | 0.00076842  | 0.004189988 |
| ENSMMUG00000009725 | triadin [Source:HGNC Symbol;Acc:HGNC:12261]                                                      | 0.917027494 | 6.92E-06    | 6.90E-05    |
| ENSMMUG00000055016 | keratin, type II cytoskeletal 6A [Source:NCBI gene;Acc:719283]                                   | 0.917615565 | 1.05E-07    | 1.57E-06    |
| ENSMMUG00000009487 | zinc finger protein 205 [Source:VGNC Symbol;Acc:VGNC:78869]                                      | 0.919544256 | 3.22E-05    | 0.000272189 |
| ENSMMUG00000006936 | gastric inhibitory polypeptide receptor [Source:VGNC Symbol;Acc:VGNC:73052]                      | 0.919730246 | 3.82E-05    | 0.000314229 |
| ENSMMUG00000051450 | phospholipase A2 receptor 1 [Source:NCBI gene;Acc:700191]                                        | 0.920937954 | 3.48E-05    | 0.000290658 |
| ENSMMUG00000020629 | SDS3 homolog, SIN3A corepressor complex component [Source:NCBI gene;Acc:696166]                  | 0.921622515 | 0.000196823 | 0.00129992  |
| ENSMMUG00000006620 | casein kinase 1 gamma 2 [Source:NCBI gene;Acc:709484]                                            | 0.923363403 | 0.006117152 | 0.023695529 |
| ENSMMUG00000008637 | WD repeat containing antisense to TP53 [Source:VGNC Symbol;Acc:VGNC:79508]                       | 0.924308861 | 0.009590298 | 0.034176385 |
| ENSMMUG00000002995 | tripartite motif containing 24 [Source:VGNC Symbol;Acc:VGNC:78562]                               | 0.925219164 | 0.000598832 | 0.003377809 |
| ENSMMUG00000003139 | Rho guanine nucleotide exchange factor 17 [Source:VGNC Symbol;Acc:VGNC:69880]                    | 0.925300145 | 0.002952814 | 0.01292487  |
| ENSMMUG00000001083 | glycine N-acyltransferase-like protein 1 [Source:NCBI gene;Acc:701437]                           | 0.925627376 | 2.64E-05    | 0.000227883 |
| ENSMMUG00000004847 | xylulokinase [Source:VGNC Symbol;Acc:VGNC:78815]                                                 | 0.925638181 | 2.81E-05    | 0.000240957 |
| ENSMMUG00000014110 | adhesion G protein-coupled receptor D2 [Source:VGNC Symbol;Acc:VGNC:69462]                       | 0.92576981  | 7.91E-07    | 9.83E-06    |
| ENSMMUG00000020970 | zinc finger protein 213 [Source:VGNC Symbol;Acc:VGNC:78872]                                      | 0.925956315 | 4.29E-05    | 0.000347632 |
| ENSMMUG00000011069 | CDC like kinase 3 [Source:VGNC Symbol;Acc:VGNC:71260]                                            | 0.927770477 | 0.01084874  | 0.037720469 |
| ENSMMUG00000020173 | bactericidal permeability increasing protein [Source:VGNC Symbol;Acc:VGNC:70277]                 | 0.929368162 | 1.48E-05    | 0.000136335 |
| ENSMMUG00000019223 | TNF receptor associated factor 7 [Source:VGNC Symbol;Acc:VGNC:79252]                             | 0.930741009 | 0.002229025 | 0.010180954 |
| ENSMMUG00000010141 | family with sequence similarity 13 member A [Source:VGNC Symbol;Acc:VGNC:72299]                  | 0.931751104 | 0.000159965 | 0.001082672 |
| ENSMMUG00000053488 | small integral membrane protein 19 [Source:NCBI gene;Acc:705371]                                 | 0.932615638 | 4.69E-06    | 4.87E-05    |
| ENSMMUG00000060572 |                                                                                                  | 0.932654558 | 0.006342724 | 0.024446038 |
| ENSMMUG00000003265 | leptin receptor [Source:VGNC Symbol;Acc:VGNC:81429]                                              | 0.933607527 | 1.55E-06    | 1.81E-05    |
| ENSMMUG00000021812 | ERCC excision repair 8, CSA ubiquitin ligase complex subunit [Source:VGNC Symbol;Acc:VGNC:72425] | 0.933869717 | 2.53E-05    | 0.000219243 |
| ENSMMUG00000053191 |                                                                                                  | 0.933912139 | 1.03E-05    | 9.88E-05    |
| ENSMMUG00000001154 | U8 snoRNA-decapping enzyme-like [Source:NCBI gene;Acc:717946]                                    | 0.93503852  | 0.000522961 | 0.003016287 |
| ENSMMUG00000003839 | mitogen-activated protein kinase binding protein 1 [Source:VGNC Symbol;Acc:VGNC:74613]           | 0.937003673 | 0.003895346 | 0.016407711 |
| ENSMMUG00000018166 | MYB proto-oncogene, transcription factor [Source:VGNC Symbol;Acc:VGNC:75089]                     | 0.938708094 | 0.001359356 | 0.00673432  |
| ENSMMUG00000021075 | Rac family small GTPase 1 [Source:NCBI gene;Acc:717755]                                          | 0.938938607 | 5.12E-08    | 8.10E-07    |
| ENSMMUG00000037449 | CUGBP Elav-like family member 2 [Source:NCBI gene;Acc:714291]                                    | 0.939363096 | 0.001068555 | 0.005506754 |
| ENSMMUG00000004520 | NADH:ubiquinone oxidoreductase core subunit S2 [Source:NCBI gene;Acc:719935]                     | 0.939769029 | 0.000586196 | 0.003320707 |
| ENSMMUG00000015663 | adaptor related protein complex 3 subunit delta 1 [Source:VGNC Symbol;Acc:VGNC:69969]            | 0.939833504 | 0.000823645 | 0.004451811 |
| ENSMMUG00000016104 | chondroitin sulfate proteoglycan 4 [Source:VGNC Symbol;Acc:VGNC:71525]                           | 0.940768608 | 0.000149865 | 0.001023326 |
| ENSMMUG00000050661 |                                                                                                  | 0.940853301 | 4.04E-05    | 0.000330636 |
| ENSMMUG00000003289 | integrin subunit beta 3 [Source:NCBI gene;Acc:717379]                                            | 0.941101073 | 1.46E-06    | 1.72E-05    |
| ENSMMUG00000051230 |                                                                                                  | 0.941153419 | 0.000352679 | 0.002137462 |
| ENSMMUG00000016909 | meiotic kinetochore factor [Source:NCBI gene;Acc:709179]                                         | 0.942406884 | 0.000261667 | 0.00164593  |
| ENSMMUG00000022481 | cytochrome P450, family 1, subfamily A, polypeptide 1 [Source:NCBI gene;Acc:678694]              | 0.943521899 | 6.24E-05    | 0.000484547 |
| ENSMMUG00000005959 | glycerol kinase [Source:NCBI gene;Acc:707531]                                                    | 0.944388705 | 0.000248065 | 0.001574878 |
| ENSMMUG00000002371 | myosin IC [Source:VGNC Symbol;Acc:VGNC:75112]                                                    | 0.945137061 | 0.000235723 | 0.001513483 |
| ENSMMUG00000057850 |                                                                                                  | 0.945693961 | 0.010604989 | 0.037082764 |
| ENSMMUG00000038858 |                                                                                                  | 0.946073329 | 2.52E-06    | 2.80E-05    |
| ENSMMUG00000054123 | vesicle transport through interaction with t-SNAREs 1A [Source:NCBI gene;Acc:696654]             | 0.947814644 | 0.001800854 | 0.008513193 |
| ENSMMUG00000003764 | TBC1 domain family member 22A [Source:VGNC Symbol;Acc:VGNC:82077]                                | 0.94878665  | 0.00071341  | 0.003942681 |
| ENSMMUG00000057543 | MyoD family inhibitor domain containing 2 [Source:HGNC Symbol;Acc:HGNC:53442]                    | 0.949563503 | 0.000698945 | 0.003873187 |



|                    |                                                                                             |             |             |             |
|--------------------|---------------------------------------------------------------------------------------------|-------------|-------------|-------------|
| ENSMMUG00000057841 | keratin 86 [Source:NCBI gene;Acc:697770]                                                    | 0.95040854  | 0.002733362 | 0.012067441 |
| ENSMMUG00000012538 | ubiquitin conjugating enzyme E2 U [Source:VGNC Symbol;Acc:VGNC:79726]                       | 0.95111149  | 0.004094178 | 0.01708131  |
| ENSMMUG00000011043 | endoplasmic reticulum aminopeptidase 2 [Source:VGNC Symbol;Acc:VGNC:72141]                  | 0.951407717 | 2.06E-09    | 4.17E-08    |
| ENSMMUG00000017605 | mitochondrial ribosomal protein L39 [Source:VGNC Symbol;Acc:VGNC:74737]                     | 0.951681043 | 7.61E-05    | 0.000575047 |
| ENSMMUG00000012472 | phosphatidylinositol-4-phosphate 5-kinase type 1 beta [Source:VGNC Symbol;Acc:VGNC:76001]   | 0.952549716 | 3.48E-05    | 0.000290683 |
| ENSMMUG00000060496 | translocase of outer mitochondrial membrane 40 like [Source:NCBI gene;Acc:100426891]        | 0.952607216 | 0.012746794 | 0.042994195 |
| ENSMMUG00000055907 |                                                                                             | 0.954167331 | 0.000128707 | 0.000896546 |
| ENSMMUG00000016093 | adenosine deaminase RNA specific [Source:VGNC Symbol;Acc:VGNC:69502]                        | 0.95548074  | 0.000578626 | 0.00328494  |
| ENSMMUG00000054573 |                                                                                             | 0.957426534 | 0.001936722 | 0.009068284 |
| ENSMMUG00000050047 | Metazoan signal recognition particle RNA [Source:RFAM;Acc:RF00017]                          | 0.95752362  | 0.001175242 | 0.005959118 |
| ENSMMUG00000057560 |                                                                                             | 0.960075941 | 6.65E-06    | 6.66E-05    |
| ENSMMUG00000018787 | PAK1 interacting protein 1 [Source:VGNC Symbol;Acc:VGNC:75661]                              | 0.960234269 | 0.001407508 | 0.006928186 |
| ENSMMUG00000016410 | acyl-CoA binding domain containing 5 [Source:VGNC Symbol;Acc:VGNC:69509]                    | 0.960465089 | 0.007975615 | 0.029486457 |
| ENSMMUG00000062394 | C-C motif chemokine receptor 2 [Source:NCBI gene;Acc:574098]                                | 0.960784914 | 0.002503019 | 0.011211591 |
| ENSMMUG00000058275 | arrestin domain containing 5 [Source:NCBI gene;Acc:697277]                                  | 0.961852575 | 0.001499386 | 0.007318884 |
| ENSMMUG00000062048 |                                                                                             | 0.961923851 | 3.74E-06    | 3.97E-05    |
| ENSMMUG00000037887 | RBMX like 1 [Source:NCBI gene;Acc:100424767]                                                | 0.962689006 | 2.55E-05    | 0.000220521 |
| ENSMMUG00000021904 | cell division cycle 45 [Source:VGNC Symbol;Acc:VGNC:70800]                                  | 0.96391411  | 0.004485298 | 0.018376264 |
| ENSMMUG00000045187 | CASC3 exon junction complex subunit [Source:NCBI gene;Acc:699712]                           | 0.964698657 | 5.98E-05    | 0.000467686 |
| ENSMMUG00000008771 | lysine demethylase 2A [Source:VGNC Symbol;Acc:VGNC:73824]                                   | 0.964727967 | 0.000260041 | 0.001636542 |
| ENSMMUG00000020603 | pyridine nucleotide-disulphide oxidoreductase domain 2 [Source:NCBI gene;Acc:707797]        | 0.965094643 | 1.06E-07    | 1.58E-06    |
| ENSMMUG00000017280 | TBC1 domain family member 10C [Source:VGNC Symbol;Acc:VGNC:78203]                           | 0.966382967 | 0.010341985 | 0.036338862 |
| ENSMMUG00000022798 | aspartyl-tRNA synthetase 2, mitochondrial [Source:VGNC Symbol;Acc:VGNC:71708]               | 0.967054053 | 0.000368905 | 0.002216134 |
| ENSMMUG00000020657 | patched domain containing 3 [Source:VGNC Symbol;Acc:VGNC:76310]                             | 0.967319345 | 0.00651517  | 0.02500873  |
| ENSMMUG00000029296 | phosphatidylinositol glycan anchor biosynthesis class Q [Source:VGNC Symbol;Acc:VGNC:75798] | 0.968698197 | 0.002653373 | 0.01178201  |
| ENSMMUG00000014413 | slingshot protein phosphatase 2 [Source:VGNC Symbol;Acc:VGNC:78018]                         | 0.969931725 | 1.12E-06    | 1.36E-05    |
| ENSMMUG00000053072 |                                                                                             | 0.970237596 | 0.000236984 | 0.001517861 |
| ENSMMUG00000021891 | kinesin light chain 3 [Source:VGNC Symbol;Acc:VGNC:73870]                                   | 0.971484757 | 0.002068939 | 0.009599596 |
| ENSMMUG00000057001 | homeobox B2 [Source:NCBI gene;Acc:106994010]                                                | 0.971892667 | 4.86E-05    | 0.000389998 |
| ENSMMUG00000013253 | protein tyrosine phosphatase non-receptor type 11 [Source:NCBI gene;Acc:712044]             | 0.97222042  | 0.006230679 | 0.024089737 |
| ENSMMUG00000056022 |                                                                                             | 0.973988611 | 0.001446328 | 0.007090871 |
| ENSMMUG00000064430 |                                                                                             | 0.974999559 | 0.00157074  | 0.007583116 |
| ENSMMUG00000018235 | chloride voltage-gated channel Kb [Source:NCBI gene;Acc:703476]                             | 0.975375706 | 0.013771607 | 0.045735429 |
| ENSMMUG00000012959 | solute carrier family 35 member E1 [Source:VGNC Symbol;Acc:VGNC:77536]                      | 0.977614192 | 2.44E-05    | 0.000212669 |
| ENSMMUG00000000458 | RNA binding protein, mRNA processing factor [Source:VGNC Symbol;Acc:VGNC:76510]             | 0.980119945 | 0.00473154  | 0.01921221  |
| ENSMMUG00000008253 | zinc finger protein 267 [Source:NCBI gene;Acc:641441]                                       | 0.981179525 | 0.001699991 | 0.008127029 |
| ENSMMUG00000015160 | Rap guanine nucleotide exchange factor like 1 [Source:VGNC Symbol;Acc:VGNC:76501]           | 0.98330929  | 0.000839334 | 0.004520705 |
| ENSMMUG00000002345 | tropomodulin 3 [Source:VGNC Symbol;Acc:VGNC:78572]                                          | 0.985299618 | 5.61E-07    | 7.22E-06    |
| ENSMMUG00000055156 |                                                                                             | 0.98671269  | 0.00763985  | 0.028437733 |
| ENSMMUG00000058873 |                                                                                             | 0.986758443 | 0.004906151 | 0.019809956 |
| ENSMMUG00000059196 |                                                                                             | 0.987081561 | 7.96E-05    | 0.000596364 |
| ENSMMUG00000008790 | zinc finger MIZ-type containing 1 [Source:VGNC Symbol;Acc:VGNC:79036]                       | 0.98722297  | 0.00129283  | 0.006451119 |
| ENSMMUG00000055122 |                                                                                             | 0.987883347 | 0.000112146 | 0.000798143 |
| ENSMMUG00000006763 | cytochrome c oxidase subunit IV isoform 1 [Source:NCBI gene;Acc:693811]                     | 0.988271751 | 8.46E-06    | 8.26E-05    |
| ENSMMUG00000059300 |                                                                                             | 0.988655082 | 0.002913266 | 0.012774509 |
| ENSMMUG00000016276 | tripartite motif containing 72 [Source:VGNC Symbol;Acc:VGNC:79927]                          | 0.989215838 | 0.005298898 | 0.021152566 |
| ENSMMUG00000009794 | protocadherin related 15 [Source:VGNC Symbol;Acc:VGNC:75608]                                | 0.993962734 | 1.23E-05    | 0.000115666 |
| ENSMMUG00000053458 | ORMDL sphingolipid biosynthesis regulator 2 [Source:NCBI gene;Acc:710296]                   | 0.994069657 | 8.05E-07    | 9.97E-06    |
| ENSMMUG00000004000 | collagen type XXIII alpha 1 chain [Source:HGNC Symbol;Acc:HGNC:22990]                       | 0.994861176 | 0.005400353 | 0.021459989 |
| ENSMMUG00000031106 | ubiquitin recognition factor in ER associated degradation 1 [Source:NCBI gene;Acc:711716]   | 0.996024535 | 1.11E-08    | 1.97E-07    |
| ENSMMUG00000017946 | rogdi atypical leucine zipper [Source:VGNC Symbol;Acc:VGNC:76862]                           | 0.996481518 | 1.97E-06    | 2.26E-05    |

|                    |                                                                                                 |             |             |             |
|--------------------|-------------------------------------------------------------------------------------------------|-------------|-------------|-------------|
| ENSMMUG00000041919 | nuclear respiratory factor 1 [Source:VGNC Symbol;Acc:VGNC:81731]                                | 0.997391165 | 0.000354187 | 0.002144489 |
| ENSMMUG00000062995 |                                                                                                 | 0.997901537 | 0.000273473 | 0.001711436 |
| ENSMMUG00000003611 | low density lipoprotein receptor [Source:VGNC Symbol;Acc:VGNC:74248]                            | 0.998780093 | 0.009271101 | 0.033280111 |
| ENSMMUG00000017533 | interferon induced protein with tetratricopeptide repeats 1 [Source:NCBI gene;Acc:695683]       | 0.998789757 | 0.005289111 | 0.021131224 |
| ENSMMUG00000055239 |                                                                                                 | 0.998825426 | 2.37E-05    | 0.000207463 |
| ENSMMUG00000039774 | Metazoan signal recognition particle RNA [Source:RFAM;Acc:RF00017]                              | 0.998866761 | 3.78E-06    | 4.01E-05    |
| ENSMMUG00000005548 | N-ethylmaleimide sensitive factor, vesicle fusing ATPase [Source:VGNC Symbol;Acc:VGNC:75536]    | 1.001899769 | 1.07E-06    | 1.30E-05    |
| ENSMMUG00000010420 | makorin ring finger protein 1 [Source:VGNC Symbol;Acc:VGNC:81476]                               | 1.00301607  | 0.000836257 | 0.004508619 |
| ENSMMUG00000020588 | protein kinase N2 [Source:VGNC Symbol;Acc:VGNC:76015]                                           | 1.005340322 | 3.88E-09    | 7.46E-08    |
| ENSMMUG00000023225 | E2F transcription factor 6 [Source:VGNC Symbol;Acc:VGNC:72027]                                  | 1.006190948 | 0.000116137 | 0.000822256 |
| ENSMMUG00000018255 | nuclear factor of activated T cells 5 [Source:VGNC Symbol;Acc:VGNC:75325]                       | 1.006361092 | 1.04E-05    | 9.89E-05    |
| ENSMMUG00000049866 |                                                                                                 | 1.006882679 | 2.95E-05    | 0.000251675 |
| ENSMMUG00000013048 | junction plakoglobin [Source:VGNC Symbol;Acc:VGNC:73960]                                        | 1.006890143 | 4.17E-05    | 0.000340104 |
| ENSMMUG00000021082 | potassium sodium-activated channel subfamily T member 2 [Source:VGNC Symbol;Acc:VGNC:73857]     | 1.008233373 | 1.03E-07    | 1.54E-06    |
| ENSMMUG00000057134 | keratin, type II cytoskeletal 6C [Source:NCBI gene;Acc:100424162]                               | 1.011231085 | 0.006856525 | 0.026050558 |
| ENSMMUG00000015303 | ATP binding cassette subfamily A member 7 [Source:VGNC Symbol;Acc:VGNC:69567]                   | 1.013092045 | 3.16E-08    | 5.19E-07    |
| ENSMMUG00000009494 | carboxypeptidase A5 [Source:VGNC Symbol;Acc:VGNC:71410]                                         | 1.013342313 | 0.009524298 | 0.033990459 |
| ENSMMUG00000021928 | CAP-Gly domain containing linker protein 1 [Source:VGNC Symbol;Acc:VGNC:71166]                  | 1.013377167 | 0.000840704 | 0.004526103 |
| ENSMMUG00000051937 | uncharacterized LOC707807 [Source:NCBI gene;Acc:707807]                                         | 1.013446302 | 0.002827192 | 0.012445924 |
| ENSMMUG00000013397 | peroxiredoxin 5 [Source:NCBI gene;Acc:719764]                                                   | 1.014126176 | 1.96E-05    | 0.000174826 |
| ENSMMUG00000061995 |                                                                                                 | 1.014498519 | 6.42E-08    | 9.92E-07    |
| ENSMMUG00000019041 | hydroxysteroid 17-beta dehydrogenase 11 [Source:VGNC Symbol;Acc:VGNC:73431]                     | 1.015264754 | 0.006911429 | 0.02619438  |
| ENSMMUG00000008566 | zinc finger protein 157 [Source:VGNC Symbol;Acc:VGNC:78850]                                     | 1.016347877 | 5.31E-05    | 0.000421828 |
| ENSMMUG00000003669 | methionine sulfoxide reductase B3 [Source:VGNC Symbol;Acc:VGNC:74842]                           | 1.017644105 | 4.29E-05    | 0.000347632 |
| ENSMMUG00000002930 | G protein-coupled receptor 158 [Source:NCBI gene;Acc:707065]                                    | 1.017657452 | 0.000772017 | 0.004204193 |
| ENSMMUG00000032030 | dolichyldiphosphatase 1 [Source:VGNC Symbol;Acc:VGNC:71947]                                     | 1.018286973 | 0.004067393 | 0.016981089 |
| ENSMMUG00000012001 | transcription factor 4 [Source:VGNC Symbol;Acc:VGNC:78288]                                      | 1.018475436 | 0.002726258 | 0.012049062 |
| ENSMMUG00000008106 | solute carrier family 25 member 17 [Source:NCBI gene;Acc:705547]                                | 1.018736323 | 0.004278821 | 0.017695322 |
| ENSMMUG00000020604 | HPS1 biogenesis of lysosomal organelles complex 3 subunit 1 [Source:VGNC Symbol;Acc:VGNC:73515] | 1.018831289 | 0.000108299 | 0.000773895 |
| ENSMMUG00000000808 | melanin concentrating hormone receptor 2 [Source:VGNC Symbol;Acc:VGNC:74550]                    | 1.019032501 | 5.78E-06    | 5.85E-05    |
| ENSMMUG00000012466 | BCL2 binding component 3 [Source:NCBI gene;Acc:717955]                                          | 1.019947444 | 0.000373118 | 0.002238162 |
| ENSMMUG00000016652 | cell division cycle and apoptosis regulator 1 [Source:NCBI gene;Acc:693585]                     | 1.021222383 | 6.30E-05    | 0.000487492 |
| ENSMMUG00000005215 | Rab9 effector protein with kelch motifs [Source:VGNC Symbol;Acc:VGNC:76495]                     | 1.021387562 | 0.001081231 | 0.005560425 |
| ENSMMUG00000049952 |                                                                                                 | 1.021894365 | 1.53E-05    | 0.000140899 |
| ENSMMUG00000017026 | fibrosin like 1 [Source:NCBI gene;Acc:696295]                                                   | 1.022649667 | 0.000108185 | 0.000773533 |
| ENSMMUG00000019835 | CD5 molecule like [Source:VGNC Symbol;Acc:VGNC:70774]                                           | 1.023559276 | 0.002030599 | 0.00943595  |
| ENSMMUG00000019172 | spectrin beta, erythrocytic [Source:VGNC Symbol;Acc:VGNC:77870]                                 | 1.024817041 | 0.001094955 | 0.005621594 |
| ENSMMUG00000005270 | ryanodine receptor 3 [Source:NCBI gene;Acc:694996]                                              | 1.025257649 | 2.25E-09    | 4.50E-08    |
| ENSMMUG00000019668 | armadillo repeat containing 6 [Source:VGNC Symbol;Acc:VGNC:69899]                               | 1.025651771 | 0.005124327 | 0.020609655 |
| ENSMMUG00000053710 |                                                                                                 | 1.027924585 | 1.56E-05    | 0.000143525 |
| ENSMMUG00000000591 | 6-phosphofructo-2-kinase/fructose-2,6-biphosphatase 4 [Source:VGNC Symbol;Acc:VGNC:75960]       | 1.02800188  | 3.80E-07    | 5.08E-06    |
| ENSMMUG00000021418 | ATPase H+ transporting V1 subunit D [Source:VGNC Symbol;Acc:VGNC:70060]                         | 1.028706845 | 0.000948452 | 0.005013946 |
| ENSMMUG00000005776 | atlastin GTPase 3 [Source:VGNC Symbol;Acc:VGNC:70125]                                           | 1.029523263 | 0.000103243 | 0.000742948 |
| ENSMMUG00000019945 | fibroblast growth factor receptor 3 [Source:VGNC Symbol;Acc:VGNC:72653]                         | 1.030102177 | 0.001096957 | 0.005627171 |
| ENSMMUG00000013560 | calcium voltage-gated channel auxiliary subunit gamma 3 [Source:VGNC Symbol;Acc:VGNC:70513]     | 1.031543931 | 1.17E-05    | 0.000110235 |
| ENSMMUG00000048463 | apolipoprotein L5 [Source:HGNC Symbol;Acc:HGNC:14869]                                           | 1.035377151 | 2.18E-05    | 0.000192592 |
| ENSMMUG00000008091 | RUN domain containing 1 [Source:VGNC Symbol;Acc:VGNC:77101]                                     | 1.038831217 | 0.015238302 | 0.049732865 |
| ENSMMUG00000005991 | TRIO and F-actin binding protein [Source:NCBI gene;Acc:701241]                                  | 1.039395125 | 2.18E-07    | 3.06E-06    |
| ENSMMUG00000003140 | RELT TNF receptor [Source:VGNC Symbol;Acc:VGNC:76728]                                           | 1.039505531 | 1.27E-05    | 0.000118736 |
| ENSMMUG00000005622 | dynein axonemal heavy chain 7 [Source:VGNC Symbol;Acc:VGNC:71859]                               | 1.040277208 | 0.006621366 | 0.025366042 |
| ENSMMUG00000056343 |                                                                                                 | 1.041006252 | 0.001799301 | 0.008509125 |



|                     |                                                                                               |             |             |             |
|---------------------|-----------------------------------------------------------------------------------------------|-------------|-------------|-------------|
| ENSMMUG00000005521  | glycogenin 1 [Source:VGNC Symbol;Acc:VGNC:73332]                                              | 1.043452025 | 1.01E-05    | 9.73E-05    |
| ENSMMUG00000009176  | calmodulin binding transcription activator 2 [Source:VGNC Symbol;Acc:VGNC:70578]              | 1.04392981  | 0.001744415 | 0.008278228 |
| ENSMMUG00000007760  | centrosomal protein 70 [Source:VGNC Symbol;Acc:VGNC:71140]                                    | 1.04520863  | 1.92E-05    | 0.000171812 |
| ENSMMUG000000049850 | proline rich and Gla domain 4 [Source:NCBI gene;Acc:694707]                                   | 1.045332063 | 0.00019294  | 0.001282543 |
| ENSMMUG00000001105  | purinergic receptor P2Y12 [Source:VGNC Symbol;Acc:VGNC:75642]                                 | 1.048191699 | 9.79E-05    | 0.000710965 |
| ENSMMUG000000060780 |                                                                                               | 1.050192433 | 2.31E-07    | 3.22E-06    |
| ENSMMUG000000054090 |                                                                                               | 1.054734222 | 0.007198383 | 0.02702362  |
| ENSMMUG00000015054  | ArfGAP with RhoGAP domain, ankyrin repeat and PH domain 1 [Source:VGNC Symbol;Acc:VGNC:69844] | 1.056826284 | 0.000300639 | 0.00186624  |
| ENSMMUG00000014010  | RNA binding fox-1 homolog 2 [Source:VGNC Symbol;Acc:VGNC:76685]                               | 1.057121294 | 1.14E-05    | 0.000108245 |
| ENSMMUG000000054175 |                                                                                               | 1.058199618 | 8.20E-08    | 1.25E-06    |
| ENSMMUG00000005455  | ring finger protein 213 [Source:VGNC Symbol;Acc:VGNC:76734]                                   | 1.059828615 | 0.000330901 | 0.002023432 |
| ENSMMUG00000000953  | family with sequence similarity 207 member A [Source:VGNC Symbol;Acc:VGNC:72273]              | 1.061712668 | 0.001500638 | 0.007322091 |
| ENSMMUG000000020488 | receptor accessory protein 5 [Source:VGNC Symbol;Acc:VGNC:76864]                              | 1.061991976 | 4.87E-06    | 5.04E-05    |
| ENSMMUG000000052238 |                                                                                               | 1.064364152 | 3.77E-06    | 4.01E-05    |
| ENSMMUG000000060967 |                                                                                               | 1.064787039 | 0.001092635 | 0.005612028 |
| ENSMMUG000000019095 | TBC1 domain family member 24 [Source:NCBI gene;Acc:697106]                                    | 1.065323582 | 8.49E-05    | 0.000631959 |
| ENSMMUG000000019607 | patatin like phospholipase domain containing 7 [Source:VGNC Symbol;Acc:VGNC:76104]            | 1.066474419 | 0.000340131 | 0.002069578 |
| ENSMMUG000000049374 |                                                                                               | 1.06662903  | 1.11E-05    | 0.00010506  |
| ENSMMUG000000019500 | methenyltetrahydrofolate synthetase domain containing [Source:VGNC Symbol;Acc:VGNC:75023]     | 1.067681314 | 0.000991727 | 0.005191362 |
| ENSMMUG000000062248 | follicular dendritic cell secreted protein [Source:NCBI gene;Acc:707784]                      | 1.069056489 | 0.00596537  | 0.023239083 |
| ENSMMUG000000016772 | solute carrier family 28 member 1 [Source:VGNC Symbol;Acc:VGNC:77444]                         | 1.069907548 | 1.69E-08    | 2.92E-07    |
| ENSMMUG000000009890 | FERM, ARH/RhoGEF and pleckstrin domain protein 1 [Source:VGNC Symbol;Acc:VGNC:72614]          | 1.074107594 | 1.24E-09    | 2.61E-08    |
| ENSMMUG000000021044 | afadin, adherens junction formation factor [Source:VGNC Symbol;Acc:VGNC:69818]                | 1.075024169 | 1.33E-07    | 1.94E-06    |
| ENSMMUG000000064122 |                                                                                               | 1.075322676 | 0.000777328 | 0.004229366 |
| ENSMMUG000000013193 | matrix metalloproteinase 16 [Source:VGNC Symbol;Acc:VGNC:74894]                               | 1.076310314 | 1.33E-06    | 1.58E-05    |
| ENSMMUG00000004224  | poly(ADP-ribose) polymerase family member 12 [Source:VGNC Symbol;Acc:VGNC:81734]              | 1.077982078 | 1.02E-05    | 9.79E-05    |
| ENSMMUG000000000776 | zinc finger matrin-type 4 [Source:VGNC Symbol;Acc:VGNC:78424]                                 | 1.07970368  | 0.001035827 | 0.005374144 |
| ENSMMUG000000048207 | syntaxin 4 [Source:NCBI gene;Acc:704880]                                                      | 1.080003243 | 5.83E-05    | 0.000457214 |
| ENSMMUG000000010556 | Snf2 related CREBBP activator protein [Source:NCBI gene;Acc:712944]                           | 1.080260772 | 1.64E-09    | 3.37E-08    |
| ENSMMUG000000038256 | aquaporin 2 [Source:NCBI gene;Acc:711719]                                                     | 1.081380005 | 2.72E-09    | 5.35E-08    |
| ENSMMUG000000053496 |                                                                                               | 1.081692893 | 0.002150749 | 0.009882188 |
| ENSMMUG000000014407 | magnesium transporter 1 [Source:VGNC Symbol;Acc:VGNC:74386]                                   | 1.08173433  | 0.00014737  | 0.001009094 |
| ENSMMUG000000009199 | glycogen phosphorylase B [Source:VGNC Symbol;Acc:VGNC:76631]                                  | 1.081991638 | 0.00199392  | 0.00929362  |
| ENSMMUG000000012007 | PH domain and leucine rich repeat protein phosphatase 2 [Source:VGNC Symbol;Acc:VGNC:81494]   | 1.08224674  | 0.002285797 | 0.010417028 |
| ENSMMUG000000050505 | small integral membrane protein 4 [Source:NCBI gene;Acc:696553]                               | 1.083692795 | 0.001087029 | 0.005587903 |
| ENSMMUG000000021655 | histone deacetylase 7 [Source:NCBI gene;Acc:718225]                                           | 1.083939059 | 6.89E-08    | 1.06E-06    |
| ENSMMUG000000060484 | heterogeneous nuclear ribonucleoprotein D [Source:NCBI gene;Acc:694867]                       | 1.08560031  | 0.000137533 | 0.000951277 |
| ENSMMUG000000023025 | synaptophysin [Source:VGNC Symbol;Acc:VGNC:78072]                                             | 1.085992497 | 3.78E-07    | 5.06E-06    |
| ENSMMUG000000002181 | SFI1 centrin binding protein [Source:VGNC Symbol;Acc:VGNC:77328]                              | 1.086431232 | 4.35E-07    | 5.72E-06    |
| ENSMMUG000000001538 | GRAM domain containing 1A [Source:VGNC Symbol;Acc:VGNC:73029]                                 | 1.08677814  | 1.52E-07    | 2.20E-06    |
| ENSMMUG000000061431 | outer dense fiber of sperm tails 3 like 1 [Source:NCBI gene;Acc:706545]                       | 1.086847376 | 0.001212042 | 0.006115436 |
| ENSMMUG000000051323 | caspase-14-like [Source:NCBI gene;Acc:702430]                                                 | 1.087716514 | 8.74E-05    | 0.000646483 |
| ENSMMUG000000041198 | muscle RAS oncogene homolog [Source:NCBI gene;Acc:716352]                                     | 1.08848887  | 0.01169875  | 0.040008162 |
| ENSMMUG000000010043 | epidermal growth factor [Source:VGNC Symbol;Acc:VGNC:72171]                                   | 1.088570993 | 0.001509568 | 0.007356897 |
| ENSMMUG000000003913 | DNA polymerase epsilon 2, accessory subunit [Source:VGNC Symbol;Acc:VGNC:76204]               | 1.090901013 | 0.000413451 | 0.002443137 |
| ENSMMUG000000023032 | intraflagellar transport 81 [Source:VGNC Symbol;Acc:VGNC:73389]                               | 1.09138275  | 1.26E-06    | 1.50E-05    |
| ENSMMUG000000045959 |                                                                                               | 1.09172231  | 0.00112313  | 0.005739874 |
| ENSMMUG000000022345 |                                                                                               | 1.092029962 | 0.004565833 | 0.01863788  |
| ENSMMUG00000002033  | serine protease 36 [Source:VGNC Symbol;Acc:VGNC:76325]                                        | 1.092936154 | 6.28E-09    | 1.17E-07    |
| ENSMMUG000000020172 | KIAA1755 [Source:VGNC Symbol;Acc:VGNC:73942]                                                  | 1.092997585 | 4.96E-06    | 5.13E-05    |
| ENSMMUG000000000194 | solute carrier family 27 member 1 [Source:VGNC Symbol;Acc:VGNC:77438]                         | 1.09854597  | 2.91E-05    | 0.000248362 |

|                    |                                                                                                     |             |             |             |
|--------------------|-----------------------------------------------------------------------------------------------------|-------------|-------------|-------------|
| ENSMMUG00000011817 | aryl hydrocarbon receptor interacting protein [Source:VGNC Symbol;Acc:VGNC:69759]                   | 1.099600109 | 1.72E-07    | 2.47E-06    |
| ENSMMUG00000051072 |                                                                                                     | 1.101262476 | 6.74E-05    | 0.000518334 |
| ENSMMUG00000005982 | coiled-coil domain containing 84 [Source:NCBI gene;Acc:707400]                                      | 1.101498365 | 0.00123775  | 0.006223267 |
| ENSMMUG00000006285 | antizyme inhibitor 2 [Source:VGNC Symbol;Acc:VGNC:70153]                                            | 1.101778007 | 1.53E-06    | 1.79E-05    |
| ENSMMUG00000013966 | legumain [Source:VGNC Symbol;Acc:VGNC:74274]                                                        | 1.103128905 | 0.000113208 | 0.000803834 |
| ENSMMUG00000011413 | acid sensing ion channel subunit 2 [Source:VGNC Symbol;Acc:VGNC:70241]                              | 1.104872891 | 0.003326048 | 0.014318234 |
| ENSMMUG00000022346 | surfeit 2 [Source:VGNC Symbol;Acc:VGNC:78059]                                                       | 1.105557599 | 0.00992975  | 0.035185115 |
| ENSMMUG00000015607 | solute carrier family 39 member 13 [Source:VGNC Symbol;Acc:VGNC:77538]                              | 1.106481593 | 0.001299852 | 0.006478702 |
| ENSMMUG00000001269 | chromosome 16 C17orf80 homolog [Source:VGNC Symbol;Acc:VGNC:70440]                                  | 1.10814798  | 2.10E-07    | 2.97E-06    |
| ENSMMUG00000004843 | sodium voltage-gated channel beta subunit 1 [Source:VGNC Symbol;Acc:VGNC:76983]                     | 1.109423896 | 1.30E-05    | 0.000121717 |
| ENSMMUG00000018648 | zinc finger protein 594 [Source:NCBI gene;Acc:711492]                                               | 1.11179462  | 0.005042492 | 0.020307101 |
| ENSMMUG00000006692 | signal peptide, CUB domain and EGF like domain containing 2 [Source:VGNC Symbol;Acc:VGNC:77138]     | 1.112586654 | 0.001958538 | 0.009145    |
| ENSMMUG00000038349 | crystallin beta-gamma domain containing 3 [Source:NCBI gene;Acc:698282]                             | 1.11262888  | 7.57E-09    | 1.39E-07    |
| ENSMMUG00000042839 |                                                                                                     | 1.114259853 | 5.22E-06    | 5.37E-05    |
| ENSMMUG00000052324 | MARVEL domain containing 3 [Source:NCBI gene;Acc:710448]                                            | 1.11471343  | 0.000480814 | 0.002810121 |
| ENSMMUG00000008618 | calcium voltage-gated channel subunit alpha1 F [Source:VGNC Symbol;Acc:VGNC:70503]                  | 1.115850413 | 7.27E-10    | 1.60E-08    |
| ENSMMUG00000060555 |                                                                                                     | 1.116565432 | 0.001012262 | 0.005280862 |
| ENSMMUG00000044822 | coiled-coil domain containing 174 [Source:VGNC Symbol;Acc:VGNC:84219]                               | 1.118194476 | 3.01E-07    | 4.12E-06    |
| ENSMMUG00000056906 |                                                                                                     | 1.121057013 | 2.39E-06    | 2.67E-05    |
| ENSMMUG00000060596 | BCL2 associated agonist of cell death [Source:NCBI gene;Acc:717740]                                 | 1.121545838 | 0.000184718 | 0.001235911 |
| ENSMMUG00000016465 | histone deacetylase 6 [Source:VGNC Symbol;Acc:VGNC:73164]                                           | 1.123244905 | 1.59E-10    | 3.87E-09    |
| ENSMMUG00000005380 | zinc finger protein 827 [Source:NCBI gene;Acc:706018]                                               | 1.123945781 | 0.00028693  | 0.001788363 |
| ENSMMUG00000053364 |                                                                                                     | 1.124363483 | 0.001338353 | 0.006649027 |
| ENSMMUG00000022348 | surfeit 4 [Source:VGNC Symbol;Acc:VGNC:78060]                                                       | 1.124653593 | 0.000947027 | 0.005008569 |
| ENSMMUG00000013044 | selectin P [Source:VGNC Symbol;Acc:VGNC:77157]                                                      | 1.124982617 | 8.96E-05    | 0.000658848 |
| ENSMMUG00000064026 | Metazoan signal recognition particle RNA [Source:RFAM;Acc:RF00017]                                  | 1.125595441 | 0.000551058 | 0.003154659 |
| ENSMMUG00000008515 | sorting nexin 7 [Source:NCBI gene;Acc:716015]                                                       | 1.126771447 | 1.19E-09    | 2.53E-08    |
| ENSMMUG00000016085 | KxDL motif containing 1 [Source:NCBI gene;Acc:720235]                                               | 1.128055175 | 1.74E-05    | 0.00015776  |
| ENSMMUG00000019536 | potassium voltage-gated channel subfamily Q member 4 [Source:VGNC Symbol;Acc:VGNC:74007]            | 1.130708304 | 6.21E-07    | 7.92E-06    |
| ENSMMUG00000015999 | interferon induced protein 35 [Source:VGNC Symbol;Acc:VGNC:73564]                                   | 1.131104065 | 0.004951502 | 0.019966835 |
| ENSMMUG00000005486 | protein tyrosine phosphatase receptor type C associated protein [Source:VGNC Symbol;Acc:VGNC:76613] | 1.131281074 | 0.000146126 | 0.001002251 |
| ENSMMUG00000005480 | carnosine synthase 1 [Source:VGNC Symbol;Acc:VGNC:81367]                                            | 1.133243584 | 2.47E-11    | 6.70E-10    |
| ENSMMUG00000062175 | carboxypeptidase B1 [Source:NCBI gene;Acc:712639]                                                   | 1.133954625 | 6.02E-05    | 0.000469537 |
| ENSMMUG00000022246 | PDZ and LIM domain 5 [Source:VGNC Symbol;Acc:VGNC:75816]                                            | 1.134056693 | 0.000677109 | 0.003762362 |
| ENSMMUG00000010858 | prolyl 4-hydroxylase subunit alpha 2 [Source:VGNC Symbol;Acc:VGNC:75742]                            | 1.134749276 | 0.008279887 | 0.030378534 |
| ENSMMUG00000058237 |                                                                                                     | 1.13554598  | 1.34E-05    | 0.000124963 |
| ENSMMUG00000019703 | RUN and FYVE domain containing 2 [Source:VGNC Symbol;Acc:VGNC:77057]                                | 1.135600131 | 8.94E-08    | 1.35E-06    |
| ENSMMUG00000015306 | calponin 2 [Source:NCBI gene;Acc:721164]                                                            | 1.136212966 | 2.41E-09    | 4.81E-08    |
| ENSMMUG00000005668 | kynurenine 3-monooxygenase [Source:VGNC Symbol;Acc:VGNC:74197]                                      | 1.137518293 | 8.00E-06    | 7.84E-05    |
| ENSMMUG00000059777 |                                                                                                     | 1.138252333 | 2.20E-06    | 2.48E-05    |
| ENSMMUG00000011661 | integrin subunit alpha 8 [Source:VGNC Symbol;Acc:VGNC:73782]                                        | 1.138586567 | 7.80E-05    | 0.000586043 |
| ENSMMUG00000010336 | DOP1 leucine zipper like protein B [Source:VGNC Symbol;Acc:VGNC:71832]                              | 1.138807531 | 4.29E-08    | 6.90E-07    |
| ENSMMUG00000003314 | aquaporin 3 (Gill blood group) [Source:NCBI gene;Acc:702721]                                        | 1.141279711 | 0.002368825 | 0.010727794 |
| ENSMMUG00000011527 | TNF receptor associated factor 2 [Source:VGNC Symbol;Acc:VGNC:78641]                                | 1.141349931 | 0.000714118 | 0.00394305  |
| ENSMMUG00000008336 | acyl-CoA dehydrogenase family member 10 [Source:NCBI gene;Acc:711080]                               | 1.141650118 | 8.65E-12    | 2.53E-10    |
| ENSMMUG00000008077 | dynein cytoplasmic 2 light intermediate chain 1 [Source:VGNC Symbol;Acc:VGNC:71899]                 | 1.142336387 | 2.25E-06    | 2.53E-05    |
| ENSMMUG00000014573 | dimethylarginine dimethylaminohydrolase 1 [Source:VGNC Symbol;Acc:VGNC:71753]                       | 1.142614307 | 5.43E-11    | 1.41E-09    |
| ENSMMUG00000060917 |                                                                                                     | 1.145665564 | 2.03E-05    | 0.000180177 |
| ENSMMUG00000053916 |                                                                                                     | 1.150464767 | 2.28E-06    | 2.55E-05    |
| ENSMMUG00000048066 | trafficking protein particle complex 9 [Source:NCBI gene;Acc:711466]                                | 1.152510392 | 3.26E-05    | 0.000274757 |
| ENSMMUG00000021005 | taste receptor type 2 member 50 [Source:NCBI gene;Acc:693513]                                       | 1.152626296 | 0.009852735 | 0.034979769 |

|                    |                                                                                                |             |             |             |
|--------------------|------------------------------------------------------------------------------------------------|-------------|-------------|-------------|
| ENSMMUG0000005845  | REST corepressor 1 [Source:VGNC Symbol;Acc:VGNC:76752]                                         | 1.153879045 | 0.000489164 | 0.00284944  |
| ENSMMUG00000011347 | DEAH-box helicase 36 [Source:VGNC Symbol;Acc:VGNC:71623]                                       | 1.15593937  | 2.19E-12    | 7.36E-11    |
| ENSMMUG00000057675 | non-compact myelin associated protein [Source:NCBI gene;Acc:712192]                            | 1.156334947 | 0.009077511 | 0.032718972 |
| ENSMMUG00000014674 | golgin, RAB6 interacting [Source:VGNC Symbol;Acc:VGNC:73012]                                   | 1.157043978 | 2.02E-05    | 0.00017903  |
| ENSMMUG00000001690 | calponin 3 [Source:VGNC Symbol;Acc:VGNC:71278]                                                 | 1.157862976 | 9.54E-06    | 9.22E-05    |
| ENSMMUG00000056227 | PRAME family member 17 [Source:NCBI gene;Acc:715953]                                           | 1.160218707 | 0.013098503 | 0.044011401 |
| ENSMMUG00000059895 |                                                                                                | 1.160895474 | 0.001560504 | 0.0075453   |
| ENSMMUG00000063694 | cyclic nucleotide gated channel subunit alpha 2 [Source:NCBI gene;Acc:704486]                  | 1.161721095 | 1.76E-11    | 4.84E-10    |
| ENSMMUG00000012940 | tRNA phosphotransferase 1 [Source:VGNC Symbol;Acc:VGNC:79242]                                  | 1.163428696 | 4.23E-05    | 0.000343767 |
| ENSMMUG00000003267 | zinc finger protein 362 [Source:NCBI gene;Acc:710013]                                          | 1.163995149 | 1.58E-05    | 0.000144505 |
| ENSMMUG00000053254 | adenylate kinase 4 [Source:NCBI gene;Acc:698560]                                               | 1.165416235 | 6.87E-08    | 1.06E-06    |
| ENSMMUG00000049862 |                                                                                                | 1.167435767 | 0.007924987 | 0.029330327 |
| ENSMMUG00000049666 |                                                                                                | 1.167447171 | 5.62E-05    | 0.000443206 |
| ENSMMUG00000050263 | TBC1 domain family member 26-like [Source:NCBI gene;Acc:100426631]                             | 1.16764503  | 0.001640184 | 0.007877884 |
| ENSMMUG00000002923 | colony stimulating factor 3 [Source:VGNC Symbol;Acc:VGNC:71520]                                | 1.168175441 | 0.000101787 | 0.000733759 |
| ENSMMUG00000010357 | cyclin and CBS domain divalent metal cation transport mediator 1 [Source:NCBI gene;Acc:708335] | 1.168438338 | 6.23E-06    | 6.26E-05    |
| ENSMMUG00000019040 | hydroxysteroid 17-beta dehydrogenase 13 [Source:VGNC Symbol;Acc:VGNC:73417]                    | 1.168789549 | 1.24E-05    | 0.000116235 |
| ENSMMUG00000062055 | glyoxalase I [Source:NCBI gene;Acc:719518]                                                     | 1.168986568 | 1.12E-07    | 1.65E-06    |
| ENSMMUG00000009368 | Abelson helper integration site 1 [Source:VGNC Symbol;Acc:VGNC:81010]                          | 1.169131702 | 6.42E-07    | 8.16E-06    |
| ENSMMUG00000023361 | GDNF family receptor alpha 2 [Source:VGNC Symbol;Acc:VGNC:72918]                               | 1.169356262 | 0.000397828 | 0.002364458 |
| ENSMMUG00000064242 |                                                                                                | 1.171537535 | 7.39E-05    | 0.00056137  |
| ENSMMUG00000060754 | Metazoan signal recognition particle RNA [Source:RFAM;Acc:RF00017]                             | 1.171636225 | 1.88E-06    | 2.16E-05    |
| ENSMMUG00000005483 | ribosomal protein S6 kinase B2 [Source:VGNC Symbol;Acc:VGNC:76934]                             | 1.171915805 | 3.00E-06    | 3.26E-05    |
| ENSMMUG00000054904 | Metazoan signal recognition particle RNA [Source:RFAM;Acc:RF00017]                             | 1.174286381 | 1.11E-07    | 1.64E-06    |
| ENSMMUG00000060562 |                                                                                                | 1.175553783 | 0.000852695 | 0.004574626 |
| ENSMMUG00000006293 | SAP domain containing ribonucleoprotein [Source:NCBI gene;Acc:709932]                          | 1.175915317 | 1.03E-06    | 1.25E-05    |
| ENSMMUG00000014771 | zinc finger homeobox 2 [Source:NCBI gene;Acc:100429448]                                        | 1.17847083  | 9.08E-09    | 1.64E-07    |
| ENSMMUG00000015097 | tripartite motif containing 62 [Source:VGNC Symbol;Acc:VGNC:79513]                             | 1.180611993 | 0.00015347  | 0.001045044 |
| ENSMMUG00000054472 |                                                                                                | 1.181672017 | 9.76E-06    | 9.41E-05    |
| ENSMMUG00000000196 | niban apoptosis regulator 3 [Source:VGNC Symbol;Acc:VGNC:75241]                                | 1.185610286 | 0.00726204  | 0.027237635 |
| ENSMMUG00000000389 | nucleolar protein 6 [Source:VGNC Symbol;Acc:VGNC:75218]                                        | 1.185724511 | 9.42E-05    | 0.000688622 |
| ENSMMUG00000019083 | solute carrier family 9 member B2 [Source:VGNC Symbol;Acc:VGNC:77773]                          | 1.187134499 | 7.61E-05    | 0.000575047 |
| ENSMMUG00000000629 | serpin family C member 1 [Source:VGNC Symbol;Acc:VGNC:77360]                                   | 1.189025068 | 8.89E-09    | 1.61E-07    |
| ENSMMUG00000052424 |                                                                                                | 1.189820239 | 1.53E-06    | 1.79E-05    |
| ENSMMUG00000053989 |                                                                                                | 1.190043672 | 1.51E-06    | 1.77E-05    |
| ENSMMUG00000012469 | KIAA2013 [Source:VGNC Symbol;Acc:VGNC:73918]                                                   | 1.191355784 | 1.32E-11    | 3.73E-10    |
| ENSMMUG00000034608 | U6 spliceosomal RNA [Source:RFAM;Acc:RF00026]                                                  | 1.191571925 | 0.007165278 | 0.026920285 |
| ENSMMUG00000063947 | oxoeicosanoid receptor 1 [Source:NCBI gene;Acc:713039]                                         | 1.192351096 | 8.81E-05    | 0.000650452 |
| ENSMMUG00000049514 | solute carrier family 48 member 1 [Source:NCBI gene;Acc:704304]                                | 1.192598485 | 6.72E-05    | 0.000516824 |
| ENSMMUG00000021988 | N-alpha-acetyltransferase 11, NatA catalytic subunit [Source:NCBI gene;Acc:696758]             | 1.193434753 | 3.47E-05    | 0.000290389 |
| ENSMMUG00000013460 | RAB8B, member RAS oncogene family [Source:VGNC Symbol;Acc:VGNC:81550]                          | 1.194191319 | 3.14E-07    | 4.28E-06    |
| ENSMMUG00000049548 |                                                                                                | 1.19699924  | 0.000148979 | 0.001018408 |
| ENSMMUG00000015108 | SV2 related protein [Source:VGNC Symbol;Acc:VGNC:78208]                                        | 1.198564931 | 1.19E-05    | 0.000112028 |
| ENSMMUG00000016454 | 4-hydroxyphenylpyruvate dioxygenase [Source:VGNC Symbol;Acc:VGNC:73511]                        | 1.198988192 | 4.17E-08    | 6.72E-07    |
| ENSMMUG00000011209 | BICD family like cargo adaptor 1 [Source:HGNC Symbol;Acc:HGNC:28095]                           | 1.200864322 | 3.96E-05    | 0.000324945 |
| ENSMMUG00000053656 |                                                                                                | 1.201068126 | 3.73E-05    | 0.000307731 |
| ENSMMUG00000058096 | CDKN2A interacting protein N-terminal like [Source:NCBI gene;Acc:710774]                       | 1.201498563 | 0.0067852   | 0.025897784 |
| ENSMMUG00000013099 | pappalysin 1 [Source:VGNC Symbol;Acc:VGNC:75756]                                               | 1.202716858 | 0.011579433 | 0.039699528 |
| ENSMMUG00000054568 |                                                                                                | 1.202771627 | 0.002080509 | 0.009649636 |
| ENSMMUG00000019925 | DiGeorge syndrome critical region gene 2 [Source:NCBI gene;Acc:100423715]                      | 1.204050764 | 7.73E-06    | 7.61E-05    |
| ENSMMUG00000009318 | BCL9 like [Source:VGNC Symbol;Acc:VGNC:70113]                                                  | 1.205446326 | 9.32E-09    | 1.68E-07    |



|                     |                                                                                             |             |             |             |
|---------------------|---------------------------------------------------------------------------------------------|-------------|-------------|-------------|
| ENSMMUG00000057452  |                                                                                             | 1.205504729 | 0.001587602 | 0.007658247 |
| ENSMMUG00000005685  | pseudouridine synthase 10 [Source:VGNC Symbol;Acc:VGNC:76547]                               | 1.206347083 | 0.000309098 | 0.001911026 |
| ENSMMUG00000009953  | ninein like [Source:VGNC Symbol;Acc:VGNC:75273]                                             | 1.210277755 | 0.000156601 | 0.001062244 |
| ENSMMUG00000012841  | kallikrein 3 [Source:NCBI gene;Acc:719444]                                                  | 1.210890992 | 0.001706529 | 0.008145609 |
| ENSMMUG000000055379 |                                                                                             | 1.211157926 | 0.000183955 | 0.001231475 |
| ENSMMUG00000009577  | atlastin GTPase 1 [Source:VGNC Symbol;Acc:VGNC:70049]                                       | 1.211813897 | 8.27E-13    | 3.02E-11    |
| ENSMMUG00000022504  | alpha-2-glycoprotein 1, zinc-binding [Source:VGNC Symbol;Acc:VGNC:70201]                    | 1.214193945 | 4.96E-05    | 0.000396882 |
| ENSMMUG00000003482  | glycine receptor alpha 2 [Source:VGNC Symbol;Acc:VGNC:73075]                                | 1.214931804 | 0.00138044  | 0.006816788 |
| ENSMMUG00000014868  | OCIA domain containing 1 [Source:VGNC Symbol;Acc:VGNC:75409]                                | 1.215639907 | 0.000447942 | 0.002629251 |
| ENSMMUG00000017619  | lysophosphatidic acid receptor 5 [Source:VGNC Symbol;Acc:VGNC:74277]                        | 1.215937293 | 4.31E-07    | 5.67E-06    |
| ENSMMUG00000022961  | solute carrier family 11 member 2 [Source:VGNC Symbol;Acc:VGNC:77383]                       | 1.21763852  | 0.001008781 | 0.005264936 |
| ENSMMUG00000006941  | exportin 1 [Source:VGNC Symbol;Acc:VGNC:78812]                                              | 1.21812359  | 3.64E-08    | 5.93E-07    |
| ENSMMUG00000016686  | BUB1 mitotic checkpoint serine/threonine kinase B [Source:VGNC Symbol;Acc:VGNC:70293]       | 1.21825461  | 5.45E-08    | 8.60E-07    |
| ENSMMUG00000015572  | GSG1 like [Source:VGNC Symbol;Acc:VGNC:82152]                                               | 1.219299155 | 2.36E-05    | 0.000206573 |
| ENSMMUG00000021080  | basic leucine zipper nuclear factor 1 [Source:VGNC Symbol;Acc:VGNC:70258]                   | 1.221831176 | 1.13E-11    | 3.22E-10    |
| ENSMMUG00000040268  | phosphatidylinositol transfer protein alpha [Source:NCBI gene;Acc:721228]                   | 1.22534784  | 7.64E-05    | 0.000575397 |
| ENSMMUG00000053200  | ubiquitin conjugating enzyme E2 R2 [Source:NCBI gene;Acc:701507]                            | 1.225843995 | 0.000758567 | 0.004141958 |
| ENSMMUG00000006405  | secretion regulating guanine nucleotide exchange factor [Source:VGNC Symbol;Acc:VGNC:77258] | 1.226341415 | 0.002138294 | 0.009842568 |
| ENSMMUG00000014045  | protein tyrosine phosphatase non-receptor type 23 [Source:VGNC Symbol;Acc:VGNC:76477]       | 1.230300783 | 4.29E-07    | 5.66E-06    |
| ENSMMUG00000030279  | A-kinase anchoring protein 10 [Source:VGNC Symbol;Acc:VGNC:69764]                           | 1.231189951 | 0.001428228 | 0.007018932 |
| ENSMMUG00000004417  | secretion associated Ras related GTPase 1B [Source:VGNC Symbol;Acc:VGNC:76970]              | 1.23248102  | 2.16E-07    | 3.04E-06    |
| ENSMMUG00000059428  | olfactory receptor 2V2 [Source:NCBI gene;Acc:707790]                                        | 1.232481891 | 0.014578268 | 0.047935123 |
| ENSMMUG00000015924  | BCAR3 adaptor protein, NSP family member [Source:VGNC Symbol;Acc:VGNC:70235]                | 1.232734221 | 2.25E-05    | 0.000198115 |
| ENSMMUG00000042886  | ETS variant transcription factor 3 [Source:NCBI gene;Acc:719741]                            | 1.232979139 | 0.004371227 | 0.01798686  |
| ENSMMUG00000058002  | zinc finger protein 669-like [Source:NCBI gene;Acc:696282]                                  | 1.233358411 | 2.57E-09    | 5.11E-08    |
| ENSMMUG00000011588  | myosin IXB [Source:HGNC Symbol;Acc:HGNC:7609]                                               | 1.233740671 | 4.03E-05    | 0.000330273 |
| ENSMMUG00000000582  | NOP58 ribonucleoprotein [Source:VGNC Symbol;Acc:VGNC:75284]                                 | 1.234166902 | 4.73E-05    | 0.000379979 |
| ENSMMUG000000060533 |                                                                                             | 1.234600993 | 7.54E-07    | 9.44E-06    |
| ENSMMUG00000003131  | interleukin 13 [Source:VGNC Symbol;Acc:VGNC:84393]                                          | 1.235632176 | 0.000880545 | 0.004705554 |
| ENSMMUG000000057953 |                                                                                             | 1.237227677 | 0.001470137 | 0.007193256 |
| ENSMMUG000000062178 | Metazoan signal recognition particle RNA [Source:RFAM;Acc:RF00017]                          | 1.237666163 | 0.011099254 | 0.038410497 |
| ENSMMUG00000006468  | FGFR1 oncogene partner 2 [Source:VGNC Symbol;Acc:VGNC:72551]                                | 1.237996377 | 0.000425071 | 0.002505781 |
| ENSMMUG000000054512 |                                                                                             | 1.238609392 | 0.008800176 | 0.031925315 |
| ENSMMUG00000020583  | FTO alpha-ketoglutarate dependent dioxygenase [Source:VGNC Symbol;Acc:VGNC:72772]           | 1.238732655 | 2.70E-06    | 2.96E-05    |
| ENSMMUG000000053378 |                                                                                             | 1.238893648 | 6.42E-05    | 0.000496337 |
| ENSMMUG00000020258  | E2F transcription factor 4 [Source:VGNC Symbol;Acc:VGNC:72025]                              | 1.240392843 | 5.86E-08    | 9.17E-07    |
| ENSMMUG00000039301  | StAR related lipid transfer domain containing 10 [Source:NCBI gene;Acc:718503]              | 1.240974938 | 0.003248583 | 0.014029632 |
| ENSMMUG00000023192  | choline kinase alpha [Source:VGNC Symbol;Acc:VGNC:71039]                                    | 1.24370148  | 0.008619468 | 0.031371596 |
| ENSMMUG00000009825  | zinc finger DHHC-type containing 1 [Source:VGNC Symbol;Acc:VGNC:79102]                      | 1.245174868 | 2.79E-07    | 3.83E-06    |
| ENSMMUG000000055048 |                                                                                             | 1.246382668 | 1.30E-07    | 1.89E-06    |
| ENSMMUG00000005440  | ELMO domain containing 1 [Source:VGNC Symbol;Acc:VGNC:72109]                                | 1.247514341 | 0.014393771 | 0.047468162 |
| ENSMMUG00000014409  | ankyrin repeat domain 13B [Source:VGNC Symbol;Acc:VGNC:69708]                               | 1.249669268 | 0.001918873 | 0.009001857 |
| ENSMMUG00000016457  | DM1 protein kinase [Source:NCBI gene;Acc:715328]                                            | 1.251659329 | 0.00197664  | 0.009220068 |
| ENSMMUG00000011767  | carnitine O-acetyltransferase [Source:VGNC Symbol;Acc:VGNC:71483]                           | 1.253067622 | 4.63E-05    | 0.000373016 |
| ENSMMUG00000042378  | pseudopodium enriched atypical kinase 1 [Source:VGNC Symbol;Acc:VGNC:84419]                 | 1.253249558 | 1.11E-10    | 2.73E-09    |
| ENSMMUG00000044265  | Metazoan signal recognition particle RNA [Source:RFAM;Acc:RF00017]                          | 1.253479323 | 0.000106778 | 0.000765698 |
| ENSMMUG000000056009 |                                                                                             | 1.255546226 | 3.09E-07    | 4.21E-06    |
| ENSMMUG00000001534  | calpain 3 [Source:VGNC Symbol;Acc:VGNC:70533]                                               | 1.256157151 | 3.12E-08    | 5.14E-07    |
| ENSMMUG00000008875  | solute carrier family 35 member F5 [Source:VGNC Symbol;Acc:VGNC:77567]                      | 1.257897102 | 5.97E-07    | 7.63E-06    |
| ENSMMUG00000023018  | RP2 activator of ARL3 GTPase [Source:VGNC Symbol;Acc:VGNC:76720]                            | 1.257923062 | 0.000580672 | 0.003293513 |
| ENSMMUG000000052476 | zinc finger and BTB domain containing 43 [Source:NCBI gene;Acc:701797]                      | 1.257988808 | 5.72E-10    | 1.28E-08    |

|                    |                                                                                             |             |             |             |
|--------------------|---------------------------------------------------------------------------------------------|-------------|-------------|-------------|
| ENSMMUG00000022933 | DNA topoisomerase I mitochondrial [Source:VGNC Symbol;Acc:VGNC:79821]                       | 1.258344991 | 1.01E-13    | 4.17E-12    |
| ENSMMUG00000020916 | coiled-coil domain containing 158 [Source:NCBI gene;Acc:699735]                             | 1.260065692 | 2.76E-11    | 7.41E-10    |
| ENSMMUG00000005478 | trimethylguanosine synthase 1 [Source:VGNC Symbol;Acc:VGNC:78404]                           | 1.261052555 | 0.001049674 | 0.005425375 |
| ENSMMUG00000010949 | SPG21 abhydrolase domain containing, maspardin [Source:VGNC Symbol;Acc:VGNC:77970]          | 1.261588136 | 7.09E-07    | 8.94E-06    |
| ENSMMUG00000015476 | unc-13 homolog A [Source:NCBI gene;Acc:720000]                                              | 1.264241187 | 2.65E-09    | 5.24E-08    |
| ENSMMUG00000015288 | adaptor related protein complex 3 subunit sigma 1 [Source:VGNC Symbol;Acc:VGNC:69867]       | 1.264556825 | 0.000777261 | 0.004229366 |
| ENSMMUG00000055601 |                                                                                             | 1.265885838 | 3.21E-12    | 1.02E-10    |
| ENSMMUG00000054055 | zinc finger protein 93 [Source:NCBI gene;Acc:720434]                                        | 1.268650677 | 5.62E-08    | 8.85E-07    |
| ENSMMUG00000053489 |                                                                                             | 1.269506599 | 0.001075101 | 0.005531214 |
| ENSMMUG00000008080 | ATP binding cassette subfamily G member 5 [Source:VGNC Symbol;Acc:VGNC:69391]               | 1.270419949 | 2.81E-08    | 4.67E-07    |
| ENSMMUG00000000706 | filamin B [Source:VGNC Symbol;Acc:VGNC:72672]                                               | 1.272788343 | 3.67E-06    | 3.91E-05    |
| ENSMMUG00000064920 |                                                                                             | 1.273913212 | 2.46E-08    | 4.14E-07    |
| ENSMMUG00000000023 | prostaglandin E receptor 2 [Source:VGNC Symbol;Acc:VGNC:76468]                              | 1.275470308 | 8.73E-05    | 0.000646483 |
| ENSMMUG00000063495 |                                                                                             | 1.275899857 | 1.78E-10    | 4.29E-09    |
| ENSMMUG00000013671 | elongation factor for RNA polymerase II [Source:VGNC Symbol;Acc:VGNC:72088]                 | 1.276509341 | 3.16E-08    | 5.19E-07    |
| ENSMMUG00000020009 | receptor tyrosine kinase like orphan receptor 2 [Source:VGNC Symbol;Acc:VGNC:76716]         | 1.27735686  | 0.000257903 | 0.001624748 |
| ENSMMUG00000007387 | G protein-coupled receptor kinase 7 [Source:VGNC Symbol;Acc:VGNC:73182]                     | 1.277633067 | 1.07E-07    | 1.60E-06    |
| ENSMMUG00000008007 | multiple EGF like domains 11 [Source:VGNC Symbol;Acc:VGNC:84376]                            | 1.278009737 | 1.16E-07    | 1.71E-06    |
| ENSMMUG00000061021 |                                                                                             | 1.278096687 | 0.004449666 | 0.018252735 |
| ENSMMUG00000050119 |                                                                                             | 1.278962879 | 4.88E-08    | 7.76E-07    |
| ENSMMUG00000018029 | amyloid beta precursor like protein 2 [Source:VGNC Symbol;Acc:VGNC:69984]                   | 1.278964979 | 2.38E-08    | 4.03E-07    |
| ENSMMUG00000011061 | ankyrin repeat domain 31 [Source:VGNC Symbol;Acc:VGNC:84277]                                | 1.279087915 | 1.19E-11    | 3.38E-10    |
| ENSMMUG00000008031 | zinc finger and BTB domain containing 17 [Source:VGNC Symbol;Acc:VGNC:78849]                | 1.279094062 | 9.33E-05    | 0.000683995 |
| ENSMMUG00000006819 | helicase for meiosis 1 [Source:NCBI gene;Acc:704516]                                        | 1.280095163 | 1.80E-05    | 0.000162491 |
| ENSMMUG00000055976 | CD99 antigen [Source:NCBI gene;Acc:106995376]                                               | 1.28037847  | 6.56E-05    | 0.000505458 |
| ENSMMUG00000019988 | homeodomain interacting protein kinase 3 [Source:VGNC Symbol;Acc:VGNC:73472]                | 1.281065587 | 9.92E-05    | 0.000717702 |
| ENSMMUG00000054377 |                                                                                             | 1.28115275  | 3.85E-11    | 1.02E-09    |
| ENSMMUG00000060712 |                                                                                             | 1.281328983 | 2.60E-08    | 4.33E-07    |
| ENSMMUG00000056729 | U6 spliceosomal RNA [Source:RFAM;Acc:RF00026]                                               | 1.283083648 | 2.44E-05    | 0.000212669 |
| ENSMMUG00000021972 | diacylglycerol kinase gamma [Source:VGNC Symbol;Acc:VGNC:71785]                             | 1.283990772 | 7.16E-07    | 9.02E-06    |
| ENSMMUG00000023761 | ectonucleoside triphosphate diphosphohydrolase 7 [Source:VGNC Symbol;Acc:VGNC:72071]        | 1.284434012 | 1.25E-07    | 1.84E-06    |
| ENSMMUG00000006530 | ATP/GTP binding protein like 3 [Source:VGNC Symbol;Acc:VGNC:69723]                          | 1.2847455   | 8.48E-10    | 1.84E-08    |
| ENSMMUG00000014425 | protein kinase C epsilon [Source:VGNC Symbol;Acc:VGNC:76412]                                | 1.285507581 | 0.000170944 | 0.001148757 |
| ENSMMUG00000015908 | RB binding protein 6, ubiquitin ligase [Source:VGNC Symbol;Acc:VGNC:76677]                  | 1.28574135  | 2.91E-06    | 3.18E-05    |
| ENSMMUG00000004014 | interferon regulatory factor 7 [Source:VGNC Symbol;Acc:VGNC:73765]                          | 1.285866259 | 0.000124723 | 0.000874286 |
| ENSMMUG00000038076 | Metazoan signal recognition particle RNA [Source:RFAM;Acc:RF00017]                          | 1.286740526 | 0.005386474 | 0.021418684 |
| ENSMMUG00000060502 |                                                                                             | 1.287921257 | 0.000112991 | 0.00080293  |
| ENSMMUG00000010536 | discs large MAGUK scaffold protein 4 [Source:VGNC Symbol;Acc:VGNC:71920]                    | 1.289074118 | 4.39E-10    | 9.94E-09    |
| ENSMMUG00000008510 | THAP domain containing 9 [Source:VGNC Symbol;Acc:VGNC:79379]                                | 1.29004017  | 0.002141273 | 0.009848834 |
| ENSMMUG00000056186 |                                                                                             | 1.290747276 | 0.005258994 | 0.021020585 |
| ENSMMUG00000004512 | Fc fragment of IgE receptor Ig [Source:VGNC Symbol;Acc:VGNC:72629]                          | 1.291102734 | 0.007418263 | 0.027754839 |
| ENSMMUG00000004765 | Sp2 transcription factor [Source:VGNC Symbol;Acc:VGNC:77845]                                | 1.292581017 | 1.58E-05    | 0.000144811 |
| ENSMMUG00000062316 | Metazoan signal recognition particle RNA [Source:RFAM;Acc:RF00017]                          | 1.293001183 | 3.39E-07    | 4.60E-06    |
| ENSMMUG00000018566 | Janus kinase 1 [Source:VGNC Symbol;Acc:VGNC:73810]                                          | 1.293872163 | 0.002360365 | 0.010701308 |
| ENSMMUG00000021736 | single-pass membrane protein with coiled-coil domains 2 [Source:VGNC Symbol;Acc:VGNC:77808] | 1.296441815 | 1.74E-07    | 2.49E-06    |
| ENSMMUG00000050132 |                                                                                             | 1.297918793 | 0.000129379 | 0.00089943  |
| ENSMMUG00000062397 |                                                                                             | 1.298822666 | 2.34E-07    | 3.26E-06    |
| ENSMMUG00000001532 | glucosidase alpha, neutral C [Source:NCBI gene;Acc:708126]                                  | 1.306792868 | 3.23E-17    | 2.28E-15    |
| ENSMMUG00000037243 | U6 spliceosomal RNA [Source:RFAM;Acc:RF00026]                                               | 1.307596901 | 0.005666688 | 0.022337802 |
| ENSMMUG00000060812 | autophagy related 12 [Source:NCBI gene;Acc:696765]                                          | 1.308429507 | 1.66E-06    | 1.93E-05    |
| ENSMMUG00000004471 | family with sequence similarity 114 member A1 [Source:VGNC Symbol;Acc:VGNC:72342]           | 1.310499732 | 0.011424152 | 0.039243782 |

|                     |                                                                                                 |             |             |             |
|---------------------|-------------------------------------------------------------------------------------------------|-------------|-------------|-------------|
| ENSMMUG00000039520  | chromosome 11 C12orf43 homolog [Source:NCBI gene;Acc:698821]                                    | 1.311001506 | 3.62E-06    | 3.87E-05    |
| ENSMMUG00000002953  | MAGE family member F1 [Source:VGNC Symbol;Acc:VGNC:74399]                                       | 1.311846839 | 0.001796229 | 0.008497866 |
| ENSMMUG00000019089  | centromere protein E [Source:VGNC Symbol;Acc:VGNC:71008]                                        | 1.312103184 | 1.86E-08    | 3.20E-07    |
| ENSMMUG00000002428  | zinc finger protein 800 [Source:VGNC Symbol;Acc:VGNC:79658]                                     | 1.313414199 | 5.20E-10    | 1.17E-08    |
| ENSMMUG000000038998 | purinergic receptor P2Y13 [Source:VGNC Symbol;Acc:VGNC:83950]                                   | 1.317014821 | 0.00020088  | 0.001319625 |
| ENSMMUG000000037977 | protein phosphatase 1 regulatory inhibitor subunit 14B [Source:NCBI gene;Acc:722103]            | 1.318028171 | 0.007713208 | 0.028676055 |
| ENSMMUG00000006470  | complement C1r subcomponent [Source:NCBI gene;Acc:722133]                                       | 1.318623598 | 5.67E-11    | 1.46E-09    |
| ENSMMUG000000052607 |                                                                                                 | 1.31891391  | 5.82E-14    | 2.54E-12    |
| ENSMMUG00000008126  | lysine demethylase 7A [Source:VGNC Symbol;Acc:VGNC:73886]                                       | 1.320072235 | 1.82E-09    | 3.71E-08    |
| ENSMMUG000000056950 |                                                                                                 | 1.320207666 | 5.09E-13    | 1.89E-11    |
| ENSMMUG000000021449 | vacuolar protein sorting 13 homolog D [Source:NCBI gene;Acc:722775]                             | 1.322327862 | 5.19E-14    | 2.30E-12    |
| ENSMMUG000000049123 | gastrokine 1 [Source:NCBI gene;Acc:706565]                                                      | 1.323496054 | 0.006922496 | 0.026228236 |
| ENSMMUG000000022590 | metallophosphoesterase domain containing 1 [Source:NCBI gene;Acc:715021]                        | 1.325151141 | 0.001656906 | 0.007937558 |
| ENSMMUG000000035748 | U6 spliceosomal RNA [Source:RFAM;Acc:RF00026]                                                   | 1.326484211 | 0.007535204 | 0.028107798 |
| ENSMMUG000000010203 | protein tyrosine phosphatase non-receptor type 6 [Source:VGNC Symbol;Acc:VGNC:76607]            | 1.327425931 | 6.18E-05    | 0.000480121 |
| ENSMMUG00000007540  | Rho related BTB domain containing 2 [Source:VGNC Symbol;Acc:VGNC:76772]                         | 1.327520272 | 4.20E-05    | 0.000341764 |
| ENSMMUG000000019085 | 3-hydroxybutyrate dehydrogenase 2 [Source:VGNC Symbol;Acc:VGNC:70161]                           | 1.328875462 | 3.25E-08    | 5.32E-07    |
| ENSMMUG000000015922 | formin binding protein 1 like [Source:VGNC Symbol;Acc:VGNC:72543]                               | 1.329386991 | 9.63E-10    | 2.07E-08    |
| ENSMMUG000000012787 | acid phosphatase 7, tartrate resistant (putative) [Source:NCBI gene;Acc:695532]                 | 1.329959184 | 0.012877309 | 0.043374897 |
| ENSMMUG00000008184  | methyltransferase like 24 [Source:VGNC Symbol;Acc:VGNC:74552]                                   | 1.330309788 | 0.000293278 | 0.00182594  |
| ENSMMUG00000001616  | peptidyl arginine deiminase 2 [Source:VGNC Symbol;Acc:VGNC:75644]                               | 1.330653457 | 0.001328839 | 0.006607105 |
| ENSMMUG000000015873 | RAD51 paralog B [Source:VGNC Symbol;Acc:VGNC:76647]                                             | 1.330902849 | 0.010945752 | 0.03799329  |
| ENSMMUG000000050696 | taste receptor type 2 member 31-like [Source:NCBI gene;Acc:693892]                              | 1.331163799 | 1.06E-05    | 0.000101341 |
| ENSMMUG000000001715 | zinc finger protein 627 [Source:VGNC Symbol;Acc:VGNC:79856]                                     | 1.331653287 | 3.21E-09    | 6.24E-08    |
| ENSMMUG000000063322 |                                                                                                 | 1.331715861 | 9.77E-07    | 1.19E-05    |
| ENSMMUG000000019837 | ribonuclease H2 subunit C [Source:NCBI gene;Acc:700330]                                         | 1.333824518 | 2.46E-06    | 2.73E-05    |
| ENSMMUG000000007379 | phosphatidylinositol 3,4,5-trisphosphate 3-phosphatase TPTE2-like [Source:NCBI gene;Acc:694255] | 1.334311392 | 8.63E-11    | 2.17E-09    |
| ENSMMUG000000020254 | exocyst complex component 3 like 1 [Source:VGNC Symbol;Acc:VGNC:72376]                          | 1.334771073 | 2.06E-06    | 2.35E-05    |
| ENSMMUG000000049494 |                                                                                                 | 1.336392589 | 0.009044202 | 0.032637193 |
| ENSMMUG000000002324 |                                                                                                 | 1.337145626 | 4.90E-07    | 6.38E-06    |
| ENSMMUG000000022031 | DNA polymerase alpha 2, accessory subunit [Source:NCBI gene;Acc:716541]                         | 1.337689702 | 1.33E-08    | 2.34E-07    |
| ENSMMUG000000006101 | myosin heavy chain 9 [Source:VGNC Symbol;Acc:VGNC:75102]                                        | 1.338382806 | 6.29E-07    | 8.01E-06    |
| ENSMMUG000000052474 |                                                                                                 | 1.338937905 | 0.000567291 | 0.003231033 |
| ENSMMUG000000018245 | EPH receptor A2 [Source:VGNC Symbol;Acc:VGNC:72235]                                             | 1.339248762 | 7.01E-06    | 6.99E-05    |
| ENSMMUG000000042407 |                                                                                                 | 1.339307178 | 0.009896209 | 0.035093569 |
| ENSMMUG000000006029 | odontogenic, ameloblast associated [Source:NCBI gene;Acc:707906]                                | 1.340604221 | 0.000883746 | 0.004716512 |
| ENSMMUG000000048076 | TNF receptor superfamily member 10b [Source:NCBI gene;Acc:716650]                               | 1.340791715 | 3.46E-07    | 4.69E-06    |
| ENSMMUG000000046969 | Fc receptor like 3 [Source:NCBI gene;Acc:718801]                                                | 1.342810766 | 9.78E-06    | 9.42E-05    |
| ENSMMUG000000003355 | lipid droplet associated hydrolase [Source:VGNC Symbol;Acc:VGNC:74130]                          | 1.342867277 | 3.08E-08    | 5.07E-07    |
| ENSMMUG000000060675 |                                                                                                 | 1.343058175 | 9.85E-06    | 9.48E-05    |
| ENSMMUG000000012942 | DnaJ heat shock protein family (Hsp40) member C4 [Source:NCBI gene;Acc:717847]                  | 1.345375711 | 0.005587852 | 0.022083031 |
| ENSMMUG000000063462 |                                                                                                 | 1.34882339  | 0.00395556  | 0.016621466 |
| ENSMMUG000000001880 | DExD/H-box helicase 60 [Source:VGNC Symbol;Acc:VGNC:71711]                                      | 1.349038403 | 9.66E-10    | 2.07E-08    |
| ENSMMUG000000015477 | lemur tyrosine kinase 2 [Source:VGNC Symbol;Acc:VGNC:74309]                                     | 1.349117154 | 1.45E-07    | 2.11E-06    |
| ENSMMUG000000055893 |                                                                                                 | 1.349795549 | 8.33E-05    | 0.000621479 |
| ENSMMUG000000006766 | RUN domain containing 3B [Source:VGNC Symbol;Acc:VGNC:77129]                                    | 1.350296255 | 1.64E-05    | 0.000149058 |
| ENSMMUG000000014291 | SPG11 vesicle trafficking associated, spatacsin [Source:VGNC Symbol;Acc:VGNC:77856]             | 1.350307057 | 7.41E-07    | 9.28E-06    |
| ENSMMUG000000010201 | atrophin 1 [Source:VGNC Symbol;Acc:VGNC:70157]                                                  | 1.350407025 | 7.53E-05    | 0.00057079  |
| ENSMMUG000000014149 | LYN proto-oncogene, Src family tyrosine kinase [Source:VGNC Symbol;Acc:VGNC:74464]              | 1.350560447 | 5.22E-12    | 1.58E-10    |
| ENSMMUG000000003356 | tenascin C [Source:VGNC Symbol;Acc:VGNC:79960]                                                  | 1.351623363 | 1.61E-09    | 3.33E-08    |
| ENSMMUG000000007799 | LIM and SH3 protein 1 [Source:VGNC Symbol;Acc:VGNC:74237]                                       | 1.353029361 | 0.004793986 | 0.019420857 |



|                    |                                                                                                                    |             |             |             |
|--------------------|--------------------------------------------------------------------------------------------------------------------|-------------|-------------|-------------|
| ENSMMUG00000017261 | galactosylceramidase [Source:VGNC Symbol;Acc:VGNC:72867]                                                           | 1.353894736 | 1.63E-09    | 3.36E-08    |
| ENSMMUG00000008623 | coiled-coil domain containing 22 [Source:VGNC Symbol;Acc:VGNC:70899]                                               | 1.354581681 | 6.88E-11    | 1.76E-09    |
| ENSMMUG00000049998 | tachykinin receptor 3 [Source:NCBI gene;Acc:653013]                                                                | 1.354788793 | 0.005567982 | 0.022033506 |
| ENSMMUG00000049432 | olfactory receptor 2T33 [Source:NCBI gene;Acc:706331]                                                              | 1.355265983 | 1.68E-11    | 4.65E-10    |
| ENSMMUG00000013892 | coiled-coil domain containing 77 [Source:VGNC Symbol;Acc:VGNC:70889]                                               | 1.357966882 | 0.00695479  | 0.026326249 |
| ENSMMUG00000001547 | zinc finger protein 106 [Source:VGNC Symbol;Acc:VGNC:78831]                                                        | 1.35983556  | 1.07E-11    | 3.08E-10    |
| ENSMMUG00000006893 | D-amino acid oxidase [Source:VGNC Symbol;Acc:VGNC:71729]                                                           | 1.361549845 | 9.39E-07    | 1.15E-05    |
| ENSMMUG00000062628 |                                                                                                                    | 1.36249271  | 2.40E-05    | 0.000210227 |
| ENSMMUG00000013385 | elongator acetyltransferase complex subunit 6 [Source:VGNC Symbol;Acc:VGNC:72113]                                  | 1.362753578 | 2.42E-05    | 0.000211497 |
| ENSMMUG00000015861 | cytochrome c oxidase subunit VIIb [Source:NCBI gene;Acc:706099]                                                    | 1.363026087 | 2.21E-06    | 2.49E-05    |
| ENSMMUG00000000588 | rhomboid 5 homolog 1 [Source:NCBI gene;Acc:693423]                                                                 | 1.363692324 | 0.008476402 | 0.030981252 |
| ENSMMUG00000005939 | serpin family I member 1 [Source:VGNC Symbol;Acc:VGNC:77366]                                                       | 1.364021984 | 0.011787181 | 0.040265769 |
| ENSMMUG00000003283 | extracellular leucine rich repeat and fibronectin type III domain containing 1 [Source:VGNC Symbol;Acc:VGNC:72204] | 1.365390828 | 9.64E-09    | 1.74E-07    |
| ENSMMUG00000007401 | arrestin domain containing 2 [Source:VGNC Symbol;Acc:VGNC:69901]                                                   | 1.365536848 | 2.55E-05    | 0.000220521 |
| ENSMMUG00000001739 | ATPase sarcoplasmic/endoplasmic reticulum Ca2+ transporting 2 [Source:VGNC Symbol;Acc:VGNC:70178]                  | 1.366756357 | 1.60E-14    | 7.51E-13    |
| ENSMMUG00000056024 |                                                                                                                    | 1.368764384 | 6.69E-10    | 1.48E-08    |
| ENSMMUG00000001949 | coiled-coil domain containing 191 [Source:VGNC Symbol;Acc:VGNC:70901]                                              | 1.368987795 | 0.006019704 | 0.023391774 |
| ENSMMUG00000050419 | ADAM metallopeptidase with thrombospondin type 1 motif 4 [Source:NCBI gene;Acc:719927]                             | 1.371415363 | 2.84E-05    | 0.000243511 |
| ENSMMUG00000014131 | microtubule affinity regulating kinase 2 [Source:VGNC Symbol;Acc:VGNC:74634]                                       | 1.371605803 | 0.000723629 | 0.00398304  |
| ENSMMUG00000015329 | MX dynamin like GTPase 1 [Source:VGNC Symbol;Acc:VGNC:75086]                                                       | 1.37209148  | 0.006149546 | 0.023798511 |
| ENSMMUG00000023636 | importin 7 [Source:NCBI gene;Acc:704213]                                                                           | 1.372913874 | 0.000836723 | 0.004508619 |
| ENSMMUG00000048824 | eva-1 homolog C [Source:NCBI gene;Acc:708681]                                                                      | 1.374143737 | 2.13E-08    | 3.62E-07    |
| ENSMMUG00000019070 | focadhesin [Source:VGNC Symbol;Acc:VGNC:72556]                                                                     | 1.376002503 | 2.63E-07    | 3.64E-06    |
| ENSMMUG00000061684 |                                                                                                                    | 1.377156814 | 0.001781001 | 0.008429067 |
| ENSMMUG00000013766 | prostaglandin E synthase 3 [Source:NCBI gene;Acc:713353]                                                           | 1.378828799 | 2.76E-07    | 3.80E-06    |
| ENSMMUG00000016255 | telomerase associated protein 1 [Source:VGNC Symbol;Acc:VGNC:78310]                                                | 1.380450684 | 3.58E-05    | 0.00029769  |
| ENSMMUG00000057486 |                                                                                                                    | 1.381617106 | 5.97E-05    | 0.000467523 |
| ENSMMUG00000058187 |                                                                                                                    | 1.383054678 | 1.09E-10    | 2.70E-09    |
| ENSMMUG00000019966 | zinc finger protein 557 [Source:NCBI gene;Acc:100424983]                                                           | 1.384314644 | 2.20E-10    | 5.27E-09    |
| ENSMMUG00000004748 | zinc finger and BTB domain containing 1 [Source:VGNC Symbol;Acc:VGNC:79238]                                        | 1.384471066 | 1.30E-06    | 1.55E-05    |
| ENSMMUG00000058587 | family with sequence similarity 131 member C [Source:NCBI gene;Acc:703604]                                         | 1.386038967 | 6.97E-09    | 1.29E-07    |
| ENSMMUG00000042870 | Macaca mulatta taste receptor, type 2, member 46 (TAS2R46), mRNA. [Source:RefSeq mRNA;Acc:NM_001080757]            | 1.386244815 | 0.002035023 | 0.009452937 |
| ENSMMUG00000013646 | unk zinc finger [Source:VGNC Symbol;Acc:VGNC:79803]                                                                | 1.38636754  | 7.47E-06    | 7.36E-05    |
| ENSMMUG00000064612 | Metazoan signal recognition particle RNA [Source:RFAM;Acc:RF00017]                                                 | 1.390176703 | 0.000232058 | 0.001494093 |
| ENSMMUG00000051677 |                                                                                                                    | 1.392664793 | 3.06E-06    | 3.32E-05    |
| ENSMMUG00000005236 | zinc finger protein 709 [Source:NCBI gene;Acc:717515]                                                              | 1.392960593 | 0.00312113  | 0.013560201 |
| ENSMMUG00000029638 | chromosome 7 C15orf65 homolog [Source:VGNC Symbol;Acc:VGNC:70689]                                                  | 1.393484997 | 0.000314498 | 0.001942461 |
| ENSMMUG00000008652 | coiled-coil domain containing 85B [Source:VGNC Symbol;Acc:VGNC:70853]                                              | 1.395106446 | 3.48E-11    | 9.23E-10    |
| ENSMMUG00000003067 | endoplasmic reticulum-golgi intermediate compartment 1 [Source:VGNC Symbol;Acc:VGNC:82141]                         | 1.396084885 | 2.84E-09    | 5.55E-08    |
| ENSMMUG00000008379 | adducin 1 [Source:VGNC Symbol;Acc:VGNC:69528]                                                                      | 1.400398214 | 9.69E-06    | 9.35E-05    |
| ENSMMUG00000064650 | SPEM family member 3 [Source:NCBI gene;Acc:106993878]                                                              | 1.40135085  | 2.02E-17    | 1.47E-15    |
| ENSMMUG00000023300 | FERM domain containing 8 [Source:NCBI gene;Acc:716379]                                                             | 1.401956656 | 0.002732787 | 0.012067441 |
| ENSMMUG00000006284 | adenylate kinase 2 [Source:VGNC Symbol;Acc:VGNC:69761]                                                             | 1.404835765 | 4.13E-07    | 5.49E-06    |
| ENSMMUG00000002397 | GINS complex subunit 1 [Source:VGNC Symbol;Acc:VGNC:73025]                                                         | 1.405236071 | 0.000155821 | 0.001057532 |
| ENSMMUG00000060901 |                                                                                                                    | 1.4061116   | 5.60E-15    | 2.87E-13    |
| ENSMMUG00000002260 | protein kinase C eta [Source:VGNC Symbol;Acc:VGNC:84424]                                                           | 1.406178508 | 1.96E-14    | 9.07E-13    |
| ENSMMUG00000053937 |                                                                                                                    | 1.407165508 | 3.25E-06    | 3.51E-05    |
| ENSMMUG00000017242 | MYCBP associated protein [Source:VGNC Symbol;Acc:VGNC:74994]                                                       | 1.408052956 | 0.005487874 | 0.021772581 |
| ENSMMUG00000045203 |                                                                                                                    | 1.408915334 | 0.000987767 | 0.005177244 |
| ENSMMUG00000001483 | RNA pseudouridine synthase domain containing 2 [Source:VGNC Symbol;Acc:VGNC:77091]                                 | 1.412285863 | 0.00759454  | 0.028290885 |
| ENSMMUG00000029420 |                                                                                                                    | 1.413581077 | 0.008658219 | 0.031484665 |

|                    |                                                                                                  |             |             |             |
|--------------------|--------------------------------------------------------------------------------------------------|-------------|-------------|-------------|
| ENSMMUG00000018788 | transmembrane protein 14B [Source:NCBI gene;Acc:698237]                                          | 1.418134161 | 3.32E-06    | 3.58E-05    |
| ENSMMUG00000058352 |                                                                                                  | 1.419677667 | 0.003284769 | 0.014175946 |
| ENSMMUG00000061165 |                                                                                                  | 1.420256236 | 4.67E-08    | 7.46E-07    |
| ENSMMUG00000000381 | IKAROS family zinc finger 2 [Source:VGNC Symbol;Acc:VGNC:73586]                                  | 1.421149006 | 4.84E-13    | 1.81E-11    |
| ENSMMUG00000015611 | proteasome 26S subunit, ATPase 3 [Source:NCBI gene;Acc:713356]                                   | 1.421951202 | 0.002402442 | 0.010848058 |
| ENSMMUG00000001536 | glutamine and serine rich 1 [Source:VGNC Symbol;Acc:VGNC:76544]                                  | 1.422889063 | 1.55E-11    | 4.31E-10    |
| ENSMMUG00000052854 | mucin like 1 [Source:NCBI gene;Acc:100423942]                                                    | 1.424173398 | 6.34E-12    | 1.90E-10    |
| ENSMMUG00000059374 |                                                                                                  | 1.424693727 | 0.014285896 | 0.047224604 |
| ENSMMUG00000054398 |                                                                                                  | 1.427001999 | 0.000122774 | 0.000862789 |
| ENSMMUG00000006181 | WD repeat, sterile alpha motif and U-box domain containing 1 [Source:VGNC Symbol;Acc:VGNC:79634] | 1.428691853 | 1.35E-05    | 0.00012528  |
| ENSMMUG00000011528 | F-box and WD repeat domain containing 5 [Source:VGNC Symbol;Acc:VGNC:72503]                      | 1.428726185 | 8.76E-05    | 0.000647633 |
| ENSMMUG00000011155 | FA complementation group I [Source:VGNC Symbol;Acc:VGNC:72575]                                   | 1.429120898 | 1.99E-09    | 4.04E-08    |
| ENSMMUG00000020489 | HscB mitochondrial iron-sulfur cluster cochaperone [Source:VGNC Symbol;Acc:VGNC:73454]           | 1.430736484 | 6.85E-07    | 8.67E-06    |
| ENSMMUG00000008651 | FGF1 intracellular binding protein [Source:VGNC Symbol;Acc:VGNC:72663]                           | 1.432801538 | 2.72E-08    | 4.52E-07    |
| ENSMMUG00000059897 | myosin light chain 9 [Source:NCBI gene;Acc:709784]                                               | 1.432897355 | 0.004865729 | 0.019659658 |
| ENSMMUG00000059491 |                                                                                                  | 1.433617007 | 2.08E-07    | 2.95E-06    |
| ENSMMUG00000052184 | inka box actin regulator 2 [Source:NCBI gene;Acc:704844]                                         | 1.434852857 | 0.000561946 | 0.00320791  |
| ENSMMUG00000003457 | protein kinase cAMP-activated catalytic subunit beta [Source:NCBI gene;Acc:709728]               | 1.435653472 | 8.77E-12    | 2.56E-10    |
| ENSMMUG00000000931 | solute carrier family 35 member A3 [Source:VGNC Symbol;Acc:VGNC:77461]                           | 1.437350955 | 0.000495819 | 0.002881375 |
| ENSMMUG00000055256 | family with sequence similarity 163 member A [Source:NCBI gene;Acc:718704]                       | 1.437467299 | 3.74E-07    | 5.02E-06    |
| ENSMMUG00000003217 | transmembrane 7 superfamily member 3 [Source:VGNC Symbol;Acc:VGNC:79371]                         | 1.438244804 | 3.90E-08    | 6.31E-07    |
| ENSMMUG00000005729 | GIPC PDZ domain containing family member 1 [Source:VGNC Symbol;Acc:VGNC:72932]                   | 1.44058632  | 6.27E-08    | 9.70E-07    |
| ENSMMUG00000001848 | sprouty RTK signaling antagonist 1 [Source:VGNC Symbol;Acc:VGNC:77867]                           | 1.444715521 | 1.00E-08    | 1.80E-07    |
| ENSMMUG00000061335 |                                                                                                  | 1.446097807 | 2.70E-05    | 0.000231839 |
| ENSMMUG00000014864 | VPS11 core subunit of CORVET and HOPS complexes [Source:VGNC Symbol;Acc:VGNC:78965]              | 1.446509903 | 3.54E-06    | 3.80E-05    |
| ENSMMUG00000017129 | solute carrier family 41 member 2 [Source:VGNC Symbol;Acc:VGNC:77585]                            | 1.446658129 | 2.76E-08    | 4.58E-07    |
| ENSMMUG00000022931 | NTPase KAP family P-loop domain containing 1 [Source:VGNC Symbol;Acc:VGNC:75250]                 | 1.446910748 | 4.16E-07    | 5.51E-06    |
| ENSMMUG00000021408 | family with sequence similarity 222 member B [Source:VGNC Symbol;Acc:VGNC:72352]                 | 1.448936854 | 7.35E-06    | 7.27E-05    |
| ENSMMUG00000006568 | basic leucine zipper ATF-like transcription factor 2 [Source:VGNC Symbol;Acc:VGNC:70127]         | 1.449049149 | 3.63E-06    | 3.88E-05    |
| ENSMMUG00000040274 | MAGE family member A4 [Source:NCBI gene;Acc:710825]                                              | 1.44921047  | 4.59E-12    | 1.40E-10    |
| ENSMMUG00000049935 |                                                                                                  | 1.450141449 | 3.16E-05    | 0.000267583 |
| ENSMMUG00000059671 |                                                                                                  | 1.450527702 | 1.43E-09    | 2.99E-08    |
| ENSMMUG00000022801 | zinc finger and BTB domain containing 37 [Source:VGNC Symbol;Acc:VGNC:79702]                     | 1.450630081 | 0.011903877 | 0.040607979 |
| ENSMMUG00000059608 | fibroblast growth factor binding protein 3 [Source:NCBI gene;Acc:697881]                         | 1.450686053 | 3.91E-06    | 4.14E-05    |
| ENSMMUG00000005532 | male germ cell associated kinase [Source:VGNC Symbol;Acc:VGNC:74480]                             | 1.450714962 | 1.19E-06    | 1.43E-05    |
| ENSMMUG00000003133 | interleukin 4 [Source:VGNC Symbol;Acc:VGNC:73729]                                                | 1.453689999 | 0.006125875 | 0.02371437  |
| ENSMMUG00000003548 | tectorin beta [Source:VGNC Symbol;Acc:VGNC:78306]                                                | 1.45820416  | 0.007595795 | 0.028290885 |
| ENSMMUG00000065208 |                                                                                                  | 1.45841096  | 0.000242469 | 0.001546544 |
| ENSMMUG00000002952 | laminin subunit beta 2 [Source:VGNC Symbol;Acc:VGNC:74229]                                       | 1.459953897 | 0.007985296 | 0.0295091   |
| ENSMMUG00000018478 | interferon regulatory factor 5 [Source:VGNC Symbol;Acc:VGNC:73763]                               | 1.460431458 | 7.05E-05    | 0.000540167 |
| ENSMMUG00000000039 | mitochondrial ribosomal protein L24 [Source:VGNC Symbol;Acc:VGNC:74739]                          | 1.460459817 | 0.00837222  | 0.030667216 |
| ENSMMUG00000015513 | CUGBP Elav-like family member 5 [Source:NCBI gene;Acc:721694]                                    | 1.460665123 | 0.012843667 | 0.043273439 |
| ENSMMUG00000049297 |                                                                                                  | 1.460705912 | 4.36E-10    | 9.90E-09    |
| ENSMMUG00000065212 |                                                                                                  | 1.460961876 | 2.71E-05    | 0.000232585 |
| ENSMMUG00000061785 |                                                                                                  | 1.461797152 | 3.94E-12    | 1.23E-10    |
| ENSMMUG00000052073 |                                                                                                  | 1.463256886 | 1.67E-06    | 1.93E-05    |
| ENSMMUG00000052348 |                                                                                                  | 1.46852923  | 7.05E-07    | 8.90E-06    |
| ENSMMUG00000004820 | pre-mRNA processing factor 8 [Source:VGNC Symbol;Acc:VGNC:76275]                                 | 1.468882623 | 1.01E-07    | 1.52E-06    |
| ENSMMUG00000014986 | testis expressed 33 [Source:VGNC Symbol;Acc:VGNC:79727]                                          | 1.469064937 | 2.08E-06    | 2.36E-05    |
| ENSMMUG00000018967 | ubiquitin conjugating enzyme E2 O [Source:VGNC Symbol;Acc:VGNC:79813]                            | 1.470330702 | 2.77E-09    | 5.43E-08    |
| ENSMMUG00000001060 | ryanodine receptor 2 [Source:VGNC Symbol;Acc:VGNC:76954]                                         | 1.470385853 | 3.58E-15    | 1.91E-13    |

|                    |                                                                                                 |             |             |             |
|--------------------|-------------------------------------------------------------------------------------------------|-------------|-------------|-------------|
| ENSMMUG00000058241 | leucine rich repeat and Ig domain containing 3 [Source:NCBI gene;Acc:721484]                    | 1.470791863 | 6.40E-05    | 0.000494352 |
| ENSMMUG00000052851 | solute carrier family 7 member 5 [Source:NCBI gene;Acc:695886]                                  | 1.470841411 | 6.54E-05    | 0.000504945 |
| ENSMMUG00000021642 | fibromodulin [Source:VGNC Symbol;Acc:VGNC:72686]                                                | 1.471094654 | 0.002714905 | 0.012024828 |
| ENSMMUG00000002926 | mediator complex subunit 24 [Source:NCBI gene;Acc:699536]                                       | 1.471768892 | 1.65E-12    | 5.66E-11    |
| ENSMMUG00000000198 | collagen beta(1-O)galactosyltransferase 1 [Source:NCBI gene;Acc:719980]                         | 1.473286008 | 2.84E-11    | 7.61E-10    |
| ENSMMUG00000018485 | methyltransferase like 7A [Source:VGNC Symbol;Acc:VGNC:74567]                                   | 1.47402662  | 0.001227324 | 0.00617986  |
| ENSMMUG00000051226 | FAD-linked sulfhydryl oxidase ERV1 [Source:NCBI gene;Acc:106994988]                             | 1.474329096 | 5.70E-19    | 4.93E-17    |
| ENSMMUG00000050511 |                                                                                                 | 1.475206548 | 0.005391506 | 0.02143176  |
| ENSMMUG00000005255 | TRAF-type zinc finger domain containing 1 [Source:VGNC Symbol;Acc:VGNC:79459]                   | 1.476626798 | 3.40E-07    | 4.62E-06    |
| ENSMMUG00000011774 | integrator complex subunit 10 [Source:VGNC Symbol;Acc:VGNC:73653]                               | 1.478397741 | 1.92E-13    | 7.64E-12    |
| ENSMMUG00000054473 | activating transcription factor 5 [Source:NCBI gene;Acc:719150]                                 | 1.478415305 | 8.32E-07    | 1.03E-05    |
| ENSMMUG00000058885 | formin binding protein 4 [Source:NCBI gene;Acc:712633]                                          | 1.4790799   | 1.18E-06    | 1.42E-05    |
| ENSMMUG00000019833 | Fc receptor like 1 [Source:VGNC Symbol;Acc:VGNC:72528]                                          | 1.480665881 | 5.58E-12    | 1.68E-10    |
| ENSMMUG00000004816 | membrane associated ring-CH-type finger 5 [Source:VGNC Symbol;Acc:VGNC:74588]                   | 1.480687973 | 7.16E-06    | 7.11E-05    |
| ENSMMUG00000051201 | zinc finger SWIM-type containing 3 [Source:NCBI gene;Acc:708804]                                | 1.481958604 | 6.07E-06    | 6.11E-05    |
| ENSMMUG00000063121 |                                                                                                 | 1.48455479  | 6.40E-14    | 2.77E-12    |
| ENSMMUG00000062583 | olfactory receptor 1A1 [Source:NCBI gene;Acc:721403]                                            | 1.484902936 | 2.49E-06    | 2.77E-05    |
| ENSMMUG00000050585 |                                                                                                 | 1.486722376 | 0.000225145 | 0.001456453 |
| ENSMMUG00000008384 | solute carrier family 4 member 10 [Source:VGNC Symbol;Acc:VGNC:77695]                           | 1.487414697 | 3.96E-07    | 5.27E-06    |
| ENSMMUG00000052832 |                                                                                                 | 1.487982057 | 0.002441422 | 0.010992179 |
| ENSMMUG00000032858 | mml-mir-583 [Source:miRBase;Acc:MI0007850]                                                      | 1.48814561  | 0.008642667 | 0.03144672  |
| ENSMMUG00000030964 | RAB6A, member RAS oncogene family [Source:NCBI gene;Acc:718717]                                 | 1.488561141 | 1.83E-09    | 3.72E-08    |
| ENSMMUG00000054803 |                                                                                                 | 1.488610163 | 0.000196178 | 0.001297056 |
| ENSMMUG00000015931 | phosphatidylinositol transfer protein membrane associated 2 [Source:VGNC Symbol;Acc:VGNC:75843] | 1.489181041 | 4.45E-06    | 4.65E-05    |
| ENSMMUG00000044581 | modulator of apoptosis 1 [Source:VGNC Symbol;Acc:VGNC:84392]                                    | 1.489980749 | 8.71E-05    | 0.000644995 |
| ENSMMUG00000016448 | DLG associated protein 4 [Source:NCBI gene;Acc:702928]                                          | 1.490268645 | 1.55E-06    | 1.81E-05    |
| ENSMMUG00000027544 | U6 spliceosomal RNA [Source:RFAM;Acc:RF00026]                                                   | 1.49029924  | 0.004143118 | 0.017250697 |
| ENSMMUG00000059292 |                                                                                                 | 1.49100459  | 4.97E-11    | 1.29E-09    |
| ENSMMUG00000062283 | homeobox B6 [Source:NCBI gene;Acc:106994013]                                                    | 1.494094958 | 5.54E-12    | 1.68E-10    |
| ENSMMUG00000013696 | myozenin 1 [Source:VGNC Symbol;Acc:VGNC:74951]                                                  | 1.495173383 | 1.92E-05    | 0.000172064 |
| ENSMMUG00000014530 | pre-mRNA processing factor 19 [Source:VGNC Symbol;Acc:VGNC:76281]                               | 1.496160495 | 1.41E-08    | 2.46E-07    |
| ENSMMUG00000049543 |                                                                                                 | 1.496272365 | 0.002439249 | 0.010990035 |
| ENSMMUG00000018986 | seizure related 6 homolog like 2 [Source:VGNC Symbol;Acc:VGNC:81567]                            | 1.496646447 | 0.000117273 | 0.000829481 |
| ENSMMUG00000018471 | serine/threonine kinase 33 [Source:VGNC Symbol;Acc:VGNC:78118]                                  | 1.49664932  | 0.008304731 | 0.030451505 |
| ENSMMUG00000007140 | MOK protein kinase [Source:VGNC Symbol;Acc:VGNC:84394]                                          | 1.500742768 | 0.010992407 | 0.038090687 |
| ENSMMUG00000054184 | Metazoan signal recognition particle RNA [Source:RFAM;Acc:RF00017]                              | 1.500841226 | 7.10E-10    | 1.57E-08    |
| ENSMMUG00000013901 | mitogen-activated protein kinase kinase kinase 3 [Source:VGNC Symbol;Acc:VGNC:81466]            | 1.50151213  | 2.28E-05    | 0.00020041  |
| ENSMMUG00000010922 | hyaluronan synthase 3 [Source:VGNC Symbol;Acc:VGNC:73348]                                       | 1.502551885 | 0.009424529 | 0.033726706 |
| ENSMMUG00000008518 | phospholipid phosphatase related 5 [Source:NCBI gene;Acc:710549]                                | 1.503983568 | 2.19E-09    | 4.41E-08    |
| ENSMMUG00000049913 |                                                                                                 | 1.505328086 | 0.009822076 | 0.034901166 |
| ENSMMUG00000049802 | olfactory receptor 51G1 [Source:NCBI gene;Acc:716561]                                           | 1.508134501 | 4.78E-05    | 0.000383794 |
| ENSMMUG00000054784 |                                                                                                 | 1.50873019  | 4.12E-05    | 0.000336828 |
| ENSMMUG00000001088 | patched domain containing 1 [Source:VGNC Symbol;Acc:VGNC:76322]                                 | 1.509682874 | 2.28E-07    | 3.20E-06    |
| ENSMMUG00000005989 | GLE1 RNA export mediator [Source:VGNC Symbol;Acc:VGNC:73067]                                    | 1.511454225 | 4.95E-09    | 9.33E-08    |
| ENSMMUG00000055775 | transmembrane p24 trafficking protein 1 [Source:NCBI gene;Acc:713618]                           | 1.512956015 | 1.63E-08    | 2.83E-07    |
| ENSMMUG00000029507 | adaptor related protein complex 3 subunit sigma 2 [Source:NCBI gene;Acc:701217]                 | 1.514390226 | 1.38E-19    | 1.36E-17    |
| ENSMMUG00000016376 | mitogen-activated protein kinase kinase kinase 5 [Source:VGNC Symbol;Acc:VGNC:74495]            | 1.514806114 | 0.000112381 | 0.000799345 |
| ENSMMUG00000057038 |                                                                                                 | 1.514996715 | 0.009274392 | 0.033282204 |
| ENSMMUG00000053990 |                                                                                                 | 1.515259745 | 0.004450691 | 0.018252735 |
| ENSMMUG00000060760 |                                                                                                 | 1.516165354 | 2.47E-05    | 0.000214756 |
| ENSMMUG00000064226 |                                                                                                 | 1.516926187 | 0.004844248 | 0.019579302 |



|                    |                                                                                            |             |             |             |
|--------------------|--------------------------------------------------------------------------------------------|-------------|-------------|-------------|
| ENSMMUG00000015928 | ankyrin repeat domain 13D [Source:VGNC Symbol;Acc:VGNC:69722]                              | 1.517566203 | 0.007135693 | 0.026837454 |
| ENSMMUG00000014508 | potassium channel tetramerization domain containing 20 [Source:VGNC Symbol;Acc:VGNC:73872] | 1.517995879 | 1.46E-06    | 1.72E-05    |
| ENSMMUG00000003106 | SEC16 homolog A, endoplasmic reticulum export factor [Source:VGNC Symbol;Acc:VGNC:77326]   | 1.51866591  | 6.36E-07    | 8.09E-06    |
| ENSMMUG00000007422 | spermatogenesis associated 5 [Source:VGNC Symbol;Acc:VGNC:77952]                           | 1.51962015  | 1.40E-09    | 2.93E-08    |
| ENSMMUG00000003950 | nucleoporin 98 and 96 precursor [Source:VGNC Symbol;Acc:VGNC:75563]                        | 1.519926662 | 2.12E-12    | 7.15E-11    |
| ENSMMUG00000022407 | serine and arginine rich splicing factor 5 [Source:NCBI gene;Acc:712867]                   | 1.520005043 | 0.000130564 | 0.000906136 |
| ENSMMUG00000057703 |                                                                                            | 1.520615871 | 3.15E-05    | 0.00026702  |
| ENSMMUG00000045256 | cellular communication network factor 5 [Source:NCBI gene;Acc:717872]                      | 1.522654554 | 0.009075821 | 0.032718972 |
| ENSMMUG00000055747 | cytochrome c oxidase subunit 6B [Source:NCBI gene;Acc:692062]                              | 1.523112864 | 6.15E-08    | 9.54E-07    |
| ENSMMUG00000059932 | Metazoan signal recognition particle RNA [Source:RFAM;Acc:RF00017]                         | 1.524631615 | 0.006622702 | 0.025366042 |
| ENSMMUG00000016401 | SGT1 homolog, MIS12 kinetochore complex assembly cochaperone [Source:NCBI gene;Acc:694046] | 1.527002574 | 1.83E-15    | 9.94E-14    |
| ENSMMUG00000062208 | Metazoan signal recognition particle RNA [Source:RFAM;Acc:RF00017]                         | 1.527104996 | 0.000957912 | 0.005053089 |
| ENSMMUG00000008385 | NOP14 nucleolar protein [Source:VGNC Symbol;Acc:VGNC:75194]                                | 1.529509561 | 1.14E-10    | 2.81E-09    |
| ENSMMUG00000014411 | coronin 6 [Source:NCBI gene;Acc:711818]                                                    | 1.533436483 | 1.76E-06    | 2.03E-05    |
| ENSMMUG00000052505 | homeobox B9 [Source:NCBI gene;Acc:106994009]                                               | 1.536992584 | 2.79E-11    | 7.48E-10    |
| ENSMMUG00000053257 | Y RNA [Source:RFAM;Acc:RF00019]                                                            | 1.537715523 | 6.61E-10    | 1.47E-08    |
| ENSMMUG00000047219 |                                                                                            | 1.538699303 | 5.04E-06    | 5.21E-05    |
| ENSMMUG00000001944 | chromosome 20 C16orf72 homolog [Source:VGNC Symbol;Acc:VGNC:70443]                         | 1.538948072 | 9.93E-09    | 1.78E-07    |
| ENSMMUG00000058800 |                                                                                            | 1.541257755 | 2.68E-06    | 2.95E-05    |
| ENSMMUG00000010308 | cyclin I family member 2 [Source:VGNC Symbol;Acc:VGNC:70923]                               | 1.541302585 | 3.41E-05    | 0.000286038 |
| ENSMMUG00000015479 | tectonin beta-propeller repeat containing 1 [Source:VGNC Symbol;Acc:VGNC:79348]            | 1.541930385 | 6.45E-13    | 2.37E-11    |
| ENSMMUG00000008189 | cadherin related family member 3 [Source:HGNC Symbol;Acc:HGNC:26308]                       | 1.546520498 | 1.52E-11    | 4.26E-10    |
| ENSMMUG00000015871 | zinc finger FYVE-type containing 26 [Source:VGNC Symbol;Acc:VGNC:79283]                    | 1.547626448 | 0.000615122 | 0.003458587 |
| ENSMMUG00000030891 | hypoxia up-regulated 1 [Source:VGNC Symbol;Acc:VGNC:73399]                                 | 1.54866061  | 2.33E-10    | 5.54E-09    |
| ENSMMUG00000046550 | coiled-coil domain containing 125 [Source:NCBI gene;Acc:704391]                            | 1.551184546 | 1.03E-12    | 3.69E-11    |
| ENSMMUG00000053498 |                                                                                            | 1.55161859  | 0.00055037  | 0.003152188 |
| ENSMMUG00000007610 | ribosomal protein S6 kinase A4 [Source:VGNC Symbol;Acc:VGNC:76930]                         | 1.551843962 | 1.77E-13    | 7.06E-12    |
| ENSMMUG00000002278 | AT-rich interaction domain 3A [Source:VGNC Symbol;Acc:VGNC:69930]                          | 1.552554981 | 0.000128394 | 0.000895622 |
| ENSMMUG00000021017 | acylglycerol kinase [Source:VGNC Symbol;Acc:VGNC:69669]                                    | 1.552890129 | 2.20E-09    | 4.43E-08    |
| ENSMMUG00000061244 |                                                                                            | 1.554179673 | 0.012393517 | 0.041986968 |
| ENSMMUG00000057160 |                                                                                            | 1.555277509 | 0.000976069 | 0.005129446 |
| ENSMMUG00000061836 |                                                                                            | 1.556045404 | 0.000198436 | 0.001309866 |
| ENSMMUG00000055324 | homeobox B7 [Source:NCBI gene;Acc:697089]                                                  | 1.557429544 | 1.19E-09    | 2.53E-08    |
| ENSMMUG00000017607 | NEDD4 binding protein 3 [Source:VGNC Symbol;Acc:VGNC:75053]                                | 1.558965578 | 0.000211343 | 0.001380974 |
| ENSMMUG00000017458 | DDB1 and CUL4 associated factor 12 [Source:VGNC Symbol;Acc:VGNC:71678]                     | 1.559077801 | 0.001456003 | 0.00713546  |
| ENSMMUG00000042510 | coagulation factor V [Source:NCBI gene;Acc:704695]                                         | 1.5593685   | 1.54E-11    | 4.29E-10    |
| ENSMMUG00000052828 |                                                                                            | 1.559952814 | 2.91E-05    | 0.000248362 |
| ENSMMUG00000058566 |                                                                                            | 1.560916001 | 5.68E-13    | 2.10E-11    |
| ENSMMUG00000052328 | FAM20C golgi associated secretory pathway kinase [Source:NCBI gene;Acc:695088]             | 1.566678015 | 0.001165369 | 0.00591638  |
| ENSMMUG00000004255 | YLP motif containing 1 [Source:VGNC Symbol;Acc:VGNC:79092]                                 | 1.569149946 | 0.000858939 | 0.004600094 |
| ENSMMUG00000061526 | synaptopodin 2 like [Source:NCBI gene;Acc:714736]                                          | 1.570401812 | 4.18E-08    | 6.73E-07    |
| ENSMMUG00000008006 | RAB11A, member RAS oncogene family [Source:VGNC Symbol;Acc:VGNC:81517]                     | 1.57182398  | 2.30E-08    | 3.90E-07    |
| ENSMMUG00000019933 | TatD DNase domain containing 2 [Source:NCBI gene;Acc:701390]                               | 1.572037147 | 0.000822393 | 0.004447338 |
| ENSMMUG00000021553 | dehydrogenase/reductase 13 [Source:VGNC Symbol;Acc:VGNC:81387]                             | 1.573180875 | 1.35E-06    | 1.60E-05    |
| ENSMMUG00000009682 | R3H domain containing 4 [Source:VGNC Symbol;Acc:VGNC:76554]                                | 1.574195177 | 0.00012159  | 0.000855938 |
| ENSMMUG00000012597 | ubiquitin associated protein 2 [Source:VGNC Symbol;Acc:VGNC:78949]                         | 1.574292552 | 0.000822455 | 0.004447338 |
| ENSMMUG00000031279 | torsin A interacting protein 2 [Source:NCBI gene;Acc:716654]                               | 1.574547486 | 8.67E-11    | 2.18E-09    |
| ENSMMUG00000006659 | aldehyde dehydrogenase 1 family member A3 [Source:VGNC Symbol;Acc:VGNC:81353]              | 1.575117217 | 0.000727557 | 0.004000647 |
| ENSMMUG00000056924 | G protein-coupled receptor 149 [Source:NCBI gene;Acc:106997054]                            | 1.575848202 | 0.000145473 | 0.000999559 |
| ENSMMUG00000003006 | serine palmitoyltransferase long chain base subunit 1 [Source:VGNC Symbol;Acc:VGNC:77873]  | 1.576545972 | 1.24E-05    | 0.000116714 |
| ENSMMUG00000044496 | H2A histone family, member X [Source:NCBI gene;Acc:703073]                                 | 1.581143138 | 5.08E-06    | 5.24E-05    |

|                     |                                                                                        |             |             |             |
|---------------------|----------------------------------------------------------------------------------------|-------------|-------------|-------------|
| ENSMMUG00000008081  | ATP binding cassette subfamily G member 8 [Source:VGNC Symbol;Acc:VGNC:69392]          | 1.58242312  | 2.04E-05    | 0.000180491 |
| ENSMMUG00000005666  | phospholipase D2 [Source:VGNC Symbol;Acc:VGNC:76172]                                   | 1.583790215 | 6.01E-08    | 9.36E-07    |
| ENSMMUG000000054286 |                                                                                        | 1.585149812 | 0.000913902 | 0.004864776 |
| ENSMMUG00000006786  | protein tyrosine phosphatase non-receptor type 22 [Source:VGNC Symbol;Acc:VGNC:76603]  | 1.585217433 | 7.36E-07    | 9.24E-06    |
| ENSMMUG000000061576 |                                                                                        | 1.586080555 | 0.010613492 | 0.037087058 |
| ENSMMUG000000059134 |                                                                                        | 1.590638384 | 0.003520874 | 0.015026084 |
| ENSMMUG000000058472 | late cornified envelope protein 1C [Source:NCBI gene;Acc:107000798]                    | 1.591439869 | 0.003219348 | 0.013918049 |
| ENSMMUG00000003439  | nuclear factor I C [Source:VGNC Symbol;Acc:VGNC:75336]                                 | 1.593234113 | 0.000613703 | 0.003453764 |
| ENSMMUG000000051975 |                                                                                        | 1.596435384 | 6.29E-05    | 0.000487387 |
| ENSMMUG000000057682 |                                                                                        | 1.59672421  | 3.30E-11    | 8.79E-10    |
| ENSMMUG000000055121 | Metazoan signal recognition particle RNA [Source:RFAM;Acc:RF00017]                     | 1.598277689 | 9.66E-07    | 1.18E-05    |
| ENSMMUG00000002452  | solute carrier family 35 member C1 [Source:VGNC Symbol;Acc:VGNC:77524]                 | 1.598312943 | 1.56E-08    | 2.72E-07    |
| ENSMMUG00000012529  | pleckstrin homology domain containing A8 [Source:VGNC Symbol;Acc:VGNC:81741]           | 1.601302217 | 0.00035763  | 0.002159608 |
| ENSMMUG00000020861  | EvC ciliary complex subunit 1 [Source:VGNC Symbol;Acc:VGNC:72445]                      | 1.606395703 | 3.77E-12    | 1.18E-10    |
| ENSMMUG00000048039  | apurinic/aprimidinic endodeoxyribonuclease 1 [Source:VGNC Symbol;Acc:VGNC:84305]       | 1.607416972 | 0.002562676 | 0.011453762 |
| ENSMMUG00000015394  | WD repeat domain 93 [Source:VGNC Symbol;Acc:VGNC:79642]                                | 1.609614401 | 6.08E-20    | 6.29E-18    |
| ENSMMUG00000007423  | transcription factor Dp-1 [Source:NCBI gene;Acc:715345]                                | 1.611087706 | 7.35E-07    | 9.22E-06    |
| ENSMMUG00000020868  | homeobox B8 [Source:VGNC Symbol;Acc:VGNC:73505]                                        | 1.613027746 | 8.00E-17    | 5.35E-15    |
| ENSMMUG00000049551  |                                                                                        | 1.61406411  | 0.001290996 | 0.006445019 |
| ENSMMUG00000016894  | ribosomal protein S25 [Source:NCBI gene;Acc:702593]                                    | 1.616656431 | 0.001524751 | 0.0074154   |
| ENSMMUG00000056841  |                                                                                        | 1.620094198 | 0.001545333 | 0.00749747  |
| ENSMMUG00000023139  | small nuclear ribonucleoprotein polypeptide N [Source:VGNC Symbol;Acc:VGNC:78437]      | 1.620106817 | 3.92E-07    | 5.22E-06    |
| ENSMMUG00000057857  |                                                                                        | 1.620199144 | 0.014367407 | 0.047406657 |
| ENSMMUG00000058106  | otoconin 90 [Source:NCBI gene;Acc:100429699]                                           | 1.621765362 | 1.86E-15    | 1.01E-13    |
| ENSMMUG00000021486  | secernin 2 [Source:NCBI gene;Acc:694571]                                               | 1.622450687 | 9.56E-05    | 0.000697434 |
| ENSMMUG00000059371  |                                                                                        | 1.624896791 | 0.004053838 | 0.016930248 |
| ENSMMUG00000013150  | MORC family CW-type zinc finger 4 [Source:VGNC Symbol;Acc:VGNC:74808]                  | 1.625099767 | 4.31E-13    | 1.62E-11    |
| ENSMMUG00000055018  | sushi domain containing 6 [Source:NCBI gene;Acc:712719]                                | 1.625130463 | 2.41E-07    | 3.35E-06    |
| ENSMMUG00000048204  | ephrin B3 [Source:NCBI gene;Acc:716257]                                                | 1.627065694 | 1.43E-09    | 2.99E-08    |
| ENSMMUG00000059681  |                                                                                        | 1.627790874 | 0.006966465 | 0.026337994 |
| ENSMMUG00000058621  |                                                                                        | 1.628260907 | 7.16E-11    | 1.83E-09    |
| ENSMMUG00000050028  |                                                                                        | 1.629681651 | 8.63E-08    | 1.31E-06    |
| ENSMMUG00000018720  | cytoskeleton associated protein 2 [Source:VGNC Symbol;Acc:VGNC:71229]                  | 1.629868792 | 7.20E-20    | 7.38E-18    |
| ENSMMUG00000051691  |                                                                                        | 1.630072065 | 5.92E-06    | 5.99E-05    |
| ENSMMUG00000020346  | carboxypeptidase X, M14 family member 2 [Source:VGNC Symbol;Acc:VGNC:71596]            | 1.630273233 | 3.53E-10    | 8.11E-09    |
| ENSMMUG00000011951  | KRI1 homolog [Source:VGNC Symbol;Acc:VGNC:74127]                                       | 1.631425473 | 3.61E-05    | 0.000299881 |
| ENSMMUG00000002217  | alkaline phosphatase, biomineralization associated [Source:VGNC Symbol;Acc:VGNC:69801] | 1.633076007 | 1.40E-15    | 7.73E-14    |
| ENSMMUG00000061833  | transmembrane protein 251 [Source:NCBI gene;Acc:708131]                                | 1.635581914 | 0.000208002 | 0.001362042 |
| ENSMMUG00000057345  | calcineurin like phosphoesterase domain containing 1 [Source:NCBI gene;Acc:716978]     | 1.636074937 | 1.41E-10    | 3.45E-09    |
| ENSMMUG00000050104  | Metazoan signal recognition particle RNA [Source:RFAM;Acc:RF00017]                     | 1.636551384 | 2.95E-07    | 4.04E-06    |
| ENSMMUG00000064005  |                                                                                        | 1.638085274 | 0.000546418 | 0.003133938 |
| ENSMMUG00000041376  | G antigen 10 [Source:NCBI gene;Acc:693330]                                             | 1.638837407 | 2.47E-09    | 4.91E-08    |
| ENSMMUG00000012944  | vascular endothelial growth factor B [Source:VGNC Symbol;Acc:VGNC:78765]               | 1.644547948 | 1.39E-14    | 6.66E-13    |
| ENSMMUG00000005108  | RCC1 domain containing 1 [Source:VGNC Symbol;Acc:VGNC:76876]                           | 1.645131218 | 0.01314755  | 0.0441159   |
| ENSMMUG00000017260  | G protein-coupled receptor 65 [Source:VGNC Symbol;Acc:VGNC:73140]                      | 1.645293229 | 1.47E-14    | 6.98E-13    |
| ENSMMUG00000062518  |                                                                                        | 1.645754736 | 0.000199075 | 0.001313057 |
| ENSMMUG00000058110  |                                                                                        | 1.647420861 | 0.009232899 | 0.033201158 |
| ENSMMUG00000044257  | MX dynamin like GTPase 2 [Source:VGNC Symbol;Acc:VGNC:81723]                           | 1.64973774  | 4.70E-05    | 0.000378145 |
| ENSMMUG00000013387  | cysteinyl leukotriene receptor 1 [Source:VGNC Symbol;Acc:VGNC:71646]                   | 1.651362243 | 1.51E-06    | 1.77E-05    |
| ENSMMUG00000063658  | leucine rich repeat neuronal 2 [Source:NCBI gene;Acc:100429709]                        | 1.653532475 | 0.000103469 | 0.000743707 |
| ENSMMUG00000023045  | zinc finger B-box domain containing [Source:VGNC Symbol;Acc:VGNC:79592]                | 1.654774499 | 0.003708253 | 0.015711183 |



|                    |                                                                                                 |             |             |             |
|--------------------|-------------------------------------------------------------------------------------------------|-------------|-------------|-------------|
| ENSMMUG00000015606 | Spi-1 proto-oncogene [Source:NCBI gene;Acc:712010]                                              | 1.656367347 | 9.02E-06    | 8.76E-05    |
| ENSMMUG00000008624 | forkhead box P3 [Source:VGNC Symbol;Acc:VGNC:72926]                                             | 1.657961663 | 0.013559299 | 0.045176836 |
| ENSMMUG00000004002 | CDC like kinase 4 [Source:VGNC Symbol;Acc:VGNC:71173]                                           | 1.658199259 | 1.07E-19    | 1.06E-17    |
| ENSMMUG00000016407 | microtubule associated serine/threonine kinase like [Source:NCBI gene;Acc:708134]               | 1.658914081 | 0.009537987 | 0.034029434 |
| ENSMMUG00000019830 | Fc receptor like 2 [Source:VGNC Symbol;Acc:VGNC:72509]                                          | 1.659404574 | 1.09E-06    | 1.32E-05    |
| ENSMMUG00000003658 | autophagy related 2B [Source:VGNC Symbol;Acc:VGNC:84310]                                        | 1.660755655 | 0.000125529 | 0.000879131 |
| ENSMMUG00000009974 | inositol-tetrakisphosphate 1-kinase [Source:VGNC Symbol;Acc:VGNC:73802]                         | 1.661116433 | 0.010579162 | 0.037013514 |
| ENSMMUG00000012941 | nudix hydrolase 22 [Source:VGNC Symbol;Acc:VGNC:75475]                                          | 1.663157991 | 3.06E-14    | 1.39E-12    |
| ENSMMUG00000056266 | Metazoan signal recognition particle RNA [Source:RFAM;Acc:RF00017]                              | 1.663717412 | 0.003235644 | 0.013978666 |
| ENSMMUG00000023048 | cytochrome b-c1 complex subunit Rieske, mitochondrial [Source:NCBI gene;Acc:705178]             | 1.665234813 | 7.57E-05    | 0.000573114 |
| ENSMMUG00000060000 |                                                                                                 | 1.666731112 | 0.010332015 | 0.036314211 |
| ENSMMUG00000004149 | eukaryotic translation initiation factor 4 gamma 3 [Source:NCBI gene;Acc:717555]                | 1.667681199 | 3.05E-12    | 9.80E-11    |
| ENSMMUG00000054449 | Metazoan signal recognition particle RNA [Source:RFAM;Acc:RF00017]                              | 1.668693682 | 0.004487253 | 0.01837815  |
| ENSMMUG00000002423 | DNA polymerase delta 2, accessory subunit [Source:VGNC Symbol;Acc:VGNC:76203]                   | 1.668844573 | 2.90E-08    | 4.80E-07    |
| ENSMMUG00000011472 | PWWP domain containing 2A [Source:VGNC Symbol;Acc:VGNC:76564]                                   | 1.67141002  | 0.001906742 | 0.008948364 |
| ENSMMUG00000055963 |                                                                                                 | 1.67175404  | 2.95E-08    | 4.87E-07    |
| ENSMMUG00000015930 | ADP ribosylation factor like GTPase 6 interacting protein 4 [Source:VGNC Symbol;Acc:VGNC:69860] | 1.673382414 | 0.001650668 | 0.007915863 |
| ENSMMUG00000005263 | chromosome X CXorf38 homolog [Source:VGNC Symbol;Acc:VGNC:71600]                                | 1.674531254 | 0.012092542 | 0.041160185 |
| ENSMMUG00000055199 | cytochrome P450, family 39, subfamily A, polypeptide 1 [Source:NCBI gene;Acc:704242]            | 1.675551676 | 0.00170428  | 0.008138035 |
| ENSMMUG00000003697 | inositol polyphosphate-4-phosphatase type II B [Source:VGNC Symbol;Acc:VGNC:73748]              | 1.676773923 | 1.10E-05    | 0.000104857 |
| ENSMMUG00000062474 | Metazoan signal recognition particle RNA [Source:RFAM;Acc:RF00017]                              | 1.677222549 | 6.58E-06    | 6.59E-05    |
| ENSMMUG00000014720 | NCK interacting protein with SH3 domain [Source:VGNC Symbol;Acc:VGNC:74960]                     | 1.677982303 | 5.71E-05    | 0.000449689 |
| ENSMMUG00000023335 | ring finger protein 13 [Source:VGNC Symbol;Acc:VGNC:81557]                                      | 1.678201024 | 1.39E-06    | 1.64E-05    |
| ENSMMUG00000055012 |                                                                                                 | 1.680973966 | 0.010864978 | 0.037766246 |
| ENSMMUG00000012523 | flotillin 2 [Source:NCBI gene;Acc:114669752]                                                    | 1.683755627 | 2.75E-07    | 3.79E-06    |
| ENSMMUG00000006997 | thioredoxin domain containing 16 [Source:VGNC Symbol;Acc:VGNC:79214]                            | 1.684712446 | 2.33E-16    | 1.42E-14    |
| ENSMMUG00000039397 | tubulin folding cofactor E like [Source:NCBI gene;Acc:706506]                                   | 1.685843859 | 6.36E-16    | 3.70E-14    |
| ENSMMUG00000003436 | tubulin tyrosine ligase like 6 [Source:VGNC Symbol;Acc:VGNC:79632]                              | 1.686312895 | 4.42E-12    | 1.36E-10    |
| ENSMMUG00000014983 | alanyl aminopeptidase, membrane [Source:VGNC Symbol;Acc:VGNC:69943]                             | 1.687792148 | 2.80E-19    | 2.63E-17    |
| ENSMMUG00000022406 | ankyrin repeat and sterile alpha motif domain containing 1B [Source:VGNC Symbol;Acc:VGNC:69689] | 1.687949523 | 6.02E-11    | 1.55E-09    |
| ENSMMUG00000003268 | alpha 1,3-galactosyltransferase 2 [Source:VGNC Symbol;Acc:VGNC:69550]                           | 1.689764062 | 0.00891351  | 0.032260293 |
| ENSMMUG00000001745 | oxysterol binding protein [Source:VGNC Symbol;Acc:VGNC:75718]                                   | 1.690227705 | 1.06E-11    | 3.07E-10    |
| ENSMMUG00000051420 | homeobox B5 [Source:NCBI gene;Acc:696732]                                                       | 1.690863079 | 7.48E-09    | 1.37E-07    |
| ENSMMUG00000018719 | nemo like kinase [Source:VGNC Symbol;Acc:VGNC:75277]                                            | 1.691639333 | 5.49E-09    | 1.03E-07    |
| ENSMMUG00000003539 | glutamine rich 2 [Source:VGNC Symbol;Acc:VGNC:76534]                                            | 1.694898673 | 0.00037744  | 0.002258574 |
| ENSMMUG00000004337 | zinc finger protein 790 [Source:VGNC Symbol;Acc:VGNC:79930]                                     | 1.696051182 | 0.007894368 | 0.029247387 |
| ENSMMUG00000011330 | neuronal PAS domain protein 1 [Source:VGNC Symbol;Acc:VGNC:75377]                               | 1.696263932 | 9.42E-14    | 3.93E-12    |
| ENSMMUG00000027375 | Y RNA [Source:RFAM;Acc:RF00019]                                                                 | 1.696421474 | 0.000357914 | 0.002159608 |
| ENSMMUG00000014046 | SREBF chaperone [Source:VGNC Symbol;Acc:VGNC:77140]                                             | 1.699342109 | 2.36E-10    | 5.57E-09    |
| ENSMMUG00000006689 | nuclear receptor interacting protein 3 [Source:VGNC Symbol;Acc:VGNC:75397]                      | 1.700162664 | 1.71E-06    | 1.98E-05    |
| ENSMMUG00000023016 | jade family PHD finger 3 [Source:VGNC Symbol;Acc:VGNC:73640]                                    | 1.700881684 | 6.94E-12    | 2.07E-10    |
| ENSMMUG00000017758 | mitogen-activated protein kinase 3 [Source:VGNC Symbol;Acc:VGNC:74646]                          | 1.701716738 | 9.43E-11    | 2.37E-09    |
| ENSMMUG00000003584 | mesoderm posterior bHLH transcription factor 2 [Source:VGNC Symbol;Acc:VGNC:74619]              | 1.703438106 | 5.97E-18    | 4.50E-16    |
| ENSMMUG00000019314 | vav guanine nucleotide exchange factor 1 [Source:VGNC Symbol;Acc:VGNC:78757]                    | 1.703569559 | 0.002507659 | 0.011228285 |
| ENSMMUG00000062755 |                                                                                                 | 1.703995098 | 0.000252377 | 0.001597638 |
| ENSMMUG00000050920 | Metazoan signal recognition particle RNA [Source:RFAM;Acc:RF00017]                              | 1.704070358 | 0.000624865 | 0.00350695  |
| ENSMMUG00000019839 | lysine acetyltransferase 5 [Source:VGNC Symbol;Acc:VGNC:73955]                                  | 1.705913999 | 5.16E-20    | 5.42E-18    |
| ENSMMUG00000016582 | chromosome 1 C1orf112 homolog [Source:VGNC Symbol;Acc:VGNC:70385]                               | 1.710671957 | 8.67E-09    | 1.57E-07    |
| ENSMMUG00000010881 | cytochrome P450, family 26, subfamily A, polypeptide 1 [Source:NCBI gene;Acc:699519]            | 1.710824989 | 0.006059923 | 0.023518318 |
| ENSMMUG00000009593 | WAS/WASL interacting protein family member 1 [Source:VGNC Symbol;Acc:VGNC:78784]                | 1.710878949 | 4.74E-09    | 8.96E-08    |
| ENSMMUG00000009583 | COP9 signalosome subunit 7A [Source:VGNC Symbol;Acc:VGNC:71185]                                 | 1.71130886  | 0.007166445 | 0.026920285 |



|                    |                                                                                                      |             |             |             |
|--------------------|------------------------------------------------------------------------------------------------------|-------------|-------------|-------------|
| ENSMMUG00000053376 |                                                                                                      | 1.712441899 | 3.53E-06    | 3.79E-05    |
| ENSMMUG00000014880 | sortilin related receptor 1 [Source:NCBI gene;Acc:713011]                                            | 1.714156129 | 8.05E-10    | 1.76E-08    |
| ENSMMUG00000022116 | PIH1 domain containing 1 [Source:VGNC Symbol;Acc:VGNC:75868]                                         | 1.714419384 | 0.000976143 | 0.005129446 |
| ENSMMUG00000020226 | WD repeat and SOCS box containing 1 [Source:VGNC Symbol;Acc:VGNC:79186]                              | 1.714631279 | 4.63E-08    | 7.41E-07    |
| ENSMMUG00000039009 |                                                                                                      | 1.717081373 | 2.25E-05    | 0.000198115 |
| ENSMMUG00000055352 |                                                                                                      | 1.717182349 | 2.41E-18    | 1.91E-16    |
| ENSMMUG00000055209 |                                                                                                      | 1.718427582 | 2.28E-10    | 5.45E-09    |
| ENSMMUG00000021554 | PHD finger protein 12 [Source:VGNC Symbol;Acc:VGNC:75838]                                            | 1.71848787  | 7.22E-08    | 1.10E-06    |
| ENSMMUG00000012350 | mercaptopyruvate sulfurtransferase [Source:VGNC Symbol;Acc:VGNC:74922]                               | 1.718633984 | 4.48E-05    | 0.000361915 |
| ENSMMUG00000008758 | zinc finger protein 143 [Source:VGNC Symbol;Acc:VGNC:81612]                                          | 1.718669735 | 0.000511554 | 0.002960224 |
| ENSMMUG00000002426 | myosin light chain 7 [Source:VGNC Symbol;Acc:VGNC:75002]                                             | 1.72039706  | 4.19E-12    | 1.30E-10    |
| ENSMMUG00000051414 | Metazoan signal recognition particle RNA [Source:RFAM;Acc:RF00017]                                   | 1.722510307 | 0.001882878 | 0.00885666  |
| ENSMMUG00000062273 | dephospho-CoA kinase domain containing [Source:NCBI gene;Acc:715841]                                 | 1.72347745  | 8.64E-05    | 0.000641231 |
| ENSMMUG00000004558 | OTU deubiquitinase 5 [Source:VGNC Symbol;Acc:VGNC:75677]                                             | 1.724435641 | 4.49E-15    | 2.35E-13    |
| ENSMMUG00000004175 | transient receptor potential cation channel subfamily M member 2 [Source:VGNC Symbol;Acc:VGNC:78655] | 1.724926493 | 1.51E-05    | 0.000139628 |
| ENSMMUG00000059984 | pellino E3 ubiquitin protein ligase family member 2 [Source:NCBI gene;Acc:699169]                    | 1.725931111 | 0.013677905 | 0.045520589 |
| ENSMMUG00000053516 |                                                                                                      | 1.726572991 | 0.000486055 | 0.002838054 |
| ENSMMUG00000001271 | cleavage and polyadenylation specific factor 4 like [Source:NCBI gene;Acc:698279]                    | 1.731209662 | 0.010291904 | 0.036256174 |
| ENSMMUG00000001702 | succinyl-CoA:glutarate-CoA transferase [Source:VGNC Symbol;Acc:VGNC:81767]                           | 1.731779271 | 2.47E-08    | 4.16E-07    |
| ENSMMUG00000051170 |                                                                                                      | 1.733559184 | 7.12E-06    | 7.07E-05    |
| ENSMMUG00000065025 |                                                                                                      | 1.734677934 | 1.64E-10    | 3.96E-09    |
| ENSMMUG00000050057 |                                                                                                      | 1.7395612   | 2.74E-12    | 8.92E-11    |
| ENSMMUG00000051879 | CAP-Gly domain containing linker protein 3 [Source:NCBI gene;Acc:712058]                             | 1.743760941 | 0.000202559 | 0.001327875 |
| ENSMMUG00000049703 | Metazoan signal recognition particle RNA [Source:RFAM;Acc:RF00017]                                   | 1.747690727 | 4.00E-09    | 7.65E-08    |
| ENSMMUG00000008538 | microfibril associated protein 4 [Source:VGNC Symbol;Acc:VGNC:74710]                                 | 1.748583826 | 0.010978219 | 0.038062987 |
| ENSMMUG00000002422 | AE binding protein 1 [Source:VGNC Symbol;Acc:VGNC:80328]                                             | 1.749267009 | 9.65E-07    | 1.18E-05    |
| ENSMMUG00000017266 | UPF0577 protein KIAA1324 [Source:NCBI gene;Acc:697670]                                               | 1.749830692 | 3.10E-09    | 6.04E-08    |
| ENSMMUG00000017654 | arrestin beta 2 [Source:VGNC Symbol;Acc:VGNC:70022]                                                  | 1.751923408 | 0.000428728 | 0.002523703 |
| ENSMMUG00000021436 | latent transforming growth factor beta binding protein 1 [Source:VGNC Symbol;Acc:VGNC:74456]         | 1.752956183 | 3.50E-08    | 5.71E-07    |
| ENSMMUG00000031291 | regulator of G protein signaling like 1 [Source:NCBI gene;Acc:715693]                                | 1.753668085 | 1.43E-09    | 2.99E-08    |
| ENSMMUG00000000590 | NPR3 like, GATOR1 complex subunit [Source:VGNC Symbol;Acc:VGNC:75173]                                | 1.754320119 | 0.001347774 | 0.006687723 |
| ENSMMUG00000056555 |                                                                                                      | 1.754657107 | 1.68E-12    | 5.76E-11    |
| ENSMMUG00000049305 | Metazoan signal recognition particle RNA [Source:RFAM;Acc:RF00017]                                   | 1.755541911 | 0.000148931 | 0.001018408 |
| ENSMMUG00000012697 | AT-rich interaction domain 1A [Source:VGNC Symbol;Acc:VGNC:69822]                                    | 1.756274257 | 2.53E-06    | 2.81E-05    |
| ENSMMUG00000061123 | Metazoan signal recognition particle RNA [Source:RFAM;Acc:RF00017]                                   | 1.75639456  | 0.002567032 | 0.011469064 |
| ENSMMUG00000051329 |                                                                                                      | 1.758093794 | 0.000195994 | 0.001296533 |
| ENSMMUG00000019667 | TAO kinase 1 [Source:VGNC Symbol;Acc:VGNC:81591]                                                     | 1.75825343  | 0.000717937 | 0.003957022 |
| ENSMMUG00000016655 | R3H domain and coiled-coil containing 1 [Source:VGNC Symbol;Acc:VGNC:76551]                          | 1.75856544  | 3.73E-05    | 0.000307731 |
| ENSMMUG00000029421 | protein tyrosine phosphatase receptor type K [Source:VGNC Symbol;Acc:VGNC:83453]                     | 1.760256919 | 0.000283506 | 0.001771517 |
| ENSMMUG00000002483 | citrate synthase [Source:VGNC Symbol;Acc:VGNC:71509]                                                 | 1.760956073 | 2.61E-06    | 2.89E-05    |
| ENSMMUG00000052134 |                                                                                                      | 1.764712033 | 0.00157207  | 0.007586304 |
| ENSMMUG00000010028 | leucine zipper tumor suppressor family member 3 [Source:VGNC Symbol;Acc:VGNC:74403]                  | 1.768781722 | 8.54E-08    | 1.30E-06    |
| ENSMMUG00000009381 | WW domain binding protein 2 [Source:VGNC Symbol;Acc:VGNC:78786]                                      | 1.770616835 | 2.66E-10    | 6.22E-09    |
| ENSMMUG00000019563 | collapsin response mediator protein 1 [Source:VGNC Symbol;Acc:VGNC:71494]                            | 1.770667888 | 1.06E-13    | 4.35E-12    |
| ENSMMUG00000051852 | Metazoan signal recognition particle RNA [Source:RFAM;Acc:RF00017]                                   | 1.77080977  | 0.001062123 | 0.005482803 |
| ENSMMUG00000061606 | Metazoan signal recognition particle RNA [Source:RFAM;Acc:RF00017]                                   | 1.771752736 | 0.005328585 | 0.021233736 |
| ENSMMUG00000006086 | pleckstrin homology, MyTH4 and FERM domain containing H3 [Source:VGNC Symbol;Acc:VGNC:76113]         | 1.772055183 | 9.48E-06    | 9.17E-05    |
| ENSMMUG00000053367 | secreted protein acidic and cysteine rich [Source:NCBI gene;Acc:712388]                              | 1.772157333 | 1.80E-11    | 4.94E-10    |
| ENSMMUG00000014277 | ITPR interacting domain containing 2 [Source:VGNC Symbol;Acc:VGNC:73584]                             | 1.773573241 | 1.48E-18    | 1.22E-16    |
| ENSMMUG00000063112 |                                                                                                      | 1.773638912 | 0.000617408 | 0.003469848 |
| ENSMMUG00000004042 | Fc receptor like A [Source:VGNC Symbol;Acc:VGNC:72526]                                               | 1.774662033 | 0.011142159 | 0.038490242 |

|                     |                                                                                                                   |             |             |             |
|---------------------|-------------------------------------------------------------------------------------------------------------------|-------------|-------------|-------------|
| ENSMMUG0000003105   | inositol polyphosphate-5-phosphatase E [Source:VGNC Symbol;Acc:VGNC:73637]                                        | 1.775093114 | 1.50E-14    | 7.11E-13    |
| ENSMMUG00000060879  | homeobox B13 [Source:NCBI gene;Acc:697572]                                                                        | 1.775631796 | 9.75E-11    | 2.44E-09    |
| ENSMMUG00000022109  | CD163 molecule like 1 [Source:VGNC Symbol;Acc:VGNC:70914]                                                         | 1.776038301 | 2.97E-09    | 5.80E-08    |
| ENSMMUG00000017627  | B-TFIID TATA-box binding protein associated factor 1 [Source:VGNC Symbol;Acc:VGNC:70336]                          | 1.781713651 | 2.33E-21    | 3.19E-19    |
| ENSMMUG00000014876  | nucleolus and neural progenitor protein [Source:VGNC Symbol;Acc:VGNC:75244]                                       | 1.782494726 | 9.33E-06    | 9.03E-05    |
| ENSMMUG00000049649  | proteasome 20S subunit beta 6 [Source:NCBI gene;Acc:710028]                                                       | 1.785248942 | 1.16E-10    | 2.85E-09    |
| ENSMMUG00000003827  | albumin [Source:VGNC Symbol;Acc:VGNC:69782]                                                                       | 1.786963857 | 1.16E-09    | 2.47E-08    |
| ENSMMUG00000015926  | 2-oxoglutarate and iron dependent oxygenase domain containing 2 [Source:VGNC Symbol;Acc:VGNC:75462]               | 1.787387866 | 2.61E-06    | 2.89E-05    |
| ENSMMUG00000013944  | regulator of microtubule dynamics 2 [Source:VGNC Symbol;Acc:VGNC:76839]                                           | 1.788230737 | 9.75E-13    | 3.50E-11    |
| ENSMMUG00000013146  | claudin 2 [Source:HGNC Symbol;Acc:HGNC:2041]                                                                      | 1.789203527 | 4.56E-14    | 2.04E-12    |
| ENSMMUG00000005745  | EYA transcriptional coactivator and phosphatase 4 [Source:VGNC Symbol;Acc:VGNC:72456]                             | 1.78965596  | 1.61E-12    | 5.56E-11    |
| ENSMMUG00000004910  | dynein axonemal light chain 1 [Source:VGNC Symbol;Acc:VGNC:71885]                                                 | 1.791991037 | 3.24E-05    | 0.000272736 |
| ENSMMUG00000064391  |                                                                                                                   | 1.794271364 | 3.57E-11    | 9.47E-10    |
| ENSMMUG00000005488  | coronin 1B [Source:VGNC Symbol;Acc:VGNC:71320]                                                                    | 1.795895942 | 3.76E-10    | 8.62E-09    |
| ENSMMUG00000000700  | CLN3 lysosomal/endosomal transmembrane protein, battenin [Source:NCBI gene;Acc:705815]                            | 1.797280447 | 7.82E-09    | 1.43E-07    |
| ENSMMUG000000051363 |                                                                                                                   | 1.798189053 | 2.30E-09    | 4.60E-08    |
| ENSMMUG00000061079  | golgin subfamily A member 6C [Source:NCBI gene;Acc:715898]                                                        | 1.798633625 | 1.18E-15    | 6.68E-14    |
| ENSMMUG00000016414  | ectonucleotide pyrophosphatase/phosphodiesterase 7 [Source:VGNC Symbol;Acc:VGNC:72090]                            | 1.800023656 | 0.000923822 | 0.00490272  |
| ENSMMUG00000020558  | serine/threonine kinase 38 [Source:VGNC Symbol;Acc:VGNC:78155]                                                    | 1.800499526 | 0.000217858 | 0.001419023 |
| ENSMMUG00000010678  | oxytocin/neurophysin I prepropeptide [Source:VGNC Symbol;Acc:VGNC:75730]                                          | 1.805104399 | 0.000304609 | 0.001888021 |
| ENSMMUG00000063639  |                                                                                                                   | 1.807694014 | 1.92E-06    | 2.20E-05    |
| ENSMMUG00000022730  | cytochrome P450, family 3, subfamily A, polypeptide 5 [Source:NCBI gene;Acc:678692]                               | 1.810081878 | 2.39E-12    | 7.94E-11    |
| ENSMMUG00000011440  | neurite extension and migration factor [Source:VGNC Symbol;Acc:VGNC:75274]                                        | 1.810717637 | 1.77E-05    | 0.000160439 |
| ENSMMUG00000010363  | ribophorin II [Source:VGNC Symbol;Acc:VGNC:76925]                                                                 | 1.811982072 | 1.85E-05    | 0.000166271 |
| ENSMMUG00000022741  | WAP, follistatin/kazal, immunoglobulin, kunitz and netrin domain containing 2 [Source:VGNC Symbol;Acc:VGNC:79900] | 1.812290179 | 2.68E-12    | 8.75E-11    |
| ENSMMUG000000057363 |                                                                                                                   | 1.812292954 | 0.000951338 | 0.005020564 |
| ENSMMUG00000013832  | ATP binding cassette subfamily B member 11 [Source:VGNC Symbol;Acc:VGNC:81339]                                    | 1.814013642 | 5.15E-06    | 5.30E-05    |
| ENSMMUG00000007204  | cytochrome P450 family 2 subfamily W member 1 [Source:VGNC Symbol;Acc:VGNC:81300]                                 | 1.81660924  | 0.01112728  | 0.03846046  |
| ENSMMUG00000002822  | unc-13 homolog D [Source:VGNC Symbol;Acc:VGNC:79375]                                                              | 1.819227563 | 1.81E-09    | 3.70E-08    |
| ENSMMUG00000022451  | proteasome 20S subunit alpha 2 [Source:NCBI gene;Acc:701683]                                                      | 1.821882197 | 0.000255696 | 0.001613329 |
| ENSMMUG000000051847 |                                                                                                                   | 1.82320793  | 0.002099882 | 0.009717487 |
| ENSMMUG00000038363  | adaptor related protein complex 5 subunit beta 1 [Source:NCBI gene;Acc:721904]                                    | 1.824300613 | 4.16E-17    | 2.92E-15    |
| ENSMMUG00000060576  |                                                                                                                   | 1.824716244 | 8.86E-13    | 3.22E-11    |
| ENSMMUG00000037890  |                                                                                                                   | 1.824968985 | 6.93E-05    | 0.000531831 |
| ENSMMUG00000002427  | glucokinase [Source:VGNC Symbol;Acc:VGNC:72901]                                                                   | 1.825987988 | 7.65E-11    | 1.94E-09    |
| ENSMMUG00000058042  | heparan sulfate-glucosamine 3-sulfotransferase 2 [Source:NCBI gene;Acc:699722]                                    | 1.827718279 | 1.75E-10    | 4.22E-09    |
| ENSMMUG00000006076  | intraflagellar transport 74 [Source:VGNC Symbol;Acc:VGNC:73430]                                                   | 1.828053626 | 0.004430541 | 0.018188302 |
| ENSMMUG00000003834  | basic leucine zipper ATF-like transcription factor [Source:VGNC Symbol;Acc:VGNC:70229]                            | 1.828632291 | 4.00E-13    | 1.52E-11    |
| ENSMMUG00000004257  | beta-secretase 2 [Source:VGNC Symbol;Acc:VGNC:70216]                                                              | 1.828642201 | 4.59E-05    | 0.000369663 |
| ENSMMUG00000012560  | HERV-H LTR-associating 1 [Source:NCBI gene;Acc:100430297]                                                         | 1.828780352 | 9.63E-13    | 3.48E-11    |
| ENSMMUG00000056971  | Metazoan signal recognition particle RNA [Source:RFAM;Acc:RF00017]                                                | 1.829575562 | 0.000141581 | 0.000975434 |
| ENSMMUG00000002810  | TOX high mobility group box family member 2 [Source:VGNC Symbol;Acc:VGNC:79007]                                   | 1.832121693 | 5.17E-14    | 2.30E-12    |
| ENSMMUG00000061951  |                                                                                                                   | 1.832370443 | 0.000768727 | 0.004189988 |
| ENSMMUG00000023303  | ecotropic viral integration site 5 like [Source:NCBI gene;Acc:706628]                                             | 1.832404412 | 6.09E-20    | 6.29E-18    |
| ENSMMUG00000002382  | serpin family F member 2 [Source:VGNC Symbol;Acc:VGNC:77372]                                                      | 1.834329058 | 4.79E-09    | 9.04E-08    |
| ENSMMUG00000054846  | Metazoan signal recognition particle RNA [Source:RFAM;Acc:RF00017]                                                | 1.834619971 | 0.000294389 | 0.001831143 |
| ENSMMUG00000006375  | coiled-coil domain containing 15 [Source:NCBI gene;Acc:716362]                                                    | 1.837375194 | 5.75E-05    | 0.000452493 |
| ENSMMUG00000008744  | lysosomal protein transmembrane 5 [Source:VGNC Symbol;Acc:VGNC:74162]                                             | 1.837513715 | 0.007511175 | 0.02803518  |
| ENSMMUG00000053625  | sterol-C5-desaturase [Source:NCBI gene;Acc:706827]                                                                | 1.838522694 | 3.02E-12    | 9.77E-11    |
| ENSMMUG00000001568  | AT-rich interaction domain 3B [Source:VGNC Symbol;Acc:VGNC:69827]                                                 | 1.838750599 | 2.23E-11    | 6.07E-10    |
| ENSMMUG00000053696  | Metazoan signal recognition particle RNA [Source:RFAM;Acc:RF00017]                                                | 1.840888769 | 0.001824812 | 0.008616507 |



|                     |                                                                                       |             |             |             |
|---------------------|---------------------------------------------------------------------------------------|-------------|-------------|-------------|
| ENSMMUG00000004273  | dedicator of cytokinesis 3 [Source:VGNC Symbol;Acc:VGNC:71967]                        | 1.842559746 | 3.65E-14    | 1.64E-12    |
| ENSMMUG00000003955  | post-GPI attachment to proteins 2 [Source:VGNC Symbol;Acc:VGNC:75823]                 | 1.8450039   | 4.18E-17    | 2.92E-15    |
| ENSMMUG00000016890  | solute carrier family 37 member 4 [Source:VGNC Symbol;Acc:VGNC:77591]                 | 1.845681678 | 1.00E-16    | 6.55E-15    |
| ENSMMUG00000004854  | leucine rich repeat containing 9 [Source:VGNC Symbol;Acc:VGNC:81443]                  | 1.846295608 | 3.17E-12    | 1.01E-10    |
| ENSMMUG00000002515  | protein phosphatase 2 phosphatase activator [Source:VGNC Symbol;Acc:VGNC:76583]       | 1.849380781 | 2.28E-07    | 3.20E-06    |
| ENSMMUG00000058108  | BMP and activin membrane bound inhibitor [Source:NCBI gene;Acc:710152]                | 1.850336389 | 0.000916725 | 0.004877691 |
| ENSMMUG00000058137  | zinc finger protein 816 [Source:NCBI gene;Acc:720058]                                 | 1.850860858 | 0.000170236 | 0.001145257 |
| ENSMMUG00000057231  | T-box transcription factor 21 [Source:NCBI gene;Acc:694044]                           | 1.851356086 | 1.28E-11    | 3.65E-10    |
| ENSMMUG00000035551  | small nucleolar RNA, C/D box 11B [Source:HGNC Symbol;Acc:HGNC:33571]                  | 1.852213736 | 0.004101672 | 0.01710677  |
| ENSMMUG00000023449  | mitofusin 2 [Source:VGNC Symbol;Acc:VGNC:74522]                                       | 1.852350661 | 0.000236843 | 0.001517746 |
| ENSMMUG00000055126  |                                                                                       | 1.859861691 | 2.60E-08    | 4.33E-07    |
| ENSMMUG00000000874  | carbohydrate sulfotransferase 1 [Source:VGNC Symbol;Acc:VGNC:71055]                   | 1.859972756 | 1.77E-09    | 3.62E-08    |
| ENSMMUG00000063988  |                                                                                       | 1.863063598 | 0.002310369 | 0.010506599 |
| ENSMMUG00000061098  |                                                                                       | 1.864332609 | 1.44E-25    | 3.15E-23    |
| ENSMMUG00000003572  | nicotinamide phosphoribosyltransferase [Source:VGNC Symbol;Acc:VGNC:75056]            | 1.868742533 | 8.79E-07    | 1.09E-05    |
| ENSMMUG00000056777  | Metazoan signal recognition particle RNA [Source:RFAM;Acc:RF00017]                    | 1.871954131 | 0.009894855 | 0.035093569 |
| ENSMMUG00000022100  | midnolin [Source:VGNC Symbol;Acc:VGNC:82186]                                          | 1.872235059 | 2.63E-19    | 2.50E-17    |
| ENSMMUG00000005511  | SON DNA binding protein [Source:VGNC Symbol;Acc:VGNC:77689]                           | 1.876030068 | 0.00015736  | 0.001066535 |
| ENSMMUG00000002836  | coiled-coil domain containing 71 [Source:VGNC Symbol;Acc:VGNC:70862]                  | 1.877579899 | 0.013230316 | 0.04434519  |
| ENSMMUG00000000327  | fatty acid desaturase 2 [Source:VGNC Symbol;Acc:VGNC:72472]                           | 1.877660274 | 4.55E-11    | 1.19E-09    |
| ENSMMUG00000032180  | RLF zinc finger [Source:VGNC Symbol;Acc:VGNC:76699]                                   | 1.878852133 | 8.04E-06    | 7.87E-05    |
| ENSMMUG00000056840  |                                                                                       | 1.879565032 | 9.59E-10    | 2.07E-08    |
| ENSMMUG00000037284  | small nucleolar RNA, H/ACA box 59A [Source:HGNC Symbol;Acc:HGNC:32653]                | 1.88212808  | 0.013982239 | 0.046309808 |
| ENSMMUG00000010586  | mesoderm posterior bHLH transcription factor 1 [Source:VGNC Symbol;Acc:VGNC:74618]    | 1.885091853 | 0.001840169 | 0.008682348 |
| ENSMMUG00000050456  | Metazoan signal recognition particle RNA [Source:RFAM;Acc:RF00017]                    | 1.886318531 | 0.007706239 | 0.028658814 |
| ENSMMUG00000001397  | multiple C2 and transmembrane domain containing 1 [Source:VGNC Symbol;Acc:VGNC:74589] | 1.887654418 | 4.64E-09    | 8.78E-08    |
| ENSMMUG00000019682  | mitochondrial ribosomal protein S9 [Source:VGNC Symbol;Acc:VGNC:74762]                | 1.888510976 | 0.003879132 | 0.016350622 |
| ENSMMUG000000041729 |                                                                                       | 1.888786519 | 2.00E-05    | 0.000177512 |
| ENSMMUG00000009684  | kinesin family member 22 [Source:VGNC Symbol;Acc:VGNC:74033]                          | 1.889817748 | 2.72E-09    | 5.35E-08    |
| ENSMMUG00000056093  | shieldin complex subunit 1 [Source:NCBI gene;Acc:718152]                              | 1.890944674 | 4.09E-08    | 6.61E-07    |
| ENSMMUG00000051343  |                                                                                       | 1.894271814 | 0.000516191 | 0.002981438 |
| ENSMMUG00000061474  |                                                                                       | 1.89806112  | 0.001378906 | 0.006811949 |
| ENSMMUG00000053481  |                                                                                       | 1.898843052 | 2.12E-07    | 2.99E-06    |
| ENSMMUG00000002384  | IGF like family receptor 1 [Source:VGNC Symbol;Acc:VGNC:73434]                        | 1.899521111 | 9.59E-14    | 3.98E-12    |
| ENSMMUG00000013160  | DnaJ heat shock protein family (Hsp40) member C17 [Source:VGNC Symbol;Acc:VGNC:84335] | 1.901379328 | 0.000235808 | 0.001513483 |
| ENSMMUG00000003499  | solute carrier family 36 member 1 [Source:VGNC Symbol;Acc:VGNC:77509]                 | 1.90143196  | 2.08E-07    | 2.95E-06    |
| ENSMMUG00000022996  | HCLS1 binding protein 3 [Source:VGNC Symbol;Acc:VGNC:82158]                           | 1.901483061 | 2.43E-14    | 1.12E-12    |
| ENSMMUG00000017660  |                                                                                       | 1.901663019 | 6.50E-10    | 1.45E-08    |
| ENSMMUG00000006855  | acyl-CoA thioesterase 2 [Source:NCBI gene;Acc:697011]                                 | 1.906078694 | 3.72E-13    | 1.42E-11    |
| ENSMMUG00000058254  |                                                                                       | 1.906770894 | 2.28E-11    | 6.19E-10    |
| ENSMMUG00000010886  | strawberry notch homolog 2 [Source:VGNC Symbol;Acc:VGNC:77123]                        | 1.911277101 | 0.007064461 | 0.02663475  |
| ENSMMUG00000032249  | procollagen-lysine,2-oxoglutarate 5-dioxygenase 1 [Source:NCBI gene;Acc:722763]       | 1.912481797 | 2.17E-16    | 1.33E-14    |
| ENSMMUG00000050822  | carbonic anhydrase 9 [Source:NCBI gene;Acc:696729]                                    | 1.913480746 | 1.65E-13    | 6.61E-12    |
| ENSMMUG00000057204  | Metazoan signal recognition particle RNA [Source:RFAM;Acc:RF00017]                    | 1.914151647 | 0.010954771 | 0.038013859 |
| ENSMMUG00000013830  | glucose-6-phosphatase catalytic subunit 2 [Source:NCBI gene;Acc:709062]               | 1.916694079 | 1.02E-07    | 1.52E-06    |
| ENSMMUG00000017927  | protein kinase D2 [Source:VGNC Symbol;Acc:VGNC:76273]                                 | 1.917138353 | 7.28E-05    | 0.000554108 |
| ENSMMUG00000065054  | G protein subunit gamma 7 [Source:NCBI gene;Acc:711335]                               | 1.918120413 | 7.37E-14    | 3.15E-12    |
| ENSMMUG00000017810  | structure specific recognition protein 1 [Source:VGNC Symbol;Acc:VGNC:77891]          | 1.918838009 | 5.43E-10    | 1.22E-08    |
| ENSMMUG00000056992  | zinc finger AN1-type containing 6 [Source:NCBI gene;Acc:717543]                       | 1.920385093 | 4.65E-06    | 4.84E-05    |
| ENSMMUG00000006596  | CCR4-NOT transcription complex subunit 10 [Source:VGNC Symbol;Acc:VGNC:71327]         | 1.924193787 | 3.67E-05    | 0.000303892 |
| ENSMMUG00000057909  |                                                                                       | 1.924486478 | 5.64E-05    | 0.000444451 |

|                    |                                                                                                           |             |             |             |
|--------------------|-----------------------------------------------------------------------------------------------------------|-------------|-------------|-------------|
| ENSMMUG0000006180  | tetratricopeptide repeat, ankyrin repeat and coiled-coil containing 1 [Source:VGNC Symbol;Acc:VGNC:78238] | 1.92611551  | 3.88E-09    | 7.46E-08    |
| ENSMMUG00000020679 | myozenin 3 [Source:VGNC Symbol;Acc:VGNC:74988]                                                            | 1.936181595 | 2.15E-11    | 5.86E-10    |
| ENSMMUG00000048375 | Metazoan signal recognition particle RNA [Source:RFAM;Acc:RF00017]                                        | 1.937774193 | 7.11E-19    | 6.03E-17    |
| ENSMMUG00000005986 | Kruppel like factor 17 [Source:NCBI gene;Acc:702810]                                                      | 1.940155661 | 0.001929977 | 0.009043595 |
| ENSMMUG00000064052 | CD300 molecule like family member d [Source:NCBI gene;Acc:703142]                                         | 1.943050945 | 2.33E-07    | 3.26E-06    |
| ENSMMUG00000050739 |                                                                                                           | 1.944832658 | 0.001530681 | 0.007439148 |
| ENSMMUG00000054225 | taste receptor type 2 member 43 [Source:NCBI gene;Acc:694161]                                             | 1.945113177 | 0.001739547 | 0.008264695 |
| ENSMMUG00000052530 |                                                                                                           | 1.947190266 | 0.000238952 | 0.001528872 |
| ENSMMUG00000063238 |                                                                                                           | 1.94831876  | 0.013759119 | 0.045706305 |
| ENSMMUG00000009960 | cathepsin A [Source:VGNC Symbol;Acc:VGNC:71617]                                                           | 1.948851793 | 4.54E-11    | 1.19E-09    |
| ENSMMUG00000023717 | MIER family member 2 [Source:VGNC Symbol;Acc:VGNC:74855]                                                  | 1.95155169  | 5.83E-10    | 1.30E-08    |
| ENSMMUG00000003167 | cytohesin 3 [Source:VGNC Symbol;Acc:VGNC:71829]                                                           | 1.95254419  | 1.37E-10    | 3.37E-09    |
| ENSMMUG00000021428 | lipocalin 12 [Source:VGNC Symbol;Acc:VGNC:74143]                                                          | 1.953399535 | 1.51E-11    | 4.25E-10    |
| ENSMMUG00000056511 |                                                                                                           | 1.953947898 | 0.000221887 | 0.00143916  |
| ENSMMUG00000014866 | hydroxymethylbilane synthase [Source:VGNC Symbol;Acc:VGNC:73479]                                          | 1.954002117 | 6.01E-06    | 6.06E-05    |
| ENSMMUG00000059472 | filaggrin family member 2 [Source:HGNC Symbol;Acc:HGNC:33276]                                             | 1.954178246 | 1.37E-08    | 2.41E-07    |
| ENSMMUG00000062083 |                                                                                                           | 1.955674582 | 0.000685664 | 0.00380302  |
| ENSMMUG00000006130 | prolyl 4-hydroxylase, transmembrane [Source:VGNC Symbol;Acc:VGNC:75693]                                   | 1.957375442 | 0.010157119 | 0.035848743 |
| ENSMMUG00000023797 | post-GPI attachment to proteins GalNAc transferase 4 [Source:VGNC Symbol;Acc:VGNC:79688]                  | 1.957731671 | 0.000266901 | 0.001675786 |
| ENSMMUG00000007534 | protein regulator of cytokinesis 1 [Source:NCBI gene;Acc:710182]                                          | 1.958898339 | 3.10E-05    | 0.000263035 |
| ENSMMUG00000032429 | forkhead box O4 [Source:VGNC Symbol;Acc:VGNC:72712]                                                       | 1.95958085  | 3.37E-09    | 6.54E-08    |
| ENSMMUG00000010581 | Rap guanine nucleotide exchange factor 2 [Source:VGNC Symbol;Acc:VGNC:76493]                              | 1.959856754 | 0.013034601 | 0.043832635 |
| ENSMMUG00000009508 | TATA-box binding protein associated factor 5 like [Source:VGNC Symbol;Acc:VGNC:78148]                     | 1.96289703  | 6.96E-05    | 0.000533758 |
| ENSMMUG00000009559 | minichromosome maintenance complex binding protein [Source:VGNC Symbol;Acc:VGNC:74583]                    | 1.962930287 | 2.74E-06    | 3.01E-05    |
| ENSMMUG00000004498 | protein inhibitor of activated STAT 2 [Source:VGNC Symbol;Acc:VGNC:75815]                                 | 1.965628993 | 0.000140775 | 0.000970968 |
| ENSMMUG00000000863 | dynein axonemal assembly factor 4 [Source:VGNC Symbol;Acc:VGNC:71881]                                     | 1.966163498 | 9.47E-15    | 4.67E-13    |
| ENSMMUG00000028906 | Rho/Rac guanine nucleotide exchange factor 18 [Source:NCBI gene;Acc:707510]                               | 1.969416714 | 0.001647644 | 0.007907533 |
| ENSMMUG00000049894 |                                                                                                           | 1.970053029 | 0.00084564  | 0.004544713 |
| ENSMMUG00000058013 | melanoma-associated antigen 3 [Source:NCBI gene;Acc:706103]                                               | 1.973371441 | 2.92E-08    | 4.84E-07    |
| ENSMMUG00000021661 | leucine rich repeat containing 56 [Source:VGNC Symbol;Acc:VGNC:74356]                                     | 1.973855863 | 3.42E-09    | 6.64E-08    |
| ENSMMUG00000016797 | tubulin gamma 1 [Source:NCBI gene;Acc:710756]                                                             | 1.977898298 | 2.64E-12    | 8.68E-11    |
| ENSMMUG00000019527 | DNA cross-link repair 1B [Source:VGNC Symbol;Acc:VGNC:71647]                                              | 1.979736698 | 6.33E-06    | 6.36E-05    |
| ENSMMUG00000035888 | small nucleolar RNA, C/D box 121A [Source:HGNC Symbol;Acc:HGNC:33560]                                     | 1.981852302 | 0.002533729 | 0.011336755 |
| ENSMMUG00000061031 |                                                                                                           | 1.982497859 | 7.19E-05    | 0.000548156 |
| ENSMMUG00000064602 |                                                                                                           | 1.982624429 | 0.011414562 | 0.039232769 |
| ENSMMUG00000009995 | arachidonate 15-lipoxygenase type B [Source:VGNC Symbol;Acc:VGNC:69797]                                   | 1.983233532 | 5.12E-12    | 1.56E-10    |
| ENSMMUG00000023477 |                                                                                                           | 1.984395067 | 2.91E-13    | 1.14E-11    |
| ENSMMUG00000020919 | shroom family member 3 [Source:VGNC Symbol;Acc:VGNC:77352]                                                | 1.984703608 | 1.87E-06    | 2.14E-05    |
| ENSMMUG00000024428 | Y RNA [Source:RFAM;Acc:RF00019]                                                                           | 1.98503091  | 0.007798858 | 0.028950697 |
| ENSMMUG00000064321 |                                                                                                           | 1.985981009 | 4.68E-07    | 6.12E-06    |
| ENSMMUG00000051892 | fms related receptor tyrosine kinase 3 ligand [Source:NCBI gene;Acc:719239]                               | 1.986503328 | 6.08E-05    | 0.000473866 |
| ENSMMUG00000009648 | paired box 9 [Source:VGNC Symbol;Acc:VGNC:75768]                                                          | 1.987973082 | 0.013106338 | 0.044018439 |
| ENSMMUG00000002564 | Fraser extracellular matrix complex subunit 1 [Source:VGNC Symbol;Acc:VGNC:72743]                         | 1.988568254 | 9.93E-13    | 3.56E-11    |
| ENSMMUG00000023622 | BCR activator of RhoGEF and GTPase [Source:NCBI gene;Acc:709258]                                          | 1.997271865 | 1.16E-06    | 1.40E-05    |
| ENSMMUG00000010313 | kinesin family member 3A [Source:VGNC Symbol;Acc:VGNC:74017]                                              | 2.000535372 | 5.79E-19    | 4.98E-17    |
| ENSMMUG00000008162 | fibroblast growth factor binding protein 1 [Source:VGNC Symbol;Acc:VGNC:72536]                            | 2.001423016 | 2.01E-12    | 6.81E-11    |
| ENSMMUG00000009184 | myelin protein zero like 1 [Source:NCBI gene;Acc:698437]                                                  | 2.005254183 | 1.24E-08    | 2.19E-07    |
| ENSMMUG00000064892 |                                                                                                           | 2.006536468 | 1.77E-16    | 1.10E-14    |
| ENSMMUG00000020185 | voltage dependent anion channel 3 [Source:VGNC Symbol;Acc:VGNC:84135]                                     | 2.00759728  | 0.000216879 | 0.001414592 |
| ENSMMUG00000006093 | enhancer of zeste 1 polycomb repressive complex 2 subunit [Source:VGNC Symbol;Acc:VGNC:72457]             | 2.007877694 | 7.19E-14    | 3.08E-12    |
| ENSMMUG00000003484 | tectonin beta-propeller repeat containing 2 [Source:NCBI gene;Acc:708959]                                 | 2.009086679 | 3.16E-12    | 1.01E-10    |



|                    |                                                                                                     |             |             |             |
|--------------------|-----------------------------------------------------------------------------------------------------|-------------|-------------|-------------|
| ENSMMUG0000002124  | beta-1,4-galactosyltransferase 5 [Source:VGNC Symbol;Acc:VGNC:70212]                                | 2.009485744 | 3.82E-07    | 5.10E-06    |
| ENSMMUG0000002376  | scavenger receptor class F member 1 [Source:VGNC Symbol;Acc:VGNC:77027]                             | 2.010644671 | 1.59E-07    | 2.29E-06    |
| ENSMMUG00000056330 |                                                                                                     | 2.011478888 | 0.000438516 | 0.002577617 |
| ENSMMUG0000002715  | solute carrier family 9 member A8 [Source:VGNC Symbol;Acc:VGNC:77749]                               | 2.013040493 | 2.64E-22    | 4.11E-20    |
| ENSMMUG00000062217 | HD domain containing 3 [Source:NCBI gene;Acc:715621]                                                | 2.013749156 | 2.67E-06    | 2.94E-05    |
| ENSMMUG00000019764 | dynactin subunit 4 [Source:VGNC Symbol;Acc:VGNC:71625]                                              | 2.014625078 | 5.05E-10    | 1.14E-08    |
| ENSMMUG00000018910 | histidine rich glycoprotein [Source:VGNC Symbol;Acc:VGNC:73521]                                     | 2.01487039  | 6.75E-06    | 6.75E-05    |
| ENSMMUG00000014699 |                                                                                                     | 2.016511048 | 6.34E-22    | 9.62E-20    |
| ENSMMUG00000048190 | U2 small nuclear RNA auxiliary factor 1 like 4 [Source:NCBI gene;Acc:718865]                        | 2.019467197 | 4.25E-05    | 0.000345603 |
| ENSMMUG00000003298 | ataxin 2 like [Source:VGNC Symbol;Acc:VGNC:70159]                                                   | 2.024951073 | 1.96E-17    | 1.43E-15    |
| ENSMMUG00000063790 |                                                                                                     | 2.027650124 | 0.006025498 | 0.023406888 |
| ENSMMUG00000052179 |                                                                                                     | 2.028515925 | 0.011123159 | 0.038457031 |
| ENSMMUG00000017224 | catenin beta like 1 [Source:VGNC Symbol;Acc:VGNC:71414]                                             | 2.028547379 | 6.85E-08    | 1.06E-06    |
| ENSMMUG00000017561 | solute carrier family 43 member 2 [Source:VGNC Symbol;Acc:VGNC:77554]                               | 2.028708472 | 1.57E-16    | 9.90E-15    |
| ENSMMUG00000008200 | Src like adaptor 2 [Source:VGNC Symbol;Acc:VGNC:77499]                                              | 2.029434177 | 3.59E-06    | 3.84E-05    |
| ENSMMUG00000019246 | regulator of calcineurin 2 [Source:VGNC Symbol;Acc:VGNC:82092]                                      | 2.029553752 | 2.44E-06    | 2.72E-05    |
| ENSMMUG00000028771 | Yip1 interacting factor homolog B, membrane trafficking protein [Source:VGNC Symbol;Acc:VGNC:79852] | 2.029970892 | 1.63E-06    | 1.89E-05    |
| ENSMMUG00000065277 | hepatic and glial cell adhesion molecule [Source:NCBI gene;Acc:716321]                              | 2.030238077 | 0.001436088 | 0.00705474  |
| ENSMMUG00000056945 |                                                                                                     | 2.033323197 | 2.36E-16    | 1.43E-14    |
| ENSMMUG00000014076 | AF4/FMR2 family member 1 [Source:VGNC Symbol;Acc:VGNC:69817]                                        | 2.033347872 | 1.00E-09    | 2.14E-08    |
| ENSMMUG00000000293 | catenin alpha 2 [Source:VGNC Symbol;Acc:VGNC:71543]                                                 | 2.035056017 | 1.06E-10    | 2.64E-09    |
| ENSMMUG00000020534 | p21 (RAC1) activated kinase 6 [Source:NCBI gene;Acc:701589]                                         | 2.035321145 | 7.44E-14    | 3.16E-12    |
| ENSMMUG00000058095 | visual system homeobox 1 [Source:NCBI gene;Acc:715973]                                              | 2.036621709 | 0.00338594  | 0.014541084 |
| ENSMMUG00000003976 | glycoprotein hormone subunit alpha 2 [Source:VGNC Symbol;Acc:VGNC:72961]                            | 2.03836465  | 2.04E-16    | 1.26E-14    |
| ENSMMUG00000020515 | adhesion G protein-coupled receptor G2 [Source:VGNC Symbol;Acc:VGNC:69802]                          | 2.0403325   | 0.00022231  | 0.001441147 |
| ENSMMUG00000052780 |                                                                                                     | 2.041063466 | 6.20E-12    | 1.86E-10    |
| ENSMMUG00000064557 |                                                                                                     | 2.041541712 | 4.17E-19    | 3.71E-17    |
| ENSMMUG00000013251 | xin actin binding repeat containing 2 [Source:VGNC Symbol;Acc:VGNC:78953]                           | 2.043598578 | 0.012288368 | 0.041722742 |
| ENSMMUG00000062454 |                                                                                                     | 2.046090013 | 4.41E-09    | 8.40E-08    |
| ENSMMUG00000001387 | p21 (RAC1) activated kinase 1 [Source:NCBI gene;Acc:698585]                                         | 2.046364284 | 1.50E-16    | 9.54E-15    |
| ENSMMUG00000022003 | multimerin 1 [Source:VGNC Symbol;Acc:VGNC:74904]                                                    | 2.046733178 | 1.62E-05    | 0.000147993 |
| ENSMMUG00000014138 | forkhead box J3 [Source:VGNC Symbol;Acc:VGNC:72596]                                                 | 2.048508529 | 8.96E-06    | 8.71E-05    |
| ENSMMUG00000008843 | lymphotoxin alpha [Source:VGNC Symbol;Acc:VGNC:74452]                                               | 2.04963848  | 0.000700453 | 0.003878046 |
| ENSMMUG00000009887 | MAX dimerization protein MLX [Source:VGNC Symbol;Acc:VGNC:74726]                                    | 2.050160224 | 3.77E-10    | 8.62E-09    |
| ENSMMUG00000002377 | Rab interacting lysosomal protein [Source:VGNC Symbol;Acc:VGNC:76866]                               | 2.050651341 | 0.000118154 | 0.000834133 |
| ENSMMUG00000017971 | nucleus accumbens associated 1 [Source:VGNC Symbol;Acc:VGNC:74996]                                  | 2.051635329 | 0.001198092 | 0.006054996 |
| ENSMMUG00000003684 | ATPase phospholipid transporting 8B4 (putative) [Source:VGNC Symbol;Acc:VGNC:84311]                 | 2.053607572 | 4.07E-12    | 1.26E-10    |
| ENSMMUG00000009886 | Coenzyme A synthase [Source:VGNC Symbol;Acc:VGNC:81373]                                             | 2.053997195 | 6.90E-23    | 1.10E-20    |
| ENSMMUG00000001427 | myosin heavy chain 14 [Source:VGNC Symbol;Acc:VGNC:75006]                                           | 2.055577632 | 1.56E-08    | 2.72E-07    |
| ENSMMUG00000009308 | histidine ammonia-lyase [Source:VGNC Symbol;Acc:VGNC:73344]                                         | 2.055759017 | 0.009377658 | 0.033574366 |
| ENSMMUG00000026243 | U6 spliceosomal RNA [Source:RFAM;Acc:RF00026]                                                       | 2.057441314 | 0.014806351 | 0.04859409  |
| ENSMMUG00000003629 | phosphatidylinositol 4-kinase type 2 beta [Source:NCBI gene;Acc:693561]                             | 2.058306    | 0.001507895 | 0.007354581 |
| ENSMMUG00000042855 | zinc finger SWIM-type containing 1 [Source:NCBI gene;Acc:717180]                                    | 2.058880468 | 7.37E-06    | 7.28E-05    |
| ENSMMUG00000007970 | CCZ1 homolog, vacuolar protein trafficking and biogenesis associated [Source:NCBI gene;Acc:718128]  | 2.059759503 | 5.24E-14    | 2.32E-12    |
| ENSMMUG00000000313 | HEAT repeat containing 4 [Source:VGNC Symbol;Acc:VGNC:73176]                                        | 2.061463814 | 1.71E-16    | 1.07E-14    |
| ENSMMUG00000010173 | presenilin 1 [Source:VGNC Symbol;Acc:VGNC:76435]                                                    | 2.062750277 | 1.98E-11    | 5.41E-10    |
| ENSMMUG00000016417 | chromobox 8 [Source:NCBI gene;Acc:717514]                                                           | 2.064464735 | 3.84E-18    | 3.00E-16    |
| ENSMMUG00000052954 | Wnt family member 6 [Source:NCBI gene;Acc:700573]                                                   | 2.064780689 | 0.010420295 | 0.03656176  |
| ENSMMUG00000008383 | major facilitator superfamily domain containing 10 [Source:NCBI gene;Acc:720098]                    | 2.066540289 | 3.13E-13    | 1.22E-11    |
| ENSMMUG00000000419 | Rho GTPase activating protein 26 [Source:VGNC Symbol;Acc:VGNC:69846]                                | 2.066734444 | 4.44E-09    | 8.45E-08    |
| ENSMMUG00000059229 | CEA cell adhesion molecule 7 [Source:NCBI gene;Acc:705572]                                          | 2.06701564  | 6.88E-17    | 4.67E-15    |

|                    |                                                                                        |             |             |             |
|--------------------|----------------------------------------------------------------------------------------|-------------|-------------|-------------|
| ENSMMUG0000000649  | UBX domain protein 11 [Source:VGNC Symbol;Acc:VGNC:79859]                              | 2.067083336 | 2.26E-05    | 0.000199028 |
| ENSMMUG00000016323 | Rho guanine nucleotide exchange factor 39 [Source:VGNC Symbol;Acc:VGNC:69912]          | 2.068527863 | 1.67E-26    | 3.96E-24    |
| ENSMMUG00000006091 | contactin associated protein 1 [Source:VGNC Symbol;Acc:VGNC:71390]                     | 2.068839205 | 6.31E-15    | 3.18E-13    |
| ENSMMUG00000007200 | NEDD4 binding protein 2 like 2 [Source:VGNC Symbol;Acc:VGNC:75031]                     | 2.070760413 | 2.04E-17    | 1.48E-15    |
| ENSMMUG00000003348 | neurofilament light [Source:VGNC Symbol;Acc:VGNC:75307]                                | 2.071660446 | 1.14E-11    | 3.26E-10    |
| ENSMMUG00000062781 | chromosome 14 C11orf97 homolog [Source:NCBI gene;Acc:106993442]                        | 2.073454352 | 1.30E-08    | 2.29E-07    |
| ENSMMUG00000008195 | TGFB induced factor homeobox 2 [Source:NCBI gene;Acc:100429616]                        | 2.07535178  | 4.68E-19    | 4.14E-17    |
| ENSMMUG00000003902 | thrombospondin 3 [Source:VGNC Symbol;Acc:VGNC:78345]                                   | 2.079769206 | 3.05E-07    | 4.17E-06    |
| ENSMMUG00000051807 |                                                                                        | 2.083594921 | 1.17E-08    | 2.08E-07    |
| ENSMMUG00000001753 | integrin subunit alpha 1 [Source:VGNC Symbol;Acc:VGNC:73772]                           | 2.084607047 | 5.99E-14    | 2.60E-12    |
| ENSMMUG00000061194 |                                                                                        | 2.086897899 | 9.88E-09    | 1.78E-07    |
| ENSMMUG00000039943 | adenylate cyclase 9 [Source:NCBI gene;Acc:706789]                                      | 2.087409943 | 0.001651712 | 0.007917783 |
| ENSMMUG00000012635 | zyxin [Source:VGNC Symbol;Acc:VGNC:78917]                                              | 2.088722433 | 5.64E-19    | 4.92E-17    |
| ENSMMUG00000014707 | cadherin EGF LAG seven-pass G-type receptor 3 [Source:VGNC Symbol;Acc:VGNC:71148]      | 2.090841502 | 0.001072753 | 0.005523757 |
| ENSMMUG00000015685 | zinc finger protein 804B [Source:VGNC Symbol;Acc:VGNC:81890]                           | 2.095489926 | 1.85E-20    | 2.16E-18    |
| ENSMMUG00000023370 | DDB1 and CUL4 associated factor 17 [Source:VGNC Symbol;Acc:VGNC:71709]                 | 2.095564466 | 3.72E-19    | 3.39E-17    |
| ENSMMUG00000054158 | acyl-CoA dehydrogenase family member 11 [Source:NCBI gene;Acc:106997118]               | 2.096709741 | 2.32E-10    | 5.51E-09    |
| ENSMMUG00000016796 | reticulophagy regulator family member 3 [Source:VGNC Symbol;Acc:VGNC:76845]            | 2.097124522 | 9.91E-17    | 6.52E-15    |
| ENSMMUG00000062254 |                                                                                        | 2.098223643 | 5.28E-05    | 0.000420234 |
| ENSMMUG00000016096 | lamin A/C [Source:VGNC Symbol;Acc:VGNC:74427]                                          | 2.098471267 | 0.002569932 | 0.011477846 |
| ENSMMUG00000021664 | lamin tail domain containing 2 [Source:VGNC Symbol;Acc:VGNC:74380]                     | 2.098714207 | 9.52E-22    | 1.39E-19    |
| ENSMMUG00000016827 | UBA domain containing 1 [Source:VGNC Symbol;Acc:VGNC:79837]                            | 2.099164552 | 0.002387123 | 0.010790778 |
| ENSMMUG00000000421 | nuclear receptor subfamily 3 group C member 1 [Source:VGNC Symbol;Acc:VGNC:75515]      | 2.10318068  | 8.01E-17    | 5.35E-15    |
| ENSMMUG00000017906 | DnaJ heat shock protein family (Hsp40) member B1 [Source:NCBI gene;Acc:718890]         | 2.104070873 | 7.71E-05    | 0.000580448 |
| ENSMMUG00000012797 | zinc finger protein 233 [Source:VGNC Symbol;Acc:VGNC:79903]                            | 2.104234051 | 9.10E-12    | 2.65E-10    |
| ENSMMUG00000012801 | zinc finger protein 235 [Source:VGNC Symbol;Acc:VGNC:78825]                            | 2.105387152 | 1.80E-21    | 2.52E-19    |
| ENSMMUG00000054960 |                                                                                        | 2.107536667 | 1.84E-06    | 2.11E-05    |
| ENSMMUG00000063383 |                                                                                        | 2.110301947 | 0.001620807 | 0.007803112 |
| ENSMMUG00000006233 | adducin 3 [Source:VGNC Symbol;Acc:VGNC:69531]                                          | 2.110715944 | 5.34E-06    | 5.47E-05    |
| ENSMMUG00000006929 | ST3 beta-galactoside alpha-2,3-sialyltransferase 4 [Source:VGNC Symbol;Acc:VGNC:77827] | 2.112150759 | 2.44E-10    | 5.75E-09    |
| ENSMMUG00000015866 | vesicle transport through interaction with t-SNAREs 1B [Source:NCBI gene;Acc:711113]   | 2.114543974 | 5.85E-17    | 3.99E-15    |
| ENSMMUG00000062522 |                                                                                        | 2.114938679 | 5.75E-11    | 1.48E-09    |
| ENSMMUG00000057454 | transmembrane protein 160 [Source:NCBI gene;Acc:716996]                                | 2.115355511 | 1.63E-07    | 2.35E-06    |
| ENSMMUG00000053423 |                                                                                        | 2.116842782 | 0.01119925  | 0.038669496 |
| ENSMMUG00000019526 | BLM RecQ like helicase [Source:VGNC Symbol;Acc:VGNC:70254]                             | 2.119932363 | 2.34E-05    | 0.000204853 |
| ENSMMUG00000059036 |                                                                                        | 2.120066827 | 0.003024311 | 0.013186167 |
| ENSMMUG00000008791 | CD47 molecule [Source:VGNC Symbol;Acc:VGNC:70767]                                      | 2.12662855  | 5.05E-07    | 6.56E-06    |
| ENSMMUG00000001151 | microtubule associated scaffold protein 1 [Source:VGNC Symbol;Acc:VGNC:84018]          | 2.127123096 | 7.83E-18    | 5.80E-16    |
| ENSMMUG00000032659 | mml-mir-711 [Source:miRBase;Acc:MI0012553]                                             | 2.129389339 | 0.000812921 | 0.004405472 |
| ENSMMUG00000053013 |                                                                                        | 2.12958568  | 1.01E-08    | 1.81E-07    |
| ENSMMUG00000039292 |                                                                                        | 2.129619297 | 8.38E-12    | 2.46E-10    |
| ENSMMUG00000020462 | CD300e molecule [Source:NCBI gene;Acc:114673189]                                       | 2.129961956 | 8.87E-06    | 8.64E-05    |
| ENSMMUG00000052252 | protein phosphatase 1 regulatory subunit 3F [Source:NCBI gene;Acc:715950]              | 2.133172676 | 4.75E-19    | 4.17E-17    |
| ENSMMUG00000054414 |                                                                                        | 2.133805528 | 1.20E-06    | 1.44E-05    |
| ENSMMUG00000057702 |                                                                                        | 2.133985498 | 3.43E-24    | 6.59E-22    |
| ENSMMUG00000056796 | NADH:ubiquinone oxidoreductase subunit A2 [Source:NCBI gene;Acc:697736]                | 2.134608518 | 0.001124954 | 0.005742028 |
| ENSMMUG00000055589 |                                                                                        | 2.134713008 | 0.00014775  | 0.001011135 |
| ENSMMUG00000060891 | histone H3.Y [Source:NCBI gene;Acc:718280]                                             | 2.136478413 | 0.009300697 | 0.03333767  |
| ENSMMUG00000010137 | microcephalin 1 [Source:VGNC Symbol;Acc:VGNC:74687]                                    | 2.13827601  | 1.02E-05    | 9.79E-05    |
| ENSMMUG00000059188 |                                                                                        | 2.138858592 | 7.66E-10    | 1.68E-08    |
| ENSMMUG00000059302 | Metazoan signal recognition particle RNA [Source:RFAM;Acc:RF00017]                     | 2.139120343 | 8.60E-06    | 8.39E-05    |



|                    |                                                                                                |             |             |             |
|--------------------|------------------------------------------------------------------------------------------------|-------------|-------------|-------------|
| ENSMMUG00000042618 | involucrin [Source:NCBI gene;Acc:713728]                                                       | 2.13956976  | 7.10E-05    | 0.000542887 |
| ENSMMUG00000055973 | phosphoglycerate mutase 1-like [Source:NCBI gene;Acc:714548]                                   | 2.142148284 | 0.005139289 | 0.020656312 |
| ENSMMUG00000018144 | C2 calcium-dependent domain-containing protein 6 [Source:NCBI gene;Acc:702140]                 | 2.143774083 | 1.01E-19    | 1.01E-17    |
| ENSMMUG00000063759 | transmembrane protein 185B [Source:NCBI gene;Acc:695744]                                       | 2.144179623 | 1.78E-11    | 4.89E-10    |
| ENSMMUG00000007201 | PDS5 cohesin associated factor B [Source:VGNC Symbol;Acc:VGNC:75835]                           | 2.144734819 | 7.85E-16    | 4.46E-14    |
| ENSMMUG00000022409 | solute carrier family 10 member 1 [Source:VGNC Symbol;Acc:VGNC:77380]                          | 2.147125894 | 1.36E-17    | 9.98E-16    |
| ENSMMUG00000018246 | transmembrane and coiled-coil domains 6 [Source:VGNC Symbol;Acc:VGNC:84507]                    | 2.149039729 | 4.89E-20    | 5.18E-18    |
| ENSMMUG00000064229 |                                                                                                | 2.154140651 | 8.87E-05    | 0.000653813 |
| ENSMMUG00000061797 | U6 spliceosomal RNA [Source:RFAM;Acc:RF00026]                                                  | 2.159440867 | 0.00063914  | 0.003577264 |
| ENSMMUG00000012316 | CDC42 effector protein 2 [Source:VGNC Symbol;Acc:VGNC:70750]                                   | 2.159865094 | 0.007033659 | 0.026526757 |
| ENSMMUG00000016552 | inverted formin, FH2 and WH2 domain containing [Source:VGNC Symbol;Acc:VGNC:84357]             | 2.160153101 | 0.005805656 | 0.022746994 |
| ENSMMUG00000017450 | MOB kinase activator 2 [Source:NCBI gene;Acc:720951]                                           | 2.161518241 | 0.000663401 | 0.0036912   |
| ENSMMUG00000003199 | CD200 receptor 1 [Source:VGNC Symbol;Acc:VGNC:70845]                                           | 2.162451502 | 0.000220784 | 0.001433519 |
| ENSMMUG00000010180 | PIN2 (TERF1) interacting telomerase inhibitor 1 [Source:NCBI gene;Acc:701523]                  | 2.167230936 | 1.44E-05    | 0.000133305 |
| ENSMMUG00000023598 | sorting nexin 2 [Source:VGNC Symbol;Acc:VGNC:77682]                                            | 2.168092633 | 0.00361115  | 0.015347386 |
| ENSMMUG00000014874 | GTP binding protein 8 (putative) [Source:VGNC Symbol;Acc:VGNC:84180]                           | 2.168613272 | 1.44E-13    | 5.83E-12    |
| ENSMMUG00000009889 | PSMC3 interacting protein [Source:VGNC Symbol;Acc:VGNC:76282]                                  | 2.169442879 | 1.50E-18    | 1.23E-16    |
| ENSMMUG00000009988 | transmembrane protein 59 like [Source:VGNC Symbol;Acc:VGNC:78919]                              | 2.170494243 | 5.64E-25    | 1.17E-22    |
| ENSMMUG00000056522 |                                                                                                | 2.170624706 | 4.22E-05    | 0.000343487 |
| ENSMMUG00000064532 | mucin 16, cell surface associated [Source:NCBI gene;Acc:106996460]                             | 2.175356635 | 4.70E-18    | 3.64E-16    |
| ENSMMUG00000003598 | tripartite motif containing 7 [Source:VGNC Symbol;Acc:VGNC:79022]                              | 2.175586511 | 1.52E-11    | 4.26E-10    |
| ENSMMUG00000056798 |                                                                                                | 2.17703564  | 0.001480816 | 0.007239739 |
| ENSMMUG00000031163 | membrane anchored junction protein [Source:VGNC Symbol;Acc:VGNC:74375]                         | 2.178193314 | 2.57E-30    | 9.02E-28    |
| ENSMMUG00000008070 | YEATS domain containing 2 [Source:VGNC Symbol;Acc:VGNC:79502]                                  | 2.179108909 | 1.82E-29    | 6.04E-27    |
| ENSMMUG00000059182 |                                                                                                | 2.179397217 | 5.66E-12    | 1.70E-10    |
| ENSMMUG00000056844 |                                                                                                | 2.180779395 | 0.000350265 | 0.00212493  |
| ENSMMUG00000003303 | Tu translation elongation factor, mitochondrial [Source:VGNC Symbol;Acc:VGNC:78674]            | 2.181995914 | 2.79E-19    | 2.63E-17    |
| ENSMMUG00000065129 |                                                                                                | 2.18304275  | 0.006813344 | 0.025942632 |
| ENSMMUG00000016327 | coiled-coil domain containing 107 [Source:VGNC Symbol;Acc:VGNC:70656]                          | 2.185496926 | 4.29E-24    | 8.12E-22    |
| ENSMMUG00000014872 | dolichyl-phosphate N-acetylglucosaminophosphotransferase 1 [Source:VGNC Symbol;Acc:VGNC:71971] | 2.186543743 | 1.51E-20    | 1.79E-18    |
| ENSMMUG00000008853 | leukocyte specific transcript 1 [Source:HGNC Symbol;Acc:HGNC:14189]                            | 2.187189865 | 0.000983515 | 0.005165976 |
| ENSMMUG00000041101 | protein phosphatase 2 regulatory subunit B'beta [Source:NCBI gene;Acc:722026]                  | 2.187357775 | 1.43E-30    | 5.19E-28    |
| ENSMMUG00000055906 | angiotensin II receptor type 2 [Source:NCBI gene;Acc:709513]                                   | 2.187535516 | 0.001030906 | 0.005355397 |
| ENSMMUG00000062863 |                                                                                                | 2.188414084 | 3.63E-07    | 4.89E-06    |
| ENSMMUG00000060761 |                                                                                                | 2.191989181 | 1.37E-15    | 7.61E-14    |
| ENSMMUG00000002536 | calcium binding protein 1 [Source:VGNC Symbol;Acc:VGNC:70495]                                  | 2.192231336 | 1.77E-09    | 3.62E-08    |
| ENSMMUG00000010466 | solute carrier family 38 member 9 [Source:VGNC Symbol;Acc:VGNC:77574]                          | 2.192548801 | 5.96E-06    | 6.02E-05    |
| ENSMMUG00000059341 | Metazoan signal recognition particle RNA [Source:RFAM;Acc:RF00017]                             | 2.192821385 | 4.86E-17    | 3.36E-15    |
| ENSMMUG00000017209 | C1D nuclear receptor corepressor [Source:NCBI gene;Acc:698450]                                 | 2.194300434 | 3.78E-05    | 0.000311554 |
| ENSMMUG00000043648 |                                                                                                | 2.195796695 | 0.000767884 | 0.004189108 |
| ENSMMUG00000055897 |                                                                                                | 2.196363633 | 3.11E-12    | 9.96E-11    |
| ENSMMUG00000053790 |                                                                                                | 2.197222295 | 6.16E-08    | 9.54E-07    |
| ENSMMUG00000058592 |                                                                                                | 2.197422413 | 1.95E-09    | 3.96E-08    |
| ENSMMUG00000002949 | motile sperm domain containing 3 [Source:VGNC Symbol;Acc:VGNC:74823]                           | 2.199253541 | 1.02E-11    | 2.95E-10    |
| ENSMMUG00000010513 | ribose-5-phosphate-3-epimerase [Source:NCBI gene;Acc:711322]                                   | 2.200482842 | 4.23E-07    | 5.58E-06    |
| ENSMMUG00000003098 | peptidase, mitochondrial processing alpha subunit [Source:VGNC Symbol;Acc:VGNC:76062]          | 2.20090309  | 1.52E-27    | 4.36E-25    |
| ENSMMUG00000046774 | RAS like proto-oncogene B [Source:NCBI gene;Acc:695852]                                        | 2.200959578 | 2.99E-16    | 1.79E-14    |
| ENSMMUG00000057179 | cation channel sperm associated 1 [Source:NCBI gene;Acc:721869]                                | 2.201294664 | 0.005500944 | 0.021817395 |
| ENSMMUG00000061151 |                                                                                                | 2.202253976 | 4.81E-06    | 4.99E-05    |
| ENSMMUG00000055914 |                                                                                                | 2.203015159 | 6.27E-09    | 1.17E-07    |
| ENSMMUG00000011798 | eukaryotic translation initiation factor 3 subunit C [Source:NCBI gene;Acc:705696]             | 2.20343903  | 2.50E-20    | 2.85E-18    |

|                    |                                                                                                                                                      |             |             |             |
|--------------------|------------------------------------------------------------------------------------------------------------------------------------------------------|-------------|-------------|-------------|
| ENSMMUG00000064824 | gremlin 2, DAN family BMP antagonist [Source:NCBI gene;Acc:708280]                                                                                   | 2.204604375 | 1.42E-05    | 0.000131247 |
| ENSMMUG00000054686 |                                                                                                                                                      | 2.206394677 | 5.74E-06    | 5.82E-05    |
| ENSMMUG00000060632 |                                                                                                                                                      | 2.207479284 | 3.18E-05    | 0.000268496 |
| ENSMMUG00000016143 | sialophorin [Source:VGNC Symbol;Acc:VGNC:77861]                                                                                                      | 2.210982997 | 2.02E-19    | 1.94E-17    |
| ENSMMUG00000050339 | Metazoan signal recognition particle RNA [Source:RFAM;Acc:RF00017]                                                                                   | 2.212417986 | 3.96E-07    | 5.27E-06    |
| ENSMMUG00000009884 | hydroxysteroid 17-beta dehydrogenase 1 [Source:VGNC Symbol;Acc:VGNC:73528]                                                                           | 2.213289464 | 5.90E-08    | 9.23E-07    |
| ENSMMUG00000001036 | coagulation factor VII [Source:VGNC Symbol;Acc:VGNC:72466]                                                                                           | 2.215908862 | 8.72E-14    | 3.66E-12    |
| ENSMMUG00000058437 |                                                                                                                                                      | 2.216682889 | 1.36E-16    | 8.76E-15    |
| ENSMMUG00000023282 | aldo-keto reductase family 1, member C1 (dihydrodiol dehydrogenase 1; 20-alpha (3-alpha)-hydroxysteroid dehydrogenase) [Source:NCBI gene;Acc:711198] | 2.217738051 | 7.42E-10    | 1.63E-08    |
| ENSMMUG00000050405 |                                                                                                                                                      | 2.221193144 | 4.15E-10    | 9.44E-09    |
| ENSMMUG00000061845 |                                                                                                                                                      | 2.221300721 | 5.48E-06    | 5.60E-05    |
| ENSMMUG00000051645 |                                                                                                                                                      | 2.221720439 | 0.008208378 | 0.030166946 |
| ENSMMUG00000053329 |                                                                                                                                                      | 2.222295429 | 3.27E-08    | 5.34E-07    |
| ENSMMUG00000057640 | plakophilin-3-like [Source:NCBI gene;Acc:114669833]                                                                                                  | 2.224252056 | 1.24E-14    | 5.99E-13    |
| ENSMMUG00000009197 | myelin associated oligodendrocyte basic protein [Source:VGNC Symbol;Acc:VGNC:74908]                                                                  | 2.224701664 | 1.01E-19    | 1.01E-17    |
| ENSMMUG00000061923 |                                                                                                                                                      | 2.225557632 | 8.46E-05    | 0.000630301 |
| ENSMMUG00000018619 | DENN domain containing 6A [Source:VGNC Symbol;Acc:VGNC:71726]                                                                                        | 2.226415331 | 5.65E-06    | 5.75E-05    |
| ENSMMUG00000055322 | EPH receptor A1 [Source:NCBI gene;Acc:706295]                                                                                                        | 2.226462687 | 7.09E-21    | 8.80E-19    |
| ENSMMUG00000006836 | chloride channel accessory 1 [Source:NCBI gene;Acc:574295]                                                                                           | 2.226522627 | 5.74E-07    | 7.37E-06    |
| ENSMMUG00000065247 | opioid receptor kappa 1 [Source:NCBI gene;Acc:710783]                                                                                                | 2.235706465 | 1.53E-13    | 6.18E-12    |
| ENSMMUG00000003819 | nitric oxide synthase interacting protein [Source:VGNC Symbol;Acc:VGNC:75207]                                                                        | 2.236294974 | 3.64E-12    | 1.14E-10    |
| ENSMMUG00000054486 | testis expressed 35 [Source:NCBI gene;Acc:717255]                                                                                                    | 2.237756367 | 0.004841412 | 0.019578219 |
| ENSMMUG00000048621 | enolase-phosphatase 1 [Source:NCBI gene;Acc:106998330]                                                                                               | 2.238794049 | 0.0008903   | 0.004749424 |
| ENSMMUG00000001748 | spleen associated tyrosine kinase [Source:VGNC Symbol;Acc:VGNC:78063]                                                                                | 2.245292792 | 1.02E-05    | 9.80E-05    |
| ENSMMUG00000023345 | adhesion G protein-coupled receptor L4 [Source:VGNC Symbol;Acc:VGNC:69652]                                                                           | 2.245730446 | 1.61E-09    | 3.33E-08    |
| ENSMMUG00000058432 | zinc finger DHHC-type palmitoyltransferase 18 [Source:NCBI gene;Acc:719959]                                                                          | 2.247141998 | 1.08E-11    | 3.11E-10    |
| ENSMMUG00000000951 | integrin subunit beta 2 [Source:VGNC Symbol;Acc:VGNC:73786]                                                                                          | 2.247629925 | 5.80E-24    | 1.08E-21    |
| ENSMMUG00000002411 | drebrin like [Source:NCBI gene;Acc:720621]                                                                                                           | 2.248010788 | 2.69E-30    | 9.17E-28    |
| ENSMMUG00000061208 | MAP3K7 C-terminal like [Source:NCBI gene;Acc:713717]                                                                                                 | 2.248789773 | 1.22E-45    | 2.99E-42    |
| ENSMMUG00000019937 | maltase-glucoamylase 2 (putative) [Source:VGNC Symbol;Acc:VGNC:81720]                                                                                | 2.249723589 | 0.006871943 | 0.026076891 |
| ENSMMUG00000007402 | potassium two pore domain channel subfamily K member 7 [Source:VGNC Symbol;Acc:VGNC:73996]                                                           | 2.250212222 | 6.63E-08    | 1.02E-06    |
| ENSMMUG00000040741 | thioredoxin related transmembrane protein 2 [Source:NCBI gene;Acc:100169970]                                                                         | 2.259625033 | 2.66E-12    | 8.72E-11    |
| ENSMMUG00000005070 | ecotropic viral integration site 5 [Source:NCBI gene;Acc:706592]                                                                                     | 2.262091472 | 2.11E-13    | 8.32E-12    |
| ENSMMUG00000059589 |                                                                                                                                                      | 2.266165364 | 5.98E-05    | 0.000467686 |
| ENSMMUG00000011427 | syntaxin 10 [Source:VGNC Symbol;Acc:VGNC:78040]                                                                                                      | 2.270390568 | 4.04E-22    | 6.21E-20    |
| ENSMMUG00000031534 | ankyrin repeat and ubiquitin domain containing 1 [Source:VGNC Symbol;Acc:VGNC:84239]                                                                 | 2.272747854 | 7.30E-16    | 4.17E-14    |
| ENSMMUG00000008839 | DExD-box helicase 39B [Source:VGNC Symbol;Acc:VGNC:71621]                                                                                            | 2.2746427   | 9.98E-06    | 9.59E-05    |
| ENSMMUG00000050793 | N-acetyl-alpha-glucosaminidase [Source:NCBI gene;Acc:707186]                                                                                         | 2.275656441 | 7.64E-18    | 5.69E-16    |
| ENSMMUG00000051408 | myelin associated oligodendrocyte basic protein [Source:NCBI gene;Acc:717265]                                                                        | 2.275922249 | 1.48E-20    | 1.77E-18    |
| ENSMMUG00000005595 | RAB14, member RAS oncogene family [Source:NCBI gene;Acc:699837]                                                                                      | 2.276496528 | 1.57E-06    | 1.83E-05    |
| ENSMMUG00000063986 |                                                                                                                                                      | 2.276775392 | 7.18E-05    | 0.000548156 |
| ENSMMUG00000004477 | solute carrier family 19 member 1 [Source:VGNC Symbol;Acc:VGNC:77408]                                                                                | 2.278481304 | 7.77E-05    | 0.000584273 |
| ENSMMUG00000011411 | sperm acrosome associated 3 [Source:VGNC Symbol;Acc:VGNC:77930]                                                                                      | 2.280434074 | 3.47E-07    | 4.69E-06    |
| ENSMMUG00000056939 |                                                                                                                                                      | 2.281550645 | 0.004622317 | 0.018830924 |
| ENSMMUG00000012065 | tubulin tyrosine ligase like 5 [Source:NCBI gene;Acc:703116]                                                                                         | 2.282801208 | 9.12E-20    | 9.27E-18    |
| ENSMMUG00000005482 | lysine methyltransferase 2A [Source:NCBI gene;Acc:705511]                                                                                            | 2.284373115 | 3.89E-06    | 4.11E-05    |
| ENSMMUG00000008160 | neutrophil cytosolic factor 4 [Source:VGNC Symbol;Acc:VGNC:75141]                                                                                    | 2.286305728 | 1.03E-05    | 9.82E-05    |
| ENSMMUG00000043134 | coiled-coil domain containing 159 [Source:NCBI gene;Acc:100424702]                                                                                   | 2.291866145 | 2.60E-08    | 4.33E-07    |
| ENSMMUG00000058557 |                                                                                                                                                      | 2.291872175 | 3.11E-10    | 7.21E-09    |
| ENSMMUG00000008828 | BEN domain containing 5 [Source:NCBI gene;Acc:711150]                                                                                                | 2.292565253 | 5.46E-15    | 2.82E-13    |

|                    |                                                                                                |             |             |             |
|--------------------|------------------------------------------------------------------------------------------------|-------------|-------------|-------------|
| ENSMMUG00000039101 | pelota mRNA surveillance and ribosome rescue factor [Source:VGNC Symbol;Acc:VGNC:84478]        | 2.297961956 | 4.26E-12    | 1.31E-10    |
| ENSMMUG00000057934 |                                                                                                | 2.302048927 | 2.57E-06    | 2.84E-05    |
| ENSMMUG00000062063 | melanoma-associated antigen 3 [Source:NCBI gene;Acc:711544]                                    | 2.302526395 | 2.82E-20    | 3.15E-18    |
| ENSMMUG00000059436 | interleukin 10 receptor subunit alpha [Source:NCBI gene;Acc:704383]                            | 2.304377039 | 1.43E-14    | 6.79E-13    |
| ENSMMUG00000052777 |                                                                                                | 2.305681064 | 0.000200822 | 0.001319625 |
| ENSMMUG00000060404 |                                                                                                | 2.305731677 | 0.010519989 | 0.036848442 |
| ENSMMUG00000001409 | coiled-coil domain containing 187 [Source:NCBI gene;Acc:710749]                                | 2.309559445 | 4.72E-16    | 2.77E-14    |
| ENSMMUG00000057196 | pulmonary surfactant-associated protein A [Source:NCBI gene;Acc:701715]                        | 2.311104646 | 1.07E-13    | 4.40E-12    |
| ENSMMUG00000048566 | MCF.2 cell line derived transforming sequence like [Source:NCBI gene;Acc:713961]               | 2.312529036 | 4.16E-21    | 5.55E-19    |
| ENSMMUG00000003437 | signal transducer and activator of transcription 5B [Source:NCBI gene;Acc:709760]              | 2.313404926 | 8.75E-22    | 1.30E-19    |
| ENSMMUG00000018396 | HAUS augmin like complex subunit 6 [Source:VGNC Symbol;Acc:VGNC:73237]                         | 2.31658697  | 7.76E-07    | 9.66E-06    |
| ENSMMUG00000054111 | Metazoan signal recognition particle RNA [Source:RFAM;Acc:RF00017]                             | 2.317231997 | 0.00441267  | 0.01812099  |
| ENSMMUG00000065005 | Metazoan signal recognition particle RNA [Source:RFAM;Acc:RF00017]                             | 2.318792382 | 3.76E-09    | 7.25E-08    |
| ENSMMUG00000005356 | integrator complex subunit 8 [Source:VGNC Symbol;Acc:VGNC:73657]                               | 2.318904166 | 0.00401946  | 0.016838168 |
| ENSMMUG00000056529 | synaptotagmin 3 [Source:NCBI gene;Acc:719650]                                                  | 2.320147738 | 0.00017033  | 0.001145257 |
| ENSMMUG00000004472 | collagen type XVIII alpha 1 chain [Source:VGNC Symbol;Acc:VGNC:81291]                          | 2.322021846 | 0.012167306 | 0.041380289 |
| ENSMMUG00000014237 | lysine methyltransferase 5B [Source:VGNC Symbol;Acc:VGNC:74110]                                | 2.323441433 | 4.84E-37    | 3.72E-34    |
| ENSMMUG00000055834 |                                                                                                | 2.324745285 | 0.000189029 | 0.001261323 |
| ENSMMUG00000006853 | crystallin beta B2 [Source:NCBI gene;Acc:100144420]                                            | 2.326143116 | 6.48E-05    | 0.000500011 |
| ENSMMUG00000015468 | checkpoint with forkhead and ring finger domains [Source:VGNC Symbol;Acc:VGNC:71064]           | 2.326540796 | 0.003590464 | 0.015264749 |
| ENSMMUG00000006758 | cytochrome P450, family 27, subfamily A, polypeptide 1 [Source:NCBI gene;Acc:700192]           | 2.32725261  | 2.94E-06    | 3.21E-05    |
| ENSMMUG00000064707 |                                                                                                | 2.327336365 | 9.02E-08    | 1.36E-06    |
| ENSMMUG00000012068 | signal induced proliferation associated 1 like 2 [Source:NCBI gene;Acc:100425123]              | 2.327892761 | 4.39E-06    | 4.60E-05    |
| ENSMMUG00000039205 |                                                                                                | 2.328284665 | 0.001052134 | 0.005435806 |
| ENSMMUG00000003739 | mannosidase beta [Source:VGNC Symbol;Acc:VGNC:74486]                                           | 2.328846754 | 5.53E-11    | 1.43E-09    |
| ENSMMUG00000005208 | RNA polymerase III subunit B [Source:VGNC Symbol;Acc:VGNC:76143]                               | 2.329230394 | 1.10E-07    | 1.64E-06    |
| ENSMMUG00000028471 | U7 small nuclear RNA [Source:RFAM;Acc:RF00066]                                                 | 2.331497848 | 2.75E-06    | 3.02E-05    |
| ENSMMUG00000058715 |                                                                                                | 2.331970212 | 0.000854008 | 0.004579675 |
| ENSMMUG00000019965 | methyl-CpG binding domain protein 3 like 1 [Source:VGNC Symbol;Acc:VGNC:74513]                 | 2.33249054  | 0.001026398 | 0.005334231 |
| ENSMMUG00000055820 |                                                                                                | 2.334578624 | 1.01E-05    | 9.69E-05    |
| ENSMMUG00000056755 |                                                                                                | 2.335332896 | 8.83E-05    | 0.000651734 |
| ENSMMUG00000017256 | calcium voltage-gated channel subunit alpha1 G [Source:VGNC Symbol;Acc:VGNC:70504]             | 2.335528123 | 1.11E-23    | 1.96E-21    |
| ENSMMUG00000022613 | reversion inducing cysteine rich protein with kazal motifs [Source:VGNC Symbol;Acc:VGNC:76722] | 2.335689232 | 5.26E-32    | 2.08E-29    |
| ENSMMUG00000056605 | Metazoan signal recognition particle RNA [Source:RFAM;Acc:RF00017]                             | 2.339043776 | 0.00279068  | 0.012307228 |
| ENSMMUG00000028947 | complement factor D [Source:VGNC Symbol;Acc:VGNC:71115]                                        | 2.339165238 | 9.13E-31    | 3.51E-28    |
| ENSMMUG00000039266 | Metazoan signal recognition particle RNA [Source:RFAM;Acc:RF00017]                             | 2.344109016 | 7.73E-05    | 0.000581801 |
| ENSMMUG00000000740 | spermatogenesis associated 2 [Source:VGNC Symbol;Acc:VGNC:77923]                               | 2.344467601 | 2.12E-12    | 7.15E-11    |
| ENSMMUG00000018492 | TARBP2 subunit of RISC loading complex [Source:VGNC Symbol;Acc:VGNC:78099]                     | 2.348661986 | 2.54E-12    | 8.42E-11    |
| ENSMMUG00000060795 |                                                                                                | 2.348740104 | 7.04E-08    | 1.08E-06    |
| ENSMMUG00000057818 |                                                                                                | 2.349801917 | 0.002138923 | 0.009842568 |
| ENSMMUG00000054637 | tubulin polymerization promoting protein family member 3 [Source:NCBI gene;Acc:100429881]      | 2.353355522 | 0.013843985 | 0.045938558 |
| ENSMMUG00000021357 | zinc finger BED-type containing 3 [Source:VGNC Symbol;Acc:VGNC:79271]                          | 2.354088728 | 0.002618286 | 0.011643039 |
| ENSMMUG00000060273 | mitochondrial ribosomal protein L32 [Source:NCBI gene;Acc:701820]                              | 2.354284495 | 3.11E-14    | 1.41E-12    |
| ENSMMUG00000001220 | adhesion G protein-coupled receptor E1 [Source:VGNC Symbol;Acc:VGNC:69561]                     | 2.354605619 | 1.03E-13    | 4.24E-12    |
| ENSMMUG00000009377 | tripartite motif containing 47 [Source:VGNC Symbol;Acc:VGNC:79171]                             | 2.354872175 | 6.16E-13    | 2.27E-11    |
| ENSMMUG00000004774 | maestro heat like repeat family member 2B [Source:VGNC Symbol;Acc:VGNC:74837]                  | 2.3597105   | 4.21E-05    | 0.000342413 |
| ENSMMUG00000045513 |                                                                                                | 2.362019763 | 2.72E-10    | 6.36E-09    |
| ENSMMUG00000064915 | Metazoan signal recognition particle RNA [Source:RFAM;Acc:RF00017]                             | 2.362881686 | 0.000603598 | 0.003403129 |
| ENSMMUG00000018030 | endoplasmic reticulum protein 27 [Source:VGNC Symbol;Acc:VGNC:72369]                           | 2.363160369 | 5.62E-08    | 8.85E-07    |
| ENSMMUG00000002886 | Bardet-Biedl syndrome 9 [Source:NCBI gene;Acc:708412]                                          | 2.364477048 | 4.13E-23    | 6.77E-21    |
| ENSMMUG00000057283 |                                                                                                | 2.367244451 | 1.16E-07    | 1.71E-06    |



|                     |                                                                                                                  |             |             |             |
|---------------------|------------------------------------------------------------------------------------------------------------------|-------------|-------------|-------------|
| ENSMMUG00000021564  | lysine demethylase 2B [Source:VGNC Symbol;Acc:VGNC:81425]                                                        | 2.367554341 | 4.90E-08    | 7.78E-07    |
| ENSMMUG00000006090  | C-C motif chemokine receptor 10 [Source:VGNC Symbol;Acc:VGNC:82119]                                              | 2.371397249 | 0.00787319  | 0.029191368 |
| ENSMMUG00000009437  | zinc finger protein 619 [Source:VGNC Symbol;Acc:VGNC:82562]                                                      | 2.375223582 | 0.00287563  | 0.01262299  |
| ENSMMUG00000005294  | casein kinase 2 beta [Source:NCBI gene;Acc:715807]                                                               | 2.381288361 | 7.26E-05    | 0.000553492 |
| ENSMMUG000000059548 |                                                                                                                  | 2.384249187 | 0.008018894 | 0.029597665 |
| ENSMMUG00000003833  | Ras association domain family member 6 [Source:VGNC Symbol;Acc:VGNC:76515]                                       | 2.387876575 | 6.15E-07    | 7.85E-06    |
| ENSMMUG000000054755 | transmembrane protein 65 [Source:NCBI gene;Acc:705727]                                                           | 2.389095361 | 8.62E-09    | 1.57E-07    |
| ENSMMUG000000059175 |                                                                                                                  | 2.394139784 | 2.29E-07    | 3.21E-06    |
| ENSMMUG00000005698  | alkaline ceramidase 1 [Source:VGNC Symbol;Acc:VGNC:69460]                                                        | 2.394816921 | 0.000679978 | 0.00377489  |
| ENSMMUG000000056381 | forkhead box R1 [Source:NCBI gene;Acc:707285]                                                                    | 2.397049332 | 1.03E-06    | 1.26E-05    |
| ENSMMUG000000027986 | U6 spliceosomal RNA [Source:RFAM;Acc:RF00026]                                                                    | 2.397997627 | 2.33E-06    | 2.61E-05    |
| ENSMMUG000000018034 | suppression of tumorigenicity 14 [Source:VGNC Symbol;Acc:VGNC:77897]                                             | 2.398771501 | 8.96E-52    | 3.67E-48    |
| ENSMMUG000000024234 | U6 spliceosomal RNA [Source:RFAM;Acc:RF00026]                                                                    | 2.399663197 | 0.001132089 | 0.005766477 |
| ENSMMUG000000052961 |                                                                                                                  | 2.404577824 | 0.000423068 | 0.002495166 |
| ENSMMUG000000039412 | cholinergic receptor muscarinic 4 [Source:NCBI gene;Acc:574195]                                                  | 2.408096404 | 0.004145409 | 0.017254055 |
| ENSMMUG000000002563 | zinc finger DHHC-type palmitoyltransferase 5 [Source:VGNC Symbol;Acc:VGNC:79145]                                 | 2.408395813 | 5.45E-05    | 0.000431659 |
| ENSMMUG000000003591 | pleckstrin homology domain containing A2 [Source:VGNC Symbol;Acc:VGNC:76026]                                     | 2.412327349 | 2.14E-06    | 2.42E-05    |
| ENSMMUG000000005432 | clathrin heavy chain like 1 [Source:VGNC Symbol;Acc:VGNC:71268]                                                  | 2.413063652 | 1.23E-20    | 1.49E-18    |
| ENSMMUG000000008251 | cilia and flagella associated protein 126 [Source:VGNC Symbol;Acc:VGNC:71150]                                    | 2.414750846 | 0.002868902 | 0.012597953 |
| ENSMMUG000000004103 | collagen type XI alpha 1 chain [Source:VGNC Symbol;Acc:VGNC:71289]                                               | 2.417629381 | 1.24E-35    | 8.45E-33    |
| ENSMMUG000000016099 | hedgehog acyltransferase [Source:NCBI gene;Acc:712333]                                                           | 2.419167516 | 9.28E-05    | 0.000680896 |
| ENSMMUG000000015416 | bromodomain and PHD finger containing 3 [Source:VGNC Symbol;Acc:VGNC:70309]                                      | 2.419730424 | 1.50E-12    | 5.19E-11    |
| ENSMMUG000000020190 | valosin containing protein [Source:VGNC Symbol;Acc:VGNC:78762]                                                   | 2.420462142 | 8.37E-10    | 1.82E-08    |
| ENSMMUG000000016438 | protein kinase D3 [Source:VGNC Symbol;Acc:VGNC:76415]                                                            | 2.42422562  | 1.57E-10    | 3.82E-09    |
| ENSMMUG000000000757 | ring finger protein 114 [Source:VGNC Symbol;Acc:VGNC:76725]                                                      | 2.426026971 | 1.16E-05    | 0.000109699 |
| ENSMMUG000000043675 | Cbp/p300 interacting transactivator with Glu/Asp rich carboxy-terminal domain 4 [Source:NCBI gene;Acc:114672840] | 2.428685688 | 8.59E-22    | 1.29E-19    |
| ENSMMUG000000018237 | plexin C1 [Source:VGNC Symbol;Acc:VGNC:76190]                                                                    | 2.437040533 | 1.03E-26    | 2.63E-24    |
| ENSMMUG000000001472 | TIA1 cytotoxic granule associated RNA binding protein like 1 [Source:VGNC Symbol;Acc:VGNC:78354]                 | 2.437496413 | 3.23E-11    | 8.62E-10    |
| ENSMMUG000000019418 | erythrocyte membrane protein band 4.1 like 3 [Source:VGNC Symbol;Acc:VGNC:72233]                                 | 2.438222144 | 5.50E-28    | 1.65E-25    |
| ENSMMUG000000008529 | chromosome 7 C15orf39 homolog [Source:VGNC Symbol;Acc:VGNC:70620]                                                | 2.442820357 | 3.52E-07    | 4.75E-06    |
| ENSMMUG000000004332 | tripartite motif containing 44 [Source:VGNC Symbol;Acc:VGNC:79168]                                               | 2.44340935  | 2.58E-08    | 4.32E-07    |
| ENSMMUG000000013176 | NAD(P) dependent steroid dehydrogenase-like [Source:NCBI gene;Acc:693333]                                        | 2.444517924 | 4.22E-06    | 4.44E-05    |
| ENSMMUG000000050495 |                                                                                                                  | 2.449421666 | 0.000134757 | 0.000932599 |
| ENSMMUG000000006609 | MHC class I polypeptide-related sequence B [Source:NCBI gene;Acc:715141]                                         | 2.452951173 | 0.000256853 | 0.001618962 |
| ENSMMUG000000001200 |                                                                                                                  | 2.454066716 | 0.004181706 | 0.017375709 |
| ENSMMUG000000020726 | dihydropyrimidine dehydrogenase [Source:VGNC Symbol;Acc:VGNC:71982]                                              | 2.45420832  | 1.49E-38    | 1.31E-35    |
| ENSMMUG000000002950 | transferrin receptor 2 [Source:VGNC Symbol;Acc:VGNC:81770]                                                       | 2.454722778 | 6.22E-19    | 5.31E-17    |
| ENSMMUG000000058907 |                                                                                                                  | 2.459551032 | 4.40E-05    | 0.00035657  |
| ENSMMUG000000016929 | proline rich and Gla domain 3 [Source:VGNC Symbol;Acc:VGNC:76350]                                                | 2.460897207 | 1.73E-05    | 0.000156827 |
| ENSMMUG000000045093 | cyclin B3 [Source:NCBI gene;Acc:694534]                                                                          | 2.462570565 | 6.78E-18    | 5.08E-16    |
| ENSMMUG000000061342 |                                                                                                                  | 2.463876458 | 2.62E-14    | 1.20E-12    |
| ENSMMUG000000018200 | RNA transcription, translation and transport factor [Source:VGNC Symbol;Acc:VGNC:77087]                          | 2.465801608 | 0.009054359 | 0.032664258 |
| ENSMMUG000000018239 | centrosomal protein 83 [Source:VGNC Symbol;Acc:VGNC:70992]                                                       | 2.466577407 | 1.37E-21    | 1.94E-19    |
| ENSMMUG000000056707 |                                                                                                                  | 2.467032147 | 0.000464463 | 0.002718437 |
| ENSMMUG000000032142 | complement C8 gamma chain [Source:VGNC Symbol;Acc:VGNC:70481]                                                    | 2.467959356 | 5.32E-09    | 1.00E-07    |
| ENSMMUG000000015952 | katanin catalytic subunit A1 like 2 [Source:VGNC Symbol;Acc:VGNC:73904]                                          | 2.468247272 | 0.000128745 | 0.000896546 |
| ENSMMUG000000000302 | WD repeat and HMG-box DNA binding protein 1 [Source:VGNC Symbol;Acc:VGNC:79376]                                  | 2.477241913 | 6.69E-21    | 8.39E-19    |
| ENSMMUG000000017036 | nicalin [Source:VGNC Symbol;Acc:VGNC:75032]                                                                      | 2.479382313 | 7.55E-14    | 3.20E-12    |
| ENSMMUG000000055266 | late cornified envelope protein 1C-like [Source:NCBI gene;Acc:107000794]                                         | 2.483073565 | 0.000843323 | 0.004536227 |
| ENSMMUG000000052891 |                                                                                                                  | 2.483272314 | 1.24E-21    | 1.78E-19    |
| ENSMMUG000000057329 |                                                                                                                  | 2.48556303  | 2.38E-07    | 3.32E-06    |

|                    |                                                                                                  |             |             |             |
|--------------------|--------------------------------------------------------------------------------------------------|-------------|-------------|-------------|
| ENSMMUG0000003612  | SPC24 component of NDC80 kinetochore complex [Source:VGNC Symbol;Acc:VGNC:78002]                 | 2.486689066 | 0.000327953 | 0.002010094 |
| ENSMMUG00000022207 | phospholipid phosphatase related 2 [Source:NCBI gene;Acc:714388]                                 | 2.486760173 | 2.95E-08    | 4.87E-07    |
| ENSMMUG00000000994 | epidermal growth factor receptor pathway substrate 15 like 1 [Source:VGNC Symbol;Acc:VGNC:72100] | 2.487441785 | 0.000404815 | 0.00240134  |
| ENSMMUG00000055811 |                                                                                                  | 2.487719974 | 1.88E-12    | 6.40E-11    |
| ENSMMUG00000040696 | Metazoan signal recognition particle RNA [Source:RFAM;Acc:RF00017]                               | 2.489229176 | 0.013076699 | 0.043950154 |
| ENSMMUG00000010826 | ral guanine nucleotide dissociation stimulator like 3 [Source:VGNC Symbol;Acc:VGNC:76869]        | 2.492379671 | 6.72E-10    | 1.49E-08    |
| ENSMMUG00000054211 |                                                                                                  | 2.493448838 | 0.000192343 | 0.001279268 |
| ENSMMUG00000022313 | activating transcription factor 7 [Source:NCBI gene;Acc:700403]                                  | 2.497791465 | 2.35E-13    | 9.22E-12    |
| ENSMMUG00000023060 | A-kinase anchoring protein 4 [Source:VGNC Symbol;Acc:VGNC:69770]                                 | 2.499609335 | 2.30E-05    | 0.00020162  |
| ENSMMUG00000018345 | phosphatidylethanolamine binding protein 4 [Source:VGNC Symbol;Acc:VGNC:82204]                   | 2.501907056 | 6.72E-15    | 3.35E-13    |
| ENSMMUG00000012668 | centriolin [Source:VGNC Symbol;Acc:VGNC:71204]                                                   | 2.504452088 | 4.33E-32    | 1.77E-29    |
| ENSMMUG00000057687 |                                                                                                  | 2.505563149 | 7.83E-21    | 9.62E-19    |
| ENSMMUG00000058758 |                                                                                                  | 2.507002194 | 0.004234681 | 0.017548369 |
| ENSMMUG00000004797 | CTP synthase 2 [Source:VGNC Symbol;Acc:VGNC:71550]                                               | 2.512173309 | 1.46E-09    | 3.04E-08    |
| ENSMMUG00000007208 | G protein-coupled receptor 146 [Source:VGNC Symbol;Acc:VGNC:72979]                               | 2.51427873  | 2.39E-07    | 3.32E-06    |
| ENSMMUG00000017740 | sperm mitochondria associated cysteine rich protein [Source:VGNC Symbol;Acc:VGNC:77816]          | 2.514294093 | 2.21E-05    | 0.000195131 |
| ENSMMUG00000012856 | nuclear FMR1 interacting protein 2 [Source:VGNC Symbol;Acc:VGNC:75422]                           | 2.515149237 | 0.002322506 | 0.010549119 |
| ENSMMUG00000059504 |                                                                                                  | 2.517323699 | 2.55E-08    | 4.28E-07    |
| ENSMMUG00000062996 |                                                                                                  | 2.519294545 | 0.000410932 | 0.002431761 |
| ENSMMUG00000001725 | solute carrier family 35 member A4 [Source:VGNC Symbol;Acc:VGNC:77532]                           | 2.525871389 | 4.62E-16    | 2.73E-14    |
| ENSMMUG00000021877 | protein kinase AMP-activated non-catalytic subunit gamma 3 [Source:VGNC Symbol;Acc:VGNC:76406]   | 2.526638617 | 1.02E-06    | 1.24E-05    |
| ENSMMUG00000053083 | C2 calcium dependent domain containing 4C [Source:NCBI gene;Acc:100424440]                       | 2.527339982 | 0.000242843 | 0.001548123 |
| ENSMMUG00000056940 | late cornified envelope protein 1C [Source:NCBI gene;Acc:713408]                                 | 2.527734096 | 0.003929059 | 0.016527057 |
| ENSMMUG00000052228 | Metazoan signal recognition particle RNA [Source:RFAM;Acc:RF00017]                               | 2.528533898 | 0.000574973 | 0.003267216 |
| ENSMMUG00000050608 |                                                                                                  | 2.529193767 | 4.07E-19    | 3.65E-17    |
| ENSMMUG00000000644 | centrosomal protein 85 [Source:VGNC Symbol;Acc:VGNC:71096]                                       | 2.530719861 | 2.58E-12    | 8.51E-11    |
| ENSMMUG00000049678 |                                                                                                  | 2.534272596 | 1.75E-09    | 3.61E-08    |
| ENSMMUG00000023816 | semaphorin 4B [Source:VGNC Symbol;Acc:VGNC:77165]                                                | 2.535314811 | 1.42E-33    | 6.99E-31    |
| ENSMMUG00000000152 | transcription factor CP2 [Source:VGNC Symbol;Acc:VGNC:78323]                                     | 2.53885762  | 0.000185105 | 0.001237829 |
| ENSMMUG00000059778 |                                                                                                  | 2.541801282 | 7.10E-06    | 7.06E-05    |
| ENSMMUG00000010515 | KAT8 regulatory NSL complex subunit 1 like [Source:VGNC Symbol;Acc:VGNC:73913]                   | 2.542869981 | 1.44E-09    | 2.99E-08    |
| ENSMMUG00000005150 | CD163 molecule [Source:VGNC Symbol;Acc:VGNC:70752]                                               | 2.545451317 | 0.000182139 | 0.00122065  |
| ENSMMUG00000006931 | kirre like nephrin family adhesion molecule 3 [Source:NCBI gene;Acc:714534]                      | 2.545635878 | 2.74E-17    | 1.95E-15    |
| ENSMMUG00000008778 | parvalbumin [Source:VGNC Symbol;Acc:VGNC:76627]                                                  | 2.546711806 | 1.14E-10    | 2.81E-09    |
| ENSMMUG00000020683 | RNA binding motif protein 22 [Source:VGNC Symbol;Acc:VGNC:76535]                                 | 2.551601078 | 3.32E-16    | 1.97E-14    |
| ENSMMUG00000054942 |                                                                                                  | 2.555743472 | 1.36E-09    | 2.86E-08    |
| ENSMMUG00000041519 | zinc finger protein 354A [Source:VGNC Symbol;Acc:VGNC:84517]                                     | 2.567756521 | 0.001728758 | 0.008229342 |
| ENSMMUG00000059299 | membrane spanning 4-domains A2 [Source:NCBI gene;Acc:697830]                                     | 2.568315028 | 0.001314154 | 0.00654203  |
| ENSMMUG00000043738 |                                                                                                  | 2.568806807 | 0.000734305 | 0.004025576 |
| ENSMMUG00000015686 | abhydrolase domain containing 16A [Source:VGNC Symbol;Acc:VGNC:69393]                            | 2.571495746 | 4.36E-17    | 3.03E-15    |
| ENSMMUG00000008838 | mitochondrial coiled-coil domain 1 [Source:VGNC Symbol;Acc:VGNC:74548]                           | 2.573912421 | 0.012249453 | 0.041613605 |
| ENSMMUG00000060497 |                                                                                                  | 2.575068932 | 4.88E-07    | 6.37E-06    |
| ENSMMUG00000005504 | nucleoporin 37 [Source:VGNC Symbol;Acc:VGNC:75491]                                               | 2.578308586 | 7.55E-08    | 1.15E-06    |
| ENSMMUG00000064174 |                                                                                                  | 2.579574202 | 5.43E-06    | 5.56E-05    |
| ENSMMUG00000052882 | RAS like family 11 member B [Source:NCBI gene;Acc:701397]                                        | 2.584901707 | 0.00922544  | 0.033184045 |
| ENSMMUG00000005992 | zinc metalloproteinase STE24 [Source:VGNC Symbol;Acc:VGNC:78830]                                 | 2.586262262 | 1.23E-09    | 2.59E-08    |
| ENSMMUG00000035943 | U6 spliceosomal RNA [Source:RFAM;Acc:RF00026]                                                    | 2.589239561 | 1.13E-07    | 1.67E-06    |
| ENSMMUG00000029455 | olfactory receptor 4Q2 [Source:NCBI gene;Acc:114679271]                                          | 2.590273655 | 1.21E-15    | 6.82E-14    |
| ENSMMUG00000062037 | stannin [Source:NCBI gene;Acc:711909]                                                            | 2.601908509 | 1.05E-10    | 2.62E-09    |
| ENSMMUG00000058536 |                                                                                                  | 2.604912559 | 1.40E-18    | 1.16E-16    |
| ENSMMUG00000004376 | calcium and integrin binding 1 [Source:VGNC Symbol;Acc:VGNC:71189]                               | 2.606378633 | 3.36E-43    | 5.16E-40    |

|                     |                                                                                              |             |             |             |
|---------------------|----------------------------------------------------------------------------------------------|-------------|-------------|-------------|
| ENSMMUG00000053781  | Rho GDP dissociation inhibitor beta [Source:NCBI gene;Acc:702320]                            | 2.608612252 | 0.00012231  | 0.000860509 |
| ENSMMUG00000013967  | TOX high mobility group box family member 3 [Source:VGNC Symbol;Acc:VGNC:78612]              | 2.617440192 | 1.20E-07    | 1.77E-06    |
| ENSMMUG00000002562  | mediator complex subunit 19 [Source:VGNC Symbol;Acc:VGNC:74615]                              | 2.623190183 | 0.002675567 | 0.011871981 |
| ENSMMUG00000018664  | collagen type IX alpha 2 chain [Source:VGNC Symbol;Acc:VGNC:71307]                           | 2.627391739 | 1.24E-20    | 1.49E-18    |
| ENSMMUG000000061896 |                                                                                              | 2.627699466 | 7.77E-14    | 3.28E-12    |
| ENSMMUG00000008854  | natural cytotoxicity triggering receptor 3 [Source:VGNC Symbol;Acc:VGNC:74990]               | 2.628373843 | 1.18E-13    | 4.79E-12    |
| ENSMMUG00000003797  | ubiquitin specific peptidase 20 [Source:VGNC Symbol;Acc:VGNC:78740]                          | 2.628474015 | 9.81E-08    | 1.47E-06    |
| ENSMMUG00000000396  | intraflagellar transport 52 [Source:NCBI gene;Acc:694933]                                    | 2.630532632 | 1.29E-11    | 3.66E-10    |
| ENSMMUG00000022728  | zinc finger and SCAN domain containing 25 [Source:VGNC Symbol;Acc:VGNC:79344]                | 2.633901697 | 2.32E-12    | 7.73E-11    |
| ENSMMUG000000056437 | Metazoan signal recognition particle RNA [Source:RFAM;Acc:RF00017]                           | 2.635025511 | 7.94E-05    | 0.000595185 |
| ENSMMUG000000006079 | leucine rich repeat containing 19 [Source:VGNC Symbol;Acc:VGNC:74337]                        | 2.639140516 | 7.47E-05    | 0.000566721 |
| ENSMMUG00000022247  | osteoclastogenesis associated transmembrane protein 1 [Source:VGNC Symbol;Acc:VGNC:75664]    | 2.640975778 | 2.41E-15    | 1.30E-13    |
| ENSMMUG000000050529 | phosphodiesterase 6H [Source:NCBI gene;Acc:700447]                                           | 2.648082366 | 0.004280279 | 0.017695322 |
| ENSMMUG00000019802  | family with sequence similarity 133 member B [Source:NCBI gene;Acc:702054]                   | 2.648845745 | 3.38E-05    | 0.000283476 |
| ENSMMUG000000064931 |                                                                                              | 2.649239676 | 0.008071485 | 0.029756034 |
| ENSMMUG00000019690  | SEC14 and spectrin domain containing 1 [Source:VGNC Symbol;Acc:VGNC:77267]                   | 2.654702701 | 1.09E-08    | 1.95E-07    |
| ENSMMUG00000011064  | synaptosome associated protein 25 [Source:VGNC Symbol;Acc:VGNC:77663]                        | 2.658716657 | 3.47E-05    | 0.000290389 |
| ENSMMUG00000001707  | amyloid beta precursor protein binding family B member 3 [Source:VGNC Symbol;Acc:VGNC:69869] | 2.659703498 | 7.53E-26    | 1.68E-23    |
| ENSMMUG000000020156 | CD1d molecule [Source:VGNC Symbol;Acc:VGNC:70757]                                            | 2.663767028 | 0.001459054 | 0.007147563 |
| ENSMMUG00000013871  | WD repeat domain 25 [Source:VGNC Symbol;Acc:VGNC:78420]                                      | 2.664270656 | 1.59E-14    | 7.49E-13    |
| ENSMMUG00000013283  | cadherin related family member 2 [Source:NCBI gene;Acc:697249]                               | 2.667851263 | 4.69E-08    | 7.48E-07    |
| ENSMMUG000000051925 |                                                                                              | 2.668022001 | 1.13E-14    | 5.50E-13    |
| ENSMMUG000000056342 | Metazoan signal recognition particle RNA [Source:RFAM;Acc:RF00017]                           | 2.668327703 | 0.004549632 | 0.01859027  |
| ENSMMUG00000009040  | cornulin [Source:VGNC Symbol;Acc:VGNC:71397]                                                 | 2.668708166 | 4.99E-05    | 0.000398912 |
| ENSMMUG000000022381 | prolyl 3-hydroxylase 1 [Source:VGNC Symbol;Acc:VGNC:75648]                                   | 2.669660637 | 0.001362723 | 0.006745559 |
| ENSMMUG000000055441 |                                                                                              | 2.672542738 | 1.69E-07    | 2.43E-06    |
| ENSMMUG000000054199 |                                                                                              | 2.673759793 | 0.000573007 | 0.003259059 |
| ENSMMUG000000051816 | keratinocyte proline rich protein [Source:NCBI gene;Acc:100424312]                           | 2.67389069  | 7.77E-13    | 2.85E-11    |
| ENSMMUG00000000958  | aldo-keto reductase family 1, member C2 [Source:NCBI gene;Acc:711360]                        | 2.676341183 | 1.67E-15    | 9.11E-14    |
| ENSMMUG000000046169 |                                                                                              | 2.676507196 | 2.79E-09    | 5.47E-08    |
| ENSMMUG000000004749 | PPARG coactivator 1 beta [Source:VGNC Symbol;Acc:VGNC:76134]                                 | 2.679257348 | 0.006165278 | 0.023851882 |
| ENSMMUG000000063525 |                                                                                              | 2.682501095 | 6.02E-08    | 9.36E-07    |
| ENSMMUG000000042419 |                                                                                              | 2.683269953 | 0.003312499 | 0.014265567 |
| ENSMMUG00000010626  | CD1c molecule [Source:VGNC Symbol;Acc:VGNC:70756]                                            | 2.684394137 | 6.72E-05    | 0.000516824 |
| ENSMMUG000000062326 |                                                                                              | 2.685509647 | 6.56E-15    | 3.29E-13    |
| ENSMMUG000000021610 | regulator of G protein signaling 10 [Source:VGNC Symbol;Acc:VGNC:76915]                      | 2.68923695  | 1.70E-18    | 1.37E-16    |
| ENSMMUG00000001380  | outer dense fiber of sperm tails 2 like [Source:VGNC Symbol;Acc:VGNC:75482]                  | 2.694925385 | 0.000117325 | 0.000829481 |
| ENSMMUG00000016678  | Rho associated coiled-coil containing protein kinase 2 [Source:VGNC Symbol;Acc:VGNC:76714]   | 2.696216274 | 3.50E-09    | 6.77E-08    |
| ENSMMUG000000022633 | replication initiator 1 [Source:VGNC Symbol;Acc:VGNC:76758]                                  | 2.697035488 | 2.58E-11    | 6.96E-10    |
| ENSMMUG00000017701  | myosin VIIA and Rab interacting protein [Source:VGNC Symbol;Acc:VGNC:74992]                  | 2.700128566 | 1.75E-13    | 7.00E-12    |
| ENSMMUG000000038524 | olfactory receptor 2M4 [Source:NCBI gene;Acc:100424541]                                      | 2.702159184 | 3.59E-35    | 2.20E-32    |
| ENSMMUG000000025050 | Y RNA [Source:RFAM;Acc:RF00019]                                                              | 2.702289773 | 0.00042741  | 0.002517153 |
| ENSMMUG000000049735 | allograft inflammatory factor 1 [Source:NCBI gene;Acc:574115]                                | 2.704108997 | 1.22E-16    | 7.94E-15    |
| ENSMMUG000000053457 | caspase 14 [Source:NCBI gene;Acc:718049]                                                     | 2.704658848 | 7.00E-08    | 1.07E-06    |
| ENSMMUG000000050465 | ZFP42 zinc finger protein [Source:NCBI gene;Acc:707621]                                      | 2.704994971 | 1.41E-15    | 7.79E-14    |
| ENSMMUG00000000375  | pleckstrin homology and RhoGEF domain containing G6 [Source:VGNC Symbol;Acc:VGNC:76110]      | 2.707603053 | 6.21E-34    | 3.18E-31    |
| ENSMMUG000000060517 |                                                                                              | 2.708268012 | 1.75E-16    | 1.09E-14    |
| ENSMMUG00000016111  | chromosome 1 C1orf50 homolog [Source:VGNC Symbol;Acc:VGNC:70432]                             | 2.708346365 | 0.001896993 | 0.008909416 |
| ENSMMUG00000016580  | selectin E [Source:VGNC Symbol;Acc:VGNC:77156]                                               | 2.709618956 | 1.47E-26    | 3.55E-24    |
| ENSMMUG00000019363  | synapse associated protein 1 [Source:VGNC Symbol;Acc:VGNC:78135]                             | 2.712203035 | 4.23E-12    | 1.31E-10    |
| ENSMMUG000000021634 | TNF alpha induced protein 2 [Source:VGNC Symbol;Acc:VGNC:78579]                              | 2.712880374 | 1.81E-27    | 5.06E-25    |



|                    |                                                                                                          |             |             |             |
|--------------------|----------------------------------------------------------------------------------------------------------|-------------|-------------|-------------|
| ENSMMUG0000000790  | ankyrin repeat domain 17 [Source:VGNC Symbol;Acc:VGNC:84240]                                             | 2.713317718 | 1.87E-05    | 0.000168076 |
| ENSMMUG00000056376 |                                                                                                          | 2.722426572 | 5.72E-18    | 4.39E-16    |
| ENSMMUG00000006066 | phosphatidylcholine transfer protein [Source:VGNC Symbol;Acc:VGNC:75789]                                 | 2.723378162 | 2.09E-09    | 4.21E-08    |
| ENSMMUG00000009312 | leukotriene A4 hydrolase [Source:VGNC Symbol;Acc:VGNC:74453]                                             | 2.726894103 | 8.00E-17    | 5.35E-15    |
| ENSMMUG00000023479 | latent transforming growth factor beta binding protein 3 [Source:VGNC Symbol;Acc:VGNC:74458]             | 2.728474216 | 2.16E-13    | 8.50E-12    |
| ENSMMUG00000012228 | ubiquitin conjugating enzyme E2 V1 [Source:NCBI gene;Acc:100425552]                                      | 2.734036594 | 2.29E-25    | 4.94E-23    |
| ENSMMUG00000015744 | zinc finger protein 302 [Source:NCBI gene;Acc:706279]                                                    | 2.735717304 | 3.12E-19    | 2.91E-17    |
| ENSMMUG00000004022 | zinc finger SWIM-type containing 2 [Source:VGNC Symbol;Acc:VGNC:79908]                                   | 2.736534225 | 5.95E-15    | 3.03E-13    |
| ENSMMUG00000058935 | Metazoan signal recognition particle RNA [Source:RFAM;Acc:RF00017]                                       | 2.737728236 | 0.000114508 | 0.00081166  |
| ENSMMUG00000022401 | EMSY transcriptional repressor, BRCA2 interacting [Source:VGNC Symbol;Acc:VGNC:72065]                    | 2.745035229 | 2.13E-16    | 1.31E-14    |
| ENSMMUG00000064341 | U6 spliceosomal RNA [Source:RFAM;Acc:RF00026]                                                            | 2.745215362 | 0.01318095  | 0.044203834 |
| ENSMMUG00000011878 | poly(A) binding protein interacting protein 1 [Source:VGNC Symbol;Acc:VGNC:84476]                        | 2.746679063 | 1.59E-11    | 4.42E-10    |
| ENSMMUG00000038944 |                                                                                                          | 2.750275537 | 1.11E-26    | 2.77E-24    |
| ENSMMUG00000007729 | ilvB acetolactate synthase like [Source:VGNC Symbol;Acc:VGNC:73739]                                      | 2.753544565 | 3.68E-13    | 1.41E-11    |
| ENSMMUG00000057157 |                                                                                                          | 2.759851239 | 3.87E-13    | 1.47E-11    |
| ENSMMUG00000017510 | membrane associated guanylate kinase, WW and PDZ domain containing 1 [Source:VGNC Symbol;Acc:VGNC:74499] | 2.76254004  | 3.54E-19    | 3.27E-17    |
| ENSMMUG00000059318 | urocortin 2 [Source:NCBI gene;Acc:106996925]                                                             | 2.766966728 | 1.05E-24    | 2.12E-22    |
| ENSMMUG00000038018 | polycomb group ring finger 5 [Source:NCBI gene;Acc:697020]                                               | 2.768169458 | 0.011290954 | 0.038905835 |
| ENSMMUG00000050844 | BTB domain containing 18 [Source:NCBI gene;Acc:703264]                                                   | 2.774136056 | 6.89E-07    | 8.71E-06    |
| ENSMMUG00000002917 | single Ig IL-1-related receptor [Source:NCBI gene;Acc:100425060]                                         | 2.775199526 | 9.16E-08    | 1.38E-06    |
| ENSMMUG00000065295 |                                                                                                          | 2.77562538  | 5.77E-18    | 4.40E-16    |
| ENSMMUG00000019032 | EMAP like 2 [Source:NCBI gene;Acc:715009]                                                                | 2.781008345 | 3.84E-15    | 2.03E-13    |
| ENSMMUG00000007538 | transient receptor potential cation channel subfamily M member 4 [Source:VGNC Symbol;Acc:VGNC:79105]     | 2.781592123 | 5.12E-21    | 6.62E-19    |
| ENSMMUG00000060581 |                                                                                                          | 2.782262899 | 1.74E-07    | 2.49E-06    |
| ENSMMUG00000061935 |                                                                                                          | 2.796660078 | 2.52E-08    | 4.23E-07    |
| ENSMMUG00000000544 | collagen type VI alpha 1 chain [Source:VGNC Symbol;Acc:VGNC:82084]                                       | 2.796724938 | 0.009454092 | 0.033788964 |
| ENSMMUG00000000894 | cellular inhibitor of PP2A [Source:VGNC Symbol;Acc:VGNC:71371]                                           | 2.799480553 | 0.004511062 | 0.018453707 |
| ENSMMUG00000046478 | WASH complex subunit 3 [Source:NCBI gene;Acc:697824]                                                     | 2.799739514 | 1.79E-23    | 3.10E-21    |
| ENSMMUG00000058162 |                                                                                                          | 2.803459982 | 0.007592922 | 0.028290885 |
| ENSMMUG00000011650 | dual specificity tyrosine phosphorylation regulated kinase 2 [Source:VGNC Symbol;Acc:VGNC:72018]         | 2.8034643   | 6.59E-14    | 2.84E-12    |
| ENSMMUG00000050549 | lysyl oxidase like 2 [Source:NCBI gene;Acc:710151]                                                       | 2.808361812 | 3.34E-20    | 3.70E-18    |
| ENSMMUG00000049508 |                                                                                                          | 2.808520082 | 3.39E-06    | 3.65E-05    |
| ENSMMUG00000015865 | arginase 2 [Source:VGNC Symbol;Acc:VGNC:70005]                                                           | 2.809446757 | 4.90E-21    | 6.41E-19    |
| ENSMMUG00000017983 | tRNA nucleotidyl transferase 1 [Source:VGNC Symbol;Acc:VGNC:79073]                                       | 2.811251074 | 0.001327666 | 0.006603944 |
| ENSMMUG00000018932 | adhesion G protein-coupled receptor E2 [Source:NCBI gene;Acc:654420]                                     | 2.813261209 | 3.07E-35    | 1.99E-32    |
| ENSMMUG00000064723 | gasdermin A [Source:NCBI gene;Acc:698841]                                                                | 2.814743982 | 0.000749145 | 0.00409597  |
| ENSMMUG00000056580 | Metazoan signal recognition particle RNA [Source:RFAM;Acc:RF00017]                                       | 2.817779154 | 0.014590767 | 0.047963392 |
| ENSMMUG00000005297 | proline rich coiled-coil 2A [Source:VGNC Symbol;Acc:VGNC:83448]                                          | 2.820070853 | 1.70E-19    | 1.64E-17    |
| ENSMMUG00000057219 | tumor protein p53 inducible nuclear protein 1 [Source:NCBI gene;Acc:700632]                              | 2.822853884 | 7.62E-05    | 0.000575283 |
| ENSMMUG00000055710 | taste 2 receptor member 38 [Source:NCBI gene;Acc:695549]                                                 | 2.827334526 | 7.05E-08    | 1.08E-06    |
| ENSMMUG00000011516 | ADP ribosylation factor like GTPase 4C [Source:VGNC Symbol;Acc:VGNC:70018]                               | 2.828108745 | 0.000111128 | 0.000791813 |
| ENSMMUG00000000452 | LSM7 homolog, U6 small nuclear RNA and mRNA degradation associated [Source:NCBI gene;Acc:721486]         | 2.831590379 | 0.00032062  | 0.001971355 |
| ENSMMUG00000038989 | erythropoietin receptor [Source:NCBI gene;Acc:714546]                                                    | 2.83567258  | 3.52E-08    | 5.75E-07    |
| ENSMMUG00000049130 |                                                                                                          | 2.838232451 | 3.67E-39    | 3.47E-36    |
| ENSMMUG00000056741 | ovostatin-like [Source:NCBI gene;Acc:722294]                                                             | 2.839636876 | 0.003464685 | 0.014827451 |
| ENSMMUG00000022785 | solute carrier family 66 member 3 [Source:VGNC Symbol;Acc:VGNC:76334]                                    | 2.840582117 | 3.23E-05    | 0.000272438 |
| ENSMMUG00000014349 | integrin subunit alpha X [Source:NCBI gene;Acc:100427850]                                                | 2.842434307 | 1.38E-12    | 4.80E-11    |
| ENSMMUG00000051719 | late cornified envelope 1C [Source:HGNC Symbol;Acc:HGNC:29464]                                           | 2.843066242 | 0.001532671 | 0.007445873 |
| ENSMMUG00000013330 | ectonucleoside triphosphate diphosphohydrolase 3 [Source:VGNC Symbol;Acc:VGNC:72226]                     | 2.844593236 | 1.22E-15    | 6.82E-14    |
| ENSMMUG00000053406 |                                                                                                          | 2.848337509 | 0.00500251  | 0.020159295 |
| ENSMMUG00000011789 | hematopoietically expressed homeobox [Source:VGNC Symbol;Acc:VGNC:73376]                                 | 2.854881277 | 1.86E-20    | 2.16E-18    |

|                    |                                                                                                              |             |             |             |
|--------------------|--------------------------------------------------------------------------------------------------------------|-------------|-------------|-------------|
| ENSMMUG00000049265 | Metazoan signal recognition particle RNA [Source:RFAM;Acc:RF00017]                                           | 2.855074934 | 1.44E-05    | 0.000133305 |
| ENSMMUG00000028948 | azurocidin 1 [Source:VGNC Symbol;Acc:VGNC:70202]                                                             | 2.861985332 | 4.31E-06    | 4.52E-05    |
| ENSMMUG00000058229 | U6 spliceosomal RNA [Source:RFAM;Acc:RF00026]                                                                | 2.865044224 | 0.002677572 | 0.011876593 |
| ENSMMUG00000014397 | NCK associated protein 1 [Source:VGNC Symbol;Acc:VGNC:75143]                                                 | 2.866761459 | 1.10E-09    | 2.33E-08    |
| ENSMMUG00000019528 | adaptor related protein complex 4 subunit beta 1 [Source:VGNC Symbol;Acc:VGNC:69972]                         | 2.866942798 | 1.30E-42    | 1.78E-39    |
| ENSMMUG00000028907 | insulin receptor [Source:NCBI gene;Acc:706009]                                                               | 2.867234782 | 7.62E-09    | 1.39E-07    |
| ENSMMUG00000053324 | lymphocyte antigen 6 complex locus protein G6d [Source:NCBI gene;Acc:715304]                                 | 2.873651307 | 1.70E-18    | 1.37E-16    |
| ENSMMUG00000064730 |                                                                                                              | 2.874247842 | 2.62E-17    | 1.88E-15    |
| ENSMMUG00000023263 | mediator complex subunit 15 [Source:VGNC Symbol;Acc:VGNC:74511]                                              | 2.881923054 | 1.58E-18    | 1.29E-16    |
| ENSMMUG00000049542 |                                                                                                              | 2.882064493 | 1.13E-12    | 3.98E-11    |
| ENSMMUG00000017189 | regulatory factor X6 [Source:VGNC Symbol;Acc:VGNC:76800]                                                     | 2.883292694 | 1.48E-16    | 9.48E-15    |
| ENSMMUG00000051537 |                                                                                                              | 2.888186401 | 8.88E-06    | 8.64E-05    |
| ENSMMUG00000007726 | synapse defective Rho GTPase homolog 1 [Source:NCBI gene;Acc:719089]                                         | 2.891293983 | 4.82E-10    | 1.09E-08    |
| ENSMMUG00000059442 |                                                                                                              | 2.893585381 | 0.00025684  | 0.001618962 |
| ENSMMUG00000023286 | UPF1 RNA helicase and ATPase [Source:VGNC Symbol;Acc:VGNC:79971]                                             | 2.898262899 | 5.47E-21    | 7.01E-19    |
| ENSMMUG00000014265 | TAP binding protein like [Source:NCBI gene;Acc:712626]                                                       | 2.89859297  | 5.66E-21    | 7.17E-19    |
| ENSMMUG00000011627 | interleukin 4 induced 1 [Source:VGNC Symbol;Acc:VGNC:73625]                                                  | 2.899466643 | 3.25E-12    | 1.03E-10    |
| ENSMMUG00000002789 | solute carrier family 25 (mitochondrial carrier; phosphate carrier), member 24 [Source:NCBI gene;Acc:694803] | 2.905564598 | 2.02E-13    | 7.99E-12    |
| ENSMMUG00000010824 | SWIM-type zinc finger 7 associated protein 1 [Source:VGNC Symbol;Acc:VGNC:78220]                             | 2.907848657 | 5.20E-12    | 1.58E-10    |
| ENSMMUG00000001350 | HERPUD family member 2 [Source:VGNC Symbol;Acc:VGNC:73216]                                                   | 2.910679738 | 6.45E-16    | 3.74E-14    |
| ENSMMUG00000038988 | RNase MRP [Source:RFAM;Acc:RF00030]                                                                          | 2.911824496 | 0.008486684 | 0.030998464 |
| ENSMMUG00000064295 |                                                                                                              | 2.919903863 | 0.008115181 | 0.029872324 |
| ENSMMUG00000049479 |                                                                                                              | 2.926656457 | 0.005961004 | 0.023237139 |
| ENSMMUG00000006738 | L3MBTL histone methyl-lysine binding protein 1 [Source:NCBI gene;Acc:695694]                                 | 2.928557294 | 3.76E-20    | 4.05E-18    |
| ENSMMUG00000000754 | Dmx like 2 [Source:VGNC Symbol;Acc:VGNC:71936]                                                               | 2.935983493 | 8.99E-19    | 7.52E-17    |
| ENSMMUG00000008834 | klotho beta [Source:VGNC Symbol;Acc:VGNC:73835]                                                              | 2.936662145 | 0.001444689 | 0.007085663 |
| ENSMMUG00000046918 |                                                                                                              | 2.938509003 | 3.16E-05    | 0.00026769  |
| ENSMMUG00000053106 |                                                                                                              | 2.938769288 | 9.46E-11    | 2.37E-09    |
| ENSMMUG00000016579 | selectin L [Source:NCBI gene;Acc:701419]                                                                     | 2.951761062 | 2.74E-29    | 8.63E-27    |
| ENSMMUG00000022921 | solute carrier family 2 member 12 [Source:VGNC Symbol;Acc:VGNC:77503]                                        | 2.960334861 | 4.96E-17    | 3.40E-15    |
| ENSMMUG00000017124 | spliceosome associated factor 3, U4/U6 recycling protein [Source:VGNC Symbol;Acc:VGNC:77029]                 | 2.968772657 | 6.64E-14    | 2.85E-12    |
| ENSMMUG00000021039 | X-ray radiation resistance associated 1 [Source:NCBI gene;Acc:693788]                                        | 2.972619468 | 1.13E-14    | 5.50E-13    |
| ENSMMUG00000065271 |                                                                                                              | 2.985890327 | 0.008957909 | 0.032381687 |
| ENSMMUG00000054634 | late cornified envelope protein 1C-like [Source:NCBI gene;Acc:713600]                                        | 2.987464248 | 0.006453692 | 0.024795975 |
| ENSMMUG00000016273 | maltase-glucoamylase [Source:VGNC Symbol;Acc:VGNC:74713]                                                     | 2.987902517 | 6.22E-27    | 1.63E-24    |
| ENSMMUG00000063914 |                                                                                                              | 3.001813253 | 1.83E-40    | 2.25E-37    |
| ENSMMUG00000015258 | glycine C-acetyltransferase [Source:NCBI gene;Acc:698811]                                                    | 3.003945178 | 0.000329313 | 0.002015731 |
| ENSMMUG00000056058 | C-type lectin domain containing 20A [Source:HGNC Symbol;Acc:HGNC:34521]                                      | 3.005460449 | 0.001043911 | 0.0054077   |
| ENSMMUG00000063622 | mitochondrial ribosomal protein S26 [Source:NCBI gene;Acc:717038]                                            | 3.010212739 | 1.45E-10    | 3.54E-09    |
| ENSMMUG00000053460 |                                                                                                              | 3.010878505 | 2.51E-23    | 4.23E-21    |
| ENSMMUG00000060435 | Metazoan signal recognition particle RNA [Source:RFAM;Acc:RF00017]                                           | 3.014900058 | 5.19E-06    | 5.34E-05    |
| ENSMMUG00000060289 |                                                                                                              | 3.01559059  | 4.06E-40    | 4.33E-37    |
| ENSMMUG00000058928 | Metazoan signal recognition particle RNA [Source:RFAM;Acc:RF00017]                                           | 3.019935738 | 3.57E-20    | 3.92E-18    |
| ENSMMUG00000011441 | transmembrane protein 106C [Source:VGNC Symbol;Acc:VGNC:79741]                                               | 3.026585607 | 0.00174684  | 0.008286536 |
| ENSMMUG00000056797 |                                                                                                              | 3.033966402 | 0.013818704 | 0.045879442 |
| ENSMMUG00000040071 |                                                                                                              | 3.043770211 | 8.60E-06    | 8.39E-05    |
| ENSMMUG00000012356 | serpin family A member 9 [Source:VGNC Symbol;Acc:VGNC:77241]                                                 | 3.047829602 | 5.43E-26    | 1.26E-23    |
| ENSMMUG00000044048 | Metazoan signal recognition particle RNA [Source:RFAM;Acc:RF00017]                                           | 3.047909016 | 1.05E-12    | 3.73E-11    |
| ENSMMUG00000045609 | CCR4-NOT transcription complex subunit 6 like [Source:NCBI gene;Acc:697981]                                  | 3.053921471 | 6.99E-23    | 1.10E-20    |
| ENSMMUG00000056063 |                                                                                                              | 3.053971492 | 1.84E-05    | 0.000166248 |
| ENSMMUG00000005302 | BAG cochaperone 6 [Source:VGNC Symbol;Acc:VGNC:81044]                                                        | 3.053981049 | 9.01E-28    | 2.64E-25    |

|                    |                                                                                                                 |             |             |             |
|--------------------|-----------------------------------------------------------------------------------------------------------------|-------------|-------------|-------------|
| ENSMMUG0000008387  | dipeptidyl peptidase 4 [Source:VGNC Symbol;Acc:VGNC:71979]                                                      | 3.055123174 | 2.48E-21    | 3.35E-19    |
| ENSMMUG000000803   | signal transducer and activator of transcription 2 [Source:VGNC Symbol;Acc:VGNC:77905]                          | 3.057253106 | 4.06E-33    | 1.92E-30    |
| ENSMMUG00000046099 | chromosome 19 C19orf81 homolog [Source:NCBI gene;Acc:719661]                                                    | 3.070569267 | 0.000507989 | 0.002942989 |
| ENSMMUG00000061603 |                                                                                                                 | 3.074685815 | 0.013549555 | 0.045156609 |
| ENSMMUG00000010007 | CD14 molecule [Source:VGNC Symbol;Acc:VGNC:70751]                                                               | 3.076280572 | 8.27E-10    | 1.80E-08    |
| ENSMMUG00000014273 | cation channel sperm associated auxiliary subunit gamma [Source:VGNC Symbol;Acc:VGNC:70626]                     | 3.077579542 | 1.92E-08    | 3.28E-07    |
| ENSMMUG00000016549 | matrix metalloproteinase 9 [Source:VGNC Symbol;Acc:VGNC:74903]                                                  | 3.082087262 | 4.71E-08    | 7.50E-07    |
| ENSMMUG00000052168 |                                                                                                                 | 3.082722297 | 3.40E-13    | 1.32E-11    |
| ENSMMUG00000020799 | BH3 interacting domain death agonist [Source:VGNC Symbol;Acc:VGNC:70250]                                        | 3.08618785  | 8.93E-17    | 5.93E-15    |
| ENSMMUG00000059782 |                                                                                                                 | 3.087848254 | 5.41E-09    | 1.02E-07    |
| ENSMMUG00000058817 |                                                                                                                 | 3.09861417  | 1.31E-12    | 4.58E-11    |
| ENSMMUG00000057063 | solute carrier family 6 member 14 [Source:NCBI gene;Acc:709598]                                                 | 3.101533543 | 0.000155619 | 0.001056747 |
| ENSMMUG00000016469 | proprotein convertase subtilisin/kexin type 1 inhibitor [Source:VGNC Symbol;Acc:VGNC:75639]                     | 3.103061202 | 9.94E-05    | 0.000718908 |
| ENSMMUG00000053220 | olfactory receptor 111 [Source:NCBI gene;Acc:719077]                                                            | 3.107332499 | 0.003378826 | 0.014517955 |
| ENSMMUG00000016069 | cubilin [Source:VGNC Symbol;Acc:VGNC:82132]                                                                     | 3.108772212 | 1.47E-12    | 5.11E-11    |
| ENSMMUG00000016442 | glutaminyl-peptide cyclotransferase [Source:VGNC Symbol;Acc:VGNC:76636]                                         | 3.114280437 | 4.64E-06    | 4.84E-05    |
| ENSMMUG00000014715 | fragile site, folic acid type, rare, fra(10)(q23.3) or fra(10)(q24.2) candidate 1 [Source:NCBI gene;Acc:700389] | 3.11512857  | 1.14E-08    | 2.03E-07    |
| ENSMMUG00000026950 | microRNA 101-2 [Source:HGNC Symbol;Acc:HGNC:31489]                                                              | 3.116602066 | 1.14E-05    | 0.000107534 |
| ENSMMUG00000010614 | C-C motif chemokine ligand 25 [Source:VGNC Symbol;Acc:VGNC:70700]                                               | 3.116710594 | 0.013695669 | 0.045531306 |
| ENSMMUG00000010451 | inositol polyphosphate phosphatase like 1 [Source:VGNC Symbol;Acc:VGNC:73752]                                   | 3.13019215  | 1.65E-11    | 4.59E-10    |
| ENSMMUG00000025918 | small nucleolar RNA, H/ACA box 38 [Source:HGNC Symbol;Acc:HGNC:32631]                                           | 3.131808798 | 0.00035368  | 0.002142475 |
| ENSMMUG00000047452 |                                                                                                                 | 3.135551108 | 0.006884533 | 0.026100493 |
| ENSMMUG00000002566 | selenoprotein H [Source:VGNC Symbol;Acc:VGNC:82234]                                                             | 3.136135338 | 0.00021817  | 0.001420304 |
| ENSMMUG00000063346 |                                                                                                                 | 3.136882731 | 0.005828543 | 0.022800324 |
| ENSMMUG00000019304 | indoleamine 2,3-dioxygenase 1 [Source:VGNC Symbol;Acc:VGNC:73580]                                               | 3.138359372 | 2.63E-14    | 1.20E-12    |
| ENSMMUG00000005293 | G-patch domain and ankyrin repeats 1 [Source:VGNC Symbol;Acc:VGNC:81073]                                        | 3.139537995 | 1.96E-08    | 3.35E-07    |
| ENSMMUG00000017930 | striatin 4 [Source:VGNC Symbol;Acc:VGNC:78128]                                                                  | 3.140071487 | 3.69E-13    | 1.41E-11    |
| ENSMMUG00000007773 | solute carrier organic anion transporter family member 4C1 [Source:VGNC Symbol;Acc:VGNC:77764]                  | 3.14441668  | 1.07E-07    | 1.59E-06    |
| ENSMMUG00000021073 | RAS protein activator like 2 [Source:VGNC Symbol;Acc:VGNC:76670]                                                | 3.151900754 | 6.21E-24    | 1.14E-21    |
| ENSMMUG00000058534 |                                                                                                                 | 3.152680837 | 1.65E-06    | 1.91E-05    |
| ENSMMUG00000062794 |                                                                                                                 | 3.153444675 | 4.88E-15    | 2.53E-13    |
| ENSMMUG00000020668 | cyclin E1 [Source:VGNC Symbol;Acc:VGNC:70727]                                                                   | 3.154790166 | 5.15E-34    | 2.75E-31    |
| ENSMMUG00000063898 | apolipoprotein F [Source:NCBI gene;Acc:712761]                                                                  | 3.157306314 | 2.08E-21    | 2.88E-19    |
| ENSMMUG00000056248 |                                                                                                                 | 3.157307791 | 8.90E-13    | 3.23E-11    |
| ENSMMUG00000045654 | tumor necrosis factor [Source:VGNC Symbol;Acc:VGNC:83501]                                                       | 3.163596661 | 1.82E-06    | 2.09E-05    |
| ENSMMUG00000061533 |                                                                                                                 | 3.16491417  | 9.76E-33    | 4.28E-30    |
| ENSMMUG00000002959 | helicase with zinc finger [Source:VGNC Symbol;Acc:VGNC:73178]                                                   | 3.165690268 | 2.13E-32    | 9.05E-30    |
| ENSMMUG00000016434 | NADH:ubiquinone oxidoreductase complex assembly factor 7 [Source:VGNC Symbol;Acc:VGNC:75035]                    | 3.165793928 | 2.35E-10    | 5.56E-09    |
| ENSMMUG00000008923 | Thy-1 cell surface antigen [Source:VGNC Symbol;Acc:VGNC:78352]                                                  | 3.177278337 | 1.87E-05    | 0.000167878 |
| ENSMMUG00000064146 | Metazoan signal recognition particle RNA [Source:RFAM;Acc:RF00017]                                              | 3.179750927 | 5.73E-14    | 2.51E-12    |
| ENSMMUG00000017287 | PAT1 homolog 1, processing body mRNA decay factor [Source:VGNC Symbol;Acc:VGNC:75684]                           | 3.185088688 | 3.49E-13    | 1.34E-11    |
| ENSMMUG00000000376 | bridging integrator 1 [Source:VGNC Symbol;Acc:VGNC:70251]                                                       | 3.186409957 | 6.87E-06    | 6.87E-05    |
| ENSMMUG00000022893 | von Willebrand factor [Source:VGNC Symbol;Acc:VGNC:78778]                                                       | 3.187209284 | 7.60E-11    | 1.94E-09    |
| ENSMMUG00000016737 | contactin 5 [Source:VGNC Symbol;Acc:VGNC:71287]                                                                 | 3.190478607 | 0.001563681 | 0.007557691 |
| ENSMMUG00000053984 |                                                                                                                 | 3.193005556 | 2.09E-07    | 2.96E-06    |
| ENSMMUG00000057499 |                                                                                                                 | 3.196909364 | 3.59E-10    | 8.23E-09    |
| ENSMMUG00000056980 |                                                                                                                 | 3.200500692 | 0.000374701 | 0.002245464 |
| ENSMMUG00000002741 | CUB and Sushi multiple domains 2 [Source:VGNC Symbol;Acc:VGNC:71441]                                            | 3.200694302 | 0.009425697 | 0.033726706 |
| ENSMMUG00000005303 | apolipoprotein M [Source:VGNC Symbol;Acc:VGNC:69825]                                                            | 3.210024444 | 1.67E-07    | 2.40E-06    |
| ENSMMUG00000058423 |                                                                                                                 | 3.211643322 | 2.69E-09    | 5.31E-08    |
| ENSMMUG00000018137 | MYB proto-oncogene like 2 [Source:VGNC Symbol;Acc:VGNC:75092]                                                   | 3.217409819 | 2.46E-29    | 7.95E-27    |



|                    |                                                                                                      |             |             |             |
|--------------------|------------------------------------------------------------------------------------------------------|-------------|-------------|-------------|
| ENSMMUG00000052637 | Metazoan signal recognition particle RNA [Source:RFAM;Acc:RF00017]                                   | 3.220554448 | 1.61E-10    | 3.91E-09    |
| ENSMMUG00000004794 | DNA ligase 3 [Source:VGNC Symbol;Acc:VGNC:74266]                                                     | 3.224992214 | 6.87E-12    | 2.05E-10    |
| ENSMMUG00000017822 | periplakin [Source:VGNC Symbol;Acc:VGNC:76240]                                                       | 3.227179841 | 8.89E-08    | 1.34E-06    |
| ENSMMUG00000007925 | serum/glucocorticoid regulated kinase 2 [Source:VGNC Symbol;Acc:VGNC:77228]                          | 3.227966836 | 5.61E-15    | 2.87E-13    |
| ENSMMUG00000028785 | zinc finger protein 146 [Source:VGNC Symbol;Acc:VGNC:78846]                                          | 3.23222091  | 0.000445182 | 0.002614301 |
| ENSMMUG00000009361 | fumarylacetoacetate hydrolase [Source:NCBI gene;Acc:712716]                                          | 3.257239007 | 4.52E-20    | 4.83E-18    |
| ENSMMUG00000054816 | interleukin 1 receptor associated kinase 3 [Source:NCBI gene;Acc:717845]                             | 3.258880068 | 0.006870949 | 0.026076891 |
| ENSMMUG00000001058 | tetratricopeptide repeat domain 28 [Source:VGNC Symbol;Acc:VGNC:79785]                               | 3.260793556 | 1.72E-24    | 3.42E-22    |
| ENSMMUG00000013713 | beta 3-glucosyltransferase [Source:NCBI gene;Acc:713498]                                             | 3.279152379 | 5.83E-18    | 4.42E-16    |
| ENSMMUG00000028733 | RAS related [Source:VGNC Symbol;Acc:VGNC:76937]                                                      | 3.284207113 | 4.03E-18    | 3.14E-16    |
| ENSMMUG00000009567 | glyoxylate reductase 1 homolog [Source:NCBI gene;Acc:706933]                                         | 3.284487831 | 1.70E-43    | 3.48E-40    |
| ENSMMUG00000057331 | RNA terminal phosphate cyclase like 1 [Source:NCBI gene;Acc:694568]                                  | 3.286448126 | 6.52E-26    | 1.48E-23    |
| ENSMMUG00000011344 | solute carrier family 52 member 1 [Source:VGNC Symbol;Acc:VGNC:77795]                                | 3.28888737  | 0.0057665   | 0.022629645 |
| ENSMMUG00000058176 | b-defensin2-like [Source:NCBI gene;Acc:100169969]                                                    | 3.295253939 | 1.76E-34    | 9.81E-32    |
| ENSMMUG00000060767 |                                                                                                      | 3.295314396 | 7.97E-11    | 2.01E-09    |
| ENSMMUG00000035160 | U4 spliceosomal RNA [Source:RFAM;Acc:RF00015]                                                        | 3.313820901 | 0.006270589 | 0.024221184 |
| ENSMMUG00000014875 | C2CD2 like [Source:VGNC Symbol;Acc:VGNC:70435]                                                       | 3.315259379 | 5.53E-06    | 5.65E-05    |
| ENSMMUG00000056749 | Metazoan signal recognition particle RNA [Source:RFAM;Acc:RF00017]                                   | 3.330957828 | 0.000217063 | 0.001414592 |
| ENSMMUG00000050832 |                                                                                                      | 3.341725635 | 0.000851273 | 0.004569193 |
| ENSMMUG00000018790 | activin A receptor type 2B [Source:VGNC Symbol;Acc:VGNC:69450]                                       | 3.343149662 | 5.05E-54    | 3.10E-50    |
| ENSMMUG00000054159 | lymphocyte antigen 6 family member G5C [Source:VGNC Symbol;Acc:VGNC:83431]                           | 3.350961471 | 9.66E-05    | 0.000703172 |
| ENSMMUG00000057539 |                                                                                                      | 3.351984091 | 1.23E-09    | 2.59E-08    |
| ENSMMUG00000012405 | transient receptor potential cation channel subfamily C member 1 [Source:VGNC Symbol;Acc:VGNC:78651] | 3.367455876 | 1.70E-11    | 4.68E-10    |
| ENSMMUG00000013798 | fatty acid desaturase 1 [Source:VGNC Symbol;Acc:VGNC:72471]                                          | 3.370674965 | 1.19E-12    | 4.16E-11    |
| ENSMMUG00000018298 | killer cell lectin like receptor D1 [Source:NCBI gene;Acc:574145]                                    | 3.379570515 | 0.000154392 | 0.001050156 |
| ENSMMUG00000013644 | potassium two pore domain channel subfamily K member 17 [Source:VGNC Symbol;Acc:VGNC:73828]          | 3.384503969 | 4.70E-21    | 6.21E-19    |
| ENSMMUG00000051972 | zinc finger CCHC-type containing 24 [Source:NCBI gene;Acc:702083]                                    | 3.393016671 | 1.07E-05    | 0.000101644 |
| ENSMMUG00000063779 |                                                                                                      | 3.396225453 | 1.88E-14    | 8.77E-13    |
| ENSMMUG00000027220 | microRNA 598 [Source:HGNC Symbol;Acc:HGNC:32854]                                                     | 3.401505245 | 0.014720899 | 0.048339451 |
| ENSMMUG00000039346 | apolipoprotein B mRNA editing enzyme catalytic subunit 3G [Source:NCBI gene;Acc:574398]              | 3.405479299 | 0.012445198 | 0.042115618 |
| ENSMMUG00000040393 | zinc finger protein 655 [Source:NCBI gene;Acc:718811]                                                | 3.409214385 | 3.93E-19    | 3.56E-17    |
| ENSMMUG00000053722 |                                                                                                      | 3.411132668 | 2.07E-06    | 2.35E-05    |
| ENSMMUG00000043396 | Metazoan signal recognition particle RNA [Source:RFAM;Acc:RF00017]                                   | 3.413864587 | 0.001498189 | 0.007315949 |
| ENSMMUG00000046417 | chromobox 2 [Source:NCBI gene;Acc:717462]                                                            | 3.430094161 | 1.35E-13    | 5.48E-12    |
| ENSMMUG00000004283 | calcium and integrin binding family member 3 [Source:VGNC Symbol;Acc:VGNC:71339]                     | 3.431294128 | 2.97E-10    | 6.91E-09    |
| ENSMMUG00000016404 | chondromodulin [Source:VGNC Symbol;Acc:VGNC:71191]                                                   | 3.436909428 | 3.90E-05    | 0.000319918 |
| ENSMMUG00000009499 | mesoderm specific transcript [Source:VGNC Symbol;Acc:VGNC:74707]                                     | 3.465277587 | 1.12E-23    | 1.96E-21    |
| ENSMMUG00000057570 |                                                                                                      | 3.468932576 | 1.35E-26    | 3.31E-24    |
| ENSMMUG00000001845 | DNA polymerase epsilon 4, accessory subunit [Source:VGNC Symbol;Acc:VGNC:76065]                      | 3.471528184 | 3.41E-12    | 1.08E-10    |
| ENSMMUG00000064638 | Y RNA [Source:RFAM;Acc:RF00019]                                                                      | 3.472509737 | 0.010754988 | 0.037458079 |
| ENSMMUG00000010142 | glutamate ionotropic receptor NMDA type subunit 2A [Source:VGNC Symbol;Acc:VGNC:73282]               | 3.47368265  | 0.006400788 | 0.024635016 |
| ENSMMUG00000044817 | nucleoporin 62 [Source:NCBI gene;Acc:100426308]                                                      | 3.47408376  | 3.96E-92    | 4.87E-88    |
| ENSMMUG00000054052 | sialic acid binding Ig like lectin 11 [Source:NCBI gene;Acc:719127]                                  | 3.480512882 | 2.09E-09    | 4.21E-08    |
| ENSMMUG00000017056 | Sad1 and UNC84 domain containing 1 [Source:VGNC Symbol;Acc:VGNC:78161]                               | 3.481308287 | 2.54E-08    | 4.27E-07    |
| ENSMMUG00000056855 | potassium inwardly rectifying channel subfamily J member 15 [Source:NCBI gene;Acc:693427]            | 3.485942656 | 0.002469799 | 0.011091084 |
| ENSMMUG00000008288 | sorting nexin 17 [Source:VGNC Symbol;Acc:VGNC:77709]                                                 | 3.486803876 | 0.000208369 | 0.001363715 |
| ENSMMUG00000053691 | Metazoan signal recognition particle RNA [Source:RFAM;Acc:RF00017]                                   | 3.49175007  | 3.08E-05    | 0.000261659 |
| ENSMMUG00000016237 | taxilin gamma [Source:NCBI gene;Acc:713769]                                                          | 3.502356699 | 5.24E-05    | 0.000416831 |
| ENSMMUG00000011513 | versican [Source:VGNC Symbol;Acc:VGNC:79445]                                                         | 3.511104275 | 3.11E-43    | 5.16E-40    |
| ENSMMUG00000049267 |                                                                                                      | 3.519290487 | 1.80E-08    | 3.10E-07    |
| ENSMMUG00000012147 | collagen type V alpha 1 chain [Source:NCBI gene;Acc:722014]                                          | 3.522731639 | 4.52E-46    | 1.39E-42    |

|                    |                                                                                                       |             |             |             |
|--------------------|-------------------------------------------------------------------------------------------------------|-------------|-------------|-------------|
| ENSMMUG00000057361 | Metazoan signal recognition particle RNA [Source:RFAM;Acc:RF00017]                                    | 3.523915758 | 5.09E-23    | 8.23E-21    |
| ENSMMUG00000060270 |                                                                                                       | 3.534116272 | 0.000656763 | 0.003662555 |
| ENSMMUG00000015555 | ST3 beta-galactoside alpha-2,3-sialyltransferase 3 [Source:VGNC Symbol;Acc:VGNC:77828]                | 3.534597242 | 2.07E-23    | 3.53E-21    |
| ENSMMUG00000031391 | RNA binding motif protein 38 [Source:VGNC Symbol;Acc:VGNC:76484]                                      | 3.548873695 | 1.22E-14    | 5.91E-13    |
| ENSMMUG00000005737 | SLC9A3 regulator 1 [Source:VGNC Symbol;Acc:VGNC:77639]                                                | 3.5569546   | 5.20E-05    | 0.000413862 |
| ENSMMUG00000003269 | polyhomeotic homolog 2 [Source:VGNC Symbol;Acc:VGNC:75903]                                            | 3.557257786 | 0.002378007 | 0.010757486 |
| ENSMMUG00000056339 |                                                                                                       | 3.557590237 | 0.003453042 | 0.014787922 |
| ENSMMUG00000029186 | exocyst complex component 3 like 4 [Source:VGNC Symbol;Acc:VGNC:72305]                                | 3.559578146 | 0.013402164 | 0.04478684  |
| ENSMMUG00000039560 | cofilin 2 [Source:NCBI gene;Acc:693875]                                                               | 3.574143618 | 0.014364437 | 0.047406657 |
| ENSMMUG00000063981 | nucleoside-triphosphatase, cancer-related [Source:NCBI gene;Acc:712959]                               | 3.584934274 | 2.09E-12    | 7.06E-11    |
| ENSMMUG00000058916 |                                                                                                       | 3.584974945 | 2.99E-24    | 5.83E-22    |
| ENSMMUG00000004932 | msh homeobox 2 [Source:VGNC Symbol;Acc:VGNC:84448]                                                    | 3.598289301 | 0.009874504 | 0.035046931 |
| ENSMMUG00000004982 | activin A receptor like type 1 [Source:VGNC Symbol;Acc:VGNC:69451]                                    | 3.611274001 | 0.011200342 | 0.038669496 |
| ENSMMUG00000014240 | thioredoxin domain containing 11 [Source:VGNC Symbol;Acc:VGNC:79678]                                  | 3.621942858 | 2.95E-12    | 9.56E-11    |
| ENSMMUG00000003874 | interferon induced transmembrane protein 10 [Source:NCBI gene;Acc:721010]                             | 3.622055197 | 8.19E-24    | 1.48E-21    |
| ENSMMUG00000052195 |                                                                                                       | 3.62520323  | 6.23E-05    | 0.000483987 |
| ENSMMUG00000056109 | Metazoan signal recognition particle RNA [Source:RFAM;Acc:RF00017]                                    | 3.63565805  | 0.00116889  | 0.005931804 |
| ENSMMUG00000050543 |                                                                                                       | 3.639569332 | 5.48E-27    | 1.46E-24    |
| ENSMMUG00000050335 |                                                                                                       | 3.644272273 | 0.00882088  | 0.031981545 |
| ENSMMUG00000058700 | Metazoan signal recognition particle RNA [Source:RFAM;Acc:RF00017]                                    | 3.669909193 | 0.000818925 | 0.004434102 |
| ENSMMUG00000003400 | baculoviral IAP repeat containing 2 [Source:NCBI gene;Acc:702592]                                     | 3.680791625 | 1.53E-16    | 9.67E-15    |
| ENSMMUG00000004576 | C-C motif chemokine receptor 3 [Source:VGNC Symbol;Acc:VGNC:70738]                                    | 3.681020776 | 2.98E-15    | 1.60E-13    |
| ENSMMUG00000060750 | Metazoan signal recognition particle RNA [Source:RFAM;Acc:RF00017]                                    | 3.686404127 | 0.000366675 | 0.002204891 |
| ENSMMUG00000010837 | VRK serine/threonine kinase 3 [Source:VGNC Symbol;Acc:VGNC:81605]                                     | 3.690342495 | 2.62E-09    | 5.20E-08    |
| ENSMMUG00000061424 | ventral anterior homeobox 2 [Source:NCBI gene;Acc:703531]                                             | 3.698078937 | 7.59E-33    | 3.45E-30    |
| ENSMMUG00000060808 |                                                                                                       | 3.711751947 | 8.11E-06    | 7.94E-05    |
| ENSMMUG00000054736 |                                                                                                       | 3.721489338 | 0.000342599 | 0.002083564 |
| ENSMMUG00000007528 | chordin [Source:VGNC Symbol;Acc:VGNC:71042]                                                           | 3.726668108 | 4.22E-40    | 4.33E-37    |
| ENSMMUG00000011682 | ribonuclease P/MRP subunit p21 [Source:NCBI gene;Acc:713056]                                          | 3.74371458  | 0.000918518 | 0.004883005 |
| ENSMMUG00000059321 |                                                                                                       | 3.758312132 | 0.000544999 | 0.003127257 |
| ENSMMUG00000022282 | collagen type IV alpha 2 chain [Source:NCBI gene;Acc:100429807]                                       | 3.759858607 | 0.000164411 | 0.001110319 |
| ENSMMUG00000000869 | small nuclear ribonucleoprotein polypeptide C [Source:NCBI gene;Acc:718654]                           | 3.768711401 | 4.48E-09    | 8.51E-08    |
| ENSMMUG00000004330 | peptidase domain containing associated with muscle regeneration 1 [Source:VGNC Symbol;Acc:VGNC:75673] | 3.775838929 | 1.07E-05    | 0.000102111 |
| ENSMMUG00000012937 | proline rich 12 [Source:NCBI gene;Acc:719344]                                                         | 3.797773965 | 9.60E-31    | 3.57E-28    |
| ENSMMUG00000004801 | COPI coat complex subunit gamma 2 [Source:VGNC Symbol;Acc:VGNC:71315]                                 | 3.815227025 | 8.99E-25    | 1.84E-22    |
| ENSMMUG00000056593 |                                                                                                       | 3.818289088 | 6.31E-05    | 0.000487893 |
| ENSMMUG00000007068 | tumor suppressor candidate 3 [Source:VGNC Symbol;Acc:VGNC:84132]                                      | 3.818779912 | 0.000338176 | 0.002060745 |
| ENSMMUG00000051989 | interleukin 5 [Source:NCBI gene;Acc:710622]                                                           | 3.833317241 | 0.000390029 | 0.002325983 |
| ENSMMUG00000054621 |                                                                                                       | 3.836846466 | 7.19E-05    | 0.000548156 |
| ENSMMUG00000047247 | matrix Gla protein [Source:NCBI gene;Acc:574116]                                                      | 3.841973918 | 0.00136367  | 0.006747529 |
| ENSMMUG00000008784 | lipopolysaccharide induced TNF factor [Source:NCBI gene;Acc:711743]                                   | 3.848465894 | 0.001034322 | 0.005368604 |
| ENSMMUG00000012938 | SR-related CTD associated factor 1 [Source:VGNC Symbol;Acc:VGNC:77137]                                | 3.85966366  | 5.51E-05    | 0.000436028 |
| ENSMMUG00000062091 |                                                                                                       | 3.861720859 | 1.58E-06    | 1.84E-05    |
| ENSMMUG00000056184 |                                                                                                       | 3.866244283 | 1.78E-09    | 3.63E-08    |
| ENSMMUG00000014658 | ninein [Source:VGNC Symbol;Acc:VGNC:75177]                                                            | 3.878076978 | 2.80E-20    | 3.15E-18    |
| ENSMMUG00000002974 | acid phosphatase 5, tartrate resistant [Source:VGNC Symbol;Acc:VGNC:69384]                            | 3.88365206  | 0.000165614 | 0.001117825 |
| ENSMMUG00000023403 | GTP binding protein 3, mitochondrial [Source:VGNC Symbol;Acc:VGNC:73170]                              | 3.888054786 | 1.85E-07    | 2.63E-06    |
| ENSMMUG00000057632 |                                                                                                       | 3.891032914 | 1.56E-19    | 1.53E-17    |
| ENSMMUG00000018549 | zinc finger protein 786 [Source:VGNC Symbol;Acc:VGNC:79338]                                           | 3.921812253 | 8.07E-12    | 2.38E-10    |
| ENSMMUG00000059087 |                                                                                                       | 3.924184    | 0.000114011 | 0.000809068 |
| ENSMMUG00000000108 | NCK associated protein 1 like [Source:VGNC Symbol;Acc:VGNC:75063]                                     | 3.943935727 | 0.015232393 | 0.049732207 |



|                     |                                                                                              |             |             |             |
|---------------------|----------------------------------------------------------------------------------------------|-------------|-------------|-------------|
| ENSMMUG00000061940  |                                                                                              | 3.94976808  | 0.014293021 | 0.047224604 |
| ENSMMUG00000042598  | transmembrane protein 18 [Source:NCBI gene;Acc:721515]                                       | 3.962250793 | 3.29E-23    | 5.47E-21    |
| ENSMMUG00000006655  | myelin regulatory factor [Source:VGNC Symbol;Acc:VGNC:74949]                                 | 3.987251892 | 3.32E-06    | 3.58E-05    |
| ENSMMUG00000002267  | laminin subunit gamma 3 [Source:NCBI gene;Acc:722430]                                        | 3.991791401 | 5.07E-07    | 6.58E-06    |
| ENSMMUG00000005552  | PAF1 homolog, Paf1/RNA polymerase II complex component [Source:VGNC Symbol;Acc:VGNC:81492]   | 4.011840267 | 3.04E-05    | 0.000258511 |
| ENSMMUG00000021476  | BCL2 like 13 [Source:VGNC Symbol;Acc:VGNC:84544]                                             | 4.040476423 | 2.77E-10    | 6.46E-09    |
| ENSMMUG00000005920  | N-acetyltransferase 1 [Source:VGNC Symbol;Acc:VGNC:75133]                                    | 4.049487564 | 0.000201377 | 0.00132218  |
| ENSMMUG00000021477  | ATPase H+ transporting V1 subunit E1 [Source:NCBI gene;Acc:709739]                           | 4.052512254 | 3.02E-06    | 3.28E-05    |
| ENSMMUG00000015693  | lymphocyte antigen 6 family member G6C [Source:VGNC Symbol;Acc:VGNC:74285]                   | 4.058470798 | 1.08E-11    | 3.12E-10    |
| ENSMMUG00000003007  | caspase recruitment domain family member 10 [Source:VGNC Symbol;Acc:VGNC:70570]              | 4.094367217 | 4.88E-08    | 7.76E-07    |
| ENSMMUG00000049755  | leucine rich repeat containing 3 [Source:NCBI gene;Acc:712418]                               | 4.094696306 | 4.18E-07    | 5.53E-06    |
| ENSMMUG00000022884  | glutamate-ammonia ligase [Source:NCBI gene;Acc:715952]                                       | 4.094872093 | 2.03E-08    | 3.47E-07    |
| ENSMMUG00000011332  | Rho GTPase activating protein 35 [Source:VGNC Symbol;Acc:VGNC:69942]                         | 4.122233845 | 8.17E-36    | 5.90E-33    |
| ENSMMUG00000009388  | F-box and leucine rich repeat protein 5 [Source:VGNC Symbol;Acc:VGNC:81408]                  | 4.12958075  | 0.008758798 | 0.03179397  |
| ENSMMUG00000004798  | S100 calcium binding protein G [Source:VGNC Symbol;Acc:VGNC:77016]                           | 4.12958075  | 0.008758798 | 0.03179397  |
| ENSMMUG00000015019  | VPS37C subunit of ESCRT-I [Source:VGNC Symbol;Acc:VGNC:79578]                                | 4.196886813 | 0.008716929 | 0.031687337 |
| ENSMMUG00000060865  | Metazoan signal recognition particle RNA [Source:RFAM;Acc:RF00017]                           | 4.22817759  | 0.003348576 | 0.014405794 |
| ENSMMUG00000058499  |                                                                                              | 4.245781597 | 0.008130026 | 0.029918009 |
| ENSMMUG00000007688  | angiominin [Source:VGNC Symbol;Acc:VGNC:69627]                                               | 4.245852572 | 0.00802919  | 0.02962677  |
| ENSMMUG00000018743  | ubiquitin specific peptidase 25 [Source:VGNC Symbol;Acc:VGNC:78744]                          | 4.25972387  | 2.54E-05    | 0.000220111 |
| ENSMMUG00000008698  | cyclin dependent kinase 6 [Source:VGNC Symbol;Acc:VGNC:70983]                                | 4.267265492 | 0.009764425 | 0.034726431 |
| ENSMMUG00000011161  | syntaxin binding protein 5 like [Source:VGNC Symbol;Acc:VGNC:78256]                          | 4.286195471 | 0.00872831  | 0.031711397 |
| ENSMMUG00000058370  | taste receptor type 2 member 62 [Source:NCBI gene;Acc:704388]                                | 4.297371048 | 0.000128178 | 0.000894626 |
| ENSMMUG00000064860  | phosphoglycerate mutase 2 [Source:NCBI gene;Acc:720615]                                      | 4.30024484  | 0.002196086 | 0.010049177 |
| ENSMMUG00000059700  |                                                                                              | 4.335233978 | 8.34E-06    | 8.15E-05    |
| ENSMMUG00000019306  | indoleamine 2,3-dioxygenase 2 [Source:VGNC Symbol;Acc:VGNC:84005]                            | 4.344891642 | 1.07E-06    | 1.30E-05    |
| ENSMMUG00000063913  | endogenous retrovirus group K member 7 Env polyprotein-like [Source:NCBI gene;Acc:114674933] | 4.346899758 | 3.11E-07    | 4.24E-06    |
| ENSMMUG00000052453  | serpin family A member 11 [Source:NCBI gene;Acc:701483]                                      | 4.369598083 | 2.41E-09    | 4.81E-08    |
| ENSMMUG00000005415  | olfactory receptor, family 2, subfamily B, member 3 [Source:NCBI gene;Acc:708747]            | 4.371787446 | 6.29E-05    | 0.000487391 |
| ENSMMUG00000050597  |                                                                                              | 4.381190642 | 0.006883258 | 0.026100493 |
| ENSMMUG00000065134  | Fas ligand [Source:NCBI gene;Acc:574159]                                                     | 4.399016031 | 0.011436105 | 0.039262895 |
| ENSMMUG00000057076  | claudin 19 [Source:NCBI gene;Acc:697807]                                                     | 4.403527473 | 0.006267757 | 0.024217857 |
| ENSMMUG00000013477  | creatine kinase, M-type [Source:VGNC Symbol;Acc:VGNC:71230]                                  | 4.408173982 | 3.78E-35    | 2.21E-32    |
| ENSMMUG00000052569  |                                                                                              | 4.415001623 | 2.59E-12    | 8.52E-11    |
| ENSMMUG00000048215  |                                                                                              | 4.416141881 | 3.74E-20    | 4.05E-18    |
| ENSMMUG00000019443  | syntaxin 11 [Source:VGNC Symbol;Acc:VGNC:78041]                                              | 4.42548363  | 0.008340483 | 0.03057348  |
| ENSMMUG00000016513  | FA complementation group M [Source:VGNC Symbol;Acc:VGNC:72554]                               | 4.439628525 | 0.003234531 | 0.013978666 |
| ENSMMUG00000024537  |                                                                                              | 4.458831488 | 5.79E-08    | 9.09E-07    |
| ENSMMUG00000006787  | BCL2 like 15 [Source:VGNC Symbol;Acc:VGNC:70162]                                             | 4.465380358 | 0.000407868 | 0.002414789 |
| ENSMMUG00000002421  | DNA polymerase mu [Source:VGNC Symbol;Acc:VGNC:81742]                                        | 4.471135482 | 0.001044054 | 0.0054077   |
| ENSMMUG00000063198  |                                                                                              | 4.483517979 | 1.10E-07    | 1.63E-06    |
| ENSMMUG00000020854  | C-type lectin domain family 4 member F [Source:VGNC Symbol;Acc:VGNC:71349]                   | 4.489555123 | 0.005581257 | 0.022071822 |
| ENSMMUG00000039268  | lymphocyte antigen 6G6e-like [Source:NCBI gene;Acc:100427419]                                | 4.506361075 | 0.00255214  | 0.011410824 |
| ENSMMUG00000021447  | TNF receptor superfamily member 1B [Source:VGNC Symbol;Acc:VGNC:78590]                       | 4.526284254 | 4.52E-05    | 0.000364625 |
| ENSMMUG00000025039  | Small nucleolar RNA SNORA73 family [Source:RFAM;Acc:RF00045]                                 | 4.538826859 | 0.002445484 | 0.011006022 |
| ENSMMUG00000016621  | transmembrane BAX inhibitor motif containing 4 [Source:NCBI gene;Acc:717825]                 | 4.541055048 | 0.010710879 | 0.037336193 |
| ENSMMUG00000062296  | potassium two pore domain channel subfamily K member 6 [Source:NCBI gene;Acc:714912]         | 4.604148672 | 0.000200839 | 0.001319625 |
| ENSMMUG00000020586  | serpin family A member 12 [Source:VGNC Symbol;Acc:VGNC:77266]                                | 4.616635969 | 0.013940508 | 0.046196489 |
| ENSMMUG00000004868  | dynein axonemal light chain 4 [Source:VGNC Symbol;Acc:VGNC:71945]                            | 4.645284479 | 0.001525192 | 0.0074154   |
| ENSMMUG000000031100 | membrane-spanning 4-domains subfamily A member 4A-like [Source:NCBI gene;Acc:698152]         | 4.646392239 | 9.79E-11    | 2.44E-09    |
| ENSMMUG00000032284  | leucine rich repeat containing 47 [Source:VGNC Symbol;Acc:VGNC:74388]                        | 4.648447958 | 0.013579375 | 0.045219207 |



|                    |                                                                                                              |             |             |             |
|--------------------|--------------------------------------------------------------------------------------------------------------|-------------|-------------|-------------|
| ENSMMUG0000004470  | CD9 molecule [Source:VGNC Symbol;Acc:VGNC:70787]                                                             | 4.712620174 | 0.000178517 | 0.001197683 |
| ENSMMUG00000031684 | KRAB box domain containing 1 [Source:NCBI gene;Acc:717189]                                                   | 4.721513322 | 2.45E-06    | 2.73E-05    |
| ENSMMUG00000001338 | antizyme inhibitor 1 [Source:VGNC Symbol;Acc:VGNC:70080]                                                     | 4.7630006   | 2.44E-08    | 4.11E-07    |
| ENSMMUG00000056778 |                                                                                                              | 4.765548438 | 0.006866416 | 0.026075194 |
| ENSMMUG00000026474 | Small nucleolar RNA SNORD83 [Source:RFAM;Acc:RF00137]                                                        | 4.823300763 | 0.006088805 | 0.023608043 |
| ENSMMUG00000050799 |                                                                                                              | 4.832992564 | 0.00083671  | 0.004508619 |
| ENSMMUG00000063820 | olfactory receptor, family 52, subfamily M, member 1 [Source:NCBI gene;Acc:717723]                           | 4.878621775 | 3.16E-05    | 0.000267488 |
| ENSMMUG00000060184 | SEC61 translocon subunit gamma [Source:NCBI gene;Acc:716898]                                                 | 4.886195053 | 1.12E-07    | 1.66E-06    |
| ENSMMUG00000003005 | MFNG O-fucosylpeptide 3-beta-N-acetylglucosaminyltransferase [Source:VGNC Symbol;Acc:VGNC:74712]             | 4.928223499 | 0.002347475 | 0.010650726 |
| ENSMMUG00000057447 |                                                                                                              | 4.963678446 | 0.002400448 | 0.010843036 |
| ENSMMUG00000053561 |                                                                                                              | 4.973181852 | 0.006322044 | 0.024381625 |
| ENSMMUG00000052785 | extracellular leucine rich repeat and fibronectin type III domain containing 2 [Source:NCBI gene;Acc:697071] | 5.073295448 | 1.55E-05    | 0.000142202 |
| ENSMMUG00000064014 |                                                                                                              | 5.101448694 | 0.005243747 | 0.02098694  |
| ENSMMUG00000010213 | GLI pathogenesis related 2 [Source:VGNC Symbol;Acc:VGNC:81414]                                               | 5.101651147 | 0.000525773 | 0.003028246 |
| ENSMMUG00000011564 | transmembrane channel like 3 [Source:VGNC Symbol;Acc:VGNC:79360]                                             | 5.12281394  | 0.000491295 | 0.002859139 |
| ENSMMUG00000054881 |                                                                                                              | 5.167405196 | 0.003705384 | 0.015704439 |
| ENSMMUG00000006851 | SPARC (osteonectin), cwcv and kazal like domains proteoglycan 3 [Source:NCBI gene;Acc:705964]                | 5.174567839 | 5.57E-25    | 1.17E-22    |
| ENSMMUG00000056905 |                                                                                                              | 5.241329831 | 0.000727977 | 0.004000647 |
| ENSMMUG00000050436 |                                                                                                              | 5.249806104 | 0.003019972 | 0.013171923 |
| ENSMMUG00000064095 |                                                                                                              | 5.27453815  | 6.57E-09    | 1.22E-07    |
| ENSMMUG00000001820 | regulator of G protein signaling 6 [Source:VGNC Symbol;Acc:VGNC:76691]                                       | 5.317646618 | 0.000109296 | 0.000780118 |
| ENSMMUG00000040007 | peroxisomal biogenesis factor 1 [Source:VGNC Symbol;Acc:VGNC:81736]                                          | 5.331490299 | 0.001964491 | 0.009166881 |
| ENSMMUG00000025150 | Y RNA [Source:RFAM;Acc:RF00019]                                                                              | 5.346605085 | 0.000815271 | 0.004416261 |
| ENSMMUG00000056168 |                                                                                                              | 5.365159662 | 0.000737906 | 0.004043517 |
| ENSMMUG00000026975 | mml-mir-206 [Source:miRBase;Acc:MI0007667]                                                                   | 5.397403487 | 0.000218504 | 0.00142172  |
| ENSMMUG00000051037 |                                                                                                              | 5.4214574   | 1.05E-12    | 3.73E-11    |
| ENSMMUG00000061282 | hyaluronan and proteoglycan link protein 1 [Source:NCBI gene;Acc:712501]                                     | 5.490808837 | 0.000930948 | 0.004934144 |
| ENSMMUG00000059335 |                                                                                                              | 5.510225363 | 0.000312028 | 0.001928175 |
| ENSMMUG00000001989 | RNA polymerase II subunit D [Source:VGNC Symbol;Acc:VGNC:76213]                                              | 5.618920233 | 0.000114502 | 0.00081166  |
| ENSMMUG00000062496 |                                                                                                              | 5.626692051 | 0.000230557 | 0.001486765 |
| ENSMMUG00000014032 | proline rich 36 [Source:NCBI gene;Acc:710443]                                                                | 5.655069588 | 1.69E-08    | 2.93E-07    |
| ENSMMUG00000047465 | Metazoan signal recognition particle RNA [Source:RFAM;Acc:RF00017]                                           | 5.684465632 | 5.95E-05    | 0.000466134 |
| ENSMMUG00000013648 | potassium two pore domain channel subfamily K member 16 [Source:VGNC Symbol;Acc:VGNC:73827]                  | 5.718270055 | 8.58E-05    | 0.000637556 |
| ENSMMUG00000048395 | chromobox 6 [Source:NCBI gene;Acc:702133]                                                                    | 5.754493454 | 2.39E-13    | 9.35E-12    |
| ENSMMUG00000019369 | pleckstrin homology and RhoGEF domain containing G2 [Source:VGNC Symbol;Acc:VGNC:76133]                      | 5.765237214 | 9.75E-07    | 1.19E-05    |
| ENSMMUG00000031540 | purinergic receptor P2Y1 [Source:VGNC Symbol;Acc:VGNC:75737]                                                 | 5.776070762 | 0.000252625 | 0.001597639 |
| ENSMMUG00000027543 | Y RNA [Source:RFAM;Acc:RF00019]                                                                              | 5.805055859 | 0.000301512 | 0.001870479 |
| ENSMMUG00000052422 | ATPase H+ transporting V1 subunit G2 [Source:NCBI gene;Acc:715331]                                           | 5.889479609 | 8.38E-05    | 0.000625223 |
| ENSMMUG00000049232 | AMMECR1 like [Source:VGNC Symbol;Acc:VGNC:84208]                                                             | 5.932352774 | 6.07E-05    | 0.000473214 |
| ENSMMUG00000005554 | mediator complex subunit 29 [Source:VGNC Symbol;Acc:VGNC:74557]                                              | 6.081702171 | 7.91E-38    | 6.48E-35    |
| ENSMMUG00000038702 | ZFP36 ring finger protein [Source:NCBI gene;Acc:722000]                                                      | 6.195896628 | 4.39E-06    | 4.60E-05    |
| ENSMMUG00000004309 | APC membrane recruitment protein 1 [Source:VGNC Symbol;Acc:VGNC:69716]                                       | 6.405232757 | 1.56E-05    | 0.000143525 |
| ENSMMUG00000049298 | cholecystokinin A receptor [Source:NCBI gene;Acc:694742]                                                     | 7.281479178 | 0.002574079 | 0.011492194 |
| ENSMMUG00000057785 |                                                                                                              | 8.314606527 | 7.05E-12    | 2.10E-10    |

## SD 2 vs. Baseline

| Ensembl Gene ID    | Description                                                                                  | Log2(FC)    | p-value     | FDR         |
|--------------------|----------------------------------------------------------------------------------------------|-------------|-------------|-------------|
| ENSMMUG00000060579 |                                                                                              | 5.674404185 | 3.09E-06    | 4.81E-05    |
| ENSMMUG0000006827  | von Willebrand factor A domain containing 7 [Source:VGNC Symbol;Acc:VGNC:78941]              | 5.437113544 | 8.14E-05    | 0.000828725 |
| ENSMMUG00000012056 | structural maintenance of chromosomes 6 [Source:VGNC Symbol;Acc:VGNC:77746]                  | 5.337108131 | 4.82E-07    | 9.50E-06    |
| ENSMMUG00000014299 | chromosome 12 C2orf80 homolog [Source:VGNC Symbol;Acc:VGNC:70459]                            | -4.96735109 | 0.000399906 | 0.003132288 |
| ENSMMUG00000001245 | zinc finger protein 532 [Source:NCBI gene;Acc:701146]                                        | 4.918118025 | 9.28E-05    | 0.000924088 |
| ENSMMUG00000022484 | ITPR interacting domain containing 1 [Source:VGNC Symbol;Acc:VGNC:73667]                     | 4.880090931 | 0.00036248  | 0.002903722 |
| ENSMMUG00000059241 |                                                                                              | 4.869811455 | 5.61E-07    | 1.08E-05    |
| ENSMMUG00000018739 | sperm flagellar 2 [Source:VGNC Symbol;Acc:VGNC:82243]                                        | 4.851556768 | 0.000211162 | 0.001852653 |
| ENSMMUG00000056056 |                                                                                              | -4.82005807 | 0.000227098 | 0.001973731 |
| ENSMMUG00000019639 | paired box 5 [Source:VGNC Symbol;Acc:VGNC:75764]                                             | 4.764414922 | 3.04E-08    | 7.93E-07    |
| ENSMMUG00000017206 | SHOC2 leucine rich repeat scaffold protein [Source:VGNC Symbol;Acc:VGNC:81569]               | 4.755209009 | 4.41E-05    | 0.00048287  |
| ENSMMUG00000001402 | solute carrier family 15 member 1 [Source:VGNC Symbol;Acc:VGNC:77393]                        | 4.604631391 | 0.00112343  | 0.007343438 |
| ENSMMUG00000013799 | ATP binding cassette subfamily G member 4 [Source:VGNC Symbol;Acc:VGNC:69390]                | 4.579604276 | 1.06E-05    | 0.000142802 |
| ENSMMUG00000063345 |                                                                                              | -4.53616564 | 3.77E-07    | 7.73E-06    |
| ENSMMUG00000024125 | small nucleolar RNA, H/ACA box 58 [Source:HGNC Symbol;Acc:HGNC:32652]                        | 4.513245467 | 0.001447432 | 0.009018965 |
| ENSMMUG00000020533 | chromosome 11 C12orf56 homolog [Source:VGNC Symbol;Acc:VGNC:70409]                           | 4.466241841 | 8.70E-09    | 2.57E-07    |
| ENSMMUG00000051155 | U2 spliceosomal RNA [Source:RFAM;Acc:RF00004]                                                | 4.398906887 | 0.000665181 | 0.00480891  |
| ENSMMUG00000059922 | family with sequence similarity 104 member B [Source:NCBI gene;Acc:705418]                   | 4.384538366 | 1.87E-05    | 0.000231201 |
| ENSMMUG00000001481 | nicotinamide nucleotide adenylyltransferase 2 [Source:VGNC Symbol;Acc:VGNC:75193]            | 4.373640655 | 8.02E-05    | 0.000818107 |
| ENSMMUG00000022865 | junctophilin 2 [Source:NCBI gene;Acc:694158]                                                 | 4.317800343 | 0.000791931 | 0.005552787 |
| ENSMMUG00000025616 |                                                                                              | 4.309263134 | 0.002857485 | 0.015470722 |
| ENSMMUG00000007187 | haloacid dehalogenase like hydrolase domain containing 3 [Source:VGNC Symbol;Acc:VGNC:73250] | 4.279908158 | 0.000810675 | 0.005667629 |
| ENSMMUG00000049682 | Metazoan signal recognition particle RNA [Source:RFAM;Acc:RF00017]                           | 4.277803114 | 8.47E-05    | 0.000860814 |
| ENSMMUG00000003693 | DIS3 like exosome 3'-5' exoribonuclease [Source:VGNC Symbol;Acc:VGNC:71796]                  | 4.203780244 | 0.007091039 | 0.031728496 |
| ENSMMUG00000054953 | leucine rich repeat containing 10 [Source:NCBI gene;Acc:114669753]                           | 4.157742249 | 0.000954065 | 0.006444377 |
| ENSMMUG00000057031 |                                                                                              | 4.146966261 | 0.000431354 | 0.003332839 |
| ENSMMUG00000001264 | BSD domain containing 1 [Source:VGNC Symbol;Acc:VGNC:70384]                                  | 4.138389818 | 9.83E-05    | 0.000970157 |
| ENSMMUG00000056369 | SAP30 like [Source:NCBI gene;Acc:714400]                                                     | 4.128301871 | 0.005798359 | 0.027074861 |

|                    |                                                                                                      |             |             |             |
|--------------------|------------------------------------------------------------------------------------------------------|-------------|-------------|-------------|
| ENSMMUG00000061572 | Metazoan signal recognition particle RNA [Source:RFAM;Acc:RF00017]                                   | 4.118710722 | 0.000212194 | 0.001858986 |
| ENSMMUG00000021656 | golgin subfamily A member 8S [Source:NCBI gene;Acc:722977]                                           | 4.096091542 | 0.009229162 | 0.039292016 |
| ENSMMUG00000022975 | sprouty related EVH1 domain containing 3 [Source:VGNC Symbol;Acc:VGNC:78030]                         | 4.086752301 | 3.10E-16    | 2.99E-14    |
| ENSMMUG00000013345 | folliculin [Source:NCBI gene;Acc:698082]                                                             | 4.083127851 | 0.00028165  | 0.002350554 |
| ENSMMUG00000061774 | taste 2 receptor member 10 [Source:NCBI gene;Acc:717960]                                             | -4.08058083 | 0.010793829 | 0.044605555 |
| ENSMMUG00000012151 | glycerol kinase 5 [Source:VGNC Symbol;Acc:VGNC:73022]                                                | 4.065351019 | 4.27E-05    | 0.000470111 |
| ENSMMUG00000045974 | suppressor APC domain containing 1 [Source:VGNC Symbol;Acc:VGNC:83461]                               | -4.05859518 | 0.008826993 | 0.037930416 |
| ENSMMUG00000026432 | small nucleolar RNA, C/D box 7 [Source:HGNC Symbol;Acc:HGNC:32704]                                   | 4.056645607 | 0.008406248 | 0.036449393 |
| ENSMMUG00000010508 | carbamoyl-phosphate synthase 1 [Source:VGNC Symbol;Acc:VGNC:71471]                                   | 4.041557722 | 0.000214088 | 0.001872841 |
| ENSMMUG00000015702 | divergent protein kinase domain 1C [Source:NCBI gene;Acc:699537]                                     | 4.021944796 | 0.000950075 | 0.006431939 |
| ENSMMUG00000052929 |                                                                                                      | 3.967789653 | 0.001122817 | 0.007343438 |
| ENSMMUG00000049842 |                                                                                                      | 3.963129668 | 0.00210987  | 0.012189005 |
| ENSMMUG00000016331 | glucosylceramidase beta 2 [Source:VGNC Symbol;Acc:VGNC:72741]                                        | -3.95640299 | 0.00359197  | 0.018752151 |
| ENSMMUG00000012690 | myocardial zonula adherens protein [Source:NCBI gene;Acc:700247]                                     | 3.919558011 | 0.001677983 | 0.010164654 |
| ENSMMUG00000049117 | CLLU1 antisense RNA 1 [Source:NCBI gene;Acc:100424000]                                               | 3.810593684 | 0.010516945 | 0.043702615 |
| ENSMMUG00000046655 | pleckstrin homology like domain family B member 1 [Source:NCBI gene;Acc:706336]                      | 3.801788918 | 1.57E-12    | 9.01E-11    |
| ENSMMUG00000052668 |                                                                                                      | 3.795488162 | 0.00419285  | 0.021115883 |
| ENSMMUG00000013777 | DDHD domain containing 2 [Source:VGNC Symbol;Acc:VGNC:83992]                                         | 3.793697304 | 0.00243217  | 0.013636551 |
| ENSMMUG00000055809 |                                                                                                      | 3.770188956 | 7.54E-07    | 1.37E-05    |
| ENSMMUG00000060993 | Metazoan signal recognition particle RNA [Source:RFAM;Acc:RF00017]                                   | 3.736104881 | 0.005008131 | 0.024106665 |
| ENSMMUG00000021331 | EBF family member 4 [Source:VGNC Symbol;Acc:VGNC:71932]                                              | 3.734613042 | 6.79E-05    | 0.000706825 |
| ENSMMUG00000018827 | multiple EGF like domains 10 [Source:VGNC Symbol;Acc:VGNC:74617]                                     | 3.690838113 | 0.011271227 | 0.045944253 |
| ENSMMUG00000002549 | trehalase [Source:NCBI gene;Acc:706449]                                                              | 3.681722141 | 1.71E-17    | 2.11E-15    |
| ENSMMUG00000005200 | PC-esterase domain containing 1A [Source:VGNC Symbol;Acc:VGNC:75622]                                 | 3.668952314 | 0.008437091 | 0.036537227 |
| ENSMMUG00000022330 | sulfotransferase family, cytosolic, 1A, phenol-preferring, member 3 [Source:NCBI gene;Acc:100428398] | -3.65621431 | 0.002519211 | 0.014000033 |
| ENSMMUG00000007001 | protein phosphatase 4 regulatory subunit 3B [Source:VGNC Symbol;Acc:VGNC:76342]                      | 3.627203551 | 0.002844097 | 0.015417834 |
| ENSMMUG00000059824 |                                                                                                      | 3.615472249 | 0.011044328 | 0.045302967 |
| ENSMMUG00000044537 | DNA polymerase epsilon 3, accessory subunit [Source:NCBI gene;Acc:705074]                            | 3.612697313 | 0.000269952 | 0.00227672  |
| ENSMMUG00000011380 | consortin, connexin sorting protein [Source:VGNC Symbol;Acc:VGNC:71355]                              | 3.588703235 | 0.009537912 | 0.040342464 |
| ENSMMUG00000060830 |                                                                                                      | 3.588208338 | 0.007480384 | 0.033142836 |

|                    |                                                                                                 |   |             |             |             |
|--------------------|-------------------------------------------------------------------------------------------------|---|-------------|-------------|-------------|
| ENSMMUG00000051271 |                                                                                                 | - | 3.569856646 | 2.42E-16    | 2.44E-14    |
| ENSMMUG0000004566  | zinc finger protein 124 [Source:VGNC Symbol;Acc:VGNC:78836]                                     | - | 3.553708971 | 0.004301507 | 0.021536308 |
| ENSMMUG0000004821  | membrane spanning 4-domains A14 [Source:NCBI gene;Acc:697083]                                   | - | 3.553361886 | 0.000104514 | 0.001016783 |
| ENSMMUG00000037485 |                                                                                                 | - | 3.553249633 | 0.000846028 | 0.005856668 |
| ENSMMUG0000003049  | testis expressed 11 [Source:VGNC Symbol;Acc:VGNC:78316]                                         | - | -3.55285575 | 2.64E-05    | 0.000312166 |
| ENSMMUG00000057859 |                                                                                                 | - | 3.537115955 | 1.61E-05    | 0.000204401 |
| ENSMMUG00000022676 | ribosomal modification protein rimK like family member B [Source:NCBI gene;Acc:722261]          | - | 3.535253458 | 0.005716026 | 0.026761193 |
| ENSMMUG0000006309  | unc-5 netrin receptor C [Source:VGNC Symbol;Acc:VGNC:78723]                                     | - | 3.512325353 | 0.000168154 | 0.001533538 |
| ENSMMUG00000051162 |                                                                                                 | - | 3.510430346 | 0.003641848 | 0.018962944 |
| ENSMMUG00000017204 | programmed cell death 4 [Source:VGNC Symbol;Acc:VGNC:75794]                                     | - | 3.498458981 | 0.003045835 | 0.01626981  |
| ENSMMUG00000054315 |                                                                                                 | - | 3.474987724 | 0.0001078   | 0.00104705  |
| ENSMMUG00000038587 | prostate and testis expressed 2 [Source:NCBI gene;Acc:717085]                                   | - | 3.469495766 | 0.004417558 | 0.02196126  |
| ENSMMUG00000008942 | carnosine dipeptidase 1 [Source:VGNC Symbol;Acc:VGNC:71257]                                     | - | 3.460131397 | 4.46E-05    | 0.000487974 |
| ENSMMUG00000017374 | G protein subunit beta 5 [Source:VGNC Symbol;Acc:VGNC:73097]                                    | - | 3.439752285 | 0.001119307 | 0.007337065 |
| ENSMMUG00000012058 | GEN1 Holliday junction 5' flap endonuclease [Source:VGNC Symbol;Acc:VGNC:72790]                 | - | 3.436257234 | 3.62E-05    | 0.000409665 |
| ENSMMUG00000009155 | SIN3-HDAC complex associated factor [Source:NCBI gene;Acc:694162]                               | - | 3.429441578 | 6.57E-06    | 9.28E-05    |
| ENSMMUG00000065131 |                                                                                                 | - | 3.425422082 | 0.012028486 | 0.048348505 |
| ENSMMUG00000020905 | chromosome 18 C18orf63 homolog [Source:VGNC Symbol;Acc:VGNC:70465]                              | - | 3.413670205 | 0.002766486 | 0.015114705 |
| ENSMMUG00000021244 | kelch like family member 40 [Source:VGNC Symbol;Acc:VGNC:74165]                                 | - | -3.40210378 | 0.001258299 | 0.008049889 |
| ENSMMUG00000029164 | glycerophosphodiester phosphodiesterase domain containing 3 [Source:VGNC Symbol;Acc:VGNC:72800] | - | 3.343712856 | 1.17E-05    | 0.000155129 |
| ENSMMUG00000054821 |                                                                                                 | - | 3.306856244 | 0.002642472 | 0.014556689 |
| ENSMMUG00000043682 | mitochondrial carrier 2 [Source:NCBI gene;Acc:712767]                                           | - | 3.268767464 | 0.00058398  | 0.004322462 |
| ENSMMUG00000055117 |                                                                                                 | - | 3.256504702 | 8.28E-05    | 0.000842758 |
| ENSMMUG00000003736 | nuclear factor kappa B subunit 1 [Source:VGNC Symbol;Acc:VGNC:75339]                            | - | 3.231096588 | 8.52E-08    | 2.04E-06    |
| ENSMMUG00000053657 |                                                                                                 | - | 3.228826951 | 0.001452629 | 0.009042732 |
| ENSMMUG00000006548 | KIAA1549 [Source:VGNC Symbol;Acc:VGNC:73885]                                                    | - | 3.209143737 | 0.000114487 | 0.001102165 |
| ENSMMUG00000061408 |                                                                                                 | - | 3.207208114 | 0.000123167 | 0.001174401 |
| ENSMMUG00000060836 |                                                                                                 | - | 3.149723017 | 0.002594642 | 0.014352625 |
| ENSMMUG00000052535 |                                                                                                 | - | 3.146643776 | 0.000242331 | 0.002080403 |



|                    |                                                                                                         |   |             |             |             |
|--------------------|---------------------------------------------------------------------------------------------------------|---|-------------|-------------|-------------|
| ENSMMUG00000053577 |                                                                                                         | - | 3.142756066 | 2.41E-08    | 6.47E-07    |
| ENSMMUG00000050435 |                                                                                                         | - | 3.135774479 | 0.006167618 | 0.02838716  |
| ENSMMUG00000055207 |                                                                                                         | - | 3.135567337 | 0.000611064 | 0.004481194 |
| ENSMMUG00000058459 |                                                                                                         | - | 3.125899766 | 0.004507343 | 0.022314983 |
| ENSMMUG00000000009 | protein tyrosine phosphatase receptor type C [Source:VGNC Symbol;Acc:VGNC:76612]                        | - | 3.118357697 | 1.20E-08    | 3.44E-07    |
| ENSMMUG00000010820 | chaperonin containing TCP1 subunit 2 [Source:VGNC Symbol;Acc:VGNC:70745]                                | - | -3.1060271  | 2.55E-09    | 8.35E-08    |
| ENSMMUG00000013302 | family with sequence similarity 184 member A [Source:VGNC Symbol;Acc:VGNC:72308]                        | - | 3.098335179 | 0.002438397 | 0.01364591  |
| ENSMMUG00000021242 | natural killer cell triggering receptor [Source:VGNC Symbol;Acc:VGNC:81486]                             | - | -3.09511207 | 0.001946043 | 0.01145249  |
| ENSMMUG00000015355 | R-spondin 3 [Source:VGNC Symbol;Acc:VGNC:77066]                                                         | - | 3.085018597 | 0.001355183 | 0.008537796 |
| ENSMMUG00000020926 | syntaxin 2 [Source:VGNC Symbol;Acc:VGNC:78259]                                                          | - | 3.082802832 | 0.001209052 | 0.007788921 |
| ENSMMUG00000065099 |                                                                                                         | - | 3.080249514 | 4.64E-12    | 2.42E-10    |
| ENSMMUG00000010596 | 6-phosphofructo-2-kinase/fructose-2,6-biphosphatase 3 [Source:VGNC Symbol;Acc:VGNC:75959]               | - | 3.074666781 | 0.009687836 | 0.0409247   |
| ENSMMUG00000008525 | minichromosome maintenance 9 homologous recombination repair factor [Source:VGNC Symbol;Acc:VGNC:83432] | - | 3.073373833 | 0.000734486 | 0.005214113 |
| ENSMMUG00000043727 | zinc finger protein 654 [Source:VGNC Symbol;Acc:VGNC:82560]                                             | - | 3.060641919 | 0.000300034 | 0.002469559 |
| ENSMMUG00000031736 |                                                                                                         | - | 3.057851596 | 0.002740802 | 0.014994902 |
| ENSMMUG00000002649 | unc-5 netrin receptor A [Source:VGNC Symbol;Acc:VGNC:78721]                                             | - | 3.053583175 | 0.005065246 | 0.024332685 |
| ENSMMUG00000056824 |                                                                                                         | - | 3.051140849 | 0.001481358 | 0.009206408 |
| ENSMMUG00000016871 | alkaline phosphatase, intestinal [Source:VGNC Symbol;Acc:VGNC:69800]                                    | - | 3.049971904 | 0.00040146  | 0.003142409 |
| ENSMMUG00000057651 | frizzled class receptor 5 [Source:NCBI gene;Acc:710796]                                                 | - | 3.035536122 | 0.002200753 | 0.012562547 |
| ENSMMUG00000010127 | chitobiase [Source:VGNC Symbol;Acc:VGNC:71540]                                                          | - | 3.029442374 | 4.73E-06    | 6.95E-05    |
| ENSMMUG00000053550 |                                                                                                         | - | 3.024982454 | 0.011138371 | 0.04554221  |
| ENSMMUG00000039300 |                                                                                                         | - | 3.007480285 | 0.000136635 | 0.001285421 |
| ENSMMUG00000031000 | Rho GTPase activating protein 8 [Source:NCBI gene;Acc:716745]                                           | - | 3.002176984 | 0.002991471 | 0.016015132 |
| ENSMMUG00000021552 | RPGR interacting protein 1 [Source:VGNC Symbol;Acc:VGNC:77007]                                          | - | 2.979887014 | 1.84E-05    | 0.000228132 |
| ENSMMUG00000062793 |                                                                                                         | - | 2.960645931 | 2.83E-07    | 6.03E-06    |
| ENSMMUG00000002755 | kelch like family member 5 [Source:VGNC Symbol;Acc:VGNC:74188]                                          | - | 2.950254358 | 0.001858793 | 0.011031172 |
| ENSMMUG00000050564 |                                                                                                         | - | 2.947757358 | 0.008398651 | 0.036429642 |
| ENSMMUG00000011401 | amyloid beta precursor protein binding family A member 1 [Source:VGNC Symbol;Acc:VGNC:69976]            | - | 2.942271067 | 7.16E-06    | 9.99E-05    |
| ENSMMUG00000019831 | neurobeachin [Source:NCBI gene;Acc:714386]                                                              | - | 2.937914663 | 2.36E-07    | 5.10E-06    |

|                     |                                                                                                  |             |             |             |
|---------------------|--------------------------------------------------------------------------------------------------|-------------|-------------|-------------|
| ENSMMUG0000009948   | histone deacetylase 1 [Source:NCBI gene;Acc:708441]                                              | 2.930588856 | 2.34E-12    | 1.30E-10    |
| ENSMMUG00000021354  | corticotropin releasing hormone binding protein [Source:VGNC Symbol;Acc:VGNC:71491]              | 2.914671278 | 0.004817446 | 0.023405167 |
| ENSMMUG0000007003   | polyribonucleotide nucleotidyltransferase 1 [Source:VGNC Symbol;Acc:VGNC:76095]                  | 2.908393336 | 0.002829462 | 0.015360672 |
| ENSMMUG00000016880  | solute carrier family 39 member 8 [Source:VGNC Symbol;Acc:VGNC:77541]                            | 2.887334858 | 1.52E-07    | 3.45E-06    |
| ENSMMUG00000058233  | C-C motif chemokine 3-like [Source:NCBI gene;Acc:100426537]                                      | -2.88725572 | 0.004684636 | 0.022870599 |
| ENSMMUG00000051115  |                                                                                                  | 2.870080272 | 8.50E-05    | 0.000863008 |
| ENSMMUG00000055229  |                                                                                                  | 2.865320327 | 2.41E-10    | 9.63E-09    |
| ENSMMUG00000015041  | CWC27 spliceosome associated cyclophilin [Source:VGNC Symbol;Acc:VGNC:71396]                     | 2.864824078 | 0.000255985 | 0.002172699 |
| ENSMMUG00000016791  | doublecortin like kinase 1 [Source:VGNC Symbol;Acc:VGNC:71745]                                   | 2.831989109 | 1.19E-18    | 1.71E-16    |
| ENSMMUG00000000972  | tyrosine kinase non receptor 2 [Source:VGNC Symbol;Acc:VGNC:79192]                               | 2.827893791 | 5.02E-06    | 7.31E-05    |
| ENSMMUG00000001742  | transforming growth factor beta receptor 3 [Source:VGNC Symbol;Acc:VGNC:78339]                   | 2.821993873 | 8.55E-15    | 6.74E-13    |
| ENSMMUG00000007751  | solute carrier family 22 member 18 [Source:NCBI gene;Acc:721230]                                 | -2.82196105 | 0.001095638 | 0.00720954  |
| ENSMMUG000000061973 |                                                                                                  | 2.818419665 | 6.87E-23    | 1.68E-20    |
| ENSMMUG00000017210  | sarcosine dehydrogenase [Source:VGNC Symbol;Acc:VGNC:76971]                                      | 2.813082789 | 4.89E-06    | 7.15E-05    |
| ENSMMUG00000040817  | interferon regulatory factor 9 [Source:VGNC Symbol;Acc:VGNC:84361]                               | 2.811469451 | 0.007917356 | 0.034744688 |
| ENSMMUG00000006457  | Rho guanine nucleotide exchange factor 40 [Source:VGNC Symbol;Acc:VGNC:69907]                    | 2.799674346 | 0.00046793  | 0.003571654 |
| ENSMMUG000000051001 |                                                                                                  | 2.785304263 | 0.008187688 | 0.035721584 |
| ENSMMUG00000021095  | desmoglein 2 [Source:VGNC Symbol;Acc:VGNC:72002]                                                 | 2.785260516 | 0.009215649 | 0.039248438 |
| ENSMMUG00000017932  | acyl-CoA synthetase short chain family member 2 [Source:VGNC Symbol;Acc:VGNC:69410]              | 2.784161798 | 0.009063588 | 0.03872477  |
| ENSMMUG00000013742  | regulator of G protein signaling 22 [Source:VGNC Symbol;Acc:VGNC:82221]                          | 2.782658515 | 0.008463522 | 0.036604963 |
| ENSMMUG00000002742  | ST8 alpha-N-acetyl-neuraminide alpha-2,8-sialyltransferase 5 [Source:VGNC Symbol;Acc:VGNC:77942] | 2.778206064 | 5.41E-13    | 3.30E-11    |
| ENSMMUG00000006898  | integrin subunit beta 8 [Source:VGNC Symbol;Acc:VGNC:73791]                                      | 2.763409627 | 1.59E-13    | 1.07E-11    |
| ENSMMUG00000020348  | BCL2 interacting protein 2 [Source:VGNC Symbol;Acc:VGNC:70272]                                   | 2.759124115 | 3.47E-05    | 0.000394908 |
| ENSMMUG00000059019  |                                                                                                  | 2.759057823 | 2.20E-08    | 5.96E-07    |
| ENSMMUG00000049786  |                                                                                                  | 2.758732792 | 0.001102797 | 0.007244706 |
| ENSMMUG00000007085  | zinc finger and BTB domain containing 16 [Source:VGNC Symbol;Acc:VGNC:78845]                     | 2.756672502 | 0.006072709 | 0.028014931 |
| ENSMMUG00000023289  | phospholipase D1 [Source:VGNC Symbol;Acc:VGNC:76171]                                             | 2.749212811 | 0.008501681 | 0.036716961 |
| ENSMMUG00000005851  | B-box and SPRY domain containing [Source:VGNC Symbol;Acc:VGNC:70342]                             | 2.743468815 | 0.000232534 | 0.002009253 |
| ENSMMUG00000024598  | U6 spliceosomal RNA [Source:RFAM;Acc:RF00026]                                                    | 2.742161941 | 0.008571934 | 0.036993687 |



|                    |                                                                                                                         |             |             |             |
|--------------------|-------------------------------------------------------------------------------------------------------------------------|-------------|-------------|-------------|
| ENSMMUG00000051522 | Metazoan signal recognition particle RNA [Source:RFAM;Acc:RF00017]                                                      | 2.725815002 | 0.011924121 | 0.048019133 |
| ENSMMUG00000031821 | chymotrypsin-like elastase family member 2B [Source:NCBI gene;Acc:106992406]                                            | 2.724050361 | 0.00034506  | 0.002784319 |
| ENSMMUG00000004215 | LRAT domain containing 1 [Source:VGNC Symbol;Acc:VGNC:74321]                                                            | -2.71378093 | 0.007092297 | 0.031728496 |
| ENSMMUG00000020370 | SRY-box transcription factor 5 [Source:VGNC Symbol;Acc:VGNC:77843]                                                      | 2.710039836 | 0.009953423 | 0.041790466 |
| ENSMMUG00000060455 |                                                                                                                         | 2.707050799 | 0.006011133 | 0.027816599 |
| ENSMMUG00000000974 | mutS homolog 2 [Source:VGNC Symbol;Acc:VGNC:74931]                                                                      | 2.703141044 | 9.93E-08    | 2.34E-06    |
| ENSMMUG00000015661 | protein tyrosine phosphatase receptor type U [Source:VGNC Symbol;Acc:VGNC:76624]                                        | 2.691511834 | 0.00011289  | 0.001087667 |
| ENSMMUG00000056387 | transcription factor 15 [Source:NCBI gene;Acc:716916]                                                                   | 2.687075976 | 1.31E-06    | 2.26E-05    |
| ENSMMUG00000055610 | homeobox C4 [Source:NCBI gene;Acc:100430434]                                                                            | 2.678659802 | 3.54E-09    | 1.13E-07    |
| ENSMMUG00000012480 | REC8 meiotic recombination protein [Source:VGNC Symbol;Acc:VGNC:76746]                                                  | 2.676970698 | 6.17E-06    | 8.79E-05    |
| ENSMMUG00000051169 |                                                                                                                         | 2.671438207 | 0.003658636 | 0.019042078 |
| ENSMMUG00000017234 | leucine rich repeat containing 59 [Source:VGNC Symbol;Acc:VGNC:81436]                                                   | 2.659254388 | 2.79E-11    | 1.28E-09    |
| ENSMMUG00000011555 | interleukin 16 [Source:VGNC Symbol;Acc:VGNC:84355]                                                                      | 2.647971769 | 0.000752564 | 0.005304712 |
| ENSMMUG00000016077 | isocitrate dehydrogenase (NADP(+)) 1 [Source:NCBI gene;Acc:710019]                                                      | 2.641138953 | 4.50E-05    | 0.000490036 |
| ENSMMUG00000015004 | TOX high mobility group box family member 4 [Source:NCBI gene;Acc:706950]                                               | 2.637612631 | 0.000158141 | 0.001460209 |
| ENSMMUG00000052277 | transthyretin [Source:NCBI gene;Acc:705943]                                                                             | 2.635762035 | 8.71E-05    | 0.000880719 |
| ENSMMUG00000051429 |                                                                                                                         | 2.622359441 | 0.004762018 | 0.023185416 |
| ENSMMUG00000013047 | S-phase kinase associated protein 1 [Source:NCBI gene;Acc:100423634]                                                    | 2.616434564 | 5.58E-18    | 7.42E-16    |
| ENSMMUG00000005137 | ATPase secretory pathway Ca <sup>2+</sup> transporting 1 [Source:VGNC Symbol;Acc:VGNC:70054]                            | -2.59343598 | 1.65E-06    | 2.73E-05    |
| ENSMMUG00000016314 | family with sequence similarity 166 member B [Source:VGNC Symbol;Acc:VGNC:72421]                                        | 2.590693081 | 2.92E-12    | 1.58E-10    |
| ENSMMUG00000037806 | chromosome 6 C5orf63 homolog [Source:NCBI gene;Acc:100423212]                                                           | 2.587972815 | 0.008211073 | 0.0357845   |
| ENSMMUG00000010543 | PHD finger protein 23 [Source:VGNC Symbol;Acc:VGNC:75877]                                                               | 2.583176569 | 0.001459158 | 0.00907786  |
| ENSMMUG00000007821 | ATP binding cassette subfamily B member 5 [Source:VGNC Symbol;Acc:VGNC:80321]                                           | 2.578291859 | 4.57E-12    | 2.40E-10    |
| ENSMMUG00000023791 | SR-related CTD associated factor 11 [Source:VGNC Symbol;Acc:VGNC:77002]                                                 | 2.571207809 | 0.002467031 | 0.013799701 |
| ENSMMUG00000000229 | transient receptor potential cation channel subfamily C member 4 associated protein [Source:VGNC Symbol;Acc:VGNC:79014] | -2.56054179 | 0.002491886 | 0.013893309 |
| ENSMMUG00000051936 |                                                                                                                         | 2.555584968 | 0.000459625 | 0.003517235 |
| ENSMMUG00000038661 |                                                                                                                         | -2.52401368 | 9.85E-14    | 6.78E-12    |
| ENSMMUG00000018342 | required for meiotic nuclear division 1 homolog [Source:VGNC Symbol;Acc:VGNC:76797]                                     | 2.517328102 | 9.44E-10    | 3.40E-08    |
| ENSMMUG00000057276 |                                                                                                                         | 2.511513701 | 0.004970579 | 0.023993414 |
| ENSMMUG00000005119 | histocompatibility minor 13 [Source:VGNC Symbol;Acc:VGNC:81418]                                                         | 2.507259517 | 0.008576408 | 0.036999661 |

|                    |                                                                                                   |             |             |             |
|--------------------|---------------------------------------------------------------------------------------------------|-------------|-------------|-------------|
| ENSMMUG00000017427 | ATPase Na <sup>+</sup> /K <sup>+</sup> transporting subunit alpha 3 [Source:NCBI gene;Acc:706513] | 2.499994109 | 0.005039227 | 0.024227129 |
| ENSMMUG00000051190 | Metazoan signal recognition particle RNA [Source:RFAM;Acc:RF00017]                                | 2.488346225 | 0.002234924 | 0.012709138 |
| ENSMMUG00000064216 |                                                                                                   | 2.486339999 | 0.00696147  | 0.031295259 |
| ENSMMUG00000044628 |                                                                                                   | 2.484485568 | 3.97E-05    | 0.000442696 |
| ENSMMUG00000059128 |                                                                                                   | 2.479703271 | 0.0010615   | 0.007031263 |
| ENSMMUG00000058332 | testis expressed 46 [Source:NCBI gene;Acc:709002]                                                 | 2.479476217 | 0.000358911 | 0.002882842 |
| ENSMMUG00000031965 | aminolevulinate dehydratase [Source:VGNC Symbol;Acc:VGNC:69779]                                   | 2.471180674 | 0.008323115 | 0.036167499 |
| ENSMMUG00000015634 | centromere protein F [Source:VGNC Symbol;Acc:VGNC:71009]                                          | 2.455886726 | 0.002704662 | 0.014858273 |
| ENSMMUG00000059406 | RGP1 homolog, RAB6A GEF complex partner 1 [Source:NCBI gene;Acc:695936]                           | 2.455000968 | 0.001263133 | 0.008072187 |
| ENSMMUG00000061986 |                                                                                                   | 2.444320446 | 0.009702262 | 0.040956748 |
| ENSMMUG00000051032 | serine protease 2 [Source:NCBI gene;Acc:698352]                                                   | 2.439983614 | 4.54E-13    | 2.82E-11    |
| ENSMMUG00000061096 | tubulin polymerization promoting protein [Source:NCBI gene;Acc:708834]                            | 2.438631714 | 0.003707558 | 0.019246518 |
| ENSMMUG00000060892 |                                                                                                   | 2.428469775 | 0.000552087 | 0.004124634 |
| ENSMMUG00000005295 | parathyroid hormone 2 receptor [Source:VGNC Symbol;Acc:VGNC:76592]                                | 2.417721431 | 0.005403684 | 0.025555426 |
| ENSMMUG00000013907 | ribosomal protein S27a [Source:NCBI gene;Acc:718909]                                              | 2.414125066 | 0.000813773 | 0.005682059 |
| ENSMMUG00000016993 | PKHD1 ciliary IPT domain containing fibrocystin/polyductin [Source:VGNC Symbol;Acc:VGNC:76010]    | 2.412045369 | 1.22E-06    | 2.12E-05    |
| ENSMMUG00000021091 | COP9 signalosome subunit 3 [Source:VGNC Symbol;Acc:VGNC:71316]                                    | -2.4090024  | 0.000642297 | 0.004673237 |
| ENSMMUG00000055585 |                                                                                                   | 2.402340491 | 5.64E-06    | 8.08E-05    |
| ENSMMUG00000007326 | ring finger protein 121 [Source:VGNC Symbol;Acc:VGNC:76788]                                       | 2.398768012 | 1.39E-12    | 8.03E-11    |
| ENSMMUG00000062791 |                                                                                                   | 2.391241022 | 0.000355275 | 0.002857473 |
| ENSMMUG00000059115 |                                                                                                   | 2.389459848 | 1.21E-05    | 0.000159795 |
| ENSMMUG00000018565 | ribonucleoprotein, PTB binding 2 [Source:VGNC Symbol;Acc:VGNC:76536]                              | 2.386225318 | 0.003908797 | 0.020108143 |
| ENSMMUG00000011974 | calcium/calmodulin dependent protein kinase IV [Source:VGNC Symbol;Acc:VGNC:70526]                | -2.37761649 | 4.04E-12    | 2.15E-10    |
| ENSMMUG00000052287 |                                                                                                   | 2.350846776 | 0.003965063 | 0.020319041 |
| ENSMMUG00000050269 | T cell receptor beta variable 14 [Source:HGNC Symbol;Acc:HGNC:12189]                              | 2.349249301 | 3.79E-10    | 1.46E-08    |
| ENSMMUG00000007816 | SMAD family member 2 [Source:VGNC Symbol;Acc:VGNC:77810]                                          | 2.340929887 | 6.32E-07    | 1.19E-05    |
| ENSMMUG00000011902 | oligosaccharyltransferase complex non-catalytic subunit [Source:NCBI gene;Acc:697283]             | 2.340584633 | 8.93E-08    | 2.12E-06    |
| ENSMMUG00000040694 | LCK proto-oncogene, Src family tyrosine kinase [Source:NCBI gene;Acc:717704]                      | 2.335225655 | 5.93E-17    | 6.77E-15    |
| ENSMMUG00000059575 |                                                                                                   | -2.32086512 | 4.67E-17    | 5.60E-15    |

|                    |                                                                                                   |             |             |             |
|--------------------|---------------------------------------------------------------------------------------------------|-------------|-------------|-------------|
| ENSMMUG0000009702  | mutS homolog 5 [Source:NCBI gene;Acc:715494]                                                      | 2.320568979 | 0.006551608 | 0.029776873 |
| ENSMMUG00000015550 | PR/SET domain 4 [Source:VGNC Symbol;Acc:VGNC:76393]                                               | 2.318362547 | 0.000106581 | 0.001036049 |
| ENSMMUG00000022762 | OMA1 zinc metalloproteinase [Source:VGNC Symbol;Acc:VGNC:75485]                                   | 2.318265255 | 5.06E-09    | 1.56E-07    |
| ENSMMUG00000022726 | dual specificity tyrosine phosphorylation regulated kinase 1B [Source:VGNC Symbol;Acc:VGNC:72016] | 2.313181481 | 0.000503433 | 0.003808665 |
| ENSMMUG00000008228 | unc-93 homolog A [Source:VGNC Symbol;Acc:VGNC:78724]                                              | 2.303633526 | 0.001082853 | 0.007141107 |
| ENSMMUG00000056165 |                                                                                                   | 2.302816677 | 0.000101241 | 0.000992197 |
| ENSMMUG00000017524 | phosphoinositide kinase, FYVE-type zinc finger containing [Source:VGNC Symbol;Acc:VGNC:75854]     | 2.299967721 | 0.00011048  | 0.001068746 |
| ENSMMUG00000015141 | ankyrin repeat domain 16 [Source:NCBI gene;Acc:720787]                                            | 2.291190363 | 0.00061321  | 0.004488877 |
| ENSMMUG00000055161 |                                                                                                   | 2.285816442 | 0.007492869 | 0.033185874 |
| ENSMMUG00000053344 | splA/ryanodine receptor domain and SOCS box containing 4 [Source:NCBI gene;Acc:715278]            | -2.27907243 | 0.001389897 | 0.008705754 |
| ENSMMUG00000011821 | phosphatidylinositol transfer protein membrane associated 1 [Source:VGNC Symbol;Acc:VGNC:76007]   | 2.277813802 | 0.010722393 | 0.044371591 |
| ENSMMUG00000019105 | RNA 3'-terminal phosphate cyclase [Source:VGNC Symbol;Acc:VGNC:77043]                             | 2.275016408 | 0.00013937  | 0.001307045 |
| ENSMMUG00000060346 |                                                                                                   | 2.265104595 | 0.000100931 | 0.000989966 |
| ENSMMUG00000002250 | beta-1,3-glucuronyltransferase 1 [Source:VGNC Symbol;Acc:VGNC:70207]                              | 2.262888462 | 0.003054419 | 0.01630839  |
| ENSMMUG00000037551 | Metazoan signal recognition particle RNA [Source:RFAM;Acc:RF00017]                                | 2.253180568 | 1.60E-05    | 0.00020344  |
| ENSMMUG00000063268 |                                                                                                   | 2.246615287 | 0.000530132 | 0.003990486 |
| ENSMMUG00000021932 | Rho GTPase activating protein 27 [Source:VGNC Symbol;Acc:VGNC:69935]                              | 2.241603204 | 0.000274862 | 0.002307393 |
| ENSMMUG00000029475 | zinc finger and BTB domain containing 2 [Source:VGNC Symbol;Acc:VGNC:79291]                       | 2.238911141 | 0.000466258 | 0.003561165 |
| ENSMMUG00000060062 |                                                                                                   | 2.237813688 | 0.007731168 | 0.034039878 |
| ENSMMUG00000012775 | nuclear receptor subfamily 0 group B member 1 [Source:NCBI gene;Acc:574154]                       | 2.226330929 | 0.01095598  | 0.045057971 |
| ENSMMUG00000063177 | StAR related lipid transfer domain containing 4 [Source:NCBI gene;Acc:706654]                     | 2.211647663 | 5.45E-17    | 6.28E-15    |
| ENSMMUG00000006731 | CECR2 histone acetyl-lysine reader [Source:VGNC Symbol;Acc:VGNC:84530]                            | 2.208738588 | 1.39E-08    | 3.93E-07    |
| ENSMMUG00000028925 | HDGF like 2 [Source:NCBI gene;Acc:693476]                                                         | 2.196274741 | 0.005382868 | 0.025510575 |
| ENSMMUG00000009965 | chromosome 15 C9orf50 homolog [Source:VGNC Symbol;Acc:VGNC:70365]                                 | 2.194912648 | 1.57E-09    | 5.39E-08    |
| ENSMMUG00000055560 |                                                                                                   | 2.192709152 | 0.004236674 | 0.021282889 |
| ENSMMUG00000055903 | Metazoan signal recognition particle RNA [Source:RFAM;Acc:RF00017]                                | 2.177766962 | 0.007551112 | 0.033393162 |
| ENSMMUG00000020050 | salt inducible kinase 1 [Source:NCBI gene;Acc:722303]                                             | 2.176301126 | 0.004558695 | 0.022467052 |
| ENSMMUG00000007313 | histone acetyltransferase 1 [Source:VGNC Symbol;Acc:VGNC:73349]                                   | 2.169749714 | 0.000143052 | 0.001335303 |
| ENSMMUG00000023462 | immunoglobulin like domain containing receptor 2 [Source:VGNC Symbol;Acc:VGNC:73619]              | -2.16938963 | 0.008924577 | 0.038198975 |

|                    |                                                                                               |   |             |             |             |
|--------------------|-----------------------------------------------------------------------------------------------|---|-------------|-------------|-------------|
| ENSMMUG00000050544 |                                                                                               | - | 2.168063877 | 3.56E-06    | 5.46E-05    |
| ENSMMUG0000000224  | RALBP1 associated Eps domain containing 1 [Source:VGNC Symbol;Acc:VGNC:76738]                 | - | 2.165243033 | 0.010022625 | 0.041954199 |
| ENSMMUG00000007504 | myosin VC [Source:VGNC Symbol;Acc:VGNC:75117]                                                 | - | 2.162680885 | 0.002940444 | 0.015812643 |
| ENSMMUG00000052518 | SIVA1 apoptosis inducing factor [Source:NCBI gene;Acc:706688]                                 | - | 2.161937564 | 0.010218991 | 0.042650639 |
| ENSMMUG00000016262 | tetratricopeptide repeat domain 38 [Source:VGNC Symbol;Acc:VGNC:79574]                        | - | -2.15858638 | 2.14E-07    | 4.73E-06    |
| ENSMMUG00000012474 | ring finger protein 31 [Source:NCBI gene;Acc:715239]                                          | - | 2.156409367 | 0.006676788 | 0.030185435 |
| ENSMMUG00000059728 | tumor protein p53 inducible protein 11 [Source:NCBI gene;Acc:715295]                          | - | 2.153995011 | 0.002582468 | 0.014305105 |
| ENSMMUG00000001172 | spermatogenesis and oogenesis specific basic helix-loop-helix 2 [Source:NCBI gene;Acc:693608] | - | -2.15384945 | 0.000478505 | 0.003636156 |
| ENSMMUG00000057302 |                                                                                               | - | 2.139099588 | 0.005222242 | 0.024926891 |
| ENSMMUG00000051482 |                                                                                               | - | 2.137279654 | 7.03E-06    | 9.86E-05    |
| ENSMMUG00000013643 | zinc finger CCHC-type containing 8 [Source:VGNC Symbol;Acc:VGNC:79487]                        | - | 2.130932307 | 0.006057352 | 0.02796563  |
| ENSMMUG00000016845 | zinc finger E-box binding homeobox 2 [Source:VGNC Symbol;Acc:VGNC:78969]                      | - | 2.120861865 | 0.003738452 | 0.019364922 |
| ENSMMUG00000005204 | VPS16 core subunit of CORVET and HOPS complexes [Source:VGNC Symbol;Acc:VGNC:78966]           | - | 2.120204653 | 0.000183775 | 0.001649841 |
| ENSMMUG00000056910 |                                                                                               | - | 2.117255092 | 4.14E-06    | 6.22E-05    |
| ENSMMUG00000052609 | ribosomal protein L34 [Source:NCBI gene;Acc:696636]                                           | - | 2.114477347 | 0.000387435 | 0.003052578 |
| ENSMMUG00000002794 | general transcription factor IIB [Source:VGNC Symbol;Acc:VGNC:73306]                          | - | 2.112893685 | 4.35E-29    | 3.11E-26    |
| ENSMMUG00000018346 | coiled-coil domain containing 170 [Source:VGNC Symbol;Acc:VGNC:70832]                         | - | 2.106829636 | 0.000204197 | 0.00180211  |
| ENSMMUG00000061594 |                                                                                               | - | 2.106646172 | 0.004328016 | 0.021632855 |
| ENSMMUG00000015002 | chromodomain helicase DNA binding protein 8 [Source:VGNC Symbol;Acc:VGNC:71060]               | - | 2.106369265 | 0.002864755 | 0.015496072 |
| ENSMMUG00000019992 | growth factor receptor bound protein 10 [Source:VGNC Symbol;Acc:VGNC:73157]                   | - | 2.105749458 | 0.00380464  | 0.019639816 |
| ENSMMUG00000023265 | A-kinase anchoring protein 12 [Source:VGNC Symbol;Acc:VGNC:69766]                             | - | 2.100202124 | 6.62E-07    | 1.23E-05    |
| ENSMMUG00000055759 | Metazoan signal recognition particle RNA [Source:RFAM;Acc:RF00017]                            | - | 2.099449167 | 2.68E-05    | 0.000316412 |
| ENSMMUG00000008643 | general transcription factor IIIC subunit 3 [Source:VGNC Symbol;Acc:VGNC:73317]               | - | 2.092696439 | 1.75E-10    | 7.12E-09    |
| ENSMMUG00000057494 | T cell receptor beta variable 7-9 [Source:HGNC Symbol;Acc:HGNC:12243]                         | - | 2.091246396 | 2.05E-07    | 4.55E-06    |
| ENSMMUG00000009958 | ankyrin repeat domain 46 [Source:VGNC Symbol;Acc:VGNC:69719]                                  | - | 2.089455955 | 0.00019221  | 0.001716558 |
| ENSMMUG00000049194 |                                                                                               | - | 2.087635304 | 0.011407212 | 0.046388037 |
| ENSMMUG00000056363 |                                                                                               | - | 2.087034134 | 0.001430767 | 0.00892441  |
| ENSMMUG00000037625 |                                                                                               | - | 2.085908891 | 2.48E-06    | 3.95E-05    |
| ENSMMUG00000059525 |                                                                                               | - | 2.085088263 | 4.55E-07    | 9.04E-06    |

|                    |                                                                                              |             |             |             |
|--------------------|----------------------------------------------------------------------------------------------|-------------|-------------|-------------|
| ENSMMUG0000000981  | T-box transcription factor 6 [Source:VGNC Symbol;Acc:VGNC:78276]                             | 2.079439248 | 1.57E-06    | 2.63E-05    |
| ENSMMUG00000059518 |                                                                                              | 2.078350075 | 0.008467491 | 0.036608908 |
| ENSMMUG00000060893 |                                                                                              | 2.077907077 | 0.001132495 | 0.007383105 |
| ENSMMUG00000007398 | potassium calcium-activated channel subfamily N member 1 [Source:VGNC Symbol;Acc:VGNC:74002] | 2.077616132 | 2.61E-05    | 0.000308842 |
| ENSMMUG00000023012 | vesicle trafficking 1 [Source:VGNC Symbol;Acc:VGNC:79296]                                    | 2.075196276 | 0.000231763 | 0.002005139 |
| ENSMMUG00000001024 | ETS transcription factor ELK4 [Source:VGNC Symbol;Acc:VGNC:72211]                            | 2.074086935 | 0.004450187 | 0.022105119 |
| ENSMMUG00000017173 | heat shock protein family A (Hsp70) member 14 [Source:NCBI gene;Acc:697257]                  | 2.072545563 | 0.000940803 | 0.006376374 |
| ENSMMUG00000059101 |                                                                                              | 2.053273171 | 0.001604738 | 0.00981028  |
| ENSMMUG00000021534 | solute carrier family 16 member 10 [Source:NCBI gene;Acc:696132]                             | 2.050607636 | 0.00155308  | 0.009557908 |
| ENSMMUG00000058603 |                                                                                              | 2.050271876 | 0.002122141 | 0.012239351 |
| ENSMMUG00000009773 | lysine demethylase 1A [Source:VGNC Symbol;Acc:VGNC:73928]                                    | -2.05016662 | 7.67E-07    | 1.39E-05    |
| ENSMMUG00000018358 | zinc finger protein 217 [Source:VGNC Symbol;Acc:VGNC:78874]                                  | 2.048969053 | 2.83E-06    | 4.44E-05    |
| ENSMMUG00000001918 | transmembrane protein 165 [Source:VGNC Symbol;Acc:VGNC:79875]                                | -2.04770422 | 0.000200238 | 0.001775016 |
| ENSMMUG00000064626 | U1 spliceosomal RNA [Source:RFAM;Acc:RF00003]                                                | 2.046003951 | 0.005806183 | 0.027087981 |
| ENSMMUG00000056585 |                                                                                              | 2.040112165 | 0.010398044 | 0.04328362  |
| ENSMMUG00000002183 | oxysterol binding protein like 6 [Source:VGNC Symbol;Acc:VGNC:75627]                         | 2.034235056 | 5.75E-09    | 1.77E-07    |
| ENSMMUG00000030099 | phospholipid phosphatase 1 [Source:VGNC Symbol;Acc:VGNC:76226]                               | 2.029407129 | 5.44E-05    | 0.000577715 |
| ENSMMUG00000001800 | cullin 5 [Source:VGNC Symbol;Acc:VGNC:71570]                                                 | 2.027641919 | 2.00E-05    | 0.000245829 |
| ENSMMUG00000045584 | leucine zipper protein 1 [Source:NCBI gene;Acc:718626]                                       | 2.022528096 | 3.90E-09    | 1.23E-07    |
| ENSMMUG00000000669 | gap junction protein beta 1 [Source:VGNC Symbol;Acc:VGNC:73059]                              | 2.022400613 | 0.00985356  | 0.041449326 |
| ENSMMUG00000060536 |                                                                                              | 2.018591746 | 0.0021278   | 0.012257108 |
| ENSMMUG00000012781 | muscular LMNA interacting protein [Source:VGNC Symbol;Acc:VGNC:83434]                        | -2.01747674 | 4.49E-05    | 0.000490036 |
| ENSMMUG00000020812 | A-kinase anchoring protein 3 [Source:VGNC Symbol;Acc:VGNC:69769]                             | 2.013576703 | 0.001222242 | 0.007856991 |
| ENSMMUG00000001940 | NME/NM23 nucleoside diphosphate kinase 2 [Source:NCBI gene;Acc:100533957]                    | 2.007132236 | 6.58E-07    | 1.23E-05    |
| ENSMMUG00000005301 | ATP binding cassette subfamily B member 9 [Source:VGNC Symbol;Acc:VGNC:81341]                | 2.002264622 | 8.65E-09    | 2.57E-07    |
| ENSMMUG00000013501 | CD68 molecule [Source:VGNC Symbol;Acc:VGNC:82121]                                            | 1.996802541 | 0.005006943 | 0.024106665 |
| ENSMMUG00000056687 |                                                                                              | 1.993459561 | 5.39E-07    | 1.05E-05    |
| ENSMMUG00000064719 |                                                                                              | 1.993156671 | 0.001122449 | 0.007343438 |
| ENSMMUG00000020175 | mediator complex subunit 25 [Source:VGNC Symbol;Acc:VGNC:74607]                              | 1.991740901 | 0.000952285 | 0.006439617 |



|                    |                                                                                             |             |             |             |             |
|--------------------|---------------------------------------------------------------------------------------------|-------------|-------------|-------------|-------------|
| ENSMMUG00000056544 |                                                                                             | -           | 1.989995018 | 0.000484642 | 0.003675791 |
| ENSMMUG00000012473 | proteasome activator subunit 2 [Source:VGNC Symbol;Acc:VGNC:76456]                          | -           | 1.989169789 | 0.008120783 | 0.035507299 |
| ENSMMUG00000060713 | epithelial membrane protein 2 [Source:NCBI gene;Acc:710315]                                 | -           | 1.986731276 | 0.000747407 | 0.005280792 |
| ENSMMUG00000053384 |                                                                                             | -           | 1.986019776 | 1.71E-10    | 7.00E-09    |
| ENSMMUG00000001293 | autophagy related 16 like 2 [Source:VGNC Symbol;Acc:VGNC:70130]                             | -           | 1.982283988 | 0.00463888  | 0.022731272 |
| ENSMMUG00000018058 | ATP binding cassette subfamily G member 1 [Source:VGNC Symbol;Acc:VGNC:69584]               | -           | 1.976865224 | 2.23E-07    | 4.91E-06    |
| ENSMMUG00000007330 | nuclear mitotic apparatus protein 1 [Source:VGNC Symbol;Acc:VGNC:75556]                     | -           | 1.971632374 | 2.62E-18    | 3.69E-16    |
| ENSMMUG00000012587 | zinc finger protein 69 [Source:NCBI gene;Acc:717030]                                        | -           | 1.968689022 | 3.42E-09    | 1.09E-07    |
| ENSMMUG00000050015 | Metazoan signal recognition particle RNA [Source:RFAM;Acc:RF00017]                          | -1.96814356 | -1.96814356 | 0.005120656 | 0.024539808 |
| ENSMMUG00000022309 | ETS repressor factor like [Source:NCBI gene;Acc:722195]                                     | -1.96283288 | -1.96283288 | 0.001883755 | 0.011146172 |
| ENSMMUG00000056103 | growth arrest and DNA damage inducible alpha [Source:NCBI gene;Acc:701054]                  | -           | 1.956165315 | 8.19E-13    | 4.90E-11    |
| ENSMMUG00000032031 |                                                                                             | -1.95386522 | -1.95386522 | 0.000567116 | 0.004215881 |
| ENSMMUG00000052526 | RAB39A, member RAS oncogene family [Source:NCBI gene;Acc:707451]                            | -           | 1.950392535 | 7.51E-20    | 1.28E-17    |
| ENSMMUG00000000982 | protein phosphatase 4 catalytic subunit [Source:VGNC Symbol;Acc:VGNC:76384]                 | -           | 1.947044313 | 2.30E-06    | 3.68E-05    |
| ENSMMUG00000015000 | SPT16 homolog, facilitates chromatin remodeling subunit [Source:VGNC Symbol;Acc:VGNC:78054] | -           | 1.945321853 | 2.81E-06    | 4.41E-05    |
| ENSMMUG00000020706 | ETS proto-oncogene 1, transcription factor [Source:VGNC Symbol;Acc:VGNC:72439]              | -1.94530283 | -1.94530283 | 4.03E-29    | 3.11E-26    |
| ENSMMUG00000005067 | elongator acetyltransferase complex subunit 3 [Source:VGNC Symbol;Acc:VGNC:72080]           | -           | 1.944332338 | 3.58E-06    | 5.46E-05    |
| ENSMMUG00000012191 | coiled-coil domain containing 153 [Source:NCBI gene;Acc:704216]                             | -           | 1.935966121 | 0.009813531 | 0.041339025 |
| ENSMMUG00000007325 | Xrcc1 N-terminal domain containing 1 [Source:NCBI gene;Acc:115945140]                       | -           | 1.934635829 | 0.000625833 | 0.004567321 |
| ENSMMUG00000009493 | family with sequence similarity 120A [Source:NCBI gene;Acc:717459]                          | -1.931871   | -1.931871   | 3.22E-06    | 4.99E-05    |
| ENSMMUG00000011386 | GTPase, IMAP family member 4 [Source:VGNC Symbol;Acc:VGNC:72982]                            | -           | 1.928424489 | 4.81E-15    | 3.95E-13    |
| ENSMMUG00000022183 | spermatogenesis associated 1 [Source:NCBI gene;Acc:710462]                                  | -           | 1.928278449 | 3.96E-11    | 1.75E-09    |
| ENSMMUG00000026103 | U1 spliceosomal RNA [Source:RFAM;Acc:RF00003]                                               | -           | 1.928126652 | 0.009103298 | 0.038852851 |
| ENSMMUG00000063354 |                                                                                             | -           | 1.924323946 | 0.001325866 | 0.008414716 |
| ENSMMUG00000022153 | solute carrier family 25 member 36 [Source:VGNC Symbol;Acc:VGNC:84079]                      | -           | 1.913538298 | 4.32E-07    | 8.66E-06    |
| ENSMMUG00000063586 | zinc finger protein 536 [Source:NCBI gene;Acc:713142]                                       | -           | 1.909130937 | 0.001277123 | 0.008148547 |
| ENSMMUG00000013029 | surfactant protein C [Source:VGNC Symbol;Acc:VGNC:84113]                                    | -           | 1.902513256 | 0.000224783 | 0.001959247 |
| ENSMMUG00000002090 | ATPase H+ transporting V1 subunit B1 [Source:VGNC Symbol;Acc:VGNC:70184]                    | -1.90238095 | -1.90238095 | 3.19E-11    | 1.44E-09    |
| ENSMMUG00000014484 | zinc finger protein 641 [Source:NCBI gene;Acc:708246]                                       | -           | 1.901269405 | 2.64E-05    | 0.000312107 |
| ENSMMUG00000014027 | nitric oxide synthase 1 [Source:VGNC Symbol;Acc:VGNC:75368]                                 | -           | 1.899197784 | 0.000111921 | 0.00108007  |
| ENSMMUG00000018474 | signal regulatory protein alpha [Source:NCBI gene;Acc:717811]                               | -           | 1.891056445 | 2.13E-05    | 0.000259303 |



|                     |                                                                                                 |             |             |             |
|---------------------|-------------------------------------------------------------------------------------------------|-------------|-------------|-------------|
| ENSMMUG00000044729  | transcription factor AP-4 [Source:NCBI gene;Acc:707513]                                         | 1.889818553 | 0.000749485 | 0.005292355 |
| ENSMMUG00000004178  | NADPH oxidase 1 [Source:VGNC Symbol;Acc:VGNC:75374]                                             | 1.884419607 | 4.24E-06    | 6.33E-05    |
| ENSMMUG000000052682 |                                                                                                 | 1.883425768 | 0.001413524 | 0.008835265 |
| ENSMMUG000000051296 | paired like homeobox 2B [Source:NCBI gene;Acc:701940]                                           | 1.879725091 | 0.005589497 | 0.026281829 |
| ENSMMUG000000011810 | FAT atypical cadherin 4 [Source:VGNC Symbol;Acc:VGNC:72552]                                     | 1.879184102 | 0.000932542 | 0.00633473  |
| ENSMMUG000000003946 | ADP-ribosyltransferase 5 [Source:VGNC Symbol;Acc:VGNC:69890]                                    | -1.876171   | 0.007767504 | 0.034162182 |
| ENSMMUG000000015117 | X-prolyl aminopeptidase 1 [Source:VGNC Symbol;Acc:VGNC:78810]                                   | 1.869292781 | 8.70E-08    | 2.07E-06    |
| ENSMMUG000000018974 | LysM domain containing 3 [Source:VGNC Symbol;Acc:VGNC:74373]                                    | 1.863079539 | 1.13E-16    | 1.19E-14    |
| ENSMMUG000000051381 | Metazoan signal recognition particle RNA [Source:RFAM;Acc:RF00017]                              | 1.862709813 | 1.69E-05    | 0.000212909 |
| ENSMMUG00000000238  | HECT domain E3 ubiquitin protein ligase 2 [Source:VGNC Symbol;Acc:VGNC:73246]                   | 1.861148754 | 4.96E-06    | 7.23E-05    |
| ENSMMUG000000012481 | importin 4 [Source:VGNC Symbol;Acc:VGNC:73630]                                                  | -1.8603275  | 0.000527494 | 0.003975627 |
| ENSMMUG000000009831 | TBC1 domain family member 2 [Source:VGNC Symbol;Acc:VGNC:78157]                                 | 1.858907519 | 3.52E-05    | 0.000399974 |
| ENSMMUG000000055783 |                                                                                                 | 1.856240095 | 0.007367754 | 0.032728571 |
| ENSMMUG000000020993 | cadherin EGF LAG seven-pass G-type receptor 1 [Source:NCBI gene;Acc:718440]                     | 1.853241582 | 0.000275481 | 0.002310337 |
| ENSMMUG000000055271 |                                                                                                 | 1.852386805 | 0.000739498 | 0.005240372 |
| ENSMMUG000000006252 | argonaute RISC catalytic component 3 [Source:NCBI gene;Acc:712543]                              | -1.84975828 | 1.10E-09    | 3.89E-08    |
| ENSMMUG000000054302 | antioxidant 1 copper chaperone [Source:NCBI gene;Acc:712464]                                    | 1.836332795 | 4.07E-05    | 0.000450752 |
| ENSMMUG000000010113 | steroid 5 alpha-reductase 3 [Source:VGNC Symbol;Acc:VGNC:82246]                                 | -1.83609369 | 2.17E-08    | 5.90E-07    |
| ENSMMUG000000002093 | testis expressed 261 [Source:NCBI gene;Acc:703863]                                              | -1.83544903 | 8.67E-12    | 4.33E-10    |
| ENSMMUG000000009038 | titin [Source:NCBI gene;Acc:703527]                                                             | 1.833516188 | 0.00054594  | 0.004086364 |
| ENSMMUG000000008974 | Fc receptor like 5 [Source:NCBI gene;Acc:718771]                                                | 1.833024694 | 6.46E-07    | 1.21E-05    |
| ENSMMUG000000009782 | C-C motif chemokine ligand 7 [Source:NCBI gene;Acc:714751]                                      | 1.827866818 | 0.001020165 | 0.006806405 |
| ENSMMUG000000007411 | integrin alpha FG-GAP repeat containing 2 [Source:VGNC Symbol;Acc:VGNC:73690]                   | -1.82750909 | 6.82E-07    | 1.26E-05    |
| ENSMMUG000000004675 | smoothelin [Source:VGNC Symbol;Acc:VGNC:77661]                                                  | 1.826091353 | 0.000455206 | 0.003487876 |
| ENSMMUG000000004208 | serine dehydratase [Source:VGNC Symbol;Acc:VGNC:77148]                                          | 1.825357944 | 0.008595624 | 0.037055864 |
| ENSMMUG000000000117 | HCK proto-oncogene, Src family tyrosine kinase [Source:VGNC Symbol;Acc:VGNC:73353]              | 1.815587473 | 1.95E-05    | 0.000239443 |
| ENSMMUG000000016526 | solute carrier family 25 member 41 [Source:VGNC Symbol;Acc:VGNC:77581]                          | -1.81317422 | 0.002915481 | 0.015699548 |
| ENSMMUG000000051354 |                                                                                                 | 1.812926634 | 0.011084745 | 0.04538123  |
| ENSMMUG000000007424 | nuclear receptor interacting protein 2 [Source:VGNC Symbol;Acc:VGNC:75448]                      | 1.810135017 | 5.44E-07    | 1.06E-05    |
| ENSMMUG000000021670 | solute carrier family 52 member 3 [Source:VGNC Symbol;Acc:VGNC:77717]                           | 1.809988723 | 3.50E-06    | 5.37E-05    |
| ENSMMUG000000019978 | HERV-H LTR-associating 2 [Source:VGNC Symbol;Acc:VGNC:73377]                                    | 1.809121912 | 0.002929906 | 0.015763051 |
| ENSMMUG000000021282 | late endosomal/lysosomal adaptor, MAPK and MTOR activator 1 [Source:VGNC Symbol;Acc:VGNC:74129] | -1.80225936 | 8.57E-06    | 0.000117877 |

|                    |                                                                                        |             |             |             |
|--------------------|----------------------------------------------------------------------------------------|-------------|-------------|-------------|
| ENSMMUG00000016286 | protease, serine, 1 (trypsin 1) [Source:NCBI gene;Acc:698729]                          | 1.801123938 | 2.75E-10    | 1.09E-08    |
| ENSMMUG00000054116 | T cell receptor alpha variable 8-6 [Source:HGNC Symbol;Acc:HGNC:12151]                 | 1.799487118 | 1.58E-06    | 2.65E-05    |
| ENSMMUG00000012120 | zinc ribbon domain containing 1 [Source:VGNC Symbol;Acc:VGNC:78912]                    | 1.794986565 | 4.19E-06    | 6.27E-05    |
| ENSMMUG00000001479 | laminin subunit gamma 2 [Source:VGNC Symbol;Acc:VGNC:74233]                            | 1.793829949 | 0.000315554 | 0.002579655 |
| ENSMMUG00000047994 | CGG triplet repeat binding protein 1 [Source:VGNC Symbol;Acc:VGNC:84203]               | 1.792376524 | 0.000241091 | 0.002072724 |
| ENSMMUG00000056045 |                                                                                        | 1.784196194 | 1.44E-05    | 0.00018528  |
| ENSMMUG00000049997 |                                                                                        | 1.779243086 | 1.25E-10    | 5.18E-09    |
| ENSMMUG00000008113 | pleckstrin homology domain containing M3 [Source:NCBI gene;Acc:711125]                 | 1.772665149 | 0.000916617 | 0.006247812 |
| ENSMMUG00000023558 | exocyst complex component 2 [Source:VGNC Symbol;Acc:VGNC:72338]                        | 1.772027131 | 0.00233233  | 0.013175463 |
| ENSMMUG00000038070 | T cell receptor alpha variable 12-3 [Source:HGNC Symbol;Acc:HGNC:12107]                | 1.770608255 | 2.64E-08    | 7.02E-07    |
| ENSMMUG00000010648 | DNA methyltransferase 3 like [Source:NCBI gene;Acc:722184]                             | 1.770507088 | 9.98E-06    | 0.000135022 |
| ENSMMUG00000043001 | milk fat globule EGF and factor V/VIII domain containing [Source:NCBI gene;Acc:703501] | 1.769651667 | 0.000604835 | 0.004446387 |
| ENSMMUG00000014687 | sterile alpha motif domain containing 14 [Source:VGNC Symbol;Acc:VGNC:77112]           | 1.766683893 | 0.001579041 | 0.009682846 |
| ENSMMUG00000051261 |                                                                                        | 1.760492527 | 0.000492211 | 0.003728476 |
| ENSMMUG00000003261 | BAF chromatin remodeling complex subunit BCL11B [Source:VGNC Symbol;Acc:VGNC:70056]    | 1.759344719 | 1.14E-09    | 4.01E-08    |
| ENSMMUG00000003302 | dystrobrevin alpha [Source:VGNC Symbol;Acc:VGNC:72007]                                 | 1.756873724 | 0.003150336 | 0.016753295 |
| ENSMMUG00000057064 |                                                                                        | 1.756872978 | 0.012219576 | 0.048943754 |
| ENSMMUG00000021788 | immunoglobulin superfamily DCC subclass member 4 [Source:VGNC Symbol;Acc:VGNC:73388]   | 1.753782211 | 0.002755305 | 0.01506049  |
| ENSMMUG00000016983 | acrosin binding protein [Source:VGNC Symbol;Acc:VGNC:69445]                            | 1.752875178 | 3.58E-06    | 5.46E-05    |
| ENSMMUG00000057606 | GPRIN family member 3 [Source:NCBI gene;Acc:703567]                                    | 1.749421424 | 7.54E-09    | 2.26E-07    |
| ENSMMUG00000054213 | parathyroid hormone [Source:NCBI gene;Acc:700195]                                      | 1.748201568 | 0.003123944 | 0.01662771  |
| ENSMMUG00000020211 | cyclin Y like 1 [Source:VGNC Symbol;Acc:VGNC:84224]                                    | 1.745046644 | 3.46E-07    | 7.17E-06    |
| ENSMMUG00000057697 |                                                                                        | 1.743479787 | 5.32E-05    | 0.000567031 |
| ENSMMUG00000019850 | arachidonate lipoxygenase 3 [Source:VGNC Symbol;Acc:VGNC:69607]                        | 1.739071309 | 2.60E-13    | 1.70E-11    |
| ENSMMUG00000043411 | zinc finger and BTB domain containing 39 [Source:NCBI gene;Acc:713914]                 | 1.738444598 | 0.001349761 | 0.008521213 |
| ENSMMUG00000011183 | olfactomedin like 2A [Source:VGNC Symbol;Acc:VGNC:75472]                               | 1.736938756 | 0.001576467 | 0.009674539 |
| ENSMMUG00000017246 | lipoxygenase homology domains 1 [Source:VGNC Symbol;Acc:VGNC:74368]                    | 1.736774297 | 7.35E-09    | 2.22E-07    |
| ENSMMUG00000061068 |                                                                                        | 1.735263748 | 8.39E-06    | 0.000115669 |

|                    |                                                                                                    |             |             |             |
|--------------------|----------------------------------------------------------------------------------------------------|-------------|-------------|-------------|
| ENSMMUG00000050952 |                                                                                                    | 1.733859568 | 0.001828882 | 0.010886028 |
| ENSMMUG00000054064 |                                                                                                    | 1.729374461 | 6.07E-07    | 1.15E-05    |
| ENSMMUG00000050239 |                                                                                                    | 1.729171437 | 0.00013002  | 0.001232873 |
| ENSMMUG00000021280 | leucine rich transmembrane and O-methyltransferase domain containing [Source:NCBI gene;Acc:718286] | 1.728937652 | 7.39E-06    | 0.000102786 |
| ENSMMUG00000021507 | chromosome 2 C3orf38 homolog [Source:VGNC Symbol;Acc:VGNC:70654]                                   | 1.727063241 | 0.007439672 | 0.032999077 |
| ENSMMUG00000017931 | gamma-glutamyltransferase 7 [Source:VGNC Symbol;Acc:VGNC:72921]                                    | 1.726880605 | 0.000102288 | 0.00100164  |
| ENSMMUG00000008009 | family with sequence similarity 13 member B [Source:VGNC Symbol;Acc:VGNC:72268]                    | 1.726601328 | 6.95E-05    | 0.000721027 |
| ENSMMUG00000015845 | beta-1,4-N-acetyl-galactosaminyltransferase 2 [Source:VGNC Symbol;Acc:VGNC:70120]                  | 1.720570198 | 0.006846855 | 0.030861097 |
| ENSMMUG00000063668 | cytochrome b5 domain containing 1 [Source:NCBI gene;Acc:716429]                                    | 1.720137814 | 0.000359271 | 0.0028838   |
| ENSMMUG00000055226 | DNA damage inducible transcript 4 [Source:NCBI gene;Acc:715307]                                    | 1.719131322 | 0.006582316 | 0.02985978  |
| ENSMMUG00000055887 |                                                                                                    | 1.717474991 | 0.001858371 | 0.011031172 |
| ENSMMUG00000024186 | U1 spliceosomal RNA [Source:RFAM;Acc:RF00003]                                                      | -1.71562898 | 0.010149017 | 0.042394359 |
| ENSMMUG00000061796 |                                                                                                    | 1.713214433 | 0.000346038 | 0.00278644  |
| ENSMMUG00000004082 | GRB10 interacting GYF protein 1 [Source:VGNC Symbol;Acc:VGNC:73158]                                | 1.712790074 | 0.004645308 | 0.022744156 |
| ENSMMUG00000039020 | zinc finger protein 141 [Source:NCBI gene;Acc:714265]                                              | 1.712005851 | 7.81E-11    | 3.32E-09    |
| ENSMMUG00000022656 | perilipin 4 [Source:NCBI gene;Acc:693610]                                                          | 1.708796718 | 0.007755715 | 0.034122868 |
| ENSMMUG00000003973 | autophagy related 2A [Source:VGNC Symbol;Acc:VGNC:70145]                                           | 1.703660589 | 0.000100505 | 0.0009866   |
| ENSMMUG00000031121 | solute carrier family 25 member 18 [Source:VGNC Symbol;Acc:VGNC:77434]                             | 1.700610961 | 0.000203303 | 0.001796868 |
| ENSMMUG00000051661 |                                                                                                    | 1.699709149 | 0.000889897 | 0.006107806 |
| ENSMMUG00000011049 | leucine rich repeat containing 1 [Source:VGNC Symbol;Acc:VGNC:81087]                               | 1.695336672 | 0.000535627 | 0.00402426  |
| ENSMMUG00000001942 | mbt domain containing 1 [Source:VGNC Symbol;Acc:VGNC:74538]                                        | 1.694561458 | 1.60E-09    | 5.51E-08    |
| ENSMMUG00000049437 | Metazoan signal recognition particle RNA [Source:RFAM;Acc:RF00017]                                 | 1.693439883 | 0.000425115 | 0.003293129 |
| ENSMMUG00000038768 | U6 spliceosomal RNA [Source:RFAM;Acc:RF00026]                                                      | 1.693130241 | 0.001257806 | 0.008049889 |
| ENSMMUG00000013503 | mannose-P-dolichol utilization defect 1 [Source:VGNC Symbol;Acc:VGNC:74913]                        | -1.69023357 | 0.00199936  | 0.011691569 |
| ENSMMUG00000005727 | protein kinase N1 [Source:VGNC Symbol;Acc:VGNC:76014]                                              | 1.690097943 | 7.28E-11    | 3.11E-09    |
| ENSMMUG00000049788 |                                                                                                    | -1.68989327 | 0.003517126 | 0.01842066  |
| ENSMMUG00000006682 | chondroitin polymerizing factor 2 [Source:VGNC Symbol;Acc:VGNC:71131]                              | 1.686889005 | 0.009524696 | 0.040320875 |
| ENSMMUG00000056303 |                                                                                                    | -1.6852383  | 0.008304385 | 0.036099205 |
| ENSMMUG00000017186 | pleckstrin homology domain interacting protein [Source:VGNC Symbol;Acc:VGNC:75803]                 | 1.684642268 | 0.000379294 | 0.003000277 |
| ENSMMUG00000039944 | Ras protein specific guanine nucleotide releasing factor 2 [Source:VGNC Symbol;Acc:VGNC:84486]     | 1.684587822 | 0.000665361 | 0.00480891  |

|                    |                                                                                                       |             |             |             |
|--------------------|-------------------------------------------------------------------------------------------------------|-------------|-------------|-------------|
| ENSMMUG00000018747 | 5-methyltetrahydrofolate-homocysteine methyltransferase reductase [Source:VGNC Symbol;Acc:VGNC:75079] | 1.680471971 | 3.04E-08    | 7.93E-07    |
| ENSMMUG00000055845 | ankyrin repeat domain 53 [Source:NCBI gene;Acc:703757]                                                | -1.68033446 | 9.48E-06    | 0.000128883 |
| ENSMMUG00000007628 | cell adhesion associated, oncogene regulated [Source:VGNC Symbol;Acc:VGNC:70961]                      | 1.678926504 | 0.00657942  | 0.02985795  |
| ENSMMUG00000064458 |                                                                                                       | 1.675025217 | 9.98E-05    | 0.000981606 |
| ENSMMUG00000008632 | myosin, light chain 6, alkali, smooth muscle and non-muscle-like [Source:NCBI gene;Acc:710137]        | 1.672775704 | 0.003231208 | 0.017114971 |
| ENSMMUG00000007620 | transmembrane serine protease 4 [Source:VGNC Symbol;Acc:VGNC:78577]                                   | 1.671325174 | 3.69E-06    | 5.60E-05    |
| ENSMMUG00000064979 | B9 domain containing 2 [Source:NCBI gene;Acc:704873]                                                  | 1.667655293 | 0.006445541 | 0.029395203 |
| ENSMMUG00000017414 | calcium voltage-gated channel subunit alpha1 S [Source:VGNC Symbol;Acc:VGNC:70507]                    | 1.667571479 | 5.61E-06    | 8.05E-05    |
| ENSMMUG00000012124 | ring finger protein 39 [Source:VGNC Symbol;Acc:VGNC:83458]                                            | 1.667456925 | 0.000739343 | 0.005240372 |
| ENSMMUG00000006775 | proenkephalin [Source:VGNC Symbol;Acc:VGNC:75941]                                                     | 1.666399052 | 1.77E-11    | 8.47E-10    |
| ENSMMUG00000008718 | zinc finger protein 280D [Source:NCBI gene;Acc:699509]                                                | 1.665972653 | 2.52E-09    | 8.27E-08    |
| ENSMMUG00000007766 | suppression of tumorigenicity 7 like [Source:VGNC Symbol;Acc:VGNC:77954]                              | 1.665751681 | 1.95E-06    | 3.17E-05    |
| ENSMMUG00000052786 |                                                                                                       | 1.664339084 | 0.00787129  | 0.034580548 |
| ENSMMUG00000050864 |                                                                                                       | 1.660284703 | 9.39E-05    | 0.000933625 |
| ENSMMUG00000005856 | glycine amidinotransferase [Source:VGNC Symbol;Acc:VGNC:72892]                                        | 1.658839818 | 5.54E-07    | 1.07E-05    |
| ENSMMUG00000012462 | proteasome activator subunit 1 [Source:VGNC Symbol;Acc:VGNC:76455]                                    | 1.658167938 | 0.007270785 | 0.032369861 |
| ENSMMUG00000045592 |                                                                                                       | 1.656114167 | 0.007055311 | 0.031610325 |
| ENSMMUG00000005442 | 5'-nucleotidase ecto [Source:VGNC Symbol;Acc:VGNC:75537]                                              | 1.654983989 | 1.12E-05    | 0.000149264 |
| ENSMMUG00000005181 | RAB3C, member RAS oncogene family [Source:VGNC Symbol;Acc:VGNC:81541]                                 | 1.649030647 | 0.004121502 | 0.020844216 |
| ENSMMUG00000051999 |                                                                                                       | 1.645735975 | 0.0053195   | 0.025270264 |
| ENSMMUG00000016927 | solute carrier family 2 member 10 [Source:VGNC Symbol;Acc:VGNC:77465]                                 | 1.644405636 | 2.39E-12    | 1.32E-10    |
| ENSMMUG00000012615 | pecanex 2 [Source:NCBI gene;Acc:712828]                                                               | 1.643728292 | 0.000161334 | 0.001483972 |
| ENSMMUG00000051112 | p53 and DNA damage regulated 1 [Source:NCBI gene;Acc:712622]                                          | 1.642106042 | 0.000471184 | 0.003592512 |
| ENSMMUG00000022199 | polyhomeotic homolog 3 [Source:VGNC Symbol;Acc:VGNC:75804]                                            | 1.641330997 | 4.31E-07    | 8.66E-06    |
| ENSMMUG00000002200 | phospholipid phosphatase 3 [Source:NCBI gene;Acc:715993]                                              | 1.640304388 | 1.38E-12    | 8.01E-11    |
| ENSMMUG00000056737 |                                                                                                       | 1.639679054 | 7.68E-05    | 0.000788052 |
| ENSMMUG00000052830 |                                                                                                       | 1.638209335 | 0.000152983 | 0.001418051 |
| ENSMMUG00000014672 | mitogen-activated protein kinase kinase kinase 20 [Source:NCBI gene;Acc:698274]                       | 1.638136805 | 0.009961502 | 0.041790466 |
| ENSMMUG00000008710 | protocadherin 1 [Source:VGNC Symbol;Acc:VGNC:75775]                                                   | -1.63765755 | 0.000208619 | 0.001837077 |

|                    |                                                                                              |             |             |             |
|--------------------|----------------------------------------------------------------------------------------------|-------------|-------------|-------------|
| ENSMMUG00000022927 | RCAN family member 3 [Source:VGNC Symbol;Acc:VGNC:76875]                                     | 1.635181625 | 4.87E-08    | 1.23E-06    |
| ENSMMUG00000010695 | adenosine deaminase RNA specific B1 [Source:VGNC Symbol;Acc:VGNC:69503]                      | 1.635125353 | 0.000291172 | 0.002415937 |
| ENSMMUG00000049859 |                                                                                              | 1.634487672 | 1.41E-06    | 2.39E-05    |
| ENSMMUG00000055365 |                                                                                              | 1.634379841 | 0.005104087 | 0.024479995 |
| ENSMMUG00000022625 | periaxin [Source:VGNC Symbol;Acc:VGNC:76248]                                                 | 1.633461282 | 0.001066915 | 0.007055425 |
| ENSMMUG0000005246  | zinc finger protein 740 [Source:VGNC Symbol;Acc:VGNC:79665]                                  | 1.633095167 | 3.77E-05    | 0.00042404  |
| ENSMMUG00000061268 | PLAG1 zinc finger [Source:NCBI gene;Acc:696149]                                              | 1.632371701 | 0.000866447 | 0.005970408 |
| ENSMMUG00000064596 | ATPase family AAA domain-containing protein 3A-like [Source:NCBI gene;Acc:114674454]         | 1.632162577 | 0.001121032 | 0.007340336 |
| ENSMMUG00000010453 | folate receptor beta [Source:VGNC Symbol;Acc:VGNC:72690]                                     | 1.629239243 | 7.10E-06    | 9.92E-05    |
| ENSMMUG00000022124 | stonin 2 [Source:VGNC Symbol;Acc:VGNC:78249]                                                 | 1.628896019 | 0.002226689 | 0.012683819 |
| ENSMMUG00000004387 | ring finger protein 19A, RBR E3 ubiquitin protein ligase [Source:VGNC Symbol;Acc:VGNC:82224] | 1.628538553 | 5.19E-05    | 0.000555435 |
| ENSMMUG00000018943 | spermatogenesis associated 18 [Source:VGNC Symbol;Acc:VGNC:78013]                            | 1.624435538 | 0.000170887 | 0.001553944 |
| ENSMMUG00000050245 |                                                                                              | 1.624292238 | 0.00661363  | 0.029962581 |
| ENSMMUG00000051088 |                                                                                              | 1.623478519 | 0.003517706 | 0.01842066  |
| ENSMMUG00000021393 | calcium/calmodulin dependent protein kinase II gamma [Source:VGNC Symbol;Acc:VGNC:70525]     | 1.623455348 | 1.61E-05    | 0.00020344  |
| ENSMMUG00000017076 | tubulin gamma complex associated protein 4 [Source:VGNC Symbol;Acc:VGNC:79045]               | 1.618698019 | 4.39E-07    | 8.80E-06    |
| ENSMMUG00000004386 | sperm associated antigen 1 [Source:VGNC Symbol;Acc:VGNC:77849]                               | -1.6171405  | 0.008836097 | 0.037942309 |
| ENSMMUG00000014001 | protein phosphatase 2 scaffold subunit A beta [Source:VGNC Symbol;Acc:VGNC:76375]            | 1.616880774 | 0.004914244 | 0.023769381 |
| ENSMMUG00000052372 |                                                                                              | 1.615784399 | 0.005164452 | 0.024710136 |
| ENSMMUG00000057840 | leucine-rich repeat-containing protein 37A3 [Source:NCBI gene;Acc:715030]                    | 1.615747473 | 0.001857968 | 0.011031172 |
| ENSMMUG00000052282 |                                                                                              | 1.613908741 | 1.12E-05    | 0.000149264 |
| ENSMMUG00000015522 | GRAM domain containing 1B [Source:VGNC Symbol;Acc:VGNC:73028]                                | 1.613896283 | 4.46E-07    | 8.93E-06    |
| ENSMMUG00000052817 | Sp7 transcription factor [Source:NCBI gene;Acc:702575]                                       | 1.612511476 | 0.001295765 | 0.008254299 |
| ENSMMUG00000059707 | MIS18 kinetochore protein A [Source:NCBI gene;Acc:709275]                                    | 1.612503619 | 0.001716834 | 0.010326873 |
| ENSMMUG00000015151 | interleukin 2 receptor subunit alpha [Source:NCBI gene;Acc:574300]                           | 1.612209278 | 0.001265016 | 0.008079911 |
| ENSMMUG00000007968 | hedgehog interacting protein [Source:VGNC Symbol;Acc:VGNC:73169]                             | 1.607680905 | 1.54E-05    | 0.000196767 |
| ENSMMUG00000001894 | cyclin dependent kinase 11B [Source:NCBI gene;Acc:703046]                                    | 1.606083028 | 2.91E-05    | 0.000338762 |
| ENSMMUG00000009520 | gephyrin [Source:VGNC Symbol;Acc:VGNC:72948]                                                 | 1.605310214 | 0.000298742 | 0.002460722 |
| ENSMMUG00000014735 | carnitine palmitoyltransferase 1C [Source:NCBI gene;Acc:719429]                              | -1.6041352  | 0.000584564 | 0.004324113 |



|                     |                                                                                                 |             |             |             |
|---------------------|-------------------------------------------------------------------------------------------------|-------------|-------------|-------------|
| ENSMMUG00000059038  | 5-hydroxytryptamine receptor 7 [Source:NCBI gene;Acc:696317]                                    | 1.601389908 | 5.87E-05    | 0.000619589 |
| ENSMMUG00000060527  |                                                                                                 | 1.599884706 | 2.58E-05    | 0.000305907 |
| ENSMMUG00000058240  |                                                                                                 | 1.598469124 | 0.000981451 | 0.00659588  |
| ENSMMUG00000003877  | KAT8 regulatory NSL complex subunit 2 [Source:VGNC Symbol;Acc:VGNC:73910]                       | -1.59552437 | 0.000681441 | 0.00489265  |
| ENSMMUG00000020898  | cap binding complex dependent translation initiation factor [Source:HGNC Symbol;Acc:HGNC:23925] | 1.594356433 | 0.001691707 | 0.010221939 |
| ENSMMUG00000000797  | exophilin 5 [Source:VGNC Symbol;Acc:VGNC:72412]                                                 | -1.58844791 | 7.17E-07    | 1.31E-05    |
| ENSMMUG00000014997  | spalt like transcription factor 2 [Source:NCBI gene;Acc:708367]                                 | 1.587236636 | 8.96E-05    | 0.000900193 |
| ENSMMUG00000002332  | RNA binding motif protein 25 [Source:VGNC Symbol;Acc:VGNC:76521]                                | 1.586620391 | 0.002289501 | 0.012970232 |
| ENSMMUG000000052031 |                                                                                                 | 1.584720735 | 4.67E-06    | 6.89E-05    |
| ENSMMUG00000008447  | fibulin 5 [Source:VGNC Symbol;Acc:VGNC:72622]                                                   | -1.58160561 | 3.12E-05    | 0.000359656 |
| ENSMMUG00000005801  | glyceronephosphate O-acyltransferase [Source:VGNC Symbol;Acc:VGNC:73100]                        | 1.581226545 | 1.06E-06    | 1.85E-05    |
| ENSMMUG00000015143  | F-box DNA helicase 1 [Source:NCBI gene;Acc:720797]                                              | 1.573935376 | 0.001542378 | 0.009526313 |
| ENSMMUG00000000690  | catenin alpha like 1 [Source:VGNC Symbol;Acc:VGNC:71544]                                        | 1.570596213 | 2.76E-05    | 0.00032461  |
| ENSMMUG000000057021 | CLOCK interacting pacemaker [Source:NCBI gene;Acc:704679]                                       | 1.569777192 | 0.000634834 | 0.004627374 |
| ENSMMUG000000064519 |                                                                                                 | -1.56922315 | 0.006011135 | 0.027816599 |
| ENSMMUG000000020540 | NmrA like redox sensor 1 [Source:VGNC Symbol;Acc:VGNC:75252]                                    | 1.561516856 | 0.000895884 | 0.006137935 |
| ENSMMUG000000049351 | MAGE family member E1 [Source:NCBI gene;Acc:705379]                                             | -1.55959018 | 3.82E-13    | 2.42E-11    |
| ENSMMUG000000051670 |                                                                                                 | 1.558929095 | 2.13E-05    | 0.000259303 |
| ENSMMUG000000053721 |                                                                                                 | 1.556589461 | 0.000815064 | 0.005685033 |
| ENSMMUG00000017114  | pleckstrin homology domain containing A6 [Source:VGNC Symbol;Acc:VGNC:76040]                    | 1.552477573 | 0.004891928 | 0.023690148 |
| ENSMMUG00000014980  | keratin 76 [Source:VGNC Symbol;Acc:VGNC:74112]                                                  | 1.551839682 | 0.007154911 | 0.031948425 |
| ENSMMUG000000041450 | zinc finger protein 432 [Source:NCBI gene;Acc:100424341]                                        | 1.550286031 | 8.54E-10    | 3.14E-08    |
| ENSMMUG00000017125  | oxysterol binding protein like 11 [Source:VGNC Symbol;Acc:VGNC:75631]                           | 1.548105464 | 2.89E-13    | 1.87E-11    |
| ENSMMUG000000054711 |                                                                                                 | -1.54778281 | 8.35E-07    | 1.50E-05    |
| ENSMMUG00000011573  | cap methyltransferase 1 [Source:VGNC Symbol;Acc:VGNC:71271]                                     | 1.545964983 | 0.000408378 | 0.003179935 |
| ENSMMUG00000007255  | microtubule associated protein 1A [Source:VGNC Symbol;Acc:VGNC:74489]                           | 1.545519189 | 0.006510952 | 0.029625822 |
| ENSMMUG000000021636 | SAP30 binding protein [Source:VGNC Symbol;Acc:VGNC:77142]                                       | 1.542824227 | 0.004862316 | 0.023575345 |
| ENSMMUG000000022278 | mitochondrial transcription termination factor 2 [Source:VGNC Symbol;Acc:VGNC:74868]            | 1.542768673 | 0.008666781 | 0.037319616 |
| ENSMMUG000000022724 |                                                                                                 | 1.540903853 | 0.000838721 | 0.005816171 |
| ENSMMUG000000049948 |                                                                                                 | 1.540580459 | 9.57E-06    | 0.00012991  |
| ENSMMUG00000000364  | translocase of outer mitochondrial membrane 22 [Source:NCBI gene;Acc:701286]                    | 1.537236407 | 0.008496676 | 0.036708581 |



|                    |                                                                                             |             |             |             |
|--------------------|---------------------------------------------------------------------------------------------|-------------|-------------|-------------|
| ENSMMUG00000054020 | U6 spliceosomal RNA [Source:RFAM;Acc:RF00026]                                               | 1.535289991 | 0.002855161 | 0.015465131 |
| ENSMMUG00000005913 | activating transcription factor 7 interacting protein 2 [Source:VGNC Symbol;Acc:VGNC:70103] | 1.534834978 | 0.001312965 | 0.008350541 |
| ENSMMUG00000044958 | adhesion G protein-coupled receptor G6 [Source:VGNC Symbol;Acc:VGNC:81009]                  | 1.532873292 | 8.13E-07    | 1.47E-05    |
| ENSMMUG00000062527 |                                                                                             | 1.531901004 | 9.88E-07    | 1.75E-05    |
| ENSMMUG00000012110 | smoothened, frizzled class receptor [Source:VGNC Symbol;Acc:VGNC:77658]                     | 1.529888582 | 0.000285964 | 0.002381574 |
| ENSMMUG00000061687 |                                                                                             | 1.529400333 | 0.007545222 | 0.03338071  |
| ENSMMUG00000051552 |                                                                                             | 1.523271542 | 4.54E-05    | 0.000494106 |
| ENSMMUG00000003987 | forkhead associated phosphopeptide binding domain 1 [Source:NCBI gene;Acc:699900]           | 1.522388956 | 0.003370776 | 0.017720987 |
| ENSMMUG00000020289 | CD83 molecule [Source:VGNC Symbol;Acc:VGNC:70783]                                           | 1.522168974 | 5.72E-07    | 1.10E-05    |
| ENSMMUG00000062559 |                                                                                             | -1.52024041 | 0.005642074 | 0.026466698 |
| ENSMMUG00000005751 | adenosine deaminase tRNA specific 1 [Source:VGNC Symbol;Acc:VGNC:69504]                     | 1.518132891 | 0.010303884 | 0.0429215   |
| ENSMMUG00000006251 | argonaute RISC component 1 [Source:VGNC Symbol;Acc:VGNC:81346]                              | 1.516736984 | 2.94E-07    | 6.20E-06    |
| ENSMMUG00000021775 | beta-1,3-galactosyltransferase 1 [Source:VGNC Symbol;Acc:VGNC:70204]                        | 1.516295057 | 1.74E-05    | 0.00021736  |
| ENSMMUG00000021145 | family with sequence similarity 120B [Source:VGNC Symbol;Acc:VGNC:72311]                    | 1.511948143 | 1.13E-08    | 3.27E-07    |
| ENSMMUG00000060744 |                                                                                             | 1.511336864 | 0.000648038 | 0.004703578 |
| ENSMMUG00000007561 | zinc finger DHHC-type palmitoyltransferase 22 [Source:NCBI gene;Acc:706468]                 | 1.511209593 | 6.43E-06    | 9.12E-05    |
| ENSMMUG00000018031 | solute carrier family 25 member 19 [Source:VGNC Symbol;Acc:VGNC:77474]                      | 1.510031848 | 0.00014108  | 0.001318953 |
| ENSMMUG00000010379 | Mtr4 exosome RNA helicase [Source:VGNC Symbol;Acc:VGNC:74989]                               | -1.50762593 | 7.58E-05    | 0.000779297 |
| ENSMMUG00000029197 | YY1 transcription factor [Source:NCBI gene;Acc:717370]                                      | 1.505653868 | 3.11E-05    | 0.000358847 |
| ENSMMUG00000043229 | carbohydrate sulfotransferase 14 [Source:NCBI gene;Acc:703115]                              | 1.501464779 | 0.01067018  | 0.044216637 |
| ENSMMUG00000060505 |                                                                                             | 1.500142344 | 0.0029714   | 0.015952694 |
| ENSMMUG00000013878 | ring finger protein 2 [Source:NCBI gene;Acc:717024]                                         | 1.500045727 | 0.001564532 | 0.009613566 |
| ENSMMUG00000019325 | mechanistic target of rapamycin kinase [Source:VGNC Symbol;Acc:VGNC:75062]                  | -1.4995325  | 8.86E-09    | 2.61E-07    |
| ENSMMUG00000062866 |                                                                                             | -1.49478701 | 0.000281316 | 0.002350554 |
| ENSMMUG00000057143 | transmembrane protein 127 [Source:NCBI gene;Acc:705069]                                     | 1.489964569 | 0.000256841 | 0.002178421 |
| ENSMMUG00000000983 | aldolase, fructose-bisphosphate A [Source:NCBI gene;Acc:708406]                             | 1.489259928 | 0.000918522 | 0.006255658 |
| ENSMMUG00000016052 | seizure related 6 homolog like [Source:VGNC Symbol;Acc:VGNC:77176]                          | 1.486187285 | 0.000174638 | 0.001577277 |
| ENSMMUG00000010980 | S100 calcium binding protein A5 [Source:VGNC Symbol;Acc:VGNC:76959]                         | 1.485649776 | 0.004946868 | 0.023888584 |
| ENSMMUG00000004791 | pleckstrin homology domain containing B1 [Source:VGNC Symbol;Acc:VGNC:76069]                | 1.485000051 | 0.009861335 | 0.041456425 |
| ENSMMUG00000046464 | coiled-coil-helix-coiled-coil-helix domain containing 7 [Source:VGNC Symbol;Acc:VGNC:83989] | 1.484634202 | 4.36E-05    | 0.000478384 |

|                    |                                                                                           |             |             |             |
|--------------------|-------------------------------------------------------------------------------------------|-------------|-------------|-------------|
| ENSMMUG0000000667  | zinc finger MYM-type containing 3 [Source:VGNC Symbol;Acc:VGNC:78886]                     | 1.484354175 | 0.001085544 | 0.007150976 |
| ENSMMUG00000061004 | ubiquitin specific peptidase 26 [Source:NCBI gene;Acc:706435]                             | 1.483681358 | 0.004745387 | 0.023130139 |
| ENSMMUG00000000262 | beta-ureidopropionase 1 [Source:VGNC Symbol;Acc:VGNC:79029]                               | 1.475510544 | 0.002673758 | 0.014715497 |
| ENSMMUG00000061761 | interferon induced protein with tetratricopeptide repeats 2 [Source:NCBI gene;Acc:695452] | 1.474552789 | 3.03E-08    | 7.93E-07    |
| ENSMMUG00000061278 |                                                                                           | 1.474503478 | 1.96E-05    | 0.000240596 |
| ENSMMUG00000058942 |                                                                                           | 1.473914445 | 8.68E-05    | 0.000879814 |
| ENSMMUG00000002890 | tripartite motif containing 15 [Source:VGNC Symbol;Acc:VGNC:83958]                        | 1.473630146 | 6.25E-08    | 1.56E-06    |
| ENSMMUG00000053036 |                                                                                           | 1.472232282 | 2.86E-05    | 0.000333766 |
| ENSMMUG00000023679 | tripartite motif containing 26 [Source:VGNC Symbol;Acc:VGNC:78854]                        | 1.468603526 | 2.19E-05    | 0.000266237 |
| ENSMMUG00000013848 | fucosyltransferase 8 [Source:VGNC Symbol;Acc:VGNC:72829]                                  | 1.467949597 | 1.12E-05    | 0.000149264 |
| ENSMMUG00000052382 | histone H4 [Source:NCBI gene;Acc:107000818]                                               | 1.467843606 | 3.80E-09    | 1.20E-07    |
| ENSMMUG00000000158 | minichromosome maintenance complex component 2 [Source:VGNC Symbol;Acc:VGNC:74680]        | 1.466999165 | 1.51E-10    | 6.25E-09    |
| ENSMMUG00000057199 |                                                                                           | 1.466828382 | 0.011903535 | 0.047982746 |
| ENSMMUG00000058580 | tripartite motif containing 40 [Source:NCBI gene;Acc:100427925]                           | 1.462104561 | 1.40E-05    | 0.000180125 |
| ENSMMUG00000041889 | ADP ribosylation factor 6 [Source:VGNC Symbol;Acc:VGNC:84306]                             | 1.461156378 | 0.012105783 | 0.048601696 |
| ENSMMUG00000065307 |                                                                                           | -1.4595283  | 0.002002246 | 0.011700706 |
| ENSMMUG00000017230 | V-set and transmembrane domain containing 2 like [Source:NCBI gene;Acc:707394]            | 1.456314985 | 1.80E-09    | 6.10E-08    |
| ENSMMUG00000055244 | U6 spliceosomal RNA [Source:RFAM;Acc:RF00026]                                             | 1.456103982 | 2.81E-05    | 0.000329102 |
| ENSMMUG00000040154 | T cell receptor alpha variable 9-2 [Source:HGNC Symbol;Acc:HGNC:12154]                    | 1.455865383 | 0.002540927 | 0.014107623 |
| ENSMMUG00000023676 | espin [Source:NCBI gene;Acc:722532]                                                       | -1.45331151 | 1.69E-08    | 4.66E-07    |
| ENSMMUG00000064529 |                                                                                           | 1.452970019 | 3.39E-05    | 0.000387954 |
| ENSMMUG00000054817 | immunoglobulin binding protein 1 [Source:NCBI gene;Acc:694632]                            | 1.450352151 | 0.001360141 | 0.008564169 |
| ENSMMUG00000054532 |                                                                                           | 1.442257284 | 0.000228775 | 0.001985367 |
| ENSMMUG00000053008 |                                                                                           | -1.43919518 | 0.00166727  | 0.010135645 |
| ENSMMUG00000041301 | TNF superfamily member 8 [Source:NCBI gene;Acc:702944]                                    | 1.437515405 | 0.000137257 | 0.00129026  |
| ENSMMUG00000002434 | inhibitor of growth family member 3 [Source:VGNC Symbol;Acc:VGNC:73595]                   | 1.435741501 | 0.000571536 | 0.004244385 |
| ENSMMUG00000022602 | methyltransferase like 21A [Source:VGNC Symbol;Acc:VGNC:74625]                            | -1.4355168  | 0.000684997 | 0.00491229  |
| ENSMMUG00000022944 | zinc finger and BTB domain containing 44 [Source:VGNC Symbol;Acc:VGNC:79466]              | 1.434775651 | 0.009281045 | 0.039446357 |
| ENSMMUG00000012101 | synaptogyrin 1 [Source:VGNC Symbol;Acc:VGNC:78068]                                        | 1.431034104 | 0.000387876 | 0.003053567 |
| ENSMMUG00000032427 | neuroligin 3 [Source:NCBI gene;Acc:574216]                                                | 1.430447999 | 1.33E-13    | 9.02E-12    |

|                    |                                                                                                         |             |             |             |
|--------------------|---------------------------------------------------------------------------------------------------------|-------------|-------------|-------------|
| ENSMMUG00000018459 | G protein signaling modulator 3 [Source:VGNC Symbol;Acc:VGNC:72938]                                     | 1.429918163 | 0.008066295 | 0.03529483  |
| ENSMMUG00000053648 | actin binding transcription modulator [Source:NCBI gene;Acc:710486]                                     | 1.428515407 | 0.000471549 | 0.003592512 |
| ENSMMUG00000015540 | BTB domain containing 11 [Source:VGNC Symbol;Acc:VGNC:70367]                                            | -1.42694383 | 0.011554039 | 0.046873703 |
| ENSMMUG00000062818 | regenerating islet-derived protein 3-alpha [Source:NCBI gene;Acc:716890]                                | 1.424951069 | 0.008251455 | 0.035934335 |
| ENSMMUG00000005900 | GID complex subunit 4 homolog [Source:NCBI gene;Acc:699842]                                             | 1.423704561 | 0.004554976 | 0.022459878 |
| ENSMMUG00000008795 | polycystin 2, transient receptor potential cation channel [Source:NCBI gene;Acc:702179]                 | -1.42257622 | 1.42E-05    | 0.000182205 |
| ENSMMUG00000051768 |                                                                                                         | 1.419887634 | 0.001767209 | 0.0105662   |
| ENSMMUG00000057501 |                                                                                                         | 1.419294166 | 0.002672842 | 0.014715497 |
| ENSMMUG00000050794 | zinc finger protein 774 [Source:NCBI gene;Acc:702985]                                                   | 1.416725516 | 0.010271333 | 0.042830599 |
| ENSMMUG00000018079 | transmembrane serine protease 3 [Source:VGNC Symbol;Acc:VGNC:78576]                                     | 1.415381085 | 0.000314388 | 0.002573553 |
| ENSMMUG00000061239 |                                                                                                         | 1.413180947 | 1.49E-05    | 0.000190758 |
| ENSMMUG00000021197 | TBC1 domain family member 4 [Source:VGNC Symbol;Acc:VGNC:78166]                                         | 1.410778614 | 0.012468304 | 0.04974031  |
| ENSMMUG00000010682 | fibrillin 2 [Source:VGNC Symbol;Acc:VGNC:72624]                                                         | 1.410373071 | 8.13E-07    | 1.47E-05    |
| ENSMMUG00000050177 |                                                                                                         | 1.409554487 | 0.000177364 | 0.001599485 |
| ENSMMUG00000011214 | solute carrier family 12 member 2 [Source:VGNC Symbol;Acc:VGNC:77386]                                   | 1.409416433 | 0.000952195 | 0.006439617 |
| ENSMMUG00000003191 | kirre like nephrin family adhesion molecule 1 [Source:VGNC Symbol;Acc:VGNC:73837]                       | 1.408885031 | 8.31E-09    | 2.48E-07    |
| ENSMMUG00000056116 |                                                                                                         | 1.407636458 | 6.64E-05    | 0.000693094 |
| ENSMMUG00000022202 | basic leucine zipper and W2 domains 1 [Source:VGNC Symbol;Acc:VGNC:84213]                               | 1.406184413 | 6.16E-07    | 1.16E-05    |
| ENSMMUG00000060932 | zinc finger protein 383-like [Source:NCBI gene;Acc:106993074]                                           | 1.405860553 | 0.005204752 | 0.02488308  |
| ENSMMUG00000018461 | notch receptor 4 [Source:VGNC Symbol;Acc:VGNC:75372]                                                    | 1.404754185 | 5.73E-05    | 0.000605713 |
| ENSMMUG00000020117 | semaphorin 3B [Source:VGNC Symbol;Acc:VGNC:77160]                                                       | 1.403743319 | 0.000173579 | 0.001570075 |
| ENSMMUG00000016610 | CD99 molecule like 2 [Source:VGNC Symbol;Acc:VGNC:70823]                                                | 1.403727286 | 0.003691466 | 0.019180172 |
| ENSMMUG00000028701 |                                                                                                         | 1.403340817 | 0.006471869 | 0.02949281  |
| ENSMMUG00000055344 | TLC domain containing 3A [Source:NCBI gene;Acc:699707]                                                  | 1.399049016 | 1.13E-05    | 0.0001497   |
| ENSMMUG00000021097 | sushi domain containing 1 [Source:VGNC Symbol;Acc:VGNC:78207]                                           | 1.394337274 | 0.005135148 | 0.024599414 |
| ENSMMUG00000005923 | failed axon connections homolog, metaxin like GST domain containing [Source:VGNC Symbol;Acc:VGNC:72541] | 1.391080806 | 0.000323335 | 0.002639581 |
| ENSMMUG00000004362 | Fc fragment of IgG receptor Ia [Source:NCBI gene;Acc:714664]                                            | 1.388252957 | 1.54E-05    | 0.00019679  |
| ENSMMUG00000003869 | WD repeat domain 46 [Source:VGNC Symbol;Acc:VGNC:78940]                                                 | 1.387450977 | 0.001904891 | 0.011260108 |
| ENSMMUG00000019148 | vitronectin [Source:NCBI gene;Acc:708499]                                                               | 1.387398758 | 5.50E-05    | 0.000583621 |

|                    |                                                                                             |             |             |             |
|--------------------|---------------------------------------------------------------------------------------------|-------------|-------------|-------------|
| ENSMMUG00000013920 | triggering receptor expressed on myeloid cells 2 [Source:VGNC Symbol;Acc:VGNC:79089]        | 1.386305339 | 0.00010863  | 0.001053402 |
| ENSMMUG00000016316 | testis associated actin remodelling kinase 1 [Source:VGNC Symbol;Acc:VGNC:78314]            | 1.385915289 | 0.006884636 | 0.031008046 |
| ENSMMUG00000055835 | nuclear casein kinase and cyclin dependent kinase substrate 1 [Source:NCBI gene;Acc:697298] | 1.385730212 | 0.000133107 | 0.001258157 |
| ENSMMUG00000041067 | Metazoan signal recognition particle RNA [Source:RFAM;Acc:RF00017]                          | -1.38465473 | 0.001664538 | 0.010129321 |
| ENSMMUG00000002678 | integrin subunit beta 6 [Source:VGNC Symbol;Acc:VGNC:73789]                                 | 1.384640265 | 0.000641468 | 0.004670043 |
| ENSMMUG00000058016 | bMERB domain containing 1 [Source:NCBI gene;Acc:713757]                                     | 1.383392651 | 0.000377392 | 0.002989865 |
| ENSMMUG00000044759 |                                                                                             | 1.383026105 | 4.16E-09    | 1.30E-07    |
| ENSMMUG00000019892 | myomesin 1 [Source:VGNC Symbol;Acc:VGNC:75123]                                              | 1.378586173 | 6.00E-07    | 1.14E-05    |
| ENSMMUG00000056662 |                                                                                             | 1.378542863 | 0.000193155 | 0.001723516 |
| ENSMMUG00000058855 | aquaporin 5 [Source:NCBI gene;Acc:711804]                                                   | 1.377467283 | 0.003293381 | 0.017390444 |
| ENSMMUG00000000717 | CD3e molecule associated protein [Source:NCBI gene;Acc:714440]                              | 1.377389321 | 0.000335826 | 0.002725912 |
| ENSMMUG00000008459 | pleckstrin homology and RUN domain containing M1 [Source:NCBI gene;Acc:716464]              | 1.375872993 | 0.000859993 | 0.005939607 |
| ENSMMUG00000052537 |                                                                                             | 1.375381436 | 0.011197191 | 0.045751471 |
| ENSMMUG00000052791 |                                                                                             | 1.373402691 | 1.87E-05    | 0.000231201 |
| ENSMMUG00000052460 |                                                                                             | -1.37156531 | 0.005006883 | 0.024106665 |
| ENSMMUG00000022185 | odd-skipped related transcription factor 2 [Source:VGNC Symbol;Acc:VGNC:84097]              | -1.36990439 | 7.02E-07    | 1.29E-05    |
| ENSMMUG00000003277 | copine 4 [Source:VGNC Symbol;Acc:VGNC:71466]                                                | 1.369628056 | 0.000292081 | 0.002420738 |
| ENSMMUG00000009087 | HDGF like 3 [Source:VGNC Symbol;Acc:VGNC:84346]                                             | 1.369085145 | 6.67E-05    | 0.000694776 |
| ENSMMUG00000018972 | RNA polymerase III subunit G [Source:VGNC Symbol;Acc:VGNC:84480]                            | 1.368290972 | 0.00392435  | 0.020146027 |
| ENSMMUG00000023443 | SRR1 domain containing [Source:VGNC Symbol;Acc:VGNC:78036]                                  | 1.367644292 | 3.46E-05    | 0.000394891 |
| ENSMMUG00000002657 | olfactomedin 4 [Source:VGNC Symbol;Acc:VGNC:75418]                                          | 1.366065997 | 0.000571659 | 0.004244385 |
| ENSMMUG00000015132 | galectin 8 [Source:VGNC Symbol;Acc:VGNC:74258]                                              | -1.36499775 | 0.005759506 | 0.026922654 |
| ENSMMUG00000054590 |                                                                                             | 1.362718351 | 5.42E-05    | 0.000576038 |
| ENSMMUG00000000620 | dehydrogenase/reductase 11 [Source:VGNC Symbol;Acc:VGNC:71792]                              | 1.360648661 | 0.009277127 | 0.039446357 |
| ENSMMUG00000001225 | calneuron 1 [Source:VGNC Symbol;Acc:VGNC:82078]                                             | 1.358698974 | 0.005464784 | 0.025786543 |
| ENSMMUG00000062974 |                                                                                             | 1.358114884 | 0.000373216 | 0.002963949 |
| ENSMMUG00000049563 |                                                                                             | -1.35307552 | 2.39E-05    | 0.000287326 |
| ENSMMUG00000064131 |                                                                                             | 1.349908143 | 0.000140679 | 0.001316229 |
| ENSMMUG00000020061 | protein phosphatase 1 regulatory subunit 9B [Source:VGNC Symbol;Acc:VGNC:76372]             | 1.347364895 | 0.000238471 | 0.002054626 |
| ENSMMUG00000023446 | tuftelin interacting protein 11 [Source:VGNC Symbol;Acc:VGNC:78399]                         | 1.346821068 | 7.71E-05    | 0.000788495 |

|                    |                                                                                      |   |             |             |             |
|--------------------|--------------------------------------------------------------------------------------|---|-------------|-------------|-------------|
| ENSMMUG00000065008 |                                                                                      | - | 1.345950578 | 0.000362973 | 0.002903782 |
| ENSMMUG00000018332 | family with sequence similarity 98 member B [Source:VGNC Symbol;Acc:VGNC:72583]      | - | 1.343849051 | 3.35E-06    | 5.17E-05    |
| ENSMMUG00000052642 | protein O-glucosyltransferase 2 [Source:NCBI gene;Acc:702156]                        | - | 1.343780365 | 0.009466998 | 0.040119168 |
| ENSMMUG00000007709 | crooked neck pre-mRNA splicing factor 1 [Source:VGNC Symbol;Acc:VGNC:71412]          | - | -1.3436083  | 1.11E-05    | 0.000148465 |
| ENSMMUG00000064364 | sulfite oxidase [Source:NCBI gene;Acc:711164]                                        | - | -1.34179997 | 0.000850185 | 0.005882046 |
| ENSMMUG00000032892 | U6 spliceosomal RNA [Source:RFAM;Acc:RF00026]                                        | - | 1.338845108 | 0.011708171 | 0.047341947 |
| ENSMMUG00000054078 | histone H3 [Source:NCBI gene;Acc:114669830]                                          | - | 1.336469923 | 0.003106034 | 0.016554459 |
| ENSMMUG00000065031 |                                                                                      | - | 1.335445472 | 8.66E-09    | 2.57E-07    |
| ENSMMUG00000003260 |                                                                                      | - | -1.33534831 | 8.91E-06    | 0.000121984 |
| ENSMMUG00000012819 | pyruvate dehydrogenase kinase 3 [Source:VGNC Symbol;Acc:VGNC:75934]                  | - | 1.333865601 | 0.004788623 | 0.023284025 |
| ENSMMUG00000015619 | ATP binding cassette subfamily B member 7 [Source:VGNC Symbol;Acc:VGNC:81340]        | - | 1.333162691 | 3.53E-05    | 0.000401488 |
| ENSMMUG00000001357 | tetraspanin 11 [Source:VGNC Symbol;Acc:VGNC:79882]                                   | - | 1.330843554 | 8.19E-11    | 3.45E-09    |
| ENSMMUG00000023076 | diacylglycerol kinase eta [Source:VGNC Symbol;Acc:VGNC:71786]                        | - | 1.330235011 | 0.00167495  | 0.010151416 |
| ENSMMUG00000002113 | NHL repeat containing 3 [Source:VGNC Symbol;Acc:VGNC:75291]                          | - | 1.327324438 | 5.48E-06    | 7.90E-05    |
| ENSMMUG00000011116 | NADPH oxidase 4 [Source:VGNC Symbol;Acc:VGNC:75376]                                  | - | 1.326676442 | 1.75E-05    | 0.000218343 |
| ENSMMUG00000016665 | NADH:ubiquinone oxidoreductase subunit A11 [Source:NCBI gene;Acc:697843]             | - | 1.326483909 | 0.002067828 | 0.011986594 |
| ENSMMUG00000012129 | tripartite motif containing 10 [Source:VGNC Symbol;Acc:VGNC:78550]                   | - | 1.325871929 | 3.01E-07    | 6.33E-06    |
| ENSMMUG00000038560 | eukaryotic translation elongation factor 1 epsilon 1 [Source:NCBI gene;Acc:695426]   | - | 1.322328141 | 4.76E-10    | 1.81E-08    |
| ENSMMUG00000022627 | HLF transcription factor, PAR bZIP family member [Source:VGNC Symbol;Acc:VGNC:73478] | - | 1.320950328 | 0.009736187 | 0.041085474 |
| ENSMMUG00000004492 | absent in melanoma 2 [Source:NCBI gene;Acc:719260]                                   | - | 1.318772944 | 0.002791352 | 0.015215852 |
| ENSMMUG00000057062 |                                                                                      | - | 1.317313522 | 0.00093127  | 0.006329676 |
| ENSMMUG00000060798 |                                                                                      | - | -1.31685335 | 0.000938728 | 0.006365919 |
| ENSMMUG00000012467 | family with sequence similarity 227 member A [Source:VGNC Symbol;Acc:VGNC:72475]     | - | 1.314324668 | 0.004087004 | 0.020704723 |
| ENSMMUG00000051107 |                                                                                      | - | 1.313210628 | 0.010436487 | 0.043428549 |
| ENSMMUG00000062443 |                                                                                      | - | 1.312679887 | 0.000363658 | 0.002905382 |
| ENSMMUG00000004052 | phosphodiesterase 12 [Source:VGNC Symbol;Acc:VGNC:75863]                             | - | -1.31072123 | 0.011513633 | 0.046725607 |
| ENSMMUG00000022636 | GTPase, IMAP family member 8 [Source:VGNC Symbol;Acc:VGNC:72981]                     | - | 1.310443774 | 0.001550657 | 0.009547902 |
| ENSMMUG00000007256 | splicing factor 3b subunit 4 [Source:VGNC Symbol;Acc:VGNC:77182]                     | - | 1.309987414 | 0.000129858 | 0.001232873 |
| ENSMMUG00000061834 |                                                                                      | - | -1.30889483 | 1.30E-07    | 2.99E-06    |
| ENSMMUG00000063262 |                                                                                      | - | 1.304963458 | 3.04E-06    | 4.75E-05    |
| ENSMMUG00000058151 | chromosome 4 C6orf62 homolog [Source:NCBI gene;Acc:708218]                           | - | 1.303719178 | 1.12E-08    | 3.26E-07    |



|                    |                                                                                                       |             |             |             |
|--------------------|-------------------------------------------------------------------------------------------------------|-------------|-------------|-------------|
| ENSMMUG00000063655 | sodium voltage-gated channel beta subunit 4 [Source:NCBI gene;Acc:100430940]                          | -1.30236589 | 9.28E-05    | 0.000924088 |
| ENSMMUG00000022631 | ubiquitin specific peptidase 21 [Source:VGNC Symbol;Acc:VGNC:78741]                                   | 1.301641806 | 0.002151819 | 0.01237167  |
| ENSMMUG00000017070 | zinc finger and SCAN domain containing 29 [Source:VGNC Symbol;Acc:VGNC:79633]                         | -1.29909317 | 7.06E-06    | 9.87E-05    |
| ENSMMUG00000022601 | cAMP responsive element binding protein 1 [Source:VGNC Symbol;Acc:VGNC:71485]                         | 1.297610587 | 9.13E-05    | 0.000913033 |
| ENSMMUG00000055272 | putative uncharacterized protein ZNRD1-AS1 [Source:NCBI gene;Acc:712069]                              | 1.294793929 | 0.001545172 | 0.009533737 |
| ENSMMUG00000044214 |                                                                                                       | 1.291960815 | 8.71E-05    | 0.00088062  |
| ENSMMUG00000061892 |                                                                                                       | 1.291117649 | 1.31E-07    | 3.02E-06    |
| ENSMMUG00000000663 | guanylate-binding protein 6-like [Source:NCBI gene;Acc:695158]                                        | 1.286379739 | 7.01E-05    | 0.000726386 |
| ENSMMUG00000043161 | endogenous retrovirus group FRD member 1, envelope [Source:VGNC Symbol;Acc:VGNC:81068]                | 1.286351943 | 0.00123156  | 0.007908399 |
| ENSMMUG00000022324 | formimidoyltransferase cyclodeaminase [Source:VGNC Symbol;Acc:VGNC:72825]                             | 1.285503783 | 0.007926065 | 0.034770168 |
| ENSMMUG00000012192 | erythrocyte membrane protein band 4.1 like 4A [Source:VGNC Symbol;Acc:VGNC:72039]                     | 1.285387764 | 0.000148134 | 0.001378445 |
| ENSMMUG00000006553 | dishevelled segment polarity protein 3 [Source:VGNC Symbol;Acc:VGNC:72014]                            | 1.283195762 | 0.002799646 | 0.015233333 |
| ENSMMUG00000016135 | neural precursor cell expressed, developmentally down-regulated 9 [Source:VGNC Symbol;Acc:VGNC:75304] | 1.283041329 | 0.000779014 | 0.005471829 |
| ENSMMUG00000018746 | FAST kinase domains 3 [Source:VGNC Symbol;Acc:VGNC:72588]                                             | 1.282139774 | 6.60E-06    | 9.32E-05    |
| ENSMMUG00000052574 |                                                                                                       | 1.279431566 | 6.68E-07    | 1.24E-05    |
| ENSMMUG00000044277 | ubiquitin conjugating enzyme E2 I [Source:NCBI gene;Acc:722434]                                       | 1.278967131 | 0.00084518  | 0.005854181 |
| ENSMMUG00000042208 | pepsin A-4 [Source:NCBI gene;Acc:694646]                                                              | 1.278341236 | 1.73E-05    | 0.000216586 |
| ENSMMUG00000055477 |                                                                                                       | 1.276694387 | 0.000137655 | 0.001292986 |
| ENSMMUG00000050975 |                                                                                                       | 1.274273796 | 0.001143516 | 0.0074428   |
| ENSMMUG00000015238 | O-linked N-acetylglucosamine (GlcNAc) transferase [Source:NCBI gene;Acc:698268]                       | -1.27199615 | 1.55E-06    | 2.61E-05    |
| ENSMMUG00000050858 | Metazoan signal recognition particle RNA [Source:RFAM;Acc:RF00017]                                    | 1.271845323 | 0.010738409 | 0.044422515 |
| ENSMMUG00000057338 |                                                                                                       | 1.271410869 | 2.85E-06    | 4.47E-05    |
| ENSMMUG00000015962 | AT-rich interaction domain 2 [Source:VGNC Symbol;Acc:VGNC:69858]                                      | 1.270866534 | 5.25E-05    | 0.000560803 |
| ENSMMUG00000018456 | PBX homeobox 2 [Source:VGNC Symbol;Acc:VGNC:75771]                                                    | 1.270512919 | 0.00819752  | 0.035751455 |
| ENSMMUG00000016723 | zinc finger protein 287 [Source:NCBI gene;Acc:695524]                                                 | 1.269327979 | 0.01199438  | 0.048235291 |
| ENSMMUG00000052676 |                                                                                                       | 1.267082254 | 4.03E-05    | 0.000447812 |
| ENSMMUG00000055400 | U6 spliceosomal RNA [Source:RFAM;Acc:RF00026]                                                         | 1.266162167 | 5.96E-05    | 0.000627803 |
| ENSMMUG00000000104 | ribosomal RNA processing 1B [Source:VGNC Symbol;Acc:VGNC:77089]                                       | 1.265679126 | 4.78E-07    | 9.45E-06    |
| ENSMMUG00000053624 |                                                                                                       | 1.265655714 | 0.002014092 | 0.011749032 |



|                    |                                                                                        |   |             |             |             |
|--------------------|----------------------------------------------------------------------------------------|---|-------------|-------------|-------------|
| ENSMMUG00000011712 | olfactory receptor 5B21 [Source:NCBI gene;Acc:702145]                                  | - | 1.265609292 | 0.010226158 | 0.042657078 |
| ENSMMUG00000061344 |                                                                                        | - | 1.265148798 | 0.007046788 | 0.031583957 |
| ENSMMUG00000002809 | unc-80 homolog, NALCN channel complex subunit [Source:NCBI gene;Acc:713007]            | - | 1.262208144 | 0.010819383 | 0.044642562 |
| ENSMMUG00000016004 | acid phosphatase 3 [Source:VGNC Symbol;Acc:VGNC:69385]                                 | - | 1.260477334 | 0.005986255 | 0.027722889 |
| ENSMMUG00000062021 |                                                                                        | - | 1.259976781 | 0.008835411 | 0.037942309 |
| ENSMMUG00000007257 | synaptic vesicle glycoprotein 2A [Source:VGNC Symbol;Acc:VGNC:78181]                   | - | 1.259929066 | 3.71E-11    | 1.65E-09    |
| ENSMMUG00000020047 | integrin subunit beta 3 binding protein [Source:VGNC Symbol;Acc:VGNC:73787]            | - | -1.25816634 | 1.98E-06    | 3.21E-05    |
| ENSMMUG00000007215 | X-box binding protein 1 [Source:VGNC Symbol;Acc:VGNC:78806]                            | - | 1.258006184 | 0.001149154 | 0.007467318 |
| ENSMMUG00000051020 | zinc finger protein 467 [Source:NCBI gene;Acc:712106]                                  | - | -1.25756272 | 6.91E-05    | 0.000717519 |
| ENSMMUG00000022589 | prostate transmembrane protein, androgen induced 1 [Source:VGNC Symbol;Acc:VGNC:76023] | - | -1.25641425 | 0.000286588 | 0.002385116 |
| ENSMMUG00000042668 | cilia and flagella associated protein 61 [Source:NCBI gene;Acc:699814]                 | - | 1.255731986 | 0.000730567 | 0.005192351 |
| ENSMMUG00000049575 | T cell receptor beta variable 7-2 [Source:HGNC Symbol;Acc:HGNC:12236]                  | - | 1.255485765 | 0.001563165 | 0.009610439 |
| ENSMMUG00000015970 | coiled-coil domain containing 150 [Source:VGNC Symbol;Acc:VGNC:84222]                  | - | 1.255304883 | 7.40E-05    | 0.00076189  |
| ENSMMUG00000060503 | Metazoan signal recognition particle RNA [Source:RFAM;Acc:RF00017]                     | - | -1.25409374 | 0.011060824 | 0.045332934 |
| ENSMMUG00000006215 | serine/threonine kinase 39 [Source:VGNC Symbol;Acc:VGNC:81587]                         | - | 1.253956749 | 1.42E-05    | 0.000182903 |
| ENSMMUG00000023137 | zinc finger protein 350 [Source:VGNC Symbol;Acc:VGNC:79041]                            | - | -1.25017209 | 0.000197164 | 0.001755565 |
| ENSMMUG00000001294 | FCH and double SH3 domains 2 [Source:VGNC Symbol;Acc:VGNC:72593]                       | - | 1.248579936 | 0.001382572 | 0.008670496 |
| ENSMMUG00000063747 |                                                                                        | - | 1.247243231 | 0.002265101 | 0.012856328 |
| ENSMMUG00000019713 | thyroid stimulating hormone receptor [Source:VGNC Symbol;Acc:VGNC:78662]               | - | 1.246175325 | 0.004641118 | 0.022732938 |
| ENSMMUG00000015189 | RAD51 associated protein 1 [Source:VGNC Symbol;Acc:VGNC:76497]                         | - | 1.245457302 | 0.000244202 | 0.002087482 |
| ENSMMUG00000022624 | putative speedy protein E16 [Source:NCBI gene;Acc:718058]                              | - | 1.244622412 | 0.000428767 | 0.003314985 |
| ENSMMUG00000015414 | family with sequence similarity 160 member B1 [Source:VGNC Symbol;Acc:VGNC:72403]      | - | 1.243743731 | 0.000148366 | 0.001379528 |
| ENSMMUG00000021114 | G protein-coupled receptor 182 [Source:VGNC Symbol;Acc:VGNC:72936]                     | - | 1.243564018 | 0.000360528 | 0.002891949 |
| ENSMMUG00000046218 | X antigen family member 5 [Source:NCBI gene;Acc:114669729]                             | - | 1.242760115 | 0.010800856 | 0.044619199 |
| ENSMMUG00000056306 |                                                                                        | - | 1.239356967 | 0.000135671 | 0.001278357 |
| ENSMMUG00000046165 | chromosome 3 C7orf33 homolog [Source:NCBI gene;Acc:710503]                             | - | 1.234516492 | 0.00594156  | 0.027590587 |
| ENSMMUG00000017615 | zinc finger CCHC-type containing 14 [Source:VGNC Symbol;Acc:VGNC:79420]                | - | 1.233915014 | 5.36E-06    | 7.75E-05    |
| ENSMMUG00000054210 | C-C motif chemokine 4 [Source:NCBI gene;Acc:100426632]                                 | - | 1.233610156 | 3.75E-13    | 2.39E-11    |
| ENSMMUG00000017113 | ubiquitin specific peptidase 32 [Source:NCBI gene;Acc:716857]                          | - | 1.233087921 | 1.40E-08    | 3.96E-07    |
| ENSMMUG00000018939 | leucine rich repeat containing 66 [Source:VGNC Symbol;Acc:VGNC:74415]                  | - | 1.232527432 | 5.77E-07    | 1.10E-05    |
| ENSMMUG00000004287 | death domain associated protein [Source:VGNC Symbol;Acc:VGNC:71737]                    | - | -1.23202615 | 0.000998575 | 0.006695929 |

|                     |                                                                                           |             |             |             |
|---------------------|-------------------------------------------------------------------------------------------|-------------|-------------|-------------|
| ENSMMUG00000022305  | Rho guanine nucleotide exchange factor 1 [Source:VGNC Symbol;Acc:VGNC:70012]              | -1.23068483 | 0.000139782 | 0.001309887 |
| ENSMMUG00000060971  |                                                                                           | 1.230113187 | 0.006189735 | 0.028445229 |
| ENSMMUG00000011893  | KIAA0513 [Source:VGNC Symbol;Acc:VGNC:73925]                                              | 1.229895594 | 6.87E-05    | 0.000714433 |
| ENSMMUG00000021083  | Josephin domain containing 1 [Source:VGNC Symbol;Acc:VGNC:73920]                          | 1.229137423 | 0.003678556 | 0.019129128 |
| ENSMMUG00000006493  | ras related dexamethasone induced 1 [Source:VGNC Symbol;Acc:VGNC:76485]                   | 1.226587467 | 1.18E-06    | 2.06E-05    |
| ENSMMUG00000004849  | casein beta [Source:VGNC Symbol;Acc:VGNC:71523]                                           | 1.225275539 | 0.001224797 | 0.007869187 |
| ENSMMUG00000008713  | myosin binding protein H like [Source:NCBI gene;Acc:698183]                               | -1.2239536  | 2.92E-10    | 1.15E-08    |
| ENSMMUG000000064202 |                                                                                           | 1.223609352 | 0.005269805 | 0.025073972 |
| ENSMMUG00000004157  | nuclear protein, coactivator of histone transcription [Source:VGNC Symbol;Acc:VGNC:75379] | 1.221397584 | 0.000380458 | 0.003006627 |
| ENSMMUG00000013053  | sperm acrosome associated 6 [Source:NCBI gene;Acc:114674203]                              | -1.22137002 | 0.000580173 | 0.004296941 |
| ENSMMUG00000021878  | timeless circadian regulator [Source:VGNC Symbol;Acc:VGNC:78356]                          | 1.220954164 | 0.000181072 | 0.001629239 |
| ENSMMUG00000011702  | tetraspanin 5 [Source:VGNC Symbol;Acc:VGNC:79086]                                         | 1.220265268 | 0.008662018 | 0.037315227 |
| ENSMMUG00000006704  | zygote arrest 1 [Source:VGNC Symbol;Acc:VGNC:79251]                                       | 1.219745717 | 0.000619222 | 0.00452459  |
| ENSMMUG00000019977  | myosin heavy chain 15 [Source:VGNC Symbol;Acc:VGNC:84148]                                 | 1.219699904 | 4.26E-07    | 8.57E-06    |
| ENSMMUG00000053889  | olfactory receptor 7C1 [Source:NCBI gene;Acc:114674087]                                   | 1.218812104 | 0.006862789 | 0.030921281 |
| ENSMMUG00000050770  |                                                                                           | 1.218256978 | 0.00026792  | 0.002264369 |
| ENSMMUG00000044047  | killer cell lectin like receptor B1 [Source:NCBI gene;Acc:100430783]                      | 1.218165314 | 0.000325883 | 0.002654946 |
| ENSMMUG00000014762  | myosin heavy chain 6 [Source:NCBI gene;Acc:713471]                                        | 1.216814246 | 3.78E-08    | 9.72E-07    |
| ENSMMUG00000007524  | RNA polymerase II subunit H [Source:VGNC Symbol;Acc:VGNC:76216]                           | 1.216432907 | 0.000252723 | 0.002148058 |
| ENSMMUG00000023124  | transmembrane protein 43 [Source:VGNC Symbol;Acc:VGNC:82711]                              | 1.214558131 | 3.66E-06    | 5.56E-05    |
| ENSMMUG00000004084  | GTP cyclohydrolase 1 [Source:VGNC Symbol;Acc:VGNC:72900]                                  | 1.213575681 | 0.001255494 | 0.008046679 |
| ENSMMUG00000019045  | estrogen receptor 1 [Source:VGNC Symbol;Acc:VGNC:72432]                                   | 1.212695295 | 0.000976482 | 0.006573553 |
| ENSMMUG00000012778  | rabphilin 3A [Source:VGNC Symbol;Acc:VGNC:77033]                                          | 1.209774063 | 0.000974903 | 0.006566613 |
| ENSMMUG00000065018  | transmembrane protein 35A [Source:NCBI gene;Acc:702205]                                   | 1.207722387 | 0.00216551  | 0.012426518 |
| ENSMMUG00000058583  | RRAD and GEM like GTPase 1 [Source:NCBI gene;Acc:713351]                                  | -1.20458808 | 4.92E-06    | 7.18E-05    |
| ENSMMUG00000005754  | lysyl-tRNA synthetase 1 [Source:NCBI gene;Acc:714516]                                     | 1.204489371 | 0.011204113 | 0.045752168 |
| ENSMMUG00000052030  | developing brain homeobox 2 [Source:NCBI gene;Acc:701170]                                 | 1.203120522 | 1.20E-05    | 0.000157945 |
| ENSMMUG00000003221  | DENN domain containing 5B [Source:VGNC Symbol;Acc:VGNC:71772]                             | 1.202137561 | 0.000721889 | 0.005136865 |
| ENSMMUG00000007920  | myosin XIX [Source:VGNC Symbol;Acc:VGNC:75026]                                            | 1.200251746 | 1.48E-05    | 0.000189123 |
| ENSMMUG00000021691  | spastin [Source:VGNC Symbol;Acc:VGNC:77857]                                               | 1.199289093 | 0.000538705 | 0.00404231  |

|                    |                                                                                                                                       |   |             |             |             |
|--------------------|---------------------------------------------------------------------------------------------------------------------------------------|---|-------------|-------------|-------------|
| ENSMMUG00000049749 |                                                                                                                                       | - | 1.198208384 | 3.20E-07    | 6.66E-06    |
| ENSMMUG00000064237 |                                                                                                                                       | - | 1.197889451 | 6.65E-05    | 0.000693522 |
| ENSMMUG00000021291 | thymine DNA glycosylase [Source:VGNC Symbol;Acc:VGNC:78297]                                                                           | - | 1.193278016 | 0.00152883  | 0.009457266 |
| ENSMMUG00000001319 | methylenetetrahydrofolate dehydrogenase, cyclohydrolase and formyltetrahydrofolate synthetase 1 [Source:VGNC Symbol;Acc:VGNC:84399]   | - | 1.192131445 | 1.33E-08    | 3.77E-07    |
| ENSMMUG00000015279 | SWI/SNF related, matrix associated, actin dependent regulator of chromatin, subfamily a, member 2 [Source:VGNC Symbol;Acc:VGNC:77647] | - | 1.191696844 | 0.000286937 | 0.002386363 |
| ENSMMUG00000007244 | OTU deubiquitinase 7B [Source:VGNC Symbol;Acc:VGNC:75634]                                                                             | - | 1.190593701 | 4.87E-05    | 0.000525182 |
| ENSMMUG00000023251 | KN motif and ankyrin repeat domains 2 [Source:VGNC Symbol;Acc:VGNC:73938]                                                             | - | -1.1902701  | 0.006307579 | 0.028864948 |
| ENSMMUG00000037675 | testis expressed 52 [Source:NCBI gene;Acc:107000723]                                                                                  | - | 1.189998714 | 1.61E-06    | 2.68E-05    |
| ENSMMUG00000062413 | CCAAT enhancer binding protein gamma [Source:NCBI gene;Acc:704322]                                                                    | - | 1.189303253 | 0.000617714 | 0.004516327 |
| ENSMMUG00000021034 | complement C6 [Source:VGNC Symbol;Acc:VGNC:70477]                                                                                     | - | -1.18927531 | 0.002518315 | 0.014000033 |
| ENSMMUG00000009519 | WASH complex subunit 4 [Source:VGNC Symbol;Acc:VGNC:79783]                                                                            | - | 1.187504226 | 0.003777288 | 0.019523869 |
| ENSMMUG00000063703 |                                                                                                                                       | - | 1.186858846 | 0.007622105 | 0.033633871 |
| ENSMMUG00000003029 | protein arginine methyltransferase 1 [Source:NCBI gene;Acc:719419]                                                                    | - | 1.186500957 | 0.000300775 | 0.002473954 |
| ENSMMUG00000064514 | keratin, type II cuticular Hb1 [Source:NCBI gene;Acc:697511]                                                                          | - | 1.185479577 | 7.37E-08    | 1.78E-06    |
| ENSMMUG00000002103 | delta/notch like EGF repeat containing [Source:VGNC Symbol;Acc:VGNC:71895]                                                            | - | 1.184008525 | 0.006310633 | 0.028867893 |
| ENSMMUG00000061260 | Spi-C transcription factor [Source:NCBI gene;Acc:695809]                                                                              | - | 1.182503178 | 2.88E-05    | 0.000335719 |
| ENSMMUG00000062861 |                                                                                                                                       | - | 1.182340799 | 0.001545106 | 0.009533737 |
| ENSMMUG00000044782 |                                                                                                                                       | - | 1.182131824 | 1.02E-05    | 0.000137562 |
| ENSMMUG00000023752 | SIX homeobox 2 [Source:VGNC Symbol;Acc:VGNC:81570]                                                                                    | - | 1.182029229 | 0.000912279 | 0.006225326 |
| ENSMMUG00000007765 | Wnt family member 2B [Source:VGNC Symbol;Acc:VGNC:78797]                                                                              | - | 1.181262984 | 4.79E-10    | 1.82E-08    |
| ENSMMUG00000001213 | spermatogenesis associated 9 [Source:VGNC Symbol;Acc:VGNC:77976]                                                                      | - | 1.180412986 | 0.000699991 | 0.005004829 |
| ENSMMUG00000012029 | sulfatase 2 [Source:VGNC Symbol;Acc:VGNC:78179]                                                                                       | - | 1.180148982 | 0.000293605 | 0.002429043 |
| ENSMMUG00000004233 | leucine rich repeats and immunoglobulin like domains 3 [Source:NCBI gene;Acc:716344]                                                  | - | -1.17493954 | 3.82E-07    | 7.81E-06    |
| ENSMMUG00000010114 | Ras and Rab interactor 2 [Source:VGNC Symbol;Acc:VGNC:76770]                                                                          | - | 1.171908181 | 0.001811176 | 0.010812886 |
| ENSMMUG00000014810 | short chain dehydrogenase/reductase family 16C member 5 [Source:VGNC Symbol;Acc:VGNC:77343]                                           | - | 1.171037504 | 7.38E-09    | 2.23E-07    |
| ENSMMUG00000002947 | procollagen C-endopeptidase enhancer [Source:VGNC Symbol;Acc:VGNC:75782]                                                              | - | 1.169057857 | 2.59E-08    | 6.91E-07    |
| ENSMMUG00000010627 | apelin receptor [Source:VGNC Symbol;Acc:VGNC:69939]                                                                                   | - | 1.168943292 | 6.39E-05    | 0.000669491 |
| ENSMMUG00000047276 | GTPase, IMAP family member 6 [Source:VGNC Symbol;Acc:VGNC:81315]                                                                      | - | 1.165306964 | 1.25E-08    | 3.57E-07    |
| ENSMMUG00000020910 | nucleoporin 54 [Source:VGNC Symbol;Acc:VGNC:75420]                                                                                    | - | 1.164398117 | 0.001759797 | 0.010527137 |

|                     |                                                                                                                      |             |             |             |             |
|---------------------|----------------------------------------------------------------------------------------------------------------------|-------------|-------------|-------------|-------------|
| ENSMMUG00000042798  |                                                                                                                      | -           | 1.164137918 | 0.00016547  | 0.001515035 |
| ENSMMUG00000015923  | ankyrin repeat and EF-hand domain containing 1 [Source:VGNC Symbol;Acc:VGNC:69615]                                   | -1.16411158 | -           | 0.007390283 | 0.032804308 |
| ENSMMUG00000010819  | fibroblast growth factor receptor substrate 2 [Source:VGNC Symbol;Acc:VGNC:72732]                                    | -           | 1.163291037 | 1.39E-05    | 0.000179462 |
| ENSMMUG00000007775  | survival motor neuron domain containing 1 [Source:NCBI gene;Acc:694761]                                              | -           | 1.162275013 | 0.009246472 | 0.039337743 |
| ENSMMUG000000061117 |                                                                                                                      | -           | 1.161258767 | 0.000677607 | 0.004876818 |
| ENSMMUG00000021459  | MYC binding protein 2 [Source:VGNC Symbol;Acc:VGNC:75011]                                                            | -           | 1.161215278 | 0.000880246 | 0.006055038 |
| ENSMMUG00000000718  | ERCC excision repair 1, endonuclease non-catalytic subunit [Source:VGNC Symbol;Acc:VGNC:72422]                       | -           | 1.159235517 | 0.000560051 | 0.004171127 |
| ENSMMUG00000020202  | melanoma-associated antigen D4 [Source:NCBI gene;Acc:106996411]                                                      | -           | 1.156958796 | 0.00816221  | 0.035649391 |
| ENSMMUG00000048823  |                                                                                                                      | -           | 1.155073601 | 0.000404301 | 0.003154335 |
| ENSMMUG00000013035  | teashirt zinc finger homeobox 2 [Source:VGNC Symbol;Acc:VGNC:78875]                                                  | -           | 1.152449379 | 0.004899747 | 0.02371842  |
| ENSMMUG00000064075  | ring finger protein 41 [Source:NCBI gene;Acc:711969]                                                                 | -           | 1.146509219 | 0.002719945 | 0.014928534 |
| ENSMMUG00000058974  |                                                                                                                      | -1.14571735 | -           | 0.012415202 | 0.049561487 |
| ENSMMUG00000060781  | G protein-coupled receptor 18 [Source:NCBI gene;Acc:698714]                                                          | -1.14497038 | -           | 0.002153042 | 0.01237276  |
| ENSMMUG00000017355  | remodeling and spacing factor 1 [Source:VGNC Symbol;Acc:VGNC:77044]                                                  | -           | 1.143148154 | 0.0090091   | 0.038505703 |
| ENSMMUG00000002912  | TLE family member 6, subcortical maternal complex member [Source:VGNC Symbol;Acc:VGNC:79879]                         | -           | 1.141027424 | 0.003041294 | 0.016260061 |
| ENSMMUG00000009524  | adaptor protein, phosphotyrosine interacting with PH domain and leucine zipper 2 [Source:VGNC Symbol;Acc:VGNC:69861] | -1.14065263 | -           | 1.87E-07    | 4.17E-06    |
| ENSMMUG00000048322  | eva-1 homolog A, regulator of programmed cell death [Source:NCBI gene;Acc:710843]                                    | -           | 1.137959167 | 0.003884839 | 0.01999348  |
| ENSMMUG00000049939  |                                                                                                                      | -           | 1.136929186 | 2.36E-08    | 6.36E-07    |
| ENSMMUG00000004988  | trace amine-associated receptor 3 [Source:NCBI gene;Acc:709130]                                                      | -1.13616508 | -           | 0.006055509 | 0.02796563  |
| ENSMMUG00000046282  |                                                                                                                      | -           | 1.135371978 | 1.07E-07    | 2.50E-06    |
| ENSMMUG00000009303  | coiled-coil domain containing 38 [Source:VGNC Symbol;Acc:VGNC:70880]                                                 | -1.13522886 | -           | 0.003836015 | 0.019759189 |
| ENSMMUG00000065117  | septin 4 [Source:HGNC Symbol;Acc:HGNC:9165]                                                                          | -           | 1.134786802 | 0.011856322 | 0.047824626 |
| ENSMMUG00000062676  |                                                                                                                      | -           | 1.133117259 | 0.00309169  | 0.016485345 |
| ENSMMUG00000012238  | polypeptide N-acetylgalactosaminyltransferase 11 [Source:VGNC Symbol;Acc:VGNC:72749]                                 | -           | 1.132890018 | 0.011346589 | 0.046212934 |
| ENSMMUG00000006197  | plasminogen receptor with a C-terminal lysine [Source:VGNC Symbol;Acc:VGNC:76098]                                    | -           | 1.131978504 | 0.000613091 | 0.004488877 |
| ENSMMUG00000038569  | 5',3'-nucleotidase, mitochondrial [Source:NCBI gene;Acc:698591]                                                      | -           | 1.130533389 | 0.002039922 | 0.011849143 |
| ENSMMUG00000054655  | immunoglobulin lambda variable 3-10 [Source:HGNC Symbol;Acc:HGNC:5897]                                               | -           | 1.128387418 | 0.006573033 | 0.029851592 |
| ENSMMUG00000017549  | ectonucleotide pyrophosphatase/phosphodiesterase 3 [Source:VGNC Symbol;Acc:VGNC:72224]                               | -           | 1.126884923 | 0.000102636 | 0.001003407 |
| ENSMMUG00000003369  | calcium/calmodulin dependent protein kinase IG [Source:VGNC Symbol;Acc:VGNC:70521]                                   | -           | 1.126226807 | 0.003349516 | 0.017624693 |
| ENSMMUG00000015577  | RIO kinase 1 [Source:VGNC Symbol;Acc:VGNC:76767]                                                                     | -           | 1.126114585 | 0.01006518  | 0.042088196 |
| ENSMMUG00000004493  | propionyl-CoA carboxylase subunit alpha [Source:VGNC Symbol;Acc:VGNC:75773]                                          | -           | 1.125680628 | 0.000475226 | 0.003618122 |



|                     |                                                                              |             |             |             |
|---------------------|------------------------------------------------------------------------------|-------------|-------------|-------------|
| ENSMMUG0000009695   | BTB domain containing 10 [Source:VGNC Symbol;Acc:VGNC:70361]                 | 1.125437923 | 0.001048209 | 0.006950914 |
| ENSMMUG00000017432  | tropomodulin 2 [Source:VGNC Symbol;Acc:VGNC:78571]                           | 1.122599143 | 3.14E-07    | 6.56E-06    |
| ENSMMUG00000016857  | prostaglandin-endoperoxide synthase 2 [Source:VGNC Symbol;Acc:VGNC:76589]    | 1.122377745 | 2.47E-05    | 0.000294214 |
| ENSMMUG00000023248  | serine/threonine kinase 38 like [Source:VGNC Symbol;Acc:VGNC:78156]          | 1.120339447 | 0.004510362 | 0.022320699 |
| ENSMMUG00000009084  | transmembrane 6 superfamily member 1 [Source:VGNC Symbol;Acc:VGNC:78566]     | 1.119841782 | 9.12E-05    | 0.000913033 |
| ENSMMUG00000002497  | zinc finger protein 777 [Source:HGNC Symbol;Acc:HGNC:22213]                  | 1.118017818 | 0.001785787 | 0.010666624 |
| ENSMMUG00000009536  | makorin ring finger protein 2 [Source:VGNC Symbol;Acc:VGNC:74878]            | 1.116875938 | 0.00195603  | 0.011492917 |
| ENSMMUG00000044175  | forkhead box O6 [Source:NCBI gene;Acc:697505]                                | 1.115161763 | 0.006118865 | 0.02819528  |
| ENSMMUG00000023450  | tyrosylprotein sulfotransferase 2 [Source:VGNC Symbol;Acc:VGNC:78639]        | 1.115037302 | 0.001724157 | 0.010365714 |
| ENSMMUG00000000205  | transmembrane protein 117 [Source:VGNC Symbol;Acc:VGNC:79488]                | 1.113139833 | 1.23E-08    | 3.53E-07    |
| ENSMMUG000000051366 |                                                                              | 1.112580941 | 0.004985715 | 0.02404709  |
| ENSMMUG00000013138  | Rho guanine nucleotide exchange factor 7 [Source:VGNC Symbol;Acc:VGNC:69833] | -1.11187584 | 1.17E-05    | 0.000155129 |
| ENSMMUG00000022963  | solute carrier family 25 member 38 [Source:VGNC Symbol;Acc:VGNC:77571]       | 1.111058279 | 0.011348717 | 0.046212934 |
| ENSMMUG00000015309  | F-box protein 24 [Source:VGNC Symbol;Acc:VGNC:72495]                         | 1.110452847 | 4.10E-06    | 6.17E-05    |
| ENSMMUG000000055392 |                                                                              | 1.108892448 | 0.01053836  | 0.043767624 |
| ENSMMUG000000056147 |                                                                              | 1.107302652 | 0.000220586 | 0.001925465 |
| ENSMMUG00000001849  | interleukin 5 receptor subunit alpha [Source:VGNC Symbol;Acc:VGNC:73731]     | 1.106973704 | 0.000730987 | 0.005192351 |
| ENSMMUG000000045105 | phospholipase A and acyltransferase 4 [Source:NCBI gene;Acc:722189]          | 1.106861412 | 0.000136208 | 0.001282408 |
| ENSMMUG00000022121  | CASK interacting protein 2 [Source:VGNC Symbol;Acc:VGNC:70577]               | -1.10667648 | 2.46E-05    | 0.0002941   |
| ENSMMUG00000005366  | alpha-L-fucosidase 2 [Source:VGNC Symbol;Acc:VGNC:72827]                     | 1.104468317 | 0.007903939 | 0.034698523 |
| ENSMMUG00000005634  | ribonuclease L [Source:VGNC Symbol;Acc:VGNC:82223]                           | 1.104316571 | 0.000327881 | 0.002669407 |
| ENSMMUG00000022123  | tRNA splicing endonuclease subunit 54 [Source:VGNC Symbol;Acc:VGNC:79666]    | 1.103738952 | 0.000190228 | 0.001702668 |
| ENSMMUG00000013094  | lipoyl(octanoyl) transferase 2 [Source:NCBI gene;Acc:718425]                 | 1.103120375 | 4.76E-07    | 9.43E-06    |
| ENSMMUG00000001728  | mitogen-activated protein kinase 9 [Source:VGNC Symbol;Acc:VGNC:74652]       | 1.098912471 | 0.004341582 | 0.021682565 |
| ENSMMUG000000050862 |                                                                              | 1.098072743 | 0.006955667 | 0.031280913 |
| ENSMMUG00000008941  | DNA topoisomerase II alpha [Source:VGNC Symbol;Acc:VGNC:78620]               | 1.097687954 | 7.34E-08    | 1.78E-06    |
| ENSMMUG00000013093  | uncharacterized LOC106993385 [Source:NCBI gene;Acc:106993385]                | 1.097544622 | 2.02E-07    | 4.48E-06    |
| ENSMMUG00000014314  | ankyrin and armadillo repeat containing [Source:VGNC Symbol;Acc:VGNC:69706]  | 1.095960184 | 0.00108282  | 0.007141107 |
| ENSMMUG000000051641 |                                                                              | 1.095738794 | 0.002968934 | 0.015951527 |

|                    |                                                                                              |             |             |             |
|--------------------|----------------------------------------------------------------------------------------------|-------------|-------------|-------------|
| ENSMMUG00000014394 | DnaJ heat shock protein family (Hsp40) member C10 [Source:VGNC Symbol;Acc:VGNC:84229]        | 1.095244253 | 4.73E-07    | 9.37E-06    |
| ENSMMUG00000017892 | RNA polymerase I subunit E [Source:VGNC Symbol;Acc:VGNC:76047]                               | -1.09353591 | 0.001412351 | 0.00883254  |
| ENSMMUG00000016449 | zinc finger protein 382 [Source:VGNC Symbol;Acc:VGNC:79078]                                  | 1.092811076 | 0.002195959 | 0.012541159 |
| ENSMMUG00000016896 | solute carrier family 12 member 1 [Source:VGNC Symbol;Acc:VGNC:77385]                        | 1.092655421 | 5.14E-08    | 1.29E-06    |
| ENSMMUG00000013552 | scribble planar cell polarity protein [Source:HGNC Symbol;Acc:HGNC:30377]                    | 1.092624516 | 0.000391269 | 0.003076715 |
| ENSMMUG00000002032 | exportin 7 [Source:VGNC Symbol;Acc:VGNC:78946]                                               | 1.091871198 | 0.003726345 | 0.019318769 |
| ENSMMUG00000062538 | adenylate cyclase type 10 [Source:NCBI gene;Acc:719662]                                      | 1.091090964 | 0.00278144  | 0.015182553 |
| ENSMMUG00000018490 | ADP ribosylation factor interacting protein 1 [Source:VGNC Symbol;Acc:VGNC:69878]            | 1.090470591 | 1.62E-05    | 0.000204469 |
| ENSMMUG00000064804 |                                                                                              | 1.087690261 | 0.004598222 | 0.022615321 |
| ENSMMUG00000019836 | myocyte enhancer factor 2C [Source:VGNC Symbol;Acc:VGNC:84438]                               | 1.087608437 | 0.005595479 | 0.026295822 |
| ENSMMUG00000007250 | RNA binding motif protein 28 [Source:VGNC Symbol;Acc:VGNC:76519]                             | 1.087126579 | 0.003986552 | 0.020402966 |
| ENSMMUG00000012332 | UBA domain containing 2 [Source:NCBI gene;Acc:703484]                                        | 1.086324523 | 2.30E-07    | 5.01E-06    |
| ENSMMUG00000022120 | transmembrane protein 94 [Source:VGNC Symbol;Acc:VGNC:79760]                                 | 1.085119278 | 5.61E-07    | 1.08E-05    |
| ENSMMUG00000058142 |                                                                                              | 1.085065614 | 0.000385974 | 0.003043071 |
| ENSMMUG00000000618 | gametogenetin binding protein 2 [Source:VGNC Symbol;Acc:VGNC:72746]                          | 1.084250746 | 0.004336253 | 0.021664984 |
| ENSMMUG00000012953 | stress induced phosphoprotein 1 [Source:NCBI gene;Acc:717926]                                | 1.084051411 | 9.93E-05    | 0.000978723 |
| ENSMMUG00000004754 | intermediate filament family orphan 2 [Source:NCBI gene;Acc:106995162]                       | -1.08060413 | 0.000559061 | 0.004166346 |
| ENSMMUG00000007783 | isoleucyl-tRNA synthetase 2, mitochondrial [Source:VGNC Symbol;Acc:VGNC:73458]               | 1.077017427 | 6.93E-08    | 1.71E-06    |
| ENSMMUG00000008797 | ATP binding cassette subfamily G member 2 (Junior blood group) [Source:NCBI gene;Acc:574307] | 1.075879563 | 8.90E-07    | 1.59E-05    |
| ENSMMUG00000018679 | glyceraldehyde-3-phosphate dehydrogenase [Source:NCBI gene;Acc:574353]                       | 1.073991428 | 0.01003048  | 0.041972409 |
| ENSMMUG00000014610 | ring finger protein 17 [Source:NCBI gene;Acc:708198]                                         | 1.071717249 | 2.33E-07    | 5.06E-06    |
| ENSMMUG00000005610 | protein tyrosine phosphatase non-receptor type 4 [Source:VGNC Symbol;Acc:VGNC:76605]         | 1.071489832 | 7.01E-06    | 9.84E-05    |
| ENSMMUG00000048513 | tudor domain containing 15 [Source:NCBI gene;Acc:703066]                                     | 1.071450904 | 0.002735737 | 0.014980881 |
| ENSMMUG00000003238 | pregnancy zone protein [Source:NCBI gene;Acc:100430319]                                      | 1.071372671 | 0.000198341 | 0.00176473  |
| ENSMMUG00000018284 | mutS homolog 3 [Source:VGNC Symbol;Acc:VGNC:74932]                                           | -1.0700293  | 5.98E-05    | 0.000628859 |
| ENSMMUG00000062140 |                                                                                              | -1.06869422 | 0.006495671 | 0.029567525 |
| ENSMMUG00000021782 | LDL receptor related protein 1 [Source:VGNC Symbol;Acc:VGNC:74442]                           | 1.065806817 | 1.27E-05    | 0.000166406 |
| ENSMMUG00000018081 | ubiquitin associated and SH3 domain containing A [Source:VGNC Symbol;Acc:VGNC:78687]         | 1.065613541 | 0.000672102 | 0.004845934 |
| ENSMMUG00000032252 | UbiA prenyltransferase domain containing 1 [Source:VGNC Symbol;Acc:VGNC:79881]               | -1.06460633 | 1.26E-06    | 2.18E-05    |
| ENSMMUG00000020913 | scavenger receptor class B member 2 [Source:VGNC Symbol;Acc:VGNC:77026]                      | 1.062326747 | 0.001350813 | 0.008523226 |



|                     |                                                                                          |             |             |             |
|---------------------|------------------------------------------------------------------------------------------|-------------|-------------|-------------|
| ENSMMUG00000054176  | methyltransferase like 8 [Source:NCBI gene;Acc:695361]                                   | 1.061912461 | 0.007134786 | 0.031871018 |
| ENSMMUG00000004974  | tripartite motif containing 21 [Source:VGNC Symbol;Acc:VGNC:78556]                       | 1.061393242 | 0.001163432 | 0.007543726 |
| ENSMMUG00000004760  | CDK5 regulatory subunit associated protein 3 [Source:VGNC Symbol;Acc:VGNC:71015]         | 1.059331791 | 0.005254518 | 0.025031304 |
| ENSMMUG000000051589 |                                                                                          | 1.056796064 | 0.00647862  | 0.029512343 |
| ENSMMUG00000001212  | Rieske Fe-S domain containing [Source:VGNC Symbol;Acc:VGNC:84487]                        | 1.056232178 | 3.00E-08    | 7.89E-07    |
| ENSMMUG00000019710  | centrosomal protein 128 [Source:VGNC Symbol;Acc:VGNC:71062]                              | 1.055206905 | 0.008941398 | 0.0382573   |
| ENSMMUG00000019145  | TNF alpha induced protein 1 [Source:VGNC Symbol;Acc:VGNC:78578]                          | 1.054888599 | 0.004925156 | 0.023812544 |
| ENSMMUG00000001008  | spectrin repeat containing nuclear envelope protein 2 [Source:NCBI gene;Acc:706759]      | -1.05443657 | 2.41E-05    | 0.000288743 |
| ENSMMUG000000061967 | carbohydrate sulfotransferase 4 [Source:NCBI gene;Acc:708116]                            | 1.052754488 | 0.001063883 | 0.007040621 |
| ENSMMUG00000002370  | integrin subunit alpha 6 [Source:VGNC Symbol;Acc:VGNC:73780]                             | 1.051765806 | 0.000444762 | 0.003414926 |
| ENSMMUG000000055447 | MDM2 proto-oncogene [Source:NCBI gene;Acc:718284]                                        | 1.050992037 | 1.73E-05    | 0.000216683 |
| ENSMMUG000000020792 | Rap guanine nucleotide exchange factor 4 [Source:VGNC Symbol;Acc:VGNC:76490]             | 1.050862909 | 0.010121345 | 0.042308284 |
| ENSMMUG000000008093 | StAR related lipid transfer domain containing 9 [Source:NCBI gene;Acc:708953]            | 1.050758136 | 3.20E-08    | 8.32E-07    |
| ENSMMUG000000017583 | single stranded DNA binding protein 2 [Source:NCBI gene;Acc:711752]                      | 1.050704861 | 0.001326968 | 0.008417252 |
| ENSMMUG000000009775 | caveolae associated protein 4 [Source:NCBI gene;Acc:714379]                              | 1.049982222 | 1.07E-06    | 1.88E-05    |
| ENSMMUG000000015371 | microtubule associated serine/threonine kinase 2 [Source:VGNC Symbol;Acc:VGNC:74532]     | 1.049034288 | 0.009368308 | 0.03978541  |
| ENSMMUG000000007742 | potassium voltage-gated channel subfamily Q member 1 [Source:VGNC Symbol;Acc:VGNC:82168] | 1.048801646 | 0.0044062   | 0.021922996 |
| ENSMMUG000000018493 | FH2 domain containing 1 [Source:VGNC Symbol;Acc:VGNC:72598]                              | 1.048684042 | 0.005413429 | 0.025564365 |
| ENSMMUG000000049196 | dispatched RND transporter family member 3 [Source:NCBI gene;Acc:722727]                 | 1.046909193 | 2.22E-06    | 3.56E-05    |
| ENSMMUG000000038051 | uncharacterized LOC106998885 [Source:NCBI gene;Acc:106998885]                            | 1.046128562 | 0.003328887 | 0.017546983 |
| ENSMMUG000000021053 | annexin A6 [Source:VGNC Symbol;Acc:VGNC:69951]                                           | 1.045645196 | 0.001068469 | 0.007060055 |
| ENSMMUG000000054462 |                                                                                          | 1.044557073 | 0.004469916 | 0.022175526 |
| ENSMMUG000000030381 | arachidonate 15-lipoxygenase [Source:VGNC Symbol;Acc:VGNC:69796]                         | 1.044235029 | 0.002256765 | 0.012815087 |
| ENSMMUG000000021837 | seryl-tRNA synthetase 1 [Source:NCBI gene;Acc:695046]                                    | 1.044070909 | 2.46E-05    | 0.000293664 |
| ENSMMUG000000019854 | transmembrane protein 108 [Source:VGNC Symbol;Acc:VGNC:79714]                            | 1.043009147 | 0.004463681 | 0.022153769 |
| ENSMMUG000000044473 |                                                                                          | 1.040503337 | 0.002233419 | 0.012706614 |
| ENSMMUG000000021409 | developmentally regulated GTP binding protein 2 [Source:VGNC Symbol;Acc:VGNC:71993]      | 1.040381834 | 0.010048636 | 0.042033692 |
| ENSMMUG000000006048 | adaptor related protein complex 2 subunit beta 1 [Source:VGNC Symbol;Acc:VGNC:69964]     | 1.039343702 | 0.000167146 | 0.001526883 |
| ENSMMUG000000000388 | plectin [Source:VGNC Symbol;Acc:VGNC:76173]                                              | 1.038714568 | 0.000516347 | 0.003901433 |

|                    |                                                                                           |             |             |             |
|--------------------|-------------------------------------------------------------------------------------------|-------------|-------------|-------------|
| ENSMMUG0000007868  | AP2 associated kinase 1 [Source:VGNC Symbol;Acc:VGNC:82094]                               | 1.037244429 | 0.000403129 | 0.003151001 |
| ENSMMUG00000043096 | nuclear transcription factor, X-box binding 1 [Source:NCBI gene;Acc:702945]               | 1.037216886 | 0.010978041 | 0.045117715 |
| ENSMMUG00000009839 | galactokinase 2 [Source:VGNC Symbol;Acc:VGNC:72870]                                       | 1.033914636 | 0.007350962 | 0.032666092 |
| ENSMMUG00000040958 | lysozyme-like protein 1 [Source:NCBI gene;Acc:698176]                                     | 1.033781623 | 0.000379125 | 0.003000277 |
| ENSMMUG00000061779 |                                                                                           | 1.032461764 | 4.02E-05    | 0.000446907 |
| ENSMMUG0000006187  | angiopoietin like 7 [Source:VGNC Symbol;Acc:VGNC:69683]                                   | 1.031035797 | 0.001715157 | 0.010321967 |
| ENSMMUG00000015168 | transmembrane p24 trafficking protein 10 [Source:NCBI gene;Acc:701522]                    | 1.030542759 | 0.006425969 | 0.029317105 |
| ENSMMUG00000019887 | synaptic vesicle glycoprotein 2C [Source:VGNC Symbol;Acc:VGNC:78252]                      | 1.029006707 | 0.004381329 | 0.02181738  |
| ENSMMUG00000002520 | solute carrier family 4 member 3 [Source:VGNC Symbol;Acc:VGNC:77604]                      | 1.028930679 | 2.64E-06    | 4.17E-05    |
| ENSMMUG00000008827 | apoptosis inhibitor 5 [Source:NCBI gene;Acc:716346]                                       | 1.025978805 | 0.004582983 | 0.022549634 |
| ENSMMUG00000014531 | transmembrane protein 109 [Source:VGNC Symbol;Acc:VGNC:79740]                             | 1.024837179 | 0.005256658 | 0.025031304 |
| ENSMMUG00000021370 | kringle containing transmembrane protein 1 [Source:VGNC Symbol;Acc:VGNC:74066]            | 1.023428463 | 0.012030607 | 0.048348505 |
| ENSMMUG00000023141 | CDC like kinase 2 [Source:VGNC Symbol;Acc:VGNC:71259]                                     | 1.023272886 | 0.009281883 | 0.039446357 |
| ENSMMUG00000016313 | RUN and SH3 domain containing 2 [Source:VGNC Symbol;Acc:VGNC:82230]                       | 1.021184495 | 0.000328434 | 0.002672099 |
| ENSMMUG00000013032 | phytanoyl-CoA 2-hydroxylase interacting protein [Source:VGNC Symbol;Acc:VGNC:75812]       | 1.018695438 | 0.001311042 | 0.008343966 |
| ENSMMUG00000005042 | RAB, member RAS oncogene family like 6 [Source:VGNC Symbol;Acc:VGNC:76529]                | -1.01728093 | 0.001191272 | 0.007682649 |
| ENSMMUG00000049539 |                                                                                           | 1.016493343 | 0.001836966 | 0.010923288 |
| ENSMMUG00000051446 |                                                                                           | 1.015389329 | 0.000361865 | 0.002900733 |
| ENSMMUG00000002961 | G protein subunit alpha 11 [Source:VGNC Symbol;Acc:VGNC:73085]                            | 1.014502077 | 9.59E-05    | 0.000949495 |
| ENSMMUG00000043922 | spermatogenesis associated 48 [Source:VGNC Symbol;Acc:VGNC:81762]                         | 1.013071849 | 3.24E-05    | 0.000372256 |
| ENSMMUG00000013220 | cytochrome b-245 beta chain [Source:VGNC Symbol;Acc:VGNC:71576]                           | 1.011770483 | 0.006193558 | 0.028451879 |
| ENSMMUG00000002231 | transmembrane protein 87B [Source:VGNC Symbol;Acc:VGNC:79557]                             | 1.011700565 | 0.004274267 | 0.021435771 |
| ENSMMUG00000015380 | proline and serine rich coiled-coil 1 [Source:VGNC Symbol;Acc:VGNC:76307]                 | 1.010546467 | 6.53E-09    | 1.99E-07    |
| ENSMMUG00000012209 | CYLD lysine 63 deubiquitinase [Source:VGNC Symbol;Acc:VGNC:71581]                         | 1.008652392 | 0.000376559 | 0.002986538 |
| ENSMMUG00000005572 | arachidonate 5-lipoxygenase activating protein [Source:VGNC Symbol;Acc:VGNC:69799]        | 1.008442314 | 0.003944028 | 0.020237225 |
| ENSMMUG00000017379 | myocardin related transcription factor B [Source:VGNC Symbol;Acc:VGNC:74865]              | 1.006921483 | 0.002738147 | 0.014987226 |
| ENSMMUG00000003872 | ral guanine nucleotide dissociation stimulator like 2 [Source:VGNC Symbol;Acc:VGNC:76886] | 1.005441315 | 0.009285562 | 0.039447992 |
| ENSMMUG00000005170 | unc-45 myosin chaperone B [Source:VGNC Symbol;Acc:VGNC:78954]                             | 1.005212548 | 0.01109581  | 0.045399186 |
| ENSMMUG00000061815 |                                                                                           | 1.004400248 | 0.000688994 | 0.004937997 |

|                    |                                                                                                    |             |             |             |
|--------------------|----------------------------------------------------------------------------------------------------|-------------|-------------|-------------|
| ENSMMUG00000021377 | SPT3 homolog, SAGA and STAGA complex component [Source:VGNC Symbol;Acc:VGNC:78055]                 | 1.003612072 | 0.000600714 | 0.004428433 |
| ENSMMUG00000064880 |                                                                                                    | 1.002312302 | 0.000170257 | 0.001549395 |
| ENSMMUG00000046901 | protein tyrosine phosphatase 4A2 [Source:NCBI gene;Acc:706489]                                     | 1.002224676 | 0.002795881 | 0.015233333 |
| ENSMMUG00000033738 | RNA, U6atac small nuclear 6, pseudogene [Source:HGNC Symbol;Acc:HGNC:46905]                        | 1.001530023 | 3.76E-05    | 0.000423196 |
| ENSMMUG00000020377 | collagen type VI alpha 5 chain [Source:NCBI gene;Acc:719331]                                       | 1.000058492 | 0.000297161 | 0.002452651 |
| ENSMMUG00000002653 | hexokinase 3 [Source:VGNC Symbol;Acc:VGNC:73476]                                                   | 0.999337076 | 7.66E-05    | 0.000786364 |
| ENSMMUG00000023249 | aryl hydrocarbon receptor nuclear translocator like 2 [Source:NCBI gene;Acc:709547]                | 0.999058168 | 0.000413163 | 0.003213012 |
| ENSMMUG00000004237 | TNF receptor superfamily member 19 [Source:VGNC Symbol;Acc:VGNC:78588]                             | 0.996311759 | 0.004661397 | 0.022781086 |
| ENSMMUG00000001892 | UDP-glucose 6-dehydrogenase [Source:VGNC Symbol;Acc:VGNC:78711]                                    | 0.995281031 | 0.001183135 | 0.007638394 |
| ENSMMUG00000016354 | IQ motif containing N [Source:VGNC Symbol;Acc:VGNC:73683]                                          | 0.995225944 | 0.000129933 | 0.001232873 |
| ENSMMUG00000021051 | TNFAIP3 interacting protein 1 [Source:VGNC Symbol;Acc:VGNC:79057]                                  | 0.994879044 | 0.00199048  | 0.01166242  |
| ENSMMUG00000007860 | diphosphoinositol pentakisphosphate kinase 1 [Source:VGNC Symbol;Acc:VGNC:76127]                   | 0.992719238 | 0.005714088 | 0.026761193 |
| ENSMMUG00000015311 | leucine rich repeats and calponin homology domain containing 4 [Source:VGNC Symbol;Acc:VGNC:74441] | -0.99254928 | 5.07E-06    | 7.38E-05    |
| ENSMMUG00000048302 | ArfGAP with FG repeats 2 [Source:VGNC Symbol;Acc:VGNC:80329]                                       | 0.991857696 | 1.66E-05    | 0.000208486 |
| ENSMMUG00000051042 |                                                                                                    | 0.991378446 | 0.000293692 | 0.002429043 |
| ENSMMUG00000059617 |                                                                                                    | 0.991045482 | 0.001979713 | 0.011610695 |
| ENSMMUG00000007601 | centromere protein I [Source:NCBI gene;Acc:702316]                                                 | 0.990807162 | 0.010516389 | 0.043702615 |
| ENSMMUG00000012561 | NOP2/Sun RNA methyltransferase family member 7 [Source:VGNC Symbol;Acc:VGNC:75463]                 | 0.990291347 | 1.91E-05    | 0.000235571 |
| ENSMMUG00000011963 | vimentin type intermediate filament associated coiled-coil protein [Source:NCBI gene;Acc:697958]   | -0.99016179 | 0.000111198 | 0.001074829 |
| ENSMMUG00000043458 | transmembrane protein 178A [Source:NCBI gene;Acc:714010]                                           | 0.990049342 | 0.004752294 | 0.023154384 |
| ENSMMUG00000003134 | ring finger protein 217 [Source:VGNC Symbol;Acc:VGNC:76801]                                        | 0.989599385 | 0.006890738 | 0.031023863 |
| ENSMMUG00000006703 | solute carrier family 10 member 4 [Source:VGNC Symbol;Acc:VGNC:77553]                              | 0.989172623 | 0.006651397 | 0.030104735 |
| ENSMMUG00000059267 | pellino E3 ubiquitin protein ligase 1 [Source:NCBI gene;Acc:696416]                                | 0.987166126 | 0.000338674 | 0.002740512 |
| ENSMMUG00000014824 | SIX homeobox 3 [Source:HGNC Symbol;Acc:HGNC:10889]                                                 | 0.986519421 | 3.90E-07    | 7.96E-06    |
| ENSMMUG00000020954 | cell division cycle 25A [Source:VGNC Symbol;Acc:VGNC:70794]                                        | 0.986280812 | 0.002980417 | 0.015984539 |
| ENSMMUG00000029265 | zinc finger protein 598 [Source:NCBI gene;Acc:694129]                                              | -0.98541922 | 0.000210076 | 0.001845833 |
| ENSMMUG00000011269 | CF transmembrane conductance regulator [Source:VGNC Symbol;Acc:VGNC:71020]                         | 0.984311978 | 0.000745085 | 0.005269798 |
| ENSMMUG00000059085 | PR/SET domain 12 [Source:NCBI gene;Acc:716040]                                                     | 0.983266055 | 0.012534002 | 0.049985752 |
| ENSMMUG00000015375 | cadherin EGF LAG seven-pass G-type receptor 2 [Source:VGNC Symbol;Acc:VGNC:71149]                  | 0.982283437 | 4.11E-07    | 8.32E-06    |

|                    |                                                                                                    |             |             |             |
|--------------------|----------------------------------------------------------------------------------------------------|-------------|-------------|-------------|
| ENSMMUG00000052977 | putative protein FAM106C [Source:NCBI gene;Acc:106994084]                                          | 0.982268514 | 0.002304708 | 0.013037878 |
| ENSMMUG00000051468 | Metazoan signal recognition particle RNA [Source:RFAM;Acc:RF00017]                                 | 0.981924399 | 0.00026521  | 0.002246217 |
| ENSMMUG00000007570 | uveal autoantigen with coiled-coil domains and ankyrin repeats [Source:VGNC Symbol;Acc:VGNC:78995] | 0.981746285 | 3.25E-05    | 0.000372256 |
| ENSMMUG00000022678 | Rh family C glycoprotein [Source:VGNC Symbol;Acc:VGNC:84427]                                       | -0.98138889 | 0.005474358 | 0.02582155  |
| ENSMMUG00000047741 | Metazoan signal recognition particle RNA [Source:RFAM;Acc:RF00017]                                 | 0.980793098 | 0.008519135 | 0.036779076 |
| ENSMMUG00000003621 | AKT serine/threonine kinase 2 [Source:VGNC Symbol;Acc:VGNC:69777]                                  | 0.980128321 | 2.24E-07    | 4.91E-06    |
| ENSMMUG00000017593 | CD3e molecule [Source:VGNC Symbol;Acc:VGNC:70764]                                                  | 0.978144057 | 1.08E-08    | 3.13E-07    |
| ENSMMUG00000004674 | phosphoribosyl pyrophosphate synthetase 1 [Source:NCBI gene;Acc:702529]                            | 0.976338869 | 2.41E-05    | 0.000289055 |
| ENSMMUG00000022840 | zonadhesin [Source:VGNC Symbol;Acc:VGNC:81797]                                                     | 0.976317328 | 0.004457663 | 0.022133072 |
| ENSMMUG00000017252 | spermatogenesis associated 20 [Source:VGNC Symbol;Acc:VGNC:77993]                                  | 0.975863827 | 0.001956752 | 0.011492917 |
| ENSMMUG00000010405 | family with sequence similarity 171 member B [Source:VGNC Symbol;Acc:VGNC:72404]                   | 0.975741232 | 0.011840596 | 0.047777283 |
| ENSMMUG00000007917 | carbonic anhydrase 4 [Source:NCBI gene;Acc:716919]                                                 | 0.971330928 | 0.00500536  | 0.024106665 |
| ENSMMUG00000002176 | ubiquitin like with PHD and ring finger domains 2 [Source:VGNC Symbol;Acc:VGNC:78714]              | 0.971183211 | 2.72E-05    | 0.000320686 |
| ENSMMUG00000018285 | cysteine rich with EGF like domains 1 [Source:VGNC Symbol;Acc:VGNC:71407]                          | 0.970635792 | 3.82E-05    | 0.000428793 |
| ENSMMUG00000028800 | solute carrier family 7 member 9 [Source:VGNC Symbol;Acc:VGNC:77633]                               | 0.969238866 | 0.000702296 | 0.005018319 |
| ENSMMUG00000002519 | serine/threonine kinase 11 interacting protein [Source:VGNC Symbol;Acc:VGNC:77963]                 | 0.968939651 | 8.65E-11    | 3.61E-09    |
| ENSMMUG00000013235 | collagen type IV alpha 3 chain [Source:VGNC Symbol;Acc:VGNC:81375]                                 | 0.968929298 | 0.002217761 | 0.012647575 |
| ENSMMUG00000006842 | doublecortin domain containing 1 [Source:NCBI gene;Acc:696721]                                     | 0.968010458 | 3.89E-06    | 5.88E-05    |
| ENSMMUG00000001549 | ATPase family AAA domain-containing protein 3A-like [Source:NCBI gene;Acc:114674453]               | 0.967807575 | 3.06E-05    | 0.000354456 |
| ENSMMUG00000019146 | DNA polymerase delta interacting protein 2 [Source:VGNC Symbol;Acc:VGNC:76099]                     | -0.9650453  | 0.003831805 | 0.019754499 |
| ENSMMUG00000000962 | H2A.Z variant histone 2 [Source:VGNC Symbol;Acc:VGNC:81324]                                        | 0.964822226 | 0.002972179 | 0.015952694 |
| ENSMMUG00000050297 |                                                                                                    | 0.963079655 | 7.30E-05    | 0.000754412 |
| ENSMMUG00000047015 | ral-GDS-related protein-like [Source:NCBI gene;Acc:106995524]                                      | 0.961510927 | 0.007313382 | 0.032523233 |
| ENSMMUG00000011675 | zinc finger and SCAN domain containing 12 [Source:VGNC Symbol;Acc:VGNC:78910]                      | 0.960532314 | 0.000171651 | 0.001558232 |
| ENSMMUG00000018525 | presenilin 2 [Source:VGNC Symbol;Acc:VGNC:76436]                                                   | 0.959085697 | 8.32E-05    | 0.000845499 |
| ENSMMUG00000012939 | fermitin family member 3 [Source:VGNC Symbol;Acc:VGNC:72553]                                       | 0.958902422 | 0.000336836 | 0.00273118  |
| ENSMMUG00000008212 | tenomodulin [Source:VGNC Symbol;Acc:VGNC:79087]                                                    | 0.955514775 | 0.005003188 | 0.024106665 |
| ENSMMUG00000020912 | spermine oxidase [Source:NCBI gene;Acc:718761]                                                     | 0.954616663 | 0.003924573 | 0.020146027 |
| ENSMMUG00000001551 | SSU72 homolog, RNA polymerase II CTD phosphatase [Source:VGNC Symbol;Acc:VGNC:77986]               | 0.953884125 | 0.002479869 | 0.013852102 |



|                    |                                                                                             |             |             |             |
|--------------------|---------------------------------------------------------------------------------------------|-------------|-------------|-------------|
| ENSMMUG00000022647 | cell division cycle 73 [Source:VGNC Symbol;Acc:VGNC:70766]                                  | 0.953807379 | 0.004078603 | 0.020688418 |
| ENSMMUG00000030453 | NLR family pyrin domain containing 1 [Source:NCBI gene;Acc:721648]                          | -0.94984401 | 3.90E-06    | 5.89E-05    |
| ENSMMUG00000031202 | RAB1B, member RAS oncogene family [Source:NCBI gene;Acc:721852]                             | 0.948478122 | 0.007866672 | 0.034572939 |
| ENSMMUG00000052743 | stearoyl-CoA desaturase 5 [Source:NCBI gene;Acc:694079]                                     | 0.948257596 | 0.005522342 | 0.025996685 |
| ENSMMUG00000021173 | nuclear transcription factor Y subunit alpha [Source:VGNC Symbol;Acc:VGNC:75344]            | 0.947501367 | 2.93E-06    | 4.58E-05    |
| ENSMMUG00000000443 | arylsulfatase F [Source:VGNC Symbol;Acc:VGNC:81362]                                         | -0.94505481 | 0.000935532 | 0.006351437 |
| ENSMMUG00000038288 | TMEM9 domain family member B [Source:NCBI gene;Acc:708447]                                  | 0.943801693 | 0.000278822 | 0.002335087 |
| ENSMMUG00000031224 | casein kinase 2 alpha 1 [Source:NCBI gene;Acc:714841]                                       | 0.943395052 | 0.0045378   | 0.022391715 |
| ENSMMUG00000021474 | zinc finger protein 45 [Source:NCBI gene;Acc:712591]                                        | 0.942766932 | 0.000154587 | 0.001429603 |
| ENSMMUG00000015166 | NIMA related kinase 9 [Source:VGNC Symbol;Acc:VGNC:75209]                                   | 0.941427816 | 2.83E-07    | 6.03E-06    |
| ENSMMUG00000007692 | apolipoprotein B [Source:VGNC Symbol;Acc:VGNC:69985]                                        | 0.940497338 | 5.57E-06    | 8.01E-05    |
| ENSMMUG00000006464 | hepatocyte nuclear factor 4 alpha [Source:VGNC Symbol;Acc:VGNC:73492]                       | 0.939187111 | 0.008442331 | 0.036539702 |
| ENSMMUG00000003858 | retinoid X receptor beta [Source:VGNC Symbol;Acc:VGNC:76952]                                | 0.938988693 | 0.002876785 | 0.015533083 |
| ENSMMUG00000005414 | N-deacetylase and N-sulfotransferase 1 [Source:VGNC Symbol;Acc:VGNC:75151]                  | 0.935167495 | 4.28E-06    | 6.37E-05    |
| ENSMMUG00000039829 |                                                                                             | 0.934456811 | 0.007101469 | 0.031745871 |
| ENSMMUG00000012463 | DEAD-box helicase 46 [Source:VGNC Symbol;Acc:VGNC:71663]                                    | -0.93181656 | 0.002175122 | 0.012463759 |
| ENSMMUG00000005466 | SPOC domain containing 1 [Source:VGNC Symbol;Acc:VGNC:77997]                                | 0.929749838 | 0.001323638 | 0.00840503  |
| ENSMMUG00000015432 | staphylococcal nuclease and tudor domain containing 1 [Source:VGNC Symbol;Acc:VGNC:77798]   | 0.929574151 | 0.003710945 | 0.019255755 |
| ENSMMUG00000007264 | transmembrane protein 30B [Source:VGNC Symbol;Acc:VGNC:79656]                               | 0.929480625 | 0.010295574 | 0.042901807 |
| ENSMMUG00000002243 | pleckstrin homology and RhoGEF domain containing G7 [Source:VGNC Symbol;Acc:VGNC:76149]     | 0.929138228 | 0.000773564 | 0.00543993  |
| ENSMMUG00000053845 |                                                                                             | -0.92719853 | 0.009110302 | 0.038868298 |
| ENSMMUG00000013707 | heat shock protein family H (Hsp110) member 1 [Source:NCBI gene;Acc:721956]                 | 0.923286399 | 0.000301167 | 0.002475482 |
| ENSMMUG00000021168 | unc-5 family C-terminal like [Source:VGNC Symbol;Acc:VGNC:79314]                            | 0.922097397 | 3.38E-05    | 0.000386222 |
| ENSMMUG00000059353 | phosphatidylserine synthase 2 [Source:NCBI gene;Acc:698582]                                 | 0.921656736 | 3.86E-05    | 0.000431748 |
| ENSMMUG00000007923 | phosphatidylinositol glycan anchor biosynthesis class W [Source:VGNC Symbol;Acc:VGNC:75850] | 0.921357785 | 0.011231857 | 0.045825789 |
| ENSMMUG00000001995 | chromosome 14 C11orf16 homolog [Source:NCBI gene;Acc:705319]                                | 0.919912723 | 0.002020859 | 0.011771307 |
| ENSMMUG00000002321 | solute carrier family 24 member 3 [Source:VGNC Symbol;Acc:VGNC:77426]                       | 0.919228786 | 0.011662315 | 0.047217001 |
| ENSMMUG00000022697 | STEAP4 metalloredutase [Source:VGNC Symbol;Acc:VGNC:77974]                                  | 0.919151868 | 0.000202089 | 0.0017901   |
| ENSMMUG00000013466 | tetratricopeptide repeat domain 39B [Source:VGNC Symbol;Acc:VGNC:79402]                     | 0.917462707 | 1.53E-06    | 2.58E-05    |
| ENSMMUG00000005515 | ATP binding cassette subfamily C member 5 [Source:VGNC Symbol;Acc:VGNC:69574]               | 0.917104529 | 0.000344245 | 0.002779959 |

|                    |                                                                                                      |             |             |             |
|--------------------|------------------------------------------------------------------------------------------------------|-------------|-------------|-------------|
| ENSMMUG00000015737 | phosphatidylinositol glycan anchor biosynthesis class A [Source:VGNC Symbol;Acc:VGNC:75984]          | 0.917088646 | 0.000659247 | 0.004773542 |
| ENSMMUG00000061002 |                                                                                                      | 0.917014223 | 0.000384552 | 0.003033859 |
| ENSMMUG00000062922 |                                                                                                      | 0.915407416 | 0.010855573 | 0.044737215 |
| ENSMMUG00000031296 | caspase 8 [Source:VGNC Symbol;Acc:VGNC:70547]                                                        | 0.914387715 | 0.006578438 | 0.02985795  |
| ENSMMUG00000022056 | DENN domain containing 4A [Source:VGNC Symbol;Acc:VGNC:71697]                                        | -0.91344747 | 0.00033827  | 0.002739094 |
| ENSMMUG00000057768 |                                                                                                      | 0.913157268 | 0.002252324 | 0.012795933 |
| ENSMMUG00000020928 | nucleolar protein interacting with the FHA domain of MKI67 [Source:VGNC Symbol;Acc:VGNC:75201]       | 0.912575877 | 0.00116161  | 0.007535995 |
| ENSMMUG00000052442 |                                                                                                      | -0.9108235  | 0.00037149  | 0.002956632 |
| ENSMMUG00000043504 |                                                                                                      | 0.908196509 | 0.00023168  | 0.002005139 |
| ENSMMUG00000052889 | Metazoan signal recognition particle RNA [Source:RFAM;Acc:RF00017]                                   | 0.907432212 | 0.008174679 | 0.035677825 |
| ENSMMUG00000009688 | IST1 factor associated with ESCRT-III [Source:VGNC Symbol;Acc:VGNC:73675]                            | 0.907167319 | 0.007511514 | 0.033243863 |
| ENSMMUG00000009540 | calmodulin regulated spectrin associated protein family member 3 [Source:VGNC Symbol;Acc:VGNC:70669] | 0.906953317 | 7.22E-08    | 1.76E-06    |
| ENSMMUG00000011593 | regulator of cell cycle [Source:VGNC Symbol;Acc:VGNC:76783]                                          | 0.906867077 | 0.000572652 | 0.004249119 |
| ENSMMUG00000056257 |                                                                                                      | 0.906748533 | 0.006077135 | 0.028024557 |
| ENSMMUG00000021112 | epithelial splicing regulatory protein 1 [Source:VGNC Symbol;Acc:VGNC:72358]                         | 0.906661087 | 0.001342106 | 0.008481826 |
| ENSMMUG00000001640 | SIX homeobox 4 [Source:NCBI gene;Acc:703798]                                                         | 0.906229371 | 0.008948776 | 0.038275192 |
| ENSMMUG00000054107 |                                                                                                      | 0.904945418 | 0.005982253 | 0.027722364 |
| ENSMMUG00000050923 |                                                                                                      | 0.903229986 | 0.004635388 | 0.022726837 |
| ENSMMUG00000008946 | chromosome 19 C19orf47 homolog [Source:VGNC Symbol;Acc:VGNC:70404]                                   | 0.901747392 | 0.000109118 | 0.00105728  |
| ENSMMUG00000052496 |                                                                                                      | 0.901497823 | 7.77E-06    | 0.000107764 |
| ENSMMUG00000008733 | ubiquitin protein ligase E3C [Source:VGNC Symbol;Acc:VGNC:79049]                                     | 0.901181694 | 0.003829995 | 0.019753671 |
| ENSMMUG00000014343 | lipase family member J [Source:VGNC Symbol;Acc:VGNC:74333]                                           | 0.899964195 | 0.01017188  | 0.042475047 |
| ENSMMUG00000058740 |                                                                                                      | 0.894885265 | 0.000161839 | 0.001486334 |
| ENSMMUG00000001374 | supervillin [Source:NCBI gene;Acc:695267]                                                            | 0.894299724 | 0.002468465 | 0.013801278 |
| ENSMMUG00000007246 | myotubularin related protein 11 [Source:VGNC Symbol;Acc:VGNC:75016]                                  | 0.892155297 | 0.000822957 | 0.00573273  |
| ENSMMUG00000059663 |                                                                                                      | 0.890543105 | 0.002438187 | 0.01364591  |
| ENSMMUG00000004606 | EMAP like 5 [Source:VGNC Symbol;Acc:VGNC:72067]                                                      | 0.889075801 | 9.63E-05    | 0.000951915 |
| ENSMMUG00000054734 |                                                                                                      | 0.888669567 | 0.000405883 | 0.003164617 |
| ENSMMUG00000049968 | RNA polymerase mitochondrial [Source:NCBI gene;Acc:100426183]                                        | 0.887495989 | 7.77E-07    | 1.41E-05    |



|                     |                                                                                       |             |             |             |
|---------------------|---------------------------------------------------------------------------------------|-------------|-------------|-------------|
| ENSMMUG00000021372  | EMI domain containing 1 [Source:VGNC Symbol;Acc:VGNC:72063]                           | 0.886796665 | 0.004068934 | 0.020648117 |
| ENSMMUG00000017819  | putative homeodomain transcription factor 1 [Source:VGNC Symbol;Acc:VGNC:75982]       | 0.886440399 | 0.003107544 | 0.016555136 |
| ENSMMUG00000011189  | tousled like kinase 1 [Source:VGNC Symbol;Acc:VGNC:78367]                             | 0.886115838 | 0.00428065  | 0.021458794 |
| ENSMMUG00000004091  | transcription factor 12 [Source:VGNC Symbol;Acc:VGNC:78283]                           | 0.885490003 | 8.88E-07    | 1.59E-05    |
| ENSMMUG00000010689  | fermitin family member 2 [Source:VGNC Symbol;Acc:VGNC:82144]                          | -0.88104403 | 0.000377478 | 0.002989865 |
| ENSMMUG00000018279  | adaptor related protein complex 5 subunit mu 1 [Source:VGNC Symbol;Acc:VGNC:69868]    | 0.879628517 | 1.73E-05    | 0.000216683 |
| ENSMMUG00000063312  |                                                                                       | 0.878755013 | 0.007749368 | 0.034107474 |
| ENSMMUG00000014474  | SPARC related modular calcium binding 2 [Source:VGNC Symbol;Acc:VGNC:83470]           | 0.878504351 | 1.48E-05    | 0.00018903  |
| ENSMMUG00000023117  | neurotrophic receptor tyrosine kinase 2 [Source:VGNC Symbol;Acc:VGNC:75541]           | 0.877848817 | 4.09E-05    | 0.000452236 |
| ENSMMUG00000013376  | POU class 2 homeobox 2 [Source:NCBI gene;Acc:706835]                                  | 0.876820914 | 0.00137672  | 0.008645833 |
| ENSMMUG00000060051  | olfactory receptor 6N1-like [Source:NCBI gene;Acc:719970]                             | 0.876620491 | 0.004272921 | 0.021435771 |
| ENSMMUG00000010878  | adaptor related protein complex 1 subunit gamma 1 [Source:VGNC Symbol;Acc:VGNC:69958] | 0.875613326 | 2.11E-06    | 3.40E-05    |
| ENSMMUG00000001919  | clock circadian regulator [Source:VGNC Symbol;Acc:VGNC:71262]                         | -0.87438248 | 0.001732784 | 0.010401914 |
| ENSMMUG00000047974  | aldehyde oxidase 4 [Source:NCBI gene;Acc:701502]                                      | 0.873308614 | 0.00038807  | 0.003053567 |
| ENSMMUG00000013718  | translocation associated membrane protein 2 [Source:VGNC Symbol;Acc:VGNC:83515]       | -0.86995813 | 6.43E-05    | 0.000673316 |
| ENSMMUG00000004173  | phosphofructokinase, liver type [Source:VGNC Symbol;Acc:VGNC:81737]                   | 0.869206041 | 0.001672588 | 0.010151416 |
| ENSMMUG00000040854  | aspartyl-tRNA synthetase 1 [Source:VGNC Symbol;Acc:VGNC:84226]                        | 0.866561168 | 0.006039274 | 0.027916326 |
| ENSMMUG00000008539  | uroporphyrinogen III synthase [Source:VGNC Symbol;Acc:VGNC:78731]                     | 0.865438803 | 0.001311234 | 0.008343966 |
| ENSMMUG00000023242  | transmembrane protein 128 [Source:VGNC Symbol;Acc:VGNC:82257]                         | 0.864154115 | 0.005283393 | 0.025128641 |
| ENSMMUG00000013188  | serine incorporator 2 [Source:VGNC Symbol;Acc:VGNC:77294]                             | 0.863746227 | 9.67E-06    | 0.000131159 |
| ENSMMUG00000016893  | solute carrier family 9 member A1 [Source:VGNC Symbol;Acc:VGNC:82241]                 | 0.863293769 | 0.000494212 | 0.003741269 |
| ENSMMUG00000008917  | S100 calcium binding protein A6 [Source:VGNC Symbol;Acc:VGNC:76960]                   | 0.863199146 | 0.000852574 | 0.005895166 |
| ENSMMUG000000053789 |                                                                                       | 0.861982045 | 0.002023236 | 0.011773699 |
| ENSMMUG00000008672  | ring finger protein 126 [Source:VGNC Symbol;Acc:VGNC:76791]                           | 0.859994435 | 0.003789127 | 0.01956817  |
| ENSMMUG00000008639  | tumor protein p53 [Source:VGNC Symbol;Acc:VGNC:78627]                                 | 0.859123458 | 0.00684349  | 0.030857542 |
| ENSMMUG000000052377 |                                                                                       | 0.858805497 | 0.004102292 | 0.020764605 |
| ENSMMUG00000002244  | early endosome antigen 1 [Source:VGNC Symbol;Acc:VGNC:72161]                          | 0.857987578 | 0.000463146 | 0.003539652 |
| ENSMMUG00000000681  | calmin [Source:VGNC Symbol;Acc:VGNC:71232]                                            | 0.857642148 | 1.01E-06    | 1.77E-05    |
| ENSMMUG00000003497  | FAT atypical cadherin 2 [Source:VGNC Symbol;Acc:VGNC:72618]                           | 0.856285909 | 0.000218729 | 0.00191065  |

|                    |                                                                                                              |             |             |             |
|--------------------|--------------------------------------------------------------------------------------------------------------|-------------|-------------|-------------|
| ENSMMUG00000012396 | zinc finger and SCAN domain containing 23 [Source:VGNC Symbol;Acc:VGNC:79313]                                | 0.855859557 | 0.004653849 | 0.022773787 |
| ENSMMUG00000008313 | zinc finger protein 792 [Source:VGNC Symbol;Acc:VGNC:79456]                                                  | 0.854889238 | 0.000243096 | 0.002083977 |
| ENSMMUG00000052651 | Metazoan signal recognition particle RNA [Source:RFAM;Acc:RF00017]                                           | 0.854288355 | 0.004780129 | 0.023252161 |
| ENSMMUG00000022548 | phosphatidylinositol-4-phosphate 3-kinase catalytic subunit type 2 alpha [Source:VGNC Symbol;Acc:VGNC:75992] | 0.853703865 | 0.010916283 | 0.044925567 |
| ENSMMUG00000065091 | myelin protein zero like 2 [Source:NCBI gene;Acc:699330]                                                     | -0.85352522 | 1.06E-05    | 0.00014217  |
| ENSMMUG00000021496 | potassium sodium-activated channel subfamily T member 1 [Source:VGNC Symbol;Acc:VGNC:73856]                  | 0.852722218 | 0.000294708 | 0.002435764 |
| ENSMMUG00000053389 |                                                                                                              | 0.851743837 | 0.000211369 | 0.001853118 |
| ENSMMUG00000051843 |                                                                                                              | 0.849877987 | 0.002809119 | 0.015270391 |
| ENSMMUG00000003288 | glutamic--pyruvic transaminase 2 [Source:VGNC Symbol;Acc:VGNC:72962]                                         | 0.849340031 | 0.007185028 | 0.032054318 |
| ENSMMUG00000004648 | KH domain containing 4, pre-mRNA splicing factor [Source:VGNC Symbol;Acc:VGNC:73931]                         | 0.848687004 | 0.000882575 | 0.006064095 |
| ENSMMUG00000020150 | xin actin binding repeat containing 1 [Source:VGNC Symbol;Acc:VGNC:78952]                                    | 0.848113605 | 1.56E-05    | 0.000198724 |
| ENSMMUG00000010978 | S100 calcium binding protein A2 [Source:VGNC Symbol;Acc:VGNC:76956]                                          | 0.847270402 | 0.00040361  | 0.003151001 |
| ENSMMUG00000005048 | MAM domain containing 4 [Source:VGNC Symbol;Acc:VGNC:74345]                                                  | 0.846891619 | 0.000713365 | 0.005091333 |
| ENSMMUG00000064089 |                                                                                                              | 0.845392411 | 0.002181278 | 0.012490552 |
| ENSMMUG00000058044 |                                                                                                              | 0.844584554 | 0.000532964 | 0.004006769 |
| ENSMMUG00000017529 | arrestin beta 1 [Source:VGNC Symbol;Acc:VGNC:70021]                                                          | 0.842490539 | 0.005386181 | 0.025516181 |
| ENSMMUG00000015987 | Ras and Rab interactor 1 [Source:VGNC Symbol;Acc:VGNC:76769]                                                 | 0.841685645 | 0.005808469 | 0.027088092 |
| ENSMMUG00000033001 | U6 spliceosomal RNA [Source:RFAM;Acc:RF00026]                                                                | 0.840768983 | 0.000556131 | 0.004149671 |
| ENSMMUG00000043809 | caspase 2 [Source:VGNC Symbol;Acc:VGNC:80804]                                                                | 0.838965923 | 0.002748814 | 0.015031872 |
| ENSMMUG00000019857 | beaded filament structural protein 2 [Source:VGNC Symbol;Acc:VGNC:70245]                                     | 0.836819083 | 0.008165898 | 0.035652496 |
| ENSMMUG00000006163 | malate dehydrogenase 1 [Source:VGNC Symbol;Acc:VGNC:74690]                                                   | 0.836789482 | 0.004415929 | 0.02196126  |
| ENSMMUG00000020435 | amine oxidase copper containing 1 [Source:VGNC Symbol;Acc:VGNC:70033]                                        | -0.83571684 | 0.008857478 | 0.038020485 |
| ENSMMUG00000007509 | myosin VA [Source:VGNC Symbol;Acc:VGNC:75116]                                                                | 0.835584245 | 0.001926981 | 0.011357052 |
| ENSMMUG00000019462 | integrin subunit alpha V [Source:VGNC Symbol;Acc:VGNC:73783]                                                 | 0.830512794 | 0.002174105 | 0.012463759 |
| ENSMMUG00000008486 | endothelial cell adhesion molecule [Source:VGNC Symbol;Acc:VGNC:72290]                                       | 0.827629278 | 0.001508804 | 0.009347871 |
| ENSMMUG00000021914 | spondin 1 [Source:VGNC Symbol;Acc:VGNC:77862]                                                                | 0.820256866 | 0.004034789 | 0.020544489 |
| ENSMMUG00000049574 | antizyme inhibitor 2-like [Source:NCBI gene;Acc:705256]                                                      | 0.819686769 | 3.23E-05    | 0.000371128 |
| ENSMMUG00000017368 | olfactory receptor 2G6 [Source:NCBI gene;Acc:694380]                                                         | 0.818290384 | 0.001887579 | 0.011163282 |
| ENSMMUG00000002003 | upstream transcription factor 1 [Source:NCBI gene;Acc:719835]                                                | 0.817702524 | 0.001754196 | 0.010503358 |

|                    |                                                                                             |             |             |             |
|--------------------|---------------------------------------------------------------------------------------------|-------------|-------------|-------------|
| ENSMMUG0000009539  | XPA binding protein 2 [Source:VGNC Symbol;Acc:VGNC:78943]                                   | 0.816525934 | 0.000281356 | 0.002350554 |
| ENSMMUG00000061035 | ZFP82 zinc finger protein [Source:NCBI gene;Acc:719145]                                     | 0.816328366 | 0.000480497 | 0.003648972 |
| ENSMMUG00000058786 | ligand of numb-protein X 2 [Source:NCBI gene;Acc:710660]                                    | 0.816293528 | 0.005625414 | 0.026419594 |
| ENSMMUG00000063979 |                                                                                             | 0.815211231 | 2.23E-06    | 3.58E-05    |
| ENSMMUG00000011809 | platelet and endothelial cell adhesion molecule 1 [Source:VGNC Symbol;Acc:VGNC:75938]       | 0.812053754 | 0.002473686 | 0.013824013 |
| ENSMMUG00000059543 | zinc finger protein 30 [Source:NCBI gene;Acc:718310]                                        | 0.810669203 | 0.000450069 | 0.003450724 |
| ENSMMUG00000016906 | F-box and leucine rich repeat protein 16 [Source:VGNC Symbol;Acc:VGNC:81405]                | 0.809492422 | 0.00540777  | 0.025557796 |
| ENSMMUG00000020784 | centrosomal protein 126 [Source:NCBI gene;Acc:701911]                                       | 0.809332243 | 0.000170181 | 0.001549395 |
| ENSMMUG00000060600 |                                                                                             | 0.808489512 | 0.012248499 | 0.049043138 |
| ENSMMUG00000049885 |                                                                                             | 0.807943018 | 0.003963117 | 0.020317758 |
| ENSMMUG00000002933 | nuclear receptor subfamily 1 group D member 1 [Source:VGNC Symbol;Acc:VGNC:75502]           | 0.807157773 | 0.00737738  | 0.032759179 |
| ENSMMUG00000003594 | ubiquitin specific peptidase 13 [Source:VGNC Symbol;Acc:VGNC:78735]                         | 0.807139817 | 0.002985976 | 0.015994622 |
| ENSMMUG00000002310 | zinc finger protein 577 [Source:VGNC Symbol;Acc:VGNC:79733]                                 | 0.806517851 | 2.22E-05    | 0.000269104 |
| ENSMMUG00000013031 | bone morphogenetic protein 1 [Source:VGNC Symbol;Acc:VGNC:70259]                            | 0.803634337 | 0.000797769 | 0.00559045  |
| ENSMMUG00000056054 | zinc finger and BTB domain containing 3 [Source:NCBI gene;Acc:722240]                       | 0.802317598 | 0.004086869 | 0.020704723 |
| ENSMMUG00000021499 | sterile alpha motif domain containing 3 [Source:VGNC Symbol;Acc:VGNC:77079]                 | 0.802163028 | 0.011929417 | 0.04802242  |
| ENSMMUG00000001267 | general transcription factor IIIC subunit 5 [Source:VGNC Symbol;Acc:VGNC:73319]             | 0.800484139 | 0.011261214 | 0.045919067 |
| ENSMMUG00000020049 | phosphoglucomutase 1 [Source:NCBI gene;Acc:699401]                                          | 0.798717852 | 8.69E-05    | 0.000880111 |
| ENSMMUG00000060221 | growth differentiation factor 9 [Source:NCBI gene;Acc:712792]                               | -0.79751112 | 0.003727929 | 0.019318769 |
| ENSMMUG00000014438 | piwi like RNA-mediated gene silencing 2 [Source:VGNC Symbol;Acc:VGNC:81502]                 | 0.796114441 | 0.000865819 | 0.005969515 |
| ENSMMUG00000020436 | potassium voltage-gated channel subfamily H member 2 [Source:VGNC Symbol;Acc:VGNC:73980]    | 0.795039952 | 0.000543432 | 0.004072677 |
| ENSMMUG00000021228 | gem nuclear organelle associated protein 5 [Source:VGNC Symbol;Acc:VGNC:72751]              | 0.794568425 | 0.002096585 | 0.012135668 |
| ENSMMUG00000006713 | cyclin Y [Source:VGNC Symbol;Acc:VGNC:70840]                                                | 0.793077937 | 0.001034075 | 0.006880046 |
| ENSMMUG00000050318 | UDP-GlcNAc:betaGal beta-1,3-N-acetylglucosaminyltransferase 6 [Source:NCBI gene;Acc:697946] | 0.792442898 | 0.004093875 | 0.02073076  |
| ENSMMUG00000064337 | nectin cell adhesion molecule 4 [Source:NCBI gene;Acc:719843]                               | 0.790865173 | 0.003239228 | 0.017149862 |
| ENSMMUG00000008423 | septin 4 [Source:NCBI gene;Acc:714724]                                                      | 0.790661727 | 0.000115437 | 0.001105548 |
| ENSMMUG00000007565 | Cbl proto-oncogene B [Source:VGNC Symbol;Acc:VGNC:70555]                                    | 0.789476715 | 0.000896513 | 0.00613873  |
| ENSMMUG00000000353 | putative methyltransferase-like protein 21E pseudogene [Source:NCBI gene;Acc:707949]        | 0.786950778 | 0.011877809 | 0.047895167 |
| ENSMMUG00000020004 | Ras association domain family member 2 [Source:VGNC Symbol;Acc:VGNC:76674]                  | 0.786550864 | 0.009131559 | 0.038917991 |

|                    |                                                                                    |             |             |             |
|--------------------|------------------------------------------------------------------------------------|-------------|-------------|-------------|
| ENSMMUG00000061186 |                                                                                    | -0.78651604 | 0.002715179 | 0.014909207 |
| ENSMMUG00000055417 |                                                                                    | -           |             |             |
| ENSMMUG0000006705  | FRY like transcription coactivator [Source:VGNC Symbol;Acc:VGNC:72803]             | 0.784664695 | 0.000207834 | 0.001831513 |
| ENSMMUG0000000059  | DNA topoisomerase II binding protein 1 [Source:VGNC Symbol;Acc:VGNC:79061]         | -           |             |             |
| ENSMMUG00000055590 |                                                                                    | 0.784235664 | 0.003229112 | 0.017111437 |
| ENSMMUG00000017145 | cell division cycle 123 [Source:VGNC Symbol;Acc:VGNC:70768]                        | -           |             |             |
| ENSMMUG0000008781  | BCL6 corepressor like 1 [Source:VGNC Symbol;Acc:VGNC:70131]                        | 0.782500265 | 0.002291261 | 0.012974061 |
| ENSMMUG00000063721 |                                                                                    | -           |             |             |
| ENSMMUG0000008396  | methyalmalonyl-CoA epimerase [Source:NCBI gene;Acc:704094]                         | 0.780578928 | 0.00021778  | 0.001903744 |
| ENSMMUG00000020539 | coiled-coil domain containing 9B [Source:VGNC Symbol;Acc:VGNC:70920]               | -           |             |             |
| ENSMMUG0000003230  | F-box and leucine rich repeat protein 19 [Source:VGNC Symbol;Acc:VGNC:81406]       | 0.779253439 | 0.002207929 | 0.012597501 |
| ENSMMUG00000017972 | zinc finger protein 200 [Source:VGNC Symbol;Acc:VGNC:78867]                        | -           |             |             |
| ENSMMUG00000010312 | shroom family member 1 [Source:VGNC Symbol;Acc:VGNC:77299]                         | 0.778810188 | 0.000425943 | 0.003295281 |
| ENSMMUG00000055233 | PRAME family member 17-like [Source:NCBI gene;Acc:100427847]                       | -           |             |             |
| ENSMMUG00000017351 | stabilin 1 [Source:VGNC Symbol;Acc:VGNC:77956]                                     | 0.778252044 | 0.000141253 | 0.001319536 |
| ENSMMUG00000023811 | boule homolog, RNA binding protein [Source:VGNC Symbol;Acc:VGNC:70310]             | -           |             |             |
| ENSMMUG00000023398 | collagen type XVI alpha 1 chain [Source:VGNC Symbol;Acc:VGNC:71293]                | 0.777203697 | 0.00024644  | 0.002105107 |
| ENSMMUG00000062362 | keratin 33A [Source:NCBI gene;Acc:705800]                                          | -           |             |             |
| ENSMMUG00000040485 | Metazoan signal recognition particle RNA [Source:RFAM;Acc:RF00017]                 | 0.777003459 | 0.012406184 | 0.049561487 |
| ENSMMUG00000056711 | ribonuclease inhibitor-like [Source:NCBI gene;Acc:114672186]                       | -           |             |             |
| ENSMMUG00000057655 |                                                                                    | 0.776511547 | 0.011064476 | 0.045332934 |
| ENSMMUG00000023401 | adhesion G protein-coupled receptor B2 [Source:VGNC Symbol;Acc:VGNC:69598]         | -           |             |             |
| ENSMMUG0000002338  | heterogeneous nuclear ribonucleoprotein L like [Source:VGNC Symbol;Acc:VGNC:73441] | 0.775228738 | 0.003337664 | 0.017585511 |
| ENSMMUG0000006268  | junction adhesion molecule like [Source:VGNC Symbol;Acc:VGNC:73860]                | -           |             |             |
| ENSMMUG00000023810 | methionyl-tRNA synthetase 2, mitochondrial [Source:VGNC Symbol;Acc:VGNC:74572]     | 0.775083895 | 0.002002876 | 0.011700706 |
| ENSMMUG00000023116 | LIM domain binding 2 [Source:VGNC Symbol;Acc:VGNC:74246]                           | -           |             |             |
| ENSMMUG00000012036 | RNA binding motif protein 47 [Source:VGNC Symbol;Acc:VGNC:76576]                   | 0.774619162 | 0.004026646 | 0.020529208 |
| ENSMMUG0000002109  | proline and serine rich 1 [Source:VGNC Symbol;Acc:VGNC:76291]                      | -           |             |             |
| ENSMMUG0000003897  | solute carrier family 9 member A7 [Source:NCBI gene;Acc:710906]                    | 0.774302916 | 0.003384905 | 0.017787459 |
|                    |                                                                                    | -           |             |             |
|                    |                                                                                    | 0.773748007 | 0.012422468 | 0.049573966 |
|                    |                                                                                    | -           |             |             |
|                    |                                                                                    | 0.772660735 | 0.000969482 | 0.006537456 |
|                    |                                                                                    | -0.77175974 | 0.006551322 | 0.029776873 |
|                    |                                                                                    | -           |             |             |
|                    |                                                                                    | 0.771650777 | 0.004086771 | 0.020704723 |
|                    |                                                                                    | -           |             |             |
|                    |                                                                                    | 0.771024124 | 3.80E-06    | 5.76E-05    |
|                    |                                                                                    | -           |             |             |
|                    |                                                                                    | 0.769192289 | 0.003450763 | 0.018109702 |
|                    |                                                                                    | -           |             |             |
|                    |                                                                                    | 0.768952092 | 0.012261079 | 0.049060703 |
|                    |                                                                                    | -           |             |             |
|                    |                                                                                    | 0.768670009 | 0.000437249 | 0.003367522 |
|                    |                                                                                    | -0.76775672 | 7.71E-05    | 0.000788495 |
|                    |                                                                                    | -           |             |             |
|                    |                                                                                    | 0.767087762 | 0.004162309 | 0.020970891 |
|                    |                                                                                    | -           |             |             |
|                    |                                                                                    | 0.766891996 | 0.004028999 | 0.020532464 |
|                    |                                                                                    | -           |             |             |
|                    |                                                                                    | 0.766324473 | 0.000335959 | 0.002725912 |
|                    |                                                                                    | -           |             |             |
|                    |                                                                                    | 0.765538519 | 4.41E-06    | 6.54E-05    |
|                    |                                                                                    | -           |             |             |
|                    |                                                                                    | 0.765322108 | 0.000827174 | 0.005749413 |



|                    |                                                                                            |   |             |             |             |
|--------------------|--------------------------------------------------------------------------------------------|---|-------------|-------------|-------------|
| ENSMMUG0000003850  | collagen type XI alpha 2 chain [Source:VGNC Symbol;Acc:VGNC:71290]                         | - | 0.764274224 | 0.001576879 | 0.009674539 |
| ENSMMUG00000050541 |                                                                                            | - | -0.76415574 | 0.002121891 | 0.012239351 |
| ENSMMUG00000021808 | cryptochrome circadian regulator 1 [Source:VGNC Symbol;Acc:VGNC:71499]                     | - | -0.76111239 | 0.000252259 | 0.002145631 |
| ENSMMUG00000049484 |                                                                                            | - | 0.759046917 | 0.000602938 | 0.004438099 |
| ENSMMUG0000003043  | PWWP domain containing 3A, DNA repair factor [Source:VGNC Symbol;Acc:VGNC:76565]           | - | 0.755888428 | 0.000203059 | 0.00179654  |
| ENSMMUG00000065322 | ATP synthase peripheral stalk-membrane subunit b [Source:NCBI gene;Acc:704072]             | - | 0.752976746 | 0.000289375 | 0.002403296 |
| ENSMMUG00000031497 |                                                                                            | - | 0.752461525 | 0.009747024 | 0.041109385 |
| ENSMMUG00000064353 | fatty acid binding protein 3 [Source:NCBI gene;Acc:717237]                                 | - | 0.747893759 | 0.001703461 | 0.010267173 |
| ENSMMUG00000010351 | KN motif and ankyrin repeat domains 4 [Source:VGNC Symbol;Acc:VGNC:73916]                  | - | 0.746441883 | 0.012141653 | 0.048713044 |
| ENSMMUG00000060822 |                                                                                            | - | 0.745592735 | 2.02E-05    | 0.00024802  |
| ENSMMUG00000009922 | mitochondrial calcium uniporter regulator 1 [Source:VGNC Symbol;Acc:VGNC:81471]            | - | 0.744836493 | 0.001771228 | 0.010584945 |
| ENSMMUG00000062635 |                                                                                            | - | 0.744445414 | 0.002506952 | 0.013964303 |
| ENSMMUG00000001768 | zinc finger protein 616 [Source:NCBI gene;Acc:719902]                                      | - | 0.741742318 | 0.004156284 | 0.020967002 |
| ENSMMUG00000001531 | leucine rich repeats and immunoglobulin like domains 1 [Source:VGNC Symbol;Acc:VGNC:84156] | - | 0.739255369 | 6.47E-05    | 0.000675998 |
| ENSMMUG00000052581 | upstream transcription factor family member 3 [Source:NCBI gene;Acc:709660]                | - | 0.735828947 | 0.004985544 | 0.02404709  |
| ENSMMUG00000016475 | M-phase phosphoprotein 8 [Source:VGNC Symbol;Acc:VGNC:74864]                               | - | 0.735129803 | 0.00358415  | 0.018719485 |
| ENSMMUG00000049295 | GTPase, IMAP family member 5 [Source:NCBI gene;Acc:713835]                                 | - | 0.734805102 | 0.001144897 | 0.00744774  |
| ENSMMUG00000002879 | GA binding protein transcription factor subunit beta 1 [Source:VGNC Symbol;Acc:VGNC:72845] | - | 0.734176306 | 0.000114746 | 0.001102889 |
| ENSMMUG00000015123 | codanin 1 [Source:VGNC Symbol;Acc:VGNC:70788]                                              | - | 0.733022857 | 0.006419825 | 0.029300238 |
| ENSMMUG00000008687 | B cell linker [Source:VGNC Symbol;Acc:VGNC:70306]                                          | - | 0.732324798 | 2.38E-05    | 0.000286501 |
| ENSMMUG00000010000 | keratin 7 [Source:VGNC Symbol;Acc:VGNC:74214]                                              | - | 0.732261428 | 3.01E-06    | 4.70E-05    |
| ENSMMUG00000021426 | solute carrier family 41 member 1 [Source:VGNC Symbol;Acc:VGNC:77515]                      | - | 0.731064465 | 0.006747542 | 0.030459314 |
| ENSMMUG00000007875 | F-box and leucine rich repeat protein 12 [Source:VGNC Symbol;Acc:VGNC:72502]               | - | 0.730737689 | 0.009862171 | 0.041456425 |
| ENSMMUG00000020510 | kelch like family member 41 [Source:VGNC Symbol;Acc:VGNC:74062]                            | - | 0.730308135 | 0.004870637 | 0.023596713 |
| ENSMMUG00000064983 |                                                                                            | - | 0.730035245 | 0.003251021 | 0.017197095 |
| ENSMMUG00000002269 | serine carboxypeptidase 1 [Source:VGNC Symbol;Acc:VGNC:82232]                              | - | 0.729048425 | 0.004616713 | 0.022659735 |
| ENSMMUG00000001649 | RUNX family transcription factor 1 [Source:VGNC Symbol;Acc:VGNC:76946]                     | - | 0.728802191 | 0.00580111  | 0.027074861 |
| ENSMMUG00000023396 | hypocretin receptor 1 [Source:VGNC Symbol;Acc:VGNC:73356]                                  | - | 0.727280535 | 0.006589297 | 0.029870468 |
| ENSMMUG00000005463 | bromodomain containing 3 [Source:VGNC Symbol;Acc:VGNC:70281]                               | - | 0.726701546 | 0.003757081 | 0.019453005 |

|                    |                                                                                                |             |             |             |
|--------------------|------------------------------------------------------------------------------------------------|-------------|-------------|-------------|
| ENSMMUG00000011800 | Myb like, SWIRM and MPN domains 1 [Source:VGNC Symbol;Acc:VGNC:75039]                          | 0.725289565 | 2.32E-05    | 0.000279634 |
| ENSMMUG00000022293 | FERM and PDZ domain containing 3 [Source:VGNC Symbol;Acc:VGNC:72805]                           | 0.720574544 | 0.000243454 | 0.002085558 |
| ENSMMUG00000018168 | alkaline ceramidase 3 [Source:VGNC Symbol;Acc:VGNC:69415]                                      | 0.718277051 | 0.004518196 | 0.022331785 |
| ENSMMUG00000022732 | SRSF protein kinase 2 [Source:VGNC Symbol;Acc:VGNC:81764]                                      | 0.715931837 | 0.012191287 | 0.04887943  |
| ENSMMUG00000054417 |                                                                                                | 0.714828874 | 0.000515905 | 0.003900555 |
| ENSMMUG00000054493 |                                                                                                | 0.714554734 | 0.001638624 | 0.009997028 |
| ENSMMUG00000001432 | t-SNARE domain containing 1 [Source:NCBI gene;Acc:701269]                                      | 0.714003904 | 0.001263019 | 0.008072187 |
| ENSMMUG00000055970 |                                                                                                | 0.712630662 | 0.011234512 | 0.045825789 |
| ENSMMUG00000016925 | laminin subunit beta 3 [Source:VGNC Symbol;Acc:VGNC:74230]                                     | 0.712610933 | 0.003287619 | 0.017367677 |
| ENSMMUG00000013183 | F-box and leucine rich repeat protein 17 [Source:VGNC Symbol;Acc:VGNC:82142]                   | 0.711208485 | 0.003703411 | 0.019233325 |
| ENSMMUG00000009126 | solute carrier organic anion transporter family member 2B1 [Source:VGNC Symbol;Acc:VGNC:77603] | 0.710802533 | 0.00200973  | 0.011729304 |
| ENSMMUG00000056765 |                                                                                                | 0.710023003 | 0.001400005 | 0.008759906 |
| ENSMMUG00000009006 | round spermatid basic protein 1 like [Source:VGNC Symbol;Acc:VGNC:77097]                       | 0.709796793 | 0.002382354 | 0.013403626 |
| ENSMMUG00000004603 | zinc finger CCCH-type containing 14 [Source:VGNC Symbol;Acc:VGNC:79255]                        | 0.709201699 | 0.00018602  | 0.001668745 |
| ENSMMUG00000052090 |                                                                                                | 0.707853936 | 0.000139132 | 0.001305836 |
| ENSMMUG00000044652 | sialic acid-binding Ig-like lectin 13 [Source:NCBI gene;Acc:719667]                            | 0.707514279 | 0.011593083 | 0.047000259 |
| ENSMMUG00000041976 | zinc finger protein 780B [Source:NCBI gene;Acc:701034]                                         | 0.706960904 | 0.00568614  | 0.026652529 |
| ENSMMUG00000056105 | T-box transcription factor 10 [Source:NCBI gene;Acc:721689]                                    | 0.706883065 | 0.00437336  | 0.021787353 |
| ENSMMUG00000014301 | nectin cell adhesion molecule 2 [Source:VGNC Symbol;Acc:VGNC:75396]                            | 0.706841444 | 0.00100601  | 0.006738241 |
| ENSMMUG00000021216 | UDP glucuronosyltransferase 1 family, polypeptide A1 [Source:NCBI gene;Acc:574210]             | 0.706336994 | 0.009001338 | 0.038486264 |
| ENSMMUG00000001399 | 3-hydroxymethyl-3-methylglutaryl-CoA lyase like 1 [Source:VGNC Symbol;Acc:VGNC:73429]          | 0.706015833 | 0.006614985 | 0.029962581 |
| ENSMMUG00000022490 | cytochrome P450, family 3, subfamily A, polypeptide 43 [Source:NCBI gene;Acc:709770]           | 0.704733102 | 0.000269885 | 0.00227672  |
| ENSMMUG00000023397 | penta-EF-hand domain containing 1 [Source:NCBI gene;Acc:706038]                                | 0.703959404 | 0.007626812 | 0.033642248 |
| ENSMMUG00000049311 | zinc finger protein 558 [Source:NCBI gene;Acc:712590]                                          | 0.703894848 | 0.00103757  | 0.006899464 |
| ENSMMUG00000008392 | huntingtin [Source:VGNC Symbol;Acc:VGNC:73468]                                                 | 0.703638256 | 0.001120338 | 0.007339807 |
| ENSMMUG00000023096 | obscurin, cytoskeletal calmodulin and titin-interacting RhoGEF [Source:NCBI gene;Acc:694413]   | 0.702625662 | 1.32E-05    | 0.000171665 |
| ENSMMUG00000018901 | FYVE, RhoGEF and PH domain containing 6 [Source:VGNC Symbol;Acc:VGNC:72548]                    | 0.701114038 | 0.006968049 | 0.031313078 |
| ENSMMUG00000021620 | ELKS/RAB6-interacting/CAST family member 2 [Source:VGNC Symbol;Acc:VGNC:72164]                 | 0.698302442 | 9.05E-05    | 0.000907956 |



|                    |                                                                                              |             |             |             |
|--------------------|----------------------------------------------------------------------------------------------|-------------|-------------|-------------|
| ENSMMUG00000012307 | periostin [Source:VGNC Symbol;Acc:VGNC:76039]                                                | 0.696305424 | 0.000689916 | 0.004941648 |
| ENSMMUG00000057700 | acid sensing ion channel subunit family member 5 [Source:NCBI gene;Acc:699617]               | 0.696165286 | 0.000714224 | 0.005094431 |
| ENSMMUG00000000547 | zinc finger protein 566 [Source:VGNC Symbol;Acc:VGNC:81619]                                  | 0.695830583 | 0.003004517 | 0.016077789 |
| ENSMMUG00000006688 | ER membrane protein complex subunit 1 [Source:VGNC Symbol;Acc:VGNC:72134]                    | 0.689622129 | 0.002016671 | 0.011758349 |
| ENSMMUG00000006327 | tumor necrosis factor (ligand) superfamily, member 12 [Source:NCBI gene;Acc:100551506]       | 0.689242441 | 5.13E-06    | 7.46E-05    |
| ENSMMUG00000013039 | solute carrier family 19 member 2 [Source:VGNC Symbol;Acc:VGNC:81571]                        | 0.689159676 | 0.001089017 | 0.007169908 |
| ENSMMUG00000029263 | polycystin 1, transient receptor potential channel interacting [Source:NCBI gene;Acc:694905] | 0.684543092 | 0.004578486 | 0.022546032 |
| ENSMMUG00000031123 | secretoglobin family 1A member 1 [Source:VGNC Symbol;Acc:VGNC:77004]                         | 0.683109732 | 0.007954889 | 0.034883834 |
| ENSMMUG00000001978 | adenosine monophosphate deaminase 1 [Source:VGNC Symbol;Acc:VGNC:69806]                      | 0.677999559 | 0.005099789 | 0.024469181 |
| ENSMMUG00000023136 | zinc finger protein 613 [Source:VGNC Symbol;Acc:VGNC:79548]                                  | 0.676844079 | 0.0014861   | 0.009231085 |
| ENSMMUG00000048882 | KIAA0408 ortholog [Source:NCBI gene;Acc:100429459]                                           | 0.676285975 | 0.000345641 | 0.002785599 |
| ENSMMUG00000012020 | nuclear receptor coactivator 3 [Source:VGNC Symbol;Acc:VGNC:75147]                           | 0.673241668 | 0.000807855 | 0.005651207 |
| ENSMMUG00000012601 | RANBP2-type and C3HC4-type zinc finger containing 1 [Source:VGNC Symbol;Acc:VGNC:81554]      | -0.67219032 | 0.004031733 | 0.020537659 |
| ENSMMUG00000002781 | peroxidasin like [Source:VGNC Symbol;Acc:VGNC:84107]                                         | -0.67000292 | 0.003195465 | 0.016978213 |
| ENSMMUG00000002010 | death effector domain containing [Source:VGNC Symbol;Acc:VGNC:71768]                         | 0.669385859 | 0.009978373 | 0.041827441 |
| ENSMMUG00000039195 | ATCAY kinesin light chain interacting caytaxin [Source:NCBI gene;Acc:721783]                 | 0.666980948 | 0.007566003 | 0.033435591 |
| ENSMMUG00000052418 |                                                                                              | 0.666319372 | 0.003691575 | 0.019180172 |
| ENSMMUG00000009394 | sestrin 3 [Source:VGNC Symbol;Acc:VGNC:77291]                                                | -0.66408161 | 0.002095519 | 0.012135364 |
| ENSMMUG00000011335 | Fc receptor like 6 [Source:VGNC Symbol;Acc:VGNC:72602]                                       | 0.663322799 | 0.000324427 | 0.002645674 |
| ENSMMUG00000049326 | GIPC PDZ domain containing family member 2 [Source:NCBI gene;Acc:707432]                     | 0.662112495 | 0.00539781  | 0.025540961 |
| ENSMMUG00000059327 | NUS1 dehydrololichyl diphosphate synthase subunit [Source:NCBI gene;Acc:715015]              | 0.661587042 | 0.002429462 | 0.013634132 |
| ENSMMUG00000010939 | rhopilin Rho GTPase binding protein 1 [Source:VGNC Symbol;Acc:VGNC:76779]                    | 0.660947143 | 0.007553614 | 0.033393162 |
| ENSMMUG00000023698 | golgi SNAP receptor complex member 1 [Source:VGNC Symbol;Acc:VGNC:73110]                     | 0.660077413 | 0.002053603 | 0.011915671 |
| ENSMMUG00000012761 | sialic acid binding Ig like lectin 5 [Source:NCBI gene;Acc:719730]                           | 0.659893049 | 0.002694252 | 0.014814675 |
| ENSMMUG00000001941 | CXXC finger protein 5 [Source:VGNC Symbol;Acc:VGNC:71594]                                    | 0.657917816 | 7.04E-05    | 0.000729027 |
| ENSMMUG00000000662 | guanylate-binding protein 1 [Source:NCBI gene;Acc:694538]                                    | 0.650959114 | 0.010619794 | 0.044038313 |
| ENSMMUG00000013716 | EF-hand domain containing 1 [Source:VGNC Symbol;Acc:VGNC:72052]                              | 0.650791998 | 0.009820216 | 0.041352639 |
| ENSMMUG00000009461 | SMAD specific E3 ubiquitin protein ligase 2 [Source:VGNC Symbol;Acc:VGNC:77727]              | 0.650635524 | 0.00114587  | 0.007450022 |
| ENSMMUG00000012091 | thioredoxin reductase 1 [Source:VGNC Symbol;Acc:VGNC:78679]                                  | 0.647779738 | 0.010876417 | 0.044792289 |

|                     |                                                                                            |             |             |             |
|---------------------|--------------------------------------------------------------------------------------------|-------------|-------------|-------------|
| ENSMMUG00000012786  | complement C1s [Source:VGNC Symbol;Acc:VGNC:70297]                                         | 0.647750726 | 4.59E-05    | 0.000499448 |
| ENSMMUG00000022442  | single stranded DNA binding protein 1 [Source:VGNC Symbol;Acc:VGNC:77886]                  | -0.64758876 | 0.005016087 | 0.02413526  |
| ENSMMUG00000017100  | solute carrier family 4 member 1 (Diego blood group) [Source:NCBI gene;Acc:100427618]      | 0.646347481 | 0.001754945 | 0.010503358 |
| ENSMMUG00000023525  | cadherin 5 [Source:VGNC Symbol;Acc:VGNC:70973]                                             | -0.64267751 | 0.005232243 | 0.024954737 |
| ENSMMUG00000016522  | neurolysin [Source:VGNC Symbol;Acc:VGNC:75183]                                             | 0.639881984 | 0.000717855 | 0.005111198 |
| ENSMMUG00000040100  | Fos proto-oncogene, AP-1 transcription factor subunit [Source:VGNC Symbol;Acc:VGNC:84340]  | 0.639207488 | 0.002799053 | 0.015233333 |
| ENSMMUG00000023027  | endo-beta-N-acetylglucosaminidase [Source:VGNC Symbol;Acc:VGNC:72099]                      | 0.636542257 | 0.006108492 | 0.028158313 |
| ENSMMUG00000010036  | tau tubulin kinase 2 [Source:VGNC Symbol;Acc:VGNC:81598]                                   | 0.636190309 | 0.006924109 | 0.031150689 |
| ENSMMUG00000050825  | potassium voltage-gated channel subfamily D member 3 [Source:NCBI gene;Acc:641437]         | 0.634289907 | 0.004039245 | 0.0205497   |
| ENSMMUG00000003864  | VPS52 subunit of GARP complex [Source:VGNC Symbol;Acc:VGNC:78551]                          | 0.632118407 | 0.007640405 | 0.033689796 |
| ENSMMUG00000010544  | mucin 5B, oligomeric mucus/gel-forming [Source:VGNC Symbol;Acc:VGNC:75081]                 | 0.629767501 | 0.00117966  | 0.007620069 |
| ENSMMUG00000022044  | scavenger receptor class A member 5 [Source:VGNC Symbol;Acc:VGNC:77117]                    | 0.628282097 | 0.008896916 | 0.038107822 |
| ENSMMUG00000008323  | C-terminal binding protein 1 [Source:VGNC Symbol;Acc:VGNC:71539]                           | 0.627105042 | 0.002626772 | 0.014505321 |
| ENSMMUG00000004624  | synaptojanin 1 [Source:VGNC Symbol;Acc:VGNC:78071]                                         | -0.62568514 | 0.008378175 | 0.036367169 |
| ENSMMUG000000054112 |                                                                                            | 0.622368299 | 0.002973147 | 0.015952694 |
| ENSMMUG000000053262 |                                                                                            | 0.620816733 | 0.011810535 | 0.047688122 |
| ENSMMUG00000007421  | zinc finger CCHC-type containing 7 [Source:VGNC Symbol;Acc:VGNC:82088]                     | 0.617649214 | 0.00866927  | 0.037319616 |
| ENSMMUG00000000289  | calcium voltage-gated channel auxiliary subunit beta 1 [Source:VGNC Symbol;Acc:VGNC:70509] | 0.614854675 | 0.011045814 | 0.045302967 |
| ENSMMUG000000056693 |                                                                                            | 0.612837033 | 0.000209904 | 0.001845678 |
| ENSMMUG00000018053  | zinc finger and BTB domain containing 21 [Source:VGNC Symbol;Acc:VGNC:78892]               | 0.611709475 | 0.007701404 | 0.0339213   |
| ENSMMUG00000023226  | RNA polymerase III subunit D [Source:VGNC Symbol;Acc:VGNC:76017]                           | 0.611580902 | 0.006409356 | 0.02927477  |
| ENSMMUG00000000978  | cramped chromatin regulator homolog 1 [Source:NCBI gene;Acc:722473]                        | 0.605955973 | 0.001571023 | 0.0096485   |
| ENSMMUG00000003462  | ankyrin repeat domain 6 [Source:VGNC Symbol;Acc:VGNC:81023]                                | 0.603624965 | 0.002286311 | 0.012959013 |
| ENSMMUG000000056280 | G protein subunit alpha i2 [Source:NCBI gene;Acc:703780]                                   | 0.593605017 | 0.011419311 | 0.046414127 |
| ENSMMUG00000017677  | chromosome 7 C14orf28 homolog [Source:VGNC Symbol;Acc:VGNC:70581]                          | 0.593249117 | 0.008341857 | 0.036222654 |
| ENSMMUG000000063474 |                                                                                            | 0.592696772 | 0.000980155 | 0.00659087  |
| ENSMMUG00000000065  | coiled-coil domain containing 181 [Source:VGNC Symbol;Acc:VGNC:70884]                      | 0.588099334 | 0.002982323 | 0.0159876   |
| ENSMMUG00000019760  | karyopherin subunit beta 1 [Source:VGNC Symbol;Acc:VGNC:74203]                             | 0.585966436 | 0.003713792 | 0.019262178 |
| ENSMMUG00000010788  | ATP binding cassette subfamily B member 1 [Source:NCBI gene;Acc:574235]                    | 0.583402245 | 0.005388844 | 0.025518702 |

|                    |                                                                                                    |   |             |             |             |
|--------------------|----------------------------------------------------------------------------------------------------|---|-------------|-------------|-------------|
| ENSMMUG0000005942  | leucine carboxyl methyltransferase 1 [Source:VGNC Symbol;Acc:VGNC:74067]                           | - | 0.577689814 | 0.002192227 | 0.012534479 |
| ENSMMUG0000002185  | protein activator of interferon induced protein kinase EIF2AK2 [Source:VGNC Symbol;Acc:VGNC:76421] | - | 0.576382329 | 0.010482065 | 0.043603061 |
| ENSMMUG0000007576  | EYA transcriptional coactivator and phosphatase 1 [Source:VGNC Symbol;Acc:VGNC:72453]              | - | 0.572882801 | 0.007266467 | 0.032362668 |
| ENSMMUG00000054625 |                                                                                                    | - | 0.572785403 | 0.009100235 | 0.038852851 |
| ENSMMUG00000018186 | sosondowah ankyrin repeat domain family member B [Source:VGNC Symbol;Acc:VGNC:78033]               | - | 0.571862677 | 0.000250135 | 0.002130592 |
| ENSMMUG0000002761  | activity dependent neuroprotector homeobox [Source:VGNC Symbol;Acc:VGNC:69614]                     | - | 0.568764983 | 0.010221053 | 0.042650639 |
| ENSMMUG0000003456  | glypican 4 [Source:VGNC Symbol;Acc:VGNC:73118]                                                     | - | 0.567669669 | 0.001168814 | 0.007574523 |
| ENSMMUG00000022715 | adenosylhomocysteinase like 1 [Source:VGNC Symbol;Acc:VGNC:81350]                                  | - | 0.566376742 | 0.011160272 | 0.045616182 |
| ENSMMUG00000054737 |                                                                                                    | - | 0.566004281 | 0.00437348  | 0.021787353 |
| ENSMMUG00000014564 | ring finger protein 123 [Source:VGNC Symbol;Acc:VGNC:76790]                                        | - | 0.565787306 | 0.001156684 | 0.007508104 |
| ENSMMUG00000004629 | nucleolar protein 8 [Source:VGNC Symbol;Acc:VGNC:75237]                                            | - | 0.565605197 | 0.005111272 | 0.024504641 |
| ENSMMUG00000021567 | neurexophilin and PC-esterase domain family member 3 [Source:VGNC Symbol;Acc:VGNC:75476]           | - | 0.564274479 | 0.001452757 | 0.009042732 |
| ENSMMUG00000065127 | insulin like 6 [Source:NCBI gene;Acc:693735]                                                       | - | 0.559302645 | 0.002627091 | 0.014505321 |
| ENSMMUG00000010321 | C2 domain containing 3 centriole elongation regulator [Source:VGNC Symbol;Acc:VGNC:70375]          | - | 0.555769724 | 0.00842285  | 0.036508161 |
| ENSMMUG00000065066 | V-set and immunoglobulin domain containing 10 like 2 [Source:NCBI gene;Acc:717387]                 | - | 0.554728181 | 0.005756713 | 0.026920109 |
| ENSMMUG00000030786 | transient receptor potential cation channel subfamily C member 4 [Source:NCBI gene;Acc:695636]     | - | 0.550957284 | 0.005374052 | 0.025478877 |
| ENSMMUG00000007078 | N-acylsphingosine amidohydrolase 2 [Source:NCBI gene;Acc:703913]                                   | - | 0.550905682 | 0.000824013 | 0.00573273  |
| ENSMMUG00000003316 | mannosidase alpha class 2A member 1 [Source:VGNC Symbol;Acc:VGNC:81449]                            | - | -0.55050382 | 0.00160221  | 0.009799829 |
| ENSMMUG00000065001 |                                                                                                    | - | 0.548233499 | 0.008678644 | 0.037346548 |
| ENSMMUG00000030422 | radial spoke head 10 homolog B [Source:NCBI gene;Acc:100424218]                                    | - | 0.546360209 | 0.01090854  | 0.044909136 |
| ENSMMUG00000006861 | dynein axonemal heavy chain 10 [Source:NCBI gene;Acc:710343]                                       | - | 0.546218237 | 0.005498762 | 0.02590605  |
| ENSMMUG00000005613 | signal transducer and activator of transcription 1 [Source:VGNC Symbol;Acc:VGNC:77904]             | - | 0.544857749 | 0.002157597 | 0.012387047 |
| ENSMMUG00000022303 | solute carrier family 7 member 2 [Source:VGNC Symbol;Acc:VGNC:77629]                               | - | 0.544694963 | 0.000199832 | 0.001773556 |
| ENSMMUG00000001518 | zinc finger protein 518A [Source:VGNC Symbol;Acc:VGNC:79767]                                       | - | 0.540131753 | 0.001351503 | 0.008523226 |
| ENSMMUG00000003110 | tyrosine kinase 2 [Source:VGNC Symbol;Acc:VGNC:78680]                                              | - | 0.538489282 | 0.007453349 | 0.033042487 |
| ENSMMUG00000017052 | StAR related lipid transfer domain containing 13 [Source:VGNC Symbol;Acc:VGNC:77962]               | - | 0.527359938 | 0.002734484 | 0.014980881 |
| ENSMMUG00000030400 | SH3 domain and tetratricopeptide repeats 1 [Source:NCBI gene;Acc:722649]                           | - | 0.524909298 | 0.012304142 | 0.049216566 |
| ENSMMUG00000009459 | centrosomal protein 95 [Source:VGNC Symbol;Acc:VGNC:71095]                                         | - | 0.523952076 | 0.011825583 | 0.047732788 |
| ENSMMUG00000018051 | FAT atypical cadherin 1 [Source:VGNC Symbol;Acc:VGNC:72617]                                        | - | 0.518831023 | 0.011371986 | 0.046269871 |

|                     |                                                                                                         |             |             |             |
|---------------------|---------------------------------------------------------------------------------------------------------|-------------|-------------|-------------|
| ENSMMUG00000004708  | SPT6 homolog, histone chaperone and transcription elongation factor [Source:VGNC Symbol;Acc:VGNC:78057] | 0.515041674 | 0.007454977 | 0.033042487 |
| ENSMMUG00000007870  | creatine kinase U-type, mitochondrial [Source:NCBI gene;Acc:114669858]                                  | 0.513960508 | 0.011960597 | 0.048131756 |
| ENSMMUG00000008965  | piwi like RNA-mediated gene silencing 4 [Source:VGNC Symbol;Acc:VGNC:81504]                             | 0.510240334 | 0.006733706 | 0.030419789 |
| ENSMMUG000000060440 | leucine rich repeat LGI family member 2 [Source:NCBI gene;Acc:693308]                                   | 0.501300598 | 0.003208863 | 0.017034284 |
| ENSMMUG000000063877 | leucine-rich repeat-containing protein 37A2 [Source:NCBI gene;Acc:716147]                               | 0.498191199 | 0.002437948 | 0.01364591  |
| ENSMMUG00000009189  | palmitoyl-protein thioesterase 1 [Source:VGNC Symbol;Acc:VGNC:76386]                                    | 0.486289288 | 0.003950026 | 0.020259318 |
| ENSMMUG00000017685  | hydroxysteroid 17-beta dehydrogenase 4 [Source:VGNC Symbol;Acc:VGNC:73530]                              | 0.471821395 | 0.001174973 | 0.007597989 |
| ENSMMUG00000021441  | amylo-alpha-1, 6-glucosidase, 4-alpha-glucanotransferase [Source:VGNC Symbol;Acc:VGNC:69744]            | 0.470158357 | 0.002584029 | 0.014307135 |
| ENSMMUG00000016740  | defective in cullin neddylation 1 domain containing 2 [Source:VGNC Symbol;Acc:VGNC:71684]               | 0.469921714 | 0.007501626 | 0.033212374 |
| ENSMMUG000000061176 |                                                                                                         | 0.456536009 | 0.011135485 | 0.04554221  |
| ENSMMUG00000019238  | RNA binding protein with serine rich domain 1 [Source:NCBI gene;Acc:695816]                             | 0.455871519 | 0.00550854  | 0.025941907 |
| ENSMMUG00000004529  | chromosome 14 C11orf80 homolog [Source:NCBI gene;Acc:721782]                                            | 0.447651283 | 0.007820886 | 0.034384338 |
| ENSMMUG00000010304  | cilia and flagella associated protein 298 [Source:NCBI gene;Acc:700721]                                 | 0.433623523 | 0.00355179  | 0.018587388 |
| ENSMMUG000000049578 | cilia and flagella associated protein 410 [Source:NCBI gene;Acc:722168]                                 | 0.400554549 | 0.012413081 | 0.049561487 |
| ENSMMUG00000016005  | DnaJ heat shock protein family (Hsp40) member C13 [Source:VGNC Symbol;Acc:VGNC:84191]                   | -0.38928885 | 0.001707408 | 0.0102805   |
| ENSMMUG00000003464  | midasin AAA ATPase 1 [Source:VGNC Symbol;Acc:VGNC:74530]                                                | 0.374127489 | 0.006123217 | 0.028204478 |
| ENSMMUG00000011557  | platelet derived growth factor receptor beta [Source:VGNC Symbol;Acc:VGNC:75929]                        | 0.348600599 | 0.002400756 | 0.013492001 |
| ENSMMUG000000042232 | NBPF member 6 [Source:NCBI gene;Acc:698524]                                                             | 0.349529152 | 0.005826219 | 0.027139166 |
| ENSMMUG00000000901  | alpha hemoglobin stabilizing protein [Source:VGNC Symbol;Acc:VGNC:69631]                                | 0.391508716 | 0.011648011 | 0.047190996 |
| ENSMMUG00000000307  | RIO kinase 2 [Source:VGNC Symbol;Acc:VGNC:76774]                                                        | 0.401332653 | 0.007003135 | 0.031422482 |
| ENSMMUG000000049145 | creatine kinase B [Source:NCBI gene;Acc:711167]                                                         | 0.417082689 | 0.011628474 | 0.047127785 |
| ENSMMUG000000005270 | ryanodine receptor 3 [Source:NCBI gene;Acc:694996]                                                      | 0.443280393 | 0.001725245 | 0.010367051 |
| ENSMMUG000000045769 | tubulin tyrosine ligase like 10 [Source:NCBI gene;Acc:702662]                                           | 0.44421735  | 0.009779349 | 0.041224034 |
| ENSMMUG000000032217 | transmembrane protein 50A [Source:VGNC Symbol;Acc:VGNC:79857]                                           | 0.447638536 | 0.010007148 | 0.041926434 |
| ENSMMUG000000062747 |                                                                                                         | 0.451557122 | 0.003253931 | 0.017197297 |
| ENSMMUG000000008931 | MAU2 sister chromatid cohesion factor [Source:NCBI gene;Acc:720347]                                     | 0.451777204 | 0.003223125 | 0.01708727  |
| ENSMMUG000000050742 | src kinase associated phosphoprotein 1 [Source:NCBI gene;Acc:697043]                                    | 0.461823197 | 0.005913124 | 0.027469189 |
| ENSMMUG000000002540 | dehydrogenase/reductase 7 [Source:VGNC Symbol;Acc:VGNC:71690]                                           | 0.463244438 | 0.011693344 | 0.04731064  |
| ENSMMUG000000007315 | ciliary rootlet coiled-coil, rootletin [Source:NCBI gene;Acc:710793]                                    | 0.466544202 | 0.00575534  | 0.026920109 |
| ENSMMUG000000005780 | dynein cytoplasmic 1 heavy chain 1 [Source:VGNC Symbol;Acc:VGNC:71951]                                  | 0.466563237 | 0.005042159 | 0.024231497 |
| ENSMMUG00000011459  | 3-phosphoinositide dependent protein kinase 1 [Source:NCBI gene;Acc:697523]                             | 0.468845211 | 0.000446999 | 0.003429381 |
| ENSMMUG00000022094  | ATP binding cassette subfamily B member 10 [Source:NCBI gene;Acc:574117]                                | 0.469465867 | 0.00346535  | 0.018170328 |
| ENSMMUG000000005352 | ubiquitin specific peptidase 36 [Source:VGNC Symbol;Acc:VGNC:79219]                                     | 0.479671843 | 0.011226772 | 0.045825433 |
| ENSMMUG000000060764 |                                                                                                         | 0.481482846 | 0.003766749 | 0.0194778   |
| ENSMMUG00000017949  | ornithine decarboxylase antizyme 1 [Source:NCBI gene;Acc:721477]                                        | 0.482530979 | 0.004555364 | 0.022459878 |
| ENSMMUG00000018139  | dedicator of cytokinesis 10 [Source:VGNC Symbol;Acc:VGNC:71888]                                         | 0.483087344 | 0.000644577 | 0.004681295 |
| ENSMMUG000000006330 | poly(A) binding protein interacting protein 2B [Source:NCBI gene;Acc:711595]                            | 0.487704489 | 0.011059389 | 0.045332934 |
| ENSMMUG00000020970  | zinc finger protein 213 [Source:VGNC Symbol;Acc:VGNC:78872]                                             | 0.490813718 | 0.008111541 | 0.035479846 |
| ENSMMUG00000000186  | protein phosphatase 2 regulatory subunit B'gamma [Source:NCBI gene;Acc:718894]                          | 0.492978351 | 0.001681905 | 0.010179259 |



|                    |                                                                                                                |             |             |             |
|--------------------|----------------------------------------------------------------------------------------------------------------|-------------|-------------|-------------|
| ENSMMUG00000061673 |                                                                                                                | 0.494459761 | 0.007259416 | 0.032343291 |
| ENSMMUG00000020840 | TBC1 domain family member 16 [Source:VGNC Symbol;Acc:VGNC:78228]                                               | 0.494550105 | 0.010762351 | 0.044490824 |
| ENSMMUG00000030597 | mitogen-activated protein kinase kinase kinase 2 [Source:VGNC Symbol;Acc:VGNC:81465]                           | 0.495567247 | 0.002436659 | 0.01364591  |
| ENSMMUG00000049440 | chromosome 16 C17orf113 homolog [Source:NCBI gene;Acc:106994045]                                               | 0.495910897 | 0.000681895 | 0.004892972 |
| ENSMMUG00000055454 |                                                                                                                | 0.497838952 | 0.007005513 | 0.031422482 |
| ENSMMUG00000022895 | DnaJ heat shock protein family (Hsp40) member B5 [Source:NCBI gene;Acc:699081]                                 | 0.502517846 | 0.000204564 | 0.001804015 |
| ENSMMUG00000008638 | CDC42 binding protein kinase alpha [Source:VGNC Symbol;Acc:VGNC:70799]                                         | 0.502819116 | 0.006221192 | 0.028556918 |
| ENSMMUG00000022404 | apoptotic peptidase activating factor 1 [Source:VGNC Symbol;Acc:VGNC:69975]                                    | 0.50501497  | 0.000660005 | 0.004775964 |
| ENSMMUG00000018909 | fetuin B [Source:VGNC Symbol;Acc:VGNC:72638]                                                                   | 0.512029684 | 0.011590027 | 0.047000259 |
| ENSMMUG00000013730 | WD repeat domain 17 [Source:NCBI gene;Acc:700546]                                                              | 0.512230428 | 0.000298755 | 0.002460722 |
| ENSMMUG00000009938 | myosin XVIIIa [Source:VGNC Symbol;Acc:VGNC:75058]                                                              | 0.513850974 | 0.000272677 | 0.002293244 |
| ENSMMUG00000013313 | cytohesin 1 [Source:VGNC Symbol;Acc:VGNC:71828]                                                                | 0.519275923 | 0.007310271 | 0.032521472 |
| ENSMMUG00000002909 | placental growth factor [Source:VGNC Symbol;Acc:VGNC:75964]                                                    | 0.521710107 | 0.005596865 | 0.026295822 |
| ENSMMUG00000010367 | myosin heavy chain 11 [Source:VGNC Symbol;Acc:VGNC:75097]                                                      | 0.523634739 | 0.005018301 | 0.024136214 |
| ENSMMUG00000008926 | lysosomal protein transmembrane 4 beta [Source:VGNC Symbol;Acc:VGNC:84010]                                     | 0.524179019 | 0.006673554 | 0.030182209 |
| ENSMMUG00000001538 | GRAM domain containing 1A [Source:VGNC Symbol;Acc:VGNC:73029]                                                  | 0.524828441 | 0.011722004 | 0.047378574 |
| ENSMMUG00000011134 | transcription factor Dp-2 [Source:VGNC Symbol;Acc:VGNC:78324]                                                  | 0.528137375 | 0.004004335 | 0.020465248 |
| ENSMMUG00000002381 | lysine methyltransferase 2B [Source:VGNC Symbol;Acc:VGNC:74053]                                                | 0.528682512 | 0.008209825 | 0.0357845   |
| ENSMMUG00000060780 |                                                                                                                | 0.528871705 | 0.011041007 | 0.045302967 |
| ENSMMUG00000019136 | taxilin beta [Source:VGNC Symbol;Acc:VGNC:79325]                                                               | 0.529604086 | 0.001736334 | 0.010418002 |
| ENSMMUG00000004847 | xylulokinase [Source:VGNC Symbol;Acc:VGNC:78815]                                                               | 0.533564135 | 0.00367084  | 0.019097298 |
| ENSMMUG00000014641 |                                                                                                                | 0.536349941 | 0.000698854 | 0.004999685 |
| ENSMMUG00000004144 | adaptor related protein complex 1 subunit gamma 2 [Source:VGNC Symbol;Acc:VGNC:69959]                          | 0.536978096 | 0.000675095 | 0.004861661 |
| ENSMMUG00000012223 | branched chain amino acid transaminase 1 [Source:VGNC Symbol;Acc:VGNC:70236]                                   | 0.537518451 | 0.007186527 | 0.032054318 |
| ENSMMUG00000059196 |                                                                                                                | 0.540991166 | 0.001399826 | 0.008759906 |
| ENSMMUG00000009430 | transient receptor potential cation channel subfamily M member 1 [Source:VGNC Symbol;Acc:VGNC:79964]           | 0.542797947 | 0.002141891 | 0.012326424 |
| ENSMMUG00000010633 | PHD finger protein 20 [Source:VGNC Symbol;Acc:VGNC:75807]                                                      | 0.543199002 | 0.001153535 | 0.007491724 |
| ENSMMUG00000049451 | Cbl proto-oncogene C [Source:NCBI gene;Acc:713112]                                                             | 0.544969023 | 0.009113408 | 0.038868298 |
| ENSMMUG00000009017 | transcription factor 3 [Source:VGNC Symbol;Acc:VGNC:78287]                                                     | 0.545006225 | 0.0012869   | 0.008202187 |
| ENSMMUG00000052557 |                                                                                                                | 0.546693678 | 0.001138421 | 0.007417697 |
| ENSMMUG00000022136 | laminin subunit alpha 2 [Source:VGNC Symbol;Acc:VGNC:74225]                                                    | 0.547130358 | 0.001488988 | 0.009244228 |
| ENSMMUG00000047621 | transmembrane 4 L six family member 18 [Source:VGNC Symbol;Acc:VGNC:82713]                                     | 0.548094148 | 0.000103025 | 0.001004148 |
| ENSMMUG00000015114 | toll like receptor adaptor molecule 2 [Source:NCBI gene;Acc:100426353]                                         | 0.549937676 | 0.000943222 | 0.006389156 |
| ENSMMUG00000009768 | ring finger protein 14 [Source:VGNC Symbol;Acc:VGNC:84488]                                                     | 0.551182385 | 0.003313328 | 0.017472663 |
| ENSMMUG00000062177 |                                                                                                                | 0.553257794 | 0.005983827 | 0.027722364 |
| ENSMMUG00000006297 | programmed cell death 7 [Source:NCBI gene;Acc:708758]                                                          | 0.556201301 | 0.004133474 | 0.020871347 |
| ENSMMUG00000006727 | vitamin D receptor [Source:VGNC Symbol;Acc:VGNC:78764]                                                         | 0.557553381 | 0.004861493 | 0.023575345 |
| ENSMMUG00000019807 | regulator of G protein signaling 14 [Source:VGNC Symbol;Acc:VGNC:76918]                                        | 0.565019455 | 0.001942768 | 0.011438834 |
| ENSMMUG00000052626 | progesterone and adiponectin receptor family member 8 [Source:NCBI gene;Acc:708418]                            | 0.567431771 | 0.006159373 | 0.028360114 |
| ENSMMUG00000006141 | ceramide transporter 1 [Source:VGNC Symbol;Acc:VGNC:71298]                                                     | 0.567634507 | 0.005900097 | 0.027429953 |
| ENSMMUG00000005775 | phospholipase A and acyltransferase 3 [Source:VGNC Symbol;Acc:VGNC:76055]                                      | 0.569708397 | 0.000562563 | 0.004184632 |
| ENSMMUG00000003894 | zinc finger protein 385C [Source:NCBI gene;Acc:708928]                                                         | 0.570032277 | 0.001602151 | 0.009799829 |
| ENSMMUG00000014873 | torsin 1A interacting protein 1 [Source:VGNC Symbol;Acc:VGNC:79810]                                            | 0.573027845 | 0.010509023 | 0.043700019 |
| ENSMMUG00000021012 | G protein-coupled receptor 155 [Source:VGNC Symbol;Acc:VGNC:72985]                                             | 0.576139579 | 0.001956173 | 0.011492917 |
| ENSMMUG00000029971 | beclin 1 [Source:VGNC Symbol;Acc:VGNC:70044]                                                                   | 0.57792843  | 0.011078458 | 0.045374698 |
| ENSMMUG00000012117 | HECT and RLD domain containing E3 ubiquitin protein ligase family member 1 [Source:VGNC Symbol;Acc:VGNC:73364] | 0.578457582 | 2.83E-05    | 0.000330899 |
| ENSMMUG00000005991 | TRIO and F-actin binding protein [Source:NCBI gene;Acc:701241]                                                 | 0.578956084 | 0.008270122 | 0.035976381 |
| ENSMMUG00000008130 | ABR activator of RhoGEF and GTPase [Source:VGNC Symbol;Acc:VGNC:69589]                                         | 0.581595315 | 0.00154677  | 0.00953868  |
| ENSMMUG00000055168 |                                                                                                                | 0.581941817 | 0.004573438 | 0.02253044  |
| ENSMMUG00000011579 | TAFI chemokine like family member 2 [Source:VGNC Symbol;Acc:VGNC:78189]                                        | 0.582316475 | 0.000959948 | 0.006480462 |
| ENSMMUG00000019820 | SH3 domain and tetratricopeptide repeats 2 [Source:VGNC Symbol;Acc:VGNC:77337]                                 | 0.583310909 | 0.012359169 | 0.049403675 |

|                    |                                                                                                  |             |             |             |
|--------------------|--------------------------------------------------------------------------------------------------|-------------|-------------|-------------|
| ENSMMUG00000019632 | ribosomal L1 domain containing 1 [Source:VGNC Symbol;Acc:VGNC:77096]                             | 0.585046551 | 0.001207517 | 0.007783219 |
| ENSMMUG00000000300 | integrin subunit alpha 4 [Source:VGNC Symbol;Acc:VGNC:73778]                                     | 0.585661334 | 0.006900107 | 0.03105437  |
| ENSMMUG00000014210 | metadherin [Source:VGNC Symbol;Acc:VGNC:74859]                                                   | 0.587711507 | 0.006272832 | 0.028716911 |
| ENSMMUG00000056548 | coagulation factor III, tissue factor [Source:NCBI gene;Acc:714456]                              | 0.588224774 | 0.005539703 | 0.026068169 |
| ENSMMUG00000015449 | phospholipase A2 group IVF [Source:VGNC Symbol;Acc:VGNC:76123]                                   | 0.589982972 | 0.005586399 | 0.026277579 |
| ENSMMUG00000021866 | deoxyribonuclease 1 [Source:VGNC Symbol;Acc:VGNC:71946]                                          | 0.598954029 | 0.006039679 | 0.027916326 |
| ENSMMUG00000004522 | DNA primase subunit 1 [Source:NCBI gene;Acc:710253]                                              | 0.60016297  | 0.000242706 | 0.002082129 |
| ENSMMUG00000009173 | serine/threonine kinase 24 [Source:VGNC Symbol;Acc:VGNC:81583]                                   | 0.602265829 | 0.004614665 | 0.022659735 |
| ENSMMUG00000003161 | microtubule associated serine/threonine kinase 3 [Source:VGNC Symbol;Acc:VGNC:74533]             | 0.604982722 | 0.009962626 | 0.041790466 |
| ENSMMUG00000006139 | 3-hydroxy-3-methylglutaryl-CoA reductase [Source:VGNC Symbol;Acc:VGNC:73484]                     | 0.605609648 | 0.005140988 | 0.024607702 |
| ENSMMUG00000013442 | minichromosome maintenance complex component 7 [Source:VGNC Symbol;Acc:VGNC:74686]               | 0.607083121 | 0.009939659 | 0.041752842 |
| ENSMMUG00000017946 | rogdi atypical leucine zipper [Source:VGNC Symbol;Acc:VGNC:76862]                                | 0.60710973  | 0.005313154 | 0.02525013  |
| ENSMMUG00000059292 |                                                                                                  | 0.60767705  | 0.000519467 | 0.003920058 |
| ENSMMUG00000005323 | phosphoribosyl pyrophosphate synthetase associated protein 2 [Source:VGNC Symbol;Acc:VGNC:76430] | 0.608749162 | 0.001682094 | 0.010179259 |
| ENSMMUG00000017505 | tetratricopeptide repeat domain 3 [Source:VGNC Symbol;Acc:VGNC:81785]                            | 0.61135514  | 0.004582423 | 0.022549634 |
| ENSMMUG00000009577 | atlastin GTPase 1 [Source:VGNC Symbol;Acc:VGNC:70049]                                            | 0.613716867 | 0.000577489 | 0.004279708 |
| ENSMMUG00000021434 | ATP binding cassette subfamily A member 2 [Source:VGNC Symbol;Acc:VGNC:69557]                    | 0.616537663 | 0.009539901 | 0.040342464 |
| ENSMMUG00000054834 |                                                                                                  | 0.619255169 | 0.000229539 | 0.001989121 |
| ENSMMUG00000064750 |                                                                                                  | 0.619520874 | 0.008762015 | 0.037664712 |
| ENSMMUG00000055016 | keratin, type II cytoskeletal 6A [Source:NCBI gene;Acc:719283]                                   | 0.620009921 | 4.31E-06    | 6.42E-05    |
| ENSMMUG00000052713 | leucine rich repeat containing 14B [Source:NCBI gene;Acc:723071]                                 | 0.621522388 | 0.008393816 | 0.036421863 |
| ENSMMUG00000010834 | REL proto-oncogene, NF-kB subunit [Source:VGNC Symbol;Acc:VGNC:76892]                            | 0.623278658 | 0.000274937 | 0.002307393 |
| ENSMMUG00000001028 | SNF related kinase [Source:VGNC Symbol;Acc:VGNC:84074]                                           | 0.623343515 | 0.001365665 | 0.008585411 |
| ENSMMUG00000003067 | endoplasmic reticulum-golgi intermediate compartment 1 [Source:VGNC Symbol;Acc:VGNC:82141]       | 0.625671515 | 0.002491629 | 0.013893309 |
| ENSMMUG00000019022 | serine/threonine kinase 17a [Source:VGNC Symbol;Acc:VGNC:77913]                                  | 0.628463077 | 0.002372453 | 0.013358012 |
| ENSMMUG00000000194 | solute carrier family 27 member 1 [Source:VGNC Symbol;Acc:VGNC:77438]                            | 0.629826982 | 0.004322119 | 0.021617219 |
| ENSMMUG00000018879 | exocyst complex component 3 like 2 [Source:NCBI gene;Acc:713992]                                 | 0.63055145  | 0.004688569 | 0.022871813 |
| ENSMMUG00000006403 | potassium voltage-gated channel subfamily C member 1 [Source:VGNC Symbol;Acc:VGNC:73971]         | 0.631786114 | 0.005267904 | 0.025073972 |
| ENSMMUG00000052680 |                                                                                                  | 0.634415464 | 0.00645501  | 0.029427181 |
| ENSMMUG00000005548 | N-ethylmaleimide sensitive factor, vesicle fusing ATPase [Source:VGNC Symbol;Acc:VGNC:75536]     | 0.635221988 | 0.000306054 | 0.0025122   |
| ENSMMUG00000004913 | mitotic deacetylase associated SANT domain protein [Source:VGNC Symbol;Acc:VGNC:72073]           | 0.635919387 | 0.001965605 | 0.011533603 |
| ENSMMUG00000038349 | crystallin beta-gamma domain containing 3 [Source:NCBI gene;Acc:698282]                          | 0.640078155 | 0.00025132  | 0.002139163 |
| ENSMMUG00000016114 | 2',3'-cyclic nucleotide 3' phosphodiesterase [Source:VGNC Symbol;Acc:VGNC:71279]                 | 0.643508991 | 0.000972449 | 0.006553773 |
| ENSMMUG00000017806 | CD109 molecule [Source:VGNC Symbol;Acc:VGNC:70834]                                               | 0.644000788 | 0.00136286  | 0.008572272 |
| ENSMMUG00000017312 | zinc finger RANBP2-type containing 2 [Source:NCBI gene;Acc:703513]                               | 0.647574483 | 0.002056372 | 0.011925963 |
| ENSMMUG00000000695 | transmembrane protein 245 [Source:VGNC Symbol;Acc:VGNC:78933]                                    | 0.647796342 | 0.005888955 | 0.027399426 |
| ENSMMUG00000008104 | proteasome activator subunit 4 [Source:VGNC Symbol;Acc:VGNC:76295]                               | 0.648763791 | 0.000112436 | 0.001084164 |
| ENSMMUG00000012667 | annexin A1 [Source:VGNC Symbol;Acc:VGNC:69944]                                                   | 0.651337207 | 0.000140115 | 0.001311973 |
| ENSMMUG00000008771 | lysine demethylase 2A [Source:VGNC Symbol;Acc:VGNC:73824]                                        | 0.652169498 | 0.005220495 | 0.024926891 |
| ENSMMUG00000013048 | junction plakoglobin [Source:VGNC Symbol;Acc:VGNC:73960]                                         | 0.653080123 | 0.00259195  | 0.014344361 |
| ENSMMUG00000015306 | calponin 2 [Source:NCBI gene;Acc:721164]                                                         | 0.653583494 | 0.006541821 | 0.029754975 |
| ENSMMUG00000005224 | tetratricopeptide repeat domain 23 [Source:VGNC Symbol;Acc:VGNC:79534]                           | 0.654485358 | 0.000600885 | 0.004428433 |
| ENSMMUG00000061917 |                                                                                                  | 0.655112917 | 0.005878524 | 0.027361525 |
| ENSMMUG00000050119 |                                                                                                  | 0.655956457 | 0.005412771 | 0.025564365 |
| ENSMMUG00000014313 | zinc finger protein 500 [Source:VGNC Symbol;Acc:VGNC:79406]                                      | 0.65956823  | 0.002552141 | 0.014163317 |
| ENSMMUG00000050418 | superoxide dismutase 2 [Source:NCBI gene;Acc:574097]                                             | 0.659937163 | 0.001038879 | 0.006904336 |
| ENSMMUG00000010138 | HECT and RLD domain containing E3 ubiquitin protein ligase 3 [Source:VGNC Symbol;Acc:VGNC:73365] | 0.663061164 | 0.004932954 | 0.023840622 |
| ENSMMUG00000055443 | G protein-coupled receptor 88 [Source:NCBI gene;Acc:716520]                                      | 0.664973091 | 0.001275895 | 0.008145051 |
| ENSMMUG00000049375 |                                                                                                  | 0.666271017 | 0.001389871 | 0.008705754 |
| ENSMMUG00000052999 | lecithin retinol acyltransferase [Source:NCBI gene;Acc:698871]                                   | 0.666906223 | 0.000244046 | 0.002087482 |
| ENSMMUG00000023025 | synaptophysin [Source:VGNC Symbol;Acc:VGNC:78072]                                                | 0.667494087 | 0.000346211 | 0.00278644  |



|                    |                                                                                            |             |             |             |
|--------------------|--------------------------------------------------------------------------------------------|-------------|-------------|-------------|
| ENSMMUG00000014407 | magnesium transporter 1 [Source:VGNC Symbol;Acc:VGNC:74386]                                | 0.667624137 | 0.007105417 | 0.03175167  |
| ENSMMUG00000016715 | p53-induced death domain protein 1 [Source:VGNC Symbol;Acc:VGNC:81498]                     | 0.667654913 | 0.000536184 | 0.004025918 |
| ENSMMUG00000010058 | ATR interacting protein [Source:VGNC Symbol;Acc:VGNC:84235]                                | 0.667857885 | 0.000177752 | 0.001601773 |
| ENSMMUG00000021655 | histone deacetylase 7 [Source:NCBI gene;Acc:718225]                                        | 0.668028872 | 0.00133658  | 0.008464772 |
| ENSMMUG00000000591 | 6-phosphofructo-2-kinase/fructose-2,6-biphosphatase 4 [Source:VGNC Symbol;Acc:VGNC:75960]  | 0.670734396 | 0.001023576 | 0.006820916 |
| ENSMMUG00000023318 | transformation/transcription domain associated protein [Source:VGNC Symbol;Acc:VGNC:78657] | 0.671350935 | 5.41E-05    | 0.000576038 |
| ENSMMUG00000054175 |                                                                                            | 0.672393268 | 3.01E-05    | 0.000348818 |
| ENSMMUG00000005220 | synemin [Source:VGNC Symbol;Acc:VGNC:78201]                                                | 0.675033483 | 0.001871083 | 0.011087626 |
| ENSMMUG00000059788 |                                                                                            | 0.675378765 | 0.00169826  | 0.01025119  |
| ENSMMUG00000055122 |                                                                                            | 0.67562241  | 0.003491069 | 0.018297176 |
| ENSMMUG00000053254 | adenylate kinase 4 [Source:NCBI gene;Acc:698560]                                           | 0.680023755 | 0.002833971 | 0.015371211 |
| ENSMMUG00000022514 | coiled-coil domain containing 186 [Source:VGNC Symbol;Acc:VGNC:70847]                      | 0.680905606 | 4.66E-06    | 6.88E-05    |
| ENSMMUG00000009368 | Abelson helper integration site 1 [Source:VGNC Symbol;Acc:VGNC:81010]                      | 0.681274499 | 0.009696923 | 0.040948641 |
| ENSMMUG00000054789 | family with sequence similarity 174 member A [Source:NCBI gene;Acc:702300]                 | 0.68243979  | 0.004358787 | 0.021751492 |
| ENSMMUG00000008556 | integrin subunit alpha E [Source:NCBI gene;Acc:721483]                                     | 0.682631829 | 0.000546347 | 0.004086851 |
| ENSMMUG00000042951 | signal recognition particle 19 [Source:NCBI gene;Acc:693829]                               | 0.68413021  | 0.001655865 | 0.010091927 |
| ENSMMUG00000019172 | spectrin beta, erythrocytic [Source:VGNC Symbol;Acc:VGNC:77870]                            | 0.684333893 | 0.011708989 | 0.047341947 |
| ENSMMUG00000016742 | CTD small phosphatase like 2 [Source:VGNC Symbol;Acc:VGNC:71593]                           | 0.686086315 | 0.000622528 | 0.004545974 |
| ENSMMUG00000063792 |                                                                                            | 0.686186372 | 0.005084192 | 0.024411889 |
| ENSMMUG00000002428 | zinc finger protein 800 [Source:VGNC Symbol;Acc:VGNC:79658]                                | 0.687526672 | 0.000110466 | 0.001068746 |
| ENSMMUG00000045179 | 1-acylglycerol-3-phosphate O-acyltransferase 3 [Source:NCBI gene;Acc:713301]               | 0.689802484 | 0.01098307  | 0.045122896 |
| ENSMMUG00000017619 | lysophosphatidic acid receptor 5 [Source:VGNC Symbol;Acc:VGNC:74277]                       | 0.690073129 | 0.000168259 | 0.001533538 |
| ENSMMUG00000053617 | torsin 1A interacting protein 2 [Source:NCBI gene;Acc:716691]                              | 0.691718697 | 0.003245867 | 0.01717742  |
| ENSMMUG00000020488 | receptor accessory protein 5 [Source:VGNC Symbol;Acc:VGNC:76864]                           | 0.698080188 | 0.001332501 | 0.008447874 |
| ENSMMUG00000015503 | zinc finger FYVE-type containing 27 [Source:VGNC Symbol;Acc:VGNC:79623]                    | 0.70018992  | 0.000266819 | 0.002258193 |
| ENSMMUG00000021031 | TMF1 regulated nuclear protein 1 [Source:VGNC Symbol;Acc:VGNC:79946]                       | 0.703825876 | 0.009534136 | 0.040342464 |
| ENSMMUG00000009128 | discs large MAGUK scaffold protein 5 [Source:VGNC Symbol;Acc:VGNC:71921]                   | 0.704112481 | 0.00044483  | 0.003414926 |
| ENSMMUG00000059777 |                                                                                            | 0.704264251 | 0.002431112 | 0.013636551 |
| ENSMMUG00000050057 |                                                                                            | 0.704340186 | 0.003304788 | 0.01744299  |
| ENSMMUG00000001302 | sucrase-isomaltase [Source:VGNC Symbol;Acc:VGNC:77213]                                     | 0.705978225 | 0.000432943 | 0.003340802 |
| ENSMMUG00000039526 | tectonic family member 1 [Source:NCBI gene;Acc:711207]                                     | 0.706197279 | 0.009961173 | 0.041790466 |
| ENSMMUG00000018419 | myotubularin related protein 6 [Source:VGNC Symbol;Acc:VGNC:75075]                         | 0.707888985 | 0.001129291 | 0.007366651 |
| ENSMMUG00000001667 | transmembrane protein 210 [Source:VGNC Symbol;Acc:VGNC:79945]                              | 0.708986337 | 0.001590637 | 0.009743975 |
| ENSMMUG00000012472 | phosphatidylinositol-4-phosphate 5-kinase type 1 beta [Source:VGNC Symbol;Acc:VGNC:76001]  | 0.711749606 | 0.00679841  | 0.030677375 |
| ENSMMUG00000006620 | casein kinase 1 gamma 2 [Source:NCBI gene;Acc:709484]                                      | 0.71189702  | 0.011790466 | 0.047623143 |
| ENSMMUG00000016773 | estrogen related receptor beta [Source:VGNC Symbol;Acc:VGNC:72434]                         | 0.712050509 | 0.012410407 | 0.049561487 |
| ENSMMUG00000005744 | glutamate ionotropic receptor NMDA type subunit 2C [Source:VGNC Symbol;Acc:VGNC:73284]     | 0.712111108 | 0.008875351 | 0.038056286 |
| ENSMMUG00000018255 | nuclear factor of activated T cells 5 [Source:VGNC Symbol;Acc:VGNC:75325]                  | 0.713740992 | 0.00181693  | 0.010836431 |
| ENSMMUG00000022504 | alpha-2-glycoprotein 1, zinc-binding [Source:VGNC Symbol;Acc:VGNC:70201]                   | 0.715509983 | 0.003786139 | 0.019561176 |
| ENSMMUG00000055345 | Y RNA [Source:RFAM;Acc:RF00019]                                                            | 0.717699127 | 0.010692016 | 0.044261178 |
| ENSMMUG00000002982 | FAST kinase domains 5 [Source:NCBI gene;Acc:100498658]                                     | 0.718650048 | 0.004161473 | 0.020970891 |
| ENSMMUG00000020489 | HscB mitochondrial iron-sulfur cluster cochaperone [Source:VGNC Symbol;Acc:VGNC:73454]     | 0.719427308 | 0.000235147 | 0.002028908 |
| ENSMMUG00000053458 | ORMDL sphingolipid biosynthesis regulator 2 [Source:NCBI gene;Acc:710296]                  | 0.719519143 | 0.000607555 | 0.004461115 |
| ENSMMUG00000057979 | growth differentiation factor 5 [Source:NCBI gene;Acc:705432]                              | 0.719871603 | 0.000895557 | 0.006137935 |
| ENSMMUG00000021676 | SVOP like [Source:VGNC Symbol;Acc:VGNC:78224]                                              | 0.720048045 | 0.009510145 | 0.040287761 |
| ENSMMUG00000018628 | tec protein tyrosine kinase [Source:VGNC Symbol;Acc:VGNC:78305]                            | 0.720194243 | 0.000743384 | 0.005264797 |
| ENSMMUG00000016772 | solute carrier family 28 member 1 [Source:VGNC Symbol;Acc:VGNC:77444]                      | 0.720706503 | 0.001249228 | 0.008013261 |
| ENSMMUG00000016128 | SIK family kinase 3 [Source:VGNC Symbol;Acc:VGNC:77330]                                    | 0.721284681 | 0.000696863 | 0.004988426 |
| ENSMMUG00000056613 |                                                                                            | 0.72431022  | 0.000158907 | 0.00146616  |
| ENSMMUG00000057187 |                                                                                            | 0.724314117 | 0.004216636 | 0.021208917 |
| ENSMMUG00000008128 | FRAS1 related extracellular matrix 1 [Source:VGNC Symbol;Acc:VGNC:72768]                   | 0.724616739 | 0.005405135 | 0.025555426 |

|                    |                                                                                          |             |             |             |
|--------------------|------------------------------------------------------------------------------------------|-------------|-------------|-------------|
| ENSMMUG00000020588 | protein kinase N2 [Source:VGNC Symbol;Acc:VGNC:76015]                                    | 0.72478398  | 7.31E-05    | 0.000754412 |
| ENSMMUG00000016454 | 4-hydroxyphenylpyruvate dioxygenase [Source:VGNC Symbol;Acc:VGNC:73511]                  | 0.725010269 | 0.000754683 | 0.005316521 |
| ENSMMUG00000004339 | RAB15, member RAS oncogene family [Source:VGNC Symbol;Acc:VGNC:81519]                    | 0.725484241 | 0.005248383 | 0.025021751 |
| ENSMMUG00000017026 | fibrosin like 1 [Source:NCBI gene;Acc:696295]                                            | 0.726277236 | 0.005392818 | 0.025527428 |
| ENSMMUG00000002033 | serine protease 36 [Source:VGNC Symbol;Acc:VGNC:76325]                                   | 0.727573094 | 9.31E-06    | 0.000126974 |
| ENSMMUG00000016909 | meiotic kinetochore factor [Source:NCBI gene;Acc:709179]                                 | 0.729755881 | 0.010320639 | 0.042976348 |
| ENSMMUG00000032677 | microRNA 760 [Source:HGNC Symbol;Acc:HGNC:33666]                                         | 0.731549389 | 0.008266554 | 0.035973928 |
| ENSMMUG00000052324 | MARVEL domain containing 3 [Source:NCBI gene;Acc:710448]                                 | 0.732207103 | 0.001697303 | 0.010250579 |
| ENSMMUG00000008133 | solute carrier family 17 member 5 [Source:VGNC Symbol;Acc:VGNC:77405]                    | 0.73372926  | 0.000554678 | 0.004141413 |
| ENSMMUG00000021938 | nudE neurodevelopment protein 1 like 1 [Source:VGNC Symbol;Acc:VGNC:74982]               | 0.735811222 | 0.002019004 | 0.011766226 |
| ENSMMUG00000008106 | solute carrier family 25 member 17 [Source:NCBI gene;Acc:705547]                         | 0.73885239  | 0.011421379 | 0.046414127 |
| ENSMMUG00000063817 | SRY-box transcription factor 9 [Source:NCBI gene;Acc:574208]                             | 0.739764252 | 0.00280634  | 0.01526282  |
| ENSMMUG00000045959 |                                                                                          | 0.740443299 | 0.003846686 | 0.019805636 |
| ENSMMUG00000019536 | potassium voltage-gated channel subfamily Q member 4 [Source:VGNC Symbol;Acc:VGNC:74007] | 0.740989944 | 0.005256299 | 0.025031304 |
| ENSMMUG00000023406 | HID1 domain containing [Source:VGNC Symbol;Acc:VGNC:73394]                               | 0.744238859 | 0.012217862 | 0.048943754 |
| ENSMMUG00000014110 | adhesion G protein-coupled receptor D2 [Source:VGNC Symbol;Acc:VGNC:69462]               | 0.744948555 | 3.44E-05    | 0.000392991 |
| ENSMMUG00000022867 | kelch domain containing 4 [Source:VGNC Symbol;Acc:VGNC:74122]                            | 0.745386189 | 0.000666522 | 0.004811497 |
| ENSMMUG00000001534 | calpain 3 [Source:VGNC Symbol;Acc:VGNC:70533]                                            | 0.746883808 | 0.001109296 | 0.007283402 |
| ENSMMUG00000056008 |                                                                                          | 0.74835047  | 0.000833444 | 0.005786275 |
| ENSMMUG00000018344 | myosin XVA [Source:VGNC Symbol;Acc:VGNC:75109]                                           | 0.749395622 | 0.000432212 | 0.003337309 |
| ENSMMUG00000003972 | EH domain containing 1 [Source:VGNC Symbol;Acc:VGNC:72175]                               | 0.752868535 | 0.002517212 | 0.014000033 |
| ENSMMUG00000060771 |                                                                                          | 0.755828365 | 0.001176598 | 0.007604389 |
| ENSMMUG00000009825 | zinc finger DHHC-type containing 1 [Source:VGNC Symbol;Acc:VGNC:79102]                   | 0.756779819 | 0.002487895 | 0.013887835 |
| ENSMMUG00000057543 | MyoD family inhibitor domain containing 2 [Source:HGNC Symbol;Acc:HGNC:53442]            | 0.758605598 | 0.002181883 | 0.012490552 |
| ENSMMUG00000015925 | G protein-coupled receptor kinase 2 [Source:VGNC Symbol;Acc:VGNC:73253]                  | 0.758686285 | 0.00450294  | 0.022302402 |
| ENSMMUG00000006763 | cytochrome c oxidase subunit IV isoform 1 [Source:NCBI gene;Acc:693811]                  | 0.75910326  | 0.000598233 | 0.004417042 |
| ENSMMUG00000015477 | lemur tyrosine kinase 2 [Source:VGNC Symbol;Acc:VGNC:74309]                              | 0.760431712 | 0.001340052 | 0.008477795 |
| ENSMMUG00000054010 |                                                                                          | 0.762194442 | 0.002286439 | 0.012959013 |
| ENSMMUG00000019966 | zinc finger protein 557 [Source:NCBI gene;Acc:100424983]                                 | 0.763263369 | 0.000178184 | 0.001604463 |
| ENSMMUG00000003289 | integrin subunit beta 3 [Source:NCBI gene;Acc:717379]                                    | 0.76611853  | 6.14E-05    | 0.000644661 |
| ENSMMUG00000016686 | BUB1 mitotic checkpoint serine/threonine kinase B [Source:VGNC Symbol;Acc:VGNC:70293]    | 0.766909156 | 0.004615312 | 0.022659735 |
| ENSMMUG00000010982 | reticulon 4 receptor like 2 [Source:VGNC Symbol;Acc:VGNC:82229]                          | 0.767460669 | 0.002903858 | 0.01565047  |
| ENSMMUG00000051186 | proteasome 20S subunit alpha 5 [Source:NCBI gene;Acc:698435]                             | 0.768467003 | 3.92E-05    | 0.000437742 |
| ENSMMUG00000020744 | metastasis associated 1 family member 3 [Source:VGNC Symbol;Acc:VGNC:74814]              | 0.768613231 | 0.009465542 | 0.040119168 |
| ENSMMUG00000004765 | Sp2 transcription factor [Source:VGNC Symbol;Acc:VGNC:77845]                             | 0.769227237 | 0.002366169 | 0.013341453 |
| ENSMMUG00000020629 | SDS3 homolog, SIN3A corepressor complex component [Source:NCBI gene;Acc:696166]          | 0.769610035 | 0.001348595 | 0.008518339 |
| ENSMMUG00000060493 |                                                                                          | 0.769720781 | 5.71E-05    | 0.000604341 |
| ENSMMUG00000006528 | Rho GTPase activating protein 15 [Source:VGNC Symbol;Acc:VGNC:69874]                     | 0.769953436 | 1.59E-06    | 2.66E-05    |
| ENSMMUG00000008357 | macrophage erythroblast attacher [Source:VGNC Symbol;Acc:VGNC:74282]                     | 0.772362533 | 0.012257812 | 0.049060703 |
| ENSMMUG00000000381 | IKAROS family zinc finger 2 [Source:VGNC Symbol;Acc:VGNC:73586]                          | 0.775687422 | 9.99E-07    | 1.76E-05    |
| ENSMMUG00000030532 | solute carrier family 25 member 16 [Source:NCBI gene;Acc:694145]                         | 0.776435516 | 0.01166865  | 0.047226681 |
| ENSMMUG00000054784 |                                                                                          | 0.786082579 | 0.008867834 | 0.038051302 |
| ENSMMUG00000023418 | nuclear receptor subfamily 1 group H member 2 [Source:VGNC Symbol;Acc:VGNC:75504]        | 0.786130998 | 4.19E-05    | 0.000462994 |
| ENSMMUG00000049374 |                                                                                          | 0.78672349  | 0.003991577 | 0.020411242 |
| ENSMMUG00000005521 | glycogenin 1 [Source:VGNC Symbol;Acc:VGNC:73332]                                         | 0.78832313  | 0.000486263 | 0.003685748 |
| ENSMMUG00000006295 | matrix metalloproteinase 19 [Source:VGNC Symbol;Acc:VGNC:74896]                          | 0.78839422  | 0.002299652 | 0.013015423 |
| ENSMMUG00000037887 | RBMX like 1 [Source:NCBI gene;Acc:100424767]                                             | 0.790843208 | 0.001437567 | 0.008962156 |
| ENSMMUG00000021840 | stereocilin [Source:NCBI gene;Acc:106996176]                                             | 0.791341607 | 0.000372824 | 0.0029628   |
| ENSMMUG00000003744 | solute carrier family 44 member 2 [Source:VGNC Symbol;Acc:VGNC:77498]                    | 0.792058775 | 6.10E-06    | 8.71E-05    |
| ENSMMUG00000056175 |                                                                                          | 0.793017444 | 0.006564389 | 0.029823641 |
| ENSMMUG00000062048 |                                                                                          | 0.793051648 | 0.000471562 | 0.003592512 |



|                    |                                                                                             |             |             |             |
|--------------------|---------------------------------------------------------------------------------------------|-------------|-------------|-------------|
| ENSMMUG0000009725  | triadin [Source:HGNC Symbol;Acc:HGNC:12261]                                                 | 0.795563048 | 0.000247379 | 0.002111626 |
| ENSMMUG0000000151  | transmembrane serine protease 6 [Source:VGNC Symbol;Acc:VGNC:79038]                         | 0.79558638  | 0.00290506  | 0.01565047  |
| ENSMMUG00000013560 | calcium voltage-gated channel auxiliary subunit gamma 3 [Source:VGNC Symbol;Acc:VGNC:70513] | 0.800477022 | 0.008046831 | 0.035235411 |
| ENSMMUG00000010949 | SPG21 abhydrolase domain containing, maspardin [Source:VGNC Symbol;Acc:VGNC:77970]          | 0.801168141 | 0.007318961 | 0.032535961 |
| ENSMMUG00000014573 | dimethylarginine dimethylaminohydrolase 1 [Source:VGNC Symbol;Acc:VGNC:71753]               | 0.804035786 | 5.95E-09    | 1.82E-07    |
| ENSMMUG00000007544 | trophinin associated protein [Source:VGNC Symbol;Acc:VGNC:78650]                            | 0.804448706 | 0.009551714 | 0.040378161 |
| ENSMMUG00000019438 | utrophin [Source:VGNC Symbol;Acc:VGNC:78749]                                                | 0.804622733 | 0.006034514 | 0.027913999 |
| ENSMMUG00000006470 | complement C1r subcomponent [Source:NCBI gene;Acc:722133]                                   | 0.805160097 | 4.68E-05    | 0.000507698 |
| ENSMMUG00000019500 | methenyltetrahydrofolate synthetase domain containing [Source:VGNC Symbol;Acc:VGNC:75023]   | 0.805838872 | 0.004038998 | 0.0205497   |
| ENSMMUG00000062055 | glyoxalase I [Source:NCBI gene;Acc:719518]                                                  | 0.805981987 | 9.46E-05    | 0.000940244 |
| ENSMMUG00000018788 | transmembrane protein 14B [Source:NCBI gene;Acc:698237]                                     | 0.807431352 | 0.001029384 | 0.006852641 |
| ENSMMUG00000021418 | ATPase H+ transporting V1 subunit D [Source:VGNC Symbol;Acc:VGNC:70060]                     | 0.813289482 | 0.001985353 | 0.011638073 |
| ENSMMUG00000054377 |                                                                                             | 0.815582608 | 5.81E-06    | 8.31E-05    |
| ENSMMUG00000016401 | SGT1 homolog, MIS12 kinetochore complex assembly cochaperone [Source:NCBI gene;Acc:694046]  | 0.816404746 | 0.001116989 | 0.007325879 |
| ENSMMUG00000008615 | nebulin [Source:NCBI gene;Acc:100430324]                                                    | 0.81643588  | 0.000103968 | 0.001012292 |
| ENSMMUG00000056022 |                                                                                             | 0.817034672 | 0.001939333 | 0.011424226 |
| ENSMMUG00000005532 | male germ cell associated kinase [Source:VGNC Symbol;Acc:VGNC:74480]                        | 0.817325136 | 0.000962201 | 0.006492012 |
| ENSMMUG00000002878 | X-ray repair cross complementing 2 [Source:VGNC Symbol;Acc:VGNC:78813]                      | 0.817359281 | 0.006186383 | 0.028440737 |
| ENSMMUG00000032341 | coiled-coil domain containing 160 [Source:VGNC Symbol;Acc:VGNC:70926]                       | 0.820659444 | 0.000865352 | 0.005969515 |
| ENSMMUG00000016652 | cell division cycle and apoptosis regulator 1 [Source:NCBI gene;Acc:693585]                 | 0.82089736  | 0.004057721 | 0.020613428 |
| ENSMMUG00000005480 | carosine synthase 1 [Source:VGNC Symbol;Acc:VGNC:81367]                                     | 0.821397995 | 1.58E-08    | 4.41E-07    |
| ENSMMUG00000057682 |                                                                                             | 0.822288608 | 1.66E-05    | 0.000208882 |
| ENSMMUG00000030891 | hypoxia up-regulated 1 [Source:VGNC Symbol;Acc:VGNC:73399]                                  | 0.825319618 | 0.001861154 | 0.011034247 |
| ENSMMUG00000060967 |                                                                                             | 0.828183773 | 0.011773553 | 0.047570873 |
| ENSMMUG00000062397 |                                                                                             | 0.830253277 | 0.00707548  | 0.031688838 |
| ENSMMUG00000020226 | WD repeat and SOCS box containing 1 [Source:VGNC Symbol;Acc:VGNC:79186]                     | 0.83130768  | 0.003152283 | 0.016756212 |
| ENSMMUG00000001532 | glucosidase alpha, neutral C [Source:NCBI gene;Acc:708126]                                  | 0.831774101 | 3.90E-08    | 1.00E-06    |
| ENSMMUG00000063322 |                                                                                             | 0.832663023 | 0.005415969 | 0.025566278 |
| ENSMMUG00000011061 | ankyrin repeat domain 31 [Source:VGNC Symbol;Acc:VGNC:84277]                                | 0.833084069 | 4.21E-05    | 0.000463801 |
| ENSMMUG00000022104 | family with sequence similarity 174 member C [Source:NCBI gene;Acc:706393]                  | 0.833284871 | 2.96E-05    | 0.000343903 |
| ENSMMUG00000022730 | cytochrome P450, family 3, subfamily A, polypeptide 5 [Source:NCBI gene;Acc:678692]         | 0.833391846 | 0.000243929 | 0.002087482 |
| ENSMMUG00000052831 |                                                                                             | 0.834021109 | 0.003617709 | 0.018853648 |
| ENSMMUG00000060533 |                                                                                             | 0.836312315 | 0.000990994 | 0.006652547 |
| ENSMMUG00000056644 |                                                                                             | 0.836596275 | 0.001813292 | 0.010820124 |
| ENSMMUG00000009249 | ring finger protein, LIM domain interacting [Source:NCBI gene;Acc:703471]                   | 0.836793812 | 0.000356202 | 0.002863007 |
| ENSMMUG00000053004 |                                                                                             | 0.837324368 | 0.000658285 | 0.004772164 |
| ENSMMUG00000052424 |                                                                                             | 0.837742907 | 0.000329487 | 0.002677028 |
| ENSMMUG00000053133 | BPI fold containing family B member 2 [Source:NCBI gene;Acc:710915]                         | 0.839362589 | 0.001668191 | 0.010136101 |
| ENSMMUG00000012442 | DExD/H-box helicase 58 [Source:VGNC Symbol;Acc:VGNC:71672]                                  | 0.840300358 | 6.56E-06    | 9.28E-05    |
| ENSMMUG00000064650 | SPEM family member 3 [Source:NCBI gene;Acc:106993878]                                       | 0.840918891 | 1.04E-07    | 2.44E-06    |
| ENSMMUG00000053488 | small integral membrane protein 19 [Source:NCBI gene;Acc:705371]                            | 0.841311989 | 1.30E-05    | 0.000170443 |
| ENSMMUG00000001944 | chromosome 20 C16orf72 homolog [Source:VGNC Symbol;Acc:VGNC:70443]                          | 0.846315538 | 0.00076716  | 0.005398063 |
| ENSMMUG00000011994 | T cell activation RhoGTPase activating protein [Source:VGNC Symbol;Acc:VGNC:78126]          | 0.847309539 | 0.004117364 | 0.020832086 |
| ENSMMUG00000023599 | chromosome alignment maintaining phosphoprotein 1 [Source:VGNC Symbol;Acc:VGNC:71061]       | 0.847853934 | 2.78E-05    | 0.00032643  |
| ENSMMUG00000031274 | GDF5 antisense RNA 1 [Source:HGNC Symbol;Acc:HGNC:33435]                                    | 0.851225144 | 0.009566461 | 0.040426231 |
| ENSMMUG00000003297 | coiled-coil domain containing 63 [Source:VGNC Symbol;Acc:VGNC:70879]                        | 0.85261787  | 0.006051963 | 0.02796231  |
| ENSMMUG00000008126 | lysine demethylase 7A [Source:VGNC Symbol;Acc:VGNC:73886]                                   | 0.853208717 | 5.39E-05    | 0.000574079 |
| ENSMMUG00000002923 | colony stimulating factor 3 [Source:VGNC Symbol;Acc:VGNC:71520]                             | 0.853327017 | 0.001052245 | 0.006973813 |
| ENSMMUG00000050516 |                                                                                             | 0.853503167 | 0.000162592 | 0.001490965 |
| ENSMMUG00000006291 | protocadherin 12 [Source:VGNC Symbol;Acc:VGNC:75776]                                        | 0.854017493 | 0.004266279 | 0.021413646 |
| ENSMMUG00000006377 | plastin 3 [Source:VGNC Symbol;Acc:VGNC:76181]                                               | 0.854368447 | 0.004361481 | 0.021754723 |

|                     |                                                                                                                    |             |             |             |
|---------------------|--------------------------------------------------------------------------------------------------------------------|-------------|-------------|-------------|
| ENSMMUG00000021082  | potassium sodium-activated channel subfamily T member 2 [Source:VGNC Symbol;Acc:VGNC:73857]                        | 0.85455477  | 7.44E-08    | 1.80E-06    |
| ENSMMUG00000017260  | G protein-coupled receptor 65 [Source:VGNC Symbol;Acc:VGNC:73140]                                                  | 0.855717693 | 0.001068794 | 0.007060055 |
| ENSMMUG000000051669 |                                                                                                                    | 0.855893623 | 5.64E-06    | 8.08E-05    |
| ENSMMUG00000008336  | acyl-CoA dehydrogenase family member 10 [Source:NCBI gene;Acc:711080]                                              | 0.856124923 | 6.67E-08    | 1.65E-06    |
| ENSMMUG000000021891 | kinesin light chain 3 [Source:VGNC Symbol;Acc:VGNC:73870]                                                          | 0.856241656 | 0.009519985 | 0.040315185 |
| ENSMMUG00000000382  | sperm associated antigen 16 [Source:VGNC Symbol;Acc:VGNC:77977]                                                    | 0.860395015 | 0.007599429 | 0.033558539 |
| ENSMMUG00000015476  | unc-13 homolog A [Source:NCBI gene;Acc:720000]                                                                     | 0.860736738 | 1.28E-05    | 0.000168299 |
| ENSMMUG00000060987  |                                                                                                                    | 0.860879204 | 7.11E-05    | 0.000735746 |
| ENSMMUG00000042077  | DNA damage regulated autophagy modulator 1 [Source:NCBI gene;Acc:697427]                                           | 0.861403861 | 5.18E-06    | 7.52E-05    |
| ENSMMUG00000020916  | coiled-coil domain containing 158 [Source:NCBI gene;Acc:699735]                                                    | 0.862659293 | 4.59E-09    | 1.43E-07    |
| ENSMMUG00000010357  | cyclin and CBS domain divalent metal cation transport mediator 1 [Source:NCBI gene;Acc:708335]                     | 0.863533321 | 0.001662907 | 0.010124545 |
| ENSMMUG00000056477  |                                                                                                                    | 0.864494762 | 7.70E-05    | 0.000788495 |
| ENSMMUG00000009792  | heterogeneous nuclear ribonucleoprotein H3 [Source:VGNC Symbol;Acc:VGNC:73497]                                     | 0.865971514 | 0.000437608 | 0.003368123 |
| ENSMMUG00000017402  | phosphoglucomutase 2 like 1 [Source:VGNC Symbol;Acc:VGNC:75839]                                                    | 0.8662277   | 0.004359016 | 0.021751492 |
| ENSMMUG00000061995  |                                                                                                                    | 0.866422044 | 1.48E-06    | 2.51E-05    |
| ENSMMUG00000002452  | solute carrier family 35 member C1 [Source:VGNC Symbol;Acc:VGNC:77524]                                             | 0.866769588 | 0.00429628  | 0.021519132 |
| ENSMMUG00000021553  | dehydrogenase/reductase 13 [Source:VGNC Symbol;Acc:VGNC:81387]                                                     | 0.867773129 | 9.05E-05    | 0.000907956 |
| ENSMMUG00000013105  | astrotactin 2 [Source:VGNC Symbol;Acc:VGNC:70087]                                                                  | 0.867837907 | 0.007216664 | 0.032176755 |
| ENSMMUG00000051583  |                                                                                                                    | 0.869506624 | 0.008582464 | 0.037012455 |
| ENSMMUG00000021446  | diacylglycerol kinase zeta [Source:VGNC Symbol;Acc:VGNC:71789]                                                     | 0.870777416 | 8.36E-06    | 0.000115386 |
| ENSMMUG00000006819  | helicase for meiosis 1 [Source:NCBI gene;Acc:704516]                                                               | 0.871362728 | 0.005800905 | 0.027074861 |
| ENSMMUG00000010336  | DOP1 leucine zipper like protein B [Source:VGNC Symbol;Acc:VGNC:71832]                                             | 0.872099187 | 0.000295511 | 0.002440718 |
| ENSMMUG00000012469  | KIAA2013 [Source:VGNC Symbol;Acc:VGNC:73918]                                                                       | 0.874338174 | 1.99E-05    | 0.00024387  |
| ENSMMUG00000006293  | SAP domain containing ribonucleoprotein [Source:NCBI gene;Acc:709932]                                              | 0.875374479 | 3.44E-06    | 5.29E-05    |
| ENSMMUG00000015288  | adaptor related protein complex 3 subunit sigma 1 [Source:VGNC Symbol;Acc:VGNC:69867]                              | 0.876310218 | 0.008258999 | 0.035954114 |
| ENSMMUG00000058544  | nucleosome assembly protein 1 like 5 [Source:NCBI gene;Acc:703223]                                                 | 0.877235461 | 0.001470504 | 0.009143696 |
| ENSMMUG00000057560  |                                                                                                                    | 0.881521378 | 0.000873658 | 0.006013175 |
| ENSMMUG00000005906  | heat shock transcription factor 4 [Source:VGNC Symbol;Acc:VGNC:73533]                                              | 0.882468412 | 0.007011309 | 0.031436702 |
| ENSMMUG00000021868  | TNF receptor associated protein 1 [Source:VGNC Symbol;Acc:VGNC:79019]                                              | 0.882606397 | 0.0019195   | 0.011329444 |
| ENSMMUG00000020346  | carboxypeptidase X, M14 family member 2 [Source:VGNC Symbol;Acc:VGNC:71596]                                        | 0.882704848 | 0.000309857 | 0.002539936 |
| ENSMMUG00000021267  | potassium calcium-activated channel subfamily N member 4 [Source:NCBI gene;Acc:712383]                             | 0.883119779 | 0.00081858  | 0.005706235 |
| ENSMMUG00000021812  | ERCC excision repair 8, CSA ubiquitin ligase complex subunit [Source:VGNC Symbol;Acc:VGNC:72425]                   | 0.883569179 | 3.70E-07    | 7.61E-06    |
| ENSMMUG00000054568  |                                                                                                                    | 0.884410364 | 0.005347446 | 0.025382884 |
| ENSMMUG00000023032  | intraflagellar transport 81 [Source:VGNC Symbol;Acc:VGNC:73389]                                                    | 0.885074168 | 0.002344275 | 0.0132367   |
| ENSMMUG00000054768  |                                                                                                                    | 0.885929203 | 0.000745411 | 0.005269798 |
| ENSMMUG00000016104  | chondroitin sulfate proteoglycan 4 [Source:VGNC Symbol;Acc:VGNC:71525]                                             | 0.886073055 | 0.001334733 | 0.008457544 |
| ENSMMUG00000016384  | nucleoporin 205 [Source:VGNC Symbol;Acc:VGNC:75432]                                                                | 0.886524224 | 0.004367784 | 0.021777093 |
| ENSMMUG00000014981  | homeobox containing 1 [Source:VGNC Symbol;Acc:VGNC:73443]                                                          | 0.887836485 | 0.001170486 | 0.007578732 |
| ENSMMUG00000011347  | DEAH-box helicase 36 [Source:VGNC Symbol;Acc:VGNC:71623]                                                           | 0.887855094 | 9.92E-13    | 5.80E-11    |
| ENSMMUG00000015922  | formin binding protein 1 like [Source:VGNC Symbol;Acc:VGNC:72543]                                                  | 0.888828758 | 2.61E-06    | 4.13E-05    |
| ENSMMUG00000058241  | leucine rich repeat and Ig domain containing 3 [Source:NCBI gene;Acc:721484]                                       | 0.888955028 | 0.001083485 | 0.007141342 |
| ENSMMUG00000018176  | clavesin 2 [Source:VGNC Symbol;Acc:VGNC:71322]                                                                     | 0.888987883 | 0.002634372 | 0.014518993 |
| ENSMMUG00000044496  | H2A histone family, member X [Source:NCBI gene;Acc:703073]                                                         | 0.890374417 | 0.01082515  | 0.044642562 |
| ENSMMUG00000004417  | secretion associated Ras related GTPase 1B [Source:VGNC Symbol;Acc:VGNC:76970]                                     | 0.892027273 | 2.75E-09    | 8.93E-08    |
| ENSMMUG00000064892  |                                                                                                                    | 0.893206661 | 0.001624493 | 0.009915864 |
| ENSMMUG00000008077  | dynein cytoplasmic 2 light intermediate chain 1 [Source:VGNC Symbol;Acc:VGNC:71899]                                | 0.893854478 | 0.000274596 | 0.002307393 |
| ENSMMUG00000015861  | cytochrome c oxidase subunit VIIb [Source:NCBI gene;Acc:706099]                                                    | 0.895145065 | 0.003015157 | 0.016127523 |
| ENSMMUG00000018787  | PAK1 interacting protein 1 [Source:VGNC Symbol;Acc:VGNC:75661]                                                     | 0.895499135 | 0.000603824 | 0.00444189  |
| ENSMMUG00000003283  | extracellular leucine rich repeat and fibronectin type III domain containing 1 [Source:VGNC Symbol;Acc:VGNC:72204] | 0.897688091 | 0.000280218 | 0.002345135 |
| ENSMMUG00000014880  | sortilin related receptor 1 [Source:NCBI gene;Acc:713011]                                                          | 0.89830107  | 0.003765162 | 0.0194778   |
| ENSMMUG00000001801  | membrane associated guanylate kinase, WW and PDZ domain containing 2 [Source:VGNC Symbol;Acc:VGNC:74312]           | 0.899467271 | 0.002272284 | 0.012890987 |



|                    |                                                                                                |             |             |             |
|--------------------|------------------------------------------------------------------------------------------------|-------------|-------------|-------------|
| ENSMMUG0000003436  | tubulin tyrosine ligase like 6 [Source:VGNC Symbol;Acc:VGNC:79632]                             | 0.899818538 | 0.000938005 | 0.006364617 |
| ENSMMUG00000060879 | homeobox B13 [Source:NCBI gene;Acc:697572]                                                     | 0.900370559 | 0.000544889 | 0.004081045 |
| ENSMMUG00000006101 | myosin heavy chain 9 [Source:VGNC Symbol;Acc:VGNC:75102]                                       | 0.900648471 | 0.000396399 | 0.003111847 |
| ENSMMUG00000008637 | WD repeat containing antisense to TP53 [Source:VGNC Symbol;Acc:VGNC:79508]                     | 0.901447915 | 0.008328739 | 0.036178811 |
| ENSMMUG00000051131 | MAS related GPR family member G [Source:NCBI gene;Acc:721253]                                  | 0.901833333 | 0.006260298 | 0.028670491 |
| ENSMMUG00000018166 | MYB proto-oncogene, transcription factor [Source:VGNC Symbol;Acc:VGNC:75089]                   | 0.902168207 | 0.001110627 | 0.007288149 |
| ENSMMUG00000014702 | TATA-box binding protein associated factor 2 [Source:VGNC Symbol;Acc:VGNC:78090]               | 0.902300901 | 0.011506799 | 0.046713704 |
| ENSMMUG00000058275 | arrestin domain containing 5 [Source:NCBI gene;Acc:697277]                                     | 0.904528794 | 0.004762535 | 0.023185416 |
| ENSMMUG00000008875 | solute carrier family 35 member F5 [Source:VGNC Symbol;Acc:VGNC:77567]                         | 0.905730231 | 0.000239763 | 0.002064274 |
| ENSMMUG00000022933 | DNA topoisomerase I mitochondrial [Source:VGNC Symbol;Acc:VGNC:79821]                          | 0.905899491 | 4.26E-08    | 1.09E-06    |
| ENSMMUG00000011043 | endoplasmic reticulum aminopeptidase 2 [Source:VGNC Symbol;Acc:VGNC:72141]                     | 0.905960773 | 3.05E-10    | 1.19E-08    |
| ENSMMUG00000031024 | lactate dehydrogenase A [Source:NCBI gene;Acc:694309]                                          | 0.906089464 | 0.001141068 | 0.007430902 |
| ENSMMUG00000012560 | HERV-H LTR-associating 1 [Source:NCBI gene;Acc:100430297]                                      | 0.907404377 | 0.004655417 | 0.022773787 |
| ENSMMUG00000017561 | solute carrier family 43 member 2 [Source:VGNC Symbol;Acc:VGNC:77554]                          | 0.908234678 | 0.000925317 | 0.006296365 |
| ENSMMUG00000002324 |                                                                                                | 0.908778278 | 0.000340811 | 0.002754082 |
| ENSMMUG00000055290 | netrin 1 [Source:NCBI gene;Acc:717645]                                                         | 0.909211374 | 0.004498851 | 0.022291368 |
| ENSMMUG00000016001 | vesicle amine transport 1 [Source:VGNC Symbol;Acc:VGNC:79058]                                  | 0.909952803 | 0.005298117 | 0.025188668 |
| ENSMMUG00000061684 |                                                                                                | 0.911689152 | 0.007615052 | 0.033615136 |
| ENSMMUG00000053496 |                                                                                                | 0.91177129  | 0.008490809 | 0.036696476 |
| ENSMMUG00000008515 | sorting nexin 7 [Source:NCBI gene;Acc:716015]                                                  | 0.912178104 | 0.000191064 | 0.001708872 |
| ENSMMUG00000055209 |                                                                                                | 0.914188875 | 0.000248213 | 0.002117239 |
| ENSMMUG00000049432 | olfactory receptor 2T33 [Source:NCBI gene;Acc:706331]                                          | 0.916159642 | 4.54E-06    | 6.71E-05    |
| ENSMMUG00000014425 | protein kinase C epsilon [Source:VGNC Symbol;Acc:VGNC:76412]                                   | 0.916481493 | 0.005684093 | 0.026652529 |
| ENSMMUG00000065269 | Rho family GTPase 2 [Source:NCBI gene;Acc:712559]                                              | 0.917614096 | 0.012350123 | 0.049383999 |
| ENSMMUG00000058621 |                                                                                                | 0.91805807  | 8.04E-05    | 0.000819589 |
| ENSMMUG00000003233 | SET domain containing 1A, histone lysine methyltransferase [Source:NCBI gene;Acc:712416]       | 0.918849522 | 1.38E-06    | 2.36E-05    |
| ENSMMUG00000018029 | amyloid beta precursor like protein 2 [Source:VGNC Symbol;Acc:VGNC:69984]                      | 0.918930215 | 0.004005556 | 0.020465248 |
| ENSMMUG00000021142 | DENN domain containing 5A [Source:VGNC Symbol;Acc:VGNC:71674]                                  | 0.919350998 | 0.004798663 | 0.02332337  |
| ENSMMUG00000003956 | interferon alpha and beta receptor subunit 2 [Source:VGNC Symbol;Acc:VGNC:81330]               | 0.919662197 | 2.94E-05    | 0.000341826 |
| ENSMMUG00000021022 | deoxynucleotidyltransferase terminal interacting protein 1 [Source:VGNC Symbol;Acc:VGNC:71845] | 0.921024121 | 0.007972657 | 0.034948953 |
| ENSMMUG00000022931 | NTPase KAP family P-loop domain containing 1 [Source:VGNC Symbol;Acc:VGNC:75250]               | 0.921601616 | 0.001018819 | 0.006805003 |
| ENSMMUG00000009496 | centrosomal protein 41 [Source:VGNC Symbol;Acc:VGNC:70937]                                     | 0.924787132 | 0.010614395 | 0.044031174 |
| ENSMMUG00000053737 | BarH like homeobox 2 [Source:NCBI gene;Acc:696831]                                             | 0.926370143 | 9.24E-05    | 0.000921237 |
| ENSMMUG00000064612 | Metazoan signal recognition particle RNA [Source:RFAM;Acc:RF00017]                             | 0.927621847 | 0.000929324 | 0.006320035 |
| ENSMMUG00000014674 | golgin, RAB6 interacting [Source:VGNC Symbol;Acc:VGNC:73012]                                   | 0.927861204 | 0.002370624 | 0.013353992 |
| ENSMMUG00000055498 | leucine carboxyl methyltransferase 2 [Source:NCBI gene;Acc:710047]                             | 0.930413719 | 0.000881777 | 0.006062093 |
| ENSMMUG00000009318 | BCL9 like [Source:VGNC Symbol;Acc:VGNC:70113]                                                  | 0.930906596 | 1.53E-05    | 0.000194777 |
| ENSMMUG00000054184 | Metazoan signal recognition particle RNA [Source:RFAM;Acc:RF00017]                             | 0.931460013 | 1.76E-05    | 0.000219387 |
| ENSMMUG00000005483 | ribosomal protein S6 kinase B2 [Source:VGNC Symbol;Acc:VGNC:76934]                             | 0.932675841 | 9.97E-05    | 0.000981606 |
| ENSMMUG00000001269 | chromosome 16 C17orf80 homolog [Source:VGNC Symbol;Acc:VGNC:70440]                             | 0.932904987 | 5.99E-06    | 8.57E-05    |
| ENSMMUG00000021017 | acylglycerol kinase [Source:VGNC Symbol;Acc:VGNC:69669]                                        | 0.933188529 | 0.003348213 | 0.017624693 |
| ENSMMUG00000000582 | NOP58 ribonucleoprotein [Source:VGNC Symbol;Acc:VGNC:75284]                                    | 0.933477491 | 0.001861017 | 0.011034247 |
| ENSMMUG00000003585 | ALG5 dolichyl-phosphate beta-glucosyltransferase [Source:VGNC Symbol;Acc:VGNC:69647]           | 0.939191196 | 7.90E-05    | 0.000806746 |
| ENSMMUG00000000389 | nucleolar protein 6 [Source:VGNC Symbol;Acc:VGNC:75218]                                        | 0.939747561 | 0.00168724  | 0.010205245 |
| ENSMMUG00000014123 | alanyl-tRNA editing protein Aarsd1 [Source:NCBI gene;Acc:712203]                               | 0.94000173  | 0.003203655 | 0.017014178 |
| ENSMMUG00000022031 | DNA polymerase alpha 2, accessory subunit [Source:NCBI gene;Acc:716541]                        | 0.94164476  | 0.000634457 | 0.004627374 |
| ENSMMUG00000020603 | pyridine nucleotide-disulphide oxidoreductase domain 2 [Source:NCBI gene;Acc:707797]           | 0.942098427 | 1.33E-05    | 0.000172819 |
| ENSMMUG00000029638 | chromosome 7 C15orf65 homolog [Source:VGNC Symbol;Acc:VGNC:70689]                              | 0.942277725 | 0.012219591 | 0.048943754 |
| ENSMMUG00000005080 | ubiquitin conjugating enzyme E2 G1 [Source:VGNC Symbol;Acc:VGNC:78695]                         | 0.943363626 | 4.57E-07    | 9.09E-06    |
| ENSMMUG00000061586 | chromosome 4 C6orf52 homolog [Source:NCBI gene;Acc:702114]                                     | 0.943553506 | 0.000172392 | 0.001560516 |
| ENSMMUG00000037413 | U5 spliceosomal RNA [Source:RFAM;Acc:RF00020]                                                  | 0.943575869 | 8.84E-05    | 0.000889307 |

|                    |                                                                                                               |             |             |             |
|--------------------|---------------------------------------------------------------------------------------------------------------|-------------|-------------|-------------|
| ENSMMUG00000040268 | phosphatidylinositol transfer protein alpha [Source:NCBI gene;Acc:721228]                                     | 0.943761484 | 0.001729697 | 0.010388589 |
| ENSMMUG00000020605 | heparanase 2 (inactive) [Source:NCBI gene;Acc:708795]                                                         | 0.94418331  | 0.001853446 | 0.011015814 |
| ENSMMUG00000001827 | phospholipid phosphatase related 1 [Source:NCBI gene;Acc:714164]                                              | 0.945883241 | 0.000680889 | 0.004891619 |
| ENSMMUG00000009381 | WW domain binding protein 2 [Source:VGNC Symbol;Acc:VGNC:78786]                                               | 0.947164649 | 0.001742831 | 0.010442787 |
| ENSMMUG00000014149 | LYN proto-oncogene, Src family tyrosine kinase [Source:VGNC Symbol;Acc:VGNC:74464]                            | 0.947648423 | 5.26E-11    | 2.29E-09    |
| ENSMMUG00000018720 | cytoskeleton associated protein 2 [Source:VGNC Symbol;Acc:VGNC:71229]                                         | 0.951956616 | 3.19E-05    | 0.000366857 |
| ENSMMUG00000001083 | glycine N-acyltransferase-like protein 1 [Source:NCBI gene;Acc:701437]                                        | 0.952510309 | 0.00014784  | 0.00137677  |
| ENSMMUG00000056552 |                                                                                                               | 0.953540623 | 0.004225904 | 0.021246609 |
| ENSMMUG00000002181 | SFI1 centrin binding protein [Source:VGNC Symbol;Acc:VGNC:77328]                                              | 0.954610598 | 3.20E-07    | 6.66E-06    |
| ENSMMUG00000021736 | single-pass membrane protein with coiled-coil domains 2 [Source:VGNC Symbol;Acc:VGNC:77808]                   | 0.959117612 | 0.000203116 | 0.00179654  |
| ENSMMUG00000042837 | mediator complex subunit 26 [Source:NCBI gene;Acc:100424604]                                                  | 0.959621409 | 0.004683307 | 0.022870599 |
| ENSMMUG00000055601 |                                                                                                               | 0.959768767 | 4.62E-05    | 0.000502035 |
| ENSMMUG00000054055 | zinc finger protein 93 [Source:NCBI gene;Acc:720434]                                                          | 0.959959408 | 4.02E-05    | 0.000446907 |
| ENSMMUG00000057906 |                                                                                                               | 0.962682412 | 4.47E-07    | 8.93E-06    |
| ENSMMUG00000064242 |                                                                                                               | 0.962694916 | 0.002845141 | 0.015417834 |
| ENSMMUG00000058106 | otoconin 90 [Source:NCBI gene;Acc:100429699]                                                                  | 0.962892837 | 0.004402913 | 0.021915747 |
| ENSMMUG00000049850 | proline rich and Gla domain 4 [Source:NCBI gene;Acc:694707]                                                   | 0.963464316 | 0.000182664 | 0.0016411   |
| ENSMMUG00000011278 | cysteine rich with EGF like domains 2 [Source:NCBI gene;Acc:720586]                                           | 0.965557154 | 0.000126414 | 0.001202491 |
| ENSMMUG00000053916 |                                                                                                               | 0.966203328 | 0.000605178 | 0.004446387 |
| ENSMMUG00000060754 | Metazoan signal recognition particle RNA [Source:RFAM;Acc:RF00017]                                            | 0.966999999 | 3.37E-05    | 0.000385731 |
| ENSMMUG00000013846 | 5-hydroxytryptamine receptor 3C [Source:VGNC Symbol;Acc:VGNC:84171]                                           | 0.968100831 | 0.002319307 | 0.013114266 |
| ENSMMUG00000015866 | vesicle transport through interaction with t-SNAREs 1B [Source:NCBI gene;Acc:711113]                          | 0.969572055 | 0.001492499 | 0.009261228 |
| ENSMMUG00000006893 | D-amino acid oxidase [Source:VGNC Symbol;Acc:VGNC:71729]                                                      | 0.970259242 | 0.002888784 | 0.01558382  |
| ENSMMUG00000053710 |                                                                                                               | 0.971486213 | 1.56E-07    | 3.54E-06    |
| ENSMMUG00000005793 | ankyrin repeat and fibronectin type III domain containing 1 [Source:VGNC Symbol;Acc:VGNC:69712]               | 0.973094722 | 0.0030683   | 0.016367913 |
| ENSMMUG00000000953 | family with sequence similarity 207 member A [Source:VGNC Symbol;Acc:VGNC:72273]                              | 0.974307515 | 0.002138589 | 0.012313338 |
| ENSMMUG00000020258 | E2F transcription factor 4 [Source:VGNC Symbol;Acc:VGNC:72025]                                                | 0.976000815 | 6.51E-06    | 9.23E-05    |
| ENSMMUG00000009494 | carboxypeptidase A5 [Source:VGNC Symbol;Acc:VGNC:71410]                                                       | 0.976061211 | 0.003457224 | 0.018135664 |
| ENSMMUG00000002347 | myosin light chain 2 [Source:VGNC Symbol;Acc:VGNC:75103]                                                      | 0.976642357 | 0.007085089 | 0.031720009 |
| ENSMMUG00000062394 | C-C motif chemokine receptor 2 [Source:NCBI gene;Acc:574098]                                                  | 0.977162248 | 0.002831162 | 0.015362932 |
| ENSMMUG00000001568 | AT-rich interaction domain 3B [Source:VGNC Symbol;Acc:VGNC:69827]                                             | 0.979252988 | 0.003916072 | 0.020122581 |
| ENSMMUG00000010943 | protein kinase AMP-activated non-catalytic subunit gamma 2 [Source:VGNC Symbol;Acc:VGNC:81745]                | 0.97938941  | 0.006234212 | 0.028605716 |
| ENSMMUG00000013671 | elongation factor for RNA polymerase II [Source:VGNC Symbol;Acc:VGNC:72088]                                   | 0.979816869 | 3.44E-06    | 5.29E-05    |
| ENSMMUG00000058042 | heparan sulfate-glucosamine 3-sulfotransferase 2 [Source:NCBI gene;Acc:699722]                                | 0.980336128 | 0.001832195 | 0.010900334 |
| ENSMMUG00000010141 | family with sequence similarity 13 member A [Source:VGNC Symbol;Acc:VGNC:72299]                               | 0.980418547 | 3.03E-07    | 6.35E-06    |
| ENSMMUG00000001739 | ATPase sarcoplasmic/endoplasmic reticulum Ca <sup>2+</sup> transporting 2 [Source:VGNC Symbol;Acc:VGNC:70178] | 0.980921701 | 3.12E-06    | 4.85E-05    |
| ENSMMUG00000053625 | sterol-C5-desaturase [Source:NCBI gene;Acc:706827]                                                            | 0.981002235 | 0.000188764 | 0.001690826 |
| ENSMMUG00000001220 | adhesion G protein-coupled receptor E1 [Source:VGNC Symbol;Acc:VGNC:69561]                                    | 0.98206975  | 0.000281529 | 0.002350554 |
| ENSMMUG00000005729 | GIPC PDZ domain containing family member 1 [Source:VGNC Symbol;Acc:VGNC:72932]                                | 0.9834653   | 0.000562151 | 0.004184168 |
| ENSMMUG00000008623 | coiled-coil domain containing 22 [Source:VGNC Symbol;Acc:VGNC:70899]                                          | 0.983876866 | 1.34E-05    | 0.000173984 |
| ENSMMUG00000021408 | family with sequence similarity 222 member B [Source:VGNC Symbol;Acc:VGNC:72352]                              | 0.985053403 | 1.32E-05    | 0.00017185  |
| ENSMMUG00000004748 | zinc finger and BTB domain containing 1 [Source:VGNC Symbol;Acc:VGNC:79238]                                   | 0.985495772 | 0.001548908 | 0.009546949 |
| ENSMMUG00000012523 | flotillin 2 [Source:NCBI gene;Acc:114669752]                                                                  | 0.985855124 | 4.67E-05    | 0.000506835 |
| ENSMMUG00000000024 | prostaglandin D2 receptor [Source:VGNC Symbol;Acc:VGNC:76467]                                                 | 0.987893648 | 0.009812484 | 0.041339025 |
| ENSMMUG00000003006 | serine palmitoyltransferase long chain base subunit 1 [Source:VGNC Symbol;Acc:VGNC:77873]                     | 0.988497316 | 0.003971765 | 0.02033598  |
| ENSMMUG00000010536 | discs large MAGUK scaffold protein 4 [Source:VGNC Symbol;Acc:VGNC:71920]                                      | 0.989217797 | 1.19E-06    | 2.07E-05    |
| ENSMMUG00000021554 | PHD finger protein 12 [Source:VGNC Symbol;Acc:VGNC:75838]                                                     | 0.990765019 | 1.58E-05    | 0.000200734 |
| ENSMMUG00000040274 | MAGE family member A4 [Source:NCBI gene;Acc:710825]                                                           | 0.99167013  | 0.000132351 | 0.001252001 |
| ENSMMUG00000031106 | ubiquitin recognition factor in ER associated degradation 1 [Source:NCBI gene;Acc:711716]                     | 0.992624136 | 1.66E-10    | 6.83E-09    |
| ENSMMUG00000010940 | telomerase reverse transcriptase [Source:VGNC Symbol;Acc:VGNC:78313]                                          | 0.994311057 | 1.52E-07    | 3.45E-06    |
| ENSMMUG00000009840 | family with sequence similarity 227 member B [Source:VGNC Symbol;Acc:VGNC:72370]                              | 0.994675772 | 0.001064089 | 0.007040621 |



|                    |                                                                                                     |             |             |             |
|--------------------|-----------------------------------------------------------------------------------------------------|-------------|-------------|-------------|
| ENSMMUG00000039397 | tubulin folding cofactor E like [Source:NCBI gene;Acc:706506]                                       | 0.99638782  | 0.000666275 | 0.004811497 |
| ENSMMUG00000058587 | family with sequence similarity 131 member C [Source:NCBI gene;Acc:703604]                          | 0.996788065 | 0.00033793  | 0.002738193 |
| ENSMMUG00000051420 | homeobox B5 [Source:NCBI gene;Acc:696732]                                                           | 0.99689421  | 0.000717376 | 0.005110821 |
| ENSMMUG00000013397 | peroxiredoxin 5 [Source:NCBI gene;Acc:719764]                                                       | 0.999648376 | 2.22E-06    | 3.56E-05    |
| ENSMMUG00000007366 |                                                                                                     | 0.99997226  | 0.000370892 | 0.002955291 |
| ENSMMUG00000056343 |                                                                                                     | 1.001140304 | 0.002385466 | 0.013412366 |
| ENSMMUG00000005486 | protein tyrosine phosphatase receptor type C associated protein [Source:VGNC Symbol;Acc:VGNC:76613] | 1.002181168 | 0.000779966 | 0.005475307 |
| ENSMMUG00000020583 | FTO alpha-ketoglutarate dependent dioxygenase [Source:VGNC Symbol;Acc:VGNC:72772]                   | 1.002285689 | 1.34E-05    | 0.000173266 |
| ENSMMUG00000055747 | cytochrome c oxidase subunit 6B [Source:NCBI gene;Acc:692062]                                       | 1.003004681 | 0.000717155 | 0.005110821 |
| ENSMMUG00000018986 | seizure related 6 homolog like 2 [Source:VGNC Symbol;Acc:VGNC:81567]                                | 1.003358192 | 0.006241935 | 0.028619225 |
| ENSMMUG00000055096 |                                                                                                     | 1.003890692 | 0.001024049 | 0.006820916 |
| ENSMMUG00000054803 |                                                                                                     | 1.005956848 | 0.002501034 | 0.013937825 |
| ENSMMUG00000000198 | collagen beta(1-O)galactosyltransferase 1 [Source:NCBI gene;Acc:719980]                             | 1.006002786 | 7.15E-06    | 9.98E-05    |
| ENSMMUG00000005745 | EYA transcriptional coactivator and phosphatase 4 [Source:VGNC Symbol;Acc:VGNC:72456]               | 1.006371061 | 0.000854568 | 0.005905541 |
| ENSMMUG00000052854 | mucin like 1 [Source:NCBI gene;Acc:100423942]                                                       | 1.007797536 | 1.86E-06    | 3.05E-05    |
| ENSMMUG00000003265 | leptin receptor [Source:VGNC Symbol;Acc:VGNC:81429]                                                 | 1.008276224 | 2.58E-15    | 2.20E-13    |
| ENSMMUG00000008006 | RAB11A, member RAS oncogene family [Source:VGNC Symbol;Acc:VGNC:81517]                              | 1.010737857 | 1.40E-06    | 2.39E-05    |
| ENSMMUG00000002926 | mediator complex subunit 24 [Source:NCBI gene;Acc:699536]                                           | 1.014946555 | 1.67E-07    | 3.76E-06    |
| ENSMMUG00000003314 | aquaporin 3 (Gill blood group) [Source:NCBI gene;Acc:702721]                                        | 1.017744163 | 0.004043948 | 0.020564892 |
| ENSMMUG00000011330 | neuronal PAS domain protein 1 [Source:VGNC Symbol;Acc:VGNC:75377]                                   | 1.017835714 | 0.000823423 | 0.00573273  |
| ENSMMUG00000055241 |                                                                                                     | 1.020254805 | 2.54E-05    | 0.000302294 |
| ENSMMUG00000006936 | gastric inhibitory polypeptide receptor [Source:VGNC Symbol;Acc:VGNC:73052]                         | 1.020318436 | 3.89E-07    | 7.95E-06    |
| ENSMMUG00000046550 | coiled-coil domain containing 125 [Source:NCBI gene;Acc:704391]                                     | 1.020654806 | 0.000117079 | 0.001119029 |
| ENSMMUG00000020254 | exocyst complex component 3 like 1 [Source:VGNC Symbol;Acc:VGNC:72376]                              | 1.022805071 | 0.000172049 | 0.001559774 |
| ENSMMUG00000005478 | trimethylguanosine synthase 1 [Source:VGNC Symbol;Acc:VGNC:78404]                                   | 1.022921595 | 0.001518893 | 0.009400655 |
| ENSMMUG00000052476 | zinc finger and BTB domain containing 43 [Source:NCBI gene;Acc:701797]                              | 1.023323246 | 2.83E-06    | 4.44E-05    |
| ENSMMUG00000008979 | protein O-fucosyltransferase 1 [Source:VGNC Symbol;Acc:VGNC:76030]                                  | 1.025543893 | 0.00167437  | 0.010151416 |
| ENSMMUG00000017055 | divergent protein kinase domain 2A [Source:VGNC Symbol;Acc:VGNC:71781]                              | 1.02811167  | 0.009233367 | 0.03929595  |
| ENSMMUG00000021449 | vacuolar protein sorting 13 homolog D [Source:NCBI gene;Acc:722775]                                 | 1.029347304 | 2.56E-07    | 5.51E-06    |
| ENSMMUG00000056093 | shieldin complex subunit 1 [Source:NCBI gene;Acc:718152]                                            | 1.031098858 | 0.001011446 | 0.006770862 |
| ENSMMUG00000058437 |                                                                                                     | 1.031379265 | 8.76E-05    | 0.000883998 |
| ENSMMUG00000019830 | Fc receptor like 2 [Source:VGNC Symbol;Acc:VGNC:72509]                                              | 1.032654541 | 0.000744    | 0.005266044 |
| ENSMMUG00000004224 | poly(ADP-ribose) polymerase family member 12 [Source:VGNC Symbol;Acc:VGNC:81734]                    | 1.032692444 | 1.73E-07    | 3.89E-06    |
| ENSMMUG00000019837 | ribonuclease H2 subunit C [Source:NCBI gene;Acc:700330]                                             | 1.032846377 | 0.000153374 | 0.001420574 |
| ENSMMUG00000003669 | methionine sulfoxide reductase B3 [Source:VGNC Symbol;Acc:VGNC:74842]                               | 1.032888286 | 2.14E-05    | 0.000260327 |
| ENSMMUG00000018648 | zinc finger protein 594 [Source:NCBI gene;Acc:711492]                                               | 1.035528183 | 0.001174639 | 0.007597989 |
| ENSMMUG00000018245 | EPH receptor A2 [Source:VGNC Symbol;Acc:VGNC:72235]                                                 | 1.036037994 | 0.0002766   | 0.002318095 |
| ENSMMUG00000029507 | adaptor related protein complex 3 subunit sigma 2 [Source:NCBI gene;Acc:701217]                     | 1.036618528 | 4.92E-17    | 5.78E-15    |
| ENSMMUG00000017533 | interferon induced protein with tetratricopeptide repeats 1 [Source:NCBI gene;Acc:695683]           | 1.036702639 | 0.01095554  | 0.045057971 |
| ENSMMUG00000011788 | zinc finger protein 212 [Source:VGNC Symbol;Acc:VGNC:78418]                                         | 1.03779879  | 0.001951633 | 0.011479746 |
| ENSMMUG00000048066 | trafficking protein particle complex 9 [Source:NCBI gene;Acc:711466]                                | 1.040574265 | 0.00067832  | 0.004879013 |
| ENSMMUG00000016890 | solute carrier family 37 member 4 [Source:VGNC Symbol;Acc:VGNC:77591]                               | 1.042843249 | 0.000199029 | 0.001769542 |
| ENSMMUG00000060812 | autophagy related 12 [Source:NCBI gene;Acc:696765]                                                  | 1.043936363 | 3.84E-05    | 0.000429419 |
| ENSMMUG00000056950 |                                                                                                     | 1.048304168 | 2.67E-07    | 5.73E-06    |
| ENSMMUG00000009976 | uridine-cytidine kinase 1 [Source:VGNC Symbol;Acc:VGNC:78967]                                       | 1.050262658 | 1.40E-06    | 2.39E-05    |
| ENSMMUG00000003267 | zinc finger protein 362 [Source:NCBI gene;Acc:710013]                                               | 1.05093322  | 0.000126769 | 0.001204905 |
| ENSMMUG00000042510 | coagulation factor V [Source:NCBI gene;Acc:704695]                                                  | 1.052330665 | 0.000396516 | 0.003111847 |
| ENSMMUG00000000187 | UV radiation resistance associated [Source:VGNC Symbol;Acc:VGNC:78751]                              | 1.054064564 | 0.00805062  | 0.035239118 |
| ENSMMUG00000002345 | tropomodulin 3 [Source:VGNC Symbol;Acc:VGNC:78572]                                                  | 1.057194173 | 5.07E-12    | 2.62E-10    |
| ENSMMUG00000063694 | cyclic nucleotide gated channel subunit alpha 2 [Source:NCBI gene;Acc:704486]                       | 1.061231325 | 1.13E-07    | 2.63E-06    |
| ENSMMUG00000058815 | core-binding factor subunit beta [Source:NCBI gene;Acc:695767]                                      | 1.062094848 | 0.004839651 | 0.023492422 |

|                    |                                                                                                  |             |             |             |
|--------------------|--------------------------------------------------------------------------------------------------|-------------|-------------|-------------|
| ENSMMUG00000052607 |                                                                                                  | 1.062105336 | 6.74E-08    | 1.66E-06    |
| ENSMMUG00000007804 | RAN binding protein 10 [Source:VGNC Symbol;Acc:VGNC:76563]                                       | 1.063023295 | 0.000977205 | 0.006574722 |
| ENSMMUG00000021904 | cell division cycle 45 [Source:VGNC Symbol;Acc:VGNC:70800]                                       | 1.063208182 | 0.000172254 | 0.001560448 |
| ENSMMUG00000002260 | protein kinase C eta [Source:VGNC Symbol;Acc:VGNC:84424]                                         | 1.063579027 | 4.34E-06    | 6.46E-05    |
| ENSMMUG00000006405 | secretion regulating guanine nucleotide exchange factor [Source:VGNC Symbol;Acc:VGNC:77258]      | 1.06635802  | 0.004913879 | 0.023769381 |
| ENSMMUG00000007610 | ribosomal protein S6 kinase A4 [Source:VGNC Symbol;Acc:VGNC:76930]                               | 1.066457383 | 1.94E-08    | 5.29E-07    |
| ENSMMUG00000011951 | KRI1 homolog [Source:VGNC Symbol;Acc:VGNC:74127]                                                 | 1.066590192 | 0.000477639 | 0.003631875 |
| ENSMMUG00000020633 | suppressor of cancer cell invasion [Source:NCBI gene;Acc:712803]                                 | 1.066815951 | 0.002508357 | 0.013965638 |
| ENSMMUG00000019223 | TNF receptor associated factor 7 [Source:VGNC Symbol;Acc:VGNC:79252]                             | 1.070892232 | 0.00017499  | 0.001579264 |
| ENSMMUG00000064391 |                                                                                                  | 1.070992675 | 0.002005051 | 0.011707702 |
| ENSMMUG00000016448 | DLG associated protein 4 [Source:NCBI gene;Acc:702928]                                           | 1.070992811 | 0.000204167 | 0.00180211  |
| ENSMMUG00000038256 | aquaporin 2 [Source:NCBI gene;Acc:711719]                                                        | 1.071429629 | 2.98E-15    | 2.51E-13    |
| ENSMMUG00000006181 | WD repeat, sterile alpha motif and U-box domain containing 1 [Source:VGNC Symbol;Acc:VGNC:79634] | 1.072690669 | 0.001823635 | 0.010870571 |
| ENSMMUG00000008385 | NOP14 nucleolar protein [Source:VGNC Symbol;Acc:VGNC:75194]                                      | 1.073994269 | 7.04E-06    | 9.87E-05    |
| ENSMMUG00000001278 | vitrin [Source:VGNC Symbol;Acc:VGNC:78773]                                                       | 1.075528069 | 0.000736308 | 0.005223945 |
| ENSMMUG00000021988 | N-alpha-acetyltransferase 11, NatA catalytic subunit [Source:NCBI gene;Acc:696758]               | 1.076319848 | 0.000518935 | 0.003918516 |
| ENSMMUG00000019833 | Fc receptor like 1 [Source:VGNC Symbol;Acc:VGNC:72528]                                           | 1.076695872 | 4.52E-08    | 1.15E-06    |
| ENSMMUG00000000808 | melanin concentrating hormone receptor 2 [Source:VGNC Symbol;Acc:VGNC:74550]                     | 1.077884636 | 7.21E-08    | 1.76E-06    |
| ENSMMUG00000003106 | SEC16 homolog A, endoplasmic reticulum export factor [Source:VGNC Symbol;Acc:VGNC:77326]         | 1.078064132 | 0.001508216 | 0.009347871 |
| ENSMMUG00000006596 | CCR4-NOT transcription complex subunit 10 [Source:VGNC Symbol;Acc:VGNC:71327]                    | 1.079206851 | 0.001640345 | 0.010002427 |
| ENSMMUG00000003105 | inositol polyphosphate-5-phosphatase E [Source:VGNC Symbol;Acc:VGNC:73637]                       | 1.080272394 | 2.79E-05    | 0.000327042 |
| ENSMMUG00000008618 | calcium voltage-gated channel subunit alpha1 F [Source:VGNC Symbol;Acc:VGNC:70503]               | 1.081305004 | 1.90E-09    | 6.41E-08    |
| ENSMMUG00000061335 |                                                                                                  | 1.085105954 | 0.005630356 | 0.026432435 |
| ENSMMUG00000013044 | selectin P [Source:VGNC Symbol;Acc:VGNC:77157]                                                   | 1.085908107 | 0.009092196 | 0.038833145 |
| ENSMMUG00000022996 | HCLS1 binding protein 3 [Source:VGNC Symbol;Acc:VGNC:82158]                                      | 1.087003099 | 3.34E-05    | 0.000382537 |
| ENSMMUG00000053481 |                                                                                                  | 1.087231963 | 0.001513718 | 0.009373468 |
| ENSMMUG00000017224 | catenin beta like 1 [Source:VGNC Symbol;Acc:VGNC:71414]                                          | 1.088357723 | 0.008916893 | 0.038179732 |
| ENSMMUG00000053378 |                                                                                                  | 1.088412064 | 0.004937778 | 0.023854308 |
| ENSMMUG00000051363 |                                                                                                  | 1.088959919 | 0.00098313  | 0.00660346  |
| ENSMMUG00000044265 | Metazoan signal recognition particle RNA [Source:RFAM;Acc:RF00017]                               | 1.089263018 | 0.001880409 | 0.011131874 |
| ENSMMUG00000023335 | ring finger protein 13 [Source:VGNC Symbol;Acc:VGNC:81557]                                       | 1.093460483 | 0.010806835 | 0.044628501 |
| ENSMMUG00000057134 | keratin, type II cytoskeletal 6C [Source:NCBI gene;Acc:100424162]                                | 1.093758683 | 0.00715745  | 0.031948425 |
| ENSMMUG00000004854 | leucine rich repeat containing 9 [Source:VGNC Symbol;Acc:VGNC:81443]                             | 1.094105298 | 0.000421151 | 0.003264536 |
| ENSMMUG00000062283 | homeobox B6 [Source:NCBI gene;Acc:106994013]                                                     | 1.094583519 | 1.31E-05    | 0.000170606 |
| ENSMMUG00000011155 | FA complementation group I [Source:VGNC Symbol;Acc:VGNC:72575]                                   | 1.095701408 | 6.87E-07    | 1.26E-05    |
| ENSMMUG00000017261 | galactosylceramidase [Source:VGNC Symbol;Acc:VGNC:72867]                                         | 1.095725978 | 2.11E-05    | 0.000258336 |
| ENSMMUG00000013385 | elongator acetyltransferase complex subunit 6 [Source:VGNC Symbol;Acc:VGNC:72113]                | 1.096986841 | 9.06E-06    | 0.000123673 |
| ENSMMUG00000050028 |                                                                                                  | 1.097247122 | 5.13E-05    | 0.000551462 |
| ENSMMUG00000013696 | myozenin 1 [Source:VGNC Symbol;Acc:VGNC:74951]                                                   | 1.099091845 | 0.006239386 | 0.028618493 |
| ENSMMUG00000055048 |                                                                                                  | 1.100135723 | 1.00E-06    | 1.77E-05    |
| ENSMMUG00000003499 | solute carrier family 36 member 1 [Source:VGNC Symbol;Acc:VGNC:77509]                            | 1.100183226 | 0.002100002 | 0.012149575 |
| ENSMMUG00000058187 |                                                                                                  | 1.100237419 | 6.02E-07    | 1.14E-05    |
| ENSMMUG00000011817 | aryl hydrocarbon receptor interacting protein [Source:VGNC Symbol;Acc:VGNC:69759]                | 1.100642378 | 3.52E-07    | 7.28E-06    |
| ENSMMUG00000001536 | glutamine and serine rich 1 [Source:VGNC Symbol;Acc:VGNC:76544]                                  | 1.102814376 | 2.03E-12    | 1.13E-10    |
| ENSMMUG00000038221 | proteasome 26S subunit, non-ATPase 8 [Source:NCBI gene;Acc:721897]                               | 1.105626413 | 4.66E-05    | 0.00050595  |
| ENSMMUG00000016376 | mitogen-activated protein kinase kinase kinase 5 [Source:VGNC Symbol;Acc:VGNC:74495]             | 1.106581241 | 0.005697328 | 0.026694523 |
| ENSMMUG00000053656 |                                                                                                  | 1.106881761 | 1.82E-06    | 2.99E-05    |
| ENSMMUG00000008189 | cadherin related family member 3 [Source:HGNC Symbol;Acc:HGNC:26308]                             | 1.10707002  | 8.15E-07    | 1.47E-05    |
| ENSMMUG00000004558 | OTU deubiquitinase 5 [Source:VGNC Symbol;Acc:VGNC:75677]                                         | 1.107252418 | 1.08E-07    | 2.52E-06    |
| ENSMMUG00000053989 |                                                                                                  | 1.109467965 | 2.85E-07    | 6.04E-06    |
| ENSMMUG00000021075 | Rac family small GTPase 1 [Source:NCBI gene;Acc:717755]                                          | 1.109831275 | 4.41E-10    | 1.69E-08    |



|                    |                                                                                                 |             |             |             |
|--------------------|-------------------------------------------------------------------------------------------------|-------------|-------------|-------------|
| ENSMMUG0000003584  | mesoderm posterior bHLH transcription factor 2 [Source:VGNC Symbol;Acc:VGNC:74619]              | 1.111179652 | 2.69E-11    | 1.24E-09    |
| ENSMMUG00000058856 | Metazoan signal recognition particle RNA [Source:RFAM;Acc:RF00017]                              | 1.111860905 | 0.001234175 | 0.007920941 |
| ENSMMUG00000063495 |                                                                                                 | 1.112008376 | 8.21E-08    | 1.97E-06    |
| ENSMMUG00000017280 | TBC1 domain family member 10C [Source:VGNC Symbol;Acc:VGNC:78203]                               | 1.114131101 | 0.002698955 | 0.014833726 |
| ENSMMUG00000014983 | alanyl aminopeptidase, membrane [Source:VGNC Symbol;Acc:VGNC:69943]                             | 1.114835684 | 4.98E-12    | 2.58E-10    |
| ENSMMUG00000022348 | surfeit 4 [Source:VGNC Symbol;Acc:VGNC:78060]                                                   | 1.115931091 | 0.000282114 | 0.002351147 |
| ENSMMUG00000015394 | WD repeat domain 93 [Source:VGNC Symbol;Acc:VGNC:79642]                                         | 1.115985986 | 5.26E-13    | 3.23E-11    |
| ENSMMUG00000016465 | histone deacetylase 6 [Source:VGNC Symbol;Acc:VGNC:73164]                                       | 1.117598941 | 2.78E-08    | 7.35E-07    |
| ENSMMUG00000061526 | synaptopodin 2 like [Source:NCBI gene;Acc:714736]                                               | 1.119379979 | 4.01E-05    | 0.000446084 |
| ENSMMUG00000006786 | protein tyrosine phosphatase non-receptor type 22 [Source:VGNC Symbol;Acc:VGNC:76603]           | 1.119543028 | 0.000226099 | 0.001969277 |
| ENSMMUG00000055963 |                                                                                                 | 1.120046546 | 0.000913692 | 0.006231424 |
| ENSMMUG00000014897 | ribonucleoprotein, PTB binding 1 [Source:NCBI gene;Acc:715250]                                  | 1.121569863 | 0.001423221 | 0.008881969 |
| ENSMMUG00000009890 | FERM, ARH/RhoGEF and pleckstrin domain protein 1 [Source:VGNC Symbol;Acc:VGNC:72614]            | 1.12228952  | 1.16E-15    | 1.03E-13    |
| ENSMMUG00000013460 | RAB8B, member RAS oncogene family [Source:VGNC Symbol;Acc:VGNC:81550]                           | 1.123146354 | 2.58E-07    | 5.55E-06    |
| ENSMMUG00000019991 | dopa decarboxylase [Source:VGNC Symbol;Acc:VGNC:71755]                                          | 1.123432249 | 4.36E-12    | 2.31E-10    |
| ENSMMUG00000055893 |                                                                                                 | 1.123751971 | 0.002382792 | 0.013403626 |
| ENSMMUG00000008007 | multiple EGF like domains 11 [Source:VGNC Symbol;Acc:VGNC:84376]                                | 1.12676886  | 9.16E-05    | 0.000914888 |
| ENSMMUG00000016582 | chromosome 1 C1orf112 homolog [Source:VGNC Symbol;Acc:VGNC:70385]                               | 1.126900457 | 0.002797975 | 0.015233333 |
| ENSMMUG00000040888 | complement C3b/C4b receptor 1 like [Source:HGNC Symbol;Acc:HGNC:2335]                           | 1.127507005 | 1.43E-06    | 2.42E-05    |
| ENSMMUG00000039774 | Metazoan signal recognition particle RNA [Source:RFAM;Acc:RF00017]                              | 1.128784832 | 1.91E-08    | 5.22E-07    |
| ENSMMUG00000049866 |                                                                                                 | 1.131189497 | 4.16E-05    | 0.000459173 |
| ENSMMUG00000003568 | testis expressed 101 [Source:VGNC Symbol;Acc:VGNC:79869]                                        | 1.133125718 | 0.002488585 | 0.013887835 |
| ENSMMUG00000006285 | antizyme inhibitor 2 [Source:VGNC Symbol;Acc:VGNC:70153]                                        | 1.133774195 | 4.79E-08    | 1.21E-06    |
| ENSMMUG00000020604 | HPS1 biogenesis of lysosomal organelles complex 3 subunit 1 [Source:VGNC Symbol;Acc:VGNC:73515] | 1.133826124 | 4.82E-07    | 9.50E-06    |
| ENSMMUG00000059897 | myosin light chain 9 [Source:NCBI gene;Acc:709784]                                              | 1.134411541 | 0.008279858 | 0.036005658 |
| ENSMMUG00000059608 | fibroblast growth factor binding protein 3 [Source:NCBI gene;Acc:697881]                        | 1.134890585 | 0.006418795 | 0.029300238 |
| ENSMMUG00000000776 | zinc finger matrin-type 4 [Source:VGNC Symbol;Acc:VGNC:78424]                                   | 1.13499264  | 0.000229125 | 0.001986964 |
| ENSMMUG00000019835 | CD5 molecule like [Source:VGNC Symbol;Acc:VGNC:70774]                                           | 1.13648081  | 0.000900243 | 0.006157232 |
| ENSMMUG00000030964 | RAB6A, member RAS oncogene family [Source:NCBI gene;Acc:718717]                                 | 1.141596919 | 1.57E-06    | 2.64E-05    |
| ENSMMUG00000020861 | EvC ciliary complex subunit 1 [Source:VGNC Symbol;Acc:VGNC:72445]                               | 1.141663007 | 0.000162265 | 0.00148911  |
| ENSMMUG00000015931 | phosphatidylinositol transfer protein membrane associated 2 [Source:VGNC Symbol;Acc:VGNC:75843] | 1.142924535 | 7.70E-05    | 0.000788495 |
| ENSMMUG00000061785 |                                                                                                 | 1.143577769 | 2.72E-11    | 1.25E-09    |
| ENSMMUG00000049935 |                                                                                                 | 1.14450329  | 0.003044467 | 0.016269761 |
| ENSMMUG00000060502 |                                                                                                 | 1.145171557 | 0.000416984 | 0.003236419 |
| ENSMMUG00000000588 | rhomboid 5 homolog 1 [Source:NCBI gene;Acc:693423]                                              | 1.151039499 | 0.004527344 | 0.022361952 |
| ENSMMUG00000019607 | patatin like phospholipase domain containing 7 [Source:VGNC Symbol;Acc:VGNC:76104]              | 1.152341503 | 8.02E-07    | 1.45E-05    |
| ENSMMUG00000009788 | tubulin alpha-1C chain [Source:NCBI gene;Acc:710110]                                            | 1.154751379 | 0.001278779 | 0.008154769 |
| ENSMMUG00000005668 | kynurenine 3-monooxygenase [Source:VGNC Symbol;Acc:VGNC:74197]                                  | 1.155840481 | 0.001318602 | 0.008377495 |
| ENSMMUG00000010363 | ribophorin II [Source:VGNC Symbol;Acc:VGNC:76925]                                               | 1.156197324 | 0.005731349 | 0.026822446 |
| ENSMMUG00000006692 | signal peptide, CUB domain and EGF like domain containing 2 [Source:VGNC Symbol;Acc:VGNC:77138] | 1.156544277 | 0.000281848 | 0.002350563 |
| ENSMMUG00000016826 | MAPK associated protein 1 [Source:VGNC Symbol;Acc:VGNC:74531]                                   | 1.157046728 | 0.003449516 | 0.018109702 |
| ENSMMUG00000060102 | cytokine receptor like factor 1 [Source:NCBI gene;Acc:720247]                                   | 1.157626058 | 0.011658274 | 0.047216603 |
| ENSMMUG00000002382 | serpin family F member 2 [Source:VGNC Symbol;Acc:VGNC:77372]                                    | 1.159314321 | 7.39E-05    | 0.000761756 |
| ENSMMUG00000002810 | TOX high mobility group box family member 2 [Source:VGNC Symbol;Acc:VGNC:79007]                 | 1.15953649  | 4.99E-05    | 0.000538078 |
| ENSMMUG00000061222 | adipocyte plasma membrane associated protein [Source:NCBI gene;Acc:704948]                      | 1.163025493 | 0.002553574 | 0.014164705 |
| ENSMMUG00000008080 | ATP binding cassette subfamily G member 5 [Source:VGNC Symbol;Acc:VGNC:69391]                   | 1.165472827 | 0.000156799 | 0.001448943 |
| ENSMMUG00000007197 | BRCA2 DNA repair associated [Source:VGNC Symbol;Acc:VGNC:70279]                                 | 1.166032549 | 9.24E-05    | 0.000921237 |
| ENSMMUG00000021498 | L3MBTL histone methyl-lysine binding protein 3 [Source:VGNC Symbol;Acc:VGNC:74106]              | 1.167023835 | 6.71E-07    | 1.25E-05    |
| ENSMMUG00000055121 | Metazoan signal recognition particle RNA [Source:RFAM;Acc:RF00017]                              | 1.169288403 | 0.001996066 | 0.011678011 |
| ENSMMUG00000005989 | GLE1 RNA export mediator [Source:VGNC Symbol;Acc:VGNC:73067]                                    | 1.169898302 | 7.06E-07    | 1.29E-05    |
| ENSMMUG00000058750 | nuclear receptor interacting protein 1 [Source:NCBI gene;Acc:693866]                            | 1.171427493 | 0.001217287 | 0.007837758 |

|                     |                                                                                                     |             |             |             |
|---------------------|-----------------------------------------------------------------------------------------------------|-------------|-------------|-------------|
| ENSMMUG0000003950   | nucleoporin 98 and 96 precursor [Source:VGNC Symbol;Acc:VGNC:75563]                                 | 1.174698156 | 3.45E-08    | 8.96E-07    |
| ENSMMUG00000058835  |                                                                                                     | 1.175001794 | 0.001257758 | 0.008049889 |
| ENSMMUG00000006284  | adenylate kinase 2 [Source:VGNC Symbol;Acc:VGNC:69761]                                              | 1.175413901 | 0.000302111 | 0.002481535 |
| ENSMMUG00000016876  | integrin subunit alpha L [Source:NCBI gene;Acc:711945]                                              | 1.175839587 | 0.000100424 | 0.0009866   |
| ENSMMUG000000041729 |                                                                                                     | 1.180993473 | 0.006679426 | 0.030185965 |
| ENSMMUG000000051408 | myelin associated oligodendrocyte basic protein [Source:NCBI gene;Acc:717265]                       | 1.182562394 | 1.08E-05    | 0.000145572 |
| ENSMMUG00000005255  | TRAF-type zinc finger domain containing 1 [Source:VGNC Symbol;Acc:VGNC:79459]                       | 1.183710144 | 7.57E-05    | 0.000778536 |
| ENSMMUG00000006568  | basic leucine zipper ATF-like transcription factor 2 [Source:VGNC Symbol;Acc:VGNC:70127]            | 1.184740609 | 0.000530955 | 0.003994171 |
| ENSMMUG00000007799  | LIM and SH3 protein 1 [Source:VGNC Symbol;Acc:VGNC:74237]                                           | 1.186521732 | 0.009432739 | 0.040010077 |
| ENSMMUG000000057703 |                                                                                                     | 1.187271897 | 0.005982822 | 0.027722364 |
| ENSMMUG00000015926  | 2-oxoglutarate and iron dependent oxygenase domain containing 2 [Source:VGNC Symbol;Acc:VGNC:75462] | 1.188750088 | 0.0002107   | 0.001849961 |
| ENSMMUG00000002483  | citrate synthase [Source:VGNC Symbol;Acc:VGNC:71509]                                                | 1.189729163 | 0.0020223   | 0.011773699 |
| ENSMMUG000000058885 | formin binding protein 4 [Source:NCBI gene;Acc:712633]                                              | 1.191320818 | 0.000557322 | 0.004155973 |
| ENSMMUG00000015303  | ATP binding cassette subfamily A member 7 [Source:VGNC Symbol;Acc:VGNC:69567]                       | 1.191399026 | 2.94E-11    | 1.33E-09    |
| ENSMMUG000000058566 |                                                                                                     | 1.191822954 | 1.30E-05    | 0.000170443 |
| ENSMMUG00000009495  | carboxypeptidase A1 [Source:VGNC Symbol;Acc:VGNC:71455]                                             | 1.192085605 | 0.008148471 | 0.035602368 |
| ENSMMUG000000050696 | taste receptor type 2 member 31-like [Source:NCBI gene;Acc:693892]                                  | 1.192836876 | 0.002598411 | 0.014366839 |
| ENSMMUG000000022109 | CD163 molecule like 1 [Source:VGNC Symbol;Acc:VGNC:70914]                                           | 1.193835835 | 0.001623113 | 0.009912491 |
| ENSMMUG000000056906 |                                                                                                     | 1.197113255 | 7.62E-06    | 0.000105751 |
| ENSMMUG00000002564  | Fraser extracellular matrix complex subunit 1 [Source:VGNC Symbol;Acc:VGNC:72743]                   | 1.197336243 | 5.81E-07    | 1.11E-05    |
| ENSMMUG00000013877  | otoancorin [Source:VGNC Symbol;Acc:VGNC:75624]                                                      | 1.197689662 | 0.012088394 | 0.048548159 |
| ENSMMUG000000055324 | homeobox B7 [Source:NCBI gene;Acc:697089]                                                           | 1.197827026 | 0.000115198 | 0.001104955 |
| ENSMMUG00000003457  | protein kinase cAMP-activated catalytic subunit beta [Source:NCBI gene;Acc:709728]                  | 1.19825861  | 1.74E-10    | 7.12E-09    |
| ENSMMUG00000004820  | pre-mRNA processing factor 8 [Source:VGNC Symbol;Acc:VGNC:76275]                                    | 1.199938415 | 3.71E-05    | 0.000418034 |
| ENSMMUG000000052073 |                                                                                                     | 1.200514239 | 5.53E-07    | 1.07E-05    |
| ENSMMUG00000015097  | tripartite motif containing 62 [Source:VGNC Symbol;Acc:VGNC:79513]                                  | 1.201190577 | 1.34E-05    | 0.000173266 |
| ENSMMUG00000005215  | Rab9 effector protein with kelch motifs [Source:VGNC Symbol;Acc:VGNC:76495]                         | 1.201832685 | 3.54E-05    | 0.000401491 |
| ENSMMUG000000031794 |                                                                                                     | 1.202141205 | 0.001991612 | 0.011663345 |
| ENSMMUG00000000313  | HEAT repeat containing 4 [Source:VGNC Symbol;Acc:VGNC:73176]                                        | 1.202265846 | 1.27E-07    | 2.94E-06    |
| ENSMMUG000000054904 | Metazoan signal recognition particle RNA [Source:RFAM;Acc:RF00017]                                  | 1.202389387 | 1.88E-10    | 7.56E-09    |
| ENSMMUG000000008652 | coiled-coil domain containing 85B [Source:VGNC Symbol;Acc:VGNC:70853]                               | 1.203206163 | 8.22E-08    | 1.97E-06    |
| ENSMMUG00000012959  | solute carrier family 35 member E1 [Source:VGNC Symbol;Acc:VGNC:77536]                              | 1.203546413 | 2.38E-10    | 9.53E-09    |
| ENSMMUG00000004816  | membrane associated ring-CH-type finger 5 [Source:VGNC Symbol;Acc:VGNC:74588]                       | 1.204805676 | 4.25E-06    | 6.34E-05    |
| ENSMMUG000000061816 |                                                                                                     | 1.204908621 | 0.001924146 | 0.011345926 |
| ENSMMUG000000037890 |                                                                                                     | 1.205137235 | 0.011919796 | 0.048019133 |
| ENSMMUG00000013447  | adaptor related protein complex 4 subunit mu 1 [Source:VGNC Symbol;Acc:VGNC:69974]                  | 1.205285282 | 0.011489147 | 0.046657859 |
| ENSMMUG00000014986  | testis expressed 33 [Source:VGNC Symbol;Acc:VGNC:79727]                                             | 1.205949741 | 3.23E-05    | 0.000371128 |
| ENSMMUG000000049297 |                                                                                                     | 1.20615854  | 5.57E-05    | 0.00059058  |
| ENSMMUG000000054090 |                                                                                                     | 1.207337094 | 0.001170729 | 0.007578732 |
| ENSMMUG000000023678 | pleckstrin homology and RhoGEF domain containing G5 [Source:VGNC Symbol;Acc:VGNC:76130]             | 1.207533376 | 0.001123958 | 0.007343438 |
| ENSMMUG00000003668  | GTPase activating protein and VPS9 domains 1 [Source:VGNC Symbol;Acc:VGNC:72767]                    | 1.208971812 | 2.91E-07    | 6.15E-06    |
| ENSMMUG000000065221 |                                                                                                     | 1.20922957  | 3.12E-10    | 1.21E-08    |
| ENSMMUG00000008031  | zinc finger and BTB domain containing 17 [Source:VGNC Symbol;Acc:VGNC:78849]                        | 1.209865005 | 0.003578584 | 0.018706729 |
| ENSMMUG00000010201  | atrophin 1 [Source:VGNC Symbol;Acc:VGNC:70157]                                                      | 1.210567384 | 0.000173882 | 0.00157163  |
| ENSMMUG000000064610 | long intergenic non-protein coding RNA 1862 [Source:HGNC Symbol;Acc:HGNC:52681]                     | 1.214416788 | 2.45E-05    | 0.000292744 |
| ENSMMUG00000010556  | Snf2 related CREBBP activator protein [Source:NCBI gene;Acc:712944]                                 | 1.214957716 | 3.01E-13    | 1.94E-11    |
| ENSMMUG000000051807 |                                                                                                     | 1.217262529 | 0.008246154 | 0.035924316 |
| ENSMMUG000000008162 | fibroblast growth factor binding protein 1 [Source:VGNC Symbol;Acc:VGNC:72536]                      | 1.217609315 | 0.000108499 | 0.001052988 |
| ENSMMUG00000010886  | strawberry notch homolog 2 [Source:VGNC Symbol;Acc:VGNC:77123]                                      | 1.218333771 | 0.000293159 | 0.002427989 |
| ENSMMUG00000014872  | dolichyl-phosphate N-acetylglucosaminophosphotransferase 1 [Source:VGNC Symbol;Acc:VGNC:71971]      | 1.219698744 | 2.85E-07    | 6.05E-06    |
| ENSMMUG00000003167  | cytohesin 3 [Source:VGNC Symbol;Acc:VGNC:71829]                                                     | 1.222533969 | 0.000370526 | 0.002954339 |



|                     |                                                                                               |             |             |             |
|---------------------|-----------------------------------------------------------------------------------------------|-------------|-------------|-------------|
| ENSMMUG00000044080  | mitochondrial ribosomal protein L54 [Source:NCBI gene;Acc:713878]                             | 1.223181104 | 0.001665781 | 0.010131741 |
| ENSMMUG00000032249  | procollagen-lysine,2-oxoglutarate 5-dioxygenase 1 [Source:NCBI gene;Acc:722763]               | 1.223234234 | 1.61E-06    | 2.69E-05    |
| ENSMMUG000000061951 |                                                                                               | 1.22403015  | 0.011205002 | 0.045752168 |
| ENSMMUG00000009346  | ArfGAP with GTPase domain, ankyrin repeat and PH domain 1 [Source:VGNC Symbol;Acc:VGNC:84206] | 1.224147899 | 0.001415014 | 0.008839962 |
| ENSMMUG00000013193  | matrix metalloproteinase 16 [Source:VGNC Symbol;Acc:VGNC:74894]                               | 1.225670566 | 1.86E-10    | 7.50E-09    |
| ENSMMUG00000057345  | calcineurin like phosphoesterase domain containing 1 [Source:NCBI gene;Acc:716978]            | 1.226648397 | 3.43E-06    | 5.29E-05    |
| ENSMMUG00000000590  | NPR3 like, GATOR1 complex subunit [Source:VGNC Symbol;Acc:VGNC:75173]                         | 1.227446278 | 0.010543553 | 0.043767624 |
| ENSMMUG00000009622  | glypican 3 [Source:VGNC Symbol;Acc:VGNC:73117]                                                | 1.228129632 | 0.004012352 | 0.020473766 |
| ENSMMUG00000031785  |                                                                                               | 1.228166989 | 1.33E-05    | 0.000172819 |
| ENSMMUG00000060496  | translocase of outer mitochondrial membrane 40 like [Source:NCBI gene;Acc:100426891]          | 1.228388366 | 0.010823637 | 0.044642562 |
| ENSMMUG00000062316  | Metazoan signal recognition particle RNA [Source:RFAM;Acc:RF00017]                            | 1.229791565 | 1.61E-06    | 2.68E-05    |
| ENSMMUG00000013099  | pappalysin 1 [Source:VGNC Symbol;Acc:VGNC:75756]                                              | 1.230247192 | 0.005974636 | 0.027711947 |
| ENSMMUG00000060063  |                                                                                               | 1.230752273 | 0.000114617 | 0.00110253  |
| ENSMMUG00000048566  | MCF.2 cell line derived transforming sequence like [Source:NCBI gene;Acc:713961]              | 1.232151462 | 0.000199925 | 0.001773556 |
| ENSMMUG00000003356  | tenascin C [Source:VGNC Symbol;Acc:VGNC:79960]                                                | 1.234282827 | 1.28E-07    | 2.95E-06    |
| ENSMMUG00000058002  | zinc finger protein 669-like [Source:NCBI gene;Acc:696282]                                    | 1.238038206 | 1.80E-10    | 7.27E-09    |
| ENSMMUG00000022100  | midnolin [Source:VGNC Symbol;Acc:VGNC:82186]                                                  | 1.239792172 | 7.47E-07    | 1.36E-05    |
| ENSMMUG00000023370  | DDB1 and CUL4 associated factor 17 [Source:VGNC Symbol;Acc:VGNC:71709]                        | 1.24198914  | 0.000115238 | 0.001104955 |
| ENSMMUG00000014291  | SPG11 vesicle trafficking associated, spatacsin [Source:VGNC Symbol;Acc:VGNC:77856]           | 1.244299874 | 6.73E-06    | 9.47E-05    |
| ENSMMUG00000060596  | BCL2 associated agonist of cell death [Source:NCBI gene;Acc:717740]                           | 1.244505425 | 1.63E-05    | 0.00020596  |
| ENSMMUG00000000293  | catenin alpha 2 [Source:VGNC Symbol;Acc:VGNC:71543]                                           | 1.245201775 | 0.00036359  | 0.002905382 |
| ENSMMUG00000059436  | interleukin 10 receptor subunit alpha [Source:NCBI gene;Acc:704383]                           | 1.246676574 | 0.001125406 | 0.007348888 |
| ENSMMUG00000007546  | complement C1q like 4 [Source:VGNC Symbol;Acc:VGNC:70450]                                     | 1.246965574 | 0.011294888 | 0.046025033 |
| ENSMMUG00000021080  | basic leucine zipper nuclear factor 1 [Source:VGNC Symbol;Acc:VGNC:70258]                     | 1.250043771 | 2.50E-11    | 1.16E-09    |
| ENSMMUG00000014589  | inositol hexakisphosphate kinase 1 [Source:VGNC Symbol;Acc:VGNC:73621]                        | 1.250391539 | 0.000403576 | 0.003151001 |
| ENSMMUG00000052348  |                                                                                               | 1.250678435 | 1.86E-05    | 0.000230609 |
| ENSMMUG00000003611  | low density lipoprotein receptor [Source:VGNC Symbol;Acc:VGNC:74248]                          | 1.250973319 | 0.000237258 | 0.002045648 |
| ENSMMUG00000002211  | doublecortin like kinase 2 [Source:VGNC Symbol;Acc:VGNC:71670]                                | 1.251303909 | 0.001659165 | 0.010106897 |
| ENSMMUG00000002124  | beta-1,4-galactosyltransferase 5 [Source:VGNC Symbol;Acc:VGNC:70212]                          | 1.25176463  | 0.003833803 | 0.019756295 |
| ENSMMUG00000051072  |                                                                                               | 1.251783885 | 9.92E-07    | 1.76E-05    |
| ENSMMUG00000016255  | telomerase associated protein 1 [Source:VGNC Symbol;Acc:VGNC:78310]                           | 1.25238243  | 0.000240707 | 0.00207091  |
| ENSMMUG00000023016  | jade family PHD finger 3 [Source:VGNC Symbol;Acc:VGNC:73640]                                  | 1.252888094 | 5.42E-07    | 1.05E-05    |
| ENSMMUG00000023300  | FERM domain containing 8 [Source:NCBI gene;Acc:716379]                                        | 1.252982253 | 0.006746828 | 0.030459314 |
| ENSMMUG00000065212  |                                                                                               | 1.253639192 | 0.000547289 | 0.004091343 |
| ENSMMUG00000051677  |                                                                                               | 1.254238016 | 0.000102772 | 0.00100391  |
| ENSMMUG00000013944  | regulator of microtubule dynamics 2 [Source:VGNC Symbol;Acc:VGNC:76839]                       | 1.254386377 | 6.22E-05    | 0.000652576 |
| ENSMMUG00000003697  | inositol polyphosphate-4-phosphatase type II B [Source:VGNC Symbol;Acc:VGNC:73748]            | 1.255910024 | 0.000297817 | 0.002456373 |
| ENSMMUG00000015479  | tectonin beta-propeller repeat containing 1 [Source:VGNC Symbol;Acc:VGNC:79348]               | 1.257721614 | 2.10E-16    | 2.15E-14    |
| ENSMMUG00000058881  | bone morphogenetic protein 8b [Source:NCBI gene;Acc:100427030]                                | 1.260534685 | 0.010144475 | 0.042390173 |
| ENSMMUG00000045970  | thiamine triphosphatase [Source:NCBI gene;Acc:714403]                                         | 1.261462215 | 1.88E-11    | 8.96E-10    |
| ENSMMUG00000062518  |                                                                                               | 1.262222265 | 0.002106757 | 0.012176893 |
| ENSMMUG00000038076  | Metazoan signal recognition particle RNA [Source:RFAM;Acc:RF00017]                            | 1.262742604 | 0.012073984 | 0.048506553 |
| ENSMMUG00000054755  | transmembrane protein 65 [Source:NCBI gene;Acc:705727]                                        | 1.262889484 | 0.01137429  | 0.046269871 |
| ENSMMUG00000008379  | adducin 1 [Source:VGNC Symbol;Acc:VGNC:69528]                                                 | 1.263999552 | 0.000340718 | 0.002754082 |
| ENSMMUG00000006941  | exportin 1 [Source:VGNC Symbol;Acc:VGNC:78812]                                                | 1.264206778 | 1.88E-06    | 3.07E-05    |
| ENSMMUG00000056924  | G protein-coupled receptor 149 [Source:NCBI gene;Acc:106997054]                               | 1.265439155 | 0.009966063 | 0.041790466 |
| ENSMMUG00000062485  | ESF1 nucleolar pre-rRNA processing protein homolog [Source:NCBI gene;Acc:694159]              | 1.266589052 | 0.000831983 | 0.005779483 |
| ENSMMUG00000009197  | myelin associated oligodendrocyte basic protein [Source:VGNC Symbol;Acc:VGNC:74908]           | 1.267880592 | 1.37E-06    | 2.35E-05    |
| ENSMMUG00000011440  | neurite extension and migration factor [Source:VGNC Symbol;Acc:VGNC:75274]                    | 1.269177628 | 0.002155987 | 0.012383741 |
| ENSMMUG00000017129  | solute carrier family 41 member 2 [Source:VGNC Symbol;Acc:VGNC:77585]                         | 1.270350737 | 3.29E-06    | 5.09E-05    |
| ENSMMUG00000001036  | coagulation factor VII [Source:VGNC Symbol;Acc:VGNC:72466]                                    | 1.270955096 | 9.53E-05    | 0.000946118 |

|                    |                                                                                                         |             |             |             |
|--------------------|---------------------------------------------------------------------------------------------------------|-------------|-------------|-------------|
| ENSMMUG0000007548  | DnaJ heat shock protein family (Hsp40) member C22 [Source:NCBI gene;Acc:710205]                         | 1.273735977 | 0.006802501 | 0.030684275 |
| ENSMMUG00000019126 | purine nucleoside phosphorylase [Source:NCBI gene;Acc:704183]                                           | 1.275803284 | 0.008872475 | 0.038056286 |
| ENSMMUG00000055352 |                                                                                                         | 1.276061974 | 1.01E-17    | 1.28E-15    |
| ENSMMUG00000014131 | microtubule affinity regulating kinase 2 [Source:VGNC Symbol;Acc:VGNC:74634]                            | 1.276171832 | 0.000328771 | 0.002673022 |
| ENSMMUG00000022406 | ankyrin repeat and sterile alpha motif domain containing 1B [Source:VGNC Symbol;Acc:VGNC:69689]         | 1.276994217 | 4.76E-08    | 1.21E-06    |
| ENSMMUG00000023048 | cytochrome b-c1 complex subunit Rieske, mitochondrial [Source:NCBI gene;Acc:705178]                     | 1.277913813 | 0.003613331 | 0.018839028 |
| ENSMMUG00000053329 |                                                                                                         | 1.278145045 | 0.003806817 | 0.019642584 |
| ENSMMUG00000062474 | Metazoan signal recognition particle RNA [Source:RFAM;Acc:RF00017]                                      | 1.279948098 | 0.010830615 | 0.044649721 |
| ENSMMUG00000008651 | FGF1 intracellular binding protein [Source:VGNC Symbol;Acc:VGNC:72663]                                  | 1.281686557 | 0.000143988 | 0.001342992 |
| ENSMMUG00000054286 |                                                                                                         | 1.282558229 | 0.005352858 | 0.025398508 |
| ENSMMUG00000042870 | Macaca mulatta taste receptor, type 2, member 46 (TAS2R46), mRNA. [Source:RefSeq mRNA;Acc:NM_001080757] | 1.283075832 | 0.004195868 | 0.021122202 |
| ENSMMUG00000010173 | presenilin 1 [Source:VGNC Symbol;Acc:VGNC:76435]                                                        | 1.284590285 | 9.15E-05    | 0.000914888 |
| ENSMMUG00000008195 | TGFB induced factor homeobox 2 [Source:NCBI gene;Acc:100429616]                                         | 1.286448322 | 1.04E-07    | 2.44E-06    |
| ENSMMUG00000044822 | coiled-coil domain containing 174 [Source:VGNC Symbol;Acc:VGNC:84219]                                   | 1.288018497 | 2.15E-09    | 7.19E-08    |
| ENSMMUG00000008081 | ATP binding cassette subfamily G member 8 [Source:VGNC Symbol;Acc:VGNC:69392]                           | 1.290325343 | 0.000433982 | 0.003344513 |
| ENSMMUG00000009995 | arachidonate 15-lipoxygenase type B [Source:VGNC Symbol;Acc:VGNC:69797]                                 | 1.292330923 | 0.000380904 | 0.003007058 |
| ENSMMUG00000009886 | Coenzyme A synthase [Source:VGNC Symbol;Acc:VGNC:81373]                                                 | 1.293910332 | 5.28E-09    | 1.63E-07    |
| ENSMMUG00000009593 | WAS/WASL interacting protein family member 1 [Source:VGNC Symbol;Acc:VGNC:78784]                        | 1.295353042 | 5.45E-06    | 7.86E-05    |
| ENSMMUG00000009887 | MAX dimerization protein MLX [Source:VGNC Symbol;Acc:VGNC:74726]                                        | 1.29674556  | 0.000213176 | 0.001866224 |
| ENSMMUG00000059341 | Metazoan signal recognition particle RNA [Source:RFAM;Acc:RF00017]                                      | 1.299066001 | 5.99E-07    | 1.14E-05    |
| ENSMMUG00000055897 |                                                                                                         | 1.301502534 | 3.58E-06    | 5.46E-05    |
| ENSMMUG00000041376 | G antigen 10 [Source:NCBI gene;Acc:693330]                                                              | 1.302101266 | 8.73E-08    | 2.08E-06    |
| ENSMMUG00000018492 | TARBP2 subunit of RISC loading complex [Source:VGNC Symbol;Acc:VGNC:78099]                              | 1.305634996 | 0.000159432 | 0.001468734 |
| ENSMMUG00000046883 | autophagy related 4D cysteine peptidase [Source:NCBI gene;Acc:713111]                                   | 1.306051565 | 0.009434574 | 0.040010077 |
| ENSMMUG00000053367 | secreted protein acidic and cysteine rich [Source:NCBI gene;Acc:712388]                                 | 1.307023458 | 2.35E-09    | 7.77E-08    |
| ENSMMUG00000002377 | Rab interacting lysosomal protein [Source:VGNC Symbol;Acc:VGNC:76866]                                   | 1.307334024 | 0.008438704 | 0.036537227 |
| ENSMMUG00000011774 | integrator complex subunit 10 [Source:VGNC Symbol;Acc:VGNC:73653]                                       | 1.307501953 | 9.83E-08    | 2.32E-06    |
| ENSMMUG00000014766 | neuroguidin [Source:VGNC Symbol;Acc:VGNC:75220]                                                         | 1.308415551 | 5.00E-05    | 0.000538078 |
| ENSMMUG00000050608 |                                                                                                         | 1.308579178 | 1.43E-05    | 0.000183339 |
| ENSMMUG00000003684 | ATPase phospholipid transporting 8B4 (putative) [Source:VGNC Symbol;Acc:VGNC:84311]                     | 1.308657302 | 1.07E-05    | 0.000143937 |
| ENSMMUG00000000700 | CLN3 lysosomal/endosomal transmembrane protein, battenin [Source:NCBI gene;Acc:705815]                  | 1.309421357 | 6.10E-05    | 0.000641203 |
| ENSMMUG00000065025 |                                                                                                         | 1.309764115 | 8.86E-05    | 0.000890723 |
| ENSMMUG00000003834 | basic leucine zipper ATF-like transcription factor [Source:VGNC Symbol;Acc:VGNC:70229]                  | 1.309767828 | 2.03E-06    | 3.28E-05    |
| ENSMMUG00000062139 |                                                                                                         | 1.314958247 | 0.009842905 | 0.041419053 |
| ENSMMUG00000031279 | torsin A interacting protein 2 [Source:NCBI gene;Acc:716654]                                            | 1.319124181 | 6.60E-08    | 1.64E-06    |
| ENSMMUG00000019527 | DNA cross-link repair 1B [Source:VGNC Symbol;Acc:VGNC:71647]                                            | 1.319548297 | 0.004662362 | 0.022781086 |
| ENSMMUG00000064920 |                                                                                                         | 1.319834684 | 6.30E-07    | 1.19E-05    |
| ENSMMUG00000049649 | proteasome 20S subunit beta 6 [Source:NCBI gene;Acc:710028]                                             | 1.32168404  | 3.39E-07    | 7.04E-06    |
| ENSMMUG00000006375 | coiled-coil domain containing 15 [Source:NCBI gene;Acc:716362]                                          | 1.322656359 | 0.00463121  | 0.022721576 |
| ENSMMUG00000018237 | plexin C1 [Source:VGNC Symbol;Acc:VGNC:76190]                                                           | 1.32365674  | 4.31E-08    | 1.10E-06    |
| ENSMMUG00000024170 | U6 spliceosomal RNA [Source:RFAM;Acc:RF00026]                                                           | 1.324323025 | 5.23E-05    | 0.000558975 |
| ENSMMUG00000054472 |                                                                                                         | 1.324693029 | 3.44E-09    | 1.10E-07    |
| ENSMMUG00000020980 | ubiquitin like modifier activating enzyme 7 [Source:VGNC Symbol;Acc:VGNC:78690]                         | 1.327135943 | 0.000199778 | 0.001773556 |
| ENSMMUG00000005639 | transmembrane protein 41B [Source:VGNC Symbol;Acc:VGNC:79754]                                           | 1.329336004 | 0.001550464 | 0.009547902 |
| ENSMMUG00000000958 | aldo-keto reductase family 1, member C2 [Source:NCBI gene;Acc:711360]                                   | 1.331817114 | 3.64E-06    | 5.54E-05    |
| ENSMMUG00000003555 | calcium voltage-gated channel subunit alpha1 A [Source:VGNC Symbol;Acc:VGNC:70498]                      | 1.333395304 | 3.24E-06    | 5.01E-05    |
| ENSMMUG00000058800 |                                                                                                         | 1.334565753 | 3.07E-06    | 4.78E-05    |
| ENSMMUG00000013387 | cysteinyl leukotriene receptor 1 [Source:VGNC Symbol;Acc:VGNC:71646]                                    | 1.33462363  | 1.73E-05    | 0.000216708 |
| ENSMMUG00000023717 | MIER family member 2 [Source:VGNC Symbol;Acc:VGNC:74855]                                                | 1.336171953 | 9.69E-07    | 1.72E-05    |
| ENSMMUG00000046969 | Fc receptor like 3 [Source:NCBI gene;Acc:718801]                                                        | 1.337752512 | 2.45E-05    | 0.000292744 |
| ENSMMUG00000022914 | RAB, member of RAS oncogene family like 2B [Source:NCBI gene;Acc:716615]                                | 1.33814797  | 1.44E-08    | 4.05E-07    |



|                    |                                                                                                    |             |             |             |
|--------------------|----------------------------------------------------------------------------------------------------|-------------|-------------|-------------|
| ENSMMUG0000006093  | enhancer of zeste 1 polycomb repressive complex 2 subunit [Source:VGNC Symbol;Acc:VGNC:72457]      | 1.343486404 | 0.000186972 | 0.00167603  |
| ENSMMUG0000008778  | parvalbumin [Source:VGNC Symbol;Acc:VGNC:76627]                                                    | 1.343919524 | 1.22E-05    | 0.000160618 |
| ENSMMUG00000049494 |                                                                                                    | 1.345008261 | 0.001046836 | 0.006949504 |
| ENSMMUG00000061342 |                                                                                                    | 1.348886838 | 0.000196177 | 0.001748075 |
| ENSMMUG00000020040 | phosphatase and actin regulator 1 [Source:VGNC Symbol;Acc:VGNC:75841]                              | 1.349202324 | 0.002225337 | 0.012683819 |
| ENSMMUG00000009377 | tripartite motif containing 47 [Source:VGNC Symbol;Acc:VGNC:79171]                                 | 1.353348857 | 8.77E-05    | 0.000884335 |
| ENSMMUG00000029421 | protein tyrosine phosphatase receptor type K [Source:VGNC Symbol;Acc:VGNC:83453]                   | 1.353791765 | 0.005800797 | 0.027074861 |
| ENSMMUG00000057702 |                                                                                                    | 1.354092121 | 1.49E-09    | 5.15E-08    |
| ENSMMUG00000053498 |                                                                                                    | 1.354932993 | 0.00190713  | 0.01126778  |
| ENSMMUG00000018246 | transmembrane and coiled-coil domains 6 [Source:VGNC Symbol;Acc:VGNC:84507]                        | 1.354938784 | 3.69E-09    | 1.17E-07    |
| ENSMMUG00000004273 | dedicator of cytokinesis 3 [Source:VGNC Symbol;Acc:VGNC:71967]                                     | 1.355004468 | 2.30E-07    | 5.01E-06    |
| ENSMMUG00000008758 | zinc finger protein 143 [Source:VGNC Symbol;Acc:VGNC:81612]                                        | 1.355656338 | 0.006971029 | 0.03131472  |
| ENSMMUG00000048204 | ephrin B3 [Source:NCBI gene;Acc:716257]                                                            | 1.356396792 | 3.90E-06    | 5.89E-05    |
| ENSMMUG00000000931 | solute carrier family 35 member A3 [Source:VGNC Symbol;Acc:VGNC:77461]                             | 1.356930932 | 0.002725613 | 0.014945945 |
| ENSMMUG00000019089 | centromere protein E [Source:VGNC Symbol;Acc:VGNC:71008]                                           | 1.357491496 | 9.25E-10    | 3.35E-08    |
| ENSMMUG00000055256 | family with sequence similarity 163 member A [Source:NCBI gene;Acc:718704]                         | 1.358082632 | 8.24E-07    | 1.48E-05    |
| ENSMMUG00000044581 | modulator of apoptosis 1 [Source:VGNC Symbol;Acc:VGNC:84392]                                       | 1.359053714 | 0.000313922 | 0.002571501 |
| ENSMMUG00000017266 | UPF0577 protein KIAA1324 [Source:NCBI gene;Acc:697670]                                             | 1.362287917 | 3.69E-08    | 9.55E-07    |
| ENSMMUG00000016476 | TRAF interacting protein [Source:VGNC Symbol;Acc:VGNC:82261]                                       | 1.363190881 | 4.08E-07    | 8.28E-06    |
| ENSMMUG00000048824 | eva-1 homolog C [Source:NCBI gene;Acc:708681]                                                      | 1.364665565 | 3.07E-09    | 9.88E-08    |
| ENSMMUG00000010203 | protein tyrosine phosphatase non-receptor type 6 [Source:VGNC Symbol;Acc:VGNC:76607]               | 1.364685887 | 2.51E-05    | 0.000298443 |
| ENSMMUG00000054158 | acyl-CoA dehydrogenase family member 11 [Source:NCBI gene;Acc:106997118]                           | 1.365222502 | 8.48E-06    | 0.000116706 |
| ENSMMUG00000019925 | DiGeorge syndrome critical region gene 2 [Source:NCBI gene;Acc:100423715]                          | 1.365692701 | 3.13E-07    | 6.55E-06    |
| ENSMMUG00000019839 | lysine acetyltransferase 5 [Source:VGNC Symbol;Acc:VGNC:73955]                                     | 1.367413925 | 1.90E-12    | 1.06E-10    |
| ENSMMUG00000018664 | collagen type IX alpha 2 chain [Source:VGNC Symbol;Acc:VGNC:71307]                                 | 1.367715165 | 0.000149022 | 0.001383479 |
| ENSMMUG00000020868 | homeobox B8 [Source:VGNC Symbol;Acc:VGNC:73505]                                                    | 1.367911265 | 2.43E-10    | 9.67E-09    |
| ENSMMUG00000009889 | PSMC3 interacting protein [Source:VGNC Symbol;Acc:VGNC:76282]                                      | 1.368178248 | 6.02E-10    | 2.24E-08    |
| ENSMMUG00000006530 | ATP/GTP binding protein like 3 [Source:VGNC Symbol;Acc:VGNC:69723]                                 | 1.368385563 | 9.84E-10    | 3.53E-08    |
| ENSMMUG00000059229 | CEA cell adhesion molecule 7 [Source:NCBI gene;Acc:705572]                                         | 1.369588375 | 9.00E-10    | 3.29E-08    |
| ENSMMUG00000001690 | calponin 3 [Source:VGNC Symbol;Acc:VGNC:71278]                                                     | 1.37296162  | 1.65E-06    | 2.73E-05    |
| ENSMMUG00000000421 | nuclear receptor subfamily 3 group C member 1 [Source:VGNC Symbol;Acc:VGNC:75515]                  | 1.374213063 | 3.47E-05    | 0.000394891 |
| ENSMMUG00000052505 | homeobox B9 [Source:NCBI gene;Acc:106994009]                                                       | 1.374569484 | 7.58E-12    | 3.82E-10    |
| ENSMMUG00000009794 | protocadherin related 15 [Source:VGNC Symbol;Acc:VGNC:75608]                                       | 1.375331623 | 1.54E-09    | 5.30E-08    |
| ENSMMUG00000056945 |                                                                                                    | 1.376033352 | 5.37E-09    | 1.65E-07    |
| ENSMMUG00000060712 |                                                                                                    | 1.378224206 | 1.27E-07    | 2.94E-06    |
| ENSMMUG00000003484 | tectonin beta-propeller repeat containing 2 [Source:NCBI gene;Acc:708959]                          | 1.378765241 | 7.35E-06    | 0.000102402 |
| ENSMMUG00000058108 | BMP and activin membrane bound inhibitor [Source:NCBI gene;Acc:710152]                             | 1.379054223 | 0.008445476 | 0.036540107 |
| ENSMMUG00000019563 | collapsin response mediator protein 1 [Source:VGNC Symbol;Acc:VGNC:71494]                          | 1.379250548 | 7.36E-08    | 1.78E-06    |
| ENSMMUG00000045544 | neuronal tyrosine-phosphorylated phosphoinositide-3-kinase adaptor 2 [Source:NCBI gene;Acc:711209] | 1.380880042 | 9.72E-09    | 2.84E-07    |
| ENSMMUG00000022409 | solute carrier family 10 member 1 [Source:VGNC Symbol;Acc:VGNC:77380]                              | 1.381033379 | 2.73E-08    | 7.23E-07    |
| ENSMMUG00000031291 | regulator of G protein signaling like 1 [Source:NCBI gene;Acc:715693]                              | 1.384010668 | 1.40E-07    | 3.20E-06    |
| ENSMMUG00000017370 | signal peptidase complex subunit 1 [Source:VGNC Symbol;Acc:VGNC:84072]                             | 1.385026257 | 0.00590557  | 0.027444742 |
| ENSMMUG00000056840 |                                                                                                    | 1.385325459 | 0.000324524 | 0.002645674 |
| ENSMMUG00000007970 | CCZ1 homolog, vacuolar protein trafficking and biogenesis associated [Source:NCBI gene;Acc:718128] | 1.38600924  | 6.11E-07    | 1.15E-05    |
| ENSMMUG00000004002 | CDC like kinase 4 [Source:VGNC Symbol;Acc:VGNC:71173]                                              | 1.386041281 | 5.45E-16    | 4.95E-14    |
| ENSMMUG00000003298 | ataxin 2 like [Source:VGNC Symbol;Acc:VGNC:70159]                                                  | 1.386608229 | 3.92E-06    | 5.90E-05    |
| ENSMMUG00000014138 | forkhead box J3 [Source:VGNC Symbol;Acc:VGNC:72596]                                                | 1.386678728 | 0.009748719 | 0.041109385 |
| ENSMMUG00000000740 | spermatogenesis associated 2 [Source:VGNC Symbol;Acc:VGNC:77923]                                   | 1.393369107 | 0.000911171 | 0.006221317 |
| ENSMMUG00000058137 | zinc finger protein 816 [Source:NCBI gene;Acc:720058]                                              | 1.394279556 | 0.00135524  | 0.008537796 |
| ENSMMUG00000056009 |                                                                                                    | 1.394691852 | 3.19E-09    | 1.02E-07    |
| ENSMMUG00000016438 | protein kinase D3 [Source:VGNC Symbol;Acc:VGNC:76415]                                              | 1.397194338 | 0.000824295 | 0.00573273  |

|                     |                                                                                        |             |             |             |
|---------------------|----------------------------------------------------------------------------------------|-------------|-------------|-------------|
| ENSMMUG00000019085  | 3-hydroxybutyrate dehydrogenase 2 [Source:VGNC Symbol;Acc:VGNC:70161]                  | 1.397427598 | 2.53E-10    | 1.00E-08    |
| ENSMMUG0000001848   | sprouty RTK signaling antagonist 1 [Source:VGNC Symbol;Acc:VGNC:77867]                 | 1.398053524 | 1.13E-05    | 0.0001497   |
| ENSMMUG00000016796  | reticulophagy regulator family member 3 [Source:VGNC Symbol;Acc:VGNC:76845]            | 1.399324828 | 3.22E-10    | 1.25E-08    |
| ENSMMUG00000058432  | zinc finger DHHC-type palmitoyltransferase 18 [Source:NCBI gene;Acc:719959]            | 1.399483218 | 0.000640747 | 0.00466763  |
| ENSMMUG00000062583  | olfactory receptor 1A1 [Source:NCBI gene;Acc:721403]                                   | 1.40232175  | 6.34E-06    | 9.00E-05    |
| ENSMMUG00000049770  | Metazoan signal recognition particle RNA [Source:RFAM;Acc:RF00017]                     | 1.402414127 | 0.002874179 | 0.015526011 |
| ENSMMUG00000006689  | nuclear receptor interacting protein 3 [Source:VGNC Symbol;Acc:VGNC:75397]             | 1.40256647  | 0.000398186 | 0.003120861 |
| ENSMMUG00000015685  | zinc finger protein 804B [Source:VGNC Symbol;Acc:VGNC:81890]                           | 1.402637022 | 2.66E-06    | 4.19E-05    |
| ENSMMUG00000053990  |                                                                                        | 1.405968242 | 0.004049155 | 0.02058263  |
| ENSMMUG00000001917  | megakaryocyte-associated tyrosine kinase [Source:NCBI gene;Acc:100430078]              | 1.406106237 | 4.00E-07    | 8.14E-06    |
| ENSMMUG000000063112 |                                                                                        | 1.407854939 | 0.006209195 | 0.028512774 |
| ENSMMUG00000004280  | DDB1 and CUL4 associated factor 1 [Source:VGNC Symbol;Acc:VGNC:71819]                  | 1.408118429 | 0.011451804 | 0.046521983 |
| ENSMMUG000000061391 | ankyrin repeat domain 49 [Source:NCBI gene;Acc:697693]                                 | 1.408350834 | 0.000999191 | 0.006696314 |
| ENSMMUG00000004222  | thromboxane A synthase 1 [Source:VGNC Symbol;Acc:VGNC:78278]                           | 1.408664502 | 9.57E-08    | 2.26E-06    |
| ENSMMUG00000018719  | nemo like kinase [Source:VGNC Symbol;Acc:VGNC:75277]                                   | 1.40941557  | 2.54E-08    | 6.78E-07    |
| ENSMMUG00000002217  | alkaline phosphatase, biomineralization associated [Source:VGNC Symbol;Acc:VGNC:69801] | 1.410128946 | 2.36E-13    | 1.55E-11    |
| ENSMMUG00000023345  | adhesion G protein-coupled receptor L4 [Source:VGNC Symbol;Acc:VGNC:69652]             | 1.41552352  | 0.009875091 | 0.041496173 |
| ENSMMUG00000003598  | tripartite motif containing 7 [Source:VGNC Symbol;Acc:VGNC:79022]                      | 1.416428462 | 1.68E-06    | 2.78E-05    |
| ENSMMUG00000003303  | Tu translation elongation factor, mitochondrial [Source:VGNC Symbol;Acc:VGNC:78674]    | 1.416906824 | 5.32E-07    | 1.04E-05    |
| ENSMMUG000000060667 |                                                                                        | 1.422173654 | 0.011087632 | 0.04538123  |
| ENSMMUG00000001060  | ryanodine receptor 2 [Source:VGNC Symbol;Acc:VGNC:76954]                               | 1.423079092 | 6.18E-20    | 1.07E-17    |
| ENSMMUG000000056186 |                                                                                        | 1.427841138 | 0.001502949 | 0.00932124  |
| ENSMMUG00000021661  | leucine rich repeat containing 56 [Source:VGNC Symbol;Acc:VGNC:74356]                  | 1.428333409 | 1.12E-05    | 0.000149264 |
| ENSMMUG000000055820 |                                                                                        | 1.428626192 | 0.002368063 | 0.013345843 |
| ENSMMUG000000050505 | small integral membrane protein 4 [Source:NCBI gene;Acc:696553]                        | 1.430877372 | 2.22E-07    | 4.90E-06    |
| ENSMMUG00000003955  | post-GPI attachment to proteins 2 [Source:VGNC Symbol;Acc:VGNC:75823]                  | 1.43182559  | 1.11E-09    | 3.93E-08    |
| ENSMMUG00000014771  | zinc finger homeobox 2 [Source:NCBI gene;Acc:100429448]                                | 1.432977913 | 2.87E-12    | 1.56E-10    |
| ENSMMUG00000019933  | TatD DNase domain containing 2 [Source:NCBI gene;Acc:701390]                           | 1.434014351 | 0.002769064 | 0.01512189  |
| ENSMMUG00000006091  | contactin associated protein 1 [Source:VGNC Symbol;Acc:VGNC:71390]                     | 1.438722897 | 1.41E-05    | 0.00018151  |
| ENSMMUG00000002715  | solute carrier family 9 member A8 [Source:VGNC Symbol;Acc:VGNC:77749]                  | 1.440064983 | 7.28E-07    | 1.33E-05    |
| ENSMMUG00000014277  | ITPR interacting domain containing 2 [Source:VGNC Symbol;Acc:VGNC:73584]               | 1.440167605 | 1.90E-11    | 9.02E-10    |
| ENSMMUG00000052252  | protein phosphatase 1 regulatory subunit 3F [Source:NCBI gene;Acc:715950]              | 1.442878756 | 1.87E-09    | 6.32E-08    |
| ENSMMUG000000063590 |                                                                                        | 1.443376802 | 5.19E-05    | 0.000555435 |
| ENSMMUG000000064463 |                                                                                        | 1.444258987 | 0.00765912  | 0.033747469 |
| ENSMMUG000000055914 |                                                                                        | 1.445169755 | 4.23E-05    | 0.000465267 |
| ENSMMUG00000006855  | acyl-CoA thioesterase 2 [Source:NCBI gene;Acc:697011]                                  | 1.445710587 | 1.83E-06    | 2.99E-05    |
| ENSMMUG000000055018 | sushi domain containing 6 [Source:NCBI gene;Acc:712719]                                | 1.445889459 | 2.50E-05    | 0.000297666 |
| ENSMMUG00000010028  | leucine zipper tumor suppressor family member 3 [Source:VGNC Symbol;Acc:VGNC:74403]    | 1.451719439 | 3.79E-05    | 0.000425463 |
| ENSMMUG000000061576 |                                                                                        | 1.452524154 | 0.012176881 | 0.048838021 |
| ENSMMUG000000038363 | adaptor related protein complex 5 subunit beta 1 [Source:NCBI gene;Acc:721904]         | 1.453294166 | 5.32E-17    | 6.19E-15    |
| ENSMMUG00000006029  | odontogenic, ameloblast associated [Source:NCBI gene;Acc:707906]                       | 1.453655084 | 1.31E-05    | 0.000170541 |
| ENSMMUG00000009508  | TATA-box binding protein associated factor 5 like [Source:VGNC Symbol;Acc:VGNC:78148]  | 1.455020399 | 0.010819564 | 0.044642562 |
| ENSMMUG000000062837 |                                                                                        | 1.455740372 | 0.007259411 | 0.032343291 |
| ENSMMUG00000007603  | coiled-coil domain containing 88B [Source:NCBI gene;Acc:722080]                        | 1.456663828 | 6.69E-06    | 9.43E-05    |
| ENSMMUG00000019667  | TAO kinase 1 [Source:VGNC Symbol;Acc:VGNC:81591]                                       | 1.457289847 | 0.004835128 | 0.023481544 |
| ENSMMUG00000004149  | eukaryotic translation initiation factor 4 gamma 3 [Source:NCBI gene;Acc:717555]       | 1.457507374 | 1.40E-11    | 6.89E-10    |
| ENSMMUG00000001088  | patched domain containing 1 [Source:VGNC Symbol;Acc:VGNC:76322]                        | 1.45888757  | 4.22E-06    | 6.31E-05    |
| ENSMMUG00000023146  | ASH1 like histone lysine methyltransferase [Source:NCBI gene;Acc:717778]               | 1.459118592 | 0.010691079 | 0.044261178 |
| ENSMMUG000000060576 |                                                                                        | 1.460330717 | 4.11E-07    | 8.32E-06    |
| ENSMMUG000000059188 |                                                                                        | 1.460688123 | 0.00256612  | 0.014221127 |
| ENSMMUG00000022728  | zinc finger and SCAN domain containing 25 [Source:VGNC Symbol;Acc:VGNC:79344]          | 1.461224699 | 0.00086109  | 0.005943755 |

|                    |                                                                                                           |             |             |             |
|--------------------|-----------------------------------------------------------------------------------------------------------|-------------|-------------|-------------|
| ENSMMUG0000000863  | dynein axonemal assembly factor 4 [Source:VGNC Symbol;Acc:VGNC:71881]                                     | 1.462073636 | 5.98E-08    | 1.49E-06    |
| ENSMMUG00000054072 |                                                                                                           | 1.464606776 | 5.03E-11    | 2.20E-09    |
| ENSMMUG00000048621 | enolase-phosphatase 1 [Source:NCBI gene;Acc:106998330]                                                    | 1.468195542 | 0.000480883 | 0.003649587 |
| ENSMMUG00000065005 | Metazoan signal recognition particle RNA [Source:RFAM;Acc:RF00017]                                        | 1.468511231 | 1.13E-05    | 0.000150217 |
| ENSMMUG00000060901 |                                                                                                           | 1.468588567 | 2.98E-14    | 2.18E-12    |
| ENSMMUG00000022207 | phospholipid phosphatase related 2 [Source:NCBI gene;Acc:714388]                                          | 1.469955066 | 0.000751268 | 0.00530182  |
| ENSMMUG00000050793 | N-acetyl-alpha-glucosaminidase [Source:NCBI gene;Acc:707186]                                              | 1.470834031 | 1.88E-12    | 1.05E-10    |
| ENSMMUG00000011798 | eukaryotic translation initiation factor 3 subunit C [Source:NCBI gene;Acc:705696]                        | 1.474067214 | 1.28E-07    | 2.95E-06    |
| ENSMMUG00000006180 | tetratricopeptide repeat, ankyrin repeat and coiled-coil containing 1 [Source:VGNC Symbol;Acc:VGNC:78238] | 1.478601423 | 1.73E-05    | 0.000216683 |
| ENSMMUG00000003098 | peptidase, mitochondrial processing alpha subunit [Source:VGNC Symbol;Acc:VGNC:76062]                     | 1.481605772 | 3.99E-11    | 1.76E-09    |
| ENSMMUG00000003131 | interleukin 13 [Source:VGNC Symbol;Acc:VGNC:84393]                                                        | 1.481643284 | 1.73E-06    | 2.86E-05    |
| ENSMMUG00000022313 | activating transcription factor 7 [Source:NCBI gene;Acc:700403]                                           | 1.482671753 | 0.000227112 | 0.001973731 |
| ENSMMUG00000012228 | ubiquitin conjugating enzyme E2 V1 [Source:NCBI gene;Acc:100425552]                                       | 1.482989415 | 9.47E-09    | 2.78E-07    |
| ENSMMUG00000016797 | tubulin gamma 1 [Source:NCBI gene;Acc:710756]                                                             | 1.484816347 | 4.17E-06    | 6.26E-05    |
| ENSMMUG00000054942 |                                                                                                           | 1.485326157 | 0.007425343 | 0.032947724 |
| ENSMMUG00000042407 |                                                                                                           | 1.485532877 | 0.005207031 | 0.024884038 |
| ENSMMUG00000062063 | melanoma-associated antigen 3 [Source:NCBI gene;Acc:711544]                                               | 1.485742259 | 3.37E-07    | 7.02E-06    |
| ENSMMUG00000008200 | Src like adaptor 2 [Source:VGNC Symbol;Acc:VGNC:77499]                                                    | 1.487528378 | 0.000788326 | 0.005530749 |
| ENSMMUG00000059671 |                                                                                                           | 1.490276171 | 4.75E-15    | 3.92E-13    |
| ENSMMUG00000023636 | importin 7 [Source:NCBI gene;Acc:704213]                                                                  | 1.491395908 | 0.000167373 | 0.001527791 |
| ENSMMUG00000015865 | arginase 2 [Source:VGNC Symbol;Acc:VGNC:70005]                                                            | 1.496105874 | 0.001621357 | 0.009906824 |
| ENSMMUG00000064532 | mucin 16, cell surface associated [Source:NCBI gene;Acc:106996460]                                        | 1.498463794 | 1.24E-09    | 4.35E-08    |
| ENSMMUG00000006468 | FGFR1 oncogene partner 2 [Source:VGNC Symbol;Acc:VGNC:72551]                                              | 1.499905879 | 1.82E-05    | 0.000225268 |
| ENSMMUG00000017660 |                                                                                                           | 1.502952553 | 7.42E-09    | 2.23E-07    |
| ENSMMUG00000001547 | zinc finger protein 106 [Source:VGNC Symbol;Acc:VGNC:78831]                                               | 1.504170269 | 1.02E-21    | 2.26E-19    |
| ENSMMUG00000048190 | U2 small nuclear RNA auxiliary factor 1 like 4 [Source:NCBI gene;Acc:718865]                              | 1.504472763 | 0.001048019 | 0.006950914 |
| ENSMMUG00000013150 | MORC family CW-type zinc finger 4 [Source:VGNC Symbol;Acc:VGNC:74808]                                     | 1.50651044  | 2.24E-11    | 1.05E-09    |
| ENSMMUG00000050739 |                                                                                                           | 1.506895128 | 0.00765215  | 0.033729168 |
| ENSMMUG00000016678 | Rho associated coiled-coil containing protein kinase 2 [Source:VGNC Symbol;Acc:VGNC:76714]                | 1.509235982 | 0.003068188 | 0.016367913 |
| ENSMMUG00000007401 | arrestin domain containing 2 [Source:VGNC Symbol;Acc:VGNC:69901]                                          | 1.509280019 | 4.50E-07    | 8.97E-06    |
| ENSMMUG00000004512 | Fc fragment of IgE receptor Ig [Source:VGNC Symbol;Acc:VGNC:72629]                                        | 1.509623647 | 6.15E-05    | 0.000645437 |
| ENSMMUG00000005440 | ELMO domain containing 1 [Source:VGNC Symbol;Acc:VGNC:72109]                                              | 1.510446703 | 0.002147822 | 0.012354619 |
| ENSMMUG00000021079 | NME/NM23 family member 7 [Source:VGNC Symbol;Acc:VGNC:75221]                                              | 1.510554717 | 0.000272668 | 0.002293244 |
| ENSMMUG00000056555 |                                                                                                           | 1.511941559 | 4.64E-10    | 1.77E-08    |
| ENSMMUG00000000023 | prostaglandin E receptor 2 [Source:VGNC Symbol;Acc:VGNC:76468]                                            | 1.512915759 | 6.59E-07    | 1.23E-05    |
| ENSMMUG00000049600 |                                                                                                           | 1.513595434 | 0.008887568 | 0.038089762 |
| ENSMMUG00000049894 |                                                                                                           | 1.514500994 | 0.00548745  | 0.025862928 |
| ENSMMUG00000061139 |                                                                                                           | 1.51644715  | 0.008031875 | 0.035182784 |
| ENSMMUG00000055322 | EPH receptor A1 [Source:NCBI gene;Acc:706295]                                                             | 1.516988338 | 1.70E-09    | 5.81E-08    |
| ENSMMUG00000004520 | NADH:ubiquinone oxidoreductase core subunit S2 [Source:NCBI gene;Acc:719935]                              | 1.52064889  | 1.49E-06    | 2.52E-05    |
| ENSMMUG00000020597 | acyl-CoA synthetase short chain family member 1 [Source:VGNC Symbol;Acc:VGNC:69416]                       | 1.521720652 | 0.000601655 | 0.004431375 |
| ENSMMUG00000016417 | chromobox 8 [Source:NCBI gene;Acc:717514]                                                                 | 1.522276775 | 3.21E-06    | 4.99E-05    |
| ENSMMUG00000018239 | centrosomal protein 83 [Source:VGNC Symbol;Acc:VGNC:70992]                                                | 1.524359692 | 9.17E-12    | 4.56E-10    |
| ENSMMUG00000008839 | DExD-box helicase 39B [Source:VGNC Symbol;Acc:VGNC:71621]                                                 | 1.524531953 | 0.004213952 | 0.021204325 |
| ENSMMUG00000005511 | SON DNA binding protein [Source:VGNC Symbol;Acc:VGNC:77689]                                               | 1.525298908 | 0.000241605 | 0.002075654 |
| ENSMMUG00000001745 | oxysterol binding protein [Source:VGNC Symbol;Acc:VGNC:75718]                                             | 1.52530076  | 2.37E-07    | 5.11E-06    |
| ENSMMUG00000002384 | IGF like family receptor 1 [Source:VGNC Symbol;Acc:VGNC:73434]                                            | 1.526249112 | 5.05E-09    | 1.56E-07    |
| ENSMMUG00000058110 |                                                                                                           | 1.527932133 | 0.000996011 | 0.006682478 |
| ENSMMUG00000001387 | p21 (RAC1) activated kinase 1 [Source:NCBI gene;Acc:698585]                                               | 1.529853972 | 8.02E-06    | 0.000110902 |
| ENSMMUG00000004028 | kelch repeat and BTB domain containing 13 [Source:VGNC Symbol;Acc:VGNC:73953]                             | 1.531484612 | 0.004130393 | 0.020871347 |
| ENSMMUG00000060437 | Metazoan signal recognition particle RNA [Source:RFAM;Acc:RF00017]                                        | 1.535303042 | 0.002986304 | 0.015994622 |



|                    |                                                                                              |             |             |             |
|--------------------|----------------------------------------------------------------------------------------------|-------------|-------------|-------------|
| ENSMMUG00000010826 | ral guanine nucleotide dissociation stimulator like 3 [Source:VGNC Symbol;Acc:VGNC:76869]    | 1.536352323 | 5.60E-05    | 0.000593111 |
| ENSMMUG00000044545 | apolipoprotein A1 [Source:NCBI gene;Acc:696969]                                              | 1.536569389 | 0.000362734 | 0.002903782 |
| ENSMMUG00000023797 | post-GPI attachment to proteins GalNAc transferase 4 [Source:VGNC Symbol;Acc:VGNC:79688]     | 1.536913617 | 0.005357426 | 0.025410114 |
| ENSMMUG00000003658 | autophagy related 2B [Source:VGNC Symbol;Acc:VGNC:84310]                                     | 1.543811743 | 5.04E-05    | 0.000541927 |
| ENSMMUG00000004255 | YLP motif containing 1 [Source:VGNC Symbol;Acc:VGNC:79092]                                   | 1.546061424 | 9.67E-05    | 0.000955906 |
| ENSMMUG00000020185 | voltage dependent anion channel 3 [Source:VGNC Symbol;Acc:VGNC:84135]                        | 1.546944412 | 0.001920405 | 0.011329444 |
| ENSMMUG00000003827 | albumin [Source:VGNC Symbol;Acc:VGNC:69782]                                                  | 1.547442884 | 8.94E-08    | 2.12E-06    |
| ENSMMUG00000017605 | mitochondrial ribosomal protein L39 [Source:VGNC Symbol;Acc:VGNC:74737]                      | 1.549218942 | 1.04E-08    | 3.03E-07    |
| ENSMMUG00000062702 |                                                                                              | 1.550835237 | 0.007579565 | 0.033483167 |
| ENSMMUG00000053013 |                                                                                              | 1.551828353 | 0.000100047 | 0.000983716 |
| ENSMMUG00000056266 | Metazoan signal recognition particle RNA [Source:RFAM;Acc:RF00017]                           | 1.552355686 | 0.002052874 | 0.011915671 |
| ENSMMUG00000005086 | homeobox protein TGIF1 [Source:NCBI gene;Acc:694580]                                         | 1.552691367 | 4.80E-05    | 0.000518981 |
| ENSMMUG00000002949 | motile sperm domain containing 3 [Source:VGNC Symbol;Acc:VGNC:74823]                         | 1.55310291  | 0.000918813 | 0.006255658 |
| ENSMMUG00000052047 |                                                                                              | 1.55666358  | 8.72E-07    | 1.56E-05    |
| ENSMMUG00000010824 | SWIM-type zinc finger 7 associated protein 1 [Source:VGNC Symbol;Acc:VGNC:78220]             | 1.558916127 | 0.000406943 | 0.003170823 |
| ENSMMUG00000022246 | PDZ and LIM domain 5 [Source:VGNC Symbol;Acc:VGNC:75816]                                     | 1.561720482 | 1.11E-06    | 1.94E-05    |
| ENSMMUG00000041101 | protein phosphatase 2 regulatory subunit B'beta [Source:NCBI gene;Acc:722026]                | 1.563834056 | 2.30E-14    | 1.70E-12    |
| ENSMMUG00000004797 | CTP synthase 2 [Source:VGNC Symbol;Acc:VGNC:71550]                                           | 1.565405438 | 0.00032027  | 0.002616337 |
| ENSMMUG00000051201 | zinc finger SWIM-type containing 3 [Source:NCBI gene;Acc:708804]                             | 1.565825345 | 1.68E-07    | 3.78E-06    |
| ENSMMUG00000012538 | ubiquitin conjugating enzyme E2 U [Source:VGNC Symbol;Acc:VGNC:79726]                        | 1.567890959 | 6.14E-07    | 1.16E-05    |
| ENSMMUG00000054449 | Metazoan signal recognition particle RNA [Source:RFAM;Acc:RF00017]                           | 1.567928245 | 0.008754845 | 0.037647406 |
| ENSMMUG00000062522 |                                                                                              | 1.569873385 | 1.82E-07    | 4.07E-06    |
| ENSMMUG00000010526 | calcium voltage-gated channel auxiliary subunit beta 4 [Source:VGNC Symbol;Acc:VGNC:82116]   | 1.571246718 | 2.12E-05    | 0.000258336 |
| ENSMMUG00000000327 | fatty acid desaturase 2 [Source:VGNC Symbol;Acc:VGNC:72472]                                  | 1.573207181 | 1.55E-06    | 2.61E-05    |
| ENSMMUG00000002427 | glucokinase [Source:VGNC Symbol;Acc:VGNC:72901]                                              | 1.573775109 | 7.66E-08    | 1.84E-06    |
| ENSMMUG00000065054 | G protein subunit gamma 7 [Source:NCBI gene;Acc:711335]                                      | 1.574297583 | 2.68E-08    | 7.13E-07    |
| ENSMMUG00000011789 | hematopoietically expressed homeobox [Source:VGNC Symbol;Acc:VGNC:73376]                     | 1.574801516 | 3.47E-07    | 7.18E-06    |
| ENSMMUG00000000419 | Rho GTPase activating protein 26 [Source:VGNC Symbol;Acc:VGNC:69846]                         | 1.574878428 | 4.37E-05    | 0.000479059 |
| ENSMMUG00000012065 | tubulin tyrosine ligase like 5 [Source:NCBI gene;Acc:703116]                                 | 1.575631186 | 3.63E-09    | 1.15E-07    |
| ENSMMUG00000057196 | pulmonary surfactant-associated protein A [Source:NCBI gene;Acc:701715]                      | 1.576737513 | 4.10E-10    | 1.58E-08    |
| ENSMMUG00000030389 |                                                                                              | 1.57722386  | 0.00041538  | 0.003228156 |
| ENSMMUG00000060399 | Metazoan signal recognition particle RNA [Source:RFAM;Acc:RF00017]                           | 1.578588355 | 0.0027858   | 0.015192504 |
| ENSMMUG00000056381 | forkhead box R1 [Source:NCBI gene;Acc:707285]                                                | 1.579823119 | 0.009392585 | 0.039874371 |
| ENSMMUG00000037243 | U6 spliceosomal RNA [Source:RFAM;Acc:RF00026]                                                | 1.580077283 | 0.000182606 | 0.0016411   |
| ENSMMUG00000021664 | lamin tail domain containing 2 [Source:VGNC Symbol;Acc:VGNC:74380]                           | 1.581500046 | 6.97E-17    | 7.73E-15    |
| ENSMMUG00000021436 | latent transforming growth factor beta binding protein 1 [Source:VGNC Symbol;Acc:VGNC:74456] | 1.582845399 | 3.93E-07    | 8.01E-06    |
| ENSMMUG00000052780 |                                                                                              | 1.58373654  | 4.49E-09    | 1.40E-07    |
| ENSMMUG00000002376 | scavenger receptor class F member 1 [Source:VGNC Symbol;Acc:VGNC:77027]                      | 1.583899276 | 0.000153863 | 0.001424009 |
| ENSMMUG00000050465 | ZFP42 zinc finger protein [Source:NCBI gene;Acc:707621]                                      | 1.584768789 | 0.002025576 | 0.011775872 |
| ENSMMUG00000020580 | RPGRIP1 like [Source:VGNC Symbol;Acc:VGNC:77124]                                             | 1.586514978 | 0.00023189  | 0.002005139 |
| ENSMMUG00000052777 |                                                                                              | 1.587482966 | 0.00618375  | 0.028439552 |
| ENSMMUG00000008383 | major facilitator superfamily domain containing 10 [Source:NCBI gene;Acc:720098]             | 1.588230708 | 1.37E-06    | 2.35E-05    |
| ENSMMUG00000003976 | glycoprotein hormone subunit alpha 2 [Source:VGNC Symbol;Acc:VGNC:72961]                     | 1.588771428 | 7.84E-09    | 2.35E-07    |
| ENSMMUG00000003217 | transmembrane 7 superfamily member 3 [Source:VGNC Symbol;Acc:VGNC:79371]                     | 1.590289845 | 1.41E-06    | 2.39E-05    |
| ENSMMUG00000061896 |                                                                                              | 1.590729771 | 8.74E-05    | 0.000882859 |
| ENSMMUG00000015416 | bromodomain and PHD finger containing 3 [Source:VGNC Symbol;Acc:VGNC:70309]                  | 1.592114203 | 5.75E-07    | 1.10E-05    |
| ENSMMUG00000012526 | glycosyltransferase 8 domain containing 1 [Source:VGNC Symbol;Acc:VGNC:73001]                | 1.592904948 | 5.97E-10    | 2.23E-08    |
| ENSMMUG00000010008 | IK cytokine [Source:VGNC Symbol;Acc:VGNC:73703]                                              | 1.596829265 | 0.000193277 | 0.001723516 |
| ENSMMUG00000016480 | CaM kinase like vesicle associated [Source:VGNC Symbol;Acc:VGNC:70663]                       | 1.597373339 | 3.58E-07    | 7.39E-06    |
| ENSMMUG00000001761 | myosin IB [Source:VGNC Symbol;Acc:VGNC:75111]                                                | 1.597375644 | 7.27E-11    | 3.11E-09    |
| ENSMMUG00000014868 | OCIA domain containing 1 [Source:VGNC Symbol;Acc:VGNC:75409]                                 | 1.597480322 | 8.00E-05    | 0.000816538 |

|                    |                                                                                                      |             |             |             |
|--------------------|------------------------------------------------------------------------------------------------------|-------------|-------------|-------------|
| ENSMMUG0000007422  | spermatogenesis associated 5 [Source:VGNC Symbol;Acc:VGNC:77952]                                     | 1.597563054 | 1.25E-06    | 2.17E-05    |
| ENSMMUG00000053516 |                                                                                                      | 1.598601676 | 9.88E-05    | 0.00097435  |
| ENSMMUG00000022613 | reversion inducing cysteine rich protein with kazal motifs [Source:VGNC Symbol;Acc:VGNC:76722]       | 1.601382004 | 5.24E-22    | 1.21E-19    |
| ENSMMUG00000063988 |                                                                                                      | 1.603185034 | 0.003132413 | 0.016665382 |
| ENSMMUG00000017810 | structure specific recognition protein 1 [Source:VGNC Symbol;Acc:VGNC:77891]                         | 1.606467695 | 2.80E-07    | 5.99E-06    |
| ENSMMUG00000001397 | multiple C2 and transmembrane domain containing 1 [Source:VGNC Symbol;Acc:VGNC:74589]                | 1.607053286 | 4.23E-07    | 8.53E-06    |
| ENSMMUG00000065094 |                                                                                                      | 1.611318196 | 0.004657064 | 0.022773787 |
| ENSMMUG00000003830 | alpha fetoprotein [Source:VGNC Symbol;Acc:VGNC:69741]                                                | 1.614372307 | 0.003217468 | 0.017066543 |
| ENSMMUG00000043134 | coiled-coil domain containing 159 [Source:NCBI gene;Acc:100424702]                                   | 1.617665658 | 4.47E-05    | 0.000488628 |
| ENSMMUG00000031163 | membrane anchored junction protein [Source:VGNC Symbol;Acc:VGNC:74375]                               | 1.624113005 | 4.03E-16    | 3.77E-14    |
| ENSMMUG00000032429 | forkhead box O4 [Source:VGNC Symbol;Acc:VGNC:72712]                                                  | 1.624571861 | 7.26E-08    | 1.77E-06    |
| ENSMMUG00000008070 | YEATS domain containing 2 [Source:VGNC Symbol;Acc:VGNC:79502]                                        | 1.626611968 | 2.78E-24    | 8.13E-22    |
| ENSMMUG00000001472 | TIA1 cytotoxic granule associated RNA binding protein like 1 [Source:VGNC Symbol;Acc:VGNC:78354]     | 1.627449538 | 0.000171175 | 0.00155538  |
| ENSMMUG00000020979 | inka box actin regulator 1 [Source:VGNC Symbol;Acc:VGNC:73692]                                       | 1.627630276 | 4.92E-12    | 2.56E-10    |
| ENSMMUG00000002433 | calcium/calmodulin dependent protein kinase II beta [Source:VGNC Symbol;Acc:VGNC:70524]              | 1.627782269 | 4.33E-05    | 0.000475274 |
| ENSMMUG00000003739 | mannosidase beta [Source:VGNC Symbol;Acc:VGNC:74486]                                                 | 1.628614243 | 0.002359047 | 0.013307558 |
| ENSMMUG00000053257 | Y RNA [Source:RFAM;Acc:RF00019]                                                                      | 1.632808404 | 6.78E-09    | 2.06E-07    |
| ENSMMUG00000014530 | pre-mRNA processing factor 19 [Source:VGNC Symbol;Acc:VGNC:76281]                                    | 1.634968839 | 2.52E-09    | 8.27E-08    |
| ENSMMUG00000011661 | integrin subunit alpha 8 [Source:VGNC Symbol;Acc:VGNC:73782]                                         | 1.636542332 | 2.02E-07    | 4.48E-06    |
| ENSMMUG00000057454 | transmembrane protein 160 [Source:NCBI gene;Acc:716996]                                              | 1.640663527 | 0.000249782 | 0.002129102 |
| ENSMMUG00000017450 | MOB kinase activator 2 [Source:NCBI gene;Acc:720951]                                                 | 1.642844503 | 0.010973802 | 0.045115775 |
| ENSMMUG00000064824 | gremlin 2, DAN family BMP antagonist [Source:NCBI gene;Acc:708280]                                   | 1.6475122   | 0.002122673 | 0.012239351 |
| ENSMMUG00000060760 |                                                                                                      | 1.647782773 | 1.12E-05    | 0.000149264 |
| ENSMMUG00000020177 | membrane spanning 4-domains A4A [Source:NCBI gene;Acc:698027]                                        | 1.647811065 | 0.002228353 | 0.012683819 |
| ENSMMUG00000062037 | stannin [Source:NCBI gene;Acc:711909]                                                                | 1.649771116 | 0.004323083 | 0.021617219 |
| ENSMMUG00000022513 | glutamate metabotropic receptor 3 [Source:VGNC Symbol;Acc:VGNC:73287]                                | 1.650408118 | 2.58E-05    | 0.000305907 |
| ENSMMUG00000021972 | diacylglycerol kinase gamma [Source:VGNC Symbol;Acc:VGNC:71785]                                      | 1.65075502  | 2.14E-11    | 1.01E-09    |
| ENSMMUG00000002423 | DNA polymerase delta 2, accessory subunit [Source:VGNC Symbol;Acc:VGNC:76203]                        | 1.650755525 | 1.34E-07    | 3.06E-06    |
| ENSMMUG00000000302 | WD repeat and HMG-box DNA binding protein 1 [Source:VGNC Symbol;Acc:VGNC:79376]                      | 1.652487232 | 7.33E-10    | 2.72E-08    |
| ENSMMUG00000007538 | transient receptor potential cation channel subfamily M member 4 [Source:VGNC Symbol;Acc:VGNC:79105] | 1.653856636 | 6.75E-06    | 9.49E-05    |
| ENSMMUG00000062254 |                                                                                                      | 1.654637095 | 0.004726979 | 0.023049794 |
| ENSMMUG00000048744 |                                                                                                      | 1.662152341 | 0.011033465 | 0.045298863 |
| ENSMMUG00000011965 | coiled-coil domain containing 175 [Source:VGNC Symbol;Acc:VGNC:84317]                                | 1.6645566   | 0.006617558 | 0.029962903 |
| ENSMMUG00000060555 |                                                                                                      | 1.665764627 | 3.60E-05    | 0.00040861  |
| ENSMMUG00000050405 |                                                                                                      | 1.666216276 | 6.69E-05    | 0.000696651 |
| ENSMMUG00000010308 | cyclin I family member 2 [Source:VGNC Symbol;Acc:VGNC:70923]                                         | 1.667650274 | 5.85E-10    | 2.20E-08    |
| ENSMMUG00000057283 |                                                                                                      | 1.667675769 | 0.000397984 | 0.003120861 |
| ENSMMUG00000055976 | CD99 antigen [Source:NCBI gene;Acc:106995376]                                                        | 1.669612848 | 3.58E-06    | 5.46E-05    |
| ENSMMUG00000051226 | FAD-linked sulfhydryl oxidase ERV1 [Source:NCBI gene;Acc:106994988]                                  | 1.672778644 | 6.75E-23    | 1.68E-20    |
| ENSMMUG00000012787 | acid phosphatase 7, tartrate resistant (putative) [Source:NCBI gene;Acc:695532]                      | 1.673215833 | 0.00174308  | 0.010442787 |
| ENSMMUG00000007201 | PDS5 cohesin associated factor B [Source:VGNC Symbol;Acc:VGNC:75835]                                 | 1.674193485 | 9.53E-07    | 1.70E-05    |
| ENSMMUG00000010309 | septin 8 [Source:VGNC Symbol;Acc:VGNC:77248]                                                         | 1.678275051 | 0.000599733 | 0.004425387 |
| ENSMMUG00000013146 | claudin 2 [Source:HGNC Symbol;Acc:HGNC:2041]                                                         | 1.679282532 | 2.75E-16    | 2.73E-14    |
| ENSMMUG00000039266 | Metazoan signal recognition particle RNA [Source:RFAM;Acc:RF00017]                                   | 1.681284977 | 0.009192294 | 0.0391629   |
| ENSMMUG00000002422 | AE binding protein 1 [Source:VGNC Symbol;Acc:VGNC:80328]                                             | 1.681939679 | 2.03E-06    | 3.28E-05    |
| ENSMMUG00000042855 | zinc finger SWIM-type containing 1 [Source:NCBI gene;Acc:717180]                                     | 1.683093135 | 0.000529967 | 0.003990486 |
| ENSMMUG00000051975 |                                                                                                      | 1.683140831 | 0.000288459 | 0.002397356 |
| ENSMMUG00000003539 | glutamine rich 2 [Source:VGNC Symbol;Acc:VGNC:76534]                                                 | 1.683748307 | 0.000234863 | 0.002027914 |
| ENSMMUG00000009816 | exosome component 9 [Source:VGNC Symbol;Acc:VGNC:72477]                                              | 1.684937856 | 0.004231242 | 0.021264524 |
| ENSMMUG00000017906 | DnaJ heat shock protein family (Hsp40) member B1 [Source:NCBI gene;Acc:718890]                       | 1.685574998 | 0.001422    | 0.008878974 |
| ENSMMUG00000019546 | regucalcin [Source:VGNC Symbol;Acc:VGNC:76912]                                                       | 1.686936453 | 0.001314319 | 0.008354717 |



|                    |                                                                                          |             |             |             |
|--------------------|------------------------------------------------------------------------------------------|-------------|-------------|-------------|
| ENSMMUG00000008197 | netrin G1 [Source:VGNC Symbol;Acc:VGNC:75450]                                            | 1.689499074 | 0.004429489 | 0.022011436 |
| ENSMMUG00000023303 | ecotropic viral integration site 5 like [Source:NCBI gene;Acc:706628]                    | 1.694006874 | 8.97E-17    | 9.60E-15    |
| ENSMMUG00000059932 | Metazoan signal recognition particle RNA [Source:RFAM;Acc:RF00017]                       | 1.694277108 | 0.002949251 | 0.015852883 |
| ENSMMUG00000050549 | lysyl oxidase like 2 [Source:NCBI gene;Acc:710151]                                       | 1.695480673 | 3.93E-05    | 0.000439018 |
| ENSMMUG00000010881 | cytochrome P450, family 26, subfamily A, polypeptide 1 [Source:NCBI gene;Acc:699519]     | 1.698813025 | 0.005197078 | 0.024856311 |
| ENSMMUG00000050419 | ADAM metalloproteinase with thrombospondin type 1 motif 4 [Source:NCBI gene;Acc:719927]  | 1.703046511 | 2.18E-05    | 0.000265328 |
| ENSMMUG00000008964 | D-glutamate cyclase [Source:VGNC Symbol;Acc:VGNC:71685]                                  | 1.707666705 | 0.000457029 | 0.003499603 |
| ENSMMUG00000056158 |                                                                                          | 1.7088224   | 0.000841993 | 0.005835481 |
| ENSMMUG00000061606 | Metazoan signal recognition particle RNA [Source:RFAM;Acc:RF00017]                       | 1.708829424 | 0.008648798 | 0.037271681 |
| ENSMMUG00000020726 | dihydropyrimidine dehydrogenase [Source:VGNC Symbol;Acc:VGNC:71982]                      | 1.711338137 | 1.47E-31    | 1.60E-28    |
| ENSMMUG00000061833 | transmembrane protein 251 [Source:NCBI gene;Acc:708131]                                  | 1.711946631 | 2.86E-05    | 0.000333766 |
| ENSMMUG00000010137 | microcephalin 1 [Source:VGNC Symbol;Acc:VGNC:74687]                                      | 1.712711308 | 0.000111514 | 0.001077014 |
| ENSMMUG00000049551 |                                                                                          | 1.713545017 | 0.000376508 | 0.002986538 |
| ENSMMUG00000039292 |                                                                                          | 1.713564722 | 1.98E-06    | 3.21E-05    |
| ENSMMUG00000023622 | BCR activator of RhoGEF and GTPase [Source:NCBI gene;Acc:709258]                         | 1.713923466 | 5.14E-05    | 0.000551721 |
| ENSMMUG00000053976 | bile acid-CoA:amino acid N-acyltransferase [Source:NCBI gene;Acc:100429419]              | 1.717061502 | 1.38E-06    | 2.36E-05    |
| ENSMMUG00000001725 | solute carrier family 35 member A4 [Source:VGNC Symbol;Acc:VGNC:77532]                   | 1.717224444 | 9.57E-05    | 0.00094902  |
| ENSMMUG00000046774 | RAS like proto-oncogene B [Source:NCBI gene;Acc:695852]                                  | 1.722070328 | 1.46E-08    | 4.11E-07    |
| ENSMMUG00000005488 | coronin 1B [Source:VGNC Symbol;Acc:VGNC:71320]                                           | 1.722576392 | 6.66E-08    | 1.65E-06    |
| ENSMMUG00000010007 | CD14 molecule [Source:VGNC Symbol;Acc:VGNC:70751]                                        | 1.724242217 | 0.001375548 | 0.008643001 |
| ENSMMUG00000063759 | transmembrane protein 185B [Source:NCBI gene;Acc:695744]                                 | 1.725040485 | 1.58E-05    | 0.000200555 |
| ENSMMUG00000056741 | ovostatin-like [Source:NCBI gene;Acc:722294]                                             | 1.725756333 | 0.006589661 | 0.029870468 |
| ENSMMUG00000014699 |                                                                                          | 1.728891521 | 1.66E-20    | 3.21E-18    |
| ENSMMUG00000009559 | minichromosome maintenance complex binding protein [Source:VGNC Symbol;Acc:VGNC:74583]   | 1.729344204 | 0.0002913   | 0.002415937 |
| ENSMMUG00000013160 | DnaJ heat shock protein family (Hsp40) member C17 [Source:VGNC Symbol;Acc:VGNC:84335]    | 1.729599856 | 0.001129356 | 0.007366651 |
| ENSMMUG00000008253 | zinc finger protein 267 [Source:NCBI gene;Acc:641441]                                    | 1.732350258 | 7.73E-10    | 2.85E-08    |
| ENSMMUG00000061194 |                                                                                          | 1.735484644 | 6.74E-07    | 1.25E-05    |
| ENSMMUG00000058928 | Metazoan signal recognition particle RNA [Source:RFAM;Acc:RF00017]                       | 1.738327182 | 1.22E-05    | 0.000159795 |
| ENSMMUG00000006766 | RUN domain containing 3B [Source:VGNC Symbol;Acc:VGNC:77129]                             | 1.74176354  | 1.77E-06    | 2.91E-05    |
| ENSMMUG00000054225 | taste receptor type 2 member 43 [Source:NCBI gene;Acc:694161]                            | 1.742136663 | 0.005486735 | 0.025862928 |
| ENSMMUG00000008387 | dipeptidyl peptidase 4 [Source:VGNC Symbol;Acc:VGNC:71979]                               | 1.747615419 | 9.59E-05    | 0.000949495 |
| ENSMMUG00000064052 | CD300 molecule like family member d [Source:NCBI gene;Acc:703142]                        | 1.748302517 | 2.56E-05    | 0.00030428  |
| ENSMMUG00000007729 | ilvB acetolactate synthase like [Source:VGNC Symbol;Acc:VGNC:73739]                      | 1.751067131 | 7.82E-06    | 0.000108311 |
| ENSMMUG00000016143 | sialophorin [Source:VGNC Symbol;Acc:VGNC:77861]                                          | 1.751271767 | 8.45E-19    | 1.25E-16    |
| ENSMMUG00000008518 | phospholipid phosphatase related 5 [Source:NCBI gene;Acc:710549]                         | 1.751832203 | 6.23E-14    | 4.44E-12    |
| ENSMMUG00000002950 | transferrin receptor 2 [Source:VGNC Symbol;Acc:VGNC:81770]                               | 1.758326945 | 2.20E-09    | 7.30E-08    |
| ENSMMUG00000061208 | MAP3K7 C-terminal like [Source:NCBI gene;Acc:713717]                                     | 1.762078919 | 3.18E-28    | 1.65E-25    |
| ENSMMUG00000061151 |                                                                                          | 1.762803219 | 5.06E-05    | 0.000543738 |
| ENSMMUG00000009583 | COP9 signalosome subunit 7A [Source:VGNC Symbol;Acc:VGNC:71185]                          | 1.768153691 | 0.002125557 | 0.012250081 |
| ENSMMUG00000061079 | golgin subfamily A member 6C [Source:NCBI gene;Acc:715898]                               | 1.768835967 | 3.52E-20    | 6.38E-18    |
| ENSMMUG00000013330 | ectonucleoside triphosphate diphosphohydrolase 3 [Source:VGNC Symbol;Acc:VGNC:72226]     | 1.772744185 | 6.39E-07    | 1.20E-05    |
| ENSMMUG00000061797 | U6 spliceosomal RNA [Source:RFAM;Acc:RF00026]                                            | 1.77452137  | 0.001583405 | 0.009704637 |
| ENSMMUG00000060761 |                                                                                          | 1.774959149 | 3.49E-08    | 9.04E-07    |
| ENSMMUG00000003750 | PLAG1 like zinc finger 1 [Source:VGNC Symbol;Acc:VGNC:83444]                             | 1.777044708 | 5.88E-05    | 0.000620024 |
| ENSMMUG00000018011 | sphingosine kinase 1 [Source:VGNC Symbol;Acc:VGNC:77858]                                 | 1.777371242 | 0.002861373 | 0.015484773 |
| ENSMMUG00000002536 | calcium binding protein 1 [Source:VGNC Symbol;Acc:VGNC:70495]                            | 1.777565932 | 3.68E-05    | 0.000416604 |
| ENSMMUG00000055126 |                                                                                          | 1.778077322 | 1.59E-07    | 3.58E-06    |
| ENSMMUG00000029034 | defensin beta 136 [Source:VGNC Symbol;Acc:VGNC:71826]                                    | 1.781977436 | 0.002725164 | 0.014945945 |
| ENSMMUG00000017627 | B-TFIID TATA-box binding protein associated factor 1 [Source:VGNC Symbol;Acc:VGNC:70336] | 1.783074189 | 5.41E-16    | 4.95E-14    |
| ENSMMUG00000002426 | myosin light chain 7 [Source:VGNC Symbol;Acc:VGNC:75002]                                 | 1.78313231  | 2.01E-09    | 6.73E-08    |
| ENSMMUG00000064557 |                                                                                          | 1.784540583 | 3.31E-14    | 2.40E-12    |



|                    |                                                                                                                  |             |             |             |
|--------------------|------------------------------------------------------------------------------------------------------------------|-------------|-------------|-------------|
| ENSMMUG0000005070  | ecotropic viral integration site 5 [Source:NCBI gene;Acc:706592]                                                 | 1.78558422  | 2.21E-07    | 4.87E-06    |
| ENSMMUG00000064707 |                                                                                                                  | 1.785918586 | 5.17E-05    | 0.000554719 |
| ENSMMUG00000012635 | zyxin [Source:VGNC Symbol;Acc:VGNC:78917]                                                                        | 1.785934323 | 3.05E-09    | 9.85E-08    |
| ENSMMUG00000003902 | thrombospondin 3 [Source:VGNC Symbol;Acc:VGNC:78345]                                                             | 1.789849692 | 3.78E-05    | 0.000425197 |
| ENSMMUG00000017654 | arrestin beta 2 [Source:VGNC Symbol;Acc:VGNC:70022]                                                              | 1.790100975 | 0.001877471 | 0.011119978 |
| ENSMMUG00000005432 | clathrin heavy chain like 1 [Source:VGNC Symbol;Acc:VGNC:71268]                                                  | 1.790489829 | 1.78E-13    | 1.17E-11    |
| ENSMMUG00000009201 | abhydrolase domain containing 12 [Source:VGNC Symbol;Acc:VGNC:69411]                                             | 1.791945047 | 4.87E-06    | 7.13E-05    |
| ENSMMUG00000053457 | caspase 14 [Source:NCBI gene;Acc:718049]                                                                         | 1.797075538 | 0.002239493 | 0.012729077 |
| ENSMMUG00000010314 | HECT and RLD domain containing E3 ubiquitin protein ligase family member 6 [Source:VGNC Symbol;Acc:VGNC:73238]   | 1.799470424 | 3.83E-05    | 0.000429419 |
| ENSMMUG00000001753 | integrin subunit alpha 1 [Source:VGNC Symbol;Acc:VGNC:73772]                                                     | 1.801718532 | 5.17E-13    | 3.19E-11    |
| ENSMMUG00000057687 |                                                                                                                  | 1.802559554 | 1.56E-10    | 6.46E-09    |
| ENSMMUG00000011427 | syntaxin 10 [Source:VGNC Symbol;Acc:VGNC:78040]                                                                  | 1.804913637 | 2.82E-11    | 1.28E-09    |
| ENSMMUG00000006758 | cytochrome P450, family 27, subfamily A, polypeptide 1 [Source:NCBI gene;Acc:700192]                             | 1.806642449 | 0.001014475 | 0.006779772 |
| ENSMMUG00000017256 | calcium voltage-gated channel subunit alpha1 G [Source:VGNC Symbol;Acc:VGNC:70504]                               | 1.806851351 | 1.37E-15    | 1.20E-13    |
| ENSMMUG00000001702 | succinyl-CoA:glutarate-CoA transferase [Source:VGNC Symbol;Acc:VGNC:81767]                                       | 1.815290897 | 2.47E-11    | 1.15E-09    |
| ENSMMUG00000004516 | apolipoprotein A2 [Source:NCBI gene;Acc:719946]                                                                  | 1.819165066 | 0.00363444  | 0.018932604 |
| ENSMMUG00000010313 | kinesin family member 3A [Source:VGNC Symbol;Acc:VGNC:74017]                                                     | 1.819663323 | 7.77E-18    | 9.90E-16    |
| ENSMMUG00000018144 | C2 calcium-dependent domain-containing protein 6 [Source:NCBI gene;Acc:702140]                                   | 1.819907655 | 2.43E-15    | 2.09E-13    |
| ENSMMUG00000018034 | suppression of tumorigenicity 14 [Source:VGNC Symbol;Acc:VGNC:77897]                                             | 1.82383815  | 2.45E-19    | 3.86E-17    |
| ENSMMUG00000063238 |                                                                                                                  | 1.824576629 | 0.010648634 | 0.044142622 |
| ENSMMUG00000054960 |                                                                                                                  | 1.825176371 | 6.47E-05    | 0.000675998 |
| ENSMMUG00000020020 | Rho GTPase activating protein 23 [Source:NCBI gene;Acc:693996]                                                   | 1.825472619 | 4.31E-05    | 0.00047305  |
| ENSMMUG00000001707 | amyloid beta precursor protein binding family B member 3 [Source:VGNC Symbol;Acc:VGNC:69869]                     | 1.826709337 | 7.67E-12    | 3.84E-10    |
| ENSMMUG00000009884 | hydroxysteroid 17-beta dehydrogenase 1 [Source:VGNC Symbol;Acc:VGNC:73528]                                       | 1.827406446 | 8.79E-05    | 0.000885788 |
| ENSMMUG00000064928 |                                                                                                                  | 1.827764462 | 0.004133837 | 0.020871347 |
| ENSMMUG00000006997 | thioredoxin domain containing 16 [Source:VGNC Symbol;Acc:VGNC:79214]                                             | 1.831459956 | 1.97E-14    | 1.48E-12    |
| ENSMMUG00000055811 |                                                                                                                  | 1.831469691 | 4.71E-06    | 6.93E-05    |
| ENSMMUG00000012178 | calcium binding and coiled-coil domain 2 [Source:VGNC Symbol;Acc:VGNC:70675]                                     | 1.832057883 | 1.40E-11    | 6.89E-10    |
| ENSMMUG00000002886 | Bardet-Biedl syndrome 9 [Source:NCBI gene;Acc:708412]                                                            | 1.833824998 | 8.50E-13    | 5.04E-11    |
| ENSMMUG00000018600 | myosin light chain 4 [Source:VGNC Symbol;Acc:VGNC:75105]                                                         | 1.838221483 | 0.00812704  | 0.035521692 |
| ENSMMUG00000054414 |                                                                                                                  | 1.839635285 | 9.18E-07    | 1.64E-05    |
| ENSMMUG00000007200 | NEDD4 binding protein 2 like 2 [Source:VGNC Symbol;Acc:VGNC:75031]                                               | 1.84000725  | 1.94E-09    | 6.51E-08    |
| ENSMMUG00000013713 | beta 3-glucosyltransferase [Source:NCBI gene;Acc:713498]                                                         | 1.845385288 | 4.23E-05    | 0.000465267 |
| ENSMMUG00000019070 | focadhesin [Source:VGNC Symbol;Acc:VGNC:72556]                                                                   | 1.848186758 | 4.06E-16    | 3.77E-14    |
| ENSMMUG00000016273 | maltase-glucoamylase [Source:VGNC Symbol;Acc:VGNC:74713]                                                         | 1.8489098   | 3.01E-08    | 7.90E-07    |
| ENSMMUG00000012001 | transcription factor 4 [Source:VGNC Symbol;Acc:VGNC:78288]                                                       | 1.849866545 | 1.69E-12    | 9.58E-11    |
| ENSMMUG00000005380 | zinc finger protein 827 [Source:NCBI gene;Acc:706018]                                                            | 1.853547786 | 7.11E-08    | 1.74E-06    |
| ENSMMUG00000006929 | ST3 beta-galactoside alpha-2,3-sialyltransferase 4 [Source:VGNC Symbol;Acc:VGNC:77827]                           | 1.854835739 | 1.75E-06    | 2.87E-05    |
| ENSMMUG00000063639 |                                                                                                                  | 1.856593126 | 9.13E-09    | 2.69E-07    |
| ENSMMUG00000000706 | filamin B [Source:VGNC Symbol;Acc:VGNC:72672]                                                                    | 1.857062475 | 1.30E-09    | 4.56E-08    |
| ENSMMUG00000004103 | collagen type XI alpha 1 chain [Source:VGNC Symbol;Acc:VGNC:71289]                                               | 1.868485104 | 6.85E-29    | 4.32E-26    |
| ENSMMUG00000023045 | zinc finger B-box domain containing [Source:VGNC Symbol;Acc:VGNC:79592]                                          | 1.870608833 | 0.000255607 | 0.002171026 |
| ENSMMUG00000059778 |                                                                                                                  | 1.875599278 | 0.004058656 | 0.020613428 |
| ENSMMUG00000022116 | PIH1 domain containing 1 [Source:VGNC Symbol;Acc:VGNC:75868]                                                     | 1.875843484 | 0.00064355  | 0.004676674 |
| ENSMMUG00000060795 |                                                                                                                  | 1.878339107 | 0.002076842 | 0.012033025 |
| ENSMMUG00000006738 | L3MBTL histone methyl-lysine binding protein 1 [Source:NCBI gene;Acc:695694]                                     | 1.879319349 | 2.81E-06    | 4.41E-05    |
| ENSMMUG00000052891 |                                                                                                                  | 1.882667295 | 4.43E-13    | 2.78E-11    |
| ENSMMUG00000058592 |                                                                                                                  | 1.882742873 | 2.49E-06    | 3.96E-05    |
| ENSMMUG00000055834 |                                                                                                                  | 1.882904937 | 0.004870664 | 0.023596713 |
| ENSMMUG00000043675 | Cbp/p300 interacting transactivator with Glu/Asp rich carboxy-terminal domain 4 [Source:NCBI gene;Acc:114672840] | 1.884783565 | 6.30E-09    | 1.92E-07    |
| ENSMMUG00000022785 | solute carrier family 66 member 3 [Source:VGNC Symbol;Acc:VGNC:76334]                                            | 1.886846577 | 0.006991371 | 0.031382555 |

|                    |                                                                                                  |             |             |             |
|--------------------|--------------------------------------------------------------------------------------------------|-------------|-------------|-------------|
| ENSMMUG00000051852 | Metazoan signal recognition particle RNA [Source:RFAM;Acc:RF00017]                               | 1.889435337 | 0.000160261 | 0.001475239 |
| ENSMMUG00000058557 |                                                                                                  | 1.891995245 | 1.17E-06    | 2.04E-05    |
| ENSMMUG00000020190 | valosin containing protein [Source:VGNC Symbol;Acc:VGNC:78762]                                   | 1.892752115 | 5.63E-07    | 1.08E-05    |
| ENSMMUG00000049542 |                                                                                                  | 1.896493235 | 2.73E-05    | 0.000321504 |
| ENSMMUG00000014876 | nucleolus and neural progenitor protein [Source:VGNC Symbol;Acc:VGNC:75244]                      | 1.897610253 | 3.72E-07    | 7.64E-06    |
| ENSMMUG00000005208 | RNA polymerase III subunit B [Source:VGNC Symbol;Acc:VGNC:76143]                                 | 1.897611484 | 4.84E-05    | 0.000522856 |
| ENSMMUG00000063121 |                                                                                                  | 1.904889847 | 7.32E-05    | 0.000755528 |
| ENSMMUG00000055441 |                                                                                                  | 1.906485711 | 0.000438962 | 0.003376371 |
| ENSMMUG00000021039 | X-ray radiation resistance associated 1 [Source:NCBI gene;Acc:693788]                            | 1.909042142 | 4.70E-06    | 6.92E-05    |
| ENSMMUG00000020679 | myozenin 3 [Source:VGNC Symbol;Acc:VGNC:74988]                                                   | 1.91002146  | 5.77E-11    | 2.50E-09    |
| ENSMMUG00000009184 | myelin protein zero like 1 [Source:NCBI gene;Acc:698437]                                         | 1.91156562  | 7.01E-08    | 1.72E-06    |
| ENSMMUG00000012356 | serpin family A member 9 [Source:VGNC Symbol;Acc:VGNC:77241]                                     | 1.917022064 | 2.19E-05    | 0.000266237 |
| ENSMMUG00000003348 | neurofilament light [Source:VGNC Symbol;Acc:VGNC:75307]                                          | 1.919528749 | 2.32E-09    | 7.66E-08    |
| ENSMMUG00000018345 | phosphatidylethanolamine binding protein 4 [Source:VGNC Symbol;Acc:VGNC:82204]                   | 1.922535035 | 6.78E-07    | 1.25E-05    |
| ENSMMUG00000056939 |                                                                                                  | 1.924081255 | 0.010542151 | 0.043767624 |
| ENSMMUG00000064321 |                                                                                                  | 1.933017287 | 5.31E-07    | 1.04E-05    |
| ENSMMUG00000013832 | ATP binding cassette subfamily B member 11 [Source:VGNC Symbol;Acc:VGNC:81339]                   | 1.933410609 | 4.48E-05    | 0.000489437 |
| ENSMMUG00000023816 | semaphorin 4B [Source:VGNC Symbol;Acc:VGNC:77165]                                                | 1.936871297 | 7.88E-15    | 6.25E-13    |
| ENSMMUG00000062863 |                                                                                                  | 1.938440158 | 3.69E-06    | 5.60E-05    |
| ENSMMUG00000009960 | cathepsin A [Source:VGNC Symbol;Acc:VGNC:71617]                                                  | 1.941931262 | 7.78E-13    | 4.68E-11    |
| ENSMMUG00000045513 |                                                                                                  | 1.943403176 | 9.47E-06    | 0.000128812 |
| ENSMMUG00000051925 |                                                                                                  | 1.946789007 | 1.10E-05    | 0.000147856 |
| ENSMMUG00000003591 | pleckstrin homology domain containing A2 [Source:VGNC Symbol;Acc:VGNC:76026]                     | 1.947364025 | 0.000655061 | 0.00475167  |
| ENSMMUG00000009199 | glycogen phosphorylase B [Source:VGNC Symbol;Acc:VGNC:76631]                                     | 1.957742913 | 5.71E-07    | 1.10E-05    |
| ENSMMUG00000009684 | kinesin family member 22 [Source:VGNC Symbol;Acc:VGNC:74033]                                     | 1.963792304 | 2.90E-09    | 9.43E-08    |
| ENSMMUG00000011627 | interleukin 4 induced 1 [Source:VGNC Symbol;Acc:VGNC:73625]                                      | 1.963865948 | 2.43E-06    | 3.88E-05    |
| ENSMMUG00000057231 | T-box transcription factor 21 [Source:NCBI gene;Acc:694044]                                      | 1.969282544 | 1.07E-18    | 1.57E-16    |
| ENSMMUG00000058013 | melanoma-associated antigen 3 [Source:NCBI gene;Acc:706103]                                      | 1.973797928 | 7.17E-07    | 1.31E-05    |
| ENSMMUG00000021877 | protein kinase AMP-activated non-catalytic subunit gamma 3 [Source:VGNC Symbol;Acc:VGNC:76406]   | 1.97983436  | 0.000476643 | 0.003626607 |
| ENSMMUG00000008536 | mitogen-activated protein kinase 7 [Source:VGNC Symbol;Acc:VGNC:74648]                           | 1.982019227 | 0.003583458 | 0.018719485 |
| ENSMMUG00000061845 |                                                                                                  | 1.982586577 | 1.64E-05    | 0.000206643 |
| ENSMMUG00000065247 | opioid receptor kappa 1 [Source:NCBI gene;Acc:710783]                                            | 1.983885721 | 8.57E-14    | 5.97E-12    |
| ENSMMUG00000011650 | dual specificity tyrosine phosphorylation regulated kinase 2 [Source:VGNC Symbol;Acc:VGNC:72018] | 1.984760105 | 6.76E-07    | 1.25E-05    |
| ENSMMUG00000014720 | NCK interacting protein with SH3 domain [Source:VGNC Symbol;Acc:VGNC:74960]                      | 1.987340029 | 5.27E-06    | 7.63E-05    |
| ENSMMUG00000004498 | protein inhibitor of activated STAT 2 [Source:VGNC Symbol;Acc:VGNC:75815]                        | 1.988026517 | 4.71E-05    | 0.000509443 |
| ENSMMUG00000003629 | phosphatidylinositol 4-kinase type 2 beta [Source:NCBI gene;Acc:693561]                          | 1.989987549 | 0.00034525  | 0.002784319 |
| ENSMMUG00000007423 | transcription factor Dp-1 [Source:NCBI gene;Acc:715345]                                          | 1.990123533 | 1.33E-08    | 3.77E-07    |
| ENSMMUG00000039101 | pelota mRNA surveillance and ribosome rescue factor [Source:VGNC Symbol;Acc:VGNC:84478]          | 1.992114765 | 5.28E-07    | 1.03E-05    |
| ENSMMUG00000002411 | drebrin like [Source:NCBI gene;Acc:720621]                                                       | 1.993185383 | 3.99E-16    | 3.76E-14    |
| ENSMMUG00000018932 | adhesion G protein-coupled receptor E2 [Source:NCBI gene;Acc:654420]                             | 1.993841642 | 7.83E-17    | 8.45E-15    |
| ENSMMUG00000010451 | inositol polyphosphate phosphatase like 1 [Source:VGNC Symbol;Acc:VGNC:73752]                    | 1.994128056 | 0.000608994 | 0.004468938 |
| ENSMMUG00000019246 | regulator of calcineurin 2 [Source:VGNC Symbol;Acc:VGNC:82092]                                   | 1.994218037 | 2.83E-05    | 0.000330899 |
| ENSMMUG00000019418 | erythrocyte membrane protein band 4.1 like 3 [Source:VGNC Symbol;Acc:VGNC:72233]                 | 1.99553889  | 1.51E-23    | 3.92E-21    |
| ENSMMUG00000056024 |                                                                                                  | 1.996862295 | 2.33E-21    | 4.90E-19    |
| ENSMMUG00000006836 | chloride channel accessory 1 [Source:NCBI gene;Acc:574295]                                       | 1.997667025 | 5.33E-06    | 7.71E-05    |
| ENSMMUG00000020462 | CD300e molecule [Source:NCBI gene;Acc:114673189]                                                 | 1.99857323  | 0.000269014 | 0.002272014 |
| ENSMMUG00000014874 | GTP binding protein 8 (putative) [Source:VGNC Symbol;Acc:VGNC:84180]                             | 2.002835271 | 2.61E-11    | 1.20E-09    |
| ENSMMUG00000023263 | mediator complex subunit 15 [Source:VGNC Symbol;Acc:VGNC:74511]                                  | 2.004575292 | 1.15E-08    | 3.30E-07    |
| ENSMMUG00000019032 | EMAP like 2 [Source:NCBI gene;Acc:715009]                                                        | 2.005920481 | 1.39E-09    | 4.85E-08    |
| ENSMMUG00000045654 | tumor necrosis factor [Source:VGNC Symbol;Acc:VGNC:83501]                                        | 2.007920515 | 0.001099642 | 0.007231915 |
| ENSMMUG00000028906 | Rho/Rac guanine nucleotide exchange factor 18 [Source:NCBI gene;Acc:707510]                      | 2.008274248 | 0.000659272 | 0.004773542 |

|                    |                                                                                       |             |             |             |
|--------------------|---------------------------------------------------------------------------------------|-------------|-------------|-------------|
| ENSMMUG00000010180 | PIN2 (TERF1) interacting telomerase inhibitor 1 [Source:NCBI gene;Acc:701523]         | 2.008601864 | 0.000134096 | 0.001265512 |
| ENSMMUG00000060289 |                                                                                       | 2.009927191 | 2.10E-24    | 6.27E-22    |
| ENSMMUG00000059182 |                                                                                       | 2.010034226 | 1.15E-06    | 2.01E-05    |
| ENSMMUG00000014045 | protein tyrosine phosphatase non-receptor type 23 [Source:VGNC Symbol;Acc:VGNC:76477] | 2.013143908 | 3.51E-12    | 1.88E-10    |
| ENSMMUG00000013450 | TATA-box binding protein associated factor 6 [Source:VGNC Symbol;Acc:VGNC:78093]      | 2.013579877 | 0.000539365 | 0.004044729 |
| ENSMMUG00000052637 | Metazoan signal recognition particle RNA [Source:RFAM;Acc:RF00017]                    | 2.015910372 | 0.002187316 | 0.012515667 |
| ENSMMUG00000017056 | Sad1 and UNC84 domain containing 1 [Source:VGNC Symbol;Acc:VGNC:78161]                | 2.017555763 | 0.010276783 | 0.042838412 |
| ENSMMUG00000046417 | chromobox 2 [Source:NCBI gene;Acc:717462]                                             | 2.023467287 | 2.61E-06    | 4.13E-05    |
| ENSMMUG00000003133 | interleukin 4 [Source:VGNC Symbol;Acc:VGNC:73729]                                     | 2.024804478 | 2.35E-05    | 0.0002826   |
| ENSMMUG00000061098 |                                                                                       | 2.026834584 | 1.20E-38    | 3.60E-35    |
| ENSMMUG00000007726 | synapse defective Rho GTPase homolog 1 [Source:NCBI gene;Acc:719089]                  | 2.029178184 | 0.000115484 | 0.001105548 |
| ENSMMUG00000003819 | nitric oxide synthase interacting protein [Source:VGNC Symbol;Acc:VGNC:75207]         | 2.029669798 | 9.58E-09    | 2.80E-07    |
| ENSMMUG00000030279 | A-kinase anchoring protein 10 [Source:VGNC Symbol;Acc:VGNC:69764]                     | 2.03302428  | 1.73E-08    | 4.77E-07    |
| ENSMMUG00000014076 | AF4/FMR2 family member 1 [Source:VGNC Symbol;Acc:VGNC:69817]                          | 2.035576167 | 1.66E-06    | 2.75E-05    |
| ENSMMUG00000049265 | Metazoan signal recognition particle RNA [Source:RFAM;Acc:RF00017]                    | 2.038260771 | 0.000706978 | 0.005048761 |
| ENSMMUG00000004283 | calcium and integrin binding family member 3 [Source:VGNC Symbol;Acc:VGNC:71339]      | 2.039923293 | 0.000674756 | 0.004861661 |
| ENSMMUG00000060497 |                                                                                       | 2.045164132 | 0.000894299 | 0.00613409  |
| ENSMMUG00000039943 | adenylate cyclase 9 [Source:NCBI gene;Acc:706789]                                     | 2.05139781  | 0.002103926 | 0.012166403 |
| ENSMMUG00000009988 | transmembrane protein 59 like [Source:VGNC Symbol;Acc:VGNC:78919]                     | 2.054639318 | 2.88E-16    | 2.80E-14    |
| ENSMMUG00000004376 | calcium and integrin binding 1 [Source:VGNC Symbol;Acc:VGNC:71189]                    | 2.055213627 | 1.72E-12    | 9.72E-11    |
| ENSMMUG00000006079 | leucine rich repeat containing 19 [Source:VGNC Symbol;Acc:VGNC:74337]                 | 2.056351207 | 0.00940134  | 0.039897397 |
| ENSMMUG00000005482 | lysine methyltransferase 2A [Source:NCBI gene;Acc:705511]                             | 2.056564284 | 0.000592353 | 0.004376326 |
| ENSMMUG00000000566 |                                                                                       | 2.056752433 | 0.003595928 | 0.018764631 |
| ENSMMUG00000023477 |                                                                                       | 2.057422508 | 1.88E-22    | 4.42E-20    |
| ENSMMUG00000012801 | zinc finger protein 235 [Source:VGNC Symbol;Acc:VGNC:78825]                           | 2.05843829  | 1.35E-23    | 3.59E-21    |
| ENSMMUG00000009953 | ninein like [Source:VGNC Symbol;Acc:VGNC:75273]                                       | 2.059178261 | 5.96E-10    | 2.23E-08    |
| ENSMMUG00000060517 |                                                                                       | 2.063921368 | 8.34E-11    | 3.51E-09    |
| ENSMMUG00000012944 | vascular endothelial growth factor B [Source:VGNC Symbol;Acc:VGNC:78765]              | 2.066841648 | 1.52E-16    | 1.57E-14    |
| ENSMMUG00000001350 | HERPUD family member 2 [Source:VGNC Symbol;Acc:VGNC:73216]                            | 2.067382461 | 4.19E-06    | 6.27E-05    |
| ENSMMUG00000019690 | SEC14 and spectrin domain containing 1 [Source:VGNC Symbol;Acc:VGNC:77267]            | 2.067732374 | 1.77E-05    | 0.000219527 |
| ENSMMUG00000062326 |                                                                                       | 2.069200865 | 7.51E-08    | 1.81E-06    |
| ENSMMUG00000050495 |                                                                                       | 2.073238527 | 0.002407317 | 0.013522527 |
| ENSMMUG00000061923 |                                                                                       | 2.077065864 | 0.001828505 | 0.010886028 |
| ENSMMUG00000010521 | ADP ribosylation factor like GTPase 5A [Source:VGNC Symbol;Acc:VGNC:70017]            | 2.078385809 | 0.009129943 | 0.038917991 |
| ENSMMUG00000055775 | transmembrane p24 trafficking protein 1 [Source:NCBI gene;Acc:713618]                 | 2.080069631 | 8.47E-14    | 5.93E-12    |
| ENSMMUG00000027986 | U6 spliceosomal RNA [Source:RFAM;Acc:RF00026]                                         | 2.080368129 | 6.72E-06    | 9.46E-05    |
| ENSMMUG00000015744 | zinc finger protein 302 [Source:NCBI gene;Acc:706279]                                 | 2.084511045 | 8.92E-13    | 5.26E-11    |
| ENSMMUG00000007208 | G protein-coupled receptor 146 [Source:VGNC Symbol;Acc:VGNC:72979]                    | 2.088292533 | 1.26E-06    | 2.18E-05    |
| ENSMMUG00000048215 |                                                                                       | 2.091460054 | 0.002618024 | 0.014468599 |
| ENSMMUG00000021610 | regulator of G protein signaling 10 [Source:VGNC Symbol;Acc:VGNC:76915]               | 2.093731738 | 7.97E-11    | 3.37E-09    |
| ENSMMUG00000037641 | chondrosarcoma-associated gene 2/3 protein [Source:NCBI gene;Acc:106992305]           | 2.096745837 | 0.010745058 | 0.044434673 |
| ENSMMUG00000019764 | dynactin subunit 4 [Source:VGNC Symbol;Acc:VGNC:71625]                                | 2.097328198 | 5.95E-12    | 3.03E-10    |
| ENSMMUG00000044429 | glycophorin A (MNS blood group) [Source:NCBI gene;Acc:574101]                         | 2.101422498 | 1.76E-10    | 7.14E-09    |
| ENSMMUG00000029420 |                                                                                       | 2.101877984 | 1.90E-05    | 0.000234228 |
| ENSMMUG00000006659 | aldehyde dehydrogenase 1 family member A3 [Source:VGNC Symbol;Acc:VGNC:81353]         | 2.109351262 | 3.13E-05    | 0.000360658 |
| ENSMMUG00000045609 | CCR4-NOT transcription complex subunit 6 like [Source:NCBI gene;Acc:697981]           | 2.111358931 | 2.20E-09    | 7.30E-08    |
| ENSMMUG00000058536 |                                                                                       | 2.111908987 | 5.30E-12    | 2.72E-10    |
| ENSMMUG00000062454 |                                                                                       | 2.112957362 | 6.51E-14    | 4.58E-12    |
| ENSMMUG00000002397 | GINS complex subunit 1 [Source:VGNC Symbol;Acc:VGNC:73025]                            | 2.114851357 | 1.86E-08    | 5.10E-07    |
| ENSMMUG00000061474 |                                                                                       | 2.116144757 | 0.000315564 | 0.002579655 |
| ENSMMUG00000059299 | membrane spanning 4-domains A2 [Source:NCBI gene;Acc:697830]                          | 2.117493036 | 0.003759503 | 0.019457132 |



|                    |                                                                                                            |             |             |             |
|--------------------|------------------------------------------------------------------------------------------------------------|-------------|-------------|-------------|
| ENSMMUG00000057570 |                                                                                                            | 2.118622417 | 3.74E-08    | 9.64E-07    |
| ENSMMUG00000013830 | glucose-6-phosphatase catalytic subunit 2 [Source:NCBI gene;Acc:709062]                                    | 2.119425229 | 7.92E-09    | 2.36E-07    |
| ENSMMUG00000061424 | ventral anterior homeobox 2 [Source:NCBI gene;Acc:703531]                                                  | 2.120034143 | 1.79E-05    | 0.000221851 |
| ENSMMUG00000005666 | phospholipase D2 [Source:VGNC Symbol;Acc:VGNC:76172]                                                       | 2.123019241 | 3.53E-11    | 1.58E-09    |
| ENSMMUG00000032659 | mml-mir-711 [Source:miRBase;Acc:MI0012553]                                                                 | 2.126941543 | 0.000889957 | 0.006107806 |
| ENSMMUG00000015686 | abhydrolase domain containing 16A [Source:VGNC Symbol;Acc:VGNC:69393]                                      | 2.132582904 | 2.94E-18    | 4.00E-16    |
| ENSMMUG00000016434 | NADH:ubiquinone oxidoreductase complex assembly factor 7 [Source:VGNC Symbol;Acc:VGNC:75035]               | 2.132776735 | 2.91E-05    | 0.000338157 |
| ENSMMUG00000020743 | centrin 2 [Source:NCBI gene;Acc:693376]                                                                    | 2.139833942 | 0.004604765 | 0.022638205 |
| ENSMMUG00000018790 | activin A receptor type 2B [Source:VGNC Symbol;Acc:VGNC:69450]                                             | 2.141052584 | 5.83E-11    | 2.52E-09    |
| ENSMMUG00000017510 | membrane associated guanylate kinase, WW and PDZ domain containing 1 [Source:VGNC Symbol;Acc:VGNC:74499]   | 2.142819551 | 1.28E-08    | 3.65E-07    |
| ENSMMUG00000058715 |                                                                                                            | 2.154093117 | 0.000589147 | 0.004355327 |
| ENSMMUG00000020799 | BH3 interacting domain death agonist [Source:VGNC Symbol;Acc:VGNC:70250]                                   | 2.154261514 | 2.51E-07    | 5.40E-06    |
| ENSMMUG00000002563 | zinc finger DHHC-type palmitoyltransferase 5 [Source:VGNC Symbol;Acc:VGNC:79145]                           | 2.155398618 | 0.000163516 | 0.00149829  |
| ENSMMUG00000064799 |                                                                                                            | 2.156298963 | 0.004488179 | 0.022247698 |
| ENSMMUG00000016069 | cubilin [Source:VGNC Symbol;Acc:VGNC:82132]                                                                | 2.156835701 | 3.69E-05    | 0.000417213 |
| ENSMMUG00000059472 | filaggrin family member 2 [Source:HGNC Symbol;Acc:HGNC:33276]                                              | 2.157497843 | 1.76E-08    | 4.84E-07    |
| ENSMMUG00000001409 | coiled-coil domain containing 187 [Source:NCBI gene;Acc:710749]                                            | 2.157702947 | 6.93E-17    | 7.73E-15    |
| ENSMMUG00000012797 | zinc finger protein 233 [Source:VGNC Symbol;Acc:VGNC:79903]                                                | 2.161558469 | 6.50E-15    | 5.26E-13    |
| ENSMMUG00000012941 | nudix hydrolase 22 [Source:VGNC Symbol;Acc:VGNC:75475]                                                     | 2.164350666 | 9.78E-20    | 1.62E-17    |
| ENSMMUG00000016929 | proline rich and Gla domain 3 [Source:VGNC Symbol;Acc:VGNC:76350]                                          | 2.169511497 | 0.000800677 | 0.005607552 |
| ENSMMUG00000060581 |                                                                                                            | 2.169905986 | 0.002892126 | 0.015594824 |
| ENSMMUG00000001475 | transmembrane protein with EGF like and two follistatin like domains 2 [Source:VGNC Symbol;Acc:VGNC:78569] | 2.175148956 | 0.002870078 | 0.015510852 |
| ENSMMUG00000025918 | small nucleolar RNA, H/ACA box 38 [Source:HGNC Symbol;Acc:HGNC:32631]                                      | 2.176815211 | 0.005839437 | 0.027190162 |
| ENSMMUG00000016323 | Rho guanine nucleotide exchange factor 39 [Source:VGNC Symbol;Acc:VGNC:69912]                              | 2.179404595 | 4.41E-29    | 3.11E-26    |
| ENSMMUG00000019314 | vav guanine nucleotide exchange factor 1 [Source:VGNC Symbol;Acc:VGNC:78757]                               | 2.181689531 | 1.16E-05    | 0.000153923 |
| ENSMMUG00000013452 | canopy FGF signaling regulator 4 [Source:VGNC Symbol;Acc:VGNC:71364]                                       | 2.182829297 | 0.007897626 | 0.034683524 |
| ENSMMUG00000011513 | versican [Source:VGNC Symbol;Acc:VGNC:79445]                                                               | 2.185895191 | 1.05E-11    | 5.20E-10    |
| ENSMMUG00000038524 | olfactory receptor 2M4 [Source:NCBI gene;Acc:100424541]                                                    | 2.1870948   | 7.31E-15    | 5.88E-13    |
| ENSMMUG00000012668 | centriolin [Source:VGNC Symbol;Acc:VGNC:71204]                                                             | 2.188309794 | 1.02E-12    | 5.91E-11    |
| ENSMMUG00000064229 |                                                                                                            | 2.190001141 | 0.000191217 | 0.001708968 |
| ENSMMUG00000023598 | sorting nexin 2 [Source:VGNC Symbol;Acc:VGNC:77682]                                                        | 2.193779093 | 0.002323335 | 0.013130847 |
| ENSMMUG00000035943 | U6 spliceosomal RNA [Source:RFAM;Acc:RF00026]                                                              | 2.19477951  | 1.13E-05    | 0.000150381 |
| ENSMMUG00000031534 | ankyrin repeat and ubiquitin domain containing 1 [Source:VGNC Symbol;Acc:VGNC:84239]                       | 2.195330747 | 1.29E-14    | 9.83E-13    |
| ENSMMUG00000001324 | tetraspanin 32 [Source:VGNC Symbol;Acc:VGNC:78920]                                                         | 2.197646981 | 0.011357537 | 0.046233128 |
| ENSMMUG00000054237 | Y RNA [Source:RFAM;Acc:RF00019]                                                                            | 2.19965574  | 0.002025248 | 0.011775872 |
| ENSMMUG00000059318 | urocortin 2 [Source:NCBI gene;Acc:106996925]                                                               | 2.202623043 | 2.75E-16    | 2.73E-14    |
| ENSMMUG00000064915 | Metazoan signal recognition particle RNA [Source:RFAM;Acc:RF00017]                                         | 2.204248815 | 0.002040158 | 0.011849143 |
| ENSMMUG00000004042 | Fc receptor like A [Source:VGNC Symbol;Acc:VGNC:72526]                                                     | 2.208473372 | 0.001563221 | 0.009610439 |
| ENSMMUG00000016593 | adaptor related protein complex 1 subunit mu 2 [Source:NCBI gene;Acc:720531]                               | 2.210434287 | 0.006493667 | 0.029567525 |
| ENSMMUG00000058423 |                                                                                                            | 2.215665678 | 2.70E-05    | 0.00031866  |
| ENSMMUG00000048375 | Metazoan signal recognition particle RNA [Source:RFAM;Acc:RF00017]                                         | 2.219292869 | 1.47E-28    | 8.40E-26    |
| ENSMMUG00000013740 | minichromosome maintenance 8 homologous recombination repair factor [Source:VGNC Symbol;Acc:VGNC:74516]    | 2.231338833 | 9.43E-06    | 0.000128419 |
| ENSMMUG00000008854 | natural cytotoxicity triggering receptor 3 [Source:VGNC Symbol;Acc:VGNC:74990]                             | 2.232381438 | 1.62E-13    | 1.08E-11    |
| ENSMMUG00000049678 |                                                                                                            | 2.237823223 | 2.90E-07    | 6.14E-06    |
| ENSMMUG00000013251 | xin actin binding repeat containing 2 [Source:VGNC Symbol;Acc:VGNC:78953]                                  | 2.240414525 | 0.000757739 | 0.005334912 |
| ENSMMUG00000046478 | WASH complex subunit 3 [Source:NCBI gene;Acc:697824]                                                       | 2.244440617 | 3.35E-11    | 1.50E-09    |
| ENSMMUG00000055710 | taste 2 receptor member 38 [Source:NCBI gene;Acc:695549]                                                   | 2.244490143 | 5.27E-05    | 0.000562381 |
| ENSMMUG00000005297 | proline rich coiled-coil 2A [Source:VGNC Symbol;Acc:VGNC:83448]                                            | 2.246455608 | 5.24E-23    | 1.34E-20    |
| ENSMMUG00000037175 | U6 spliceosomal RNA [Source:RFAM;Acc:RF00026]                                                              | 2.25054251  | 4.87E-06    | 7.13E-05    |
| ENSMMUG00000064554 | leucine rich repeat neuronal 4 [Source:NCBI gene;Acc:718283]                                               | 2.255285013 | 0.000365699 | 0.002917797 |
| ENSMMUG00000011633 | kallikrein B1 [Source:VGNC Symbol;Acc:VGNC:74195]                                                          | 2.257277396 | 0.003353456 | 0.017637677 |

|                     |                                                                                                  |             |             |             |
|---------------------|--------------------------------------------------------------------------------------------------|-------------|-------------|-------------|
| ENSMMUG00000049703  | Metazoan signal recognition particle RNA [Source:RFAM;Acc:RF00017]                               | 2.257608163 | 3.29E-16    | 3.15E-14    |
| ENSMMUG0000007010   | coiled-coil domain-containing protein 162-like [Source:NCBI gene;Acc:700544]                     | 2.260008342 | 0.00182447  | 0.010870571 |
| ENSMMUG00000014237  | lysine methyltransferase 5B [Source:VGNC Symbol;Acc:VGNC:74110]                                  | 2.264208721 | 1.04E-31    | 1.24E-28    |
| ENSMMUG00000049391  |                                                                                                  | 2.264933315 | 0.000836416 | 0.005803548 |
| ENSMMUG00000000951  | integrin subunit beta 2 [Source:VGNC Symbol;Acc:VGNC:73786]                                      | 2.269800985 | 2.08E-17    | 2.54E-15    |
| ENSMMUG00000016327  | coiled-coil domain containing 107 [Source:VGNC Symbol;Acc:VGNC:70656]                            | 2.270020954 | 5.36E-28    | 2.67E-25    |
| ENSMMUG00000053106  |                                                                                                  | 2.276631003 | 3.51E-06    | 5.38E-05    |
| ENSMMUG00000009361  | fumarylacetoacetate hydrolase [Source:NCBI gene;Acc:712716]                                      | 2.276900191 | 6.31E-06    | 8.97E-05    |
| ENSMMUG00000000827  | ubiquitin specific peptidase 38 [Source:VGNC Symbol;Acc:VGNC:79224]                              | 2.278384024 | 0.000220765 | 0.001925623 |
| ENSMMUG00000005504  | nucleoporin 37 [Source:VGNC Symbol;Acc:VGNC:75491]                                               | 2.28056828  | 1.36E-05    | 0.00017617  |
| ENSMMUG00000014273  | cation channel sperm associated auxiliary subunit gamma [Source:VGNC Symbol;Acc:VGNC:70626]      | 2.283360162 | 7.12E-05    | 0.0007359   |
| ENSMMUG00000016827  | UBA domain containing 1 [Source:VGNC Symbol;Acc:VGNC:79837]                                      | 2.288569972 | 0.000460357 | 0.003520585 |
| ENSMMUG00000054111  | Metazoan signal recognition particle RNA [Source:RFAM;Acc:RF00017]                               | 2.290800953 | 0.0063383   | 0.028961267 |
| ENSMMUG00000014658  | ninein [Source:VGNC Symbol;Acc:VGNC:75177]                                                       | 2.29429483  | 3.70E-05    | 0.000417213 |
| ENSMMUG00000023479  | latent transforming growth factor beta binding protein 3 [Source:VGNC Symbol;Acc:VGNC:74458]     | 2.29649889  | 1.38E-09    | 4.81E-08    |
| ENSMMUG00000006931  | kirre like nephrin family adhesion molecule 3 [Source:NCBI gene;Acc:714534]                      | 2.296884268 | 2.85E-12    | 1.56E-10    |
| ENSMMUG00000014265  | TAP binding protein like [Source:NCBI gene;Acc:712626]                                           | 2.297605056 | 2.97E-12    | 1.60E-10    |
| ENSMMUG00000058935  | Metazoan signal recognition particle RNA [Source:RFAM;Acc:RF00017]                               | 2.299765928 | 0.002539985 | 0.014107623 |
| ENSMMUG00000065295  |                                                                                                  | 2.300704998 | 6.03E-07    | 1.14E-05    |
| ENSMMUG00000014349  | integrin subunit alpha X [Source:NCBI gene;Acc:100427850]                                        | 2.307565718 | 1.94E-06    | 3.15E-05    |
| ENSMMUG00000017242  | MYCBP associated protein [Source:VGNC Symbol;Acc:VGNC:74994]                                     | 2.307829581 | 1.51E-07    | 3.43E-06    |
| ENSMMUG00000004616  | plasminogen activator, urokinase receptor [Source:VGNC Symbol;Acc:VGNC:76163]                    | 2.312873186 | 0.010012492 | 0.041926434 |
| ENSMMUG00000057063  | solute carrier family 6 member 14 [Source:NCBI gene;Acc:709598]                                  | 2.314666932 | 0.008684584 | 0.037358683 |
| ENSMMUG00000000452  | LSM7 homolog, U6 small nuclear RNA and mRNA degradation associated [Source:NCBI gene;Acc:721486] | 2.315248731 | 0.00508581  | 0.024411889 |
| ENSMMUG00000023192  | choline kinase alpha [Source:VGNC Symbol;Acc:VGNC:71039]                                         | 2.317047448 | 1.15E-08    | 3.30E-07    |
| ENSMMUG00000017189  | regulatory factor X6 [Source:VGNC Symbol;Acc:VGNC:76800]                                         | 2.319501132 | 1.72E-11    | 8.29E-10    |
| ENSMMUG00000008828  | BEN domain containing 5 [Source:NCBI gene;Acc:711150]                                            | 2.320053415 | 7.37E-18    | 9.60E-16    |
| ENSMMUG00000045093  | cyclin B3 [Source:NCBI gene;Acc:694534]                                                          | 2.320925969 | 1.68E-11    | 8.10E-10    |
| ENSMMUG00000017971  | nucleus accumbens associated 1 [Source:VGNC Symbol;Acc:VGNC:74996]                               | 2.321887439 | 0.000267001 | 0.002258193 |
| ENSMMUG00000017758  | mitogen-activated protein kinase 3 [Source:VGNC Symbol;Acc:VGNC:74646]                           | 2.323541124 | 1.02E-20    | 2.00E-18    |
| ENSMMUG00000059374  |                                                                                                  | 2.334517414 | 1.52E-08    | 4.26E-07    |
| ENSMMUG00000050844  | BTB domain containing 18 [Source:NCBI gene;Acc:703264]                                           | 2.338238368 | 4.83E-06    | 7.08E-05    |
| ENSMMUG00000001273  | clathrin binding box of aftiphilin containing 1 [Source:VGNC Symbol;Acc:VGNC:84325]              | 2.342502369 | 2.24E-07    | 4.91E-06    |
| ENSMMUG00000003572  | nicotinamide phosphoribosyltransferase [Source:VGNC Symbol;Acc:VGNC:75056]                       | 2.342733475 | 3.77E-16    | 3.59E-14    |
| ENSMMUG00000018030  | endoplasmic reticulum protein 27 [Source:VGNC Symbol;Acc:VGNC:72369]                             | 2.343650725 | 1.61E-09    | 5.51E-08    |
| ENSMMUG00000017287  | PAT1 homolog 1, processing body mRNA decay factor [Source:VGNC Symbol;Acc:VGNC:75684]            | 2.34438586  | 0.00219388  | 0.012535264 |
| ENSMMUG00000007925  | serum/glucocorticoid regulated kinase 2 [Source:VGNC Symbol;Acc:VGNC:77228]                      | 2.346976213 | 1.03E-05    | 0.000138442 |
| ENSMMUG00000000396  | intraflagellar transport 52 [Source:NCBI gene;Acc:694933]                                        | 2.347825979 | 4.69E-08    | 1.19E-06    |
| ENSMMUG000000049130 |                                                                                                  | 2.352739848 | 4.90E-21    | 9.95E-19    |
| ENSMMUG00000059504  |                                                                                                  | 2.356217724 | 8.59E-06    | 0.000118021 |
| ENSMMUG00000022401  | EMSY transcriptional repressor, BRCA2 interacting [Source:VGNC Symbol;Acc:VGNC:72065]            | 2.357905299 | 4.39E-12    | 2.31E-10    |
| ENSMMUG00000004022  | zinc finger SWIM-type containing 2 [Source:VGNC Symbol;Acc:VGNC:79908]                           | 2.358391458 | 5.68E-19    | 8.61E-17    |
| ENSMMUG00000063525  |                                                                                                  | 2.358711555 | 8.79E-06    | 0.000120596 |
| ENSMMUG00000017209  | C1D nuclear receptor corepressor [Source:NCBI gene;Acc:698450]                                   | 2.360766281 | 2.22E-05    | 0.000269138 |
| ENSMMUG00000000649  | UBX domain protein 11 [Source:VGNC Symbol;Acc:VGNC:79859]                                        | 2.365330921 | 4.42E-08    | 1.13E-06    |
| ENSMMUG00000014046  | SREBF chaperone [Source:VGNC Symbol;Acc:VGNC:77140]                                              | 2.36870692  | 7.70E-29    | 4.61E-26    |
| ENSMMUG00000022247  | osteoclastogenesis associated transmembrane protein 1 [Source:VGNC Symbol;Acc:VGNC:75664]        | 2.371422433 | 2.63E-20    | 4.93E-18    |
| ENSMMUG00000008529  | chromosome 7 C15orf39 homolog [Source:VGNC Symbol;Acc:VGNC:70620]                                | 2.372173795 | 9.24E-08    | 2.19E-06    |
| ENSMMUG00000019363  | synapse associated protein 1 [Source:VGNC Symbol;Acc:VGNC:78135]                                 | 2.372782709 | 1.18E-08    | 3.38E-07    |
| ENSMMUG00000028907  | insulin receptor [Source:NCBI gene;Acc:706009]                                                   | 2.377719979 | 0.000102986 | 0.001004148 |
| ENSMMUG00000055906  | angiotensin II receptor type 2 [Source:NCBI gene;Acc:709513]                                     | 2.378967978 | 0.000130168 | 0.0012333   |



|                     |                                                                                                |             |             |             |
|---------------------|------------------------------------------------------------------------------------------------|-------------|-------------|-------------|
| ENSMMUG00000058326  | neuralized E3 ubiquitin protein ligase 2 [Source:NCBI gene;Acc:708904]                         | 2.380935234 | 0.00803108  | 0.035182784 |
| ENSMMUG00000054211  |                                                                                                | 2.382559208 | 0.000775187 | 0.005448145 |
| ENSMMUG00000049735  | allograft inflammatory factor 1 [Source:NCBI gene;Acc:574115]                                  | 2.386677535 | 1.33E-16    | 1.38E-14    |
| ENSMMUG00000019513  | U2AF homology motif kinase 1 [Source:VGNC Symbol;Acc:VGNC:79198]                               | 2.390366338 | 0.010862701 | 0.044751189 |
| ENSMMUG00000040741  | thioredoxin related transmembrane protein 2 [Source:NCBI gene;Acc:100169970]                   | 2.415876145 | 6.89E-17    | 7.73E-15    |
| ENSMMUG00000024234  | U6 spliceosomal RNA [Source:RFAM;Acc:RF00026]                                                  | 2.42573812  | 2.50E-07    | 5.40E-06    |
| ENSMMUG00000013967  | TOX high mobility group box family member 3 [Source:VGNC Symbol;Acc:VGNC:78612]                | 2.425772849 | 5.01E-08    | 1.26E-06    |
| ENSMMUG00000008923  | Thy-1 cell surface antigen [Source:VGNC Symbol;Acc:VGNC:78352]                                 | 2.428938587 | 0.002634097 | 0.014518993 |
| ENSMMUG00000000754  | Dmx like 2 [Source:VGNC Symbol;Acc:VGNC:71936]                                                 | 2.431760593 | 1.65E-14    | 1.24E-12    |
| ENSMMUG00000000894  | cellular inhibitor of PP2A [Source:VGNC Symbol;Acc:VGNC:71371]                                 | 2.432455771 | 0.004772697 | 0.023225445 |
| ENSMMUG00000009437  | zinc finger protein 619 [Source:VGNC Symbol;Acc:VGNC:82562]                                    | 2.434242423 | 0.002350827 | 0.013267438 |
| ENSMMUG00000003548  | tectorin beta [Source:VGNC Symbol;Acc:VGNC:78306]                                              | 2.434891584 | 0.000103048 | 0.001004148 |
| ENSMMUG00000060273  | mitochondrial ribosomal protein L32 [Source:NCBI gene;Acc:701820]                              | 2.436482195 | 4.33E-10    | 1.66E-08    |
| ENSMMUG00000063981  | nucleoside-triphosphatase, cancer-related [Source:NCBI gene;Acc:712959]                        | 2.437174134 | 9.54E-05    | 0.000946118 |
| ENSMMUG00000002566  | selenoprotein H [Source:VGNC Symbol;Acc:VGNC:82234]                                            | 2.439871752 | 0.005635124 | 0.026444451 |
| ENSMMUG000000053691 | Metazoan signal recognition particle RNA [Source:RFAM;Acc:RF00017]                             | 2.440432208 | 0.0109994   | 0.045174491 |
| ENSMMUG00000009312  | leukotriene A4 hydrolase [Source:VGNC Symbol;Acc:VGNC:74453]                                   | 2.440644558 | 5.47E-20    | 9.63E-18    |
| ENSMMUG00000017983  | tRNA nucleotidyl transferase 1 [Source:VGNC Symbol;Acc:VGNC:79073]                             | 2.441067672 | 0.000433836 | 0.003344513 |
| ENSMMUG00000015952  | katanin catalytic subunit A1 like 2 [Source:VGNC Symbol;Acc:VGNC:73904]                        | 2.444405991 | 0.000144956 | 0.001350966 |
| ENSMMUG00000005294  | casein kinase 2 beta [Source:NCBI gene;Acc:715807]                                             | 2.445670539 | 5.27E-06    | 7.63E-05    |
| ENSMMUG00000009667  | zinc finger protein 385D [Source:VGNC Symbol;Acc:VGNC:79587]                                   | 2.450940937 | 0.006258221 | 0.028670491 |
| ENSMMUG00000021073  | RAS protein activator like 2 [Source:VGNC Symbol;Acc:VGNC:76670]                               | 2.451275768 | 9.19E-10    | 3.35E-08    |
| ENSMMUG000000057219 | tumor protein p53 inducible nuclear protein 1 [Source:NCBI gene;Acc:700632]                    | 2.45171473  | 0.001361798 | 0.008570096 |
| ENSMMUG000000051537 |                                                                                                | 2.461958103 | 0.000364796 | 0.002912532 |
| ENSMMUG00000002430  | YKT6 v-SNARE homolog [Source:VGNC Symbol;Acc:VGNC:81796]                                       | 2.463283305 | 9.69E-06    | 0.000131221 |
| ENSMMUG00000023060  | A-kinase anchoring protein 4 [Source:VGNC Symbol;Acc:VGNC:69770]                               | 2.463676498 | 1.36E-05    | 0.000175776 |
| ENSMMUG00000044048  | Metazoan signal recognition particle RNA [Source:RFAM;Acc:RF00017]                             | 2.464222045 | 2.07E-08    | 5.65E-07    |
| ENSMMUG00000017501  | N-acyl ethanolamine acid amidase [Source:VGNC Symbol;Acc:VGNC:75068]                           | 2.46938603  | 1.64E-05    | 0.000206643 |
| ENSMMUG00000012349  | thiosulfate sulfurtransferase [Source:VGNC Symbol;Acc:VGNC:78664]                              | 2.474145153 | 0.004161871 | 0.020970891 |
| ENSMMUG00000040393  | zinc finger protein 655 [Source:NCBI gene;Acc:718811]                                          | 2.474550532 | 9.99E-10    | 3.56E-08    |
| ENSMMUG00000012697  | AT-rich interaction domain 1A [Source:VGNC Symbol;Acc:VGNC:69822]                              | 2.476141704 | 4.53E-13    | 2.82E-11    |
| ENSMMUG000000054473 | activating transcription factor 5 [Source:NCBI gene;Acc:719150]                                | 2.477436282 | 6.42E-09    | 1.96E-07    |
| ENSMMUG00000009441  | abhydrolase domain containing 4 [Source:VGNC Symbol;Acc:VGNC:84296]                            | 2.477930673 | 0.00041084  | 0.003197023 |
| ENSMMUG00000013644  | potassium two pore domain channel subfamily K member 17 [Source:VGNC Symbol;Acc:VGNC:73828]    | 2.482790608 | 2.30E-07    | 5.01E-06    |
| ENSMMUG00000015716  | protein phosphatase with EF-hand domain 2 [Source:VGNC Symbol;Acc:VGNC:76233]                  | 2.483509695 | 0.0002724   | 0.002293244 |
| ENSMMUG000000057361 | Metazoan signal recognition particle RNA [Source:RFAM;Acc:RF00017]                             | 2.486026415 | 7.90E-07    | 1.43E-05    |
| ENSMMUG00000012856  | nuclear FMR1 interacting protein 2 [Source:VGNC Symbol;Acc:VGNC:75422]                         | 2.491771577 | 0.004255064 | 0.021366309 |
| ENSMMUG000000052734 |                                                                                                | 2.492765783 | 0.009832341 | 0.041389144 |
| ENSMMUG00000018137  | MYB proto-oncogene like 2 [Source:VGNC Symbol;Acc:VGNC:75092]                                  | 2.493333969 | 6.60E-13    | 4.01E-11    |
| ENSMMUG000000056063 |                                                                                                | 2.496336393 | 0.001255782 | 0.008046679 |
| ENSMMUG00000005303  | apolipoprotein M [Source:VGNC Symbol;Acc:VGNC:69825]                                           | 2.502691945 | 0.000272323 | 0.002293244 |
| ENSMMUG00000021019  | E3 SUMO-protein ligase RanBP2 [Source:NCBI gene;Acc:694823]                                    | 2.505536847 | 0.003991237 | 0.020411242 |
| ENSMMUG000000050339 | Metazoan signal recognition particle RNA [Source:RFAM;Acc:RF00017]                             | 2.507508291 | 1.06E-07    | 2.47E-06    |
| ENSMMUG000000053937 |                                                                                                | 2.508346855 | 7.10E-17    | 7.73E-15    |
| ENSMMUG00000007773  | solute carrier organic anion transporter family member 4C1 [Source:VGNC Symbol;Acc:VGNC:77764] | 2.513301779 | 0.000751712 | 0.005301825 |
| ENSMMUG00000014707  | cadherin EGF LAG seven-pass G-type receptor 3 [Source:VGNC Symbol;Acc:VGNC:71148]              | 2.514998338 | 5.56E-06    | 8.01E-05    |
| ENSMMUG000000063622 | mitochondrial ribosomal protein S26 [Source:NCBI gene;Acc:717038]                              | 2.516740958 | 4.97E-08    | 1.25E-06    |
| ENSMMUG00000003437  | signal transducer and activator of transcription 5B [Source:NCBI gene;Acc:709760]              | 2.521519071 | 2.74E-12    | 1.50E-10    |
| ENSMMUG00000021634  | TNF alpha induced protein 2 [Source:VGNC Symbol;Acc:VGNC:78579]                                | 2.52307558  | 9.51E-26    | 3.56E-23    |
| ENSMMUG000000063914 |                                                                                                | 2.523184571 | 2.94E-24    | 8.40E-22    |
| ENSMMUG000000056605 | Metazoan signal recognition particle RNA [Source:RFAM;Acc:RF00017]                             | 2.523371056 | 5.97E-05    | 0.000628859 |



|                    |                                                                               |             |             |             |
|--------------------|-------------------------------------------------------------------------------|-------------|-------------|-------------|
| ENSMMUG00000041519 | zinc finger protein 354A [Source:VGNC Symbol;Acc:VGNC:84517]                  | 2.52353227  | 0.000520978 | 0.003928989 |
| ENSMMUG00000059432 |                                                                               | 2.5242475   | 0.003253476 | 0.017197297 |
| ENSMMUG00000011332 | Rho GTPase activating protein 35 [Source:VGNC Symbol;Acc:VGNC:69942]          | 2.527400306 | 1.05E-06    | 1.84E-05    |
| ENSMMUG00000055038 |                                                                               | 2.530415021 | 5.77E-05    | 0.000610207 |
| ENSMMUG00000043648 |                                                                               | 2.535268789 | 8.88E-06    | 0.000121628 |
| ENSMMUG00000004774 | maestro heat like repeat family member 2B [Source:VGNC Symbol;Acc:VGNC:74837] | 2.540224332 | 1.90E-06    | 3.10E-05    |
| ENSMMUG00000059332 | Metazoan signal recognition particle RNA [Source:RFAM;Acc:RF00017]            | 2.545823222 | 0.000371554 | 0.002956632 |
| ENSMMUG00000058472 | late cornified envelope protein 1C [Source:NCBI gene;Acc:107000798]           | 2.547951764 | 5.56E-07    | 1.07E-05    |
| ENSMMUG00000014032 | proline rich 36 [Source:NCBI gene;Acc:710443]                                 | 2.54908616  | 0.002170365 | 0.012448413 |
| ENSMMUG00000018619 | DENN domain containing 6A [Source:VGNC Symbol;Acc:VGNC:71726]                 | 2.550174372 | 3.48E-13    | 2.23E-11    |
| ENSMMUG00000013176 | NAD(P) dependent steroid dehydrogenase-like [Source:NCBI gene;Acc:693333]     | 2.551361604 | 4.84E-07    | 9.50E-06    |
| ENSMMUG00000011634 | coagulation factor XI [Source:VGNC Symbol;Acc:VGNC:72460]                     | 2.554782998 | 0.000573686 | 0.004254157 |
| ENSMMUG00000000644 | centrosomal protein 85 [Source:VGNC Symbol;Acc:VGNC:71096]                    | 2.556732251 | 5.52E-08    | 1.38E-06    |
| ENSMMUG00000053460 |                                                                               | 2.559059274 | 6.38E-14    | 4.52E-12    |
| ENSMMUG00000000152 | transcription factor CP2 [Source:VGNC Symbol;Acc:VGNC:78323]                  | 2.559976164 | 4.37E-06    | 6.49E-05    |
| ENSMMUG00000016580 | selectin E [Source:VGNC Symbol;Acc:VGNC:77156]                                | 2.560589984 | 7.74E-15    | 6.18E-13    |
| ENSMMUG00000017701 | myosin VIIA and Rab interacting protein [Source:VGNC Symbol;Acc:VGNC:74992]   | 2.563047146 | 4.19E-07    | 8.46E-06    |
| ENSMMUG00000042618 | involucrin [Source:NCBI gene;Acc:713728]                                      | 2.567288485 | 9.83E-07    | 1.74E-05    |
| ENSMMUG00000056511 |                                                                               | 2.57120054  | 4.52E-06    | 6.69E-05    |
| ENSMMUG00000011637 | coiled-coil domain containing 148 [Source:VGNC Symbol;Acc:VGNC:70856]         | 2.572893818 | 0.00196322  | 0.011525255 |
| ENSMMUG00000057157 |                                                                               | 2.573092151 | 8.62E-10    | 3.16E-08    |
| ENSMMUG00000055379 |                                                                               | 2.575664782 | 2.60E-19    | 3.98E-17    |
| ENSMMUG00000005302 | BAG cochaperone 6 [Source:VGNC Symbol;Acc:VGNC:81044]                         | 2.577920617 | 1.17E-32    | 1.55E-29    |
| ENSMMUG00000016579 | selectin L [Source:NCBI gene;Acc:701419]                                      | 2.588841748 | 8.71E-16    | 7.78E-14    |
| ENSMMUG00000007387 | G protein-coupled receptor kinase 7 [Source:VGNC Symbol;Acc:VGNC:73182]       | 2.589965448 | 1.14E-26    | 4.86E-24    |
| ENSMMUG00000009567 | glyoxylate reductase 1 homolog [Source:NCBI gene;Acc:706933]                  | 2.593469566 | 2.46E-29    | 2.10E-26    |
| ENSMMUG00000005108 | RCC1 domain containing 1 [Source:VGNC Symbol;Acc:VGNC:76876]                  | 2.594011233 | 5.64E-08    | 1.41E-06    |
| ENSMMUG00000006980 | septin 7 [Source:VGNC Symbol;Acc:VGNC:81759]                                  | 2.599820758 | 0.001673587 | 0.010151416 |
| ENSMMUG00000006723 | solute carrier family 8 member B1 [Source:NCBI gene;Acc:714561]               | 2.605474398 | 6.02E-18    | 7.92E-16    |
| ENSMMUG00000050822 | carbonic anhydrase 9 [Source:NCBI gene;Acc:696729]                            | 2.608219884 | 1.54E-22    | 3.70E-20    |
| ENSMMUG00000020683 | RNA binding motif protein 22 [Source:VGNC Symbol;Acc:VGNC:76535]              | 2.609309763 | 2.81E-18    | 3.87E-16    |
| ENSMMUG00000011411 | sperm acrosome associated 3 [Source:VGNC Symbol;Acc:VGNC:77930]               | 2.61289963  | 4.28E-13    | 2.70E-11    |
| ENSMMUG00000063351 | Metazoan signal recognition particle RNA [Source:RFAM;Acc:RF00017]            | 2.615238087 | 7.50E-06    | 0.000104214 |
| ENSMMUG00000005293 | G-patch domain and ankyrin repeats 1 [Source:VGNC Symbol;Acc:VGNC:81073]      | 2.617594939 | 2.26E-05    | 0.000272938 |
| ENSMMUG00000056058 | C-type lectin domain containing 20A [Source:HGNC Symbol;Acc:HGNC:34521]       | 2.630151345 | 0.011924591 | 0.048019133 |
| ENSMMUG00000025050 | Y RNA [Source:RFAM;Acc:RF00019]                                               | 2.632263483 | 0.000395272 | 0.003106151 |
| ENSMMUG00000064730 |                                                                               | 2.635939214 | 2.36E-15    | 2.05E-13    |
| ENSMMUG00000017036 | nicalin [Source:VGNC Symbol;Acc:VGNC:75032]                                   | 2.638049339 | 2.78E-15    | 2.36E-13    |
| ENSMMUG00000020080 | GDNF family receptor alpha 1 [Source:VGNC Symbol;Acc:VGNC:72917]              | 2.638881521 | 0.004615666 | 0.022659735 |
| ENSMMUG00000001151 | microtubule associated scaffold protein 1 [Source:VGNC Symbol;Acc:VGNC:84018] | 2.63959869  | 1.96E-21    | 4.20E-19    |
| ENSMMUG00000040696 | Metazoan signal recognition particle RNA [Source:RFAM;Acc:RF00017]            | 2.646938221 | 0.006172075 | 0.028396763 |
| ENSMMUG00000020534 | p21 (RAC1) activated kinase 6 [Source:NCBI gene;Acc:701589]                   | 2.649970522 | 2.30E-20    | 4.37E-18    |
| ENSMMUG00000054621 |                                                                               | 2.652366119 | 0.005230809 | 0.024954737 |
| ENSMMUG00000058534 |                                                                               | 2.65450581  | 4.14E-05    | 0.000457313 |
| ENSMMUG00000019304 | indoleamine 2,3-dioxygenase 1 [Source:VGNC Symbol;Acc:VGNC:73580]             | 2.656919844 | 2.10E-06    | 3.39E-05    |
| ENSMMUG00000062419 |                                                                               | 2.659113829 | 0.00431919  | 0.021615804 |
| ENSMMUG00000014875 | C2CD2 like [Source:VGNC Symbol;Acc:VGNC:70435]                                | 2.662144157 | 0.000801682 | 0.005611307 |
| ENSMMUG00000000826 | storkhead box 1 [Source:VGNC Symbol;Acc:VGNC:78197]                           | 2.667961406 | 0.00468641  | 0.022870599 |
| ENSMMUG00000017927 | protein kinase D2 [Source:VGNC Symbol;Acc:VGNC:76273]                         | 2.669107659 | 6.56E-11    | 2.83E-09    |
| ENSMMUG00000062781 | chromosome 14 C11orf97 homolog [Source:NCBI gene;Acc:106993442]               | 2.669592616 | 1.25E-26    | 5.15E-24    |
| ENSMMUG00000052474 |                                                                               | 2.671253165 | 2.12E-14    | 1.57E-12    |

|                    |                                                                                         |             |             |             |
|--------------------|-----------------------------------------------------------------------------------------|-------------|-------------|-------------|
| ENSMMUG00000003797 | ubiquitin specific peptidase 20 [Source:VGNC Symbol;Acc:VGNC:78740]                     | 2.671760468 | 1.92E-07    | 4.27E-06    |
| ENSMMUG00000009040 | cornulin [Source:VGNC Symbol;Acc:VGNC:71397]                                            | 2.67616915  | 0.000308357 | 0.002529371 |
| ENSMMUG00000016404 | chondromodulin [Source:VGNC Symbol;Acc:VGNC:71191]                                      | 2.677239425 | 0.004528034 | 0.022361952 |
| ENSMMUG00000017740 | sperm mitochondria associated cysteine rich protein [Source:VGNC Symbol;Acc:VGNC:77816] | 2.683325851 | 2.27E-06    | 3.63E-05    |
| ENSMMUG00000004332 | tripartite motif containing 44 [Source:VGNC Symbol;Acc:VGNC:79168]                      | 2.684796919 | 2.94E-10    | 1.15E-08    |
| ENSMMUG00000053324 | lymphocyte antigen 6 complex locus protein G6d [Source:NCBI gene;Acc:715304]            | 2.690602934 | 2.84E-16    | 2.78E-14    |
| ENSMMUG00000000869 | small nuclear ribonucleoprotein polypeptide C [Source:NCBI gene;Acc:718654]             | 2.697240389 | 0.000611412 | 0.004481194 |
| ENSMMUG00000002330 | ecto-NOX disulfide-thiol exchanger 1 [Source:VGNC Symbol;Acc:VGNC:72110]                | 2.700383265 | 2.62E-09    | 8.55E-08    |
| ENSMMUG00000001545 | aquaporin 7 [Source:NCBI gene;Acc:702836]                                               | 2.709398867 | 7.12E-08    | 1.74E-06    |
| ENSMMUG00000053722 |                                                                                         | 2.712241739 | 0.002561611 | 0.014202711 |
| ENSMMUG00000049021 | Metazoan signal recognition particle RNA [Source:RFAM;Acc:RF00017]                      | 2.71339692  | 0.002634416 | 0.014518993 |
| ENSMMUG00000058916 |                                                                                         | 2.715302119 | 3.88E-11    | 1.72E-09    |
| ENSMMUG00000023139 | small nuclear ribonucleoprotein polypeptide N [Source:VGNC Symbol;Acc:VGNC:78437]       | 2.719450538 | 2.61E-13    | 1.70E-11    |
| ENSMMUG00000062217 | HD domain containing 3 [Source:NCBI gene;Acc:715621]                                    | 2.721587895 | 7.46E-11    | 3.18E-09    |
| ENSMMUG00000019526 | BLM RecQ like helicase [Source:VGNC Symbol;Acc:VGNC:70254]                              | 2.725655422 | 2.10E-11    | 9.92E-10    |
| ENSMMUG00000000803 | signal transducer and activator of transcription 2 [Source:VGNC Symbol;Acc:VGNC:77905]  | 2.726557833 | 1.03E-14    | 8.03E-13    |
| ENSMMUG00000060767 |                                                                                         | 2.729277707 | 1.61E-07    | 3.62E-06    |
| ENSMMUG00000012938 | SR-related CTD associated factor 1 [Source:VGNC Symbol;Acc:VGNC:77137]                  | 2.737515292 | 0.008438708 | 0.036537227 |
| ENSMMUG00000053601 |                                                                                         | 2.744153132 | 0.001341851 | 0.008481826 |
| ENSMMUG00000015555 | ST3 beta-galactoside alpha-2,3-sialyltransferase 3 [Source:VGNC Symbol;Acc:VGNC:77828]  | 2.746882453 | 8.23E-13    | 4.91E-11    |
| ENSMMUG00000055571 |                                                                                         | 2.746894065 | 0.005220691 | 0.024926891 |
| ENSMMUG00000028948 | azurocidin 1 [Source:VGNC Symbol;Acc:VGNC:70202]                                        | 2.748434019 | 3.66E-05    | 0.000414381 |
| ENSMMUG00000022381 | prolyl 3-hydroxylase 1 [Source:VGNC Symbol;Acc:VGNC:75648]                              | 2.753076948 | 0.001100351 | 0.007232602 |
| ENSMMUG00000017767 | integrin subunit beta 1 [Source:VGNC Symbol;Acc:VGNC:73784]                             | 2.755575986 | 0.00513888  | 0.024607449 |
| ENSMMUG00000015258 | glycine C-acetyltransferase [Source:NCBI gene;Acc:698811]                               | 2.760352162 | 0.001598335 | 0.009786127 |
| ENSMMUG00000043738 |                                                                                         | 2.767412491 | 0.000171749 | 0.001558232 |
| ENSMMUG00000028733 | RAS related [Source:VGNC Symbol;Acc:VGNC:76937]                                         | 2.770974067 | 9.16E-13    | 5.38E-11    |
| ENSMMUG00000016237 | taxilin gamma [Source:NCBI gene;Acc:713769]                                             | 2.77616038  | 0.005958036 | 0.027645659 |
| ENSMMUG00000064860 | phosphoglycerate mutase 2 [Source:NCBI gene;Acc:720615]                                 | 2.776488811 | 0.004636077 | 0.022726837 |
| ENSMMUG00000008384 | solute carrier family 4 member 10 [Source:VGNC Symbol;Acc:VGNC:77695]                   | 2.781603357 | 1.91E-18    | 2.72E-16    |
| ENSMMUG00000053781 | Rho GDP dissociation inhibitor beta [Source:NCBI gene;Acc:702320]                       | 2.782988195 | 1.80E-07    | 4.02E-06    |
| ENSMMUG00000016737 | contactin 5 [Source:VGNC Symbol;Acc:VGNC:71287]                                         | 2.784997453 | 0.007094933 | 0.031728496 |
| ENSMMUG00000006066 | phosphatidylcholine transfer protein [Source:VGNC Symbol;Acc:VGNC:75789]                | 2.786566362 | 1.50E-11    | 7.32E-10    |
| ENSMMUG00000002959 | helicase with zinc finger [Source:VGNC Symbol;Acc:VGNC:73178]                           | 2.795899595 | 3.84E-14    | 2.77E-12    |
| ENSMMUG00000018967 | ubiquitin conjugating enzyme E2 O [Source:VGNC Symbol;Acc:VGNC:79813]                   | 2.800418772 | 2.24E-19    | 3.57E-17    |
| ENSMMUG00000020668 | cyclin E1 [Source:VGNC Symbol;Acc:VGNC:70727]                                           | 2.808349715 | 1.02E-21    | 2.26E-19    |
| ENSMMUG00000058095 | visual system homeobox 1 [Source:NCBI gene;Acc:715973]                                  | 2.811123208 | 0.000208941 | 0.001838556 |
| ENSMMUG00000021477 | ATPase H+ transporting V1 subunit E1 [Source:NCBI gene;Acc:709739]                      | 2.823015026 | 0.000149001 | 0.001383479 |
| ENSMMUG00000014240 | thioredoxin domain containing 11 [Source:VGNC Symbol;Acc:VGNC:79678]                    | 2.829028452 | 2.29E-05    | 0.000276075 |
| ENSMMUG00000058229 | U6 spliceosomal RNA [Source:RFAM;Acc:RF00026]                                           | 2.842681718 | 0.000669507 | 0.004830132 |
| ENSMMUG00000038944 |                                                                                         | 2.846054856 | 8.40E-20    | 1.42E-17    |
| ENSMMUG00000034978 | U6 spliceosomal RNA [Source:RFAM;Acc:RF00026]                                           | 2.848323708 | 0.002735031 | 0.014980881 |
| ENSMMUG00000018151 | membrane palmitoylated protein 4 [Source:VGNC Symbol;Acc:VGNC:74734]                    | 2.848831954 | 0.000614874 | 0.00449831  |
| ENSMMUG00000064174 |                                                                                         | 2.852438405 | 8.21E-07    | 1.48E-05    |
| ENSMMUG00000063898 | apolipoprotein F [Source:NCBI gene;Acc:712761]                                          | 2.867659315 | 2.69E-14    | 1.98E-12    |
| ENSMMUG00000011095 | BTB domain and CNC homolog 1 [Source:VGNC Symbol;Acc:VGNC:70217]                        | 2.871402268 | 0.002428955 | 0.013634132 |
| ENSMMUG00000008251 | cilia and flagella associated protein 126 [Source:VGNC Symbol;Acc:VGNC:71150]           | 2.872640335 | 0.000897233 | 0.00614015  |
| ENSMMUG00000055199 | cytochrome P450, family 39, subfamily A, polypeptide 1 [Source:NCBI gene;Acc:704242]    | 2.876284086 | 1.60E-08    | 4.45E-07    |
| ENSMMUG00000014397 | NCK associated protein 1 [Source:VGNC Symbol;Acc:VGNC:75143]                            | 2.876433758 | 1.54E-11    | 7.46E-10    |
| ENSMMUG00000061533 |                                                                                         | 2.87796728  | 1.23E-24    | 3.87E-22    |
| ENSMMUG00000061031 |                                                                                         | 2.878133928 | 1.58E-12    | 9.03E-11    |

|                    |                                                                                      |             |             |             |
|--------------------|--------------------------------------------------------------------------------------|-------------|-------------|-------------|
| ENSMMUG00000056940 | late cornified envelope protein 1C [Source:NCBI gene;Acc:713408]                     | 2.885501878 | 0.00087154  | 0.006002049 |
| ENSMMUG00000021357 | zinc finger BED-type containing 3 [Source:VGNC Symbol;Acc:VGNC:79271]                | 2.893250026 | 9.07E-05    | 0.000908649 |
| ENSMMUG00000051503 | nuclear pore associated protein 1 [Source:NCBI gene;Acc:719891]                      | 2.899269175 | 1.21E-05    | 0.000159491 |
| ENSMMUG00000017503 | SDA1 domain containing 1 [Source:NCBI gene;Acc:700863]                               | 2.900995642 | 0.000166032 | 0.001519019 |
| ENSMMUG00000056376 |                                                                                      | 2.909332744 | 5.13E-18    | 6.90E-16    |
| ENSMMUG00000038997 | zygote arrest 1 like [Source:NCBI gene;Acc:100427970]                                | 2.909582802 | 0.000678767 | 0.004879298 |
| ENSMMUG00000023286 | UPF1 RNA helicase and ATPase [Source:VGNC Symbol;Acc:VGNC:79971]                     | 2.919049286 | 1.47E-19    | 2.38E-17    |
| ENSMMUG00000022003 | multimerin 1 [Source:VGNC Symbol;Acc:VGNC:74904]                                     | 2.928873146 | 4.82E-11    | 2.11E-09    |
| ENSMMUG00000013283 | cadherin related family member 2 [Source:NCBI gene;Acc:697249]                       | 2.930177624 | 5.42E-10    | 2.04E-08    |
| ENSMMUG00000008196 | aconitase 1 [Source:VGNC Symbol;Acc:VGNC:69378]                                      | 2.93112977  | 7.06E-17    | 7.73E-15    |
| ENSMMUG00000004435 | two pore segment channel 1 [Source:VGNC Symbol;Acc:VGNC:79117]                       | 2.941994703 | 3.54E-12    | 1.89E-10    |
| ENSMMUG00000011914 | prospero homeobox 1 [Source:VGNC Symbol;Acc:VGNC:76427]                              | 2.943879687 | 0.001535001 | 0.009485643 |
| ENSMMUG00000047247 | matrix Gla protein [Source:NCBI gene;Acc:574116]                                     | 2.945907041 | 0.001741864 | 0.010442787 |
| ENSMMUG00000009308 | histidine ammonia-lyase [Source:VGNC Symbol;Acc:VGNC:73344]                          | 2.94985125  | 0.000133392 | 0.001259855 |
| ENSMMUG00000010837 | VRK serine/threonine kinase 3 [Source:VGNC Symbol;Acc:VGNC:81605]                    | 2.964690842 | 0.000416114 | 0.003231765 |
| ENSMMUG00000006853 | crystallin beta B2 [Source:NCBI gene;Acc:100144420]                                  | 2.96919321  | 2.26E-07    | 4.93E-06    |
| ENSMMUG00000053083 | C2 calcium dependent domain containing 4C [Source:NCBI gene;Acc:100424440]           | 2.969845408 | 6.85E-07    | 1.26E-05    |
| ENSMMUG00000057934 |                                                                                      | 2.970440903 | 6.17E-06    | 8.79E-05    |
| ENSMMUG00000057539 |                                                                                      | 2.975791879 | 1.32E-07    | 3.03E-06    |
| ENSMMUG00000012937 | proline rich 12 [Source:NCBI gene;Acc:719344]                                        | 2.979300723 | 1.17E-14    | 8.99E-13    |
| ENSMMUG00000028947 | complement factor D [Source:VGNC Symbol;Acc:VGNC:71115]                              | 2.984044695 | 5.54E-29    | 3.68E-26    |
| ENSMMUG00000019528 | adaptor related protein complex 4 subunit beta 1 [Source:VGNC Symbol;Acc:VGNC:69972] | 2.995078418 | 1.90E-65    | 2.28E-61    |
| ENSMMUG00000051816 | keratinocyte proline rich protein [Source:NCBI gene;Acc:100424312]                   | 2.998483749 | 1.64E-14    | 1.24E-12    |
| ENSMMUG00000004794 | DNA ligase 3 [Source:VGNC Symbol;Acc:VGNC:74266]                                     | 2.999701188 | 9.51E-10    | 3.42E-08    |
| ENSMMUG00000050529 | phosphodiesterase 6H [Source:NCBI gene;Acc:700447]                                   | 3.018785474 | 0.000118547 | 0.001131246 |
| ENSMMUG00000056980 |                                                                                      | 3.023459072 | 0.004008784 | 0.02046958  |
| ENSMMUG00000001380 | outer dense fiber of sperm tails 2 like [Source:VGNC Symbol;Acc:VGNC:75482]          | 3.028559444 | 1.50E-06    | 2.54E-05    |
| ENSMMUG00000010466 | solute carrier family 38 member 9 [Source:VGNC Symbol;Acc:VGNC:77574]                | 3.028720951 | 5.96E-14    | 4.27E-12    |
| ENSMMUG00000017380 | neuregulin 3 [Source:NCBI gene;Acc:699268]                                           | 3.032213523 | 0.004017598 | 0.020491803 |
| ENSMMUG00000013871 | WD repeat domain 25 [Source:VGNC Symbol;Acc:VGNC:78420]                              | 3.036396043 | 2.39E-25    | 7.95E-23    |
| ENSMMUG00000060808 |                                                                                      | 3.037745732 | 0.004288614 | 0.021489723 |
| ENSMMUG00000050585 |                                                                                      | 3.044462411 | 6.22E-12    | 3.16E-10    |
| ENSMMUG00000054811 |                                                                                      | 3.045392459 | 0.001014454 | 0.006779772 |
| ENSMMUG00000005997 | cell division cycle 14B [Source:NCBI gene;Acc:710300]                                | 3.051055538 | 0.000131659 | 0.001246437 |
| ENSMMUG00000003833 | Ras association domain family member 6 [Source:VGNC Symbol;Acc:VGNC:76515]           | 3.053955706 | 7.01E-13    | 4.24E-11    |
| ENSMMUG00000051645 |                                                                                      | 3.057033191 | 0.000149512 | 0.001386952 |
| ENSMMUG00000054686 |                                                                                      | 3.060850744 | 5.33E-12    | 2.73E-10    |
| ENSMMUG00000031391 | RNA binding motif protein 38 [Source:VGNC Symbol;Acc:VGNC:76484]                     | 3.063623845 | 1.74E-09    | 5.91E-08    |
| ENSMMUG00000062996 |                                                                                      | 3.069028254 | 8.16E-06    | 0.00011275  |
| ENSMMUG00000064401 |                                                                                      | 3.073180126 | 0.00138282  | 0.008670496 |
| ENSMMUG00000005625 | fibrosin [Source:NCBI gene;Acc:712741]                                               | 3.079938129 | 0.000425549 | 0.003294363 |
| ENSMMUG00000004749 | PPARG coactivator 1 beta [Source:VGNC Symbol;Acc:VGNC:76134]                         | 3.087544875 | 0.002227363 | 0.012683819 |
| ENSMMUG00000007534 | protein regulator of cytokinesis 1 [Source:NCBI gene;Acc:710182]                     | 3.091546942 | 9.97E-10    | 3.56E-08    |
| ENSMMUG00000000376 | bridging integrator 1 [Source:VGNC Symbol;Acc:VGNC:70251]                            | 3.095402213 | 4.69E-05    | 0.000508224 |
| ENSMMUG00000015693 | lymphocyte antigen 6 family member G6C [Source:VGNC Symbol;Acc:VGNC:74285]           | 3.114498615 | 2.82E-08    | 7.44E-07    |
| ENSMMUG00000022884 | glutamate-ammonia ligase [Source:NCBI gene;Acc:715952]                               | 3.115672089 | 1.62E-08    | 4.49E-07    |
| ENSMMUG00000053611 | stromal cell derived factor 2 [Source:NCBI gene;Acc:716189]                          | 3.116688468 | 0.001044448 | 0.006937498 |
| ENSMMUG00000059175 |                                                                                      | 3.135096878 | 3.47E-15    | 2.91E-13    |
| ENSMMUG00000054746 |                                                                                      | 3.146573219 | 0.000227269 | 0.001973731 |
| ENSMMUG00000040071 |                                                                                      | 3.150893053 | 1.50E-06    | 2.54E-05    |
| ENSMMUG00000046918 |                                                                                      | 3.151238439 | 4.84E-07    | 9.50E-06    |



|                    |                                                                                              |             |             |             |
|--------------------|----------------------------------------------------------------------------------------------|-------------|-------------|-------------|
| ENSMMUG00000062794 |                                                                                              | 3.151420506 | 1.68E-13    | 1.12E-11    |
| ENSMMUG00000054634 | late cornified envelope protein 1C-like [Source:NCBI gene;Acc:713600]                        | 3.155698262 | 0.00451248  | 0.022321959 |
| ENSMMUG00000005106 | unc-45 myosin chaperone A [Source:VGNC Symbol;Acc:VGNC:79858]                                | 3.156359201 | 0.002784203 | 0.015190711 |
| ENSMMUG00000021476 | BCL2 like 13 [Source:VGNC Symbol;Acc:VGNC:84544]                                             | 3.156620477 | 1.93E-06    | 3.15E-05    |
| ENSMMUG00000059700 |                                                                                              | 3.172178728 | 0.003600383 | 0.018779697 |
| ENSMMUG00000055266 | late cornified envelope protein 1C-like [Source:NCBI gene;Acc:107000794]                     | 3.173205338 | 5.16E-07    | 1.01E-05    |
| ENSMMUG00000053376 |                                                                                              | 3.178164426 | 1.16E-15    | 1.03E-13    |
| ENSMMUG00000057499 |                                                                                              | 3.190964742 | 2.95E-09    | 9.54E-08    |
| ENSMMUG00000044817 | nucleoporin 62 [Source:NCBI gene;Acc:100426308]                                              | 3.192924567 | 2.37E-57    | 1.42E-53    |
| ENSMMUG00000019961 | protein phosphatase 1 regulatory subunit 18 [Source:NCBI gene;Acc:712176]                    | 3.200492122 | 0.003388399 | 0.017798011 |
| ENSMMUG00000058176 | b-defensin2-like [Source:NCBI gene;Acc:100169969]                                            | 3.202956719 | 1.68E-27    | 8.07E-25    |
| ENSMMUG00000062092 |                                                                                              | 3.206291302 | 0.005821697 | 0.027128655 |
| ENSMMUG00000052453 | serpin family A member 11 [Source:NCBI gene;Acc:701483]                                      | 3.207520433 | 0.00015943  | 0.001468734 |
| ENSMMUG00000056184 |                                                                                              | 3.210721956 | 9.04E-06    | 0.000123567 |
| ENSMMUG00000002963 | Rho GTPase activating protein 32 [Source:VGNC Symbol;Acc:VGNC:69855]                         | 3.221015948 | 7.72E-10    | 2.85E-08    |
| ENSMMUG00000013284 | G protein regulated inducer of neurite outgrowth 1 [Source:VGNC Symbol;Acc:VGNC:72998]       | 3.233714525 | 0.003969802 | 0.020334622 |
| ENSMMUG00000064146 | Metazoan signal recognition particle RNA [Source:RFAM;Acc:RF00017]                           | 3.234404819 | 1.03E-09    | 3.65E-08    |
| ENSMMUG00000057719 |                                                                                              | 3.24485037  | 0.006070428 | 0.028014931 |
| ENSMMUG00000004257 | beta-secretase 2 [Source:VGNC Symbol;Acc:VGNC:70216]                                         | 3.259077295 | 7.92E-19    | 1.19E-16    |
| ENSMMUG00000007528 | chordin [Source:VGNC Symbol;Acc:VGNC:71042]                                                  | 3.260462294 | 1.01E-13    | 6.93E-12    |
| ENSMMUG00000060750 | Metazoan signal recognition particle RNA [Source:RFAM;Acc:RF00017]                           | 3.26812525  | 0.001672754 | 0.010151416 |
| ENSMMUG00000065227 |                                                                                              | 3.273785823 | 0.011966399 | 0.048138929 |
| ENSMMUG00000057813 |                                                                                              | 3.287168014 | 2.31E-08    | 6.26E-07    |
| ENSMMUG00000000375 | pleckstrin homology and RhoGEF domain containing G6 [Source:VGNC Symbol;Acc:VGNC:76110]      | 3.287743422 | 7.90E-52    | 3.15E-48    |
| ENSMMUG00000005554 | mediator complex subunit 29 [Source:VGNC Symbol;Acc:VGNC:74557]                              | 3.298517547 | 6.80E-12    | 3.44E-10    |
| ENSMMUG00000056797 |                                                                                              | 3.298961707 | 0.006672509 | 0.030182209 |
| ENSMMUG00000002267 | laminin subunit gamma 3 [Source:NCBI gene;Acc:722430]                                        | 3.303538197 | 0.002684711 | 0.014768993 |
| ENSMMUG00000015468 | checkpoint with forkhead and ring finger domains [Source:VGNC Symbol;Acc:VGNC:71064]         | 3.311109012 | 1.27E-06    | 2.19E-05    |
| ENSMMUG00000053627 |                                                                                              | 3.311761301 | 0.000401751 | 0.003142634 |
| ENSMMUG00000018549 | zinc finger protein 786 [Source:VGNC Symbol;Acc:VGNC:79338]                                  | 3.316234142 | 1.44E-09    | 4.99E-08    |
| ENSMMUG00000019306 | indoleamine 2,3-dioxygenase 2 [Source:VGNC Symbol;Acc:VGNC:84005]                            | 3.331629035 | 0.002879463 | 0.015540538 |
| ENSMMUG00000015329 | MX dynamin like GTPase 1 [Source:VGNC Symbol;Acc:VGNC:75086]                                 | 3.334162263 | 1.37E-13    | 9.25E-12    |
| ENSMMUG00000031100 | membrane-spanning 4-domains subfamily A member 4A-like [Source:NCBI gene;Acc:698152]         | 3.345448829 | 2.51E-06    | 3.99E-05    |
| ENSMMUG00000065319 |                                                                                              | 3.345684073 | 0.00102299  | 0.006820916 |
| ENSMMUG00000049755 | leucine rich repeat containing 3 [Source:NCBI gene;Acc:712418]                               | 3.346998954 | 1.20E-06    | 2.08E-05    |
| ENSMMUG00000063913 | endogenous retrovirus group K member 7 Env polyprotein-like [Source:NCBI gene;Acc:114674933] | 3.347844983 | 0.000953627 | 0.006444377 |
| ENSMMUG00000005595 | RAB14, member RAS oncogene family [Source:NCBI gene;Acc:699837]                              | 3.359920312 | 2.91E-11    | 1.32E-09    |
| ENSMMUG00000021157 | TBC1 domain family member 31 [Source:VGNC Symbol;Acc:VGNC:84121]                             | 3.367112737 | 0.000419961 | 0.003257418 |
| ENSMMUG00000064729 | small proline rich protein 3 [Source:NCBI gene;Acc:713857]                                   | 3.394478772 | 0.010683657 | 0.044257171 |
| ENSMMUG00000050543 |                                                                                              | 3.402541222 | 3.17E-30    | 2.92E-27    |
| ENSMMUG00000063346 |                                                                                              | 3.404460633 | 0.001071833 | 0.007076227 |
| ENSMMUG00000036060 | U6 spliceosomal RNA [Source:RFAM;Acc:RF00026]                                                | 3.426156008 | 0.00170348  | 0.010267173 |
| ENSMMUG00000011064 | synaptosome associated protein 25 [Source:VGNC Symbol;Acc:VGNC:77663]                        | 3.429861636 | 3.91E-09    | 1.23E-07    |
| ENSMMUG00000055918 |                                                                                              | 3.448498186 | 0.000725726 | 0.0051611   |
| ENSMMUG00000003874 | interferon induced transmembrane protein 10 [Source:NCBI gene;Acc:721010]                    | 3.450637721 | 3.36E-20    | 6.20E-18    |
| ENSMMUG00000001338 | antizyme inhibitor 1 [Source:VGNC Symbol;Acc:VGNC:70080]                                     | 3.452131957 | 0.000372194 | 0.002959759 |
| ENSMMUG00000033200 | Small nucleolar RNA U3 [Source:RFAM;Acc:RF00012]                                             | 3.460984247 | 0.006338167 | 0.028961267 |
| ENSMMUG00000003269 | polyhomeotic homolog 2 [Source:VGNC Symbol;Acc:VGNC:75903]                                   | 3.469017151 | 0.00594828  | 0.027611084 |
| ENSMMUG00000001058 | tetratricopeptide repeat domain 28 [Source:VGNC Symbol;Acc:VGNC:79785]                       | 3.469106101 | 4.31E-26    | 1.66E-23    |
| ENSMMUG00000057640 | plakophilin-3-like [Source:NCBI gene;Acc:114669833]                                          | 3.490203134 | 3.09E-27    | 1.42E-24    |
| ENSMMUG00000053790 |                                                                                              | 3.498657968 | 1.20E-21    | 2.62E-19    |

|                    |                                                                                                      |             |             |             |
|--------------------|------------------------------------------------------------------------------------------------------|-------------|-------------|-------------|
| ENSMMUG0000002562  | mediator complex subunit 19 [Source:VGNC Symbol;Acc:VGNC:74615]                                      | 3.502806217 | 2.96E-07    | 6.22E-06    |
| ENSMMUG0000000276  | NACC family member 2 [Source:VGNC Symbol;Acc:VGNC:75013]                                             | 3.520266198 | 0.002919585 | 0.015714583 |
| ENSMMUG00000058085 | coiled-coil domain containing 195 [Source:HGNC Symbol;Acc:HGNC:53441]                                | 3.524330732 | 0.001379682 | 0.008659892 |
| ENSMMUG00000046169 |                                                                                                      | 3.527577837 | 9.87E-20    | 1.62E-17    |
| ENSMMUG00000057331 | RNA terminal phosphate cyclase like 1 [Source:NCBI gene;Acc:694568]                                  | 3.530677718 | 1.74E-25    | 6.13E-23    |
| ENSMMUG00000061603 |                                                                                                      | 3.5363073   | 0.010608485 | 0.044021904 |
| ENSMMUG00000026950 | microRNA 101-2 [Source:HGNC Symbol;Acc:HGNC:31489]                                                   | 3.545503368 | 2.08E-06    | 3.36E-05    |
| ENSMMUG00000018396 | HAUS augmin like complex subunit 6 [Source:VGNC Symbol;Acc:VGNC:73237]                               | 3.54646533  | 7.46E-18    | 9.60E-16    |
| ENSMMUG0000003007  | caspase recruitment domain family member 10 [Source:VGNC Symbol;Acc:VGNC:70570]                      | 3.554584962 | 0.000166927 | 0.001526042 |
| ENSMMUG00000016549 | matrix metalloproteinase 9 [Source:VGNC Symbol;Acc:VGNC:74903]                                       | 3.563544065 | 8.99E-14    | 6.22E-12    |
| ENSMMUG00000012147 | collagen type V alpha 1 chain [Source:NCBI gene;Acc:722014]                                          | 3.595566561 | 1.73E-28    | 9.43E-26    |
| ENSMMUG00000002917 | single Ig IL-1-related receptor [Source:NCBI gene;Acc:100425060]                                     | 3.597132437 | 1.43E-11    | 6.99E-10    |
| ENSMMUG00000005415 | olfactory receptor, family 2, subfamily B, member 3 [Source:NCBI gene;Acc:708747]                    | 3.606396767 | 0.006318595 | 0.028893275 |
| ENSMMUG00000054052 | sialic acid binding Ig like lectin 11 [Source:NCBI gene;Acc:719127]                                  | 3.619156025 | 0.000102556 | 0.001003407 |
| ENSMMUG00000008506 | metaxin-1 [Source:NCBI gene;Acc:717595]                                                              | 3.620211094 | 0.005895307 | 0.027418327 |
| ENSMMUG00000008791 | CD47 molecule [Source:VGNC Symbol;Acc:VGNC:70767]                                                    | 3.627448372 | 4.37E-20    | 7.81E-18    |
| ENSMMUG00000000790 | ankyrin repeat domain 17 [Source:VGNC Symbol;Acc:VGNC:84240]                                         | 3.635151096 | 4.01E-27    | 1.78E-24    |
| ENSMMUG00000061935 |                                                                                                      | 3.635162893 | 2.84E-17    | 3.43E-15    |
| ENSMMUG00000053984 |                                                                                                      | 3.658904193 | 1.58E-08    | 4.41E-07    |
| ENSMMUG00000057983 |                                                                                                      | 3.680865712 | 0.003111754 | 0.016570195 |
| ENSMMUG00000051719 | late cornified envelope 1C [Source:HGNC Symbol;Acc:HGNC:29464]                                       | 3.691678478 | 1.18E-05    | 0.000155907 |
| ENSMMUG00000010316 | HECT and RLD domain containing E3 ubiquitin protein ligase 5 [Source:VGNC Symbol;Acc:VGNC:73226]     | 3.69818583  | 2.66E-18    | 3.70E-16    |
| ENSMMUG00000013798 | fatty acid desaturase 1 [Source:VGNC Symbol;Acc:VGNC:72471]                                          | 3.711029751 | 9.81E-15    | 7.68E-13    |
| ENSMMUG00000014534 | phosphatidylinositol transfer protein beta [Source:VGNC Symbol;Acc:VGNC:76006]                       | 3.733683909 | 0.004532729 | 0.022375914 |
| ENSMMUG00000057179 | cation channel sperm associated 1 [Source:NCBI gene;Acc:721869]                                      | 3.75540914  | 2.91E-10    | 1.15E-08    |
| ENSMMUG00000008784 | lipopolysaccharide induced TNF factor [Source:NCBI gene;Acc:711743]                                  | 3.769698941 | 0.00321779  | 0.017066543 |
| ENSMMUG00000001845 | DNA polymerase epsilon 4, accessory subunit [Source:VGNC Symbol;Acc:VGNC:76065]                      | 3.796330792 | 2.53E-19    | 3.93E-17    |
| ENSMMUG00000013477 | creatine kinase, M-type [Source:VGNC Symbol;Acc:VGNC:71230]                                          | 3.799908254 | 5.24E-15    | 4.27E-13    |
| ENSMMUG00000005737 | SLC9A3 regulator 1 [Source:VGNC Symbol;Acc:VGNC:77639]                                               | 3.813368545 | 1.74E-05    | 0.00021736  |
| ENSMMUG00000044257 | MX dynamin like GTPase 2 [Source:VGNC Symbol;Acc:VGNC:81723]                                         | 3.81830646  | 2.26E-25    | 7.75E-23    |
| ENSMMUG00000038707 | U6 spliceosomal RNA [Source:RFAM;Acc:RF00026]                                                        | 3.83945782  | 0.004009823 | 0.02046958  |
| ENSMMUG00000022893 | von Willebrand factor [Source:VGNC Symbol;Acc:VGNC:78778]                                            | 3.854568881 | 4.74E-17    | 5.62E-15    |
| ENSMMUG00000022921 | solute carrier family 2 member 12 [Source:VGNC Symbol;Acc:VGNC:77503]                                | 3.855477035 | 2.49E-26    | 9.95E-24    |
| ENSMMUG00000062091 |                                                                                                      | 3.856465864 | 2.44E-08    | 6.53E-07    |
| ENSMMUG00000002741 | CUB and Sushi multiple domains 2 [Source:VGNC Symbol;Acc:VGNC:71441]                                 | 3.880531399 | 0.000115006 | 0.0011045   |
| ENSMMUG00000000544 | collagen type VI alpha 1 chain [Source:VGNC Symbol;Acc:VGNC:82084]                                   | 3.881046242 | 0.000264965 | 0.002245735 |
| ENSMMUG00000024537 |                                                                                                      | 3.882042917 | 1.71E-06    | 2.82E-05    |
| ENSMMUG00000060184 | SEC61 translocon subunit gamma [Source:NCBI gene;Acc:716898]                                         | 3.886281431 | 2.66E-05    | 0.000314047 |
| ENSMMUG00000049843 | late cornified envelope protein 2D [Source:NCBI gene;Acc:100424118]                                  | 3.88802307  | 0.003558359 | 0.018609131 |
| ENSMMUG00000051349 |                                                                                                      | 3.892328082 | 0.001337997 | 0.008469264 |
| ENSMMUG00000055022 | Metazoan signal recognition particle RNA [Source:RFAM;Acc:RF00017]                                   | 3.895170299 | 0.000226948 | 0.001973731 |
| ENSMMUG00000053249 |                                                                                                      | 3.901323671 | 0.008889519 | 0.038089762 |
| ENSMMUG00000062296 | potassium two pore domain channel subfamily K member 6 [Source:NCBI gene;Acc:714912]                 | 3.9016123   | 0.002817669 | 0.015303583 |
| ENSMMUG00000017822 | periplakin [Source:VGNC Symbol;Acc:VGNC:76240]                                                       | 3.915405984 | 1.28E-16    | 1.34E-14    |
| ENSMMUG00000018767 | cell division cycle associated 5 [Source:NCBI gene;Acc:721998]                                       | 3.925879122 | 0.000904347 | 0.006181769 |
| ENSMMUG00000031684 | KRAB box domain containing 1 [Source:NCBI gene;Acc:717189]                                           | 3.929909239 | 0.001012927 | 0.006776989 |
| ENSMMUG00000009499 | mesoderm specific transcript [Source:VGNC Symbol;Acc:VGNC:74707]                                     | 3.964042515 | 6.37E-38    | 1.53E-34    |
| ENSMMUG00000007068 | tumor suppressor candidate 3 [Source:VGNC Symbol;Acc:VGNC:84132]                                     | 3.983230176 | 0.000135651 | 0.001278357 |
| ENSMMUG00000004982 | activin A receptor like type 1 [Source:VGNC Symbol;Acc:VGNC:69451]                                   | 3.995616769 | 0.004841291 | 0.023492422 |
| ENSMMUG00000012405 | transient receptor potential cation channel subfamily C member 1 [Source:VGNC Symbol;Acc:VGNC:78651] | 3.995726555 | 1.10E-14    | 8.47E-13    |
| ENSMMUG00000052168 |                                                                                                      | 4.005426924 | 5.48E-34    | 8.20E-31    |

|                    |                                                                                                              |             |             |             |
|--------------------|--------------------------------------------------------------------------------------------------------------|-------------|-------------|-------------|
| ENSMMUG00000011878 | poly(A) binding protein interacting protein 1 [Source:VGNC Symbol;Acc:VGNC:84476]                            | 4.035702565 | 1.15E-23    | 3.13E-21    |
| ENSMMUG00000052785 | extracellular leucine rich repeat and fibronectin type III domain containing 2 [Source:NCBI gene;Acc:697071] | 4.045334035 | 0.003311597 | 0.017471226 |
| ENSMMUG00000018743 | ubiquitin specific peptidase 25 [Source:VGNC Symbol;Acc:VGNC:78744]                                          | 4.068769678 | 3.78E-05    | 0.000425197 |
| ENSMMUG00000011344 | solute carrier family 52 member 1 [Source:VGNC Symbol;Acc:VGNC:77795]                                        | 4.101123756 | 2.77E-06    | 4.36E-05    |
| ENSMMUG00000011682 | ribonuclease P/MRP subunit p21 [Source:NCBI gene;Acc:713056]                                                 | 4.131518073 | 2.25E-05    | 0.000272206 |
| ENSMMUG00000029186 | exocyst complex component 3 like 4 [Source:VGNC Symbol;Acc:VGNC:72305]                                       | 4.133829767 | 0.001706534 | 0.01028041  |
| ENSMMUG00000058817 |                                                                                                              | 4.139017055 | 5.63E-21    | 1.12E-18    |
| ENSMMUG00000021447 | TNF receptor superfamily member 1B [Source:VGNC Symbol;Acc:VGNC:78590]                                       | 4.140172829 | 0.002512352 | 0.013981379 |
| ENSMMUG00000042598 | transmembrane protein 18 [Source:NCBI gene;Acc:721515]                                                       | 4.153294771 | 4.66E-16    | 4.30E-14    |
| ENSMMUG00000023403 | GTP binding protein 3, mitochondrial [Source:VGNC Symbol;Acc:VGNC:73170]                                     | 4.16180089  | 8.59E-11    | 3.60E-09    |
| ENSMMUG00000063198 |                                                                                                              | 4.202272829 | 2.72E-07    | 5.81E-06    |
| ENSMMUG00000010318 | phosphatidylinositol glycan anchor biosynthesis class Y [Source:NCBI gene;Acc:100426107]                     | 4.210645273 | 1.48E-17    | 1.85E-15    |
| ENSMMUG0000004330  | peptidase domain containing associated with muscle regeneration 1 [Source:VGNC Symbol;Acc:VGNC:75673]        | 4.220081843 | 1.32E-06    | 2.28E-05    |
| ENSMMUG00000022818 | inhibitor of growth family member 1 [Source:VGNC Symbol;Acc:VGNC:73742]                                      | 4.222013191 | 0.004139807 | 0.020892678 |
| ENSMMUG00000021564 | lysine demethylase 2B [Source:VGNC Symbol;Acc:VGNC:81425]                                                    | 4.241471826 | 2.51E-21    | 5.19E-19    |
| ENSMMUG00000017930 | striatin 4 [Source:VGNC Symbol;Acc:VGNC:78128]                                                               | 4.244460879 | 1.35E-24    | 4.13E-22    |
| ENSMMUG00000006655 | myelin regulatory factor [Source:VGNC Symbol;Acc:VGNC:74949]                                                 | 4.24826332  | 1.62E-08    | 4.49E-07    |
| ENSMMUG0000004868  | dynein axonemal light chain 4 [Source:VGNC Symbol;Acc:VGNC:71945]                                            | 4.256349654 | 0.007296501 | 0.032472278 |
| ENSMMUG00000009388 | F-box and leucine rich repeat protein 5 [Source:VGNC Symbol;Acc:VGNC:81408]                                  | 4.256361122 | 0.0058111   | 0.027089815 |
| ENSMMUG00000004470 | CD9 molecule [Source:VGNC Symbol;Acc:VGNC:70787]                                                             | 4.279224568 | 1.69E-06    | 2.79E-05    |
| ENSMMUG00000010444 | ring finger protein 150 [Source:VGNC Symbol;Acc:VGNC:76805]                                                  | 4.324098251 | 0.006253956 | 0.028663366 |
| ENSMMUG00000004801 | COPI coat complex subunit gamma 2 [Source:VGNC Symbol;Acc:VGNC:71315]                                        | 4.334263054 | 1.05E-35    | 1.80E-32    |
| ENSMMUG00000005920 | N-acetyltransferase 1 [Source:VGNC Symbol;Acc:VGNC:75133]                                                    | 4.335190981 | 4.07E-05    | 0.000450752 |
| ENSMMUG00000057632 |                                                                                                              | 4.335978225 | 3.87E-24    | 1.08E-21    |
| ENSMMUG00000054736 |                                                                                                              | 4.340760619 | 9.27E-10    | 3.35E-08    |
| ENSMMUG00000022282 | collagen type IV alpha 2 chain [Source:NCBI gene;Acc:100429807]                                              | 4.417258626 | 2.74E-05    | 0.00032153  |
| ENSMMUG00000064095 |                                                                                                              | 4.438267239 | 2.32E-05    | 0.000279634 |
| ENSMMUG00000023570 | interleukin 19 [Source:NCBI gene;Acc:694806]                                                                 | 4.439351546 | 0.004131968 | 0.020871347 |
| ENSMMUG00000056248 |                                                                                                              | 4.507783789 | 1.41E-25    | 5.10E-23    |
| ENSMMUG00000013648 | potassium two pore domain channel subfamily K member 16 [Source:VGNC Symbol;Acc:VGNC:73827]                  | 4.535051763 | 0.003916645 | 0.020122581 |
| ENSMMUG00000050799 |                                                                                                              | 4.535051763 | 0.003916645 | 0.020122581 |
| ENSMMUG00000014738 | bromodomain containing 9 [Source:VGNC Symbol;Acc:VGNC:70386]                                                 | 4.554296154 | 0.004516471 | 0.022331785 |
| ENSMMUG00000064931 |                                                                                                              | 4.579853554 | 2.34E-08    | 6.31E-07    |
| ENSMMUG00000019443 | syntaxin 11 [Source:VGNC Symbol;Acc:VGNC:78041]                                                              | 4.589465405 | 0.001911075 | 0.011285522 |
| ENSMMUG00000018298 | killer cell lectin like receptor D1 [Source:NCBI gene;Acc:574145]                                            | 4.590637057 | 4.66E-09    | 1.45E-07    |
| ENSMMUG00000051037 |                                                                                                              | 4.600664897 | 5.11E-10    | 1.93E-08    |
| ENSMMUG00000058370 | taste receptor type 2 member 62 [Source:NCBI gene;Acc:704388]                                                | 4.604517747 | 1.64E-06    | 2.72E-05    |
| ENSMMUG00000007688 | angiominin [Source:VGNC Symbol;Acc:VGNC:69627]                                                               | 4.612987763 | 0.001994314 | 0.01167346  |
| ENSMMUG00000051976 |                                                                                                              | 4.620284606 | 0.00697817  | 0.031335046 |
| ENSMMUG00000063779 |                                                                                                              | 4.717202744 | 9.22E-31    | 9.20E-28    |
| ENSMMUG00000062294 |                                                                                                              | 4.73139864  | 0.000441287 | 0.003392077 |
| ENSMMUG00000058029 | Metazoan signal recognition particle RNA [Source:RFAM;Acc:RF00017]                                           | 4.736506634 | 0.000813433 | 0.005682059 |
| ENSMMUG00000006389 | zinc finger and SCAN domain containing 20 [Source:VGNC Symbol;Acc:VGNC:78895]                                | 4.79197956  | 0.000161462 | 0.00148401  |
| ENSMMUG00000057076 | claudin 19 [Source:NCBI gene;Acc:697807]                                                                     | 4.808172267 | 0.001221295 | 0.007855224 |
| ENSMMUG00000021062 | CD177 molecule [Source:VGNC Symbol;Acc:VGNC:70912]                                                           | 4.817568267 | 5.84E-16    | 5.26E-14    |
| ENSMMUG00000001820 | regulator of G protein signaling 6 [Source:VGNC Symbol;Acc:VGNC:76691]                                       | 4.825415917 | 0.00263111  | 0.014518993 |
| ENSMMUG00000017053 | death associated protein kinase 1 [Source:VGNC Symbol;Acc:VGNC:71732]                                        | 4.87448887  | 0.002192696 | 0.012534479 |
| ENSMMUG00000052569 |                                                                                                              | 4.883165839 | 2.34E-16    | 2.37E-14    |
| ENSMMUG00000003005 | MFNG O-fucosylpeptide 3-beta-N-acetylglucosaminyltransferase [Source:VGNC Symbol;Acc:VGNC:74712]             | 4.920297851 | 0.001221311 | 0.007855224 |
| ENSMMUG00000063140 | Metazoan signal recognition particle RNA [Source:RFAM;Acc:RF00017]                                           | 4.945921086 | 0.004064126 | 0.020632461 |
| ENSMMUG00000043396 | Metazoan signal recognition particle RNA [Source:RFAM;Acc:RF00017]                                           | 4.9496883   | 2.50E-06    | 3.98E-05    |



|                     |                                                                                               |             |             |             |
|---------------------|-----------------------------------------------------------------------------------------------|-------------|-------------|-------------|
| ENSMMUG00000064520  |                                                                                               | 4.961400743 | 2.08E-05    | 0.000254493 |
| ENSMMUG00000004274  | myotubularin related protein 8 [Source:VGNC Symbol;Acc:VGNC:74974]                            | 4.965937308 | 0.001688693 | 0.010208879 |
| ENSMMUG00000003353  | macrophage stimulating 1 receptor [Source:VGNC Symbol;Acc:VGNC:74941]                         | 4.968236015 | 0.002117931 | 0.012229673 |
| ENSMMUG000000059782 |                                                                                               | 4.973802373 | 3.78E-25    | 1.22E-22    |
| ENSMMUG000000061282 | hyaluronan and proteoglycan link protein 1 [Source:NCBI gene;Acc:712501]                      | 4.975412345 | 0.002810282 | 0.015270391 |
| ENSMMUG00000000632  | SH3 binding domain protein 5 like [Source:VGNC Symbol;Acc:VGNC:77334]                         | 4.975555984 | 1.80E-09    | 6.10E-08    |
| ENSMMUG000000062949 |                                                                                               | 4.993696932 | 0.003552649 | 0.018587388 |
| ENSMMUG000000042039 |                                                                                               | 5.005586783 | 0.012132145 | 0.04869121  |
| ENSMMUG000000023823 | Y RNA [Source:RFAM;Acc:RF00019]                                                               | 5.006519554 | 0.00448767  | 0.022247698 |
| ENSMMUG000000064014 |                                                                                               | 5.006916682 | 0.001531006 | 0.009465836 |
| ENSMMUG000000049267 |                                                                                               | 5.011196007 | 3.83E-15    | 3.19E-13    |
| ENSMMUG000000061940 |                                                                                               | 5.04676445  | 0.000642777 | 0.004673892 |
| ENSMMUG000000025150 | Y RNA [Source:RFAM;Acc:RF00019]                                                               | 5.054695252 | 0.005328273 | 0.025301902 |
| ENSMMUG000000021269 | Josephin domain containing 2 [Source:VGNC Symbol;Acc:VGNC:73919]                              | 5.079869431 | 0.002866942 | 0.015500904 |
| ENSMMUG000000032284 | leucine rich repeat containing 47 [Source:VGNC Symbol;Acc:VGNC:74388]                         | 5.18150719  | 0.00090488  | 0.006181882 |
| ENSMMUG000000065109 | ankyrin repeat and SOCS box containing 12 [Source:NCBI gene;Acc:707931]                       | 5.184888018 | 0.001701117 | 0.010263262 |
| ENSMMUG000000064358 |                                                                                               | 5.18896303  | 0.010010836 | 0.041926434 |
| ENSMMUG000000001116 | SUZ12 polycomb repressive complex 2 subunit [Source:VGNC Symbol;Acc:VGNC:78144]               | 5.27456684  | 0.000814163 | 0.005682059 |
| ENSMMUG000000063744 |                                                                                               | 5.296126451 | 0.001186401 | 0.007655355 |
| ENSMMUG000000011564 | transmembrane channel like 3 [Source:VGNC Symbol;Acc:VGNC:79360]                              | 5.451432981 | 0.000123288 | 0.001174616 |
| ENSMMUG000000065134 | Fas ligand [Source:NCBI gene;Acc:574159]                                                      | 5.455337672 | 0.00012583  | 0.001197888 |
| ENSMMUG000000048462 | Metazoan signal recognition particle RNA [Source:RFAM;Acc:RF00017]                            | 5.475155143 | 0.000380598 | 0.003006627 |
| ENSMMUG000000060218 | chemokine (C motif) ligand 1 [Source:NCBI gene;Acc:574367]                                    | 5.608750784 | 8.68E-05    | 0.000879722 |
| ENSMMUG000000053561 |                                                                                               | 5.700740585 | 0.000117487 | 0.00112203  |
| ENSMMUG000000056168 |                                                                                               | 5.862936276 | 3.10E-05    | 0.000358134 |
| ENSMMUG000000006851 | SPARC (osteonectin), cwcv and kazal like domains proteoglycan 3 [Source:NCBI gene;Acc:705964] | 5.949683833 | 3.81E-37    | 7.61E-34    |
| ENSMMUG000000059335 |                                                                                               | 5.95308511  | 3.95E-05    | 0.000439948 |
| ENSMMUG000000013540 | RAN guanine nucleotide release factor [Source:VGNC Symbol;Acc:VGNC:76503]                     | 6.022446693 | 0.001019824 | 0.006806405 |
| ENSMMUG000000026975 | mml-mir-206 [Source:miRBase;Acc:MI0007667]                                                    | 6.073534731 | 1.01E-05    | 0.00013713  |
| ENSMMUG000000031540 | purinergic receptor P2Y1 [Source:VGNC Symbol;Acc:VGNC:75737]                                  | 6.198656538 | 3.06E-05    | 0.000354261 |
| ENSMMUG000000047465 | Metazoan signal recognition particle RNA [Source:RFAM;Acc:RF00017]                            | 6.339105492 | 2.00E-06    | 3.23E-05    |
| ENSMMUG000000062496 |                                                                                               | 6.385434242 | 0.000115688 | 0.001106612 |
| ENSMMUG000000057785 |                                                                                               | 6.510682263 | 1.75E-05    | 0.000218188 |
| ENSMMUG000000004309 | APC membrane recruitment protein 1 [Source:VGNC Symbol;Acc:VGNC:69716]                        | 7.033038695 | 0.003345337 | 0.017618185 |
| ENSMMUG000000049232 | AMMECR1 like [Source:VGNC Symbol;Acc:VGNC:84208]                                              | 8.706993793 | 2.12E-05    | 0.000258336 |
| ENSMMUG000000001989 | RNA polymerase II subunit D [Source:VGNC Symbol;Acc:VGNC:76213]                               | 8.793397736 | 1.26E-07    | 2.93E-06    |
| ENSMMUG000000027543 | Y RNA [Source:RFAM;Acc:RF00019]                                                               | 9.061245781 | 2.22E-11    | 1.04E-09    |

## SD 3 vs. Baseline

| Ensembl Gene ID    | Description                                                                     | Log2(FC)    | p-value     | FDR         |
|--------------------|---------------------------------------------------------------------------------|-------------|-------------|-------------|
| ENSMMUG00000061572 | Metazoan signal recognition particle RNA [Source:RFAM;Acc:RF00017]              | 6.195648702 | 7.05E-07    | 1.26E-05    |
| ENSMMUG00000055207 |                                                                                 | 6.151350598 | 3.11E-07    | 5.98E-06    |
| ENSMMUG00000015702 | divergent protein kinase domain 1C [Source:NCBI gene;Acc:699537]                | 6.055064417 | 5.24E-06    | 7.51E-05    |
| ENSMMUG00000012056 | structural maintenance of chromosomes 6 [Source:VGNC Symbol;Acc:VGNC:77746]     | 5.968981836 | 2.49E-08    | 6.04E-07    |
| ENSMMUG00000051155 | U2 spliceosomal RNA [Source:RFAM;Acc:RF00004]                                   | 5.832804892 | 9.89E-06    | 0.000130902 |
| ENSMMUG00000001245 | zinc finger protein 532 [Source:NCBI gene;Acc:701146]                           | 5.581682482 | 9.88E-06    | 0.000130902 |
| ENSMMUG00000051522 | Metazoan signal recognition particle RNA [Source:RFAM;Acc:RF00017]              | 5.538528614 | 3.97E-05    | 0.000444212 |
| ENSMMUG00000043682 | mitochondrial carrier 2 [Source:NCBI gene;Acc:712767]                           | 5.417992189 | 1.03E-05    | 0.000135474 |
| ENSMMUG00000056056 |                                                                                 | 5.400652998 | 0.00182006  | 0.011082637 |
| ENSMMUG00000020533 | chromosome 11 C12orf56 homolog [Source:VGNC Symbol;Acc:VGNC:70409]              | 5.383543872 | 1.36E-10    | 5.14E-09    |
| ENSMMUG00000004566 | zinc finger protein 124 [Source:VGNC Symbol;Acc:VGNC:78836]                     | 5.363688501 | 4.02E-05    | 0.000449573 |
| ENSMMUG00000007001 | protein phosphatase 4 regulatory subunit 3B [Source:VGNC Symbol;Acc:VGNC:76342] | 5.289857809 | 3.18E-05    | 0.000362875 |
| ENSMMUG00000049117 | CLUU1 antisense RNA 1 [Source:NCBI gene;Acc:100424000]                          | 5.262198979 | 0.000447797 | 0.003432138 |
| ENSMMUG00000009155 | SIN3-HDAC complex associated factor [Source:NCBI gene;Acc:694162]               | 5.048336555 | 3.42E-11    | 1.44E-09    |
| ENSMMUG00000008942 | carnosine dipeptidase 1 [Source:VGNC Symbol;Acc:VGNC:71257]                     | 4.999530552 | 1.01E-09    | 3.25E-08    |
| ENSMMUG00000003693 | DIS3 like exosome 3'-5' exoribonuclease [Source:VGNC Symbol;Acc:VGNC:71796]     | 4.898266609 | 0.001318231 | 0.008497449 |
| ENSMMUG00000059241 |                                                                                 | 4.880585139 | 8.32E-09    | 2.25E-07    |
| ENSMMUG00000011282 | DnaJ heat shock protein family (Hsp40) member C9 [Source:NCBI gene;Acc:707599]  | 4.877232887 | 0.003865743 | 0.020283815 |
| ENSMMUG00000004821 | membrane spanning 4-domains A14 [Source:NCBI gene;Acc:697083]                   | 4.839718448 | 2.76E-06    | 4.24E-05    |
| ENSMMUG00000001264 | BSD domain containing 1 [Source:VGNC Symbol;Acc:VGNC:70384]                     | 4.818441802 | 4.26E-06    | 6.19E-05    |
| ENSMMUG00000050445 | ribonuclease A family member 8 [Source:NCBI gene;Acc:716333]                    | 4.810574969 | 0.001765233 | 0.010819868 |
| ENSMMUG00000019639 | paired box 5 [Source:VGNC Symbol;Acc:VGNC:75764]                                | 4.785575447 | 3.86E-10    | 1.35E-08    |
| ENSMMUG00000010871 | crystallin gamma B [Source:VGNC Symbol;Acc:VGNC:71507]                          | 4.761047727 | 0.002300075 | 0.013395769 |
| ENSMMUG00000052176 |                                                                                 | 4.704533769 | 0.004662552 | 0.023721635 |
| ENSMMUG00000049842 |                                                                                 | 4.675622108 | 0.000440307 | 0.003386737 |
| ENSMMUG00000055529 | sulfotransferase family 1C member 4 [Source:NCBI gene;Acc:693903]               | 4.674557079 | 0.002281997 | 0.013308403 |
| ENSMMUG00000000352 | family with sequence similarity 229 member A [Source:NCBI gene;Acc:708770]      | 4.663754438 | 0.00323535  | 0.017644315 |

|                     |                                                                                        |   |             |             |             |
|---------------------|----------------------------------------------------------------------------------------|---|-------------|-------------|-------------|
| ENSMMUG00000010049  | NOP9 nucleolar protein [Source:VGNC Symbol;Acc:VGNC:75216]                             | - | 4.618133804 | 0.000605799 | 0.004441156 |
| ENSMMUG00000021242  | natural killer cell triggering receptor [Source:VGNC Symbol;Acc:VGNC:81486]            | - | 4.616473939 | 1.32E-05    | 0.000167771 |
| ENSMMUG00000000496  | zinc finger and BTB domain containing 6 [Source:VGNC Symbol;Acc:VGNC:79047]            | - | 4.556746574 | 0.000762243 | 0.005384247 |
| ENSMMUG00000010621  | heart and neural crest derivatives expressed 1 [Source:VGNC Symbol;Acc:VGNC:73345]     | - | 4.520339361 | 0.006352182 | 0.030596108 |
| ENSMMUG000000051162 |                                                                                        | - | 4.492073151 | 0.000305014 | 0.002530537 |
| ENSMMUG00000024125  | small nucleolar RNA, H/ACA box 58 [Source:HGNC Symbol;Acc:HGNC:32652]                  | - | 4.491371626 | 0.001018537 | 0.006857828 |
| ENSMMUG00000049682  | Metazoan signal recognition particle RNA [Source:RFAM;Acc:RF00017]                     | - | 4.459113493 | 1.05E-05    | 0.000137114 |
| ENSMMUG00000038389  |                                                                                        | - | 4.409912958 | 0.009488113 | 0.04208339  |
| ENSMMUG00000052169  | potassium two pore domain channel subfamily K member 12 [Source:NCBI gene;Acc:715556]  | - | 4.347329208 | 0.00283332  | 0.015895013 |
| ENSMMUG00000009951  | MARCKS like 1 [Source:VGNC Symbol;Acc:VGNC:74723]                                      | - | 4.310762284 | 0.009951734 | 0.043685284 |
| ENSMMUG00000011811  | anoctamin 6 [Source:VGNC Symbol;Acc:VGNC:69902]                                        | - | 4.310762284 | 0.009951734 | 0.043685284 |
| ENSMMUG00000008945  | zinc finger protein 407 [Source:NCBI gene;Acc:695303]                                  | - | 4.289760587 | 2.45E-08    | 5.96E-07    |
| ENSMMUG00000025616  |                                                                                        | - | 4.285909238 | 0.002237672 | 0.013079294 |
| ENSMMUG00000021095  | desmoglein 2 [Source:VGNC Symbol;Acc:VGNC:72002]                                       | - | -4.28067519 | 9.22E-05    | 0.000906962 |
| ENSMMUG00000017204  | programmed cell death 4 [Source:VGNC Symbol;Acc:VGNC:75794]                            | - | 4.254273244 | 0.000333912 | 0.002723343 |
| ENSMMUG00000001040  | nuclear GTPase, germinal center associated [Source:VGNC Symbol;Acc:VGNC:75497]         | - | 4.245825742 | 0.002721076 | 0.015378346 |
| ENSMMUG00000018739  | sperm flagellar 2 [Source:VGNC Symbol;Acc:VGNC:82243]                                  | - | 4.206098535 | 0.000235265 | 0.002023064 |
| ENSMMUG000000059464 |                                                                                        | - | -4.15531132 | 0.005864371 | 0.028629072 |
| ENSMMUG00000022975  | sprouty related EVH1 domain containing 3 [Source:VGNC Symbol;Acc:VGNC:78030]           | - | 4.123845912 | 1.64E-06    | 2.69E-05    |
| ENSMMUG00000056369  | SAP30 like [Source:NCBI gene;Acc:714400]                                               | - | 4.102546332 | 0.004177422 | 0.02169117  |
| ENSMMUG00000063345  |                                                                                        | - | 4.101132057 | 2.90E-07    | 5.63E-06    |
| ENSMMUG00000062461  | chromosome 15 C9orf43 homolog [Source:NCBI gene;Acc:704968]                            | - | 4.081749854 | 0.009580928 | 0.04243076  |
| ENSMMUG00000021656  | golgin subfamily A member 8S [Source:NCBI gene;Acc:722977]                             | - | 4.077593105 | 0.005735254 | 0.028178967 |
| ENSMMUG00000050407  |                                                                                        | - | 4.065020404 | 0.005895703 | 0.028738786 |
| ENSMMUG00000060158  |                                                                                        | - | -4.05962694 | 0.007673212 | 0.035636218 |
| ENSMMUG00000061774  | taste 2 receptor member 10 [Source:NCBI gene;Acc:717960]                               | - | 4.054149736 | 0.006991091 | 0.033060276 |
| ENSMMUG00000022676  | ribosomal modification protein rimK like family member B [Source:NCBI gene;Acc:722261] | - | 4.052065822 | 0.001086787 | 0.007220761 |
| ENSMMUG00000022553  | pyruvate dehydrogenase kinase 1 [Source:VGNC Symbol;Acc:VGNC:75932]                    | - | 4.048465011 | 0.008844112 | 0.039847639 |
| ENSMMUG00000026432  | small nucleolar RNA, C/D box 7 [Source:HGNC Symbol;Acc:HGNC:32704]                     | - | 4.029400509 | 0.006139243 | 0.029769362 |

|                    |                                                                                                 |             |             |             |
|--------------------|-------------------------------------------------------------------------------------------------|-------------|-------------|-------------|
| ENSMMUG00000057793 | dual specificity phosphatase 5 [Source:NCBI gene;Acc:698178]                                    | -           | 0.000118099 | 0.001116947 |
| ENSMMUG00000058754 |                                                                                                 | 4.019853275 | -           | -           |
| ENSMMUG00000037551 | Metazoan signal recognition particle RNA [Source:RFAM;Acc:RF00017]                              | 4.012727242 | 0.007032904 | 0.033233416 |
| ENSMMUG00000021094 | desmoglein 3 [Source:VGNC Symbol;Acc:VGNC:72003]                                                | -           | 4.90E-21    | 7.95E-19    |
| ENSMMUG00000013799 | ATP binding cassette subfamily G member 4 [Source:VGNC Symbol;Acc:VGNC:69390]                   | 3.999091486 | 7.93E-05    | 0.000802301 |
| ENSMMUG00000006827 | von Willebrand factor A domain containing 7 [Source:VGNC Symbol;Acc:VGNC:78941]                 | 3.959297197 | 4.59E-06    | 6.62E-05    |
| ENSMMUG00000065131 |                                                                                                 | -3.94650984 | -           | -           |
| ENSMMUG00000048493 | neuroblastoma breakpoint family member 6-like protein [Source:NCBI gene;Acc:711999]             | 3.945017269 | 0.000364837 | 0.002927722 |
| ENSMMUG00000011367 | BUD23 rRNA methyltransferase and ribosome maturation factor [Source:VGNC Symbol;Acc:VGNC:70325] | -           | 0.0024406   | 0.014056424 |
| ENSMMUG00000056790 |                                                                                                 | 3.924957978 | 0.0099861   | 0.043776904 |
| ENSMMUG00000017206 | SHOC2 leucine rich repeat scaffold protein [Source:VGNC Symbol;Acc:VGNC:81569]                  | 3.871609551 | 0.010440815 | 0.045356551 |
| ENSMMUG00000022865 | junctophilin 2 [Source:NCBI gene;Acc:694158]                                                    | -           | 0.010329502 | 0.045008602 |
| ENSMMUG00000017210 | sarcosine dehydrogenase [Source:VGNC Symbol;Acc:VGNC:76971]                                     | 3.868959642 | 1.82E-06    | 2.93E-05    |
| ENSMMUG00000062793 |                                                                                                 | 3.863447339 | -           | -           |
| ENSMMUG00000017207 | dopamine beta-hydroxylase [Source:VGNC Symbol;Acc:VGNC:71740]                                   | 3.860473361 | 0.000741262 | 0.005258949 |
| ENSMMUG0000005295  | parathyroid hormone 2 receptor [Source:VGNC Symbol;Acc:VGNC:76592]                              | -           | 0.000598876 | 0.00440534  |
| ENSMMUG0000003736  | nuclear factor kappa B subunit 1 [Source:VGNC Symbol;Acc:VGNC:75339]                            | 3.842486327 | 0.00010704  | 0.001030376 |
| ENSMMUG00000058864 |                                                                                                 | -3.82179195 | 9.33E-12    | 4.27E-10    |
| ENSMMUG00000009785 | C-C motif chemokine ligand 13 [Source:VGNC Symbol;Acc:VGNC:70696]                               | 3.819822668 | 9.60E-07    | 1.67E-05    |
| ENSMMUG00000001742 | transforming growth factor beta receptor 3 [Source:VGNC Symbol;Acc:VGNC:78339]                  | -           | 1.40E-21    | 2.43E-19    |
| ENSMMUG00000052535 |                                                                                                 | 3.760696388 | -           | -           |
| ENSMMUG00000060011 | hyaluronan and proteoglycan link protein 2 [Source:NCBI gene;Acc:718500]                        | 3.74647833  | 0.005391523 | 0.026743274 |
| ENSMMUG00000020370 | SRY-box transcription factor 5 [Source:VGNC Symbol;Acc:VGNC:77843]                              | -           | -           | -           |
| ENSMMUG00000029164 | glycerophosphodiester phosphodiesterase domain containing 3 [Source:VGNC Symbol;Acc:VGNC:72800] | 3.736907545 | 0.000347173 | 0.002820862 |
| ENSMMUG00000053323 |                                                                                                 | 3.721613179 | 2.07E-23    | 5.07E-21    |
| ENSMMUG00000021331 | EBF family member 4 [Source:VGNC Symbol;Acc:VGNC:71932]                                         | -3.70477557 | 0.000270115 | 0.00228191  |
| ENSMMUG0000006828  | valyl-tRNA synthetase 1 [Source:VGNC Symbol;Acc:VGNC:78755]                                     | 3.686430227 | 0.004471574 | 0.022952193 |
| ENSMMUG00000010508 | carbamoyl-phosphate synthase 1 [Source:VGNC Symbol;Acc:VGNC:71471]                              | -           | 0.000149995 | 0.001376477 |
| ENSMMUG00000051115 |                                                                                                 | 3.664337616 | 4.73E-11    | 1.94E-09    |
| ENSMMUG0000006548  | KIAA1549 [Source:VGNC Symbol;Acc:VGNC:73885]                                                    | 3.639532232 | 0.007788306 | 0.036054607 |
| ENSMMUG00000013345 | folliculin [Source:NCBI gene;Acc:698082]                                                        | -           | 8.94E-06    | 0.00011977  |
|                    |                                                                                                 | 3.603203163 | 0.000992556 | 0.006722028 |
|                    |                                                                                                 | -           | 8.99E-05    | 0.000887602 |
|                    |                                                                                                 | 3.563272972 | 0.001467444 | 0.009293093 |
|                    |                                                                                                 | 3.557628335 | 4.82E-06    | 6.94E-05    |
|                    |                                                                                                 | -3.55652339 | -           | -           |
|                    |                                                                                                 | 3.553554981 | 3.17E-05    | 0.00036259  |



|                    |                                                                                                         |   |             |             |             |
|--------------------|---------------------------------------------------------------------------------------------------------|---|-------------|-------------|-------------|
| ENSMMUG00000019423 | zinc finger protein 2 [Source:NCBI gene;Acc:703864]                                                     | - | 3.544839639 | 0.007138469 | 0.033658713 |
| ENSMMUG00000020926 | syntaxin 2 [Source:VGNC Symbol;Acc:VGNC:78259]                                                          | - | 3.543990855 | 8.23E-05    | 0.000826893 |
| ENSMMUG00000052682 |                                                                                                         | - | 3.539918439 | 4.62E-08    | 1.06E-06    |
| ENSMMUG00000016331 | glucosylceramidase beta 2 [Source:VGNC Symbol;Acc:VGNC:72741]                                           | - | 3.537085536 | 0.003824481 | 0.020091684 |
| ENSMMUG00000059824 |                                                                                                         | - | 3.535983419 | 0.010435319 | 0.045347857 |
| ENSMMUG00000016845 | zinc finger E-box binding homeobox 2 [Source:VGNC Symbol;Acc:VGNC:78969]                                | - | 3.534882092 | 9.00E-07    | 1.57E-05    |
| ENSMMUG00000010661 | BICD cargo adaptor 2 [Source:VGNC Symbol;Acc:VGNC:70333]                                                | - | -3.5290809  | 0.007550323 | 0.03517881  |
| ENSMMUG00000007187 | haloacid dehalogenase like hydrolase domain containing 3 [Source:VGNC Symbol;Acc:VGNC:73250]            | - | 3.520486771 | 0.001296833 | 0.008384504 |
| ENSMMUG00000008525 | minichromosome maintenance 9 homologous recombination repair factor [Source:VGNC Symbol;Acc:VGNC:83432] | - | 3.493878172 | 0.000173186 | 0.001549832 |
| ENSMMUG00000061953 |                                                                                                         | - | 3.490413908 | 0.007561234 | 0.035217006 |
| ENSMMUG00000021243 | zinc finger and BTB domain containing 47 [Source:VGNC Symbol;Acc:VGNC:79645]                            | - | 3.473505583 | 0.005254553 | 0.026160027 |
| ENSMMUG00000060359 |                                                                                                         | - | 3.461825609 | 0.004658252 | 0.023713408 |
| ENSMMUG00000026876 | mml-mir-181a-2 [Source:miRBase;Acc:MI0002808]                                                           | - | 3.458837575 | 0.000742516 | 0.005264963 |
| ENSMMUG00000002549 | trehalase [Source:NCBI gene;Acc:706449]                                                                 | - | 3.451676667 | 1.04E-24    | 2.93E-22    |
| ENSMMUG00000024598 | U6 spliceosomal RNA [Source:RFAM;Acc:RF00026]                                                           | - | 3.447234358 | 0.001076689 | 0.007179403 |
| ENSMMUG00000061408 |                                                                                                         | - | 3.442209459 | 2.81E-05    | 0.000325642 |
| ENSMMUG00000004412 | arginine and serine rich coiled-coil 2 [Source:VGNC Symbol;Acc:VGNC:77139]                              | - | 3.430444379 | 1.16E-06    | 1.98E-05    |
| ENSMMUG00000002166 | tousled like kinase 2 [Source:VGNC Symbol;Acc:VGNC:78368]                                               | - | 3.417121288 | 0.002316809 | 0.013475087 |
| ENSMMUG00000020905 | chromosome 18 C18orf63 homolog [Source:VGNC Symbol;Acc:VGNC:70465]                                      | - | 3.406446142 | 7.28E-05    | 0.00074611  |
| ENSMMUG00000039300 |                                                                                                         | - | 3.405999181 | 1.34E-06    | 2.24E-05    |
| ENSMMUG00000002649 | unc-5 netrin receptor A [Source:VGNC Symbol;Acc:VGNC:78721]                                             | - | 3.403907135 | 0.000233913 | 0.00201277  |
| ENSMMUG00000031000 | Rho GTPase activating protein 8 [Source:NCBI gene;Acc:716745]                                           | - | -3.39702996 | 0.000208881 | 0.001833853 |
| ENSMMUG00000008346 | structural maintenance of chromosomes 5 [Source:NCBI gene;Acc:702219]                                   | - | 3.372122394 | 0.001061676 | 0.007097531 |
| ENSMMUG00000021091 | COP9 signalosome subunit 3 [Source:VGNC Symbol;Acc:VGNC:71316]                                          | - | 3.358998246 | 1.25E-07    | 2.63E-06    |
| ENSMMUG00000051271 |                                                                                                         | - | 3.350346163 | 2.51E-18    | 2.86E-16    |
| ENSMMUG00000060836 |                                                                                                         | - | 3.321180957 | 0.001548291 | 0.009696247 |
| ENSMMUG00000046655 | pleckstrin homology like domain family B member 1 [Source:NCBI gene;Acc:706336]                         | - | 3.319179306 | 9.43E-13    | 4.88E-11    |
| ENSMMUG00000016018 | establishment of sister chromatid cohesion N-acetyltransferase 2 [Source:VGNC Symbol;Acc:VGNC:72374]    | - | 3.312585458 | 0.002543266 | 0.01455731  |
| ENSMMUG00000065099 |                                                                                                         | - | 3.304062689 | 8.92E-15    | 6.15E-13    |

|                     |                                                                                                                         |   |             |             |             |
|---------------------|-------------------------------------------------------------------------------------------------------------------------|---|-------------|-------------|-------------|
| ENSMMUG0000007003   | polyribonucleotide nucleotidyltransferase 1 [Source:VGNC Symbol;Acc:VGNC:76095]                                         | - | 3.278542468 | 0.000229943 | 0.001982549 |
| ENSMMUG00000018827  | multiple EGF like domains 10 [Source:VGNC Symbol;Acc:VGNC:74617]                                                        | - | 3.274778742 | 0.006348007 | 0.030596108 |
| ENSMMUG00000016880  | solute carrier family 39 member 8 [Source:VGNC Symbol;Acc:VGNC:77541]                                                   | - | 3.253236815 | 2.14E-14    | 1.37E-12    |
| ENSMMUG00000002755  | kelch like family member 5 [Source:VGNC Symbol;Acc:VGNC:74188]                                                          | - | 3.252908722 | 0.000495554 | 0.003729878 |
| ENSMMUG00000014018  | bromodomain testis associated [Source:VGNC Symbol;Acc:VGNC:70282]                                                       | - | 3.251118224 | 0.000428642 | 0.00332063  |
| ENSMMUG00000005851  | B-box and SPRY domain containing [Source:VGNC Symbol;Acc:VGNC:70342]                                                    | - | 3.244233212 | 2.70E-06    | 4.16E-05    |
| ENSMMUG00000038587  | prostate and testis expressed 2 [Source:NCBI gene;Acc:717085]                                                           | - | 3.242080103 | 0.008302091 | 0.037865704 |
| ENSMMUG00000016314  | family with sequence similarity 166 member B [Source:VGNC Symbol;Acc:VGNC:72421]                                        | - | 3.227768184 | 1.15E-19    | 1.58E-17    |
| ENSMMUG000000058603 |                                                                                                                         | - | 3.226977126 | 1.95E-05    | 0.00023829  |
| ENSMMUG00000031965  | aminolevulinate dehydratase [Source:VGNC Symbol;Acc:VGNC:69779]                                                         | - | 3.224641251 | 5.86E-06    | 8.24E-05    |
| ENSMMUG00000053344  | spla/ryanodine receptor domain and SOCS box containing 4 [Source:NCBI gene;Acc:715278]                                  | - | -3.22030504 | 4.66E-08    | 1.07E-06    |
| ENSMMUG00000014809  | heterogeneous nuclear ribonucleoprotein C [Source:VGNC Symbol;Acc:VGNC:84348]                                           | - | 3.218272747 | 0.003370106 | 0.018182009 |
| ENSMMUG00000000009  | protein tyrosine phosphatase receptor type C [Source:VGNC Symbol;Acc:VGNC:76612]                                        | - | -3.21550831 | 5.68E-11    | 2.29E-09    |
| ENSMMUG000000059922 | family with sequence similarity 104 member B [Source:NCBI gene;Acc:705418]                                              | - | 3.197474097 | 1.19E-05    | 0.000153069 |
| ENSMMUG000000045775 | macrophage expressed 1 [Source:NCBI gene;Acc:700274]                                                                    | - | 3.193851424 | 0.00665798  | 0.031809258 |
| ENSMMUG000000053577 |                                                                                                                         | - | 3.185159986 | 1.73E-08    | 4.37E-07    |
| ENSMMUG000000055610 | homeobox C4 [Source:NCBI gene;Acc:100430434]                                                                            | - | 3.137564482 | 3.57E-24    | 9.45E-22    |
| ENSMMUG00000006866  | CUGBP Elav-like family member 4 [Source:VGNC Symbol;Acc:VGNC:70945]                                                     | - | -3.12562303 | 0.006860115 | 0.03254661  |
| ENSMMUG000000060830 |                                                                                                                         | - | 3.121762013 | 0.010677474 | 0.046137495 |
| ENSMMUG000000052277 | transthyretin [Source:NCBI gene;Acc:705943]                                                                             | - | 3.119544987 | 2.27E-06    | 3.59E-05    |
| ENSMMUG00000016077  | isocitrate dehydrogenase (NADP(+)) 1 [Source:NCBI gene;Acc:710019]                                                      | - | 3.116560865 | 5.83E-06    | 8.21E-05    |
| ENSMMUG000000065232 |                                                                                                                         | - | 3.104017438 | 0.006374291 | 0.030668447 |
| ENSMMUG00000026103  | U1 spliceosomal RNA [Source:RFAM;Acc:RF00003]                                                                           | - | -3.10094191 | 0.000359925 | 0.002899062 |
| ENSMMUG00000000229  | transient receptor potential cation channel subfamily C member 4 associated protein [Source:VGNC Symbol;Acc:VGNC:79014] | - | 3.073821203 | 5.02E-05    | 0.000545539 |
| ENSMMUG000000052605 | Metazoan signal recognition particle RNA [Source:RFAM;Acc:RF00017]                                                      | - | -3.05622504 | 0.00518213  | 0.025883755 |
| ENSMMUG000000037485 |                                                                                                                         | - | -3.05464437 | 0.000961617 | 0.006553542 |
| ENSMMUG00000021244  | kelch like family member 40 [Source:VGNC Symbol;Acc:VGNC:74165]                                                         | - | 3.051673635 | 0.000783734 | 0.005506081 |
| ENSMMUG00000021552  | RPGR interacting protein 1 [Source:VGNC Symbol;Acc:VGNC:77007]                                                          | - | 3.040077686 | 2.79E-08    | 6.68E-07    |
| ENSMMUG000000059019 |                                                                                                                         | - | 3.038852991 | 5.01E-15    | 3.59E-13    |
| ENSMMUG00000005137  | ATPase secretory pathway Ca <sup>2+</sup> transporting 1 [Source:VGNC Symbol;Acc:VGNC:70054]                            | - | 3.034605254 | 3.37E-11    | 1.42E-09    |
| ENSMMUG000000060892 |                                                                                                                         | - | 3.019053557 | 6.60E-07    | 1.19E-05    |



|                    |                                                                                                  |   |             |             |             |
|--------------------|--------------------------------------------------------------------------------------------------|---|-------------|-------------|-------------|
| ENSMMUG00000012058 | GEN1 Holliday junction 5' flap endonuclease [Source:VGNC Symbol;Acc:VGNC:72790]                  | - | 3.011205687 | 1.09E-05    | 0.000142659 |
| ENSMMUG00000064721 |                                                                                                  | - | -3.00171431 | 0.003113318 | 0.017117972 |
| ENSMMUG00000054821 |                                                                                                  | - | 2.997903967 | 0.000875005 | 0.006045825 |
| ENSMMUG00000063718 | Kruppel like factor 9 [Source:NCBI gene;Acc:700585]                                              | - | 2.983714848 | 0.000686072 | 0.004929386 |
| ENSMMUG00000051482 |                                                                                                  | - | 2.974678039 | 3.18E-11    | 1.35E-09    |
| ENSMMUG00000010959 | kelch like family member 9 [Source:VGNC Symbol;Acc:VGNC:74080]                                   | - | 2.970776646 | 0.002386276 | 0.013811024 |
| ENSMMUG00000055809 |                                                                                                  | - | 2.956884624 | 4.98E-07    | 9.20E-06    |
| ENSMMUG00000019831 | neurobeachin [Source:NCBI gene;Acc:714386]                                                       | - | 2.952379693 | 2.94E-08    | 7.02E-07    |
| ENSMMUG00000013666 | copine 8 [Source:NCBI gene;Acc:114669741]                                                        | - | 2.944587237 | 0.003670933 | 0.019402861 |
| ENSMMUG00000000974 | mutS homolog 2 [Source:VGNC Symbol;Acc:VGNC:74931]                                               | - | -2.92996215 | 6.45E-10    | 2.15E-08    |
| ENSMMUG00000021246 | hedgehog acyltransferase like [Source:NCBI gene;Acc:717333]                                      | - | -2.92455996 | 1.70E-05    | 0.000209167 |
| ENSMMUG00000017703 | collagen type XXV alpha 1 chain [Source:VGNC Symbol;Acc:VGNC:81374]                              | - | 2.897209143 | 0.0022153   | 0.01297776  |
| ENSMMUG00000017524 | phosphoinositide kinase, FYVE-type zinc finger containing [Source:VGNC Symbol;Acc:VGNC:75854]    | - | 2.895430105 | 0.005533267 | 0.027352256 |
| ENSMMUG00000060455 |                                                                                                  | - | 2.846317811 | 0.000174089 | 0.001555775 |
| ENSMMUG00000057031 |                                                                                                  | - | 2.840732988 | 0.001649656 | 0.010222512 |
| ENSMMUG00000007821 | ATP binding cassette subfamily B member 5 [Source:VGNC Symbol;Acc:VGNC:80321]                    | - | 2.834994821 | 2.32E-12    | 1.15E-10    |
| ENSMMUG00000004205 | phospholipase B domain containing 2 [Source:VGNC Symbol;Acc:VGNC:76122]                          | - | 2.822552276 | 0.000401112 | 0.003154443 |
| ENSMMUG00000006457 | Rho guanine nucleotide exchange factor 40 [Source:VGNC Symbol;Acc:VGNC:69907]                    | - | 2.816350377 | 0.000166373 | 0.001500244 |
| ENSMMUG00000016791 | doublecortin like kinase 1 [Source:VGNC Symbol;Acc:VGNC:71745]                                   | - | 2.813878527 | 2.66E-24    | 7.20E-22    |
| ENSMMUG00000004492 | absent in melanoma 2 [Source:NCBI gene;Acc:719260]                                               | - | 2.807484977 | 0.000279867 | 0.002347479 |
| ENSMMUG00000028925 | HDGF like 2 [Source:NCBI gene;Acc:693476]                                                        | - | 2.803281493 | 0.000226927 | 0.001961758 |
| ENSMMUG00000023289 | phospholipase D1 [Source:VGNC Symbol;Acc:VGNC:76171]                                             | - | 2.799057042 | 0.000638181 | 0.004644439 |
| ENSMMUG00000017234 | leucine rich repeat containing 59 [Source:VGNC Symbol;Acc:VGNC:81436]                            | - | 2.797115677 | 1.46E-17    | 1.48E-15    |
| ENSMMUG00000018163 | caspase 9 [Source:NCBI gene;Acc:694544]                                                          | - | -2.77957873 | 0.005139596 | 0.025729707 |
| ENSMMUG00000044537 | DNA polymerase epsilon 3, accessory subunit [Source:NCBI gene;Acc:705074]                        | - | 2.778210999 | 0.000322218 | 0.002641618 |
| ENSMMUG00000015634 | centromere protein F [Source:VGNC Symbol;Acc:VGNC:71009]                                         | - | 2.773737084 | 7.24E-05    | 0.000742908 |
| ENSMMUG00000022879 | EARP complex and GARP complex interacting protein 1 [Source:NCBI gene;Acc:707650]                | - | -2.75807856 | 0.006199421 | 0.030005104 |
| ENSMMUG00000008974 | Fc receptor like 5 [Source:NCBI gene;Acc:718771]                                                 | - | 2.740229195 | 5.28E-06    | 7.56E-05    |
| ENSMMUG00000031736 |                                                                                                  | - | 2.736467628 | 0.000836979 | 0.005826524 |
| ENSMMUG00000002742 | ST8 alpha-N-acetyl-neuraminide alpha-2,8-sialyltransferase 5 [Source:VGNC Symbol;Acc:VGNC:77942] | - | 2.734374353 | 1.82E-16    | 1.65E-14    |

|                    |                                                                                               |   |             |             |             |
|--------------------|-----------------------------------------------------------------------------------------------|---|-------------|-------------|-------------|
| ENSMMUG0000004598  | bisphosphoglycerate mutase [Source:VGNC Symbol;Acc:VGNC:70275]                                | - | 2.733313246 | 0.006310509 | 0.030429271 |
| ENSMMUG00000013302 | family with sequence similarity 184 member A [Source:VGNC Symbol;Acc:VGNC:72308]              | - | 2.732979329 | 0.000385294 | 0.00306567  |
| ENSMMUG00000022191 | laeverin [Source:VGNC Symbol;Acc:VGNC:74372]                                                  | - | 2.732543319 | 0.011597239 | 0.049146234 |
| ENSMMUG00000029475 | zinc finger and BTB domain containing 2 [Source:VGNC Symbol;Acc:VGNC:79291]                   | - | 2.731557063 | 1.73E-07    | 3.52E-06    |
| ENSMMUG00000017374 | G protein subunit beta 5 [Source:VGNC Symbol;Acc:VGNC:73097]                                  | - | 2.706859435 | 0.001855416 | 0.011252472 |
| ENSMMUG00000042299 | DENN domain containing 2A [Source:VGNC Symbol;Acc:VGNC:81302]                                 | - | 2.699511568 | 0.004429377 | 0.022789688 |
| ENSMMUG00000053657 |                                                                                               | - | 2.668889831 | 0.003942371 | 0.020627504 |
| ENSMMUG00000008867 | exoribonuclease 1 [Source:VGNC Symbol;Acc:VGNC:72324]                                         | - | 2.662961777 | 1.50E-05    | 0.00018713  |
| ENSMMUG00000009694 | solute carrier family 9 member A9 [Source:VGNC Symbol;Acc:VGNC:77747]                         | - | 2.650757027 | 0.005178022 | 0.025883755 |
| ENSMMUG00000051001 |                                                                                               | - | 2.646542645 | 0.00375299  | 0.019772146 |
| ENSMMUG00000012690 | myocardial zonula adherens protein [Source:NCBI gene;Acc:700247]                              | - | 2.632756605 | 0.003732836 | 0.019689952 |
| ENSMMUG00000002182 | phosphatidylserine decarboxylase [Source:VGNC Symbol;Acc:VGNC:76005]                          | - | 2.631888873 | 0.00010315  | 0.00099737  |
| ENSMMUG00000010820 | chaperonin containing TCP1 subunit 2 [Source:VGNC Symbol;Acc:VGNC:70745]                      | - | 2.631508125 | 1.34E-10    | 5.09E-09    |
| ENSMMUG00000006898 | integrin subunit beta 8 [Source:VGNC Symbol;Acc:VGNC:73791]                                   | - | 2.625991877 | 5.15E-13    | 2.75E-11    |
| ENSMMUG00000003049 | testis expressed 11 [Source:VGNC Symbol;Acc:VGNC:78316]                                       | - | 2.623066647 | 2.15E-05    | 0.000259809 |
| ENSMMUG00000023803 | myosin heavy chain 10 [Source:NCBI gene;Acc:721979]                                           | - | 2.622922588 | 0.001268837 | 0.008232215 |
| ENSMMUG00000054315 |                                                                                               | - | 2.617299198 | 0.000136159 | 0.001258403 |
| ENSMMUG00000049194 |                                                                                               | - | 2.612717988 | 0.000790627 | 0.005551502 |
| ENSMMUG00000064793 | C-C motif chemokine ligand 11 [Source:NCBI gene;Acc:574218]                                   | - | 2.599339805 | 0.002285994 | 0.01331974  |
| ENSMMUG00000022250 | beta-1,3-glucuronyltransferase 1 [Source:VGNC Symbol;Acc:VGNC:70207]                          | - | 2.595520535 | 0.000499418 | 0.003754602 |
| ENSMMUG00000056387 | transcription factor 15 [Source:NCBI gene;Acc:716916]                                         | - | 2.589918613 | 1.10E-10    | 4.24E-09    |
| ENSMMUG00000018342 | required for meiotic nuclear division 1 homolog [Source:VGNC Symbol;Acc:VGNC:76797]           | - | 2.584387088 | 1.15E-10    | 4.41E-09    |
| ENSMMUG00000011401 | amyloid beta precursor protein binding family A member 1 [Source:VGNC Symbol;Acc:VGNC:69976]  | - | -2.58226581 | 1.54E-05    | 0.000191675 |
| ENSMMUG00000001172 | spermatogenesis and oogenesis specific basic helix-loop-helix 2 [Source:NCBI gene;Acc:693608] | - | 2.568360245 | 1.74E-05    | 0.000214685 |
| ENSMMUG00000060940 | acidic residue methyltransferase 1 [Source:NCBI gene;Acc:704570]                              | - | 2.557419801 | 0.001615901 | 0.010056561 |
| ENSMMUG00000064216 |                                                                                               | - | 2.556964035 | 0.000973382 | 0.006616344 |
| ENSMMUG00000057859 |                                                                                               | - | -2.5243344  | 6.12E-05    | 0.000644897 |
| ENSMMUG00000022762 | OMA1 zinc metalloproteinase [Source:VGNC Symbol;Acc:VGNC:75485]                               | - | 2.512620454 | 1.20E-11    | 5.38E-10    |
| ENSMMUG00000055229 |                                                                                               | - | 2.507340872 | 3.07E-10    | 1.10E-08    |

|                     |                                                                                                  |   |             |             |             |
|---------------------|--------------------------------------------------------------------------------------------------|---|-------------|-------------|-------------|
| ENSMMUG00000055585  |                                                                                                  | - | 2.505365077 | 1.38E-08    | 3.59E-07    |
| ENSMMUG0000007504   | myosin VC [Source:VGNC Symbol;Acc:VGNC:75117]                                                    | - | 2.488549699 | 0.000890445 | 0.006126498 |
| ENSMMUG0000009038   | titin [Source:NCBI gene;Acc:703527]                                                              | - | 2.487572577 | 0.000145991 | 0.001343529 |
| ENSMMUG00000014424  | ADP ribosylation factor guanine nucleotide exchange factor 1 [Source:VGNC Symbol;Acc:VGNC:69834] | - | 2.484585827 | 0.005058253 | 0.025391059 |
| ENSMMUG00000009948  | histone deacetylase 1 [Source:NCBI gene;Acc:708441]                                              | - | 2.482488575 | 1.91E-12    | 9.69E-11    |
| ENSMMUG00000059406  | RGP1 homolog, RAB6A GEF complex partner 1 [Source:NCBI gene;Acc:695936]                          | - | 2.468376282 | 0.00083041  | 0.005790116 |
| ENSMMUG00000020348  | BCL2 interacting protein 2 [Source:VGNC Symbol;Acc:VGNC:70272]                                   | - | 2.467963062 | 7.70E-05    | 0.000783758 |
| ENSMMUG00000000238  | HECT domain E3 ubiquitin protein ligase 2 [Source:VGNC Symbol;Acc:VGNC:73246]                    | - | 2.465006529 | 1.61E-11    | 7.05E-10    |
| ENSMMUG00000007628  | cell adhesion associated, oncogene regulated [Source:VGNC Symbol;Acc:VGNC:70961]                 | - | 2.453613167 | 0.000590769 | 0.004363019 |
| ENSMMUG000000051936 |                                                                                                  | - | 2.447272024 | 0.000207793 | 0.001826776 |
| ENSMMUG000000052830 |                                                                                                  | - | 2.438134368 | 1.94E-08    | 4.86E-07    |
| ENSMMUG00000012479  | lysine demethylase 4A [Source:NCBI gene;Acc:701272]                                              | - | 2.420718478 | 0.008265879 | 0.037744295 |
| ENSMMUG00000009782  | C-C motif chemokine ligand 7 [Source:NCBI gene;Acc:714751]                                       | - | 2.404093606 | 5.11E-05    | 0.000553687 |
| ENSMMUG00000008113  | pleckstrin homology domain containing M3 [Source:NCBI gene;Acc:711125]                           | - | 2.394049093 | 1.68E-05    | 0.000207432 |
| ENSMMUG00000016871  | alkaline phosphatase, intestinal [Source:VGNC Symbol;Acc:VGNC:69800]                             | - | 2.392989997 | 0.000807524 | 0.005660647 |
| ENSMMUG00000004215  | LRAT domain containing 1 [Source:VGNC Symbol;Acc:VGNC:74321]                                     | - | 2.366593506 | 0.009259683 | 0.041332524 |
| ENSMMUG00000017628  | pleckstrin homology domain containing A7 [Source:VGNC Symbol;Acc:VGNC:76121]                     | - | 2.362574893 | 0.008057331 | 0.036983351 |
| ENSMMUG00000021034  | complement C6 [Source:VGNC Symbol;Acc:VGNC:70477]                                                | - | 2.361506188 | 0.000245895 | 0.00210055  |
| ENSMMUG00000049908  | Metazoan signal recognition particle RNA [Source:RFAM;Acc:RF00017]                               | - | 2.355990163 | 0.004448209 | 0.022859392 |
| ENSMMUG000000056303 |                                                                                                  | - | 2.353154787 | 0.000126233 | 0.001181814 |
| ENSMMUG00000023791  | SR-related CTD associated factor 11 [Source:VGNC Symbol;Acc:VGNC:77002]                          | - | 2.348367936 | 0.002589155 | 0.014780853 |
| ENSMMUG00000022484  | ITPR interacting domain containing 1 [Source:VGNC Symbol;Acc:VGNC:73667]                         | - | 2.347980967 | 0.01070506  | 0.046225912 |
| ENSMMUG000000037806 | chromosome 6 C5orf63 homolog [Source:NCBI gene;Acc:100423212]                                    | - | 2.343922538 | 0.002581352 | 0.014749284 |
| ENSMMUG00000017932  | acyl-CoA synthetase short chain family member 2 [Source:VGNC Symbol;Acc:VGNC:69410]              | - | 2.340732766 | 0.005570998 | 0.027486417 |
| ENSMMUG00000060278  | Metazoan signal recognition particle RNA [Source:RFAM;Acc:RF00017]                               | - | 2.320133844 | 0.001880039 | 0.011346689 |
| ENSMMUG00000023265  | A-kinase anchoring protein 12 [Source:VGNC Symbol;Acc:VGNC:69766]                                | - | 2.299110291 | 1.51E-09    | 4.72E-08    |
| ENSMMUG00000060536  |                                                                                                  | - | 2.298093336 | 0.000303342 | 0.00252318  |
| ENSMMUG00000010543  | PHD finger protein 23 [Source:VGNC Symbol;Acc:VGNC:75877]                                        | - | 2.297456219 | 0.000904476 | 0.006213063 |

|                    |                                                                                                |   |             |             |             |
|--------------------|------------------------------------------------------------------------------------------------|---|-------------|-------------|-------------|
| ENSMMUG00000057302 |                                                                                                | - | 2.295017286 | 0.000405891 | 0.003184304 |
| ENSMMUG00000059575 |                                                                                                | - | 2.294195945 | 1.63E-24    | 4.50E-22    |
| ENSMMUG00000060579 |                                                                                                | - | 2.283692122 | 0.000813483 | 0.005693507 |
| ENSMMUG00000052609 | ribosomal protein L34 [Source:NCBI gene;Acc:696636]                                            | - | 2.281370958 | 2.78E-06    | 4.27E-05    |
| ENSMMUG00000063177 | StAR related lipid transfer domain containing 4 [Source:NCBI gene;Acc:706654]                  | - | 2.277181329 | 3.96E-14    | 2.46E-12    |
| ENSMMUG00000018358 | zinc finger protein 217 [Source:VGNC Symbol;Acc:VGNC:78874]                                    | - | 2.274548488 | 4.11E-09    | 1.20E-07    |
| ENSMMUG00000010050 | small nuclear ribonucleoprotein polypeptides B and B1 [Source:VGNC Symbol;Acc:VGNC:77676]      | - | 2.272913445 | 0.001150575 | 0.007574763 |
| ENSMMUG00000051999 |                                                                                                | - | 2.260746685 | 1.07E-05    | 0.000139627 |
| ENSMMUG00000010648 | DNA methyltransferase 3 like [Source:NCBI gene;Acc:722184]                                     | - | 2.258220318 | 1.11E-07    | 2.37E-06    |
| ENSMMUG00000022153 | solute carrier family 25 member 36 [Source:VGNC Symbol;Acc:VGNC:84079]                         | - | 2.248935069 | 2.16E-15    | 1.62E-13    |
| ENSMMUG00000022199 | polyhomeotic homolog 3 [Source:VGNC Symbol;Acc:VGNC:75804]                                     | - | 2.240665407 | 4.50E-10    | 1.56E-08    |
| ENSMMUG00000021534 | solute carrier family 16 member 10 [Source:NCBI gene;Acc:696132]                               | - | 2.239394313 | 0.000753322 | 0.00532994  |
| ENSMMUG00000056113 |                                                                                                | - | -2.2214908  | 0.002881957 | 0.016091341 |
| ENSMMUG00000061973 |                                                                                                | - | 2.211012032 | 4.09E-20    | 5.96E-18    |
| ENSMMUG00000037662 | selenoprotein M [Source:NCBI gene;Acc:718290]                                                  | - | 2.207628688 | 0.009755422 | 0.04302413  |
| ENSMMUG00000040694 | LCK proto-oncogene, Src family tyrosine kinase [Source:NCBI gene;Acc:717704]                   | - | 2.203441664 | 6.29E-27    | 2.27E-24    |
| ENSMMUG00000009965 | chromosome 15 C9orf50 homolog [Source:VGNC Symbol;Acc:VGNC:70365]                              | - | 2.185911081 | 1.51E-10    | 5.63E-09    |
| ENSMMUG00000004885 | quiescin sulfhydryl oxidase 2 [Source:VGNC Symbol;Acc:VGNC:76568]                              | - | 2.185553927 | 0.007238301 | 0.034042838 |
| ENSMMUG00000024966 | U4 spliceosomal RNA [Source:RFAM;Acc:RF00015]                                                  | - | 2.181495385 | 0.010116569 | 0.044226539 |
| ENSMMUG00000013940 | kinesin family member 4A [Source:NCBI gene;Acc:695574]                                         | - | 2.171118504 | 2.93E-05    | 0.000337486 |
| ENSMMUG00000052287 |                                                                                                | - | 2.170784158 | 0.003653917 | 0.019336552 |
| ENSMMUG00000013643 | zinc finger CCHC-type containing 8 [Source:VGNC Symbol;Acc:VGNC:79487]                         | - | 2.168302989 | 0.00569965  | 0.028046515 |
| ENSMMUG00000019883 | RNA binding motif protein 20 [Source:NCBI gene;Acc:698677]                                     | - | 2.165454245 | 0.000150386 | 0.001379089 |
| ENSMMUG00000013476 | PHD finger protein 11 [Source:VGNC Symbol;Acc:VGNC:75814]                                      | - | 2.162287264 | 0.010575528 | 0.045788474 |
| ENSMMUG00000038661 |                                                                                                | - | -2.15923582 | 1.05E-10    | 4.06E-09    |
| ENSMMUG00000013047 | S-phase kinase associated protein 1 [Source:NCBI gene;Acc:100423634]                           | - | 2.149275832 | 2.35E-14    | 1.50E-12    |
| ENSMMUG00000019105 | RNA 3'-terminal phosphate cyclase [Source:VGNC Symbol;Acc:VGNC:77043]                          | - | 2.144911391 | 8.58E-05    | 0.00085427  |
| ENSMMUG00000064798 |                                                                                                | - | 2.144675886 | 0.004987247 | 0.025102607 |
| ENSMMUG00000016993 | PKHD1 ciliary IPT domain containing fibrocystin/polyductin [Source:VGNC Symbol;Acc:VGNC:76010] | - | 2.141074264 | 1.15E-07    | 2.45E-06    |

|                    |                                                                                                        |             |             |             |
|--------------------|--------------------------------------------------------------------------------------------------------|-------------|-------------|-------------|
| ENSMMUG0000006731  | CECR2 histone acetyl-lysine reader [Source:VGNC Symbol;Acc:VGNC:84530]                                 | 2.140739865 | 1.28E-08    | 3.36E-07    |
| ENSMMUG00000040771 |                                                                                                        | 2.131872817 | 0.000219346 | 0.001907667 |
| ENSMMUG00000022726 | dual specificity tyrosine phosphorylation regulated kinase 1B [Source:VGNC Symbol;Acc:VGNC:72016]      | 2.130738686 | 0.000264082 | 0.002238229 |
| ENSMMUG00000059852 |                                                                                                        | 2.127843073 | 0.008887096 | 0.039986764 |
| ENSMMUG00000065257 |                                                                                                        | 2.124207557 | 0.002714817 | 0.015349659 |
| ENSMMUG00000051169 |                                                                                                        | 2.118675231 | 0.003315266 | 0.01795446  |
| ENSMMUG00000056664 | U6 spliceosomal RNA [Source:RFAM;Acc:RF00026]                                                          | 2.111404556 | 0.002262934 | 0.013209102 |
| ENSMMUG00000044628 |                                                                                                        | 2.111173022 | 0.000168371 | 0.001514051 |
| ENSMMUG00000020731 | terminal nucleotidyltransferase 2 [Source:VGNC Symbol;Acc:VGNC:79637]                                  | -2.11015799 | 0.007823455 | 0.036178599 |
| ENSMMUG00000052031 |                                                                                                        | 2.104241065 | 1.54E-09    | 4.78E-08    |
| ENSMMUG00000007816 | SMAD family member 2 [Source:VGNC Symbol;Acc:VGNC:77810]                                               | 2.103570686 | 3.66E-07    | 6.92E-06    |
| ENSMMUG00000017931 | gamma-glutamyltransferase 7 [Source:VGNC Symbol;Acc:VGNC:72921]                                        | 2.089504871 | 9.09E-06    | 0.000121411 |
| ENSMMUG00000013501 | CD68 molecule [Source:VGNC Symbol;Acc:VGNC:82121]                                                      | -2.08334235 | 0.000331985 | 0.002709332 |
| ENSMMUG00000011974 | calcium/calmodulin dependent protein kinase IV [Source:VGNC Symbol;Acc:VGNC:70526]                     | 2.076160136 | 4.45E-11    | 1.83E-09    |
| ENSMMUG00000009831 | TBC1 domain family member 2 [Source:VGNC Symbol;Acc:VGNC:78157]                                        | 2.072016163 | 7.21E-08    | 1.60E-06    |
| ENSMMUG00000008643 | general transcription factor IIIC subunit 3 [Source:VGNC Symbol;Acc:VGNC:73317]                        | 2.062763054 | 9.61E-11    | 3.72E-09    |
| ENSMMUG00000015000 | SPT16 homolog, facilitates chromatin remodeling subunit [Source:VGNC Symbol;Acc:VGNC:78054]            | 2.058848738 | 1.24E-06    | 2.09E-05    |
| ENSMMUG00000009702 | mutS homolog 5 [Source:NCBI gene;Acc:715494]                                                           | 2.042357167 | 0.005822923 | 0.028469574 |
| ENSMMUG00000021078 | ATPase Na <sup>+</sup> /K <sup>+</sup> transporting subunit beta 1 [Source:VGNC Symbol;Acc:VGNC:70176] | 2.037120933 | 0.000316949 | 0.002604644 |
| ENSMMUG00000061766 |                                                                                                        | 2.036944303 | 0.00730735  | 0.034293009 |
| ENSMMUG00000017143 | LDL receptor related protein 2 [Source:VGNC Symbol;Acc:VGNC:81430]                                     | 2.027716825 | 0.011183951 | 0.047901343 |
| ENSMMUG00000041775 | Metazoan signal recognition particle RNA [Source:RFAM;Acc:RF00017]                                     | 2.024765559 | 0.002483402 | 0.014277634 |
| ENSMMUG00000039317 | cAMP responsive element binding protein 5 [Source:VGNC Symbol;Acc:VGNC:81295]                          | 2.024216516 | 0.003621017 | 0.019225169 |
| ENSMMUG00000049786 |                                                                                                        | 2.023744738 | 0.000430032 | 0.00332743  |
| ENSMMUG00000008228 | unc-93 homolog A [Source:VGNC Symbol;Acc:VGNC:78724]                                                   | 2.023053631 | 0.000971292 | 0.006606025 |
| ENSMMUG00000012151 | glycerol kinase 5 [Source:VGNC Symbol;Acc:VGNC:73022]                                                  | 2.014515212 | 0.00182318  | 0.011096429 |
| ENSMMUG00000050630 |                                                                                                        | 2.013068991 | 0.002995302 | 0.016602753 |
| ENSMMUG00000057763 |                                                                                                        | 2.010502009 | 8.36E-05    | 0.000835235 |
| ENSMMUG00000056363 |                                                                                                        | 2.003030714 | 0.000847632 | 0.005878607 |



|                    |                                                                                                 |   |             |             |             |
|--------------------|-------------------------------------------------------------------------------------------------|---|-------------|-------------|-------------|
| ENSMMUG00000059525 |                                                                                                 | - | 1.988861495 | 1.68E-06    | 2.73E-05    |
| ENSMMUG00000013943 | glycerophosphodiester phosphodiesterase domain containing 2 [Source:VGNC Symbol;Acc:VGNC:72787] | - | 1.987357918 | 0.000460291 | 0.003515441 |
| ENSMMUG00000007325 | Xrcc1 N-terminal domain containing 1 [Source:NCBI gene;Acc:115945140]                           | - | -1.9853867  | 1.37E-05    | 0.000173483 |
| ENSMMUG00000006252 | argonaute RISC catalytic component 3 [Source:NCBI gene;Acc:712543]                              | - | 1.977692289 | 3.65E-12    | 1.76E-10    |
| ENSMMUG00000006309 | unc-5 netrin receptor C [Source:VGNC Symbol;Acc:VGNC:78723]                                     | - | 1.974518208 | 0.004819861 | 0.024354563 |
| ENSMMUG00000018346 | coiled-coil domain containing 170 [Source:VGNC Symbol;Acc:VGNC:70832]                           | - | 1.973827254 | 0.000386311 | 0.003071547 |
| ENSMMUG00000064158 |                                                                                                 | - | 1.973559018 | 0.000108892 | 0.001045364 |
| ENSMMUG00000015002 | chromodomain helicase DNA binding protein 8 [Source:VGNC Symbol;Acc:VGNC:71060]                 | - | 1.966760397 | 0.000136436 | 0.00126007  |
| ENSMMUG00000010858 | prolyl 4-hydroxylase subunit alpha 2 [Source:VGNC Symbol;Acc:VGNC:75742]                        | - | 1.962072396 | 2.19E-08    | 5.38E-07    |
| ENSMMUG00000060062 |                                                                                                 | - | 1.955442066 | 0.011684638 | 0.049387578 |
| ENSMMUG00000039944 | Ras protein specific guanine nucleotide releasing factor 2 [Source:VGNC Symbol;Acc:VGNC:84486]  | - | 1.952478774 | 3.00E-06    | 4.55E-05    |
| ENSMMUG00000010127 | chitobiase [Source:VGNC Symbol;Acc:VGNC:71540]                                                  | - | 1.946920843 | 4.48E-05    | 0.000492646 |
| ENSMMUG00000055759 | Metazoan signal recognition particle RNA [Source:RFAM;Acc:RF00017]                              | - | 1.943448406 | 1.95E-06    | 3.13E-05    |
| ENSMMUG00000011902 | oligosaccharyltransferase complex non-catalytic subunit [Source:NCBI gene;Acc:697283]           | - | 1.942073247 | 3.38E-09    | 1.00E-07    |
| ENSMMUG00000004675 | smoothelin [Source:VGNC Symbol;Acc:VGNC:77661]                                                  | - | 1.937222707 | 0.009628237 | 0.042611186 |
| ENSMMUG00000014672 | mitogen-activated protein kinase kinase kinase 20 [Source:NCBI gene;Acc:698274]                 | - | 1.933076607 | 0.002254873 | 0.013173897 |
| ENSMMUG00000003221 | DENN domain containing 5B [Source:VGNC Symbol;Acc:VGNC:71772]                                   | - | 1.931570888 | 1.25E-06    | 2.10E-05    |
| ENSMMUG00000001918 | transmembrane protein 165 [Source:VGNC Symbol;Acc:VGNC:79875]                                   | - | 1.930257151 | 3.57E-05    | 0.000403832 |
| ENSMMUG00000015661 | protein tyrosine phosphatase receptor type U [Source:VGNC Symbol;Acc:VGNC:76624]                | - | 1.924536092 | 0.000405143 | 0.00318036  |
| ENSMMUG00000051523 | Metazoan signal recognition particle RNA [Source:RFAM;Acc:RF00017]                              | - | 1.922195703 | 0.001067764 | 0.007134556 |
| ENSMMUG00000053721 |                                                                                                 | - | 1.908475674 | 3.93E-05    | 0.000440328 |
| ENSMMUG00000020812 | A-kinase anchoring protein 3 [Source:VGNC Symbol;Acc:VGNC:69769]                                | - | 1.907773255 | 0.001248524 | 0.008119445 |
| ENSMMUG00000010695 | adenosine deaminase RNA specific B1 [Source:VGNC Symbol;Acc:VGNC:69503]                         | - | 1.905386961 | 1.02E-05    | 0.000134372 |
| ENSMMUG00000000982 | protein phosphatase 4 catalytic subunit [Source:VGNC Symbol;Acc:VGNC:76384]                     | - | 1.902671849 | 6.44E-09    | 1.79E-07    |
| ENSMMUG00000059115 |                                                                                                 | - | 1.902605265 | 2.70E-05    | 0.00031558  |
| ENSMMUG00000018974 | LysM domain containing 3 [Source:VGNC Symbol;Acc:VGNC:74373]                                    | - | 1.902555823 | 2.53E-16    | 2.26E-14    |
| ENSMMUG00000012462 | proteasome activator subunit 1 [Source:VGNC Symbol;Acc:VGNC:76455]                              | - | 1.900409299 | 0.000280933 | 0.002353383 |
| ENSMMUG00000051032 | serine protease 2 [Source:NCBI gene;Acc:698352]                                                 | - | 1.898919779 | 5.32E-07    | 9.78E-06    |
| ENSMMUG00000007330 | nuclear mitotic apparatus protein 1 [Source:VGNC Symbol;Acc:VGNC:75556]                         | - | 1.898406935 | 5.13E-13    | 2.75E-11    |



|                    |                                                                                           |             |             |             |
|--------------------|-------------------------------------------------------------------------------------------|-------------|-------------|-------------|
| ENSMMUG0000005067  | elongator acetyltransferase complex subunit 3 [Source:VGNC Symbol;Acc:VGNC:72080]         | 1.893683764 | 3.00E-05    | 0.000344801 |
| ENSMMUG00000010113 | steroid 5 alpha-reductase 3 [Source:VGNC Symbol;Acc:VGNC:82246]                           | 1.888969066 | 2.15E-08    | 5.31E-07    |
| ENSMMUG00000052642 | protein O-glucosyltransferase 2 [Source:NCBI gene;Acc:702156]                             | 1.885719192 | 0.003256124 | 0.017704856 |
| ENSMMUG00000057747 |                                                                                           | 1.883611492 | 0.010776442 | 0.04649892  |
| ENSMMUG00000064529 |                                                                                           | 1.883499102 | 5.95E-08    | 1.33E-06    |
| ENSMMUG00000020125 | SUMO specific peptidase 1 [Source:NCBI gene;Acc:707603]                                   | 1.882114648 | 0.006416005 | 0.030846267 |
| ENSMMUG00000020211 | cyclin Y like 1 [Source:VGNC Symbol;Acc:VGNC:84224]                                       | 1.878820985 | 8.47E-11    | 3.32E-09    |
| ENSMMUG00000060713 | epithelial membrane protein 2 [Source:NCBI gene;Acc:710315]                               | 1.874967799 | 0.000393196 | 0.003111044 |
| ENSMMUG00000003946 | ADP-ribosyltransferase 5 [Source:VGNC Symbol;Acc:VGNC:69890]                              | 1.868400103 | 0.001767294 | 0.010827385 |
| ENSMMUG00000043727 | zinc finger protein 654 [Source:VGNC Symbol;Acc:VGNC:82560]                               | 1.867332814 | 0.003394503 | 0.018284377 |
| ENSMMUG00000061594 |                                                                                           | 1.863156317 | 0.001551054 | 0.009708866 |
| ENSMMUG00000030099 | phospholipid phosphatase 1 [Source:VGNC Symbol;Acc:VGNC:76226]                            | 1.858704525 | 3.23E-05    | 0.00036886  |
| ENSMMUG00000056910 |                                                                                           | 1.855651302 | 2.30E-06    | 3.63E-05    |
| ENSMMUG00000022656 | perilipin 4 [Source:NCBI gene;Acc:693610]                                                 | 1.851394532 | 0.001409361 | 0.008995897 |
| ENSMMUG00000007255 | microtubule associated protein 1A [Source:VGNC Symbol;Acc:VGNC:74489]                     | 1.845518412 | 0.001303641 | 0.008420132 |
| ENSMMUG00000060346 |                                                                                           | 1.832899908 | 0.000127774 | 0.001193657 |
| ENSMMUG00000022305 | Rho guanine nucleotide exchange factor 1 [Source:VGNC Symbol;Acc:VGNC:70012]              | 1.831505033 | 9.47E-08    | 2.06E-06    |
| ENSMMUG00000011555 | interleukin 16 [Source:VGNC Symbol;Acc:VGNC:84355]                                        | 1.831440315 | 0.003783098 | 0.01990652  |
| ENSMMUG00000016683 | phosphorylated adaptor for RNA export [Source:NCBI gene;Acc:702980]                       | 1.826063165 | 0.001240961 | 0.008087748 |
| ENSMMUG00000056687 |                                                                                           | 1.824628954 | 3.77E-06    | 5.57E-05    |
| ENSMMUG00000058942 |                                                                                           | 1.824443372 | 2.01E-08    | 5.01E-07    |
| ENSMMUG00000061590 |                                                                                           | 1.821667008 | 0.008042872 | 0.036969291 |
| ENSMMUG00000000288 | C-C motif chemokine ligand 2 [Source:VGNC Symbol;Acc:VGNC:70698]                          | 1.818362144 | 2.02E-05    | 0.000245891 |
| ENSMMUG00000056824 |                                                                                           | 1.815318425 | 0.010836598 | 0.046715408 |
| ENSMMUG00000012615 | pecanex 2 [Source:NCBI gene;Acc:712828]                                                   | 1.812442251 | 4.83E-05    | 0.000527119 |
| ENSMMUG00000061761 | interferon induced protein with tetratricopeptide repeats 2 [Source:NCBI gene;Acc:695452] | -1.80840894 | 3.80E-11    | 1.58E-09    |
| ENSMMUG00000064748 | Metazoan signal recognition particle RNA [Source:RFAM;Acc:RF00017]                        | 1.806219494 | 0.001803969 | 0.011015674 |
| ENSMMUG00000009773 | lysine demethylase 1A [Source:VGNC Symbol;Acc:VGNC:73928]                                 | 1.805130553 | 1.32E-07    | 2.78E-06    |
| ENSMMUG00000012473 | proteasome activator subunit 2 [Source:VGNC Symbol;Acc:VGNC:76456]                        | 1.804417963 | 0.009372291 | 0.041706051 |

|                    |                                                                                           |   |             |             |             |
|--------------------|-------------------------------------------------------------------------------------------|---|-------------|-------------|-------------|
| ENSMMUG00000022982 | IQ motif containing GTPase activating protein 2 [Source:VGNC Symbol;Acc:VGNC:73756]       | - | 1.803811829 | 0.001241845 | 0.008089449 |
| ENSMMUG00000054793 |                                                                                           | - | 1.802728898 | 0.002230606 | 0.013043869 |
| ENSMMUG00000017252 | spermatogenesis associated 20 [Source:VGNC Symbol;Acc:VGNC:77993]                         | - | 1.793852052 | 1.36E-08    | 3.56E-07    |
| ENSMMUG00000056165 |                                                                                           | - | 1.788746382 | 0.00042221  | 0.003284533 |
| ENSMMUG00000052518 | SIVA1 apoptosis inducing factor [Source:NCBI gene;Acc:706688]                             | - | 1.784039623 | 0.010870891 | 0.046817351 |
| ENSMMUG00000017246 | lipoygenase homology domains 1 [Source:VGNC Symbol;Acc:VGNC:74368]                        | - | 1.780538217 | 7.72E-13    | 4.04E-11    |
| ENSMMUG00000012474 | ring finger protein 31 [Source:NCBI gene;Acc:715239]                                      | - | 1.780193246 | 0.006025219 | 0.02929754  |
| ENSMMUG00000000981 | T-box transcription factor 6 [Source:VGNC Symbol;Acc:VGNC:78276]                          | - | 1.776816113 | 1.13E-06    | 1.93E-05    |
| ENSMMUG00000014997 | spalt like transcription factor 2 [Source:NCBI gene;Acc:708367]                           | - | 1.776443446 | 2.31E-08    | 5.64E-07    |
| ENSMMUG00000063268 |                                                                                           | - | 1.776267765 | 0.000316052 | 0.002602216 |
| ENSMMUG00000055271 |                                                                                           | - | 1.773833056 | 2.72E-05    | 0.000316727 |
| ENSMMUG00000054064 |                                                                                           | - | 1.773680604 | 1.44E-08    | 3.71E-07    |
| ENSMMUG00000012778 | rabphilin 3A [Source:VGNC Symbol;Acc:VGNC:77033]                                          | - | 1.768802063 | 0.001909107 | 0.011479412 |
| ENSMMUG00000056103 | growth arrest and DNA damage inducible alpha [Source:NCBI gene;Acc:701054]                | - | 1.759048939 | 2.18E-13    | 1.23E-11    |
| ENSMMUG00000015590 | siah E3 ubiquitin protein ligase 2 [Source:VGNC Symbol;Acc:VGNC:77215]                    | - | 1.757403312 | 0.003465931 | 0.018568916 |
| ENSMMUG00000022183 | spermatogenesis associated 1 [Source:NCBI gene;Acc:710462]                                | - | 1.756377812 | 2.17E-12    | 1.09E-10    |
| ENSMMUG00000014685 | pyruvate dehydrogenase kinase 2 [Source:VGNC Symbol;Acc:VGNC:75933]                       | - | 1.756150259 | 9.42E-05    | 0.000924518 |
| ENSMMUG00000004386 | sperm associated antigen 1 [Source:VGNC Symbol;Acc:VGNC:77849]                            | - | -1.75497943 | 0.001810867 | 0.01103702  |
| ENSMMUG00000004157 | nuclear protein, coactivator of histone transcription [Source:VGNC Symbol;Acc:VGNC:75379] | - | 1.750619183 | 5.23E-07    | 9.63E-06    |
| ENSMMUG00000022724 |                                                                                           | - | 1.748288524 | 0.001008657 | 0.006806207 |
| ENSMMUG00000015577 | RIO kinase 1 [Source:VGNC Symbol;Acc:VGNC:76767]                                          | - | 1.747594164 | 3.09E-05    | 0.000354692 |
| ENSMMUG00000042707 | angiopoietin like 6 [Source:NCBI gene;Acc:106994633]                                      | - | 1.746289023 | 1.51E-06    | 2.49E-05    |
| ENSMMUG00000062527 |                                                                                           | - | 1.744654429 | 2.53E-18    | 2.86E-16    |
| ENSMMUG00000041905 | protein phosphatase 2 regulatory subunit Balpha [Source:VGNC Symbol;Acc:VGNC:84103]       | - | 1.740672487 | 0.004690425 | 0.023839778 |
| ENSMMUG00000051190 | Metazoan signal recognition particle RNA [Source:RFAM;Acc:RF00017]                        | - | 1.739770643 | 0.006548308 | 0.031400902 |
| ENSMMUG00000021507 | chromosome 2 C3orf38 homolog [Source:VGNC Symbol;Acc:VGNC:70654]                          | - | 1.731997208 | 0.005886995 | 0.028716027 |
| ENSMMUG00000009520 | gephyrin [Source:VGNC Symbol;Acc:VGNC:72948]                                              | - | 1.729298433 | 5.22E-05    | 0.0005626   |
| ENSMMUG00000052377 |                                                                                           | - | 1.728669447 | 2.93E-06    | 4.46E-05    |
| ENSMMUG00000056544 |                                                                                           | - | 1.728408052 | 0.000389485 | 0.003091102 |

|                     |                                                                                                |   |             |             |             |
|---------------------|------------------------------------------------------------------------------------------------|---|-------------|-------------|-------------|
| ENSMMUG00000055117  |                                                                                                | - | 1.728046691 | 0.001900278 | 0.011447541 |
| ENSMMUG00000010453  | folate receptor beta [Source:VGNC Symbol;Acc:VGNC:72690]                                       | - | 1.725579667 | 8.01E-08    | 1.77E-06    |
| ENSMMUG00000016262  | tetratricopeptide repeat domain 38 [Source:VGNC Symbol;Acc:VGNC:79574]                         | - | 1.724670019 | 4.01E-06    | 5.89E-05    |
| ENSMMUG00000002093  | testis expressed 261 [Source:NCBI gene;Acc:703863]                                             | - | 1.723822814 | 5.78E-13    | 3.06E-11    |
| ENSMMUG00000021393  | calcium/calmodulin dependent protein kinase II gamma [Source:VGNC Symbol;Acc:VGNC:70525]       | - | 1.718292264 | 5.46E-07    | 9.99E-06    |
| ENSMMUG00000016526  | solute carrier family 25 member 41 [Source:VGNC Symbol;Acc:VGNC:77581]                         | - | 1.712893302 | 0.002827494 | 0.01586919  |
| ENSMMUG00000003987  | forkhead associated phosphopeptide binding domain 1 [Source:NCBI gene;Acc:699900]              | - | 1.712031837 | 0.000471271 | 0.003574061 |
| ENSMMUG00000018972  | RNA polymerase III subunit G [Source:VGNC Symbol;Acc:VGNC:84480]                               | - | 1.711839922 | 5.57E-05    | 0.000596989 |
| ENSMMUG000000059938 |                                                                                                | - | -1.71120038 | 0.002309452 | 0.013444346 |
| ENSMMUG00000014002  | cyclin dependent kinase 16 [Source:VGNC Symbol;Acc:VGNC:71160]                                 | - | 1.711054382 | 0.003077883 | 0.016973483 |
| ENSMMUG000000059850 | immunoglobulin kappa variable 1-9 [Source:NCBI gene;Acc:106993071]                             | - | 1.709775678 | 0.004773008 | 0.024174299 |
| ENSMMUG000000050245 |                                                                                                | - | 1.705274498 | 0.001356365 | 0.008704346 |
| ENSMMUG00000021145  | family with sequence similarity 120B [Source:VGNC Symbol;Acc:VGNC:72311]                       | - | 1.703923668 | 2.88E-12    | 1.40E-10    |
| ENSMMUG000000051381 | Metazoan signal recognition particle RNA [Source:RFAM;Acc:RF00017]                             | - | 1.697997979 | 0.00037336  | 0.002984539 |
| ENSMMUG00000008632  | myosin, light chain 6, alkali, smooth muscle and non-muscle-like [Source:NCBI gene;Acc:710137] | - | 1.696311583 | 0.000943461 | 0.00645013  |
| ENSMMUG000000055244 | U6 spliceosomal RNA [Source:RFAM;Acc:RF00026]                                                  | - | -1.69239098 | 2.13E-07    | 4.25E-06    |
| ENSMMUG00000002200  | phospholipid phosphatase 3 [Source:NCBI gene;Acc:715993]                                       | - | -1.69137649 | 3.39E-14    | 2.12E-12    |
| ENSMMUG00000006857  | epididymal sperm binding protein 1 [Source:VGNC Symbol;Acc:VGNC:72046]                         | - | 1.684681742 | 4.30E-05    | 0.000475639 |
| ENSMMUG00000048322  | eva-1 homolog A, regulator of programmed cell death [Source:NCBI gene;Acc:710843]              | - | 1.678194671 | 7.02E-05    | 0.000724209 |
| ENSMMUG00000005913  | activating transcription factor 7 interacting protein 2 [Source:VGNC Symbol;Acc:VGNC:70103]    | - | 1.677723216 | 0.000102836 | 0.000995083 |
| ENSMMUG00000011386  | GTPase, IMAP family member 4 [Source:VGNC Symbol;Acc:VGNC:72982]                               | - | -1.67498478 | 9.99E-12    | 4.55E-10    |
| ENSMMUG00000009222  | pleckstrin homology domain containing A4 [Source:VGNC Symbol;Acc:VGNC:76027]                   | - | 1.674893903 | 0.006603877 | 0.031597312 |
| ENSMMUG000000058698 |                                                                                                | - | 1.674148526 | 0.009843781 | 0.043358078 |
| ENSMMUG00000012781  | muscular LMNA interacting protein [Source:VGNC Symbol;Acc:VGNC:83434]                          | - | 1.673122315 | 0.000111791 | 0.001066619 |
| ENSMMUG00000014687  | sterile alpha motif domain containing 14 [Source:VGNC Symbol;Acc:VGNC:77112]                   | - | 1.670877197 | 1.06E-05    | 0.000138664 |
| ENSMMUG00000005181  | RAB3C, member RAS oncogene family [Source:VGNC Symbol;Acc:VGNC:81541]                          | - | 1.667789922 | 0.001451823 | 0.009216662 |
| ENSMMUG00000002434  | inhibitor of growth family member 3 [Source:VGNC Symbol;Acc:VGNC:73595]                        | - | 1.666628487 | 4.41E-05    | 0.00048613  |
| ENSMMUG00000004052  | phosphodiesterase 12 [Source:VGNC Symbol;Acc:VGNC:75863]                                       | - | 1.664780181 | 0.00040059  | 0.003153576 |
| ENSMMUG000000050239 |                                                                                                | - | 1.660166518 | 7.08E-06    | 9.79E-05    |
| ENSMMUG00000023141  | CDC like kinase 2 [Source:VGNC Symbol;Acc:VGNC:71259]                                          | - | 1.659058291 | 0.000165292 | 0.00149295  |

|                     |                                                                                                    |   |             |             |             |
|---------------------|----------------------------------------------------------------------------------------------------|---|-------------|-------------|-------------|
| ENSMMUG00000014027  | nitric oxide synthase 1 [Source:VGNC Symbol;Acc:VGNC:75368]                                        | - | 1.658773324 | 0.000166538 | 0.001500696 |
| ENSMMUG00000021280  | leucine rich transmembrane and O-methyltransferase domain containing [Source:NCBI gene;Acc:718286] | - | 1.658720821 | 1.02E-05    | 0.000134329 |
| ENSMMUG00000003260  |                                                                                                    | - | 1.658267223 | 1.86E-09    | 5.66E-08    |
| ENSMMUG00000001481  | nicotinamide nucleotide adenyltransferase 2 [Source:VGNC Symbol;Acc:VGNC:75193]                    | - | 1.646741741 | 0.008052835 | 0.036975791 |
| ENSMMUG000000058933 |                                                                                                    | - | 1.645811121 | 0.010400621 | 0.045242526 |
| ENSMMUG00000001213  | spermatogenesis associated 9 [Source:VGNC Symbol;Acc:VGNC:77976]                                   | - | 1.639566803 | 1.97E-06    | 3.16E-05    |
| ENSMMUG00000018415  | Ras interacting protein 1 [Source:HGNC Symbol;Acc:HGNC:24716]                                      | - | 1.631407541 | 4.26E-05    | 0.000472078 |
| ENSMMUG00000000158  | minichromosome maintenance complex component 2 [Source:VGNC Symbol;Acc:VGNC:74680]                 | - | 1.631239809 | 7.22E-13    | 3.79E-11    |
| ENSMMUG00000011183  | olfactomedin like 2A [Source:VGNC Symbol;Acc:VGNC:75472]                                           | - | 1.628401012 | 0.001876944 | 0.011335447 |
| ENSMMUG00000019850  | arachidonate lipoxygenase 3 [Source:VGNC Symbol;Acc:VGNC:69607]                                    | - | 1.626227863 | 2.29E-13    | 1.28E-11    |
| ENSMMUG00000017186  | pleckstrin homology domain interacting protein [Source:VGNC Symbol;Acc:VGNC:75803]                 | - | 1.623832639 | 0.000682389 | 0.004905641 |
| ENSMMUG00000003282  | phosphodiesterase 6B [Source:VGNC Symbol;Acc:VGNC:75920]                                           | - | 1.621462306 | 0.000277835 | 0.002333451 |
| ENSMMUG00000004387  | ring finger protein 19A, RBR E3 ubiquitin protein ligase [Source:VGNC Symbol;Acc:VGNC:82224]       | - | 1.616579803 | 2.58E-06    | 4.00E-05    |
| ENSMMUG000000057606 | GPRIN family member 3 [Source:NCBI gene;Acc:703567]                                                | - | 1.614477961 | 3.41E-10    | 1.22E-08    |
| ENSMMUG00000015117  | X-prolyl aminopeptidase 1 [Source:VGNC Symbol;Acc:VGNC:78810]                                      | - | 1.612616373 | 4.00E-09    | 1.17E-07    |
| ENSMMUG00000017549  | ectonucleotide pyrophosphatase/phosphodiesterase 3 [Source:VGNC Symbol;Acc:VGNC:72224]             | - | 1.609303051 | 6.66E-06    | 9.26E-05    |
| ENSMMUG00000020819  | protein phosphatase 2 catalytic subunit beta [Source:VGNC Symbol;Acc:VGNC:76373]                   | - | 1.608392911 | 0.004544462 | 0.02324357  |
| ENSMMUG00000060080  | U6 spliceosomal RNA [Source:RFAM;Acc:RF00026]                                                      | - | 1.606214848 | 0.001988054 | 0.01185229  |
| ENSMMUG00000005751  | adenosine deaminase tRNA specific 1 [Source:VGNC Symbol;Acc:VGNC:69504]                            | - | 1.604160822 | 0.006991168 | 0.033060276 |
| ENSMMUG00000018474  | signal regulatory protein alpha [Source:NCBI gene;Acc:717811]                                      | - | 1.602460642 | 1.62E-05    | 0.000200352 |
| ENSMMUG00000013907  | ribosomal protein S27a [Source:NCBI gene;Acc:718909]                                               | - | -1.60154513 | 0.004006909 | 0.020931422 |
| ENSMMUG00000014484  | zinc finger protein 641 [Source:NCBI gene;Acc:708246]                                              | - | 1.593758112 | 8.36E-05    | 0.000835235 |
| ENSMMUG000000061536 |                                                                                                    | - | 1.591425686 | 7.10E-05    | 0.000731187 |
| ENSMMUG000000046428 |                                                                                                    | - | 1.587846264 | 0.000160268 | 0.001454291 |
| ENSMMUG00000020184  | carboxypeptidase vitellogenic like [Source:VGNC Symbol;Acc:VGNC:71406]                             | - | -1.58668571 | 0.001535167 | 0.009641976 |
| ENSMMUG00000020114  | cadherin 13 [Source:VGNC Symbol;Acc:VGNC:70807]                                                    | - | -1.58317628 | 0.005085685 | 0.02548932  |
| ENSMMUG00000002794  | general transcription factor IIB [Source:VGNC Symbol;Acc:VGNC:73306]                               | - | 1.581827996 | 1.13E-11    | 5.09E-10    |
| ENSMMUG000000051661 |                                                                                                    | - | 1.578711098 | 0.000426419 | 0.003310566 |
| ENSMMUG00000009493  | family with sequence similarity 120A [Source:NCBI gene;Acc:717459]                                 | - | 1.578685856 | 5.81E-06    | 8.19E-05    |

|                     |                                                                                                 |             |             |             |             |
|---------------------|-------------------------------------------------------------------------------------------------|-------------|-------------|-------------|-------------|
| ENSMMUG00000051042  |                                                                                                 | -           | 1.577984422 | 4.06E-13    | 2.21E-11    |
| ENSMMUG00000055447  | MDM2 proto-oncogene [Source:NCBI gene;Acc:718284]                                               | -           | 1.572413035 | 2.43E-09    | 7.36E-08    |
| ENSMMUG00000015141  | ankyrin repeat domain 16 [Source:NCBI gene;Acc:720787]                                          | -1.57076277 | 0.003657116 | 0.019341967 |             |
| ENSMMUG00000017125  | oxysterol binding protein like 11 [Source:VGNC Symbol;Acc:VGNC:75631]                           | -           | 1.570244674 | 1.14E-11    | 5.14E-10    |
| ENSMMUG00000049788  |                                                                                                 | -           | 1.566562744 | 0.005182328 | 0.025883755 |
| ENSMMUG00000061268  | PLAG1 zinc finger [Source:NCBI gene;Acc:696149]                                                 | -           | 1.566121485 | 0.000959176 | 0.006543778 |
| ENSMMUG00000043229  | carbohydrate sulfotransferase 14 [Source:NCBI gene;Acc:703115]                                  | -           | 1.564528825 | 0.006868493 | 0.032563234 |
| ENSMMUG00000012120  | zinc ribbon domain containing 1 [Source:VGNC Symbol;Acc:VGNC:78912]                             | -           | 1.562213634 | 6.40E-06    | 8.97E-05    |
| ENSMMUG00000021282  | late endosomal/lysosomal adaptor, MAPK and MTOR activator 1 [Source:VGNC Symbol;Acc:VGNC:74129] | -           | 1.557358165 | 7.23E-05    | 0.000742908 |
| ENSMMUG00000039020  | zinc finger protein 141 [Source:NCBI gene;Acc:714265]                                           | -           | 1.555459071 | 1.44E-08    | 3.71E-07    |
| ENSMMUG00000062791  |                                                                                                 | -1.54962991 | 0.002310519 | 0.013444525 |             |
| ENSMMUG00000007313  | histone acetyltransferase 1 [Source:VGNC Symbol;Acc:VGNC:73349]                                 | -           | 1.548907078 | 0.001328249 | 0.008540815 |
| ENSMMUG00000015619  | ATP binding cassette subfamily B member 7 [Source:VGNC Symbol;Acc:VGNC:81340]                   | -           | 1.548817339 | 4.59E-10    | 1.58E-08    |
| ENSMMUG00000007115  | RALY RNA binding protein like [Source:VGNC Symbol;Acc:VGNC:82217]                               | -           | 1.545571549 | 0.007482727 | 0.034951717 |
| ENSMMUG00000001940  | NME/NM23 nucleoside diphosphate kinase 2 [Source:NCBI gene;Acc:100533957]                       | -           | 1.544722732 | 3.44E-06    | 5.13E-05    |
| ENSMMUG00000008718  | zinc finger protein 280D [Source:NCBI gene;Acc:699509]                                          | -           | 1.542945799 | 2.13E-08    | 5.27E-07    |
| ENSMMUG00000008540  | ring finger protein 112 [Source:VGNC Symbol;Acc:VGNC:76724]                                     | -           | 1.540850785 | 0.000323343 | 0.002647127 |
| ENSMMUG000000056737 |                                                                                                 | -           | 1.539907499 | 7.64E-05    | 0.000779469 |
| ENSMMUG00000020821  | testis expressed 15, meiosis and synapsis associated [Source:VGNC Symbol;Acc:VGNC:78318]        | -           | 1.539139515 | 5.65E-09    | 1.60E-07    |
| ENSMMUG00000022625  | periaxin [Source:VGNC Symbol;Acc:VGNC:76248]                                                    | -           | 1.538335463 | 0.000364473 | 0.002926609 |
| ENSMMUG00000058332  | testis expressed 46 [Source:NCBI gene;Acc:709002]                                               | -           | 1.534778012 | 0.005032005 | 0.02527886  |
| ENSMMUG00000052817  | Sp7 transcription factor [Source:NCBI gene;Acc:702575]                                          | -           | 1.534756405 | 0.001932219 | 0.01159153  |
| ENSMMUG00000014049  | collagen type VI alpha 3 chain [Source:VGNC Symbol;Acc:VGNC:71303]                              | -           | 1.534512671 | 0.002870124 | 0.016045985 |
| ENSMMUG00000005442  | 5'-nucleotidase ecto [Source:VGNC Symbol;Acc:VGNC:75537]                                        | -           | 1.534066479 | 7.01E-05    | 0.000724027 |
| ENSMMUG00000013008  | cleavage stimulation factor subunit 2 [Source:VGNC Symbol;Acc:VGNC:71536]                       | -           | 1.532723112 | 0.000775579 | 0.005466548 |
| ENSMMUG00000053008  |                                                                                                 | -           | 1.531047981 | 0.000269364 | 0.002278531 |
| ENSMMUG00000050177  |                                                                                                 | -           | 1.530694014 | 1.17E-05    | 0.000150302 |
| ENSMMUG00000005246  | zinc finger protein 740 [Source:VGNC Symbol;Acc:VGNC:79665]                                     | -           | 1.527634244 | 0.000851555 | 0.00590266  |
| ENSMMUG00000058281  | ITPRIP like 2 [Source:NCBI gene;Acc:694060]                                                     | -           | 1.526536053 | 1.15E-08    | 3.02E-07    |



|                    |                                                                                        |   |             |             |             |
|--------------------|----------------------------------------------------------------------------------------|---|-------------|-------------|-------------|
| ENSMMUG00000057143 | transmembrane protein 127 [Source:NCBI gene;Acc:705069]                                | - | 1.526311429 | 5.81E-06    | 8.19E-05    |
| ENSMMUG00000032892 | U6 spliceosomal RNA [Source:RFAM;Acc:RF00026]                                          | - | -1.52499835 | 0.001718059 | 0.010570665 |
| ENSMMUG00000023083 | A-kinase anchoring protein 11 [Source:VGNC Symbol;Acc:VGNC:69765]                      | - | 1.524380481 | 0.00016831  | 0.001514051 |
| ENSMMUG00000013503 | mannose-P-dolichol utilization defect 1 [Source:VGNC Symbol;Acc:VGNC:74913]            | - | 1.519718326 | 0.007270896 | 0.034158995 |
| ENSMMUG00000014955 | nuclear receptor subfamily 3 group C member 2 [Source:VGNC Symbol;Acc:VGNC:75516]      | - | 1.518223366 | 0.000843735 | 0.00585471  |
| ENSMMUG00000052526 | RAB39A, member RAS oncogene family [Source:NCBI gene;Acc:707451]                       | - | -1.51749334 | 1.24E-13    | 7.19E-12    |
| ENSMMUG00000003634 | DExD/H-box 60 like [Source:VGNC Symbol;Acc:VGNC:71720]                                 | - | -1.51706458 | 5.11E-05    | 0.000553687 |
| ENSMMUG00000012481 | importin 4 [Source:VGNC Symbol;Acc:VGNC:73630]                                         | - | 1.512333675 | 9.71E-05    | 0.000946876 |
| ENSMMUG00000043411 | zinc finger and BTB domain containing 39 [Source:NCBI gene;Acc:713914]                 | - | 1.508961171 | 0.000149605 | 0.001374202 |
| ENSMMUG00000052460 |                                                                                        | - | 1.508431865 | 0.000754264 | 0.005331752 |
| ENSMMUG00000021053 | annexin A6 [Source:VGNC Symbol;Acc:VGNC:69951]                                         | - | 1.508092346 | 2.29E-05    | 0.000273409 |
| ENSMMUG00000002113 | NHL repeat containing 3 [Source:VGNC Symbol;Acc:VGNC:75291]                            | - | 1.507280644 | 1.29E-08    | 3.37E-07    |
| ENSMMUG00000002678 | integrin subunit beta 6 [Source:VGNC Symbol;Acc:VGNC:73789]                            | - | 1.506196391 | 9.76E-05    | 0.000949598 |
| ENSMMUG00000012486 | retinoic acid receptor alpha [Source:VGNC Symbol;Acc:VGNC:76662]                       | - | 1.500129925 | 5.98E-05    | 0.000632568 |
| ENSMMUG00000020993 | cadherin EGF LAG seven-pass G-type receptor 1 [Source:NCBI gene;Acc:718440]            | - | 1.498179109 | 0.002971409 | 0.016517165 |
| ENSMMUG00000054615 |                                                                                        | - | 1.494348075 | 0.000468056 | 0.003559803 |
| ENSMMUG00000017173 | heat shock protein family A (Hsp70) member 14 [Source:NCBI gene;Acc:697257]            | - | 1.493252571 | 0.008649862 | 0.039108227 |
| ENSMMUG00000050269 | T cell receptor beta variable 14 [Source:HGNC Symbol;Acc:HGNC:12189]                   | - | 1.493108989 | 3.65E-06    | 5.40E-05    |
| ENSMMUG00000049563 |                                                                                        | - | 1.492349967 | 5.98E-08    | 1.34E-06    |
| ENSMMUG00000001479 | laminin subunit gamma 2 [Source:VGNC Symbol;Acc:VGNC:74233]                            | - | 1.490366317 | 0.002026548 | 0.012023999 |
| ENSMMUG00000021197 | TBC1 domain family member 4 [Source:VGNC Symbol;Acc:VGNC:78166]                        | - | 1.485788739 | 0.005796903 | 0.028385136 |
| ENSMMUG00000016983 | acrosin binding protein [Source:VGNC Symbol;Acc:VGNC:69445]                            | - | 1.483944525 | 2.41E-05    | 0.00028627  |
| ENSMMUG00000009319 | transmembrane protein 161B [Source:VGNC Symbol;Acc:VGNC:84508]                         | - | 1.482952421 | 0.003277715 | 0.017773349 |
| ENSMMUG00000002090 | ATPase H+ transporting V1 subunit B1 [Source:VGNC Symbol;Acc:VGNC:70184]               | - | 1.481379453 | 1.98E-08    | 4.94E-07    |
| ENSMMUG00000060798 |                                                                                        | - | -1.4807873  | 9.67E-06    | 0.000128578 |
| ENSMMUG00000003394 | cilia and flagella associated protein 300 [Source:VGNC Symbol;Acc:VGNC:71120]          | - | 1.480501299 | 1.30E-10    | 4.95E-09    |
| ENSMMUG00000009536 | makorin ring finger protein 2 [Source:VGNC Symbol;Acc:VGNC:74878]                      | - | 1.478630865 | 0.000128663 | 0.001198511 |
| ENSMMUG00000043001 | milk fat globule EGF and factor V/VIII domain containing [Source:NCBI gene;Acc:703501] | - | 1.477019517 | 0.011360622 | 0.048396397 |
| ENSMMUG00000050300 |                                                                                        | - | 1.474553682 | 0.004405694 | 0.02268583  |
| ENSMMUG00000005856 | glycine amidinotransferase [Source:VGNC Symbol;Acc:VGNC:72892]                         | - | 1.471991953 | 4.21E-06    | 6.13E-05    |



|                     |                                                                                                       |   |             |             |             |
|---------------------|-------------------------------------------------------------------------------------------------------|---|-------------|-------------|-------------|
| ENSMMUG00000016093  | adenosine deaminase RNA specific [Source:VGNC Symbol;Acc:VGNC:69502]                                  | - | 1.470033604 | 1.13E-06    | 1.93E-05    |
| ENSMMUG00000019978  | HERV-H LTR-associating 2 [Source:VGNC Symbol;Acc:VGNC:73377]                                          | - | 1.468920643 | 0.008349159 | 0.038013577 |
| ENSMMUG00000045584  | leucine zipper protein 1 [Source:NCBI gene;Acc:718626]                                                | - | 1.465716208 | 8.42E-08    | 1.85E-06    |
| ENSMMUG00000020792  | Rap guanine nucleotide exchange factor 4 [Source:VGNC Symbol;Acc:VGNC:76490]                          | - | 1.465168834 | 0.000482963 | 0.003658453 |
| ENSMMUG00000041450  | zinc finger protein 432 [Source:NCBI gene;Acc:100424341]                                              | - | 1.463270225 | 4.99E-08    | 1.13E-06    |
| ENSMMUG00000020706  | ETS proto-oncogene 1, transcription factor [Source:VGNC Symbol;Acc:VGNC:72439]                        | - | 1.459215428 | 2.81E-15    | 2.08E-13    |
| ENSMMUG00000003771  | ubiquitin like 3 [Source:VGNC Symbol;Acc:VGNC:78701]                                                  | - | 1.457486362 | 0.00237746  | 0.013766142 |
| ENSMMUG00000020289  | CD83 molecule [Source:VGNC Symbol;Acc:VGNC:70783]                                                     | - | 1.457387325 | 4.33E-07    | 8.09E-06    |
| ENSMMUG00000039781  | sosondowah ankyrin repeat domain family member A [Source:VGNC Symbol;Acc:VGNC:84498]                  | - | 1.457293383 | 0.001986444 | 0.01185229  |
| ENSMMUG00000005204  | VPS16 core subunit of CORVET and HOPS complexes [Source:VGNC Symbol;Acc:VGNC:78966]                   | - | 1.455502436 | 0.001996577 | 0.011878766 |
| ENSMMUG00000020847  | CKLF like MARVEL transmembrane domain containing 3 [Source:VGNC Symbol;Acc:VGNC:71215]                | - | 1.452493505 | 0.001099294 | 0.007288931 |
| ENSMMUG00000015550  | PR/SET domain 4 [Source:VGNC Symbol;Acc:VGNC:76393]                                                   | - | 1.448545091 | 0.001120904 | 0.007405725 |
| ENSMMUG00000007326  | ring finger protein 121 [Source:VGNC Symbol;Acc:VGNC:76788]                                           | - | 1.448523233 | 1.98E-05    | 0.000241748 |
| ENSMMUG00000001209  | arylsulfatase family member K [Source:VGNC Symbol;Acc:VGNC:84280]                                     | - | 1.446946379 | 0.001484092 | 0.009371086 |
| ENSMMUG00000019371  | major histocompatibility complex, class II, DP alpha [Source:NCBI gene;Acc:717992]                    | - | 1.446340446 | 0.009136123 | 0.040893525 |
| ENSMMUG00000002809  | unc-80 homolog, NALCN channel complex subunit [Source:NCBI gene;Acc:713007]                           | - | 1.445100068 | 6.00E-05    | 0.000632941 |
| ENSMMUG00000007424  | nuclear receptor interacting protein 2 [Source:VGNC Symbol;Acc:VGNC:75448]                            | - | 1.442877556 | 8.55E-08    | 1.87E-06    |
| ENSMMUG00000005895  | nucleobindin 2 [Source:VGNC Symbol;Acc:VGNC:75549]                                                    | - | 1.441851656 | 0.00070119  | 0.005024095 |
| ENSMMUG00000012449  | synaptotagmin like 2 [Source:VGNC Symbol;Acc:VGNC:78123]                                              | - | 1.441646379 | 0.005012759 | 0.025211458 |
| ENSMMUG00000021459  | MYC binding protein 2 [Source:VGNC Symbol;Acc:VGNC:75011]                                             | - | 1.441322748 | 4.08E-08    | 9.40E-07    |
| ENSMMUG00000049661  | Metazoan signal recognition particle RNA [Source:RFAM;Acc:RF00017]                                    | - | 1.440682863 | 3.15E-05    | 0.00036091  |
| ENSMMUG00000002332  | RNA binding motif protein 25 [Source:VGNC Symbol;Acc:VGNC:76521]                                      | - | 1.439604718 | 0.001417342 | 0.009024257 |
| ENSMMUG00000012480  | REC8 meiotic recombination protein [Source:VGNC Symbol;Acc:VGNC:76746]                                | - | 1.438302045 | 0.001472699 | 0.009317283 |
| ENSMMUG00000002032  | exportin 7 [Source:VGNC Symbol;Acc:VGNC:78946]                                                        | - | 1.436670809 | 0.000163609 | 0.001482208 |
| ENSMMUG00000015143  | F-box DNA helicase 1 [Source:NCBI gene;Acc:720797]                                                    | - | 1.433848055 | 0.000585503 | 0.004331522 |
| ENSMMUG00000018747  | 5-methyltetrahydrofolate-homocysteine methyltransferase reductase [Source:VGNC Symbol;Acc:VGNC:75079] | - | 1.433076531 | 7.86E-07    | 1.39E-05    |
| ENSMMUG000000053384 |                                                                                                       | - | 1.430574006 | 1.39E-08    | 3.62E-07    |
| ENSMMUG00000006251  | argonaute RISC component 1 [Source:VGNC Symbol;Acc:VGNC:81346]                                        | - | 1.427830572 | 1.04E-06    | 1.79E-05    |

|                    |                                                                                  |   |             |             |             |
|--------------------|----------------------------------------------------------------------------------|---|-------------|-------------|-------------|
| ENSMMUG0000003302  | dystrobrevin alpha [Source:VGNC Symbol;Acc:VGNC:72007]                           | - | 1.427593829 | 0.003597436 | 0.01910779  |
| ENSMMUG00000057338 |                                                                                  | - | 1.427552171 | 9.06E-08    | 1.98E-06    |
| ENSMMUG00000010312 | shroom family member 1 [Source:VGNC Symbol;Acc:VGNC:77299]                       | - | 1.427361545 | 4.21E-08    | 9.69E-07    |
| ENSMMUG00000057494 | T cell receptor beta variable 7-9 [Source:HGNC Symbol;Acc:HGNC:12243]            | - | 1.426903459 | 0.000222994 | 0.001935495 |
| ENSMMUG00000059101 |                                                                                  | - | 1.424934918 | 0.005545436 | 0.027382937 |
| ENSMMUG00000022963 | solute carrier family 25 member 38 [Source:VGNC Symbol;Acc:VGNC:77571]           | - | 1.423934042 | 0.001555449 | 0.009726989 |
| ENSMMUG00000007159 | tubulin epsilon and delta complex 1 [Source:VGNC Symbol;Acc:VGNC:79235]          | - | 1.422611971 | 0.000414658 | 0.003237425 |
| ENSMMUG00000010405 | family with sequence similarity 171 member B [Source:VGNC Symbol;Acc:VGNC:72404] | - | 1.419864305 | 0.000388312 | 0.003083679 |
| ENSMMUG00000004178 | NADPH oxidase 1 [Source:VGNC Symbol;Acc:VGNC:75374]                              | - | -1.41963533 | 8.10E-06    | 0.000109923 |
| ENSMMUG00000007411 | integrin alpha FG-GAP repeat containing 2 [Source:VGNC Symbol;Acc:VGNC:73690]    | - | 1.419137309 | 8.19E-07    | 1.44E-05    |
| ENSMMUG00000061372 |                                                                                  | - | 1.418617988 | 0.006174588 | 0.029918394 |
| ENSMMUG00000022430 | splicing factor 3b subunit 1 [Source:VGNC Symbol;Acc:VGNC:77179]                 | - | 1.415327799 | 0.003411048 | 0.018344722 |
| ENSMMUG00000011573 | cap methyltransferase 1 [Source:VGNC Symbol;Acc:VGNC:71271]                      | - | -1.4116923  | 4.92E-07    | 9.11E-06    |
| ENSMMUG00000063354 |                                                                                  | - | 1.409906857 | 0.002591581 | 0.014788197 |
| ENSMMUG00000011116 | NADPH oxidase 4 [Source:VGNC Symbol;Acc:VGNC:75376]                              | - | 1.406677456 | 1.38E-06    | 2.29E-05    |
| ENSMMUG00000033290 | mml-mir-643 [Source:miRBase;Acc:MI0007886]                                       | - | 1.403277374 | 2.97E-05    | 0.000341806 |
| ENSMMUG00000056045 |                                                                                  | - | -1.40237243 | 0.000114233 | 0.00108672  |
| ENSMMUG00000003277 | copine 4 [Source:VGNC Symbol;Acc:VGNC:71466]                                     | - | 1.402270105 | 8.68E-05    | 0.000861981 |
| ENSMMUG00000018901 | FYVE, RhoGEF and PH domain containing 6 [Source:VGNC Symbol;Acc:VGNC:72548]      | - | 1.401575673 | 4.21E-06    | 6.13E-05    |
| ENSMMUG00000016581 | methyltransferase like 18 [Source:VGNC Symbol;Acc:VGNC:74606]                    | - | 1.401362007 | 0.008151065 | 0.037334353 |
| ENSMMUG00000011810 | FAT atypical cadherin 4 [Source:VGNC Symbol;Acc:VGNC:72552]                      | - | 1.401099609 | 0.000499772 | 0.003755093 |
| ENSMMUG00000005727 | protein kinase N1 [Source:VGNC Symbol;Acc:VGNC:76014]                            | - | 1.396986207 | 4.59E-06    | 6.62E-05    |
| ENSMMUG00000022602 | methyltransferase like 21A [Source:VGNC Symbol;Acc:VGNC:74625]                   | - | 1.394606302 | 7.66E-05    | 0.000780326 |
| ENSMMUG00000044958 | adhesion G protein-coupled receptor G6 [Source:VGNC Symbol;Acc:VGNC:81009]       | - | 1.389525645 | 1.45E-06    | 2.41E-05    |
| ENSMMUG00000000983 | aldolase, fructose-bisphosphate A [Source:NCBI gene;Acc:708406]                  | - | 1.388993556 | 1.82E-05    | 0.00022347  |
| ENSMMUG00000057544 |                                                                                  | - | 1.385671633 | 0.000118705 | 0.001121044 |
| ENSMMUG00000009114 | maestro heat like repeat family member 7 [Source:NCBI gene;Acc:715310]           | - | 1.384560798 | 0.001491579 | 0.0094092   |
| ENSMMUG00000057199 |                                                                                  | - | 1.382732739 | 0.010956348 | 0.047060435 |
| ENSMMUG00000014314 | ankyrin and armadillo repeat containing [Source:VGNC Symbol;Acc:VGNC:69706]      | - | -1.37935435 | 1.33E-06    | 2.22E-05    |
| ENSMMUG00000022185 | odd-skipped related transcription factor 2 [Source:VGNC Symbol;Acc:VGNC:84097]   | - | 1.375060613 | 3.01E-08    | 7.17E-07    |

|                    |                                                                                                |   |             |             |             |
|--------------------|------------------------------------------------------------------------------------------------|---|-------------|-------------|-------------|
| ENSMMUG00000016316 | testis associated actin remodelling kinase 1 [Source:VGNC Symbol;Acc:VGNC:78314]               | - | 1.374993323 | 0.002131024 | 0.012540664 |
| ENSMMUG00000021499 | sterile alpha motif domain containing 3 [Source:VGNC Symbol;Acc:VGNC:77079]                    | - | 1.374787076 | 0.000160868 | 0.001458719 |
| ENSMMUG00000022624 | putative speedy protein E16 [Source:NCBI gene;Acc:718058]                                      | - | -1.37275451 | 5.61E-05    | 0.000600194 |
| ENSMMUG00000031296 | caspase 8 [Source:VGNC Symbol;Acc:VGNC:70547]                                                  | - | 1.372235761 | 2.22E-05    | 0.00026717  |
| ENSMMUG00000047994 | CGG triplet repeat binding protein 1 [Source:VGNC Symbol;Acc:VGNC:84203]                       | - | 1.371627631 | 0.000485072 | 0.003670145 |
| ENSMMUG00000038288 | TMEM9 domain family member B [Source:NCBI gene;Acc:708447]                                     | - | 1.371449417 | 4.78E-08    | 1.09E-06    |
| ENSMMUG00000060505 |                                                                                                | - | 1.370652146 | 0.002748412 | 0.01549235  |
| ENSMMUG00000000667 | zinc finger MYM-type containing 3 [Source:VGNC Symbol;Acc:VGNC:78886]                          | - | -1.37060314 | 0.000884029 | 0.00609844  |
| ENSMMUG00000060744 |                                                                                                | - | 1.364476691 | 0.000555626 | 0.004131695 |
| ENSMMUG00000014394 | DnaJ heat shock protein family (Hsp40) member C10 [Source:VGNC Symbol;Acc:VGNC:84229]          | - | 1.364217581 | 3.55E-13    | 1.94E-11    |
| ENSMMUG00000018976 | adhesion G protein-coupled receptor V1 [Source:VGNC Symbol;Acc:VGNC:69625]                     | - | 1.364203922 | 0.003623311 | 0.019229484 |
| ENSMMUG00000011049 | leucine rich repeat containing 1 [Source:VGNC Symbol;Acc:VGNC:81087]                           | - | 1.363595904 | 0.001175111 | 0.007724536 |
| ENSMMUG00000001357 | tetraspanin 11 [Source:VGNC Symbol;Acc:VGNC:79882]                                             | - | 1.362550059 | 2.63E-13    | 1.46E-11    |
| ENSMMUG00000049539 |                                                                                                | - | 1.361986603 | 0.00032887  | 0.002687291 |
| ENSMMUG00000002657 | olfactomedin 4 [Source:VGNC Symbol;Acc:VGNC:75418]                                             | - | 1.358425407 | 0.001477892 | 0.009336478 |
| ENSMMUG00000015151 | interleukin 2 receptor subunit alpha [Source:NCBI gene;Acc:574300]                             | - | -1.3583811  | 0.004402954 | 0.022683587 |
| ENSMMUG00000062140 |                                                                                                | - | 1.357443575 | 0.002616859 | 0.014918401 |
| ENSMMUG00000005301 | ATP binding cassette subfamily B member 9 [Source:VGNC Symbol;Acc:VGNC:81341]                  | - | 1.355405163 | 3.85E-05    | 0.000432745 |
| ENSMMUG00000020928 | nucleolar protein interacting with the FHA domain of MKI67 [Source:VGNC Symbol;Acc:VGNC:75201] | - | 1.355184177 | 8.70E-05    | 0.000863683 |
| ENSMMUG00000019836 | myocyte enhancer factor 2C [Source:VGNC Symbol;Acc:VGNC:84438]                                 | - | -1.35494805 | 0.000359001 | 0.002893412 |
| ENSMMUG00000020784 | centrosomal protein 126 [Source:NCBI gene;Acc:701911]                                          | - | -1.35448725 | 1.70E-07    | 3.48E-06    |
| ENSMMUG00000055392 |                                                                                                | - | 1.350257969 | 0.00060427  | 0.00443432  |
| ENSMMUG00000002183 | oxysterol binding protein like 6 [Source:VGNC Symbol;Acc:VGNC:75627]                           | - | -1.34765318 | 0.000106411 | 0.001025081 |
| ENSMMUG00000051020 | zinc finger protein 467 [Source:NCBI gene;Acc:712106]                                          | - | 1.340173175 | 7.83E-05    | 0.000795175 |
| ENSMMUG00000014334 | dopamine receptor D2 [Source:VGNC Symbol;Acc:VGNC:71989]                                       | - | 1.338808743 | 0.005511808 | 0.027266956 |
| ENSMMUG00000021496 | potassium sodium-activated channel subfamily T member 1 [Source:VGNC Symbol;Acc:VGNC:73856]    | - | 1.336040854 | 3.83E-06    | 5.63E-05    |
| ENSMMUG00000038667 |                                                                                                | - | 1.333268533 | 0.008602441 | 0.038934522 |
| ENSMMUG00000064804 |                                                                                                | - | 1.332113686 | 0.000930632 | 0.0063725   |
| ENSMMUG00000056662 |                                                                                                | - | 1.325887687 | 0.000295611 | 0.002463617 |
| ENSMMUG00000061239 |                                                                                                | - | 1.325635182 | 4.26E-06    | 6.19E-05    |
| ENSMMUG00000061261 | Metazoan signal recognition particle RNA [Source:RFAM;Acc:RF00017]                             | - | 1.324703764 | 0.009259564 | 0.041332524 |

|                    |                                                                                                                                       |   |             |             |             |
|--------------------|---------------------------------------------------------------------------------------------------------------------------------------|---|-------------|-------------|-------------|
| ENSMMUG00000018356 | flagellum associated containing coiled-coil domains 1 [Source:VGNC Symbol;Acc:VGNC:72508]                                             | - | 1.321736834 | 0.010543505 | 0.045680308 |
| ENSMMUG00000056116 |                                                                                                                                       | - | 1.320633912 | 1.57E-05    | 0.000195596 |
| ENSMMUG00000003261 | BAF chromatin remodeling complex subunit BCL11B [Source:VGNC Symbol;Acc:VGNC:70056]                                                   | - | 1.319635668 | 5.77E-06    | 8.16E-05    |
| ENSMMUG00000054116 | T cell receptor alpha variable 8-6 [Source:HGNC Symbol;Acc:HGNC:12151]                                                                | - | 1.318504595 | 0.000528457 | 0.003943216 |
| ENSMMUG00000010060 | serine rich single-pass membrane protein 1 [Source:VGNC Symbol;Acc:VGNC:78014]                                                        | - | 1.318139037 | 0.007700988 | 0.035752421 |
| ENSMMUG00000042208 | pepsin A-4 [Source:NCBI gene;Acc:694646]                                                                                              | - | 1.317498798 | 1.15E-06    | 1.96E-05    |
| ENSMMUG00000059659 |                                                                                                                                       | - | 1.313244193 | 0.001018935 | 0.006857828 |
| ENSMMUG00000058974 |                                                                                                                                       | - | 1.308800449 | 0.002814906 | 0.015812216 |
| ENSMMUG00000032427 | neuroligin 3 [Source:NCBI gene;Acc:574216]                                                                                            | - | 1.307655361 | 1.60E-09    | 4.96E-08    |
| ENSMMUG00000015970 | coiled-coil domain containing 150 [Source:VGNC Symbol;Acc:VGNC:84222]                                                                 | - | 1.304165695 | 5.15E-09    | 1.48E-07    |
| ENSMMUG00000003973 | autophagy related 2A [Source:VGNC Symbol;Acc:VGNC:70145]                                                                              | - | 1.301831461 | 0.000217529 | 0.001896949 |
| ENSMMUG00000037675 | testis expressed 52 [Source:NCBI gene;Acc:107000723]                                                                                  | - | 1.300227954 | 1.04E-07    | 2.25E-06    |
| ENSMMUG00000030453 | NLR family pyrin domain containing 1 [Source:NCBI gene;Acc:721648]                                                                    | - | 1.299799254 | 5.35E-09    | 1.53E-07    |
| ENSMMUG00000014735 | carnitine palmitoyltransferase 1C [Source:NCBI gene;Acc:719429]                                                                       | - | 1.298461067 | 2.90E-05    | 0.000335225 |
| ENSMMUG00000060221 | growth differentiation factor 9 [Source:NCBI gene;Acc:712792]                                                                         | - | 1.296838776 | 7.06E-06    | 9.77E-05    |
| ENSMMUG00000061344 |                                                                                                                                       | - | -1.29168892 | 0.001988474 | 0.01185229  |
| ENSMMUG00000021670 | solute carrier family 52 member 3 [Source:VGNC Symbol;Acc:VGNC:77717]                                                                 | - | 1.290050495 | 6.24E-05    | 0.000654665 |
| ENSMMUG00000020175 | mediator complex subunit 25 [Source:VGNC Symbol;Acc:VGNC:74607]                                                                       | - | 1.289509637 | 0.00341136  | 0.018344722 |
| ENSMMUG00000051468 | Metazoan signal recognition particle RNA [Source:RFAM;Acc:RF00017]                                                                    | - | 1.288977023 | 7.54E-07    | 1.34E-05    |
| ENSMMUG00000055481 | regulator of G protein signaling 16 [Source:NCBI gene;Acc:715599]                                                                     | - | 1.288272851 | 0.000331487 | 0.002706969 |
| ENSMMUG00000058580 | tripartite motif containing 40 [Source:NCBI gene;Acc:100427925]                                                                       | - | -1.28635742 | 0.000128789 | 0.001198824 |
| ENSMMUG00000015279 | SWI/SNF related, matrix associated, actin dependent regulator of chromatin, subfamily a, member 2 [Source:VGNC Symbol;Acc:VGNC:77647] | - | 1.284761682 | 4.35E-05    | 0.000481004 |
| ENSMMUG00000040154 | T cell receptor alpha variable 9-2 [Source:HGNC Symbol;Acc:HGNC:12154]                                                                | - | 1.283024017 | 0.002694597 | 0.015288626 |
| ENSMMUG00000022324 | formimidoyltransferase cyclodeaminase [Source:VGNC Symbol;Acc:VGNC:72825]                                                             | - | 1.282923825 | 0.003368574 | 0.018182009 |
| ENSMMUG00000044175 | forkhead box O6 [Source:NCBI gene;Acc:697505]                                                                                         | - | 1.280275753 | 1.74E-06    | 2.82E-05    |
| ENSMMUG00000043161 | endogenous retrovirus group FRD member 1, envelope [Source:VGNC Symbol;Acc:VGNC:81068]                                                | - | 1.280020039 | 0.000520469 | 0.003894815 |
| ENSMMUG00000012576 | sorting nexin 6 [Source:NCBI gene;Acc:693626]                                                                                         | - | -1.2799515  | 0.002916059 | 0.016260759 |
| ENSMMUG00000050975 |                                                                                                                                       | - | 1.278205479 | 0.001372261 | 0.008793311 |
| ENSMMUG00000008199 | leucine-rich repeat-containing protein 37A [Source:NCBI gene;Acc:714675]                                                              | - | -1.2776208  | 0.003793778 | 0.01994654  |
| ENSMMUG00000055835 | nuclear casein kinase and cyclin dependent kinase substrate 1 [Source:NCBI gene;Acc:697298]                                           | - | 1.276864219 | 9.20E-05    | 0.000906208 |



|                    |                                                                                                                                     |   |             |             |             |
|--------------------|-------------------------------------------------------------------------------------------------------------------------------------|---|-------------|-------------|-------------|
| ENSMMUG00000054590 |                                                                                                                                     | - | 1.273385946 | 3.39E-07    | 6.46E-06    |
| ENSMMUG00000011214 | solute carrier family 12 member 2 [Source:VGNC Symbol;Acc:VGNC:77386]                                                               | - | 1.271368558 | 0.001733884 | 0.010657924 |
| ENSMMUG00000023676 | espin [Source:NCBI gene;Acc:722532]                                                                                                 | - | 1.270592444 | 5.42E-07    | 9.93E-06    |
| ENSMMUG00000001225 | calneuron 1 [Source:VGNC Symbol;Acc:VGNC:82078]                                                                                     | - | 1.268922059 | 0.000730758 | 0.00520956  |
| ENSMMUG00000023249 | aryl hydrocarbon receptor nuclear translocator like 2 [Source:NCBI gene;Acc:709547]                                                 | - | 1.267867519 | 9.89E-05    | 0.000961266 |
| ENSMMUG00000001319 | methylenetetrahydrofolate dehydrogenase, cyclohydrolase and formyltetrahydrofolate synthetase 1 [Source:VGNC Symbol;Acc:VGNC:84399] | - | 1.266893569 | 7.43E-10    | 2.45E-08    |
| ENSMMUG00000060024 |                                                                                                                                     | - | 1.264162601 | 0.00241431  | 0.013936293 |
| ENSMMUG00000016717 | polycystin 1 like 3, transient receptor potential channel interacting [Source:VGNC Symbol;Acc:VGNC:75846]                           | - | 1.262339911 | 0.002081832 | 0.012306992 |
| ENSMMUG00000021772 | nephrocystin 3 [Source:NCBI gene;Acc:717622]                                                                                        | - | 1.261332657 | 0.001707098 | 0.010518185 |
| ENSMMUG00000007620 | transmembrane serine protease 4 [Source:VGNC Symbol;Acc:VGNC:78577]                                                                 | - | 1.261212503 | 0.000708817 | 0.005070346 |
| ENSMMUG00000001800 | cullin 5 [Source:VGNC Symbol;Acc:VGNC:71570]                                                                                        | - | 1.260722638 | 0.001867399 | 0.011307219 |
| ENSMMUG00000054417 |                                                                                                                                     | - | 1.259501574 | 0.000226302 | 0.001957663 |
| ENSMMUG00000001942 | mbt domain containing 1 [Source:VGNC Symbol;Acc:VGNC:74538]                                                                         | - | 1.259051603 | 2.14E-07    | 4.26E-06    |
| ENSMMUG00000046464 | coiled-coil-helix-coiled-coil-helix domain containing 7 [Source:VGNC Symbol;Acc:VGNC:83989]                                         | - | 1.258914208 | 0.000290629 | 0.002428333 |
| ENSMMUG00000020047 | integrin subunit beta 3 binding protein [Source:VGNC Symbol;Acc:VGNC:73787]                                                         | - | 1.258638104 | 4.47E-09    | 1.29E-07    |
| ENSMMUG00000020540 | NmrA like redox sensor 1 [Source:VGNC Symbol;Acc:VGNC:75252]                                                                        | - | 1.257803377 | 0.000193056 | 0.001706467 |
| ENSMMUG00000001728 | mitogen-activated protein kinase 9 [Source:VGNC Symbol;Acc:VGNC:74652]                                                              | - | 1.256020894 | 0.000196844 | 0.001737585 |
| ENSMMUG00000001995 | chromosome 14 C11orf16 homolog [Source:NCBI gene;Acc:705319]                                                                        | - | 1.255362063 | 3.96E-06    | 5.81E-05    |
| ENSMMUG00000049523 | ankyrin repeat domain 12 [Source:NCBI gene;Acc:114673693]                                                                           | - | 1.254321093 | 0.002868845 | 0.016045748 |
| ENSMMUG00000060932 | zinc finger protein 383-like [Source:NCBI gene;Acc:106993074]                                                                       | - | -1.25323158 | 0.001326831 | 0.00853673  |
| ENSMMUG00000007626 | intersectin 1 [Source:VGNC Symbol;Acc:VGNC:73806]                                                                                   | - | 1.251181339 | 6.22E-05    | 0.00065364  |
| ENSMMUG00000010601 | solute carrier family 43 member 3 [Source:NCBI gene;Acc:706267]                                                                     | - | 1.249004227 | 0.000317646 | 0.002608718 |
| ENSMMUG00000059707 | MIS18 kinetochore protein A [Source:NCBI gene;Acc:709275]                                                                           | - | 1.247650214 | 0.006163678 | 0.029876683 |
| ENSMMUG00000007917 | carbonic anhydrase 4 [Source:NCBI gene;Acc:716919]                                                                                  | - | -1.24473027 | 6.43E-05    | 0.000673311 |
| ENSMMUG00000053648 | actin binding transcription modulator [Source:NCBI gene;Acc:710486]                                                                 | - | 1.244174971 | 0.00161089  | 0.010035001 |
| ENSMMUG00000008214 | nuclear export mediator factor [Source:VGNC Symbol;Acc:VGNC:84407]                                                                  | - | 1.244122936 | 0.003195551 | 0.017476049 |
| ENSMMUG00000051966 |                                                                                                                                     | - | 1.241946389 | 0.000227106 | 0.001962005 |
| ENSMMUG00000019262 | calcium voltage-gated channel subunit alpha1 D [Source:VGNC Symbol;Acc:VGNC:70501]                                                  | - | 1.241801432 | 0.01087968  | 0.046824123 |
| ENSMMUG00000012290 | GLIPR1 like 2 [Source:VGNC Symbol;Acc:VGNC:81413]                                                                                   | - | 1.238971668 | 0.009471494 | 0.042075354 |

|                    |                                                                                              |             |             |             |
|--------------------|----------------------------------------------------------------------------------------------|-------------|-------------|-------------|
| ENSMMUG0000002321  | solute carrier family 24 member 3 [Source:VGNC Symbol;Acc:VGNC:77426]                        | 1.235898552 | 0.000766464 | 0.005411117 |
| ENSMMUG00000010495 | MAPK activated protein kinase 3 [Source:VGNC Symbol;Acc:VGNC:74654]                          | -1.23476581 | 0.00832019  | 0.037934922 |
| ENSMMUG00000019325 | mechanistic target of rapamycin kinase [Source:VGNC Symbol;Acc:VGNC:75062]                   | 1.233669723 | 2.45E-06    | 3.84E-05    |
| ENSMMUG00000022680 | alpha-2-macroglobulin like 1 [Source:VGNC Symbol;Acc:VGNC:69507]                             | 1.232758578 | 0.004203019 | 0.021806628 |
| ENSMMUG00000055477 |                                                                                              | 1.231587778 | 0.000118034 | 0.001116947 |
| ENSMMUG00000003191 | kirre like nephrin family adhesion molecule 1 [Source:VGNC Symbol;Acc:VGNC:73837]            | 1.228670947 | 1.58E-07    | 3.25E-06    |
| ENSMMUG00000002103 | delta/notch like EGF repeat containing [Source:VGNC Symbol;Acc:VGNC:71895]                   | 1.228269583 | 0.001096932 | 0.007277625 |
| ENSMMUG00000050544 |                                                                                              | 1.227983375 | 0.001350235 | 0.008669296 |
| ENSMMUG00000008797 | ATP binding cassette subfamily G member 2 (Junior blood group) [Source:NCBI gene;Acc:574307] | 1.227222185 | 1.99E-08    | 4.97E-07    |
| ENSMMUG00000060894 | Metazoan signal recognition particle RNA [Source:RFAM;Acc:RF00017]                           | 1.225911064 | 0.000780718 | 0.005493813 |
| ENSMMUG00000023778 | F-box protein 32 [Source:VGNC Symbol;Acc:VGNC:72517]                                         | 1.225852902 | 0.005418646 | 0.02684702  |
| ENSMMUG00000059038 | 5-hydroxytryptamine receptor 7 [Source:NCBI gene;Acc:696317]                                 | 1.223820297 | 0.001885948 | 0.011377061 |
| ENSMMUG00000011986 | chibby family member 2 [Source:VGNC Symbol;Acc:VGNC:78029]                                   | 1.222790131 | 0.002668547 | 0.015167353 |
| ENSMMUG00000032252 | UbiA prenyltransferase domain containing 1 [Source:VGNC Symbol;Acc:VGNC:79881]               | 1.221883322 | 2.45E-08    | 5.96E-07    |
| ENSMMUG00000050952 |                                                                                              | 1.215325029 | 0.008253747 | 0.037724771 |
| ENSMMUG00000042668 | cilia and flagella associated protein 61 [Source:NCBI gene;Acc:699814]                       | 1.212948619 | 0.001798533 | 0.01098765  |
| ENSMMUG00000021572 | solute carrier family 39 member 9 [Source:VGNC Symbol;Acc:VGNC:77523]                        | 1.211023778 | 2.75E-05    | 0.000320834 |
| ENSMMUG00000018625 | NIPA like domain containing 1 [Source:NCBI gene;Acc:704998]                                  | 1.210957685 | 1.79E-05    | 0.000219384 |
| ENSMMUG00000004153 | ATM serine/threonine kinase [Source:VGNC Symbol;Acc:VGNC:70173]                              | 1.208844263 | 0.01084002  | 0.046715408 |
| ENSMMUG00000019977 | myosin heavy chain 15 [Source:VGNC Symbol;Acc:VGNC:84148]                                    | 1.207961782 | 5.13E-05    | 0.000554583 |
| ENSMMUG00000004287 | death domain associated protein [Source:VGNC Symbol;Acc:VGNC:71737]                          | 1.207776894 | 0.000485813 | 0.003673604 |
| ENSMMUG00000052574 |                                                                                              | 1.207766492 | 3.82E-07    | 7.18E-06    |
| ENSMMUG00000017396 | 3'(2'), 5'-bisphosphate nucleotidase 1 [Source:NCBI gene;Acc:721277]                         | 1.206606284 | 0.004695604 | 0.023856757 |
| ENSMMUG00000019892 | myomesin 1 [Source:VGNC Symbol;Acc:VGNC:75123]                                               | 1.205442737 | 1.22E-05    | 0.000156494 |
| ENSMMUG00000020992 | calcineurin binding protein 1 [Source:NCBI gene;Acc:700566]                                  | -1.204406   | 7.26E-06    | 1.00E-04    |
| ENSMMUG00000038070 | T cell receptor alpha variable 12-3 [Source:HGNC Symbol;Acc:HGNC:12107]                      | 1.204332542 | 6.81E-05    | 0.000708335 |
| ENSMMUG00000018746 | FAST kinase domains 3 [Source:VGNC Symbol;Acc:VGNC:72588]                                    | 1.204086952 | 0.00041038  | 0.003209823 |
| ENSMMUG00000058240 |                                                                                              | 1.203907135 | 0.005426642 | 0.026876376 |
| ENSMMUG00000051112 | p53 and DNA damage regulated 1 [Source:NCBI gene;Acc:712622]                                 | 1.202832345 | 0.002618732 | 0.014918401 |



|                     |                                                                                         |             |             |             |
|---------------------|-----------------------------------------------------------------------------------------|-------------|-------------|-------------|
| ENSMMUG00000032973  | mml-mir-550 [Source:miRBase;Acc:MI0007826]                                              | -1.20218011 | 0.003260907 | 0.017711816 |
| ENSMMUG00000002947  | procollagen C-endopeptidase enhancer [Source:VGNC Symbol;Acc:VGNC:75782]                | 1.202000709 | 6.14E-09    | 1.73E-07    |
| ENSMMUG00000015004  | TOX high mobility group box family member 4 [Source:NCBI gene;Acc:706950]               | -1.20199626 | 0.005060988 | 0.025394967 |
| ENSMMUG00000011269  | CF transmembrane conductance regulator [Source:VGNC Symbol;Acc:VGNC:71020]              | 1.201249736 | 6.67E-06    | 9.27E-05    |
| ENSMMUG00000049351  | MAGE family member E1 [Source:NCBI gene;Acc:705379]                                     | 1.199736042 | 4.35E-07    | 8.11E-06    |
| ENSMMUG00000000797  | exophilin 5 [Source:VGNC Symbol;Acc:VGNC:72412]                                         | 1.198913678 | 4.13E-05    | 0.000460575 |
| ENSMMUG00000009087  | HDGF like 3 [Source:VGNC Symbol;Acc:VGNC:84346]                                         | 1.198897792 | 5.99E-05    | 0.000632941 |
| ENSMMUG000000054711 |                                                                                         | 1.197489972 | 1.49E-05    | 0.000186548 |
| ENSMMUG00000006704  | zygote arrest 1 [Source:VGNC Symbol;Acc:VGNC:79251]                                     | 1.197071621 | 0.000782895 | 0.005503166 |
| ENSMMUG00000008795  | polycystin 2, transient receptor potential cation channel [Source:NCBI gene;Acc:702179] | 1.195525969 | 3.28E-05    | 0.000373538 |
| ENSMMUG000000050458 |                                                                                         | 1.194960122 | 3.45E-06    | 5.14E-05    |
| ENSMMUG000000055344 | TLC domain containing 3A [Source:NCBI gene;Acc:699707]                                  | 1.194949581 | 0.000305294 | 0.002530537 |
| ENSMMUG00000015380  | proline and serine rich coiled-coil 1 [Source:VGNC Symbol;Acc:VGNC:76307]               | 1.194071448 | 2.16E-06    | 3.43E-05    |
| ENSMMUG00000008710  | protocadherin 1 [Source:VGNC Symbol;Acc:VGNC:75775]                                     | 1.192396898 | 0.003273947 | 0.017763724 |
| ENSMMUG00000000413  | solute carrier family 7 member 7 [Source:VGNC Symbol;Acc:VGNC:77631]                    | 1.191724997 | 4.62E-05    | 0.000506361 |
| ENSMMUG000000061796 |                                                                                         | 1.191051292 | 0.003450318 | 0.018515851 |
| ENSMMUG000000057697 |                                                                                         | 1.190001581 | 0.002631672 | 0.014977446 |
| ENSMMUG000000055845 | ankyrin repeat domain 53 [Source:NCBI gene;Acc:703757]                                  | 1.187865858 | 0.000296961 | 0.002473275 |
| ENSMMUG00000013848  | fucosyltransferase 8 [Source:VGNC Symbol;Acc:VGNC:72829]                                | 1.187477864 | 0.001119261 | 0.007398642 |
| ENSMMUG00000006128  | peptidase D [Source:VGNC Symbol;Acc:VGNC:82205]                                         | -1.18591087 | 0.000873542 | 0.006038938 |
| ENSMMUG00000023752  | SIX homeobox 2 [Source:VGNC Symbol;Acc:VGNC:81570]                                      | -1.18479049 | 0.001787628 | 0.010934028 |
| ENSMMUG000000050923 |                                                                                         | 1.184693325 | 8.19E-05    | 0.000823518 |
| ENSMMUG00000001212  | Rieske Fe-S domain containing [Source:VGNC Symbol;Acc:VGNC:84487]                       | 1.183355298 | 1.38E-07    | 2.89E-06    |
| ENSMMUG00000016857  | prostaglandin-endoperoxide synthase 2 [Source:VGNC Symbol;Acc:VGNC:76589]               | 1.181315938 | 2.48E-05    | 0.000294286 |
| ENSMMUG00000015522  | GRAM domain containing 1B [Source:VGNC Symbol;Acc:VGNC:73028]                           | 1.181111205 | 0.000121843 | 0.001144023 |
| ENSMMUG000000037625 |                                                                                         | 1.180708791 | 0.003069697 | 0.016949954 |
| ENSMMUG000000063463 |                                                                                         | 1.179147057 | 0.003548013 | 0.018907195 |
| ENSMMUG00000015962  | AT-rich interaction domain 2 [Source:VGNC Symbol;Acc:VGNC:69858]                        | 1.175799247 | 2.27E-05    | 0.000271685 |
| ENSMMUG00000008941  | DNA topoisomerase II alpha [Source:VGNC Symbol;Acc:VGNC:78620]                          | 1.173029787 | 2.96E-07    | 5.74E-06    |
| ENSMMUG00000013053  | sperm acrosome associated 6 [Source:NCBI gene;Acc:114674203]                            | -1.17251932 | 0.000233862 | 0.00201277  |

|                     |                                                                                                                      |   |             |             |             |
|---------------------|----------------------------------------------------------------------------------------------------------------------|---|-------------|-------------|-------------|
| ENSMMUG00000060319  | Metazoan signal recognition particle RNA [Source:RFAM;Acc:RF00017]                                                   | - | 1.170947468 | 0.002497956 | 0.014354949 |
| ENSMMUG00000023248  | serine/threonine kinase 38 like [Source:VGNC Symbol;Acc:VGNC:78156]                                                  | - | 1.167839852 | 0.004504443 | 0.023101207 |
| ENSMMUG00000004237  | TNF receptor superfamily member 19 [Source:VGNC Symbol;Acc:VGNC:78588]                                               | - | 1.166587797 | 1.69E-06    | 2.75E-05    |
| ENSMMUG00000009524  | adaptor protein, phosphotyrosine interacting with PH domain and leucine zipper 2 [Source:VGNC Symbol;Acc:VGNC:69861] | - | 1.165806191 | 6.96E-05    | 0.000721859 |
| ENSMMUG00000006217  | general transcription factor IIH subunit 2 [Source:NCBI gene;Acc:700737]                                             | - | 1.165711634 | 0.010478269 | 0.045488797 |
| ENSMMUG00000006775  | proenkephalin [Source:VGNC Symbol;Acc:VGNC:75941]                                                                    | - | 1.164597324 | 5.06E-05    | 0.000549691 |
| ENSMMUG00000044214  |                                                                                                                      | - | 1.163809384 | 1.33E-05    | 0.000169415 |
| ENSMMUG000000051641 |                                                                                                                      | - | 1.163423903 | 0.000157404 | 0.001431894 |
| ENSMMUG00000016286  | protease, serine, 1 (trypsin 1) [Source:NCBI gene;Acc:698729]                                                        | - | 1.163274192 | 8.25E-06    | 0.000111456 |
| ENSMMUG000000056306 |                                                                                                                      | - | 1.160500832 | 2.94E-05    | 0.000338522 |
| ENSMMUG000000063703 |                                                                                                                      | - | 1.159817269 | 0.00390849  | 0.02049154  |
| ENSMMUG000000052676 |                                                                                                                      | - | 1.159315123 | 3.56E-05    | 0.000403658 |
| ENSMMUG00000000717  | CD3e molecule associated protein [Source:NCBI gene;Acc:714440]                                                       | - | 1.158786346 | 0.000504486 | 0.003788317 |
| ENSMMUG00000008009  | family with sequence similarity 13 member B [Source:VGNC Symbol;Acc:VGNC:72268]                                      | - | 1.158638486 | 0.002077412 | 0.012287283 |
| ENSMMUG00000022442  | single stranded DNA binding protein 1 [Source:VGNC Symbol;Acc:VGNC:77886]                                            | - | 1.158065036 | 9.31E-06    | 0.000124128 |
| ENSMMUG00000009001  | transmembrane 131 like [Source:VGNC Symbol;Acc:VGNC:79781]                                                           | - | 1.157557073 | 0.01135071  | 0.048385943 |
| ENSMMUG000000053845 |                                                                                                                      | - | 1.156393934 | 0.000735009 | 0.00523175  |
| ENSMMUG00000022636  | GTPase, IMAP family member 8 [Source:VGNC Symbol;Acc:VGNC:72981]                                                     | - | 1.156036819 | 0.00086377  | 0.005977746 |
| ENSMMUG00000012192  | erythrocyte membrane protein band 4.1 like 4A [Source:VGNC Symbol;Acc:VGNC:72039]                                    | - | 1.155570879 | 0.000172679 | 0.001546363 |
| ENSMMUG00000022589  | prostate transmembrane protein, androgen induced 1 [Source:VGNC Symbol;Acc:VGNC:76023]                               | - | 1.153556375 | 0.000204887 | 0.001804901 |
| ENSMMUG00000010682  | fibrillin 2 [Source:VGNC Symbol;Acc:VGNC:72624]                                                                      | - | 1.151493291 | 2.52E-06    | 3.93E-05    |
| ENSMMUG00000017243  | ring finger protein 165 [Source:VGNC Symbol;Acc:VGNC:76877]                                                          | - | 1.151217808 | 0.007228544 | 0.034009276 |
| ENSMMUG00000020061  | protein phosphatase 1 regulatory subunit 9B [Source:VGNC Symbol;Acc:VGNC:76372]                                      | - | 1.149166581 | 2.25E-05    | 0.000270128 |
| ENSMMUG000000051261 |                                                                                                                      | - | 1.148438468 | 0.009532315 | 0.042244304 |
| ENSMMUG00000003621  | AKT serine/threonine kinase 2 [Source:VGNC Symbol;Acc:VGNC:69777]                                                    | - | -1.1461429  | 1.41E-07    | 2.93E-06    |
| ENSMMUG000000056054 | zinc finger and BTB domain containing 3 [Source:NCBI gene;Acc:722240]                                                | - | 1.143367026 | 1.62E-07    | 3.32E-06    |
| ENSMMUG00000009303  | coiled-coil domain containing 38 [Source:VGNC Symbol;Acc:VGNC:70880]                                                 | - | 1.143139121 | 0.001526828 | 0.009596746 |
| ENSMMUG000000053889 | olfactory receptor 7C1 [Source:NCBI gene;Acc:114674087]                                                              | - | 1.142798149 | 0.010000829 | 0.043815524 |
| ENSMMUG00000018332  | family with sequence similarity 98 member B [Source:VGNC Symbol;Acc:VGNC:72583]                                      | - | 1.140971048 | 1.59E-05    | 0.00019693  |

|                     |                                                                                    |             |             |             |
|---------------------|------------------------------------------------------------------------------------|-------------|-------------|-------------|
| ENSMMUG00000001894  | cyclin dependent kinase 11B [Source:NCBI gene;Acc:703046]                          | 1.140781966 | 0.000687487 | 0.004936816 |
| ENSMMUG000000062866 |                                                                                    | 1.139372893 | 0.001574144 | 0.009829686 |
| ENSMMUG00000003877  | KAT8 regulatory NSL complex subunit 2 [Source:VGNC Symbol;Acc:VGNC:73910]          | 1.138452844 | 0.006801112 | 0.032326458 |
| ENSMMUG000000011593 | regulator of cell cycle [Source:VGNC Symbol;Acc:VGNC:76783]                        | 1.133214828 | 9.63E-06    | 0.000128179 |
| ENSMMUG000000061779 |                                                                                    | 1.132833793 | 0.000209613 | 0.00183887  |
| ENSMMUG000000064089 |                                                                                    | 1.132284454 | 1.81E-08    | 4.57E-07    |
| ENSMMUG000000014307 | myostatin [Source:VGNC Symbol;Acc:VGNC:74870]                                      | 1.131775383 | 1.23E-06    | 2.07E-05    |
| ENSMMUG000000050773 |                                                                                    | 1.130993248 | 0.001968975 | 0.01178479  |
| ENSMMUG00000001640  | SIX homeobox 4 [Source:NCBI gene;Acc:703798]                                       | 1.129405713 | 0.001269723 | 0.008233844 |
| ENSMMUG00000008212  | tenomodulin [Source:VGNC Symbol;Acc:VGNC:79087]                                    | 1.127383112 | 0.000452508 | 0.003464155 |
| ENSMMUG000000064202 |                                                                                    | 1.127297416 | 0.00720367  | 0.033941474 |
| ENSMMUG000000060503 | Metazoan signal recognition particle RNA [Source:RFAM;Acc:RF00017]                 | 1.127111667 | 0.006351599 | 0.030596108 |
| ENSMMUG00000002890  | tripartite motif containing 15 [Source:VGNC Symbol;Acc:VGNC:83958]                 | 1.127016647 | 0.000309268 | 0.00255935  |
| ENSMMUG00000003497  | FAT atypical cadherin 2 [Source:VGNC Symbol;Acc:VGNC:72618]                        | 1.126252035 | 2.54E-06    | 3.95E-05    |
| ENSMMUG00000007524  | RNA polymerase II subunit H [Source:VGNC Symbol;Acc:VGNC:76216]                    | 1.124130926 | 9.57E-05    | 0.000936078 |
| ENSMMUG000000038560 | eukaryotic translation elongation factor 1 epsilon 1 [Source:NCBI gene;Acc:695426] | 1.123927437 | 1.09E-07    | 2.33E-06    |
| ENSMMUG000000018685 | chromodomain helicase DNA binding protein 4 [Source:VGNC Symbol;Acc:VGNC:71029]    | 1.123767429 | 4.51E-06    | 6.52E-05    |
| ENSMMUG000000015640 | AF4/FMR2 family member 4 [Source:VGNC Symbol;Acc:VGNC:69629]                       | 1.123032905 | 0.000170948 | 0.001534038 |
| ENSMMUG000000013552 | scribble planar cell polarity protein [Source:HGNC Symbol;Acc:HGNC:30377]          | 1.121294142 | 1.10E-06    | 1.87E-05    |
| ENSMMUG000000044782 |                                                                                    | 1.120621158 | 2.45E-06    | 3.84E-05    |
| ENSMMUG00000007709  | crooked neck pre-mRNA splicing factor 1 [Source:VGNC Symbol;Acc:VGNC:71412]        | 1.120593189 | 3.08E-06    | 4.66E-05    |
| ENSMMUG000000010689 | fermitin family member 2 [Source:VGNC Symbol;Acc:VGNC:82144]                       | 1.119871618 | 5.78E-05    | 0.000613306 |
| ENSMMUG000000012203 | aryl hydrocarbon receptor [Source:NCBI gene;Acc:714254]                            | 1.119212645 | 0.000168812 | 0.001516967 |
| ENSMMUG000000054210 | C-C motif chemokine 4 [Source:NCBI gene;Acc:100426632]                             | 1.118513021 | 4.68E-10    | 1.60E-08    |
| ENSMMUG00000003288  | glutamic--pyruvic transaminase 2 [Source:VGNC Symbol;Acc:VGNC:72962]               | 1.116676589 | 0.00013411  | 0.001243006 |
| ENSMMUG00000002337  | aquarius intron-binding spliceosomal factor [Source:VGNC Symbol;Acc:VGNC:69925]    | 1.115578649 | 0.006293478 | 0.030369716 |
| ENSMMUG000000055400 | U6 spliceosomal RNA [Source:RFAM;Acc:RF00026]                                      | 1.115254634 | 0.000841032 | 0.005845327 |
| ENSMMUG000000016927 | solute carrier family 2 member 10 [Source:VGNC Symbol;Acc:VGNC:77465]              | 1.114035509 | 1.68E-06    | 2.73E-05    |

|                    |                                                                                                    |   |             |             |             |
|--------------------|----------------------------------------------------------------------------------------------------|---|-------------|-------------|-------------|
| ENSMMUG00000012156 | zinc finger CCHC-type containing 17 [Source:VGNC Symbol;Acc:VGNC:79840]                            | - | 1.113843873 | 1.05E-07    | 2.26E-06    |
| ENSMMUG00000048302 | ArfGAP with FG repeats 2 [Source:VGNC Symbol;Acc:VGNC:80329]                                       | - | 1.111710403 | 3.82E-07    | 7.18E-06    |
| ENSMMUG00000013920 | triggering receptor expressed on myeloid cells 2 [Source:VGNC Symbol;Acc:VGNC:79089]               | - | 1.111457658 | 0.000600723 | 0.004416422 |
| ENSMMUG00000012029 | sulfatase 2 [Source:VGNC Symbol;Acc:VGNC:78179]                                                    | - | 1.108739505 | 0.000207348 | 0.001824104 |
| ENSMMUG00000009519 | WASH complex subunit 4 [Source:VGNC Symbol;Acc:VGNC:79783]                                         | - | -1.10846667 | 0.001108468 | 0.007342255 |
| ENSMMUG00000006187 | angiopoietin like 7 [Source:VGNC Symbol;Acc:VGNC:69683]                                            | - | 1.107756137 | 0.000218185 | 0.001900111 |
| ENSMMUG00000017414 | calcium voltage-gated channel subunit alpha1 S [Source:VGNC Symbol;Acc:VGNC:70507]                 | - | 1.107577126 | 0.000467664 | 0.003559187 |
| ENSMMUG00000007783 | isoleucyl-tRNA synthetase 2, mitochondrial [Source:VGNC Symbol;Acc:VGNC:73458]                     | - | 1.106265967 | 3.23E-08    | 7.67E-07    |
| ENSMMUG00000010879 | NAD kinase [Source:VGNC Symbol;Acc:VGNC:75047]                                                     | - | 1.104532501 | 0.009350321 | 0.0416581   |
| ENSMMUG00000040854 | aspartyl-tRNA synthetase 1 [Source:VGNC Symbol;Acc:VGNC:84226]                                     | - | 1.104206928 | 0.001222414 | 0.007978895 |
| ENSMMUG00000020435 | amine oxidase copper containing 1 [Source:VGNC Symbol;Acc:VGNC:70033]                              | - | 1.103044166 | 0.000456586 | 0.003491257 |
| ENSMMUG00000017259 | DnaJ heat shock protein family (Hsp40) member C6 [Source:NCBI gene;Acc:698682]                     | - | 1.101476472 | 0.001987312 | 0.01185229  |
| ENSMMUG00000015311 | leucine rich repeats and calponin homology domain containing 4 [Source:VGNC Symbol;Acc:VGNC:74441] | - | 1.101256291 | 3.69E-08    | 8.59E-07    |
| ENSMMUG00000013862 | ArfGAP with coiled-coil, ankyrin repeat and PH domains 3 [Source:VGNC Symbol;Acc:VGNC:69434]       | - | 1.100314502 | 0.000160193 | 0.001454291 |
| ENSMMUG00000054302 | antioxidant 1 copper chaperone [Source:NCBI gene;Acc:712464]                                       | - | -1.09185396 | 0.001379624 | 0.008836128 |
| ENSMMUG00000028701 |                                                                                                    | - | 1.091850509 | 0.009855521 | 0.043383165 |
| ENSMMUG00000059267 | pellino E3 ubiquitin protein ligase 1 [Source:NCBI gene;Acc:696416]                                | - | 1.091068293 | 1.36E-05    | 0.000171687 |
| ENSMMUG00000052889 | Metazoan signal recognition particle RNA [Source:RFAM;Acc:RF00017]                                 | - | 1.087693807 | 0.000352594 | 0.002854185 |
| ENSMMUG00000054817 | immunoglobulin binding protein 1 [Source:NCBI gene;Acc:694632]                                     | - | 1.087157418 | 0.009889305 | 0.043484793 |
| ENSMMUG00000017939 | FA core complex associated protein 24 [Source:VGNC Symbol;Acc:VGNC:72388]                          | - | 1.086946747 | 0.004317116 | 0.022291642 |
| ENSMMUG00000012561 | NOP2/Sun RNA methyltransferase family member 7 [Source:VGNC Symbol;Acc:VGNC:75463]                 | - | 1.086353292 | 2.19E-05    | 0.000264257 |
| ENSMMUG00000049196 | dispatched RND transporter family member 3 [Source:NCBI gene;Acc:722727]                           | - | 1.082145967 | 4.05E-06    | 5.94E-05    |
| ENSMMUG00000023137 | zinc finger protein 350 [Source:VGNC Symbol;Acc:VGNC:79041]                                        | - | 1.081848802 | 0.001202977 | 0.007871823 |
| ENSMMUG00000004974 | tripartite motif containing 21 [Source:VGNC Symbol;Acc:VGNC:78556]                                 | - | 1.081047075 | 0.000567884 | 0.004210778 |
| ENSMMUG00000017113 | ubiquitin specific peptidase 32 [Source:NCBI gene;Acc:716857]                                      | - | 1.080303837 | 5.87E-07    | 1.07E-05    |
| ENSMMUG00000015238 | O-linked N-acetylglucosamine (GlcNAc) transferase [Source:NCBI gene;Acc:698268]                    | - | 1.079481415 | 0.000396103 | 0.003126421 |
| ENSMMUG00000048823 |                                                                                                    | - | 1.078187496 | 0.000174487 | 0.001558258 |
| ENSMMUG00000007868 | AP2 associated kinase 1 [Source:VGNC Symbol;Acc:VGNC:82094]                                        | - | 1.076519479 | 0.000363147 | 0.002919579 |
| ENSMMUG00000011845 | hexokinase 2 [Source:VGNC Symbol;Acc:VGNC:73475]                                                   | - | 1.076100751 | 0.002792293 | 0.015712399 |



|                     |                                                                                    |             |             |             |
|---------------------|------------------------------------------------------------------------------------|-------------|-------------|-------------|
| ENSMMUG00000022163  | solute carrier family 1 member 5 [Source:VGNC Symbol;Acc:VGNC:77413]               | -1.07589907 | 0.009347508 | 0.0416581   |
| ENSMMUG00000028736  | hydroxysteroid 17-beta dehydrogenase 14 [Source:NCBI gene;Acc:106994816]           | 1.074513408 | 0.00252445  | 0.014475148 |
| ENSMMUG00000054462  |                                                                                    | -           |             |             |
| ENSMMUG00000013093  | uncharacterized LOC106993385 [Source:NCBI gene;Acc:106993385]                      | 1.074065982 | 8.13E-05    | 0.000817354 |
| ENSMMUG00000006197  | plasminogen receptor with a C-terminal lysine [Source:VGNC Symbol;Acc:VGNC:76098]  | -           |             |             |
| ENSMMUG00000028800  | solute carrier family 7 member 9 [Source:VGNC Symbol;Acc:VGNC:77633]               | 1.073686647 | 5.80E-07    | 1.05E-05    |
| ENSMMUG00000017615  | zinc finger CCHC-type containing 14 [Source:VGNC Symbol;Acc:VGNC:79420]            | -           |             |             |
| ENSMMUG00000031202  | RAB1B, member RAS oncogene family [Source:NCBI gene;Acc:721852]                    | 1.073580017 | 0.000431891 | 0.003339371 |
| ENSMMUG00000047741  | Metazoan signal recognition particle RNA [Source:RFAM;Acc:RF00017]                 | -           |             |             |
| ENSMMUG00000017351  | stabilin 1 [Source:VGNC Symbol;Acc:VGNC:77956]                                     | 1.072736575 | 0.00377758  | 0.019885547 |
| ENSMMUG00000058016  | bMERB domain containing 1 [Source:NCBI gene;Acc:713757]                            | -           |             |             |
| ENSMMUG00000001919  | clock circadian regulator [Source:VGNC Symbol;Acc:VGNC:71262]                      | 1.072159341 | 1.61E-08    | 4.08E-07    |
| ENSMMUG00000000058  | CDV3 homolog [Source:VGNC Symbol;Acc:VGNC:71114]                                   | -           |             |             |
| ENSMMUG00000018057  | uromodulin like 1 [Source:VGNC Symbol;Acc:VGNC:78717]                              | 1.072146344 | 0.000808216 | 0.005660647 |
| ENSMMUG00000013707  | heat shock protein family H (Hsp110) member 1 [Source:NCBI gene;Acc:721956]        | -1.07137656 | 0.000791529 | 0.005554827 |
| ENSMMUG00000017145  | cell division cycle 123 [Source:VGNC Symbol;Acc:VGNC:70768]                        | -           |             |             |
| ENSMMUG00000040506  | H2B clustered histone 18 [Source:HGNC Symbol;Acc:HGNC:24700]                       | 1.070959813 | 0.000411118 | 0.003213655 |
| ENSMMUG00000001892  | UDP-glucose 6-dehydrogenase [Source:VGNC Symbol;Acc:VGNC:78711]                    | -           |             |             |
| ENSMMUG00000063668  | cytochrome b5 domain containing 1 [Source:NCBI gene;Acc:716429]                    | 1.070653355 | 0.00108455  | 0.007213288 |
| ENSMMUG00000013812  | ubiquitin specific peptidase 44 [Source:VGNC Symbol;Acc:VGNC:79221]                | -           |             |             |
| ENSMMUG00000002653  | hexokinase 3 [Source:VGNC Symbol;Acc:VGNC:73476]                                   | 1.070478262 | 0.00073277  | 0.005218672 |
| ENSMMUG000000011702 | tetraspanin 5 [Source:VGNC Symbol;Acc:VGNC:79086]                                  | -           |             |             |
| ENSMMUG00000044759  |                                                                                    | 1.070172827 | 0.004029361 | 0.021014868 |
| ENSMMUG00000062443  |                                                                                    | -           |             |             |
| ENSMMUG00000015375  | cadherin EGF LAG seven-pass G-type receptor 2 [Source:VGNC Symbol;Acc:VGNC:71149]  | 1.069200522 | 0.003970639 | 0.020767036 |
| ENSMMUG00000055272  | putative uncharacterized protein ZNRD1-AS1 [Source:NCBI gene;Acc:712069]           | -           |             |             |
| ENSMMUG00000000117  | HCK proto-oncogene, Src family tyrosine kinase [Source:VGNC Symbol;Acc:VGNC:73353] | 1.069147306 | 8.13E-06    | 0.000110117 |
| ENSMMUG00000002775  | U2 snRNP associated SURP domain containing [Source:VGNC Symbol;Acc:VGNC:79889]     | -1.06860685 | 5.89E-05    | 0.000624119 |
| ENSMMUG00000015309  | F-box protein 24 [Source:VGNC Symbol;Acc:VGNC:72495]                               | -1.0685303  | 0.006191273 | 0.029976849 |
| ENSMMUG00000059080  |                                                                                    | -           |             |             |
| ENSMMUG00000061186  |                                                                                    | 1.067083939 | 0.000351826 | 0.002849748 |
|                     |                                                                                    | -           |             |             |
|                     |                                                                                    | 1.066901445 | 0.0066699   | 0.031819346 |
|                     |                                                                                    | -           |             |             |
|                     |                                                                                    | 1.066261783 | 0.004422675 | 0.022764235 |
|                     |                                                                                    | -1.06516281 | 5.73E-05    | 0.000608928 |
|                     |                                                                                    | -           |             |             |
|                     |                                                                                    | 1.064134951 | 0.0085002   | 0.03852553  |
|                     |                                                                                    | -           |             |             |
|                     |                                                                                    | 1.059376501 | 4.83E-05    | 0.000527119 |
|                     |                                                                                    | -           |             |             |
|                     |                                                                                    | 1.058431162 | 0.000981251 | 0.006662854 |
|                     |                                                                                    | -           |             |             |
|                     |                                                                                    | 1.057132101 | 3.10E-06    | 4.68E-05    |
|                     |                                                                                    | -           |             |             |
|                     |                                                                                    | 1.057040979 | 0.002978752 | 0.0165322   |
|                     |                                                                                    | -           |             |             |
|                     |                                                                                    | 1.056084315 | 0.003639932 | 0.019301906 |
|                     |                                                                                    | -           |             |             |
|                     |                                                                                    | 1.055190648 | 0.01078994  | 0.046530496 |
|                     |                                                                                    | -1.05486763 | 5.68E-06    | 8.05E-05    |
|                     |                                                                                    | -           |             |             |
|                     |                                                                                    | 1.054590084 | 0.011678056 | 0.049375839 |
|                     |                                                                                    | -           |             |             |
|                     |                                                                                    | 1.053442665 | 0.001658656 | 0.010263574 |

|                     |                                                                                                   |   |             |             |             |
|---------------------|---------------------------------------------------------------------------------------------------|---|-------------|-------------|-------------|
| ENSMMUG00000059353  | phosphatidylserine synthase 2 [Source:NCBI gene;Acc:698582]                                       | - | 1.053397103 | 3.92E-05    | 0.000439658 |
| ENSMMUG00000023679  | tripartite motif containing 26 [Source:VGNC Symbol;Acc:VGNC:78854]                                | - | 1.051458224 | 0.000428943 | 0.00332098  |
| ENSMMUG00000008539  | uroporphyrinogen III synthase [Source:VGNC Symbol;Acc:VGNC:78731]                                 | - | 1.051148558 | 3.83E-06    | 5.63E-05    |
| ENSMMUG00000019265  | zinc finger protein 575 [Source:VGNC Symbol;Acc:VGNC:79667]                                       | - | 1.050302601 | 0.003102847 | 0.017074871 |
| ENSMMUG00000003712  | zinc finger protein 615 [Source:VGNC Symbol;Acc:VGNC:79454]                                       | - | 1.044624518 | 0.008359622 | 0.038034521 |
| ENSMMUG00000022202  | basic leucine zipper and W2 domains 1 [Source:VGNC Symbol;Acc:VGNC:84213]                         | - | 1.042786312 | 8.36E-05    | 0.000835235 |
| ENSMMUG00000064237  |                                                                                                   | - | -1.04241093 | 0.000219871 | 0.001910952 |
| ENSMMUG00000001008  | spectrin repeat containing nuclear envelope protein 2 [Source:NCBI gene;Acc:706759]               | - | 1.041856138 | 7.30E-05    | 0.000748049 |
| ENSMMUG000000051552 |                                                                                                   | - | 1.041419163 | 0.006028393 | 0.02929754  |
| ENSMMUG00000061260  | Spi-C transcription factor [Source:NCBI gene;Acc:695809]                                          | - | 1.040448342 | 0.000439823 | 0.003385021 |
| ENSMMUG00000000388  | plectin [Source:VGNC Symbol;Acc:VGNC:76173]                                                       | - | 1.038800904 | 0.000357375 | 0.002885683 |
| ENSMMUG00000018058  | ATP binding cassette subfamily G member 1 [Source:VGNC Symbol;Acc:VGNC:69584]                     | - | 1.037739181 | 0.008853549 | 0.03987631  |
| ENSMMUG00000021878  | timeless circadian regulator [Source:VGNC Symbol;Acc:VGNC:78356]                                  | - | 1.037513234 | 0.002810605 | 0.015801738 |
| ENSMMUG00000013094  | lipoyl(octanoyl) transferase 2 [Source:NCBI gene;Acc:718425]                                      | - | 1.034366731 | 1.76E-05    | 0.000216117 |
| ENSMMUG00000007256  | splicing factor 3b subunit 4 [Source:VGNC Symbol;Acc:VGNC:77182]                                  | - | 1.033807375 | 0.000394336 | 0.00311626  |
| ENSMMUG00000005801  | glyceronephosphate O-acyltransferase [Source:VGNC Symbol;Acc:VGNC:73100]                          | - | 1.030938795 | 0.000814642 | 0.005698539 |
| ENSMMUG00000021837  | seryl-tRNA synthetase 1 [Source:NCBI gene;Acc:695046]                                             | - | 1.030768053 | 2.28E-05    | 0.000272293 |
| ENSMMUG00000016896  | solute carrier family 12 member 1 [Source:VGNC Symbol;Acc:VGNC:77385]                             | - | -1.0299646  | 2.36E-06    | 3.71E-05    |
| ENSMMUG00000013510  | FMR1 autosomal homolog 2 [Source:NCBI gene;Acc:721889]                                            | - | 1.028588133 | 0.002405011 | 0.013907049 |
| ENSMMUG00000023810  | methionyl-tRNA synthetase 2, mitochondrial [Source:VGNC Symbol;Acc:VGNC:74572]                    | - | 1.028505436 | 2.53E-05    | 0.000298239 |
| ENSMMUG00000014350  | MAX interactor 1, dimerization protein [Source:VGNC Symbol;Acc:VGNC:75087]                        | - | 1.028236556 | 0.000735906 | 0.005235258 |
| ENSMMUG00000007570  | veal autoantigen with coiled-coil domains and ankyrin repeats [Source:VGNC Symbol;Acc:VGNC:78995] | - | 1.028117628 | 3.79E-06    | 5.59E-05    |
| ENSMMUG00000008459  | pleckstrin homology and RUN domain containing M1 [Source:NCBI gene;Acc:716464]                    | - | -1.02704187 | 0.004755692 | 0.024114834 |
| ENSMMUG00000043458  | transmembrane protein 178A [Source:NCBI gene;Acc:714010]                                          | - | -1.02677672 | 0.001490764 | 0.009408632 |
| ENSMMUG00000007692  | apolipoprotein B [Source:VGNC Symbol;Acc:VGNC:69985]                                              | - | 1.026136184 | 3.57E-06    | 5.29E-05    |
| ENSMMUG00000016543  | CREB/ATF bZIP transcription factor [Source:VGNC Symbol;Acc:VGNC:71538]                            | - | -1.02503381 | 0.008345912 | 0.038012129 |
| ENSMMUG00000006713  | cyclin Y [Source:VGNC Symbol;Acc:VGNC:70840]                                                      | - | 1.022839998 | 0.000121509 | 0.00114171  |
| ENSMMUG00000022631  | ubiquitin specific peptidase 21 [Source:VGNC Symbol;Acc:VGNC:78741]                               | - | 1.022487135 | 0.007509634 | 0.035039556 |
| ENSMMUG00000017678  | kelch like family member 28 [Source:VGNC Symbol;Acc:VGNC:74085]                                   | - | 1.021666307 | 0.010520187 | 0.045609738 |
| ENSMMUG00000062538  | adenylate cyclase type 10 [Source:NCBI gene;Acc:719662]                                           | - | -1.02148235 | 0.002839355 | 0.015915107 |
| ENSMMUG00000049997  |                                                                                                   | - | 1.021344593 | 0.000277796 | 0.002333451 |



|                    |                                                                                                |   |             |             |             |
|--------------------|------------------------------------------------------------------------------------------------|---|-------------|-------------|-------------|
| ENSMMUG00000049948 |                                                                                                | - | 1.020890622 | 0.000656617 | 0.004749311 |
| ENSMMUG00000017892 | RNA polymerase I subunit E [Source:VGNC Symbol;Acc:VGNC:76047]                                 | - | 1.020154289 | 0.003865601 | 0.020283815 |
| ENSMMUG00000007724 | aprataxin [Source:VGNC Symbol;Acc:VGNC:69838]                                                  | - | 1.017886866 | 1.10E-05    | 0.000143195 |
| ENSMMUG00000000059 | DNA topoisomerase II binding protein 1 [Source:VGNC Symbol;Acc:VGNC:79061]                     | - | -1.01732091 | 2.13E-05    | 0.000258309 |
| ENSMMUG00000017230 | V-set and transmembrane domain containing 2 like [Source:NCBI gene;Acc:707394]                 | - | 1.016661082 | 2.63E-06    | 4.07E-05    |
| ENSMMUG00000001121 | zinc finger protein 689 [Source:VGNC Symbol;Acc:VGNC:79480]                                    | - | 1.016660386 | 0.004891338 | 0.024658119 |
| ENSMMUG00000002109 | proline and serine rich 1 [Source:VGNC Symbol;Acc:VGNC:76291]                                  | - | 1.016386844 | 2.29E-05    | 0.000273195 |
| ENSMMUG00000020036 | Sp1 transcription factor [Source:VGNC Symbol;Acc:VGNC:77844]                                   | - | 1.015760134 | 0.003234811 | 0.017644315 |
| ENSMMUG00000033001 | U6 spliceosomal RNA [Source:RFAM;Acc:RF00026]                                                  | - | 1.015126817 | 0.000121433 | 0.00114171  |
| ENSMMUG00000009695 | BTB domain containing 10 [Source:VGNC Symbol;Acc:VGNC:70361]                                   | - | 1.014666688 | 0.00190715  | 0.011472961 |
| ENSMMUG00000060665 |                                                                                                | - | 1.013153303 | 0.006058881 | 0.029434684 |
| ENSMMUG00000023446 | tuftelin interacting protein 11 [Source:VGNC Symbol;Acc:VGNC:78399]                            | - | 1.011471172 | 0.001414114 | 0.009012544 |
| ENSMMUG00000010252 | FERM and PDZ domain containing 4 [Source:VGNC Symbol;Acc:VGNC:72802]                           | - | 1.010725381 | 0.010937329 | 0.047025441 |
| ENSMMUG00000054660 | R-spondin 2 [Source:NCBI gene;Acc:697376]                                                      | - | 1.009753703 | 0.000938483 | 0.006419482 |
| ENSMMUG00000015168 | transmembrane p24 trafficking protein 10 [Source:NCBI gene;Acc:701522]                         | - | 1.008923532 | 0.006459079 | 0.031018878 |
| ENSMMUG00000047974 | aldehyde oxidase 4 [Source:NCBI gene;Acc:701502]                                               | - | 1.008256571 | 5.71E-06    | 8.09E-05    |
| ENSMMUG00000049437 | Metazoan signal recognition particle RNA [Source:RFAM;Acc:RF00017]                             | - | 1.007872597 | 0.004642497 | 0.023670761 |
| ENSMMUG00000050271 |                                                                                                | - | 1.007695304 | 0.009856163 | 0.043383165 |
| ENSMMUG00000000718 | ERCC excision repair 1, endonuclease non-catalytic subunit [Source:VGNC Symbol;Acc:VGNC:72422] | - | -1.00660546 | 0.000407304 | 0.003191809 |
| ENSMMUG00000010819 | fibroblast growth factor receptor substrate 2 [Source:VGNC Symbol;Acc:VGNC:72732]              | - | 1.006444774 | 1.90E-07    | 3.81E-06    |
| ENSMMUG00000053624 |                                                                                                | - | 1.005662978 | 0.004750905 | 0.024099977 |
| ENSMMUG00000004362 | Fc fragment of IgG receptor Ia [Source:NCBI gene;Acc:714664]                                   | - | 1.003968515 | 0.000961611 | 0.006553542 |
| ENSMMUG00000012124 | ring finger protein 39 [Source:VGNC Symbol;Acc:VGNC:83458]                                     | - | 1.003349304 | 0.010902548 | 0.046891438 |
| ENSMMUG00000018814 | diacylglycerol kinase alpha [Source:VGNC Symbol;Acc:VGNC:71780]                                | - | 0.998753959 | 0.005743725 | 0.028188567 |
| ENSMMUG00000063262 |                                                                                                | - | 0.997916134 | 5.33E-05    | 0.000574147 |
| ENSMMUG00000012129 | tripartite motif containing 10 [Source:VGNC Symbol;Acc:VGNC:78550]                             | - | 0.997387167 | 6.48E-05    | 0.000677634 |
| ENSMMUG00000003325 | pyridoxamine 5'-phosphate oxidase [Source:VGNC Symbol;Acc:VGNC:76141]                          | - | 0.997137107 | 0.000491614 | 0.003710987 |
| ENSMMUG00000020510 | kelch like family member 41 [Source:VGNC Symbol;Acc:VGNC:74062]                                | - | 0.993468276 | 0.000229907 | 0.001982549 |
| ENSMMUG00000023811 | boule homolog, RNA binding protein [Source:VGNC Symbol;Acc:VGNC:70310]                         | - | 0.992760093 | 0.00082404  | 0.005755529 |

|                    |                                                                                                         |   |             |             |             |
|--------------------|---------------------------------------------------------------------------------------------------------|---|-------------|-------------|-------------|
| ENSMMUG0000002244  | early endosome antigen 1 [Source:VGNC Symbol;Acc:VGNC:72161]                                            | - | 0.992389003 | 7.40E-05    | 0.00075621  |
| ENSMMUG00000011359 | eukaryotic translation initiation factor 3 subunit E [Source:VGNC Symbol;Acc:VGNC:83997]                | - | -0.99142225 | 0.009489519 | 0.04208339  |
| ENSMMUG00000009425 | actin, cytoplasmic 2-like [Source:NCBI gene;Acc:705671]                                                 | - | 0.991334455 | 0.000153625 | 0.001403101 |
| ENSMMUG00000012110 | smoothened, frizzled class receptor [Source:VGNC Symbol;Acc:VGNC:77658]                                 | - | 0.989620267 | 0.001412884 | 0.009009135 |
| ENSMMUG00000057021 | CLOCK interacting pacemaker [Source:NCBI gene;Acc:704679]                                               | - | -0.98954637 | 0.008430077 | 0.038301359 |
| ENSMMUG00000043504 |                                                                                                         | - | 0.989240506 | 0.000166669 | 0.001500833 |
| ENSMMUG00000007244 | OTU deubiquitinase 7B [Source:VGNC Symbol;Acc:VGNC:75634]                                               | - | 0.987995725 | 0.000315666 | 0.002600691 |
| ENSMMUG00000007310 | solute carrier family 25 member 12 [Source:VGNC Symbol;Acc:VGNC:77430]                                  | - | 0.987496327 | 0.000408989 | 0.00320087  |
| ENSMMUG00000018657 | dedicator of cytokinesis 9 [Source:VGNC Symbol;Acc:VGNC:71835]                                          | - | -0.98727396 | 0.003195951 | 0.017476049 |
| ENSMMUG00000003029 | protein arginine methyltransferase 1 [Source:NCBI gene;Acc:719419]                                      | - | 0.986874018 | 5.30E-06    | 7.58E-05    |
| ENSMMUG00000065031 |                                                                                                         | - | 0.986331241 | 1.51E-05    | 0.000188868 |
| ENSMMUG00000061834 |                                                                                                         | - | 0.985115086 | 0.002875731 | 0.01606587  |
| ENSMMUG00000061433 |                                                                                                         | - | 0.984673558 | 0.002188859 | 0.012851873 |
| ENSMMUG00000022697 | STEAP4 metalloredutase [Source:VGNC Symbol;Acc:VGNC:77974]                                              | - | 0.984593488 | 1.95E-05    | 0.000238207 |
| ENSMMUG00000002121 | armadillo like helical domain containing 4 [Source:VGNC Symbol;Acc:VGNC:82106]                          | - | 0.984279273 | 0.002267459 | 0.01322956  |
| ENSMMUG00000008713 | myosin binding protein H like [Source:NCBI gene;Acc:698183]                                             | - | 0.982785164 | 0.000153653 | 0.001403101 |
| ENSMMUG00000009775 | caveolae associated protein 4 [Source:NCBI gene;Acc:714379]                                             | - | 0.982639498 | 2.27E-05    | 0.000271685 |
| ENSMMUG00000057627 |                                                                                                         | - | 0.982173224 | 0.001395131 | 0.008926635 |
| ENSMMUG00000008396 | methylmalonyl-CoA epimerase [Source:NCBI gene;Acc:704094]                                               | - | 0.981200615 | 2.57E-06    | 3.99E-05    |
| ENSMMUG00000007561 | zinc finger DHHC-type palmitoyltransferase 22 [Source:NCBI gene;Acc:706468]                             | - | 0.981134562 | 0.003755561 | 0.019777664 |
| ENSMMUG00000062006 | methionyl aminopeptidase 2 [Source:NCBI gene;Acc:712400]                                                | - | 0.980022373 | 0.000490183 | 0.00370234  |
| ENSMMUG00000051670 |                                                                                                         | - | 0.979809438 | 0.004765185 | 0.024151266 |
| ENSMMUG00000052791 |                                                                                                         | - | 0.979425423 | 0.003258148 | 0.017704856 |
| ENSMMUG00000005923 | failed axon connections homolog, metaxin like GST domain containing [Source:VGNC Symbol;Acc:VGNC:72541] | - | 0.976279321 | 0.006761866 | 0.03216348  |
| ENSMMUG00000021806 | vestigial like family member 4 [Source:VGNC Symbol;Acc:VGNC:79755]                                      | - | 0.974404572 | 0.001796169 | 0.010978372 |
| ENSMMUG00000007968 | hedgehog interacting protein [Source:VGNC Symbol;Acc:VGNC:73169]                                        | - | 0.973526928 | 0.00251715  | 0.014439674 |
| ENSMMUG00000064458 |                                                                                                         | - | 0.973420804 | 0.005226669 | 0.026055038 |
| ENSMMUG00000021620 | ELKS/RAB6-interacting/CAST family member 2 [Source:VGNC Symbol;Acc:VGNC:72164]                          | - | 0.973211459 | 5.52E-06    | 7.85E-05    |
| ENSMMUG00000044344 | vasorin [Source:NCBI gene;Acc:100426861]                                                                | - | 0.973122238 | 0.00591998  | 0.028835458 |

|                    |                                                                                             |   |             |             |             |
|--------------------|---------------------------------------------------------------------------------------------|---|-------------|-------------|-------------|
| ENSMMUG00000019146 | DNA polymerase delta interacting protein 2 [Source:VGNC Symbol;Acc:VGNC:76099]              | - | 0.971476509 | 0.001445363 | 0.009184638 |
| ENSMMUG00000047027 | zinc finger protein 100-like [Source:NCBI gene;Acc:693860]                                  | - | 0.971301707 | 0.005015623 | 0.025216086 |
| ENSMMUG00000030381 | arachidonate 15-lipoxygenase [Source:VGNC Symbol;Acc:VGNC:69796]                            | - | 0.971242029 | 0.000575615 | 0.0042608   |
| ENSMMUG00000063482 |                                                                                             | - | 0.969950098 | 0.01129504  | 0.048227852 |
| ENSMMUG00000022293 | FERM and PDZ domain containing 3 [Source:VGNC Symbol;Acc:VGNC:72805]                        | - | -0.96976891 | 2.48E-06    | 3.88E-05    |
| ENSMMUG00000049575 | T cell receptor beta variable 7-2 [Source:HGNC Symbol;Acc:HGNC:12236]                       | - | 0.969533682 | 0.00284138  | 0.015919581 |
| ENSMMUG00000007565 | Cbl proto-oncogene B [Source:VGNC Symbol;Acc:VGNC:70555]                                    | - | 0.969291129 | 8.82E-05    | 0.00087331  |
| ENSMMUG00000020202 | melanoma-associated antigen D4 [Source:NCBI gene;Acc:106996411]                             | - | 0.969193683 | 0.00732493  | 0.034348326 |
| ENSMMUG00000047015 | ral-GDS-related protein-like [Source:NCBI gene;Acc:106995524]                               | - | -0.96824274 | 0.006712489 | 0.031987239 |
| ENSMMUG00000021474 | zinc finger protein 45 [Source:NCBI gene;Acc:712591]                                        | - | 0.966703253 | 7.44E-05    | 0.000760602 |
| ENSMMUG00000022359 | solute carrier family 38 member 2 [Source:VGNC Symbol;Acc:VGNC:77469]                       | - | 0.966436841 | 0.000421265 | 0.003279376 |
| ENSMMUG00000003120 | HECT domain E3 ubiquitin protein ligase 1 [Source:VGNC Symbol;Acc:VGNC:73200]               | - | 0.966284767 | 0.003254512 | 0.017704856 |
| ENSMMUG00000047276 | GTPase, IMAP family member 6 [Source:VGNC Symbol;Acc:VGNC:81315]                            | - | -0.96577837 | 0.001287894 | 0.008330863 |
| ENSMMUG00000065035 | kallikrein-2 [Source:NCBI gene;Acc:719436]                                                  | - | 0.965748188 | 0.007506859 | 0.03503921  |
| ENSMMUG00000063655 | sodium voltage-gated channel beta subunit 4 [Source:NCBI gene;Acc:100430940]                | - | 0.965623632 | 0.001235722 | 0.008057654 |
| ENSMMUG00000018285 | cysteine rich with EGF like domains 1 [Source:VGNC Symbol;Acc:VGNC:71407]                   | - | 0.965497895 | 3.09E-05    | 0.000354543 |
| ENSMMUG00000061458 | zinc finger protein 681 [Source:NCBI gene;Acc:698090]                                       | - | 0.964454953 | 0.005611015 | 0.027641813 |
| ENSMMUG00000007923 | phosphatidylinositol glycan anchor biosynthesis class W [Source:VGNC Symbol;Acc:VGNC:75850] | - | 0.964183971 | 0.003550543 | 0.01891291  |
| ENSMMUG00000002176 | ubiquitin like with PHD and ring finger domains 2 [Source:VGNC Symbol;Acc:VGNC:78714]       | - | 0.964090941 | 1.06E-05    | 0.000138884 |
| ENSMMUG00000021691 | spastin [Source:VGNC Symbol;Acc:VGNC:77857]                                                 | - | 0.963726745 | 0.002670616 | 0.015172464 |
| ENSMMUG00000021168 | unc-5 family C-terminal like [Source:VGNC Symbol;Acc:VGNC:79314]                            | - | 0.963459118 | 5.12E-05    | 0.000553944 |
| ENSMMUG00000055970 |                                                                                             | - | 0.962682122 | 0.001671865 | 0.010325617 |
| ENSMMUG00000058583 | RRAD and GEM like GTPase 1 [Source:NCBI gene;Acc:713351]                                    | - | 0.959319225 | 7.06E-05    | 0.000727489 |
| ENSMMUG00000054683 | dynein axonemal heavy chain 12 [Source:NCBI gene;Acc:703670]                                | - | 0.956558609 | 0.003075487 | 0.016967484 |
| ENSMMUG00000001482 | coiled-coil domain containing 32 [Source:VGNC Symbol;Acc:VGNC:70891]                        | - | 0.956371718 | 0.003060808 | 0.016908067 |
| ENSMMUG00000002519 | serine/threonine kinase 11 interacting protein [Source:VGNC Symbol;Acc:VGNC:77963]          | - | 0.955944185 | 5.21E-09    | 1.49E-07    |
| ENSMMUG00000044047 | killer cell lectin like receptor B1 [Source:NCBI gene;Acc:100430783]                        | - | 0.955675012 | 0.008570272 | 0.03880246  |
| ENSMMUG00000018284 | mutS homolog 3 [Source:VGNC Symbol;Acc:VGNC:74932]                                          | - | -0.95525202 | 0.00059252  | 0.004367252 |
| ENSMMUG00000021377 | SPT3 homolog, SAGA and STAGA complex component [Source:VGNC Symbol;Acc:VGNC:78055]          | - | 0.955032337 | 0.000994185 | 0.006729548 |
| ENSMMUG00000065008 |                                                                                             | - | 0.953705559 | 0.006969082 | 0.032984366 |

|                    |                                                                                                       |             |             |             |
|--------------------|-------------------------------------------------------------------------------------------------------|-------------|-------------|-------------|
| ENSMMUG0000008946  | chromosome 19 C19orf47 homolog [Source:VGNC Symbol;Acc:VGNC:70404]                                    | -0.95343205 | 0.000284161 | 0.002377355 |
| ENSMMUG0000000353  | putative methyltransferase-like protein 21E pseudogene [Source:NCBI gene;Acc:707949]                  | 0.953309892 | 0.004396901 | 0.022667537 |
| ENSMMUG00000058151 | chromosome 4 C6orf62 homolog [Source:NCBI gene;Acc:708218]                                            | 0.952616976 | 4.24E-05    | 0.000470695 |
| ENSMMUG00000002370 | integrin subunit alpha 6 [Source:VGNC Symbol;Acc:VGNC:73780]                                          | 0.952454696 | 0.000100705 | 0.000977375 |
| ENSMMUG00000064131 |                                                                                                       | 0.951993997 | 0.004996504 | 0.025139446 |
| ENSMMUG00000013032 | phytanoyl-CoA 2-hydroxylase interacting protein [Source:VGNC Symbol;Acc:VGNC:75812]                   | 0.949691136 | 0.005078602 | 0.025463656 |
| ENSMMUG00000052581 | upstream transcription factor family member 3 [Source:NCBI gene;Acc:709660]                           | 0.949378695 | 5.62E-05    | 0.000600194 |
| ENSMMUG00000052382 | histone H4 [Source:NCBI gene;Acc:107000818]                                                           | 0.947950609 | 1.29E-05    | 0.000164006 |
| ENSMMUG00000022678 | Rh family C glycoprotein [Source:VGNC Symbol;Acc:VGNC:84427]                                          | 0.946622847 | 0.003702258 | 0.019552503 |
| ENSMMUG00000016135 | neural precursor cell expressed, developmentally down-regulated 9 [Source:VGNC Symbol;Acc:VGNC:75304] | 0.944572489 | 0.008648716 | 0.039108227 |
| ENSMMUG00000018282 | interleukin 17 receptor C [Source:VGNC Symbol;Acc:VGNC:84164]                                         | 0.944338144 | 0.002146759 | 0.012621816 |
| ENSMMUG00000006454 | kelch like family member 18 [Source:VGNC Symbol;Acc:VGNC:74154]                                       | 0.943582763 | 0.007223358 | 0.033997203 |
| ENSMMUG00000008918 | SRP receptor subunit beta [Source:VGNC Symbol;Acc:VGNC:77980]                                         | 0.943180014 | 0.003570388 | 0.018987442 |
| ENSMMUG00000050082 |                                                                                                       | 0.942986496 | 0.010426109 | 0.04532474  |
| ENSMMUG00000016753 | dynein axonemal heavy chain 3 [Source:VGNC Symbol;Acc:VGNC:71941]                                     | 0.941924546 | 7.01E-05    | 0.000724027 |
| ENSMMUG00000009006 | round spermatid basic protein 1 like [Source:VGNC Symbol;Acc:VGNC:77097]                              | 0.941922682 | 4.36E-05    | 0.000481004 |
| ENSMMUG00000010944 | GATA binding protein 6 [Source:VGNC Symbol;Acc:VGNC:72891]                                            | 0.941777026 | 0.001828383 | 0.011122878 |
| ENSMMUG00000060439 | schlafen family member 12 like [Source:NCBI gene;Acc:106992394]                                       | 0.941090079 | 0.003566911 | 0.018977594 |
| ENSMMUG00000004754 | intermediate filament family orphan 2 [Source:NCBI gene;Acc:106995162]                                | 0.940462634 | 0.003091047 | 0.017033706 |
| ENSMMUG00000046901 | protein tyrosine phosphatase 4A2 [Source:NCBI gene;Acc:706489]                                        | 0.939357714 | 0.002730705 | 0.015412626 |
| ENSMMUG00000058836 | transmembrane p24 trafficking protein 2 [Source:NCBI gene;Acc:106992483]                              | 0.939086926 | 0.001311073 | 0.008459713 |
| ENSMMUG00000023450 | tyrosylprotein sulfotransferase 2 [Source:VGNC Symbol;Acc:VGNC:78639]                                 | 0.937956384 | 0.011433931 | 0.048628873 |
| ENSMMUG00000003876 | zinc finger and BTB domain containing 22 [Source:VGNC Symbol;Acc:VGNC:78893]                          | 0.935922561 | 0.000863402 | 0.005977746 |
| ENSMMUG00000015371 | microtubule associated serine/threonine kinase 2 [Source:VGNC Symbol;Acc:VGNC:74532]                  | 0.935294354 | 0.0060824   | 0.029526834 |
| ENSMMUG00000009688 | IST1 factor associated with ESCRT-III [Source:VGNC Symbol;Acc:VGNC:73675]                             | 0.934660944 | 0.004356546 | 0.022486292 |
| ENSMMUG00000052030 | developing brain homeobox 2 [Source:NCBI gene;Acc:701170]                                             | 0.933610241 | 1.17E-06    | 1.99E-05    |
| ENSMMUG00000023398 | collagen type XVI alpha 1 chain [Source:VGNC Symbol;Acc:VGNC:71293]                                   | 0.931723272 | 0.000316331 | 0.002602858 |
| ENSMMUG00000040958 | lysozyme-like protein 1 [Source:NCBI gene;Acc:698176]                                                 | 0.931343037 | 0.000258639 | 0.00220072  |
| ENSMMUG00000005028 | phosphodiesterase 4C [Source:NCBI gene;Acc:720171]                                                    | 0.930325511 | 0.002765955 | 0.015584471 |



|                    |                                                                                                   |   |             |             |             |
|--------------------|---------------------------------------------------------------------------------------------------|---|-------------|-------------|-------------|
| ENSMMUG00000057137 |                                                                                                   | - | 0.929371218 | 0.00400455  | 0.020927522 |
| ENSMMUG0000004411  | 25-hydroxycholesterol 7-alpha-hydroxylase [Source:NCBI gene;Acc:710188]                           | - | 0.927174409 | 0.000458144 | 0.003501103 |
| ENSMMUG0000007485  | zinc finger protein 555 [Source:VGNC Symbol;Acc:VGNC:79705]                                       | - | 0.926852842 | 0.003409628 | 0.018344722 |
| ENSMMUG00000015737 | phosphatidylinositol glycan anchor biosynthesis class A [Source:VGNC Symbol;Acc:VGNC:75984]       | - | 0.926712954 | 0.00043209  | 0.003339371 |
| ENSMMUG00000038051 | uncharacterized LOC106998885 [Source:NCBI gene;Acc:106998885]                                     | - | 0.924496705 | 0.001662309 | 0.010276381 |
| ENSMMUG0000004606  | EMAP like 5 [Source:VGNC Symbol;Acc:VGNC:72067]                                                   | - | 0.924382523 | 0.000114321 | 0.001086764 |
| ENSMMUG00000062676 |                                                                                                   | - | 0.923246935 | 0.004083569 | 0.02123783  |
| ENSMMUG00000021291 | thymine DNA glycosylase [Source:VGNC Symbol;Acc:VGNC:78297]                                       | - | 0.922734924 | 0.007994054 | 0.036797037 |
| ENSMMUG00000023076 | diacylglycerol kinase eta [Source:VGNC Symbol;Acc:VGNC:71786]                                     | - | 0.920496263 | 0.001670722 | 0.01032347  |
| ENSMMUG00000058740 |                                                                                                   | - | 0.915740523 | 8.73E-05    | 0.000866052 |
| ENSMMUG0000008965  | piwi like RNA-mediated gene silencing 4 [Source:VGNC Symbol;Acc:VGNC:81504]                       | - | 0.914786211 | 1.43E-06    | 2.37E-05    |
| ENSMMUG00000017276 | nucleolar protein 4 [Source:VGNC Symbol;Acc:VGNC:75366]                                           | - | 0.913196366 | 0.00996242  | 0.043702623 |
| ENSMMUG00000001551 | SSU72 homolog, RNA polymerase II CTD phosphatase [Source:VGNC Symbol;Acc:VGNC:77986]              | - | 0.912386926 | 0.003038378 | 0.016805622 |
| ENSMMUG00000014727 | NSF attachment protein alpha [Source:VGNC Symbol;Acc:VGNC:75131]                                  | - | 0.911857522 | 0.003741158 | 0.019717817 |
| ENSMMUG00000000690 | catenin alpha like 1 [Source:VGNC Symbol;Acc:VGNC:71544]                                          | - | 0.911675125 | 0.00413097  | 0.021475748 |
| ENSMMUG00000051843 |                                                                                                   | - | 0.911464617 | 0.002055621 | 0.012174227 |
| ENSMMUG00000014301 | nectin cell adhesion molecule 2 [Source:VGNC Symbol;Acc:VGNC:75396]                               | - | 0.911033616 | 0.000363812 | 0.002923111 |
| ENSMMUG00000056711 | ribonuclease inhibitor-like [Source:NCBI gene;Acc:114672186]                                      | - | 0.910984507 | 2.52E-06    | 3.93E-05    |
| ENSMMUG00000053103 | disintegrin and metalloproteinase domain-containing protein 20-like [Source:NCBI gene;Acc:713573] | - | 0.910251723 | 0.007452313 | 0.034822187 |
| ENSMMUG00000052977 | putative protein FAM106C [Source:NCBI gene;Acc:106994084]                                         | - | 0.907880183 | 0.00059152  | 0.004366077 |
| ENSMMUG00000014762 | myosin heavy chain 6 [Source:NCBI gene;Acc:713471]                                                | - | 0.907720038 | 0.000231941 | 0.001998449 |
| ENSMMUG00000005634 | ribonuclease L [Source:VGNC Symbol;Acc:VGNC:82223]                                                | - | 0.907690761 | 0.00072153  | 0.005152765 |
| ENSMMUG00000052651 | Metazoan signal recognition particle RNA [Source:RFAM;Acc:RF00017]                                | - | -0.90709422 | 0.005390055 | 0.026743274 |
| ENSMMUG00000007775 | survival motor neuron domain containing 1 [Source:NCBI gene;Acc:694761]                           | - | 0.906203006 | 0.011408711 | 0.048537519 |
| ENSMMUG00000022630 | protoporphyrinogen oxidase [Source:VGNC Symbol;Acc:VGNC:76365]                                    | - | -0.90310185 | 0.010269685 | 0.044808149 |
| ENSMMUG00000061035 | ZFP82 zinc finger protein [Source:NCBI gene;Acc:719145]                                           | - | 0.902514008 | 0.00126102  | 0.008193786 |
| ENSMMUG00000046282 |                                                                                                   | - | 0.900848029 | 7.31E-06    | 0.000100339 |
| ENSMMUG00000007257 | synaptic vesicle glycoprotein 2A [Source:VGNC Symbol;Acc:VGNC:78181]                              | - | 0.899796395 | 8.30E-06    | 0.000112091 |
| ENSMMUG00000012307 | periostin [Source:VGNC Symbol;Acc:VGNC:76039]                                                     | - | 0.898484657 | 0.000121291 | 0.00114131  |

|                    |                                                                                       |   |             |             |             |
|--------------------|---------------------------------------------------------------------------------------|---|-------------|-------------|-------------|
| ENSMMUG00000060781 | G protein-coupled receptor 18 [Source:NCBI gene;Acc:698714]                           | - | 0.897269745 | 0.010779034 | 0.04649892  |
| ENSMMUG00000016906 | F-box and leucine rich repeat protein 16 [Source:VGNC Symbol;Acc:VGNC:81405]          | - | 0.894554346 | 0.002502901 | 0.014370638 |
| ENSMMUG00000053298 |                                                                                       | - | -0.89389792 | 0.000772659 | 0.005448926 |
| ENSMMUG00000004233 | leucine rich repeats and immunoglobulin like domains 3 [Source:NCBI gene;Acc:716344]  | - | -0.89377228 | 0.000651818 | 0.004727779 |
| ENSMMUG00000023443 | SRR1 domain containing [Source:VGNC Symbol;Acc:VGNC:78036]                            | - | 0.893302962 | 0.000707043 | 0.005060448 |
| ENSMMUG00000004710 | protein interacting with cyclin A1 [Source:VGNC Symbol;Acc:VGNC:76336]                | - | 0.893160493 | 0.005545382 | 0.027382937 |
| ENSMMUG00000007509 | myosin VA [Source:VGNC Symbol;Acc:VGNC:75116]                                         | - | 0.892859109 | 0.001106115 | 0.007330416 |
| ENSMMUG00000013188 | serine incorporator 2 [Source:VGNC Symbol;Acc:VGNC:77294]                             | - | 0.891580751 | 2.36E-05    | 0.000280833 |
| ENSMMUG00000013235 | collagen type IV alpha 3 chain [Source:VGNC Symbol;Acc:VGNC:81375]                    | - | 0.891484456 | 0.000730597 | 0.00520956  |
| ENSMMUG00000020049 | phosphoglucomutase 1 [Source:NCBI gene;Acc:699401]                                    | - | 0.891218753 | 9.96E-06    | 0.000131792 |
| ENSMMUG00000021775 | beta-1,3-galactosyltransferase 1 [Source:VGNC Symbol;Acc:VGNC:70204]                  | - | 0.890002522 | 0.008160996 | 0.03736665  |
| ENSMMUG00000017432 | tropomodulin 2 [Source:VGNC Symbol;Acc:VGNC:78571]                                    | - | 0.889958049 | 0.000393464 | 0.00311127  |
| ENSMMUG00000059663 |                                                                                       | - | 0.889149711 | 0.002333385 | 0.013547207 |
| ENSMMUG00000010978 | S100 calcium binding protein A2 [Source:VGNC Symbol;Acc:VGNC:76956]                   | - | 0.888801136 | 0.000144906 | 0.001334492 |
| ENSMMUG00000031224 | casein kinase 2 alpha 1 [Source:NCBI gene;Acc:714841]                                 | - | 0.888778985 | 0.007728633 | 0.035816693 |
| ENSMMUG00000056765 |                                                                                       | - | 0.888678171 | 0.00011281  | 0.001074251 |
| ENSMMUG00000007920 | myosin XIX [Source:VGNC Symbol;Acc:VGNC:75026]                                        | - | 0.888174484 | 0.000645384 | 0.004683728 |
| ENSMMUG00000008916 | transferrin [Source:VGNC Symbol;Acc:VGNC:82716]                                       | - | 0.887459238 | 0.000971354 | 0.006606025 |
| ENSMMUG00000000618 | gametogenetin binding protein 2 [Source:VGNC Symbol;Acc:VGNC:72746]                   | - | -0.88736929 | 0.008278417 | 0.037771007 |
| ENSMMUG00000000681 | calmin [Source:VGNC Symbol;Acc:VGNC:71232]                                            | - | 0.885181109 | 2.80E-05    | 0.00032435  |
| ENSMMUG00000001374 | supervillin [Source:NCBI gene;Acc:695267]                                             | - | 0.884934949 | 0.008235194 | 0.037653235 |
| ENSMMUG00000060527 |                                                                                       | - | 0.883537847 | 0.005449902 | 0.026981277 |
| ENSMMUG00000015189 | RAD51 associated protein 1 [Source:VGNC Symbol;Acc:VGNC:76497]                        | - | 0.882560841 | 0.008257776 | 0.037729896 |
| ENSMMUG00000017100 | solute carrier family 4 member 1 (Diego blood group) [Source:NCBI gene;Acc:100427618] | - | 0.882474759 | 0.000696173 | 0.004993664 |
| ENSMMUG00000007293 | RAB34, member RAS oncogene family [Source:VGNC Symbol;Acc:VGNC:81533]                 | - | 0.881229343 | 0.002158476 | 0.012679214 |
| ENSMMUG00000017355 | remodeling and spacing factor 1 [Source:VGNC Symbol;Acc:VGNC:77044]                   | - | 0.879089437 | 0.007363357 | 0.034468586 |
| ENSMMUG00000004223 | ring finger protein 10 [Source:VGNC Symbol;Acc:VGNC:76702]                            | - | -0.87745318 | 0.001362498 | 0.008735066 |
| ENSMMUG00000050862 |                                                                                       | - | 0.877076494 | 0.008355453 | 0.038028887 |
| ENSMMUG00000016812 | coiled-coil domain containing 18 [Source:VGNC Symbol;Acc:VGNC:70913]                  | - | 0.875867552 | 0.006614273 | 0.031635388 |
| ENSMMUG00000060215 | Y RNA [Source:RFAM;Acc:RF00019]                                                       | - | 0.875163083 | 0.000104838 | 0.001012189 |



|                    |                                                                                           |   |             |             |             |
|--------------------|-------------------------------------------------------------------------------------------|---|-------------|-------------|-------------|
| ENSMMUG00000022601 | cAMP responsive element binding protein 1 [Source:VGNC Symbol;Acc:VGNC:71485]             | - | 0.874175018 | 0.001805699 | 0.011021047 |
| ENSMMUG00000021114 | G protein-coupled receptor 182 [Source:VGNC Symbol;Acc:VGNC:72936]                        | - | 0.874172923 | 0.001629639 | 0.010137195 |
| ENSMMUG00000023124 | transmembrane protein 43 [Source:VGNC Symbol;Acc:VGNC:82711]                              | - | 0.874138548 | 0.005230078 | 0.026062017 |
| ENSMMUG00000058786 | ligand of numb-protein X 2 [Source:NCBI gene;Acc:710660]                                  | - | 0.873871547 | 0.005660089 | 0.027862412 |
| ENSMMUG00000001074 | unc-51 like kinase 4 [Source:VGNC Symbol;Acc:VGNC:82565]                                  | - | 0.870742319 | 0.007414051 | 0.034655882 |
| ENSMMUG00000059848 | olfactory receptor 5B2 [Source:NCBI gene;Acc:100429465]                                   | - | 0.869680829 | 0.008014674 | 0.036878871 |
| ENSMMUG00000052282 |                                                                                           | - | 0.869567209 | 0.004588118 | 0.023420701 |
| ENSMMUG00000003051 | COPI coat complex subunit beta 2 [Source:VGNC Symbol;Acc:VGNC:71313]                      | - | 0.869089426 | 0.000207085 | 0.001823021 |
| ENSMMUG00000010379 | Mtr4 exosome RNA helicase [Source:VGNC Symbol;Acc:VGNC:74989]                             | - | 0.868824549 | 0.008982889 | 0.040346821 |
| ENSMMUG00000010321 | C2 domain containing 3 centriole elongation regulator [Source:VGNC Symbol;Acc:VGNC:70375] | - | 0.868686208 | 0.000139616 | 0.001286687 |
| ENSMMUG00000014824 | SIX homeobox 3 [Source:HGNC Symbol;Acc:HGNC:10889]                                        | - | 0.868681338 | 2.50E-05    | 0.000296059 |
| ENSMMUG00000061653 |                                                                                           | - | 0.867841919 | 0.007952228 | 0.036643506 |
| ENSMMUG00000064983 |                                                                                           | - | 0.866528755 | 0.000992018 | 0.006721892 |
| ENSMMUG00000022121 | CASK interacting protein 2 [Source:VGNC Symbol;Acc:VGNC:70577]                            | - | 0.866256071 | 0.000808352 | 0.005660647 |
| ENSMMUG00000005414 | N-deacetylase and N-sulfotransferase 1 [Source:VGNC Symbol;Acc:VGNC:75151]                | - | 0.865433572 | 0.000128067 | 0.001195192 |
| ENSMMUG00000046663 | Metazoan signal recognition particle RNA [Source:RFAM;Acc:RF00017]                        | - | 0.864992191 | 0.008443723 | 0.038345739 |
| ENSMMUG00000047594 |                                                                                           | - | 0.863096009 | 0.000225894 | 0.001955435 |
| ENSMMUG00000001849 | interleukin 5 receptor subunit alpha [Source:VGNC Symbol;Acc:VGNC:73731]                  | - | 0.862910026 | 0.005598237 | 0.027610307 |
| ENSMMUG00000010627 | apelin receptor [Source:VGNC Symbol;Acc:VGNC:69939]                                       | - | 0.859790699 | 0.002284651 | 0.013317893 |
| ENSMMUG00000022732 | SRSF protein kinase 2 [Source:VGNC Symbol;Acc:VGNC:81764]                                 | - | 0.858053821 | 0.000593057 | 0.004367483 |
| ENSMMUG00000005622 | dynein axonemal heavy chain 7 [Source:VGNC Symbol;Acc:VGNC:71859]                         | - | 0.857228388 | 0.001435119 | 0.009124007 |
| ENSMMUG00000018490 | ADP ribosylation factor interacting protein 1 [Source:VGNC Symbol;Acc:VGNC:69878]         | - | 0.856702972 | 0.001061631 | 0.007097531 |
| ENSMMUG00000008093 | StAR related lipid transfer domain containing 9 [Source:NCBI gene;Acc:708953]             | - | 0.856516409 | 6.34E-05    | 0.000664993 |
| ENSMMUG00000040055 |                                                                                           | - | -0.8560005  | 0.003446122 | 0.018508643 |
| ENSMMUG00000006310 | solute carrier family 3 member 1 [Source:VGNC Symbol;Acc:VGNC:77462]                      | - | 0.855923704 | 0.010876149 | 0.046824123 |
| ENSMMUG00000052496 |                                                                                           | - | -0.85539565 | 9.39E-05    | 0.000922254 |
| ENSMMUG00000041976 | zinc finger protein 780B [Source:NCBI gene;Acc:701034]                                    | - | 0.855131505 | 0.001081779 | 0.007198548 |
| ENSMMUG00000003565 | galectin 3 [Source:VGNC Symbol;Acc:VGNC:74255]                                            | - | 0.853379996 | 0.008960972 | 0.040262318 |
| ENSMMUG00000018525 | presenilin 2 [Source:VGNC Symbol;Acc:VGNC:76436]                                          | - | 0.853059803 | 1.03E-05    | 0.000135474 |

|                     |                                                                                           |   |             |             |             |
|---------------------|-------------------------------------------------------------------------------------------|---|-------------|-------------|-------------|
| ENSMMUG00000029197  | YY1 transcription factor [Source:NCBI gene;Acc:717370]                                    | - | 0.851085884 | 0.004044442 | 0.021076577 |
| ENSMMUG00000050770  |                                                                                           | - | 0.850254611 | 0.005106974 | 0.025586135 |
| ENSMMUG00000002961  | G protein subunit alpha 11 [Source:VGNC Symbol;Acc:VGNC:73085]                            | - | 0.848826358 | 1.28E-05    | 0.00016369  |
| ENSMMUG00000006669  | ubiquitin protein ligase E3 component n-recognin 4 [Source:VGNC Symbol;Acc:VGNC:79845]    | - | 0.847521463 | 0.00021902  | 0.001906108 |
| ENSMMUG00000010878  | adaptor related protein complex 1 subunit gamma 1 [Source:VGNC Symbol;Acc:VGNC:69958]     | - | 0.847209631 | 6.00E-05    | 0.000632941 |
| ENSMMUG00000006311  | prolyl endopeptidase like [Source:VGNC Symbol;Acc:VGNC:76346]                             | - | 0.845992908 | 0.000604525 | 0.00443432  |
| ENSMMUG00000023226  | RNA polymerase III subunit D [Source:VGNC Symbol;Acc:VGNC:76017]                          | - | 0.845782344 | 0.00055356  | 0.00411869  |
| ENSMMUG00000003462  | ankyrin repeat domain 6 [Source:VGNC Symbol;Acc:VGNC:81023]                               | - | 0.844127083 | 0.000209735 | 0.00183887  |
| ENSMMUG000000059973 |                                                                                           | - | 0.843175123 | 0.000639336 | 0.004650237 |
| ENSMMUG00000046237  | 4-aminobutyrate aminotransferase [Source:NCBI gene;Acc:714017]                            | - | 0.841324877 | 0.000572166 | 0.004237683 |
| ENSMMUG00000017070  | zinc finger and SCAN domain containing 29 [Source:VGNC Symbol;Acc:VGNC:79633]             | - | -0.8375095  | 0.00042256  | 0.003285284 |
| ENSMMUG00000004849  | casein beta [Source:VGNC Symbol;Acc:VGNC:71523]                                           | - | 0.836122069 | 0.001975952 | 0.011810206 |
| ENSMMUG00000015347  | protein kinase, DNA-activated, catalytic subunit [Source:VGNC Symbol;Acc:VGNC:76418]      | - | 0.835479313 | 0.008370136 | 0.038069008 |
| ENSMMUG000000061002 |                                                                                           | - | 0.835369257 | 0.000136973 | 0.001264124 |
| ENSMMUG000000053389 |                                                                                           | - | 0.832710217 | 0.002197    | 0.012891233 |
| ENSMMUG00000006493  | ras related dexamethasone induced 1 [Source:VGNC Symbol;Acc:VGNC:76485]                   | - | 0.831691712 | 0.00036308  | 0.002919579 |
| ENSMMUG000000056785 |                                                                                           | - | 0.830199868 | 0.006011371 | 0.029258647 |
| ENSMMUG00000018289  | proline rich transmembrane protein 3 [Source:VGNC Symbol;Acc:VGNC:76324]                  | - | 0.828235619 | 7.01E-05    | 0.000724027 |
| ENSMMUG00000006754  | tetratricopeptide repeat domain 4 [Source:VGNC Symbol;Acc:VGNC:78668]                     | - | 0.826771845 | 0.006183095 | 0.029948429 |
| ENSMMUG00000000205  | transmembrane protein 117 [Source:VGNC Symbol;Acc:VGNC:79488]                             | - | 0.826547111 | 8.09E-05    | 0.000815782 |
| ENSMMUG000000050907 |                                                                                           | - | 0.825818912 | 0.000297678 | 0.002477659 |
| ENSMMUG000000021782 | LDL receptor related protein 1 [Source:VGNC Symbol;Acc:VGNC:74442]                        | - | 0.825407154 | 2.27E-05    | 0.000271797 |
| ENSMMUG00000003264  | leptin receptor overlapping transcript [Source:VGNC Symbol;Acc:VGNC:74158]                | - | 0.825230495 | 0.001547166 | 0.009693878 |
| ENSMMUG00000012289  | GLIPR1 like 1 [Source:VGNC Symbol;Acc:VGNC:81412]                                         | - | 0.824271262 | 0.010382363 | 0.045193407 |
| ENSMMUG00000017593  | CD3e molecule [Source:VGNC Symbol;Acc:VGNC:70764]                                         | - | -0.82356224 | 0.000128122 | 0.001195192 |
| ENSMMUG00000018738  | alcohol dehydrogenase 1B (class I), beta polypeptide [Source:NCBI gene;Acc:707908]        | - | 0.821753588 | 0.000343239 | 0.002792394 |
| ENSMMUG00000015432  | staphylococcal nuclease and tudor domain containing 1 [Source:VGNC Symbol;Acc:VGNC:77798] | - | 0.821622453 | 0.002743464 | 0.01547118  |
| ENSMMUG00000004091  | transcription factor 12 [Source:VGNC Symbol;Acc:VGNC:78283]                               | - | 0.820513108 | 7.99E-05    | 0.000806592 |
| ENSMMUG00000008639  | tumor protein p53 [Source:VGNC Symbol;Acc:VGNC:78627]                                     | - | 0.818969354 | 0.011343518 | 0.048371178 |

|                    |                                                                                        |   |             |             |             |
|--------------------|----------------------------------------------------------------------------------------|---|-------------|-------------|-------------|
| ENSMMUG0000005515  | ATP binding cassette subfamily C member 5 [Source:VGNC Symbol;Acc:VGNC:69574]          | - | 0.818709837 | 0.000989257 | 0.006709998 |
| ENSMMUG00000054107 |                                                                                        | - | 0.817242325 | 0.008112885 | 0.037185729 |
| ENSMMUG00000018279 | adaptor related protein complex 5 subunit mu 1 [Source:VGNC Symbol;Acc:VGNC:69868]     | - | 0.817145314 | 0.000171485 | 0.001537792 |
| ENSMMUG00000006842 | doublecortin domain containing 1 [Source:NCBI gene;Acc:696721]                         | - | 0.814128361 | 0.001903255 | 0.011454843 |
| ENSMMUG00000010114 | Ras and Rab interactor 2 [Source:VGNC Symbol;Acc:VGNC:76770]                           | - | 0.813472925 | 0.007526797 | 0.035081797 |
| ENSMMUG00000013681 | pleckstrin homology domain containing O1 [Source:VGNC Symbol;Acc:VGNC:76101]           | - | -0.8130096  | 0.001634819 | 0.010159683 |
| ENSMMUG00000023372 | RCSD domain containing 1 [Source:VGNC Symbol;Acc:VGNC:76850]                           | - | 0.812408952 | 0.004807848 | 0.024312796 |
| ENSMMUG00000019838 | phosphodiesterase 8A [Source:VGNC Symbol;Acc:VGNC:75924]                               | - | -0.8122457  | 0.002825249 | 0.015863452 |
| ENSMMUG00000064514 | keratin, type II cuticular Hb1 [Source:NCBI gene;Acc:697511]                           | - | 0.810870659 | 0.000174839 | 0.001560324 |
| ENSMMUG00000057209 |                                                                                        | - | 0.809249933 | 0.00131277  | 0.008466455 |
| ENSMMUG00000019923 | ataxin 7 like 3 [Source:VGNC Symbol;Acc:VGNC:70128]                                    | - | 0.808580947 | 0.003098552 | 0.01705847  |
| ENSMMUG00000008398 | Myb/SANT DNA binding domain containing 1 [Source:VGNC Symbol;Acc:VGNC:74869]           | - | 0.808485597 | 0.00403516  | 0.021036658 |
| ENSMMUG00000008917 | S100 calcium binding protein A6 [Source:VGNC Symbol;Acc:VGNC:76960]                    | - | 0.805876287 | 0.00199326  | 0.011869913 |
| ENSMMUG00000049939 |                                                                                        | - | -0.80584693 | 0.00083964  | 0.005838782 |
| ENSMMUG00000000662 | guanylate-binding protein 1 [Source:NCBI gene;Acc:694538]                              | - | 0.805362316 | 1.15E-05    | 0.000148921 |
| ENSMMUG00000058142 |                                                                                        | - | 0.803746955 | 0.002679183 | 0.015207823 |
| ENSMMUG00000005613 | signal transducer and activator of transcription 1 [Source:VGNC Symbol;Acc:VGNC:77904] | - | 0.803733025 | 0.000384538 | 0.003063082 |
| ENSMMUG00000012953 | stress induced phosphoprotein 1 [Source:NCBI gene;Acc:717926]                          | - | 0.802405751 | 0.001788071 | 0.010934028 |
| ENSMMUG00000040660 | heparin binding growth factor [Source:NCBI gene;Acc:716742]                            | - | 0.801249691 | 0.010426507 | 0.04532474  |
| ENSMMUG00000029176 | Rho GTPase activating protein 17 [Source:NCBI gene;Acc:701988]                         | - | 0.801120352 | 0.00010509  | 0.001013869 |
| ENSMMUG00000023116 | LIM domain binding 2 [Source:VGNC Symbol;Acc:VGNC:74246]                               | - | -0.80041949 | 0.00209745  | 0.012388032 |
| ENSMMUG00000012396 | zinc finger and SCAN domain containing 23 [Source:VGNC Symbol;Acc:VGNC:79313]          | - | 0.799515198 | 0.009042362 | 0.040557793 |
| ENSMMUG00000018281 | interleukin 17 receptor E [Source:VGNC Symbol;Acc:VGNC:73623]                          | - | 0.798576481 | 0.001979104 | 0.011823594 |
| ENSMMUG00000002520 | solute carrier family 4 member 3 [Source:VGNC Symbol;Acc:VGNC:77604]                   | - | 0.798327337 | 0.001514723 | 0.009536053 |
| ENSMMUG00000056769 | C-C motif chemokine receptor 1 [Source:VGNC Symbol;Acc:VGNC:70737]                     | - | 0.797029646 | 0.007320308 | 0.0343414   |
| ENSMMUG00000017048 | klotho [Source:VGNC Symbol;Acc:VGNC:74026]                                             | - | 0.796519095 | 0.001645044 | 0.010208558 |
| ENSMMUG00000017972 | zinc finger protein 200 [Source:VGNC Symbol;Acc:VGNC:78867]                            | - | 0.795240915 | 0.001870175 | 0.011318187 |
| ENSMMUG00000002494 | actinin alpha 3 [Source:NCBI gene;Acc:713811]                                          | - | 0.794750539 | 0.002705479 | 0.015316881 |
| ENSMMUG00000009310 | myelin transcription factor 1 like [Source:NCBI gene;Acc:706914]                       | - | 0.794595044 | 0.001673308 | 0.010329609 |
| ENSMMUG00000049484 |                                                                                        | - | 0.794539152 | 0.000121125 | 0.001140581 |

|                     |                                                                                      |             |             |             |
|---------------------|--------------------------------------------------------------------------------------|-------------|-------------|-------------|
| ENSMMUG0000008919   | RAB6B, member RAS oncogene family [Source:VGNC Symbol;Acc:VGNC:81547]                | -0.79282248 | 0.008720879 | 0.039360739 |
| ENSMMUG00000013991  | exonuclease 3'-5' domain containing 1 [Source:VGNC Symbol;Acc:VGNC:72390]            | 0.791010364 | 0.003470785 | 0.018579583 |
| ENSMMUG00000001518  | zinc finger protein 518A [Source:VGNC Symbol;Acc:VGNC:79767]                         | 0.790737557 | 4.94E-05    | 0.000537068 |
| ENSMMUG00000004603  | zinc finger CCCH-type containing 14 [Source:VGNC Symbol;Acc:VGNC:79255]              | 0.790267192 | 0.001553326 | 0.009718397 |
| ENSMMUG000000055417 |                                                                                      | 0.790016367 | 0.000568526 | 0.00421313  |
| ENSMMUG00000014723  | kaptin, actin binding protein [Source:VGNC Symbol;Acc:VGNC:74204]                    | 0.789707705 | 0.011206233 | 0.0479343   |
| ENSMMUG00000023698  | golgi SNAP receptor complex member 1 [Source:VGNC Symbol;Acc:VGNC:73110]             | 0.789181494 | 0.000319905 | 0.002625612 |
| ENSMMUG00000022935  | BMP/retinoic acid inducible neural specific 2 [Source:VGNC Symbol;Acc:VGNC:70303]    | 0.787564312 | 0.009210516 | 0.041155528 |
| ENSMMUG00000022120  | transmembrane protein 94 [Source:VGNC Symbol;Acc:VGNC:79760]                         | 0.786329668 | 0.000740684 | 0.005257721 |
| ENSMMUG00000020412  | parkin coregulated [Source:VGNC Symbol;Acc:VGNC:75646]                               | 0.785118365 | 0.003119225 | 0.017143187 |
| ENSMMUG00000015604  | myosin binding protein C3 [Source:VGNC Symbol;Acc:VGNC:75094]                        | 0.783847423 | 0.007593204 | 0.035315203 |
| ENSMMUG000000064880 |                                                                                      | 0.782128449 | 0.001139091 | 0.007511912 |
| ENSMMUG00000020823  | vinculin [Source:NCBI gene;Acc:721921]                                               | 0.781348254 | 0.007251742 | 0.034093698 |
| ENSMMUG00000000104  | ribosomal RNA processing 1B [Source:VGNC Symbol;Acc:VGNC:77089]                      | 0.780938288 | 0.00056344  | 0.004180217 |
| ENSMMUG000000060167 |                                                                                      | 0.779179155 | 0.01045485  | 0.04540232  |
| ENSMMUG00000020913  | scavenger receptor class B member 2 [Source:VGNC Symbol;Acc:VGNC:77026]              | 0.775476168 | 0.001850231 | 0.011239983 |
| ENSMMUG00000006340  | solute carrier family 6 member 6 [Source:VGNC Symbol;Acc:VGNC:77622]                 | 0.775233277 | 0.001012136 | 0.006826134 |
| ENSMMUG00000003316  | mannosidase alpha class 2A member 1 [Source:VGNC Symbol;Acc:VGNC:81449]              | 0.775147979 | 2.02E-05    | 0.000245395 |
| ENSMMUG00000009084  | transmembrane 6 superfamily member 1 [Source:VGNC Symbol;Acc:VGNC:78566]             | 0.774659665 | 0.00283663  | 0.015906705 |
| ENSMMUG00000004493  | propionyl-CoA carboxylase subunit alpha [Source:VGNC Symbol;Acc:VGNC:75773]          | 0.774639573 | 0.011631269 | 0.049242201 |
| ENSMMUG00000007246  | myotubularin related protein 11 [Source:VGNC Symbol;Acc:VGNC:75016]                  | 0.773234055 | 0.002978434 | 0.0165322   |
| ENSMMUG00000002175  | TPD52 like 3 [Source:HGNC Symbol;Acc:HGNC:23382]                                     | 0.771630709 | 0.008748373 | 0.039471101 |
| ENSMMUG00000001768  | zinc finger protein 616 [Source:NCBI gene;Acc:719902]                                | 0.771558127 | 0.002479097 | 0.014259201 |
| ENSMMUG00000006411  | 3'-phosphoadenosine 5'-phosphosulfate synthase 2 [Source:VGNC Symbol;Acc:VGNC:75758] | 0.770547104 | 0.0117042   | 0.049438052 |
| ENSMMUG00000002310  | zinc finger protein 577 [Source:VGNC Symbol;Acc:VGNC:79733]                          | 0.770453918 | 0.002843733 | 0.015925884 |
| ENSMMUG00000021216  | UDP glucuronosyltransferase 1 family, polypeptide A1 [Source:NCBI gene;Acc:574210]   | 0.769104458 | 0.002672112 | 0.015174321 |
| ENSMMUG00000023401  | adhesion G protein-coupled receptor B2 [Source:VGNC Symbol;Acc:VGNC:69598]           | 0.768521487 | 0.004705486 | 0.023897605 |
| ENSMMUG00000003567  | DLG associated protein 5 [Source:VGNC Symbol;Acc:VGNC:71850]                         | 0.768451951 | 0.005822223 | 0.028469574 |
| ENSMMUG00000012574  | inositol 1,4,5-trisphosphate receptor type 1 [Source:VGNC Symbol;Acc:VGNC:73804]     | 0.767127861 | 0.004876184 | 0.024600839 |



|                    |                                                                                            |   |             |             |             |
|--------------------|--------------------------------------------------------------------------------------------|---|-------------|-------------|-------------|
| ENSMMUG00000023117 | neurotrophic receptor tyrosine kinase 2 [Source:VGNC Symbol;Acc:VGNC:75541]                | - | 0.766684305 | 4.57E-05    | 0.000500873 |
| ENSMMUG00000013031 | bone morphogenetic protein 1 [Source:VGNC Symbol;Acc:VGNC:70259]                           | - | 0.766626388 | 0.001615069 | 0.010056207 |
| ENSMMUG00000006688 | ER membrane protein complex subunit 1 [Source:VGNC Symbol;Acc:VGNC:72134]                  | - | 0.763665749 | 0.001114918 | 0.007377451 |
| ENSMMUG00000011675 | zinc finger and SCAN domain containing 12 [Source:VGNC Symbol;Acc:VGNC:78910]              | - | 0.763188815 | 0.001060014 | 0.007097389 |
| ENSMMUG00000020954 | cell division cycle 25A [Source:VGNC Symbol;Acc:VGNC:70794]                                | - | 0.762622161 | 0.010110208 | 0.044216398 |
| ENSMMUG00000063858 |                                                                                            | - | 0.761682804 | 0.003226844 | 0.017615284 |
| ENSMMUG00000004624 | synaptojanin 1 [Source:VGNC Symbol;Acc:VGNC:78071]                                         | - | 0.761390893 | 0.002050005 | 0.012146516 |
| ENSMMUG00000007875 | F-box and leucine rich repeat protein 12 [Source:VGNC Symbol;Acc:VGNC:72502]               | - | 0.760243071 | 0.009191691 | 0.041085561 |
| ENSMMUG00000058044 |                                                                                            | - | 0.759041922 | 0.001914942 | 0.011503836 |
| ENSMMUG00000065018 | transmembrane protein 35A [Source:NCBI gene;Acc:702205]                                    | - | 0.758890394 | 0.004015213 | 0.020957925 |
| ENSMMUG00000002879 | GA binding protein transcription factor subunit beta 1 [Source:VGNC Symbol;Acc:VGNC:72845] | - | 0.755418415 | 0.002667518 | 0.015167353 |
| ENSMMUG00000021173 | nuclear transcription factor Y subunit alpha [Source:VGNC Symbol;Acc:VGNC:75344]           | - | 0.755389898 | 0.000450785 | 0.003453001 |
| ENSMMUG00000052711 |                                                                                            | - | 0.755326341 | 0.004937898 | 0.024873509 |
| ENSMMUG00000002243 | pleckstrin homology and RhoGEF domain containing G7 [Source:VGNC Symbol;Acc:VGNC:76149]    | - | 0.754440149 | 0.002423165 | 0.013980875 |
| ENSMMUG00000065301 |                                                                                            | - | 0.754294136 | 0.002704691 | 0.015316881 |
| ENSMMUG00000006215 | serine/threonine kinase 39 [Source:VGNC Symbol;Acc:VGNC:81587]                             | - | 0.752544714 | 0.006740131 | 0.032076432 |
| ENSMMUG00000017076 | tubulin gamma complex associated protein 4 [Source:VGNC Symbol;Acc:VGNC:79045]             | - | 0.752443136 | 0.008823    | 0.039766323 |
| ENSMMUG00000002781 | peroxidase like [Source:VGNC Symbol;Acc:VGNC:84107]                                        | - | 0.752349703 | 0.000983813 | 0.006676758 |
| ENSMMUG00000001549 | ATPase family AAA domain-containing protein 3A-like [Source:NCBI gene;Acc:114674453]       | - | 0.752269833 | 0.000493529 | 0.003718949 |
| ENSMMUG00000008423 | septin 4 [Source:NCBI gene;Acc:714724]                                                     | - | 0.751538356 | 3.17E-05    | 0.000362242 |
| ENSMMUG00000009394 | sestrin 3 [Source:VGNC Symbol;Acc:VGNC:77291]                                              | - | 0.750802891 | 0.000828667 | 0.005781066 |
| ENSMMUG00000013466 | tetratricopeptide repeat domain 39B [Source:VGNC Symbol;Acc:VGNC:79402]                    | - | 0.749135175 | 5.55E-05    | 0.000595478 |
| ENSMMUG00000013138 | Rho guanine nucleotide exchange factor 7 [Source:VGNC Symbol;Acc:VGNC:69833]               | - | 0.748478255 | 0.000989745 | 0.006709998 |
| ENSMMUG00000008392 | huntingtin [Source:VGNC Symbol;Acc:VGNC:73468]                                             | - | 0.746511399 | 0.000890457 | 0.006126498 |
| ENSMMUG00000013601 | chromosome 14 C11orf54 homolog [Source:NCBI gene;Acc:696483]                               | - | 0.746469879 | 0.001337316 | 0.008594854 |
| ENSMMUG00000015166 | NIMA related kinase 9 [Source:VGNC Symbol;Acc:VGNC:75209]                                  | - | 0.745003978 | 1.39E-05    | 0.00017514  |
| ENSMMUG00000021169 | translocator protein 2 [Source:VGNC Symbol;Acc:VGNC:83960]                                 | - | 0.744443636 | 0.008815529 | 0.039760273 |
| ENSMMUG00000011850 | cadherin 1 [Source:VGNC Symbol;Acc:VGNC:70803]                                             | - | 0.743921253 | 0.000772461 | 0.005448926 |

|                    |                                                                                              |   |             |             |             |
|--------------------|----------------------------------------------------------------------------------------------|---|-------------|-------------|-------------|
| ENSMMUG00000046171 | myotubularin related protein 4 [Source:NCBI gene;Acc:714621]                                 | - | 0.742663425 | 0.000133914 | 0.001242078 |
| ENSMMUG00000064152 | netrin 5 [Source:NCBI gene;Acc:718157]                                                       | - | 0.742283048 | 0.004663524 | 0.023721635 |
| ENSMMUG00000031853 | RAB5B, member RAS oncogene family [Source:VGNC Symbol;Acc:VGNC:81546]                        | - | 0.739959068 | 0.009237813 | 0.041263291 |
| ENSMMUG00000065322 | ATP synthase peripheral stalk-membrane subunit b [Source:NCBI gene;Acc:704072]               | - | 0.736852064 | 0.003186181 | 0.017446811 |
| ENSMMUG00000017529 | arrestin beta 1 [Source:VGNC Symbol;Acc:VGNC:70021]                                          | - | 0.734551537 | 0.004215225 | 0.021861217 |
| ENSMMUG00000046195 | MIS12 kinetochore complex component [Source:NCBI gene;Acc:712202]                            | - | 0.733815581 | 0.007520765 | 0.035066274 |
| ENSMMUG00000005466 | SPOC domain containing 1 [Source:VGNC Symbol;Acc:VGNC:77997]                                 | - | 0.733426041 | 0.011540906 | 0.048987505 |
| ENSMMUG00000021817 | dopachrome tautomerase [Source:VGNC Symbol;Acc:VGNC:71749]                                   | - | 0.732998191 | 0.008410479 | 0.038225699 |
| ENSMMUG00000012961 | mindbomb E3 ubiquitin protein ligase 2 [Source:VGNC Symbol;Acc:VGNC:74627]                   | - | 0.732964766 | 0.004617956 | 0.023563742 |
| ENSMMUG00000002853 | coronin 2A [Source:VGNC Symbol;Acc:VGNC:71451]                                               | - | -0.73266971 | 0.006223208 | 0.03008657  |
| ENSMMUG00000010000 | keratin 7 [Source:VGNC Symbol;Acc:VGNC:74214]                                                | - | 0.732648734 | 6.99E-05    | 0.000722905 |
| ENSMMUG00000001876 | phosphoinositide-3-kinase adaptor protein 1 [Source:VGNC Symbol;Acc:VGNC:75891]              | - | 0.732220084 | 0.009097412 | 0.040748369 |
| ENSMMUG00000009324 | replication factor C subunit 1 [Source:NCBI gene;Acc:698987]                                 | - | 0.730812558 | 0.011206896 | 0.0479343   |
| ENSMMUG00000032084 | prolyl-tRNA synthetase 2, mitochondrial [Source:VGNC Symbol;Acc:VGNC:75707]                  | - | -0.73031211 | 0.00444547  | 0.022855075 |
| ENSMMUG00000016313 | RUN and SH3 domain containing 2 [Source:VGNC Symbol;Acc:VGNC:82230]                          | - | 0.727803944 | 0.006280415 | 0.030317956 |
| ENSMMUG00000023096 | obscurin, cytoskeletal calmodulin and titin-interacting RhoGEF [Source:NCBI gene;Acc:694413] | - | 0.727778044 | 0.000131076 | 0.001217492 |
| ENSMMUG00000008422 | trophinin [Source:NCBI gene;Acc:704512]                                                      | - | 0.725733872 | 0.007293896 | 0.034242255 |
| ENSMMUG00000010788 | ATP binding cassette subfamily B member 1 [Source:NCBI gene;Acc:574235]                      | - | 0.725391443 | 0.000486114 | 0.003673744 |
| ENSMMUG00000012761 | sialic acid binding Ig like lectin 5 [Source:NCBI gene;Acc:719730]                           | - | 0.723021682 | 0.003246211 | 0.017676389 |
| ENSMMUG00000017583 | single stranded DNA binding protein 2 [Source:NCBI gene;Acc:711752]                          | - | 0.721672794 | 0.009115411 | 0.040814899 |
| ENSMMUG00000019857 | beaded filament structural protein 2 [Source:VGNC Symbol;Acc:VGNC:70245]                     | - | 0.719174232 | 0.01000504  | 0.043815524 |
| ENSMMUG00000020436 | potassium voltage-gated channel subfamily H member 2 [Source:VGNC Symbol;Acc:VGNC:73980]     | - | 0.718693375 | 0.009570626 | 0.042399605 |
| ENSMMUG00000002231 | transmembrane protein 87B [Source:VGNC Symbol;Acc:VGNC:79557]                                | - | 0.718191129 | 0.009638408 | 0.042622723 |
| ENSMMUG00000014564 | ring finger protein 123 [Source:VGNC Symbol;Acc:VGNC:76790]                                  | - | 0.718141884 | 0.000311279 | 0.002571076 |
| ENSMMUG00000062413 | CCAAT enhancer binding protein gamma [Source:NCBI gene;Acc:704322]                           | - | 0.717679588 | 0.011260412 | 0.048095823 |
| ENSMMUG00000007301 | dynein cytoplasmic 1 intermediate chain 2 [Source:VGNC Symbol;Acc:VGNC:71953]                | - | 0.716550757 | 0.007971177 | 0.036704755 |
| ENSMMUG00000020004 | Ras association domain family member 2 [Source:VGNC Symbol;Acc:VGNC:76674]                   | - | 0.711567451 | 0.002777227 | 0.015641186 |
| ENSMMUG00000016475 | M-phase phosphoprotein 8 [Source:VGNC Symbol;Acc:VGNC:74864]                                 | - | 0.706702374 | 0.002732333 | 0.015415108 |
| ENSMMUG00000015414 | family with sequence similarity 160 member B1 [Source:VGNC Symbol;Acc:VGNC:72403]            | - | -0.70632331 | 0.004779007 | 0.024195238 |



|                    |                                                                                                |   |             |             |             |
|--------------------|------------------------------------------------------------------------------------------------|---|-------------|-------------|-------------|
| ENSMMUG00000052442 |                                                                                                | - | 0.705182493 | 0.003540731 | 0.018876142 |
| ENSMMUG00000043922 | spermatogenesis associated 48 [Source:VGNC Symbol;Acc:VGNC:81762]                              | - | 0.703112313 | 0.000164671 | 0.001489035 |
| ENSMMUG00000008781 | BCL6 corepressor like 1 [Source:VGNC Symbol;Acc:VGNC:70131]                                    | - | 0.703088322 | 0.003492971 | 0.01866754  |
| ENSMMUG00000063474 |                                                                                                | - | 0.701897451 | 0.00064089  | 0.004658928 |
| ENSMMUG00000017025 | zinc finger CCCH-type containing 13 [Source:VGNC Symbol;Acc:VGNC:79248]                        | - | 0.700918783 | 0.002646925 | 0.015057647 |
| ENSMMUG00000009126 | solute carrier organic anion transporter family member 2B1 [Source:VGNC Symbol;Acc:VGNC:77603] | - | 0.698178105 | 0.001992445 | 0.011869913 |
| ENSMMUG00000061892 |                                                                                                | - | 0.697705707 | 0.007709994 | 0.035775217 |
| ENSMMUG00000039869 |                                                                                                | - | 0.697050394 | 0.003108884 | 0.017100836 |
| ENSMMUG00000019254 | phospholipase A2 group VII [Source:VGNC Symbol;Acc:VGNC:76158]                                 | - | 0.696616384 | 0.008992532 | 0.040376156 |
| ENSMMUG00000018939 | leucine rich repeat containing 66 [Source:VGNC Symbol;Acc:VGNC:74415]                          | - | 0.693859026 | 0.003186571 | 0.017446811 |
| ENSMMUG00000055590 |                                                                                                | - | 0.693755353 | 0.00136008  | 0.008723877 |
| ENSMMUG00000010351 | KN motif and ankyrin repeat domains 4 [Source:VGNC Symbol;Acc:VGNC:73916]                      | - | 0.693051815 | 0.005746801 | 0.028193004 |
| ENSMMUG00000056064 | serine and arginine rich splicing factor 1 [Source:NCBI gene;Acc:713958]                       | - | 0.692607977 | 0.002403004 | 0.013901641 |
| ENSMMUG00000011274 | prolyl 4-hydroxylase subunit alpha 1 [Source:VGNC Symbol;Acc:VGNC:75741]                       | - | 0.689793725 | 0.001631569 | 0.010144342 |
| ENSMMUG00000021438 | BTG anti-proliferation factor 4 [Source:VGNC Symbol;Acc:VGNC:70305]                            | - | 0.688951224 | 0.004001122 | 0.020918035 |
| ENSMMUG00000004329 | solute carrier family 1 member 2 [Source:VGNC Symbol;Acc:VGNC:77410]                           | - | -0.68786564 | 0.011593141 | 0.049144917 |
| ENSMMUG00000004674 | phosphoribosyl pyrophosphate synthetase 1 [Source:NCBI gene;Acc:702529]                        | - | -0.68677203 | 0.002710388 | 0.015336786 |
| ENSMMUG00000053262 |                                                                                                | - | 0.684938538 | 0.011037331 | 0.047392589 |
| ENSMMUG00000029265 | zinc finger protein 598 [Source:NCBI gene;Acc:694129]                                          | - | 0.684638898 | 0.009441247 | 0.041955351 |
| ENSMMUG00000061085 |                                                                                                | - | 0.683758992 | 0.001726354 | 0.010616669 |
| ENSMMUG00000007765 | Wnt family member 2B [Source:VGNC Symbol;Acc:VGNC:78797]                                       | - | -0.68306336 | 9.71E-05    | 0.000946876 |
| ENSMMUG00000000065 | coiled-coil domain containing 181 [Source:VGNC Symbol;Acc:VGNC:70884]                          | - | 0.679947137 | 0.007403631 | 0.034632128 |
| ENSMMUG00000023397 | penta-EF-hand domain containing 1 [Source:NCBI gene;Acc:706038]                                | - | 0.679622688 | 0.006824837 | 0.032403617 |
| ENSMMUG00000012036 | RNA binding motif protein 47 [Source:VGNC Symbol;Acc:VGNC:76576]                               | - | 0.678978018 | 0.000997919 | 0.006750106 |
| ENSMMUG00000056466 |                                                                                                | - | -0.67564068 | 0.009479109 | 0.04208037  |
| ENSMMUG00000002338 | heterogeneous nuclear ribonucleoprotein L like [Source:VGNC Symbol;Acc:VGNC:73441]             | - | 0.675196988 | 0.00659572  | 0.031569925 |
| ENSMMUG00000022570 | nuclear transcription factor Y subunit beta [Source:NCBI gene;Acc:700451]                      | - | -0.67516906 | 0.008393988 | 0.038164115 |
| ENSMMUG00000021420 | pleckstrin 2 [Source:VGNC Symbol;Acc:VGNC:76071]                                               | - | 0.673955454 | 0.008946682 | 0.040224125 |
| ENSMMUG00000014474 | SPARC related modular calcium binding 2 [Source:VGNC Symbol;Acc:VGNC:83470]                    | - | 0.673062964 | 0.000885428 | 0.006104562 |
| ENSMMUG00000042157 | caspase recruitment domain-containing protein 8 [Source:NCBI gene;Acc:718594]                  | - | 0.671621387 | 0.002812478 | 0.015805422 |

|                    |                                                                                                    |   |             |             |             |
|--------------------|----------------------------------------------------------------------------------------------------|---|-------------|-------------|-------------|
| ENSMMUG00000004723 | vascular endothelial zinc finger 1 [Source:NCBI gene;Acc:713848]                                   | - | 0.671105069 | 0.004811893 | 0.02432377  |
| ENSMMUG00000023136 | zinc finger protein 613 [Source:VGNC Symbol;Acc:VGNC:79548]                                        | - | 0.668323268 | 0.001088145 | 0.007226087 |
| ENSMMUG00000002185 | protein activator of interferon induced protein kinase EIF2AK2 [Source:VGNC Symbol;Acc:VGNC:76421] | - | 0.666704194 | 0.003129033 | 0.017182537 |
| ENSMMUG00000011002 | PYM homolog 1, exon junction complex associated factor [Source:VGNC Symbol;Acc:VGNC:76570]         | - | 0.666428071 | 0.00173678  | 0.010665618 |
| ENSMMUG00000004113 | major facilitator superfamily domain containing 4A [Source:VGNC Symbol;Acc:VGNC:74575]             | - | 0.665140879 | 0.005650903 | 0.027827751 |
| ENSMMUG00000016893 | solute carrier family 9 member A1 [Source:VGNC Symbol;Acc:VGNC:82241]                              | - | 0.664536433 | 0.01113309  | 0.047724803 |
| ENSMMUG00000013475 | calpain 1 [Source:VGNC Symbol;Acc:VGNC:70529]                                                      | - | 0.664432068 | 0.005269975 | 0.026220551 |
| ENSMMUG00000054493 |                                                                                                    | - | -0.66286704 | 0.003311217 | 0.01794002  |
| ENSMMUG00000057655 |                                                                                                    | - | 0.662401248 | 0.009653307 | 0.042663936 |
| ENSMMUG00000022303 | solute carrier family 7 member 2 [Source:VGNC Symbol;Acc:VGNC:77629]                               | - | 0.659856085 | 0.000135409 | 0.001252361 |
| ENSMMUG00000014610 | ring finger protein 17 [Source:NCBI gene;Acc:708198]                                               | - | 0.658007711 | 0.001202677 | 0.007871823 |
| ENSMMUG00000008486 | endothelial cell adhesion molecule [Source:VGNC Symbol;Acc:VGNC:72290]                             | - | 0.657572313 | 0.010001773 | 0.043815524 |
| ENSMMUG00000003594 | ubiquitin specific peptidase 13 [Source:VGNC Symbol;Acc:VGNC:78735]                                | - | 0.656978336 | 0.003163227 | 0.017348279 |
| ENSMMUG00000020150 | xin actin binding repeat containing 1 [Source:VGNC Symbol;Acc:VGNC:78952]                          | - | 0.654863605 | 0.000243931 | 0.002085147 |
| ENSMMUG00000047381 | DDB1 and CUL4 associated factor 10 [Source:NCBI gene;Acc:716256]                                   | - | 0.654090698 | 0.002414364 | 0.013936293 |
| ENSMMUG00000049364 | serine palmitoyltransferase small subunit A [Source:NCBI gene;Acc:717580]                          | - | 0.653966492 | 0.009841272 | 0.043358078 |
| ENSMMUG00000019462 | integrin subunit alpha V [Source:VGNC Symbol;Acc:VGNC:73783]                                       | - | 0.648977598 | 0.011062087 | 0.047467472 |
| ENSMMUG00000022490 | cytochrome P450, family 3, subfamily A, polypeptide 43 [Source:NCBI gene;Acc:709770]               | - | 0.647485901 | 0.001461581 | 0.00926954  |
| ENSMMUG00000005048 | MAM domain containing 4 [Source:VGNC Symbol;Acc:VGNC:74345]                                        | - | 0.646880292 | 0.003215556 | 0.01756105  |
| ENSMMUG00000061846 |                                                                                                    | - | 0.646241846 | 0.004250129 | 0.021989501 |
| ENSMMUG00000018053 | zinc finger and BTB domain containing 21 [Source:VGNC Symbol;Acc:VGNC:78892]                       | - | 0.645777107 | 0.004263354 | 0.022040352 |
| ENSMMUG00000003435 | transcriptional repressor GATA binding 1 [Source:VGNC Symbol;Acc:VGNC:78656]                       | - | 0.644926739 | 0.000998262 | 0.006750106 |
| ENSMMUG00000007043 | glutaryl-CoA dehydrogenase [Source:VGNC Symbol;Acc:VGNC:72898]                                     | - | 0.641234515 | 0.005707817 | 0.028076056 |
| ENSMMUG00000007077 | APOBEC1 complementation factor [Source:VGNC Symbol;Acc:VGNC:69523]                                 | - | 0.639413072 | 0.005908309 | 0.028789417 |
| ENSMMUG00000000547 | zinc finger protein 566 [Source:VGNC Symbol;Acc:VGNC:81619]                                        | - | 0.638720686 | 0.005777255 | 0.028320988 |
| ENSMMUG00000015463 | DNA polymerase epsilon, catalytic subunit [Source:NCBI gene;Acc:698023]                            | - | 0.636951037 | 0.009324738 | 0.041594296 |
| ENSMMUG00000030422 | radial spoke head 10 homolog B [Source:NCBI gene;Acc:100424218]                                    | - | 0.636896096 | 0.005725429 | 0.02814135  |
| ENSMMUG00000012332 | UBA domain containing 2 [Source:NCBI gene;Acc:703484]                                              | - | 0.636117092 | 0.007514793 | 0.035051025 |
| ENSMMUG00000031856 | talin 1 [Source:VGNC Symbol;Acc:VGNC:78371]                                                        | - | 0.635525795 | 0.007965167 | 0.036690097 |

|                    |                                                                                                         |   |             |             |             |
|--------------------|---------------------------------------------------------------------------------------------------------|---|-------------|-------------|-------------|
| ENSMMUG00000063979 |                                                                                                         | - | 0.634526729 | 0.00029298  | 0.002443254 |
| ENSMMUG00000049574 | antizyme inhibitor 2-like [Source:NCBI gene;Acc:705256]                                                 | - | 0.632557112 | 0.007714169 | 0.035775217 |
| ENSMMUG00000054625 |                                                                                                         | - | 0.632044624 | 0.005255795 | 0.026160027 |
| ENSMMUG00000059231 |                                                                                                         | - | 0.630906311 | 0.001527226 | 0.009596746 |
| ENSMMUG00000030400 | SH3 domain and tetratricopeptide repeats 1 [Source:NCBI gene;Acc:722649]                                | - | 0.630574271 | 0.004267407 | 0.02205252  |
| ENSMMUG00000004648 | KH domain containing 4, pre-mRNA splicing factor [Source:VGNC Symbol;Acc:VGNC:73931]                    | - | 0.630206073 | 0.005207199 | 0.025987929 |
| ENSMMUG00000019760 | karyopherin subunit beta 1 [Source:VGNC Symbol;Acc:VGNC:74203]                                          | - | 0.628212707 | 0.000616564 | 0.004499739 |
| ENSMMUG00000017379 | myocardin related transcription factor B [Source:VGNC Symbol;Acc:VGNC:74865]                            | - | 0.627607874 | 0.008090473 | 0.037096104 |
| ENSMMUG00000004708 | SPT6 homolog, histone chaperone and transcription elongation factor [Source:VGNC Symbol;Acc:VGNC:78057] | - | 0.625339955 | 0.010487603 | 0.04550995  |
| ENSMMUG00000001941 | CXXC finger protein 5 [Source:VGNC Symbol;Acc:VGNC:71594]                                               | - | 0.624257628 | 0.000120008 | 0.00113088  |
| ENSMMUG00000017677 | chromosome 7 C14orf28 homolog [Source:VGNC Symbol;Acc:VGNC:70581]                                       | - | 0.621335878 | 0.002122092 | 0.012494784 |
| ENSMMUG00000022715 | adenosylhomocysteinase like 1 [Source:VGNC Symbol;Acc:VGNC:81350]                                       | - | 0.620608141 | 0.007283101 | 0.034203953 |
| ENSMMUG00000057700 | acid sensing ion channel subunit family member 5 [Source:NCBI gene;Acc:699617]                          | - | 0.619753934 | 0.004445608 | 0.022855075 |
| ENSMMUG00000061176 |                                                                                                         | - | 0.619499249 | 0.001736355 | 0.010665618 |
| ENSMMUG00000052090 |                                                                                                         | - | 0.619165333 | 0.001581222 | 0.009869135 |
| ENSMMUG00000044652 | sialic acid-binding Ig-like lectin 13 [Source:NCBI gene;Acc:719667]                                     | - | 0.619089615 | 0.010508217 | 0.045573068 |
| ENSMMUG00000021567 | neurexophilin and PC-esterase domain family member 3 [Source:VGNC Symbol;Acc:VGNC:75476]                | - | 0.614529747 | 0.000315228 | 0.002598725 |
| ENSMMUG00000017508 | neurofascin [Source:VGNC Symbol;Acc:VGNC:75278]                                                         | - | 0.613880976 | 0.000721021 | 0.005151965 |
| ENSMMUG00000005980 | glutathione hydrolase 5 proenzyme [Source:NCBI gene;Acc:720345]                                         | - | -0.61376946 | 0.002321669 | 0.013492773 |
| ENSMMUG00000060822 |                                                                                                         | - | 0.613047351 | 0.011058269 | 0.047466788 |
| ENSMMUG00000007078 | N-acylsphingosine amidohydrolase 2 [Source:NCBI gene;Acc:703913]                                        | - | 0.610542402 | 0.00101895  | 0.006857828 |
| ENSMMUG00000064634 |                                                                                                         | - | 0.609733489 | 0.00331103  | 0.01794002  |
| ENSMMUG00000063721 |                                                                                                         | - | 0.608960659 | 0.005888821 | 0.028716027 |
| ENSMMUG00000059327 | NUS1 dehydrodolichyl diphosphate synthase subunit [Source:NCBI gene;Acc:715015]                         | - | 0.607591687 | 0.00973564  | 0.042954665 |
| ENSMMUG00000009189 | palmitoyl-protein thioesterase 1 [Source:VGNC Symbol;Acc:VGNC:76386]                                    | - | 0.607029306 | 0.00043929  | 0.003384293 |
| ENSMMUG00000003897 | solute carrier family 9 member A7 [Source:NCBI gene;Acc:710906]                                         | - | 0.602864943 | 0.007495577 | 0.034999139 |
| ENSMMUG00000006599 | derlin 2 [Source:VGNC Symbol;Acc:VGNC:71654]                                                            | - | 0.601771888 | 0.006652356 | 0.031794098 |
| ENSMMUG00000017725 | eukaryotic elongation factor 2 kinase [Source:VGNC Symbol;Acc:VGNC:72098]                               | - | 0.594459448 | 0.004450643 | 0.022862842 |
| ENSMMUG00000011963 | vimentin type intermediate filament associated coiled-coil protein [Source:NCBI gene;Acc:697958]        | - | 0.592353015 | 0.001040435 | 0.006995176 |

|                    |                                                                                                      |   |             |             |             |
|--------------------|------------------------------------------------------------------------------------------------------|---|-------------|-------------|-------------|
| ENSMMUG00000059910 |                                                                                                      | - | 0.591059958 | 0.003248523 | 0.017681555 |
| ENSMMUG00000012601 | RANBP2-type and C3HC4-type zinc finger containing 1 [Source:VGNC Symbol;Acc:VGNC:81554]              | - | -0.59049437 | 0.008719931 | 0.039360739 |
| ENSMMUG00000065066 | V-set and immunoglobulin domain containing 10 like 2 [Source:NCBI gene;Acc:717387]                   | - | 0.589673846 | 0.009940861 | 0.043667101 |
| ENSMMUG00000006163 | malate dehydrogenase 1 [Source:VGNC Symbol;Acc:VGNC:74690]                                           | - | 0.587723923 | 0.006250289 | 0.030206238 |
| ENSMMUG00000014438 | piwi like RNA-mediated gene silencing 2 [Source:VGNC Symbol;Acc:VGNC:81502]                          | - | 0.587077113 | 0.007334418 | 0.03435791  |
| ENSMMUG00000009837 | SECIS binding protein 2 like [Source:VGNC Symbol;Acc:VGNC:77325]                                     | - | 0.584674728 | 0.01064262  | 0.046017538 |
| ENSMMUG00000008313 | zinc finger protein 792 [Source:VGNC Symbol;Acc:VGNC:79456]                                          | - | 0.583773379 | 0.003739788 | 0.019717817 |
| ENSMMUG00000006268 | junction adhesion molecule like [Source:VGNC Symbol;Acc:VGNC:73860]                                  | - | 0.582317633 | 0.005031747 | 0.02527886  |
| ENSMMUG00000010589 | nebulette [Source:VGNC Symbol;Acc:VGNC:75195]                                                        | - | 0.579788248 | 0.005356463 | 0.026610053 |
| ENSMMUG00000014884 | ubiquitin specific peptidase 8 [Source:VGNC Symbol;Acc:VGNC:78748]                                   | - | 0.579739208 | 0.001273892 | 0.008252635 |
| ENSMMUG00000065091 | myelin protein zero like 2 [Source:NCBI gene;Acc:699330]                                             | - | 0.579524566 | 0.000970635 | 0.006606025 |
| ENSMMUG00000054737 |                                                                                                      | - | 0.577772051 | 0.002852375 | 0.015960507 |
| ENSMMUG00000049311 | zinc finger protein 558 [Source:NCBI gene;Acc:712590]                                                | - | 0.573164851 | 0.003461018 | 0.018557924 |
| ENSMMUG00000003456 | glypican 4 [Source:VGNC Symbol;Acc:VGNC:73118]                                                       | - | 0.570578643 | 0.002963954 | 0.016485329 |
| ENSMMUG00000001537 | apolipoprotein L2 [Source:VGNC Symbol;Acc:VGNC:69989]                                                | - | 0.570297824 | 0.008266745 | 0.037744295 |
| ENSMMUG00000000800 | proteasome 26S subunit, non-ATPase 2 [Source:VGNC Symbol;Acc:VGNC:84144]                             | - | 0.568767266 | 0.004396568 | 0.022667537 |
| ENSMMUG00000012912 | itchy E3 ubiquitin protein ligase [Source:VGNC Symbol;Acc:VGNC:73589]                                | - | -0.56525444 | 0.00107501  | 0.007171892 |
| ENSMMUG00000002018 | tyrosine aminotransferase [Source:VGNC Symbol;Acc:VGNC:78100]                                        | - | 0.561899173 | 0.009709771 | 0.042869681 |
| ENSMMUG00000049968 | RNA polymerase mitochondrial [Source:NCBI gene;Acc:100426183]                                        | - | 0.554208329 | 0.007220549 | 0.033996316 |
| ENSMMUG00000022906 | vascular cell adhesion molecule 1 [Source:VGNC Symbol;Acc:VGNC:78761]                                | - | 0.553642573 | 0.011236775 | 0.048026479 |
| ENSMMUG00000012020 | nuclear receptor coactivator 3 [Source:VGNC Symbol;Acc:VGNC:75147]                                   | - | 0.551278187 | 0.003399818 | 0.018305411 |
| ENSMMUG00000020555 | IQ motif and Sec7 domain ArfGEF 2 [Source:VGNC Symbol;Acc:VGNC:73676]                                | - | 0.541525112 | 0.010574514 | 0.045788474 |
| ENSMMUG00000051510 |                                                                                                      | - | 0.538589391 | 0.005334706 | 0.02651212  |
| ENSMMUG00000059543 | zinc finger protein 30 [Source:NCBI gene;Acc:718310]                                                 | - | -0.53841976 | 0.004928774 | 0.024837192 |
| ENSMMUG00000045482 | G0/G1 switch 2 [Source:NCBI gene;Acc:717581]                                                         | - | 0.536677277 | 0.008878772 | 0.039976038 |
| ENSMMUG00000008575 | transient receptor potential cation channel subfamily M member 7 [Source:VGNC Symbol;Acc:VGNC:79106] | - | 0.533925097 | 0.002989571 | 0.016578066 |
| ENSMMUG00000005942 | leucine carboxyl methyltransferase 1 [Source:VGNC Symbol;Acc:VGNC:74067]                             | - | 0.532937907 | 0.005568094 | 0.027482535 |
| ENSMMUG00000007507 | chloride voltage-gated channel 2 [Source:VGNC Symbol;Acc:VGNC:71235]                                 | - | 0.531567273 | 0.008169244 | 0.037391223 |
| ENSMMUG00000016005 | DnaJ heat shock protein family (Hsp40) member C13 [Source:VGNC Symbol;Acc:VGNC:84191]                | - | 0.530818906 | 0.002367066 | 0.013712078 |



|                    |                                                                                                |   |             |             |             |
|--------------------|------------------------------------------------------------------------------------------------|---|-------------|-------------|-------------|
| ENSMMUG00000010934 | eukaryotic translation initiation factor 4 gamma 1 [Source:VGNC Symbol;Acc:VGNC:72195]         | - | 0.518167651 | 0.009151689 | 0.040949075 |
| ENSMMUG00000010304 | cilia and flagella associated protein 298 [Source:NCBI gene;Acc:700721]                        | - | 0.517152494 | 0.002214865 | 0.01297776  |
| ENSMMUG00000016522 | neurolysin [Source:VGNC Symbol;Acc:VGNC:75183]                                                 | - | 0.515897824 | 0.01169244  | 0.049404462 |
| ENSMMUG00000007576 | EYA transcriptional coactivator and phosphatase 1 [Source:VGNC Symbol;Acc:VGNC:72453]          | - | 0.513174388 | 0.008035092 | 0.036946618 |
| ENSMMUG00000010544 | mucin 5B, oligomeric mucus/gel-forming [Source:VGNC Symbol;Acc:VGNC:75081]                     | - | 0.505133274 | 0.002895975 | 0.016162656 |
| ENSMMUG00000016740 | defective in cullin neddylation 1 domain containing 2 [Source:VGNC Symbol;Acc:VGNC:71684]      | - | 0.496106857 | 0.001660643 | 0.010270973 |
| ENSMMUG00000030786 | transient receptor potential cation channel subfamily C member 4 [Source:NCBI gene;Acc:695636] | - | 0.491693776 | 0.010134384 | 0.044274668 |
| ENSMMUG00000017685 | hydroxysteroid 17-beta dehydrogenase 4 [Source:VGNC Symbol;Acc:VGNC:73530]                     | - | 0.491534356 | 0.002077551 | 0.012287283 |
| ENSMMUG00000002096 | N-acetylglucosamine kinase [Source:VGNC Symbol;Acc:VGNC:74977]                                 | - | 0.482013586 | 0.001975406 | 0.011810206 |
| ENSMMUG00000005646 | diacylglycerol kinase delta [Source:VGNC Symbol;Acc:VGNC:71783]                                | - | 0.468958405 | 0.011401078 | 0.048520954 |
| ENSMMUG00000009188 | cyclase associated actin cytoskeleton regulatory protein 1 [Source:NCBI gene;Acc:693719]       | - | 0.464391965 | 0.003855834 | 0.020248202 |
| ENSMMUG00000003464 | midasin AAA ATPase 1 [Source:VGNC Symbol;Acc:VGNC:74530]                                       | - | 0.458308087 | 0.006385806 | 0.030712462 |
| ENSMMUG00000056693 |                                                                                                | - | 0.439721377 | 0.006813101 | 0.032371585 |
| ENSMMUG00000011557 | platelet derived growth factor receptor beta [Source:VGNC Symbol;Acc:VGNC:75929]               | - | 0.383416652 | 0.006573384 | 0.031497869 |
| ENSMMUG00000005960 | transmembrane BAX inhibitor motif containing 6 [Source:NCBI gene;Acc:677702]                   | - | 0.390093673 | 0.011647173 | 0.049293449 |
| ENSMMUG00000013797 | glutamine--fructose-6-phosphate transaminase 1 [Source:VGNC Symbol;Acc:VGNC:72915]             | - | 0.391972715 | 0.010527515 | 0.045626262 |
| ENSMMUG00000061481 | inosine triphosphatase [Source:NCBI gene;Acc:717257]                                           | - | 0.420890044 | 0.005247267 | 0.026137632 |
| ENSMMUG00000003633 | solute carrier family 4 member 11 [Source:VGNC Symbol;Acc:VGNC:77721]                          | - | 0.422611548 | 0.003239813 | 0.017653505 |
| ENSMMUG00000020734 | golgi integral membrane protein 4 [Source:VGNC Symbol;Acc:VGNC:72945]                          | - | 0.426363484 | 0.008538758 | 0.038686774 |
| ENSMMUG00000003047 | DAZ associated protein 1 [Source:VGNC Symbol;Acc:VGNC:71738]                                   | - | 0.42960888  | 0.004261881 | 0.022040352 |
| ENSMMUG00000016727 | cadherin 16 [Source:VGNC Symbol;Acc:VGNC:70809]                                                | - | 0.434114557 | 0.007123743 | 0.033601487 |
| ENSMMUG00000006820 | WD repeat domain 87 [Source:NCBI gene;Acc:719441]                                              | - | 0.439392423 | 0.008661371 | 0.039132992 |
| ENSMMUG00000061189 |                                                                                                | - | 0.440986607 | 0.009715925 | 0.042882259 |
| ENSMMUG00000008885 | exocyst complex component 7 [Source:VGNC Symbol;Acc:VGNC:72319]                                | - | 0.459068404 | 0.003919674 | 0.020541879 |
| ENSMMUG00000006550 | zinc finger CCCH-type containing, antiviral 1 [Source:VGNC Symbol;Acc:VGNC:79408]              | - | 0.464225708 | 0.010941908 | 0.047029544 |
| ENSMMUG00000061710 |                                                                                                | - | 0.465036646 | 0.003377405 | 0.018207398 |
| ENSMMUG00000019184 | ankyrin repeat and FYVE domain containing 1 [Source:VGNC Symbol;Acc:VGNC:69651]                | - | 0.46950808  | 0.005737524 | 0.028179452 |
| ENSMMUG00000029181 | X-ray repair cross complementing 3 [Source:NCBI gene;Acc:695788]                               | - | 0.470274026 | 0.007589984 | 0.035312882 |
| ENSMMUG00000015114 | toll like receptor adaptor molecule 2 [Source:NCBI gene;Acc:100426353]                         | - | 0.48134646  | 0.011326765 | 0.048331506 |
| ENSMMUG00000005775 | phospholipase A and acyltransferase 3 [Source:VGNC Symbol;Acc:VGNC:76055]                      | - | 0.481509103 | 0.004064628 | 0.021163501 |
| ENSMMUG00000023128 | inositol 1,4,5-trisphosphate receptor type 2 [Source:VGNC Symbol;Acc:VGNC:73805]               | - | 0.483088965 | 0.00219755  | 0.012891233 |
| ENSMMUG00000061384 | sodium voltage-gated channel beta subunit 2 [Source:NCBI gene;Acc:678698]                      | - | 0.483461761 | 0.004821769 | 0.024354717 |
| ENSMMUG00000010062 | shisa family member 5 [Source:VGNC Symbol;Acc:VGNC:84082]                                      | - | 0.486329886 | 0.00979384  | 0.043167414 |
| ENSMMUG00000051674 | IKBKB interacting protein [Source:NCBI gene;Acc:693896]                                        | - | 0.487927423 | 0.008887317 | 0.039986764 |
| ENSMMUG00000015301 | Rho GTPase activating protein 45 [Source:VGNC Symbol;Acc:VGNC:69847]                           | - | 0.492536958 | 0.006817532 | 0.032380782 |
| ENSMMUG00000006558 | ATP binding cassette subfamily F member 3 [Source:VGNC Symbol;Acc:VGNC:69583]                  | - | 0.496486957 | 0.008077241 | 0.037058374 |
| ENSMMUG00000022070 | sialic acid binding Ig like lectin 1 [Source:VGNC Symbol;Acc:VGNC:77220]                       | - | 0.49979347  | 0.007950463 | 0.036643506 |
| ENSMMUG00000054834 |                                                                                                | - | 0.500911215 | 0.003032753 | 0.016781666 |
| ENSMMUG00000021866 | deoxyribonuclease 1 [Source:VGNC Symbol;Acc:VGNC:71946]                                        | - | 0.503646309 | 0.006928248 | 0.032810562 |
| ENSMMUG00000005780 | dynein cytoplasmic 1 heavy chain 1 [Source:VGNC Symbol;Acc:VGNC:71951]                         | - | 0.508757282 | 0.001080638 | 0.007198548 |
| ENSMMUG00000009938 | myosin XVIII A [Source:VGNC Symbol;Acc:VGNC:75058]                                             | - | 0.508786643 | 0.007216169 | 0.033988024 |

|                     |                                                                                                                |             |             |             |
|---------------------|----------------------------------------------------------------------------------------------------------------|-------------|-------------|-------------|
| ENSMMUG00000015267  | C-terminal Src kinase [Source:VGNC Symbol;Acc:VGNC:81380]                                                      | 0.508800747 | 0.003332495 | 0.018031317 |
| ENSMMUG00000010058  | ATR interacting protein [Source:VGNC Symbol;Acc:VGNC:84235]                                                    | 0.514520104 | 0.002425227 | 0.013986553 |
| ENSMMUG00000022825  | carboxylesterase 2 [Source:VGNC Symbol;Acc:VGNC:71012]                                                         | 0.515847816 | 0.000392033 | 0.003106233 |
| ENSMMUG00000016742  | CTD small phosphatase like 2 [Source:VGNC Symbol;Acc:VGNC:71593]                                               | 0.516227853 | 0.005820392 | 0.028469574 |
| ENSMMUG00000042378  | pseudopodium enriched atypical kinase 1 [Source:VGNC Symbol;Acc:VGNC:84419]                                    | 0.517314157 | 0.009878235 | 0.043450841 |
| ENSMMUG00000010633  | PHD finger protein 20 [Source:VGNC Symbol;Acc:VGNC:75807]                                                      | 0.517730937 | 0.00335347  | 0.018116    |
| ENSMMUG00000000695  | transmembrane protein 245 [Source:VGNC Symbol;Acc:VGNC:78933]                                                  | 0.520941192 | 0.006356222 | 0.030604204 |
| ENSMMUG00000022895  | DnaJ heat shock protein family (Hsp40) member B5 [Source:NCBI gene;Acc:699081]                                 | 0.520999078 | 0.001568233 | 0.00979749  |
| ENSMMUG00000007556  | kinetochore associated 1 [Source:VGNC Symbol;Acc:VGNC:74064]                                                   | 0.521836908 | 0.009614287 | 0.042563968 |
| ENSMMUG00000011459  | 3-phosphoinositide dependent protein kinase 1 [Source:NCBI gene;Acc:697523]                                    | 0.524511013 | 0.00171039  | 0.010533473 |
| ENSMMUG000000059612 |                                                                                                                | 0.527361964 | 0.001193017 | 0.007818478 |
| ENSMMUG00000013730  | WD repeat domain 17 [Source:NCBI gene;Acc:700546]                                                              | 0.528012696 | 0.001126747 | 0.007436761 |
| ENSMMUG00000019136  | taxilin beta [Source:VGNC Symbol;Acc:VGNC:79325]                                                               | 0.531987215 | 0.003884956 | 0.020376392 |
| ENSMMUG00000021012  | G protein-coupled receptor 155 [Source:VGNC Symbol;Acc:VGNC:72985]                                             | 0.532979718 | 0.001086371 | 0.007220761 |
| ENSMMUG00000008133  | solute carrier family 17 member 5 [Source:VGNC Symbol;Acc:VGNC:77405]                                          | 0.534080069 | 0.007732989 | 0.035824088 |
| ENSMMUG000000058733 | zinc finger CCCH-type containing 3 [Source:NCBI gene;Acc:708584]                                               | 0.536862964 | 0.001516097 | 0.009536053 |
| ENSMMUG00000046092  | adhesion G protein-coupled receptor B3 [Source:VGNC Symbol;Acc:VGNC:81006]                                     | 0.53992136  | 0.008233002 | 0.037653235 |
| ENSMMUG00000009017  | transcription factor 3 [Source:VGNC Symbol;Acc:VGNC:78287]                                                     | 0.546058086 | 0.000499046 | 0.003753985 |
| ENSMMUG00000012667  | annexin A1 [Source:VGNC Symbol;Acc:VGNC:69944]                                                                 | 0.546093472 | 0.002360814 | 0.013681967 |
| ENSMMUG000000005080 | ubiquitin conjugating enzyme E2 G1 [Source:VGNC Symbol;Acc:VGNC:78695]                                         | 0.549510896 | 0.000656565 | 0.004749311 |
| ENSMMUG000000060493 |                                                                                                                | 0.556986177 | 0.003645324 | 0.019314707 |
| ENSMMUG00000012472  | phosphatidylinositol-4-phosphate 5-kinase type 1 beta [Source:VGNC Symbol;Acc:VGNC:76001]                      | 0.560911275 | 0.003477963 | 0.01860539  |
| ENSMMUG00000003161  | microtubule associated serine/threonine kinase 3 [Source:VGNC Symbol;Acc:VGNC:74533]                           | 0.560918305 | 0.007618172 | 0.035418633 |
| ENSMMUG00000022094  | ATP binding cassette subfamily B member 10 [Source:NCBI gene;Acc:574117]                                       | 0.561194062 | 0.001403645 | 0.008972266 |
| ENSMMUG000000007760 | centrosomal protein 70 [Source:VGNC Symbol;Acc:VGNC:71140]                                                     | 0.562185752 | 0.004647494 | 0.023684326 |
| ENSMMUG00000022682  | tripartite motif containing 68 [Source:NCBI gene;Acc:717644]                                                   | 0.565920192 | 0.001851999 | 0.011240197 |
| ENSMMUG000000050742 | src kinase associated phosphoprotein 1 [Source:NCBI gene;Acc:697043]                                           | 0.566835593 | 0.001406203 | 0.00898419  |
| ENSMMUG00000015840  | RAN binding protein 17 [Source:VGNC Symbol;Acc:VGNC:84485]                                                     | 0.567089929 | 0.003126399 | 0.017175343 |
| ENSMMUG00000002381  | lysine methyltransferase 2B [Source:VGNC Symbol;Acc:VGNC:74053]                                                | 0.568561623 | 0.000899716 | 0.006183644 |
| ENSMMUG00000010367  | myosin heavy chain 11 [Source:VGNC Symbol;Acc:VGNC:75097]                                                      | 0.571329828 | 0.003236241 | 0.017644315 |
| ENSMMUG000000065276 |                                                                                                                | 0.572435805 | 0.008906497 | 0.040059172 |
| ENSMMUG00000009577  | atlastin GTPase 1 [Source:VGNC Symbol;Acc:VGNC:70049]                                                          | 0.572952746 | 0.008278223 | 0.037771007 |
| ENSMMUG000000005878 | protein tyrosine phosphatase receptor type A [Source:VGNC Symbol;Acc:VGNC:76610]                               | 0.576933915 | 0.006253009 | 0.030208134 |
| ENSMMUG00000007223  | DIRAS family GTPase 2 [Source:VGNC Symbol;Acc:VGNC:71673]                                                      | 0.577311695 | 0.005068136 | 0.025421    |
| ENSMMUG00000022136  | laminin subunit alpha 2 [Source:VGNC Symbol;Acc:VGNC:74225]                                                    | 0.57786358  | 0.000796971 | 0.005589995 |
| ENSMMUG000000008104 | proteasome activator subunit 4 [Source:VGNC Symbol;Acc:VGNC:76295]                                             | 0.577933758 | 0.001784322 | 0.010921396 |
| ENSMMUG000000060764 |                                                                                                                | 0.578442906 | 0.002118374 | 0.012494557 |
| ENSMMUG00000017038  | RAB2A, member RAS oncogene family [Source:VGNC Symbol;Acc:VGNC:81529]                                          | 0.580056165 | 0.008553482 | 0.038739959 |
| ENSMMUG00000018579  | sperm antigen with calponin homology and coiled-coil domains 1 [Source:VGNC Symbol;Acc:VGNC:78021]             | 0.581375516 | 0.006205244 | 0.0300109   |
| ENSMMUG00000019807  | regulator of G protein signaling 14 [Source:VGNC Symbol;Acc:VGNC:76918]                                        | 0.583460101 | 0.004559478 | 0.023311184 |
| ENSMMUG000000000151 | transmembrane serine protease 6 [Source:VGNC Symbol;Acc:VGNC:79038]                                            | 0.585808563 | 0.003526887 | 0.018817799 |
| ENSMMUG000000005264 | mediator complex subunit 14 [Source:VGNC Symbol;Acc:VGNC:74561]                                                | 0.585867648 | 0.010623115 | 0.045953219 |
| ENSMMUG000000060311 | G antigen 10-like [Source:NCBI gene;Acc:114674954]                                                             | 0.586681479 | 0.009918937 | 0.043600314 |
| ENSMMUG00000014873  | torsin 1A interacting protein 1 [Source:VGNC Symbol;Acc:VGNC:79810]                                            | 0.587152346 | 0.008478138 | 0.0384524   |
| ENSMMUG00000013128  | coiled-coil domain containing 30 [Source:VGNC Symbol;Acc:VGNC:70866]                                           | 0.590094182 | 0.001851128 | 0.011240164 |
| ENSMMUG00000012117  | HECT and RLD domain containing E3 ubiquitin protein ligase family member 1 [Source:VGNC Symbol;Acc:VGNC:73364] | 0.591208393 | 4.24E-05    | 0.000470695 |
| ENSMMUG00000010996  | Janus kinase 3 [Source:VGNC Symbol;Acc:VGNC:73812]                                                             | 0.591759148 | 0.003642562 | 0.019307958 |
| ENSMMUG000000009768 | ring finger protein 14 [Source:VGNC Symbol;Acc:VGNC:84488]                                                     | 0.592589148 | 0.00165647  | 0.010259837 |
| ENSMMUG00000009430  | transient receptor potential cation channel subfamily M member 1 [Source:VGNC Symbol;Acc:VGNC:79964]           | 0.595009983 | 0.000782567 | 0.005503166 |
| ENSMMUG000000051669 |                                                                                                                | 0.595396401 | 0.003941556 | 0.020627504 |
| ENSMMUG00000006182  | bromodomain adjacent to zinc finger domain 2B [Source:NCBI gene;Acc:702780]                                    | 0.59884218  | 0.002996707 | 0.016603446 |



|                    |                                                                                                     |             |             |             |
|--------------------|-----------------------------------------------------------------------------------------------------|-------------|-------------|-------------|
| ENSMMUG0000006727  | vitamin D receptor [Source:VGNC Symbol;Acc:VGNC:78764]                                              | 0.601455225 | 0.001170185 | 0.007699962 |
| ENSMMUG0000005323  | phosphoribosyl pyrophosphate synthetase associated protein 2 [Source:VGNC Symbol;Acc:VGNC:76430]    | 0.601823942 | 0.001081217 | 0.007198548 |
| ENSMMUG00000013653 | lysine demethylase 5A [Source:VGNC Symbol;Acc:VGNC:82169]                                           | 0.60329419  | 0.000833638 | 0.005809501 |
| ENSMMUG00000020676 | BPI fold containing family B member 4 [Source:VGNC Symbol;Acc:VGNC:70321]                           | 0.605884839 | 0.009005566 | 0.040420692 |
| ENSMMUG00000006528 | Rho GTPase activating protein 15 [Source:VGNC Symbol;Acc:VGNC:69874]                                | 0.614120591 | 0.000126749 | 0.001184978 |
| ENSMMUG00000018154 | cartilage acidic protein 1 [Source:VGNC Symbol;Acc:VGNC:71408]                                      | 0.616790662 | 0.008949372 | 0.040224125 |
| ENSMMUG00000053458 | ORMDL sphingolipid biosynthesis regulator 2 [Source:NCBI gene;Acc:710296]                           | 0.61781488  | 0.004250001 | 0.021989501 |
| ENSMMUG00000015115 | terminal nucleotidyltransferase 5B [Source:VGNC Symbol;Acc:VGNC:79692]                              | 0.61785881  | 0.002902767 | 0.016193597 |
| ENSMMUG00000002371 | myosin IC [Source:VGNC Symbol;Acc:VGNC:75112]                                                       | 0.618120143 | 0.007914752 | 0.036509712 |
| ENSMMUG00000055016 | keratin, type II cytoskeletal 6A [Source:NCBI gene;Acc:719283]                                      | 0.62306902  | 0.000225426 | 0.001952685 |
| ENSMMUG00000020629 | SDS3 homolog, SIN3A corepressor complex component [Source:NCBI gene;Acc:696166]                     | 0.624187044 | 0.007725493 | 0.035814935 |
| ENSMMUG00000019703 | RUN and FYVE domain containing 2 [Source:VGNC Symbol;Acc:VGNC:77057]                                | 0.624244584 | 0.000659678 | 0.004763487 |
| ENSMMUG00000038349 | crystallin beta-gamma domain containing 3 [Source:NCBI gene;Acc:698282]                             | 0.626773014 | 0.003567074 | 0.018977594 |
| ENSMMUG00000005270 | ryanodine receptor 3 [Source:NCBI gene;Acc:694996]                                                  | 0.628802825 | 0.004515253 | 0.023127157 |
| ENSMMUG00000006403 | potassium voltage-gated channel subfamily C member 1 [Source:VGNC Symbol;Acc:VGNC:73971]            | 0.629525318 | 0.003073364 | 0.016962985 |
| ENSMMUG00000015982 | neuronal PAS domain protein 4 [Source:VGNC Symbol;Acc:VGNC:75211]                                   | 0.629738391 | 0.009683132 | 0.04278118  |
| ENSMMUG00000020172 | KIAA1755 [Source:VGNC Symbol;Acc:VGNC:73942]                                                        | 0.62986096  | 0.003240648 | 0.017653505 |
| ENSMMUG00000019926 | cytoplasmic polyadenylation element binding protein 4 [Source:VGNC Symbol;Acc:VGNC:71450]           | 0.629936076 | 0.002704342 | 0.015316881 |
| ENSMMUG00000000500 | fibronectin type III domain containing 1 [Source:VGNC Symbol;Acc:VGNC:72546]                        | 0.630176789 | 0.007586723 | 0.035312882 |
| ENSMMUG00000048207 | syntaxin 4 [Source:NCBI gene;Acc:704880]                                                            | 0.630577753 | 0.001245293 | 0.008104302 |
| ENSMMUG00000062747 |                                                                                                     | 0.631126043 | 0.000494402 | 0.003723363 |
| ENSMMUG00000058082 |                                                                                                     | 0.631150669 | 0.001321621 | 0.008515069 |
| ENSMMUG00000044736 | WT1 interacting protein [Source:NCBI gene;Acc:717999]                                               | 0.631206029 | 0.010028969 | 0.043905499 |
| ENSMMUG00000017505 | tetratricopeptide repeat domain 3 [Source:VGNC Symbol;Acc:VGNC:81785]                               | 0.631268449 | 0.000999516 | 0.006755064 |
| ENSMMUG00000031160 | menin 1 [Source:NCBI gene;Acc:106995582]                                                            | 0.631846189 | 5.64E-05    | 0.00060196  |
| ENSMMUG00000053437 |                                                                                                     | 0.632577243 | 0.003650463 | 0.019326154 |
| ENSMMUG00000004522 | DNA primase subunit 1 [Source:NCBI gene;Acc:710253]                                                 | 0.635169847 | 0.000305396 | 0.002530537 |
| ENSMMUG00000049666 |                                                                                                     | 0.635891822 | 0.006664304 | 0.031819346 |
| ENSMMUG00000057506 |                                                                                                     | 0.635959128 | 0.003635545 | 0.019286523 |
| ENSMMUG00000022744 | muscleblind like splicing regulator 2 [Source:VGNC Symbol;Acc:VGNC:74519]                           | 0.636513865 | 0.008445755 | 0.038345739 |
| ENSMMUG00000023321 | UDP-glucose glycoprotein glucosyltransferase 1 [Source:VGNC Symbol;Acc:VGNC:78981]                  | 0.638226979 | 0.008457183 | 0.038384191 |
| ENSMMUG00000016114 | 2',3'-cyclic nucleotide 3' phosphodiesterase [Source:VGNC Symbol;Acc:VGNC:71279]                    | 0.638754177 | 0.00100283  | 0.00677393  |
| ENSMMUG00000006287 | DAP3 binding cell death enhancer 1 [Source:VGNC Symbol;Acc:VGNC:71806]                              | 0.6388928   | 0.001424203 | 0.009059048 |
| ENSMMUG00000021082 | potassium sodium-activated channel subfamily T member 2 [Source:VGNC Symbol;Acc:VGNC:73857]         | 0.639000897 | 0.002015995 | 0.011977818 |
| ENSMMUG00000023025 | synaptophysin [Source:VGNC Symbol;Acc:VGNC:78072]                                                   | 0.639251203 | 0.001326956 | 0.00853673  |
| ENSMMUG00000004026 | integrin subunit alpha 11 [Source:VGNC Symbol;Acc:VGNC:73774]                                       | 0.640002893 | 0.001388448 | 0.008888258 |
| ENSMMUG00000064750 |                                                                                                     | 0.6412261   | 0.005545804 | 0.027382937 |
| ENSMMUG00000056500 |                                                                                                     | 0.641235902 | 0.000326718 | 0.002671389 |
| ENSMMUG00000002909 | placental growth factor [Source:VGNC Symbol;Acc:VGNC:75964]                                         | 0.643027746 | 0.002851921 | 0.015960507 |
| ENSMMUG00000011278 | cysteine rich with EGF like domains 2 [Source:NCBI gene;Acc:720586]                                 | 0.643518489 | 0.000267369 | 0.002264607 |
| ENSMMUG00000019015 | HECT, C2 and WW domain containing E3 ubiquitin protein ligase 1 [Source:VGNC Symbol;Acc:VGNC:73217] | 0.64453544  | 0.000652812 | 0.004732342 |
| ENSMMUG00000005667 | fumarate hydratase [Source:VGNC Symbol;Acc:VGNC:72659]                                              | 0.644933353 | 0.006678098 | 0.031846748 |
| ENSMMUG00000001167 | tRNA methyltransferase 1 [Source:VGNC Symbol;Acc:VGNC:79562]                                        | 0.646318557 | 0.006080654 | 0.029526834 |
| ENSMMUG00000060495 |                                                                                                     | 0.646458975 | 0.011129442 | 0.047724803 |
| ENSMMUG00000052836 |                                                                                                     | 0.647711044 | 0.00661768  | 0.031640022 |
| ENSMMUG00000002540 | dehydrogenase/reductase 7 [Source:VGNC Symbol;Acc:VGNC:71690]                                       | 0.648743978 | 0.001045223 | 0.007018187 |
| ENSMMUG00000053488 | small integral membrane protein 19 [Source:NCBI gene;Acc:705371]                                    | 0.649146528 | 0.000385335 | 0.00306567  |
| ENSMMUG00000060987 |                                                                                                     | 0.649204707 | 0.004651887 | 0.0236903   |
| ENSMMUG00000050119 |                                                                                                     | 0.649635489 | 0.001049863 | 0.007040324 |
| ENSMMUG00000055978 |                                                                                                     | 0.650284682 | 0.007912685 | 0.036509712 |
| ENSMMUG00000011134 | transcription factor Dp-2 [Source:VGNC Symbol;Acc:VGNC:78324]                                       | 0.651578883 | 0.003274571 | 0.017763724 |

|                     |                                                                                                                   |             |             |             |
|---------------------|-------------------------------------------------------------------------------------------------------------------|-------------|-------------|-------------|
| ENSMMUG0000004417   | secretion associated Ras related GTPase 1B [Source:VGNC Symbol;Acc:VGNC:76970]                                    | 0.652751154 | 0.001543579 | 0.009680755 |
| ENSMMUG00000019115  | eukaryotic translation initiation factor 1A domain containing [Source:VGNC Symbol;Acc:VGNC:72127]                 | 0.65290283  | 0.003017316 | 0.016710494 |
| ENSMMUG00000011043  | endoplasmic reticulum aminopeptidase 2 [Source:VGNC Symbol;Acc:VGNC:72141]                                        | 0.654570176 | 0.000399798 | 0.003153576 |
| ENSMMUG00000038858  |                                                                                                                   | 0.655664225 | 0.001112572 | 0.007365682 |
| ENSMMUG0000001083   | glycine N-acyltransferase-like protein 1 [Source:NCBI gene;Acc:701437]                                            | 0.656561941 | 0.002876157 | 0.01606587  |
| ENSMMUG00000005991  | TRIO and F-actin binding protein [Source:NCBI gene;Acc:701241]                                                    | 0.658912957 | 0.001888298 | 0.011385946 |
| ENSMMUG00000001801  | membrane associated guanylate kinase, WW and PDZ domain containing 2 [Source:VGNC Symbol;Acc:VGNC:74312]          | 0.659281927 | 0.009531988 | 0.042244304 |
| ENSMMUG00000045544  | neuronal tyrosine-phosphorylated phosphoinositide-3-kinase adaptor 2 [Source:NCBI gene;Acc:711209]                | 0.660066057 | 0.003939318 | 0.020627504 |
| ENSMMUG00000008931  | MAU2 sister chromatid cohesion factor [Source:NCBI gene;Acc:720347]                                               | 0.660143667 | 0.000404114 | 0.003175868 |
| ENSMMUG00000020173  | bactericidal permeability increasing protein [Source:VGNC Symbol;Acc:VGNC:70277]                                  | 0.661737607 | 0.00577212  | 0.028306511 |
| ENSMMUG00000017806  | CD109 molecule [Source:VGNC Symbol;Acc:VGNC:70834]                                                                | 0.663000759 | 0.000749556 | 0.00530908  |
| ENSMMUG00000047621  | transmembrane 4 L six family member 18 [Source:VGNC Symbol;Acc:VGNC:82713]                                        | 0.663777023 | 0.00171802  | 0.010570665 |
| ENSMMUG00000005906  | heat shock transcription factor 4 [Source:VGNC Symbol;Acc:VGNC:73533]                                             | 0.664216465 | 0.0093376   | 0.041637352 |
| ENSMMUG00000019500  | methenyltetrahydrofolate synthetase domain containing [Source:VGNC Symbol;Acc:VGNC:75023]                         | 0.664448548 | 0.001306454 | 0.008434103 |
| ENSMMUG00000000591  | 6-phosphofructo-2-kinase/fructose-2,6-biphosphatase 4 [Source:VGNC Symbol;Acc:VGNC:75960]                         | 0.664528875 | 0.000895713 | 0.006159388 |
| ENSMMUG00000020575  | SOS Ras/Rac guanine nucleotide exchange factor 1 [Source:VGNC Symbol;Acc:VGNC:77837]                              | 0.669885748 | 0.001587396 | 0.009902433 |
| ENSMMUG00000022404  | apoptotic peptidase activating factor 1 [Source:VGNC Symbol;Acc:VGNC:69975]                                       | 0.670009742 | 8.04E-06    | 0.000109343 |
| ENSMMUG00000004339  | RAB15, member RAS oncogene family [Source:VGNC Symbol;Acc:VGNC:81519]                                             | 0.670245007 | 0.005828877 | 0.028487949 |
| ENSMMUG00000008130  | ABR activator of RhoGEF and GTPase [Source:VGNC Symbol;Acc:VGNC:69589]                                            | 0.671370645 | 7.21E-05    | 0.000741497 |
| ENSMMUG00000011001  | ankyrin repeat and sterile alpha motif domain containing 3 [Source:VGNC Symbol;Acc:VGNC:69735]                    | 0.672121048 | 0.003730444 | 0.019685337 |
| ENSMMUG00000013460  | RAB8B, member RAS oncogene family [Source:VGNC Symbol;Acc:VGNC:81550]                                             | 0.672996535 | 0.00735323  | 0.034433601 |
| ENSMMUG00000032341  | coiled-coil domain containing 160 [Source:VGNC Symbol;Acc:VGNC:70926]                                             | 0.675876751 | 0.000493173 | 0.00371843  |
| ENSMMUG00000058241  | leucine rich repeat and Ig domain containing 3 [Source:NCBI gene;Acc:721484]                                      | 0.675936858 | 0.001657387 | 0.010260616 |
| ENSMMUG00000009173  | serine/threonine kinase 24 [Source:VGNC Symbol;Acc:VGNC:81583]                                                    | 0.679413598 | 0.000463634 | 0.00353633  |
| ENSMMUG00000020601  | coenzyme Q5, methyltransferase [Source:VGNC Symbol;Acc:VGNC:81376]                                                | 0.680871078 | 0.000358056 | 0.002887594 |
| ENSMMUG00000006139  | 3-hydroxy-3-methylglutaryl-CoA reductase [Source:VGNC Symbol;Acc:VGNC:73484]                                      | 0.682464658 | 0.000354707 | 0.00286771  |
| ENSMMUG00000001667  | transmembrane protein 210 [Source:VGNC Symbol;Acc:VGNC:79945]                                                     | 0.683896224 | 0.000126048 | 0.00118094  |
| ENSMMUG00000000291  | leucine rich repeat transmembrane neuronal 1 [Source:VGNC Symbol;Acc:VGNC:74315]                                  | 0.68418599  | 0.011389787 | 0.048488805 |
| ENSMMUG00000010141  | family with sequence similarity 13 member A [Source:VGNC Symbol;Acc:VGNC:72299]                                   | 0.686410952 | 0.000210251 | 0.001842141 |
| ENSMMUG00000017949  | ornithine decarboxylase antizyme 1 [Source:NCBI gene;Acc:721477]                                                  | 0.687506788 | 2.60E-05    | 0.00030537  |
| ENSMMUG00000022741  | WAP, follistatin/kazal, immunoglobulin, kunitz and netrin domain containing 2 [Source:VGNC Symbol;Acc:VGNC:79900] | 0.689987889 | 0.000838665 | 0.00583513  |
| ENSMMUG00000022973  | gametogenetin [Source:VGNC Symbol;Acc:VGNC:72740]                                                                 | 0.690453258 | 0.002510609 | 0.01440852  |
| ENSMMUG00000014311  | chromosome 20 C16orf71 homolog [Source:NCBI gene;Acc:709711]                                                      | 0.690601602 | 0.002972224 | 0.016517165 |
| ENSMMUG000000060780 |                                                                                                                   | 0.693065224 | 0.000521879 | 0.003903114 |
| ENSMMUG00000001538  | GRAM domain containing 1A [Source:VGNC Symbol;Acc:VGNC:73029]                                                     | 0.693887069 | 0.001183109 | 0.007773175 |
| ENSMMUG000000051751 |                                                                                                                   | 0.693910999 | 0.004581793 | 0.023397616 |
| ENSMMUG00000018255  | nuclear factor of activated T cells 5 [Source:VGNC Symbol;Acc:VGNC:75325]                                         | 0.694682136 | 0.005182336 | 0.025883755 |
| ENSMMUG000000051450 | phospholipase A2 receptor 1 [Source:NCBI gene;Acc:700191]                                                         | 0.696688344 | 0.000361711 | 0.002911636 |
| ENSMMUG000000049866 |                                                                                                                   | 0.696994761 | 0.007330894 | 0.034353803 |
| ENSMMUG00000042077  | DNA damage regulated autophagy modulator 1 [Source:NCBI gene;Acc:697427]                                          | 0.697587569 | 0.000878134 | 0.006060993 |
| ENSMMUG00000003956  | interferon alpha and beta receptor subunit 2 [Source:VGNC Symbol;Acc:VGNC:81330]                                  | 0.698648271 | 0.000598447 | 0.004404678 |
| ENSMMUG00000045187  | CASC3 exon junction complex subunit [Source:NCBI gene;Acc:699712]                                                 | 0.700022904 | 0.005855934 | 0.028598645 |
| ENSMMUG00000037887  | RBMX like 1 [Source:NCBI gene;Acc:100424767]                                                                      | 0.700112162 | 1.16E-05    | 0.000149005 |
| ENSMMUG00000000237  | TBC1 domain family member 1 [Source:VGNC Symbol;Acc:VGNC:78103]                                                   | 0.700218534 | 0.010036215 | 0.043922403 |
| ENSMMUG00000011579  | TAFA chemokine like family member 2 [Source:VGNC Symbol;Acc:VGNC:78189]                                           | 0.700383216 | 0.000513078 | 0.003841718 |
| ENSMMUG00000013193  | matrix metalloproteinase 16 [Source:VGNC Symbol;Acc:VGNC:74894]                                                   | 0.700768825 | 0.002945101 | 0.016387491 |
| ENSMMUG00000016128  | SIK family kinase 3 [Source:VGNC Symbol;Acc:VGNC:77330]                                                           | 0.701135175 | 0.000680721 | 0.004896363 |
| ENSMMUG00000011209  | BICD family like cargo adaptor 1 [Source:HGNC Symbol;Acc:HGNC:28095]                                              | 0.701828531 | 0.011185347 | 0.047901343 |
| ENSMMUG00000022104  | family with sequence similarity 174 member C [Source:NCBI gene;Acc:706393]                                        | 0.702449009 | 0.000110594 | 0.001058305 |
| ENSMMUG00000017619  | lysophosphatidic acid receptor 5 [Source:VGNC Symbol;Acc:VGNC:74277]                                              | 0.703150478 | 0.000126753 | 0.001184978 |
| ENSMMUG00000008979  | protein O-fucosyltransferase 1 [Source:VGNC Symbol;Acc:VGNC:76030]                                                | 0.703225284 | 0.003490105 | 0.018659909 |



|                     |                                                                                          |             |             |             |
|---------------------|------------------------------------------------------------------------------------------|-------------|-------------|-------------|
| ENSMMUG00000062055  | glyoxalase I [Source:NCBI gene;Acc:719518]                                               | 0.703539249 | 0.003447801 | 0.018509996 |
| ENSMMUG00000003267  | zinc finger protein 362 [Source:NCBI gene;Acc:710013]                                    | 0.704306546 | 0.002158099 | 0.012679214 |
| ENSMMUG000000059777 |                                                                                          | 0.704432778 | 0.008623688 | 0.039017075 |
| ENSMMUG00000019536  | potassium voltage-gated channel subfamily Q member 4 [Source:VGNC Symbol;Acc:VGNC:74007] | 0.70591123  | 0.000533146 | 0.003973639 |
| ENSMMUG00000019763  | DEK proto-oncogene [Source:NCBI gene;Acc:712460]                                         | 0.70612599  | 0.003192314 | 0.017470885 |
| ENSMMUG00000015572  | GSG1 like [Source:VGNC Symbol;Acc:VGNC:82152]                                            | 0.708508231 | 0.000914572 | 0.006275342 |
| ENSMMUG00000004847  | xylulokinase [Source:VGNC Symbol;Acc:VGNC:78815]                                         | 0.708868044 | 0.000180198 | 0.001603333 |
| ENSMMUG000000061366 |                                                                                          | 0.709112646 | 0.000696162 | 0.004993664 |
| ENSMMUG00000019023  | cytochrome c oxidase assembly factor 1 homolog [Source:VGNC Symbol;Acc:VGNC:81290]       | 0.709545669 | 0.005300581 | 0.026352619 |
| ENSMMUG00000018909  | fetuin B [Source:VGNC Symbol;Acc:VGNC:72638]                                             | 0.71145783  | 4.07E-05    | 0.000454418 |
| ENSMMUG00000020860  | EvC ciliary complex subunit 2 [Source:VGNC Symbol;Acc:VGNC:72301]                        | 0.712446022 | 0.00210426  | 0.012422601 |
| ENSMMUG00000030532  | solute carrier family 25 member 16 [Source:NCBI gene;Acc:694145]                         | 0.713441924 | 0.00201364  | 0.011969306 |
| ENSMMUG00000005744  | glutamate ionotropic receptor NMDA type subunit 2C [Source:VGNC Symbol;Acc:VGNC:73284]   | 0.714422363 | 0.000720645 | 0.005151965 |
| ENSMMUG00000008615  | nebulin [Source:NCBI gene;Acc:100430324]                                                 | 0.715220211 | 0.002327638 | 0.013519891 |
| ENSMMUG00000006284  | adenylate kinase 2 [Source:VGNC Symbol;Acc:VGNC:69761]                                   | 0.716758632 | 8.85E-05    | 0.000874538 |
| ENSMMUG00000014407  | magnesium transporter 1 [Source:VGNC Symbol;Acc:VGNC:74386]                              | 0.716977471 | 0.001987248 | 0.01185229  |
| ENSMMUG000000062394 | C-C motif chemokine receptor 2 [Source:NCBI gene;Acc:574098]                             | 0.720205346 | 0.000559877 | 0.004158225 |
| ENSMMUG00000014641  |                                                                                          | 0.720343704 | 5.13E-05    | 0.000554686 |
| ENSMMUG000000049374 |                                                                                          | 0.72275574  | 0.003533728 | 0.018846549 |
| ENSMMUG00000022504  | alpha-2-glycoprotein 1, zinc-binding [Source:VGNC Symbol;Acc:VGNC:70201]                 | 0.722935824 | 0.00449691  | 0.023073115 |
| ENSMMUG00000015503  | zinc finger FYVE-type containing 27 [Source:VGNC Symbol;Acc:VGNC:79623]                  | 0.723657453 | 7.99E-05    | 0.000806592 |
| ENSMMUG000000056008 |                                                                                          | 0.72467068  | 0.000260464 | 0.0022119   |
| ENSMMUG00000008556  | integrin subunit alpha E [Source:NCBI gene;Acc:721483]                                   | 0.724981514 | 0.001877302 | 0.011335447 |
| ENSMMUG000000049917 | U6 spliceosomal RNA [Source:RFAM;Acc:RF00026]                                            | 0.725796824 | 0.011300011 | 0.048233205 |
| ENSMMUG000000051186 | proteasome 20S subunit alpha 5 [Source:NCBI gene;Acc:698435]                             | 0.727173234 | 3.69E-05    | 0.000415781 |
| ENSMMUG000000052972 |                                                                                          | 0.727532978 | 0.001399524 | 0.008950332 |
| ENSMMUG000000063792 |                                                                                          | 0.727558115 | 0.011537475 | 0.048987505 |
| ENSMMUG00000014010  | RNA binding fox-1 homolog 2 [Source:VGNC Symbol;Acc:VGNC:76685]                          | 0.728438898 | 1.82E-05    | 0.00022347  |
| ENSMMUG00000011839  | acyl-CoA synthetase bubblegum family member 1 [Source:VGNC Symbol;Acc:VGNC:69547]        | 0.729140505 | 0.006136441 | 0.0297669   |
| ENSMMUG00000010201  | atrophin 1 [Source:VGNC Symbol;Acc:VGNC:70157]                                           | 0.731228382 | 0.003590292 | 0.01907989  |
| ENSMMUG000000054072 |                                                                                          | 0.733059262 | 0.000442958 | 0.003404854 |
| ENSMMUG00000014210  | metadherin [Source:VGNC Symbol;Acc:VGNC:74859]                                           | 0.734458726 | 0.00034752  | 0.002821918 |
| ENSMMUG000000061825 | U6 spliceosomal RNA [Source:RFAM;Acc:RF00026]                                            | 0.735091742 | 0.005833708 | 0.028500825 |
| ENSMMUG00000014313  | zinc finger protein 500 [Source:VGNC Symbol;Acc:VGNC:79406]                              | 0.737431157 | 0.000654688 | 0.004740646 |
| ENSMMUG00000000194  | solute carrier family 27 member 1 [Source:VGNC Symbol;Acc:VGNC:77438]                    | 0.738345518 | 0.004830905 | 0.024391371 |
| ENSMMUG000000053710 |                                                                                          | 0.74021873  | 0.000724881 | 0.00517385  |
| ENSMMUG00000016454  | 4-hydroxyphenylpyruvate dioxygenase [Source:VGNC Symbol;Acc:VGNC:73511]                  | 0.74026555  | 0.000531229 | 0.003961628 |
| ENSMMUG00000006234  | acyl-CoA oxidase 3, pristanoyl [Source:VGNC Symbol;Acc:VGNC:69382]                       | 0.740380866 | 0.000602109 | 0.004421602 |
| ENSMMUG00000015477  | lemur tyrosine kinase 2 [Source:VGNC Symbol;Acc:VGNC:74309]                              | 0.741454325 | 0.001809078 | 0.011036431 |
| ENSMMUG000000043846 |                                                                                          | 0.741465933 | 0.002974029 | 0.016520122 |
| ENSMMUG00000016773  | estrogen related receptor beta [Source:VGNC Symbol;Acc:VGNC:72434]                       | 0.742442847 | 0.009076788 | 0.040684075 |
| ENSMMUG00000023406  | HID1 domain containing [Source:VGNC Symbol;Acc:VGNC:73394]                               | 0.742465796 | 0.000382771 | 0.003050884 |
| ENSMMUG00000003297  | coiled-coil domain containing 63 [Source:VGNC Symbol;Acc:VGNC:70879]                     | 0.74311373  | 0.001952111 | 0.01169464  |
| ENSMMUG00000010577  | RNA-binding protein 4B [Source:NCBI gene;Acc:713553]                                     | 0.744229882 | 4.43E-05    | 0.000487841 |
| ENSMMUG000000056022 |                                                                                          | 0.744879675 | 0.004515886 | 0.023127157 |
| ENSMMUG00000019820  | SH3 domain and tetratricopeptide repeats 2 [Source:VGNC Symbol;Acc:VGNC:77337]           | 0.745092627 | 0.001588846 | 0.009902433 |
| ENSMMUG00000017382  | biliverdin reductase A [Source:VGNC Symbol;Acc:VGNC:70256]                               | 0.746079486 | 0.000207964 | 0.001827042 |
| ENSMMUG00000009368  | Abelson helper integration site 1 [Source:VGNC Symbol;Acc:VGNC:81010]                    | 0.746135532 | 0.000128537 | 0.0011982   |
| ENSMMUG00000009677  | mediator complex subunit 16 [Source:VGNC Symbol;Acc:VGNC:74525]                          | 0.746954265 | 0.011248617 | 0.048061264 |
| ENSMMUG00000002033  | serine protease 36 [Source:VGNC Symbol;Acc:VGNC:76325]                                   | 0.747691606 | 1.38E-05    | 0.000174068 |
| ENSMMUG00000008041  | ankyrin repeat domain 27 [Source:VGNC Symbol;Acc:VGNC:69693]                             | 0.747703069 | 5.71E-05    | 0.000608188 |

|                    |                                                                                      |             |             |             |
|--------------------|--------------------------------------------------------------------------------------|-------------|-------------|-------------|
| ENSMMUG0000001534  | calpain 3 [Source:VGNC Symbol;Acc:VGNC:70533]                                        | 0.747909119 | 0.001772086 | 0.01085162  |
| ENSMMUG00000052626 | progesterin and adipoQ receptor family member 8 [Source:NCBI gene;Acc:708418]        | 0.748641668 | 5.73E-05    | 0.000608928 |
| ENSMMUG00000019837 | ribonuclease H2 subunit C [Source:NCBI gene;Acc:700330]                              | 0.748805398 | 0.004887372 | 0.024647701 |
| ENSMMUG00000030597 | mitogen-activated protein kinase kinase kinase 2 [Source:VGNC Symbol;Acc:VGNC:81465] | 0.748908495 | 1.03E-05    | 0.000135331 |
| ENSMMUG00000020486 | checkpoint kinase 2 [Source:VGNC Symbol;Acc:VGNC:70958]                              | 0.749115111 | 0.000549011 | 0.00408719  |
| ENSMMUG00000052713 | leucine rich repeat containing 14B [Source:NCBI gene;Acc:723071]                     | 0.749644464 | 0.00222355  | 0.013014336 |
| ENSMMUG00000053072 |                                                                                      | 0.749726793 | 0.0014489   | 0.009202606 |
| ENSMMUG00000002181 | SFI1 centrin binding protein [Source:VGNC Symbol;Acc:VGNC:77328]                     | 0.752322574 | 0.000395052 | 0.003120022 |
| ENSMMUG00000014981 | homeobox containing 1 [Source:VGNC Symbol;Acc:VGNC:73443]                            | 0.754676274 | 0.004713695 | 0.023929934 |
| ENSMMUG00000016255 | telomerase associated protein 1 [Source:VGNC Symbol;Acc:VGNC:78310]                  | 0.758447633 | 0.000129102 | 0.00120088  |
| ENSMMUG00000016772 | solute carrier family 28 member 1 [Source:VGNC Symbol;Acc:VGNC:77444]                | 0.758970647 | 0.000619322 | 0.004517329 |
| ENSMMUG00000053617 | torsin 1A interacting protein 2 [Source:NCBI gene;Acc:716691]                        | 0.761084259 | 0.000677148 | 0.004873363 |
| ENSMMUG00000011767 | carnitine O-acetyltransferase [Source:VGNC Symbol;Acc:VGNC:71483]                    | 0.761299036 | 0.009956704 | 0.043692319 |
| ENSMMUG00000064612 | Metazoan signal recognition particle RNA [Source:RFAM;Acc:RF00017]                   | 0.761526361 | 0.000702932 | 0.005033803 |
| ENSMMUG00000002822 | unc-13 homolog D [Source:VGNC Symbol;Acc:VGNC:79375]                                 | 0.762131578 | 0.000382307 | 0.003049058 |
| ENSMMUG00000046646 | Y RNA [Source:RFAM;Acc:RF00019]                                                      | 0.762277996 | 0.006481792 | 0.03111644  |
| ENSMMUG00000049375 |                                                                                      | 0.762643605 | 0.001149701 | 0.007572852 |
| ENSMMUG00000010336 | DOP1 leucine zipper like protein B [Source:VGNC Symbol;Acc:VGNC:71832]               | 0.762712853 | 1.76E-06    | 2.85E-05    |
| ENSMMUG00000002347 | myosin light chain 2 [Source:VGNC Symbol;Acc:VGNC:75103]                             | 0.762822208 | 0.00474456  | 0.024077204 |
| ENSMMUG00000055934 |                                                                                      | 0.762940816 | 0.010153891 | 0.044332736 |
| ENSMMUG00000011061 | ankyrin repeat domain 31 [Source:VGNC Symbol;Acc:VGNC:84277]                         | 0.76312646  | 0.000237692 | 0.00203853  |
| ENSMMUG00000006819 | helicase for meiosis 1 [Source:NCBI gene;Acc:704516]                                 | 0.763406037 | 0.010352584 | 0.045078902 |
| ENSMMUG00000005769 | EF-hand calcium binding domain 6 [Source:VGNC Symbol;Acc:VGNC:72092]                 | 0.76463835  | 0.01111139  | 0.047663273 |
| ENSMMUG00000058237 |                                                                                      | 0.764808141 | 0.002226813 | 0.013027558 |
| ENSMMUG00000008399 | synaptic vesicle glycoprotein 2B [Source:VGNC Symbol;Acc:VGNC:78140]                 | 0.764856206 | 2.25E-05    | 0.000269735 |
| ENSMMUG00000000901 | alpha hemoglobin stabilizing protein [Source:VGNC Symbol;Acc:VGNC:69631]             | 0.766204908 | 7.36E-05    | 0.000753262 |
| ENSMMUG00000000382 | sperm associated antigen 16 [Source:VGNC Symbol;Acc:VGNC:77977]                      | 0.766634445 | 0.001995063 | 0.011875202 |
| ENSMMUG00000062048 |                                                                                      | 0.767095752 | 0.000417652 | 0.003256885 |
| ENSMMUG00000056906 |                                                                                      | 0.769305423 | 0.000339178 | 0.002762824 |
| ENSMMUG00000005361 | mucolipin 3 [Source:VGNC Symbol;Acc:VGNC:74505]                                      | 0.769831957 | 0.006771492 | 0.032197467 |
| ENSMMUG00000064074 |                                                                                      | 0.773074033 | 0.0008615   | 0.005968407 |
| ENSMMUG00000021655 | histone deacetylase 7 [Source:NCBI gene;Acc:718225]                                  | 0.773516212 | 0.000468294 | 0.003559803 |
| ENSMMUG00000053254 | adenylate kinase 4 [Source:NCBI gene;Acc:698560]                                     | 0.773592753 | 0.000914993 | 0.006275342 |
| ENSMMUG00000012113 | LARGE xylosyl- and glucuronyltransferase 1 [Source:VGNC Symbol;Acc:VGNC:74236]       | 0.774480303 | 0.000310011 | 0.002563864 |
| ENSMMUG00000001715 | zinc finger protein 627 [Source:VGNC Symbol;Acc:VGNC:79856]                          | 0.774960558 | 0.001071424 | 0.007155055 |
| ENSMMUG00000022914 | RAB, member of RAS oncogene family like 2B [Source:NCBI gene;Acc:716615]             | 0.775769934 | 0.007911721 | 0.036509712 |
| ENSMMUG00000020603 | pyridine nucleotide-disulphide oxidoreductase domain 2 [Source:NCBI gene;Acc:707797] | 0.777580512 | 0.002711358 | 0.015336786 |
| ENSMMUG00000061917 |                                                                                      | 0.777839676 | 8.09E-05    | 0.000815782 |
| ENSMMUG00000002923 | colony stimulating factor 3 [Source:VGNC Symbol;Acc:VGNC:71520]                      | 0.778695662 | 0.001245374 | 0.008104302 |
| ENSMMUG00000058275 | arrestin domain containing 5 [Source:NCBI gene;Acc:697277]                           | 0.779096157 | 0.005387349 | 0.026743274 |
| ENSMMUG00000045769 | tubulin tyrosine ligase like 10 [Source:NCBI gene;Acc:702662]                        | 0.779119899 | 0.000153395 | 0.001402713 |
| ENSMMUG00000031024 | lactate dehydrogenase A [Source:NCBI gene;Acc:694309]                                | 0.781034925 | 0.008048955 | 0.036975791 |
| ENSMMUG00000057187 |                                                                                      | 0.782038265 | 0.000464457 | 0.003538925 |
| ENSMMUG00000005982 | coiled-coil domain containing 84 [Source:NCBI gene;Acc:707400]                       | 0.783309129 | 0.01089447  | 0.046872229 |
| ENSMMUG00000003742 | butyrylcholinesterase [Source:VGNC Symbol;Acc:VGNC:70238]                            | 0.784457838 | 0.004051865 | 0.021106783 |
| ENSMMUG00000054789 | family with sequence similarity 174 member A [Source:NCBI gene;Acc:702300]           | 0.785186252 | 1.14E-05    | 0.000146894 |
| ENSMMUG00000014149 | LYN proto-oncogene, Src family tyrosine kinase [Source:VGNC Symbol;Acc:VGNC:74464]   | 0.785376766 | 2.18E-05    | 0.000262875 |
| ENSMMUG00000020605 | heparanase 2 (inactive) [Source:NCBI gene;Acc:708795]                                | 0.785868786 | 0.006432718 | 0.030903722 |
| ENSMMUG00000022730 | cytochrome P450, family 3, subfamily A, polypeptide 5 [Source:NCBI gene;Acc:678692]  | 0.788929199 | 0.000607065 | 0.004445844 |
| ENSMMUG00000023377 | retinoic acid induced 1 [Source:VGNC Symbol;Acc:VGNC:76651]                          | 0.789711821 | 0.010137179 | 0.044274668 |
| ENSMMUG00000019022 | serine/threonine kinase 17a [Source:VGNC Symbol;Acc:VGNC:77913]                      | 0.789911765 | 6.47E-05    | 0.000677141 |



|                    |                                                                                              |             |             |             |
|--------------------|----------------------------------------------------------------------------------------------|-------------|-------------|-------------|
| ENSMMUG00000058544 | nucleosome assembly protein 1 like 5 [Source:NCBI gene;Acc:703223]                           | 0.790547529 | 0.000260397 | 0.0022119   |
| ENSMMUG00000015922 | formin binding protein 1 like [Source:VGNC Symbol;Acc:VGNC:72543]                            | 0.791560912 | 0.000243784 | 0.002085147 |
| ENSMMUG00000003697 | inositol polyphosphate-4-phosphatase type II B [Source:VGNC Symbol;Acc:VGNC:73748]           | 0.791804361 | 0.006590284 | 0.031555543 |
| ENSMMUG00000064122 |                                                                                              | 0.793779273 | 0.007199975 | 0.033936388 |
| ENSMMUG00000020488 | receptor accessory protein 5 [Source:VGNC Symbol;Acc:VGNC:76864]                             | 0.794189282 | 0.000199314 | 0.001758194 |
| ENSMMUG00000005548 | N-ethylmaleimide sensitive factor, vesicle fusing ATPase [Source:VGNC Symbol;Acc:VGNC:75536] | 0.79465378  | 1.49E-05    | 0.000186246 |
| ENSMMUG00000010420 | makorin ring finger protein 1 [Source:VGNC Symbol;Acc:VGNC:81476]                            | 0.795828957 | 0.005413622 | 0.026832377 |
| ENSMMUG00000046141 | defensin beta 123 [Source:NCBI gene;Acc:619504]                                              | 0.797746233 | 8.24E-05    | 0.000827124 |
| ENSMMUG00000028928 | ankyrin repeat domain 24 [Source:NCBI gene;Acc:721829]                                       | 0.800463298 | 0.000268823 | 0.002275442 |
| ENSMMUG00000012940 | tRNA phosphotransferase 1 [Source:VGNC Symbol;Acc:VGNC:79242]                                | 0.800489808 | 0.001186944 | 0.007786545 |
| ENSMMUG00000017945 | septin 12 [Source:VGNC Symbol;Acc:VGNC:82235]                                                | 0.801150294 | 0.001173606 | 0.007718554 |
| ENSMMUG00000023032 | intraflagellar transport 81 [Source:VGNC Symbol;Acc:VGNC:73389]                              | 0.802293319 | 7.27E-05    | 0.000745888 |
| ENSMMUG00000042951 | signal recognition particle 19 [Source:NCBI gene;Acc:693829]                                 | 0.802707557 | 0.003725968 | 0.019669716 |
| ENSMMUG00000020588 | protein kinase N2 [Source:VGNC Symbol;Acc:VGNC:76015]                                        | 0.803040475 | 8.48E-06    | 0.000114174 |
| ENSMMUG00000021868 | TNF receptor associated protein 1 [Source:VGNC Symbol;Acc:VGNC:79019]                        | 0.804374992 | 0.000592689 | 0.004367252 |
| ENSMMUG00000003067 | endoplasmic reticulum-golgi intermediate compartment 1 [Source:VGNC Symbol;Acc:VGNC:82141]   | 0.804468933 | 0.000280899 | 0.002353383 |
| ENSMMUG00000048463 | apolipoprotein L5 [Source:HGNC Symbol;Acc:HGNC:14869]                                        | 0.804794416 | 0.000525742 | 0.003929741 |
| ENSMMUG00000005116 | defensin beta 124 [Source:VGNC Symbol;Acc:VGNC:71655]                                        | 0.805382288 | 0.004192523 | 0.02176087  |
| ENSMMUG00000003669 | methionine sulfoxide reductase B3 [Source:VGNC Symbol;Acc:VGNC:74842]                        | 0.805718569 | 3.81E-05    | 0.000428882 |
| ENSMMUG00000001635 | zinc finger protein 703 [Source:VGNC Symbol;Acc:VGNC:79552]                                  | 0.806408469 | 0.005720001 | 0.028125327 |
| ENSMMUG00000001302 | sucrase-isomaltase [Source:VGNC Symbol;Acc:VGNC:77213]                                       | 0.806920897 | 1.42E-05    | 0.000177911 |
| ENSMMUG00000000959 | cytochrome P450, family 11, subfamily B, polypeptide 2 [Source:NCBI gene;Acc:695914]         | 0.80704939  | 0.000216321 | 0.001889516 |
| ENSMMUG00000022514 | coiled-coil domain containing 186 [Source:VGNC Symbol;Acc:VGNC:70847]                        | 0.807109904 | 2.51E-05    | 0.000296254 |
| ENSMMUG00000040830 |                                                                                              | 0.807338323 | 0.011672168 | 0.049367031 |
| ENSMMUG00000013483 | prolyl endopeptidase [Source:VGNC Symbol;Acc:VGNC:76396]                                     | 0.807394782 | 0.000203106 | 0.001790426 |
| ENSMMUG00000038898 | Metazoan signal recognition particle RNA [Source:RFAM;Acc:RF00017]                           | 0.807413522 | 0.006920075 | 0.032783821 |
| ENSMMUG00000054768 |                                                                                              | 0.808556245 | 0.000842299 | 0.005850986 |
| ENSMMUG00000009128 | discs large MAGUK scaffold protein 5 [Source:VGNC Symbol;Acc:VGNC:71921]                     | 0.809769851 | 9.56E-05    | 0.000935468 |
| ENSMMUG00000053004 |                                                                                              | 0.810447837 | 0.002608821 | 0.014880025 |
| ENSMMUG00000008651 | FGF1 intracellular binding protein [Source:VGNC Symbol;Acc:VGNC:72663]                       | 0.810510229 | 0.000480921 | 0.003645113 |
| ENSMMUG00000055290 | netrin 1 [Source:NCBI gene;Acc:717645]                                                       | 0.810670519 | 0.000636989 | 0.004638366 |
| ENSMMUG00000021498 | L3MBTL histone methyl-lysine binding protein 3 [Source:VGNC Symbol;Acc:VGNC:74106]           | 0.811510452 | 2.11E-05    | 0.000256202 |
| ENSMMUG00000015861 | cytochrome c oxidase subunit VIIb [Source:NCBI gene;Acc:706099]                              | 0.812215969 | 0.01030043  | 0.044912089 |
| ENSMMUG00000008515 | sorting nexin 7 [Source:NCBI gene;Acc:716015]                                                | 0.81347653  | 8.30E-07    | 1.45E-05    |
| ENSMMUG00000047393 | protein phosphatase 1 regulatory subunit 7-like [Source:NCBI gene;Acc:699349]                | 0.815564648 | 0.001686552 | 0.010396529 |
| ENSMMUG00000051681 | retrotransposon Gag like 6 [Source:NCBI gene;Acc:712760]                                     | 0.81615466  | 8.83E-05    | 0.000873506 |
| ENSMMUG00000064430 |                                                                                              | 0.816282927 | 0.001423628 | 0.009059048 |
| ENSMMUG00000064763 |                                                                                              | 0.816498676 | 0.008331947 | 0.037961851 |
| ENSMMUG00000060157 | zinc finger protein 330 [Source:NCBI gene;Acc:699364]                                        | 0.817308177 | 0.000505819 | 0.003796129 |
| ENSMMUG00000052999 | lecithin retinol acyltransferase [Source:NCBI gene;Acc:698871]                               | 0.81843249  | 1.63E-05    | 0.000201227 |
| ENSMMUG00000006763 | cytochrome c oxidase subunit IV isoform 1 [Source:NCBI gene;Acc:693811]                      | 0.820381879 | 0.000386692 | 0.003072698 |
| ENSMMUG00000005215 | Rab9 effector protein with kelch motifs [Source:VGNC Symbol;Acc:VGNC:76495]                  | 0.820699108 | 0.000978282 | 0.006646174 |
| ENSMMUG00000006293 | SAP domain containing ribonucleoprotein [Source:NCBI gene;Acc:709932]                        | 0.820830558 | 0.000289613 | 0.002421407 |
| ENSMMUG00000062995 |                                                                                              | 0.821490211 | 0.003130378 | 0.017182649 |
| ENSMMUG00000023761 | ectonucleoside triphosphate diphosphohydrolase 7 [Source:VGNC Symbol;Acc:VGNC:72071]         | 0.822944003 | 0.002095132 | 0.01237998  |
| ENSMMUG00000017026 | fibrosin like 1 [Source:NCBI gene;Acc:696295]                                                | 0.822996344 | 0.002526182 | 0.014478684 |
| ENSMMUG00000054235 |                                                                                              | 0.827205571 | 0.006360094 | 0.03061149  |
| ENSMMUG00000059491 |                                                                                              | 0.82848738  | 0.001544428 | 0.009681399 |
| ENSMMUG00000023418 | nuclear receptor subfamily 1 group H member 2 [Source:VGNC Symbol;Acc:VGNC:75504]            | 0.830201522 | 7.66E-05    | 0.000780326 |
| ENSMMUG00000004222 | thromboxane A synthase 1 [Source:VGNC Symbol;Acc:VGNC:78278]                                 | 0.831005614 | 2.15E-05    | 0.000259723 |
| ENSMMUG00000010536 | discs large MAGUK scaffold protein 4 [Source:VGNC Symbol;Acc:VGNC:71920]                     | 0.831201642 | 5.70E-05    | 0.000608156 |

|                    |                                                                                                  |             |             |             |
|--------------------|--------------------------------------------------------------------------------------------------|-------------|-------------|-------------|
| ENSMMUG0000004913  | mitotic deacetylase associated SANT domain protein [Source:VGNC Symbol;Acc:VGNC:72073]           | 0.832278098 | 0.000588433 | 0.004348235 |
| ENSMMUG0000005514  | RNA polymerase III subunit A [Source:VGNC Symbol;Acc:VGNC:76138]                                 | 0.833477543 | 0.008145357 | 0.037321384 |
| ENSMMUG00000022867 | kelch domain containing 4 [Source:VGNC Symbol;Acc:VGNC:74122]                                    | 0.834453972 | 0.000322263 | 0.002641618 |
| ENSMMUG00000061586 | chromosome 4 C6orf52 homolog [Source:NCBI gene;Acc:702114]                                       | 0.834496897 | 0.001641306 | 0.010190234 |
| ENSMMUG00000021031 | TMF1 regulated nuclear protein 1 [Source:VGNC Symbol;Acc:VGNC:79946]                             | 0.838495332 | 9.46E-05    | 0.000927826 |
| ENSMMUG00000012469 | KIAA2013 [Source:VGNC Symbol;Acc:VGNC:73918]                                                     | 0.838548955 | 2.29E-07    | 4.52E-06    |
| ENSMMUG00000056729 | U6 spliceosomal RNA [Source:RFAM;Acc:RF00026]                                                    | 0.839609802 | 0.003371294 | 0.018182009 |
| ENSMMUG00000014425 | protein kinase C epsilon [Source:VGNC Symbol;Acc:VGNC:76412]                                     | 0.840274629 | 0.005276642 | 0.02624366  |
| ENSMMUG00000011527 | TNF receptor associated factor 2 [Source:VGNC Symbol;Acc:VGNC:78641]                             | 0.840449295 | 0.00935356  | 0.0416581   |
| ENSMMUG00000014110 | adhesion G protein-coupled receptor D2 [Source:VGNC Symbol;Acc:VGNC:69462]                       | 0.840490524 | 1.96E-06    | 3.14E-05    |
| ENSMMUG00000001154 | U8 snoRNA-decapping enzyme-like [Source:NCBI gene;Acc:717946]                                    | 0.840725561 | 0.001848702 | 0.011235949 |
| ENSMMUG00000058042 | heparan sulfate-glucosamine 3-sulfotransferase 2 [Source:NCBI gene;Acc:699722]                   | 0.841460014 | 0.002985513 | 0.016562639 |
| ENSMMUG00000013105 | astrotactin 2 [Source:VGNC Symbol;Acc:VGNC:70087]                                                | 0.84199929  | 0.005795696 | 0.028385136 |
| ENSMMUG00000022031 | DNA polymerase alpha 2, accessory subunit [Source:NCBI gene;Acc:716541]                          | 0.844024247 | 0.000115654 | 0.001097824 |
| ENSMMUG00000058002 | zinc finger protein 669-like [Source:NCBI gene;Acc:696282]                                       | 0.844707196 | 7.49E-05    | 0.000764954 |
| ENSMMUG00000049514 | solute carrier family 48 member 1 [Source:NCBI gene;Acc:704304]                                  | 0.846557602 | 0.002259174 | 0.013193087 |
| ENSMMUG00000010886 | strawberry notch homolog 2 [Source:VGNC Symbol;Acc:VGNC:77123]                                   | 0.847713193 | 8.46E-05    | 0.00084462  |
| ENSMMUG00000003265 | leptin receptor [Source:VGNC Symbol;Acc:VGNC:81429]                                              | 0.848534677 | 3.26E-07    | 6.25E-06    |
| ENSMMUG00000055239 |                                                                                                  | 0.850090675 | 0.000177212 | 0.001580415 |
| ENSMMUG00000037413 | U5 spliceosomal RNA [Source:RFAM;Acc:RF00020]                                                    | 0.850863849 | 0.001469589 | 0.009302137 |
| ENSMMUG00000015663 | adaptor related protein complex 3 subunit delta 1 [Source:VGNC Symbol;Acc:VGNC:69969]            | 0.851195498 | 0.000700522 | 0.005022084 |
| ENSMMUG00000005217 | heat shock protein family A (Hsp70) member 5 [Source:NCBI gene;Acc:703193]                       | 0.852095298 | 0.006097989 | 0.029591436 |
| ENSMMUG00000061749 | PAXIP1 associated glutamate rich protein 1 [Source:NCBI gene;Acc:706839]                         | 0.852657225 | 1.14E-07    | 2.44E-06    |
| ENSMMUG00000005729 | GIPC PDZ domain containing family member 1 [Source:VGNC Symbol;Acc:VGNC:72932]                   | 0.853066271 | 0.00514725  | 0.025758083 |
| ENSMMUG00000015476 | unc-13 homolog A [Source:NCBI gene;Acc:720000]                                                   | 0.853348707 | 3.14E-05    | 0.000359786 |
| ENSMMUG00000022481 | cytochrome P450, family 1, subfamily A, polypeptide 1 [Source:NCBI gene;Acc:678694]              | 0.854559077 | 5.69E-05    | 0.000606793 |
| ENSMMUG00000011547 | reticulon 4 receptor [Source:VGNC Symbol;Acc:VGNC:77047]                                         | 0.855502302 | 0.010596808 | 0.045865302 |
| ENSMMUG00000000381 | IKAROS family zinc finger 2 [Source:VGNC Symbol;Acc:VGNC:73586]                                  | 0.85741074  | 3.92E-07    | 7.36E-06    |
| ENSMMUG00000050057 |                                                                                                  | 0.857630814 | 0.000185642 | 0.001645413 |
| ENSMMUG00000018166 | MYB proto-oncogene, transcription factor [Source:VGNC Symbol;Acc:VGNC:75089]                     | 0.858094139 | 0.00031025  | 0.00256421  |
| ENSMMUG00000012178 | calcium binding and coiled-coil domain 2 [Source:VGNC Symbol;Acc:VGNC:70675]                     | 0.858708809 | 0.000303797 | 0.002523733 |
| ENSMMUG00000021812 | ERCC excision repair 8, CSA ubiquitin ligase complex subunit [Source:VGNC Symbol;Acc:VGNC:72425] | 0.859830644 | 9.33E-07    | 1.62E-05    |
| ENSMMUG00000055728 |                                                                                                  | 0.860119652 | 0.001873779 | 0.011329988 |
| ENSMMUG00000052680 |                                                                                                  | 0.861210017 | 0.000439468 | 0.003384293 |
| ENSMMUG00000060675 |                                                                                                  | 0.863692872 | 0.000214719 | 0.001877486 |
| ENSMMUG00000020549 | protein phosphatase 6 catalytic subunit [Source:NCBI gene;Acc:703658]                            | 0.864001973 | 0.011778387 | 0.049719046 |
| ENSMMUG00000021839 | Grid2 interacting protein [Source:VGNC Symbol;Acc:VGNC:73191]                                    | 0.864139544 | 0.004133582 | 0.021480723 |
| ENSMMUG00000010949 | SPG21 abhydrolase domain containing, maspardin [Source:VGNC Symbol;Acc:VGNC:77970]               | 0.864780624 | 0.000392483 | 0.003107294 |
| ENSMMUG00000065221 |                                                                                                  | 0.865208417 | 0.000106047 | 0.001022339 |
| ENSMMUG00000003289 | integrin subunit beta 3 [Source:NCBI gene;Acc:717379]                                            | 0.867468026 | 5.39E-06    | 7.69E-05    |
| ENSMMUG00000052867 |                                                                                                  | 0.867684529 | 0.003424518 | 0.01840299  |
| ENSMMUG00000022798 | aspartyl-tRNA synthetase 2, mitochondrial [Source:VGNC Symbol;Acc:VGNC:71708]                    | 0.868493474 | 0.001409422 | 0.008995897 |
| ENSMMUG00000004877 | heterogeneous nuclear ribonucleoprotein L [Source:VGNC Symbol;Acc:VGNC:81187]                    | 0.86941829  | 0.008462197 | 0.038393519 |
| ENSMMUG00000057001 | homeobox B2 [Source:NCBI gene;Acc:106994010]                                                     | 0.869697151 | 0.000353644 | 0.002860902 |
| ENSMMUG00000008106 | solute carrier family 25 member 17 [Source:NCBI gene;Acc:705547]                                 | 0.870575557 | 0.002791045 | 0.015712189 |
| ENSMMUG00000060712 |                                                                                                  | 0.875428959 | 0.000291475 | 0.002433839 |
| ENSMMUG00000008126 | lysine demethylase 7A [Source:VGNC Symbol;Acc:VGNC:73886]                                        | 0.878190352 | 4.50E-05    | 0.000494406 |
| ENSMMUG00000018159 | syntaphilin [Source:NCBI gene;Acc:100429237]                                                     | 0.879631743 | 0.001016563 | 0.006852429 |
| ENSMMUG00000007610 | ribosomal protein S6 kinase A4 [Source:VGNC Symbol;Acc:VGNC:76930]                               | 0.881529806 | 0.000246536 | 0.002103252 |
| ENSMMUG00000006332 | SUMO specific peptidase 3 [Source:NCBI gene;Acc:715884]                                          | 0.884937912 | 0.000633944 | 0.004618784 |
| ENSMMUG00000001532 | glucosidase alpha, neutral C [Source:NCBI gene;Acc:708126]                                       | 0.887203594 | 6.73E-05    | 0.000700807 |



|                    |                                                                                                |             |             |             |
|--------------------|------------------------------------------------------------------------------------------------|-------------|-------------|-------------|
| ENSMMUG00000039397 | tubulin folding cofactor E like [Source:NCBI gene;Acc:706506]                                  | 0.887322831 | 0.001230776 | 0.008029438 |
| ENSMMUG00000012538 | ubiquitin conjugating enzyme E2 U [Source:VGNC Symbol;Acc:VGNC:79726]                          | 0.887927236 | 0.003203121 | 0.017507875 |
| ENSMMUG00000055639 |                                                                                                | 0.888737548 | 0.011849233 | 0.04998558  |
| ENSMMUG00000010357 | cyclin and CBS domain divalent metal cation transport mediator 1 [Source:NCBI gene;Acc:708335] | 0.88917156  | 0.000664064 | 0.004792489 |
| ENSMMUG00000013766 | prostaglandin E synthase 3 [Source:NCBI gene;Acc:713353]                                       | 0.890632292 | 0.000610617 | 0.004461352 |
| ENSMMUG00000016104 | chondroitin sulfate proteoglycan 4 [Source:VGNC Symbol;Acc:VGNC:71525]                         | 0.892042317 | 0.00025991  | 0.002210083 |
| ENSMMUG00000015924 | BCAR3 adaptor protein, NSP family member [Source:VGNC Symbol;Acc:VGNC:70235]                   | 0.895919333 | 0.001267658 | 0.008228681 |
| ENSMMUG00000053916 |                                                                                                | 0.898067039 | 0.000492106 | 0.003712539 |
| ENSMMUG00000011328 | cytoplasmic polyadenylation element binding protein 1 [Source:NCBI gene;Acc:694357]            | 0.89921265  | 0.002728966 | 0.015409513 |
| ENSMMUG00000043955 | three prime repair exonuclease 1 [Source:VGNC Symbol;Acc:VGNC:82708]                           | 0.899680594 | 1.35E-05    | 0.000171017 |
| ENSMMUG00000009318 | BCL9 like [Source:VGNC Symbol;Acc:VGNC:70113]                                                  | 0.901018617 | 4.16E-05    | 0.000464114 |
| ENSMMUG00000008357 | macrophage erythroblast attacher [Source:VGNC Symbol;Acc:VGNC:74282]                           | 0.901466591 | 0.003175677 | 0.017401853 |
| ENSMMUG00000016686 | BUB1 mitotic checkpoint serine/threonine kinase B [Source:VGNC Symbol;Acc:VGNC:70293]          | 0.902568754 | 0.000303629 | 0.002523733 |
| ENSMMUG00000017402 | phosphoglucomutase 2 like 1 [Source:VGNC Symbol;Acc:VGNC:75839]                                | 0.905084484 | 0.000842748 | 0.005850986 |
| ENSMMUG00000056175 |                                                                                                | 0.905094421 | 0.00018814  | 0.001665884 |
| ENSMMUG00000039553 | ubiquitin specific peptidase 30 [Source:NCBI gene;Acc:706607]                                  | 0.905349457 | 0.00194983  | 0.011686369 |
| ENSMMUG00000058106 | otoconin 90 [Source:NCBI gene;Acc:100429699]                                                   | 0.905805834 | 0.000116019 | 0.001099678 |
| ENSMMUG00000057134 | keratin, type II cytoskeletal 6C [Source:NCBI gene;Acc:100424162]                              | 0.905969918 | 0.010775855 | 0.04649892  |
| ENSMMUG00000005668 | kynurenine 3-monooxygenase [Source:VGNC Symbol;Acc:VGNC:74197]                                 | 0.907565283 | 0.000586981 | 0.004339978 |
| ENSMMUG00000015108 | SV2 related protein [Source:VGNC Symbol;Acc:VGNC:78208]                                        | 0.90803008  | 5.73E-05    | 0.000608928 |
| ENSMMUG00000018788 | transmembrane protein 14B [Source:NCBI gene;Acc:698237]                                        | 0.908214034 | 0.000446264 | 0.003425853 |
| ENSMMUG00000003744 | solute carrier family 44 member 2 [Source:VGNC Symbol;Acc:VGNC:77498]                          | 0.908401012 | 1.62E-07    | 3.33E-06    |
| ENSMMUG00000004074 | bone morphogenetic protein 7 [Source:VGNC Symbol;Acc:VGNC:70266]                               | 0.908602146 | 0.004082059 | 0.02123783  |
| ENSMMUG00000008336 | acyl-CoA dehydrogenase family member 10 [Source:NCBI gene;Acc:711080]                          | 0.909964602 | 3.38E-07    | 6.45E-06    |
| ENSMMUG00000051363 |                                                                                                | 0.910778547 | 0.00207706  | 0.012287283 |
| ENSMMUG00000002452 | solute carrier family 35 member C1 [Source:VGNC Symbol;Acc:VGNC:77524]                         | 0.911412436 | 0.000292097 | 0.002437462 |
| ENSMMUG00000016890 | solute carrier family 37 member 4 [Source:VGNC Symbol;Acc:VGNC:77591]                          | 0.91147877  | 7.91E-05    | 0.000801199 |
| ENSMMUG00000054904 | Metazoan signal recognition particle RNA [Source:RFAM;Acc:RF00017]                             | 0.911833635 | 0.001282681 | 0.008305424 |
| ENSMMUG00000053989 |                                                                                                | 0.91232535  | 0.000129517 | 0.001203874 |
| ENSMMUG00000008566 | zinc finger protein 157 [Source:VGNC Symbol;Acc:VGNC:78850]                                    | 0.916480376 | 3.35E-05    | 0.000381421 |
| ENSMMUG00000055498 | leucine carboxyl methyltransferase 2 [Source:NCBI gene;Acc:710047]                             | 0.918060333 | 7.89E-05    | 0.000800349 |
| ENSMMUG00000044822 | coiled-coil domain containing 174 [Source:VGNC Symbol;Acc:VGNC:84219]                          | 0.918177659 | 1.26E-05    | 0.000160997 |
| ENSMMUG00000021904 | cell division cycle 45 [Source:VGNC Symbol;Acc:VGNC:70800]                                     | 0.919084798 | 0.003329016 | 0.018021407 |
| ENSMMUG00000013901 | mitogen-activated protein kinase kinase kinase 3 [Source:VGNC Symbol;Acc:VGNC:81466]           | 0.919230052 | 0.01120782  | 0.0479343   |
| ENSMMUG00000002345 | tropomodulin 3 [Source:VGNC Symbol;Acc:VGNC:78572]                                             | 0.921201804 | 1.84E-09    | 5.62E-08    |
| ENSMMUG00000053199 |                                                                                                | 0.921778609 | 0.000100478 | 0.000975905 |
| ENSMMUG00000001568 | AT-rich interaction domain 3B [Source:VGNC Symbol;Acc:VGNC:69827]                              | 0.926156262 | 0.001648957 | 0.010222512 |
| ENSMMUG00000017946 | rogdi atypical leucine zipper [Source:VGNC Symbol;Acc:VGNC:76862]                              | 0.927961859 | 4.94E-05    | 0.000537068 |
| ENSMMUG00000011155 | FA complementation group I [Source:VGNC Symbol;Acc:VGNC:72575]                                 | 0.928395262 | 0.000164603 | 0.001489035 |
| ENSMMUG00000003356 | tenascin C [Source:VGNC Symbol;Acc:VGNC:79960]                                                 | 0.928963335 | 0.0004079   | 0.003194274 |
| ENSMMUG00000016909 | meiotic kinetochore factor [Source:NCBI gene;Acc:709179]                                       | 0.9308986   | 3.62E-07    | 6.86E-06    |
| ENSMMUG00000040274 | MAGE family member A4 [Source:NCBI gene;Acc:710825]                                            | 0.931878944 | 4.90E-06    | 7.05E-05    |
| ENSMMUG00000057906 |                                                                                                | 0.932211155 | 5.11E-07    | 9.43E-06    |
| ENSMMUG00000005521 | glycogenin 1 [Source:VGNC Symbol;Acc:VGNC:73332]                                               | 0.932334743 | 7.92E-05    | 0.000801689 |
| ENSMMUG00000057345 | calcineurin like phosphoesterase domain containing 1 [Source:NCBI gene;Acc:716978]             | 0.933564888 | 0.000154503 | 0.001409865 |
| ENSMMUG00000014880 | sortilin related receptor 1 [Source:NCBI gene;Acc:713011]                                      | 0.934780367 | 0.000151023 | 0.001383954 |
| ENSMMUG00000040268 | phosphatidylinositol transfer protein alpha [Source:NCBI gene;Acc:721228]                      | 0.934965525 | 0.001474876 | 0.009326509 |
| ENSMMUG00000052476 | zinc finger and BTB domain containing 43 [Source:NCBI gene;Acc:701797]                         | 0.936316123 | 7.39E-06    | 0.000101211 |
| ENSMMUG00000016876 | integrin subunit alpha L [Source:NCBI gene;Acc:711945]                                         | 0.936773466 | 3.52E-06    | 5.23E-05    |
| ENSMMUG00000013385 | elongator acetyltransferase complex subunit 6 [Source:VGNC Symbol;Acc:VGNC:72113]              | 0.938615887 | 0.000949985 | 0.0064879   |
| ENSMMUG00000019966 | zinc finger protein 557 [Source:NCBI gene;Acc:100424983]                                       | 0.938660481 | 2.36E-07    | 4.65E-06    |

|                    |                                                                                                            |             |             |             |
|--------------------|------------------------------------------------------------------------------------------------------------|-------------|-------------|-------------|
| ENSMMUG00000018344 | myosin XVA [Source:VGNC Symbol;Acc:VGNC:75109]                                                             | 0.94034368  | 0.000154976 | 0.001411474 |
| ENSMMUG00000020346 | carboxypeptidase X, M14 family member 2 [Source:VGNC Symbol;Acc:VGNC:71596]                                | 0.941966637 | 0.000163687 | 0.001482208 |
| ENSMMUG00000003972 | EH domain containing 1 [Source:VGNC Symbol;Acc:VGNC:72175]                                                 | 0.944382795 | 6.58E-06    | 9.18E-05    |
| ENSMMUG00000016465 | histone deacetylase 6 [Source:VGNC Symbol;Acc:VGNC:73164]                                                  | 0.945935261 | 2.67E-08    | 6.42E-07    |
| ENSMMUG00000008006 | RAB11A, member RAS oncogene family [Source:VGNC Symbol;Acc:VGNC:81517]                                     | 0.945984625 | 1.51E-05    | 0.000188597 |
| ENSMMUG00000002564 | Fraser extracellular matrix complex subunit 1 [Source:VGNC Symbol;Acc:VGNC:72743]                          | 0.94881695  | 1.12E-05    | 0.00014587  |
| ENSMMUG00000029507 | adaptor related protein complex 3 subunit sigma 2 [Source:NCBI gene;Acc:701217]                            | 0.951125115 | 5.44E-06    | 7.76E-05    |
| ENSMMUG00000000629 | serpin family C member 1 [Source:VGNC Symbol;Acc:VGNC:77360]                                               | 0.952389519 | 6.45E-06    | 9.03E-05    |
| ENSMMUG00000009381 | WW domain binding protein 2 [Source:VGNC Symbol;Acc:VGNC:78786]                                            | 0.953912444 | 1.49E-06    | 2.47E-05    |
| ENSMMUG00000030891 | hypoxia up-regulated 1 [Source:VGNC Symbol;Acc:VGNC:73399]                                                 | 0.954663832 | 1.54E-05    | 0.000191977 |
| ENSMMUG00000060754 | Metazoan signal recognition particle RNA [Source:RFAM;Acc:RF00017]                                         | 0.956575678 | 8.10E-05    | 0.000816103 |
| ENSMMUG00000051583 |                                                                                                            | 0.957872499 | 0.01146919  | 0.048746874 |
| ENSMMUG00000065269 | Rho family GTPase 2 [Source:NCBI gene;Acc:712559]                                                          | 0.958047492 | 0.001911774 | 0.011490127 |
| ENSMMUG00000018274 | FERM domain containing 6 [Source:VGNC Symbol;Acc:VGNC:72747]                                               | 0.958181972 | 7.43E-06    | 0.000101612 |
| ENSMMUG00000001397 | multiple C2 and transmembrane domain containing 1 [Source:VGNC Symbol;Acc:VGNC:74589]                      | 0.959105488 | 0.00783764  | 0.036231285 |
| ENSMMUG00000061995 |                                                                                                            | 0.960599298 | 3.23E-07    | 6.20E-06    |
| ENSMMUG00000054090 |                                                                                                            | 0.960814769 | 0.001248953 | 0.008119445 |
| ENSMMUG00000037727 | hydroxy-delta-5-steroid dehydrogenase, 3 beta- and steroid delta-isomerase 7 [Source:NCBI gene;Acc:714136] | 0.961072681 | 0.000470856 | 0.003572998 |
| ENSMMUG00000009825 | zinc finger DHHC-type containing 1 [Source:VGNC Symbol;Acc:VGNC:79102]                                     | 0.96135359  | 2.54E-05    | 0.000298688 |
| ENSMMUG00000058257 |                                                                                                            | 0.962177849 | 8.47E-05    | 0.000844859 |
| ENSMMUG00000004224 | poly(ADP-ribose) polymerase family member 12 [Source:VGNC Symbol;Acc:VGNC:81734]                           | 0.962888939 | 3.78E-05    | 0.000425807 |
| ENSMMUG00000047219 |                                                                                                            | 0.963672812 | 0.000366068 | 0.002935785 |
| ENSMMUG00000023599 | chromosome alignment maintaining phosphoprotein 1 [Source:VGNC Symbol;Acc:VGNC:71061]                      | 0.963758618 | 5.28E-06    | 7.56E-05    |
| ENSMMUG00000013560 | calcium voltage-gated channel auxiliary subunit gamma 3 [Source:VGNC Symbol;Acc:VGNC:70513]                | 0.96587884  | 0.001677548 | 0.010350861 |
| ENSMMUG00000055893 |                                                                                                            | 0.966525304 | 0.003657921 | 0.019341967 |
| ENSMMUG00000062485 | ESF1 nucleolar pre-rRNA processing protein homolog [Source:NCBI gene;Acc:694159]                           | 0.96822814  | 0.006583953 | 0.031536865 |
| ENSMMUG00000054377 |                                                                                                            | 0.968933977 | 3.98E-07    | 7.45E-06    |
| ENSMMUG00000017224 | catenin beta like 1 [Source:VGNC Symbol;Acc:VGNC:71414]                                                    | 0.969162558 | 0.003590713 | 0.01907989  |
| ENSMMUG00000021267 | potassium calcium-activated channel subfamily N member 4 [Source:NCBI gene;Acc:712383]                     | 0.969864665 | 0.000115204 | 0.00109435  |
| ENSMMUG00000003314 | aquaporin 3 (Gill blood group) [Source:NCBI gene;Acc:702721]                                               | 0.97047686  | 0.002113877 | 0.0124737   |
| ENSMMUG00000000198 | collagen beta(1-O)galactosyltransferase 1 [Source:NCBI gene;Acc:719980]                                    | 0.971449205 | 1.13E-05    | 0.000146023 |
| ENSMMUG00000057979 | growth differentiation factor 5 [Source:NCBI gene;Acc:705432]                                              | 0.972496127 | 2.65E-05    | 0.000310449 |
| ENSMMUG00000060973 |                                                                                                            | 0.972773555 | 0.000179405 | 0.00159778  |
| ENSMMUG00000061021 |                                                                                                            | 0.972870474 | 0.00574339  | 0.028188567 |
| ENSMMUG00000059608 | fibroblast growth factor binding protein 3 [Source:NCBI gene;Acc:697881]                                   | 0.973055831 | 0.002041813 | 0.012103502 |
| ENSMMUG00000055209 |                                                                                                            | 0.97319673  | 7.29E-06    | 0.000100212 |
| ENSMMUG00000052831 |                                                                                                            | 0.973311106 | 8.48E-05    | 0.000844859 |
| ENSMMUG00000022931 | NTPase KAP family P-loop domain containing 1 [Source:VGNC Symbol;Acc:VGNC:75250]                           | 0.974785472 | 0.000116457 | 0.001103028 |
| ENSMMUG00000013397 | peroxiredoxin 5 [Source:NCBI gene;Acc:719764]                                                              | 0.975067814 | 2.13E-06    | 3.39E-05    |
| ENSMMUG00000055601 |                                                                                                            | 0.976085819 | 1.83E-07    | 3.71E-06    |
| ENSMMUG00000063121 |                                                                                                            | 0.977100608 | 0.000181878 | 0.001615369 |
| ENSMMUG00000007804 | RAN binding protein 10 [Source:VGNC Symbol;Acc:VGNC:76563]                                                 | 0.97762623  | 5.42E-05    | 0.000583402 |
| ENSMMUG00000055096 |                                                                                                            | 0.978401118 | 2.60E-05    | 0.000306044 |
| ENSMMUG00000010203 | protein tyrosine phosphatase non-receptor type 6 [Source:VGNC Symbol;Acc:VGNC:76607]                       | 0.982453524 | 8.85E-06    | 0.00011865  |
| ENSMMUG00000014123 | alanyl-tRNA editing protein Aarsd1 [Source:NCBI gene;Acc:712203]                                           | 0.982586226 | 0.001465525 | 0.009289378 |
| ENSMMUG00000003555 | calcium voltage-gated channel subunit alpha1 A [Source:VGNC Symbol;Acc:VGNC:70498]                         | 0.983970104 | 2.78E-05    | 0.000322672 |
| ENSMMUG00000021446 | diacylglycerol kinase zeta [Source:VGNC Symbol;Acc:VGNC:71789]                                             | 0.984765551 | 6.65E-06    | 9.26E-05    |
| ENSMMUG00000022109 | CD163 molecule like 1 [Source:VGNC Symbol;Acc:VGNC:70914]                                                  | 0.985038947 | 0.001006886 | 0.006797793 |
| ENSMMUG00000038221 | proteasome 26S subunit, non-ATPase 8 [Source:NCBI gene;Acc:721897]                                         | 0.98534972  | 0.000424073 | 0.003295069 |
| ENSMMUG00000004014 | interferon regulatory factor 7 [Source:VGNC Symbol;Acc:VGNC:73765]                                         | 0.98588927  | 0.0004381   | 0.003377768 |
| ENSMMUG00000017261 | galactosylceramidase [Source:VGNC Symbol;Acc:VGNC:72867]                                                   | 0.986604318 | 0.000122293 | 0.001147411 |



|                    |                                                                                                         |             |             |             |
|--------------------|---------------------------------------------------------------------------------------------------------|-------------|-------------|-------------|
| ENSMMUG0000001944  | chromosome 20 C16orf72 homolog [Source:VGNC Symbol;Acc:VGNC:70443]                                      | 0.987295126 | 9.81E-08    | 2.12E-06    |
| ENSMMUG00000018029 | amyloid beta precursor like protein 2 [Source:VGNC Symbol;Acc:VGNC:69984]                               | 0.987655448 | 2.64E-05    | 0.000308882 |
| ENSMMUG00000058885 | formin binding protein 4 [Source:NCBI gene;Acc:712633]                                                  | 0.988329117 | 0.00013429  | 0.001243788 |
| ENSMMUG00000011347 | DEAH-box helicase 36 [Source:VGNC Symbol;Acc:VGNC:71623]                                                | 0.989761443 | 1.23E-09    | 3.91E-08    |
| ENSMMUG00000021080 | basic leucine zipper nuclear factor 1 [Source:VGNC Symbol;Acc:VGNC:70258]                               | 0.990650643 | 2.21E-07    | 4.39E-06    |
| ENSMMUG00000057682 |                                                                                                         | 0.992673744 | 1.20E-06    | 2.03E-05    |
| ENSMMUG00000062583 | olfactory receptor 1A1 [Source:NCBI gene;Acc:721403]                                                    | 0.993791926 | 0.001560283 | 0.00975252  |
| ENSMMUG00000000582 | NOP58 ribonucleoprotein [Source:VGNC Symbol;Acc:VGNC:75284]                                             | 0.996939773 | 0.001139291 | 0.007511912 |
| ENSMMUG00000042870 | Macaca mulatta taste receptor, type 2, member 46 (TAS2R46), mRNA. [Source:RefSeq mRNA;Acc:NM_001080757] | 0.998239093 | 0.01122834  | 0.048006241 |
| ENSMMUG00000006470 | complement C1r subcomponent [Source:NCBI gene;Acc:722133]                                               | 1.000561664 | 2.06E-07    | 4.13E-06    |
| ENSMMUG00000052780 |                                                                                                         | 1.000864931 | 0.000159382 | 0.001448279 |
| ENSMMUG00000006029 | odontogenic, ameloblast associated [Source:NCBI gene;Acc:707906]                                        | 1.001035616 | 0.000188208 | 0.001665884 |
| ENSMMUG00000002926 | mediator complex subunit 24 [Source:NCBI gene;Acc:699536]                                               | 1.002320899 | 9.22E-08    | 2.01E-06    |
| ENSMMUG00000050132 |                                                                                                         | 1.003340467 | 0.000350943 | 0.002846147 |
| ENSMMUG00000016769 | proteasome 26S subunit, ATPase 5 [Source:VGNC Symbol;Acc:VGNC:81513]                                    | 1.003482431 | 0.007623081 | 0.03542876  |
| ENSMMUG00000003568 | testis expressed 101 [Source:VGNC Symbol;Acc:VGNC:79869]                                                | 1.003488556 | 0.002477229 | 0.014254779 |
| ENSMMUG00000064204 | kelch like family member 26 [Source:NCBI gene;Acc:719583]                                               | 1.004238639 | 0.003499563 | 0.018695069 |
| ENSMMUG00000064821 |                                                                                                         | 1.004424699 | 0.001504576 | 0.009477366 |
| ENSMMUG00000002995 | tripartite motif containing 24 [Source:VGNC Symbol;Acc:VGNC:78562]                                      | 1.006018986 | 0.00037769  | 0.003015942 |
| ENSMMUG00000003668 | GTPase activating protein and VPS9 domains 1 [Source:VGNC Symbol;Acc:VGNC:72767]                        | 1.006301052 | 2.90E-06    | 4.42E-05    |
| ENSMMUG00000014573 | dimethylarginine dimethylaminohydrolase 1 [Source:VGNC Symbol;Acc:VGNC:71753]                           | 1.009050587 | 7.74E-08    | 1.72E-06    |
| ENSMMUG00000004854 | leucine rich repeat containing 9 [Source:VGNC Symbol;Acc:VGNC:81443]                                    | 1.010038896 | 0.00036778  | 0.002945869 |
| ENSMMUG00000022348 | surfeit 4 [Source:VGNC Symbol;Acc:VGNC:78060]                                                           | 1.01018833  | 2.49E-05    | 0.000294554 |
| ENSMMUG00000013697 | PDX1 C-terminal inhibiting factor 1 [Source:VGNC Symbol;Acc:VGNC:75621]                                 | 1.011560474 | 3.46E-06    | 5.15E-05    |
| ENSMMUG00000022933 | DNA topoisomerase I mitochondrial [Source:VGNC Symbol;Acc:VGNC:79821]                                   | 1.011859959 | 1.22E-07    | 2.57E-06    |
| ENSMMUG00000016652 | cell division cycle and apoptosis regulator 1 [Source:NCBI gene;Acc:693585]                             | 1.012373065 | 0.000123603 | 0.001158863 |
| ENSMMUG00000032809 | mml-mir-642 [Source:miRBase;Acc:MI0007885]                                                              | 1.012765866 | 0.000357206 | 0.002885683 |
| ENSMMUG00000008618 | calcium voltage-gated channel subunit alpha1 F [Source:VGNC Symbol;Acc:VGNC:70503]                      | 1.013608711 | 5.43E-08    | 1.22E-06    |
| ENSMMUG00000014674 | golgin, RAB6 interacting [Source:VGNC Symbol;Acc:VGNC:73012]                                            | 1.014630746 | 0.000235675 | 0.002023904 |
| ENSMMUG00000060812 | autophagy related 12 [Source:NCBI gene;Acc:696765]                                                      | 1.014922918 | 7.80E-05    | 0.000793549 |
| ENSMMUG00000014766 | neuroguidin [Source:VGNC Symbol;Acc:VGNC:75220]                                                         | 1.016580378 | 0.000213545 | 0.001869747 |
| ENSMMUG00000063694 | cyclic nucleotide gated channel subunit alpha 2 [Source:NCBI gene;Acc:704486]                           | 1.020570784 | 1.25E-07    | 2.64E-06    |
| ENSMMUG00000005532 | male germ cell associated kinase [Source:VGNC Symbol;Acc:VGNC:74480]                                    | 1.0215708   | 4.55E-05    | 0.000499268 |
| ENSMMUG00000001702 | succinyl-CoA:glutarate-CoA transferase [Source:VGNC Symbol;Acc:VGNC:81767]                              | 1.021800874 | 0.000927612 | 0.006358526 |
| ENSMMUG00000013696 | myozenin 1 [Source:VGNC Symbol;Acc:VGNC:74951]                                                          | 1.024368626 | 0.002629897 | 0.014973909 |
| ENSMMUG00000059292 |                                                                                                         | 1.025993155 | 1.13E-06    | 1.93E-05    |
| ENSMMUG00000016401 | SGT1 homolog, MIS12 kinetochore complex assembly cochaperone [Source:NCBI gene;Acc:694046]              | 1.026288005 | 0.000108019 | 0.001038258 |
| ENSMMUG00000063590 |                                                                                                         | 1.028100934 | 0.000824563 | 0.005755529 |
| ENSMMUG00000001761 | myosin IB [Source:VGNC Symbol;Acc:VGNC:75111]                                                           | 1.029021931 | 0.00025273  | 0.002151851 |
| ENSMMUG00000051072 |                                                                                                         | 1.029273654 | 4.22E-09    | 1.22E-07    |
| ENSMMUG00000056613 |                                                                                                         | 1.029435503 | 1.19E-06    | 2.01E-05    |
| ENSMMUG00000005483 | ribosomal protein S6 kinase B2 [Source:VGNC Symbol;Acc:VGNC:76934]                                      | 1.030138236 | 0.000273174 | 0.002300264 |
| ENSMMUG00000034608 | U6 spliceosomal RNA [Source:RFAM;Acc:RF00026]                                                           | 1.030248653 | 0.005531477 | 0.027352256 |
| ENSMMUG00000061785 |                                                                                                         | 1.030779102 | 6.13E-08    | 1.37E-06    |
| ENSMMUG00000015394 | WD repeat domain 93 [Source:VGNC Symbol;Acc:VGNC:79642]                                                 | 1.035317818 | 2.43E-08    | 5.94E-07    |
| ENSMMUG00000018879 | exocyst complex component 3 like 2 [Source:NCBI gene;Acc:713992]                                        | 1.035446232 | 6.73E-05    | 0.000700807 |
| ENSMMUG00000014868 | OCIA domain containing 1 [Source:VGNC Symbol;Acc:VGNC:75409]                                            | 1.035676857 | 0.000240136 | 0.002056765 |
| ENSMMUG00000058254 |                                                                                                         | 1.036676308 | 0.000312834 | 0.002582274 |
| ENSMMUG00000001028 | SNF related kinase [Source:VGNC Symbol;Acc:VGNC:84074]                                                  | 1.037919622 | 4.46E-09    | 1.29E-07    |
| ENSMMUG00000044496 | H2A histone family, member X [Source:NCBI gene;Acc:703073]                                              | 1.040760693 | 0.004870465 | 0.024581548 |
| ENSMMUG00000049850 | proline rich and Gla domain 4 [Source:NCBI gene;Acc:694707]                                             | 1.042218014 | 1.93E-05    | 0.000236825 |

|                    |                                                                                                     |             |             |             |
|--------------------|-----------------------------------------------------------------------------------------------------|-------------|-------------|-------------|
| ENSMMUG0000000196  | niban apoptosis regulator 3 [Source:VGNC Symbol;Acc:VGNC:75241]                                     | 1.043007454 | 0.00786075  | 0.036312244 |
| ENSMMUG00000005480 | carnosine synthase 1 [Source:VGNC Symbol;Acc:VGNC:81367]                                            | 1.044521355 | 1.59E-09    | 4.93E-08    |
| ENSMMUG00000019607 | patatin like phospholipase domain containing 7 [Source:VGNC Symbol;Acc:VGNC:76104]                  | 1.051682011 | 1.96E-06    | 3.14E-05    |
| ENSMMUG00000020258 | E2F transcription factor 4 [Source:VGNC Symbol;Acc:VGNC:72025]                                      | 1.052052966 | 6.23E-06    | 8.74E-05    |
| ENSMMUG00000053496 |                                                                                                     | 1.052423709 | 0.00141288  | 0.009009135 |
| ENSMMUG00000046550 | coiled-coil domain containing 125 [Source:NCBI gene;Acc:704391]                                     | 1.053750478 | 6.14E-05    | 0.000646103 |
| ENSMMUG00000003584 | mesoderm posterior bHLH transcription factor 2 [Source:VGNC Symbol;Acc:VGNC:74619]                  | 1.055900318 | 1.31E-08    | 3.41E-07    |
| ENSMMUG00000001902 | TruB pseudouridine synthase family member 1 [Source:VGNC Symbol;Acc:VGNC:79005]                     | 1.059062181 | 0.005213923 | 0.026001484 |
| ENSMMUG00000055048 |                                                                                                     | 1.059530466 | 1.53E-06    | 2.51E-05    |
| ENSMMUG00000006723 | solute carrier family 8 member B1 [Source:NCBI gene;Acc:714561]                                     | 1.06168892  | 0.006701689 | 0.03194751  |
| ENSMMUG00000001739 | ATPase sarcoplasmic/endoplasmic reticulum Ca2+ transporting 2 [Source:VGNC Symbol;Acc:VGNC:70178]   | 1.062988239 | 2.04E-08    | 5.06E-07    |
| ENSMMUG00000005745 | EYA transcriptional coactivator and phosphatase 4 [Source:VGNC Symbol;Acc:VGNC:72456]               | 1.06360983  | 6.63E-07    | 1.20E-05    |
| ENSMMUG00000015479 | tectonin beta-propeller repeat containing 1 [Source:VGNC Symbol;Acc:VGNC:79348]                     | 1.063975026 | 1.71E-09    | 5.28E-08    |
| ENSMMUG00000021449 | vacuolar protein sorting 13 homolog D [Source:NCBI gene;Acc:722775]                                 | 1.064992963 | 1.47E-06    | 2.44E-05    |
| ENSMMUG00000052854 | mucin like 1 [Source:NCBI gene;Acc:100423942]                                                       | 1.066654973 | 1.04E-09    | 3.33E-08    |
| ENSMMUG00000032249 | procollagen-lysine,2-oxoglutarate 5-dioxygenase 1 [Source:NCBI gene;Acc:722763]                     | 1.068112728 | 4.02E-07    | 7.51E-06    |
| ENSMMUG00000063322 |                                                                                                     | 1.068761953 | 0.000274816 | 0.002312585 |
| ENSMMUG00000054472 |                                                                                                     | 1.069420507 | 3.25E-06    | 4.88E-05    |
| ENSMMUG00000008875 | solute carrier family 35 member F5 [Source:VGNC Symbol;Acc:VGNC:77567]                              | 1.069503506 | 7.16E-05    | 0.000737185 |
| ENSMMUG00000002953 | MAGE family member F1 [Source:VGNC Symbol;Acc:VGNC:74399]                                           | 1.070956557 | 0.009691612 | 0.04280407  |
| ENSMMUG00000001910 | heat shock protein family B (small) member 7 [Source:NCBI gene;Acc:696704]                          | 1.071124813 | 0.005390531 | 0.026743274 |
| ENSMMUG00000020580 | RPGRIP1 like [Source:VGNC Symbol;Acc:VGNC:77124]                                                    | 1.071363464 | 0.000463844 | 0.00353633  |
| ENSMMUG00000062628 |                                                                                                     | 1.071467585 | 0.001497059 | 0.009434601 |
| ENSMMUG00000052828 |                                                                                                     | 1.073290947 | 0.00705797  | 0.033327592 |
| ENSMMUG00000001745 | oxysterol binding protein [Source:VGNC Symbol;Acc:VGNC:75718]                                       | 1.074916034 | 6.73E-05    | 0.000700807 |
| ENSMMUG00000006997 | thioredoxin domain containing 16 [Source:VGNC Symbol;Acc:VGNC:79214]                                | 1.074971287 | 6.72E-07    | 1.21E-05    |
| ENSMMUG00000049432 | olfactory receptor 2T33 [Source:NCBI gene;Acc:706331]                                               | 1.076827349 | 1.86E-07    | 3.74E-06    |
| ENSMMUG00000012001 | transcription factor 4 [Source:VGNC Symbol;Acc:VGNC:78288]                                          | 1.078255295 | 8.74E-05    | 0.000866777 |
| ENSMMUG00000061632 | fibrillin 3 [Source:NCBI gene;Acc:709446]                                                           | 1.080424352 | 0.000246981 | 0.002105671 |
| ENSMMUG00000019991 | dopa decarboxylase [Source:VGNC Symbol;Acc:VGNC:71755]                                              | 1.082222472 | 6.16E-10    | 2.07E-08    |
| ENSMMUG00000001943 | GRAM domain containing 1C [Source:VGNC Symbol;Acc:VGNC:73007]                                       | 1.082558916 | 0.000557063 | 0.004140003 |
| ENSMMUG00000055241 |                                                                                                     | 1.083565657 | 2.14E-07    | 4.26E-06    |
| ENSMMUG00000008474 | transforming growth factor beta regulator 1 [Source:VGNC Symbol;Acc:VGNC:78239]                     | 1.083614072 | 0.006274305 | 0.030299735 |
| ENSMMUG00000022407 | serine and arginine rich splicing factor 5 [Source:NCBI gene;Acc:712867]                            | 1.084540241 | 5.91E-05    | 0.000626089 |
| ENSMMUG00000007401 | arrestin domain containing 2 [Source:VGNC Symbol;Acc:VGNC:69901]                                    | 1.084561048 | 0.000185608 | 0.001645413 |
| ENSMMUG00000056548 | coagulation factor III, tissue factor [Source:NCBI gene;Acc:714456]                                 | 1.085432907 | 8.17E-09    | 2.22E-07    |
| ENSMMUG00000031451 | golgin A3 [Source:VGNC Symbol;Acc:VGNC:73106]                                                       | 1.085627984 | 0.002122265 | 0.012494784 |
| ENSMMUG00000009794 | protocadherin related 15 [Source:VGNC Symbol;Acc:VGNC:75608]                                        | 1.085957764 | 1.13E-05    | 0.000145962 |
| ENSMMUG00000005486 | protein tyrosine phosphatase receptor type C associated protein [Source:VGNC Symbol;Acc:VGNC:76613] | 1.087520117 | 0.000171893 | 0.001540389 |
| ENSMMUG00000018787 | PAK1 interacting protein 1 [Source:VGNC Symbol;Acc:VGNC:75661]                                      | 1.088702375 | 0.000185391 | 0.001645413 |
| ENSMMUG00000060959 |                                                                                                     | 1.089434454 | 0.004577983 | 0.023387365 |
| ENSMMUG00000058621 |                                                                                                     | 1.090256751 | 0.000110362 | 0.001057652 |
| ENSMMUG00000019441 | solute carrier family 12 member 7 [Source:VGNC Symbol;Acc:VGNC:77390]                               | 1.09137587  | 0.000949159 | 0.006485669 |
| ENSMMUG00000004024 | cadherin related family member 5 [Source:VGNC Symbol;Acc:VGNC:71158]                                | 1.092213874 | 0.001955754 | 0.011711059 |
| ENSMMUG00000060496 | translocase of outer mitochondrial membrane 40 like [Source:NCBI gene;Acc:100426891]                | 1.092616093 | 0.007005978 | 0.033118242 |
| ENSMMUG00000015866 | vesicle transport through interaction with t-SNAREs 1B [Source:NCBI gene;Acc:711113]                | 1.093252443 | 2.73E-06    | 4.20E-05    |
| ENSMMUG00000003233 | SET domain containing 1A, histone lysine methyltransferase [Source:NCBI gene;Acc:712416]            | 1.093702086 | 4.37E-05    | 0.000481922 |
| ENSMMUG00000049802 | olfactory receptor 51G1 [Source:NCBI gene;Acc:716561]                                               | 1.093776926 | 0.001877255 | 0.011335447 |
| ENSMMUG00000054259 |                                                                                                     | 1.094571306 | 0.006724206 | 0.032031312 |
| ENSMMUG00000000730 | spectrin alpha, erythrocytic 1 [Source:VGNC Symbol;Acc:VGNC:77868]                                  | 1.095039442 | 0.001061452 | 0.007097531 |
| ENSMMUG00000054055 | zinc finger protein 93 [Source:NCBI gene;Acc:720434]                                                | 1.0963981   | 3.63E-08    | 8.48E-07    |



|                     |                                                                                                                    |             |             |             |
|---------------------|--------------------------------------------------------------------------------------------------------------------|-------------|-------------|-------------|
| ENSMMUG0000005256   | family with sequence similarity 163 member A [Source:NCBI gene;Acc:718704]                                         | 1.097007449 | 0.000346657 | 0.002818435 |
| ENSMMUG0000000953   | family with sequence similarity 207 member A [Source:VGNC Symbol;Acc:VGNC:72273]                                   | 1.098757481 | 0.000115868 | 0.001099051 |
| ENSMMUG00000050028  |                                                                                                                    | 1.1001584   | 6.62E-05    | 0.000691332 |
| ENSMMUG00000062316  | Metazoan signal recognition particle RNA [Source:RFAM;Acc:RF00017]                                                 | 1.101221007 | 8.60E-05    | 0.00085513  |
| ENSMMUG00000064650  | SPEM family member 3 [Source:NCBI gene;Acc:106993878]                                                              | 1.102985561 | 3.85E-09    | 1.13E-07    |
| ENSMMUG00000015097  | tripartite motif containing 62 [Source:VGNC Symbol;Acc:VGNC:79513]                                                 | 1.103241912 | 2.03E-06    | 3.24E-05    |
| ENSMMUG00000049297  |                                                                                                                    | 1.10442814  | 1.78E-06    | 2.88E-05    |
| ENSMMUG00000021891  | kinesin light chain 3 [Source:VGNC Symbol;Acc:VGNC:73870]                                                          | 1.104670496 | 0.00026981  | 0.00228082  |
| ENSMMUG00000061335  |                                                                                                                    | 1.104757473 | 0.000664794 | 0.004795093 |
| ENSMMUG00000060967  |                                                                                                                    | 1.104781892 | 0.000415895 | 0.003245131 |
| ENSMMUG00000016001  | vesicle amine transport 1 [Source:VGNC Symbol;Acc:VGNC:79058]                                                      | 1.105860973 | 9.62E-06    | 0.000128137 |
| ENSMMUG00000024170  | U6 spliceosomal RNA [Source:RFAM;Acc:RF00026]                                                                      | 1.106216564 | 0.000157469 | 0.001431894 |
| ENSMMUG00000057702  |                                                                                                                    | 1.106740762 | 4.19E-06    | 6.11E-05    |
| ENSMMUG00000000389  | nucleolar protein 6 [Source:VGNC Symbol;Acc:VGNC:75218]                                                            | 1.10839805  | 0.000283608 | 0.002374252 |
| ENSMMUG00000012560  | HERV-H LTR-associating 1 [Source:NCBI gene;Acc:100430297]                                                          | 1.108985978 | 6.76E-08    | 1.51E-06    |
| ENSMMUG00000019223  | TNF receptor associated factor 7 [Source:VGNC Symbol;Acc:VGNC:79252]                                               | 1.108999305 | 9.48E-05    | 0.000928632 |
| ENSMMUG00000051230  |                                                                                                                    | 1.110103065 | 2.33E-05    | 0.000277277 |
| ENSMMUG00000001269  | chromosome 16 C17orf80 homolog [Source:VGNC Symbol;Acc:VGNC:70440]                                                 | 1.110758247 | 2.68E-07    | 5.23E-06    |
| ENSMMUG00000003006  | serine palmitoyltransferase long chain base subunit 1 [Source:VGNC Symbol;Acc:VGNC:77873]                          | 1.113071696 | 3.62E-05    | 0.000408738 |
| ENSMMUG00000016761  | coiled-coil domain containing 47 [Source:NCBI gene;Acc:717944]                                                     | 1.114964715 | 0.001515725 | 0.009536053 |
| ENSMMUG00000008623  | coiled-coil domain containing 22 [Source:VGNC Symbol;Acc:VGNC:70899]                                               | 1.116981466 | 1.52E-07    | 3.15E-06    |
| ENSMMUG00000003283  | extracellular leucine rich repeat and fibronectin type III domain containing 1 [Source:VGNC Symbol;Acc:VGNC:72204] | 1.117113472 | 1.51E-06    | 2.49E-05    |
| ENSMMUG00000020916  | coiled-coil domain containing 158 [Source:NCBI gene;Acc:699735]                                                    | 1.117592097 | 1.04E-09    | 3.34E-08    |
| ENSMMUG00000054158  | acyl-CoA dehydrogenase family member 11 [Source:NCBI gene;Acc:106997118]                                           | 1.118682336 | 6.14E-05    | 0.000646103 |
| ENSMMUG00000001536  | glutamine and serine rich 1 [Source:VGNC Symbol;Acc:VGNC:76544]                                                    | 1.119485826 | 2.00E-07    | 4.01E-06    |
| ENSMMUG00000060533  |                                                                                                                    | 1.121352113 | 2.70E-06    | 4.16E-05    |
| ENSMMUG00000018235  | chloride voltage-gated channel Kb [Source:NCBI gene;Acc:703476]                                                    | 1.12168299  | 0.004529652 | 0.0231861   |
| ENSMMUG00000063495  |                                                                                                                    | 1.122694014 | 1.72E-08    | 4.35E-07    |
| ENSMMUG00000005478  | trimethylguanosine synthase 1 [Source:VGNC Symbol;Acc:VGNC:78404]                                                  | 1.123296975 | 0.000609727 | 0.004460025 |
| ENSMMUG00000019839  | lysine acetyltransferase 5 [Source:VGNC Symbol;Acc:VGNC:73955]                                                     | 1.12397188  | 4.00E-08    | 9.23E-07    |
| ENSMMUG00000017561  | solute carrier family 43 member 2 [Source:VGNC Symbol;Acc:VGNC:77554]                                              | 1.124897629 | 0.000102092 | 0.000988621 |
| ENSMMUG00000003457  | protein kinase cAMP-activated catalytic subunit beta [Source:NCBI gene;Acc:709728]                                 | 1.125158718 | 4.83E-08    | 1.10E-06    |
| ENSMMUG00000014592  | zinc finger SWIM-type containing 9 [Source:VGNC Symbol;Acc:VGNC:79949]                                             | 1.125242701 | 0.004457882 | 0.022890967 |
| ENSMMUG00000000023  | prostaglandin E receptor 2 [Source:VGNC Symbol;Acc:VGNC:76468]                                                     | 1.126056729 | 1.10E-05    | 0.000142687 |
| ENSMMUG00000014702  | TATA-box binding protein associated factor 2 [Source:VGNC Symbol;Acc:VGNC:78090]                                   | 1.127046533 | 1.44E-07    | 3.00E-06    |
| ENSMMUG00000003611  | low density lipoprotein receptor [Source:VGNC Symbol;Acc:VGNC:74248]                                               | 1.127423092 | 0.002406447 | 0.013909158 |
| ENSMMUG000000031279 | torsin A interacting protein 2 [Source:NCBI gene;Acc:716654]                                                       | 1.127752787 | 8.47E-06    | 0.000114174 |
| ENSMMUG00000056950  |                                                                                                                    | 1.129431735 | 2.85E-09    | 8.55E-08    |
| ENSMMUG00000008652  | coiled-coil domain containing 85B [Source:VGNC Symbol;Acc:VGNC:70853]                                              | 1.130084372 | 1.80E-06    | 2.91E-05    |
| ENSMMUG00000005989  | GLE1 RNA export mediator [Source:VGNC Symbol;Acc:VGNC:73067]                                                       | 1.130087014 | 3.29E-06    | 4.92E-05    |
| ENSMMUG00000021736  | single-pass membrane protein with coiled-coil domains 2 [Source:VGNC Symbol;Acc:VGNC:77808]                        | 1.130698782 | 9.01E-06    | 0.000120505 |
| ENSMMUG00000020980  | ubiquitin like modifier activating enzyme 7 [Source:VGNC Symbol;Acc:VGNC:78690]                                    | 1.133060301 | 0.000668701 | 0.00482059  |
| ENSMMUG00000011774  | integrator complex subunit 10 [Source:VGNC Symbol;Acc:VGNC:73653]                                                  | 1.133582991 | 9.90E-08    | 2.14E-06    |
| ENSMMUG00000014983  | alanyl aminopeptidase, membrane [Source:VGNC Symbol;Acc:VGNC:69943]                                                | 1.133662595 | 3.54E-08    | 8.30E-07    |
| ENSMMUG00000016448  | DLG associated protein 4 [Source:NCBI gene;Acc:702928]                                                             | 1.137343972 | 0.000261822 | 0.002221978 |
| ENSMMUG00000054184  | Metazoan signal recognition particle RNA [Source:RFAM;Acc:RF00017]                                                 | 1.139817478 | 3.55E-09    | 1.05E-07    |
| ENSMMUG00000015931  | phosphatidylinositol transfer protein membrane associated 2 [Source:VGNC Symbol;Acc:VGNC:75843]                    | 1.140243325 | 2.30E-05    | 0.000273853 |
| ENSMMUG00000057560  |                                                                                                                    | 1.140998634 | 8.06E-07    | 1.42E-05    |
| ENSMMUG00000063817  | SRY-box transcription factor 9 [Source:NCBI gene;Acc:574208]                                                       | 1.143104347 | 5.33E-08    | 1.20E-06    |
| ENSMMUG00000006766  | RUN domain containing 3B [Source:VGNC Symbol;Acc:VGNC:77129]                                                       | 1.144369552 | 0.0007544   | 0.005331752 |
| ENSMMUG00000053516  |                                                                                                                    | 1.145986278 | 0.002337977 | 0.013561732 |

|                     |                                                                                                  |             |             |             |
|---------------------|--------------------------------------------------------------------------------------------------|-------------|-------------|-------------|
| ENSMMUG00000007379  | phosphatidylinositol 3,4,5-trisphosphate 3-phosphatase TPTE2-like [Source:NCBI gene;Acc:694255]  | 1.147280611 | 2.64E-05    | 0.000308882 |
| ENSMMUG00000007197  | BRCA2 DNA repair associated [Source:VGNC Symbol;Acc:VGNC:70279]                                  | 1.147389122 | 0.001042611 | 0.007006176 |
| ENSMMUG000000060576 |                                                                                                  | 1.147514981 | 0.000228483 | 0.001972581 |
| ENSMMUG00000005793  | ankyrin repeat and fibronectin type III domain containing 1 [Source:VGNC Symbol;Acc:VGNC:69712]  | 1.147987565 | 0.000180563 | 0.001604788 |
| ENSMMUG00000014866  | hydroxymethylbilane synthase [Source:VGNC Symbol;Acc:VGNC:73479]                                 | 1.148431166 | 0.005394682 | 0.026748719 |
| ENSMMUG00000040888  | complement C3b/C4b receptor 1 like [Source:HGNC Symbol;Acc:HGNC:2335]                            | 1.150103484 | 3.05E-06    | 4.62E-05    |
| ENSMMUG00000017605  | mitochondrial ribosomal protein L39 [Source:VGNC Symbol;Acc:VGNC:74737]                          | 1.150472232 | 9.68E-06    | 0.000128616 |
| ENSMMUG00000031106  | ubiquitin recognition factor in ER associated degradation 1 [Source:NCBI gene;Acc:711716]        | 1.156006397 | 3.89E-11    | 1.61E-09    |
| ENSMMUG00000006786  | protein tyrosine phosphatase non-receptor type 22 [Source:VGNC Symbol;Acc:VGNC:76603]            | 1.156366706 | 2.76E-05    | 0.000321416 |
| ENSMMUG00000015306  | calponin 2 [Source:NCBI gene;Acc:721164]                                                         | 1.157854468 | 1.67E-09    | 5.17E-08    |
| ENSMMUG00000002810  | TOX high mobility group box family member 2 [Source:VGNC Symbol;Acc:VGNC:79007]                  | 1.161677469 | 4.64E-07    | 8.61E-06    |
| ENSMMUG00000010526  | calcium voltage-gated channel auxiliary subunit beta 4 [Source:VGNC Symbol;Acc:VGNC:82116]       | 1.163378926 | 0.003646874 | 0.019315037 |
| ENSMMUG00000017810  | structure specific recognition protein 1 [Source:VGNC Symbol;Acc:VGNC:77891]                     | 1.164243464 | 0.00016902  | 0.001517787 |
| ENSMMUG000000058187 |                                                                                                  | 1.165196275 | 9.58E-09    | 2.56E-07    |
| ENSMMUG000000065113 |                                                                                                  | 1.170655562 | 0.000743248 | 0.00526728  |
| ENSMMUG00000010556  | Snf2 related CREBBP activator protein [Source:NCBI gene;Acc:712944]                              | 1.173140212 | 1.40E-08    | 3.64E-07    |
| ENSMMUG000000053378 |                                                                                                  | 1.173163064 | 9.35E-05    | 0.00091948  |
| ENSMMUG00000004816  | membrane associated ring-CH-type finger 5 [Source:VGNC Symbol;Acc:VGNC:74588]                    | 1.173619161 | 2.51E-05    | 0.000296208 |
| ENSMMUG00000015303  | ATP binding cassette subfamily A member 7 [Source:VGNC Symbol;Acc:VGNC:69567]                    | 1.173758223 | 7.34E-09    | 2.01E-07    |
| ENSMMUG00000008090  | ribosomal protein L27 [Source:NCBI gene;Acc:712352]                                              | 1.174269092 | 0.006668298 | 0.031819346 |
| ENSMMUG00000006181  | WD repeat, sterile alpha motif and U-box domain containing 1 [Source:VGNC Symbol;Acc:VGNC:79634] | 1.175065039 | 2.79E-05    | 0.000323666 |
| ENSMMUG00000002428  | zinc finger protein 800 [Source:VGNC Symbol;Acc:VGNC:79658]                                      | 1.175380575 | 8.11E-05    | 0.000816642 |
| ENSMMUG00000005255  | TRAF-type zinc finger domain containing 1 [Source:VGNC Symbol;Acc:VGNC:79459]                    | 1.175971181 | 7.76E-06    | 0.000105706 |
| ENSMMUG00000008077  | dynein cytoplasmic 2 light intermediate chain 1 [Source:VGNC Symbol;Acc:VGNC:71899]              | 1.176188264 | 6.04E-06    | 8.48E-05    |
| ENSMMUG00000008080  | ATP binding cassette subfamily G member 5 [Source:VGNC Symbol;Acc:VGNC:69391]                    | 1.17778234  | 7.45E-06    | 0.00010182  |
| ENSMMUG000000060063 |                                                                                                  | 1.178033466 | 6.87E-05    | 0.000712678 |
| ENSMMUG00000002211  | doublecortin like kinase 2 [Source:VGNC Symbol;Acc:VGNC:71670]                                   | 1.182288073 | 0.000392109 | 0.003106233 |
| ENSMMUG00000003105  | inositol polyphosphate-5-phosphatase E [Source:VGNC Symbol;Acc:VGNC:73637]                       | 1.183307944 | 2.29E-07    | 4.52E-06    |
| ENSMMUG000000053625 | sterol-C5-desaturase [Source:NCBI gene;Acc:706827]                                               | 1.183366215 | 2.74E-06    | 4.22E-05    |
| ENSMMUG00000000808  | melanin concentrating hormone receptor 2 [Source:VGNC Symbol;Acc:VGNC:74550]                     | 1.184282294 | 2.57E-08    | 6.20E-07    |
| ENSMMUG000000059969 |                                                                                                  | 1.184821178 | 0.008196616 | 0.037503277 |
| ENSMMUG00000008385  | NOP14 nucleolar protein [Source:VGNC Symbol;Acc:VGNC:75194]                                      | 1.186674543 | 7.82E-07    | 1.39E-05    |
| ENSMMUG000000051677 |                                                                                                  | 1.188364994 | 1.38E-07    | 2.89E-06    |
| ENSMMUG000000053329 |                                                                                                  | 1.188475923 | 0.00269591  | 0.015289392 |
| ENSMMUG00000004002  | CDC like kinase 4 [Source:VGNC Symbol;Acc:VGNC:71173]                                            | 1.189272138 | 7.82E-11    | 3.09E-09    |
| ENSMMUG00000021017  | acylglycerol kinase [Source:VGNC Symbol;Acc:VGNC:69669]                                          | 1.192204968 | 8.11E-08    | 1.79E-06    |
| ENSMMUG00000005440  | ELMO domain containing 1 [Source:VGNC Symbol;Acc:VGNC:72109]                                     | 1.19273117  | 0.009488012 | 0.04208339  |
| ENSMMUG00000004558  | OTU deubiquitinase 5 [Source:VGNC Symbol;Acc:VGNC:75677]                                         | 1.19348656  | 2.25E-07    | 4.46E-06    |
| ENSMMUG000000051420 | homeobox B5 [Source:NCBI gene;Acc:696732]                                                        | 1.193905017 | 2.02E-05    | 0.000245609 |
| ENSMMUG000000043134 | coiled-coil domain containing 159 [Source:NCBI gene;Acc:100424702]                               | 1.193934876 | 0.009758016 | 0.04302413  |
| ENSMMUG00000002124  | beta-1,4-galactosyltransferase 5 [Source:VGNC Symbol;Acc:VGNC:70212]                             | 1.19406562  | 0.002934861 | 0.01634453  |
| ENSMMUG00000022246  | PDZ and LIM domain 5 [Source:VGNC Symbol;Acc:VGNC:75816]                                         | 1.195836292 | 7.62E-06    | 0.000103838 |
| ENSMMUG00000048066  | trafficking protein particle complex 9 [Source:NCBI gene;Acc:711466]                             | 1.196596423 | 2.67E-05    | 0.000312635 |
| ENSMMUG00000013447  | adaptor related protein complex 4 subunit mu 1 [Source:VGNC Symbol;Acc:VGNC:69974]               | 1.197883123 | 0.004010135 | 0.020939845 |
| ENSMMUG000000055126 |                                                                                                  | 1.198046877 | 0.002933592 | 0.016344476 |
| ENSMMUG00000014986  | testis expressed 33 [Source:VGNC Symbol;Acc:VGNC:79727]                                          | 1.199288863 | 3.51E-05    | 0.000398425 |
| ENSMMUG00000018986  | seizure related 6 homolog like 2 [Source:VGNC Symbol;Acc:VGNC:81567]                             | 1.19996292  | 0.000194662 | 0.001719496 |
| ENSMMUG00000020254  | exocyst complex component 3 like 1 [Source:VGNC Symbol;Acc:VGNC:72376]                           | 1.200201126 | 4.34E-06    | 6.30E-05    |
| ENSMMUG00000001220  | adhesion G protein-coupled receptor E1 [Source:VGNC Symbol;Acc:VGNC:69561]                       | 1.200585786 | 7.86E-05    | 0.000797    |
| ENSMMUG00000003131  | interleukin 13 [Source:VGNC Symbol;Acc:VGNC:84393]                                               | 1.200940416 | 9.69E-05    | 0.000946534 |
| ENSMMUG000000050608 |                                                                                                  | 1.201721404 | 7.11E-06    | 9.81E-05    |



|                     |                                                                                                                                                      |             |             |             |
|---------------------|------------------------------------------------------------------------------------------------------------------------------------------------------|-------------|-------------|-------------|
| ENSMMUG00000051201  | zinc finger SWIM-type containing 3 [Source:NCBI gene;Acc:708804]                                                                                     | 1.203475376 | 1.02E-05    | 0.000134313 |
| ENSMMUG00000010940  | telomerase reverse transcriptase [Source:VGNC Symbol;Acc:VGNC:78313]                                                                                 | 1.20571601  | 5.06E-10    | 1.72E-08    |
| ENSMMUG000000061194 |                                                                                                                                                      | 1.208169239 | 8.76E-06    | 0.000117715 |
| ENSMMUG00000015873  | RAD51 paralog B [Source:VGNC Symbol;Acc:VGNC:76647]                                                                                                  | 1.208388683 | 0.006203481 | 0.0300109   |
| ENSMMUG00000022633  | replication initiator 1 [Source:VGNC Symbol;Acc:VGNC:76758]                                                                                          | 1.209386691 | 0.006558981 | 0.031440465 |
| ENSMMUG00000020604  | HPS1 biogenesis of lysosomal organelles complex 3 subunit 1 [Source:VGNC Symbol;Acc:VGNC:73515]                                                      | 1.212133269 | 3.16E-06    | 4.75E-05    |
| ENSMMUG00000059754  |                                                                                                                                                      | 1.21262496  | 0.000235545 | 0.002023904 |
| ENSMMUG00000065005  | Metazoan signal recognition particle RNA [Source:RFAM;Acc:RF00017]                                                                                   | 1.216619335 | 0.002021935 | 0.012002117 |
| ENSMMUG00000056024  |                                                                                                                                                      | 1.216800432 | 6.82E-07    | 1.22E-05    |
| ENSMMUG00000006893  | D-amino acid oxidase [Source:VGNC Symbol;Acc:VGNC:71729]                                                                                             | 1.21768896  | 1.55E-07    | 3.20E-06    |
| ENSMMUG00000056924  | G protein-coupled receptor 149 [Source:NCBI gene;Acc:106997054]                                                                                      | 1.218321053 | 0.002532107 | 0.014504073 |
| ENSMMUG00000001088  | patched domain containing 1 [Source:VGNC Symbol;Acc:VGNC:76322]                                                                                      | 1.219538641 | 5.67E-06    | 8.05E-05    |
| ENSMMUG00000000776  | zinc finger matrin-type 4 [Source:VGNC Symbol;Acc:VGNC:78424]                                                                                        | 1.222491671 | 4.86E-05    | 0.000529789 |
| ENSMMUG00000042510  | coagulation factor V [Source:NCBI gene;Acc:704695]                                                                                                   | 1.22266393  | 2.76E-09    | 8.34E-08    |
| ENSMMUG00000060879  | homeobox B13 [Source:NCBI gene;Acc:697572]                                                                                                           | 1.227725292 | 2.60E-07    | 5.09E-06    |
| ENSMMUG00000006936  | gastric inhibitory polypeptide receptor [Source:VGNC Symbol;Acc:VGNC:73052]                                                                          | 1.227953015 | 6.71E-09    | 1.85E-07    |
| ENSMMUG00000019040  | hydroxysteroid 17-beta dehydrogenase 13 [Source:VGNC Symbol;Acc:VGNC:73417]                                                                          | 1.228745474 | 3.65E-06    | 5.40E-05    |
| ENSMMUG00000035748  | U6 spliceosomal RNA [Source:RFAM;Acc:RF00026]                                                                                                        | 1.228930853 | 0.002532848 | 0.014504073 |
| ENSMMUG00000008379  | adducin 1 [Source:VGNC Symbol;Acc:VGNC:69528]                                                                                                        | 1.22984598  | 0.000400759 | 0.003153576 |
| ENSMMUG00000061526  | synaptopodin 2 like [Source:NCBI gene;Acc:714736]                                                                                                    | 1.231227499 | 6.98E-05    | 0.000722905 |
| ENSMMUG00000059341  | Metazoan signal recognition particle RNA [Source:RFAM;Acc:RF00017]                                                                                   | 1.232878235 | 7.29E-07    | 1.30E-05    |
| ENSMMUG00000002330  | ecto-NOX disulfide-thiol exchanger 1 [Source:VGNC Symbol;Acc:VGNC:72110]                                                                             | 1.234694066 | 0.005601624 | 0.027614276 |
| ENSMMUG00000008091  | RUN domain containing 1 [Source:VGNC Symbol;Acc:VGNC:77101]                                                                                          | 1.238693749 | 0.001054602 | 0.007068446 |
| ENSMMUG00000064920  |                                                                                                                                                      | 1.239435337 | 2.60E-08    | 6.26E-07    |
| ENSMMUG00000050696  | taste receptor type 2 member 31-like [Source:NCBI gene;Acc:693892]                                                                                   | 1.240891428 | 4.57E-05    | 0.000500873 |
| ENSMMUG00000011528  | F-box and WD repeat domain containing 5 [Source:VGNC Symbol;Acc:VGNC:72503]                                                                          | 1.24092289  | 0.000110521 | 0.001058305 |
| ENSMMUG00000062283  | homeobox B6 [Source:NCBI gene;Acc:106994013]                                                                                                         | 1.241255863 | 3.43E-08    | 8.08E-07    |
| ENSMMUG00000015999  | interferon induced protein 35 [Source:VGNC Symbol;Acc:VGNC:73564]                                                                                    | 1.242679849 | 0.000367117 | 0.002942381 |
| ENSMMUG00000052607  |                                                                                                                                                      | 1.24458871  | 1.16E-11    | 5.21E-10    |
| ENSMMUG00000059788  |                                                                                                                                                      | 1.245163047 | 3.60E-10    | 1.28E-08    |
| ENSMMUG00000021988  | N-alpha-acetyltransferase 11, NatA catalytic subunit [Source:NCBI gene;Acc:696758]                                                                   | 1.24538907  | 1.68E-05    | 0.000207035 |
| ENSMMUG00000021428  | lipocalin 12 [Source:VGNC Symbol;Acc:VGNC:74143]                                                                                                     | 1.24590426  | 4.34E-05    | 0.000480525 |
| ENSMMUG00000023282  | aldo-keto reductase family 1, member C1 (dihydrodiol dehydrogenase 1; 20-alpha (3-alpha)-hydroxysteroid dehydrogenase) [Source:NCBI gene;Acc:711198] | 1.248407847 | 4.22E-06    | 6.13E-05    |
| ENSMMUG00000013150  | MORC family CW-type zinc finger 4 [Source:VGNC Symbol;Acc:VGNC:74808]                                                                                | 1.249767194 | 3.04E-07    | 5.87E-06    |
| ENSMMUG00000016476  | TRAF interacting protein [Source:VGNC Symbol;Acc:VGNC:82261]                                                                                         | 1.249778236 | 4.67E-05    | 0.000510659 |
| ENSMMUG00000053656  |                                                                                                                                                      | 1.250253891 | 6.76E-07    | 1.21E-05    |
| ENSMMUG00000016796  | reticulophagy regulator family member 3 [Source:VGNC Symbol;Acc:VGNC:76845]                                                                          | 1.250305776 | 9.80E-08    | 2.12E-06    |
| ENSMMUG00000056343  |                                                                                                                                                      | 1.250472431 | 0.000179179 | 0.001596863 |
| ENSMMUG00000062837  |                                                                                                                                                      | 1.251063851 | 0.004984286 | 0.025097438 |
| ENSMMUG00000052112  |                                                                                                                                                      | 1.251123725 | 0.002198795 | 0.012892706 |
| ENSMMUG00000023717  | MIER family member 2 [Source:VGNC Symbol;Acc:VGNC:74855]                                                                                             | 1.251165227 | 6.01E-06    | 8.45E-05    |
| ENSMMUG00000022996  | HCLS1 binding protein 3 [Source:VGNC Symbol;Acc:VGNC:82158]                                                                                          | 1.251791311 | 6.94E-06    | 9.63E-05    |
| ENSMMUG00000021408  | family with sequence similarity 222 member B [Source:VGNC Symbol;Acc:VGNC:72352]                                                                     | 1.254175225 | 1.10E-05    | 0.000143464 |
| ENSMMUG00000019527  | DNA cross-link repair 1B [Source:VGNC Symbol;Acc:VGNC:71647]                                                                                         | 1.255261363 | 0.00232193  | 0.013492773 |
| ENSMMUG00000001917  | megakaryocyte-associated tyrosine kinase [Source:NCBI gene;Acc:100430078]                                                                            | 1.255600036 | 1.04E-06    | 1.79E-05    |
| ENSMMUG00000060596  | BCL2 associated agonist of cell death [Source:NCBI gene;Acc:717740]                                                                                  | 1.256704999 | 5.22E-06    | 7.49E-05    |
| ENSMMUG00000058856  | Metazoan signal recognition particle RNA [Source:RFAM;Acc:RF00017]                                                                                   | 1.256798833 | 0.001286418 | 0.008325465 |
| ENSMMUG00000030964  | RAB6A, member RAS oncogene family [Source:NCBI gene;Acc:718717]                                                                                      | 1.257144637 | 5.15E-11    | 2.09E-09    |
| ENSMMUG00000009890  | FERM, ARH/RhoGEF and pleckstrin domain protein 1 [Source:VGNC Symbol;Acc:VGNC:72614]                                                                 | 1.25750162  | 4.65E-12    | 2.21E-10    |
| ENSMMUG00000054175  |                                                                                                                                                      | 1.258128538 | 6.40E-09    | 1.79E-07    |

|                    |                                                                                                          |             |             |             |
|--------------------|----------------------------------------------------------------------------------------------------------|-------------|-------------|-------------|
| ENSMMUG00000021075 | Rac family small GTPase 1 [Source:NCBI gene;Acc:717755]                                                  | 1.258506802 | 8.39E-14    | 5.02E-12    |
| ENSMMUG00000008007 | multiple EGF like domains 11 [Source:VGNC Symbol;Acc:VGNC:84376]                                         | 1.258987958 | 2.52E-06    | 3.93E-05    |
| ENSMMUG00000012523 | flotillin 2 [Source:NCBI gene;Acc:114669752]                                                             | 1.260589451 | 2.55E-07    | 4.99E-06    |
| ENSMMUG00000052424 |                                                                                                          | 1.260654663 | 8.15E-07    | 1.43E-05    |
| ENSMMUG00000018720 | cytoskeleton associated protein 2 [Source:VGNC Symbol;Acc:VGNC:71229]                                    | 1.261902621 | 5.58E-06    | 7.94E-05    |
| ENSMMUG00000055352 |                                                                                                          | 1.262279956 | 6.66E-09    | 1.84E-07    |
| ENSMMUG00000058432 | zinc finger DHHC-type palmitoyltransferase 18 [Source:NCBI gene;Acc:719959]                              | 1.264003188 | 1.67E-05    | 0.00020631  |
| ENSMMUG00000054579 | zinc finger RNA binding protein 2 [Source:NCBI gene;Acc:100430166]                                       | 1.265227644 | 0.001021318 | 0.006870201 |
| ENSMMUG00000007366 |                                                                                                          | 1.266447274 | 1.63E-07    | 3.34E-06    |
| ENSMMUG00000050511 |                                                                                                          | 1.269252261 | 0.00243384  | 0.014029988 |
| ENSMMUG00000012959 | solute carrier family 35 member E1 [Source:VGNC Symbol;Acc:VGNC:77536]                                   | 1.269662057 | 1.33E-09    | 4.21E-08    |
| ENSMMUG00000019835 | CD5 molecule like [Source:VGNC Symbol;Acc:VGNC:70774]                                                    | 1.270637102 | 0.000214295 | 0.001875042 |
| ENSMMUG00000059725 |                                                                                                          | 1.271683494 | 0.004800043 | 0.02429226  |
| ENSMMUG00000003827 | albumin [Source:VGNC Symbol;Acc:VGNC:69782]                                                              | 1.274264455 | 1.14E-05    | 0.000147169 |
| ENSMMUG00000003439 | nuclear factor I C [Source:VGNC Symbol;Acc:VGNC:75336]                                                   | 1.274604832 | 0.003337165 | 0.018042938 |
| ENSMMUG00000003684 | ATPase phospholipid transporting 8B4 (putative) [Source:VGNC Symbol;Acc:VGNC:84311]                      | 1.274617852 | 2.69E-07    | 5.24E-06    |
| ENSMMUG00000048824 | eva-1 homolog C [Source:NCBI gene;Acc:708681]                                                            | 1.276829027 | 6.89E-08    | 1.53E-06    |
| ENSMMUG00000021553 | dehydrogenase/reductase 13 [Source:VGNC Symbol;Acc:VGNC:81387]                                           | 1.279904581 | 3.87E-08    | 8.98E-07    |
| ENSMMUG00000006941 | exportin 1 [Source:VGNC Symbol;Acc:VGNC:78812]                                                           | 1.280138275 | 1.17E-09    | 3.72E-08    |
| ENSMMUG00000008778 | parvalbumin [Source:VGNC Symbol;Acc:VGNC:76627]                                                          | 1.280353311 | 1.60E-05    | 0.000198543 |
| ENSMMUG00000006285 | antizyme inhibitor 2 [Source:VGNC Symbol;Acc:VGNC:70153]                                                 | 1.283153752 | 1.46E-10    | 5.43E-09    |
| ENSMMUG00000020226 | WD repeat and SOCS box containing 1 [Source:VGNC Symbol;Acc:VGNC:79186]                                  | 1.283336272 | 1.31E-06    | 2.20E-05    |
| ENSMMUG00000017280 | TBC1 domain family member 10C [Source:VGNC Symbol;Acc:VGNC:78203]                                        | 1.286034455 | 0.001342876 | 0.008626315 |
| ENSMMUG00000049770 | Metazoan signal recognition particle RNA [Source:RFAM;Acc:RF00017]                                       | 1.288283214 | 0.005124576 | 0.025664415 |
| ENSMMUG00000011788 | zinc finger protein 212 [Source:VGNC Symbol;Acc:VGNC:78418]                                              | 1.293025713 | 2.49E-05    | 0.000294613 |
| ENSMMUG00000000313 | HEAT repeat containing 4 [Source:VGNC Symbol;Acc:VGNC:73176]                                             | 1.294880975 | 5.43E-08    | 1.22E-06    |
| ENSMMUG00000054784 |                                                                                                          | 1.295850651 | 2.23E-05    | 0.000268145 |
| ENSMMUG00000048204 | ephrin B3 [Source:NCBI gene;Acc:716257]                                                                  | 1.296252885 | 3.23E-06    | 4.86E-05    |
| ENSMMUG00000061951 |                                                                                                          | 1.297303468 | 0.003425032 | 0.01840299  |
| ENSMMUG00000001616 | peptidyl arginine deiminase 2 [Source:VGNC Symbol;Acc:VGNC:75644]                                        | 1.297384834 | 0.002137844 | 0.012575095 |
| ENSMMUG00000044080 | mitochondrial ribosomal protein L54 [Source:NCBI gene;Acc:713878]                                        | 1.29843228  | 0.000407339 | 0.003191809 |
| ENSMMUG00000039774 | Metazoan signal recognition particle RNA [Source:RFAM;Acc:RF00017]                                       | 1.299696714 | 1.72E-09    | 5.29E-08    |
| ENSMMUG00000006530 | ATP/GTP binding protein like 3 [Source:VGNC Symbol;Acc:VGNC:69723]                                       | 1.301029585 | 9.35E-12    | 4.27E-10    |
| ENSMMUG00000009887 | MAX dimerization protein MLX [Source:VGNC Symbol;Acc:VGNC:74726]                                         | 1.305471302 | 4.19E-05    | 0.000466749 |
| ENSMMUG00000015926 | 2-oxoglutarate and iron dependent oxygenase domain containing 2 [Source:VGNC Symbol;Acc:VGNC:75462]      | 1.305855925 | 0.000101501 | 0.000983624 |
| ENSMMUG00000010610 | WW domain containing oxidoreductase [Source:VGNC Symbol;Acc:VGNC:78805]                                  | 1.306023515 | 0.001097028 | 0.007277625 |
| ENSMMUG00000020979 | inka box actin regulator 1 [Source:VGNC Symbol;Acc:VGNC:73692]                                           | 1.306335425 | 0.000443187 | 0.003404854 |
| ENSMMUG00000060230 | Metazoan signal recognition particle RNA [Source:RFAM;Acc:RF00017]                                       | 1.307131961 | 0.000248257 | 0.002115152 |
| ENSMMUG00000008964 | D-glutamate cyclase [Source:VGNC Symbol;Acc:VGNC:71685]                                                  | 1.307998249 | 0.011467067 | 0.048746874 |
| ENSMMUG00000019089 | centromere protein E [Source:VGNC Symbol;Acc:VGNC:71008]                                                 | 1.309560719 | 7.58E-15    | 5.29E-13    |
| ENSMMUG00000004903 | ectonucleotide pyrophosphatase/phosphodiesterase 2 [Source:VGNC Symbol;Acc:VGNC:72223]                   | 1.311417217 | 6.51E-11    | 2.61E-09    |
| ENSMMUG00000006692 | signal peptide, CUB domain and EGF like domain containing 2 [Source:VGNC Symbol;Acc:VGNC:77138]          | 1.314915183 | 5.20E-06    | 7.48E-05    |
| ENSMMUG00000014277 | ITPR interacting domain containing 2 [Source:VGNC Symbol;Acc:VGNC:73584]                                 | 1.316534624 | 3.00E-07    | 5.81E-06    |
| ENSMMUG00000057329 |                                                                                                          | 1.31860695  | 0.003350618 | 0.018108129 |
| ENSMMUG00000006086 | pleckstrin homology, MyTH4 and FERM domain containing H3 [Source:VGNC Symbol;Acc:VGNC:76113]             | 1.318662186 | 0.001124534 | 0.007425931 |
| ENSMMUG00000060632 |                                                                                                          | 1.31922823  | 0.00422436  | 0.021891093 |
| ENSMMUG00000064005 |                                                                                                          | 1.324366673 | 0.001541603 | 0.009677719 |
| ENSMMUG00000063215 | T cell receptor alpha variable 29/delta variable 5 (gene/pseudogene) [Source:HGNC Symbol;Acc:HGNC:12127] | 1.325157348 | 0.003333626 | 0.018031317 |
| ENSMMUG00000041729 |                                                                                                          | 1.325370973 | 0.00082423  | 0.005755529 |
| ENSMMUG00000000327 | fatty acid desaturase 2 [Source:VGNC Symbol;Acc:VGNC:72472]                                              | 1.326205217 | 1.06E-07    | 2.29E-06    |
| ENSMMUG00000062063 | melanoma-associated antigen 3 [Source:NCBI gene;Acc:711544]                                              | 1.328233378 | 1.03E-05    | 0.000135265 |

|                    |                                                                                                 |             |             |             |
|--------------------|-------------------------------------------------------------------------------------------------|-------------|-------------|-------------|
| ENSMMUG00000051408 | myelin associated oligodendrocyte basic protein [Source:NCBI gene;Acc:717265]                   | 1.328357884 | 4.05E-10    | 1.41E-08    |
| ENSMMUG00000001848 | sprouty RTK signaling antagonist 1 [Source:VGNC Symbol;Acc:VGNC:77867]                          | 1.328705439 | 2.97E-10    | 1.07E-08    |
| ENSMMUG00000009886 | Coenzyme A synthase [Source:VGNC Symbol;Acc:VGNC:81373]                                         | 1.328772882 | 1.38E-09    | 4.35E-08    |
| ENSMMUG00000014771 | zinc finger homeobox 2 [Source:NCBI gene;Acc:100429448]                                         | 1.330219151 | 2.63E-09    | 7.96E-08    |
| ENSMMUG00000049935 |                                                                                                 | 1.330886115 | 5.57E-05    | 0.000596989 |
| ENSMMUG00000042407 |                                                                                                 | 1.331343413 | 0.006970032 | 0.032984366 |
| ENSMMUG00000004520 | NADH:ubiquinone oxidoreductase core subunit S2 [Source:NCBI gene;Acc:719935]                    | 1.335781906 | 0.000111237 | 0.001062109 |
| ENSMMUG00000050405 |                                                                                                 | 1.336205435 | 4.24E-05    | 0.000470695 |
| ENSMMUG00000059117 | Metazoan signal recognition particle RNA [Source:RFAM;Acc:RF00017]                              | 1.336492519 | 0.004687219 | 0.02383282  |
| ENSMMUG00000002260 | protein kinase C eta [Source:VGNC Symbol;Acc:VGNC:84424]                                        | 1.336739277 | 1.00E-06    | 1.73E-05    |
| ENSMMUG00000056093 | shieldin complex subunit 1 [Source:NCBI gene;Acc:718152]                                        | 1.336977225 | 2.14E-05    | 0.000258972 |
| ENSMMUG00000056841 |                                                                                                 | 1.337387979 | 0.004219701 | 0.021875685 |
| ENSMMUG00000011789 | hematopoietically expressed homeobox [Source:VGNC Symbol;Acc:VGNC:73376]                        | 1.337804485 | 0.000217061 | 0.001894141 |
| ENSMMUG00000009197 | myelin associated oligodendrocyte basic protein [Source:VGNC Symbol;Acc:VGNC:74908]             | 1.338931059 | 9.73E-10    | 3.15E-08    |
| ENSMMUG00000064824 | gremlin 2, DAN family BMP antagonist [Source:NCBI gene;Acc:708280]                              | 1.339101096 | 0.005880469 | 0.028696868 |
| ENSMMUG00000004820 | pre-mRNA processing factor 8 [Source:VGNC Symbol;Acc:VGNC:76275]                                | 1.340113371 | 4.20E-13    | 2.28E-11    |
| ENSMMUG00000053367 | secreted protein acidic and cysteine rich [Source:NCBI gene;Acc:712388]                         | 1.341925464 | 9.44E-10    | 3.07E-08    |
| ENSMMUG00000059897 | myosin light chain 9 [Source:NCBI gene;Acc:709784]                                              | 1.342582763 | 0.00241324  | 0.013936293 |
| ENSMMUG00000001547 | zinc finger protein 106 [Source:VGNC Symbol;Acc:VGNC:78831]                                     | 1.342634213 | 1.17E-13    | 6.84E-12    |
| ENSMMUG00000015685 | zinc finger protein 804B [Source:VGNC Symbol;Acc:VGNC:81890]                                    | 1.344516951 | 5.82E-11    | 2.35E-09    |
| ENSMMUG00000058566 |                                                                                                 | 1.344896059 | 3.53E-07    | 6.70E-06    |
| ENSMMUG00000055897 |                                                                                                 | 1.346965002 | 6.64E-06    | 9.25E-05    |
| ENSMMUG00000003217 | transmembrane 7 superfamily member 3 [Source:VGNC Symbol;Acc:VGNC:79371]                        | 1.347081268 | 8.28E-07    | 1.45E-05    |
| ENSMMUG00000063658 | leucine rich repeat neuronal 2 [Source:NCBI gene;Acc:100429709]                                 | 1.348152973 | 0.000672244 | 0.00484344  |
| ENSMMUG00000013044 | selectin P [Source:VGNC Symbol;Acc:VGNC:77157]                                                  | 1.348372424 | 1.02E-05    | 0.000134329 |
| ENSMMUG00000001911 | steroid receptor associated and regulated protein [Source:VGNC Symbol;Acc:VGNC:78008]           | 1.348462888 | 0.000149641 | 0.001374202 |
| ENSMMUG00000007208 | G protein-coupled receptor 146 [Source:VGNC Symbol;Acc:VGNC:72979]                              | 1.348732127 | 0.009085005 | 0.040706845 |
| ENSMMUG00000010137 | microcephalin 1 [Source:VGNC Symbol;Acc:VGNC:74687]                                             | 1.349255179 | 0.00050717  | 0.003801873 |
| ENSMMUG00000003436 | tubulin tyrosine ligase like 6 [Source:VGNC Symbol;Acc:VGNC:79632]                              | 1.349774921 | 2.17E-13    | 1.23E-11    |
| ENSMMUG00000017127 | carbohydrate sulfotransferase 11 [Source:VGNC Symbol;Acc:VGNC:82123]                            | 1.350784112 | 0.002004133 | 0.011918252 |
| ENSMMUG00000006233 | adducin 3 [Source:VGNC Symbol;Acc:VGNC:69531]                                                   | 1.352777858 | 0.003043343 | 0.016825911 |
| ENSMMUG00000061836 |                                                                                                 | 1.353023421 | 0.000780433 | 0.005493813 |
| ENSMMUG00000062863 |                                                                                                 | 1.357399422 | 9.54E-05    | 0.000934556 |
| ENSMMUG00000064391 |                                                                                                 | 1.358093761 | 3.84E-07    | 7.20E-06    |
| ENSMMUG00000021554 | PHD finger protein 12 [Source:VGNC Symbol;Acc:VGNC:75838]                                       | 1.358515127 | 1.94E-08    | 4.86E-07    |
| ENSMMUG00000023016 | jade family PHD finger 3 [Source:VGNC Symbol;Acc:VGNC:73640]                                    | 1.359150352 | 1.73E-09    | 5.32E-08    |
| ENSMMUG00000009377 | tripartite motif containing 47 [Source:VGNC Symbol;Acc:VGNC:79171]                              | 1.360104986 | 2.44E-06    | 3.84E-05    |
| ENSMMUG00000014872 | dolichyl-phosphate N-acetylglucosaminophosphotransferase 1 [Source:VGNC Symbol;Acc:VGNC:71971]  | 1.361146254 | 1.36E-13    | 7.86E-12    |
| ENSMMUG00000055018 | sushi domain containing 6 [Source:NCBI gene;Acc:712719]                                         | 1.361703564 | 5.57E-08    | 1.25E-06    |
| ENSMMUG00000004748 | zinc finger and BTB domain containing 1 [Source:VGNC Symbol;Acc:VGNC:79238]                     | 1.36193964  | 3.39E-07    | 6.46E-06    |
| ENSMMUG00000008518 | phospholipid phosphatase related 5 [Source:NCBI gene;Acc:710549]                                | 1.362669988 | 4.85E-08    | 1.10E-06    |
| ENSMMUG00000000863 | dynein axonemal assembly factor 4 [Source:VGNC Symbol;Acc:VGNC:71881]                           | 1.363275483 | 6.69E-07    | 1.20E-05    |
| ENSMMUG00000003106 | SEC16 homolog A, endoplasmic reticulum export factor [Source:VGNC Symbol;Acc:VGNC:77326]        | 1.363315487 | 2.31E-06    | 3.65E-05    |
| ENSMMUG00000009184 | myelin protein zero like 1 [Source:NCBI gene;Acc:698437]                                        | 1.365135381 | 9.74E-05    | 0.000948972 |
| ENSMMUG00000022406 | ankyrin repeat and sterile alpha motif domain containing 1B [Source:VGNC Symbol;Acc:VGNC:69689] | 1.366222651 | 1.75E-07    | 3.56E-06    |
| ENSMMUG00000000421 | nuclear receptor subfamily 3 group C member 1 [Source:VGNC Symbol;Acc:VGNC:75515]               | 1.36632824  | 2.09E-08    | 5.17E-07    |
| ENSMMUG00000019085 | 3-hydroxybutyrate dehydrogenase 2 [Source:VGNC Symbol;Acc:VGNC:70161]                           | 1.366366346 | 1.87E-13    | 1.07E-11    |
| ENSMMUG00000006093 | enhancer of zeste 1 polycomb repressive complex 2 subunit [Source:VGNC Symbol;Acc:VGNC:72457]   | 1.367423135 | 7.71E-07    | 1.37E-05    |
| ENSMMUG00000018719 | nemo like kinase [Source:VGNC Symbol;Acc:VGNC:75277]                                            | 1.368020315 | 2.41E-08    | 5.88E-07    |
| ENSMMUG00000004910 | dynein axonemal light chain 1 [Source:VGNC Symbol;Acc:VGNC:71885]                               | 1.368809662 | 0.000165451 | 0.001492966 |
| ENSMMUG00000049913 |                                                                                                 | 1.369059578 | 0.011659193 | 0.049328231 |



|                    |                                                                                                           |             |             |             |
|--------------------|-----------------------------------------------------------------------------------------------------------|-------------|-------------|-------------|
| ENSMMUG0000000740  | spermatogenesis associated 2 [Source:VGNC Symbol;Acc:VGNC:77923]                                          | 1.369263035 | 0.000225077 | 0.001950966 |
| ENSMMUG00000004273 | dedicator of cytokinesis 3 [Source:VGNC Symbol;Acc:VGNC:71967]                                            | 1.370101021 | 4.32E-08    | 9.92E-07    |
| ENSMMUG00000008162 | fibroblast growth factor binding protein 1 [Source:VGNC Symbol;Acc:VGNC:72536]                            | 1.373249568 | 0.000221905 | 0.001927334 |
| ENSMMUG00000006836 | chloride channel accessory 1 [Source:NCBI gene;Acc:574295]                                                | 1.378594317 | 0.000615323 | 0.004493209 |
| ENSMMUG00000013671 | elongation factor for RNA polymerase II [Source:VGNC Symbol;Acc:VGNC:72088]                               | 1.378931453 | 7.05E-10    | 2.33E-08    |
| ENSMMUG00000049649 | proteasome 20S subunit beta 6 [Source:NCBI gene;Acc:710028]                                               | 1.379316351 | 9.00E-09    | 2.42E-07    |
| ENSMMUG00000061222 | adipocyte plasma membrane associated protein [Source:NCBI gene;Acc:704948]                                | 1.380668581 | 7.29E-06    | 0.000100212 |
| ENSMMUG00000018471 | serine/threonine kinase 33 [Source:VGNC Symbol;Acc:VGNC:78118]                                            | 1.383646682 | 0.009405986 | 0.041841642 |
| ENSMMUG00000020861 | EvC ciliary complex subunit 1 [Source:VGNC Symbol;Acc:VGNC:72445]                                         | 1.384202322 | 5.12E-11    | 2.08E-09    |
| ENSMMUG00000020868 | homeobox B8 [Source:VGNC Symbol;Acc:VGNC:73505]                                                           | 1.384794065 | 6.90E-13    | 3.64E-11    |
| ENSMMUG00000006180 | tetratricopeptide repeat, ankyrin repeat and coiled-coil containing 1 [Source:VGNC Symbol;Acc:VGNC:78238] | 1.38961175  | 8.40E-06    | 0.00011336  |
| ENSMMUG00000038256 | aquaporin 2 [Source:NCBI gene;Acc:711719]                                                                 | 1.390129989 | 3.09E-16    | 2.71E-14    |
| ENSMMUG00000007603 | coiled-coil domain containing 88B [Source:NCBI gene;Acc:722080]                                           | 1.39077326  | 1.38E-07    | 2.89E-06    |
| ENSMMUG00000062254 |                                                                                                           | 1.391215705 | 0.005191776 | 0.025920924 |
| ENSMMUG00000057703 |                                                                                                           | 1.393643609 | 1.74E-07    | 3.55E-06    |
| ENSMMUG00000055324 | homeobox B7 [Source:NCBI gene;Acc:697089]                                                                 | 1.393661603 | 1.54E-07    | 3.19E-06    |
| ENSMMUG00000063988 |                                                                                                           | 1.39409937  | 0.007841378 | 0.036235656 |
| ENSMMUG00000051453 |                                                                                                           | 1.394346051 | 0.006429781 | 0.030901049 |
| ENSMMUG00000061391 | ankyrin repeat domain 49 [Source:NCBI gene;Acc:697693]                                                    | 1.396230191 | 0.001115729 | 0.007379053 |
| ENSMMUG00000007198 | NEDD4 binding protein 2 like 1 [Source:VGNC Symbol;Acc:VGNC:75017]                                        | 1.397452613 | 0.009984257 | 0.043776904 |
| ENSMMUG00000007970 | CCZ1 homolog, vacuolar protein trafficking and biogenesis associated [Source:NCBI gene;Acc:718128]        | 1.39983112  | 4.73E-08    | 1.08E-06    |
| ENSMMUG00000052073 |                                                                                                           | 1.401438918 | 1.23E-09    | 3.90E-08    |
| ENSMMUG00000049543 |                                                                                                           | 1.403119106 | 0.000911249 | 0.006256282 |
| ENSMMUG00000060000 |                                                                                                           | 1.404260409 | 0.006512088 | 0.031250316 |
| ENSMMUG00000018245 | EPH receptor A2 [Source:VGNC Symbol;Acc:VGNC:72235]                                                       | 1.404882385 | 2.87E-08    | 6.86E-07    |
| ENSMMUG00000013877 | otoancorin [Source:VGNC Symbol;Acc:VGNC:75624]                                                            | 1.405503196 | 0.002943747 | 0.016386982 |
| ENSMMUG00000064009 | galactose-3-O-sulfotransferase 1 [Source:NCBI gene;Acc:715998]                                            | 1.406076835 | 0.008029378 | 0.036933431 |
| ENSMMUG00000002536 | calcium binding protein 1 [Source:VGNC Symbol;Acc:VGNC:70495]                                             | 1.406327589 | 4.18E-06    | 6.11E-05    |
| ENSMMUG00000065025 |                                                                                                           | 1.409806441 | 1.41E-09    | 4.42E-08    |
| ENSMMUG00000014131 | microtubule affinity regulating kinase 2 [Source:VGNC Symbol;Acc:VGNC:74634]                              | 1.410513189 | 6.63E-05    | 0.000692028 |
| ENSMMUG00000013387 | cysteinyl leukotriene receptor 1 [Source:VGNC Symbol;Acc:VGNC:71646]                                      | 1.411326918 | 1.33E-05    | 0.000168858 |
| ENSMMUG00000018239 | centrosomal protein 83 [Source:VGNC Symbol;Acc:VGNC:70992]                                                | 1.413411317 | 1.16E-07    | 2.45E-06    |
| ENSMMUG00000014508 | potassium channel tetramerization domain containing 20 [Source:VGNC Symbol;Acc:VGNC:73872]                | 1.413727427 | 5.70E-07    | 1.04E-05    |
| ENSMMUG00000014530 | pre-mRNA processing factor 19 [Source:VGNC Symbol;Acc:VGNC:76281]                                         | 1.413818184 | 4.45E-07    | 8.28E-06    |
| ENSMMUG00000050739 |                                                                                                           | 1.414650441 | 0.00726962  | 0.034158995 |
| ENSMMUG00000054449 | Metazoan signal recognition particle RNA [Source:RFAM;Acc:RF00017]                                        | 1.415660859 | 0.00992492  | 0.043611838 |
| ENSMMUG00000064610 | long intergenic non-protein coding RNA 1862 [Source:HGNC Symbol;Acc:HGNC:52681]                           | 1.417600928 | 8.91E-08    | 1.95E-06    |
| ENSMMUG00000057363 |                                                                                                           | 1.417682741 | 0.005035901 | 0.025288645 |
| ENSMMUG00000011661 | integrin subunit alpha 8 [Source:VGNC Symbol;Acc:VGNC:73782]                                              | 1.41889546  | 1.42E-08    | 3.66E-07    |
| ENSMMUG00000022100 | midnolin [Source:VGNC Symbol;Acc:VGNC:82186]                                                              | 1.420625219 | 6.56E-10    | 2.18E-08    |
| ENSMMUG00000003950 | nucleoporin 98 and 96 precursor [Source:VGNC Symbol;Acc:VGNC:75563]                                       | 1.42099949  | 2.93E-11    | 1.25E-09    |
| ENSMMUG00000064052 | CD300 molecule like family member d [Source:NCBI gene;Acc:703142]                                         | 1.421581932 | 2.78E-06    | 4.27E-05    |
| ENSMMUG00000003199 | CD200 receptor 1 [Source:VGNC Symbol;Acc:VGNC:70845]                                                      | 1.423962243 | 0.011618742 | 0.0492164   |
| ENSMMUG00000006689 | nuclear receptor interacting protein 3 [Source:VGNC Symbol;Acc:VGNC:75397]                                | 1.425120043 | 0.000460979 | 0.003518628 |
| ENSMMUG00000053257 | Y RNA [Source:RFAM;Acc:RF00019]                                                                           | 1.425227183 | 6.20E-09    | 1.74E-07    |
| ENSMMUG00000029034 | defensin beta 136 [Source:VGNC Symbol;Acc:VGNC:71826]                                                     | 1.42537445  | 0.000322772 | 0.002644121 |
| ENSMMUG00000062139 |                                                                                                           | 1.426415584 | 0.001205167 | 0.007882181 |
| ENSMMUG00000023335 | ring finger protein 13 [Source:VGNC Symbol;Acc:VGNC:81557]                                                | 1.426566066 | 7.00E-06    | 9.70E-05    |
| ENSMMUG00000059436 | interleukin 10 receptor subunit alpha [Source:NCBI gene;Acc:704383]                                       | 1.426717173 | 2.17E-08    | 5.33E-07    |
| ENSMMUG00000054755 | transmembrane protein 65 [Source:NCBI gene;Acc:705727]                                                    | 1.427491451 | 0.000506391 | 0.003798223 |
| ENSMMUG00000017654 | arrestin beta 2 [Source:VGNC Symbol;Acc:VGNC:70022]                                                       | 1.432194782 | 0.000119203 | 0.001124926 |

|                    |                                                                                                              |             |             |             |
|--------------------|--------------------------------------------------------------------------------------------------------------|-------------|-------------|-------------|
| ENSMMUG00000016376 | mitogen-activated protein kinase kinase kinase 5 [Source:VGNC Symbol;Acc:VGNC:74495]                         | 1.432505094 | 3.82E-05    | 0.000429581 |
| ENSMMUG00000019925 | DiGeorge syndrome critical region gene 2 [Source:NCBI gene;Acc:100423715]                                    | 1.433970197 | 5.42E-08    | 1.22E-06    |
| ENSMMUG00000019833 | Fc receptor like 1 [Source:VGNC Symbol;Acc:VGNC:72528]                                                       | 1.434728485 | 4.20E-11    | 1.73E-09    |
| ENSMMUG00000059472 | filaggrin family member 2 [Source:HGNC Symbol;Acc:HGNC:33276]                                                | 1.436581823 | 3.09E-06    | 4.67E-05    |
| ENSMMUG00000037243 | U6 spliceosomal RNA [Source:RFAM;Acc:RF00026]                                                                | 1.438468778 | 0.000446713 | 0.003425853 |
| ENSMMUG00000058800 |                                                                                                              | 1.440326026 | 2.03E-07    | 4.08E-06    |
| ENSMMUG00000018246 | transmembrane and coiled-coil domains 6 [Source:VGNC Symbol;Acc:VGNC:84507]                                  | 1.446312546 | 3.03E-08    | 7.19E-07    |
| ENSMMUG00000003739 | mannosidase beta [Source:VGNC Symbol;Acc:VGNC:74486]                                                         | 1.448664453 | 0.000560155 | 0.004158225 |
| ENSMMUG00000059681 |                                                                                                              | 1.448967754 | 0.011386739 | 0.048488805 |
| ENSMMUG00000048190 | U2 small nuclear RNA auxiliary factor 1 like 4 [Source:NCBI gene;Acc:718865]                                 | 1.449256778 | 0.000428548 | 0.00332063  |
| ENSMMUG00000058881 | bone morphogenetic protein 8b [Source:NCBI gene;Acc:100427030]                                               | 1.450268329 | 0.00180992  | 0.011036431 |
| ENSMMUG00000011817 | aryl hydrocarbon receptor interacting protein [Source:VGNC Symbol;Acc:VGNC:69759]                            | 1.450828026 | 1.41E-14    | 9.37E-13    |
| ENSMMUG00000004149 | eukaryotic translation initiation factor 4 gamma 3 [Source:NCBI gene;Acc:717555]                             | 1.452488132 | 1.15E-13    | 6.78E-12    |
| ENSMMUG00000037175 | U6 spliceosomal RNA [Source:RFAM;Acc:RF00026]                                                                | 1.453140691 | 0.00673581  | 0.032074813 |
| ENSMMUG00000018237 | plexin C1 [Source:VGNC Symbol;Acc:VGNC:76190]                                                                | 1.453958814 | 1.52E-09    | 4.75E-08    |
| ENSMMUG00000060555 |                                                                                                              | 1.454841319 | 2.33E-06    | 3.67E-05    |
| ENSMMUG00000006091 | contactin associated protein 1 [Source:VGNC Symbol;Acc:VGNC:71390]                                           | 1.457135391 | 9.29E-09    | 2.50E-07    |
| ENSMMUG00000013146 | claudin 2 [Source:HGNC Symbol;Acc:HGNC:2041]                                                                 | 1.457873193 | 6.66E-09    | 1.84E-07    |
| ENSMMUG00000058587 | family with sequence similarity 131 member C [Source:NCBI gene;Acc:703604]                                   | 1.46035182  | 1.07E-12    | 5.49E-11    |
| ENSMMUG00000003658 | autophagy related 2B [Source:VGNC Symbol;Acc:VGNC:84310]                                                     | 1.462133921 | 0.000111145 | 0.00106202  |
| ENSMMUG00000008253 | zinc finger protein 267 [Source:NCBI gene;Acc:641441]                                                        | 1.46252436  | 8.38E-10    | 2.75E-08    |
| ENSMMUG00000016797 | tubulin gamma 1 [Source:NCBI gene;Acc:710756]                                                                | 1.464043064 | 2.99E-09    | 8.95E-08    |
| ENSMMUG00000000700 | CLN3 lysosomal/endosomal transmembrane protein, battenin [Source:NCBI gene;Acc:705815]                       | 1.465620991 | 5.12E-09    | 1.47E-07    |
| ENSMMUG00000008031 | zinc finger and BTB domain containing 17 [Source:VGNC Symbol;Acc:VGNC:78849]                                 | 1.466757453 | 5.43E-10    | 1.84E-08    |
| ENSMMUG00000002789 | solute carrier family 25 (mitochondrial carrier; phosphate carrier), member 24 [Source:NCBI gene;Acc:694803] | 1.466836712 | 0.000731089 | 0.00520956  |
| ENSMMUG00000005511 | SON DNA binding protein [Source:VGNC Symbol;Acc:VGNC:77689]                                                  | 1.470509345 | 0.000217869 | 0.001898633 |
| ENSMMUG00000031291 | regulator of G protein signaling like 1 [Source:NCBI gene;Acc:715693]                                        | 1.471835969 | 7.30E-14    | 4.38E-12    |
| ENSMMUG00000001187 | mitogen-activated protein kinase 15 [Source:VGNC Symbol;Acc:VGNC:74570]                                      | 1.473096679 | 0.007327078 | 0.034348326 |
| ENSMMUG00000061797 | U6 spliceosomal RNA [Source:RFAM;Acc:RF00026]                                                                | 1.477680706 | 0.010701837 | 0.046225912 |
| ENSMMUG00000009889 | PSMC3 interacting protein [Source:VGNC Symbol;Acc:VGNC:76282]                                                | 1.47810438  | 4.54E-09    | 1.31E-07    |
| ENSMMUG00000008160 | neutrophil cytosolic factor 4 [Source:VGNC Symbol;Acc:VGNC:75141]                                            | 1.479667699 | 0.00602687  | 0.02929754  |
| ENSMMUG00000003298 | ataxin 2 like [Source:VGNC Symbol;Acc:VGNC:70159]                                                            | 1.482551542 | 4.80E-15    | 3.46E-13    |
| ENSMMUG00000060437 | Metazoan signal recognition particle RNA [Source:RFAM;Acc:RF00017]                                           | 1.483143111 | 0.003150948 | 0.017288244 |
| ENSMMUG00000003167 | cytohesin 3 [Source:VGNC Symbol;Acc:VGNC:71829]                                                              | 1.483282537 | 1.80E-07    | 3.66E-06    |
| ENSMMUG00000052505 | homeobox B9 [Source:NCBI gene;Acc:106994009]                                                                 | 1.484767988 | 5.10E-16    | 4.39E-14    |
| ENSMMUG00000050793 | N-acetyl-alpha-glucosaminidase [Source:NCBI gene;Acc:707186]                                                 | 1.486270165 | 1.58E-08    | 4.04E-07    |
| ENSMMUG00000057231 | T-box transcription factor 21 [Source:NCBI gene;Acc:694044]                                                  | 1.488010711 | 9.52E-10    | 3.09E-08    |
| ENSMMUG00000013330 | ectonucleoside triphosphate diphosphohydrolase 3 [Source:VGNC Symbol;Acc:VGNC:72226]                         | 1.488907185 | 0.001477197 | 0.009336478 |
| ENSMMUG00000018648 | zinc finger protein 594 [Source:NCBI gene;Acc:711492]                                                        | 1.490219328 | 2.42E-07    | 4.76E-06    |
| ENSMMUG00000007726 | synapse defective Rho GTPase homolog 1 [Source:NCBI gene;Acc:719089]                                         | 1.492110675 | 0.004505946 | 0.023101207 |
| ENSMMUG00000053937 |                                                                                                              | 1.493796892 | 5.72E-07    | 1.04E-05    |
| ENSMMUG00000000419 | Rho GTPase activating protein 26 [Source:VGNC Symbol;Acc:VGNC:69846]                                         | 1.494169585 | 1.46E-05    | 0.000183833 |
| ENSMMUG00000055820 |                                                                                                              | 1.495363976 | 0.007742291 | 0.035854377 |
| ENSMMUG00000028471 | U7 small nuclear RNA [Source:RFAM;Acc:RF00066]                                                               | 1.496194211 | 0.001149695 | 0.007572852 |
| ENSMMUG00000023300 | FERM domain containing 8 [Source:NCBI gene;Acc:716379]                                                       | 1.500877353 | 0.001184182 | 0.007776289 |
| ENSMMUG00000009176 | calmodulin binding transcription activator 2 [Source:VGNC Symbol;Acc:VGNC:70578]                             | 1.501323348 | 1.98E-08    | 4.94E-07    |
| ENSMMUG00000002422 | AE binding protein 1 [Source:VGNC Symbol;Acc:VGNC:80328]                                                     | 1.502268905 | 6.45E-07    | 1.17E-05    |
| ENSMMUG00000009995 | arachidonate 15-lipoxygenase type B [Source:VGNC Symbol;Acc:VGNC:69797]                                      | 1.502851646 | 1.93E-08    | 4.85E-07    |
| ENSMMUG00000051226 | FAD-linked sulfhydryl oxidase ERV1 [Source:NCBI gene;Acc:106994988]                                          | 1.5045793   | 5.40E-12    | 2.55E-10    |
| ENSMMUG00000044581 | modulator of apoptosis 1 [Source:VGNC Symbol;Acc:VGNC:84392]                                                 | 1.505017372 | 0.000100868 | 0.000978222 |
| ENSMMUG00000017129 | solute carrier family 41 member 2 [Source:VGNC Symbol;Acc:VGNC:77585]                                        | 1.509408047 | 6.61E-12    | 3.08E-10    |

|                    |                                                                                                  |             |             |             |
|--------------------|--------------------------------------------------------------------------------------------------|-------------|-------------|-------------|
| ENSMMUG00000017242 | MYCBP associated protein [Source:VGNC Symbol;Acc:VGNC:74994]                                     | 1.509923653 | 0.000739471 | 0.005251985 |
| ENSMMUG00000053013 |                                                                                                  | 1.511047553 | 1.89E-06    | 3.04E-05    |
| ENSMMUG00000050844 | BTB domain containing 18 [Source:NCBI gene;Acc:703264]                                           | 1.511230052 | 0.007867737 | 0.036331585 |
| ENSMMUG00000065208 |                                                                                                  | 1.512735583 | 0.00048386  | 0.003663109 |
| ENSMMUG00000060502 |                                                                                                  | 1.51346065  | 8.08E-06    | 0.000109814 |
| ENSMMUG00000062702 |                                                                                                  | 1.514248999 | 0.004574606 | 0.023379319 |
| ENSMMUG00000001036 | coagulation factor VII [Source:VGNC Symbol;Acc:VGNC:72466]                                       | 1.514296768 | 9.73E-07    | 1.69E-05    |
| ENSMMUG00000002217 | alkaline phosphatase, biomineralization associated [Source:VGNC Symbol;Acc:VGNC:69801]           | 1.517346269 | 4.87E-16    | 4.21E-14    |
| ENSMMUG00000048566 | MCF.2 cell line derived transforming sequence like [Source:NCBI gene;Acc:713961]                 | 1.519255384 | 4.06E-10    | 1.41E-08    |
| ENSMMUG00000017660 |                                                                                                  | 1.5226081   | 1.61E-08    | 4.08E-07    |
| ENSMMUG00000054960 |                                                                                                  | 1.532651555 | 0.000180276 | 0.001603333 |
| ENSMMUG00000004498 | protein inhibitor of activated STAT 2 [Source:VGNC Symbol;Acc:VGNC:75815]                        | 1.5341102   | 0.001299502 | 0.008397578 |
| ENSMMUG00000061896 |                                                                                                  | 1.536867158 | 7.02E-06    | 9.72E-05    |
| ENSMMUG00000052252 | protein phosphatase 1 regulatory subunit 3F [Source:NCBI gene;Acc:715950]                        | 1.538420219 | 4.01E-11    | 1.66E-09    |
| ENSMMUG00000023345 | adhesion G protein-coupled receptor L4 [Source:VGNC Symbol;Acc:VGNC:69652]                       | 1.539316562 | 2.21E-05    | 0.000265902 |
| ENSMMUG00000056009 |                                                                                                  | 1.539968398 | 1.38E-10    | 5.18E-09    |
| ENSMMUG00000006468 | FGFR1 oncogene partner 2 [Source:VGNC Symbol;Acc:VGNC:72551]                                     | 1.540046898 | 8.72E-07    | 1.52E-05    |
| ENSMMUG00000018030 | endoplasmic reticulum protein 27 [Source:VGNC Symbol;Acc:VGNC:72369]                             | 1.540193369 | 0.000271424 | 0.002291476 |
| ENSMMUG00000053481 |                                                                                                  | 1.542210502 | 1.58E-06    | 2.60E-05    |
| ENSMMUG00000009564 | NMD3 ribosome export adaptor [Source:VGNC Symbol;Acc:VGNC:75242]                                 | 1.542344333 | 0.009640697 | 0.042622723 |
| ENSMMUG00000003955 | post-GPI attachment to proteins 2 [Source:VGNC Symbol;Acc:VGNC:75823]                            | 1.542462796 | 2.12E-12    | 1.06E-10    |
| ENSMMUG00000008189 | cadherin related family member 3 [Source:HGNC Symbol;Acc:HGNC:26308]                             | 1.542524379 | 1.72E-11    | 7.45E-10    |
| ENSMMUG00000021436 | latent transforming growth factor beta binding protein 1 [Source:VGNC Symbol;Acc:VGNC:74456]     | 1.54342822  | 3.15E-06    | 4.75E-05    |
| ENSMMUG00000061126 | golgi associated olfactory signaling regulator [Source:NCBI gene;Acc:719194]                     | 1.545370108 | 0.011506813 | 0.048890769 |
| ENSMMUG00000005086 | homeobox protein TGIF1 [Source:NCBI gene;Acc:694580]                                             | 1.548026763 | 2.62E-07    | 5.12E-06    |
| ENSMMUG00000057196 | pulmonary surfactant-associated protein A [Source:NCBI gene;Acc:701715]                          | 1.548045829 | 4.17E-09    | 1.21E-07    |
| ENSMMUG00000008196 | aconitase 1 [Source:VGNC Symbol;Acc:VGNC:69378]                                                  | 1.548317727 | 2.35E-07    | 4.64E-06    |
| ENSMMUG00000008758 | zinc finger protein 143 [Source:VGNC Symbol;Acc:VGNC:81612]                                      | 1.549880157 | 0.001685733 | 0.010396423 |
| ENSMMUG00000019933 | TatD DNase domain containing 2 [Source:NCBI gene;Acc:701390]                                     | 1.549977863 | 0.001046021 | 0.007018187 |
| ENSMMUG00000007387 | G protein-coupled receptor kinase 7 [Source:VGNC Symbol;Acc:VGNC:73182]                          | 1.552512823 | 1.55E-08    | 3.98E-07    |
| ENSMMUG00000003484 | tectonin beta-propeller repeat containing 2 [Source:NCBI gene;Acc:708959]                        | 1.553188633 | 1.13E-07    | 2.41E-06    |
| ENSMMUG00000060761 |                                                                                                  | 1.554897304 | 1.32E-11    | 5.87E-10    |
| ENSMMUG00000051852 | Metazoan signal recognition particle RNA [Source:RFAM;Acc:RF00017]                               | 1.554942476 | 0.003210654 | 0.017541663 |
| ENSMMUG00000056330 |                                                                                                  | 1.557392467 | 0.003501795 | 0.018699296 |
| ENSMMUG00000006855 | acyl-CoA thioesterase 2 [Source:NCBI gene;Acc:697011]                                            | 1.558730872 | 1.76E-08    | 4.44E-07    |
| ENSMMUG00000060497 |                                                                                                  | 1.56009264  | 0.007804192 | 0.036102389 |
| ENSMMUG00000038363 | adaptor related protein complex 5 subunit beta 1 [Source:NCBI gene;Acc:721904]                   | 1.561025626 | 5.86E-14    | 3.57E-12    |
| ENSMMUG00000054286 |                                                                                                  | 1.561336825 | 0.000527034 | 0.003937067 |
| ENSMMUG00000011650 | dual specificity tyrosine phosphorylation regulated kinase 2 [Source:VGNC Symbol;Acc:VGNC:72018] | 1.563413157 | 8.11E-06    | 0.000109937 |
| ENSMMUG00000064707 |                                                                                                  | 1.56347373  | 5.55E-05    | 0.000595478 |
| ENSMMUG00000022409 | solute carrier family 10 member 1 [Source:VGNC Symbol;Acc:VGNC:77380]                            | 1.56377609  | 2.78E-08    | 6.66E-07    |
| ENSMMUG00000000757 | ring finger protein 114 [Source:VGNC Symbol;Acc:VGNC:76725]                                      | 1.565458244 | 0.004159221 | 0.021605305 |
| ENSMMUG00000009960 | cathepsin A [Source:VGNC Symbol;Acc:VGNC:71617]                                                  | 1.566294632 | 5.90E-11    | 2.37E-09    |
| ENSMMUG00000055379 |                                                                                                  | 1.56873598  | 8.15E-08    | 1.79E-06    |
| ENSMMUG00000059428 | olfactory receptor 2V2 [Source:NCBI gene;Acc:707790]                                             | 1.569274372 | 6.22E-05    | 0.00065364  |
| ENSMMUG00000060901 |                                                                                                  | 1.570179857 | 1.51E-16    | 1.40E-14    |
| ENSMMUG00000053106 |                                                                                                  | 1.573220319 | 0.000644558 | 0.00468297  |
| ENSMMUG00000061576 |                                                                                                  | 1.574200004 | 0.001071935 | 0.007155055 |
| ENSMMUG00000054942 |                                                                                                  | 1.576884234 | 1.79E-05    | 0.00021943  |
| ENSMMUG00000059134 |                                                                                                  | 1.577557209 | 0.000836758 | 0.005826524 |
| ENSMMUG00000010180 | PIN2 (TERF1) interacting telomerase inhibitor 1 [Source:NCBI gene;Acc:701523]                    | 1.578252345 | 0.000109777 | 0.001052821 |



|                    |                                                                                                |             |             |             |
|--------------------|------------------------------------------------------------------------------------------------|-------------|-------------|-------------|
| ENSMMUG00000009593 | WAS/WASL interacting protein family member 1 [Source:VGNC Symbol;Acc:VGNC:78784]               | 1.579895901 | 3.68E-11    | 1.54E-09    |
| ENSMMUG00000054414 |                                                                                                | 1.581421545 | 7.47E-06    | 0.00010195  |
| ENSMMUG00000016069 | cubilin [Source:VGNC Symbol;Acc:VGNC:82132]                                                    | 1.584144273 | 0.000958127 | 0.006540061 |
| ENSMMUG00000016582 | chromosome 1 C1orf112 homolog [Source:VGNC Symbol;Acc:VGNC:70385]                              | 1.584996538 | 1.18E-07    | 2.50E-06    |
| ENSMMUG00000001060 | ryanodine receptor 2 [Source:VGNC Symbol;Acc:VGNC:76954]                                       | 1.585781258 | 2.57E-22    | 4.76E-20    |
| ENSMMUG00000002427 | glucokinase [Source:VGNC Symbol;Acc:VGNC:72901]                                                | 1.588918973 | 3.21E-11    | 1.36E-09    |
| ENSMMUG00000056555 |                                                                                                | 1.589010166 | 2.72E-12    | 1.34E-10    |
| ENSMMUG00000028906 | Rho/Rac guanine nucleotide exchange factor 18 [Source:NCBI gene;Acc:707510]                    | 1.591862693 | 0.009162313 | 0.040968359 |
| ENSMMUG00000019563 | collapsin response mediator protein 1 [Source:VGNC Symbol;Acc:VGNC:71494]                      | 1.591888982 | 6.42E-16    | 5.37E-14    |
| ENSMMUG00000019667 | TAO kinase 1 [Source:VGNC Symbol;Acc:VGNC:81591]                                               | 1.593247508 | 0.001466141 | 0.009289378 |
| ENSMMUG00000022728 | zinc finger and SCAN domain containing 25 [Source:VGNC Symbol;Acc:VGNC:79344]                  | 1.594074179 | 3.92E-05    | 0.000439826 |
| ENSMMUG00000039009 |                                                                                                | 1.595951623 | 1.27E-06    | 2.14E-05    |
| ENSMMUG00000049494 |                                                                                                | 1.596287109 | 0.00043671  | 0.003369564 |
| ENSMMUG00000020185 | voltage dependent anion channel 3 [Source:VGNC Symbol;Acc:VGNC:84135]                          | 1.596721889 | 0.001273758 | 0.008252635 |
| ENSMMUG00000059778 |                                                                                                | 1.596822914 | 0.006526799 | 0.031309331 |
| ENSMMUG00000057283 |                                                                                                | 1.598569222 | 8.25E-05    | 0.000827786 |
| ENSMMUG00000010173 | presenilin 1 [Source:VGNC Symbol;Acc:VGNC:76435]                                               | 1.599830451 | 3.82E-08    | 8.89E-07    |
| ENSMMUG00000023045 | zinc finger B-box domain containing [Source:VGNC Symbol;Acc:VGNC:79592]                        | 1.601277093 | 0.003258261 | 0.017704856 |
| ENSMMUG00000013160 | DnaJ heat shock protein family (Hsp40) member C17 [Source:VGNC Symbol;Acc:VGNC:84335]          | 1.601870761 | 0.000607124 | 0.004445844 |
| ENSMMUG00000000958 | aldo-keto reductase family 1, member C2 [Source:NCBI gene;Acc:711360]                          | 1.603636491 | 7.41E-09    | 2.02E-07    |
| ENSMMUG00000004337 | zinc finger protein 790 [Source:VGNC Symbol;Acc:VGNC:79930]                                    | 1.606344269 | 0.003925983 | 0.020566634 |
| ENSMMUG00000003098 | peptidase, mitochondrial processing alpha subunit [Source:VGNC Symbol;Acc:VGNC:76062]          | 1.606585592 | 1.06E-14    | 7.19E-13    |
| ENSMMUG00000020597 | acyl-CoA synthetase short chain family member 1 [Source:VGNC Symbol;Acc:VGNC:69416]            | 1.607172199 | 8.14E-08    | 1.79E-06    |
| ENSMMUG00000023449 | mitofusin 2 [Source:VGNC Symbol;Acc:VGNC:74522]                                                | 1.611397474 | 0.0004676   | 0.003559187 |
| ENSMMUG00000065094 |                                                                                                | 1.611420629 | 0.004403511 | 0.022683587 |
| ENSMMUG00000023303 | ecotropic viral integration site 5 like [Source:NCBI gene;Acc:706628]                          | 1.613516006 | 1.34E-12    | 6.84E-11    |
| ENSMMUG00000051807 |                                                                                                | 1.615832856 | 3.41E-07    | 6.48E-06    |
| ENSMMUG00000039266 | Metazoan signal recognition particle RNA [Source:RFAM;Acc:RF00017]                             | 1.61640107  | 0.003361226 | 0.018150343 |
| ENSMMUG00000060626 | U6 spliceosomal RNA [Source:RFAM;Acc:RF00026]                                                  | 1.619025265 | 0.002219274 | 0.012995171 |
| ENSMMUG00000010363 | ribophorin II [Source:VGNC Symbol;Acc:VGNC:76925]                                              | 1.620107276 | 3.47E-05    | 0.000394214 |
| ENSMMUG00000046969 | Fc receptor like 3 [Source:NCBI gene;Acc:718801]                                               | 1.620389158 | 1.46E-11    | 6.43E-10    |
| ENSMMUG00000060760 |                                                                                                | 1.625465037 | 1.41E-07    | 2.93E-06    |
| ENSMMUG00000041376 | G antigen 10 [Source:NCBI gene;Acc:693330]                                                     | 1.626220926 | 1.83E-09    | 5.60E-08    |
| ENSMMUG00000008383 | major facilitator superfamily domain containing 10 [Source:NCBI gene;Acc:720098]               | 1.634019702 | 3.55E-08    | 8.31E-07    |
| ENSMMUG00000020679 | myozenin 3 [Source:VGNC Symbol;Acc:VGNC:74988]                                                 | 1.636054391 | 1.04E-08    | 2.77E-07    |
| ENSMMUG00000003591 | pleckstrin homology domain containing A2 [Source:VGNC Symbol;Acc:VGNC:76026]                   | 1.638481422 | 0.000111112 | 0.00106202  |
| ENSMMUG00000010678 | oxytocin/neurophysin I prepropeptide [Source:VGNC Symbol;Acc:VGNC:75730]                       | 1.640222327 | 0.00043565  | 0.003364878 |
| ENSMMUG00000000302 | WD repeat and HMG-box DNA binding protein 1 [Source:VGNC Symbol;Acc:VGNC:79376]                | 1.640293509 | 2.20E-13    | 1.23E-11    |
| ENSMMUG00000061342 |                                                                                                | 1.641862509 | 1.35E-10    | 5.13E-09    |
| ENSMMUG00000021661 | leucine rich repeat containing 56 [Source:VGNC Symbol;Acc:VGNC:74356]                          | 1.642118313 | 2.32E-06    | 3.65E-05    |
| ENSMMUG00000009884 | hydroxysteroid 17-beta dehydrogenase 1 [Source:VGNC Symbol;Acc:VGNC:73528]                     | 1.643675558 | 0.000165334 | 0.00149295  |
| ENSMMUG00000013944 | regulator of microtubule dynamics 2 [Source:VGNC Symbol;Acc:VGNC:76839]                        | 1.647224986 | 1.42E-10    | 5.30E-09    |
| ENSMMUG00000051329 |                                                                                                | 1.648114842 | 0.000592534 | 0.004367252 |
| ENSMMUG00000007422 | spermatogenesis associated 5 [Source:VGNC Symbol;Acc:VGNC:77952]                               | 1.648261699 | 8.94E-18    | 9.44E-16    |
| ENSMMUG00000064321 |                                                                                                | 1.64898469  | 1.27E-05    | 0.000162606 |
| ENSMMUG00000055914 |                                                                                                | 1.649943993 | 2.22E-06    | 3.52E-05    |
| ENSMMUG00000058437 |                                                                                                | 1.654829126 | 7.91E-08    | 1.75E-06    |
| ENSMMUG00000022613 | reversion inducing cysteine rich protein with kazal motifs [Source:VGNC Symbol;Acc:VGNC:76722] | 1.654888196 | 2.58E-23    | 6.19E-21    |
| ENSMMUG00000001753 | integrin subunit alpha 1 [Source:VGNC Symbol;Acc:VGNC:73772]                                   | 1.655138422 | 2.84E-10    | 1.03E-08    |
| ENSMMUG00000018478 | interferon regulatory factor 5 [Source:VGNC Symbol;Acc:VGNC:73763]                             | 1.656143239 | 5.21E-07    | 9.60E-06    |
| ENSMMUG00000058907 |                                                                                                | 1.657223299 | 0.008494823 | 0.038514611 |

|                     |                                                                                                  |             |             |             |
|---------------------|--------------------------------------------------------------------------------------------------|-------------|-------------|-------------|
| ENSMMUG00000016099  | hedgehog acyltransferase [Source:NCBI gene;Acc:712333]                                           | 1.657600762 | 0.002809675 | 0.015801738 |
| ENSMMUG00000050419  | ADAM metalloproteinase with thrombospondin type 1 motif 4 [Source:NCBI gene;Acc:719927]          | 1.658083791 | 3.63E-10    | 1.29E-08    |
| ENSMMUG00000049894  |                                                                                                  | 1.658146701 | 0.00257543  | 0.014721927 |
| ENSMMUG00000064532  | mucin 16, cell surface associated [Source:NCBI gene;Acc:106996460]                               | 1.659030214 | 5.64E-13    | 3.00E-11    |
| ENSMMUG00000010592  | adducin 2 [Source:VGNC Symbol;Acc:VGNC:69529]                                                    | 1.659058714 | 0.00937105  | 0.041706051 |
| ENSMMUG00000032180  | RLF zinc finger [Source:VGNC Symbol;Acc:VGNC:76699]                                              | 1.664669943 | 2.86E-05    | 0.00033111  |
| ENSMMUG00000056796  | NADH:ubiquinone oxidoreductase subunit A2 [Source:NCBI gene;Acc:697736]                          | 1.666293186 | 0.010279175 | 0.044834477 |
| ENSMMUG00000017627  | B-TFIID TATA-box binding protein associated factor 1 [Source:VGNC Symbol;Acc:VGNC:70336]         | 1.669264289 | 9.84E-18    | 1.02E-15    |
| ENSMMUG00000023636  | importin 7 [Source:NCBI gene;Acc:704213]                                                         | 1.669331846 | 1.12E-05    | 0.00014587  |
| ENSMMUG00000010313  | kinesin family member 3A [Source:VGNC Symbol;Acc:VGNC:74017]                                     | 1.669850266 | 8.29E-15    | 5.76E-13    |
| ENSMMUG00000024234  | U6 spliceosomal RNA [Source:RFAM;Acc:RF00026]                                                    | 1.674873396 | 0.008079388 | 0.037058374 |
| ENSMMUG00000009559  | minichromosome maintenance complex binding protein [Source:VGNC Symbol;Acc:VGNC:74583]           | 1.676886867 | 0.000108919 | 0.001045364 |
| ENSMMUG00000041101  | protein phosphatase 2 regulatory subunit B'beta [Source:NCBI gene;Acc:722026]                    | 1.679725307 | 4.09E-17    | 3.94E-15    |
| ENSMMUG00000056266  | Metazoan signal recognition particle RNA [Source:RFAM;Acc:RF00017]                               | 1.680644164 | 4.77E-05    | 0.000521789 |
| ENSMMUG00000008195  | TGFB induced factor homeobox 2 [Source:NCBI gene;Acc:100429616]                                  | 1.681257455 | 1.55E-14    | 1.01E-12    |
| ENSMMUG00000065247  | opioid receptor kappa 1 [Source:NCBI gene;Acc:710783]                                            | 1.682115724 | 2.15E-10    | 7.84E-09    |
| ENSMMUG00000008200  | Src like adaptor 2 [Source:VGNC Symbol;Acc:VGNC:77499]                                           | 1.68447962  | 2.62E-05    | 0.000307932 |
| ENSMMUG00000039943  | adenylate cyclase 9 [Source:NCBI gene;Acc:706789]                                                | 1.686862167 | 0.008655432 | 0.039119778 |
| ENSMMUG00000060399  | Metazoan signal recognition particle RNA [Source:RFAM;Acc:RF00017]                               | 1.687441547 | 0.0001531   | 0.00140101  |
| ENSMMUG00000059932  | Metazoan signal recognition particle RNA [Source:RFAM;Acc:RF00017]                               | 1.68803435  | 0.000817776 | 0.005717383 |
| ENSMMUG00000057038  |                                                                                                  | 1.690434692 | 0.000609747 | 0.004460025 |
| ENSMMUG00000002423  | DNA polymerase delta 2, accessory subunit [Source:VGNC Symbol;Acc:VGNC:76203]                    | 1.692865044 | 4.90E-12    | 2.32E-10    |
| ENSMMUG00000010308  | cyclin I family member 2 [Source:VGNC Symbol;Acc:VGNC:70923]                                     | 1.695932129 | 1.90E-12    | 9.65E-11    |
| ENSMMUG00000012797  | zinc finger protein 233 [Source:VGNC Symbol;Acc:VGNC:79903]                                      | 1.699788824 | 3.35E-09    | 9.98E-08    |
| ENSMMUG00000061474  |                                                                                                  | 1.703636808 | 0.001855756 | 0.011252472 |
| ENSMMUG00000048039  | apurinic/aprimidinic endodeoxyribonuclease 1 [Source:VGNC Symbol;Acc:VGNC:84305]                 | 1.706261699 | 0.000378891 | 0.003023673 |
| ENSMMUG00000050549  | lysyl oxidase like 2 [Source:NCBI gene;Acc:710151]                                               | 1.706464321 | 1.50E-09    | 4.71E-08    |
| ENSMMUG00000015686  | abhydrolase domain containing 16A [Source:VGNC Symbol;Acc:VGNC:69393]                            | 1.706601364 | 1.79E-10    | 6.57E-09    |
| ENSMMUG00000003976  | glycoprotein hormone subunit alpha 2 [Source:VGNC Symbol;Acc:VGNC:72961]                         | 1.707161678 | 2.99E-11    | 1.27E-09    |
| ENSMMUG00000010451  | inositol polyphosphate phosphatase like 1 [Source:VGNC Symbol;Acc:VGNC:73752]                    | 1.707906673 | 0.001265936 | 0.008221613 |
| ENSMMUG00000056945  |                                                                                                  | 1.711551949 | 2.78E-12    | 1.36E-10    |
| ENSMMUG00000060289  |                                                                                                  | 1.712781162 | 1.23E-18    | 1.50E-16    |
| ENSMMUG00000002384  | IGF like family receptor 1 [Source:VGNC Symbol;Acc:VGNC:73434]                                   | 1.713620128 | 3.78E-10    | 1.33E-08    |
| ENSMMUG000000020743 | centrin 2 [Source:NCBI gene;Acc:693376]                                                          | 1.714690884 | 0.011191036 | 0.047909894 |
| ENSMMUG00000016143  | sialophorin [Source:VGNC Symbol;Acc:VGNC:77861]                                                  | 1.715360313 | 1.19E-13    | 6.98E-12    |
| ENSMMUG00000055976  | CD99 antigen [Source:NCBI gene;Acc:106995376]                                                    | 1.720173158 | 1.01E-09    | 3.25E-08    |
| ENSMMUG00000020190  | valosin containing protein [Source:VGNC Symbol;Acc:VGNC:78762]                                   | 1.724423937 | 7.24E-06    | 9.99E-05    |
| ENSMMUG00000051343  |                                                                                                  | 1.724526676 | 0.01135951  | 0.048396397 |
| ENSMMUG00000059229  | CEA cell adhesion molecule 7 [Source:NCBI gene;Acc:705572]                                       | 1.72460545  | 1.77E-13    | 1.01E-11    |
| ENSMMUG00000061151  |                                                                                                  | 1.724793713 | 8.53E-05    | 0.000849085 |
| ENSMMUG00000003750  | PLAG1 like zinc finger 1 [Source:VGNC Symbol;Acc:VGNC:83444]                                     | 1.725189676 | 5.92E-05    | 0.000626749 |
| ENSMMUG00000002886  | Bardet-Biedl syndrome 9 [Source:NCBI gene;Acc:708412]                                            | 1.725649651 | 3.98E-08    | 9.21E-07    |
| ENSMMUG00000012801  | zinc finger protein 235 [Source:VGNC Symbol;Acc:VGNC:78825]                                      | 1.728147854 | 4.33E-19    | 5.56E-17    |
| ENSMMUG00000000706  | filamin B [Source:VGNC Symbol;Acc:VGNC:72672]                                                    | 1.732538855 | 9.37E-13    | 4.86E-11    |
| ENSMMUG00000001472  | TIA1 cytotoxic granule associated RNA binding protein like 1 [Source:VGNC Symbol;Acc:VGNC:78354] | 1.734844423 | 4.58E-10    | 1.58E-08    |
| ENSMMUG00000008387  | dipeptidyl peptidase 4 [Source:VGNC Symbol;Acc:VGNC:71979]                                       | 1.734955295 | 3.27E-06    | 4.90E-05    |
| ENSMMUG00000056755  |                                                                                                  | 1.736014429 | 0.010673661 | 0.046136383 |
| ENSMMUG00000013967  | TOX high mobility group box family member 3 [Source:VGNC Symbol;Acc:VGNC:78612]                  | 1.737037836 | 0.000527329 | 0.003937067 |
| ENSMMUG00000011798  | eukaryotic translation initiation factor 3 subunit C [Source:NCBI gene;Acc:705696]               | 1.737536365 | 1.53E-18    | 1.82E-16    |
| ENSMMUG00000056158  |                                                                                                  | 1.739201855 | 3.64E-06    | 5.39E-05    |
| ENSMMUG00000055322  | EPH receptor A1 [Source:NCBI gene;Acc:706295]                                                    | 1.743105686 | 4.81E-11    | 1.96E-09    |

|                     |                                                                                          |             |             |             |
|---------------------|------------------------------------------------------------------------------------------|-------------|-------------|-------------|
| ENSMMUG00000015865  | arginase 2 [Source:VGNC Symbol;Acc:VGNC:70005]                                           | 1.744012748 | 3.55E-07    | 6.73E-06    |
| ENSMMUG00000018034  | suppression of tumorigenicity 14 [Source:VGNC Symbol;Acc:VGNC:77897]                     | 1.746913082 | 8.17E-12    | 3.77E-10    |
| ENSMMUG00000003133  | interleukin 4 [Source:VGNC Symbol;Acc:VGNC:73729]                                        | 1.750403266 | 2.79E-05    | 0.000323666 |
| ENSMMUG000000049551 |                                                                                          | 1.752355245 | 5.58E-05    | 0.000597716 |
| ENSMMUG00000030279  | A-kinase anchoring protein 10 [Source:VGNC Symbol;Acc:VGNC:69764]                        | 1.75381635  | 1.59E-06    | 2.61E-05    |
| ENSMMUG00000065054  | G protein subunit gamma 7 [Source:NCBI gene;Acc:711335]                                  | 1.754219103 | 1.04E-15    | 8.31E-14    |
| ENSMMUG00000009684  | kinesin family member 22 [Source:VGNC Symbol;Acc:VGNC:74033]                             | 1.756138942 | 1.93E-09    | 5.87E-08    |
| ENSMMUG00000040741  | thioredoxin related transmembrane protein 2 [Source:NCBI gene;Acc:100169970]             | 1.756299604 | 2.29E-10    | 8.34E-09    |
| ENSMMUG00000010028  | leucine zipper tumor suppressor family member 3 [Source:VGNC Symbol;Acc:VGNC:74403]      | 1.758063912 | 6.91E-12    | 3.20E-10    |
| ENSMMUG000000059188 |                                                                                          | 1.75915498  | 2.92E-05    | 0.000337077 |
| ENSMMUG00000005504  | nucleoporin 37 [Source:VGNC Symbol;Acc:VGNC:75491]                                       | 1.760138189 | 0.000777062 | 0.005474023 |
| ENSMMUG00000017906  | DnaJ heat shock protein family (Hsp40) member B1 [Source:NCBI gene;Acc:718890]           | 1.760326679 | 0.000469957 | 0.003570352 |
| ENSMMUG00000012065  | tubulin tyrosine ligase like 5 [Source:NCBI gene;Acc:703116]                             | 1.763043254 | 3.62E-10    | 1.28E-08    |
| ENSMMUG00000014045  | protein tyrosine phosphatase non-receptor type 23 [Source:VGNC Symbol;Acc:VGNC:76477]    | 1.763617752 | 4.62E-25    | 1.36E-22    |
| ENSMMUG00000003598  | tripartite motif containing 7 [Source:VGNC Symbol;Acc:VGNC:79022]                        | 1.766672541 | 4.80E-10    | 1.64E-08    |
| ENSMMUG00000008384  | solute carrier family 4 member 10 [Source:VGNC Symbol;Acc:VGNC:77695]                    | 1.768533971 | 9.73E-09    | 2.60E-07    |
| ENSMMUG00000018492  | TARBP2 subunit of RISC loading complex [Source:VGNC Symbol;Acc:VGNC:78099]               | 1.769547586 | 5.80E-09    | 1.64E-07    |
| ENSMMUG00000015329  | MX dynamin like GTPase 1 [Source:VGNC Symbol;Acc:VGNC:75086]                             | 1.774320205 | 0.000103835 | 0.001003248 |
| ENSMMUG00000010309  | septin 8 [Source:VGNC Symbol;Acc:VGNC:77248]                                             | 1.775347246 | 2.27E-05    | 0.000271844 |
| ENSMMUG00000027986  | U6 spliceosomal RNA [Source:RFAM;Acc:RF00026]                                            | 1.776780835 | 6.83E-05    | 0.000709451 |
| ENSMMUG00000010881  | cytochrome P450, family 26, subfamily A, polypeptide 1 [Source:NCBI gene;Acc:699519]     | 1.780788553 | 0.007055055 | 0.033325954 |
| ENSMMUG00000002426  | myosin light chain 7 [Source:VGNC Symbol;Acc:VGNC:75002]                                 | 1.784100302 | 1.66E-15    | 1.29E-13    |
| ENSMMUG00000007729  | ilvB acetolactate synthase like [Source:VGNC Symbol;Acc:VGNC:73739]                      | 1.784856067 | 2.76E-07    | 5.37E-06    |
| ENSMMUG00000002949  | motile sperm domain containing 3 [Source:VGNC Symbol;Acc:VGNC:74823]                     | 1.792377339 | 2.43E-07    | 4.77E-06    |
| ENSMMUG00000017971  | nucleus accumbens associated 1 [Source:VGNC Symbol;Acc:VGNC:74996]                       | 1.792538965 | 0.002701337 | 0.015313474 |
| ENSMMUG000000050505 | small integral membrane protein 4 [Source:NCBI gene;Acc:696553]                          | 1.793256383 | 1.41E-10    | 5.28E-09    |
| ENSMMUG00000021972  | diacylglycerol kinase gamma [Source:VGNC Symbol;Acc:VGNC:71785]                          | 1.797213831 | 2.95E-16    | 2.61E-14    |
| ENSMMUG00000023477  |                                                                                          | 1.803431366 | 8.04E-25    | 2.32E-22    |
| ENSMMUG000000052572 |                                                                                          | 1.80659424  | 0.001926316 | 0.011566808 |
| ENSMMUG00000015555  | ST3 beta-galactoside alpha-2,3-sialyltransferase 3 [Source:VGNC Symbol;Acc:VGNC:77828]   | 1.808782486 | 5.62E-10    | 1.89E-08    |
| ENSMMUG00000002377  | Rab interacting lysosomal protein [Source:VGNC Symbol;Acc:VGNC:76866]                    | 1.814835881 | 6.83E-05    | 0.000709451 |
| ENSMMUG00000063351  | Metazoan signal recognition particle RNA [Source:RFAM;Acc:RF00017]                       | 1.815947668 | 0.004539664 | 0.023228187 |
| ENSMMUG00000006738  | L3MBTL histone methyl-lysine binding protein 1 [Source:NCBI gene;Acc:695694]             | 1.817461582 | 5.56E-12    | 2.62E-10    |
| ENSMMUG000000052474 |                                                                                          | 1.818007039 | 9.54E-08    | 2.07E-06    |
| ENSMMUG00000015416  | bromodomain and PHD finger containing 3 [Source:VGNC Symbol;Acc:VGNC:70309]              | 1.818256947 | 8.80E-09    | 2.38E-07    |
| ENSMMUG00000005488  | coronin 1B [Source:VGNC Symbol;Acc:VGNC:71320]                                           | 1.819415807 | 8.52E-11    | 3.33E-09    |
| ENSMMUG00000061833  | transmembrane protein 251 [Source:NCBI gene;Acc:708131]                                  | 1.82357765  | 3.23E-06    | 4.86E-05    |
| ENSMMUG00000004512  | Fc fragment of IgE receptor Ig [Source:VGNC Symbol;Acc:VGNC:72629]                       | 1.828408032 | 3.67E-05    | 0.000414328 |
| ENSMMUG00000022513  | glutamate metabotropic receptor 3 [Source:VGNC Symbol;Acc:VGNC:73287]                    | 1.829230529 | 1.17E-07    | 2.48E-06    |
| ENSMMUG00000014699  |                                                                                          | 1.831857401 | 1.70E-25    | 5.65E-23    |
| ENSMMUG000000059671 |                                                                                          | 1.835013963 | 2.44E-16    | 2.20E-14    |
| ENSMMUG00000012526  | glycosyltransferase 8 domain containing 1 [Source:VGNC Symbol;Acc:VGNC:73001]            | 1.835032651 | 6.29E-21    | 1.01E-18    |
| ENSMMUG000000056840 |                                                                                          | 1.835146388 | 3.12E-12    | 1.52E-10    |
| ENSMMUG00000029420  |                                                                                          | 1.835497969 | 0.000154877 | 0.001411474 |
| ENSMMUG00000023797  | post-GPI attachment to proteins GalNAc transferase 4 [Source:VGNC Symbol;Acc:VGNC:79688] | 1.836495998 | 0.000963204 | 0.006560914 |
| ENSMMUG00000031163  | membrane anchored junction protein [Source:VGNC Symbol;Acc:VGNC:74375]                   | 1.837546118 | 9.12E-16    | 7.36E-14    |
| ENSMMUG00000018932  | adhesion G protein-coupled receptor E2 [Source:NCBI gene;Acc:654420]                     | 1.838187847 | 2.47E-22    | 4.64E-20    |
| ENSMMUG000000061923 |                                                                                          | 1.839900463 | 0.001211374 | 0.007918782 |
| ENSMMUG00000005303  | apolipoprotein M [Source:VGNC Symbol;Acc:VGNC:69825]                                     | 1.844495383 | 0.011621382 | 0.0492164   |
| ENSMMUG00000016273  | maltase-glucoamylase [Source:VGNC Symbol;Acc:VGNC:74713]                                 | 1.84529276  | 1.05E-08    | 2.78E-07    |
| ENSMMUG00000039292  |                                                                                          | 1.845812868 | 2.48E-08    | 6.02E-07    |



|                    |                                                                                     |             |             |             |
|--------------------|-------------------------------------------------------------------------------------|-------------|-------------|-------------|
| ENSMMUG0000002411  | drebrin like [Source:NCBI gene;Acc:720621]                                          | 1.846831564 | 1.93E-15    | 1.47E-13    |
| ENSMMUG00000014874 | GTP binding protein 8 (putative) [Source:VGNC Symbol;Acc:VGNC:84180]                | 1.848061953 | 1.67E-10    | 6.16E-09    |
| ENSMMUG00000014876 | nucleolus and neural progenitor protein [Source:VGNC Symbol;Acc:VGNC:75244]         | 1.849521754 | 2.79E-09    | 8.38E-08    |
| ENSMMUG00000045609 | CCR4-NOT transcription complex subunit 6 like [Source:NCBI gene;Acc:697981]         | 1.849857344 | 3.29E-09    | 9.81E-08    |
| ENSMMUG00000009622 | glypican 3 [Source:VGNC Symbol;Acc:VGNC:73117]                                      | 1.853069451 | 8.61E-06    | 0.000115774 |
| ENSMMUG00000054225 | taste receptor type 2 member 43 [Source:NCBI gene;Acc:694161]                       | 1.855065974 | 0.002336689 | 0.013560318 |
| ENSMMUG00000061208 | MAP3K7 C-terminal like [Source:NCBI gene;Acc:713717]                                | 1.855716892 | 1.27E-18    | 1.54E-16    |
| ENSMMUG00000001387 | p21 (RAC1) activated kinase 1 [Source:NCBI gene;Acc:698585]                         | 1.855893607 | 8.21E-13    | 4.28E-11    |
| ENSMMUG00000004103 | collagen type XI alpha 1 chain [Source:VGNC Symbol;Acc:VGNC:71289]                  | 1.85826268  | 1.96E-25    | 6.37E-23    |
| ENSMMUG00000063759 | transmembrane protein 185B [Source:NCBI gene;Acc:695744]                            | 1.860488544 | 3.09E-14    | 1.96E-12    |
| ENSMMUG00000018345 | phosphatidylethanolamine binding protein 4 [Source:VGNC Symbol;Acc:VGNC:82204]      | 1.862659991 | 1.84E-11    | 7.97E-10    |
| ENSMMUG00000013251 | xin actin binding repeat containing 2 [Source:VGNC Symbol;Acc:VGNC:78953]           | 1.862833085 | 0.001942235 | 0.011646228 |
| ENSMMUG00000019246 | regulator of calcineurin 2 [Source:VGNC Symbol;Acc:VGNC:82092]                      | 1.863671956 | 0.000316665 | 0.002603959 |
| ENSMMUG00000017370 | signal peptidase complex subunit 1 [Source:VGNC Symbol;Acc:VGNC:84072]              | 1.865976405 | 2.80E-06    | 4.28E-05    |
| ENSMMUG00000059302 | Metazoan signal recognition particle RNA [Source:RFAM;Acc:RF00017]                  | 1.867265194 | 0.000134489 | 0.001244745 |
| ENSMMUG00000058592 |                                                                                     | 1.86735647  | 3.97E-08    | 9.21E-07    |
| ENSMMUG00000000293 | catenin alpha 2 [Source:VGNC Symbol;Acc:VGNC:71543]                                 | 1.870147866 | 7.74E-11    | 3.06E-09    |
| ENSMMUG00000050465 | ZFP42 zinc finger protein [Source:NCBI gene;Acc:707621]                             | 1.872084477 | 3.42E-06    | 5.11E-05    |
| ENSMMUG00000012635 | zyxin [Source:VGNC Symbol;Acc:VGNC:78917]                                           | 1.873194515 | 2.81E-13    | 1.55E-11    |
| ENSMMUG00000012356 | serpin family A member 9 [Source:VGNC Symbol;Acc:VGNC:77241]                        | 1.873607267 | 2.70E-08    | 6.49E-07    |
| ENSMMUG00000021664 | lamin tail domain containing 2 [Source:VGNC Symbol;Acc:VGNC:74380]                  | 1.876353051 | 3.54E-23    | 8.21E-21    |
| ENSMMUG00000060517 |                                                                                     | 1.877088202 | 3.37E-08    | 7.97E-07    |
| ENSMMUG00000020020 | Rho GTPase activating protein 23 [Source:NCBI gene;Acc:693996]                      | 1.877566714 | 2.96E-07    | 5.74E-06    |
| ENSMMUG00000055710 | taste 2 receptor member 38 [Source:NCBI gene;Acc:695549]                            | 1.88007574  | 0.001496463 | 0.009434601 |
| ENSMMUG00000002430 | YKT6 v-SNARE homolog [Source:VGNC Symbol;Acc:VGNC:81796]                            | 1.883915088 | 0.000470552 | 0.003572784 |
| ENSMMUG00000014349 | integrin subunit alpha X [Source:NCBI gene;Acc:100427850]                           | 1.885529574 | 1.59E-05    | 0.000197445 |
| ENSMMUG00000023370 | DDB1 and CUL4 associated factor 17 [Source:VGNC Symbol;Acc:VGNC:71709]              | 1.886228761 | 3.70E-11    | 1.55E-09    |
| ENSMMUG00000003303 | Tu translation elongation factor, mitochondrial [Source:VGNC Symbol;Acc:VGNC:78674] | 1.886676002 | 1.51E-18    | 1.81E-16    |
| ENSMMUG00000063639 |                                                                                     | 1.886968707 | 6.66E-10    | 2.21E-08    |
| ENSMMUG00000048375 | Metazoan signal recognition particle RNA [Source:RFAM;Acc:RF00017]                  | 1.888173763 | 5.99E-15    | 4.20E-13    |
| ENSMMUG00000058557 |                                                                                     | 1.888349031 | 1.19E-05    | 0.000152954 |
| ENSMMUG00000018144 | C2 calcium-dependent domain-containing protein 6 [Source:NCBI gene;Acc:702140]      | 1.88947218  | 9.94E-20    | 1.37E-17    |
| ENSMMUG00000010521 | ADP ribosylation factor like GTPase 5A [Source:VGNC Symbol;Acc:VGNC:70017]          | 1.893715723 | 0.009155724 | 0.040953005 |
| ENSMMUG00000008854 | natural cytotoxicity triggering receptor 3 [Source:VGNC Symbol;Acc:VGNC:74990]      | 1.893925374 | 5.79E-09    | 1.64E-07    |
| ENSMMUG00000001271 | cleavage and polyadenylation specific factor 4 like [Source:NCBI gene;Acc:698279]   | 1.89411112  | 0.003048295 | 0.016846114 |
| ENSMMUG00000055038 |                                                                                     | 1.897724319 | 0.004516354 | 0.023127157 |
| ENSMMUG00000060273 | mitochondrial ribosomal protein L32 [Source:NCBI gene;Acc:701820]                   | 1.897788203 | 6.33E-07    | 1.15E-05    |
| ENSMMUG00000017701 | myosin VIIA and Rab interacting protein [Source:VGNC Symbol;Acc:VGNC:74992]         | 1.903331507 | 5.36E-07    | 9.83E-06    |
| ENSMMUG00000002376 | scavenger receptor class F member 1 [Source:VGNC Symbol;Acc:VGNC:77027]             | 1.905360622 | 7.03E-09    | 1.93E-07    |
| ENSMMUG00000005482 | lysine methyltransferase 2A [Source:NCBI gene;Acc:705511]                           | 1.905444515 | 3.66E-05    | 0.000412884 |
| ENSMMUG00000046774 | RAS like proto-oncogene B [Source:NCBI gene;Acc:695852]                             | 1.911089086 | 2.30E-19    | 3.01E-17    |
| ENSMMUG00000003539 | glutamine rich 2 [Source:VGNC Symbol;Acc:VGNC:76534]                                | 1.911836259 | 1.17E-05    | 0.000150302 |
| ENSMMUG00000004774 | maestro heat like repeat family member 2B [Source:VGNC Symbol;Acc:VGNC:74837]       | 1.913531207 | 0.000751724 | 0.005321535 |
| ENSMMUG00000062454 |                                                                                     | 1.915266235 | 4.97E-14    | 3.06E-12    |
| ENSMMUG00000056511 |                                                                                     | 1.915858008 | 8.82E-05    | 0.00087331  |
| ENSMMUG00000012228 | ubiquitin conjugating enzyme E2 V1 [Source:NCBI gene;Acc:100425552]                 | 1.926939514 | 2.98E-15    | 2.19E-13    |
| ENSMMUG00000013270 | RNA binding protein, mRNA processing factor 2 [Source:VGNC Symbol;Acc:VGNC:76511]   | 1.930311941 | 0.005156897 | 0.025796413 |
| ENSMMUG00000011332 | Rho GTPase activating protein 35 [Source:VGNC Symbol;Acc:VGNC:69942]                | 1.931694453 | 1.28E-05    | 0.000162875 |
| ENSMMUG00000055906 | angiotensin II receptor type 2 [Source:NCBI gene;Acc:709513]                        | 1.934202429 | 0.001454739 | 0.009230657 |
| ENSMMUG00000064557 |                                                                                     | 1.934944765 | 1.00E-17    | 1.03E-15    |
| ENSMMUG00000011427 | syntaxin 10 [Source:VGNC Symbol;Acc:VGNC:78040]                                     | 1.936461117 | 1.98E-23    | 4.94E-21    |

|                    |                                                                                                                 |             |             |             |
|--------------------|-----------------------------------------------------------------------------------------------------------------|-------------|-------------|-------------|
| ENSMMUG00000031785 |                                                                                                                 | 1.936802339 | 2.50E-14    | 1.59E-12    |
| ENSMMUG00000059182 |                                                                                                                 | 1.937603835 | 3.68E-10    | 1.30E-08    |
| ENSMMUG00000020462 | CD300e molecule [Source:NCBI gene;Acc:114673189]                                                                | 1.93950346  | 3.55E-06    | 5.28E-05    |
| ENSMMUG00000005208 | RNA polymerase III subunit B [Source:VGNC Symbol;Acc:VGNC:76143]                                                | 1.93986819  | 2.13E-06    | 3.39E-05    |
| ENSMMUG00000062522 |                                                                                                                 | 1.944673713 | 1.44E-08    | 3.71E-07    |
| ENSMMUG00000002715 | solute carrier family 9 member A8 [Source:VGNC Symbol;Acc:VGNC:77749]                                           | 1.945555842 | 5.46E-15    | 3.85E-13    |
| ENSMMUG00000005070 | ecotropic viral integration site 5 [Source:NCBI gene;Acc:706592]                                                | 1.946105641 | 1.64E-10    | 6.07E-09    |
| ENSMMUG00000020558 | serine/threonine kinase 38 [Source:VGNC Symbol;Acc:VGNC:78155]                                                  | 1.951127652 | 3.99E-05    | 0.000446339 |
| ENSMMUG00000056605 | Metazoan signal recognition particle RNA [Source:RFAM;Acc:RF00017]                                              | 1.951519884 | 0.004066015 | 0.021163501 |
| ENSMMUG00000007201 | PDS5 cohesin associated factor B [Source:VGNC Symbol;Acc:VGNC:75835]                                            | 1.95254265  | 1.80E-16    | 1.65E-14    |
| ENSMMUG00000056971 | Metazoan signal recognition particle RNA [Source:RFAM;Acc:RF00017]                                              | 1.955021539 | 4.54E-06    | 6.55E-05    |
| ENSMMUG00000039101 | pelota mRNA surveillance and ribosome rescue factor [Source:VGNC Symbol;Acc:VGNC:84478]                         | 1.956688302 | 1.45E-15    | 1.14E-13    |
| ENSMMUG00000014273 | cation channel sperm associated auxiliary subunit gamma [Source:VGNC Symbol;Acc:VGNC:70626]                     | 1.956804437 | 0.000738549 | 0.005248308 |
| ENSMMUG00000005150 | CD163 molecule [Source:VGNC Symbol;Acc:VGNC:70752]                                                              | 1.958977068 | 0.009037469 | 0.040549859 |
| ENSMMUG00000014715 | fragile site, folic acid type, rare, fra(10)(q23.3) or fra(10)(q24.2) candidate 1 [Source:NCBI gene;Acc:700389] | 1.960750368 | 3.52E-05    | 0.000399162 |
| ENSMMUG00000062037 | stannin [Source:NCBI gene;Acc:711909]                                                                           | 1.961475686 | 6.86E-07    | 1.23E-05    |
| ENSMMUG00000002950 | transferrin receptor 2 [Source:VGNC Symbol;Acc:VGNC:81770]                                                      | 1.961989771 | 1.27E-10    | 4.85E-09    |
| ENSMMUG00000049265 | Metazoan signal recognition particle RNA [Source:RFAM;Acc:RF00017]                                              | 1.962551798 | 0.000888025 | 0.006116248 |
| ENSMMUG00000061098 |                                                                                                                 | 1.963190871 | 2.43E-30    | 1.17E-27    |
| ENSMMUG00000020726 | dihydropyrimidine dehydrogenase [Source:VGNC Symbol;Acc:VGNC:71982]                                             | 1.964933137 | 1.43E-22    | 2.86E-20    |
| ENSMMUG00000000917 | aldo-keto reductase family 1 member B [Source:NCBI gene;Acc:705957]                                             | 1.965838242 | 0.000737197 | 0.005241569 |
| ENSMMUG00000016323 | Rho guanine nucleotide exchange factor 39 [Source:VGNC Symbol;Acc:VGNC:69912]                                   | 1.965843732 | 1.19E-15    | 9.45E-14    |
| ENSMMUG00000011627 | interleukin 4 induced 1 [Source:VGNC Symbol;Acc:VGNC:73625]                                                     | 1.966958214 | 1.02E-06    | 1.77E-05    |
| ENSMMUG00000049735 | allograft inflammatory factor 1 [Source:NCBI gene;Acc:574115]                                                   | 1.967790458 | 3.72E-12    | 1.77E-10    |
| ENSMMUG00000000396 | intraflagellar transport 52 [Source:NCBI gene;Acc:694933]                                                       | 1.967918583 | 2.88E-06    | 4.40E-05    |
| ENSMMUG00000031391 | RNA binding motif protein 38 [Source:VGNC Symbol;Acc:VGNC:76484]                                                | 1.970500068 | 0.000512521 | 0.003839762 |
| ENSMMUG00000013099 | pappalysin 1 [Source:VGNC Symbol;Acc:VGNC:75756]                                                                | 1.970742825 | 3.08E-06    | 4.66E-05    |
| ENSMMUG00000001409 | coiled-coil domain containing 187 [Source:NCBI gene;Acc:710749]                                                 | 1.970774299 | 5.88E-16    | 4.95E-14    |
| ENSMMUG00000054161 | Metazoan signal recognition particle RNA [Source:RFAM;Acc:RF00017]                                              | 1.97185619  | 0.010948463 | 0.047042137 |
| ENSMMUG00000009437 | zinc finger protein 619 [Source:VGNC Symbol;Acc:VGNC:82562]                                                     | 1.976758878 | 0.009045733 | 0.04055889  |
| ENSMMUG00000008070 | YEATS domain containing 2 [Source:VGNC Symbol;Acc:VGNC:79502]                                                   | 1.977386989 | 1.90E-20    | 2.84E-18    |
| ENSMMUG00000006929 | ST3 beta-galactoside alpha-2,3-sialyltransferase 4 [Source:VGNC Symbol;Acc:VGNC:77827]                          | 1.981340182 | 7.99E-16    | 6.56E-14    |
| ENSMMUG00000052047 |                                                                                                                 | 1.98260913  | 5.12E-15    | 3.63E-13    |
| ENSMMUG00000009040 | cornulin [Source:VGNC Symbol;Acc:VGNC:71397]                                                                    | 1.98519826  | 0.002548929 | 0.01458329  |
| ENSMMUG00000005294 | casein kinase 2 beta [Source:NCBI gene;Acc:715807]                                                              | 1.986443989 | 0.000155005 | 0.001411474 |
| ENSMMUG00000023263 | mediator complex subunit 15 [Source:VGNC Symbol;Acc:VGNC:74511]                                                 | 1.989073879 | 1.23E-11    | 5.48E-10    |
| ENSMMUG00000007423 | transcription factor Dp-1 [Source:NCBI gene;Acc:715345]                                                         | 1.98922222  | 6.63E-12    | 3.08E-10    |
| ENSMMUG00000007206 | chromosome 3 C7orf50 homolog [Source:VGNC Symbol;Acc:VGNC:70609]                                                | 1.990486022 | 0.009307674 | 0.041532455 |
| ENSMMUG00000013176 | NAD(P) dependent steroid dehydrogenase-like [Source:NCBI gene;Acc:693333]                                       | 1.991741484 | 0.00027232  | 0.002296049 |
| ENSMMUG00000019764 | dynactin subunit 4 [Source:VGNC Symbol;Acc:VGNC:71625]                                                          | 1.994268196 | 1.07E-14    | 7.22E-13    |
| ENSMMUG00000012944 | vascular endothelial growth factor B [Source:VGNC Symbol;Acc:VGNC:78765]                                        | 1.995645094 | 1.15E-18    | 1.42E-16    |
| ENSMMUG00000058013 | melanoma-associated antigen 3 [Source:NCBI gene;Acc:706103]                                                     | 1.997325297 | 7.94E-11    | 3.12E-09    |
| ENSMMUG00000017256 | calcium voltage-gated channel subunit alpha1 G [Source:VGNC Symbol;Acc:VGNC:70504]                              | 1.999189391 | 8.74E-19    | 1.09E-16    |
| ENSMMUG00000002563 | zinc finger DHHC-type palmitoyltransferase 5 [Source:VGNC Symbol;Acc:VGNC:79145]                                | 2.001865917 | 0.000263071 | 0.00223112  |
| ENSMMUG00000022313 | activating transcription factor 7 [Source:NCBI gene;Acc:700403]                                                 | 2.001970776 | 9.11E-10    | 2.97E-08    |
| ENSMMUG00000032429 | forkhead box O4 [Source:VGNC Symbol;Acc:VGNC:72712]                                                             | 2.005169604 | 1.41E-13    | 8.15E-12    |
| ENSMMUG00000005293 | G-patch domain and ankyrin repeats 1 [Source:VGNC Symbol;Acc:VGNC:81073]                                        | 2.005837279 | 0.000404326 | 0.003175868 |
| ENSMMUG00000061079 | golgin subfamily A member 6C [Source:NCBI gene;Acc:715898]                                                      | 2.008286819 | 1.56E-20    | 2.36E-18    |
| ENSMMUG00000013713 | beta 3-glucosyltransferase [Source:NCBI gene;Acc:713498]                                                        | 2.008407136 | 4.20E-05    | 0.000467339 |
| ENSMMUG00000019314 | vav guanine nucleotide exchange factor 1 [Source:VGNC Symbol;Acc:VGNC:78757]                                    | 2.011444622 | 1.52E-06    | 2.51E-05    |
| ENSMMUG00000009201 | abhydrolase domain containing 12 [Source:VGNC Symbol;Acc:VGNC:69411]                                            | 2.012319763 | 2.12E-15    | 1.60E-13    |



|                    |                                                                                                                  |             |             |             |
|--------------------|------------------------------------------------------------------------------------------------------------------|-------------|-------------|-------------|
| ENSMMUG00000045513 |                                                                                                                  | 2.012896495 | 2.88E-06    | 4.39E-05    |
| ENSMMUG00000011411 | sperm acrosome associated 3 [Source:VGNC Symbol;Acc:VGNC:77930]                                                  | 2.020916836 | 1.57E-08    | 4.01E-07    |
| ENSMMUG00000044429 | glycophorin A (MNS blood group) [Source:NCBI gene;Acc:574101]                                                    | 2.023850113 | 1.94E-14    | 1.25E-12    |
| ENSMMUG00000009441 | abhydrolase domain containing 4 [Source:VGNC Symbol;Acc:VGNC:84296]                                              | 2.026503692 | 0.000357802 | 0.002887336 |
| ENSMMUG00000053324 | lymphocyte antigen 6 complex locus protein G6d [Source:NCBI gene;Acc:715304]                                     | 2.028780983 | 5.15E-10    | 1.74E-08    |
| ENSMMUG00000042618 | involucrin [Source:NCBI gene;Acc:713728]                                                                         | 2.030219706 | 4.17E-05    | 0.000464143 |
| ENSMMUG00000020799 | BH3 interacting domain death agonist [Source:VGNC Symbol;Acc:VGNC:70250]                                         | 2.030691023 | 1.36E-10    | 5.14E-09    |
| ENSMMUG00000046417 | chromobox 2 [Source:NCBI gene;Acc:717462]                                                                        | 2.031784583 | 5.77E-07    | 1.05E-05    |
| ENSMMUG00000000649 | UBX domain protein 11 [Source:VGNC Symbol;Acc:VGNC:79859]                                                        | 2.033815792 | 3.16E-05    | 0.000361118 |
| ENSMMUG00000000951 | integrin subunit beta 2 [Source:VGNC Symbol;Acc:VGNC:73786]                                                      | 2.040269438 | 1.70E-15    | 1.30E-13    |
| ENSMMUG00000010007 | CD14 molecule [Source:VGNC Symbol;Acc:VGNC:70751]                                                                | 2.040712441 | 8.49E-07    | 1.48E-05    |
| ENSMMUG00000016438 | protein kinase D3 [Source:VGNC Symbol;Acc:VGNC:76415]                                                            | 2.040869085 | 9.72E-07    | 1.69E-05    |
| ENSMMUG00000052227 |                                                                                                                  | 2.042194903 | 0.000216386 | 0.001889516 |
| ENSMMUG00000009973 | proline rich coiled-coil 2B [Source:VGNC Symbol;Acc:VGNC:76327]                                                  | 2.043709213 | 0.003453403 | 0.018524742 |
| ENSMMUG00000058928 | Metazoan signal recognition particle RNA [Source:RFAM;Acc:RF00017]                                               | 2.044471437 | 8.91E-10    | 2.91E-08    |
| ENSMMUG00000049542 |                                                                                                                  | 2.046563938 | 1.40E-05    | 0.000175957 |
| ENSMMUG00000016111 | chromosome 1 C1orf50 homolog [Source:VGNC Symbol;Acc:VGNC:70432]                                                 | 2.046641463 | 0.009475082 | 0.042076886 |
| ENSMMUG00000016327 | coiled-coil domain containing 107 [Source:VGNC Symbol;Acc:VGNC:70656]                                            | 2.049501177 | 3.64E-16    | 3.17E-14    |
| ENSMMUG00000041519 | zinc finger protein 354A [Source:VGNC Symbol;Acc:VGNC:84517]                                                     | 2.050062342 | 0.007644382 | 0.035515037 |
| ENSMMUG00000008828 | BEN domain containing 5 [Source:NCBI gene;Acc:711150]                                                            | 2.052380628 | 3.91E-14    | 2.44E-12    |
| ENSMMUG00000012941 | nudix hydrolase 22 [Source:VGNC Symbol;Acc:VGNC:75475]                                                           | 2.054520933 | 9.33E-22    | 1.66E-19    |
| ENSMMUG00000003437 | signal transducer and activator of transcription 5B [Source:NCBI gene;Acc:709760]                                | 2.055040957 | 1.03E-20    | 1.62E-18    |
| ENSMMUG00000045654 | tumor necrosis factor [Source:VGNC Symbol;Acc:VGNC:83501]                                                        | 2.058050831 | 0.000446698 | 0.003425853 |
| ENSMMUG00000028907 | insulin receptor [Source:NCBI gene;Acc:706009]                                                                   | 2.059614072 | 4.78E-05    | 0.00052192  |
| ENSMMUG00000016417 | chromobox 8 [Source:NCBI gene;Acc:717514]                                                                        | 2.059676023 | 9.77E-24    | 2.49E-21    |
| ENSMMUG00000009988 | transmembrane protein 59 like [Source:VGNC Symbol;Acc:VGNC:78919]                                                | 2.061181297 | 6.67E-20    | 9.31E-18    |
| ENSMMUG00000005432 | clathrin heavy chain like 1 [Source:VGNC Symbol;Acc:VGNC:71268]                                                  | 2.062637604 | 2.84E-13    | 1.56E-11    |
| ENSMMUG00000012697 | AT-rich interaction domain 1A [Source:VGNC Symbol;Acc:VGNC:69822]                                                | 2.063558792 | 1.08E-09    | 3.45E-08    |
| ENSMMUG00000011513 | versican [Source:VGNC Symbol;Acc:VGNC:79445]                                                                     | 2.064721546 | 1.43E-11    | 6.33E-10    |
| ENSMMUG00000023192 | choline kinase alpha [Source:VGNC Symbol;Acc:VGNC:71039]                                                         | 2.06487059  | 6.42E-07    | 1.16E-05    |
| ENSMMUG00000006568 | basic leucine zipper ATF-like transcription factor 2 [Source:VGNC Symbol;Acc:VGNC:70127]                         | 2.068186778 | 9.09E-12    | 4.18E-10    |
| ENSMMUG00000043675 | Cbp/p300 interacting transactivator with Glu/Asp rich carboxy-terminal domain 4 [Source:NCBI gene;Acc:114672840] | 2.069052721 | 4.93E-14    | 3.04E-12    |
| ENSMMUG00000023479 | latent transforming growth factor beta binding protein 3 [Source:VGNC Symbol;Acc:VGNC:74458]                     | 2.071074147 | 6.68E-16    | 5.56E-14    |
| ENSMMUG00000013644 | potassium two pore domain channel subfamily K member 17 [Source:VGNC Symbol;Acc:VGNC:73828]                      | 2.071835254 | 5.85E-09    | 1.65E-07    |
| ENSMMUG00000009953 | ninein like [Source:VGNC Symbol;Acc:VGNC:75273]                                                                  | 2.073108379 | 7.41E-19    | 9.33E-17    |
| ENSMMUG00000055441 |                                                                                                                  | 2.074007357 | 0.001045757 | 0.007018187 |
| ENSMMUG00000019126 | purine nucleoside phosphorylase [Source:NCBI gene;Acc:704183]                                                    | 2.074811036 | 1.40E-07    | 2.92E-06    |
| ENSMMUG00000057934 |                                                                                                                  | 2.07552311  | 1.84E-07    | 3.71E-06    |
| ENSMMUG00000011634 | coagulation factor XI [Source:VGNC Symbol;Acc:VGNC:72460]                                                        | 2.078899572 | 0.00350858  | 0.018727823 |
| ENSMMUG00000003348 | neurofilament light [Source:VGNC Symbol;Acc:VGNC:75307]                                                          | 2.079117847 | 2.37E-17    | 2.29E-15    |
| ENSMMUG00000057687 |                                                                                                                  | 2.082669458 | 5.24E-18    | 5.72E-16    |
| ENSMMUG00000017287 | PAT1 homolog 1, processing body mRNA decay factor [Source:VGNC Symbol;Acc:VGNC:75684]                            | 2.083085608 | 7.12E-14    | 4.30E-12    |
| ENSMMUG00000009361 | fumarylacetoacetate hydrolase [Source:NCBI gene;Acc:712716]                                                      | 2.084374412 | 1.71E-10    | 6.27E-09    |
| ENSMMUG00000057681 |                                                                                                                  | 2.084541902 | 0.006666449 | 0.031819346 |
| ENSMMUG00000014720 | NCK interacting protein with SH3 domain [Source:VGNC Symbol;Acc:VGNC:74960]                                      | 2.084650666 | 1.07E-06    | 1.83E-05    |
| ENSMMUG00000007799 | LIM and SH3 protein 1 [Source:VGNC Symbol;Acc:VGNC:74237]                                                        | 2.084893326 | 8.13E-08    | 1.79E-06    |
| ENSMMUG00000019690 | SEC14 and spectrin domain containing 1 [Source:VGNC Symbol;Acc:VGNC:77267]                                       | 2.086586483 | 1.18E-06    | 2.01E-05    |
| ENSMMUG00000023598 | sorting nexin 2 [Source:VGNC Symbol;Acc:VGNC:77682]                                                              | 2.089356498 | 0.004304739 | 0.022236581 |
| ENSMMUG00000007140 | MOK protein kinase [Source:VGNC Symbol;Acc:VGNC:84394]                                                           | 2.092775968 | 2.54E-05    | 0.000298688 |
| ENSMMUG00000046478 | WASH complex subunit 3 [Source:NCBI gene;Acc:697824]                                                             | 2.093361611 | 1.02E-14    | 7.02E-13    |
| ENSMMUG00000002421 | DNA polymerase mu [Source:VGNC Symbol;Acc:VGNC:81742]                                                            | 2.098374179 | 0.005785924 | 0.028352777 |

|                     |                                                                                                          |             |             |             |
|---------------------|----------------------------------------------------------------------------------------------------------|-------------|-------------|-------------|
| ENSMMUG00000050822  | carbonic anhydrase 9 [Source:NCBI gene;Acc:696729]                                                       | 2.101433083 | 1.49E-17    | 1.50E-15    |
| ENSMMUG00000060435  | Metazoan signal recognition particle RNA [Source:RFAM;Acc:RF00017]                                       | 2.102152231 | 0.007711737 | 0.035775217 |
| ENSMMUG00000005297  | proline rich coiled-coil 2A [Source:VGNC Symbol;Acc:VGNC:83448]                                          | 2.103966744 | 2.89E-15    | 2.13E-13    |
| ENSMMUG000000057157 |                                                                                                          | 2.108238696 | 1.01E-08    | 2.68E-07    |
| ENSMMUG00000003819  | nitric oxide synthase interacting protein [Source:VGNC Symbol;Acc:VGNC:75207]                            | 2.109053745 | 2.61E-13    | 1.45E-11    |
| ENSMMUG00000022116  | PIH1 domain containing 1 [Source:VGNC Symbol;Acc:VGNC:75868]                                             | 2.110770098 | 7.40E-06    | 0.000101296 |
| ENSMMUG00000012316  | CDC42 effector protein 2 [Source:VGNC Symbol;Acc:VGNC:70750]                                             | 2.111828684 | 0.010201728 | 0.044526612 |
| ENSMMUG00000019304  | indoleamine 2,3-dioxygenase 1 [Source:VGNC Symbol;Acc:VGNC:73580]                                        | 2.11387055  | 2.15E-06    | 3.42E-05    |
| ENSMMUG00000050456  | Metazoan signal recognition particle RNA [Source:RFAM;Acc:RF00017]                                       | 2.114184244 | 0.000631957 | 0.004606898 |
| ENSMMUG00000053460  |                                                                                                          | 2.116528931 | 1.02E-11    | 4.63E-10    |
| ENSMMUG00000019070  | focadhesin [Source:VGNC Symbol;Acc:VGNC:72556]                                                           | 2.123866402 | 1.54E-29    | 7.16E-27    |
| ENSMMUG00000014265  | TAP binding protein like [Source:NCBI gene;Acc:712626]                                                   | 2.125070749 | 1.51E-14    | 9.96E-13    |
| ENSMMUG00000004283  | calcium and integrin binding family member 3 [Source:VGNC Symbol;Acc:VGNC:71339]                         | 2.129521149 | 5.14E-05    | 0.000555241 |
| ENSMMUG00000059504  |                                                                                                          | 2.130356553 | 2.79E-06    | 4.27E-05    |
| ENSMMUG00000009508  | TATA-box binding protein associated factor 5 like [Source:VGNC Symbol;Acc:VGNC:78148]                    | 2.132454314 | 0.000876841 | 0.006055291 |
| ENSMMUG00000058536  |                                                                                                          | 2.132646288 | 1.03E-14    | 7.04E-13    |
| ENSMMUG00000018664  | collagen type IX alpha 2 chain [Source:VGNC Symbol;Acc:VGNC:71307]                                       | 2.133405665 | 3.68E-12    | 1.76E-10    |
| ENSMMUG00000006659  | aldehyde dehydrogenase 1 family member A3 [Source:VGNC Symbol;Acc:VGNC:81353]                            | 2.136130563 | 6.38E-09    | 1.78E-07    |
| ENSMMUG00000022003  | multimerin 1 [Source:VGNC Symbol;Acc:VGNC:74904]                                                         | 2.136879954 | 2.00E-10    | 7.30E-09    |
| ENSMMUG00000014828  | heparan sulfate proteoglycan 2 [Source:VGNC Symbol;Acc:VGNC:73534]                                       | 2.137871534 | 0.004025596 | 0.021003673 |
| ENSMMUG00000004257  | beta-secretase 2 [Source:VGNC Symbol;Acc:VGNC:70216]                                                     | 2.141539469 | 2.27E-08    | 5.56E-07    |
| ENSMMUG00000007925  | serum/glucocorticoid regulated kinase 2 [Source:VGNC Symbol;Acc:VGNC:77228]                              | 2.146668338 | 1.22E-05    | 0.000156105 |
| ENSMMUG00000001707  | amyloid beta precursor protein binding family B member 3 [Source:VGNC Symbol;Acc:VGNC:69869]             | 2.146951375 | 2.09E-17    | 2.04E-15    |
| ENSMMUG00000052961  |                                                                                                          | 2.147519989 | 0.000347756 | 0.002822063 |
| ENSMMUG00000017510  | membrane associated guanylate kinase, WW and PDZ domain containing 1 [Source:VGNC Symbol;Acc:VGNC:74499] | 2.150277693 | 1.39E-15    | 1.10E-13    |
| ENSMMUG00000005666  | phospholipase D2 [Source:VGNC Symbol;Acc:VGNC:76172]                                                     | 2.152273898 | 1.62E-18    | 1.91E-16    |
| ENSMMUG00000058472  | late cornified envelope protein 1C [Source:NCBI gene;Acc:107000798]                                      | 2.152656792 | 9.17E-06    | 0.000122411 |
| ENSMMUG00000055199  | cytochrome P450, family 39, subfamily A, polypeptide 1 [Source:NCBI gene;Acc:704242]                     | 2.15718975  | 2.72E-06    | 4.19E-05    |
| ENSMMUG00000064229  |                                                                                                          | 2.157847273 | 1.96E-05    | 0.000239067 |
| ENSMMUG00000017209  | C1D nuclear receptor corepressor [Source:NCBI gene;Acc:698450]                                           | 2.158035789 | 7.81E-05    | 0.00079394  |
| ENSMMUG00000051975  |                                                                                                          | 2.159044917 | 1.70E-10    | 6.27E-09    |
| ENSMMUG00000056381  | forkhead box R1 [Source:NCBI gene;Acc:707285]                                                            | 2.162720589 | 1.57E-08    | 4.01E-07    |
| ENSMMUG00000014237  | lysine methyltransferase 5B [Source:VGNC Symbol;Acc:VGNC:74110]                                          | 2.163203454 | 6.00E-29    | 2.46E-26    |
| ENSMMUG00000064915  | Metazoan signal recognition particle RNA [Source:RFAM;Acc:RF00017]                                       | 2.163768364 | 0.002931268 | 0.016338543 |
| ENSMMUG00000049130  |                                                                                                          | 2.165351453 | 2.43E-22    | 4.64E-20    |
| ENSMMUG00000031534  | ankyrin repeat and ubiquitin domain containing 1 [Source:VGNC Symbol;Acc:VGNC:84239]                     | 2.166493881 | 5.67E-16    | 4.81E-14    |
| ENSMMUG00000018790  | activin A receptor type 2B [Source:VGNC Symbol;Acc:VGNC:69450]                                           | 2.167466056 | 5.40E-16    | 4.61E-14    |
| ENSMMUG00000021039  | X-ray radiation resistance associated 1 [Source:NCBI gene;Acc:693788]                                    | 2.171821157 | 2.95E-10    | 1.07E-08    |
| ENSMMUG00000009199  | glycogen phosphorylase B [Source:VGNC Symbol;Acc:VGNC:76631]                                             | 2.171975983 | 2.27E-18    | 2.60E-16    |
| ENSMMUG00000001151  | microtubule associated scaffold protein 1 [Source:VGNC Symbol;Acc:VGNC:84018]                            | 2.175243366 | 1.15E-12    | 5.88E-11    |
| ENSMMUG00000001725  | solute carrier family 35 member A4 [Source:VGNC Symbol;Acc:VGNC:77532]                                   | 2.175575938 | 2.06E-11    | 8.84E-10    |
| ENSMMUG00000060581  |                                                                                                          | 2.178815024 | 2.32E-05    | 0.000275759 |
| ENSMMUG00000053781  | Rho GDP dissociation inhibitor beta [Source:NCBI gene;Acc:702320]                                        | 2.179257543 | 9.06E-05    | 0.000893736 |
| ENSMMUG00000061424  | ventral anterior homeobox 2 [Source:NCBI gene;Acc:703531]                                                | 2.179677472 | 3.33E-07    | 6.37E-06    |
| ENSMMUG00000017927  | protein kinase D2 [Source:VGNC Symbol;Acc:VGNC:76273]                                                    | 2.184190314 | 1.29E-05    | 0.000164565 |
| ENSMMUG00000044048  | Metazoan signal recognition particle RNA [Source:RFAM;Acc:RF00017]                                       | 2.188173894 | 1.17E-07    | 2.48E-06    |
| ENSMMUG00000023816  | semaphorin 4B [Source:VGNC Symbol;Acc:VGNC:77165]                                                        | 2.191066922 | 2.12E-21    | 3.62E-19    |
| ENSMMUG00000045256  | cellular communication network factor 5 [Source:NCBI gene;Acc:717872]                                    | 2.192450428 | 6.47E-06    | 9.05E-05    |
| ENSMMUG00000019418  | erythrocyte membrane protein band 4.1 like 3 [Source:VGNC Symbol;Acc:VGNC:72233]                         | 2.193531076 | 1.17E-19    | 1.58E-17    |
| ENSMMUG00000056010  |                                                                                                          | 2.2022034   | 0.006741094 | 0.032076432 |
| ENSMMUG00000014658  | ninein [Source:VGNC Symbol;Acc:VGNC:75177]                                                               | 2.203101092 | 4.48E-07    | 8.32E-06    |



|                     |                                                                                                      |             |             |             |
|---------------------|------------------------------------------------------------------------------------------------------|-------------|-------------|-------------|
| ENSMMUG0000000802   | regulatory factor X3 [Source:VGNC Symbol;Acc:VGNC:76908]                                             | 2.203223044 | 2.68E-05    | 0.000313128 |
| ENSMMUG00000049391  |                                                                                                      | 2.207490121 | 0.000139185 | 0.001283632 |
| ENSMMUG00000004797  | CTP synthase 2 [Source:VGNC Symbol;Acc:VGNC:71550]                                                   | 2.207639436 | 3.24E-07    | 6.22E-06    |
| ENSMMUG00000002566  | selenoprotein H [Source:VGNC Symbol;Acc:VGNC:82234]                                                  | 2.20972243  | 0.008689131 | 0.039244749 |
| ENSMMUG00000004022  | zinc finger SWIM-type containing 2 [Source:VGNC Symbol;Acc:VGNC:79908]                               | 2.215320463 | 1.43E-20    | 2.18E-18    |
| ENSMMUG000000032659 | mml-mir-711 [Source:miRBase;Acc:MI0012553]                                                           | 2.216454956 | 9.69E-05    | 0.000946534 |
| ENSMMUG000000062794 |                                                                                                      | 2.219365115 | 6.79E-09    | 1.87E-07    |
| ENSMMUG00000010316  | HECT and RLD domain containing E3 ubiquitin protein ligase 5 [Source:VGNC Symbol;Acc:VGNC:73226]     | 2.22061478  | 0.000453051 | 0.003466269 |
| ENSMMUG00000012668  | centriolin [Source:VGNC Symbol;Acc:VGNC:71204]                                                       | 2.225372178 | 6.15E-18    | 6.65E-16    |
| ENSMMUG000000051925 |                                                                                                      | 2.226570916 | 6.96E-11    | 2.76E-09    |
| ENSMMUG000000055775 | transmembrane p24 trafficking protein 1 [Source:NCBI gene;Acc:713618]                                | 2.226803307 | 1.49E-22    | 2.93E-20    |
| ENSMMUG00000003572  | nicotinamide phosphoribosyltransferase [Source:VGNC Symbol;Acc:VGNC:75056]                           | 2.230534527 | 3.31E-14    | 2.08E-12    |
| ENSMMUG00000002397  | GIN5 complex subunit 1 [Source:VGNC Symbol;Acc:VGNC:73025]                                           | 2.235864182 | 1.70E-19    | 2.25E-17    |
| ENSMMUG00000001748  | spleen associated tyrosine kinase [Source:VGNC Symbol;Acc:VGNC:78063]                                | 2.235886041 | 2.55E-06    | 3.96E-05    |
| ENSMMUG00000017450  | MOB kinase activator 2 [Source:NCBI gene;Acc:720951]                                                 | 2.240869633 | 9.08E-05    | 0.000894873 |
| ENSMMUG000000059318 | urocortin 2 [Source:NCBI gene;Acc:106996925]                                                         | 2.246959168 | 1.97E-29    | 8.82E-27    |
| ENSMMUG000000051645 |                                                                                                      | 2.248537993 | 0.003462476 | 0.018558072 |
| ENSMMUG00000015952  | katanin catalytic subunit A1 like 2 [Source:VGNC Symbol;Acc:VGNC:73904]                              | 2.250579043 | 0.000306    | 0.002533926 |
| ENSMMUG00000003834  | basic leucine zipper ATF-like transcription factor [Source:VGNC Symbol;Acc:VGNC:70229]               | 2.251501963 | 1.18E-14    | 7.89E-13    |
| ENSMMUG000000063914 |                                                                                                      | 2.256395612 | 4.57E-24    | 1.19E-21    |
| ENSMMUG00000013832  | ATP binding cassette subfamily B member 11 [Source:VGNC Symbol;Acc:VGNC:81339]                       | 2.257455565 | 6.95E-10    | 2.30E-08    |
| ENSMMUG00000013830  | glucose-6-phosphatase catalytic subunit 2 [Source:NCBI gene;Acc:709062]                              | 2.258282643 | 1.58E-11    | 6.91E-10    |
| ENSMMUG000000064250 |                                                                                                      | 2.25971044  | 0.011812609 | 0.04984729  |
| ENSMMUG00000007200  | NEDD4 binding protein 2 like 2 [Source:VGNC Symbol;Acc:VGNC:75031]                                   | 2.26082148  | 6.38E-21    | 1.01E-18    |
| ENSMMUG000000021073 | RAS protein activator like 2 [Source:VGNC Symbol;Acc:VGNC:76670]                                     | 2.263011247 | 9.56E-18    | 1.00E-15    |
| ENSMMUG00000007538  | transient receptor potential cation channel subfamily M member 4 [Source:VGNC Symbol;Acc:VGNC:79105] | 2.2630753   | 5.25E-14    | 3.22E-12    |
| ENSMMUG00000017189  | regulatory factor X6 [Source:VGNC Symbol;Acc:VGNC:76800]                                             | 2.263649144 | 2.42E-12    | 1.20E-10    |
| ENSMMUG000000009066 | 60S ribosomal protein L26 [Source:NCBI gene;Acc:696134]                                              | 2.266879908 | 0.01152184  | 0.048938592 |
| ENSMMUG000000052637 | Metazoan signal recognition particle RNA [Source:RFAM;Acc:RF00017]                                   | 2.267706798 | 0.000351754 | 0.002849748 |
| ENSMMUG000000062326 |                                                                                                      | 2.269593217 | 1.97E-11    | 8.51E-10    |
| ENSMMUG000000057095 |                                                                                                      | 2.270195347 | 0.001870955 | 0.011318187 |
| ENSMMUG000000064554 | leucine rich repeat neuronal 4 [Source:NCBI gene;Acc:718283]                                         | 2.271967822 | 2.09E-06    | 3.35E-05    |
| ENSMMUG00000018967  | ubiquitin conjugating enzyme E2 O [Source:VGNC Symbol;Acc:VGNC:79813]                                | 2.272319218 | 1.88E-18    | 2.19E-16    |
| ENSMMUG000000062781 | chromosome 14 C11orf97 homolog [Source:NCBI gene;Acc:106993442]                                      | 2.28538952  | 5.55E-20    | 7.83E-18    |
| ENSMMUG00000006758  | cytochrome P450, family 27, subfamily A, polypeptide 1 [Source:NCBI gene;Acc:700192]                 | 2.289535179 | 0.000275716 | 0.002318655 |
| ENSMMUG00000005992  | zinc metalloproteinase STE24 [Source:VGNC Symbol;Acc:VGNC:78830]                                     | 2.289799524 | 2.28E-07    | 4.52E-06    |
| ENSMMUG000000044257 | MX dynamin like GTPase 2 [Source:VGNC Symbol;Acc:VGNC:81723]                                         | 2.297135107 | 9.19E-11    | 3.58E-09    |
| ENSMMUG00000018823  | transmembrane protein 191C [Source:NCBI gene;Acc:697070]                                             | 2.311535269 | 0.003030271 | 0.016775083 |
| ENSMMUG00000004376  | calcium and integrin binding 1 [Source:VGNC Symbol;Acc:VGNC:71189]                                   | 2.311906915 | 1.25E-22    | 2.52E-20    |
| ENSMMUG00000001350  | HERPUD family member 2 [Source:VGNC Symbol;Acc:VGNC:73216]                                           | 2.312795345 | 2.87E-16    | 2.55E-14    |
| ENSMMUG000000021634 | TNF alpha induced protein 2 [Source:VGNC Symbol;Acc:VGNC:78579]                                      | 2.313641396 | 3.68E-21    | 6.12E-19    |
| ENSMMUG000000059374 |                                                                                                      | 2.313964619 | 3.42E-08    | 8.08E-07    |
| ENSMMUG00000008529  | chromosome 7 C15orf39 homolog [Source:VGNC Symbol;Acc:VGNC:70620]                                    | 2.314306641 | 1.62E-07    | 3.32E-06    |
| ENSMMUG00000006980  | septin 7 [Source:VGNC Symbol;Acc:VGNC:81759]                                                         | 2.317138332 | 0.000542011 | 0.004037391 |
| ENSMMUG000000056798 |                                                                                                      | 2.318950201 | 1.58E-05    | 0.000196697 |
| ENSMMUG000000054473 | activating transcription factor 5 [Source:NCBI gene;Acc:719150]                                      | 2.319800091 | 1.19E-17    | 1.22E-15    |
| ENSMMUG000000063525 |                                                                                                      | 2.321327984 | 1.15E-07    | 2.45E-06    |
| ENSMMUG00000019526  | BLM RecQ like helicase [Source:VGNC Symbol;Acc:VGNC:70254]                                           | 2.321500125 | 7.84E-10    | 2.58E-08    |
| ENSMMUG00000017740  | sperm mitochondria associated cysteine rich protein [Source:VGNC Symbol;Acc:VGNC:77816]              | 2.322311858 | 2.94E-05    | 0.000338956 |
| ENSMMUG00000016678  | Rho associated coiled-coil containing protein kinase 2 [Source:VGNC Symbol;Acc:VGNC:76714]           | 2.331480697 | 3.26E-10    | 1.17E-08    |
| ENSMMUG000000049703 | Metazoan signal recognition particle RNA [Source:RFAM;Acc:RF00017]                                   | 2.332379995 | 6.76E-23    | 1.44E-20    |

|                    |                                                                                                |             |             |             |
|--------------------|------------------------------------------------------------------------------------------------|-------------|-------------|-------------|
| ENSMMUG00000014240 | thioredoxin domain containing 11 [Source:VGNC Symbol;Acc:VGNC:79678]                           | 2.334374356 | 1.84E-07    | 3.72E-06    |
| ENSMMUG00000019363 | synapse associated protein 1 [Source:VGNC Symbol;Acc:VGNC:78135]                               | 2.33536013  | 6.39E-10    | 2.14E-08    |
| ENSMMUG00000011633 | kallikrein B1 [Source:VGNC Symbol;Acc:VGNC:74195]                                              | 2.33578395  | 0.000279376 | 0.002344882 |
| ENSMMUG00000060795 |                                                                                                | 2.341292504 | 1.56E-06    | 2.55E-05    |
| ENSMMUG00000005302 | BAG cochaperone 6 [Source:VGNC Symbol;Acc:VGNC:81044]                                          | 2.343350045 | 2.92E-23    | 6.90E-21    |
| ENSMMUG00000045093 | cyclin B3 [Source:NCBI gene;Acc:694534]                                                        | 2.344530927 | 2.28E-20    | 3.37E-18    |
| ENSMMUG00000053722 |                                                                                                | 2.345472535 | 0.007935989 | 0.036594668 |
| ENSMMUG00000049537 | phosphoribosyl pyrophosphate synthetase associated protein 1 [Source:NCBI gene;Acc:706625]     | 2.346084082 | 0.008323611 | 0.03793719  |
| ENSMMUG00000019032 | EMAP like 2 [Source:NCBI gene;Acc:715009]                                                      | 2.346511958 | 0.000653252 | 0.004732882 |
| ENSMMUG00000016096 | lamin A/C [Source:VGNC Symbol;Acc:VGNC:74427]                                                  | 2.35458245  | 0.000373232 | 0.002984539 |
| ENSMMUG00000005380 | zinc finger protein 827 [Source:NCBI gene;Acc:706018]                                          | 2.356849176 | 1.67E-15    | 1.29E-13    |
| ENSMMUG00000015744 | zinc finger protein 302 [Source:NCBI gene;Acc:706279]                                          | 2.358342166 | 3.88E-15    | 2.83E-13    |
| ENSMMUG00000021610 | regulator of G protein signaling 10 [Source:VGNC Symbol;Acc:VGNC:76915]                        | 2.35960899  | 1.59E-17    | 1.59E-15    |
| ENSMMUG00000055811 |                                                                                                | 2.361568982 | 1.97E-15    | 1.50E-13    |
| ENSMMUG00000062217 | HD domain containing 3 [Source:NCBI gene;Acc:715621]                                           | 2.361866506 | 3.66E-09    | 1.08E-07    |
| ENSMMUG00000063898 | apolipoprotein F [Source:NCBI gene;Acc:712761]                                                 | 2.365186044 | 2.11E-12    | 1.06E-10    |
| ENSMMUG00000013871 | WD repeat domain 25 [Source:VGNC Symbol;Acc:VGNC:78420]                                        | 2.366508197 | 6.72E-23    | 1.44E-20    |
| ENSMMUG00000022381 | prolyl 3-hydroxylase 1 [Source:VGNC Symbol;Acc:VGNC:75648]                                     | 2.368149047 | 0.003091429 | 0.017033706 |
| ENSMMUG00000000803 | signal transducer and activator of transcription 2 [Source:VGNC Symbol;Acc:VGNC:77905]         | 2.368656986 | 7.34E-18    | 7.88E-16    |
| ENSMMUG00000023060 | A-kinase anchoring protein 4 [Source:VGNC Symbol;Acc:VGNC:69770]                               | 2.36975352  | 1.05E-06    | 1.80E-05    |
| ENSMMUG00000020177 | membrane spanning 4-domains A4A [Source:NCBI gene;Acc:698027]                                  | 2.372308284 | 1.07E-06    | 1.83E-05    |
| ENSMMUG00000051816 | keratinocyte proline rich protein [Source:NCBI gene;Acc:100424312]                             | 2.377958055 | 8.98E-16    | 7.33E-14    |
| ENSMMUG00000006931 | kirre like nephrin family adhesion molecule 3 [Source:NCBI gene;Acc:714534]                    | 2.379332087 | 9.81E-23    | 2.02E-20    |
| ENSMMUG00000002679 | lactate dehydrogenase B [Source:NCBI gene;Acc:706110]                                          | 2.389202366 | 0.004648889 | 0.023684326 |
| ENSMMUG00000054211 |                                                                                                | 2.390697636 | 0.000400399 | 0.003153576 |
| ENSMMUG00000018619 | DENN domain containing 6A [Source:VGNC Symbol;Acc:VGNC:71726]                                  | 2.395180774 | 5.30E-05    | 0.000571551 |
| ENSMMUG00000050529 | phosphodiesterase 6H [Source:NCBI gene;Acc:700447]                                             | 2.395183664 | 0.005468291 | 0.027061993 |
| ENSMMUG00000050339 | Metazoan signal recognition particle RNA [Source:RFAM;Acc:RF00017]                             | 2.396069505 | 3.05E-07    | 5.87E-06    |
| ENSMMUG00000016442 | glutaminyl-peptide cyclotransferase [Source:VGNC Symbol;Acc:VGNC:76636]                        | 2.403037643 | 0.000421295 | 0.003279376 |
| ENSMMUG00000004587 | gasdermin B [Source:VGNC Symbol;Acc:VGNC:73219]                                                | 2.406969063 | 0.000610505 | 0.004461352 |
| ENSMMUG00000025918 | small nucleolar RNA, H/ACA box 38 [Source:HGNC Symbol;Acc:HGNC:32631]                          | 2.412342578 | 0.002570626 | 0.014700943 |
| ENSMMUG00000000644 | centrosomal protein 85 [Source:VGNC Symbol;Acc:VGNC:71096]                                     | 2.414726041 | 5.54E-09    | 1.58E-07    |
| ENSMMUG00000057570 |                                                                                                | 2.418213955 | 1.13E-14    | 7.60E-13    |
| ENSMMUG00000000754 | Dmx like 2 [Source:VGNC Symbol;Acc:VGNC:71936]                                                 | 2.420281124 | 1.49E-14    | 9.84E-13    |
| ENSMMUG00000018137 | MYB proto-oncogene like 2 [Source:VGNC Symbol;Acc:VGNC:75092]                                  | 2.421913159 | 9.67E-17    | 9.03E-15    |
| ENSMMUG00000009816 | exosome component 9 [Source:VGNC Symbol;Acc:VGNC:72477]                                        | 2.427565591 | 1.89E-06    | 3.05E-05    |
| ENSMMUG00000043738 |                                                                                                | 2.428260498 | 0.001056821 | 0.007079663 |
| ENSMMUG00000001380 | outer dense fiber of sperm tails 2 like [Source:VGNC Symbol;Acc:VGNC:75482]                    | 2.431722532 | 0.00032666  | 0.002671389 |
| ENSMMUG00000020683 | RNA binding motif protein 22 [Source:VGNC Symbol;Acc:VGNC:76535]                               | 2.435275256 | 1.79E-16    | 1.65E-14    |
| ENSMMUG00000017758 | mitogen-activated protein kinase 3 [Source:VGNC Symbol;Acc:VGNC:74646]                         | 2.444460696 | 2.97E-25    | 9.16E-23    |
| ENSMMUG00000065295 |                                                                                                | 2.444764955 | 5.98E-23    | 1.32E-20    |
| ENSMMUG00000018151 | membrane palmitoylated protein 4 [Source:VGNC Symbol;Acc:VGNC:74734]                           | 2.445483822 | 0.000400142 | 0.003153576 |
| ENSMMUG00000043648 |                                                                                                | 2.451989895 | 4.13E-06    | 6.03E-05    |
| ENSMMUG00000016404 | chondromodulin [Source:VGNC Symbol;Acc:VGNC:71191]                                             | 2.453340284 | 0.002033653 | 0.012060643 |
| ENSMMUG00000062996 |                                                                                                | 2.4584153   | 0.00011237  | 0.001071357 |
| ENSMMUG00000007773 | solute carrier organic anion transporter family member 4C1 [Source:VGNC Symbol;Acc:VGNC:77764] | 2.460033004 | 0.0018965   | 0.011430091 |
| ENSMMUG00000035943 | U6 spliceosomal RNA [Source:RFAM;Acc:RF00026]                                                  | 2.461668534 | 3.50E-08    | 8.23E-07    |
| ENSMMUG00000015258 | glycine C-acetyltransferase [Source:NCBI gene;Acc:698811]                                      | 2.467674018 | 0.009418279 | 0.041867621 |
| ENSMMUG00000013450 | TATA-box binding protein associated factor 6 [Source:VGNC Symbol;Acc:VGNC:78093]               | 2.47058187  | 1.37E-06    | 2.29E-05    |
| ENSMMUG00000055266 | late cornified envelope protein 1C-like [Source:NCBI gene;Acc:107000794]                       | 2.474101574 | 0.000190986 | 0.001689325 |
| ENSMMUG00000038524 | olfactory receptor 2M4 [Source:NCBI gene;Acc:100424541]                                        | 2.474723246 | 3.07E-27    | 1.14E-24    |

|                    |                                                                                                |             |             |             |
|--------------------|------------------------------------------------------------------------------------------------|-------------|-------------|-------------|
| ENSMMUG00000021877 | protein kinase AMP-activated non-catalytic subunit gamma 3 [Source:VGNC Symbol;Acc:VGNC:76406] | 2.476712627 | 0.000271882 | 0.002293846 |
| ENSMMUG00000061787 |                                                                                                | 2.478899583 | 0.001862629 | 0.011283604 |
| ENSMMUG00000009567 | glyoxylate reductase 1 homolog [Source:NCBI gene;Acc:706933]                                   | 2.487775518 | 3.82E-25    | 1.15E-22    |
| ENSMMUG00000021476 | BCL2 like 13 [Source:VGNC Symbol;Acc:VGNC:84544]                                               | 2.501928211 | 0.000658091 | 0.004757323 |
| ENSMMUG00000004616 | plasminogen activator, urokinase receptor [Source:VGNC Symbol;Acc:VGNC:76163]                  | 2.502916011 | 0.004380825 | 0.022602618 |
| ENSMMUG00000017036 | nicalin [Source:VGNC Symbol;Acc:VGNC:75032]                                                    | 2.505971752 | 3.89E-21    | 6.40E-19    |
| ENSMMUG00000013283 | cadherin related family member 2 [Source:NCBI gene;Acc:697249]                                 | 2.51544345  | 6.95E-11    | 2.76E-09    |
| ENSMMUG00000049678 |                                                                                                | 2.517594348 | 1.85E-13    | 1.06E-11    |
| ENSMMUG00000040393 | zinc finger protein 655 [Source:NCBI gene;Acc:718811]                                          | 2.52059288  | 6.20E-10    | 2.08E-08    |
| ENSMMUG00000008923 | Thy-1 cell surface antigen [Source:VGNC Symbol;Acc:VGNC:78352]                                 | 2.52066989  | 3.67E-12    | 1.76E-10    |
| ENSMMUG00000063981 | nucleoside-triphosphatase, cancer-related [Source:NCBI gene;Acc:712959]                        | 2.521899133 | 1.71E-06    | 2.77E-05    |
| ENSMMUG00000064931 |                                                                                                | 2.522527795 | 0.003784908 | 0.019907971 |
| ENSMMUG00000022401 | EMSY transcriptional repressor, BRCA2 interacting [Source:VGNC Symbol;Acc:VGNC:72065]          | 2.526635505 | 2.07E-17    | 2.03E-15    |
| ENSMMUG00000053457 | caspase 14 [Source:NCBI gene;Acc:718049]                                                       | 2.529610846 | 4.64E-07    | 8.61E-06    |
| ENSMMUG00000054237 | Y RNA [Source:RFAM;Acc:RF00019]                                                                | 2.530859004 | 9.77E-05    | 0.00095033  |
| ENSMMUG00000022247 | osteoclastogenesis associated transmembrane protein 1 [Source:VGNC Symbol;Acc:VGNC:75664]      | 2.53364698  | 2.19E-12    | 1.09E-10    |
| ENSMMUG00000048215 |                                                                                                | 2.538691624 | 3.83E-06    | 5.63E-05    |
| ENSMMUG00000056376 |                                                                                                | 2.541261894 | 1.24E-21    | 2.18E-19    |
| ENSMMUG00000004332 | tripartite motif containing 44 [Source:VGNC Symbol;Acc:VGNC:79168]                             | 2.557047644 | 4.24E-10    | 1.47E-08    |
| ENSMMUG00000003833 | Ras association domain family member 6 [Source:VGNC Symbol;Acc:VGNC:76515]                     | 2.558586885 | 7.93E-09    | 2.16E-07    |
| ENSMMUG00000058534 |                                                                                                | 2.559544458 | 6.49E-05    | 0.0006784   |
| ENSMMUG00000059432 |                                                                                                | 2.560115346 | 0.000414476 | 0.003237425 |
| ENSMMUG00000058176 | b-defensin2-like [Source:NCBI gene;Acc:100169969]                                              | 2.560493928 | 2.44E-29    | 1.06E-26    |
| ENSMMUG00000058935 | Metazoan signal recognition particle RNA [Source:RFAM;Acc:RF00017]                             | 2.561264119 | 0.000174076 | 0.001555775 |
| ENSMMUG00000058229 | U6 spliceosomal RNA [Source:RFAM;Acc:RF00026]                                                  | 2.562330534 | 0.003823928 | 0.020091684 |
| ENSMMUG00000005108 | RCC1 domain containing 1 [Source:VGNC Symbol;Acc:VGNC:76876]                                   | 2.56434212  | 9.79E-07    | 1.69E-05    |
| ENSMMUG00000049479 |                                                                                                | 2.575812379 | 0.011584702 | 0.049141252 |
| ENSMMUG00000057361 | Metazoan signal recognition particle RNA [Source:RFAM;Acc:RF00017]                             | 2.579134693 | 6.37E-12    | 2.99E-10    |
| ENSMMUG00000004794 | DNA ligase 3 [Source:VGNC Symbol;Acc:VGNC:74266]                                               | 2.582698609 | 4.75E-08    | 1.08E-06    |
| ENSMMUG00000054746 |                                                                                                | 2.584161195 | 0.003269191 | 0.017749384 |
| ENSMMUG00000015716 | protein phosphatase with EF-hand domain 2 [Source:VGNC Symbol;Acc:VGNC:76233]                  | 2.589151075 | 3.05E-06    | 4.62E-05    |
| ENSMMUG00000012040 | enolase 3 [Source:VGNC Symbol;Acc:VGNC:72220]                                                  | 2.589449415 | 0.008821203 | 0.039766323 |
| ENSMMUG00000014046 | SREBF chaperone [Source:VGNC Symbol;Acc:VGNC:77140]                                            | 2.59227537  | 3.46E-22    | 6.23E-20    |
| ENSMMUG00000058758 |                                                                                                | 2.594533606 | 0.001197331 | 0.007842789 |
| ENSMMUG00000052228 | Metazoan signal recognition particle RNA [Source:RFAM;Acc:RF00017]                             | 2.595475243 | 0.000336638 | 0.002743853 |
| ENSMMUG00000001545 | aquaporin 7 [Source:NCBI gene;Acc:702836]                                                      | 2.596353447 | 3.45E-09    | 1.02E-07    |
| ENSMMUG00000064401 |                                                                                                | 2.597303067 | 0.006307933 | 0.030428155 |
| ENSMMUG00000038997 | zygote arrest 1 like [Source:NCBI gene;Acc:100427970]                                          | 2.598437587 | 0.003469736 | 0.018579583 |
| ENSMMUG00000010318 | phosphatidylinositol glycan anchor biosynthesis class Y [Source:NCBI gene;Acc:100426107]       | 2.602897362 | 3.72E-09    | 1.10E-07    |
| ENSMMUG00000023139 | small nuclear ribonucleoprotein polypeptide N [Source:VGNC Symbol;Acc:VGNC:78437]              | 2.60399278  | 2.24E-25    | 7.10E-23    |
| ENSMMUG00000017983 | tRNA nucleotidyl transferase 1 [Source:VGNC Symbol;Acc:VGNC:79073]                             | 2.615141015 | 0.001646532 | 0.010212908 |
| ENSMMUG00000050585 |                                                                                                | 2.616854711 | 8.57E-17    | 8.06E-15    |
| ENSMMUG00000008536 | mitogen-activated protein kinase 7 [Source:VGNC Symbol;Acc:VGNC:74648]                         | 2.618199075 | 0.000118417 | 0.001119139 |
| ENSMMUG00000050495 |                                                                                                | 2.620427856 | 4.44E-05    | 0.000488385 |
| ENSMMUG00000058423 |                                                                                                | 2.628268347 | 4.62E-10    | 1.58E-08    |
| ENSMMUG00000028733 | RAS related [Source:VGNC Symbol;Acc:VGNC:76937]                                                | 2.630461097 | 3.16E-12    | 1.53E-10    |
| ENSMMUG00000017501 | N-acylethanolamine acid amidase [Source:VGNC Symbol;Acc:VGNC:75068]                            | 2.631337319 | 4.59E-10    | 1.58E-08    |
| ENSMMUG00000052954 | Wnt family member 6 [Source:NCBI gene;Acc:700573]                                              | 2.641457347 | 3.27E-06    | 4.90E-05    |
| ENSMMUG00000054686 |                                                                                                | 2.650345402 | 4.16E-20    | 6.00E-18    |
| ENSMMUG00000046918 |                                                                                                | 2.657265612 | 3.54E-05    | 0.000401269 |
| ENSMMUG00000058095 | visual system homeobox 1 [Source:NCBI gene;Acc:715973]                                         | 2.667146427 | 1.36E-06    | 2.26E-05    |



|                    |                                                                                                   |             |             |             |
|--------------------|---------------------------------------------------------------------------------------------------|-------------|-------------|-------------|
| ENSMMUG00000064174 |                                                                                                   | 2.669017818 | 4.39E-06    | 6.36E-05    |
| ENSMMUG00000057640 | plakophilin-3-like [Source:NCBI gene;Acc:114669833]                                               | 2.670382504 | 5.13E-19    | 6.53E-17    |
| ENSMMUG00000053376 |                                                                                                   | 2.673968363 | 2.02E-17    | 2.00E-15    |
| ENSMMUG00000057790 |                                                                                                   | 2.674555623 | 0.003093183 | 0.017036139 |
| ENSMMUG00000016580 | selectin E [Source:VGNC Symbol;Acc:VGNC:77156]                                                    | 2.695079059 | 1.22E-31    | 6.61E-29    |
| ENSMMUG00000019528 | adaptor related protein complex 4 subunit beta 1 [Source:VGNC Symbol;Acc:VGNC:69972]              | 2.697420262 | 9.50E-29    | 3.73E-26    |
| ENSMMUG00000022467 | membrane bound transcription factor peptidase, site 2 [Source:NCBI gene;Acc:696540]               | 2.70964231  | 0.011590349 | 0.049144917 |
| ENSMMUG00000058916 |                                                                                                   | 2.713530267 | 5.02E-13    | 2.70E-11    |
| ENSMMUG00000003797 | ubiquitin specific peptidase 20 [Source:VGNC Symbol;Acc:VGNC:78740]                               | 2.714404623 | 9.52E-09    | 2.55E-07    |
| ENSMMUG00000000869 | small nuclear ribonucleoprotein polypeptide C [Source:NCBI gene;Acc:718654]                       | 2.717203807 | 0.000242588 | 0.0020764   |
| ENSMMUG00000002963 | Rho GTPase activating protein 32 [Source:VGNC Symbol;Acc:VGNC:69855]                              | 2.721579132 | 9.67E-07    | 1.68E-05    |
| ENSMMUG00000059087 |                                                                                                   | 2.7259611   | 0.010490156 | 0.04550995  |
| ENSMMUG00000051503 | nuclear pore associated protein 1 [Source:NCBI gene;Acc:719891]                                   | 2.728527379 | 5.74E-07    | 1.05E-05    |
| ENSMMUG00000008538 | microfibril associated protein 4 [Source:VGNC Symbol;Acc:VGNC:74710]                              | 2.73210696  | 1.39E-05    | 0.000175353 |
| ENSMMUG00000033121 | Small nucleolar RNA U3 [Source:RFAM;Acc:RF00012]                                                  | 2.737666166 | 0.011744275 | 0.049591186 |
| ENSMMUG00000011777 | UDP-GlcNAc:betaGal beta-1,3-N-acetylglucosaminyltransferase 7 [Source:VGNC Symbol;Acc:VGNC:82108] | 2.741145506 | 0.002502138 | 0.014370638 |
| ENSMMUG00000002959 | helicase with zinc finger [Source:VGNC Symbol;Acc:VGNC:73178]                                     | 2.747766042 | 7.61E-23    | 1.59E-20    |
| ENSMMUG00000016827 | UBA domain containing 1 [Source:VGNC Symbol;Acc:VGNC:79837]                                       | 2.750221242 | 7.14E-07    | 1.27E-05    |
| ENSMMUG00000036223 |                                                                                                   | 2.75076903  | 0.004232937 | 0.02192678  |
| ENSMMUG00000056063 |                                                                                                   | 2.754166662 | 0.000390241 | 0.003095214 |
| ENSMMUG00000060767 |                                                                                                   | 2.756854726 | 3.72E-07    | 7.02E-06    |
| ENSMMUG00000054634 | late cornified envelope protein 1C-like [Source:NCBI gene;Acc:713600]                             | 2.763321845 | 0.0098696   | 0.043427578 |
| ENSMMUG00000064895 |                                                                                                   | 2.764978428 | 0.002353835 | 0.013647616 |
| ENSMMUG00000025050 | Y RNA [Source:RFAM;Acc:RF00019]                                                                   | 2.776734139 | 0.000428393 | 0.00332063  |
| ENSMMUG00000000452 | LSM7 homolog, U6 small nuclear RNA and mRNA degradation associated [Source:NCBI gene;Acc:721486]  | 2.778304873 | 0.000304118 | 0.002524786 |
| ENSMMUG00000000152 | transcription factor CP2 [Source:VGNC Symbol;Acc:VGNC:78323]                                      | 2.779331979 | 4.48E-09    | 1.29E-07    |
| ENSMMUG00000001273 | clathrin binding box of aftiphilin containing 1 [Source:VGNC Symbol;Acc:VGNC:84325]               | 2.779700556 | 4.81E-20    | 6.85E-18    |
| ENSMMUG00000005595 | RAB14, member RAS oncogene family [Source:NCBI gene;Acc:699837]                                   | 2.779831723 | 0.000340217 | 0.002769547 |
| ENSMMUG00000053601 |                                                                                                   | 2.786234731 | 0.00163756  | 0.010171842 |
| ENSMMUG00000012938 | SR-related CTD associated factor 1 [Source:VGNC Symbol;Acc:VGNC:77137]                            | 2.791181446 | 0.011332188 | 0.048338749 |
| ENSMMUG00000016434 | NADH:ubiquinone oxidoreductase complex assembly factor 7 [Source:VGNC Symbol;Acc:VGNC:75035]      | 2.791991911 | 1.46E-07    | 3.03E-06    |
| ENSMMUG00000063622 | mitochondrial ribosomal protein S26 [Source:NCBI gene;Acc:717038]                                 | 2.794883325 | 3.05E-10    | 1.09E-08    |
| ENSMMUG00000018743 | ubiquitin specific peptidase 25 [Source:VGNC Symbol;Acc:VGNC:78744]                               | 2.798303434 | 0.010119343 | 0.044226539 |
| ENSMMUG00000009308 | histidine ammonia-lyase [Source:VGNC Symbol;Acc:VGNC:73344]                                       | 2.799681764 | 1.27E-05    | 0.000162486 |
| ENSMMUG00000012937 | proline rich 12 [Source:NCBI gene;Acc:719344]                                                     | 2.808632585 | 4.82E-39    | 5.68E-36    |
| ENSMMUG00000056184 |                                                                                                   | 2.819809665 | 5.55E-05    | 0.000595478 |
| ENSMMUG00000017056 | Sad1 and UNC84 domain containing 1 [Source:VGNC Symbol;Acc:VGNC:78161]                            | 2.820912992 | 1.80E-07    | 3.66E-06    |
| ENSMMUG00000059700 |                                                                                                   | 2.824762048 | 0.01155844  | 0.049045887 |
| ENSMMUG00000038988 | RNase MRP [Source:RFAM;Acc:RF00030]                                                               | 2.8321585   | 0.009355094 | 0.0416581   |
| ENSMMUG00000061533 |                                                                                                   | 2.834550381 | 2.05E-18    | 2.38E-16    |
| ENSMMUG00000007534 | protein regulator of cytokinesis 1 [Source:NCBI gene;Acc:710182]                                  | 2.835504519 | 6.73E-14    | 4.08E-12    |
| ENSMMUG00000058311 |                                                                                                   | 2.837111634 | 6.78E-09    | 1.87E-07    |
| ENSMMUG00000040071 |                                                                                                   | 2.846010049 | 9.84E-06    | 0.000130546 |
| ENSMMUG00000021357 | zinc finger BED-type containing 3 [Source:VGNC Symbol;Acc:VGNC:79271]                             | 2.860549664 | 3.35E-05    | 0.000381421 |
| ENSMMUG00000015693 | lymphocyte antigen 6 family member G6C [Source:VGNC Symbol;Acc:VGNC:74285]                        | 2.862019315 | 1.66E-06    | 2.72E-05    |
| ENSMMUG00000038944 |                                                                                                   | 2.86647995  | 3.17E-37    | 2.57E-34    |
| ENSMMUG00000013284 | G protein regulated inducer of neurite outgrowth 1 [Source:VGNC Symbol;Acc:VGNC:72998]            | 2.86969963  | 0.003561691 | 0.018964506 |
| ENSMMUG00000010466 | solute carrier family 38 member 9 [Source:VGNC Symbol;Acc:VGNC:77574]                             | 2.870873749 | 1.79E-14    | 1.16E-12    |
| ENSMMUG00000053984 |                                                                                                   | 2.872139561 | 1.48E-06    | 2.46E-05    |
| ENSMMUG00000016579 | selectin L [Source:NCBI gene;Acc:701419]                                                          | 2.872679507 | 2.19E-36    | 1.58E-33    |
| ENSMMUG00000057539 |                                                                                                   | 2.87733107  | 3.94E-09    | 1.15E-07    |

|                    |                                                                                                            |             |             |             |
|--------------------|------------------------------------------------------------------------------------------------------------|-------------|-------------|-------------|
| ENSMMUG00000064694 | AHNAK nucleoprotein 2 [Source:NCBI gene;Acc:707626]                                                        | 2.87936961  | 0.006013702 | 0.029259016 |
| ENSMMUG00000016929 | proline rich and Gla domain 3 [Source:VGNC Symbol;Acc:VGNC:76350]                                          | 2.88536175  | 1.23E-08    | 3.24E-07    |
| ENSMMUG00000057499 |                                                                                                            | 2.886577105 | 7.65E-09    | 2.08E-07    |
| ENSMMUG00000000376 | bridging integrator 1 [Source:VGNC Symbol;Acc:VGNC:70251]                                                  | 2.896104997 | 5.10E-05    | 0.000553587 |
| ENSMMUG00000007528 | chordin [Source:VGNC Symbol;Acc:VGNC:71042]                                                                | 2.897758103 | 2.68E-18    | 2.99E-16    |
| ENSMMUG00000009312 | leukotriene A4 hydrolase [Source:VGNC Symbol;Acc:VGNC:74453]                                               | 2.898302906 | 1.54E-14    | 1.01E-12    |
| ENSMMUG00000009668 | transmembrane and coiled-coil domains 5A [Source:VGNC Symbol;Acc:VGNC:79725]                               | 2.907539804 | 0.001326315 | 0.00853673  |
| ENSMMUG00000006066 | phosphatidylcholine transfer protein [Source:VGNC Symbol;Acc:VGNC:75789]                                   | 2.910829398 | 3.16E-21    | 5.32E-19    |
| ENSMMUG00000064341 | U6 spliceosomal RNA [Source:RFAM;Acc:RF00026]                                                              | 2.911809411 | 0.005821941 | 0.028469574 |
| ENSMMUG00000053406 |                                                                                                            | 2.915535287 | 0.002441675 | 0.014056424 |
| ENSMMUG00000020534 | p21 (RAC1) activated kinase 6 [Source:NCBI gene;Acc:701589]                                                | 2.93349669  | 1.16E-33    | 6.84E-31    |
| ENSMMUG00000013136 | Y-box binding protein 1 [Source:NCBI gene;Acc:700140]                                                      | 2.935916754 | 0.007801304 | 0.036101896 |
| ENSMMUG00000000790 | ankyrin repeat domain 17 [Source:VGNC Symbol;Acc:VGNC:84240]                                               | 2.937321285 | 6.30E-26    | 2.15E-23    |
| ENSMMUG00000019306 | indoleamine 2,3-dioxygenase 2 [Source:VGNC Symbol;Acc:VGNC:84005]                                          | 2.938138921 | 0.002618998 | 0.014918401 |
| ENSMMUG00000061031 |                                                                                                            | 2.941164432 | 3.82E-19    | 4.96E-17    |
| ENSMMUG00000002917 | single Ig IL-1-related receptor [Source:NCBI gene;Acc:100425060]                                           | 2.941344656 | 6.84E-11    | 2.73E-09    |
| ENSMMUG00000064730 |                                                                                                            | 2.944276937 | 8.27E-18    | 8.80E-16    |
| ENSMMUG00000044817 | nucleoporin 62 [Source:NCBI gene;Acc:100426308]                                                            | 2.947989893 | 2.72E-40    | 3.53E-37    |
| ENSMMUG00000051537 |                                                                                                            | 2.957963039 | 1.78E-06    | 2.88E-05    |
| ENSMMUG00000014707 | cadherin EGF LAG seven-pass G-type receptor 3 [Source:VGNC Symbol;Acc:VGNC:71148]                          | 2.967204254 | 1.19E-08    | 3.14E-07    |
| ENSMMUG00000010837 | VRK serine/threonine kinase 3 [Source:VGNC Symbol;Acc:VGNC:81605]                                          | 2.977985197 | 6.99E-07    | 1.25E-05    |
| ENSMMUG00000021477 | ATPase H+ transporting V1 subunit E1 [Source:NCBI gene;Acc:709739]                                         | 2.985195053 | 0.000417967 | 0.003257382 |
| ENSMMUG00000057331 | RNA terminal phosphate cyclase like 1 [Source:NCBI gene;Acc:694568]                                        | 2.995680267 | 1.93E-40    | 3.12E-37    |
| ENSMMUG00000016737 | contactin 5 [Source:VGNC Symbol;Acc:VGNC:71287]                                                            | 3.003691853 | 0.002021033 | 0.012002117 |
| ENSMMUG00000014397 | NCK associated protein 1 [Source:VGNC Symbol;Acc:VGNC:75143]                                               | 3.005419248 | 8.71E-14    | 5.19E-12    |
| ENSMMUG00000005554 | mediator complex subunit 29 [Source:VGNC Symbol;Acc:VGNC:74557]                                            | 3.026816478 | 2.70E-12    | 1.33E-10    |
| ENSMMUG00000060750 | Metazoan signal recognition particle RNA [Source:RFAM;Acc:RF00017]                                         | 3.037036936 | 0.003696982 | 0.019532588 |
| ENSMMUG00000049755 | leucine rich repeat containing 3 [Source:NCBI gene;Acc:712418]                                             | 3.046011206 | 1.01E-05    | 0.000133042 |
| ENSMMUG00000017503 | SDA1 domain containing 1 [Source:NCBI gene;Acc:700863]                                                     | 3.04723874  | 1.95E-05    | 0.000238586 |
| ENSMMUG00000023286 | UPF1 RNA helicase and ATPase [Source:VGNC Symbol;Acc:VGNC:79971]                                           | 3.047677257 | 1.89E-26    | 6.62E-24    |
| ENSMMUG00000001475 | transmembrane protein with EGF like and two follistatin like domains 2 [Source:VGNC Symbol;Acc:VGNC:78569] | 3.048090127 | 3.54E-08    | 8.30E-07    |
| ENSMMUG00000054052 | sialic acid binding Ig like lectin 11 [Source:NCBI gene;Acc:719127]                                        | 3.071744958 | 0.000239378 | 0.00205163  |
| ENSMMUG00000011914 | prospero homeobox 1 [Source:VGNC Symbol;Acc:VGNC:76427]                                                    | 3.074749262 | 5.62E-06    | 7.98E-05    |
| ENSMMUG00000017380 | neuregulin 3 [Source:NCBI gene;Acc:699268]                                                                 | 3.078264563 | 0.000602084 | 0.004421602 |
| ENSMMUG00000005106 | unc-45 myosin chaperone A [Source:VGNC Symbol;Acc:VGNC:79858]                                              | 3.081059044 | 0.001931476 | 0.01159153  |
| ENSMMUG00000005625 | fibrosin [Source:NCBI gene;Acc:712741]                                                                     | 3.082078175 | 0.000929684 | 0.006369368 |
| ENSMMUG00000000544 | collagen type VI alpha 1 chain [Source:VGNC Symbol;Acc:VGNC:82084]                                         | 3.082748123 | 0.002120861 | 0.012494784 |
| ENSMMUG00000058700 | Metazoan signal recognition particle RNA [Source:RFAM;Acc:RF00017]                                         | 3.092968317 | 0.006903091 | 0.032715308 |
| ENSMMUG00000063198 |                                                                                                            | 3.105485475 | 0.000147892 | 0.001360057 |
| ENSMMUG00000012147 | collagen type V alpha 1 chain [Source:NCBI gene;Acc:722014]                                                | 3.11672704  | 6.97E-31    | 3.48E-28    |
| ENSMMUG00000015468 | checkpoint with forkhead and ring finger domains [Source:VGNC Symbol;Acc:VGNC:71064]                       | 3.117637123 | 9.13E-16    | 7.36E-14    |
| ENSMMUG00000057813 |                                                                                                            | 3.122600681 | 7.92E-07    | 1.40E-05    |
| ENSMMUG00000005997 | cell division cycle 14B [Source:NCBI gene;Acc:710300]                                                      | 3.124775474 | 8.34E-05    | 0.000835235 |
| ENSMMUG00000056393 |                                                                                                            | 3.127782054 | 0.011180934 | 0.047901343 |
| ENSMMUG00000005355 | TIMP metalloproteinase inhibitor 2 [Source:NCBI gene;Acc:574357]                                           | 3.131495784 | 0.000370164 | 0.002963138 |
| ENSMMUG00000026950 | microRNA 101-2 [Source:HGNC Symbol;Acc:HGNC:31489]                                                         | 3.137935491 | 1.42E-05    | 0.000177911 |
| ENSMMUG00000033550 |                                                                                                            | 3.156514259 | 0.003478474 | 0.01860539  |
| ENSMMUG00000027541 | Small nucleolar RNA SNORA70 [Source:RFAM;Acc:RF00156]                                                      | 3.157140534 | 0.005209925 | 0.025991539 |
| ENSMMUG00000055918 |                                                                                                            | 3.16418876  | 0.001193015 | 0.007818478 |
| ENSMMUG00000059175 |                                                                                                            | 3.183217226 | 1.09E-27    | 4.14E-25    |
| ENSMMUG00000019961 | protein phosphatase 1 regulatory subunit 18 [Source:NCBI gene;Acc:712176]                                  | 3.187505927 | 0.001815167 | 0.011058032 |

|                    |                                                                                              |             |             |             |
|--------------------|----------------------------------------------------------------------------------------------|-------------|-------------|-------------|
| ENSMMUG00000064146 | Metazoan signal recognition particle RNA [Source:RFAM;Acc:RF00017]                           | 3.192304684 | 5.10E-15    | 3.63E-13    |
| ENSMMUG00000057520 |                                                                                              | 3.202335026 | 0.006862479 | 0.03254661  |
| ENSMMUG00000053790 |                                                                                              | 3.205149698 | 1.88E-37    | 1.63E-34    |
| ENSMMUG00000063346 |                                                                                              | 3.222553985 | 0.000436776 | 0.003369564 |
| ENSMMUG00000042598 | transmembrane protein 18 [Source:NCBI gene;Acc:721515]                                       | 3.236821489 | 5.11E-18    | 5.61E-16    |
| ENSMMUG00000020668 | cyclin E1 [Source:VGNC Symbol;Acc:VGNC:70727]                                                | 3.241893557 | 6.06E-46    | 2.62E-42    |
| ENSMMUG00000050543 |                                                                                              | 3.291521027 | 5.95E-23    | 1.32E-20    |
| ENSMMUG00000035160 | U4 spliceosomal RNA [Source:RFAM;Acc:RF00015]                                                | 3.3159477   | 0.005958426 | 0.029011833 |
| ENSMMUG00000021019 | E3 SUMO-protein ligase RanBP2 [Source:NCBI gene;Acc:694823]                                  | 3.328231161 | 0.000373527 | 0.002984539 |
| ENSMMUG00000021062 | CD177 molecule [Source:VGNC Symbol;Acc:VGNC:70912]                                           | 3.330574498 | 7.91E-07    | 1.40E-05    |
| ENSMMUG00000053611 | stromal cell derived factor 2 [Source:NCBI gene;Acc:716189]                                  | 3.338361708 | 0.000119302 | 0.001125042 |
| ENSMMUG00000057983 |                                                                                              | 3.340689612 | 0.003174883 | 0.017401853 |
| ENSMMUG00000001058 | tetratricopeptide repeat domain 28 [Source:VGNC Symbol;Acc:VGNC:79785]                       | 3.343383387 | 2.53E-40    | 3.53E-37    |
| ENSMMUG00000055022 | Metazoan signal recognition particle RNA [Source:RFAM;Acc:RF00017]                           | 3.345737514 | 0.00338952  | 0.018265119 |
| ENSMMUG00000053083 | C2 calcium dependent domain containing 4C [Source:NCBI gene;Acc:100424440]                   | 3.351956411 | 9.22E-14    | 5.46E-12    |
| ENSMMUG00000005415 | olfactory receptor, family 2, subfamily B, member 3 [Source:NCBI gene;Acc:708747]            | 3.355234662 | 0.009635281 | 0.042622723 |
| ENSMMUG00000001845 | DNA polymerase epsilon 4, accessory subunit [Source:VGNC Symbol;Acc:VGNC:76065]              | 3.355965869 | 1.36E-20    | 2.10E-18    |
| ENSMMUG00000059321 |                                                                                              | 3.383778535 | 0.00174084  | 0.010685494 |
| ENSMMUG00000000375 | pleckstrin homology and RhoGEF domain containing G6 [Source:VGNC Symbol;Acc:VGNC:76110]      | 3.409948927 | 7.76E-62    | 7.15E-58    |
| ENSMMUG00000010632 | family with sequence similarity 81 member B [Source:VGNC Symbol;Acc:VGNC:72365]              | 3.447102928 | 0.00243605  | 0.014036497 |
| ENSMMUG00000018298 | killer cell lectin like receptor D1 [Source:NCBI gene;Acc:574145]                            | 3.449038534 | 0.000313393 | 0.002585242 |
| ENSMMUG00000006853 | crystallin beta B2 [Source:NCBI gene;Acc:100144420]                                          | 3.461625579 | 4.52E-13    | 2.44E-11    |
| ENSMMUG00000010614 | C-C motif chemokine ligand 25 [Source:VGNC Symbol;Acc:VGNC:70700]                            | 3.467074444 | 0.001901674 | 0.011450638 |
| ENSMMUG00000024668 | Y RNA [Source:RFAM;Acc:RF00019]                                                              | 3.469983293 | 0.01034607  | 0.045065661 |
| ENSMMUG00000053627 |                                                                                              | 3.495016736 | 8.78E-06    | 0.000117796 |
| ENSMMUG00000004470 | CD9 molecule [Source:VGNC Symbol;Acc:VGNC:70787]                                             | 3.502798284 | 1.35E-05    | 0.000171004 |
| ENSMMUG00000021564 | lysine demethylase 2B [Source:VGNC Symbol;Acc:VGNC:81425]                                    | 3.505826047 | 5.52E-06    | 7.85E-05    |
| ENSMMUG00000053220 | olfactory receptor 111 [Source:NCBI gene;Acc:719077]                                         | 3.509379079 | 0.000133467 | 0.001238815 |
| ENSMMUG00000000632 | SH3 binding domain protein 5 like [Source:VGNC Symbol;Acc:VGNC:77334]                        | 3.513722494 | 0.000224319 | 0.001945694 |
| ENSMMUG00000022437 | peptidyl arginine deiminase 6 [Source:VGNC Symbol;Acc:VGNC:75657]                            | 3.517445583 | 0.001185229 | 0.007779224 |
| ENSMMUG00000023310 | tetraspanin 12 [Source:VGNC Symbol;Acc:VGNC:79328]                                           | 3.51990588  | 0.009410287 | 0.041846431 |
| ENSMMUG00000028947 | complement factor D [Source:VGNC Symbol;Acc:VGNC:71115]                                      | 3.524090317 | 1.10E-61    | 7.15E-58    |
| ENSMMUG00000059084 |                                                                                              | 3.539905101 | 0.006853786 | 0.032529162 |
| ENSMMUG00000062092 |                                                                                              | 3.547477644 | 0.000153004 | 0.00140101  |
| ENSMMUG00000063913 | endogenous retrovirus group K member 7 Env polyprotein-like [Source:NCBI gene;Acc:114674933] | 3.552539107 | 6.24E-05    | 0.000654969 |
| ENSMMUG00000022282 | collagen type IV alpha 2 chain [Source:NCBI gene;Acc:100429807]                              | 3.567008622 | 0.000112839 | 0.001074251 |
| ENSMMUG00000063699 |                                                                                              | 3.590244211 | 0.007394108 | 0.034600054 |
| ENSMMUG00000028948 | azurocidin 1 [Source:VGNC Symbol;Acc:VGNC:70202]                                             | 3.594928983 | 1.09E-08    | 2.87E-07    |
| ENSMMUG00000022893 | von Willebrand factor [Source:VGNC Symbol;Acc:VGNC:78778]                                    | 3.596920317 | 7.66E-16    | 6.33E-14    |
| ENSMMUG00000004749 | PPARG coactivator 1 beta [Source:VGNC Symbol;Acc:VGNC:76134]                                 | 3.606393221 | 2.18E-06    | 3.45E-05    |
| ENSMMUG00000013477 | creatine kinase, M-type [Source:VGNC Symbol;Acc:VGNC:71230]                                  | 3.608576184 | 8.23E-35    | 5.34E-32    |
| ENSMMUG00000001967 | late cornified envelope 5A [Source:VGNC Symbol;Acc:VGNC:74061]                               | 3.616917324 | 0.007407942 | 0.034639803 |
| ENSMMUG00000008784 | lipopolysaccharide induced TNF factor [Source:NCBI gene;Acc:711743]                          | 3.61997364  | 0.002121828 | 0.012494784 |
| ENSMMUG00000008791 | CD47 molecule [Source:VGNC Symbol;Acc:VGNC:70767]                                            | 3.628796951 | 5.07E-38    | 5.49E-35    |
| ENSMMUG00000061935 |                                                                                              | 3.633480109 | 2.71E-22    | 4.96E-20    |
| ENSMMUG00000056794 | cystatin E/M [Source:NCBI gene;Acc:714999]                                                   | 3.662964834 | 0.004642578 | 0.023670761 |
| ENSMMUG00000000276 | NACC family member 2 [Source:VGNC Symbol;Acc:VGNC:75013]                                     | 3.673271669 | 0.000658855 | 0.004760193 |
| ENSMMUG00000011878 | poly(A) binding protein interacting protein 1 [Source:VGNC Symbol;Acc:VGNC:84476]            | 3.677852041 | 1.75E-35    | 1.19E-32    |
| ENSMMUG00000016549 | matrix metalloproteinase 9 [Source:VGNC Symbol;Acc:VGNC:74903]                               | 3.701846037 | 2.17E-15    | 1.62E-13    |
| ENSMMUG00000057632 |                                                                                              | 3.702781722 | 2.70E-18    | 3.00E-16    |
| ENSMMUG00000018549 | zinc finger protein 786 [Source:VGNC Symbol;Acc:VGNC:79338]                                  | 3.707265521 | 1.40E-11    | 6.22E-10    |



|                    |                                                                                                              |             |             |             |
|--------------------|--------------------------------------------------------------------------------------------------------------|-------------|-------------|-------------|
| ENSMMUG00000012405 | transient receptor potential cation channel subfamily C member 1 [Source:VGNC Symbol;Acc:VGNC:78651]         | 3.711731719 | 9.59E-16    | 7.68E-14    |
| ENSMMUG0000001338  | antizyme inhibitor 1 [Source:VGNC Symbol;Acc:VGNC:70080]                                                     | 3.719835453 | 2.64E-05    | 0.000308882 |
| ENSMMUG0000002267  | laminin subunit gamma 3 [Source:NCBI gene;Acc:722430]                                                        | 3.726670934 | 2.65E-06    | 4.10E-05    |
| ENSMMUG00000017822 | periplakin [Source:VGNC Symbol;Acc:VGNC:76240]                                                               | 3.733861004 | 8.21E-17    | 7.78E-15    |
| ENSMMUG00000064095 |                                                                                                              | 3.740376207 | 2.04E-05    | 0.000247511 |
| ENSMMUG00000057481 |                                                                                                              | 3.742970355 | 0.000236788 | 0.00203212  |
| ENSMMUG00000062294 |                                                                                                              | 3.774332767 | 0.008051595 | 0.036975791 |
| ENSMMUG00000024537 |                                                                                                              | 3.779281209 | 1.23E-06    | 2.07E-05    |
| ENSMMUG00000058817 |                                                                                                              | 3.834498475 | 1.99E-22    | 3.85E-20    |
| ENSMMUG00000046169 |                                                                                                              | 3.835560722 | 9.35E-32    | 5.27E-29    |
| ENSMMUG00000052168 |                                                                                                              | 3.840462742 | 1.62E-37    | 1.51E-34    |
| ENSMMUG00000011064 | synaptosome associated protein 25 [Source:VGNC Symbol;Acc:VGNC:77663]                                        | 3.841799533 | 1.68E-11    | 7.31E-10    |
| ENSMMUG00000052785 | extracellular leucine rich repeat and fibronectin type III domain containing 2 [Source:NCBI gene;Acc:697071] | 3.842285001 | 0.004242897 | 0.021969604 |
| ENSMMUG00000018396 | HAUS augmin like complex subunit 6 [Source:VGNC Symbol;Acc:VGNC:73237]                                       | 3.856534991 | 6.08E-29    | 2.46E-26    |
| ENSMMUG00000060184 | SEC61 translocon subunit gamma [Source:NCBI gene;Acc:716898]                                                 | 3.950688899 | 5.80E-05    | 0.000615302 |
| ENSMMUG0000004330  | peptidase domain containing associated with muscle regeneration 1 [Source:VGNC Symbol;Acc:VGNC:75673]        | 3.955595348 | 1.05E-06    | 1.81E-05    |
| ENSMMUG00000022884 | glutamate-ammonia ligase [Source:NCBI gene;Acc:715952]                                                       | 3.961222387 | 3.58E-08    | 8.36E-07    |
| ENSMMUG00000065319 |                                                                                                              | 3.99633178  | 8.17E-06    | 0.000110546 |
| ENSMMUG00000050799 |                                                                                                              | 4.031254365 | 0.010043034 | 0.043937428 |
| ENSMMUG00000017930 | striatin 4 [Source:VGNC Symbol;Acc:VGNC:78128]                                                               | 4.047897202 | 6.01E-23    | 1.32E-20    |
| ENSMMUG00000005920 | N-acetyltransferase 1 [Source:VGNC Symbol;Acc:VGNC:75133]                                                    | 4.070584692 | 8.36E-05    | 0.000835235 |
| ENSMMUG00000031684 | KRAB box domain containing 1 [Source:NCBI gene;Acc:717189]                                                   | 4.129302468 | 0.000107793 | 0.001036859 |
| ENSMMUG00000029186 | exocyst complex component 3 like 4 [Source:VGNC Symbol;Acc:VGNC:72305]                                       | 4.131181525 | 0.001217658 | 0.007951854 |
| ENSMMUG00000003926 | BCL2 like 12 [Source:NCBI gene;Acc:718981]                                                                   | 4.136829281 | 0.007100047 | 0.033514083 |
| ENSMMUG00000023403 | GTP binding protein 3, mitochondrial [Source:VGNC Symbol;Acc:VGNC:73170]                                     | 4.146245463 | 9.28E-11    | 3.60E-09    |
| ENSMMUG00000004982 | activin A receptor like type 1 [Source:VGNC Symbol;Acc:VGNC:69451]                                           | 4.150772134 | 0.001972596 | 0.011801015 |
| ENSMMUG00000005737 | SLC9A3 regulator 1 [Source:VGNC Symbol;Acc:VGNC:77639]                                                       | 4.155328355 | 2.10E-07    | 4.20E-06    |
| ENSMMUG00000057671 |                                                                                                              | 4.168113503 | 0.010624203 | 0.045953219 |
| ENSMMUG00000062091 |                                                                                                              | 4.168795114 | 2.78E-09    | 8.36E-08    |
| ENSMMUG00000003874 | interferon induced transmembrane protein 10 [Source:NCBI gene;Acc:721010]                                    | 4.177527886 | 2.05E-36    | 1.56E-33    |
| ENSMMUG00000064014 |                                                                                                              | 4.207970367 | 0.007105744 | 0.033528777 |
| ENSMMUG00000009499 | mesoderm specific transcript [Source:VGNC Symbol;Acc:VGNC:74707]                                             | 4.241590791 | 3.97E-44    | 1.29E-40    |
| ENSMMUG00000059985 |                                                                                                              | 4.265189018 | 0.001542551 | 0.009678985 |
| ENSMMUG00000011344 | solute carrier family 52 member 1 [Source:VGNC Symbol;Acc:VGNC:77795]                                        | 4.280862654 | 6.71E-07    | 1.21E-05    |
| ENSMMUG00000049267 |                                                                                                              | 4.299661339 | 4.59E-15    | 3.33E-13    |
| ENSMMUG00000013798 | fatty acid desaturase 1 [Source:VGNC Symbol;Acc:VGNC:72471]                                                  | 4.311737614 | 6.59E-31    | 3.42E-28    |
| ENSMMUG00000059782 |                                                                                                              | 4.327730792 | 3.70E-07    | 6.99E-06    |
| ENSMMUG00000043396 | Metazoan signal recognition particle RNA [Source:RFAM;Acc:RF00017]                                           | 4.332575126 | 7.33E-06    | 0.000100563 |
| ENSMMUG00000006655 | myelin regulatory factor [Source:VGNC Symbol;Acc:VGNC:74949]                                                 | 4.344106845 | 1.05E-08    | 2.79E-07    |
| ENSMMUG00000057179 | cation channel sperm associated 1 [Source:NCBI gene;Acc:721869]                                              | 4.357209655 | 6.63E-17    | 6.33E-15    |
| ENSMMUG00000029652 | mitogen-activated protein kinase 6 [Source:NCBI gene;Acc:694998]                                             | 4.385240524 | 0.01032207  | 0.044991325 |
| ENSMMUG00000011682 | ribonuclease P/MRP subunit p21 [Source:NCBI gene;Acc:713056]                                                 | 4.406840247 | 1.25E-06    | 2.11E-05    |
| ENSMMUG00000013493 | ornithine carbamoyltransferase [Source:VGNC Symbol;Acc:VGNC:75723]                                           | 4.456189774 | 0.007588375 | 0.035312882 |
| ENSMMUG00000021157 | TBC1 domain family member 31 [Source:VGNC Symbol;Acc:VGNC:84121]                                             | 4.475080386 | 8.82E-09    | 2.38E-07    |
| ENSMMUG00000016999 | KIAA0232 [Source:VGNC Symbol;Acc:VGNC:73922]                                                                 | 4.48622769  | 0.000645347 | 0.004683728 |
| ENSMMUG00000056248 |                                                                                                              | 4.508518862 | 6.13E-34    | 3.79E-31    |
| ENSMMUG00000022921 | solute carrier family 2 member 12 [Source:VGNC Symbol;Acc:VGNC:77503]                                        | 4.533066475 | 4.13E-43    | 8.92E-40    |
| ENSMMUG00000048462 | Metazoan signal recognition particle RNA [Source:RFAM;Acc:RF00017]                                           | 4.556801906 | 0.010868604 | 0.046817351 |
| ENSMMUG00000061974 |                                                                                                              | 4.587954666 | 0.010396537 | 0.045239929 |
| ENSMMUG00000004801 | COPI coat complex subunit gamma 2 [Source:VGNC Symbol;Acc:VGNC:71315]                                        | 4.610187018 | 3.83E-43    | 8.92E-40    |
| ENSMMUG00000014738 | bromodomain containing 9 [Source:VGNC Symbol;Acc:VGNC:70386]                                                 | 4.610195675 | 0.002587601 | 0.014778482 |

|                     |                                                                                                  |             |             |             |
|---------------------|--------------------------------------------------------------------------------------------------|-------------|-------------|-------------|
| ENSMMUG00000060308  |                                                                                                  | 4.619276024 | 0.005603297 | 0.027614276 |
| ENSMMUG00000020010  | cadherin 17 [Source:VGNC Symbol;Acc:VGNC:70810]                                                  | 4.663560124 | 0.004766599 | 0.024151266 |
| ENSMMUG00000014227  | cholinergic receptor muscarinic 5 [Source:VGNC Symbol;Acc:VGNC:71044]                            | 4.696986948 | 0.001761981 | 0.01081015  |
| ENSMMUG00000063779  |                                                                                                  | 4.708901558 | 7.54E-42    | 1.40E-38    |
| ENSMMUG00000051037  |                                                                                                  | 4.718648478 | 1.29E-09    | 4.10E-08    |
| ENSMMUG00000003005  | MFNG O-fucosylpeptide 3-beta-N-acetylglucosaminyltransferase [Source:VGNC Symbol;Acc:VGNC:74712] | 4.751512466 | 0.000885858 | 0.006104562 |
| ENSMMUG00000049298  | cholecystokinin A receptor [Source:NCBI gene;Acc:694742]                                         | 4.851396991 | 0.002725307 | 0.015395553 |
| ENSMMUG00000054736  |                                                                                                  | 4.881758645 | 2.17E-11    | 9.27E-10    |
| ENSMMUG00000016553  | solute carrier family 12 member 5 [Source:VGNC Symbol;Acc:VGNC:77471]                            | 4.94110727  | 0.001856851 | 0.011253851 |
| ENSMMUG00000050436  |                                                                                                  | 4.948810419 | 0.00480774  | 0.024312796 |
| ENSMMUG00000004274  | myotubularin related protein 8 [Source:VGNC Symbol;Acc:VGNC:74974]                               | 5.023450446 | 0.00108143  | 0.007198548 |
| ENSMMUG00000019593  | synaptophysin like 1 [Source:VGNC Symbol;Acc:VGNC:78073]                                         | 5.024539616 | 0.001217391 | 0.007951854 |
| ENSMMUG00000011026  | dynein axonemal heavy chain 5 [Source:VGNC Symbol;Acc:VGNC:71942]                                | 5.037061164 | 0.001846626 | 0.011228595 |
| ENSMMUG00000011564  | transmembrane channel like 3 [Source:VGNC Symbol;Acc:VGNC:79360]                                 | 5.058089025 | 0.000246404 | 0.002103252 |
| ENSMMUG00000056168  |                                                                                                  | 5.058757718 | 0.001588614 | 0.009902433 |
| ENSMMUG00000052569  |                                                                                                  | 5.118383144 | 1.20E-19    | 1.60E-17    |
| ENSMMUG00000026975  | mml-mir-206 [Source:miRBase;Acc:MI0007667]                                                       | 5.126081077 | 0.000272524 | 0.002296282 |
| ENSMMUG00000003780  | tight junction protein 2 [Source:NCBI gene;Acc:699586]                                           | 5.158699718 | 0.000868903 | 0.006010067 |
| ENSMMUG00000060366  |                                                                                                  | 5.278194117 | 0.000426577 | 0.003310566 |
| ENSMMUG00000058370  | taste receptor type 2 member 62 [Source:NCBI gene;Acc:704388]                                    | 5.301051651 | 5.06E-10    | 1.72E-08    |
| ENSMMUG00000057447  |                                                                                                  | 5.353408451 | 0.00067262  | 0.004843461 |
| ENSMMUG00000053561  |                                                                                                  | 5.462965604 | 0.001764438 | 0.010819868 |
| ENSMMUG00000006237  | carboxypeptidase Z [Source:VGNC Symbol;Acc:VGNC:71478]                                           | 5.526324461 | 0.000938229 | 0.006419482 |
| ENSMMUG00000001820  | regulator of G protein signaling 6 [Source:VGNC Symbol;Acc:VGNC:76691]                           | 5.676856856 | 1.48E-05    | 0.000185079 |
| ENSMMUG00000062496  |                                                                                                  | 5.788845438 | 9.03E-05    | 0.000890851 |
| ENSMMUG00000059335  |                                                                                                  | 5.866276993 | 2.91E-05    | 0.000336005 |
| ENSMMUG00000057785  |                                                                                                  | 5.940703329 | 1.40E-05    | 0.000176044 |
| ENSMMUG00000047465  | Metazoan signal recognition particle RNA [Source:RFAM;Acc:RF00017]                               | 5.986734932 | 6.50E-06    | 9.08E-05    |
| ENSMMUG00000006851  | SPARC (osteonectin), cwcv and kazal like domains proteoglycan 3 [Source:NCBI gene;Acc:705964]    | 6.107316735 | 8.37E-38    | 8.36E-35    |
| ENSMMUG000000031540 | purinergic receptor P2Y1 [Source:VGNC Symbol;Acc:VGNC:75737]                                     | 6.400477341 | 2.13E-06    | 3.39E-05    |
| ENSMMUG00000004309  | APC membrane recruitment protein 1 [Source:VGNC Symbol;Acc:VGNC:69716]                           | 6.437089462 | 2.14E-06    | 3.40E-05    |
| ENSMMUG00000001989  | RNA polymerase II subunit D [Source:VGNC Symbol;Acc:VGNC:76213]                                  | 7.469326061 | 6.60E-09    | 1.83E-07    |
| ENSMMUG00000027543  | Y RNA [Source:RFAM;Acc:RF00019]                                                                  | 7.860154245 | 0.001416235 | 0.009021636 |
| ENSMMUG00000049232  | AMMECR1 like [Source:VGNC Symbol;Acc:VGNC:84208]                                                 | 7.870894776 | 6.29E-09    | 1.76E-07    |



# Supp. Table 3

## A. Up-regulated Gene ID

### Survivors - SD1 vs. Baseline

| Ensembl Gene ID    | Description                                                                                                  |
|--------------------|--------------------------------------------------------------------------------------------------------------|
| ENSMMUG00000000419 | Rho GTPase activating protein 26 [Source:VGNC Symbol;Acc:VGNC:69846]                                         |
| ENSMMUG00000000421 | nuclear receptor subfamily 3 group C member 1 [Source:VGNC Symbol;Acc:VGNC:75515]                            |
| ENSMMUG00000000480 | KIAA1324 like [Source:VGNC Symbol;Acc:VGNC:73882]                                                            |
| ENSMMUG00000000591 | 6-phosphofructo-2-kinase/fructose-2,6-biphosphatase 4 [Source:VGNC Symbol;Acc:VGNC:75960]                    |
| ENSMMUG00000000629 | serpin family C member 1 [Source:VGNC Symbol;Acc:VGNC:77360]                                                 |
| ENSMMUG00000000644 | centrosomal protein 85 [Source:VGNC Symbol;Acc:VGNC:71096]                                                   |
| ENSMMUG00000000649 | UBX domain protein 11 [Source:VGNC Symbol;Acc:VGNC:79859]                                                    |
| ENSMMUG00000000706 | filamin B [Source:VGNC Symbol;Acc:VGNC:72672]                                                                |
| ENSMMUG00000000756 | transmembrane protein adipocyte associated 1 [Source:VGNC Symbol;Acc:VGNC:79848]                             |
| ENSMMUG00000000790 | ankyrin repeat domain 17 [Source:VGNC Symbol;Acc:VGNC:84240]                                                 |
| ENSMMUG00000000931 | solute carrier family 35 member A3 [Source:VGNC Symbol;Acc:VGNC:77461]                                       |
| ENSMMUG00000000951 | integrin subunit beta 2 [Source:VGNC Symbol;Acc:VGNC:73786]                                                  |
| ENSMMUG00000000953 | family with sequence similarity 207 member A [Source:VGNC Symbol;Acc:VGNC:72273]                             |
| ENSMMUG00000001060 | ryanodine receptor 2 [Source:VGNC Symbol;Acc:VGNC:76954]                                                     |
| ENSMMUG00000001105 | purinergic receptor P2Y12 [Source:VGNC Symbol;Acc:VGNC:75642]                                                |
| ENSMMUG00000001350 | HERPUD family member 2 [Source:VGNC Symbol;Acc:VGNC:73216]                                                   |
| ENSMMUG00000001397 | multiple C2 and transmembrane domain containing 1 [Source:VGNC Symbol;Acc:VGNC:74589]                        |
| ENSMMUG00000001485 | transmembrane protein 150C [Source:NCBI gene;Acc:694136]                                                     |
| ENSMMUG00000001616 | peptidyl arginine deiminase 2 [Source:VGNC Symbol;Acc:VGNC:75644]                                            |
| ENSMMUG00000001702 | succinyl-CoA:glutarate-CoA transferase [Source:VGNC Symbol;Acc:VGNC:81767]                                   |
| ENSMMUG00000001707 | amyloid beta precursor protein binding family B member 3 [Source:VGNC Symbol;Acc:VGNC:69869]                 |
| ENSMMUG00000001725 | solute carrier family 35 member A4 [Source:VGNC Symbol;Acc:VGNC:77532]                                       |
| ENSMMUG00000001753 | integrin subunit alpha 1 [Source:VGNC Symbol;Acc:VGNC:73772]                                                 |
| ENSMMUG00000001848 | sprouty RTK signaling antagonist 1 [Source:VGNC Symbol;Acc:VGNC:77867]                                       |
| ENSMMUG00000001879 | annexin A10 [Source:VGNC Symbol;Acc:VGNC:69945]                                                              |
| ENSMMUG00000001880 | DExD/H-box helicase 60 [Source:VGNC Symbol;Acc:VGNC:71711]                                                   |
| ENSMMUG00000001910 | heat shock protein family B (small) member 7 [Source:NCBI gene;Acc:696704]                                   |
| ENSMMUG00000001943 | GRAM domain containing 1C [Source:VGNC Symbol;Acc:VGNC:73007]                                                |
| ENSMMUG00000002063 | endoplasmic reticulum aminopeptidase 1 [Source:VGNC Symbol;Acc:VGNC:72066]                                   |
| ENSMMUG00000002217 | alkaline phosphatase, biomineralization associated [Source:VGNC Symbol;Acc:VGNC:69801]                       |
| ENSMMUG00000002411 | drebrin like [Source:NCBI gene;Acc:720621]                                                                   |
| ENSMMUG00000002422 | AE binding protein 1 [Source:VGNC Symbol;Acc:VGNC:80328]                                                     |
| ENSMMUG00000002423 | DNA polymerase delta 2, accessory subunit [Source:VGNC Symbol;Acc:VGNC:76203]                                |
| ENSMMUG00000002426 | myosin light chain 7 [Source:VGNC Symbol;Acc:VGNC:75002]                                                     |
| ENSMMUG00000002427 | glucokinase [Source:VGNC Symbol;Acc:VGNC:72901]                                                              |
| ENSMMUG00000002428 | zinc finger protein 800 [Source:VGNC Symbol;Acc:VGNC:79658]                                                  |
| ENSMMUG00000002433 | calcium/calmodulin dependent protein kinase II beta [Source:VGNC Symbol;Acc:VGNC:70524]                      |
| ENSMMUG00000002564 | Fraser extracellular matrix complex subunit 1 [Source:VGNC Symbol;Acc:VGNC:72743]                            |
| ENSMMUG00000002789 | solute carrier family 25 (mitochondrial carrier; phosphate carrier), member 24 [Source:NCBI gene;Acc:694803] |
| ENSMMUG00000002886 | Bardet-Biedl syndrome 9 [Source:NCBI gene;Acc:708412]                                                        |
| ENSMMUG00000002943 | glutaminyl-tRNA synthetase 1 [Source:VGNC Symbol;Acc:VGNC:76634]                                             |
| ENSMMUG00000002949 | motile sperm domain containing 3 [Source:VGNC Symbol;Acc:VGNC:74823]                                         |

ENSMMUG0000002950 transferrin receptor 2 [Source:VGNC Symbol;Acc:VGNC:81770]  
ENSMMUG0000002953 MAGE family member F1 [Source:VGNC Symbol;Acc:VGNC:74399]  
ENSMMUG0000002995 tripartite motif containing 24 [Source:VGNC Symbol;Acc:VGNC:78562]  
ENSMMUG0000003023 chaperonin containing TCP1 subunit 8 [Source:VGNC Symbol;Acc:VGNC:70749]  
ENSMMUG0000003067 endoplasmic reticulum-golgi intermediate compartment 1 [Source:VGNC Symbol;Acc:VGNC:82141]  
ENSMMUG0000003074 plexin B1 [Source:VGNC Symbol;Acc:VGNC:76187]  
ENSMMUG0000003131 interleukin 13 [Source:VGNC Symbol;Acc:VGNC:84393]  
ENSMMUG0000003167 cytohesin 3 [Source:VGNC Symbol;Acc:VGNC:71829]  
ENSMMUG0000003199 CD200 receptor 1 [Source:VGNC Symbol;Acc:VGNC:70845]  
ENSMMUG0000003267 zinc finger protein 362 [Source:NCBI gene;Acc:710013]  
ENSMMUG0000003283 extracellular leucine rich repeat and fibronectin type III domain containing 1 [Source:VGNC Symbol;Acc:VGNC:72204]  
ENSMMUG0000003363 Kruppel like factor 3 [Source:VGNC Symbol;Acc:VGNC:73840]  
ENSMMUG0000003457 protein kinase cAMP-activated catalytic subunit beta [Source:NCBI gene;Acc:709728]  
ENSMMUG0000003499 solute carrier family 36 member 1 [Source:VGNC Symbol;Acc:VGNC:77509]  
ENSMMUG0000003598 tripartite motif containing 7 [Source:VGNC Symbol;Acc:VGNC:79022]  
ENSMMUG0000003697 inositol polyphosphate-4-phosphatase type II B [Source:VGNC Symbol;Acc:VGNC:73748]  
ENSMMUG0000003739 mannosidase beta [Source:VGNC Symbol;Acc:VGNC:74486]  
ENSMMUG0000003750 PLAG1 like zinc finger 1 [Source:VGNC Symbol;Acc:VGNC:83444]  
ENSMMUG0000003827 albumin [Source:VGNC Symbol;Acc:VGNC:69782]  
ENSMMUG0000004002 CDC like kinase 4 [Source:VGNC Symbol;Acc:VGNC:71173]  
ENSMMUG0000004103 collagen type XI alpha 1 chain [Source:VGNC Symbol;Acc:VGNC:71289]  
ENSMMUG0000004149 eukaryotic translation initiation factor 4 gamma 3 [Source:NCBI gene;Acc:717555]  
ENSMMUG0000004175 transient receptor potential cation channel subfamily M member 2 [Source:VGNC Symbol;Acc:VGNC:78655]  
ENSMMUG0000004257 beta-secretase 2 [Source:VGNC Symbol;Acc:VGNC:70216]  
ENSMMUG0000004273 dedicator of cytokinesis 3 [Source:VGNC Symbol;Acc:VGNC:71967]  
ENSMMUG0000004472 collagen type XVIII alpha 1 chain [Source:VGNC Symbol;Acc:VGNC:81291]  
ENSMMUG0000004477 solute carrier family 19 member 1 [Source:VGNC Symbol;Acc:VGNC:77408]  
ENSMMUG0000004576 C-C motif chemokine receptor 3 [Source:VGNC Symbol;Acc:VGNC:70738]  
ENSMMUG0000004774 maestro heat like repeat family member 2B [Source:VGNC Symbol;Acc:VGNC:74837]  
ENSMMUG0000004801 COPI coat complex subunit gamma 2 [Source:VGNC Symbol;Acc:VGNC:71315]  
ENSMMUG0000004847 xylulokinase [Source:VGNC Symbol;Acc:VGNC:78815]  
ENSMMUG0000004996 monooxygenase DBH like 1 [Source:VGNC Symbol;Acc:VGNC:74800]  
ENSMMUG0000005070 ecotropic viral integration site 5 [Source:NCBI gene;Acc:706592]  
ENSMMUG0000005511 SON DNA binding protein [Source:VGNC Symbol;Acc:VGNC:77689]  
ENSMMUG0000005745 EYA transcriptional coactivator and phosphatase 4 [Source:VGNC Symbol;Acc:VGNC:72456]  
ENSMMUG0000005939 serpin family I member 1 [Source:VGNC Symbol;Acc:VGNC:77366]  
ENSMMUG0000005986 Kruppel like factor 17 [Source:NCBI gene;Acc:702810]  
ENSMMUG0000005992 zinc metalloproteinase STE24 [Source:VGNC Symbol;Acc:VGNC:78830]  
ENSMMUG0000006130 prolyl 4-hydroxylase, transmembrane [Source:VGNC Symbol;Acc:VGNC:75693]  
ENSMMUG0000006284 adenylate kinase 2 [Source:VGNC Symbol;Acc:VGNC:69761]  
ENSMMUG0000006285 antizyme inhibitor 2 [Source:VGNC Symbol;Acc:VGNC:70153]  
ENSMMUG0000006291 protocadherin 12 [Source:VGNC Symbol;Acc:VGNC:75776]  
ENSMMUG0000006530 ATP/GTP binding protein like 3 [Source:VGNC Symbol;Acc:VGNC:69723]  
ENSMMUG0000006596 CCR4-NOT transcription complex subunit 10 [Source:VGNC Symbol;Acc:VGNC:71327]  
ENSMMUG0000006766 RUN domain containing 3B [Source:VGNC Symbol;Acc:VGNC:77129]  
ENSMMUG0000006786 protein tyrosine phosphatase non-receptor type 22 [Source:VGNC Symbol;Acc:VGNC:76603]  
ENSMMUG0000006836 chloride channel accessory 1 [Source:NCBI gene;Acc:574295]  
ENSMMUG0000006851 SPARC (osteonectin), cwcv and kazal like domains proteoglycan 3 [Source:NCBI gene;Acc:705964]  
ENSMMUG0000007195 tRNA splicing endonuclease subunit 2 [Source:VGNC Symbol;Acc:VGNC:82707]  
ENSMMUG0000007206 chromosome 3 C7orf50 homolog [Source:VGNC Symbol;Acc:VGNC:70609]  
ENSMMUG0000007208 G protein-coupled receptor 146 [Source:VGNC Symbol;Acc:VGNC:72979]

ENSMMUG0000007279 phosphatidylinositol glycan anchor biosynthesis class C [Source:VGNC Symbol;Acc:VGNC:75986]  
ENSMMUG0000007366  
ENSMMUG0000007387 G protein-coupled receptor kinase 7 [Source:VGNC Symbol;Acc:VGNC:73182]  
ENSMMUG0000007422 spermatogenesis associated 5 [Source:VGNC Symbol;Acc:VGNC:77952]  
ENSMMUG0000007528 chordin [Source:VGNC Symbol;Acc:VGNC:71042]  
ENSMMUG0000007760 centrosomal protein 70 [Source:VGNC Symbol;Acc:VGNC:71140]  
ENSMMUG0000007773 solute carrier organic anion transporter family member 4C1 [Source:VGNC Symbol;Acc:VGNC:77764]  
ENSMMUG0000007970 CCZ1 homolog, vacuolar protein trafficking and biogenesis associated [Source:NCBI gene;Acc:718128]  
ENSMMUG0000008031 zinc finger and BTB domain containing 17 [Source:VGNC Symbol;Acc:VGNC:78849]  
ENSMMUG0000008070 YEATS domain containing 2 [Source:VGNC Symbol;Acc:VGNC:79502]  
ENSMMUG0000008126 lysine demethylase 7A [Source:VGNC Symbol;Acc:VGNC:73886]  
ENSMMUG0000008162 fibroblast growth factor binding protein 1 [Source:VGNC Symbol;Acc:VGNC:72536]  
ENSMMUG0000008184 methyltransferase like 24 [Source:VGNC Symbol;Acc:VGNC:74552]  
ENSMMUG0000008189 cadherin related family member 3 [Source:HGNC Symbol;Acc:HGNC:26308]  
ENSMMUG0000008197 netrin G1 [Source:VGNC Symbol;Acc:VGNC:75450]  
ENSMMUG0000008379 adducin 1 [Source:VGNC Symbol;Acc:VGNC:69528]  
ENSMMUG0000008383 major facilitator superfamily domain containing 10 [Source:NCBI gene;Acc:720098]  
ENSMMUG0000008385 NOP14 nucleolar protein [Source:VGNC Symbol;Acc:VGNC:75194]  
ENSMMUG0000008514 lin-54 DREAM MuvB core complex component [Source:VGNC Symbol;Acc:VGNC:74123]  
ENSMMUG0000008518 phospholipid phosphatase related 5 [Source:NCBI gene;Acc:710549]  
ENSMMUG0000008791 CD47 molecule [Source:VGNC Symbol;Acc:VGNC:70767]  
ENSMMUG0000008828 BEN domain containing 5 [Source:NCBI gene;Acc:711150]  
ENSMMUG0000009040 cornulin [Source:VGNC Symbol;Acc:VGNC:71397]  
ENSMMUG0000009184 myelin protein zero like 1 [Source:NCBI gene;Acc:698437]  
ENSMMUG0000009197 myelin associated oligodendrocyte basic protein [Source:VGNC Symbol;Acc:VGNC:74908]  
ENSMMUG0000009324 replication factor C subunit 1 [Source:NCBI gene;Acc:698987]  
ENSMMUG0000009368 Abelson helper integration site 1 [Source:VGNC Symbol;Acc:VGNC:81010]  
ENSMMUG0000009437 zinc finger protein 619 [Source:VGNC Symbol;Acc:VGNC:82562]  
ENSMMUG0000009499 mesoderm specific transcript [Source:VGNC Symbol;Acc:VGNC:74707]  
ENSMMUG0000009508 TATA-box binding protein associated factor 5 like [Source:VGNC Symbol;Acc:VGNC:78148]  
ENSMMUG0000009564 NMD3 ribosome export adaptor [Source:VGNC Symbol;Acc:VGNC:75242]  
ENSMMUG0000001007 CD14 molecule [Source:VGNC Symbol;Acc:VGNC:70751]  
ENSMMUG00000010043 epidermal growth factor [Source:VGNC Symbol;Acc:VGNC:72171]  
ENSMMUG00000010058 ATR interacting protein [Source:VGNC Symbol;Acc:VGNC:84235]  
ENSMMUG00000010062 shisa family member 5 [Source:VGNC Symbol;Acc:VGNC:84082]  
ENSMMUG00000010308 cyclin I family member 2 [Source:VGNC Symbol;Acc:VGNC:70923]  
ENSMMUG00000010309 septin 8 [Source:VGNC Symbol;Acc:VGNC:77248]  
ENSMMUG00000010313 kinesin family member 3A [Source:VGNC Symbol;Acc:VGNC:74017]  
ENSMMUG00000010336 DOP1 leucine zipper like protein B [Source:VGNC Symbol;Acc:VGNC:71832]  
ENSMMUG00000010466 solute carrier family 38 member 9 [Source:VGNC Symbol;Acc:VGNC:77574]  
ENSMMUG00000010626 CD1c molecule [Source:VGNC Symbol;Acc:VGNC:70756]  
ENSMMUG00000010967 tripartite motif family like 2 [Source:VGNC Symbol;Acc:VGNC:79603]  
ENSMMUG00000011061 ankyrin repeat domain 31 [Source:VGNC Symbol;Acc:VGNC:84277]  
ENSMMUG00000011206 solute carrier family 9 member B1 [Source:NCBI gene;Acc:710949]  
ENSMMUG00000011347 DEAH-box helicase 36 [Source:VGNC Symbol;Acc:VGNC:71623]  
ENSMMUG00000011472 PWWP domain containing 2A [Source:VGNC Symbol;Acc:VGNC:76564]  
ENSMMUG00000011513 versican [Source:VGNC Symbol;Acc:VGNC:79445]  
ENSMMUG00000011878 poly(A) binding protein interacting protein 1 [Source:VGNC Symbol;Acc:VGNC:84476]  
ENSMMUG00000012068 signal induced proliferation associated 1 like 2 [Source:NCBI gene;Acc:100425123]  
ENSMMUG00000012405 transient receptor potential cation channel subfamily C member 1 [Source:VGNC Symbol;Acc:VGNC:78651]  
ENSMMUG00000012469 KIAA2013 [Source:VGNC Symbol;Acc:VGNC:73918]

ENSMMUG00000012529 pleckstrin homology domain containing A8 [Source:VGNC Symbol;Acc:VGNC:81741]  
ENSMMUG00000012635 zyxin [Source:VGNC Symbol;Acc:VGNC:78917]  
ENSMMUG00000012697 AT-rich interaction domain 1A [Source:VGNC Symbol;Acc:VGNC:69822]  
ENSMMUG00000013044 selectin P [Source:VGNC Symbol;Acc:VGNC:77157]  
ENSMMUG00000013098 aldo-keto reductase family 1 member B10 [Source:NCBI gene;Acc:713150]  
ENSMMUG00000013283 cadherin related family member 2 [Source:NCBI gene;Acc:697249]  
ENSMMUG00000013330 ectonucleoside triphosphate diphosphohydrolase 3 [Source:VGNC Symbol;Acc:VGNC:72226]  
ENSMMUG00000013385 elongator acetyltransferase complex subunit 6 [Source:VGNC Symbol;Acc:VGNC:72113]  
ENSMMUG00000014046 SREBF chaperone [Source:VGNC Symbol;Acc:VGNC:77140]  
ENSMMUG00000014076 AF4/FMR2 family member 1 [Source:VGNC Symbol;Acc:VGNC:69817]  
ENSMMUG00000014138 forkhead box J3 [Source:VGNC Symbol;Acc:VGNC:72596]  
ENSMMUG00000014537 bassoon presynaptic cytomatrix protein [Source:VGNC Symbol;Acc:VGNC:70284]  
ENSMMUG00000014674 golgin, RAB6 interacting [Source:VGNC Symbol;Acc:VGNC:73012]  
ENSMMUG00000014699  
ENSMMUG00000014720 NCK interacting protein with SH3 domain [Source:VGNC Symbol;Acc:VGNC:74960]  
ENSMMUG00000014868 OCIA domain containing 1 [Source:VGNC Symbol;Acc:VGNC:75409]  
ENSMMUG00000014874 GTP binding protein 8 (putative) [Source:VGNC Symbol;Acc:VGNC:84180]  
ENSMMUG00000014876 nucleolus and neural progenitor protein [Source:VGNC Symbol;Acc:VGNC:75244]  
ENSMMUG00000015115 terminal nucleotidyltransferase 5B [Source:VGNC Symbol;Acc:VGNC:79692]  
ENSMMUG00000015246 TBC1 domain family member 9 [Source:VGNC Symbol;Acc:VGNC:78193]  
ENSMMUG00000015288 adaptor related protein complex 3 subunit sigma 1 [Source:VGNC Symbol;Acc:VGNC:69867]  
ENSMMUG00000015477 lemur tyrosine kinase 2 [Source:VGNC Symbol;Acc:VGNC:74309]  
ENSMMUG00000015479 tectonin beta-propeller repeat containing 1 [Source:VGNC Symbol;Acc:VGNC:79348]  
ENSMMUG00000015555 ST3 beta-galactoside alpha-2,3-sialyltransferase 3 [Source:VGNC Symbol;Acc:VGNC:77828]  
ENSMMUG00000015685 zinc finger protein 804B [Source:VGNC Symbol;Acc:VGNC:81890]  
ENSMMUG00000015797 disco interacting protein 2 homolog A [Source:VGNC Symbol;Acc:VGNC:71641]  
ENSMMUG00000015922 formin binding protein 1 like [Source:VGNC Symbol;Acc:VGNC:72543]  
ENSMMUG00000015924 BCAR3 adaptor protein, NSP family member [Source:VGNC Symbol;Acc:VGNC:70235]  
ENSMMUG00000016056 potassium voltage-gated channel subfamily A member 10 [Source:VGNC Symbol;Acc:VGNC:73963]  
ENSMMUG00000016099 hedgehog acyltransferase [Source:NCBI gene;Acc:712333]  
ENSMMUG00000016191 ATP binding cassette subfamily A member 13 [Source:VGNC Symbol;Acc:VGNC:69402]  
ENSMMUG00000016273 maltase-glucoamylase [Source:VGNC Symbol;Acc:VGNC:74713]  
ENSMMUG00000016376 mitogen-activated protein kinase kinase kinase 5 [Source:VGNC Symbol;Acc:VGNC:74495]  
ENSMMUG00000016579 selectin L [Source:NCBI gene;Acc:701419]  
ENSMMUG00000016580 selectin E [Source:VGNC Symbol;Acc:VGNC:77156]  
ENSMMUG00000016582 chromosome 1 C1orf112 homolog [Source:VGNC Symbol;Acc:VGNC:70385]  
ENSMMUG00000016922 serine/threonine kinase 32B [Source:VGNC Symbol;Acc:VGNC:78114]  
ENSMMUG00000017056 Sad1 and UNC84 domain containing 1 [Source:VGNC Symbol;Acc:VGNC:78161]  
ENSMMUG00000017189 regulatory factor X6 [Source:VGNC Symbol;Acc:VGNC:76800]  
ENSMMUG00000017266 UPF0577 protein KIAA1324 [Source:NCBI gene;Acc:697670]  
ENSMMUG00000017510 membrane associated guanylate kinase, WW and PDZ domain containing 1 [Source:VGNC Symbol;Acc:VGNC:74499]  
ENSMMUG00000017701 myosin VIIA and Rab interacting protein [Source:VGNC Symbol;Acc:VGNC:74992]  
ENSMMUG00000017761 zinc finger protein 518B [Source:VGNC Symbol;Acc:VGNC:79802]  
ENSMMUG00000018166 MYB proto-oncogene, transcription factor [Source:VGNC Symbol;Acc:VGNC:75089]  
ENSMMUG00000018245 EPH receptor A2 [Source:VGNC Symbol;Acc:VGNC:72235]  
ENSMMUG00000018246 transmembrane and coiled-coil domains 6 [Source:VGNC Symbol;Acc:VGNC:84507]  
ENSMMUG00000018478 interferon regulatory factor 5 [Source:VGNC Symbol;Acc:VGNC:73763]  
ENSMMUG00000018549 zinc finger protein 786 [Source:VGNC Symbol;Acc:VGNC:79338]  
ENSMMUG00000018619 DENN domain containing 6A [Source:VGNC Symbol;Acc:VGNC:71726]  
ENSMMUG00000018664 collagen type IX alpha 2 chain [Source:VGNC Symbol;Acc:VGNC:71307]  
ENSMMUG00000018743 ubiquitin specific peptidase 25 [Source:VGNC Symbol;Acc:VGNC:78744]

ENSMMUG00000018790 activin A receptor type 2B [Source:VGNC Symbol;Acc:VGNC:69450]  
ENSMMUG00000018910 histidine rich glycoprotein [Source:VGNC Symbol;Acc:VGNC:73521]  
ENSMMUG00000019040 hydroxysteroid 17-beta dehydrogenase 13 [Source:VGNC Symbol;Acc:VGNC:73417]  
ENSMMUG00000019085 3-hydroxybutyrate dehydrogenase 2 [Source:VGNC Symbol;Acc:VGNC:70161]  
ENSMMUG00000019089 centromere protein E [Source:VGNC Symbol;Acc:VGNC:71008]  
ENSMMUG00000019527 DNA cross-link repair 1B [Source:VGNC Symbol;Acc:VGNC:71647]  
ENSMMUG00000019528 adaptor related protein complex 4 subunit beta 1 [Source:VGNC Symbol;Acc:VGNC:69972]  
ENSMMUG00000019536 potassium voltage-gated channel subfamily Q member 4 [Source:VGNC Symbol;Acc:VGNC:74007]  
ENSMMUG00000019563 collapsin response mediator protein 1 [Source:VGNC Symbol;Acc:VGNC:71494]  
ENSMMUG00000019764 dynactin subunit 4 [Source:VGNC Symbol;Acc:VGNC:71625]  
ENSMMUG00000019802 family with sequence similarity 133 member B [Source:NCBI gene;Acc:702054]  
ENSMMUG00000019820 SH3 domain and tetratricopeptide repeats 2 [Source:VGNC Symbol;Acc:VGNC:77337]  
ENSMMUG00000019830 Fc receptor like 2 [Source:VGNC Symbol;Acc:VGNC:72509]  
ENSMMUG00000019833 Fc receptor like 1 [Source:VGNC Symbol;Acc:VGNC:72528]  
ENSMMUG00000019835 CD5 molecule like [Source:VGNC Symbol;Acc:VGNC:70774]  
ENSMMUG00000019945 fibroblast growth factor receptor 3 [Source:VGNC Symbol;Acc:VGNC:72653]  
ENSMMUG00000019991 dopa decarboxylase [Source:VGNC Symbol;Acc:VGNC:71755]  
ENSMMUG00000020156 CD1d molecule [Source:VGNC Symbol;Acc:VGNC:70757]  
ENSMMUG00000020488 receptor accessory protein 5 [Source:VGNC Symbol;Acc:VGNC:76864]  
ENSMMUG00000020679 myozenin 3 [Source:VGNC Symbol;Acc:VGNC:74988]  
ENSMMUG00000020683 RNA binding motif protein 22 [Source:VGNC Symbol;Acc:VGNC:76535]  
ENSMMUG00000020726 dihydropyrimidine dehydrogenase [Source:VGNC Symbol;Acc:VGNC:71982]  
ENSMMUG00000020861 EvC ciliary complex subunit 1 [Source:VGNC Symbol;Acc:VGNC:72445]  
ENSMMUG00000020916 coiled-coil domain containing 158 [Source:NCBI gene;Acc:699735]  
ENSMMUG00000020919 shroom family member 3 [Source:VGNC Symbol;Acc:VGNC:77352]  
ENSMMUG00000021017 acylglycerol kinase [Source:VGNC Symbol;Acc:VGNC:69669]  
ENSMMUG00000021031 TMF1 regulated nuclear protein 1 [Source:VGNC Symbol;Acc:VGNC:79946]  
ENSMMUG00000021044 afadin, adherens junction formation factor [Source:VGNC Symbol;Acc:VGNC:69818]  
ENSMMUG00000021073 RAS protein activator like 2 [Source:VGNC Symbol;Acc:VGNC:76670]  
ENSMMUG00000021075 Rac family small GTPase 1 [Source:NCBI gene;Acc:717755]  
ENSMMUG00000021080 basic leucine zipper nuclear factor 1 [Source:VGNC Symbol;Acc:VGNC:70258]  
ENSMMUG00000021447 TNF receptor superfamily member 1B [Source:VGNC Symbol;Acc:VGNC:78590]  
ENSMMUG00000021449 vacuolar protein sorting 13 homolog D [Source:NCBI gene;Acc:722775]  
ENSMMUG00000021972 diacylglycerol kinase gamma [Source:VGNC Symbol;Acc:VGNC:71785]  
ENSMMUG00000021988 N-alpha-acetyltransferase 11, NatA catalytic subunit [Source:NCBI gene;Acc:696758]  
ENSMMUG00000022003 multimerin 1 [Source:VGNC Symbol;Acc:VGNC:74904]  
ENSMMUG00000022247 osteoclastogenesis associated transmembrane protein 1 [Source:VGNC Symbol;Acc:VGNC:75664]  
ENSMMUG00000022451 proteasome 20S subunit alpha 2 [Source:NCBI gene;Acc:701683]  
ENSMMUG00000022633 replication initiator 1 [Source:VGNC Symbol;Acc:VGNC:76758]  
ENSMMUG00000022702 phosphoribosylglycinamide formyltransferase, phosphoribosylglycinamide synthetase, phosphoribosylaminoimidazole synthetase [Source:VGNC Symbol;Acc:VGNC:72882]  
ENSMMUG00000022728 zinc finger and SCAN domain containing 25 [Source:VGNC Symbol;Acc:VGNC:79344]  
ENSMMUG00000022730 cytochrome P450, family 3, subfamily A, polypeptide 5 [Source:NCBI gene;Acc:678692]  
ENSMMUG00000022884 glutamate-ammonia ligase [Source:NCBI gene;Acc:715952]  
ENSMMUG00000022920 TATA-box binding protein like 1 [Source:VGNC Symbol;Acc:VGNC:83491]  
ENSMMUG00000022921 solute carrier family 2 member 12 [Source:VGNC Symbol;Acc:VGNC:77503]  
ENSMMUG00000023045 zinc finger B-box domain containing [Source:VGNC Symbol;Acc:VGNC:79592]  
ENSMMUG00000023244 guanylate cyclase 1 soluble subunit alpha 1 [Source:VGNC Symbol;Acc:VGNC:73327]  
ENSMMUG00000023335 ring finger protein 13 [Source:VGNC Symbol;Acc:VGNC:81557]  
ENSMMUG00000023449 mitofusin 2 [Source:VGNC Symbol;Acc:VGNC:74522]  
ENSMMUG00000024537  
ENSMMUG00000031279 torsin A interacting protein 2 [Source:NCBI gene;Acc:716654]



ENSMMUG00000031291 regulator of G protein signaling like 1 [Source:NCBI gene;Acc:715693]  
ENSMMUG00000031534 ankyrin repeat and ubiquitin domain containing 1 [Source:VGNC Symbol;Acc:VGNC:84239]  
ENSMMUG00000032180 RLF zinc finger [Source:VGNC Symbol;Acc:VGNC:76699]  
ENSMMUG00000032249 procollagen-lysine,2-oxoglutarate 5-dioxygenase 1 [Source:NCBI gene;Acc:722763]  
ENSMMUG00000035653 small Cajal body-specific RNA 18 [Source:HGNC Symbol;Acc:HGNC:32559]  
ENSMMUG00000035943 U6 spliceosomal RNA [Source:RFAM;Acc:RF00026]  
ENSMMUG00000036820 U7 small nuclear RNA [Source:RFAM;Acc:RF00066]  
ENSMMUG00000037887 RBMX like 1 [Source:NCBI gene;Acc:100424767]  
ENSMMUG00000038349 crystallin beta-gamma domain containing 3 [Source:NCBI gene;Acc:698282]  
ENSMMUG00000038524 olfactory receptor 2M4 [Source:NCBI gene;Acc:100424541]  
ENSMMUG00000038998 purinergic receptor P2Y13 [Source:VGNC Symbol;Acc:VGNC:83950]  
ENSMMUG00000039009  
ENSMMUG00000039101 pelota mRNA surveillance and ribosome rescue factor [Source:VGNC Symbol;Acc:VGNC:84478]  
ENSMMUG00000040393 zinc finger protein 655 [Source:NCBI gene;Acc:718811]  
ENSMMUG00000041919 nuclear respiratory factor 1 [Source:VGNC Symbol;Acc:VGNC:81731]  
ENSMMUG00000042472 Metazoan signal recognition particle RNA [Source:RFAM;Acc:RF00017]  
ENSMMUG00000042510 coagulation factor V [Source:NCBI gene;Acc:704695]  
ENSMMUG00000042951 signal recognition particle 19 [Source:NCBI gene;Acc:693829]  
ENSMMUG00000043675 Cbp/p300 interacting transactivator with Glu/Asp rich carboxy-terminal domain 4 [Source:NCBI gene;Acc:114672840]  
ENSMMUG00000044257 MX dynamin like GTPase 2 [Source:VGNC Symbol;Acc:VGNC:81723]  
ENSMMUG00000044822 coiled-coil domain containing 174 [Source:VGNC Symbol;Acc:VGNC:84219]  
ENSMMUG00000045513  
ENSMMUG00000045609 CCR4-NOT transcription complex subunit 6 like [Source:NCBI gene;Acc:697981]  
ENSMMUG00000045959  
ENSMMUG00000046550 coiled-coil domain containing 125 [Source:NCBI gene;Acc:704391]  
ENSMMUG00000046969 Fc receptor like 3 [Source:NCBI gene;Acc:718801]  
ENSMMUG00000048283 mml-mir-3145 [Source:miRBase;Acc:MI0020897]  
ENSMMUG00000048621 enolase-phosphatase 1 [Source:NCBI gene;Acc:106998330]  
ENSMMUG00000048824 eva-1 homolog C [Source:NCBI gene;Acc:708681]  
ENSMMUG00000049297  
ENSMMUG00000049298 cholecystokinin A receptor [Source:NCBI gene;Acc:694742]  
ENSMMUG00000049432 olfactory receptor 2T33 [Source:NCBI gene;Acc:706331]  
ENSMMUG00000049494  
ENSMMUG00000049548  
ENSMMUG00000049678  
ENSMMUG00000049755 leucine rich repeat containing 3 [Source:NCBI gene;Acc:712418]  
ENSMMUG00000049935  
ENSMMUG00000049998 tachykinin receptor 3 [Source:NCBI gene;Acc:653013]  
ENSMMUG00000050132  
ENSMMUG00000050339 Metazoan signal recognition particle RNA [Source:RFAM;Acc:RF00017]  
ENSMMUG00000050405  
ENSMMUG00000050465 ZFP42 zinc finger protein [Source:NCBI gene;Acc:707621]  
ENSMMUG00000050505 small integral membrane protein 4 [Source:NCBI gene;Acc:696553]  
ENSMMUG00000050661  
ENSMMUG00000051170  
ENSMMUG00000051329  
ENSMMUG00000051408 myelin associated oligodendrocyte basic protein [Source:NCBI gene;Acc:717265]  
ENSMMUG00000051619 peptidyl arginine deiminase 3 [Source:NCBI gene;Acc:700560]  
ENSMMUG00000051645  
ENSMMUG00000051677  
ENSMMUG00000051816 keratinocyte proline rich protein [Source:NCBI gene;Acc:100424312]

ENSMMUG00000051975  
ENSMMUG00000052046  
ENSMMUG00000052184 inka box actin regulator 2 [Source:NCBI gene;Acc:704844]  
ENSMMUG00000052195  
ENSMMUG00000052238  
ENSMMUG00000052348  
ENSMMUG00000052530  
ENSMMUG00000052777  
ENSMMUG00000052780  
ENSMMUG00000052961  
ENSMMUG00000053072  
ENSMMUG00000053254 adenylate kinase 4 [Source:NCBI gene;Acc:698560]  
ENSMMUG00000053367 secreted protein acidic and cysteine rich [Source:NCBI gene;Acc:712388]  
ENSMMUG00000053516  
ENSMMUG00000053691 Metazoan signal recognition particle RNA [Source:RFAM;Acc:RF00017]  
ENSMMUG00000053790  
ENSMMUG00000054017 potassium voltage-gated channel subfamily A member 2 [Source:NCBI gene;Acc:702126]  
ENSMMUG00000054158 acyl-CoA dehydrogenase family member 11 [Source:NCBI gene;Acc:106997118]  
ENSMMUG00000054175  
ENSMMUG00000054414  
ENSMMUG00000054486 testis expressed 35 [Source:NCBI gene;Acc:717255]  
ENSMMUG00000054568  
ENSMMUG00000054686  
ENSMMUG00000055038  
ENSMMUG00000055126  
ENSMMUG00000055256 family with sequence similarity 163 member A [Source:NCBI gene;Acc:718704]  
ENSMMUG00000055322 EPH receptor A1 [Source:NCBI gene;Acc:706295]  
ENSMMUG00000055345 Y RNA [Source:RFAM;Acc:RF00019]  
ENSMMUG00000055441  
ENSMMUG00000055589  
ENSMMUG00000055710 taste 2 receptor member 38 [Source:NCBI gene;Acc:695549]  
ENSMMUG00000056024  
ENSMMUG00000056058 C-type lectin domain containing 20A [Source:HGNC Symbol;Acc:HGNC:34521]  
ENSMMUG00000056266 Metazoan signal recognition particle RNA [Source:RFAM;Acc:RF00017]  
ENSMMUG00000056548 coagulation factor III, tissue factor [Source:NCBI gene;Acc:714456]  
ENSMMUG00000056593  
ENSMMUG00000056707  
ENSMMUG00000056796 NADH:ubiquinone oxidoreductase subunit A2 [Source:NCBI gene;Acc:697736]  
ENSMMUG00000056798  
ENSMMUG00000056971 Metazoan signal recognition particle RNA [Source:RFAM;Acc:RF00017]  
ENSMMUG00000056980  
ENSMMUG00000057452  
ENSMMUG00000057539  
ENSMMUG00000057554 Metazoan signal recognition particle RNA [Source:RFAM;Acc:RF00017]  
ENSMMUG00000057643  
ENSMMUG00000057702  
ENSMMUG00000057703  
ENSMMUG00000058187  
ENSMMUG00000058229 U6 spliceosomal RNA [Source:RFAM;Acc:RF00026]  
ENSMMUG00000058423  
ENSMMUG00000058432 zinc finger DHHC-type palmitoyltransferase 18 [Source:NCBI gene;Acc:719959]

ENSMMUG00000058557  
ENSMMUG00000058587 family with sequence similarity 131 member C [Source:NCBI gene;Acc:703604]  
ENSMMUG00000058817  
ENSMMUG00000059036  
ENSMMUG00000059318 urocortin 2 [Source:NCBI gene;Acc:106996925]  
ENSMMUG00000059472 filaggrin family member 2 [Source:HGNC Symbol;Acc:HGNC:33276]  
ENSMMUG00000059491  
ENSMMUG00000059671  
ENSMMUG00000059777  
ENSMMUG00000060184 SEC61 translocon subunit gamma [Source:NCBI gene;Acc:716898]  
ENSMMUG00000060273 mitochondrial ribosomal protein L32 [Source:NCBI gene;Acc:701820]  
ENSMMUG00000060484 heterogeneous nuclear ribonucleoprotein D [Source:NCBI gene;Acc:694867]  
ENSMMUG00000060572  
ENSMMUG00000060576  
ENSMMUG00000060581  
ENSMMUG00000060605  
ENSMMUG00000060632  
ENSMMUG00000060760  
ENSMMUG00000060770  
ENSMMUG00000060795  
ENSMMUG00000060808  
ENSMMUG00000060812 autophagy related 12 [Source:NCBI gene;Acc:696765]  
ENSMMUG00000060901  
ENSMMUG00000061031  
ENSMMUG00000061098  
ENSMMUG00000061151  
ENSMMUG00000061165  
ENSMMUG00000061194  
ENSMMUG00000061208 MAP3K7 C-terminal like [Source:NCBI gene;Acc:713717]  
ENSMMUG00000061250 ABRA C-terminal like [Source:NCBI gene;Acc:708266]  
ENSMMUG00000061298  
ENSMMUG00000061684  
ENSMMUG00000061785  
ENSMMUG00000061845  
ENSMMUG00000062048  
ENSMMUG00000062083  
ENSMMUG00000062092  
ENSMMUG00000062175 carboxypeptidase B1 [Source:NCBI gene;Acc:712639]  
ENSMMUG00000062316 Metazoan signal recognition particle RNA [Source:RFAM;Acc:RF00017]  
ENSMMUG00000062326  
ENSMMUG00000062394 C-C motif chemokine receptor 2 [Source:NCBI gene;Acc:574098]  
ENSMMUG00000062397  
ENSMMUG00000062419  
ENSMMUG00000062454  
ENSMMUG00000062522  
ENSMMUG00000062595  
ENSMMUG00000062794  
ENSMMUG00000062996  
ENSMMUG00000063981 nucleoside-triphosphatase, cancer-related [Source:NCBI gene;Acc:712959]  
ENSMMUG00000064074  
ENSMMUG00000064226

ENSMMUG00000064242  
ENSMMUG00000064324  
ENSMMUG00000064707  
ENSMMUG00000064824 gremlin 2, DAN family BMP antagonist [Source:NCBI gene;Acc:708280]  
ENSMMUG00000065005 Metazoan signal recognition particle RNA [Source:RFAM;Acc:RF00017]  
ENSMMUG00000065295  
ENSMMUG00000000302 WD repeat and HMG-box DNA binding protein 1 [Source:VGNC Symbol;Acc:VGNC:79376]  
ENSMMUG00000000313 HEAT repeat containing 4 [Source:VGNC Symbol;Acc:VGNC:73176]  
ENSMMUG00000000375 pleckstrin homology and RhoGEF domain containing G6 [Source:VGNC Symbol;Acc:VGNC:76110]  
ENSMMUG00000000377 TNF receptor superfamily member 1A [Source:VGNC Symbol;Acc:VGNC:78589]  
ENSMMUG00000000381 IKAROS family zinc finger 2 [Source:VGNC Symbol;Acc:VGNC:73586]  
ENSMMUG00000000582 NOP58 ribonucleoprotein [Source:VGNC Symbol;Acc:VGNC:75284]  
ENSMMUG00000000754 Dmx like 2 [Source:VGNC Symbol;Acc:VGNC:71936]  
ENSMMUG00000000776 zinc finger matrin-type 4 [Source:VGNC Symbol;Acc:VGNC:78424]  
ENSMMUG00000000803 signal transducer and activator of transcription 2 [Source:VGNC Symbol;Acc:VGNC:77905]  
ENSMMUG00000000808 melanin concentrating hormone receptor 2 [Source:VGNC Symbol;Acc:VGNC:74550]  
ENSMMUG00000000863 dynein axonemal assembly factor 4 [Source:VGNC Symbol;Acc:VGNC:71881]  
ENSMMUG00000000869 small nuclear ribonucleoprotein polypeptide C [Source:NCBI gene;Acc:718654]  
ENSMMUG00000000958 aldo-keto reductase family 1, member C2 [Source:NCBI gene;Acc:711360]  
ENSMMUG00000001088 patched domain containing 1 [Source:VGNC Symbol;Acc:VGNC:76322]  
ENSMMUG00000001151 microtubule associated scaffold protein 1 [Source:VGNC Symbol;Acc:VGNC:84018]  
ENSMMUG00000001338 antizyme inhibitor 1 [Source:VGNC Symbol;Acc:VGNC:70080]  
ENSMMUG00000001472 TIA1 cytotoxic granule associated RNA binding protein like 1 [Source:VGNC Symbol;Acc:VGNC:78354]  
ENSMMUG00000001532 glucosidase alpha, neutral C [Source:NCBI gene;Acc:708126]  
ENSMMUG00000001534 calpain 3 [Source:VGNC Symbol;Acc:VGNC:70533]  
ENSMMUG00000001547 zinc finger protein 106 [Source:VGNC Symbol;Acc:VGNC:78831]  
ENSMMUG00000001568 AT-rich interaction domain 3B [Source:VGNC Symbol;Acc:VGNC:69827]  
ENSMMUG00000001635 zinc finger protein 703 [Source:VGNC Symbol;Acc:VGNC:79552]  
ENSMMUG00000001739 ATPase sarcoplasmic/endoplasmic reticulum Ca<sup>2+</sup> transporting 2 [Source:VGNC Symbol;Acc:VGNC:70178]  
ENSMMUG00000001820 regulator of G protein signaling 6 [Source:VGNC Symbol;Acc:VGNC:76691]  
ENSMMUG00000002260 protein kinase C eta [Source:VGNC Symbol;Acc:VGNC:84424]  
ENSMMUG00000002304 keratin 73 [Source:VGNC Symbol;Acc:VGNC:74148]  
ENSMMUG00000002345 tropomodulin 3 [Source:VGNC Symbol;Acc:VGNC:78572]  
ENSMMUG00000002536 calcium binding protein 1 [Source:VGNC Symbol;Acc:VGNC:70495]  
ENSMMUG00000002917 single Ig IL-1-related receptor [Source:NCBI gene;Acc:100425060]  
ENSMMUG00000003217 transmembrane 7 superfamily member 3 [Source:VGNC Symbol;Acc:VGNC:79371]  
ENSMMUG00000003348 neurofilament light [Source:VGNC Symbol;Acc:VGNC:75307]  
ENSMMUG00000003482 glycine receptor alpha 2 [Source:VGNC Symbol;Acc:VGNC:73075]  
ENSMMUG00000003484 tectonin beta-propeller repeat containing 2 [Source:NCBI gene;Acc:708959]  
ENSMMUG00000003584 mesoderm posterior bHLH transcription factor 2 [Source:VGNC Symbol;Acc:VGNC:74619]  
ENSMMUG00000003591 pleckstrin homology domain containing A2 [Source:VGNC Symbol;Acc:VGNC:76026]  
ENSMMUG00000003684 ATPase phospholipid transporting 8B4 (putative) [Source:VGNC Symbol;Acc:VGNC:84311]  
ENSMMUG00000003834 basic leucine zipper ATF-like transcription factor [Source:VGNC Symbol;Acc:VGNC:70229]  
ENSMMUG00000003839 mitogen-activated protein kinase binding protein 1 [Source:VGNC Symbol;Acc:VGNC:74613]  
ENSMMUG00000004022 zinc finger SWIM-type containing 2 [Source:VGNC Symbol;Acc:VGNC:79908]  
ENSMMUG00000004024 cadherin related family member 5 [Source:VGNC Symbol;Acc:VGNC:71158]  
ENSMMUG00000004028 kelch repeat and BTB domain containing 13 [Source:VGNC Symbol;Acc:VGNC:73953]  
ENSMMUG00000004309 APC membrane recruitment protein 1 [Source:VGNC Symbol;Acc:VGNC:69716]  
ENSMMUG00000004376 calcium and integrin binding 1 [Source:VGNC Symbol;Acc:VGNC:71189]  
ENSMMUG00000004470 CD9 molecule [Source:VGNC Symbol;Acc:VGNC:70787]  
ENSMMUG00000004558 OTU deubiquitinase 5 [Source:VGNC Symbol;Acc:VGNC:75677]

ENSMMUG0000004748 zinc finger and BTB domain containing 1 [Source:VGNC Symbol;Acc:VGNC:79238]  
ENSMMUG0000004797 CTP synthase 2 [Source:VGNC Symbol;Acc:VGNC:71550]  
ENSMMUG0000004816 membrane associated ring-CH-type finger 5 [Source:VGNC Symbol;Acc:VGNC:74588]  
ENSMMUG0000004854 leucine rich repeat containing 9 [Source:VGNC Symbol;Acc:VGNC:81443]  
ENSMMUG0000004910 dynein axonemal light chain 1 [Source:VGNC Symbol;Acc:VGNC:71885]  
ENSMMUG0000005208 RNA polymerase III subunit B [Source:VGNC Symbol;Acc:VGNC:76143]  
ENSMMUG0000005255 TRAF-type zinc finger domain containing 1 [Source:VGNC Symbol;Acc:VGNC:79459]  
ENSMMUG0000005270 ryanodine receptor 3 [Source:NCBI gene;Acc:694996]  
ENSMMUG0000005293 G-patch domain and ankyrin repeats 1 [Source:VGNC Symbol;Acc:VGNC:81073]  
ENSMMUG0000005294 casein kinase 2 beta [Source:NCBI gene;Acc:715807]  
ENSMMUG0000005297 proline rich coiled-coil 2A [Source:VGNC Symbol;Acc:VGNC:83448]  
ENSMMUG0000005302 BAG cochaperone 6 [Source:VGNC Symbol;Acc:VGNC:81044]  
ENSMMUG0000005303 apolipoprotein M [Source:VGNC Symbol;Acc:VGNC:69825]  
ENSMMUG0000005356 integrator complex subunit 8 [Source:VGNC Symbol;Acc:VGNC:73657]  
ENSMMUG0000005415 olfactory receptor, family 2, subfamily B, member 3 [Source:NCBI gene;Acc:708747]  
ENSMMUG0000005478 trimethylguanosine synthase 1 [Source:VGNC Symbol;Acc:VGNC:78404]  
ENSMMUG0000005504 nucleoporin 37 [Source:VGNC Symbol;Acc:VGNC:75491]  
ENSMMUG0000005530 synaptotagmin 1 [Source:VGNC Symbol;Acc:VGNC:78074]  
ENSMMUG0000005845 REST corepressor 1 [Source:VGNC Symbol;Acc:VGNC:76752]  
ENSMMUG0000006180 tetratricopeptide repeat, ankyrin repeat and coiled-coil containing 1 [Source:VGNC Symbol;Acc:VGNC:78238]  
ENSMMUG0000006181 WD repeat, sterile alpha motif and U-box domain containing 1 [Source:VGNC Symbol;Acc:VGNC:79634]  
ENSMMUG0000006233 adducin 3 [Source:VGNC Symbol;Acc:VGNC:69531]  
ENSMMUG0000006293 SAP domain containing ribonucleoprotein [Source:NCBI gene;Acc:709932]  
ENSMMUG0000006295 matrix metalloproteinase 19 [Source:VGNC Symbol;Acc:VGNC:74896]  
ENSMMUG0000006435 HNF1 homeobox A [Source:NCBI gene;Acc:107001057]  
ENSMMUG0000006468 FGFR1 oncogene partner 2 [Source:VGNC Symbol;Acc:VGNC:72551]  
ENSMMUG0000006470 complement C1r subcomponent [Source:NCBI gene;Acc:722133]  
ENSMMUG0000006758 cytochrome P450, family 27, subfamily A, polypeptide 1 [Source:NCBI gene;Acc:700192]  
ENSMMUG0000006855 acyl-CoA thioesterase 2 [Source:NCBI gene;Acc:697011]  
ENSMMUG0000006893 D-amino acid oxidase [Source:VGNC Symbol;Acc:VGNC:71729]  
ENSMMUG0000006997 thioredoxin domain containing 16 [Source:VGNC Symbol;Acc:VGNC:79214]  
ENSMMUG0000007068 tumor suppressor candidate 3 [Source:VGNC Symbol;Acc:VGNC:84132]  
ENSMMUG0000007140 MOK protein kinase [Source:VGNC Symbol;Acc:VGNC:84394]  
ENSMMUG0000007540 Rho related BTB domain containing 2 [Source:VGNC Symbol;Acc:VGNC:76772]  
ENSMMUG0000007544 trophinin associated protein [Source:VGNC Symbol;Acc:VGNC:78650]  
ENSMMUG0000007546 complement C1q like 4 [Source:VGNC Symbol;Acc:VGNC:70450]  
ENSMMUG0000007688 angiomin 1 [Source:VGNC Symbol;Acc:VGNC:69627]  
ENSMMUG0000008006 RAB11A, member RAS oncogene family [Source:VGNC Symbol;Acc:VGNC:81517]  
ENSMMUG0000008007 multiple EGF like domains 11 [Source:VGNC Symbol;Acc:VGNC:84376]  
ENSMMUG0000008384 solute carrier family 4 member 10 [Source:VGNC Symbol;Acc:VGNC:77695]  
ENSMMUG0000008387 dipeptidyl peptidase 4 [Source:VGNC Symbol;Acc:VGNC:71979]  
ENSMMUG0000008529 chromosome 7 C15orf39 homolog [Source:VGNC Symbol;Acc:VGNC:70620]  
ENSMMUG0000008566 zinc finger protein 157 [Source:VGNC Symbol;Acc:VGNC:78850]  
ENSMMUG0000008615 nebulin [Source:NCBI gene;Acc:100430324]  
ENSMMUG0000008618 calcium voltage-gated channel subunit alpha1 F [Source:VGNC Symbol;Acc:VGNC:70503]  
ENSMMUG0000008623 coiled-coil domain containing 22 [Source:VGNC Symbol;Acc:VGNC:70899]  
ENSMMUG0000008839 DExD-box helicase 39B [Source:VGNC Symbol;Acc:VGNC:71621]  
ENSMMUG0000008843 lymphotoxin alpha [Source:VGNC Symbol;Acc:VGNC:74452]  
ENSMMUG0000008849 lymphotoxin beta [Source:VGNC Symbol;Acc:VGNC:74454]  
ENSMMUG0000008853 leukocyte specific transcript 1 [Source:HGNC Symbol;Acc:HGNC:14189]  
ENSMMUG0000008854 natural cytotoxicity triggering receptor 3 [Source:VGNC Symbol;Acc:VGNC:74990]



ENSMMUG0000008875 solute carrier family 35 member F5 [Source:VGNC Symbol;Acc:VGNC:77567]  
ENSMMUG0000009182 caspase 8 associated protein 2 [Source:VGNC Symbol;Acc:VGNC:70548]  
ENSMMUG0000009312 leukotriene A4 hydrolase [Source:VGNC Symbol;Acc:VGNC:74453]  
ENSMMUG0000009361 fumarylacetoacetate hydrolase [Source:NCBI gene;Acc:712716]  
ENSMMUG0000009559 minichromosome maintenance complex binding protein [Source:VGNC Symbol;Acc:VGNC:74583]  
ENSMMUG0000009577 atlastin GTPase 1 [Source:VGNC Symbol;Acc:VGNC:70049]  
ENSMMUG0000009593 WAS/WASL interacting protein family member 1 [Source:VGNC Symbol;Acc:VGNC:78784]  
ENSMMUG0000009794 protocadherin related 15 [Source:VGNC Symbol;Acc:VGNC:75608]  
ENSMMUG0000010137 microcephalin 1 [Source:VGNC Symbol;Acc:VGNC:74687]  
ENSMMUG0000010173 presenilin 1 [Source:VGNC Symbol;Acc:VGNC:76435]  
ENSMMUG0000010180 PIN2 (TERF1) interacting telomerase inhibitor 1 [Source:NCBI gene;Acc:701523]  
ENSMMUG0000010357 cyclin and CBS domain divalent metal cation transport mediator 1 [Source:NCBI gene;Acc:708335]  
ENSMMUG0000010513 ribulose-5-phosphate-3-epimerase [Source:NCBI gene;Acc:711322]  
ENSMMUG0000010515 KAT8 regulatory NSL complex subunit 1 like [Source:VGNC Symbol;Acc:VGNC:73913]  
ENSMMUG0000010586 mesoderm posterior bHLH transcription factor 1 [Source:VGNC Symbol;Acc:VGNC:74618]  
ENSMMUG0000010949 SPG21 abhydrolase domain containing, maspardin [Source:VGNC Symbol;Acc:VGNC:77970]  
ENSMMUG0000011155 FA complementation group I [Source:VGNC Symbol;Acc:VGNC:72575]  
ENSMMUG0000011209 BICD family like cargo adaptor 1 [Source:HGNC Symbol;Acc:HGNC:28095]  
ENSMMUG0000011328 cytoplasmic polyadenylation element binding protein 1 [Source:NCBI gene;Acc:694357]  
ENSMMUG0000011440 neurite extension and migration factor [Source:VGNC Symbol;Acc:VGNC:75274]  
ENSMMUG0000011650 dual specificity tyrosine phosphorylation regulated kinase 2 [Source:VGNC Symbol;Acc:VGNC:72018]  
ENSMMUG0000011774 integrator complex subunit 10 [Source:VGNC Symbol;Acc:VGNC:73653]  
ENSMMUG0000011789 hematopoietically expressed homeobox [Source:VGNC Symbol;Acc:VGNC:73376]  
ENSMMUG0000011858 bone morphogenetic protein 5 [Source:VGNC Symbol;Acc:VGNC:70264]  
ENSMMUG0000012065 tubulin tyrosine ligase like 5 [Source:NCBI gene;Acc:703116]  
ENSMMUG0000012223 branched chain amino acid transaminase 1 [Source:VGNC Symbol;Acc:VGNC:70236]  
ENSMMUG0000012356 serpin family A member 9 [Source:VGNC Symbol;Acc:VGNC:77241]  
ENSMMUG0000012560 HERV-H LTR-associating 1 [Source:NCBI gene;Acc:100430297]  
ENSMMUG0000012842 SET domain containing 1B, histone lysine methyltransferase [Source:NCBI gene;Acc:703717]  
ENSMMUG0000013146 claudin 2 [Source:HGNC Symbol;Acc:HGNC:2041]  
ENSMMUG0000013150 MORC family CW-type zinc finger 4 [Source:VGNC Symbol;Acc:VGNC:74808]  
ENSMMUG0000013160 DnaJ heat shock protein family (Hsp40) member C17 [Source:VGNC Symbol;Acc:VGNC:84335]  
ENSMMUG0000013176 NAD(P) dependent steroid dehydrogenase-like [Source:NCBI gene;Acc:693333]  
ENSMMUG0000013251 xin actin binding repeat containing 2 [Source:VGNC Symbol;Acc:VGNC:78953]  
ENSMMUG0000013387 cysteinyl leukotriene receptor 1 [Source:VGNC Symbol;Acc:VGNC:71646]  
ENSMMUG0000013460 RAB8B, member RAS oncogene family [Source:VGNC Symbol;Acc:VGNC:81550]  
ENSMMUG0000013644 potassium two pore domain channel subfamily K member 17 [Source:VGNC Symbol;Acc:VGNC:73828]  
ENSMMUG0000013651 kinesin family member 6 [Source:VGNC Symbol;Acc:VGNC:73873]  
ENSMMUG0000013696 myozenin 1 [Source:VGNC Symbol;Acc:VGNC:74951]  
ENSMMUG0000013766 prostaglandin E synthase 3 [Source:NCBI gene;Acc:713353]  
ENSMMUG0000013830 glucose-6-phosphatase catalytic subunit 2 [Source:NCBI gene;Acc:709062]  
ENSMMUG0000013832 ATP binding cassette subfamily B member 11 [Source:VGNC Symbol;Acc:VGNC:81339]  
ENSMMUG0000013871 WD repeat domain 25 [Source:VGNC Symbol;Acc:VGNC:78420]  
ENSMMUG0000013966 legumain [Source:VGNC Symbol;Acc:VGNC:74274]  
ENSMMUG0000014149 LYN proto-oncogene, Src family tyrosine kinase [Source:VGNC Symbol;Acc:VGNC:74464]  
ENSMMUG0000014265 TAP binding protein like [Source:NCBI gene;Acc:712626]  
ENSMMUG0000014277 ITPR interacting domain containing 2 [Source:VGNC Symbol;Acc:VGNC:73584]  
ENSMMUG0000014291 SPG11 vesicle trafficking associated, spatacsin [Source:VGNC Symbol;Acc:VGNC:77856]  
ENSMMUG0000014397 NCK associated protein 1 [Source:VGNC Symbol;Acc:VGNC:75143]  
ENSMMUG0000014407 magnesium transporter 1 [Source:VGNC Symbol;Acc:VGNC:74386]  
ENSMMUG0000014658 ninein [Source:VGNC Symbol;Acc:VGNC:75177]

ENSMMUG00000014715 fragile site, folic acid type, rare, fra(10)(q23.3) or fra(10)(q24.2) candidate 1 [Source:NCBI gene;Acc:700389]  
ENSMMUG00000014771 zinc finger homeobox 2 [Source:NCBI gene;Acc:100429448]  
ENSMMUG00000014981 homeobox containing 1 [Source:VGNC Symbol;Acc:VGNC:73443]  
ENSMMUG00000014983 alanyl aminopeptidase, membrane [Source:VGNC Symbol;Acc:VGNC:69943]  
ENSMMUG00000015108 SV2 related protein [Source:VGNC Symbol;Acc:VGNC:78208]  
ENSMMUG00000015221 huntingtin interacting protein 1 related [Source:VGNC Symbol;Acc:VGNC:73412]  
ENSMMUG00000015267 C-terminal Src kinase [Source:VGNC Symbol;Acc:VGNC:81380]  
ENSMMUG00000015394 WD repeat domain 93 [Source:VGNC Symbol;Acc:VGNC:79642]  
ENSMMUG00000015416 bromodomain and PHD finger containing 3 [Source:VGNC Symbol;Acc:VGNC:70309]  
ENSMMUG00000015583 nucleosome assembly protein 1 like 1 [Source:NCBI gene;Acc:719047]  
ENSMMUG00000015686 abhydrolase domain containing 16A [Source:VGNC Symbol;Acc:VGNC:69393]  
ENSMMUG00000015693 lymphocyte antigen 6 family member G6C [Source:VGNC Symbol;Acc:VGNC:74285]  
ENSMMUG00000015861 cytochrome c oxidase subunit VIIb [Source:NCBI gene;Acc:706099]  
ENSMMUG00000015865 arginase 2 [Source:VGNC Symbol;Acc:VGNC:70005]  
ENSMMUG00000015866 vesicle transport through interaction with t-SNAREs 1B [Source:NCBI gene;Acc:711113]  
ENSMMUG00000015868 retinol dehydrogenase 11 [Source:NCBI gene;Acc:711195]  
ENSMMUG00000015871 zinc finger FYVE-type containing 26 [Source:VGNC Symbol;Acc:VGNC:79283]  
ENSMMUG00000015926 2-oxoglutarate and iron dependent oxygenase domain containing 2 [Source:VGNC Symbol;Acc:VGNC:75462]  
ENSMMUG00000015930 ADP ribosylation factor like GTPase 6 interacting protein 4 [Source:VGNC Symbol;Acc:VGNC:69860]  
ENSMMUG00000015931 phosphatidylinositol transfer protein membrane associated 2 [Source:VGNC Symbol;Acc:VGNC:75843]  
ENSMMUG00000016069 cubilin [Source:VGNC Symbol;Acc:VGNC:82132]  
ENSMMUG00000016104 chondroitin sulfate proteoglycan 4 [Source:VGNC Symbol;Acc:VGNC:71525]  
ENSMMUG00000016237 taxilin gamma [Source:NCBI gene;Acc:713769]  
ENSMMUG00000016255 telomerase associated protein 1 [Source:VGNC Symbol;Acc:VGNC:78310]  
ENSMMUG00000016454 4-hydroxyphenylpyruvate dioxygenase [Source:VGNC Symbol;Acc:VGNC:73511]  
ENSMMUG00000016465 histone deacetylase 6 [Source:VGNC Symbol;Acc:VGNC:73164]  
ENSMMUG00000016655 R3H domain and coiled-coil containing 1 [Source:VGNC Symbol;Acc:VGNC:76551]  
ENSMMUG00000016772 solute carrier family 28 member 1 [Source:VGNC Symbol;Acc:VGNC:77444]  
ENSMMUG00000016929 proline rich and Gla domain 3 [Source:VGNC Symbol;Acc:VGNC:76350]  
ENSMMUG00000017102 coiled-coil domain containing 62 [Source:NCBI gene;Acc:707179]  
ENSMMUG00000017124 spliceosome associated factor 3, U4/U6 recycling protein [Source:VGNC Symbol;Acc:VGNC:77029]  
ENSMMUG00000017129 solute carrier family 41 member 2 [Source:VGNC Symbol;Acc:VGNC:77585]  
ENSMMUG00000017260 G protein-coupled receptor 65 [Source:VGNC Symbol;Acc:VGNC:73140]  
ENSMMUG00000017261 galactosylceramidase [Source:VGNC Symbol;Acc:VGNC:72867]  
ENSMMUG00000017619 lysophosphatidic acid receptor 5 [Source:VGNC Symbol;Acc:VGNC:74277]  
ENSMMUG00000017627 B-TFIIID TATA-box binding protein associated factor 1 [Source:VGNC Symbol;Acc:VGNC:70336]  
ENSMMUG00000017660  
ENSMMUG00000017864 oxysterol binding protein like 8 [Source:VGNC Symbol;Acc:VGNC:75630]  
ENSMMUG00000018144 C2 calcium-dependent domain-containing protein 6 [Source:NCBI gene;Acc:702140]  
ENSMMUG00000018237 plexin C1 [Source:VGNC Symbol;Acc:VGNC:76190]  
ENSMMUG00000018239 centrosomal protein 83 [Source:VGNC Symbol;Acc:VGNC:70992]  
ENSMMUG00000018274 FERM domain containing 6 [Source:VGNC Symbol;Acc:VGNC:72747]  
ENSMMUG00000018298 killer cell lectin like receptor D1 [Source:NCBI gene;Acc:574145]  
ENSMMUG00000018345 phosphatidylethanolamine binding protein 4 [Source:VGNC Symbol;Acc:VGNC:82204]  
ENSMMUG00000018485 methyltransferase like 7A [Source:VGNC Symbol;Acc:VGNC:74567]  
ENSMMUG00000018492 TARBP2 subunit of RISC loading complex [Source:VGNC Symbol;Acc:VGNC:78099]  
ENSMMUG00000018787 PAK1 interacting protein 1 [Source:VGNC Symbol;Acc:VGNC:75661]  
ENSMMUG00000019126 purine nucleoside phosphorylase [Source:NCBI gene;Acc:704183]  
ENSMMUG00000019172 spectrin beta, erythrocytic [Source:VGNC Symbol;Acc:VGNC:77870]  
ENSMMUG00000019246 regulator of calcineurin 2 [Source:VGNC Symbol;Acc:VGNC:82092]  
ENSMMUG00000019304 indoleamine 2,3-dioxygenase 1 [Source:VGNC Symbol;Acc:VGNC:73580]

ENSMMUG00000019363 synapse associated protein 1 [Source:VGNC Symbol;Acc:VGNC:78135]  
ENSMMUG00000019438 utrophin [Source:VGNC Symbol;Acc:VGNC:78749]  
ENSMMUG00000019546 regucalcin [Source:VGNC Symbol;Acc:VGNC:76912]  
ENSMMUG00000019690 SEC14 and spectrin domain containing 1 [Source:VGNC Symbol;Acc:VGNC:77267]  
ENSMMUG00000019703 RUN and FYVE domain containing 2 [Source:VGNC Symbol;Acc:VGNC:77057]  
ENSMMUG00000020185 voltage dependent anion channel 3 [Source:VGNC Symbol;Acc:VGNC:84135]  
ENSMMUG00000020186 solute carrier family 20 member 2 [Source:VGNC Symbol;Acc:VGNC:77416]  
ENSMMUG00000020346 carboxypeptidase X, M14 family member 2 [Source:VGNC Symbol;Acc:VGNC:71596]  
ENSMMUG00000020515 adhesion G protein-coupled receptor G2 [Source:VGNC Symbol;Acc:VGNC:69802]  
ENSMMUG00000020534 p21 (RAC1) activated kinase 6 [Source:NCBI gene;Acc:701589]  
ENSMMUG00000020603 pyridine nucleotide-disulphide oxidoreductase domain 2 [Source:NCBI gene;Acc:707797]  
ENSMMUG00000020604 HPS1 biogenesis of lysosomal organelles complex 3 subunit 1 [Source:VGNC Symbol;Acc:VGNC:73515]  
ENSMMUG00000020629 SDS3 homolog, SIN3A corepressor complex component [Source:NCBI gene;Acc:696166]  
ENSMMUG00000021418 ATPase H+ transporting V1 subunit D [Source:VGNC Symbol;Acc:VGNC:70060]  
ENSMMUG00000021564 lysine demethylase 2B [Source:VGNC Symbol;Acc:VGNC:81425]  
ENSMMUG00000021610 regulator of G protein signaling 10 [Source:VGNC Symbol;Acc:VGNC:76915]  
ENSMMUG00000021634 TNF alpha induced protein 2 [Source:VGNC Symbol;Acc:VGNC:78579]  
ENSMMUG00000021655 histone deacetylase 7 [Source:NCBI gene;Acc:718225]  
ENSMMUG00000021661 leucine rich repeat containing 56 [Source:VGNC Symbol;Acc:VGNC:74356]  
ENSMMUG00000021664 lamin tail domain containing 2 [Source:VGNC Symbol;Acc:VGNC:74380]  
ENSMMUG00000021736 single-pass membrane protein with coiled-coil domains 2 [Source:VGNC Symbol;Acc:VGNC:77808]  
ENSMMUG00000021877 protein kinase AMP-activated non-catalytic subunit gamma 3 [Source:VGNC Symbol;Acc:VGNC:76406]  
ENSMMUG00000022109 CD163 molecule like 1 [Source:VGNC Symbol;Acc:VGNC:70914]  
ENSMMUG00000022313 activating transcription factor 7 [Source:NCBI gene;Acc:700403]  
ENSMMUG00000022406 ankyrin repeat and sterile alpha motif domain containing 1B [Source:VGNC Symbol;Acc:VGNC:69689]  
ENSMMUG00000022407 serine and arginine rich splicing factor 5 [Source:NCBI gene;Acc:712867]  
ENSMMUG00000022409 solute carrier family 10 member 1 [Source:VGNC Symbol;Acc:VGNC:77380]  
ENSMMUG00000022481 cytochrome P450, family 1, subfamily A, polypeptide 1 [Source:NCBI gene;Acc:678694]  
ENSMMUG00000022893 von Willebrand factor [Source:VGNC Symbol;Acc:VGNC:78778]  
ENSMMUG00000022933 DNA topoisomerase I mitochondrial [Source:VGNC Symbol;Acc:VGNC:79821]  
ENSMMUG00000023016 jade family PHD finger 3 [Source:VGNC Symbol;Acc:VGNC:73640]  
ENSMMUG00000023032 intraflagellar transport 81 [Source:VGNC Symbol;Acc:VGNC:73389]  
ENSMMUG00000023048 cytochrome b-c1 complex subunit Rieske, mitochondrial [Source:NCBI gene;Acc:705178]  
ENSMMUG00000023060 A-kinase anchoring protein 4 [Source:VGNC Symbol;Acc:VGNC:69770]  
ENSMMUG00000023282 aldo-keto reductase family 1, member C1 (dihydrodiol dehydrogenase 1; 20-alpha (3-alpha)-hydroxysteroid dehydrogenase) [Source:NCBI gene;Acc:711198]  
ENSMMUG00000023370 DDB1 and CUL4 associated factor 17 [Source:VGNC Symbol;Acc:VGNC:71709]  
ENSMMUG00000023719 thymopoietin [Source:VGNC Symbol;Acc:VGNC:78574]  
ENSMMUG00000023761 ectonucleoside triphosphate diphosphohydrolase 7 [Source:VGNC Symbol;Acc:VGNC:72071]  
ENSMMUG00000023816 semaphorin 4B [Source:VGNC Symbol;Acc:VGNC:77165]  
ENSMMUG00000024234 U6 spliceosomal RNA [Source:RFAM;Acc:RF00026]  
ENSMMUG00000025918 small nucleolar RNA, H/ACA box 38 [Source:HGNC Symbol;Acc:HGNC:32631]  
ENSMMUG00000026243 U6 spliceosomal RNA [Source:RFAM;Acc:RF00026]  
ENSMMUG00000026474 Small nucleolar RNA SNORD83 [Source:RFAM;Acc:RF00137]  
ENSMMUG00000026584 Y RNA [Source:RFAM;Acc:RF00019]  
ENSMMUG00000028000 Y RNA [Source:RFAM;Acc:RF00019]  
ENSMMUG00000029455 olfactory receptor 4Q2 [Source:NCBI gene;Acc:114679271]  
ENSMMUG00000029507 adaptor related protein complex 3 subunit sigma 2 [Source:NCBI gene;Acc:701217]  
ENSMMUG00000029638 chromosome 7 C15orf65 homolog [Source:VGNC Symbol;Acc:VGNC:70689]  
ENSMMUG00000029883 olfactory receptor, family 2, subfamily J, member 3 [Source:NCBI gene;Acc:708943]  
ENSMMUG00000030532 solute carrier family 25 member 16 [Source:NCBI gene;Acc:694145]  
ENSMMUG00000032429 forkhead box O4 [Source:VGNC Symbol;Acc:VGNC:72712]

ENSMMUG00000035748 U6 spliceosomal RNA [Source:RFAM;Acc:RF00026]  
ENSMMUG00000037243 U6 spliceosomal RNA [Source:RFAM;Acc:RF00026]  
ENSMMUG00000037449 CUGBP Elav-like family member 2 [Source:NCBI gene;Acc:714291]  
ENSMMUG00000037641 chondrosarcoma-associated gene 2/3 protein [Source:NCBI gene;Acc:106992305]  
ENSMMUG00000038067  
ENSMMUG00000038256 aquaporin 2 [Source:NCBI gene;Acc:711719]  
ENSMMUG00000039292  
ENSMMUG00000039520 chromosome 11 C12orf43 homolog [Source:NCBI gene;Acc:698821]  
ENSMMUG00000040274 MAGE family member A4 [Source:NCBI gene;Acc:710825]  
ENSMMUG00000041376 G antigen 10 [Source:NCBI gene;Acc:693330]  
ENSMMUG00000041729  
ENSMMUG00000042378 pseudopodium enriched atypical kinase 1 [Source:VGNC Symbol;Acc:VGNC:84419]  
ENSMMUG00000045093 cyclin B3 [Source:NCBI gene;Acc:694534]  
ENSMMUG00000045654 tumor necrosis factor [Source:VGNC Symbol;Acc:VGNC:83501]  
ENSMMUG00000046186 stanniocalcin 1 [Source:VGNC Symbol;Acc:VGNC:84120]  
ENSMMUG00000046478 WASH complex subunit 3 [Source:NCBI gene;Acc:697824]  
ENSMMUG00000046774 RAS like proto-oncogene B [Source:NCBI gene;Acc:695852]  
ENSMMUG00000047465 Metazoan signal recognition particle RNA [Source:RFAM;Acc:RF00017]  
ENSMMUG00000048066 trafficking protein particle complex 9 [Source:NCBI gene;Acc:711466]  
ENSMMUG00000048076 TNF receptor superfamily member 10b [Source:NCBI gene;Acc:716650]  
ENSMMUG00000048744  
ENSMMUG00000049234 ninjurin 2 [Source:NCBI gene;Acc:706368]  
ENSMMUG00000049265 Metazoan signal recognition particle RNA [Source:RFAM;Acc:RF00017]  
ENSMMUG00000049267  
ENSMMUG00000049455 Metazoan signal recognition particle RNA [Source:RFAM;Acc:RF00017]  
ENSMMUG00000049508  
ENSMMUG00000049514 solute carrier family 48 member 1 [Source:NCBI gene;Acc:704304]  
ENSMMUG00000049543  
ENSMMUG00000049735 allograft inflammatory factor 1 [Source:NCBI gene;Acc:574115]  
ENSMMUG00000049862  
ENSMMUG00000049894  
ENSMMUG00000050047 Metazoan signal recognition particle RNA [Source:RFAM;Acc:RF00017]  
ENSMMUG00000050549 lysyl oxidase like 2 [Source:NCBI gene;Acc:710151]  
ENSMMUG00000050608  
ENSMMUG00000050696 taste receptor type 2 member 31-like [Source:NCBI gene;Acc:693892]  
ENSMMUG00000050868  
ENSMMUG00000051037  
ENSMMUG00000051363  
ENSMMUG00000051450 phospholipase A2 receptor 1 [Source:NCBI gene;Acc:700191]  
ENSMMUG00000051807  
ENSMMUG00000051972 zinc finger CCHC-type containing 24 [Source:NCBI gene;Acc:702083]  
ENSMMUG00000052073  
ENSMMUG00000052252 protein phosphatase 1 regulatory subunit 3F [Source:NCBI gene;Acc:715950]  
ENSMMUG00000052453 serpin family A member 11 [Source:NCBI gene;Acc:701483]  
ENSMMUG00000052637 Metazoan signal recognition particle RNA [Source:RFAM;Acc:RF00017]  
ENSMMUG00000052828  
ENSMMUG00000052854 mucin like 1 [Source:NCBI gene;Acc:100423942]  
ENSMMUG00000052891  
ENSMMUG00000052954 Wnt family member 6 [Source:NCBI gene;Acc:700573]  
ENSMMUG00000053013  
ENSMMUG00000053106

ENSMMUG00000053324 lymphocyte antigen 6 complex locus protein G6d [Source:NCBI gene;Acc:715304]  
ENSMMUG00000053333 acetylserotonin O-methyltransferase like [Source:NCBI gene;Acc:106995142]  
ENSMMUG00000053376  
ENSMMUG00000053406  
ENSMMUG00000053460  
ENSMMUG00000053481  
ENSMMUG00000053489  
ENSMMUG00000053722  
ENSMMUG00000053781 Rho GDP dissociation inhibitor beta [Source:NCBI gene;Acc:702320]  
ENSMMUG00000053984  
ENSMMUG00000053989  
ENSMMUG00000054159 lymphocyte antigen 6 family member G5C [Source:VGNC Symbol;Acc:VGNC:83431]  
ENSMMUG00000054184 Metazoan signal recognition particle RNA [Source:RFAM;Acc:RF00017]  
ENSMMUG00000054377  
ENSMMUG00000054621  
ENSMMUG00000054755 transmembrane protein 65 [Source:NCBI gene;Acc:705727]  
ENSMMUG00000054768  
ENSMMUG00000054816 interleukin 1 receptor associated kinase 3 [Source:NCBI gene;Acc:717845]  
ENSMMUG00000054904 Metazoan signal recognition particle RNA [Source:RFAM;Acc:RF00017]  
ENSMMUG00000054942  
ENSMMUG00000054960  
ENSMMUG00000055012  
ENSMMUG00000055018 sushi domain containing 6 [Source:NCBI gene;Acc:712719]  
ENSMMUG00000055121 Metazoan signal recognition particle RNA [Source:RFAM;Acc:RF00017]  
ENSMMUG00000055209  
ENSMMUG00000055239  
ENSMMUG00000055906 angiotensin II receptor type 2 [Source:NCBI gene;Acc:709513]  
ENSMMUG00000055914  
ENSMMUG00000056063  
ENSMMUG00000056151  
ENSMMUG00000056376  
ENSMMUG00000056522  
ENSMMUG00000056605 Metazoan signal recognition particle RNA [Source:RFAM;Acc:RF00017]  
ENSMMUG00000056729 U6 spliceosomal RNA [Source:RFAM;Acc:RF00026]  
ENSMMUG00000056741 ovostatin-like [Source:NCBI gene;Acc:722294]  
ENSMMUG00000056749 Metazoan signal recognition particle RNA [Source:RFAM;Acc:RF00017]  
ENSMMUG00000056906  
ENSMMUG00000056992 zinc finger AN1-type containing 6 [Source:NCBI gene;Acc:717543]  
ENSMMUG00000057134 keratin, type II cytoskeletal 6C [Source:NCBI gene;Acc:100424162]  
ENSMMUG00000057196 pulmonary surfactant-associated protein A [Source:NCBI gene;Acc:701715]  
ENSMMUG00000057219 tumor protein p53 inducible nuclear protein 1 [Source:NCBI gene;Acc:700632]  
ENSMMUG00000057283  
ENSMMUG00000057473  
ENSMMUG00000057570  
ENSMMUG00000057640 plakophilin-3-like [Source:NCBI gene;Acc:114669833]  
ENSMMUG00000057785  
ENSMMUG00000057791  
ENSMMUG00000057909  
ENSMMUG00000058002 zinc finger protein 669-like [Source:NCBI gene;Acc:696282]  
ENSMMUG00000058013 melanoma-associated antigen 3 [Source:NCBI gene;Acc:706103]  
ENSMMUG00000058106 otoconin 90 [Source:NCBI gene;Acc:100429699]



ENSMMUG00000058162  
ENSMMUG00000058176 b-defensin2-like [Source:NCBI gene;Acc:100169969]  
ENSMMUG00000058534  
ENSMMUG00000058536  
ENSMMUG00000058700 Metazoan signal recognition particle RNA [Source:RFAM;Acc:RF00017]  
ENSMMUG00000058797  
ENSMMUG00000058800  
ENSMMUG00000059134  
ENSMMUG00000059181  
ENSMMUG00000059182  
ENSMMUG00000059196  
ENSMMUG00000059335  
ENSMMUG00000059442  
ENSMMUG00000059504  
ENSMMUG00000059589  
ENSMMUG00000059608 fibroblast growth factor binding protein 3 [Source:NCBI gene;Acc:697881]  
ENSMMUG00000059782  
ENSMMUG00000060063  
ENSMMUG00000060675  
ENSMMUG00000060754 Metazoan signal recognition particle RNA [Source:RFAM;Acc:RF00017]  
ENSMMUG00000061021  
ENSMMUG00000061079 golgin subfamily A member 6C [Source:NCBI gene;Acc:715898]  
ENSMMUG00000061123 Metazoan signal recognition particle RNA [Source:RFAM;Acc:RF00017]  
ENSMMUG00000061244  
ENSMMUG00000061342  
ENSMMUG00000061526 synaptopodin 2 like [Source:NCBI gene;Acc:714736]  
ENSMMUG00000061576  
ENSMMUG00000061606 Metazoan signal recognition particle RNA [Source:RFAM;Acc:RF00017]  
ENSMMUG00000061923  
ENSMMUG00000061935  
ENSMMUG00000062055 glyoxalase I [Source:NCBI gene;Acc:719518]  
ENSMMUG00000062063 melanoma-associated antigen 3 [Source:NCBI gene;Acc:711544]  
ENSMMUG00000062139  
ENSMMUG00000062217 HD domain containing 3 [Source:NCBI gene;Acc:715621]  
ENSMMUG00000062254  
ENSMMUG00000062628  
ENSMMUG00000062863  
ENSMMUG00000063112  
ENSMMUG00000063198  
ENSMMUG00000063322  
ENSMMUG00000063346  
ENSMMUG00000063495  
ENSMMUG00000063525  
ENSMMUG00000063694 cyclic nucleotide gated channel subunit alpha 2 [Source:NCBI gene;Acc:704486]  
ENSMMUG00000063759 transmembrane protein 185B [Source:NCBI gene;Acc:695744]  
ENSMMUG00000063868 Metazoan signal recognition particle RNA [Source:RFAM;Acc:RF00017]  
ENSMMUG00000063898 apolipoprotein F [Source:NCBI gene;Acc:712761]  
ENSMMUG00000063913 endogenous retrovirus group K member 7 Env polyprotein-like [Source:NCBI gene;Acc:114674933]  
ENSMMUG00000064321  
ENSMMUG00000064341 U6 spliceosomal RNA [Source:RFAM;Acc:RF00026]  
ENSMMUG00000064557

ENSMMUG00000064694 AHNAK nucleoprotein 2 [Source:NCBI gene;Acc:707626]  
ENSMMUG00000064730  
ENSMMUG00000065247 opioid receptor kappa 1 [Source:NCBI gene;Acc:710783]  
ENSMMUG00000000187 UV radiation resistance associated [Source:VGNC Symbol;Acc:VGNC:78751]  
ENSMMUG00000000293 catenin alpha 2 [Source:VGNC Symbol;Acc:VGNC:71543]  
ENSMMUG00000000327 fatty acid desaturase 2 [Source:VGNC Symbol;Acc:VGNC:72472]  
ENSMMUG00000000396 intraflagellar transport 52 [Source:NCBI gene;Acc:694933]  
ENSMMUG00000000740 spermatogenesis associated 2 [Source:VGNC Symbol;Acc:VGNC:77923]  
ENSMMUG00000000757 ring finger protein 114 [Source:VGNC Symbol;Acc:VGNC:76725]  
ENSMMUG00000000874 carbohydrate sulfotransferase 1 [Source:VGNC Symbol;Acc:VGNC:71055]  
ENSMMUG00000001036 coagulation factor VII [Source:VGNC Symbol;Acc:VGNC:72466]  
ENSMMUG00000001058 tetratricopeptide repeat domain 28 [Source:VGNC Symbol;Acc:VGNC:79785]  
ENSMMUG00000001387 p21 (RAC1) activated kinase 1 [Source:NCBI gene;Acc:698585]  
ENSMMUG00000001409 coiled-coil domain containing 187 [Source:NCBI gene;Acc:710749]  
ENSMMUG00000001536 glutamine and serine rich 1 [Source:VGNC Symbol;Acc:VGNC:76544]  
ENSMMUG00000001745 oxysterol binding protein [Source:VGNC Symbol;Acc:VGNC:75718]  
ENSMMUG00000001748 spleen associated tyrosine kinase [Source:VGNC Symbol;Acc:VGNC:78063]  
ENSMMUG00000001777 testis expressed metallothionein like protein [Source:VGNC Symbol;Acc:VGNC:79965]  
ENSMMUG00000001845 DNA polymerase epsilon 4, accessory subunit [Source:VGNC Symbol;Acc:VGNC:76065]  
ENSMMUG00000002124 beta-1,4-galactosyltransferase 5 [Source:VGNC Symbol;Acc:VGNC:70212]  
ENSMMUG00000002267 laminin subunit gamma 3 [Source:NCBI gene;Acc:722430]  
ENSMMUG00000002324  
ENSMMUG00000002376 scavenger receptor class F member 1 [Source:VGNC Symbol;Acc:VGNC:77027]  
ENSMMUG00000002377 Rab interacting lysosomal protein [Source:VGNC Symbol;Acc:VGNC:76866]  
ENSMMUG00000002382 serpin family F member 2 [Source:VGNC Symbol;Acc:VGNC:77372]  
ENSMMUG00000002452 solute carrier family 35 member C1 [Source:VGNC Symbol;Acc:VGNC:77524]  
ENSMMUG00000002515 protein phosphatase 2 phosphatase activator [Source:VGNC Symbol;Acc:VGNC:76583]  
ENSMMUG00000002566 selenoprotein H [Source:VGNC Symbol;Acc:VGNC:82234]  
ENSMMUG00000002715 solute carrier family 9 member A8 [Source:VGNC Symbol;Acc:VGNC:77749]  
ENSMMUG00000002810 TOX high mobility group box family member 2 [Source:VGNC Symbol;Acc:VGNC:79007]  
ENSMMUG00000002923 colony stimulating factor 3 [Source:VGNC Symbol;Acc:VGNC:71520]  
ENSMMUG00000002926 mediator complex subunit 24 [Source:NCBI gene;Acc:699536]  
ENSMMUG00000003005 MFNG O-fucosylpeptide 3-beta-N-acetylglucosaminyltransferase [Source:VGNC Symbol;Acc:VGNC:74712]  
ENSMMUG00000003006 serine palmitoyltransferase long chain base subunit 1 [Source:VGNC Symbol;Acc:VGNC:77873]  
ENSMMUG00000003007 caspase recruitment domain family member 10 [Source:VGNC Symbol;Acc:VGNC:70570]  
ENSMMUG00000003098 peptidase, mitochondrial processing alpha subunit [Source:VGNC Symbol;Acc:VGNC:76062]  
ENSMMUG00000003105 inositol polyphosphate-5-phosphatase E [Source:VGNC Symbol;Acc:VGNC:73637]  
ENSMMUG00000003106 SEC16 homolog A, endoplasmic reticulum export factor [Source:VGNC Symbol;Acc:VGNC:77326]  
ENSMMUG00000003139 Rho guanine nucleotide exchange factor 17 [Source:VGNC Symbol;Acc:VGNC:69880]  
ENSMMUG00000003140 RELT TNF receptor [Source:VGNC Symbol;Acc:VGNC:76728]  
ENSMMUG00000003142 family with sequence similarity 168 member A [Source:VGNC Symbol;Acc:VGNC:72398]  
ENSMMUG00000003355 lipid droplet associated hydrolase [Source:VGNC Symbol;Acc:VGNC:74130]  
ENSMMUG00000003356 tenascin C [Source:VGNC Symbol;Acc:VGNC:79960]  
ENSMMUG00000003400 baculoviral IAP repeat containing 2 [Source:NCBI gene;Acc:702592]  
ENSMMUG00000003421 ankyrin repeat domain 40 [Source:VGNC Symbol;Acc:VGNC:69725]  
ENSMMUG00000003436 tubulin tyrosine ligase like 6 [Source:VGNC Symbol;Acc:VGNC:79632]  
ENSMMUG00000003437 signal transducer and activator of transcription 5B [Source:NCBI gene;Acc:709760]  
ENSMMUG00000003585 ALG5 dolichyl-phosphate beta-glucosyltransferase [Source:VGNC Symbol;Acc:VGNC:69647]  
ENSMMUG00000003797 ubiquitin specific peptidase 20 [Source:VGNC Symbol;Acc:VGNC:78740]  
ENSMMUG00000003874 interferon induced transmembrane protein 10 [Source:NCBI gene;Acc:721010]  
ENSMMUG00000003950 nucleoporin 98 and 96 precursor [Source:VGNC Symbol;Acc:VGNC:75563]

ENSMMUG0000003955 post-GPI attachment to proteins 2 [Source:VGNC Symbol;Acc:VGNC:75823]  
ENSMMUG0000003976 glycoprotein hormone subunit alpha 2 [Source:VGNC Symbol;Acc:VGNC:72961]  
ENSMMUG0000004330 peptidase domain containing associated with muscle regeneration 1 [Source:VGNC Symbol;Acc:VGNC:75673]  
ENSMMUG0000004332 tripartite motif containing 44 [Source:VGNC Symbol;Acc:VGNC:79168]  
ENSMMUG0000004523 DNA polymerase delta 4, accessory subunit [Source:NCBI gene;Acc:712632]  
ENSMMUG0000004587 gasdermin B [Source:VGNC Symbol;Acc:VGNC:73219]  
ENSMMUG0000004761 Cbl proto-oncogene [Source:VGNC Symbol;Acc:VGNC:70554]  
ENSMMUG0000004765 Sp2 transcription factor [Source:VGNC Symbol;Acc:VGNC:77845]  
ENSMMUG0000004794 DNA ligase 3 [Source:VGNC Symbol;Acc:VGNC:74266]  
ENSMMUG0000004820 pre-mRNA processing factor 8 [Source:VGNC Symbol;Acc:VGNC:76275]  
ENSMMUG0000004868 dynein axonemal light chain 4 [Source:VGNC Symbol;Acc:VGNC:71945]  
ENSMMUG0000005423 caseinolytic mitochondrial matrix peptidase chaperone subunit B [Source:VGNC Symbol;Acc:VGNC:71375]  
ENSMMUG0000005432 clathrin heavy chain like 1 [Source:VGNC Symbol;Acc:VGNC:71268]  
ENSMMUG0000005480 carnosine synthase 1 [Source:VGNC Symbol;Acc:VGNC:81367]  
ENSMMUG0000005482 lysine methyltransferase 2A [Source:NCBI gene;Acc:705511]  
ENSMMUG0000005483 ribosomal protein S6 kinase B2 [Source:VGNC Symbol;Acc:VGNC:76934]  
ENSMMUG0000005486 protein tyrosine phosphatase receptor type C associated protein [Source:VGNC Symbol;Acc:VGNC:76613]  
ENSMMUG0000005488 coronin 1B [Source:VGNC Symbol;Acc:VGNC:71320]  
ENSMMUG0000005595 RAB14, member RAS oncogene family [Source:NCBI gene;Acc:699837]  
ENSMMUG0000005666 phospholipase D2 [Source:VGNC Symbol;Acc:VGNC:76172]  
ENSMMUG0000005685 pseudouridine synthase 10 [Source:VGNC Symbol;Acc:VGNC:76547]  
ENSMMUG0000005769 EF-hand calcium binding domain 6 [Source:VGNC Symbol;Acc:VGNC:72092]  
ENSMMUG0000005776 atlastin GTPase 3 [Source:VGNC Symbol;Acc:VGNC:70125]  
ENSMMUG0000005793 ankyrin repeat and fibronectin type III domain containing 1 [Source:VGNC Symbol;Acc:VGNC:69712]  
ENSMMUG0000005982 coiled-coil domain containing 84 [Source:NCBI gene;Acc:707400]  
ENSMMUG0000005989 GLE1 RNA export mediator [Source:VGNC Symbol;Acc:VGNC:73067]  
ENSMMUG0000005991 TRIO and F-actin binding protein [Source:NCBI gene;Acc:701241]  
ENSMMUG0000005997 cell division cycle 14B [Source:NCBI gene;Acc:710300]  
ENSMMUG0000006066 phosphatidylcholine transfer protein [Source:VGNC Symbol;Acc:VGNC:75789]  
ENSMMUG0000006079 leucine rich repeat containing 19 [Source:VGNC Symbol;Acc:VGNC:74337]  
ENSMMUG0000006086 pleckstrin homology, MyTH4 and FERM domain containing H3 [Source:VGNC Symbol;Acc:VGNC:76113]  
ENSMMUG0000006091 contactin associated protein 1 [Source:VGNC Symbol;Acc:VGNC:71390]  
ENSMMUG0000006093 enhancer of zeste 1 polycomb repressive complex 2 subunit [Source:VGNC Symbol;Acc:VGNC:72457]  
ENSMMUG0000006101 myosin heavy chain 9 [Source:VGNC Symbol;Acc:VGNC:75102]  
ENSMMUG0000006375 coiled-coil domain containing 15 [Source:NCBI gene;Acc:716362]  
ENSMMUG0000006405 secretion regulating guanine nucleotide exchange factor [Source:VGNC Symbol;Acc:VGNC:77258]  
ENSMMUG0000006568 basic leucine zipper ATF-like transcription factor 2 [Source:VGNC Symbol;Acc:VGNC:70127]  
ENSMMUG0000006689 nuclear receptor interacting protein 3 [Source:VGNC Symbol;Acc:VGNC:75397]  
ENSMMUG0000006692 signal peptide, CUB domain and EGF like domain containing 2 [Source:VGNC Symbol;Acc:VGNC:77138]  
ENSMMUG0000006738 L3MBTL histone methyl-lysine binding protein 1 [Source:NCBI gene;Acc:695694]  
ENSMMUG0000006853 crystallin beta B2 [Source:NCBI gene;Acc:100144420]  
ENSMMUG0000006929 ST3 beta-galactoside alpha-2,3-sialyltransferase 4 [Source:VGNC Symbol;Acc:VGNC:77827]  
ENSMMUG0000006931 kirre like nephrin family adhesion molecule 3 [Source:NCBI gene;Acc:714534]  
ENSMMUG0000007200 NEDD4 binding protein 2 like 2 [Source:VGNC Symbol;Acc:VGNC:75031]  
ENSMMUG0000007201 PDS5 cohesin associated factor B [Source:VGNC Symbol;Acc:VGNC:75835]  
ENSMMUG0000007379 phosphatidylinositol 3,4,5-trisphosphate 3-phosphatase TPTE2-like [Source:NCBI gene;Acc:694255]  
ENSMMUG0000007402 potassium two pore domain channel subfamily K member 7 [Source:VGNC Symbol;Acc:VGNC:73996]  
ENSMMUG0000007423 transcription factor Dp-1 [Source:NCBI gene;Acc:715345]  
ENSMMUG0000007610 ribosomal protein S6 kinase A4 [Source:VGNC Symbol;Acc:VGNC:76930]  
ENSMMUG0000007925 serum/glucocorticoid regulated kinase 2 [Source:VGNC Symbol;Acc:VGNC:77228]  
ENSMMUG0000008077 dynein cytoplasmic 2 light intermediate chain 1 [Source:VGNC Symbol;Acc:VGNC:71899]

ENSMMUG0000008080 ATP binding cassette subfamily G member 5 [Source:VGNC Symbol;Acc:VGNC:69391]  
ENSMMUG0000008081 ATP binding cassette subfamily G member 8 [Source:VGNC Symbol;Acc:VGNC:69392]  
ENSMMUG0000008090 ribosomal protein L27 [Source:NCBI gene;Acc:712352]  
ENSMMUG0000008160 neutrophil cytosolic factor 4 [Source:VGNC Symbol;Acc:VGNC:75141]  
ENSMMUG0000008183 retinoid X receptor alpha [Source:VGNC Symbol;Acc:VGNC:76951]  
ENSMMUG0000008195 TGFB induced factor homeobox 2 [Source:NCBI gene;Acc:100429616]  
ENSMMUG0000008200 Src like adaptor 2 [Source:VGNC Symbol;Acc:VGNC:77499]  
ENSMMUG0000008651 FGF1 intracellular binding protein [Source:VGNC Symbol;Acc:VGNC:72663]  
ENSMMUG0000008652 coiled-coil domain containing 85B [Source:VGNC Symbol;Acc:VGNC:70853]  
ENSMMUG0000008758 zinc finger protein 143 [Source:VGNC Symbol;Acc:VGNC:81612]  
ENSMMUG0000008778 parvalbumin [Source:VGNC Symbol;Acc:VGNC:76627]  
ENSMMUG0000008923 Thy-1 cell surface antigen [Source:VGNC Symbol;Acc:VGNC:78352]  
ENSMMUG0000009176 calmodulin binding transcription activator 2 [Source:VGNC Symbol;Acc:VGNC:70578]  
ENSMMUG0000009318 BCL9 like [Source:VGNC Symbol;Acc:VGNC:70113]  
ENSMMUG0000009372 tetratricopeptide repeat domain 27 [Source:VGNC Symbol;Acc:VGNC:79565]  
ENSMMUG0000009884 hydroxysteroid 17-beta dehydrogenase 1 [Source:VGNC Symbol;Acc:VGNC:73528]  
ENSMMUG0000009886 Coenzyme A synthase [Source:VGNC Symbol;Acc:VGNC:81373]  
ENSMMUG0000009887 MAX dimerization protein MLX [Source:VGNC Symbol;Acc:VGNC:74726]  
ENSMMUG0000009889 PSMC3 interacting protein [Source:VGNC Symbol;Acc:VGNC:76282]  
ENSMMUG0000009890 FERM, ARH/RhoGEF and pleckstrin domain protein 1 [Source:VGNC Symbol;Acc:VGNC:72614]  
ENSMMUG0000009957 spermatogenesis associated 25 [Source:VGNC Symbol;Acc:VGNC:77928]  
ENSMMUG0000009960 cathepsin A [Source:VGNC Symbol;Acc:VGNC:71617]  
ENSMMUG0000009995 arachidonate 15-lipoxygenase type B [Source:VGNC Symbol;Acc:VGNC:69797]  
ENSMMUG00000010028 leucine zipper tumor suppressor family member 3 [Source:VGNC Symbol;Acc:VGNC:74403]  
ENSMMUG00000010363 ribophorin II [Source:VGNC Symbol;Acc:VGNC:76925]  
ENSMMUG00000010451 inositol polyphosphate phosphatase like 1 [Source:VGNC Symbol;Acc:VGNC:73752]  
ENSMMUG00000010536 discs large MAGUK scaffold protein 4 [Source:VGNC Symbol;Acc:VGNC:71920]  
ENSMMUG00000010678 oxytocin/neurophysin I prepropeptide [Source:VGNC Symbol;Acc:VGNC:75730]  
ENSMMUG00000010869 nucleoporin 160 [Source:VGNC Symbol;Acc:VGNC:75429]  
ENSMMUG00000011411 sperm acrosome associated 3 [Source:VGNC Symbol;Acc:VGNC:77930]  
ENSMMUG00000011527 TNF receptor associated factor 2 [Source:VGNC Symbol;Acc:VGNC:78641]  
ENSMMUG00000011528 F-box and WD repeat domain containing 5 [Source:VGNC Symbol;Acc:VGNC:72503]  
ENSMMUG00000011767 carnitine O-acetyltransferase [Source:VGNC Symbol;Acc:VGNC:71483]  
ENSMMUG00000011817 aryl hydrocarbon receptor interacting protein [Source:VGNC Symbol;Acc:VGNC:69759]  
ENSMMUG00000011866 phosphatidylinositol glycan anchor biosynthesis class O [Source:VGNC Symbol;Acc:VGNC:75851]  
ENSMMUG00000012147 collagen type V alpha 1 chain [Source:NCBI gene;Acc:722014]  
ENSMMUG00000012228 ubiquitin conjugating enzyme E2 V1 [Source:NCBI gene;Acc:100425552]  
ENSMMUG00000012316 CDC42 effector protein 2 [Source:VGNC Symbol;Acc:VGNC:70750]  
ENSMMUG00000012472 phosphatidylinositol-4-phosphate 5-kinase type 1 beta [Source:VGNC Symbol;Acc:VGNC:76001]  
ENSMMUG00000012523 flotillin 2 [Source:NCBI gene;Acc:114669752]  
ENSMMUG00000012668 centriolin [Source:VGNC Symbol;Acc:VGNC:71204]  
ENSMMUG00000012941 nudix hydrolase 22 [Source:VGNC Symbol;Acc:VGNC:75475]  
ENSMMUG00000012944 vascular endothelial growth factor B [Source:VGNC Symbol;Acc:VGNC:78765]  
ENSMMUG00000013048 junction plakoglobin [Source:VGNC Symbol;Acc:VGNC:73960]  
ENSMMUG00000013099 pappalysin 1 [Source:VGNC Symbol;Acc:VGNC:75756]  
ENSMMUG00000013107 tripartite motif containing 32 [Source:VGNC Symbol;Acc:VGNC:79032]  
ENSMMUG00000013397 peroxiredoxin 5 [Source:NCBI gene;Acc:719764]  
ENSMMUG00000013713 beta 3-glucosyltransferase [Source:NCBI gene;Acc:713498]  
ENSMMUG00000013798 fatty acid desaturase 1 [Source:VGNC Symbol;Acc:VGNC:72471]  
ENSMMUG00000013901 mitogen-activated protein kinase kinase kinase 3 [Source:VGNC Symbol;Acc:VGNC:81466]  
ENSMMUG00000013944 regulator of microtubule dynamics 2 [Source:VGNC Symbol;Acc:VGNC:76839]

ENSMMUG00000014010 RNA binding fox-1 homolog 2 [Source:VGNC Symbol;Acc:VGNC:76685]  
ENSMMUG00000014123 alanyl-tRNA editing protein Aarsd1 [Source:NCBI gene;Acc:712203]  
ENSMMUG00000014237 lysine methyltransferase 5B [Source:VGNC Symbol;Acc:VGNC:74110]  
ENSMMUG00000014309 zinc finger protein 280A [Source:VGNC Symbol;Acc:VGNC:79152]  
ENSMMUG00000014408 GIT ArfGAP 1 [Source:VGNC Symbol;Acc:VGNC:73053]  
ENSMMUG00000014409 ankyrin repeat domain 13B [Source:VGNC Symbol;Acc:VGNC:69708]  
ENSMMUG00000014411 coronin 6 [Source:NCBI gene;Acc:711818]  
ENSMMUG00000014413 slingshot protein phosphatase 2 [Source:VGNC Symbol;Acc:VGNC:78018]  
ENSMMUG00000014425 protein kinase C epsilon [Source:VGNC Symbol;Acc:VGNC:76412]  
ENSMMUG00000014530 pre-mRNA processing factor 19 [Source:VGNC Symbol;Acc:VGNC:76281]  
ENSMMUG00000014615 lactate dehydrogenase C [Source:VGNC Symbol;Acc:VGNC:74247]  
ENSMMUG00000014864 VPS11 core subunit of CORVET and HOPS complexes [Source:VGNC Symbol;Acc:VGNC:78965]  
ENSMMUG00000014866 hydroxymethylbilane synthase [Source:VGNC Symbol;Acc:VGNC:73479]  
ENSMMUG00000014872 dolichyl-phosphate N-acetylglucosaminophosphotransferase 1 [Source:VGNC Symbol;Acc:VGNC:71971]  
ENSMMUG00000014880 sortilin related receptor 1 [Source:NCBI gene;Acc:713011]  
ENSMMUG00000014986 testis expressed 33 [Source:VGNC Symbol;Acc:VGNC:79727]  
ENSMMUG00000015054 ArfGAP with RhoGAP domain, ankyrin repeat and PH domain 1 [Source:VGNC Symbol;Acc:VGNC:69844]  
ENSMMUG00000015160 Rap guanine nucleotide exchange factor like 1 [Source:VGNC Symbol;Acc:VGNC:76501]  
ENSMMUG00000015606 Spi-1 proto-oncogene [Source:NCBI gene;Acc:712010]  
ENSMMUG00000015611 proteasome 26S subunit, ATPase 3 [Source:NCBI gene;Acc:713356]  
ENSMMUG00000015925 G protein-coupled receptor kinase 2 [Source:VGNC Symbol;Acc:VGNC:73253]  
ENSMMUG00000016001 vesicle amine transport 1 [Source:VGNC Symbol;Acc:VGNC:79058]  
ENSMMUG00000016323 Rho guanine nucleotide exchange factor 39 [Source:VGNC Symbol;Acc:VGNC:69912]  
ENSMMUG00000016327 coiled-coil domain containing 107 [Source:VGNC Symbol;Acc:VGNC:70656]  
ENSMMUG00000016401 SGT1 homolog, MIS12 kinetochore complex assembly cochaperone [Source:NCBI gene;Acc:694046]  
ENSMMUG00000016404 chondromodulin [Source:VGNC Symbol;Acc:VGNC:71191]  
ENSMMUG00000016434 NADH:ubiquinone oxidoreductase complex assembly factor 7 [Source:VGNC Symbol;Acc:VGNC:75035]  
ENSMMUG00000016438 protein kinase D3 [Source:VGNC Symbol;Acc:VGNC:76415]  
ENSMMUG00000016442 glutaminyl-peptide cyclotransferase [Source:VGNC Symbol;Acc:VGNC:76636]  
ENSMMUG00000016448 DLG associated protein 4 [Source:NCBI gene;Acc:702928]  
ENSMMUG00000016549 matrix metalloproteinase 9 [Source:VGNC Symbol;Acc:VGNC:74903]  
ENSMMUG00000016678 Rho associated coiled-coil containing protein kinase 2 [Source:VGNC Symbol;Acc:VGNC:76714]  
ENSMMUG00000016737 contactin 5 [Source:VGNC Symbol;Acc:VGNC:71287]  
ENSMMUG00000016796 reticulophagy regulator family member 3 [Source:VGNC Symbol;Acc:VGNC:76845]  
ENSMMUG00000016797 tubulin gamma 1 [Source:NCBI gene;Acc:710756]  
ENSMMUG00000016827 UBA domain containing 1 [Source:VGNC Symbol;Acc:VGNC:79837]  
ENSMMUG00000016890 solute carrier family 37 member 4 [Source:VGNC Symbol;Acc:VGNC:77591]  
ENSMMUG00000016894 ribosomal protein S25 [Source:NCBI gene;Acc:702593]  
ENSMMUG00000016946 trafficking protein particle complex 4 [Source:VGNC Symbol;Acc:VGNC:79211]  
ENSMMUG00000017224 catenin beta like 1 [Source:VGNC Symbol;Acc:VGNC:71414]  
ENSMMUG00000017256 calcium voltage-gated channel subunit alpha1 G [Source:VGNC Symbol;Acc:VGNC:70504]  
ENSMMUG00000017280 TBC1 domain family member 10C [Source:VGNC Symbol;Acc:VGNC:78203]  
ENSMMUG00000017287 PAT1 homolog 1, processing body mRNA decay factor [Source:VGNC Symbol;Acc:VGNC:75684]  
ENSMMUG00000017561 solute carrier family 43 member 2 [Source:VGNC Symbol;Acc:VGNC:77554]  
ENSMMUG00000017810 structure specific recognition protein 1 [Source:VGNC Symbol;Acc:VGNC:77891]  
ENSMMUG00000018029 amyloid beta precursor like protein 2 [Source:VGNC Symbol;Acc:VGNC:69984]  
ENSMMUG00000018034 suppression of tumorigenicity 14 [Source:VGNC Symbol;Acc:VGNC:77897]  
ENSMMUG00000018137 MYB proto-oncogene like 2 [Source:VGNC Symbol;Acc:VGNC:75092]  
ENSMMUG00000018396 HAUS augmin like complex subunit 6 [Source:VGNC Symbol;Acc:VGNC:73237]  
ENSMMUG00000018471 serine/threonine kinase 33 [Source:VGNC Symbol;Acc:VGNC:78118]  
ENSMMUG00000018719 nemo like kinase [Source:VGNC Symbol;Acc:VGNC:75277]



ENSMMUG00000018720 cytoskeleton associated protein 2 [Source:VGNC Symbol;Acc:VGNC:71229]  
ENSMMUG00000018798 stromal cell derived factor 2 like 1 [Source:NCBI gene;Acc:697928]  
ENSMMUG00000019070 focadhesin [Source:VGNC Symbol;Acc:VGNC:72556]  
ENSMMUG00000019354 actin like 7B [Source:VGNC Symbol;Acc:VGNC:69421]  
ENSMMUG00000019667 TAO kinase 1 [Source:VGNC Symbol;Acc:VGNC:81591]  
ENSMMUG00000019837 ribonuclease H2 subunit C [Source:NCBI gene;Acc:700330]  
ENSMMUG00000019839 lysine acetyltransferase 5 [Source:VGNC Symbol;Acc:VGNC:73955]  
ENSMMUG00000019925 DiGeorge syndrome critical region gene 2 [Source:NCBI gene;Acc:100423715]  
ENSMMUG00000019988 homeodomain interacting protein kinase 3 [Source:VGNC Symbol;Acc:VGNC:73472]  
ENSMMUG00000020009 receptor tyrosine kinase like orphan receptor 2 [Source:VGNC Symbol;Acc:VGNC:76716]  
ENSMMUG00000020020 Rho GTPase activating protein 23 [Source:NCBI gene;Acc:693996]  
ENSMMUG00000020172 KIAA1755 [Source:VGNC Symbol;Acc:VGNC:73942]  
ENSMMUG00000020190 valosin containing protein [Source:VGNC Symbol;Acc:VGNC:78762]  
ENSMMUG00000020226 WD repeat and SOCS box containing 1 [Source:VGNC Symbol;Acc:VGNC:79186]  
ENSMMUG00000020489 HscB mitochondrial iron-sulfur cluster cochaperone [Source:VGNC Symbol;Acc:VGNC:73454]  
ENSMMUG00000020744 metastasis associated 1 family member 3 [Source:VGNC Symbol;Acc:VGNC:74814]  
ENSMMUG00000020799 BH3 interacting domain death agonist [Source:VGNC Symbol;Acc:VGNC:70250]  
ENSMMUG00000020854 C-type lectin domain family 4 member F [Source:VGNC Symbol;Acc:VGNC:71349]  
ENSMMUG00000020868 homeobox B8 [Source:VGNC Symbol;Acc:VGNC:73505]  
ENSMMUG00000020956 parvin alpha [Source:VGNC Symbol;Acc:VGNC:75605]  
ENSMMUG00000021039 X-ray radiation resistance associated 1 [Source:NCBI gene;Acc:693788]  
ENSMMUG00000021408 family with sequence similarity 222 member B [Source:VGNC Symbol;Acc:VGNC:72352]  
ENSMMUG00000021428 lipocalin 12 [Source:VGNC Symbol;Acc:VGNC:74143]  
ENSMMUG00000021436 latent transforming growth factor beta binding protein 1 [Source:VGNC Symbol;Acc:VGNC:74456]  
ENSMMUG00000021476 BCL2 like 13 [Source:VGNC Symbol;Acc:VGNC:84544]  
ENSMMUG00000021477 ATPase H+ transporting V1 subunit E1 [Source:NCBI gene;Acc:709739]  
ENSMMUG00000021486 secernin 2 [Source:NCBI gene;Acc:694571]  
ENSMMUG00000021553 dehydrogenase/reductase 13 [Source:VGNC Symbol;Acc:VGNC:81387]  
ENSMMUG00000021554 PHD finger protein 12 [Source:VGNC Symbol;Acc:VGNC:75838]  
ENSMMUG00000021938 nudE neurodevelopment protein 1 like 1 [Source:VGNC Symbol;Acc:VGNC:74982]  
ENSMMUG00000022031 DNA polymerase alpha 2, accessory subunit [Source:NCBI gene;Acc:716541]  
ENSMMUG00000022282 collagen type IV alpha 2 chain [Source:NCBI gene;Acc:100429807]  
ENSMMUG00000022345  
ENSMMUG00000022401 EMSY transcriptional repressor, BRCA2 interacting [Source:VGNC Symbol;Acc:VGNC:72065]  
ENSMMUG00000022613 reversion inducing cysteine rich protein with kazal motifs [Source:VGNC Symbol;Acc:VGNC:76722]  
ENSMMUG00000022741 WAP, follistatin/kazal, immunoglobulin, kunitz and netrin domain containing 2 [Source:VGNC Symbol;Acc:VGNC:79900]  
ENSMMUG00000022785 solute carrier family 66 member 3 [Source:VGNC Symbol;Acc:VGNC:76334]  
ENSMMUG00000022818 inhibitor of growth family member 1 [Source:VGNC Symbol;Acc:VGNC:73742]  
ENSMMUG00000022996 HCLS1 binding protein 3 [Source:VGNC Symbol;Acc:VGNC:82158]  
ENSMMUG00000023263 mediator complex subunit 15 [Source:VGNC Symbol;Acc:VGNC:74511]  
ENSMMUG00000023300 FERM domain containing 8 [Source:NCBI gene;Acc:716379]  
ENSMMUG00000023477  
ENSMMUG00000023479 latent transforming growth factor beta binding protein 3 [Source:VGNC Symbol;Acc:VGNC:74458]  
ENSMMUG00000025050 Y RNA [Source:RFAM;Acc:RF00019]  
ENSMMUG00000026950 microRNA 101-2 [Source:HGNC Symbol;Acc:HGNC:31489]  
ENSMMUG00000027986 U6 spliceosomal RNA [Source:RFAM;Acc:RF00026]  
ENSMMUG00000028471 U7 small nuclear RNA [Source:RFAM;Acc:RF00066]  
ENSMMUG00000030279 A-kinase anchoring protein 10 [Source:VGNC Symbol;Acc:VGNC:69764]  
ENSMMUG00000030389  
ENSMMUG00000030891 hypoxia up-regulated 1 [Source:VGNC Symbol;Acc:VGNC:73399]  
ENSMMUG00000030964 RAB6A, member RAS oncogene family [Source:NCBI gene;Acc:718717]

ENSMMUG00000031024 lactate dehydrogenase A [Source:NCBI gene;Acc:694309]  
ENSMMUG00000031100 membrane-spanning 4-domains subfamily A member 4A-like [Source:NCBI gene;Acc:698152]  
ENSMMUG00000031163 membrane anchored junction protein [Source:VGNC Symbol;Acc:VGNC:74375]  
ENSMMUG00000031166 McKusick-Kaufman syndrome [Source:NCBI gene;Acc:718547]  
ENSMMUG00000031391 RNA binding motif protein 38 [Source:VGNC Symbol;Acc:VGNC:76484]  
ENSMMUG00000032030 dolichyldiphosphatase 1 [Source:VGNC Symbol;Acc:VGNC:71947]  
ENSMMUG00000032142 complement C8 gamma chain [Source:VGNC Symbol;Acc:VGNC:70481]  
ENSMMUG00000033550  
ENSMMUG00000035888 small nucleolar RNA, C/D box 121A [Source:HGNC Symbol;Acc:HGNC:33560]  
ENSMMUG00000036223  
ENSMMUG00000037426 U7 small nuclear RNA [Source:RFAM;Acc:RF00066]  
ENSMMUG00000038363 adaptor related protein complex 5 subunit beta 1 [Source:NCBI gene;Acc:721904]  
ENSMMUG00000038858  
ENSMMUG00000038944  
ENSMMUG00000039205  
ENSMMUG00000039266 Metazoan signal recognition particle RNA [Source:RFAM;Acc:RF00017]  
ENSMMUG00000039397 tubulin folding cofactor E like [Source:NCBI gene;Acc:706506]  
ENSMMUG00000040741 thioredoxin related transmembrane protein 2 [Source:NCBI gene;Acc:100169970]  
ENSMMUG00000041101 protein phosphatase 2 regulatory subunit B'beta [Source:NCBI gene;Acc:722026]  
ENSMMUG00000042598 transmembrane protein 18 [Source:NCBI gene;Acc:721515]  
ENSMMUG00000043396 Metazoan signal recognition particle RNA [Source:RFAM;Acc:RF00017]  
ENSMMUG00000044048 Metazoan signal recognition particle RNA [Source:RFAM;Acc:RF00017]  
ENSMMUG00000044496 H2A histone family, member X [Source:NCBI gene;Acc:703073]  
ENSMMUG00000045187 CAS3 exon junction complex subunit [Source:NCBI gene;Acc:699712]  
ENSMMUG00000045203  
ENSMMUG00000046169  
ENSMMUG00000047219  
ENSMMUG00000047452  
ENSMMUG00000048204 ephrin B3 [Source:NCBI gene;Acc:716257]  
ENSMMUG00000048375 Metazoan signal recognition particle RNA [Source:RFAM;Acc:RF00017]  
ENSMMUG00000048395 chromobox 6 [Source:NCBI gene;Acc:702133]  
ENSMMUG00000048463 apolipoprotein L5 [Source:HGNC Symbol;Acc:HGNC:14869]  
ENSMMUG00000048566 MCF.2 cell line derived transforming sequence like [Source:NCBI gene;Acc:713961]  
ENSMMUG00000049130  
ENSMMUG00000049305 Metazoan signal recognition particle RNA [Source:RFAM;Acc:RF00017]  
ENSMMUG00000049355 ALX homeobox 4 [Source:NCBI gene;Acc:715652]  
ENSMMUG00000049479  
ENSMMUG00000049542  
ENSMMUG00000049649 proteasome 20S subunit beta 6 [Source:NCBI gene;Acc:710028]  
ENSMMUG00000049802 olfactory receptor 51G1 [Source:NCBI gene;Acc:716561]  
ENSMMUG00000049850 proline rich and Gla domain 4 [Source:NCBI gene;Acc:694707]  
ENSMMUG00000050028  
ENSMMUG00000050119  
ENSMMUG00000050543  
ENSMMUG00000050686  
ENSMMUG00000050793 N-acetyl-alpha-glucosaminidase [Source:NCBI gene;Acc:707186]  
ENSMMUG00000050822 carbonic anhydrase 9 [Source:NCBI gene;Acc:696729]  
ENSMMUG00000050844 BTB domain containing 18 [Source:NCBI gene;Acc:703264]  
ENSMMUG00000051201 zinc finger SWIM-type containing 3 [Source:NCBI gene;Acc:708804]  
ENSMMUG00000051420 homeobox B5 [Source:NCBI gene;Acc:696732]  
ENSMMUG00000051925

ENSMMUG00000052168  
ENSMMUG00000052505 homeobox B9 [Source:NCBI gene;Acc:106994009]  
ENSMMUG00000052569  
ENSMMUG00000052785 extracellular leucine rich repeat and fibronectin type III domain containing 2 [Source:NCBI gene;Acc:697071]  
ENSMMUG00000053200 ubiquitin conjugating enzyme E2 R2 [Source:NCBI gene;Acc:701507]  
ENSMMUG00000053378  
ENSMMUG00000053625 sterol-C5-desaturase [Source:NCBI gene;Acc:706827]  
ENSMMUG00000054211  
ENSMMUG00000054398  
ENSMMUG00000054784  
ENSMMUG00000055048  
ENSMMUG00000055122  
ENSMMUG00000055290 netrin 1 [Source:NCBI gene;Acc:717645]  
ENSMMUG00000055324 homeobox B7 [Source:NCBI gene;Acc:697089]  
ENSMMUG00000055352  
ENSMMUG00000055811  
ENSMMUG00000055820  
ENSMMUG00000055897  
ENSMMUG00000055963  
ENSMMUG00000056008  
ENSMMUG00000056009  
ENSMMUG00000056093 shieldin complex subunit 1 [Source:NCBI gene;Acc:718152]  
ENSMMUG00000056184  
ENSMMUG00000056186  
ENSMMUG00000056248  
ENSMMUG00000056342 Metazoan signal recognition particle RNA [Source:RFAM;Acc:RF00017]  
ENSMMUG00000056343  
ENSMMUG00000056381 forkhead box R1 [Source:NCBI gene;Acc:707285]  
ENSMMUG00000056629 nucleolar protein 12 [Source:NCBI gene;Acc:698318]  
ENSMMUG00000056646  
ENSMMUG00000056840  
ENSMMUG00000056905  
ENSMMUG00000056945  
ENSMMUG00000056950  
ENSMMUG00000057001 homeobox B2 [Source:NCBI gene;Acc:106994010]  
ENSMMUG00000057095  
ENSMMUG00000057231 T-box transcription factor 21 [Source:NCBI gene;Acc:694044]  
ENSMMUG00000057331 RNA terminal phosphate cyclase like 1 [Source:NCBI gene;Acc:694568]  
ENSMMUG00000057499  
ENSMMUG00000057632  
ENSMMUG00000057687  
ENSMMUG00000057934  
ENSMMUG00000058237  
ENSMMUG00000058326 neuralized E3 ubiquitin protein ligase 2 [Source:NCBI gene;Acc:708904]  
ENSMMUG00000058566  
ENSMMUG00000058758  
ENSMMUG00000058885 formin binding protein 4 [Source:NCBI gene;Acc:712633]  
ENSMMUG00000058916  
ENSMMUG00000059188  
ENSMMUG00000059292  
ENSMMUG00000059299 membrane spanning 4-domains A2 [Source:NCBI gene;Acc:697830]

ENSMMUG00000059302 Metazoan signal recognition particle RNA [Source:RFAM;Acc:RF00017]  
ENSMMUG00000059341 Metazoan signal recognition particle RNA [Source:RFAM;Acc:RF00017]  
ENSMMUG00000059436 interleukin 10 receptor subunit alpha [Source:NCBI gene;Acc:704383]  
ENSMMUG00000059700  
ENSMMUG00000059778  
ENSMMUG00000059897 myosin light chain 9 [Source:NCBI gene;Acc:709784]  
ENSMMUG00000060261  
ENSMMUG00000060435 Metazoan signal recognition particle RNA [Source:RFAM;Acc:RF00017]  
ENSMMUG00000060437 Metazoan signal recognition particle RNA [Source:RFAM;Acc:RF00017]  
ENSMMUG00000060502  
ENSMMUG00000060517  
ENSMMUG00000060533  
ENSMMUG00000060712  
ENSMMUG00000060761  
ENSMMUG00000060879 homeobox B13 [Source:NCBI gene;Acc:697572]  
ENSMMUG00000061225  
ENSMMUG00000061335  
ENSMMUG00000061424 ventral anterior homeobox 2 [Source:NCBI gene;Acc:703531]  
ENSMMUG00000061533  
ENSMMUG00000061603  
ENSMMUG00000061698  
ENSMMUG00000061896  
ENSMMUG00000061951  
ENSMMUG00000062091  
ENSMMUG00000062208 Metazoan signal recognition particle RNA [Source:RFAM;Acc:RF00017]  
ENSMMUG00000062283 homeobox B6 [Source:NCBI gene;Acc:106994013]  
ENSMMUG00000062474 Metazoan signal recognition particle RNA [Source:RFAM;Acc:RF00017]  
ENSMMUG00000062755  
ENSMMUG00000062781 chromosome 14 C11orf97 homolog [Source:NCBI gene;Acc:106993442]  
ENSMMUG00000063238  
ENSMMUG00000063383  
ENSMMUG00000063622 mitochondrial ribosomal protein S26 [Source:NCBI gene;Acc:717038]  
ENSMMUG00000063639  
ENSMMUG00000063735  
ENSMMUG00000063779  
ENSMMUG00000063820 olfactory receptor, family 52, subfamily M, member 1 [Source:NCBI gene;Acc:717723]  
ENSMMUG00000063914  
ENSMMUG00000063947 oxoeicosanoid receptor 1 [Source:NCBI gene;Acc:713039]  
ENSMMUG00000064005  
ENSMMUG00000064026 Metazoan signal recognition particle RNA [Source:RFAM;Acc:RF00017]  
ENSMMUG00000064122  
ENSMMUG00000064229  
ENSMMUG00000064391  
ENSMMUG00000064401  
ENSMMUG00000064650 SPEM family member 3 [Source:NCBI gene;Acc:106993878]  
ENSMMUG00000064892  
ENSMMUG00000064920  
ENSMMUG00000065113  
ENSMMUG00000065129  
ENSMMUG00000065208  
ENSMMUG00000065269 Rho family GTPase 2 [Source:NCBI gene;Acc:712559]

ENSMMUG0000000198 collagen beta(1-O)galactosyltransferase 1 [Source:NCBI gene;Acc:719980]  
ENSMMUG00000000566  
ENSMMUG00000000700 CLN3 lysosomal/endosomal transmembrane protein, battenin [Source:NCBI gene;Acc:705815]  
ENSMMUG00000001220 adhesion G protein-coupled receptor E1 [Source:VGNC Symbol;Acc:VGNC:69561]  
ENSMMUG00000001269 chromosome 16 C17orf80 homolog [Source:VGNC Symbol;Acc:VGNC:70440]  
ENSMMUG00000001427 myosin heavy chain 14 [Source:VGNC Symbol;Acc:VGNC:75006]  
ENSMMUG00000001538 GRAM domain containing 1A [Source:VGNC Symbol;Acc:VGNC:73029]  
ENSMMUG00000001715 zinc finger protein 627 [Source:VGNC Symbol;Acc:VGNC:79856]  
ENSMMUG00000001944 chromosome 20 C16orf72 homolog [Source:VGNC Symbol;Acc:VGNC:70443]  
ENSMMUG00000002033 serine protease 36 [Source:VGNC Symbol;Acc:VGNC:76325]  
ENSMMUG00000002278 AT-rich interaction domain 3A [Source:VGNC Symbol;Acc:VGNC:69930]  
ENSMMUG00000002381 lysine methyltransferase 2B [Source:VGNC Symbol;Acc:VGNC:74053]  
ENSMMUG00000002384 IGF like family receptor 1 [Source:VGNC Symbol;Acc:VGNC:73434]  
ENSMMUG00000002822 unc-13 homolog D [Source:VGNC Symbol;Acc:VGNC:79375]  
ENSMMUG00000002959 helicase with zinc finger [Source:VGNC Symbol;Acc:VGNC:73178]  
ENSMMUG00000003075 coiled-coil domain containing 9 [Source:VGNC Symbol;Acc:VGNC:70851]  
ENSMMUG00000003298 ataxin 2 like [Source:VGNC Symbol;Acc:VGNC:70159]  
ENSMMUG00000003303 Tu translation elongation factor, mitochondrial [Source:VGNC Symbol;Acc:VGNC:78674]  
ENSMMUG00000003534 ring finger protein 157 [Source:VGNC Symbol;Acc:VGNC:76860]  
ENSMMUG00000003539 glutamine rich 2 [Source:VGNC Symbol;Acc:VGNC:76534]  
ENSMMUG00000003819 nitric oxide synthase interacting protein [Source:VGNC Symbol;Acc:VGNC:75207]  
ENSMMUG00000003926 BCL2 like 12 [Source:NCBI gene;Acc:718981]  
ENSMMUG00000004283 calcium and integrin binding family member 3 [Source:VGNC Symbol;Acc:VGNC:71339]  
ENSMMUG00000004498 protein inhibitor of activated STAT 2 [Source:VGNC Symbol;Acc:VGNC:75815]  
ENSMMUG00000004843 sodium voltage-gated channel beta subunit 1 [Source:VGNC Symbol;Acc:VGNC:76983]  
ENSMMUG00000005086 homeobox protein TGIF1 [Source:NCBI gene;Acc:694580]  
ENSMMUG00000005236 zinc finger protein 709 [Source:NCBI gene;Acc:717515]  
ENSMMUG00000005548 N-ethylmaleimide sensitive factor, vesicle fusing ATPase [Source:VGNC Symbol;Acc:VGNC:75536]  
ENSMMUG00000005552 PAF1 homolog, Paf1/RNA polymerase II complex component [Source:VGNC Symbol;Acc:VGNC:81492]  
ENSMMUG00000005554 mediator complex subunit 29 [Source:VGNC Symbol;Acc:VGNC:74557]  
ENSMMUG00000005698 alkaline ceramidase 1 [Source:VGNC Symbol;Acc:VGNC:69460]  
ENSMMUG00000005729 GIPC PDZ domain containing family member 1 [Source:VGNC Symbol;Acc:VGNC:72932]  
ENSMMUG00000005737 SLC9A3 regulator 1 [Source:VGNC Symbol;Acc:VGNC:77639]  
ENSMMUG00000005738 N-acetyltransferase 9 (putative) [Source:NCBI gene;Acc:699085]  
ENSMMUG00000005906 heat shock transcription factor 4 [Source:VGNC Symbol;Acc:VGNC:73533]  
ENSMMUG00000007401 arrestin domain containing 2 [Source:VGNC Symbol;Acc:VGNC:69901]  
ENSMMUG00000007538 transient receptor potential cation channel subfamily M member 4 [Source:VGNC Symbol;Acc:VGNC:79105]  
ENSMMUG00000007726 synapse defective Rho GTPase homolog 1 [Source:NCBI gene;Acc:719089]  
ENSMMUG00000007729 ilvB acetolactate synthase like [Source:VGNC Symbol;Acc:VGNC:73739]  
ENSMMUG00000008784 lipopolysaccharide induced TNF factor [Source:NCBI gene;Acc:711743]  
ENSMMUG00000009377 tripartite motif containing 47 [Source:VGNC Symbol;Acc:VGNC:79171]  
ENSMMUG00000009381 WW domain binding protein 2 [Source:VGNC Symbol;Acc:VGNC:78786]  
ENSMMUG00000009487 zinc finger protein 205 [Source:VGNC Symbol;Acc:VGNC:78869]  
ENSMMUG00000009567 glyoxylate reductase 1 homolog [Source:NCBI gene;Acc:706933]  
ENSMMUG00000009684 kinesin family member 22 [Source:VGNC Symbol;Acc:VGNC:74033]  
ENSMMUG00000009825 zinc finger DHHC-type containing 1 [Source:VGNC Symbol;Acc:VGNC:79102]  
ENSMMUG00000009988 transmembrane protein 59 like [Source:VGNC Symbol;Acc:VGNC:78919]  
ENSMMUG00000010824 SWIM-type zinc finger 7 associated protein 1 [Source:VGNC Symbol;Acc:VGNC:78220]  
ENSMMUG00000010837 VRK serine/threonine kinase 3 [Source:VGNC Symbol;Acc:VGNC:81605]  
ENSMMUG00000010840 zinc finger protein 507 [Source:VGNC Symbol;Acc:VGNC:79410]  
ENSMMUG00000010886 strawberry notch homolog 2 [Source:VGNC Symbol;Acc:VGNC:77123]



ENSMMUG00000011332 Rho GTPase activating protein 35 [Source:VGNC Symbol;Acc:VGNC:69942]  
ENSMMUG00000011427 syntaxin 10 [Source:VGNC Symbol;Acc:VGNC:78040]  
ENSMMUG00000011627 interleukin 4 induced 1 [Source:VGNC Symbol;Acc:VGNC:73625]  
ENSMMUG00000011798 eukaryotic translation initiation factor 3 subunit C [Source:NCBI gene;Acc:705696]  
ENSMMUG00000011951 KRI1 homolog [Source:VGNC Symbol;Acc:VGNC:74127]  
ENSMMUG00000012039 cytochrome b5 type B (outer mitochondrial membrane) [Source:NCBI gene;Acc:705093]  
ENSMMUG00000012466 BCL2 binding component 3 [Source:NCBI gene;Acc:717955]  
ENSMMUG00000012797 zinc finger protein 233 [Source:VGNC Symbol;Acc:VGNC:79903]  
ENSMMUG00000012801 zinc finger protein 235 [Source:VGNC Symbol;Acc:VGNC:78825]  
ENSMMUG00000012841 kallikrein 3 [Source:NCBI gene;Acc:719444]  
ENSMMUG00000012937 proline rich 12 [Source:NCBI gene;Acc:719344]  
ENSMMUG00000012938 SR-related CTD associated factor 1 [Source:VGNC Symbol;Acc:VGNC:77137]  
ENSMMUG00000013477 creatine kinase, M-type [Source:VGNC Symbol;Acc:VGNC:71230]  
ENSMMUG00000013646 unk zinc finger [Source:VGNC Symbol;Acc:VGNC:79803]  
ENSMMUG00000013671 elongation factor for RNA polymerase II [Source:VGNC Symbol;Acc:VGNC:72088]  
ENSMMUG00000013967 TOX high mobility group box family member 3 [Source:VGNC Symbol;Acc:VGNC:78612]  
ENSMMUG00000014032 proline rich 36 [Source:NCBI gene;Acc:710443]  
ENSMMUG00000014240 thioredoxin domain containing 11 [Source:VGNC Symbol;Acc:VGNC:79678]  
ENSMMUG00000014273 cation channel sperm associated auxiliary subunit gamma [Source:VGNC Symbol;Acc:VGNC:70626]  
ENSMMUG00000014349 integrin subunit alpha X [Source:NCBI gene;Acc:100427850]  
ENSMMUG00000014897 ribonucleoprotein, PTB binding 1 [Source:NCBI gene;Acc:715250]  
ENSMMUG00000015306 calponin 2 [Source:NCBI gene;Acc:721164]  
ENSMMUG00000015476 unc-13 homolog A [Source:NCBI gene;Acc:720000]  
ENSMMUG00000015513 CUGBP Elav-like family member 5 [Source:NCBI gene;Acc:721694]  
ENSMMUG00000015572 GSG1 like [Source:VGNC Symbol;Acc:VGNC:82152]  
ENSMMUG00000015744 zinc finger protein 302 [Source:NCBI gene;Acc:706279]  
ENSMMUG00000015908 RB binding protein 6, ubiquitin ligase [Source:VGNC Symbol;Acc:VGNC:76677]  
ENSMMUG00000016085 KxDL motif containing 1 [Source:NCBI gene;Acc:720235]  
ENSMMUG00000016143 sialophorin [Source:VGNC Symbol;Acc:VGNC:77861]  
ENSMMUG00000016417 chromobox 8 [Source:NCBI gene;Acc:717514]  
ENSMMUG00000016758 transmembrane protein 159 [Source:VGNC Symbol;Acc:VGNC:79836]  
ENSMMUG00000017036 nicalin [Source:VGNC Symbol;Acc:VGNC:75032]  
ENSMMUG00000017188 proteasome 26S subunit, ATPase 4 [Source:VGNC Symbol;Acc:VGNC:76448]  
ENSMMUG00000017758 mitogen-activated protein kinase 3 [Source:VGNC Symbol;Acc:VGNC:74646]  
ENSMMUG00000017822 periplakin [Source:VGNC Symbol;Acc:VGNC:76240]  
ENSMMUG00000017906 DnaJ heat shock protein family (Hsp40) member B1 [Source:NCBI gene;Acc:718890]  
ENSMMUG00000017949 ornithine decarboxylase antizyme 1 [Source:NCBI gene;Acc:721477]  
ENSMMUG00000018623 exportin 6 [Source:NCBI gene;Acc:704332]  
ENSMMUG00000018932 adhesion G protein-coupled receptor E2 [Source:NCBI gene;Acc:654420]  
ENSMMUG00000018967 ubiquitin conjugating enzyme E2 O [Source:VGNC Symbol;Acc:VGNC:79813]  
ENSMMUG00000018986 seizure related 6 homolog like 2 [Source:VGNC Symbol;Acc:VGNC:81567]  
ENSMMUG00000019095 TBC1 domain family member 24 [Source:NCBI gene;Acc:697106]  
ENSMMUG00000019314 vav guanine nucleotide exchange factor 1 [Source:VGNC Symbol;Acc:VGNC:78757]  
ENSMMUG00000019369 pleckstrin homology and RhoGEF domain containing G2 [Source:VGNC Symbol;Acc:VGNC:76133]  
ENSMMUG00000019418 erythrocyte membrane protein band 4.1 like 3 [Source:VGNC Symbol;Acc:VGNC:72233]  
ENSMMUG00000019704 WD repeat domain 62 [Source:NCBI gene;Acc:719053]  
ENSMMUG00000019966 zinc finger protein 557 [Source:NCBI gene;Acc:100424983]  
ENSMMUG00000020254 exocyst complex component 3 like 1 [Source:VGNC Symbol;Acc:VGNC:72376]  
ENSMMUG00000020258 E2F transcription factor 4 [Source:VGNC Symbol;Acc:VGNC:72025]  
ENSMMUG00000020462 CD300e molecule [Source:NCBI gene;Acc:114673189]  
ENSMMUG00000020668 cyclin E1 [Source:VGNC Symbol;Acc:VGNC:70727]

ENSMMUG00000022100 midnolin [Source:VGNC Symbol;Acc:VGNC:82186]  
ENSMMUG00000022207 phospholipid phosphatase related 2 [Source:NCBI gene;Acc:714388]  
ENSMMUG00000022463 C-type lectin CD209L2 [Source:NCBI gene;Acc:574373]  
ENSMMUG00000022931 NTPase KAP family P-loop domain containing 1 [Source:VGNC Symbol;Acc:VGNC:75250]  
ENSMMUG00000023286 UPF1 RNA helicase and ATPase [Source:VGNC Symbol;Acc:VGNC:79971]  
ENSMMUG00000023303 ecotropic viral integration site 5 like [Source:NCBI gene;Acc:706628]  
ENSMMUG00000023403 GTP binding protein 3, mitochondrial [Source:VGNC Symbol;Acc:VGNC:73170]  
ENSMMUG00000023717 MIER family member 2 [Source:VGNC Symbol;Acc:VGNC:74855]  
ENSMMUG00000028733 RAS related [Source:VGNC Symbol;Acc:VGNC:76937]  
ENSMMUG00000028771 Yip1 interacting factor homolog B, membrane trafficking protein [Source:VGNC Symbol;Acc:VGNC:79852]  
ENSMMUG00000028785 zinc finger protein 146 [Source:VGNC Symbol;Acc:VGNC:78846]  
ENSMMUG00000028907 insulin receptor [Source:NCBI gene;Acc:706009]  
ENSMMUG00000028947 complement factor D [Source:VGNC Symbol;Acc:VGNC:71115]  
ENSMMUG00000028948 azurocidin 1 [Source:VGNC Symbol;Acc:VGNC:70202]  
ENSMMUG00000029296 phosphatidylinositol glycan anchor biosynthesis class Q [Source:VGNC Symbol;Acc:VGNC:75798]  
ENSMMUG00000038702 ZFP36 ring finger protein [Source:NCBI gene;Acc:722000]  
ENSMMUG00000038989 erythropoietin receptor [Source:NCBI gene;Acc:714546]  
ENSMMUG00000043134 coiled-coil domain containing 159 [Source:NCBI gene;Acc:100424702]  
ENSMMUG00000044817 nucleoporin 62 [Source:NCBI gene;Acc:100426308]  
ENSMMUG00000046099 chromosome 19 C19orf81 homolog [Source:NCBI gene;Acc:719661]  
ENSMMUG00000046417 chromobox 2 [Source:NCBI gene;Acc:717462]  
ENSMMUG00000046918 zinc finger protein 223 [Source:NCBI gene;Acc:711652]  
ENSMMUG00000048190 U2 small nuclear RNA auxiliary factor 1 like 4 [Source:NCBI gene;Acc:718865]  
ENSMMUG00000048207 syntaxin 4 [Source:NCBI gene;Acc:704880]  
ENSMMUG00000048215 Metazoan signal recognition particle RNA [Source:RFAM;Acc:RF00017]  
ENSMMUG00000050057 FAD-linked sulfhydryl oxidase ERV1 [Source:NCBI gene;Acc:106994988]  
ENSMMUG00000050739 caspase-14-like [Source:NCBI gene;Acc:702430]  
ENSMMUG00000051226 CAP-Gly domain containing linker protein 3 [Source:NCBI gene;Acc:712058]  
ENSMMUG00000051240 caspase 14 [Source:NCBI gene;Acc:718049]  
ENSMMUG00000051323 caspase-14-like [Source:NCBI gene;Acc:702430]  
ENSMMUG00000051537 CAP-Gly domain containing linker protein 3 [Source:NCBI gene;Acc:712058]  
ENSMMUG00000052607 solute carrier family 7 member 5 [Source:NCBI gene;Acc:695886]  
ENSMMUG00000052851 C2 calcium dependent domain containing 4C [Source:NCBI gene;Acc:100424440]  
ENSMMUG00000053083 Y RNA [Source:RFAM;Acc:RF00019]  
ENSMMUG00000053257 caspase 14 [Source:NCBI gene;Acc:718049]  
ENSMMUG00000053457 sialic acid binding Ig like lectin 11 [Source:NCBI gene;Acc:719127]  
ENSMMUG00000053937 zinc finger protein 93 [Source:NCBI gene;Acc:720434]  
ENSMMUG00000054052 activating transcription factor 5 [Source:NCBI gene;Acc:719150]  
ENSMMUG00000054055 cytochrome c oxidase subunit 6B [Source:NCBI gene;Acc:692062]  
ENSMMUG00000054473 transmembrane p24 trafficking protein 1 [Source:NCBI gene;Acc:713618]  
ENSMMUG00000054512 phosphoglycerate mutase 1-like [Source:NCBI gene;Acc:714548]  
ENSMMUG00000055747 CD99 antigen [Source:NCBI gene;Acc:106995376]  
ENSMMUG00000055751 Metazoan signal recognition particle RNA [Source:RFAM;Acc:RF00017]  
ENSMMUG00000055775  
ENSMMUG00000055893  
ENSMMUG00000055973  
ENSMMUG00000055976  
ENSMMUG00000056109

ENSMMUG00000056437 Metazoan signal recognition particle RNA [Source:RFAM;Acc:RF00017]  
ENSMMUG00000056529 synaptotagmin 3 [Source:NCBI gene;Acc:719650]  
ENSMMUG00000056555  
ENSMMUG00000057157  
ENSMMUG00000057160  
ENSMMUG00000057329  
ENSMMUG00000057345 calcineurin like phosphoesterase domain containing 1 [Source:NCBI gene;Acc:716978]  
ENSMMUG00000057361 Metazoan signal recognition particle RNA [Source:RFAM;Acc:RF00017]  
ENSMMUG00000057552 hematopoietic SH2 domain containing [Source:NCBI gene;Acc:719440]  
ENSMMUG00000057682  
ENSMMUG00000057850  
ENSMMUG00000058042 heparan sulfate-glucosamine 3-sulfotransferase 2 [Source:NCBI gene;Acc:699722]  
ENSMMUG00000058137 zinc finger protein 816 [Source:NCBI gene;Acc:720058]  
ENSMMUG00000058437  
ENSMMUG00000058592  
ENSMMUG00000058621  
ENSMMUG00000058907  
ENSMMUG00000058928 Metazoan signal recognition particle RNA [Source:RFAM;Acc:RF00017]  
ENSMMUG00000059087  
ENSMMUG00000059175  
ENSMMUG00000059229 CEA cell adhesion molecule 7 [Source:NCBI gene;Acc:705572]  
ENSMMUG00000060289  
ENSMMUG00000060497  
ENSMMUG00000060767  
ENSMMUG00000061589 proteinase 3 [Source:HGNC Symbol;Acc:HGNC:9495]  
ENSMMUG00000061749 PAXIP1 associated glutamate rich protein 1 [Source:NCBI gene;Acc:706839]  
ENSMMUG00000061995  
ENSMMUG00000062037 stannin [Source:NCBI gene;Acc:711909]  
ENSMMUG00000062273 dephospho-CoA kinase domain containing [Source:NCBI gene;Acc:715841]  
ENSMMUG00000062296 potassium two pore domain channel subfamily K member 6 [Source:NCBI gene;Acc:714912]  
ENSMMUG00000063988  
ENSMMUG00000064052 CD300 molecule like family member d [Source:NCBI gene;Acc:703142]  
ENSMMUG00000064095  
ENSMMUG00000064146 Metazoan signal recognition particle RNA [Source:RFAM;Acc:RF00017]  
ENSMMUG00000064204 kelch like family member 26 [Source:NCBI gene;Acc:719583]  
ENSMMUG00000064463  
ENSMMUG00000064532 mucin 16, cell surface associated [Source:NCBI gene;Acc:106996460]  
ENSMMUG00000065025  
ENSMMUG00000065054 G protein subunit gamma 7 [Source:NCBI gene;Acc:711335]

# Non-Survivors - SD1 vs. Baseline

| Ensembl Gene ID    | Description                                                                                                        |
|--------------------|--------------------------------------------------------------------------------------------------------------------|
| ENSMMUG00000000039 | mitochondrial ribosomal protein L24 [Source:VGNC Symbol;Acc:VGNC:74739]                                            |
| ENSMMUG00000000544 | collagen type VI alpha 1 chain [Source:VGNC Symbol;Acc:VGNC:82084]                                                 |
| ENSMMUG00000000591 | 6-phosphofructo-2-kinase/fructose-2,6-biphosphatase 4 [Source:VGNC Symbol;Acc:VGNC:75960]                          |
| ENSMMUG00000000629 | serpin family C member 1 [Source:VGNC Symbol;Acc:VGNC:77360]                                                       |
| ENSMMUG00000000644 | centrosomal protein 85 [Source:VGNC Symbol;Acc:VGNC:71096]                                                         |
| ENSMMUG00000000649 | UBX domain protein 11 [Source:VGNC Symbol;Acc:VGNC:79859]                                                          |
| ENSMMUG00000000706 | filamin B [Source:VGNC Symbol;Acc:VGNC:72672]                                                                      |
| ENSMMUG00000000790 | ankyrin repeat domain 17 [Source:VGNC Symbol;Acc:VGNC:84240]                                                       |
| ENSMMUG00000000894 | cellular inhibitor of PP2A [Source:VGNC Symbol;Acc:VGNC:71371]                                                     |
| ENSMMUG00000000931 | solute carrier family 35 member A3 [Source:VGNC Symbol;Acc:VGNC:77461]                                             |
| ENSMMUG00000000951 | integrin subunit beta 2 [Source:VGNC Symbol;Acc:VGNC:73786]                                                        |
| ENSMMUG00000000953 | family with sequence similarity 207 member A [Source:VGNC Symbol;Acc:VGNC:72273]                                   |
| ENSMMUG00000001060 | ryanodine receptor 2 [Source:VGNC Symbol;Acc:VGNC:76954]                                                           |
| ENSMMUG00000001105 | purinergic receptor P2Y12 [Source:VGNC Symbol;Acc:VGNC:75642]                                                      |
| ENSMMUG00000001350 | HERPUD family member 2 [Source:VGNC Symbol;Acc:VGNC:73216]                                                         |
| ENSMMUG00000001380 | outer dense fiber of sperm tails 2 like [Source:VGNC Symbol;Acc:VGNC:75482]                                        |
| ENSMMUG00000001616 | peptidyl arginine deiminase 2 [Source:VGNC Symbol;Acc:VGNC:75644]                                                  |
| ENSMMUG00000001690 | calponin 3 [Source:VGNC Symbol;Acc:VGNC:71278]                                                                     |
| ENSMMUG00000001702 | succinyl-CoA:glutarate-CoA transferase [Source:VGNC Symbol;Acc:VGNC:81767]                                         |
| ENSMMUG00000001753 | integrin subunit alpha 1 [Source:VGNC Symbol;Acc:VGNC:73772]                                                       |
| ENSMMUG00000001848 | sprouty RTK signaling antagonist 1 [Source:VGNC Symbol;Acc:VGNC:77867]                                             |
| ENSMMUG00000001880 | DExD/H-box helicase 60 [Source:VGNC Symbol;Acc:VGNC:71711]                                                         |
| ENSMMUG00000001949 | coiled-coil domain containing 191 [Source:VGNC Symbol;Acc:VGNC:70901]                                              |
| ENSMMUG00000002217 | alkaline phosphatase, biomineralization associated [Source:VGNC Symbol;Acc:VGNC:69801]                             |
| ENSMMUG00000002411 | drebrin like [Source:NCBI gene;Acc:720621]                                                                         |
| ENSMMUG00000002421 | DNA polymerase mu [Source:VGNC Symbol;Acc:VGNC:81742]                                                              |
| ENSMMUG00000002422 | AE binding protein 1 [Source:VGNC Symbol;Acc:VGNC:80328]                                                           |
| ENSMMUG00000002423 | DNA polymerase delta 2, accessory subunit [Source:VGNC Symbol;Acc:VGNC:76203]                                      |
| ENSMMUG00000002426 | myosin light chain 7 [Source:VGNC Symbol;Acc:VGNC:75002]                                                           |
| ENSMMUG00000002427 | glucokinase [Source:VGNC Symbol;Acc:VGNC:72901]                                                                    |
| ENSMMUG00000002428 | zinc finger protein 800 [Source:VGNC Symbol;Acc:VGNC:79658]                                                        |
| ENSMMUG00000002564 | Fraser extracellular matrix complex subunit 1 [Source:VGNC Symbol;Acc:VGNC:72743]                                  |
| ENSMMUG00000002741 | CUB and Sushi multiple domains 2 [Source:VGNC Symbol;Acc:VGNC:71441]                                               |
| ENSMMUG00000002789 | solute carrier family 25 (mitochondrial carrier; phosphate carrier), member 24 [Source:NCBI gene;Acc:694803]       |
| ENSMMUG00000002836 | coiled-coil domain containing 71 [Source:VGNC Symbol;Acc:VGNC:70862]                                               |
| ENSMMUG00000002886 | Bardet-Biedl syndrome 9 [Source:NCBI gene;Acc:708412]                                                              |
| ENSMMUG00000002949 | motile sperm domain containing 3 [Source:VGNC Symbol;Acc:VGNC:74823]                                               |
| ENSMMUG00000002950 | transferrin receptor 2 [Source:VGNC Symbol;Acc:VGNC:81770]                                                         |
| ENSMMUG00000002952 | laminin subunit beta 2 [Source:VGNC Symbol;Acc:VGNC:74229]                                                         |
| ENSMMUG00000002953 | MAGE family member F1 [Source:VGNC Symbol;Acc:VGNC:74399]                                                          |
| ENSMMUG00000003167 | cytohesin 3 [Source:VGNC Symbol;Acc:VGNC:71829]                                                                    |
| ENSMMUG00000003199 | CD200 receptor 1 [Source:VGNC Symbol;Acc:VGNC:70845]                                                               |
| ENSMMUG00000003267 | zinc finger protein 362 [Source:NCBI gene;Acc:710013]                                                              |
| ENSMMUG00000003268 | alpha 1,3-galactosyltransferase 2 [Source:VGNC Symbol;Acc:VGNC:69550]                                              |
| ENSMMUG00000003269 | polyhomeotic homolog 2 [Source:VGNC Symbol;Acc:VGNC:75903]                                                         |
| ENSMMUG00000003283 | extracellular leucine rich repeat and fibronectin type III domain containing 1 [Source:VGNC Symbol;Acc:VGNC:72204] |
| ENSMMUG00000003457 | protein kinase cAMP-activated catalytic subunit beta [Source:NCBI gene;Acc:709728]                                 |
| ENSMMUG00000003572 | nicotinamide phosphoribosyltransferase [Source:VGNC Symbol;Acc:VGNC:75056]                                         |

ENSMMUG0000003629 phosphatidylinositol 4-kinase type 2 beta [Source:NCBI gene;Acc:693561]  
ENSMMUG0000003697 inositol polyphosphate-4-phosphatase type II B [Source:VGNC Symbol;Acc:VGNC:73748]  
ENSMMUG0000003739 mannosidase beta [Source:VGNC Symbol;Acc:VGNC:74486]  
ENSMMUG0000003827 albumin [Source:VGNC Symbol;Acc:VGNC:69782]  
ENSMMUG0000003833 Ras association domain family member 6 [Source:VGNC Symbol;Acc:VGNC:76515]  
ENSMMUG0000003902 thrombospondin 3 [Source:VGNC Symbol;Acc:VGNC:78345]  
ENSMMUG0000004042 Fc receptor like A [Source:VGNC Symbol;Acc:VGNC:72526]  
ENSMMUG0000004103 collagen type XI alpha 1 chain [Source:VGNC Symbol;Acc:VGNC:71289]  
ENSMMUG0000004149 eukaryotic translation initiation factor 4 gamma 3 [Source:NCBI gene;Acc:717555]  
ENSMMUG0000004175 transient receptor potential cation channel subfamily M member 2 [Source:VGNC Symbol;Acc:VGNC:78655]  
ENSMMUG0000004224 poly(ADP-ribose) polymerase family member 12 [Source:VGNC Symbol;Acc:VGNC:81734]  
ENSMMUG0000004257 beta-secretase 2 [Source:VGNC Symbol;Acc:VGNC:70216]  
ENSMMUG0000004273 dedicator of cytokinesis 3 [Source:VGNC Symbol;Acc:VGNC:71967]  
ENSMMUG0000004471 family with sequence similarity 114 member A1 [Source:VGNC Symbol;Acc:VGNC:72342]  
ENSMMUG0000004472 collagen type XVIII alpha 1 chain [Source:VGNC Symbol;Acc:VGNC:81291]  
ENSMMUG0000004477 solute carrier family 19 member 1 [Source:VGNC Symbol;Acc:VGNC:77408]  
ENSMMUG0000004512 Fc fragment of IgE receptor Ig [Source:VGNC Symbol;Acc:VGNC:72629]  
ENSMMUG0000004576 C-C motif chemokine receptor 3 [Source:VGNC Symbol;Acc:VGNC:70738]  
ENSMMUG0000004774 maestro heat like repeat family member 2B [Source:VGNC Symbol;Acc:VGNC:74837]  
ENSMMUG0000004801 COPI coat complex subunit gamma 2 [Source:VGNC Symbol;Acc:VGNC:71315]  
ENSMMUG0000005070 ecotropic viral integration site 5 [Source:NCBI gene;Acc:706592]  
ENSMMUG0000005380 zinc finger protein 827 [Source:NCBI gene;Acc:706018]  
ENSMMUG0000005511 SON DNA binding protein [Source:VGNC Symbol;Acc:VGNC:77689]  
ENSMMUG0000005521 glycogenin 1 [Source:VGNC Symbol;Acc:VGNC:73332]  
ENSMMUG0000005668 kynurenine 3-monooxygenase [Source:VGNC Symbol;Acc:VGNC:74197]  
ENSMMUG0000005939 serpin family I member 1 [Source:VGNC Symbol;Acc:VGNC:77366]  
ENSMMUG0000005986 Kruppel like factor 17 [Source:NCBI gene;Acc:702810]  
ENSMMUG0000005992 zinc metalloproteinase STE24 [Source:VGNC Symbol;Acc:VGNC:78830]  
ENSMMUG0000006029 odontogenic, ameloblast associated [Source:NCBI gene;Acc:707906]  
ENSMMUG0000006130 prolyl 4-hydroxylase, transmembrane [Source:VGNC Symbol;Acc:VGNC:75693]  
ENSMMUG0000006284 adenylate kinase 2 [Source:VGNC Symbol;Acc:VGNC:69761]  
ENSMMUG0000006285 antizyme inhibitor 2 [Source:VGNC Symbol;Acc:VGNC:70153]  
ENSMMUG0000006530 ATP/GTP binding protein like 3 [Source:VGNC Symbol;Acc:VGNC:69723]  
ENSMMUG0000006596 CCR4-NOT transcription complex subunit 10 [Source:VGNC Symbol;Acc:VGNC:71327]  
ENSMMUG0000006766 RUN domain containing 3B [Source:VGNC Symbol;Acc:VGNC:77129]  
ENSMMUG0000006786 protein tyrosine phosphatase non-receptor type 22 [Source:VGNC Symbol;Acc:VGNC:76603]  
ENSMMUG0000006787 BCL2 like 15 [Source:VGNC Symbol;Acc:VGNC:70162]  
ENSMMUG0000006819 helicase for meiosis 1 [Source:NCBI gene;Acc:704516]  
ENSMMUG0000006836 chloride channel accessory 1 [Source:NCBI gene;Acc:574295]  
ENSMMUG0000006851 SPARC (osteonectin), cwcv and kazal like domains proteoglycan 3 [Source:NCBI gene;Acc:705964]  
ENSMMUG0000007204 cytochrome P450 family 2 subfamily W member 1 [Source:VGNC Symbol;Acc:VGNC:81300]  
ENSMMUG0000007208 G protein-coupled receptor 146 [Source:VGNC Symbol;Acc:VGNC:72979]  
ENSMMUG0000007387 G protein-coupled receptor kinase 7 [Source:VGNC Symbol;Acc:VGNC:73182]  
ENSMMUG0000007422 spermatogenesis associated 5 [Source:VGNC Symbol;Acc:VGNC:77952]  
ENSMMUG0000007528 chordin [Source:VGNC Symbol;Acc:VGNC:71042]  
ENSMMUG0000007760 centrosomal protein 70 [Source:VGNC Symbol;Acc:VGNC:71140]  
ENSMMUG0000007970 CCZ1 homolog, vacuolar protein trafficking and biogenesis associated [Source:NCBI gene;Acc:718128]  
ENSMMUG0000008031 zinc finger and BTB domain containing 17 [Source:VGNC Symbol;Acc:VGNC:78849]  
ENSMMUG0000008070 YEATS domain containing 2 [Source:VGNC Symbol;Acc:VGNC:79502]  
ENSMMUG0000008126 lysine demethylase 7A [Source:VGNC Symbol;Acc:VGNC:73886]  
ENSMMUG0000008162 fibroblast growth factor binding protein 1 [Source:VGNC Symbol;Acc:VGNC:72536]



ENSMMUG00000008189 cadherin related family member 3 [Source:HGNC Symbol;Acc:HGNC:26308]  
ENSMMUG00000008251 cilia and flagella associated protein 126 [Source:VGNC Symbol;Acc:VGNC:71150]  
ENSMMUG00000008379 adducin 1 [Source:VGNC Symbol;Acc:VGNC:69528]  
ENSMMUG00000008383 major facilitator superfamily domain containing 10 [Source:NCBI gene;Acc:720098]  
ENSMMUG00000008385 NOP14 nucleolar protein [Source:VGNC Symbol;Acc:VGNC:75194]  
ENSMMUG00000008510 THAP domain containing 9 [Source:VGNC Symbol;Acc:VGNC:79379]  
ENSMMUG00000008515 sorting nexin 7 [Source:NCBI gene;Acc:716015]  
ENSMMUG00000008518 phospholipid phosphatase related 5 [Source:NCBI gene;Acc:710549]  
ENSMMUG00000008698 cyclin dependent kinase 6 [Source:VGNC Symbol;Acc:VGNC:70983]  
ENSMMUG00000008744 lysosomal protein transmembrane 5 [Source:VGNC Symbol;Acc:VGNC:74162]  
ENSMMUG00000008791 CD47 molecule [Source:VGNC Symbol;Acc:VGNC:70767]  
ENSMMUG00000008828 BEN domain containing 5 [Source:NCBI gene;Acc:711150]  
ENSMMUG00000008834 klotho beta [Source:VGNC Symbol;Acc:VGNC:73835]  
ENSMMUG00000009040 cornulin [Source:VGNC Symbol;Acc:VGNC:71397]  
ENSMMUG00000009184 myelin protein zero like 1 [Source:NCBI gene;Acc:698437]  
ENSMMUG00000009197 myelin associated oligodendrocyte basic protein [Source:VGNC Symbol;Acc:VGNC:74908]  
ENSMMUG00000009388 F-box and leucine rich repeat protein 5 [Source:VGNC Symbol;Acc:VGNC:81408]  
ENSMMUG00000009437 zinc finger protein 619 [Source:VGNC Symbol;Acc:VGNC:82562]  
ENSMMUG00000009494 carboxypeptidase A5 [Source:VGNC Symbol;Acc:VGNC:71410]  
ENSMMUG00000009499 mesoderm specific transcript [Source:VGNC Symbol;Acc:VGNC:74707]  
ENSMMUG00000009508 TATA-box binding protein associated factor 5 like [Source:VGNC Symbol;Acc:VGNC:78148]  
ENSMMUG00000010043 epidermal growth factor [Source:VGNC Symbol;Acc:VGNC:72171]  
ENSMMUG00000010336 DOP1 leucine zipper like protein B [Source:VGNC Symbol;Acc:VGNC:71832]  
ENSMMUG00000010420 makorin ring finger protein 1 [Source:VGNC Symbol;Acc:VGNC:81476]  
ENSMMUG00000010581 Rap guanine nucleotide exchange factor 2 [Source:VGNC Symbol;Acc:VGNC:76493]  
ENSMMUG00000010626 CD1c molecule [Source:VGNC Symbol;Acc:VGNC:70756]  
ENSMMUG00000011161 syntaxin binding protein 5 like [Source:VGNC Symbol;Acc:VGNC:78256]  
ENSMMUG00000011347 DEAH-box helicase 36 [Source:VGNC Symbol;Acc:VGNC:71623]  
ENSMMUG00000011878 poly(A) binding protein interacting protein 1 [Source:VGNC Symbol;Acc:VGNC:84476]  
ENSMMUG00000012068 signal induced proliferation associated 1 like 2 [Source:NCBI gene;Acc:100425123]  
ENSMMUG00000012405 transient receptor potential cation channel subfamily C member 1 [Source:VGNC Symbol;Acc:VGNC:78651]  
ENSMMUG00000012469 KIAA2013 [Source:VGNC Symbol;Acc:VGNC:73918]  
ENSMMUG00000012529 pleckstrin homology domain containing A8 [Source:VGNC Symbol;Acc:VGNC:81741]  
ENSMMUG00000012635 zyxin [Source:VGNC Symbol;Acc:VGNC:78917]  
ENSMMUG00000012697 AT-rich interaction domain 1A [Source:VGNC Symbol;Acc:VGNC:69822]  
ENSMMUG00000013044 selectin P [Source:VGNC Symbol;Acc:VGNC:77157]  
ENSMMUG00000013330 ectonucleoside triphosphate diphosphohydrolase 3 [Source:VGNC Symbol;Acc:VGNC:72226]  
ENSMMUG00000013385 elongator acetyltransferase complex subunit 6 [Source:VGNC Symbol;Acc:VGNC:72113]  
ENSMMUG00000014045 protein tyrosine phosphatase non-receptor type 23 [Source:VGNC Symbol;Acc:VGNC:76477]  
ENSMMUG00000014046 SREBF chaperone [Source:VGNC Symbol;Acc:VGNC:77140]  
ENSMMUG00000014076 AF4/FMR2 family member 1 [Source:VGNC Symbol;Acc:VGNC:69817]  
ENSMMUG00000014138 forkhead box J3 [Source:VGNC Symbol;Acc:VGNC:72596]  
ENSMMUG00000014573 dimethylarginine dimethylaminohydrolase 1 [Source:VGNC Symbol;Acc:VGNC:71753]  
ENSMMUG00000014674 golgin, RAB6 interacting [Source:VGNC Symbol;Acc:VGNC:73012]  
ENSMMUG00000014699  
ENSMMUG00000014707 cadherin EGF LAG seven-pass G-type receptor 3 [Source:VGNC Symbol;Acc:VGNC:71148]  
ENSMMUG00000014720 NCK interacting protein with SH3 domain [Source:VGNC Symbol;Acc:VGNC:74960]  
ENSMMUG00000014868 OCIA domain containing 1 [Source:VGNC Symbol;Acc:VGNC:75409]  
ENSMMUG00000014874 GTP binding protein 8 (putative) [Source:VGNC Symbol;Acc:VGNC:84180]  
ENSMMUG00000014876 nucleolus and neural progenitor protein [Source:VGNC Symbol;Acc:VGNC:75244]  
ENSMMUG00000015097 tripartite motif containing 62 [Source:VGNC Symbol;Acc:VGNC:79513]

ENSMMUG00000015329 MX dynamin like GTPase 1 [Source:VGNC Symbol;Acc:VGNC:75086]  
ENSMMUG00000015477 lemur tyrosine kinase 2 [Source:VGNC Symbol;Acc:VGNC:74309]  
ENSMMUG00000015479 tectonin beta-propeller repeat containing 1 [Source:VGNC Symbol;Acc:VGNC:79348]  
ENSMMUG00000015555 ST3 beta-galactoside alpha-2,3-sialyltransferase 3 [Source:VGNC Symbol;Acc:VGNC:77828]  
ENSMMUG00000015685 zinc finger protein 804B [Source:VGNC Symbol;Acc:VGNC:81890]  
ENSMMUG00000015922 formin binding protein 1 like [Source:VGNC Symbol;Acc:VGNC:72543]  
ENSMMUG00000015924 BCAR3 adaptor protein, NSP family member [Source:VGNC Symbol;Acc:VGNC:70235]  
ENSMMUG00000016096 lamin A/C [Source:VGNC Symbol;Acc:VGNC:74427]  
ENSMMUG00000016099 hedgehog acyltransferase [Source:NCBI gene;Acc:712333]  
ENSMMUG00000016111 chromosome 1 C1orf50 homolog [Source:VGNC Symbol;Acc:VGNC:70432]  
ENSMMUG00000016273 maltase-glucoamylase [Source:VGNC Symbol;Acc:VGNC:74713]  
ENSMMUG00000016579 selectin L [Source:NCBI gene;Acc:701419]  
ENSMMUG00000016580 selectin E [Source:VGNC Symbol;Acc:VGNC:77156]  
ENSMMUG00000016582 chromosome 1 C1orf112 homolog [Source:VGNC Symbol;Acc:VGNC:70385]  
ENSMMUG00000017056 Sad1 and UNC84 domain containing 1 [Source:VGNC Symbol;Acc:VGNC:78161]  
ENSMMUG00000017266 UPF0577 protein KIAA1324 [Source:NCBI gene;Acc:697670]  
ENSMMUG00000017510 membrane associated guanylate kinase, WW and PDZ domain containing 1 [Source:VGNC Symbol;Acc:VGNC:74499]  
ENSMMUG00000017701 myosin VIIA and Rab interacting protein [Source:VGNC Symbol;Acc:VGNC:74992]  
ENSMMUG00000017740 sperm mitochondria associated cysteine rich protein [Source:VGNC Symbol;Acc:VGNC:77816]  
ENSMMUG00000017983 tRNA nucleotidyl transferase 1 [Source:VGNC Symbol;Acc:VGNC:79073]  
ENSMMUG00000018245 EPH receptor A2 [Source:VGNC Symbol;Acc:VGNC:72235]  
ENSMMUG00000018478 interferon regulatory factor 5 [Source:VGNC Symbol;Acc:VGNC:73763]  
ENSMMUG00000018549 zinc finger protein 786 [Source:VGNC Symbol;Acc:VGNC:79338]  
ENSMMUG00000018566 Janus kinase 1 [Source:VGNC Symbol;Acc:VGNC:73810]  
ENSMMUG00000018619 DENN domain containing 6A [Source:VGNC Symbol;Acc:VGNC:71726]  
ENSMMUG00000018664 collagen type IX alpha 2 chain [Source:VGNC Symbol;Acc:VGNC:71307]  
ENSMMUG00000018743 ubiquitin specific peptidase 25 [Source:VGNC Symbol;Acc:VGNC:78744]  
ENSMMUG00000018790 activin A receptor type 2B [Source:VGNC Symbol;Acc:VGNC:69450]  
ENSMMUG00000018910 histidine rich glycoprotein [Source:VGNC Symbol;Acc:VGNC:73521]  
ENSMMUG00000019040 hydroxysteroid 17-beta dehydrogenase 13 [Source:VGNC Symbol;Acc:VGNC:73417]  
ENSMMUG00000019041 hydroxysteroid 17-beta dehydrogenase 11 [Source:VGNC Symbol;Acc:VGNC:73431]  
ENSMMUG00000019083 solute carrier family 9 member B2 [Source:VGNC Symbol;Acc:VGNC:77773]  
ENSMMUG00000019085 3-hydroxybutyrate dehydrogenase 2 [Source:VGNC Symbol;Acc:VGNC:70161]  
ENSMMUG00000019089 centromere protein E [Source:VGNC Symbol;Acc:VGNC:71008]  
ENSMMUG00000019527 DNA cross-link repair 1B [Source:VGNC Symbol;Acc:VGNC:71647]  
ENSMMUG00000019528 adaptor related protein complex 4 subunit beta 1 [Source:VGNC Symbol;Acc:VGNC:69972]  
ENSMMUG00000019536 potassium voltage-gated channel subfamily Q member 4 [Source:VGNC Symbol;Acc:VGNC:74007]  
ENSMMUG00000019563 collapsin response mediator protein 1 [Source:VGNC Symbol;Acc:VGNC:71494]  
ENSMMUG00000019802 family with sequence similarity 133 member B [Source:NCBI gene;Acc:702054]  
ENSMMUG00000019830 Fc receptor like 2 [Source:VGNC Symbol;Acc:VGNC:72509]  
ENSMMUG00000019833 Fc receptor like 1 [Source:VGNC Symbol;Acc:VGNC:72528]  
ENSMMUG00000019835 CD5 molecule like [Source:VGNC Symbol;Acc:VGNC:70774]  
ENSMMUG00000019933 TatD DNase domain containing 2 [Source:NCBI gene;Acc:701390]  
ENSMMUG00000019937 maltase-glucoamylase 2 (putative) [Source:VGNC Symbol;Acc:VGNC:81720]  
ENSMMUG00000019945 fibroblast growth factor receptor 3 [Source:VGNC Symbol;Acc:VGNC:72653]  
ENSMMUG00000020156 CD1d molecule [Source:VGNC Symbol;Acc:VGNC:70757]  
ENSMMUG00000020588 protein kinase N2 [Source:VGNC Symbol;Acc:VGNC:76015]  
ENSMMUG00000020726 dihydropyrimidine dehydrogenase [Source:VGNC Symbol;Acc:VGNC:71982]  
ENSMMUG00000020861 EvC ciliary complex subunit 1 [Source:VGNC Symbol;Acc:VGNC:72445]  
ENSMMUG00000020916 coiled-coil domain containing 158 [Source:NCBI gene;Acc:699735]  
ENSMMUG00000020919 shroom family member 3 [Source:VGNC Symbol;Acc:VGNC:77352]

ENSMMUG00000021017 acylglycerol kinase [Source:VGNC Symbol;Acc:VGNC:69669]  
ENSMMUG00000021073 RAS protein activator like 2 [Source:VGNC Symbol;Acc:VGNC:76670]  
ENSMMUG00000021080 basic leucine zipper nuclear factor 1 [Source:VGNC Symbol;Acc:VGNC:70258]  
ENSMMUG00000021082 potassium sodium-activated channel subfamily T member 2 [Source:VGNC Symbol;Acc:VGNC:73857]  
ENSMMUG00000021447 TNF receptor superfamily member 1B [Source:VGNC Symbol;Acc:VGNC:78590]  
ENSMMUG00000021449 vacuolar protein sorting 13 homolog D [Source:NCBI gene;Acc:722775]  
ENSMMUG00000021642 fibromodulin [Source:VGNC Symbol;Acc:VGNC:72686]  
ENSMMUG00000021972 diacylglycerol kinase gamma [Source:VGNC Symbol;Acc:VGNC:71785]  
ENSMMUG00000021988 N-alpha-acetyltransferase 11, NatA catalytic subunit [Source:NCBI gene;Acc:696758]  
ENSMMUG00000022003 multimerin 1 [Source:VGNC Symbol;Acc:VGNC:74904]  
ENSMMUG00000022246 PDZ and LIM domain 5 [Source:VGNC Symbol;Acc:VGNC:75816]  
ENSMMUG00000022381 prolyl 3-hydroxylase 1 [Source:VGNC Symbol;Acc:VGNC:75648]  
ENSMMUG00000022451 proteasome 20S subunit alpha 2 [Source:NCBI gene;Acc:701683]  
ENSMMUG00000022504 alpha-2-glycoprotein 1, zinc-binding [Source:VGNC Symbol;Acc:VGNC:70201]  
ENSMMUG00000022633 replication initiator 1 [Source:VGNC Symbol;Acc:VGNC:76758]  
ENSMMUG00000022728 zinc finger and SCAN domain containing 25 [Source:VGNC Symbol;Acc:VGNC:79344]  
ENSMMUG00000022730 cytochrome P450, family 3, subfamily A, polypeptide 5 [Source:NCBI gene;Acc:678692]  
ENSMMUG00000022801 zinc finger and BTB domain containing 37 [Source:VGNC Symbol;Acc:VGNC:79702]  
ENSMMUG00000022884 glutamate-ammonia ligase [Source:NCBI gene;Acc:715952]  
ENSMMUG00000023045 zinc finger B-box domain containing [Source:VGNC Symbol;Acc:VGNC:79592]  
ENSMMUG00000023335 ring finger protein 13 [Source:VGNC Symbol;Acc:VGNC:81557]  
ENSMMUG00000023345 adhesion G protein-coupled receptor L4 [Source:VGNC Symbol;Acc:VGNC:69652]  
ENSMMUG00000023449 mitofusin 2 [Source:VGNC Symbol;Acc:VGNC:74522]  
ENSMMUG00000024428 Y RNA [Source:RFAM;Acc:RF00019]  
ENSMMUG00000031279 torsin A interacting protein 2 [Source:NCBI gene;Acc:716654]  
ENSMMUG00000031291 regulator of G protein signaling like 1 [Source:NCBI gene;Acc:715693]  
ENSMMUG00000031534 ankyrin repeat and ubiquitin domain containing 1 [Source:VGNC Symbol;Acc:VGNC:84239]  
ENSMMUG00000031540 purinergic receptor P2Y1 [Source:VGNC Symbol;Acc:VGNC:75737]  
ENSMMUG00000031684 KRAB box domain containing 1 [Source:NCBI gene;Acc:717189]  
ENSMMUG00000032180 RLF zinc finger [Source:VGNC Symbol;Acc:VGNC:76699]  
ENSMMUG00000032249 procollagen-lysine,2-oxoglutarate 5-dioxygenase 1 [Source:NCBI gene;Acc:722763]  
ENSMMUG00000032284 leucine rich repeat containing 47 [Source:VGNC Symbol;Acc:VGNC:74388]  
ENSMMUG00000032659 mml-mir-711 [Source:miRBase;Acc:MI0012553]  
ENSMMUG00000035160 U4 spliceosomal RNA [Source:RFAM;Acc:RF00015]  
ENSMMUG00000035943 U6 spliceosomal RNA [Source:RFAM;Acc:RF00026]  
ENSMMUG00000037284 small nucleolar RNA, H/ACA box 59A [Source:HGNC Symbol;Acc:HGNC:32653]  
ENSMMUG00000038349 crystallin beta-gamma domain containing 3 [Source:NCBI gene;Acc:698282]  
ENSMMUG00000038524 olfactory receptor 2M4 [Source:NCBI gene;Acc:100424541]  
ENSMMUG00000038998 purinergic receptor P2Y13 [Source:VGNC Symbol;Acc:VGNC:83950]  
ENSMMUG00000039009  
ENSMMUG00000040007 peroxisomal biogenesis factor 1 [Source:VGNC Symbol;Acc:VGNC:81736]  
ENSMMUG00000040393 zinc finger protein 655 [Source:NCBI gene;Acc:718811]  
ENSMMUG00000040696 Metazoan signal recognition particle RNA [Source:RFAM;Acc:RF00017]  
ENSMMUG00000041198 muscle RAS oncogene homolog [Source:NCBI gene;Acc:716352]  
ENSMMUG00000042419  
ENSMMUG00000042510 coagulation factor V [Source:NCBI gene;Acc:704695]  
ENSMMUG00000042618 involucrin [Source:NCBI gene;Acc:713728]  
ENSMMUG00000042886 ETS variant transcription factor 3 [Source:NCBI gene;Acc:719741]  
ENSMMUG00000043675 Cbp/p300 interacting transactivator with Glu/Asp rich carboxy-terminal domain 4 [Source:NCBI gene;Acc:114672840]  
ENSMMUG00000044257 MX dynamin like GTPase 2 [Source:VGNC Symbol;Acc:VGNC:81723]  
ENSMMUG00000044265 Metazoan signal recognition particle RNA [Source:RFAM;Acc:RF00017]

ENSMMUG00000044822 coiled-coil domain containing 174 [Source:VGNC Symbol;Acc:VGNC:84219]  
ENSMMUG00000045513  
ENSMMUG00000045609 CCR4-NOT transcription complex subunit 6 like [Source:NCBI gene;Acc:697981]  
ENSMMUG00000045959  
ENSMMUG00000046969 Fc receptor like 3 [Source:NCBI gene;Acc:718801]  
ENSMMUG00000048621 enolase-phosphatase 1 [Source:NCBI gene;Acc:106998330]  
ENSMMUG00000048824 eva-1 homolog C [Source:NCBI gene;Acc:708681]  
ENSMMUG00000049297  
ENSMMUG00000049298 cholecystokinin A receptor [Source:NCBI gene;Acc:694742]  
ENSMMUG00000049432 olfactory receptor 2T33 [Source:NCBI gene;Acc:706331]  
ENSMMUG00000049494  
ENSMMUG00000049548  
ENSMMUG00000049551  
ENSMMUG00000049678  
ENSMMUG00000049755 leucine rich repeat containing 3 [Source:NCBI gene;Acc:712418]  
ENSMMUG00000049913  
ENSMMUG00000049952  
ENSMMUG00000049998 tachykinin receptor 3 [Source:NCBI gene;Acc:653013]  
ENSMMUG00000050132  
ENSMMUG00000050335  
ENSMMUG00000050339 Metazoan signal recognition particle RNA [Source:RFAM;Acc:RF00017]  
ENSMMUG00000050419 ADAM metalloproteinase with thrombospondin type 1 motif 4 [Source:NCBI gene;Acc:719927]  
ENSMMUG00000050465 ZFP42 zinc finger protein [Source:NCBI gene;Acc:707621]  
ENSMMUG00000050505 small integral membrane protein 4 [Source:NCBI gene;Acc:696553]  
ENSMMUG00000050832  
ENSMMUG00000050920 Metazoan signal recognition particle RNA [Source:RFAM;Acc:RF00017]  
ENSMMUG00000051329  
ENSMMUG00000051408 myelin associated oligodendrocyte basic protein [Source:NCBI gene;Acc:717265]  
ENSMMUG00000051645  
ENSMMUG00000051677  
ENSMMUG00000051719 late cornified envelope 1C [Source:HGNC Symbol;Acc:HGNC:29464]  
ENSMMUG00000051816 keratinocyte proline rich protein [Source:NCBI gene;Acc:100424312]  
ENSMMUG00000051847  
ENSMMUG00000051975  
ENSMMUG00000052179  
ENSMMUG00000052184 inka box actin regulator 2 [Source:NCBI gene;Acc:704844]  
ENSMMUG00000052195  
ENSMMUG00000052228 Metazoan signal recognition particle RNA [Source:RFAM;Acc:RF00017]  
ENSMMUG00000052238  
ENSMMUG00000052328 FAM20C golgi associated secretory pathway kinase [Source:NCBI gene;Acc:695088]  
ENSMMUG00000052348  
ENSMMUG00000052474  
ENSMMUG00000052530  
ENSMMUG00000052777  
ENSMMUG00000052780  
ENSMMUG00000052832  
ENSMMUG00000052882 RAS like family 11 member B [Source:NCBI gene;Acc:701397]  
ENSMMUG00000052961  
ENSMMUG00000053254 adenylate kinase 4 [Source:NCBI gene;Acc:698560]  
ENSMMUG00000053423  
ENSMMUG00000053498

ENSMMUG00000053516  
ENSMMUG00000053696 Metazoan signal recognition particle RNA [Source:RFAM;Acc:RF00017]  
ENSMMUG00000053790  
ENSMMUG00000054158 acyl-CoA dehydrogenase family member 11 [Source:NCBI gene;Acc:106997118]  
ENSMMUG00000054175  
ENSMMUG00000054286  
ENSMMUG00000054486 testis expressed 35 [Source:NCBI gene;Acc:717255]  
ENSMMUG00000054568  
ENSMMUG00000054634 late cornified envelope protein 1C-like [Source:NCBI gene;Acc:713600]  
ENSMMUG00000054686  
ENSMMUG00000054846 Metazoan signal recognition particle RNA [Source:RFAM;Acc:RF00017]  
ENSMMUG00000054881  
ENSMMUG00000055126  
ENSMMUG00000055256 family with sequence similarity 163 member A [Source:NCBI gene;Acc:718704]  
ENSMMUG00000055266 late cornified envelope protein 1C-like [Source:NCBI gene;Acc:107000794]  
ENSMMUG00000055322 EPH receptor A1 [Source:NCBI gene;Acc:706295]  
ENSMMUG00000055441  
ENSMMUG00000055589  
ENSMMUG00000055710 taste 2 receptor member 38 [Source:NCBI gene;Acc:695549]  
ENSMMUG00000055834  
ENSMMUG00000056024  
ENSMMUG00000056058 C-type lectin domain containing 20A [Source:HGNC Symbol;Acc:HGNC:34521]  
ENSMMUG00000056227 PRAME family member 17 [Source:NCBI gene;Acc:715953]  
ENSMMUG00000056266 Metazoan signal recognition particle RNA [Source:RFAM;Acc:RF00017]  
ENSMMUG00000056511  
ENSMMUG00000056593  
ENSMMUG00000056707  
ENSMMUG00000056798  
ENSMMUG00000056841  
ENSMMUG00000056855 potassium inwardly rectifying channel subfamily J member 15 [Source:NCBI gene;Acc:693427]  
ENSMMUG00000056924 G protein-coupled receptor 149 [Source:NCBI gene;Acc:106997054]  
ENSMMUG00000056940 late cornified envelope protein 1C [Source:NCBI gene;Acc:713408]  
ENSMMUG00000056971 Metazoan signal recognition particle RNA [Source:RFAM;Acc:RF00017]  
ENSMMUG00000056980  
ENSMMUG00000057076 claudin 19 [Source:NCBI gene;Acc:697807]  
ENSMMUG00000057204 Metazoan signal recognition particle RNA [Source:RFAM;Acc:RF00017]  
ENSMMUG00000057363  
ENSMMUG00000057452  
ENSMMUG00000057486  
ENSMMUG00000057539  
ENSMMUG00000057675 non-compact myelin associated protein [Source:NCBI gene;Acc:712192]  
ENSMMUG00000057702  
ENSMMUG00000057703  
ENSMMUG00000057857  
ENSMMUG00000057953  
ENSMMUG00000058229 U6 spliceosomal RNA [Source:RFAM;Acc:RF00026]  
ENSMMUG00000058370 taste receptor type 2 member 62 [Source:NCBI gene;Acc:704388]  
ENSMMUG00000058423  
ENSMMUG00000058432 zinc finger DHHC-type palmitoyltransferase 18 [Source:NCBI gene;Acc:719959]  
ENSMMUG00000058472 late cornified envelope protein 1C [Source:NCBI gene;Acc:107000798]  
ENSMMUG00000058499



ENSMMUG00000058587 family with sequence similarity 131 member C [Source:NCBI gene;Acc:703604]  
ENSMMUG00000058817  
ENSMMUG00000059036  
ENSMMUG00000059318 urocortin 2 [Source:NCBI gene;Acc:106996925]  
ENSMMUG00000059472 filaggrin family member 2 [Source:HGNC Symbol;Acc:HGNC:33276]  
ENSMMUG00000059777  
ENSMMUG00000059895  
ENSMMUG00000060184 SEC61 translocon subunit gamma [Source:NCBI gene;Acc:716898]  
ENSMMUG00000060273 mitochondrial ribosomal protein L32 [Source:NCBI gene;Acc:701820]  
ENSMMUG00000060404  
ENSMMUG00000060484 heterogeneous nuclear ribonucleoprotein D [Source:NCBI gene;Acc:694867]  
ENSMMUG00000060555  
ENSMMUG00000060576  
ENSMMUG00000060581  
ENSMMUG00000060760  
ENSMMUG00000060795  
ENSMMUG00000060808  
ENSMMUG00000060891 histone H3.Y [Source:NCBI gene;Acc:718280]  
ENSMMUG00000061098  
ENSMMUG00000061194  
ENSMMUG00000061208 MAP3K7 C-terminal like [Source:NCBI gene;Acc:713717]  
ENSMMUG00000061474  
ENSMMUG00000061684  
ENSMMUG00000061785  
ENSMMUG00000061845  
ENSMMUG00000062083  
ENSMMUG00000062175 carboxypeptidase B1 [Source:NCBI gene;Acc:712639]  
ENSMMUG00000062248 follicular dendritic cell secreted protein [Source:NCBI gene;Acc:707784]  
ENSMMUG00000062316 Metazoan signal recognition particle RNA [Source:RFAM;Acc:RF00017]  
ENSMMUG00000062397  
ENSMMUG00000062454  
ENSMMUG00000062496  
ENSMMUG00000062794  
ENSMMUG00000062996  
ENSMMUG00000063658 leucine rich repeat neuronal 2 [Source:NCBI gene;Acc:100429709]  
ENSMMUG00000063790  
ENSMMUG00000063981 nucleoside-triphosphatase, cancer-related [Source:NCBI gene;Acc:712959]  
ENSMMUG00000064014  
ENSMMUG00000064174  
ENSMMUG00000064226  
ENSMMUG00000064242  
ENSMMUG00000064602  
ENSMMUG00000064638 Y RNA [Source:RFAM;Acc:RF00019]  
ENSMMUG00000064707  
ENSMMUG00000064824 gremlin 2, DAN family BMP antagonist [Source:NCBI gene;Acc:708280]  
ENSMMUG00000064860 phosphoglycerate mutase 2 [Source:NCBI gene;Acc:720615]  
ENSMMUG00000064915 Metazoan signal recognition particle RNA [Source:RFAM;Acc:RF00017]  
ENSMMUG00000065005 Metazoan signal recognition particle RNA [Source:RFAM;Acc:RF00017]  
ENSMMUG00000065134 Fas ligand [Source:NCBI gene;Acc:574159]  
ENSMMUG00000065271  
ENSMMUG00000065295

ENSMMUG0000000023 prostaglandin E receptor 2 [Source:VGNC Symbol;Acc:VGNC:76468]  
ENSMMUG00000000302 WD repeat and HMG-box DNA binding protein 1 [Source:VGNC Symbol;Acc:VGNC:79376]  
ENSMMUG00000000313 HEAT repeat containing 4 [Source:VGNC Symbol;Acc:VGNC:73176]  
ENSMMUG00000000375 pleckstrin homology and RhoGEF domain containing G6 [Source:VGNC Symbol;Acc:VGNC:76110]  
ENSMMUG00000000419 Rho GTPase activating protein 26 [Source:VGNC Symbol;Acc:VGNC:69846]  
ENSMMUG00000000421 nuclear receptor subfamily 3 group C member 1 [Source:VGNC Symbol;Acc:VGNC:75515]  
ENSMMUG00000000754 Dmx like 2 [Source:VGNC Symbol;Acc:VGNC:71936]  
ENSMMUG00000000776 zinc finger matrin-type 4 [Source:VGNC Symbol;Acc:VGNC:78424]  
ENSMMUG00000000808 melanin concentrating hormone receptor 2 [Source:VGNC Symbol;Acc:VGNC:74550]  
ENSMMUG00000000863 dynein axonemal assembly factor 4 [Source:VGNC Symbol;Acc:VGNC:71881]  
ENSMMUG00000000869 small nuclear ribonucleoprotein polypeptide C [Source:NCBI gene;Acc:718654]  
ENSMMUG00000000958 aldo-keto reductase family 1, member C2 [Source:NCBI gene;Acc:711360]  
ENSMMUG00000001088 patched domain containing 1 [Source:VGNC Symbol;Acc:VGNC:76322]  
ENSMMUG00000001151 microtubule associated scaffold protein 1 [Source:VGNC Symbol;Acc:VGNC:84018]  
ENSMMUG00000001200  
ENSMMUG00000001338 antizyme inhibitor 1 [Source:VGNC Symbol;Acc:VGNC:70080]  
ENSMMUG00000001397 multiple C2 and transmembrane domain containing 1 [Source:VGNC Symbol;Acc:VGNC:74589]  
ENSMMUG00000001472 TIA1 cytotoxic granule associated RNA binding protein like 1 [Source:VGNC Symbol;Acc:VGNC:78354]  
ENSMMUG00000001483 RNA pseudouridine synthase domain containing 2 [Source:VGNC Symbol;Acc:VGNC:77091]  
ENSMMUG00000001532 glucosidase alpha, neutral C [Source:NCBI gene;Acc:708126]  
ENSMMUG00000001534 calpain 3 [Source:VGNC Symbol;Acc:VGNC:70533]  
ENSMMUG00000001547 zinc finger protein 106 [Source:VGNC Symbol;Acc:VGNC:78831]  
ENSMMUG00000001568 AT-rich interaction domain 3B [Source:VGNC Symbol;Acc:VGNC:69827]  
ENSMMUG00000001707 amyloid beta precursor protein binding family B member 3 [Source:VGNC Symbol;Acc:VGNC:69869]  
ENSMMUG00000001725 solute carrier family 35 member A4 [Source:VGNC Symbol;Acc:VGNC:77532]  
ENSMMUG00000001820 regulator of G protein signaling 6 [Source:VGNC Symbol;Acc:VGNC:76691]  
ENSMMUG00000002260 protein kinase C eta [Source:VGNC Symbol;Acc:VGNC:84424]  
ENSMMUG00000002930 G protein-coupled receptor 158 [Source:NCBI gene;Acc:707065]  
ENSMMUG00000003067 endoplasmic reticulum-golgi intermediate compartment 1 [Source:VGNC Symbol;Acc:VGNC:82141]  
ENSMMUG00000003131 interleukin 13 [Source:VGNC Symbol;Acc:VGNC:84393]  
ENSMMUG00000003133 interleukin 4 [Source:VGNC Symbol;Acc:VGNC:73729]  
ENSMMUG00000003348 neurofilament light [Source:VGNC Symbol;Acc:VGNC:75307]  
ENSMMUG00000003482 glycine receptor alpha 2 [Source:VGNC Symbol;Acc:VGNC:73075]  
ENSMMUG00000003484 tectonin beta-propeller repeat containing 2 [Source:NCBI gene;Acc:708959]  
ENSMMUG00000003499 solute carrier family 36 member 1 [Source:VGNC Symbol;Acc:VGNC:77509]  
ENSMMUG00000003548 tectorin beta [Source:VGNC Symbol;Acc:VGNC:78306]  
ENSMMUG00000003584 mesoderm posterior bHLH transcription factor 2 [Source:VGNC Symbol;Acc:VGNC:74619]  
ENSMMUG00000003591 pleckstrin homology domain containing A2 [Source:VGNC Symbol;Acc:VGNC:76026]  
ENSMMUG00000003598 tripartite motif containing 7 [Source:VGNC Symbol;Acc:VGNC:79022]  
ENSMMUG00000003658 autophagy related 2B [Source:VGNC Symbol;Acc:VGNC:84310]  
ENSMMUG00000003684 ATPase phospholipid transporting 8B4 (putative) [Source:VGNC Symbol;Acc:VGNC:84311]  
ENSMMUG00000003834 basic leucine zipper ATF-like transcription factor [Source:VGNC Symbol;Acc:VGNC:70229]  
ENSMMUG00000003913 DNA polymerase epsilon 2, accessory subunit [Source:VGNC Symbol;Acc:VGNC:76204]  
ENSMMUG00000004002 CDC like kinase 4 [Source:VGNC Symbol;Acc:VGNC:71173]  
ENSMMUG00000004255 YLP motif containing 1 [Source:VGNC Symbol;Acc:VGNC:79092]  
ENSMMUG00000004309 APC membrane recruitment protein 1 [Source:VGNC Symbol;Acc:VGNC:69716]  
ENSMMUG00000004376 calcium and integrin binding 1 [Source:VGNC Symbol;Acc:VGNC:71189]  
ENSMMUG00000004417 secretion associated Ras related GTPase 1B [Source:VGNC Symbol;Acc:VGNC:76970]  
ENSMMUG00000004470 CD9 molecule [Source:VGNC Symbol;Acc:VGNC:70787]  
ENSMMUG00000004558 OTU deubiquitinase 5 [Source:VGNC Symbol;Acc:VGNC:75677]  
ENSMMUG00000004748 zinc finger and BTB domain containing 1 [Source:VGNC Symbol;Acc:VGNC:79238]

ENSMMUG0000004749 PPARG coactivator 1 beta [Source:VGNC Symbol;Acc:VGNC:76134]  
ENSMMUG0000004797 CTP synthase 2 [Source:VGNC Symbol;Acc:VGNC:71550]  
ENSMMUG0000004798 S100 calcium binding protein G [Source:VGNC Symbol;Acc:VGNC:77016]  
ENSMMUG0000004816 membrane associated ring-CH-type finger 5 [Source:VGNC Symbol;Acc:VGNC:74588]  
ENSMMUG0000004854 leucine rich repeat containing 9 [Source:VGNC Symbol;Acc:VGNC:81443]  
ENSMMUG0000004910 dynein axonemal light chain 1 [Source:VGNC Symbol;Acc:VGNC:71885]  
ENSMMUG0000004932 msh homeobox 2 [Source:VGNC Symbol;Acc:VGNC:84448]  
ENSMMUG0000005108 RCC1 domain containing 1 [Source:VGNC Symbol;Acc:VGNC:76876]  
ENSMMUG0000005263 chromosome X CXorf38 homolog [Source:VGNC Symbol;Acc:VGNC:71600]  
ENSMMUG0000005270 ryanodine receptor 3 [Source:NCBI gene;Acc:694996]  
ENSMMUG0000005293 G-patch domain and ankyrin repeats 1 [Source:VGNC Symbol;Acc:VGNC:81073]  
ENSMMUG0000005294 casein kinase 2 beta [Source:NCBI gene;Acc:715807]  
ENSMMUG0000005297 proline rich coiled-coil 2A [Source:VGNC Symbol;Acc:VGNC:83448]  
ENSMMUG0000005302 BAG cochaperone 6 [Source:VGNC Symbol;Acc:VGNC:81044]  
ENSMMUG0000005303 apolipoprotein M [Source:VGNC Symbol;Acc:VGNC:69825]  
ENSMMUG0000005356 integrator complex subunit 8 [Source:VGNC Symbol;Acc:VGNC:73657]  
ENSMMUG0000005415 olfactory receptor, family 2, subfamily B, member 3 [Source:NCBI gene;Acc:708747]  
ENSMMUG0000005478 trimethylguanosine synthase 1 [Source:VGNC Symbol;Acc:VGNC:78404]  
ENSMMUG0000005532 male germ cell associated kinase [Source:VGNC Symbol;Acc:VGNC:74480]  
ENSMMUG0000005745 EYA transcriptional coactivator and phosphatase 4 [Source:VGNC Symbol;Acc:VGNC:72456]  
ENSMMUG0000005845 REST corepressor 1 [Source:VGNC Symbol;Acc:VGNC:76752]  
ENSMMUG0000005920 N-acetyltransferase 1 [Source:VGNC Symbol;Acc:VGNC:75133]  
ENSMMUG0000006233 adducin 3 [Source:VGNC Symbol;Acc:VGNC:69531]  
ENSMMUG0000006609 MHC class I polypeptide-related sequence B [Source:NCBI gene;Acc:715141]  
ENSMMUG0000006659 aldehyde dehydrogenase 1 family member A3 [Source:VGNC Symbol;Acc:VGNC:81353]  
ENSMMUG0000006855 acyl-CoA thioesterase 2 [Source:NCBI gene;Acc:697011]  
ENSMMUG0000006997 thioredoxin domain containing 16 [Source:VGNC Symbol;Acc:VGNC:79214]  
ENSMMUG0000007068 tumor suppressor candidate 3 [Source:VGNC Symbol;Acc:VGNC:84132]  
ENSMMUG0000007140 MOK protein kinase [Source:VGNC Symbol;Acc:VGNC:84394]  
ENSMMUG0000007534 protein regulator of cytokinesis 1 [Source:NCBI gene;Acc:710182]  
ENSMMUG0000007540 Rho related BTB domain containing 2 [Source:VGNC Symbol;Acc:VGNC:76772]  
ENSMMUG0000007688 angiomin [Source:VGNC Symbol;Acc:VGNC:69627]  
ENSMMUG0000007773 solute carrier organic anion transporter family member 4C1 [Source:VGNC Symbol;Acc:VGNC:77764]  
ENSMMUG0000008006 RAB11A, member RAS oncogene family [Source:VGNC Symbol;Acc:VGNC:81517]  
ENSMMUG0000008007 multiple EGF like domains 11 [Source:VGNC Symbol;Acc:VGNC:84376]  
ENSMMUG0000008184 methyltransferase like 24 [Source:VGNC Symbol;Acc:VGNC:74552]  
ENSMMUG0000008529 chromosome 7 C15orf39 homolog [Source:VGNC Symbol;Acc:VGNC:70620]  
ENSMMUG0000008566 zinc finger protein 157 [Source:VGNC Symbol;Acc:VGNC:78850]  
ENSMMUG0000008618 calcium voltage-gated channel subunit alpha1 F [Source:VGNC Symbol;Acc:VGNC:70503]  
ENSMMUG0000008623 coiled-coil domain containing 22 [Source:VGNC Symbol;Acc:VGNC:70899]  
ENSMMUG0000008624 forkhead box P3 [Source:VGNC Symbol;Acc:VGNC:72926]  
ENSMMUG0000008838 mitochondrial coiled-coil domain 1 [Source:VGNC Symbol;Acc:VGNC:74548]  
ENSMMUG0000008839 DExD-box helicase 39B [Source:VGNC Symbol;Acc:VGNC:71621]  
ENSMMUG0000008843 lymphotoxin alpha [Source:VGNC Symbol;Acc:VGNC:74452]  
ENSMMUG0000008853 leukocyte specific transcript 1 [Source:HGNC Symbol;Acc:HGNC:14189]  
ENSMMUG0000008854 natural cytotoxicity triggering receptor 3 [Source:VGNC Symbol;Acc:VGNC:74990]  
ENSMMUG0000009361 fumarylacetoacetate hydrolase [Source:NCBI gene;Acc:712716]  
ENSMMUG0000009368 Abelson helper integration site 1 [Source:VGNC Symbol;Acc:VGNC:81010]  
ENSMMUG0000009559 minichromosome maintenance complex binding protein [Source:VGNC Symbol;Acc:VGNC:74583]  
ENSMMUG0000009577 atlastin GTPase 1 [Source:VGNC Symbol;Acc:VGNC:70049]  
ENSMMUG0000009583 COP9 signalosome subunit 7A [Source:VGNC Symbol;Acc:VGNC:71185]

ENSMMUG0000009648 paired box 9 [Source:VGNC Symbol;Acc:VGNC:75768]  
ENSMMUG0000009974 inositol-tetrakisphosphate 1-kinase [Source:VGNC Symbol;Acc:VGNC:73802]  
ENSMMUG00000010007 CD14 molecule [Source:VGNC Symbol;Acc:VGNC:70751]  
ENSMMUG00000010137 microcephalin 1 [Source:VGNC Symbol;Acc:VGNC:74687]  
ENSMMUG00000010173 presenilin 1 [Source:VGNC Symbol;Acc:VGNC:76435]  
ENSMMUG00000010180 PIN2 (TERF1) interacting telomerase inhibitor 1 [Source:NCBI gene;Acc:701523]  
ENSMMUG00000010201 atrophin 1 [Source:VGNC Symbol;Acc:VGNC:70157]  
ENSMMUG00000010203 protein tyrosine phosphatase non-receptor type 6 [Source:VGNC Symbol;Acc:VGNC:76607]  
ENSMMUG00000010308 cyclin I family member 2 [Source:VGNC Symbol;Acc:VGNC:70923]  
ENSMMUG00000010313 kinesin family member 3A [Source:VGNC Symbol;Acc:VGNC:74017]  
ENSMMUG00000010357 cyclin and CBS domain divalent metal cation transport mediator 1 [Source:NCBI gene;Acc:708335]  
ENSMMUG00000010466 solute carrier family 38 member 9 [Source:VGNC Symbol;Acc:VGNC:77574]  
ENSMMUG00000010586 mesoderm posterior bHLH transcription factor 1 [Source:VGNC Symbol;Acc:VGNC:74618]  
ENSMMUG00000010858 prolyl 4-hydroxylase subunit alpha 2 [Source:VGNC Symbol;Acc:VGNC:75742]  
ENSMMUG00000010881 cytochrome P450, family 26, subfamily A, polypeptide 1 [Source:NCBI gene;Acc:699519]  
ENSMMUG00000010949 SPG21 abhydrolase domain containing, maspardin [Source:VGNC Symbol;Acc:VGNC:77970]  
ENSMMUG00000011061 ankyrin repeat domain 31 [Source:VGNC Symbol;Acc:VGNC:84277]  
ENSMMUG00000011155 FA complementation group I [Source:VGNC Symbol;Acc:VGNC:72575]  
ENSMMUG00000011440 neurite extension and migration factor [Source:VGNC Symbol;Acc:VGNC:75274]  
ENSMMUG00000011472 PWWP domain containing 2A [Source:VGNC Symbol;Acc:VGNC:76564]  
ENSMMUG00000011513 versican [Source:VGNC Symbol;Acc:VGNC:79445]  
ENSMMUG00000011564 transmembrane channel like 3 [Source:VGNC Symbol;Acc:VGNC:79360]  
ENSMMUG00000011661 integrin subunit alpha 8 [Source:VGNC Symbol;Acc:VGNC:73782]  
ENSMMUG00000011682 ribonuclease P/MRP subunit p21 [Source:NCBI gene;Acc:713056]  
ENSMMUG00000011774 integrator complex subunit 10 [Source:VGNC Symbol;Acc:VGNC:73653]  
ENSMMUG00000011789 hematopoietically expressed homeobox [Source:VGNC Symbol;Acc:VGNC:73376]  
ENSMMUG00000012065 tubulin tyrosine ligase like 5 [Source:NCBI gene;Acc:703116]  
ENSMMUG00000012356 serpin family A member 9 [Source:VGNC Symbol;Acc:VGNC:77241]  
ENSMMUG00000012560 HERV-H LTR-associating 1 [Source:NCBI gene;Acc:100430297]  
ENSMMUG00000013146 claudin 2 [Source:HGNC Symbol;Acc:HGNC:2041]  
ENSMMUG00000013150 MORC family CW-type zinc finger 4 [Source:VGNC Symbol;Acc:VGNC:74808]  
ENSMMUG00000013160 DnaJ heat shock protein family (Hsp40) member C17 [Source:VGNC Symbol;Acc:VGNC:84335]  
ENSMMUG00000013176 NAD(P) dependent steroid dehydrogenase-like [Source:NCBI gene;Acc:693333]  
ENSMMUG00000013193 matrix metalloproteinase 16 [Source:VGNC Symbol;Acc:VGNC:74894]  
ENSMMUG00000013283 cadherin related family member 2 [Source:NCBI gene;Acc:697249]  
ENSMMUG00000013387 cysteinyl leukotriene receptor 1 [Source:VGNC Symbol;Acc:VGNC:71646]  
ENSMMUG00000013460 RAB8B, member RAS oncogene family [Source:VGNC Symbol;Acc:VGNC:81550]  
ENSMMUG00000013644 potassium two pore domain channel subfamily K member 17 [Source:VGNC Symbol;Acc:VGNC:73828]  
ENSMMUG00000013648 potassium two pore domain channel subfamily K member 16 [Source:VGNC Symbol;Acc:VGNC:73827]  
ENSMMUG00000013696 myozenin 1 [Source:VGNC Symbol;Acc:VGNC:74951]  
ENSMMUG00000013871 WD repeat domain 25 [Source:VGNC Symbol;Acc:VGNC:78420]  
ENSMMUG00000013892 coiled-coil domain containing 77 [Source:VGNC Symbol;Acc:VGNC:70889]  
ENSMMUG00000013966 legumain [Source:VGNC Symbol;Acc:VGNC:74274]  
ENSMMUG00000014149 LYN proto-oncogene, Src family tyrosine kinase [Source:VGNC Symbol;Acc:VGNC:74464]  
ENSMMUG00000014265 TAP binding protein like [Source:NCBI gene;Acc:712626]  
ENSMMUG00000014291 SPG11 vesicle trafficking associated, spatacin [Source:VGNC Symbol;Acc:VGNC:77856]  
ENSMMUG00000014407 magnesium transporter 1 [Source:VGNC Symbol;Acc:VGNC:74386]  
ENSMMUG00000014508 potassium channel tetramerization domain containing 20 [Source:VGNC Symbol;Acc:VGNC:73872]  
ENSMMUG00000014658 ninein [Source:VGNC Symbol;Acc:VGNC:75177]  
ENSMMUG00000014715 fragile site, folic acid type, rare, fra(10)(q23.3) or fra(10)(q24.2) candidate 1 [Source:NCBI gene;Acc:700389]  
ENSMMUG00000014771 zinc finger homeobox 2 [Source:NCBI gene;Acc:100429448]

ENSMMUG00000014983 alanyl aminopeptidase, membrane [Source:VGNC Symbol;Acc:VGNC:69943]  
ENSMMUG00000015288 adaptor related protein complex 3 subunit sigma 1 [Source:VGNC Symbol;Acc:VGNC:69867]  
ENSMMUG00000015394 WD repeat domain 93 [Source:VGNC Symbol;Acc:VGNC:79642]  
ENSMMUG00000015416 bromodomain and PHD finger containing 3 [Source:VGNC Symbol;Acc:VGNC:70309]  
ENSMMUG00000015686 abhydrolase domain containing 16A [Source:VGNC Symbol;Acc:VGNC:69393]  
ENSMMUG00000015693 lymphocyte antigen 6 family member G6C [Source:VGNC Symbol;Acc:VGNC:74285]  
ENSMMUG00000015861 cytochrome c oxidase subunit VIIb [Source:NCBI gene;Acc:706099]  
ENSMMUG00000015865 arginase 2 [Source:VGNC Symbol;Acc:VGNC:70005]  
ENSMMUG00000015866 vesicle transport through interaction with t-SNAREs 1B [Source:NCBI gene;Acc:711113]  
ENSMMUG00000015871 zinc finger FYVE-type containing 26 [Source:VGNC Symbol;Acc:VGNC:79283]  
ENSMMUG00000015873 RAD51 paralog B [Source:VGNC Symbol;Acc:VGNC:76647]  
ENSMMUG00000016069 cubilin [Source:VGNC Symbol;Acc:VGNC:82132]  
ENSMMUG00000016237 taxilin gamma [Source:NCBI gene;Acc:713769]  
ENSMMUG00000016255 telomerase associated protein 1 [Source:VGNC Symbol;Acc:VGNC:78310]  
ENSMMUG00000016376 mitogen-activated protein kinase kinase kinase 5 [Source:VGNC Symbol;Acc:VGNC:74495]  
ENSMMUG00000016407 microtubule associated serine/threonine kinase like [Source:NCBI gene;Acc:708134]  
ENSMMUG00000016465 histone deacetylase 6 [Source:VGNC Symbol;Acc:VGNC:73164]  
ENSMMUG00000016469 proprotein convertase subtilisin/kexin type 1 inhibitor [Source:VGNC Symbol;Acc:VGNC:75639]  
ENSMMUG00000016513 FA complementation group M [Source:VGNC Symbol;Acc:VGNC:72554]  
ENSMMUG00000016552 inverted formin, FH2 and WH2 domain containing [Source:VGNC Symbol;Acc:VGNC:84357]  
ENSMMUG00000016652 cell division cycle and apoptosis regulator 1 [Source:NCBI gene;Acc:693585]  
ENSMMUG00000016655 R3H domain and coiled-coil containing 1 [Source:VGNC Symbol;Acc:VGNC:76551]  
ENSMMUG00000016686 BUB1 mitotic checkpoint serine/threonine kinase B [Source:VGNC Symbol;Acc:VGNC:70293]  
ENSMMUG00000016772 solute carrier family 28 member 1 [Source:VGNC Symbol;Acc:VGNC:77444]  
ENSMMUG00000016929 proline rich and Gla domain 3 [Source:VGNC Symbol;Acc:VGNC:76350]  
ENSMMUG00000017189 regulatory factor X6 [Source:VGNC Symbol;Acc:VGNC:76800]  
ENSMMUG00000017260 G protein-coupled receptor 65 [Source:VGNC Symbol;Acc:VGNC:73140]  
ENSMMUG00000017261 galactosylceramidase [Source:VGNC Symbol;Acc:VGNC:72867]  
ENSMMUG00000017607 NEDD4 binding protein 3 [Source:VGNC Symbol;Acc:VGNC:75053]  
ENSMMUG00000017619 lysophosphatidic acid receptor 5 [Source:VGNC Symbol;Acc:VGNC:74277]  
ENSMMUG00000017627 B-TFIID TATA-box binding protein associated factor 1 [Source:VGNC Symbol;Acc:VGNC:70336]  
ENSMMUG00000017660  
ENSMMUG00000018200 RNA transcription, translation and transport factor [Source:VGNC Symbol;Acc:VGNC:77087]  
ENSMMUG00000018246 transmembrane and coiled-coil domains 6 [Source:VGNC Symbol;Acc:VGNC:84507]  
ENSMMUG00000018345 phosphatidylethanolamine binding protein 4 [Source:VGNC Symbol;Acc:VGNC:82204]  
ENSMMUG00000018788 transmembrane protein 14B [Source:NCBI gene;Acc:698237]  
ENSMMUG00000019172 spectrin beta, erythrocytic [Source:VGNC Symbol;Acc:VGNC:77870]  
ENSMMUG00000019246 regulator of calcineurin 2 [Source:VGNC Symbol;Acc:VGNC:82092]  
ENSMMUG00000019304 indoleamine 2,3-dioxygenase 1 [Source:VGNC Symbol;Acc:VGNC:73580]  
ENSMMUG00000019306 indoleamine 2,3-dioxygenase 2 [Source:VGNC Symbol;Acc:VGNC:84005]  
ENSMMUG00000019363 synapse associated protein 1 [Source:VGNC Symbol;Acc:VGNC:78135]  
ENSMMUG00000019443 syntaxin 11 [Source:VGNC Symbol;Acc:VGNC:78041]  
ENSMMUG00000019526 BLM RecQ like helicase [Source:VGNC Symbol;Acc:VGNC:70254]  
ENSMMUG00000019703 RUN and FYVE domain containing 2 [Source:VGNC Symbol;Acc:VGNC:77057]  
ENSMMUG00000019764 dynactin subunit 4 [Source:VGNC Symbol;Acc:VGNC:71625]  
ENSMMUG00000020185 voltage dependent anion channel 3 [Source:VGNC Symbol;Acc:VGNC:84135]  
ENSMMUG00000020346 carboxypeptidase X, M14 family member 2 [Source:VGNC Symbol;Acc:VGNC:71596]  
ENSMMUG00000020488 receptor accessory protein 5 [Source:VGNC Symbol;Acc:VGNC:76864]  
ENSMMUG00000020515 adhesion G protein-coupled receptor G2 [Source:VGNC Symbol;Acc:VGNC:69802]  
ENSMMUG00000020534 p21 (RAC1) activated kinase 6 [Source:NCBI gene;Acc:701589]  
ENSMMUG00000020558 serine/threonine kinase 38 [Source:VGNC Symbol;Acc:VGNC:78155]



ENSMMUG00000020586 serpin family A member 12 [Source:VGNC Symbol;Acc:VGNC:77266]  
ENSMMUG00000020604 HPS1 biogenesis of lysosomal organelles complex 3 subunit 1 [Source:VGNC Symbol;Acc:VGNC:73515]  
ENSMMUG00000020679 myozenin 3 [Source:VGNC Symbol;Acc:VGNC:74988]  
ENSMMUG00000020683 RNA binding motif protein 22 [Source:VGNC Symbol;Acc:VGNC:76535]  
ENSMMUG00000021044 afadin, adherens junction formation factor [Source:VGNC Symbol;Acc:VGNC:69818]  
ENSMMUG00000021357 zinc finger BED-type containing 3 [Source:VGNC Symbol;Acc:VGNC:79271]  
ENSMMUG00000021418 ATPase H+ transporting V1 subunit D [Source:VGNC Symbol;Acc:VGNC:70060]  
ENSMMUG00000021610 regulator of G protein signaling 10 [Source:VGNC Symbol;Acc:VGNC:76915]  
ENSMMUG00000021634 TNF alpha induced protein 2 [Source:VGNC Symbol;Acc:VGNC:78579]  
ENSMMUG00000022247 osteoclastogenesis associated transmembrane protein 1 [Source:VGNC Symbol;Acc:VGNC:75664]  
ENSMMUG00000022407 serine and arginine rich splicing factor 5 [Source:NCBI gene;Acc:712867]  
ENSMMUG00000022409 solute carrier family 10 member 1 [Source:VGNC Symbol;Acc:VGNC:77380]  
ENSMMUG00000022893 von Willebrand factor [Source:VGNC Symbol;Acc:VGNC:78778]  
ENSMMUG00000022921 solute carrier family 2 member 12 [Source:VGNC Symbol;Acc:VGNC:77503]  
ENSMMUG00000022933 DNA topoisomerase I mitochondrial [Source:VGNC Symbol;Acc:VGNC:79821]  
ENSMMUG00000023016 jade family PHD finger 3 [Source:VGNC Symbol;Acc:VGNC:73640]  
ENSMMUG00000023018 RP2 activator of ARL3 GTPase [Source:VGNC Symbol;Acc:VGNC:76720]  
ENSMMUG00000023025 synaptophysin [Source:VGNC Symbol;Acc:VGNC:78072]  
ENSMMUG00000023060 A-kinase anchoring protein 4 [Source:VGNC Symbol;Acc:VGNC:69770]  
ENSMMUG00000023139 small nuclear ribonucleoprotein polypeptide N [Source:VGNC Symbol;Acc:VGNC:78437]  
ENSMMUG00000023282 aldo-keto reductase family 1, member C1 (dihydrodiol dehydrogenase 1; 20-alpha (3-alpha)-hydroxysteroid dehydrogenase) [Source:NCBI gene;Acc:711198]  
ENSMMUG00000023361 GDNF family receptor alpha 2 [Source:VGNC Symbol;Acc:VGNC:72918]  
ENSMMUG00000023598 sorting nexin 2 [Source:VGNC Symbol;Acc:VGNC:77682]  
ENSMMUG00000023761 ectonucleoside triphosphate diphosphohydrolase 7 [Source:VGNC Symbol;Acc:VGNC:72071]  
ENSMMUG00000023816 semaphorin 4B [Source:VGNC Symbol;Acc:VGNC:77165]  
ENSMMUG00000024234 U6 spliceosomal RNA [Source:RFAM;Acc:RF00026]  
ENSMMUG00000024537 Small nucleolar RNA SNORA73 family [Source:RFAM;Acc:RF00045]  
ENSMMUG00000025039 small nucleolar RNA, H/ACA box 38 [Source:HGNC Symbol;Acc:HGNC:32631]  
ENSMMUG00000025918 U6 spliceosomal RNA [Source:RFAM;Acc:RF00026]  
ENSMMUG00000026243 U6 spliceosomal RNA [Source:RFAM;Acc:RF00026]  
ENSMMUG00000026474 Small nucleolar RNA SNORD83 [Source:RFAM;Acc:RF00137]  
ENSMMUG00000026975 mml-mir-206 [Source:miRBase;Acc:MI0007667]  
ENSMMUG00000027220 microRNA 598 [Source:HGNC Symbol;Acc:HGNC:32854]  
ENSMMUG00000027544 U6 spliceosomal RNA [Source:RFAM;Acc:RF00026]  
ENSMMUG00000029186 exocyst complex component 3 like 4 [Source:VGNC Symbol;Acc:VGNC:72305]  
ENSMMUG00000029420 protein tyrosine phosphatase receptor type K [Source:VGNC Symbol;Acc:VGNC:83453]  
ENSMMUG00000029421 protein tyrosine phosphatase receptor type K [Source:VGNC Symbol;Acc:VGNC:83453]  
ENSMMUG00000029455 olfactory receptor 4Q2 [Source:NCBI gene;Acc:114679271]  
ENSMMUG00000029507 adaptor related protein complex 3 subunit sigma 2 [Source:NCBI gene;Acc:701217]  
ENSMMUG00000029638 chromosome 7 C15orf65 homolog [Source:VGNC Symbol;Acc:VGNC:70689]  
ENSMMUG00000032429 forkhead box O4 [Source:VGNC Symbol;Acc:VGNC:72712]  
ENSMMUG00000032858 mml-mir-583 [Source:miRBase;Acc:MI0007850]  
ENSMMUG00000034608 U6 spliceosomal RNA [Source:RFAM;Acc:RF00026]  
ENSMMUG00000035748 U6 spliceosomal RNA [Source:RFAM;Acc:RF00026]  
ENSMMUG00000037243 U6 spliceosomal RNA [Source:RFAM;Acc:RF00026]  
ENSMMUG00000037890 polycomb group ring finger 5 [Source:NCBI gene;Acc:697020]  
ENSMMUG00000038018 polycomb group ring finger 5 [Source:NCBI gene;Acc:697020]  
ENSMMUG00000039101 pelota mRNA surveillance and ribosome rescue factor [Source:VGNC Symbol;Acc:VGNC:84478]  
ENSMMUG00000039268 lymphocyte antigen 6G6e-like [Source:NCBI gene;Acc:100427419]  
ENSMMUG00000039292 lymphocyte antigen 6G6e-like [Source:NCBI gene;Acc:100427419]  
ENSMMUG00000039560 cofilin 2 [Source:NCBI gene;Acc:693875]

ENSMMUG00000040071  
ENSMMUG00000040274 MAGE family member A4 [Source:NCBI gene;Acc:710825]  
ENSMMUG00000041376 G antigen 10 [Source:NCBI gene;Acc:693330]  
ENSMMUG00000041519 zinc finger protein 354A [Source:VGNC Symbol;Acc:VGNC:84517]  
ENSMMUG00000042378 pseudopodium enriched atypical kinase 1 [Source:VGNC Symbol;Acc:VGNC:84419]  
ENSMMUG00000043648  
ENSMMUG00000044581 modulator of apoptosis 1 [Source:VGNC Symbol;Acc:VGNC:84392]  
ENSMMUG00000045093 cyclin B3 [Source:NCBI gene;Acc:694534]  
ENSMMUG00000045654 tumor necrosis factor [Source:VGNC Symbol;Acc:VGNC:83501]  
ENSMMUG00000046550 coiled-coil domain containing 125 [Source:NCBI gene;Acc:704391]  
ENSMMUG00000047465 Metazoan signal recognition particle RNA [Source:RFAM;Acc:RF00017]  
ENSMMUG00000048039 apurinic/aprimidinic endodeoxyribonuclease 1 [Source:VGNC Symbol;Acc:VGNC:84305]  
ENSMMUG00000048066 trafficking protein particle complex 9 [Source:NCBI gene;Acc:711466]  
ENSMMUG00000048076 TNF receptor superfamily member 10b [Source:NCBI gene;Acc:716650]  
ENSMMUG00000049265 Metazoan signal recognition particle RNA [Source:RFAM;Acc:RF00017]  
ENSMMUG00000049267  
ENSMMUG00000049508  
ENSMMUG00000049543  
ENSMMUG00000049666  
ENSMMUG00000049735 allograft inflammatory factor 1 [Source:NCBI gene;Acc:574115]  
ENSMMUG00000049862  
ENSMMUG00000049866  
ENSMMUG00000049894  
ENSMMUG00000049935  
ENSMMUG00000050104 Metazoan signal recognition particle RNA [Source:RFAM;Acc:RF00017]  
ENSMMUG00000050405  
ENSMMUG00000050495  
ENSMMUG00000050511  
ENSMMUG00000050549 lysyl oxidase like 2 [Source:NCBI gene;Acc:710151]  
ENSMMUG00000050597  
ENSMMUG00000050608  
ENSMMUG00000051037  
ENSMMUG00000051170  
ENSMMUG00000051414 Metazoan signal recognition particle RNA [Source:RFAM;Acc:RF00017]  
ENSMMUG00000051972 zinc finger CCHC-type containing 24 [Source:NCBI gene;Acc:702083]  
ENSMMUG00000051989 interleukin 5 [Source:NCBI gene;Acc:710622]  
ENSMMUG00000052073  
ENSMMUG00000052252 protein phosphatase 1 regulatory subunit 3F [Source:NCBI gene;Acc:715950]  
ENSMMUG00000052422 ATPase H+ transporting V1 subunit G2 [Source:NCBI gene;Acc:715331]  
ENSMMUG00000052453 serpin family A member 11 [Source:NCBI gene;Acc:701483]  
ENSMMUG00000052637 Metazoan signal recognition particle RNA [Source:RFAM;Acc:RF00017]  
ENSMMUG00000052828  
ENSMMUG00000052891  
ENSMMUG00000053013  
ENSMMUG00000053106  
ENSMMUG00000053324 lymphocyte antigen 6 complex locus protein G6d [Source:NCBI gene;Acc:715304]  
ENSMMUG00000053367 secreted protein acidic and cysteine rich [Source:NCBI gene;Acc:712388]  
ENSMMUG00000053481  
ENSMMUG00000053489  
ENSMMUG00000053561  
ENSMMUG00000053656

ENSMMUG00000053691 Metazoan signal recognition particle RNA [Source:RFAM;Acc:RF00017]  
ENSMMUG00000053916  
ENSMMUG00000053984  
ENSMMUG00000053989  
ENSMMUG00000053990  
ENSMMUG00000054159 lymphocyte antigen 6 family member G5C [Source:VGNC Symbol;Acc:VGNC:83431]  
ENSMMUG00000054184 Metazoan signal recognition particle RNA [Source:RFAM;Acc:RF00017]  
ENSMMUG00000054377  
ENSMMUG00000054414  
ENSMMUG00000054755 transmembrane protein 65 [Source:NCBI gene;Acc:705727]  
ENSMMUG00000054904 Metazoan signal recognition particle RNA [Source:RFAM;Acc:RF00017]  
ENSMMUG00000054942  
ENSMMUG00000054960  
ENSMMUG00000055012  
ENSMMUG00000055018 sushi domain containing 6 [Source:NCBI gene;Acc:712719]  
ENSMMUG00000055121 Metazoan signal recognition particle RNA [Source:RFAM;Acc:RF00017]  
ENSMMUG00000055199 cytochrome P450, family 39, subfamily A, polypeptide 1 [Source:NCBI gene;Acc:704242]  
ENSMMUG00000055601  
ENSMMUG00000055906 angiotensin II receptor type 2 [Source:NCBI gene;Acc:709513]  
ENSMMUG00000055914  
ENSMMUG00000056063  
ENSMMUG00000056168  
ENSMMUG00000056376  
ENSMMUG00000056522  
ENSMMUG00000056580 Metazoan signal recognition particle RNA [Source:RFAM;Acc:RF00017]  
ENSMMUG00000056605 Metazoan signal recognition particle RNA [Source:RFAM;Acc:RF00017]  
ENSMMUG00000056749 Metazoan signal recognition particle RNA [Source:RFAM;Acc:RF00017]  
ENSMMUG00000056796 NADH:ubiquinone oxidoreductase subunit A2 [Source:NCBI gene;Acc:697736]  
ENSMMUG00000056797  
ENSMMUG00000056844  
ENSMMUG00000056906  
ENSMMUG00000056992 zinc finger AN1-type containing 6 [Source:NCBI gene;Acc:717543]  
ENSMMUG00000057063 solute carrier family 6 member 14 [Source:NCBI gene;Acc:709598]  
ENSMMUG00000057196 pulmonary surfactant-associated protein A [Source:NCBI gene;Acc:701715]  
ENSMMUG00000057219 tumor protein p53 inducible nuclear protein 1 [Source:NCBI gene;Acc:700632]  
ENSMMUG00000057283  
ENSMMUG00000057818  
ENSMMUG00000057909  
ENSMMUG00000058002 zinc finger protein 669-like [Source:NCBI gene;Acc:696282]  
ENSMMUG00000058013 melanoma-associated antigen 3 [Source:NCBI gene;Acc:706103]  
ENSMMUG00000058096 CDKN2A interacting protein N-terminal like [Source:NCBI gene;Acc:710774]  
ENSMMUG00000058106 otoconin 90 [Source:NCBI gene;Acc:100429699]  
ENSMMUG00000058108 BMP and activin membrane bound inhibitor [Source:NCBI gene;Acc:710152]  
ENSMMUG00000058162  
ENSMMUG00000058176 b-defensin2-like [Source:NCBI gene;Acc:100169969]  
ENSMMUG00000058187  
ENSMMUG00000058534  
ENSMMUG00000058557  
ENSMMUG00000058700 Metazoan signal recognition particle RNA [Source:RFAM;Acc:RF00017]  
ENSMMUG00000058800  
ENSMMUG00000058935 Metazoan signal recognition particle RNA [Source:RFAM;Acc:RF00017]

ENSMMUG00000059134  
ENSMMUG00000059335  
ENSMMUG00000059428 olfactory receptor 2V2 [Source:NCBI gene;Acc:707790]  
ENSMMUG00000059442  
ENSMMUG00000059491  
ENSMMUG00000059589  
ENSMMUG00000059608 fibroblast growth factor binding protein 3 [Source:NCBI gene;Acc:697881]  
ENSMMUG00000059671  
ENSMMUG00000059681  
ENSMMUG00000059932 Metazoan signal recognition particle RNA [Source:RFAM;Acc:RF00017]  
ENSMMUG00000059984 pellino E3 ubiquitin protein ligase family member 2 [Source:NCBI gene;Acc:699169]  
ENSMMUG00000060632  
ENSMMUG00000060812 autophagy related 12 [Source:NCBI gene;Acc:696765]  
ENSMMUG00000060865 Metazoan signal recognition particle RNA [Source:RFAM;Acc:RF00017]  
ENSMMUG00000060901  
ENSMMUG00000061031  
ENSMMUG00000061079 golgin subfamily A member 6C [Source:NCBI gene;Acc:715898]  
ENSMMUG00000061151  
ENSMMUG00000061165  
ENSMMUG00000061282 hyaluronan and proteoglycan link protein 1 [Source:NCBI gene;Acc:712501]  
ENSMMUG00000061431 outer dense fiber of sperm tails 3 like 1 [Source:NCBI gene;Acc:706545]  
ENSMMUG00000061526 synaptopodin 2 like [Source:NCBI gene;Acc:714736]  
ENSMMUG00000061576  
ENSMMUG00000061833 transmembrane protein 251 [Source:NCBI gene;Acc:708131]  
ENSMMUG00000061935  
ENSMMUG00000062055 glyoxalase I [Source:NCBI gene;Acc:719518]  
ENSMMUG00000062063 melanoma-associated antigen 3 [Source:NCBI gene;Acc:711544]  
ENSMMUG00000062217 HD domain containing 3 [Source:NCBI gene;Acc:715621]  
ENSMMUG00000062254  
ENSMMUG00000062326  
ENSMMUG00000062518  
ENSMMUG00000062522  
ENSMMUG00000062628  
ENSMMUG00000063121  
ENSMMUG00000063198  
ENSMMUG00000063322  
ENSMMUG00000063346  
ENSMMUG00000063462  
ENSMMUG00000063495  
ENSMMUG00000063525  
ENSMMUG00000063694 cyclic nucleotide gated channel subunit alpha 2 [Source:NCBI gene;Acc:704486]  
ENSMMUG00000063913 endogenous retrovirus group K member 7 Env polyprotein-like [Source:NCBI gene;Acc:114674933]  
ENSMMUG00000063986  
ENSMMUG00000064321  
ENSMMUG00000064341 U6 spliceosomal RNA [Source:RFAM;Acc:RF00026]  
ENSMMUG00000064557  
ENSMMUG00000065212  
ENSMMUG00000065247 opioid receptor kappa 1 [Source:NCBI gene;Acc:710783]  
ENSMMUG00000000108 NCK associated protein 1 like [Source:VGNC Symbol;Acc:VGNC:75063]  
ENSMMUG00000000152 transcription factor CP2 [Source:VGNC Symbol;Acc:VGNC:78323]  
ENSMMUG00000000293 catenin alpha 2 [Source:VGNC Symbol;Acc:VGNC:71543]

ENSMMUG0000000327 fatty acid desaturase 2 [Source:VGNC Symbol;Acc:VGNC:72472]  
ENSMMUG0000000376 bridging integrator 1 [Source:VGNC Symbol;Acc:VGNC:70251]  
ENSMMUG0000000381 IKAROS family zinc finger 2 [Source:VGNC Symbol;Acc:VGNC:73586]  
ENSMMUG0000000389 nucleolar protein 6 [Source:VGNC Symbol;Acc:VGNC:75218]  
ENSMMUG0000000582 NOP58 ribonucleoprotein [Source:VGNC Symbol;Acc:VGNC:75284]  
ENSMMUG0000000803 signal transducer and activator of transcription 2 [Source:VGNC Symbol;Acc:VGNC:77905]  
ENSMMUG0000000874 carbohydrate sulfotransferase 1 [Source:VGNC Symbol;Acc:VGNC:71055]  
ENSMMUG0000001387 p21 (RAC1) activated kinase 1 [Source:NCBI gene;Acc:698585]  
ENSMMUG0000001409 coiled-coil domain containing 187 [Source:NCBI gene;Acc:710749]  
ENSMMUG0000001536 glutamine and serine rich 1 [Source:VGNC Symbol;Acc:VGNC:76544]  
ENSMMUG0000001739 ATPase sarcoplasmic/endoplasmic reticulum Ca<sup>2+</sup> transporting 2 [Source:VGNC Symbol;Acc:VGNC:70178]  
ENSMMUG0000001745 oxysterol binding protein [Source:VGNC Symbol;Acc:VGNC:75718]  
ENSMMUG0000001748 spleen associated tyrosine kinase [Source:VGNC Symbol;Acc:VGNC:78063]  
ENSMMUG0000001845 DNA polymerase epsilon 4, accessory subunit [Source:VGNC Symbol;Acc:VGNC:76065]  
ENSMMUG0000001989 RNA polymerase II subunit D [Source:VGNC Symbol;Acc:VGNC:76213]  
ENSMMUG0000002267 laminin subunit gamma 3 [Source:NCBI gene;Acc:722430]  
ENSMMUG0000002452 solute carrier family 35 member C1 [Source:VGNC Symbol;Acc:VGNC:77524]  
ENSMMUG0000002483 citrate synthase [Source:VGNC Symbol;Acc:VGNC:71509]  
ENSMMUG0000002515 protein phosphatase 2 phosphatase activator [Source:VGNC Symbol;Acc:VGNC:76583]  
ENSMMUG0000002536 calcium binding protein 1 [Source:VGNC Symbol;Acc:VGNC:70495]  
ENSMMUG0000002562 mediator complex subunit 19 [Source:VGNC Symbol;Acc:VGNC:74615]  
ENSMMUG0000002563 zinc finger DHC-type palmitoyltransferase 5 [Source:VGNC Symbol;Acc:VGNC:79145]  
ENSMMUG0000002566 selenoprotein H [Source:VGNC Symbol;Acc:VGNC:82234]  
ENSMMUG0000002917 single Ig IL-1-related receptor [Source:NCBI gene;Acc:100425060]  
ENSMMUG0000003005 MFNG O-fucosylpeptide 3-beta-N-acetylglucosaminyltransferase [Source:VGNC Symbol;Acc:VGNC:74712]  
ENSMMUG0000003006 serine palmitoyltransferase long chain base subunit 1 [Source:VGNC Symbol;Acc:VGNC:77873]  
ENSMMUG0000003007 caspase recruitment domain family member 10 [Source:VGNC Symbol;Acc:VGNC:70570]  
ENSMMUG0000003098 peptidase, mitochondrial processing alpha subunit [Source:VGNC Symbol;Acc:VGNC:76062]  
ENSMMUG0000003105 inositol polyphosphate-5-phosphatase E [Source:VGNC Symbol;Acc:VGNC:73637]  
ENSMMUG0000003106 SEC16 homolog A, endoplasmic reticulum export factor [Source:VGNC Symbol;Acc:VGNC:77326]  
ENSMMUG0000003140 RELT TNF receptor [Source:VGNC Symbol;Acc:VGNC:76728]  
ENSMMUG0000003217 transmembrane 7 superfamily member 3 [Source:VGNC Symbol;Acc:VGNC:79371]  
ENSMMUG0000003314 aquaporin 3 (Gill blood group) [Source:NCBI gene;Acc:702721]  
ENSMMUG0000003355 lipid droplet associated hydrolase [Source:VGNC Symbol;Acc:VGNC:74130]  
ENSMMUG0000003356 tenascin C [Source:VGNC Symbol;Acc:VGNC:79960]  
ENSMMUG0000003400 baculoviral IAP repeat containing 2 [Source:NCBI gene;Acc:702592]  
ENSMMUG0000003669 methionine sulfoxide reductase B3 [Source:VGNC Symbol;Acc:VGNC:74842]  
ENSMMUG0000003797 ubiquitin specific peptidase 20 [Source:VGNC Symbol;Acc:VGNC:78740]  
ENSMMUG0000003874 interferon induced transmembrane protein 10 [Source:NCBI gene;Acc:721010]  
ENSMMUG0000003950 nucleoporin 98 and 96 precursor [Source:VGNC Symbol;Acc:VGNC:75563]  
ENSMMUG0000003955 post-GPI attachment to proteins 2 [Source:VGNC Symbol;Acc:VGNC:75823]  
ENSMMUG0000003976 glycoprotein hormone subunit alpha 2 [Source:VGNC Symbol;Acc:VGNC:72961]  
ENSMMUG0000004014 interferon regulatory factor 7 [Source:VGNC Symbol;Acc:VGNC:73765]  
ENSMMUG0000004022 zinc finger SWIM-type containing 2 [Source:VGNC Symbol;Acc:VGNC:79908]  
ENSMMUG0000004330 peptidase domain containing associated with muscle regeneration 1 [Source:VGNC Symbol;Acc:VGNC:75673]  
ENSMMUG0000004332 tripartite motif containing 44 [Source:VGNC Symbol;Acc:VGNC:79168]  
ENSMMUG0000004868 dynein axonemal light chain 4 [Source:VGNC Symbol;Acc:VGNC:71945]  
ENSMMUG0000004982 activin A receptor like type 1 [Source:VGNC Symbol;Acc:VGNC:69451]  
ENSMMUG0000005150 CD163 molecule [Source:VGNC Symbol;Acc:VGNC:70752]  
ENSMMUG0000005208 RNA polymerase III subunit B [Source:VGNC Symbol;Acc:VGNC:76143]  
ENSMMUG0000005215 Rab9 effector protein with kelch motifs [Source:VGNC Symbol;Acc:VGNC:76495]



ENSMMUG0000005255 TRAF-type zinc finger domain containing 1 [Source:VGNC Symbol;Acc:VGNC:79459]  
ENSMMUG0000005440 ELMO domain containing 1 [Source:VGNC Symbol;Acc:VGNC:72109]  
ENSMMUG0000005480 carnosine synthase 1 [Source:VGNC Symbol;Acc:VGNC:81367]  
ENSMMUG0000005482 lysine methyltransferase 2A [Source:NCBI gene;Acc:705511]  
ENSMMUG0000005483 ribosomal protein S6 kinase B2 [Source:VGNC Symbol;Acc:VGNC:76934]  
ENSMMUG0000005486 protein tyrosine phosphatase receptor type C associated protein [Source:VGNC Symbol;Acc:VGNC:76613]  
ENSMMUG0000005488 coronin 1B [Source:VGNC Symbol;Acc:VGNC:71320]  
ENSMMUG0000005504 nucleoporin 37 [Source:VGNC Symbol;Acc:VGNC:75491]  
ENSMMUG0000005595 RAB14, member RAS oncogene family [Source:NCBI gene;Acc:699837]  
ENSMMUG0000005622 dynein axonemal heavy chain 7 [Source:VGNC Symbol;Acc:VGNC:71859]  
ENSMMUG0000005685 pseudouridine synthase 10 [Source:VGNC Symbol;Acc:VGNC:76547]  
ENSMMUG0000005776 atlastin GTPase 3 [Source:VGNC Symbol;Acc:VGNC:70125]  
ENSMMUG0000005982 coiled-coil domain containing 84 [Source:NCBI gene;Acc:707400]  
ENSMMUG0000005989 GLE1 RNA export mediator [Source:VGNC Symbol;Acc:VGNC:73067]  
ENSMMUG0000005991 TRIO and F-actin binding protein [Source:NCBI gene;Acc:701241]  
ENSMMUG0000006076 intraflagellar transport 74 [Source:VGNC Symbol;Acc:VGNC:73430]  
ENSMMUG0000006079 leucine rich repeat containing 19 [Source:VGNC Symbol;Acc:VGNC:74337]  
ENSMMUG0000006180 tetratricopeptide repeat, ankyrin repeat and coiled-coil containing 1 [Source:VGNC Symbol;Acc:VGNC:78238]  
ENSMMUG0000006181 WD repeat, sterile alpha motif and U-box domain containing 1 [Source:VGNC Symbol;Acc:VGNC:79634]  
ENSMMUG0000006293 SAP domain containing ribonucleoprotein [Source:NCBI gene;Acc:709932]  
ENSMMUG0000006375 coiled-coil domain containing 15 [Source:NCBI gene;Acc:716362]  
ENSMMUG0000006405 secretion regulating guanine nucleotide exchange factor [Source:VGNC Symbol;Acc:VGNC:77258]  
ENSMMUG0000006468 FGFR1 oncogene partner 2 [Source:VGNC Symbol;Acc:VGNC:72551]  
ENSMMUG0000006470 complement C1r subcomponent [Source:NCBI gene;Acc:722133]  
ENSMMUG0000006568 basic leucine zipper ATF-like transcription factor 2 [Source:VGNC Symbol;Acc:VGNC:70127]  
ENSMMUG0000006655 myelin regulatory factor [Source:VGNC Symbol;Acc:VGNC:74949]  
ENSMMUG0000006689 nuclear receptor interacting protein 3 [Source:VGNC Symbol;Acc:VGNC:75397]  
ENSMMUG0000006692 signal peptide, CUB domain and EGF like domain containing 2 [Source:VGNC Symbol;Acc:VGNC:77138]  
ENSMMUG0000006758 cytochrome P450, family 27, subfamily A, polypeptide 1 [Source:NCBI gene;Acc:700192]  
ENSMMUG0000006893 D-amino acid oxidase [Source:VGNC Symbol;Acc:VGNC:71729]  
ENSMMUG0000006929 ST3 beta-galactoside alpha-2,3-sialyltransferase 4 [Source:VGNC Symbol;Acc:VGNC:77827]  
ENSMMUG0000006931 kirre like nephrin family adhesion molecule 3 [Source:NCBI gene;Acc:714534]  
ENSMMUG0000006941 exportin 1 [Source:VGNC Symbol;Acc:VGNC:78812]  
ENSMMUG0000007402 potassium two pore domain channel subfamily K member 7 [Source:VGNC Symbol;Acc:VGNC:73996]  
ENSMMUG0000007610 ribosomal protein S6 kinase A4 [Source:VGNC Symbol;Acc:VGNC:76930]  
ENSMMUG0000008077 dynein cytoplasmic 2 light intermediate chain 1 [Source:VGNC Symbol;Acc:VGNC:71899]  
ENSMMUG0000008080 ATP binding cassette subfamily G member 5 [Source:VGNC Symbol;Acc:VGNC:69391]  
ENSMMUG0000008081 ATP binding cassette subfamily G member 8 [Source:VGNC Symbol;Acc:VGNC:69392]  
ENSMMUG0000008106 solute carrier family 25 member 17 [Source:NCBI gene;Acc:705547]  
ENSMMUG0000008160 neutrophil cytosolic factor 4 [Source:VGNC Symbol;Acc:VGNC:75141]  
ENSMMUG0000008288 sorting nexin 17 [Source:VGNC Symbol;Acc:VGNC:77709]  
ENSMMUG0000008336 acyl-CoA dehydrogenase family member 10 [Source:NCBI gene;Acc:711080]  
ENSMMUG0000008384 solute carrier family 4 member 10 [Source:VGNC Symbol;Acc:VGNC:77695]  
ENSMMUG0000008387 dipeptidyl peptidase 4 [Source:VGNC Symbol;Acc:VGNC:71979]  
ENSMMUG0000008651 FGF1 intracellular binding protein [Source:VGNC Symbol;Acc:VGNC:72663]  
ENSMMUG0000008652 coiled-coil domain containing 85B [Source:VGNC Symbol;Acc:VGNC:70853]  
ENSMMUG0000008758 zinc finger protein 143 [Source:VGNC Symbol;Acc:VGNC:81612]  
ENSMMUG0000008778 parvalbumin [Source:VGNC Symbol;Acc:VGNC:76627]  
ENSMMUG0000008875 solute carrier family 35 member F5 [Source:VGNC Symbol;Acc:VGNC:77567]  
ENSMMUG0000008923 Thy-1 cell surface antigen [Source:VGNC Symbol;Acc:VGNC:78352]  
ENSMMUG0000009308 histidine ammonia-lyase [Source:VGNC Symbol;Acc:VGNC:73344]

ENSMMUG0000009312 leukotriene A4 hydrolase [Source:VGNC Symbol;Acc:VGNC:74453]  
ENSMMUG0000009318 BCL9 like [Source:VGNC Symbol;Acc:VGNC:70113]  
ENSMMUG0000009593 WAS/WASL interacting protein family member 1 [Source:VGNC Symbol;Acc:VGNC:78784]  
ENSMMUG00000010213 GLI pathogenesis related 2 [Source:VGNC Symbol;Acc:VGNC:81414]  
ENSMMUG00000010451 inositol polyphosphate phosphatase like 1 [Source:VGNC Symbol;Acc:VGNC:73752]  
ENSMMUG00000010513 ribulose-5-phosphate-3-epimerase [Source:NCBI gene;Acc:711322]  
ENSMMUG00000010515 KAT8 regulatory NSL complex subunit 1 like [Source:VGNC Symbol;Acc:VGNC:73913]  
ENSMMUG00000011209 BICD family like cargo adaptor 1 [Source:HGNC Symbol;Acc:HGNC:28095]  
ENSMMUG00000011441 transmembrane protein 106C [Source:VGNC Symbol;Acc:VGNC:79741]  
ENSMMUG00000011516 ADP ribosylation factor like GTPase 4C [Source:VGNC Symbol;Acc:VGNC:70018]  
ENSMMUG00000011527 TNF receptor associated factor 2 [Source:VGNC Symbol;Acc:VGNC:78641]  
ENSMMUG00000011528 F-box and WD repeat domain containing 5 [Source:VGNC Symbol;Acc:VGNC:72503]  
ENSMMUG00000011650 dual specificity tyrosine phosphorylation regulated kinase 2 [Source:VGNC Symbol;Acc:VGNC:72018]  
ENSMMUG00000011767 carnitine O-acetyltransferase [Source:VGNC Symbol;Acc:VGNC:71483]  
ENSMMUG00000011817 aryl hydrocarbon receptor interacting protein [Source:VGNC Symbol;Acc:VGNC:69759]  
ENSMMUG00000012147 collagen type V alpha 1 chain [Source:NCBI gene;Acc:722014]  
ENSMMUG00000012316 CDC42 effector protein 2 [Source:VGNC Symbol;Acc:VGNC:70750]  
ENSMMUG00000012350 mercaptopyruvate sulfurtransferase [Source:VGNC Symbol;Acc:VGNC:74922]  
ENSMMUG00000012597 ubiquitin associated protein 2 [Source:VGNC Symbol;Acc:VGNC:78949]  
ENSMMUG00000012668 centriolin [Source:VGNC Symbol;Acc:VGNC:71204]  
ENSMMUG00000012940 tRNA phosphotransferase 1 [Source:VGNC Symbol;Acc:VGNC:79242]  
ENSMMUG00000012941 nudix hydrolase 22 [Source:VGNC Symbol;Acc:VGNC:75475]  
ENSMMUG00000012942 DnaJ heat shock protein family (Hsp40) member C4 [Source:NCBI gene;Acc:717847]  
ENSMMUG00000012944 vascular endothelial growth factor B [Source:VGNC Symbol;Acc:VGNC:78765]  
ENSMMUG00000013099 pappalysin 1 [Source:VGNC Symbol;Acc:VGNC:75756]  
ENSMMUG00000013251 xin actin binding repeat containing 2 [Source:VGNC Symbol;Acc:VGNC:78953]  
ENSMMUG00000013397 peroxiredoxin 5 [Source:NCBI gene;Acc:719764]  
ENSMMUG00000013766 prostaglandin E synthase 3 [Source:NCBI gene;Acc:713353]  
ENSMMUG00000013798 fatty acid desaturase 1 [Source:VGNC Symbol;Acc:VGNC:72471]  
ENSMMUG00000013830 glucose-6-phosphatase catalytic subunit 2 [Source:NCBI gene;Acc:709062]  
ENSMMUG00000013832 ATP binding cassette subfamily B member 11 [Source:VGNC Symbol;Acc:VGNC:81339]  
ENSMMUG00000013901 mitogen-activated protein kinase kinase kinase 3 [Source:VGNC Symbol;Acc:VGNC:81466]  
ENSMMUG00000013944 regulator of microtubule dynamics 2 [Source:VGNC Symbol;Acc:VGNC:76839]  
ENSMMUG00000014131 microtubule affinity regulating kinase 2 [Source:VGNC Symbol;Acc:VGNC:74634]  
ENSMMUG00000014237 lysine methyltransferase 5B [Source:VGNC Symbol;Acc:VGNC:74110]  
ENSMMUG00000014277 ITPR interacting domain containing 2 [Source:VGNC Symbol;Acc:VGNC:73584]  
ENSMMUG00000014397 NCK associated protein 1 [Source:VGNC Symbol;Acc:VGNC:75143]  
ENSMMUG00000014425 protein kinase C epsilon [Source:VGNC Symbol;Acc:VGNC:76412]  
ENSMMUG00000014530 pre-mRNA processing factor 19 [Source:VGNC Symbol;Acc:VGNC:76281]  
ENSMMUG00000014864 VPS11 core subunit of CORVET and HOPS complexes [Source:VGNC Symbol;Acc:VGNC:78965]  
ENSMMUG00000014866 hydroxymethylbilane synthase [Source:VGNC Symbol;Acc:VGNC:73479]  
ENSMMUG00000014872 dolichyl-phosphate N-acetylglucosaminophosphotransferase 1 [Source:VGNC Symbol;Acc:VGNC:71971]  
ENSMMUG00000014875 C2CD2 like [Source:VGNC Symbol;Acc:VGNC:70435]  
ENSMMUG00000014880 sortilin related receptor 1 [Source:NCBI gene;Acc:713011]  
ENSMMUG00000014986 testis expressed 33 [Source:VGNC Symbol;Acc:VGNC:79727]  
ENSMMUG00000015019 VPS37C subunit of ESCRT-I [Source:VGNC Symbol;Acc:VGNC:79578]  
ENSMMUG00000015054 ArfGAP with RhoGAP domain, ankyrin repeat and PH domain 1 [Source:VGNC Symbol;Acc:VGNC:69844]  
ENSMMUG00000015108 SV2 related protein [Source:VGNC Symbol;Acc:VGNC:78208]  
ENSMMUG00000015258 glycine C-acetyltransferase [Source:NCBI gene;Acc:698811]  
ENSMMUG00000015468 checkpoint with forkhead and ring finger domains [Source:VGNC Symbol;Acc:VGNC:71064]  
ENSMMUG00000015606 Spi-1 proto-oncogene [Source:NCBI gene;Acc:712010]

ENSMMUG00000015607 solute carrier family 39 member 13 [Source:VGNC Symbol;Acc:VGNC:77538]  
ENSMMUG00000015611 proteasome 26S subunit, ATPase 3 [Source:NCBI gene;Acc:713356]  
ENSMMUG00000015926 2-oxoglutarate and iron dependent oxygenase domain containing 2 [Source:VGNC Symbol;Acc:VGNC:75462]  
ENSMMUG00000015928 ankyrin repeat domain 13D [Source:VGNC Symbol;Acc:VGNC:69722]  
ENSMMUG00000015930 ADP ribosylation factor like GTPase 6 interacting protein 4 [Source:VGNC Symbol;Acc:VGNC:69860]  
ENSMMUG00000015931 phosphatidylinositol transfer protein membrane associated 2 [Source:VGNC Symbol;Acc:VGNC:75843]  
ENSMMUG00000016323 Rho guanine nucleotide exchange factor 39 [Source:VGNC Symbol;Acc:VGNC:69912]  
ENSMMUG00000016327 coiled-coil domain containing 107 [Source:VGNC Symbol;Acc:VGNC:70656]  
ENSMMUG00000016434 NADH:ubiquinone oxidoreductase complex assembly factor 7 [Source:VGNC Symbol;Acc:VGNC:75035]  
ENSMMUG00000016438 protein kinase D3 [Source:VGNC Symbol;Acc:VGNC:76415]  
ENSMMUG00000016442 glutaminyl-peptide cyclotransferase [Source:VGNC Symbol;Acc:VGNC:76636]  
ENSMMUG00000016454 4-hydroxyphenylpyruvate dioxygenase [Source:VGNC Symbol;Acc:VGNC:73511]  
ENSMMUG00000016621 transmembrane BAX inhibitor motif containing 4 [Source:NCBI gene;Acc:717825]  
ENSMMUG00000016678 Rho associated coiled-coil containing protein kinase 2 [Source:VGNC Symbol;Acc:VGNC:76714]  
ENSMMUG00000016737 contactin 5 [Source:VGNC Symbol;Acc:VGNC:71287]  
ENSMMUG00000016827 UBA domain containing 1 [Source:VGNC Symbol;Acc:VGNC:79837]  
ENSMMUG00000016890 solute carrier family 37 member 4 [Source:VGNC Symbol;Acc:VGNC:77591]  
ENSMMUG00000016894 ribosomal protein S25 [Source:NCBI gene;Acc:702593]  
ENSMMUG00000017026 fibrosin like 1 [Source:NCBI gene;Acc:696295]  
ENSMMUG00000017124 spliceosome associated factor 3, U4/U6 recycling protein [Source:VGNC Symbol;Acc:VGNC:77029]  
ENSMMUG00000017129 solute carrier family 41 member 2 [Source:VGNC Symbol;Acc:VGNC:77585]  
ENSMMUG00000017209 C1D nuclear receptor corepressor [Source:NCBI gene;Acc:698450]  
ENSMMUG00000017287 PAT1 homolog 1, processing body mRNA decay factor [Source:VGNC Symbol;Acc:VGNC:75684]  
ENSMMUG00000017450 MOB kinase activator 2 [Source:NCBI gene;Acc:720951]  
ENSMMUG00000017458 DDB1 and CUL4 associated factor 12 [Source:VGNC Symbol;Acc:VGNC:71678]  
ENSMMUG00000017810 structure specific recognition protein 1 [Source:VGNC Symbol;Acc:VGNC:77891]  
ENSMMUG00000018029 amyloid beta precursor like protein 2 [Source:VGNC Symbol;Acc:VGNC:69984]  
ENSMMUG00000018030 endoplasmic reticulum protein 27 [Source:VGNC Symbol;Acc:VGNC:72369]  
ENSMMUG00000018034 suppression of tumorigenicity 14 [Source:VGNC Symbol;Acc:VGNC:77897]  
ENSMMUG00000018144 C2 calcium-dependent domain-containing protein 6 [Source:NCBI gene;Acc:702140]  
ENSMMUG00000018237 plexin C1 [Source:VGNC Symbol;Acc:VGNC:76190]  
ENSMMUG00000018239 centrosomal protein 83 [Source:VGNC Symbol;Acc:VGNC:70992]  
ENSMMUG00000018298 killer cell lectin like receptor D1 [Source:NCBI gene;Acc:574145]  
ENSMMUG00000018396 HAUS augmin like complex subunit 6 [Source:VGNC Symbol;Acc:VGNC:73237]  
ENSMMUG00000018471 serine/threonine kinase 33 [Source:VGNC Symbol;Acc:VGNC:78118]  
ENSMMUG00000018485 methyltransferase like 7A [Source:VGNC Symbol;Acc:VGNC:74567]  
ENSMMUG00000018492 TARBP2 subunit of RISC loading complex [Source:VGNC Symbol;Acc:VGNC:78099]  
ENSMMUG00000019070 focadhesin [Source:VGNC Symbol;Acc:VGNC:72556]  
ENSMMUG00000019607 patatin like phospholipase domain containing 7 [Source:VGNC Symbol;Acc:VGNC:76104]  
ENSMMUG00000019682 mitochondrial ribosomal protein S9 [Source:VGNC Symbol;Acc:VGNC:74762]  
ENSMMUG00000019690 SEC14 and spectrin domain containing 1 [Source:VGNC Symbol;Acc:VGNC:77267]  
ENSMMUG00000019837 ribonuclease H2 subunit C [Source:NCBI gene;Acc:700330]  
ENSMMUG00000019839 lysine acetyltransferase 5 [Source:VGNC Symbol;Acc:VGNC:73955]  
ENSMMUG00000019988 homeodomain interacting protein kinase 3 [Source:VGNC Symbol;Acc:VGNC:73472]  
ENSMMUG00000020009 receptor tyrosine kinase like orphan receptor 2 [Source:VGNC Symbol;Acc:VGNC:76716]  
ENSMMUG00000020190 valosin containing protein [Source:VGNC Symbol;Acc:VGNC:78762]  
ENSMMUG00000020854 C-type lectin domain family 4 member F [Source:VGNC Symbol;Acc:VGNC:71349]  
ENSMMUG00000021005 taste receptor type 2 member 50 [Source:NCBI gene;Acc:693513]  
ENSMMUG00000021039 X-ray radiation resistance associated 1 [Source:NCBI gene;Acc:693788]  
ENSMMUG00000021428 lipocalin 12 [Source:VGNC Symbol;Acc:VGNC:74143]  
ENSMMUG00000021436 latent transforming growth factor beta binding protein 1 [Source:VGNC Symbol;Acc:VGNC:74456]

ENSMMUG00000021564 lysine demethylase 2B [Source:VGNC Symbol;Acc:VGNC:81425]  
ENSMMUG00000021655 histone deacetylase 7 [Source:NCBI gene;Acc:718225]  
ENSMMUG00000021661 leucine rich repeat containing 56 [Source:VGNC Symbol;Acc:VGNC:74356]  
ENSMMUG00000021664 lamin tail domain containing 2 [Source:VGNC Symbol;Acc:VGNC:74380]  
ENSMMUG00000021736 single-pass membrane protein with coiled-coil domains 2 [Source:VGNC Symbol;Acc:VGNC:77808]  
ENSMMUG00000021877 protein kinase AMP-activated non-catalytic subunit gamma 3 [Source:VGNC Symbol;Acc:VGNC:76406]  
ENSMMUG00000021928 CAP-Gly domain containing linker protein 1 [Source:VGNC Symbol;Acc:VGNC:71166]  
ENSMMUG00000022031 DNA polymerase alpha 2, accessory subunit [Source:NCBI gene;Acc:716541]  
ENSMMUG00000022109 CD163 molecule like 1 [Source:VGNC Symbol;Acc:VGNC:70914]  
ENSMMUG00000022313 activating transcription factor 7 [Source:NCBI gene;Acc:700403]  
ENSMMUG00000022346 surfeit 2 [Source:VGNC Symbol;Acc:VGNC:78059]  
ENSMMUG00000022348 surfeit 4 [Source:VGNC Symbol;Acc:VGNC:78060]  
ENSMMUG00000022401 EMSY transcriptional repressor, BRCA2 interacting [Source:VGNC Symbol;Acc:VGNC:72065]  
ENSMMUG00000022406 ankyrin repeat and sterile alpha motif domain containing 1B [Source:VGNC Symbol;Acc:VGNC:69689]  
ENSMMUG00000022590 metallophosphoesterase domain containing 1 [Source:NCBI gene;Acc:715021]  
ENSMMUG00000022613 reversion inducing cysteine rich protein with kazal motifs [Source:VGNC Symbol;Acc:VGNC:76722]  
ENSMMUG00000022785 solute carrier family 66 member 3 [Source:VGNC Symbol;Acc:VGNC:76334]  
ENSMMUG00000022961 solute carrier family 11 member 2 [Source:VGNC Symbol;Acc:VGNC:77383]  
ENSMMUG00000022996 HCLS1 binding protein 3 [Source:VGNC Symbol;Acc:VGNC:82158]  
ENSMMUG00000023032 intraflagellar transport 81 [Source:VGNC Symbol;Acc:VGNC:73389]  
ENSMMUG00000023048 cytochrome b-c1 complex subunit Rieske, mitochondrial [Source:NCBI gene;Acc:705178]  
ENSMMUG00000023192 choline kinase alpha [Source:VGNC Symbol;Acc:VGNC:71039]  
ENSMMUG00000023225 E2F transcription factor 6 [Source:VGNC Symbol;Acc:VGNC:72027]  
ENSMMUG00000023300 FERM domain containing 8 [Source:NCBI gene;Acc:716379]  
ENSMMUG00000023370 DDB1 and CUL4 associated factor 17 [Source:VGNC Symbol;Acc:VGNC:71709]  
ENSMMUG00000023477  
ENSMMUG00000023479 latent transforming growth factor beta binding protein 3 [Source:VGNC Symbol;Acc:VGNC:74458]  
ENSMMUG00000023636 importin 7 [Source:NCBI gene;Acc:704213]  
ENSMMUG00000023797 post-GPI attachment to proteins GalNAc transferase 4 [Source:VGNC Symbol;Acc:VGNC:79688]  
ENSMMUG00000025150 Y RNA [Source:RFAM;Acc:RF00019]  
ENSMMUG00000026950 microRNA 101-2 [Source:HGNC Symbol;Acc:HGNC:31489]  
ENSMMUG00000027375 Y RNA [Source:RFAM;Acc:RF00019]  
ENSMMUG00000027543 Y RNA [Source:RFAM;Acc:RF00019]  
ENSMMUG00000027986 U6 spliceosomal RNA [Source:RFAM;Acc:RF00026]  
ENSMMUG00000030891 hypoxia up-regulated 1 [Source:VGNC Symbol;Acc:VGNC:73399]  
ENSMMUG00000030964 RAB6A, member RAS oncogene family [Source:NCBI gene;Acc:718717]  
ENSMMUG00000031100 membrane-spanning 4-domains subfamily A member 4A-like [Source:NCBI gene;Acc:698152]  
ENSMMUG00000031163 membrane anchored junction protein [Source:VGNC Symbol;Acc:VGNC:74375]  
ENSMMUG00000032030 dolichyldiphosphatase 1 [Source:VGNC Symbol;Acc:VGNC:71947]  
ENSMMUG00000032142 complement C8 gamma chain [Source:VGNC Symbol;Acc:VGNC:70481]  
ENSMMUG00000035551 small nucleolar RNA, C/D box 11B [Source:HGNC Symbol;Acc:HGNC:33571]  
ENSMMUG00000035888 small nucleolar RNA, C/D box 121A [Source:HGNC Symbol;Acc:HGNC:33560]  
ENSMMUG00000037977 protein phosphatase 1 regulatory inhibitor subunit 14B [Source:NCBI gene;Acc:722103]  
ENSMMUG00000038076 Metazoan signal recognition particle RNA [Source:RFAM;Acc:RF00017]  
ENSMMUG00000038256 aquaporin 2 [Source:NCBI gene;Acc:711719]  
ENSMMUG00000038363 adaptor related protein complex 5 subunit beta 1 [Source:NCBI gene;Acc:721904]  
ENSMMUG00000038944  
ENSMMUG00000038988 RNase MRP [Source:RFAM;Acc:RF00030]  
ENSMMUG00000039301 StAR related lipid transfer domain containing 10 [Source:NCBI gene;Acc:718503]  
ENSMMUG00000039346 apolipoprotein B mRNA editing enzyme catalytic subunit 3G [Source:NCBI gene;Acc:574398]  
ENSMMUG00000039397 tubulin folding cofactor E like [Source:NCBI gene;Acc:706506]

ENSMMUG00000039412 cholinergic receptor muscarinic 4 [Source:NCBI gene;Acc:574195]  
ENSMMUG00000039520 chromosome 11 C12orf43 homolog [Source:NCBI gene;Acc:698821]  
ENSMMUG00000040741 thioredoxin related transmembrane protein 2 [Source:NCBI gene;Acc:100169970]  
ENSMMUG00000041101 protein phosphatase 2 regulatory subunit B'beta [Source:NCBI gene;Acc:722026]  
ENSMMUG00000041729  
ENSMMUG00000042598 transmembrane protein 18 [Source:NCBI gene;Acc:721515]  
ENSMMUG00000042839  
ENSMMUG00000042870 Macaca mulatta taste receptor, type 2, member 46 (TAS2R46), mRNA. [Source:RefSeq mRNA;Acc:NM\_001080757]  
ENSMMUG00000043396 Metazoan signal recognition particle RNA [Source:RFAM;Acc:RF00017]  
ENSMMUG00000044048 Metazoan signal recognition particle RNA [Source:RFAM;Acc:RF00017]  
ENSMMUG00000044496 H2A histone family, member X [Source:NCBI gene;Acc:703073]  
ENSMMUG00000046169  
ENSMMUG00000046478 WASH complex subunit 3 [Source:NCBI gene;Acc:697824]  
ENSMMUG00000046774 RAS like proto-oncogene B [Source:NCBI gene;Acc:695852]  
ENSMMUG00000047219  
ENSMMUG00000047247 matrix Gla protein [Source:NCBI gene;Acc:574116]  
ENSMMUG00000048375 Metazoan signal recognition particle RNA [Source:RFAM;Acc:RF00017]  
ENSMMUG00000048395 chromobox 6 [Source:NCBI gene;Acc:702133]  
ENSMMUG00000049123 gastrokine 1 [Source:NCBI gene;Acc:706565]  
ENSMMUG00000049232 AMMECR1 like [Source:VGNC Symbol;Acc:VGNC:84208]  
ENSMMUG00000049305 Metazoan signal recognition particle RNA [Source:RFAM;Acc:RF00017]  
ENSMMUG00000049374  
ENSMMUG00000049479  
ENSMMUG00000049514 solute carrier family 48 member 1 [Source:NCBI gene;Acc:704304]  
ENSMMUG00000049802 olfactory receptor 51G1 [Source:NCBI gene;Acc:716561]  
ENSMMUG00000049850 proline rich and Gla domain 4 [Source:NCBI gene;Acc:694707]  
ENSMMUG00000050028  
ENSMMUG00000050119  
ENSMMUG00000050529 phosphodiesterase 6H [Source:NCBI gene;Acc:700447]  
ENSMMUG00000050543  
ENSMMUG00000050585  
ENSMMUG00000050696 taste receptor type 2 member 31-like [Source:NCBI gene;Acc:693892]  
ENSMMUG00000050822 carbonic anhydrase 9 [Source:NCBI gene;Acc:696729]  
ENSMMUG00000050844 BTB domain containing 18 [Source:NCBI gene;Acc:703264]  
ENSMMUG00000051072  
ENSMMUG00000051363  
ENSMMUG00000051691  
ENSMMUG00000051807  
ENSMMUG00000051852 Metazoan signal recognition particle RNA [Source:RFAM;Acc:RF00017]  
ENSMMUG00000051925  
ENSMMUG00000051937 uncharacterized LOC707807 [Source:NCBI gene;Acc:707807]  
ENSMMUG00000052134  
ENSMMUG00000052168  
ENSMMUG00000052424  
ENSMMUG00000052476 zinc finger and BTB domain containing 43 [Source:NCBI gene;Acc:701797]  
ENSMMUG00000052569  
ENSMMUG00000052785 extracellular leucine rich repeat and fibronectin type III domain containing 2 [Source:NCBI gene;Acc:697071]  
ENSMMUG00000052854 mucin like 1 [Source:NCBI gene;Acc:100423942]  
ENSMMUG00000052954 Wnt family member 6 [Source:NCBI gene;Acc:700573]  
ENSMMUG00000053200 ubiquitin conjugating enzyme E2 R2 [Source:NCBI gene;Acc:701507]  
ENSMMUG00000053376



ENSMMUG00000053378  
ENSMMUG00000053406  
ENSMMUG00000053460  
ENSMMUG00000053496  
ENSMMUG00000053625 sterol-C5-desaturase [Source:NCBI gene;Acc:706827]  
ENSMMUG00000053710  
ENSMMUG00000053722  
ENSMMUG00000053781 Rho GDP dissociation inhibitor beta [Source:NCBI gene;Acc:702320]  
ENSMMUG00000054199  
ENSMMUG00000054211  
ENSMMUG00000054225 taste receptor type 2 member 43 [Source:NCBI gene;Acc:694161]  
ENSMMUG00000054398  
ENSMMUG00000054449 Metazoan signal recognition particle RNA [Source:RFAM;Acc:RF00017]  
ENSMMUG00000054621  
ENSMMUG00000054736  
ENSMMUG00000054816 interleukin 1 receptor associated kinase 3 [Source:NCBI gene;Acc:717845]  
ENSMMUG00000055209  
ENSMMUG00000055352  
ENSMMUG00000055820  
ENSMMUG00000055963  
ENSMMUG00000056009  
ENSMMUG00000056184  
ENSMMUG00000056186  
ENSMMUG00000056330  
ENSMMUG00000056342 Metazoan signal recognition particle RNA [Source:RFAM;Acc:RF00017]  
ENSMMUG00000056343  
ENSMMUG00000056381 forkhead box R1 [Source:NCBI gene;Acc:707285]  
ENSMMUG00000056729 U6 spliceosomal RNA [Source:RFAM;Acc:RF00026]  
ENSMMUG00000056741 ovostatin-like [Source:NCBI gene;Acc:722294]  
ENSMMUG00000056755  
ENSMMUG00000056840  
ENSMMUG00000056905  
ENSMMUG00000056939  
ENSMMUG00000057134 keratin, type II cytoskeletal 6C [Source:NCBI gene;Acc:100424162]  
ENSMMUG00000057179 cation channel sperm associated 1 [Source:NCBI gene;Acc:721869]  
ENSMMUG00000057331 RNA terminal phosphate cyclase like 1 [Source:NCBI gene;Acc:694568]  
ENSMMUG00000057499  
ENSMMUG00000057570  
ENSMMUG00000057640 plakophilin-3-like [Source:NCBI gene;Acc:114669833]  
ENSMMUG00000057785  
ENSMMUG00000057934  
ENSMMUG00000058237  
ENSMMUG00000058352  
ENSMMUG00000058536  
ENSMMUG00000058885 formin binding protein 4 [Source:NCBI gene;Acc:712633]  
ENSMMUG00000059182  
ENSMMUG00000059188  
ENSMMUG00000059299 membrane spanning 4-domains A2 [Source:NCBI gene;Acc:697830]  
ENSMMUG00000059341 Metazoan signal recognition particle RNA [Source:RFAM;Acc:RF00017]  
ENSMMUG00000059436 interleukin 10 receptor subunit alpha [Source:NCBI gene;Acc:704383]  
ENSMMUG00000059504

ENSMMUG00000059548  
ENSMMUG00000059700  
ENSMMUG00000059782  
ENSMMUG00000060435 Metazoan signal recognition particle RNA [Source:RFAM;Acc:RF00017]  
ENSMMUG00000060517  
ENSMMUG00000060533  
ENSMMUG00000060562  
ENSMMUG00000060596 BCL2 associated agonist of cell death [Source:NCBI gene;Acc:717740]  
ENSMMUG00000060675  
ENSMMUG00000060712  
ENSMMUG00000060750 Metazoan signal recognition particle RNA [Source:RFAM;Acc:RF00017]  
ENSMMUG00000060754 Metazoan signal recognition particle RNA [Source:RFAM;Acc:RF00017]  
ENSMMUG00000060761  
ENSMMUG00000060917  
ENSMMUG00000061021  
ENSMMUG00000061123 Metazoan signal recognition particle RNA [Source:RFAM;Acc:RF00017]  
ENSMMUG00000061244  
ENSMMUG00000061342  
ENSMMUG00000061424 ventral anterior homeobox 2 [Source:NCBI gene;Acc:703531]  
ENSMMUG00000061533  
ENSMMUG00000061603  
ENSMMUG00000061606 Metazoan signal recognition particle RNA [Source:RFAM;Acc:RF00017]  
ENSMMUG00000061797 U6 spliceosomal RNA [Source:RFAM;Acc:RF00026]  
ENSMMUG00000061896  
ENSMMUG00000061923  
ENSMMUG00000062091  
ENSMMUG00000062208 Metazoan signal recognition particle RNA [Source:RFAM;Acc:RF00017]  
ENSMMUG00000062474 Metazoan signal recognition particle RNA [Source:RFAM;Acc:RF00017]  
ENSMMUG00000062781 chromosome 14 C11orf97 homolog [Source:NCBI gene;Acc:106993442]  
ENSMMUG00000062863  
ENSMMUG00000063112  
ENSMMUG00000063238  
ENSMMUG00000063639  
ENSMMUG00000063759 transmembrane protein 185B [Source:NCBI gene;Acc:695744]  
ENSMMUG00000063820 olfactory receptor, family 52, subfamily M, member 1 [Source:NCBI gene;Acc:717723]  
ENSMMUG00000063898 apolipoprotein F [Source:NCBI gene;Acc:712761]  
ENSMMUG00000063947 oxoeicosanoid receptor 1 [Source:NCBI gene;Acc:713039]  
ENSMMUG00000064005  
ENSMMUG00000064122  
ENSMMUG00000064229  
ENSMMUG00000064295  
ENSMMUG00000064730  
ENSMMUG00000064892  
ENSMMUG00000064931  
ENSMMUG00000065277 hepatic and glial cell adhesion molecule [Source:NCBI gene;Acc:716321]  
ENSMMUG00000000194 solute carrier family 27 member 1 [Source:VGNC Symbol;Acc:VGNC:77438]  
ENSMMUG00000000196 niban apoptosis regulator 3 [Source:VGNC Symbol;Acc:VGNC:75241]  
ENSMMUG00000000198 collagen beta(1-O)galactosyltransferase 1 [Source:NCBI gene;Acc:719980]  
ENSMMUG00000000396 intraflagellar transport 52 [Source:NCBI gene;Acc:694933]  
ENSMMUG00000000452 LSM7 homolog, U6 small nuclear RNA and mRNA degradation associated [Source:NCBI gene;Acc:721486]  
ENSMMUG00000000588 rhomboid 5 homolog 1 [Source:NCBI gene;Acc:693423]

ENSMMUG0000000590 NPR3 like, GATOR1 complex subunit [Source:VGNC Symbol;Acc:VGNC:75173]  
ENSMMUG0000000700 CLN3 lysosomal/endosomal transmembrane protein, battenin [Source:NCBI gene;Acc:705815]  
ENSMMUG0000000740 spermatogenesis associated 2 [Source:VGNC Symbol;Acc:VGNC:77923]  
ENSMMUG0000000757 ring finger protein 114 [Source:VGNC Symbol;Acc:VGNC:76725]  
ENSMMUG0000000994 epidermal growth factor receptor pathway substrate 15 like 1 [Source:VGNC Symbol;Acc:VGNC:72100]  
ENSMMUG0000001036 coagulation factor VII [Source:VGNC Symbol;Acc:VGNC:72466]  
ENSMMUG0000001058 tetratricopeptide repeat domain 28 [Source:VGNC Symbol;Acc:VGNC:79785]  
ENSMMUG0000001220 adhesion G protein-coupled receptor E1 [Source:VGNC Symbol;Acc:VGNC:69561]  
ENSMMUG0000001269 chromosome 16 C17orf80 homolog [Source:VGNC Symbol;Acc:VGNC:70440]  
ENSMMUG0000001271 cleavage and polyadenylation specific factor 4 like [Source:NCBI gene;Acc:698279]  
ENSMMUG0000001427 myosin heavy chain 14 [Source:VGNC Symbol;Acc:VGNC:75006]  
ENSMMUG0000001538 GRAM domain containing 1A [Source:VGNC Symbol;Acc:VGNC:73029]  
ENSMMUG0000001715 zinc finger protein 627 [Source:VGNC Symbol;Acc:VGNC:79856]  
ENSMMUG0000001944 chromosome 20 C16orf72 homolog [Source:VGNC Symbol;Acc:VGNC:70443]  
ENSMMUG0000002033 serine protease 36 [Source:VGNC Symbol;Acc:VGNC:76325]  
ENSMMUG0000002124 beta-1,4-galactosyltransferase 5 [Source:VGNC Symbol;Acc:VGNC:70212]  
ENSMMUG0000002181 SFI1 centrin binding protein [Source:VGNC Symbol;Acc:VGNC:77328]  
ENSMMUG0000002278 AT-rich interaction domain 3A [Source:VGNC Symbol;Acc:VGNC:69930]  
ENSMMUG0000002324  
ENSMMUG0000002376 scavenger receptor class F member 1 [Source:VGNC Symbol;Acc:VGNC:77027]  
ENSMMUG0000002377 Rab interacting lysosomal protein [Source:VGNC Symbol;Acc:VGNC:76866]  
ENSMMUG0000002382 serpin family F member 2 [Source:VGNC Symbol;Acc:VGNC:77372]  
ENSMMUG0000002384 IGF like family receptor 1 [Source:VGNC Symbol;Acc:VGNC:73434]  
ENSMMUG0000002397 GINS complex subunit 1 [Source:VGNC Symbol;Acc:VGNC:73025]  
ENSMMUG0000002715 solute carrier family 9 member A8 [Source:VGNC Symbol;Acc:VGNC:77749]  
ENSMMUG0000002810 TOX high mobility group box family member 2 [Source:VGNC Symbol;Acc:VGNC:79007]  
ENSMMUG0000002822 unc-13 homolog D [Source:VGNC Symbol;Acc:VGNC:79375]  
ENSMMUG0000002923 colony stimulating factor 3 [Source:VGNC Symbol;Acc:VGNC:71520]  
ENSMMUG0000002926 mediator complex subunit 24 [Source:NCBI gene;Acc:699536]  
ENSMMUG0000002959 helicase with zinc finger [Source:VGNC Symbol;Acc:VGNC:73178]  
ENSMMUG0000002974 acid phosphatase 5, tartrate resistant [Source:VGNC Symbol;Acc:VGNC:69384]  
ENSMMUG0000003298 ataxin 2 like [Source:VGNC Symbol;Acc:VGNC:70159]  
ENSMMUG0000003303 Tu translation elongation factor, mitochondrial [Source:VGNC Symbol;Acc:VGNC:78674]  
ENSMMUG0000003436 tubulin tyrosine ligase like 6 [Source:VGNC Symbol;Acc:VGNC:79632]  
ENSMMUG0000003437 signal transducer and activator of transcription 5B [Source:NCBI gene;Acc:709760]  
ENSMMUG0000003439 nuclear factor I C [Source:VGNC Symbol;Acc:VGNC:75336]  
ENSMMUG0000003539 glutamine rich 2 [Source:VGNC Symbol;Acc:VGNC:76534]  
ENSMMUG0000003612 SPC24 component of NDC80 kinetochore complex [Source:VGNC Symbol;Acc:VGNC:78002]  
ENSMMUG0000003819 nitric oxide synthase interacting protein [Source:VGNC Symbol;Acc:VGNC:75207]  
ENSMMUG0000004283 calcium and integrin binding family member 3 [Source:VGNC Symbol;Acc:VGNC:71339]  
ENSMMUG0000004337 zinc finger protein 790 [Source:VGNC Symbol;Acc:VGNC:79930]  
ENSMMUG0000004498 protein inhibitor of activated STAT 2 [Source:VGNC Symbol;Acc:VGNC:75815]  
ENSMMUG0000004765 Sp2 transcription factor [Source:VGNC Symbol;Acc:VGNC:77845]  
ENSMMUG0000004794 DNA ligase 3 [Source:VGNC Symbol;Acc:VGNC:74266]  
ENSMMUG0000004820 pre-mRNA processing factor 8 [Source:VGNC Symbol;Acc:VGNC:76275]  
ENSMMUG0000004843 sodium voltage-gated channel beta subunit 1 [Source:VGNC Symbol;Acc:VGNC:76983]  
ENSMMUG0000005236 zinc finger protein 709 [Source:NCBI gene;Acc:717515]  
ENSMMUG0000005432 clathrin heavy chain like 1 [Source:VGNC Symbol;Acc:VGNC:71268]  
ENSMMUG0000005455 ring finger protein 213 [Source:VGNC Symbol;Acc:VGNC:76734]  
ENSMMUG0000005548 N-ethylmaleimide sensitive factor, vesicle fusing ATPase [Source:VGNC Symbol;Acc:VGNC:75536]  
ENSMMUG0000005552 PAF1 homolog, Paf1/RNA polymerase II complex component [Source:VGNC Symbol;Acc:VGNC:81492]

ENSMMUG0000005554 mediator complex subunit 29 [Source:VGNC Symbol;Acc:VGNC:74557]  
ENSMMUG0000005666 phospholipase D2 [Source:VGNC Symbol;Acc:VGNC:76172]  
ENSMMUG0000005698 alkaline ceramidase 1 [Source:VGNC Symbol;Acc:VGNC:69460]  
ENSMMUG0000005729 GIPC PDZ domain containing family member 1 [Source:VGNC Symbol;Acc:VGNC:72932]  
ENSMMUG0000005737 SLC9A3 regulator 1 [Source:VGNC Symbol;Acc:VGNC:77639]  
ENSMMUG0000006066 phosphatidylcholine transfer protein [Source:VGNC Symbol;Acc:VGNC:75789]  
ENSMMUG0000006086 pleckstrin homology, MyTH4 and FERM domain containing H3 [Source:VGNC Symbol;Acc:VGNC:76113]  
ENSMMUG0000006090 C-C motif chemokine receptor 10 [Source:VGNC Symbol;Acc:VGNC:82119]  
ENSMMUG0000006091 contactin associated protein 1 [Source:VGNC Symbol;Acc:VGNC:71390]  
ENSMMUG0000006093 enhancer of zeste 1 polycomb repressive complex 2 subunit [Source:VGNC Symbol;Acc:VGNC:72457]  
ENSMMUG0000006101 myosin heavy chain 9 [Source:VGNC Symbol;Acc:VGNC:75102]  
ENSMMUG0000006738 L3MBTL histone methyl-lysine binding protein 1 [Source:NCBI gene;Acc:695694]  
ENSMMUG0000006853 crystallin beta B2 [Source:NCBI gene;Acc:100144420]  
ENSMMUG0000007200 NEDD4 binding protein 2 like 2 [Source:VGNC Symbol;Acc:VGNC:75031]  
ENSMMUG0000007201 PDS5 cohesin associated factor B [Source:VGNC Symbol;Acc:VGNC:75835]  
ENSMMUG0000007379 phosphatidylinositol 3,4,5-trisphosphate 3-phosphatase TPTE2-like [Source:NCBI gene;Acc:694255]  
ENSMMUG0000007401 arrestin domain containing 2 [Source:VGNC Symbol;Acc:VGNC:69901]  
ENSMMUG0000007423 transcription factor Dp-1 [Source:NCBI gene;Acc:715345]  
ENSMMUG0000007538 transient receptor potential cation channel subfamily M member 4 [Source:VGNC Symbol;Acc:VGNC:79105]  
ENSMMUG0000007726 synapse defective Rho GTPase homolog 1 [Source:NCBI gene;Acc:719089]  
ENSMMUG0000007729 ilvB acetolactate synthase like [Source:VGNC Symbol;Acc:VGNC:73739]  
ENSMMUG0000007799 LIM and SH3 protein 1 [Source:VGNC Symbol;Acc:VGNC:74237]  
ENSMMUG0000007925 serum/glucocorticoid regulated kinase 2 [Source:VGNC Symbol;Acc:VGNC:77228]  
ENSMMUG0000008091 RUN domain containing 1 [Source:VGNC Symbol;Acc:VGNC:77101]  
ENSMMUG0000008195 TGFB induced factor homeobox 2 [Source:NCBI gene;Acc:100429616]  
ENSMMUG0000008200 Src like adaptor 2 [Source:VGNC Symbol;Acc:VGNC:77499]  
ENSMMUG0000008538 microfibril associated protein 4 [Source:VGNC Symbol;Acc:VGNC:74710]  
ENSMMUG0000008784 lipopolysaccharide induced TNF factor [Source:NCBI gene;Acc:711743]  
ENSMMUG0000009176 calmodulin binding transcription activator 2 [Source:VGNC Symbol;Acc:VGNC:70578]  
ENSMMUG0000009199 glycogen phosphorylase B [Source:VGNC Symbol;Acc:VGNC:76631]  
ENSMMUG0000009377 tripartite motif containing 47 [Source:VGNC Symbol;Acc:VGNC:79171]  
ENSMMUG0000009381 WW domain binding protein 2 [Source:VGNC Symbol;Acc:VGNC:78786]  
ENSMMUG0000009567 glyoxylate reductase 1 homolog [Source:NCBI gene;Acc:706933]  
ENSMMUG0000009682 R3H domain containing 4 [Source:VGNC Symbol;Acc:VGNC:76554]  
ENSMMUG0000009684 kinesin family member 22 [Source:VGNC Symbol;Acc:VGNC:74033]  
ENSMMUG0000009825 zinc finger DHHC-type containing 1 [Source:VGNC Symbol;Acc:VGNC:79102]  
ENSMMUG0000009884 hydroxysteroid 17-beta dehydrogenase 1 [Source:VGNC Symbol;Acc:VGNC:73528]  
ENSMMUG0000009886 Coenzyme A synthase [Source:VGNC Symbol;Acc:VGNC:81373]  
ENSMMUG0000009887 MAX dimerization protein MLX [Source:VGNC Symbol;Acc:VGNC:74726]  
ENSMMUG0000009889 PSMC3 interacting protein [Source:VGNC Symbol;Acc:VGNC:76282]  
ENSMMUG0000009890 FERM, ARH/RhoGEF and pleckstrin domain protein 1 [Source:VGNC Symbol;Acc:VGNC:72614]  
ENSMMUG0000009953 ninein like [Source:VGNC Symbol;Acc:VGNC:75273]  
ENSMMUG0000009960 cathepsin A [Source:VGNC Symbol;Acc:VGNC:71617]  
ENSMMUG0000009988 transmembrane protein 59 like [Source:VGNC Symbol;Acc:VGNC:78919]  
ENSMMUG0000009995 arachidonate 15-lipoxygenase type B [Source:VGNC Symbol;Acc:VGNC:69797]  
ENSMMUG00000010028 leucine zipper tumor suppressor family member 3 [Source:VGNC Symbol;Acc:VGNC:74403]  
ENSMMUG00000010142 glutamate ionotropic receptor NMDA type subunit 2A [Source:VGNC Symbol;Acc:VGNC:73282]  
ENSMMUG00000010363 ribophorin II [Source:VGNC Symbol;Acc:VGNC:76925]  
ENSMMUG00000010536 discs large MAGUK scaffold protein 4 [Source:VGNC Symbol;Acc:VGNC:71920]  
ENSMMUG00000010556 Snf2 related CREBBP activator protein [Source:NCBI gene;Acc:712944]  
ENSMMUG00000010614 C-C motif chemokine ligand 25 [Source:VGNC Symbol;Acc:VGNC:70700]

ENSMMUG00000010678 oxytocin/neurophysin I prepropeptide [Source:VGNC Symbol;Acc:VGNC:75730]  
ENSMMUG00000010824 SWIM-type zinc finger 7 associated protein 1 [Source:VGNC Symbol;Acc:VGNC:78220]  
ENSMMUG00000010826 ral guanine nucleotide dissociation stimulator like 3 [Source:VGNC Symbol;Acc:VGNC:76869]  
ENSMMUG00000010837 VRK serine/threonine kinase 3 [Source:VGNC Symbol;Acc:VGNC:81605]  
ENSMMUG00000010886 strawberry notch homolog 2 [Source:VGNC Symbol;Acc:VGNC:77123]  
ENSMMUG00000010922 hyaluronan synthase 3 [Source:VGNC Symbol;Acc:VGNC:73348]  
ENSMMUG00000011064 synaptosome associated protein 25 [Source:VGNC Symbol;Acc:VGNC:77663]  
ENSMMUG00000011330 neuronal PAS domain protein 1 [Source:VGNC Symbol;Acc:VGNC:75377]  
ENSMMUG00000011332 Rho GTPase activating protein 35 [Source:VGNC Symbol;Acc:VGNC:69942]  
ENSMMUG00000011344 solute carrier family 52 member 1 [Source:VGNC Symbol;Acc:VGNC:77795]  
ENSMMUG00000011411 sperm acrosome associated 3 [Source:VGNC Symbol;Acc:VGNC:77930]  
ENSMMUG00000011413 acid sensing ion channel subunit 2 [Source:VGNC Symbol;Acc:VGNC:70241]  
ENSMMUG00000011427 syntaxin 10 [Source:VGNC Symbol;Acc:VGNC:78040]  
ENSMMUG00000011588 myosin IXB [Source:HGNC Symbol;Acc:HGNC:7609]  
ENSMMUG00000011627 interleukin 4 induced 1 [Source:VGNC Symbol;Acc:VGNC:73625]  
ENSMMUG00000011798 eukaryotic translation initiation factor 3 subunit C [Source:NCBI gene;Acc:705696]  
ENSMMUG00000011951 KRI1 homolog [Source:VGNC Symbol;Acc:VGNC:74127]  
ENSMMUG00000012001 transcription factor 4 [Source:VGNC Symbol;Acc:VGNC:78288]  
ENSMMUG00000012007 PH domain and leucine rich repeat protein phosphatase 2 [Source:VGNC Symbol;Acc:VGNC:81494]  
ENSMMUG00000012228 ubiquitin conjugating enzyme E2 V1 [Source:NCBI gene;Acc:100425552]  
ENSMMUG00000012466 BCL2 binding component 3 [Source:NCBI gene;Acc:717955]  
ENSMMUG00000012523 flotillin 2 [Source:NCBI gene;Acc:114669752]  
ENSMMUG00000012787 acid phosphatase 7, tartrate resistant (putative) [Source:NCBI gene;Acc:695532]  
ENSMMUG00000012797 zinc finger protein 233 [Source:VGNC Symbol;Acc:VGNC:79903]  
ENSMMUG00000012801 zinc finger protein 235 [Source:VGNC Symbol;Acc:VGNC:78825]  
ENSMMUG00000012841 kallikrein 3 [Source:NCBI gene;Acc:719444]  
ENSMMUG00000012856 nuclear FMR1 interacting protein 2 [Source:VGNC Symbol;Acc:VGNC:75422]  
ENSMMUG00000012937 proline rich 12 [Source:NCBI gene;Acc:719344]  
ENSMMUG00000012938 SR-related CTD associated factor 1 [Source:VGNC Symbol;Acc:VGNC:77137]  
ENSMMUG00000013048 junction plakoglobin [Source:VGNC Symbol;Acc:VGNC:73960]  
ENSMMUG00000013477 creatine kinase, M-type [Source:VGNC Symbol;Acc:VGNC:71230]  
ENSMMUG00000013560 calcium voltage-gated channel auxiliary subunit gamma 3 [Source:VGNC Symbol;Acc:VGNC:70513]  
ENSMMUG00000013646 unk zinc finger [Source:VGNC Symbol;Acc:VGNC:79803]  
ENSMMUG00000013671 elongation factor for RNA polymerase II [Source:VGNC Symbol;Acc:VGNC:72088]  
ENSMMUG00000013713 beta 3-glucosyltransferase [Source:NCBI gene;Acc:713498]  
ENSMMUG00000013967 TOX high mobility group box family member 3 [Source:VGNC Symbol;Acc:VGNC:78612]  
ENSMMUG00000014010 RNA binding fox-1 homolog 2 [Source:VGNC Symbol;Acc:VGNC:76685]  
ENSMMUG00000014032 proline rich 36 [Source:NCBI gene;Acc:710443]  
ENSMMUG00000014240 thioredoxin domain containing 11 [Source:VGNC Symbol;Acc:VGNC:79678]  
ENSMMUG00000014273 cation channel sperm associated auxiliary subunit gamma [Source:VGNC Symbol;Acc:VGNC:70626]  
ENSMMUG00000014349 integrin subunit alpha X [Source:NCBI gene;Acc:100427850]  
ENSMMUG00000014409 ankyrin repeat domain 13B [Source:VGNC Symbol;Acc:VGNC:69708]  
ENSMMUG00000014411 coronin 6 [Source:NCBI gene;Acc:711818]  
ENSMMUG00000015303 ATP binding cassette subfamily A member 7 [Source:VGNC Symbol;Acc:VGNC:69567]  
ENSMMUG00000015306 calponin 2 [Source:NCBI gene;Acc:721164]  
ENSMMUG00000015476 unc-13 homolog A [Source:NCBI gene;Acc:720000]  
ENSMMUG00000015513 CUGBP Elav-like family member 5 [Source:NCBI gene;Acc:721694]  
ENSMMUG00000015572 GSG1 like [Source:VGNC Symbol;Acc:VGNC:82152]  
ENSMMUG00000015744 zinc finger protein 302 [Source:NCBI gene;Acc:706279]  
ENSMMUG00000015908 RB binding protein 6, ubiquitin ligase [Source:VGNC Symbol;Acc:VGNC:76677]  
ENSMMUG00000015952 katanin catalytic subunit A1 like 2 [Source:VGNC Symbol;Acc:VGNC:73904]



ENSMMUG00000015999 interferon induced protein 35 [Source:VGNC Symbol;Acc:VGNC:73564]  
ENSMMUG00000016085 KxDL motif containing 1 [Source:NCBI gene;Acc:720235]  
ENSMMUG00000016143 sialophorin [Source:VGNC Symbol;Acc:VGNC:77861]  
ENSMMUG00000016401 SGT1 homolog, MIS12 kinetochore complex assembly cochaperone [Source:NCBI gene;Acc:694046]  
ENSMMUG00000016404 chondromodulin [Source:VGNC Symbol;Acc:VGNC:71191]  
ENSMMUG00000016414 ectonucleotide pyrophosphatase/phosphodiesterase 7 [Source:VGNC Symbol;Acc:VGNC:72090]  
ENSMMUG00000016417 chromobox 8 [Source:NCBI gene;Acc:717514]  
ENSMMUG00000016448 DLG associated protein 4 [Source:NCBI gene;Acc:702928]  
ENSMMUG00000016457 DM1 protein kinase [Source:NCBI gene;Acc:715328]  
ENSMMUG00000016549 matrix metalloproteinase 9 [Source:VGNC Symbol;Acc:VGNC:74903]  
ENSMMUG00000016796 reticulophagy regulator family member 3 [Source:VGNC Symbol;Acc:VGNC:76845]  
ENSMMUG00000016797 tubulin gamma 1 [Source:NCBI gene;Acc:710756]  
ENSMMUG00000017036 nicalin [Source:VGNC Symbol;Acc:VGNC:75032]  
ENSMMUG00000017224 catenin beta like 1 [Source:VGNC Symbol;Acc:VGNC:71414]  
ENSMMUG00000017242 MYCBP associated protein [Source:VGNC Symbol;Acc:VGNC:74994]  
ENSMMUG00000017256 calcium voltage-gated channel subunit alpha1 G [Source:VGNC Symbol;Acc:VGNC:70504]  
ENSMMUG00000017561 solute carrier family 43 member 2 [Source:VGNC Symbol;Acc:VGNC:77554]  
ENSMMUG00000017654 arrestin beta 2 [Source:VGNC Symbol;Acc:VGNC:70022]  
ENSMMUG00000017758 mitogen-activated protein kinase 3 [Source:VGNC Symbol;Acc:VGNC:74646]  
ENSMMUG00000017822 periplakin [Source:VGNC Symbol;Acc:VGNC:76240]  
ENSMMUG00000017906 DnaJ heat shock protein family (Hsp40) member B1 [Source:NCBI gene;Acc:718890]  
ENSMMUG00000017927 protein kinase D2 [Source:VGNC Symbol;Acc:VGNC:76273]  
ENSMMUG00000017930 striatin 4 [Source:VGNC Symbol;Acc:VGNC:78128]  
ENSMMUG00000017971 nucleus accumbens associated 1 [Source:VGNC Symbol;Acc:VGNC:74996]  
ENSMMUG00000018137 MYB proto-oncogene like 2 [Source:VGNC Symbol;Acc:VGNC:75092]  
ENSMMUG00000018255 nuclear factor of activated T cells 5 [Source:VGNC Symbol;Acc:VGNC:75325]  
ENSMMUG00000018648 zinc finger protein 594 [Source:NCBI gene;Acc:711492]  
ENSMMUG00000018719 nemo like kinase [Source:VGNC Symbol;Acc:VGNC:75277]  
ENSMMUG00000018720 cytoskeleton associated protein 2 [Source:VGNC Symbol;Acc:VGNC:71229]  
ENSMMUG00000018932 adhesion G protein-coupled receptor E2 [Source:NCBI gene;Acc:654420]  
ENSMMUG00000018967 ubiquitin conjugating enzyme E2 O [Source:VGNC Symbol;Acc:VGNC:79813]  
ENSMMUG00000018986 seizure related 6 homolog like 2 [Source:VGNC Symbol;Acc:VGNC:81567]  
ENSMMUG00000019032 EMAP like 2 [Source:NCBI gene;Acc:715009]  
ENSMMUG00000019095 TBC1 domain family member 24 [Source:NCBI gene;Acc:697106]  
ENSMMUG00000019314 vav guanine nucleotide exchange factor 1 [Source:VGNC Symbol;Acc:VGNC:78757]  
ENSMMUG00000019369 pleckstrin homology and RhoGEF domain containing G2 [Source:VGNC Symbol;Acc:VGNC:76133]  
ENSMMUG00000019418 erythrocyte membrane protein band 4.1 like 3 [Source:VGNC Symbol;Acc:VGNC:72233]  
ENSMMUG00000019500 methenyltetrahydrofolate synthetase domain containing [Source:VGNC Symbol;Acc:VGNC:75023]  
ENSMMUG00000019667 TAO kinase 1 [Source:VGNC Symbol;Acc:VGNC:81591]  
ENSMMUG00000019668 armadillo repeat containing 6 [Source:VGNC Symbol;Acc:VGNC:69899]  
ENSMMUG00000019925 DiGeorge syndrome critical region gene 2 [Source:NCBI gene;Acc:100423715]  
ENSMMUG00000019965 methyl-CpG binding domain protein 3 like 1 [Source:VGNC Symbol;Acc:VGNC:74513]  
ENSMMUG00000019966 zinc finger protein 557 [Source:NCBI gene;Acc:100424983]  
ENSMMUG00000020172 KIAA1755 [Source:VGNC Symbol;Acc:VGNC:73942]  
ENSMMUG00000020226 WD repeat and SOCS box containing 1 [Source:VGNC Symbol;Acc:VGNC:79186]  
ENSMMUG00000020254 exocyst complex component 3 like 1 [Source:VGNC Symbol;Acc:VGNC:72376]  
ENSMMUG00000020258 E2F transcription factor 4 [Source:VGNC Symbol;Acc:VGNC:72025]  
ENSMMUG00000020462 CD300e molecule [Source:NCBI gene;Acc:114673189]  
ENSMMUG00000020489 HscB mitochondrial iron-sulfur cluster cochaperone [Source:VGNC Symbol;Acc:VGNC:73454]  
ENSMMUG00000020583 FTO alpha-ketoglutarate dependent dioxygenase [Source:VGNC Symbol;Acc:VGNC:72772]  
ENSMMUG00000020668 cyclin E1 [Source:VGNC Symbol;Acc:VGNC:70727]

ENSMMUG00000020799 BH3 interacting domain death agonist [Source:VGNC Symbol;Acc:VGNC:70250]  
ENSMMUG00000020868 homeobox B8 [Source:VGNC Symbol;Acc:VGNC:73505]  
ENSMMUG00000021408 family with sequence similarity 222 member B [Source:VGNC Symbol;Acc:VGNC:72352]  
ENSMMUG00000021476 BCL2 like 13 [Source:VGNC Symbol;Acc:VGNC:84544]  
ENSMMUG00000021477 ATPase H+ transporting V1 subunit E1 [Source:NCBI gene;Acc:709739]  
ENSMMUG00000021486 secernin 2 [Source:NCBI gene;Acc:694571]  
ENSMMUG00000021553 dehydrogenase/reductase 13 [Source:VGNC Symbol;Acc:VGNC:81387]  
ENSMMUG00000021554 PHD finger protein 12 [Source:VGNC Symbol;Acc:VGNC:75838]  
ENSMMUG00000022100 midnolin [Source:VGNC Symbol;Acc:VGNC:82186]  
ENSMMUG00000022116 PIH1 domain containing 1 [Source:VGNC Symbol;Acc:VGNC:75868]  
ENSMMUG00000022207 phospholipid phosphatase related 2 [Source:NCBI gene;Acc:714388]  
ENSMMUG00000022282 collagen type IV alpha 2 chain [Source:NCBI gene;Acc:100429807]  
ENSMMUG00000022345  
ENSMMUG00000022741 WAP, follistatin/kazal, immunoglobulin, kunitz and netrin domain containing 2 [Source:VGNC Symbol;Acc:VGNC:79900]  
ENSMMUG00000022931 NTPase KAP family P-loop domain containing 1 [Source:VGNC Symbol;Acc:VGNC:75250]  
ENSMMUG00000023263 mediator complex subunit 15 [Source:VGNC Symbol;Acc:VGNC:74511]  
ENSMMUG00000023286 UPF1 RNA helicase and ATPase [Source:VGNC Symbol;Acc:VGNC:79971]  
ENSMMUG00000023303 ecotropic viral integration site 5 like [Source:NCBI gene;Acc:706628]  
ENSMMUG00000023403 GTP binding protein 3, mitochondrial [Source:VGNC Symbol;Acc:VGNC:73170]  
ENSMMUG00000023622 BCR activator of RhoGEF and GTPase [Source:NCBI gene;Acc:709258]  
ENSMMUG00000023717 MIER family member 2 [Source:VGNC Symbol;Acc:VGNC:74855]  
ENSMMUG00000025050 Y RNA [Source:RFAM;Acc:RF00019]  
ENSMMUG00000028471 U7 small nuclear RNA [Source:RFAM;Acc:RF00066]  
ENSMMUG00000028733 RAS related [Source:VGNC Symbol;Acc:VGNC:76937]  
ENSMMUG00000028771 Yip1 interacting factor homolog B, membrane trafficking protein [Source:VGNC Symbol;Acc:VGNC:79852]  
ENSMMUG00000028785 zinc finger protein 146 [Source:VGNC Symbol;Acc:VGNC:78846]  
ENSMMUG00000028906 Rho/Rac guanine nucleotide exchange factor 18 [Source:NCBI gene;Acc:707510]  
ENSMMUG00000028907 insulin receptor [Source:NCBI gene;Acc:706009]  
ENSMMUG00000028947 complement factor D [Source:VGNC Symbol;Acc:VGNC:71115]  
ENSMMUG00000028948 azurocidin 1 [Source:VGNC Symbol;Acc:VGNC:70202]  
ENSMMUG00000030279 A-kinase anchoring protein 10 [Source:VGNC Symbol;Acc:VGNC:69764]  
ENSMMUG00000031391 RNA binding motif protein 38 [Source:VGNC Symbol;Acc:VGNC:76484]  
ENSMMUG00000038702 ZFP36 ring finger protein [Source:NCBI gene;Acc:722000]  
ENSMMUG00000038989 erythropoietin receptor [Source:NCBI gene;Acc:714546]  
ENSMMUG00000039205  
ENSMMUG00000039266 Metazoan signal recognition particle RNA [Source:RFAM;Acc:RF00017]  
ENSMMUG00000039943 adenylate cyclase 9 [Source:NCBI gene;Acc:706789]  
ENSMMUG00000040268 phosphatidylinositol transfer protein alpha [Source:NCBI gene;Acc:721228]  
ENSMMUG00000042407  
ENSMMUG00000042855 zinc finger SWIM-type containing 1 [Source:NCBI gene;Acc:717180]  
ENSMMUG00000043134 coiled-coil domain containing 159 [Source:NCBI gene;Acc:100424702]  
ENSMMUG00000043738  
ENSMMUG00000044817 nucleoporin 62 [Source:NCBI gene;Acc:100426308]  
ENSMMUG00000045203  
ENSMMUG00000045256 cellular communication network factor 5 [Source:NCBI gene;Acc:717872]  
ENSMMUG00000046099 chromosome 19 C19orf81 homolog [Source:NCBI gene;Acc:719661]  
ENSMMUG00000046417 chromobox 2 [Source:NCBI gene;Acc:717462]  
ENSMMUG00000046918  
ENSMMUG00000047452  
ENSMMUG00000048190 U2 small nuclear RNA auxiliary factor 1 like 4 [Source:NCBI gene;Acc:718865]  
ENSMMUG00000048204 ephrin B3 [Source:NCBI gene;Acc:716257]

ENSMMUG00000048207 syntaxin 4 [Source:NCBI gene;Acc:704880]  
ENSMMUG00000048215  
ENSMMUG00000048463 apolipoprotein L5 [Source:HGNC Symbol;Acc:HGNC:14869]  
ENSMMUG00000048566 MCF.2 cell line derived transforming sequence like [Source:NCBI gene;Acc:713961]  
ENSMMUG00000049130  
ENSMMUG00000049542  
ENSMMUG00000049649 proteasome 20S subunit beta 6 [Source:NCBI gene;Acc:710028]  
ENSMMUG00000049703 Metazoan signal recognition particle RNA [Source:RFAM;Acc:RF00017]  
ENSMMUG00000050057  
ENSMMUG00000050263 TBC1 domain family member 26-like [Source:NCBI gene;Acc:100426631]  
ENSMMUG00000050436  
ENSMMUG00000050456 Metazoan signal recognition particle RNA [Source:RFAM;Acc:RF00017]  
ENSMMUG00000050739  
ENSMMUG00000050793 N-acetyl-alpha-glucosaminidase [Source:NCBI gene;Acc:707186]  
ENSMMUG00000050799  
ENSMMUG00000051201 zinc finger SWIM-type containing 3 [Source:NCBI gene;Acc:708804]  
ENSMMUG00000051226 FAD-linked sulfhydryl oxidase ERV1 [Source:NCBI gene;Acc:106994988]  
ENSMMUG00000051323 caspase-14-like [Source:NCBI gene;Acc:702430]  
ENSMMUG00000051343  
ENSMMUG00000051420 homeobox B5 [Source:NCBI gene;Acc:696732]  
ENSMMUG00000051537  
ENSMMUG00000051879 CAP-Gly domain containing linker protein 3 [Source:NCBI gene;Acc:712058]  
ENSMMUG00000051892 fms related receptor tyrosine kinase 3 ligand [Source:NCBI gene;Acc:719239]  
ENSMMUG00000052324 MARVEL domain containing 3 [Source:NCBI gene;Acc:710448]  
ENSMMUG00000052505 homeobox B9 [Source:NCBI gene;Acc:106994009]  
ENSMMUG00000052607  
ENSMMUG00000052851 solute carrier family 7 member 5 [Source:NCBI gene;Acc:695886]  
ENSMMUG00000053083 C2 calcium dependent domain containing 4C [Source:NCBI gene;Acc:100424440]  
ENSMMUG00000053220 olfactory receptor 111 [Source:NCBI gene;Acc:719077]  
ENSMMUG00000053257 Y RNA [Source:RFAM;Acc:RF00019]  
ENSMMUG00000053329  
ENSMMUG00000053364  
ENSMMUG00000053457 caspase 14 [Source:NCBI gene;Acc:718049]  
ENSMMUG00000053937  
ENSMMUG00000054052 sialic acid binding Ig like lectin 11 [Source:NCBI gene;Acc:719127]  
ENSMMUG00000054055 zinc finger protein 93 [Source:NCBI gene;Acc:720434]  
ENSMMUG00000054090  
ENSMMUG00000054111 Metazoan signal recognition particle RNA [Source:RFAM;Acc:RF00017]  
ENSMMUG00000054472  
ENSMMUG00000054473 activating transcription factor 5 [Source:NCBI gene;Acc:719150]  
ENSMMUG00000054512  
ENSMMUG00000054637 tubulin polymerization promoting protein family member 3 [Source:NCBI gene;Acc:100429881]  
ENSMMUG00000054784  
ENSMMUG00000054803  
ENSMMUG00000055048  
ENSMMUG00000055324 homeobox B7 [Source:NCBI gene;Acc:697089]  
ENSMMUG00000055379  
ENSMMUG00000055747 cytochrome c oxidase subunit 6B [Source:NCBI gene;Acc:692062]  
ENSMMUG00000055775 transmembrane p24 trafficking protein 1 [Source:NCBI gene;Acc:713618]  
ENSMMUG00000055811  
ENSMMUG00000055893

ENSMMUG00000055897  
ENSMMUG00000055973 phosphoglycerate mutase 1-like [Source:NCBI gene;Acc:714548]  
ENSMMUG00000055976 CD99 antigen [Source:NCBI gene;Acc:106995376]  
ENSMMUG00000056093 shieldin complex subunit 1 [Source:NCBI gene;Acc:718152]  
ENSMMUG00000056109 Metazoan signal recognition particle RNA [Source:RFAM;Acc:RF00017]  
ENSMMUG00000056248  
ENSMMUG00000056339  
ENSMMUG00000056437 Metazoan signal recognition particle RNA [Source:RFAM;Acc:RF00017]  
ENSMMUG00000056529 synaptotagmin 3 [Source:NCBI gene;Acc:719650]  
ENSMMUG00000056555  
ENSMMUG00000056777 Metazoan signal recognition particle RNA [Source:RFAM;Acc:RF00017]  
ENSMMUG00000056778  
ENSMMUG00000056945  
ENSMMUG00000056950  
ENSMMUG00000057038  
ENSMMUG00000057157  
ENSMMUG00000057160  
ENSMMUG00000057231 T-box transcription factor 21 [Source:NCBI gene;Acc:694044]  
ENSMMUG00000057329  
ENSMMUG00000057345 calcineurin like phosphoesterase domain containing 1 [Source:NCBI gene;Acc:716978]  
ENSMMUG00000057361 Metazoan signal recognition particle RNA [Source:RFAM;Acc:RF00017]  
ENSMMUG00000057447  
ENSMMUG00000057454 transmembrane protein 160 [Source:NCBI gene;Acc:716996]  
ENSMMUG00000057632  
ENSMMUG00000057682  
ENSMMUG00000057687  
ENSMMUG00000058042 heparan sulfate-glucosamine 3-sulfotransferase 2 [Source:NCBI gene;Acc:699722]  
ENSMMUG00000058095 visual system homeobox 1 [Source:NCBI gene;Acc:715973]  
ENSMMUG00000058110  
ENSMMUG00000058137 zinc finger protein 816 [Source:NCBI gene;Acc:720058]  
ENSMMUG00000058241 leucine rich repeat and Ig domain containing 3 [Source:NCBI gene;Acc:721484]  
ENSMMUG00000058254  
ENSMMUG00000058437  
ENSMMUG00000058566  
ENSMMUG00000058592  
ENSMMUG00000058621  
ENSMMUG00000058715  
ENSMMUG00000058758  
ENSMMUG00000058907  
ENSMMUG00000058916  
ENSMMUG00000058928 Metazoan signal recognition particle RNA [Source:RFAM;Acc:RF00017]  
ENSMMUG00000059087  
ENSMMUG00000059175  
ENSMMUG00000059229 CEA cell adhesion molecule 7 [Source:NCBI gene;Acc:705572]  
ENSMMUG00000059292  
ENSMMUG00000059302 Metazoan signal recognition particle RNA [Source:RFAM;Acc:RF00017]  
ENSMMUG00000059321  
ENSMMUG00000059371  
ENSMMUG00000059374  
ENSMMUG00000059778  
ENSMMUG00000059897 myosin light chain 9 [Source:NCBI gene;Acc:709784]

ENSMMUG00000060000  
ENSMMUG00000060270  
ENSMMUG00000060289  
ENSMMUG00000060497  
ENSMMUG00000060502  
ENSMMUG00000060767  
ENSMMUG00000060780  
ENSMMUG00000060879 homeobox B13 [Source:NCBI gene;Acc:697572]  
ENSMMUG00000060967  
ENSMMUG00000061335  
ENSMMUG00000061836  
ENSMMUG00000061940  
ENSMMUG00000061951  
ENSMMUG00000061995  
ENSMMUG00000062037 stannin [Source:NCBI gene;Acc:711909]  
ENSMMUG00000062178 Metazoan signal recognition particle RNA [Source:RFAM;Acc:RF00017]  
ENSMMUG00000062273 dephospho-CoA kinase domain containing [Source:NCBI gene;Acc:715841]  
ENSMMUG00000062283 homeobox B6 [Source:NCBI gene;Acc:106994013]  
ENSMMUG00000062296 potassium two pore domain channel subfamily K member 6 [Source:NCBI gene;Acc:714912]  
ENSMMUG00000062583 olfactory receptor 1A1 [Source:NCBI gene;Acc:721403]  
ENSMMUG00000062755  
ENSMMUG00000063383  
ENSMMUG00000063622 mitochondrial ribosomal protein S26 [Source:NCBI gene;Acc:717038]  
ENSMMUG00000063779  
ENSMMUG00000063914  
ENSMMUG00000063988  
ENSMMUG00000064026 Metazoan signal recognition particle RNA [Source:RFAM;Acc:RF00017]  
ENSMMUG00000064052 CD300 molecule like family member d [Source:NCBI gene;Acc:703142]  
ENSMMUG00000064095  
ENSMMUG00000064146 Metazoan signal recognition particle RNA [Source:RFAM;Acc:RF00017]  
ENSMMUG00000064391  
ENSMMUG00000064532 mucin 16, cell surface associated [Source:NCBI gene;Acc:106996460]  
ENSMMUG00000064612 Metazoan signal recognition particle RNA [Source:RFAM;Acc:RF00017]  
ENSMMUG00000064650 SPEM family member 3 [Source:NCBI gene;Acc:106993878]  
ENSMMUG00000064723 gasdermin A [Source:NCBI gene;Acc:698841]  
ENSMMUG00000064920  
ENSMMUG00000065025  
ENSMMUG00000065054 G protein subunit gamma 7 [Source:NCBI gene;Acc:711335]  
ENSMMUG00000065129  
ENSMMUG00000065208



# Survivors – SD2 vs. Baseline

| Ensembl Gene ID   | Description                                                                                  |
|-------------------|----------------------------------------------------------------------------------------------|
| ENSMMUG0000000302 | WD repeat and HMG-box DNA binding protein 1 [Source:VGNC Symbol;Acc:VGNC:79376]              |
| ENSMMUG0000000313 | HEAT repeat containing 4 [Source:VGNC Symbol;Acc:VGNC:73176]                                 |
| ENSMMUG0000000419 | Rho GTPase activating protein 26 [Source:VGNC Symbol;Acc:VGNC:69846]                         |
| ENSMMUG0000000421 | nuclear receptor subfamily 3 group C member 1 [Source:VGNC Symbol;Acc:VGNC:75515]            |
| ENSMMUG0000000632 | SH3 binding domain protein 5 like [Source:VGNC Symbol;Acc:VGNC:77334]                        |
| ENSMMUG0000000644 | centrosomal protein 85 [Source:VGNC Symbol;Acc:VGNC:71096]                                   |
| ENSMMUG0000000649 | UBX domain protein 11 [Source:VGNC Symbol;Acc:VGNC:79859]                                    |
| ENSMMUG0000000706 | filamin B [Source:VGNC Symbol;Acc:VGNC:72672]                                                |
| ENSMMUG0000000754 | Dmx like 2 [Source:VGNC Symbol;Acc:VGNC:71936]                                               |
| ENSMMUG0000000776 | zinc finger matrin-type 4 [Source:VGNC Symbol;Acc:VGNC:78424]                                |
| ENSMMUG0000000790 | ankyrin repeat domain 17 [Source:VGNC Symbol;Acc:VGNC:84240]                                 |
| ENSMMUG0000000808 | melanin concentrating hormone receptor 2 [Source:VGNC Symbol;Acc:VGNC:74550]                 |
| ENSMMUG0000000863 | dynein axonemal assembly factor 4 [Source:VGNC Symbol;Acc:VGNC:71881]                        |
| ENSMMUG0000000869 | small nuclear ribonucleoprotein polypeptide C [Source:NCBI gene;Acc:718654]                  |
| ENSMMUG0000000931 | solute carrier family 35 member A3 [Source:VGNC Symbol;Acc:VGNC:77461]                       |
| ENSMMUG0000000951 | integrin subunit beta 2 [Source:VGNC Symbol;Acc:VGNC:73786]                                  |
| ENSMMUG0000000958 | aldo-keto reductase family 1, member C2 [Source:NCBI gene;Acc:711360]                        |
| ENSMMUG0000001060 | ryanodine receptor 2 [Source:VGNC Symbol;Acc:VGNC:76954]                                     |
| ENSMMUG0000001088 | patched domain containing 1 [Source:VGNC Symbol;Acc:VGNC:76322]                              |
| ENSMMUG0000001151 | microtubule associated scaffold protein 1 [Source:VGNC Symbol;Acc:VGNC:84018]                |
| ENSMMUG0000001273 | clathrin binding box of aftiphilin containing 1 [Source:VGNC Symbol;Acc:VGNC:84325]          |
| ENSMMUG0000001338 | antizyme inhibitor 1 [Source:VGNC Symbol;Acc:VGNC:70080]                                     |
| ENSMMUG0000001350 | HERPUD family member 2 [Source:VGNC Symbol;Acc:VGNC:73216]                                   |
| ENSMMUG0000001397 | multiple C2 and transmembrane domain containing 1 [Source:VGNC Symbol;Acc:VGNC:74589]        |
| ENSMMUG0000001456 | MCF.2 cell line derived transforming sequence-like 2 [Source:VGNC Symbol;Acc:VGNC:74624]     |
| ENSMMUG0000001547 | zinc finger protein 106 [Source:VGNC Symbol;Acc:VGNC:78831]                                  |
| ENSMMUG0000001568 | AT-rich interaction domain 3B [Source:VGNC Symbol;Acc:VGNC:69827]                            |
| ENSMMUG0000001690 | calponin 3 [Source:VGNC Symbol;Acc:VGNC:71278]                                               |
| ENSMMUG0000001702 | succinyl-CoA:glutarate-CoA transferase [Source:VGNC Symbol;Acc:VGNC:81767]                   |
| ENSMMUG0000001707 | amyloid beta precursor protein binding family B member 3 [Source:VGNC Symbol;Acc:VGNC:69869] |
| ENSMMUG0000001725 | solute carrier family 35 member A4 [Source:VGNC Symbol;Acc:VGNC:77532]                       |
| ENSMMUG0000001753 | integrin subunit alpha 1 [Source:VGNC Symbol;Acc:VGNC:73772]                                 |
| ENSMMUG0000001848 | sprouty RTK signaling antagonist 1 [Source:VGNC Symbol;Acc:VGNC:77867]                       |
| ENSMMUG0000002217 | alkaline phosphatase, biomineralization associated [Source:VGNC Symbol;Acc:VGNC:69801]       |
| ENSMMUG0000002260 | protein kinase C eta [Source:VGNC Symbol;Acc:VGNC:84424]                                     |
| ENSMMUG0000002411 | drebrin like [Source:NCBI gene;Acc:720621]                                                   |
| ENSMMUG0000002422 | AE binding protein 1 [Source:VGNC Symbol;Acc:VGNC:80328]                                     |
| ENSMMUG0000002423 | DNA polymerase delta 2, accessory subunit [Source:VGNC Symbol;Acc:VGNC:76203]                |
| ENSMMUG0000002426 | myosin light chain 7 [Source:VGNC Symbol;Acc:VGNC:75002]                                     |
| ENSMMUG0000002427 | glucokinase [Source:VGNC Symbol;Acc:VGNC:72901]                                              |
| ENSMMUG0000002430 | YKT6 v-SNARE homolog [Source:VGNC Symbol;Acc:VGNC:81796]                                     |
| ENSMMUG0000002433 | calcium/calmodulin dependent protein kinase II beta [Source:VGNC Symbol;Acc:VGNC:70524]      |
| ENSMMUG0000002564 | Fraser extracellular matrix complex subunit 1 [Source:VGNC Symbol;Acc:VGNC:72743]            |
| ENSMMUG0000002741 | CUB and Sushi multiple domains 2 [Source:VGNC Symbol;Acc:VGNC:71441]                         |
| ENSMMUG0000002886 | Bardet-Biedl syndrome 9 [Source:NCBI gene;Acc:708412]                                        |
| ENSMMUG0000002949 | motile sperm domain containing 3 [Source:VGNC Symbol;Acc:VGNC:74823]                         |
| ENSMMUG0000002950 | transferrin receptor 2 [Source:VGNC Symbol;Acc:VGNC:81770]                                   |
| ENSMMUG0000003131 | interleukin 13 [Source:VGNC Symbol;Acc:VGNC:84393]                                           |

ENSMMUG00000003133 interleukin 4 [Source:VGNC Symbol;Acc:VGNC:73729]  
ENSMMUG00000003167 cytohesin 3 [Source:VGNC Symbol;Acc:VGNC:71829]  
ENSMMUG00000003267 zinc finger protein 362 [Source:NCBI gene;Acc:710013]  
ENSMMUG00000003348 neurofilament light [Source:VGNC Symbol;Acc:VGNC:75307]  
ENSMMUG00000003457 protein kinase cAMP-activated catalytic subunit beta [Source:NCBI gene;Acc:709728]  
ENSMMUG00000003484 tectonin beta-propeller repeat containing 2 [Source:NCBI gene;Acc:708959]  
ENSMMUG00000003572 nicotinamide phosphoribosyltransferase [Source:VGNC Symbol;Acc:VGNC:75056]  
ENSMMUG00000003598 tripartite motif containing 7 [Source:VGNC Symbol;Acc:VGNC:79022]  
ENSMMUG00000003684 ATPase phospholipid transporting 8B4 (putative) [Source:VGNC Symbol;Acc:VGNC:84311]  
ENSMMUG00000003697 inositol polyphosphate-4-phosphatase type II B [Source:VGNC Symbol;Acc:VGNC:73748]  
ENSMMUG00000003833 Ras association domain family member 6 [Source:VGNC Symbol;Acc:VGNC:76515]  
ENSMMUG00000004002 CDC like kinase 4 [Source:VGNC Symbol;Acc:VGNC:71173]  
ENSMMUG00000004042 Fc receptor like A [Source:VGNC Symbol;Acc:VGNC:72526]  
ENSMMUG00000004103 collagen type XI alpha 1 chain [Source:VGNC Symbol;Acc:VGNC:71289]  
ENSMMUG00000004149 eukaryotic translation initiation factor 4 gamma 3 [Source:NCBI gene;Acc:717555]  
ENSMMUG00000004222 thromboxane A synthase 1 [Source:VGNC Symbol;Acc:VGNC:78278]  
ENSMMUG00000004257 beta-secretase 2 [Source:VGNC Symbol;Acc:VGNC:70216]  
ENSMMUG00000004273 dedicator of cytokinesis 3 [Source:VGNC Symbol;Acc:VGNC:71967]  
ENSMMUG00000004309 APC membrane recruitment protein 1 [Source:VGNC Symbol;Acc:VGNC:69716]  
ENSMMUG00000004376 calcium and integrin binding 1 [Source:VGNC Symbol;Acc:VGNC:71189]  
ENSMMUG00000004512 Fc fragment of IgE receptor Ig [Source:VGNC Symbol;Acc:VGNC:72629]  
ENSMMUG00000004576 C-C motif chemokine receptor 3 [Source:VGNC Symbol;Acc:VGNC:70738]  
ENSMMUG00000004668 receptor tyrosine kinase like orphan receptor 1 [Source:VGNC Symbol;Acc:VGNC:76715]  
ENSMMUG00000004748 zinc finger and BTB domain containing 1 [Source:VGNC Symbol;Acc:VGNC:79238]  
ENSMMUG00000004774 maestro heat like repeat family member 2B [Source:VGNC Symbol;Acc:VGNC:74837]  
ENSMMUG00000004797 CTP synthase 2 [Source:VGNC Symbol;Acc:VGNC:71550]  
ENSMMUG00000004801 COPI coat complex subunit gamma 2 [Source:VGNC Symbol;Acc:VGNC:71315]  
ENSMMUG00000005070 ecotropic viral integration site 5 [Source:NCBI gene;Acc:706592]  
ENSMMUG00000005106 unc-45 myosin chaperone A [Source:VGNC Symbol;Acc:VGNC:79858]  
ENSMMUG00000005108 RCC1 domain containing 1 [Source:VGNC Symbol;Acc:VGNC:76876]  
ENSMMUG00000005293 G-patch domain and ankyrin repeats 1 [Source:VGNC Symbol;Acc:VGNC:81073]  
ENSMMUG00000005294 casein kinase 2 beta [Source:NCBI gene;Acc:715807]  
ENSMMUG00000005297 proline rich coiled-coil 2A [Source:VGNC Symbol;Acc:VGNC:83448]  
ENSMMUG00000005302 BAG cochaperone 6 [Source:VGNC Symbol;Acc:VGNC:81044]  
ENSMMUG00000005667 fumarate hydratase [Source:VGNC Symbol;Acc:VGNC:72659]  
ENSMMUG00000005668 kynurenine 3-monooxygenase [Source:VGNC Symbol;Acc:VGNC:74197]  
ENSMMUG00000005745 EYA transcriptional coactivator and phosphatase 4 [Source:VGNC Symbol;Acc:VGNC:72456]  
ENSMMUG00000005964 CMP-N-acetylneuraminic acid hydroxylase [Source:NCBI gene;Acc:574186]  
ENSMMUG00000006029 odontogenic, ameloblast associated [Source:NCBI gene;Acc:707906]  
ENSMMUG00000006284 adenylate kinase 2 [Source:VGNC Symbol;Acc:VGNC:69761]  
ENSMMUG00000006285 antizyme inhibitor 2 [Source:VGNC Symbol;Acc:VGNC:70153]  
ENSMMUG00000006530 ATP/GTP binding protein like 3 [Source:VGNC Symbol;Acc:VGNC:69723]  
ENSMMUG00000006596 CCR4-NOT transcription complex subunit 10 [Source:VGNC Symbol;Acc:VGNC:71327]  
ENSMMUG00000006659 aldehyde dehydrogenase 1 family member A3 [Source:VGNC Symbol;Acc:VGNC:81353]  
ENSMMUG00000006766 RUN domain containing 3B [Source:VGNC Symbol;Acc:VGNC:77129]  
ENSMMUG00000006786 protein tyrosine phosphatase non-receptor type 22 [Source:VGNC Symbol;Acc:VGNC:76603]  
ENSMMUG00000006836 chloride channel accessory 1 [Source:NCBI gene;Acc:574295]  
ENSMMUG00000006841 myoferlin [Source:VGNC Symbol;Acc:VGNC:75061]  
ENSMMUG00000006851 SPARC (osteonectin), cwcv and kazal like domains proteoglycan 3 [Source:NCBI gene;Acc:705964]  
ENSMMUG00000006855 acyl-CoA thioesterase 2 [Source:NCBI gene;Acc:697011]  
ENSMMUG00000006997 thioredoxin domain containing 16 [Source:VGNC Symbol;Acc:VGNC:79214]

ENSMMUG0000007140 MOK protein kinase [Source:VGNC Symbol;Acc:VGNC:84394]  
ENSMMUG0000007366  
ENSMMUG0000007387 G protein-coupled receptor kinase 7 [Source:VGNC Symbol;Acc:VGNC:73182]  
ENSMMUG0000007422 spermatogenesis associated 5 [Source:VGNC Symbol;Acc:VGNC:77952]  
ENSMMUG0000007528 chordin [Source:VGNC Symbol;Acc:VGNC:71042]  
ENSMMUG0000007534 protein regulator of cytokinesis 1 [Source:NCBI gene;Acc:710182]  
ENSMMUG0000007773 solute carrier organic anion transporter family member 4C1 [Source:VGNC Symbol;Acc:VGNC:77764]  
ENSMMUG0000008007 multiple EGF like domains 11 [Source:VGNC Symbol;Acc:VGNC:84376]  
ENSMMUG0000008031 zinc finger and BTB domain containing 17 [Source:VGNC Symbol;Acc:VGNC:78849]  
ENSMMUG0000008070 YEATS domain containing 2 [Source:VGNC Symbol;Acc:VGNC:79502]  
ENSMMUG0000008197 netrin G1 [Source:VGNC Symbol;Acc:VGNC:75450]  
ENSMMUG0000008218 ADAMTS like 4 [Source:VGNC Symbol;Acc:VGNC:69480]  
ENSMMUG0000008379 adducin 1 [Source:VGNC Symbol;Acc:VGNC:69528]  
ENSMMUG0000008383 major facilitator superfamily domain containing 10 [Source:NCBI gene;Acc:720098]  
ENSMMUG0000008385 NOP14 nucleolar protein [Source:VGNC Symbol;Acc:VGNC:75194]  
ENSMMUG0000008518 phospholipid phosphatase related 5 [Source:NCBI gene;Acc:710549]  
ENSMMUG0000008623 coiled-coil domain containing 22 [Source:VGNC Symbol;Acc:VGNC:70899]  
ENSMMUG0000008791 CD47 molecule [Source:VGNC Symbol;Acc:VGNC:70767]  
ENSMMUG0000008828 BEN domain containing 5 [Source:NCBI gene;Acc:711150]  
ENSMMUG0000008854 natural cytotoxicity triggering receptor 3 [Source:VGNC Symbol;Acc:VGNC:74990]  
ENSMMUG0000009040 cornulin [Source:VGNC Symbol;Acc:VGNC:71397]  
ENSMMUG0000009184 myelin protein zero like 1 [Source:NCBI gene;Acc:698437]  
ENSMMUG0000009197 myelin associated oligodendrocyte basic protein [Source:VGNC Symbol;Acc:VGNC:74908]  
ENSMMUG0000009441 abhydrolase domain containing 4 [Source:VGNC Symbol;Acc:VGNC:84296]  
ENSMMUG0000009499 mesoderm specific transcript [Source:VGNC Symbol;Acc:VGNC:74707]  
ENSMMUG0000009564 NMD3 ribosome export adaptor [Source:VGNC Symbol;Acc:VGNC:75242]  
ENSMMUG0000009794 protocadherin related 15 [Source:VGNC Symbol;Acc:VGNC:75608]  
ENSMMUG00000010137 microcephalin 1 [Source:VGNC Symbol;Acc:VGNC:74687]  
ENSMMUG00000010141 family with sequence similarity 13 member A [Source:VGNC Symbol;Acc:VGNC:72299]  
ENSMMUG00000010180 PIN2 (TERF1) interacting telomerase inhibitor 1 [Source:NCBI gene;Acc:701523]  
ENSMMUG00000010308 cyclin I family member 2 [Source:VGNC Symbol;Acc:VGNC:70923]  
ENSMMUG00000010309 septin 8 [Source:VGNC Symbol;Acc:VGNC:77248]  
ENSMMUG00000010313 kinesin family member 3A [Source:VGNC Symbol;Acc:VGNC:74017]  
ENSMMUG00000010314 HECT and RLD domain containing E3 ubiquitin protein ligase family member 6 [Source:VGNC Symbol;Acc:VGNC:73238]  
ENSMMUG00000010316 HECT and RLD domain containing E3 ubiquitin protein ligase 5 [Source:VGNC Symbol;Acc:VGNC:73226]  
ENSMMUG00000010318 phosphatidylinositol glycan anchor biosynthesis class Y [Source:NCBI gene;Acc:100426107]  
ENSMMUG00000010466 solute carrier family 38 member 9 [Source:VGNC Symbol;Acc:VGNC:77574]  
ENSMMUG00000011155 FA complementation group I [Source:VGNC Symbol;Acc:VGNC:72575]  
ENSMMUG00000011328 cytoplasmic polyadenylation element binding protein 1 [Source:NCBI gene;Acc:694357]  
ENSMMUG00000011440 neurite extension and migration factor [Source:VGNC Symbol;Acc:VGNC:75274]  
ENSMMUG00000011513 versican [Source:VGNC Symbol;Acc:VGNC:79445]  
ENSMMUG00000011661 integrin subunit alpha 8 [Source:VGNC Symbol;Acc:VGNC:73782]  
ENSMMUG00000011774 integrator complex subunit 10 [Source:VGNC Symbol;Acc:VGNC:73653]  
ENSMMUG00000011789 hematopoietically expressed homeobox [Source:VGNC Symbol;Acc:VGNC:73376]  
ENSMMUG00000011878 poly(A) binding protein interacting protein 1 [Source:VGNC Symbol;Acc:VGNC:84476]  
ENSMMUG00000011914 prospero homeobox 1 [Source:VGNC Symbol;Acc:VGNC:76427]  
ENSMMUG00000012356 serpin family A member 9 [Source:VGNC Symbol;Acc:VGNC:77241]  
ENSMMUG00000012405 transient receptor potential cation channel subfamily C member 1 [Source:VGNC Symbol;Acc:VGNC:78651]  
ENSMMUG00000012526 glycosyltransferase 8 domain containing 1 [Source:VGNC Symbol;Acc:VGNC:73001]  
ENSMMUG00000012538 ubiquitin conjugating enzyme E2 U [Source:VGNC Symbol;Acc:VGNC:79726]  
ENSMMUG00000012635 zyxin [Source:VGNC Symbol;Acc:VGNC:78917]

ENSMMUG00000012697 AT-rich interaction domain 1A [Source:VGNC Symbol;Acc:VGNC:69822]  
ENSMMUG00000013044 selectin P [Source:VGNC Symbol;Acc:VGNC:77157]  
ENSMMUG00000013146 claudin 2 [Source:HGNC Symbol;Acc:HGNC:2041]  
ENSMMUG00000013150 MORC family CW-type zinc finger 4 [Source:VGNC Symbol;Acc:VGNC:74808]  
ENSMMUG00000013330 ectonucleoside triphosphate diphosphohydrolase 3 [Source:VGNC Symbol;Acc:VGNC:72226]  
ENSMMUG00000013385 elongator acetyltransferase complex subunit 6 [Source:VGNC Symbol;Acc:VGNC:72113]  
ENSMMUG00000013387 cysteinyl leukotriene receptor 1 [Source:VGNC Symbol;Acc:VGNC:71646]  
ENSMMUG00000013450 TATA-box binding protein associated factor 6 [Source:VGNC Symbol;Acc:VGNC:78093]  
ENSMMUG00000013460 RAB8B, member RAS oncogene family [Source:VGNC Symbol;Acc:VGNC:81550]  
ENSMMUG00000013644 potassium two pore domain channel subfamily K member 17 [Source:VGNC Symbol;Acc:VGNC:73828]  
ENSMMUG00000013696 myozenin 1 [Source:VGNC Symbol;Acc:VGNC:74951]  
ENSMMUG00000013871 WD repeat domain 25 [Source:VGNC Symbol;Acc:VGNC:78420]  
ENSMMUG00000014045 protein tyrosine phosphatase non-receptor type 23 [Source:VGNC Symbol;Acc:VGNC:76477]  
ENSMMUG00000014046 SREBF chaperone [Source:VGNC Symbol;Acc:VGNC:77140]  
ENSMMUG00000014076 AF4/FMR2 family member 1 [Source:VGNC Symbol;Acc:VGNC:69817]  
ENSMMUG00000014138 forkhead box J3 [Source:VGNC Symbol;Acc:VGNC:72596]  
ENSMMUG00000014291 SPG11 vesicle trafficking associated, spatacsin [Source:VGNC Symbol;Acc:VGNC:77856]  
ENSMMUG00000014658 ninein [Source:VGNC Symbol;Acc:VGNC:75177]  
ENSMMUG00000014674 golgin, RAB6 interacting [Source:VGNC Symbol;Acc:VGNC:73012]  
ENSMMUG00000014699  
ENSMMUG00000014715 fragile site, folic acid type, rare, fra(10)(q23.3) or fra(10)(q24.2) candidate 1 [Source:NCBI gene;Acc:700389]  
ENSMMUG00000014766 neuroguidin [Source:VGNC Symbol;Acc:VGNC:75220]  
ENSMMUG00000014771 zinc finger homeobox 2 [Source:NCBI gene;Acc:100429448]  
ENSMMUG00000014868 OCIA domain containing 1 [Source:VGNC Symbol;Acc:VGNC:75409]  
ENSMMUG00000014874 GTP binding protein 8 (putative) [Source:VGNC Symbol;Acc:VGNC:84180]  
ENSMMUG00000014876 nucleolus and neural progenitor protein [Source:VGNC Symbol;Acc:VGNC:75244]  
ENSMMUG00000015097 tripartite motif containing 62 [Source:VGNC Symbol;Acc:VGNC:79513]  
ENSMMUG00000015115 terminal nucleotidyltransferase 5B [Source:VGNC Symbol;Acc:VGNC:79692]  
ENSMMUG00000015329 MX dynamin like GTPase 1 [Source:VGNC Symbol;Acc:VGNC:75086]  
ENSMMUG00000015416 bromodomain and PHD finger containing 3 [Source:VGNC Symbol;Acc:VGNC:70309]  
ENSMMUG00000015479 tectonin beta-propeller repeat containing 1 [Source:VGNC Symbol;Acc:VGNC:79348]  
ENSMMUG00000015487 pericentriolar material 1 [Source:VGNC Symbol;Acc:VGNC:75781]  
ENSMMUG00000015555 ST3 beta-galactoside alpha-2,3-sialyltransferase 3 [Source:VGNC Symbol;Acc:VGNC:77828]  
ENSMMUG00000015685 zinc finger protein 804B [Source:VGNC Symbol;Acc:VGNC:81890]  
ENSMMUG00000015686 abhydrolase domain containing 16A [Source:VGNC Symbol;Acc:VGNC:69393]  
ENSMMUG00000015693 lymphocyte antigen 6 family member G6C [Source:VGNC Symbol;Acc:VGNC:74285]  
ENSMMUG00000015865 arginase 2 [Source:VGNC Symbol;Acc:VGNC:70005]  
ENSMMUG00000015866 vesicle transport through interaction with t-SNAREs 1B [Source:NCBI gene;Acc:711113]  
ENSMMUG00000016069 cubilin [Source:VGNC Symbol;Acc:VGNC:82132]  
ENSMMUG00000016273 maltase-glucoamylase [Source:VGNC Symbol;Acc:VGNC:74713]  
ENSMMUG00000016476 TRAF interacting protein [Source:VGNC Symbol;Acc:VGNC:82261]  
ENSMMUG00000016480 CaM kinase like vesicle associated [Source:VGNC Symbol;Acc:VGNC:70663]  
ENSMMUG00000016579 selectin L [Source:NCBI gene;Acc:701419]  
ENSMMUG00000016580 selectin E [Source:VGNC Symbol;Acc:VGNC:77156]  
ENSMMUG00000016582 chromosome 1 C1orf112 homolog [Source:VGNC Symbol;Acc:VGNC:70385]  
ENSMMUG00000017056 Sad1 and UNC84 domain containing 1 [Source:VGNC Symbol;Acc:VGNC:78161]  
ENSMMUG00000017189 regulatory factor X6 [Source:VGNC Symbol;Acc:VGNC:76800]  
ENSMMUG00000017261 galactosylceramidase [Source:VGNC Symbol;Acc:VGNC:72867]  
ENSMMUG00000017266 UPF0577 protein KIAA1324 [Source:NCBI gene;Acc:697670]  
ENSMMUG00000017501 N-acylethanolamine acid amidase [Source:VGNC Symbol;Acc:VGNC:75068]  
ENSMMUG00000017510 membrane associated guanylate kinase, WW and PDZ domain containing 1 [Source:VGNC Symbol;Acc:VGNC:74499]

ENSMMUG00000017605 mitochondrial ribosomal protein L39 [Source:VGNC Symbol;Acc:VGNC:74737]  
ENSMMUG00000017627 B-TFIID TATA-box binding protein associated factor 1 [Source:VGNC Symbol;Acc:VGNC:70336]  
ENSMMUG00000017660  
ENSMMUG00000017701 myosin VIIA and Rab interacting protein [Source:VGNC Symbol;Acc:VGNC:74992]  
ENSMMUG00000018246 transmembrane and coiled-coil domains 6 [Source:VGNC Symbol;Acc:VGNC:84507]  
ENSMMUG00000018345 phosphatidylethanolamine binding protein 4 [Source:VGNC Symbol;Acc:VGNC:82204]  
ENSMMUG00000018549 zinc finger protein 786 [Source:VGNC Symbol;Acc:VGNC:79338]  
ENSMMUG00000018619 DENN domain containing 6A [Source:VGNC Symbol;Acc:VGNC:71726]  
ENSMMUG00000018743 ubiquitin specific peptidase 25 [Source:VGNC Symbol;Acc:VGNC:78744]  
ENSMMUG00000018790 activin A receptor type 2B [Source:VGNC Symbol;Acc:VGNC:69450]  
ENSMMUG00000019085 3-hydroxybutyrate dehydrogenase 2 [Source:VGNC Symbol;Acc:VGNC:70161]  
ENSMMUG00000019089 centromere protein E [Source:VGNC Symbol;Acc:VGNC:71008]  
ENSMMUG00000019246 regulator of calcineurin 2 [Source:VGNC Symbol;Acc:VGNC:82092]  
ENSMMUG00000019304 indoleamine 2,3-dioxygenase 1 [Source:VGNC Symbol;Acc:VGNC:73580]  
ENSMMUG00000019363 synapse associated protein 1 [Source:VGNC Symbol;Acc:VGNC:78135]  
ENSMMUG00000019526 BLM RecQ like helicase [Source:VGNC Symbol;Acc:VGNC:70254]  
ENSMMUG00000019528 adaptor related protein complex 4 subunit beta 1 [Source:VGNC Symbol;Acc:VGNC:69972]  
ENSMMUG00000019536 potassium voltage-gated channel subfamily Q member 4 [Source:VGNC Symbol;Acc:VGNC:74007]  
ENSMMUG00000019830 Fc receptor like 2 [Source:VGNC Symbol;Acc:VGNC:72509]  
ENSMMUG00000019833 Fc receptor like 1 [Source:VGNC Symbol;Acc:VGNC:72528]  
ENSMMUG00000019991 dopa decarboxylase [Source:VGNC Symbol;Acc:VGNC:71755]  
ENSMMUG00000020185 voltage dependent anion channel 3 [Source:VGNC Symbol;Acc:VGNC:84135]  
ENSMMUG00000020186 solute carrier family 20 member 2 [Source:VGNC Symbol;Acc:VGNC:77416]  
ENSMMUG00000020534 p21 (RAC1) activated kinase 6 [Source:NCBI gene;Acc:701589]  
ENSMMUG00000020586 serpin family A member 12 [Source:VGNC Symbol;Acc:VGNC:77266]  
ENSMMUG00000020603 pyridine nucleotide-disulphide oxidoreductase domain 2 [Source:NCBI gene;Acc:707797]  
ENSMMUG00000020604 HPS1 biogenesis of lysosomal organelles complex 3 subunit 1 [Source:VGNC Symbol;Acc:VGNC:73515]  
ENSMMUG00000020683 RNA binding motif protein 22 [Source:VGNC Symbol;Acc:VGNC:76535]  
ENSMMUG00000020726 dihydropyrimidine dehydrogenase [Source:VGNC Symbol;Acc:VGNC:71982]  
ENSMMUG00000020979 inka box actin regulator 1 [Source:VGNC Symbol;Acc:VGNC:73692]  
ENSMMUG00000020980 ubiquitin like modifier activating enzyme 7 [Source:VGNC Symbol;Acc:VGNC:78690]  
ENSMMUG00000021044 afadin, adherens junction formation factor [Source:VGNC Symbol;Acc:VGNC:69818]  
ENSMMUG00000021073 RAS protein activator like 2 [Source:VGNC Symbol;Acc:VGNC:76670]  
ENSMMUG00000021075 Rac family small GTPase 1 [Source:NCBI gene;Acc:717755]  
ENSMMUG00000021080 basic leucine zipper nuclear factor 1 [Source:VGNC Symbol;Acc:VGNC:70258]  
ENSMMUG00000021157 TBC1 domain family member 31 [Source:VGNC Symbol;Acc:VGNC:84121]  
ENSMMUG00000021449 vacuolar protein sorting 13 homolog D [Source:NCBI gene;Acc:722775]  
ENSMMUG00000021498 L3MBTL histone methyl-lysine binding protein 3 [Source:VGNC Symbol;Acc:VGNC:74106]  
ENSMMUG00000021634 TNF alpha induced protein 2 [Source:VGNC Symbol;Acc:VGNC:78579]  
ENSMMUG00000021972 diacylglycerol kinase gamma [Source:VGNC Symbol;Acc:VGNC:71785]  
ENSMMUG00000021988 N-alpha-acetyltransferase 11, NatA catalytic subunit [Source:NCBI gene;Acc:696758]  
ENSMMUG00000022003 multimerin 1 [Source:VGNC Symbol;Acc:VGNC:74904]  
ENSMMUG00000022247 osteoclastogenesis associated transmembrane protein 1 [Source:VGNC Symbol;Acc:VGNC:75664]  
ENSMMUG00000022407 serine and arginine rich splicing factor 5 [Source:NCBI gene;Acc:712867]  
ENSMMUG00000022409 solute carrier family 10 member 1 [Source:VGNC Symbol;Acc:VGNC:77380]  
ENSMMUG00000022451 proteasome 20S subunit alpha 2 [Source:NCBI gene;Acc:701683]  
ENSMMUG00000022728 zinc finger and SCAN domain containing 25 [Source:VGNC Symbol;Acc:VGNC:79344]  
ENSMMUG00000022730 cytochrome P450, family 3, subfamily A, polypeptide 5 [Source:NCBI gene;Acc:678692]  
ENSMMUG00000022884 glutamate-ammonia ligase [Source:NCBI gene;Acc:715952]  
ENSMMUG00000022921 solute carrier family 2 member 12 [Source:VGNC Symbol;Acc:VGNC:77503]  
ENSMMUG00000023016 jade family PHD finger 3 [Source:VGNC Symbol;Acc:VGNC:73640]

ENSMMUG00000023060 A-kinase anchoring protein 4 [Source:VGNC Symbol;Acc:VGNC:69770]  
ENSMMUG00000023139 small nuclear ribonucleoprotein polypeptide N [Source:VGNC Symbol;Acc:VGNC:78437]  
ENSMMUG00000023282 aldo-keto reductase family 1, member C1 (dihydrodiol dehydrogenase 1; 20-alpha (3-alpha)-hydroxysteroid dehydrogenase) [Source:NCBI gene;Acc:711198]  
ENSMMUG00000023310 tetraspanin 12 [Source:VGNC Symbol;Acc:VGNC:79328]  
ENSMMUG00000023335 ring finger protein 13 [Source:VGNC Symbol;Acc:VGNC:81557]  
ENSMMUG00000023449 mitofusin 2 [Source:VGNC Symbol;Acc:VGNC:74522]  
ENSMMUG00000023681 nucleolar protein 9 [Source:VGNC Symbol;Acc:VGNC:75263]  
ENSMMUG00000023816 semaphorin 4B [Source:VGNC Symbol;Acc:VGNC:77165]  
ENSMMUG00000024234 U6 spliceosomal RNA [Source:RFAM;Acc:RF00026]  
ENSMMUG00000029034 defensin beta 136 [Source:VGNC Symbol;Acc:VGNC:71826]  
ENSMMUG00000029883 olfactory receptor, family 2, subfamily J, member 3 [Source:NCBI gene;Acc:708943]  
ENSMMUG00000031279 torsin A interacting protein 2 [Source:NCBI gene;Acc:716654]  
ENSMMUG00000031291 regulator of G protein signaling like 1 [Source:NCBI gene;Acc:715693]  
ENSMMUG00000031534 ankyrin repeat and ubiquitin domain containing 1 [Source:VGNC Symbol;Acc:VGNC:84239]  
ENSMMUG00000032249 procollagen-lysine,2-oxoglutarate 5-dioxygenase 1 [Source:NCBI gene;Acc:722763]  
ENSMMUG00000032429 forkhead box O4 [Source:VGNC Symbol;Acc:VGNC:72712]  
ENSMMUG00000035943 U6 spliceosomal RNA [Source:RFAM;Acc:RF00026]  
ENSMMUG00000037243 U6 spliceosomal RNA [Source:RFAM;Acc:RF00026]  
ENSMMUG00000037413 U5 spliceosomal RNA [Source:RFAM;Acc:RF00020]  
ENSMMUG00000038067  
ENSMMUG00000038524 olfactory receptor 2M4 [Source:NCBI gene;Acc:100424541]  
ENSMMUG00000039009  
ENSMMUG00000039101 pelota mRNA surveillance and ribosome rescue factor [Source:VGNC Symbol;Acc:VGNC:84478]  
ENSMMUG00000039292  
ENSMMUG00000040274 MAGE family member A4 [Source:NCBI gene;Acc:710825]  
ENSMMUG00000040393 zinc finger protein 655 [Source:NCBI gene;Acc:718811]  
ENSMMUG00000041376 G antigen 10 [Source:NCBI gene;Acc:693330]  
ENSMMUG00000042472 Metazoan signal recognition particle RNA [Source:RFAM;Acc:RF00017]  
ENSMMUG00000042951 signal recognition particle 19 [Source:NCBI gene;Acc:693829]  
ENSMMUG00000043675 Cbp/p300 interacting transactivator with Glu/Asp rich carboxy-terminal domain 4 [Source:NCBI gene;Acc:114672840]  
ENSMMUG00000044257 MX dynamin like GTPase 2 [Source:VGNC Symbol;Acc:VGNC:81723]  
ENSMMUG00000044429 glycophorin A (MNS blood group) [Source:NCBI gene;Acc:574101]  
ENSMMUG00000045093 cyclin B3 [Source:NCBI gene;Acc:694534]  
ENSMMUG00000045513  
ENSMMUG00000045609 CCR4-NOT transcription complex subunit 6 like [Source:NCBI gene;Acc:697981]  
ENSMMUG00000045970 thiamine triphosphatase [Source:NCBI gene;Acc:714403]  
ENSMMUG00000046186 stanniocalcin 1 [Source:VGNC Symbol;Acc:VGNC:84120]  
ENSMMUG00000046550 coiled-coil domain containing 125 [Source:NCBI gene;Acc:704391]  
ENSMMUG00000046969 Fc receptor like 3 [Source:NCBI gene;Acc:718801]  
ENSMMUG00000048066 trafficking protein particle complex 9 [Source:NCBI gene;Acc:711466]  
ENSMMUG00000048621 enolase-phosphatase 1 [Source:NCBI gene;Acc:106998330]  
ENSMMUG00000048824 eva-1 homolog C [Source:NCBI gene;Acc:708681]  
ENSMMUG00000049021 Metazoan signal recognition particle RNA [Source:RFAM;Acc:RF00017]  
ENSMMUG00000049267  
ENSMMUG00000049494  
ENSMMUG00000049678  
ENSMMUG00000049735 allograft inflammatory factor 1 [Source:NCBI gene;Acc:574115]  
ENSMMUG00000049866  
ENSMMUG00000050339 Metazoan signal recognition particle RNA [Source:RFAM;Acc:RF00017]  
ENSMMUG00000050405  
ENSMMUG00000050419 ADAM metallopeptidase with thrombospondin type 1 motif 4 [Source:NCBI gene;Acc:719927]



ENSMMUG00000050465 ZFP42 zinc finger protein [Source:NCBI gene;Acc:707621]  
ENSMMUG00000050495  
ENSMMUG00000050505 small integral membrane protein 4 [Source:NCBI gene;Acc:696553]  
ENSMMUG00000050549 lysyl oxidase like 2 [Source:NCBI gene;Acc:710151]  
ENSMMUG00000050608  
ENSMMUG00000050868  
ENSMMUG00000051037  
ENSMMUG00000051645  
ENSMMUG00000051677  
ENSMMUG00000051816 keratinocyte proline rich protein [Source:NCBI gene;Acc:100424312]  
ENSMMUG00000051972 zinc finger CCHC-type containing 24 [Source:NCBI gene;Acc:702083]  
ENSMMUG00000051975  
ENSMMUG00000052073  
ENSMMUG00000052252 protein phosphatase 1 regulatory subunit 3F [Source:NCBI gene;Acc:715950]  
ENSMMUG00000052348  
ENSMMUG00000052474  
ENSMMUG00000052777  
ENSMMUG00000052780  
ENSMMUG00000052891  
ENSMMUG00000053106  
ENSMMUG00000053324 lymphocyte antigen 6 complex locus protein G6d [Source:NCBI gene;Acc:715304]  
ENSMMUG00000053367 secreted protein acidic and cysteine rich [Source:NCBI gene;Acc:712388]  
ENSMMUG00000053481  
ENSMMUG00000053516  
ENSMMUG00000053737 BarH like homeobox 2 [Source:NCBI gene;Acc:696831]  
ENSMMUG00000053790  
ENSMMUG00000053837  
ENSMMUG00000053984  
ENSMMUG00000054158 acyl-CoA dehydrogenase family member 11 [Source:NCBI gene;Acc:106997118]  
ENSMMUG00000054414  
ENSMMUG00000054568  
ENSMMUG00000054686  
ENSMMUG00000054904 Metazoan signal recognition particle RNA [Source:RFAM;Acc:RF00017]  
ENSMMUG00000054960  
ENSMMUG00000055018 sushi domain containing 6 [Source:NCBI gene;Acc:712719]  
ENSMMUG00000055038  
ENSMMUG00000055096  
ENSMMUG00000055121 Metazoan signal recognition particle RNA [Source:RFAM;Acc:RF00017]  
ENSMMUG00000055199 cytochrome P450, family 39, subfamily A, polypeptide 1 [Source:NCBI gene;Acc:704242]  
ENSMMUG00000055322 EPH receptor A1 [Source:NCBI gene;Acc:706295]  
ENSMMUG00000055556  
ENSMMUG00000055914  
ENSMMUG00000056024  
ENSMMUG00000056058 C-type lectin domain containing 20A [Source:HGNC Symbol;Acc:HGNC:34521]  
ENSMMUG00000056266 Metazoan signal recognition particle RNA [Source:RFAM;Acc:RF00017]  
ENSMMUG00000056376  
ENSMMUG00000056522  
ENSMMUG00000056906  
ENSMMUG00000057196 pulmonary surfactant-associated protein A [Source:NCBI gene;Acc:701715]  
ENSMMUG00000057539  
ENSMMUG00000057702

ENSMMUG00000057953  
ENSMMUG00000058002 zinc finger protein 669-like [Source:NCBI gene;Acc:696282]  
ENSMMUG00000058013 melanoma-associated antigen 3 [Source:NCBI gene;Acc:706103]  
ENSMMUG00000058176 b-defensin2-like [Source:NCBI gene;Acc:100169969]  
ENSMMUG00000058187  
ENSMMUG00000058423  
ENSMMUG00000058432 zinc finger DHHC-type palmitoyltransferase 18 [Source:NCBI gene;Acc:719959]  
ENSMMUG00000058534  
ENSMMUG00000058574  
ENSMMUG00000058817  
ENSMMUG00000059318 urocortin 2 [Source:NCBI gene;Acc:106996925]  
ENSMMUG00000059472 filaggrin family member 2 [Source:HGNC Symbol;Acc:HGNC:33276]  
ENSMMUG00000059671  
ENSMMUG00000060063  
ENSMMUG00000060218 chemokine (C motif) ligand 1 [Source:NCBI gene;Acc:574367]  
ENSMMUG00000060273 mitochondrial ribosomal protein L32 [Source:NCBI gene;Acc:701820]  
ENSMMUG00000060576  
ENSMMUG00000060760  
ENSMMUG00000060795  
ENSMMUG00000060812 autophagy related 12 [Source:NCBI gene;Acc:696765]  
ENSMMUG00000060901  
ENSMMUG00000061031  
ENSMMUG00000061079 golgin subfamily A member 6C [Source:NCBI gene;Acc:715898]  
ENSMMUG00000061098  
ENSMMUG00000061194  
ENSMMUG00000061208 MAP3K7 C-terminal like [Source:NCBI gene;Acc:713717]  
ENSMMUG00000061318  
ENSMMUG00000061684  
ENSMMUG00000061785  
ENSMMUG00000061816  
ENSMMUG00000062063 melanoma-associated antigen 3 [Source:NCBI gene;Acc:711544]  
ENSMMUG00000062092  
ENSMMUG00000062217 HD domain containing 3 [Source:NCBI gene;Acc:715621]  
ENSMMUG00000062326  
ENSMMUG00000062394 C-C motif chemokine receptor 2 [Source:NCBI gene;Acc:574098]  
ENSMMUG00000062397  
ENSMMUG00000062454  
ENSMMUG00000062794  
ENSMMUG00000062996  
ENSMMUG00000063198  
ENSMMUG00000063322  
ENSMMUG00000063351 Metazoan signal recognition particle RNA [Source:RFAM;Acc:RF00017]  
ENSMMUG00000063495  
ENSMMUG00000063525  
ENSMMUG00000063981 nucleoside-triphosphatase, cancer-related [Source:NCBI gene;Acc:712959]  
ENSMMUG00000064173 prokineticin 1 [Source:NCBI gene;Acc:701766]  
ENSMMUG00000064242  
ENSMMUG00000064707  
ENSMMUG00000064824 gremlin 2, DAN family BMP antagonist [Source:NCBI gene;Acc:708280]  
ENSMMUG00000065247 opioid receptor kappa 1 [Source:NCBI gene;Acc:710783]  
ENSMMUG00000065295

ENSMMUG0000000327 fatty acid desaturase 2 [Source:VGNC Symbol;Acc:VGNC:72472]  
ENSMMUG0000000375 pleckstrin homology and RhoGEF domain containing G6 [Source:VGNC Symbol;Acc:VGNC:76110]  
ENSMMUG0000000382 sperm associated antigen 16 [Source:VGNC Symbol;Acc:VGNC:77977]  
ENSMMUG0000000396 intraflagellar transport 52 [Source:NCBI gene;Acc:694933]  
ENSMMUG0000000566  
ENSMMUG0000000590 NPR3 like, GATOR1 complex subunit [Source:VGNC Symbol;Acc:VGNC:75173]  
ENSMMUG0000000700 CLN3 lysosomal/endosomal transmembrane protein, battenin [Source:NCBI gene;Acc:705815]  
ENSMMUG0000000740 spermatogenesis associated 2 [Source:VGNC Symbol;Acc:VGNC:77923]  
ENSMMUG0000000803 signal transducer and activator of transcription 2 [Source:VGNC Symbol;Acc:VGNC:77905]  
ENSMMUG0000000874 carbohydrate sulfotransferase 1 [Source:VGNC Symbol;Acc:VGNC:71055]  
ENSMMUG0000001036 coagulation factor VII [Source:VGNC Symbol;Acc:VGNC:72466]  
ENSMMUG0000001058 tetratricopeptide repeat domain 28 [Source:VGNC Symbol;Acc:VGNC:79785]  
ENSMMUG0000001083 glycine N-acyltransferase-like protein 1 [Source:NCBI gene;Acc:701437]  
ENSMMUG0000001278 vitrin [Source:VGNC Symbol;Acc:VGNC:78773]  
ENSMMUG0000001387 p21 (RAC1) activated kinase 1 [Source:NCBI gene;Acc:698585]  
ENSMMUG0000001409 coiled-coil domain containing 187 [Source:NCBI gene;Acc:710749]  
ENSMMUG0000001472 TIA1 cytotoxic granule associated RNA binding protein like 1 [Source:VGNC Symbol;Acc:VGNC:78354]  
ENSMMUG0000001475 transmembrane protein with EGF like and two follistatin like domains 2 [Source:VGNC Symbol;Acc:VGNC:78569]  
ENSMMUG0000001545 aquaporin 7 [Source:NCBI gene;Acc:702836]  
ENSMMUG0000001745 oxysterol binding protein [Source:VGNC Symbol;Acc:VGNC:75718]  
ENSMMUG0000001761 myosin IB [Source:VGNC Symbol;Acc:VGNC:75111]  
ENSMMUG0000001845 DNA polymerase epsilon 4, accessory subunit [Source:VGNC Symbol;Acc:VGNC:76065]  
ENSMMUG0000001989 RNA polymerase II subunit D [Source:VGNC Symbol;Acc:VGNC:76213]  
ENSMMUG0000002267 laminin subunit gamma 3 [Source:NCBI gene;Acc:722430]  
ENSMMUG0000002330 ecto-NOX disulfide-thiol exchanger 1 [Source:VGNC Symbol;Acc:VGNC:72110]  
ENSMMUG0000002376 scavenger receptor class F member 1 [Source:VGNC Symbol;Acc:VGNC:77027]  
ENSMMUG0000002384 IGF like family receptor 1 [Source:VGNC Symbol;Acc:VGNC:73434]  
ENSMMUG0000002397 GINS complex subunit 1 [Source:VGNC Symbol;Acc:VGNC:73025]  
ENSMMUG0000002452 solute carrier family 35 member C1 [Source:VGNC Symbol;Acc:VGNC:77524]  
ENSMMUG0000002483 citrate synthase [Source:VGNC Symbol;Acc:VGNC:71509]  
ENSMMUG0000002536 calcium binding protein 1 [Source:VGNC Symbol;Acc:VGNC:70495]  
ENSMMUG0000002715 solute carrier family 9 member A8 [Source:VGNC Symbol;Acc:VGNC:77749]  
ENSMMUG0000002810 TOX high mobility group box family member 2 [Source:VGNC Symbol;Acc:VGNC:79007]  
ENSMMUG0000002917 single Ig IL-1-related receptor [Source:NCBI gene;Acc:100425060]  
ENSMMUG0000002959 helicase with zinc finger [Source:VGNC Symbol;Acc:VGNC:73178]  
ENSMMUG0000003005 MFNG O-fucosylpeptide 3-beta-N-acetylglucosaminyltransferase [Source:VGNC Symbol;Acc:VGNC:74712]  
ENSMMUG0000003006 serine palmitoyltransferase long chain base subunit 1 [Source:VGNC Symbol;Acc:VGNC:77873]  
ENSMMUG0000003007 caspase recruitment domain family member 10 [Source:VGNC Symbol;Acc:VGNC:70570]  
ENSMMUG0000003098 peptidase, mitochondrial processing alpha subunit [Source:VGNC Symbol;Acc:VGNC:76062]  
ENSMMUG0000003106 SEC16 homolog A, endoplasmic reticulum export factor [Source:VGNC Symbol;Acc:VGNC:77326]  
ENSMMUG0000003217 transmembrane 7 superfamily member 3 [Source:VGNC Symbol;Acc:VGNC:79371]  
ENSMMUG0000003298 ataxin 2 like [Source:VGNC Symbol;Acc:VGNC:70159]  
ENSMMUG0000003303 Tu translation elongation factor, mitochondrial [Source:VGNC Symbol;Acc:VGNC:78674]  
ENSMMUG0000003356 tenascin C [Source:VGNC Symbol;Acc:VGNC:79960]  
ENSMMUG0000003436 tubulin tyrosine ligase like 6 [Source:VGNC Symbol;Acc:VGNC:79632]  
ENSMMUG0000003437 signal transducer and activator of transcription 5B [Source:NCBI gene;Acc:709760]  
ENSMMUG0000003539 glutamine rich 2 [Source:VGNC Symbol;Acc:VGNC:76534]  
ENSMMUG0000003568 testis expressed 101 [Source:VGNC Symbol;Acc:VGNC:79869]  
ENSMMUG0000003668 GTPase activating protein and VPS9 domains 1 [Source:VGNC Symbol;Acc:VGNC:72767]  
ENSMMUG0000003819 nitric oxide synthase interacting protein [Source:VGNC Symbol;Acc:VGNC:75207]  
ENSMMUG0000003874 interferon induced transmembrane protein 10 [Source:NCBI gene;Acc:721010]

ENSMMUG00000003950 nucleoporin 98 and 96 precursor [Source:VGNC Symbol;Acc:VGNC:75563]  
ENSMMUG00000003955 post-GPI attachment to proteins 2 [Source:VGNC Symbol;Acc:VGNC:75823]  
ENSMMUG00000004022 zinc finger SWIM-type containing 2 [Source:VGNC Symbol;Acc:VGNC:79908]  
ENSMMUG00000004024 cadherin related family member 5 [Source:VGNC Symbol;Acc:VGNC:71158]  
ENSMMUG00000004332 tripartite motif containing 44 [Source:VGNC Symbol;Acc:VGNC:79168]  
ENSMMUG00000004435 two pore segment channel 1 [Source:VGNC Symbol;Acc:VGNC:79117]  
ENSMMUG00000004794 DNA ligase 3 [Source:VGNC Symbol;Acc:VGNC:74266]  
ENSMMUG00000005086 homeobox protein TGIF1 [Source:NCBI gene;Acc:694580]  
ENSMMUG00000005208 RNA polymerase III subunit B [Source:VGNC Symbol;Acc:VGNC:76143]  
ENSMMUG00000005215 Rab9 effector protein with kelch motifs [Source:VGNC Symbol;Acc:VGNC:76495]  
ENSMMUG00000005432 clathrin heavy chain like 1 [Source:VGNC Symbol;Acc:VGNC:71268]  
ENSMMUG00000005482 lysine methyltransferase 2A [Source:NCBI gene;Acc:705511]  
ENSMMUG00000005483 ribosomal protein S6 kinase B2 [Source:VGNC Symbol;Acc:VGNC:76934]  
ENSMMUG00000005488 coronin 1B [Source:VGNC Symbol;Acc:VGNC:71320]  
ENSMMUG00000005504 nucleoporin 37 [Source:VGNC Symbol;Acc:VGNC:75491]  
ENSMMUG00000005554 mediator complex subunit 29 [Source:VGNC Symbol;Acc:VGNC:74557]  
ENSMMUG00000005595 RAB14, member RAS oncogene family [Source:NCBI gene;Acc:699837]  
ENSMMUG00000005666 phospholipase D2 [Source:VGNC Symbol;Acc:VGNC:76172]  
ENSMMUG00000005989 GLE1 RNA export mediator [Source:VGNC Symbol;Acc:VGNC:73067]  
ENSMMUG00000005997 cell division cycle 14B [Source:NCBI gene;Acc:710300]  
ENSMMUG00000006066 phosphatidylcholine transfer protein [Source:VGNC Symbol;Acc:VGNC:75789]  
ENSMMUG00000006091 contactin associated protein 1 [Source:VGNC Symbol;Acc:VGNC:71390]  
ENSMMUG00000006093 enhancer of zeste 1 polycomb repressive complex 2 subunit [Source:VGNC Symbol;Acc:VGNC:72457]  
ENSMMUG00000006180 tetratricopeptide repeat, ankyrin repeat and coiled-coil containing 1 [Source:VGNC Symbol;Acc:VGNC:78238]  
ENSMMUG00000006181 WD repeat, sterile alpha motif and U-box domain containing 1 [Source:VGNC Symbol;Acc:VGNC:79634]  
ENSMMUG00000006468 FGFR1 oncogene partner 2 [Source:VGNC Symbol;Acc:VGNC:72551]  
ENSMMUG00000006568 basic leucine zipper ATF-like transcription factor 2 [Source:VGNC Symbol;Acc:VGNC:70127]  
ENSMMUG00000006723 solute carrier family 8 member B1 [Source:NCBI gene;Acc:714561]  
ENSMMUG00000006738 L3MBTL histone methyl-lysine binding protein 1 [Source:NCBI gene;Acc:695694]  
ENSMMUG00000006853 crystallin beta B2 [Source:NCBI gene;Acc:100144420]  
ENSMMUG00000006893 D-amino acid oxidase [Source:VGNC Symbol;Acc:VGNC:71729]  
ENSMMUG00000006929 ST3 beta-galactoside alpha-2,3-sialyltransferase 4 [Source:VGNC Symbol;Acc:VGNC:77827]  
ENSMMUG00000006931 kirre like nephrin family adhesion molecule 3 [Source:NCBI gene;Acc:714534]  
ENSMMUG00000007200 NEDD4 binding protein 2 like 2 [Source:VGNC Symbol;Acc:VGNC:75031]  
ENSMMUG00000007201 PDS5 cohesin associated factor B [Source:VGNC Symbol;Acc:VGNC:75835]  
ENSMMUG00000007423 transcription factor Dp-1 [Source:NCBI gene;Acc:715345]  
ENSMMUG00000007538 transient receptor potential cation channel subfamily M member 4 [Source:VGNC Symbol;Acc:VGNC:79105]  
ENSMMUG00000007603 coiled-coil domain containing 88B [Source:NCBI gene;Acc:722080]  
ENSMMUG00000007925 serum/glucocorticoid regulated kinase 2 [Source:VGNC Symbol;Acc:VGNC:77228]  
ENSMMUG00000008077 dynein cytoplasmic 2 light intermediate chain 1 [Source:VGNC Symbol;Acc:VGNC:71899]  
ENSMMUG00000008080 ATP binding cassette subfamily G member 5 [Source:VGNC Symbol;Acc:VGNC:69391]  
ENSMMUG00000008195 TGFB induced factor homeobox 2 [Source:NCBI gene;Acc:100429616]  
ENSMMUG00000008196 aconitase 1 [Source:VGNC Symbol;Acc:VGNC:69378]  
ENSMMUG00000008253 zinc finger protein 267 [Source:NCBI gene;Acc:641441]  
ENSMMUG00000008384 solute carrier family 4 member 10 [Source:VGNC Symbol;Acc:VGNC:77695]  
ENSMMUG00000008387 dipeptidyl peptidase 4 [Source:VGNC Symbol;Acc:VGNC:71979]  
ENSMMUG00000008474 transforming growth factor beta regulator 1 [Source:VGNC Symbol;Acc:VGNC:78239]  
ENSMMUG00000008615 nebulin [Source:NCBI gene;Acc:100430324]  
ENSMMUG00000008875 solute carrier family 35 member F5 [Source:VGNC Symbol;Acc:VGNC:77567]  
ENSMMUG00000008923 Thy-1 cell surface antigen [Source:VGNC Symbol;Acc:VGNC:78352]  
ENSMMUG00000009187 calcium voltage-gated channel subunit alpha1 B [Source:VGNC Symbol;Acc:VGNC:70499]

ENSMMUG0000009199 glycogen phosphorylase B [Source:VGNC Symbol;Acc:VGNC:76631]  
ENSMMUG0000009201 abhydrolase domain containing 12 [Source:VGNC Symbol;Acc:VGNC:69411]  
ENSMMUG0000009312 leukotriene A4 hydrolase [Source:VGNC Symbol;Acc:VGNC:74453]  
ENSMMUG0000009377 tripartite motif containing 47 [Source:VGNC Symbol;Acc:VGNC:79171]  
ENSMMUG0000009414 Sad1 and UNC84 domain containing 5 [Source:VGNC Symbol;Acc:VGNC:78133]  
ENSMMUG0000009559 minichromosome maintenance complex binding protein [Source:VGNC Symbol;Acc:VGNC:74583]  
ENSMMUG0000009567 glyoxylate reductase 1 homolog [Source:NCBI gene;Acc:706933]  
ENSMMUG0000009593 WAS/WASL interacting protein family member 1 [Source:VGNC Symbol;Acc:VGNC:78784]  
ENSMMUG0000009684 kinesin family member 22 [Source:VGNC Symbol;Acc:VGNC:74033]  
ENSMMUG0000009788 tubulin alpha-1C chain [Source:NCBI gene;Acc:710110]  
ENSMMUG0000009886 Coenzyme A synthase [Source:VGNC Symbol;Acc:VGNC:81373]  
ENSMMUG0000009890 FERM, ARH/RhoGEF and pleckstrin domain protein 1 [Source:VGNC Symbol;Acc:VGNC:72614]  
ENSMMUG0000009960 cathepsin A [Source:VGNC Symbol;Acc:VGNC:71617]  
ENSMMUG0000009988 transmembrane protein 59 like [Source:VGNC Symbol;Acc:VGNC:78919]  
ENSMMUG0000009995 arachidonate 15-lipoxygenase type B [Source:VGNC Symbol;Acc:VGNC:69797]  
ENSMMUG0000010028 leucine zipper tumor suppressor family member 3 [Source:VGNC Symbol;Acc:VGNC:74403]  
ENSMMUG0000010357 cyclin and CBS domain divalent metal cation transport mediator 1 [Source:NCBI gene;Acc:708335]  
ENSMMUG0000010451 inositol polyphosphate phosphatase like 1 [Source:VGNC Symbol;Acc:VGNC:73752]  
ENSMMUG0000010521 ADP ribosylation factor like GTPase 5A [Source:VGNC Symbol;Acc:VGNC:70017]  
ENSMMUG0000010526 calcium voltage-gated channel auxiliary subunit beta 4 [Source:VGNC Symbol;Acc:VGNC:82116]  
ENSMMUG0000010592 adducin 2 [Source:VGNC Symbol;Acc:VGNC:69529]  
ENSMMUG0000010614 C-C motif chemokine ligand 25 [Source:VGNC Symbol;Acc:VGNC:70700]  
ENSMMUG0000010824 SWIM-type zinc finger 7 associated protein 1 [Source:VGNC Symbol;Acc:VGNC:78220]  
ENSMMUG0000010869 nucleoporin 160 [Source:VGNC Symbol;Acc:VGNC:75429]  
ENSMMUG0000011064 synaptosome associated protein 25 [Source:VGNC Symbol;Acc:VGNC:77663]  
ENSMMUG0000011209 BICD family like cargo adaptor 1 [Source:HGNC Symbol;Acc:HGNC:28095]  
ENSMMUG0000011278 cysteine rich with EGF like domains 2 [Source:NCBI gene;Acc:720586]  
ENSMMUG0000011332 Rho GTPase activating protein 35 [Source:VGNC Symbol;Acc:VGNC:69942]  
ENSMMUG0000011411 sperm acrosome associated 3 [Source:VGNC Symbol;Acc:VGNC:77930]  
ENSMMUG0000011427 syntaxin 10 [Source:VGNC Symbol;Acc:VGNC:78040]  
ENSMMUG0000011798 eukaryotic translation initiation factor 3 subunit C [Source:NCBI gene;Acc:705696]  
ENSMMUG0000011817 aryl hydrocarbon receptor interacting protein [Source:VGNC Symbol;Acc:VGNC:69759]  
ENSMMUG0000011951 KRI1 homolog [Source:VGNC Symbol;Acc:VGNC:74127]  
ENSMMUG0000012001 transcription factor 4 [Source:VGNC Symbol;Acc:VGNC:78288]  
ENSMMUG0000012039 cytochrome b5 type B (outer mitochondrial membrane) [Source:NCBI gene;Acc:705093]  
ENSMMUG0000012147 collagen type V alpha 1 chain [Source:NCBI gene;Acc:722014]  
ENSMMUG0000012178 calcium binding and coiled-coil domain 2 [Source:VGNC Symbol;Acc:VGNC:70675]  
ENSMMUG0000012228 ubiquitin conjugating enzyme E2 V1 [Source:NCBI gene;Acc:100425552]  
ENSMMUG0000012472 phosphatidylinositol-4-phosphate 5-kinase type 1 beta [Source:VGNC Symbol;Acc:VGNC:76001]  
ENSMMUG0000012668 centriolin [Source:VGNC Symbol;Acc:VGNC:71204]  
ENSMMUG0000012787 acid phosphatase 7, tartrate resistant (putative) [Source:NCBI gene;Acc:695532]  
ENSMMUG0000012797 zinc finger protein 233 [Source:VGNC Symbol;Acc:VGNC:79903]  
ENSMMUG0000012801 zinc finger protein 235 [Source:VGNC Symbol;Acc:VGNC:78825]  
ENSMMUG0000012937 proline rich 12 [Source:NCBI gene;Acc:719344]  
ENSMMUG0000012941 nudix hydrolase 22 [Source:VGNC Symbol;Acc:VGNC:75475]  
ENSMMUG0000012944 vascular endothelial growth factor B [Source:VGNC Symbol;Acc:VGNC:78765]  
ENSMMUG0000012959 solute carrier family 35 member E1 [Source:VGNC Symbol;Acc:VGNC:77536]  
ENSMMUG0000013251 xin actin binding repeat containing 2 [Source:VGNC Symbol;Acc:VGNC:78953]  
ENSMMUG0000013477 creatine kinase, M-type [Source:VGNC Symbol;Acc:VGNC:71230]  
ENSMMUG0000013671 elongation factor for RNA polymerase II [Source:VGNC Symbol;Acc:VGNC:72088]  
ENSMMUG0000013713 beta 3-glucosyltransferase [Source:NCBI gene;Acc:713498]

ENSMMUG00000013740 minichromosome maintenance 8 homologous recombination repair factor [Source:VGNC Symbol;Acc:VGNC:74516]  
ENSMMUG00000013798 fatty acid desaturase 1 [Source:VGNC Symbol;Acc:VGNC:72471]  
ENSMMUG00000013830 glucose-6-phosphatase catalytic subunit 2 [Source:NCBI gene;Acc:709062]  
ENSMMUG00000013832 ATP binding cassette subfamily B member 11 [Source:VGNC Symbol;Acc:VGNC:81339]  
ENSMMUG00000013944 regulator of microtubule dynamics 2 [Source:VGNC Symbol;Acc:VGNC:76839]  
ENSMMUG00000013967 TOX high mobility group box family member 3 [Source:VGNC Symbol;Acc:VGNC:78612]  
ENSMMUG00000014032 proline rich 36 [Source:NCBI gene;Acc:710443]  
ENSMMUG00000014123 alanyl-tRNA editing protein Aarsd1 [Source:NCBI gene;Acc:712203]  
ENSMMUG00000014237 lysine methyltransferase 5B [Source:VGNC Symbol;Acc:VGNC:74110]  
ENSMMUG00000014240 thioredoxin domain containing 11 [Source:VGNC Symbol;Acc:VGNC:79678]  
ENSMMUG00000014265 TAP binding protein like [Source:NCBI gene;Acc:712626]  
ENSMMUG00000014273 cation channel sperm associated auxiliary subunit gamma [Source:VGNC Symbol;Acc:VGNC:70626]  
ENSMMUG00000014277 ITPR interacting domain containing 2 [Source:VGNC Symbol;Acc:VGNC:73584]  
ENSMMUG00000014397 NCK associated protein 1 [Source:VGNC Symbol;Acc:VGNC:75143]  
ENSMMUG00000014530 pre-mRNA processing factor 19 [Source:VGNC Symbol;Acc:VGNC:76281]  
ENSMMUG00000014864 VPS11 core subunit of CORVET and HOPS complexes [Source:VGNC Symbol;Acc:VGNC:78965]  
ENSMMUG00000014897 ribonucleoprotein, PTB binding 1 [Source:NCBI gene;Acc:715250]  
ENSMMUG00000015468 checkpoint with forkhead and ring finger domains [Source:VGNC Symbol;Acc:VGNC:71064]  
ENSMMUG00000015744 zinc finger protein 302 [Source:NCBI gene;Acc:706279]  
ENSMMUG00000015931 phosphatidylinositol transfer protein membrane associated 2 [Source:VGNC Symbol;Acc:VGNC:75843]  
ENSMMUG00000016001 vesicle amine transport 1 [Source:VGNC Symbol;Acc:VGNC:79058]  
ENSMMUG00000016143 sialophorin [Source:VGNC Symbol;Acc:VGNC:77861]  
ENSMMUG00000016323 Rho guanine nucleotide exchange factor 39 [Source:VGNC Symbol;Acc:VGNC:69912]  
ENSMMUG00000016327 coiled-coil domain containing 107 [Source:VGNC Symbol;Acc:VGNC:70656]  
ENSMMUG00000016417 chromobox 8 [Source:NCBI gene;Acc:717514]  
ENSMMUG00000016438 protein kinase D3 [Source:VGNC Symbol;Acc:VGNC:76415]  
ENSMMUG00000016448 DLG associated protein 4 [Source:NCBI gene;Acc:702928]  
ENSMMUG00000016549 matrix metalloproteinase 9 [Source:VGNC Symbol;Acc:VGNC:74903]  
ENSMMUG00000016678 Rho associated coiled-coil containing protein kinase 2 [Source:VGNC Symbol;Acc:VGNC:76714]  
ENSMMUG00000016796 reticulophagy regulator family member 3 [Source:VGNC Symbol;Acc:VGNC:76845]  
ENSMMUG00000016797 tubulin gamma 1 [Source:NCBI gene;Acc:710756]  
ENSMMUG00000016890 solute carrier family 37 member 4 [Source:VGNC Symbol;Acc:VGNC:77591]  
ENSMMUG00000017036 nicalin [Source:VGNC Symbol;Acc:VGNC:75032]  
ENSMMUG00000017224 catenin beta like 1 [Source:VGNC Symbol;Acc:VGNC:71414]  
ENSMMUG00000017256 calcium voltage-gated channel subunit alpha1 G [Source:VGNC Symbol;Acc:VGNC:70504]  
ENSMMUG00000017561 solute carrier family 43 member 2 [Source:VGNC Symbol;Acc:VGNC:77554]  
ENSMMUG00000017758 mitogen-activated protein kinase 3 [Source:VGNC Symbol;Acc:VGNC:74646]  
ENSMMUG00000017810 structure specific recognition protein 1 [Source:VGNC Symbol;Acc:VGNC:77891]  
ENSMMUG00000017822 periplakin [Source:VGNC Symbol;Acc:VGNC:76240]  
ENSMMUG00000018034 suppression of tumorigenicity 14 [Source:VGNC Symbol;Acc:VGNC:77897]  
ENSMMUG00000018137 MYB proto-oncogene like 2 [Source:VGNC Symbol;Acc:VGNC:75092]  
ENSMMUG00000018144 C2 calcium-dependent domain-containing protein 6 [Source:NCBI gene;Acc:702140]  
ENSMMUG00000018237 plexin C1 [Source:VGNC Symbol;Acc:VGNC:76190]  
ENSMMUG00000018239 centrosomal protein 83 [Source:VGNC Symbol;Acc:VGNC:70992]  
ENSMMUG00000018396 HAUS augmin like complex subunit 6 [Source:VGNC Symbol;Acc:VGNC:73237]  
ENSMMUG00000018485 methyltransferase like 7A [Source:VGNC Symbol;Acc:VGNC:74567]  
ENSMMUG00000018719 nemo like kinase [Source:VGNC Symbol;Acc:VGNC:75277]  
ENSMMUG00000018767 cell division cycle associated 5 [Source:NCBI gene;Acc:721998]  
ENSMMUG00000018932 adhesion G protein-coupled receptor E2 [Source:NCBI gene;Acc:654420]  
ENSMMUG00000018967 ubiquitin conjugating enzyme E2 O [Source:VGNC Symbol;Acc:VGNC:79813]  
ENSMMUG00000018986 seizure related 6 homolog like 2 [Source:VGNC Symbol;Acc:VGNC:81567]



ENSMMUG00000019070 focadhesin [Source:VGNC Symbol;Acc:VGNC:72556]  
ENSMMUG00000019314 vav guanine nucleotide exchange factor 1 [Source:VGNC Symbol;Acc:VGNC:78757]  
ENSMMUG00000019418 erythrocyte membrane protein band 4.1 like 3 [Source:VGNC Symbol;Acc:VGNC:72233]  
ENSMMUG00000019690 SEC14 and spectrin domain containing 1 [Source:VGNC Symbol;Acc:VGNC:77267]  
ENSMMUG00000019839 lysine acetyltransferase 5 [Source:VGNC Symbol;Acc:VGNC:73955]  
ENSMMUG00000019988 homeodomain interacting protein kinase 3 [Source:VGNC Symbol;Acc:VGNC:73472]  
ENSMMUG00000020009 receptor tyrosine kinase like orphan receptor 2 [Source:VGNC Symbol;Acc:VGNC:76716]  
ENSMMUG00000020020 Rho GTPase activating protein 23 [Source:NCBI gene;Acc:693996]  
ENSMMUG00000020254 exocyst complex component 3 like 1 [Source:VGNC Symbol;Acc:VGNC:72376]  
ENSMMUG00000020462 CD300e molecule [Source:NCBI gene;Acc:114673189]  
ENSMMUG00000020549 protein phosphatase 6 catalytic subunit [Source:NCBI gene;Acc:703658]  
ENSMMUG00000020580 RPGRIP1 like [Source:VGNC Symbol;Acc:VGNC:77124]  
ENSMMUG00000020605 heparanase 2 (inactive) [Source:NCBI gene;Acc:708795]  
ENSMMUG00000020629 SDS3 homolog, SIN3A corepressor complex component [Source:NCBI gene;Acc:696166]  
ENSMMUG00000020668 cyclin E1 [Source:VGNC Symbol;Acc:VGNC:70727]  
ENSMMUG00000020799 BH3 interacting domain death agonist [Source:VGNC Symbol;Acc:VGNC:70250]  
ENSMMUG00000020868 homeobox B8 [Source:VGNC Symbol;Acc:VGNC:73505]  
ENSMMUG00000021022 deoxynucleotidyltransferase terminal interacting protein 1 [Source:VGNC Symbol;Acc:VGNC:71845]  
ENSMMUG00000021039 X-ray radiation resistance associated 1 [Source:NCBI gene;Acc:693788]  
ENSMMUG00000021062 CD177 molecule [Source:VGNC Symbol;Acc:VGNC:70912]  
ENSMMUG00000021428 lipocalin 12 [Source:VGNC Symbol;Acc:VGNC:74143]  
ENSMMUG00000021436 latent transforming growth factor beta binding protein 1 [Source:VGNC Symbol;Acc:VGNC:74456]  
ENSMMUG00000021477 ATPase H+ transporting V1 subunit E1 [Source:NCBI gene;Acc:709739]  
ENSMMUG00000021564 lysine demethylase 2B [Source:VGNC Symbol;Acc:VGNC:81425]  
ENSMMUG00000021610 regulator of G protein signaling 10 [Source:VGNC Symbol;Acc:VGNC:76915]  
ENSMMUG00000021661 leucine rich repeat containing 56 [Source:VGNC Symbol;Acc:VGNC:74356]  
ENSMMUG00000021664 lamin tail domain containing 2 [Source:VGNC Symbol;Acc:VGNC:74380]  
ENSMMUG00000022031 DNA polymerase alpha 2, accessory subunit [Source:NCBI gene;Acc:716541]  
ENSMMUG00000022100 midnolin [Source:VGNC Symbol;Acc:VGNC:82186]  
ENSMMUG00000022207 phospholipid phosphatase related 2 [Source:NCBI gene;Acc:714388]  
ENSMMUG00000022313 activating transcription factor 7 [Source:NCBI gene;Acc:700403]  
ENSMMUG00000022401 EMSY transcriptional repressor, BRCA2 interacting [Source:VGNC Symbol;Acc:VGNC:72065]  
ENSMMUG00000022613 reversion inducing cysteine rich protein with kazal motifs [Source:VGNC Symbol;Acc:VGNC:76722]  
ENSMMUG00000022893 von Willebrand factor [Source:VGNC Symbol;Acc:VGNC:78778]  
ENSMMUG00000022914 RAB, member of RAS oncogene family like 2B [Source:NCBI gene;Acc:716615]  
ENSMMUG00000022996 HCLS1 binding protein 3 [Source:VGNC Symbol;Acc:VGNC:82158]  
ENSMMUG00000023048 cytochrome b-c1 complex subunit Rieske, mitochondrial [Source:NCBI gene;Acc:705178]  
ENSMMUG00000023192 choline kinase alpha [Source:VGNC Symbol;Acc:VGNC:71039]  
ENSMMUG00000023263 mediator complex subunit 15 [Source:VGNC Symbol;Acc:VGNC:74511]  
ENSMMUG00000023286 UPF1 RNA helicase and ATPase [Source:VGNC Symbol;Acc:VGNC:79971]  
ENSMMUG00000023303 ecotropic viral integration site 5 like [Source:NCBI gene;Acc:706628]  
ENSMMUG00000023370 DDB1 and CUL4 associated factor 17 [Source:VGNC Symbol;Acc:VGNC:71709]  
ENSMMUG00000023403 GTP binding protein 3, mitochondrial [Source:VGNC Symbol;Acc:VGNC:73170]  
ENSMMUG00000023477  
ENSMMUG00000023479 latent transforming growth factor beta binding protein 3 [Source:VGNC Symbol;Acc:VGNC:74458]  
ENSMMUG00000023599 chromosome alignment maintaining phosphoprotein 1 [Source:VGNC Symbol;Acc:VGNC:71061]  
ENSMMUG00000025625 U6 spliceosomal RNA [Source:RFAM;Acc:RF00026]  
ENSMMUG00000026950 microRNA 101-2 [Source:HGNC Symbol;Acc:HGNC:31489]  
ENSMMUG00000027543 Y RNA [Source:RFAM;Acc:RF00019]  
ENSMMUG00000027986 U6 spliceosomal RNA [Source:RFAM;Acc:RF00026]  
ENSMMUG00000028907 insulin receptor [Source:NCBI gene;Acc:706009]

ENSMMUG00000028947 complement factor D [Source:VGNC Symbol;Acc:VGNC:71115]  
ENSMMUG00000028948 azurocidin 1 [Source:VGNC Symbol;Acc:VGNC:70202]  
ENSMMUG00000029296 phosphatidylinositol glycan anchor biosynthesis class Q [Source:VGNC Symbol;Acc:VGNC:75798]  
ENSMMUG00000030279 A-kinase anchoring protein 10 [Source:VGNC Symbol;Acc:VGNC:69764]  
ENSMMUG00000030964 RAB6A, member RAS oncogene family [Source:NCBI gene;Acc:718717]  
ENSMMUG00000031100 membrane-spanning 4-domains subfamily A member 4A-like [Source:NCBI gene;Acc:698152]  
ENSMMUG00000031163 membrane anchored junction protein [Source:VGNC Symbol;Acc:VGNC:74375]  
ENSMMUG00000031391 RNA binding motif protein 38 [Source:VGNC Symbol;Acc:VGNC:76484]  
ENSMMUG00000037175 U6 spliceosomal RNA [Source:RFAM;Acc:RF00026]  
ENSMMUG00000038363 adaptor related protein complex 5 subunit beta 1 [Source:NCBI gene;Acc:721904]  
ENSMMUG00000038944  
ENSMMUG00000039774 Metazoan signal recognition particle RNA [Source:RFAM;Acc:RF00017]  
ENSMMUG00000040741 thioredoxin related transmembrane protein 2 [Source:NCBI gene;Acc:100169970]  
ENSMMUG00000041101 protein phosphatase 2 regulatory subunit B'beta [Source:NCBI gene;Acc:722026]  
ENSMMUG00000042598 transmembrane protein 18 [Source:NCBI gene;Acc:721515]  
ENSMMUG00000043134 coiled-coil domain containing 159 [Source:NCBI gene;Acc:100424702]  
ENSMMUG00000043396 Metazoan signal recognition particle RNA [Source:RFAM;Acc:RF00017]  
ENSMMUG00000045544 neuronal tyrosine-phosphorylated phosphoinositide-3-kinase adaptor 2 [Source:NCBI gene;Acc:711209]  
ENSMMUG00000046169  
ENSMMUG00000046417 chromobox 2 [Source:NCBI gene;Acc:717462]  
ENSMMUG00000046478 WASH complex subunit 3 [Source:NCBI gene;Acc:697824]  
ENSMMUG00000046774 RAS like proto-oncogene B [Source:NCBI gene;Acc:695852]  
ENSMMUG00000047465 Metazoan signal recognition particle RNA [Source:RFAM;Acc:RF00017]  
ENSMMUG00000048204 ephrin B3 [Source:NCBI gene;Acc:716257]  
ENSMMUG00000048215  
ENSMMUG00000048375 Metazoan signal recognition particle RNA [Source:RFAM;Acc:RF00017]  
ENSMMUG00000048566 MCF.2 cell line derived transforming sequence like [Source:NCBI gene;Acc:713961]  
ENSMMUG00000049130  
ENSMMUG00000049232 AMMECR1 like [Source:VGNC Symbol;Acc:VGNC:84208]  
ENSMMUG00000049234 ninjurin 2 [Source:NCBI gene;Acc:706368]  
ENSMMUG00000049703 Metazoan signal recognition particle RNA [Source:RFAM;Acc:RF00017]  
ENSMMUG00000049850 proline rich and Gla domain 4 [Source:NCBI gene;Acc:694707]  
ENSMMUG00000050028  
ENSMMUG00000050516  
ENSMMUG00000050543  
ENSMMUG00000050585  
ENSMMUG00000050696 taste receptor type 2 member 31-like [Source:NCBI gene;Acc:693892]  
ENSMMUG00000050793 N-acetyl-alpha-glucosaminidase [Source:NCBI gene;Acc:707186]  
ENSMMUG00000050822 carbonic anhydrase 9 [Source:NCBI gene;Acc:696729]  
ENSMMUG00000051072  
ENSMMUG00000051201 zinc finger SWIM-type containing 3 [Source:NCBI gene;Acc:708804]  
ENSMMUG00000051226 FAD-linked sulfhydryl oxidase ERV1 [Source:NCBI gene;Acc:106994988]  
ENSMMUG00000051807  
ENSMMUG00000051925  
ENSMMUG00000052168  
ENSMMUG00000052505 homeobox B9 [Source:NCBI gene;Acc:106994009]  
ENSMMUG00000052569  
ENSMMUG00000052607  
ENSMMUG00000052854 mucin like 1 [Source:NCBI gene;Acc:100423942]  
ENSMMUG00000053013  
ENSMMUG00000053083 C2 calcium dependent domain containing 4C [Source:NCBI gene;Acc:100424440]

ENSMMUG00000053376  
ENSMMUG00000053457 caspase 14 [Source:NCBI gene;Acc:718049]  
ENSMMUG00000053655  
ENSMMUG00000053937  
ENSMMUG00000054072  
ENSMMUG00000055048  
ENSMMUG00000055290 netrin 1 [Source:NCBI gene;Acc:717645]  
ENSMMUG00000055324 homeobox B7 [Source:NCBI gene;Acc:697089]  
ENSMMUG00000055352  
ENSMMUG00000055379  
ENSMMUG00000055747 cytochrome c oxidase subunit 6B [Source:NCBI gene;Acc:692062]  
ENSMMUG00000055775 transmembrane p24 trafficking protein 1 [Source:NCBI gene;Acc:713618]  
ENSMMUG00000055811  
ENSMMUG00000055820  
ENSMMUG00000055897  
ENSMMUG00000055963  
ENSMMUG00000056248  
ENSMMUG00000056381 forkhead box R1 [Source:NCBI gene;Acc:707285]  
ENSMMUG00000056477  
ENSMMUG00000056555  
ENSMMUG00000056629 nucleolar protein 12 [Source:NCBI gene;Acc:698318]  
ENSMMUG00000056840  
ENSMMUG00000056945  
ENSMMUG00000056950  
ENSMMUG00000057001 homeobox B2 [Source:NCBI gene;Acc:106994010]  
ENSMMUG00000057157  
ENSMMUG00000057179 cation channel sperm associated 1 [Source:NCBI gene;Acc:721869]  
ENSMMUG00000057231 T-box transcription factor 21 [Source:NCBI gene;Acc:694044]  
ENSMMUG00000057331 RNA terminal phosphate cyclase like 1 [Source:NCBI gene;Acc:694568]  
ENSMMUG00000057345 calcineurin like phosphoesterase domain containing 1 [Source:NCBI gene;Acc:716978]  
ENSMMUG00000057361 Metazoan signal recognition particle RNA [Source:RFAM;Acc:RF00017]  
ENSMMUG00000057570  
ENSMMUG00000057632  
ENSMMUG00000057640 plakophilin-3-like [Source:NCBI gene;Acc:114669833]  
ENSMMUG00000057687  
ENSMMUG00000057785  
ENSMMUG00000057934  
ENSMMUG00000058110  
ENSMMUG00000058326 neuralized E3 ubiquitin protein ligase 2 [Source:NCBI gene;Acc:708904]  
ENSMMUG00000058536  
ENSMMUG00000058566  
ENSMMUG00000058592  
ENSMMUG00000058885 formin binding protein 4 [Source:NCBI gene;Acc:712633]  
ENSMMUG00000058916  
ENSMMUG00000058928 Metazoan signal recognition particle RNA [Source:RFAM;Acc:RF00017]  
ENSMMUG00000059175  
ENSMMUG00000059182  
ENSMMUG00000059229 CEA cell adhesion molecule 7 [Source:NCBI gene;Acc:705572]  
ENSMMUG00000059332 Metazoan signal recognition particle RNA [Source:RFAM;Acc:RF00017]  
ENSMMUG00000059341 Metazoan signal recognition particle RNA [Source:RFAM;Acc:RF00017]  
ENSMMUG00000059374

ENSMMUG00000059436 interleukin 10 receptor subunit alpha [Source:NCBI gene;Acc:704383]  
ENSMMUG00000059504  
ENSMMUG00000059782  
ENSMMUG00000059985  
ENSMMUG00000060289  
ENSMMUG00000060502  
ENSMMUG00000060517  
ENSMMUG00000060675  
ENSMMUG00000060712  
ENSMMUG00000060761  
ENSMMUG00000060767  
ENSMMUG00000060879 homeobox B13 [Source:NCBI gene;Acc:697572]  
ENSMMUG00000060987  
ENSMMUG00000061335  
ENSMMUG00000061342  
ENSMMUG00000061424 ventral anterior homeobox 2 [Source:NCBI gene;Acc:703531]  
ENSMMUG00000061533  
ENSMMUG00000061896  
ENSMMUG00000061923  
ENSMMUG00000061935  
ENSMMUG00000061995  
ENSMMUG00000062037 stannin [Source:NCBI gene;Acc:711909]  
ENSMMUG00000062091  
ENSMMUG00000062139  
ENSMMUG00000062283 homeobox B6 [Source:NCBI gene;Acc:106994013]  
ENSMMUG00000062583 olfactory receptor 1A1 [Source:NCBI gene;Acc:721403]  
ENSMMUG00000062781 chromosome 14 C11orf97 homolog [Source:NCBI gene;Acc:106993442]  
ENSMMUG00000062863  
ENSMMUG00000063590  
ENSMMUG00000063622 mitochondrial ribosomal protein S26 [Source:NCBI gene;Acc:717038]  
ENSMMUG00000063759 transmembrane protein 185B [Source:NCBI gene;Acc:695744]  
ENSMMUG00000063779  
ENSMMUG00000063868 Metazoan signal recognition particle RNA [Source:RFAM;Acc:RF00017]  
ENSMMUG00000063898 apolipoprotein F [Source:NCBI gene;Acc:712761]  
ENSMMUG00000063914  
ENSMMUG00000064052 CD300 molecule like family member d [Source:NCBI gene;Acc:703142]  
ENSMMUG00000064391  
ENSMMUG00000064463  
ENSMMUG00000064532 mucin 16, cell surface associated [Source:NCBI gene;Acc:106996460]  
ENSMMUG00000064554 leucine rich repeat neuronal 4 [Source:NCBI gene;Acc:718283]  
ENSMMUG00000064557  
ENSMMUG00000064730  
ENSMMUG00000064892  
ENSMMUG00000064920  
ENSMMUG00000064931  
ENSMMUG00000065025  
ENSMMUG00000065054 G protein subunit gamma 7 [Source:NCBI gene;Acc:711335]  
ENSMMUG00000065269 Rho family GTPase 2 [Source:NCBI gene;Acc:712559]  
ENSMMUG00000011627 interleukin 4 induced 1 [Source:VGNC Symbol;Acc:VGNC:73625]  
ENSMMUG00000012938 SR-related CTD associated factor 1 [Source:VGNC Symbol;Acc:VGNC:77137]  
ENSMMUG00000028733 RAS related [Source:VGNC Symbol;Acc:VGNC:76937]

ENSMMUG00000044817 nucleoporin 62 [Source:NCBI gene;Acc:100426308]  
ENSMMUG00000054052 sialic acid binding Ig like lectin 11 [Source:NCBI gene;Acc:719127]  
ENSMMUG00000054473 activating transcription factor 5 [Source:NCBI gene;Acc:719150]  
ENSMMUG00000055976 CD99 antigen [Source:NCBI gene;Acc:106995376]  
ENSMMUG00000058137 zinc finger protein 816 [Source:NCBI gene;Acc:720058]  
ENSMMUG00000064146 Metazoan signal recognition particle RNA [Source:RFAM;Acc:RF00017]

# Non-Survivors – SD2 vs. Baseline

| Ensembl Gene ID    | Description                                                                                  |
|--------------------|----------------------------------------------------------------------------------------------|
| ENSMMUG00000000419 | Rho GTPase activating protein 26 [Source:VGNC Symbol;Acc:VGNC:69846]                         |
| ENSMMUG00000000421 | nuclear receptor subfamily 3 group C member 1 [Source:VGNC Symbol;Acc:VGNC:75515]            |
| ENSMMUG00000000544 | collagen type VI alpha 1 chain [Source:VGNC Symbol;Acc:VGNC:82084]                           |
| ENSMMUG00000000632 | SH3 binding domain protein 5 like [Source:VGNC Symbol;Acc:VGNC:77334]                        |
| ENSMMUG00000000644 | centrosomal protein 85 [Source:VGNC Symbol;Acc:VGNC:71096]                                   |
| ENSMMUG00000000649 | UBX domain protein 11 [Source:VGNC Symbol;Acc:VGNC:79859]                                    |
| ENSMMUG00000000706 | filamin B [Source:VGNC Symbol;Acc:VGNC:72672]                                                |
| ENSMMUG00000000790 | ankyrin repeat domain 17 [Source:VGNC Symbol;Acc:VGNC:84240]                                 |
| ENSMMUG00000000808 | melanin concentrating hormone receptor 2 [Source:VGNC Symbol;Acc:VGNC:74550]                 |
| ENSMMUG00000000827 | ubiquitin specific peptidase 38 [Source:VGNC Symbol;Acc:VGNC:79224]                          |
| ENSMMUG00000000894 | cellular inhibitor of PP2A [Source:VGNC Symbol;Acc:VGNC:71371]                               |
| ENSMMUG00000000931 | solute carrier family 35 member A3 [Source:VGNC Symbol;Acc:VGNC:77461]                       |
| ENSMMUG00000000951 | integrin subunit beta 2 [Source:VGNC Symbol;Acc:VGNC:73786]                                  |
| ENSMMUG00000001060 | ryanodine receptor 2 [Source:VGNC Symbol;Acc:VGNC:76954]                                     |
| ENSMMUG00000001350 | HERPUD family member 2 [Source:VGNC Symbol;Acc:VGNC:73216]                                   |
| ENSMMUG00000001380 | outer dense fiber of sperm tails 2 like [Source:VGNC Symbol;Acc:VGNC:75482]                  |
| ENSMMUG00000001397 | multiple C2 and transmembrane domain containing 1 [Source:VGNC Symbol;Acc:VGNC:74589]        |
| ENSMMUG00000001690 | calponin 3 [Source:VGNC Symbol;Acc:VGNC:71278]                                               |
| ENSMMUG00000001702 | succinyl-CoA:glutarate-CoA transferase [Source:VGNC Symbol;Acc:VGNC:81767]                   |
| ENSMMUG00000001707 | amyloid beta precursor protein binding family B member 3 [Source:VGNC Symbol;Acc:VGNC:69869] |
| ENSMMUG00000001725 | solute carrier family 35 member A4 [Source:VGNC Symbol;Acc:VGNC:77532]                       |
| ENSMMUG00000001753 | integrin subunit alpha 1 [Source:VGNC Symbol;Acc:VGNC:73772]                                 |
| ENSMMUG00000001848 | sprouty RTK signaling antagonist 1 [Source:VGNC Symbol;Acc:VGNC:77867]                       |
| ENSMMUG00000002211 | doublecortin like kinase 2 [Source:VGNC Symbol;Acc:VGNC:71670]                               |
| ENSMMUG00000002217 | alkaline phosphatase, biomineralization associated [Source:VGNC Symbol;Acc:VGNC:69801]       |
| ENSMMUG00000002411 | drebrin like [Source:NCBI gene;Acc:720621]                                                   |
| ENSMMUG00000002422 | AE binding protein 1 [Source:VGNC Symbol;Acc:VGNC:80328]                                     |
| ENSMMUG00000002423 | DNA polymerase delta 2, accessory subunit [Source:VGNC Symbol;Acc:VGNC:76203]                |
| ENSMMUG00000002426 | myosin light chain 7 [Source:VGNC Symbol;Acc:VGNC:75002]                                     |
| ENSMMUG00000002427 | glucokinase [Source:VGNC Symbol;Acc:VGNC:72901]                                              |
| ENSMMUG00000002430 | YKT6 v-SNARE homolog [Source:VGNC Symbol;Acc:VGNC:81796]                                     |
| ENSMMUG00000002433 | calcium/calmodulin dependent protein kinase II beta [Source:VGNC Symbol;Acc:VGNC:70524]      |
| ENSMMUG00000002564 | Fraser extracellular matrix complex subunit 1 [Source:VGNC Symbol;Acc:VGNC:72743]            |
| ENSMMUG00000002741 | CUB and Sushi multiple domains 2 [Source:VGNC Symbol;Acc:VGNC:71441]                         |
| ENSMMUG00000002886 | Bardet-Biedl syndrome 9 [Source:NCBI gene;Acc:708412]                                        |
| ENSMMUG00000002949 | motile sperm domain containing 3 [Source:VGNC Symbol;Acc:VGNC:74823]                         |
| ENSMMUG00000002950 | transferrin receptor 2 [Source:VGNC Symbol;Acc:VGNC:81770]                                   |
| ENSMMUG00000003131 | interleukin 13 [Source:VGNC Symbol;Acc:VGNC:84393]                                           |
| ENSMMUG00000003133 | interleukin 4 [Source:VGNC Symbol;Acc:VGNC:73729]                                            |
| ENSMMUG00000003167 | cytohesin 3 [Source:VGNC Symbol;Acc:VGNC:71829]                                              |
| ENSMMUG00000003265 | leptin receptor [Source:VGNC Symbol;Acc:VGNC:81429]                                          |
| ENSMMUG00000003267 | zinc finger protein 362 [Source:NCBI gene;Acc:710013]                                        |
| ENSMMUG00000003269 | polyhomeotic homolog 2 [Source:VGNC Symbol;Acc:VGNC:75903]                                   |
| ENSMMUG00000003353 | macrophage stimulating 1 receptor [Source:VGNC Symbol;Acc:VGNC:74941]                        |
| ENSMMUG00000003457 | protein kinase cAMP-activated catalytic subunit beta [Source:NCBI gene;Acc:709728]           |
| ENSMMUG00000003499 | solute carrier family 36 member 1 [Source:VGNC Symbol;Acc:VGNC:77509]                        |
| ENSMMUG00000003572 | nicotinamide phosphoribosyltransferase [Source:VGNC Symbol;Acc:VGNC:75056]                   |
| ENSMMUG00000003598 | tripartite motif containing 7 [Source:VGNC Symbol;Acc:VGNC:79022]                            |



ENSMMUG0000003629 phosphatidylinositol 4-kinase type 2 beta [Source:NCBI gene;Acc:693561]  
ENSMMUG0000003697 inositol polyphosphate-4-phosphatase type II B [Source:VGNC Symbol;Acc:VGNC:73748]  
ENSMMUG0000003739 mannosidase beta [Source:VGNC Symbol;Acc:VGNC:74486]  
ENSMMUG0000003750 PLAG1 like zinc finger 1 [Source:VGNC Symbol;Acc:VGNC:83444]  
ENSMMUG0000003827 albumin [Source:VGNC Symbol;Acc:VGNC:69782]  
ENSMMUG0000003830 alpha fetoprotein [Source:VGNC Symbol;Acc:VGNC:69741]  
ENSMMUG0000003833 Ras association domain family member 6 [Source:VGNC Symbol;Acc:VGNC:76515]  
ENSMMUG0000003902 thrombospondin 3 [Source:VGNC Symbol;Acc:VGNC:78345]  
ENSMMUG0000004002 CDC like kinase 4 [Source:VGNC Symbol;Acc:VGNC:71173]  
ENSMMUG0000004042 Fc receptor like A [Source:VGNC Symbol;Acc:VGNC:72526]  
ENSMMUG0000004103 collagen type XI alpha 1 chain [Source:VGNC Symbol;Acc:VGNC:71289]  
ENSMMUG0000004149 eukaryotic translation initiation factor 4 gamma 3 [Source:NCBI gene;Acc:717555]  
ENSMMUG0000004222 thromboxane A synthase 1 [Source:VGNC Symbol;Acc:VGNC:78278]  
ENSMMUG0000004224 poly(ADP-ribose) polymerase family member 12 [Source:VGNC Symbol;Acc:VGNC:81734]  
ENSMMUG0000004257 beta-secretase 2 [Source:VGNC Symbol;Acc:VGNC:70216]  
ENSMMUG0000004273 dedicator of cytokinesis 3 [Source:VGNC Symbol;Acc:VGNC:71967]  
ENSMMUG0000004280 DDB1 and CUL4 associated factor 1 [Source:VGNC Symbol;Acc:VGNC:71819]  
ENSMMUG0000004512 Fc fragment of IgE receptor Ig [Source:VGNC Symbol;Acc:VGNC:72629]  
ENSMMUG0000004516 apolipoprotein A2 [Source:NCBI gene;Acc:719946]  
ENSMMUG0000004520 NADH:ubiquinone oxidoreductase core subunit S2 [Source:NCBI gene;Acc:719935]  
ENSMMUG0000004749 PPARG coactivator 1 beta [Source:VGNC Symbol;Acc:VGNC:76134]  
ENSMMUG0000004774 maestro heat like repeat family member 2B [Source:VGNC Symbol;Acc:VGNC:74837]  
ENSMMUG0000004801 COPI coat complex subunit gamma 2 [Source:VGNC Symbol;Acc:VGNC:71315]  
ENSMMUG0000005070 ecotropic viral integration site 5 [Source:NCBI gene;Acc:706592]  
ENSMMUG0000005380 zinc finger protein 827 [Source:NCBI gene;Acc:706018]  
ENSMMUG0000005511 SON DNA binding protein [Source:VGNC Symbol;Acc:VGNC:77689]  
ENSMMUG0000005668 kynurenine 3-monooxygenase [Source:VGNC Symbol;Acc:VGNC:74197]  
ENSMMUG0000005745 EYA transcriptional coactivator and phosphatase 4 [Source:VGNC Symbol;Acc:VGNC:72456]  
ENSMMUG0000006029 odontogenic, ameloblast associated [Source:NCBI gene;Acc:707906]  
ENSMMUG0000006284 adenylate kinase 2 [Source:VGNC Symbol;Acc:VGNC:69761]  
ENSMMUG0000006285 antizyme inhibitor 2 [Source:VGNC Symbol;Acc:VGNC:70153]  
ENSMMUG0000006389 zinc finger and SCAN domain containing 20 [Source:VGNC Symbol;Acc:VGNC:78895]  
ENSMMUG0000006530 ATP/GTP binding protein like 3 [Source:VGNC Symbol;Acc:VGNC:69723]  
ENSMMUG0000006596 CCR4-NOT transcription complex subunit 10 [Source:VGNC Symbol;Acc:VGNC:71327]  
ENSMMUG0000006766 RUN domain containing 3B [Source:VGNC Symbol;Acc:VGNC:77129]  
ENSMMUG0000006786 protein tyrosine phosphatase non-receptor type 22 [Source:VGNC Symbol;Acc:VGNC:76603]  
ENSMMUG0000006836 chloride channel accessory 1 [Source:NCBI gene;Acc:574295]  
ENSMMUG0000006851 SPARC (osteonectin), cwcv and kazal like domains proteoglycan 3 [Source:NCBI gene;Acc:705964]  
ENSMMUG0000006980 septin 7 [Source:VGNC Symbol;Acc:VGNC:81759]  
ENSMMUG0000007010 coiled-coil domain-containing protein 162-like [Source:NCBI gene;Acc:700544]  
ENSMMUG0000007208 G protein-coupled receptor 146 [Source:VGNC Symbol;Acc:VGNC:72979]  
ENSMMUG0000007387 G protein-coupled receptor kinase 7 [Source:VGNC Symbol;Acc:VGNC:73182]  
ENSMMUG0000007422 spermatogenesis associated 5 [Source:VGNC Symbol;Acc:VGNC:77952]  
ENSMMUG0000007528 chordin [Source:VGNC Symbol;Acc:VGNC:71042]  
ENSMMUG0000007773 solute carrier organic anion transporter family member 4C1 [Source:VGNC Symbol;Acc:VGNC:77764]  
ENSMMUG0000007970 CCZ1 homolog, vacuolar protein trafficking and biogenesis associated [Source:NCBI gene;Acc:718128]  
ENSMMUG0000008031 zinc finger and BTB domain containing 17 [Source:VGNC Symbol;Acc:VGNC:78849]  
ENSMMUG0000008070 YEATS domain containing 2 [Source:VGNC Symbol;Acc:VGNC:79502]  
ENSMMUG0000008162 fibroblast growth factor binding protein 1 [Source:VGNC Symbol;Acc:VGNC:72536]  
ENSMMUG0000008189 cadherin related family member 3 [Source:HGNC Symbol;Acc:HGNC:26308]  
ENSMMUG0000008197 netrin G1 [Source:VGNC Symbol;Acc:VGNC:75450]

ENSMMUG0000008251 cilia and flagella associated protein 126 [Source:VGNC Symbol;Acc:VGNC:71150]  
ENSMMUG0000008379 adducin 1 [Source:VGNC Symbol;Acc:VGNC:69528]  
ENSMMUG0000008383 major facilitator superfamily domain containing 10 [Source:NCBI gene;Acc:720098]  
ENSMMUG0000008385 NOP14 nucleolar protein [Source:VGNC Symbol;Acc:VGNC:75194]  
ENSMMUG0000008506 metaxin-1 [Source:NCBI gene;Acc:717595]  
ENSMMUG0000008518 phospholipid phosphatase related 5 [Source:NCBI gene;Acc:710549]  
ENSMMUG0000008791 CD47 molecule [Source:VGNC Symbol;Acc:VGNC:70767]  
ENSMMUG0000008828 BEN domain containing 5 [Source:NCBI gene;Acc:711150]  
ENSMMUG0000009040 cornulin [Source:VGNC Symbol;Acc:VGNC:71397]  
ENSMMUG0000009184 myelin protein zero like 1 [Source:NCBI gene;Acc:698437]  
ENSMMUG0000009197 myelin associated oligodendrocyte basic protein [Source:VGNC Symbol;Acc:VGNC:74908]  
ENSMMUG0000009388 F-box and leucine rich repeat protein 5 [Source:VGNC Symbol;Acc:VGNC:81408]  
ENSMMUG0000009437 zinc finger protein 619 [Source:VGNC Symbol;Acc:VGNC:82562]  
ENSMMUG0000009495 carboxypeptidase A1 [Source:VGNC Symbol;Acc:VGNC:71455]  
ENSMMUG0000009499 mesoderm specific transcript [Source:VGNC Symbol;Acc:VGNC:74707]  
ENSMMUG0000009508 TATA-box binding protein associated factor 5 like [Source:VGNC Symbol;Acc:VGNC:78148]  
ENSMMUG0000009667 zinc finger protein 385D [Source:VGNC Symbol;Acc:VGNC:79587]  
ENSMMUG0000009816 exosome component 9 [Source:VGNC Symbol;Acc:VGNC:72477]  
ENSMMUG00000010007 CD14 molecule [Source:VGNC Symbol;Acc:VGNC:70751]  
ENSMMUG00000010008 IK cytokine [Source:VGNC Symbol;Acc:VGNC:73703]  
ENSMMUG00000010308 cyclin I family member 2 [Source:VGNC Symbol;Acc:VGNC:70923]  
ENSMMUG00000010309 septin 8 [Source:VGNC Symbol;Acc:VGNC:77248]  
ENSMMUG00000010313 kinesin family member 3A [Source:VGNC Symbol;Acc:VGNC:74017]  
ENSMMUG00000010314 HECT and RLD domain containing E3 ubiquitin protein ligase family member 6 [Source:VGNC Symbol;Acc:VGNC:73238]  
ENSMMUG00000010316 HECT and RLD domain containing E3 ubiquitin protein ligase 5 [Source:VGNC Symbol;Acc:VGNC:73226]  
ENSMMUG00000010318 phosphatidylinositol glycan anchor biosynthesis class Y [Source:NCBI gene;Acc:100426107]  
ENSMMUG00000010444 ring finger protein 150 [Source:VGNC Symbol;Acc:VGNC:76805]  
ENSMMUG00000010466 solute carrier family 38 member 9 [Source:VGNC Symbol;Acc:VGNC:77574]  
ENSMMUG00000011095 BTB domain and CNC homolog 1 [Source:VGNC Symbol;Acc:VGNC:70217]  
ENSMMUG00000011513 versican [Source:VGNC Symbol;Acc:VGNC:79445]  
ENSMMUG00000011633 kallikrein B1 [Source:VGNC Symbol;Acc:VGNC:74195]  
ENSMMUG00000011634 coagulation factor XI [Source:VGNC Symbol;Acc:VGNC:72460]  
ENSMMUG00000011788 zinc finger protein 212 [Source:VGNC Symbol;Acc:VGNC:78418]  
ENSMMUG00000011878 poly(A) binding protein interacting protein 1 [Source:VGNC Symbol;Acc:VGNC:84476]  
ENSMMUG00000011914 prospero homeobox 1 [Source:VGNC Symbol;Acc:VGNC:76427]  
ENSMMUG00000012405 transient receptor potential cation channel subfamily C member 1 [Source:VGNC Symbol;Acc:VGNC:78651]  
ENSMMUG00000012526 glycosyltransferase 8 domain containing 1 [Source:VGNC Symbol;Acc:VGNC:73001]  
ENSMMUG00000012538 ubiquitin conjugating enzyme E2 U [Source:VGNC Symbol;Acc:VGNC:79726]  
ENSMMUG00000012635 zyxin [Source:VGNC Symbol;Acc:VGNC:78917]  
ENSMMUG00000012697 AT-rich interaction domain 1A [Source:VGNC Symbol;Acc:VGNC:69822]  
ENSMMUG00000013044 selectin P [Source:VGNC Symbol;Acc:VGNC:77157]  
ENSMMUG00000013283 cadherin related family member 2 [Source:NCBI gene;Acc:697249]  
ENSMMUG00000013284 G protein regulated inducer of neurite outgrowth 1 [Source:VGNC Symbol;Acc:VGNC:72998]  
ENSMMUG00000013330 ectonucleoside triphosphate diphosphohydrolase 3 [Source:VGNC Symbol;Acc:VGNC:72226]  
ENSMMUG00000013385 elongator acetyltransferase complex subunit 6 [Source:VGNC Symbol;Acc:VGNC:72113]  
ENSMMUG00000013447 adaptor related protein complex 4 subunit mu 1 [Source:VGNC Symbol;Acc:VGNC:69974]  
ENSMMUG00000013450 TATA-box binding protein associated factor 6 [Source:VGNC Symbol;Acc:VGNC:78093]  
ENSMMUG00000013452 canopy FGF signaling regulator 4 [Source:VGNC Symbol;Acc:VGNC:71364]  
ENSMMUG00000013644 potassium two pore domain channel subfamily K member 17 [Source:VGNC Symbol;Acc:VGNC:73828]  
ENSMMUG00000013648 potassium two pore domain channel subfamily K member 16 [Source:VGNC Symbol;Acc:VGNC:73827]  
ENSMMUG00000014045 protein tyrosine phosphatase non-receptor type 23 [Source:VGNC Symbol;Acc:VGNC:76477]

ENSMMUG00000014046 SREBF chaperone [Source:VGNC Symbol;Acc:VGNC:77140]  
ENSMMUG00000014076 AF4/FMR2 family member 1 [Source:VGNC Symbol;Acc:VGNC:69817]  
ENSMMUG00000014138 forkhead box J3 [Source:VGNC Symbol;Acc:VGNC:72596]  
ENSMMUG00000014589 inositol hexakisphosphate kinase 1 [Source:VGNC Symbol;Acc:VGNC:73621]  
ENSMMUG00000014699  
ENSMMUG00000014707 cadherin EGF LAG seven-pass G-type receptor 3 [Source:VGNC Symbol;Acc:VGNC:71148]  
ENSMMUG00000014720 NCK interacting protein with SH3 domain [Source:VGNC Symbol;Acc:VGNC:74960]  
ENSMMUG00000014738 bromodomain containing 9 [Source:VGNC Symbol;Acc:VGNC:70386]  
ENSMMUG00000014868 OCIA domain containing 1 [Source:VGNC Symbol;Acc:VGNC:75409]  
ENSMMUG00000014874 GTP binding protein 8 (putative) [Source:VGNC Symbol;Acc:VGNC:84180]  
ENSMMUG00000014876 nucleolus and neural progenitor protein [Source:VGNC Symbol;Acc:VGNC:75244]  
ENSMMUG00000015097 tripartite motif containing 62 [Source:VGNC Symbol;Acc:VGNC:79513]  
ENSMMUG00000015329 MX dynamin like GTPase 1 [Source:VGNC Symbol;Acc:VGNC:75086]  
ENSMMUG00000015416 bromodomain and PHD finger containing 3 [Source:VGNC Symbol;Acc:VGNC:70309]  
ENSMMUG00000015479 tectonin beta-propeller repeat containing 1 [Source:VGNC Symbol;Acc:VGNC:79348]  
ENSMMUG00000015555 ST3 beta-galactoside alpha-2,3-sialyltransferase 3 [Source:VGNC Symbol;Acc:VGNC:77828]  
ENSMMUG00000015685 zinc finger protein 804B [Source:VGNC Symbol;Acc:VGNC:81890]  
ENSMMUG00000015716 protein phosphatase with EF-hand domain 2 [Source:VGNC Symbol;Acc:VGNC:76233]  
ENSMMUG00000016273 maltase-glucoamylase [Source:VGNC Symbol;Acc:VGNC:74713]  
ENSMMUG00000016376 mitogen-activated protein kinase kinase kinase 5 [Source:VGNC Symbol;Acc:VGNC:74495]  
ENSMMUG00000016476 TRAF interacting protein [Source:VGNC Symbol;Acc:VGNC:82261]  
ENSMMUG00000016480 CaM kinase like vesicle associated [Source:VGNC Symbol;Acc:VGNC:70663]  
ENSMMUG00000016579 selectin L [Source:NCBI gene;Acc:701419]  
ENSMMUG00000016580 selectin E [Source:VGNC Symbol;Acc:VGNC:77156]  
ENSMMUG00000016582 chromosome 1 C1orf112 homolog [Source:VGNC Symbol;Acc:VGNC:70385]  
ENSMMUG00000017055 divergent protein kinase domain 2A [Source:VGNC Symbol;Acc:VGNC:71781]  
ENSMMUG00000017056 Sad1 and UNC84 domain containing 1 [Source:VGNC Symbol;Acc:VGNC:78161]  
ENSMMUG00000017189 regulatory factor X6 [Source:VGNC Symbol;Acc:VGNC:76800]  
ENSMMUG00000017266 UPF0577 protein KIAA1324 [Source:NCBI gene;Acc:697670]  
ENSMMUG00000017370 signal peptidase complex subunit 1 [Source:VGNC Symbol;Acc:VGNC:84072]  
ENSMMUG00000017501 N-acyl ethanolamine acid amidase [Source:VGNC Symbol;Acc:VGNC:75068]  
ENSMMUG00000017503 SDA1 domain containing 1 [Source:NCBI gene;Acc:700863]  
ENSMMUG00000017510 membrane associated guanylate kinase, WW and PDZ domain containing 1 [Source:VGNC Symbol;Acc:VGNC:74499]  
ENSMMUG00000017605 mitochondrial ribosomal protein L39 [Source:VGNC Symbol;Acc:VGNC:74737]  
ENSMMUG00000017701 myosin VIIA and Rab interacting protein [Source:VGNC Symbol;Acc:VGNC:74992]  
ENSMMUG00000017740 sperm mitochondria associated cysteine rich protein [Source:VGNC Symbol;Acc:VGNC:77816]  
ENSMMUG00000017983 tRNA nucleotidyl transferase 1 [Source:VGNC Symbol;Acc:VGNC:79073]  
ENSMMUG00000018245 EPH receptor A2 [Source:VGNC Symbol;Acc:VGNC:72235]  
ENSMMUG00000018246 transmembrane and coiled-coil domains 6 [Source:VGNC Symbol;Acc:VGNC:84507]  
ENSMMUG00000018549 zinc finger protein 786 [Source:VGNC Symbol;Acc:VGNC:79338]  
ENSMMUG00000018619 DENN domain containing 6A [Source:VGNC Symbol;Acc:VGNC:71726]  
ENSMMUG00000018664 collagen type IX alpha 2 chain [Source:VGNC Symbol;Acc:VGNC:71307]  
ENSMMUG00000018743 ubiquitin specific peptidase 25 [Source:VGNC Symbol;Acc:VGNC:78744]  
ENSMMUG00000018790 activin A receptor type 2B [Source:VGNC Symbol;Acc:VGNC:69450]  
ENSMMUG00000019085 3-hydroxybutyrate dehydrogenase 2 [Source:VGNC Symbol;Acc:VGNC:70161]  
ENSMMUG00000019089 centromere protein E [Source:VGNC Symbol;Acc:VGNC:71008]  
ENSMMUG00000019246 regulator of calcineurin 2 [Source:VGNC Symbol;Acc:VGNC:82092]  
ENSMMUG00000019443 syntaxin 11 [Source:VGNC Symbol;Acc:VGNC:78041]  
ENSMMUG00000019513 U2AF homology motif kinase 1 [Source:VGNC Symbol;Acc:VGNC:79198]  
ENSMMUG00000019527 DNA cross-link repair 1B [Source:VGNC Symbol;Acc:VGNC:71647]  
ENSMMUG00000019528 adaptor related protein complex 4 subunit beta 1 [Source:VGNC Symbol;Acc:VGNC:69972]

ENSMMUG00000019563 collapsin response mediator protein 1 [Source:VGNC Symbol;Acc:VGNC:71494]  
ENSMMUG00000019764 dynactin subunit 4 [Source:VGNC Symbol;Acc:VGNC:71625]  
ENSMMUG00000019830 Fc receptor like 2 [Source:VGNC Symbol;Acc:VGNC:72509]  
ENSMMUG00000019833 Fc receptor like 1 [Source:VGNC Symbol;Acc:VGNC:72528]  
ENSMMUG00000019835 CD5 molecule like [Source:VGNC Symbol;Acc:VGNC:70774]  
ENSMMUG00000019933 TatD DNase domain containing 2 [Source:NCBI gene;Acc:701390]  
ENSMMUG00000019991 dopa decarboxylase [Source:VGNC Symbol;Acc:VGNC:71755]  
ENSMMUG00000020679 myozenin 3 [Source:VGNC Symbol;Acc:VGNC:74988]  
ENSMMUG00000020683 RNA binding motif protein 22 [Source:VGNC Symbol;Acc:VGNC:76535]  
ENSMMUG00000020726 dihydropyrimidine dehydrogenase [Source:VGNC Symbol;Acc:VGNC:71982]  
ENSMMUG00000020861 EvC ciliary complex subunit 1 [Source:VGNC Symbol;Acc:VGNC:72445]  
ENSMMUG00000020979 inka box actin regulator 1 [Source:VGNC Symbol;Acc:VGNC:73692]  
ENSMMUG00000020980 ubiquitin like modifier activating enzyme 7 [Source:VGNC Symbol;Acc:VGNC:78690]  
ENSMMUG00000021073 RAS protein activator like 2 [Source:VGNC Symbol;Acc:VGNC:76670]  
ENSMMUG00000021075 Rac family small GTPase 1 [Source:NCBI gene;Acc:717755]  
ENSMMUG00000021079 NME/NM23 family member 7 [Source:VGNC Symbol;Acc:VGNC:75221]  
ENSMMUG00000021080 basic leucine zipper nuclear factor 1 [Source:VGNC Symbol;Acc:VGNC:70258]  
ENSMMUG00000021357 zinc finger BED-type containing 3 [Source:VGNC Symbol;Acc:VGNC:79271]  
ENSMMUG00000021447 TNF receptor superfamily member 1B [Source:VGNC Symbol;Acc:VGNC:78590]  
ENSMMUG00000021449 vacuolar protein sorting 13 homolog D [Source:NCBI gene;Acc:722775]  
ENSMMUG00000021498 L3MBTL histone methyl-lysine binding protein 3 [Source:VGNC Symbol;Acc:VGNC:74106]  
ENSMMUG00000021972 diacylglycerol kinase gamma [Source:VGNC Symbol;Acc:VGNC:71785]  
ENSMMUG00000021988 N-alpha-acetyltransferase 11, NatA catalytic subunit [Source:NCBI gene;Acc:696758]  
ENSMMUG00000022003 multimerin 1 [Source:VGNC Symbol;Acc:VGNC:74904]  
ENSMMUG00000022246 PDZ and LIM domain 5 [Source:VGNC Symbol;Acc:VGNC:75816]  
ENSMMUG00000022247 osteoclastogenesis associated transmembrane protein 1 [Source:VGNC Symbol;Acc:VGNC:75664]  
ENSMMUG00000022381 prolyl 3-hydroxylase 1 [Source:VGNC Symbol;Acc:VGNC:75648]  
ENSMMUG00000022513 glutamate metabotropic receptor 3 [Source:VGNC Symbol;Acc:VGNC:73287]  
ENSMMUG00000022728 zinc finger and SCAN domain containing 25 [Source:VGNC Symbol;Acc:VGNC:79344]  
ENSMMUG00000022884 glutamate-ammonia ligase [Source:NCBI gene;Acc:715952]  
ENSMMUG00000022921 solute carrier family 2 member 12 [Source:VGNC Symbol;Acc:VGNC:77503]  
ENSMMUG00000023045 zinc finger B-box domain containing [Source:VGNC Symbol;Acc:VGNC:79592]  
ENSMMUG00000023146 ASH1 like histone lysine methyltransferase [Source:NCBI gene;Acc:717778]  
ENSMMUG00000023335 ring finger protein 13 [Source:VGNC Symbol;Acc:VGNC:81557]  
ENSMMUG00000023345 adhesion G protein-coupled receptor L4 [Source:VGNC Symbol;Acc:VGNC:69652]  
ENSMMUG00000023570 interleukin 19 [Source:NCBI gene;Acc:694806]  
ENSMMUG00000023598 sorting nexin 2 [Source:VGNC Symbol;Acc:VGNC:77682]  
ENSMMUG00000023678 pleckstrin homology and RhoGEF domain containing G5 [Source:VGNC Symbol;Acc:VGNC:76130]  
ENSMMUG00000023823 Y RNA [Source:RFAM;Acc:RF00019]  
ENSMMUG00000024537  
ENSMMUG00000026975 mml-mir-206 [Source:miRBase;Acc:MI0007667]  
ENSMMUG00000029421 protein tyrosine phosphatase receptor type K [Source:VGNC Symbol;Acc:VGNC:83453]  
ENSMMUG00000031279 torsin A interacting protein 2 [Source:NCBI gene;Acc:716654]  
ENSMMUG00000031291 regulator of G protein signaling like 1 [Source:NCBI gene;Acc:715693]  
ENSMMUG00000031534 ankyrin repeat and ubiquitin domain containing 1 [Source:VGNC Symbol;Acc:VGNC:84239]  
ENSMMUG00000031540 purinergic receptor P2Y1 [Source:VGNC Symbol;Acc:VGNC:75737]  
ENSMMUG00000031684 KRAB box domain containing 1 [Source:NCBI gene;Acc:717189]  
ENSMMUG00000031785  
ENSMMUG00000031794  
ENSMMUG00000032249 procollagen-lysine,2-oxoglutarate 5-dioxygenase 1 [Source:NCBI gene;Acc:722763]  
ENSMMUG00000032284 leucine rich repeat containing 47 [Source:VGNC Symbol;Acc:VGNC:74388]

ENSMMUG00000032659 mml-mir-711 [Source:miRBase;Acc:MI0012553]  
ENSMMUG00000033200 Small nucleolar RNA U3 [Source:RFAM;Acc:RF00012]  
ENSMMUG00000035943 U6 spliceosomal RNA [Source:RFAM;Acc:RF00026]  
ENSMMUG00000036060 U6 spliceosomal RNA [Source:RFAM;Acc:RF00026]  
ENSMMUG00000037890  
ENSMMUG00000038524 olfactory receptor 2M4 [Source:NCBI gene;Acc:100424541]  
ENSMMUG00000039101 pelota mRNA surveillance and ribosome rescue factor [Source:VGNC Symbol;Acc:VGNC:84478]  
ENSMMUG00000040393 zinc finger protein 655 [Source:NCBI gene;Acc:718811]  
ENSMMUG00000040696 Metazoan signal recognition particle RNA [Source:RFAM;Acc:RF00017]  
ENSMMUG00000040888 complement C3b/C4b receptor 1 like [Source:HGNC Symbol;Acc:HGNC:2335]  
ENSMMUG00000041519 zinc finger protein 354A [Source:VGNC Symbol;Acc:VGNC:84517]  
ENSMMUG00000042510 coagulation factor V [Source:NCBI gene;Acc:704695]  
ENSMMUG00000042618 involucrin [Source:NCBI gene;Acc:713728]  
ENSMMUG00000043675 Cbp/p300 interacting transactivator with Glu/Asp rich carboxy-terminal domain 4 [Source:NCBI gene;Acc:114672840]  
ENSMMUG00000044257 MX dynamin like GTPase 2 [Source:VGNC Symbol;Acc:VGNC:81723]  
ENSMMUG00000044265 Metazoan signal recognition particle RNA [Source:RFAM;Acc:RF00017]  
ENSMMUG00000044429 glycophorin A (MNS blood group) [Source:NCBI gene;Acc:574101]  
ENSMMUG00000044822 coiled-coil domain containing 174 [Source:VGNC Symbol;Acc:VGNC:84219]  
ENSMMUG00000045513  
ENSMMUG00000045609 CCR4-NOT transcription complex subunit 6 like [Source:NCBI gene;Acc:697981]  
ENSMMUG00000046550 coiled-coil domain containing 125 [Source:NCBI gene;Acc:704391]  
ENSMMUG00000046969 Fc receptor like 3 [Source:NCBI gene;Acc:718801]  
ENSMMUG00000048621 enolase-phosphatase 1 [Source:NCBI gene;Acc:106998330]  
ENSMMUG00000048824 eva-1 homolog C [Source:NCBI gene;Acc:708681]  
ENSMMUG00000049297  
ENSMMUG00000049494  
ENSMMUG00000049551  
ENSMMUG00000049678  
ENSMMUG00000049755 leucine rich repeat containing 3 [Source:NCBI gene;Acc:712418]  
ENSMMUG00000049843 late cornified envelope protein 2D [Source:NCBI gene;Acc:100424118]  
ENSMMUG00000049935  
ENSMMUG00000050339 Metazoan signal recognition particle RNA [Source:RFAM;Acc:RF00017]  
ENSMMUG00000050405  
ENSMMUG00000050419 ADAM metallopeptidase with thrombospondin type 1 motif 4 [Source:NCBI gene;Acc:719927]  
ENSMMUG00000050465 ZFP42 zinc finger protein [Source:NCBI gene;Acc:707621]  
ENSMMUG00000050505 small integral membrane protein 4 [Source:NCBI gene;Acc:696553]  
ENSMMUG00000051408 myelin associated oligodendrocyte basic protein [Source:NCBI gene;Acc:717265]  
ENSMMUG00000051645  
ENSMMUG00000051677  
ENSMMUG00000051719 late cornified envelope 1C [Source:HGNC Symbol;Acc:HGNC:29464]  
ENSMMUG00000051816 keratinocyte proline rich protein [Source:NCBI gene;Acc:100424312]  
ENSMMUG00000051975  
ENSMMUG00000052348  
ENSMMUG00000052474  
ENSMMUG00000052734  
ENSMMUG00000052777  
ENSMMUG00000052780  
ENSMMUG00000053367 secreted protein acidic and cysteine rich [Source:NCBI gene;Acc:712388]  
ENSMMUG00000053498  
ENSMMUG00000053516  
ENSMMUG00000053601

ENSMMUG00000053656  
ENSMMUG00000053691 Metazoan signal recognition particle RNA [Source:RFAM;Acc:RF00017]  
ENSMMUG00000053790  
ENSMMUG00000053984  
ENSMMUG00000053990  
ENSMMUG00000054158 acyl-CoA dehydrogenase family member 11 [Source:NCBI gene;Acc:106997118]  
ENSMMUG00000054237 Y RNA [Source:RFAM;Acc:RF00019]  
ENSMMUG00000054286  
ENSMMUG00000054414  
ENSMMUG00000054634 late cornified envelope protein 1C-like [Source:NCBI gene;Acc:713600]  
ENSMMUG00000054686  
ENSMMUG00000055022 Metazoan signal recognition particle RNA [Source:RFAM;Acc:RF00017]  
ENSMMUG00000055038  
ENSMMUG00000055096  
ENSMMUG00000055126  
ENSMMUG00000055199 cytochrome P450, family 39, subfamily A, polypeptide 1 [Source:NCBI gene;Acc:704242]  
ENSMMUG00000055256 family with sequence similarity 163 member A [Source:NCBI gene;Acc:718704]  
ENSMMUG00000055266 late cornified envelope protein 1C-like [Source:NCBI gene;Acc:107000794]  
ENSMMUG00000055322 EPH receptor A1 [Source:NCBI gene;Acc:706295]  
ENSMMUG00000055441  
ENSMMUG00000055571  
ENSMMUG00000055710 taste 2 receptor member 38 [Source:NCBI gene;Acc:695549]  
ENSMMUG00000055834  
ENSMMUG00000055914  
ENSMMUG00000056024  
ENSMMUG00000056058 C-type lectin domain containing 20A [Source:HGNC Symbol;Acc:HGNC:34521]  
ENSMMUG00000056158  
ENSMMUG00000056168  
ENSMMUG00000056266 Metazoan signal recognition particle RNA [Source:RFAM;Acc:RF00017]  
ENSMMUG00000056511  
ENSMMUG00000056924 G protein-coupled receptor 149 [Source:NCBI gene;Acc:106997054]  
ENSMMUG00000056940 late cornified envelope protein 1C [Source:NCBI gene;Acc:713408]  
ENSMMUG00000056980  
ENSMMUG00000057076 claudin 19 [Source:NCBI gene;Acc:697807]  
ENSMMUG00000057539  
ENSMMUG00000057702  
ENSMMUG00000057703  
ENSMMUG00000057983  
ENSMMUG00000058187  
ENSMMUG00000058229 U6 spliceosomal RNA [Source:RFAM;Acc:RF00026]  
ENSMMUG00000058370 taste receptor type 2 member 62 [Source:NCBI gene;Acc:704388]  
ENSMMUG00000058423  
ENSMMUG00000058432 zinc finger DHHC-type palmitoyltransferase 18 [Source:NCBI gene;Acc:719959]  
ENSMMUG00000058472 late cornified envelope protein 1C [Source:NCBI gene;Acc:107000798]  
ENSMMUG00000058557  
ENSMMUG00000058750 nuclear receptor interacting protein 1 [Source:NCBI gene;Acc:693866]  
ENSMMUG00000058817  
ENSMMUG00000058881 bone morphogenetic protein 8b [Source:NCBI gene;Acc:100427030]  
ENSMMUG00000059318 urocortin 2 [Source:NCBI gene;Acc:106996925]  
ENSMMUG00000059472 filaggrin family member 2 [Source:HGNC Symbol;Acc:HGNC:33276]  
ENSMMUG00000059671



ENSMMUG00000060184 SEC61 translocon subunit gamma [Source:NCBI gene;Acc:716898]  
ENSMMUG00000060218 chemokine (C motif) ligand 1 [Source:NCBI gene;Acc:574367]  
ENSMMUG00000060273 mitochondrial ribosomal protein L32 [Source:NCBI gene;Acc:701820]  
ENSMMUG00000060496 translocase of outer mitochondrial membrane 40 like [Source:NCBI gene;Acc:100426891]  
ENSMMUG00000060555  
ENSMMUG00000060576  
ENSMMUG00000060581  
ENSMMUG00000060760  
ENSMMUG00000060795  
ENSMMUG00000060808  
ENSMMUG00000060812 autophagy related 12 [Source:NCBI gene;Acc:696765]  
ENSMMUG00000060901  
ENSMMUG00000061031  
ENSMMUG00000061098  
ENSMMUG00000061139  
ENSMMUG00000061151  
ENSMMUG00000061194  
ENSMMUG00000061208 MAP3K7 C-terminal like [Source:NCBI gene;Acc:713717]  
ENSMMUG00000061282 hyaluronan and proteoglycan link protein 1 [Source:NCBI gene;Acc:712501]  
ENSMMUG00000061474  
ENSMMUG00000061785  
ENSMMUG00000061816  
ENSMMUG00000061845  
ENSMMUG00000062092  
ENSMMUG00000062294  
ENSMMUG00000062316 Metazoan signal recognition particle RNA [Source:RFAM;Acc:RF00017]  
ENSMMUG00000062326  
ENSMMUG00000062419  
ENSMMUG00000062454  
ENSMMUG00000062496  
ENSMMUG00000062522  
ENSMMUG00000062794  
ENSMMUG00000062837  
ENSMMUG00000062949  
ENSMMUG00000062996  
ENSMMUG00000063198  
ENSMMUG00000063351 Metazoan signal recognition particle RNA [Source:RFAM;Acc:RF00017]  
ENSMMUG00000063981 nucleoside-triphosphatase, cancer-related [Source:NCBI gene;Acc:712959]  
ENSMMUG00000064014  
ENSMMUG00000064174  
ENSMMUG00000064707  
ENSMMUG00000064729 small proline rich protein 3 [Source:NCBI gene;Acc:713857]  
ENSMMUG00000064799  
ENSMMUG00000064824 gremlin 2, DAN family BMP antagonist [Source:NCBI gene;Acc:708280]  
ENSMMUG00000064860 phosphoglycerate mutase 2 [Source:NCBI gene;Acc:720615]  
ENSMMUG00000064915 Metazoan signal recognition particle RNA [Source:RFAM;Acc:RF00017]  
ENSMMUG00000065005 Metazoan signal recognition particle RNA [Source:RFAM;Acc:RF00017]  
ENSMMUG00000065134 Fas ligand [Source:NCBI gene;Acc:574159]  
ENSMMUG00000065212  
ENSMMUG00000065221  
ENSMMUG00000065295

ENSMMUG0000000023 prostaglandin E receptor 2 [Source:VGNC Symbol;Acc:VGNC:76468]  
ENSMMUG00000000152 transcription factor CP2 [Source:VGNC Symbol;Acc:VGNC:78323]  
ENSMMUG00000000302 WD repeat and HMG-box DNA binding protein 1 [Source:VGNC Symbol;Acc:VGNC:79376]  
ENSMMUG00000000313 HEAT repeat containing 4 [Source:VGNC Symbol;Acc:VGNC:73176]  
ENSMMUG00000000327 fatty acid desaturase 2 [Source:VGNC Symbol;Acc:VGNC:72472]  
ENSMMUG00000000375 pleckstrin homology and RhoGEF domain containing G6 [Source:VGNC Symbol;Acc:VGNC:76110]  
ENSMMUG00000000376 bridging integrator 1 [Source:VGNC Symbol;Acc:VGNC:70251]  
ENSMMUG00000000754 Dmx like 2 [Source:VGNC Symbol;Acc:VGNC:71936]  
ENSMMUG00000000776 zinc finger matrin-type 4 [Source:VGNC Symbol;Acc:VGNC:78424]  
ENSMMUG00000000803 signal transducer and activator of transcription 2 [Source:VGNC Symbol;Acc:VGNC:77905]  
ENSMMUG00000000826 storkhead box 1 [Source:VGNC Symbol;Acc:VGNC:78197]  
ENSMMUG00000000863 dynein axonemal assembly factor 4 [Source:VGNC Symbol;Acc:VGNC:71881]  
ENSMMUG00000000869 small nuclear ribonucleoprotein polypeptide C [Source:NCBI gene;Acc:718654]  
ENSMMUG00000000958 aldo-keto reductase family 1, member C2 [Source:NCBI gene;Acc:711360]  
ENSMMUG00000001088 patched domain containing 1 [Source:VGNC Symbol;Acc:VGNC:76322]  
ENSMMUG00000001151 microtubule associated scaffold protein 1 [Source:VGNC Symbol;Acc:VGNC:84018]  
ENSMMUG00000001273 clathrin binding box of aftiphilin containing 1 [Source:VGNC Symbol;Acc:VGNC:84325]  
ENSMMUG00000001324 tetraspanin 32 [Source:VGNC Symbol;Acc:VGNC:78920]  
ENSMMUG00000001338 antizyme inhibitor 1 [Source:VGNC Symbol;Acc:VGNC:70080]  
ENSMMUG00000001472 TIA1 cytotoxic granule associated RNA binding protein like 1 [Source:VGNC Symbol;Acc:VGNC:78354]  
ENSMMUG00000001475 transmembrane protein with EGF like and two follistatin like domains 2 [Source:VGNC Symbol;Acc:VGNC:78569]  
ENSMMUG00000001547 zinc finger protein 106 [Source:VGNC Symbol;Acc:VGNC:78831]  
ENSMMUG00000001745 oxysterol binding protein [Source:VGNC Symbol;Acc:VGNC:75718]  
ENSMMUG00000001761 myosin IB [Source:VGNC Symbol;Acc:VGNC:75111]  
ENSMMUG00000001820 regulator of G protein signaling 6 [Source:VGNC Symbol;Acc:VGNC:76691]  
ENSMMUG00000001989 RNA polymerase II subunit D [Source:VGNC Symbol;Acc:VGNC:76213]  
ENSMMUG00000002260 protein kinase C eta [Source:VGNC Symbol;Acc:VGNC:84424]  
ENSMMUG00000002345 tropomodulin 3 [Source:VGNC Symbol;Acc:VGNC:78572]  
ENSMMUG00000002483 citrate synthase [Source:VGNC Symbol;Acc:VGNC:71509]  
ENSMMUG00000002536 calcium binding protein 1 [Source:VGNC Symbol;Acc:VGNC:70495]  
ENSMMUG00000002562 mediator complex subunit 19 [Source:VGNC Symbol;Acc:VGNC:74615]  
ENSMMUG00000002563 zinc finger DHHC-type palmitoyltransferase 5 [Source:VGNC Symbol;Acc:VGNC:79145]  
ENSMMUG00000002566 selenoprotein H [Source:VGNC Symbol;Acc:VGNC:82234]  
ENSMMUG00000002917 single Ig IL-1-related receptor [Source:NCBI gene;Acc:100425060]  
ENSMMUG00000003217 transmembrane 7 superfamily member 3 [Source:VGNC Symbol;Acc:VGNC:79371]  
ENSMMUG00000003348 neurofilament light [Source:VGNC Symbol;Acc:VGNC:75307]  
ENSMMUG00000003484 tectonin beta-propeller repeat containing 2 [Source:NCBI gene;Acc:708959]  
ENSMMUG00000003548 tectorin beta [Source:VGNC Symbol;Acc:VGNC:78306]  
ENSMMUG00000003584 mesoderm posterior bHLH transcription factor 2 [Source:VGNC Symbol;Acc:VGNC:74619]  
ENSMMUG00000003591 pleckstrin homology domain containing A2 [Source:VGNC Symbol;Acc:VGNC:76026]  
ENSMMUG00000003658 autophagy related 2B [Source:VGNC Symbol;Acc:VGNC:84310]  
ENSMMUG00000003669 methionine sulfoxide reductase B3 [Source:VGNC Symbol;Acc:VGNC:74842]  
ENSMMUG00000003684 ATPase phospholipid transporting 8B4 (putative) [Source:VGNC Symbol;Acc:VGNC:84311]  
ENSMMUG00000003834 basic leucine zipper ATF-like transcription factor [Source:VGNC Symbol;Acc:VGNC:70229]  
ENSMMUG00000003874 interferon induced transmembrane protein 10 [Source:NCBI gene;Acc:721010]  
ENSMMUG00000003976 glycoprotein hormone subunit alpha 2 [Source:VGNC Symbol;Acc:VGNC:72961]  
ENSMMUG00000004022 zinc finger SWIM-type containing 2 [Source:VGNC Symbol;Acc:VGNC:79908]  
ENSMMUG00000004028 kelch repeat and BTB domain containing 13 [Source:VGNC Symbol;Acc:VGNC:73953]  
ENSMMUG00000004255 YLP motif containing 1 [Source:VGNC Symbol;Acc:VGNC:79092]  
ENSMMUG00000004274 myotubularin related protein 8 [Source:VGNC Symbol;Acc:VGNC:74974]  
ENSMMUG00000004309 APC membrane recruitment protein 1 [Source:VGNC Symbol;Acc:VGNC:69716]

ENSMMUG0000004332 tripartite motif containing 44 [Source:VGNC Symbol;Acc:VGNC:79168]  
ENSMMUG0000004376 calcium and integrin binding 1 [Source:VGNC Symbol;Acc:VGNC:71189]  
ENSMMUG0000004435 two pore segment channel 1 [Source:VGNC Symbol;Acc:VGNC:79117]  
ENSMMUG0000004470 CD9 molecule [Source:VGNC Symbol;Acc:VGNC:70787]  
ENSMMUG0000004558 OTU deubiquitinase 5 [Source:VGNC Symbol;Acc:VGNC:75677]  
ENSMMUG0000004797 CTP synthase 2 [Source:VGNC Symbol;Acc:VGNC:71550]  
ENSMMUG0000004816 membrane associated ring-CH-type finger 5 [Source:VGNC Symbol;Acc:VGNC:74588]  
ENSMMUG0000004854 leucine rich repeat containing 9 [Source:VGNC Symbol;Acc:VGNC:81443]  
ENSMMUG0000004982 activin A receptor like type 1 [Source:VGNC Symbol;Acc:VGNC:69451]  
ENSMMUG0000005106 unc-45 myosin chaperone A [Source:VGNC Symbol;Acc:VGNC:79858]  
ENSMMUG0000005108 RCC1 domain containing 1 [Source:VGNC Symbol;Acc:VGNC:76876]  
ENSMMUG0000005208 RNA polymerase III subunit B [Source:VGNC Symbol;Acc:VGNC:76143]  
ENSMMUG0000005255 TRAF-type zinc finger domain containing 1 [Source:VGNC Symbol;Acc:VGNC:79459]  
ENSMMUG0000005293 G-patch domain and ankyrin repeats 1 [Source:VGNC Symbol;Acc:VGNC:81073]  
ENSMMUG0000005294 casein kinase 2 beta [Source:NCBI gene;Acc:715807]  
ENSMMUG0000005297 proline rich coiled-coil 2A [Source:VGNC Symbol;Acc:VGNC:83448]  
ENSMMUG0000005302 BAG cochaperone 6 [Source:VGNC Symbol;Acc:VGNC:81044]  
ENSMMUG0000005303 apolipoprotein M [Source:VGNC Symbol;Acc:VGNC:69825]  
ENSMMUG0000005415 olfactory receptor, family 2, subfamily B, member 3 [Source:NCBI gene;Acc:708747]  
ENSMMUG0000005478 trimethylguanosine synthase 1 [Source:VGNC Symbol;Acc:VGNC:78404]  
ENSMMUG0000005486 protein tyrosine phosphatase receptor type C associated protein [Source:VGNC Symbol;Acc:VGNC:76613]  
ENSMMUG0000005488 coronin 1B [Source:VGNC Symbol;Acc:VGNC:71320]  
ENSMMUG0000005504 nucleoporin 37 [Source:VGNC Symbol;Acc:VGNC:75491]  
ENSMMUG0000005920 N-acetyltransferase 1 [Source:VGNC Symbol;Acc:VGNC:75133]  
ENSMMUG0000006180 tetratricopeptide repeat, ankyrin repeat and coiled-coil containing 1 [Source:VGNC Symbol;Acc:VGNC:78238]  
ENSMMUG0000006181 WD repeat, sterile alpha motif and U-box domain containing 1 [Source:VGNC Symbol;Acc:VGNC:79634]  
ENSMMUG0000006468 FGFR1 oncogene partner 2 [Source:VGNC Symbol;Acc:VGNC:72551]  
ENSMMUG0000006568 basic leucine zipper ATF-like transcription factor 2 [Source:VGNC Symbol;Acc:VGNC:70127]  
ENSMMUG0000006655 myelin regulatory factor [Source:VGNC Symbol;Acc:VGNC:74949]  
ENSMMUG0000006659 aldehyde dehydrogenase 1 family member A3 [Source:VGNC Symbol;Acc:VGNC:81353]  
ENSMMUG0000006723 solute carrier family 8 member B1 [Source:NCBI gene;Acc:714561]  
ENSMMUG0000006758 cytochrome P450, family 27, subfamily A, polypeptide 1 [Source:NCBI gene;Acc:700192]  
ENSMMUG0000006855 acyl-CoA thioesterase 2 [Source:NCBI gene;Acc:697011]  
ENSMMUG0000006997 thioredoxin domain containing 16 [Source:VGNC Symbol;Acc:VGNC:79214]  
ENSMMUG0000007068 tumor suppressor candidate 3 [Source:VGNC Symbol;Acc:VGNC:84132]  
ENSMMUG0000007534 protein regulator of cytokinesis 1 [Source:NCBI gene;Acc:710182]  
ENSMMUG0000007546 complement C1q like 4 [Source:VGNC Symbol;Acc:VGNC:70450]  
ENSMMUG0000007548 DnaJ heat shock protein family (Hsp40) member C22 [Source:NCBI gene;Acc:710205]  
ENSMMUG0000007603 coiled-coil domain containing 88B [Source:NCBI gene;Acc:722080]  
ENSMMUG0000007610 ribosomal protein S6 kinase A4 [Source:VGNC Symbol;Acc:VGNC:76930]  
ENSMMUG0000007688 angiominin [Source:VGNC Symbol;Acc:VGNC:69627]  
ENSMMUG0000008006 RAB11A, member RAS oncogene family [Source:VGNC Symbol;Acc:VGNC:81517]  
ENSMMUG0000008007 multiple EGF like domains 11 [Source:VGNC Symbol;Acc:VGNC:84376]  
ENSMMUG0000008384 solute carrier family 4 member 10 [Source:VGNC Symbol;Acc:VGNC:77695]  
ENSMMUG0000008387 dipeptidyl peptidase 4 [Source:VGNC Symbol;Acc:VGNC:71979]  
ENSMMUG0000008529 chromosome 7 C15orf39 homolog [Source:VGNC Symbol;Acc:VGNC:70620]  
ENSMMUG0000008618 calcium voltage-gated channel subunit alpha1 F [Source:VGNC Symbol;Acc:VGNC:70503]  
ENSMMUG0000008651 FGF1 intracellular binding protein [Source:VGNC Symbol;Acc:VGNC:72663]  
ENSMMUG0000008652 coiled-coil domain containing 85B [Source:VGNC Symbol;Acc:VGNC:70853]  
ENSMMUG0000008839 DExD-box helicase 39B [Source:VGNC Symbol;Acc:VGNC:71621]  
ENSMMUG0000008854 natural cytotoxicity triggering receptor 3 [Source:VGNC Symbol;Acc:VGNC:74990]

ENSMMUG0000008964 D-glutamate cyclase [Source:VGNC Symbol;Acc:VGNC:71685]  
ENSMMUG0000009308 histidine ammonia-lyase [Source:VGNC Symbol;Acc:VGNC:73344]  
ENSMMUG0000009312 leukotriene A4 hydrolase [Source:VGNC Symbol;Acc:VGNC:74453]  
ENSMMUG0000009346 ArfGAP with GTPase domain, ankyrin repeat and PH domain 1 [Source:VGNC Symbol;Acc:VGNC:84206]  
ENSMMUG0000009361 fumarylacetoacetate hydrolase [Source:NCBI gene;Acc:712716]  
ENSMMUG0000009441 abhydrolase domain containing 4 [Source:VGNC Symbol;Acc:VGNC:84296]  
ENSMMUG0000009559 minichromosome maintenance complex binding protein [Source:VGNC Symbol;Acc:VGNC:74583]  
ENSMMUG0000009583 COP9 signalosome subunit 7A [Source:VGNC Symbol;Acc:VGNC:71185]  
ENSMMUG0000009593 WAS/WASL interacting protein family member 1 [Source:VGNC Symbol;Acc:VGNC:78784]  
ENSMMUG0000009622 glypican 3 [Source:VGNC Symbol;Acc:VGNC:73117]  
ENSMMUG0000009788 tubulin alpha-1C chain [Source:NCBI gene;Acc:710110]  
ENSMMUG0000009794 protocadherin related 15 [Source:VGNC Symbol;Acc:VGNC:75608]  
ENSMMUG00000010137 microcephalin 1 [Source:VGNC Symbol;Acc:VGNC:74687]  
ENSMMUG00000010173 presenilin 1 [Source:VGNC Symbol;Acc:VGNC:76435]  
ENSMMUG00000010180 PIN2 (TERF1) interacting telomerase inhibitor 1 [Source:NCBI gene;Acc:701523]  
ENSMMUG00000010201 atrophin 1 [Source:VGNC Symbol;Acc:VGNC:70157]  
ENSMMUG00000010203 protein tyrosine phosphatase non-receptor type 6 [Source:VGNC Symbol;Acc:VGNC:76607]  
ENSMMUG00000010521 ADP ribosylation factor like GTPase 5A [Source:VGNC Symbol;Acc:VGNC:70017]  
ENSMMUG00000010526 calcium voltage-gated channel auxiliary subunit beta 4 [Source:VGNC Symbol;Acc:VGNC:82116]  
ENSMMUG00000010881 cytochrome P450, family 26, subfamily A, polypeptide 1 [Source:NCBI gene;Acc:699519]  
ENSMMUG00000011155 FA complementation group I [Source:VGNC Symbol;Acc:VGNC:72575]  
ENSMMUG00000011440 neurite extension and migration factor [Source:VGNC Symbol;Acc:VGNC:75274]  
ENSMMUG00000011564 transmembrane channel like 3 [Source:VGNC Symbol;Acc:VGNC:79360]  
ENSMMUG00000011637 coiled-coil domain containing 148 [Source:VGNC Symbol;Acc:VGNC:70856]  
ENSMMUG00000011650 dual specificity tyrosine phosphorylation regulated kinase 2 [Source:VGNC Symbol;Acc:VGNC:72018]  
ENSMMUG00000011661 integrin subunit alpha 8 [Source:VGNC Symbol;Acc:VGNC:73782]  
ENSMMUG00000011682 ribonuclease P/MRP subunit p21 [Source:NCBI gene;Acc:713056]  
ENSMMUG00000011774 integrator complex subunit 10 [Source:VGNC Symbol;Acc:VGNC:73653]  
ENSMMUG00000011789 hematopoietically expressed homeobox [Source:VGNC Symbol;Acc:VGNC:73376]  
ENSMMUG00000011817 aryl hydrocarbon receptor interacting protein [Source:VGNC Symbol;Acc:VGNC:69759]  
ENSMMUG00000011965 coiled-coil domain containing 175 [Source:VGNC Symbol;Acc:VGNC:84317]  
ENSMMUG00000012065 tubulin tyrosine ligase like 5 [Source:NCBI gene;Acc:703116]  
ENSMMUG00000012356 serpin family A member 9 [Source:VGNC Symbol;Acc:VGNC:77241]  
ENSMMUG00000012941 nudix hydrolase 22 [Source:VGNC Symbol;Acc:VGNC:75475]  
ENSMMUG00000012944 vascular endothelial growth factor B [Source:VGNC Symbol;Acc:VGNC:78765]  
ENSMMUG00000013146 claudin 2 [Source:HGNC Symbol;Acc:HGNC:2041]  
ENSMMUG00000013150 MORC family CW-type zinc finger 4 [Source:VGNC Symbol;Acc:VGNC:74808]  
ENSMMUG00000013160 DnaJ heat shock protein family (Hsp40) member C17 [Source:VGNC Symbol;Acc:VGNC:84335]  
ENSMMUG00000013176 NAD(P) dependent steroid dehydrogenase-like [Source:NCBI gene;Acc:693333]  
ENSMMUG00000013193 matrix metalloproteinase 16 [Source:VGNC Symbol;Acc:VGNC:74894]  
ENSMMUG00000013251 xin actin binding repeat containing 2 [Source:VGNC Symbol;Acc:VGNC:78953]  
ENSMMUG00000013387 cysteinyl leukotriene receptor 1 [Source:VGNC Symbol;Acc:VGNC:71646]  
ENSMMUG00000013460 RAB8B, member RAS oncogene family [Source:VGNC Symbol;Acc:VGNC:81550]  
ENSMMUG00000013696 myozenin 1 [Source:VGNC Symbol;Acc:VGNC:74951]  
ENSMMUG00000013798 fatty acid desaturase 1 [Source:VGNC Symbol;Acc:VGNC:72471]  
ENSMMUG00000013830 glucose-6-phosphatase catalytic subunit 2 [Source:NCBI gene;Acc:709062]  
ENSMMUG00000013832 ATP binding cassette subfamily B member 11 [Source:VGNC Symbol;Acc:VGNC:81339]  
ENSMMUG00000013871 WD repeat domain 25 [Source:VGNC Symbol;Acc:VGNC:78420]  
ENSMMUG00000014131 microtubule affinity regulating kinase 2 [Source:VGNC Symbol;Acc:VGNC:74634]  
ENSMMUG00000014237 lysine methyltransferase 5B [Source:VGNC Symbol;Acc:VGNC:74110]  
ENSMMUG00000014265 TAP binding protein like [Source:NCBI gene;Acc:712626]

ENSMMUG00000014277 ITPR interacting domain containing 2 [Source:VGNC Symbol;Acc:VGNC:73584]  
ENSMMUG00000014291 SPG11 vesicle trafficking associated, spatacsin [Source:VGNC Symbol;Acc:VGNC:77856]  
ENSMMUG00000014397 NCK associated protein 1 [Source:VGNC Symbol;Acc:VGNC:75143]  
ENSMMUG00000014530 pre-mRNA processing factor 19 [Source:VGNC Symbol;Acc:VGNC:76281]  
ENSMMUG00000014658 ninein [Source:VGNC Symbol;Acc:VGNC:75177]  
ENSMMUG00000014766 neuroguidin [Source:VGNC Symbol;Acc:VGNC:75220]  
ENSMMUG00000014771 zinc finger homeobox 2 [Source:NCBI gene;Acc:100429448]  
ENSMMUG00000014983 alanyl aminopeptidase, membrane [Source:VGNC Symbol;Acc:VGNC:69943]  
ENSMMUG00000015394 WD repeat domain 93 [Source:VGNC Symbol;Acc:VGNC:79642]  
ENSMMUG00000015468 checkpoint with forkhead and ring finger domains [Source:VGNC Symbol;Acc:VGNC:71064]  
ENSMMUG00000015686 abhydrolase domain containing 16A [Source:VGNC Symbol;Acc:VGNC:69393]  
ENSMMUG00000015693 lymphocyte antigen 6 family member G6C [Source:VGNC Symbol;Acc:VGNC:74285]  
ENSMMUG00000015865 arginase 2 [Source:VGNC Symbol;Acc:VGNC:70005]  
ENSMMUG00000015926 2-oxoglutarate and iron dependent oxygenase domain containing 2 [Source:VGNC Symbol;Acc:VGNC:75462]  
ENSMMUG00000015931 phosphatidylinositol transfer protein membrane associated 2 [Source:VGNC Symbol;Acc:VGNC:75843]  
ENSMMUG00000016069 cubilin [Source:VGNC Symbol;Acc:VGNC:82132]  
ENSMMUG00000016237 taxilin gamma [Source:NCBI gene;Acc:713769]  
ENSMMUG00000016255 telomerase associated protein 1 [Source:VGNC Symbol;Acc:VGNC:78310]  
ENSMMUG00000016465 histone deacetylase 6 [Source:VGNC Symbol;Acc:VGNC:73164]  
ENSMMUG00000016929 proline rich and Gla domain 3 [Source:VGNC Symbol;Acc:VGNC:76350]  
ENSMMUG00000017129 solute carrier family 41 member 2 [Source:VGNC Symbol;Acc:VGNC:77585]  
ENSMMUG00000017261 galactosylceramidase [Source:VGNC Symbol;Acc:VGNC:72867]  
ENSMMUG00000017280 TBC1 domain family member 10C [Source:VGNC Symbol;Acc:VGNC:78203]  
ENSMMUG00000017287 PAT1 homolog 1, processing body mRNA decay factor [Source:VGNC Symbol;Acc:VGNC:75684]  
ENSMMUG00000017380 neuregulin 3 [Source:NCBI gene;Acc:699268]  
ENSMMUG00000017450 MOB kinase activator 2 [Source:NCBI gene;Acc:720951]  
ENSMMUG00000017533 interferon induced protein with tetratricopeptide repeats 1 [Source:NCBI gene;Acc:695683]  
ENSMMUG00000017627 B-TFIID TATA-box binding protein associated factor 1 [Source:VGNC Symbol;Acc:VGNC:70336]  
ENSMMUG00000017660  
ENSMMUG00000017767 integrin subunit beta 1 [Source:VGNC Symbol;Acc:VGNC:73784]  
ENSMMUG00000017810 structure specific recognition protein 1 [Source:VGNC Symbol;Acc:VGNC:77891]  
ENSMMUG00000018030 endoplasmic reticulum protein 27 [Source:VGNC Symbol;Acc:VGNC:72369]  
ENSMMUG00000018144 C2 calcium-dependent domain-containing protein 6 [Source:NCBI gene;Acc:702140]  
ENSMMUG00000018151 membrane palmitoylated protein 4 [Source:VGNC Symbol;Acc:VGNC:74734]  
ENSMMUG00000018237 plexin C1 [Source:VGNC Symbol;Acc:VGNC:76190]  
ENSMMUG00000018239 centrosomal protein 83 [Source:VGNC Symbol;Acc:VGNC:70992]  
ENSMMUG00000018298 killer cell lectin like receptor D1 [Source:NCBI gene;Acc:574145]  
ENSMMUG00000018345 phosphatidylethanolamine binding protein 4 [Source:VGNC Symbol;Acc:VGNC:82204]  
ENSMMUG00000018492 TARBP2 subunit of RISC loading complex [Source:VGNC Symbol;Acc:VGNC:78099]  
ENSMMUG00000018767 cell division cycle associated 5 [Source:NCBI gene;Acc:721998]  
ENSMMUG00000019126 purine nucleoside phosphorylase [Source:NCBI gene;Acc:704183]  
ENSMMUG00000019304 indoleamine 2,3-dioxygenase 1 [Source:VGNC Symbol;Acc:VGNC:73580]  
ENSMMUG00000019306 indoleamine 2,3-dioxygenase 2 [Source:VGNC Symbol;Acc:VGNC:84005]  
ENSMMUG00000019363 synapse associated protein 1 [Source:VGNC Symbol;Acc:VGNC:78135]  
ENSMMUG00000019526 BLM RecQ like helicase [Source:VGNC Symbol;Acc:VGNC:70254]  
ENSMMUG00000019546 regucalcin [Source:VGNC Symbol;Acc:VGNC:76912]  
ENSMMUG00000019690 SEC14 and spectrin domain containing 1 [Source:VGNC Symbol;Acc:VGNC:77267]  
ENSMMUG00000019837 ribonuclease H2 subunit C [Source:NCBI gene;Acc:700330]  
ENSMMUG00000019839 lysine acetyltransferase 5 [Source:VGNC Symbol;Acc:VGNC:73955]  
ENSMMUG00000019961 protein phosphatase 1 regulatory subunit 18 [Source:NCBI gene;Acc:712176]  
ENSMMUG00000020040 phosphatase and actin regulator 1 [Source:VGNC Symbol;Acc:VGNC:75841]

ENSMMUG00000020080 GDNF family receptor alpha 1 [Source:VGNC Symbol;Acc:VGNC:72917]  
ENSMMUG00000020177 membrane spanning 4-domains A4A [Source:NCBI gene;Acc:698027]  
ENSMMUG00000020185 voltage dependent anion channel 3 [Source:VGNC Symbol;Acc:VGNC:84135]  
ENSMMUG00000020534 p21 (RAC1) activated kinase 6 [Source:NCBI gene;Acc:701589]  
ENSMMUG00000020604 HPS1 biogenesis of lysosomal organelles complex 3 subunit 1 [Source:VGNC Symbol;Acc:VGNC:73515]  
ENSMMUG00000020743 centrin 2 [Source:NCBI gene;Acc:693376]  
ENSMMUG00000021157 TBC1 domain family member 31 [Source:VGNC Symbol;Acc:VGNC:84121]  
ENSMMUG00000021564 lysine demethylase 2B [Source:VGNC Symbol;Acc:VGNC:81425]  
ENSMMUG00000021610 regulator of G protein signaling 10 [Source:VGNC Symbol;Acc:VGNC:76915]  
ENSMMUG00000021634 TNF alpha induced protein 2 [Source:VGNC Symbol;Acc:VGNC:78579]  
ENSMMUG00000021661 leucine rich repeat containing 56 [Source:VGNC Symbol;Acc:VGNC:74356]  
ENSMMUG00000021664 lamin tail domain containing 2 [Source:VGNC Symbol;Acc:VGNC:74380]  
ENSMMUG00000021877 protein kinase AMP-activated non-catalytic subunit gamma 3 [Source:VGNC Symbol;Acc:VGNC:76406]  
ENSMMUG00000022109 CD163 molecule like 1 [Source:VGNC Symbol;Acc:VGNC:70914]  
ENSMMUG00000022313 activating transcription factor 7 [Source:NCBI gene;Acc:700403]  
ENSMMUG00000022406 ankyrin repeat and sterile alpha motif domain containing 1B [Source:VGNC Symbol;Acc:VGNC:69689]  
ENSMMUG00000022409 solute carrier family 10 member 1 [Source:VGNC Symbol;Acc:VGNC:77380]  
ENSMMUG00000022893 von Willebrand factor [Source:VGNC Symbol;Acc:VGNC:78778]  
ENSMMUG00000023016 jade family PHD finger 3 [Source:VGNC Symbol;Acc:VGNC:73640]  
ENSMMUG00000023048 cytochrome b-c1 complex subunit Rieske, mitochondrial [Source:NCBI gene;Acc:705178]  
ENSMMUG00000023060 A-kinase anchoring protein 4 [Source:VGNC Symbol;Acc:VGNC:69770]  
ENSMMUG00000023139 small nuclear ribonucleoprotein polypeptide N [Source:VGNC Symbol;Acc:VGNC:78437]  
ENSMMUG00000023192 choline kinase alpha [Source:VGNC Symbol;Acc:VGNC:71039]  
ENSMMUG00000023300 FERM domain containing 8 [Source:NCBI gene;Acc:716379]  
ENSMMUG00000023370 DDB1 and CUL4 associated factor 17 [Source:VGNC Symbol;Acc:VGNC:71709]  
ENSMMUG00000023477  
ENSMMUG00000023479 latent transforming growth factor beta binding protein 3 [Source:VGNC Symbol;Acc:VGNC:74458]  
ENSMMUG00000023816 semaphorin 4B [Source:VGNC Symbol;Acc:VGNC:77165]  
ENSMMUG00000024234 U6 spliceosomal RNA [Source:RFAM;Acc:RF00026]  
ENSMMUG00000025918 small nucleolar RNA, H/ACA box 38 [Source:HGNC Symbol;Acc:HGNC:32631]  
ENSMMUG00000027543 Y RNA [Source:RFAM;Acc:RF00019]  
ENSMMUG00000029034 defensin beta 136 [Source:VGNC Symbol;Acc:VGNC:71826]  
ENSMMUG00000029186 exocyst complex component 3 like 4 [Source:VGNC Symbol;Acc:VGNC:72305]  
ENSMMUG00000029420  
ENSMMUG00000029507 adaptor related protein complex 3 subunit sigma 2 [Source:NCBI gene;Acc:701217]  
ENSMMUG00000031100 membrane-spanning 4-domains subfamily A member 4A-like [Source:NCBI gene;Acc:698152]  
ENSMMUG00000031163 membrane anchored junction protein [Source:VGNC Symbol;Acc:VGNC:74375]  
ENSMMUG00000032429 forkhead box O4 [Source:VGNC Symbol;Acc:VGNC:72712]  
ENSMMUG00000034978 U6 spliceosomal RNA [Source:RFAM;Acc:RF00026]  
ENSMMUG00000037175 U6 spliceosomal RNA [Source:RFAM;Acc:RF00026]  
ENSMMUG00000037243 U6 spliceosomal RNA [Source:RFAM;Acc:RF00026]  
ENSMMUG00000037641 chondrosarcoma-associated gene 2/3 protein [Source:NCBI gene;Acc:106992305]  
ENSMMUG00000038076 Metazoan signal recognition particle RNA [Source:RFAM;Acc:RF00017]  
ENSMMUG00000038256 aquaporin 2 [Source:NCBI gene;Acc:711719]  
ENSMMUG00000038363 adaptor related protein complex 5 subunit beta 1 [Source:NCBI gene;Acc:721904]  
ENSMMUG00000038707 U6 spliceosomal RNA [Source:RFAM;Acc:RF00026]  
ENSMMUG00000039292  
ENSMMUG00000040071  
ENSMMUG00000040741 thioredoxin related transmembrane protein 2 [Source:NCBI gene;Acc:100169970]  
ENSMMUG00000041101 protein phosphatase 2 regulatory subunit B'beta [Source:NCBI gene;Acc:722026]  
ENSMMUG00000041376 G antigen 10 [Source:NCBI gene;Acc:693330]



ENSMMUG00000041729  
ENSMMUG00000042039  
ENSMMUG00000042870 Macaca mulatta taste receptor, type 2, member 46 (TAS2R46), mRNA. [Source:RefSeq mRNA;Acc:NM\_001080757]  
ENSMMUG00000043648  
ENSMMUG00000044581 modulator of apoptosis 1 [Source:VGNC Symbol;Acc:VGNC:84392]  
ENSMMUG00000045093 cyclin B3 [Source:NCBI gene;Acc:694534]  
ENSMMUG00000045544 neuronal tyrosine-phosphorylated phosphoinositide-3-kinase adaptor 2 [Source:NCBI gene;Acc:711209]  
ENSMMUG00000045654 tumor necrosis factor [Source:VGNC Symbol;Acc:VGNC:83501]  
ENSMMUG00000045970 thiamine triphosphatase [Source:NCBI gene;Acc:714403]  
ENSMMUG00000046478 WASH complex subunit 3 [Source:NCBI gene;Acc:697824]  
ENSMMUG00000046774 RAS like proto-oncogene B [Source:NCBI gene;Acc:695852]  
ENSMMUG00000047247 matrix Gla protein [Source:NCBI gene;Acc:574116]  
ENSMMUG00000047465 Metazoan signal recognition particle RNA [Source:RFAM;Acc:RF00017]  
ENSMMUG00000048066 trafficking protein particle complex 9 [Source:NCBI gene;Acc:711466]  
ENSMMUG00000048462 Metazoan signal recognition particle RNA [Source:RFAM;Acc:RF00017]  
ENSMMUG00000048744  
ENSMMUG00000049021 Metazoan signal recognition particle RNA [Source:RFAM;Acc:RF00017]  
ENSMMUG00000049232 AMMECR1 like [Source:VGNC Symbol;Acc:VGNC:84208]  
ENSMMUG00000049265 Metazoan signal recognition particle RNA [Source:RFAM;Acc:RF00017]  
ENSMMUG00000049267  
ENSMMUG00000049735 allograft inflammatory factor 1 [Source:NCBI gene;Acc:574115]  
ENSMMUG00000049770 Metazoan signal recognition particle RNA [Source:RFAM;Acc:RF00017]  
ENSMMUG00000049866  
ENSMMUG00000049894  
ENSMMUG00000050028  
ENSMMUG00000050495  
ENSMMUG00000050529 phosphodiesterase 6H [Source:NCBI gene;Acc:700447]  
ENSMMUG00000050549 lysyl oxidase like 2 [Source:NCBI gene;Acc:710151]  
ENSMMUG00000050585  
ENSMMUG00000050608  
ENSMMUG00000050696 taste receptor type 2 member 31-like [Source:NCBI gene;Acc:693892]  
ENSMMUG00000050844 BTB domain containing 18 [Source:NCBI gene;Acc:703264]  
ENSMMUG00000051037  
ENSMMUG00000051349  
ENSMMUG00000051363  
ENSMMUG00000051503 nuclear pore associated protein 1 [Source:NCBI gene;Acc:719891]  
ENSMMUG00000051807  
ENSMMUG00000052073  
ENSMMUG00000052168  
ENSMMUG00000052252 protein phosphatase 1 regulatory subunit 3F [Source:NCBI gene;Acc:715950]  
ENSMMUG00000052453 serpin family A member 11 [Source:NCBI gene;Acc:701483]  
ENSMMUG00000052569  
ENSMMUG00000052637 Metazoan signal recognition particle RNA [Source:RFAM;Acc:RF00017]  
ENSMMUG00000052854 mucin like 1 [Source:NCBI gene;Acc:100423942]  
ENSMMUG00000052891  
ENSMMUG00000053013  
ENSMMUG00000053106  
ENSMMUG00000053249  
ENSMMUG00000053324 lymphocyte antigen 6 complex locus protein G6d [Source:NCBI gene;Acc:715304]  
ENSMMUG00000053376  
ENSMMUG00000053378

ENSMMUG00000053460  
ENSMMUG00000053481  
ENSMMUG00000053561  
ENSMMUG00000053627  
ENSMMUG00000053722  
ENSMMUG00000053781 Rho GDP dissociation inhibitor beta [Source:NCBI gene;Acc:702320]  
ENSMMUG00000053989  
ENSMMUG00000054072  
ENSMMUG00000054225 taste receptor type 2 member 43 [Source:NCBI gene;Acc:694161]  
ENSMMUG00000054449 Metazoan signal recognition particle RNA [Source:RFAM;Acc:RF00017]  
ENSMMUG00000054621  
ENSMMUG00000054755 transmembrane protein 65 [Source:NCBI gene;Acc:705727]  
ENSMMUG00000054904 Metazoan signal recognition particle RNA [Source:RFAM;Acc:RF00017]  
ENSMMUG00000054942  
ENSMMUG00000054960  
ENSMMUG00000055018 sushi domain containing 6 [Source:NCBI gene;Acc:712719]  
ENSMMUG00000055121 Metazoan signal recognition particle RNA [Source:RFAM;Acc:RF00017]  
ENSMMUG00000055906 angiotensin II receptor type 2 [Source:NCBI gene;Acc:709513]  
ENSMMUG00000055918  
ENSMMUG00000056063  
ENSMMUG00000056184  
ENSMMUG00000056343  
ENSMMUG00000056376  
ENSMMUG00000056605 Metazoan signal recognition particle RNA [Source:RFAM;Acc:RF00017]  
ENSMMUG00000056741 ovostatin-like [Source:NCBI gene;Acc:722294]  
ENSMMUG00000056797  
ENSMMUG00000056906  
ENSMMUG00000057063 solute carrier family 6 member 14 [Source:NCBI gene;Acc:709598]  
ENSMMUG00000057134 keratin, type II cytoskeletal 6C [Source:NCBI gene;Acc:100424162]  
ENSMMUG00000057179 cation channel sperm associated 1 [Source:NCBI gene;Acc:721869]  
ENSMMUG00000057196 pulmonary surfactant-associated protein A [Source:NCBI gene;Acc:701715]  
ENSMMUG00000057219 tumor protein p53 inducible nuclear protein 1 [Source:NCBI gene;Acc:700632]  
ENSMMUG00000057283  
ENSMMUG00000057570  
ENSMMUG00000057640 plakophilin-3-like [Source:NCBI gene;Acc:114669833]  
ENSMMUG00000057719  
ENSMMUG00000057785  
ENSMMUG00000058002 zinc finger protein 669-like [Source:NCBI gene;Acc:696282]  
ENSMMUG00000058013 melanoma-associated antigen 3 [Source:NCBI gene;Acc:706103]  
ENSMMUG00000058085 coiled-coil domain containing 195 [Source:HGNC Symbol;Acc:HGNC:53441]  
ENSMMUG00000058108 BMP and activin membrane bound inhibitor [Source:NCBI gene;Acc:710152]  
ENSMMUG00000058176 b-defensin2-like [Source:NCBI gene;Acc:100169969]  
ENSMMUG00000058534  
ENSMMUG00000058536  
ENSMMUG00000058800  
ENSMMUG00000058835  
ENSMMUG00000058885 formin binding protein 4 [Source:NCBI gene;Acc:712633]  
ENSMMUG00000058935 Metazoan signal recognition particle RNA [Source:RFAM;Acc:RF00017]  
ENSMMUG00000059182  
ENSMMUG00000059299 membrane spanning 4-domains A2 [Source:NCBI gene;Acc:697830]  
ENSMMUG00000059335

ENSMMUG00000059432  
ENSMMUG00000059504  
ENSMMUG00000059608 fibroblast growth factor binding protein 3 [Source:NCBI gene;Acc:697881]  
ENSMMUG00000059782  
ENSMMUG00000059932 Metazoan signal recognition particle RNA [Source:RFAM;Acc:RF00017]  
ENSMMUG00000060063  
ENSMMUG00000060437 Metazoan signal recognition particle RNA [Source:RFAM;Acc:RF00017]  
ENSMMUG00000060517  
ENSMMUG00000060596 BCL2 associated agonist of cell death [Source:NCBI gene;Acc:717740]  
ENSMMUG00000060667  
ENSMMUG00000060712  
ENSMMUG00000060750 Metazoan signal recognition particle RNA [Source:RFAM;Acc:RF00017]  
ENSMMUG00000061079 golgin subfamily A member 6C [Source:NCBI gene;Acc:715898]  
ENSMMUG00000061342  
ENSMMUG00000061526 synaptopodin 2 like [Source:NCBI gene;Acc:714736]  
ENSMMUG00000061576  
ENSMMUG00000061603  
ENSMMUG00000061606 Metazoan signal recognition particle RNA [Source:RFAM;Acc:RF00017]  
ENSMMUG00000061797 U6 spliceosomal RNA [Source:RFAM;Acc:RF00026]  
ENSMMUG00000061833 transmembrane protein 251 [Source:NCBI gene;Acc:708131]  
ENSMMUG00000061923  
ENSMMUG00000061935  
ENSMMUG00000062063 melanoma-associated antigen 3 [Source:NCBI gene;Acc:711544]  
ENSMMUG00000062139  
ENSMMUG00000062217 HD domain containing 3 [Source:NCBI gene;Acc:715621]  
ENSMMUG00000062254  
ENSMMUG00000062518  
ENSMMUG00000062863  
ENSMMUG00000063112  
ENSMMUG00000063121  
ENSMMUG00000063346  
ENSMMUG00000063495  
ENSMMUG00000063525  
ENSMMUG00000063694 cyclic nucleotide gated channel subunit alpha 2 [Source:NCBI gene;Acc:704486]  
ENSMMUG00000063744  
ENSMMUG00000063759 transmembrane protein 185B [Source:NCBI gene;Acc:695744]  
ENSMMUG00000063898 apolipoprotein F [Source:NCBI gene;Acc:712761]  
ENSMMUG00000063913 endogenous retrovirus group K member 7 Env polyprotein-like [Source:NCBI gene;Acc:114674933]  
ENSMMUG00000064321  
ENSMMUG00000064358  
ENSMMUG00000064557  
ENSMMUG00000064730  
ENSMMUG00000064928  
ENSMMUG00000064931  
ENSMMUG00000065109 ankyrin repeat and SOCS box containing 12 [Source:NCBI gene;Acc:707931]  
ENSMMUG00000065227  
ENSMMUG00000065247 opioid receptor kappa 1 [Source:NCBI gene;Acc:710783]  
ENSMMUG00000065319  
ENSMMUG00000000187 UV radiation resistance associated [Source:VGNC Symbol;Acc:VGNC:78751]  
ENSMMUG00000000198 collagen beta(1-O)galactosyltransferase 1 [Source:NCBI gene;Acc:719980]  
ENSMMUG00000000276 NACC family member 2 [Source:VGNC Symbol;Acc:VGNC:75013]

ENSMMUG0000000293 catenin alpha 2 [Source:VGNC Symbol;Acc:VGNC:71543]  
ENSMMUG0000000396 intraflagellar transport 52 [Source:NCBI gene;Acc:694933]  
ENSMMUG0000000452 LSM7 homolog, U6 small nuclear RNA and mRNA degradation associated [Source:NCBI gene;Acc:721486]  
ENSMMUG0000000566  
ENSMMUG0000000588 rhomboid 5 homolog 1 [Source:NCBI gene;Acc:693423]  
ENSMMUG0000000590 NPR3 like, GATOR1 complex subunit [Source:VGNC Symbol;Acc:VGNC:75173]  
ENSMMUG0000000700 CLN3 lysosomal/endosomal transmembrane protein, battenin [Source:NCBI gene;Acc:705815]  
ENSMMUG0000000740 spermatogenesis associated 2 [Source:VGNC Symbol;Acc:VGNC:77923]  
ENSMMUG0000001036 coagulation factor VII [Source:VGNC Symbol;Acc:VGNC:72466]  
ENSMMUG0000001058 tetratricopeptide repeat domain 28 [Source:VGNC Symbol;Acc:VGNC:79785]  
ENSMMUG0000001116 SUZ12 polycomb repressive complex 2 subunit [Source:VGNC Symbol;Acc:VGNC:78144]  
ENSMMUG0000001278 vitrin [Source:VGNC Symbol;Acc:VGNC:78773]  
ENSMMUG0000001387 p21 (RAC1) activated kinase 1 [Source:NCBI gene;Acc:698585]  
ENSMMUG0000001409 coiled-coil domain containing 187 [Source:NCBI gene;Acc:710749]  
ENSMMUG0000001536 glutamine and serine rich 1 [Source:VGNC Symbol;Acc:VGNC:76544]  
ENSMMUG0000001545 aquaporin 7 [Source:NCBI gene;Acc:702836]  
ENSMMUG0000001845 DNA polymerase epsilon 4, accessory subunit [Source:VGNC Symbol;Acc:VGNC:76065]  
ENSMMUG0000001917 megakaryocyte-associated tyrosine kinase [Source:NCBI gene;Acc:100430078]  
ENSMMUG0000002124 beta-1,4-galactosyltransferase 5 [Source:VGNC Symbol;Acc:VGNC:70212]  
ENSMMUG0000002267 laminin subunit gamma 3 [Source:NCBI gene;Acc:722430]  
ENSMMUG0000002330 ecto-NOX disulfide-thiol exchanger 1 [Source:VGNC Symbol;Acc:VGNC:72110]  
ENSMMUG0000002376 scavenger receptor class F member 1 [Source:VGNC Symbol;Acc:VGNC:77027]  
ENSMMUG0000002377 Rab interacting lysosomal protein [Source:VGNC Symbol;Acc:VGNC:76866]  
ENSMMUG0000002382 serpin family F member 2 [Source:VGNC Symbol;Acc:VGNC:77372]  
ENSMMUG0000002397 GINS complex subunit 1 [Source:VGNC Symbol;Acc:VGNC:73025]  
ENSMMUG0000002715 solute carrier family 9 member A8 [Source:VGNC Symbol;Acc:VGNC:77749]  
ENSMMUG0000002810 TOX high mobility group box family member 2 [Source:VGNC Symbol;Acc:VGNC:79007]  
ENSMMUG0000002926 mediator complex subunit 24 [Source:NCBI gene;Acc:699536]  
ENSMMUG0000002959 helicase with zinc finger [Source:VGNC Symbol;Acc:VGNC:73178]  
ENSMMUG0000002963 Rho GTPase activating protein 32 [Source:VGNC Symbol;Acc:VGNC:69855]  
ENSMMUG0000003005 MFNG O-fucosylpeptide 3-beta-N-acetylglucosaminyltransferase [Source:VGNC Symbol;Acc:VGNC:74712]  
ENSMMUG0000003007 caspase recruitment domain family member 10 [Source:VGNC Symbol;Acc:VGNC:70570]  
ENSMMUG0000003098 peptidase, mitochondrial processing alpha subunit [Source:VGNC Symbol;Acc:VGNC:76062]  
ENSMMUG0000003105 inositol polyphosphate-5-phosphatase E [Source:VGNC Symbol;Acc:VGNC:73637]  
ENSMMUG0000003106 SEC16 homolog A, endoplasmic reticulum export factor [Source:VGNC Symbol;Acc:VGNC:77326]  
ENSMMUG0000003298 ataxin 2 like [Source:VGNC Symbol;Acc:VGNC:70159]  
ENSMMUG0000003303 Tu translation elongation factor, mitochondrial [Source:VGNC Symbol;Acc:VGNC:78674]  
ENSMMUG0000003314 aquaporin 3 (Gill blood group) [Source:NCBI gene;Acc:702721]  
ENSMMUG0000003356 tenascin C [Source:VGNC Symbol;Acc:VGNC:79960]  
ENSMMUG0000003437 signal transducer and activator of transcription 5B [Source:NCBI gene;Acc:709760]  
ENSMMUG0000003539 glutamine rich 2 [Source:VGNC Symbol;Acc:VGNC:76534]  
ENSMMUG0000003555 calcium voltage-gated channel subunit alpha1 A [Source:VGNC Symbol;Acc:VGNC:70498]  
ENSMMUG0000003611 low density lipoprotein receptor [Source:VGNC Symbol;Acc:VGNC:74248]  
ENSMMUG0000003668 GTPase activating protein and VPS9 domains 1 [Source:VGNC Symbol;Acc:VGNC:72767]  
ENSMMUG0000003797 ubiquitin specific peptidase 20 [Source:VGNC Symbol;Acc:VGNC:78740]  
ENSMMUG0000003950 nucleoporin 98 and 96 precursor [Source:VGNC Symbol;Acc:VGNC:75563]  
ENSMMUG0000003955 post-GPI attachment to proteins 2 [Source:VGNC Symbol;Acc:VGNC:75823]  
ENSMMUG0000004283 calcium and integrin binding family member 3 [Source:VGNC Symbol;Acc:VGNC:71339]  
ENSMMUG0000004330 peptidase domain containing associated with muscle regeneration 1 [Source:VGNC Symbol;Acc:VGNC:75673]  
ENSMMUG0000004498 protein inhibitor of activated STAT 2 [Source:VGNC Symbol;Acc:VGNC:75815]  
ENSMMUG0000004794 DNA ligase 3 [Source:VGNC Symbol;Acc:VGNC:74266]

ENSMMUG0000004820 pre-mRNA processing factor 8 [Source:VGNC Symbol;Acc:VGNC:76275]  
ENSMMUG0000004868 dynein axonemal light chain 4 [Source:VGNC Symbol;Acc:VGNC:71945]  
ENSMMUG0000005086 homeobox protein TGIF1 [Source:NCBI gene;Acc:694580]  
ENSMMUG0000005215 Rab9 effector protein with kelch motifs [Source:VGNC Symbol;Acc:VGNC:76495]  
ENSMMUG0000005432 clathrin heavy chain like 1 [Source:VGNC Symbol;Acc:VGNC:71268]  
ENSMMUG0000005440 ELMO domain containing 1 [Source:VGNC Symbol;Acc:VGNC:72109]  
ENSMMUG0000005482 lysine methyltransferase 2A [Source:NCBI gene;Acc:705511]  
ENSMMUG0000005595 RAB14, member RAS oncogene family [Source:NCBI gene;Acc:699837]  
ENSMMUG0000005625 fibrosin [Source:NCBI gene;Acc:712741]  
ENSMMUG0000005639 transmembrane protein 41B [Source:VGNC Symbol;Acc:VGNC:79754]  
ENSMMUG0000005666 phospholipase D2 [Source:VGNC Symbol;Acc:VGNC:76172]  
ENSMMUG0000005737 SLC9A3 regulator 1 [Source:VGNC Symbol;Acc:VGNC:77639]  
ENSMMUG0000005989 GLE1 RNA export mediator [Source:VGNC Symbol;Acc:VGNC:73067]  
ENSMMUG0000005997 cell division cycle 14B [Source:NCBI gene;Acc:710300]  
ENSMMUG0000006066 phosphatidylcholine transfer protein [Source:VGNC Symbol;Acc:VGNC:75789]  
ENSMMUG0000006079 leucine rich repeat containing 19 [Source:VGNC Symbol;Acc:VGNC:74337]  
ENSMMUG0000006091 contactin associated protein 1 [Source:VGNC Symbol;Acc:VGNC:71390]  
ENSMMUG0000006093 enhancer of zeste 1 polycomb repressive complex 2 subunit [Source:VGNC Symbol;Acc:VGNC:72457]  
ENSMMUG0000006375 coiled-coil domain containing 15 [Source:NCBI gene;Acc:716362]  
ENSMMUG0000006405 secretion regulating guanine nucleotide exchange factor [Source:VGNC Symbol;Acc:VGNC:77258]  
ENSMMUG0000006689 nuclear receptor interacting protein 3 [Source:VGNC Symbol;Acc:VGNC:75397]  
ENSMMUG0000006692 signal peptide, CUB domain and EGF like domain containing 2 [Source:VGNC Symbol;Acc:VGNC:77138]  
ENSMMUG0000006738 L3MBTL histone methyl-lysine binding protein 1 [Source:NCBI gene;Acc:695694]  
ENSMMUG0000006853 crystallin beta B2 [Source:NCBI gene;Acc:100144420]  
ENSMMUG0000006929 ST3 beta-galactoside alpha-2,3-sialyltransferase 4 [Source:VGNC Symbol;Acc:VGNC:77827]  
ENSMMUG0000006931 kirre like nephrin family adhesion molecule 3 [Source:NCBI gene;Acc:714534]  
ENSMMUG0000006941 exportin 1 [Source:VGNC Symbol;Acc:VGNC:78812]  
ENSMMUG0000007197 BRCA2 DNA repair associated [Source:VGNC Symbol;Acc:VGNC:70279]  
ENSMMUG0000007200 NEDD4 binding protein 2 like 2 [Source:VGNC Symbol;Acc:VGNC:75031]  
ENSMMUG0000007201 PDS5 cohesin associated factor B [Source:VGNC Symbol;Acc:VGNC:75835]  
ENSMMUG0000007401 arrestin domain containing 2 [Source:VGNC Symbol;Acc:VGNC:69901]  
ENSMMUG0000007423 transcription factor Dp-1 [Source:NCBI gene;Acc:715345]  
ENSMMUG0000007726 synapse defective Rho GTPase homolog 1 [Source:NCBI gene;Acc:719089]  
ENSMMUG0000007729 ilvB acetolactate synthase like [Source:VGNC Symbol;Acc:VGNC:73739]  
ENSMMUG0000007799 LIM and SH3 protein 1 [Source:VGNC Symbol;Acc:VGNC:74237]  
ENSMMUG0000007804 RAN binding protein 10 [Source:VGNC Symbol;Acc:VGNC:76563]  
ENSMMUG0000007925 serum/glucocorticoid regulated kinase 2 [Source:VGNC Symbol;Acc:VGNC:77228]  
ENSMMUG0000008080 ATP binding cassette subfamily G member 5 [Source:VGNC Symbol;Acc:VGNC:69391]  
ENSMMUG0000008081 ATP binding cassette subfamily G member 8 [Source:VGNC Symbol;Acc:VGNC:69392]  
ENSMMUG0000008195 TGFB induced factor homeobox 2 [Source:NCBI gene;Acc:100429616]  
ENSMMUG0000008196 aconitase 1 [Source:VGNC Symbol;Acc:VGNC:69378]  
ENSMMUG0000008200 Src like adaptor 2 [Source:VGNC Symbol;Acc:VGNC:77499]  
ENSMMUG0000008253 zinc finger protein 267 [Source:NCBI gene;Acc:641441]  
ENSMMUG0000008536 mitogen-activated protein kinase 7 [Source:VGNC Symbol;Acc:VGNC:74648]  
ENSMMUG0000008758 zinc finger protein 143 [Source:VGNC Symbol;Acc:VGNC:81612]  
ENSMMUG0000008778 parvalbumin [Source:VGNC Symbol;Acc:VGNC:76627]  
ENSMMUG0000008784 lipopolysaccharide induced TNF factor [Source:NCBI gene;Acc:711743]  
ENSMMUG0000008923 Thy-1 cell surface antigen [Source:VGNC Symbol;Acc:VGNC:78352]  
ENSMMUG0000008979 protein O-fucosyltransferase 1 [Source:VGNC Symbol;Acc:VGNC:76030]  
ENSMMUG0000009199 glycogen phosphorylase B [Source:VGNC Symbol;Acc:VGNC:76631]  
ENSMMUG0000009201 abhydrolase domain containing 12 [Source:VGNC Symbol;Acc:VGNC:69411]

ENSMMUG0000009377 tripartite motif containing 47 [Source:VGNC Symbol;Acc:VGNC:79171]  
ENSMMUG0000009567 glyoxylate reductase 1 homolog [Source:NCBI gene;Acc:706933]  
ENSMMUG0000009684 kinesin family member 22 [Source:VGNC Symbol;Acc:VGNC:74033]  
ENSMMUG0000009884 hydroxysteroid 17-beta dehydrogenase 1 [Source:VGNC Symbol;Acc:VGNC:73528]  
ENSMMUG0000009886 Coenzyme A synthase [Source:VGNC Symbol;Acc:VGNC:81373]  
ENSMMUG0000009887 MAX dimerization protein MLX [Source:VGNC Symbol;Acc:VGNC:74726]  
ENSMMUG0000009889 PSMC3 interacting protein [Source:VGNC Symbol;Acc:VGNC:76282]  
ENSMMUG0000009890 FERM, ARH/RhoGEF and pleckstrin domain protein 1 [Source:VGNC Symbol;Acc:VGNC:72614]  
ENSMMUG0000009953 ninein like [Source:VGNC Symbol;Acc:VGNC:75273]  
ENSMMUG0000009960 cathepsin A [Source:VGNC Symbol;Acc:VGNC:71617]  
ENSMMUG0000009976 uridine-cytidine kinase 1 [Source:VGNC Symbol;Acc:VGNC:78967]  
ENSMMUG0000009988 transmembrane protein 59 like [Source:VGNC Symbol;Acc:VGNC:78919]  
ENSMMUG0000009995 arachidonate 15-lipoxygenase type B [Source:VGNC Symbol;Acc:VGNC:69797]  
ENSMMUG00000010028 leucine zipper tumor suppressor family member 3 [Source:VGNC Symbol;Acc:VGNC:74403]  
ENSMMUG00000010363 ribophorin II [Source:VGNC Symbol;Acc:VGNC:76925]  
ENSMMUG00000010451 inositol polyphosphate phosphatase like 1 [Source:VGNC Symbol;Acc:VGNC:73752]  
ENSMMUG00000010556 Snf2 related CREBBP activator protein [Source:NCBI gene;Acc:712944]  
ENSMMUG00000010824 SWIM-type zinc finger 7 associated protein 1 [Source:VGNC Symbol;Acc:VGNC:78220]  
ENSMMUG00000010826 ral guanine nucleotide dissociation stimulator like 3 [Source:VGNC Symbol;Acc:VGNC:76869]  
ENSMMUG00000010886 strawberry notch homolog 2 [Source:VGNC Symbol;Acc:VGNC:77123]  
ENSMMUG00000011064 synaptosome associated protein 25 [Source:VGNC Symbol;Acc:VGNC:77663]  
ENSMMUG00000011344 solute carrier family 52 member 1 [Source:VGNC Symbol;Acc:VGNC:77795]  
ENSMMUG00000011411 sperm acrosome associated 3 [Source:VGNC Symbol;Acc:VGNC:77930]  
ENSMMUG00000011427 syntaxin 10 [Source:VGNC Symbol;Acc:VGNC:78040]  
ENSMMUG00000011798 eukaryotic translation initiation factor 3 subunit C [Source:NCBI gene;Acc:705696]  
ENSMMUG00000011951 KRI1 homolog [Source:VGNC Symbol;Acc:VGNC:74127]  
ENSMMUG00000012001 transcription factor 4 [Source:VGNC Symbol;Acc:VGNC:78288]  
ENSMMUG00000012147 collagen type V alpha 1 chain [Source:NCBI gene;Acc:722014]  
ENSMMUG00000012178 calcium binding and coiled-coil domain 2 [Source:VGNC Symbol;Acc:VGNC:70675]  
ENSMMUG00000012228 ubiquitin conjugating enzyme E2 V1 [Source:NCBI gene;Acc:100425552]  
ENSMMUG00000012349 thiosulfate sulfurtransferase [Source:VGNC Symbol;Acc:VGNC:78664]  
ENSMMUG00000012668 centriolin [Source:VGNC Symbol;Acc:VGNC:71204]  
ENSMMUG00000012856 nuclear FMR1 interacting protein 2 [Source:VGNC Symbol;Acc:VGNC:75422]  
ENSMMUG00000012959 solute carrier family 35 member E1 [Source:VGNC Symbol;Acc:VGNC:77536]  
ENSMMUG00000013099 pappalysin 1 [Source:VGNC Symbol;Acc:VGNC:75756]  
ENSMMUG00000013540 RAN guanine nucleotide release factor [Source:VGNC Symbol;Acc:VGNC:76503]  
ENSMMUG00000013713 beta 3-glucosyltransferase [Source:NCBI gene;Acc:713498]  
ENSMMUG00000013740 minichromosome maintenance 8 homologous recombination repair factor [Source:VGNC Symbol;Acc:VGNC:74516]  
ENSMMUG00000013877 otoancorin [Source:VGNC Symbol;Acc:VGNC:75624]  
ENSMMUG00000013944 regulator of microtubule dynamics 2 [Source:VGNC Symbol;Acc:VGNC:76839]  
ENSMMUG00000013967 TOX high mobility group box family member 3 [Source:VGNC Symbol;Acc:VGNC:78612]  
ENSMMUG00000014032 proline rich 36 [Source:NCBI gene;Acc:710443]  
ENSMMUG00000014240 thioredoxin domain containing 11 [Source:VGNC Symbol;Acc:VGNC:79678]  
ENSMMUG00000014349 integrin subunit alpha X [Source:NCBI gene;Acc:100427850]  
ENSMMUG00000014534 phosphatidylinositol transfer protein beta [Source:VGNC Symbol;Acc:VGNC:76006]  
ENSMMUG00000014872 dolichyl-phosphate N-acetylglucosaminophosphotransferase 1 [Source:VGNC Symbol;Acc:VGNC:71971]  
ENSMMUG00000014875 C2CD2 like [Source:VGNC Symbol;Acc:VGNC:70435]  
ENSMMUG00000014897 ribonucleoprotein, PTB binding 1 [Source:NCBI gene;Acc:715250]  
ENSMMUG00000014986 testis expressed 33 [Source:VGNC Symbol;Acc:VGNC:79727]  
ENSMMUG00000015258 glycine C-acetyltransferase [Source:NCBI gene;Acc:698811]  
ENSMMUG00000015303 ATP binding cassette subfamily A member 7 [Source:VGNC Symbol;Acc:VGNC:69567]



ENSMMUG00000015744 zinc finger protein 302 [Source:NCBI gene;Acc:706279]  
ENSMMUG00000015952 katanin catalytic subunit A1 like 2 [Source:VGNC Symbol;Acc:VGNC:73904]  
ENSMMUG00000016143 sialophorin [Source:VGNC Symbol;Acc:VGNC:77861]  
ENSMMUG00000016323 Rho guanine nucleotide exchange factor 39 [Source:VGNC Symbol;Acc:VGNC:69912]  
ENSMMUG00000016327 coiled-coil domain containing 107 [Source:VGNC Symbol;Acc:VGNC:70656]  
ENSMMUG00000016404 chondromodulin [Source:VGNC Symbol;Acc:VGNC:71191]  
ENSMMUG00000016417 chromobox 8 [Source:NCBI gene;Acc:717514]  
ENSMMUG00000016434 NADH:ubiquinone oxidoreductase complex assembly factor 7 [Source:VGNC Symbol;Acc:VGNC:75035]  
ENSMMUG00000016438 protein kinase D3 [Source:VGNC Symbol;Acc:VGNC:76415]  
ENSMMUG00000016448 DLG associated protein 4 [Source:NCBI gene;Acc:702928]  
ENSMMUG00000016549 matrix metalloproteinase 9 [Source:VGNC Symbol;Acc:VGNC:74903]  
ENSMMUG00000016593 adaptor related protein complex 1 subunit mu 2 [Source:NCBI gene;Acc:720531]  
ENSMMUG00000016678 Rho associated coiled-coil containing protein kinase 2 [Source:VGNC Symbol;Acc:VGNC:76714]  
ENSMMUG00000016737 contactin 5 [Source:VGNC Symbol;Acc:VGNC:71287]  
ENSMMUG00000016796 reticulophagy regulator family member 3 [Source:VGNC Symbol;Acc:VGNC:76845]  
ENSMMUG00000016797 tubulin gamma 1 [Source:NCBI gene;Acc:710756]  
ENSMMUG00000016826 MAPK associated protein 1 [Source:VGNC Symbol;Acc:VGNC:74531]  
ENSMMUG00000016827 UBA domain containing 1 [Source:VGNC Symbol;Acc:VGNC:79837]  
ENSMMUG00000016876 integrin subunit alpha L [Source:NCBI gene;Acc:711945]  
ENSMMUG00000016890 solute carrier family 37 member 4 [Source:VGNC Symbol;Acc:VGNC:77591]  
ENSMMUG00000017036 nicalin [Source:VGNC Symbol;Acc:VGNC:75032]  
ENSMMUG00000017053 death associated protein kinase 1 [Source:VGNC Symbol;Acc:VGNC:71732]  
ENSMMUG00000017209 C1D nuclear receptor corepressor [Source:NCBI gene;Acc:698450]  
ENSMMUG00000017224 catenin beta like 1 [Source:VGNC Symbol;Acc:VGNC:71414]  
ENSMMUG00000017242 MYCBP associated protein [Source:VGNC Symbol;Acc:VGNC:74994]  
ENSMMUG00000017256 calcium voltage-gated channel subunit alpha1 G [Source:VGNC Symbol;Acc:VGNC:70504]  
ENSMMUG00000017654 arrestin beta 2 [Source:VGNC Symbol;Acc:VGNC:70022]  
ENSMMUG00000017758 mitogen-activated protein kinase 3 [Source:VGNC Symbol;Acc:VGNC:74646]  
ENSMMUG00000017822 periplakin [Source:VGNC Symbol;Acc:VGNC:76240]  
ENSMMUG00000017906 DnaJ heat shock protein family (Hsp40) member B1 [Source:NCBI gene;Acc:718890]  
ENSMMUG00000017971 nucleus accumbens associated 1 [Source:VGNC Symbol;Acc:VGNC:74996]  
ENSMMUG00000018011 sphingosine kinase 1 [Source:VGNC Symbol;Acc:VGNC:77858]  
ENSMMUG00000018034 suppression of tumorigenicity 14 [Source:VGNC Symbol;Acc:VGNC:77897]  
ENSMMUG00000018137 MYB proto-oncogene like 2 [Source:VGNC Symbol;Acc:VGNC:75092]  
ENSMMUG00000018396 HAUS augmin like complex subunit 6 [Source:VGNC Symbol;Acc:VGNC:73237]  
ENSMMUG00000018600 myosin light chain 4 [Source:VGNC Symbol;Acc:VGNC:75105]  
ENSMMUG00000018648 zinc finger protein 594 [Source:NCBI gene;Acc:711492]  
ENSMMUG00000018719 nemo like kinase [Source:VGNC Symbol;Acc:VGNC:75277]  
ENSMMUG00000018932 adhesion G protein-coupled receptor E2 [Source:NCBI gene;Acc:654420]  
ENSMMUG00000018967 ubiquitin conjugating enzyme E2 O [Source:VGNC Symbol;Acc:VGNC:79813]  
ENSMMUG00000018986 seizure related 6 homolog like 2 [Source:VGNC Symbol;Acc:VGNC:81567]  
ENSMMUG00000019070 focadhesin [Source:VGNC Symbol;Acc:VGNC:72556]  
ENSMMUG00000019223 TNF receptor associated factor 7 [Source:VGNC Symbol;Acc:VGNC:79252]  
ENSMMUG00000019314 vav guanine nucleotide exchange factor 1 [Source:VGNC Symbol;Acc:VGNC:78757]  
ENSMMUG00000019418 erythrocyte membrane protein band 4.1 like 3 [Source:VGNC Symbol;Acc:VGNC:72233]  
ENSMMUG00000019607 patatin like phospholipase domain containing 7 [Source:VGNC Symbol;Acc:VGNC:76104]  
ENSMMUG00000019667 TAO kinase 1 [Source:VGNC Symbol;Acc:VGNC:81591]  
ENSMMUG00000019925 DiGeorge syndrome critical region gene 2 [Source:NCBI gene;Acc:100423715]  
ENSMMUG00000020020 Rho GTPase activating protein 23 [Source:NCBI gene;Acc:693996]  
ENSMMUG00000020190 valosin containing protein [Source:VGNC Symbol;Acc:VGNC:78762]  
ENSMMUG00000020254 exocyst complex component 3 like 1 [Source:VGNC Symbol;Acc:VGNC:72376]

ENSMMUG00000020462 CD300e molecule [Source:NCBI gene;Acc:114673189]  
ENSMMUG00000020580 RPGRIP1 like [Source:VGNC Symbol;Acc:VGNC:77124]  
ENSMMUG00000020583 FTO alpha-ketoglutarate dependent dioxygenase [Source:VGNC Symbol;Acc:VGNC:72772]  
ENSMMUG00000020597 acyl-CoA synthetase short chain family member 1 [Source:VGNC Symbol;Acc:VGNC:69416]  
ENSMMUG00000020633 suppressor of cancer cell invasion [Source:NCBI gene;Acc:712803]  
ENSMMUG00000020668 cyclin E1 [Source:VGNC Symbol;Acc:VGNC:70727]  
ENSMMUG00000020799 BH3 interacting domain death agonist [Source:VGNC Symbol;Acc:VGNC:70250]  
ENSMMUG00000020868 homeobox B8 [Source:VGNC Symbol;Acc:VGNC:73505]  
ENSMMUG00000021019 E3 SUMO-protein ligase RanBP2 [Source:NCBI gene;Acc:694823]  
ENSMMUG00000021039 X-ray radiation resistance associated 1 [Source:NCBI gene;Acc:693788]  
ENSMMUG00000021436 latent transforming growth factor beta binding protein 1 [Source:VGNC Symbol;Acc:VGNC:74456]  
ENSMMUG00000021476 BCL2 like 13 [Source:VGNC Symbol;Acc:VGNC:84544]  
ENSMMUG00000021477 ATPase H+ transporting V1 subunit E1 [Source:NCBI gene;Acc:709739]  
ENSMMUG00000021904 cell division cycle 45 [Source:VGNC Symbol;Acc:VGNC:70800]  
ENSMMUG00000022100 midnolin [Source:VGNC Symbol;Acc:VGNC:82186]  
ENSMMUG00000022207 phospholipid phosphatase related 2 [Source:NCBI gene;Acc:714388]  
ENSMMUG00000022282 collagen type IV alpha 2 chain [Source:NCBI gene;Acc:100429807]  
ENSMMUG00000022348 surfait 4 [Source:VGNC Symbol;Acc:VGNC:78060]  
ENSMMUG00000022401 EMSY transcriptional repressor, BRCA2 interacting [Source:VGNC Symbol;Acc:VGNC:72065]  
ENSMMUG00000022613 reversion inducing cysteine rich protein with kazal motifs [Source:VGNC Symbol;Acc:VGNC:76722]  
ENSMMUG00000022785 solute carrier family 66 member 3 [Source:VGNC Symbol;Acc:VGNC:76334]  
ENSMMUG00000022818 inhibitor of growth family member 1 [Source:VGNC Symbol;Acc:VGNC:73742]  
ENSMMUG00000022914 RAB, member of RAS oncogene family like 2B [Source:NCBI gene;Acc:716615]  
ENSMMUG00000022996 HCLS1 binding protein 3 [Source:VGNC Symbol;Acc:VGNC:82158]  
ENSMMUG00000023263 mediator complex subunit 15 [Source:VGNC Symbol;Acc:VGNC:74511]  
ENSMMUG00000023286 UPF1 RNA helicase and ATPase [Source:VGNC Symbol;Acc:VGNC:79971]  
ENSMMUG00000023303 ecotropic viral integration site 5 like [Source:NCBI gene;Acc:706628]  
ENSMMUG00000023403 GTP binding protein 3, mitochondrial [Source:VGNC Symbol;Acc:VGNC:73170]  
ENSMMUG00000023622 BCR activator of RhoGEF and GTPase [Source:NCBI gene;Acc:709258]  
ENSMMUG00000023636 importin 7 [Source:NCBI gene;Acc:704213]  
ENSMMUG00000023717 MIER family member 2 [Source:VGNC Symbol;Acc:VGNC:74855]  
ENSMMUG00000023797 post-GPI attachment to proteins GalNAc transferase 4 [Source:VGNC Symbol;Acc:VGNC:79688]  
ENSMMUG00000024170 U6 spliceosomal RNA [Source:RFAM;Acc:RF00026]  
ENSMMUG00000025050 Y RNA [Source:RFAM;Acc:RF00019]  
ENSMMUG00000025150 Y RNA [Source:RFAM;Acc:RF00019]  
ENSMMUG00000026950 microRNA 101-2 [Source:HGNC Symbol;Acc:HGNC:31489]  
ENSMMUG00000027986 U6 spliceosomal RNA [Source:RFAM;Acc:RF00026]  
ENSMMUG00000028906 Rho/Rac guanine nucleotide exchange factor 18 [Source:NCBI gene;Acc:707510]  
ENSMMUG00000028907 insulin receptor [Source:NCBI gene;Acc:706009]  
ENSMMUG00000028947 complement factor D [Source:VGNC Symbol;Acc:VGNC:71115]  
ENSMMUG00000028948 azurocidin 1 [Source:VGNC Symbol;Acc:VGNC:70202]  
ENSMMUG00000030279 A-kinase anchoring protein 10 [Source:VGNC Symbol;Acc:VGNC:69764]  
ENSMMUG00000030389  
ENSMMUG00000030964 RAB6A, member RAS oncogene family [Source:NCBI gene;Acc:718717]  
ENSMMUG00000031391 RNA binding motif protein 38 [Source:VGNC Symbol;Acc:VGNC:76484]  
ENSMMUG00000038944  
ENSMMUG00000038997 zygote arrest 1 like [Source:NCBI gene;Acc:100427970]  
ENSMMUG00000039266 Metazoan signal recognition particle RNA [Source:RFAM;Acc:RF00017]  
ENSMMUG00000039774 Metazoan signal recognition particle RNA [Source:RFAM;Acc:RF00017]  
ENSMMUG00000039943 adenylate cyclase 9 [Source:NCBI gene;Acc:706789]  
ENSMMUG00000042407

ENSMMUG00000042598 transmembrane protein 18 [Source:NCBI gene;Acc:721515]  
ENSMMUG00000042855 zinc finger SWIM-type containing 1 [Source:NCBI gene;Acc:717180]  
ENSMMUG00000043134 coiled-coil domain containing 159 [Source:NCBI gene;Acc:100424702]  
ENSMMUG00000043396 Metazoan signal recognition particle RNA [Source:RFAM;Acc:RF00017]  
ENSMMUG00000043738  
ENSMMUG00000044048 Metazoan signal recognition particle RNA [Source:RFAM;Acc:RF00017]  
ENSMMUG00000044080 mitochondrial ribosomal protein L54 [Source:NCBI gene;Acc:713878]  
ENSMMUG00000044545 apolipoprotein A1 [Source:NCBI gene;Acc:696969]  
ENSMMUG00000046169  
ENSMMUG00000046417 chromobox 2 [Source:NCBI gene;Acc:717462]  
ENSMMUG00000046883 autophagy related 4D cysteine peptidase [Source:NCBI gene;Acc:713111]  
ENSMMUG00000046918  
ENSMMUG00000048204 ephrin B3 [Source:NCBI gene;Acc:716257]  
ENSMMUG00000048375 Metazoan signal recognition particle RNA [Source:RFAM;Acc:RF00017]  
ENSMMUG00000048566 MCF.2 cell line derived transforming sequence like [Source:NCBI gene;Acc:713961]  
ENSMMUG00000049130  
ENSMMUG00000049391  
ENSMMUG00000049542  
ENSMMUG00000049600  
ENSMMUG00000049649 proteasome 20S subunit beta 6 [Source:NCBI gene;Acc:710028]  
ENSMMUG00000049703 Metazoan signal recognition particle RNA [Source:RFAM;Acc:RF00017]  
ENSMMUG00000050543  
ENSMMUG00000050739  
ENSMMUG00000050793 N-acetyl-alpha-glucosaminidase [Source:NCBI gene;Acc:707186]  
ENSMMUG00000050822 carbonic anhydrase 9 [Source:NCBI gene;Acc:696729]  
ENSMMUG00000051072  
ENSMMUG00000051201 zinc finger SWIM-type containing 3 [Source:NCBI gene;Acc:708804]  
ENSMMUG00000051226 FAD-linked sulfhydryl oxidase ERV1 [Source:NCBI gene;Acc:106994988]  
ENSMMUG00000051537  
ENSMMUG00000051852 Metazoan signal recognition particle RNA [Source:RFAM;Acc:RF00017]  
ENSMMUG00000051925  
ENSMMUG00000051976  
ENSMMUG00000052047  
ENSMMUG00000052476 zinc finger and BTB domain containing 43 [Source:NCBI gene;Acc:701797]  
ENSMMUG00000052505 homeobox B9 [Source:NCBI gene;Acc:106994009]  
ENSMMUG00000052607  
ENSMMUG00000052785 extracellular leucine rich repeat and fibronectin type III domain containing 2 [Source:NCBI gene;Acc:697071]  
ENSMMUG00000053083 C2 calcium dependent domain containing 4C [Source:NCBI gene;Acc:100424440]  
ENSMMUG00000053257 Y RNA [Source:RFAM;Acc:RF00019]  
ENSMMUG00000053329  
ENSMMUG00000053457 caspase 14 [Source:NCBI gene;Acc:718049]  
ENSMMUG00000053611 stromal cell derived factor 2 [Source:NCBI gene;Acc:716189]  
ENSMMUG00000053937  
ENSMMUG00000053976 bile acid-CoA:amino acid N-acyltransferase [Source:NCBI gene;Acc:100429419]  
ENSMMUG00000054111 Metazoan signal recognition particle RNA [Source:RFAM;Acc:RF00017]  
ENSMMUG00000054211  
ENSMMUG00000054472  
ENSMMUG00000054736  
ENSMMUG00000054746  
ENSMMUG00000054803  
ENSMMUG00000054811

ENSMMUG00000055048  
ENSMMUG00000055241  
ENSMMUG00000055324 homeobox B7 [Source:NCBI gene;Acc:697089]  
ENSMMUG00000055352  
ENSMMUG00000055379  
ENSMMUG00000055747 cytochrome c oxidase subunit 6B [Source:NCBI gene;Acc:692062]  
ENSMMUG00000055775 transmembrane p24 trafficking protein 1 [Source:NCBI gene;Acc:713618]  
ENSMMUG00000055811  
ENSMMUG00000055820  
ENSMMUG00000055897  
ENSMMUG00000055963  
ENSMMUG00000056009  
ENSMMUG00000056093 shieldin complex subunit 1 [Source:NCBI gene;Acc:718152]  
ENSMMUG00000056186  
ENSMMUG00000056248  
ENSMMUG00000056381 forkhead box R1 [Source:NCBI gene;Acc:707285]  
ENSMMUG00000056555  
ENSMMUG00000056840  
ENSMMUG00000056939  
ENSMMUG00000056945  
ENSMMUG00000056950  
ENSMMUG00000057157  
ENSMMUG00000057231 T-box transcription factor 21 [Source:NCBI gene;Acc:694044]  
ENSMMUG00000057331 RNA terminal phosphate cyclase like 1 [Source:NCBI gene;Acc:694568]  
ENSMMUG00000057345 calcineurin like phosphoesterase domain containing 1 [Source:NCBI gene;Acc:716978]  
ENSMMUG00000057499  
ENSMMUG00000057632  
ENSMMUG00000057687  
ENSMMUG00000057813  
ENSMMUG00000057934  
ENSMMUG00000058029 Metazoan signal recognition particle RNA [Source:RFAM;Acc:RF00017]  
ENSMMUG00000058095 visual system homeobox 1 [Source:NCBI gene;Acc:715973]  
ENSMMUG00000058110  
ENSMMUG00000058326 neuralized E3 ubiquitin protein ligase 2 [Source:NCBI gene;Acc:708904]  
ENSMMUG00000058437  
ENSMMUG00000058566  
ENSMMUG00000058592  
ENSMMUG00000058715  
ENSMMUG00000058815 core-binding factor subunit beta [Source:NCBI gene;Acc:695767]  
ENSMMUG00000058856 Metazoan signal recognition particle RNA [Source:RFAM;Acc:RF00017]  
ENSMMUG00000058916  
ENSMMUG00000058928 Metazoan signal recognition particle RNA [Source:RFAM;Acc:RF00017]  
ENSMMUG00000059175  
ENSMMUG00000059188  
ENSMMUG00000059332 Metazoan signal recognition particle RNA [Source:RFAM;Acc:RF00017]  
ENSMMUG00000059341 Metazoan signal recognition particle RNA [Source:RFAM;Acc:RF00017]  
ENSMMUG00000059374  
ENSMMUG00000059436 interleukin 10 receptor subunit alpha [Source:NCBI gene;Acc:704383]  
ENSMMUG00000059700  
ENSMMUG00000059778  
ENSMMUG00000059897 myosin light chain 9 [Source:NCBI gene;Acc:709784]

ENSMMUG00000060102 cytokine receptor like factor 1 [Source:NCBI gene;Acc:720247]  
ENSMMUG00000060289  
ENSMMUG00000060399 Metazoan signal recognition particle RNA [Source:RFAM;Acc:RF00017]  
ENSMMUG00000060497  
ENSMMUG00000060502  
ENSMMUG00000060761  
ENSMMUG00000060767  
ENSMMUG00000061222 adipocyte plasma membrane associated protein [Source:NCBI gene;Acc:704948]  
ENSMMUG00000061335  
ENSMMUG00000061391 ankyrin repeat domain 49 [Source:NCBI gene;Acc:697693]  
ENSMMUG00000061424 ventral anterior homeobox 2 [Source:NCBI gene;Acc:703531]  
ENSMMUG00000061533  
ENSMMUG00000061896  
ENSMMUG00000061940  
ENSMMUG00000061951  
ENSMMUG00000062037 stannin [Source:NCBI gene;Acc:711909]  
ENSMMUG00000062091  
ENSMMUG00000062283 homeobox B6 [Source:NCBI gene;Acc:106994013]  
ENSMMUG00000062474 Metazoan signal recognition particle RNA [Source:RFAM;Acc:RF00017]  
ENSMMUG00000062485 ESF1 nucleolar pre-rRNA processing protein homolog [Source:NCBI gene;Acc:694159]  
ENSMMUG00000062583 olfactory receptor 1A1 [Source:NCBI gene;Acc:721403]  
ENSMMUG00000062702  
ENSMMUG00000062781 chromosome 14 C11orf97 homolog [Source:NCBI gene;Acc:106993442]  
ENSMMUG00000063140 Metazoan signal recognition particle RNA [Source:RFAM;Acc:RF00017]  
ENSMMUG00000063238  
ENSMMUG00000063590  
ENSMMUG00000063622 mitochondrial ribosomal protein S26 [Source:NCBI gene;Acc:717038]  
ENSMMUG00000063639  
ENSMMUG00000063779  
ENSMMUG00000063914  
ENSMMUG00000063988  
ENSMMUG00000064052 CD300 molecule like family member d [Source:NCBI gene;Acc:703142]  
ENSMMUG00000064095  
ENSMMUG00000064229  
ENSMMUG00000064391  
ENSMMUG00000064401  
ENSMMUG00000064463  
ENSMMUG00000064520  
ENSMMUG00000064532 mucin 16, cell surface associated [Source:NCBI gene;Acc:106996460]  
ENSMMUG00000064554 leucine rich repeat neuronal 4 [Source:NCBI gene;Acc:718283]  
ENSMMUG00000064610 long intergenic non-protein coding RNA 1862 [Source:HGNC Symbol;Acc:HGNC:52681]  
ENSMMUG00000064920  
ENSMMUG00000065025  
ENSMMUG00000065054 G protein subunit gamma 7 [Source:NCBI gene;Acc:711335]  
ENSMMUG00000065094  
ENSMMUG00000002384 IGF like family receptor 1 [Source:VGNC Symbol;Acc:VGNC:73434]  
ENSMMUG00000003568 testis expressed 101 [Source:VGNC Symbol;Acc:VGNC:79869]  
ENSMMUG00000003819 nitric oxide synthase interacting protein [Source:VGNC Symbol;Acc:VGNC:75207]  
ENSMMUG00000004616 plasminogen activator, urokinase receptor [Source:VGNC Symbol;Acc:VGNC:76163]  
ENSMMUG00000005554 mediator complex subunit 29 [Source:VGNC Symbol;Acc:VGNC:74557]  
ENSMMUG00000006936 gastric inhibitory polypeptide receptor [Source:VGNC Symbol;Acc:VGNC:73052]

|                    |                                                                                                      |
|--------------------|------------------------------------------------------------------------------------------------------|
| ENSMMUG0000007538  | transient receptor potential cation channel subfamily M member 4 [Source:VGNC Symbol;Acc:VGNC:79105] |
| ENSMMUG00000010837 | VRK serine/threonine kinase 3 [Source:VGNC Symbol;Acc:VGNC:81605]                                    |
| ENSMMUG00000011330 | neuronal PAS domain protein 1 [Source:VGNC Symbol;Acc:VGNC:75377]                                    |
| ENSMMUG00000011332 | Rho GTPase activating protein 35 [Source:VGNC Symbol;Acc:VGNC:69942]                                 |
| ENSMMUG00000011627 | interleukin 4 induced 1 [Source:VGNC Symbol;Acc:VGNC:73625]                                          |
| ENSMMUG00000012787 | acid phosphatase 7, tartrate resistant (putative) [Source:NCBI gene;Acc:695532]                      |
| ENSMMUG00000012797 | zinc finger protein 233 [Source:VGNC Symbol;Acc:VGNC:79903]                                          |
| ENSMMUG00000012801 | zinc finger protein 235 [Source:VGNC Symbol;Acc:VGNC:78825]                                          |
| ENSMMUG00000012937 | proline rich 12 [Source:NCBI gene;Acc:719344]                                                        |
| ENSMMUG00000012938 | SR-related CTD associated factor 1 [Source:VGNC Symbol;Acc:VGNC:77137]                               |
| ENSMMUG00000013477 | creatine kinase, M-type [Source:VGNC Symbol;Acc:VGNC:71230]                                          |
| ENSMMUG00000014273 | cation channel sperm associated auxiliary subunit gamma [Source:VGNC Symbol;Acc:VGNC:70626]          |
| ENSMMUG00000017927 | protein kinase D2 [Source:VGNC Symbol;Acc:VGNC:76273]                                                |
| ENSMMUG00000017930 | striatin 4 [Source:VGNC Symbol;Acc:VGNC:78128]                                                       |
| ENSMMUG00000019032 | EMAP like 2 [Source:NCBI gene;Acc:715009]                                                            |
| ENSMMUG00000021062 | CD177 molecule [Source:VGNC Symbol;Acc:VGNC:70912]                                                   |
| ENSMMUG00000021269 | Josephin domain containing 2 [Source:VGNC Symbol;Acc:VGNC:73919]                                     |
| ENSMMUG00000022116 | PIH1 domain containing 1 [Source:VGNC Symbol;Acc:VGNC:75868]                                         |
| ENSMMUG00000028733 | RAS related [Source:VGNC Symbol;Acc:VGNC:76937]                                                      |
| ENSMMUG00000038221 | proteasome 26S subunit, non-ATPase 8 [Source:NCBI gene;Acc:721897]                                   |
| ENSMMUG00000044817 | nucleoporin 62 [Source:NCBI gene;Acc:100426308]                                                      |
| ENSMMUG00000048190 | U2 small nuclear RNA auxiliary factor 1 like 4 [Source:NCBI gene;Acc:718865]                         |
| ENSMMUG00000048215 |                                                                                                      |
| ENSMMUG00000050799 |                                                                                                      |
| ENSMMUG00000054052 | sialic acid binding Ig like lectin 11 [Source:NCBI gene;Acc:719127]                                  |
| ENSMMUG00000054090 |                                                                                                      |
| ENSMMUG00000054473 | activating transcription factor 5 [Source:NCBI gene;Acc:719150]                                      |
| ENSMMUG00000055893 |                                                                                                      |
| ENSMMUG00000055976 | CD99 antigen [Source:NCBI gene;Acc:106995376]                                                        |
| ENSMMUG00000057361 | Metazoan signal recognition particle RNA [Source:RFAM;Acc:RF00017]                                   |
| ENSMMUG00000057454 | transmembrane protein 160 [Source:NCBI gene;Acc:716996]                                              |
| ENSMMUG00000058137 | zinc finger protein 816 [Source:NCBI gene;Acc:720058]                                                |
| ENSMMUG00000059229 | CEA cell adhesion molecule 7 [Source:NCBI gene;Acc:705572]                                           |
| ENSMMUG00000062296 | potassium two pore domain channel subfamily K member 6 [Source:NCBI gene;Acc:714912]                 |
| ENSMMUG00000064146 | Metazoan signal recognition particle RNA [Source:RFAM;Acc:RF00017]                                   |

## Survivors – SD 3 vs. Baseline

| Ensembl Gene ID    | Description                                                                             |
|--------------------|-----------------------------------------------------------------------------------------|
| ENSMMUG00000000302 | WD repeat and HMG-box DNA binding protein 1 [Source:VGNC Symbol;Acc:VGNC:79376]         |
| ENSMMUG00000000313 | HEAT repeat containing 4 [Source:VGNC Symbol;Acc:VGNC:73176]                            |
| ENSMMUG00000000375 | pleckstrin homology and RhoGEF domain containing G6 [Source:VGNC Symbol;Acc:VGNC:76110] |
| ENSMMUG00000000419 | Rho GTPase activating protein 26 [Source:VGNC Symbol;Acc:VGNC:69846]                    |
| ENSMMUG00000000421 | nuclear receptor subfamily 3 group C member 1 [Source:VGNC Symbol;Acc:VGNC:75515]       |
| ENSMMUG00000000632 | SH3 binding domain protein 5 like [Source:VGNC Symbol;Acc:VGNC:77334]                   |
| ENSMMUG00000000644 | centrosomal protein 85 [Source:VGNC Symbol;Acc:VGNC:71096]                              |
| ENSMMUG00000000649 | UBX domain protein 11 [Source:VGNC Symbol;Acc:VGNC:79859]                               |
| ENSMMUG00000000706 | filamin B [Source:VGNC Symbol;Acc:VGNC:72672]                                           |
| ENSMMUG00000000754 | Dmx like 2 [Source:VGNC Symbol;Acc:VGNC:71936]                                          |



ENSMMUG0000000790 ankyrin repeat domain 17 [Source:VGNC Symbol;Acc:VGNC:84240]  
ENSMMUG0000000863 dynein axonemal assembly factor 4 [Source:VGNC Symbol;Acc:VGNC:71881]  
ENSMMUG0000000869 small nuclear ribonucleoprotein polypeptide C [Source:NCBI gene;Acc:718654]  
ENSMMUG0000000894 cellular inhibitor of PP2A [Source:VGNC Symbol;Acc:VGNC:71371]  
ENSMMUG0000000951 integrin subunit beta 2 [Source:VGNC Symbol;Acc:VGNC:73786]  
ENSMMUG0000000958 aldo-keto reductase family 1, member C2 [Source:NCBI gene;Acc:711360]  
ENSMMUG0000001060 ryanodine receptor 2 [Source:VGNC Symbol;Acc:VGNC:76954]  
ENSMMUG0000001088 patched domain containing 1 [Source:VGNC Symbol;Acc:VGNC:76322]  
ENSMMUG0000001151 microtubule associated scaffold protein 1 [Source:VGNC Symbol;Acc:VGNC:84018]  
ENSMMUG0000001273 clathrin binding box of aftiphilin containing 1 [Source:VGNC Symbol;Acc:VGNC:84325]  
ENSMMUG0000001350 HERPUD family member 2 [Source:VGNC Symbol;Acc:VGNC:73216]  
ENSMMUG0000001397 multiple C2 and transmembrane domain containing 1 [Source:VGNC Symbol;Acc:VGNC:74589]  
ENSMMUG0000001472 TIA1 cytotoxic granule associated RNA binding protein like 1 [Source:VGNC Symbol;Acc:VGNC:78354]  
ENSMMUG0000001547 zinc finger protein 106 [Source:VGNC Symbol;Acc:VGNC:78831]  
ENSMMUG0000001568 AT-rich interaction domain 3B [Source:VGNC Symbol;Acc:VGNC:69827]  
ENSMMUG0000001635 zinc finger protein 703 [Source:VGNC Symbol;Acc:VGNC:79552]  
ENSMMUG0000001707 amyloid beta precursor protein binding family B member 3 [Source:VGNC Symbol;Acc:VGNC:69869]  
ENSMMUG0000001725 solute carrier family 35 member A4 [Source:VGNC Symbol;Acc:VGNC:77532]  
ENSMMUG0000001753 integrin subunit alpha 1 [Source:VGNC Symbol;Acc:VGNC:73772]  
ENSMMUG0000001820 regulator of G protein signaling 6 [Source:VGNC Symbol;Acc:VGNC:76691]  
ENSMMUG0000001848 sprouty RTK signaling antagonist 1 [Source:VGNC Symbol;Acc:VGNC:77867]  
ENSMMUG0000001910 heat shock protein family B (small) member 7 [Source:NCBI gene;Acc:696704]  
ENSMMUG0000001911 steroid receptor associated and regulated protein [Source:VGNC Symbol;Acc:VGNC:78008]  
ENSMMUG0000001943 GRAM domain containing 1C [Source:VGNC Symbol;Acc:VGNC:73007]  
ENSMMUG0000001989 RNA polymerase II subunit D [Source:VGNC Symbol;Acc:VGNC:76213]  
ENSMMUG0000002217 alkaline phosphatase, biomineralization associated [Source:VGNC Symbol;Acc:VGNC:69801]  
ENSMMUG0000002260 protein kinase C eta [Source:VGNC Symbol;Acc:VGNC:84424]  
ENSMMUG0000002411 drebrin like [Source:NCBI gene;Acc:720621]  
ENSMMUG0000002422 AE binding protein 1 [Source:VGNC Symbol;Acc:VGNC:80328]  
ENSMMUG0000002423 DNA polymerase delta 2, accessory subunit [Source:VGNC Symbol;Acc:VGNC:76203]  
ENSMMUG0000002426 myosin light chain 7 [Source:VGNC Symbol;Acc:VGNC:75002]  
ENSMMUG0000002427 glucokinase [Source:VGNC Symbol;Acc:VGNC:72901]  
ENSMMUG0000002428 zinc finger protein 800 [Source:VGNC Symbol;Acc:VGNC:79658]  
ENSMMUG0000002433 calcium/calmodulin dependent protein kinase II beta [Source:VGNC Symbol;Acc:VGNC:70524]  
ENSMMUG0000002536 calcium binding protein 1 [Source:VGNC Symbol;Acc:VGNC:70495]  
ENSMMUG0000002789 solute carrier family 25 (mitochondrial carrier; phosphate carrier), member 24 [Source:NCBI gene;Acc:694803]  
ENSMMUG0000002949 motile sperm domain containing 3 [Source:VGNC Symbol;Acc:VGNC:74823]  
ENSMMUG0000002950 transferrin receptor 2 [Source:VGNC Symbol;Acc:VGNC:81770]  
ENSMMUG0000003131 interleukin 13 [Source:VGNC Symbol;Acc:VGNC:84393]  
ENSMMUG0000003167 cytohesin 3 [Source:VGNC Symbol;Acc:VGNC:71829]  
ENSMMUG0000003217 transmembrane 7 superfamily member 3 [Source:VGNC Symbol;Acc:VGNC:79371]  
ENSMMUG0000003283 extracellular leucine rich repeat and fibronectin type III domain containing 1 [Source:VGNC Symbol;Acc:VGNC:72204]  
ENSMMUG0000003348 neurofilament light [Source:VGNC Symbol;Acc:VGNC:75307]  
ENSMMUG0000003484 tectonin beta-propeller repeat containing 2 [Source:NCBI gene;Acc:708959]  
ENSMMUG0000003572 nicotinamide phosphoribosyltransferase [Source:VGNC Symbol;Acc:VGNC:75056]  
ENSMMUG0000003598 tripartite motif containing 7 [Source:VGNC Symbol;Acc:VGNC:79022]  
ENSMMUG0000003684 ATPase phospholipid transporting 8B4 (putative) [Source:VGNC Symbol;Acc:VGNC:84311]  
ENSMMUG0000003739 mannosidase beta [Source:VGNC Symbol;Acc:VGNC:74486]  
ENSMMUG0000003834 basic leucine zipper ATF-like transcription factor [Source:VGNC Symbol;Acc:VGNC:70229]  
ENSMMUG0000004002 CDC like kinase 4 [Source:VGNC Symbol;Acc:VGNC:71173]  
ENSMMUG0000004103 collagen type XI alpha 1 chain [Source:VGNC Symbol;Acc:VGNC:71289]

ENSMMUG00000004149 eukaryotic translation initiation factor 4 gamma 3 [Source:NCBI gene;Acc:717555]  
ENSMMUG00000004257 beta-secretase 2 [Source:VGNC Symbol;Acc:VGNC:70216]  
ENSMMUG00000004273 dedicator of cytokinesis 3 [Source:VGNC Symbol;Acc:VGNC:71967]  
ENSMMUG00000004376 calcium and integrin binding 1 [Source:VGNC Symbol;Acc:VGNC:71189]  
ENSMMUG00000004435 two pore segment channel 1 [Source:VGNC Symbol;Acc:VGNC:79117]  
ENSMMUG00000004558 OTU deubiquitinase 5 [Source:VGNC Symbol;Acc:VGNC:75677]  
ENSMMUG00000004576 C-C motif chemokine receptor 3 [Source:VGNC Symbol;Acc:VGNC:70738]  
ENSMMUG00000004748 zinc finger and BTB domain containing 1 [Source:VGNC Symbol;Acc:VGNC:79238]  
ENSMMUG00000004749 PPARG coactivator 1 beta [Source:VGNC Symbol;Acc:VGNC:76134]  
ENSMMUG00000004797 CTP synthase 2 [Source:VGNC Symbol;Acc:VGNC:71550]  
ENSMMUG00000004801 COPI coat complex subunit gamma 2 [Source:VGNC Symbol;Acc:VGNC:71315]  
ENSMMUG00000004816 membrane associated ring-CH-type finger 5 [Source:VGNC Symbol;Acc:VGNC:74588]  
ENSMMUG00000004854 leucine rich repeat containing 9 [Source:VGNC Symbol;Acc:VGNC:81443]  
ENSMMUG00000004903 ectonucleotide pyrophosphatase/phosphodiesterase 2 [Source:VGNC Symbol;Acc:VGNC:72223]  
ENSMMUG00000005070 ecotropic viral integration site 5 [Source:NCBI gene;Acc:706592]  
ENSMMUG00000005108 RCC1 domain containing 1 [Source:VGNC Symbol;Acc:VGNC:76876]  
ENSMMUG00000005208 RNA polymerase III subunit B [Source:VGNC Symbol;Acc:VGNC:76143]  
ENSMMUG00000005297 proline rich coiled-coil 2A [Source:VGNC Symbol;Acc:VGNC:83448]  
ENSMMUG00000005302 BAG cochaperone 6 [Source:VGNC Symbol;Acc:VGNC:81044]  
ENSMMUG00000005504 nucleoporin 37 [Source:VGNC Symbol;Acc:VGNC:75491]  
ENSMMUG00000005745 EYA transcriptional coactivator and phosphatase 4 [Source:VGNC Symbol;Acc:VGNC:72456]  
ENSMMUG00000005920 N-acetyltransferase 1 [Source:VGNC Symbol;Acc:VGNC:75133]  
ENSMMUG00000006285 antizyme inhibitor 2 [Source:VGNC Symbol;Acc:VGNC:70153]  
ENSMMUG00000006468 FGFR1 oncogene partner 2 [Source:VGNC Symbol;Acc:VGNC:72551]  
ENSMMUG00000006530 ATP/GTP binding protein like 3 [Source:VGNC Symbol;Acc:VGNC:69723]  
ENSMMUG00000006659 aldehyde dehydrogenase 1 family member A3 [Source:VGNC Symbol;Acc:VGNC:81353]  
ENSMMUG00000006786 protein tyrosine phosphatase non-receptor type 22 [Source:VGNC Symbol;Acc:VGNC:76603]  
ENSMMUG00000006851 SPARC (osteonectin), cwcv and kazal like domains proteoglycan 3 [Source:NCBI gene;Acc:705964]  
ENSMMUG00000006855 acyl-CoA thioesterase 2 [Source:NCBI gene;Acc:697011]  
ENSMMUG00000006893 D-amino acid oxidase [Source:VGNC Symbol;Acc:VGNC:71729]  
ENSMMUG00000007366  
ENSMMUG00000007387 G protein-coupled receptor kinase 7 [Source:VGNC Symbol;Acc:VGNC:73182]  
ENSMMUG00000007422 spermatogenesis associated 5 [Source:VGNC Symbol;Acc:VGNC:77952]  
ENSMMUG00000007528 chordin [Source:VGNC Symbol;Acc:VGNC:71042]  
ENSMMUG00000007534 protein regulator of cytokinesis 1 [Source:NCBI gene;Acc:710182]  
ENSMMUG00000007970 CCZ1 homolog, vacuolar protein trafficking and biogenesis associated [Source:NCBI gene;Acc:718128]  
ENSMMUG00000008031 zinc finger and BTB domain containing 17 [Source:VGNC Symbol;Acc:VGNC:78849]  
ENSMMUG00000008070 YEATS domain containing 2 [Source:VGNC Symbol;Acc:VGNC:79502]  
ENSMMUG00000008162 fibroblast growth factor binding protein 1 [Source:VGNC Symbol;Acc:VGNC:72536]  
ENSMMUG00000008189 cadherin related family member 3 [Source:HGNC Symbol;Acc:HGNC:26308]  
ENSMMUG00000008197 netrin G1 [Source:VGNC Symbol;Acc:VGNC:75450]  
ENSMMUG00000008379 adducin 1 [Source:VGNC Symbol;Acc:VGNC:69528]  
ENSMMUG00000008383 major facilitator superfamily domain containing 10 [Source:NCBI gene;Acc:720098]  
ENSMMUG00000008385 NOP14 nucleolar protein [Source:VGNC Symbol;Acc:VGNC:75194]  
ENSMMUG00000008566 zinc finger protein 157 [Source:VGNC Symbol;Acc:VGNC:78850]  
ENSMMUG00000008618 calcium voltage-gated channel subunit alpha1 F [Source:VGNC Symbol;Acc:VGNC:70503]  
ENSMMUG00000008623 coiled-coil domain containing 22 [Source:VGNC Symbol;Acc:VGNC:70899]  
ENSMMUG00000008791 CD47 molecule [Source:VGNC Symbol;Acc:VGNC:70767]  
ENSMMUG00000008828 BEN domain containing 5 [Source:NCBI gene;Acc:711150]  
ENSMMUG00000008854 natural cytotoxicity triggering receptor 3 [Source:VGNC Symbol;Acc:VGNC:74990]  
ENSMMUG00000009197 myelin associated oligodendrocyte basic protein [Source:VGNC Symbol;Acc:VGNC:74908]

ENSMMUG0000009312 leukotriene A4 hydrolase [Source:VGNC Symbol;Acc:VGNC:74453]  
ENSMMUG0000009361 fumarylacetoacetate hydrolase [Source:NCBI gene;Acc:712716]  
ENSMMUG0000009441 abhydrolase domain containing 4 [Source:VGNC Symbol;Acc:VGNC:84296]  
ENSMMUG0000009499 mesoderm specific transcript [Source:VGNC Symbol;Acc:VGNC:74707]  
ENSMMUG0000009508 TATA-box binding protein associated factor 5 like [Source:VGNC Symbol;Acc:VGNC:78148]  
ENSMMUG0000009559 minichromosome maintenance complex binding protein [Source:VGNC Symbol;Acc:VGNC:74583]  
ENSMMUG0000009564 NMD3 ribosome export adaptor [Source:VGNC Symbol;Acc:VGNC:75242]  
ENSMMUG0000009788 tubulin alpha-1C chain [Source:NCBI gene;Acc:710110]  
ENSMMUG0000001007 CD14 molecule [Source:VGNC Symbol;Acc:VGNC:70751]  
ENSMMUG0000001008 IK cytokine [Source:VGNC Symbol;Acc:VGNC:73703]  
ENSMMUG00000010137 microcephalin 1 [Source:VGNC Symbol;Acc:VGNC:74687]  
ENSMMUG00000010180 PIN2 (TERF1) interacting telomerase inhibitor 1 [Source:NCBI gene;Acc:701523]  
ENSMMUG00000010308 cyclin I family member 2 [Source:VGNC Symbol;Acc:VGNC:70923]  
ENSMMUG00000010309 septin 8 [Source:VGNC Symbol;Acc:VGNC:77248]  
ENSMMUG00000010313 kinesin family member 3A [Source:VGNC Symbol;Acc:VGNC:74017]  
ENSMMUG00000010316 HECT and RLD domain containing E3 ubiquitin protein ligase 5 [Source:VGNC Symbol;Acc:VGNC:73226]  
ENSMMUG00000010318 phosphatidylinositol glycan anchor biosynthesis class Y [Source:NCBI gene;Acc:100426107]  
ENSMMUG00000010466 solute carrier family 38 member 9 [Source:VGNC Symbol;Acc:VGNC:77574]  
ENSMMUG00000010940 telomerase reverse transcriptase [Source:VGNC Symbol;Acc:VGNC:78313]  
ENSMMUG00000011209 BICD family like cargo adaptor 1 [Source:HGNC Symbol;Acc:HGNC:28095]  
ENSMMUG00000011513 versican [Source:VGNC Symbol;Acc:VGNC:79445]  
ENSMMUG00000011661 integrin subunit alpha 8 [Source:VGNC Symbol;Acc:VGNC:73782]  
ENSMMUG00000011682 ribonuclease P/MRP subunit p21 [Source:NCBI gene;Acc:713056]  
ENSMMUG00000011789 hematopoietically expressed homeobox [Source:VGNC Symbol;Acc:VGNC:73376]  
ENSMMUG00000011878 poly(A) binding protein interacting protein 1 [Source:VGNC Symbol;Acc:VGNC:84476]  
ENSMMUG00000012065 tubulin tyrosine ligase like 5 [Source:NCBI gene;Acc:703116]  
ENSMMUG00000012356 serpin family A member 9 [Source:VGNC Symbol;Acc:VGNC:77241]  
ENSMMUG00000012405 transient receptor potential cation channel subfamily C member 1 [Source:VGNC Symbol;Acc:VGNC:78651]  
ENSMMUG00000012526 glycosyltransferase 8 domain containing 1 [Source:VGNC Symbol;Acc:VGNC:73001]  
ENSMMUG00000012560 HERV-H LTR-associating 1 [Source:NCBI gene;Acc:100430297]  
ENSMMUG00000012635 zyxin [Source:VGNC Symbol;Acc:VGNC:78917]  
ENSMMUG00000012697 AT-rich interaction domain 1A [Source:VGNC Symbol;Acc:VGNC:69822]  
ENSMMUG00000013044 selectin P [Source:VGNC Symbol;Acc:VGNC:77157]  
ENSMMUG00000013129 peptidylprolyl isomerase H [Source:NCBI gene;Acc:697669]  
ENSMMUG00000013146 claudin 2 [Source:HGNC Symbol;Acc:HGNC:2041]  
ENSMMUG00000013150 MORC family CW-type zinc finger 4 [Source:VGNC Symbol;Acc:VGNC:74808]  
ENSMMUG00000013387 cysteinyl leukotriene receptor 1 [Source:VGNC Symbol;Acc:VGNC:71646]  
ENSMMUG00000013450 TATA-box binding protein associated factor 6 [Source:VGNC Symbol;Acc:VGNC:78093]  
ENSMMUG00000013644 potassium two pore domain channel subfamily K member 17 [Source:VGNC Symbol;Acc:VGNC:73828]  
ENSMMUG00000013871 WD repeat domain 25 [Source:VGNC Symbol;Acc:VGNC:78420]  
ENSMMUG00000013966 legumain [Source:VGNC Symbol;Acc:VGNC:74274]  
ENSMMUG00000014045 protein tyrosine phosphatase non-receptor type 23 [Source:VGNC Symbol;Acc:VGNC:76477]  
ENSMMUG00000014046 SREBF chaperone [Source:VGNC Symbol;Acc:VGNC:77140]  
ENSMMUG00000014138 forkhead box J3 [Source:VGNC Symbol;Acc:VGNC:72596]  
ENSMMUG00000014265 TAP binding protein like [Source:NCBI gene;Acc:712626]  
ENSMMUG00000014508 potassium channel tetramerization domain containing 20 [Source:VGNC Symbol;Acc:VGNC:73872]  
ENSMMUG00000014658 ninein [Source:VGNC Symbol;Acc:VGNC:75177]  
ENSMMUG00000014674 golgin, RAB6 interacting [Source:VGNC Symbol;Acc:VGNC:73012]  
ENSMMUG00000014699  
ENSMMUG00000014715 fragile site, folic acid type, rare, fra(10)(q23.3) or fra(10)(q24.2) candidate 1 [Source:NCBI gene;Acc:700389]  
ENSMMUG00000014771 zinc finger homeobox 2 [Source:NCBI gene;Acc:100429448]

ENSMMUG00000014874 GTP binding protein 8 (putative) [Source:VGNC Symbol;Acc:VGNC:84180]  
ENSMMUG00000014983 alanyl aminopeptidase, membrane [Source:VGNC Symbol;Acc:VGNC:69943]  
ENSMMUG00000015244 uncoupling protein 1 [Source:VGNC Symbol;Acc:VGNC:78708]  
ENSMMUG00000015416 bromodomain and PHD finger containing 3 [Source:VGNC Symbol;Acc:VGNC:70309]  
ENSMMUG00000015468 checkpoint with forkhead and ring finger domains [Source:VGNC Symbol;Acc:VGNC:71064]  
ENSMMUG00000015477 lemur tyrosine kinase 2 [Source:VGNC Symbol;Acc:VGNC:74309]  
ENSMMUG00000015479 tectonin beta-propeller repeat containing 1 [Source:VGNC Symbol;Acc:VGNC:79348]  
ENSMMUG00000015685 zinc finger protein 804B [Source:VGNC Symbol;Acc:VGNC:81890]  
ENSMMUG00000015686 abhydrolase domain containing 16A [Source:VGNC Symbol;Acc:VGNC:69393]  
ENSMMUG00000015865 arginase 2 [Source:VGNC Symbol;Acc:VGNC:70005]  
ENSMMUG00000015866 vesicle transport through interaction with t-SNAREs 1B [Source:NCBI gene;Acc:711113]  
ENSMMUG00000015931 phosphatidylinositol transfer protein membrane associated 2 [Source:VGNC Symbol;Acc:VGNC:75843]  
ENSMMUG00000016273 maltase-glucoamylase [Source:VGNC Symbol;Acc:VGNC:74713]  
ENSMMUG00000016579 selectin L [Source:NCBI gene;Acc:701419]  
ENSMMUG00000016580 selectin E [Source:VGNC Symbol;Acc:VGNC:77156]  
ENSMMUG00000016582 chromosome 1 C1orf112 homolog [Source:VGNC Symbol;Acc:VGNC:70385]  
ENSMMUG00000016929 proline rich and Gla domain 3 [Source:VGNC Symbol;Acc:VGNC:76350]  
ENSMMUG00000017056 Sad1 and UNC84 domain containing 1 [Source:VGNC Symbol;Acc:VGNC:78161]  
ENSMMUG00000017129 solute carrier family 41 member 2 [Source:VGNC Symbol;Acc:VGNC:77585]  
ENSMMUG00000017189 regulatory factor X6 [Source:VGNC Symbol;Acc:VGNC:76800]  
ENSMMUG00000017370 signal peptidase complex subunit 1 [Source:VGNC Symbol;Acc:VGNC:84072]  
ENSMMUG00000017510 membrane associated guanylate kinase, WW and PDZ domain containing 1 [Source:VGNC Symbol;Acc:VGNC:74499]  
ENSMMUG00000017605 mitochondrial ribosomal protein L39 [Source:VGNC Symbol;Acc:VGNC:74737]  
ENSMMUG00000017627 B-TFIID TATA-box binding protein associated factor 1 [Source:VGNC Symbol;Acc:VGNC:70336]  
ENSMMUG00000017660  
ENSMMUG00000017701 myosin VIIA and Rab interacting protein [Source:VGNC Symbol;Acc:VGNC:74992]  
ENSMMUG00000017983 tRNA nucleotidyl transferase 1 [Source:VGNC Symbol;Acc:VGNC:79073]  
ENSMMUG00000018235 chloride voltage-gated channel Kb [Source:NCBI gene;Acc:703476]  
ENSMMUG00000018237 plexin C1 [Source:VGNC Symbol;Acc:VGNC:76190]  
ENSMMUG00000018239 centrosomal protein 83 [Source:VGNC Symbol;Acc:VGNC:70992]  
ENSMMUG00000018245 EPH receptor A2 [Source:VGNC Symbol;Acc:VGNC:72235]  
ENSMMUG00000018246 transmembrane and coiled-coil domains 6 [Source:VGNC Symbol;Acc:VGNC:84507]  
ENSMMUG00000018345 phosphatidylethanolamine binding protein 4 [Source:VGNC Symbol;Acc:VGNC:82204]  
ENSMMUG00000018478 interferon regulatory factor 5 [Source:VGNC Symbol;Acc:VGNC:73763]  
ENSMMUG00000018492 TARBP2 subunit of RISC loading complex [Source:VGNC Symbol;Acc:VGNC:78099]  
ENSMMUG00000018619 DENN domain containing 6A [Source:VGNC Symbol;Acc:VGNC:71726]  
ENSMMUG00000018664 collagen type IX alpha 2 chain [Source:VGNC Symbol;Acc:VGNC:71307]  
ENSMMUG00000018790 activin A receptor type 2B [Source:VGNC Symbol;Acc:VGNC:69450]  
ENSMMUG00000019040 hydroxysteroid 17-beta dehydrogenase 13 [Source:VGNC Symbol;Acc:VGNC:73417]  
ENSMMUG00000019041 hydroxysteroid 17-beta dehydrogenase 11 [Source:VGNC Symbol;Acc:VGNC:73431]  
ENSMMUG00000019085 3-hydroxybutyrate dehydrogenase 2 [Source:VGNC Symbol;Acc:VGNC:70161]  
ENSMMUG00000019089 centromere protein E [Source:VGNC Symbol;Acc:VGNC:71008]  
ENSMMUG00000019126 purine nucleoside phosphorylase [Source:NCBI gene;Acc:704183]  
ENSMMUG00000019246 regulator of calcineurin 2 [Source:VGNC Symbol;Acc:VGNC:82092]  
ENSMMUG00000019304 indoleamine 2,3-dioxygenase 1 [Source:VGNC Symbol;Acc:VGNC:73580]  
ENSMMUG00000019363 synapse associated protein 1 [Source:VGNC Symbol;Acc:VGNC:78135]  
ENSMMUG00000019526 BLM RecQ like helicase [Source:VGNC Symbol;Acc:VGNC:70254]  
ENSMMUG00000019528 adaptor related protein complex 4 subunit beta 1 [Source:VGNC Symbol;Acc:VGNC:69972]  
ENSMMUG00000019536 potassium voltage-gated channel subfamily Q member 4 [Source:VGNC Symbol;Acc:VGNC:74007]  
ENSMMUG00000019563 collapsin response mediator protein 1 [Source:VGNC Symbol;Acc:VGNC:71494]  
ENSMMUG00000019764 dynactin subunit 4 [Source:VGNC Symbol;Acc:VGNC:71625]

ENSMMUG00000019833 Fc receptor like 1 [Source:VGNC Symbol;Acc:VGNC:72528]  
ENSMMUG00000019961 protein phosphatase 1 regulatory subunit 18 [Source:NCBI gene;Acc:712176]  
ENSMMUG00000019991 dopa decarboxylase [Source:VGNC Symbol;Acc:VGNC:71755]  
ENSMMUG00000020185 voltage dependent anion channel 3 [Source:VGNC Symbol;Acc:VGNC:84135]  
ENSMMUG00000020534 p21 (RAC1) activated kinase 6 [Source:NCBI gene;Acc:701589]  
ENSMMUG00000020604 HPS1 biogenesis of lysosomal organelles complex 3 subunit 1 [Source:VGNC Symbol;Acc:VGNC:73515]  
ENSMMUG00000020683 RNA binding motif protein 22 [Source:VGNC Symbol;Acc:VGNC:76535]  
ENSMMUG00000020726 dihydropyrimidine dehydrogenase [Source:VGNC Symbol;Acc:VGNC:71982]  
ENSMMUG00000020861 EvC ciliary complex subunit 1 [Source:VGNC Symbol;Acc:VGNC:72445]  
ENSMMUG00000021017 acylglycerol kinase [Source:VGNC Symbol;Acc:VGNC:69669]  
ENSMMUG00000021031 TMF1 regulated nuclear protein 1 [Source:VGNC Symbol;Acc:VGNC:79946]  
ENSMMUG00000021073 RAS protein activator like 2 [Source:VGNC Symbol;Acc:VGNC:76670]  
ENSMMUG00000021075 Rac family small GTPase 1 [Source:NCBI gene;Acc:717755]  
ENSMMUG00000021157 TBC1 domain family member 31 [Source:VGNC Symbol;Acc:VGNC:84121]  
ENSMMUG00000021447 TNF receptor superfamily member 1B [Source:VGNC Symbol;Acc:VGNC:78590]  
ENSMMUG00000021564 lysine demethylase 2B [Source:VGNC Symbol;Acc:VGNC:81425]  
ENSMMUG00000021610 regulator of G protein signaling 10 [Source:VGNC Symbol;Acc:VGNC:76915]  
ENSMMUG00000021634 TNF alpha induced protein 2 [Source:VGNC Symbol;Acc:VGNC:78579]  
ENSMMUG00000021655 histone deacetylase 7 [Source:NCBI gene;Acc:718225]  
ENSMMUG00000021736 single-pass membrane protein with coiled-coil domains 2 [Source:VGNC Symbol;Acc:VGNC:77808]  
ENSMMUG00000021972 diacylglycerol kinase gamma [Source:VGNC Symbol;Acc:VGNC:71785]  
ENSMMUG00000021988 N-alpha-acetyltransferase 11, NatA catalytic subunit [Source:NCBI gene;Acc:696758]  
ENSMMUG00000022003 multimerin 1 [Source:VGNC Symbol;Acc:VGNC:74904]  
ENSMMUG00000022247 osteoclastogenesis associated transmembrane protein 1 [Source:VGNC Symbol;Acc:VGNC:75664]  
ENSMMUG00000022313 activating transcription factor 7 [Source:NCBI gene;Acc:700403]  
ENSMMUG00000022407 serine and arginine rich splicing factor 5 [Source:NCBI gene;Acc:712867]  
ENSMMUG00000022409 solute carrier family 10 member 1 [Source:VGNC Symbol;Acc:VGNC:77380]  
ENSMMUG00000022481 cytochrome P450, family 1, subfamily A, polypeptide 1 [Source:NCBI gene;Acc:678694]  
ENSMMUG00000022728 zinc finger and SCAN domain containing 25 [Source:VGNC Symbol;Acc:VGNC:79344]  
ENSMMUG00000022730 cytochrome P450, family 3, subfamily A, polypeptide 5 [Source:NCBI gene;Acc:678692]  
ENSMMUG00000022884 glutamate-ammonia ligase [Source:NCBI gene;Acc:715952]  
ENSMMUG00000022893 von Willebrand factor [Source:VGNC Symbol;Acc:VGNC:78778]  
ENSMMUG00000022921 solute carrier family 2 member 12 [Source:VGNC Symbol;Acc:VGNC:77503]  
ENSMMUG00000023016 jade family PHD finger 3 [Source:VGNC Symbol;Acc:VGNC:73640]  
ENSMMUG00000023032 intraflagellar transport 81 [Source:VGNC Symbol;Acc:VGNC:73389]  
ENSMMUG00000023139 small nuclear ribonucleoprotein polypeptide N [Source:VGNC Symbol;Acc:VGNC:78437]  
ENSMMUG00000023146 ASH1 like histone lysine methyltransferase [Source:NCBI gene;Acc:717778]  
ENSMMUG00000023282 aldo-keto reductase family 1, member C1 (dihydrodiol dehydrogenase 1; 20-alpha (3-alpha)-hydroxysteroid dehydrogenase) [Source:NCBI gene;Acc:711198]  
ENSMMUG00000023335 ring finger protein 13 [Source:VGNC Symbol;Acc:VGNC:81557]  
ENSMMUG00000023449 mitofusin 2 [Source:VGNC Symbol;Acc:VGNC:74522]  
ENSMMUG00000023816 semaphorin 4B [Source:VGNC Symbol;Acc:VGNC:77165]  
ENSMMUG00000024234 U6 spliceosomal RNA [Source:RFAM;Acc:RF00026]  
ENSMMUG00000027543 Y RNA [Source:RFAM;Acc:RF00019]  
ENSMMUG00000031279 torsin A interacting protein 2 [Source:NCBI gene;Acc:716654]  
ENSMMUG00000031291 regulator of G protein signaling like 1 [Source:NCBI gene;Acc:715693]  
ENSMMUG00000031534 ankyrin repeat and ubiquitin domain containing 1 [Source:VGNC Symbol;Acc:VGNC:84239]  
ENSMMUG00000031785  
ENSMMUG00000032249 procollagen-lysine,2-oxoglutarate 5-dioxygenase 1 [Source:NCBI gene;Acc:722763]  
ENSMMUG00000032429 forkhead box O4 [Source:VGNC Symbol;Acc:VGNC:72712]  
ENSMMUG00000035943 U6 spliceosomal RNA [Source:RFAM;Acc:RF00026]  
ENSMMUG00000038067

ENSMMUG00000038256 aquaporin 2 [Source:NCBI gene;Acc:711719]  
ENSMMUG00000038524 olfactory receptor 2M4 [Source:NCBI gene;Acc:100424541]  
ENSMMUG00000039009  
ENSMMUG00000039101 pelota mRNA surveillance and ribosome rescue factor [Source:VGNC Symbol;Acc:VGNC:84478]  
ENSMMUG00000040274 MAGE family member A4 [Source:NCBI gene;Acc:710825]  
ENSMMUG00000040393 zinc finger protein 655 [Source:NCBI gene;Acc:718811]  
ENSMMUG00000041376 G antigen 10 [Source:NCBI gene;Acc:693330]  
ENSMMUG00000042510 coagulation factor V [Source:NCBI gene;Acc:704695]  
ENSMMUG00000042951 signal recognition particle 19 [Source:NCBI gene;Acc:693829]  
ENSMMUG00000043675 Cbp/p300 interacting transactivator with Glu/Asp rich carboxy-terminal domain 4 [Source:NCBI gene;Acc:114672840]  
ENSMMUG00000044257 MX dynamin like GTPase 2 [Source:VGNC Symbol;Acc:VGNC:81723]  
ENSMMUG00000044429 glycophorin A (MNS blood group) [Source:NCBI gene;Acc:574101]  
ENSMMUG00000045093 cyclin B3 [Source:NCBI gene;Acc:694534]  
ENSMMUG00000045513  
ENSMMUG00000045609 CCR4-NOT transcription complex subunit 6 like [Source:NCBI gene;Acc:697981]  
ENSMMUG00000046186 stanniocalcin 1 [Source:VGNC Symbol;Acc:VGNC:84120]  
ENSMMUG00000046478 WASH complex subunit 3 [Source:NCBI gene;Acc:697824]  
ENSMMUG00000046550 coiled-coil domain containing 125 [Source:NCBI gene;Acc:704391]  
ENSMMUG00000046774 RAS like proto-oncogene B [Source:NCBI gene;Acc:695852]  
ENSMMUG00000046969 Fc receptor like 3 [Source:NCBI gene;Acc:718801]  
ENSMMUG00000047465 Metazoan signal recognition particle RNA [Source:RFAM;Acc:RF00017]  
ENSMMUG00000047729 inositol 1,4,5-trisphosphate receptor type 3 [Source:NCBI gene;Acc:718040]  
ENSMMUG00000048066 trafficking protein particle complex 9 [Source:NCBI gene;Acc:711466]  
ENSMMUG00000048824 eva-1 homolog C [Source:NCBI gene;Acc:708681]  
ENSMMUG00000049232 AMMECR1 like [Source:VGNC Symbol;Acc:VGNC:84208]  
ENSMMUG00000049267  
ENSMMUG00000049494  
ENSMMUG00000049678  
ENSMMUG00000049735 allograft inflammatory factor 1 [Source:NCBI gene;Acc:574115]  
ENSMMUG00000049894  
ENSMMUG00000049935  
ENSMMUG00000050132  
ENSMMUG00000050339 Metazoan signal recognition particle RNA [Source:RFAM;Acc:RF00017]  
ENSMMUG00000050405  
ENSMMUG00000050465 ZFP42 zinc finger protein [Source:NCBI gene;Acc:707621]  
ENSMMUG00000050495  
ENSMMUG00000050505 small integral membrane protein 4 [Source:NCBI gene;Acc:696553]  
ENSMMUG00000050549 lysyl oxidase like 2 [Source:NCBI gene;Acc:710151]  
ENSMMUG00000050585  
ENSMMUG00000050608  
ENSMMUG00000050696 taste receptor type 2 member 31-like [Source:NCBI gene;Acc:693892]  
ENSMMUG00000050868  
ENSMMUG00000051037  
ENSMMUG00000051329  
ENSMMUG00000051408 myelin associated oligodendrocyte basic protein [Source:NCBI gene;Acc:717265]  
ENSMMUG00000051677  
ENSMMUG00000051975  
ENSMMUG00000052073  
ENSMMUG00000052252 protein phosphatase 1 regulatory subunit 3F [Source:NCBI gene;Acc:715950]  
ENSMMUG00000052530  
ENSMMUG00000052777



ENSMMUG00000052854 mucin like 1 [Source:NCBI gene;Acc:100423942]  
ENSMMUG00000052891  
ENSMMUG00000053013  
ENSMMUG00000053199  
ENSMMUG00000053324 lymphocyte antigen 6 complex locus protein G6d [Source:NCBI gene;Acc:715304]  
ENSMMUG00000053367 secreted protein acidic and cysteine rich [Source:NCBI gene;Acc:712388]  
ENSMMUG00000053376  
ENSMMUG00000053481  
ENSMMUG00000053627  
ENSMMUG00000053790  
ENSMMUG00000053837  
ENSMMUG00000054158 acyl-CoA dehydrogenase family member 11 [Source:NCBI gene;Acc:106997118]  
ENSMMUG00000054175  
ENSMMUG00000054377  
ENSMMUG00000054414  
ENSMMUG00000054568  
ENSMMUG00000054686  
ENSMMUG00000054755 transmembrane protein 65 [Source:NCBI gene;Acc:705727]  
ENSMMUG00000054942  
ENSMMUG00000055018 sushi domain containing 6 [Source:NCBI gene;Acc:712719]  
ENSMMUG00000055096  
ENSMMUG00000055322 EPH receptor A1 [Source:NCBI gene;Acc:706295]  
ENSMMUG00000055914  
ENSMMUG00000056376  
ENSMMUG00000056613  
ENSMMUG00000056796 NADH:ubiquinone oxidoreductase subunit A2 [Source:NCBI gene;Acc:697736]  
ENSMMUG00000056798  
ENSMMUG00000056971 Metazoan signal recognition particle RNA [Source:RFAM;Acc:RF00017]  
ENSMMUG00000057196 pulmonary surfactant-associated protein A [Source:NCBI gene;Acc:701715]  
ENSMMUG00000057539  
ENSMMUG00000057570  
ENSMMUG00000057702  
ENSMMUG00000057703  
ENSMMUG00000057785  
ENSMMUG00000058176 b-defensin2-like [Source:NCBI gene;Acc:100169969]  
ENSMMUG00000058187  
ENSMMUG00000058423  
ENSMMUG00000058432 zinc finger DHHC-type palmitoyltransferase 18 [Source:NCBI gene;Acc:719959]  
ENSMMUG00000058536  
ENSMMUG00000058587 family with sequence similarity 131 member C [Source:NCBI gene;Acc:703604]  
ENSMMUG00000058817  
ENSMMUG00000059036  
ENSMMUG00000059318 urocortin 2 [Source:NCBI gene;Acc:106996925]  
ENSMMUG00000059491  
ENSMMUG00000059671  
ENSMMUG00000059777  
ENSMMUG00000059782  
ENSMMUG00000059985  
ENSMMUG00000060063  
ENSMMUG00000060184 SEC61 translocon subunit gamma [Source:NCBI gene;Acc:716898]  
ENSMMUG00000060273 mitochondrial ribosomal protein L32 [Source:NCBI gene;Acc:701820]

ENSMMUG00000060572  
ENSMMUG00000060576  
ENSMMUG00000060632  
ENSMMUG00000060795  
ENSMMUG00000060901  
ENSMMUG00000060973  
ENSMMUG00000061031  
ENSMMUG00000061079 golgin subfamily A member 6C [Source:NCBI gene;Acc:715898]  
ENSMMUG00000061098  
ENSMMUG00000061208 MAP3K7 C-terminal like [Source:NCBI gene;Acc:713717]  
ENSMMUG00000061514 mucin-3A-like [Source:NCBI gene;Acc:100428559]  
ENSMMUG00000061576  
ENSMMUG00000061935  
ENSMMUG00000062083  
ENSMMUG00000062139  
ENSMMUG00000062217 HD domain containing 3 [Source:NCBI gene;Acc:715621]  
ENSMMUG00000062254  
ENSMMUG00000062316 Metazoan signal recognition particle RNA [Source:RFAM;Acc:RF00017]  
ENSMMUG00000062326  
ENSMMUG00000062397  
ENSMMUG00000062454  
ENSMMUG00000062794  
ENSMMUG00000063121  
ENSMMUG00000063198  
ENSMMUG00000063322  
ENSMMUG00000063495  
ENSMMUG00000063525  
ENSMMUG00000063694 cyclic nucleotide gated channel subunit alpha 2 [Source:NCBI gene;Acc:704486]  
ENSMMUG00000063886 Metazoan signal recognition particle RNA [Source:RFAM;Acc:RF00017]  
ENSMMUG00000063898 apolipoprotein F [Source:NCBI gene;Acc:712761]  
ENSMMUG00000063981 nucleoside-triphosphatase, cancer-related [Source:NCBI gene;Acc:712959]  
ENSMMUG00000064557  
ENSMMUG00000064694 AHNAK nucleoprotein 2 [Source:NCBI gene;Acc:707626]  
ENSMMUG00000064707  
ENSMMUG00000064730  
ENSMMUG00000065247 opioid receptor kappa 1 [Source:NCBI gene;Acc:710783]  
ENSMMUG00000065295  
ENSMMUG00000065319  
ENSMMUG00000000196 niban apoptosis regulator 3 [Source:VGNC Symbol;Acc:VGNC:75241]  
ENSMMUG00000000293 catenin alpha 2 [Source:VGNC Symbol;Acc:VGNC:71543]  
ENSMMUG00000000327 fatty acid desaturase 2 [Source:VGNC Symbol;Acc:VGNC:72472]  
ENSMMUG00000000396 intraflagellar transport 52 [Source:NCBI gene;Acc:694933]  
ENSMMUG00000000553 bromodomain containing 1 [Source:VGNC Symbol;Acc:VGNC:70280]  
ENSMMUG00000000582 NOP58 ribonucleoprotein [Source:VGNC Symbol;Acc:VGNC:75284]  
ENSMMUG00000000603 Rho GDP dissociation inhibitor gamma [Source:VGNC Symbol;Acc:VGNC:70011]  
ENSMMUG00000000700 CLN3 lysosomal/endosomal transmembrane protein, battenin [Source:NCBI gene;Acc:705815]  
ENSMMUG00000000740 spermatogenesis associated 2 [Source:VGNC Symbol;Acc:VGNC:77923]  
ENSMMUG00000000842 RNA pseudouridine synthase domain containing 1 [Source:NCBI gene;Acc:722393]  
ENSMMUG00000000874 carbohydrate sulfotransferase 1 [Source:VGNC Symbol;Acc:VGNC:71055]  
ENSMMUG00000001036 coagulation factor VII [Source:VGNC Symbol;Acc:VGNC:72466]  
ENSMMUG00000001058 tetratricopeptide repeat domain 28 [Source:VGNC Symbol;Acc:VGNC:79785]

ENSMMUG0000001220 adhesion G protein-coupled receptor E1 [Source:VGNC Symbol;Acc:VGNC:69561]  
ENSMMUG0000001269 chromosome 16 C17orf80 homolog [Source:VGNC Symbol;Acc:VGNC:70440]  
ENSMMUG0000001387 p21 (RAC1) activated kinase 1 [Source:NCBI gene;Acc:698585]  
ENSMMUG0000001475 transmembrane protein with EGF like and two follistatin like domains 2 [Source:VGNC Symbol;Acc:VGNC:78569]  
ENSMMUG0000001545 aquaporin 7 [Source:NCBI gene;Acc:702836]  
ENSMMUG0000001748 spleen associated tyrosine kinase [Source:VGNC Symbol;Acc:VGNC:78063]  
ENSMMUG0000001845 DNA polymerase epsilon 4, accessory subunit [Source:VGNC Symbol;Acc:VGNC:76065]  
ENSMMUG0000001944 chromosome 20 C16orf72 homolog [Source:VGNC Symbol;Acc:VGNC:70443]  
ENSMMUG0000002267 laminin subunit gamma 3 [Source:NCBI gene;Acc:722430]  
ENSMMUG0000002376 scavenger receptor class F member 1 [Source:VGNC Symbol;Acc:VGNC:77027]  
ENSMMUG0000002384 IGF like family receptor 1 [Source:VGNC Symbol;Acc:VGNC:73434]  
ENSMMUG0000002452 solute carrier family 35 member C1 [Source:VGNC Symbol;Acc:VGNC:77524]  
ENSMMUG0000002715 solute carrier family 9 member A8 [Source:VGNC Symbol;Acc:VGNC:77749]  
ENSMMUG0000002810 TOX high mobility group box family member 2 [Source:VGNC Symbol;Acc:VGNC:79007]  
ENSMMUG0000002822 unc-13 homolog D [Source:VGNC Symbol;Acc:VGNC:79375]  
ENSMMUG0000002917 single Ig IL-1-related receptor [Source:NCBI gene;Acc:100425060]  
ENSMMUG0000002923 colony stimulating factor 3 [Source:VGNC Symbol;Acc:VGNC:71520]  
ENSMMUG0000002926 mediator complex subunit 24 [Source:NCBI gene;Acc:699536]  
ENSMMUG0000002959 helicase with zinc finger [Source:VGNC Symbol;Acc:VGNC:73178]  
ENSMMUG0000003006 serine palmitoyltransferase long chain base subunit 1 [Source:VGNC Symbol;Acc:VGNC:77873]  
ENSMMUG0000003098 peptidase, mitochondrial processing alpha subunit [Source:VGNC Symbol;Acc:VGNC:76062]  
ENSMMUG0000003105 inositol polyphosphate-5-phosphatase E [Source:VGNC Symbol;Acc:VGNC:73637]  
ENSMMUG0000003106 SEC16 homolog A, endoplasmic reticulum export factor [Source:VGNC Symbol;Acc:VGNC:77326]  
ENSMMUG0000003298 ataxin 2 like [Source:VGNC Symbol;Acc:VGNC:70159]  
ENSMMUG0000003303 Tu translation elongation factor, mitochondrial [Source:VGNC Symbol;Acc:VGNC:78674]  
ENSMMUG0000003436 tubulin tyrosine ligase like 6 [Source:VGNC Symbol;Acc:VGNC:79632]  
ENSMMUG0000003437 signal transducer and activator of transcription 5B [Source:NCBI gene;Acc:709760]  
ENSMMUG0000003539 glutamine rich 2 [Source:VGNC Symbol;Acc:VGNC:76534]  
ENSMMUG0000003797 ubiquitin specific peptidase 20 [Source:VGNC Symbol;Acc:VGNC:78740]  
ENSMMUG0000003819 nitric oxide synthase interacting protein [Source:VGNC Symbol;Acc:VGNC:75207]  
ENSMMUG0000003874 interferon induced transmembrane protein 10 [Source:NCBI gene;Acc:721010]  
ENSMMUG0000003950 nucleoporin 98 and 96 precursor [Source:VGNC Symbol;Acc:VGNC:75563]  
ENSMMUG0000003955 post-GPI attachment to proteins 2 [Source:VGNC Symbol;Acc:VGNC:75823]  
ENSMMUG0000003976 glycoprotein hormone subunit alpha 2 [Source:VGNC Symbol;Acc:VGNC:72961]  
ENSMMUG0000004022 zinc finger SWIM-type containing 2 [Source:VGNC Symbol;Acc:VGNC:79908]  
ENSMMUG0000004024 cadherin related family member 5 [Source:VGNC Symbol;Acc:VGNC:71158]  
ENSMMUG0000004108 corticotropin releasing hormone receptor 1 [Source:VGNC Symbol;Acc:VGNC:81184]  
ENSMMUG0000004283 calcium and integrin binding family member 3 [Source:VGNC Symbol;Acc:VGNC:71339]  
ENSMMUG0000004332 tripartite motif containing 44 [Source:VGNC Symbol;Acc:VGNC:79168]  
ENSMMUG0000004587 gasdermin B [Source:VGNC Symbol;Acc:VGNC:73219]  
ENSMMUG0000004794 DNA ligase 3 [Source:VGNC Symbol;Acc:VGNC:74266]  
ENSMMUG0000004820 pre-mRNA processing factor 8 [Source:VGNC Symbol;Acc:VGNC:76275]  
ENSMMUG0000004877 heterogeneous nuclear ribonucleoprotein L [Source:VGNC Symbol;Acc:VGNC:81187]  
ENSMMUG0000005086 homeobox protein TGIF1 [Source:NCBI gene;Acc:694580]  
ENSMMUG0000005215 Rab9 effector protein with kelch motifs [Source:VGNC Symbol;Acc:VGNC:76495]  
ENSMMUG0000005482 lysine methyltransferase 2A [Source:NCBI gene;Acc:705511]  
ENSMMUG0000005483 ribosomal protein S6 kinase B2 [Source:VGNC Symbol;Acc:VGNC:76934]  
ENSMMUG0000005486 protein tyrosine phosphatase receptor type C associated protein [Source:VGNC Symbol;Acc:VGNC:76613]  
ENSMMUG0000005488 coronin 1B [Source:VGNC Symbol;Acc:VGNC:71320]  
ENSMMUG0000005595 RAB14, member RAS oncogene family [Source:NCBI gene;Acc:699837]  
ENSMMUG0000005666 phospholipase D2 [Source:VGNC Symbol;Acc:VGNC:76172]

ENSMMUG0000005776 atlastin GTPase 3 [Source:VGNC Symbol;Acc:VGNC:70125]  
ENSMMUG0000005793 ankyrin repeat and fibronectin type III domain containing 1 [Source:VGNC Symbol;Acc:VGNC:69712]  
ENSMMUG0000005989 GLE1 RNA export mediator [Source:VGNC Symbol;Acc:VGNC:73067]  
ENSMMUG0000006066 phosphatidylcholine transfer protein [Source:VGNC Symbol;Acc:VGNC:75789]  
ENSMMUG0000006091 contactin associated protein 1 [Source:VGNC Symbol;Acc:VGNC:71390]  
ENSMMUG0000006093 enhancer of zeste 1 polycomb repressive complex 2 subunit [Source:VGNC Symbol;Acc:VGNC:72457]  
ENSMMUG0000006180 tetratricopeptide repeat, ankyrin repeat and coiled-coil containing 1 [Source:VGNC Symbol;Acc:VGNC:78238]  
ENSMMUG0000006181 WD repeat, sterile alpha motif and U-box domain containing 1 [Source:VGNC Symbol;Acc:VGNC:79634]  
ENSMMUG0000006568 basic leucine zipper ATF-like transcription factor 2 [Source:VGNC Symbol;Acc:VGNC:70127]  
ENSMMUG0000006655 myelin regulatory factor [Source:VGNC Symbol;Acc:VGNC:74949]  
ENSMMUG0000006738 L3MBTL histone methyl-lysine binding protein 1 [Source:NCBI gene;Acc:695694]  
ENSMMUG0000006758 cytochrome P450, family 27, subfamily A, polypeptide 1 [Source:NCBI gene;Acc:700192]  
ENSMMUG0000006853 crystallin beta B2 [Source:NCBI gene;Acc:100144420]  
ENSMMUG0000006929 ST3 beta-galactoside alpha-2,3-sialyltransferase 4 [Source:VGNC Symbol;Acc:VGNC:77827]  
ENSMMUG0000006931 kirre like nephrin family adhesion molecule 3 [Source:NCBI gene;Acc:714534]  
ENSMMUG0000006936 gastric inhibitory polypeptide receptor [Source:VGNC Symbol;Acc:VGNC:73052]  
ENSMMUG0000007200 NEDD4 binding protein 2 like 2 [Source:VGNC Symbol;Acc:VGNC:75031]  
ENSMMUG0000007201 PDS5 cohesin associated factor B [Source:VGNC Symbol;Acc:VGNC:75835]  
ENSMMUG0000007379 phosphatidylinositol 3,4,5-trisphosphate 3-phosphatase TPTE2-like [Source:NCBI gene;Acc:694255]  
ENSMMUG0000007423 transcription factor Dp-1 [Source:NCBI gene;Acc:715345]  
ENSMMUG0000007538 transient receptor potential cation channel subfamily M member 4 [Source:VGNC Symbol;Acc:VGNC:79105]  
ENSMMUG0000007610 ribosomal protein S6 kinase A4 [Source:VGNC Symbol;Acc:VGNC:76930]  
ENSMMUG0000007726 synapse defective Rho GTPase homolog 1 [Source:NCBI gene;Acc:719089]  
ENSMMUG0000007799 LIM and SH3 protein 1 [Source:VGNC Symbol;Acc:VGNC:74237]  
ENSMMUG0000007925 serum/glucocorticoid regulated kinase 2 [Source:VGNC Symbol;Acc:VGNC:77228]  
ENSMMUG0000008080 ATP binding cassette subfamily G member 5 [Source:VGNC Symbol;Acc:VGNC:69391]  
ENSMMUG0000008195 TGFB induced factor homeobox 2 [Source:NCBI gene;Acc:100429616]  
ENSMMUG0000008196 aconitase 1 [Source:VGNC Symbol;Acc:VGNC:69378]  
ENSMMUG0000008253 zinc finger protein 267 [Source:NCBI gene;Acc:641441]  
ENSMMUG0000008384 solute carrier family 4 member 10 [Source:VGNC Symbol;Acc:VGNC:77695]  
ENSMMUG0000008387 dipeptidyl peptidase 4 [Source:VGNC Symbol;Acc:VGNC:71979]  
ENSMMUG0000008770 UDP-glucose pyrophosphorylase 2 [Source:VGNC Symbol;Acc:VGNC:78712]  
ENSMMUG0000008923 Thy-1 cell surface antigen [Source:VGNC Symbol;Acc:VGNC:78352]  
ENSMMUG0000009176 calmodulin binding transcription activator 2 [Source:VGNC Symbol;Acc:VGNC:70578]  
ENSMMUG0000009199 glycogen phosphorylase B [Source:VGNC Symbol;Acc:VGNC:76631]  
ENSMMUG0000009318 BCL9 like [Source:VGNC Symbol;Acc:VGNC:70113]  
ENSMMUG0000009377 tripartite motif containing 47 [Source:VGNC Symbol;Acc:VGNC:79171]  
ENSMMUG0000009381 WW domain binding protein 2 [Source:VGNC Symbol;Acc:VGNC:78786]  
ENSMMUG0000009567 glyoxylate reductase 1 homolog [Source:NCBI gene;Acc:706933]  
ENSMMUG0000009593 WAS/WASL interacting protein family member 1 [Source:VGNC Symbol;Acc:VGNC:78784]  
ENSMMUG0000009884 hydroxysteroid 17-beta dehydrogenase 1 [Source:VGNC Symbol;Acc:VGNC:73528]  
ENSMMUG0000009886 Coenzyme A synthase [Source:VGNC Symbol;Acc:VGNC:81373]  
ENSMMUG0000009889 PSMC3 interacting protein [Source:VGNC Symbol;Acc:VGNC:76282]  
ENSMMUG0000009890 FERM, ARH/RhoGEF and pleckstrin domain protein 1 [Source:VGNC Symbol;Acc:VGNC:72614]  
ENSMMUG0000009960 cathepsin A [Source:VGNC Symbol;Acc:VGNC:71617]  
ENSMMUG0000009988 transmembrane protein 59 like [Source:VGNC Symbol;Acc:VGNC:78919]  
ENSMMUG0000009995 arachidonate 15-lipoxygenase type B [Source:VGNC Symbol;Acc:VGNC:69797]  
ENSMMUG00000010028 leucine zipper tumor suppressor family member 3 [Source:VGNC Symbol;Acc:VGNC:74403]  
ENSMMUG00000010451 inositol polyphosphate phosphatase like 1 [Source:VGNC Symbol;Acc:VGNC:73752]  
ENSMMUG00000010470 zinc finger with KRAB and SCAN domains 2 [Source:VGNC Symbol;Acc:VGNC:79529]  
ENSMMUG00000010614 C-C motif chemokine ligand 25 [Source:VGNC Symbol;Acc:VGNC:70700]

ENSMMUG00000010824 SWIM-type zinc finger 7 associated protein 1 [Source:VGNC Symbol;Acc:VGNC:78220]  
ENSMMUG00000010869 nucleoporin 160 [Source:VGNC Symbol;Acc:VGNC:75429]  
ENSMMUG00000011064 synaptosome associated protein 25 [Source:VGNC Symbol;Acc:VGNC:77663]  
ENSMMUG00000011332 Rho GTPase activating protein 35 [Source:VGNC Symbol;Acc:VGNC:69942]  
ENSMMUG00000011344 solute carrier family 52 member 1 [Source:VGNC Symbol;Acc:VGNC:77795]  
ENSMMUG00000011411 sperm acrosome associated 3 [Source:VGNC Symbol;Acc:VGNC:77930]  
ENSMMUG00000011427 syntaxin 10 [Source:VGNC Symbol;Acc:VGNC:78040]  
ENSMMUG00000011528 F-box and WD repeat domain containing 5 [Source:VGNC Symbol;Acc:VGNC:72503]  
ENSMMUG00000011627 interleukin 4 induced 1 [Source:VGNC Symbol;Acc:VGNC:73625]  
ENSMMUG00000011767 carnitine O-acetyltransferase [Source:VGNC Symbol;Acc:VGNC:71483]  
ENSMMUG00000011798 eukaryotic translation initiation factor 3 subunit C [Source:NCBI gene;Acc:705696]  
ENSMMUG00000011817 aryl hydrocarbon receptor interacting protein [Source:VGNC Symbol;Acc:VGNC:69759]  
ENSMMUG00000011962 protein tyrosine phosphatase receptor type S [Source:VGNC Symbol;Acc:VGNC:76622]  
ENSMMUG00000012039 cytochrome b5 type B (outer mitochondrial membrane) [Source:NCBI gene;Acc:705093]  
ENSMMUG00000012228 ubiquitin conjugating enzyme E2 V1 [Source:NCBI gene;Acc:100425552]  
ENSMMUG00000012349 thiosulfate sulfurtransferase [Source:VGNC Symbol;Acc:VGNC:78664]  
ENSMMUG00000012523 flotillin 2 [Source:NCBI gene;Acc:114669752]  
ENSMMUG00000012668 centriolin [Source:VGNC Symbol;Acc:VGNC:71204]  
ENSMMUG00000012797 zinc finger protein 233 [Source:VGNC Symbol;Acc:VGNC:79903]  
ENSMMUG00000012801 zinc finger protein 235 [Source:VGNC Symbol;Acc:VGNC:78825]  
ENSMMUG00000012937 proline rich 12 [Source:NCBI gene;Acc:719344]  
ENSMMUG00000012941 nudix hydrolase 22 [Source:VGNC Symbol;Acc:VGNC:75475]  
ENSMMUG00000012944 vascular endothelial growth factor B [Source:VGNC Symbol;Acc:VGNC:78765]  
ENSMMUG00000012959 solute carrier family 35 member E1 [Source:VGNC Symbol;Acc:VGNC:77536]  
ENSMMUG00000013099 pappalysin 1 [Source:VGNC Symbol;Acc:VGNC:75756]  
ENSMMUG00000013206 tyrosine 3-monooxygenase/tryptophan 5-monooxygenase activation protein beta [Source:VGNC Symbol;Acc:VGNC:78819]  
ENSMMUG00000013397 peroxiredoxin 5 [Source:NCBI gene;Acc:719764]  
ENSMMUG00000013422 CEA cell adhesion molecule 4 [Source:NCBI gene;Acc:705453]  
ENSMMUG00000013477 creatine kinase, M-type [Source:VGNC Symbol;Acc:VGNC:71230]  
ENSMMUG00000013671 elongation factor for RNA polymerase II [Source:VGNC Symbol;Acc:VGNC:72088]  
ENSMMUG00000013713 beta 3-glucosyltransferase [Source:NCBI gene;Acc:713498]  
ENSMMUG00000013798 fatty acid desaturase 1 [Source:VGNC Symbol;Acc:VGNC:72471]  
ENSMMUG00000013830 glucose-6-phosphatase catalytic subunit 2 [Source:NCBI gene;Acc:709062]  
ENSMMUG00000013832 ATP binding cassette subfamily B member 11 [Source:VGNC Symbol;Acc:VGNC:81339]  
ENSMMUG00000013944 regulator of microtubule dynamics 2 [Source:VGNC Symbol;Acc:VGNC:76839]  
ENSMMUG00000013967 TOX high mobility group box family member 3 [Source:VGNC Symbol;Acc:VGNC:78612]  
ENSMMUG00000014010 RNA binding fox-1 homolog 2 [Source:VGNC Symbol;Acc:VGNC:76685]  
ENSMMUG00000014032 proline rich 36 [Source:NCBI gene;Acc:710443]  
ENSMMUG00000014123 alanyl-tRNA editing protein Aarsd1 [Source:NCBI gene;Acc:712203]  
ENSMMUG00000014131 microtubule affinity regulating kinase 2 [Source:VGNC Symbol;Acc:VGNC:74634]  
ENSMMUG00000014237 lysine methyltransferase 5B [Source:VGNC Symbol;Acc:VGNC:74110]  
ENSMMUG00000014240 thioredoxin domain containing 11 [Source:VGNC Symbol;Acc:VGNC:79678]  
ENSMMUG00000014273 cation channel sperm associated auxiliary subunit gamma [Source:VGNC Symbol;Acc:VGNC:70626]  
ENSMMUG00000014277 ITPR interacting domain containing 2 [Source:VGNC Symbol;Acc:VGNC:73584]  
ENSMMUG00000014313 zinc finger protein 500 [Source:VGNC Symbol;Acc:VGNC:79406]  
ENSMMUG00000014397 NCK associated protein 1 [Source:VGNC Symbol;Acc:VGNC:75143]  
ENSMMUG00000014530 pre-mRNA processing factor 19 [Source:VGNC Symbol;Acc:VGNC:76281]  
ENSMMUG00000014872 dolichyl-phosphate N-acetylglucosaminophosphotransferase 1 [Source:VGNC Symbol;Acc:VGNC:71971]  
ENSMMUG00000015663 adaptor related protein complex 3 subunit delta 1 [Source:VGNC Symbol;Acc:VGNC:69969]  
ENSMMUG00000015744 zinc finger protein 302 [Source:NCBI gene;Acc:706279]  
ENSMMUG00000016143 sialophorin [Source:VGNC Symbol;Acc:VGNC:77861]

ENSMMUG00000016323 Rho guanine nucleotide exchange factor 39 [Source:VGNC Symbol;Acc:VGNC:69912]  
ENSMMUG00000016327 coiled-coil domain containing 107 [Source:VGNC Symbol;Acc:VGNC:70656]  
ENSMMUG00000016417 chromobox 8 [Source:NCBI gene;Acc:717514]  
ENSMMUG00000016438 protein kinase D3 [Source:VGNC Symbol;Acc:VGNC:76415]  
ENSMMUG00000016448 DLG associated protein 4 [Source:NCBI gene;Acc:702928]  
ENSMMUG00000016549 matrix metalloproteinase 9 [Source:VGNC Symbol;Acc:VGNC:74903]  
ENSMMUG00000016678 Rho associated coiled-coil containing protein kinase 2 [Source:VGNC Symbol;Acc:VGNC:76714]  
ENSMMUG00000016796 reticulophagy regulator family member 3 [Source:VGNC Symbol;Acc:VGNC:76845]  
ENSMMUG00000016797 tubulin gamma 1 [Source:NCBI gene;Acc:710756]  
ENSMMUG00000016890 solute carrier family 37 member 4 [Source:VGNC Symbol;Acc:VGNC:77591]  
ENSMMUG00000016894 ribosomal protein S25 [Source:NCBI gene;Acc:702593]  
ENSMMUG00000017036 nicalin [Source:VGNC Symbol;Acc:VGNC:75032]  
ENSMMUG00000017150 mitochondrial antiviral signaling protein [Source:VGNC Symbol;Acc:VGNC:74609]  
ENSMMUG00000017224 catenin beta like 1 [Source:VGNC Symbol;Acc:VGNC:71414]  
ENSMMUG00000017256 calcium voltage-gated channel subunit alpha1 G [Source:VGNC Symbol;Acc:VGNC:70504]  
ENSMMUG00000017280 TBC1 domain family member 10C [Source:VGNC Symbol;Acc:VGNC:78203]  
ENSMMUG00000017287 PAT1 homolog 1, processing body mRNA decay factor [Source:VGNC Symbol;Acc:VGNC:75684]  
ENSMMUG00000017561 solute carrier family 43 member 2 [Source:VGNC Symbol;Acc:VGNC:77554]  
ENSMMUG00000017758 mitogen-activated protein kinase 3 [Source:VGNC Symbol;Acc:VGNC:74646]  
ENSMMUG00000017810 structure specific recognition protein 1 [Source:VGNC Symbol;Acc:VGNC:77891]  
ENSMMUG00000017822 periplakin [Source:VGNC Symbol;Acc:VGNC:76240]  
ENSMMUG00000017906 DnaJ heat shock protein family (Hsp40) member B1 [Source:NCBI gene;Acc:718890]  
ENSMMUG00000017945 septin 12 [Source:VGNC Symbol;Acc:VGNC:82235]  
ENSMMUG00000017946 rogdi atypical leucine zipper [Source:VGNC Symbol;Acc:VGNC:76862]  
ENSMMUG00000018034 suppression of tumorigenicity 14 [Source:VGNC Symbol;Acc:VGNC:77897]  
ENSMMUG00000018137 MYB proto-oncogene like 2 [Source:VGNC Symbol;Acc:VGNC:75092]  
ENSMMUG00000018144 C2 calcium-dependent domain-containing protein 6 [Source:NCBI gene;Acc:702140]  
ENSMMUG00000018151 membrane palmitoylated protein 4 [Source:VGNC Symbol;Acc:VGNC:74734]  
ENSMMUG00000018275 docking protein 6 [Source:VGNC Symbol;Acc:VGNC:71915]  
ENSMMUG00000018344 myosin XVA [Source:VGNC Symbol;Acc:VGNC:75109]  
ENSMMUG00000018396 HAUS augmin like complex subunit 6 [Source:VGNC Symbol;Acc:VGNC:73237]  
ENSMMUG00000018719 nemo like kinase [Source:VGNC Symbol;Acc:VGNC:75277]  
ENSMMUG00000018720 cytoskeleton associated protein 2 [Source:VGNC Symbol;Acc:VGNC:71229]  
ENSMMUG00000018823 transmembrane protein 191C [Source:NCBI gene;Acc:697070]  
ENSMMUG00000018879 exocyst complex component 3 like 2 [Source:NCBI gene;Acc:713992]  
ENSMMUG00000018932 adhesion G protein-coupled receptor E2 [Source:NCBI gene;Acc:654420]  
ENSMMUG00000018967 ubiquitin conjugating enzyme E2 O [Source:VGNC Symbol;Acc:VGNC:79813]  
ENSMMUG00000018986 seizure related 6 homolog like 2 [Source:VGNC Symbol;Acc:VGNC:81567]  
ENSMMUG00000019070 focadhesin [Source:VGNC Symbol;Acc:VGNC:72556]  
ENSMMUG00000019314 vav guanine nucleotide exchange factor 1 [Source:VGNC Symbol;Acc:VGNC:78757]  
ENSMMUG00000019418 erythrocyte membrane protein band 4.1 like 3 [Source:VGNC Symbol;Acc:VGNC:72233]  
ENSMMUG00000019690 SEC14 and spectrin domain containing 1 [Source:VGNC Symbol;Acc:VGNC:77267]  
ENSMMUG00000019925 DiGeorge syndrome critical region gene 2 [Source:NCBI gene;Acc:100423715]  
ENSMMUG00000020020 Rho GTPase activating protein 23 [Source:NCBI gene;Acc:693996]  
ENSMMUG00000020226 WD repeat and SOCS box containing 1 [Source:VGNC Symbol;Acc:VGNC:79186]  
ENSMMUG00000020254 exocyst complex component 3 like 1 [Source:VGNC Symbol;Acc:VGNC:72376]  
ENSMMUG00000020462 CD300e molecule [Source:NCBI gene;Acc:114673189]  
ENSMMUG00000020668 cyclin E1 [Source:VGNC Symbol;Acc:VGNC:70727]  
ENSMMUG00000020799 BH3 interacting domain death agonist [Source:VGNC Symbol;Acc:VGNC:70250]  
ENSMMUG00000020868 homeobox B8 [Source:VGNC Symbol;Acc:VGNC:73505]  
ENSMMUG00000020956 parvin alpha [Source:VGNC Symbol;Acc:VGNC:75605]



ENSMMUG00000021022 deoxynucleotidyltransferase terminal interacting protein 1 [Source:VGNC Symbol;Acc:VGNC:71845]  
ENSMMUG00000021039 X-ray radiation resistance associated 1 [Source:NCBI gene;Acc:693788]  
ENSMMUG00000021408 family with sequence similarity 222 member B [Source:VGNC Symbol;Acc:VGNC:72352]  
ENSMMUG00000021415 BAI1 associated protein 3 [Source:VGNC Symbol;Acc:VGNC:70223]  
ENSMMUG00000021428 lipocalin 12 [Source:VGNC Symbol;Acc:VGNC:74143]  
ENSMMUG00000021477 ATPase H+ transporting V1 subunit E1 [Source:NCBI gene;Acc:709739]  
ENSMMUG00000021553 dehydrogenase/reductase 13 [Source:VGNC Symbol;Acc:VGNC:81387]  
ENSMMUG00000021554 PHD finger protein 12 [Source:VGNC Symbol;Acc:VGNC:75838]  
ENSMMUG00000021661 leucine rich repeat containing 56 [Source:VGNC Symbol;Acc:VGNC:74356]  
ENSMMUG00000021664 lamin tail domain containing 2 [Source:VGNC Symbol;Acc:VGNC:74380]  
ENSMMUG00000021877 protein kinase AMP-activated non-catalytic subunit gamma 3 [Source:VGNC Symbol;Acc:VGNC:76406]  
ENSMMUG00000022100 midnolin [Source:VGNC Symbol;Acc:VGNC:82186]  
ENSMMUG00000022345  
ENSMMUG00000022401 EMSY transcriptional repressor, BRCA2 interacting [Source:VGNC Symbol;Acc:VGNC:72065]  
ENSMMUG00000022613 reversion inducing cysteine rich protein with kazal motifs [Source:VGNC Symbol;Acc:VGNC:76722]  
ENSMMUG00000022931 NTPase KAP family P-loop domain containing 1 [Source:VGNC Symbol;Acc:VGNC:75250]  
ENSMMUG00000022996 HCLS1 binding protein 3 [Source:VGNC Symbol;Acc:VGNC:82158]  
ENSMMUG00000023263 mediator complex subunit 15 [Source:VGNC Symbol;Acc:VGNC:74511]  
ENSMMUG00000023286 UPF1 RNA helicase and ATPase [Source:VGNC Symbol;Acc:VGNC:79971]  
ENSMMUG00000023297 solute carrier family 25 member 45 [Source:VGNC Symbol;Acc:VGNC:77576]  
ENSMMUG00000023300 FERM domain containing 8 [Source:NCBI gene;Acc:716379]  
ENSMMUG00000023303 ecotropic viral integration site 5 like [Source:NCBI gene;Acc:706628]  
ENSMMUG00000023370 DDB1 and CUL4 associated factor 17 [Source:VGNC Symbol;Acc:VGNC:71709]  
ENSMMUG00000023403 GTP binding protein 3, mitochondrial [Source:VGNC Symbol;Acc:VGNC:73170]  
ENSMMUG00000023477  
ENSMMUG00000023479 latent transforming growth factor beta binding protein 3 [Source:VGNC Symbol;Acc:VGNC:74458]  
ENSMMUG00000023599 chromosome alignment maintaining phosphoprotein 1 [Source:VGNC Symbol;Acc:VGNC:71061]  
ENSMMUG00000023636 importin 7 [Source:NCBI gene;Acc:704213]  
ENSMMUG00000023717 MIER family member 2 [Source:VGNC Symbol;Acc:VGNC:74855]  
ENSMMUG00000026950 microRNA 101-2 [Source:HGNC Symbol;Acc:HGNC:31489]  
ENSMMUG00000027986 U6 spliceosomal RNA [Source:RFAM;Acc:RF00026]  
ENSMMUG00000028733 RAS related [Source:VGNC Symbol;Acc:VGNC:76937]  
ENSMMUG00000028907 insulin receptor [Source:NCBI gene;Acc:706009]  
ENSMMUG00000028947 complement factor D [Source:VGNC Symbol;Acc:VGNC:71115]  
ENSMMUG00000028948 azurocidin 1 [Source:VGNC Symbol;Acc:VGNC:70202]  
ENSMMUG00000030279 A-kinase anchoring protein 10 [Source:VGNC Symbol;Acc:VGNC:69764]  
ENSMMUG00000030964 RAB6A, member RAS oncogene family [Source:NCBI gene;Acc:718717]  
ENSMMUG00000031163 membrane anchored junction protein [Source:VGNC Symbol;Acc:VGNC:74375]  
ENSMMUG00000032142 complement C8 gamma chain [Source:VGNC Symbol;Acc:VGNC:70481]  
ENSMMUG00000032809 mmi-mir-642 [Source:miRBase;Acc:MI0007885]  
ENSMMUG00000038363 adaptor related protein complex 5 subunit beta 1 [Source:NCBI gene;Acc:721904]  
ENSMMUG00000038944  
ENSMMUG00000039397 tubulin folding cofactor E like [Source:NCBI gene;Acc:706506]  
ENSMMUG00000039774 Metazoan signal recognition particle RNA [Source:RFAM;Acc:RF00017]  
ENSMMUG00000041101 protein phosphatase 2 regulatory subunit B'beta [Source:NCBI gene;Acc:722026]  
ENSMMUG00000042598 transmembrane protein 18 [Source:NCBI gene;Acc:721515]  
ENSMMUG00000044817 nucleoporin 62 [Source:NCBI gene;Acc:100426308]  
ENSMMUG00000045187 CASC3 exon junction complex subunit [Source:NCBI gene;Acc:699712]  
ENSMMUG00000046169  
ENSMMUG00000046417 chromobox 2 [Source:NCBI gene;Acc:717462]  
ENSMMUG00000047219

ENSMMUG00000048204 ephrin B3 [Source:NCBI gene;Acc:716257]  
ENSMMUG00000048375 Metazoan signal recognition particle RNA [Source:RFAM;Acc:RF00017]  
ENSMMUG00000048395 chromobox 6 [Source:NCBI gene;Acc:702133]  
ENSMMUG00000048566 MCF.2 cell line derived transforming sequence like [Source:NCBI gene;Acc:713961]  
ENSMMUG00000049130  
ENSMMUG00000049355 ALX homeobox 4 [Source:NCBI gene;Acc:715652]  
ENSMMUG00000049649 proteasome 20S subunit beta 6 [Source:NCBI gene;Acc:710028]  
ENSMMUG00000049703 Metazoan signal recognition particle RNA [Source:RFAM;Acc:RF00017]  
ENSMMUG00000049802 olfactory receptor 51G1 [Source:NCBI gene;Acc:716561]  
ENSMMUG00000049850 proline rich and Gla domain 4 [Source:NCBI gene;Acc:694707]  
ENSMMUG00000050028  
ENSMMUG00000050543  
ENSMMUG00000050793 N-acetyl-alpha-glucosaminidase [Source:NCBI gene;Acc:707186]  
ENSMMUG00000050822 carbonic anhydrase 9 [Source:NCBI gene;Acc:696729]  
ENSMMUG00000051201 zinc finger SWIM-type containing 3 [Source:NCBI gene;Acc:708804]  
ENSMMUG00000051323 caspase-14-like [Source:NCBI gene;Acc:702430]  
ENSMMUG00000051420 homeobox B5 [Source:NCBI gene;Acc:696732]  
ENSMMUG00000051807  
ENSMMUG00000051925  
ENSMMUG00000052047  
ENSMMUG00000052168  
ENSMMUG00000052505 homeobox B9 [Source:NCBI gene;Acc:106994009]  
ENSMMUG00000052569  
ENSMMUG00000052607  
ENSMMUG00000052851 solute carrier family 7 member 5 [Source:NCBI gene;Acc:695886]  
ENSMMUG00000052867  
ENSMMUG00000052954 Wnt family member 6 [Source:NCBI gene;Acc:700573]  
ENSMMUG00000053083 C2 calcium dependent domain containing 4C [Source:NCBI gene;Acc:100424440]  
ENSMMUG00000053378  
ENSMMUG00000053457 caspase 14 [Source:NCBI gene;Acc:718049]  
ENSMMUG00000053937  
ENSMMUG00000054052 sialic acid binding Ig like lectin 11 [Source:NCBI gene;Acc:719127]  
ENSMMUG00000054055 zinc finger protein 93 [Source:NCBI gene;Acc:720434]  
ENSMMUG00000054473 activating transcription factor 5 [Source:NCBI gene;Acc:719150]  
ENSMMUG00000054512  
ENSMMUG00000054784  
ENSMMUG00000055048  
ENSMMUG00000055290 netrin 1 [Source:NCBI gene;Acc:717645]  
ENSMMUG00000055324 homeobox B7 [Source:NCBI gene;Acc:697089]  
ENSMMUG00000055352  
ENSMMUG00000055379  
ENSMMUG00000055775 transmembrane p24 trafficking protein 1 [Source:NCBI gene;Acc:713618]  
ENSMMUG00000055811  
ENSMMUG00000055820  
ENSMMUG00000055897  
ENSMMUG00000055973 phosphoglycerate mutase 1-like [Source:NCBI gene;Acc:714548]  
ENSMMUG00000055976 CD99 antigen [Source:NCBI gene;Acc:106995376]  
ENSMMUG00000056009  
ENSMMUG00000056093 shieldin complex subunit 1 [Source:NCBI gene;Acc:718152]  
ENSMMUG00000056184  
ENSMMUG00000056248

ENSMMUG00000056381 forkhead box R1 [Source:NCBI gene;Acc:707285]  
ENSMMUG00000056555  
ENSMMUG00000056840  
ENSMMUG00000056945  
ENSMMUG00000056950  
ENSMMUG00000057095  
ENSMMUG00000057157  
ENSMMUG00000057179 cation channel sperm associated 1 [Source:NCBI gene;Acc:721869]  
ENSMMUG00000057274 hemoglobin subunit mu [Source:NCBI gene;Acc:694058]  
ENSMMUG00000057329  
ENSMMUG00000057331 RNA terminal phosphate cyclase like 1 [Source:NCBI gene;Acc:694568]  
ENSMMUG00000057361 Metazoan signal recognition particle RNA [Source:RFAM;Acc:RF00017]  
ENSMMUG00000057481  
ENSMMUG00000057499  
ENSMMUG00000057632  
ENSMMUG00000057640 plakophilin-3-like [Source:NCBI gene;Acc:114669833]  
ENSMMUG00000057687  
ENSMMUG00000057825  
ENSMMUG00000057934  
ENSMMUG00000058237  
ENSMMUG00000058311  
ENSMMUG00000058437  
ENSMMUG00000058566  
ENSMMUG00000058592  
ENSMMUG00000058621  
ENSMMUG00000058885 formin binding protein 4 [Source:NCBI gene;Acc:712633]  
ENSMMUG00000058916  
ENSMMUG00000058928 Metazoan signal recognition particle RNA [Source:RFAM;Acc:RF00017]  
ENSMMUG00000059175  
ENSMMUG00000059182  
ENSMMUG00000059188  
ENSMMUG00000059229 CEA cell adhesion molecule 7 [Source:NCBI gene;Acc:705572]  
ENSMMUG00000059436 interleukin 10 receptor subunit alpha [Source:NCBI gene;Acc:704383]  
ENSMMUG00000059504  
ENSMMUG00000060000  
ENSMMUG00000060289  
ENSMMUG00000060435 Metazoan signal recognition particle RNA [Source:RFAM;Acc:RF00017]  
ENSMMUG00000060502  
ENSMMUG00000060517  
ENSMMUG00000060533  
ENSMMUG00000060761  
ENSMMUG00000060767  
ENSMMUG00000060879 homeobox B13 [Source:NCBI gene;Acc:697572]  
ENSMMUG00000061335  
ENSMMUG00000061342  
ENSMMUG00000061424 ventral anterior homeobox 2 [Source:NCBI gene;Acc:703531]  
ENSMMUG00000061533  
ENSMMUG00000061896  
ENSMMUG00000061995  
ENSMMUG00000062037 stannin [Source:NCBI gene;Acc:711909]  
ENSMMUG00000062091

ENSMMUG00000062283 homeobox B6 [Source:NCBI gene;Acc:106994013]  
 ENSMMUG00000062781 chromosome 14 C11orf97 homolog [Source:NCBI gene;Acc:106993442]  
 ENSMMUG00000062863  
 ENSMMUG00000063622 mitochondrial ribosomal protein S26 [Source:NCBI gene;Acc:717038]  
 ENSMMUG00000063639  
 ENSMMUG00000063759 transmembrane protein 185B [Source:NCBI gene;Acc:695744]  
 ENSMMUG00000063779  
 ENSMMUG00000063817 SRY-box transcription factor 9 [Source:NCBI gene;Acc:574208]  
 ENSMMUG00000063914  
 ENSMMUG00000063988  
 ENSMMUG00000064005  
 ENSMMUG00000064052 CD300 molecule like family member d [Source:NCBI gene;Acc:703142]  
 ENSMMUG00000064146 Metazoan signal recognition particle RNA [Source:RFAM;Acc:RF00017]  
 ENSMMUG00000064391  
 ENSMMUG00000064532 mucin 16, cell surface associated [Source:NCBI gene;Acc:106996460]  
 ENSMMUG00000064554 leucine rich repeat neuronal 4 [Source:NCBI gene;Acc:718283]  
 ENSMMUG00000064650 SPEM family member 3 [Source:NCBI gene;Acc:106993878]  
 ENSMMUG00000064920  
 ENSMMUG00000065025  
 ENSMMUG00000065054 G protein subunit gamma 7 [Source:NCBI gene;Acc:711335]  
 ENSMMUG00000065208  
 ENSMMUG00000065269 Rho family GTPase 2 [Source:NCBI gene;Acc:712559]

## Survivors – SD 3 vs. Baseline

| Ensembl Gene ID    | Description                                                                                  |
|--------------------|----------------------------------------------------------------------------------------------|
| ENSMMUG00000000419 | Rho GTPase activating protein 26 [Source:VGNC Symbol;Acc:VGNC:69846]                         |
| ENSMMUG00000000421 | nuclear receptor subfamily 3 group C member 1 [Source:VGNC Symbol;Acc:VGNC:75515]            |
| ENSMMUG00000000544 | collagen type VI alpha 1 chain [Source:VGNC Symbol;Acc:VGNC:82084]                           |
| ENSMMUG00000000632 | SH3 binding domain protein 5 like [Source:VGNC Symbol;Acc:VGNC:77334]                        |
| ENSMMUG00000000644 | centrosomal protein 85 [Source:VGNC Symbol;Acc:VGNC:71096]                                   |
| ENSMMUG00000000649 | UBX domain protein 11 [Source:VGNC Symbol;Acc:VGNC:79859]                                    |
| ENSMMUG00000000706 | filamin B [Source:VGNC Symbol;Acc:VGNC:72672]                                                |
| ENSMMUG00000000730 | spectrin alpha, erythrocytic 1 [Source:VGNC Symbol;Acc:VGNC:77868]                           |
| ENSMMUG00000000790 | ankyrin repeat domain 17 [Source:VGNC Symbol;Acc:VGNC:84240]                                 |
| ENSMMUG00000000808 | melanin concentrating hormone receptor 2 [Source:VGNC Symbol;Acc:VGNC:74550]                 |
| ENSMMUG00000000869 | small nuclear ribonucleoprotein polypeptide C [Source:NCBI gene;Acc:718654]                  |
| ENSMMUG00000000917 | aldo-keto reductase family 1 member B [Source:NCBI gene;Acc:705957]                          |
| ENSMMUG00000000951 | integrin subunit beta 2 [Source:VGNC Symbol;Acc:VGNC:73786]                                  |
| ENSMMUG00000000953 | family with sequence similarity 207 member A [Source:VGNC Symbol;Acc:VGNC:72273]             |
| ENSMMUG00000001028 | SNF related kinase [Source:VGNC Symbol;Acc:VGNC:84074]                                       |
| ENSMMUG00000001060 | ryanodine receptor 2 [Source:VGNC Symbol;Acc:VGNC:76954]                                     |
| ENSMMUG00000001350 | HERPUD family member 2 [Source:VGNC Symbol;Acc:VGNC:73216]                                   |
| ENSMMUG00000001380 | outer dense fiber of sperm tails 2 like [Source:VGNC Symbol;Acc:VGNC:75482]                  |
| ENSMMUG00000001616 | peptidyl arginine deiminase 2 [Source:VGNC Symbol;Acc:VGNC:75644]                            |
| ENSMMUG00000001702 | succinyl-CoA:glutarate-CoA transferase [Source:VGNC Symbol;Acc:VGNC:81767]                   |
| ENSMMUG00000001707 | amyloid beta precursor protein binding family B member 3 [Source:VGNC Symbol;Acc:VGNC:69869] |
| ENSMMUG00000001725 | solute carrier family 35 member A4 [Source:VGNC Symbol;Acc:VGNC:77532]                       |
| ENSMMUG00000001753 | integrin subunit alpha 1 [Source:VGNC Symbol;Acc:VGNC:73772]                                 |

ENSMMUG0000001848 sprouty RTK signaling antagonist 1 [Source:VGNC Symbol;Acc:VGNC:77867]  
ENSMMUG0000001910 heat shock protein family B (small) member 7 [Source:NCBI gene;Acc:696704]  
ENSMMUG0000001911 steroid receptor associated and regulated protein [Source:VGNC Symbol;Acc:VGNC:78008]  
ENSMMUG0000001943 GRAM domain containing 1C [Source:VGNC Symbol;Acc:VGNC:73007]  
ENSMMUG0000001967 late cornified envelope 5A [Source:VGNC Symbol;Acc:VGNC:74061]  
ENSMMUG0000002211 doublecortin like kinase 2 [Source:VGNC Symbol;Acc:VGNC:71670]  
ENSMMUG0000002217 alkaline phosphatase, biomineralization associated [Source:VGNC Symbol;Acc:VGNC:69801]  
ENSMMUG0000002411 drebrin like [Source:NCBI gene;Acc:720621]  
ENSMMUG0000002421 DNA polymerase mu [Source:VGNC Symbol;Acc:VGNC:81742]  
ENSMMUG0000002422 AE binding protein 1 [Source:VGNC Symbol;Acc:VGNC:80328]  
ENSMMUG0000002423 DNA polymerase delta 2, accessory subunit [Source:VGNC Symbol;Acc:VGNC:76203]  
ENSMMUG0000002426 myosin light chain 7 [Source:VGNC Symbol;Acc:VGNC:75002]  
ENSMMUG0000002427 glucokinase [Source:VGNC Symbol;Acc:VGNC:72901]  
ENSMMUG0000002428 zinc finger protein 800 [Source:VGNC Symbol;Acc:VGNC:79658]  
ENSMMUG0000002430 YKT6 v-SNARE homolog [Source:VGNC Symbol;Acc:VGNC:81796]  
ENSMMUG0000002789 solute carrier family 25 (mitochondrial carrier; phosphate carrier), member 24 [Source:NCBI gene;Acc:694803]  
ENSMMUG0000002886 Bardet-Biedl syndrome 9 [Source:NCBI gene;Acc:708412]  
ENSMMUG0000002949 motile sperm domain containing 3 [Source:VGNC Symbol;Acc:VGNC:74823]  
ENSMMUG0000002950 transferrin receptor 2 [Source:VGNC Symbol;Acc:VGNC:81770]  
ENSMMUG0000002953 MAGE family member F1 [Source:VGNC Symbol;Acc:VGNC:74399]  
ENSMMUG0000002995 tripartite motif containing 24 [Source:VGNC Symbol;Acc:VGNC:78562]  
ENSMMUG0000003131 interleukin 13 [Source:VGNC Symbol;Acc:VGNC:84393]  
ENSMMUG0000003133 interleukin 4 [Source:VGNC Symbol;Acc:VGNC:73729]  
ENSMMUG0000003167 cytohesin 3 [Source:VGNC Symbol;Acc:VGNC:71829]  
ENSMMUG0000003199 CD200 receptor 1 [Source:VGNC Symbol;Acc:VGNC:70845]  
ENSMMUG0000003283 extracellular leucine rich repeat and fibronectin type III domain containing 1 [Source:VGNC Symbol;Acc:VGNC:72204]  
ENSMMUG0000003457 protein kinase cAMP-activated catalytic subunit beta [Source:NCBI gene;Acc:709728]  
ENSMMUG0000003572 nicotinamide phosphoribosyltransferase [Source:VGNC Symbol;Acc:VGNC:75056]  
ENSMMUG0000003598 tripartite motif containing 7 [Source:VGNC Symbol;Acc:VGNC:79022]  
ENSMMUG0000003739 mannosidase beta [Source:VGNC Symbol;Acc:VGNC:74486]  
ENSMMUG0000003750 PLAG1 like zinc finger 1 [Source:VGNC Symbol;Acc:VGNC:83444]  
ENSMMUG0000003827 albumin [Source:VGNC Symbol;Acc:VGNC:69782]  
ENSMMUG0000003833 Ras association domain family member 6 [Source:VGNC Symbol;Acc:VGNC:76515]  
ENSMMUG0000004002 CDC like kinase 4 [Source:VGNC Symbol;Acc:VGNC:71173]  
ENSMMUG0000004103 collagen type XI alpha 1 chain [Source:VGNC Symbol;Acc:VGNC:71289]  
ENSMMUG0000004149 eukaryotic translation initiation factor 4 gamma 3 [Source:NCBI gene;Acc:717555]  
ENSMMUG0000004257 beta-secretase 2 [Source:VGNC Symbol;Acc:VGNC:70216]  
ENSMMUG0000004273 dedicator of cytokinesis 3 [Source:VGNC Symbol;Acc:VGNC:71967]  
ENSMMUG0000004512 Fc fragment of IgE receptor Ig [Source:VGNC Symbol;Acc:VGNC:72629]  
ENSMMUG0000004520 NADH:ubiquinone oxidoreductase core subunit S2 [Source:NCBI gene;Acc:719935]  
ENSMMUG0000004749 PPARG coactivator 1 beta [Source:VGNC Symbol;Acc:VGNC:76134]  
ENSMMUG0000004774 maestro heat like repeat family member 2B [Source:VGNC Symbol;Acc:VGNC:74837]  
ENSMMUG0000004801 COPI coat complex subunit gamma 2 [Source:VGNC Symbol;Acc:VGNC:71315]  
ENSMMUG0000005070 ecotropic viral integration site 5 [Source:NCBI gene;Acc:706592]  
ENSMMUG0000005293 G-patch domain and ankyrin repeats 1 [Source:VGNC Symbol;Acc:VGNC:81073]  
ENSMMUG0000005294 casein kinase 2 beta [Source:NCBI gene;Acc:715807]  
ENSMMUG0000005297 proline rich coiled-coil 2A [Source:VGNC Symbol;Acc:VGNC:83448]  
ENSMMUG0000005302 BAG cochaperone 6 [Source:VGNC Symbol;Acc:VGNC:81044]  
ENSMMUG0000005303 apolipoprotein M [Source:VGNC Symbol;Acc:VGNC:69825]  
ENSMMUG0000005380 zinc finger protein 827 [Source:NCBI gene;Acc:706018]  
ENSMMUG0000005415 olfactory receptor, family 2, subfamily B, member 3 [Source:NCBI gene;Acc:708747]

ENSMMUG00000005511 SON DNA binding protein [Source:VGNC Symbol;Acc:VGNC:77689]  
ENSMMUG00000005745 EYA transcriptional coactivator and phosphatase 4 [Source:VGNC Symbol;Acc:VGNC:72456]  
ENSMMUG00000005992 zinc metallopeptidase STE24 [Source:VGNC Symbol;Acc:VGNC:78830]  
ENSMMUG00000006029 odontogenic, ameloblast associated [Source:NCBI gene;Acc:707906]  
ENSMMUG00000006237 carboxypeptidase Z [Source:VGNC Symbol;Acc:VGNC:71478]  
ENSMMUG00000006285 antizyme inhibitor 2 [Source:VGNC Symbol;Acc:VGNC:70153]  
ENSMMUG00000006530 ATP/GTP binding protein like 3 [Source:VGNC Symbol;Acc:VGNC:69723]  
ENSMMUG00000006766 RUN domain containing 3B [Source:VGNC Symbol;Acc:VGNC:77129]  
ENSMMUG00000006786 protein tyrosine phosphatase non-receptor type 22 [Source:VGNC Symbol;Acc:VGNC:76603]  
ENSMMUG00000006836 chloride channel accessory 1 [Source:NCBI gene;Acc:574295]  
ENSMMUG00000006851 SPARC (osteonectin), cwcv and kazal like domains proteoglycan 3 [Source:NCBI gene;Acc:705964]  
ENSMMUG00000006980 septin 7 [Source:VGNC Symbol;Acc:VGNC:81759]  
ENSMMUG00000007206 chromosome 3 C7orf50 homolog [Source:VGNC Symbol;Acc:VGNC:70609]  
ENSMMUG00000007208 G protein-coupled receptor 146 [Source:VGNC Symbol;Acc:VGNC:72979]  
ENSMMUG00000007366  
ENSMMUG00000007387 G protein-coupled receptor kinase 7 [Source:VGNC Symbol;Acc:VGNC:73182]  
ENSMMUG00000007422 spermatogenesis associated 5 [Source:VGNC Symbol;Acc:VGNC:77952]  
ENSMMUG00000007528 chordin [Source:VGNC Symbol;Acc:VGNC:71042]  
ENSMMUG00000007773 solute carrier organic anion transporter family member 4C1 [Source:VGNC Symbol;Acc:VGNC:77764]  
ENSMMUG00000007970 CCZ1 homolog, vacuolar protein trafficking and biogenesis associated [Source:NCBI gene;Acc:718128]  
ENSMMUG00000008031 zinc finger and BTB domain containing 17 [Source:VGNC Symbol;Acc:VGNC:78849]  
ENSMMUG00000008070 YEATS domain containing 2 [Source:VGNC Symbol;Acc:VGNC:79502]  
ENSMMUG00000008162 fibroblast growth factor binding protein 1 [Source:VGNC Symbol;Acc:VGNC:72536]  
ENSMMUG00000008189 cadherin related family member 3 [Source:HGNC Symbol;Acc:HGNC:26308]  
ENSMMUG00000008379 adducin 1 [Source:VGNC Symbol;Acc:VGNC:69528]  
ENSMMUG00000008383 major facilitator superfamily domain containing 10 [Source:NCBI gene;Acc:720098]  
ENSMMUG00000008385 NOP14 nucleolar protein [Source:VGNC Symbol;Acc:VGNC:75194]  
ENSMMUG00000008518 phospholipid phosphatase related 5 [Source:NCBI gene;Acc:710549]  
ENSMMUG00000008791 CD47 molecule [Source:VGNC Symbol;Acc:VGNC:70767]  
ENSMMUG00000008828 BEN domain containing 5 [Source:NCBI gene;Acc:711150]  
ENSMMUG00000008854 natural cytotoxicity triggering receptor 3 [Source:VGNC Symbol;Acc:VGNC:74990]  
ENSMMUG00000009040 cornulin [Source:VGNC Symbol;Acc:VGNC:71397]  
ENSMMUG00000009066 60S ribosomal protein L26 [Source:NCBI gene;Acc:696134]  
ENSMMUG00000009184 myelin protein zero like 1 [Source:NCBI gene;Acc:698437]  
ENSMMUG00000009197 myelin associated oligodendrocyte basic protein [Source:VGNC Symbol;Acc:VGNC:74908]  
ENSMMUG00000009437 zinc finger protein 619 [Source:VGNC Symbol;Acc:VGNC:82562]  
ENSMMUG00000009499 mesoderm specific transcript [Source:VGNC Symbol;Acc:VGNC:74707]  
ENSMMUG00000009508 TATA-box binding protein associated factor 5 like [Source:VGNC Symbol;Acc:VGNC:78148]  
ENSMMUG00000009564 NMD3 ribosome export adaptor [Source:VGNC Symbol;Acc:VGNC:75242]  
ENSMMUG00000009816 exosome component 9 [Source:VGNC Symbol;Acc:VGNC:72477]  
ENSMMUG00000010007 CD14 molecule [Source:VGNC Symbol;Acc:VGNC:70751]  
ENSMMUG00000010308 cyclin I family member 2 [Source:VGNC Symbol;Acc:VGNC:70923]  
ENSMMUG00000010309 septin 8 [Source:VGNC Symbol;Acc:VGNC:77248]  
ENSMMUG00000010313 kinesin family member 3A [Source:VGNC Symbol;Acc:VGNC:74017]  
ENSMMUG00000010316 HECT and RLD domain containing E3 ubiquitin protein ligase 5 [Source:VGNC Symbol;Acc:VGNC:73226]  
ENSMMUG00000010318 phosphatidylinositol glycan anchor biosynthesis class Y [Source:NCBI gene;Acc:100426107]  
ENSMMUG00000010466 solute carrier family 38 member 9 [Source:VGNC Symbol;Acc:VGNC:77574]  
ENSMMUG00000010632 family with sequence similarity 81 member B [Source:VGNC Symbol;Acc:VGNC:72365]  
ENSMMUG00000010940 telomerase reverse transcriptase [Source:VGNC Symbol;Acc:VGNC:78313]  
ENSMMUG00000011026 dynein axonemal heavy chain 5 [Source:VGNC Symbol;Acc:VGNC:71942]  
ENSMMUG00000011513 versican [Source:VGNC Symbol;Acc:VGNC:79445]



ENSMMUG00000011633 kallikrein B1 [Source:VGNC Symbol;Acc:VGNC:74195]  
ENSMMUG00000011634 coagulation factor XI [Source:VGNC Symbol;Acc:VGNC:72460]  
ENSMMUG00000011682 ribonuclease P/MRP subunit p21 [Source:NCBI gene;Acc:713056]  
ENSMMUG00000011788 zinc finger protein 212 [Source:VGNC Symbol;Acc:VGNC:78418]  
ENSMMUG00000011878 poly(A) binding protein interacting protein 1 [Source:VGNC Symbol;Acc:VGNC:84476]  
ENSMMUG00000011914 prospero homeobox 1 [Source:VGNC Symbol;Acc:VGNC:76427]  
ENSMMUG00000012405 transient receptor potential cation channel subfamily C member 1 [Source:VGNC Symbol;Acc:VGNC:78651]  
ENSMMUG00000012526 glycosyltransferase 8 domain containing 1 [Source:VGNC Symbol;Acc:VGNC:73001]  
ENSMMUG00000012635 zyxin [Source:VGNC Symbol;Acc:VGNC:78917]  
ENSMMUG00000012697 AT-rich interaction domain 1A [Source:VGNC Symbol;Acc:VGNC:69822]  
ENSMMUG00000013044 selectin P [Source:VGNC Symbol;Acc:VGNC:77157]  
ENSMMUG00000013136 Y-box binding protein 1 [Source:NCBI gene;Acc:700140]  
ENSMMUG00000013283 cadherin related family member 2 [Source:NCBI gene;Acc:697249]  
ENSMMUG00000013284 G protein regulated inducer of neurite outgrowth 1 [Source:VGNC Symbol;Acc:VGNC:72998]  
ENSMMUG00000013330 ectonucleoside triphosphate diphosphohydrolase 3 [Source:VGNC Symbol;Acc:VGNC:72226]  
ENSMMUG00000013447 adaptor related protein complex 4 subunit mu 1 [Source:VGNC Symbol;Acc:VGNC:69974]  
ENSMMUG00000013450 TATA-box binding protein associated factor 6 [Source:VGNC Symbol;Acc:VGNC:78093]  
ENSMMUG00000013644 potassium two pore domain channel subfamily K member 17 [Source:VGNC Symbol;Acc:VGNC:73828]  
ENSMMUG00000014045 protein tyrosine phosphatase non-receptor type 23 [Source:VGNC Symbol;Acc:VGNC:76477]  
ENSMMUG00000014046 SREBF chaperone [Source:VGNC Symbol;Acc:VGNC:77140]  
ENSMMUG00000014508 potassium channel tetramerization domain containing 20 [Source:VGNC Symbol;Acc:VGNC:73872]  
ENSMMUG00000014573 dimethylarginine dimethylaminohydrolase 1 [Source:VGNC Symbol;Acc:VGNC:71753]  
ENSMMUG00000014674 golgin, RAB6 interacting [Source:VGNC Symbol;Acc:VGNC:73012]  
ENSMMUG00000014699  
ENSMMUG00000014707 cadherin EGF LAG seven-pass G-type receptor 3 [Source:VGNC Symbol;Acc:VGNC:71148]  
ENSMMUG00000014720 NCK interacting protein with SH3 domain [Source:VGNC Symbol;Acc:VGNC:74960]  
ENSMMUG00000014738 bromodomain containing 9 [Source:VGNC Symbol;Acc:VGNC:70386]  
ENSMMUG00000014828 heparan sulfate proteoglycan 2 [Source:VGNC Symbol;Acc:VGNC:73534]  
ENSMMUG00000014868 OCIA domain containing 1 [Source:VGNC Symbol;Acc:VGNC:75409]  
ENSMMUG00000014874 GTP binding protein 8 (putative) [Source:VGNC Symbol;Acc:VGNC:84180]  
ENSMMUG00000014876 nucleolus and neural progenitor protein [Source:VGNC Symbol;Acc:VGNC:75244]  
ENSMMUG00000015097 tripartite motif containing 62 [Source:VGNC Symbol;Acc:VGNC:79513]  
ENSMMUG00000015329 MX dynamin like GTPase 1 [Source:VGNC Symbol;Acc:VGNC:75086]  
ENSMMUG00000015416 bromodomain and PHD finger containing 3 [Source:VGNC Symbol;Acc:VGNC:70309]  
ENSMMUG00000015479 tectonin beta-propeller repeat containing 1 [Source:VGNC Symbol;Acc:VGNC:79348]  
ENSMMUG00000015555 ST3 beta-galactoside alpha-2,3-sialyltransferase 3 [Source:VGNC Symbol;Acc:VGNC:77828]  
ENSMMUG00000015685 zinc finger protein 804B [Source:VGNC Symbol;Acc:VGNC:81890]  
ENSMMUG00000015686 abhydrolase domain containing 16A [Source:VGNC Symbol;Acc:VGNC:69393]  
ENSMMUG00000015693 lymphocyte antigen 6 family member G6C [Source:VGNC Symbol;Acc:VGNC:74285]  
ENSMMUG00000015716 protein phosphatase with EF-hand domain 2 [Source:VGNC Symbol;Acc:VGNC:76233]  
ENSMMUG00000016096 lamin A/C [Source:VGNC Symbol;Acc:VGNC:74427]  
ENSMMUG00000016099 hedgehog acyltransferase [Source:NCBI gene;Acc:712333]  
ENSMMUG00000016111 chromosome 1 C1orf50 homolog [Source:VGNC Symbol;Acc:VGNC:70432]  
ENSMMUG00000016273 maltase-glucoamylase [Source:VGNC Symbol;Acc:VGNC:74713]  
ENSMMUG00000016376 mitogen-activated protein kinase kinase kinase 5 [Source:VGNC Symbol;Acc:VGNC:74495]  
ENSMMUG00000016476 TRAF interacting protein [Source:VGNC Symbol;Acc:VGNC:82261]  
ENSMMUG00000016579 selectin L [Source:NCBI gene;Acc:701419]  
ENSMMUG00000016580 selectin E [Source:VGNC Symbol;Acc:VGNC:77156]  
ENSMMUG00000016582 chromosome 1 C1orf112 homolog [Source:VGNC Symbol;Acc:VGNC:70385]  
ENSMMUG00000016999 KIAA0232 [Source:VGNC Symbol;Acc:VGNC:73922]  
ENSMMUG00000017056 Sad1 and UNC84 domain containing 1 [Source:VGNC Symbol;Acc:VGNC:78161]

ENSMMUG00000017189 regulatory factor X6 [Source:VGNC Symbol;Acc:VGNC:76800]  
ENSMMUG00000017370 signal peptidase complex subunit 1 [Source:VGNC Symbol;Acc:VGNC:84072]  
ENSMMUG00000017501 N-acyl ethanolamine acid amidase [Source:VGNC Symbol;Acc:VGNC:75068]  
ENSMMUG00000017503 SDA1 domain containing 1 [Source:NCBI gene;Acc:700863]  
ENSMMUG00000017510 membrane associated guanylate kinase, WW and PDZ domain containing 1 [Source:VGNC Symbol;Acc:VGNC:74499]  
ENSMMUG00000017605 mitochondrial ribosomal protein L39 [Source:VGNC Symbol;Acc:VGNC:74737]  
ENSMMUG00000017701 myosin VIIA and Rab interacting protein [Source:VGNC Symbol;Acc:VGNC:74992]  
ENSMMUG00000017740 sperm mitochondria associated cysteine rich protein [Source:VGNC Symbol;Acc:VGNC:77816]  
ENSMMUG00000017983 tRNA nucleotidyl transferase 1 [Source:VGNC Symbol;Acc:VGNC:79073]  
ENSMMUG00000018235 chloride voltage-gated channel Kb [Source:NCBI gene;Acc:703476]  
ENSMMUG00000018245 EPH receptor A2 [Source:VGNC Symbol;Acc:VGNC:72235]  
ENSMMUG00000018246 transmembrane and coiled-coil domains 6 [Source:VGNC Symbol;Acc:VGNC:84507]  
ENSMMUG00000018478 interferon regulatory factor 5 [Source:VGNC Symbol;Acc:VGNC:73763]  
ENSMMUG00000018549 zinc finger protein 786 [Source:VGNC Symbol;Acc:VGNC:79338]  
ENSMMUG00000018619 DENN domain containing 6A [Source:VGNC Symbol;Acc:VGNC:71726]  
ENSMMUG00000018664 collagen type IX alpha 2 chain [Source:VGNC Symbol;Acc:VGNC:71307]  
ENSMMUG00000018743 ubiquitin specific peptidase 25 [Source:VGNC Symbol;Acc:VGNC:78744]  
ENSMMUG00000018790 activin A receptor type 2B [Source:VGNC Symbol;Acc:VGNC:69450]  
ENSMMUG00000019040 hydroxysteroid 17-beta dehydrogenase 13 [Source:VGNC Symbol;Acc:VGNC:73417]  
ENSMMUG00000019085 3-hydroxybutyrate dehydrogenase 2 [Source:VGNC Symbol;Acc:VGNC:70161]  
ENSMMUG00000019089 centromere protein E [Source:VGNC Symbol;Acc:VGNC:71008]  
ENSMMUG00000019246 regulator of calcineurin 2 [Source:VGNC Symbol;Acc:VGNC:82092]  
ENSMMUG00000019441 solute carrier family 12 member 7 [Source:VGNC Symbol;Acc:VGNC:77390]  
ENSMMUG00000019527 DNA cross-link repair 1B [Source:VGNC Symbol;Acc:VGNC:71647]  
ENSMMUG00000019528 adaptor related protein complex 4 subunit beta 1 [Source:VGNC Symbol;Acc:VGNC:69972]  
ENSMMUG00000019563 collapsin response mediator protein 1 [Source:VGNC Symbol;Acc:VGNC:71494]  
ENSMMUG00000019593 synaptophysin like 1 [Source:VGNC Symbol;Acc:VGNC:78073]  
ENSMMUG00000019764 dynactin subunit 4 [Source:VGNC Symbol;Acc:VGNC:71625]  
ENSMMUG00000019833 Fc receptor like 1 [Source:VGNC Symbol;Acc:VGNC:72528]  
ENSMMUG00000019835 CD5 molecule like [Source:VGNC Symbol;Acc:VGNC:70774]  
ENSMMUG00000019933 TatD DNase domain containing 2 [Source:NCBI gene;Acc:701390]  
ENSMMUG00000019961 protein phosphatase 1 regulatory subunit 18 [Source:NCBI gene;Acc:712176]  
ENSMMUG00000019991 dopa decarboxylase [Source:VGNC Symbol;Acc:VGNC:71755]  
ENSMMUG00000020558 serine/threonine kinase 38 [Source:VGNC Symbol;Acc:VGNC:78155]  
ENSMMUG00000020679 myozenin 3 [Source:VGNC Symbol;Acc:VGNC:74988]  
ENSMMUG00000020683 RNA binding motif protein 22 [Source:VGNC Symbol;Acc:VGNC:76535]  
ENSMMUG00000020726 dihydropyrimidine dehydrogenase [Source:VGNC Symbol;Acc:VGNC:71982]  
ENSMMUG00000020861 EvC ciliary complex subunit 1 [Source:VGNC Symbol;Acc:VGNC:72445]  
ENSMMUG00000020916 coiled-coil domain containing 158 [Source:NCBI gene;Acc:699735]  
ENSMMUG00000020979 inka box actin regulator 1 [Source:VGNC Symbol;Acc:VGNC:73692]  
ENSMMUG00000020980 ubiquitin like modifier activating enzyme 7 [Source:VGNC Symbol;Acc:VGNC:78690]  
ENSMMUG00000021017 acylglycerol kinase [Source:VGNC Symbol;Acc:VGNC:69669]  
ENSMMUG00000021073 RAS protein activator like 2 [Source:VGNC Symbol;Acc:VGNC:76670]  
ENSMMUG00000021075 Rac family small GTPase 1 [Source:NCBI gene;Acc:717755]  
ENSMMUG00000021357 zinc finger BED-type containing 3 [Source:VGNC Symbol;Acc:VGNC:79271]  
ENSMMUG00000021449 vacuolar protein sorting 13 homolog D [Source:NCBI gene;Acc:722775]  
ENSMMUG00000021972 diacylglycerol kinase gamma [Source:VGNC Symbol;Acc:VGNC:71785]  
ENSMMUG00000021988 N-alpha-acetyltransferase 11, NatA catalytic subunit [Source:NCBI gene;Acc:696758]  
ENSMMUG00000022003 multimerin 1 [Source:VGNC Symbol;Acc:VGNC:74904]  
ENSMMUG00000022246 PDZ and LIM domain 5 [Source:VGNC Symbol;Acc:VGNC:75816]  
ENSMMUG00000022247 osteoclastogenesis associated transmembrane protein 1 [Source:VGNC Symbol;Acc:VGNC:75664]

ENSMMUG00000022381 prolyl 3-hydroxylase 1 [Source:VGNC Symbol;Acc:VGNC:75648]  
ENSMMUG00000022437 peptidyl arginine deiminase 6 [Source:VGNC Symbol;Acc:VGNC:75657]  
ENSMMUG00000022513 glutamate metabotropic receptor 3 [Source:VGNC Symbol;Acc:VGNC:73287]  
ENSMMUG00000022633 replication initiator 1 [Source:VGNC Symbol;Acc:VGNC:76758]  
ENSMMUG00000022728 zinc finger and SCAN domain containing 25 [Source:VGNC Symbol;Acc:VGNC:79344]  
ENSMMUG00000022884 glutamate-ammonia ligase [Source:NCBI gene;Acc:715952]  
ENSMMUG00000022921 solute carrier family 2 member 12 [Source:VGNC Symbol;Acc:VGNC:77503]  
ENSMMUG00000023045 zinc finger B-box domain containing [Source:VGNC Symbol;Acc:VGNC:79592]  
ENSMMUG00000023310 tetraspanin 12 [Source:VGNC Symbol;Acc:VGNC:79328]  
ENSMMUG00000023335 ring finger protein 13 [Source:VGNC Symbol;Acc:VGNC:81557]  
ENSMMUG00000023345 adhesion G protein-coupled receptor L4 [Source:VGNC Symbol;Acc:VGNC:69652]  
ENSMMUG00000023449 mitofusin 2 [Source:VGNC Symbol;Acc:VGNC:74522]  
ENSMMUG00000023598 sorting nexin 2 [Source:VGNC Symbol;Acc:VGNC:77682]  
ENSMMUG00000024537  
ENSMMUG00000025918 small nucleolar RNA, H/ACA box 38 [Source:HGNC Symbol;Acc:HGNC:32631]  
ENSMMUG00000026975 mml-mir-206 [Source:miRBase;Acc:MI0007667]  
ENSMMUG00000027541 Small nucleolar RNA SNORA70 [Source:RFAM;Acc:RF00156]  
ENSMMUG00000031279 torsin A interacting protein 2 [Source:NCBI gene;Acc:716654]  
ENSMMUG00000031291 regulator of G protein signaling like 1 [Source:NCBI gene;Acc:715693]  
ENSMMUG00000031534 ankyrin repeat and ubiquitin domain containing 1 [Source:VGNC Symbol;Acc:VGNC:84239]  
ENSMMUG00000031540 purinergic receptor P2Y1 [Source:VGNC Symbol;Acc:VGNC:75737]  
ENSMMUG00000031684 KRAB box domain containing 1 [Source:NCBI gene;Acc:717189]  
ENSMMUG00000031785  
ENSMMUG00000032180 RLF zinc finger [Source:VGNC Symbol;Acc:VGNC:76699]  
ENSMMUG00000032249 procollagen-lysine,2-oxoglutarate 5-dioxygenase 1 [Source:NCBI gene;Acc:722763]  
ENSMMUG00000032659 mml-mir-711 [Source:miRBase;Acc:MI0012553]  
ENSMMUG00000033121 Small nucleolar RNA U3 [Source:RFAM;Acc:RF00012]  
ENSMMUG00000035160 U4 spliceosomal RNA [Source:RFAM;Acc:RF00015]  
ENSMMUG00000035943 U6 spliceosomal RNA [Source:RFAM;Acc:RF00026]  
ENSMMUG00000038524 olfactory receptor 2M4 [Source:NCBI gene;Acc:100424541]  
ENSMMUG00000039009  
ENSMMUG00000039101 pelota mRNA surveillance and ribosome rescue factor [Source:VGNC Symbol;Acc:VGNC:84478]  
ENSMMUG00000040393 zinc finger protein 655 [Source:NCBI gene;Acc:718811]  
ENSMMUG00000040888 complement C3b/C4b receptor 1 like [Source:HGNC Symbol;Acc:HGNC:2335]  
ENSMMUG00000041519 zinc finger protein 354A [Source:VGNC Symbol;Acc:VGNC:84517]  
ENSMMUG00000042510 coagulation factor V [Source:NCBI gene;Acc:704695]  
ENSMMUG00000042618 involucrin [Source:NCBI gene;Acc:713728]  
ENSMMUG00000043675 Cbp/p300 interacting transactivator with Glu/Asp rich carboxy-terminal domain 4 [Source:NCBI gene;Acc:114672840]  
ENSMMUG00000044257 MX dynamin like GTPase 2 [Source:VGNC Symbol;Acc:VGNC:81723]  
ENSMMUG00000044429 glycophorin A (MNS blood group) [Source:NCBI gene;Acc:574101]  
ENSMMUG00000045513  
ENSMMUG00000045609 CCR4-NOT transcription complex subunit 6 like [Source:NCBI gene;Acc:697981]  
ENSMMUG00000045654 tumor necrosis factor [Source:VGNC Symbol;Acc:VGNC:83501]  
ENSMMUG00000046550 coiled-coil domain containing 125 [Source:NCBI gene;Acc:704391]  
ENSMMUG00000046969 Fc receptor like 3 [Source:NCBI gene;Acc:718801]  
ENSMMUG00000048824 eva-1 homolog C [Source:NCBI gene;Acc:708681]  
ENSMMUG00000049297  
ENSMMUG00000049298 cholecystokinin A receptor [Source:NCBI gene;Acc:694742]  
ENSMMUG00000049432 olfactory receptor 2T33 [Source:NCBI gene;Acc:706331]  
ENSMMUG00000049494  
ENSMMUG00000049551

ENSMMUG00000049678  
ENSMMUG00000049735 allograft inflammatory factor 1 [Source:NCBI gene;Acc:574115]  
ENSMMUG00000049755 leucine rich repeat containing 3 [Source:NCBI gene;Acc:712418]  
ENSMMUG00000049913  
ENSMMUG00000049935  
ENSMMUG00000050132  
ENSMMUG00000050339 Metazoan signal recognition particle RNA [Source:RFAM;Acc:RF00017]  
ENSMMUG00000050405  
ENSMMUG00000050419 ADAM metalloproteinase with thrombospondin type 1 motif 4 [Source:NCBI gene;Acc:719927]  
ENSMMUG00000050465 ZFP42 zinc finger protein [Source:NCBI gene;Acc:707621]  
ENSMMUG00000050505 small integral membrane protein 4 [Source:NCBI gene;Acc:696553]  
ENSMMUG00000051230  
ENSMMUG00000051329  
ENSMMUG00000051408 myelin associated oligodendrocyte basic protein [Source:NCBI gene;Acc:717265]  
ENSMMUG00000051645  
ENSMMUG00000051677  
ENSMMUG00000051816 keratinocyte proline rich protein [Source:NCBI gene;Acc:100424312]  
ENSMMUG00000051975  
ENSMMUG00000052228 Metazoan signal recognition particle RNA [Source:RFAM;Acc:RF00017]  
ENSMMUG00000052474  
ENSMMUG00000052780  
ENSMMUG00000052961  
ENSMMUG00000053324 lymphocyte antigen 6 complex locus protein G6d [Source:NCBI gene;Acc:715304]  
ENSMMUG00000053367 secreted protein acidic and cysteine rich [Source:NCBI gene;Acc:712388]  
ENSMMUG00000053516  
ENSMMUG00000053561  
ENSMMUG00000053601  
ENSMMUG00000053627  
ENSMMUG00000053656  
ENSMMUG00000053790  
ENSMMUG00000053984  
ENSMMUG00000054158 acyl-CoA dehydrogenase family member 11 [Source:NCBI gene;Acc:106997118]  
ENSMMUG00000054175  
ENSMMUG00000054237 Y RNA [Source:RFAM;Acc:RF00019]  
ENSMMUG00000054286  
ENSMMUG00000054414  
ENSMMUG00000054634 late cornified envelope protein 1C-like [Source:NCBI gene;Acc:713600]  
ENSMMUG00000054686  
ENSMMUG00000055022 Metazoan signal recognition particle RNA [Source:RFAM;Acc:RF00017]  
ENSMMUG00000055038  
ENSMMUG00000055126  
ENSMMUG00000055199 cytochrome P450, family 39, subfamily A, polypeptide 1 [Source:NCBI gene;Acc:704242]  
ENSMMUG00000055256 family with sequence similarity 163 member A [Source:NCBI gene;Acc:718704]  
ENSMMUG00000055266 late cornified envelope protein 1C-like [Source:NCBI gene;Acc:107000794]  
ENSMMUG00000055322 EPH receptor A1 [Source:NCBI gene;Acc:706295]  
ENSMMUG00000055441  
ENSMMUG00000055710 taste 2 receptor member 38 [Source:NCBI gene;Acc:695549]  
ENSMMUG00000055914  
ENSMMUG00000056024  
ENSMMUG00000056158  
ENSMMUG00000056168

ENSMMUG00000056266 Metazoan signal recognition particle RNA [Source:RFAM;Acc:RF00017]  
ENSMMUG00000056393  
ENSMMUG00000056511  
ENSMMUG00000056548 coagulation factor III, tissue factor [Source:NCBI gene;Acc:714456]  
ENSMMUG00000056613  
ENSMMUG00000056796 NADH:ubiquinone oxidoreductase subunit A2 [Source:NCBI gene;Acc:697736]  
ENSMMUG00000056798  
ENSMMUG00000056841  
ENSMMUG00000056924 G protein-coupled receptor 149 [Source:NCBI gene;Acc:106997054]  
ENSMMUG00000056971 Metazoan signal recognition particle RNA [Source:RFAM;Acc:RF00017]  
ENSMMUG00000057363  
ENSMMUG00000057539  
ENSMMUG00000057560  
ENSMMUG00000057702  
ENSMMUG00000057703  
ENSMMUG00000057983  
ENSMMUG00000058187  
ENSMMUG00000058229 U6 spliceosomal RNA [Source:RFAM;Acc:RF00026]  
ENSMMUG00000058370 taste receptor type 2 member 62 [Source:NCBI gene;Acc:704388]  
ENSMMUG00000058423  
ENSMMUG00000058432 zinc finger DHHC-type palmitoyltransferase 18 [Source:NCBI gene;Acc:719959]  
ENSMMUG00000058472 late cornified envelope protein 1C [Source:NCBI gene;Acc:107000798]  
ENSMMUG00000058534  
ENSMMUG00000058557  
ENSMMUG00000058587 family with sequence similarity 131 member C [Source:NCBI gene;Acc:703604]  
ENSMMUG00000058817  
ENSMMUG00000058881 bone morphogenetic protein 8b [Source:NCBI gene;Acc:100427030]  
ENSMMUG00000059117 Metazoan signal recognition particle RNA [Source:RFAM;Acc:RF00017]  
ENSMMUG00000059318 urocortin 2 [Source:NCBI gene;Acc:106996925]  
ENSMMUG00000059428 olfactory receptor 2V2 [Source:NCBI gene;Acc:707790]  
ENSMMUG00000059472 filaggrin family member 2 [Source:HGNC Symbol;Acc:HGNC:33276]  
ENSMMUG00000059671  
ENSMMUG00000059788  
ENSMMUG00000060184 SEC61 translocon subunit gamma [Source:NCBI gene;Acc:716898]  
ENSMMUG00000060273 mitochondrial ribosomal protein L32 [Source:NCBI gene;Acc:701820]  
ENSMMUG00000060308  
ENSMMUG00000060366  
ENSMMUG00000060496 translocase of outer mitochondrial membrane 40 like [Source:NCBI gene;Acc:100426891]  
ENSMMUG00000060555  
ENSMMUG00000060576  
ENSMMUG00000060581  
ENSMMUG00000060626 U6 spliceosomal RNA [Source:RFAM;Acc:RF00026]  
ENSMMUG00000060632  
ENSMMUG00000060760  
ENSMMUG00000060795  
ENSMMUG00000060812 autophagy related 12 [Source:NCBI gene;Acc:696765]  
ENSMMUG00000060901  
ENSMMUG00000061031  
ENSMMUG00000061098  
ENSMMUG00000061151  
ENSMMUG00000061194

ENSMMUG00000061208 MAP3K7 C-terminal like [Source:NCBI gene;Acc:713717]  
ENSMMUG00000061474  
ENSMMUG00000061785  
ENSMMUG00000061787  
ENSMMUG00000062092  
ENSMMUG00000062294  
ENSMMUG00000062316 Metazoan signal recognition particle RNA [Source:RFAM;Acc:RF00017]  
ENSMMUG00000062326  
ENSMMUG00000062454  
ENSMMUG00000062496  
ENSMMUG00000062522  
ENSMMUG00000062794  
ENSMMUG00000062837  
ENSMMUG00000062996  
ENSMMUG00000063198  
ENSMMUG00000063351 Metazoan signal recognition particle RNA [Source:RFAM;Acc:RF00017]  
ENSMMUG00000063658 leucine rich repeat neuronal 2 [Source:NCBI gene;Acc:100429709]  
ENSMMUG00000063981 nucleoside-triphosphatase, cancer-related [Source:NCBI gene;Acc:712959]  
ENSMMUG00000064014  
ENSMMUG00000064174  
ENSMMUG00000064707  
ENSMMUG00000064824 gremlin 2, DAN family BMP antagonist [Source:NCBI gene;Acc:708280]  
ENSMMUG00000064915 Metazoan signal recognition particle RNA [Source:RFAM;Acc:RF00017]  
ENSMMUG00000065005 Metazoan signal recognition particle RNA [Source:RFAM;Acc:RF00017]  
ENSMMUG00000065295  
ENSMMUG00000000023 prostaglandin E receptor 2 [Source:VGNC Symbol;Acc:VGNC:76468]  
ENSMMUG00000000152 transcription factor CP2 [Source:VGNC Symbol;Acc:VGNC:78323]  
ENSMMUG00000000302 WD repeat and HMG-box DNA binding protein 1 [Source:VGNC Symbol;Acc:VGNC:79376]  
ENSMMUG00000000313 HEAT repeat containing 4 [Source:VGNC Symbol;Acc:VGNC:73176]  
ENSMMUG00000000327 fatty acid desaturase 2 [Source:VGNC Symbol;Acc:VGNC:72472]  
ENSMMUG00000000375 pleckstrin homology and RhoGEF domain containing G6 [Source:VGNC Symbol;Acc:VGNC:76110]  
ENSMMUG00000000376 bridging integrator 1 [Source:VGNC Symbol;Acc:VGNC:70251]  
ENSMMUG00000000754 Dmx like 2 [Source:VGNC Symbol;Acc:VGNC:71936]  
ENSMMUG00000000776 zinc finger matrin-type 4 [Source:VGNC Symbol;Acc:VGNC:78424]  
ENSMMUG00000000803 signal transducer and activator of transcription 2 [Source:VGNC Symbol;Acc:VGNC:77905]  
ENSMMUG00000000863 dynein axonemal assembly factor 4 [Source:VGNC Symbol;Acc:VGNC:71881]  
ENSMMUG00000000958 aldo-keto reductase family 1, member C2 [Source:NCBI gene;Acc:711360]  
ENSMMUG00000001088 patched domain containing 1 [Source:VGNC Symbol;Acc:VGNC:76322]  
ENSMMUG00000001151 microtubule associated scaffold protein 1 [Source:VGNC Symbol;Acc:VGNC:84018]  
ENSMMUG00000001187 mitogen-activated protein kinase 15 [Source:VGNC Symbol;Acc:VGNC:74570]  
ENSMMUG00000001273 clathrin binding box of aftiphilin containing 1 [Source:VGNC Symbol;Acc:VGNC:84325]  
ENSMMUG00000001338 antizyme inhibitor 1 [Source:VGNC Symbol;Acc:VGNC:70080]  
ENSMMUG00000001387 p21 (RAC1) activated kinase 1 [Source:NCBI gene;Acc:698585]  
ENSMMUG00000001472 TIA1 cytotoxic granule associated RNA binding protein like 1 [Source:VGNC Symbol;Acc:VGNC:78354]  
ENSMMUG00000001475 transmembrane protein with EGF like and two follistatin like domains 2 [Source:VGNC Symbol;Acc:VGNC:78569]  
ENSMMUG00000001536 glutamine and serine rich 1 [Source:VGNC Symbol;Acc:VGNC:76544]  
ENSMMUG00000001547 zinc finger protein 106 [Source:VGNC Symbol;Acc:VGNC:78831]  
ENSMMUG00000001739 ATPase sarcoplasmic/endoplasmic reticulum Ca2+ transporting 2 [Source:VGNC Symbol;Acc:VGNC:70178]  
ENSMMUG00000001745 oxysterol binding protein [Source:VGNC Symbol;Acc:VGNC:75718]  
ENSMMUG00000001761 myosin IB [Source:VGNC Symbol;Acc:VGNC:75111]  
ENSMMUG00000001820 regulator of G protein signaling 6 [Source:VGNC Symbol;Acc:VGNC:76691]



ENSMMUG00000001902 TruB pseudouridine synthase family member 1 [Source:VGNC Symbol;Acc:VGNC:79005]  
ENSMMUG00000001989 RNA polymerase II subunit D [Source:VGNC Symbol;Acc:VGNC:76213]  
ENSMMUG00000002260 protein kinase C eta [Source:VGNC Symbol;Acc:VGNC:84424]  
ENSMMUG00000002536 calcium binding protein 1 [Source:VGNC Symbol;Acc:VGNC:70495]  
ENSMMUG00000002563 zinc finger DHC-type palmitoyltransferase 5 [Source:VGNC Symbol;Acc:VGNC:79145]  
ENSMMUG00000002566 selenoprotein H [Source:VGNC Symbol;Acc:VGNC:82234]  
ENSMMUG00000002679 lactate dehydrogenase B [Source:NCBI gene;Acc:706110]  
ENSMMUG00000002917 single Ig IL-1-related receptor [Source:NCBI gene;Acc:100425060]  
ENSMMUG00000002963 Rho GTPase activating protein 32 [Source:VGNC Symbol;Acc:VGNC:69855]  
ENSMMUG00000003217 transmembrane 7 superfamily member 3 [Source:VGNC Symbol;Acc:VGNC:79371]  
ENSMMUG00000003348 neurofilament light [Source:VGNC Symbol;Acc:VGNC:75307]  
ENSMMUG00000003484 tectonin beta-propeller repeat containing 2 [Source:NCBI gene;Acc:708959]  
ENSMMUG00000003584 mesoderm posterior bHLH transcription factor 2 [Source:VGNC Symbol;Acc:VGNC:74619]  
ENSMMUG00000003591 pleckstrin homology domain containing A2 [Source:VGNC Symbol;Acc:VGNC:76026]  
ENSMMUG00000003658 autophagy related 2B [Source:VGNC Symbol;Acc:VGNC:84310]  
ENSMMUG00000003684 ATPase phospholipid transporting 8B4 (putative) [Source:VGNC Symbol;Acc:VGNC:84311]  
ENSMMUG00000003834 basic leucine zipper ATF-like transcription factor [Source:VGNC Symbol;Acc:VGNC:70229]  
ENSMMUG00000003874 interferon induced transmembrane protein 10 [Source:NCBI gene;Acc:721010]  
ENSMMUG00000003950 nucleoporin 98 and 96 precursor [Source:VGNC Symbol;Acc:VGNC:75563]  
ENSMMUG00000003955 post-GPI attachment to proteins 2 [Source:VGNC Symbol;Acc:VGNC:75823]  
ENSMMUG00000003976 glycoprotein hormone subunit alpha 2 [Source:VGNC Symbol;Acc:VGNC:72961]  
ENSMMUG00000004022 zinc finger SWIM-type containing 2 [Source:VGNC Symbol;Acc:VGNC:79908]  
ENSMMUG00000004024 cadherin related family member 5 [Source:VGNC Symbol;Acc:VGNC:71158]  
ENSMMUG00000004274 myotubularin related protein 8 [Source:VGNC Symbol;Acc:VGNC:74974]  
ENSMMUG00000004309 APC membrane recruitment protein 1 [Source:VGNC Symbol;Acc:VGNC:69716]  
ENSMMUG00000004330 peptidase domain containing associated with muscle regeneration 1 [Source:VGNC Symbol;Acc:VGNC:75673]  
ENSMMUG00000004332 tripartite motif containing 44 [Source:VGNC Symbol;Acc:VGNC:79168]  
ENSMMUG00000004376 calcium and integrin binding 1 [Source:VGNC Symbol;Acc:VGNC:71189]  
ENSMMUG00000004470 CD9 molecule [Source:VGNC Symbol;Acc:VGNC:70787]  
ENSMMUG00000004558 OTU deubiquitinase 5 [Source:VGNC Symbol;Acc:VGNC:75677]  
ENSMMUG00000004748 zinc finger and BTB domain containing 1 [Source:VGNC Symbol;Acc:VGNC:79238]  
ENSMMUG00000004797 CTP synthase 2 [Source:VGNC Symbol;Acc:VGNC:71550]  
ENSMMUG00000004816 membrane associated ring-CH-type finger 5 [Source:VGNC Symbol;Acc:VGNC:74588]  
ENSMMUG00000004854 leucine rich repeat containing 9 [Source:VGNC Symbol;Acc:VGNC:81443]  
ENSMMUG00000004903 ectonucleotide pyrophosphatase/phosphodiesterase 2 [Source:VGNC Symbol;Acc:VGNC:72223]  
ENSMMUG00000004910 dynein axonemal light chain 1 [Source:VGNC Symbol;Acc:VGNC:71885]  
ENSMMUG00000004982 activin A receptor like type 1 [Source:VGNC Symbol;Acc:VGNC:69451]  
ENSMMUG00000005106 unc-45 myosin chaperone A [Source:VGNC Symbol;Acc:VGNC:79858]  
ENSMMUG00000005108 RCC1 domain containing 1 [Source:VGNC Symbol;Acc:VGNC:76876]  
ENSMMUG00000005150 CD163 molecule [Source:VGNC Symbol;Acc:VGNC:70752]  
ENSMMUG00000005208 RNA polymerase III subunit B [Source:VGNC Symbol;Acc:VGNC:76143]  
ENSMMUG00000005255 TRAF-type zinc finger domain containing 1 [Source:VGNC Symbol;Acc:VGNC:79459]  
ENSMMUG00000005440 ELMO domain containing 1 [Source:VGNC Symbol;Acc:VGNC:72109]  
ENSMMUG00000005478 trimethylguanosine synthase 1 [Source:VGNC Symbol;Acc:VGNC:78404]  
ENSMMUG00000005480 carnosine synthase 1 [Source:VGNC Symbol;Acc:VGNC:81367]  
ENSMMUG00000005482 lysine methyltransferase 2A [Source:NCBI gene;Acc:705511]  
ENSMMUG00000005483 ribosomal protein S6 kinase B2 [Source:VGNC Symbol;Acc:VGNC:76934]  
ENSMMUG00000005486 protein tyrosine phosphatase receptor type C associated protein [Source:VGNC Symbol;Acc:VGNC:76613]  
ENSMMUG00000005488 coronin 1B [Source:VGNC Symbol;Acc:VGNC:71320]  
ENSMMUG00000005504 nucleoporin 37 [Source:VGNC Symbol;Acc:VGNC:75491]  
ENSMMUG00000005532 male germ cell associated kinase [Source:VGNC Symbol;Acc:VGNC:74480]

ENSMMUG0000005920 N-acetyltransferase 1 [Source:VGNC Symbol;Acc:VGNC:75133]  
ENSMMUG0000006180 tetratricopeptide repeat, ankyrin repeat and coiled-coil containing 1 [Source:VGNC Symbol;Acc:VGNC:78238]  
ENSMMUG0000006181 WD repeat, sterile alpha motif and U-box domain containing 1 [Source:VGNC Symbol;Acc:VGNC:79634]  
ENSMMUG0000006233 adducin 3 [Source:VGNC Symbol;Acc:VGNC:69531]  
ENSMMUG0000006468 FGFR1 oncogene partner 2 [Source:VGNC Symbol;Acc:VGNC:72551]  
ENSMMUG0000006470 complement C1r subcomponent [Source:NCBI gene;Acc:722133]  
ENSMMUG0000006568 basic leucine zipper ATF-like transcription factor 2 [Source:VGNC Symbol;Acc:VGNC:70127]  
ENSMMUG0000006655 myelin regulatory factor [Source:VGNC Symbol;Acc:VGNC:74949]  
ENSMMUG0000006659 aldehyde dehydrogenase 1 family member A3 [Source:VGNC Symbol;Acc:VGNC:81353]  
ENSMMUG0000006689 nuclear receptor interacting protein 3 [Source:VGNC Symbol;Acc:VGNC:75397]  
ENSMMUG0000006692 signal peptide, CUB domain and EGF like domain containing 2 [Source:VGNC Symbol;Acc:VGNC:77138]  
ENSMMUG0000006723 solute carrier family 8 member B1 [Source:NCBI gene;Acc:714561]  
ENSMMUG0000006758 cytochrome P450, family 27, subfamily A, polypeptide 1 [Source:NCBI gene;Acc:700192]  
ENSMMUG0000006855 acyl-CoA thioesterase 2 [Source:NCBI gene;Acc:697011]  
ENSMMUG0000006893 D-amino acid oxidase [Source:VGNC Symbol;Acc:VGNC:71729]  
ENSMMUG0000006929 ST3 beta-galactoside alpha-2,3-sialyltransferase 4 [Source:VGNC Symbol;Acc:VGNC:77827]  
ENSMMUG0000006931 kirre like nephrin family adhesion molecule 3 [Source:NCBI gene;Acc:714534]  
ENSMMUG0000006997 thioredoxin domain containing 16 [Source:VGNC Symbol;Acc:VGNC:79214]  
ENSMMUG0000007140 MOK protein kinase [Source:VGNC Symbol;Acc:VGNC:84394]  
ENSMMUG0000007534 protein regulator of cytokinesis 1 [Source:NCBI gene;Acc:710182]  
ENSMMUG0000007603 coiled-coil domain containing 88B [Source:NCBI gene;Acc:722080]  
ENSMMUG0000008007 multiple EGF like domains 11 [Source:VGNC Symbol;Acc:VGNC:84376]  
ENSMMUG0000008384 solute carrier family 4 member 10 [Source:VGNC Symbol;Acc:VGNC:77695]  
ENSMMUG0000008387 dipeptidyl peptidase 4 [Source:VGNC Symbol;Acc:VGNC:71979]  
ENSMMUG0000008474 transforming growth factor beta regulator 1 [Source:VGNC Symbol;Acc:VGNC:78239]  
ENSMMUG0000008529 chromosome 7 C15orf39 homolog [Source:VGNC Symbol;Acc:VGNC:70620]  
ENSMMUG0000008618 calcium voltage-gated channel subunit alpha1 F [Source:VGNC Symbol;Acc:VGNC:70503]  
ENSMMUG0000008623 coiled-coil domain containing 22 [Source:VGNC Symbol;Acc:VGNC:70899]  
ENSMMUG0000008652 coiled-coil domain containing 85B [Source:VGNC Symbol;Acc:VGNC:70853]  
ENSMMUG0000008758 zinc finger protein 143 [Source:VGNC Symbol;Acc:VGNC:81612]  
ENSMMUG0000008875 solute carrier family 35 member F5 [Source:VGNC Symbol;Acc:VGNC:77567]  
ENSMMUG0000008923 Thy-1 cell surface antigen [Source:VGNC Symbol;Acc:VGNC:78352]  
ENSMMUG0000008964 D-glutamate cyclase [Source:VGNC Symbol;Acc:VGNC:71685]  
ENSMMUG0000009308 histidine ammonia-lyase [Source:VGNC Symbol;Acc:VGNC:73344]  
ENSMMUG0000009312 leukotriene A4 hydrolase [Source:VGNC Symbol;Acc:VGNC:74453]  
ENSMMUG0000009361 fumarylacetoacetate hydrolase [Source:NCBI gene;Acc:712716]  
ENSMMUG0000009441 abhydrolase domain containing 4 [Source:VGNC Symbol;Acc:VGNC:84296]  
ENSMMUG0000009559 minichromosome maintenance complex binding protein [Source:VGNC Symbol;Acc:VGNC:74583]  
ENSMMUG0000009593 WAS/WASL interacting protein family member 1 [Source:VGNC Symbol;Acc:VGNC:78784]  
ENSMMUG0000009622 glypican 3 [Source:VGNC Symbol;Acc:VGNC:73117]  
ENSMMUG0000009668 transmembrane and coiled-coil domains 5A [Source:VGNC Symbol;Acc:VGNC:79725]  
ENSMMUG0000009794 protocadherin related 15 [Source:VGNC Symbol;Acc:VGNC:75608]  
ENSMMUG00000010137 microcephalin 1 [Source:VGNC Symbol;Acc:VGNC:74687]  
ENSMMUG00000010173 presenilin 1 [Source:VGNC Symbol;Acc:VGNC:76435]  
ENSMMUG00000010180 PIN2 (TERF1) interacting telomerase inhibitor 1 [Source:NCBI gene;Acc:701523]  
ENSMMUG00000010451 inositol polyphosphate phosphatase like 1 [Source:VGNC Symbol;Acc:VGNC:73752]  
ENSMMUG00000010521 ADP ribosylation factor like GTPase 5A [Source:VGNC Symbol;Acc:VGNC:70017]  
ENSMMUG00000010526 calcium voltage-gated channel auxiliary subunit beta 4 [Source:VGNC Symbol;Acc:VGNC:82116]  
ENSMMUG00000010881 cytochrome P450, family 26, subfamily A, polypeptide 1 [Source:NCBI gene;Acc:699519]  
ENSMMUG00000011528 F-box and WD repeat domain containing 5 [Source:VGNC Symbol;Acc:VGNC:72503]  
ENSMMUG00000011564 transmembrane channel like 3 [Source:VGNC Symbol;Acc:VGNC:79360]

ENSMMUG00000011650 dual specificity tyrosine phosphorylation regulated kinase 2 [Source:VGNC Symbol;Acc:VGNC:72018]  
ENSMMUG00000011661 integrin subunit alpha 8 [Source:VGNC Symbol;Acc:VGNC:73782]  
ENSMMUG00000011774 integrator complex subunit 10 [Source:VGNC Symbol;Acc:VGNC:73653]  
ENSMMUG00000011777 UDP-GlcNAc:betaGal beta-1,3-N-acetylglucosaminyltransferase 7 [Source:VGNC Symbol;Acc:VGNC:82108]  
ENSMMUG00000011789 hematopoietically expressed homeobox [Source:VGNC Symbol;Acc:VGNC:73376]  
ENSMMUG00000011817 aryl hydrocarbon receptor interacting protein [Source:VGNC Symbol;Acc:VGNC:69759]  
ENSMMUG00000012065 tubulin tyrosine ligase like 5 [Source:NCBI gene;Acc:703116]  
ENSMMUG00000012316 CDC42 effector protein 2 [Source:VGNC Symbol;Acc:VGNC:70750]  
ENSMMUG00000012356 serpin family A member 9 [Source:VGNC Symbol;Acc:VGNC:77241]  
ENSMMUG00000012560 HERV-H LTR-associating 1 [Source:NCBI gene;Acc:100430297]  
ENSMMUG00000012941 nudix hydrolase 22 [Source:VGNC Symbol;Acc:VGNC:75475]  
ENSMMUG00000012944 vascular endothelial growth factor B [Source:VGNC Symbol;Acc:VGNC:78765]  
ENSMMUG00000013146 claudin 2 [Source:HGNC Symbol;Acc:HGNC:2041]  
ENSMMUG00000013150 MORC family CW-type zinc finger 4 [Source:VGNC Symbol;Acc:VGNC:74808]  
ENSMMUG00000013160 DnaJ heat shock protein family (Hsp40) member C17 [Source:VGNC Symbol;Acc:VGNC:84335]  
ENSMMUG00000013176 NAD(P) dependent steroid dehydrogenase-like [Source:NCBI gene;Acc:693333]  
ENSMMUG00000013251 xin actin binding repeat containing 2 [Source:VGNC Symbol;Acc:VGNC:78953]  
ENSMMUG00000013270 RNA binding protein, mRNA processing factor 2 [Source:VGNC Symbol;Acc:VGNC:76511]  
ENSMMUG00000013387 cysteinyl leukotriene receptor 1 [Source:VGNC Symbol;Acc:VGNC:71646]  
ENSMMUG00000013493 ornithine carbamoyltransferase [Source:VGNC Symbol;Acc:VGNC:75723]  
ENSMMUG00000013696 myozenin 1 [Source:VGNC Symbol;Acc:VGNC:74951]  
ENSMMUG00000013798 fatty acid desaturase 1 [Source:VGNC Symbol;Acc:VGNC:72471]  
ENSMMUG00000013830 glucose-6-phosphatase catalytic subunit 2 [Source:NCBI gene;Acc:709062]  
ENSMMUG00000013832 ATP binding cassette subfamily B member 11 [Source:VGNC Symbol;Acc:VGNC:81339]  
ENSMMUG00000013871 WD repeat domain 25 [Source:VGNC Symbol;Acc:VGNC:78420]  
ENSMMUG00000014131 microtubule affinity regulating kinase 2 [Source:VGNC Symbol;Acc:VGNC:74634]  
ENSMMUG00000014227 cholinergic receptor muscarinic 5 [Source:VGNC Symbol;Acc:VGNC:71044]  
ENSMMUG00000014237 lysine methyltransferase 5B [Source:VGNC Symbol;Acc:VGNC:74110]  
ENSMMUG00000014265 TAP binding protein like [Source:NCBI gene;Acc:712626]  
ENSMMUG00000014277 ITPR interacting domain containing 2 [Source:VGNC Symbol;Acc:VGNC:73584]  
ENSMMUG00000014397 NCK associated protein 1 [Source:VGNC Symbol;Acc:VGNC:75143]  
ENSMMUG00000014530 pre-mRNA processing factor 19 [Source:VGNC Symbol;Acc:VGNC:76281]  
ENSMMUG00000014658 ninein [Source:VGNC Symbol;Acc:VGNC:75177]  
ENSMMUG00000014702 TATA-box binding protein associated factor 2 [Source:VGNC Symbol;Acc:VGNC:78090]  
ENSMMUG00000014715 fragile site, folic acid type, rare, fra(10)(q23.3) or fra(10)(q24.2) candidate 1 [Source:NCBI gene;Acc:700389]  
ENSMMUG00000014766 neuroguidin [Source:VGNC Symbol;Acc:VGNC:75220]  
ENSMMUG00000014771 zinc finger homeobox 2 [Source:NCBI gene;Acc:100429448]  
ENSMMUG00000014866 hydroxymethylbilane synthase [Source:VGNC Symbol;Acc:VGNC:73479]  
ENSMMUG00000014872 dolichyl-phosphate N-acetylglucosaminophosphotransferase 1 [Source:VGNC Symbol;Acc:VGNC:71971]  
ENSMMUG00000014983 alanyl aminopeptidase, membrane [Source:VGNC Symbol;Acc:VGNC:69943]  
ENSMMUG00000015394 WD repeat domain 93 [Source:VGNC Symbol;Acc:VGNC:79642]  
ENSMMUG00000015468 checkpoint with forkhead and ring finger domains [Source:VGNC Symbol;Acc:VGNC:71064]  
ENSMMUG00000015865 arginase 2 [Source:VGNC Symbol;Acc:VGNC:70005]  
ENSMMUG00000015866 vesicle transport through interaction with t-SNAREs 1B [Source:NCBI gene;Acc:711113]  
ENSMMUG00000015873 RAD51 paralog B [Source:VGNC Symbol;Acc:VGNC:76647]  
ENSMMUG00000015926 2-oxoglutarate and iron dependent oxygenase domain containing 2 [Source:VGNC Symbol;Acc:VGNC:75462]  
ENSMMUG00000015931 phosphatidylinositol transfer protein membrane associated 2 [Source:VGNC Symbol;Acc:VGNC:75843]  
ENSMMUG00000016069 cubilin [Source:VGNC Symbol;Acc:VGNC:82132]  
ENSMMUG00000016652 cell division cycle and apoptosis regulator 1 [Source:NCBI gene;Acc:693585]  
ENSMMUG00000016737 contactin 5 [Source:VGNC Symbol;Acc:VGNC:71287]  
ENSMMUG00000016929 proline rich and Gla domain 3 [Source:VGNC Symbol;Acc:VGNC:76350]

ENSMMUG00000017127 carbohydrate sulfotransferase 11 [Source:VGNC Symbol;Acc:VGNC:82123]  
ENSMMUG00000017129 solute carrier family 41 member 2 [Source:VGNC Symbol;Acc:VGNC:77585]  
ENSMMUG00000017280 TBC1 domain family member 10C [Source:VGNC Symbol;Acc:VGNC:78203]  
ENSMMUG00000017287 PAT1 homolog 1, processing body mRNA decay factor [Source:VGNC Symbol;Acc:VGNC:75684]  
ENSMMUG00000017380 neuregulin 3 [Source:NCBI gene;Acc:699268]  
ENSMMUG00000017450 MOB kinase activator 2 [Source:NCBI gene;Acc:720951]  
ENSMMUG00000017627 B-TFIID TATA-box binding protein associated factor 1 [Source:VGNC Symbol;Acc:VGNC:70336]  
ENSMMUG00000017660  
ENSMMUG00000017810 structure specific recognition protein 1 [Source:VGNC Symbol;Acc:VGNC:77891]  
ENSMMUG00000018030 endoplasmic reticulum protein 27 [Source:VGNC Symbol;Acc:VGNC:72369]  
ENSMMUG00000018034 suppression of tumorigenicity 14 [Source:VGNC Symbol;Acc:VGNC:77897]  
ENSMMUG00000018144 C2 calcium-dependent domain-containing protein 6 [Source:NCBI gene;Acc:702140]  
ENSMMUG00000018151 membrane palmitoylated protein 4 [Source:VGNC Symbol;Acc:VGNC:74734]  
ENSMMUG00000018237 plexin C1 [Source:VGNC Symbol;Acc:VGNC:76190]  
ENSMMUG00000018239 centrosomal protein 83 [Source:VGNC Symbol;Acc:VGNC:70992]  
ENSMMUG00000018298 killer cell lectin like receptor D1 [Source:NCBI gene;Acc:574145]  
ENSMMUG00000018345 phosphatidylethanolamine binding protein 4 [Source:VGNC Symbol;Acc:VGNC:82204]  
ENSMMUG00000018471 serine/threonine kinase 33 [Source:VGNC Symbol;Acc:VGNC:78118]  
ENSMMUG00000018492 TARBP2 subunit of RISC loading complex [Source:VGNC Symbol;Acc:VGNC:78099]  
ENSMMUG00000018787 PAK1 interacting protein 1 [Source:VGNC Symbol;Acc:VGNC:75661]  
ENSMMUG00000019126 purine nucleoside phosphorylase [Source:NCBI gene;Acc:704183]  
ENSMMUG00000019304 indoleamine 2,3-dioxygenase 1 [Source:VGNC Symbol;Acc:VGNC:73580]  
ENSMMUG00000019306 indoleamine 2,3-dioxygenase 2 [Source:VGNC Symbol;Acc:VGNC:84005]  
ENSMMUG00000019363 synapse associated protein 1 [Source:VGNC Symbol;Acc:VGNC:78135]  
ENSMMUG00000019526 BLM RecQ like helicase [Source:VGNC Symbol;Acc:VGNC:70254]  
ENSMMUG00000019607 patatin like phospholipase domain containing 7 [Source:VGNC Symbol;Acc:VGNC:76104]  
ENSMMUG00000019690 SEC14 and spectrin domain containing 1 [Source:VGNC Symbol;Acc:VGNC:77267]  
ENSMMUG00000019839 lysine acetyltransferase 5 [Source:VGNC Symbol;Acc:VGNC:73955]  
ENSMMUG00000020010 cadherin 17 [Source:VGNC Symbol;Acc:VGNC:70810]  
ENSMMUG00000020177 membrane spanning 4-domains A4A [Source:NCBI gene;Acc:698027]  
ENSMMUG00000020185 voltage dependent anion channel 3 [Source:VGNC Symbol;Acc:VGNC:84135]  
ENSMMUG00000020534 p21 (RAC1) activated kinase 6 [Source:NCBI gene;Acc:701589]  
ENSMMUG00000020604 HPS1 biogenesis of lysosomal organelles complex 3 subunit 1 [Source:VGNC Symbol;Acc:VGNC:73515]  
ENSMMUG00000020743 centrin 2 [Source:NCBI gene;Acc:693376]  
ENSMMUG00000021039 X-ray radiation resistance associated 1 [Source:NCBI gene;Acc:693788]  
ENSMMUG00000021157 TBC1 domain family member 31 [Source:VGNC Symbol;Acc:VGNC:84121]  
ENSMMUG00000021428 lipocalin 12 [Source:VGNC Symbol;Acc:VGNC:74143]  
ENSMMUG00000021564 lysine demethylase 2B [Source:VGNC Symbol;Acc:VGNC:81425]  
ENSMMUG00000021610 regulator of G protein signaling 10 [Source:VGNC Symbol;Acc:VGNC:76915]  
ENSMMUG00000021634 TNF alpha induced protein 2 [Source:VGNC Symbol;Acc:VGNC:78579]  
ENSMMUG00000021661 leucine rich repeat containing 56 [Source:VGNC Symbol;Acc:VGNC:74356]  
ENSMMUG00000021664 lamin tail domain containing 2 [Source:VGNC Symbol;Acc:VGNC:74380]  
ENSMMUG00000021736 single-pass membrane protein with coiled-coil domains 2 [Source:VGNC Symbol;Acc:VGNC:77808]  
ENSMMUG00000021877 protein kinase AMP-activated non-catalytic subunit gamma 3 [Source:VGNC Symbol;Acc:VGNC:76406]  
ENSMMUG00000022313 activating transcription factor 7 [Source:NCBI gene;Acc:700403]  
ENSMMUG00000022401 EMSY transcriptional repressor, BRCA2 interacting [Source:VGNC Symbol;Acc:VGNC:72065]  
ENSMMUG00000022406 ankyrin repeat and sterile alpha motif domain containing 1B [Source:VGNC Symbol;Acc:VGNC:69689]  
ENSMMUG00000022407 serine and arginine rich splicing factor 5 [Source:NCBI gene;Acc:712867]  
ENSMMUG00000022409 solute carrier family 10 member 1 [Source:VGNC Symbol;Acc:VGNC:77380]  
ENSMMUG00000022467 membrane bound transcription factor peptidase, site 2 [Source:NCBI gene;Acc:696540]  
ENSMMUG00000022893 von Willebrand factor [Source:VGNC Symbol;Acc:VGNC:78778]

ENSMMUG00000022933 DNA topoisomerase I mitochondrial [Source:VGNC Symbol;Acc:VGNC:79821]  
ENSMMUG00000023016 jade family PHD finger 3 [Source:VGNC Symbol;Acc:VGNC:73640]  
ENSMMUG00000023060 A-kinase anchoring protein 4 [Source:VGNC Symbol;Acc:VGNC:69770]  
ENSMMUG00000023139 small nuclear ribonucleoprotein polypeptide N [Source:VGNC Symbol;Acc:VGNC:78437]  
ENSMMUG00000023192 choline kinase alpha [Source:VGNC Symbol;Acc:VGNC:71039]  
ENSMMUG00000023282 aldo-keto reductase family 1, member C1 (dihydrodiol dehydrogenase 1; 20-alpha (3-alpha)-hydroxysteroid dehydrogenase) [Source:NCBI gene;Acc:711198]  
ENSMMUG00000023300 FERM domain containing 8 [Source:NCBI gene;Acc:716379]  
ENSMMUG00000023370 DDB1 and CUL4 associated factor 17 [Source:VGNC Symbol;Acc:VGNC:71709]  
ENSMMUG00000023477  
ENSMMUG00000023479 latent transforming growth factor beta binding protein 3 [Source:VGNC Symbol;Acc:VGNC:74458]  
ENSMMUG00000023636 importin 7 [Source:NCBI gene;Acc:704213]  
ENSMMUG00000023816 semaphorin 4B [Source:VGNC Symbol;Acc:VGNC:77165]  
ENSMMUG00000024234 U6 spliceosomal RNA [Source:RFAM;Acc:RF00026]  
ENSMMUG00000027543 Y RNA [Source:RFAM;Acc:RF00019]  
ENSMMUG00000029034 defensin beta 136 [Source:VGNC Symbol;Acc:VGNC:71826]  
ENSMMUG00000029186 exocyst complex component 3 like 4 [Source:VGNC Symbol;Acc:VGNC:72305]  
ENSMMUG00000029420  
ENSMMUG00000029652 mitogen-activated protein kinase 6 [Source:NCBI gene;Acc:694998]  
ENSMMUG00000030964 RAB6A, member RAS oncogene family [Source:NCBI gene;Acc:718717]  
ENSMMUG00000031163 membrane anchored junction protein [Source:VGNC Symbol;Acc:VGNC:74375]  
ENSMMUG00000031451 golgin A3 [Source:VGNC Symbol;Acc:VGNC:73106]  
ENSMMUG00000032429 forkhead box O4 [Source:VGNC Symbol;Acc:VGNC:72712]  
ENSMMUG00000034608 U6 spliceosomal RNA [Source:RFAM;Acc:RF00026]  
ENSMMUG00000035748 U6 spliceosomal RNA [Source:RFAM;Acc:RF00026]  
ENSMMUG00000037175 U6 spliceosomal RNA [Source:RFAM;Acc:RF00026]  
ENSMMUG00000037243 U6 spliceosomal RNA [Source:RFAM;Acc:RF00026]  
ENSMMUG00000038256 aquaporin 2 [Source:NCBI gene;Acc:711719]  
ENSMMUG00000038363 adaptor related protein complex 5 subunit beta 1 [Source:NCBI gene;Acc:721904]  
ENSMMUG00000039292  
ENSMMUG00000040071  
ENSMMUG00000040741 thioredoxin related transmembrane protein 2 [Source:NCBI gene;Acc:100169970]  
ENSMMUG00000041101 protein phosphatase 2 regulatory subunit B'beta [Source:NCBI gene;Acc:722026]  
ENSMMUG00000041376 G antigen 10 [Source:NCBI gene;Acc:693330]  
ENSMMUG00000041729  
ENSMMUG00000043648  
ENSMMUG00000044496 H2A histone family, member X [Source:NCBI gene;Acc:703073]  
ENSMMUG00000044581 modulator of apoptosis 1 [Source:VGNC Symbol;Acc:VGNC:84392]  
ENSMMUG00000045093 cyclin B3 [Source:NCBI gene;Acc:694534]  
ENSMMUG00000046478 WASH complex subunit 3 [Source:NCBI gene;Acc:697824]  
ENSMMUG00000046774 RAS like proto-oncogene B [Source:NCBI gene;Acc:695852]  
ENSMMUG00000047465 Metazoan signal recognition particle RNA [Source:RFAM;Acc:RF00017]  
ENSMMUG00000048039 apurinic/aprimidinic endodeoxyribonuclease 1 [Source:VGNC Symbol;Acc:VGNC:84305]  
ENSMMUG00000048066 trafficking protein particle complex 9 [Source:NCBI gene;Acc:711466]  
ENSMMUG00000048462 Metazoan signal recognition particle RNA [Source:RFAM;Acc:RF00017]  
ENSMMUG00000049232 AMMECR1 like [Source:VGNC Symbol;Acc:VGNC:84208]  
ENSMMUG00000049265 Metazoan signal recognition particle RNA [Source:RFAM;Acc:RF00017]  
ENSMMUG00000049267  
ENSMMUG00000049543  
ENSMMUG00000049770 Metazoan signal recognition particle RNA [Source:RFAM;Acc:RF00017]  
ENSMMUG00000049802 olfactory receptor 51G1 [Source:NCBI gene;Acc:716561]  
ENSMMUG00000049850 proline rich and Gla domain 4 [Source:NCBI gene;Acc:694707]

ENSMMUG00000049894  
ENSMMUG00000050028  
ENSMMUG00000050495  
ENSMMUG00000050511  
ENSMMUG00000050529 phosphodiesterase 6H [Source:NCBI gene;Acc:700447]  
ENSMMUG00000050549 lysyl oxidase like 2 [Source:NCBI gene;Acc:710151]  
ENSMMUG00000050585  
ENSMMUG00000050608  
ENSMMUG00000050696 taste receptor type 2 member 31-like [Source:NCBI gene;Acc:693892]  
ENSMMUG00000050844 BTB domain containing 18 [Source:NCBI gene;Acc:703264]  
ENSMMUG00000051037  
ENSMMUG00000051503 nuclear pore associated protein 1 [Source:NCBI gene;Acc:719891]  
ENSMMUG00000051807  
ENSMMUG00000052073  
ENSMMUG00000052168  
ENSMMUG00000052252 protein phosphatase 1 regulatory subunit 3F [Source:NCBI gene;Acc:715950]  
ENSMMUG00000052424  
ENSMMUG00000052569  
ENSMMUG00000052637 Metazoan signal recognition particle RNA [Source:RFAM;Acc:RF00017]  
ENSMMUG00000052828  
ENSMMUG00000052854 mucin like 1 [Source:NCBI gene;Acc:100423942]  
ENSMMUG00000052954 Wnt family member 6 [Source:NCBI gene;Acc:700573]  
ENSMMUG00000053013  
ENSMMUG00000053106  
ENSMMUG00000053376  
ENSMMUG00000053378  
ENSMMUG00000053406  
ENSMMUG00000053460  
ENSMMUG00000053481  
ENSMMUG00000053496  
ENSMMUG00000053625 sterol-C5-desaturase [Source:NCBI gene;Acc:706827]  
ENSMMUG00000053722  
ENSMMUG00000053781 Rho GDP dissociation inhibitor beta [Source:NCBI gene;Acc:702320]  
ENSMMUG00000054161 Metazoan signal recognition particle RNA [Source:RFAM;Acc:RF00017]  
ENSMMUG00000054184 Metazoan signal recognition particle RNA [Source:RFAM;Acc:RF00017]  
ENSMMUG00000054225 taste receptor type 2 member 43 [Source:NCBI gene;Acc:694161]  
ENSMMUG00000054259  
ENSMMUG00000054449 Metazoan signal recognition particle RNA [Source:RFAM;Acc:RF00017]  
ENSMMUG00000054755 transmembrane protein 65 [Source:NCBI gene;Acc:705727]  
ENSMMUG00000054942  
ENSMMUG00000054960  
ENSMMUG00000055018 sushi domain containing 6 [Source:NCBI gene;Acc:712719]  
ENSMMUG00000055352  
ENSMMUG00000055906 angiotensin II receptor type 2 [Source:NCBI gene;Acc:709513]  
ENSMMUG00000055918  
ENSMMUG00000056009  
ENSMMUG00000056063  
ENSMMUG00000056184  
ENSMMUG00000056343  
ENSMMUG00000056376  
ENSMMUG00000056381 forkhead box R1 [Source:NCBI gene;Acc:707285]



ENSMMUG00000056605 Metazoan signal recognition particle RNA [Source:RFAM;Acc:RF00017]  
ENSMMUG00000056794 cystatin E/M [Source:NCBI gene;Acc:714999]  
ENSMMUG00000057179 cation channel sperm associated 1 [Source:NCBI gene;Acc:721869]  
ENSMMUG00000057196 pulmonary surfactant-associated protein A [Source:NCBI gene;Acc:701715]  
ENSMMUG00000057283  
ENSMMUG00000057570  
ENSMMUG00000057640 plakophilin-3-like [Source:NCBI gene;Acc:114669833]  
ENSMMUG00000057671  
ENSMMUG00000057681  
ENSMMUG00000057785  
ENSMMUG00000057813  
ENSMMUG00000057934  
ENSMMUG00000058013 melanoma-associated antigen 3 [Source:NCBI gene;Acc:706103]  
ENSMMUG00000058176 b-defensin2-like [Source:NCBI gene;Acc:100169969]  
ENSMMUG00000058536  
ENSMMUG00000058700 Metazoan signal recognition particle RNA [Source:RFAM;Acc:RF00017]  
ENSMMUG00000058800  
ENSMMUG00000058935 Metazoan signal recognition particle RNA [Source:RFAM;Acc:RF00017]  
ENSMMUG00000059134  
ENSMMUG00000059182  
ENSMMUG00000059335  
ENSMMUG00000059341 Metazoan signal recognition particle RNA [Source:RFAM;Acc:RF00017]  
ENSMMUG00000059432  
ENSMMUG00000059436 interleukin 10 receptor subunit alpha [Source:NCBI gene;Acc:704383]  
ENSMMUG00000059504  
ENSMMUG00000059681  
ENSMMUG00000059754  
ENSMMUG00000059782  
ENSMMUG00000059932 Metazoan signal recognition particle RNA [Source:RFAM;Acc:RF00017]  
ENSMMUG00000059969  
ENSMMUG00000059985  
ENSMMUG00000060063  
ENSMMUG00000060230 Metazoan signal recognition particle RNA [Source:RFAM;Acc:RF00017]  
ENSMMUG00000060437 Metazoan signal recognition particle RNA [Source:RFAM;Acc:RF00017]  
ENSMMUG00000060517  
ENSMMUG00000060596 BCL2 associated agonist of cell death [Source:NCBI gene;Acc:717740]  
ENSMMUG00000060750 Metazoan signal recognition particle RNA [Source:RFAM;Acc:RF00017]  
ENSMMUG00000061079 golgin subfamily A member 6C [Source:NCBI gene;Acc:715898]  
ENSMMUG00000061342  
ENSMMUG00000061391 ankyrin repeat domain 49 [Source:NCBI gene;Acc:697693]  
ENSMMUG00000061526 synaptopodin 2 like [Source:NCBI gene;Acc:714736]  
ENSMMUG00000061576  
ENSMMUG00000061797 U6 spliceosomal RNA [Source:RFAM;Acc:RF00026]  
ENSMMUG00000061833 transmembrane protein 251 [Source:NCBI gene;Acc:708131]  
ENSMMUG00000061923  
ENSMMUG00000061935  
ENSMMUG00000061974  
ENSMMUG00000062063 melanoma-associated antigen 3 [Source:NCBI gene;Acc:711544]  
ENSMMUG00000062139  
ENSMMUG00000062217 HD domain containing 3 [Source:NCBI gene;Acc:715621]  
ENSMMUG00000062254

ENSMMUG00000062628  
ENSMMUG00000062781 chromosome 14 C11orf97 homolog [Source:NCBI gene;Acc:106993442]  
ENSMMUG00000062863  
ENSMMUG00000063215 T cell receptor alpha variable 29/delta variable 5 (gene/pseudogene) [Source:HGNC Symbol;Acc:HGNC:12127]  
ENSMMUG00000063322  
ENSMMUG00000063346  
ENSMMUG00000063495  
ENSMMUG00000063525  
ENSMMUG00000063694 cyclic nucleotide gated channel subunit alpha 2 [Source:NCBI gene;Acc:704486]  
ENSMMUG00000063759 transmembrane protein 185B [Source:NCBI gene;Acc:695744]  
ENSMMUG00000063898 apolipoprotein F [Source:NCBI gene;Acc:712761]  
ENSMMUG00000063913 endogenous retrovirus group K member 7 Env polyprotein-like [Source:NCBI gene;Acc:114674933]  
ENSMMUG00000064005  
ENSMMUG00000064321  
ENSMMUG00000064341 U6 spliceosomal RNA [Source:RFAM;Acc:RF00026]  
ENSMMUG00000064557  
ENSMMUG00000064694 AHNAK nucleoprotein 2 [Source:NCBI gene;Acc:707626]  
ENSMMUG00000064730  
ENSMMUG00000064895  
ENSMMUG00000064931  
ENSMMUG00000065247 opioid receptor kappa 1 [Source:NCBI gene;Acc:710783]  
ENSMMUG00000065319  
ENSMMUG00000000196 niban apoptosis regulator 3 [Source:VGNC Symbol;Acc:VGNC:75241]  
ENSMMUG00000000276 NACC family member 2 [Source:VGNC Symbol;Acc:VGNC:75013]  
ENSMMUG00000000293 catenin alpha 2 [Source:VGNC Symbol;Acc:VGNC:71543]  
ENSMMUG00000000389 nucleolar protein 6 [Source:VGNC Symbol;Acc:VGNC:75218]  
ENSMMUG00000000396 intraflagellar transport 52 [Source:NCBI gene;Acc:694933]  
ENSMMUG00000000452 LSM7 homolog, U6 small nuclear RNA and mRNA degradation associated [Source:NCBI gene;Acc:721486]  
ENSMMUG00000000700 CLN3 lysosomal/endosomal transmembrane protein, battenin [Source:NCBI gene;Acc:705815]  
ENSMMUG00000000740 spermatogenesis associated 2 [Source:VGNC Symbol;Acc:VGNC:77923]  
ENSMMUG00000000757 ring finger protein 114 [Source:VGNC Symbol;Acc:VGNC:76725]  
ENSMMUG00000000802 regulatory factor X3 [Source:VGNC Symbol;Acc:VGNC:76908]  
ENSMMUG00000001036 coagulation factor VII [Source:VGNC Symbol;Acc:VGNC:72466]  
ENSMMUG00000001058 tetratricopeptide repeat domain 28 [Source:VGNC Symbol;Acc:VGNC:79785]  
ENSMMUG00000001220 adhesion G protein-coupled receptor E1 [Source:VGNC Symbol;Acc:VGNC:69561]  
ENSMMUG00000001269 chromosome 16 C17orf80 homolog [Source:VGNC Symbol;Acc:VGNC:70440]  
ENSMMUG00000001271 cleavage and polyadenylation specific factor 4 like [Source:NCBI gene;Acc:698279]  
ENSMMUG00000001409 coiled-coil domain containing 187 [Source:NCBI gene;Acc:710749]  
ENSMMUG00000001545 aquaporin 7 [Source:NCBI gene;Acc:702836]  
ENSMMUG00000001748 spleen associated tyrosine kinase [Source:VGNC Symbol;Acc:VGNC:78063]  
ENSMMUG00000001845 DNA polymerase epsilon 4, accessory subunit [Source:VGNC Symbol;Acc:VGNC:76065]  
ENSMMUG00000001917 megakaryocyte-associated tyrosine kinase [Source:NCBI gene;Acc:100430078]  
ENSMMUG00000002124 beta-1,4-galactosyltransferase 5 [Source:VGNC Symbol;Acc:VGNC:70212]  
ENSMMUG00000002267 laminin subunit gamma 3 [Source:NCBI gene;Acc:722430]  
ENSMMUG00000002330 ecto-NOX disulfide-thiol exchanger 1 [Source:VGNC Symbol;Acc:VGNC:72110]  
ENSMMUG00000002376 scavenger receptor class F member 1 [Source:VGNC Symbol;Acc:VGNC:77027]  
ENSMMUG00000002377 Rab interacting lysosomal protein [Source:VGNC Symbol;Acc:VGNC:76866]  
ENSMMUG00000002384 IGF like family receptor 1 [Source:VGNC Symbol;Acc:VGNC:73434]  
ENSMMUG00000002397 GINS complex subunit 1 [Source:VGNC Symbol;Acc:VGNC:73025]  
ENSMMUG00000002715 solute carrier family 9 member A8 [Source:VGNC Symbol;Acc:VGNC:77749]  
ENSMMUG00000002810 TOX high mobility group box family member 2 [Source:VGNC Symbol;Acc:VGNC:79007]

ENSMMUG0000002926 mediator complex subunit 24 [Source:NCBI gene;Acc:699536]  
ENSMMUG0000002959 helicase with zinc finger [Source:VGNC Symbol;Acc:VGNC:73178]  
ENSMMUG0000003005 MFNG O-fucosylpeptide 3-beta-N-acetylglucosaminyltransferase [Source:VGNC Symbol;Acc:VGNC:74712]  
ENSMMUG0000003006 serine palmitoyltransferase long chain base subunit 1 [Source:VGNC Symbol;Acc:VGNC:77873]  
ENSMMUG0000003098 peptidase, mitochondrial processing alpha subunit [Source:VGNC Symbol;Acc:VGNC:76062]  
ENSMMUG0000003105 inositol polyphosphate-5-phosphatase E [Source:VGNC Symbol;Acc:VGNC:73637]  
ENSMMUG0000003106 SEC16 homolog A, endoplasmic reticulum export factor [Source:VGNC Symbol;Acc:VGNC:77326]  
ENSMMUG0000003233 SET domain containing 1A, histone lysine methyltransferase [Source:NCBI gene;Acc:712416]  
ENSMMUG0000003298 ataxin 2 like [Source:VGNC Symbol;Acc:VGNC:70159]  
ENSMMUG0000003303 Tu translation elongation factor, mitochondrial [Source:VGNC Symbol;Acc:VGNC:78674]  
ENSMMUG0000003436 tubulin tyrosine ligase like 6 [Source:VGNC Symbol;Acc:VGNC:79632]  
ENSMMUG0000003437 signal transducer and activator of transcription 5B [Source:NCBI gene;Acc:709760]  
ENSMMUG0000003439 nuclear factor I C [Source:VGNC Symbol;Acc:VGNC:75336]  
ENSMMUG0000003539 glutamine rich 2 [Source:VGNC Symbol;Acc:VGNC:76534]  
ENSMMUG0000003611 low density lipoprotein receptor [Source:VGNC Symbol;Acc:VGNC:74248]  
ENSMMUG0000003668 GTPase activating protein and VPS9 domains 1 [Source:VGNC Symbol;Acc:VGNC:72767]  
ENSMMUG0000003780 tight junction protein 2 [Source:NCBI gene;Acc:699586]  
ENSMMUG0000003797 ubiquitin specific peptidase 20 [Source:VGNC Symbol;Acc:VGNC:78740]  
ENSMMUG0000004283 calcium and integrin binding family member 3 [Source:VGNC Symbol;Acc:VGNC:71339]  
ENSMMUG0000004337 zinc finger protein 790 [Source:VGNC Symbol;Acc:VGNC:79930]  
ENSMMUG0000004498 protein inhibitor of activated STAT 2 [Source:VGNC Symbol;Acc:VGNC:75815]  
ENSMMUG0000004587 gasdermin B [Source:VGNC Symbol;Acc:VGNC:73219]  
ENSMMUG0000004794 DNA ligase 3 [Source:VGNC Symbol;Acc:VGNC:74266]  
ENSMMUG0000004820 pre-mRNA processing factor 8 [Source:VGNC Symbol;Acc:VGNC:76275]  
ENSMMUG0000005086 homeobox protein TGIF1 [Source:NCBI gene;Acc:694580]  
ENSMMUG0000005355 TIMP metalloproteinase inhibitor 2 [Source:NCBI gene;Acc:574357]  
ENSMMUG0000005432 clathrin heavy chain like 1 [Source:VGNC Symbol;Acc:VGNC:71268]  
ENSMMUG0000005554 mediator complex subunit 29 [Source:VGNC Symbol;Acc:VGNC:74557]  
ENSMMUG0000005595 RAB14, member RAS oncogene family [Source:NCBI gene;Acc:699837]  
ENSMMUG0000005625 fibrosin [Source:NCBI gene;Acc:712741]  
ENSMMUG0000005666 phospholipase D2 [Source:VGNC Symbol;Acc:VGNC:76172]  
ENSMMUG0000005737 SLC9A3 regulator 1 [Source:VGNC Symbol;Acc:VGNC:77639]  
ENSMMUG0000005793 ankyrin repeat and fibronectin type III domain containing 1 [Source:VGNC Symbol;Acc:VGNC:69712]  
ENSMMUG0000005989 GLE1 RNA export mediator [Source:VGNC Symbol;Acc:VGNC:73067]  
ENSMMUG0000005997 cell division cycle 14B [Source:NCBI gene;Acc:710300]  
ENSMMUG0000006066 phosphatidylcholine transfer protein [Source:VGNC Symbol;Acc:VGNC:75789]  
ENSMMUG0000006086 pleckstrin homology, MyTH4 and FERM domain containing H3 [Source:VGNC Symbol;Acc:VGNC:76113]  
ENSMMUG0000006091 contactin associated protein 1 [Source:VGNC Symbol;Acc:VGNC:71390]  
ENSMMUG0000006093 enhancer of zeste 1 polycomb repressive complex 2 subunit [Source:VGNC Symbol;Acc:VGNC:72457]  
ENSMMUG0000006738 L3MBTL histone methyl-lysine binding protein 1 [Source:NCBI gene;Acc:695694]  
ENSMMUG0000006853 crystallin beta B2 [Source:NCBI gene;Acc:100144420]  
ENSMMUG0000006941 exportin 1 [Source:VGNC Symbol;Acc:VGNC:78812]  
ENSMMUG0000007197 BRCA2 DNA repair associated [Source:VGNC Symbol;Acc:VGNC:70279]  
ENSMMUG0000007198 NEDD4 binding protein 2 like 1 [Source:VGNC Symbol;Acc:VGNC:75017]  
ENSMMUG0000007200 NEDD4 binding protein 2 like 2 [Source:VGNC Symbol;Acc:VGNC:75031]  
ENSMMUG0000007201 PDS5 cohesin associated factor B [Source:VGNC Symbol;Acc:VGNC:75835]  
ENSMMUG0000007379 phosphatidylinositol 3,4,5-trisphosphate 3-phosphatase TPTE2-like [Source:NCBI gene;Acc:694255]  
ENSMMUG0000007401 arrestin domain containing 2 [Source:VGNC Symbol;Acc:VGNC:69901]  
ENSMMUG0000007423 transcription factor Dp-1 [Source:NCBI gene;Acc:715345]  
ENSMMUG0000007726 synapse defective Rho GTPase homolog 1 [Source:NCBI gene;Acc:719089]  
ENSMMUG0000007729 ilvB acetolactate synthase like [Source:VGNC Symbol;Acc:VGNC:73739]

ENSMMUG0000007799 LIM and SH3 protein 1 [Source:VGNC Symbol;Acc:VGNC:74237]  
ENSMMUG0000007925 serum/glucocorticoid regulated kinase 2 [Source:VGNC Symbol;Acc:VGNC:77228]  
ENSMMUG0000008077 dynein cytoplasmic 2 light intermediate chain 1 [Source:VGNC Symbol;Acc:VGNC:71899]  
ENSMMUG0000008080 ATP binding cassette subfamily G member 5 [Source:VGNC Symbol;Acc:VGNC:69391]  
ENSMMUG0000008090 ribosomal protein L27 [Source:NCBI gene;Acc:712352]  
ENSMMUG0000008091 RUN domain containing 1 [Source:VGNC Symbol;Acc:VGNC:77101]  
ENSMMUG0000008160 neutrophil cytosolic factor 4 [Source:VGNC Symbol;Acc:VGNC:75141]  
ENSMMUG0000008195 TGFB induced factor homeobox 2 [Source:NCBI gene;Acc:100429616]  
ENSMMUG0000008196 aconitase 1 [Source:VGNC Symbol;Acc:VGNC:69378]  
ENSMMUG0000008200 Src like adaptor 2 [Source:VGNC Symbol;Acc:VGNC:77499]  
ENSMMUG0000008253 zinc finger protein 267 [Source:NCBI gene;Acc:641441]  
ENSMMUG0000008536 mitogen-activated protein kinase 7 [Source:VGNC Symbol;Acc:VGNC:74648]  
ENSMMUG0000008538 microfibril associated protein 4 [Source:VGNC Symbol;Acc:VGNC:74710]  
ENSMMUG0000008778 parvalbumin [Source:VGNC Symbol;Acc:VGNC:76627]  
ENSMMUG0000008784 lipopolysaccharide induced TNF factor [Source:NCBI gene;Acc:711743]  
ENSMMUG0000009176 calmodulin binding transcription activator 2 [Source:VGNC Symbol;Acc:VGNC:70578]  
ENSMMUG0000009199 glycogen phosphorylase B [Source:VGNC Symbol;Acc:VGNC:76631]  
ENSMMUG0000009201 abhydrolase domain containing 12 [Source:VGNC Symbol;Acc:VGNC:69411]  
ENSMMUG0000009377 tripartite motif containing 47 [Source:VGNC Symbol;Acc:VGNC:79171]  
ENSMMUG0000009567 glyoxylate reductase 1 homolog [Source:NCBI gene;Acc:706933]  
ENSMMUG0000009684 kinesin family member 22 [Source:VGNC Symbol;Acc:VGNC:74033]  
ENSMMUG0000009884 hydroxysteroid 17-beta dehydrogenase 1 [Source:VGNC Symbol;Acc:VGNC:73528]  
ENSMMUG0000009886 Coenzyme A synthase [Source:VGNC Symbol;Acc:VGNC:81373]  
ENSMMUG0000009887 MAX dimerization protein MLX [Source:VGNC Symbol;Acc:VGNC:74726]  
ENSMMUG0000009889 PSMC3 interacting protein [Source:VGNC Symbol;Acc:VGNC:76282]  
ENSMMUG0000009890 FERM, ARH/RhoGEF and pleckstrin domain protein 1 [Source:VGNC Symbol;Acc:VGNC:72614]  
ENSMMUG0000009953 ninein like [Source:VGNC Symbol;Acc:VGNC:75273]  
ENSMMUG0000009960 cathepsin A [Source:VGNC Symbol;Acc:VGNC:71617]  
ENSMMUG0000009973 proline rich coiled-coil 2B [Source:VGNC Symbol;Acc:VGNC:76327]  
ENSMMUG0000009988 transmembrane protein 59 like [Source:VGNC Symbol;Acc:VGNC:78919]  
ENSMMUG0000009995 arachidonate 15-lipoxygenase type B [Source:VGNC Symbol;Acc:VGNC:69797]  
ENSMMUG0000010028 leucine zipper tumor suppressor family member 3 [Source:VGNC Symbol;Acc:VGNC:74403]  
ENSMMUG0000010363 ribophorin II [Source:VGNC Symbol;Acc:VGNC:76925]  
ENSMMUG0000010556 Snf2 related CREBBP activator protein [Source:NCBI gene;Acc:712944]  
ENSMMUG0000010592 adducin 2 [Source:VGNC Symbol;Acc:VGNC:69529]  
ENSMMUG0000010610 WW domain containing oxidoreductase [Source:VGNC Symbol;Acc:VGNC:78805]  
ENSMMUG0000010614 C-C motif chemokine ligand 25 [Source:VGNC Symbol;Acc:VGNC:70700]  
ENSMMUG0000010678 oxytocin/neurophysin I prepropeptide [Source:VGNC Symbol;Acc:VGNC:75730]  
ENSMMUG0000011064 synaptosome associated protein 25 [Source:VGNC Symbol;Acc:VGNC:77663]  
ENSMMUG0000011344 solute carrier family 52 member 1 [Source:VGNC Symbol;Acc:VGNC:77795]  
ENSMMUG0000011411 sperm acrosome associated 3 [Source:VGNC Symbol;Acc:VGNC:77930]  
ENSMMUG0000011427 syntaxin 10 [Source:VGNC Symbol;Acc:VGNC:78040]  
ENSMMUG0000011798 eukaryotic translation initiation factor 3 subunit C [Source:NCBI gene;Acc:705696]  
ENSMMUG0000012001 transcription factor 4 [Source:VGNC Symbol;Acc:VGNC:78288]  
ENSMMUG0000012040 enolase 3 [Source:VGNC Symbol;Acc:VGNC:72220]  
ENSMMUG0000012147 collagen type V alpha 1 chain [Source:NCBI gene;Acc:722014]  
ENSMMUG0000012228 ubiquitin conjugating enzyme E2 V1 [Source:NCBI gene;Acc:100425552]  
ENSMMUG0000012523 flotillin 2 [Source:NCBI gene;Acc:114669752]  
ENSMMUG0000012668 centriolin [Source:VGNC Symbol;Acc:VGNC:71204]  
ENSMMUG0000012959 solute carrier family 35 member E1 [Source:VGNC Symbol;Acc:VGNC:77536]  
ENSMMUG0000013099 pappalysin 1 [Source:VGNC Symbol;Acc:VGNC:75756]

ENSMMUG00000013671 elongation factor for RNA polymerase II [Source:VGNC Symbol;Acc:VGNC:72088]  
ENSMMUG00000013697 PDX1 C-terminal inhibiting factor 1 [Source:VGNC Symbol;Acc:VGNC:75621]  
ENSMMUG00000013713 beta 3-glucosyltransferase [Source:NCBI gene;Acc:713498]  
ENSMMUG00000013877 otoancorin [Source:VGNC Symbol;Acc:VGNC:75624]  
ENSMMUG00000013944 regulator of microtubule dynamics 2 [Source:VGNC Symbol;Acc:VGNC:76839]  
ENSMMUG00000013967 TOX high mobility group box family member 3 [Source:VGNC Symbol;Acc:VGNC:78612]  
ENSMMUG00000014240 thioredoxin domain containing 11 [Source:VGNC Symbol;Acc:VGNC:79678]  
ENSMMUG00000014273 cation channel sperm associated auxiliary subunit gamma [Source:VGNC Symbol;Acc:VGNC:70626]  
ENSMMUG00000014349 integrin subunit alpha X [Source:NCBI gene;Acc:100427850]  
ENSMMUG00000014986 testis expressed 33 [Source:VGNC Symbol;Acc:VGNC:79727]  
ENSMMUG00000015258 glycine C-acetyltransferase [Source:NCBI gene;Acc:698811]  
ENSMMUG00000015303 ATP binding cassette subfamily A member 7 [Source:VGNC Symbol;Acc:VGNC:69567]  
ENSMMUG00000015306 calponin 2 [Source:NCBI gene;Acc:721164]  
ENSMMUG00000015744 zinc finger protein 302 [Source:NCBI gene;Acc:706279]  
ENSMMUG00000015952 katanin catalytic subunit A1 like 2 [Source:VGNC Symbol;Acc:VGNC:73904]  
ENSMMUG00000015999 interferon induced protein 35 [Source:VGNC Symbol;Acc:VGNC:73564]  
ENSMMUG00000016001 vesicle amine transport 1 [Source:VGNC Symbol;Acc:VGNC:79058]  
ENSMMUG00000016143 sialophorin [Source:VGNC Symbol;Acc:VGNC:77861]  
ENSMMUG00000016323 Rho guanine nucleotide exchange factor 39 [Source:VGNC Symbol;Acc:VGNC:69912]  
ENSMMUG00000016327 coiled-coil domain containing 107 [Source:VGNC Symbol;Acc:VGNC:70656]  
ENSMMUG00000016401 SGT1 homolog, MIS12 kinetochore complex assembly cochaperone [Source:NCBI gene;Acc:694046]  
ENSMMUG00000016404 chondromodulin [Source:VGNC Symbol;Acc:VGNC:71191]  
ENSMMUG00000016417 chromobox 8 [Source:NCBI gene;Acc:717514]  
ENSMMUG00000016434 NADH:ubiquinone oxidoreductase complex assembly factor 7 [Source:VGNC Symbol;Acc:VGNC:75035]  
ENSMMUG00000016438 protein kinase D3 [Source:VGNC Symbol;Acc:VGNC:76415]  
ENSMMUG00000016442 glutaminyl-peptide cyclotransferase [Source:VGNC Symbol;Acc:VGNC:76636]  
ENSMMUG00000016448 DLG associated protein 4 [Source:NCBI gene;Acc:702928]  
ENSMMUG00000016549 matrix metalloproteinase 9 [Source:VGNC Symbol;Acc:VGNC:74903]  
ENSMMUG00000016553 solute carrier family 12 member 5 [Source:VGNC Symbol;Acc:VGNC:77471]  
ENSMMUG00000016678 Rho associated coiled-coil containing protein kinase 2 [Source:VGNC Symbol;Acc:VGNC:76714]  
ENSMMUG00000016761 coiled-coil domain containing 47 [Source:NCBI gene;Acc:717944]  
ENSMMUG00000016769 proteasome 26S subunit, ATPase 5 [Source:VGNC Symbol;Acc:VGNC:81513]  
ENSMMUG00000016796 reticulophagy regulator family member 3 [Source:VGNC Symbol;Acc:VGNC:76845]  
ENSMMUG00000016797 tubulin gamma 1 [Source:NCBI gene;Acc:710756]  
ENSMMUG00000016827 UBA domain containing 1 [Source:VGNC Symbol;Acc:VGNC:79837]  
ENSMMUG00000017036 nicalin [Source:VGNC Symbol;Acc:VGNC:75032]  
ENSMMUG00000017209 C1D nuclear receptor corepressor [Source:NCBI gene;Acc:698450]  
ENSMMUG00000017242 MYCBP associated protein [Source:VGNC Symbol;Acc:VGNC:74994]  
ENSMMUG00000017256 calcium voltage-gated channel subunit alpha1 G [Source:VGNC Symbol;Acc:VGNC:70504]  
ENSMMUG00000017561 solute carrier family 43 member 2 [Source:VGNC Symbol;Acc:VGNC:77554]  
ENSMMUG00000017654 arrestin beta 2 [Source:VGNC Symbol;Acc:VGNC:70022]  
ENSMMUG00000017758 mitogen-activated protein kinase 3 [Source:VGNC Symbol;Acc:VGNC:74646]  
ENSMMUG00000017822 periplakin [Source:VGNC Symbol;Acc:VGNC:76240]  
ENSMMUG00000017906 DnaJ heat shock protein family (Hsp40) member B1 [Source:NCBI gene;Acc:718890]  
ENSMMUG00000017971 nucleus accumbens associated 1 [Source:VGNC Symbol;Acc:VGNC:74996]  
ENSMMUG00000018137 MYB proto-oncogene like 2 [Source:VGNC Symbol;Acc:VGNC:75092]  
ENSMMUG00000018396 HAUS augmin like complex subunit 6 [Source:VGNC Symbol;Acc:VGNC:73237]  
ENSMMUG00000018648 zinc finger protein 594 [Source:NCBI gene;Acc:711492]  
ENSMMUG00000018719 nemo like kinase [Source:VGNC Symbol;Acc:VGNC:75277]  
ENSMMUG00000018720 cytoskeleton associated protein 2 [Source:VGNC Symbol;Acc:VGNC:71229]  
ENSMMUG00000018823 transmembrane protein 191C [Source:NCBI gene;Acc:697070]

ENSMMUG00000018932 adhesion G protein-coupled receptor E2 [Source:NCBI gene;Acc:654420]  
ENSMMUG00000018967 ubiquitin conjugating enzyme E2 O [Source:VGNC Symbol;Acc:VGNC:79813]  
ENSMMUG00000018986 seizure related 6 homolog like 2 [Source:VGNC Symbol;Acc:VGNC:81567]  
ENSMMUG00000019070 focadhesin [Source:VGNC Symbol;Acc:VGNC:72556]  
ENSMMUG00000019223 TNF receptor associated factor 7 [Source:VGNC Symbol;Acc:VGNC:79252]  
ENSMMUG00000019314 vav guanine nucleotide exchange factor 1 [Source:VGNC Symbol;Acc:VGNC:78757]  
ENSMMUG00000019418 erythrocyte membrane protein band 4.1 like 3 [Source:VGNC Symbol;Acc:VGNC:72233]  
ENSMMUG00000019667 TAO kinase 1 [Source:VGNC Symbol;Acc:VGNC:81591]  
ENSMMUG00000019925 DiGeorge syndrome critical region gene 2 [Source:NCBI gene;Acc:100423715]  
ENSMMUG00000020020 Rho GTPase activating protein 23 [Source:NCBI gene;Acc:693996]  
ENSMMUG00000020190 valosin containing protein [Source:VGNC Symbol;Acc:VGNC:78762]  
ENSMMUG00000020226 WD repeat and SOCS box containing 1 [Source:VGNC Symbol;Acc:VGNC:79186]  
ENSMMUG00000020254 exocyst complex component 3 like 1 [Source:VGNC Symbol;Acc:VGNC:72376]  
ENSMMUG00000020258 E2F transcription factor 4 [Source:VGNC Symbol;Acc:VGNC:72025]  
ENSMMUG00000020462 CD300e molecule [Source:NCBI gene;Acc:114673189]  
ENSMMUG00000020580 RPRIP1 like [Source:VGNC Symbol;Acc:VGNC:77124]  
ENSMMUG00000020597 acyl-CoA synthetase short chain family member 1 [Source:VGNC Symbol;Acc:VGNC:69416]  
ENSMMUG00000020668 cyclin E1 [Source:VGNC Symbol;Acc:VGNC:70727]  
ENSMMUG00000020799 BH3 interacting domain death agonist [Source:VGNC Symbol;Acc:VGNC:70250]  
ENSMMUG00000020868 homeobox B8 [Source:VGNC Symbol;Acc:VGNC:73505]  
ENSMMUG00000021019 E3 SUMO-protein ligase RanBP2 [Source:NCBI gene;Acc:694823]  
ENSMMUG00000021408 family with sequence similarity 222 member B [Source:VGNC Symbol;Acc:VGNC:72352]  
ENSMMUG00000021436 latent transforming growth factor beta binding protein 1 [Source:VGNC Symbol;Acc:VGNC:74456]  
ENSMMUG00000021476 BCL2 like 13 [Source:VGNC Symbol;Acc:VGNC:84544]  
ENSMMUG00000021477 ATPase H+ transporting V1 subunit E1 [Source:NCBI gene;Acc:709739]  
ENSMMUG00000021553 dehydrogenase/reductase 13 [Source:VGNC Symbol;Acc:VGNC:81387]  
ENSMMUG00000021554 PHD finger protein 12 [Source:VGNC Symbol;Acc:VGNC:75838]  
ENSMMUG00000022100 midnolin [Source:VGNC Symbol;Acc:VGNC:82186]  
ENSMMUG00000022282 collagen type IV alpha 2 chain [Source:NCBI gene;Acc:100429807]  
ENSMMUG00000022348 surfait 4 [Source:VGNC Symbol;Acc:VGNC:78060]  
ENSMMUG00000022613 reversion inducing cysteine rich protein with kazal motifs [Source:VGNC Symbol;Acc:VGNC:76722]  
ENSMMUG00000022996 HCLS1 binding protein 3 [Source:VGNC Symbol;Acc:VGNC:82158]  
ENSMMUG00000023263 mediator complex subunit 15 [Source:VGNC Symbol;Acc:VGNC:74511]  
ENSMMUG00000023286 UPF1 RNA helicase and ATPase [Source:VGNC Symbol;Acc:VGNC:79971]  
ENSMMUG00000023303 ecotropic viral integration site 5 like [Source:NCBI gene;Acc:706628]  
ENSMMUG00000023403 GTP binding protein 3, mitochondrial [Source:VGNC Symbol;Acc:VGNC:73170]  
ENSMMUG00000023717 MIER family member 2 [Source:VGNC Symbol;Acc:VGNC:74855]  
ENSMMUG00000023797 post-GPI attachment to proteins GalNAc transferase 4 [Source:VGNC Symbol;Acc:VGNC:79688]  
ENSMMUG00000024170 U6 spliceosomal RNA [Source:RFAM;Acc:RF00026]  
ENSMMUG00000024668 Y RNA [Source:RFAM;Acc:RF00019]  
ENSMMUG00000025050 Y RNA [Source:RFAM;Acc:RF00019]  
ENSMMUG00000026950 microRNA 101-2 [Source:HGNC Symbol;Acc:HGNC:31489]  
ENSMMUG00000027986 U6 spliceosomal RNA [Source:RFAM;Acc:RF00026]  
ENSMMUG00000028471 U7 small nuclear RNA [Source:RFAM;Acc:RF00066]  
ENSMMUG00000028906 Rho/Rac guanine nucleotide exchange factor 18 [Source:NCBI gene;Acc:707510]  
ENSMMUG00000028907 insulin receptor [Source:NCBI gene;Acc:706009]  
ENSMMUG00000028947 complement factor D [Source:VGNC Symbol;Acc:VGNC:71115]  
ENSMMUG00000028948 azurocidin 1 [Source:VGNC Symbol;Acc:VGNC:70202]  
ENSMMUG00000030279 A-kinase anchoring protein 10 [Source:VGNC Symbol;Acc:VGNC:69764]  
ENSMMUG00000031106 ubiquitin recognition factor in ER associated degradation 1 [Source:NCBI gene;Acc:711716]  
ENSMMUG00000031391 RNA binding motif protein 38 [Source:VGNC Symbol;Acc:VGNC:76484]



ENSMMUG00000033550  
ENSMMUG00000036223  
ENSMMUG00000038944  
ENSMMUG00000038988 RNase MRP [Source:RFAM;Acc:RF00030]  
ENSMMUG00000038997 zygote arrest 1 like [Source:NCBI gene;Acc:100427970]  
ENSMMUG00000039266 Metazoan signal recognition particle RNA [Source:RFAM;Acc:RF00017]  
ENSMMUG00000039774 Metazoan signal recognition particle RNA [Source:RFAM;Acc:RF00017]  
ENSMMUG00000039943 adenylate cyclase 9 [Source:NCBI gene;Acc:706789]  
ENSMMUG00000042407  
ENSMMUG00000042598 transmembrane protein 18 [Source:NCBI gene;Acc:721515]  
ENSMMUG00000043134 coiled-coil domain containing 159 [Source:NCBI gene;Acc:100424702]  
ENSMMUG00000043396 Metazoan signal recognition particle RNA [Source:RFAM;Acc:RF00017]  
ENSMMUG00000043738  
ENSMMUG00000044048 Metazoan signal recognition particle RNA [Source:RFAM;Acc:RF00017]  
ENSMMUG00000044080 mitochondrial ribosomal protein L54 [Source:NCBI gene;Acc:713878]  
ENSMMUG00000045256 cellular communication network factor 5 [Source:NCBI gene;Acc:717872]  
ENSMMUG00000046169  
ENSMMUG00000046417 chromobox 2 [Source:NCBI gene;Acc:717462]  
ENSMMUG00000046918  
ENSMMUG00000048190 U2 small nuclear RNA auxiliary factor 1 like 4 [Source:NCBI gene;Acc:718865]  
ENSMMUG00000048204 ephrin B3 [Source:NCBI gene;Acc:716257]  
ENSMMUG00000048215  
ENSMMUG00000048375 Metazoan signal recognition particle RNA [Source:RFAM;Acc:RF00017]  
ENSMMUG00000048566 MCF.2 cell line derived transforming sequence like [Source:NCBI gene;Acc:713961]  
ENSMMUG00000049130  
ENSMMUG00000049391  
ENSMMUG00000049479  
ENSMMUG00000049537 phosphoribosyl pyrophosphate synthetase associated protein 1 [Source:NCBI gene;Acc:706625]  
ENSMMUG00000049542  
ENSMMUG00000049649 proteasome 20S subunit beta 6 [Source:NCBI gene;Acc:710028]  
ENSMMUG00000049703 Metazoan signal recognition particle RNA [Source:RFAM;Acc:RF00017]  
ENSMMUG00000050436  
ENSMMUG00000050543  
ENSMMUG00000050739  
ENSMMUG00000050793 N-acetyl-alpha-glucosaminidase [Source:NCBI gene;Acc:707186]  
ENSMMUG00000050799  
ENSMMUG00000050822 carbonic anhydrase 9 [Source:NCBI gene;Acc:696729]  
ENSMMUG00000051072  
ENSMMUG00000051201 zinc finger SWIM-type containing 3 [Source:NCBI gene;Acc:708804]  
ENSMMUG00000051226 FAD-linked sulfhydryl oxidase ERV1 [Source:NCBI gene;Acc:106994988]  
ENSMMUG00000051343  
ENSMMUG00000051420 homeobox B5 [Source:NCBI gene;Acc:696732]  
ENSMMUG00000051453  
ENSMMUG00000051537  
ENSMMUG00000051852 Metazoan signal recognition particle RNA [Source:RFAM;Acc:RF00017]  
ENSMMUG00000051925  
ENSMMUG00000052047  
ENSMMUG00000052112  
ENSMMUG00000052227  
ENSMMUG00000052505 homeobox B9 [Source:NCBI gene;Acc:106994009]  
ENSMMUG00000052572

ENSMMUG00000052607  
ENSMMUG00000052785 extracellular leucine rich repeat and fibronectin type III domain containing 2 [Source:NCBI gene;Acc:697071]  
ENSMMUG00000053083 C2 calcium dependent domain containing 4C [Source:NCBI gene;Acc:100424440]  
ENSMMUG00000053220 olfactory receptor 111 [Source:NCBI gene;Acc:719077]  
ENSMMUG00000053257 Y RNA [Source:RFAM;Acc:RF00019]  
ENSMMUG00000053329  
ENSMMUG00000053457 caspase 14 [Source:NCBI gene;Acc:718049]  
ENSMMUG00000053611 stromal cell derived factor 2 [Source:NCBI gene;Acc:716189]  
ENSMMUG00000053937  
ENSMMUG00000054055 zinc finger protein 93 [Source:NCBI gene;Acc:720434]  
ENSMMUG00000054211  
ENSMMUG00000054472  
ENSMMUG00000054579 zinc finger RNA binding protein 2 [Source:NCBI gene;Acc:100430166]  
ENSMMUG00000054736  
ENSMMUG00000054746  
ENSMMUG00000054784  
ENSMMUG00000055048  
ENSMMUG00000055241  
ENSMMUG00000055324 homeobox B7 [Source:NCBI gene;Acc:697089]  
ENSMMUG00000055379  
ENSMMUG00000055775 transmembrane p24 trafficking protein 1 [Source:NCBI gene;Acc:713618]  
ENSMMUG00000055811  
ENSMMUG00000055820  
ENSMMUG00000055897  
ENSMMUG00000056010  
ENSMMUG00000056093 shieldin complex subunit 1 [Source:NCBI gene;Acc:718152]  
ENSMMUG00000056248  
ENSMMUG00000056330  
ENSMMUG00000056555  
ENSMMUG00000056755  
ENSMMUG00000056840  
ENSMMUG00000056945  
ENSMMUG00000056950  
ENSMMUG00000057038  
ENSMMUG00000057095  
ENSMMUG00000057157  
ENSMMUG00000057231 T-box transcription factor 21 [Source:NCBI gene;Acc:694044]  
ENSMMUG00000057329  
ENSMMUG00000057331 RNA terminal phosphate cyclase like 1 [Source:NCBI gene;Acc:694568]  
ENSMMUG00000057447  
ENSMMUG00000057481  
ENSMMUG00000057499  
ENSMMUG00000057520  
ENSMMUG00000057632  
ENSMMUG00000057687  
ENSMMUG00000057790  
ENSMMUG00000058095 visual system homeobox 1 [Source:NCBI gene;Acc:715973]  
ENSMMUG00000058254  
ENSMMUG00000058311  
ENSMMUG00000058437  
ENSMMUG00000058566

ENSMMUG00000058592  
ENSMMUG00000058621  
ENSMMUG00000058758  
ENSMMUG00000058856 Metazoan signal recognition particle RNA [Source:RFAM;Acc:RF00017]  
ENSMMUG00000058907  
ENSMMUG00000058916  
ENSMMUG00000058928 Metazoan signal recognition particle RNA [Source:RFAM;Acc:RF00017]  
ENSMMUG00000059084  
ENSMMUG00000059175  
ENSMMUG00000059188  
ENSMMUG00000059229 CEA cell adhesion molecule 7 [Source:NCBI gene;Acc:705572]  
ENSMMUG00000059292  
ENSMMUG00000059302 Metazoan signal recognition particle RNA [Source:RFAM;Acc:RF00017]  
ENSMMUG00000059321  
ENSMMUG00000059374  
ENSMMUG00000059700  
ENSMMUG00000059725  
ENSMMUG00000059778  
ENSMMUG00000059897 myosin light chain 9 [Source:NCBI gene;Acc:709784]  
ENSMMUG00000060000  
ENSMMUG00000060289  
ENSMMUG00000060399 Metazoan signal recognition particle RNA [Source:RFAM;Acc:RF00017]  
ENSMMUG00000060435 Metazoan signal recognition particle RNA [Source:RFAM;Acc:RF00017]  
ENSMMUG00000060497  
ENSMMUG00000060502  
ENSMMUG00000060533  
ENSMMUG00000060761  
ENSMMUG00000060767  
ENSMMUG00000060879 homeobox B13 [Source:NCBI gene;Acc:697572]  
ENSMMUG00000060959  
ENSMMUG00000060967  
ENSMMUG00000061222 adipocyte plasma membrane associated protein [Source:NCBI gene;Acc:704948]  
ENSMMUG00000061335  
ENSMMUG00000061424 ventral anterior homeobox 2 [Source:NCBI gene;Acc:703531]  
ENSMMUG00000061533  
ENSMMUG00000061632 fibrillin 3 [Source:NCBI gene;Acc:709446]  
ENSMMUG00000061836  
ENSMMUG00000061896  
ENSMMUG00000061951  
ENSMMUG00000062037 stannin [Source:NCBI gene;Acc:711909]  
ENSMMUG00000062091  
ENSMMUG00000062283 homeobox B6 [Source:NCBI gene;Acc:106994013]  
ENSMMUG00000062702  
ENSMMUG00000063590  
ENSMMUG00000063622 mitochondrial ribosomal protein S26 [Source:NCBI gene;Acc:717038]  
ENSMMUG00000063639  
ENSMMUG00000063699  
ENSMMUG00000063779  
ENSMMUG00000063817 SRY-box transcription factor 9 [Source:NCBI gene;Acc:574208]  
ENSMMUG00000063914  
ENSMMUG00000063988

ENSMMUG00000064009 galactose-3-O-sulfotransferase 1 [Source:NCBI gene;Acc:715998]  
ENSMMUG00000064052 CD300 molecule like family member d [Source:NCBI gene;Acc:703142]  
ENSMMUG00000064095  
ENSMMUG00000064204 kelch like family member 26 [Source:NCBI gene;Acc:719583]  
ENSMMUG00000064229  
ENSMMUG00000064250  
ENSMMUG00000064391  
ENSMMUG00000064401  
ENSMMUG00000064532 mucin 16, cell surface associated [Source:NCBI gene;Acc:106996460]  
ENSMMUG00000064554 leucine rich repeat neuronal 4 [Source:NCBI gene;Acc:718283]  
ENSMMUG00000064610 long intergenic non-protein coding RNA 1862 [Source:HGNC Symbol;Acc:HGNC:52681]  
ENSMMUG00000064650 SPEM family member 3 [Source:NCBI gene;Acc:106993878]  
ENSMMUG00000064821  
ENSMMUG00000064920  
ENSMMUG00000065025  
ENSMMUG00000065054 G protein subunit gamma 7 [Source:NCBI gene;Acc:711335]  
ENSMMUG00000065094  
ENSMMUG00000065113  
ENSMMUG00000065208  
ENSMMUG00000003568 testis expressed 101 [Source:VGNC Symbol;Acc:VGNC:79869]  
ENSMMUG00000003819 nitric oxide synthase interacting protein [Source:VGNC Symbol;Acc:VGNC:75207]  
ENSMMUG00000003926 BCL2 like 12 [Source:NCBI gene;Acc:718981]  
ENSMMUG00000004616 plasminogen activator, urokinase receptor [Source:VGNC Symbol;Acc:VGNC:76163]  
ENSMMUG00000006936 gastric inhibitory polypeptide receptor [Source:VGNC Symbol;Acc:VGNC:73052]  
ENSMMUG00000007538 transient receptor potential cation channel subfamily M member 4 [Source:VGNC Symbol;Acc:VGNC:79105]  
ENSMMUG00000010837 VRK serine/threonine kinase 3 [Source:VGNC Symbol;Acc:VGNC:81605]  
ENSMMUG00000011332 Rho GTPase activating protein 35 [Source:VGNC Symbol;Acc:VGNC:69942]  
ENSMMUG00000011627 interleukin 4 induced 1 [Source:VGNC Symbol;Acc:VGNC:73625]  
ENSMMUG00000012797 zinc finger protein 233 [Source:VGNC Symbol;Acc:VGNC:79903]  
ENSMMUG00000012801 zinc finger protein 235 [Source:VGNC Symbol;Acc:VGNC:78825]  
ENSMMUG00000012937 proline rich 12 [Source:NCBI gene;Acc:719344]  
ENSMMUG00000012938 SR-related CTD associated factor 1 [Source:VGNC Symbol;Acc:VGNC:77137]  
ENSMMUG00000013477 creatine kinase, M-type [Source:VGNC Symbol;Acc:VGNC:71230]  
ENSMMUG00000014592 zinc finger SWIM-type containing 9 [Source:VGNC Symbol;Acc:VGNC:79949]  
ENSMMUG00000017927 protein kinase D2 [Source:VGNC Symbol;Acc:VGNC:76273]  
ENSMMUG00000017930 striatin 4 [Source:VGNC Symbol;Acc:VGNC:78128]  
ENSMMUG00000018879 exocyst complex component 3 like 2 [Source:NCBI gene;Acc:713992]  
ENSMMUG00000019032 EMAP like 2 [Source:NCBI gene;Acc:715009]  
ENSMMUG00000021062 CD177 molecule [Source:VGNC Symbol;Acc:VGNC:70912]  
ENSMMUG00000021891 kinesin light chain 3 [Source:VGNC Symbol;Acc:VGNC:73870]  
ENSMMUG00000022116 PIH1 domain containing 1 [Source:VGNC Symbol;Acc:VGNC:75868]  
ENSMMUG00000028733 RAS related [Source:VGNC Symbol;Acc:VGNC:76937]  
ENSMMUG00000032809 mml-mir-642 [Source:miRBase;Acc:MI0007885]  
ENSMMUG00000044817 nucleoporin 62 [Source:NCBI gene;Acc:100426308]  
ENSMMUG00000050456 Metazoan signal recognition particle RNA [Source:RFAM;Acc:RF00017]  
ENSMMUG00000054052 sialic acid binding Ig like lectin 11 [Source:NCBI gene;Acc:719127]  
ENSMMUG00000054473 activating transcription factor 5 [Source:NCBI gene;Acc:719150]  
ENSMMUG00000055976 CD99 antigen [Source:NCBI gene;Acc:106995376]  
ENSMMUG00000057361 Metazoan signal recognition particle RNA [Source:RFAM;Acc:RF00017]  
ENSMMUG00000059087  
ENSMMUG00000061126 golgi associated olfactory signaling regulator [Source:NCBI gene;Acc:719194]

## B. Down-regulated Gene ID

### Survivors - SD1 vs. Baseline

| Ensembl Gene ID    | Description                                                                                |
|--------------------|--------------------------------------------------------------------------------------------|
| ENSMMUG00000000009 | protein tyrosine phosphatase receptor type C [Source:VGNC Symbol;Acc:VGNC:76612]           |
| ENSMMUG00000000058 | CDV3 homolog [Source:VGNC Symbol;Acc:VGNC:71114]                                           |
| ENSMMUG00000000059 | DNA topoisomerase II binding protein 1 [Source:VGNC Symbol;Acc:VGNC:79061]                 |
| ENSMMUG00000000065 | coiled-coil domain containing 181 [Source:VGNC Symbol;Acc:VGNC:70884]                      |
| ENSMMUG00000000104 | ribosomal RNA processing 1B [Source:VGNC Symbol;Acc:VGNC:77089]                            |
| ENSMMUG00000000158 | minichromosome maintenance complex component 2 [Source:VGNC Symbol;Acc:VGNC:74680]         |
| ENSMMUG00000000546 | KIAA0040 ortholog [Source:NCBI gene;Acc:100423509]                                         |
| ENSMMUG00000000663 | guanylate-binding protein 6-like [Source:NCBI gene;Acc:695158]                             |
| ENSMMUG00000000777 | dystonin [Source:VGNC Symbol;Acc:VGNC:81061]                                               |
| ENSMMUG00000000962 | H2A.Z variant histone 2 [Source:VGNC Symbol;Acc:VGNC:81324]                                |
| ENSMMUG00000001264 | BSD domain containing 1 [Source:VGNC Symbol;Acc:VGNC:70384]                                |
| ENSMMUG00000001479 | laminin subunit gamma 2 [Source:VGNC Symbol;Acc:VGNC:74233]                                |
| ENSMMUG00000001481 | nicotinamide nucleotide adenylyltransferase 2 [Source:VGNC Symbol;Acc:VGNC:75193]          |
| ENSMMUG00000001529 | solute carrier family 25 member 26 [Source:VGNC Symbol;Acc:VGNC:77530]                     |
| ENSMMUG00000001531 | leucine rich repeats and immunoglobulin like domains 1 [Source:VGNC Symbol;Acc:VGNC:84156] |
| ENSMMUG00000001549 | ATPase family AAA domain-containing protein 3A-like [Source:NCBI gene;Acc:114674453]       |
| ENSMMUG00000001551 | SSU72 homolog, RNA polymerase II CTD phosphatase [Source:VGNC Symbol;Acc:VGNC:77986]       |
| ENSMMUG00000001664 | arylacetamide deacetylase [Source:VGNC Symbol;Acc:VGNC:81172]                              |
| ENSMMUG00000001728 | mitogen-activated protein kinase 9 [Source:VGNC Symbol;Acc:VGNC:74652]                     |
| ENSMMUG00000001742 | transforming growth factor beta receptor 3 [Source:VGNC Symbol;Acc:VGNC:78339]             |
| ENSMMUG00000001892 | UDP-glucose 6-dehydrogenase [Source:VGNC Symbol;Acc:VGNC:78711]                            |
| ENSMMUG00000001894 | cyclin dependent kinase 11B [Source:NCBI gene;Acc:703046]                                  |
| ENSMMUG00000001918 | transmembrane protein 165 [Source:VGNC Symbol;Acc:VGNC:79875]                              |
| ENSMMUG00000001919 | clock circadian regulator [Source:VGNC Symbol;Acc:VGNC:71262]                              |
| ENSMMUG00000002009 | nitrilase 1 [Source:VGNC Symbol;Acc:VGNC:75351]                                            |
| ENSMMUG00000002010 | death effector domain containing [Source:VGNC Symbol;Acc:VGNC:71768]                       |
| ENSMMUG00000002200 | phospholipid phosphatase 3 [Source:NCBI gene;Acc:715993]                                   |
| ENSMMUG00000002434 | inhibitor of growth family member 3 [Source:VGNC Symbol;Acc:VGNC:73595]                    |
| ENSMMUG00000002497 | zinc finger protein 777 [Source:HGNC Symbol;Acc:HGNC:22213]                                |
| ENSMMUG00000002561 | NOP2/Sun RNA methyltransferase 2 [Source:VGNC Symbol;Acc:VGNC:75466]                       |
| ENSMMUG00000002653 | hexokinase 3 [Source:VGNC Symbol;Acc:VGNC:73476]                                           |
| ENSMMUG00000002794 | general transcription factor IIB [Source:VGNC Symbol;Acc:VGNC:73306]                       |
| ENSMMUG00000002802 | agmatinase [Source:NCBI gene;Acc:713190]                                                   |
| ENSMMUG00000002821 | origin recognition complex subunit 3 [Source:VGNC Symbol;Acc:VGNC:75715]                   |
| ENSMMUG00000002890 | tripartite motif containing 15 [Source:VGNC Symbol;Acc:VGNC:83958]                         |
| ENSMMUG00000002894 | dedicator of cytokinesis 4 [Source:VGNC Symbol;Acc:VGNC:71866]                             |
| ENSMMUG00000003191 | kirre like nephrin family adhesion molecule 1 [Source:VGNC Symbol;Acc:VGNC:73837]          |
| ENSMMUG00000003277 | copine 4 [Source:VGNC Symbol;Acc:VGNC:71466]                                               |
| ENSMMUG00000003316 | mannosidase alpha class 2A member 1 [Source:VGNC Symbol;Acc:VGNC:81449]                    |
| ENSMMUG00000003497 | FAT atypical cadherin 2 [Source:VGNC Symbol;Acc:VGNC:72618]                                |
| ENSMMUG00000003634 | DExD/H-box 60 like [Source:VGNC Symbol;Acc:VGNC:71720]                                     |

ENSMMUG00000003726 protein tyrosine phosphatase non-receptor type 13 [Source:VGNC Symbol;Acc:VGNC:76599]  
ENSMMUG00000003736 nuclear factor kappa B subunit 1 [Source:VGNC Symbol;Acc:VGNC:75339]  
ENSMMUG00000003850 collagen type XI alpha 2 chain [Source:VGNC Symbol;Acc:VGNC:71290]  
ENSMMUG00000003987 forkhead associated phosphopeptide binding domain 1 [Source:NCBI gene;Acc:699900]  
ENSMMUG00000004362 Fc fragment of IgG receptor Ia [Source:NCBI gene;Acc:714664]  
ENSMMUG00000004579 RAD51 recombinase [Source:VGNC Symbol;Acc:VGNC:76645]  
ENSMMUG00000004617 glutathione peroxidase 6 [Source:VGNC Symbol;Acc:VGNC:73154]  
ENSMMUG00000004754 intermediate filament family orphan 2 [Source:NCBI gene;Acc:106995162]  
ENSMMUG00000004849 casein beta [Source:VGNC Symbol;Acc:VGNC:71523]  
ENSMMUG00000005137 ATPase secretory pathway Ca<sup>2+</sup> transporting 1 [Source:VGNC Symbol;Acc:VGNC:70054]  
ENSMMUG00000005225 gap junction protein alpha 1 [Source:VGNC Symbol;Acc:VGNC:73055]  
ENSMMUG00000005414 N-deacetylase and N-sulfotransferase 1 [Source:VGNC Symbol;Acc:VGNC:75151]  
ENSMMUG00000005442 5'-nucleotidase ecto [Source:VGNC Symbol;Acc:VGNC:75537]  
ENSMMUG00000005515 ATP binding cassette subfamily C member 5 [Source:VGNC Symbol;Acc:VGNC:69574]  
ENSMMUG00000005578 solute carrier family 35 member E2 [Source:VGNC Symbol;Acc:VGNC:77590]  
ENSMMUG00000005801 glyceronephosphate O-acyltransferase [Source:VGNC Symbol;Acc:VGNC:73100]  
ENSMMUG00000005856 glycine amidinotransferase [Source:VGNC Symbol;Acc:VGNC:72892]  
ENSMMUG00000005923 failed axon connections homolog, metaxin like GST domain containing [Source:VGNC Symbol;Acc:VGNC:72541]  
ENSMMUG00000005949 olfactory receptor 2B11 [Source:NCBI gene;Acc:709256]  
ENSMMUG00000006187 angiotensin like 7 [Source:VGNC Symbol;Acc:VGNC:69683]  
ENSMMUG00000006217 general transcription factor IIH subunit 2 [Source:NCBI gene;Acc:700737]  
ENSMMUG00000006252 argonaute RISC catalytic component 3 [Source:NCBI gene;Acc:712543]  
ENSMMUG00000006547 ATPase H<sup>+</sup> transporting VO subunit a4 [Source:VGNC Symbol;Acc:VGNC:70189]  
ENSMMUG00000006548 KIAA1549 [Source:VGNC Symbol;Acc:VGNC:73885]  
ENSMMUG00000006553 dishevelled segment polarity protein 3 [Source:VGNC Symbol;Acc:VGNC:72014]  
ENSMMUG00000006682 chondroitin polymerizing factor 2 [Source:VGNC Symbol;Acc:VGNC:71131]  
ENSMMUG00000006688 ER membrane protein complex subunit 1 [Source:VGNC Symbol;Acc:VGNC:72134]  
ENSMMUG00000006703 solute carrier family 10 member 4 [Source:VGNC Symbol;Acc:VGNC:77553]  
ENSMMUG00000006898 integrin subunit beta 8 [Source:VGNC Symbol;Acc:VGNC:73791]  
ENSMMUG00000007244 OTU deubiquitinase 7B [Source:VGNC Symbol;Acc:VGNC:75634]  
ENSMMUG00000007246 myotubularin related protein 11 [Source:VGNC Symbol;Acc:VGNC:75016]  
ENSMMUG00000007250 RNA binding motif protein 28 [Source:VGNC Symbol;Acc:VGNC:76519]  
ENSMMUG00000007256 splicing factor 3b subunit 4 [Source:VGNC Symbol;Acc:VGNC:77182]  
ENSMMUG00000007257 synaptic vesicle glycoprotein 2A [Source:VGNC Symbol;Acc:VGNC:78181]  
ENSMMUG00000007504 myosin VC [Source:VGNC Symbol;Acc:VGNC:75117]  
ENSMMUG00000007765 Wnt family member 2B [Source:VGNC Symbol;Acc:VGNC:78797]  
ENSMMUG00000007766 suppression of tumorigenicity 7 like [Source:VGNC Symbol;Acc:VGNC:77954]  
ENSMMUG00000007783 isoleucyl-tRNA synthetase 2, mitochondrial [Source:VGNC Symbol;Acc:VGNC:73458]  
ENSMMUG00000007821 ATP binding cassette subfamily B member 5 [Source:VGNC Symbol;Acc:VGNC:80321]  
ENSMMUG00000007968 hedgehog interacting protein [Source:VGNC Symbol;Acc:VGNC:73169]  
ENSMMUG00000007998 HIVEP zinc finger 2 [Source:VGNC Symbol;Acc:VGNC:83427]  
ENSMMUG00000008009 family with sequence similarity 13 member B [Source:VGNC Symbol;Acc:VGNC:72268]  
ENSMMUG00000008093 StAR related lipid transfer domain containing 9 [Source:NCBI gene;Acc:708953]  
ENSMMUG00000008228 unc-93 homolog A [Source:VGNC Symbol;Acc:VGNC:78724]  
ENSMMUG00000008419 G protein nucleolar 2 [Source:VGNC Symbol;Acc:VGNC:73037]  
ENSMMUG00000008525 minichromosome maintenance 9 homologous recombination repair factor [Source:VGNC Symbol;Acc:VGNC:83432]  
ENSMMUG00000008733 ubiquitin protein ligase E3C [Source:VGNC Symbol;Acc:VGNC:79049]  
ENSMMUG00000008738 COMM domain containing 10 [Source:VGNC Symbol;Acc:VGNC:71374]  
ENSMMUG00000008797 ATP binding cassette subfamily G member 2 (Junior blood group) [Source:NCBI gene;Acc:574307]  
ENSMMUG00000008916 transferrin [Source:VGNC Symbol;Acc:VGNC:82716]  
ENSMMUG00000008917 S100 calcium binding protein A6 [Source:VGNC Symbol;Acc:VGNC:76960]



ENSMMUG0000008918 SRP receptor subunit beta [Source:VGNC Symbol;Acc:VGNC:77980]  
ENSMMUG0000008919 RAB6B, member RAS oncogene family [Source:VGNC Symbol;Acc:VGNC:81547]  
ENSMMUG0000008974 Fc receptor like 5 [Source:NCBI gene;Acc:718771]  
ENSMMUG0000009006 round spermatid basic protein 1 like [Source:VGNC Symbol;Acc:VGNC:77097]  
ENSMMUG0000009059 Fas associated factor family member 2 [Source:VGNC Symbol;Acc:VGNC:72332]  
ENSMMUG0000009226 mitogen-activated protein kinase kinase kinase 21 [Source:NCBI gene;Acc:712755]  
ENSMMUG0000009319 transmembrane protein 161B [Source:VGNC Symbol;Acc:VGNC:84508]  
ENSMMUG0000009536 makorin ring finger protein 2 [Source:VGNC Symbol;Acc:VGNC:74878]  
ENSMMUG0000009702 mutS homolog 5 [Source:NCBI gene;Acc:715494]  
ENSMMUG0000009773 lysine demethylase 1A [Source:VGNC Symbol;Acc:VGNC:73928]  
ENSMMUG0000009922 mitochondrial calcium uniporter regulator 1 [Source:VGNC Symbol;Acc:VGNC:81471]  
ENSMMUG0000009948 histone deacetylase 1 [Source:NCBI gene;Acc:708441]  
ENSMMUG00000010067 MINDY lysine 48 deubiquitinase 1 [Source:VGNC Symbol;Acc:VGNC:74828]  
ENSMMUG00000010127 chitinase [Source:VGNC Symbol;Acc:VGNC:71540]  
ENSMMUG00000010295 URB1 ribosome biogenesis homolog [Source:VGNC Symbol;Acc:VGNC:79074]  
ENSMMUG00000010323 zinc finger CCCH-type containing 12A [Source:VGNC Symbol;Acc:VGNC:79595]  
ENSMMUG00000010379 Mtr4 exosome RNA helicase [Source:VGNC Symbol;Acc:VGNC:74989]  
ENSMMUG00000010648 DNA methyltransferase 3 like [Source:NCBI gene;Acc:722184]  
ENSMMUG00000010682 fibrillin 2 [Source:VGNC Symbol;Acc:VGNC:72624]  
ENSMMUG00000010695 adenosine deaminase RNA specific B1 [Source:VGNC Symbol;Acc:VGNC:69503]  
ENSMMUG00000011214 solute carrier family 12 member 2 [Source:VGNC Symbol;Acc:VGNC:77386]  
ENSMMUG00000011386 GTPase, IMAP family member 4 [Source:VGNC Symbol;Acc:VGNC:72982]  
ENSMMUG00000011573 cap methyltransferase 1 [Source:VGNC Symbol;Acc:VGNC:71271]  
ENSMMUG00000011575 coiled-coil domain containing 167 [Source:VGNC Symbol;Acc:VGNC:70833]  
ENSMMUG00000011675 zinc finger and SCAN domain containing 12 [Source:VGNC Symbol;Acc:VGNC:78910]  
ENSMMUG00000011702 tetraspanin 5 [Source:VGNC Symbol;Acc:VGNC:79086]  
ENSMMUG00000011810 FAT atypical cadherin 4 [Source:VGNC Symbol;Acc:VGNC:72552]  
ENSMMUG00000011902 oligosaccharyltransferase complex non-catalytic subunit [Source:NCBI gene;Acc:697283]  
ENSMMUG00000011974 calcium/calmodulin dependent protein kinase IV [Source:VGNC Symbol;Acc:VGNC:70526]  
ENSMMUG00000012110 smoothed, frizzled class receptor [Source:VGNC Symbol;Acc:VGNC:77658]  
ENSMMUG00000012120 zinc ribbon domain containing 1 [Source:VGNC Symbol;Acc:VGNC:78912]  
ENSMMUG00000012122 protein phosphatase 1 regulatory inhibitor subunit 11 [Source:VGNC Symbol;Acc:VGNC:82209]  
ENSMMUG00000012124 ring finger protein 39 [Source:VGNC Symbol;Acc:VGNC:83458]  
ENSMMUG00000012129 tripartite motif containing 10 [Source:VGNC Symbol;Acc:VGNC:78550]  
ENSMMUG00000012192 erythrocyte membrane protein band 4.1 like 4A [Source:VGNC Symbol;Acc:VGNC:72039]  
ENSMMUG00000012238 polypeptide N-acetylgalactosaminyltransferase 11 [Source:VGNC Symbol;Acc:VGNC:72749]  
ENSMMUG00000012396 zinc finger and SCAN domain containing 23 [Source:VGNC Symbol;Acc:VGNC:79313]  
ENSMMUG00000012408 dispatched RND transporter family member 2 [Source:VGNC Symbol;Acc:VGNC:71676]  
ENSMMUG00000012463 DEAD-box helicase 46 [Source:VGNC Symbol;Acc:VGNC:71663]  
ENSMMUG00000012561 NOP2/Sun RNA methyltransferase family member 7 [Source:VGNC Symbol;Acc:VGNC:75463]  
ENSMMUG00000012781 muscular LMNA interacting protein [Source:VGNC Symbol;Acc:VGNC:83434]  
ENSMMUG00000012961 mindbomb E3 ubiquitin protein ligase 2 [Source:VGNC Symbol;Acc:VGNC:74627]  
ENSMMUG00000013047 S-phase kinase associated protein 1 [Source:NCBI gene;Acc:100423634]  
ENSMMUG00000013183 F-box and leucine rich repeat protein 17 [Source:VGNC Symbol;Acc:VGNC:82142]  
ENSMMUG00000013302 family with sequence similarity 184 member A [Source:VGNC Symbol;Acc:VGNC:72308]  
ENSMMUG00000013718 translocation associated membrane protein 2 [Source:VGNC Symbol;Acc:VGNC:83515]  
ENSMMUG00000014018 bromodomain testis associated [Source:VGNC Symbol;Acc:VGNC:70282]  
ENSMMUG00000014080 kelch like family member 8 [Source:VGNC Symbol;Acc:VGNC:74076]  
ENSMMUG00000014474 SPARC related modular calcium binding 2 [Source:VGNC Symbol;Acc:VGNC:83470]  
ENSMMUG00000014955 nuclear receptor subfamily 3 group C member 2 [Source:VGNC Symbol;Acc:VGNC:75516]  
ENSMMUG00000015041 CWC27 spliceosome associated cyclophilin [Source:VGNC Symbol;Acc:VGNC:71396]

ENSMMUG00000015309 F-box protein 24 [Source:VGNC Symbol;Acc:VGNC:72495]  
ENSMMUG00000015371 microtubule associated serine/threonine kinase 2 [Source:VGNC Symbol;Acc:VGNC:74532]  
ENSMMUG00000015640 AF4/FMR2 family member 4 [Source:VGNC Symbol;Acc:VGNC:69629]  
ENSMMUG00000015661 protein tyrosine phosphatase receptor type U [Source:VGNC Symbol;Acc:VGNC:76624]  
ENSMMUG00000015909 TEA domain transcription factor 3 [Source:VGNC Symbol;Acc:VGNC:78303]  
ENSMMUG00000016004 acid phosphatase 3 [Source:VGNC Symbol;Acc:VGNC:69385]  
ENSMMUG00000016135 neural precursor cell expressed, developmentally down-regulated 9 [Source:VGNC Symbol;Acc:VGNC:75304]  
ENSMMUG00000016857 prostaglandin-endoperoxide synthase 2 [Source:VGNC Symbol;Acc:VGNC:76589]  
ENSMMUG00000016880 solute carrier family 39 member 8 [Source:VGNC Symbol;Acc:VGNC:77541]  
ENSMMUG00000016893 solute carrier family 9 member A1 [Source:VGNC Symbol;Acc:VGNC:82241]  
ENSMMUG00000016896 solute carrier family 12 member 1 [Source:VGNC Symbol;Acc:VGNC:77385]  
ENSMMUG00000016911 DEAD-box helicase 41 [Source:VGNC Symbol;Acc:VGNC:71660]  
ENSMMUG00000016993 PKHD1 ciliary IPT domain containing fibrocystin/polyductin [Source:VGNC Symbol;Acc:VGNC:76010]  
ENSMMUG00000017008 GTPase, IMAP family member 2 [Source:VGNC Symbol;Acc:VGNC:72980]  
ENSMMUG00000017114 pleckstrin homology domain containing A6 [Source:VGNC Symbol;Acc:VGNC:76040]  
ENSMMUG00000017186 pleckstrin homology domain interacting protein [Source:VGNC Symbol;Acc:VGNC:75803]  
ENSMMUG00000017374 G protein subunit beta 5 [Source:VGNC Symbol;Acc:VGNC:73097]  
ENSMMUG00000017396 3'(2'), 5'-bisphosphate nucleotidase 1 [Source:NCBI gene;Acc:721277]  
ENSMMUG00000017432 tropomodulin 2 [Source:VGNC Symbol;Acc:VGNC:78571]  
ENSMMUG00000017437 LysM domain containing 2 [Source:NCBI gene;Acc:694916]  
ENSMMUG00000017583 single stranded DNA binding protein 2 [Source:NCBI gene;Acc:711752]  
ENSMMUG00000017819 putative homeodomain transcription factor 1 [Source:VGNC Symbol;Acc:VGNC:75982]  
ENSMMUG00000018057 uromodulin like 1 [Source:VGNC Symbol;Acc:VGNC:78717]  
ENSMMUG00000018058 ATP binding cassette subfamily G member 1 [Source:VGNC Symbol;Acc:VGNC:69584]  
ENSMMUG00000018073 ligand dependent nuclear receptor corepressor like [Source:NCBI gene;Acc:715285]  
ENSMMUG00000018081 ubiquitin associated and SH3 domain containing A [Source:VGNC Symbol;Acc:VGNC:78687]  
ENSMMUG00000018163 caspase 9 [Source:NCBI gene;Acc:694544]  
ENSMMUG00000018285 cysteine rich with EGF like domains 1 [Source:VGNC Symbol;Acc:VGNC:71407]  
ENSMMUG00000018332 family with sequence similarity 98 member B [Source:VGNC Symbol;Acc:VGNC:72583]  
ENSMMUG00000018342 required for meiotic nuclear division 1 homolog [Source:VGNC Symbol;Acc:VGNC:76797]  
ENSMMUG00000018346 coiled-coil domain containing 170 [Source:VGNC Symbol;Acc:VGNC:70832]  
ENSMMUG00000018490 ADP ribosylation factor interacting protein 1 [Source:VGNC Symbol;Acc:VGNC:69878]  
ENSMMUG00000018493 FH2 domain containing 1 [Source:VGNC Symbol;Acc:VGNC:72598]  
ENSMMUG00000018525 presenilin 2 [Source:VGNC Symbol;Acc:VGNC:76436]  
ENSMMUG00000018565 ribonucleoprotein, PTB binding 2 [Source:VGNC Symbol;Acc:VGNC:76536]  
ENSMMUG00000018739 sperm flagellar 2 [Source:VGNC Symbol;Acc:VGNC:82243]  
ENSMMUG00000018746 FAST kinase domains 3 [Source:VGNC Symbol;Acc:VGNC:72588]  
ENSMMUG00000018747 5-methyltetrahydrofolate-homocysteine methyltransferase reductase [Source:VGNC Symbol;Acc:VGNC:75079]  
ENSMMUG00000018911 protein kinase C zeta [Source:VGNC Symbol;Acc:VGNC:82212]  
ENSMMUG00000018939 leucine rich repeat containing 66 [Source:VGNC Symbol;Acc:VGNC:74415]  
ENSMMUG00000018974 LysM domain containing 3 [Source:VGNC Symbol;Acc:VGNC:74373]  
ENSMMUG00000018976 adhesion G protein-coupled receptor V1 [Source:VGNC Symbol;Acc:VGNC:69625]  
ENSMMUG00000019045 estrogen receptor 1 [Source:VGNC Symbol;Acc:VGNC:72432]  
ENSMMUG00000019250 solute carrier family 25 member 27 [Source:VGNC Symbol;Acc:VGNC:77543]  
ENSMMUG00000019252 tudor domain containing 6 [Source:VGNC Symbol;Acc:VGNC:79319]  
ENSMMUG00000019254 phospholipase A2 group VII [Source:VGNC Symbol;Acc:VGNC:76158]  
ENSMMUG00000019267 interleukin 17 receptor B [Source:VGNC Symbol;Acc:VGNC:73618]  
ENSMMUG00000019325 mechanistic target of rapamycin kinase [Source:VGNC Symbol;Acc:VGNC:75062]  
ENSMMUG00000019815 transcription factor AP-2 epsilon [Source:VGNC Symbol;Acc:VGNC:79878]  
ENSMMUG00000019836 myocyte enhancer factor 2C [Source:VGNC Symbol;Acc:VGNC:84438]  
ENSMMUG00000019854 transmembrane protein 108 [Source:VGNC Symbol;Acc:VGNC:79714]

ENSMMUG00000019857 beaded filament structural protein 2 [Source:VGNC Symbol;Acc:VGNC:70245]  
ENSMMUG00000019977 myosin heavy chain 15 [Source:VGNC Symbol;Acc:VGNC:84148]  
ENSMMUG00000020047 integrin subunit beta 3 binding protein [Source:VGNC Symbol;Acc:VGNC:73787]  
ENSMMUG00000020122 RAN binding protein 9 [Source:VGNC Symbol;Acc:VGNC:76475]  
ENSMMUG00000020289 CD83 molecule [Source:VGNC Symbol;Acc:VGNC:70783]  
ENSMMUG00000020377 collagen type VI alpha 5 chain [Source:NCBI gene;Acc:719331]  
ENSMMUG00000020418 diacylglycerol kinase beta [Source:VGNC Symbol;Acc:VGNC:71782]  
ENSMMUG00000020435 amine oxidase copper containing 1 [Source:VGNC Symbol;Acc:VGNC:70033]  
ENSMMUG00000020436 potassium voltage-gated channel subfamily H member 2 [Source:VGNC Symbol;Acc:VGNC:73980]  
ENSMMUG00000020910 nucleoporin 54 [Source:VGNC Symbol;Acc:VGNC:75420]  
ENSMMUG00000021008 ankyrin repeat and SOCS box containing 14 [Source:VGNC Symbol;Acc:VGNC:84237]  
ENSMMUG00000021051 TNFAIP3 interacting protein 1 [Source:VGNC Symbol;Acc:VGNC:79057]  
ENSMMUG00000021053 annexin A6 [Source:VGNC Symbol;Acc:VGNC:69951]  
ENSMMUG00000021145 family with sequence similarity 120B [Source:VGNC Symbol;Acc:VGNC:72311]  
ENSMMUG00000021168 unc-5 family C-terminal like [Source:VGNC Symbol;Acc:VGNC:79314]  
ENSMMUG00000021169 translocator protein 2 [Source:VGNC Symbol;Acc:VGNC:83960]  
ENSMMUG00000021171 apolipoprotein B mRNA editing enzyme catalytic subunit 2 [Source:VGNC Symbol;Acc:VGNC:69986]  
ENSMMUG00000021173 nuclear transcription factor Y subunit alpha [Source:VGNC Symbol;Acc:VGNC:75344]  
ENSMMUG00000021186 anillin actin binding protein [Source:VGNC Symbol;Acc:VGNC:69610]  
ENSMMUG00000021377 SPT3 homolog, SAGA and STAGA complex component [Source:VGNC Symbol;Acc:VGNC:78055]  
ENSMMUG00000021388 circadian associated repressor of transcription [Source:VGNC Symbol;Acc:VGNC:71345]  
ENSMMUG00000022153 solute carrier family 25 member 36 [Source:VGNC Symbol;Acc:VGNC:84079]  
ENSMMUG00000022183 spermatogenesis associated 1 [Source:NCBI gene;Acc:710462]  
ENSMMUG00000022199 polyhomeotic homolog 3 [Source:VGNC Symbol;Acc:VGNC:75804]  
ENSMMUG00000022484 ITPR interacting domain containing 1 [Source:VGNC Symbol;Acc:VGNC:73667]  
ENSMMUG00000022532 EPM2A interacting protein 1 [Source:VGNC Symbol;Acc:VGNC:84184]  
ENSMMUG00000022630 protoporphyrinogen oxidase [Source:VGNC Symbol;Acc:VGNC:76365]  
ENSMMUG00000022631 ubiquitin specific peptidase 21 [Source:VGNC Symbol;Acc:VGNC:78741]  
ENSMMUG00000022632 ubiquitin-fold modifier conjugating enzyme 1 [Source:VGNC Symbol;Acc:VGNC:79643]  
ENSMMUG00000022636 GTPase, IMAP family member 8 [Source:VGNC Symbol;Acc:VGNC:72981]  
ENSMMUG00000022641 ubiquitin C-terminal hydrolase L5 [Source:VGNC Symbol;Acc:VGNC:79197]  
ENSMMUG00000022647 cell division cycle 73 [Source:VGNC Symbol;Acc:VGNC:70766]  
ENSMMUG00000022648 beta-1,3-galactosyltransferase 2 [Source:VGNC Symbol;Acc:VGNC:70205]  
ENSMMUG00000022697 STEAP4 metalloredutase [Source:VGNC Symbol;Acc:VGNC:77974]  
ENSMMUG00000022791 heat shock transcription factor 2 binding protein [Source:VGNC Symbol;Acc:VGNC:73532]  
ENSMMUG00000022840 zonadhesin [Source:VGNC Symbol;Acc:VGNC:81797]  
ENSMMUG00000022880 eukaryotic translation initiation factor 5A2 [Source:VGNC Symbol;Acc:VGNC:72198]  
ENSMMUG00000022927 RCAN family member 3 [Source:VGNC Symbol;Acc:VGNC:76875]  
ENSMMUG00000023012 vesicle trafficking 1 [Source:VGNC Symbol;Acc:VGNC:79296]  
ENSMMUG00000023096 obscurin, cytoskeletal calmodulin and titin-interacting RhoGEF [Source:NCBI gene;Acc:694413]  
ENSMMUG00000023124 transmembrane protein 43 [Source:VGNC Symbol;Acc:VGNC:82711]  
ENSMMUG00000023125 XPC complex subunit, DNA damage recognition and repair factor [Source:VGNC Symbol;Acc:VGNC:78809]  
ENSMMUG00000023138 bromodomain containing 2 [Source:VGNC Symbol;Acc:VGNC:83422]  
ENSMMUG00000023235 SET domain bifurcated histone lysine methyltransferase 1 [Source:NCBI gene;Acc:716141]  
ENSMMUG00000023265 A-kinase anchoring protein 12 [Source:VGNC Symbol;Acc:VGNC:69766]  
ENSMMUG00000023398 collagen type XVI alpha 1 chain [Source:VGNC Symbol;Acc:VGNC:71293]  
ENSMMUG00000023401 adhesion G protein-coupled receptor B2 [Source:VGNC Symbol;Acc:VGNC:69598]  
ENSMMUG00000023558 exocyst complex component 2 [Source:VGNC Symbol;Acc:VGNC:72338]  
ENSMMUG00000023676 espin [Source:NCBI gene;Acc:722532]  
ENSMMUG00000023679 tripartite motif containing 26 [Source:VGNC Symbol;Acc:VGNC:78854]  
ENSMMUG00000023814 mitogen-activated protein kinase kinase kinase 13 [Source:VGNC Symbol;Acc:VGNC:74494]

ENSMMUG00000024186 U1 spliceosomal RNA [Source:RFAM;Acc:RF00003]  
ENSMMUG00000027053 mml-mir-194-1 [Source:miRBase;Acc:MI0003024]  
ENSMMUG00000029475 zinc finger and BTB domain containing 2 [Source:VGNC Symbol;Acc:VGNC:79291]  
ENSMMUG00000030099 phospholipid phosphatase 1 [Source:VGNC Symbol;Acc:VGNC:76226]  
ENSMMUG00000031821 chymotrypsin-like elastase family member 2B [Source:NCBI gene;Acc:106992406]  
ENSMMUG00000032244 DnaJ heat shock protein family (Hsp40) member C16 [Source:NCBI gene;Acc:700894]  
ENSMMUG00000032252 UbiA prenyltransferase domain containing 1 [Source:VGNC Symbol;Acc:VGNC:79881]  
ENSMMUG00000032281 zinc finger and BTB domain containing 48 [Source:VGNC Symbol;Acc:VGNC:79959]  
ENSMMUG00000037458 endoplasmic reticulum resident protein 29 [Source:NCBI gene;Acc:720396]  
ENSMMUG00000037551 Metazoan signal recognition particle RNA [Source:RFAM;Acc:RF00017]  
ENSMMUG00000037625  
ENSMMUG00000038051 uncharacterized LOC106998885 [Source:NCBI gene;Acc:106998885]  
ENSMMUG00000038560 eukaryotic translation elongation factor 1 epsilon 1 [Source:NCBI gene;Acc:695426]  
ENSMMUG00000039020 zinc finger protein 141 [Source:NCBI gene;Acc:714265]  
ENSMMUG00000039033 nucleolar protein with MIF4G domain 1 [Source:VGNC Symbol;Acc:VGNC:81729]  
ENSMMUG00000039085 adaptor protein, phosphotyrosine interacting with PH domain and leucine zipper 1 [Source:NCBI gene;Acc:100425753]  
ENSMMUG00000039317 cAMP responsive element binding protein 5 [Source:VGNC Symbol;Acc:VGNC:81295]  
ENSMMUG00000039944 Ras protein specific guanine nucleotide releasing factor 2 [Source:VGNC Symbol;Acc:VGNC:84486]  
ENSMMUG00000040694 LCK proto-oncogene, Src family tyrosine kinase [Source:NCBI gene;Acc:717704]  
ENSMMUG00000040764 alcohol dehydrogenase 1A [Source:NCBI gene;Acc:100424103]  
ENSMMUG00000042798  
ENSMMUG00000043161 endogenous retrovirus group FRD member 1, envelope [Source:VGNC Symbol;Acc:VGNC:81068]  
ENSMMUG00000043809 caspase 2 [Source:VGNC Symbol;Acc:VGNC:80804]  
ENSMMUG00000043922 spermatogenesis associated 48 [Source:VGNC Symbol;Acc:VGNC:81762]  
ENSMMUG00000044175 forkhead box O6 [Source:NCBI gene;Acc:697505]  
ENSMMUG00000044473  
ENSMMUG00000044759  
ENSMMUG00000044958 adhesion G protein-coupled receptor G6 [Source:VGNC Symbol;Acc:VGNC:81009]  
ENSMMUG00000045584 leucine zipper protein 1 [Source:NCBI gene;Acc:718626]  
ENSMMUG00000046663 Metazoan signal recognition particle RNA [Source:RFAM;Acc:RF00017]  
ENSMMUG00000047162 fibroblast growth factor 10 [Source:VGNC Symbol;Acc:VGNC:84378]  
ENSMMUG00000047276 GTPase, IMAP family member 6 [Source:VGNC Symbol;Acc:VGNC:81315]  
ENSMMUG00000047324 casein alpha s1 [Source:HGNC Symbol;Acc:HGNC:2445]  
ENSMMUG00000047994 CGG triplet repeat binding protein 1 [Source:VGNC Symbol;Acc:VGNC:84203]  
ENSMMUG00000048232 MINDY family member 4B [Source:VGNC Symbol;Acc:VGNC:84153]  
ENSMMUG00000048805  
ENSMMUG00000048823  
ENSMMUG00000048892 SCO-spondin [Source:VGNC Symbol;Acc:VGNC:81765]  
ENSMMUG00000049196 dispatched RND transporter family member 3 [Source:NCBI gene;Acc:722727]  
ENSMMUG00000049295 GTPase, IMAP family member 5 [Source:NCBI gene;Acc:713835]  
ENSMMUG00000049396 Metazoan signal recognition particle RNA [Source:RFAM;Acc:RF00017]  
ENSMMUG00000049575 T cell receptor beta variable 7-2 [Source:HGNC Symbol;Acc:HGNC:12236]  
ENSMMUG00000049859  
ENSMMUG00000049939  
ENSMMUG00000050239  
ENSMMUG00000050269 T cell receptor beta variable 14 [Source:HGNC Symbol;Acc:HGNC:12189]  
ENSMMUG00000050991  
ENSMMUG00000051008  
ENSMMUG00000051020 zinc finger protein 467 [Source:NCBI gene;Acc:712106]  
ENSMMUG00000051032 serine protease 2 [Source:NCBI gene;Acc:698352]  
ENSMMUG00000051107

ENSMMUG00000051169  
ENSMMUG00000051271  
ENSMMUG00000051381 Metazoan signal recognition particle RNA [Source:RFAM;Acc:RF00017]  
ENSMMUG00000051385  
ENSMMUG00000051429  
ENSMMUG00000051523 Metazoan signal recognition particle RNA [Source:RFAM;Acc:RF00017]  
ENSMMUG00000051641  
ENSMMUG00000051768  
ENSMMUG00000052282  
ENSMMUG00000052287  
ENSMMUG00000052382 histone H4 [Source:NCBI gene;Acc:107000818]  
ENSMMUG00000052435 Metazoan signal recognition particle RNA [Source:RFAM;Acc:RF00017]  
ENSMMUG00000052442  
ENSMMUG00000052574  
ENSMMUG00000052609 ribosomal protein L34 [Source:NCBI gene;Acc:696636]  
ENSMMUG00000052682  
ENSMMUG00000052830  
ENSMMUG00000052887  
ENSMMUG00000053036  
ENSMMUG00000053235  
ENSMMUG00000053344 splA/ryanodine receptor domain and SOCS box containing 4 [Source:NCBI gene;Acc:715278]  
ENSMMUG00000053384  
ENSMMUG00000053541  
ENSMMUG00000053550  
ENSMMUG00000053660 Metazoan signal recognition particle RNA [Source:RFAM;Acc:RF00017]  
ENSMMUG00000053794  
ENSMMUG00000054107  
ENSMMUG00000054168 mitotic arrest deficient 2 like 1 [Source:NCBI gene;Acc:708574]  
ENSMMUG00000054315  
ENSMMUG00000054412  
ENSMMUG00000054532  
ENSMMUG00000054719  
ENSMMUG00000054916 Metazoan signal recognition particle RNA [Source:RFAM;Acc:RF00017]  
ENSMMUG00000055028  
ENSMMUG00000055117  
ENSMMUG00000055233 PRAME family member 17-like [Source:NCBI gene;Acc:100427847]  
ENSMMUG00000055244 U6 spliceosomal RNA [Source:RFAM;Acc:RF00026]  
ENSMMUG00000055271  
ENSMMUG00000055272 putative uncharacterized protein ZNRD1-AS1 [Source:NCBI gene;Acc:712069]  
ENSMMUG00000055392  
ENSMMUG00000055585  
ENSMMUG00000055759 Metazoan signal recognition particle RNA [Source:RFAM;Acc:RF00017]  
ENSMMUG00000055783  
ENSMMUG00000055809  
ENSMMUG00000056103 growth arrest and DNA damage inducible alpha [Source:NCBI gene;Acc:701054]  
ENSMMUG00000056116  
ENSMMUG00000056280 G protein subunit alpha i2 [Source:NCBI gene;Acc:703780]  
ENSMMUG00000056363  
ENSMMUG00000056515  
ENSMMUG00000056790  
ENSMMUG00000057282 Y RNA [Source:RFAM;Acc:RF00019]

ENSMMUG00000057494 T cell receptor beta variable 7-9 [Source:HGNC Symbol;Acc:HGNC:12243]  
ENSMMUG00000057501  
ENSMMUG00000057606 GPRIN family member 3 [Source:NCBI gene;Acc:703567]  
ENSMMUG00000057697  
ENSMMUG00000057768  
ENSMMUG00000057859  
ENSMMUG00000058133  
ENSMMUG00000058151 chromosome 4 C6orf62 homolog [Source:NCBI gene;Acc:708218]  
ENSMMUG00000058580 tripartite motif containing 40 [Source:NCBI gene;Acc:100427925]  
ENSMMUG00000058765  
ENSMMUG00000059019  
ENSMMUG00000059101  
ENSMMUG00000059208 aurora kinase A interacting protein 1 [Source:NCBI gene;Acc:706329]  
ENSMMUG00000059241  
ENSMMUG00000059327 NUS1 dehydrolipoyl diphosphate synthase subunit [Source:NCBI gene;Acc:715015]  
ENSMMUG00000059677 melanocortin 2 receptor accessory protein [Source:NCBI gene;Acc:701330]  
ENSMMUG00000059707 MIS18 kinetochore protein A [Source:NCBI gene;Acc:709275]  
ENSMMUG00000059773 methyltransferase like 11B [Source:NCBI gene;Acc:705503]  
ENSMMUG00000059855 Smad nuclear interacting protein 1 [Source:NCBI gene;Acc:713733]  
ENSMMUG00000059938  
ENSMMUG00000059986  
ENSMMUG00000060167  
ENSMMUG00000060278 Metazoan signal recognition particle RNA [Source:RFAM;Acc:RF00017]  
ENSMMUG00000060527  
ENSMMUG00000060541  
ENSMMUG00000060600  
ENSMMUG00000060744  
ENSMMUG00000060798  
ENSMMUG00000060822  
ENSMMUG00000060841  
ENSMMUG00000060940 acidic residue methyltransferase 1 [Source:NCBI gene;Acc:704570]  
ENSMMUG00000061117  
ENSMMUG00000061590  
ENSMMUG00000061973  
ENSMMUG00000062021  
ENSMMUG00000062110 TPD52 like 1 [Source:NCBI gene;Acc:716568]  
ENSMMUG00000062140  
ENSMMUG00000062443  
ENSMMUG00000062527  
ENSMMUG00000062538 adenylate cyclase type 10 [Source:NCBI gene;Acc:719662]  
ENSMMUG00000062676  
ENSMMUG00000062861  
ENSMMUG00000063177 StAR related lipid transfer domain containing 4 [Source:NCBI gene;Acc:706654]  
ENSMMUG00000063228  
ENSMMUG00000063268  
ENSMMUG00000063288  
ENSMMUG00000063298  
ENSMMUG00000063570 Metazoan signal recognition particle RNA [Source:RFAM;Acc:RF00017]  
ENSMMUG00000063576 Metazoan signal recognition particle RNA [Source:RFAM;Acc:RF00017]  
ENSMMUG00000063659  
ENSMMUG00000063972



ENSMMUG00000064337 nectin cell adhesion molecule 4 [Source:NCBI gene;Acc:719843]  
ENSMMUG00000064344 Metazoan signal recognition particle RNA [Source:RFAM;Acc:RF00017]  
ENSMMUG00000064458  
ENSMMUG00000064473 MRT4 homolog, ribosome maturation factor [Source:NCBI gene;Acc:702926]  
ENSMMUG00000064529  
ENSMMUG00000064804  
ENSMMUG00000065031  
ENSMMUG00000000205 transmembrane protein 117 [Source:VGNC Symbol;Acc:VGNC:79488]  
ENSMMUG00000000238 HECT domain E3 ubiquitin protein ligase 2 [Source:VGNC Symbol;Acc:VGNC:73246]  
ENSMMUG00000000443 arylsulfatase F [Source:VGNC Symbol;Acc:VGNC:81362]  
ENSMMUG00000000511 cysteinyl-tRNA synthetase 1 [Source:VGNC Symbol;Acc:VGNC:70540]  
ENSMMUG00000000667 zinc finger MYM-type containing 3 [Source:VGNC Symbol;Acc:VGNC:78886]  
ENSMMUG00000000669 gap junction protein beta 1 [Source:VGNC Symbol;Acc:VGNC:73059]  
ENSMMUG00000000684 acyl-CoA dehydrogenase short/branched chain [Source:VGNC Symbol;Acc:VGNC:81343]  
ENSMMUG00000000690 catenin alpha like 1 [Source:VGNC Symbol;Acc:VGNC:71544]  
ENSMMUG00000000797 exophilin 5 [Source:VGNC Symbol;Acc:VGNC:72412]  
ENSMMUG00000000807 tRNA 5-methylaminomethyl-2-thiouridylate methyltransferase [Source:VGNC Symbol;Acc:VGNC:79500]  
ENSMMUG00000000974 mutS homolog 2 [Source:VGNC Symbol;Acc:VGNC:74931]  
ENSMMUG00000001008 spectrin repeat containing nuclear envelope protein 2 [Source:NCBI gene;Acc:706759]  
ENSMMUG00000001294 FCH and double SH3 domains 2 [Source:VGNC Symbol;Acc:VGNC:72593]  
ENSMMUG00000001357 tetraspanin 11 [Source:VGNC Symbol;Acc:VGNC:79882]  
ENSMMUG00000001374 supervillin [Source:NCBI gene;Acc:695267]  
ENSMMUG00000001386 neurotrophic receptor tyrosine kinase 3 [Source:VGNC Symbol;Acc:VGNC:75542]  
ENSMMUG00000001640 SIX homeobox 4 [Source:NCBI gene;Acc:703798]  
ENSMMUG00000002090 ATPase H+ transporting V1 subunit B1 [Source:VGNC Symbol;Acc:VGNC:70184]  
ENSMMUG00000002093 testis expressed 261 [Source:NCBI gene;Acc:703863]  
ENSMMUG00000002103 delta/notch like EGF repeat containing [Source:VGNC Symbol;Acc:VGNC:71895]  
ENSMMUG00000002176 ubiquitin like with PHD and ring finger domains 2 [Source:VGNC Symbol;Acc:VGNC:78714]  
ENSMMUG00000002183 oxysterol binding protein like 6 [Source:VGNC Symbol;Acc:VGNC:75627]  
ENSMMUG00000002244 early endosome antigen 1 [Source:VGNC Symbol;Acc:VGNC:72161]  
ENSMMUG00000002250 beta-1,3-glucuronyltransferase 1 [Source:VGNC Symbol;Acc:VGNC:70207]  
ENSMMUG00000002517 protein tyrosine phosphatase domain containing 1 [Source:VGNC Symbol;Acc:VGNC:76567]  
ENSMMUG00000002519 serine/threonine kinase 11 interacting protein [Source:VGNC Symbol;Acc:VGNC:77963]  
ENSMMUG00000002520 solute carrier family 4 member 3 [Source:VGNC Symbol;Acc:VGNC:77604]  
ENSMMUG00000002549 trehalase [Source:NCBI gene;Acc:706449]  
ENSMMUG00000002589 sulfotransferase 1C3-like [Source:NCBI gene;Acc:114671897]  
ENSMMUG00000002678 integrin subunit beta 6 [Source:VGNC Symbol;Acc:VGNC:73789]  
ENSMMUG00000002809 unc-80 homolog, NALCN channel complex subunit [Source:NCBI gene;Acc:713007]  
ENSMMUG00000003049 testis expressed 11 [Source:VGNC Symbol;Acc:VGNC:78316]  
ENSMMUG00000003120 HECT domain E3 ubiquitin protein ligase 1 [Source:VGNC Symbol;Acc:VGNC:73200]  
ENSMMUG00000003123 adaptor related protein complex 4 subunit sigma 1 [Source:VGNC Symbol;Acc:VGNC:84304]  
ENSMMUG00000003231 coiled-coil domain containing 33 [Source:VGNC Symbol;Acc:VGNC:70876]  
ENSMMUG00000003260  
ENSMMUG00000003261 BAF chromatin remodeling complex subunit BCL11B [Source:VGNC Symbol;Acc:VGNC:70056]  
ENSMMUG00000003394 cilia and flagella associated protein 300 [Source:VGNC Symbol;Acc:VGNC:71120]  
ENSMMUG00000003483 cyclin dependent kinase 2 interacting protein [Source:VGNC Symbol;Acc:VGNC:71326]  
ENSMMUG00000003631 cytoskeleton associated protein 5 [Source:VGNC Symbol;Acc:VGNC:71368]  
ENSMMUG00000003979 WD repeat containing planar cell polarity effector [Source:VGNC Symbol;Acc:VGNC:79677]  
ENSMMUG00000004091 transcription factor 12 [Source:VGNC Symbol;Acc:VGNC:78283]  
ENSMMUG00000004157 nuclear protein, coactivator of histone transcription [Source:VGNC Symbol;Acc:VGNC:75379]  
ENSMMUG00000004178 NADPH oxidase 1 [Source:VGNC Symbol;Acc:VGNC:75374]

ENSMMUG00000004208 serine dehydratase [Source:VGNC Symbol;Acc:VGNC:77148]  
ENSMMUG00000004233 leucine rich repeats and immunoglobulin like domains 3 [Source:NCBI gene;Acc:716344]  
ENSMMUG00000004329 solute carrier family 1 member 2 [Source:VGNC Symbol;Acc:VGNC:77410]  
ENSMMUG00000004606 EMAP like 5 [Source:VGNC Symbol;Acc:VGNC:72067]  
ENSMMUG00000004674 phosphoribosyl pyrophosphate synthetase 1 [Source:NCBI gene;Acc:702529]  
ENSMMUG00000004675 smoothelin [Source:VGNC Symbol;Acc:VGNC:77661]  
ENSMMUG00000004709 proteasome inhibitor subunit 1 [Source:VGNC Symbol;Acc:VGNC:76458]  
ENSMMUG00000004711 transmembrane protein 74B [Source:VGNC Symbol;Acc:VGNC:78990]  
ENSMMUG00000004791 pleckstrin homology domain containing B1 [Source:VGNC Symbol;Acc:VGNC:76069]  
ENSMMUG00000004821 membrane spanning 4-domains A14 [Source:NCBI gene;Acc:697083]  
ENSMMUG00000004954 apoptosis inducing factor mitochondria associated 1 [Source:VGNC Symbol;Acc:VGNC:69820]  
ENSMMUG00000004985 arylsulfatase L [Source:VGNC Symbol;Acc:VGNC:81361]  
ENSMMUG00000005042 RAB, member RAS oncogene family like 6 [Source:VGNC Symbol;Acc:VGNC:76529]  
ENSMMUG00000005048 MAM domain containing 4 [Source:VGNC Symbol;Acc:VGNC:74345]  
ENSMMUG00000005067 elongator acetyltransferase complex subunit 3 [Source:VGNC Symbol;Acc:VGNC:72080]  
ENSMMUG00000005200 PC-esterase domain containing 1A [Source:VGNC Symbol;Acc:VGNC:75622]  
ENSMMUG00000005204 VPS16 core subunit of CORVET and HOPS complexes [Source:VGNC Symbol;Acc:VGNC:78966]  
ENSMMUG00000005246 zinc finger protein 740 [Source:VGNC Symbol;Acc:VGNC:79665]  
ENSMMUG00000005301 ATP binding cassette subfamily B member 9 [Source:VGNC Symbol;Acc:VGNC:81341]  
ENSMMUG00000005463 bromodomain containing 3 [Source:VGNC Symbol;Acc:VGNC:70281]  
ENSMMUG00000005610 protein tyrosine phosphatase non-receptor type 4 [Source:VGNC Symbol;Acc:VGNC:76605]  
ENSMMUG00000005761 UBX domain protein 1 [Source:VGNC Symbol;Acc:VGNC:79135]  
ENSMMUG00000005851 B-box and SPRY domain containing [Source:VGNC Symbol;Acc:VGNC:70342]  
ENSMMUG00000005895 nucleobindin 2 [Source:VGNC Symbol;Acc:VGNC:75549]  
ENSMMUG00000006215 serine/threonine kinase 39 [Source:VGNC Symbol;Acc:VGNC:81587]  
ENSMMUG00000006268 junction adhesion molecule like [Source:VGNC Symbol;Acc:VGNC:73860]  
ENSMMUG00000006446 transmembrane protein 177 [Source:VGNC Symbol;Acc:VGNC:79686]  
ENSMMUG00000006457 Rho guanine nucleotide exchange factor 40 [Source:VGNC Symbol;Acc:VGNC:69907]  
ENSMMUG00000006531 SWI/SNF related, matrix associated, actin dependent regulator of chromatin, subfamily d, member 1 [Source:VGNC Symbol;Acc:VGNC:77653]  
ENSMMUG00000006639 NGG1 interacting factor 3 like 1 [Source:VGNC Symbol;Acc:VGNC:75166]  
ENSMMUG00000006731 CECR2 histone acetyl-lysine reader [Source:VGNC Symbol;Acc:VGNC:84530]  
ENSMMUG00000006755 tubulin tyrosine ligase like 4 [Source:VGNC Symbol;Acc:VGNC:79758]  
ENSMMUG00000006768 coiled-coil domain containing 196 [Source:VGNC Symbol;Acc:VGNC:70828]  
ENSMMUG00000006775 proenkephalin [Source:VGNC Symbol;Acc:VGNC:75941]  
ENSMMUG00000006842 doublecortin domain containing 1 [Source:NCBI gene;Acc:696721]  
ENSMMUG00000006950 cornichon family AMPA receptor auxiliary protein 2 [Source:VGNC Symbol;Acc:VGNC:71366]  
ENSMMUG00000007003 polyribonucleotide nucleotidyltransferase 1 [Source:VGNC Symbol;Acc:VGNC:76095]  
ENSMMUG00000007187 haloacid dehalogenase like hydrolase domain containing 3 [Source:VGNC Symbol;Acc:VGNC:73250]  
ENSMMUG00000007215 X-box binding protein 1 [Source:VGNC Symbol;Acc:VGNC:78806]  
ENSMMUG00000007277 GTP binding protein 1 [Source:VGNC Symbol;Acc:VGNC:73320]  
ENSMMUG00000007313 histone acetyltransferase 1 [Source:VGNC Symbol;Acc:VGNC:73349]  
ENSMMUG00000007325 Xrcc1 N-terminal domain containing 1 [Source:NCBI gene;Acc:115945140]  
ENSMMUG00000007326 ring finger protein 121 [Source:VGNC Symbol;Acc:VGNC:76788]  
ENSMMUG00000007330 nuclear mitotic apparatus protein 1 [Source:VGNC Symbol;Acc:VGNC:75556]  
ENSMMUG00000007411 integrin alpha FG-GAP repeat containing 2 [Source:VGNC Symbol;Acc:VGNC:73690]  
ENSMMUG00000007421 zinc finger CCHC-type containing 7 [Source:VGNC Symbol;Acc:VGNC:82088]  
ENSMMUG00000007424 nuclear receptor interacting protein 2 [Source:VGNC Symbol;Acc:VGNC:75448]  
ENSMMUG00000007561 zinc finger DHHC-type palmitoyltransferase 22 [Source:NCBI gene;Acc:706468]  
ENSMMUG00000007620 transmembrane serine protease 4 [Source:VGNC Symbol;Acc:VGNC:78577]  
ENSMMUG00000007628 cell adhesion associated, oncogene regulated [Source:VGNC Symbol;Acc:VGNC:70961]  
ENSMMUG00000007709 crooked neck pre-mRNA splicing factor 1 [Source:VGNC Symbol;Acc:VGNC:71412]

ENSMMUG0000007775 survival motor neuron domain containing 1 [Source:NCBI gene;Acc:694761]  
ENSMMUG0000008113 pleckstrin homology domain containing M3 [Source:NCBI gene;Acc:711125]  
ENSMMUG0000008486 endothelial cell adhesion molecule [Source:VGNC Symbol;Acc:VGNC:72290]  
ENSMMUG0000008539 uroporphyrinogen III synthase [Source:VGNC Symbol;Acc:VGNC:78731]  
ENSMMUG0000008541 BRCA2 and CDKN1A interacting protein [Source:NCBI gene;Acc:699437]  
ENSMMUG0000008643 general transcription factor IIIC subunit 3 [Source:VGNC Symbol;Acc:VGNC:73317]  
ENSMMUG0000008718 zinc finger protein 280D [Source:NCBI gene;Acc:699509]  
ENSMMUG0000008781 BCL6 corepressor like 1 [Source:VGNC Symbol;Acc:VGNC:70131]  
ENSMMUG0000008792 G-patch domain containing 2 like [Source:VGNC Symbol;Acc:VGNC:72973]  
ENSMMUG0000008867 exoribonuclease 1 [Source:VGNC Symbol;Acc:VGNC:72324]  
ENSMMUG0000009038 titin [Source:NCBI gene;Acc:703527]  
ENSMMUG0000009084 transmembrane 6 superfamily member 1 [Source:VGNC Symbol;Acc:VGNC:78566]  
ENSMMUG0000009087 HDGF like 3 [Source:VGNC Symbol;Acc:VGNC:84346]  
ENSMMUG0000009126 solute carrier organic anion transporter family member 2B1 [Source:VGNC Symbol;Acc:VGNC:77603]  
ENSMMUG0000009155 SIN3-HDAC complex associated factor [Source:NCBI gene;Acc:694162]  
ENSMMUG0000009303 coiled-coil domain containing 38 [Source:VGNC Symbol;Acc:VGNC:70880]  
ENSMMUG0000009493 family with sequence similarity 120A [Source:NCBI gene;Acc:717459]  
ENSMMUG0000009519 WASH complex subunit 4 [Source:VGNC Symbol;Acc:VGNC:79783]  
ENSMMUG0000009520 gephyrin [Source:VGNC Symbol;Acc:VGNC:72948]  
ENSMMUG0000009524 adaptor protein, phosphotyrosine interacting with PH domain and leucine zipper 2 [Source:VGNC Symbol;Acc:VGNC:69861]  
ENSMMUG0000009695 BTB domain containing 10 [Source:VGNC Symbol;Acc:VGNC:70361]  
ENSMMUG0000009958 ankyrin repeat domain 46 [Source:VGNC Symbol;Acc:VGNC:69719]  
ENSMMUG0000009965 chromosome 15 C9orf50 homolog [Source:VGNC Symbol;Acc:VGNC:70365]  
ENSMMUG0000010050 small nuclear ribonucleoprotein polypeptides B and B1 [Source:VGNC Symbol;Acc:VGNC:77676]  
ENSMMUG0000010114 Ras and Rab interactor 2 [Source:VGNC Symbol;Acc:VGNC:76770]  
ENSMMUG0000010453 folate receptor beta [Source:VGNC Symbol;Acc:VGNC:72690]  
ENSMMUG0000010627 apelin receptor [Source:VGNC Symbol;Acc:VGNC:69939]  
ENSMMUG0000010744  
ENSMMUG0000010819 fibroblast growth factor receptor substrate 2 [Source:VGNC Symbol;Acc:VGNC:72732]  
ENSMMUG0000010820 chaperonin containing TCP1 subunit 2 [Source:VGNC Symbol;Acc:VGNC:70745]  
ENSMMUG0000011116 NADPH oxidase 4 [Source:VGNC Symbol;Acc:VGNC:75376]  
ENSMMUG0000011129 cilia and flagella associated protein 221 [Source:VGNC Symbol;Acc:VGNC:71153]  
ENSMMUG0000011183 olfactomedin like 2A [Source:VGNC Symbol;Acc:VGNC:75472]  
ENSMMUG0000011189 tousled like kinase 1 [Source:VGNC Symbol;Acc:VGNC:78367]  
ENSMMUG0000011359 eukaryotic translation initiation factor 3 subunit E [Source:VGNC Symbol;Acc:VGNC:83997]  
ENSMMUG0000011469 germ cell nuclear acidic peptidase [Source:VGNC Symbol;Acc:VGNC:72724]  
ENSMMUG0000012056 structural maintenance of chromosomes 6 [Source:VGNC Symbol;Acc:VGNC:77746]  
ENSMMUG0000012058 GEN1 Holliday junction 5' flap endonuclease [Source:VGNC Symbol;Acc:VGNC:72790]  
ENSMMUG0000012101 synaptogyrin 1 [Source:VGNC Symbol;Acc:VGNC:78068]  
ENSMMUG0000012224 family with sequence similarity 126 member B [Source:VGNC Symbol;Acc:VGNC:72393]  
ENSMMUG0000012452 transglutaminase 1 [Source:NCBI gene;Acc:715854]  
ENSMMUG0000012462 proteasome activator subunit 1 [Source:VGNC Symbol;Acc:VGNC:76455]  
ENSMMUG0000012467 family with sequence similarity 227 member A [Source:VGNC Symbol;Acc:VGNC:72475]  
ENSMMUG0000012473 proteasome activator subunit 2 [Source:VGNC Symbol;Acc:VGNC:76456]  
ENSMMUG0000012480 REC8 meiotic recombination protein [Source:VGNC Symbol;Acc:VGNC:76746]  
ENSMMUG0000012481 importin 4 [Source:VGNC Symbol;Acc:VGNC:73630]  
ENSMMUG0000012690 myocardial zonula adherens protein [Source:NCBI gene;Acc:700247]  
ENSMMUG0000012769 limb development membrane protein 1 like [Source:VGNC Symbol;Acc:VGNC:74310]  
ENSMMUG0000012894 NHS actin remodeling regulator [Source:VGNC Symbol;Acc:VGNC:75348]  
ENSMMUG0000013029 surfactant protein C [Source:VGNC Symbol;Acc:VGNC:84113]  
ENSMMUG0000013032 phytanoyl-CoA 2-hydroxylase interacting protein [Source:VGNC Symbol;Acc:VGNC:75812]

ENSMMUG00000013045 coiled-coil domain containing 81 [Source:VGNC Symbol;Acc:VGNC:70868]  
ENSMMUG00000013055 malic enzyme 3 [Source:VGNC Symbol;Acc:VGNC:74695]  
ENSMMUG00000013261 CDP-diacylglycerol synthase 2 [Source:VGNC Symbol;Acc:VGNC:70995]  
ENSMMUG00000013552 scribble planar cell polarity protein [Source:HGNC Symbol;Acc:HGNC:30377]  
ENSMMUG00000013601 chromosome 14 C11orf54 homolog [Source:NCBI gene;Acc:696483]  
ENSMMUG00000013799 ATP binding cassette subfamily G member 4 [Source:VGNC Symbol;Acc:VGNC:69390]  
ENSMMUG00000013848 fucosyltransferase 8 [Source:VGNC Symbol;Acc:VGNC:72829]  
ENSMMUG00000013937 RAB41, member RAS oncogene family [Source:VGNC Symbol;Acc:VGNC:81544]  
ENSMMUG00000014176 cytohesin 1 interacting protein [Source:VGNC Symbol;Acc:VGNC:71831]  
ENSMMUG00000014350 MAX interactor 1, dimerization protein [Source:VGNC Symbol;Acc:VGNC:75087]  
ENSMMUG00000014438 piwi like RNA-mediated gene silencing 2 [Source:VGNC Symbol;Acc:VGNC:81502]  
ENSMMUG00000014484 zinc finger protein 641 [Source:NCBI gene;Acc:708246]  
ENSMMUG00000014531 transmembrane protein 109 [Source:VGNC Symbol;Acc:VGNC:79740]  
ENSMMUG00000014762 myosin heavy chain 6 [Source:NCBI gene;Acc:713471]  
ENSMMUG00000014809 heterogeneous nuclear ribonucleoprotein C [Source:VGNC Symbol;Acc:VGNC:84348]  
ENSMMUG00000014810 short chain dehydrogenase/reductase family 16C member 5 [Source:VGNC Symbol;Acc:VGNC:77343]  
ENSMMUG00000014824 SIX homeobox 3 [Source:HGNC Symbol;Acc:HGNC:10889]  
ENSMMUG00000015000 SPT16 homolog, facilitates chromatin remodeling subunit [Source:VGNC Symbol;Acc:VGNC:78054]  
ENSMMUG00000015002 chromodomain helicase DNA binding protein 8 [Source:VGNC Symbol;Acc:VGNC:71060]  
ENSMMUG00000015117 X-prolyl aminopeptidase 1 [Source:VGNC Symbol;Acc:VGNC:78810]  
ENSMMUG00000015141 ankyrin repeat domain 16 [Source:NCBI gene;Acc:720787]  
ENSMMUG00000015143 F-box DNA helicase 1 [Source:NCBI gene;Acc:720797]  
ENSMMUG00000015151 interleukin 2 receptor subunit alpha [Source:NCBI gene;Acc:574300]  
ENSMMUG00000015166 NIMA related kinase 9 [Source:VGNC Symbol;Acc:VGNC:75209]  
ENSMMUG00000015198 glutamate decarboxylase 1 [Source:VGNC Symbol;Acc:VGNC:72862]  
ENSMMUG00000015202  
ENSMMUG00000015238 O-linked N-acetylglucosamine (GlcNAc) transferase [Source:NCBI gene;Acc:698268]  
ENSMMUG00000015279 SWI/SNF related, matrix associated, actin dependent regulator of chromatin, subfamily a, member 2 [Source:VGNC Symbol;Acc:VGNC:77647]  
ENSMMUG00000015414 family with sequence similarity 160 member B1 [Source:VGNC Symbol;Acc:VGNC:72403]  
ENSMMUG00000015522 GRAM domain containing 1B [Source:VGNC Symbol;Acc:VGNC:73028]  
ENSMMUG00000015550 PR/SET domain 4 [Source:VGNC Symbol;Acc:VGNC:76393]  
ENSMMUG00000015619 ATP binding cassette subfamily B member 7 [Source:VGNC Symbol;Acc:VGNC:81340]  
ENSMMUG00000015962 AT-rich interaction domain 2 [Source:VGNC Symbol;Acc:VGNC:69858]  
ENSMMUG00000015970 coiled-coil domain containing 150 [Source:VGNC Symbol;Acc:VGNC:84222]  
ENSMMUG00000016019 PDZ binding kinase [Source:VGNC Symbol;Acc:VGNC:75643]  
ENSMMUG00000016052 seizure related 6 homolog like [Source:VGNC Symbol;Acc:VGNC:77176]  
ENSMMUG00000016262 tetratricopeptide repeat domain 38 [Source:VGNC Symbol;Acc:VGNC:79574]  
ENSMMUG00000016313 RUN and SH3 domain containing 2 [Source:VGNC Symbol;Acc:VGNC:82230]  
ENSMMUG00000016314 family with sequence similarity 166 member B [Source:VGNC Symbol;Acc:VGNC:72421]  
ENSMMUG00000016316 testis associated actin remodelling kinase 1 [Source:VGNC Symbol;Acc:VGNC:78314]  
ENSMMUG00000016331 glucosylceramidase beta 2 [Source:VGNC Symbol;Acc:VGNC:72741]  
ENSMMUG00000016543 CREB/ATF bZIP transcription factor [Source:VGNC Symbol;Acc:VGNC:71538]  
ENSMMUG00000016610 CD99 molecule like 2 [Source:VGNC Symbol;Acc:VGNC:70823]  
ENSMMUG00000016983 acrosin binding protein [Source:VGNC Symbol;Acc:VGNC:69445]  
ENSMMUG00000017145 cell division cycle 123 [Source:VGNC Symbol;Acc:VGNC:70768]  
ENSMMUG00000017204 programmed cell death 4 [Source:VGNC Symbol;Acc:VGNC:75794]  
ENSMMUG00000017206 SHOC2 leucine rich repeat scaffold protein [Source:VGNC Symbol;Acc:VGNC:81569]  
ENSMMUG00000017207 dopamine beta-hydroxylase [Source:VGNC Symbol;Acc:VGNC:71740]  
ENSMMUG00000017210 sarcosine dehydrogenase [Source:VGNC Symbol;Acc:VGNC:76971]  
ENSMMUG00000017355 remodeling and spacing factor 1 [Source:VGNC Symbol;Acc:VGNC:77044]  
ENSMMUG00000017378 steroid sulfatase [Source:VGNC Symbol;Acc:VGNC:81590]

ENSMMUG00000017486 minichromosome maintenance complex component 6 [Source:VGNC Symbol;Acc:VGNC:74685]  
ENSMMUG00000017524 phosphoinositide kinase, FYVE-type zinc finger containing [Source:VGNC Symbol;Acc:VGNC:75854]  
ENSMMUG00000017593 CD3e molecule [Source:VGNC Symbol;Acc:VGNC:70764]  
ENSMMUG00000017628 pleckstrin homology domain containing A7 [Source:VGNC Symbol;Acc:VGNC:76121]  
ENSMMUG00000017886 F-box protein 10 [Source:NCBI gene;Acc:718443]  
ENSMMUG00000018468 senataxin [Source:VGNC Symbol;Acc:VGNC:77356]  
ENSMMUG00000018474 signal regulatory protein alpha [Source:NCBI gene;Acc:717811]  
ENSMMUG00000018510 sodium voltage-gated channel alpha subunit 9 [Source:VGNC Symbol;Acc:VGNC:76990]  
ENSMMUG00000018679 glyceraldehyde-3-phosphate dehydrogenase [Source:NCBI gene;Acc:574353]  
ENSMMUG00000018945 chloride nucleotide-sensitive channel 1A [Source:VGNC Symbol;Acc:VGNC:71261]  
ENSMMUG00000019462 integrin subunit alpha V [Source:VGNC Symbol;Acc:VGNC:73783]  
ENSMMUG00000019639 paired box 5 [Source:VGNC Symbol;Acc:VGNC:75764]  
ENSMMUG00000019672 autophagy related 13 [Source:VGNC Symbol;Acc:VGNC:70148]  
ENSMMUG00000019838 phosphodiesterase 8A [Source:VGNC Symbol;Acc:VGNC:75924]  
ENSMMUG00000019841 leucine rich pentatricopeptide repeat containing [Source:VGNC Symbol;Acc:VGNC:82177]  
ENSMMUG00000020004 Ras association domain family member 2 [Source:VGNC Symbol;Acc:VGNC:76674]  
ENSMMUG00000020005 solute carrier family 23 member 2 [Source:NCBI gene;Acc:717939]  
ENSMMUG00000020036 Sp1 transcription factor [Source:VGNC Symbol;Acc:VGNC:77844]  
ENSMMUG00000020211 cyclin Y like 1 [Source:VGNC Symbol;Acc:VGNC:84224]  
ENSMMUG00000020348 BCL2 interacting protein 2 [Source:VGNC Symbol;Acc:VGNC:70272]  
ENSMMUG00000020370 SRY-box transcription factor 5 [Source:VGNC Symbol;Acc:VGNC:77843]  
ENSMMUG00000020533 chromosome 11 C12orf56 homolog [Source:VGNC Symbol;Acc:VGNC:70409]  
ENSMMUG00000020706 ETS proto-oncogene 1, transcription factor [Source:VGNC Symbol;Acc:VGNC:72439]  
ENSMMUG00000020804 transmembrane protein 132B [Source:NCBI gene;Acc:707118]  
ENSMMUG00000020813 NADH:ubiquinone oxidoreductase subunit A9 [Source:VGNC Symbol;Acc:VGNC:81480]  
ENSMMUG00000020926 syntaxin 2 [Source:VGNC Symbol;Acc:VGNC:78259]  
ENSMMUG00000020993 cadherin EGF LAG seven-pass G-type receptor 1 [Source:NCBI gene;Acc:718440]  
ENSMMUG00000021049 ret finger protein-like 3 [Source:NCBI gene;Acc:705507]  
ENSMMUG00000021112 epithelial splicing regulatory protein 1 [Source:VGNC Symbol;Acc:VGNC:72358]  
ENSMMUG00000021114 G protein-coupled receptor 182 [Source:VGNC Symbol;Acc:VGNC:72936]  
ENSMMUG00000021216 UDP glucuronosyltransferase 1 family, polypeptide A1 [Source:NCBI gene;Acc:574210]  
ENSMMUG00000021280 leucine rich transmembrane and O-methyltransferase domain containing [Source:NCBI gene;Acc:718286]  
ENSMMUG00000021282 late endosomal/lysosomal adaptor, MAPK and MTOR activator 1 [Source:VGNC Symbol;Acc:VGNC:74129]  
ENSMMUG00000021308 chromosome 9 C10orf71 homolog [Source:NCBI gene;Acc:710332]  
ENSMMUG00000021372 EMI domain containing 1 [Source:VGNC Symbol;Acc:VGNC:72063]  
ENSMMUG00000021373 rhomboid domain containing 3 [Source:NCBI gene;Acc:714479]  
ENSMMUG00000021374 EWS RNA binding protein 1 [Source:VGNC Symbol;Acc:VGNC:72446]  
ENSMMUG00000021393 calcium/calmodulin dependent protein kinase II gamma [Source:VGNC Symbol;Acc:VGNC:70525]  
ENSMMUG00000021552 RPGR interacting protein 1 [Source:VGNC Symbol;Acc:VGNC:77007]  
ENSMMUG00000021670 solute carrier family 52 member 3 [Source:VGNC Symbol;Acc:VGNC:77717]  
ENSMMUG00000021691 spastin [Source:VGNC Symbol;Acc:VGNC:77857]  
ENSMMUG00000021760 zinc finger protein 79 [Source:NCBI gene;Acc:700961]  
ENSMMUG00000021775 beta-1,3-galactosyltransferase 1 [Source:VGNC Symbol;Acc:VGNC:70204]  
ENSMMUG00000021808 cryptochrome circadian regulator 1 [Source:VGNC Symbol;Acc:VGNC:71499]  
ENSMMUG00000021878 timeless circadian regulator [Source:VGNC Symbol;Acc:VGNC:78356]  
ENSMMUG00000021914 spondin 1 [Source:VGNC Symbol;Acc:VGNC:77862]  
ENSMMUG00000022044 scavenger receptor class A member 5 [Source:VGNC Symbol;Acc:VGNC:77117]  
ENSMMUG00000022056 DENN domain containing 4A [Source:VGNC Symbol;Acc:VGNC:71697]  
ENSMMUG00000022118 regulatory factor X4 [Source:VGNC Symbol;Acc:VGNC:76909]  
ENSMMUG00000022185 odd-skipped related transcription factor 2 [Source:VGNC Symbol;Acc:VGNC:84097]  
ENSMMUG00000022202 basic leucine zipper and W2 domains 1 [Source:VGNC Symbol;Acc:VGNC:84213]

ENSMMUG00000022520 kinesin light chain 2 [Source:VGNC Symbol;Acc:VGNC:73869]  
ENSMMUG00000022548 phosphatidylinositol-4-phosphate 3-kinase catalytic subunit type 2 alpha [Source:VGNC Symbol;Acc:VGNC:75992]  
ENSMMUG00000022601 cAMP responsive element binding protein 1 [Source:VGNC Symbol;Acc:VGNC:71485]  
ENSMMUG00000022602 methyltransferase like 21A [Source:VGNC Symbol;Acc:VGNC:74625]  
ENSMMUG00000022680 alpha-2-macroglobulin like 1 [Source:VGNC Symbol;Acc:VGNC:69507]  
ENSMMUG00000023005 Sp9 transcription factor [Source:VGNC Symbol;Acc:VGNC:78027]  
ENSMMUG00000023006 corepressor interacting with RBPJ, 1 [Source:VGNC Symbol;Acc:VGNC:71331]  
ENSMMUG00000023226 RNA polymerase III subunit D [Source:VGNC Symbol;Acc:VGNC:76017]  
ENSMMUG00000023248 serine/threonine kinase 38 like [Source:VGNC Symbol;Acc:VGNC:78156]  
ENSMMUG00000023443 SRR1 domain containing [Source:VGNC Symbol;Acc:VGNC:78036]  
ENSMMUG00000023480 IKAROS family zinc finger 5 [Source:VGNC Symbol;Acc:VGNC:73590]  
ENSMMUG00000023583 calcium release activated channel regulator 2A [Source:NCBI gene;Acc:709929]  
ENSMMUG00000023791 SR-related CTD associated factor 11 [Source:VGNC Symbol;Acc:VGNC:77002]  
ENSMMUG00000023810 methionyl-tRNA synthetase 2, mitochondrial [Source:VGNC Symbol;Acc:VGNC:74572]  
ENSMMUG00000026876 mml-mir-181a-2 [Source:miRBase;Acc:MI0002808]  
ENSMMUG00000026981 EGF like domain multiple 7 [Source:VGNC Symbol;Acc:VGNC:72079]  
ENSMMUG00000029197 YY1 transcription factor [Source:NCBI gene;Acc:717370]  
ENSMMUG00000031202 RAB1B, member RAS oncogene family [Source:NCBI gene;Acc:721852]  
ENSMMUG00000031296 caspase 8 [Source:VGNC Symbol;Acc:VGNC:70547]  
ENSMMUG00000031856 talin 1 [Source:VGNC Symbol;Acc:VGNC:78371]  
ENSMMUG00000032427 neuroligin 3 [Source:NCBI gene;Acc:574216]  
ENSMMUG00000033001 U6 spliceosomal RNA [Source:RFAM;Acc:RF00026]  
ENSMMUG00000033102 mml-mir-181b-2 [Source:miRBase;Acc:MI0007646]  
ENSMMUG00000037675 testis expressed 52 [Source:NCBI gene;Acc:107000723]  
ENSMMUG00000037908  
ENSMMUG00000038070 T cell receptor alpha variable 12-3 [Source:HGNC Symbol;Acc:HGNC:12107]  
ENSMMUG00000038319 Metazoan signal recognition particle RNA [Source:RFAM;Acc:RF00017]  
ENSMMUG00000038587 prostate and testis expressed 2 [Source:NCBI gene;Acc:717085]  
ENSMMUG00000038661  
ENSMMUG00000040154 T cell receptor alpha variable 9-2 [Source:HGNC Symbol;Acc:HGNC:12154]  
ENSMMUG00000040361 ATPase H+ transporting V1 subunit C1 [Source:NCBI gene;Acc:693840]  
ENSMMUG00000040771  
ENSMMUG00000040817 interferon regulatory factor 9 [Source:VGNC Symbol;Acc:VGNC:84361]  
ENSMMUG00000041415 alpha and gamma adaptin binding protein [Source:NCBI gene;Acc:711436]  
ENSMMUG00000042208 pepsin A-4 [Source:NCBI gene;Acc:694646]  
ENSMMUG00000042668 cilia and flagella associated protein 61 [Source:NCBI gene;Acc:699814]  
ENSMMUG00000043411 zinc finger and BTB domain containing 39 [Source:NCBI gene;Acc:713914]  
ENSMMUG00000044047 killer cell lectin like receptor B1 [Source:NCBI gene;Acc:100430783]  
ENSMMUG00000044214  
ENSMMUG00000044417 CD6 molecule [Source:NCBI gene;Acc:695183]  
ENSMMUG00000045105 phospholipase A and acyltransferase 4 [Source:NCBI gene;Acc:722189]  
ENSMMUG00000045446  
ENSMMUG00000046218 X antigen family member 5 [Source:NCBI gene;Acc:114669729]  
ENSMMUG00000046282  
ENSMMUG00000046464 coiled-coil-helix-coiled-coil-helix domain containing 7 [Source:VGNC Symbol;Acc:VGNC:83989]  
ENSMMUG00000046655 pleckstrin homology like domain family B member 1 [Source:NCBI gene;Acc:706336]  
ENSMMUG00000047067 SERTA domain containing 2 [Source:NCBI gene;Acc:696216]  
ENSMMUG00000047542 U4 spliceosomal RNA [Source:RFAM;Acc:RF00015]  
ENSMMUG00000049314 dual specificity phosphatase 2 [Source:NCBI gene;Acc:718442]  
ENSMMUG00000049351 MAGE family member E1 [Source:NCBI gene;Acc:705379]  
ENSMMUG00000049437 Metazoan signal recognition particle RNA [Source:RFAM;Acc:RF00017]



ENSMMUG00000049563  
ENSMMUG00000049720  
ENSMMUG00000049749  
ENSMMUG00000049788  
ENSMMUG00000050493 paired related homeobox 2 [Source:NCBI gene;Acc:716699]  
ENSMMUG00000050862  
ENSMMUG00000050864  
ENSMMUG00000050907  
ENSMMUG00000050923  
ENSMMUG00000050975  
ENSMMUG00000050979 PILR alpha associated neural protein [Source:NCBI gene;Acc:713548]  
ENSMMUG00000051100 Metazoan signal recognition particle RNA [Source:RFAM;Acc:RF00017]  
ENSMMUG00000051482  
ENSMMUG00000051552  
ENSMMUG00000051670  
ENSMMUG00000051843  
ENSMMUG00000051936  
ENSMMUG00000052440  
ENSMMUG00000052526 RAB39A, member RAS oncogene family [Source:NCBI gene;Acc:707451]  
ENSMMUG00000052535  
ENSMMUG00000052651 Metazoan signal recognition particle RNA [Source:RFAM;Acc:RF00017]  
ENSMMUG00000052791  
ENSMMUG00000052818 death associated protein like 1 [Source:NCBI gene;Acc:699071]  
ENSMMUG00000052929  
ENSMMUG00000053250  
ENSMMUG00000053389  
ENSMMUG00000053577  
ENSMMUG00000053648 actin binding transcription modulator [Source:NCBI gene;Acc:710486]  
ENSMMUG00000053721  
ENSMMUG00000053778  
ENSMMUG00000053789  
ENSMMUG00000054116 T cell receptor alpha variable 8-6 [Source:HGNC Symbol;Acc:HGNC:12151]  
ENSMMUG00000054176 methyltransferase like 8 [Source:NCBI gene;Acc:695361]  
ENSMMUG00000054213 parathyroid hormone [Source:NCBI gene;Acc:700195]  
ENSMMUG00000054357  
ENSMMUG00000054689  
ENSMMUG00000054953 leucine rich repeat containing 10 [Source:NCBI gene;Acc:114669753]  
ENSMMUG00000055071 Y RNA [Source:RFAM;Acc:RF00019]  
ENSMMUG00000055207  
ENSMMUG00000055229  
ENSMMUG00000055284  
ENSMMUG00000055400 U6 spliceosomal RNA [Source:RFAM;Acc:RF00026]  
ENSMMUG00000055477  
ENSMMUG00000055590  
ENSMMUG00000055610 homeobox C4 [Source:NCBI gene;Acc:100430434]  
ENSMMUG00000055678 translocase of outer mitochondrial membrane 20 like [Source:NCBI gene;Acc:700628]  
ENSMMUG00000055845 ankyrin repeat domain 53 [Source:NCBI gene;Acc:703757]  
ENSMMUG00000056045  
ENSMMUG00000056303  
ENSMMUG00000056553  
ENSMMUG00000056737

ENSMMUG00000057021 CLOCK interacting pacemaker [Source:NCBI gene;Acc:704679]  
ENSMMUG00000057031  
ENSMMUG00000057073  
ENSMMUG00000057143 transmembrane protein 127 [Source:NCBI gene;Acc:705069]  
ENSMMUG00000057276  
ENSMMUG00000057600 V-set and immunoglobulin domain containing 2 [Source:NCBI gene;Acc:712047]  
ENSMMUG00000057651 frizzled class receptor 5 [Source:NCBI gene;Acc:710796]  
ENSMMUG00000058044  
ENSMMUG00000058240  
ENSMMUG00000058539  
ENSMMUG00000058603  
ENSMMUG00000058836 transmembrane p24 trafficking protein 2 [Source:NCBI gene;Acc:106992483]  
ENSMMUG00000058933  
ENSMMUG00000059267 pellino E3 ubiquitin protein ligase 1 [Source:NCBI gene;Acc:696416]  
ENSMMUG00000059406 RGP1 homolog, RAB6A GEF complex partner 1 [Source:NCBI gene;Acc:695936]  
ENSMMUG00000059525  
ENSMMUG00000059575  
ENSMMUG00000059617  
ENSMMUG00000059663  
ENSMMUG00000060346  
ENSMMUG00000060487 atypical chemokine receptor 3 [Source:NCBI gene;Acc:694428]  
ENSMMUG00000060836  
ENSMMUG00000060892  
ENSMMUG00000060932 zinc finger protein 383-like [Source:NCBI gene;Acc:106993074]  
ENSMMUG00000061068  
ENSMMUG00000061260 Spi-C transcription factor [Source:NCBI gene;Acc:695809]  
ENSMMUG00000061268 PLAG1 zinc finger [Source:NCBI gene;Acc:696149]  
ENSMMUG00000061295 PDZ domain containing 11 [Source:NCBI gene;Acc:695458]  
ENSMMUG00000061305  
ENSMMUG00000061408  
ENSMMUG00000061433  
ENSMMUG00000061815  
ENSMMUG00000061834  
ENSMMUG00000061892  
ENSMMUG00000062615  
ENSMMUG00000062642  
ENSMMUG00000062793  
ENSMMUG00000062974  
ENSMMUG00000063262  
ENSMMUG00000063267 aldo-keto reductase family 1 member C15 [Source:NCBI gene;Acc:722496]  
ENSMMUG00000063345  
ENSMMUG00000063463  
ENSMMUG00000063555  
ENSMMUG00000063598 leucine rich repeat containing 26 [Source:NCBI gene;Acc:706616]  
ENSMMUG00000063655 sodium voltage-gated channel beta subunit 4 [Source:NCBI gene;Acc:100430940]  
ENSMMUG00000064066  
ENSMMUG00000064177  
ENSMMUG00000064752 phospholipase A2 activating protein [Source:NCBI gene;Acc:707876]  
ENSMMUG00000064980  
ENSMMUG00000065018 transmembrane protein 35A [Source:NCBI gene;Acc:702205]  
ENSMMUG00000065019 Metazoan signal recognition particle RNA [Source:RFAM;Acc:RF00017]

ENSMMUG00000065058  
ENSMMUG00000065091 myelin protein zero like 2 [Source:NCBI gene;Acc:699330]  
ENSMMUG00000065099  
ENSMMUG00000065344 homeobox D1 [Source:NCBI gene;Acc:701064]  
ENSMMUG00000000117 HCK proto-oncogene, Src family tyrosine kinase [Source:VGNC Symbol;Acc:VGNC:73353]  
ENSMMUG00000000350 basic, immunoglobulin-like variable motif containing [Source:NCBI gene;Acc:100426213]  
ENSMMUG00000000618 gametogenetin binding protein 2 [Source:VGNC Symbol;Acc:VGNC:72746]  
ENSMMUG00000000620 dehydrogenase/reductase 11 [Source:VGNC Symbol;Acc:VGNC:71792]  
ENSMMUG00000000717 CD3e molecule associated protein [Source:NCBI gene;Acc:714440]  
ENSMMUG00000000981 T-box transcription factor 6 [Source:VGNC Symbol;Acc:VGNC:78276]  
ENSMMUG00000000982 protein phosphatase 4 catalytic subunit [Source:VGNC Symbol;Acc:VGNC:76384]  
ENSMMUG00000000983 aldolase, fructose-bisphosphate A [Source:NCBI gene;Acc:708406]  
ENSMMUG00000001121 zinc finger protein 689 [Source:VGNC Symbol;Acc:VGNC:79480]  
ENSMMUG00000001245 zinc finger protein 532 [Source:NCBI gene;Acc:701146]  
ENSMMUG00000001888 mahogunin ring finger 1 [Source:VGNC Symbol;Acc:VGNC:74542]  
ENSMMUG00000001940 NME/NM23 nucleoside diphosphate kinase 2 [Source:NCBI gene;Acc:100533957]  
ENSMMUG00000001942 mbt domain containing 1 [Source:VGNC Symbol;Acc:VGNC:74538]  
ENSMMUG00000001986 WD repeat domain 24 [Source:VGNC Symbol;Acc:VGNC:79289]  
ENSMMUG00000002109 proline and serine rich 1 [Source:VGNC Symbol;Acc:VGNC:76291]  
ENSMMUG00000002113 NHL repeat containing 3 [Source:VGNC Symbol;Acc:VGNC:75291]  
ENSMMUG00000002167 mannose receptor C type 2 [Source:VGNC Symbol;Acc:VGNC:74784]  
ENSMMUG00000002533 progesterone immunomodulatory binding factor 1 [Source:NCBI gene;Acc:694190]  
ENSMMUG00000002638 WD repeat domain 18 [Source:VGNC Symbol;Acc:VGNC:79103]  
ENSMMUG00000002657 olfactomedin 4 [Source:VGNC Symbol;Acc:VGNC:75418]  
ENSMMUG00000002742 ST8 alpha-N-acetyl-neuraminide alpha-2,8-sialyltransferase 5 [Source:VGNC Symbol;Acc:VGNC:77942]  
ENSMMUG00000002961 G protein subunit alpha 11 [Source:VGNC Symbol;Acc:VGNC:73085]  
ENSMMUG00000003029 protein arginine methyltransferase 1 [Source:NCBI gene;Acc:719419]  
ENSMMUG00000003043 PWWP domain containing 3A, DNA repair factor [Source:VGNC Symbol;Acc:VGNC:76565]  
ENSMMUG00000003288 glutamic--pyruvic transaminase 2 [Source:VGNC Symbol;Acc:VGNC:72962]  
ENSMMUG00000003621 AKT serine/threonine kinase 2 [Source:VGNC Symbol;Acc:VGNC:69777]  
ENSMMUG00000004019 izumo sperm-egg fusion 1 [Source:VGNC Symbol;Acc:VGNC:73670]  
ENSMMUG00000004237 TNF receptor superfamily member 19 [Source:VGNC Symbol;Acc:VGNC:78588]  
ENSMMUG00000005170 unc-45 myosin chaperone B [Source:VGNC Symbol;Acc:VGNC:78954]  
ENSMMUG00000005727 protein kinase N1 [Source:VGNC Symbol;Acc:VGNC:76014]  
ENSMMUG00000006018 sperm associated antigen 5 [Source:NCBI gene;Acc:709400]  
ENSMMUG00000006491 mediator complex subunit 9 [Source:VGNC Symbol;Acc:VGNC:74577]  
ENSMMUG00000007293 RAB34, member RAS oncogene family [Source:VGNC Symbol;Acc:VGNC:81533]  
ENSMMUG00000007398 potassium calcium-activated channel subfamily N member 1 [Source:VGNC Symbol;Acc:VGNC:74002]  
ENSMMUG00000007816 SMAD family member 2 [Source:VGNC Symbol;Acc:VGNC:77810]  
ENSMMUG00000007875 F-box and leucine rich repeat protein 12 [Source:VGNC Symbol;Acc:VGNC:72502]  
ENSMMUG00000007920 myosin XIX [Source:VGNC Symbol;Acc:VGNC:75026]  
ENSMMUG00000008004 transmembrane immune signaling adaptor TYROBP [Source:NCBI gene;Acc:574207]  
ENSMMUG00000008119 telomere maintenance 2 [Source:NCBI gene;Acc:701679]  
ENSMMUG00000008237 phosphatidylglycerophosphate synthase 1 [Source:VGNC Symbol;Acc:VGNC:75890]  
ENSMMUG00000008540 ring finger protein 112 [Source:VGNC Symbol;Acc:VGNC:76724]  
ENSMMUG00000008578 hyaluronan and proteoglycan link protein 4 [Source:VGNC Symbol;Acc:VGNC:73261]  
ENSMMUG00000008639 tumor protein p53 [Source:VGNC Symbol;Acc:VGNC:78627]  
ENSMMUG00000008942 carnosine dipeptidase 1 [Source:VGNC Symbol;Acc:VGNC:71257]  
ENSMMUG00000008945 zinc finger protein 407 [Source:NCBI gene;Acc:695303]  
ENSMMUG00000008946 chromosome 19 C19orf47 homolog [Source:VGNC Symbol;Acc:VGNC:70404]  
ENSMMUG00000009669 cutaneous T cell lymphoma-associated antigen 1 [Source:NCBI gene;Acc:106994443]

ENSMMUG00000011893 KIAA0513 [Source:VGNC Symbol;Acc:VGNC:73925]  
ENSMMUG00000011894 CBY1 interacting BAR domain containing 2 [Source:VGNC Symbol;Acc:VGNC:72335]  
ENSMMUG00000011963 vimentin type intermediate filament associated coiled-coil protein [Source:NCBI gene;Acc:697958]  
ENSMMUG00000012029 sulfatase 2 [Source:VGNC Symbol;Acc:VGNC:78179]  
ENSMMUG00000012209 CYLD lysine 63 deubiquitinase [Source:VGNC Symbol;Acc:VGNC:71581]  
ENSMMUG00000012307 periostin [Source:VGNC Symbol;Acc:VGNC:76039]  
ENSMMUG00000012332 UBA domain containing 2 [Source:NCBI gene;Acc:703484]  
ENSMMUG00000012338 G protein-coupled receptor 183 [Source:VGNC Symbol;Acc:VGNC:73042]  
ENSMMUG00000012677 lysine demethylase 4B [Source:VGNC Symbol;Acc:VGNC:73930]  
ENSMMUG00000013035 teashirt zinc finger homeobox 2 [Source:VGNC Symbol;Acc:VGNC:78875]  
ENSMMUG00000013049 formyl peptide receptor 1 [Source:NCBI gene;Acc:719782]  
ENSMMUG00000013053 sperm acrosome associated 6 [Source:NCBI gene;Acc:114674203]  
ENSMMUG00000013138 Rho guanine nucleotide exchange factor 7 [Source:VGNC Symbol;Acc:VGNC:69833]  
ENSMMUG00000013376 POU class 2 homeobox 2 [Source:NCBI gene;Acc:706835]  
ENSMMUG00000013501 CD68 molecule [Source:VGNC Symbol;Acc:VGNC:82121]  
ENSMMUG00000013513 sex hormone binding globulin [Source:VGNC Symbol;Acc:VGNC:77208]  
ENSMMUG00000013707 heat shock protein family H (Hsp110) member 1 [Source:NCBI gene;Acc:721956]  
ENSMMUG00000014451 ASXL transcriptional regulator 3 [Source:VGNC Symbol;Acc:VGNC:70152]  
ENSMMUG00000014677 dynamin 2 [Source:VGNC Symbol;Acc:VGNC:71957]  
ENSMMUG00000014687 sterile alpha motif domain containing 14 [Source:VGNC Symbol;Acc:VGNC:77112]  
ENSMMUG00000014727 NSF attachment protein alpha [Source:VGNC Symbol;Acc:VGNC:75131]  
ENSMMUG00000014735 carnitine palmitoyltransferase 1C [Source:NCBI gene;Acc:719429]  
ENSMMUG00000016354 IQ motif containing N [Source:VGNC Symbol;Acc:VGNC:73683]  
ENSMMUG00000016526 solute carrier family 25 member 41 [Source:VGNC Symbol;Acc:VGNC:77581]  
ENSMMUG00000016695 CD320 molecule [Source:VGNC Symbol;Acc:VGNC:70763]  
ENSMMUG00000016723 zinc finger protein 287 [Source:NCBI gene;Acc:695524]  
ENSMMUG00000016791 doublecortin like kinase 1 [Source:VGNC Symbol;Acc:VGNC:71745]  
ENSMMUG00000016906 F-box and leucine rich repeat protein 16 [Source:VGNC Symbol;Acc:VGNC:81405]  
ENSMMUG00000016927 solute carrier family 2 member 10 [Source:VGNC Symbol;Acc:VGNC:77465]  
ENSMMUG00000017113 ubiquitin specific peptidase 32 [Source:NCBI gene;Acc:716857]  
ENSMMUG00000017211 peter pan homolog (Drosophila) [Source:NCBI gene;Acc:100533472]  
ENSMMUG00000017230 V-set and transmembrane domain containing 2 like [Source:NCBI gene;Acc:707394]  
ENSMMUG00000017234 leucine rich repeat containing 59 [Source:VGNC Symbol;Acc:VGNC:81436]  
ENSMMUG00000017246 lipoxigenase homology domains 1 [Source:VGNC Symbol;Acc:VGNC:74368]  
ENSMMUG00000017379 myocardin related transcription factor B [Source:VGNC Symbol;Acc:VGNC:74865]  
ENSMMUG00000017615 zinc finger CCHC-type containing 14 [Source:VGNC Symbol;Acc:VGNC:79420]  
ENSMMUG00000017972 zinc finger protein 200 [Source:VGNC Symbol;Acc:VGNC:78867]  
ENSMMUG00000018031 solute carrier family 25 member 19 [Source:VGNC Symbol;Acc:VGNC:77474]  
ENSMMUG00000018358 zinc finger protein 217 [Source:VGNC Symbol;Acc:VGNC:78874]  
ENSMMUG00000018791 molybdenum cofactor sulfurase [Source:VGNC Symbol;Acc:VGNC:74792]  
ENSMMUG00000019145 TNF alpha induced protein 1 [Source:VGNC Symbol;Acc:VGNC:78578]  
ENSMMUG00000019146 DNA polymerase delta interacting protein 2 [Source:VGNC Symbol;Acc:VGNC:76099]  
ENSMMUG00000019148 vitronectin [Source:NCBI gene;Acc:708499]  
ENSMMUG00000019831 neurobeachin [Source:NCBI gene;Acc:714386]  
ENSMMUG00000019850 arachidonate lipoxigenase 3 [Source:VGNC Symbol;Acc:VGNC:69607]  
ENSMMUG00000019892 myomesin 1 [Source:VGNC Symbol;Acc:VGNC:75123]  
ENSMMUG00000020061 protein phosphatase 1 regulatory subunit 9B [Source:VGNC Symbol;Acc:VGNC:76372]  
ENSMMUG00000020175 mediator complex subunit 25 [Source:VGNC Symbol;Acc:VGNC:74607]  
ENSMMUG00000020540 NmrA like redox sensor 1 [Source:VGNC Symbol;Acc:VGNC:75252]  
ENSMMUG00000020690 erythrocyte membrane protein band 4.1 like 1 [Source:VGNC Symbol;Acc:VGNC:72231]  
ENSMMUG00000020691 AAR2 splicing factor [Source:VGNC Symbol;Acc:VGNC:69412]

ENSMMUG00000020898 cap binding complex dependent translation initiation factor [Source:HGNC Symbol;Acc:HGNC:23925]  
ENSMMUG00000021091 COP9 signalosome subunit 3 [Source:VGNC Symbol;Acc:VGNC:71316]  
ENSMMUG00000021409 developmentally regulated GTP binding protein 2 [Source:VGNC Symbol;Acc:VGNC:71993]  
ENSMMUG00000022120 transmembrane protein 94 [Source:VGNC Symbol;Acc:VGNC:79760]  
ENSMMUG00000022121 CASK interacting protein 2 [Source:VGNC Symbol;Acc:VGNC:70577]  
ENSMMUG00000022123 tRNA splicing endonuclease subunit 54 [Source:VGNC Symbol;Acc:VGNC:79666]  
ENSMMUG00000022726 dual specificity tyrosine phosphorylation regulated kinase 1B [Source:VGNC Symbol;Acc:VGNC:72016]  
ENSMMUG00000022975 sprouty related EVH1 domain containing 3 [Source:VGNC Symbol;Acc:VGNC:78030]  
ENSMMUG00000023076 diacylglycerol kinase eta [Source:VGNC Symbol;Acc:VGNC:71786]  
ENSMMUG00000023083 A-kinase anchoring protein 11 [Source:VGNC Symbol;Acc:VGNC:69765]  
ENSMMUG00000023137 zinc finger protein 350 [Source:VGNC Symbol;Acc:VGNC:79041]  
ENSMMUG00000023312 haptoglobin [Source:NCBI gene;Acc:706640]  
ENSMMUG00000026836 Y RNA [Source:RFAM;Acc:RF00019]  
ENSMMUG00000027108 mml-mir-193b [Source:miRBase;Acc:MI0007656]  
ENSMMUG00000028800 solute carrier family 7 member 9 [Source:VGNC Symbol;Acc:VGNC:77633]  
ENSMMUG00000028925 HDGF like 2 [Source:NCBI gene;Acc:693476]  
ENSMMUG00000029164 glycerophosphodiester phosphodiesterase domain containing 3 [Source:VGNC Symbol;Acc:VGNC:72800]  
ENSMMUG00000029263 polycystin 1, transient receptor potential channel interacting [Source:NCBI gene;Acc:694905]  
ENSMMUG00000030381 arachidonate 15-lipoxygenase [Source:VGNC Symbol;Acc:VGNC:69796]  
ENSMMUG00000031224 casein kinase 2 alpha 1 [Source:NCBI gene;Acc:714841]  
ENSMMUG00000038371 JunD proto-oncogene, AP-1 transcription factor subunit [Source:NCBI gene;Acc:720182]  
ENSMMUG00000038447  
ENSMMUG00000038935 zinc finger CCHC-type containing 3 [Source:NCBI gene;Acc:714477]  
ENSMMUG00000040803 sarcalumenin [Source:NCBI gene;Acc:704655]  
ENSMMUG00000041450 zinc finger protein 432 [Source:NCBI gene;Acc:100424341]  
ENSMMUG00000046237 4-aminobutyrate aminotransferase [Source:NCBI gene;Acc:714017]  
ENSMMUG00000048077 ataxin 1 like [Source:NCBI gene;Acc:709805]  
ENSMMUG00000049699 thioredoxin like 4B [Source:NCBI gene;Acc:706840]  
ENSMMUG00000049948  
ENSMMUG00000049968 RNA polymerase mitochondrial [Source:NCBI gene;Acc:100426183]  
ENSMMUG00000049997  
ENSMMUG00000050065  
ENSMMUG00000050177  
ENSMMUG00000050544  
ENSMMUG00000051112 p53 and DNA damage regulated 1 [Source:NCBI gene;Acc:712622]  
ENSMMUG00000051115  
ENSMMUG00000051261  
ENSMMUG00000051286  
ENSMMUG00000051743 TLC domain containing 1 [Source:NCBI gene;Acc:710391]  
ENSMMUG00000051911  
ENSMMUG00000052070 caudal type homeobox 2 [Source:NCBI gene;Acc:711094]  
ENSMMUG00000052091 dishevelled segment polarity protein 2 [Source:NCBI gene;Acc:714381]  
ENSMMUG00000052277 transthyretin [Source:NCBI gene;Acc:705943]  
ENSMMUG00000052605 Metazoan signal recognition particle RNA [Source:RFAM;Acc:RF00017]  
ENSMMUG00000052676  
ENSMMUG00000052786  
ENSMMUG00000052977 putative protein FAM106C [Source:NCBI gene;Acc:106994084]  
ENSMMUG00000053008  
ENSMMUG00000053150 Metazoan signal recognition particle RNA [Source:RFAM;Acc:RF00017]  
ENSMMUG00000053675  
ENSMMUG00000054064

|                    |                                                                    |
|--------------------|--------------------------------------------------------------------|
| ENSMMUG00000054210 | C-C motif chemokine 4 [Source:NCBI gene;Acc:100426632]             |
| ENSMMUG00000054246 |                                                                    |
| ENSMMUG00000054711 |                                                                    |
| ENSMMUG00000055344 | TLC domain containing 3A [Source:NCBI gene;Acc:699707]             |
| ENSMMUG00000055864 |                                                                    |
| ENSMMUG00000055889 |                                                                    |
| ENSMMUG00000056147 |                                                                    |
| ENSMMUG00000056257 |                                                                    |
| ENSMMUG00000056306 |                                                                    |
| ENSMMUG00000056387 | transcription factor 15 [Source:NCBI gene;Acc:716916]              |
| ENSMMUG00000057302 |                                                                    |
| ENSMMUG00000057475 |                                                                    |
| ENSMMUG00000057655 |                                                                    |
| ENSMMUG00000057808 |                                                                    |
| ENSMMUG00000058016 | bMERB domain containing 1 [Source:NCBI gene;Acc:713757]            |
| ENSMMUG00000058142 |                                                                    |
| ENSMMUG00000058966 |                                                                    |
| ENSMMUG00000060408 |                                                                    |
| ENSMMUG00000060713 | epithelial membrane protein 2 [Source:NCBI gene;Acc:710315]        |
| ENSMMUG00000061035 | ZFP82 zinc finger protein [Source:NCBI gene;Acc:719145]            |
| ENSMMUG00000061452 |                                                                    |
| ENSMMUG00000061572 | Metazoan signal recognition particle RNA [Source:RFAM;Acc:RF00017] |
| ENSMMUG00000062017 |                                                                    |
| ENSMMUG00000062198 | transmembrane protein 204 [Source:NCBI gene;Acc:701926]            |
| ENSMMUG00000062413 | CCAAT enhancer binding protein gamma [Source:NCBI gene;Acc:704322] |
| ENSMMUG00000062623 | Metazoan signal recognition particle RNA [Source:RFAM;Acc:RF00017] |
| ENSMMUG00000062664 |                                                                    |
| ENSMMUG00000062791 |                                                                    |
| ENSMMUG00000062866 |                                                                    |
| ENSMMUG00000063312 |                                                                    |
| ENSMMUG00000063668 | cytochrome b5 domain containing 1 [Source:NCBI gene;Acc:716429]    |
| ENSMMUG00000064131 |                                                                    |
| ENSMMUG00000064237 |                                                                    |
| ENSMMUG00000064642 |                                                                    |
| ENSMMUG00000064806 |                                                                    |
| ENSMMUG00000064975 | zinc finger protein 221 [Source:NCBI gene;Acc:100423743]           |
| ENSMMUG00000065008 |                                                                    |
| ENSMMUG00000065117 | septin 4 [Source:HGNC Symbol;Acc:HGNC:9165]                        |

## Non-Survivors - SD1 vs. Baseline

| Ensembl Gene ID    | Description                                                                        |
|--------------------|------------------------------------------------------------------------------------|
| ENSMMUG00000000009 | protein tyrosine phosphatase receptor type C [Source:VGNC Symbol;Acc:VGNC:76612]   |
| ENSMMUG00000000021 | catsper channel auxiliary subunit epsilon [Source:VGNC Symbol;Acc:VGNC:70657]      |
| ENSMMUG00000000058 | CDV3 homolog [Source:VGNC Symbol;Acc:VGNC:71114]                                   |
| ENSMMUG00000000059 | DNA topoisomerase II binding protein 1 [Source:VGNC Symbol;Acc:VGNC:79061]         |
| ENSMMUG00000000104 | ribosomal RNA processing 1B [Source:VGNC Symbol;Acc:VGNC:77089]                    |
| ENSMMUG00000000158 | minichromosome maintenance complex component 2 [Source:VGNC Symbol;Acc:VGNC:74680] |
| ENSMMUG00000000244 | coagulation factor XIII B chain [Source:VGNC Symbol;Acc:VGNC:72463]                |



ENSMMUG0000000662 guanylate-binding protein 1 [Source:NCBI gene;Acc:694538]  
ENSMMUG0000000663 guanylate-binding protein 6-like [Source:NCBI gene;Acc:695158]  
ENSMMUG0000000962 H2A.Z variant histone 2 [Source:VGNC Symbol;Acc:VGNC:81324]  
ENSMMUG0000000972 tyrosine kinase non receptor 2 [Source:VGNC Symbol;Acc:VGNC:79192]  
ENSMMUG0000001264 BSD domain containing 1 [Source:VGNC Symbol;Acc:VGNC:70384]  
ENSMMUG0000001479 laminin subunit gamma 2 [Source:VGNC Symbol;Acc:VGNC:74233]  
ENSMMUG0000001481 nicotinamide nucleotide adenylyltransferase 2 [Source:VGNC Symbol;Acc:VGNC:75193]  
ENSMMUG0000001529 solute carrier family 25 member 26 [Source:VGNC Symbol;Acc:VGNC:77530]  
ENSMMUG0000001531 leucine rich repeats and immunoglobulin like domains 1 [Source:VGNC Symbol;Acc:VGNC:84156]  
ENSMMUG0000001549 ATPase family AAA domain-containing protein 3A-like [Source:NCBI gene;Acc:114674453]  
ENSMMUG0000001551 SSU72 homolog, RNA polymerase II CTD phosphatase [Source:VGNC Symbol;Acc:VGNC:77986]  
ENSMMUG0000001742 transforming growth factor beta receptor 3 [Source:VGNC Symbol;Acc:VGNC:78339]  
ENSMMUG0000001849 interleukin 5 receptor subunit alpha [Source:VGNC Symbol;Acc:VGNC:73731]  
ENSMMUG0000001892 UDP-glucose 6-dehydrogenase [Source:VGNC Symbol;Acc:VGNC:78711]  
ENSMMUG0000001894 cyclin dependent kinase 11B [Source:NCBI gene;Acc:703046]  
ENSMMUG0000001896 G protein subunit beta 1 [Source:VGNC Symbol;Acc:VGNC:73095]  
ENSMMUG0000001918 transmembrane protein 165 [Source:VGNC Symbol;Acc:VGNC:79875]  
ENSMMUG0000002003 upstream transcription factor 1 [Source:NCBI gene;Acc:719835]  
ENSMMUG0000002007 kelch domain containing 9 [Source:NCBI gene;Acc:719863]  
ENSMMUG0000002010 death effector domain containing [Source:VGNC Symbol;Acc:VGNC:71768]  
ENSMMUG0000002200 phospholipid phosphatase 3 [Source:NCBI gene;Acc:715993]  
ENSMMUG0000002318 stimulated by retinoic acid 8 [Source:VGNC Symbol;Acc:VGNC:78250]  
ENSMMUG0000002434 inhibitor of growth family member 3 [Source:VGNC Symbol;Acc:VGNC:73595]  
ENSMMUG0000002497 zinc finger protein 777 [Source:HGNC Symbol;Acc:HGNC:22213]  
ENSMMUG0000002652 zinc finger MIZ-type containing 2 [Source:VGNC Symbol;Acc:VGNC:79350]  
ENSMMUG0000002794 general transcription factor IIB [Source:VGNC Symbol;Acc:VGNC:73306]  
ENSMMUG0000002894 dedicator of cytokinesis 4 [Source:VGNC Symbol;Acc:VGNC:71866]  
ENSMMUG0000002947 procollagen C-endopeptidase enhancer [Source:VGNC Symbol;Acc:VGNC:75782]  
ENSMMUG0000003051 COPI coat complex subunit beta 2 [Source:VGNC Symbol;Acc:VGNC:71313]  
ENSMMUG0000003191 kirre like nephrin family adhesion molecule 1 [Source:VGNC Symbol;Acc:VGNC:73837]  
ENSMMUG0000003277 copine 4 [Source:VGNC Symbol;Acc:VGNC:71466]  
ENSMMUG0000003369 calcium/calmodulin dependent protein kinase IG [Source:VGNC Symbol;Acc:VGNC:70521]  
ENSMMUG0000003595 peroxisomal biogenesis factor 5 like [Source:VGNC Symbol;Acc:VGNC:75889]  
ENSMMUG0000003634 DExD/H-box 60 like [Source:VGNC Symbol;Acc:VGNC:71720]  
ENSMMUG0000003736 nuclear factor kappa B subunit 1 [Source:VGNC Symbol;Acc:VGNC:75339]  
ENSMMUG0000003987 forkhead associated phosphopeptide binding domain 1 [Source:NCBI gene;Acc:699900]  
ENSMMUG0000004052 phosphodiesterase 12 [Source:VGNC Symbol;Acc:VGNC:75863]  
ENSMMUG0000004362 Fc fragment of IgG receptor Ia [Source:NCBI gene;Acc:714664]  
ENSMMUG0000004432 anaphase promoting complex subunit 10 [Source:VGNC Symbol;Acc:VGNC:69682]  
ENSMMUG0000004433 ATP binding cassette subfamily E member 1 [Source:VGNC Symbol;Acc:VGNC:69581]  
ENSMMUG0000004437 OTU deubiquitinase 4 [Source:VGNC Symbol;Acc:VGNC:75675]  
ENSMMUG0000004566 zinc finger protein 124 [Source:VGNC Symbol;Acc:VGNC:78836]  
ENSMMUG0000004598 bisphosphoglycerate mutase [Source:VGNC Symbol;Acc:VGNC:70275]  
ENSMMUG0000004648 KH domain containing 4, pre-mRNA splicing factor [Source:VGNC Symbol;Acc:VGNC:73931]  
ENSMMUG0000004754 intermediate filament family orphan 2 [Source:NCBI gene;Acc:106995162]  
ENSMMUG0000004849 casein beta [Source:VGNC Symbol;Acc:VGNC:71523]  
ENSMMUG0000005137 ATPase secretory pathway Ca<sup>2+</sup> transporting 1 [Source:VGNC Symbol;Acc:VGNC:70054]  
ENSMMUG0000005181 RAB3C, member RAS oncogene family [Source:VGNC Symbol;Acc:VGNC:81541]  
ENSMMUG0000005466 SPOC domain containing 1 [Source:VGNC Symbol;Acc:VGNC:77997]  
ENSMMUG0000005515 ATP binding cassette subfamily C member 5 [Source:VGNC Symbol;Acc:VGNC:69574]  
ENSMMUG0000005634 ribonuclease L [Source:VGNC Symbol;Acc:VGNC:82223]

ENSMMUG0000005801 glyceronephosphate O-acyltransferase [Source:VGNC Symbol;Acc:VGNC:73100]  
ENSMMUG0000005888 tetratricopeptide repeat domain 13 [Source:VGNC Symbol;Acc:VGNC:79588]  
ENSMMUG0000006155 zinc finger C3HC-type containing 1 [Source:VGNC Symbol;Acc:VGNC:79827]  
ENSMMUG0000006187 angiopoietin like 7 [Source:VGNC Symbol;Acc:VGNC:69683]  
ENSMMUG0000006214 olfactory receptor family 11 subfamily L member 1 [Source:HGNC Symbol;Acc:HGNC:14998]  
ENSMMUG0000006217 general transcription factor IIH subunit 2 [Source:NCBI gene;Acc:700737]  
ENSMMUG0000006252 argonaute RISC catalytic component 3 [Source:NCBI gene;Acc:712543]  
ENSMMUG0000006309 unc-5 netrin receptor C [Source:VGNC Symbol;Acc:VGNC:78723]  
ENSMMUG0000006454 kelch like family member 18 [Source:VGNC Symbol;Acc:VGNC:74154]  
ENSMMUG0000006548 KIAA1549 [Source:VGNC Symbol;Acc:VGNC:73885]  
ENSMMUG0000006553 dishevelled segment polarity protein 3 [Source:VGNC Symbol;Acc:VGNC:72014]  
ENSMMUG0000006561 tRNA selenocysteine 1 associated protein 1 [Source:VGNC Symbol;Acc:VGNC:79885]  
ENSMMUG0000006682 chondroitin polymerizing factor 2 [Source:VGNC Symbol;Acc:VGNC:71131]  
ENSMMUG0000006688 ER membrane protein complex subunit 1 [Source:VGNC Symbol;Acc:VGNC:72134]  
ENSMMUG0000006702 bone morphogenetic protein receptor type 1B [Source:VGNC Symbol;Acc:VGNC:70267]  
ENSMMUG0000006703 solute carrier family 10 member 4 [Source:VGNC Symbol;Acc:VGNC:77553]  
ENSMMUG0000006704 zygote arrest 1 [Source:VGNC Symbol;Acc:VGNC:79251]  
ENSMMUG0000006705 FRY like transcription coactivator [Source:VGNC Symbol;Acc:VGNC:72803]  
ENSMMUG0000006796 betaine--homocysteine S-methyltransferase 2 [Source:VGNC Symbol;Acc:VGNC:70248]  
ENSMMUG0000006898 integrin subunit beta 8 [Source:VGNC Symbol;Acc:VGNC:73791]  
ENSMMUG0000006904 cyclin L2 [Source:NCBI gene;Acc:114669744]  
ENSMMUG0000007109 dishevelled segment polarity protein 1 [Source:NCBI gene;Acc:705864]  
ENSMMUG0000007110 serine and arginine rich splicing factor 4 [Source:NCBI gene;Acc:717401]  
ENSMMUG0000007244 OTU deubiquitinase 7B [Source:VGNC Symbol;Acc:VGNC:75634]  
ENSMMUG0000007246 myotubularin related protein 11 [Source:VGNC Symbol;Acc:VGNC:75016]  
ENSMMUG0000007250 RNA binding motif protein 28 [Source:VGNC Symbol;Acc:VGNC:76519]  
ENSMMUG0000007256 splicing factor 3b subunit 4 [Source:VGNC Symbol;Acc:VGNC:77182]  
ENSMMUG0000007257 synaptic vesicle glycoprotein 2A [Source:VGNC Symbol;Acc:VGNC:78181]  
ENSMMUG0000007524 RNA polymerase II subunit H [Source:VGNC Symbol;Acc:VGNC:76216]  
ENSMMUG0000007565 Cbl proto-oncogene B [Source:VGNC Symbol;Acc:VGNC:70555]  
ENSMMUG0000007765 Wnt family member 2B [Source:VGNC Symbol;Acc:VGNC:78797]  
ENSMMUG0000007766 suppression of tumorigenicity 7 like [Source:VGNC Symbol;Acc:VGNC:77954]  
ENSMMUG0000007783 isoleucyl-tRNA synthetase 2, mitochondrial [Source:VGNC Symbol;Acc:VGNC:73458]  
ENSMMUG0000007821 ATP binding cassette subfamily B member 5 [Source:VGNC Symbol;Acc:VGNC:80321]  
ENSMMUG0000007968 hedgehog interacting protein [Source:VGNC Symbol;Acc:VGNC:73169]  
ENSMMUG0000008155 POU class 2 homeobox 1 [Source:VGNC Symbol;Acc:VGNC:76223]  
ENSMMUG0000008579 defective in cullin neddylation 1 domain containing 4 [Source:VGNC Symbol;Acc:VGNC:71809]  
ENSMMUG0000008632 myosin, light chain 6, alkali, smooth muscle and non-muscle-like [Source:NCBI gene;Acc:710137]  
ENSMMUG0000008705 ubiquitin specific peptidase 53 [Source:VGNC Symbol;Acc:VGNC:79793]  
ENSMMUG0000008713 myosin binding protein H like [Source:NCBI gene;Acc:698183]  
ENSMMUG0000008733 ubiquitin protein ligase E3C [Source:VGNC Symbol;Acc:VGNC:79049]  
ENSMMUG0000008795 polycystin 2, transient receptor potential cation channel [Source:NCBI gene;Acc:702179]  
ENSMMUG0000008797 ATP binding cassette subfamily G member 2 (Junior blood group) [Source:NCBI gene;Acc:574307]  
ENSMMUG0000008916 transferrin [Source:VGNC Symbol;Acc:VGNC:82716]  
ENSMMUG0000008917 S100 calcium binding protein A6 [Source:VGNC Symbol;Acc:VGNC:76960]  
ENSMMUG0000008918 SRP receptor subunit beta [Source:VGNC Symbol;Acc:VGNC:77980]  
ENSMMUG0000008919 RAB6B, member RAS oncogene family [Source:VGNC Symbol;Acc:VGNC:81547]  
ENSMMUG0000008974 Fc receptor like 5 [Source:NCBI gene;Acc:718771]  
ENSMMUG0000009001 transmembrane 131 like [Source:VGNC Symbol;Acc:VGNC:79781]  
ENSMMUG0000009431 HEN methyltransferase 1 [Source:VGNC Symbol;Acc:VGNC:73241]  
ENSMMUG0000009536 makorin ring finger protein 2 [Source:VGNC Symbol;Acc:VGNC:74878]

ENSMMUG0000009694 solute carrier family 9 member A9 [Source:VGNC Symbol;Acc:VGNC:77747]  
ENSMMUG0000009773 lysine demethylase 1A [Source:VGNC Symbol;Acc:VGNC:73928]  
ENSMMUG0000009948 histone deacetylase 1 [Source:NCBI gene;Acc:708441]  
ENSMMUG00000010113 steroid 5 alpha-reductase 3 [Source:VGNC Symbol;Acc:VGNC:82246]  
ENSMMUG00000010127 chitobiase [Source:VGNC Symbol;Acc:VGNC:71540]  
ENSMMUG00000010328 MYST/Esa1 associated factor 6 [Source:VGNC Symbol;Acc:VGNC:74580]  
ENSMMUG00000010379 Mtr4 exosome RNA helicase [Source:VGNC Symbol;Acc:VGNC:74989]  
ENSMMUG00000010648 DNA methyltransferase 3 like [Source:NCBI gene;Acc:722184]  
ENSMMUG00000010695 adenosine deaminase RNA specific B1 [Source:VGNC Symbol;Acc:VGNC:69503]  
ENSMMUG00000010703 KIAA0895 [Source:VGNC Symbol;Acc:VGNC:73884]  
ENSMMUG00000010879 NAD kinase [Source:VGNC Symbol;Acc:VGNC:75047]  
ENSMMUG00000010978 S100 calcium binding protein A2 [Source:VGNC Symbol;Acc:VGNC:76956]  
ENSMMUG00000011137 arylacetamide deacetylase like 4 [Source:VGNC Symbol;Acc:VGNC:81338]  
ENSMMUG00000011269 CF transmembrane conductance regulator [Source:VGNC Symbol;Acc:VGNC:71020]  
ENSMMUG00000011335 Fc receptor like 6 [Source:VGNC Symbol;Acc:VGNC:72602]  
ENSMMUG00000011338 SLAM family member 8 [Source:VGNC Symbol;Acc:VGNC:77545]  
ENSMMUG00000011386 GTPase, IMAP family member 4 [Source:VGNC Symbol;Acc:VGNC:72982]  
ENSMMUG00000011702 tetraspanin 5 [Source:VGNC Symbol;Acc:VGNC:79086]  
ENSMMUG00000011810 FAT atypical cadherin 4 [Source:VGNC Symbol;Acc:VGNC:72552]  
ENSMMUG00000011902 oligosaccharyltransferase complex non-catalytic subunit [Source:NCBI gene;Acc:697283]  
ENSMMUG00000012110 smoothed, frizzled class receptor [Source:VGNC Symbol;Acc:VGNC:77658]  
ENSMMUG00000012151 glycerol kinase 5 [Source:VGNC Symbol;Acc:VGNC:73022]  
ENSMMUG00000012561 NOP2/Sun RNA methyltransferase family member 7 [Source:VGNC Symbol;Acc:VGNC:75463]  
ENSMMUG00000012961 mindbomb E3 ubiquitin protein ligase 2 [Source:VGNC Symbol;Acc:VGNC:74627]  
ENSMMUG00000013188 serine incorporator 2 [Source:VGNC Symbol;Acc:VGNC:77294]  
ENSMMUG00000013661 presenilin associated rhomboid like [Source:NCBI gene;Acc:704652]  
ENSMMUG00000013851 lipoic acid synthetase [Source:VGNC Symbol;Acc:VGNC:74057]  
ENSMMUG00000014018 bromodomain testis associated [Source:VGNC Symbol;Acc:VGNC:70282]  
ENSMMUG00000014173  
ENSMMUG00000014540 acylaminoacyl-peptide hydrolase [Source:VGNC Symbol;Acc:VGNC:69982]  
ENSMMUG00000014955 nuclear receptor subfamily 3 group C member 2 [Source:VGNC Symbol;Acc:VGNC:75516]  
ENSMMUG00000015041 CWC27 spliceosome associated cyclophilin [Source:VGNC Symbol;Acc:VGNC:71396]  
ENSMMUG00000015132 galectin 8 [Source:VGNC Symbol;Acc:VGNC:74258]  
ENSMMUG00000015309 F-box protein 24 [Source:VGNC Symbol;Acc:VGNC:72495]  
ENSMMUG00000015311 leucine rich repeats and calponin homology domain containing 4 [Source:VGNC Symbol;Acc:VGNC:74441]  
ENSMMUG00000015371 microtubule associated serine/threonine kinase 2 [Source:VGNC Symbol;Acc:VGNC:74532]  
ENSMMUG00000015566 holocarboxylase synthetase [Source:VGNC Symbol;Acc:VGNC:73477]  
ENSMMUG00000015661 protein tyrosine phosphatase receptor type U [Source:VGNC Symbol;Acc:VGNC:76624]  
ENSMMUG00000015799 tolloid like 1 [Source:VGNC Symbol;Acc:VGNC:78369]  
ENSMMUG00000016004 acid phosphatase 3 [Source:VGNC Symbol;Acc:VGNC:69385]  
ENSMMUG00000016286 protease, serine, 1 (trypsin 1) [Source:NCBI gene;Acc:698729]  
ENSMMUG00000016399 ral guanine nucleotide dissociation stimulator like 1 [Source:VGNC Symbol;Acc:VGNC:76868]  
ENSMMUG00000016581 methyltransferase like 18 [Source:VGNC Symbol;Acc:VGNC:74606]  
ENSMMUG00000016812 coiled-coil domain containing 18 [Source:VGNC Symbol;Acc:VGNC:70913]  
ENSMMUG00000016857 prostaglandin-endoperoxide synthase 2 [Source:VGNC Symbol;Acc:VGNC:76589]  
ENSMMUG00000016880 solute carrier family 39 member 8 [Source:VGNC Symbol;Acc:VGNC:77541]  
ENSMMUG00000016893 solute carrier family 9 member A1 [Source:VGNC Symbol;Acc:VGNC:82241]  
ENSMMUG00000016925 laminin subunit beta 3 [Source:VGNC Symbol;Acc:VGNC:74230]  
ENSMMUG00000017008 GTPase, IMAP family member 2 [Source:VGNC Symbol;Acc:VGNC:72980]  
ENSMMUG00000017125 oxysterol binding protein like 11 [Source:VGNC Symbol;Acc:VGNC:75631]  
ENSMMUG00000017333 CD244 molecule [Source:VGNC Symbol;Acc:VGNC:70821]

ENSMMUG00000017396 3'(2'), 5'-bisphosphate nucleotidase 1 [Source:NCBI gene;Acc:721277]  
ENSMMUG00000017583 single stranded DNA binding protein 2 [Source:NCBI gene;Acc:711752]  
ENSMMUG00000018057 uromodulin like 1 [Source:VGNC Symbol;Acc:VGNC:78717]  
ENSMMUG00000018058 ATP binding cassette subfamily G member 1 [Source:VGNC Symbol;Acc:VGNC:69584]  
ENSMMUG00000018073 ligand dependent nuclear receptor corepressor like [Source:NCBI gene;Acc:715285]  
ENSMMUG00000018079 transmembrane serine protease 3 [Source:VGNC Symbol;Acc:VGNC:78576]  
ENSMMUG00000018081 ubiquitin associated and SH3 domain containing A [Source:VGNC Symbol;Acc:VGNC:78687]  
ENSMMUG00000018163 caspase 9 [Source:NCBI gene;Acc:694544]  
ENSMMUG00000018282 interleukin 17 receptor C [Source:VGNC Symbol;Acc:VGNC:84164]  
ENSMMUG00000018283 dihydrofolate reductase [Source:NCBI gene;Acc:711268]  
ENSMMUG00000018285 cysteine rich with EGF like domains 1 [Source:VGNC Symbol;Acc:VGNC:71407]  
ENSMMUG00000018290 ER membrane protein complex subunit 3 [Source:VGNC Symbol;Acc:VGNC:72091]  
ENSMMUG00000018444 dual specificity phosphatase 23 [Source:VGNC Symbol;Acc:VGNC:71880]  
ENSMMUG00000018490 ADP ribosylation factor interacting protein 1 [Source:VGNC Symbol;Acc:VGNC:69878]  
ENSMMUG00000018493 FH2 domain containing 1 [Source:VGNC Symbol;Acc:VGNC:72598]  
ENSMMUG00000018525 presenilin 2 [Source:VGNC Symbol;Acc:VGNC:76436]  
ENSMMUG00000018565 ribonucleoprotein, PTB binding 2 [Source:VGNC Symbol;Acc:VGNC:76536]  
ENSMMUG00000018625 NIPA like domain containing 1 [Source:NCBI gene;Acc:704998]  
ENSMMUG00000018745 chromosome 6 C5orf49 homolog [Source:VGNC Symbol;Acc:VGNC:70646]  
ENSMMUG00000018746 FAST kinase domains 3 [Source:VGNC Symbol;Acc:VGNC:72588]  
ENSMMUG00000018747 5-methyltetrahydrofolate-homocysteine methyltransferase reductase [Source:VGNC Symbol;Acc:VGNC:75079]  
ENSMMUG00000018795 kynurenine aminotransferase 3 [Source:VGNC Symbol;Acc:VGNC:74177]  
ENSMMUG00000018939 leucine rich repeat containing 66 [Source:VGNC Symbol;Acc:VGNC:74415]  
ENSMMUG00000018943 spermatogenesis associated 18 [Source:VGNC Symbol;Acc:VGNC:78013]  
ENSMMUG00000019105 RNA 3'-terminal phosphate cyclase [Source:VGNC Symbol;Acc:VGNC:77043]  
ENSMMUG00000019262 calcium voltage-gated channel subunit alpha1 D [Source:VGNC Symbol;Acc:VGNC:70501]  
ENSMMUG00000019266 choline dehydrogenase [Source:VGNC Symbol;Acc:VGNC:71086]  
ENSMMUG00000019325 mechanistic target of rapamycin kinase [Source:VGNC Symbol;Acc:VGNC:75062]  
ENSMMUG00000019714 vav guanine nucleotide exchange factor 3 [Source:VGNC Symbol;Acc:VGNC:78759]  
ENSMMUG00000019740 zinc finger DHHC-type palmitoyltransferase 3 [Source:VGNC Symbol;Acc:VGNC:79143]  
ENSMMUG00000019815 transcription factor AP-2 epsilon [Source:VGNC Symbol;Acc:VGNC:79878]  
ENSMMUG00000019854 transmembrane protein 108 [Source:VGNC Symbol;Acc:VGNC:79714]  
ENSMMUG00000019856 olfactory receptor 2F2-like [Source:NCBI gene;Acc:100428924]  
ENSMMUG00000019857 beaded filament structural protein 2 [Source:VGNC Symbol;Acc:VGNC:70245]  
ENSMMUG00000019977 myosin heavy chain 15 [Source:VGNC Symbol;Acc:VGNC:84148]  
ENSMMUG00000019992 growth factor receptor bound protein 10 [Source:VGNC Symbol;Acc:VGNC:73157]  
ENSMMUG00000020049 phosphoglucomutase 1 [Source:NCBI gene;Acc:699401]  
ENSMMUG00000020117 semaphorin 3B [Source:VGNC Symbol;Acc:VGNC:77160]  
ENSMMUG00000020184 carboxypeptidase vitellogenic like [Source:VGNC Symbol;Acc:VGNC:71406]  
ENSMMUG00000020294 phosphoinositide-3-kinase regulatory subunit 4 [Source:VGNC Symbol;Acc:VGNC:84060]  
ENSMMUG00000020377 collagen type VI alpha 5 chain [Source:NCBI gene;Acc:719331]  
ENSMMUG00000020418 diacylglycerol kinase beta [Source:VGNC Symbol;Acc:VGNC:71782]  
ENSMMUG00000020435 amine oxidase copper containing 1 [Source:VGNC Symbol;Acc:VGNC:70033]  
ENSMMUG00000020436 potassium voltage-gated channel subfamily H member 2 [Source:VGNC Symbol;Acc:VGNC:73980]  
ENSMMUG00000020731 terminal nucleotidyltransferase 2 [Source:VGNC Symbol;Acc:VGNC:79637]  
ENSMMUG00000020910 nucleoporin 54 [Source:VGNC Symbol;Acc:VGNC:75420]  
ENSMMUG00000020913 scavenger receptor class B member 2 [Source:VGNC Symbol;Acc:VGNC:77026]  
ENSMMUG00000020954 cell division cycle 25A [Source:VGNC Symbol;Acc:VGNC:70794]  
ENSMMUG00000021078 ATPase Na<sup>+</sup>/K<sup>+</sup> transporting subunit beta 1 [Source:VGNC Symbol;Acc:VGNC:70176]  
ENSMMUG00000021385 carbonic anhydrase 14 [Source:VGNC Symbol;Acc:VGNC:70489]  
ENSMMUG00000021388 circadian associated repressor of transcription [Source:VGNC Symbol;Acc:VGNC:71345]

ENSMMUG00000021507 chromosome 2 C3orf38 homolog [Source:VGNC Symbol;Acc:VGNC:70654]  
ENSMMUG00000021695 Morf4 family associated protein 1 [Source:NCBI gene;Acc:710771]  
ENSMMUG00000021806 vestigial like family member 4 [Source:VGNC Symbol;Acc:VGNC:79755]  
ENSMMUG00000021875 myoneurin [Source:VGNC Symbol;Acc:VGNC:74958]  
ENSMMUG00000021917 leucine rich repeat containing 7 [Source:NCBI gene;Acc:702347]  
ENSMMUG00000022153 solute carrier family 25 member 36 [Source:VGNC Symbol;Acc:VGNC:84079]  
ENSMMUG00000022183 spermatogenesis associated 1 [Source:NCBI gene;Acc:710462]  
ENSMMUG00000022199 polyhomeotic homolog 3 [Source:VGNC Symbol;Acc:VGNC:75804]  
ENSMMUG00000022484 ITPR interacting domain containing 1 [Source:VGNC Symbol;Acc:VGNC:73667]  
ENSMMUG00000022562 interleukin 1 receptor accessory protein [Source:VGNC Symbol;Acc:VGNC:73718]  
ENSMMUG00000022624 putative speedy protein E16 [Source:NCBI gene;Acc:718058]  
ENSMMUG00000022630 protoporphyrinogen oxidase [Source:VGNC Symbol;Acc:VGNC:76365]  
ENSMMUG00000022631 ubiquitin specific peptidase 21 [Source:VGNC Symbol;Acc:VGNC:78741]  
ENSMMUG00000022632 ubiquitin-fold modifier conjugating enzyme 1 [Source:VGNC Symbol;Acc:VGNC:79643]  
ENSMMUG00000022636 GTPase, IMAP family member 8 [Source:VGNC Symbol;Acc:VGNC:72981]  
ENSMMUG00000022643 Ro60, Y RNA binding protein [Source:NCBI gene;Acc:715194]  
ENSMMUG00000022647 cell division cycle 73 [Source:VGNC Symbol;Acc:VGNC:70766]  
ENSMMUG00000022697 STEAP4 metalloredutase [Source:VGNC Symbol;Acc:VGNC:77974]  
ENSMMUG00000022715 adenosylhomocysteinase like 1 [Source:VGNC Symbol;Acc:VGNC:81350]  
ENSMMUG00000022727 lysine methyltransferase 2E [Source:VGNC Symbol;Acc:VGNC:74073]  
ENSMMUG00000022762 OMA1 zinc metallopeptidase [Source:VGNC Symbol;Acc:VGNC:75485]  
ENSMMUG00000022791 heat shock transcription factor 2 binding protein [Source:VGNC Symbol;Acc:VGNC:73532]  
ENSMMUG00000022880 eukaryotic translation initiation factor 5A2 [Source:VGNC Symbol;Acc:VGNC:72198]  
ENSMMUG00000022927 RCAN family member 3 [Source:VGNC Symbol;Acc:VGNC:76875]  
ENSMMUG00000023096 obscurin, cytoskeletal calmodulin and titin-interacting RhoGEF [Source:NCBI gene;Acc:694413]  
ENSMMUG00000023116 LIM domain binding 2 [Source:VGNC Symbol;Acc:VGNC:74246]  
ENSMMUG00000023124 transmembrane protein 43 [Source:VGNC Symbol;Acc:VGNC:82711]  
ENSMMUG00000023125 XPC complex subunit, DNA damage recognition and repair factor [Source:VGNC Symbol;Acc:VGNC:78809]  
ENSMMUG00000023141 CDC like kinase 2 [Source:VGNC Symbol;Acc:VGNC:71259]  
ENSMMUG00000023396 hypocretin receptor 1 [Source:VGNC Symbol;Acc:VGNC:73356]  
ENSMMUG00000023398 collagen type XVI alpha 1 chain [Source:VGNC Symbol;Acc:VGNC:71293]  
ENSMMUG00000023401 adhesion G protein-coupled receptor B2 [Source:VGNC Symbol;Acc:VGNC:69598]  
ENSMMUG00000023462 immunoglobulin like domain containing receptor 2 [Source:VGNC Symbol;Acc:VGNC:73619]  
ENSMMUG00000023676 espin [Source:NCBI gene;Acc:722532]  
ENSMMUG00000024186 U1 spliceosomal RNA [Source:RFAM;Acc:RF00003]  
ENSMMUG00000024598 U6 spliceosomal RNA [Source:RFAM;Acc:RF00026]  
ENSMMUG00000026103 U1 spliceosomal RNA [Source:RFAM;Acc:RF00003]  
ENSMMUG00000026897 mml-mir-215 [Source:miRBase;Acc:MI0003025]  
ENSMMUG00000030099 phospholipid phosphatase 1 [Source:VGNC Symbol;Acc:VGNC:76226]  
ENSMMUG00000031497  
ENSMMUG00000031821 chymotrypsin-like elastase family member 2B [Source:NCBI gene;Acc:106992406]  
ENSMMUG00000032244 DnaJ heat shock protein family (Hsp40) member C16 [Source:NCBI gene;Acc:700894]  
ENSMMUG00000032252 UbiA prenyltransferase domain containing 1 [Source:VGNC Symbol;Acc:VGNC:79881]  
ENSMMUG00000032306 zinc finger FYVE-type containing 28 [Source:NCBI gene;Acc:720600]  
ENSMMUG00000032973 mml-mir-550 [Source:miRBase;Acc:MI0007826]  
ENSMMUG00000037485  
ENSMMUG00000037551 Metazoan signal recognition particle RNA [Source:RFAM;Acc:RF00017]  
ENSMMUG00000039020 zinc finger protein 141 [Source:NCBI gene;Acc:714265]  
ENSMMUG00000039033 nucleolar protein with MIF4G domain 1 [Source:VGNC Symbol;Acc:VGNC:81729]  
ENSMMUG00000039441 mab-21 like 2 [Source:NCBI gene;Acc:693948]  
ENSMMUG00000039944 Ras protein specific guanine nucleotide releasing factor 2 [Source:VGNC Symbol;Acc:VGNC:84486]

ENSMMUG00000040506 H2B clustered histone 18 [Source:HGNC Symbol;Acc:HGNC:24700]  
ENSMMUG00000040694 LCK proto-oncogene, Src family tyrosine kinase [Source:NCBI gene;Acc:717704]  
ENSMMUG00000040764 alcohol dehydrogenase 1A [Source:NCBI gene;Acc:100424103]  
ENSMMUG00000041837 Metazoan signal recognition particle RNA [Source:RFAM;Acc:RF00017]  
ENSMMUG00000042798  
ENSMMUG00000043727 zinc finger protein 654 [Source:VGNC Symbol;Acc:VGNC:82560]  
ENSMMUG00000043809 caspase 2 [Source:VGNC Symbol;Acc:VGNC:80804]  
ENSMMUG00000043922 spermatogenesis associated 48 [Source:VGNC Symbol;Acc:VGNC:81762]  
ENSMMUG00000044175 forkhead box O6 [Source:NCBI gene;Acc:697505]  
ENSMMUG00000044628  
ENSMMUG00000044759  
ENSMMUG00000045497 complement factor H [Source:NCBI gene;Acc:717346]  
ENSMMUG00000045584 leucine zipper protein 1 [Source:NCBI gene;Acc:718626]  
ENSMMUG00000046785  
ENSMMUG00000047162 fibroblast growth factor 10 [Source:VGNC Symbol;Acc:VGNC:84378]  
ENSMMUG00000047276 GTPase, IMAP family member 6 [Source:VGNC Symbol;Acc:VGNC:81315]  
ENSMMUG00000047994 CGG triplet repeat binding protein 1 [Source:VGNC Symbol;Acc:VGNC:84203]  
ENSMMUG00000048232 MINDY family member 4B [Source:VGNC Symbol;Acc:VGNC:84153]  
ENSMMUG00000048805  
ENSMMUG00000048823  
ENSMMUG00000048892 SCO-spondin [Source:VGNC Symbol;Acc:VGNC:81765]  
ENSMMUG00000049196 dispatched RND transporter family member 3 [Source:NCBI gene;Acc:722727]  
ENSMMUG00000049295 GTPase, IMAP family member 5 [Source:NCBI gene;Acc:713835]  
ENSMMUG00000049396 Metazoan signal recognition particle RNA [Source:RFAM;Acc:RF00017]  
ENSMMUG00000049575 T cell receptor beta variable 7-2 [Source:HGNC Symbol;Acc:HGNC:12236]  
ENSMMUG00000049640  
ENSMMUG00000049786  
ENSMMUG00000049859  
ENSMMUG00000049885  
ENSMMUG00000049939  
ENSMMUG00000050186 Metazoan signal recognition particle RNA [Source:RFAM;Acc:RF00017]  
ENSMMUG00000050269 T cell receptor beta variable 14 [Source:HGNC Symbol;Acc:HGNC:12189]  
ENSMMUG00000050300  
ENSMMUG00000050858 Metazoan signal recognition particle RNA [Source:RFAM;Acc:RF00017]  
ENSMMUG00000050994  
ENSMMUG00000051020 zinc finger protein 467 [Source:NCBI gene;Acc:712106]  
ENSMMUG00000051032 serine protease 2 [Source:NCBI gene;Acc:698352]  
ENSMMUG00000051155 U2 spliceosomal RNA [Source:RFAM;Acc:RF00004]  
ENSMMUG00000051296 paired like homeobox 2B [Source:NCBI gene;Acc:701940]  
ENSMMUG00000051381 Metazoan signal recognition particle RNA [Source:RFAM;Acc:RF00017]  
ENSMMUG00000051385  
ENSMMUG00000051429  
ENSMMUG00000051523 Metazoan signal recognition particle RNA [Source:RFAM;Acc:RF00017]  
ENSMMUG00000051641  
ENSMMUG00000051661  
ENSMMUG00000051768  
ENSMMUG00000052282  
ENSMMUG00000052287  
ENSMMUG00000052327  
ENSMMUG00000052382 histone H4 [Source:NCBI gene;Acc:107000818]  
ENSMMUG00000052435 Metazoan signal recognition particle RNA [Source:RFAM;Acc:RF00017]



ENSMMUG00000052463 Metazoan signal recognition particle RNA [Source:RFAM;Acc:RF00017]  
ENSMMUG00000052479  
ENSMMUG00000052537  
ENSMMUG00000052540  
ENSMMUG00000052574  
ENSMMUG00000052609 ribosomal protein L34 [Source:NCBI gene;Acc:696636]  
ENSMMUG00000052682  
ENSMMUG00000052830  
ENSMMUG00000053036  
ENSMMUG00000053235  
ENSMMUG00000053344 splA/ryanodine receptor domain and SOCS box containing 4 [Source:NCBI gene;Acc:715278]  
ENSMMUG00000053454 Ras like without CAAX 1 [Source:NCBI gene;Acc:717985]  
ENSMMUG00000053541  
ENSMMUG00000053550  
ENSMMUG00000054078 histone H3 [Source:NCBI gene;Acc:114669830]  
ENSMMUG00000054290  
ENSMMUG00000054309 PRAME family member 5 [Source:NCBI gene;Acc:722781]  
ENSMMUG00000054312  
ENSMMUG00000054412  
ENSMMUG00000054615  
ENSMMUG00000054719  
ENSMMUG00000054821  
ENSMMUG00000055097  
ENSMMUG00000055233 PRAME family member 17-like [Source:NCBI gene;Acc:100427847]  
ENSMMUG00000055244 U6 spliceosomal RNA [Source:RFAM;Acc:RF00026]  
ENSMMUG00000055530 Metazoan signal recognition particle RNA [Source:RFAM;Acc:RF00017]  
ENSMMUG00000055585  
ENSMMUG00000055637  
ENSMMUG00000055759 Metazoan signal recognition particle RNA [Source:RFAM;Acc:RF00017]  
ENSMMUG00000055783  
ENSMMUG00000055809  
ENSMMUG00000055835 nuclear casein kinase and cyclin dependent kinase substrate 1 [Source:NCBI gene;Acc:697298]  
ENSMMUG00000056103 growth arrest and DNA damage inducible alpha [Source:NCBI gene;Acc:701054]  
ENSMMUG00000056116  
ENSMMUG00000056196  
ENSMMUG00000056280 G protein subunit alpha i2 [Source:NCBI gene;Acc:703780]  
ENSMMUG00000056687  
ENSMMUG00000056769 C-C motif chemokine receptor 1 [Source:VGNC Symbol;Acc:VGNC:70737]  
ENSMMUG00000057173  
ENSMMUG00000057494 T cell receptor beta variable 7-9 [Source:HGNC Symbol;Acc:HGNC:12243]  
ENSMMUG00000057501  
ENSMMUG00000057606 GPRIN family member 3 [Source:NCBI gene;Acc:703567]  
ENSMMUG00000057763  
ENSMMUG00000057768  
ENSMMUG00000057895  
ENSMMUG00000057951 U6 spliceosomal RNA [Source:RFAM;Acc:RF00026]  
ENSMMUG00000057973  
ENSMMUG00000058133  
ENSMMUG00000058302  
ENSMMUG00000058332 testis expressed 46 [Source:NCBI gene;Acc:709002]  
ENSMMUG00000058459

ENSMMUG00000059019  
ENSMMUG00000059101  
ENSMMUG00000059208 aurora kinase A interacting protein 1 [Source:NCBI gene;Acc:706329]  
ENSMMUG00000059657 chromosome 5 C4orf36 homolog [Source:NCBI gene;Acc:700500]  
ENSMMUG00000059707 MIS18 kinetochore protein A [Source:NCBI gene;Acc:709275]  
ENSMMUG00000059773 methyltransferase like 11B [Source:NCBI gene;Acc:705503]  
ENSMMUG00000059855 Smad nuclear interacting protein 1 [Source:NCBI gene;Acc:713733]  
ENSMMUG00000059938  
ENSMMUG00000059986  
ENSMMUG00000060167  
ENSMMUG00000060319 Metazoan signal recognition particle RNA [Source:RFAM;Acc:RF00017]  
ENSMMUG00000060505  
ENSMMUG00000060541  
ENSMMUG00000060600  
ENSMMUG00000060744  
ENSMMUG00000060798  
ENSMMUG00000060830  
ENSMMUG00000060871 prefoldin subunit 2 [Source:NCBI gene;Acc:719886]  
ENSMMUG00000060893  
ENSMMUG00000060894 Metazoan signal recognition particle RNA [Source:RFAM;Acc:RF00017]  
ENSMMUG00000061036 histone cluster 2, H2ab [Source:NCBI gene;Acc:705170]  
ENSMMUG00000061096 tubulin polymerization promoting protein [Source:NCBI gene;Acc:708834]  
ENSMMUG00000061973  
ENSMMUG00000062021  
ENSMMUG00000062140  
ENSMMUG00000062338  
ENSMMUG00000062527  
ENSMMUG00000063972  
ENSMMUG00000064202  
ENSMMUG00000064337 nectin cell adhesion molecule 4 [Source:NCBI gene;Acc:719843]  
ENSMMUG00000064458  
ENSMMUG00000064529  
ENSMMUG00000064587  
ENSMMUG00000064596 ATPase family AAA domain-containing protein 3A-like [Source:NCBI gene;Acc:114674454]  
ENSMMUG00000064721  
ENSMMUG00000065105  
ENSMMUG00000065108  
ENSMMUG00000065128 Metazoan signal recognition particle RNA [Source:RFAM;Acc:RF00017]  
ENSMMUG00000065257  
ENSMMUG00000065307  
ENSMMUG00000065322 ATP synthase peripheral stalk-membrane subunit b [Source:NCBI gene;Acc:704072]  
ENSMMUG00000000205 transmembrane protein 117 [Source:VGNC Symbol;Acc:VGNC:79488]  
ENSMMUG00000000238 HECT domain E3 ubiquitin protein ligase 2 [Source:VGNC Symbol;Acc:VGNC:73246]  
ENSMMUG00000000443 arylsulfatase F [Source:VGNC Symbol;Acc:VGNC:81362]  
ENSMMUG00000000667 zinc finger MYM-type containing 3 [Source:VGNC Symbol;Acc:VGNC:78886]  
ENSMMUG00000000669 gap junction protein beta 1 [Source:VGNC Symbol;Acc:VGNC:73059]  
ENSMMUG00000000681 calmin [Source:VGNC Symbol;Acc:VGNC:71232]  
ENSMMUG00000001008 spectrin repeat containing nuclear envelope protein 2 [Source:NCBI gene;Acc:706759]  
ENSMMUG00000001209 arylsulfatase family member K [Source:VGNC Symbol;Acc:VGNC:84280]  
ENSMMUG00000001212 Rieske Fe-S domain containing [Source:VGNC Symbol;Acc:VGNC:84487]  
ENSMMUG00000001213 spermatogenesis associated 9 [Source:VGNC Symbol;Acc:VGNC:77976]

ENSMMUG00000001319 methylenetetrahydrofolate dehydrogenase, cyclohydrolase and formyltetrahydrofolate synthetase 1 [Source:VGNC Symbol;Acc:VGNC:84399]  
ENSMMUG00000001357 tetraspanin 11 [Source:VGNC Symbol;Acc:VGNC:79882]  
ENSMMUG00000001359 caprin family member 2 [Source:VGNC Symbol;Acc:VGNC:70599]  
ENSMMUG00000001374 supervillin [Source:NCBI gene;Acc:695267]  
ENSMMUG00000001386 neurotrophic receptor tyrosine kinase 3 [Source:VGNC Symbol;Acc:VGNC:75542]  
ENSMMUG00000001640 SIX homeobox 4 [Source:NCBI gene;Acc:703798]  
ENSMMUG00000001642 MNAT1 component of CDK activating kinase [Source:VGNC Symbol;Acc:VGNC:74905]  
ENSMMUG00000001728 mitogen-activated protein kinase 9 [Source:VGNC Symbol;Acc:VGNC:74652]  
ENSMMUG00000001876 phosphoinositide-3-kinase adaptor protein 1 [Source:VGNC Symbol;Acc:VGNC:75891]  
ENSMMUG00000002032 exportin 7 [Source:VGNC Symbol;Acc:VGNC:78946]  
ENSMMUG00000002038 cell migration inducing hyaluronidase 1 [Source:VGNC Symbol;Acc:VGNC:71130]  
ENSMMUG00000002332 RNA binding motif protein 25 [Source:VGNC Symbol;Acc:VGNC:76521]  
ENSMMUG00000002649 unc-5 netrin receptor A [Source:VGNC Symbol;Acc:VGNC:78721]  
ENSMMUG00000002653 hexokinase 3 [Source:VGNC Symbol;Acc:VGNC:73476]  
ENSMMUG00000002768 neuronal regeneration related protein [Source:VGNC Symbol;Acc:VGNC:84454]  
ENSMMUG00000002879 GA binding protein transcription factor subunit beta 1 [Source:VGNC Symbol;Acc:VGNC:72845]  
ENSMMUG00000002890 tripartite motif containing 15 [Source:VGNC Symbol;Acc:VGNC:83958]  
ENSMMUG00000002911 mutL homolog 3 [Source:VGNC Symbol;Acc:VGNC:82187]  
ENSMMUG00000003049 testis expressed 11 [Source:VGNC Symbol;Acc:VGNC:78316]  
ENSMMUG00000003120 HECT domain E3 ubiquitin protein ligase 1 [Source:VGNC Symbol;Acc:VGNC:73200]  
ENSMMUG00000003134 ring finger protein 217 [Source:VGNC Symbol;Acc:VGNC:76801]  
ENSMMUG00000003221 DENN domain containing 5B [Source:VGNC Symbol;Acc:VGNC:71772]  
ENSMMUG00000003238 pregnancy zone protein [Source:NCBI gene;Acc:100430319]  
ENSMMUG00000003261 BAF chromatin remodeling complex subunit BCL11B [Source:VGNC Symbol;Acc:VGNC:70056]  
ENSMMUG00000003483 cyclin dependent kinase 2 interacting protein [Source:VGNC Symbol;Acc:VGNC:71326]  
ENSMMUG00000003497 FAT atypical cadherin 2 [Source:VGNC Symbol;Acc:VGNC:72618]  
ENSMMUG00000003511 chloride intracellular channel 5 [Source:VGNC Symbol;Acc:VGNC:71171]  
ENSMMUG00000003850 collagen type XI alpha 2 chain [Source:VGNC Symbol;Acc:VGNC:71290]  
ENSMMUG00000003858 retinoid X receptor beta [Source:VGNC Symbol;Acc:VGNC:76952]  
ENSMMUG00000003859 solute carrier family 39 member 7 [Source:VGNC Symbol;Acc:VGNC:77592]  
ENSMMUG00000003864 VPS52 subunit of GARP complex [Source:VGNC Symbol;Acc:VGNC:78551]  
ENSMMUG00000003869 WD repeat domain 46 [Source:VGNC Symbol;Acc:VGNC:78940]  
ENSMMUG00000003872 ral guanine nucleotide dissociation stimulator like 2 [Source:VGNC Symbol;Acc:VGNC:76886]  
ENSMMUG00000003877 KAT8 regulatory NSL complex subunit 2 [Source:VGNC Symbol;Acc:VGNC:73910]  
ENSMMUG00000004091 transcription factor 12 [Source:VGNC Symbol;Acc:VGNC:78283]  
ENSMMUG00000004178 NADPH oxidase 1 [Source:VGNC Symbol;Acc:VGNC:75374]  
ENSMMUG00000004233 leucine rich repeats and immunoglobulin like domains 3 [Source:NCBI gene;Acc:716344]  
ENSMMUG00000004287 death domain associated protein [Source:VGNC Symbol;Acc:VGNC:71737]  
ENSMMUG00000004386 sperm associated antigen 1 [Source:VGNC Symbol;Acc:VGNC:77849]  
ENSMMUG00000004387 ring finger protein 19A, RBR E3 ubiquitin protein ligase [Source:VGNC Symbol;Acc:VGNC:82224]  
ENSMMUG00000004460 tyrosyl-DNA phosphodiesterase 1 [Source:VGNC Symbol;Acc:VGNC:79164]  
ENSMMUG00000004559 potassium voltage-gated channel subfamily D member 1 [Source:VGNC Symbol;Acc:VGNC:73975]  
ENSMMUG00000004617 glutathione peroxidase 6 [Source:VGNC Symbol;Acc:VGNC:73154]  
ENSMMUG00000004674 phosphoribosyl pyrophosphate synthetase 1 [Source:NCBI gene;Acc:702529]  
ENSMMUG00000004954 apoptosis inducing factor mitochondria associated 1 [Source:VGNC Symbol;Acc:VGNC:69820]  
ENSMMUG00000005067 elongator acetyltransferase complex subunit 3 [Source:VGNC Symbol;Acc:VGNC:72080]  
ENSMMUG00000005225 gap junction protein alpha 1 [Source:VGNC Symbol;Acc:VGNC:73055]  
ENSMMUG00000005246 zinc finger protein 740 [Source:VGNC Symbol;Acc:VGNC:79665]  
ENSMMUG00000005312 glutaredoxin [Source:VGNC Symbol;Acc:VGNC:84383]  
ENSMMUG00000005365 peroxisomal biogenesis factor 3 [Source:VGNC Symbol;Acc:VGNC:75951]  
ENSMMUG00000005366 alpha-L-fucosidase 2 [Source:VGNC Symbol;Acc:VGNC:72827]

ENSMMUG0000005442 5'-nucleotidase ecto [Source:VGNC Symbol;Acc:VGNC:75537]  
ENSMMUG0000005856 glycine amidinotransferase [Source:VGNC Symbol;Acc:VGNC:72892]  
ENSMMUG0000005923 failed axon connections homolog, metaxin like GST domain containing [Source:VGNC Symbol;Acc:VGNC:72541]  
ENSMMUG0000006457 Rho guanine nucleotide exchange factor 40 [Source:VGNC Symbol;Acc:VGNC:69907]  
ENSMMUG0000006768 coiled-coil domain containing 196 [Source:VGNC Symbol;Acc:VGNC:70828]  
ENSMMUG0000006775 proenkephalin [Source:VGNC Symbol;Acc:VGNC:75941]  
ENSMMUG0000007159 tubulin epsilon and delta complex 1 [Source:VGNC Symbol;Acc:VGNC:79235]  
ENSMMUG0000007255 microtubule associated protein 1A [Source:VGNC Symbol;Acc:VGNC:74489]  
ENSMMUG0000007264 transmembrane protein 30B [Source:VGNC Symbol;Acc:VGNC:79656]  
ENSMMUG0000007411 integrin alpha FG-GAP repeat containing 2 [Source:VGNC Symbol;Acc:VGNC:73690]  
ENSMMUG0000007424 nuclear receptor interacting protein 2 [Source:VGNC Symbol;Acc:VGNC:75448]  
ENSMMUG0000007504 myosin VC [Source:VGNC Symbol;Acc:VGNC:75117]  
ENSMMUG0000007561 zinc finger DHHC-type palmitoyltransferase 22 [Source:NCBI gene;Acc:706468]  
ENSMMUG0000007775 survival motor neuron domain containing 1 [Source:NCBI gene;Acc:694761]  
ENSMMUG0000008009 family with sequence similarity 13 member B [Source:VGNC Symbol;Acc:VGNC:72268]  
ENSMMUG0000008093 StAR related lipid transfer domain containing 9 [Source:NCBI gene;Acc:708953]  
ENSMMUG0000008212 tenomodulin [Source:VGNC Symbol;Acc:VGNC:79087]  
ENSMMUG0000008213 reticulocalbin 2 [Source:VGNC Symbol;Acc:VGNC:76887]  
ENSMMUG0000008214 nuclear export mediator factor [Source:VGNC Symbol;Acc:VGNC:84407]  
ENSMMUG0000008228 unc-93 homolog A [Source:VGNC Symbol;Acc:VGNC:78724]  
ENSMMUG0000008447 fibulin 5 [Source:VGNC Symbol;Acc:VGNC:72622]  
ENSMMUG0000008525 minichromosome maintenance 9 homologous recombination repair factor [Source:VGNC Symbol;Acc:VGNC:83432]  
ENSMMUG0000008539 uroporphyrinogen III synthase [Source:VGNC Symbol;Acc:VGNC:78731]  
ENSMMUG0000008542 DEAH-box helicase 32 (putative) [Source:NCBI gene;Acc:695919]  
ENSMMUG0000008546 cyclin D2 [Source:NCBI gene;Acc:710379]  
ENSMMUG0000008710 protocadherin 1 [Source:VGNC Symbol;Acc:VGNC:75775]  
ENSMMUG0000008718 zinc finger protein 280D [Source:NCBI gene;Acc:699509]  
ENSMMUG0000008738 COMM domain containing 10 [Source:VGNC Symbol;Acc:VGNC:71374]  
ENSMMUG0000008781 BCL6 corepressor like 1 [Source:VGNC Symbol;Acc:VGNC:70131]  
ENSMMUG0000008792 G-patch domain containing 2 like [Source:VGNC Symbol;Acc:VGNC:72973]  
ENSMMUG0000008867 exoribonuclease 1 [Source:VGNC Symbol;Acc:VGNC:72324]  
ENSMMUG0000009084 transmembrane 6 superfamily member 1 [Source:VGNC Symbol;Acc:VGNC:78566]  
ENSMMUG0000009155 SIN3-HDAC complex associated factor [Source:NCBI gene;Acc:694162]  
ENSMMUG0000009409 mesoderm development LRP chaperone [Source:VGNC Symbol;Acc:VGNC:74507]  
ENSMMUG0000009520 gephyrin [Source:VGNC Symbol;Acc:VGNC:72948]  
ENSMMUG0000009838 COP9 signalosome subunit 2 [Source:VGNC Symbol;Acc:VGNC:71376]  
ENSMMUG0000009839 galactokinase 2 [Source:VGNC Symbol;Acc:VGNC:72870]  
ENSMMUG0000009958 ankyrin repeat domain 46 [Source:VGNC Symbol;Acc:VGNC:69719]  
ENSMMUG0000010049 NOP9 nucleolar protein [Source:VGNC Symbol;Acc:VGNC:75216]  
ENSMMUG0000010171 proline-serine-threonine phosphatase interacting protein 1 [Source:VGNC Symbol;Acc:VGNC:76459]  
ENSMMUG0000010404 zinc finger protein 41 [Source:VGNC Symbol;Acc:VGNC:78900]  
ENSMMUG0000010440 adenylate cyclase 8 [Source:VGNC Symbol;Acc:VGNC:69516]  
ENSMMUG0000010682 fibrillin 2 [Source:VGNC Symbol;Acc:VGNC:72624]  
ENSMMUG0000010748 transient receptor potential cation channel subfamily A member 1 [Source:VGNC Symbol;Acc:VGNC:78429]  
ENSMMUG0000010819 fibroblast growth factor receptor substrate 2 [Source:VGNC Symbol;Acc:VGNC:72732]  
ENSMMUG0000010891 lysine acetyltransferase 6A [Source:VGNC Symbol;Acc:VGNC:73821]  
ENSMMUG0000011047 S-phase cyclin A associated protein in the ER [Source:VGNC Symbol;Acc:VGNC:77006]  
ENSMMUG0000011214 solute carrier family 12 member 2 [Source:VGNC Symbol;Acc:VGNC:77386]  
ENSMMUG0000011469 germ cell nuclear acidic peptidase [Source:VGNC Symbol;Acc:VGNC:72724]  
ENSMMUG0000011515 striatin 3 [Source:VGNC Symbol;Acc:VGNC:78127]  
ENSMMUG0000011573 cap methyltransferase 1 [Source:VGNC Symbol;Acc:VGNC:71271]

ENSMMUG00000011575 coiled-coil domain containing 167 [Source:VGNC Symbol;Acc:VGNC:70833]  
ENSMMUG00000011675 zinc finger and SCAN domain containing 12 [Source:VGNC Symbol;Acc:VGNC:78910]  
ENSMMUG00000011974 calcium/calmodulin dependent protein kinase IV [Source:VGNC Symbol;Acc:VGNC:70526]  
ENSMMUG00000012120 zinc ribbon domain containing 1 [Source:VGNC Symbol;Acc:VGNC:78912]  
ENSMMUG00000012122 protein phosphatase 1 regulatory inhibitor subunit 11 [Source:VGNC Symbol;Acc:VGNC:82209]  
ENSMMUG00000012124 ring finger protein 39 [Source:VGNC Symbol;Acc:VGNC:83458]  
ENSMMUG00000012129 tripartite motif containing 10 [Source:VGNC Symbol;Acc:VGNC:78550]  
ENSMMUG00000012192 erythrocyte membrane protein band 4.1 like 4A [Source:VGNC Symbol;Acc:VGNC:72039]  
ENSMMUG00000012396 zinc finger and SCAN domain containing 23 [Source:VGNC Symbol;Acc:VGNC:79313]  
ENSMMUG00000012462 proteasome activator subunit 1 [Source:VGNC Symbol;Acc:VGNC:76455]  
ENSMMUG00000012463 DEAD-box helicase 46 [Source:VGNC Symbol;Acc:VGNC:71663]  
ENSMMUG00000012473 proteasome activator subunit 2 [Source:VGNC Symbol;Acc:VGNC:76456]  
ENSMMUG00000012474 ring finger protein 31 [Source:NCBI gene;Acc:715239]  
ENSMMUG00000012480 REC8 meiotic recombination protein [Source:VGNC Symbol;Acc:VGNC:76746]  
ENSMMUG00000012481 importin 4 [Source:VGNC Symbol;Acc:VGNC:73630]  
ENSMMUG00000012513 lactamase beta 2 [Source:VGNC Symbol;Acc:VGNC:74072]  
ENSMMUG00000012576 sorting nexin 6 [Source:NCBI gene;Acc:693626]  
ENSMMUG00000012781 muscular LMNA interacting protein [Source:VGNC Symbol;Acc:VGNC:83434]  
ENSMMUG00000013008 cleavage stimulation factor subunit 2 [Source:VGNC Symbol;Acc:VGNC:71536]  
ENSMMUG00000013029 surfactant protein C [Source:VGNC Symbol;Acc:VGNC:84113]  
ENSMMUG00000013031 bone morphogenetic protein 1 [Source:VGNC Symbol;Acc:VGNC:70259]  
ENSMMUG00000013032 phytanoyl-CoA 2-hydroxylase interacting protein [Source:VGNC Symbol;Acc:VGNC:75812]  
ENSMMUG00000013047 S-phase kinase associated protein 1 [Source:NCBI gene;Acc:100423634]  
ENSMMUG00000013183 F-box and leucine rich repeat protein 17 [Source:VGNC Symbol;Acc:VGNC:82142]  
ENSMMUG00000013302 family with sequence similarity 184 member A [Source:VGNC Symbol;Acc:VGNC:72308]  
ENSMMUG00000013552 scribble planar cell polarity protein [Source:HGNC Symbol;Acc:HGNC:30377]  
ENSMMUG00000013655 dynamin 1 like [Source:VGNC Symbol;Acc:VGNC:71956]  
ENSMMUG00000013718 translocation associated membrane protein 2 [Source:VGNC Symbol;Acc:VGNC:83515]  
ENSMMUG00000013848 fucosyltransferase 8 [Source:VGNC Symbol;Acc:VGNC:72829]  
ENSMMUG00000013894 beta-1,4-N-acetyl-galactosaminyltransferase 3 [Source:VGNC Symbol;Acc:VGNC:70121]  
ENSMMUG00000013907 ribosomal protein S27a [Source:NCBI gene;Acc:718909]  
ENSMMUG00000013937 RAB41, member RAS oncogene family [Source:VGNC Symbol;Acc:VGNC:81544]  
ENSMMUG00000013940 kinesin family member 4A [Source:NCBI gene;Acc:695574]  
ENSMMUG00000013943 glycerophosphodiester phosphodiesterase domain containing 2 [Source:VGNC Symbol;Acc:VGNC:72787]  
ENSMMUG00000014343 lipase family member J [Source:VGNC Symbol;Acc:VGNC:74333]  
ENSMMUG00000014350 MAX interactor 1, dimerization protein [Source:VGNC Symbol;Acc:VGNC:75087]  
ENSMMUG00000014438 piwi like RNA-mediated gene silencing 2 [Source:VGNC Symbol;Acc:VGNC:81502]  
ENSMMUG00000014474 SPARC related modular calcium binding 2 [Source:VGNC Symbol;Acc:VGNC:83470]  
ENSMMUG00000014484 zinc finger protein 641 [Source:NCBI gene;Acc:708246]  
ENSMMUG00000014702 TATA-box binding protein associated factor 2 [Source:VGNC Symbol;Acc:VGNC:78090]  
ENSMMUG00000014762 myosin heavy chain 6 [Source:NCBI gene;Acc:713471]  
ENSMMUG00000014809 heterogeneous nuclear ribonucleoprotein C [Source:VGNC Symbol;Acc:VGNC:84348]  
ENSMMUG00000014810 short chain dehydrogenase/reductase family 16C member 5 [Source:VGNC Symbol;Acc:VGNC:77343]  
ENSMMUG00000014997 spalt like transcription factor 2 [Source:NCBI gene;Acc:708367]  
ENSMMUG00000015000 SPT16 homolog, facilitates chromatin remodeling subunit [Source:VGNC Symbol;Acc:VGNC:78054]  
ENSMMUG00000015002 chromodomain helicase DNA binding protein 8 [Source:VGNC Symbol;Acc:VGNC:71060]  
ENSMMUG00000015004 TOX high mobility group box family member 4 [Source:NCBI gene;Acc:706950]  
ENSMMUG00000015117 X-prolyl aminopeptidase 1 [Source:VGNC Symbol;Acc:VGNC:78810]  
ENSMMUG00000015141 ankyrin repeat domain 16 [Source:NCBI gene;Acc:720787]  
ENSMMUG00000015143 F-box DNA helicase 1 [Source:NCBI gene;Acc:720797]  
ENSMMUG00000015151 interleukin 2 receptor subunit alpha [Source:NCBI gene;Acc:574300]

ENSMMUG00000015166 NIMA related kinase 9 [Source:VGNC Symbol;Acc:VGNC:75209]  
ENSMMUG00000015168 transmembrane p24 trafficking protein 10 [Source:NCBI gene;Acc:701522]  
ENSMMUG00000015189 RAD51 associated protein 1 [Source:VGNC Symbol;Acc:VGNC:76497]  
ENSMMUG00000015238 O-linked N-acetylglucosamine (GlcNAc) transferase [Source:NCBI gene;Acc:698268]  
ENSMMUG00000015414 family with sequence similarity 160 member B1 [Source:VGNC Symbol;Acc:VGNC:72403]  
ENSMMUG00000015577 RIO kinase 1 [Source:VGNC Symbol;Acc:VGNC:76767]  
ENSMMUG00000015619 ATP binding cassette subfamily B member 7 [Source:VGNC Symbol;Acc:VGNC:81340]  
ENSMMUG00000015640 AF4/FMR2 family member 4 [Source:VGNC Symbol;Acc:VGNC:69629]  
ENSMMUG00000015737 phosphatidylinositol glycan anchor biosynthesis class A [Source:VGNC Symbol;Acc:VGNC:75984]  
ENSMMUG00000015738 vascular endothelial growth factor D [Source:VGNC Symbol;Acc:VGNC:79953]  
ENSMMUG00000015962 AT-rich interaction domain 2 [Source:VGNC Symbol;Acc:VGNC:69858]  
ENSMMUG00000016135 neural precursor cell expressed, developmentally down-regulated 9 [Source:VGNC Symbol;Acc:VGNC:75304]  
ENSMMUG00000016357 polycystin 2 like 2, transient receptor potential cation channel [Source:VGNC Symbol;Acc:VGNC:76009]  
ENSMMUG00000016610 CD99 molecule like 2 [Source:VGNC Symbol;Acc:VGNC:70823]  
ENSMMUG00000016631 glutamate receptor interacting protein 1 [Source:VGNC Symbol;Acc:VGNC:73195]  
ENSMMUG00000016896 solute carrier family 12 member 1 [Source:VGNC Symbol;Acc:VGNC:77385]  
ENSMMUG00000016983 acrosin binding protein [Source:VGNC Symbol;Acc:VGNC:69445]  
ENSMMUG00000016993 PKHD1 ciliary IPT domain containing fibrocystin/polyductin [Source:VGNC Symbol;Acc:VGNC:76010]  
ENSMMUG00000017076 tubulin gamma complex associated protein 4 [Source:VGNC Symbol;Acc:VGNC:79045]  
ENSMMUG00000017145 cell division cycle 123 [Source:VGNC Symbol;Acc:VGNC:70768]  
ENSMMUG00000017173 heat shock protein family A (Hsp70) member 14 [Source:NCBI gene;Acc:697257]  
ENSMMUG00000017176 DNA cross-link repair 1C [Source:NCBI gene;Acc:697493]  
ENSMMUG00000017186 pleckstrin homology domain interacting protein [Source:VGNC Symbol;Acc:VGNC:75803]  
ENSMMUG00000017374 G protein subunit beta 5 [Source:VGNC Symbol;Acc:VGNC:73097]  
ENSMMUG00000017432 tropomodulin 2 [Source:VGNC Symbol;Acc:VGNC:78571]  
ENSMMUG00000017558 discoidin, CUB and LCCL domain containing 1 [Source:VGNC Symbol;Acc:VGNC:71689]  
ENSMMUG00000018216 keratin, type II cuticular Hb5 [Source:NCBI gene;Acc:698320]  
ENSMMUG00000018332 family with sequence similarity 98 member B [Source:VGNC Symbol;Acc:VGNC:72583]  
ENSMMUG00000018342 required for meiotic nuclear division 1 homolog [Source:VGNC Symbol;Acc:VGNC:76797]  
ENSMMUG00000018346 coiled-coil domain containing 170 [Source:VGNC Symbol;Acc:VGNC:70832]  
ENSMMUG00000018456 PBX homeobox 2 [Source:VGNC Symbol;Acc:VGNC:75771]  
ENSMMUG00000018461 notch receptor 4 [Source:VGNC Symbol;Acc:VGNC:75372]  
ENSMMUG00000018634 methionine adenosyltransferase 1A [Source:VGNC Symbol;Acc:VGNC:74663]  
ENSMMUG00000018640 Dmx like 1 [Source:VGNC Symbol;Acc:VGNC:71935]  
ENSMMUG00000018679 glyceraldehyde-3-phosphate dehydrogenase [Source:NCBI gene;Acc:574353]  
ENSMMUG00000018827 multiple EGF like domains 10 [Source:VGNC Symbol;Acc:VGNC:74617]  
ENSMMUG00000018972 RNA polymerase III subunit G [Source:VGNC Symbol;Acc:VGNC:84480]  
ENSMMUG00000018974 LysM domain containing 3 [Source:VGNC Symbol;Acc:VGNC:74373]  
ENSMMUG00000018976 adhesion G protein-coupled receptor V1 [Source:VGNC Symbol;Acc:VGNC:69625]  
ENSMMUG00000019045 estrogen receptor 1 [Source:VGNC Symbol;Acc:VGNC:72432]  
ENSMMUG00000019250 solute carrier family 25 member 27 [Source:VGNC Symbol;Acc:VGNC:77543]  
ENSMMUG00000019252 tudor domain containing 6 [Source:VGNC Symbol;Acc:VGNC:79319]  
ENSMMUG00000019254 phospholipase A2 group VII [Source:VGNC Symbol;Acc:VGNC:76158]  
ENSMMUG00000019371 major histocompatibility complex, class II, DP alpha [Source:NCBI gene;Acc:717992]  
ENSMMUG00000019713 thyroid stimulating hormone receptor [Source:VGNC Symbol;Acc:VGNC:78662]  
ENSMMUG00000019836 myocyte enhancer factor 2C [Source:VGNC Symbol;Acc:VGNC:84438]  
ENSMMUG00000019838 phosphodiesterase 8A [Source:VGNC Symbol;Acc:VGNC:75924]  
ENSMMUG00000020036 Sp1 transcription factor [Source:VGNC Symbol;Acc:VGNC:77844]  
ENSMMUG00000020202 melanoma-associated antigen D4 [Source:NCBI gene;Acc:106996411]  
ENSMMUG00000020289 CD83 molecule [Source:VGNC Symbol;Acc:VGNC:70783]  
ENSMMUG00000020348 BCL2 interacting protein 2 [Source:VGNC Symbol;Acc:VGNC:70272]



ENSMMUG00000020370 SRY-box transcription factor 5 [Source:VGNC Symbol;Acc:VGNC:77843]  
ENSMMUG00000020533 chromosome 11 C12orf56 homolog [Source:VGNC Symbol;Acc:VGNC:70409]  
ENSMMUG00000020812 A-kinase anchoring protein 3 [Source:VGNC Symbol;Acc:VGNC:69769]  
ENSMMUG00000021114 G protein-coupled receptor 182 [Source:VGNC Symbol;Acc:VGNC:72936]  
ENSMMUG00000021145 family with sequence similarity 120B [Source:VGNC Symbol;Acc:VGNC:72311]  
ENSMMUG00000021168 unc-5 family C-terminal like [Source:VGNC Symbol;Acc:VGNC:79314]  
ENSMMUG00000021171 apolipoprotein B mRNA editing enzyme catalytic subunit 2 [Source:VGNC Symbol;Acc:VGNC:69986]  
ENSMMUG00000021173 nuclear transcription factor Y subunit alpha [Source:VGNC Symbol;Acc:VGNC:75344]  
ENSMMUG00000021308 chromosome 9 C10orf71 homolog [Source:NCBI gene;Acc:710332]  
ENSMMUG00000021315 molybdenum cofactor synthesis 1 [Source:NCBI gene;Acc:719625]  
ENSMMUG00000021327 phosphatidylinositol glycan anchor biosynthesis class H [Source:VGNC Symbol;Acc:VGNC:75987]  
ENSMMUG00000021377 SPT3 homolog, SAGA and STAGA complex component [Source:VGNC Symbol;Acc:VGNC:78055]  
ENSMMUG00000021393 calcium/calmodulin dependent protein kinase II gamma [Source:VGNC Symbol;Acc:VGNC:70525]  
ENSMMUG00000021534 solute carrier family 16 member 10 [Source:NCBI gene;Acc:696132]  
ENSMMUG00000021552 RPGR interacting protein 1 [Source:VGNC Symbol;Acc:VGNC:77007]  
ENSMMUG00000021788 immunoglobulin superfamily DCC subclass member 4 [Source:VGNC Symbol;Acc:VGNC:73388]  
ENSMMUG00000021878 timeless circadian regulator [Source:VGNC Symbol;Acc:VGNC:78356]  
ENSMMUG00000022044 scavenger receptor class A member 5 [Source:VGNC Symbol;Acc:VGNC:77117]  
ENSMMUG00000022056 DENN domain containing 4A [Source:VGNC Symbol;Acc:VGNC:71697]  
ENSMMUG00000022124 stonin 2 [Source:VGNC Symbol;Acc:VGNC:78249]  
ENSMMUG00000022185 odd-skipped related transcription factor 2 [Source:VGNC Symbol;Acc:VGNC:84097]  
ENSMMUG00000022293 FERM and PDZ domain containing 3 [Source:VGNC Symbol;Acc:VGNC:72805]  
ENSMMUG00000022676 ribosomal modification protein rimK like family member B [Source:NCBI gene;Acc:722261]  
ENSMMUG00000022680 alpha-2-macroglobulin like 1 [Source:VGNC Symbol;Acc:VGNC:69507]  
ENSMMUG00000022983 adhesion G protein-coupled receptor F1 [Source:VGNC Symbol;Acc:VGNC:81007]  
ENSMMUG00000023012 vesicle trafficking 1 [Source:VGNC Symbol;Acc:VGNC:79296]  
ENSMMUG00000023226 RNA polymerase III subunit D [Source:VGNC Symbol;Acc:VGNC:76017]  
ENSMMUG00000023248 serine/threonine kinase 38 like [Source:VGNC Symbol;Acc:VGNC:78156]  
ENSMMUG00000023249 aryl hydrocarbon receptor nuclear translocator like 2 [Source:NCBI gene;Acc:709547]  
ENSMMUG00000023265 A-kinase anchoring protein 12 [Source:VGNC Symbol;Acc:VGNC:69766]  
ENSMMUG00000023488 lysine acetyltransferase 6B [Source:VGNC Symbol;Acc:VGNC:73846]  
ENSMMUG00000023558 exocyst complex component 2 [Source:VGNC Symbol;Acc:VGNC:72338]  
ENSMMUG00000023679 tripartite motif containing 26 [Source:VGNC Symbol;Acc:VGNC:78854]  
ENSMMUG00000023791 SR-related CTD associated factor 11 [Source:VGNC Symbol;Acc:VGNC:77002]  
ENSMMUG00000024448  
ENSMMUG00000024966 U4 spliceosomal RNA [Source:RFAM;Acc:RF00015]  
ENSMMUG00000025616  
ENSMMUG00000028701  
ENSMMUG00000029197 YY1 transcription factor [Source:NCBI gene;Acc:717370]  
ENSMMUG00000029475 zinc finger and BTB domain containing 2 [Source:VGNC Symbol;Acc:VGNC:79291]  
ENSMMUG00000032427 neuroligin 3 [Source:NCBI gene;Acc:574216]  
ENSMMUG00000032892 U6 spliceosomal RNA [Source:RFAM;Acc:RF00026]  
ENSMMUG00000033001 U6 spliceosomal RNA [Source:RFAM;Acc:RF00026]  
ENSMMUG00000033490 mml-mir-625 [Source:miRBase;Acc:MI0007874]  
ENSMMUG00000037625  
ENSMMUG00000037675 testis expressed 52 [Source:NCBI gene;Acc:107000723]  
ENSMMUG00000037806 chromosome 6 C5orf63 homolog [Source:NCBI gene;Acc:100423212]  
ENSMMUG00000038051 uncharacterized LOC106998885 [Source:NCBI gene;Acc:106998885]  
ENSMMUG00000038070 T cell receptor alpha variable 12-3 [Source:HGNC Symbol;Acc:HGNC:12107]  
ENSMMUG00000038560 eukaryotic translation elongation factor 1 epsilon 1 [Source:NCBI gene;Acc:695426]  
ENSMMUG00000038661

ENSMMUG00000039515 kinesin family member 13B [Source:NCBI gene;Acc:100429368]  
ENSMMUG00000039829  
ENSMMUG00000040154 T cell receptor alpha variable 9-2 [Source:HGNC Symbol;Acc:HGNC:12154]  
ENSMMUG00000040771  
ENSMMUG00000042154 ankyrin repeat domain 66 [Source:VGNC Symbol;Acc:VGNC:81024]  
ENSMMUG00000042416  
ENSMMUG00000043161 endogenous retrovirus group FRD member 1, envelope [Source:VGNC Symbol;Acc:VGNC:81068]  
ENSMMUG00000043411 zinc finger and BTB domain containing 39 [Source:NCBI gene;Acc:713914]  
ENSMMUG00000044047 killer cell lectin like receptor B1 [Source:NCBI gene;Acc:100430783]  
ENSMMUG00000044214  
ENSMMUG00000044473  
ENSMMUG00000044859  
ENSMMUG00000044958 adhesion G protein-coupled receptor G6 [Source:VGNC Symbol;Acc:VGNC:81009]  
ENSMMUG00000045446  
ENSMMUG00000045680 iron responsive element binding protein 2 [Source:VGNC Symbol;Acc:VGNC:84360]  
ENSMMUG00000046218 X antigen family member 5 [Source:NCBI gene;Acc:114669729]  
ENSMMUG00000046464 coiled-coil-helix-coiled-coil-helix domain containing 7 [Source:VGNC Symbol;Acc:VGNC:83989]  
ENSMMUG00000046520 small integral membrane protein 13 [Source:NCBI gene;Acc:703387]  
ENSMMUG00000046765  
ENSMMUG00000047127  
ENSMMUG00000047342 T cell receptor alpha variable 12-2 [Source:HGNC Symbol;Acc:HGNC:12106]  
ENSMMUG00000047741 Metazoan signal recognition particle RNA [Source:RFAM;Acc:RF00017]  
ENSMMUG00000049351 MAGE family member E1 [Source:NCBI gene;Acc:705379]  
ENSMMUG00000049437 Metazoan signal recognition particle RNA [Source:RFAM;Acc:RF00017]  
ENSMMUG00000049563  
ENSMMUG00000049749  
ENSMMUG00000050174  
ENSMMUG00000050297  
ENSMMUG00000050503  
ENSMMUG00000050534  
ENSMMUG00000050862  
ENSMMUG00000050975  
ENSMMUG00000051088  
ENSMMUG00000051271  
ENSMMUG00000051277  
ENSMMUG00000051446  
ENSMMUG00000051522 Metazoan signal recognition particle RNA [Source:RFAM;Acc:RF00017]  
ENSMMUG00000051552  
ENSMMUG00000051670  
ENSMMUG00000051999  
ENSMMUG00000052442  
ENSMMUG00000052518 SIVA1 apoptosis inducing factor [Source:NCBI gene;Acc:706688]  
ENSMMUG00000052535  
ENSMMUG00000052651 Metazoan signal recognition particle RNA [Source:RFAM;Acc:RF00017]  
ENSMMUG00000052791  
ENSMMUG00000052817 Sp7 transcription factor [Source:NCBI gene;Acc:702575]  
ENSMMUG00000053250  
ENSMMUG00000053384  
ENSMMUG00000053760  
ENSMMUG00000053789  
ENSMMUG00000053794

ENSMMUG00000054112  
ENSMMUG00000054116 T cell receptor alpha variable 8-6 [Source:HGNC Symbol;Acc:HGNC:12151]  
ENSMMUG00000054302 antioxidant 1 copper chaperone [Source:NCBI gene;Acc:712464]  
ENSMMUG00000054315  
ENSMMUG00000054447 T-box transcription factor 22 [Source:NCBI gene;Acc:708338]  
ENSMMUG00000054532  
ENSMMUG00000054689  
ENSMMUG00000054713  
ENSMMUG00000054817 immunoglobulin binding protein 1 [Source:NCBI gene;Acc:694632]  
ENSMMUG00000054825  
ENSMMUG00000055117  
ENSMMUG00000055207  
ENSMMUG00000055229  
ENSMMUG00000055271  
ENSMMUG00000055272 putative uncharacterized protein ZNRD1-AS1 [Source:NCBI gene;Acc:712069]  
ENSMMUG00000055392  
ENSMMUG00000055447 MDM2 proto-oncogene [Source:NCBI gene;Acc:718284]  
ENSMMUG00000055477  
ENSMMUG00000055610 homeobox C4 [Source:NCBI gene;Acc:100430434]  
ENSMMUG00000056045  
ENSMMUG00000056303  
ENSMMUG00000056544  
ENSMMUG00000056737  
ENSMMUG00000056910  
ENSMMUG00000057021 CLOCK interacting pacemaker [Source:NCBI gene;Acc:704679]  
ENSMMUG00000057407 dorsal root ganglia homeobox [Source:NCBI gene;Acc:719355]  
ENSMMUG00000057531 mitochondrial ribosomal protein S11 [Source:NCBI gene;Acc:697743]  
ENSMMUG00000057544  
ENSMMUG00000057697  
ENSMMUG00000057859  
ENSMMUG00000058151 chromosome 4 C6orf62 homolog [Source:NCBI gene;Acc:708218]  
ENSMMUG00000058240  
ENSMMUG00000058450  
ENSMMUG00000058580 tripartite motif containing 40 [Source:NCBI gene;Acc:100427925]  
ENSMMUG00000058603  
ENSMMUG00000058933  
ENSMMUG00000058942  
ENSMMUG00000059038 5-hydroxytryptamine receptor 7 [Source:NCBI gene;Acc:696317]  
ENSMMUG00000059080  
ENSMMUG00000059145  
ENSMMUG00000059153  
ENSMMUG00000059241  
ENSMMUG00000059327 NUS1 dehydrololichyl diphosphate synthase subunit [Source:NCBI gene;Acc:715015]  
ENSMMUG00000059525  
ENSMMUG00000059575  
ENSMMUG00000059617  
ENSMMUG00000059663  
ENSMMUG00000059794  
ENSMMUG00000059922 family with sequence similarity 104 member B [Source:NCBI gene;Acc:705418]  
ENSMMUG00000060062  
ENSMMUG00000060503 Metazoan signal recognition particle RNA [Source:RFAM;Acc:RF00017]

ENSMMUG00000060524  
ENSMMUG00000060527  
ENSMMUG00000060765  
ENSMMUG00000060822  
ENSMMUG00000060995  
ENSMMUG00000061068  
ENSMMUG00000061117  
ENSMMUG00000061268 PLAG1 zinc finger [Source:NCBI gene;Acc:696149]  
ENSMMUG00000061278  
ENSMMUG00000061295 PDZ domain containing 11 [Source:NCBI gene;Acc:695458]  
ENSMMUG00000061590  
ENSMMUG00000061687  
ENSMMUG00000061761 interferon induced protein with tetratricopeptide repeats 2 [Source:NCBI gene;Acc:695452]  
ENSMMUG00000061892  
ENSMMUG00000062264  
ENSMMUG00000062339 endogenous retrovirus group K member 25 Env polyprotein-like [Source:NCBI gene;Acc:114677579]  
ENSMMUG00000062443  
ENSMMUG00000062538 adenylate cyclase type 10 [Source:NCBI gene;Acc:719662]  
ENSMMUG00000062638 methyltransferase like 3 [Source:NCBI gene;Acc:706852]  
ENSMMUG00000062642  
ENSMMUG00000062676  
ENSMMUG00000062861  
ENSMMUG00000062974  
ENSMMUG00000063177 StAR related lipid transfer domain containing 4 [Source:NCBI gene;Acc:706654]  
ENSMMUG00000063267 aldo-keto reductase family 1 member C15 [Source:NCBI gene;Acc:722496]  
ENSMMUG00000063268  
ENSMMUG00000063345  
ENSMMUG00000063396  
ENSMMUG00000063659  
ENSMMUG00000063703  
ENSMMUG00000064075 ring finger protein 41 [Source:NCBI gene;Acc:711969]  
ENSMMUG00000064249  
ENSMMUG00000064448  
ENSMMUG00000064507 beta-1,3-galactosyltransferase 4 [Source:NCBI gene;Acc:718178]  
ENSMMUG00000064804  
ENSMMUG00000064980  
ENSMMUG00000065018 transmembrane protein 35A [Source:NCBI gene;Acc:702205]  
ENSMMUG00000065031  
ENSMMUG00000000117 HCK proto-oncogene, Src family tyrosine kinase [Source:VGNC Symbol;Acc:VGNC:73353]  
ENSMMUG00000000227 myosin heavy chain 7B [Source:VGNC Symbol;Acc:VGNC:74965]  
ENSMMUG00000000229 transient receptor potential cation channel subfamily C member 4 associated protein [Source:VGNC Symbol;Acc:VGNC:79014]  
ENSMMUG00000000262 beta-ureidopropionase 1 [Source:VGNC Symbol;Acc:VGNC:79029]  
ENSMMUG00000000288 C-C motif chemokine ligand 2 [Source:VGNC Symbol;Acc:VGNC:70698]  
ENSMMUG00000000350 basic, immunoglobulin-like variable motif containing [Source:NCBI gene;Acc:100426213]  
ENSMMUG00000000353 putative methyltransferase-like protein 21E pseudogene [Source:NCBI gene;Acc:707949]  
ENSMMUG00000000364 translocase of outer mitochondrial membrane 22 [Source:NCBI gene;Acc:701286]  
ENSMMUG00000000434 cyclin dependent kinase 2 associated protein 1 [Source:VGNC Symbol;Acc:VGNC:70944]  
ENSMMUG00000000496 zinc finger and BTB domain containing 6 [Source:VGNC Symbol;Acc:VGNC:79047]  
ENSMMUG00000000618 gametogenetin binding protein 2 [Source:VGNC Symbol;Acc:VGNC:72746]  
ENSMMUG00000000620 dehydrogenase/reductase 11 [Source:VGNC Symbol;Acc:VGNC:71792]  
ENSMMUG00000000690 catenin alpha like 1 [Source:VGNC Symbol;Acc:VGNC:71544]

ENSMMUG0000000797 exophilin 5 [Source:VGNC Symbol;Acc:VGNC:72412]  
ENSMMUG0000000807 tRNA 5-methylaminomethyl-2-thiouridylate methyltransferase [Source:VGNC Symbol;Acc:VGNC:79500]  
ENSMMUG0000000974 mutS homolog 2 [Source:VGNC Symbol;Acc:VGNC:74931]  
ENSMMUG0000001065 olfactory receptor, family 51, subfamily A, member 4 [Source:NCBI gene;Acc:100425539]  
ENSMMUG0000001172 spermatogenesis and oogenesis specific basic helix-loop-helix 2 [Source:NCBI gene;Acc:693608]  
ENSMMUG0000001294 FCH and double SH3 domains 2 [Source:VGNC Symbol;Acc:VGNC:72593]  
ENSMMUG0000001800 cullin 5 [Source:VGNC Symbol;Acc:VGNC:71570]  
ENSMMUG0000002090 ATPase H+ transporting V1 subunit B1 [Source:VGNC Symbol;Acc:VGNC:70184]  
ENSMMUG0000002093 testis expressed 261 [Source:NCBI gene;Acc:703863]  
ENSMMUG0000002103 delta/notch like EGF repeat containing [Source:VGNC Symbol;Acc:VGNC:71895]  
ENSMMUG0000002109 proline and serine rich 1 [Source:VGNC Symbol;Acc:VGNC:76291]  
ENSMMUG0000002113 NHL repeat containing 3 [Source:VGNC Symbol;Acc:VGNC:75291]  
ENSMMUG0000002176 ubiquitin like with PHD and ring finger domains 2 [Source:VGNC Symbol;Acc:VGNC:78714]  
ENSMMUG0000002182 phosphatidylserine decarboxylase [Source:VGNC Symbol;Acc:VGNC:76005]  
ENSMMUG0000002183 oxysterol binding protein like 6 [Source:VGNC Symbol;Acc:VGNC:75627]  
ENSMMUG0000002231 transmembrane protein 87B [Source:VGNC Symbol;Acc:VGNC:79557]  
ENSMMUG0000002243 pleckstrin homology and RhoGEF domain containing G7 [Source:VGNC Symbol;Acc:VGNC:76149]  
ENSMMUG0000002244 early endosome antigen 1 [Source:VGNC Symbol;Acc:VGNC:72161]  
ENSMMUG0000002321 solute carrier family 24 member 3 [Source:VGNC Symbol;Acc:VGNC:77426]  
ENSMMUG0000002370 integrin subunit alpha 6 [Source:VGNC Symbol;Acc:VGNC:73780]  
ENSMMUG0000002514 methyltransferase like 25 [Source:VGNC Symbol;Acc:VGNC:74591]  
ENSMMUG0000002517 protein tyrosine phosphatase domain containing 1 [Source:VGNC Symbol;Acc:VGNC:76567]  
ENSMMUG0000002520 solute carrier family 4 member 3 [Source:VGNC Symbol;Acc:VGNC:77604]  
ENSMMUG0000002533 progesterone immunomodulatory binding factor 1 [Source:NCBI gene;Acc:694190]  
ENSMMUG0000002549 trehalase [Source:NCBI gene;Acc:706449]  
ENSMMUG0000002589 sulfotransferase 1C3-like [Source:NCBI gene;Acc:114671897]  
ENSMMUG0000002657 olfactomedin 4 [Source:VGNC Symbol;Acc:VGNC:75418]  
ENSMMUG0000002678 integrin subunit beta 6 [Source:VGNC Symbol;Acc:VGNC:73789]  
ENSMMUG0000002809 unc-80 homolog, NALCN channel complex subunit [Source:NCBI gene;Acc:713007]  
ENSMMUG0000003260  
ENSMMUG0000003394 cilia and flagella associated protein 300 [Source:VGNC Symbol;Acc:VGNC:71120]  
ENSMMUG0000003631 cytoskeleton associated protein 5 [Source:VGNC Symbol;Acc:VGNC:71368]  
ENSMMUG0000003949 cholinergic receptor nicotinic alpha 10 subunit [Source:NCBI gene;Acc:718133]  
ENSMMUG0000003958 stromal interaction molecule 1 [Source:VGNC Symbol;Acc:VGNC:77911]  
ENSMMUG0000003973 autophagy related 2A [Source:VGNC Symbol;Acc:VGNC:70145]  
ENSMMUG0000004153 ATM serine/threonine kinase [Source:VGNC Symbol;Acc:VGNC:70173]  
ENSMMUG0000004157 nuclear protein, coactivator of histone transcription [Source:VGNC Symbol;Acc:VGNC:75379]  
ENSMMUG0000004205 phospholipase B domain containing 2 [Source:VGNC Symbol;Acc:VGNC:76122]  
ENSMMUG0000004208 serine dehydratase [Source:VGNC Symbol;Acc:VGNC:77148]  
ENSMMUG0000004237 TNF receptor superfamily member 19 [Source:VGNC Symbol;Acc:VGNC:78588]  
ENSMMUG0000004329 solute carrier family 1 member 2 [Source:VGNC Symbol;Acc:VGNC:77410]  
ENSMMUG0000004412 arginine and serine rich coiled-coil 2 [Source:VGNC Symbol;Acc:VGNC:77139]  
ENSMMUG0000004493 propionyl-CoA carboxylase subunit alpha [Source:VGNC Symbol;Acc:VGNC:75773]  
ENSMMUG0000004560 crystallin lambda 1 [Source:VGNC Symbol;Acc:VGNC:71433]  
ENSMMUG0000004675 smoothelin [Source:VGNC Symbol;Acc:VGNC:77661]  
ENSMMUG0000004709 proteasome inhibitor subunit 1 [Source:VGNC Symbol;Acc:VGNC:76458]  
ENSMMUG0000004710 protein interacting with cyclin A1 [Source:VGNC Symbol;Acc:VGNC:76336]  
ENSMMUG0000004821 membrane spanning 4-domains A14 [Source:NCBI gene;Acc:697083]  
ENSMMUG0000005040 coiled-coil domain containing 183 [Source:NCBI gene;Acc:709019]  
ENSMMUG0000005042 RAB, member RAS oncogene family like 6 [Source:VGNC Symbol;Acc:VGNC:76529]  
ENSMMUG0000005048 MAM domain containing 4 [Source:VGNC Symbol;Acc:VGNC:74345]

ENSMMUG0000005204 VPS16 core subunit of CORVET and HOPS complexes [Source:VGNC Symbol;Acc:VGNC:78966]  
ENSMMUG0000005301 ATP binding cassette subfamily B member 9 [Source:VGNC Symbol;Acc:VGNC:81341]  
ENSMMUG0000005610 protein tyrosine phosphatase non-receptor type 4 [Source:VGNC Symbol;Acc:VGNC:76605]  
ENSMMUG0000005851 B-box and SPRY domain containing [Source:VGNC Symbol;Acc:VGNC:70342]  
ENSMMUG0000005895 nucleobindin 2 [Source:VGNC Symbol;Acc:VGNC:75549]  
ENSMMUG0000006163 malate dehydrogenase 1 [Source:VGNC Symbol;Acc:VGNC:74690]  
ENSMMUG0000006215 serine/threonine kinase 39 [Source:VGNC Symbol;Acc:VGNC:81587]  
ENSMMUG0000006268 junction adhesion molecule like [Source:VGNC Symbol;Acc:VGNC:73860]  
ENSMMUG0000006446 transmembrane protein 177 [Source:VGNC Symbol;Acc:VGNC:79686]  
ENSMMUG0000006493 ras related dexamethasone induced 1 [Source:VGNC Symbol;Acc:VGNC:76485]  
ENSMMUG0000006668 tubulin alpha-3 chain [Source:NCBI gene;Acc:707215]  
ENSMMUG0000006731 CECR2 histone acetyl-lysine reader [Source:VGNC Symbol;Acc:VGNC:84530]  
ENSMMUG0000006755 tubulin tyrosine ligase like 4 [Source:VGNC Symbol;Acc:VGNC:79758]  
ENSMMUG0000006842 doublecortin domain containing 1 [Source:NCBI gene;Acc:696721]  
ENSMMUG0000006950 cornichon family AMPA receptor auxiliary protein 2 [Source:VGNC Symbol;Acc:VGNC:71366]  
ENSMMUG0000007001 protein phosphatase 4 regulatory subunit 3B [Source:VGNC Symbol;Acc:VGNC:76342]  
ENSMMUG0000007003 polyribonucleotide nucleotidyltransferase 1 [Source:VGNC Symbol;Acc:VGNC:76095]  
ENSMMUG0000007215 X-box binding protein 1 [Source:VGNC Symbol;Acc:VGNC:78806]  
ENSMMUG0000007293 RAB34, member RAS oncogene family [Source:VGNC Symbol;Acc:VGNC:81533]  
ENSMMUG0000007310 solute carrier family 25 member 12 [Source:VGNC Symbol;Acc:VGNC:77430]  
ENSMMUG0000007313 histone acetyltransferase 1 [Source:VGNC Symbol;Acc:VGNC:73349]  
ENSMMUG0000007325 Xrcc1 N-terminal domain containing 1 [Source:NCBI gene;Acc:115945140]  
ENSMMUG0000007326 ring finger protein 121 [Source:VGNC Symbol;Acc:VGNC:76788]  
ENSMMUG0000007330 nuclear mitotic apparatus protein 1 [Source:VGNC Symbol;Acc:VGNC:75556]  
ENSMMUG0000007421 zinc finger CCHC-type containing 7 [Source:VGNC Symbol;Acc:VGNC:82088]  
ENSMMUG0000007620 transmembrane serine protease 4 [Source:VGNC Symbol;Acc:VGNC:78577]  
ENSMMUG0000007628 cell adhesion associated, oncogene regulated [Source:VGNC Symbol;Acc:VGNC:70961]  
ENSMMUG0000007692 apolipoprotein B [Source:VGNC Symbol;Acc:VGNC:69985]  
ENSMMUG0000007708 N-alpha-acetyltransferase 20, NatB catalytic subunit [Source:VGNC Symbol;Acc:VGNC:84533]  
ENSMMUG0000007709 crooked neck pre-mRNA splicing factor 1 [Source:VGNC Symbol;Acc:VGNC:71412]  
ENSMMUG0000007742 potassium voltage-gated channel subfamily Q member 1 [Source:VGNC Symbol;Acc:VGNC:82168]  
ENSMMUG0000007751 solute carrier family 22 member 18 [Source:NCBI gene;Acc:721230]  
ENSMMUG0000007868 AP2 associated kinase 1 [Source:VGNC Symbol;Acc:VGNC:82094]  
ENSMMUG0000007920 myosin XIX [Source:VGNC Symbol;Acc:VGNC:75026]  
ENSMMUG0000008113 pleckstrin homology domain containing M3 [Source:NCBI gene;Acc:711125]  
ENSMMUG0000008136 G2 and S-phase expressed 1 [Source:VGNC Symbol;Acc:VGNC:73162]  
ENSMMUG0000008396 methylmalonyl-CoA epimerase [Source:NCBI gene;Acc:704094]  
ENSMMUG0000008540 ring finger protein 112 [Source:VGNC Symbol;Acc:VGNC:76724]  
ENSMMUG0000008639 tumor protein p53 [Source:VGNC Symbol;Acc:VGNC:78627]  
ENSMMUG0000008643 general transcription factor IIIC subunit 3 [Source:VGNC Symbol;Acc:VGNC:73317]  
ENSMMUG0000009038 titin [Source:NCBI gene;Acc:703527]  
ENSMMUG0000009303 coiled-coil domain containing 38 [Source:VGNC Symbol;Acc:VGNC:70880]  
ENSMMUG0000009310 myelin transcription factor 1 like [Source:NCBI gene;Acc:706914]  
ENSMMUG0000009394 sestrin 3 [Source:VGNC Symbol;Acc:VGNC:77291]  
ENSMMUG0000009493 family with sequence similarity 120A [Source:NCBI gene;Acc:717459]  
ENSMMUG0000009519 WASH complex subunit 4 [Source:VGNC Symbol;Acc:VGNC:79783]  
ENSMMUG0000009524 adaptor protein, phosphotyrosine interacting with PH domain and leucine zipper 2 [Source:VGNC Symbol;Acc:VGNC:69861]  
ENSMMUG0000009615 IMP U3 small nucleolar ribonucleoprotein 4 [Source:VGNC Symbol;Acc:VGNC:73689]  
ENSMMUG0000009695 BTB domain containing 10 [Source:VGNC Symbol;Acc:VGNC:70361]  
ENSMMUG0000009775 caveolae associated protein 4 [Source:NCBI gene;Acc:714379]  
ENSMMUG0000009782 C-C motif chemokine ligand 7 [Source:NCBI gene;Acc:714751]



ENSMMUG0000009831 TBC1 domain family member 2 [Source:VGNC Symbol;Acc:VGNC:78157]  
ENSMMUG0000009961 niban apoptosis regulator 2 [Source:VGNC Symbol;Acc:VGNC:75254]  
ENSMMUG0000009965 chromosome 15 C9orf50 homolog [Source:VGNC Symbol;Acc:VGNC:70365]  
ENSMMUG0000009984 prodynorphin [Source:VGNC Symbol;Acc:VGNC:75937]  
ENSMMUG00000010114 Ras and Rab interactor 2 [Source:VGNC Symbol;Acc:VGNC:76770]  
ENSMMUG00000010320 ATPase H+ transporting V1 subunit C2 [Source:VGNC Symbol;Acc:VGNC:70091]  
ENSMMUG00000010405 family with sequence similarity 171 member B [Source:VGNC Symbol;Acc:VGNC:72404]  
ENSMMUG00000010453 folate receptor beta [Source:VGNC Symbol;Acc:VGNC:72690]  
ENSMMUG00000010508 carbamoyl-phosphate synthase 1 [Source:VGNC Symbol;Acc:VGNC:71471]  
ENSMMUG00000010543 PHD finger protein 23 [Source:VGNC Symbol;Acc:VGNC:75877]  
ENSMMUG00000010627 apelin receptor [Source:VGNC Symbol;Acc:VGNC:69939]  
ENSMMUG00000010688 olfactory receptor, family 2, subfamily AT, member 4 [Source:NCBI gene;Acc:694711]  
ENSMMUG00000010820 chaperonin containing TCP1 subunit 2 [Source:VGNC Symbol;Acc:VGNC:70745]  
ENSMMUG00000010959 kelch like family member 9 [Source:VGNC Symbol;Acc:VGNC:74080]  
ENSMMUG00000011015 matrix metalloproteinase 27 [Source:VGNC Symbol;Acc:VGNC:74749]  
ENSMMUG00000011116 NADPH oxidase 4 [Source:VGNC Symbol;Acc:VGNC:75376]  
ENSMMUG00000011183 olfactomedin like 2A [Source:VGNC Symbol;Acc:VGNC:75472]  
ENSMMUG00000011401 amyloid beta precursor protein binding family A member 1 [Source:VGNC Symbol;Acc:VGNC:69976]  
ENSMMUG00000011646 TATA-box binding protein associated factor, RNA polymerase I subunit D [Source:NCBI gene;Acc:696602]  
ENSMMUG00000011712 olfactory receptor 5B21 [Source:NCBI gene;Acc:702145]  
ENSMMUG00000011986 chibby family member 2 [Source:VGNC Symbol;Acc:VGNC:78029]  
ENSMMUG00000012029 sulfatase 2 [Source:VGNC Symbol;Acc:VGNC:78179]  
ENSMMUG00000012056 structural maintenance of chromosomes 6 [Source:VGNC Symbol;Acc:VGNC:77746]  
ENSMMUG00000012058 GEN1 Holliday junction 5' flap endonuclease [Source:VGNC Symbol;Acc:VGNC:72790]  
ENSMMUG00000012091 thioredoxin reductase 1 [Source:VGNC Symbol;Acc:VGNC:78679]  
ENSMMUG00000012101 synaptogyrin 1 [Source:VGNC Symbol;Acc:VGNC:78068]  
ENSMMUG00000012167 solute carrier family 2 member 8 [Source:VGNC Symbol;Acc:VGNC:77470]  
ENSMMUG00000012224 family with sequence similarity 126 member B [Source:VGNC Symbol;Acc:VGNC:72393]  
ENSMMUG00000012250 lactase [Source:VGNC Symbol;Acc:VGNC:74244]  
ENSMMUG00000012290 GLIPR1 like 2 [Source:VGNC Symbol;Acc:VGNC:81413]  
ENSMMUG00000012307 periostin [Source:VGNC Symbol;Acc:VGNC:76039]  
ENSMMUG00000012310 CASP8 and FADD like apoptosis regulator [Source:VGNC Symbol;Acc:VGNC:71019]  
ENSMMUG00000012332 UBA domain containing 2 [Source:NCBI gene;Acc:703484]  
ENSMMUG00000012338 G protein-coupled receptor 183 [Source:VGNC Symbol;Acc:VGNC:73042]  
ENSMMUG00000012449 synaptotagmin like 2 [Source:VGNC Symbol;Acc:VGNC:78123]  
ENSMMUG00000012467 family with sequence similarity 227 member A [Source:VGNC Symbol;Acc:VGNC:72475]  
ENSMMUG00000012601 RANBP2-type and C3HC4-type zinc finger containing 1 [Source:VGNC Symbol;Acc:VGNC:81554]  
ENSMMUG00000012636 potassium channel tetramerization domain containing 4 [Source:VGNC Symbol;Acc:VGNC:73892]  
ENSMMUG00000012778 rabphilin 3A [Source:VGNC Symbol;Acc:VGNC:77033]  
ENSMMUG00000012953 stress induced phosphoprotein 1 [Source:NCBI gene;Acc:717926]  
ENSMMUG00000013035 teashirt zinc finger homeobox 2 [Source:VGNC Symbol;Acc:VGNC:78875]  
ENSMMUG00000013055 malic enzyme 3 [Source:VGNC Symbol;Acc:VGNC:74695]  
ENSMMUG00000013233 collagen type IV alpha 4 chain [Source:VGNC Symbol;Acc:VGNC:71299]  
ENSMMUG00000013235 collagen type IV alpha 3 chain [Source:VGNC Symbol;Acc:VGNC:81375]  
ENSMMUG00000013419 guanylate cyclase 1 soluble subunit alpha 2 [Source:VGNC Symbol;Acc:VGNC:82154]  
ENSMMUG00000013501 CD68 molecule [Source:VGNC Symbol;Acc:VGNC:82121]  
ENSMMUG00000013503 mannose-P-dolichol utilization defect 1 [Source:VGNC Symbol;Acc:VGNC:74913]  
ENSMMUG00000013707 heat shock protein family H (Hsp110) member 1 [Source:NCBI gene;Acc:721956]  
ENSMMUG00000013799 ATP binding cassette subfamily G member 4 [Source:VGNC Symbol;Acc:VGNC:69390]  
ENSMMUG00000013888 NOP56 ribonucleoprotein [Source:VGNC Symbol;Acc:VGNC:75181]  
ENSMMUG00000014027 nitric oxide synthase 1 [Source:VGNC Symbol;Acc:VGNC:75368]

ENSMMUG00000014049 collagen type VI alpha 3 chain [Source:VGNC Symbol;Acc:VGNC:71303]  
ENSMMUG00000014140 peroxisomal biogenesis factor 26 [Source:NCBI gene;Acc:710470]  
ENSMMUG00000014531 transmembrane protein 109 [Source:VGNC Symbol;Acc:VGNC:79740]  
ENSMMUG00000014535 solute carrier family 15 member 3 [Source:VGNC Symbol;Acc:VGNC:77504]  
ENSMMUG00000014824 SIX homeobox 3 [Source:HGNC Symbol;Acc:HGNC:10889]  
ENSMMUG00000015167 DIS3 like 3'-5' exoribonuclease 2 [Source:VGNC Symbol;Acc:VGNC:71793]  
ENSMMUG00000015203 golgi reassembly stacking protein 2 [Source:VGNC Symbol;Acc:VGNC:72957]  
ENSMMUG00000015279 SWI/SNF related, matrix associated, actin dependent regulator of chromatin, subfamily a, member 2 [Source:VGNC Symbol;Acc:VGNC:77647]  
ENSMMUG00000015522 GRAM domain containing 1B [Source:VGNC Symbol;Acc:VGNC:73028]  
ENSMMUG00000015544 PWP1 homolog, endonuclein [Source:NCBI gene;Acc:705262]  
ENSMMUG00000015550 PR/SET domain 4 [Source:VGNC Symbol;Acc:VGNC:76393]  
ENSMMUG00000015970 coiled-coil domain containing 150 [Source:VGNC Symbol;Acc:VGNC:84222]  
ENSMMUG00000015987 Ras and Rab interactor 1 [Source:VGNC Symbol;Acc:VGNC:76769]  
ENSMMUG00000016052 seizure related 6 homolog like [Source:VGNC Symbol;Acc:VGNC:77176]  
ENSMMUG00000016077 isocitrate dehydrogenase (NADP(+)) 1 [Source:NCBI gene;Acc:710019]  
ENSMMUG00000016262 tetratricopeptide repeat domain 38 [Source:VGNC Symbol;Acc:VGNC:79574]  
ENSMMUG00000016313 RUN and SH3 domain containing 2 [Source:VGNC Symbol;Acc:VGNC:82230]  
ENSMMUG00000016314 family with sequence similarity 166 member B [Source:VGNC Symbol;Acc:VGNC:72421]  
ENSMMUG00000016316 testis associated actin remodelling kinase 1 [Source:VGNC Symbol;Acc:VGNC:78314]  
ENSMMUG00000016475 M-phase phosphoprotein 8 [Source:VGNC Symbol;Acc:VGNC:74864]  
ENSMMUG00000016543 CREB/ATF bZIP transcription factor [Source:VGNC Symbol;Acc:VGNC:71538]  
ENSMMUG00000016723 zinc finger protein 287 [Source:NCBI gene;Acc:695524]  
ENSMMUG00000016791 doublecortin like kinase 1 [Source:VGNC Symbol;Acc:VGNC:71745]  
ENSMMUG00000016845 zinc finger E-box binding homeobox 2 [Source:VGNC Symbol;Acc:VGNC:78969]  
ENSMMUG00000016871 alkaline phosphatase, intestinal [Source:VGNC Symbol;Acc:VGNC:69800]  
ENSMMUG00000016927 solute carrier family 2 member 10 [Source:VGNC Symbol;Acc:VGNC:77465]  
ENSMMUG00000017207 dopamine beta-hydroxylase [Source:VGNC Symbol;Acc:VGNC:71740]  
ENSMMUG00000017210 sarcosine dehydrogenase [Source:VGNC Symbol;Acc:VGNC:76971]  
ENSMMUG00000017230 V-set and transmembrane domain containing 2 like [Source:NCBI gene;Acc:707394]  
ENSMMUG00000017355 remodeling and spacing factor 1 [Source:VGNC Symbol;Acc:VGNC:77044]  
ENSMMUG00000017486 minichromosome maintenance complex component 6 [Source:VGNC Symbol;Acc:VGNC:74685]  
ENSMMUG00000017524 phosphoinositide kinase, FYVE-type zinc finger containing [Source:VGNC Symbol;Acc:VGNC:75854]  
ENSMMUG00000017593 CD3e molecule [Source:VGNC Symbol;Acc:VGNC:70764]  
ENSMMUG00000017628 pleckstrin homology domain containing A7 [Source:VGNC Symbol;Acc:VGNC:76121]  
ENSMMUG00000017680 chibby family member 1, beta catenin antagonist [Source:NCBI gene;Acc:100429409]  
ENSMMUG00000017886 F-box protein 10 [Source:NCBI gene;Acc:718443]  
ENSMMUG00000017892 RNA polymerase I subunit E [Source:VGNC Symbol;Acc:VGNC:76047]  
ENSMMUG00000017931 gamma-glutamyltransferase 7 [Source:VGNC Symbol;Acc:VGNC:72921]  
ENSMMUG00000018165 syndecan binding protein 2 [Source:VGNC Symbol;Acc:VGNC:77017]  
ENSMMUG00000018356 flagellum associated containing coiled-coil domains 1 [Source:VGNC Symbol;Acc:VGNC:72508]  
ENSMMUG00000018358 zinc finger protein 217 [Source:VGNC Symbol;Acc:VGNC:78874]  
ENSMMUG00000018474 signal regulatory protein alpha [Source:NCBI gene;Acc:717811]  
ENSMMUG00000018657 dedicator of cytokinesis 9 [Source:VGNC Symbol;Acc:VGNC:71835]  
ENSMMUG00000018898 nuclear receptor subfamily 2 group C member 1 [Source:VGNC Symbol;Acc:VGNC:75508]  
ENSMMUG00000019145 TNF alpha induced protein 1 [Source:VGNC Symbol;Acc:VGNC:78578]  
ENSMMUG00000019146 DNA polymerase delta interacting protein 2 [Source:VGNC Symbol;Acc:VGNC:76099]  
ENSMMUG00000019148 vitronectin [Source:NCBI gene;Acc:708499]  
ENSMMUG00000019462 integrin subunit alpha V [Source:VGNC Symbol;Acc:VGNC:73783]  
ENSMMUG00000019639 paired box 5 [Source:VGNC Symbol;Acc:VGNC:75764]  
ENSMMUG00000019672 autophagy related 13 [Source:VGNC Symbol;Acc:VGNC:70148]  
ENSMMUG00000019831 neurobeachin [Source:NCBI gene;Acc:714386]

ENSMMUG00000019850 arachidonate lipoxygenase 3 [Source:VGNC Symbol;Acc:VGNC:69607]  
ENSMMUG00000020004 Ras association domain family member 2 [Source:VGNC Symbol;Acc:VGNC:76674]  
ENSMMUG00000020148 BAG cochaperone 1 [Source:NCBI gene;Acc:702101]  
ENSMMUG00000020211 cyclin Y like 1 [Source:VGNC Symbol;Acc:VGNC:84224]  
ENSMMUG00000020690 erythrocyte membrane protein band 4.1 like 1 [Source:VGNC Symbol;Acc:VGNC:72231]  
ENSMMUG00000020706 ETS proto-oncogene 1, transcription factor [Source:VGNC Symbol;Acc:VGNC:72439]  
ENSMMUG00000020926 syntaxin 2 [Source:VGNC Symbol;Acc:VGNC:78259]  
ENSMMUG00000020928 nucleolar protein interacting with the FHA domain of MKI67 [Source:VGNC Symbol;Acc:VGNC:75201]  
ENSMMUG00000020993 cadherin EGF LAG seven-pass G-type receptor 1 [Source:NCBI gene;Acc:718440]  
ENSMMUG00000021083 Josephin domain containing 1 [Source:VGNC Symbol;Acc:VGNC:73920]  
ENSMMUG00000021091 COP9 signalosome subunit 3 [Source:VGNC Symbol;Acc:VGNC:71316]  
ENSMMUG00000021097 sushi domain containing 1 [Source:VGNC Symbol;Acc:VGNC:78207]  
ENSMMUG00000021137 thioredoxin related transmembrane protein 4 [Source:VGNC Symbol;Acc:VGNC:79484]  
ENSMMUG00000021280 leucine rich transmembrane and O-methyltransferase domain containing [Source:NCBI gene;Acc:718286]  
ENSMMUG00000021282 late endosomal/lysosomal adaptor, MAPK and MTOR activator 1 [Source:VGNC Symbol;Acc:VGNC:74129]  
ENSMMUG00000021291 thymine DNA glycosylase [Source:VGNC Symbol;Acc:VGNC:78297]  
ENSMMUG00000021331 EBF family member 4 [Source:VGNC Symbol;Acc:VGNC:71932]  
ENSMMUG00000021344 interleukin 33 [Source:VGNC Symbol;Acc:VGNC:73606]  
ENSMMUG00000021370 kringle containing transmembrane protein 1 [Source:VGNC Symbol;Acc:VGNC:74066]  
ENSMMUG00000021372 EMI domain containing 1 [Source:VGNC Symbol;Acc:VGNC:72063]  
ENSMMUG00000021373 rhomboid domain containing 3 [Source:NCBI gene;Acc:714479]  
ENSMMUG00000021374 EWS RNA binding protein 1 [Source:VGNC Symbol;Acc:VGNC:72446]  
ENSMMUG00000021670 solute carrier family 52 member 3 [Source:VGNC Symbol;Acc:VGNC:77717]  
ENSMMUG00000021691 spastin [Source:VGNC Symbol;Acc:VGNC:77857]  
ENSMMUG00000021760 zinc finger protein 79 [Source:NCBI gene;Acc:700961]  
ENSMMUG00000021775 beta-1,3-galactosyltransferase 1 [Source:VGNC Symbol;Acc:VGNC:70204]  
ENSMMUG00000021808 cryptochrome circadian regulator 1 [Source:VGNC Symbol;Acc:VGNC:71499]  
ENSMMUG00000021914 spondin 1 [Source:VGNC Symbol;Acc:VGNC:77862]  
ENSMMUG00000022202 basic leucine zipper and W2 domains 1 [Source:VGNC Symbol;Acc:VGNC:84213]  
ENSMMUG00000022548 phosphatidylinositol-4-phosphate 3-kinase catalytic subunit type 2 alpha [Source:VGNC Symbol;Acc:VGNC:75992]  
ENSMMUG00000022570 nuclear transcription factor Y subunit beta [Source:NCBI gene;Acc:700451]  
ENSMMUG00000022589 prostate transmembrane protein, androgen induced 1 [Source:VGNC Symbol;Acc:VGNC:76023]  
ENSMMUG00000022601 cAMP responsive element binding protein 1 [Source:VGNC Symbol;Acc:VGNC:71485]  
ENSMMUG00000022602 methyltransferase like 21A [Source:VGNC Symbol;Acc:VGNC:74625]  
ENSMMUG00000022879 EARP complex and GARP complex interacting protein 1 [Source:NCBI gene;Acc:707650]  
ENSMMUG00000023076 diacylglycerol kinase eta [Source:VGNC Symbol;Acc:VGNC:71786]  
ENSMMUG00000023083 A-kinase anchoring protein 11 [Source:VGNC Symbol;Acc:VGNC:69765]  
ENSMMUG00000023119 lin-7 homolog C, crumbs cell polarity complex component [Source:VGNC Symbol;Acc:VGNC:74070]  
ENSMMUG00000023443 SRR1 domain containing [Source:VGNC Symbol;Acc:VGNC:78036]  
ENSMMUG00000023446 tuftelin interacting protein 11 [Source:VGNC Symbol;Acc:VGNC:78399]  
ENSMMUG00000023469 heat shock protein 90 beta family member 1 [Source:NCBI gene;Acc:699568]  
ENSMMUG00000023621 DEAD-box helicase 27 [Source:NCBI gene;Acc:703852]  
ENSMMUG00000023752 SIX homeobox 2 [Source:VGNC Symbol;Acc:VGNC:81570]  
ENSMMUG00000023810 methionyl-tRNA synthetase 2, mitochondrial [Source:VGNC Symbol;Acc:VGNC:74572]  
ENSMMUG00000023811 boule homolog, RNA binding protein [Source:VGNC Symbol;Acc:VGNC:70310]  
ENSMMUG00000026876 mml-mir-181a-2 [Source:miRBase;Acc:MI0002808]  
ENSMMUG00000030381 arachidonate 15-lipoxygenase [Source:VGNC Symbol;Acc:VGNC:69796]  
ENSMMUG00000030401 gem nuclear organelle associated protein 4 [Source:VGNC Symbol;Acc:VGNC:72723]  
ENSMMUG00000031121 solute carrier family 25 member 18 [Source:VGNC Symbol;Acc:VGNC:77434]  
ENSMMUG00000031202 RAB1B, member RAS oncogene family [Source:NCBI gene;Acc:721852]  
ENSMMUG00000031224 casein kinase 2 alpha 1 [Source:NCBI gene;Acc:714841]

ENSMMUG00000031296 caspase 8 [Source:VGNC Symbol;Acc:VGNC:70547]  
ENSMMUG00000031398 coiled-coil domain containing 173 [Source:NCBI gene;Acc:709886]  
ENSMMUG00000031736  
ENSMMUG00000031965 aminolevulinate dehydratase [Source:VGNC Symbol;Acc:VGNC:69779]  
ENSMMUG00000033102 mml-mir-181b-2 [Source:miRBase;Acc:MI0007646]  
ENSMMUG00000035632 U6 spliceosomal RNA [Source:RFAM;Acc:RF00026]  
ENSMMUG00000038410  
ENSMMUG00000038569 5',3'-nucleotidase, mitochondrial [Source:NCBI gene;Acc:698591]  
ENSMMUG00000038587 prostate and testis expressed 2 [Source:NCBI gene;Acc:717085]  
ENSMMUG00000040046 lithostathine-1-alpha [Source:NCBI gene;Acc:711810]  
ENSMMUG00000040854 aspartyl-tRNA synthetase 1 [Source:VGNC Symbol;Acc:VGNC:84226]  
ENSMMUG00000041301 TNF superfamily member 8 [Source:NCBI gene;Acc:702944]  
ENSMMUG00000042668 cilia and flagella associated protein 61 [Source:NCBI gene;Acc:699814]  
ENSMMUG00000043504  
ENSMMUG00000043682 mitochondrial carrier 2 [Source:NCBI gene;Acc:712767]  
ENSMMUG00000044537 DNA polymerase epsilon 3, accessory subunit [Source:NCBI gene;Acc:705074]  
ENSMMUG00000044782  
ENSMMUG00000045105 phospholipase A and acyltransferase 4 [Source:NCBI gene;Acc:722189]  
ENSMMUG00000046282  
ENSMMUG00000046655 pleckstrin homology like domain family B member 1 [Source:NCBI gene;Acc:706336]  
ENSMMUG00000046665 glutamyl-tRNA amidotransferase subunit C [Source:NCBI gene;Acc:702258]  
ENSMMUG00000048322 eva-1 homolog A, regulator of programmed cell death [Source:NCBI gene;Acc:710843]  
ENSMMUG00000048710 HIC ZBTB transcriptional repressor 1 [Source:NCBI gene;Acc:721284]  
ENSMMUG00000049117 CLLU1 antisense RNA 1 [Source:NCBI gene;Acc:100424000]  
ENSMMUG00000049539  
ENSMMUG00000049690  
ENSMMUG00000049788  
ENSMMUG00000050245  
ENSMMUG00000050630  
ENSMMUG00000050676 leucine rich repeat containing 75A [Source:NCBI gene;Acc:699649]  
ENSMMUG00000050923  
ENSMMUG00000051112 p53 and DNA damage regulated 1 [Source:NCBI gene;Acc:712622]  
ENSMMUG00000051190 Metazoan signal recognition particle RNA [Source:RFAM;Acc:RF00017]  
ENSMMUG00000051202  
ENSMMUG00000051286  
ENSMMUG00000051366  
ENSMMUG00000051482  
ENSMMUG00000051743 TLC domain containing 1 [Source:NCBI gene;Acc:710391]  
ENSMMUG00000051936  
ENSMMUG00000052070 caudal type homeobox 2 [Source:NCBI gene;Acc:711094]  
ENSMMUG00000052229  
ENSMMUG00000052326 U7 small nuclear RNA [Source:RFAM;Acc:RF00066]  
ENSMMUG00000052420 transmembrane protein 132A [Source:NCBI gene;Acc:695291]  
ENSMMUG00000052454 prostaglandin D2 receptor 2 [Source:NCBI gene;Acc:695853]  
ENSMMUG00000052457 Metazoan signal recognition particle RNA [Source:RFAM;Acc:RF00017]  
ENSMMUG00000052460  
ENSMMUG00000052496  
ENSMMUG00000052526 RAB39A, member RAS oncogene family [Source:NCBI gene;Acc:707451]  
ENSMMUG00000052642 protein O-glucosyltransferase 2 [Source:NCBI gene;Acc:702156]  
ENSMMUG00000052676  
ENSMMUG00000052786

ENSMMUG00000052815  
ENSMMUG00000053482 protocadherin 20 [Source:NCBI gene;Acc:696607]  
ENSMMUG00000053565  
ENSMMUG00000053577  
ENSMMUG00000053648 actin binding transcription modulator [Source:NCBI gene;Acc:710486]  
ENSMMUG00000053721  
ENSMMUG00000053778  
ENSMMUG00000054176 methyltransferase like 8 [Source:NCBI gene;Acc:695361]  
ENSMMUG00000054210 C-C motif chemokine 4 [Source:NCBI gene;Acc:100426632]  
ENSMMUG00000054462  
ENSMMUG00000054625  
ENSMMUG00000054675  
ENSMMUG00000054711  
ENSMMUG00000054737  
ENSMMUG00000054953 leucine rich repeat containing 10 [Source:NCBI gene;Acc:114669753]  
ENSMMUG00000055161  
ENSMMUG00000055344 TLC domain containing 3A [Source:NCBI gene;Acc:699707]  
ENSMMUG00000055400 U6 spliceosomal RNA [Source:RFAM;Acc:RF00026]  
ENSMMUG00000055529 sulfotransferase family 1C member 4 [Source:NCBI gene;Acc:693903]  
ENSMMUG00000055560  
ENSMMUG00000055575 olfactory marker protein [Source:HGNC Symbol;Acc:HGNC:8136]  
ENSMMUG00000055845 ankyrin repeat domain 53 [Source:NCBI gene;Acc:703757]  
ENSMMUG00000056054 zinc finger and BTB domain containing 3 [Source:NCBI gene;Acc:722240]  
ENSMMUG00000056306  
ENSMMUG00000056387 transcription factor 15 [Source:NCBI gene;Acc:716916]  
ENSMMUG00000056824  
ENSMMUG00000056962  
ENSMMUG00000057073  
ENSMMUG00000057228 SRY-box transcription factor 15 [Source:NCBI gene;Acc:106993880]  
ENSMMUG00000057627  
ENSMMUG00000057651 frizzled class receptor 5 [Source:NCBI gene;Acc:710796]  
ENSMMUG00000057852  
ENSMMUG00000057860 olfactory receptor 51E1 [Source:NCBI gene;Acc:717598]  
ENSMMUG00000057986 transmembrane protein 17 [Source:NCBI gene;Acc:694384]  
ENSMMUG00000058170 U6 spliceosomal RNA [Source:RFAM;Acc:RF00026]  
ENSMMUG00000058233 C-C motif chemokine 3-like [Source:NCBI gene;Acc:100426537]  
ENSMMUG00000058336  
ENSMMUG00000058583 RRAD and GEM like GTPase 1 [Source:NCBI gene;Acc:713351]  
ENSMMUG00000058586  
ENSMMUG00000058836 transmembrane p24 trafficking protein 2 [Source:NCBI gene;Acc:106992483]  
ENSMMUG00000059068  
ENSMMUG00000059115  
ENSMMUG00000059406 RGP1 homolog, RAB6A GEF complex partner 1 [Source:NCBI gene;Acc:695936]  
ENSMMUG00000059518  
ENSMMUG00000059848 olfactory receptor 5B2 [Source:NCBI gene;Acc:100429465]  
ENSMMUG00000060101  
ENSMMUG00000060346  
ENSMMUG00000060359  
ENSMMUG00000060547 Metazoan signal recognition particle RNA [Source:RFAM;Acc:RF00017]  
ENSMMUG00000060579  
ENSMMUG00000060781 G protein-coupled receptor 18 [Source:NCBI gene;Acc:698714]

ENSMMUG00000060932 zinc finger protein 383-like [Source:NCBI gene;Acc:106993074]  
ENSMMUG00000060971  
ENSMMUG00000061118  
ENSMMUG00000061260 Spi-C transcription factor [Source:NCBI gene;Acc:695809]  
ENSMMUG00000061305  
ENSMMUG00000061344  
ENSMMUG00000061433  
ENSMMUG00000061594  
ENSMMUG00000061688 Metazoan signal recognition particle RNA [Source:RFAM;Acc:RF00017]  
ENSMMUG00000061779  
ENSMMUG00000061815  
ENSMMUG00000061834  
ENSMMUG00000062615  
ENSMMUG00000062697 olfactory receptor 5B12 [Source:NCBI gene;Acc:106993236]  
ENSMMUG00000062793  
ENSMMUG00000062818 regenerating islet-derived protein 3-alpha [Source:NCBI gene;Acc:716890]  
ENSMMUG00000062882  
ENSMMUG00000063262  
ENSMMUG00000063312  
ENSMMUG00000063463  
ENSMMUG00000063482  
ENSMMUG00000063609 cytochrome c oxidase subunit 6A1, mitochondrial [Source:NCBI gene;Acc:696956]  
ENSMMUG00000063655 sodium voltage-gated channel beta subunit 4 [Source:NCBI gene;Acc:100430940]  
ENSMMUG00000063747  
ENSMMUG00000063884  
ENSMMUG00000064013  
ENSMMUG00000064615 pancreatic and duodenal homeobox 1 [Source:NCBI gene;Acc:710936]  
ENSMMUG00000064749  
ENSMMUG00000065008  
ENSMMUG00000065060  
ENSMMUG00000065099  
ENSMMUG00000065232  
ENSMMUG00000065273  
ENSMMUG00000065301  
ENSMMUG00000065344 homeobox D1 [Source:NCBI gene;Acc:701064]  
ENSMMUG00000000717 CD3e molecule associated protein [Source:NCBI gene;Acc:714440]  
ENSMMUG00000000718 ERCC excision repair 1, endonuclease non-catalytic subunit [Source:VGNC Symbol;Acc:VGNC:72422]  
ENSMMUG00000000981 T-box transcription factor 6 [Source:VGNC Symbol;Acc:VGNC:78276]  
ENSMMUG00000000982 protein phosphatase 4 catalytic subunit [Source:VGNC Symbol;Acc:VGNC:76384]  
ENSMMUG00000000983 aldolase, fructose-bisphosphate A [Source:NCBI gene;Acc:708406]  
ENSMMUG00000001121 zinc finger protein 689 [Source:VGNC Symbol;Acc:VGNC:79480]  
ENSMMUG00000001219 mitochondrial ribosomal protein L4 [Source:VGNC Symbol;Acc:VGNC:74750]  
ENSMMUG00000001245 zinc finger protein 532 [Source:NCBI gene;Acc:701146]  
ENSMMUG00000001404 neuronal differentiation 2 [Source:VGNC Symbol;Acc:VGNC:75321]  
ENSMMUG00000001940 NME/NM23 nucleoside diphosphate kinase 2 [Source:NCBI gene;Acc:100533957]  
ENSMMUG00000001942 mbt domain containing 1 [Source:VGNC Symbol;Acc:VGNC:74538]  
ENSMMUG00000002166 tousled like kinase 2 [Source:VGNC Symbol;Acc:VGNC:78368]  
ENSMMUG00000002269 serine carboxypeptidase 1 [Source:VGNC Symbol;Acc:VGNC:82232]  
ENSMMUG00000002472 CLPTM1 regulator of GABA type A receptor forward trafficking [Source:VGNC Symbol;Acc:VGNC:71265]  
ENSMMUG00000002709 G protein-coupled receptor class C group 5 member B [Source:VGNC Symbol;Acc:VGNC:72934]  
ENSMMUG00000002742 ST8 alpha-N-acetyl-neuraminide alpha-2,8-sialyltransferase 5 [Source:VGNC Symbol;Acc:VGNC:77942]



ENSMMUG0000002912 TLE family member 6, subcortical maternal complex member [Source:VGNC Symbol;Acc:VGNC:79879]  
ENSMMUG0000002961 G protein subunit alpha 11 [Source:VGNC Symbol;Acc:VGNC:73085]  
ENSMMUG0000003029 protein arginine methyltransferase 1 [Source:NCBI gene;Acc:719419]  
ENSMMUG0000003053 APC regulator of WNT signaling pathway 2 [Source:VGNC Symbol;Acc:VGNC:69888]  
ENSMMUG0000003288 glutamic--pyruvic transaminase 2 [Source:VGNC Symbol;Acc:VGNC:72962]  
ENSMMUG0000003468 growth arrest and DNA damage inducible beta [Source:VGNC Symbol;Acc:VGNC:72864]  
ENSMMUG0000003621 AKT serine/threonine kinase 2 [Source:VGNC Symbol;Acc:VGNC:69777]  
ENSMMUG0000003688 zinc finger protein 91 [Source:HGNC Symbol;Acc:HGNC:13166]  
ENSMMUG0000003712 zinc finger protein 615 [Source:VGNC Symbol;Acc:VGNC:79454]  
ENSMMUG0000004760 CDK5 regulatory subunit associated protein 3 [Source:VGNC Symbol;Acc:VGNC:71015]  
ENSMMUG0000005028 phosphodiesterase 4C [Source:NCBI gene;Acc:720171]  
ENSMMUG0000005727 protein kinase N1 [Source:VGNC Symbol;Acc:VGNC:76014]  
ENSMMUG0000005751 adenosine deaminase tRNA specific 1 [Source:VGNC Symbol;Acc:VGNC:69504]  
ENSMMUG0000005754 lysyl-tRNA synthetase 1 [Source:NCBI gene;Acc:714516]  
ENSMMUG0000006128 peptidase D [Source:VGNC Symbol;Acc:VGNC:82205]  
ENSMMUG0000006509 CREB regulated transcription coactivator 1 [Source:VGNC Symbol;Acc:VGNC:71418]  
ENSMMUG0000006857 epididymal sperm binding protein 1 [Source:VGNC Symbol;Acc:VGNC:72046]  
ENSMMUG0000006937 small nuclear ribonucleoprotein D2 polypeptide [Source:NCBI gene;Acc:715183]  
ENSMMUG0000007398 potassium calcium-activated channel subfamily N member 1 [Source:VGNC Symbol;Acc:VGNC:74002]  
ENSMMUG0000007485 zinc finger protein 555 [Source:VGNC Symbol;Acc:VGNC:79705]  
ENSMMUG0000007816 SMAD family member 2 [Source:VGNC Symbol;Acc:VGNC:77810]  
ENSMMUG0000007875 F-box and leucine rich repeat protein 12 [Source:VGNC Symbol;Acc:VGNC:72502]  
ENSMMUG0000007923 phosphatidylinositol glycan anchor biosynthesis class W [Source:VGNC Symbol;Acc:VGNC:75850]  
ENSMMUG0000008004 transmembrane immune signaling adaptor TYROBP [Source:NCBI gene;Acc:574207]  
ENSMMUG0000008119 telomere maintenance 2 [Source:NCBI gene;Acc:701679]  
ENSMMUG0000008459 pleckstrin homology and RUN domain containing M1 [Source:NCBI gene;Acc:716464]  
ENSMMUG0000008942 carnosine dipeptidase 1 [Source:VGNC Symbol;Acc:VGNC:71257]  
ENSMMUG0000009669 cutaneous T cell lymphoma-associated antigen 1 [Source:NCBI gene;Acc:106994443]  
ENSMMUG0000010944 GATA binding protein 6 [Source:VGNC Symbol;Acc:VGNC:72891]  
ENSMMUG0000011319 potassium channel tetramerization domain containing 15 [Source:VGNC Symbol;Acc:VGNC:73894]  
ENSMMUG0000011893 KIAA0513 [Source:VGNC Symbol;Acc:VGNC:73925]  
ENSMMUG0000011963 vimentin type intermediate filament associated coiled-coil protein [Source:NCBI gene;Acc:697958]  
ENSMMUG0000012209 CYLD lysine 63 deubiquitinase [Source:VGNC Symbol;Acc:VGNC:71581]  
ENSMMUG0000013053 sperm acrosome associated 6 [Source:NCBI gene;Acc:114674203]  
ENSMMUG0000013376 POU class 2 homeobox 2 [Source:NCBI gene;Acc:706835]  
ENSMMUG0000014155 CLK4 associating serine/arginine rich protein [Source:VGNC Symbol;Acc:VGNC:71198]  
ENSMMUG0000014213 calcium voltage-gated channel subunit alpha1 H [Source:VGNC Symbol;Acc:VGNC:70505]  
ENSMMUG0000014685 pyruvate dehydrogenase kinase 2 [Source:VGNC Symbol;Acc:VGNC:75933]  
ENSMMUG0000014687 sterile alpha motif domain containing 14 [Source:VGNC Symbol;Acc:VGNC:77112]  
ENSMMUG0000014727 NSF attachment protein alpha [Source:VGNC Symbol;Acc:VGNC:75131]  
ENSMMUG0000014735 carnitine palmitoyltransferase 1C [Source:NCBI gene;Acc:719429]  
ENSMMUG0000015608 tudor domain containing 12 [Source:VGNC Symbol;Acc:VGNC:82254]  
ENSMMUG0000015702 divergent protein kinase domain 1C [Source:NCBI gene;Acc:699537]  
ENSMMUG0000016354 IQ motif containing N [Source:VGNC Symbol;Acc:VGNC:73683]  
ENSMMUG0000016526 solute carrier family 25 member 41 [Source:VGNC Symbol;Acc:VGNC:77581]  
ENSMMUG0000016665 NADH:ubiquinone oxidoreductase subunit A11 [Source:NCBI gene;Acc:697843]  
ENSMMUG0000016695 CD320 molecule [Source:VGNC Symbol;Acc:VGNC:70763]  
ENSMMUG0000016906 F-box and leucine rich repeat protein 16 [Source:VGNC Symbol;Acc:VGNC:81405]  
ENSMMUG0000017113 ubiquitin specific peptidase 32 [Source:NCBI gene;Acc:716857]  
ENSMMUG0000017234 leucine rich repeat containing 59 [Source:VGNC Symbol;Acc:VGNC:81436]  
ENSMMUG0000017246 lipoxigenase homology domains 1 [Source:VGNC Symbol;Acc:VGNC:74368]

ENSMMUG00000017379 myocardin related transcription factor B [Source:VGNC Symbol;Acc:VGNC:74865]  
ENSMMUG00000017615 zinc finger CCHC-type containing 14 [Source:VGNC Symbol;Acc:VGNC:79420]  
ENSMMUG00000017922 prostaglandin I2 receptor [Source:VGNC Symbol;Acc:VGNC:76586]  
ENSMMUG00000018031 solute carrier family 25 member 19 [Source:VGNC Symbol;Acc:VGNC:77474]  
ENSMMUG00000018777 regulation of nuclear pre-mRNA domain containing 1A [Source:VGNC Symbol;Acc:VGNC:77103]  
ENSMMUG00000018785 elongator acetyltransferase complex subunit 2 [Source:VGNC Symbol;Acc:VGNC:72069]  
ENSMMUG00000019566 hemoglobin subunit alpha 1 [Source:NCBI gene;Acc:701930]  
ENSMMUG00000019756 NFkB inhibitor delta [Source:VGNC Symbol;Acc:VGNC:75179]  
ENSMMUG00000019868 NKD inhibitor of WNT signaling pathway 1 [Source:VGNC Symbol;Acc:VGNC:75198]  
ENSMMUG00000019892 myomesin 1 [Source:VGNC Symbol;Acc:VGNC:75123]  
ENSMMUG00000020061 protein phosphatase 1 regulatory subunit 9B [Source:VGNC Symbol;Acc:VGNC:76372]  
ENSMMUG00000020175 mediator complex subunit 25 [Source:VGNC Symbol;Acc:VGNC:74607]  
ENSMMUG00000020540 NmrA like redox sensor 1 [Source:VGNC Symbol;Acc:VGNC:75252]  
ENSMMUG00000020592 Gse1 coiled-coil protein [Source:VGNC Symbol;Acc:VGNC:73254]  
ENSMMUG00000020847 CKLF like MARVEL transmembrane domain containing 3 [Source:VGNC Symbol;Acc:VGNC:71215]  
ENSMMUG00000020898 cap binding complex dependent translation initiation factor [Source:HGNC Symbol;Acc:HGNC:23925]  
ENSMMUG00000021474 zinc finger protein 45 [Source:NCBI gene;Acc:712591]  
ENSMMUG00000021932 Rho GTPase activating protein 27 [Source:VGNC Symbol;Acc:VGNC:69935]  
ENSMMUG00000022120 transmembrane protein 94 [Source:VGNC Symbol;Acc:VGNC:79760]  
ENSMMUG00000022121 CASK interacting protein 2 [Source:VGNC Symbol;Acc:VGNC:70577]  
ENSMMUG00000022123 tRNA splicing endonuclease subunit 54 [Source:VGNC Symbol;Acc:VGNC:79666]  
ENSMMUG00000022163 solute carrier family 1 member 5 [Source:VGNC Symbol;Acc:VGNC:77413]  
ENSMMUG00000022305 Rho guanine nucleotide exchange factor 1 [Source:VGNC Symbol;Acc:VGNC:70012]  
ENSMMUG00000022625 periaxin [Source:VGNC Symbol;Acc:VGNC:76248]  
ENSMMUG00000022627 HLF transcription factor, PAR bZIP family member [Source:VGNC Symbol;Acc:VGNC:73478]  
ENSMMUG00000022656 perilipin 4 [Source:NCBI gene;Acc:693610]  
ENSMMUG00000022724  
ENSMMUG00000022726 dual specificity tyrosine phosphorylation regulated kinase 1B [Source:VGNC Symbol;Acc:VGNC:72016]  
ENSMMUG00000022975 sprouty related EVH1 domain containing 3 [Source:VGNC Symbol;Acc:VGNC:78030]  
ENSMMUG00000023137 zinc finger protein 350 [Source:VGNC Symbol;Acc:VGNC:79041]  
ENSMMUG00000023298 F-box protein 15 [Source:VGNC Symbol;Acc:VGNC:72504]  
ENSMMUG00000027108 mml-mir-193b [Source:miRBase;Acc:MI0007656]  
ENSMMUG00000028800 solute carrier family 7 member 9 [Source:VGNC Symbol;Acc:VGNC:77633]  
ENSMMUG00000028863 WIZ zinc finger [Source:VGNC Symbol;Acc:VGNC:79901]  
ENSMMUG00000028925 HDGF like 2 [Source:NCBI gene;Acc:693476]  
ENSMMUG00000029164 glycerophosphodiester phosphodiesterase domain containing 3 [Source:VGNC Symbol;Acc:VGNC:72800]  
ENSMMUG00000029263 polycystin 1, transient receptor potential channel interacting [Source:NCBI gene;Acc:694905]  
ENSMMUG00000029927 ADAM metallopeptidase domain 11 [Source:VGNC Symbol;Acc:VGNC:69466]  
ENSMMUG00000033290 mml-mir-643 [Source:miRBase;Acc:MI0007886]  
ENSMMUG00000038768 U6 spliceosomal RNA [Source:RFAM;Acc:RF00026]  
ENSMMUG00000040273 zinc finger protein 257 [Source:NCBI gene;Acc:694388]  
ENSMMUG00000040803 sarcalumenin [Source:NCBI gene;Acc:704655]  
ENSMMUG00000041043 Metazoan signal recognition particle RNA [Source:RFAM;Acc:RF00017]  
ENSMMUG00000041450 zinc finger protein 432 [Source:NCBI gene;Acc:100424341]  
ENSMMUG00000044729 transcription factor AP-4 [Source:NCBI gene;Acc:707513]  
ENSMMUG00000045966 granzyme M [Source:NCBI gene;Acc:715031]  
ENSMMUG00000047370 IgLON family member 5 [Source:NCBI gene;Acc:719890]  
ENSMMUG00000048077 ataxin 1 like [Source:NCBI gene;Acc:709805]  
ENSMMUG00000049366 Metazoan signal recognition particle RNA [Source:RFAM;Acc:RF00017]  
ENSMMUG00000049484  
ENSMMUG00000049523 ankyrin repeat domain 12 [Source:NCBI gene;Acc:114673693]

|                    |                                                                                                |
|--------------------|------------------------------------------------------------------------------------------------|
| ENSMMUG00000049948 |                                                                                                |
| ENSMMUG00000049968 | RNA polymerase mitochondrial [Source:NCBI gene;Acc:100426183]                                  |
| ENSMMUG00000049997 |                                                                                                |
| ENSMMUG00000050177 |                                                                                                |
| ENSMMUG00000050544 |                                                                                                |
| ENSMMUG00000051115 |                                                                                                |
| ENSMMUG00000051261 |                                                                                                |
| ENSMMUG00000052977 | putative protein FAM106C [Source:NCBI gene;Acc:106994084]                                      |
| ENSMMUG00000053008 |                                                                                                |
| ENSMMUG00000053231 |                                                                                                |
| ENSMMUG00000053624 |                                                                                                |
| ENSMMUG00000053889 | olfactory receptor 7C1 [Source:NCBI gene;Acc:114674087]                                        |
| ENSMMUG00000054064 |                                                                                                |
| ENSMMUG00000054935 |                                                                                                |
| ENSMMUG00000055885 | napsin-A [Source:NCBI gene;Acc:719235]                                                         |
| ENSMMUG00000055889 |                                                                                                |
| ENSMMUG00000056147 |                                                                                                |
| ENSMMUG00000056165 |                                                                                                |
| ENSMMUG00000056220 | folliculin like 3 [Source:NCBI gene;Acc:721100]                                                |
| ENSMMUG00000056602 |                                                                                                |
| ENSMMUG00000057215 |                                                                                                |
| ENSMMUG00000057475 |                                                                                                |
| ENSMMUG00000058016 | bMERB domain containing 1 [Source:NCBI gene;Acc:713757]                                        |
| ENSMMUG00000058142 |                                                                                                |
| ENSMMUG00000058242 | zinc finger protein 160 [Source:NCBI gene;Acc:722722]                                          |
| ENSMMUG00000059128 |                                                                                                |
| ENSMMUG00000059400 |                                                                                                |
| ENSMMUG00000060455 |                                                                                                |
| ENSMMUG00000060536 |                                                                                                |
| ENSMMUG00000060665 |                                                                                                |
| ENSMMUG00000060713 | epithelial membrane protein 2 [Source:NCBI gene;Acc:710315]                                    |
| ENSMMUG00000060966 |                                                                                                |
| ENSMMUG00000061396 | kallikrein related peptidase 6 [Source:NCBI gene;Acc:719776]                                   |
| ENSMMUG00000062047 |                                                                                                |
| ENSMMUG00000062413 | CCAAT enhancer binding protein gamma [Source:NCBI gene;Acc:704322]                             |
| ENSMMUG00000062667 | leucine rich repeat and fibronectin type III domain containing 3 [Source:NCBI gene;Acc:711565] |
| ENSMMUG00000062704 | Metazoan signal recognition particle RNA [Source:RFAM;Acc:RF00017]                             |
| ENSMMUG00000062791 |                                                                                                |
| ENSMMUG00000062866 |                                                                                                |
| ENSMMUG00000063586 | zinc finger protein 536 [Source:NCBI gene;Acc:713142]                                          |
| ENSMMUG00000064131 |                                                                                                |
| ENSMMUG00000064563 |                                                                                                |
| ENSMMUG00000064806 |                                                                                                |
| ENSMMUG00000064975 | zinc finger protein 221 [Source:NCBI gene;Acc:100423743]                                       |
| ENSMMUG00000065117 | septin 4 [Source:HGNC Symbol;Acc:HGNC:9165]                                                    |

## Survivors – SD2 vs. Baseline

Ensembl Gene ID      Description

ENSMMUG0000000009 protein tyrosine phosphatase receptor type C [Source:VGNC Symbol;Acc:VGNC:76612]  
ENSMMUG00000000104 ribosomal RNA processing 1B [Source:VGNC Symbol;Acc:VGNC:77089]  
ENSMMUG00000000238 HECT domain E3 ubiquitin protein ligase 2 [Source:VGNC Symbol;Acc:VGNC:73246]  
ENSMMUG00000000717 CD3e molecule associated protein [Source:NCBI gene;Acc:714440]  
ENSMMUG00000000972 tyrosine kinase non receptor 2 [Source:VGNC Symbol;Acc:VGNC:79192]  
ENSMMUG00000000974 mutS homolog 2 [Source:VGNC Symbol;Acc:VGNC:74931]  
ENSMMUG00000000981 T-box transcription factor 6 [Source:VGNC Symbol;Acc:VGNC:78276]  
ENSMMUG00000000982 protein phosphatase 4 catalytic subunit [Source:VGNC Symbol;Acc:VGNC:76384]  
ENSMMUG00000000983 aldolase, fructose-bisphosphate A [Source:NCBI gene;Acc:708406]  
ENSMMUG00000001121 zinc finger protein 689 [Source:VGNC Symbol;Acc:VGNC:79480]  
ENSMMUG00000001212 Rieske Fe-S domain containing [Source:VGNC Symbol;Acc:VGNC:84487]  
ENSMMUG00000001213 spermatogenesis associated 9 [Source:VGNC Symbol;Acc:VGNC:77976]  
ENSMMUG00000001225 calneuron 1 [Source:VGNC Symbol;Acc:VGNC:82078]  
ENSMMUG00000001357 tetraspanin 11 [Source:VGNC Symbol;Acc:VGNC:79882]  
ENSMMUG00000001479 laminin subunit gamma 2 [Source:VGNC Symbol;Acc:VGNC:74233]  
ENSMMUG00000001481 nicotinamide nucleotide adenylyltransferase 2 [Source:VGNC Symbol;Acc:VGNC:75193]  
ENSMMUG00000001728 mitogen-activated protein kinase 9 [Source:VGNC Symbol;Acc:VGNC:74652]  
ENSMMUG00000001742 transforming growth factor beta receptor 3 [Source:VGNC Symbol;Acc:VGNC:78339]  
ENSMMUG00000001919 clock circadian regulator [Source:VGNC Symbol;Acc:VGNC:71262]  
ENSMMUG00000001940 NME/NM23 nucleoside diphosphate kinase 2 [Source:NCBI gene;Acc:100533957]  
ENSMMUG00000002090 ATPase H+ transporting V1 subunit B1 [Source:VGNC Symbol;Acc:VGNC:70184]  
ENSMMUG00000002103 delta/notch like EGF repeat containing [Source:VGNC Symbol;Acc:VGNC:71895]  
ENSMMUG00000002113 NHL repeat containing 3 [Source:VGNC Symbol;Acc:VGNC:75291]  
ENSMMUG00000002183 oxysterol binding protein like 6 [Source:VGNC Symbol;Acc:VGNC:75627]  
ENSMMUG00000002200 phospholipid phosphatase 3 [Source:NCBI gene;Acc:715993]  
ENSMMUG00000002321 solute carrier family 24 member 3 [Source:VGNC Symbol;Acc:VGNC:77426]  
ENSMMUG00000002332 RNA binding motif protein 25 [Source:VGNC Symbol;Acc:VGNC:76521]  
ENSMMUG00000002549 trehalase [Source:NCBI gene;Acc:706449]  
ENSMMUG00000002638 WD repeat domain 18 [Source:VGNC Symbol;Acc:VGNC:79103]  
ENSMMUG00000002657 olfactomedin 4 [Source:VGNC Symbol;Acc:VGNC:75418]  
ENSMMUG00000002742 ST8 alpha-N-acetyl-neuraminide alpha-2,8-sialyltransferase 5 [Source:VGNC Symbol;Acc:VGNC:77942]  
ENSMMUG00000002755 kelch like family member 5 [Source:VGNC Symbol;Acc:VGNC:74188]  
ENSMMUG00000002794 general transcription factor IIB [Source:VGNC Symbol;Acc:VGNC:73306]  
ENSMMUG00000002809 unc-80 homolog, NALCN channel complex subunit [Source:NCBI gene;Acc:713007]  
ENSMMUG00000002890 tripartite motif containing 15 [Source:VGNC Symbol;Acc:VGNC:83958]  
ENSMMUG00000002894 dedicator of cytokinesis 4 [Source:VGNC Symbol;Acc:VGNC:71866]  
ENSMMUG00000002947 procollagen C-endopeptidase enhancer [Source:VGNC Symbol;Acc:VGNC:75782]  
ENSMMUG00000003029 protein arginine methyltransferase 1 [Source:NCBI gene;Acc:719419]  
ENSMMUG00000003049 testis expressed 11 [Source:VGNC Symbol;Acc:VGNC:78316]  
ENSMMUG00000003260  
ENSMMUG00000003261 BAF chromatin remodeling complex subunit BCL11B [Source:VGNC Symbol;Acc:VGNC:70056]  
ENSMMUG00000003277 copine 4 [Source:VGNC Symbol;Acc:VGNC:71466]  
ENSMMUG00000003634 DExD/H-box 60 like [Source:VGNC Symbol;Acc:VGNC:71720]  
ENSMMUG00000003726 protein tyrosine phosphatase non-receptor type 13 [Source:VGNC Symbol;Acc:VGNC:76599]  
ENSMMUG00000003736 nuclear factor kappa B subunit 1 [Source:VGNC Symbol;Acc:VGNC:75339]  
ENSMMUG00000004157 nuclear protein, coactivator of histone transcription [Source:VGNC Symbol;Acc:VGNC:75379]  
ENSMMUG00000004178 NADPH oxidase 1 [Source:VGNC Symbol;Acc:VGNC:75374]  
ENSMMUG00000004223 ring finger protein 10 [Source:VGNC Symbol;Acc:VGNC:76702]  
ENSMMUG00000004233 leucine rich repeats and immunoglobulin like domains 3 [Source:NCBI gene;Acc:716344]  
ENSMMUG00000004237 TNF receptor superfamily member 19 [Source:VGNC Symbol;Acc:VGNC:78588]  
ENSMMUG00000004606 EMAP like 5 [Source:VGNC Symbol;Acc:VGNC:72067]

ENSMMUG0000004674 phosphoribosyl pyrophosphate synthetase 1 [Source:NCBI gene;Acc:702529]  
ENSMMUG0000004675 smoothelin [Source:VGNC Symbol;Acc:VGNC:77661]  
ENSMMUG0000004709 proteasome inhibitor subunit 1 [Source:VGNC Symbol;Acc:VGNC:76458]  
ENSMMUG0000004791 pleckstrin homology domain containing B1 [Source:VGNC Symbol;Acc:VGNC:76069]  
ENSMMUG0000004821 membrane spanning 4-domains A14 [Source:NCBI gene;Acc:697083]  
ENSMMUG0000005028 phosphodiesterase 4C [Source:NCBI gene;Acc:720171]  
ENSMMUG0000005137 ATPase secretory pathway Ca<sup>2+</sup> transporting 1 [Source:VGNC Symbol;Acc:VGNC:70054]  
ENSMMUG0000005204 VPS16 core subunit of CORVET and HOPS complexes [Source:VGNC Symbol;Acc:VGNC:78966]  
ENSMMUG0000005246 zinc finger protein 740 [Source:VGNC Symbol;Acc:VGNC:79665]  
ENSMMUG0000005301 ATP binding cassette subfamily B member 9 [Source:VGNC Symbol;Acc:VGNC:81341]  
ENSMMUG0000005463 bromodomain containing 3 [Source:VGNC Symbol;Acc:VGNC:70281]  
ENSMMUG0000005515 ATP binding cassette subfamily C member 5 [Source:VGNC Symbol;Acc:VGNC:69574]  
ENSMMUG0000005727 protein kinase N1 [Source:VGNC Symbol;Acc:VGNC:76014]  
ENSMMUG0000005801 glyceronephosphate O-acyltransferase [Source:VGNC Symbol;Acc:VGNC:73100]  
ENSMMUG0000005851 B-box and SPRY domain containing [Source:VGNC Symbol;Acc:VGNC:70342]  
ENSMMUG0000005856 glycine amidinotransferase [Source:VGNC Symbol;Acc:VGNC:72892]  
ENSMMUG0000006187 angiopoietin like 7 [Source:VGNC Symbol;Acc:VGNC:69683]  
ENSMMUG0000006251 argonaute RISC component 1 [Source:VGNC Symbol;Acc:VGNC:81346]  
ENSMMUG0000006252 argonaute RISC catalytic component 3 [Source:NCBI gene;Acc:712543]  
ENSMMUG0000006547 ATPase H<sup>+</sup> transporting V0 subunit a4 [Source:VGNC Symbol;Acc:VGNC:70189]  
ENSMMUG0000006548 KIAA1549 [Source:VGNC Symbol;Acc:VGNC:73885]  
ENSMMUG0000006682 chondroitin polymerizing factor 2 [Source:VGNC Symbol;Acc:VGNC:71131]  
ENSMMUG0000006688 ER membrane protein complex subunit 1 [Source:VGNC Symbol;Acc:VGNC:72134]  
ENSMMUG0000006704 zygote arrest 1 [Source:VGNC Symbol;Acc:VGNC:79251]  
ENSMMUG0000006731 CECR2 histone acetyl-lysine reader [Source:VGNC Symbol;Acc:VGNC:84530]  
ENSMMUG0000006898 integrin subunit beta 8 [Source:VGNC Symbol;Acc:VGNC:73791]  
ENSMMUG0000007003 polyribonucleotide nucleotidyltransferase 1 [Source:VGNC Symbol;Acc:VGNC:76095]  
ENSMMUG0000007159 tubulin epsilon and delta complex 1 [Source:VGNC Symbol;Acc:VGNC:79235]  
ENSMMUG0000007246 myotubularin related protein 11 [Source:VGNC Symbol;Acc:VGNC:75016]  
ENSMMUG0000007256 splicing factor 3b subunit 4 [Source:VGNC Symbol;Acc:VGNC:77182]  
ENSMMUG0000007283 3-hydroxyisobutyryl-CoA hydrolase [Source:NCBI gene;Acc:713951]  
ENSMMUG0000007313 histone acetyltransferase 1 [Source:VGNC Symbol;Acc:VGNC:73349]  
ENSMMUG0000007325 Xrcc1 N-terminal domain containing 1 [Source:NCBI gene;Acc:115945140]  
ENSMMUG0000007326 ring finger protein 121 [Source:VGNC Symbol;Acc:VGNC:76788]  
ENSMMUG0000007330 nuclear mitotic apparatus protein 1 [Source:VGNC Symbol;Acc:VGNC:75556]  
ENSMMUG0000007398 potassium calcium-activated channel subfamily N member 1 [Source:VGNC Symbol;Acc:VGNC:74002]  
ENSMMUG0000007411 integrin alpha FG-GAP repeat containing 2 [Source:VGNC Symbol;Acc:VGNC:73690]  
ENSMMUG0000007424 nuclear receptor interacting protein 2 [Source:VGNC Symbol;Acc:VGNC:75448]  
ENSMMUG0000007561 zinc finger DHHC-type palmitoyltransferase 22 [Source:NCBI gene;Acc:706468]  
ENSMMUG0000007620 transmembrane serine protease 4 [Source:VGNC Symbol;Acc:VGNC:78577]  
ENSMMUG0000007628 cell adhesion associated, oncogene regulated [Source:VGNC Symbol;Acc:VGNC:70961]  
ENSMMUG0000007765 Wnt family member 2B [Source:VGNC Symbol;Acc:VGNC:78797]  
ENSMMUG0000007816 SMAD family member 2 [Source:VGNC Symbol;Acc:VGNC:77810]  
ENSMMUG0000007821 ATP binding cassette subfamily B member 5 [Source:VGNC Symbol;Acc:VGNC:80321]  
ENSMMUG0000007875 F-box and leucine rich repeat protein 12 [Source:VGNC Symbol;Acc:VGNC:72502]  
ENSMMUG0000008009 family with sequence similarity 13 member B [Source:VGNC Symbol;Acc:VGNC:72268]  
ENSMMUG0000008228 unc-93 homolog A [Source:VGNC Symbol;Acc:VGNC:78724]  
ENSMMUG0000008540 ring finger protein 112 [Source:VGNC Symbol;Acc:VGNC:76724]  
ENSMMUG0000008639 tumor protein p53 [Source:VGNC Symbol;Acc:VGNC:78627]  
ENSMMUG0000008643 general transcription factor IIIC subunit 3 [Source:VGNC Symbol;Acc:VGNC:73317]  
ENSMMUG0000008718 zinc finger protein 280D [Source:NCBI gene;Acc:699509]

ENSMMUG00000008867 exoribonuclease 1 [Source:VGNC Symbol;Acc:VGNC:72324]  
ENSMMUG00000008945 zinc finger protein 407 [Source:NCBI gene;Acc:695303]  
ENSMMUG00000008974 Fc receptor like 5 [Source:NCBI gene;Acc:718771]  
ENSMMUG00000009038 titin [Source:NCBI gene;Acc:703527]  
ENSMMUG00000009084 transmembrane 6 superfamily member 1 [Source:VGNC Symbol;Acc:VGNC:78566]  
ENSMMUG00000009155 SIN3-HDAC complex associated factor [Source:NCBI gene;Acc:694162]  
ENSMMUG00000009493 family with sequence similarity 120A [Source:NCBI gene;Acc:717459]  
ENSMMUG00000009519 WASH complex subunit 4 [Source:VGNC Symbol;Acc:VGNC:79783]  
ENSMMUG00000009536 makorin ring finger protein 2 [Source:VGNC Symbol;Acc:VGNC:74878]  
ENSMMUG00000009773 lysine demethylase 1A [Source:VGNC Symbol;Acc:VGNC:73928]  
ENSMMUG00000009948 histone deacetylase 1 [Source:NCBI gene;Acc:708441]  
ENSMMUG00000009965 chromosome 15 C9orf50 homolog [Source:VGNC Symbol;Acc:VGNC:70365]  
ENSMMUG00000010050 small nuclear ribonucleoprotein polypeptides B and B1 [Source:VGNC Symbol;Acc:VGNC:77676]  
ENSMMUG00000010127 chitinase [Source:VGNC Symbol;Acc:VGNC:71540]  
ENSMMUG00000010379 Mtr4 exosome RNA helicase [Source:VGNC Symbol;Acc:VGNC:74989]  
ENSMMUG00000010453 folate receptor beta [Source:VGNC Symbol;Acc:VGNC:72690]  
ENSMMUG00000010508 carbamoyl-phosphate synthase 1 [Source:VGNC Symbol;Acc:VGNC:71471]  
ENSMMUG00000010543 PHD finger protein 23 [Source:VGNC Symbol;Acc:VGNC:75877]  
ENSMMUG00000010627 apelin receptor [Source:VGNC Symbol;Acc:VGNC:69939]  
ENSMMUG00000010648 DNA methyltransferase 3 like [Source:NCBI gene;Acc:722184]  
ENSMMUG00000010682 fibrillin 2 [Source:VGNC Symbol;Acc:VGNC:72624]  
ENSMMUG00000010820 chaperonin containing TCP1 subunit 2 [Source:VGNC Symbol;Acc:VGNC:70745]  
ENSMMUG00000011386 GTPase, IMAP family member 4 [Source:VGNC Symbol;Acc:VGNC:72982]  
ENSMMUG00000011410 nuclear receptor subfamily 4 group A member 3 [Source:VGNC Symbol;Acc:VGNC:75519]  
ENSMMUG00000011469 germ cell nuclear acidic peptidase [Source:VGNC Symbol;Acc:VGNC:72724]  
ENSMMUG00000011702 tetraspanin 5 [Source:VGNC Symbol;Acc:VGNC:79086]  
ENSMMUG00000011902 oligosaccharyltransferase complex non-catalytic subunit [Source:NCBI gene;Acc:697283]  
ENSMMUG00000011974 calcium/calmodulin dependent protein kinase IV [Source:VGNC Symbol;Acc:VGNC:70526]  
ENSMMUG00000012056 structural maintenance of chromosomes 6 [Source:VGNC Symbol;Acc:VGNC:77746]  
ENSMMUG00000012058 GEN1 Holliday junction 5' flap endonuclease [Source:VGNC Symbol;Acc:VGNC:72790]  
ENSMMUG00000012101 synaptogyrin 1 [Source:VGNC Symbol;Acc:VGNC:78068]  
ENSMMUG00000012110 smoothed, frizzled class receptor [Source:VGNC Symbol;Acc:VGNC:77658]  
ENSMMUG00000012129 tripartite motif containing 10 [Source:VGNC Symbol;Acc:VGNC:78550]  
ENSMMUG00000012192 erythrocyte membrane protein band 4.1 like 4A [Source:VGNC Symbol;Acc:VGNC:72039]  
ENSMMUG00000012338 G protein-coupled receptor 183 [Source:VGNC Symbol;Acc:VGNC:73042]  
ENSMMUG00000012462 proteasome activator subunit 1 [Source:VGNC Symbol;Acc:VGNC:76455]  
ENSMMUG00000012480 REC8 meiotic recombination protein [Source:VGNC Symbol;Acc:VGNC:76746]  
ENSMMUG00000012481 importin 4 [Source:VGNC Symbol;Acc:VGNC:73630]  
ENSMMUG00000012587 zinc finger protein 69 [Source:NCBI gene;Acc:717030]  
ENSMMUG00000012778 rabphilin 3A [Source:VGNC Symbol;Acc:VGNC:77033]  
ENSMMUG00000012781 muscular LMNA interacting protein [Source:VGNC Symbol;Acc:VGNC:83434]  
ENSMMUG00000012953 stress induced phosphoprotein 1 [Source:NCBI gene;Acc:717926]  
ENSMMUG00000013029 surfactant protein C [Source:VGNC Symbol;Acc:VGNC:84113]  
ENSMMUG00000013047 S-phase kinase associated protein 1 [Source:NCBI gene;Acc:100423634]  
ENSMMUG00000013302 family with sequence similarity 184 member A [Source:VGNC Symbol;Acc:VGNC:72308]  
ENSMMUG00000013501 CD68 molecule [Source:VGNC Symbol;Acc:VGNC:82121]  
ENSMMUG00000013513 sex hormone binding globulin [Source:VGNC Symbol;Acc:VGNC:77208]  
ENSMMUG00000013552 scribble planar cell polarity protein [Source:HGNC Symbol;Acc:HGNC:30377]  
ENSMMUG00000013848 fucosyltransferase 8 [Source:VGNC Symbol;Acc:VGNC:72829]  
ENSMMUG00000014018 bromodomain testis associated [Source:VGNC Symbol;Acc:VGNC:70282]  
ENSMMUG00000014484 zinc finger protein 641 [Source:NCBI gene;Acc:708246]



ENSMMUG00000014687 sterile alpha motif domain containing 14 [Source:VGNC Symbol;Acc:VGNC:77112]  
ENSMMUG00000014735 carnitine palmitoyltransferase 1C [Source:NCBI gene;Acc:719429]  
ENSMMUG00000014762 myosin heavy chain 6 [Source:NCBI gene;Acc:713471]  
ENSMMUG00000015000 SPT16 homolog, facilitates chromatin remodeling subunit [Source:VGNC Symbol;Acc:VGNC:78054]  
ENSMMUG00000015002 chromodomain helicase DNA binding protein 8 [Source:VGNC Symbol;Acc:VGNC:71060]  
ENSMMUG00000015117 X-prolyl aminopeptidase 1 [Source:VGNC Symbol;Acc:VGNC:78810]  
ENSMMUG00000015141 ankyrin repeat domain 16 [Source:NCBI gene;Acc:720787]  
ENSMMUG00000015143 F-box DNA helicase 1 [Source:NCBI gene;Acc:720797]  
ENSMMUG00000015167 DIS3 like 3'-5' exoribonuclease 2 [Source:VGNC Symbol;Acc:VGNC:71793]  
ENSMMUG00000015202  
ENSMMUG00000015279 SWI/SNF related, matrix associated, actin dependent regulator of chromatin, subfamily a, member 2 [Source:VGNC Symbol;Acc:VGNC:77647]  
ENSMMUG00000015309 F-box protein 24 [Source:VGNC Symbol;Acc:VGNC:72495]  
ENSMMUG00000015371 microtubule associated serine/threonine kinase 2 [Source:VGNC Symbol;Acc:VGNC:74532]  
ENSMMUG00000015522 GRAM domain containing 1B [Source:VGNC Symbol;Acc:VGNC:73028]  
ENSMMUG00000015661 protein tyrosine phosphatase receptor type U [Source:VGNC Symbol;Acc:VGNC:76624]  
ENSMMUG00000015970 coiled-coil domain containing 150 [Source:VGNC Symbol;Acc:VGNC:84222]  
ENSMMUG00000016052 seizure related 6 homolog like [Source:VGNC Symbol;Acc:VGNC:77176]  
ENSMMUG00000016093 adenosine deaminase RNA specific [Source:VGNC Symbol;Acc:VGNC:69502]  
ENSMMUG00000016262 tetratricopeptide repeat domain 38 [Source:VGNC Symbol;Acc:VGNC:79574]  
ENSMMUG00000016313 RUN and SH3 domain containing 2 [Source:VGNC Symbol;Acc:VGNC:82230]  
ENSMMUG00000016314 family with sequence similarity 166 member B [Source:VGNC Symbol;Acc:VGNC:72421]  
ENSMMUG00000016526 solute carrier family 25 member 41 [Source:VGNC Symbol;Acc:VGNC:77581]  
ENSMMUG00000016610 CD99 molecule like 2 [Source:VGNC Symbol;Acc:VGNC:70823]  
ENSMMUG00000016791 doublecortin like kinase 1 [Source:VGNC Symbol;Acc:VGNC:71745]  
ENSMMUG00000016880 solute carrier family 39 member 8 [Source:VGNC Symbol;Acc:VGNC:77541]  
ENSMMUG00000016906 F-box and leucine rich repeat protein 16 [Source:VGNC Symbol;Acc:VGNC:81405]  
ENSMMUG00000016927 solute carrier family 2 member 10 [Source:VGNC Symbol;Acc:VGNC:77465]  
ENSMMUG00000016983 acrosin binding protein [Source:VGNC Symbol;Acc:VGNC:69445]  
ENSMMUG00000016993 PKHD1 ciliary IPT domain containing fibrocystin/polyductin [Source:VGNC Symbol;Acc:VGNC:76010]  
ENSMMUG00000017113 ubiquitin specific peptidase 32 [Source:NCBI gene;Acc:716857]  
ENSMMUG00000017125 oxysterol binding protein like 11 [Source:VGNC Symbol;Acc:VGNC:75631]  
ENSMMUG00000017145 cell division cycle 123 [Source:VGNC Symbol;Acc:VGNC:70768]  
ENSMMUG00000017186 pleckstrin homology domain interacting protein [Source:VGNC Symbol;Acc:VGNC:75803]  
ENSMMUG00000017191 zinc finger protein 546 [Source:VGNC Symbol;Acc:VGNC:79732]  
ENSMMUG00000017204 programmed cell death 4 [Source:VGNC Symbol;Acc:VGNC:75794]  
ENSMMUG00000017207 dopamine beta-hydroxylase [Source:VGNC Symbol;Acc:VGNC:71740]  
ENSMMUG00000017210 sarcosine dehydrogenase [Source:VGNC Symbol;Acc:VGNC:76971]  
ENSMMUG00000017230 V-set and transmembrane domain containing 2 like [Source:NCBI gene;Acc:707394]  
ENSMMUG00000017234 leucine rich repeat containing 59 [Source:VGNC Symbol;Acc:VGNC:81436]  
ENSMMUG00000017246 lipoxigenase homology domains 1 [Source:VGNC Symbol;Acc:VGNC:74368]  
ENSMMUG00000017276 nucleolar protein 4 [Source:VGNC Symbol;Acc:VGNC:75366]  
ENSMMUG00000017378 steroid sulfatase [Source:VGNC Symbol;Acc:VGNC:81590]  
ENSMMUG00000017414 calcium voltage-gated channel subunit alpha1 S [Source:VGNC Symbol;Acc:VGNC:70507]  
ENSMMUG00000017432 tropomodulin 2 [Source:VGNC Symbol;Acc:VGNC:78571]  
ENSMMUG00000017524 phosphoinositide kinase, FYVE-type zinc finger containing [Source:VGNC Symbol;Acc:VGNC:75854]  
ENSMMUG00000017583 single stranded DNA binding protein 2 [Source:NCBI gene;Acc:711752]  
ENSMMUG00000017615 zinc finger CCHC-type containing 14 [Source:VGNC Symbol;Acc:VGNC:79420]  
ENSMMUG00000017819 putative homeodomain transcription factor 1 [Source:VGNC Symbol;Acc:VGNC:75982]  
ENSMMUG00000018031 solute carrier family 25 member 19 [Source:VGNC Symbol;Acc:VGNC:77474]  
ENSMMUG00000018057 uromodulin like 1 [Source:VGNC Symbol;Acc:VGNC:78717]  
ENSMMUG00000018058 ATP binding cassette subfamily G member 1 [Source:VGNC Symbol;Acc:VGNC:69584]

ENSMMUG00000018342 required for meiotic nuclear division 1 homolog [Source:VGNC Symbol;Acc:VGNC:76797]  
ENSMMUG00000018358 zinc finger protein 217 [Source:VGNC Symbol;Acc:VGNC:78874]  
ENSMMUG00000018474 signal regulatory protein alpha [Source:NCBI gene;Acc:717811]  
ENSMMUG00000018565 ribonucleoprotein, PTB binding 2 [Source:VGNC Symbol;Acc:VGNC:76536]  
ENSMMUG00000018746 FAST kinase domains 3 [Source:VGNC Symbol;Acc:VGNC:72588]  
ENSMMUG00000018974 LysM domain containing 3 [Source:VGNC Symbol;Acc:VGNC:74373]  
ENSMMUG00000019325 mechanistic target of rapamycin kinase [Source:VGNC Symbol;Acc:VGNC:75062]  
ENSMMUG00000019462 integrin subunit alpha V [Source:VGNC Symbol;Acc:VGNC:73783]  
ENSMMUG00000019639 paired box 5 [Source:VGNC Symbol;Acc:VGNC:75764]  
ENSMMUG00000019815 transcription factor AP-2 epsilon [Source:VGNC Symbol;Acc:VGNC:79878]  
ENSMMUG00000019831 neurobeachin [Source:NCBI gene;Acc:714386]  
ENSMMUG00000019850 arachidonate lipoxygenase 3 [Source:VGNC Symbol;Acc:VGNC:69607]  
ENSMMUG00000019892 myomesin 1 [Source:VGNC Symbol;Acc:VGNC:75123]  
ENSMMUG00000019977 myosin heavy chain 15 [Source:VGNC Symbol;Acc:VGNC:84148]  
ENSMMUG00000020047 integrin subunit beta 3 binding protein [Source:VGNC Symbol;Acc:VGNC:73787]  
ENSMMUG00000020061 protein phosphatase 1 regulatory subunit 9B [Source:VGNC Symbol;Acc:VGNC:76372]  
ENSMMUG00000020184 carboxypeptidase vitellogenic like [Source:VGNC Symbol;Acc:VGNC:71406]  
ENSMMUG00000020211 cyclin Y like 1 [Source:VGNC Symbol;Acc:VGNC:84224]  
ENSMMUG00000020289 CD83 molecule [Source:VGNC Symbol;Acc:VGNC:70783]  
ENSMMUG00000020370 SRY-box transcription factor 5 [Source:VGNC Symbol;Acc:VGNC:77843]  
ENSMMUG00000020533 chromosome 11 C12orf56 homolog [Source:VGNC Symbol;Acc:VGNC:70409]  
ENSMMUG00000020540 NmrA like redox sensor 1 [Source:VGNC Symbol;Acc:VGNC:75252]  
ENSMMUG00000020706 ETS proto-oncogene 1, transcription factor [Source:VGNC Symbol;Acc:VGNC:72439]  
ENSMMUG00000020804 transmembrane protein 132B [Source:NCBI gene;Acc:707118]  
ENSMMUG00000020910 nucleoporin 54 [Source:VGNC Symbol;Acc:VGNC:75420]  
ENSMMUG00000020926 syntaxin 2 [Source:VGNC Symbol;Acc:VGNC:78259]  
ENSMMUG00000020993 cadherin EGF LAG seven-pass G-type receptor 1 [Source:NCBI gene;Acc:718440]  
ENSMMUG00000021051 TNFAIP3 interacting protein 1 [Source:VGNC Symbol;Acc:VGNC:79057]  
ENSMMUG00000021091 COP9 signalosome subunit 3 [Source:VGNC Symbol;Acc:VGNC:71316]  
ENSMMUG00000021114 G protein-coupled receptor 182 [Source:VGNC Symbol;Acc:VGNC:72936]  
ENSMMUG00000021145 family with sequence similarity 120B [Source:VGNC Symbol;Acc:VGNC:72311]  
ENSMMUG00000021169 translocator protein 2 [Source:VGNC Symbol;Acc:VGNC:83960]  
ENSMMUG00000021280 leucine rich transmembrane and O-methyltransferase domain containing [Source:NCBI gene;Acc:718286]  
ENSMMUG00000021282 late endosomal/lysosomal adaptor, MAPK and MTOR activator 1 [Source:VGNC Symbol;Acc:VGNC:74129]  
ENSMMUG00000021332 carboxypeptidase X, M14 family member 1 [Source:VGNC Symbol;Acc:VGNC:71413]  
ENSMMUG00000021552 RPGR interacting protein 1 [Source:VGNC Symbol;Acc:VGNC:77007]  
ENSMMUG00000021670 solute carrier family 52 member 3 [Source:VGNC Symbol;Acc:VGNC:77717]  
ENSMMUG00000021691 spastin [Source:VGNC Symbol;Acc:VGNC:77857]  
ENSMMUG00000021878 timeless circadian regulator [Source:VGNC Symbol;Acc:VGNC:78356]  
ENSMMUG00000021914 spondin 1 [Source:VGNC Symbol;Acc:VGNC:77862]  
ENSMMUG00000022056 DENN domain containing 4A [Source:VGNC Symbol;Acc:VGNC:71697]  
ENSMMUG00000022121 CASK interacting protein 2 [Source:VGNC Symbol;Acc:VGNC:70577]  
ENSMMUG00000022153 solute carrier family 25 member 36 [Source:VGNC Symbol;Acc:VGNC:84079]  
ENSMMUG00000022183 spermatogenesis associated 1 [Source:NCBI gene;Acc:710462]  
ENSMMUG00000022185 odd-skipped related transcription factor 2 [Source:VGNC Symbol;Acc:VGNC:84097]  
ENSMMUG00000022199 polyhomeotic homolog 3 [Source:VGNC Symbol;Acc:VGNC:75804]  
ENSMMUG00000022202 basic leucine zipper and W2 domains 1 [Source:VGNC Symbol;Acc:VGNC:84213]  
ENSMMUG00000022562 interleukin 1 receptor accessory protein [Source:VGNC Symbol;Acc:VGNC:73718]  
ENSMMUG00000022630 protoporphyrinogen oxidase [Source:VGNC Symbol;Acc:VGNC:76365]  
ENSMMUG00000022680 alpha-2-macroglobulin like 1 [Source:VGNC Symbol;Acc:VGNC:69507]  
ENSMMUG00000022697 STEAP4 metalloredutase [Source:VGNC Symbol;Acc:VGNC:77974]

ENSMMUG00000022762 OMA1 zinc metalloproteinase [Source:VGNC Symbol;Acc:VGNC:75485]  
ENSMMUG00000022975 sprouty related EVH1 domain containing 3 [Source:VGNC Symbol;Acc:VGNC:78030]  
ENSMMUG00000022982 IQ motif containing GTPase activating protein 2 [Source:VGNC Symbol;Acc:VGNC:73756]  
ENSMMUG00000023124 transmembrane protein 43 [Source:VGNC Symbol;Acc:VGNC:82711]  
ENSMMUG00000023249 aryl hydrocarbon receptor nuclear translocator like 2 [Source:NCBI gene;Acc:709547]  
ENSMMUG00000023265 A-kinase anchoring protein 12 [Source:VGNC Symbol;Acc:VGNC:69766]  
ENSMMUG00000023676 espin [Source:NCBI gene;Acc:722532]  
ENSMMUG00000023679 tripartite motif containing 26 [Source:VGNC Symbol;Acc:VGNC:78854]  
ENSMMUG00000026876 mmi-181a-2 [Source:miRBase;Acc:MI0002808]  
ENSMMUG00000029164 glycerophosphodiester phosphodiesterase domain containing 3 [Source:VGNC Symbol;Acc:VGNC:72800]  
ENSMMUG00000030099 phospholipid phosphatase 1 [Source:VGNC Symbol;Acc:VGNC:76226]  
ENSMMUG00000030381 arachidonate 15-lipoxygenase [Source:VGNC Symbol;Acc:VGNC:69796]  
ENSMMUG00000032252 UbiA prenyltransferase domain containing 1 [Source:VGNC Symbol;Acc:VGNC:79881]  
ENSMMUG00000037551 Metazoan signal recognition particle RNA [Source:RFAM;Acc:RF00017]  
ENSMMUG00000037675 testis expressed 52 [Source:NCBI gene;Acc:107000723]  
ENSMMUG00000038070 T cell receptor alpha variable 12-3 [Source:HGNC Symbol;Acc:HGNC:12107]  
ENSMMUG00000038447  
ENSMMUG00000038560 eukaryotic translation elongation factor 1 epsilon 1 [Source:NCBI gene;Acc:695426]  
ENSMMUG00000038661  
ENSMMUG00000039020 zinc finger protein 141 [Source:NCBI gene;Acc:714265]  
ENSMMUG00000039317 cAMP responsive element binding protein 5 [Source:VGNC Symbol;Acc:VGNC:81295]  
ENSMMUG00000039944 Ras protein specific guanine nucleotide releasing factor 2 [Source:VGNC Symbol;Acc:VGNC:84486]  
ENSMMUG00000040154 T cell receptor alpha variable 9-2 [Source:HGNC Symbol;Acc:HGNC:12154]  
ENSMMUG00000040694 LCK proto-oncogene, Src family tyrosine kinase [Source:NCBI gene;Acc:717704]  
ENSMMUG00000040764 alcohol dehydrogenase 1A [Source:NCBI gene;Acc:100424103]  
ENSMMUG00000040771  
ENSMMUG00000040958 lysozyme-like protein 1 [Source:NCBI gene;Acc:698176]  
ENSMMUG00000042208 pepsin A-4 [Source:NCBI gene;Acc:694646]  
ENSMMUG00000042798  
ENSMMUG00000043809 caspase 2 [Source:VGNC Symbol;Acc:VGNC:80804]  
ENSMMUG00000044214  
ENSMMUG00000044473  
ENSMMUG00000044759  
ENSMMUG00000045446  
ENSMMUG00000045584 leucine zipper protein 1 [Source:NCBI gene;Acc:718626]  
ENSMMUG00000046282  
ENSMMUG00000046655 pleckstrin homology like domain family B member 1 [Source:NCBI gene;Acc:706336]  
ENSMMUG00000047324 casein alpha s1 [Source:HGNC Symbol;Acc:HGNC:2445]  
ENSMMUG00000047542 U4 spliceosomal RNA [Source:RFAM;Acc:RF00015]  
ENSMMUG00000049196 dispatched RND transporter family member 3 [Source:NCBI gene;Acc:722727]  
ENSMMUG00000049351 MAGE family member E1 [Source:NCBI gene;Acc:705379]  
ENSMMUG00000049563  
ENSMMUG00000049749  
ENSMMUG00000049859  
ENSMMUG00000049948  
ENSMMUG00000050065  
ENSMMUG00000050177  
ENSMMUG00000050239  
ENSMMUG00000050269 T cell receptor beta variable 14 [Source:HGNC Symbol;Acc:HGNC:12189]  
ENSMMUG00000050864  
ENSMMUG00000051032 serine protease 2 [Source:NCBI gene;Acc:698352]

ENSMMUG00000051115  
ENSMMUG00000051271  
ENSMMUG00000051286  
ENSMMUG00000051381 Metazoan signal recognition particle RNA [Source:RFAM;Acc:RF00017]  
ENSMMUG00000051482  
ENSMMUG00000052019  
ENSMMUG00000052277 transthyretin [Source:NCBI gene;Acc:705943]  
ENSMMUG00000052382 histone H4 [Source:NCBI gene;Acc:107000818]  
ENSMMUG00000052526 RAB39A, member RAS oncogene family [Source:NCBI gene;Acc:707451]  
ENSMMUG00000052535  
ENSMMUG00000052574  
ENSMMUG00000052605 Metazoan signal recognition particle RNA [Source:RFAM;Acc:RF00017]  
ENSMMUG00000052642 protein O-glucosyltransferase 2 [Source:NCBI gene;Acc:702156]  
ENSMMUG00000052676  
ENSMMUG00000052682  
ENSMMUG00000052830  
ENSMMUG00000052929  
ENSMMUG00000052977 putative protein FAM106C [Source:NCBI gene;Acc:106994084]  
ENSMMUG00000053384  
ENSMMUG00000053577  
ENSMMUG00000053675  
ENSMMUG00000053721  
ENSMMUG00000054064  
ENSMMUG00000054116 T cell receptor alpha variable 8-6 [Source:HGNC Symbol;Acc:HGNC:12151]  
ENSMMUG00000054210 C-C motif chemokine 4 [Source:NCBI gene;Acc:100426632]  
ENSMMUG00000054315  
ENSMMUG00000054590  
ENSMMUG00000054711  
ENSMMUG00000055117  
ENSMMUG00000055207  
ENSMMUG00000055229  
ENSMMUG00000055244 U6 spliceosomal RNA [Source:RFAM;Acc:RF00026]  
ENSMMUG00000055344 TLC domain containing 3A [Source:NCBI gene;Acc:699707]  
ENSMMUG00000055477  
ENSMMUG00000055585  
ENSMMUG00000055590  
ENSMMUG00000055610 homeobox C4 [Source:NCBI gene;Acc:100430434]  
ENSMMUG00000055809  
ENSMMUG00000055845 ankyrin repeat domain 53 [Source:NCBI gene;Acc:703757]  
ENSMMUG00000056045  
ENSMMUG00000056103 growth arrest and DNA damage inducible alpha [Source:NCBI gene;Acc:701054]  
ENSMMUG00000056116  
ENSMMUG00000056306  
ENSMMUG00000056363  
ENSMMUG00000056387 transcription factor 15 [Source:NCBI gene;Acc:716916]  
ENSMMUG00000056687  
ENSMMUG00000056790  
ENSMMUG00000057031  
ENSMMUG00000057073  
ENSMMUG00000057143 transmembrane protein 127 [Source:NCBI gene;Acc:705069]  
ENSMMUG00000057276

ENSMMUG00000057494 T cell receptor beta variable 7-9 [Source:HGNC Symbol;Acc:HGNC:12243]  
ENSMMUG00000057501  
ENSMMUG00000057606 GPRIN family member 3 [Source:NCBI gene;Acc:703567]  
ENSMMUG00000057859  
ENSMMUG00000058151 chromosome 4 C6orf62 homolog [Source:NCBI gene;Acc:708218]  
ENSMMUG00000058583 RRAD and GEM like GTPase 1 [Source:NCBI gene;Acc:713351]  
ENSMMUG00000058603  
ENSMMUG00000058740  
ENSMMUG00000058942  
ENSMMUG00000059019  
ENSMMUG00000059241  
ENSMMUG00000059267 pellino E3 ubiquitin protein ligase 1 [Source:NCBI gene;Acc:696416]  
ENSMMUG00000059575  
ENSMMUG00000059707 MIS18 kinetochore protein A [Source:NCBI gene;Acc:709275]  
ENSMMUG00000059773 methyltransferase like 11B [Source:NCBI gene;Acc:705503]  
ENSMMUG00000059986  
ENSMMUG00000060042  
ENSMMUG00000060278 Metazoan signal recognition particle RNA [Source:RFAM;Acc:RF00017]  
ENSMMUG00000060346  
ENSMMUG00000060713 epithelial membrane protein 2 [Source:NCBI gene;Acc:710315]  
ENSMMUG00000060744  
ENSMMUG00000060836  
ENSMMUG00000060892  
ENSMMUG00000061002  
ENSMMUG00000061035 ZFP82 zinc finger protein [Source:NCBI gene;Acc:719145]  
ENSMMUG00000061239  
ENSMMUG00000061408  
ENSMMUG00000061433  
ENSMMUG00000061572 Metazoan signal recognition particle RNA [Source:RFAM;Acc:RF00017]  
ENSMMUG00000061815  
ENSMMUG00000061892  
ENSMMUG00000061973  
ENSMMUG00000062140  
ENSMMUG00000062443  
ENSMMUG00000062527  
ENSMMUG00000062793  
ENSMMUG00000062974  
ENSMMUG00000063177 StAR related lipid transfer domain containing 4 [Source:NCBI gene;Acc:706654]  
ENSMMUG00000063298  
ENSMMUG00000063345  
ENSMMUG00000064237  
ENSMMUG00000064514 keratin, type II cuticular Hb1 [Source:NCBI gene;Acc:697511]  
ENSMMUG00000064529  
ENSMMUG00000064804  
ENSMMUG00000065018 transmembrane protein 35A [Source:NCBI gene;Acc:702205]  
ENSMMUG00000065031  
ENSMMUG00000065099  
ENSMMUG00000065117 septin 4 [Source:HGNC Symbol;Acc:HGNC:9165]  
ENSMMUG00000020175 mediator complex subunit 25 [Source:VGNC Symbol;Acc:VGNC:74607]  
ENSMMUG00000023137 zinc finger protein 350 [Source:VGNC Symbol;Acc:VGNC:79041]  
ENSMMUG00000041450 zinc finger protein 432 [Source:NCBI gene;Acc:100424341]

## Non-Survivors – SD2 vs. Baseline

| Ensembl Gene ID    | Description                                                                                                                         |
|--------------------|-------------------------------------------------------------------------------------------------------------------------------------|
| ENSMMUG0000000009  | protein tyrosine phosphatase receptor type C [Source:VGNC Symbol;Acc:VGNC:76612]                                                    |
| ENSMMUG00000000104 | ribosomal RNA processing 1B [Source:VGNC Symbol;Acc:VGNC:77089]                                                                     |
| ENSMMUG00000000158 | minichromosome maintenance complex component 2 [Source:VGNC Symbol;Acc:VGNC:74680]                                                  |
| ENSMMUG00000000224 | RALBP1 associated Eps domain containing 1 [Source:VGNC Symbol;Acc:VGNC:76738]                                                       |
| ENSMMUG00000000663 | guanylate-binding protein 6-like [Source:NCBI gene;Acc:695158]                                                                      |
| ENSMMUG00000000972 | tyrosine kinase non receptor 2 [Source:VGNC Symbol;Acc:VGNC:79192]                                                                  |
| ENSMMUG00000001008 | spectrin repeat containing nuclear envelope protein 2 [Source:NCBI gene;Acc:706759]                                                 |
| ENSMMUG00000001024 | ETS transcription factor ELK4 [Source:VGNC Symbol;Acc:VGNC:72211]                                                                   |
| ENSMMUG00000001212 | Rieske Fe-S domain containing [Source:VGNC Symbol;Acc:VGNC:84487]                                                                   |
| ENSMMUG00000001213 | spermatogenesis associated 9 [Source:VGNC Symbol;Acc:VGNC:77976]                                                                    |
| ENSMMUG00000001225 | calneuron 1 [Source:VGNC Symbol;Acc:VGNC:82078]                                                                                     |
| ENSMMUG00000001264 | BSD domain containing 1 [Source:VGNC Symbol;Acc:VGNC:70384]                                                                         |
| ENSMMUG00000001319 | methylenetetrahydrofolate dehydrogenase, cyclohydrolase and formyltetrahydrofolate synthetase 1 [Source:VGNC Symbol;Acc:VGNC:84399] |
| ENSMMUG00000001479 | laminin subunit gamma 2 [Source:VGNC Symbol;Acc:VGNC:74233]                                                                         |
| ENSMMUG00000001481 | nicotinamide nucleotide adenylyltransferase 2 [Source:VGNC Symbol;Acc:VGNC:75193]                                                   |
| ENSMMUG00000001728 | mitogen-activated protein kinase 9 [Source:VGNC Symbol;Acc:VGNC:74652]                                                              |
| ENSMMUG00000001742 | transforming growth factor beta receptor 3 [Source:VGNC Symbol;Acc:VGNC:78339]                                                      |
| ENSMMUG00000001849 | interleukin 5 receptor subunit alpha [Source:VGNC Symbol;Acc:VGNC:73731]                                                            |
| ENSMMUG00000001894 | cyclin dependent kinase 11B [Source:NCBI gene;Acc:703046]                                                                           |
| ENSMMUG00000001918 | transmembrane protein 165 [Source:VGNC Symbol;Acc:VGNC:79875]                                                                       |
| ENSMMUG00000002200 | phospholipid phosphatase 3 [Source:NCBI gene;Acc:715993]                                                                            |
| ENSMMUG00000002332 | RNA binding motif protein 25 [Source:VGNC Symbol;Acc:VGNC:76521]                                                                    |
| ENSMMUG00000002434 | inhibitor of growth family member 3 [Source:VGNC Symbol;Acc:VGNC:73595]                                                             |
| ENSMMUG00000002497 | zinc finger protein 777 [Source:HGNC Symbol;Acc:HGNC:22213]                                                                         |
| ENSMMUG00000002649 | unc-5 netrin receptor A [Source:VGNC Symbol;Acc:VGNC:78721]                                                                         |
| ENSMMUG00000002755 | kelch like family member 5 [Source:VGNC Symbol;Acc:VGNC:74188]                                                                      |
| ENSMMUG00000002794 | general transcription factor IIB [Source:VGNC Symbol;Acc:VGNC:73306]                                                                |
| ENSMMUG00000002890 | tripartite motif containing 15 [Source:VGNC Symbol;Acc:VGNC:83958]                                                                  |
| ENSMMUG00000002947 | procollagen C-endopeptidase enhancer [Source:VGNC Symbol;Acc:VGNC:75782]                                                            |
| ENSMMUG00000003191 | kirre like nephrin family adhesion molecule 1 [Source:VGNC Symbol;Acc:VGNC:73837]                                                   |
| ENSMMUG00000003277 | copine 4 [Source:VGNC Symbol;Acc:VGNC:71466]                                                                                        |
| ENSMMUG00000003369 | calcium/calmodulin dependent protein kinase IG [Source:VGNC Symbol;Acc:VGNC:70521]                                                  |
| ENSMMUG00000003693 | DIS3 like exosome 3'-5' exoribonuclease [Source:VGNC Symbol;Acc:VGNC:71796]                                                         |
| ENSMMUG00000003736 | nuclear factor kappa B subunit 1 [Source:VGNC Symbol;Acc:VGNC:75339]                                                                |
| ENSMMUG00000003869 | WD repeat domain 46 [Source:VGNC Symbol;Acc:VGNC:78940]                                                                             |
| ENSMMUG00000003872 | ral guanine nucleotide dissociation stimulator like 2 [Source:VGNC Symbol;Acc:VGNC:76886]                                           |
| ENSMMUG00000003987 | forkhead associated phosphopeptide binding domain 1 [Source:NCBI gene;Acc:699900]                                                   |
| ENSMMUG00000004052 | phosphodiesterase 12 [Source:VGNC Symbol;Acc:VGNC:75863]                                                                            |
| ENSMMUG00000004082 | GRB10 interacting GYF protein 1 [Source:VGNC Symbol;Acc:VGNC:73158]                                                                 |



ENSMMUG0000004084 GTP cyclohydrolase 1 [Source:VGNC Symbol;Acc:VGNC:72900]  
ENSMMUG0000004287 death domain associated protein [Source:VGNC Symbol;Acc:VGNC:71737]  
ENSMMUG0000004362 Fc fragment of IgG receptor Ia [Source:NCBI gene;Acc:714664]  
ENSMMUG0000004492 absent in melanoma 2 [Source:NCBI gene;Acc:719260]  
ENSMMUG0000004566 zinc finger protein 124 [Source:VGNC Symbol;Acc:VGNC:78836]  
ENSMMUG0000004754 intermediate filament family orphan 2 [Source:NCBI gene;Acc:106995162]  
ENSMMUG0000004849 casein beta [Source:VGNC Symbol;Acc:VGNC:71523]  
ENSMMUG0000004988 trace amine-associated receptor 3 [Source:NCBI gene;Acc:709130]  
ENSMMUG0000005137 ATPase secretory pathway Ca<sup>2+</sup> transporting 1 [Source:VGNC Symbol;Acc:VGNC:70054]  
ENSMMUG0000005181 RAB3C, member RAS oncogene family [Source:VGNC Symbol;Acc:VGNC:81541]  
ENSMMUG0000005366 alpha-L-fucosidase 2 [Source:VGNC Symbol;Acc:VGNC:72827]  
ENSMMUG0000005442 5'-nucleotidase ecto [Source:VGNC Symbol;Acc:VGNC:75537]  
ENSMMUG0000005634 ribonuclease L [Source:VGNC Symbol;Acc:VGNC:82223]  
ENSMMUG0000005801 glyceronephosphate O-acyltransferase [Source:VGNC Symbol;Acc:VGNC:73100]  
ENSMMUG0000005856 glycine amidinotransferase [Source:VGNC Symbol;Acc:VGNC:72892]  
ENSMMUG0000005923 failed axon connections homolog, metaxin like GST domain containing [Source:VGNC Symbol;Acc:VGNC:72541]  
ENSMMUG0000006187 angiopoietin like 7 [Source:VGNC Symbol;Acc:VGNC:69683]  
ENSMMUG0000006251 argonaute RISC component 1 [Source:VGNC Symbol;Acc:VGNC:81346]  
ENSMMUG0000006252 argonaute RISC catalytic component 3 [Source:NCBI gene;Acc:712543]  
ENSMMUG0000006309 unc-5 netrin receptor C [Source:VGNC Symbol;Acc:VGNC:78723]  
ENSMMUG0000006457 Rho guanine nucleotide exchange factor 40 [Source:VGNC Symbol;Acc:VGNC:69907]  
ENSMMUG0000006548 KIAA1549 [Source:VGNC Symbol;Acc:VGNC:73885]  
ENSMMUG0000006553 dishevelled segment polarity protein 3 [Source:VGNC Symbol;Acc:VGNC:72014]  
ENSMMUG0000006682 chondroitin polymerizing factor 2 [Source:VGNC Symbol;Acc:VGNC:71131]  
ENSMMUG0000006704 zygote arrest 1 [Source:VGNC Symbol;Acc:VGNC:79251]  
ENSMMUG0000006827 von Willebrand factor A domain containing 7 [Source:VGNC Symbol;Acc:VGNC:78941]  
ENSMMUG0000006898 integrin subunit beta 8 [Source:VGNC Symbol;Acc:VGNC:73791]  
ENSMMUG0000007244 OTU deubiquitinase 7B [Source:VGNC Symbol;Acc:VGNC:75634]  
ENSMMUG0000007250 RNA binding motif protein 28 [Source:VGNC Symbol;Acc:VGNC:76519]  
ENSMMUG0000007255 microtubule associated protein 1A [Source:VGNC Symbol;Acc:VGNC:74489]  
ENSMMUG0000007256 splicing factor 3b subunit 4 [Source:VGNC Symbol;Acc:VGNC:77182]  
ENSMMUG0000007257 synaptic vesicle glycoprotein 2A [Source:VGNC Symbol;Acc:VGNC:78181]  
ENSMMUG0000007504 myosin VC [Source:VGNC Symbol;Acc:VGNC:75117]  
ENSMMUG0000007524 RNA polymerase II subunit H [Source:VGNC Symbol;Acc:VGNC:76216]  
ENSMMUG0000007561 zinc finger DHHC-type palmitoyltransferase 22 [Source:NCBI gene;Acc:706468]  
ENSMMUG0000007765 Wnt family member 2B [Source:VGNC Symbol;Acc:VGNC:78797]  
ENSMMUG0000007766 suppression of tumorigenicity 7 like [Source:VGNC Symbol;Acc:VGNC:77954]  
ENSMMUG0000007783 isoleucyl-tRNA synthetase 2, mitochondrial [Source:VGNC Symbol;Acc:VGNC:73458]  
ENSMMUG0000007821 ATP binding cassette subfamily B member 5 [Source:VGNC Symbol;Acc:VGNC:80321]  
ENSMMUG0000007968 hedgehog interacting protein [Source:VGNC Symbol;Acc:VGNC:73169]  
ENSMMUG0000008009 family with sequence similarity 13 member B [Source:VGNC Symbol;Acc:VGNC:72268]  
ENSMMUG0000008093 StAR related lipid transfer domain containing 9 [Source:NCBI gene;Acc:708953]  
ENSMMUG0000008228 unc-93 homolog A [Source:VGNC Symbol;Acc:VGNC:78724]  
ENSMMUG0000008447 fibulin 5 [Source:VGNC Symbol;Acc:VGNC:72622]  
ENSMMUG0000008525 minichromosome maintenance 9 homologous recombination repair factor [Source:VGNC Symbol;Acc:VGNC:83432]  
ENSMMUG0000008632 myosin, light chain 6, alkali, smooth muscle and non-muscle-like [Source:NCBI gene;Acc:710137]  
ENSMMUG0000008710 protocadherin 1 [Source:VGNC Symbol;Acc:VGNC:75775]  
ENSMMUG0000008713 myosin binding protein H like [Source:NCBI gene;Acc:698183]  
ENSMMUG0000008718 zinc finger protein 280D [Source:NCBI gene;Acc:699509]  
ENSMMUG0000008795 polycystin 2, transient receptor potential cation channel [Source:NCBI gene;Acc:702179]  
ENSMMUG0000008797 ATP binding cassette subfamily G member 2 (Junior blood group) [Source:NCBI gene;Acc:574307]

ENSMMUG0000008974 Fc receptor like 5 [Source:NCBI gene;Acc:718771]  
ENSMMUG0000009084 transmembrane 6 superfamily member 1 [Source:VGNC Symbol;Acc:VGNC:78566]  
ENSMMUG0000009087 HDGF like 3 [Source:VGNC Symbol;Acc:VGNC:84346]  
ENSMMUG0000009520 gephyrin [Source:VGNC Symbol;Acc:VGNC:72948]  
ENSMMUG0000009536 makorin ring finger protein 2 [Source:VGNC Symbol;Acc:VGNC:74878]  
ENSMMUG0000009702 mutS homolog 5 [Source:NCBI gene;Acc:715494]  
ENSMMUG0000009773 lysine demethylase 1A [Source:VGNC Symbol;Acc:VGNC:73928]  
ENSMMUG0000009839 galactokinase 2 [Source:VGNC Symbol;Acc:VGNC:72870]  
ENSMMUG0000009948 histone deacetylase 1 [Source:NCBI gene;Acc:708441]  
ENSMMUG00000010113 steroid 5 alpha-reductase 3 [Source:VGNC Symbol;Acc:VGNC:82246]  
ENSMMUG00000010127 chitobiase [Source:VGNC Symbol;Acc:VGNC:71540]  
ENSMMUG00000010379 Mtr4 exosome RNA helicase [Source:VGNC Symbol;Acc:VGNC:74989]  
ENSMMUG00000010648 DNA methyltransferase 3 like [Source:NCBI gene;Acc:722184]  
ENSMMUG00000010682 fibrillin 2 [Source:VGNC Symbol;Acc:VGNC:72624]  
ENSMMUG00000010695 adenosine deaminase RNA specific B1 [Source:VGNC Symbol;Acc:VGNC:69503]  
ENSMMUG00000010980 S100 calcium binding protein A5 [Source:VGNC Symbol;Acc:VGNC:76959]  
ENSMMUG00000011049 leucine rich repeat containing 1 [Source:VGNC Symbol;Acc:VGNC:81087]  
ENSMMUG00000011214 solute carrier family 12 member 2 [Source:VGNC Symbol;Acc:VGNC:77386]  
ENSMMUG00000011380 consortin, connexin sorting protein [Source:VGNC Symbol;Acc:VGNC:71355]  
ENSMMUG00000011386 GTPase, IMAP family member 4 [Source:VGNC Symbol;Acc:VGNC:72982]  
ENSMMUG00000011555 interleukin 16 [Source:VGNC Symbol;Acc:VGNC:84355]  
ENSMMUG00000011573 cap methyltransferase 1 [Source:VGNC Symbol;Acc:VGNC:71271]  
ENSMMUG00000011702 tetraspanin 5 [Source:VGNC Symbol;Acc:VGNC:79086]  
ENSMMUG00000011810 FAT atypical cadherin 4 [Source:VGNC Symbol;Acc:VGNC:72552]  
ENSMMUG00000011902 oligosaccharyltransferase complex non-catalytic subunit [Source:NCBI gene;Acc:697283]  
ENSMMUG00000011974 calcium/calmodulin dependent protein kinase IV [Source:VGNC Symbol;Acc:VGNC:70526]  
ENSMMUG00000012110 smoothed, frizzled class receptor [Source:VGNC Symbol;Acc:VGNC:77658]  
ENSMMUG00000012120 zinc ribbon domain containing 1 [Source:VGNC Symbol;Acc:VGNC:78912]  
ENSMMUG00000012124 ring finger protein 39 [Source:VGNC Symbol;Acc:VGNC:83458]  
ENSMMUG00000012129 tripartite motif containing 10 [Source:VGNC Symbol;Acc:VGNC:78550]  
ENSMMUG00000012151 glycerol kinase 5 [Source:VGNC Symbol;Acc:VGNC:73022]  
ENSMMUG00000012192 erythrocyte membrane protein band 4.1 like 4A [Source:VGNC Symbol;Acc:VGNC:72039]  
ENSMMUG00000012238 polypeptide N-acetylgalactosaminyltransferase 11 [Source:VGNC Symbol;Acc:VGNC:72749]  
ENSMMUG00000012462 proteasome activator subunit 1 [Source:VGNC Symbol;Acc:VGNC:76455]  
ENSMMUG00000012473 proteasome activator subunit 2 [Source:VGNC Symbol;Acc:VGNC:76456]  
ENSMMUG00000012474 ring finger protein 31 [Source:NCBI gene;Acc:715239]  
ENSMMUG00000012480 REC8 meiotic recombination protein [Source:VGNC Symbol;Acc:VGNC:76746]  
ENSMMUG00000012481 importin 4 [Source:VGNC Symbol;Acc:VGNC:73630]  
ENSMMUG00000012615 pecanex 2 [Source:NCBI gene;Acc:712828]  
ENSMMUG00000012690 myocardial zonula adherens protein [Source:NCBI gene;Acc:700247]  
ENSMMUG00000012781 muscular LMNA interacting protein [Source:VGNC Symbol;Acc:VGNC:83434]  
ENSMMUG00000013047 S-phase kinase associated protein 1 [Source:NCBI gene;Acc:100423634]  
ENSMMUG00000013302 family with sequence similarity 184 member A [Source:VGNC Symbol;Acc:VGNC:72308]  
ENSMMUG00000013848 fucosyltransferase 8 [Source:VGNC Symbol;Acc:VGNC:72829]  
ENSMMUG00000013878 ring finger protein 2 [Source:NCBI gene;Acc:717024]  
ENSMMUG00000013907 ribosomal protein S27a [Source:NCBI gene;Acc:718909]  
ENSMMUG00000013920 triggering receptor expressed on myeloid cells 2 [Source:VGNC Symbol;Acc:VGNC:79089]  
ENSMMUG00000014762 myosin heavy chain 6 [Source:NCBI gene;Acc:713471]  
ENSMMUG00000014997 spalt like transcription factor 2 [Source:NCBI gene;Acc:708367]  
ENSMMUG00000015000 SPT16 homolog, facilitates chromatin remodeling subunit [Source:VGNC Symbol;Acc:VGNC:78054]  
ENSMMUG00000015002 chromodomain helicase DNA binding protein 8 [Source:VGNC Symbol;Acc:VGNC:71060]

ENSMMUG00000015004 TOX high mobility group box family member 4 [Source:NCBI gene;Acc:706950]  
ENSMMUG00000015041 CWC27 spliceosome associated cyclophilin [Source:VGNC Symbol;Acc:VGNC:71396]  
ENSMMUG00000015132 galectin 8 [Source:VGNC Symbol;Acc:VGNC:74258]  
ENSMMUG00000015168 transmembrane p24 trafficking protein 10 [Source:NCBI gene;Acc:701522]  
ENSMMUG00000015309 F-box protein 24 [Source:VGNC Symbol;Acc:VGNC:72495]  
ENSMMUG00000015355 R-spondin 3 [Source:VGNC Symbol;Acc:VGNC:77066]  
ENSMMUG00000015371 microtubule associated serine/threonine kinase 2 [Source:VGNC Symbol;Acc:VGNC:74532]  
ENSMMUG00000015380 proline and serine rich coiled-coil 1 [Source:VGNC Symbol;Acc:VGNC:76307]  
ENSMMUG00000015577 RIO kinase 1 [Source:VGNC Symbol;Acc:VGNC:76767]  
ENSMMUG00000015634 centromere protein F [Source:VGNC Symbol;Acc:VGNC:71009]  
ENSMMUG00000015661 protein tyrosine phosphatase receptor type U [Source:VGNC Symbol;Acc:VGNC:76624]  
ENSMMUG00000016004 acid phosphatase 3 [Source:VGNC Symbol;Acc:VGNC:69385]  
ENSMMUG00000016135 neural precursor cell expressed, developmentally down-regulated 9 [Source:VGNC Symbol;Acc:VGNC:75304]  
ENSMMUG00000016286 protease, serine, 1 (trypsin 1) [Source:NCBI gene;Acc:698729]  
ENSMMUG00000016857 prostaglandin-endoperoxide synthase 2 [Source:VGNC Symbol;Acc:VGNC:76589]  
ENSMMUG00000016880 solute carrier family 39 member 8 [Source:VGNC Symbol;Acc:VGNC:77541]  
ENSMMUG00000016896 solute carrier family 12 member 1 [Source:VGNC Symbol;Acc:VGNC:77385]  
ENSMMUG00000016993 PKHD1 ciliary IPT domain containing fibrocystin/polyductin [Source:VGNC Symbol;Acc:VGNC:76010]  
ENSMMUG00000017070 zinc finger and SCAN domain containing 29 [Source:VGNC Symbol;Acc:VGNC:79633]  
ENSMMUG00000017076 tubulin gamma complex associated protein 4 [Source:VGNC Symbol;Acc:VGNC:79045]  
ENSMMUG00000017114 pleckstrin homology domain containing A6 [Source:VGNC Symbol;Acc:VGNC:76040]  
ENSMMUG00000017125 oxysterol binding protein like 11 [Source:VGNC Symbol;Acc:VGNC:75631]  
ENSMMUG00000017186 pleckstrin homology domain interacting protein [Source:VGNC Symbol;Acc:VGNC:75803]  
ENSMMUG00000017374 G protein subunit beta 5 [Source:VGNC Symbol;Acc:VGNC:73097]  
ENSMMUG00000017414 calcium voltage-gated channel subunit alpha1 S [Source:VGNC Symbol;Acc:VGNC:70507]  
ENSMMUG00000017432 tropomodulin 2 [Source:VGNC Symbol;Acc:VGNC:78571]  
ENSMMUG00000017549 ectonucleotide pyrophosphatase/phosphodiesterase 3 [Source:VGNC Symbol;Acc:VGNC:72224]  
ENSMMUG00000017583 single stranded DNA binding protein 2 [Source:NCBI gene;Acc:711752]  
ENSMMUG00000018058 ATP binding cassette subfamily G member 1 [Source:VGNC Symbol;Acc:VGNC:69584]  
ENSMMUG00000018079 transmembrane serine protease 3 [Source:VGNC Symbol;Acc:VGNC:78576]  
ENSMMUG00000018081 ubiquitin associated and SH3 domain containing A [Source:VGNC Symbol;Acc:VGNC:78687]  
ENSMMUG00000018284 mutS homolog 3 [Source:VGNC Symbol;Acc:VGNC:74932]  
ENSMMUG00000018332 family with sequence similarity 98 member B [Source:VGNC Symbol;Acc:VGNC:72583]  
ENSMMUG00000018342 required for meiotic nuclear division 1 homolog [Source:VGNC Symbol;Acc:VGNC:76797]  
ENSMMUG00000018346 coiled-coil domain containing 170 [Source:VGNC Symbol;Acc:VGNC:70832]  
ENSMMUG00000018456 PBX homeobox 2 [Source:VGNC Symbol;Acc:VGNC:75771]  
ENSMMUG00000018459 G protein signaling modulator 3 [Source:VGNC Symbol;Acc:VGNC:72938]  
ENSMMUG00000018461 notch receptor 4 [Source:VGNC Symbol;Acc:VGNC:75372]  
ENSMMUG00000018490 ADP ribosylation factor interacting protein 1 [Source:VGNC Symbol;Acc:VGNC:69878]  
ENSMMUG00000018493 FH2 domain containing 1 [Source:VGNC Symbol;Acc:VGNC:72598]  
ENSMMUG00000018565 ribonucleoprotein, PTB binding 2 [Source:VGNC Symbol;Acc:VGNC:76536]  
ENSMMUG00000018739 sperm flagellar 2 [Source:VGNC Symbol;Acc:VGNC:82243]  
ENSMMUG00000018746 FAST kinase domains 3 [Source:VGNC Symbol;Acc:VGNC:72588]  
ENSMMUG00000018747 5-methyltetrahydrofolate-homocysteine methyltransferase reductase [Source:VGNC Symbol;Acc:VGNC:75079]  
ENSMMUG00000018827 multiple EGF like domains 10 [Source:VGNC Symbol;Acc:VGNC:74617]  
ENSMMUG00000018939 leucine rich repeat containing 66 [Source:VGNC Symbol;Acc:VGNC:74415]  
ENSMMUG00000018943 spermatogenesis associated 18 [Source:VGNC Symbol;Acc:VGNC:78013]  
ENSMMUG00000018972 RNA polymerase III subunit G [Source:VGNC Symbol;Acc:VGNC:84480]  
ENSMMUG00000018974 LysM domain containing 3 [Source:VGNC Symbol;Acc:VGNC:74373]  
ENSMMUG00000019045 estrogen receptor 1 [Source:VGNC Symbol;Acc:VGNC:72432]  
ENSMMUG00000019105 RNA 3'-terminal phosphate cyclase [Source:VGNC Symbol;Acc:VGNC:77043]

ENSMMUG00000019325 mechanistic target of rapamycin kinase [Source:VGNC Symbol;Acc:VGNC:75062]  
ENSMMUG00000019710 centrosomal protein 128 [Source:VGNC Symbol;Acc:VGNC:71062]  
ENSMMUG00000019713 thyroid stimulating hormone receptor [Source:VGNC Symbol;Acc:VGNC:78662]  
ENSMMUG00000019836 myocyte enhancer factor 2C [Source:VGNC Symbol;Acc:VGNC:84438]  
ENSMMUG00000019854 transmembrane protein 108 [Source:VGNC Symbol;Acc:VGNC:79714]  
ENSMMUG00000019887 synaptic vesicle glycoprotein 2C [Source:VGNC Symbol;Acc:VGNC:78252]  
ENSMMUG00000019977 myosin heavy chain 15 [Source:VGNC Symbol;Acc:VGNC:84148]  
ENSMMUG00000019978 HERV-H LTR-associating 2 [Source:VGNC Symbol;Acc:VGNC:73377]  
ENSMMUG00000019992 growth factor receptor bound protein 10 [Source:VGNC Symbol;Acc:VGNC:73157]  
ENSMMUG00000020047 integrin subunit beta 3 binding protein [Source:VGNC Symbol;Acc:VGNC:73787]  
ENSMMUG00000020050 salt inducible kinase 1 [Source:NCBI gene;Acc:722303]  
ENSMMUG00000020117 semaphorin 3B [Source:VGNC Symbol;Acc:VGNC:77160]  
ENSMMUG00000020289 CD83 molecule [Source:VGNC Symbol;Acc:VGNC:70783]  
ENSMMUG00000020348 BCL2 interacting protein 2 [Source:VGNC Symbol;Acc:VGNC:70272]  
ENSMMUG00000020377 collagen type VI alpha 5 chain [Source:NCBI gene;Acc:719331]  
ENSMMUG00000020910 nucleoporin 54 [Source:VGNC Symbol;Acc:VGNC:75420]  
ENSMMUG00000020913 scavenger receptor class B member 2 [Source:VGNC Symbol;Acc:VGNC:77026]  
ENSMMUG00000021034 complement C6 [Source:VGNC Symbol;Acc:VGNC:70477]  
ENSMMUG00000021053 annexin A6 [Source:VGNC Symbol;Acc:VGNC:69951]  
ENSMMUG00000021145 family with sequence similarity 120B [Source:VGNC Symbol;Acc:VGNC:72311]  
ENSMMUG00000021242 natural killer cell triggering receptor [Source:VGNC Symbol;Acc:VGNC:81486]  
ENSMMUG00000021244 kelch like family member 40 [Source:VGNC Symbol;Acc:VGNC:74165]  
ENSMMUG00000021354 corticotropin releasing hormone binding protein [Source:VGNC Symbol;Acc:VGNC:71491]  
ENSMMUG00000021377 SPT3 homolog, SAGA and STAGA complex component [Source:VGNC Symbol;Acc:VGNC:78055]  
ENSMMUG00000021507 chromosome 2 C3orf38 homolog [Source:VGNC Symbol;Acc:VGNC:70654]  
ENSMMUG00000021534 solute carrier family 16 member 10 [Source:NCBI gene;Acc:696132]  
ENSMMUG00000021552 RPGR interacting protein 1 [Source:VGNC Symbol;Acc:VGNC:77007]  
ENSMMUG00000021656 golgin subfamily A member 8S [Source:NCBI gene;Acc:722977]  
ENSMMUG00000021788 immunoglobulin superfamily DCC subclass member 4 [Source:VGNC Symbol;Acc:VGNC:73388]  
ENSMMUG00000021837 seryl-tRNA synthetase 1 [Source:NCBI gene;Acc:695046]  
ENSMMUG00000022124 stonin 2 [Source:VGNC Symbol;Acc:VGNC:78249]  
ENSMMUG00000022153 solute carrier family 25 member 36 [Source:VGNC Symbol;Acc:VGNC:84079]  
ENSMMUG00000022183 spermatogenesis associated 1 [Source:NCBI gene;Acc:710462]  
ENSMMUG00000022199 polyhomeotic homolog 3 [Source:VGNC Symbol;Acc:VGNC:75804]  
ENSMMUG00000022324 formimidoyltransferase cyclodeaminase [Source:VGNC Symbol;Acc:VGNC:72825]  
ENSMMUG00000022484 ITPR interacting domain containing 1 [Source:VGNC Symbol;Acc:VGNC:73667]  
ENSMMUG00000022624 putative speedy protein E16 [Source:NCBI gene;Acc:718058]  
ENSMMUG00000022631 ubiquitin specific peptidase 21 [Source:VGNC Symbol;Acc:VGNC:78741]  
ENSMMUG00000022636 GTPase, IMAP family member 8 [Source:VGNC Symbol;Acc:VGNC:72981]  
ENSMMUG00000022762 OMA1 zinc metallopeptidase [Source:VGNC Symbol;Acc:VGNC:75485]  
ENSMMUG00000022927 RCAN family member 3 [Source:VGNC Symbol;Acc:VGNC:76875]  
ENSMMUG00000022963 solute carrier family 25 member 38 [Source:VGNC Symbol;Acc:VGNC:77571]  
ENSMMUG00000023012 vesicle trafficking 1 [Source:VGNC Symbol;Acc:VGNC:79296]  
ENSMMUG00000023124 transmembrane protein 43 [Source:VGNC Symbol;Acc:VGNC:82711]  
ENSMMUG00000023141 CDC like kinase 2 [Source:VGNC Symbol;Acc:VGNC:71259]  
ENSMMUG00000023265 A-kinase anchoring protein 12 [Source:VGNC Symbol;Acc:VGNC:69766]  
ENSMMUG00000023289 phospholipase D1 [Source:VGNC Symbol;Acc:VGNC:76171]  
ENSMMUG00000023462 immunoglobulin like domain containing receptor 2 [Source:VGNC Symbol;Acc:VGNC:73619]  
ENSMMUG00000023558 exocyst complex component 2 [Source:VGNC Symbol;Acc:VGNC:72338]  
ENSMMUG00000023676 espin [Source:NCBI gene;Acc:722532]  
ENSMMUG00000023679 tripartite motif containing 26 [Source:VGNC Symbol;Acc:VGNC:78854]

ENSMMUG00000024125 small nucleolar RNA, H/ACA box 58 [Source:HGNC Symbol;Acc:HGNC:32652]  
ENSMMUG00000024186 U1 spliceosomal RNA [Source:RFAM;Acc:RF00003]  
ENSMMUG00000024598 U6 spliceosomal RNA [Source:RFAM;Acc:RF00026]  
ENSMMUG00000026103 U1 spliceosomal RNA [Source:RFAM;Acc:RF00003]  
ENSMMUG00000029475 zinc finger and BTB domain containing 2 [Source:VGNC Symbol;Acc:VGNC:79291]  
ENSMMUG00000030099 phospholipid phosphatase 1 [Source:VGNC Symbol;Acc:VGNC:76226]  
ENSMMUG00000031821 chymotrypsin-like elastase family member 2B [Source:NCBI gene;Acc:106992406]  
ENSMMUG00000032031  
ENSMMUG00000032252 UbiA prenyltransferase domain containing 1 [Source:VGNC Symbol;Acc:VGNC:79881]  
ENSMMUG00000033738 RNA, U6atac small nuclear 6, pseudogene [Source:HGNC Symbol;Acc:HGNC:46905]  
ENSMMUG00000037485  
ENSMMUG00000037551 Metazoan signal recognition particle RNA [Source:RFAM;Acc:RF00017]  
ENSMMUG00000037625  
ENSMMUG00000037806 chromosome 6 C5orf63 homolog [Source:NCBI gene;Acc:100423212]  
ENSMMUG00000038051 uncharacterized LOC106998885 [Source:NCBI gene;Acc:106998885]  
ENSMMUG00000038070 T cell receptor alpha variable 12-3 [Source:HGNC Symbol;Acc:HGNC:12107]  
ENSMMUG00000038560 eukaryotic translation elongation factor 1 epsilon 1 [Source:NCBI gene;Acc:695426]  
ENSMMUG00000039020 zinc finger protein 141 [Source:NCBI gene;Acc:714265]  
ENSMMUG00000039944 Ras protein specific guanine nucleotide releasing factor 2 [Source:VGNC Symbol;Acc:VGNC:84486]  
ENSMMUG00000040154 T cell receptor alpha variable 9-2 [Source:HGNC Symbol;Acc:HGNC:12154]  
ENSMMUG00000040694 LCK proto-oncogene, Src family tyrosine kinase [Source:NCBI gene;Acc:717704]  
ENSMMUG00000040817 interferon regulatory factor 9 [Source:VGNC Symbol;Acc:VGNC:84361]  
ENSMMUG00000041889 ADP ribosylation factor 6 [Source:VGNC Symbol;Acc:VGNC:84306]  
ENSMMUG00000042798  
ENSMMUG00000043001 milk fat globule EGF and factor V/VIII domain containing [Source:NCBI gene;Acc:703501]  
ENSMMUG00000043161 endogenous retrovirus group FRD member 1, envelope [Source:VGNC Symbol;Acc:VGNC:81068]  
ENSMMUG00000043229 carbohydrate sulfotransferase 14 [Source:NCBI gene;Acc:703115]  
ENSMMUG00000043727 zinc finger protein 654 [Source:VGNC Symbol;Acc:VGNC:82560]  
ENSMMUG00000043922 spermatogenesis associated 48 [Source:VGNC Symbol;Acc:VGNC:81762]  
ENSMMUG00000044175 forkhead box O6 [Source:NCBI gene;Acc:697505]  
ENSMMUG00000044473  
ENSMMUG00000044628  
ENSMMUG00000044759  
ENSMMUG00000044958 adhesion G protein-coupled receptor G6 [Source:VGNC Symbol;Acc:VGNC:81009]  
ENSMMUG00000045584 leucine zipper protein 1 [Source:NCBI gene;Acc:718626]  
ENSMMUG00000045974 suppressor APC domain containing 1 [Source:VGNC Symbol;Acc:VGNC:83461]  
ENSMMUG00000046165 chromosome 3 C7orf33 homolog [Source:NCBI gene;Acc:710503]  
ENSMMUG00000046901 protein tyrosine phosphatase 4A2 [Source:NCBI gene;Acc:706489]  
ENSMMUG00000047276 GTPase, IMAP family member 6 [Source:VGNC Symbol;Acc:VGNC:81315]  
ENSMMUG00000047994 CGG triplet repeat binding protein 1 [Source:VGNC Symbol;Acc:VGNC:84203]  
ENSMMUG00000048823  
ENSMMUG00000049196 dispatched RND transporter family member 3 [Source:NCBI gene;Acc:722727]  
ENSMMUG00000049563  
ENSMMUG00000049575 T cell receptor beta variable 7-2 [Source:HGNC Symbol;Acc:HGNC:12236]  
ENSMMUG00000049749  
ENSMMUG00000049786  
ENSMMUG00000049859  
ENSMMUG00000049939  
ENSMMUG00000050239  
ENSMMUG00000050269 T cell receptor beta variable 14 [Source:HGNC Symbol;Acc:HGNC:12189]  
ENSMMUG00000050435

ENSMMUG00000050564  
ENSMMUG00000050770  
ENSMMUG00000050794 zinc finger protein 774 [Source:NCBI gene;Acc:702985]  
ENSMMUG00000050858 Metazoan signal recognition particle RNA [Source:RFAM;Acc:RF00017]  
ENSMMUG00000051020 zinc finger protein 467 [Source:NCBI gene;Acc:712106]  
ENSMMUG00000051032 serine protease 2 [Source:NCBI gene;Acc:698352]  
ENSMMUG00000051107  
ENSMMUG00000051155 U2 spliceosomal RNA [Source:RFAM;Acc:RF00004]  
ENSMMUG00000051169  
ENSMMUG00000051271  
ENSMMUG00000051296 paired like homeobox 2B [Source:NCBI gene;Acc:701940]  
ENSMMUG00000051354  
ENSMMUG00000051381 Metazoan signal recognition particle RNA [Source:RFAM;Acc:RF00017]  
ENSMMUG00000051429  
ENSMMUG00000051446  
ENSMMUG00000051522 Metazoan signal recognition particle RNA [Source:RFAM;Acc:RF00017]  
ENSMMUG00000051589  
ENSMMUG00000051641  
ENSMMUG00000051661  
ENSMMUG00000051768  
ENSMMUG00000052282  
ENSMMUG00000052287  
ENSMMUG00000052382 histone H4 [Source:NCBI gene;Acc:107000818]  
ENSMMUG00000052537  
ENSMMUG00000052574  
ENSMMUG00000052609 ribosomal protein L34 [Source:NCBI gene;Acc:696636]  
ENSMMUG00000052682  
ENSMMUG00000052830  
ENSMMUG00000053036  
ENSMMUG00000053344 splA/ryanodine receptor domain and SOCS box containing 4 [Source:NCBI gene;Acc:715278]  
ENSMMUG00000053384  
ENSMMUG00000053550  
ENSMMUG00000054078 histone H3 [Source:NCBI gene;Acc:114669830]  
ENSMMUG00000054116 T cell receptor alpha variable 8-6 [Source:HGNC Symbol;Acc:HGNC:12151]  
ENSMMUG00000054302 antioxidant 1 copper chaperone [Source:NCBI gene;Acc:712464]  
ENSMMUG00000054315  
ENSMMUG00000054532  
ENSMMUG00000054590  
ENSMMUG00000054821  
ENSMMUG00000055117  
ENSMMUG00000055229  
ENSMMUG00000055244 U6 spliceosomal RNA [Source:RFAM;Acc:RF00026]  
ENSMMUG00000055271  
ENSMMUG00000055272 putative uncharacterized protein ZNRD1-AS1 [Source:NCBI gene;Acc:712069]  
ENSMMUG00000055392  
ENSMMUG00000055585  
ENSMMUG00000055759 Metazoan signal recognition particle RNA [Source:RFAM;Acc:RF00017]  
ENSMMUG00000055783  
ENSMMUG00000055809  
ENSMMUG00000055835 nuclear casein kinase and cyclin dependent kinase substrate 1 [Source:NCBI gene;Acc:697298]  
ENSMMUG00000055903 Metazoan signal recognition particle RNA [Source:RFAM;Acc:RF00017]



ENSMMUG00000056103 growth arrest and DNA damage inducible alpha [Source:NCBI gene;Acc:701054]  
ENSMMUG00000056116  
ENSMMUG00000056363  
ENSMMUG00000056369 SAP30 like [Source:NCBI gene;Acc:714400]  
ENSMMUG00000056544  
ENSMMUG00000056585  
ENSMMUG00000056687  
ENSMMUG00000056737  
ENSMMUG00000056910  
ENSMMUG00000057021 CLOCK interacting pacemaker [Source:NCBI gene;Acc:704679]  
ENSMMUG00000057062  
ENSMMUG00000057064  
ENSMMUG00000057338  
ENSMMUG00000057494 T cell receptor beta variable 7-9 [Source:HGNC Symbol;Acc:HGNC:12243]  
ENSMMUG00000057501  
ENSMMUG00000057606 GPRIN family member 3 [Source:NCBI gene;Acc:703567]  
ENSMMUG00000057697  
ENSMMUG00000057859  
ENSMMUG00000058151 chromosome 4 C6orf62 homolog [Source:NCBI gene;Acc:708218]  
ENSMMUG00000058332 testis expressed 46 [Source:NCBI gene;Acc:709002]  
ENSMMUG00000058459  
ENSMMUG00000058580 tripartite motif containing 40 [Source:NCBI gene;Acc:100427925]  
ENSMMUG00000058974  
ENSMMUG00000059019  
ENSMMUG00000059101  
ENSMMUG00000059241  
ENSMMUG00000059707 MIS18 kinetochore protein A [Source:NCBI gene;Acc:709275]  
ENSMMUG00000060503 Metazoan signal recognition particle RNA [Source:RFAM;Acc:RF00017]  
ENSMMUG00000060505  
ENSMMUG00000060527  
ENSMMUG00000060744  
ENSMMUG00000060798  
ENSMMUG00000060830  
ENSMMUG00000060893  
ENSMMUG00000061096 tubulin polymerization promoting protein [Source:NCBI gene;Acc:708834]  
ENSMMUG00000061117  
ENSMMUG00000061239  
ENSMMUG00000061796  
ENSMMUG00000061973  
ENSMMUG00000062021  
ENSMMUG00000062140  
ENSMMUG00000062443  
ENSMMUG00000062527  
ENSMMUG00000062538 adenylate cyclase type 10 [Source:NCBI gene;Acc:719662]  
ENSMMUG00000062559  
ENSMMUG00000062676  
ENSMMUG00000062861  
ENSMMUG00000062974  
ENSMMUG00000063177 StAR related lipid transfer domain containing 4 [Source:NCBI gene;Acc:706654]  
ENSMMUG00000063268  
ENSMMUG00000063354

ENSMMUG00000064202  
ENSMMUG00000064458  
ENSMMUG00000064529  
ENSMMUG00000064596 ATPase family AAA domain-containing protein 3A-like [Source:NCBI gene;Acc:114674454]  
ENSMMUG00000064626 U1 spliceosomal RNA [Source:RFAM;Acc:RF00003]  
ENSMMUG00000064719  
ENSMMUG00000064804  
ENSMMUG00000065031  
ENSMMUG00000065307  
ENSMMUG00000000117 HCK proto-oncogene, Src family tyrosine kinase [Source:VGNC Symbol;Acc:VGNC:73353]  
ENSMMUG00000000205 transmembrane protein 117 [Source:VGNC Symbol;Acc:VGNC:79488]  
ENSMMUG00000000229 transient receptor potential cation channel subfamily C member 4 associated protein [Source:VGNC Symbol;Acc:VGNC:79014]  
ENSMMUG00000000238 HECT domain E3 ubiquitin protein ligase 2 [Source:VGNC Symbol;Acc:VGNC:73246]  
ENSMMUG00000000262 beta-ureidopropionase 1 [Source:VGNC Symbol;Acc:VGNC:79029]  
ENSMMUG00000000364 translocase of outer mitochondrial membrane 22 [Source:NCBI gene;Acc:701286]  
ENSMMUG00000000388 plectin [Source:VGNC Symbol;Acc:VGNC:76173]  
ENSMMUG00000000667 zinc finger MYM-type containing 3 [Source:VGNC Symbol;Acc:VGNC:78886]  
ENSMMUG00000000669 gap junction protein beta 1 [Source:VGNC Symbol;Acc:VGNC:73059]  
ENSMMUG00000000690 catenin alpha like 1 [Source:VGNC Symbol;Acc:VGNC:71544]  
ENSMMUG00000000797 exophilin 5 [Source:VGNC Symbol;Acc:VGNC:72412]  
ENSMMUG00000000974 mutS homolog 2 [Source:VGNC Symbol;Acc:VGNC:74931]  
ENSMMUG00000001172 spermatogenesis and oogenesis specific basic helix-loop-helix 2 [Source:NCBI gene;Acc:693608]  
ENSMMUG00000001293 autophagy related 16 like 2 [Source:VGNC Symbol;Acc:VGNC:70130]  
ENSMMUG00000001294 FCH and double SH3 domains 2 [Source:VGNC Symbol;Acc:VGNC:72593]  
ENSMMUG00000001357 tetraspanin 11 [Source:VGNC Symbol;Acc:VGNC:79882]  
ENSMMUG00000001402 solute carrier family 15 member 1 [Source:VGNC Symbol;Acc:VGNC:77393]  
ENSMMUG00000001800 cullin 5 [Source:VGNC Symbol;Acc:VGNC:71570]  
ENSMMUG00000002032 exportin 7 [Source:VGNC Symbol;Acc:VGNC:78946]  
ENSMMUG00000002090 ATPase H+ transporting V1 subunit B1 [Source:VGNC Symbol;Acc:VGNC:70184]  
ENSMMUG00000002093 testis expressed 261 [Source:NCBI gene;Acc:703863]  
ENSMMUG00000002103 delta/notch like EGF repeat containing [Source:VGNC Symbol;Acc:VGNC:71895]  
ENSMMUG00000002113 NHL repeat containing 3 [Source:VGNC Symbol;Acc:VGNC:75291]  
ENSMMUG00000002183 oxysterol binding protein like 6 [Source:VGNC Symbol;Acc:VGNC:75627]  
ENSMMUG00000002231 transmembrane protein 87B [Source:VGNC Symbol;Acc:VGNC:79557]  
ENSMMUG00000002250 beta-1,3-glucuronyltransferase 1 [Source:VGNC Symbol;Acc:VGNC:70207]  
ENSMMUG00000002370 integrin subunit alpha 6 [Source:VGNC Symbol;Acc:VGNC:73780]  
ENSMMUG00000002520 solute carrier family 4 member 3 [Source:VGNC Symbol;Acc:VGNC:77604]  
ENSMMUG00000002549 trehalase [Source:NCBI gene;Acc:706449]  
ENSMMUG00000002657 olfactomedin 4 [Source:VGNC Symbol;Acc:VGNC:75418]  
ENSMMUG00000002678 integrin subunit beta 6 [Source:VGNC Symbol;Acc:VGNC:73789]  
ENSMMUG00000002809 unc-80 homolog, NALCN channel complex subunit [Source:NCBI gene;Acc:713007]  
ENSMMUG00000003049 testis expressed 11 [Source:VGNC Symbol;Acc:VGNC:78316]  
ENSMMUG00000003221 DENN domain containing 5B [Source:VGNC Symbol;Acc:VGNC:71772]  
ENSMMUG00000003238 pregnancy zone protein [Source:NCBI gene;Acc:100430319]  
ENSMMUG00000003260  
ENSMMUG00000003261 BAF chromatin remodeling complex subunit BCL11B [Source:VGNC Symbol;Acc:VGNC:70056]  
ENSMMUG00000003877 KAT8 regulatory NSL complex subunit 2 [Source:VGNC Symbol;Acc:VGNC:73910]  
ENSMMUG00000003946 ADP-ribosyltransferase 5 [Source:VGNC Symbol;Acc:VGNC:69890]  
ENSMMUG00000003973 autophagy related 2A [Source:VGNC Symbol;Acc:VGNC:70145]  
ENSMMUG00000004157 nuclear protein, coactivator of histone transcription [Source:VGNC Symbol;Acc:VGNC:75379]  
ENSMMUG00000004178 NADPH oxidase 1 [Source:VGNC Symbol;Acc:VGNC:75374]

ENSMMUG00000004208 serine dehydratase [Source:VGNC Symbol;Acc:VGNC:77148]  
ENSMMUG00000004215 LRAT domain containing 1 [Source:VGNC Symbol;Acc:VGNC:74321]  
ENSMMUG00000004233 leucine rich repeats and immunoglobulin like domains 3 [Source:NCBI gene;Acc:716344]  
ENSMMUG00000004386 sperm associated antigen 1 [Source:VGNC Symbol;Acc:VGNC:77849]  
ENSMMUG00000004387 ring finger protein 19A, RBR E3 ubiquitin protein ligase [Source:VGNC Symbol;Acc:VGNC:82224]  
ENSMMUG00000004493 propionyl-CoA carboxylase subunit alpha [Source:VGNC Symbol;Acc:VGNC:75773]  
ENSMMUG00000004675 smoothelin [Source:VGNC Symbol;Acc:VGNC:77661]  
ENSMMUG00000004791 pleckstrin homology domain containing B1 [Source:VGNC Symbol;Acc:VGNC:76069]  
ENSMMUG00000004821 membrane spanning 4-domains A14 [Source:NCBI gene;Acc:697083]  
ENSMMUG00000004974 tripartite motif containing 21 [Source:VGNC Symbol;Acc:VGNC:78556]  
ENSMMUG00000005042 RAB, member RAS oncogene family like 6 [Source:VGNC Symbol;Acc:VGNC:76529]  
ENSMMUG00000005067 elongator acetyltransferase complex subunit 3 [Source:VGNC Symbol;Acc:VGNC:72080]  
ENSMMUG00000005119 histocompatibility minor 13 [Source:VGNC Symbol;Acc:VGNC:81418]  
ENSMMUG00000005170 unc-45 myosin chaperone B [Source:VGNC Symbol;Acc:VGNC:78954]  
ENSMMUG00000005200 PC-esterase domain containing 1A [Source:VGNC Symbol;Acc:VGNC:75622]  
ENSMMUG00000005204 VPS16 core subunit of CORVET and HOPS complexes [Source:VGNC Symbol;Acc:VGNC:78966]  
ENSMMUG00000005246 zinc finger protein 740 [Source:VGNC Symbol;Acc:VGNC:79665]  
ENSMMUG00000005295 parathyroid hormone 2 receptor [Source:VGNC Symbol;Acc:VGNC:76592]  
ENSMMUG00000005301 ATP binding cassette subfamily B member 9 [Source:VGNC Symbol;Acc:VGNC:81341]  
ENSMMUG00000005572 arachidonate 5-lipoxygenase activating protein [Source:VGNC Symbol;Acc:VGNC:69799]  
ENSMMUG00000005610 protein tyrosine phosphatase non-receptor type 4 [Source:VGNC Symbol;Acc:VGNC:76605]  
ENSMMUG00000005851 B-box and SPRY domain containing [Source:VGNC Symbol;Acc:VGNC:70342]  
ENSMMUG00000005900 GID complex subunit 4 homolog [Source:NCBI gene;Acc:699842]  
ENSMMUG00000006048 adaptor related protein complex 2 subunit beta 1 [Source:VGNC Symbol;Acc:VGNC:69964]  
ENSMMUG00000006197 plasminogen receptor with a C-terminal lysine [Source:VGNC Symbol;Acc:VGNC:76098]  
ENSMMUG00000006215 serine/threonine kinase 39 [Source:VGNC Symbol;Acc:VGNC:81587]  
ENSMMUG00000006493 ras related dexamethasone induced 1 [Source:VGNC Symbol;Acc:VGNC:76485]  
ENSMMUG00000006731 CECR2 histone acetyl-lysine reader [Source:VGNC Symbol;Acc:VGNC:84530]  
ENSMMUG00000006775 proenkephalin [Source:VGNC Symbol;Acc:VGNC:75941]  
ENSMMUG00000007001 protein phosphatase 4 regulatory subunit 3B [Source:VGNC Symbol;Acc:VGNC:76342]  
ENSMMUG00000007003 polyribonucleotide nucleotidyltransferase 1 [Source:VGNC Symbol;Acc:VGNC:76095]  
ENSMMUG00000007085 zinc finger and BTB domain containing 16 [Source:VGNC Symbol;Acc:VGNC:78845]  
ENSMMUG00000007187 haloacid dehalogenase like hydrolase domain containing 3 [Source:VGNC Symbol;Acc:VGNC:73250]  
ENSMMUG00000007215 X-box binding protein 1 [Source:VGNC Symbol;Acc:VGNC:78806]  
ENSMMUG00000007313 histone acetyltransferase 1 [Source:VGNC Symbol;Acc:VGNC:73349]  
ENSMMUG00000007325 Xrcc1 N-terminal domain containing 1 [Source:NCBI gene;Acc:115945140]  
ENSMMUG00000007326 ring finger protein 121 [Source:VGNC Symbol;Acc:VGNC:76788]  
ENSMMUG00000007330 nuclear mitotic apparatus protein 1 [Source:VGNC Symbol;Acc:VGNC:75556]  
ENSMMUG00000007411 integrin alpha FG-GAP repeat containing 2 [Source:VGNC Symbol;Acc:VGNC:73690]  
ENSMMUG00000007424 nuclear receptor interacting protein 2 [Source:VGNC Symbol;Acc:VGNC:75448]  
ENSMMUG00000007620 transmembrane serine protease 4 [Source:VGNC Symbol;Acc:VGNC:78577]  
ENSMMUG00000007628 cell adhesion associated, oncogene regulated [Source:VGNC Symbol;Acc:VGNC:70961]  
ENSMMUG00000007709 crooked neck pre-mRNA splicing factor 1 [Source:VGNC Symbol;Acc:VGNC:71412]  
ENSMMUG00000007742 potassium voltage-gated channel subfamily Q member 1 [Source:VGNC Symbol;Acc:VGNC:82168]  
ENSMMUG00000007751 solute carrier family 22 member 18 [Source:NCBI gene;Acc:721230]  
ENSMMUG00000007775 survival motor neuron domain containing 1 [Source:NCBI gene;Acc:694761]  
ENSMMUG00000007868 AP2 associated kinase 1 [Source:VGNC Symbol;Acc:VGNC:82094]  
ENSMMUG00000008113 pleckstrin homology domain containing M3 [Source:NCBI gene;Acc:711125]  
ENSMMUG00000008643 general transcription factor IIIC subunit 3 [Source:VGNC Symbol;Acc:VGNC:73317]  
ENSMMUG00000008827 apoptosis inhibitor 5 [Source:NCBI gene;Acc:716346]  
ENSMMUG00000009038 titin [Source:NCBI gene;Acc:703527]

ENSMMUG00000009155 SIN3-HDAC complex associated factor [Source:NCBI gene;Acc:694162]  
ENSMMUG00000009303 coiled-coil domain containing 38 [Source:VGNC Symbol;Acc:VGNC:70880]  
ENSMMUG00000009493 family with sequence similarity 120A [Source:NCBI gene;Acc:717459]  
ENSMMUG00000009519 WASH complex subunit 4 [Source:VGNC Symbol;Acc:VGNC:79783]  
ENSMMUG00000009524 adaptor protein, phosphotyrosine interacting with PH domain and leucine zipper 2 [Source:VGNC Symbol;Acc:VGNC:69861]  
ENSMMUG00000009695 BTB domain containing 10 [Source:VGNC Symbol;Acc:VGNC:70361]  
ENSMMUG00000009775 caveolae associated protein 4 [Source:NCBI gene;Acc:714379]  
ENSMMUG00000009782 C-C motif chemokine ligand 7 [Source:NCBI gene;Acc:714751]  
ENSMMUG00000009831 TBC1 domain family member 2 [Source:VGNC Symbol;Acc:VGNC:78157]  
ENSMMUG00000009958 ankyrin repeat domain 46 [Source:VGNC Symbol;Acc:VGNC:69719]  
ENSMMUG00000009965 chromosome 15 C9orf50 homolog [Source:VGNC Symbol;Acc:VGNC:70365]  
ENSMMUG00000010114 Ras and Rab interactor 2 [Source:VGNC Symbol;Acc:VGNC:76770]  
ENSMMUG00000010453 folate receptor beta [Source:VGNC Symbol;Acc:VGNC:72690]  
ENSMMUG00000010508 carbamoyl-phosphate synthase 1 [Source:VGNC Symbol;Acc:VGNC:71471]  
ENSMMUG00000010543 PHD finger protein 23 [Source:VGNC Symbol;Acc:VGNC:75877]  
ENSMMUG00000010596 6-phosphofructo-2-kinase/fructose-2,6-biphosphatase 3 [Source:VGNC Symbol;Acc:VGNC:75959]  
ENSMMUG00000010627 apelin receptor [Source:VGNC Symbol;Acc:VGNC:69939]  
ENSMMUG00000010819 fibroblast growth factor receptor substrate 2 [Source:VGNC Symbol;Acc:VGNC:72732]  
ENSMMUG00000010820 chaperonin containing TCP1 subunit 2 [Source:VGNC Symbol;Acc:VGNC:70745]  
ENSMMUG00000011116 NADPH oxidase 4 [Source:VGNC Symbol;Acc:VGNC:75376]  
ENSMMUG00000011183 olfactomedin like 2A [Source:VGNC Symbol;Acc:VGNC:75472]  
ENSMMUG00000011401 amyloid beta precursor protein binding family A member 1 [Source:VGNC Symbol;Acc:VGNC:69976]  
ENSMMUG00000011712 olfactory receptor 5B21 [Source:NCBI gene;Acc:702145]  
ENSMMUG00000011821 phosphatidylinositol transfer protein membrane associated 1 [Source:VGNC Symbol;Acc:VGNC:76007]  
ENSMMUG00000012029 sulfatase 2 [Source:VGNC Symbol;Acc:VGNC:78179]  
ENSMMUG00000012056 structural maintenance of chromosomes 6 [Source:VGNC Symbol;Acc:VGNC:77746]  
ENSMMUG00000012058 GEN1 Holliday junction 5' flap endonuclease [Source:VGNC Symbol;Acc:VGNC:72790]  
ENSMMUG00000012101 synaptogyrin 1 [Source:VGNC Symbol;Acc:VGNC:78068]  
ENSMMUG00000012191 coiled-coil domain containing 153 [Source:NCBI gene;Acc:704216]  
ENSMMUG00000012332 UBA domain containing 2 [Source:NCBI gene;Acc:703484]  
ENSMMUG00000012467 family with sequence similarity 227 member A [Source:VGNC Symbol;Acc:VGNC:72475]  
ENSMMUG00000012775 nuclear receptor subfamily 0 group B member 1 [Source:NCBI gene;Acc:574154]  
ENSMMUG00000012778 rabphilin 3A [Source:VGNC Symbol;Acc:VGNC:77033]  
ENSMMUG00000012819 pyruvate dehydrogenase kinase 3 [Source:VGNC Symbol;Acc:VGNC:75934]  
ENSMMUG00000012953 stress induced phosphoprotein 1 [Source:NCBI gene;Acc:717926]  
ENSMMUG00000013029 surfactant protein C [Source:VGNC Symbol;Acc:VGNC:84113]  
ENSMMUG00000013032 phytanoyl-CoA 2-hydroxylase interacting protein [Source:VGNC Symbol;Acc:VGNC:75812]  
ENSMMUG00000013035 teashirt zinc finger homeobox 2 [Source:VGNC Symbol;Acc:VGNC:78875]  
ENSMMUG00000013093 uncharacterized LOC106993385 [Source:NCBI gene;Acc:106993385]  
ENSMMUG00000013094 lipoyl(octanoyl) transferase 2 [Source:NCBI gene;Acc:718425]  
ENSMMUG00000013138 Rho guanine nucleotide exchange factor 7 [Source:VGNC Symbol;Acc:VGNC:69833]  
ENSMMUG00000013220 cytochrome b-245 beta chain [Source:VGNC Symbol;Acc:VGNC:71576]  
ENSMMUG00000013345 folliculin [Source:NCBI gene;Acc:698082]  
ENSMMUG00000013501 CD68 molecule [Source:VGNC Symbol;Acc:VGNC:82121]  
ENSMMUG00000013503 mannose-P-dolichol utilization defect 1 [Source:VGNC Symbol;Acc:VGNC:74913]  
ENSMMUG00000013552 scribble planar cell polarity protein [Source:HGNC Symbol;Acc:HGNC:30377]  
ENSMMUG00000013643 zinc finger CCHC-type containing 8 [Source:VGNC Symbol;Acc:VGNC:79487]  
ENSMMUG00000013742 regulator of G protein signaling 22 [Source:VGNC Symbol;Acc:VGNC:82221]  
ENSMMUG00000013777 DDHD domain containing 2 [Source:VGNC Symbol;Acc:VGNC:83992]  
ENSMMUG00000013799 ATP binding cassette subfamily G member 4 [Source:VGNC Symbol;Acc:VGNC:69390]  
ENSMMUG00000014001 protein phosphatase 2 scaffold subunit A beta [Source:VGNC Symbol;Acc:VGNC:76375]

ENSMMUG00000014027 nitric oxide synthase 1 [Source:VGNC Symbol;Acc:VGNC:75368]  
ENSMMUG00000014299 chromosome 12 C2orf80 homolog [Source:VGNC Symbol;Acc:VGNC:70459]  
ENSMMUG00000014314 ankyrin and armadillo repeat containing [Source:VGNC Symbol;Acc:VGNC:69706]  
ENSMMUG00000014394 DnaJ heat shock protein family (Hsp40) member C10 [Source:VGNC Symbol;Acc:VGNC:84229]  
ENSMMUG00000014484 zinc finger protein 641 [Source:NCBI gene;Acc:708246]  
ENSMMUG00000014531 transmembrane protein 109 [Source:VGNC Symbol;Acc:VGNC:79740]  
ENSMMUG00000014610 ring finger protein 17 [Source:NCBI gene;Acc:708198]  
ENSMMUG00000014672 mitogen-activated protein kinase kinase kinase 20 [Source:NCBI gene;Acc:698274]  
ENSMMUG00000014810 short chain dehydrogenase/reductase family 16C member 5 [Source:VGNC Symbol;Acc:VGNC:77343]  
ENSMMUG00000014980 keratin 76 [Source:VGNC Symbol;Acc:VGNC:74112]  
ENSMMUG00000015117 X-prolyl aminopeptidase 1 [Source:VGNC Symbol;Acc:VGNC:78810]  
ENSMMUG00000015141 ankyrin repeat domain 16 [Source:NCBI gene;Acc:720787]  
ENSMMUG00000015143 F-box DNA helicase 1 [Source:NCBI gene;Acc:720797]  
ENSMMUG00000015151 interleukin 2 receptor subunit alpha [Source:NCBI gene;Acc:574300]  
ENSMMUG00000015189 RAD51 associated protein 1 [Source:VGNC Symbol;Acc:VGNC:76497]  
ENSMMUG00000015238 O-linked N-acetylglucosamine (GlcNAc) transferase [Source:NCBI gene;Acc:698268]  
ENSMMUG00000015279 SWI/SNF related, matrix associated, actin dependent regulator of chromatin, subfamily a, member 2 [Source:VGNC Symbol;Acc:VGNC:77647]  
ENSMMUG00000015414 family with sequence similarity 160 member B1 [Source:VGNC Symbol;Acc:VGNC:72403]  
ENSMMUG00000015522 GRAM domain containing 1B [Source:VGNC Symbol;Acc:VGNC:73028]  
ENSMMUG00000015540 BTB domain containing 11 [Source:VGNC Symbol;Acc:VGNC:70367]  
ENSMMUG00000015550 PR/SET domain 4 [Source:VGNC Symbol;Acc:VGNC:76393]  
ENSMMUG00000015619 ATP binding cassette subfamily B member 7 [Source:VGNC Symbol;Acc:VGNC:81340]  
ENSMMUG00000015923 ankyrin repeat and EF-hand domain containing 1 [Source:VGNC Symbol;Acc:VGNC:69615]  
ENSMMUG00000015962 AT-rich interaction domain 2 [Source:VGNC Symbol;Acc:VGNC:69858]  
ENSMMUG00000015970 coiled-coil domain containing 150 [Source:VGNC Symbol;Acc:VGNC:84222]  
ENSMMUG00000016052 seizure related 6 homolog like [Source:VGNC Symbol;Acc:VGNC:77176]  
ENSMMUG00000016077 isocitrate dehydrogenase (NADP(+)) 1 [Source:NCBI gene;Acc:710019]  
ENSMMUG00000016262 tetratricopeptide repeat domain 38 [Source:VGNC Symbol;Acc:VGNC:79574]  
ENSMMUG00000016313 RUN and SH3 domain containing 2 [Source:VGNC Symbol;Acc:VGNC:82230]  
ENSMMUG00000016314 family with sequence similarity 166 member B [Source:VGNC Symbol;Acc:VGNC:72421]  
ENSMMUG00000016316 testis associated actin remodelling kinase 1 [Source:VGNC Symbol;Acc:VGNC:78314]  
ENSMMUG00000016331 glucosylceramidase beta 2 [Source:VGNC Symbol;Acc:VGNC:72741]  
ENSMMUG00000016610 CD99 molecule like 2 [Source:VGNC Symbol;Acc:VGNC:70823]  
ENSMMUG00000016723 zinc finger protein 287 [Source:NCBI gene;Acc:695524]  
ENSMMUG00000016791 doublecortin like kinase 1 [Source:VGNC Symbol;Acc:VGNC:71745]  
ENSMMUG00000016845 zinc finger E-box binding homeobox 2 [Source:VGNC Symbol;Acc:VGNC:78969]  
ENSMMUG00000016871 alkaline phosphatase, intestinal [Source:VGNC Symbol;Acc:VGNC:69800]  
ENSMMUG00000016927 solute carrier family 2 member 10 [Source:VGNC Symbol;Acc:VGNC:77465]  
ENSMMUG00000016983 acrosin binding protein [Source:VGNC Symbol;Acc:VGNC:69445]  
ENSMMUG00000017173 heat shock protein family A (Hsp70) member 14 [Source:NCBI gene;Acc:697257]  
ENSMMUG00000017204 programmed cell death 4 [Source:VGNC Symbol;Acc:VGNC:75794]  
ENSMMUG00000017206 SHOC2 leucine rich repeat scaffold protein [Source:VGNC Symbol;Acc:VGNC:81569]  
ENSMMUG00000017210 sarcosine dehydrogenase [Source:VGNC Symbol;Acc:VGNC:76971]  
ENSMMUG00000017230 V-set and transmembrane domain containing 2 like [Source:NCBI gene;Acc:707394]  
ENSMMUG00000017355 remodeling and spacing factor 1 [Source:VGNC Symbol;Acc:VGNC:77044]  
ENSMMUG00000017524 phosphoinositide kinase, FYVE-type zinc finger containing [Source:VGNC Symbol;Acc:VGNC:75854]  
ENSMMUG00000017892 RNA polymerase I subunit E [Source:VGNC Symbol;Acc:VGNC:76047]  
ENSMMUG00000017931 gamma-glutamyltransferase 7 [Source:VGNC Symbol;Acc:VGNC:72921]  
ENSMMUG00000017932 acyl-CoA synthetase short chain family member 2 [Source:VGNC Symbol;Acc:VGNC:69410]  
ENSMMUG00000018358 zinc finger protein 217 [Source:VGNC Symbol;Acc:VGNC:78874]  
ENSMMUG00000018474 signal regulatory protein alpha [Source:NCBI gene;Acc:717811]

ENSMMUG00000018679 glycerdehyde-3-phosphate dehydrogenase [Source:NCBI gene;Acc:574353]  
ENSMMUG00000019145 TNF alpha induced protein 1 [Source:VGNC Symbol;Acc:VGNC:78578]  
ENSMMUG00000019148 vitronectin [Source:NCBI gene;Acc:708499]  
ENSMMUG00000019639 paired box 5 [Source:VGNC Symbol;Acc:VGNC:75764]  
ENSMMUG00000019831 neurobeachin [Source:NCBI gene;Acc:714386]  
ENSMMUG00000019850 arachidonate lipoxygenase 3 [Source:VGNC Symbol;Acc:VGNC:69607]  
ENSMMUG00000020202 melanoma-associated antigen D4 [Source:NCBI gene;Acc:106996411]  
ENSMMUG00000020211 cyclin Y like 1 [Source:VGNC Symbol;Acc:VGNC:84224]  
ENSMMUG00000020370 SRY-box transcription factor 5 [Source:VGNC Symbol;Acc:VGNC:77843]  
ENSMMUG00000020533 chromosome 11 C12orf56 homolog [Source:VGNC Symbol;Acc:VGNC:70409]  
ENSMMUG00000020706 ETS proto-oncogene 1, transcription factor [Source:VGNC Symbol;Acc:VGNC:72439]  
ENSMMUG00000020792 Rap guanine nucleotide exchange factor 4 [Source:VGNC Symbol;Acc:VGNC:76490]  
ENSMMUG00000020812 A-kinase anchoring protein 3 [Source:VGNC Symbol;Acc:VGNC:69769]  
ENSMMUG00000020926 syntaxin 2 [Source:VGNC Symbol;Acc:VGNC:78259]  
ENSMMUG00000020993 cadherin EGF LAG seven-pass G-type receptor 1 [Source:NCBI gene;Acc:718440]  
ENSMMUG00000021083 Josephin domain containing 1 [Source:VGNC Symbol;Acc:VGNC:73920]  
ENSMMUG00000021091 COP9 signalosome subunit 3 [Source:VGNC Symbol;Acc:VGNC:71316]  
ENSMMUG00000021097 sushi domain containing 1 [Source:VGNC Symbol;Acc:VGNC:78207]  
ENSMMUG00000021114 G protein-coupled receptor 182 [Source:VGNC Symbol;Acc:VGNC:72936]  
ENSMMUG00000021197 TBC1 domain family member 4 [Source:VGNC Symbol;Acc:VGNC:78166]  
ENSMMUG00000021280 leucine rich transmembrane and O-methyltransferase domain containing [Source:NCBI gene;Acc:718286]  
ENSMMUG00000021282 late endosomal/lysosomal adaptor, MAPK and MTOR activator 1 [Source:VGNC Symbol;Acc:VGNC:74129]  
ENSMMUG00000021291 thymine DNA glycosylase [Source:VGNC Symbol;Acc:VGNC:78297]  
ENSMMUG00000021331 EBF family member 4 [Source:VGNC Symbol;Acc:VGNC:71932]  
ENSMMUG00000021370 kringle containing transmembrane protein 1 [Source:VGNC Symbol;Acc:VGNC:74066]  
ENSMMUG00000021393 calcium/calmodulin dependent protein kinase II gamma [Source:VGNC Symbol;Acc:VGNC:70525]  
ENSMMUG00000021409 developmentally regulated GTP binding protein 2 [Source:VGNC Symbol;Acc:VGNC:71993]  
ENSMMUG00000021459 MYC binding protein 2 [Source:VGNC Symbol;Acc:VGNC:75011]  
ENSMMUG00000021670 solute carrier family 52 member 3 [Source:VGNC Symbol;Acc:VGNC:77717]  
ENSMMUG00000021691 spastin [Source:VGNC Symbol;Acc:VGNC:77857]  
ENSMMUG00000021775 beta-1,3-galactosyltransferase 1 [Source:VGNC Symbol;Acc:VGNC:70204]  
ENSMMUG00000021782 LDL receptor related protein 1 [Source:VGNC Symbol;Acc:VGNC:74442]  
ENSMMUG00000021878 timeless circadian regulator [Source:VGNC Symbol;Acc:VGNC:78356]  
ENSMMUG00000022185 odd-skipped related transcription factor 2 [Source:VGNC Symbol;Acc:VGNC:84097]  
ENSMMUG00000022202 basic leucine zipper and W2 domains 1 [Source:VGNC Symbol;Acc:VGNC:84213]  
ENSMMUG00000022278 mitochondrial transcription termination factor 2 [Source:VGNC Symbol;Acc:VGNC:74868]  
ENSMMUG00000022589 prostate transmembrane protein, androgen induced 1 [Source:VGNC Symbol;Acc:VGNC:76023]  
ENSMMUG00000022601 cAMP responsive element binding protein 1 [Source:VGNC Symbol;Acc:VGNC:71485]  
ENSMMUG00000022602 methyltransferase like 21A [Source:VGNC Symbol;Acc:VGNC:74625]  
ENSMMUG00000022676 ribosomal modification protein rimK like family member B [Source:NCBI gene;Acc:722261]  
ENSMMUG00000022865 junctophilin 2 [Source:NCBI gene;Acc:694158]  
ENSMMUG00000022944 zinc finger and BTB domain containing 44 [Source:VGNC Symbol;Acc:VGNC:79466]  
ENSMMUG00000023076 diacylglycerol kinase eta [Source:VGNC Symbol;Acc:VGNC:71786]  
ENSMMUG00000023248 serine/threonine kinase 38 like [Source:VGNC Symbol;Acc:VGNC:78156]  
ENSMMUG00000023443 SRR1 domain containing [Source:VGNC Symbol;Acc:VGNC:78036]  
ENSMMUG00000023446 tuftelin interacting protein 11 [Source:VGNC Symbol;Acc:VGNC:78399]  
ENSMMUG00000023450 tyrosylprotein sulfotransferase 2 [Source:VGNC Symbol;Acc:VGNC:78639]  
ENSMMUG00000023752 SIX homeobox 2 [Source:VGNC Symbol;Acc:VGNC:81570]  
ENSMMUG00000023791 SR-related CTD associated factor 11 [Source:VGNC Symbol;Acc:VGNC:77002]  
ENSMMUG00000025616  
ENSMMUG00000026432 small nucleolar RNA, C/D box 7 [Source:HGNC Symbol;Acc:HGNC:32704]



ENSMMUG00000028701  
ENSMMUG00000029197 YY1 transcription factor [Source:NCBI gene;Acc:717370]  
ENSMMUG00000030381 arachidonate 15-lipoxygenase [Source:VGNC Symbol;Acc:VGNC:69796]  
ENSMMUG00000031000 Rho GTPase activating protein 8 [Source:NCBI gene;Acc:716745]  
ENSMMUG00000031121 solute carrier family 25 member 18 [Source:VGNC Symbol;Acc:VGNC:77434]  
ENSMMUG00000031736  
ENSMMUG00000031965 aminolevulinate dehydratase [Source:VGNC Symbol;Acc:VGNC:69779]  
ENSMMUG00000032427 neuroligin 3 [Source:NCBI gene;Acc:574216]  
ENSMMUG00000032892 U6 spliceosomal RNA [Source:RFAM;Acc:RF00026]  
ENSMMUG00000037675 testis expressed 52 [Source:NCBI gene;Acc:107000723]  
ENSMMUG00000038569 5',3'-nucleotidase, mitochondrial [Source:NCBI gene;Acc:698591]  
ENSMMUG00000038587 prostate and testis expressed 2 [Source:NCBI gene;Acc:717085]  
ENSMMUG00000038661  
ENSMMUG00000039300  
ENSMMUG00000040958 lysozyme-like protein 1 [Source:NCBI gene;Acc:698176]  
ENSMMUG00000041067 Metazoan signal recognition particle RNA [Source:RFAM;Acc:RF00017]  
ENSMMUG00000041301 TNF superfamily member 8 [Source:NCBI gene;Acc:702944]  
ENSMMUG00000042208 pepsin A-4 [Source:NCBI gene;Acc:694646]  
ENSMMUG00000042668 cilia and flagella associated protein 61 [Source:NCBI gene;Acc:699814]  
ENSMMUG00000043096 nuclear transcription factor, X-box binding 1 [Source:NCBI gene;Acc:702945]  
ENSMMUG00000043411 zinc finger and BTB domain containing 39 [Source:NCBI gene;Acc:713914]  
ENSMMUG00000043682 mitochondrial carrier 2 [Source:NCBI gene;Acc:712767]  
ENSMMUG00000044047 killer cell lectin like receptor B1 [Source:NCBI gene;Acc:100430783]  
ENSMMUG00000044214  
ENSMMUG00000044537 DNA polymerase epsilon 3, accessory subunit [Source:NCBI gene;Acc:705074]  
ENSMMUG00000044782  
ENSMMUG00000045105 phospholipase A and acyltransferase 4 [Source:NCBI gene;Acc:722189]  
ENSMMUG00000046218 X antigen family member 5 [Source:NCBI gene;Acc:114669729]  
ENSMMUG00000046282  
ENSMMUG00000046464 coiled-coil-helix-coiled-coil-helix domain containing 7 [Source:VGNC Symbol;Acc:VGNC:83989]  
ENSMMUG00000046655 pleckstrin homology like domain family B member 1 [Source:NCBI gene;Acc:706336]  
ENSMMUG00000048322 eva-1 homolog A, regulator of programmed cell death [Source:NCBI gene;Acc:710843]  
ENSMMUG00000048513 tudor domain containing 15 [Source:NCBI gene;Acc:703066]  
ENSMMUG00000049117 CLLU1 antisense RNA 1 [Source:NCBI gene;Acc:100424000]  
ENSMMUG00000049351 MAGE family member E1 [Source:NCBI gene;Acc:705379]  
ENSMMUG00000049437 Metazoan signal recognition particle RNA [Source:RFAM;Acc:RF00017]  
ENSMMUG00000049539  
ENSMMUG00000049682 Metazoan signal recognition particle RNA [Source:RFAM;Acc:RF00017]  
ENSMMUG00000049788  
ENSMMUG00000049842  
ENSMMUG00000050015 Metazoan signal recognition particle RNA [Source:RFAM;Acc:RF00017]  
ENSMMUG00000050245  
ENSMMUG00000050862  
ENSMMUG00000050864  
ENSMMUG00000050952  
ENSMMUG00000050975  
ENSMMUG00000051001  
ENSMMUG00000051088  
ENSMMUG00000051112 p53 and DNA damage regulated 1 [Source:NCBI gene;Acc:712622]  
ENSMMUG00000051162  
ENSMMUG00000051366

ENSMMUG00000051482  
ENSMMUG00000051552  
ENSMMUG00000051670  
ENSMMUG00000051936  
ENSMMUG00000051999  
ENSMMUG00000052030 developing brain homeobox 2 [Source:NCBI gene;Acc:701170]  
ENSMMUG00000052372  
ENSMMUG00000052460  
ENSMMUG00000052518 SIVA1 apoptosis inducing factor [Source:NCBI gene;Acc:706688]  
ENSMMUG00000052526 RAB39A, member RAS oncogene family [Source:NCBI gene;Acc:707451]  
ENSMMUG00000052535  
ENSMMUG00000052642 protein O-glucosyltransferase 2 [Source:NCBI gene;Acc:702156]  
ENSMMUG00000052668  
ENSMMUG00000052676  
ENSMMUG00000052791  
ENSMMUG00000052817 Sp7 transcription factor [Source:NCBI gene;Acc:702575]  
ENSMMUG00000052929  
ENSMMUG00000053577  
ENSMMUG00000053648 actin binding transcription modulator [Source:NCBI gene;Acc:710486]  
ENSMMUG00000053657  
ENSMMUG00000053721  
ENSMMUG00000054020 U6 spliceosomal RNA [Source:RFAM;Acc:RF00026]  
ENSMMUG00000054176 methyltransferase like 8 [Source:NCBI gene;Acc:695361]  
ENSMMUG00000054210 C-C motif chemokine 4 [Source:NCBI gene;Acc:100426632]  
ENSMMUG00000054213 parathyroid hormone [Source:NCBI gene;Acc:700195]  
ENSMMUG00000054462  
ENSMMUG00000054655 immunoglobulin lambda variable 3-10 [Source:HGNC Symbol;Acc:HGNC:5897]  
ENSMMUG00000054711  
ENSMMUG00000054817 immunoglobulin binding protein 1 [Source:NCBI gene;Acc:694632]  
ENSMMUG00000054953 leucine rich repeat containing 10 [Source:NCBI gene;Acc:114669753]  
ENSMMUG00000055161  
ENSMMUG00000055207  
ENSMMUG00000055226 DNA damage inducible transcript 4 [Source:NCBI gene;Acc:715307]  
ENSMMUG00000055344 TLC domain containing 3A [Source:NCBI gene;Acc:699707]  
ENSMMUG00000055365  
ENSMMUG00000055400 U6 spliceosomal RNA [Source:RFAM;Acc:RF00026]  
ENSMMUG00000055447 MDM2 proto-oncogene [Source:NCBI gene;Acc:718284]  
ENSMMUG00000055477  
ENSMMUG00000055560  
ENSMMUG00000055610 homeobox C4 [Source:NCBI gene;Acc:100430434]  
ENSMMUG00000055845 ankyrin repeat domain 53 [Source:NCBI gene;Acc:703757]  
ENSMMUG00000055887  
ENSMMUG00000056045  
ENSMMUG00000056056  
ENSMMUG00000056303  
ENSMMUG00000056306  
ENSMMUG00000056387 transcription factor 15 [Source:NCBI gene;Acc:716916]  
ENSMMUG00000056662  
ENSMMUG00000056824  
ENSMMUG00000057031  
ENSMMUG00000057143 transmembrane protein 127 [Source:NCBI gene;Acc:705069]

ENSMMUG00000057199  
ENSMMUG00000057276  
ENSMMUG00000057302  
ENSMMUG00000057651 frizzled class receptor 5 [Source:NCBI gene;Acc:710796]  
ENSMMUG00000058240  
ENSMMUG00000058583 RRAD and GEM like GTPase 1 [Source:NCBI gene;Acc:713351]  
ENSMMUG00000058603  
ENSMMUG00000058855 aquaporin 5 [Source:NCBI gene;Acc:711804]  
ENSMMUG00000058942  
ENSMMUG00000059038 5-hydroxytryptamine receptor 7 [Source:NCBI gene;Acc:696317]  
ENSMMUG00000059115  
ENSMMUG00000059406 RGP1 homolog, RAB6A GEF complex partner 1 [Source:NCBI gene;Acc:695936]  
ENSMMUG00000059518  
ENSMMUG00000059525  
ENSMMUG00000059575  
ENSMMUG00000059728 tumor protein p53 inducible protein 11 [Source:NCBI gene;Acc:715295]  
ENSMMUG00000059824  
ENSMMUG00000059922 family with sequence similarity 104 member B [Source:NCBI gene;Acc:705418]  
ENSMMUG00000060062  
ENSMMUG00000060346  
ENSMMUG00000060579  
ENSMMUG00000060781 G protein-coupled receptor 18 [Source:NCBI gene;Acc:698714]  
ENSMMUG00000060836  
ENSMMUG00000060892  
ENSMMUG00000060932 zinc finger protein 383-like [Source:NCBI gene;Acc:106993074]  
ENSMMUG00000060971  
ENSMMUG00000061004 ubiquitin specific peptidase 26 [Source:NCBI gene;Acc:706435]  
ENSMMUG00000061068  
ENSMMUG00000061260 Spi-C transcription factor [Source:NCBI gene;Acc:695809]  
ENSMMUG00000061268 PLAG1 zinc finger [Source:NCBI gene;Acc:696149]  
ENSMMUG00000061278  
ENSMMUG00000061344  
ENSMMUG00000061408  
ENSMMUG00000061687  
ENSMMUG00000061761 interferon induced protein with tetratricopeptide repeats 2 [Source:NCBI gene;Acc:695452]  
ENSMMUG00000061774 taste 2 receptor member 10 [Source:NCBI gene;Acc:717960]  
ENSMMUG00000061779  
ENSMMUG00000061815  
ENSMMUG00000061834  
ENSMMUG00000061892  
ENSMMUG00000061986  
ENSMMUG00000062793  
ENSMMUG00000062818 regenerating islet-derived protein 3-alpha [Source:NCBI gene;Acc:716890]  
ENSMMUG00000063262  
ENSMMUG00000063345  
ENSMMUG00000063655 sodium voltage-gated channel beta subunit 4 [Source:NCBI gene;Acc:100430940]  
ENSMMUG00000063668 cytochrome b5 domain containing 1 [Source:NCBI gene;Acc:716429]  
ENSMMUG00000063703  
ENSMMUG00000063747  
ENSMMUG00000064075 ring finger protein 41 [Source:NCBI gene;Acc:711969]  
ENSMMUG00000064216

ENSMMUG00000064364 sulfite oxidase [Source:NCBI gene;Acc:711164]  
ENSMMUG00000064514 keratin, type II cuticular Hb1 [Source:NCBI gene;Acc:697511]  
ENSMMUG00000064880  
ENSMMUG00000065008  
ENSMMUG00000065018 transmembrane protein 35A [Source:NCBI gene;Acc:702205]  
ENSMMUG00000065099  
ENSMMUG00000000618 gametogenetin binding protein 2 [Source:VGNC Symbol;Acc:VGNC:72746]  
ENSMMUG00000000620 dehydrogenase/reductase 11 [Source:VGNC Symbol;Acc:VGNC:71792]  
ENSMMUG00000000717 CD3e molecule associated protein [Source:NCBI gene;Acc:714440]  
ENSMMUG00000000718 ERCC excision repair 1, endonuclease non-catalytic subunit [Source:VGNC Symbol;Acc:VGNC:72422]  
ENSMMUG00000000981 T-box transcription factor 6 [Source:VGNC Symbol;Acc:VGNC:78276]  
ENSMMUG00000000982 protein phosphatase 4 catalytic subunit [Source:VGNC Symbol;Acc:VGNC:76384]  
ENSMMUG00000000983 aldolase, fructose-bisphosphate A [Source:NCBI gene;Acc:708406]  
ENSMMUG00000001245 zinc finger protein 532 [Source:NCBI gene;Acc:701146]  
ENSMMUG00000001940 NME/NM23 nucleoside diphosphate kinase 2 [Source:NCBI gene;Acc:100533957]  
ENSMMUG00000001942 mbt domain containing 1 [Source:VGNC Symbol;Acc:VGNC:74538]  
ENSMMUG00000002742 ST8 alpha-N-acetyl-neuraminide alpha-2,8-sialyltransferase 5 [Source:VGNC Symbol;Acc:VGNC:77942]  
ENSMMUG00000002912 TLE family member 6, subcortical maternal complex member [Source:VGNC Symbol;Acc:VGNC:79879]  
ENSMMUG00000002961 G protein subunit alpha 11 [Source:VGNC Symbol;Acc:VGNC:73085]  
ENSMMUG00000003029 protein arginine methyltransferase 1 [Source:NCBI gene;Acc:719419]  
ENSMMUG00000003302 dystrobrevin alpha [Source:VGNC Symbol;Acc:VGNC:72007]  
ENSMMUG00000004760 CDK5 regulatory subunit associated protein 3 [Source:VGNC Symbol;Acc:VGNC:71015]  
ENSMMUG00000005727 protein kinase N1 [Source:VGNC Symbol;Acc:VGNC:76014]  
ENSMMUG00000005751 adenosine deaminase tRNA specific 1 [Source:VGNC Symbol;Acc:VGNC:69504]  
ENSMMUG00000005754 lysyl-tRNA synthetase 1 [Source:NCBI gene;Acc:714516]  
ENSMMUG00000005913 activating transcription factor 7 interacting protein 2 [Source:VGNC Symbol;Acc:VGNC:70103]  
ENSMMUG00000007398 potassium calcium-activated channel subfamily N member 1 [Source:VGNC Symbol;Acc:VGNC:74002]  
ENSMMUG00000007816 SMAD family member 2 [Source:VGNC Symbol;Acc:VGNC:77810]  
ENSMMUG00000007920 myosin XIX [Source:VGNC Symbol;Acc:VGNC:75026]  
ENSMMUG00000008459 pleckstrin homology and RUN domain containing M1 [Source:NCBI gene;Acc:716464]  
ENSMMUG00000008941 DNA topoisomerase II alpha [Source:VGNC Symbol;Acc:VGNC:78620]  
ENSMMUG00000008942 carnosine dipeptidase 1 [Source:VGNC Symbol;Acc:VGNC:71257]  
ENSMMUG00000011893 KIAA0513 [Source:VGNC Symbol;Acc:VGNC:73925]  
ENSMMUG00000012209 CYLD lysine 63 deubiquitinase [Source:VGNC Symbol;Acc:VGNC:71581]  
ENSMMUG00000012587 zinc finger protein 69 [Source:NCBI gene;Acc:717030]  
ENSMMUG00000013053 sperm acrosome associated 6 [Source:NCBI gene;Acc:114674203]  
ENSMMUG00000014687 sterile alpha motif domain containing 14 [Source:VGNC Symbol;Acc:VGNC:77112]  
ENSMMUG00000014735 carnitine palmitoyltransferase 1C [Source:NCBI gene;Acc:719429]  
ENSMMUG00000015702 divergent protein kinase domain 1C [Source:NCBI gene;Acc:699537]  
ENSMMUG00000015845 beta-1,4-N-acetyl-galactosaminyltransferase 2 [Source:VGNC Symbol;Acc:VGNC:70120]  
ENSMMUG00000016449 zinc finger protein 382 [Source:VGNC Symbol;Acc:VGNC:79078]  
ENSMMUG00000016526 solute carrier family 25 member 41 [Source:VGNC Symbol;Acc:VGNC:77581]  
ENSMMUG00000016665 NADH:ubiquinone oxidoreductase subunit A11 [Source:NCBI gene;Acc:697843]  
ENSMMUG00000017113 ubiquitin specific peptidase 32 [Source:NCBI gene;Acc:716857]  
ENSMMUG00000017234 leucine rich repeat containing 59 [Source:VGNC Symbol;Acc:VGNC:81436]  
ENSMMUG00000017246 lipoxxygenase homology domains 1 [Source:VGNC Symbol;Acc:VGNC:74368]  
ENSMMUG00000017379 myocardin related transcription factor B [Source:VGNC Symbol;Acc:VGNC:74865]  
ENSMMUG00000017427 ATPase Na<sup>+</sup>/K<sup>+</sup> transporting subunit alpha 3 [Source:NCBI gene;Acc:706513]  
ENSMMUG00000017615 zinc finger CCHC-type containing 14 [Source:VGNC Symbol;Acc:VGNC:79420]  
ENSMMUG00000018031 solute carrier family 25 member 19 [Source:VGNC Symbol;Acc:VGNC:77474]  
ENSMMUG00000019892 myomesin 1 [Source:VGNC Symbol;Acc:VGNC:75123]

ENSMMUG00000020061 protein phosphatase 1 regulatory subunit 9B [Source:VGNC Symbol;Acc:VGNC:76372]  
ENSMMUG00000020175 mediator complex subunit 25 [Source:VGNC Symbol;Acc:VGNC:74607]  
ENSMMUG00000020540 NmrA like redox sensor 1 [Source:VGNC Symbol;Acc:VGNC:75252]  
ENSMMUG00000020898 cap binding complex dependent translation initiation factor [Source:HGNC Symbol;Acc:HGNC:23925]  
ENSMMUG00000020905 chromosome 18 C18orf63 homolog [Source:VGNC Symbol;Acc:VGNC:70465]  
ENSMMUG00000021095 desmoglein 2 [Source:VGNC Symbol;Acc:VGNC:72002]  
ENSMMUG00000021636 SAP30 binding protein [Source:VGNC Symbol;Acc:VGNC:77142]  
ENSMMUG00000021932 Rho GTPase activating protein 27 [Source:VGNC Symbol;Acc:VGNC:69935]  
ENSMMUG00000022120 transmembrane protein 94 [Source:VGNC Symbol;Acc:VGNC:79760]  
ENSMMUG00000022121 CASK interacting protein 2 [Source:VGNC Symbol;Acc:VGNC:70577]  
ENSMMUG00000022123 tRNA splicing endonuclease subunit 54 [Source:VGNC Symbol;Acc:VGNC:79666]  
ENSMMUG00000022305 Rho guanine nucleotide exchange factor 1 [Source:VGNC Symbol;Acc:VGNC:70012]  
ENSMMUG00000022309 ETS repressor factor like [Source:NCBI gene;Acc:722195]  
ENSMMUG00000022330 sulfotransferase family, cytosolic, 1A, phenol-preferring, member 3 [Source:NCBI gene;Acc:100428398]  
ENSMMUG00000022625 periaxin [Source:VGNC Symbol;Acc:VGNC:76248]  
ENSMMUG00000022627 HLF transcription factor, PAR bZIP family member [Source:VGNC Symbol;Acc:VGNC:73478]  
ENSMMUG00000022656 perilipin 4 [Source:NCBI gene;Acc:693610]  
ENSMMUG00000022724  
ENSMMUG00000022726 dual specificity tyrosine phosphorylation regulated kinase 1B [Source:VGNC Symbol;Acc:VGNC:72016]  
ENSMMUG00000022975 sprouty related EVH1 domain containing 3 [Source:VGNC Symbol;Acc:VGNC:78030]  
ENSMMUG00000023137 zinc finger protein 350 [Source:VGNC Symbol;Acc:VGNC:79041]  
ENSMMUG00000023251 KN motif and ankyrin repeat domains 2 [Source:VGNC Symbol;Acc:VGNC:73938]  
ENSMMUG00000028925 HDGF like 2 [Source:NCBI gene;Acc:693476]  
ENSMMUG00000029164 glycerophosphodiester phosphodiesterase domain containing 3 [Source:VGNC Symbol;Acc:VGNC:72800]  
ENSMMUG00000038768 U6 spliceosomal RNA [Source:RFAM;Acc:RF00026]  
ENSMMUG00000041450 zinc finger protein 432 [Source:NCBI gene;Acc:100424341]  
ENSMMUG00000044277 ubiquitin conjugating enzyme E2 I [Source:NCBI gene;Acc:722434]  
ENSMMUG00000044729 transcription factor AP-4 [Source:NCBI gene;Acc:707513]  
ENSMMUG00000045592  
ENSMMUG00000049194  
ENSMMUG00000049948  
ENSMMUG00000049997  
ENSMMUG00000050177  
ENSMMUG00000050544  
ENSMMUG00000051115  
ENSMMUG00000051190 Metazoan signal recognition particle RNA [Source:RFAM;Acc:RF00017]  
ENSMMUG00000051261  
ENSMMUG00000052031  
ENSMMUG00000052277 transthyretin [Source:NCBI gene;Acc:705943]  
ENSMMUG00000052786  
ENSMMUG00000053008  
ENSMMUG00000053624  
ENSMMUG00000053889 olfactory receptor 7C1 [Source:NCBI gene;Acc:114674087]  
ENSMMUG00000054064  
ENSMMUG00000056147  
ENSMMUG00000056165  
ENSMMUG00000057840 leucine-rich repeat-containing protein 37A3 [Source:NCBI gene;Acc:715030]  
ENSMMUG00000058016 bMERB domain containing 1 [Source:NCBI gene;Acc:713757]  
ENSMMUG00000058142  
ENSMMUG00000058233 C-C motif chemokine 3-like [Source:NCBI gene;Acc:100426537]  
ENSMMUG00000059128

ENSMMUG00000060455  
 ENSMMUG00000060536  
 ENSMMUG00000060713 epithelial membrane protein 2 [Source:NCBI gene;Acc:710315]  
 ENSMMUG00000060993 Metazoan signal recognition particle RNA [Source:RFAM;Acc:RF00017]  
 ENSMMUG00000061572 Metazoan signal recognition particle RNA [Source:RFAM;Acc:RF00017]  
 ENSMMUG00000061594  
 ENSMMUG00000061967 carbohydrate sulfotransferase 4 [Source:NCBI gene;Acc:708116]  
 ENSMMUG00000062413 CCAAT enhancer binding protein gamma [Source:NCBI gene;Acc:704322]  
 ENSMMUG00000062791  
 ENSMMUG00000062866  
 ENSMMUG00000063586 zinc finger protein 536 [Source:NCBI gene;Acc:713142]  
 ENSMMUG00000064131  
 ENSMMUG00000064237  
 ENSMMUG00000064519  
 ENSMMUG00000064979 B9 domain containing 2 [Source:NCBI gene;Acc:704873]  
 ENSMMUG00000065117 septin 4 [Source:HGNC Symbol;Acc:HGNC:9165]  
 ENSMMUG00000065131

## Survivors – SD3 vs. Baseline

| Ensembl Gene ID    | Description                                                                                                                         |
|--------------------|-------------------------------------------------------------------------------------------------------------------------------------|
| ENSMMUG00000000009 | protein tyrosine phosphatase receptor type C [Source:VGNC Symbol;Acc:VGNC:76612]                                                    |
| ENSMMUG00000000059 | DNA topoisomerase II binding protein 1 [Source:VGNC Symbol;Acc:VGNC:79061]                                                          |
| ENSMMUG00000000065 | coiled-coil domain containing 181 [Source:VGNC Symbol;Acc:VGNC:70884]                                                               |
| ENSMMUG00000000104 | ribosomal RNA processing 1B [Source:VGNC Symbol;Acc:VGNC:77089]                                                                     |
| ENSMMUG00000000158 | minichromosome maintenance complex component 2 [Source:VGNC Symbol;Acc:VGNC:74680]                                                  |
| ENSMMUG00000000238 | HECT domain E3 ubiquitin protein ligase 2 [Source:VGNC Symbol;Acc:VGNC:73246]                                                       |
| ENSMMUG00000000388 | plectin [Source:VGNC Symbol;Acc:VGNC:76173]                                                                                         |
| ENSMMUG00000000413 | solute carrier family 7 member 7 [Source:VGNC Symbol;Acc:VGNC:77631]                                                                |
| ENSMMUG00000000974 | mutS homolog 2 [Source:VGNC Symbol;Acc:VGNC:74931]                                                                                  |
| ENSMMUG00000001212 | Rieske Fe-S domain containing [Source:VGNC Symbol;Acc:VGNC:84487]                                                                   |
| ENSMMUG00000001213 | spermatogenesis associated 9 [Source:VGNC Symbol;Acc:VGNC:77976]                                                                    |
| ENSMMUG00000001319 | methylenetetrahydrofolate dehydrogenase, cyclohydrolase and formyltetrahydrofolate synthetase 1 [Source:VGNC Symbol;Acc:VGNC:84399] |
| ENSMMUG00000001357 | tetraspanin 11 [Source:VGNC Symbol;Acc:VGNC:79882]                                                                                  |
| ENSMMUG00000001374 | supervillin [Source:NCBI gene;Acc:695267]                                                                                           |
| ENSMMUG00000001479 | laminin subunit gamma 2 [Source:VGNC Symbol;Acc:VGNC:74233]                                                                         |
| ENSMMUG00000001549 | ATPase family AAA domain-containing protein 3A-like [Source:NCBI gene;Acc:114674453]                                                |
| ENSMMUG00000001728 | mitogen-activated protein kinase 9 [Source:VGNC Symbol;Acc:VGNC:74652]                                                              |
| ENSMMUG00000001742 | transforming growth factor beta receptor 3 [Source:VGNC Symbol;Acc:VGNC:78339]                                                      |
| ENSMMUG00000001919 | clock circadian regulator [Source:VGNC Symbol;Acc:VGNC:71262]                                                                       |
| ENSMMUG00000002090 | ATPase H <sup>+</sup> transporting V1 subunit B1 [Source:VGNC Symbol;Acc:VGNC:70184]                                                |
| ENSMMUG00000002103 | delta/notch like EGF repeat containing [Source:VGNC Symbol;Acc:VGNC:71895]                                                          |
| ENSMMUG00000002121 | armadillo like helical domain containing 4 [Source:VGNC Symbol;Acc:VGNC:82106]                                                      |
| ENSMMUG00000002176 | ubiquitin like with PHD and ring finger domains 2 [Source:VGNC Symbol;Acc:VGNC:78714]                                               |
| ENSMMUG00000002200 | phospholipid phosphatase 3 [Source:NCBI gene;Acc:715993]                                                                            |
| ENSMMUG00000002321 | solute carrier family 24 member 3 [Source:VGNC Symbol;Acc:VGNC:77426]                                                               |
| ENSMMUG00000002338 | heterogeneous nuclear ribonucleoprotein L like [Source:VGNC Symbol;Acc:VGNC:73441]                                                  |
| ENSMMUG00000002370 | integrin subunit alpha 6 [Source:VGNC Symbol;Acc:VGNC:73780]                                                                        |
| ENSMMUG00000002520 | solute carrier family 4 member 3 [Source:VGNC Symbol;Acc:VGNC:77604]                                                                |



ENSMMUG0000002549 trehalase [Source:NCBI gene;Acc:706449]  
ENSMMUG0000002653 hexokinase 3 [Source:VGNC Symbol;Acc:VGNC:73476]  
ENSMMUG0000002794 general transcription factor IIB [Source:VGNC Symbol;Acc:VGNC:73306]  
ENSMMUG0000002890 tripartite motif containing 15 [Source:VGNC Symbol;Acc:VGNC:83958]  
ENSMMUG0000002894 dedicator of cytokinesis 4 [Source:VGNC Symbol;Acc:VGNC:71866]  
ENSMMUG0000003051 COPI coat complex subunit beta 2 [Source:VGNC Symbol;Acc:VGNC:71313]  
ENSMMUG0000003260  
ENSMMUG0000003261 BAF chromatin remodeling complex subunit BCL11B [Source:VGNC Symbol;Acc:VGNC:70056]  
ENSMMUG0000003277 copine 4 [Source:VGNC Symbol;Acc:VGNC:71466]  
ENSMMUG0000003282 phosphodiesterase 6B [Source:VGNC Symbol;Acc:VGNC:75920]  
ENSMMUG0000003316 mannosidase alpha class 2A member 1 [Source:VGNC Symbol;Acc:VGNC:81449]  
ENSMMUG0000003394 cilia and flagella associated protein 300 [Source:VGNC Symbol;Acc:VGNC:71120]  
ENSMMUG0000003462 ankyrin repeat domain 6 [Source:VGNC Symbol;Acc:VGNC:81023]  
ENSMMUG0000003497 FAT atypical cadherin 2 [Source:VGNC Symbol;Acc:VGNC:72618]  
ENSMMUG0000003634 DExD/H-box 60 like [Source:VGNC Symbol;Acc:VGNC:71720]  
ENSMMUG0000003736 nuclear factor kappa B subunit 1 [Source:VGNC Symbol;Acc:VGNC:75339]  
ENSMMUG0000004091 transcription factor 12 [Source:VGNC Symbol;Acc:VGNC:78283]  
ENSMMUG0000004157 nuclear protein, coactivator of histone transcription [Source:VGNC Symbol;Acc:VGNC:75379]  
ENSMMUG0000004233 leucine rich repeats and immunoglobulin like domains 3 [Source:NCBI gene;Acc:716344]  
ENSMMUG0000004492 absent in melanoma 2 [Source:NCBI gene;Acc:719260]  
ENSMMUG0000004603 zinc finger CCCH-type containing 14 [Source:VGNC Symbol;Acc:VGNC:79255]  
ENSMMUG0000004606 EMAP like 5 [Source:VGNC Symbol;Acc:VGNC:72067]  
ENSMMUG0000004614 potassium voltage-gated channel subfamily C member 4 [Source:VGNC Symbol;Acc:VGNC:73974]  
ENSMMUG0000004675 smoothelin [Source:VGNC Symbol;Acc:VGNC:77661]  
ENSMMUG0000004821 membrane spanning 4-domains A14 [Source:NCBI gene;Acc:697083]  
ENSMMUG0000004849 casein beta [Source:VGNC Symbol;Acc:VGNC:71523]  
ENSMMUG0000005137 ATPase secretory pathway Ca2+ transporting 1 [Source:VGNC Symbol;Acc:VGNC:70054]  
ENSMMUG0000005246 zinc finger protein 740 [Source:VGNC Symbol;Acc:VGNC:79665]  
ENSMMUG0000005301 ATP binding cassette subfamily B member 9 [Source:VGNC Symbol;Acc:VGNC:81341]  
ENSMMUG0000005515 ATP binding cassette subfamily C member 5 [Source:VGNC Symbol;Acc:VGNC:69574]  
ENSMMUG0000005622 dynein axonemal heavy chain 7 [Source:VGNC Symbol;Acc:VGNC:71859]  
ENSMMUG0000005634 ribonuclease L [Source:VGNC Symbol;Acc:VGNC:82223]  
ENSMMUG0000005851 B-box and SPRY domain containing [Source:VGNC Symbol;Acc:VGNC:70342]  
ENSMMUG0000005856 glycine amidinotransferase [Source:VGNC Symbol;Acc:VGNC:72892]  
ENSMMUG0000005895 nucleobindin 2 [Source:VGNC Symbol;Acc:VGNC:75549]  
ENSMMUG0000006251 argonaute RISC component 1 [Source:VGNC Symbol;Acc:VGNC:81346]  
ENSMMUG0000006252 argonaute RISC catalytic component 3 [Source:NCBI gene;Acc:712543]  
ENSMMUG0000006310 solute carrier family 3 member 1 [Source:VGNC Symbol;Acc:VGNC:77462]  
ENSMMUG0000006311 prolyl endopeptidase like [Source:VGNC Symbol;Acc:VGNC:76346]  
ENSMMUG0000006340 solute carrier family 6 member 6 [Source:VGNC Symbol;Acc:VGNC:77622]  
ENSMMUG0000006669 ubiquitin protein ligase E3 component n-recognin 4 [Source:VGNC Symbol;Acc:VGNC:79845]  
ENSMMUG0000006688 ER membrane protein complex subunit 1 [Source:VGNC Symbol;Acc:VGNC:72134]  
ENSMMUG0000006704 zygote arrest 1 [Source:VGNC Symbol;Acc:VGNC:79251]  
ENSMMUG0000006713 cyclin Y [Source:VGNC Symbol;Acc:VGNC:70840]  
ENSMMUG0000006731 CECR2 histone acetyl-lysine reader [Source:VGNC Symbol;Acc:VGNC:84530]  
ENSMMUG0000006768 coiled-coil domain containing 196 [Source:VGNC Symbol;Acc:VGNC:70828]  
ENSMMUG0000006842 doublecortin domain containing 1 [Source:NCBI gene;Acc:696721]  
ENSMMUG0000006898 integrin subunit beta 8 [Source:VGNC Symbol;Acc:VGNC:73791]  
ENSMMUG0000007003 polyribonucleotide nucleotidyltransferase 1 [Source:VGNC Symbol;Acc:VGNC:76095]  
ENSMMUG0000007077 APOBEC1 complementation factor [Source:VGNC Symbol;Acc:VGNC:69523]  
ENSMMUG0000007310 solute carrier family 25 member 12 [Source:VGNC Symbol;Acc:VGNC:77430]

ENSMMUG0000007326 ring finger protein 121 [Source:VGNC Symbol;Acc:VGNC:76788]  
ENSMMUG0000007330 nuclear mitotic apparatus protein 1 [Source:VGNC Symbol;Acc:VGNC:75556]  
ENSMMUG0000007411 integrin alpha FG-GAP repeat containing 2 [Source:VGNC Symbol;Acc:VGNC:73690]  
ENSMMUG0000007424 nuclear receptor interacting protein 2 [Source:VGNC Symbol;Acc:VGNC:75448]  
ENSMMUG0000007565 Cbl proto-oncogene B [Source:VGNC Symbol;Acc:VGNC:70555]  
ENSMMUG0000007570 uveal autoantigen with coiled-coil domains and ankyrin repeats [Source:VGNC Symbol;Acc:VGNC:78995]  
ENSMMUG0000007692 apolipoprotein B [Source:VGNC Symbol;Acc:VGNC:69985]  
ENSMMUG0000007709 crooked neck pre-mRNA splicing factor 1 [Source:VGNC Symbol;Acc:VGNC:71412]  
ENSMMUG0000007783 isoleucyl-tRNA synthetase 2, mitochondrial [Source:VGNC Symbol;Acc:VGNC:73458]  
ENSMMUG0000007821 ATP binding cassette subfamily B member 5 [Source:VGNC Symbol;Acc:VGNC:80321]  
ENSMMUG0000008093 StAR related lipid transfer domain containing 9 [Source:NCBI gene;Acc:708953]  
ENSMMUG0000008396 methylmalonyl-CoA epimerase [Source:NCBI gene;Acc:704094]  
ENSMMUG0000008643 general transcription factor IIIC subunit 3 [Source:VGNC Symbol;Acc:VGNC:73317]  
ENSMMUG0000008713 myosin binding protein H like [Source:NCBI gene;Acc:698183]  
ENSMMUG0000008718 zinc finger protein 280D [Source:NCBI gene;Acc:699509]  
ENSMMUG0000008781 BCL6 corepressor like 1 [Source:VGNC Symbol;Acc:VGNC:70131]  
ENSMMUG0000008785 E74 like ETS transcription factor 4 [Source:VGNC Symbol;Acc:VGNC:72208]  
ENSMMUG0000008795 polycystin 2, transient receptor potential cation channel [Source:NCBI gene;Acc:702179]  
ENSMMUG0000008797 ATP binding cassette subfamily G member 2 (Junior blood group) [Source:NCBI gene;Acc:574307]  
ENSMMUG0000008867 exoribonuclease 1 [Source:VGNC Symbol;Acc:VGNC:72324]  
ENSMMUG0000008916 transferrin [Source:VGNC Symbol;Acc:VGNC:82716]  
ENSMMUG0000008918 SRP receptor subunit beta [Source:VGNC Symbol;Acc:VGNC:77980]  
ENSMMUG0000008919 RAB6B, member RAS oncogene family [Source:VGNC Symbol;Acc:VGNC:81547]  
ENSMMUG0000008965 piwi like RNA-mediated gene silencing 4 [Source:VGNC Symbol;Acc:VGNC:81504]  
ENSMMUG0000008974 Fc receptor like 5 [Source:NCBI gene;Acc:718771]  
ENSMMUG0000009006 round spermatid basic protein 1 like [Source:VGNC Symbol;Acc:VGNC:77097]  
ENSMMUG0000009038 titin [Source:NCBI gene;Acc:703527]  
ENSMMUG0000009155 SIN3-HDAC complex associated factor [Source:NCBI gene;Acc:694162]  
ENSMMUG0000009425 actin, cytoplasmic 2-like [Source:NCBI gene;Acc:705671]  
ENSMMUG0000009524 adaptor protein, phosphotyrosine interacting with PH domain and leucine zipper 2 [Source:VGNC Symbol;Acc:VGNC:69861]  
ENSMMUG0000009773 lysine demethylase 1A [Source:VGNC Symbol;Acc:VGNC:73928]  
ENSMMUG0000009948 histone deacetylase 1 [Source:NCBI gene;Acc:708441]  
ENSMMUG0000009965 chromosome 15 C9orf50 homolog [Source:VGNC Symbol;Acc:VGNC:70365]  
ENSMMUG00000010304 cilia and flagella associated protein 298 [Source:NCBI gene;Acc:700721]  
ENSMMUG00000010312 shroom family member 1 [Source:VGNC Symbol;Acc:VGNC:77299]  
ENSMMUG00000010321 C2 domain containing 3 centriole elongation regulator [Source:VGNC Symbol;Acc:VGNC:70375]  
ENSMMUG00000010453 folate receptor beta [Source:VGNC Symbol;Acc:VGNC:72690]  
ENSMMUG00000010601 solute carrier family 43 member 3 [Source:NCBI gene;Acc:706267]  
ENSMMUG00000010647 inducible T cell costimulator ligand [Source:NCBI gene;Acc:722191]  
ENSMMUG00000010648 DNA methyltransferase 3 like [Source:NCBI gene;Acc:722184]  
ENSMMUG00000010682 fibrillin 2 [Source:VGNC Symbol;Acc:VGNC:72624]  
ENSMMUG00000010788 ATP binding cassette subfamily B member 1 [Source:NCBI gene;Acc:574235]  
ENSMMUG00000010819 fibroblast growth factor receptor substrate 2 [Source:VGNC Symbol;Acc:VGNC:72732]  
ENSMMUG00000010820 chaperonin containing TCP1 subunit 2 [Source:VGNC Symbol;Acc:VGNC:70745]  
ENSMMUG00000010858 prolyl 4-hydroxylase subunit alpha 2 [Source:VGNC Symbol;Acc:VGNC:75742]  
ENSMMUG00000010978 S100 calcium binding protein A2 [Source:VGNC Symbol;Acc:VGNC:76956]  
ENSMMUG00000011116 NADPH oxidase 4 [Source:VGNC Symbol;Acc:VGNC:75376]  
ENSMMUG00000011274 prolyl 4-hydroxylase subunit alpha 1 [Source:VGNC Symbol;Acc:VGNC:75741]  
ENSMMUG00000011386 GTPase, IMAP family member 4 [Source:VGNC Symbol;Acc:VGNC:72982]  
ENSMMUG00000011974 calcium/calmodulin dependent protein kinase IV [Source:VGNC Symbol;Acc:VGNC:70526]  
ENSMMUG00000012036 RNA binding motif protein 47 [Source:VGNC Symbol;Acc:VGNC:76576]

ENSMMUG00000012056 structural maintenance of chromosomes 6 [Source:VGNC Symbol;Acc:VGNC:77746]  
ENSMMUG00000012058 GEN1 Holliday junction 5' flap endonuclease [Source:VGNC Symbol;Acc:VGNC:72790]  
ENSMMUG00000012110 smoothed, frizzled class receptor [Source:VGNC Symbol;Acc:VGNC:77658]  
ENSMMUG00000012120 zinc ribbon domain containing 1 [Source:VGNC Symbol;Acc:VGNC:78912]  
ENSMMUG00000012129 tripartite motif containing 10 [Source:VGNC Symbol;Acc:VGNC:78550]  
ENSMMUG00000012156 zinc finger CCHC-type containing 17 [Source:VGNC Symbol;Acc:VGNC:79840]  
ENSMMUG00000012192 erythrocyte membrane protein band 4.1 like 4A [Source:VGNC Symbol;Acc:VGNC:72039]  
ENSMMUG00000012203 aryl hydrocarbon receptor [Source:NCBI gene;Acc:714254]  
ENSMMUG00000012218 calmodulin regulated spectrin associated protein family member 2 [Source:VGNC Symbol;Acc:VGNC:70666]  
ENSMMUG00000012462 proteasome activator subunit 1 [Source:VGNC Symbol;Acc:VGNC:76455]  
ENSMMUG00000012481 importin 4 [Source:VGNC Symbol;Acc:VGNC:73630]  
ENSMMUG00000012561 NOP2/Sun RNA methyltransferase family member 7 [Source:VGNC Symbol;Acc:VGNC:75463]  
ENSMMUG00000012778 rabphilin 3A [Source:VGNC Symbol;Acc:VGNC:77033]  
ENSMMUG00000012781 muscular LMNA interacting protein [Source:VGNC Symbol;Acc:VGNC:83434]  
ENSMMUG00000013047 S-phase kinase associated protein 1 [Source:NCBI gene;Acc:100423634]  
ENSMMUG00000013093 uncharacterized LOC106993385 [Source:NCBI gene;Acc:106993385]  
ENSMMUG00000013094 lipoyl(octanoyl) transferase 2 [Source:NCBI gene;Acc:718425]  
ENSMMUG00000013302 family with sequence similarity 184 member A [Source:VGNC Symbol;Acc:VGNC:72308]  
ENSMMUG00000013552 scribble planar cell polarity protein [Source:HGNC Symbol;Acc:HGNC:30377]  
ENSMMUG00000013601 chromosome 14 C11orf54 homolog [Source:NCBI gene;Acc:696483]  
ENSMMUG00000013812 ubiquitin specific peptidase 44 [Source:VGNC Symbol;Acc:VGNC:79221]  
ENSMMUG00000014018 bromodomain testis associated [Source:VGNC Symbol;Acc:VGNC:70282]  
ENSMMUG00000014307 myostatin [Source:VGNC Symbol;Acc:VGNC:74870]  
ENSMMUG00000014314 ankyrin and armadillo repeat containing [Source:VGNC Symbol;Acc:VGNC:69706]  
ENSMMUG00000014350 MAX interactor 1, dimerization protein [Source:VGNC Symbol;Acc:VGNC:75087]  
ENSMMUG00000014394 DnaJ heat shock protein family (Hsp40) member C10 [Source:VGNC Symbol;Acc:VGNC:84229]  
ENSMMUG00000014474 SPARC related modular calcium binding 2 [Source:VGNC Symbol;Acc:VGNC:83470]  
ENSMMUG00000014484 zinc finger protein 641 [Source:NCBI gene;Acc:708246]  
ENSMMUG00000014691 inhibitor of DNA binding 4, HLH protein [Source:VGNC Symbol;Acc:VGNC:73557]  
ENSMMUG00000014697 nuclear factor I B [Source:VGNC Symbol;Acc:VGNC:75335]  
ENSMMUG00000014884 ubiquitin specific peptidase 8 [Source:VGNC Symbol;Acc:VGNC:78748]  
ENSMMUG00000015000 SPT16 homolog, facilitates chromatin remodeling subunit [Source:VGNC Symbol;Acc:VGNC:78054]  
ENSMMUG00000015018 CD5 molecule [Source:VGNC Symbol;Acc:VGNC:70770]  
ENSMMUG00000015117 X-prolyl aminopeptidase 1 [Source:VGNC Symbol;Acc:VGNC:78810]  
ENSMMUG00000015141 ankyrin repeat domain 16 [Source:NCBI gene;Acc:720787]  
ENSMMUG00000015143 F-box DNA helicase 1 [Source:NCBI gene;Acc:720797]  
ENSMMUG00000015238 O-linked N-acetylglucosamine (GlcNAc) transferase [Source:NCBI gene;Acc:698268]  
ENSMMUG00000015279 SWI/SNF related, matrix associated, actin dependent regulator of chromatin, subfamily a, member 2 [Source:VGNC Symbol;Acc:VGNC:77647]  
ENSMMUG00000015309 F-box protein 24 [Source:VGNC Symbol;Acc:VGNC:72495]  
ENSMMUG00000015311 leucine rich repeats and calponin homology domain containing 4 [Source:VGNC Symbol;Acc:VGNC:74441]  
ENSMMUG00000015317 HD domain containing 2 [Source:VGNC Symbol;Acc:VGNC:73209]  
ENSMMUG00000015347 protein kinase, DNA-activated, catalytic subunit [Source:VGNC Symbol;Acc:VGNC:76418]  
ENSMMUG00000015522 GRAM domain containing 1B [Source:VGNC Symbol;Acc:VGNC:73028]  
ENSMMUG00000015577 RIO kinase 1 [Source:VGNC Symbol;Acc:VGNC:76767]  
ENSMMUG00000015590 siah E3 ubiquitin protein ligase 2 [Source:VGNC Symbol;Acc:VGNC:77215]  
ENSMMUG00000015604 myosin binding protein C3 [Source:VGNC Symbol;Acc:VGNC:75094]  
ENSMMUG00000015661 protein tyrosine phosphatase receptor type U [Source:VGNC Symbol;Acc:VGNC:76624]  
ENSMMUG00000015962 AT-rich interaction domain 2 [Source:VGNC Symbol;Acc:VGNC:69858]  
ENSMMUG00000015970 coiled-coil domain containing 150 [Source:VGNC Symbol;Acc:VGNC:84222]  
ENSMMUG00000016004 acid phosphatase 3 [Source:VGNC Symbol;Acc:VGNC:69385]  
ENSMMUG00000016093 adenosine deaminase RNA specific [Source:VGNC Symbol;Acc:VGNC:69502]

ENSMMUG00000016262 tetratricopeptide repeat domain 38 [Source:VGNC Symbol;Acc:VGNC:79574]  
ENSMMUG00000016313 RUN and SH3 domain containing 2 [Source:VGNC Symbol;Acc:VGNC:82230]  
ENSMMUG00000016314 family with sequence similarity 166 member B [Source:VGNC Symbol;Acc:VGNC:72421]  
ENSMMUG00000016641 ubiquitin conjugating enzyme E2 B [Source:VGNC Symbol;Acc:VGNC:78692]  
ENSMMUG00000016880 solute carrier family 39 member 8 [Source:VGNC Symbol;Acc:VGNC:77541]  
ENSMMUG00000016893 solute carrier family 9 member A1 [Source:VGNC Symbol;Acc:VGNC:82241]  
ENSMMUG00000016896 solute carrier family 12 member 1 [Source:VGNC Symbol;Acc:VGNC:77385]  
ENSMMUG00000016983 acrosin binding protein [Source:VGNC Symbol;Acc:VGNC:69445]  
ENSMMUG00000017125 oxysterol binding protein like 11 [Source:VGNC Symbol;Acc:VGNC:75631]  
ENSMMUG00000017186 pleckstrin homology domain interacting protein [Source:VGNC Symbol;Acc:VGNC:75803]  
ENSMMUG00000017204 programmed cell death 4 [Source:VGNC Symbol;Acc:VGNC:75794]  
ENSMMUG00000017207 dopamine beta-hydroxylase [Source:VGNC Symbol;Acc:VGNC:71740]  
ENSMMUG00000017210 sarcosine dehydrogenase [Source:VGNC Symbol;Acc:VGNC:76971]  
ENSMMUG00000017259 DnaJ heat shock protein family (Hsp40) member C6 [Source:NCBI gene;Acc:698682]  
ENSMMUG00000017351 stabilin 1 [Source:VGNC Symbol;Acc:VGNC:77956]  
ENSMMUG00000017378 steroid sulfatase [Source:VGNC Symbol;Acc:VGNC:81590]  
ENSMMUG00000017524 phosphoinositide kinase, FYVE-type zinc finger containing [Source:VGNC Symbol;Acc:VGNC:75854]  
ENSMMUG00000017549 ectonucleotide pyrophosphatase/phosphodiesterase 3 [Source:VGNC Symbol;Acc:VGNC:72224]  
ENSMMUG00000017583 single stranded DNA binding protein 2 [Source:NCBI gene;Acc:711752]  
ENSMMUG00000017593 CD3e molecule [Source:VGNC Symbol;Acc:VGNC:70764]  
ENSMMUG00000017703 collagen type XXV alpha 1 chain [Source:VGNC Symbol;Acc:VGNC:81374]  
ENSMMUG00000018051 FAT atypical cadherin 1 [Source:VGNC Symbol;Acc:VGNC:72617]  
ENSMMUG00000018279 adaptor related protein complex 5 subunit mu 1 [Source:VGNC Symbol;Acc:VGNC:69868]  
ENSMMUG00000018282 interleukin 17 receptor C [Source:VGNC Symbol;Acc:VGNC:84164]  
ENSMMUG00000018342 required for meiotic nuclear division 1 homolog [Source:VGNC Symbol;Acc:VGNC:76797]  
ENSMMUG00000018490 ADP ribosylation factor interacting protein 1 [Source:VGNC Symbol;Acc:VGNC:69878]  
ENSMMUG00000018525 presenilin 2 [Source:VGNC Symbol;Acc:VGNC:76436]  
ENSMMUG00000018565 ribonucleoprotein, PTB binding 2 [Source:VGNC Symbol;Acc:VGNC:76536]  
ENSMMUG00000018566 Janus kinase 1 [Source:VGNC Symbol;Acc:VGNC:73810]  
ENSMMUG00000018685 chromodomain helicase DNA binding protein 4 [Source:VGNC Symbol;Acc:VGNC:71029]  
ENSMMUG00000018738 alcohol dehydrogenase 1B (class I), beta polypeptide [Source:NCBI gene;Acc:707908]  
ENSMMUG00000018747 5-methyltetrahydrofolate-homocysteine methyltransferase reductase [Source:VGNC Symbol;Acc:VGNC:75079]  
ENSMMUG00000018814 diacylglycerol kinase alpha [Source:VGNC Symbol;Acc:VGNC:71780]  
ENSMMUG00000018901 FYVE, RhoGEF and PH domain containing 6 [Source:VGNC Symbol;Acc:VGNC:72548]  
ENSMMUG00000018974 LysM domain containing 3 [Source:VGNC Symbol;Acc:VGNC:74373]  
ENSMMUG00000019325 mechanistic target of rapamycin kinase [Source:VGNC Symbol;Acc:VGNC:75062]  
ENSMMUG00000019462 integrin subunit alpha V [Source:VGNC Symbol;Acc:VGNC:73783]  
ENSMMUG00000019639 paired box 5 [Source:VGNC Symbol;Acc:VGNC:75764]  
ENSMMUG00000019857 beaded filament structural protein 2 [Source:VGNC Symbol;Acc:VGNC:70245]  
ENSMMUG00000020047 integrin subunit beta 3 binding protein [Source:VGNC Symbol;Acc:VGNC:73787]  
ENSMMUG00000020049 phosphoglucomutase 1 [Source:NCBI gene;Acc:699401]  
ENSMMUG00000020211 cyclin Y like 1 [Source:VGNC Symbol;Acc:VGNC:84224]  
ENSMMUG00000020289 CD83 molecule [Source:VGNC Symbol;Acc:VGNC:70783]  
ENSMMUG00000020370 SRY-box transcription factor 5 [Source:VGNC Symbol;Acc:VGNC:77843]  
ENSMMUG00000020412 parkin coregulated [Source:VGNC Symbol;Acc:VGNC:75646]  
ENSMMUG00000020436 potassium voltage-gated channel subfamily H member 2 [Source:VGNC Symbol;Acc:VGNC:73980]  
ENSMMUG00000020533 chromosome 11 C12orf56 homolog [Source:VGNC Symbol;Acc:VGNC:70409]  
ENSMMUG00000020706 ETS proto-oncogene 1, transcription factor [Source:VGNC Symbol;Acc:VGNC:72439]  
ENSMMUG00000020784 centrosomal protein 126 [Source:NCBI gene;Acc:701911]  
ENSMMUG00000020821 testis expressed 15, meiosis and synapsis associated [Source:VGNC Symbol;Acc:VGNC:78318]  
ENSMMUG00000020928 nucleolar protein interacting with the FHA domain of MKI67 [Source:VGNC Symbol;Acc:VGNC:75201]

ENSMMUG00000020992 calcineurin binding protein 1 [Source:NCBI gene;Acc:700566]  
ENSMMUG00000021034 complement C6 [Source:VGNC Symbol;Acc:VGNC:70477]  
ENSMMUG00000021051 TNFAIP3 interacting protein 1 [Source:VGNC Symbol;Acc:VGNC:79057]  
ENSMMUG00000021053 annexin A6 [Source:VGNC Symbol;Acc:VGNC:69951]  
ENSMMUG00000021145 family with sequence similarity 120B [Source:VGNC Symbol;Acc:VGNC:72311]  
ENSMMUG00000021168 unc-5 family C-terminal like [Source:VGNC Symbol;Acc:VGNC:79314]  
ENSMMUG00000021169 translocator protein 2 [Source:VGNC Symbol;Acc:VGNC:83960]  
ENSMMUG00000021216 UDP glucuronosyltransferase 1 family, polypeptide A1 [Source:NCBI gene;Acc:574210]  
ENSMMUG00000021393 calcium/calmodulin dependent protein kinase II gamma [Source:VGNC Symbol;Acc:VGNC:70525]  
ENSMMUG00000021420 pleckstrin 2 [Source:VGNC Symbol;Acc:VGNC:76071]  
ENSMMUG00000021496 potassium sodium-activated channel subfamily T member 1 [Source:VGNC Symbol;Acc:VGNC:73856]  
ENSMMUG00000021499 sterile alpha motif domain containing 3 [Source:VGNC Symbol;Acc:VGNC:77079]  
ENSMMUG00000021572 solute carrier family 39 member 9 [Source:VGNC Symbol;Acc:VGNC:77523]  
ENSMMUG00000021620 ELKS/RAB6-interacting/CAST family member 2 [Source:VGNC Symbol;Acc:VGNC:72164]  
ENSMMUG00000021782 LDL receptor related protein 1 [Source:VGNC Symbol;Acc:VGNC:74442]  
ENSMMUG00000021878 timeless circadian regulator [Source:VGNC Symbol;Acc:VGNC:78356]  
ENSMMUG00000022044 scavenger receptor class A member 5 [Source:VGNC Symbol;Acc:VGNC:77117]  
ENSMMUG00000022153 solute carrier family 25 member 36 [Source:VGNC Symbol;Acc:VGNC:84079]  
ENSMMUG00000022183 spermatogenesis associated 1 [Source:NCBI gene;Acc:710462]  
ENSMMUG00000022185 odd-skipped related transcription factor 2 [Source:VGNC Symbol;Acc:VGNC:84097]  
ENSMMUG00000022199 polyhomeotic homolog 3 [Source:VGNC Symbol;Acc:VGNC:75804]  
ENSMMUG00000022202 basic leucine zipper and W2 domains 1 [Source:VGNC Symbol;Acc:VGNC:84213]  
ENSMMUG00000022256 transglutaminase 5 [Source:VGNC Symbol;Acc:VGNC:78341]  
ENSMMUG00000022303 solute carrier family 7 member 2 [Source:VGNC Symbol;Acc:VGNC:77629]  
ENSMMUG00000022359 solute carrier family 38 member 2 [Source:VGNC Symbol;Acc:VGNC:77469]  
ENSMMUG00000022372 cytochrome b561 family member A3 [Source:VGNC Symbol;Acc:VGNC:71458]  
ENSMMUG00000022602 methyltransferase like 21A [Source:VGNC Symbol;Acc:VGNC:74625]  
ENSMMUG00000022624 putative speedy protein E16 [Source:NCBI gene;Acc:718058]  
ENSMMUG00000022630 protoporphyrinogen oxidase [Source:VGNC Symbol;Acc:VGNC:76365]  
ENSMMUG00000022680 alpha-2-macroglobulin like 1 [Source:VGNC Symbol;Acc:VGNC:69507]  
ENSMMUG00000022697 STEAP4 metalloredutase [Source:VGNC Symbol;Acc:VGNC:77974]  
ENSMMUG00000022762 OMA1 zinc metallopeptidase [Source:VGNC Symbol;Acc:VGNC:75485]  
ENSMMUG00000023226 RNA polymerase III subunit D [Source:VGNC Symbol;Acc:VGNC:76017]  
ENSMMUG00000023248 serine/threonine kinase 38 like [Source:VGNC Symbol;Acc:VGNC:78156]  
ENSMMUG00000023249 aryl hydrocarbon receptor nuclear translocator like 2 [Source:NCBI gene;Acc:709547]  
ENSMMUG00000023265 A-kinase anchoring protein 12 [Source:VGNC Symbol;Acc:VGNC:69766]  
ENSMMUG00000023401 adhesion G protein-coupled receptor B2 [Source:VGNC Symbol;Acc:VGNC:69598]  
ENSMMUG00000023676 espin [Source:NCBI gene;Acc:722532]  
ENSMMUG00000023679 tripartite motif containing 26 [Source:VGNC Symbol;Acc:VGNC:78854]  
ENSMMUG00000023811 boule homolog, RNA binding protein [Source:VGNC Symbol;Acc:VGNC:70310]  
ENSMMUG00000030099 phospholipid phosphatase 1 [Source:VGNC Symbol;Acc:VGNC:76226]  
ENSMMUG00000031296 caspase 8 [Source:VGNC Symbol;Acc:VGNC:70547]  
ENSMMUG00000031853 RAB5B, member RAS oncogene family [Source:VGNC Symbol;Acc:VGNC:81546]  
ENSMMUG00000032252 UbiA prenyltransferase domain containing 1 [Source:VGNC Symbol;Acc:VGNC:79881]  
ENSMMUG00000032427 neuroligin 3 [Source:NCBI gene;Acc:574216]  
ENSMMUG00000032973 mml-mir-550 [Source:miRBase;Acc:MI0007826]  
ENSMMUG00000033001 U6 spliceosomal RNA [Source:RFAM;Acc:RF00026]  
ENSMMUG00000037551 Metazoan signal recognition particle RNA [Source:RFAM;Acc:RF00017]  
ENSMMUG00000037625  
ENSMMUG00000037675 testis expressed 52 [Source:NCBI gene;Acc:107000723]  
ENSMMUG00000038051 uncharacterized LOC106998885 [Source:NCBI gene;Acc:106998885]

ENSMMUG00000038070 T cell receptor alpha variable 12-3 [Source:HGNC Symbol;Acc:HGNC:12107]  
ENSMMUG00000038288 TMEM9 domain family member B [Source:NCBI gene;Acc:708447]  
ENSMMUG00000038560 eukaryotic translation elongation factor 1 epsilon 1 [Source:NCBI gene;Acc:695426]  
ENSMMUG00000038661  
ENSMMUG00000039020 zinc finger protein 141 [Source:NCBI gene;Acc:714265]  
ENSMMUG00000039317 cAMP responsive element binding protein 5 [Source:VGNC Symbol;Acc:VGNC:81295]  
ENSMMUG00000039944 Ras protein specific guanine nucleotide releasing factor 2 [Source:VGNC Symbol;Acc:VGNC:84486]  
ENSMMUG00000040154 T cell receptor alpha variable 9-2 [Source:HGNC Symbol;Acc:HGNC:12154]  
ENSMMUG00000040694 LCK proto-oncogene, Src family tyrosine kinase [Source:NCBI gene;Acc:717704]  
ENSMMUG00000040771  
ENSMMUG00000040854 aspartyl-tRNA synthetase 1 [Source:VGNC Symbol;Acc:VGNC:84226]  
ENSMMUG00000042208 pepsin A-4 [Source:NCBI gene;Acc:694646]  
ENSMMUG00000042798  
ENSMMUG00000043504  
ENSMMUG00000043809 caspase 2 [Source:VGNC Symbol;Acc:VGNC:80804]  
ENSMMUG00000044175 forkhead box O6 [Source:NCBI gene;Acc:697505]  
ENSMMUG00000044759  
ENSMMUG00000045584 leucine zipper protein 1 [Source:NCBI gene;Acc:718626]  
ENSMMUG00000046655 pleckstrin homology like domain family B member 1 [Source:NCBI gene;Acc:706336]  
ENSMMUG00000046901 protein tyrosine phosphatase 4A2 [Source:NCBI gene;Acc:706489]  
ENSMMUG00000047276 GTPase, IMAP family member 6 [Source:VGNC Symbol;Acc:VGNC:81315]  
ENSMMUG00000047594  
ENSMMUG00000047974 aldehyde oxidase 4 [Source:NCBI gene;Acc:701502]  
ENSMMUG00000048232 MINDY family member 4B [Source:VGNC Symbol;Acc:VGNC:84153]  
ENSMMUG00000048302 ArfGAP with FG repeats 2 [Source:VGNC Symbol;Acc:VGNC:80329]  
ENSMMUG00000049196 dispatched RND transporter family member 3 [Source:NCBI gene;Acc:722727]  
ENSMMUG00000049351 MAGE family member E1 [Source:NCBI gene;Acc:705379]  
ENSMMUG00000049661 Metazoan signal recognition particle RNA [Source:RFAM;Acc:RF00017]  
ENSMMUG00000049939  
ENSMMUG00000049945  
ENSMMUG00000050239  
ENSMMUG00000050269 T cell receptor beta variable 14 [Source:HGNC Symbol;Acc:HGNC:12189]  
ENSMMUG00000050418 superoxide dismutase 2 [Source:NCBI gene;Acc:574097]  
ENSMMUG00000050975  
ENSMMUG00000051032 serine protease 2 [Source:NCBI gene;Acc:698352]  
ENSMMUG00000051042  
ENSMMUG00000051271  
ENSMMUG00000051381 Metazoan signal recognition particle RNA [Source:RFAM;Acc:RF00017]  
ENSMMUG00000051468 Metazoan signal recognition particle RNA [Source:RFAM;Acc:RF00017]  
ENSMMUG00000051482  
ENSMMUG00000051641  
ENSMMUG00000052328 FAM20C golgi associated secretory pathway kinase [Source:NCBI gene;Acc:695088]  
ENSMMUG00000052377  
ENSMMUG00000052526 RAB39A, member RAS oncogene family [Source:NCBI gene;Acc:707451]  
ENSMMUG00000052535  
ENSMMUG00000052574  
ENSMMUG00000052581 upstream transcription factor family member 3 [Source:NCBI gene;Acc:709660]  
ENSMMUG00000052651 Metazoan signal recognition particle RNA [Source:RFAM;Acc:RF00017]  
ENSMMUG00000052682  
ENSMMUG00000052929  
ENSMMUG00000053384



ENSMMUG00000053541  
ENSMMUG00000053577  
ENSMMUG00000053721  
ENSMMUG00000054417  
ENSMMUG00000054462  
ENSMMUG00000054683 dynein axonemal heavy chain 12 [Source:NCBI gene;Acc:703670]  
ENSMMUG00000054719  
ENSMMUG00000055207  
ENSMMUG00000055229  
ENSMMUG00000055244 U6 spliceosomal RNA [Source:RFAM;Acc:RF00026]  
ENSMMUG00000055392  
ENSMMUG00000055400 U6 spliceosomal RNA [Source:RFAM;Acc:RF00026]  
ENSMMUG00000055447 MDM2 proto-oncogene [Source:NCBI gene;Acc:718284]  
ENSMMUG00000055477  
ENSMMUG00000055590  
ENSMMUG00000055610 homeobox C4 [Source:NCBI gene;Acc:100430434]  
ENSMMUG00000055783  
ENSMMUG00000055809  
ENSMMUG00000055845 ankyrin repeat domain 53 [Source:NCBI gene;Acc:703757]  
ENSMMUG00000055970  
ENSMMUG00000056045  
ENSMMUG00000056054 zinc finger and BTB domain containing 3 [Source:NCBI gene;Acc:722240]  
ENSMMUG00000056103 growth arrest and DNA damage inducible alpha [Source:NCBI gene;Acc:701054]  
ENSMMUG00000056116  
ENSMMUG00000056790  
ENSMMUG00000057073  
ENSMMUG00000057276  
ENSMMUG00000057494 T cell receptor beta variable 7-9 [Source:HGNC Symbol;Acc:HGNC:12243]  
ENSMMUG00000057501  
ENSMMUG00000057544  
ENSMMUG00000057606 GPRIN family member 3 [Source:NCBI gene;Acc:703567]  
ENSMMUG00000057697  
ENSMMUG00000058151 chromosome 4 C6orf62 homolog [Source:NCBI gene;Acc:708218]  
ENSMMUG00000058580 tripartite motif containing 40 [Source:NCBI gene;Acc:100427925]  
ENSMMUG00000058836 transmembrane p24 trafficking protein 2 [Source:NCBI gene;Acc:106992483]  
ENSMMUG00000058942  
ENSMMUG00000059019  
ENSMMUG00000059241  
ENSMMUG00000059267 pellino E3 ubiquitin protein ligase 1 [Source:NCBI gene;Acc:696416]  
ENSMMUG00000059327 NUS1 dehydrololichyl diphosphate synthase subunit [Source:NCBI gene;Acc:715015]  
ENSMMUG00000059353 phosphatidylserine synthase 2 [Source:NCBI gene;Acc:698582]  
ENSMMUG00000059525  
ENSMMUG00000059575  
ENSMMUG00000059707 MIS18 kinetochore protein A [Source:NCBI gene;Acc:709275]  
ENSMMUG00000059973  
ENSMMUG00000060167  
ENSMMUG00000060168  
ENSMMUG00000060215 Y RNA [Source:RFAM;Acc:RF00019]  
ENSMMUG00000060278 Metazoan signal recognition particle RNA [Source:RFAM;Acc:RF00017]  
ENSMMUG00000060346  
ENSMMUG00000060744

ENSMMUG00000060845 F-box protein 48 [Source:NCBI gene;Acc:699202]  
ENSMMUG00000060892  
ENSMMUG00000061239  
ENSMMUG00000061408  
ENSMMUG00000061761 interferon induced protein with tetratricopeptide repeats 2 [Source:NCBI gene;Acc:695452]  
ENSMMUG00000061892  
ENSMMUG00000061973  
ENSMMUG00000062006 methionyl aminopeptidase 2 [Source:NCBI gene;Acc:712400]  
ENSMMUG00000062527  
ENSMMUG00000062793  
ENSMMUG00000062974  
ENSMMUG00000063177 StAR related lipid transfer domain containing 4 [Source:NCBI gene;Acc:706654]  
ENSMMUG00000063345  
ENSMMUG00000063348  
ENSMMUG00000064089  
ENSMMUG00000064529  
ENSMMUG00000064804  
ENSMMUG00000065099  
ENSMMUG00000065128 Metazoan signal recognition particle RNA [Source:RFAM;Acc:RF00017]  
ENSMMUG00000065301  
ENSMMUG00000000717 CD3e molecule associated protein [Source:NCBI gene;Acc:714440]  
ENSMMUG00000000981 T-box transcription factor 6 [Source:VGNC Symbol;Acc:VGNC:78276]  
ENSMMUG00000000982 protein phosphatase 4 catalytic subunit [Source:VGNC Symbol;Acc:VGNC:76384]  
ENSMMUG00000002109 proline and serine rich 1 [Source:VGNC Symbol;Acc:VGNC:76291]  
ENSMMUG00000002113 NHL repeat containing 3 [Source:VGNC Symbol;Acc:VGNC:75291]  
ENSMMUG00000002742 ST8 alpha-N-acetyl-neuraminide alpha-2,8-sialyltransferase 5 [Source:VGNC Symbol;Acc:VGNC:77942]  
ENSMMUG00000003029 protein arginine methyltransferase 1 [Source:NCBI gene;Acc:719419]  
ENSMMUG00000003043 PWWP domain containing 3A, DNA repair factor [Source:VGNC Symbol;Acc:VGNC:76565]  
ENSMMUG00000003621 AKT serine/threonine kinase 2 [Source:VGNC Symbol;Acc:VGNC:69777]  
ENSMMUG00000004237 TNF receptor superfamily member 19 [Source:VGNC Symbol;Acc:VGNC:78588]  
ENSMMUG00000004467 X-ray repair cross complementing 1 [Source:NCBI gene;Acc:711457]  
ENSMMUG00000004709 proteasome inhibitor subunit 1 [Source:VGNC Symbol;Acc:VGNC:76458]  
ENSMMUG00000004711 transmembrane protein 74B [Source:VGNC Symbol;Acc:VGNC:78990]  
ENSMMUG00000005204 VPS16 core subunit of CORVET and HOPS complexes [Source:VGNC Symbol;Acc:VGNC:78966]  
ENSMMUG00000005727 protein kinase N1 [Source:VGNC Symbol;Acc:VGNC:76014]  
ENSMMUG00000007398 potassium calcium-activated channel subfamily N member 1 [Source:VGNC Symbol;Acc:VGNC:74002]  
ENSMMUG00000007816 SMAD family member 2 [Source:VGNC Symbol;Acc:VGNC:77810]  
ENSMMUG00000007875 F-box and leucine rich repeat protein 12 [Source:VGNC Symbol;Acc:VGNC:72502]  
ENSMMUG00000008313 zinc finger protein 792 [Source:VGNC Symbol;Acc:VGNC:79456]  
ENSMMUG00000008540 ring finger protein 112 [Source:VGNC Symbol;Acc:VGNC:76724]  
ENSMMUG00000008941 DNA topoisomerase II alpha [Source:VGNC Symbol;Acc:VGNC:78620]  
ENSMMUG00000008942 carnosine dipeptidase 1 [Source:VGNC Symbol;Acc:VGNC:71257]  
ENSMMUG00000008945 zinc finger protein 407 [Source:NCBI gene;Acc:695303]  
ENSMMUG00000008946 chromosome 19 C19orf47 homolog [Source:VGNC Symbol;Acc:VGNC:70404]  
ENSMMUG00000010050 small nuclear ribonucleoprotein polypeptides B and B1 [Source:VGNC Symbol;Acc:VGNC:77676]  
ENSMMUG00000010878 adaptor related protein complex 1 subunit gamma 1 [Source:VGNC Symbol;Acc:VGNC:69958]  
ENSMMUG00000011593 regulator of cell cycle [Source:VGNC Symbol;Acc:VGNC:76783]  
ENSMMUG00000011850 cadherin 1 [Source:VGNC Symbol;Acc:VGNC:70803]  
ENSMMUG00000011893 KIAA0513 [Source:VGNC Symbol;Acc:VGNC:73925]  
ENSMMUG00000012486 retinoic acid receptor alpha [Source:VGNC Symbol;Acc:VGNC:76662]  
ENSMMUG00000012761 sialic acid binding Ig like lectin 5 [Source:NCBI gene;Acc:719730]

ENSMMUG00000014687 sterile alpha motif domain containing 14 [Source:VGNC Symbol;Acc:VGNC:77112]  
ENSMMUG00000014735 carnitine palmitoyltransferase 1C [Source:NCBI gene;Acc:719429]  
ENSMMUG00000016753 dynein axonemal heavy chain 3 [Source:VGNC Symbol;Acc:VGNC:71941]  
ENSMMUG00000016791 doublecortin like kinase 1 [Source:VGNC Symbol;Acc:VGNC:71745]  
ENSMMUG00000016860 zinc finger protein 490 [Source:NCBI gene;Acc:100426568]  
ENSMMUG00000016927 solute carrier family 2 member 10 [Source:VGNC Symbol;Acc:VGNC:77465]  
ENSMMUG00000017025 zinc finger CCCH-type containing 13 [Source:VGNC Symbol;Acc:VGNC:79248]  
ENSMMUG00000017113 ubiquitin specific peptidase 32 [Source:NCBI gene;Acc:716857]  
ENSMMUG00000017230 V-set and transmembrane domain containing 2 like [Source:NCBI gene;Acc:707394]  
ENSMMUG00000017234 leucine rich repeat containing 59 [Source:VGNC Symbol;Acc:VGNC:81436]  
ENSMMUG00000017246 lipoxigenase homology domains 1 [Source:VGNC Symbol;Acc:VGNC:74368]  
ENSMMUG00000017276 nucleolar protein 4 [Source:VGNC Symbol;Acc:VGNC:75366]  
ENSMMUG00000017379 myocardin related transcription factor B [Source:VGNC Symbol;Acc:VGNC:74865]  
ENSMMUG00000017615 zinc finger CCHC-type containing 14 [Source:VGNC Symbol;Acc:VGNC:79420]  
ENSMMUG00000017725 eukaryotic elongation factor 2 kinase [Source:VGNC Symbol;Acc:VGNC:72098]  
ENSMMUG00000017972 zinc finger protein 200 [Source:VGNC Symbol;Acc:VGNC:78867]  
ENSMMUG00000018358 zinc finger protein 217 [Source:VGNC Symbol;Acc:VGNC:78874]  
ENSMMUG00000018415 Ras interacting protein 1 [Source:HGNC Symbol;Acc:HGNC:24716]  
ENSMMUG00000018474 signal regulatory protein alpha [Source:NCBI gene;Acc:717811]  
ENSMMUG00000019265 zinc finger protein 575 [Source:VGNC Symbol;Acc:VGNC:79667]  
ENSMMUG00000019665 SURP and G-patch domain containing 2 [Source:VGNC Symbol;Acc:VGNC:78163]  
ENSMMUG00000019850 arachidonate lipoxigenase 3 [Source:VGNC Symbol;Acc:VGNC:69607]  
ENSMMUG00000019892 myomesin 1 [Source:VGNC Symbol;Acc:VGNC:75123]  
ENSMMUG00000020061 protein phosphatase 1 regulatory subunit 9B [Source:VGNC Symbol;Acc:VGNC:76372]  
ENSMMUG00000021091 COP9 signalosome subunit 3 [Source:VGNC Symbol;Acc:VGNC:71316]  
ENSMMUG00000021332 carboxypeptidase X, M14 family member 1 [Source:VGNC Symbol;Acc:VGNC:71413]  
ENSMMUG00000021459 MYC binding protein 2 [Source:VGNC Symbol;Acc:VGNC:75011]  
ENSMMUG00000021474 zinc finger protein 45 [Source:NCBI gene;Acc:712591]  
ENSMMUG00000022305 Rho guanine nucleotide exchange factor 1 [Source:VGNC Symbol;Acc:VGNC:70012]  
ENSMMUG00000022975 sprouty related EVH1 domain containing 3 [Source:VGNC Symbol;Acc:VGNC:78030]  
ENSMMUG00000023803 myosin heavy chain 10 [Source:NCBI gene;Acc:721979]  
ENSMMUG00000028800 solute carrier family 7 member 9 [Source:VGNC Symbol;Acc:VGNC:77633]  
ENSMMUG00000029164 glycerophosphodiester phosphodiesterase domain containing 3 [Source:VGNC Symbol;Acc:VGNC:72800]  
ENSMMUG00000029176 Rho GTPase activating protein 17 [Source:NCBI gene;Acc:701988]  
ENSMMUG00000030381 arachidonate 15-lipoxigenase [Source:VGNC Symbol;Acc:VGNC:69796]  
ENSMMUG00000030453 NLR family pyrin domain containing 1 [Source:NCBI gene;Acc:721648]  
ENSMMUG00000037975 solute carrier family 7 member 6 [Source:NCBI gene;Acc:702903]  
ENSMMUG00000041450 zinc finger protein 432 [Source:NCBI gene;Acc:100424341]  
ENSMMUG00000041976 zinc finger protein 780B [Source:NCBI gene;Acc:701034]  
ENSMMUG00000042157 caspase recruitment domain-containing protein 8 [Source:NCBI gene;Acc:718594]  
ENSMMUG00000042707 angiopoietin like 6 [Source:NCBI gene;Acc:106994633]  
ENSMMUG00000046195 MIS12 kinetochore complex component [Source:NCBI gene;Acc:712202]  
ENSMMUG00000046237 4-aminobutyrate aminotransferase [Source:NCBI gene;Acc:714017]  
ENSMMUG00000049997  
ENSMMUG00000049999 cone-rod homeobox [Source:NCBI gene;Acc:717550]  
ENSMMUG00000050177  
ENSMMUG00000050458  
ENSMMUG00000051115  
ENSMMUG00000051286  
ENSMMUG00000051966  
ENSMMUG00000052031

ENSMMUG00000052277 transthyretin [Source:NCBI gene;Acc:705943]  
 ENSMMUG00000053233  
 ENSMMUG00000053298  
 ENSMMUG00000054064  
 ENSMMUG00000054210 C-C motif chemokine 4 [Source:NCBI gene;Acc:100426632]  
 ENSMMUG00000054711  
 ENSMMUG00000055344 TLC domain containing 3A [Source:NCBI gene;Acc:699707]  
 ENSMMUG00000056387 transcription factor 15 [Source:NCBI gene;Acc:716916]  
 ENSMMUG00000057209  
 ENSMMUG00000058142  
 ENSMMUG00000058583 RRAD and GEM like GTPase 1 [Source:NCBI gene;Acc:713351]  
 ENSMMUG00000058740  
 ENSMMUG00000059543 zinc finger protein 30 [Source:NCBI gene;Acc:718310]  
 ENSMMUG00000060439 schlafen family member 12 like [Source:NCBI gene;Acc:106992394]  
 ENSMMUG00000061035 ZFP82 zinc finger protein [Source:NCBI gene;Acc:719145]  
 ENSMMUG00000061085  
 ENSMMUG00000061536  
 ENSMMUG00000062623 Metazoan signal recognition particle RNA [Source:RFAM;Acc:RF00017]  
 ENSMMUG00000062784  
 ENSMMUG00000064114 zinc finger protein 709 [Source:NCBI gene;Acc:100427466]  
 ENSMMUG00000064131  
 ENSMMUG00000064158  
 ENSMMUG00000064237

## Non-Survivors – SD3 vs. Baseline

| Ensembl Gene ID    | Description                                                                                                                         |
|--------------------|-------------------------------------------------------------------------------------------------------------------------------------|
| ENSMMUG00000000009 | protein tyrosine phosphatase receptor type C [Source:VGNC Symbol;Acc:VGNC:76612]                                                    |
| ENSMMUG00000000058 | CDV3 homolog [Source:VGNC Symbol;Acc:VGNC:71114]                                                                                    |
| ENSMMUG00000000059 | DNA topoisomerase II binding protein 1 [Source:VGNC Symbol;Acc:VGNC:79061]                                                          |
| ENSMMUG00000000158 | minichromosome maintenance complex component 2 [Source:VGNC Symbol;Acc:VGNC:74680]                                                  |
| ENSMMUG00000000352 | family with sequence similarity 229 member A [Source:NCBI gene;Acc:708770]                                                          |
| ENSMMUG00000000413 | solute carrier family 7 member 7 [Source:VGNC Symbol;Acc:VGNC:77631]                                                                |
| ENSMMUG00000000667 | zinc finger MYM-type containing 3 [Source:VGNC Symbol;Acc:VGNC:78886]                                                               |
| ENSMMUG00000001008 | spectrin repeat containing nuclear envelope protein 2 [Source:NCBI gene;Acc:706759]                                                 |
| ENSMMUG00000001209 | arylsulfatase family member K [Source:VGNC Symbol;Acc:VGNC:84280]                                                                   |
| ENSMMUG00000001212 | Rieske Fe-S domain containing [Source:VGNC Symbol;Acc:VGNC:84487]                                                                   |
| ENSMMUG00000001213 | spermatogenesis associated 9 [Source:VGNC Symbol;Acc:VGNC:77976]                                                                    |
| ENSMMUG00000001225 | calneuron 1 [Source:VGNC Symbol;Acc:VGNC:82078]                                                                                     |
| ENSMMUG00000001264 | BSD domain containing 1 [Source:VGNC Symbol;Acc:VGNC:70384]                                                                         |
| ENSMMUG00000001319 | methylenetetrahydrofolate dehydrogenase, cyclohydrolase and formyltetrahydrofolate synthetase 1 [Source:VGNC Symbol;Acc:VGNC:84399] |
| ENSMMUG00000001479 | laminin subunit gamma 2 [Source:VGNC Symbol;Acc:VGNC:74233]                                                                         |
| ENSMMUG00000001481 | nicotinamide nucleotide adenylyltransferase 2 [Source:VGNC Symbol;Acc:VGNC:75193]                                                   |
| ENSMMUG00000001640 | SIX homeobox 4 [Source:NCBI gene;Acc:703798]                                                                                        |
| ENSMMUG00000001728 | mitogen-activated protein kinase 9 [Source:VGNC Symbol;Acc:VGNC:74652]                                                              |
| ENSMMUG00000001742 | transforming growth factor beta receptor 3 [Source:VGNC Symbol;Acc:VGNC:78339]                                                      |
| ENSMMUG00000001892 | UDP-glucose 6-dehydrogenase [Source:VGNC Symbol;Acc:VGNC:78711]                                                                     |
| ENSMMUG00000001894 | cyclin dependent kinase 11B [Source:NCBI gene;Acc:703046]                                                                           |
| ENSMMUG00000001918 | transmembrane protein 165 [Source:VGNC Symbol;Acc:VGNC:79875]                                                                       |

ENSMMUG0000001919 clock circadian regulator [Source:VGNC Symbol;Acc:VGNC:71262]  
ENSMMUG0000002200 phospholipid phosphatase 3 [Source:NCBI gene;Acc:715993]  
ENSMMUG0000002332 RNA binding motif protein 25 [Source:VGNC Symbol;Acc:VGNC:76521]  
ENSMMUG0000002337 aquarius intron-binding spliceosomal factor [Source:VGNC Symbol;Acc:VGNC:69925]  
ENSMMUG0000002434 inhibitor of growth family member 3 [Source:VGNC Symbol;Acc:VGNC:73595]  
ENSMMUG0000002649 unc-5 netrin receptor A [Source:VGNC Symbol;Acc:VGNC:78721]  
ENSMMUG0000002653 hexokinase 3 [Source:VGNC Symbol;Acc:VGNC:73476]  
ENSMMUG0000002755 kelch like family member 5 [Source:VGNC Symbol;Acc:VGNC:74188]  
ENSMMUG0000002775 U2 snRNP associated SURP domain containing [Source:VGNC Symbol;Acc:VGNC:79889]  
ENSMMUG0000002794 general transcription factor IIB [Source:VGNC Symbol;Acc:VGNC:73306]  
ENSMMUG0000002890 tripartite motif containing 15 [Source:VGNC Symbol;Acc:VGNC:83958]  
ENSMMUG0000002947 procollagen C-endopeptidase enhancer [Source:VGNC Symbol;Acc:VGNC:75782]  
ENSMMUG0000003049 testis expressed 11 [Source:VGNC Symbol;Acc:VGNC:78316]  
ENSMMUG0000003191 kirre like nephrin family adhesion molecule 1 [Source:VGNC Symbol;Acc:VGNC:73837]  
ENSMMUG0000003261 BAF chromatin remodeling complex subunit BCL11B [Source:VGNC Symbol;Acc:VGNC:70056]  
ENSMMUG0000003277 copine 4 [Source:VGNC Symbol;Acc:VGNC:71466]  
ENSMMUG0000003282 phosphodiesterase 6B [Source:VGNC Symbol;Acc:VGNC:75920]  
ENSMMUG0000003497 FAT atypical cadherin 2 [Source:VGNC Symbol;Acc:VGNC:72618]  
ENSMMUG0000003634 DExD/H-box 60 like [Source:VGNC Symbol;Acc:VGNC:71720]  
ENSMMUG0000003693 DIS3 like exosome 3'-5' exoribonuclease [Source:VGNC Symbol;Acc:VGNC:71796]  
ENSMMUG0000003736 nuclear factor kappa B subunit 1 [Source:VGNC Symbol;Acc:VGNC:75339]  
ENSMMUG0000003987 forkhead associated phosphopeptide binding domain 1 [Source:NCBI gene;Acc:699900]  
ENSMMUG0000004052 phosphodiesterase 12 [Source:VGNC Symbol;Acc:VGNC:75863]  
ENSMMUG0000004178 NADPH oxidase 1 [Source:VGNC Symbol;Acc:VGNC:75374]  
ENSMMUG0000004287 death domain associated protein [Source:VGNC Symbol;Acc:VGNC:71737]  
ENSMMUG0000004362 Fc fragment of IgG receptor Ia [Source:NCBI gene;Acc:714664]  
ENSMMUG0000004492 absent in melanoma 2 [Source:NCBI gene;Acc:719260]  
ENSMMUG0000004566 zinc finger protein 124 [Source:VGNC Symbol;Acc:VGNC:78836]  
ENSMMUG0000004598 bisphosphoglycerate mutase [Source:VGNC Symbol;Acc:VGNC:70275]  
ENSMMUG0000005137 ATPase secretory pathway Ca<sup>2+</sup> transporting 1 [Source:VGNC Symbol;Acc:VGNC:70054]  
ENSMMUG0000005181 RAB3C, member RAS oncogene family [Source:VGNC Symbol;Acc:VGNC:81541]  
ENSMMUG0000005442 5'-nucleotidase ecto [Source:VGNC Symbol;Acc:VGNC:75537]  
ENSMMUG0000005801 glyceronephosphate O-acyltransferase [Source:VGNC Symbol;Acc:VGNC:73100]  
ENSMMUG0000005856 glycine amidinotransferase [Source:VGNC Symbol;Acc:VGNC:72892]  
ENSMMUG0000006187 angiopoietin like 7 [Source:VGNC Symbol;Acc:VGNC:69683]  
ENSMMUG0000006217 general transcription factor IIH subunit 2 [Source:NCBI gene;Acc:700737]  
ENSMMUG0000006251 argonaute RISC component 1 [Source:VGNC Symbol;Acc:VGNC:81346]  
ENSMMUG0000006252 argonaute RISC catalytic component 3 [Source:NCBI gene;Acc:712543]  
ENSMMUG0000006309 unc-5 netrin receptor C [Source:VGNC Symbol;Acc:VGNC:78723]  
ENSMMUG0000006457 Rho guanine nucleotide exchange factor 40 [Source:VGNC Symbol;Acc:VGNC:69907]  
ENSMMUG0000006548 KIAA1549 [Source:VGNC Symbol;Acc:VGNC:73885]  
ENSMMUG0000006704 zygote arrest 1 [Source:VGNC Symbol;Acc:VGNC:79251]  
ENSMMUG0000006827 von Willebrand factor A domain containing 7 [Source:VGNC Symbol;Acc:VGNC:78941]  
ENSMMUG0000006828 valyl-tRNA synthetase 1 [Source:VGNC Symbol;Acc:VGNC:78755]  
ENSMMUG0000006898 integrin subunit beta 8 [Source:VGNC Symbol;Acc:VGNC:73791]  
ENSMMUG0000007159 tubulin epsilon and delta complex 1 [Source:VGNC Symbol;Acc:VGNC:79235]  
ENSMMUG0000007255 microtubule associated protein 1A [Source:VGNC Symbol;Acc:VGNC:74489]  
ENSMMUG0000007256 splicing factor 3b subunit 4 [Source:VGNC Symbol;Acc:VGNC:77182]  
ENSMMUG0000007504 myosin VC [Source:VGNC Symbol;Acc:VGNC:75117]  
ENSMMUG0000007524 RNA polymerase II subunit H [Source:VGNC Symbol;Acc:VGNC:76216]  
ENSMMUG0000007570 uveal autoantigen with coiled-coil domains and ankyrin repeats [Source:VGNC Symbol;Acc:VGNC:78995]

ENSMMUG0000007626 intersectin 1 [Source:VGNC Symbol;Acc:VGNC:73806]  
ENSMMUG0000007783 isoleucyl-tRNA synthetase 2, mitochondrial [Source:VGNC Symbol;Acc:VGNC:73458]  
ENSMMUG0000007821 ATP binding cassette subfamily B member 5 [Source:VGNC Symbol;Acc:VGNC:80321]  
ENSMMUG0000008009 family with sequence similarity 13 member B [Source:VGNC Symbol;Acc:VGNC:72268]  
ENSMMUG0000008212 tenomodulin [Source:VGNC Symbol;Acc:VGNC:79087]  
ENSMMUG0000008214 nuclear export mediator factor [Source:VGNC Symbol;Acc:VGNC:84407]  
ENSMMUG0000008228 unc-93 homolog A [Source:VGNC Symbol;Acc:VGNC:78724]  
ENSMMUG0000008525 minichromosome maintenance 9 homologous recombination repair factor [Source:VGNC Symbol;Acc:VGNC:83432]  
ENSMMUG0000008632 myosin, light chain 6, alkali, smooth muscle and non-muscle-like [Source:NCBI gene;Acc:710137]  
ENSMMUG0000008710 protocadherin 1 [Source:VGNC Symbol;Acc:VGNC:75775]  
ENSMMUG0000008718 zinc finger protein 280D [Source:NCBI gene;Acc:699509]  
ENSMMUG0000008795 polycystin 2, transient receptor potential cation channel [Source:NCBI gene;Acc:702179]  
ENSMMUG0000008797 ATP binding cassette subfamily G member 2 (Junior blood group) [Source:NCBI gene;Acc:574307]  
ENSMMUG0000008974 Fc receptor like 5 [Source:NCBI gene;Acc:718771]  
ENSMMUG0000009001 transmembrane 131 like [Source:VGNC Symbol;Acc:VGNC:79781]  
ENSMMUG0000009087 HDGF like 3 [Source:VGNC Symbol;Acc:VGNC:84346]  
ENSMMUG0000009114 maestro heat like repeat family member 7 [Source:NCBI gene;Acc:715310]  
ENSMMUG0000009319 transmembrane protein 161B [Source:VGNC Symbol;Acc:VGNC:84508]  
ENSMMUG0000009520 gephyrin [Source:VGNC Symbol;Acc:VGNC:72948]  
ENSMMUG0000009536 makorin ring finger protein 2 [Source:VGNC Symbol;Acc:VGNC:74878]  
ENSMMUG0000009694 solute carrier family 9 member A9 [Source:VGNC Symbol;Acc:VGNC:77747]  
ENSMMUG0000009702 mutS homolog 5 [Source:NCBI gene;Acc:715494]  
ENSMMUG0000009773 lysine demethylase 1A [Source:VGNC Symbol;Acc:VGNC:73928]  
ENSMMUG0000009948 histone deacetylase 1 [Source:NCBI gene;Acc:708441]  
ENSMMUG0000009951 MARCKS like 1 [Source:VGNC Symbol;Acc:VGNC:74723]  
ENSMMUG0000010049 NOP9 nucleolar protein [Source:VGNC Symbol;Acc:VGNC:75216]  
ENSMMUG0000010060 serine rich single-pass membrane protein 1 [Source:VGNC Symbol;Acc:VGNC:78014]  
ENSMMUG0000010113 steroid 5 alpha-reductase 3 [Source:VGNC Symbol;Acc:VGNC:82246]  
ENSMMUG0000010127 chitinase [Source:VGNC Symbol;Acc:VGNC:71540]  
ENSMMUG0000010252 FERM and PDZ domain containing 4 [Source:VGNC Symbol;Acc:VGNC:72802]  
ENSMMUG0000010312 shroom family member 1 [Source:VGNC Symbol;Acc:VGNC:77299]  
ENSMMUG0000010495 MAPK activated protein kinase 3 [Source:VGNC Symbol;Acc:VGNC:74654]  
ENSMMUG0000010621 heart and neural crest derivatives expressed 1 [Source:VGNC Symbol;Acc:VGNC:73345]  
ENSMMUG0000010648 DNA methyltransferase 3 like [Source:NCBI gene;Acc:722184]  
ENSMMUG0000010682 fibrillin 2 [Source:VGNC Symbol;Acc:VGNC:72624]  
ENSMMUG0000010689 fermitin family member 2 [Source:VGNC Symbol;Acc:VGNC:82144]  
ENSMMUG0000010695 adenosine deaminase RNA specific B1 [Source:VGNC Symbol;Acc:VGNC:69503]  
ENSMMUG0000010858 prolyl 4-hydroxylase subunit alpha 2 [Source:VGNC Symbol;Acc:VGNC:75742]  
ENSMMUG0000010879 NAD kinase [Source:VGNC Symbol;Acc:VGNC:75047]  
ENSMMUG0000011049 leucine rich repeat containing 1 [Source:VGNC Symbol;Acc:VGNC:81087]  
ENSMMUG0000011214 solute carrier family 12 member 2 [Source:VGNC Symbol;Acc:VGNC:77386]  
ENSMMUG0000011269 CF transmembrane conductance regulator [Source:VGNC Symbol;Acc:VGNC:71020]  
ENSMMUG0000011367 BUD23 rRNA methyltransferase and ribosome maturation factor [Source:VGNC Symbol;Acc:VGNC:70325]  
ENSMMUG0000011386 GTPase, IMAP family member 4 [Source:VGNC Symbol;Acc:VGNC:72982]  
ENSMMUG0000011555 interleukin 16 [Source:VGNC Symbol;Acc:VGNC:84355]  
ENSMMUG0000011573 cap methyltransferase 1 [Source:VGNC Symbol;Acc:VGNC:71271]  
ENSMMUG0000011702 tetraspanin 5 [Source:VGNC Symbol;Acc:VGNC:79086]  
ENSMMUG0000011810 FAT atypical cadherin 4 [Source:VGNC Symbol;Acc:VGNC:72552]  
ENSMMUG0000011902 oligosaccharyltransferase complex non-catalytic subunit [Source:NCBI gene;Acc:697283]  
ENSMMUG0000011974 calcium/calmodulin dependent protein kinase IV [Source:VGNC Symbol;Acc:VGNC:70526]  
ENSMMUG0000012120 zinc ribbon domain containing 1 [Source:VGNC Symbol;Acc:VGNC:78912]



ENSMMUG00000012124 ring finger protein 39 [Source:VGNC Symbol;Acc:VGNC:83458]  
ENSMMUG00000012151 glycerol kinase 5 [Source:VGNC Symbol;Acc:VGNC:73022]  
ENSMMUG00000012156 zinc finger CCHC-type containing 17 [Source:VGNC Symbol;Acc:VGNC:79840]  
ENSMMUG00000012192 erythrocyte membrane protein band 4.1 like 4A [Source:VGNC Symbol;Acc:VGNC:72039]  
ENSMMUG00000012203 aryl hydrocarbon receptor [Source:NCBI gene;Acc:714254]  
ENSMMUG00000012462 proteasome activator subunit 1 [Source:VGNC Symbol;Acc:VGNC:76455]  
ENSMMUG00000012473 proteasome activator subunit 2 [Source:VGNC Symbol;Acc:VGNC:76456]  
ENSMMUG00000012474 ring finger protein 31 [Source:NCBI gene;Acc:715239]  
ENSMMUG00000012479 lysine demethylase 4A [Source:NCBI gene;Acc:701272]  
ENSMMUG00000012480 REC8 meiotic recombination protein [Source:VGNC Symbol;Acc:VGNC:76746]  
ENSMMUG00000012481 importin 4 [Source:VGNC Symbol;Acc:VGNC:73630]  
ENSMMUG00000012561 NOP2/Sun RNA methyltransferase family member 7 [Source:VGNC Symbol;Acc:VGNC:75463]  
ENSMMUG00000012576 sorting nexin 6 [Source:NCBI gene;Acc:693626]  
ENSMMUG00000012615 pecanex 2 [Source:NCBI gene;Acc:712828]  
ENSMMUG00000012690 myocardial zonula adherens protein [Source:NCBI gene;Acc:700247]  
ENSMMUG00000012781 muscular LMNA interacting protein [Source:VGNC Symbol;Acc:VGNC:83434]  
ENSMMUG00000013008 cleavage stimulation factor subunit 2 [Source:VGNC Symbol;Acc:VGNC:71536]  
ENSMMUG00000013047 S-phase kinase associated protein 1 [Source:NCBI gene;Acc:100423634]  
ENSMMUG00000013302 family with sequence similarity 184 member A [Source:VGNC Symbol;Acc:VGNC:72308]  
ENSMMUG00000013848 fucosyltransferase 8 [Source:VGNC Symbol;Acc:VGNC:72829]  
ENSMMUG00000013862 ArfGAP with coiled-coil, ankyrin repeat and PH domains 3 [Source:VGNC Symbol;Acc:VGNC:69434]  
ENSMMUG00000013907 ribosomal protein S27a [Source:NCBI gene;Acc:718909]  
ENSMMUG00000013920 triggering receptor expressed on myeloid cells 2 [Source:VGNC Symbol;Acc:VGNC:79089]  
ENSMMUG00000013940 kinesin family member 4A [Source:NCBI gene;Acc:695574]  
ENSMMUG00000013943 glycerophosphodiester phosphodiesterase domain containing 2 [Source:VGNC Symbol;Acc:VGNC:72787]  
ENSMMUG00000014002 cyclin dependent kinase 16 [Source:VGNC Symbol;Acc:VGNC:71160]  
ENSMMUG00000014018 bromodomain testis associated [Source:VGNC Symbol;Acc:VGNC:70282]  
ENSMMUG00000014809 heterogeneous nuclear ribonucleoprotein C [Source:VGNC Symbol;Acc:VGNC:84348]  
ENSMMUG00000014955 nuclear receptor subfamily 3 group C member 2 [Source:VGNC Symbol;Acc:VGNC:75516]  
ENSMMUG00000014997 spalt like transcription factor 2 [Source:NCBI gene;Acc:708367]  
ENSMMUG00000015000 SPT16 homolog, facilitates chromatin remodeling subunit [Source:VGNC Symbol;Acc:VGNC:78054]  
ENSMMUG00000015002 chromodomain helicase DNA binding protein 8 [Source:VGNC Symbol;Acc:VGNC:71060]  
ENSMMUG00000015004 TOX high mobility group box family member 4 [Source:NCBI gene;Acc:706950]  
ENSMMUG00000015168 transmembrane p24 trafficking protein 10 [Source:NCBI gene;Acc:701522]  
ENSMMUG00000015238 O-linked N-acetylglucosamine (GlcNAc) transferase [Source:NCBI gene;Acc:698268]  
ENSMMUG00000015309 F-box protein 24 [Source:VGNC Symbol;Acc:VGNC:72495]  
ENSMMUG00000015311 leucine rich repeats and calponin homology domain containing 4 [Source:VGNC Symbol;Acc:VGNC:74441]  
ENSMMUG00000015375 cadherin EGF LAG seven-pass G-type receptor 2 [Source:VGNC Symbol;Acc:VGNC:71149]  
ENSMMUG00000015380 proline and serine rich coiled-coil 1 [Source:VGNC Symbol;Acc:VGNC:76307]  
ENSMMUG00000015577 RIO kinase 1 [Source:VGNC Symbol;Acc:VGNC:76767]  
ENSMMUG00000015590 siah E3 ubiquitin protein ligase 2 [Source:VGNC Symbol;Acc:VGNC:77215]  
ENSMMUG00000015619 ATP binding cassette subfamily B member 7 [Source:VGNC Symbol;Acc:VGNC:81340]  
ENSMMUG00000015634 centromere protein F [Source:VGNC Symbol;Acc:VGNC:71009]  
ENSMMUG00000015640 AF4/FMR2 family member 4 [Source:VGNC Symbol;Acc:VGNC:69629]  
ENSMMUG00000015661 protein tyrosine phosphatase receptor type U [Source:VGNC Symbol;Acc:VGNC:76624]  
ENSMMUG00000016093 adenosine deaminase RNA specific [Source:VGNC Symbol;Acc:VGNC:69502]  
ENSMMUG00000016286 protease, serine, 1 (trypsin 1) [Source:NCBI gene;Acc:698729]  
ENSMMUG00000016581 methyltransferase like 18 [Source:VGNC Symbol;Acc:VGNC:74606]  
ENSMMUG00000016683 phosphorylated adaptor for RNA export [Source:NCBI gene;Acc:702980]  
ENSMMUG00000016857 prostaglandin-endoperoxide synthase 2 [Source:VGNC Symbol;Acc:VGNC:76589]  
ENSMMUG00000016880 solute carrier family 39 member 8 [Source:VGNC Symbol;Acc:VGNC:77541]

ENSMMUG00000016896 solute carrier family 12 member 1 [Source:VGNC Symbol;Acc:VGNC:77385]  
ENSMMUG00000016993 PKHD1 ciliary IPT domain containing fibrocystin/polyductin [Source:VGNC Symbol;Acc:VGNC:76010]  
ENSMMUG00000017125 oxysterol binding protein like 11 [Source:VGNC Symbol;Acc:VGNC:75631]  
ENSMMUG00000017186 pleckstrin homology domain interacting protein [Source:VGNC Symbol;Acc:VGNC:75803]  
ENSMMUG00000017259 DnaJ heat shock protein family (Hsp40) member C6 [Source:NCBI gene;Acc:698682]  
ENSMMUG00000017351 stabilin 1 [Source:VGNC Symbol;Acc:VGNC:77956]  
ENSMMUG00000017374 G protein subunit beta 5 [Source:VGNC Symbol;Acc:VGNC:73097]  
ENSMMUG00000017396 3'(2'), 5'-bisphosphate nucleotidase 1 [Source:NCBI gene;Acc:721277]  
ENSMMUG00000017414 calcium voltage-gated channel subunit alpha1 S [Source:VGNC Symbol;Acc:VGNC:70507]  
ENSMMUG00000017549 ectonucleotide pyrophosphatase/phosphodiesterase 3 [Source:VGNC Symbol;Acc:VGNC:72224]  
ENSMMUG00000017678 kelch like family member 28 [Source:VGNC Symbol;Acc:VGNC:74085]  
ENSMMUG00000017703 collagen type XXV alpha 1 chain [Source:VGNC Symbol;Acc:VGNC:81374]  
ENSMMUG00000018057 uromodulin like 1 [Source:VGNC Symbol;Acc:VGNC:78717]  
ENSMMUG00000018058 ATP binding cassette subfamily G member 1 [Source:VGNC Symbol;Acc:VGNC:69584]  
ENSMMUG00000018163 caspase 9 [Source:NCBI gene;Acc:694544]  
ENSMMUG00000018332 family with sequence similarity 98 member B [Source:VGNC Symbol;Acc:VGNC:72583]  
ENSMMUG00000018342 required for meiotic nuclear division 1 homolog [Source:VGNC Symbol;Acc:VGNC:76797]  
ENSMMUG00000018346 coiled-coil domain containing 170 [Source:VGNC Symbol;Acc:VGNC:70832]  
ENSMMUG00000018625 NIPA like domain containing 1 [Source:NCBI gene;Acc:704998]  
ENSMMUG00000018739 sperm flagellar 2 [Source:VGNC Symbol;Acc:VGNC:82243]  
ENSMMUG00000018746 FAST kinase domains 3 [Source:VGNC Symbol;Acc:VGNC:72588]  
ENSMMUG00000018747 5-methyltetrahydrofolate-homocysteine methyltransferase reductase [Source:VGNC Symbol;Acc:VGNC:75079]  
ENSMMUG00000018827 multiple EGF like domains 10 [Source:VGNC Symbol;Acc:VGNC:74617]  
ENSMMUG00000018972 RNA polymerase III subunit G [Source:VGNC Symbol;Acc:VGNC:84480]  
ENSMMUG00000018974 LysM domain containing 3 [Source:VGNC Symbol;Acc:VGNC:74373]  
ENSMMUG00000018976 adhesion G protein-coupled receptor V1 [Source:VGNC Symbol;Acc:VGNC:69625]  
ENSMMUG00000019105 RNA 3'-terminal phosphate cyclase [Source:VGNC Symbol;Acc:VGNC:77043]  
ENSMMUG00000019262 calcium voltage-gated channel subunit alpha1 D [Source:VGNC Symbol;Acc:VGNC:70501]  
ENSMMUG00000019325 mechanistic target of rapamycin kinase [Source:VGNC Symbol;Acc:VGNC:75062]  
ENSMMUG00000019371 major histocompatibility complex, class II, DP alpha [Source:NCBI gene;Acc:717992]  
ENSMMUG00000019836 myocyte enhancer factor 2C [Source:VGNC Symbol;Acc:VGNC:84438]  
ENSMMUG00000019977 myosin heavy chain 15 [Source:VGNC Symbol;Acc:VGNC:84148]  
ENSMMUG00000019978 HERV-H LTR-associating 2 [Source:VGNC Symbol;Acc:VGNC:73377]  
ENSMMUG00000020047 integrin subunit beta 3 binding protein [Source:VGNC Symbol;Acc:VGNC:73787]  
ENSMMUG00000020184 carboxypeptidase vitellogenic like [Source:VGNC Symbol;Acc:VGNC:71406]  
ENSMMUG00000020289 CD83 molecule [Source:VGNC Symbol;Acc:VGNC:70783]  
ENSMMUG00000020348 BCL2 interacting protein 2 [Source:VGNC Symbol;Acc:VGNC:70272]  
ENSMMUG00000020435 amine oxidase copper containing 1 [Source:VGNC Symbol;Acc:VGNC:70033]  
ENSMMUG00000020731 terminal nucleotidyltransferase 2 [Source:VGNC Symbol;Acc:VGNC:79637]  
ENSMMUG00000021034 complement C6 [Source:VGNC Symbol;Acc:VGNC:70477]  
ENSMMUG00000021053 annexin A6 [Source:VGNC Symbol;Acc:VGNC:69951]  
ENSMMUG00000021078 ATPase Na<sup>+</sup>/K<sup>+</sup> transporting subunit beta 1 [Source:VGNC Symbol;Acc:VGNC:70176]  
ENSMMUG00000021145 family with sequence similarity 120B [Source:VGNC Symbol;Acc:VGNC:72311]  
ENSMMUG00000021242 natural killer cell triggering receptor [Source:VGNC Symbol;Acc:VGNC:81486]  
ENSMMUG00000021243 zinc finger and BTB domain containing 47 [Source:VGNC Symbol;Acc:VGNC:79645]  
ENSMMUG00000021244 kelch like family member 40 [Source:VGNC Symbol;Acc:VGNC:74165]  
ENSMMUG00000021246 hedgehog acyltransferase like [Source:NCBI gene;Acc:717333]  
ENSMMUG00000021499 sterile alpha motif domain containing 3 [Source:VGNC Symbol;Acc:VGNC:77079]  
ENSMMUG00000021507 chromosome 2 C3orf38 homolog [Source:VGNC Symbol;Acc:VGNC:70654]  
ENSMMUG00000021534 solute carrier family 16 member 10 [Source:NCBI gene;Acc:696132]  
ENSMMUG00000021552 RPGR interacting protein 1 [Source:VGNC Symbol;Acc:VGNC:77007]

ENSMMUG00000021572 solute carrier family 39 member 9 [Source:VGNC Symbol;Acc:VGNC:77523]  
ENSMMUG00000021656 golgin subfamily A member 8S [Source:NCBI gene;Acc:722977]  
ENSMMUG00000021772 nephrocystin 3 [Source:NCBI gene;Acc:717622]  
ENSMMUG00000021837 seryl-tRNA synthetase 1 [Source:NCBI gene;Acc:695046]  
ENSMMUG00000022153 solute carrier family 25 member 36 [Source:VGNC Symbol;Acc:VGNC:84079]  
ENSMMUG00000022183 spermatogenesis associated 1 [Source:NCBI gene;Acc:710462]  
ENSMMUG00000022191 laeverin [Source:VGNC Symbol;Acc:VGNC:74372]  
ENSMMUG00000022199 polyhomeotic homolog 3 [Source:VGNC Symbol;Acc:VGNC:75804]  
ENSMMUG00000022324 formimidoyltransferase cyclodeaminase [Source:VGNC Symbol;Acc:VGNC:72825]  
ENSMMUG00000022442 single stranded DNA binding protein 1 [Source:VGNC Symbol;Acc:VGNC:77886]  
ENSMMUG00000022484 ITPR interacting domain containing 1 [Source:VGNC Symbol;Acc:VGNC:73667]  
ENSMMUG00000022624 putative speedy protein E16 [Source:NCBI gene;Acc:718058]  
ENSMMUG00000022631 ubiquitin specific peptidase 21 [Source:VGNC Symbol;Acc:VGNC:78741]  
ENSMMUG00000022636 GTPase, IMAP family member 8 [Source:VGNC Symbol;Acc:VGNC:72981]  
ENSMMUG00000022762 OMA1 zinc metallopeptidase [Source:VGNC Symbol;Acc:VGNC:75485]  
ENSMMUG00000022963 solute carrier family 25 member 38 [Source:VGNC Symbol;Acc:VGNC:77571]  
ENSMMUG00000022982 IQ motif containing GTPase activating protein 2 [Source:VGNC Symbol;Acc:VGNC:73756]  
ENSMMUG00000023141 CDC like kinase 2 [Source:VGNC Symbol;Acc:VGNC:71259]  
ENSMMUG00000023265 A-kinase anchoring protein 12 [Source:VGNC Symbol;Acc:VGNC:69766]  
ENSMMUG00000023289 phospholipase D1 [Source:VGNC Symbol;Acc:VGNC:76171]  
ENSMMUG00000023676 espin [Source:NCBI gene;Acc:722532]  
ENSMMUG00000023679 tripartite motif containing 26 [Source:VGNC Symbol;Acc:VGNC:78854]  
ENSMMUG00000024125 small nucleolar RNA, H/ACA box 58 [Source:HGNC Symbol;Acc:HGNC:32652]  
ENSMMUG00000024598 U6 spliceosomal RNA [Source:RFAM;Acc:RF00026]  
ENSMMUG00000024966 U4 spliceosomal RNA [Source:RFAM;Acc:RF00015]  
ENSMMUG00000026103 U1 spliceosomal RNA [Source:RFAM;Acc:RF00003]  
ENSMMUG00000029475 zinc finger and BTB domain containing 2 [Source:VGNC Symbol;Acc:VGNC:79291]  
ENSMMUG00000030099 phospholipid phosphatase 1 [Source:VGNC Symbol;Acc:VGNC:76226]  
ENSMMUG00000032252 UbiA prenyltransferase domain containing 1 [Source:VGNC Symbol;Acc:VGNC:79881]  
ENSMMUG00000032427 neuroligin 3 [Source:NCBI gene;Acc:574216]  
ENSMMUG00000032973 mml-mir-550 [Source:miRBase;Acc:MI0007826]  
ENSMMUG00000037485  
ENSMMUG00000037551 Metazoan signal recognition particle RNA [Source:RFAM;Acc:RF00017]  
ENSMMUG00000037625  
ENSMMUG00000037806 chromosome 6 C5orf63 homolog [Source:NCBI gene;Acc:100423212]  
ENSMMUG00000038070 T cell receptor alpha variable 12-3 [Source:HGNC Symbol;Acc:HGNC:12107]  
ENSMMUG00000038389  
ENSMMUG00000038560 eukaryotic translation elongation factor 1 epsilon 1 [Source:NCBI gene;Acc:695426]  
ENSMMUG00000038667  
ENSMMUG00000039020 zinc finger protein 141 [Source:NCBI gene;Acc:714265]  
ENSMMUG00000039317 cAMP responsive element binding protein 5 [Source:VGNC Symbol;Acc:VGNC:81295]  
ENSMMUG00000039781 sosondowah ankyrin repeat domain family member A [Source:VGNC Symbol;Acc:VGNC:84498]  
ENSMMUG00000039944 Ras protein specific guanine nucleotide releasing factor 2 [Source:VGNC Symbol;Acc:VGNC:84486]  
ENSMMUG00000040154 T cell receptor alpha variable 9-2 [Source:HGNC Symbol;Acc:HGNC:12154]  
ENSMMUG00000040506 H2B clustered histone 18 [Source:HGNC Symbol;Acc:HGNC:24700]  
ENSMMUG00000040694 LCK proto-oncogene, Src family tyrosine kinase [Source:NCBI gene;Acc:717704]  
ENSMMUG00000040771  
ENSMMUG00000042299 DENN domain containing 2A [Source:VGNC Symbol;Acc:VGNC:81302]  
ENSMMUG00000043001 milk fat globule EGF and factor V/VIII domain containing [Source:NCBI gene;Acc:703501]  
ENSMMUG00000043161 endogenous retrovirus group FRD member 1, envelope [Source:VGNC Symbol;Acc:VGNC:81068]  
ENSMMUG00000043229 carbohydrate sulfotransferase 14 [Source:NCBI gene;Acc:703115]

ENSMMUG00000043727 zinc finger protein 654 [Source:VGNC Symbol;Acc:VGNC:82560]  
ENSMMUG00000044175 forkhead box O6 [Source:NCBI gene;Acc:697505]  
ENSMMUG00000044628  
ENSMMUG00000044759  
ENSMMUG00000044958 adhesion G protein-coupled receptor G6 [Source:VGNC Symbol;Acc:VGNC:81009]  
ENSMMUG00000045584 leucine zipper protein 1 [Source:NCBI gene;Acc:718626]  
ENSMMUG00000046428  
ENSMMUG00000047741 Metazoan signal recognition particle RNA [Source:RFAM;Acc:RF00017]  
ENSMMUG00000047994 CGG triplet repeat binding protein 1 [Source:VGNC Symbol;Acc:VGNC:84203]  
ENSMMUG00000048302 ArfGAP with FG repeats 2 [Source:VGNC Symbol;Acc:VGNC:80329]  
ENSMMUG00000048493 neuroblastoma breakpoint family member 6-like protein [Source:NCBI gene;Acc:711999]  
ENSMMUG00000048823  
ENSMMUG00000049196 dispatched RND transporter family member 3 [Source:NCBI gene;Acc:722727]  
ENSMMUG00000049351 MAGE family member E1 [Source:NCBI gene;Acc:705379]  
ENSMMUG00000049437 Metazoan signal recognition particle RNA [Source:RFAM;Acc:RF00017]  
ENSMMUG00000049563  
ENSMMUG00000049786  
ENSMMUG00000049908 Metazoan signal recognition particle RNA [Source:RFAM;Acc:RF00017]  
ENSMMUG00000050239  
ENSMMUG00000050269 T cell receptor beta variable 14 [Source:HGNC Symbol;Acc:HGNC:12189]  
ENSMMUG00000050300  
ENSMMUG00000050407  
ENSMMUG00000050445 ribonuclease A family member 8 [Source:NCBI gene;Acc:716333]  
ENSMMUG00000051020 zinc finger protein 467 [Source:NCBI gene;Acc:712106]  
ENSMMUG00000051032 serine protease 2 [Source:NCBI gene;Acc:698352]  
ENSMMUG00000051155 U2 spliceosomal RNA [Source:RFAM;Acc:RF00004]  
ENSMMUG00000051169  
ENSMMUG00000051271  
ENSMMUG00000051381 Metazoan signal recognition particle RNA [Source:RFAM;Acc:RF00017]  
ENSMMUG00000051522 Metazoan signal recognition particle RNA [Source:RFAM;Acc:RF00017]  
ENSMMUG00000051523 Metazoan signal recognition particle RNA [Source:RFAM;Acc:RF00017]  
ENSMMUG00000051552  
ENSMMUG00000051641  
ENSMMUG00000051661  
ENSMMUG00000052176  
ENSMMUG00000052287  
ENSMMUG00000052518 SIVA1 apoptosis inducing factor [Source:NCBI gene;Acc:706688]  
ENSMMUG00000052535  
ENSMMUG00000052574  
ENSMMUG00000052609 ribosomal protein L34 [Source:NCBI gene;Acc:696636]  
ENSMMUG00000052682  
ENSMMUG00000052830  
ENSMMUG00000053323  
ENSMMUG00000053344 splA/ryanodine receptor domain and SOCS box containing 4 [Source:NCBI gene;Acc:715278]  
ENSMMUG00000053384  
ENSMMUG00000054116 T cell receptor alpha variable 8-6 [Source:HGNC Symbol;Acc:HGNC:12151]  
ENSMMUG00000054302 antioxidant 1 copper chaperone [Source:NCBI gene;Acc:712464]  
ENSMMUG00000054315  
ENSMMUG00000054417  
ENSMMUG00000054590  
ENSMMUG00000054615

ENSMMUG00000054793  
ENSMMUG00000054817 immunoglobulin binding protein 1 [Source:NCBI gene;Acc:694632]  
ENSMMUG00000054821  
ENSMMUG00000055117  
ENSMMUG00000055207  
ENSMMUG00000055229  
ENSMMUG00000055244 U6 spliceosomal RNA [Source:RFAM;Acc:RF00026]  
ENSMMUG00000055271  
ENSMMUG00000055272 putative uncharacterized protein ZNRD1-AS1 [Source:NCBI gene;Acc:712069]  
ENSMMUG00000055392  
ENSMMUG00000055481 regulator of G protein signaling 16 [Source:NCBI gene;Acc:715599]  
ENSMMUG00000055585  
ENSMMUG00000055759 Metazoan signal recognition particle RNA [Source:RFAM;Acc:RF00017]  
ENSMMUG00000055809  
ENSMMUG00000055835 nuclear casein kinase and cyclin dependent kinase substrate 1 [Source:NCBI gene;Acc:697298]  
ENSMMUG00000056103 growth arrest and DNA damage inducible alpha [Source:NCBI gene;Acc:701054]  
ENSMMUG00000056116  
ENSMMUG00000056363  
ENSMMUG00000056369 SAP30 like [Source:NCBI gene;Acc:714400]  
ENSMMUG00000056544  
ENSMMUG00000056664 U6 spliceosomal RNA [Source:RFAM;Acc:RF00026]  
ENSMMUG00000056687  
ENSMMUG00000056737  
ENSMMUG00000056790  
ENSMMUG00000056910  
ENSMMUG00000057338  
ENSMMUG00000057494 T cell receptor beta variable 7-9 [Source:HGNC Symbol;Acc:HGNC:12243]  
ENSMMUG00000057544  
ENSMMUG00000057606 GPRIN family member 3 [Source:NCBI gene;Acc:703567]  
ENSMMUG00000057697  
ENSMMUG00000057763  
ENSMMUG00000057859  
ENSMMUG00000058332 testis expressed 46 [Source:NCBI gene;Acc:709002]  
ENSMMUG00000058580 tripartite motif containing 40 [Source:NCBI gene;Acc:100427925]  
ENSMMUG00000058698  
ENSMMUG00000058974  
ENSMMUG00000059019  
ENSMMUG00000059080  
ENSMMUG00000059101  
ENSMMUG00000059241  
ENSMMUG00000059525  
ENSMMUG00000059659  
ENSMMUG00000059707 MIS18 kinetochore protein A [Source:NCBI gene;Acc:709275]  
ENSMMUG00000059922 family with sequence similarity 104 member B [Source:NCBI gene;Acc:705418]  
ENSMMUG00000059938  
ENSMMUG00000060011 hyaluronan and proteoglycan link protein 2 [Source:NCBI gene;Acc:718500]  
ENSMMUG00000060221 growth differentiation factor 9 [Source:NCBI gene;Acc:712792]  
ENSMMUG00000060278 Metazoan signal recognition particle RNA [Source:RFAM;Acc:RF00017]  
ENSMMUG00000060319 Metazoan signal recognition particle RNA [Source:RFAM;Acc:RF00017]  
ENSMMUG00000060503 Metazoan signal recognition particle RNA [Source:RFAM;Acc:RF00017]  
ENSMMUG00000060505

ENSMMUG00000060744  
ENSMMUG00000060798  
ENSMMUG00000060830  
ENSMMUG00000060892  
ENSMMUG00000060894 Metazoan signal recognition particle RNA [Source:RFAM;Acc:RF00017]  
ENSMMUG00000060940 acidic residue methyltransferase 1 [Source:NCBI gene;Acc:704570]  
ENSMMUG00000061239  
ENSMMUG00000061261 Metazoan signal recognition particle RNA [Source:RFAM;Acc:RF00017]  
ENSMMUG00000061590  
ENSMMUG00000061766  
ENSMMUG00000061796  
ENSMMUG00000061973  
ENSMMUG00000062140  
ENSMMUG00000062443  
ENSMMUG00000062527  
ENSMMUG00000062538 adenylate cyclase type 10 [Source:NCBI gene;Acc:719662]  
ENSMMUG00000063177 StAR related lipid transfer domain containing 4 [Source:NCBI gene;Acc:706654]  
ENSMMUG00000063268  
ENSMMUG00000063354  
ENSMMUG00000063703  
ENSMMUG00000064202  
ENSMMUG00000064529  
ENSMMUG00000064721  
ENSMMUG00000064748 Metazoan signal recognition particle RNA [Source:RFAM;Acc:RF00017]  
ENSMMUG00000064804  
ENSMMUG00000065257  
ENSMMUG00000000117 HCK proto-oncogene, Src family tyrosine kinase [Source:VGNC Symbol;Acc:VGNC:73353]  
ENSMMUG00000000229 transient receptor potential cation channel subfamily C member 4 associated protein [Source:VGNC Symbol;Acc:VGNC:79014]  
ENSMMUG00000000238 HECT domain E3 ubiquitin protein ligase 2 [Source:VGNC Symbol;Acc:VGNC:73246]  
ENSMMUG00000000288 C-C motif chemokine ligand 2 [Source:VGNC Symbol;Acc:VGNC:70698]  
ENSMMUG00000000388 plectin [Source:VGNC Symbol;Acc:VGNC:76173]  
ENSMMUG00000000496 zinc finger and BTB domain containing 6 [Source:VGNC Symbol;Acc:VGNC:79047]  
ENSMMUG00000000797 exophilin 5 [Source:VGNC Symbol;Acc:VGNC:72412]  
ENSMMUG00000000974 mutS homolog 2 [Source:VGNC Symbol;Acc:VGNC:74931]  
ENSMMUG00000000981 T-box transcription factor 6 [Source:VGNC Symbol;Acc:VGNC:78276]  
ENSMMUG00000000982 protein phosphatase 4 catalytic subunit [Source:VGNC Symbol;Acc:VGNC:76384]  
ENSMMUG00000000983 aldolase, fructose-bisphosphate A [Source:NCBI gene;Acc:708406]  
ENSMMUG00000001040 nuclear GTPase, germinal center associated [Source:VGNC Symbol;Acc:VGNC:75497]  
ENSMMUG00000001061 BICD cargo adaptor 2 [Source:VGNC Symbol;Acc:VGNC:70333]  
ENSMMUG00000001121 zinc finger protein 689 [Source:VGNC Symbol;Acc:VGNC:79480]  
ENSMMUG00000001172 spermatogenesis and oogenesis specific basic helix-loop-helix 2 [Source:NCBI gene;Acc:693608]  
ENSMMUG00000001357 tetraspanin 11 [Source:VGNC Symbol;Acc:VGNC:79882]  
ENSMMUG00000001800 cullin 5 [Source:VGNC Symbol;Acc:VGNC:71570]  
ENSMMUG00000001940 NME/NM23 nucleoside diphosphate kinase 2 [Source:NCBI gene;Acc:100533957]  
ENSMMUG00000001942 mbt domain containing 1 [Source:VGNC Symbol;Acc:VGNC:74538]  
ENSMMUG00000001995 chromosome 14 C11orf16 homolog [Source:NCBI gene;Acc:705319]  
ENSMMUG00000002032 exportin 7 [Source:VGNC Symbol;Acc:VGNC:78946]  
ENSMMUG00000002090 ATPase H+ transporting V1 subunit B1 [Source:VGNC Symbol;Acc:VGNC:70184]  
ENSMMUG00000002093 testis expressed 261 [Source:NCBI gene;Acc:703863]  
ENSMMUG00000002103 delta/notch like EGF repeat containing [Source:VGNC Symbol;Acc:VGNC:71895]  
ENSMMUG00000002109 proline and serine rich 1 [Source:VGNC Symbol;Acc:VGNC:76291]



ENSMMUG00000002113 NHL repeat containing 3 [Source:VGNC Symbol;Acc:VGNC:75291]  
ENSMMUG00000002166 tousled like kinase 2 [Source:VGNC Symbol;Acc:VGNC:78368]  
ENSMMUG00000002182 phosphatidylserine decarboxylase [Source:VGNC Symbol;Acc:VGNC:76005]  
ENSMMUG00000002183 oxysterol binding protein like 6 [Source:VGNC Symbol;Acc:VGNC:75627]  
ENSMMUG00000002250 beta-1,3-glucuronyltransferase 1 [Source:VGNC Symbol;Acc:VGNC:70207]  
ENSMMUG00000002321 solute carrier family 24 member 3 [Source:VGNC Symbol;Acc:VGNC:77426]  
ENSMMUG00000002549 trehalase [Source:NCBI gene;Acc:706449]  
ENSMMUG00000002657 olfactomedin 4 [Source:VGNC Symbol;Acc:VGNC:75418]  
ENSMMUG00000002678 integrin subunit beta 6 [Source:VGNC Symbol;Acc:VGNC:73789]  
ENSMMUG00000002809 unc-80 homolog, NALCN channel complex subunit [Source:NCBI gene;Acc:713007]  
ENSMMUG00000003221 DENN domain containing 5B [Source:VGNC Symbol;Acc:VGNC:71772]  
ENSMMUG00000003260  
ENSMMUG00000003288 glutamic--pyruvic transaminase 2 [Source:VGNC Symbol;Acc:VGNC:72962]  
ENSMMUG00000003394 cilia and flagella associated protein 300 [Source:VGNC Symbol;Acc:VGNC:71120]  
ENSMMUG00000003771 ubiquitin like 3 [Source:VGNC Symbol;Acc:VGNC:78701]  
ENSMMUG00000003877 KAT8 regulatory NSL complex subunit 2 [Source:VGNC Symbol;Acc:VGNC:73910]  
ENSMMUG00000003946 ADP-ribosyltransferase 5 [Source:VGNC Symbol;Acc:VGNC:69890]  
ENSMMUG00000003973 autophagy related 2A [Source:VGNC Symbol;Acc:VGNC:70145]  
ENSMMUG00000004153 ATM serine/threonine kinase [Source:VGNC Symbol;Acc:VGNC:70173]  
ENSMMUG00000004157 nuclear protein, coactivator of histone transcription [Source:VGNC Symbol;Acc:VGNC:75379]  
ENSMMUG00000004205 phospholipase B domain containing 2 [Source:VGNC Symbol;Acc:VGNC:76122]  
ENSMMUG00000004215 LRAT domain containing 1 [Source:VGNC Symbol;Acc:VGNC:74321]  
ENSMMUG00000004237 TNF receptor superfamily member 19 [Source:VGNC Symbol;Acc:VGNC:78588]  
ENSMMUG00000004386 sperm associated antigen 1 [Source:VGNC Symbol;Acc:VGNC:77849]  
ENSMMUG00000004387 ring finger protein 19A, RBR E3 ubiquitin protein ligase [Source:VGNC Symbol;Acc:VGNC:82224]  
ENSMMUG00000004412 arginine and serine rich coiled-coil 2 [Source:VGNC Symbol;Acc:VGNC:77139]  
ENSMMUG00000004675 smoothelin [Source:VGNC Symbol;Acc:VGNC:77661]  
ENSMMUG00000004821 membrane spanning 4-domains A14 [Source:NCBI gene;Acc:697083]  
ENSMMUG00000004885 quiescin sulfhydryl oxidase 2 [Source:VGNC Symbol;Acc:VGNC:76568]  
ENSMMUG00000004974 tripartite motif containing 21 [Source:VGNC Symbol;Acc:VGNC:78556]  
ENSMMUG00000005067 elongator acetyltransferase complex subunit 3 [Source:VGNC Symbol;Acc:VGNC:72080]  
ENSMMUG00000005204 VPS16 core subunit of CORVET and HOPS complexes [Source:VGNC Symbol;Acc:VGNC:78966]  
ENSMMUG00000005246 zinc finger protein 740 [Source:VGNC Symbol;Acc:VGNC:79665]  
ENSMMUG00000005295 parathyroid hormone 2 receptor [Source:VGNC Symbol;Acc:VGNC:76592]  
ENSMMUG00000005301 ATP binding cassette subfamily B member 9 [Source:VGNC Symbol;Acc:VGNC:81341]  
ENSMMUG00000005751 adenosine deaminase tRNA specific 1 [Source:VGNC Symbol;Acc:VGNC:69504]  
ENSMMUG00000005851 B-box and SPRY domain containing [Source:VGNC Symbol;Acc:VGNC:70342]  
ENSMMUG00000005895 nucleobindin 2 [Source:VGNC Symbol;Acc:VGNC:75549]  
ENSMMUG00000005913 activating transcription factor 7 interacting protein 2 [Source:VGNC Symbol;Acc:VGNC:70103]  
ENSMMUG00000006197 plasminogen receptor with a C-terminal lysine [Source:VGNC Symbol;Acc:VGNC:76098]  
ENSMMUG00000006713 cyclin Y [Source:VGNC Symbol;Acc:VGNC:70840]  
ENSMMUG00000006731 CECR2 histone acetyl-lysine reader [Source:VGNC Symbol;Acc:VGNC:84530]  
ENSMMUG00000006775 proenkephalin [Source:VGNC Symbol;Acc:VGNC:75941]  
ENSMMUG00000007001 protein phosphatase 4 regulatory subunit 3B [Source:VGNC Symbol;Acc:VGNC:76342]  
ENSMMUG00000007003 polyribonucleotide nucleotidyltransferase 1 [Source:VGNC Symbol;Acc:VGNC:76095]  
ENSMMUG00000007115 RALY RNA binding protein like [Source:VGNC Symbol;Acc:VGNC:82217]  
ENSMMUG00000007187 haloacid dehalogenase like hydrolase domain containing 3 [Source:VGNC Symbol;Acc:VGNC:73250]  
ENSMMUG00000007313 histone acetyltransferase 1 [Source:VGNC Symbol;Acc:VGNC:73349]  
ENSMMUG00000007325 Xrcc1 N-terminal domain containing 1 [Source:NCBI gene;Acc:115945140]  
ENSMMUG00000007326 ring finger protein 121 [Source:VGNC Symbol;Acc:VGNC:76788]  
ENSMMUG00000007330 nuclear mitotic apparatus protein 1 [Source:VGNC Symbol;Acc:VGNC:75556]

ENSMMUG0000007411 integrin alpha FG-GAP repeat containing 2 [Source:VGNC Symbol;Acc:VGNC:73690]  
ENSMMUG0000007424 nuclear receptor interacting protein 2 [Source:VGNC Symbol;Acc:VGNC:75448]  
ENSMMUG0000007620 transmembrane serine protease 4 [Source:VGNC Symbol;Acc:VGNC:78577]  
ENSMMUG0000007628 cell adhesion associated, oncogene regulated [Source:VGNC Symbol;Acc:VGNC:70961]  
ENSMMUG0000007692 apolipoprotein B [Source:VGNC Symbol;Acc:VGNC:69985]  
ENSMMUG0000007709 crooked neck pre-mRNA splicing factor 1 [Source:VGNC Symbol;Acc:VGNC:71412]  
ENSMMUG0000007724 aprataxin [Source:VGNC Symbol;Acc:VGNC:69838]  
ENSMMUG0000007868 AP2 associated kinase 1 [Source:VGNC Symbol;Acc:VGNC:82094]  
ENSMMUG0000007917 carbonic anhydrase 4 [Source:NCBI gene;Acc:716919]  
ENSMMUG0000008113 pleckstrin homology domain containing M3 [Source:NCBI gene;Acc:711125]  
ENSMMUG0000008199 leucine-rich repeat-containing protein 37A [Source:NCBI gene;Acc:714675]  
ENSMMUG0000008346 structural maintenance of chromosomes 5 [Source:NCBI gene;Acc:702219]  
ENSMMUG0000008459 pleckstrin homology and RUN domain containing M1 [Source:NCBI gene;Acc:716464]  
ENSMMUG0000008539 uroporphyrinogen III synthase [Source:VGNC Symbol;Acc:VGNC:78731]  
ENSMMUG0000008540 ring finger protein 112 [Source:VGNC Symbol;Acc:VGNC:76724]  
ENSMMUG0000008643 general transcription factor IIIC subunit 3 [Source:VGNC Symbol;Acc:VGNC:73317]  
ENSMMUG0000008867 exoribonuclease 1 [Source:VGNC Symbol;Acc:VGNC:72324]  
ENSMMUG0000008941 DNA topoisomerase II alpha [Source:VGNC Symbol;Acc:VGNC:78620]  
ENSMMUG0000009038 titin [Source:NCBI gene;Acc:703527]  
ENSMMUG0000009155 SIN3-HDAC complex associated factor [Source:NCBI gene;Acc:694162]  
ENSMMUG0000009303 coiled-coil domain containing 38 [Source:VGNC Symbol;Acc:VGNC:70880]  
ENSMMUG0000009493 family with sequence similarity 120A [Source:NCBI gene;Acc:717459]  
ENSMMUG0000009519 WASH complex subunit 4 [Source:VGNC Symbol;Acc:VGNC:79783]  
ENSMMUG0000009524 adaptor protein, phosphotyrosine interacting with PH domain and leucine zipper 2 [Source:VGNC Symbol;Acc:VGNC:69861]  
ENSMMUG0000009695 BTB domain containing 10 [Source:VGNC Symbol;Acc:VGNC:70361]  
ENSMMUG0000009782 C-C motif chemokine ligand 7 [Source:NCBI gene;Acc:714751]  
ENSMMUG0000009785 C-C motif chemokine ligand 13 [Source:VGNC Symbol;Acc:VGNC:70696]  
ENSMMUG0000009831 TBC1 domain family member 2 [Source:VGNC Symbol;Acc:VGNC:78157]  
ENSMMUG0000009965 chromosome 15 C9orf50 homolog [Source:VGNC Symbol;Acc:VGNC:70365]  
ENSMMUG00000010050 small nuclear ribonucleoprotein polypeptides B and B1 [Source:VGNC Symbol;Acc:VGNC:77676]  
ENSMMUG00000010405 family with sequence similarity 171 member B [Source:VGNC Symbol;Acc:VGNC:72404]  
ENSMMUG00000010453 folate receptor beta [Source:VGNC Symbol;Acc:VGNC:72690]  
ENSMMUG00000010508 carbamoyl-phosphate synthase 1 [Source:VGNC Symbol;Acc:VGNC:71471]  
ENSMMUG00000010543 PHD finger protein 23 [Source:VGNC Symbol;Acc:VGNC:75877]  
ENSMMUG00000010601 solute carrier family 43 member 3 [Source:NCBI gene;Acc:706267]  
ENSMMUG00000010819 fibroblast growth factor receptor substrate 2 [Source:VGNC Symbol;Acc:VGNC:72732]  
ENSMMUG00000010820 chaperonin containing TCP1 subunit 2 [Source:VGNC Symbol;Acc:VGNC:70745]  
ENSMMUG00000010871 crystallin gamma B [Source:VGNC Symbol;Acc:VGNC:71507]  
ENSMMUG00000010959 kelch like family member 9 [Source:VGNC Symbol;Acc:VGNC:74080]  
ENSMMUG00000011116 NADPH oxidase 4 [Source:VGNC Symbol;Acc:VGNC:75376]  
ENSMMUG00000011183 olfactomedin like 2A [Source:VGNC Symbol;Acc:VGNC:75472]  
ENSMMUG00000011282 DnaJ heat shock protein family (Hsp40) member C9 [Source:NCBI gene;Acc:707599]  
ENSMMUG00000011401 amyloid beta precursor protein binding family A member 1 [Source:VGNC Symbol;Acc:VGNC:69976]  
ENSMMUG00000011593 regulator of cell cycle [Source:VGNC Symbol;Acc:VGNC:76783]  
ENSMMUG00000011811 anoctamin 6 [Source:VGNC Symbol;Acc:VGNC:69902]  
ENSMMUG00000011845 hexokinase 2 [Source:VGNC Symbol;Acc:VGNC:73475]  
ENSMMUG00000011986 chibby family member 2 [Source:VGNC Symbol;Acc:VGNC:78029]  
ENSMMUG00000012029 sulfatase 2 [Source:VGNC Symbol;Acc:VGNC:78179]  
ENSMMUG00000012056 structural maintenance of chromosomes 6 [Source:VGNC Symbol;Acc:VGNC:77746]  
ENSMMUG00000012058 GEN1 Holliday junction 5' flap endonuclease [Source:VGNC Symbol;Acc:VGNC:72790]  
ENSMMUG00000012290 GLIPR1 like 2 [Source:VGNC Symbol;Acc:VGNC:81413]

ENSMMUG00000012449 synaptotagmin like 2 [Source:VGNC Symbol;Acc:VGNC:78123]  
ENSMMUG00000012486 retinoic acid receptor alpha [Source:VGNC Symbol;Acc:VGNC:76662]  
ENSMMUG00000012778 rabphilin 3A [Source:VGNC Symbol;Acc:VGNC:77033]  
ENSMMUG00000013093 uncharacterized LOC106993385 [Source:NCBI gene;Acc:106993385]  
ENSMMUG00000013094 lipoyl(octanoyl) transferase 2 [Source:NCBI gene;Acc:718425]  
ENSMMUG00000013345 folliculin [Source:NCBI gene;Acc:698082]  
ENSMMUG00000013476 PHD finger protein 11 [Source:VGNC Symbol;Acc:VGNC:75814]  
ENSMMUG00000013501 CD68 molecule [Source:VGNC Symbol;Acc:VGNC:82121]  
ENSMMUG00000013503 mannose-P-dolichol utilization defect 1 [Source:VGNC Symbol;Acc:VGNC:74913]  
ENSMMUG00000013510 FMR1 autosomal homolog 2 [Source:NCBI gene;Acc:721889]  
ENSMMUG00000013552 scribble planar cell polarity protein [Source:HGNC Symbol;Acc:HGNC:30377]  
ENSMMUG00000013643 zinc finger CCHC-type containing 8 [Source:VGNC Symbol;Acc:VGNC:79487]  
ENSMMUG00000013666 copine 8 [Source:NCBI gene;Acc:114669741]  
ENSMMUG00000013707 heat shock protein family H (Hsp110) member 1 [Source:NCBI gene;Acc:721956]  
ENSMMUG00000013799 ATP binding cassette subfamily G member 4 [Source:VGNC Symbol;Acc:VGNC:69390]  
ENSMMUG00000013812 ubiquitin specific peptidase 44 [Source:VGNC Symbol;Acc:VGNC:79221]  
ENSMMUG00000014027 nitric oxide synthase 1 [Source:VGNC Symbol;Acc:VGNC:75368]  
ENSMMUG00000014049 collagen type VI alpha 3 chain [Source:VGNC Symbol;Acc:VGNC:71303]  
ENSMMUG00000014307 myostatin [Source:VGNC Symbol;Acc:VGNC:74870]  
ENSMMUG00000014314 ankyrin and armadillo repeat containing [Source:VGNC Symbol;Acc:VGNC:69706]  
ENSMMUG00000014334 dopamine receptor D2 [Source:VGNC Symbol;Acc:VGNC:71989]  
ENSMMUG00000014350 MAX interactor 1, dimerization protein [Source:VGNC Symbol;Acc:VGNC:75087]  
ENSMMUG00000014394 DnaJ heat shock protein family (Hsp40) member C10 [Source:VGNC Symbol;Acc:VGNC:84229]  
ENSMMUG00000014424 ADP ribosylation factor guanine nucleotide exchange factor 1 [Source:VGNC Symbol;Acc:VGNC:69834]  
ENSMMUG00000014484 zinc finger protein 641 [Source:NCBI gene;Acc:708246]  
ENSMMUG00000014672 mitogen-activated protein kinase kinase kinase 20 [Source:NCBI gene;Acc:698274]  
ENSMMUG00000014685 pyruvate dehydrogenase kinase 2 [Source:VGNC Symbol;Acc:VGNC:75933]  
ENSMMUG00000014687 sterile alpha motif domain containing 14 [Source:VGNC Symbol;Acc:VGNC:77112]  
ENSMMUG00000015117 X-prolyl aminopeptidase 1 [Source:VGNC Symbol;Acc:VGNC:78810]  
ENSMMUG00000015141 ankyrin repeat domain 16 [Source:NCBI gene;Acc:720787]  
ENSMMUG00000015143 F-box DNA helicase 1 [Source:NCBI gene;Acc:720797]  
ENSMMUG00000015151 interleukin 2 receptor subunit alpha [Source:NCBI gene;Acc:574300]  
ENSMMUG00000015279 SWI/SNF related, matrix associated, actin dependent regulator of chromatin, subfamily a, member 2 [Source:VGNC Symbol;Acc:VGNC:77647]  
ENSMMUG00000015522 GRAM domain containing 1B [Source:VGNC Symbol;Acc:VGNC:73028]  
ENSMMUG00000015550 PR/SET domain 4 [Source:VGNC Symbol;Acc:VGNC:76393]  
ENSMMUG00000015962 AT-rich interaction domain 2 [Source:VGNC Symbol;Acc:VGNC:69858]  
ENSMMUG00000015970 coiled-coil domain containing 150 [Source:VGNC Symbol;Acc:VGNC:84222]  
ENSMMUG00000016018 establishment of sister chromatid cohesion N-acetyltransferase 2 [Source:VGNC Symbol;Acc:VGNC:72374]  
ENSMMUG00000016077 isocitrate dehydrogenase (NADP(+)) 1 [Source:NCBI gene;Acc:710019]  
ENSMMUG00000016262 tetratricopeptide repeat domain 38 [Source:VGNC Symbol;Acc:VGNC:79574]  
ENSMMUG00000016314 family with sequence similarity 166 member B [Source:VGNC Symbol;Acc:VGNC:72421]  
ENSMMUG00000016316 testis associated actin remodelling kinase 1 [Source:VGNC Symbol;Acc:VGNC:78314]  
ENSMMUG00000016331 glucosylceramidase beta 2 [Source:VGNC Symbol;Acc:VGNC:72741]  
ENSMMUG00000016543 CREB/ATF bZIP transcription factor [Source:VGNC Symbol;Acc:VGNC:71538]  
ENSMMUG00000016717 polycystin 1 like 3, transient receptor potential channel interacting [Source:VGNC Symbol;Acc:VGNC:75846]  
ENSMMUG00000016791 doublecortin like kinase 1 [Source:VGNC Symbol;Acc:VGNC:71745]  
ENSMMUG00000016845 zinc finger E-box binding homeobox 2 [Source:VGNC Symbol;Acc:VGNC:78969]  
ENSMMUG00000016871 alkaline phosphatase, intestinal [Source:VGNC Symbol;Acc:VGNC:69800]  
ENSMMUG00000016927 solute carrier family 2 member 10 [Source:VGNC Symbol;Acc:VGNC:77465]  
ENSMMUG00000016983 acrosin binding protein [Source:VGNC Symbol;Acc:VGNC:69445]  
ENSMMUG00000017113 ubiquitin specific peptidase 32 [Source:NCBI gene;Acc:716857]

ENSMMUG00000017143 LDL receptor related protein 2 [Source:VGNC Symbol;Acc:VGNC:81430]  
ENSMMUG00000017145 cell division cycle 123 [Source:VGNC Symbol;Acc:VGNC:70768]  
ENSMMUG00000017173 heat shock protein family A (Hsp70) member 14 [Source:NCBI gene;Acc:697257]  
ENSMMUG00000017204 programmed cell death 4 [Source:VGNC Symbol;Acc:VGNC:75794]  
ENSMMUG00000017206 SHOC2 leucine rich repeat scaffold protein [Source:VGNC Symbol;Acc:VGNC:81569]  
ENSMMUG00000017207 dopamine beta-hydroxylase [Source:VGNC Symbol;Acc:VGNC:71740]  
ENSMMUG00000017210 sarcosine dehydrogenase [Source:VGNC Symbol;Acc:VGNC:76971]  
ENSMMUG00000017230 V-set and transmembrane domain containing 2 like [Source:NCBI gene;Acc:707394]  
ENSMMUG00000017234 leucine rich repeat containing 59 [Source:VGNC Symbol;Acc:VGNC:81436]  
ENSMMUG00000017252 spermatogenesis associated 20 [Source:VGNC Symbol;Acc:VGNC:77993]  
ENSMMUG00000017524 phosphoinositide kinase, FYVE-type zinc finger containing [Source:VGNC Symbol;Acc:VGNC:75854]  
ENSMMUG00000017628 pleckstrin homology domain containing A7 [Source:VGNC Symbol;Acc:VGNC:76121]  
ENSMMUG00000017892 RNA polymerase I subunit E [Source:VGNC Symbol;Acc:VGNC:76047]  
ENSMMUG00000017931 gamma-glutamyltransferase 7 [Source:VGNC Symbol;Acc:VGNC:72921]  
ENSMMUG00000017932 acyl-CoA synthetase short chain family member 2 [Source:VGNC Symbol;Acc:VGNC:69410]  
ENSMMUG00000018356 flagellum associated containing coiled-coil domains 1 [Source:VGNC Symbol;Acc:VGNC:72508]  
ENSMMUG00000018358 zinc finger protein 217 [Source:VGNC Symbol;Acc:VGNC:78874]  
ENSMMUG00000018474 signal regulatory protein alpha [Source:NCBI gene;Acc:717811]  
ENSMMUG00000018685 chromodomain helicase DNA binding protein 4 [Source:VGNC Symbol;Acc:VGNC:71029]  
ENSMMUG00000018901 FYVE, RhoGEF and PH domain containing 6 [Source:VGNC Symbol;Acc:VGNC:72548]  
ENSMMUG00000019423 zinc finger protein 2 [Source:NCBI gene;Acc:703864]  
ENSMMUG00000019639 paired box 5 [Source:VGNC Symbol;Acc:VGNC:75764]  
ENSMMUG00000019831 neurobeachin [Source:NCBI gene;Acc:714386]  
ENSMMUG00000019850 arachidonate lipoxygenase 3 [Source:VGNC Symbol;Acc:VGNC:69607]  
ENSMMUG00000019883 RNA binding motif protein 20 [Source:NCBI gene;Acc:698677]  
ENSMMUG00000020036 Sp1 transcription factor [Source:VGNC Symbol;Acc:VGNC:77844]  
ENSMMUG00000020061 protein phosphatase 1 regulatory subunit 9B [Source:VGNC Symbol;Acc:VGNC:76372]  
ENSMMUG00000020125 SUMO specific peptidase 1 [Source:NCBI gene;Acc:707603]  
ENSMMUG00000020211 cyclin Y like 1 [Source:VGNC Symbol;Acc:VGNC:84224]  
ENSMMUG00000020370 SRY-box transcription factor 5 [Source:VGNC Symbol;Acc:VGNC:77843]  
ENSMMUG00000020533 chromosome 11 C12orf56 homolog [Source:VGNC Symbol;Acc:VGNC:70409]  
ENSMMUG00000020540 NmrA like redox sensor 1 [Source:VGNC Symbol;Acc:VGNC:75252]  
ENSMMUG00000020706 ETS proto-oncogene 1, transcription factor [Source:VGNC Symbol;Acc:VGNC:72439]  
ENSMMUG00000020784 centrosomal protein 126 [Source:NCBI gene;Acc:701911]  
ENSMMUG00000020792 Rap guanine nucleotide exchange factor 4 [Source:VGNC Symbol;Acc:VGNC:76490]  
ENSMMUG00000020812 A-kinase anchoring protein 3 [Source:VGNC Symbol;Acc:VGNC:69769]  
ENSMMUG00000020819 protein phosphatase 2 catalytic subunit beta [Source:VGNC Symbol;Acc:VGNC:76373]  
ENSMMUG00000020821 testis expressed 15, meiosis and synapsis associated [Source:VGNC Symbol;Acc:VGNC:78318]  
ENSMMUG00000020847 CKLF like MARVEL transmembrane domain containing 3 [Source:VGNC Symbol;Acc:VGNC:71215]  
ENSMMUG00000020926 syntaxin 2 [Source:VGNC Symbol;Acc:VGNC:78259]  
ENSMMUG00000020928 nucleolar protein interacting with the FHA domain of MKI67 [Source:VGNC Symbol;Acc:VGNC:75201]  
ENSMMUG00000020992 calcineurin binding protein 1 [Source:NCBI gene;Acc:700566]  
ENSMMUG00000020993 cadherin EGF LAG seven-pass G-type receptor 1 [Source:NCBI gene;Acc:718440]  
ENSMMUG00000021091 COP9 signalosome subunit 3 [Source:VGNC Symbol;Acc:VGNC:71316]  
ENSMMUG00000021197 TBC1 domain family member 4 [Source:VGNC Symbol;Acc:VGNC:78166]  
ENSMMUG00000021280 leucine rich transmembrane and O-methyltransferase domain containing [Source:NCBI gene;Acc:718286]  
ENSMMUG00000021282 late endosomal/lysosomal adaptor, MAPK and MTOR activator 1 [Source:VGNC Symbol;Acc:VGNC:74129]  
ENSMMUG00000021331 EBF family member 4 [Source:VGNC Symbol;Acc:VGNC:71932]  
ENSMMUG00000021393 calcium/calmodulin dependent protein kinase II gamma [Source:VGNC Symbol;Acc:VGNC:70525]  
ENSMMUG00000021459 MYC binding protein 2 [Source:VGNC Symbol;Acc:VGNC:75011]  
ENSMMUG00000021496 potassium sodium-activated channel subfamily T member 1 [Source:VGNC Symbol;Acc:VGNC:73856]

ENSMMUG00000021670 solute carrier family 52 member 3 [Source:VGNC Symbol;Acc:VGNC:77717]  
ENSMMUG00000021878 timeless circadian regulator [Source:VGNC Symbol;Acc:VGNC:78356]  
ENSMMUG00000022185 odd-skipped related transcription factor 2 [Source:VGNC Symbol;Acc:VGNC:84097]  
ENSMMUG00000022202 basic leucine zipper and W2 domains 1 [Source:VGNC Symbol;Acc:VGNC:84213]  
ENSMMUG00000022430 splicing factor 3b subunit 1 [Source:VGNC Symbol;Acc:VGNC:77179]  
ENSMMUG00000022553 pyruvate dehydrogenase kinase 1 [Source:VGNC Symbol;Acc:VGNC:75932]  
ENSMMUG00000022589 prostate transmembrane protein, androgen induced 1 [Source:VGNC Symbol;Acc:VGNC:76023]  
ENSMMUG00000022602 methyltransferase like 21A [Source:VGNC Symbol;Acc:VGNC:74625]  
ENSMMUG00000022676 ribosomal modification protein rimK like family member B [Source:NCBI gene;Acc:722261]  
ENSMMUG00000022680 alpha-2-macroglobulin like 1 [Source:VGNC Symbol;Acc:VGNC:69507]  
ENSMMUG00000022865 junctophilin 2 [Source:NCBI gene;Acc:694158]  
ENSMMUG00000022879 EARP complex and GARP complex interacting protein 1 [Source:NCBI gene;Acc:707650]  
ENSMMUG00000023083 A-kinase anchoring protein 11 [Source:VGNC Symbol;Acc:VGNC:69765]  
ENSMMUG00000023248 serine/threonine kinase 38 like [Source:VGNC Symbol;Acc:VGNC:78156]  
ENSMMUG00000023249 aryl hydrocarbon receptor nuclear translocator like 2 [Source:NCBI gene;Acc:709547]  
ENSMMUG00000023446 tuftelin interacting protein 11 [Source:VGNC Symbol;Acc:VGNC:78399]  
ENSMMUG00000023752 SIX homeobox 2 [Source:VGNC Symbol;Acc:VGNC:81570]  
ENSMMUG00000023778 F-box protein 32 [Source:VGNC Symbol;Acc:VGNC:72517]  
ENSMMUG00000023791 SR-related CTD associated factor 11 [Source:VGNC Symbol;Acc:VGNC:77002]  
ENSMMUG00000023803 myosin heavy chain 10 [Source:NCBI gene;Acc:721979]  
ENSMMUG00000023810 methionyl-tRNA synthetase 2, mitochondrial [Source:VGNC Symbol;Acc:VGNC:74572]  
ENSMMUG00000025616  
ENSMMUG00000026432 small nucleolar RNA, C/D box 7 [Source:HGNC Symbol;Acc:HGNC:32704]  
ENSMMUG00000026876 mml-mir-181a-2 [Source:miRBase;Acc:MI0002808]  
ENSMMUG00000028701  
ENSMMUG00000029164 glycerophosphodiester phosphodiesterase domain containing 3 [Source:VGNC Symbol;Acc:VGNC:72800]  
ENSMMUG00000030453 NLR family pyrin domain containing 1 [Source:NCBI gene;Acc:721648]  
ENSMMUG00000031000 Rho GTPase activating protein 8 [Source:NCBI gene;Acc:716745]  
ENSMMUG00000031202 RAB1B, member RAS oncogene family [Source:NCBI gene;Acc:721852]  
ENSMMUG00000031296 caspase 8 [Source:VGNC Symbol;Acc:VGNC:70547]  
ENSMMUG00000031736  
ENSMMUG00000031965 aminolevulinate dehydratase [Source:VGNC Symbol;Acc:VGNC:69779]  
ENSMMUG00000032892 U6 spliceosomal RNA [Source:RFAM;Acc:RF00026]  
ENSMMUG00000033001 U6 spliceosomal RNA [Source:RFAM;Acc:RF00026]  
ENSMMUG00000037662 selenoprotein M [Source:NCBI gene;Acc:718290]  
ENSMMUG00000037675 testis expressed 52 [Source:NCBI gene;Acc:107000723]  
ENSMMUG00000038288 TMEM9 domain family member B [Source:NCBI gene;Acc:708447]  
ENSMMUG00000038587 prostate and testis expressed 2 [Source:NCBI gene;Acc:717085]  
ENSMMUG00000038661  
ENSMMUG00000039300  
ENSMMUG00000040854 aspartyl-tRNA synthetase 1 [Source:VGNC Symbol;Acc:VGNC:84226]  
ENSMMUG00000041775 Metazoan signal recognition particle RNA [Source:RFAM;Acc:RF00017]  
ENSMMUG00000041905 protein phosphatase 2 regulatory subunit Balpha [Source:VGNC Symbol;Acc:VGNC:84103]  
ENSMMUG00000042208 pepsin A-4 [Source:NCBI gene;Acc:694646]  
ENSMMUG00000042668 cilia and flagella associated protein 61 [Source:NCBI gene;Acc:699814]  
ENSMMUG00000043411 zinc finger and BTB domain containing 39 [Source:NCBI gene;Acc:713914]  
ENSMMUG00000043458 transmembrane protein 178A [Source:NCBI gene;Acc:714010]  
ENSMMUG00000043682 mitochondrial carrier 2 [Source:NCBI gene;Acc:712767]  
ENSMMUG00000044214  
ENSMMUG00000044537 DNA polymerase epsilon 3, accessory subunit [Source:NCBI gene;Acc:705074]  
ENSMMUG00000044782

ENSMMUG00000045775 macrophage expressed 1 [Source:NCBI gene;Acc:700274]  
ENSMMUG00000046464 coiled-coil-helix-coiled-coil-helix domain containing 7 [Source:VGNC Symbol;Acc:VGNC:83989]  
ENSMMUG00000046655 pleckstrin homology like domain family B member 1 [Source:NCBI gene;Acc:706336]  
ENSMMUG00000047974 aldehyde oxidase 4 [Source:NCBI gene;Acc:701502]  
ENSMMUG00000048322 eva-1 homolog A, regulator of programmed cell death [Source:NCBI gene;Acc:710843]  
ENSMMUG00000049117 CLLU1 antisense RNA 1 [Source:NCBI gene;Acc:100424000]  
ENSMMUG00000049539  
ENSMMUG00000049661 Metazoan signal recognition particle RNA [Source:RFAM;Acc:RF00017]  
ENSMMUG00000049682 Metazoan signal recognition particle RNA [Source:RFAM;Acc:RF00017]  
ENSMMUG00000049788  
ENSMMUG00000049842  
ENSMMUG00000049948  
ENSMMUG00000049997  
ENSMMUG00000050245  
ENSMMUG00000050271  
ENSMMUG00000050458  
ENSMMUG00000050544  
ENSMMUG00000050630  
ENSMMUG00000050773  
ENSMMUG00000050923  
ENSMMUG00000050952  
ENSMMUG00000050975  
ENSMMUG00000051001  
ENSMMUG00000051042  
ENSMMUG00000051112 p53 and DNA damage regulated 1 [Source:NCBI gene;Acc:712622]  
ENSMMUG00000051162  
ENSMMUG00000051190 Metazoan signal recognition particle RNA [Source:RFAM;Acc:RF00017]  
ENSMMUG00000051468 Metazoan signal recognition particle RNA [Source:RFAM;Acc:RF00017]  
ENSMMUG00000051482  
ENSMMUG00000051936  
ENSMMUG00000051999  
ENSMMUG00000052031  
ENSMMUG00000052169 potassium two pore domain channel subfamily K member 12 [Source:NCBI gene;Acc:715556]  
ENSMMUG00000052377  
ENSMMUG00000052460  
ENSMMUG00000052526 RAB39A, member RAS oncogene family [Source:NCBI gene;Acc:707451]  
ENSMMUG00000052642 protein O-glucosyltransferase 2 [Source:NCBI gene;Acc:702156]  
ENSMMUG00000052676  
ENSMMUG00000052817 Sp7 transcription factor [Source:NCBI gene;Acc:702575]  
ENSMMUG00000052889 Metazoan signal recognition particle RNA [Source:RFAM;Acc:RF00017]  
ENSMMUG00000053577  
ENSMMUG00000053648 actin binding transcription modulator [Source:NCBI gene;Acc:710486]  
ENSMMUG00000053657  
ENSMMUG00000053721  
ENSMMUG00000053845  
ENSMMUG00000054064  
ENSMMUG00000054210 C-C motif chemokine 4 [Source:NCBI gene;Acc:100426632]  
ENSMMUG00000054462  
ENSMMUG00000054660 R-spondin 2 [Source:NCBI gene;Acc:697376]  
ENSMMUG00000054711  
ENSMMUG00000055344 TLC domain containing 3A [Source:NCBI gene;Acc:699707]



ENSMMUG00000055400 U6 spliceosomal RNA [Source:RFAM;Acc:RF00026]  
ENSMMUG00000055447 MDM2 proto-oncogene [Source:NCBI gene;Acc:718284]  
ENSMMUG00000055477  
ENSMMUG00000055529 sulfotransferase family 1C member 4 [Source:NCBI gene;Acc:693903]  
ENSMMUG00000055610 homeobox C4 [Source:NCBI gene;Acc:100430434]  
ENSMMUG00000055845 ankyrin repeat domain 53 [Source:NCBI gene;Acc:703757]  
ENSMMUG00000056045  
ENSMMUG00000056054 zinc finger and BTB domain containing 3 [Source:NCBI gene;Acc:722240]  
ENSMMUG00000056056  
ENSMMUG00000056113  
ENSMMUG00000056165  
ENSMMUG00000056303  
ENSMMUG00000056306  
ENSMMUG00000056387 transcription factor 15 [Source:NCBI gene;Acc:716916]  
ENSMMUG00000056662  
ENSMMUG00000056824  
ENSMMUG00000057031  
ENSMMUG00000057143 transmembrane protein 127 [Source:NCBI gene;Acc:705069]  
ENSMMUG00000057199  
ENSMMUG00000057302  
ENSMMUG00000057747  
ENSMMUG00000057793 dual specificity phosphatase 5 [Source:NCBI gene;Acc:698178]  
ENSMMUG00000058016 bMERB domain containing 1 [Source:NCBI gene;Acc:713757]  
ENSMMUG00000058240  
ENSMMUG00000058281 ITPRIP like 2 [Source:NCBI gene;Acc:694060]  
ENSMMUG00000058603  
ENSMMUG00000058754  
ENSMMUG00000058933  
ENSMMUG00000058942  
ENSMMUG00000059038 5-hydroxytryptamine receptor 7 [Source:NCBI gene;Acc:696317]  
ENSMMUG00000059115  
ENSMMUG00000059267 pellino E3 ubiquitin protein ligase 1 [Source:NCBI gene;Acc:696416]  
ENSMMUG00000059353 phosphatidylserine synthase 2 [Source:NCBI gene;Acc:698582]  
ENSMMUG00000059406 RGP1 homolog, RAB6A GEF complex partner 1 [Source:NCBI gene;Acc:695936]  
ENSMMUG00000059464  
ENSMMUG00000059575  
ENSMMUG00000059824  
ENSMMUG00000059850 immunoglobulin kappa variable 1-9 [Source:NCBI gene;Acc:106993071]  
ENSMMUG00000059852  
ENSMMUG00000060024  
ENSMMUG00000060062  
ENSMMUG00000060080 U6 spliceosomal RNA [Source:RFAM;Acc:RF00026]  
ENSMMUG00000060158  
ENSMMUG00000060346  
ENSMMUG00000060359  
ENSMMUG00000060579  
ENSMMUG00000060665  
ENSMMUG00000060713 epithelial membrane protein 2 [Source:NCBI gene;Acc:710315]  
ENSMMUG00000060836  
ENSMMUG00000060932 zinc finger protein 383-like [Source:NCBI gene;Acc:106993074]  
ENSMMUG00000061260 Spi-C transcription factor [Source:NCBI gene;Acc:695809]

ENSMMUG00000061268 PLAG1 zinc finger [Source:NCBI gene;Acc:696149]  
ENSMMUG00000061344  
ENSMMUG00000061408  
ENSMMUG00000061594  
ENSMMUG00000061761 interferon induced protein with tetratricopeptide repeats 2 [Source:NCBI gene;Acc:695452]  
ENSMMUG00000061774 taste 2 receptor member 10 [Source:NCBI gene;Acc:717960]  
ENSMMUG00000061779  
ENSMMUG00000061953  
ENSMMUG00000062461 chromosome 15 C9orf43 homolog [Source:NCBI gene;Acc:704968]  
ENSMMUG00000062791  
ENSMMUG00000062793  
ENSMMUG00000063345  
ENSMMUG00000063463  
ENSMMUG00000063668 cytochrome b5 domain containing 1 [Source:NCBI gene;Acc:716429]  
ENSMMUG00000063718 Kruppel like factor 9 [Source:NCBI gene;Acc:700585]  
ENSMMUG00000064089  
ENSMMUG00000064158  
ENSMMUG00000064216  
ENSMMUG00000064237  
ENSMMUG00000064793 C-C motif chemokine ligand 11 [Source:NCBI gene;Acc:574218]  
ENSMMUG00000064798  
ENSMMUG00000065099  
ENSMMUG00000065232  
ENSMMUG00000000717 CD3e molecule associated protein [Source:NCBI gene;Acc:714440]  
ENSMMUG00000000718 ERCC excision repair 1, endonuclease non-catalytic subunit [Source:VGNC Symbol;Acc:VGNC:72422]  
ENSMMUG00000001245 zinc finger protein 532 [Source:NCBI gene;Acc:701146]  
ENSMMUG00000002742 ST8 alpha-N-acetyl-neuraminide alpha-2,8-sialyltransferase 5 [Source:VGNC Symbol;Acc:VGNC:77942]  
ENSMMUG00000003302 dystrobrevin alpha [Source:VGNC Symbol;Acc:VGNC:72007]  
ENSMMUG00000003621 AKT serine/threonine kinase 2 [Source:VGNC Symbol;Acc:VGNC:69777]  
ENSMMUG00000003712 zinc finger protein 615 [Source:VGNC Symbol;Acc:VGNC:79454]  
ENSMMUG00000005727 protein kinase N1 [Source:VGNC Symbol;Acc:VGNC:76014]  
ENSMMUG00000006128 peptidase D [Source:VGNC Symbol;Acc:VGNC:82205]  
ENSMMUG00000006857 epididymal sperm binding protein 1 [Source:VGNC Symbol;Acc:VGNC:72046]  
ENSMMUG00000006866 CUGBP Elav-like family member 4 [Source:VGNC Symbol;Acc:VGNC:70945]  
ENSMMUG00000007816 SMAD family member 2 [Source:VGNC Symbol;Acc:VGNC:77810]  
ENSMMUG00000008942 carnosine dipeptidase 1 [Source:VGNC Symbol;Acc:VGNC:71257]  
ENSMMUG00000008945 zinc finger protein 407 [Source:NCBI gene;Acc:695303]  
ENSMMUG00000009222 pleckstrin homology domain containing A4 [Source:VGNC Symbol;Acc:VGNC:76027]  
ENSMMUG00000013053 sperm acrosome associated 6 [Source:NCBI gene;Acc:114674203]  
ENSMMUG00000014735 carnitine palmitoyltransferase 1C [Source:NCBI gene;Acc:719429]  
ENSMMUG00000015702 divergent protein kinase domain 1C [Source:NCBI gene;Acc:699537]  
ENSMMUG00000016526 solute carrier family 25 member 41 [Source:VGNC Symbol;Acc:VGNC:77581]  
ENSMMUG00000017243 ring finger protein 165 [Source:VGNC Symbol;Acc:VGNC:76877]  
ENSMMUG00000017246 lipoxxygenase homology domains 1 [Source:VGNC Symbol;Acc:VGNC:74368]  
ENSMMUG00000017615 zinc finger CCHC-type containing 14 [Source:VGNC Symbol;Acc:VGNC:79420]  
ENSMMUG00000017939 FA core complex associated protein 24 [Source:VGNC Symbol;Acc:VGNC:72388]  
ENSMMUG00000018415 Ras interacting protein 1 [Source:HGNC Symbol;Acc:HGNC:24716]  
ENSMMUG00000019265 zinc finger protein 575 [Source:VGNC Symbol;Acc:VGNC:79667]  
ENSMMUG00000019892 myomesin 1 [Source:VGNC Symbol;Acc:VGNC:75123]  
ENSMMUG00000020114 cadherin 13 [Source:VGNC Symbol;Acc:VGNC:70807]  
ENSMMUG00000020175 mediator complex subunit 25 [Source:VGNC Symbol;Acc:VGNC:74607]

ENSMMUG00000020905 chromosome 18 C18orf63 homolog [Source:VGNC Symbol;Acc:VGNC:70465]  
ENSMMUG00000021094 desmoglein 3 [Source:VGNC Symbol;Acc:VGNC:72003]  
ENSMMUG00000021095 desmoglein 2 [Source:VGNC Symbol;Acc:VGNC:72002]  
ENSMMUG00000022163 solute carrier family 1 member 5 [Source:VGNC Symbol;Acc:VGNC:77413]  
ENSMMUG00000022305 Rho guanine nucleotide exchange factor 1 [Source:VGNC Symbol;Acc:VGNC:70012]  
ENSMMUG00000022625 periaxin [Source:VGNC Symbol;Acc:VGNC:76248]  
ENSMMUG00000022656 perilipin 4 [Source:NCBI gene;Acc:693610]  
ENSMMUG00000022724  
ENSMMUG00000022726 dual specificity tyrosine phosphorylation regulated kinase 1B [Source:VGNC Symbol;Acc:VGNC:72016]  
ENSMMUG00000022975 sprouty related EVH1 domain containing 3 [Source:VGNC Symbol;Acc:VGNC:78030]  
ENSMMUG00000023137 zinc finger protein 350 [Source:VGNC Symbol;Acc:VGNC:79041]  
ENSMMUG00000028736 hydroxysteroid 17-beta dehydrogenase 14 [Source:NCBI gene;Acc:106994816]  
ENSMMUG00000028800 solute carrier family 7 member 9 [Source:VGNC Symbol;Acc:VGNC:77633]  
ENSMMUG00000028925 HDGF like 2 [Source:NCBI gene;Acc:693476]  
ENSMMUG00000033290 mml-mir-643 [Source:miRBase;Acc:MI0007886]  
ENSMMUG00000041450 zinc finger protein 432 [Source:NCBI gene;Acc:100424341]  
ENSMMUG00000042707 angiopoietin like 6 [Source:NCBI gene;Acc:106994633]  
ENSMMUG00000049194  
ENSMMUG00000049523 ankyrin repeat domain 12 [Source:NCBI gene;Acc:114673693]  
ENSMMUG00000050177  
ENSMMUG00000051115  
ENSMMUG00000051261  
ENSMMUG00000051966  
ENSMMUG00000052277 transthyretin [Source:NCBI gene;Acc:705943]  
ENSMMUG00000052605 Metazoan signal recognition particle RNA [Source:RFAM;Acc:RF00017]  
ENSMMUG00000053008  
ENSMMUG00000053624  
ENSMMUG00000053889 olfactory receptor 7C1 [Source:NCBI gene;Acc:114674087]  
ENSMMUG00000058864  
ENSMMUG00000060455  
ENSMMUG00000060536  
ENSMMUG00000061186  
ENSMMUG00000061372  
ENSMMUG00000061536  
ENSMMUG00000061572 Metazoan signal recognition particle RNA [Source:RFAM;Acc:RF00017]  
ENSMMUG00000062866  
ENSMMUG00000065131

## C. Up-regulated common and unique gene names in Venn Diagram

| Names                               | total | elements           | description                                                                                      |
|-------------------------------------|-------|--------------------|--------------------------------------------------------------------------------------------------|
| NS_D1 NS_D2 NS_D3 S_D1 S_D2<br>S_D3 | 471   | ENSMMUG00000062454 |                                                                                                  |
|                                     |       | ENSMMUG00000049267 |                                                                                                  |
|                                     |       | ENSMMUG00000013832 | ATP binding cassette subfamily B member 11 [Source:VGNC Symbol;Acc:VGNC:81339]                   |
|                                     |       | ENSMMUG00000003348 | neurofilament light [Source:VGNC Symbol;Acc:VGNC:75307]                                          |
|                                     |       | ENSMMUG00000016143 | sialophorin [Source:VGNC Symbol;Acc:VGNC:77861]                                                  |
|                                     |       | ENSMMUG00000005666 | phospholipase D2 [Source:VGNC Symbol;Acc:VGNC:76172]                                             |
|                                     |       | ENSMMUG00000008854 | natural cytotoxicity triggering receptor 3 [Source:VGNC Symbol;Acc:VGNC:74990]                   |
|                                     |       | ENSMMUG00000003819 | nitric oxide synthase interacting protein [Source:VGNC Symbol;Acc:VGNC:75207]                    |
|                                     |       | ENSMMUG00000059175 |                                                                                                  |
|                                     |       | ENSMMUG00000021661 | leucine rich repeat containing 56 [Source:VGNC Symbol;Acc:VGNC:74356]                            |
|                                     |       | ENSMMUG00000019363 | synapse associated protein 1 [Source:VGNC Symbol;Acc:VGNC:78135]                                 |
|                                     |       | ENSMMUG00000041376 | G antigen 10 [Source:NCBI gene;Acc:693330]                                                       |
|                                     |       | ENSMMUG00000009559 | minichromosome maintenance complex binding protein [Source:VGNC Symbol;Acc:VGNC:74583]           |
|                                     |       | ENSMMUG00000014046 | SREBF chaperone [Source:VGNC Symbol;Acc:VGNC:77140]                                              |
|                                     |       | ENSMMUG00000001472 | TIA1 cytotoxic granule associated RNA binding protein like 1 [Source:VGNC Symbol;Acc:VGNC:78354] |
|                                     |       | ENSMMUG00000004797 | CTP synthase 2 [Source:VGNC Symbol;Acc:VGNC:71550]                                               |
|                                     |       | ENSMMUG00000000706 | filamin B [Source:VGNC Symbol;Acc:VGNC:72672]                                                    |
|                                     |       | ENSMMUG00000015479 | tectonin beta-propeller repeat containing 1 [Source:VGNC Symbol;Acc:VGNC:79348]                  |
|                                     |       | ENSMMUG00000062283 | homeobox B6 [Source:NCBI gene;Acc:106994013]                                                     |
|                                     |       | ENSMMUG00000017056 | Sad1 and UNC84 domain containing 1 [Source:VGNC Symbol;Acc:VGNC:78161]                           |
|                                     |       | ENSMMUG00000011427 | syntaxin 10 [Source:VGNC Symbol;Acc:VGNC:78040]                                                  |
|                                     |       | ENSMMUG00000007528 | chordin [Source:VGNC Symbol;Acc:VGNC:71042]                                                      |
|                                     |       | ENSMMUG00000030279 | A-kinase anchoring protein 10 [Source:VGNC Symbol;Acc:VGNC:69764]                                |
|                                     |       | ENSMMUG00000000327 | fatty acid desaturase 2 [Source:VGNC Symbol;Acc:VGNC:72472]                                      |
|                                     |       | ENSMMUG00000012228 | ubiquitin conjugating enzyme E2 V1 [Source:NCBI gene;Acc:100425552]                              |
|                                     |       | ENSMMUG00000063898 | apolipoprotein F [Source:NCBI gene;Acc:712761]                                                   |
|                                     |       | ENSMMUG00000004149 | eukaryotic translation initiation factor 4 gamma 3 [Source:NCBI gene;Acc:717555]                 |
|                                     |       | ENSMMUG00000011798 | eukaryotic translation initiation factor 3 subunit C [Source:NCBI gene;Acc:705696]               |
|                                     |       | ENSMMUG00000060517 |                                                                                                  |
|                                     |       | ENSMMUG00000002423 | DNA polymerase delta 2, accessory subunit [Source:VGNC Symbol;Acc:VGNC:76203]                    |
|                                     |       | ENSMMUG00000064052 | CD300 molecule like family member d [Source:NCBI gene;Acc:703142]                                |
|                                     |       | ENSMMUG00000019314 | vav guanine nucleotide exchange factor 1 [Source:VGNC Symbol;Acc:VGNC:78757]                     |
|                                     |       | ENSMMUG00000015931 | phosphatidylinositol transfer protein membrane associated 2 [Source:VGNC Symbol;Acc:VGNC:75843]  |
|                                     |       | ENSMMUG00000020462 | CD300e molecule [Source:NCBI gene;Acc:114673189]                                                 |
|                                     |       | ENSMMUG00000002260 | protein kinase C eta [Source:VGNC Symbol;Acc:VGNC:84424]                                         |
|                                     |       | ENSMMUG00000053481 |                                                                                                  |
|                                     |       | ENSMMUG00000012937 | proline rich 12 [Source:NCBI gene;Acc:719344]                                                    |
|                                     |       | ENSMMUG00000014658 | ninein [Source:VGNC Symbol;Acc:VGNC:75177]                                                       |
|                                     |       | ENSMMUG00000052607 |                                                                                                  |
|                                     |       | ENSMMUG00000063495 |                                                                                                  |
|                                     |       | ENSMMUG00000009567 | glyoxylate reductase 1 homolog [Source:NCBI gene;Acc:706933]                                     |
|                                     |       | ENSMMUG00000012944 | vascular endothelial growth factor B [Source:VGNC Symbol;Acc:VGNC:78765]                         |
|                                     |       | ENSMMUG00000048204 | ephrin B3 [Source:NCBI gene;Acc:716257]                                                          |
|                                     |       | ENSMMUG00000013798 | fatty acid desaturase 1 [Source:VGNC Symbol;Acc:VGNC:72471]                                      |
|                                     |       | ENSMMUG00000023263 | mediator complex subunit 15 [Source:VGNC Symbol;Acc:VGNC:74511]                                  |
|                                     |       | ENSMMUG00000046169 |                                                                                                  |
|                                     |       | ENSMMUG00000004022 | zinc finger SWIM-type containing 2 [Source:VGNC Symbol;Acc:VGNC:79908]                           |

ENSMMUG00000023303 ecotropic viral integration site 5 like [Source:NCBI gene;Acc:706628]  
ENSMMUG00000012697 AT-rich interaction domain 1A [Source:VGNC Symbol;Acc:VGNC:69822]  
ENSMMUG00000003437 signal transducer and activator of transcription 5B [Source:NCBI gene;Acc:709760]  
ENSMMUG000000059504  
ENSMMUG00000021564 lysine demethylase 2B [Source:VGNC Symbol;Acc:VGNC:81425]  
ENSMMUG00000053324 lymphocyte antigen 6 complex locus protein G6d [Source:NCBI gene;Acc:715304]  
ENSMMUG00000020868 homeobox B8 [Source:VGNC Symbol;Acc:VGNC:73505]  
ENSMMUG00000057157  
ENSMMUG00000046969 Fc receptor like 3 [Source:NCBI gene;Acc:718801]  
ENSMMUG00000023286 UPF1 RNA helicase and ATPase [Source:VGNC Symbol;Acc:VGNC:79971]  
ENSMMUG00000014530 pre-mRNA processing factor 19 [Source:VGNC Symbol;Acc:VGNC:76281]  
ENSMMUG00000028907 insulin receptor [Source:NCBI gene;Acc:706009]  
ENSMMUG00000049678  
ENSMMUG00000016549 matrix metalloproteinase 9 [Source:VGNC Symbol;Acc:VGNC:74903]  
ENSMMUG00000058592  
ENSMMUG00000014874 GTP binding protein 8 (putative) [Source:VGNC Symbol;Acc:VGNC:84180]  
ENSMMUG00000006738 L3MBTL histone methyl-lysine binding protein 1 [Source:NCBI gene;Acc:695694]  
ENSMMUG00000053083 C2 calcium dependent domain containing 4C [Source:NCBI gene;Acc:100424440]  
ENSMMUG00000018790 activin A receptor type 2B [Source:VGNC Symbol;Acc:VGNC:69450]  
ENSMMUG00000014265 TAP binding protein like [Source:NCBI gene;Acc:712626]  
ENSMMUG00000019418 erythrocyte membrane protein band 4.1 like 3 [Source:VGNC Symbol;Acc:VGNC:72233]  
ENSMMUG00000003106 SEC16 homolog A, endoplasmic reticulum export factor [Source:VGNC Symbol;Acc:VGNC:77326]  
ENSMMUG00000008791 CD47 molecule [Source:VGNC Symbol;Acc:VGNC:70767]  
ENSMMUG00000003098 peptidase, mitochondrial processing alpha subunit [Source:VGNC Symbol;Acc:VGNC:76062]  
ENSMMUG00000002427 glucokinase [Source:VGNC Symbol;Acc:VGNC:72901]  
ENSMMUG00000032249 procollagen-lysine,2-oxoglutarate 5-dioxygenase 1 [Source:NCBI gene;Acc:722763]  
ENSMMUG00000059436 interleukin 10 receptor subunit alpha [Source:NCBI gene;Acc:704383]  
ENSMMUG00000057539  
ENSMMUG00000001350 HERPUD family member 2 [Source:VGNC Symbol;Acc:VGNC:73216]  
ENSMMUG00000063525  
ENSMMUG00000048375 Metazoan signal recognition particle RNA [Source:RFAM;Acc:RF00017]  
ENSMMUG00000055322 EPH receptor A1 [Source:NCBI gene;Acc:706295]  
ENSMMUG00000050549 lysyl oxidase like 2 [Source:NCBI gene;Acc:710151]  
ENSMMUG00000006468 FGFR1 oncogene partner 2 [Source:VGNC Symbol;Acc:VGNC:72551]  
ENSMMUG00000022247 osteoclastogenesis associated transmembrane protein 1 [Source:VGNC Symbol;Acc:VGNC:75664]  
ENSMMUG00000052252 protein phosphatase 1 regulatory subunit 3F [Source:NCBI gene;Acc:715950]  
ENSMMUG00000000421 nuclear receptor subfamily 3 group C member 1 [Source:VGNC Symbol;Acc:VGNC:75515]  
ENSMMUG00000000419 Rho GTPase activating protein 26 [Source:VGNC Symbol;Acc:VGNC:69846]  
ENSMMUG00000016582 chromosome 1 C1orf112 homolog [Source:VGNC Symbol;Acc:VGNC:70385]  
ENSMMUG00000020254 exocyst complex component 3 like 1 [Source:VGNC Symbol;Acc:VGNC:72376]  
ENSMMUG00000052854 mucin like 1 [Source:NCBI gene;Acc:100423942]  
ENSMMUG00000058928 Metazoan signal recognition particle RNA [Source:RFAM;Acc:RF00017]  
ENSMMUG00000055820  
ENSMMUG00000063779  
ENSMMUG00000001725 solute carrier family 35 member A4 [Source:VGNC Symbol;Acc:VGNC:77532]  
ENSMMUG00000051037  
ENSMMUG00000058187  
ENSMMUG00000049735 allograft inflammatory factor 1 [Source:NCBI gene;Acc:574115]  
ENSMMUG00000053013  
ENSMMUG00000062091  
ENSMMUG00000007423 transcription factor Dp-1 [Source:NCBI gene;Acc:715345]

ENSMMUG00000060795  
ENSMMUG00000054414  
ENSMMUG00000058566  
ENSMMUG00000057687  
ENSMMUG00000000649 UBX domain protein 11 [Source:VGNC Symbol;Acc:VGNC:79859]  
ENSMMUG00000008385 NOP14 nucleolar protein [Source:VGNC Symbol;Acc:VGNC:75194]  
ENSMMUG00000013150 MORC family CW-type zinc finger 4 [Source:VGNC Symbol;Acc:VGNC:74808]  
ENSMMUG00000019089 centromere protein E [Source:VGNC Symbol;Acc:VGNC:71008]  
ENSMMUG00000004794 DNA ligase 3 [Source:VGNC Symbol;Acc:VGNC:74266]  
ENSMMUG00000020683 RNA binding motif protein 22 [Source:VGNC Symbol;Acc:VGNC:76535]  
ENSMMUG00000005070 ecotropic viral integration site 5 [Source:NCBI gene;Acc:706592]  
ENSMMUG00000006786 protein tyrosine phosphatase non-receptor type 22 [Source:VGNC Symbol;Acc:VGNC:76603]  
ENSMMUG00000014237 lysine methyltransferase 5B [Source:VGNC Symbol;Acc:VGNC:74110]  
ENSMMUG00000053376  
ENSMMUG00000009988 transmembrane protein 59 like [Source:VGNC Symbol;Acc:VGNC:78919]  
ENSMMUG00000054158 acyl-CoA dehydrogenase family member 11 [Source:NCBI gene;Acc:106997118]  
ENSMMUG00000022728 zinc finger and SCAN domain containing 25 [Source:VGNC Symbol;Acc:VGNC:79344]  
ENSMMUG00000056840  
ENSMMUG00000018237 plexin C1 [Source:VGNC Symbol;Acc:VGNC:76190]  
ENSMMUG00000021073 RAS protein activator like 2 [Source:VGNC Symbol;Acc:VGNC:76670]  
ENSMMUG00000019246 regulator of calcineurin 2 [Source:VGNC Symbol;Acc:VGNC:82092]  
ENSMMUG00000056950  
ENSMMUG00000051925  
ENSMMUG00000056376  
ENSMMUG00000010028 leucine zipper tumor suppressor family member 3 [Source:VGNC Symbol;Acc:VGNC:74403]  
ENSMMUG00000048824 eva-1 homolog C [Source:NCBI gene;Acc:708681]  
ENSMMUG00000052168  
ENSMMUG00000049703 Metazoan signal recognition particle RNA [Source:RFAM;Acc:RF00017]  
ENSMMUG00000054052 sialic acid binding Ig like lectin 11 [Source:NCBI gene;Acc:719127]  
ENSMMUG00000017660  
ENSMMUG00000061098  
ENSMMUG00000065025  
ENSMMUG00000022613 reversion inducing cysteine rich protein with kazal motifs [Source:VGNC Symbol;Acc:VGNC:76722]  
ENSMMUG00000008080 ATP binding cassette subfamily G member 5 [Source:VGNC Symbol;Acc:VGNC:69391]  
ENSMMUG00000010451 inositol polyphosphate phosphatase like 1 [Source:VGNC Symbol;Acc:VGNC:73752]  
ENSMMUG00000001387 p21 (RAC1) activated kinase 1 [Source:NCBI gene;Acc:698585]  
ENSMMUG00000012668 centriolin [Source:VGNC Symbol;Acc:VGNC:71204]  
ENSMMUG00000009886 Coenzyme A synthase [Source:VGNC Symbol;Acc:VGNC:81373]  
ENSMMUG00000050543  
ENSMMUG00000016438 protein kinase D3 [Source:VGNC Symbol;Acc:VGNC:76415]  
ENSMMUG00000021988 N-alpha-acetyltransferase 11, NatA catalytic subunit [Source:NCBI gene;Acc:696758]  
ENSMMUG00000003167 cytohesin 3 [Source:VGNC Symbol;Acc:VGNC:71829]  
ENSMMUG00000050505 small integral membrane protein 4 [Source:NCBI gene;Acc:696553]  
ENSMMUG00000007201 PDS5 cohesin associated factor B [Source:VGNC Symbol;Acc:VGNC:75835]  
ENSMMUG00000000302 WD repeat and HMG-box DNA binding protein 1 [Source:VGNC Symbol;Acc:VGNC:79376]  
ENSMMUG00000011627 interleukin 4 induced 1 [Source:VGNC Symbol;Acc:VGNC:73625]  
ENSMMUG00000000754 Dmx like 2 [Source:VGNC Symbol;Acc:VGNC:71936]  
ENSMMUG00000001058 tetratricopeptide repeat domain 28 [Source:VGNC Symbol;Acc:VGNC:79785]  
ENSMMUG00000022409 solute carrier family 10 member 1 [Source:VGNC Symbol;Acc:VGNC:77380]  
ENSMMUG00000011411 sperm acrosome associated 3 [Source:VGNC Symbol;Acc:VGNC:77930]  
ENSMMUG00000017758 mitogen-activated protein kinase 3 [Source:VGNC Symbol;Acc:VGNC:74646]



ENSMMUG00000046774 RAS like proto-oncogene B [Source:NCBI gene;Acc:695852]  
ENSMMUG00000013713 beta 3-glycosyltransferase [Source:NCBI gene;Acc:713498]  
ENSMMUG00000031291 regulator of G protein signaling like 1 [Source:NCBI gene;Acc:715693]  
ENSMMUG00000064920  
ENSMMUG00000008070 YEATS domain containing 2 [Source:VGNC Symbol;Acc:VGNC:79502]  
ENSMMUG00000044817 nucleoporin 62 [Source:NCBI gene;Acc:100426308]  
ENSMMUG00000018932 adhesion G protein-coupled receptor E2 [Source:NCBI gene;Acc:654420]  
ENSMMUG00000060767  
ENSMMUG00000043675 Cbp/p300 interacting transactivator with Glu/Asp rich carboxy-terminal domain 4 [Source:NCBI gene;Acc:114672840]  
ENSMMUG00000050339 Metazoan signal recognition particle RNA [Source:RFAM;Acc:RF00017]  
ENSMMUG00000003874 interferon induced transmembrane protein 10 [Source:NCBI gene;Acc:721010]  
ENSMMUG00000011332 Rho GTPase activating protein 35 [Source:VGNC Symbol;Acc:VGNC:69942]  
ENSMMUG00000048066 trafficking protein particle complex 9 [Source:NCBI gene;Acc:711466]  
ENSMMUG00000006853 crystallin beta B2 [Source:NCBI gene;Acc:100144420]  
ENSMMUG00000014277 ITPR interacting domain containing 2 [Source:VGNC Symbol;Acc:VGNC:73584]  
ENSMMUG00000061079 golgin subfamily A member 6C [Source:NCBI gene;Acc:715898]  
ENSMMUG00000057361 Metazoan signal recognition particle RNA [Source:RFAM;Acc:RF00017]  
ENSMMUG00000017810 structure specific recognition protein 1 [Source:VGNC Symbol;Acc:VGNC:77891]  
ENSMMUG00000060273 mitochondrial ribosomal protein L32 [Source:NCBI gene;Acc:701820]  
ENSMMUG00000064557  
ENSMMUG00000051807  
ENSMMUG00000058432 zinc finger DHC-type palmitoyltransferase 18 [Source:NCBI gene;Acc:719959]  
ENSMMUG00000055018 sushi domain containing 6 [Source:NCBI gene;Acc:712719]  
ENSMMUG00000019085 3-hydroxybutyrate dehydrogenase 2 [Source:VGNC Symbol;Acc:VGNC:70161]  
ENSMMUG00000045513  
ENSMMUG00000009995 arachidonate 15-lipoxygenase type B [Source:VGNC Symbol;Acc:VGNC:69797]  
ENSMMUG00000013644 potassium two pore domain channel subfamily K member 17 [Source:VGNC Symbol;Acc:VGNC:73828]  
ENSMMUG00000063981 nucleoside-triphosphatase, cancer-related [Source:NCBI gene;Acc:712959]  
ENSMMUG00000001845 DNA polymerase epsilon 4, accessory subunit [Source:VGNC Symbol;Acc:VGNC:76065]  
ENSMMUG00000014397 NCK associated protein 1 [Source:VGNC Symbol;Acc:VGNC:75143]  
ENSMMUG00000030964 RAB6A, member RAS oncogene family [Source:NCBI gene;Acc:718717]  
ENSMMUG00000017510 membrane associated guanylate kinase, WW and PDZ domain containing 1 [Source:VGNC Symbol;Acc:VGNC:74499]  
ENSMMUG00000028947 complement factor D [Source:VGNC Symbol;Acc:VGNC:71115]  
ENSMMUG00000011513 versican [Source:VGNC Symbol;Acc:VGNC:79445]  
ENSMMUG00000009890 FERM, ARH/RhoGEF and pleckstrin domain protein 1 [Source:VGNC Symbol;Acc:VGNC:72614]  
ENSMMUG00000019833 Fc receptor like 1 [Source:VGNC Symbol;Acc:VGNC:72528]  
ENSMMUG00000056248  
ENSMMUG00000000863 dynein axonemal assembly factor 4 [Source:VGNC Symbol;Acc:VGNC:71881]  
ENSMMUG00000045609 CCR4-NOT transcription complex subunit 6 like [Source:NCBI gene;Acc:697981]  
ENSMMUG00000023816 semaphorin 4B [Source:VGNC Symbol;Acc:VGNC:77165]  
ENSMMUG00000016797 tubulin gamma 1 [Source:NCBI gene;Acc:710756]  
ENSMMUG00000016417 chromobox 8 [Source:NCBI gene;Acc:717514]  
ENSMMUG00000002267 laminin subunit gamma 3 [Source:NCBI gene;Acc:722430]  
ENSMMUG00000000869 small nuclear ribonucleoprotein polypeptide C [Source:NCBI gene;Acc:718654]  
ENSMMUG00000060289  
ENSMMUG00000064391  
ENSMMUG00000049494  
ENSMMUG00000020799 BH3 interacting domain death agonist [Source:VGNC Symbol;Acc:VGNC:70250]  
ENSMMUG00000057570  
ENSMMUG00000022100 midnolin [Source:VGNC Symbol;Acc:VGNC:82186]  
ENSMMUG00000016273 maltase-glucoamylase [Source:VGNC Symbol;Acc:VGNC:74713]

ENSMMUG0000007538 transient receptor potential cation channel subfamily M member 4 [Source:VGNC Symbol;Acc:VGNC:79105]  
ENSMMUG00000055352  
ENSMMUG00000023335 ring finger protein 13 [Source:VGNC Symbol;Acc:VGNC:81557]  
ENSMMUG00000011878 poly(A) binding protein interacting protein 1 [Source:VGNC Symbol;Acc:VGNC:84476]  
ENSMMUG00000022401 EMSY transcriptional repressor, BRCA2 interacting [Source:VGNC Symbol;Acc:VGNC:72065]  
ENSMMUG00000060901  
ENSMMUG00000060576  
ENSMMUG00000027986 U6 spliceosomal RNA [Source:RFAM;Acc:RF00026]  
ENSMMUG00000059318 urocortin 2 [Source:NCBI gene;Acc:106996925]  
ENSMMUG00000000396 intraflagellar transport 52 [Source:NCBI gene;Acc:694933]  
ENSMMUG00000013944 regulator of microtubule dynamics 2 [Source:VGNC Symbol;Acc:VGNC:76839]  
ENSMMUG00000023370 DDB1 and CUL4 associated factor 17 [Source:VGNC Symbol;Acc:VGNC:71709]  
ENSMMUG00000055976 CD99 antigen [Source:NCBI gene;Acc:106995376]  
ENSMMUG00000023477  
ENSMMUG0000006093 enhancer of zeste 1 polycomb repressive complex 2 subunit [Source:VGNC Symbol;Acc:VGNC:72457]  
ENSMMUG00000055324 homeobox B7 [Source:NCBI gene;Acc:697089]  
ENSMMUG00000018144 C2 calcium-dependent domain-containing protein 6 [Source:NCBI gene;Acc:702140]  
ENSMMUG00000001753 integrin subunit alpha 1 [Source:VGNC Symbol;Acc:VGNC:73772]  
ENSMMUG00000061031  
ENSMMUG00000000313 HEAT repeat containing 4 [Source:VGNC Symbol;Acc:VGNC:73176]  
ENSMMUG00000011789 hematopoietically expressed homeobox [Source:VGNC Symbol;Acc:VGNC:73376]  
ENSMMUG00000022003 multimerin 1 [Source:VGNC Symbol;Acc:VGNC:74904]  
ENSMMUG00000018396 HAUS augmin like complex subunit 6 [Source:VGNC Symbol;Acc:VGNC:73237]  
ENSMMUG00000045093 cyclin B3 [Source:NCBI gene;Acc:694534]  
ENSMMUG00000021477 ATPase H+ transporting V1 subunit E1 [Source:NCBI gene;Acc:709739]  
ENSMMUG00000002950 transferrin receptor 2 [Source:VGNC Symbol;Acc:VGNC:81770]  
ENSMMUG00000042598 transmembrane protein 18 [Source:NCBI gene;Acc:721515]  
ENSMMUG00000020185 voltage dependent anion channel 3 [Source:VGNC Symbol;Acc:VGNC:84135]  
ENSMMUG00000006181 WD repeat, sterile alpha motif and U-box domain containing 1 [Source:VGNC Symbol;Acc:VGNC:79634]  
ENSMMUG00000001088 patched domain containing 1 [Source:VGNC Symbol;Acc:VGNC:76322]  
ENSMMUG00000046550 coiled-coil domain containing 125 [Source:NCBI gene;Acc:704391]  
ENSMMUG00000016678 Rho associated coiled-coil containing protein kinase 2 [Source:VGNC Symbol;Acc:VGNC:76714]  
ENSMMUG00000038944  
ENSMMUG00000003484 tectonin beta-propeller repeat containing 2 [Source:NCBI gene;Acc:708959]  
ENSMMUG00000016796 reticulophagy regulator family member 3 [Source:VGNC Symbol;Acc:VGNC:76845]  
ENSMMUG00000053457 caspase 14 [Source:NCBI gene;Acc:718049]  
ENSMMUG00000056945  
ENSMMUG0000006066 phosphatidylcholine transfer protein [Source:VGNC Symbol;Acc:VGNC:75789]  
ENSMMUG00000051201 zinc finger SWIM-type containing 3 [Source:NCBI gene;Acc:708804]  
ENSMMUG00000004257 beta-secretase 2 [Source:VGNC Symbol;Acc:VGNC:70216]  
ENSMMUG00000062794  
ENSMMUG00000003955 post-GPI attachment to proteins 2 [Source:VGNC Symbol;Acc:VGNC:75823]  
ENSMMUG00000039101 pelota mRNA surveillance and ribosome rescue factor [Source:VGNC Symbol;Acc:VGNC:84478]  
ENSMMUG00000008383 major facilitator superfamily domain containing 10 [Source:NCBI gene;Acc:720098]  
ENSMMUG000000031163 membrane anchored junction protein [Source:VGNC Symbol;Acc:VGNC:74375]  
ENSMMUG00000000790 ankyrin repeat domain 17 [Source:VGNC Symbol;Acc:VGNC:84240]  
ENSMMUG00000002810 TOX high mobility group box family member 2 [Source:VGNC Symbol;Acc:VGNC:79007]  
ENSMMUG00000060761  
ENSMMUG00000065054 G protein subunit gamma 7 [Source:NCBI gene;Acc:711335]  
ENSMMUG00000024234 U6 spliceosomal RNA [Source:RFAM;Acc:RF00026]  
ENSMMUG00000004801 COPI coat complex subunit gamma 2 [Source:VGNC Symbol;Acc:VGNC:71315]

ENSMMUG00000015865 arginase 2 [Source:VGNC Symbol;Acc:VGNC:70005]  
ENSMMUG0000000700 CLN3 lysosomal/endosomal transmembrane protein, battenin [Source:NCBI gene;Acc:705815]  
ENSMMUG00000013387 cysteinyl leukotriene receptor 1 [Source:VGNC Symbol;Acc:VGNC:71646]  
ENSMMUG00000050822 carbonic anhydrase 9 [Source:NCBI gene;Acc:696729]  
ENSMMUG00000008379 adducin 1 [Source:VGNC Symbol;Acc:VGNC:69528]  
ENSMMUG00000002376 scavenger receptor class F member 1 [Source:VGNC Symbol;Acc:VGNC:77027]  
ENSMMUG00000028948 azurocidin 1 [Source:VGNC Symbol;Acc:VGNC:70202]  
ENSMMUG00000002536 calcium binding protein 1 [Source:VGNC Symbol;Acc:VGNC:70495]  
ENSMMUG00000005208 RNA polymerase III subunit B [Source:VGNC Symbol;Acc:VGNC:76143]  
ENSMMUG00000012405 transient receptor potential cation channel subfamily C member 1 [Source:VGNC Symbol;Acc:VGNC:78651]  
ENSMMUG00000044257 MX dynamin like GTPase 2 [Source:VGNC Symbol;Acc:VGNC:81723]  
ENSMMUG00000013967 TOX high mobility group box family member 3 [Source:VGNC Symbol;Acc:VGNC:78612]  
ENSMMUG00000017189 regulatory factor X6 [Source:VGNC Symbol;Acc:VGNC:76800]  
ENSMMUG00000051975  
ENSMMUG00000065247 opioid receptor kappa 1 [Source:NCBI gene;Acc:710783]  
ENSMMUG00000062326  
ENSMMUG0000006285 antizyme inhibitor 2 [Source:VGNC Symbol;Acc:VGNC:70153]  
ENSMMUG00000063914  
ENSMMUG0000000644 centrosomal protein 85 [Source:VGNC Symbol;Acc:VGNC:71096]  
ENSMMUG00000015686 abhydrolase domain containing 16A [Source:VGNC Symbol;Acc:VGNC:69393]  
ENSMMUG00000057934  
ENSMMUG00000006931 kirre like nephrin family adhesion molecule 3 [Source:NCBI gene;Acc:714534]  
ENSMMUG00000055914  
ENSMMUG00000007422 spermatogenesis associated 5 [Source:VGNC Symbol;Acc:VGNC:77952]  
ENSMMUG00000010137 microcephalin 1 [Source:VGNC Symbol;Acc:VGNC:74687]  
ENSMMUG00000050793 N-acetyl-alpha-glucosaminidase [Source:NCBI gene;Acc:707186]  
ENSMMUG00000035943 U6 spliceosomal RNA [Source:RFAM;Acc:RF00026]  
ENSMMUG00000050465 ZFP42 zinc finger protein [Source:NCBI gene;Acc:707621]  
ENSMMUG00000003950 nucleoporin 98 and 96 precursor [Source:VGNC Symbol;Acc:VGNC:75563]  
ENSMMUG00000004376 calcium and integrin binding 1 [Source:VGNC Symbol;Acc:VGNC:71189]  
ENSMMUG00000064707  
ENSMMUG00000003217 transmembrane 7 superfamily member 3 [Source:VGNC Symbol;Acc:VGNC:79371]  
ENSMMUG00000006568 basic leucine zipper ATF-like transcription factor 2 [Source:VGNC Symbol;Acc:VGNC:70127]  
ENSMMUG00000021634 TNF alpha induced protein 2 [Source:VGNC Symbol;Acc:VGNC:78579]  
ENSMMUG00000061424 ventral anterior homeobox 2 [Source:NCBI gene;Acc:703531]  
ENSMMUG00000008923 Thy-1 cell surface antigen [Source:VGNC Symbol;Acc:VGNC:78352]  
ENSMMUG00000002959 helicase with zinc finger [Source:VGNC Symbol;Acc:VGNC:73178]  
ENSMMUG00000002917 single Ig IL-1-related receptor [Source:NCBI gene;Acc:100425060]  
ENSMMUG00000061896  
ENSMMUG00000021610 regulator of G protein signaling 10 [Source:VGNC Symbol;Acc:VGNC:76915]  
ENSMMUG00000041101 protein phosphatase 2 regulatory subunit B'beta [Source:NCBI gene;Acc:722026]  
ENSMMUG00000009593 WAS/WASL interacting protein family member 1 [Source:VGNC Symbol;Acc:VGNC:78784]  
ENSMMUG00000057632  
ENSMMUG00000008031 zinc finger and BTB domain containing 17 [Source:VGNC Symbol;Acc:VGNC:78849]  
ENSMMUG00000015744 zinc finger protein 302 [Source:NCBI gene;Acc:706279]  
ENSMMUG00000008828 BEN domain containing 5 [Source:NCBI gene;Acc:711150]  
ENSMMUG00000055048  
ENSMMUG00000055897  
ENSMMUG00000052569  
ENSMMUG00000018719 nemo like kinase [Source:VGNC Symbol;Acc:VGNC:75277]  
ENSMMUG00000055775 transmembrane p24 trafficking protein 1 [Source:NCBI gene;Acc:713618]

ENSMMUG00000062781 chromosome 14 C11orf97 homolog [Source:NCBI gene;Acc:106993442]  
ENSMMUG00000014273 cation channel sperm associated auxiliary subunit gamma [Source:VGNC Symbol;Acc:VGNC:70626]  
ENSMMUG00000018246 transmembrane and coiled-coil domains 6 [Source:VGNC Symbol;Acc:VGNC:84507]  
ENSMMUG00000000951 integrin subunit beta 2 [Source:VGNC Symbol;Acc:VGNC:73786]  
ENSMMUG00000005595 RAB14, member RAS oncogene family [Source:NCBI gene;Acc:699837]  
ENSMMUG00000060502  
ENSMMUG00000018239 centrosomal protein 83 [Source:VGNC Symbol;Acc:VGNC:70992]  
ENSMMUG00000016580 selectin E [Source:VGNC Symbol;Acc:VGNC:77156]  
ENSMMUG00000010180 PIN2 (TERF1) interacting telomerase inhibitor 1 [Source:NCBI gene;Acc:701523]  
ENSMMUG00000058817  
ENSMMUG00000021972 diacylglycerol kinase gamma [Source:VGNC Symbol;Acc:VGNC:71785]  
ENSMMUG00000055811  
ENSMMUG00000002715 solute carrier family 9 member A8 [Source:VGNC Symbol;Acc:VGNC:77749]  
ENSMMUG00000052505 homeobox B9 [Source:NCBI gene;Acc:106994009]  
ENSMMUG00000053937  
ENSMMUG00000053790  
ENSMMUG00000005745 EYA transcriptional coactivator and phosphatase 4 [Source:VGNC Symbol;Acc:VGNC:72456]  
ENSMMUG00000061342  
ENSMMUG00000058176 b-defensin2-like [Source:NCBI gene;Acc:100169969]  
ENSMMUG00000050028  
ENSMMUG00000004332 tripartite motif containing 44 [Source:VGNC Symbol;Acc:VGNC:79168]  
ENSMMUG00000012801 zinc finger protein 235 [Source:VGNC Symbol;Acc:VGNC:78825]  
ENSMMUG00000003684 ATPase phospholipid transporting 8B4 (putative) [Source:VGNC Symbol;Acc:VGNC:84311]  
ENSMMUG00000002411 drebrin like [Source:NCBI gene;Acc:720621]  
ENSMMUG00000017256 calcium voltage-gated channel subunit alpha1 G [Source:VGNC Symbol;Acc:VGNC:70504]  
ENSMMUG00000018986 seizure related 6 homolog like 2 [Source:VGNC Symbol;Acc:VGNC:81567]  
ENSMMUG00000001707 amyloid beta precursor protein binding family B member 3 [Source:VGNC Symbol;Acc:VGNC:69869]  
ENSMMUG00000047465 Metazoan signal recognition particle RNA [Source:RFAM;Acc:RF00017]  
ENSMMUG00000063759 transmembrane protein 185B [Source:NCBI gene;Acc:695744]  
ENSMMUG00000057331 RNA terminal phosphate cyclase like 1 [Source:NCBI gene;Acc:694568]  
ENSMMUG00000002384 IGF like family receptor 1 [Source:VGNC Symbol;Acc:VGNC:73434]  
ENSMMUG00000001848 sprouty RTK signaling antagonist 1 [Source:VGNC Symbol;Acc:VGNC:77867]  
ENSMMUG00000004103 collagen type XI alpha 1 chain [Source:VGNC Symbol;Acc:VGNC:71289]  
ENSMMUG00000000740 spermatogenesis associated 2 [Source:VGNC Symbol;Acc:VGNC:77923]  
ENSMMUG00000006530 ATP/GTP binding protein like 3 [Source:VGNC Symbol;Acc:VGNC:69723]  
ENSMMUG00000003598 tripartite motif containing 7 [Source:VGNC Symbol;Acc:VGNC:79022]  
ENSMMUG00000014240 thioredoxin domain containing 11 [Source:VGNC Symbol;Acc:VGNC:79678]  
ENSMMUG00000009960 cathepsin A [Source:VGNC Symbol;Acc:VGNC:71617]  
ENSMMUG00000016579 selectin L [Source:NCBI gene;Acc:701419]  
ENSMMUG00000005482 lysine methyltransferase 2A [Source:NCBI gene;Acc:705511]  
ENSMMUG00000013830 glucose-6-phosphatase catalytic subunit 2 [Source:NCBI gene;Acc:709062]  
ENSMMUG00000062217 HD domain containing 3 [Source:NCBI gene;Acc:715621]  
ENSMMUG00000005989 GLE1 RNA export mediator [Source:VGNC Symbol;Acc:VGNC:73067]  
ENSMMUG00000062037 stannin [Source:NCBI gene;Acc:711909]  
ENSMMUG00000013044 selectin P [Source:VGNC Symbol;Acc:VGNC:77157]  
ENSMMUG00000009312 leukotriene A4 hydrolase [Source:VGNC Symbol;Acc:VGNC:74453]  
ENSMMUG00000006851 SPARC (osteonectin), cwcv and kazal like domains proteoglycan 3 [Source:NCBI gene;Acc:705964]  
ENSMMUG00000001547 zinc finger protein 106 [Source:VGNC Symbol;Acc:VGNC:78831]  
ENSMMUG00000020534 p21 (RAC1) activated kinase 6 [Source:NCBI gene;Acc:701589]  
ENSMMUG00000008384 solute carrier family 4 member 10 [Source:VGNC Symbol;Acc:VGNC:77695]  
ENSMMUG00000015416 bromodomain and PHD finger containing 3 [Source:VGNC Symbol;Acc:VGNC:70309]

ENSMMUG0000004273 dedicator of cytokinesis 3 [Source:VGNC Symbol;Acc:VGNC:71967]  
ENSMMUG00000046478 WASH complex subunit 3 [Source:NCBI gene;Acc:697824]  
ENSMMUG00000023479 latent transforming growth factor beta binding protein 3 [Source:VGNC Symbol;Acc:VGNC:74458]  
ENSMMUG00000005302 BAG cochaperone 6 [Source:VGNC Symbol;Acc:VGNC:81044]  
ENSMMUG00000057785  
ENSMMUG00000019528 adaptor related protein complex 4 subunit beta 1 [Source:VGNC Symbol;Acc:VGNC:69972]  
ENSMMUG00000057702  
ENSMMUG00000018345 phosphatidylethanolamine binding protein 4 [Source:VGNC Symbol;Acc:VGNC:82204]  
ENSMMUG00000052073  
ENSMMUG00000059782  
ENSMMUG00000064532 mucin 16, cell surface associated [Source:NCBI gene;Acc:106996460]  
ENSMMUG00000053367 secreted protein acidic and cysteine rich [Source:NCBI gene;Acc:712388]  
ENSMMUG00000006180 tetratricopeptide repeat, ankyrin repeat and coiled-coil containing 1 [Source:VGNC Symbol;Acc:VGNC:78238]  
ENSMMUG00000006091 contactin associated protein 1 [Source:VGNC Symbol;Acc:VGNC:71390]  
ENSMMUG00000012797 zinc finger protein 233 [Source:VGNC Symbol;Acc:VGNC:79903]  
ENSMMUG00000007925 serum/glucocorticoid regulated kinase 2 [Source:VGNC Symbol;Acc:VGNC:77228]  
ENSMMUG00000038524 olfactory receptor 2M4 [Source:NCBI gene;Acc:100424541]  
ENSMMUG00000023403 GTP binding protein 3, mitochondrial [Source:VGNC Symbol;Acc:VGNC:73170]  
ENSMMUG00000010466 solute carrier family 38 member 9 [Source:VGNC Symbol;Acc:VGNC:77574]  
ENSMMUG00000040393 zinc finger protein 655 [Source:NCBI gene;Acc:718811]  
ENSMMUG00000056381 forkhead box R1 [Source:NCBI gene;Acc:707285]  
ENSMMUG00000008387 dipeptidyl peptidase 4 [Source:VGNC Symbol;Acc:VGNC:71979]  
ENSMMUG00000018034 suppression of tumorigenicity 14 [Source:VGNC Symbol;Acc:VGNC:77897]  
ENSMMUG00000001060 ryanodine receptor 2 [Source:VGNC Symbol;Acc:VGNC:76954]  
ENSMMUG00000007200 NEDD4 binding protein 2 like 2 [Source:VGNC Symbol;Acc:VGNC:75031]  
ENSMMUG00000008195 TGF $\beta$  induced factor homeobox 2 [Source:NCBI gene;Acc:100429616]  
ENSMMUG00000015685 zinc finger protein 804B [Source:VGNC Symbol;Acc:VGNC:81890]  
ENSMMUG00000019304 indoleamine 2,3-dioxygenase 1 [Source:VGNC Symbol;Acc:VGNC:73580]  
ENSMMUG00000063198  
ENSMMUG00000059182  
ENSMMUG00000059229 CEA cell adhesion molecule 7 [Source:NCBI gene;Acc:705572]  
ENSMMUG00000018619 DENN domain containing 6A [Source:VGNC Symbol;Acc:VGNC:71726]  
ENSMMUG00000017822 periplakin [Source:VGNC Symbol;Acc:VGNC:76240]  
ENSMMUG00000031279 torsin A interacting protein 2 [Source:NCBI gene;Acc:716654]  
ENSMMUG00000020726 dihydropyrimidine dehydrogenase [Source:VGNC Symbol;Acc:VGNC:71982]  
ENSMMUG00000002422 AE binding protein 1 [Source:VGNC Symbol;Acc:VGNC:80328]  
ENSMMUG00000012941 nudix hydrolase 22 [Source:VGNC Symbol;Acc:VGNC:75475]  
ENSMMUG00000000958 aldo-keto reductase family 1, member C2 [Source:NCBI gene;Acc:711360]  
ENSMMUG00000050405  
ENSMMUG00000061935  
ENSMMUG00000010313 kinesin family member 3A [Source:VGNC Symbol;Acc:VGNC:74017]  
ENSMMUG00000009197 myelin associated oligodendrocyte basic protein [Source:VGNC Symbol;Acc:VGNC:74908]  
ENSMMUG00000016323 Rho guanine nucleotide exchange factor 39 [Source:VGNC Symbol;Acc:VGNC:69912]  
ENSMMUG00000005297 proline rich coiled-coil 2A [Source:VGNC Symbol;Acc:VGNC:83448]  
ENSMMUG00000022313 activating transcription factor 7 [Source:NCBI gene;Acc:700403]  
ENSMMUG00000001036 coagulation factor VII [Source:VGNC Symbol;Acc:VGNC:72466]  
ENSMMUG00000061533  
ENSMMUG00000014699  
ENSMMUG00000020604 HPS1 biogenesis of lysosomal organelles complex 3 subunit 1 [Source:VGNC Symbol;Acc:VGNC:73515]  
ENSMMUG00000003539 glutamine rich 2 [Source:VGNC Symbol;Acc:VGNC:76534]  
ENSMMUG00000065295

ENSMMUG00000061335  
ENSMMUG00000054686  
ENSMMUG00000064146 Metazoan signal recognition particle RNA [Source:RFAM;Acc:RF00017]  
ENSMMUG00000050696 taste receptor type 2 member 31-like [Source:NCBI gene;Acc:693892]  
ENSMMUG00000009499 mesoderm specific transcript [Source:VGNC Symbol;Acc:VGNC:74707]  
ENSMMUG00000064730  
ENSMMUG00000013871 WD repeat domain 25 [Source:VGNC Symbol;Acc:VGNC:78420]  
ENSMMUG00000013477 creatine kinase, M-type [Source:VGNC Symbol;Acc:VGNC:71230]  
ENSMMUG00000023016 jade family PHD finger 3 [Source:VGNC Symbol;Acc:VGNC:73640]  
ENSMMUG00000038363 adaptor related protein complex 5 subunit beta 1 [Source:NCBI gene;Acc:721904]  
ENSMMUG00000058536  
ENSMMUG00000022893 von Willebrand factor [Source:VGNC Symbol;Acc:VGNC:78778]  
ENSMMUG00000009377 tripartite motif containing 47 [Source:VGNC Symbol;Acc:VGNC:79171]  
ENSMMUG00000019070 focadhesin [Source:VGNC Symbol;Acc:VGNC:72556]  
ENSMMUG00000014771 zinc finger homeobox 2 [Source:NCBI gene;Acc:100429448]  
ENSMMUG00000048566 MCF.2 cell line derived transforming sequence like [Source:NCBI gene;Acc:713961]  
ENSMMUG00000026950 microRNA 101-2 [Source:HGNC Symbol;Acc:HGNC:31489]  
ENSMMUG00000017627 B-TFIID TATA-box binding protein associated factor 1 [Source:VGNC Symbol;Acc:VGNC:70336]  
ENSMMUG00000057196 pulmonary surfactant-associated protein A [Source:NCBI gene;Acc:701715]  
ENSMMUG00000002949 motile sperm domain containing 3 [Source:VGNC Symbol;Acc:VGNC:74823]  
ENSMMUG00000007387 G protein-coupled receptor kinase 7 [Source:VGNC Symbol;Acc:VGNC:73182]  
ENSMMUG00000016448 DLG associated protein 4 [Source:NCBI gene;Acc:702928]  
ENSMMUG00000046417 chromobox 2 [Source:NCBI gene;Acc:717462]  
ENSMMUG00000016327 coiled-coil domain containing 107 [Source:VGNC Symbol;Acc:VGNC:70656]  
ENSMMUG00000018967 ubiquitin conjugating enzyme E2 O [Source:VGNC Symbol;Acc:VGNC:79813]  
ENSMMUG00000005504 nucleoporin 37 [Source:VGNC Symbol;Acc:VGNC:75491]  
ENSMMUG00000032429 forkhead box O4 [Source:VGNC Symbol;Acc:VGNC:72712]  
ENSMMUG00000006929 ST3 beta-galactoside alpha-2,3-sialyltransferase 4 [Source:VGNC Symbol;Acc:VGNC:77827]  
ENSMMUG00000020668 cyclin E1 [Source:VGNC Symbol;Acc:VGNC:70727]  
ENSMMUG00000022884 glutamate-ammonia ligase [Source:NCBI gene;Acc:715952]  
ENSMMUG00000001151 microtubule associated scaffold protein 1 [Source:VGNC Symbol;Acc:VGNC:84018]  
ENSMMUG00000003303 Tu translation elongation factor, mitochondrial [Source:VGNC Symbol;Acc:VGNC:78674]  
ENSMMUG00000011817 aryl hydrocarbon receptor interacting protein [Source:VGNC Symbol;Acc:VGNC:69759]  
ENSMMUG00000006855 acyl-CoA thioesterase 2 [Source:NCBI gene;Acc:697011]  
ENSMMUG00000017036 nicalin [Source:VGNC Symbol;Acc:VGNC:75032]  
ENSMMUG00000063622 mitochondrial ribosomal protein S26 [Source:NCBI gene;Acc:717038]  
ENSMMUG00000022921 solute carrier family 2 member 12 [Source:VGNC Symbol;Acc:VGNC:77503]  
ENSMMUG00000017701 myosin VIIA and Rab interacting protein [Source:VGNC Symbol;Acc:VGNC:74992]  
ENSMMUG00000004002 CDC like kinase 4 [Source:VGNC Symbol;Acc:VGNC:71173]  
ENSMMUG00000012356 serpin family A member 9 [Source:VGNC Symbol;Acc:VGNC:77241]  
ENSMMUG00000021039 X-ray radiation resistance associated 1 [Source:NCBI gene;Acc:693788]  
ENSMMUG00000050608  
ENSMMUG00000061208 MAP3K7 C-terminal like [Source:NCBI gene;Acc:713717]  
ENSMMUG00000021664 lamin tail domain containing 2 [Source:VGNC Symbol;Acc:VGNC:74380]  
ENSMMUG00000003298 ataxin 2 like [Source:VGNC Symbol;Acc:VGNC:70159]  
ENSMMUG00000062863  
ENSMMUG00000057640 plakophilin-3-like [Source:NCBI gene;Acc:114669833]  
ENSMMUG00000002426 myosin light chain 7 [Source:VGNC Symbol;Acc:VGNC:75002]  
ENSMMUG00000058916  
ENSMMUG00000031534 ankyrin repeat and ubiquitin domain containing 1 [Source:VGNC Symbol;Acc:VGNC:84239]  
ENSMMUG00000028733 RAS related [Source:VGNC Symbol;Acc:VGNC:76937]



ENSMMUG00000049130  
 ENSMMUG00000056555  
 ENSMMUG00000010308 cyclin I family member 2 [Source:VGNC Symbol;Acc:VGNC:70923]  
 ENSMMUG00000054473 activating transcription factor 5 [Source:NCBI gene;Acc:719150]  
 ENSMMUG00000019690 SEC14 and spectrin domain containing 1 [Source:VGNC Symbol;Acc:VGNC:77267]  
 ENSMMUG00000022996 HCLS1 binding protein 3 [Source:VGNC Symbol;Acc:VGNC:82158]  
 ENSMMUG00000000375 pleckstrin homology and RhoGEF domain containing G6 [Source:VGNC Symbol;Acc:VGNC:76110]  
 ENSMMUG00000058423  
 ENSMMUG00000012635 zyxin [Source:VGNC Symbol;Acc:VGNC:78917]  
 ENSMMUG00000051677  
 ENSMMUG00000018137 MYB proto-oncogene like 2 [Source:VGNC Symbol;Acc:VGNC:75092]  
 ENSMMUG00000002217 alkaline phosphatase, biomineralization associated [Source:VGNC Symbol;Acc:VGNC:69801]  
 ENSMMUG00000003131 interleukin 13 [Source:VGNC Symbol;Acc:VGNC:84393]  
 ENSMMUG00000059671  
 ENSMMUG00000013146 claudin 2 [Source:HGNC Symbol;Acc:HGNC:2041]  
 ENSMMUG00000005488 coronin 1B [Source:VGNC Symbol;Acc:VGNC:71320]  
 ENSMMUG00000010824 SWIM-type zinc finger 7 associated protein 1 [Source:VGNC Symbol;Acc:VGNC:78220]  
 ENSMMUG00000052777  
 ENSMMUG00000014138 forkhead box J3 [Source:VGNC Symbol;Acc:VGNC:72596]  
 ENSMMUG00000001397 multiple C2 and transmembrane domain containing 1 [Source:VGNC Symbol;Acc:VGNC:74589]  
 ENSMMUG00000058885 formin binding protein 4 [Source:NCBI gene;Acc:712633]  
 ENSMMUG00000016890 solute carrier family 37 member 4 [Source:VGNC Symbol;Acc:VGNC:77591]  
 ENSMMUG00000017224 catenin beta like 1 [Source:VGNC Symbol;Acc:VGNC:71414]  
 ENSMMUG00000052891  
 ENSMMUG00000014032 proline rich 36 [Source:NCBI gene;Acc:710443]  
 ENSMMUG00000064824 gremlin 2, DAN family BMP antagonist [Source:NCBI gene;Acc:708280]  
 ENSMMUG00000012147 collagen type V alpha 1 chain [Source:NCBI gene;Acc:722014]  
 ENSMMUG00000002886 Bardet-Biedl syndrome 9 [Source:NCBI gene;Acc:708412]  
 ENSMMUG00000051816 keratinocyte proline rich protein [Source:NCBI gene;Acc:100424312]  
 ENSMMUG00000013696 myozenin 1 [Source:VGNC Symbol;Acc:VGNC:74951]  
 ENSMMUG00000001745 oxysterol binding protein [Source:VGNC Symbol;Acc:VGNC:75718]  
 ENSMMUG00000007773 solute carrier organic anion transporter family member 4C1 [Source:VGNC Symbol;Acc:VGNC:77764]  
 ENSMMUG00000015693 lymphocyte antigen 6 family member G6C [Source:VGNC Symbol;Acc:VGNC:74285]  
 ENSMMUG00000053106  
 ENSMMUG00000003005 MFNG O-fucosylpeptide 3-beta-N-acetylglucosaminyltransferase [Source:VGNC Symbol;Acc:VGNC:74712]  
 ENSMMUG00000000808 melanin concentrating hormone receptor 2 [Source:VGNC Symbol;Acc:VGNC:74550]  
 ENSMMUG000000031391 RNA binding motif protein 38 [Source:VGNC Symbol;Acc:VGNC:76484]  
 ENSMMUG00000014868 OCIA domain containing 1 [Source:VGNC Symbol;Acc:VGNC:75409]  
 ENSMMUG00000001702 succinyl-CoA:glutarate-CoA transferase [Source:VGNC Symbol;Acc:VGNC:81767]  
 ENSMMUG00000005294 casein kinase 2 beta [Source:NCBI gene;Acc:715807]  
 ENSMMUG00000006997 thioredoxin domain containing 16 [Source:VGNC Symbol;Acc:VGNC:79214]  
 ENSMMUG00000005293 G-patch domain and ankyrin repeats 1 [Source:VGNC Symbol;Acc:VGNC:81073]  
 ENSMMUG00000015555 ST3 beta-galactoside alpha-2,3-sialyltransferase 3 [Source:VGNC Symbol;Acc:VGNC:77828]  
 ENSMMUG00000061923  
 ENSMMUG00000056266 Metazoan signal recognition particle RNA [Source:RFAM;Acc:RF00017]  
 ENSMMUG00000012938 SR-related CTD associated factor 1 [Source:VGNC Symbol;Acc:VGNC:77137]  
 ENSMMUG00000053516  
 ENSMMUG00000005554 mediator complex subunit 29 [Source:VGNC Symbol;Acc:VGNC:74557]  
 ENSMMUG00000051645  
 ENSMMUG00000008518 phospholipid phosphatase related 5 [Source:NCBI gene;Acc:710549]  
 ENSMMUG00000058013 melanoma-associated antigen 3 [Source:NCBI gene;Acc:706103]

NS\_D1 NS\_D2 S\_D1 S\_D2 S\_D3

9

NS\_D1 NS\_D2 NS\_D3 S\_D1 S\_D2

72

ENSMMUG00000018743 ubiquitin specific peptidase 25 [Source:VGNC Symbol;Acc:VGNC:78744]  
 ENSMMUG00000003457 protein kinase cAMP-activated catalytic subunit beta [Source:NCBI gene;Acc:709728]  
 ENSMMUG00000014876 nucleolus and neural progenitor protein [Source:VGNC Symbol;Acc:VGNC:75244]  
 ENSMMUG00000005432 clathrin heavy chain like 1 [Source:VGNC Symbol;Acc:VGNC:71268]  
 ENSMMUG00000043134 coiled-coil domain containing 159 [Source:NCBI gene;Acc:100424702]  
 ENSMMUG00000016069 cubilin [Source:VGNC Symbol;Acc:VGNC:82132]  
 ENSMMUG00000053984  
 ENSMMUG00000058534  
 ENSMMUG00000008007 multiple EGF like domains 11 [Source:VGNC Symbol;Acc:VGNC:84376]  
 ENSMMUG00000000803 signal transducer and activator of transcription 2 [Source:VGNC Symbol;Acc:VGNC:77905]  
 ENSMMUG00000057231 T-box transcription factor 21 [Source:NCBI gene;Acc:694044]  
 ENSMMUG00000040741 thioredoxin related transmembrane protein 2 [Source:NCBI gene;Acc:100169970]  
 ENSMMUG00000006766 RUN domain containing 3B [Source:VGNC Symbol;Acc:VGNC:77129]  
 ENSMMUG00000054960  
 ENSMMUG00000051226 FAD-linked sulfhydryl oxidase ERV1 [Source:NCBI gene;Acc:106994988]  
 ENSMMUG00000059341 Metazoan signal recognition particle RNA [Source:RFAM;Acc:RF00017]  
 ENSMMUG00000009040 cornulin [Source:VGNC Symbol;Acc:VGNC:71397]  
 ENSMMUG00000021449 vacuolar protein sorting 13 homolog D [Source:NCBI gene;Acc:722775]  
 ENSMMUG00000011774 integrator complex subunit 10 [Source:VGNC Symbol;Acc:VGNC:73653]  
 ENSMMUG00000009184 myelin protein zero like 1 [Source:NCBI gene;Acc:698437]  
 ENSMMUG00000009684 kinesin family member 22 [Source:VGNC Symbol;Acc:VGNC:74033]  
 ENSMMUG00000013251 xin actin binding repeat containing 2 [Source:VGNC Symbol;Acc:VGNC:78953]  
 ENSMMUG00000037243 U6 spliceosomal RNA [Source:RFAM;Acc:RF00026]  
 ENSMMUG00000060760  
 ENSMMUG00000023060 A-kinase anchoring protein 4 [Source:VGNC Symbol;Acc:VGNC:69770]  
 ENSMMUG00000043396 Metazoan signal recognition particle RNA [Source:RFAM;Acc:RF00017]  
 ENSMMUG00000018549 zinc finger protein 786 [Source:VGNC Symbol;Acc:VGNC:79338]  
 ENSMMUG00000052780  
 ENSMMUG00000021436 latent transforming growth factor beta binding protein 1 [Source:VGNC Symbol;Acc:VGNC:74456]  
 ENSMMUG00000001338 antizyme inhibitor 1 [Source:VGNC Symbol;Acc:VGNC:70080]  
 ENSMMUG00000039292  
 ENSMMUG00000059472 filaggrin family member 2 [Source:HGNC Symbol;Acc:HGNC:33276]  
 ENSMMUG00000000776 zinc finger matrin-type 4 [Source:VGNC Symbol;Acc:VGNC:78424]  
 ENSMMUG00000061194  
 ENSMMUG00000019839 lysine acetyltransferase 5 [Source:VGNC Symbol;Acc:VGNC:73955]  
 ENSMMUG00000001409 coiled-coil domain containing 187 [Source:NCBI gene;Acc:710749]  
 ENSMMUG00000004309 APC membrane recruitment protein 1 [Source:VGNC Symbol;Acc:VGNC:69716]  
 ENSMMUG00000056024  
 ENSMMUG00000062996  
 ENSMMUG00000004774 maestro heat like repeat family member 2B [Source:VGNC Symbol;Acc:VGNC:74837]  
 ENSMMUG00000006836 chloride channel accessory 1 [Source:NCBI gene;Acc:574295]  
 ENSMMUG00000013330 ectonucleoside triphosphate diphosphohydrolase 3 [Source:VGNC Symbol;Acc:VGNC:72226]  
 ENSMMUG00000048215  
 ENSMMUG00000060812 autophagy related 12 [Source:NCBI gene;Acc:696765]  
 ENSMMUG00000061785  
 ENSMMUG00000062063 melanoma-associated antigen 3 [Source:NCBI gene;Acc:711544]  
 19 ENSMMUG00000023282 aldo-keto reductase family 1, member C1 (dihydrodiol dehydrogenase 1; 20-alpha (3-alpha)-hydroxysteroid dehydrogenase) [Source:NCBI gene;Acc:711198]  
 ENSMMUG00000039009  
 ENSMMUG00000023449 mitofusin 2 [Source:VGNC Symbol;Acc:VGNC:74522]  
 ENSMMUG00000063322  
 ENSMMUG00000005483 ribosomal protein S6 kinase B2 [Source:VGNC Symbol;Acc:VGNC:76934]

ENSMMUG00000014674 golgin, RAB6 interacting [Source:VGNC Symbol;Acc:VGNC:73012]  
 ENSMMUG00000015866 vesicle transport through interaction with t-SNAREs 1B [Source:NCBI gene;Acc:711113]  
 ENSMMUG00000003006 serine palmitoyltransferase long chain base subunit 1 [Source:VGNC Symbol;Acc:VGNC:77873]  
 ENSMMUG00000006893 D-amino acid oxidase [Source:VGNC Symbol;Acc:VGNC:71729]  
 ENSMMUG00000017561 solute carrier family 43 member 2 [Source:VGNC Symbol;Acc:VGNC:77554]  
 ENSMMUG00000021428 lipocalin 12 [Source:VGNC Symbol;Acc:VGNC:74143]  
 ENSMMUG00000003436 tubulin tyrosine ligase like 6 [Source:VGNC Symbol;Acc:VGNC:79632]  
 ENSMMUG00000022407 serine and arginine rich splicing factor 5 [Source:NCBI gene;Acc:712867]  
 ENSMMUG00000014715 fragile site, folic acid type, rare, fra(10)(q23.3) or fra(10)(q24.2) candidate 1 [Source:NCBI gene;Acc:700389]  
 ENSMMUG00000013671 elongation factor for RNA polymerase II [Source:VGNC Symbol;Acc:VGNC:72088]  
 ENSMMUG00000004748 zinc finger and BTB domain containing 1 [Source:VGNC Symbol;Acc:VGNC:79238]  
 ENSMMUG00000008623 coiled-coil domain containing 22 [Source:VGNC Symbol;Acc:VGNC:70899]  
 ENSMMUG00000049850 proline rich and Gla domain 4 [Source:NCBI gene;Acc:694707]  
 ENSMMUG00000060879 homeobox B13 [Source:NCBI gene;Acc:697572]  
 66 ENSMMUG00000054942 pre-mRNA processing factor 8 [Source:VGNC Symbol;Acc:VGNC:76275]  
 ENSMMUG00000004820 cytochrome P450, family 27, subfamily A, polypeptide 1 [Source:NCBI gene;Acc:700192]  
 ENSMMUG00000053378 mediator complex subunit 24 [Source:NCBI gene;Acc:699536]  
 ENSMMUG00000061576 EPH receptor A2 [Source:VGNC Symbol;Acc:VGNC:72235]  
 ENSMMUG00000018245 collapsin response mediator protein 1 [Source:VGNC Symbol;Acc:VGNC:71494]  
 ENSMMUG00000018664 collagen type IX alpha 2 chain [Source:VGNC Symbol;Acc:VGNC:71307]  
 ENSMMUG00000056009 MIER family member 2 [Source:VGNC Symbol;Acc:VGNC:74855]  
 ENSMMUG00000059188 protein kinase AMP-activated non-catalytic subunit gamma 3 [Source:VGNC Symbol;Acc:VGNC:76406]  
 ENSMMUG00000021877 glycoprotein hormone subunit alpha 2 [Source:VGNC Symbol;Acc:VGNC:72961]  
 ENSMMUG00000049894 solute carrier family 41 member 2 [Source:VGNC Symbol;Acc:VGNC:77585]  
 ENSMMUG00000017129 dynactin subunit 4 [Source:VGNC Symbol;Acc:VGNC:71625]  
 ENSMMUG00000019764 TATA-box binding protein associated factor 5 like [Source:VGNC Symbol;Acc:VGNC:78148]  
 ENSMMUG00000009508 DiGeorge syndrome critical region gene 2 [Source:NCBI gene;Acc:100423715]  
 ENSMMUG00000019925 ubiquitin specific peptidase 20 [Source:VGNC Symbol;Acc:VGNC:78740]  
 ENSMMUG00000058437 mannosidase beta [Source:VGNC Symbol;Acc:VGNC:74486]  
 ENSMMUG00000003797 protein tyrosine phosphatase receptor type C associated protein [Source:VGNC Symbol;Acc:VGNC:76613]  
 ENSMMUG00000003739 cadherin related family member 3 [Source:HGNC Symbol;Acc:HGNC:26308]  
 ENSMMUG00000005486 alanyl aminopeptidase, membrane [Source:VGNC Symbol;Acc:VGNC:69943]  
 ENSMMUG00000008189 synapse defective Rho GTPase homolog 1 [Source:NCBI gene;Acc:719089]  
 ENSMMUG00000014983 CCZ1 homolog, vacuolar protein trafficking and biogenesis associated [Source:NCBI gene;Acc:718128]  
 ENSMMUG00000007726 calcium voltage-gated channel subunit alpha1 F [Source:VGNC Symbol;Acc:VGNC:70503]  
 ENSMMUG0000007970 PAT1 homolog 1, processing body mRNA decay factor [Source:VGNC Symbol;Acc:VGNC:75684]  
 ENSMMUG00000008618 CD14 molecule [Source:VGNC Symbol;Acc:VGNC:70751]  
 ENSMMUG00000017287 shieldin complex subunit 1 [Source:NCBI gene;Acc:718152]  
 ENSMMUG00000010007 PSMC3 interacting protein [Source:VGNC Symbol;Acc:VGNC:76282]  
 ENSMMUG00000056093 Metazoan signal recognition particle RNA [Source:RFAM;Acc:RF00017]  
 ENSMMUG00000009889 SEC61 translocon subunit gamma [Source:NCBI gene;Acc:716898]  
 ENSMMUG00000062316  
 ENSMMUG00000060184

NS\_D1 NS\_D2 NS\_D3 S\_D1 S\_D3

ENSMMUG00000063988  
 ENSMMUG00000018492 TARBP2 subunit of RISC loading complex [Source:VGNC Symbol;Acc:VGNC:78099]  
 ENSMMUG00000004816 membrane associated ring-CH-type finger 5 [Source:VGNC Symbol;Acc:VGNC:74588]  
 ENSMMUG00000001820 regulator of G protein signaling 6 [Source:VGNC Symbol;Acc:VGNC:76691]  
 ENSMMUG00000016929 proline rich and Gla domain 3 [Source:VGNC Symbol;Acc:VGNC:76350]  
 ENSMMUG00000008162 fibroblast growth factor binding protein 1 [Source:VGNC Symbol;Acc:VGNC:72536]  
 ENSMMUG00000020861 EvC ciliary complex subunit 1 [Source:VGNC Symbol;Acc:VGNC:72445]  
 ENSMMUG00000051408 myelin associated oligodendrocyte basic protein [Source:NCBI gene;Acc:717265]  
 ENSMMUG00000063639  
 ENSMMUG00000014872 dolichyl-phosphate N-acetylglucosaminophosphotransferase 1 [Source:VGNC Symbol;Acc:VGNC:71971]  
 ENSMMUG00000042510 coagulation factor V [Source:NCBI gene;Acc:704695]  
 ENSMMUG00000003834 basic leucine zipper ATF-like transcription factor [Source:VGNC Symbol;Acc:VGNC:70229]  
 ENSMMUG00000056184  
 ENSMMUG00000013099 pappalysin 1 [Source:VGNC Symbol;Acc:VGNC:75756]  
 ENSMMUG00000012065 tubulin tyrosine ligase like 5 [Source:NCBI gene;Acc:703116]  
 ENSMMUG00000004854 leucine rich repeat containing 9 [Source:VGNC Symbol;Acc:VGNC:81443]  
 ENSMMUG00000063694 cyclic nucleotide gated channel subunit alpha 2 [Source:NCBI gene;Acc:704486]  
 ENSMMUG00000062254  
 ENSMMUG00000038256 aquaporin 2 [Source:NCBI gene;Acc:711719]  
 ENSMMUG00000049649 proteasome 20S subunit beta 6 [Source:NCBI gene;Acc:710028]  
 ENSMMUG00000009361 fumarylacetoacetate hydrolase [Source:NCBI gene;Acc:712716]  
 ENSMMUG00000004283 calcium and integrin binding family member 3 [Source:VGNC Symbol;Acc:VGNC:71339]  
 ENSMMUG00000054755 transmembrane protein 65 [Source:NCBI gene;Acc:705727]  
 ENSMMUG00000000293 catenin alpha 2 [Source:VGNC Symbol;Acc:VGNC:71543]  
 ENSMMUG00000003105 inositol polyphosphate-5-phosphatase E [Source:VGNC Symbol;Acc:VGNC:73637]  
 ENSMMUG00000004558 OTU deubiquitinase 5 [Source:VGNC Symbol;Acc:VGNC:75677]  
 ENSMMUG00000017906 DnaJ heat shock protein family (Hsp40) member B1 [Source:NCBI gene;Acc:718890]  
 ENSMMUG00000023300 FERM domain containing 8 [Source:NCBI gene;Acc:716379]  
 ENSMMUG00000009884 hydroxysteroid 17-beta dehydrogenase 1 [Source:VGNC Symbol;Acc:VGNC:73528]  
 ENSMMUG00000060063  
 ENSMMUG00000062139  
 ENSMMUG00000020020 Rho GTPase activating protein 23 [Source:NCBI gene;Acc:693996]  
 ENSMMUG00000010309 septin 8 [Source:VGNC Symbol;Acc:VGNC:77248]  
 ENSMMUG00000021075 Rac family small GTPase 1 [Source:NCBI gene;Acc:717755]  
 ENSMMUG00000005086 homeobox protein TGIF1 [Source:NCBI gene;Acc:694580]  
 ENSMMUG00000019991 dopa decarboxylase [Source:VGNC Symbol;Acc:VGNC:71755]  
 ENSMMUG0000006659  
 ENSMMUG00000055379  
 ENSMMUG00000019526 BLM RecQ like helicase [Source:VGNC Symbol;Acc:VGNC:70254]  
 ENSMMUG00000007534 protein regulator of cytokinesis 1 [Source:NCBI gene;Acc:710182]  
 ENSMMUG00000049232 AMMECR1 like [Source:VGNC Symbol;Acc:VGNC:84208]  
 ENSMMUG00000014045 protein tyrosine phosphatase non-receptor type 23 [Source:VGNC Symbol;Acc:VGNC:76477]  
 ENSMMUG00000015468 checkpoint with forkhead and ring finger domains [Source:VGNC Symbol;Acc:VGNC:71064]  
 ENSMMUG00000011661 integrin subunit alpha 8 [Source:VGNC Symbol;Acc:VGNC:73782]  
 ENSMMUG00000050495  
 ENSMMUG00000027543 Y RNA [Source:RFAM;Acc:RF00019]  
 ENSMMUG00000009199 glycogen phosphorylase B [Source:VGNC Symbol;Acc:VGNC:76631]  
 ENSMMUG00000005108 RCC1 domain containing 1 [Source:VGNC Symbol;Acc:VGNC:76876]  
 ENSMMUG00000050585  
 ENSMMUG00000003572 nicotinamide phosphoribosyltransferase [Source:VGNC Symbol;Acc:VGNC:75056]  
 ENSMMUG0000001989 RNA polymerase II subunit D [Source:VGNC Symbol;Acc:VGNC:76213]

NS\_D2 NS\_D3 S\_D1 S\_D2 S\_D3

7

NS\_D1 NS\_D2 NS\_D3 S\_D2 S\_D3

18

|                       |                      |                                                                                          |
|-----------------------|----------------------|------------------------------------------------------------------------------------------|
|                       | ENSMMUG00000011064   | synaptosome associated protein 25 [Source:VGNC Symbol;Acc:VGNC:77663]                    |
|                       | ENSMMUG00000057179   | cation channel sperm associated 1 [Source:NCBI gene;Acc:721869]                          |
|                       | ENSMMUG00000023139   | small nuclear ribonucleoprotein polypeptide N [Source:VGNC Symbol;Acc:VGNC:78437]        |
| NS_D1 NS_D2 S_D1 S_D2 | 34 ENSMUG00000021080 | basic leucine zipper nuclear factor 1 [Source:VGNC Symbol;Acc:VGNC:70258]                |
|                       | ENSMUG00000013460    | RAB8B, member RAS oncogene family [Source:VGNC Symbol;Acc:VGNC:81550]                    |
|                       | ENSMUG00000056058    | C-type lectin domain containing 20A [Source:HGNC Symbol;Acc:HGNC:34521]                  |
|                       | ENSMUG00000052348    |                                                                                          |
|                       | ENSMUG00000006596    | CCR4-NOT transcription complex subunit 10 [Source:VGNC Symbol;Acc:VGNC:71327]            |
|                       | ENSMUG00000055121    | Metazoan signal recognition particle RNA [Source:RFAM;Acc:RF00017]                       |
|                       | ENSMUG00000056906    |                                                                                          |
|                       | ENSMUG00000014076    | AF4/FMR2 family member 1 [Source:VGNC Symbol;Acc:VGNC:69817]                             |
|                       | ENSMUG00000013385    | elongator acetyltransferase complex subunit 6 [Source:VGNC Symbol;Acc:VGNC:72113]        |
|                       | ENSMUG00000017266    | UPF0577 protein KIAA1324 [Source:NCBI gene;Acc:697670]                                   |
|                       | ENSMUG00000048621    | enolase-phosphatase 1 [Source:NCBI gene;Acc:106998330]                                   |
|                       | ENSMUG00000058137    | zinc finger protein 816 [Source:NCBI gene;Acc:720058]                                    |
|                       | ENSMUG00000054904    | Metazoan signal recognition particle RNA [Source:RFAM;Acc:RF00017]                       |
|                       | ENSMUG00000023048    | cytochrome b-c1 complex subunit Rieske, mitochondrial [Source:NCBI gene;Acc:705178]      |
|                       | ENSMUG00000014291    | SPG11 vesicle trafficking associated, spatacsin [Source:VGNC Symbol;Acc:VGNC:77856]      |
|                       | ENSMUG00000022207    | phospholipid phosphatase related 2 [Source:NCBI gene;Acc:714388]                         |
|                       | ENSMUG00000011155    | FA complementation group I [Source:VGNC Symbol;Acc:VGNC:72575]                           |
|                       | ENSMUG00000031100    | membrane-spanning 4-domains subfamily A member 4A-like [Source:NCBI gene;Acc:698152]     |
|                       | ENSMUG00000055963    |                                                                                          |
|                       | ENSMUG00000017261    | galactosylceramidase [Source:VGNC Symbol;Acc:VGNC:72867]                                 |
|                       | ENSMUG00000058002    | zinc finger protein 669-like [Source:NCBI gene;Acc:696282]                               |
|                       | ENSMUG00000006284    | adenylate kinase 2 [Source:VGNC Symbol;Acc:VGNC:69761]                                   |
|                       | ENSMUG00000003267    | zinc finger protein 362 [Source:NCBI gene;Acc:710013]                                    |
|                       | ENSMUG00000060712    |                                                                                          |
|                       | ENSMUG00000003007    | caspase recruitment domain family member 10 [Source:VGNC Symbol;Acc:VGNC:70570]          |
|                       | ENSMUG00000055747    | cytochrome c oxidase subunit 6B [Source:NCBI gene;Acc:692062]                            |
|                       | ENSMUG00000011951    | KRI1 homolog [Source:VGNC Symbol;Acc:VGNC:74127]                                         |
|                       | ENSMUG00000002564    | Fraser extracellular matrix complex subunit 1 [Source:VGNC Symbol;Acc:VGNC:72743]        |
|                       | ENSMUG00000019830    | Fc receptor like 2 [Source:VGNC Symbol;Acc:VGNC:72509]                                   |
|                       | ENSMUG00000000931    | solute carrier family 35 member A3 [Source:VGNC Symbol;Acc:VGNC:77461]                   |
|                       | ENSMUG00000003356    | tenascin C [Source:VGNC Symbol;Acc:VGNC:79960]                                           |
|                       | ENSMUG00000011440    | neurite extension and migration factor [Source:VGNC Symbol;Acc:VGNC:75274]               |
|                       | ENSMUG00000003697    | inositol polyphosphate-4-phosphatase type II B [Source:VGNC Symbol;Acc:VGNC:73748]       |
|                       | ENSMUG00000057345    | calcineurin like phosphoesterase domain containing 1 [Source:NCBI gene;Acc:716978]       |
| NS_D1 S_D1 S_D2 S_D3  | 11 ENSMUG00000054568 |                                                                                          |
|                       | ENSMUG00000001568    | AT-rich interaction domain 3B [Source:VGNC Symbol;Acc:VGNC:69827]                        |
|                       | ENSMUG00000022730    | cytochrome P450, family 3, subfamily A, polypeptide 5 [Source:NCBI gene;Acc:678692]      |
|                       | ENSMUG00000000874    | carbohydrate sulfotransferase 1 [Source:VGNC Symbol;Acc:VGNC:71055]                      |
|                       | ENSMUG00000019536    | potassium voltage-gated channel subfamily Q member 4 [Source:VGNC Symbol;Acc:VGNC:74007] |
|                       | ENSMUG00000061995    |                                                                                          |
|                       | ENSMUG00000040274    | MAGE family member A4 [Source:NCBI gene;Acc:710825]                                      |
|                       | ENSMUG00000004576    | C-C motif chemokine receptor 3 [Source:VGNC Symbol;Acc:VGNC:70738]                       |
|                       | ENSMUG00000002452    | solute carrier family 35 member C1 [Source:VGNC Symbol;Acc:VGNC:77524]                   |
|                       | ENSMUG00000011209    | BICD family like cargo adaptor 1 [Source:HGNC Symbol;Acc:HGNC:28095]                     |
|                       | ENSMUG00000062397    |                                                                                          |
| NS_D1 NS_D3 S_D1 S_D2 | 3 ENSMUG00000008077  | dynein cytoplasmic 2 light intermediate chain 1 [Source:VGNC Symbol;Acc:VGNC:71899]      |
|                       | ENSMUG00000008875    | solute carrier family 35 member F5 [Source:VGNC Symbol;Acc:VGNC:77567]                   |
|                       | ENSMUG00000007140    | MOK protein kinase [Source:VGNC Symbol;Acc:VGNC:84394]                                   |

|                        |     |                     |                                                                                                       |
|------------------------|-----|---------------------|-------------------------------------------------------------------------------------------------------|
| NS_D1 NS_D2 S_D1 S_D3  | 2   | ENSMMUG00000021447  | TNF receptor superfamily member 1B [Source:VGNC Symbol;Acc:VGNC:78590]                                |
|                        |     | ENSMMUG00000007610  | ribosomal protein S6 kinase A4 [Source:VGNC Symbol;Acc:VGNC:76930]                                    |
| NS_D1 NS_D2 NS_D3 S_D1 | 107 | ENSMMUG000000051537 |                                                                                                       |
|                        |     | ENSMMUG00000006692  | signal peptide, CUB domain and EGF like domain containing 2 [Source:VGNC Symbol;Acc:VGNC:77138]       |
|                        |     | ENSMMUG00000023045  | zinc finger B-box domain containing [Source:VGNC Symbol;Acc:VGNC:79592]                               |
|                        |     | ENSMMUG00000008652  | coiled-coil domain containing 85B [Source:VGNC Symbol;Acc:VGNC:70853]                                 |
|                        |     | ENSMMUG00000053257  | Y RNA [Source:RFAM;Acc:RF00019]                                                                       |
|                        |     | ENSMMUG00000039266  | Metazoan signal recognition particle RNA [Source:RFAM;Acc:RF00017]                                    |
|                        |     | ENSMMUG00000016404  | chondromodulin [Source:VGNC Symbol;Acc:VGNC:71191]                                                    |
|                        |     | ENSMMUG00000005303  | apolipoprotein M [Source:VGNC Symbol;Acc:VGNC:69825]                                                  |
|                        |     | ENSMMUG00000004330  | peptidase domain containing associated with muscle regeneration 1 [Source:VGNC Symbol;Acc:VGNC:75673] |
|                        |     | ENSMMUG00000014349  | integrin subunit alpha X [Source:NCBI gene;Acc:100427850]                                             |
|                        |     | ENSMMUG00000049297  |                                                                                                       |
|                        |     | ENSMMUG00000008529  | chromosome 7 C15orf39 homolog [Source:VGNC Symbol;Acc:VGNC:70620]                                     |
|                        |     | ENSMMUG00000041729  |                                                                                                       |
|                        |     | ENSMMUG00000022406  | ankyrin repeat and sterile alpha motif domain containing 1B [Source:VGNC Symbol;Acc:VGNC:69689]       |
|                        |     | ENSMMUG00000008778  | parvalbumin [Source:VGNC Symbol;Acc:VGNC:76627]                                                       |
|                        |     | ENSMMUG00000010363  | ribophorin II [Source:VGNC Symbol;Acc:VGNC:76925]                                                     |
|                        |     | ENSMMUG00000064321  |                                                                                                       |
|                        |     | ENSMMUG00000021476  | BCL2 like 13 [Source:VGNC Symbol;Acc:VGNC:84544]                                                      |
|                        |     | ENSMMUG00000005511  | SON DNA binding protein [Source:VGNC Symbol;Acc:VGNC:77689]                                           |
|                        |     | ENSMMUG00000049755  | leucine rich repeat containing 3 [Source:NCBI gene;Acc:712418]                                        |
|                        |     | ENSMMUG00000056343  |                                                                                                       |
|                        |     | ENSMMUG00000052637  | Metazoan signal recognition particle RNA [Source:RFAM;Acc:RF00017]                                    |
|                        |     | ENSMMUG00000022282  | collagen type IV alpha 2 chain [Source:NCBI gene;Acc:100429807]                                       |
|                        |     | ENSMMUG00000054211  |                                                                                                       |
|                        |     | ENSMMUG00000010837  | VRK serine/threonine kinase 3 [Source:VGNC Symbol;Acc:VGNC:81605]                                     |
|                        |     | ENSMMUG00000002124  | beta-1,4-galactosyltransferase 5 [Source:VGNC Symbol;Acc:VGNC:70212]                                  |
|                        |     | ENSMMUG00000019527  | DNA cross-link repair 1B [Source:VGNC Symbol;Acc:VGNC:71647]                                          |
|                        |     | ENSMMUG00000005255  | TRAF-type zinc finger domain containing 1 [Source:VGNC Symbol;Acc:VGNC:79459]                         |
|                        |     | ENSMMUG00000055710  | taste 2 receptor member 38 [Source:NCBI gene;Acc:695549]                                              |
|                        |     | ENSMMUG00000005478  | trimethylguanosine synthase 1 [Source:VGNC Symbol;Acc:VGNC:78404]                                     |
|                        |     | ENSMMUG00000046918  |                                                                                                       |
|                        |     | ENSMMUG00000016376  | mitogen-activated protein kinase kinase kinase 5 [Source:VGNC Symbol;Acc:VGNC:74495]                  |
|                        |     | ENSMMUG00000025050  | Y RNA [Source:RFAM;Acc:RF00019]                                                                       |
|                        |     | ENSMMUG00000059897  | myosin light chain 9 [Source:NCBI gene;Acc:709784]                                                    |
|                        |     | ENSMMUG00000064229  |                                                                                                       |
|                        |     | ENSMMUG00000061151  |                                                                                                       |
|                        |     | ENSMMUG00000061526  | synaptopodin 2 like [Source:NCBI gene;Acc:714736]                                                     |
|                        |     | ENSMMUG00000045654  | tumor necrosis factor [Source:VGNC Symbol;Acc:VGNC:83501]                                             |
|                        |     | ENSMMUG00000053781  | Rho GDP dissociation inhibitor beta [Source:NCBI gene;Acc:702320]                                     |
|                        |     | ENSMMUG00000020679  | myozenin 3 [Source:VGNC Symbol;Acc:VGNC:74988]                                                        |
|                        |     | ENSMMUG00000058229  | U6 spliceosomal RNA [Source:RFAM;Acc:RF00026]                                                         |
|                        |     | ENSMMUG00000007208  | G protein-coupled receptor 146 [Source:VGNC Symbol;Acc:VGNC:72979]                                    |
|                        |     | ENSMMUG00000060497  |                                                                                                       |
|                        |     | ENSMMUG00000063913  | endogenous retrovirus group K member 7 Env polyprotein-like [Source:NCBI gene;Acc:114674933]          |
|                        |     | ENSMMUG00000058800  |                                                                                                       |
|                        |     | ENSMMUG00000001536  | glutamine and serine rich 1 [Source:VGNC Symbol;Acc:VGNC:76544]                                       |
|                        |     | ENSMMUG00000004470  | CD9 molecule [Source:VGNC Symbol;Acc:VGNC:70787]                                                      |
|                        |     | ENSMMUG00000061951  |                                                                                                       |
|                        |     | ENSMMUG00000014986  | testis expressed 33 [Source:VGNC Symbol;Acc:VGNC:79727]                                               |



ENSMMUG00000062522  
ENSMMUG0000009887 MAX dimerization protein MLX [Source:VGNC Symbol;Acc:VGNC:74726]  
ENSMMUG00000049265 Metazoan signal recognition particle RNA [Source:RFAM;Acc:RF00017]  
ENSMMUG0000008758 zinc finger protein 143 [Source:VGNC Symbol;Acc:VGNC:81612]  
ENSMMUG00000019667 TAO kinase 1 [Source:VGNC Symbol;Acc:VGNC:81591]  
ENSMMUG00000015394 WD repeat domain 93 [Source:VGNC Symbol;Acc:VGNC:79642]  
ENSMMUG0000007729 ilvB acetolactate synthase like [Source:VGNC Symbol;Acc:VGNC:73739]  
ENSMMUG00000057283  
ENSMMUG0000008200 Src like adaptor 2 [Source:VGNC Symbol;Acc:VGNC:77499]  
ENSMMUG00000013160 DnaJ heat shock protein family (Hsp40) member C17 [Source:VGNC Symbol;Acc:VGNC:84335]  
ENSMMUG0000007401 arrestin domain containing 2 [Source:VGNC Symbol;Acc:VGNC:69901]  
ENSMMUG00000010173 presenilin 1 [Source:VGNC Symbol;Acc:VGNC:76435]  
ENSMMUG00000011650 dual specificity tyrosine phosphorylation regulated kinase 2 [Source:VGNC Symbol;Acc:VGNC:72018]  
ENSMMUG00000013283 cadherin related family member 2 [Source:NCBI gene;Acc:697249]  
ENSMMUG00000056063  
ENSMMUG00000025918 small nucleolar RNA, H/ACA box 38 [Source:HGNC Symbol;Acc:HGNC:32631]  
ENSMMUG0000006689 nuclear receptor interacting protein 3 [Source:VGNC Symbol;Acc:VGNC:75397]  
ENSMMUG00000013176 NAD(P) dependent steroid dehydrogenase-like [Source:NCBI gene;Acc:693333]  
ENSMMUG00000056605 Metazoan signal recognition particle RNA [Source:RFAM;Acc:RF00017]  
ENSMMUG00000059700  
ENSMMUG0000005737 SLC9A3 regulator 1 [Source:VGNC Symbol;Acc:VGNC:77639]  
ENSMMUG00000058557  
ENSMMUG0000002566 selenoprotein H [Source:VGNC Symbol;Acc:VGNC:82234]  
ENSMMUG00000064095  
ENSMMUG00000014720 NCK interacting protein with SH3 domain [Source:VGNC Symbol;Acc:VGNC:74960]  
ENSMMUG00000015926 2-oxoglutarate and iron dependent oxygenase domain containing 2 [Source:VGNC Symbol;Acc:VGNC:75462]  
ENSMMUG00000016827 UBA domain containing 1 [Source:VGNC Symbol;Acc:VGNC:79837]  
ENSMMUG00000003584 mesoderm posterior bHLH transcription factor 2 [Source:VGNC Symbol;Acc:VGNC:74619]  
ENSMMUG00000016434 NADH:ubiquinone oxidoreductase complex assembly factor 7 [Source:VGNC Symbol;Acc:VGNC:75035]  
ENSMMUG00000059778  
ENSMMUG00000060581  
ENSMMUG0000005126  
ENSMMUG00000050739  
ENSMMUG00000002377 Rab interacting lysosomal protein [Source:VGNC Symbol;Acc:VGNC:76866]  
ENSMMUG00000003827 albumin [Source:VGNC Symbol;Acc:VGNC:69782]  
ENSMMUG00000003591 pleckstrin homology domain containing A2 [Source:VGNC Symbol;Acc:VGNC:76026]  
ENSMMUG00000005415 olfactory receptor, family 2, subfamily B, member 3 [Source:NCBI gene;Acc:708747]  
ENSMMUG00000063346  
ENSMMUG00000050844 BTB domain containing 18 [Source:NCBI gene;Acc:703264]  
ENSMMUG00000049542  
ENSMMUG00000044048 Metazoan signal recognition particle RNA [Source:RFAM;Acc:RF00017]  
ENSMMUG00000016737 contactin 5 [Source:VGNC Symbol;Acc:VGNC:71287]  
ENSMMUG00000052785 extracellular leucine rich repeat and fibronectin type III domain containing 2 [Source:NCBI gene;Acc:697071]  
ENSMMUG00000020190 valosin containing protein [Source:VGNC Symbol;Acc:VGNC:78762]  
ENSMMUG00000055441  
ENSMMUG00000024537  
ENSMMUG00000065005 Metazoan signal recognition particle RNA [Source:RFAM;Acc:RF00017]  
ENSMMUG00000055256 family with sequence similarity 163 member A [Source:NCBI gene;Acc:718704]  
ENSMMUG00000008784 lipopolysaccharide induced TNF factor [Source:NCBI gene;Acc:711743]  
ENSMMUG00000009437 zinc finger protein 619 [Source:VGNC Symbol;Acc:VGNC:82562]  
ENSMMUG00000053722

|                       |                       |                                                                                                                    |
|-----------------------|-----------------------|--------------------------------------------------------------------------------------------------------------------|
|                       | ENSMMUG00000053460    |                                                                                                                    |
|                       | ENSMMUG00000059335    |                                                                                                                    |
|                       | ENSMMUG00000048190    | U2 small nuclear RNA auxiliary factor 1 like 4 [Source:NCBI gene;Acc:718865]                                       |
|                       | ENSMMUG00000019835    | CD5 molecule like [Source:VGNC Symbol;Acc:VGNC:70774]                                                              |
|                       | ENSMMUG00000018298    | killer cell lectin like receptor D1 [Source:NCBI gene;Acc:574145]                                                  |
|                       | ENSMMUG00000004498    | protein inhibitor of activated STAT 2 [Source:VGNC Symbol;Acc:VGNC:75815]                                          |
|                       | ENSMMUG00000055906    | angiotensin II receptor type 2 [Source:NCBI gene;Acc:709513]                                                       |
| NS_D1 NS_D3 S_D1 S_D3 | 40 ENSMMUG00000021736 | single-pass membrane protein with coiled-coil domains 2 [Source:VGNC Symbol;Acc:VGNC:77808]                        |
|                       | ENSMMUG00000018720    | cytoskeleton associated protein 2 [Source:VGNC Symbol;Acc:VGNC:71229]                                              |
|                       | ENSMMUG00000020226    | WD repeat and SOCS box containing 1 [Source:VGNC Symbol;Acc:VGNC:79186]                                            |
|                       | ENSMMUG00000011528    | F-box and WD repeat domain containing 5 [Source:VGNC Symbol;Acc:VGNC:72503]                                        |
|                       | ENSMMUG00000021017    | acylglycerol kinase [Source:VGNC Symbol;Acc:VGNC:69669]                                                            |
|                       | ENSMMUG00000001220    | adhesion G protein-coupled receptor E1 [Source:VGNC Symbol;Acc:VGNC:69561]                                         |
|                       | ENSMMUG00000060632    |                                                                                                                    |
|                       | ENSMMUG00000060435    | Metazoan signal recognition particle RNA [Source:RFAM;Acc:RF00017]                                                 |
|                       | ENSMMUG00000064650    | SPEM family member 3 [Source:NCBI gene;Acc:106993878]                                                              |
|                       | ENSMMUG00000056798    |                                                                                                                    |
|                       | ENSMMUG00000054784    |                                                                                                                    |
|                       | ENSMMUG00000058621    |                                                                                                                    |
|                       | ENSMMUG00000002789    | solute carrier family 25 (mitochondrial carrier; phosphate carrier), member 24 [Source:NCBI gene;Acc:694803]       |
|                       | ENSMMUG00000050132    |                                                                                                                    |
|                       | ENSMMUG00000064005    |                                                                                                                    |
|                       | ENSMMUG00000058587    | family with sequence similarity 131 member C [Source:NCBI gene;Acc:703604]                                         |
|                       | ENSMMUG00000018478    | interferon regulatory factor 5 [Source:VGNC Symbol;Acc:VGNC:73763]                                                 |
|                       | ENSMMUG00000051420    | homeobox B5 [Source:NCBI gene;Acc:696732]                                                                          |
|                       | ENSMMUG00000012523    | flotillin 2 [Source:NCBI gene;Acc:114669752]                                                                       |
|                       | ENSMMUG00000012560    | HERV-H LTR-associating 1 [Source:NCBI gene;Acc:100430297]                                                          |
|                       | ENSMMUG00000056796    | NADH:ubiquinone oxidoreductase subunit A2 [Source:NCBI gene;Acc:697736]                                            |
|                       | ENSMMUG00000001748    | spleen associated tyrosine kinase [Source:VGNC Symbol;Acc:VGNC:78063]                                              |
|                       | ENSMMUG00000056971    | Metazoan signal recognition particle RNA [Source:RFAM;Acc:RF00017]                                                 |
|                       | ENSMMUG00000051329    |                                                                                                                    |
|                       | ENSMMUG00000002428    | zinc finger protein 800 [Source:VGNC Symbol;Acc:VGNC:79658]                                                        |
|                       | ENSMMUG00000021408    | family with sequence similarity 222 member B [Source:VGNC Symbol;Acc:VGNC:72352]                                   |
|                       | ENSMMUG00000003283    | extracellular leucine rich repeat and fibronectin type III domain containing 1 [Source:VGNC Symbol;Acc:VGNC:72204] |
|                       | ENSMMUG00000019040    | hydroxysteroid 17-beta dehydrogenase 13 [Source:VGNC Symbol;Acc:VGNC:73417]                                        |
|                       | ENSMMUG00000001269    | chromosome 16 C17orf80 homolog [Source:VGNC Symbol;Acc:VGNC:70440]                                                 |
|                       | ENSMMUG00000065208    |                                                                                                                    |
|                       | ENSMMUG00000021554    | PHD finger protein 12 [Source:VGNC Symbol;Acc:VGNC:75838]                                                          |
|                       | ENSMMUG00000054055    | zinc finger protein 93 [Source:NCBI gene;Acc:720434]                                                               |
|                       | ENSMMUG00000060533    |                                                                                                                    |
|                       | ENSMMUG00000049802    | olfactory receptor 51G1 [Source:NCBI gene;Acc:716561]                                                              |
|                       | ENSMMUG00000007379    | phosphatidylinositol 3,4,5-trisphosphate 3-phosphatase TPTE2-like [Source:NCBI gene;Acc:694255]                    |
|                       | ENSMMUG00000054175    |                                                                                                                    |
|                       | ENSMMUG00000052954    | Wnt family member 6 [Source:NCBI gene;Acc:700573]                                                                  |
|                       | ENSMMUG00000021553    | dehydrogenase/reductase 13 [Source:VGNC Symbol;Acc:VGNC:81387]                                                     |
|                       | ENSMMUG00000009176    | calmodulin binding transcription activator 2 [Source:VGNC Symbol;Acc:VGNC:70578]                                   |
|                       | ENSMMUG00000057329    |                                                                                                                    |
| NS_D2 S_D1 S_D2 S_D3  | 2 ENSMMUG00000002433  | calcium/calmodulin dependent protein kinase II beta [Source:VGNC Symbol;Acc:VGNC:70524]                            |
|                       | ENSMMUG00000008197    | netrin G1 [Source:VGNC Symbol;Acc:VGNC:75450]                                                                      |
| NS_D2 NS_D3 S_D1 S_D2 | 4 ENSMMUG00000005997  | cell division cycle 14B [Source:NCBI gene;Acc:710300]                                                              |
|                       | ENSMMUG00000009794    | protocadherin related 15 [Source:VGNC Symbol;Acc:VGNC:75608]                                                       |

|                        |    |                    |                                                                                                            |
|------------------------|----|--------------------|------------------------------------------------------------------------------------------------------------|
|                        |    | ENSMMUG00000062092 |                                                                                                            |
|                        |    | ENSMMUG00000055038 |                                                                                                            |
| NS_D3 S_D1 S_D2 S_D3   | 3  | ENSMMUG0000004024  | cadherin related family member 5 [Source:VGNC Symbol;Acc:VGNC:71158]                                       |
|                        |    | ENSMMUG0000007366  |                                                                                                            |
|                        |    | ENSMMUG0000009564  | NMD3 ribosome export adaptor [Source:VGNC Symbol;Acc:VGNC:75242]                                           |
| NS_D2 NS_D3 S_D1 S_D3  | 2  | ENSMMUG00000019126 | purine nucleoside phosphorylase [Source:NCBI gene;Acc:704183]                                              |
|                        |    | ENSMMUG00000017280 | TBC1 domain family member 10C [Source:VGNC Symbol;Acc:VGNC:78203]                                          |
| NS_D1 NS_D2 S_D2 S_D3  | 1  | ENSMMUG0000005215  | Rab9 effector protein with kelch motifs [Source:VGNC Symbol;Acc:VGNC:76495]                                |
| NS_D1 NS_D2 NS_D3 S_D2 | 15 | ENSMMUG0000003133  | interleukin 4 [Source:VGNC Symbol;Acc:VGNC:73729]                                                          |
|                        |    | ENSMMUG00000023192 | choline kinase alpha [Source:VGNC Symbol;Acc:VGNC:71039]                                                   |
|                        |    | ENSMMUG00000051072 |                                                                                                            |
|                        |    | ENSMMUG0000006029  | odontogenic, ameloblast associated [Source:NCBI gene;Acc:707906]                                           |
|                        |    | ENSMMUG00000015329 | MX dynamin like GTPase 1 [Source:VGNC Symbol;Acc:VGNC:75086]                                               |
|                        |    | ENSMMUG00000050419 | ADAM metallopeptidase with thrombospondin type 1 motif 4 [Source:NCBI gene;Acc:719927]                     |
|                        |    | ENSMMUG00000059374 |                                                                                                            |
|                        |    | ENSMMUG0000004512  | Fc fragment of IgE receptor Ig [Source:VGNC Symbol;Acc:VGNC:72629]                                         |
|                        |    | ENSMMUG0000002397  | GINS complex subunit 1 [Source:VGNC Symbol;Acc:VGNC:73025]                                                 |
|                        |    | ENSMMUG00000055199 | cytochrome P450, family 39, subfamily A, polypeptide 1 [Source:NCBI gene;Acc:704242]                       |
|                        |    | ENSMMUG00000012001 | transcription factor 4 [Source:VGNC Symbol;Acc:VGNC:78288]                                                 |
|                        |    | ENSMMUG00000064931 |                                                                                                            |
|                        |    | ENSMMUG00000015097 | tripartite motif containing 62 [Source:VGNC Symbol;Acc:VGNC:79513]                                         |
|                        |    | ENSMMUG0000003833  | Ras association domain family member 6 [Source:VGNC Symbol;Acc:VGNC:76515]                                 |
|                        |    | ENSMMUG00000052474 |                                                                                                            |
| NS_D1 NS_D3 S_D2 S_D3  | 1  | ENSMMUG00000010614 | C-C motif chemokine ligand 25 [Source:VGNC Symbol;Acc:VGNC:70700]                                          |
| NS_D1 NS_D2 NS_D3 S_D3 | 9  | ENSMMUG00000017983 | tRNA nucleotidyl transferase 1 [Source:VGNC Symbol;Acc:VGNC:79073]                                         |
|                        |    | ENSMMUG00000011682 | ribonuclease P/MRP subunit p21 [Source:NCBI gene;Acc:713056]                                               |
|                        |    | ENSMMUG0000006655  | myelin regulatory factor [Source:VGNC Symbol;Acc:VGNC:74949]                                               |
|                        |    | ENSMMUG0000007799  | LIM and SH3 protein 1 [Source:VGNC Symbol;Acc:VGNC:74237]                                                  |
|                        |    | ENSMMUG00000014131 | microtubule affinity regulating kinase 2 [Source:VGNC Symbol;Acc:VGNC:74634]                               |
|                        |    | ENSMMUG0000005920  | N-acetyltransferase 1 [Source:VGNC Symbol;Acc:VGNC:75133]                                                  |
|                        |    | ENSMMUG00000011344 | solute carrier family 52 member 1 [Source:VGNC Symbol;Acc:VGNC:77795]                                      |
|                        |    | ENSMMUG0000004749  | PPARG coactivator 1 beta [Source:VGNC Symbol;Acc:VGNC:76134]                                               |
|                        |    | ENSMMUG00000023636 | importin 7 [Source:NCBI gene;Acc:704213]                                                                   |
| NS_D2 NS_D3 S_D2 S_D3  | 17 | ENSMMUG00000008253 | zinc finger protein 267 [Source:NCBI gene;Acc:641441]                                                      |
|                        |    | ENSMMUG00000001273 | clathrin binding box of aftiphilin containing 1 [Source:VGNC Symbol;Acc:VGNC:84325]                        |
|                        |    | ENSMMUG00000039774 | Metazoan signal recognition particle RNA [Source:RFAM;Acc:RF00017]                                         |
|                        |    | ENSMMUG00000000632 | SH3 binding domain protein 5 like [Source:VGNC Symbol;Acc:VGNC:77334]                                      |
|                        |    | ENSMMUG00000012526 | glycosyltransferase 8 domain containing 1 [Source:VGNC Symbol;Acc:VGNC:73001]                              |
|                        |    | ENSMMUG00000012959 | solute carrier family 35 member E1 [Source:VGNC Symbol;Acc:VGNC:77536]                                     |
|                        |    | ENSMMUG00000010318 | phosphatidylinositol glycan anchor biosynthesis class Y [Source:NCBI gene;Acc:100426107]                   |
|                        |    | ENSMMUG00000017605 | mitochondrial ribosomal protein L39 [Source:VGNC Symbol;Acc:VGNC:74737]                                    |
|                        |    | ENSMMUG00000044429 | glycophorin A (MNS blood group) [Source:NCBI gene;Acc:574101]                                              |
|                        |    | ENSMMUG00000008196 | aconitase 1 [Source:VGNC Symbol;Acc:VGNC:69378]                                                            |
|                        |    | ENSMMUG00000010316 | HECT and RLD domain containing E3 ubiquitin protein ligase 5 [Source:VGNC Symbol;Acc:VGNC:73226]           |
|                        |    | ENSMMUG00000001545 | aquaporin 7 [Source:NCBI gene;Acc:702836]                                                                  |
|                        |    | ENSMMUG00000064554 | leucine rich repeat neuronal 4 [Source:NCBI gene;Acc:718283]                                               |
|                        |    | ENSMMUG00000009441 | abhydrolase domain containing 4 [Source:VGNC Symbol;Acc:VGNC:84296]                                        |
|                        |    | ENSMMUG00000021157 | TBC1 domain family member 31 [Source:VGNC Symbol;Acc:VGNC:84121]                                           |
|                        |    | ENSMMUG00000013450 | TATA-box binding protein associated factor 6 [Source:VGNC Symbol;Acc:VGNC:78093]                           |
|                        |    | ENSMMUG00000001475 | transmembrane protein with EGF like and two follistatin like domains 2 [Source:VGNC Symbol;Acc:VGNC:78569] |
| NS_D1 S_D1 S_D2        | 14 | ENSMMUG00000019988 | homeodomain interacting protein kinase 3 [Source:VGNC Symbol;Acc:VGNC:73472]                               |

ENSMMUG00000010357 cyclin and CBS domain divalent metal cation transport mediator 1 [Source:NCBI gene;Acc:708335]  
ENSMMUG00000022031 DNA polymerase alpha 2, accessory subunit [Source:NCBI gene;Acc:716541]  
ENSMMUG00000020009 receptor tyrosine kinase like orphan receptor 2 [Source:VGNC Symbol;Acc:VGNC:76716]  
ENSMMUG00000056522  
ENSMMUG00000061684  
ENSMMUG00000064242  
ENSMMUG00000022451 proteasome 20S subunit alpha 2 [Source:NCBI gene;Acc:701683]  
ENSMMUG00000018485 methyltransferase like 7A [Source:VGNC Symbol;Acc:VGNC:74567]  
ENSMMUG00000051972 zinc finger CCHC-type containing 24 [Source:NCBI gene;Acc:702083]  
ENSMMUG00000060675  
ENSMMUG00000064892  
ENSMMUG00000014864 VPS11 core subunit of CORVET and HOPS complexes [Source:VGNC Symbol;Acc:VGNC:78965]  
ENSMMUG00000021044 afadin, adherens junction formation factor [Source:VGNC Symbol;Acc:VGNC:69818]  
43 ENSMMUG00000056186  
ENSMMUG00000060808  
ENSMMUG00000010886 strawberry notch homolog 2 [Source:VGNC Symbol;Acc:VGNC:77123]  
ENSMMUG00000006375 coiled-coil domain containing 15 [Source:NCBI gene;Acc:716362]  
ENSMMUG00000007688 angiominin [Source:VGNC Symbol;Acc:VGNC:69627]  
ENSMMUG00000053691 Metazoan signal recognition particle RNA [Source:RFAM;Acc:RF00017]  
ENSMMUG00000008839 DExD-box helicase 39B [Source:VGNC Symbol;Acc:VGNC:71621]  
ENSMMUG00000052453 serpin family A member 11 [Source:NCBI gene;Acc:701483]  
ENSMMUG00000055893  
ENSMMUG00000061606 Metazoan signal recognition particle RNA [Source:RFAM;Acc:RF00017]  
ENSMMUG00000003499 solute carrier family 36 member 1 [Source:VGNC Symbol;Acc:VGNC:77509]  
ENSMMUG00000063112  
ENSMMUG00000053989  
ENSMMUG00000019837 ribonuclease H2 subunit C [Source:NCBI gene;Acc:700330]  
ENSMMUG00000000198 collagen beta(1-O)galactosyltransferase 1 [Source:NCBI gene;Acc:719980]  
ENSMMUG00000057134 keratin, type II cytoskeletal 6C [Source:NCBI gene;Acc:100424162]  
ENSMMUG00000059299 membrane spanning 4-domains A2 [Source:NCBI gene;Acc:697830]  
ENSMMUG00000016255 telomerase associated protein 1 [Source:VGNC Symbol;Acc:VGNC:78310]  
ENSMMUG00000002382 serpin family F member 2 [Source:VGNC Symbol;Acc:VGNC:77372]  
ENSMMUG00000056980  
ENSMMUG00000006079 leucine rich repeat containing 19 [Source:VGNC Symbol;Acc:VGNC:74337]  
ENSMMUG00000007068 tumor suppressor candidate 3 [Source:VGNC Symbol;Acc:VGNC:84132]  
ENSMMUG00000044822 coiled-coil domain containing 174 [Source:VGNC Symbol;Acc:VGNC:84219]  
ENSMMUG00000063238  
ENSMMUG00000029507 adaptor related protein complex 3 subunit sigma 2 [Source:NCBI gene;Acc:701217]  
ENSMMUG00000059608 fibroblast growth factor binding protein 3 [Source:NCBI gene;Acc:697881]  
ENSMMUG00000056741 ovostatin-like [Source:NCBI gene;Acc:722294]  
ENSMMUG00000061845  
ENSMMUG00000062474 Metazoan signal recognition particle RNA [Source:RFAM;Acc:RF00017]  
ENSMMUG00000008081 ATP binding cassette subfamily G member 8 [Source:VGNC Symbol;Acc:VGNC:69392]  
ENSMMUG00000016465 histone deacetylase 6 [Source:VGNC Symbol;Acc:VGNC:73164]  
ENSMMUG00000054621  
ENSMMUG00000051363  
ENSMMUG00000022785 solute carrier family 66 member 3 [Source:VGNC Symbol;Acc:VGNC:76334]  
ENSMMUG00000061603  
ENSMMUG00000016237 taxilin gamma [Source:NCBI gene;Acc:713769]  
ENSMMUG00000062296 potassium two pore domain channel subfamily K member 6 [Source:NCBI gene;Acc:714912]  
ENSMMUG00000057219 tumor protein p53 inducible nuclear protein 1 [Source:NCBI gene;Acc:700632]

NS\_D1 NS\_D2 S\_D1

ENSMMUG00000008651 FGF1 intracellular binding protein [Source:VGNC Symbol;Acc:VGNC:72663]  
 ENSMMUG00000004868 dynein axonemal light chain 4 [Source:VGNC Symbol;Acc:VGNC:71945]  
 ENSMMUG00000022109 CD163 molecule like 1 [Source:VGNC Symbol;Acc:VGNC:70914]  
 ENSMMUG00000006405 secretion regulating guanine nucleotide exchange factor [Source:VGNC Symbol;Acc:VGNC:77258]  
 ENSMMUG00000008006 RAB11A, member RAS oncogene family [Source:VGNC Symbol;Acc:VGNC:81517]  
 33 ENSMMUG00000009318 BCL9 like [Source:VGNC Symbol;Acc:VGNC:70113]  
 ENSMMUG00000055973 phosphoglycerate mutase 1-like [Source:NCBI gene;Acc:714548]  
 ENSMMUG00000052851 solute carrier family 7 member 5 [Source:NCBI gene;Acc:695886]  
 ENSMMUG00000005776 atlastin GTPase 3 [Source:VGNC Symbol;Acc:VGNC:70125]  
 ENSMMUG00000021655 histone deacetylase 7 [Source:NCBI gene;Acc:718225]  
 ENSMMUG00000039397 tubulin folding cofactor E like [Source:NCBI gene;Acc:706506]  
 ENSMMUG00000000582 NOP58 ribonucleoprotein [Source:VGNC Symbol;Acc:VGNC:75284]  
 ENSMMUG00000059491  
 ENSMMUG00000014010 RNA binding fox-1 homolog 2 [Source:VGNC Symbol;Acc:VGNC:76685]  
 ENSMMUG00000013966 legumain [Source:VGNC Symbol;Acc:VGNC:74274]  
 ENSMMUG00000022345  
 ENSMMUG00000009381 WW domain binding protein 2 [Source:VGNC Symbol;Acc:VGNC:78786]  
 ENSMMUG00000022931 NTPase KAP family P-loop domain containing 1 [Source:VGNC Symbol;Acc:VGNC:75250]  
 ENSMMUG00000023032 intraflagellar transport 81 [Source:VGNC Symbol;Acc:VGNC:73389]  
 ENSMMUG00000008566 zinc finger protein 157 [Source:VGNC Symbol;Acc:VGNC:78850]  
 ENSMMUG00000001944 chromosome 20 C16orf72 homolog [Source:VGNC Symbol;Acc:VGNC:70443]  
 ENSMMUG00000059777  
 ENSMMUG00000002923 colony stimulating factor 3 [Source:VGNC Symbol;Acc:VGNC:71520]  
 ENSMMUG00000016894 ribosomal protein S25 [Source:NCBI gene;Acc:702593]  
 ENSMMUG00000015477 lemur tyrosine kinase 2 [Source:VGNC Symbol;Acc:VGNC:74309]  
 ENSMMUG00000013397 peroxiredoxin 5 [Source:NCBI gene;Acc:719764]  
 ENSMMUG00000054377  
 ENSMMUG00000052530  
 ENSMMUG00000062083  
 ENSMMUG00000059036  
 ENSMMUG00000051323 caspase-14-like [Source:NCBI gene;Acc:702430]  
 ENSMMUG00000032142 complement C8 gamma chain [Source:VGNC Symbol;Acc:VGNC:70481]  
 ENSMMUG00000048395 chromobox 6 [Source:NCBI gene;Acc:702133]  
 ENSMMUG00000011767 carnitine O-acetyltransferase [Source:VGNC Symbol;Acc:VGNC:71483]  
 ENSMMUG00000058237  
 ENSMMUG00000047219  
 ENSMMUG00000002822 unc-13 homolog D [Source:VGNC Symbol;Acc:VGNC:79375]  
 ENSMMUG00000054512  
 47 ENSMMUG00000008160 neutrophil cytosolic factor 4 [Source:VGNC Symbol;Acc:VGNC:75141]  
 ENSMMUG00000004910 dynein axonemal light chain 1 [Source:VGNC Symbol;Acc:VGNC:71885]  
 ENSMMUG00000059087  
 ENSMMUG00000052961  
 ENSMMUG00000049432 olfactory receptor 2T33 [Source:NCBI gene;Acc:706331]  
 ENSMMUG00000018471 serine/threonine kinase 33 [Source:VGNC Symbol;Acc:VGNC:78118]  
 ENSMMUG00000001739 ATPase sarcoplasmic/endoplasmic reticulum Ca<sup>2+</sup> transporting 2 [Source:VGNC Symbol;Acc:VGNC:70178]  
 ENSMMUG00000006470 complement C1r subcomponent [Source:NCBI gene;Acc:722133]  
 ENSMMUG00000005480 carnosine synthase 1 [Source:VGNC Symbol;Acc:VGNC:81367]  
 ENSMMUG00000016442 glutaminyl-peptide cyclotransferase [Source:VGNC Symbol;Acc:VGNC:76636]  
 ENSMMUG00000016099 hedgehog acyltransferase [Source:NCBI gene;Acc:712333]  
 ENSMMUG00000053406  
 ENSMMUG00000028471 U7 small nuclear RNA [Source:RFAM;Acc:RF00066]

NS\_D1 S\_D1 S\_D3

NS\_D1 NS\_D3 S\_D1

ENSMMUG00000059302 Metazoan signal recognition particle RNA [Source:RFAM;Acc:RF00017]  
 ENSMMUG0000006233 adducin 3 [Source:VGNC Symbol;Acc:VGNC:69531]  
 ENSMMUG00000022633 replication initiator 1 [Source:VGNC Symbol;Acc:VGNC:76758]  
 ENSMMUG00000020916 coiled-coil domain containing 158 [Source:NCBI gene;Acc:699735]  
 ENSMMUG0000000953 family with sequence similarity 207 member A [Source:VGNC Symbol;Acc:VGNC:72273]  
 ENSMMUG00000058758  
 ENSMMUG00000003199 CD200 receptor 1 [Source:VGNC Symbol;Acc:VGNC:70845]  
 ENSMMUG00000049543  
 ENSMMUG00000052828  
 ENSMMUG00000012316 CDC42 effector protein 2 [Source:VGNC Symbol;Acc:VGNC:70750]  
 ENSMMUG00000010678 oxytocin/neurophysin I prepropeptide [Source:VGNC Symbol;Acc:VGNC:75730]  
 ENSMMUG00000001616 peptidyl arginine deiminase 2 [Source:VGNC Symbol;Acc:VGNC:75644]  
 ENSMMUG00000053625 sterol-C5-desaturase [Source:NCBI gene;Acc:706827]  
 ENSMMUG0000006086 pleckstrin homology, MyTH4 and FERM domain containing H3 [Source:VGNC Symbol;Acc:VGNC:76113]  
 ENSMMUG00000049479  
 ENSMMUG00000058907  
 ENSMMUG00000054184 Metazoan signal recognition particle RNA [Source:RFAM;Acc:RF00017]  
 ENSMMUG00000014866 hydroxymethylbilane synthase [Source:VGNC Symbol;Acc:VGNC:73479]  
 ENSMMUG00000058700 Metazoan signal recognition particle RNA [Source:RFAM;Acc:RF00017]  
 ENSMMUG00000000757 ring finger protein 114 [Source:VGNC Symbol;Acc:VGNC:76725]  
 ENSMMUG00000035748 U6 spliceosomal RNA [Source:RFAM;Acc:RF00026]  
 ENSMMUG00000022933 DNA topoisomerase I mitochondrial [Source:VGNC Symbol;Acc:VGNC:79821]  
 ENSMMUG00000002953 MAGE family member F1 [Source:VGNC Symbol;Acc:VGNC:74399]  
 ENSMMUG00000059292  
 ENSMMUG00000016401 SGT1 homolog, MIS12 kinetochore complex assembly cochaperone [Source:NCBI gene;Acc:694046]  
 ENSMMUG00000062628  
 ENSMMUG00000015306 calponin 2 [Source:NCBI gene;Acc:721164]  
 ENSMMUG00000020258 E2F transcription factor 4 [Source:VGNC Symbol;Acc:VGNC:72025]  
 ENSMMUG00000005992 zinc metallopeptidase STE24 [Source:VGNC Symbol;Acc:VGNC:78830]  
 ENSMMUG00000032180 RLF zinc finger [Source:VGNC Symbol;Acc:VGNC:76699]  
 ENSMMUG00000049298 cholecystokinin A receptor [Source:NCBI gene;Acc:694742]  
 ENSMMUG00000064341 U6 spliceosomal RNA [Source:RFAM;Acc:RF00026]  
 ENSMMUG00000044496 H2A histone family, member X [Source:NCBI gene;Acc:703073]  
 ENSMMUG00000059134  
 NS\_D2 S\_D1 S\_D2 4 ENSMMUG00000014897 ribonucleoprotein, PTB binding 1 [Source:NCBI gene;Acc:715250]  
 ENSMMUG00000064463  
 ENSMMUG00000000566  
 S\_D1 S\_D2 S\_D3 9 ENSMMUG00000058326 neuralized E3 ubiquitin protein ligase 2 [Source:NCBI gene;Acc:708904]  
 ENSMMUG00000046186 stanniocalcin 1 [Source:VGNC Symbol;Acc:VGNC:84120]  
 ENSMMUG00000050868  
 ENSMMUG00000012039 cytochrome b5 type B (outer mitochondrial membrane) [Source:NCBI gene;Acc:705093]  
 ENSMMUG00000014123 alanyl-tRNA editing protein Aarsd1 [Source:NCBI gene;Acc:712203]  
 ENSMMUG00000065269 Rho family GTPase 2 [Source:NCBI gene;Acc:712559]  
 ENSMMUG00000042951 signal recognition particle 19 [Source:NCBI gene;Acc:693829]  
 ENSMMUG00000038067  
 ENSMMUG00000010869 nucleoporin 160 [Source:VGNC Symbol;Acc:VGNC:75429]  
 ENSMMUG00000055290 netrin 1 [Source:NCBI gene;Acc:717645]  
 NS\_D3 S\_D1 S\_D2 1 ENSMMUG00000016001 vesicle amine transport 1 [Source:VGNC Symbol;Acc:VGNC:79058]  
 NS\_D2 NS\_D3 S\_D1 3 ENSMMUG00000003750 PLAG1 like zinc finger 1 [Source:VGNC Symbol;Acc:VGNC:83444]  
 ENSMMUG00000064401  
 ENSMMUG00000060437 Metazoan signal recognition particle RNA [Source:RFAM;Acc:RF00017]



|                   |                    |                                                                     |                                                                                                 |
|-------------------|--------------------|---------------------------------------------------------------------|-------------------------------------------------------------------------------------------------|
| NS_D3 S_D1 S_D3   | 6                  | ENSMMUG0000001910                                                   | heat shock protein family B (small) member 7 [Source:NCBI gene;Acc:696704]                      |
|                   |                    | ENSMMUG00000057095                                                  |                                                                                                 |
|                   |                    | ENSMMUG0000001943                                                   | GRAM domain containing 1C [Source:VGNC Symbol;Acc:VGNC:73007]                                   |
|                   |                    | ENSMMUG00000064694                                                  | AHNAK nucleoprotein 2 [Source:NCBI gene;Acc:707626]                                             |
|                   |                    | ENSMMUG00000005793                                                  | ankyrin repeat and fibronectin type III domain containing 1 [Source:VGNC Symbol;Acc:VGNC:69712] |
| NS_D1 NS_D2 S_D2  | 10                 | ENSMMUG00000002741                                                  | gasdermin B [Source:VGNC Symbol;Acc:VGNC:73219]                                                 |
|                   |                    | ENSMMUG00000012787                                                  | CUB and Sushi multiple domains 2 [Source:VGNC Symbol;Acc:VGNC:71441]                            |
|                   |                    | ENSMMUG00000012787                                                  | acid phosphatase 7, tartrate resistant (putative) [Source:NCBI gene;Acc:695532]                 |
|                   |                    | ENSMMUG00000002483                                                  | citrate synthase [Source:VGNC Symbol;Acc:VGNC:71509]                                            |
|                   |                    | ENSMMUG000000058110                                                 |                                                                                                 |
|                   |                    | ENSMMUG00000000590                                                  | NPR3 like, GATOR1 complex subunit [Source:VGNC Symbol;Acc:VGNC:75173]                           |
|                   |                    | ENSMMUG00000004042                                                  | Fc receptor like A [Source:VGNC Symbol;Acc:VGNC:72526]                                          |
|                   |                    | ENSMMUG00000001690                                                  | calponin 3 [Source:VGNC Symbol;Acc:VGNC:71278]                                                  |
|                   |                    | ENSMMUG00000005668                                                  | kynurenine 3-monooxygenase [Source:VGNC Symbol;Acc:VGNC:74197]                                  |
|                   |                    | ENSMMUG00000062583                                                  | olfactory receptor 1A1 [Source:NCBI gene;Acc:721403]                                            |
| NS_D1 NS_D2 S_D3  | 2                  | ENSMMUG00000063121                                                  |                                                                                                 |
|                   |                    | ENSMMUG00000000894                                                  | cellular inhibitor of PP2A [Source:VGNC Symbol;Acc:VGNC:71371]                                  |
| NS_D1 NS_D2 NS_D3 | 90                 | ENSMMUG00000028906                                                  | Rho/Rac guanine nucleotide exchange factor 18 [Source:NCBI gene;Acc:707510]                     |
|                   |                    | ENSMMUG00000000376                                                  | bridging integrator 1 [Source:VGNC Symbol;Acc:VGNC:70251]                                       |
|                   |                    | ENSMMUG00000004982                                                  | activin A receptor like type 1 [Source:VGNC Symbol;Acc:VGNC:69451]                              |
|                   |                    | ENSMMUG00000017654                                                  | arrestin beta 2 [Source:VGNC Symbol;Acc:VGNC:70022]                                             |
|                   |                    | ENSMMUG00000021357                                                  | zinc finger BED-type containing 3 [Source:VGNC Symbol;Acc:VGNC:79271]                           |
|                   |                    | ENSMMUG00000056168                                                  |                                                                                                 |
|                   |                    | ENSMMUG00000022246                                                  | PDZ and LIM domain 5 [Source:VGNC Symbol;Acc:VGNC:75816]                                        |
|                   |                    | ENSMMUG00000032659                                                  | mml-mir-711 [Source:miRBase;Acc:MI0012553]                                                      |
|                   |                    | ENSMMUG00000023797                                                  | post-GPI attachment to proteins GalNAc transferase 4 [Source:VGNC Symbol;Acc:VGNC:79688]        |
|                   |                    | ENSMMUG00000054225                                                  | taste receptor type 2 member 43 [Source:NCBI gene;Acc:694161]                                   |
|                   |                    | ENSMMUG00000029186                                                  | exocyst complex component 3 like 4 [Source:VGNC Symbol;Acc:VGNC:72305]                          |
|                   |                    | ENSMMUG00000053329                                                  |                                                                                                 |
|                   |                    | ENSMMUG00000009308                                                  | histidine ammonia-lyase [Source:VGNC Symbol;Acc:VGNC:73344]                                     |
|                   |                    | ENSMMUG00000019607                                                  | patatin like phospholipase domain containing 7 [Source:VGNC Symbol;Acc:VGNC:76104]              |
|                   |                    | ENSMMUG00000062496                                                  |                                                                                                 |
|                   |                    | ENSMMUG00000018030                                                  | endoplasmic reticulum protein 27 [Source:VGNC Symbol;Acc:VGNC:72369]                            |
|                   |                    | ENSMMUG00000058472                                                  | late cornified envelope protein 1C [Source:NCBI gene;Acc:107000798]                             |
|                   |                    | ENSMMUG00000015952                                                  | katanin catalytic subunit A1 like 2 [Source:VGNC Symbol;Acc:VGNC:73904]                         |
|                   |                    | ENSMMUG00000054449                                                  | Metazoan signal recognition particle RNA [Source:RFAM;Acc:RF00017]                              |
|                   |                    | ENSMMUG00000061797                                                  | U6 spliceosomal RNA [Source:RFAM;Acc:RF00026]                                                   |
|                   |                    | ENSMMUG00000044581                                                  | modulator of apoptosis 1 [Source:VGNC Symbol;Acc:VGNC:84392]                                    |
|                   |                    | ENSMMUG00000017740                                                  | sperm mitochondria associated cysteine rich protein [Source:VGNC Symbol;Acc:VGNC:77816]         |
|                   |                    | ENSMMUG00000056924                                                  | G protein-coupled receptor 149 [Source:NCBI gene;Acc:106997054]                                 |
|                   |                    | ENSMMUG00000022381                                                  | prolyl 3-hydroxylase 1 [Source:VGNC Symbol;Acc:VGNC:75648]                                      |
|                   |                    | ENSMMUG00000049551                                                  |                                                                                                 |
|                   |                    | ENSMMUG00000054472                                                  |                                                                                                 |
|                   |                    | ENSMMUG00000019933                                                  | TatD DNase domain containing 2 [Source:NCBI gene;Acc:701390]                                    |
|                   |                    | ENSMMUG00000058935                                                  | Metazoan signal recognition particle RNA [Source:RFAM;Acc:RF00017]                              |
|                   |                    | ENSMMUG00000017927                                                  | protein kinase D2 [Source:VGNC Symbol;Acc:VGNC:76273]                                           |
|                   |                    | ENSMMUG00000061833                                                  | transmembrane protein 251 [Source:NCBI gene;Acc:708131]                                         |
|                   | ENSMMUG00000010556 | Snf2 related CREBBP activator protein [Source:NCBI gene;Acc:712944] |                                                                                                 |
|                   | ENSMMUG00000000544 | collagen type VI alpha 1 chain [Source:VGNC Symbol;Acc:VGNC:82084]  |                                                                                                 |
|                   | ENSMMUG00000058095 | visual system homeobox 1 [Source:NCBI gene;Acc:715973]              |                                                                                                 |

ENSMMUG00000043648  
ENSMMUG00000010881 cytochrome P450, family 26, subfamily A, polypeptide 1 [Source:NCBI gene;Acc:699519]  
ENSMMUG00000053656  
ENSMMUG00000058370 taste receptor type 2 member 62 [Source:NCBI gene;Acc:704388]  
ENSMMUG00000054286  
ENSMMUG00000017242 MYCBP associated protein [Source:VGNC Symbol;Acc:VGNC:74994]  
ENSMMUG00000060596 BCL2 associated agonist of cell death [Source:NCBI gene;Acc:717740]  
ENSMMUG00000019306 indoleamine 2,3-dioxygenase 2 [Source:VGNC Symbol;Acc:VGNC:84005]  
ENSMMUG00000060555  
ENSMMUG00000055266 late cornified envelope protein 1C-like [Source:NCBI gene;Acc:107000794]  
ENSMMUG00000031684 KRAB box domain containing 1 [Source:NCBI gene;Acc:717189]  
ENSMMUG00000041519 zinc finger protein 354A [Source:VGNC Symbol;Acc:VGNC:84517]  
ENSMMUG00000064014  
ENSMMUG00000022348 surfeit 4 [Source:VGNC Symbol;Acc:VGNC:78060]  
ENSMMUG00000059932 Metazoan signal recognition particle RNA [Source:RFAM;Acc:RF00017]  
ENSMMUG00000060750 Metazoan signal recognition particle RNA [Source:RFAM;Acc:RF00017]  
ENSMMUG00000053561  
ENSMMUG00000002563 zinc finger DHHC-type palmitoyltransferase 5 [Source:VGNC Symbol;Acc:VGNC:79145]  
ENSMMUG00000000023 prostaglandin E receptor 2 [Source:VGNC Symbol;Acc:VGNC:76468]  
ENSMMUG00000040071  
ENSMMUG00000005380 zinc finger protein 827 [Source:NCBI gene;Acc:706018]  
ENSMMUG00000015303 ATP binding cassette subfamily A member 7 [Source:VGNC Symbol;Acc:VGNC:69567]  
ENSMMUG00000015258 glycine C-acetyltransferase [Source:NCBI gene;Acc:698811]  
ENSMMUG00000009953 ninein like [Source:VGNC Symbol;Acc:VGNC:75273]  
ENSMMUG00000064915 Metazoan signal recognition particle RNA [Source:RFAM;Acc:RF00017]  
ENSMMUG00000050529 phosphodiesterase 6H [Source:NCBI gene;Acc:700447]  
ENSMMUG00000005440 ELMO domain containing 1 [Source:VGNC Symbol;Acc:VGNC:72109]  
ENSMMUG00000023598 sorting nexin 2 [Source:VGNC Symbol;Acc:VGNC:77682]  
ENSMMUG00000026975 mml-mir-206 [Source:miRBase;Acc:MI0007667]  
ENSMMUG00000019032 EMAP like 2 [Source:NCBI gene;Acc:715009]  
ENSMMUG00000042618 involucrin [Source:NCBI gene;Acc:713728]  
ENSMMUG00000051852 Metazoan signal recognition particle RNA [Source:RFAM;Acc:RF00017]  
ENSMMUG00000056511  
ENSMMUG00000054634 late cornified envelope protein 1C-like [Source:NCBI gene;Acc:713600]  
ENSMMUG00000017930 striatin 4 [Source:VGNC Symbol;Acc:VGNC:78128]  
ENSMMUG00000022116 PIH1 domain containing 1 [Source:VGNC Symbol;Acc:VGNC:75868]  
ENSMMUG00000061474  
ENSMMUG00000001380 outer dense fiber of sperm tails 2 like [Source:VGNC Symbol;Acc:VGNC:75482]  
ENSMMUG00000006941 exportin 1 [Source:VGNC Symbol;Acc:VGNC:78812]  
ENSMMUG00000014707 cadherin EGF LAG seven-pass G-type receptor 3 [Source:VGNC Symbol;Acc:VGNC:71148]  
ENSMMUG00000031540 purinergic receptor P2Y1 [Source:VGNC Symbol;Acc:VGNC:75737]  
ENSMMUG00000042407  
ENSMMUG00000003658 autophagy related 2B [Source:VGNC Symbol;Acc:VGNC:84310]  
ENSMMUG00000017971 nucleus accumbens associated 1 [Source:VGNC Symbol;Acc:VGNC:74996]  
ENSMMUG00000018648 zinc finger protein 594 [Source:NCBI gene;Acc:711492]  
ENSMMUG00000000152 transcription factor CP2 [Source:VGNC Symbol;Acc:VGNC:78323]  
ENSMMUG00000017209 C1D nuclear receptor corepressor [Source:NCBI gene;Acc:698450]  
ENSMMUG00000064174  
ENSMMUG00000029420  
ENSMMUG00000043738  
ENSMMUG00000011564 transmembrane channel like 3 [Source:VGNC Symbol;Acc:VGNC:79360]

|                  |     |                    |                                                                                                  |
|------------------|-----|--------------------|--------------------------------------------------------------------------------------------------|
|                  |     | ENSMMUG0000000452  | LSM7 homolog, U6 small nuclear RNA and mRNA degradation associated [Source:NCBI gene;Acc:721486] |
|                  |     | ENSMMUG00000039943 | adenylate cyclase 9 [Source:NCBI gene;Acc:706789]                                                |
|                  |     | ENSMMUG00000023345 | adhesion G protein-coupled receptor L4 [Source:VGNC Symbol;Acc:VGNC:69652]                       |
|                  |     | ENSMMUG00000054736 |                                                                                                  |
|                  |     | ENSMMUG00000017450 | MOB kinase activator 2 [Source:NCBI gene;Acc:720951]                                             |
|                  |     | ENSMMUG00000050799 |                                                                                                  |
| NS_D1 NS_D3 S_D3 | 3   | ENSMMUG00000014508 | potassium channel tetramerization domain containing 20 [Source:VGNC Symbol;Acc:VGNC:73872]       |
|                  |     | ENSMMUG00000000196 | niban apoptosis regulator 3 [Source:VGNC Symbol;Acc:VGNC:75241]                                  |
|                  |     | ENSMMUG00000060000 |                                                                                                  |
| NS_D2 S_D2 S_D3  | 3   | ENSMMUG00000055096 |                                                                                                  |
|                  |     | ENSMMUG00000009788 | tubulin alpha-1C chain [Source:NCBI gene;Acc:710110]                                             |
|                  |     | ENSMMUG00000004435 | two pore segment channel 1 [Source:VGNC Symbol;Acc:VGNC:79117]                                   |
| NS_D2 NS_D3 S_D2 | 23  | ENSMMUG00000005106 | unc-45 myosin chaperone A [Source:VGNC Symbol;Acc:VGNC:79858]                                    |
|                  |     | ENSMMUG00000021062 | CD177 molecule [Source:VGNC Symbol;Acc:VGNC:70912]                                               |
|                  |     | ENSMMUG00000003568 | testis expressed 101 [Source:VGNC Symbol;Acc:VGNC:79869]                                         |
|                  |     | ENSMMUG00000037175 | U6 spliceosomal RNA [Source:RFAM;Acc:RF00026]                                                    |
|                  |     | ENSMMUG00000020980 | ubiquitin like modifier activating enzyme 7 [Source:VGNC Symbol;Acc:VGNC:78690]                  |
|                  |     | ENSMMUG00000010526 | calcium voltage-gated channel auxiliary subunit beta 4 [Source:VGNC Symbol;Acc:VGNC:82116]       |
|                  |     | ENSMMUG00000002430 | YKT6 v-SNARE homolog [Source:VGNC Symbol;Acc:VGNC:81796]                                         |
|                  |     | ENSMMUG00000010521 | ADP ribosylation factor like GTPase 5A [Source:VGNC Symbol;Acc:VGNC:70017]                       |
|                  |     | ENSMMUG00000014766 | neuroguidin [Source:VGNC Symbol;Acc:VGNC:75220]                                                  |
|                  |     | ENSMMUG00000007603 | coiled-coil domain containing 88B [Source:NCBI gene;Acc:722080]                                  |
|                  |     | ENSMMUG00000006723 | solute carrier family 8 member B1 [Source:NCBI gene;Acc:714561]                                  |
|                  |     | ENSMMUG00000017501 | N-acylethanolamine acid amidase [Source:VGNC Symbol;Acc:VGNC:75068]                              |
|                  |     | ENSMMUG00000016476 | TRAF interacting protein [Source:VGNC Symbol;Acc:VGNC:82261]                                     |
|                  |     | ENSMMUG00000063351 | Metazoan signal recognition particle RNA [Source:RFAM;Acc:RF00017]                               |
|                  |     | ENSMMUG00000011914 | prospero homeobox 1 [Source:VGNC Symbol;Acc:VGNC:76427]                                          |
|                  |     | ENSMMUG00000002330 | ecto-NOX disulfide-thiol exchanger 1 [Source:VGNC Symbol;Acc:VGNC:72110]                         |
|                  |     | ENSMMUG00000063590 |                                                                                                  |
|                  |     | ENSMMUG00000029034 | defensin beta 136 [Source:VGNC Symbol;Acc:VGNC:71826]                                            |
|                  |     | ENSMMUG00000020580 | RPGRIP1 like [Source:VGNC Symbol;Acc:VGNC:77124]                                                 |
|                  |     | ENSMMUG00000009201 | abhydrolase domain containing 12 [Source:VGNC Symbol;Acc:VGNC:69411]                             |
|                  |     | ENSMMUG00000020979 | inka box actin regulator 1 [Source:VGNC Symbol;Acc:VGNC:73692]                                   |
|                  |     | ENSMMUG00000001761 | myosin IB [Source:VGNC Symbol;Acc:VGNC:75111]                                                    |
|                  |     | ENSMMUG00000003668 | GTPase activating protein and VPS9 domains 1 [Source:VGNC Symbol;Acc:VGNC:72767]                 |
| NS_D3 S_D2 S_D3  | 1   | ENSMMUG00000059985 |                                                                                                  |
| NS_D2 NS_D3 S_D3 | 8   | ENSMMUG00000018151 | membrane palmitoylated protein 4 [Source:VGNC Symbol;Acc:VGNC:74734]                             |
|                  |     | ENSMMUG00000053627 |                                                                                                  |
|                  |     | ENSMMUG00000019961 | protein phosphatase 1 regulatory subunit 18 [Source:NCBI gene;Acc:712176]                        |
|                  |     | ENSMMUG00000017370 | signal peptidase complex subunit 1 [Source:VGNC Symbol;Acc:VGNC:84072]                           |
|                  |     | ENSMMUG00000006936 | gastric inhibitory polypeptide receptor [Source:VGNC Symbol;Acc:VGNC:73052]                      |
|                  |     | ENSMMUG00000065319 |                                                                                                  |
|                  |     | ENSMMUG00000031785 |                                                                                                  |
|                  |     | ENSMMUG00000052047 |                                                                                                  |
| NS_D1 S_D1       | 202 | ENSMMUG00000049514 | solute carrier family 48 member 1 [Source:NCBI gene;Acc:704304]                                  |
|                  |     | ENSMMUG00000028785 | zinc finger protein 146 [Source:VGNC Symbol;Acc:VGNC:78846]                                      |
|                  |     | ENSMMUG00000049548 |                                                                                                  |
|                  |     | ENSMMUG00000003482 | glycine receptor alpha 2 [Source:VGNC Symbol;Acc:VGNC:73075]                                     |
|                  |     | ENSMMUG00000010586 | mesoderm posterior bHLH transcription factor 1 [Source:VGNC Symbol;Acc:VGNC:74618]               |
|                  |     | ENSMMUG00000050057 |                                                                                                  |
|                  |     | ENSMMUG00000064122 |                                                                                                  |

ENSMMUG00000035888 small nucleolar RNA, C/D box 121A [Source:HGNC Symbol;Acc:HGNC:33560]  
ENSMMUG00000058162  
ENSMMUG00000062755  
ENSMMUG00000014880 sortilin related receptor 1 [Source:NCBI gene;Acc:713011]  
ENSMMUG00000028771 Yip1 interacting factor homolog B, membrane trafficking protein [Source:VGNC Symbol;Acc:VGNC:79852]  
ENSMMUG00000054398  
ENSMMUG00000021418 ATPase H+ transporting V1 subunit D [Source:VGNC Symbol;Acc:VGNC:70060]  
ENSMMUG0000002278 AT-rich interaction domain 3A [Source:VGNC Symbol;Acc:VGNC:69930]  
ENSMMUG00000014407 magnesium transporter 1 [Source:VGNC Symbol;Acc:VGNC:74386]  
ENSMMUG00000020489 HscB mitochondrial iron-sulfur cluster cochaperone [Source:VGNC Symbol;Acc:VGNC:73454]  
ENSMMUG00000054486 testis expressed 35 [Source:NCBI gene;Acc:717255]  
ENSMMUG00000001880 DExD/H-box helicase 60 [Source:VGNC Symbol;Acc:VGNC:71711]  
ENSMMUG00000064026 Metazoan signal recognition particle RNA [Source:RFAM;Acc:RF00017]  
ENSMMUG00000059442  
ENSMMUG00000008126 lysine demethylase 7A [Source:VGNC Symbol;Acc:VGNC:73886]  
ENSMMUG00000019802 family with sequence similarity 133 member B [Source:NCBI gene;Acc:702054]  
ENSMMUG00000048076 TNF receptor superfamily member 10b [Source:NCBI gene;Acc:716650]  
ENSMMUG00000045203  
ENSMMUG00000020919 shroom family member 3 [Source:VGNC Symbol;Acc:VGNC:77352]  
ENSMMUG00000062055 glyoxalase I [Source:NCBI gene;Acc:719518]  
ENSMMUG00000014149 LYN proto-oncogene, Src family tyrosine kinase [Source:VGNC Symbol;Acc:VGNC:74464]  
ENSMMUG00000059589  
ENSMMUG00000010513 ribulose-5-phosphate-3-epimerase [Source:NCBI gene;Acc:711322]  
ENSMMUG00000056749 Metazoan signal recognition particle RNA [Source:RFAM;Acc:RF00017]  
ENSMMUG00000011061 ankyrin repeat domain 31 [Source:VGNC Symbol;Acc:VGNC:84277]  
ENSMMUG00000050119  
ENSMMUG00000014425 protein kinase C epsilon [Source:VGNC Symbol;Acc:VGNC:76412]  
ENSMMUG00000016655 R3H domain and coiled-coil containing 1 [Source:VGNC Symbol;Acc:VGNC:76551]  
ENSMMUG00000009368 Abelson helper integration site 1 [Source:VGNC Symbol;Acc:VGNC:81010]  
ENSMMUG00000008843 lymphotoxin alpha [Source:VGNC Symbol;Acc:VGNC:74452]  
ENSMMUG00000061123 Metazoan signal recognition particle RNA [Source:RFAM;Acc:RF00017]  
ENSMMUG00000011527 TNF receptor associated factor 2 [Source:VGNC Symbol;Acc:VGNC:78641]  
ENSMMUG00000015908 RB binding protein 6, ubiquitin ligase [Source:VGNC Symbol;Acc:VGNC:76677]  
ENSMMUG00000049305 Metazoan signal recognition particle RNA [Source:RFAM;Acc:RF00017]  
ENSMMUG00000005939 serpin family I member 1 [Source:VGNC Symbol;Acc:VGNC:77366]  
ENSMMUG00000055209  
ENSMMUG00000052195  
ENSMMUG00000003067 endoplasmic reticulum-golgi intermediate compartment 1 [Source:VGNC Symbol;Acc:VGNC:82141]  
ENSMMUG00000007540 Rho related BTB domain containing 2 [Source:VGNC Symbol;Acc:VGNC:76772]  
ENSMMUG00000012529 pleckstrin homology domain containing A8 [Source:VGNC Symbol;Acc:VGNC:81741]  
ENSMMUG00000018910 histidine rich glycoprotein [Source:VGNC Symbol;Acc:VGNC:73521]  
ENSMMUG00000015922 formin binding protein 1 like [Source:VGNC Symbol;Acc:VGNC:72543]  
ENSMMUG00000029455 olfactory receptor 4Q2 [Source:NCBI gene;Acc:114679271]  
ENSMMUG00000053489  
ENSMMUG00000007402 potassium two pore domain channel subfamily K member 7 [Source:VGNC Symbol;Acc:VGNC:73996]  
ENSMMUG00000029638 chromosome 7 C15orf65 homolog [Source:VGNC Symbol;Acc:VGNC:70689]  
ENSMMUG00000051879 CAP-Gly domain containing linker protein 3 [Source:NCBI gene;Acc:712058]  
ENSMMUG00000015611 proteasome 26S subunit, ATPase 3 [Source:NCBI gene;Acc:713356]  
ENSMMUG00000020854 C-type lectin domain family 4 member F [Source:VGNC Symbol;Acc:VGNC:71349]  
ENSMMUG00000019369 pleckstrin homology and RhoGEF domain containing G2 [Source:VGNC Symbol;Acc:VGNC:76133]  
ENSMMUG00000016085 KxDL motif containing 1 [Source:NCBI gene;Acc:720235]

ENSMMUG00000039205  
ENSMMUG00000053200 ubiquitin conjugating enzyme E2 R2 [Source:NCBI gene;Acc:701507]  
ENSMMUG00000053254 adenylate kinase 4 [Source:NCBI gene;Acc:698560]  
ENSMMUG00000038989 erythropoietin receptor [Source:NCBI gene;Acc:714546]  
ENSMMUG00000013901 mitogen-activated protein kinase kinase kinase 3 [Source:VGNC Symbol;Acc:VGNC:81466]  
ENSMMUG00000052238  
ENSMMUG00000004477 solute carrier family 19 member 1 [Source:VGNC Symbol;Acc:VGNC:77408]  
ENSMMUG00000009825 zinc finger DHHC-type containing 1 [Source:VGNC Symbol;Acc:VGNC:79102]  
ENSMMUG00000015288 adaptor related protein complex 3 subunit sigma 1 [Source:VGNC Symbol;Acc:VGNC:69867]  
ENSMMUG00000012469 KIAA2013 [Source:VGNC Symbol;Acc:VGNC:73918]  
ENSMMUG00000015513 CUGBP Elav-like family member 5 [Source:NCBI gene;Acc:721694]  
ENSMMUG00000005236 zinc finger protein 709 [Source:NCBI gene;Acc:717515]  
ENSMMUG00000015606 Spi-1 proto-oncogene [Source:NCBI gene;Acc:712010]  
ENSMMUG00000008184 methyltransferase like 24 [Source:VGNC Symbol;Acc:VGNC:74552]  
ENSMMUG00000003140 RELT TNF receptor [Source:VGNC Symbol;Acc:VGNC:76728]  
ENSMMUG00000000381 IKAROS family zinc finger 2 [Source:VGNC Symbol;Acc:VGNC:73586]  
ENSMMUG00000005986 Kruppel like factor 17 [Source:NCBI gene;Acc:702810]  
ENSMMUG000000056729 U6 spliceosomal RNA [Source:RFAM;Acc:RF00026]  
ENSMMUG000000056707  
ENSMMUG000000062273 dephospho-CoA kinase domain containing [Source:NCBI gene;Acc:715841]  
ENSMMUG00000003355 lipid droplet associated hydrolase [Source:VGNC Symbol;Acc:VGNC:74130]  
ENSMMUG000000056593  
ENSMMUG00000003400 baculoviral IAP repeat containing 2 [Source:NCBI gene;Acc:702592]  
ENSMMUG00000007760 centrosomal protein 70 [Source:VGNC Symbol;Acc:VGNC:71140]  
ENSMMUG000000063820 olfactory receptor, family 52, subfamily M, member 1 [Source:NCBI gene;Acc:717723]  
ENSMMUG00000011347 DEAH-box helicase 36 [Source:VGNC Symbol;Acc:VGNC:71623]  
ENSMMUG00000000629 serpin family C member 1 [Source:VGNC Symbol;Acc:VGNC:77360]  
ENSMMUG00000001534 calpain 3 [Source:VGNC Symbol;Acc:VGNC:70533]  
ENSMMUG00000001715 zinc finger protein 627 [Source:VGNC Symbol;Acc:VGNC:79856]  
ENSMMUG00000015572 GSG1 like [Source:VGNC Symbol;Acc:VGNC:82152]  
ENSMMUG000000049998 tachykinin receptor 3 [Source:NCBI gene;Acc:653013]  
ENSMMUG00000015871 zinc finger FYVE-type containing 26 [Source:VGNC Symbol;Acc:VGNC:79283]  
ENSMMUG00000006130 prolyl 4-hydroxylase, transmembrane [Source:VGNC Symbol;Acc:VGNC:75693]  
ENSMMUG00000016772 solute carrier family 28 member 1 [Source:VGNC Symbol;Acc:VGNC:77444]  
ENSMMUG00000005845 REST corepressor 1 [Source:VGNC Symbol;Acc:VGNC:76752]  
ENSMMUG00000005685 pseudouridine synthase 10 [Source:VGNC Symbol;Acc:VGNC:76547]  
ENSMMUG000000057909  
ENSMMUG00000013048 junction plakoglobin [Source:VGNC Symbol;Acc:VGNC:73960]  
ENSMMUG00000020488 receptor accessory protein 5 [Source:VGNC Symbol;Acc:VGNC:76864]  
ENSMMUG00000001532 glucosidase alpha, neutral C [Source:NCBI gene;Acc:708126]  
ENSMMUG000000052184 inka box actin regulator 2 [Source:NCBI gene;Acc:704844]  
ENSMMUG00000017260 G protein-coupled receptor 65 [Source:VGNC Symbol;Acc:VGNC:73140]  
ENSMMUG00000010336 DOP1 leucine zipper like protein B [Source:VGNC Symbol;Acc:VGNC:71832]  
ENSMMUG000000055012  
ENSMMUG00000015861 cytochrome c oxidase subunit VIIb [Source:NCBI gene;Acc:706099]  
ENSMMUG00000006101 myosin heavy chain 9 [Source:VGNC Symbol;Acc:VGNC:75102]  
ENSMMUG00000020515 adhesion G protein-coupled receptor G2 [Source:VGNC Symbol;Acc:VGNC:69802]  
ENSMMUG00000014409 ankyrin repeat domain 13B [Source:VGNC Symbol;Acc:VGNC:69708]  
ENSMMUG00000013646 unk zinc finger [Source:VGNC Symbol;Acc:VGNC:79803]  
ENSMMUG000000054816 interleukin 1 receptor associated kinase 3 [Source:NCBI gene;Acc:717845]  
ENSMMUG00000017124 spliceosome associated factor 3, U4/U6 recycling protein [Source:VGNC Symbol;Acc:VGNC:77029]

ENSMMUG00000056437 Metazoan signal recognition particle RNA [Source:RFAM;Acc:RF00017]  
ENSMMUG00000026474 Small nucleolar RNA SNORD83 [Source:RFAM;Acc:RF00137]  
ENSMMUG00000062175 carboxypeptidase B1 [Source:NCBI gene;Acc:712639]  
ENSMMUG00000048463 apolipoprotein L5 [Source:HGNC Symbol;Acc:HGNC:14869]  
ENSMMUG00000039520 chromosome 11 C12orf43 homolog [Source:NCBI gene;Acc:698821]  
ENSMMUG00000013766 prostaglandin E synthase 3 [Source:NCBI gene;Acc:713353]  
ENSMMUG00000060484 heterogeneous nuclear ribonucleoprotein D [Source:NCBI gene;Acc:694867]  
ENSMMUG00000045959  
ENSMMUG00000063383  
ENSMMUG00000065129  
ENSMMUG00000042378 pseudopodium enriched atypical kinase 1 [Source:VGNC Symbol;Acc:VGNC:84419]  
ENSMMUG00000019703 RUN and FYVE domain containing 2 [Source:VGNC Symbol;Acc:VGNC:77057]  
ENSMMUG00000001427 myosin heavy chain 14 [Source:VGNC Symbol;Acc:VGNC:75006]  
ENSMMUG00000060754 Metazoan signal recognition particle RNA [Source:RFAM;Acc:RF00017]  
ENSMMUG00000051170  
ENSMMUG00000058106 otoconin 90 [Source:NCBI gene;Acc:100429699]  
ENSMMUG00000019095 TBC1 domain family member 24 [Source:NCBI gene;Acc:697106]  
ENSMMUG00000005991 TRIO and F-actin binding protein [Source:NCBI gene;Acc:701241]  
ENSMMUG00000056342 Metazoan signal recognition particle RNA [Source:RFAM;Acc:RF00017]  
ENSMMUG00000011472 PWWP domain containing 2A [Source:VGNC Symbol;Acc:VGNC:76564]  
ENSMMUG00000010515 KAT8 regulatory NSL complex subunit 1 like [Source:VGNC Symbol;Acc:VGNC:73913]  
ENSMMUG00000054159 lymphocyte antigen 6 family member G5C [Source:VGNC Symbol;Acc:VGNC:83431]  
ENSMMUG00000032030 dolichyldiphosphatase 1 [Source:VGNC Symbol;Acc:VGNC:71947]  
ENSMMUG00000020346 carboxypeptidase X, M14 family member 2 [Source:VGNC Symbol;Acc:VGNC:71596]  
ENSMMUG00000002324  
ENSMMUG00000046099 chromosome 19 C19orf81 homolog [Source:NCBI gene;Acc:719661]  
ENSMMUG00000038998 purinergic receptor P2Y13 [Source:VGNC Symbol;Acc:VGNC:83950]  
ENSMMUG00000055589  
ENSMMUG00000005698 alkaline ceramidase 1 [Source:VGNC Symbol;Acc:VGNC:69460]  
ENSMMUG00000026243 U6 spliceosomal RNA [Source:RFAM;Acc:RF00026]  
ENSMMUG00000002033 serine protease 36 [Source:VGNC Symbol;Acc:VGNC:76325]  
ENSMMUG00000056905  
ENSMMUG00000061021  
ENSMMUG00000022741 WAP, follistatin/kazal, immunoglobulin, kunitz and netrin domain containing 2 [Source:VGNC Symbol;Acc:VGNC:79900]  
ENSMMUG00000004472 collagen type XVIII alpha 1 chain [Source:VGNC Symbol;Acc:VGNC:81291]  
ENSMMUG00000010536 discs large MAGUK scaffold protein 4 [Source:VGNC Symbol;Acc:VGNC:71920]  
ENSMMUG00000019966 zinc finger protein 557 [Source:NCBI gene;Acc:100424983]  
ENSMMUG00000049862  
ENSMMUG00000030891 hypoxia up-regulated 1 [Source:VGNC Symbol;Acc:VGNC:73399]  
ENSMMUG00000064226  
ENSMMUG00000061244  
ENSMMUG00000012841 kallikrein 3 [Source:NCBI gene;Acc:719444]  
ENSMMUG00000001105 purinergic receptor P2Y12 [Source:VGNC Symbol;Acc:VGNC:75642]  
ENSMMUG00000004843 sodium voltage-gated channel beta subunit 1 [Source:VGNC Symbol;Acc:VGNC:76983]  
ENSMMUG00000057452  
ENSMMUG00000063947 oxoeicosanoid receptor 1 [Source:NCBI gene;Acc:713039]  
ENSMMUG00000056109 Metazoan signal recognition particle RNA [Source:RFAM;Acc:RF00017]  
ENSMMUG00000012466 BCL2 binding component 3 [Source:NCBI gene;Acc:717955]  
ENSMMUG00000058042 heparan sulfate-glucosamine 3-sulfotransferase 2 [Source:NCBI gene;Acc:699722]  
ENSMMUG00000049508  
ENSMMUG00000062208 Metazoan signal recognition particle RNA [Source:RFAM;Acc:RF00017]



ENSMMUG00000012068 signal induced proliferation associated 1 like 2 [Source:NCBI gene;Acc:100425123]  
 ENSMMUG00000015930 ADP ribosylation factor like GTPase 6 interacting protein 4 [Source:VGNC Symbol;Acc:VGNC:69860]  
 ENSMMUG00000005270 ryanodine receptor 3 [Source:NCBI gene;Acc:694996]  
 ENSMMUG00000019172 spectrin beta, erythrocytic [Source:VGNC Symbol;Acc:VGNC:77870]  
 ENSMMUG00000015054 ArfGAP with RhoGAP domain, ankyrin repeat and PH domain 1 [Source:VGNC Symbol;Acc:VGNC:69844]  
 ENSMMUG00000015108 SV2 related protein [Source:VGNC Symbol;Acc:VGNC:78208]  
 ENSMMUG00000023761 ectonucleoside triphosphate diphosphohydrolase 7 [Source:VGNC Symbol;Acc:VGNC:72071]  
 ENSMMUG00000000591 6-phosphofructo-2-kinase/fructose-2,6-biphosphatase 4 [Source:VGNC Symbol;Acc:VGNC:75960]  
 ENSMMUG00000056529 synaptotagmin 3 [Source:NCBI gene;Acc:719650]  
 ENSMMUG00000006293 SAP domain containing ribonucleoprotein [Source:NCBI gene;Acc:709932]  
 ENSMMUG00000016454 4-hydroxyphenylpyruvate dioxygenase [Source:VGNC Symbol;Acc:VGNC:73511]  
 ENSMMUG00000019945 fibroblast growth factor receptor 3 [Source:VGNC Symbol;Acc:VGNC:72653]  
 ENSMMUG00000021486 secernin 2 [Source:NCBI gene;Acc:694571]  
 ENSMMUG00000015924 BCAR3 adaptor protein, NSP family member [Source:VGNC Symbol;Acc:VGNC:70235]  
 ENSMMUG00000005356 integrator complex subunit 8 [Source:VGNC Symbol;Acc:VGNC:73657]  
 ENSMMUG00000005982 coiled-coil domain containing 84 [Source:NCBI gene;Acc:707400]  
 ENSMMUG00000057160  
 ENSMMUG00000001538 GRAM domain containing 1A [Source:VGNC Symbol;Acc:VGNC:73029]  
 ENSMMUG00000015476 unc-13 homolog A [Source:NCBI gene;Acc:720000]  
 ENSMMUG00000005548 N-ethylmaleimide sensitive factor, vesicle fusing ATPase [Source:VGNC Symbol;Acc:VGNC:75536]  
 ENSMMUG00000005552 PAF1 homolog, Paf1/RNA polymerase II complex component [Source:VGNC Symbol;Acc:VGNC:81492]  
 ENSMMUG00000004765 Sp2 transcription factor [Source:VGNC Symbol;Acc:VGNC:77845]  
 ENSMMUG00000010043 epidermal growth factor [Source:VGNC Symbol;Acc:VGNC:72171]  
 ENSMMUG00000056992 zinc finger AN1-type containing 6 [Source:NCBI gene;Acc:717543]  
 ENSMMUG00000038702 ZFP36 ring finger protein [Source:NCBI gene;Acc:722000]  
 ENSMMUG00000057682  
 ENSMMUG00000061165  
 ENSMMUG00000017619 lysophosphatidic acid receptor 5 [Source:VGNC Symbol;Acc:VGNC:74277]  
 ENSMMUG00000004175 transient receptor potential cation channel subfamily M member 2 [Source:VGNC Symbol;Acc:VGNC:78655]  
 ENSMMUG00000047452  
 ENSMMUG00000020172 KIAA1755 [Source:VGNC Symbol;Acc:VGNC:73942]  
 ENSMMUG00000008853 leukocyte specific transcript 1 [Source:HGNC Symbol;Acc:HGNC:14189]  
 ENSMMUG00000002515 protein phosphatase 2 phosphatase activator [Source:VGNC Symbol;Acc:VGNC:76583]  
 ENSMMUG00000018029 amyloid beta precursor like protein 2 [Source:VGNC Symbol;Acc:VGNC:69984]  
 ENSMMUG00000010949 SPG21 abhydrolase domain containing, maspardin [Source:VGNC Symbol;Acc:VGNC:77970]  
 ENSMMUG00000038349 crystallin beta-gamma domain containing 3 [Source:NCBI gene;Acc:698282]  
 ENSMMUG00000020156 CD1d molecule [Source:VGNC Symbol;Acc:VGNC:70757]  
 ENSMMUG00000048207 syntaxin 4 [Source:NCBI gene;Acc:704880]  
 ENSMMUG00000005729 GIPC PDZ domain containing family member 1 [Source:VGNC Symbol;Acc:VGNC:72932]  
 ENSMMUG00000009577 atlastin GTPase 1 [Source:VGNC Symbol;Acc:VGNC:70049]  
 ENSMMUG00000010626 CD1c molecule [Source:VGNC Symbol;Acc:VGNC:70756]  
 ENSMMUG00000014411 coronin 6 [Source:NCBI gene;Acc:711818]  
 15 ENSMMUG00000056629 nucleolar protein 12 [Source:NCBI gene;Acc:698318]  
 ENSMMUG00000020186 solute carrier family 20 member 2 [Source:VGNC Symbol;Acc:VGNC:77416]  
 ENSMMUG00000062394 C-C motif chemokine receptor 2 [Source:NCBI gene;Acc:574098]  
 ENSMMUG00000011328 cytoplasmic polyadenylation element binding protein 1 [Source:NCBI gene;Acc:694357]  
 ENSMMUG00000012472 phosphatidylinositol-4-phosphate 5-kinase type 1 beta [Source:VGNC Symbol;Acc:VGNC:76001]  
 ENSMMUG00000020603 pyridine nucleotide-disulphide oxidoreductase domain 2 [Source:NCBI gene;Acc:707797]  
 ENSMMUG00000029296 phosphatidylinositol glycan anchor biosynthesis class Q [Source:VGNC Symbol;Acc:VGNC:75798]  
 ENSMMUG00000020629 SDS3 homolog, SIN3A corepressor complex component [Source:NCBI gene;Acc:696166]  
 ENSMMUG00000049234 ninjurin 2 [Source:NCBI gene;Acc:706368]

|             |    |                    |                                                                                                         |
|-------------|----|--------------------|---------------------------------------------------------------------------------------------------------|
|             |    | ENSMMUG00000008615 | nebulin [Source:NCBI gene;Acc:100430324]                                                                |
|             |    | ENSMMUG00000015115 | terminal nucleotidyltransferase 5B [Source:VGNC Symbol;Acc:VGNC:79692]                                  |
|             |    | ENSMMUG00000063868 | Metazoan signal recognition particle RNA [Source:RFAM;Acc:RF00017]                                      |
|             |    | ENSMMUG00000057001 | homeobox B2 [Source:NCBI gene;Acc:106994010]                                                            |
|             |    | ENSMMUG00000029883 | olfactory receptor, family 2, subfamily J, member 3 [Source:NCBI gene;Acc:708943]                       |
|             |    | ENSMMUG00000042472 | Metazoan signal recognition particle RNA [Source:RFAM;Acc:RF00017]                                      |
| NS_D2 S_D1  | 10 | ENSMMUG00000037641 | chondrosarcoma-associated gene 2/3 protein [Source:NCBI gene;Acc:106992305]                             |
|             |    | ENSMMUG00000000187 | UV radiation resistance associated [Source:VGNC Symbol;Acc:VGNC:78751]                                  |
|             |    | ENSMMUG00000030389 |                                                                                                         |
|             |    | ENSMMUG00000022818 | inhibitor of growth family member 1 [Source:VGNC Symbol;Acc:VGNC:73742]                                 |
|             |    | ENSMMUG00000004028 | kelch repeat and BTB domain containing 13 [Source:VGNC Symbol;Acc:VGNC:73953]                           |
|             |    | ENSMMUG00000019546 | regucalcin [Source:VGNC Symbol;Acc:VGNC:76912]                                                          |
|             |    | ENSMMUG00000048744 |                                                                                                         |
|             |    | ENSMMUG00000002345 | tropomodulin 3 [Source:VGNC Symbol;Acc:VGNC:78572]                                                      |
|             |    | ENSMMUG00000062419 |                                                                                                         |
|             |    | ENSMMUG00000007546 | complement C1q like 4 [Source:VGNC Symbol;Acc:VGNC:70450]                                               |
| S_D1 S_D3   | 7  | ENSMMUG00000045187 | CASC3 exon junction complex subunit [Source:NCBI gene;Acc:699712]                                       |
|             |    | ENSMMUG00000060572 |                                                                                                         |
|             |    | ENSMMUG00000020956 | parvin alpha [Source:VGNC Symbol;Acc:VGNC:75605]                                                        |
|             |    | ENSMMUG00000021031 | TMF1 regulated nuclear protein 1 [Source:VGNC Symbol;Acc:VGNC:79946]                                    |
|             |    | ENSMMUG00000049355 | ALX homeobox 4 [Source:NCBI gene;Acc:715652]                                                            |
|             |    | ENSMMUG00000001635 | zinc finger protein 703 [Source:VGNC Symbol;Acc:VGNC:79552]                                             |
|             |    | ENSMMUG00000022481 | cytochrome P450, family 1, subfamily A, polypeptide 1 [Source:NCBI gene;Acc:678694]                     |
| NS_D3 S_D1  | 10 | ENSMMUG00000056548 | coagulation factor III, tissue factor [Source:NCBI gene;Acc:714456]                                     |
|             |    | ENSMMUG00000036223 |                                                                                                         |
|             |    | ENSMMUG00000033550 |                                                                                                         |
|             |    | ENSMMUG00000065113 |                                                                                                         |
|             |    | ENSMMUG00000002995 | tripartite motif containing 24 [Source:VGNC Symbol;Acc:VGNC:78562]                                      |
|             |    | ENSMMUG00000018787 | PAK1 interacting protein 1 [Source:VGNC Symbol;Acc:VGNC:75661]                                          |
|             |    | ENSMMUG00000003926 | BCL2 like 12 [Source:NCBI gene;Acc:718981]                                                              |
|             |    | ENSMMUG00000008090 | ribosomal protein L27 [Source:NCBI gene;Acc:712352]                                                     |
|             |    | ENSMMUG00000064204 | kelch like family member 26 [Source:NCBI gene;Acc:719583]                                               |
|             |    | ENSMMUG00000007206 | chromosome 3 C7orf50 homolog [Source:VGNC Symbol;Acc:VGNC:70609]                                        |
| NS_D1 S_D2  | 2  | ENSMMUG00000020586 | serpin family A member 12 [Source:VGNC Symbol;Acc:VGNC:77266]                                           |
|             |    | ENSMMUG00000057953 |                                                                                                         |
| NS_D1 NS_D2 | 56 | ENSMMUG00000012856 | nuclear FMR1 interacting protein 2 [Source:VGNC Symbol;Acc:VGNC:75422]                                  |
|             |    | ENSMMUG00000065212 |                                                                                                         |
|             |    | ENSMMUG00000010201 | atrophin 1 [Source:VGNC Symbol;Acc:VGNC:70157]                                                          |
|             |    | ENSMMUG00000004255 | YLP motif containing 1 [Source:VGNC Symbol;Acc:VGNC:79092]                                              |
|             |    | ENSMMUG00000058108 | BMP and activin membrane bound inhibitor [Source:NCBI gene;Acc:710152]                                  |
|             |    | ENSMMUG00000003629 | phosphatidylinositol 4-kinase type 2 beta [Source:NCBI gene;Acc:693561]                                 |
|             |    | ENSMMUG00000003269 | polyhomeotic homolog 2 [Source:VGNC Symbol;Acc:VGNC:75903]                                              |
|             |    | ENSMMUG00000047247 | matrix Gla protein [Source:NCBI gene;Acc:574116]                                                        |
|             |    | ENSMMUG00000042870 | Macaca mulatta taste receptor, type 2, member 46 (TAS2R46), mRNA. [Source:RefSeq mRNA;Acc:NM_001080757] |
|             |    | ENSMMUG00000003669 | methionine sulfoxide reductase B3 [Source:VGNC Symbol;Acc:VGNC:74842]                                   |
|             |    | ENSMMUG00000000588 | rhomboid 5 homolog 1 [Source:NCBI gene;Acc:693423]                                                      |
|             |    | ENSMMUG00000003548 | tectorin beta [Source:VGNC Symbol;Acc:VGNC:78306]                                                       |
|             |    | ENSMMUG00000019443 | syntaxin 11 [Source:VGNC Symbol;Acc:VGNC:78041]                                                         |
|             |    | ENSMMUG00000056797 |                                                                                                         |
|             |    | ENSMMUG00000057454 | transmembrane protein 160 [Source:NCBI gene;Acc:716996]                                                 |
|             |    | ENSMMUG00000054111 | Metazoan signal recognition particle RNA [Source:RFAM;Acc:RF00017]                                      |

ENSMMUG00000051719 late cornified envelope 1C [Source:HGNC Symbol;Acc:HGNC:29464]  
 ENSMMUG00000044265 Metazoan signal recognition particle RNA [Source:RFAM;Acc:RF00017]  
 ENSMMUG00000054803  
 ENSMMUG00000061282 hyaluronan and proteoglycan link protein 1 [Source:NCBI gene;Acc:712501]  
 ENSMMUG00000054090  
 ENSMMUG00000009583 COP9 signalosome subunit 7A [Source:VGNC Symbol;Acc:VGNC:71185]  
 ENSMMUG00000008251 cilia and flagella associated protein 126 [Source:VGNC Symbol;Acc:VGNC:71150]  
 ENSMMUG00000023622 BCR activator of RhoGEF and GTPase [Source:NCBI gene;Acc:709258]  
 ENSMMUG00000058715  
 ENSMMUG00000053990  
 ENSMMUG00000004224 poly(ADP-ribose) polymerase family member 12 [Source:VGNC Symbol;Acc:VGNC:81734]  
 ENSMMUG00000038076 Metazoan signal recognition particle RNA [Source:RFAM;Acc:RF00017]  
 ENSMMUG00000010203 protein tyrosine phosphatase non-receptor type 6 [Source:VGNC Symbol;Acc:VGNC:76607]  
 ENSMMUG00000002562 mediator complex subunit 19 [Source:VGNC Symbol;Acc:VGNC:74615]  
 ENSMMUG00000020583 FTO alpha-ketoglutarate dependent dioxygenase [Source:VGNC Symbol;Acc:VGNC:72772]  
 ENSMMUG00000057063 solute carrier family 6 member 14 [Source:NCBI gene;Acc:709598]  
 ENSMMUG00000052476 zinc finger and BTB domain containing 43 [Source:NCBI gene;Acc:701797]  
 ENSMMUG00000061940  
 ENSMMUG00000055834  
 ENSMMUG00000011330 neuronal PAS domain protein 1 [Source:VGNC Symbol;Acc:VGNC:75377]  
 ENSMMUG00000062518  
 ENSMMUG00000014875 C2CD2 like [Source:VGNC Symbol;Acc:VGNC:70435]  
 ENSMMUG00000032284 leucine rich repeat containing 47 [Source:VGNC Symbol;Acc:VGNC:74388]  
 ENSMMUG00000065134 Fas ligand [Source:NCBI gene;Acc:574159]  
 ENSMMUG00000029421 protein tyrosine phosphatase receptor type K [Source:VGNC Symbol;Acc:VGNC:83453]  
 ENSMMUG00000025150 Y RNA [Source:RFAM;Acc:RF00019]  
 ENSMMUG00000003314 aquaporin 3 (Gill blood group) [Source:NCBI gene;Acc:702721]  
 ENSMMUG00000037890  
 ENSMMUG00000056940 late cornified envelope protein 1C [Source:NCBI gene;Acc:713408]  
 ENSMMUG00000042855 zinc finger SWIM-type containing 1 [Source:NCBI gene;Acc:717180]  
 ENSMMUG00000057076 claudin 19 [Source:NCBI gene;Acc:697807]  
 ENSMMUG00000040696 Metazoan signal recognition particle RNA [Source:RFAM;Acc:RF00017]  
 ENSMMUG00000064860 phosphoglycerate mutase 2 [Source:NCBI gene;Acc:720615]  
 ENSMMUG00000056939  
 ENSMMUG00000013193 matrix metalloproteinase 16 [Source:VGNC Symbol;Acc:VGNC:74894]  
 ENSMMUG00000013648 potassium two pore domain channel subfamily K member 16 [Source:VGNC Symbol;Acc:VGNC:73827]  
 ENSMMUG00000010826 ral guanine nucleotide dissociation stimulator like 3 [Source:VGNC Symbol;Acc:VGNC:76869]  
 ENSMMUG00000003902 thrombospondin 3 [Source:VGNC Symbol;Acc:VGNC:78345]  
 ENSMMUG00000053498  
 ENSMMUG00000009388 F-box and leucine rich repeat protein 5 [Source:VGNC Symbol;Acc:VGNC:81408]  
 1 ENSMMUG00000019041 hydroxysteroid 17-beta dehydrogenase 11 [Source:VGNC Symbol;Acc:VGNC:73431]  
 NS\_D1 S\_D3  
 43 NS\_D1 NS\_D3 ENSMMUG00000015873 RAD51 paralog B [Source:VGNC Symbol;Acc:VGNC:76647]  
 ENSMMUG00000016652 cell division cycle and apoptosis regulator 1 [Source:NCBI gene;Acc:693585]  
 ENSMMUG00000059321  
 ENSMMUG00000059681  
 ENSMMUG00000051343  
 ENSMMUG00000008091 RUN domain containing 1 [Source:VGNC Symbol;Acc:VGNC:77101]  
 ENSMMUG00000063658 leucine rich repeat neuronal 2 [Source:NCBI gene;Acc:100429709]  
 ENSMMUG00000050456 Metazoan signal recognition particle RNA [Source:RFAM;Acc:RF00017]  
 ENSMMUG00000000389 nucleolar protein 6 [Source:VGNC Symbol;Acc:VGNC:75218]  
 ENSMMUG00000045256 cellular communication network factor 5 [Source:NCBI gene;Acc:717872]

ENSMMUG00000005150 CD163 molecule [Source:VGNC Symbol;Acc:VGNC:70752]  
 ENSMMUG00000016111 chromosome 1 C1orf50 homolog [Source:VGNC Symbol;Acc:VGNC:70432]  
 ENSMMUG00000049913  
 ENSMMUG00000038988 RNase MRP [Source:RFAM;Acc:RF00030]  
 ENSMMUG00000056841  
 ENSMMUG0000002421 DNA polymerase mu [Source:VGNC Symbol;Acc:VGNC:81742]  
 ENSMMUG0000005532 male germ cell associated kinase [Source:VGNC Symbol;Acc:VGNC:74480]  
 ENSMMUG00000056330  
 ENSMMUG00000052228 Metazoan signal recognition particle RNA [Source:RFAM;Acc:RF00017]  
 ENSMMUG00000048039 apurinic/apurimidinic endodeoxyribonuclease 1 [Source:VGNC Symbol;Acc:VGNC:84305]  
 ENSMMUG00000053220 olfactory receptor 111 [Source:NCBI gene;Acc:719077]  
 ENSMMUG00000035160 U4 spliceosomal RNA [Source:RFAM;Acc:RF00015]  
 ENSMMUG00000058254  
 ENSMMUG0000003439 nuclear factor I C [Source:VGNC Symbol;Acc:VGNC:75336]  
 ENSMMUG00000016096 lamin A/C [Source:VGNC Symbol;Acc:VGNC:74427]  
 ENSMMUG00000061836  
 ENSMMUG00000020558 serine/threonine kinase 38 [Source:VGNC Symbol;Acc:VGNC:78155]  
 ENSMMUG00000050436  
 ENSMMUG00000008538 microfibril associated protein 4 [Source:VGNC Symbol;Acc:VGNC:74710]  
 ENSMMUG00000053496  
 ENSMMUG00000052424  
 ENSMMUG00000056755  
 ENSMMUG00000057363  
 ENSMMUG0000001271 cleavage and polyadenylation specific factor 4 like [Source:NCBI gene;Acc:698279]  
 ENSMMUG00000014573 dimethylarginine dimethylaminohydrolase 1 [Source:VGNC Symbol;Acc:VGNC:71753]  
 ENSMMUG0000004337 zinc finger protein 790 [Source:VGNC Symbol;Acc:VGNC:79930]  
 ENSMMUG00000050511  
 ENSMMUG00000060967  
 ENSMMUG00000057038  
 ENSMMUG00000059428 olfactory receptor 2V2 [Source:NCBI gene;Acc:707790]  
 ENSMMUG00000015999 interferon induced protein 35 [Source:VGNC Symbol;Acc:VGNC:73564]  
 ENSMMUG00000034608 U6 spliceosomal RNA [Source:RFAM;Acc:RF00026]  
 ENSMMUG00000057447  
 17 ENSMMUG00000010314 HECT and RLD domain containing E3 ubiquitin protein ligase family member 6 [Source:VGNC Symbol;Acc:VGNC:73238]  
 ENSMMUG0000004222 thromboxane A synthase 1 [Source:VGNC Symbol;Acc:VGNC:78278]  
 ENSMMUG00000049021 Metazoan signal recognition particle RNA [Source:RFAM;Acc:RF00017]  
 ENSMMUG00000021498 L3MBTL histone methyl-lysine binding protein 3 [Source:VGNC Symbol;Acc:VGNC:74106]  
 ENSMMUG00000045544 neuronal tyrosine-phosphorylated phosphoinositide-3-kinase adaptor 2 [Source:NCBI gene;Acc:711209]  
 ENSMMUG0000001278 vitrin [Source:VGNC Symbol;Acc:VGNC:78773]  
 ENSMMUG00000018767 cell division cycle associated 5 [Source:NCBI gene;Acc:721998]  
 ENSMMUG00000060218 chemokine (C motif) ligand 1 [Source:NCBI gene;Acc:574367]  
 ENSMMUG00000012178 calcium binding and coiled-coil domain 2 [Source:VGNC Symbol;Acc:VGNC:70675]  
 ENSMMUG00000022914 RAB, member of RAS oncogene family like 2B [Source:NCBI gene;Acc:716615]  
 ENSMMUG00000059332 Metazoan signal recognition particle RNA [Source:RFAM;Acc:RF00017]  
 ENSMMUG00000054072  
 ENSMMUG00000012538 ubiquitin conjugating enzyme E2 U [Source:VGNC Symbol;Acc:VGNC:79726]  
 ENSMMUG00000016480 CaM kinase like vesicle associated [Source:VGNC Symbol;Acc:VGNC:70663]  
 ENSMMUG00000013740 minichromosome maintenance 8 homologous recombination repair factor [Source:VGNC Symbol;Acc:VGNC:74516]  
 ENSMMUG00000061816  
 ENSMMUG00000045970 thiamine triphosphatase [Source:NCBI gene;Acc:714403]  
 3 ENSMMUG00000053837

NS\_D2 S\_D2

S\_D2 S\_D3

|             |                       |                                                                                                |
|-------------|-----------------------|------------------------------------------------------------------------------------------------|
|             | ENSMMUG00000023599    | chromosome alignment maintaining phosphoprotein 1 [Source:VGNC Symbol;Acc:VGNC:71061]          |
|             | ENSMMUG00000021022    | deoxynucleotidyltransferase terminal interacting protein 1 [Source:VGNC Symbol;Acc:VGNC:71845] |
| NS_D3 S_D2  | 3 ENSMMUG00000023310  | tetraspanin 12 [Source:VGNC Symbol;Acc:VGNC:79328]                                             |
|             | ENSMMUG00000008474    | transforming growth factor beta regulator 1 [Source:VGNC Symbol;Acc:VGNC:78239]                |
|             | ENSMMUG00000010592    | adducin 2 [Source:VGNC Symbol;Acc:VGNC:69529]                                                  |
| NS_D2 S_D3  | 3 ENSMMUG00000010008  | IK cytokine [Source:VGNC Symbol;Acc:VGNC:73703]                                                |
|             | ENSMMUG00000012349    | thiosulfate sulfurtransferase [Source:VGNC Symbol;Acc:VGNC:78664]                              |
|             | ENSMMUG00000023146    | ASH1 like histone lysine methyltransferase [Source:NCBI gene;Acc:717778]                       |
| NS_D2 NS_D3 | 61 ENSMMUG00000000276 | NACC family member 2 [Source:VGNC Symbol;Acc:VGNC:75013]                                       |
|             | ENSMMUG00000020597    | acyl-CoA synthetase short chain family member 1 [Source:VGNC Symbol;Acc:VGNC:69416]            |
|             | ENSMMUG00000017503    | SDA1 domain containing 1 [Source:NCBI gene;Acc:700863]                                         |
|             | ENSMMUG00000019223    | TNF receptor associated factor 7 [Source:VGNC Symbol;Acc:VGNC:79252]                           |
|             | ENSMMUG00000004274    | myotubularin related protein 8 [Source:VGNC Symbol;Acc:VGNC:74974]                             |
|             | ENSMMUG00000060496    | translocase of outer mitochondrial membrane 40 like [Source:NCBI gene;Acc:100426891]           |
|             | ENSMMUG00000004616    | plasminogen activator, urokinase receptor [Source:VGNC Symbol;Acc:VGNC:76163]                  |
|             | ENSMMUG00000015716    | protein phosphatase with EF-hand domain 2 [Source:VGNC Symbol;Acc:VGNC:76233]                  |
|             | ENSMMUG00000057983    |                                                                                                |
|             | ENSMMUG00000065094    |                                                                                                |
|             | ENSMMUG00000061391    | ankyrin repeat domain 49 [Source:NCBI gene;Acc:697693]                                         |
|             | ENSMMUG00000011788    | zinc finger protein 212 [Source:VGNC Symbol;Acc:VGNC:78418]                                    |
|             | ENSMMUG00000013877    | otoancorin [Source:VGNC Symbol;Acc:VGNC:75624]                                                 |
|             | ENSMMUG00000062294    |                                                                                                |
|             | ENSMMUG00000002211    | doublecortin like kinase 2 [Source:VGNC Symbol;Acc:VGNC:71670]                                 |
|             | ENSMMUG00000004520    | NADH:ubiquinone oxidoreductase core subunit S2 [Source:NCBI gene;Acc:719935]                   |
|             | ENSMMUG00000007197    | BRCA2 DNA repair associated [Source:VGNC Symbol;Acc:VGNC:70279]                                |
|             | ENSMMUG00000013284    | G protein regulated inducer of neurite outgrowth 1 [Source:VGNC Symbol;Acc:VGNC:72998]         |
|             | ENSMMUG00000017380    | neuregulin 3 [Source:NCBI gene;Acc:699268]                                                     |
|             | ENSMMUG00000009622    | glypican 3 [Source:VGNC Symbol;Acc:VGNC:73117]                                                 |
|             | ENSMMUG00000060399    | Metazoan signal recognition particle RNA [Source:RFAM;Acc:RF00017]                             |
|             | ENSMMUG00000061222    | adipocyte plasma membrane associated protein [Source:NCBI gene;Acc:704948]                     |
|             | ENSMMUG00000020177    | membrane spanning 4-domains A4A [Source:NCBI gene;Acc:698027]                                  |
|             | ENSMMUG00000055918    |                                                                                                |
|             | ENSMMUG00000048462    | Metazoan signal recognition particle RNA [Source:RFAM;Acc:RF00017]                             |
|             | ENSMMUG00000040888    | complement C3b/C4b receptor 1 like [Source:HGNC Symbol;Acc:HGNC:2335]                          |
|             | ENSMMUG00000053601    |                                                                                                |
|             | ENSMMUG00000014738    | bromodomain containing 9 [Source:VGNC Symbol;Acc:VGNC:70386]                                   |
|             | ENSMMUG00000021019    | E3 SUMO-protein ligase RanBP2 [Source:NCBI gene;Acc:694823]                                    |
|             | ENSMMUG00000064610    | long intergenic non-protein coding RNA 1862 [Source:HGNC Symbol;Acc:HGNC:52681]                |
|             | ENSMMUG00000009816    | exosome component 9 [Source:VGNC Symbol;Acc:VGNC:72477]                                        |
|             | ENSMMUG00000011634    | coagulation factor XI [Source:VGNC Symbol;Acc:VGNC:72460]                                      |
|             | ENSMMUG00000011633    | kallikrein B1 [Source:VGNC Symbol;Acc:VGNC:74195]                                              |
|             | ENSMMUG00000020743    | centrin 2 [Source:NCBI gene;Acc:693376]                                                        |
|             | ENSMMUG00000062702    |                                                                                                |
|             | ENSMMUG00000002963    | Rho GTPase activating protein 32 [Source:VGNC Symbol;Acc:VGNC:69855]                           |
|             | ENSMMUG00000054746    |                                                                                                |
|             | ENSMMUG00000013447    | adaptor related protein complex 4 subunit mu 1 [Source:VGNC Symbol;Acc:VGNC:69974]             |
|             | ENSMMUG00000006980    | septin 7 [Source:VGNC Symbol;Acc:VGNC:81759]                                                   |
|             | ENSMMUG00000062837    |                                                                                                |
|             | ENSMMUG00000001917    | megakaryocyte-associated tyrosine kinase [Source:NCBI gene;Acc:100430078]                      |
|             | ENSMMUG00000058856    | Metazoan signal recognition particle RNA [Source:RFAM;Acc:RF00017]                             |
|             | ENSMMUG00000008536    | mitogen-activated protein kinase 7 [Source:VGNC Symbol;Acc:VGNC:74648]                         |

ENSMMUG00000022513 glutamate metabotropic receptor 3 [Source:VGNC Symbol;Acc:VGNC:73287]  
 ENSMMUG00000049770 Metazoan signal recognition particle RNA [Source:RFAM;Acc:RF00017]  
 ENSMMUG00000059432  
 ENSMMUG0000005625 fibrosin [Source:NCBI gene;Acc:712741]  
 ENSMMUG00000049391  
 ENSMMUG00000054237 Y RNA [Source:RFAM;Acc:RF00019]  
 ENSMMUG00000044080 mitochondrial ribosomal protein L54 [Source:NCBI gene;Acc:713878]  
 ENSMMUG00000055241  
 ENSMMUG00000056158  
 ENSMMUG00000055022 Metazoan signal recognition particle RNA [Source:RFAM;Acc:RF00017]  
 ENSMMUG00000051503 nuclear pore associated protein 1 [Source:NCBI gene;Acc:719891]  
 ENSMMUG00000024170 U6 spliceosomal RNA [Source:RFAM;Acc:RF00026]  
 ENSMMUG00000038997 zygote arrest 1 like [Source:NCBI gene;Acc:100427970]  
 ENSMMUG00000058881 bone morphogenetic protein 8b [Source:NCBI gene;Acc:100427030]  
 ENSMMUG00000057813  
 ENSMMUG00000008964 D-glutamate cyclase [Source:VGNC Symbol;Acc:VGNC:71685]  
 ENSMMUG00000053611 stromal cell derived factor 2 [Source:NCBI gene;Acc:716189]  
 ENSMMUG00000003611 low density lipoprotein receptor [Source:VGNC Symbol;Acc:VGNC:74248]  
 11 ENSMMUG00000057481  
 ENSMMUG00000010940 telomerase reverse transcriptase [Source:VGNC Symbol;Acc:VGNC:78313]  
 ENSMMUG00000018879 exocyst complex component 3 like 2 [Source:NCBI gene;Acc:713992]  
 ENSMMUG00000018823 transmembrane protein 191C [Source:NCBI gene;Acc:697070]  
 ENSMMUG00000032809 mml-mir-642 [Source:miRBase;Acc:MI0007885]  
 ENSMMUG00000056613  
 ENSMMUG00000058311  
 ENSMMUG00000063817 SRY-box transcription factor 9 [Source:NCBI gene;Acc:574208]  
 ENSMMUG00000004903 ectonucleotide pyrophosphatase/phosphodiesterase 2 [Source:VGNC Symbol;Acc:VGNC:72223]  
 ENSMMUG00000018235 chloride voltage-gated channel Kb [Source:NCBI gene;Acc:703476]  
 ENSMMUG00000001911 steroid receptor associated and regulated protein [Source:VGNC Symbol;Acc:VGNC:78008]  
 S\_D1 151 ENSMMUG00000013107 tripartite motif containing 32 [Source:VGNC Symbol;Acc:VGNC:79032]  
 ENSMMUG00000015221 huntingtin interacting protein 1 related [Source:VGNC Symbol;Acc:VGNC:73412]  
 ENSMMUG00000012842 SET domain containing 1B, histone lysine methyltransferase [Source:NCBI gene;Acc:703717]  
 ENSMMUG00000022463 C-type lectin CD209L2 [Source:NCBI gene;Acc:574373]  
 ENSMMUG00000017761 zinc finger protein 518B [Source:VGNC Symbol;Acc:VGNC:79802]  
 ENSMMUG00000007544 trophinin associated protein [Source:VGNC Symbol;Acc:VGNC:78650]  
 ENSMMUG00000017102 coiled-coil domain containing 62 [Source:NCBI gene;Acc:707179]  
 ENSMMUG00000015267 C-terminal Src kinase [Source:VGNC Symbol;Acc:VGNC:81380]  
 ENSMMUG00000053333 acetylserotonin O-methyltransferase like [Source:NCBI gene;Acc:106995142]  
 ENSMMUG00000030532 solute carrier family 25 member 16 [Source:NCBI gene;Acc:694145]  
 ENSMMUG00000002063 endoplasmic reticulum aminopeptidase 1 [Source:VGNC Symbol;Acc:VGNC:72066]  
 ENSMMUG00000000480 KIAA1324 like [Source:VGNC Symbol;Acc:VGNC:73882]  
 ENSMMUG00000004523 DNA polymerase delta 4, accessory subunit [Source:NCBI gene;Acc:712632]  
 ENSMMUG00000008849 lymphotoxin beta [Source:VGNC Symbol;Acc:VGNC:74454]  
 ENSMMUG00000009182 caspase 8 associated protein 2 [Source:VGNC Symbol;Acc:VGNC:70548]  
 ENSMMUG00000015797 disco interacting protein 2 homolog A [Source:VGNC Symbol;Acc:VGNC:71641]  
 ENSMMUG00000057850  
 ENSMMUG00000056008  
 ENSMMUG00000011206 solute carrier family 9 member B1 [Source:NCBI gene;Acc:710949]  
 ENSMMUG00000006435 HNF1 homeobox A [Source:NCBI gene;Acc:107001057]  
 ENSMMUG00000051240  
 ENSMMUG00000052046



ENSMMUG0000002381 lysine methyltransferase 2B [Source:VGNC Symbol;Acc:VGNC:74053]  
ENSMMUG00000056151  
ENSMMUG00000047704 zinc finger protein 223 [Source:NCBI gene;Acc:711652]  
ENSMMUG00000012223 branched chain amino acid transaminase 1 [Source:VGNC Symbol;Acc:VGNC:70236]  
ENSMMUG00000003139 Rho guanine nucleotide exchange factor 17 [Source:VGNC Symbol;Acc:VGNC:69880]  
ENSMMUG00000021938 nudE neurodevelopment protein 1 like 1 [Source:VGNC Symbol;Acc:VGNC:74982]  
ENSMMUG00000008514 lin-54 DREAM MuvB core complex component [Source:VGNC Symbol;Acc:VGNC:74123]  
ENSMMUG00000003023 chaperonin containing TCP1 subunit 8 [Source:VGNC Symbol;Acc:VGNC:70749]  
ENSMMUG00000017188 proteasome 26S subunit, ATPase 4 [Source:VGNC Symbol;Acc:VGNC:76448]  
ENSMMUG00000010062 shisa family member 5 [Source:VGNC Symbol;Acc:VGNC:84082]  
ENSMMUG00000016922 serine/threonine kinase 32B [Source:VGNC Symbol;Acc:VGNC:78114]  
ENSMMUG00000003585 ALG5 dolichyl-phosphate beta-glucosyltransferase [Source:VGNC Symbol;Acc:VGNC:69647]  
ENSMMUG00000057643  
ENSMMUG00000056646  
ENSMMUG00000004847 xylulokinase [Source:VGNC Symbol;Acc:VGNC:78815]  
ENSMMUG00000003534 ring finger protein 157 [Source:VGNC Symbol;Acc:VGNC:76860]  
ENSMMUG00000050686  
ENSMMUG00000018623 exportin 6 [Source:NCBI gene;Acc:704332]  
ENSMMUG00000008183 retinoid X receptor alpha [Source:VGNC Symbol;Acc:VGNC:76951]  
ENSMMUG00000005769 EF-hand calcium binding domain 6 [Source:VGNC Symbol;Acc:VGNC:72092]  
ENSMMUG00000017864 oxysterol binding protein like 8 [Source:VGNC Symbol;Acc:VGNC:75630]  
ENSMMUG00000028000 Y RNA [Source:RFAM;Acc:RF00019]  
ENSMMUG00000022920 TATA-box binding protein like 1 [Source:VGNC Symbol;Acc:VGNC:83491]  
ENSMMUG00000015583 nucleosome assembly protein 1 like 1 [Source:NCBI gene;Acc:719047]  
ENSMMUG00000062048  
ENSMMUG00000000377 TNF receptor superfamily member 1A [Source:VGNC Symbol;Acc:VGNC:78589]  
ENSMMUG00000058797  
ENSMMUG00000016946 trafficking protein particle complex 4 [Source:VGNC Symbol;Acc:VGNC:79211]  
ENSMMUG00000011866 phosphatidylinositol glycan anchor biosynthesis class O [Source:VGNC Symbol;Acc:VGNC:75851]  
ENSMMUG00000006295 matrix metalloproteinase 19 [Source:VGNC Symbol;Acc:VGNC:74896]  
ENSMMUG00000014309 zinc finger protein 280A [Source:VGNC Symbol;Acc:VGNC:79152]  
ENSMMUG00000010967 tripartite motif family like 2 [Source:VGNC Symbol;Acc:VGNC:79603]  
ENSMMUG00000016056 potassium voltage-gated channel subfamily A member 10 [Source:VGNC Symbol;Acc:VGNC:73963]  
ENSMMUG00000061298  
ENSMMUG00000050047 Metazoan signal recognition particle RNA [Source:RFAM;Acc:RF00017]  
ENSMMUG00000050661  
ENSMMUG00000061749 PAXIP1 associated glutamate rich protein 1 [Source:NCBI gene;Acc:706839]  
ENSMMUG00000015925 G protein-coupled receptor kinase 2 [Source:VGNC Symbol;Acc:VGNC:73253]  
ENSMMUG00000019704 WD repeat domain 62 [Source:NCBI gene;Acc:719053]  
ENSMMUG00000014413 slingshot protein phosphatase 2 [Source:VGNC Symbol;Acc:VGNC:78018]  
ENSMMUG00000003074 plexin B1 [Source:VGNC Symbol;Acc:VGNC:76187]  
ENSMMUG00000060605  
ENSMMUG00000018798 stromal cell derived factor 2 like 1 [Source:NCBI gene;Acc:697928]  
ENSMMUG00000053072  
ENSMMUG00000006291 protocadherin 12 [Source:VGNC Symbol;Acc:VGNC:75776]  
ENSMMUG00000005738 N-acetyltransferase 9 (putative) [Source:NCBI gene;Acc:699085]  
ENSMMUG00000009957 spermatogenesis associated 25 [Source:VGNC Symbol;Acc:VGNC:77928]  
ENSMMUG00000054017 potassium voltage-gated channel subfamily A member 2 [Source:NCBI gene;Acc:702126]  
ENSMMUG00000009324 replication factor C subunit 1 [Source:NCBI gene;Acc:698987]  
ENSMMUG00000061250 ABRA C-terminal like [Source:NCBI gene;Acc:708266]  
ENSMMUG00000013651 kinesin family member 6 [Source:VGNC Symbol;Acc:VGNC:73873]

ENSMMUG00000016758 transmembrane protein 159 [Source:VGNC Symbol;Acc:VGNC:79836]  
ENSMMUG00000061589 proteinase 3 [Source:HGNC Symbol;Acc:HGNC:9495]  
ENSMMUG00000013098 aldo-keto reductase family 1 member B10 [Source:NCBI gene;Acc:713150]  
ENSMMUG00000037426 U7 small nuclear RNA [Source:RFAM;Acc:RF00066]  
ENSMMUG00000023719 thymopoietin [Source:VGNC Symbol;Acc:VGNC:78574]  
ENSMMUG00000005906 heat shock transcription factor 4 [Source:VGNC Symbol;Acc:VGNC:73533]  
ENSMMUG00000017949 ornithine decarboxylase antizyme 1 [Source:NCBI gene;Acc:721477]  
ENSMMUG00000026584 Y RNA [Source:RFAM;Acc:RF00019]  
ENSMMUG00000019820 SH3 domain and tetratricopeptide repeats 2 [Source:VGNC Symbol;Acc:VGNC:77337]  
ENSMMUG00000018274 FERM domain containing 6 [Source:VGNC Symbol;Acc:VGNC:72747]  
ENSMMUG00000064074  
ENSMMUG00000054768  
ENSMMUG00000055751  
ENSMMUG00000036820 U7 small nuclear RNA [Source:RFAM;Acc:RF00066]  
ENSMMUG00000014981 homeobox containing 1 [Source:VGNC Symbol;Acc:VGNC:73443]  
ENSMMUG00000004761 Cbl proto-oncogene [Source:VGNC Symbol;Acc:VGNC:70554]  
ENSMMUG00000009372 tetratricopeptide repeat domain 27 [Source:VGNC Symbol;Acc:VGNC:79565]  
ENSMMUG00000037887 RBMX like 1 [Source:NCBI gene;Acc:100424767]  
ENSMMUG00000016191 ATP binding cassette subfamily A member 13 [Source:VGNC Symbol;Acc:VGNC:69402]  
ENSMMUG00000003839 mitogen-activated protein kinase binding protein 1 [Source:VGNC Symbol;Acc:VGNC:74613]  
ENSMMUG00000037449 CUGBP Elav-like family member 2 [Source:NCBI gene;Acc:714291]  
ENSMMUG00000057791  
ENSMMUG00000018166 MYB proto-oncogene, transcription factor [Source:VGNC Symbol;Acc:VGNC:75089]  
ENSMMUG00000003142 family with sequence similarity 168 member A [Source:VGNC Symbol;Acc:VGNC:72398]  
ENSMMUG00000031166 McKusick-Kaufman syndrome [Source:NCBI gene;Acc:718547]  
ENSMMUG00000005423 caseinolytic mitochondrial matrix peptidase chaperone subunit B [Source:VGNC Symbol;Acc:VGNC:71375]  
ENSMMUG00000011858 bone morphogenetic protein 5 [Source:VGNC Symbol;Acc:VGNC:70264]  
ENSMMUG00000001879 annexin A10 [Source:VGNC Symbol;Acc:VGNC:69945]  
ENSMMUG00000055345 Y RNA [Source:RFAM;Acc:RF00019]  
ENSMMUG00000022702 phosphoribosylglycinamide formyltransferase, phosphoribosylglycinamide synthetase, phosphoribosylaminoimidazole synthetase [Source:VGNC Symbol;Acc:VGNC:72882]  
ENSMMUG00000002943 glutamyl-tRNA synthetase 1 [Source:VGNC Symbol;Acc:VGNC:76634]  
ENSMMUG00000051450 phospholipase A2 receptor 1 [Source:NCBI gene;Acc:700191]  
ENSMMUG00000055239  
ENSMMUG00000019438 utrophin [Source:VGNC Symbol;Acc:VGNC:78749]  
ENSMMUG00000016104 chondroitin sulfate proteoglycan 4 [Source:VGNC Symbol;Acc:VGNC:71525]  
ENSMMUG00000055122  
ENSMMUG00000003421 ankyrin repeat domain 40 [Source:VGNC Symbol;Acc:VGNC:69725]  
ENSMMUG00000064324  
ENSMMUG00000014537 bassoon presynaptic cytomatrix protein [Source:VGNC Symbol;Acc:VGNC:70284]  
ENSMMUG00000005530 synaptotagmin 1 [Source:VGNC Symbol;Acc:VGNC:78074]  
ENSMMUG00000031024 lactate dehydrogenase A [Source:NCBI gene;Acc:694309]  
ENSMMUG00000057552 hematopoietic SH2 domain containing [Source:NCBI gene;Acc:719440]  
ENSMMUG00000057554 Metazoan signal recognition particle RNA [Source:RFAM;Acc:RF00017]  
ENSMMUG00000015160 Rap guanine nucleotide exchange factor like 1 [Source:VGNC Symbol;Acc:VGNC:76501]  
ENSMMUG00000004996 monooxygenase DBH like 1 [Source:VGNC Symbol;Acc:VGNC:74800]  
ENSMMUG00000003075 coiled-coil domain containing 9 [Source:VGNC Symbol;Acc:VGNC:70851]  
ENSMMUG00000063735  
ENSMMUG00000060770  
ENSMMUG00000020744 metastasis associated 1 family member 3 [Source:VGNC Symbol;Acc:VGNC:74814]  
ENSMMUG00000019354 actin like 7B [Source:VGNC Symbol;Acc:VGNC:69421]

ENSMMUG00000041919 nuclear respiratory factor 1 [Source:VGNC Symbol;Acc:VGNC:81731]  
ENSMMUG00000014408 GIT ArfGAP 1 [Source:VGNC Symbol;Acc:VGNC:73053]  
ENSMMUG00000060261  
ENSMMUG00000007195 tRNA splicing endonuclease subunit 2 [Source:VGNC Symbol;Acc:VGNC:82707]  
ENSMMUG00000062595  
ENSMMUG00000014615 lactate dehydrogenase C [Source:VGNC Symbol;Acc:VGNC:74247]  
ENSMMUG00000015868 retinol dehydrogenase 11 [Source:NCBI gene;Acc:711195]  
ENSMMUG00000010058 ATR interacting protein [Source:VGNC Symbol;Acc:VGNC:84235]  
ENSMMUG00000000756 transmembrane protein adipocyte associated 1 [Source:VGNC Symbol;Acc:VGNC:79848]  
ENSMMUG00000007279 phosphatidylinositol glycan anchor biosynthesis class C [Source:VGNC Symbol;Acc:VGNC:75986]  
ENSMMUG00000038858  
ENSMMUG00000051619 peptidyl arginine deiminase 3 [Source:NCBI gene;Acc:700560]  
ENSMMUG00000059181  
ENSMMUG00000057473  
ENSMMUG00000035653 small Cajal body-specific RNA 18 [Source:HGNC Symbol;Acc:HGNC:32559]  
ENSMMUG00000001485 transmembrane protein 150C [Source:NCBI gene;Acc:694136]  
ENSMMUG00000009487 zinc finger protein 205 [Source:VGNC Symbol;Acc:VGNC:78869]  
ENSMMUG00000061225  
ENSMMUG00000061698  
ENSMMUG00000010840 zinc finger protein 507 [Source:VGNC Symbol;Acc:VGNC:79410]  
ENSMMUG00000023244 guanylate cyclase 1 soluble subunit alpha 1 [Source:VGNC Symbol;Acc:VGNC:73327]  
ENSMMUG00000048283 mml-mir-3145 [Source:miRBase;Acc:MI0020897]  
ENSMMUG00000002304 keratin 73 [Source:VGNC Symbol;Acc:VGNC:74148]  
ENSMMUG00000049455 Metazoan signal recognition particle RNA [Source:RFAM;Acc:RF00017]  
ENSMMUG00000003363 Kruppel like factor 3 [Source:VGNC Symbol;Acc:VGNC:73840]  
ENSMMUG00000015246 TBC1 domain family member 9 [Source:VGNC Symbol;Acc:VGNC:78193]  
ENSMMUG00000001777 testis expressed metallothionein like protein [Source:VGNC Symbol;Acc:VGNC:79965]  
ENSMMUG00000059196  
194 ENSMMUG00000006076 intraflagellar transport 74 [Source:VGNC Symbol;Acc:VGNC:73430]  
ENSMMUG00000063790  
ENSMMUG00000051892 fms related receptor tyrosine kinase 3 ligand [Source:NCBI gene;Acc:719239]  
ENSMMUG00000006609 MHC class I polypeptide-related sequence B [Source:NCBI gene;Acc:715141]  
ENSMMUG00000018788 transmembrane protein 14B [Source:NCBI gene;Acc:698237]  
ENSMMUG00000017026 fibrosin like 1 [Source:NCBI gene;Acc:696295]  
ENSMMUG00000059895  
ENSMMUG00000005263 chromosome X CXorf38 homolog [Source:VGNC Symbol;Acc:VGNC:71600]  
ENSMMUG00000027375 Y RNA [Source:RFAM;Acc:RF00019]  
ENSMMUG00000016414 ectonucleotide pyrophosphatase/phosphodiesterase 7 [Source:VGNC Symbol;Acc:VGNC:72090]  
ENSMMUG00000064612 Metazoan signal recognition particle RNA [Source:RFAM;Acc:RF00017]  
ENSMMUG00000064638 Y RNA [Source:RFAM;Acc:RF00019]  
ENSMMUG00000052882 RAS like family 11 member B [Source:NCBI gene;Acc:701397]  
ENSMMUG00000042886 ETS variant transcription factor 3 [Source:NCBI gene;Acc:719741]  
ENSMMUG00000002974 acid phosphatase 5, tartrate resistant [Source:VGNC Symbol;Acc:VGNC:69384]  
ENSMMUG00000023225 E2F transcription factor 6 [Source:VGNC Symbol;Acc:VGNC:72027]  
ENSMMUG00000051937 uncharacterized LOC707807 [Source:NCBI gene;Acc:707807]  
ENSMMUG00000008834 klotho beta [Source:VGNC Symbol;Acc:VGNC:73835]  
ENSMMUG00000023025 synaptophysin [Source:VGNC Symbol;Acc:VGNC:78072]  
ENSMMUG00000013892 coiled-coil domain containing 77 [Source:VGNC Symbol;Acc:VGNC:70889]  
ENSMMUG00000019937 maltase-glucoamylase 2 (putative) [Source:VGNC Symbol;Acc:VGNC:81720]  
ENSMMUG00000056777 Metazoan signal recognition particle RNA [Source:RFAM;Acc:RF00017]  
ENSMMUG00000056227 PRAME family member 17 [Source:NCBI gene;Acc:715953]

NS\_D1

ENSMMUG0000002952 laminin subunit beta 2 [Source:VGNC Symbol;Acc:VGNC:74229]  
ENSMMUG00000019965 methyl-CpG binding domain protein 3 like 1 [Source:VGNC Symbol;Acc:VGNC:74513]  
ENSMMUG0000006819 helicase for meiosis 1 [Source:NCBI gene;Acc:704516]  
ENSMMUG0000002181 SF11 centrin binding protein [Source:VGNC Symbol;Acc:VGNC:77328]  
ENSMMUG0000000194 solute carrier family 27 member 1 [Source:VGNC Symbol;Acc:VGNC:77438]  
ENSMMUG00000016686 BUB1 mitotic checkpoint serine/threonine kinase B [Source:VGNC Symbol;Acc:VGNC:70293]  
ENSMMUG00000021928 CAP-Gly domain containing linker protein 1 [Source:VGNC Symbol;Acc:VGNC:71166]  
ENSMMUG0000000039 mitochondrial ribosomal protein L24 [Source:VGNC Symbol;Acc:VGNC:74739]  
ENSMMUG0000000994 epidermal growth factor receptor pathway substrate 15 like 1 [Source:VGNC Symbol;Acc:VGNC:72100]  
ENSMMUG00000010858 prolyl 4-hydroxylase subunit alpha 2 [Source:VGNC Symbol;Acc:VGNC:75742]  
ENSMMUG00000054199  
ENSMMUG00000001483 RNA pseudouridine synthase domain containing 2 [Source:VGNC Symbol;Acc:VGNC:77091]  
ENSMMUG00000008838 mitochondrial coiled-coil domain 1 [Source:VGNC Symbol;Acc:VGNC:74548]  
ENSMMUG00000063462  
ENSMMUG00000050597  
ENSMMUG00000003913 DNA polymerase epsilon 2, accessory subunit [Source:VGNC Symbol;Acc:VGNC:76204]  
ENSMMUG00000053423  
ENSMMUG00000059984 pellino E3 ubiquitin protein ligase family member 2 [Source:NCBI gene;Acc:699169]  
ENSMMUG00000017458 DDB1 and CUL4 associated factor 12 [Source:VGNC Symbol;Acc:VGNC:71678]  
ENSMMUG00000015928 ankyrin repeat domain 13D [Source:VGNC Symbol;Acc:VGNC:69722]  
ENSMMUG00000039346 apolipoprotein B mRNA editing enzyme catalytic subunit 3G [Source:NCBI gene;Acc:574398]  
ENSMMUG00000009682 R3H domain containing 4 [Source:VGNC Symbol;Acc:VGNC:76554]  
ENSMMUG00000001200  
ENSMMUG00000050263 TBC1 domain family member 26-like [Source:NCBI gene;Acc:100426631]  
ENSMMUG00000011588 myosin IXB [Source:HGNC Symbol;Acc:HGNC:7609]  
ENSMMUG00000040007 peroxisomal biogenesis factor 1 [Source:VGNC Symbol;Acc:VGNC:81736]  
ENSMMUG00000011516 ADP ribosylation factor like GTPase 4C [Source:VGNC Symbol;Acc:VGNC:70018]  
ENSMMUG00000056855 potassium inwardly rectifying channel subfamily J member 15 [Source:NCBI gene;Acc:693427]  
ENSMMUG00000049123 gastrokine 1 [Source:NCBI gene;Acc:706565]  
ENSMMUG00000012007 PH domain and leucine rich repeat protein phosphatase 2 [Source:VGNC Symbol;Acc:VGNC:81494]  
ENSMMUG00000007204 cytochrome P450 family 2 subfamily W member 1 [Source:VGNC Symbol;Acc:VGNC:81300]  
ENSMMUG00000019682 mitochondrial ribosomal protein S9 [Source:VGNC Symbol;Acc:VGNC:74762]  
ENSMMUG00000051691  
ENSMMUG00000010142 glutamate ionotropic receptor NMDA type subunit 2A [Source:VGNC Symbol;Acc:VGNC:73282]  
ENSMMUG00000024428 Y RNA [Source:RFAM;Acc:RF00019]  
ENSMMUG00000057818  
ENSMMUG00000065271  
ENSMMUG00000012940 tRNA phosphotransferase 1 [Source:VGNC Symbol;Acc:VGNC:79242]  
ENSMMUG00000012597 ubiquitin associated protein 2 [Source:VGNC Symbol;Acc:VGNC:78949]  
ENSMMUG00000021642 fibromodulin [Source:VGNC Symbol;Acc:VGNC:72686]  
ENSMMUG00000022504 alpha-2-glycoprotein 1, zinc-binding [Source:VGNC Symbol;Acc:VGNC:70201]  
ENSMMUG00000016407 microtubule associated serine/threonine kinase like [Source:NCBI gene;Acc:708134]  
ENSMMUG00000016513 FA complementation group M [Source:VGNC Symbol;Acc:VGNC:72554]  
ENSMMUG00000021005 taste receptor type 2 member 50 [Source:NCBI gene;Acc:693513]  
ENSMMUG00000008336 acyl-CoA dehydrogenase family member 10 [Source:NCBI gene;Acc:711080]  
ENSMMUG00000053916  
ENSMMUG00000016457 DM1 protein kinase [Source:NCBI gene;Acc:715328]  
ENSMMUG00000010420 makorin ring finger protein 1 [Source:VGNC Symbol;Acc:VGNC:81476]  
ENSMMUG00000054637 tubulin polymerization promoting protein family member 3 [Source:NCBI gene;Acc:100429881]  
ENSMMUG00000052422 ATPase H+ transporting V1 subunit G2 [Source:NCBI gene;Acc:715331]  
ENSMMUG00000016552 inverted formin, FH2 and WH2 domain containing [Source:VGNC Symbol;Acc:VGNC:84357]

ENSMMUG00000058352  
ENSMMUG00000057486  
ENSMMUG00000018200 RNA transcription, translation and transport factor [Source:VGNC Symbol;Acc:VGNC:77087]  
ENSMMUG00000060865 Metazoan signal recognition particle RNA [Source:RFAM;Acc:RF00017]  
ENSMMUG00000022590 metallophosphoesterase domain containing 1 [Source:NCBI gene;Acc:715021]  
ENSMMUG0000006090 C-C motif chemokine receptor 10 [Source:VGNC Symbol;Acc:VGNC:82119]  
ENSMMUG00000008515 sorting nexin 7 [Source:NCBI gene;Acc:716015]  
ENSMMUG00000016469 proprotein convertase subtilisin/kexin type 1 inhibitor [Source:VGNC Symbol;Acc:VGNC:75639]  
ENSMMUG00000010922 hyaluronan synthase 3 [Source:VGNC Symbol;Acc:VGNC:73348]  
ENSMMUG0000000108 NCK associated protein 1 like [Source:VGNC Symbol;Acc:VGNC:75063]  
ENSMMUG00000018566 Janus kinase 1 [Source:VGNC Symbol;Acc:VGNC:73810]  
ENSMMUG00000023018 RP2 activator of ARL3 GTPase [Source:VGNC Symbol;Acc:VGNC:76720]  
ENSMMUG00000025039 Small nucleolar RNA SNORA73 family [Source:RFAM;Acc:RF00045]  
ENSMMUG00000060917  
ENSMMUG00000053696 Metazoan signal recognition particle RNA [Source:RFAM;Acc:RF00017]  
ENSMMUG00000062248 follicular dendritic cell secreted protein [Source:NCBI gene;Acc:707784]  
ENSMMUG00000050104 Metazoan signal recognition particle RNA [Source:RFAM;Acc:RF00017]  
ENSMMUG00000050335  
ENSMMUG00000056844  
ENSMMUG00000002930 G protein-coupled receptor 158 [Source:NCBI gene;Acc:707065]  
ENSMMUG00000060780  
ENSMMUG00000052324 MARVEL domain containing 3 [Source:NCBI gene;Acc:710448]  
ENSMMUG00000012350 mercaptopyruvate sulfurtransferase [Source:VGNC Symbol;Acc:VGNC:74922]  
ENSMMUG00000035551 small nucleolar RNA, C/D box 11B [Source:HGNC Symbol;Acc:HGNC:33571]  
ENSMMUG00000022961 solute carrier family 11 member 2 [Source:VGNC Symbol;Acc:VGNC:77383]  
ENSMMUG00000061431 outer dense fiber of sperm tails 3 like 1 [Source:NCBI gene;Acc:706545]  
ENSMMUG00000055601  
ENSMMUG00000008698 cyclin dependent kinase 6 [Source:VGNC Symbol;Acc:VGNC:70983]  
ENSMMUG00000058499  
ENSMMUG00000022801 zinc finger and BTB domain containing 37 [Source:VGNC Symbol;Acc:VGNC:79702]  
ENSMMUG00000013560 calcium voltage-gated channel auxiliary subunit gamma 3 [Source:VGNC Symbol;Acc:VGNC:70513]  
ENSMMUG00000005521 glycogenin 1 [Source:VGNC Symbol;Acc:VGNC:73332]  
ENSMMUG00000056778  
ENSMMUG00000003612 SPC24 component of NDC80 kinetochore complex [Source:VGNC Symbol;Acc:VGNC:78002]  
ENSMMUG00000002836 coiled-coil domain containing 71 [Source:VGNC Symbol;Acc:VGNC:70862]  
ENSMMUG00000011441 transmembrane protein 106C [Source:VGNC Symbol;Acc:VGNC:79741]  
ENSMMUG00000056580 Metazoan signal recognition particle RNA [Source:RFAM;Acc:RF00017]  
ENSMMUG00000039268 lymphocyte antigen 6G6e-like [Source:NCBI gene;Acc:100427419]  
ENSMMUG00000041198 muscle RAS oncogene homolog [Source:NCBI gene;Acc:716352]  
ENSMMUG00000057857  
ENSMMUG00000037284 small nucleolar RNA, H/ACA box 59A [Source:HGNC Symbol;Acc:HGNC:32653]  
ENSMMUG00000022346 surfeit 2 [Source:VGNC Symbol;Acc:VGNC:78059]  
ENSMMUG00000027220 microRNA 598 [Source:HGNC Symbol;Acc:HGNC:32854]  
ENSMMUG00000004471 family with sequence similarity 114 member A1 [Source:VGNC Symbol;Acc:VGNC:72342]  
ENSMMUG00000027544 U6 spliceosomal RNA [Source:RFAM;Acc:RF00026]  
ENSMMUG00000010581 Rap guanine nucleotide exchange factor 2 [Source:VGNC Symbol;Acc:VGNC:76493]  
ENSMMUG00000001949 coiled-coil domain containing 191 [Source:VGNC Symbol;Acc:VGNC:70901]  
ENSMMUG00000012942 DnaJ heat shock protein family (Hsp40) member C4 [Source:NCBI gene;Acc:717847]  
ENSMMUG00000009974 inositol-tetrakisphosphate 1-kinase [Source:VGNC Symbol;Acc:VGNC:73802]  
ENSMMUG00000054846 Metazoan signal recognition particle RNA [Source:RFAM;Acc:RF00017]  
ENSMMUG00000058096 CDKN2A interacting protein N-terminal like [Source:NCBI gene;Acc:710774]

ENSMMUG00000042839  
ENSMMUG00000008624 forkhead box P3 [Source:VGNC Symbol;Acc:VGNC:72926]  
ENSMMUG00000039412 cholinergic receptor muscarinic 4 [Source:NCBI gene;Acc:574195]  
ENSMMUG00000015607 solute carrier family 39 member 13 [Source:VGNC Symbol;Acc:VGNC:77538]  
ENSMMUG00000016621 transmembrane BAX inhibitor motif containing 4 [Source:NCBI gene;Acc:717825]  
ENSMMUG00000057204 Metazoan signal recognition particle RNA [Source:RFAM;Acc:RF00017]  
ENSMMUG0000004798 S100 calcium binding protein G [Source:VGNC Symbol;Acc:VGNC:77016]  
ENSMMUG00000011161 syntaxin binding protein 5 like [Source:VGNC Symbol;Acc:VGNC:78256]  
ENSMMUG00000019500 methenyltetrahydrofolate synthetase domain containing [Source:VGNC Symbol;Acc:VGNC:75023]  
ENSMMUG00000059371  
ENSMMUG00000060270  
ENSMMUG00000064295  
ENSMMUG00000049374  
ENSMMUG00000008106 solute carrier family 25 member 17 [Source:NCBI gene;Acc:705547]  
ENSMMUG00000051847  
ENSMMUG00000049952  
ENSMMUG00000020588 protein kinase N2 [Source:VGNC Symbol;Acc:VGNC:76015]  
ENSMMUG00000051414 Metazoan signal recognition particle RNA [Source:RFAM;Acc:RF00017]  
ENSMMUG00000009648 paired box 9 [Source:VGNC Symbol;Acc:VGNC:75768]  
ENSMMUG00000010213 GLI pathogenesis related 2 [Source:VGNC Symbol;Acc:VGNC:81414]  
ENSMMUG00000064723 gasdermin A [Source:NCBI gene;Acc:698841]  
ENSMMUG00000064602  
ENSMMUG00000049666  
ENSMMUG0000006787 BCL2 like 15 [Source:VGNC Symbol;Acc:VGNC:70162]  
ENSMMUG00000056339  
ENSMMUG00000052832  
ENSMMUG00000060404  
ENSMMUG00000050832  
ENSMMUG00000058241 leucine rich repeat and Ig domain containing 3 [Source:NCBI gene;Acc:721484]  
ENSMMUG00000039560 cofilin 2 [Source:NCBI gene;Acc:693875]  
ENSMMUG00000057675 non-compact myelin associated protein [Source:NCBI gene;Acc:712192]  
ENSMMUG00000040268 phosphatidylinositol transfer protein alpha [Source:NCBI gene;Acc:721228]  
ENSMMUG00000011413 acid sensing ion channel subunit 2 [Source:VGNC Symbol;Acc:VGNC:70241]  
ENSMMUG00000059548  
ENSMMUG0000004014 interferon regulatory factor 7 [Source:VGNC Symbol;Acc:VGNC:73765]  
ENSMMUG0000004932 msh homeobox 2 [Source:VGNC Symbol;Acc:VGNC:84448]  
ENSMMUG00000021082 potassium sodium-activated channel subfamily T member 2 [Source:VGNC Symbol;Acc:VGNC:73857]  
ENSMMUG00000009494 carboxypeptidase A5 [Source:VGNC Symbol;Acc:VGNC:71410]  
ENSMMUG00000019668 armadillo repeat containing 6 [Source:VGNC Symbol;Acc:VGNC:69899]  
ENSMMUG00000038018 polycomb group ring finger 5 [Source:NCBI gene;Acc:697020]  
ENSMMUG00000008744 lysosomal protein transmembrane 5 [Source:VGNC Symbol;Acc:VGNC:74162]  
ENSMMUG00000050920 Metazoan signal recognition particle RNA [Source:RFAM;Acc:RF00017]  
ENSMMUG00000051989 interleukin 5 [Source:NCBI gene;Acc:710622]  
ENSMMUG00000008288 sorting nexin 17 [Source:VGNC Symbol;Acc:VGNC:77709]  
ENSMMUG00000060562  
ENSMMUG00000042419  
ENSMMUG00000063986  
ENSMMUG00000003268 alpha 1,3-galactosyltransferase 2 [Source:VGNC Symbol;Acc:VGNC:69550]  
ENSMMUG00000065277 hepatic and glial cell adhesion molecule [Source:NCBI gene;Acc:716321]  
ENSMMUG00000060891 histone H3.Y [Source:NCBI gene;Acc:718280]  
ENSMMUG00000052134



ENSMMUG00000015019 VPS37C subunit of ESCRT-I [Source:VGNC Symbol;Acc:VGNC:79578]  
 ENSMMUG00000018255 nuclear factor of activated T cells 5 [Source:VGNC Symbol;Acc:VGNC:75325]  
 ENSMMUG00000052328 FAM20C golgi associated secretory pathway kinase [Source:NCBI gene;Acc:695088]  
 ENSMMUG00000052179  
 ENSMMUG00000062178 Metazoan signal recognition particle RNA [Source:RFAM;Acc:RF00017]  
 ENSMMUG00000023361 GDNF family receptor alpha 2 [Source:VGNC Symbol;Acc:VGNC:72918]  
 ENSMMUG00000054881  
 ENSMMUG00000053364  
 ENSMMUG00000037977 protein phosphatase 1 regulatory inhibitor subunit 14B [Source:NCBI gene;Acc:722103]  
 ENSMMUG00000004417 secretion associated Ras related GTPase 1B [Source:VGNC Symbol;Acc:VGNC:76970]  
 ENSMMUG00000017607 NEDD4 binding protein 3 [Source:VGNC Symbol;Acc:VGNC:75053]  
 ENSMMUG00000039301 StAR related lipid transfer domain containing 10 [Source:NCBI gene;Acc:718503]  
 ENSMMUG0000005455 ring finger protein 213 [Source:VGNC Symbol;Acc:VGNC:76734]  
 ENSMMUG00000019083 solute carrier family 9 member B2 [Source:VGNC Symbol;Acc:VGNC:77773]  
 ENSMMUG00000032858 mml-mir-583 [Source:miRBase;Acc:MI0007850]  
 ENSMMUG00000053710  
 ENSMMUG00000008510 THAP domain containing 9 [Source:VGNC Symbol;Acc:VGNC:79379]  
 ENSMMUG00000005622 dynein axonemal heavy chain 7 [Source:VGNC Symbol;Acc:VGNC:71859]  
 27 ENSMMUG00000064173 prokineticin 1 [Source:NCBI gene;Acc:701766]  
 ENSMMUG00000005964 CMP-N-acetylneuraminic acid hydroxylase [Source:NCBI gene;Acc:574186]  
 ENSMMUG00000056477  
 ENSMMUG00000023681 nucleolar protein 9 [Source:VGNC Symbol;Acc:VGNC:75263]  
 ENSMMUG00000001456 MCF.2 cell line derived transforming sequence-like 2 [Source:VGNC Symbol;Acc:VGNC:74624]  
 ENSMMUG00000000382 sperm associated antigen 16 [Source:VGNC Symbol;Acc:VGNC:77977]  
 ENSMMUG00000058574  
 ENSMMUG00000055556  
 ENSMMUG00000020549 protein phosphatase 6 catalytic subunit [Source:NCBI gene;Acc:703658]  
 ENSMMUG00000008218 ADAMTS like 4 [Source:VGNC Symbol;Acc:VGNC:69480]  
 ENSMMUG00000015487 pericentriolar material 1 [Source:VGNC Symbol;Acc:VGNC:75781]  
 ENSMMUG00000037413 U5 spliceosomal RNA [Source:RFAM;Acc:RF00020]  
 ENSMMUG00000006841 myoferlin [Source:VGNC Symbol;Acc:VGNC:75061]  
 ENSMMUG00000050516  
 ENSMMUG00000010141 family with sequence similarity 13 member A [Source:VGNC Symbol;Acc:VGNC:72299]  
 ENSMMUG00000011278 cysteine rich with EGF like domains 2 [Source:NCBI gene;Acc:720586]  
 ENSMMUG00000009187 calcium voltage-gated channel subunit alpha1 B [Source:VGNC Symbol;Acc:VGNC:70499]  
 ENSMMUG00000009414 Sad1 and UNC84 domain containing 5 [Source:VGNC Symbol;Acc:VGNC:78133]  
 ENSMMUG00000053737 BarH like homeobox 2 [Source:NCBI gene;Acc:696831]  
 ENSMMUG00000004668 receptor tyrosine kinase like orphan receptor 1 [Source:VGNC Symbol;Acc:VGNC:76715]  
 ENSMMUG00000005667 fumarate hydratase [Source:VGNC Symbol;Acc:VGNC:72659]  
 ENSMMUG00000060987  
 ENSMMUG00000053655  
 ENSMMUG00000001083 glycine N-acyltransferase-like protein 1 [Source:NCBI gene;Acc:701437]  
 ENSMMUG00000025625 U6 spliceosomal RNA [Source:RFAM;Acc:RF00026]  
 ENSMMUG00000020605 heparanase 2 (inactive) [Source:NCBI gene;Acc:708795]  
 ENSMMUG00000061318  
 NS\_D2 87 ENSMMUG00000009976 uridine-cytidine kinase 1 [Source:VGNC Symbol;Acc:VGNC:78967]  
 ENSMMUG00000007804 RAN binding protein 10 [Source:VGNC Symbol;Acc:VGNC:76563]  
 ENSMMUG00000009495 carboxypeptidase A1 [Source:VGNC Symbol;Acc:VGNC:71455]  
 ENSMMUG00000064928  
 ENSMMUG00000014534 phosphatidylinositol transfer protein beta [Source:VGNC Symbol;Acc:VGNC:76006]  
 ENSMMUG00000014589 inositol hexakisphosphate kinase 1 [Source:VGNC Symbol;Acc:VGNC:73621]

ENSMMUG00000011965 coiled-coil domain containing 175 [Source:VGNC Symbol;Acc:VGNC:84317]  
ENSMMUG00000053249  
ENSMMUG00000023678 pleckstrin homology and RhoGEF domain containing G5 [Source:VGNC Symbol;Acc:VGNC:76130]  
ENSMMUG00000001116 SUZ12 polycomb repressive complex 2 subunit [Source:VGNC Symbol;Acc:VGNC:78144]  
ENSMMUG00000023823 Y RNA [Source:RFAM;Acc:RF00019]  
ENSMMUG00000017767 integrin subunit beta 1 [Source:VGNC Symbol;Acc:VGNC:73784]  
ENSMMUG00000016826 MAPK associated protein 1 [Source:VGNC Symbol;Acc:VGNC:74531]  
ENSMMUG00000038221 proteasome 26S subunit, non-ATPase 8 [Source:NCBI gene;Acc:721897]  
ENSMMUG00000008979 protein O-fucosyltransferase 1 [Source:VGNC Symbol;Acc:VGNC:76030]  
ENSMMUG00000031794  
ENSMMUG00000000827 ubiquitin specific peptidase 38 [Source:VGNC Symbol;Acc:VGNC:79224]  
ENSMMUG00000021269 Josephin domain containing 2 [Source:VGNC Symbol;Acc:VGNC:73919]  
ENSMMUG00000044545 apolipoprotein A1 [Source:NCBI gene;Acc:696969]  
ENSMMUG00000064520  
ENSMMUG00000021904 cell division cycle 45 [Source:VGNC Symbol;Acc:VGNC:70800]  
ENSMMUG00000011637 coiled-coil domain containing 148 [Source:VGNC Symbol;Acc:VGNC:70856]  
ENSMMUG00000011095 BTB domain and CNC homolog 1 [Source:VGNC Symbol;Acc:VGNC:70217]  
ENSMMUG00000051349  
ENSMMUG00000017055 divergent protein kinase domain 2A [Source:VGNC Symbol;Acc:VGNC:71781]  
ENSMMUG00000003265 leptin receptor [Source:VGNC Symbol;Acc:VGNC:81429]  
ENSMMUG00000060102 cytokine receptor like factor 1 [Source:NCBI gene;Acc:720247]  
ENSMMUG00000065221  
ENSMMUG00000058815 core-binding factor subunit beta [Source:NCBI gene;Acc:695767]  
ENSMMUG00000033200 Small nucleolar RNA U3 [Source:RFAM;Acc:RF00012]  
ENSMMUG00000000826 storkhead box 1 [Source:VGNC Symbol;Acc:VGNC:78197]  
ENSMMUG00000004280 DDB1 and CUL4 associated factor 1 [Source:VGNC Symbol;Acc:VGNC:71819]  
ENSMMUG00000013452 canopy FGF signaling regulator 4 [Source:VGNC Symbol;Acc:VGNC:71364]  
ENSMMUG00000049843 late cornified envelope protein 2D [Source:NCBI gene;Acc:100424118]  
ENSMMUG00000053976 bile acid-CoA:amino acid N-acyltransferase [Source:NCBI gene;Acc:100429419]  
ENSMMUG00000007010 coiled-coil domain-containing protein 162-like [Source:NCBI gene;Acc:700544]  
ENSMMUG00000019513 U2AF homology motif kinase 1 [Source:VGNC Symbol;Acc:VGNC:79198]  
ENSMMUG00000058835  
ENSMMUG00000055571  
ENSMMUG00000063744  
ENSMMUG00000051976  
ENSMMUG00000010444 ring finger protein 150 [Source:VGNC Symbol;Acc:VGNC:76805]  
ENSMMUG00000003830 alpha fetoprotein [Source:VGNC Symbol;Acc:VGNC:69741]  
ENSMMUG00000065227  
ENSMMUG00000008506 metaxin-1 [Source:NCBI gene;Acc:717595]  
ENSMMUG00000020633 suppressor of cancer cell invasion [Source:NCBI gene;Acc:712803]  
ENSMMUG00000021079 NME/NM23 family member 7 [Source:VGNC Symbol;Acc:VGNC:75221]  
ENSMMUG00000017533 interferon induced protein with tetratricopeptide repeats 1 [Source:NCBI gene;Acc:695683]  
ENSMMUG00000054811  
ENSMMUG00000049600  
ENSMMUG00000064799  
ENSMMUG00000065109 ankyrin repeat and SOCS box containing 12 [Source:NCBI gene;Acc:707931]  
ENSMMUG00000058750 nuclear receptor interacting protein 1 [Source:NCBI gene;Acc:693866]  
ENSMMUG00000020080 GDNF family receptor alpha 1 [Source:VGNC Symbol;Acc:VGNC:72917]  
ENSMMUG00000057719  
ENSMMUG00000062485 ESF1 nucleolar pre-rRNA processing protein homolog [Source:NCBI gene;Acc:694159]  
ENSMMUG00000007548 DnaJ heat shock protein family (Hsp40) member C22 [Source:NCBI gene;Acc:710205]

ENSMMUG00000023570 interleukin 19 [Source:NCBI gene;Acc:694806]  
 ENSMMUG00000018011 sphingosine kinase 1 [Source:VGNC Symbol;Acc:VGNC:77858]  
 ENSMMUG00000064358  
 ENSMMUG00000003555 calcium voltage-gated channel subunit alpha1 A [Source:VGNC Symbol;Acc:VGNC:70498]  
 ENSMMUG00000064729 small proline rich protein 3 [Source:NCBI gene;Acc:713857]  
 ENSMMUG00000016876 integrin subunit alpha L [Source:NCBI gene;Acc:711945]  
 ENSMMUG0000006389 zinc finger and SCAN domain containing 20 [Source:VGNC Symbol;Acc:VGNC:78895]  
 ENSMMUG00000060667  
 ENSMMUG00000036060 U6 spliceosomal RNA [Source:RFAM;Acc:RF00026]  
 ENSMMUG00000001324 tetraspanin 32 [Source:VGNC Symbol;Acc:VGNC:78920]  
 ENSMMUG00000063140 Metazoan signal recognition particle RNA [Source:RFAM;Acc:RF00017]  
 ENSMMUG00000003353 macrophage stimulating 1 receptor [Source:VGNC Symbol;Acc:VGNC:74941]  
 ENSMMUG00000005639 transmembrane protein 41B [Source:VGNC Symbol;Acc:VGNC:79754]  
 ENSMMUG00000004516 apolipoprotein A2 [Source:NCBI gene;Acc:719946]  
 ENSMMUG00000018600 myosin light chain 4 [Source:VGNC Symbol;Acc:VGNC:75105]  
 ENSMMUG00000016593 adaptor related protein complex 1 subunit mu 2 [Source:NCBI gene;Acc:720531]  
 ENSMMUG00000038707 U6 spliceosomal RNA [Source:RFAM;Acc:RF00026]  
 ENSMMUG00000042039  
 ENSMMUG00000009667 zinc finger protein 385D [Source:VGNC Symbol;Acc:VGNC:79587]  
 ENSMMUG00000058085 coiled-coil domain containing 195 [Source:HGNC Symbol;Acc:HGNC:53441]  
 ENSMMUG00000062949  
 ENSMMUG00000013540 RAN guanine nucleotide release factor [Source:VGNC Symbol;Acc:VGNC:76503]  
 ENSMMUG00000052734  
 ENSMMUG00000046883 autophagy related 4D cysteine peptidase [Source:NCBI gene;Acc:713111]  
 ENSMMUG00000058029 Metazoan signal recognition particle RNA [Source:RFAM;Acc:RF00017]  
 ENSMMUG00000034978 U6 spliceosomal RNA [Source:RFAM;Acc:RF00026]  
 ENSMMUG00000061139  
 ENSMMUG00000020040 phosphatase and actin regulator 1 [Source:VGNC Symbol;Acc:VGNC:75841]  
 ENSMMUG00000009346 ArfGAP with GTPase domain, ankyrin repeat and PH domain 1 [Source:VGNC Symbol;Acc:VGNC:84206]  
 ENSMMUG00000017053 death associated protein kinase 1 [Source:VGNC Symbol;Acc:VGNC:71732]  
 29 ENSMMUG00000008770 UDP-glucose pyrophosphorylase 2 [Source:VGNC Symbol;Acc:VGNC:78712]  
 ENSMMUG00000000603 Rho GDP dissociation inhibitor gamma [Source:VGNC Symbol;Acc:VGNC:70011]  
 ENSMMUG00000047729 inositol 1,4,5-trisphosphate receptor type 3 [Source:NCBI gene;Acc:718040]  
 ENSMMUG00000011962 protein tyrosine phosphatase receptor type S [Source:VGNC Symbol;Acc:VGNC:76622]  
 ENSMMUG00000015244 uncoupling protein 1 [Source:VGNC Symbol;Acc:VGNC:78708]  
 ENSMMUG00000053199  
 ENSMMUG00000013422 CEA cell adhesion molecule 4 [Source:NCBI gene;Acc:705453]  
 ENSMMUG00000018275 docking protein 6 [Source:VGNC Symbol;Acc:VGNC:71915]  
 ENSMMUG00000015663 adaptor related protein complex 3 subunit delta 1 [Source:VGNC Symbol;Acc:VGNC:69969]  
 ENSMMUG00000017150 mitochondrial antiviral signaling protein [Source:VGNC Symbol;Acc:VGNC:74609]  
 ENSMMUG00000061514 mucin-3A-like [Source:NCBI gene;Acc:100428559]  
 ENSMMUG00000017945 septin 12 [Source:VGNC Symbol;Acc:VGNC:82235]  
 ENSMMUG00000063886 Metazoan signal recognition particle RNA [Source:RFAM;Acc:RF00017]  
 ENSMMUG00000060973  
 ENSMMUG00000017946 rogd1 atypical leucine zipper [Source:VGNC Symbol;Acc:VGNC:76862]  
 ENSMMUG00000057825  
 ENSMMUG00000023297 solute carrier family 25 member 45 [Source:VGNC Symbol;Acc:VGNC:77576]  
 ENSMMUG00000010470 zinc finger with KRAB and SCAN domains 2 [Source:VGNC Symbol;Acc:VGNC:79529]  
 ENSMMUG00000004877 heterogeneous nuclear ribonucleoprotein L [Source:VGNC Symbol;Acc:VGNC:81187]  
 ENSMMUG00000057274 hemoglobin subunit mu [Source:NCBI gene;Acc:694058]  
 ENSMMUG00000052867

NS\_D3

84 ENSMUG00000018344 myosin XVA [Source:VGNC Symbol;Acc:VGNC:75109]  
ENSMUG00000004108 corticotropin releasing hormone receptor 1 [Source:VGNC Symbol;Acc:VGNC:81184]  
ENSMUG00000021415 BAI1 associated protein 3 [Source:VGNC Symbol;Acc:VGNC:70223]  
ENSMUG00000014313 zinc finger protein 500 [Source:VGNC Symbol;Acc:VGNC:79406]  
ENSMUG00000000842 RNA pseudouridine synthase domain containing 1 [Source:NCBI gene;Acc:722393]  
ENSMUG00000013206 tyrosine 3-monooxygenase/tryptophan 5-monooxygenase activation protein beta [Source:VGNC Symbol;Acc:VGNC:78819]  
ENSMUG00000000553 bromodomain containing 1 [Source:VGNC Symbol;Acc:VGNC:70280]  
ENSMUG00000013129 peptidylprolyl isomerase H [Source:NCBI gene;Acc:697669]  
ENSMUG00000003780 tight junction protein 2 [Source:NCBI gene;Acc:699586]  
ENSMUG00000001967 late cornified envelope 5A [Source:VGNC Symbol;Acc:VGNC:74061]  
ENSMUG00000020010 cadherin 17 [Source:VGNC Symbol;Acc:VGNC:70810]  
ENSMUG00000019593 synaptophysin like 1 [Source:VGNC Symbol;Acc:VGNC:78073]  
ENSMUG00000061787  
ENSMUG00000063215 T cell receptor alpha variable 29/delta variable 5 (gene/pseudogene) [Source:HGNC Symbol;Acc:HGNC:12127]  
ENSMUG00000057560  
ENSMUG00000059788  
ENSMUG00000014592 zinc finger SWIM-type containing 9 [Source:VGNC Symbol;Acc:VGNC:79949]  
ENSMUG00000011777 UDP-GlcNAc:betaGal beta-1,3-N-acetylglucosaminyltransferase 7 [Source:VGNC Symbol;Acc:VGNC:82108]  
ENSMUG00000054259  
ENSMUG00000054161 Metazoan signal recognition particle RNA [Source:RFAM;Acc:RF00017]  
ENSMUG00000016553 solute carrier family 12 member 5 [Source:VGNC Symbol;Acc:VGNC:77471]  
ENSMUG00000056010  
ENSMUG00000063699  
ENSMUG00000009973 proline rich coiled-coil 2B [Source:VGNC Symbol;Acc:VGNC:76327]  
ENSMUG00000031106 ubiquitin recognition factor in ER associated degradation 1 [Source:NCBI gene;Acc:711716]  
ENSMUG00000057520  
ENSMUG00000009066 60S ribosomal protein L26 [Source:NCBI gene;Acc:696134]  
ENSMUG00000052112  
ENSMUG00000007198 NEDD4 binding protein 2 like 1 [Source:VGNC Symbol;Acc:VGNC:75017]  
ENSMUG00000060366  
ENSMUG00000000917 aldo-keto reductase family 1 member B [Source:NCBI gene;Acc:705957]  
ENSMUG00000057681  
ENSMUG00000051230  
ENSMUG00000064895  
ENSMUG00000024668 Y RNA [Source:RFAM;Acc:RF00019]  
ENSMUG00000021891 kinesin light chain 3 [Source:VGNC Symbol;Acc:VGNC:73870]  
ENSMUG00000057790  
ENSMUG00000060230 Metazoan signal recognition particle RNA [Source:RFAM;Acc:RF00017]  
ENSMUG00000059084  
ENSMUG00000052227  
ENSMUG00000013270 RNA binding protein, mRNA processing factor 2 [Source:VGNC Symbol;Acc:VGNC:76511]  
ENSMUG00000014828 heparan sulfate proteoglycan 2 [Source:VGNC Symbol;Acc:VGNC:73534]  
ENSMUG00000056393  
ENSMUG00000061126 golgi associated olfactory signaling regulator [Source:NCBI gene;Acc:719194]  
ENSMUG00000000730 spectrin alpha, erythrocytic 1 [Source:VGNC Symbol;Acc:VGNC:77868]  
ENSMUG00000059754  
ENSMUG00000014702 TATA-box binding protein associated factor 2 [Source:VGNC Symbol;Acc:VGNC:78090]  
ENSMUG00000059969  
ENSMUG00000060626 U6 spliceosomal RNA [Source:RFAM;Acc:RF00026]  
ENSMUG00000051453  
ENSMUG0000006237 carboxypeptidase Z [Source:VGNC Symbol;Acc:VGNC:71478]

ENSMMUG00000052572  
ENSMMUG00000061974  
ENSMMUG00000010632 family with sequence similarity 81 member B [Source:VGNC Symbol;Acc:VGNC:72365]  
ENSMMUG00000056794 cystatin E/M [Source:NCBI gene;Acc:714999]  
ENSMMUG00000014227 cholinergic receptor muscarinic 5 [Source:VGNC Symbol;Acc:VGNC:71044]  
ENSMMUG00000031451 golgin A3 [Source:VGNC Symbol;Acc:VGNC:73106]  
ENSMMUG00000000802 regulatory factor X3 [Source:VGNC Symbol;Acc:VGNC:76908]  
ENSMMUG00000009668 transmembrane and coiled-coil domains 5A [Source:VGNC Symbol;Acc:VGNC:79725]  
ENSMMUG00000005355 TIMP metalloproteinase inhibitor 2 [Source:NCBI gene;Acc:574357]  
ENSMMUG00000064009 galactose-3-O-sulfotransferase 1 [Source:NCBI gene;Acc:715998]  
ENSMMUG00000057671  
ENSMMUG00000022467 membrane bound transcription factor peptidase, site 2 [Source:NCBI gene;Acc:696540]  
ENSMMUG00000016999 KIAA0232 [Source:VGNC Symbol;Acc:VGNC:73922]  
ENSMMUG00000060308  
ENSMMUG00000061632 fibrillin 3 [Source:NCBI gene;Acc:709446]  
ENSMMUG00000013697 PDX1 C-terminal inhibiting factor 1 [Source:VGNC Symbol;Acc:VGNC:75621]  
ENSMMUG00000060959  
ENSMMUG00000029652 mitogen-activated protein kinase 6 [Source:NCBI gene;Acc:694998]  
ENSMMUG00000027541 Small nucleolar RNA SNORA70 [Source:RFAM;Acc:RF00156]  
ENSMMUG00000017127 carbohydrate sulfotransferase 11 [Source:VGNC Symbol;Acc:VGNC:82123]  
ENSMMUG00000013136 Y-box binding protein 1 [Source:NCBI gene;Acc:700140]  
ENSMMUG00000019441 solute carrier family 12 member 7 [Source:VGNC Symbol;Acc:VGNC:77390]  
ENSMMUG00000013493 ornithine carbamoyltransferase [Source:VGNC Symbol;Acc:VGNC:75723]  
ENSMMUG00000010610 WW domain containing oxidoreductase [Source:VGNC Symbol;Acc:VGNC:78805]  
ENSMMUG00000001187 mitogen-activated protein kinase 15 [Source:VGNC Symbol;Acc:VGNC:74570]  
ENSMMUG00000054579 zinc finger RNA binding protein 2 [Source:NCBI gene;Acc:100430166]  
ENSMMUG00000016769 proteasome 26S subunit, ATPase 5 [Source:VGNC Symbol;Acc:VGNC:81513]  
ENSMMUG00000033121 Small nucleolar RNA U3 [Source:RFAM;Acc:RF00012]  
ENSMMUG00000001028 SNF related kinase [Source:VGNC Symbol;Acc:VGNC:84074]  
ENSMMUG00000059117 Metazoan signal recognition particle RNA [Source:RFAM;Acc:RF00017]  
ENSMMUG00000022437 peptidyl arginine deiminase 6 [Source:VGNC Symbol;Acc:VGNC:75657]  
ENSMMUG00000064250  
ENSMMUG00000059725  
ENSMMUG00000064821  
ENSMMUG00000001902 TruB pseudouridine synthase family member 1 [Source:VGNC Symbol;Acc:VGNC:79005]  
ENSMMUG00000049537 phosphoribosyl pyrophosphate synthetase associated protein 1 [Source:NCBI gene;Acc:706625]  
ENSMMUG00000003233 SET domain containing 1A, histone lysine methyltransferase [Source:NCBI gene;Acc:712416]  
ENSMMUG00000012040 enolase 3 [Source:VGNC Symbol;Acc:VGNC:72220]  
ENSMMUG00000016761 coiled-coil domain containing 47 [Source:NCBI gene;Acc:717944]  
ENSMMUG00000002679 lactate dehydrogenase B [Source:NCBI gene;Acc:706110]  
ENSMMUG00000011026 dynein axonemal heavy chain 5 [Source:VGNC Symbol;Acc:VGNC:71942]

## D. Down-regulated common and unique gene names in Venn Diagram

| Names                            | total | elements            | description                                                                                   |
|----------------------------------|-------|---------------------|-----------------------------------------------------------------------------------------------|
| NS_D1 NS_D2 NS_D3 S_D1 S_D2 S_D3 | 180   | ENSMMUG00000017230  | V-set and transmembrane domain containing 2 like [Source:NCBI gene;Acc:707394]                |
|                                  |       | ENSMMUG00000009155  | SIN3-HDAC complex associated factor [Source:NCBI gene;Acc:694162]                             |
|                                  |       | ENSMMUG00000046655  | pleckstrin homology like domain family B member 1 [Source:NCBI gene;Acc:706336]               |
|                                  |       | ENSMMUG00000021878  | timeless circadian regulator [Source:VGNC Symbol;Acc:VGNC:78356]                              |
|                                  |       | ENSMMUG00000015117  | X-prolyl aminopeptidase 1 [Source:VGNC Symbol;Acc:VGNC:78810]                                 |
|                                  |       | ENSMMUG00000016983  | acrosin binding protein [Source:VGNC Symbol;Acc:VGNC:69445]                                   |
|                                  |       | ENSMMUG00000002200  | phospholipid phosphatase 3 [Source:NCBI gene;Acc:715993]                                      |
|                                  |       | ENSMMUG00000005246  | zinc finger protein 740 [Source:VGNC Symbol;Acc:VGNC:79665]                                   |
|                                  |       | ENSMMUG00000002794  | general transcription factor IIB [Source:VGNC Symbol;Acc:VGNC:73306]                          |
|                                  |       | ENSMMUG00000016927  | solute carrier family 2 member 10 [Source:VGNC Symbol;Acc:VGNC:77465]                         |
|                                  |       | ENSMMUG00000002549  | trehalase [Source:NCBI gene;Acc:706449]                                                       |
|                                  |       | ENSMMUG00000012192  | erythrocyte membrane protein band 4.1 like 4A [Source:VGNC Symbol;Acc:VGNC:72039]             |
|                                  |       | ENSMMUG00000010648  | DNA methyltransferase 3 like [Source:NCBI gene;Acc:722184]                                    |
|                                  |       | ENSMMUG000000065099 |                                                                                               |
|                                  |       | ENSMMUG00000020533  | chromosome 11 C12orf56 homolog [Source:VGNC Symbol;Acc:VGNC:70409]                            |
|                                  |       | ENSMMUG00000000981  | T-box transcription factor 6 [Source:VGNC Symbol;Acc:VGNC:78276]                              |
|                                  |       | ENSMMUG00000004675  | smoothelin [Source:VGNC Symbol;Acc:VGNC:77661]                                                |
|                                  |       | ENSMMUG00000006898  | integrin subunit beta 8 [Source:VGNC Symbol;Acc:VGNC:73791]                                   |
|                                  |       | ENSMMUG000000062527 |                                                                                               |
|                                  |       | ENSMMUG00000045584  | leucine zipper protein 1 [Source:NCBI gene;Acc:718626]                                        |
|                                  |       | ENSMMUG000000050177 |                                                                                               |
|                                  |       | ENSMMUG000000059019 |                                                                                               |
|                                  |       | ENSMMUG00000009038  | titin [Source:NCBI gene;Acc:703527]                                                           |
|                                  |       | ENSMMUG00000039020  | zinc finger protein 141 [Source:NCBI gene;Acc:714265]                                         |
|                                  |       | ENSMMUG000000055244 | U6 spliceosomal RNA [Source:RFAM;Acc:RF00026]                                                 |
|                                  |       | ENSMMUG00000017113  | ubiquitin specific peptidase 32 [Source:NCBI gene;Acc:716857]                                 |
|                                  |       | ENSMMUG00000012781  | muscular LMNA interacting protein [Source:VGNC Symbol;Acc:VGNC:83434]                         |
|                                  |       | ENSMMUG00000017210  | sarcosine dehydrogenase [Source:VGNC Symbol;Acc:VGNC:76971]                                   |
|                                  |       | ENSMMUG00000000238  | HECT domain E3 ubiquitin protein ligase 2 [Source:VGNC Symbol;Acc:VGNC:73246]                 |
|                                  |       | ENSMMUG00000049351  | MAGE family member E1 [Source:NCBI gene;Acc:705379]                                           |
|                                  |       | ENSMMUG00000009773  | lysine demethylase 1A [Source:VGNC Symbol;Acc:VGNC:73928]                                     |
|                                  |       | ENSMMUG000000056045 |                                                                                               |
|                                  |       | ENSMMUG000000053721 |                                                                                               |
|                                  |       | ENSMMUG00000000009  | protein tyrosine phosphatase receptor type C [Source:VGNC Symbol;Acc:VGNC:76612]              |
|                                  |       | ENSMMUG00000000974  | mutS homolog 2 [Source:VGNC Symbol;Acc:VGNC:74931]                                            |
|                                  |       | ENSMMUG00000008718  | zinc finger protein 280D [Source:NCBI gene;Acc:699509]                                        |
|                                  |       | ENSMMUG000000054210 | C-C motif chemokine 4 [Source:NCBI gene;Acc:100426632]                                        |
|                                  |       | ENSMMUG00000012462  | proteasome activator subunit 1 [Source:VGNC Symbol;Acc:VGNC:76455]                            |
|                                  |       | ENSMMUG00000017524  | phosphoinositide kinase, FYVE-type zinc finger containing [Source:VGNC Symbol;Acc:VGNC:75854] |
|                                  |       | ENSMMUG00000016880  | solute carrier family 39 member 8 [Source:VGNC Symbol;Acc:VGNC:77541]                         |
|                                  |       | ENSMMUG00000018358  | zinc finger protein 217 [Source:VGNC Symbol;Acc:VGNC:78874]                                   |
|                                  |       | ENSMMUG00000011386  | GTPase, IMAP family member 4 [Source:VGNC Symbol;Acc:VGNC:72982]                              |
|                                  |       | ENSMMUG00000015141  | ankyrin repeat domain 16 [Source:NCBI gene;Acc:720787]                                        |
|                                  |       | ENSMMUG00000017234  | leucine rich repeat containing 59 [Source:VGNC Symbol;Acc:VGNC:81436]                         |
|                                  |       | ENSMMUG00000014484  | zinc finger protein 641 [Source:NCBI gene;Acc:708246]                                         |



ENSMMUG0000005856 glycine amidinotransferase [Source:VGNC Symbol;Acc:VGNC:72892]  
ENSMMUG0000005851 B-box and SPRY domain containing [Source:VGNC Symbol;Acc:VGNC:70342]  
ENSMMUG00000012058 GEN1 Holliday junction 5' flap endonuclease [Source:VGNC Symbol;Acc:VGNC:72790]  
ENSMMUG00000019850 arachidonate lipoxygenase 3 [Source:VGNC Symbol;Acc:VGNC:69607]  
ENSMMUG00000014735 carnitine palmitoyltransferase 1C [Source:NCBI gene;Acc:719429]  
ENSMMUG00000059241  
ENSMMUG00000004157 nuclear protein, coactivator of histone transcription [Source:VGNC Symbol;Acc:VGNC:75379]  
ENSMMUG00000022153 solute carrier family 25 member 36 [Source:VGNC Symbol;Acc:VGNC:84079]  
ENSMMUG00000063177 StAR related lipid transfer domain containing 4 [Source:NCBI gene;Acc:706654]  
ENSMMUG00000059575  
ENSMMUG00000059707 MIS18 kinetochore protein A [Source:NCBI gene;Acc:709275]  
ENSMMUG00000006252 argonaute RISC catalytic component 3 [Source:NCBI gene;Acc:712543]  
ENSMMUG00000038070 T cell receptor alpha variable 12-3 [Source:HGNC Symbol;Acc:HGNC:12107]  
ENSMMUG00000021145 family with sequence similarity 120B [Source:VGNC Symbol;Acc:VGNC:72311]  
ENSMMUG00000021091 COP9 signalosome subunit 3 [Source:VGNC Symbol;Acc:VGNC:71316]  
ENSMMUG00000055207  
ENSMMUG00000015522 GRAM domain containing 1B [Source:VGNC Symbol;Acc:VGNC:73028]  
ENSMMUG00000007411 integrin alpha FG-GAP repeat containing 2 [Source:VGNC Symbol;Acc:VGNC:73690]  
ENSMMUG00000050269 T cell receptor beta variable 14 [Source:HGNC Symbol;Acc:HGNC:12189]  
ENSMMUG00000056103 growth arrest and DNA damage inducible alpha [Source:NCBI gene;Acc:701054]  
ENSMMUG00000007816 SMAD family member 2 [Source:VGNC Symbol;Acc:VGNC:77810]  
ENSMMUG00000010453 folate receptor beta [Source:VGNC Symbol;Acc:VGNC:72690]  
ENSMMUG00000014687 sterile alpha motif domain containing 14 [Source:VGNC Symbol;Acc:VGNC:77112]  
ENSMMUG00000007003 polyribonucleotide nucleotidyltransferase 1 [Source:VGNC Symbol;Acc:VGNC:76095]  
ENSMMUG00000012056 structural maintenance of chromosomes 6 [Source:VGNC Symbol;Acc:VGNC:77746]  
ENSMMUG00000062793  
ENSMMUG00000023676 espin [Source:NCBI gene;Acc:722532]  
ENSMMUG00000015000 SPT16 homolog, facilitates chromatin remodeling subunit [Source:VGNC Symbol;Acc:VGNC:78054]  
ENSMMUG00000013302 family with sequence similarity 184 member A [Source:VGNC Symbol;Acc:VGNC:72308]  
ENSMMUG00000015309 F-box protein 24 [Source:VGNC Symbol;Acc:VGNC:72495]  
ENSMMUG00000002113 NHL repeat containing 3 [Source:VGNC Symbol;Acc:VGNC:75291]  
ENSMMUG00000054064  
ENSMMUG00000015970 coiled-coil domain containing 150 [Source:VGNC Symbol;Acc:VGNC:84222]  
ENSMMUG00000053384  
ENSMMUG00000003261 BAF chromatin remodeling complex subunit BCL11B [Source:VGNC Symbol;Acc:VGNC:70056]  
ENSMMUG00000011974 calcium/calmodulin dependent protein kinase IV [Source:VGNC Symbol;Acc:VGNC:70526]  
ENSMMUG00000007330 nuclear mitotic apparatus protein 1 [Source:VGNC Symbol;Acc:VGNC:75556]  
ENSMMUG00000003277 copine 4 [Source:VGNC Symbol;Acc:VGNC:71466]  
ENSMMUG00000039944 Ras protein specific guanine nucleotide releasing factor 2 [Source:VGNC Symbol;Acc:VGNC:84486]  
ENSMMUG00000037675 testis expressed 52 [Source:NCBI gene;Acc:107000723]  
ENSMMUG00000057606 GPRIN family member 3 [Source:NCBI gene;Acc:703567]  
ENSMMUG00000016262 tetratricopeptide repeat domain 38 [Source:VGNC Symbol;Acc:VGNC:79574]  
ENSMMUG00000019639 paired box 5 [Source:VGNC Symbol;Acc:VGNC:75764]  
ENSMMUG00000002090 ATPase H+ transporting V1 subunit B1 [Source:VGNC Symbol;Acc:VGNC:70184]  
ENSMMUG00000002103 delta/notch like EGF repeat containing [Source:VGNC Symbol;Acc:VGNC:71895]  
ENSMMUG00000015661 protein tyrosine phosphatase receptor type U [Source:VGNC Symbol;Acc:VGNC:76624]  
ENSMMUG00000052535  
ENSMMUG00000015279 SWI/SNF related, matrix associated, actin dependent regulator of chromatin, subfamily a, member 2 [Source:VGNC Symbol;Acc:VGNC:77647]  
ENSMMUG00000015143 F-box DNA helicase 1 [Source:NCBI gene;Acc:720797]  
ENSMMUG00000052526 RAB39A, member RAS oncogene family [Source:NCBI gene;Acc:707451]

ENSMMUG00000018974 LysM domain containing 3 [Source:VGNC Symbol;Acc:VGNC:74373]  
ENSMMUG00000022199 polyhomeotic homolog 3 [Source:VGNC Symbol;Acc:VGNC:75804]  
ENSMMUG00000029164 glycerophosphodiester phosphodiesterase domain containing 3 [Source:VGNC Symbol;Acc:VGNC:72800]  
ENSMMUG00000004821 membrane spanning 4-domains A14 [Source:NCBI gene;Acc:697083]  
ENSMMUG00000064529  
ENSMMUG00000013047 S-phase kinase associated protein 1 [Source:NCBI gene;Acc:100423634]  
ENSMMUG00000020370 SRY-box transcription factor 5 [Source:VGNC Symbol;Acc:VGNC:77843]  
ENSMMUG00000001357 tetraspanin 11 [Source:VGNC Symbol;Acc:VGNC:79882]  
ENSMMUG00000051115  
ENSMMUG00000009948 histone deacetylase 1 [Source:NCBI gene;Acc:708441]  
ENSMMUG00000055809  
ENSMMUG00000023679 tripartite motif containing 26 [Source:VGNC Symbol;Acc:VGNC:78854]  
ENSMMUG00000017246 lipoygenase homology domains 1 [Source:VGNC Symbol;Acc:VGNC:74368]  
ENSMMUG00000007821 ATP binding cassette subfamily B member 5 [Source:VGNC Symbol;Acc:VGNC:80321]  
ENSMMUG00000055610 homeobox C4 [Source:NCBI gene;Acc:100430434]  
ENSMMUG00000008643 general transcription factor IIIC subunit 3 [Source:VGNC Symbol;Acc:VGNC:73317]  
ENSMMUG00000005727 protein kinase N1 [Source:VGNC Symbol;Acc:VGNC:76014]  
ENSMMUG00000013552 scribble planar cell polarity protein [Source:HGNC Symbol;Acc:HGNC:30377]  
ENSMMUG00000000717 CD3e molecule associated protein [Source:NCBI gene;Acc:714440]  
ENSMMUG00000054711  
ENSMMUG00000012481 importin 4 [Source:VGNC Symbol;Acc:VGNC:73630]  
ENSMMUG00000018342 required for meiotic nuclear division 1 homolog [Source:VGNC Symbol;Acc:VGNC:76797]  
ENSMMUG00000020289 CD83 molecule [Source:VGNC Symbol;Acc:VGNC:70783]  
ENSMMUG00000049196 dispatched RND transporter family member 3 [Source:NCBI gene;Acc:722727]  
ENSMMUG00000056116  
ENSMMUG00000061973  
ENSMMUG00000017615 zinc finger CCHC-type containing 14 [Source:VGNC Symbol;Acc:VGNC:79420]  
ENSMMUG00000051482  
ENSMMUG00000038560 eukaryotic translation elongation factor 1 epsilon 1 [Source:NCBI gene;Acc:695426]  
ENSMMUG00000022202 basic leucine zipper and W2 domains 1 [Source:VGNC Symbol;Acc:VGNC:84213]  
ENSMMUG00000057494 T cell receptor beta variable 7-9 [Source:HGNC Symbol;Acc:HGNC:12243]  
ENSMMUG00000023265 A-kinase anchoring protein 12 [Source:VGNC Symbol;Acc:VGNC:69766]  
ENSMMUG00000005137 ATPase secretory pathway Ca<sup>2+</sup> transporting 1 [Source:VGNC Symbol;Acc:VGNC:70054]  
ENSMMUG00000040694 LCK proto-oncogene, Src family tyrosine kinase [Source:NCBI gene;Acc:717704]  
ENSMMUG00000060744  
ENSMMUG00000008974 Fc receptor like 5 [Source:NCBI gene;Acc:718771]  
ENSMMUG00000007326 ring finger protein 121 [Source:VGNC Symbol;Acc:VGNC:76788]  
ENSMMUG00000055229  
ENSMMUG00000063345  
ENSMMUG00000001742 transforming growth factor beta receptor 3 [Source:VGNC Symbol;Acc:VGNC:78339]  
ENSMMUG00000017186 pleckstrin homology domain interacting protein [Source:VGNC Symbol;Acc:VGNC:75803]  
ENSMMUG00000002890 tripartite motif containing 15 [Source:VGNC Symbol;Acc:VGNC:83958]  
ENSMMUG00000016314 family with sequence similarity 166 member B [Source:VGNC Symbol;Acc:VGNC:72421]  
ENSMMUG00000020211 cyclin Y like 1 [Source:VGNC Symbol;Acc:VGNC:84224]  
ENSMMUG00000051381 Metazoan signal recognition particle RNA [Source:RFAM;Acc:RF00017]  
ENSMMUG00000064804  
ENSMMUG00000000982 protein phosphatase 4 catalytic subunit [Source:VGNC Symbol;Acc:VGNC:76384]  
ENSMMUG00000038661  
ENSMMUG00000044759  
ENSMMUG00000022185 odd-skipped related transcription factor 2 [Source:VGNC Symbol;Acc:VGNC:84097]  
ENSMMUG00000032252 UbiA prenyltransferase domain containing 1 [Source:VGNC Symbol;Acc:VGNC:79881]

ENSMMUG00000030099 phospholipid phosphatase 1 [Source:VGNC Symbol;Acc:VGNC:76226]  
 ENSMMUG00000020706 ETS proto-oncogene 1, transcription factor [Source:VGNC Symbol;Acc:VGNC:72439]  
 ENSMMUG00000052574  
 ENSMMUG00000006731 CECR2 histone acetyl-lysine reader [Source:VGNC Symbol;Acc:VGNC:84530]  
 ENSMMUG00000041450 zinc finger protein 432 [Source:NCBI gene;Acc:100424341]  
 ENSMMUG00000051271  
 ENSMMUG00000010820 chaperonin containing TCP1 subunit 2 [Source:VGNC Symbol;Acc:VGNC:70745]  
 ENSMMUG00000051032 serine protease 2 [Source:NCBI gene;Acc:698352]  
 ENSMMUG00000020061 protein phosphatase 1 regulatory subunit 9B [Source:VGNC Symbol;Acc:VGNC:76372]  
 ENSMMUG00000016791 doublecortin like kinase 1 [Source:VGNC Symbol;Acc:VGNC:71745]  
 ENSMMUG00000060346  
 ENSMMUG00000037551 Metazoan signal recognition particle RNA [Source:RFAM;Acc:RF00017]  
 ENSMMUG00000019325 mechanistic target of rapamycin kinase [Source:VGNC Symbol;Acc:VGNC:75062]  
 ENSMMUG00000056387 transcription factor 15 [Source:NCBI gene;Acc:716916]  
 ENSMMUG00000040154 T cell receptor alpha variable 9-2 [Source:HGNC Symbol;Acc:HGNC:12154]  
 ENSMMUG00000003260  
 ENSMMUG00000002742 ST8 alpha-N-acetyl-neuraminide alpha-2,8-sialyltransferase 5 [Source:VGNC Symbol;Acc:VGNC:77942]  
 ENSMMUG00000055344 TLC domain containing 3A [Source:NCBI gene;Acc:699707]  
 ENSMMUG0000005301 ATP binding cassette subfamily B member 9 [Source:VGNC Symbol;Acc:VGNC:81341]  
 ENSMMUG00000055845 ankyrin repeat domain 53 [Source:NCBI gene;Acc:703757]  
 ENSMMUG00000052682  
 ENSMMUG00000007424 nuclear receptor interacting protein 2 [Source:VGNC Symbol;Acc:VGNC:75448]  
 ENSMMUG00000022183 spermatogenesis associated 1 [Source:NCBI gene;Acc:710462]  
 ENSMMUG00000022975 sprouty related EVH1 domain containing 3 [Source:VGNC Symbol;Acc:VGNC:78030]  
 ENSMMUG00000055477  
 ENSMMUG00000001728 mitogen-activated protein kinase 9 [Source:VGNC Symbol;Acc:VGNC:74652]  
 ENSMMUG00000053577  
 ENSMMUG00000003736 nuclear factor kappa B subunit 1 [Source:VGNC Symbol;Acc:VGNC:75339]  
 ENSMMUG00000019892 myomesin 1 [Source:VGNC Symbol;Acc:VGNC:75123]  
 ENSMMUG00000009965 chromosome 15 C9orf50 homolog [Source:VGNC Symbol;Acc:VGNC:70365]  
 ENSMMUG00000001479 laminin subunit gamma 2 [Source:VGNC Symbol;Acc:VGNC:74233]  
 ENSMMUG00000018474 signal regulatory protein alpha [Source:NCBI gene;Acc:717811]  
 ENSMMUG00000005204 VPS16 core subunit of CORVET and HOPS complexes [Source:VGNC Symbol;Acc:VGNC:78966]  
 ENSMMUG00000010682 fibrillin 2 [Source:VGNC Symbol;Acc:VGNC:72624]  
 NS\_D1 NS\_D2 S\_D1 S\_D2 S\_D3 15 ENSMMUG00000007398 potassium calcium-activated channel subfamily N member 1 [Source:VGNC Symbol;Acc:VGNC:74002]  
 ENSMMUG00000057501  
 ENSMMUG00000004233 leucine rich repeats and immunoglobulin like domains 3 [Source:NCBI gene;Acc:716344]  
 ENSMMUG00000003029 protein arginine methyltransferase 1 [Source:NCBI gene;Acc:719419]  
 ENSMMUG00000016313 RUN and SH3 domain containing 2 [Source:VGNC Symbol;Acc:VGNC:82230]  
 ENSMMUG00000030381 arachidonate 15-lipoxygenase [Source:VGNC Symbol;Acc:VGNC:69796]  
 ENSMMUG00000058151 chromosome 4 C6orf62 homolog [Source:NCBI gene;Acc:708218]  
 ENSMMUG00000000104 ribosomal RNA processing 1B [Source:VGNC Symbol;Acc:VGNC:77089]  
 ENSMMUG00000012129 tripartite motif containing 10 [Source:VGNC Symbol;Acc:VGNC:78550]  
 ENSMMUG00000017583 single stranded DNA binding protein 2 [Source:NCBI gene;Acc:711752]  
 ENSMMUG00000061892  
 ENSMMUG00000012110 smoothed, frizzled class receptor [Source:VGNC Symbol;Acc:VGNC:77658]  
 ENSMMUG00000062974  
 ENSMMUG00000018565 ribonucleoprotein, PTB binding 2 [Source:VGNC Symbol;Acc:VGNC:76536]  
 ENSMMUG00000042798  
 NS\_D1 NS\_D2 NS\_D3 S\_D1 S\_D2 58 ENSMMUG00000060713 epithelial membrane protein 2 [Source:NCBI gene;Acc:710315]  
 ENSMMUG00000054315

ENSMMUG00000009519 WASH complex subunit 4 [Source:VGNC Symbol;Acc:VGNC:79783]  
ENSMMUG00000021282 late endosomal/lysosomal adaptor, MAPK and MTOR activator 1 [Source:VGNC Symbol;Acc:VGNC:74129]  
ENSMMUG00000007628 cell adhesion associated, oncogene regulated [Source:VGNC Symbol;Acc:VGNC:70961]  
ENSMMUG00000052830  
ENSMMUG00000057859  
ENSMMUG00000001481 nicotinamide nucleotide adenylyltransferase 2 [Source:VGNC Symbol;Acc:VGNC:75193]  
ENSMMUG00000019831 neurobeachin [Source:NCBI gene;Acc:714386]  
ENSMMUG00000056306  
ENSMMUG00000013501 CD68 molecule [Source:VGNC Symbol;Acc:VGNC:82121]  
ENSMMUG00000049563  
ENSMMUG00000012480 REC8 meiotic recombination protein [Source:VGNC Symbol;Acc:VGNC:76746]  
ENSMMUG00000021280 leucine rich transmembrane and O-methyltransferase domain containing [Source:NCBI gene;Acc:718286]  
ENSMMUG00000007325 Xrcc1 N-terminal domain containing 1 [Source:NCBI gene;Acc:115945140]  
ENSMMUG00000009493 family with sequence similarity 120A [Source:NCBI gene;Acc:717459]  
ENSMMUG00000007313 histone acetyltransferase 1 [Source:VGNC Symbol;Acc:VGNC:73349]  
ENSMMUG00000006187 angiopoietin like 7 [Source:VGNC Symbol;Acc:VGNC:69683]  
ENSMMUG00000016526 solute carrier family 25 member 41 [Source:VGNC Symbol;Acc:VGNC:77581]  
ENSMMUG00000055585  
ENSMMUG00000020175 mediator complex subunit 25 [Source:VGNC Symbol;Acc:VGNC:74607]  
ENSMMUG00000007256 splicing factor 3b subunit 4 [Source:VGNC Symbol;Acc:VGNC:77182]  
ENSMMUG00000018746 FAST kinase domains 3 [Source:VGNC Symbol;Acc:VGNC:72588]  
ENSMMUG00000054116 T cell receptor alpha variable 8-6 [Source:HGNC Symbol;Acc:HGNC:12151]  
ENSMMUG00000002657 olfactomedin 4 [Source:VGNC Symbol;Acc:VGNC:75418]  
ENSMMUG00000049948  
ENSMMUG00000000983 aldolase, fructose-bisphosphate A [Source:NCBI gene;Acc:708406]  
ENSMMUG00000002183 oxysterol binding protein like 6 [Source:VGNC Symbol;Acc:VGNC:75627]  
ENSMMUG00000006548 KIAA1549 [Source:VGNC Symbol;Acc:VGNC:73885]  
ENSMMUG00000008228 unc-93 homolog A [Source:VGNC Symbol;Acc:VGNC:78724]  
ENSMMUG00000055117  
ENSMMUG00000020993 cadherin EGF LAG seven-pass G-type receptor 1 [Source:NCBI gene;Acc:718440]  
ENSMMUG00000011702 tetraspanin 5 [Source:VGNC Symbol;Acc:VGNC:79086]  
ENSMMUG00000004178 NADPH oxidase 1 [Source:VGNC Symbol;Acc:VGNC:75374]  
ENSMMUG00000005801 glyceronephosphate O-acyltransferase [Source:VGNC Symbol;Acc:VGNC:73100]  
ENSMMUG00000002809 unc-80 homolog, NALCN channel complex subunit [Source:NCBI gene;Acc:713007]  
ENSMMUG00000010127 chitobiase [Source:VGNC Symbol;Acc:VGNC:71540]  
ENSMMUG00000052676  
ENSMMUG00000018058 ATP binding cassette subfamily G member 1 [Source:VGNC Symbol;Acc:VGNC:69584]  
ENSMMUG00000020926 syntaxin 2 [Source:VGNC Symbol;Acc:VGNC:78259]  
ENSMMUG00000015002 chromodomain helicase DNA binding protein 8 [Source:VGNC Symbol;Acc:VGNC:71060]  
ENSMMUG00000019977 myosin heavy chain 15 [Source:VGNC Symbol;Acc:VGNC:84148]  
ENSMMUG00000023137 zinc finger protein 350 [Source:VGNC Symbol;Acc:VGNC:79041]  
ENSMMUG00000001940 NME/NM23 nucleoside diphosphate kinase 2 [Source:NCBI gene;Acc:100533957]  
ENSMMUG00000007620 transmembrane serine protease 4 [Source:VGNC Symbol;Acc:VGNC:78577]  
ENSMMUG00000016993 PKHD1 ciliary IPT domain containing fibrocystin/polyductin [Source:VGNC Symbol;Acc:VGNC:76010]  
ENSMMUG00000021670 solute carrier family 52 member 3 [Source:VGNC Symbol;Acc:VGNC:77717]  
ENSMMUG00000011902 oligosaccharyltransferase complex non-catalytic subunit [Source:NCBI gene;Acc:697283]  
ENSMMUG00000003049 testis expressed 11 [Source:VGNC Symbol;Acc:VGNC:78316]  
ENSMMUG00000008009 family with sequence similarity 13 member B [Source:VGNC Symbol;Acc:VGNC:72268]  
ENSMMUG00000058603  
ENSMMUG00000020540 NmrA like redox sensor 1 [Source:VGNC Symbol;Acc:VGNC:75252]  
ENSMMUG00000044214

|                             |    |                    |                                                                                                                      |
|-----------------------------|----|--------------------|----------------------------------------------------------------------------------------------------------------------|
|                             |    | ENSMMUG0000009536  | makorin ring finger protein 2 [Source:VGNC Symbol;Acc:VGNC:74878]                                                    |
|                             |    | ENSMMUG00000013848 | fucosyltransferase 8 [Source:VGNC Symbol;Acc:VGNC:72829]                                                             |
|                             |    | ENSMMUG00000062443 |                                                                                                                      |
|                             |    | ENSMMUG00000021552 | RPGR interacting protein 1 [Source:VGNC Symbol;Acc:VGNC:77007]                                                       |
|                             |    | ENSMMUG00000062140 |                                                                                                                      |
| NS_D1 NS_D3 S_D1 S_D2 S_D3  | 8  | ENSMMUG00000014018 | bromodomain testis associated [Source:VGNC Symbol;Acc:VGNC:70282]                                                    |
|                             |    | ENSMMUG00000008540 | ring finger protein 112 [Source:VGNC Symbol;Acc:VGNC:76724]                                                          |
|                             |    | ENSMMUG00000022680 | alpha-2-macroglobulin like 1 [Source:VGNC Symbol;Acc:VGNC:69507]                                                     |
|                             |    | ENSMMUG00000008867 | exoribonuclease 1 [Source:VGNC Symbol;Acc:VGNC:72324]                                                                |
|                             |    | ENSMMUG00000004237 | TNF receptor superfamily member 19 [Source:VGNC Symbol;Acc:VGNC:78588]                                               |
|                             |    | ENSMMUG00000017207 | dopamine beta-hydroxylase [Source:VGNC Symbol;Acc:VGNC:71740]                                                        |
|                             |    | ENSMMUG00000040771 |                                                                                                                      |
|                             |    | ENSMMUG00000003634 | DExD/H-box 60 like [Source:VGNC Symbol;Acc:VGNC:71720]                                                               |
| NS_D1 NS_D2 NS_D3 S_D1 S_D3 | 27 | ENSMMUG00000051641 |                                                                                                                      |
|                             |    | ENSMMUG00000050975 |                                                                                                                      |
|                             |    | ENSMMUG00000009524 | adaptor protein, phosphotyrosine interacting with PH domain and leucine zipper 2 [Source:VGNC Symbol;Acc:VGNC:69861] |
|                             |    | ENSMMUG00000010819 | fibroblast growth factor receptor substrate 2 [Source:VGNC Symbol;Acc:VGNC:72732]                                    |
|                             |    | ENSMMUG00000044175 | forkhead box O6 [Source:NCBI gene;Acc:697505]                                                                        |
|                             |    | ENSMMUG00000016896 | solute carrier family 12 member 1 [Source:VGNC Symbol;Acc:VGNC:77385]                                                |
|                             |    | ENSMMUG00000059525 |                                                                                                                      |
|                             |    | ENSMMUG00000032427 | neuroigin 3 [Source:NCBI gene;Acc:574216]                                                                            |
|                             |    | ENSMMUG00000012120 | zinc ribbon domain containing 1 [Source:VGNC Symbol;Acc:VGNC:78912]                                                  |
|                             |    | ENSMMUG00000015238 | O-linked N-acetylglucosamine (GlcNAc) transferase [Source:NCBI gene;Acc:698268]                                      |
|                             |    | ENSMMUG00000008942 | carnosine dipeptidase 1 [Source:VGNC Symbol;Acc:VGNC:71257]                                                          |
|                             |    | ENSMMUG00000018747 | 5-methyltetrahydrofolate-homocysteine methyltransferase reductase [Source:VGNC Symbol;Acc:VGNC:75079]                |
|                             |    | ENSMMUG00000049997 |                                                                                                                      |
|                             |    | ENSMMUG00000008797 | ATP binding cassette subfamily G member 2 (Junior blood group) [Source:NCBI gene;Acc:574307]                         |
|                             |    | ENSMMUG00000058580 | tripartite motif containing 40 [Source:NCBI gene;Acc:100427925]                                                      |
|                             |    | ENSMMUG00000007709 | crooked neck pre-mRNA splicing factor 1 [Source:VGNC Symbol;Acc:VGNC:71412]                                          |
|                             |    | ENSMMUG00000055400 | U6 spliceosomal RNA [Source:RFAM;Acc:RF00026]                                                                        |
|                             |    | ENSMMUG00000007783 | isoleucyl-tRNA synthetase 2, mitochondrial [Source:VGNC Symbol;Acc:VGNC:73458]                                       |
|                             |    | ENSMMUG00000000158 | minichromosome maintenance complex component 2 [Source:VGNC Symbol;Acc:VGNC:74680]                                   |
|                             |    | ENSMMUG00000037625 |                                                                                                                      |
|                             |    | ENSMMUG00000057697 |                                                                                                                      |
|                             |    | ENSMMUG00000022602 | methyltransferase like 21A [Source:VGNC Symbol;Acc:VGNC:74625]                                                       |
|                             |    | ENSMMUG00000015962 | AT-rich interaction domain 2 [Source:VGNC Symbol;Acc:VGNC:69858]                                                     |
|                             |    | ENSMMUG00000023248 | serine/threonine kinase 38 like [Source:VGNC Symbol;Acc:VGNC:78156]                                                  |
|                             |    | ENSMMUG00000011116 | NADPH oxidase 4 [Source:VGNC Symbol;Acc:VGNC:75376]                                                                  |
|                             |    | ENSMMUG00000055392 |                                                                                                                      |
|                             |    | ENSMMUG00000021393 | calcium/calmodulin dependent protein kinase II gamma [Source:VGNC Symbol;Acc:VGNC:70525]                             |
| NS_D2 NS_D3 S_D1 S_D2 S_D3  | 8  | ENSMMUG00000061408 |                                                                                                                      |
|                             |    | ENSMMUG00000060892 |                                                                                                                      |
|                             |    | ENSMMUG00000042208 | pepsin A-4 [Source:NCBI gene;Acc:694646]                                                                             |
|                             |    | ENSMMUG00000064237 |                                                                                                                      |
|                             |    | ENSMMUG00000050239 |                                                                                                                      |
|                             |    | ENSMMUG00000020047 | integrin subunit beta 3 binding protein [Source:VGNC Symbol;Acc:VGNC:73787]                                          |
|                             |    | ENSMMUG00000017204 | programmed cell death 4 [Source:VGNC Symbol;Acc:VGNC:75794]                                                          |
|                             |    | ENSMMUG00000052277 | transthyretin [Source:NCBI gene;Acc:705943]                                                                          |
| NS_D1 NS_D2 NS_D3 S_D2 S_D3 | 7  | ENSMMUG00000006704 | zygote arrest 1 [Source:VGNC Symbol;Acc:VGNC:79251]                                                                  |
|                             |    | ENSMMUG00000001213 | spermatogenesis associated 9 [Source:VGNC Symbol;Acc:VGNC:77976]                                                     |
|                             |    | ENSMMUG00000012778 | rabphilin 3A [Source:VGNC Symbol;Acc:VGNC:77033]                                                                     |

|                       |    |                    |                                                                                      |
|-----------------------|----|--------------------|--------------------------------------------------------------------------------------|
|                       |    | ENSMMUG00000017125 | oxysterol binding protein like 11 [Source:VGNC Symbol;Acc:VGNC:75631]                |
|                       |    | ENSMMUG00000058942 |                                                                                      |
|                       |    | ENSMMUG00000022762 | OMA1 zinc metalloproteinase [Source:VGNC Symbol;Acc:VGNC:75485]                      |
|                       |    | ENSMMUG00000001212 | Rieske Fe-S domain containing [Source:VGNC Symbol;Acc:VGNC:84487]                    |
| NS_D1 NS_D2 S_D1 S_D2 | 28 | ENSMMUG00000007765 | Wnt family member 2B [Source:VGNC Symbol;Acc:VGNC:78797]                             |
|                       |    | ENSMMUG00000052382 | histone H4 [Source:NCBI gene;Acc:107000818]                                          |
|                       |    | ENSMMUG00000018031 | solute carrier family 25 member 19 [Source:VGNC Symbol;Acc:VGNC:77474]               |
|                       |    | ENSMMUG00000065031 |                                                                                      |
|                       |    | ENSMMUG00000021114 | G protein-coupled receptor 182 [Source:VGNC Symbol;Acc:VGNC:72936]                   |
|                       |    | ENSMMUG00000065018 | transmembrane protein 35A [Source:NCBI gene;Acc:702205]                              |
|                       |    | ENSMMUG00000014762 | myosin heavy chain 6 [Source:NCBI gene;Acc:713471]                                   |
|                       |    | ENSMMUG00000010379 | Mtr4 exosome RNA helicase [Source:VGNC Symbol;Acc:VGNC:74989]                        |
|                       |    | ENSMMUG00000012101 | synaptogyrin 1 [Source:VGNC Symbol;Acc:VGNC:78068]                                   |
|                       |    | ENSMMUG00000009084 | transmembrane 6 superfamily member 1 [Source:VGNC Symbol;Acc:VGNC:78566]             |
|                       |    | ENSMMUG00000022121 | CASK interacting protein 2 [Source:VGNC Symbol;Acc:VGNC:70577]                       |
|                       |    | ENSMMUG00000006682 | chondroitin polymerizing factor 2 [Source:VGNC Symbol;Acc:VGNC:71131]                |
|                       |    | ENSMMUG00000016610 | CD99 molecule like 2 [Source:VGNC Symbol;Acc:VGNC:70823]                             |
|                       |    | ENSMMUG00000010627 | apelin receptor [Source:VGNC Symbol;Acc:VGNC:69939]                                  |
|                       |    | ENSMMUG00000016052 | seizure related 6 homolog like [Source:VGNC Symbol;Acc:VGNC:77176]                   |
|                       |    | ENSMMUG00000020910 | nucleoporin 54 [Source:VGNC Symbol;Acc:VGNC:75420]                                   |
|                       |    | ENSMMUG00000046282 |                                                                                      |
|                       |    | ENSMMUG00000015371 | microtubule associated serine/threonine kinase 2 [Source:VGNC Symbol;Acc:VGNC:74532] |
|                       |    | ENSMMUG00000049749 |                                                                                      |
|                       |    | ENSMMUG00000044473 |                                                                                      |
|                       |    | ENSMMUG00000061815 |                                                                                      |
|                       |    | ENSMMUG00000017432 | tropomodulin 2 [Source:VGNC Symbol;Acc:VGNC:78571]                                   |
|                       |    | ENSMMUG00000065117 | septin 4 [Source:HGNC Symbol;Acc:HGNC:9165]                                          |
|                       |    | ENSMMUG00000023124 | transmembrane protein 43 [Source:VGNC Symbol;Acc:VGNC:82711]                         |
|                       |    | ENSMMUG00000049859 |                                                                                      |
|                       |    | ENSMMUG00000007561 | zinc finger DHHC-type palmitoyltransferase 22 [Source:NCBI gene;Acc:706468]          |
|                       |    | ENSMMUG00000013029 | surfactant protein C [Source:VGNC Symbol;Acc:VGNC:84113]                             |
|                       |    | ENSMMUG00000021691 | spastin [Source:VGNC Symbol;Acc:VGNC:77857]                                          |
| NS_D1 S_D1 S_D2 S_D3  | 11 | ENSMMUG00000019462 | integrin subunit alpha V [Source:VGNC Symbol;Acc:VGNC:73783]                         |
|                       |    | ENSMMUG00000007875 | F-box and leucine rich repeat protein 12 [Source:VGNC Symbol;Acc:VGNC:72502]         |
|                       |    | ENSMMUG00000022630 | protoporphyrinogen oxidase [Source:VGNC Symbol;Acc:VGNC:76365]                       |
|                       |    | ENSMMUG00000005515 | ATP binding cassette subfamily C member 5 [Source:VGNC Symbol;Acc:VGNC:69574]        |
|                       |    | ENSMMUG00000002894 | dedicator of cytokinesis 4 [Source:VGNC Symbol;Acc:VGNC:71866]                       |
|                       |    | ENSMMUG00000057073 |                                                                                      |
|                       |    | ENSMMUG00000006688 | ER membrane protein complex subunit 1 [Source:VGNC Symbol;Acc:VGNC:72134]            |
|                       |    | ENSMMUG00000004709 | proteasome inhibitor subunit 1 [Source:VGNC Symbol;Acc:VGNC:76458]                   |
|                       |    | ENSMMUG00000043809 | caspase 2 [Source:VGNC Symbol;Acc:VGNC:80804]                                        |
|                       |    | ENSMMUG00000051286 |                                                                                      |
|                       |    | ENSMMUG00000022697 | STEAP4 metalloproteinase [Source:VGNC Symbol;Acc:VGNC:77974]                         |
| NS_D1 NS_D3 S_D1 S_D2 | 4  | ENSMMUG00000001121 | zinc finger protein 689 [Source:VGNC Symbol;Acc:VGNC:79480]                          |
|                       |    | ENSMMUG00000017145 | cell division cycle 123 [Source:VGNC Symbol;Acc:VGNC:70768]                          |
|                       |    | ENSMMUG00000018057 | uromodulin like 1 [Source:VGNC Symbol;Acc:VGNC:78717]                                |
|                       |    | ENSMMUG00000026876 | mml-mir-181a-2 [Source:miRBase;Acc:MI0002808]                                        |
| NS_D1 NS_D2 S_D1 S_D3 | 13 | ENSMMUG00000018490 | ADP ribosylation factor interacting protein 1 [Source:VGNC Symbol;Acc:VGNC:69878]    |
|                       |    | ENSMMUG00000058142 |                                                                                      |
|                       |    | ENSMMUG00000002520 | solute carrier family 4 member 3 [Source:VGNC Symbol;Acc:VGNC:77604]                 |
|                       |    | ENSMMUG00000038051 | uncharacterized LOC106998885 [Source:NCBI gene;Acc:106998885]                        |



ENSMMUG00000017379 myocardin related transcription factor B [Source:VGNC Symbol;Acc:VGNC:74865]  
 ENSMMUG00000016004 acid phosphatase 3 [Source:VGNC Symbol;Acc:VGNC:69385]  
 ENSMMUG00000004849 casein beta [Source:VGNC Symbol;Acc:VGNC:71523]  
 ENSMMUG000000049939  
 ENSMMUG00000008093 StAR related lipid transfer domain containing 9 [Source:NCBI gene;Acc:708953]  
 ENSMMUG000000055783  
 ENSMMUG000000011893 KIAA0513 [Source:VGNC Symbol;Acc:VGNC:73925]  
 ENSMMUG000000064131  
 ENSMMUG000000047276 GTPase, IMAP family member 6 [Source:VGNC Symbol;Acc:VGNC:81315]  
 ENSMMUG000000012029 sulfatase 2 [Source:VGNC Symbol;Acc:VGNC:78179]  
 ENSMMUG000000053344 splA/ryanodine receptor domain and SOCS box containing 4 [Source:NCBI gene;Acc:715278]  
 ENSMMUG000000051112 p53 and DNA damage regulated 1 [Source:NCBI gene;Acc:712622]  
 ENSMMUG000000022484 ITPR interacting domain containing 1 [Source:VGNC Symbol;Acc:VGNC:73667]  
 ENSMMUG000000011810 FAT atypical cadherin 4 [Source:VGNC Symbol;Acc:VGNC:72552]  
 ENSMMUG000000051020 zinc finger protein 467 [Source:NCBI gene;Acc:712106]  
 ENSMMUG000000053648 actin binding transcription modulator [Source:NCBI gene;Acc:710486]  
 ENSMMUG000000062866  
 ENSMMUG000000049437 Metazoan signal recognition particle RNA [Source:RFAM;Acc:RF00017]  
 ENSMMUG000000055271  
 ENSMMUG000000018346 coiled-coil domain containing 170 [Source:VGNC Symbol;Acc:VGNC:70832]  
 ENSMMUG000000061260 Spi-C transcription factor [Source:NCBI gene;Acc:695809]  
 ENSMMUG000000046464 coiled-coil-helix-coiled-coil-helix domain containing 7 [Source:VGNC Symbol;Acc:VGNC:83989]  
 ENSMMUG000000008525 minichromosome maintenance 9 homologous recombination repair factor [Source:VGNC Symbol;Acc:VGNC:83432]  
 ENSMMUG000000008113 pleckstrin homology domain containing M3 [Source:NCBI gene;Acc:711125]  
 ENSMMUG000000018332 family with sequence similarity 98 member B [Source:VGNC Symbol;Acc:VGNC:72583]  
 ENSMMUG000000001894 cyclin dependent kinase 11B [Source:NCBI gene;Acc:703046]  
 ENSMMUG000000001008 spectrin repeat containing nuclear envelope protein 2 [Source:NCBI gene;Acc:706759]  
 ENSMMUG000000058240  
 ENSMMUG000000055272 putative uncharacterized protein ZNRD1-AS1 [Source:NCBI gene;Acc:712069]  
 ENSMMUG000000015619 ATP binding cassette subfamily B member 7 [Source:VGNC Symbol;Acc:VGNC:81340]  
 ENSMMUG000000009520 gephyrin [Source:VGNC Symbol;Acc:VGNC:72948]  
 ENSMMUG000000011573 cap methyltransferase 1 [Source:VGNC Symbol;Acc:VGNC:71271]  
 ENSMMUG000000063268  
 ENSMMUG000000029475 zinc finger and BTB domain containing 2 [Source:VGNC Symbol;Acc:VGNC:79291]  
 ENSMMUG000000052609 ribosomal protein L34 [Source:NCBI gene;Acc:696636]  
 ENSMMUG000000000117 HCK proto-oncogene, Src family tyrosine kinase [Source:VGNC Symbol;Acc:VGNC:73353]  
 ENSMMUG000000044958 adhesion G protein-coupled receptor G6 [Source:VGNC Symbol;Acc:VGNC:81009]  
 ENSMMUG000000022631 ubiquitin specific peptidase 21 [Source:VGNC Symbol;Acc:VGNC:78741]  
 ENSMMUG000000001264 BSD domain containing 1 [Source:VGNC Symbol;Acc:VGNC:70384]  
 ENSMMUG000000012473 proteasome activator subunit 2 [Source:VGNC Symbol;Acc:VGNC:76456]  
 ENSMMUG000000023791 SR-related CTD associated factor 11 [Source:VGNC Symbol;Acc:VGNC:77002]  
 ENSMMUG000000022636 GTPase, IMAP family member 8 [Source:VGNC Symbol;Acc:VGNC:72981]  
 ENSMMUG000000004362 Fc fragment of IgG receptor Ia [Source:NCBI gene;Acc:714664]  
 ENSMMUG000000019836 myocyte enhancer factor 2C [Source:VGNC Symbol;Acc:VGNC:84438]  
 ENSMMUG000000009695 BTB domain containing 10 [Source:VGNC Symbol;Acc:VGNC:70361]  
 ENSMMUG000000016857 prostaglandin-endoperoxide synthase 2 [Source:VGNC Symbol;Acc:VGNC:76589]  
 ENSMMUG000000059101  
 ENSMMUG000000003191 kirre like nephrin family adhesion molecule 1 [Source:VGNC Symbol;Acc:VGNC:73837]  
 ENSMMUG000000001942 mbt domain containing 1 [Source:VGNC Symbol;Acc:VGNC:74538]  
 ENSMMUG000000043411 zinc finger and BTB domain containing 39 [Source:NCBI gene;Acc:713914]  
 ENSMMUG000000002678 integrin subunit beta 6 [Source:VGNC Symbol;Acc:VGNC:73789]

NS\_D1 NS\_D2 NS\_D3 S\_D1

90

ENSMMUG0000005442 5'-nucleotidase ecto [Source:VGNC Symbol;Acc:VGNC:75537]  
 ENSMMUG00000058016 bMERB domain containing 1 [Source:NCBI gene;Acc:713757]  
 ENSMMUG00000015550 PR/SET domain 4 [Source:VGNC Symbol;Acc:VGNC:76393]  
 ENSMMUG00000060798  
 ENSMMUG00000010695 adenosine deaminase RNA specific B1 [Source:VGNC Symbol;Acc:VGNC:69503]  
 ENSMMUG00000020348 BCL2 interacting protein 2 [Source:VGNC Symbol;Acc:VGNC:70272]  
 ENSMMUG0000002434 inhibitor of growth family member 3 [Source:VGNC Symbol;Acc:VGNC:73595]  
 ENSMMUG0000006457 Rho guanine nucleotide exchange factor 40 [Source:VGNC Symbol;Acc:VGNC:69907]  
 ENSMMUG00000012124 ring finger protein 39 [Source:VGNC Symbol;Acc:VGNC:83458]  
 ENSMMUG00000009303 coiled-coil domain containing 38 [Source:VGNC Symbol;Acc:VGNC:70880]  
 ENSMMUG00000049788  
 ENSMMUG00000060932 zinc finger protein 383-like [Source:NCBI gene;Acc:106993074]  
 ENSMMUG00000015151 interleukin 2 receptor subunit alpha [Source:NCBI gene;Acc:574300]  
 ENSMMUG00000013799 ATP binding cassette subfamily G member 4 [Source:VGNC Symbol;Acc:VGNC:69390]  
 ENSMMUG00000043161 endogenous retrovirus group FRD member 1, envelope [Source:VGNC Symbol;Acc:VGNC:81068]  
 ENSMMUG00000042668 cilia and flagella associated protein 61 [Source:NCBI gene;Acc:699814]  
 ENSMMUG00000002093 testis expressed 261 [Source:NCBI gene;Acc:703863]  
 ENSMMUG00000050544  
 ENSMMUG00000022726 dual specificity tyrosine phosphorylation regulated kinase 1B [Source:VGNC Symbol;Acc:VGNC:72016]  
 ENSMMUG00000047994 CGG triplet repeat binding protein 1 [Source:VGNC Symbol;Acc:VGNC:84203]  
 ENSMMUG00000051552  
 ENSMMUG00000051261  
 ENSMMUG00000053008  
 ENSMMUG00000061268 PLAG1 zinc finger [Source:NCBI gene;Acc:696149]  
 ENSMMUG00000007504 myosin VC [Source:VGNC Symbol;Acc:VGNC:75117]  
 ENSMMUG00000011214 solute carrier family 12 member 2 [Source:VGNC Symbol;Acc:VGNC:77386]  
 ENSMMUG00000051936  
 ENSMMUG00000028925 HDGF like 2 [Source:NCBI gene;Acc:693476]  
 ENSMMUG00000001245 zinc finger protein 532 [Source:NCBI gene;Acc:701146]  
 ENSMMUG00000000797 exophilin 5 [Source:VGNC Symbol;Acc:VGNC:72412]  
 ENSMMUG00000011183 olfactomedin like 2A [Source:VGNC Symbol;Acc:VGNC:75472]  
 ENSMMUG00000056303  
 ENSMMUG00000013053 sperm acrosome associated 6 [Source:NCBI gene;Acc:114674203]  
 ENSMMUG00000005067 elongator acetyltransferase complex subunit 3 [Source:VGNC Symbol;Acc:VGNC:72080]  
 ENSMMUG00000038587 prostate and testis expressed 2 [Source:NCBI gene;Acc:717085]  
 ENSMMUG00000006775 proenkephalin [Source:VGNC Symbol;Acc:VGNC:75941]  
 ENSMMUG00000052287  
 ENSMMUG00000017374 G protein subunit beta 5 [Source:VGNC Symbol;Acc:VGNC:73097]  
 ENSMMUG00000055759 Metazoan signal recognition particle RNA [Source:RFAM;Acc:RF00017]  
 ENSMMUG00000062791  
 ENSMMUG00000000667 zinc finger MYM-type containing 3 [Source:VGNC Symbol;Acc:VGNC:78886]  
 ENSMMUG00000048823  
 ENSMMUG00000003987 forkhead associated phosphopeptide binding domain 1 [Source:NCBI gene;Acc:699900]  
 ENSMMUG00000016316 testis associated actin remodelling kinase 1 [Source:VGNC Symbol;Acc:VGNC:78314]  
 ENSMMUG00000059406 RGP1 homolog, RAB6A GEF complex partner 1 [Source:NCBI gene;Acc:695936]  
 ENSMMUG00000056737  
 ENSMMUG00000001918 transmembrane protein 165 [Source:VGNC Symbol;Acc:VGNC:79875]  
 ENSMMUG00000062538 adenylate cyclase type 10 [Source:NCBI gene;Acc:719662]  
 ENSMMUG00000003394 cilia and flagella associated protein 300 [Source:VGNC Symbol;Acc:VGNC:71120]  
 ENSMMUG00000002653 hexokinase 3 [Source:VGNC Symbol;Acc:VGNC:73476]  
 ENSMMUG00000003621 AKT serine/threonine kinase 2 [Source:VGNC Symbol;Acc:VGNC:69777]

|                        |    |                    |                                                                                                              |
|------------------------|----|--------------------|--------------------------------------------------------------------------------------------------------------|
|                        |    | ENSMMUG00000031296 | caspase 8 [Source:VGNC Symbol;Acc:VGNC:70547]                                                                |
|                        |    | ENSMMUG00000005895 | nucleobindin 2 [Source:VGNC Symbol;Acc:VGNC:75549]                                                           |
|                        |    | ENSMMUG00000012561 | NOP2/Sun RNA methyltransferase family member 7 [Source:VGNC Symbol;Acc:VGNC:75463]                           |
|                        |    | ENSMMUG00000003497 | FAT atypical cadherin 2 [Source:VGNC Symbol;Acc:VGNC:72618]                                                  |
|                        |    | ENSMMUG00000033001 | U6 spliceosomal RNA [Source:RFAM;Acc:RF00026]                                                                |
|                        |    | ENSMMUG00000014350 | MAX interactor 1, dimerization protein [Source:VGNC Symbol;Acc:VGNC:75087]                                   |
|                        |    | ENSMMUG00000000059 | DNA topoisomerase II binding protein 1 [Source:VGNC Symbol;Acc:VGNC:79061]                                   |
|                        |    | ENSMMUG00000028800 | solute carrier family 7 member 9 [Source:VGNC Symbol;Acc:VGNC:77633]                                         |
|                        |    | ENSMMUG00000002109 | proline and serine rich 1 [Source:VGNC Symbol;Acc:VGNC:76291]                                                |
| NS_D2 S_D1 S_D2 S_D3   | 2  | ENSMMUG00000052929 |                                                                                                              |
|                        |    | ENSMMUG00000057276 |                                                                                                              |
| NS_D2 NS_D3 S_D1 S_D2  | 5  | ENSMMUG00000057143 | transmembrane protein 127 [Source:NCBI gene;Acc:705069]                                                      |
|                        |    | ENSMMUG00000057031 |                                                                                                              |
|                        |    | ENSMMUG00000060836 |                                                                                                              |
|                        |    | ENSMMUG00000061572 | Metazoan signal recognition particle RNA [Source:RFAM;Acc:RF00017]                                           |
|                        |    | ENSMMUG00000056363 |                                                                                                              |
| NS_D3 S_D1 S_D2 S_D3   | 7  | ENSMMUG00000059267 | pellino E3 ubiquitin protein ligase 1 [Source:NCBI gene;Acc:696416]                                          |
|                        |    | ENSMMUG00000010050 | small nuclear ribonucleoprotein polypeptides B and B1 [Source:VGNC Symbol;Acc:VGNC:77676]                    |
|                        |    | ENSMMUG00000001919 | clock circadian regulator [Source:VGNC Symbol;Acc:VGNC:71262]                                                |
|                        |    | ENSMMUG00000039317 | cAMP responsive element binding protein 5 [Source:VGNC Symbol;Acc:VGNC:81295]                                |
|                        |    | ENSMMUG00000008945 | zinc finger protein 407 [Source:NCBI gene;Acc:695303]                                                        |
|                        |    | ENSMMUG00000060278 | Metazoan signal recognition particle RNA [Source:RFAM;Acc:RF00017]                                           |
|                        |    | ENSMMUG00000056790 |                                                                                                              |
| NS_D2 NS_D3 S_D1 S_D3  | 1  | ENSMMUG00000021053 | annexin A6 [Source:VGNC Symbol;Acc:VGNC:69951]                                                               |
| NS_D1 NS_D2 S_D2 S_D3  | 1  | ENSMMUG00000058583 | RRAD and GEM like GTPase 1 [Source:NCBI gene;Acc:713351]                                                     |
| NS_D1 NS_D2 NS_D3 S_D2 | 6  | ENSMMUG00000010508 | carbamoyl-phosphate synthase 1 [Source:VGNC Symbol;Acc:VGNC:71471]                                           |
|                        |    | ENSMMUG00000002947 | procollagen C-endopeptidase enhancer [Source:VGNC Symbol;Acc:VGNC:75782]                                     |
|                        |    | ENSMMUG00000002332 | RNA binding motif protein 25 [Source:VGNC Symbol;Acc:VGNC:76521]                                             |
|                        |    | ENSMMUG00000056687 |                                                                                                              |
|                        |    | ENSMMUG00000052642 | protein O-glucosyltransferase 2 [Source:NCBI gene;Acc:702156]                                                |
|                        |    | ENSMMUG00000010543 | PHD finger protein 23 [Source:VGNC Symbol;Acc:VGNC:75877]                                                    |
| NS_D1 NS_D3 S_D2 S_D3  | 2  | ENSMMUG00000023249 | aryl hydrocarbon receptor nuclear translocator like 2 [Source:NCBI gene;Acc:709547]                          |
|                        |    | ENSMMUG00000002321 | solute carrier family 24 member 3 [Source:VGNC Symbol;Acc:VGNC:77426]                                        |
|                        |    |                    | methylenetetrahydrofolate dehydrogenase, cyclohydrolase and formyltetrahydrofolate synthetase 1 [Source:VGNC |
| NS_D1 NS_D2 NS_D3 S_D3 | 8  | ENSMMUG00000001319 | Symbol;Acc:VGNC:84399]                                                                                       |
|                        |    | ENSMMUG00000008795 | polycystin 2, transient receptor potential cation channel [Source:NCBI gene;Acc:702179]                      |
|                        |    | ENSMMUG00000015577 | RIO kinase 1 [Source:VGNC Symbol;Acc:VGNC:76767]                                                             |
|                        |    | ENSMMUG00000022624 | putative speedy protein E16 [Source:NCBI gene;Acc:718058]                                                    |
|                        |    | ENSMMUG00000054462 |                                                                                                              |
|                        |    | ENSMMUG00000022305 | Rho guanine nucleotide exchange factor 1 [Source:VGNC Symbol;Acc:VGNC:70012]                                 |
|                        |    | ENSMMUG00000061761 | interferon induced protein with tetratricopeptide repeats 2 [Source:NCBI gene;Acc:695452]                    |
|                        |    | ENSMMUG00000055447 | MDM2 proto-oncogene [Source:NCBI gene;Acc:718284]                                                            |
| NS_D2 NS_D3 S_D2 S_D3  | 2  | ENSMMUG00000061239 |                                                                                                              |
|                        |    | ENSMMUG00000006251 | argonate RISC component 1 [Source:VGNC Symbol;Acc:VGNC:81346]                                                |
| NS_D1 S_D1 S_D2        | 15 | ENSMMUG00000007246 | myotubularin related protein 11 [Source:VGNC Symbol;Acc:VGNC:75016]                                          |
|                        |    | ENSMMUG00000022056 | DENN domain containing 4A [Source:VGNC Symbol;Acc:VGNC:71697]                                                |
|                        |    | ENSMMUG00000059773 | methyltransferase like 11B [Source:NCBI gene;Acc:705503]                                                     |
|                        |    | ENSMMUG00000021914 | spondin 1 [Source:VGNC Symbol;Acc:VGNC:77862]                                                                |
|                        |    | ENSMMUG00000019815 | transcription factor AP-2 epsilon [Source:VGNC Symbol;Acc:VGNC:79878]                                        |
|                        |    | ENSMMUG00000008639 | tumor protein p53 [Source:VGNC Symbol;Acc:VGNC:78627]                                                        |
|                        |    | ENSMMUG00000016906 | F-box and leucine rich repeat protein 16 [Source:VGNC Symbol;Acc:VGNC:81405]                                 |

NS\_D1 NS\_D2 S\_D1

93 ENSMMUG00000011469 germ cell nuclear acidic peptidase [Source:VGNC Symbol;Acc:VGNC:72724]  
ENSMMUG00000012338 G protein-coupled receptor 183 [Source:VGNC Symbol;Acc:VGNC:73042]  
ENSMMUG00000004674 phosphoribosyl pyrophosphate synthetase 1 [Source:NCBI gene;Acc:702529]  
ENSMMUG00000052977 putative protein FAM106C [Source:NCBI gene;Acc:106994084]  
ENSMMUG00000045446  
ENSMMUG00000061433  
ENSMMUG00000040764 alcohol dehydrogenase 1A [Source:NCBI gene;Acc:100424103]  
ENSMMUG00000059986  
ENSMMUG00000053036  
ENSMMUG00000013035 teashirt zinc finger homeobox 2 [Source:VGNC Symbol;Acc:VGNC:78875]  
ENSMMUG00000061068  
ENSMMUG00000000618 gametogenetin binding protein 2 [Source:VGNC Symbol;Acc:VGNC:72746]  
ENSMMUG00000000205 transmembrane protein 117 [Source:VGNC Symbol;Acc:VGNC:79488]  
ENSMMUG00000019045 estrogen receptor 1 [Source:VGNC Symbol;Acc:VGNC:72432]  
ENSMMUG00000018081 ubiquitin associated and SH3 domain containing A [Source:VGNC Symbol;Acc:VGNC:78687]  
ENSMMUG00000062021  
ENSMMUG00000002497 zinc finger protein 777 [Source:HGNC Symbol;Acc:HGNC:22213]  
ENSMMUG00000013032 phytanoyl-CoA 2-hydroxylase interacting protein [Source:VGNC Symbol;Acc:VGNC:75812]  
ENSMMUG00000044047 killer cell lectin like receptor B1 [Source:NCBI gene;Acc:100430783]  
ENSMMUG00000065008  
ENSMMUG00000006553 dishevelled segment polarity protein 3 [Source:VGNC Symbol;Acc:VGNC:72014]  
ENSMMUG00000021377 SPT3 homolog, SAGA and STAGA complex component [Source:VGNC Symbol;Acc:VGNC:78055]  
ENSMMUG00000018679 glyceraldehyde-3-phosphate dehydrogenase [Source:NCBI gene;Acc:574353]  
ENSMMUG00000052786  
ENSMMUG00000012467 family with sequence similarity 227 member A [Source:VGNC Symbol;Acc:VGNC:72475]  
ENSMMUG00000024186 U1 spliceosomal RNA [Source:RFAM;Acc:RF00003]  
ENSMMUG00000054532  
ENSMMUG00000061834  
ENSMMUG00000000669 gap junction protein beta 1 [Source:VGNC Symbol;Acc:VGNC:73059]  
ENSMMUG00000019148 vitronectin [Source:NCBI gene;Acc:708499]  
ENSMMUG00000060527  
ENSMMUG00000014531 transmembrane protein 109 [Source:VGNC Symbol;Acc:VGNC:79740]  
ENSMMUG00000064458  
ENSMMUG00000061117  
ENSMMUG00000063655 sodium voltage-gated channel beta subunit 4 [Source:NCBI gene;Acc:100430940]  
ENSMMUG00000007920 myosin XIX [Source:VGNC Symbol;Acc:VGNC:75026]  
ENSMMUG00000023443 SRR1 domain containing [Source:VGNC Symbol;Acc:VGNC:78036]  
ENSMMUG00000005923 failed axon connections homolog, metaxin like GST domain containing [Source:VGNC Symbol;Acc:VGNC:72541]  
ENSMMUG00000009958 ankyrin repeat domain 46 [Source:VGNC Symbol;Acc:VGNC:69719]  
ENSMMUG00000007775 survival motor neuron domain containing 1 [Source:NCBI gene;Acc:694761]  
ENSMMUG00000001294 FCH and double SH3 domains 2 [Source:VGNC Symbol;Acc:VGNC:72593]  
ENSMMUG00000045105 phospholipase A and acyltransferase 4 [Source:NCBI gene;Acc:722189]  
ENSMMUG00000022123 tRNA splicing endonuclease subunit 54 [Source:VGNC Symbol;Acc:VGNC:79666]  
ENSMMUG00000052282  
ENSMMUG00000012332 UBA domain containing 2 [Source:NCBI gene;Acc:703484]  
ENSMMUG00000019854 transmembrane protein 108 [Source:VGNC Symbol;Acc:VGNC:79714]  
ENSMMUG00000022601 cAMP responsive element binding protein 1 [Source:VGNC Symbol;Acc:VGNC:71485]  
ENSMMUG00000010114 Ras and Rab interactor 2 [Source:VGNC Symbol;Acc:VGNC:76770]  
ENSMMUG00000007244 OTU deubiquitinase 7B [Source:VGNC Symbol;Acc:VGNC:75634]  
ENSMMUG00000015414 family with sequence similarity 160 member B1 [Source:VGNC Symbol;Acc:VGNC:72403]  
ENSMMUG00000012209 CYLD lysine 63 deubiquitinase [Source:VGNC Symbol;Acc:VGNC:71581]

ENSMMUG00000023012 vesicle trafficking 1 [Source:VGNC Symbol;Acc:VGNC:79296]  
 ENSMMUG00000018493 FH2 domain containing 1 [Source:VGNC Symbol;Acc:VGNC:72598]  
 ENSMMUG00000017355 remodeling and spacing factor 1 [Source:VGNC Symbol;Acc:VGNC:77044]  
 ENSMMUG00000005610 protein tyrosine phosphatase non-receptor type 4 [Source:VGNC Symbol;Acc:VGNC:76605]  
 ENSMMUG00000062413 CCAAT enhancer binding protein gamma [Source:NCBI gene;Acc:704322]  
 ENSMMUG00000022927 RCAN family member 3 [Source:VGNC Symbol;Acc:VGNC:76875]  
 ENSMMUG00000000690 catenin alpha like 1 [Source:VGNC Symbol;Acc:VGNC:71544]  
 ENSMMUG00000046218 X antigen family member 5 [Source:NCBI gene;Acc:114669729]  
 ENSMMUG00000020898 cap binding complex dependent translation initiation factor [Source:HGNC Symbol;Acc:HGNC:23925]  
 ENSMMUG00000004754 intermediate filament family orphan 2 [Source:NCBI gene;Acc:106995162]  
 ENSMMUG00000023076 diacylglycerol kinase eta [Source:VGNC Symbol;Acc:VGNC:71786]  
 ENSMMUG00000007766 suppression of tumorigenicity 7 like [Source:VGNC Symbol;Acc:VGNC:77954]  
 ENSMMUG00000062861  
 ENSMMUG00000000663 guanylate-binding protein 6-like [Source:NCBI gene;Acc:695158]  
 ENSMMUG00000062676  
 ENSMMUG00000000620 dehydrogenase/reductase 11 [Source:VGNC Symbol;Acc:VGNC:71792]  
 ENSMMUG00000056147  
 ENSMMUG00000029197 YY1 transcription factor [Source:NCBI gene;Acc:717370]  
 ENSMMUG00000043922 spermatogenesis associated 48 [Source:VGNC Symbol;Acc:VGNC:81762]  
 ENSMMUG00000052791  
 ENSMMUG00000005042 RAB, member RAS oncogene family like 6 [Source:VGNC Symbol;Acc:VGNC:76529]  
 ENSMMUG00000023558 exocyst complex component 2 [Source:VGNC Symbol;Acc:VGNC:72338]  
 ENSMMUG00000004208 serine dehydratase [Source:VGNC Symbol;Acc:VGNC:77148]  
 ENSMMUG00000018939 leucine rich repeat containing 66 [Source:VGNC Symbol;Acc:VGNC:74415]  
 ENSMMUG00000049575 T cell receptor beta variable 7-2 [Source:HGNC Symbol;Acc:HGNC:12236]  
 ENSMMUG00000006215 serine/threonine kinase 39 [Source:VGNC Symbol;Acc:VGNC:81587]  
 ENSMMUG00000051429  
 ENSMMUG00000051768  
 ENSMMUG00000014810 short chain dehydrogenase/reductase family 16C member 5 [Source:VGNC Symbol;Acc:VGNC:77343]  
 ENSMMUG00000054176 methyltransferase like 8 [Source:NCBI gene;Acc:695361]  
 ENSMMUG00000020377 collagen type VI alpha 5 chain [Source:NCBI gene;Acc:719331]  
 ENSMMUG00000016723 zinc finger protein 287 [Source:NCBI gene;Acc:695524]  
 ENSMMUG00000051670  
 ENSMMUG00000015041 CWC27 spliceosome associated cyclophilin [Source:VGNC Symbol;Acc:VGNC:71396]  
 ENSMMUG00000007257 synaptic vesicle glycoprotein 2A [Source:VGNC Symbol;Acc:VGNC:78181]  
 ENSMMUG00000031821 chymotrypsin-like elastase family member 2B [Source:NCBI gene;Acc:106992406]  
 ENSMMUG00000016135 neural precursor cell expressed, developmentally down-regulated 9 [Source:VGNC Symbol;Acc:VGNC:75304]  
 ENSMMUG00000053550  
 ENSMMUG00000007215 X-box binding protein 1 [Source:VGNC Symbol;Acc:VGNC:78806]  
 ENSMMUG00000007250 RNA binding motif protein 28 [Source:VGNC Symbol;Acc:VGNC:76519]  
 ENSMMUG00000063262  
 ENSMMUG00000021775 beta-1,3-galactosyltransferase 1 [Source:VGNC Symbol;Acc:VGNC:70204]  
 ENSMMUG00000050862  
 ENSMMUG00000002961 G protein subunit alpha 11 [Source:VGNC Symbol;Acc:VGNC:73085]  
 ENSMMUG00000022120 transmembrane protein 94 [Source:VGNC Symbol;Acc:VGNC:79760]  
 ENSMMUG00000054953 leucine rich repeat containing 10 [Source:NCBI gene;Acc:114669753]  
 ENSMMUG00000057021 CLOCK interacting pacemaker [Source:NCBI gene;Acc:704679]  
 ENSMMUG00000057651 frizzled class receptor 5 [Source:NCBI gene;Acc:710796]  
 ENSMMUG00000007968 hedgehog interacting protein [Source:VGNC Symbol;Acc:VGNC:73169]  
 ENSMMUG00000019145 TNF alpha induced protein 1 [Source:VGNC Symbol;Acc:VGNC:78578]  
 27 ENSMMUG00000054719

ENSMMUG00000060167  
 ENSMMUG00000018525 presenilin 2 [Source:VGNC Symbol;Acc:VGNC:76436]  
 ENSMMUG00000048232 MINDY family member 4B [Source:VGNC Symbol;Acc:VGNC:84153]  
 ENSMMUG00000006768 coiled-coil domain containing 196 [Source:VGNC Symbol;Acc:VGNC:70828]  
 ENSMMUG00000006842 doublecortin domain containing 1 [Source:NCBI gene;Acc:696721]  
 ENSMMUG00000052651 Metazoan signal recognition particle RNA [Source:RFAM;Acc:RF00017]  
 ENSMMUG00000023401 adhesion G protein-coupled receptor B2 [Source:VGNC Symbol;Acc:VGNC:69598]  
 ENSMMUG00000059327 NUS1 dehydrodolichyl diphosphate synthase subunit [Source:NCBI gene;Acc:715015]  
 ENSMMUG00000017593 CD3e molecule [Source:VGNC Symbol;Acc:VGNC:70764]  
 ENSMMUG00000008918 SRP receptor subunit beta [Source:VGNC Symbol;Acc:VGNC:77980]  
 ENSMMUG00000001549 ATPase family AAA domain-containing protein 3A-like [Source:NCBI gene;Acc:114674453]  
 ENSMMUG00000008916 transferrin [Source:VGNC Symbol;Acc:VGNC:82716]  
 ENSMMUG00000053541  
 ENSMMUG00000008781 BCL6 corepressor like 1 [Source:VGNC Symbol;Acc:VGNC:70131]  
 ENSMMUG00000058836 transmembrane p24 trafficking protein 2 [Source:NCBI gene;Acc:106992483]  
 ENSMMUG00000014474 SPARC related modular calcium binding 2 [Source:VGNC Symbol;Acc:VGNC:83470]  
 ENSMMUG00000016893 solute carrier family 9 member A1 [Source:VGNC Symbol;Acc:VGNC:82241]  
 ENSMMUG00000020436 potassium voltage-gated channel subfamily H member 2 [Source:VGNC Symbol;Acc:VGNC:73980]  
 ENSMMUG00000021168 unc-5 family C-terminal like [Source:VGNC Symbol;Acc:VGNC:79314]  
 ENSMMUG00000004091 transcription factor 12 [Source:VGNC Symbol;Acc:VGNC:78283]  
 ENSMMUG00000001374 supervillin [Source:NCBI gene;Acc:695267]  
 ENSMMUG00000022044 scavenger receptor class A member 5 [Source:VGNC Symbol;Acc:VGNC:77117]  
 ENSMMUG00000008919 RAB6B, member RAS oncogene family [Source:VGNC Symbol;Acc:VGNC:81547]  
 ENSMMUG00000019857 beaded filament structural protein 2 [Source:VGNC Symbol;Acc:VGNC:70245]  
 ENSMMUG00000002176 ubiquitin like with PHD and ring finger domains 2 [Source:VGNC Symbol;Acc:VGNC:78714]  
 ENSMMUG00000023226 RNA polymerase III subunit D [Source:VGNC Symbol;Acc:VGNC:76017]  
 26 ENSMMUG00000017628 pleckstrin homology domain containing A7 [Source:VGNC Symbol;Acc:VGNC:76121]  
 ENSMMUG00000013707 heat shock protein family H (Hsp110) member 1 [Source:NCBI gene;Acc:721956]  
 ENSMMUG00000051523 Metazoan signal recognition particle RNA [Source:RFAM;Acc:RF00017]  
 ENSMMUG00000001640 SIX homeobox 4 [Source:NCBI gene;Acc:703798]  
 ENSMMUG00000001892 UDP-glucose 6-dehydrogenase [Source:VGNC Symbol;Acc:VGNC:78711]  
 ENSMMUG00000016543 CREB/ATF bZIP transcription factor [Source:VGNC Symbol;Acc:VGNC:71538]  
 ENSMMUG00000023810 methionyl-tRNA synthetase 2, mitochondrial [Source:VGNC Symbol;Acc:VGNC:74572]  
 ENSMMUG00000003288 glutamic--pyruvic transaminase 2 [Source:VGNC Symbol;Acc:VGNC:72962]  
 ENSMMUG00000000058 CDV3 homolog [Source:VGNC Symbol;Acc:VGNC:71114]  
 ENSMMUG00000059938  
 ENSMMUG00000006217 general transcription factor IIH subunit 2 [Source:NCBI gene;Acc:700737]  
 ENSMMUG00000015640 AF4/FMR2 family member 4 [Source:VGNC Symbol;Acc:VGNC:69629]  
 ENSMMUG00000017396 3'(2'), 5'-bisphosphate nucleotidase 1 [Source:NCBI gene;Acc:721277]  
 ENSMMUG00000023083 A-kinase anchoring protein 11 [Source:VGNC Symbol;Acc:VGNC:69765]  
 ENSMMUG00000058933  
 ENSMMUG00000020435 amine oxidase copper containing 1 [Source:VGNC Symbol;Acc:VGNC:70033]  
 ENSMMUG00000061590  
 ENSMMUG00000050923  
 ENSMMUG00000031202 RAB1B, member RAS oncogene family [Source:NCBI gene;Acc:721852]  
 ENSMMUG00000018976 adhesion G protein-coupled receptor V1 [Source:VGNC Symbol;Acc:VGNC:69625]  
 ENSMMUG00000020036 Sp1 transcription factor [Source:VGNC Symbol;Acc:VGNC:77844]  
 ENSMMUG00000063463  
 ENSMMUG00000014955 nuclear receptor subfamily 3 group C member 2 [Source:VGNC Symbol;Acc:VGNC:75516]  
 ENSMMUG00000008539 uroporphyrinogen III synthase [Source:VGNC Symbol;Acc:VGNC:78731]  
 ENSMMUG00000018163 caspase 9 [Source:NCBI gene;Acc:694544]

NS\_D1 NS\_D3 S\_D1



|                   |     |                     |                                                                                              |
|-------------------|-----|---------------------|----------------------------------------------------------------------------------------------|
|                   |     | ENSMMUG00000014809  | heterogeneous nuclear ribonucleoprotein C [Source:VGNC Symbol;Acc:VGNC:84348]                |
| NS_D2 S_D1 S_D2   | 2   | ENSMMUG00000004791  | pleckstrin homology domain containing B1 [Source:VGNC Symbol;Acc:VGNC:76069]                 |
|                   |     | ENSMMUG000000050864 |                                                                                              |
| S_D1 S_D2 S_D3    | 6   | ENSMMUG000000061035 | ZFP82 zinc finger protein [Source:NCBI gene;Acc:719145]                                      |
|                   |     | ENSMMUG00000004606  | EMAP like 5 [Source:VGNC Symbol;Acc:VGNC:72067]                                              |
|                   |     | ENSMMUG000000021051 | TNFAIP3 interacting protein 1 [Source:VGNC Symbol;Acc:VGNC:79057]                            |
|                   |     | ENSMMUG000000021169 | translocator protein 2 [Source:VGNC Symbol;Acc:VGNC:83960]                                   |
|                   |     | ENSMMUG000000055590 |                                                                                              |
|                   |     | ENSMMUG000000017378 | steroid sulfatase [Source:VGNC Symbol;Acc:VGNC:81590]                                        |
| NS_D3 S_D1 S_D2   | 1   | ENSMMUG000000052605 | Metazoan signal recognition particle RNA [Source:RFAM;Acc:RF00017]                           |
| NS_D2 NS_D3 S_D1  | 11  | ENSMMUG000000002250 | beta-1,3-glucuronyltransferase 1 [Source:VGNC Symbol;Acc:VGNC:70207]                         |
|                   |     | ENSMMUG000000018739 | sperm flagellar 2 [Source:VGNC Symbol;Acc:VGNC:82243]                                        |
|                   |     | ENSMMUG000000057302 |                                                                                              |
|                   |     | ENSMMUG000000009087 | HDGF like 3 [Source:VGNC Symbol;Acc:VGNC:84346]                                              |
|                   |     | ENSMMUG000000063668 | cytochrome b5 domain containing 1 [Source:NCBI gene;Acc:716429]                              |
|                   |     | ENSMMUG000000009702 | mutS homolog 5 [Source:NCBI gene;Acc:715494]                                                 |
|                   |     | ENSMMUG000000051169 |                                                                                              |
|                   |     | ENSMMUG000000016331 | glucosylceramidase beta 2 [Source:VGNC Symbol;Acc:VGNC:72741]                                |
|                   |     | ENSMMUG000000017206 | SHOC2 leucine rich repeat scaffold protein [Source:VGNC Symbol;Acc:VGNC:81569]               |
|                   |     | ENSMMUG000000007187 | haloacid dehalogenase like hydrolase domain containing 3 [Source:VGNC Symbol;Acc:VGNC:73250] |
|                   |     | ENSMMUG000000012690 | myocardial zonula adherens protein [Source:NCBI gene;Acc:700247]                             |
| NS_D1 NS_D2 S_D2  | 2   | ENSMMUG000000012953 | stress induced phosphoprotein 1 [Source:NCBI gene;Acc:717926]                                |
|                   |     | ENSMMUG000000000972 | tyrosine kinase non receptor 2 [Source:VGNC Symbol;Acc:VGNC:79192]                           |
| NS_D1 NS_D3 S_D2  | 2   | ENSMMUG000000007159 | tubulin epsilon and delta complex 1 [Source:VGNC Symbol;Acc:VGNC:79235]                      |
|                   |     | ENSMMUG000000020184 | carboxypeptidase vitellogenic like [Source:VGNC Symbol;Acc:VGNC:71406]                       |
| NS_D1 NS_D2 S_D3  | 3   | ENSMMUG000000005634 | ribonuclease L [Source:VGNC Symbol;Acc:VGNC:82223]                                           |
|                   |     | ENSMMUG000000002370 | integrin subunit alpha 6 [Source:VGNC Symbol;Acc:VGNC:73780]                                 |
|                   |     | ENSMMUG000000008713 | myosin binding protein H like [Source:NCBI gene;Acc:698183]                                  |
| NS_D1 NS_D2 NS_D3 | 112 | ENSMMUG000000023752 | SIX homeobox 2 [Source:VGNC Symbol;Acc:VGNC:81570]                                           |
|                   |     | ENSMMUG000000050245 |                                                                                              |
|                   |     | ENSMMUG000000014997 | spalt like transcription factor 2 [Source:NCBI gene;Acc:708367]                              |
|                   |     | ENSMMUG000000056824 |                                                                                              |
|                   |     | ENSMMUG000000015168 | transmembrane p24 trafficking protein 10 [Source:NCBI gene;Acc:701522]                       |
|                   |     | ENSMMUG000000016871 | alkaline phosphatase, intestinal [Source:VGNC Symbol;Acc:VGNC:69800]                         |
|                   |     | ENSMMUG000000053624 |                                                                                              |
|                   |     | ENSMMUG000000059922 | family with sequence similarity 104 member B [Source:NCBI gene;Acc:705418]                   |
|                   |     | ENSMMUG000000009831 | TBC1 domain family member 2 [Source:VGNC Symbol;Acc:VGNC:78157]                              |
|                   |     | ENSMMUG000000051190 | Metazoan signal recognition particle RNA [Source:RFAM;Acc:RF00017]                           |
|                   |     | ENSMMUG000000025616 |                                                                                              |
|                   |     | ENSMMUG000000002032 | exportin 7 [Source:VGNC Symbol;Acc:VGNC:78946]                                               |
|                   |     | ENSMMUG000000052460 |                                                                                              |
|                   |     | ENSMMUG000000010113 | steroid 5 alpha-reductase 3 [Source:VGNC Symbol;Acc:VGNC:82246]                              |
|                   |     | ENSMMUG000000060536 |                                                                                              |
|                   |     | ENSMMUG000000004287 | death domain associated protein [Source:VGNC Symbol;Acc:VGNC:71737]                          |
|                   |     | ENSMMUG000000026103 | U1 spliceosomal RNA [Source:RFAM;Acc:RF00003]                                                |
|                   |     | ENSMMUG000000049117 | CLU1 antisense RNA 1 [Source:NCBI gene;Acc:100424000]                                        |
|                   |     | ENSMMUG000000016286 | protease, serine, 1 (trypsin 1) [Source:NCBI gene;Acc:698729]                                |
|                   |     | ENSMMUG000000016845 | zinc finger E-box binding homeobox 2 [Source:VGNC Symbol;Acc:VGNC:78969]                     |
|                   |     | ENSMMUG000000001800 | cullin 5 [Source:VGNC Symbol;Acc:VGNC:71570]                                                 |
|                   |     | ENSMMUG000000007868 | AP2 associated kinase 1 [Source:VGNC Symbol;Acc:VGNC:82094]                                  |
|                   |     | ENSMMUG000000022724 |                                                                                              |

ENSMMUG00000054302 antioxidant 1 copper chaperone [Source:NCBI gene;Acc:712464]  
ENSMMUG0000000718 ERCC excision repair 1, endonuclease non-catalytic subunit [Source:VGNC Symbol;Acc:VGNC:72422]  
ENSMMUG00000061344  
ENSMMUG00000002649 unc-5 netrin receptor A [Source:VGNC Symbol;Acc:VGNC:78721]  
ENSMMUG0000000229 transient receptor potential cation channel subfamily C member 4 associated protein [Source:VGNC Symbol;Acc:VGNC:79014]  
ENSMMUG00000031736  
ENSMMUG00000004052 phosphodiesterase 12 [Source:VGNC Symbol;Acc:VGNC:75863]  
ENSMMUG00000022676 ribosomal modification protein rimK like family member B [Source:NCBI gene;Acc:722261]  
ENSMMUG00000060455  
ENSMMUG00000014027 nitric oxide synthase 1 [Source:VGNC Symbol;Acc:VGNC:75368]  
ENSMMUG00000004387 ring finger protein 19A, RBR E3 ubiquitin protein ligase [Source:VGNC Symbol;Acc:VGNC:82224]  
ENSMMUG00000013907 ribosomal protein S27a [Source:NCBI gene;Acc:718909]  
ENSMMUG00000022589 prostate transmembrane protein, androgen induced 1 [Source:VGNC Symbol;Acc:VGNC:76023]  
ENSMMUG00000008632 myosin, light chain 6, alkali, smooth muscle and non-muscle-like [Source:NCBI gene;Acc:710137]  
ENSMMUG00000056165  
ENSMMUG00000004566 zinc finger protein 124 [Source:VGNC Symbol;Acc:VGNC:78836]  
ENSMMUG00000022656 perilipin 4 [Source:NCBI gene;Acc:693610]  
ENSMMUG00000023446 tuftelin interacting protein 11 [Source:VGNC Symbol;Acc:VGNC:78399]  
ENSMMUG00000053889 olfactory receptor 7C1 [Source:NCBI gene;Acc:114674087]  
ENSMMUG00000020812 A-kinase anchoring protein 3 [Source:VGNC Symbol;Acc:VGNC:69769]  
ENSMMUG00000059038 5-hydroxytryptamine receptor 7 [Source:NCBI gene;Acc:696317]  
ENSMMUG00000013503 mannose-P-dolichol utilization defect 1 [Source:VGNC Symbol;Acc:VGNC:74913]  
ENSMMUG00000008710 protocadherin 1 [Source:VGNC Symbol;Acc:VGNC:75775]  
ENSMMUG00000056910  
ENSMMUG00000058332 testis expressed 46 [Source:NCBI gene;Acc:709002]  
ENSMMUG00000051155 U2 spliceosomal RNA [Source:RFAM;Acc:RF00004]  
ENSMMUG00000037806 chromosome 6 C5orf63 homolog [Source:NCBI gene;Acc:100423212]  
ENSMMUG00000061594  
ENSMMUG00000060579  
ENSMMUG00000049786  
ENSMMUG00000003877 KAT8 regulatory NSL complex subunit 2 [Source:VGNC Symbol;Acc:VGNC:73910]  
ENSMMUG00000015004 TOX high mobility group box family member 4 [Source:NCBI gene;Acc:706950]  
ENSMMUG00000017173 heat shock protein family A (Hsp70) member 14 [Source:NCBI gene;Acc:697257]  
ENSMMUG00000017892 RNA polymerase I subunit E [Source:VGNC Symbol;Acc:VGNC:76047]  
ENSMMUG00000011401 amyloid beta precursor protein binding family A member 1 [Source:VGNC Symbol;Acc:VGNC:69976]  
ENSMMUG00000051522 Metazoan signal recognition particle RNA [Source:RFAM;Acc:RF00017]  
ENSMMUG00000003221 DENN domain containing 5B [Source:VGNC Symbol;Acc:VGNC:71772]  
ENSMMUG00000021507 chromosome 2 C3orf38 homolog [Source:VGNC Symbol;Acc:VGNC:70654]  
ENSMMUG00000031965 aminolevulinate dehydratase [Source:VGNC Symbol;Acc:VGNC:69779]  
ENSMMUG00000028701  
ENSMMUG00000051999  
ENSMMUG00000012151 glycerol kinase 5 [Source:VGNC Symbol;Acc:VGNC:73022]  
ENSMMUG00000052518 SIVA1 apoptosis inducing factor [Source:NCBI gene;Acc:706688]  
ENSMMUG00000007001 protein phosphatase 4 regulatory subunit 3B [Source:VGNC Symbol;Acc:VGNC:76342]  
ENSMMUG00000060062  
ENSMMUG00000021534 solute carrier family 16 member 10 [Source:NCBI gene;Acc:696132]  
ENSMMUG00000018972 RNA polymerase III subunit G [Source:VGNC Symbol;Acc:VGNC:84480]  
ENSMMUG00000005751 adenosine deaminase tRNA specific 1 [Source:VGNC Symbol;Acc:VGNC:69504]  
ENSMMUG00000064202  
ENSMMUG00000037485  
ENSMMUG00000043682 mitochondrial carrier 2 [Source:NCBI gene;Acc:712767]

ENSMMUG00000044782  
 ENSMMUG0000003973 autophagy related 2A [Source:VGNC Symbol;Acc:VGNC:70145]  
 ENSMMUG00000018827 multiple EGF like domains 10 [Source:VGNC Symbol;Acc:VGNC:74617]  
 ENSMMUG0000006309 unc-5 netrin receptor C [Source:VGNC Symbol;Acc:VGNC:78723]  
 ENSMMUG00000016077 isocitrate dehydrogenase (NADP(+)) 1 [Source:NCBI gene;Acc:710019]  
 ENSMMUG00000022625 periaxin [Source:VGNC Symbol;Acc:VGNC:76248]  
 ENSMMUG00000063703  
 ENSMMUG00000024598 U6 spliceosomal RNA [Source:RFAM;Acc:RF00026]  
 ENSMMUG0000007255 microtubule associated protein 1A [Source:VGNC Symbol;Acc:VGNC:74489]  
 ENSMMUG00000032892 U6 spliceosomal RNA [Source:RFAM;Acc:RF00026]  
 ENSMMUG00000060505  
 ENSMMUG00000060830  
 ENSMMUG0000009782 C-C motif chemokine ligand 7 [Source:NCBI gene;Acc:714751]  
 ENSMMUG00000056544  
 ENSMMUG00000043727 zinc finger protein 654 [Source:VGNC Symbol;Acc:VGNC:82560]  
 ENSMMUG00000061779  
 ENSMMUG00000054817 immunoglobulin binding protein 1 [Source:NCBI gene;Acc:694632]  
 ENSMMUG00000055835 nuclear casein kinase and cyclin dependent kinase substrate 1 [Source:NCBI gene;Acc:697298]  
 ENSMMUG00000060503 Metazoan signal recognition particle RNA [Source:RFAM;Acc:RF00017]  
 ENSMMUG00000015702 divergent protein kinase domain 1C [Source:NCBI gene;Acc:699537]  
 ENSMMUG00000044628  
 ENSMMUG00000001172 spermatogenesis and oogenesis specific basic helix-loop-helix 2 [Source:NCBI gene;Acc:693608]  
 ENSMMUG00000005181 RAB3C, member RAS oncogene family [Source:VGNC Symbol;Acc:VGNC:81541]  
 ENSMMUG00000048322 eva-1 homolog A, regulator of programmed cell death [Source:NCBI gene;Acc:710843]  
 ENSMMUG00000007524 RNA polymerase II subunit H [Source:VGNC Symbol;Acc:VGNC:76216]  
 ENSMMUG00000051661  
 ENSMMUG00000044537 DNA polymerase epsilon 3, accessory subunit [Source:NCBI gene;Acc:705074]  
 ENSMMUG00000049539  
 ENSMMUG00000012474 ring finger protein 31 [Source:NCBI gene;Acc:715239]  
 ENSMMUG00000008459 pleckstrin homology and RUN domain containing M1 [Source:NCBI gene;Acc:716464]  
 ENSMMUG00000004386 sperm associated antigen 1 [Source:VGNC Symbol;Acc:VGNC:77849]  
 ENSMMUG00000052817 Sp7 transcription factor [Source:NCBI gene;Acc:702575]  
 ENSMMUG00000054821  
 ENSMMUG00000023141 CDC like kinase 2 [Source:VGNC Symbol;Acc:VGNC:71259]  
 ENSMMUG00000021331 EBF family member 4 [Source:VGNC Symbol;Acc:VGNC:71932]  
 ENSMMUG00000017931 gamma-glutamyltransferase 7 [Source:VGNC Symbol;Acc:VGNC:72921]  
 ENSMMUG00000059115  
 ENSMMUG00000019105 RNA 3'-terminal phosphate cyclase [Source:VGNC Symbol;Acc:VGNC:77043]  
 NS\_D1 NS\_D3 S\_D3 7 ENSMMUG00000032973 mml-mir-550 [Source:miRBase;Acc:MI0007826]  
 ENSMMUG00000020928 nucleolar protein interacting with the FHA domain of MKI67 [Source:VGNC Symbol;Acc:VGNC:75201]  
 ENSMMUG00000015311 leucine rich repeats and calponin homology domain containing 4 [Source:VGNC Symbol;Acc:VGNC:74441]  
 ENSMMUG00000056054 zinc finger and BTB domain containing 3 [Source:NCBI gene;Acc:722240]  
 ENSMMUG00000040854 aspartyl-tRNA synthetase 1 [Source:VGNC Symbol;Acc:VGNC:84226]  
 ENSMMUG00000057544  
 NS\_D2 NS\_D3 S\_D2 4 ENSMMUG00000007692 apolipoprotein B [Source:VGNC Symbol;Acc:VGNC:69985]  
 ENSMMUG00000001225 calneuron 1 [Source:VGNC Symbol;Acc:VGNC:82078]  
 ENSMMUG00000002755 kelch like family member 5 [Source:VGNC Symbol;Acc:VGNC:74188]  
 ENSMMUG00000054590  
 ENSMMUG00000017414 calcium voltage-gated channel subunit alpha1 S [Source:VGNC Symbol;Acc:VGNC:70507]  
 NS\_D3 S\_D2 S\_D3 1 ENSMMUG00000016093 adenosine deaminase RNA specific [Source:VGNC Symbol;Acc:VGNC:69502]  
 NS\_D2 NS\_D3 S\_D3 11 ENSMMUG00000017549 ectonucleotide pyrophosphatase/phosphodiesterase 3 [Source:VGNC Symbol;Acc:VGNC:72224]

NS\_D1 S\_D1

139 ENSMMUG00000008941 DNA topoisomerase II alpha [Source:VGNC Symbol;Acc:VGNC:78620]  
ENSMMUG00000014394 DnaJ heat shock protein family (Hsp40) member C10 [Source:VGNC Symbol;Acc:VGNC:84229]  
ENSMMUG00000021459 MYC binding protein 2 [Source:VGNC Symbol;Acc:VGNC:75011]  
ENSMMUG00000014314 ankyrin and armadillo repeat containing [Source:VGNC Symbol;Acc:VGNC:69706]  
ENSMMUG00000021034 complement C6 [Source:VGNC Symbol;Acc:VGNC:70477]  
ENSMMUG00000013094 lipoyl(octanoyl) transferase 2 [Source:NCBI gene;Acc:718425]  
ENSMMUG00000052031  
ENSMMUG00000004492 absent in melanoma 2 [Source:NCBI gene;Acc:719260]  
ENSMMUG00000013093 uncharacterized LOC106993385 [Source:NCBI gene;Acc:106993385]  
ENSMMUG00000000388 plectin [Source:VGNC Symbol;Acc:VGNC:76173]  
ENSMMUG000000003631 cytoskeleton associated protein 5 [Source:VGNC Symbol;Acc:VGNC:71368]  
ENSMMUG00000020690 erythrocyte membrane protein band 4.1 like 1 [Source:VGNC Symbol;Acc:VGNC:72231]  
ENSMMUG00000008738 COMM domain containing 10 [Source:VGNC Symbol;Acc:VGNC:71374]  
ENSMMUG00000065344 homeobox D1 [Source:NCBI gene;Acc:701064]  
ENSMMUG00000022880 eukaryotic translation initiation factor 5A2 [Source:VGNC Symbol;Acc:VGNC:72198]  
ENSMMUG00000013718 translocation associated membrane protein 2 [Source:VGNC Symbol;Acc:VGNC:83515]  
ENSMMUG00000061295 PDZ domain containing 11 [Source:NCBI gene;Acc:695458]  
ENSMMUG00000053250  
ENSMMUG00000000350 basic, immunoglobulin-like variable motif containing [Source:NCBI gene;Acc:100426213]  
ENSMMUG00000005225 gap junction protein alpha 1 [Source:VGNC Symbol;Acc:VGNC:73055]  
ENSMMUG00000019838 phosphodiesterase 8A [Source:VGNC Symbol;Acc:VGNC:75924]  
ENSMMUG00000052070 caudal type homeobox 2 [Source:NCBI gene;Acc:711094]  
ENSMMUG00000012307 periostin [Source:VGNC Symbol;Acc:VGNC:76039]  
ENSMMUG00000006950 cornichon family AMPA receptor auxiliary protein 2 [Source:VGNC Symbol;Acc:VGNC:71366]  
ENSMMUG00000053794  
ENSMMUG00000059208 aurora kinase A interacting protein 1 [Source:NCBI gene;Acc:706329]  
ENSMMUG00000062615  
ENSMMUG00000008792 G-patch domain containing 2 like [Source:VGNC Symbol;Acc:VGNC:72973]  
ENSMMUG00000008917 S100 calcium binding protein A6 [Source:VGNC Symbol;Acc:VGNC:76960]  
ENSMMUG00000064337 nectin cell adhesion molecule 4 [Source:NCBI gene;Acc:719843]  
ENSMMUG00000013183 F-box and leucine rich repeat protein 17 [Source:VGNC Symbol;Acc:VGNC:82142]  
ENSMMUG00000013937 RAB41, member RAS oncogene family [Source:VGNC Symbol;Acc:VGNC:81544]  
ENSMMUG00000064806  
ENSMMUG00000007293 RAB34, member RAS oncogene family [Source:VGNC Symbol;Acc:VGNC:81533]  
ENSMMUG00000021808 cryptochrome circadian regulator 1 [Source:VGNC Symbol;Acc:VGNC:71499]  
ENSMMUG00000002589 sulfotransferase 1C3-like [Source:NCBI gene;Acc:114671897]  
ENSMMUG00000017486 minichromosome maintenance complex component 6 [Source:VGNC Symbol;Acc:VGNC:74685]  
ENSMMUG00000064980  
ENSMMUG00000002010 death effector domain containing [Source:VGNC Symbol;Acc:VGNC:71768]  
ENSMMUG00000062642  
ENSMMUG00000000807 tRNA 5-methylaminomethyl-2-thiouridylate methyltransferase [Source:VGNC Symbol;Acc:VGNC:79500]  
ENSMMUG00000022632 ubiquitin-fold modifier conjugating enzyme 1 [Source:VGNC Symbol;Acc:VGNC:79643]  
ENSMMUG00000049396 Metazoan signal recognition particle RNA [Source:RFAM;Acc:RF00017]  
ENSMMUG00000039033 nucleolar protein with MIF4G domain 1 [Source:VGNC Symbol;Acc:VGNC:81729]  
ENSMMUG00000016695 CD320 molecule [Source:VGNC Symbol;Acc:VGNC:70763]  
ENSMMUG00000006446 transmembrane protein 177 [Source:VGNC Symbol;Acc:VGNC:79686]  
ENSMMUG00000048892 SCO-spondin [Source:VGNC Symbol;Acc:VGNC:81765]  
ENSMMUG00000011963 vimentin type intermediate filament associated coiled-coil protein [Source:NCBI gene;Acc:697958]  
ENSMMUG00000004329 solute carrier family 1 member 2 [Source:VGNC Symbol;Acc:VGNC:77410]  
ENSMMUG00000012224 family with sequence similarity 126 member B [Source:VGNC Symbol;Acc:VGNC:72393]  
ENSMMUG00000021173 nuclear transcription factor Y subunit alpha [Source:VGNC Symbol;Acc:VGNC:75344]

ENSMMUG0000001551 SSU72 homolog, RNA polymerase II CTD phosphatase [Source:VGNC Symbol;Acc:VGNC:77986]  
ENSMMUG00000055233 PRAME family member 17-like [Source:NCBI gene;Acc:100427847]  
ENSMMUG00000012396 zinc finger and SCAN domain containing 23 [Source:VGNC Symbol;Acc:VGNC:79313]  
ENSMMUG00000008733 ubiquitin protein ligase E3C [Source:VGNC Symbol;Acc:VGNC:79049]  
ENSMMUG00000002517 protein tyrosine phosphatase domain containing 1 [Source:VGNC Symbol;Acc:VGNC:76567]  
ENSMMUG00000002244 early endosome antigen 1 [Source:VGNC Symbol;Acc:VGNC:72161]  
ENSMMUG00000004617 glutathione peroxidase 6 [Source:VGNC Symbol;Acc:VGNC:73154]  
ENSMMUG00000054412  
ENSMMUG00000048077 ataxin 1 like [Source:NCBI gene;Acc:709805]  
ENSMMUG00000052442  
ENSMMUG00000023096 obscurin, cytoskeletal calmodulin and titin-interacting RhoGEF [Source:NCBI gene;Acc:694413]  
ENSMMUG00000058133  
ENSMMUG00000057475  
ENSMMUG00000007421 zinc finger CCHC-type containing 7 [Source:VGNC Symbol;Acc:VGNC:82088]  
ENSMMUG00000013376 POU class 2 homeobox 2 [Source:NCBI gene;Acc:706835]  
ENSMMUG00000002533 progesterone immunomodulatory binding factor 1 [Source:NCBI gene;Acc:694190]  
ENSMMUG00000021374 EWS RNA binding protein 1 [Source:VGNC Symbol;Acc:VGNC:72446]  
ENSMMUG00000053789  
ENSMMUG00000027108 mml-mir-193b [Source:miRBase;Acc:MI0007656]  
ENSMMUG00000003850 collagen type XI alpha 2 chain [Source:VGNC Symbol;Acc:VGNC:71290]  
ENSMMUG00000023125 XPC complex subunit, DNA damage recognition and repair factor [Source:VGNC Symbol;Acc:VGNC:78809]  
ENSMMUG00000001386 neurotrophic receptor tyrosine kinase 3 [Source:VGNC Symbol;Acc:VGNC:75542]  
ENSMMUG00000001529 solute carrier family 25 member 26 [Source:VGNC Symbol;Acc:VGNC:77530]  
ENSMMUG00000023398 collagen type XVI alpha 1 chain [Source:VGNC Symbol;Acc:VGNC:71293]  
ENSMMUG00000021372 EMI domain containing 1 [Source:VGNC Symbol;Acc:VGNC:72063]  
ENSMMUG00000060600  
ENSMMUG00000006268 junction adhesion molecule like [Source:VGNC Symbol;Acc:VGNC:73860]  
ENSMMUG00000018073 ligand dependent nuclear receptor corepressor like [Source:NCBI gene;Acc:715285]  
ENSMMUG00000019146 DNA polymerase delta interacting protein 2 [Source:VGNC Symbol;Acc:VGNC:76099]  
ENSMMUG00000059855 Smad nuclear interacting protein 1 [Source:NCBI gene;Acc:713733]  
ENSMMUG00000000443 arylsulfatase F [Source:VGNC Symbol;Acc:VGNC:81362]  
ENSMMUG00000014727 NSF attachment protein alpha [Source:VGNC Symbol;Acc:VGNC:75131]  
ENSMMUG00000021308 chromosome 9 C10orf71 homolog [Source:NCBI gene;Acc:710332]  
ENSMMUG00000049295 GTPase, IMAP family member 5 [Source:NCBI gene;Acc:713835]  
ENSMMUG00000022791 heat shock transcription factor 2 binding protein [Source:VGNC Symbol;Acc:VGNC:73532]  
ENSMMUG00000018285 cysteine rich with EGF like domains 1 [Source:VGNC Symbol;Acc:VGNC:71407]  
ENSMMUG00000021171 apolipoprotein B mRNA editing enzyme catalytic subunit 2 [Source:VGNC Symbol;Acc:VGNC:69986]  
ENSMMUG00000040803 sarcalumenin [Source:NCBI gene;Acc:704655]  
ENSMMUG00000015166 NIMA related kinase 9 [Source:VGNC Symbol;Acc:VGNC:75209]  
ENSMMUG00000011675 zinc finger and SCAN domain containing 12 [Source:VGNC Symbol;Acc:VGNC:78910]  
ENSMMUG00000056280 G protein subunit alpha i2 [Source:NCBI gene;Acc:703780]  
ENSMMUG00000064975 zinc finger protein 221 [Source:NCBI gene;Acc:100423743]  
ENSMMUG00000014824 SIX homeobox 3 [Source:HGNC Symbol;Acc:HGNC:10889]  
ENSMMUG00000017886 F-box protein 10 [Source:NCBI gene;Acc:718443]  
ENSMMUG00000005048 MAM domain containing 4 [Source:VGNC Symbol;Acc:VGNC:74345]  
ENSMMUG00000017008 GTPase, IMAP family member 2 [Source:VGNC Symbol;Acc:VGNC:72980]  
ENSMMUG00000001531 leucine rich repeats and immunoglobulin like domains 1 [Source:VGNC Symbol;Acc:VGNC:84156]  
ENSMMUG00000012122 protein phosphatase 1 regulatory inhibitor subunit 11 [Source:VGNC Symbol;Acc:VGNC:82209]  
ENSMMUG00000063659  
ENSMMUG00000029263 polycystin 1, transient receptor potential channel interacting [Source:NCBI gene;Acc:694905]  
ENSMMUG00000049968 RNA polymerase mitochondrial [Source:NCBI gene;Acc:100426183]

ENSMMUG00000022548 phosphatidylinositol-4-phosphate 3-kinase catalytic subunit type 2 alpha [Source:VGNC Symbol;Acc:VGNC:75992]  
 ENSMMUG00000032244 DnaJ heat shock protein family (Hsp40) member C16 [Source:NCBI gene;Acc:700894]  
 ENSMMUG00000013055 malic enzyme 3 [Source:VGNC Symbol;Acc:VGNC:74695]  
 ENSMMUG00000003483 cyclin dependent kinase 2 interacting protein [Source:VGNC Symbol;Acc:VGNC:71326]  
 ENSMMUG00000047162 fibroblast growth factor 10 [Source:VGNC Symbol;Acc:VGNC:84378]  
 ENSMMUG00000012463 DEAD-box helicase 46 [Source:VGNC Symbol;Acc:VGNC:71663]  
 ENSMMUG00000059663  
 ENSMMUG00000019250 solute carrier family 25 member 27 [Source:VGNC Symbol;Acc:VGNC:77543]  
 ENSMMUG00000011575 coiled-coil domain containing 167 [Source:VGNC Symbol;Acc:VGNC:70833]  
 ENSMMUG00000051743 TLC domain containing 1 [Source:NCBI gene;Acc:710391]  
 ENSMMUG00000054689  
 ENSMMUG00000021388 circadian associated repressor of transcription [Source:VGNC Symbol;Acc:VGNC:71345]  
 ENSMMUG00000014438 piwi like RNA-mediated gene silencing 2 [Source:VGNC Symbol;Acc:VGNC:81502]  
 ENSMMUG00000059617  
 ENSMMUG00000006703 solute carrier family 10 member 4 [Source:VGNC Symbol;Acc:VGNC:77553]  
 ENSMMUG00000019672 autophagy related 13 [Source:VGNC Symbol;Acc:VGNC:70148]  
 ENSMMUG00000053235  
 ENSMMUG00000008119 telomere maintenance 2 [Source:NCBI gene;Acc:701679]  
 ENSMMUG00000019254 phospholipase A2 group VII [Source:VGNC Symbol;Acc:VGNC:76158]  
 ENSMMUG00000008004 transmembrane immune signaling adaptor TYROBP [Source:NCBI gene;Acc:574207]  
 ENSMMUG00000061305  
 ENSMMUG00000021373 rhomboid domain containing 3 [Source:NCBI gene;Acc:714479]  
 ENSMMUG00000020418 diacylglycerol kinase beta [Source:VGNC Symbol;Acc:VGNC:71782]  
 ENSMMUG00000052435 Metazoan signal recognition particle RNA [Source:RFAM;Acc:RF00017]  
 ENSMMUG00000003120 HECT domain E3 ubiquitin protein ligase 1 [Source:VGNC Symbol;Acc:VGNC:73200]  
 ENSMMUG00000020004 Ras association domain family member 2 [Source:VGNC Symbol;Acc:VGNC:76674]  
 ENSMMUG00000063267 aldo-keto reductase family 1 member C15 [Source:NCBI gene;Acc:722496]  
 ENSMMUG00000055889  
 ENSMMUG00000009669 cutaneous T cell lymphoma-associated antigen 1 [Source:NCBI gene;Acc:106994443]  
 ENSMMUG00000006755 tubulin tyrosine ligase like 4 [Source:VGNC Symbol;Acc:VGNC:79758]  
 ENSMMUG00000051385  
 ENSMMUG00000063312  
 ENSMMUG00000022647 cell division cycle 73 [Source:VGNC Symbol;Acc:VGNC:70766]  
 ENSMMUG00000012961 mindbomb E3 ubiquitin protein ligase 2 [Source:VGNC Symbol;Acc:VGNC:74627]  
 ENSMMUG00000053778  
 ENSMMUG00000016354 IQ motif containing N [Source:VGNC Symbol;Acc:VGNC:73683]  
 ENSMMUG00000000962 H2A.Z variant histone 2 [Source:VGNC Symbol;Acc:VGNC:81324]  
 ENSMMUG00000004954 apoptosis inducing factor mitochondria associated 1 [Source:VGNC Symbol;Acc:VGNC:69820]  
 ENSMMUG00000021760 zinc finger protein 79 [Source:NCBI gene;Acc:700961]  
 ENSMMUG00000063972  
 ENSMMUG00000057768  
 ENSMMUG00000060541  
 ENSMMUG00000048805  
 ENSMMUG00000060822  
 ENSMMUG00000033102 mml-mir-181b-2 [Source:miRBase;Acc:MI0007646]  
 ENSMMUG00000031224 casein kinase 2 alpha 1 [Source:NCBI gene;Acc:714841]  
 ENSMMUG00000019252 tudor domain containing 6 [Source:VGNC Symbol;Acc:VGNC:79319]  
 14 ENSMMUG00000015202  
 ENSMMUG00000020804 transmembrane protein 132B [Source:NCBI gene;Acc:707118]  
 ENSMMUG00000005463 bromodomain containing 3 [Source:VGNC Symbol;Acc:VGNC:70281]  
 ENSMMUG00000053675



|             |    |                    |                                                                                       |
|-------------|----|--------------------|---------------------------------------------------------------------------------------|
|             |    | ENSMMUG00000063298 |                                                                                       |
|             |    | ENSMMUG00000047542 | U4 spliceosomal RNA [Source:RFAM;Acc:RF00015]                                         |
|             |    | ENSMMUG00000002638 | WD repeat domain 18 [Source:VGNC Symbol;Acc:VGNC:79103]                               |
|             |    | ENSMMUG00000003726 | protein tyrosine phosphatase non-receptor type 13 [Source:VGNC Symbol;Acc:VGNC:76599] |
|             |    | ENSMMUG00000013513 | sex hormone binding globulin [Source:VGNC Symbol;Acc:VGNC:77208]                      |
|             |    | ENSMMUG00000038447 |                                                                                       |
|             |    | ENSMMUG00000050065 |                                                                                       |
|             |    | ENSMMUG00000047324 | casein alpha s1 [Source:HGNC Symbol;Acc:HGNC:2445]                                    |
|             |    | ENSMMUG00000006547 | ATPase H+ transporting V0 subunit a4 [Source:VGNC Symbol;Acc:VGNC:70189]              |
|             |    | ENSMMUG00000017819 | putative homeodomain transcription factor 1 [Source:VGNC Symbol;Acc:VGNC:75982]       |
| NS_D2 S_D1  | 9  | ENSMMUG00000017114 | pleckstrin homology domain containing A6 [Source:VGNC Symbol;Acc:VGNC:76040]          |
|             |    | ENSMMUG00000051107 |                                                                                       |
|             |    | ENSMMUG00000012238 | polypeptide N-acetylgalactosaminyltransferase 11 [Source:VGNC Symbol;Acc:VGNC:72749]  |
|             |    | ENSMMUG00000013138 | Rho guanine nucleotide exchange factor 7 [Source:VGNC Symbol;Acc:VGNC:69833]          |
|             |    | ENSMMUG00000021409 | developmentally regulated GTP binding protein 2 [Source:VGNC Symbol;Acc:VGNC:71993]   |
|             |    | ENSMMUG00000005170 | unc-45 myosin chaperone B [Source:VGNC Symbol;Acc:VGNC:78954]                         |
|             |    | ENSMMUG00000005200 | PC-esterase domain containing 1A [Source:VGNC Symbol;Acc:VGNC:75622]                  |
|             |    | ENSMMUG00000040817 | interferon regulatory factor 9 [Source:VGNC Symbol;Acc:VGNC:84361]                    |
|             |    | ENSMMUG00000054213 | parathyroid hormone [Source:NCBI gene;Acc:700195]                                     |
| S_D1 S_D3   | 11 | ENSMMUG00000003316 | mannosidase alpha class 2A member 1 [Source:VGNC Symbol;Acc:VGNC:81449]               |
|             |    | ENSMMUG00000003043 | PWWP domain containing 3A, DNA repair factor [Source:VGNC Symbol;Acc:VGNC:76565]      |
|             |    | ENSMMUG00000008946 | chromosome 19 C19orf47 homolog [Source:VGNC Symbol;Acc:VGNC:70404]                    |
|             |    | ENSMMUG00000017972 | zinc finger protein 200 [Source:VGNC Symbol;Acc:VGNC:78867]                           |
|             |    | ENSMMUG00000046237 | 4-aminobutyrate aminotransferase [Source:NCBI gene;Acc:714017]                        |
|             |    | ENSMMUG00000000065 | coiled-coil domain containing 181 [Source:VGNC Symbol;Acc:VGNC:70884]                 |
|             |    | ENSMMUG00000062623 | Metazoan signal recognition particle RNA [Source:RFAM;Acc:RF00017]                    |
|             |    | ENSMMUG00000021216 | UDP glucuronosyltransferase 1 family, polypeptide A1 [Source:NCBI gene;Acc:574210]    |
|             |    | ENSMMUG00000009006 | round spermatid basic protein 1 like [Source:VGNC Symbol;Acc:VGNC:77097]              |
|             |    | ENSMMUG00000004711 | transmembrane protein 74B [Source:VGNC Symbol;Acc:VGNC:78990]                         |
|             |    | ENSMMUG00000013601 | chromosome 14 C11orf54 homolog [Source:NCBI gene;Acc:696483]                          |
| NS_D3 S_D1  | 2  | ENSMMUG00000009319 | transmembrane protein 161B [Source:VGNC Symbol;Acc:VGNC:84508]                        |
|             |    | ENSMMUG00000060940 | acidic residue methyltransferase 1 [Source:NCBI gene;Acc:704570]                      |
| NS_D1 S_D2  | 3  | ENSMMUG00000022562 | interleukin 1 receptor accessory protein [Source:VGNC Symbol;Acc:VGNC:73718]          |
|             |    | ENSMMUG00000015167 | DIS3 like 3'-5' exoribonuclease 2 [Source:VGNC Symbol;Acc:VGNC:71793]                 |
|             |    | ENSMMUG00000005028 | phosphodiesterase 4C [Source:NCBI gene;Acc:720171]                                    |
| NS_D1 NS_D2 | 72 | ENSMMUG00000021788 | immunoglobulin superfamily DCC subclass member 4 [Source:VGNC Symbol;Acc:VGNC:73388]  |
|             |    | ENSMMUG00000051366 |                                                                                       |
|             |    | ENSMMUG00000018461 | notch receptor 4 [Source:VGNC Symbol;Acc:VGNC:75372]                                  |
|             |    | ENSMMUG00000017076 | tubulin gamma complex associated protein 4 [Source:VGNC Symbol;Acc:VGNC:79045]        |
|             |    | ENSMMUG00000021370 | kringle containing transmembrane protein 1 [Source:VGNC Symbol;Acc:VGNC:74066]        |
|             |    | ENSMMUG00000004493 | propionyl-CoA carboxylase subunit alpha [Source:VGNC Symbol;Acc:VGNC:75773]           |
|             |    | ENSMMUG00000058459 |                                                                                       |
|             |    | ENSMMUG00000022124 | stonin 2 [Source:VGNC Symbol;Acc:VGNC:78249]                                          |
|             |    | ENSMMUG00000063586 | zinc finger protein 536 [Source:NCBI gene;Acc:713142]                                 |
|             |    | ENSMMUG00000061687 |                                                                                       |
|             |    | ENSMMUG00000021083 | Josephin domain containing 1 [Source:VGNC Symbol;Acc:VGNC:73920]                      |
|             |    | ENSMMUG00000059518 |                                                                                       |
|             |    | ENSMMUG00000019713 | thyroid stimulating hormone receptor [Source:VGNC Symbol;Acc:VGNC:78662]              |
|             |    | ENSMMUG00000018456 | PBX homeobox 2 [Source:VGNC Symbol;Acc:VGNC:75771]                                    |
|             |    | ENSMMUG00000021097 | sushi domain containing 1 [Source:VGNC Symbol;Acc:VGNC:78207]                         |
|             |    | ENSMMUG00000020913 | scavenger receptor class B member 2 [Source:VGNC Symbol;Acc:VGNC:77026]               |

ENSMMUG00000051088  
ENSMMUG00000018079 transmembrane serine protease 3 [Source:VGNC Symbol;Acc:VGNC:78576]  
ENSMMUG00000003872 ral guanine nucleotide dissociation stimulator like 2 [Source:VGNC Symbol;Acc:VGNC:76886]  
ENSMMUG00000016665 NADH:ubiquinone oxidoreductase subunit A11 [Source:NCBI gene;Acc:697843]  
ENSMMUG00000007742 potassium voltage-gated channel subfamily Q member 1 [Source:VGNC Symbol;Acc:VGNC:82168]  
ENSMMUG00000005754 lysyl-tRNA synthetase 1 [Source:NCBI gene;Acc:714516]  
ENSMMUG00000023462 immunoglobulin like domain containing receptor 2 [Source:VGNC Symbol;Acc:VGNC:73619]  
ENSMMUG00000059128  
ENSMMUG00000009775 caveolae associated protein 4 [Source:NCBI gene;Acc:714379]  
ENSMMUG00000038768 U6 spliceosomal RNA [Source:RFAM;Acc:RF00026]  
ENSMMUG00000003369 calcium/calmodulin dependent protein kinase IG [Source:VGNC Symbol;Acc:VGNC:70521]  
ENSMMUG00000018943 spermatogenesis associated 18 [Source:VGNC Symbol;Acc:VGNC:78013]  
ENSMMUG00000015132 galectin 8 [Source:VGNC Symbol;Acc:VGNC:74258]  
ENSMMUG00000051296 paired like homeobox 2B [Source:NCBI gene;Acc:701940]  
ENSMMUG00000054078 histone H3 [Source:NCBI gene;Acc:114669830]  
ENSMMUG00000060971  
ENSMMUG00000003869 WD repeat domain 46 [Source:VGNC Symbol;Acc:VGNC:78940]  
ENSMMUG00000008447 fibulin 5 [Source:VGNC Symbol;Acc:VGNC:72622]  
ENSMMUG00000004760 CDK5 regulatory subunit associated protein 3 [Source:VGNC Symbol;Acc:VGNC:71015]  
ENSMMUG00000009839 galactokinase 2 [Source:VGNC Symbol;Acc:VGNC:72870]  
ENSMMUG00000000364 translocase of outer mitochondrial membrane 22 [Source:NCBI gene;Acc:701286]  
ENSMMUG00000003238 pregnancy zone protein [Source:NCBI gene;Acc:100430319]  
ENSMMUG00000063747  
ENSMMUG00000064075 ring finger protein 41 [Source:NCBI gene;Acc:711969]  
ENSMMUG00000019992 growth factor receptor bound protein 10 [Source:VGNC Symbol;Acc:VGNC:73157]  
ENSMMUG00000060781 G protein-coupled receptor 18 [Source:NCBI gene;Acc:698714]  
ENSMMUG00000064596 ATPase family AAA domain-containing protein 3A-like [Source:NCBI gene;Acc:114674454]  
ENSMMUG00000002231 transmembrane protein 87B [Source:VGNC Symbol;Acc:VGNC:79557]  
ENSMMUG00000038569 5',3'-nucleotidase, mitochondrial [Source:NCBI gene;Acc:698591]  
ENSMMUG00000002912 TLE family member 6, subcortical maternal complex member [Source:VGNC Symbol;Acc:VGNC:79879]  
ENSMMUG00000065307  
ENSMMUG00000005366 alpha-L-fucosidase 2 [Source:VGNC Symbol;Acc:VGNC:72827]  
ENSMMUG00000011712 olfactory receptor 5B21 [Source:NCBI gene;Acc:702145]  
ENSMMUG00000031121 solute carrier family 25 member 18 [Source:VGNC Symbol;Acc:VGNC:77434]  
ENSMMUG00000020202 melanoma-associated antigen D4 [Source:NCBI gene;Acc:106996411]  
ENSMMUG00000061278  
ENSMMUG00000044729 transcription factor AP-4 [Source:NCBI gene;Acc:707513]  
ENSMMUG00000055161  
ENSMMUG00000007751 solute carrier family 22 member 18 [Source:NCBI gene;Acc:721230]  
ENSMMUG00000051446  
ENSMMUG00000006493 ras related dexamethasone induced 1 [Source:VGNC Symbol;Acc:VGNC:76485]  
ENSMMUG00000000262 beta-ureidopropionase 1 [Source:VGNC Symbol;Acc:VGNC:79029]  
ENSMMUG00000052537  
ENSMMUG00000055560  
ENSMMUG00000041301 TNF superfamily member 8 [Source:NCBI gene;Acc:702944]  
ENSMMUG00000020117 semaphorin 3B [Source:VGNC Symbol;Acc:VGNC:77160]  
ENSMMUG00000001849 interleukin 5 receptor subunit alpha [Source:VGNC Symbol;Acc:VGNC:73731]  
ENSMMUG00000022627 HLF transcription factor, PAR bZIP family member [Source:VGNC Symbol;Acc:VGNC:73478]  
ENSMMUG00000015189 RAD51 associated protein 1 [Source:VGNC Symbol;Acc:VGNC:76497]  
ENSMMUG00000021291 thymine DNA glycosylase [Source:VGNC Symbol;Acc:VGNC:78297]  
ENSMMUG00000060893

|             |                    |                                                                                                        |
|-------------|--------------------|--------------------------------------------------------------------------------------------------------|
|             | ENSMMUG00000061096 | tubulin polymerization promoting protein [Source:NCBI gene;Acc:708834]                                 |
|             | ENSMMUG00000050858 | Metazoan signal recognition particle RNA [Source:RFAM;Acc:RF00017]                                     |
|             | ENSMMUG00000021932 | Rho GTPase activating protein 27 [Source:VGNC Symbol;Acc:VGNC:69935]                                   |
|             | ENSMMUG00000062818 | regenerating islet-derived protein 3-alpha [Source:NCBI gene;Acc:716890]                               |
|             | ENSMMUG00000058233 | C-C motif chemokine 3-like [Source:NCBI gene;Acc:100426537]                                            |
| NS_D1 S_D3  | 12                 | ENSMMUG00000018282 interleukin 17 receptor C [Source:VGNC Symbol;Acc:VGNC:84164]                       |
|             | ENSMMUG00000008396 | methyalmalonyl-CoA epimerase [Source:NCBI gene;Acc:704094]                                             |
|             | ENSMMUG00000010978 | S100 calcium binding protein A2 [Source:VGNC Symbol;Acc:VGNC:76956]                                    |
|             | ENSMMUG00000007310 | solute carrier family 25 member 12 [Source:VGNC Symbol;Acc:VGNC:77430]                                 |
|             | ENSMMUG00000043504 |                                                                                                        |
|             | ENSMMUG00000065301 |                                                                                                        |
|             | ENSMMUG00000023811 | boule homolog, RNA binding protein [Source:VGNC Symbol;Acc:VGNC:70310]                                 |
|             | ENSMMUG00000003051 | COPI coat complex subunit beta 2 [Source:VGNC Symbol;Acc:VGNC:71313]                                   |
|             | ENSMMUG00000020049 | phosphoglucomutase 1 [Source:NCBI gene;Acc:699401]                                                     |
|             | ENSMMUG00000065128 | Metazoan signal recognition particle RNA [Source:RFAM;Acc:RF00017]                                     |
|             | ENSMMUG00000021474 | zinc finger protein 45 [Source:NCBI gene;Acc:712591]                                                   |
|             | ENSMMUG00000007565 | Cbl proto-oncogene B [Source:VGNC Symbol;Acc:VGNC:70555]                                               |
| NS_D1 NS_D3 | 58                 | ENSMMUG00000019262 calcium voltage-gated channel subunit alpha1 D [Source:VGNC Symbol;Acc:VGNC:70501]  |
|             | ENSMMUG00000012576 | sorting nexin 6 [Source:NCBI gene;Acc:693626]                                                          |
|             | ENSMMUG00000024966 | U4 spliceosomal RNA [Source:RFAM;Acc:RF00015]                                                          |
|             | ENSMMUG00000065257 |                                                                                                        |
|             | ENSMMUG00000013943 | glycerophosphodiester phosphodiesterase domain containing 2 [Source:VGNC Symbol;Acc:VGNC:72787]        |
|             | ENSMMUG00000001209 | arylsulfatase family member K [Source:VGNC Symbol;Acc:VGNC:84280]                                      |
|             | ENSMMUG00000014685 | pyruvate dehydrogenase kinase 2 [Source:VGNC Symbol;Acc:VGNC:75933]                                    |
|             | ENSMMUG00000013008 | cleavage stimulation factor subunit 2 [Source:VGNC Symbol;Acc:VGNC:71536]                              |
|             | ENSMMUG00000020731 | terminal nucleotidyltransferase 2 [Source:VGNC Symbol;Acc:VGNC:79637]                                  |
|             | ENSMMUG00000008212 | tenomodulin [Source:VGNC Symbol;Acc:VGNC:79087]                                                        |
|             | ENSMMUG00000014049 | collagen type VI alpha 3 chain [Source:VGNC Symbol;Acc:VGNC:71303]                                     |
|             | ENSMMUG00000059080 |                                                                                                        |
|             | ENSMMUG00000018625 | NIPA like domain containing 1 [Source:NCBI gene;Acc:704998]                                            |
|             | ENSMMUG00000002166 | tousled like kinase 2 [Source:VGNC Symbol;Acc:VGNC:78368]                                              |
|             | ENSMMUG00000004598 | bisphosphoglycerate mutase [Source:VGNC Symbol;Acc:VGNC:70275]                                         |
|             | ENSMMUG00000060894 | Metazoan signal recognition particle RNA [Source:RFAM;Acc:RF00017]                                     |
|             | ENSMMUG00000022163 | solute carrier family 1 member 5 [Source:VGNC Symbol;Acc:VGNC:77413]                                   |
|             | ENSMMUG00000009694 | solute carrier family 9 member A9 [Source:VGNC Symbol;Acc:VGNC:77747]                                  |
|             | ENSMMUG00000040506 | H2B clustered histone 18 [Source:HGNC Symbol;Acc:HGNC:24700]                                           |
|             | ENSMMUG00000050630 |                                                                                                        |
|             | ENSMMUG00000064721 |                                                                                                        |
|             | ENSMMUG00000010049 | NOP9 nucleolar protein [Source:VGNC Symbol;Acc:VGNC:75216]                                             |
|             | ENSMMUG00000009001 | transmembrane 131 like [Source:VGNC Symbol;Acc:VGNC:79781]                                             |
|             | ENSMMUG00000004205 | phospholipase B domain containing 2 [Source:VGNC Symbol;Acc:VGNC:76122]                                |
|             | ENSMMUG00000055529 | sulfotransferase family 1C member 4 [Source:NCBI gene;Acc:693903]                                      |
|             | ENSMMUG00000018356 | flagellum associated containing coiled-coil domains 1 [Source:VGNC Symbol;Acc:VGNC:72508]              |
|             | ENSMMUG00000047741 | Metazoan signal recognition particle RNA [Source:RFAM;Acc:RF00017]                                     |
|             | ENSMMUG00000013940 | kinesin family member 4A [Source:NCBI gene;Acc:695574]                                                 |
|             | ENSMMUG00000000496 | zinc finger and BTB domain containing 6 [Source:VGNC Symbol;Acc:VGNC:79047]                            |
|             | ENSMMUG00000021078 | ATPase Na <sup>+</sup> /K <sup>+</sup> transporting subunit beta 1 [Source:VGNC Symbol;Acc:VGNC:70176] |
|             | ENSMMUG00000012290 | GLIPR1 like 2 [Source:VGNC Symbol;Acc:VGNC:81413]                                                      |
|             | ENSMMUG00000002182 | phosphatidylserine decarboxylase [Source:VGNC Symbol;Acc:VGNC:76005]                                   |
|             | ENSMMUG00000022879 | EARP complex and GARP complex interacting protein 1 [Source:NCBI gene;Acc:707650]                      |
|             | ENSMMUG00000010879 | NAD kinase [Source:VGNC Symbol;Acc:VGNC:75047]                                                         |

ENSMMUG00000011269 CF transmembrane conductance regulator [Source:VGNC Symbol;Acc:VGNC:71020]  
 ENSMMUG00000008214 nuclear export mediator factor [Source:VGNC Symbol;Acc:VGNC:84407]  
 ENSMMUG00000010405 family with sequence similarity 171 member B [Source:VGNC Symbol;Acc:VGNC:72404]  
 ENSMMUG00000019371 major histocompatibility complex, class II, DP alpha [Source:NCBI gene;Acc:717992]  
 ENSMMUG00000054615  
 ENSMMUG00000000288 C-C motif chemokine ligand 2 [Source:VGNC Symbol;Acc:VGNC:70698]  
 ENSMMUG00000060359  
 ENSMMUG00000057763  
 ENSMMUG00000050300  
 ENSMMUG00000020847 CKLF like MARVEL transmembrane domain containing 3 [Source:VGNC Symbol;Acc:VGNC:71215]  
 ENSMMUG00000010959 kelch like family member 9 [Source:VGNC Symbol;Acc:VGNC:74080]  
 ENSMMUG00000060319 Metazoan signal recognition particle RNA [Source:RFAM;Acc:RF00017]  
 ENSMMUG00000033290 mml-mir-643 [Source:miRBase;Acc:MI0007886]  
 ENSMMUG00000060665  
 ENSMMUG00000003712 zinc finger protein 615 [Source:VGNC Symbol;Acc:VGNC:79454]  
 ENSMMUG00000065232  
 ENSMMUG00000006857 epididymal sperm binding protein 1 [Source:VGNC Symbol;Acc:VGNC:72046]  
 ENSMMUG00000012449 synaptotagmin like 2 [Source:VGNC Symbol;Acc:VGNC:78123]  
 ENSMMUG00000006128 peptidase D [Source:VGNC Symbol;Acc:VGNC:82205]  
 ENSMMUG00000004412 arginine and serine rich coiled-coil 2 [Source:VGNC Symbol;Acc:VGNC:77139]  
 ENSMMUG00000049523 ankyrin repeat domain 12 [Source:NCBI gene;Acc:114673693]  
 ENSMMUG00000011986 chibby family member 2 [Source:VGNC Symbol;Acc:VGNC:78029]  
 ENSMMUG00000016581 methyltransferase like 18 [Source:VGNC Symbol;Acc:VGNC:74606]  
 ENSMMUG00000004153 ATM serine/threonine kinase [Source:VGNC Symbol;Acc:VGNC:70173]  
 ENSMMUG00000040958 3 lysozyme-like protein 1 [Source:NCBI gene;Acc:698176]  
 ENSMMUG00000064514 keratin, type II cuticular Hb1 [Source:NCBI gene;Acc:697511]  
 ENSMMUG00000012587 zinc finger protein 69 [Source:NCBI gene;Acc:717030]  
 ENSMMUG00000021332 3 carboxypeptidase X, M14 family member 1 [Source:VGNC Symbol;Acc:VGNC:71413]  
 ENSMMUG00000017276 nucleolar protein 4 [Source:VGNC Symbol;Acc:VGNC:75366]  
 ENSMMUG00000058740  
 NS\_D2 S\_D2 1 ENSMMUG00000022982 IQ motif containing GTPase activating protein 2 [Source:VGNC Symbol;Acc:VGNC:73756]  
 NS\_D2 S\_D3 2 ENSMMUG00000021782 LDL receptor related protein 1 [Source:VGNC Symbol;Acc:VGNC:74442]  
 ENSMMUG00000046901 protein tyrosine phosphatase 4A2 [Source:NCBI gene;Acc:706489]  
 NS\_D2 NS\_D3 57 ENSMMUG00000024125 small nucleolar RNA, H/ACA box 58 [Source:HGNC Symbol;Acc:HGNC:32652]  
 ENSMMUG00000023289 phospholipase D1 [Source:VGNC Symbol;Acc:VGNC:76171]  
 ENSMMUG00000020905 chromosome 18 C18orf63 homolog [Source:VGNC Symbol;Acc:VGNC:70465]  
 ENSMMUG00000019978 HERV-H LTR-associating 2 [Source:VGNC Symbol;Acc:VGNC:73377]  
 ENSMMUG00000057338  
 ENSMMUG00000011049 leucine rich repeat containing 1 [Source:VGNC Symbol;Acc:VGNC:81087]  
 ENSMMUG00000021244 kelch like family member 40 [Source:VGNC Symbol;Acc:VGNC:74165]  
 ENSMMUG00000006827 von Willebrand factor A domain containing 7 [Source:VGNC Symbol;Acc:VGNC:78941]  
 ENSMMUG00000003302 dystrobrevin alpha [Source:VGNC Symbol;Acc:VGNC:72007]  
 ENSMMUG00000058974  
 ENSMMUG00000012615 pecanex 2 [Source:NCBI gene;Acc:712828]  
 ENSMMUG00000021837 seryl-tRNA synthetase 1 [Source:NCBI gene;Acc:695046]  
 ENSMMUG00000013345 folliculin [Source:NCBI gene;Acc:698082]  
 ENSMMUG00000061774 taste 2 receptor member 10 [Source:NCBI gene;Acc:717960]  
 ENSMMUG00000050952  
 ENSMMUG00000003946 ADP-ribosyltransferase 5 [Source:VGNC Symbol;Acc:VGNC:69890]  
 ENSMMUG00000013920 triggering receptor expressed on myeloid cells 2 [Source:VGNC Symbol;Acc:VGNC:79089]  
 ENSMMUG00000053657

ENSMMUG0000004215 LRAT domain containing 1 [Source:VGNC Symbol;Acc:VGNC:74321]  
ENSMMUG0000003693 DIS3 like exosome 3'-5' exoribonuclease [Source:VGNC Symbol;Acc:VGNC:71796]  
ENSMMUG0000005913 activating transcription factor 7 interacting protein 2 [Source:VGNC Symbol;Acc:VGNC:70103]  
ENSMMUG00000031000 Rho GTPase activating protein 8 [Source:NCBI gene;Acc:716745]  
ENSMMUG00000051001  
ENSMMUG00000017932 acyl-CoA synthetase short chain family member 2 [Source:VGNC Symbol;Acc:VGNC:69410]  
ENSMMUG00000059824  
ENSMMUG00000014672 mitogen-activated protein kinase kinase kinase 20 [Source:NCBI gene;Acc:698274]  
ENSMMUG00000043001 milk fat globule EGF and factor V/VIII domain containing [Source:NCBI gene;Acc:703501]  
ENSMMUG00000022865 junctophilin 2 [Source:NCBI gene;Acc:694158]  
ENSMMUG00000056662  
ENSMMUG00000049194  
ENSMMUG00000021242 natural killer cell triggering receptor [Source:VGNC Symbol;Acc:VGNC:81486]  
ENSMMUG00000063354  
ENSMMUG00000057199  
ENSMMUG00000065131  
ENSMMUG0000005295 parathyroid hormone 2 receptor [Source:VGNC Symbol;Acc:VGNC:76592]  
ENSMMUG00000021095 desmoglein 2 [Source:VGNC Symbol;Acc:VGNC:72002]  
ENSMMUG00000064216  
ENSMMUG00000011555 interleukin 16 [Source:VGNC Symbol;Acc:VGNC:84355]  
ENSMMUG00000056056  
ENSMMUG00000021656 golgin subfamily A member 8S [Source:NCBI gene;Acc:722977]  
ENSMMUG0000004974 tripartite motif containing 21 [Source:VGNC Symbol;Acc:VGNC:78556]  
ENSMMUG00000022324 formimidoyltransferase cyclodeaminase [Source:VGNC Symbol;Acc:VGNC:72825]  
ENSMMUG00000039300  
ENSMMUG00000051162  
ENSMMUG00000022963 solute carrier family 25 member 38 [Source:VGNC Symbol;Acc:VGNC:77571]  
ENSMMUG00000021197 TBC1 domain family member 4 [Source:VGNC Symbol;Acc:VGNC:78166]  
ENSMMUG00000049842  
ENSMMUG00000056369 SAP30 like [Source:NCBI gene;Acc:714400]  
ENSMMUG00000006197 plasminogen receptor with a C-terminal lysine [Source:VGNC Symbol;Acc:VGNC:76098]  
ENSMMUG00000013643 zinc finger CCHC-type containing 8 [Source:VGNC Symbol;Acc:VGNC:79487]  
ENSMMUG00000020792 Rap guanine nucleotide exchange factor 4 [Source:VGNC Symbol;Acc:VGNC:76490]  
ENSMMUG00000015634 centromere protein F [Source:VGNC Symbol;Acc:VGNC:71009]  
ENSMMUG00000061796  
ENSMMUG00000015380 proline and serine rich coiled-coil 1 [Source:VGNC Symbol;Acc:VGNC:76307]  
ENSMMUG00000049682 Metazoan signal recognition particle RNA [Source:RFAM;Acc:RF00017]  
ENSMMUG00000026432 small nucleolar RNA, C/D box 7 [Source:HGNC Symbol;Acc:HGNC:32704]  
ENSMMUG00000043229 carbohydrate sulfotransferase 14 [Source:NCBI gene;Acc:703115]  
44 ENSMMUG00000018685 chromodomain helicase DNA binding protein 4 [Source:VGNC Symbol;Acc:VGNC:71029]  
ENSMMUG00000054417  
ENSMMUG00000020821 testis expressed 15, meiosis and synapsis associated [Source:VGNC Symbol;Acc:VGNC:78318]  
ENSMMUG00000000413 solute carrier family 7 member 7 [Source:VGNC Symbol;Acc:VGNC:77631]  
ENSMMUG00000021572 solute carrier family 39 member 9 [Source:VGNC Symbol;Acc:VGNC:77523]  
ENSMMUG00000059353 phosphatidylserine synthase 2 [Source:NCBI gene;Acc:698582]  
ENSMMUG00000061536  
ENSMMUG00000019265 zinc finger protein 575 [Source:VGNC Symbol;Acc:VGNC:79667]  
ENSMMUG00000015590 siah E3 ubiquitin protein ligase 2 [Source:VGNC Symbol;Acc:VGNC:77215]  
ENSMMUG00000023803 myosin heavy chain 10 [Source:NCBI gene;Acc:721979]  
ENSMMUG00000017703 collagen type XXV alpha 1 chain [Source:VGNC Symbol;Acc:VGNC:81374]  
ENSMMUG00000049661 Metazoan signal recognition particle RNA [Source:RFAM;Acc:RF00017]

ENSMMUG00000017259 DnaJ heat shock protein family (Hsp40) member C6 [Source:NCBI gene;Acc:698682]  
 ENSMMUG00000010858 prolyl 4-hydroxylase subunit alpha 2 [Source:VGNC Symbol;Acc:VGNC:75742]  
 ENSMMUG00000064089  
 ENSMMUG00000017351 stabilin 1 [Source:VGNC Symbol;Acc:VGNC:77956]  
 ENSMMUG00000011593 regulator of cell cycle [Source:VGNC Symbol;Acc:VGNC:76783]  
 ENSMMUG00000051966  
 ENSMMUG00000018415 Ras interacting protein 1 [Source:HGNC Symbol;Acc:HGNC:24716]  
 ENSMMUG00000030453 NLR family pyrin domain containing 1 [Source:NCBI gene;Acc:721648]  
 ENSMMUG00000010312 shroom family member 1 [Source:VGNC Symbol;Acc:VGNC:77299]  
 ENSMMUG00000013812 ubiquitin specific peptidase 44 [Source:VGNC Symbol;Acc:VGNC:79221]  
 ENSMMUG00000006713 cyclin Y [Source:VGNC Symbol;Acc:VGNC:70840]  
 ENSMMUG00000051042  
 ENSMMUG00000064158  
 ENSMMUG00000003282 phosphodiesterase 6B [Source:VGNC Symbol;Acc:VGNC:75920]  
 ENSMMUG00000020784 centrosomal protein 126 [Source:NCBI gene;Acc:701911]  
 ENSMMUG00000012156 zinc finger CCHC-type containing 17 [Source:VGNC Symbol;Acc:VGNC:79840]  
 ENSMMUG00000018901 FYVE, RhoGEF and PH domain containing 6 [Source:VGNC Symbol;Acc:VGNC:72548]  
 ENSMMUG00000021496 potassium sodium-activated channel subfamily T member 1 [Source:VGNC Symbol;Acc:VGNC:73856]  
 ENSMMUG00000042707 angiotensin II type 1 receptor-like 6 [Source:NCBI gene;Acc:106994633]  
 ENSMMUG00000010601 solute carrier family 43 member 3 [Source:NCBI gene;Acc:706267]  
 ENSMMUG00000050458  
 ENSMMUG00000048302 ArfGAP with FG repeats 2 [Source:VGNC Symbol;Acc:VGNC:80329]  
 ENSMMUG00000020992 calcineurin binding protein 1 [Source:NCBI gene;Acc:700566]  
 ENSMMUG00000012203 aryl hydrocarbon receptor [Source:NCBI gene;Acc:714254]  
 ENSMMUG00000012486 retinoic acid receptor alpha [Source:VGNC Symbol;Acc:VGNC:76662]  
 ENSMMUG00000021499 sterile alpha motif domain containing 3 [Source:VGNC Symbol;Acc:VGNC:77079]  
 ENSMMUG00000051468 Metazoan signal recognition particle RNA [Source:RFAM;Acc:RF00017]  
 ENSMMUG00000038288 TMEM9 domain family member B [Source:NCBI gene;Acc:708447]  
 ENSMMUG00000014307 myostatin [Source:VGNC Symbol;Acc:VGNC:74870]  
 ENSMMUG00000052377  
 ENSMMUG00000047974 aldehyde oxidase 4 [Source:NCBI gene;Acc:701502]  
 ENSMMUG00000007570 uveal autoantigen with coiled-coil domains and ankyrin repeats [Source:VGNC Symbol;Acc:VGNC:78995]  
 172 ENSMMUG00000041415 alpha and gamma adaptin binding protein [Source:NCBI gene;Acc:711436]  
 ENSMMUG00000052818 death associated protein like 1 [Source:NCBI gene;Acc:699071]  
 ENSMMUG00000021112 epithelial splicing regulatory protein 1 [Source:VGNC Symbol;Acc:VGNC:72358]  
 ENSMMUG00000023583 calcium release activated channel regulator 2A [Source:NCBI gene;Acc:709929]  
 ENSMMUG00000021186 anillin actin binding protein [Source:VGNC Symbol;Acc:VGNC:69610]  
 ENSMMUG00000009126 solute carrier organic anion transporter family member 2B1 [Source:VGNC Symbol;Acc:VGNC:77603]  
 ENSMMUG00000000511 cysteinyl-tRNA synthetase 1 [Source:VGNC Symbol;Acc:VGNC:70540]  
 ENSMMUG00000000684 acyl-CoA dehydrogenase short/branched chain [Source:VGNC Symbol;Acc:VGNC:81343]  
 ENSMMUG00000057655  
 ENSMMUG00000058966  
 ENSMMUG00000022118 regulatory factor X4 [Source:VGNC Symbol;Acc:VGNC:76909]  
 ENSMMUG00000002519 serine/threonine kinase 11 interacting protein [Source:VGNC Symbol;Acc:VGNC:77963]  
 ENSMMUG00000063288  
 ENSMMUG00000001986 WD repeat domain 24 [Source:VGNC Symbol;Acc:VGNC:79289]  
 ENSMMUG00000050991  
 ENSMMUG00000002167 mannose receptor C type 2 [Source:VGNC Symbol;Acc:VGNC:74784]  
 ENSMMUG00000023480 IKAROS family zinc finger 5 [Source:VGNC Symbol;Acc:VGNC:73590]  
 ENSMMUG00000002009 nitrilase 1 [Source:VGNC Symbol;Acc:VGNC:75351]  
 ENSMMUG00000057808



ENSMMUG00000014080 kelch like family member 8 [Source:VGNC Symbol;Acc:VGNC:74076]  
ENSMMUG00000003979 WD repeat containing planar cell polarity effector [Source:VGNC Symbol;Acc:VGNC:79677]  
ENSMMUG000000031856 talin 1 [Source:VGNC Symbol;Acc:VGNC:78371]  
ENSMMUG00000000777 dystonin [Source:VGNC Symbol;Acc:VGNC:81061]  
ENSMMUG00000001888 mahogunin ring finger 1 [Source:VGNC Symbol;Acc:VGNC:74542]  
SWI/SNF related, matrix associated, actin dependent regulator of chromatin, subfamily d, member 1 [Source:VGNC  
Symbol;Acc:VGNC:77653]  
ENSMMUG00000006531  
ENSMMUG000000056257  
ENSMMUG000000055678 translocase of outer mitochondrial membrane 20 like [Source:NCBI gene;Acc:700628]  
ENSMMUG00000007277 GTP binding protein 1 [Source:VGNC Symbol;Acc:VGNC:73320]  
ENSMMUG000000060841  
ENSMMUG000000023235 SET domain bifurcated histone lysine methyltransferase 1 [Source:NCBI gene;Acc:716141]  
ENSMMUG000000038935 zinc finger CCHC-type containing 3 [Source:NCBI gene;Acc:714477]  
ENSMMUG000000038319 Metazoan signal recognition particle RNA [Source:RFAM;Acc:RF00017]  
ENSMMUG000000053389  
ENSMMUG000000020005 solute carrier family 23 member 2 [Source:NCBI gene;Acc:717939]  
ENSMMUG000000056515  
ENSMMUG000000018911 protein kinase C zeta [Source:VGNC Symbol;Acc:VGNC:82212]  
ENSMMUG000000064344 Metazoan signal recognition particle RNA [Source:RFAM;Acc:RF00017]  
ENSMMUG000000017437 LysM domain containing 2 [Source:NCBI gene;Acc:694916]  
ENSMMUG000000051843  
ENSMMUG000000023814 mitogen-activated protein kinase kinase kinase 13 [Source:VGNC Symbol;Acc:VGNC:74494]  
ENSMMUG000000018468 senataxin [Source:VGNC Symbol;Acc:VGNC:77356]  
ENSMMUG000000058539  
ENSMMUG000000013045 coiled-coil domain containing 81 [Source:VGNC Symbol;Acc:VGNC:70868]  
ENSMMUG00000006491 mediator complex subunit 9 [Source:VGNC Symbol;Acc:VGNC:74577]  
ENSMMUG000000064177  
ENSMMUG000000049314 dual specificity phosphatase 2 [Source:NCBI gene;Acc:718442]  
ENSMMUG000000051100 Metazoan signal recognition particle RNA [Source:RFAM;Acc:RF00017]  
ENSMMUG000000016911 DEAD-box helicase 41 [Source:VGNC Symbol;Acc:VGNC:71660]  
ENSMMUG000000050493 paired related homeobox 2 [Source:NCBI gene;Acc:716699]  
ENSMMUG000000002802 agmatinase [Source:NCBI gene;Acc:713190]  
ENSMMUG000000052440  
ENSMMUG000000018791 molybdenum cofactor sulfurase [Source:VGNC Symbol;Acc:VGNC:74792]  
ENSMMUG000000008486 endothelial cell adhesion molecule [Source:VGNC Symbol;Acc:VGNC:72290]  
ENSMMUG000000004985 arylsulfatase L [Source:VGNC Symbol;Acc:VGNC:81361]  
ENSMMUG000000022648 beta-1,3-galactosyltransferase 2 [Source:VGNC Symbol;Acc:VGNC:70205]  
ENSMMUG000000020122 RAN binding protein 9 [Source:VGNC Symbol;Acc:VGNC:76475]  
ENSMMUG000000040361 ATPase H+ transporting V1 subunit C1 [Source:NCBI gene;Acc:693840]  
ENSMMUG000000063555  
ENSMMUG000000055864  
ENSMMUG000000054246  
ENSMMUG000000011894 CBY1 interacting BAR domain containing 2 [Source:VGNC Symbol;Acc:VGNC:72335]  
ENSMMUG000000012408 dispatched RND transporter family member 2 [Source:VGNC Symbol;Acc:VGNC:71676]  
ENSMMUG000000049699 thioredoxin like 4B [Source:NCBI gene;Acc:706840]  
ENSMMUG000000027053 mml-mir-194-1 [Source:miRBase;Acc:MI0003024]  
ENSMMUG000000017211 peter pan homolog (Drosophila) [Source:NCBI gene;Acc:100533472]  
ENSMMUG000000062198 transmembrane protein 204 [Source:NCBI gene;Acc:701926]  
ENSMMUG000000010295 URB1 ribosome biogenesis homolog [Source:VGNC Symbol;Acc:VGNC:79074]  
ENSMMUG000000010744  
ENSMMUG000000021008 ankyrin repeat and SOCS box containing 14 [Source:VGNC Symbol;Acc:VGNC:84237]

ENSMMUG00000062110 TPD52 like 1 [Source:NCBI gene;Acc:716568]  
ENSMMUG00000014451 ASXL transcriptional regulator 3 [Source:VGNC Symbol;Acc:VGNC:70152]  
ENSMMUG00000063576 Metazoan signal recognition particle RNA [Source:RFAM;Acc:RF00017]  
ENSMMUG00000012769 limb development membrane protein 1 like [Source:VGNC Symbol;Acc:VGNC:74310]  
ENSMMUG00000054168 mitotic arrest deficient 2 like 1 [Source:NCBI gene;Acc:708574]  
ENSMMUG00000023138 bromodomain containing 2 [Source:VGNC Symbol;Acc:VGNC:83422]  
ENSMMUG0000003231 coiled-coil domain containing 33 [Source:VGNC Symbol;Acc:VGNC:70876]  
ENSMMUG00000046663 Metazoan signal recognition particle RNA [Source:RFAM;Acc:RF00017]  
ENSMMUG00000060487 atypical chemokine receptor 3 [Source:NCBI gene;Acc:694428]  
ENSMMUG00000012894 NHS actin remodeling regulator [Source:VGNC Symbol;Acc:VGNC:75348]  
ENSMMUG00000014176 cytohesin 1 interacting protein [Source:VGNC Symbol;Acc:VGNC:71831]  
ENSMMUG00000009226 mitogen-activated protein kinase kinase kinase 21 [Source:NCBI gene;Acc:712755]  
ENSMMUG00000044417 CD6 molecule [Source:NCBI gene;Acc:695183]  
ENSMMUG00000010323 zinc finger CCCH-type containing 12A [Source:VGNC Symbol;Acc:VGNC:79595]  
ENSMMUG00000056553  
ENSMMUG00000051008  
ENSMMUG00000008419 G protein nucleolar 2 [Source:VGNC Symbol;Acc:VGNC:73037]  
ENSMMUG00000014677 dynamin 2 [Source:VGNC Symbol;Acc:VGNC:71957]  
ENSMMUG00000057600 V-set and immunoglobulin domain containing 2 [Source:NCBI gene;Acc:712047]  
ENSMMUG00000013261 CDP-diacylglycerol synthase 2 [Source:VGNC Symbol;Acc:VGNC:70995]  
ENSMMUG00000054107  
ENSMMUG00000015909 TEA domain transcription factor 3 [Source:VGNC Symbol;Acc:VGNC:78303]  
ENSMMUG00000018945 chloride nucleotide-sensitive channel 1A [Source:VGNC Symbol;Acc:VGNC:71261]  
ENSMMUG00000008578 hyaluronan and proteoglycan link protein 4 [Source:VGNC Symbol;Acc:VGNC:73261]  
ENSMMUG00000038371 JunD proto-oncogene, AP-1 transcription factor subunit [Source:NCBI gene;Acc:720182]  
ENSMMUG00000022532 EPM2A interacting protein 1 [Source:VGNC Symbol;Acc:VGNC:84184]  
ENSMMUG0000005414 N-deacetylase and N-sulfotransferase 1 [Source:VGNC Symbol;Acc:VGNC:75151]  
ENSMMUG00000058044  
ENSMMUG00000005949 olfactory receptor 2B11 [Source:NCBI gene;Acc:709256]  
ENSMMUG00000064066  
ENSMMUG00000010067 MINDY lysine 48 deubiquitinase 1 [Source:VGNC Symbol;Acc:VGNC:74828]  
ENSMMUG00000002561 NOP2/Sun RNA methyltransferase 2 [Source:VGNC Symbol;Acc:VGNC:75466]  
ENSMMUG00000007998 HIVEP zinc finger 2 [Source:VGNC Symbol;Acc:VGNC:83427]  
ENSMMUG00000011129 cilia and flagella associated protein 221 [Source:VGNC Symbol;Acc:VGNC:71153]  
ENSMMUG00000052887  
ENSMMUG00000019841 leucine rich pentatricopeptide repeat containing [Source:VGNC Symbol;Acc:VGNC:82177]  
ENSMMUG00000005578 solute carrier family 35 member E2 [Source:VGNC Symbol;Acc:VGNC:77590]  
ENSMMUG00000055071 Y RNA [Source:RFAM;Acc:RF00019]  
ENSMMUG00000059677 melanocortin 2 receptor accessory protein [Source:NCBI gene;Acc:701330]  
ENSMMUG00000063228  
ENSMMUG00000039085 adaptor protein, phosphotyrosine interacting with PH domain and leucine zipper 1 [Source:NCBI gene;Acc:100425753]  
ENSMMUG00000050979 PILR alpha associated neural protein [Source:NCBI gene;Acc:713548]  
ENSMMUG00000009922 mitochondrial calcium uniporter regulator 1 [Source:VGNC Symbol;Acc:VGNC:81471]  
ENSMMUG00000054357  
ENSMMUG00000003123 adaptor related protein complex 4 subunit sigma 1 [Source:VGNC Symbol;Acc:VGNC:84304]  
ENSMMUG00000020691 AAR2 splicing factor [Source:VGNC Symbol;Acc:VGNC:69412]  
ENSMMUG00000050907  
ENSMMUG00000018510 sodium voltage-gated channel alpha subunit 9 [Source:VGNC Symbol;Acc:VGNC:76990]  
ENSMMUG00000004019 izumo sperm-egg fusion 1 [Source:VGNC Symbol;Acc:VGNC:73670]  
ENSMMUG00000037908  
ENSMMUG00000064642

ENSMMUG00000063598 leucine rich repeat containing 26 [Source:NCBI gene;Acc:706616]  
ENSMMUG00000023312 haptoglobin [Source:NCBI gene;Acc:706640]  
ENSMMUG00000058765  
ENSMMUG00000049720  
ENSMMUG00000012677 lysine demethylase 4B [Source:VGNC Symbol;Acc:VGNC:73930]  
ENSMMUG00000023005 Sp9 transcription factor [Source:VGNC Symbol;Acc:VGNC:78027]  
ENSMMUG00000055028  
ENSMMUG00000021049 ret finger protein-like 3 [Source:NCBI gene;Acc:705507]  
ENSMMUG00000023006 corepressor interacting with RBPJ, 1 [Source:VGNC Symbol;Acc:VGNC:71331]  
ENSMMUG00000065019 Metazoan signal recognition particle RNA [Source:RFAM;Acc:RF00017]  
ENSMMUG00000051911  
ENSMMUG00000063570 Metazoan signal recognition particle RNA [Source:RFAM;Acc:RF00017]  
ENSMMUG00000009059 Fas associated factor family member 2 [Source:VGNC Symbol;Acc:VGNC:72332]  
ENSMMUG00000019267 interleukin 17 receptor B [Source:VGNC Symbol;Acc:VGNC:73618]  
ENSMMUG00000006639 NGG1 interacting factor 3 like 1 [Source:VGNC Symbol;Acc:VGNC:75166]  
ENSMMUG00000053150 Metazoan signal recognition particle RNA [Source:RFAM;Acc:RF00017]  
ENSMMUG00000001664 arylacetamide deacetylase [Source:VGNC Symbol;Acc:VGNC:81172]  
ENSMMUG00000011359 eukaryotic translation initiation factor 3 subunit E [Source:VGNC Symbol;Acc:VGNC:83997]  
ENSMMUG00000052091 dishevelled segment polarity protein 2 [Source:NCBI gene;Acc:714381]  
ENSMMUG00000008541 BRCA2 and CDKN1A interacting protein [Source:NCBI gene;Acc:699437]  
ENSMMUG00000060408  
ENSMMUG00000054916 Metazoan signal recognition particle RNA [Source:RFAM;Acc:RF00017]  
ENSMMUG00000065091 myelin protein zero like 2 [Source:NCBI gene;Acc:699330]  
ENSMMUG00000016019 PDZ binding kinase [Source:VGNC Symbol;Acc:VGNC:75643]  
ENSMMUG00000012452 transglutaminase 1 [Source:NCBI gene;Acc:715854]  
ENSMMUG00000008237 phosphatidylglycerophosphate synthase 1 [Source:VGNC Symbol;Acc:VGNC:75890]  
ENSMMUG00000006018 sperm associated antigen 5 [Source:NCBI gene;Acc:709400]  
ENSMMUG00000002821 origin recognition complex subunit 3 [Source:VGNC Symbol;Acc:VGNC:75715]  
ENSMMUG00000000546 KIAA0040 ortholog [Source:NCBI gene;Acc:100423509]  
ENSMMUG00000064473 MRT4 homolog, ribosome maturation factor [Source:NCBI gene;Acc:702926]  
ENSMMUG00000065058  
ENSMMUG00000005761 UBX domain protein 1 [Source:VGNC Symbol;Acc:VGNC:79135]  
ENSMMUG00000020813 NADH:ubiquinone oxidoreductase subunit A9 [Source:VGNC Symbol;Acc:VGNC:81480]  
ENSMMUG00000062017  
ENSMMUG00000062664  
ENSMMUG00000057282 Y RNA [Source:RFAM;Acc:RF00019]  
ENSMMUG00000055284  
ENSMMUG00000032281 zinc finger and BTB domain containing 48 [Source:VGNC Symbol;Acc:VGNC:79959]  
ENSMMUG00000004579 RAD51 recombinase [Source:VGNC Symbol;Acc:VGNC:76645]  
ENSMMUG00000026981 EGF like domain multiple 7 [Source:VGNC Symbol;Acc:VGNC:72079]  
ENSMMUG00000047067 SERTA domain containing 2 [Source:NCBI gene;Acc:696216]  
ENSMMUG00000015198 glutamate decarboxylase 1 [Source:VGNC Symbol;Acc:VGNC:72862]  
ENSMMUG00000022520 kinesin light chain 2 [Source:VGNC Symbol;Acc:VGNC:73869]  
ENSMMUG00000022641 ubiquitin C-terminal hydrolase L5 [Source:VGNC Symbol;Acc:VGNC:79197]  
ENSMMUG00000037458 endoplasmic reticulum resident protein 29 [Source:NCBI gene;Acc:720396]  
ENSMMUG00000011189 tousled like kinase 1 [Source:VGNC Symbol;Acc:VGNC:78367]  
ENSMMUG00000061452  
ENSMMUG00000053660 Metazoan signal recognition particle RNA [Source:RFAM;Acc:RF00017]  
ENSMMUG00000064752 phospholipase A2 activating protein [Source:NCBI gene;Acc:707876]  
ENSMMUG00000026836 Y RNA [Source:RFAM;Acc:RF00019]  
ENSMMUG00000013049 formyl peptide receptor 1 [Source:NCBI gene;Acc:719782]

337 ENSMMUG00000022840 zonadhesin [Source:VGNC Symbol;Acc:VGNC:81797]  
ENSMMUG00000010688 olfactory receptor, family 2, subfamily AT, member 4 [Source:NCBI gene;Acc:694711]  
ENSMMUG00000009310 myelin transcription factor 1 like [Source:NCBI gene;Acc:706914]  
ENSMMUG00000011015 matrix metalloproteinase 27 [Source:VGNC Symbol;Acc:VGNC:74749]  
ENSMMUG00000021137 thioredoxin related transmembrane protein 4 [Source:VGNC Symbol;Acc:VGNC:79484]  
ENSMMUG00000063609 cytochrome c oxidase subunit 6A1, mitochondrial [Source:NCBI gene;Acc:696956]  
ENSMMUG00000013851 lipoic acid synthetase [Source:VGNC Symbol;Acc:VGNC:74057]  
ENSMMUG00000058302  
ENSMMUG00000011646 TATA-box binding protein associated factor, RNA polymerase I subunit D [Source:NCBI gene;Acc:696602]  
ENSMMUG00000058170 U6 spliceosomal RNA [Source:RFAM;Acc:RF00026]  
ENSMMUG00000009838 COP9 signalosome subunit 2 [Source:VGNC Symbol;Acc:VGNC:71376]  
ENSMMUG00000039829  
ENSMMUG00000009984 prodynorphin [Source:VGNC Symbol;Acc:VGNC:75937]  
ENSMMUG00000060995  
ENSMMUG00000010320 ATPase H+ transporting V1 subunit C2 [Source:VGNC Symbol;Acc:VGNC:70091]  
ENSMMUG00000008579 defective in cullin neddylation 1 domain containing 4 [Source:VGNC Symbol;Acc:VGNC:71809]  
ENSMMUG00000012601 RANBP2-type and C3HC4-type zinc finger containing 1 [Source:VGNC Symbol;Acc:VGNC:81554]  
ENSMMUG00000054447 T-box transcription factor 22 [Source:NCBI gene;Acc:708338]  
ENSMMUG00000054625  
ENSMMUG00000007708 N-alpha-acetyltransferase 20, NatB catalytic subunit [Source:VGNC Symbol;Acc:VGNC:84533]  
ENSMMUG00000054713  
ENSMMUG00000019740 zinc finger DHC-type palmitoyltransferase 3 [Source:VGNC Symbol;Acc:VGNC:79143]  
ENSMMUG00000032306 zinc finger FYVE-type containing 28 [Source:NCBI gene;Acc:720600]  
ENSMMUG00000022727 lysine methyltransferase 2E [Source:VGNC Symbol;Acc:VGNC:74073]  
ENSMMUG00000029927 ADAM metalloproteinase domain 11 [Source:VGNC Symbol;Acc:VGNC:69466]  
ENSMMUG00000056196  
ENSMMUG00000003468 growth arrest and DNA damage inducible beta [Source:VGNC Symbol;Acc:VGNC:72864]  
ENSMMUG00000052479  
ENSMMUG00000019566 hemoglobin subunit alpha 1 [Source:NCBI gene;Acc:701930]  
ENSMMUG00000054675  
ENSMMUG00000015737 phosphatidylinositol glycan anchor biosynthesis class A [Source:VGNC Symbol;Acc:VGNC:75984]  
ENSMMUG00000003858 retinoid X receptor beta [Source:VGNC Symbol;Acc:VGNC:76952]  
ENSMMUG00000017680 chibby family member 1, beta catenin antagonist [Source:NCBI gene;Acc:100429409]  
ENSMMUG00000021327 phosphatidylinositol glycan anchor biosynthesis class H [Source:VGNC Symbol;Acc:VGNC:75987]  
ENSMMUG00000058242 zinc finger protein 160 [Source:NCBI gene;Acc:722722]  
ENSMMUG00000054112  
ENSMMUG00000011335 Fc receptor like 6 [Source:VGNC Symbol;Acc:VGNC:72602]  
ENSMMUG00000014155 CLK4 associating serine/arginine rich protein [Source:VGNC Symbol;Acc:VGNC:71198]  
ENSMMUG00000018657 dedicator of cytokinesis 9 [Source:VGNC Symbol;Acc:VGNC:71835]  
ENSMMUG00000002514 methyltransferase like 25 [Source:VGNC Symbol;Acc:VGNC:74591]  
ENSMMUG00000014535 solute carrier family 15 member 3 [Source:VGNC Symbol;Acc:VGNC:77504]  
ENSMMUG00000045497 complement factor H [Source:NCBI gene;Acc:717346]  
ENSMMUG00000007485 zinc finger protein 555 [Source:VGNC Symbol;Acc:VGNC:79705]  
ENSMMUG00000040273 zinc finger protein 257 [Source:NCBI gene;Acc:694388]  
ENSMMUG00000065273  
ENSMMUG00000054290  
ENSMMUG00000057852  
ENSMMUG00000002911 mutL homolog 3 [Source:VGNC Symbol;Acc:VGNC:82187]  
ENSMMUG00000017176 DNA cross-link repair 1C [Source:NCBI gene;Acc:697493]  
ENSMMUG00000017558 discoidin, CUB and LCCL domain containing 1 [Source:VGNC Symbol;Acc:VGNC:71689]  
ENSMMUG00000023119 lin-7 homolog C, crumbs cell polarity complex component [Source:VGNC Symbol;Acc:VGNC:74070]

ENSMMUG00000062339 endogenous retrovirus group K member 25 Env polyprotein-like [Source:NCBI gene;Acc:114677579]  
ENSMMUG00000058450  
ENSMMUG00000003053 APC regulator of WNT signaling pathway 2 [Source:VGNC Symbol;Acc:VGNC:69888]  
ENSMMUG00000062638 methyltransferase like 3 [Source:NCBI gene;Acc:706852]  
ENSMMUG00000006796 betaine--homocysteine S-methyltransferase 2 [Source:VGNC Symbol;Acc:VGNC:70248]  
ENSMMUG00000062667 leucine rich repeat and fibronectin type III domain containing 3 [Source:NCBI gene;Acc:711565]  
ENSMMUG00000060101  
ENSMMUG00000003958 stromal interaction molecule 1 [Source:VGNC Symbol;Acc:VGNC:77911]  
ENSMMUG00000021917 leucine rich repeat containing 7 [Source:NCBI gene;Acc:702347]  
ENSMMUG00000007264 transmembrane protein 30B [Source:VGNC Symbol;Acc:VGNC:79656]  
ENSMMUG00000010404 zinc finger protein 41 [Source:VGNC Symbol;Acc:VGNC:78900]  
ENSMMUG00000009615 IMP U3 small nucleolar ribonucleoprotein 4 [Source:VGNC Symbol;Acc:VGNC:73689]  
ENSMMUG00000006702 bone morphogenetic protein receptor type 1B [Source:VGNC Symbol;Acc:VGNC:70267]  
ENSMMUG00000002318 stimulated by retinoic acid 8 [Source:VGNC Symbol;Acc:VGNC:78250]  
ENSMMUG00000047370 IgLON family member 5 [Source:NCBI gene;Acc:719890]  
ENSMMUG00000050676 leucine rich repeat containing 75A [Source:NCBI gene;Acc:699649]  
ENSMMUG00000061396 kallikrein related peptidase 6 [Source:NCBI gene;Acc:719776]  
ENSMMUG00000061688 Metazoan signal recognition particle RNA [Source:RFAM;Acc:RF00017]  
ENSMMUG00000003688 zinc finger protein 91 [Source:HGNC Symbol;Acc:HGNC:13166]  
ENSMMUG00000062697 olfactory receptor 5B12 [Source:NCBI gene;Acc:106993236]  
ENSMMUG00000001219 mitochondrial ribosomal protein L4 [Source:VGNC Symbol;Acc:VGNC:74750]  
ENSMMUG00000021315 molybdenum cofactor synthesis 1 [Source:NCBI gene;Acc:719625]  
ENSMMUG00000062047  
ENSMMUG00000054309 PRAME family member 5 [Source:NCBI gene;Acc:722781]  
ENSMMUG00000011047 S-phase cyclin A associated protein in the ER [Source:VGNC Symbol;Acc:VGNC:77006]  
ENSMMUG00000016475 M-phase phosphoprotein 8 [Source:VGNC Symbol;Acc:VGNC:74864]  
ENSMMUG00000011515 striatin 3 [Source:VGNC Symbol;Acc:VGNC:78127]  
ENSMMUG00000006937 small nuclear ribonucleoprotein D2 polypeptide [Source:NCBI gene;Acc:715183]  
ENSMMUG00000060547 Metazoan signal recognition particle RNA [Source:RFAM;Acc:RF00017]  
ENSMMUG00000052496  
ENSMMUG00000033490 mml-mir-625 [Source:miRBase;Acc:MI0007874]  
ENSMMUG00000022715 adenosylhomocysteinase like 1 [Source:VGNC Symbol;Acc:VGNC:81350]  
ENSMMUG00000005888 tetratricopeptide repeat domain 13 [Source:VGNC Symbol;Acc:VGNC:79588]  
ENSMMUG00000023396 hypocretin receptor 1 [Source:VGNC Symbol;Acc:VGNC:73356]  
ENSMMUG00000050994  
ENSMMUG00000064749  
ENSMMUG00000063396  
ENSMMUG00000000244 coagulation factor XIII B chain [Source:VGNC Symbol;Acc:VGNC:72463]  
ENSMMUG00000017922 prostaglandin I2 receptor [Source:VGNC Symbol;Acc:VGNC:76586]  
ENSMMUG00000000353 putative methyltransferase-like protein 21E pseudogene [Source:NCBI gene;Acc:707949]  
ENSMMUG00000053565  
ENSMMUG00000010891 lysine acetyltransferase 6A [Source:VGNC Symbol;Acc:VGNC:73821]  
ENSMMUG00000018283 dihydrofolate reductase [Source:NCBI gene;Acc:711268]  
ENSMMUG00000052463 Metazoan signal recognition particle RNA [Source:RFAM;Acc:RF00017]  
ENSMMUG00000031398 coiled-coil domain containing 173 [Source:NCBI gene;Acc:709886]  
ENSMMUG00000005365 peroxisomal biogenesis factor 3 [Source:VGNC Symbol;Acc:VGNC:75951]  
ENSMMUG00000058586  
ENSMMUG00000059657 chromosome 5 C4orf36 homolog [Source:NCBI gene;Acc:700500]  
ENSMMUG00000020592 Gse1 coiled-coil protein [Source:VGNC Symbol;Acc:VGNC:73254]  
ENSMMUG00000018444 dual specificity phosphatase 23 [Source:VGNC Symbol;Acc:VGNC:71880]  
ENSMMUG00000003595 peroxisomal biogenesis factor 5 like [Source:VGNC Symbol;Acc:VGNC:75889]

ENSMMUG00000064563  
ENSMMUG0000006214 olfactory receptor family 11 subfamily L member 1 [Source:HGNC Symbol;Acc:HGNC:14998]  
ENSMMUG00000050503  
ENSMMUG00000015566 holocarboxylase synthetase [Source:VGNC Symbol;Acc:VGNC:73477]  
ENSMMUG00000048710 HIC ZBTB transcriptional repressor 1 [Source:NCBI gene;Acc:721284]  
ENSMMUG00000045680 iron responsive element binding protein 2 [Source:VGNC Symbol;Acc:VGNC:84360]  
ENSMMUG00000013894 beta-1,4-N-acetyl-galactosaminyltransferase 3 [Source:VGNC Symbol;Acc:VGNC:70121]  
ENSMMUG00000021344 interleukin 33 [Source:VGNC Symbol;Acc:VGNC:73606]  
ENSMMUG00000013655 dynamin 1 like [Source:VGNC Symbol;Acc:VGNC:71956]  
ENSMMUG00000011319 potassium channel tetramerization domain containing 15 [Source:VGNC Symbol;Acc:VGNC:73894]  
ENSMMUG00000022983 adhesion G protein-coupled receptor F1 [Source:VGNC Symbol;Acc:VGNC:81007]  
ENSMMUG00000008213 reticulocalbin 2 [Source:VGNC Symbol;Acc:VGNC:76887]  
ENSMMUG00000021806 vestigial like family member 4 [Source:VGNC Symbol;Acc:VGNC:79755]  
ENSMMUG00000008136 G2 and S-phase expressed 1 [Source:VGNC Symbol;Acc:VGNC:73162]  
ENSMMUG00000006904 cyclin L2 [Source:NCBI gene;Acc:114669744]  
ENSMMUG00000054737  
ENSMMUG00000052420 transmembrane protein 132A [Source:NCBI gene;Acc:695291]  
ENSMMUG00000056220 follistatin like 3 [Source:NCBI gene;Acc:721100]  
ENSMMUG00000012310 CASP8 and FADD like apoptosis regulator [Source:VGNC Symbol;Acc:VGNC:71019]  
ENSMMUG00000002768 neuronal regeneration related protein [Source:VGNC Symbol;Acc:VGNC:84454]  
ENSMMUG00000038410  
ENSMMUG00000008546 cyclin D2 [Source:NCBI gene;Acc:710379]  
ENSMMUG00000042416  
ENSMMUG00000017333 CD244 molecule [Source:VGNC Symbol;Acc:VGNC:70821]  
ENSMMUG00000005312 glutaredoxin [Source:VGNC Symbol;Acc:VGNC:84383]  
ENSMMUG00000052327  
ENSMMUG00000047342 T cell receptor alpha variable 12-2 [Source:HGNC Symbol;Acc:HGNC:12106]  
ENSMMUG00000044859  
ENSMMUG00000000662 guanylate-binding protein 1 [Source:NCBI gene;Acc:694538]  
ENSMMUG00000014343 lipase family member J [Source:VGNC Symbol;Acc:VGNC:74333]  
ENSMMUG00000023488 lysine acetyltransferase 6B [Source:VGNC Symbol;Acc:VGNC:73846]  
ENSMMUG00000064013  
ENSMMUG00000046785  
ENSMMUG00000047127  
ENSMMUG00000010328 MYST/Esa1 associated factor 6 [Source:VGNC Symbol;Acc:VGNC:74580]  
ENSMMUG00000004433 ATP binding cassette subfamily E member 1 [Source:VGNC Symbol;Acc:VGNC:69581]  
ENSMMUG00000059153  
ENSMMUG00000004559 potassium voltage-gated channel subfamily D member 1 [Source:VGNC Symbol;Acc:VGNC:73975]  
ENSMMUG00000054935  
ENSMMUG00000049690  
ENSMMUG00000057531 mitochondrial ribosomal protein S11 [Source:NCBI gene;Acc:697743]  
ENSMMUG00000005040 coiled-coil domain containing 183 [Source:NCBI gene;Acc:709019]  
ENSMMUG00000030401 gem nuclear organelle associated protein 4 [Source:VGNC Symbol;Acc:VGNC:72723]  
ENSMMUG00000057973  
ENSMMUG00000006561 tRNA selenocysteine 1 associated protein 1 [Source:VGNC Symbol;Acc:VGNC:79885]  
ENSMMUG00000049885  
ENSMMUG00000003134 ring finger protein 217 [Source:VGNC Symbol;Acc:VGNC:76801]  
ENSMMUG00000023469 heat shock protein 90 beta family member 1 [Source:NCBI gene;Acc:699568]  
ENSMMUG00000002709 G protein-coupled receptor class C group 5 member B [Source:VGNC Symbol;Acc:VGNC:72934]  
ENSMMUG00000004560 crystallin lambda 1 [Source:VGNC Symbol;Acc:VGNC:71433]  
ENSMMUG00000053231



ENSMMUG00000050186 Metazoan signal recognition particle RNA [Source:RFAM;Acc:RF00017]  
ENSMMUG00000055575 olfactory marker protein [Source:HGNC Symbol;Acc:HGNC:8136]  
ENSMMUG00000050297  
ENSMMUG00000052540  
ENSMMUG00000002038 cell migration inducing hyaluronidase 1 [Source:VGNC Symbol;Acc:VGNC:71130]  
ENSMMUG00000007110 serine and arginine rich splicing factor 4 [Source:NCBI gene;Acc:717401]  
ENSMMUG00000022570 nuclear transcription factor Y subunit beta [Source:NCBI gene;Acc:700451]  
ENSMMUG00000028863 WIZ zinc finger [Source:VGNC Symbol;Acc:VGNC:79901]  
ENSMMUG00000062882  
ENSMMUG00000057860 olfactory receptor 51E1 [Source:NCBI gene;Acc:717598]  
ENSMMUG00000001876 phosphoinositide-3-kinase adaptor protein 1 [Source:VGNC Symbol;Acc:VGNC:75891]  
ENSMMUG00000015203 golgi reassembly stacking protein 2 [Source:VGNC Symbol;Acc:VGNC:72957]  
ENSMMUG00000057895  
ENSMMUG00000002652 zinc finger MIZ-type containing 2 [Source:VGNC Symbol;Acc:VGNC:79350]  
ENSMMUG00000015608 tudor domain containing 12 [Source:VGNC Symbol;Acc:VGNC:82254]  
ENSMMUG00000016631 glutamate receptor interacting protein 1 [Source:VGNC Symbol;Acc:VGNC:73195]  
ENSMMUG00000059794  
ENSMMUG00000013888 NOP56 ribonucleoprotein [Source:VGNC Symbol;Acc:VGNC:75181]  
ENSMMUG00000050174  
ENSMMUG00000052229  
ENSMMUG00000003859 solute carrier family 39 member 7 [Source:VGNC Symbol;Acc:VGNC:77592]  
ENSMMUG00000007109 dishevelled segment polarity protein 1 [Source:NCBI gene;Acc:705864]  
ENSMMUG00000062264  
ENSMMUG00000001404 neuronal differentiation 2 [Source:VGNC Symbol;Acc:VGNC:75321]  
ENSMMUG00000018216 keratin, type II cuticular Hb5 [Source:NCBI gene;Acc:698320]  
ENSMMUG00000039515 kinesin family member 13B [Source:NCBI gene;Acc:100429368]  
ENSMMUG00000057228 SRY-box transcription factor 15 [Source:NCBI gene;Acc:106993880]  
ENSMMUG00000016357 polycystin 2 like 2, transient receptor potential cation channel [Source:VGNC Symbol;Acc:VGNC:76009]  
ENSMMUG00000008705 ubiquitin specific peptidase 53 [Source:VGNC Symbol;Acc:VGNC:79793]  
ENSMMUG00000006155 zinc finger C3HC-type containing 1 [Source:VGNC Symbol;Acc:VGNC:79827]  
ENSMMUG00000015987 Ras and Rab interactor 1 [Source:VGNC Symbol;Acc:VGNC:76769]  
ENSMMUG00000000681 calmin [Source:VGNC Symbol;Acc:VGNC:71232]  
ENSMMUG00000020148 BAG cochaperone 1 [Source:NCBI gene;Acc:702101]  
ENSMMUG00000012513 lactamase beta 2 [Source:VGNC Symbol;Acc:VGNC:74072]  
ENSMMUG00000039441 mab-21 like 2 [Source:NCBI gene;Acc:693948]  
ENSMMUG00000060966  
ENSMMUG00000013235 collagen type IV alpha 3 chain [Source:VGNC Symbol;Acc:VGNC:81375]  
ENSMMUG00000010703 KIAA0895 [Source:VGNC Symbol;Acc:VGNC:73884]  
ENSMMUG00000019856 olfactory receptor 2F2-like [Source:NCBI gene;Acc:100428924]  
ENSMMUG00000059400  
ENSMMUG00000001065 olfactory receptor, family 51, subfamily A, member 4 [Source:NCBI gene;Acc:100425539]  
ENSMMUG00000022643 Ro60, Y RNA binding protein [Source:NCBI gene;Acc:715194]  
ENSMMUG00000018898 nuclear receptor subfamily 2 group C member 1 [Source:VGNC Symbol;Acc:VGNC:75508]  
ENSMMUG00000055885 napsin-A [Source:NCBI gene;Acc:719235]  
ENSMMUG00000001642 MNAT1 component of CDK activating kinase [Source:VGNC Symbol;Acc:VGNC:74905]  
ENSMMUG00000046765  
ENSMMUG00000004710 protein interacting with cyclin A1 [Source:VGNC Symbol;Acc:VGNC:76336]  
ENSMMUG00000003864 VPS52 subunit of GARP complex [Source:VGNC Symbol;Acc:VGNC:78551]  
ENSMMUG00000053760  
ENSMMUG00000041043 Metazoan signal recognition particle RNA [Source:RFAM;Acc:RF00017]  
ENSMMUG00000019756 NFKB inhibitor delta [Source:VGNC Symbol;Acc:VGNC:75179]

ENSMMUG00000056962  
ENSMMUG00000041837 Metazoan signal recognition particle RNA [Source:RFAM;Acc:RF00017]  
ENSMMUG0000006668 tubulin alpha-3 chain [Source:NCBI gene;Acc:707215]  
ENSMMUG00000013188 serine incorporator 2 [Source:VGNC Symbol;Acc:VGNC:77294]  
ENSMMUG00000018165 syndecan binding protein 2 [Source:VGNC Symbol;Acc:VGNC:77017]  
ENSMMUG00000018640 Dmx like 1 [Source:VGNC Symbol;Acc:VGNC:71935]  
ENSMMUG00000057215  
ENSMMUG00000019868 NKD inhibitor of WNT signaling pathway 1 [Source:VGNC Symbol;Acc:VGNC:75198]  
ENSMMUG00000064249  
ENSMMUG00000018290 ER membrane protein complex subunit 3 [Source:VGNC Symbol;Acc:VGNC:72091]  
ENSMMUG00000019714 vav guanine nucleotide exchange factor 3 [Source:VGNC Symbol;Acc:VGNC:78759]  
ENSMMUG0000002879 GA binding protein transcription factor subunit beta 1 [Source:VGNC Symbol;Acc:VGNC:72845]  
ENSMMUG00000051202  
ENSMMUG00000049484  
ENSMMUG00000055637  
ENSMMUG00000020294 phosphoinositide-3-kinase regulatory subunit 4 [Source:VGNC Symbol;Acc:VGNC:84060]  
ENSMMUG0000003511 chloride intracellular channel 5 [Source:VGNC Symbol;Acc:VGNC:71171]  
ENSMMUG00000022293 FERM and PDZ domain containing 3 [Source:VGNC Symbol;Acc:VGNC:72805]  
ENSMMUG00000018795 kynurenine aminotransferase 3 [Source:VGNC Symbol;Acc:VGNC:74177]  
ENSMMUG00000015544 PWP1 homolog, endonuclein [Source:NCBI gene;Acc:705262]  
ENSMMUG00000008542 DEAH-box helicase 32 (putative) [Source:NCBI gene;Acc:695919]  
ENSMMUG00000064615 pancreatic and duodenal homeobox 1 [Source:NCBI gene;Acc:710936]  
ENSMMUG00000014140 peroxisomal biogenesis factor 26 [Source:NCBI gene;Acc:710470]  
ENSMMUG00000013031 bone morphogenetic protein 1 [Source:VGNC Symbol;Acc:VGNC:70259]  
ENSMMUG00000065105  
ENSMMUG00000054825  
ENSMMUG00000002269 serine carboxypeptidase 1 [Source:VGNC Symbol;Acc:VGNC:82232]  
ENSMMUG00000019266 choline dehydrogenase [Source:VGNC Symbol;Acc:VGNC:71086]  
ENSMMUG00000004460 tyrosyl-DNA phosphodiesterase 1 [Source:VGNC Symbol;Acc:VGNC:79164]  
ENSMMUG00000018777 regulation of nuclear pre-mRNA domain containing 1A [Source:VGNC Symbol;Acc:VGNC:77103]  
ENSMMUG00000046520 small integral membrane protein 13 [Source:NCBI gene;Acc:703387]  
ENSMMUG00000023621 DEAD-box helicase 27 [Source:NCBI gene;Acc:703852]  
ENSMMUG00000009431 HEN methyltransferase 1 [Source:VGNC Symbol;Acc:VGNC:73241]  
ENSMMUG00000015799 tolloid like 1 [Source:VGNC Symbol;Acc:VGNC:78369]  
ENSMMUG00000013233 collagen type IV alpha 4 chain [Source:VGNC Symbol;Acc:VGNC:71299]  
ENSMMUG00000053482 protocadherin 20 [Source:NCBI gene;Acc:696607]  
ENSMMUG00000061036 histone cluster 2, H2ab [Source:NCBI gene;Acc:705170]  
ENSMMUG00000057407 dorsal root ganglia homeobox [Source:NCBI gene;Acc:719355]  
ENSMMUG00000013419 guanylate cyclase 1 soluble subunit alpha 2 [Source:VGNC Symbol;Acc:VGNC:82154]  
ENSMMUG00000045966 granzyme M [Source:NCBI gene;Acc:715031]  
ENSMMUG00000052815  
ENSMMUG00000012091 thioredoxin reductase 1 [Source:VGNC Symbol;Acc:VGNC:78679]  
ENSMMUG00000042154 ankyrin repeat domain 66 [Source:VGNC Symbol;Acc:VGNC:81024]  
ENSMMUG00000062338  
ENSMMUG00000001359 caprin family member 2 [Source:VGNC Symbol;Acc:VGNC:70599]  
ENSMMUG00000010748 transient receptor potential cation channel subfamily A member 1 [Source:VGNC Symbol;Acc:VGNC:78429]  
ENSMMUG00000021695 Morf4 family associated protein 1 [Source:NCBI gene;Acc:710771]  
ENSMMUG00000002243 pleckstrin homology and RhoGEF domain containing G7 [Source:VGNC Symbol;Acc:VGNC:76149]  
ENSMMUG00000002007 kelch domain containing 9 [Source:NCBI gene;Acc:719863]  
ENSMMUG00000000227 myosin heavy chain 7B [Source:VGNC Symbol;Acc:VGNC:74965]  
ENSMMUG00000009409 mesoderm development LRP chaperone [Source:VGNC Symbol;Acc:VGNC:74507]

ENSMMUG00000052454 prostaglandin D2 receptor 2 [Source:NCBI gene;Acc:695853]  
ENSMMUG00000010171 proline-serine-threonine phosphatase interacting protein 1 [Source:VGNC Symbol;Acc:VGNC:76459]  
ENSMMUG00000020954 cell division cycle 25A [Source:VGNC Symbol;Acc:VGNC:70794]  
ENSMMUG00000065322 ATP synthase peripheral stalk-membrane subunit b [Source:NCBI gene;Acc:704072]  
ENSMMUG00000010944 GATA binding protein 6 [Source:VGNC Symbol;Acc:VGNC:72891]  
ENSMMUG00000035632 U6 spliceosomal RNA [Source:RFAM;Acc:RF00026]  
ENSMMUG00000065060  
ENSMMUG00000014213 calcium voltage-gated channel subunit alpha1 H [Source:VGNC Symbol;Acc:VGNC:70505]  
ENSMMUG00000012250 lactase [Source:VGNC Symbol;Acc:VGNC:74244]  
ENSMMUG00000060765  
ENSMMUG00000064448  
ENSMMUG00000010440 adenylate cyclase 8 [Source:VGNC Symbol;Acc:VGNC:69516]  
ENSMMUG0000005466 SPOC domain containing 1 [Source:VGNC Symbol;Acc:VGNC:77997]  
ENSMMUG00000021875 myoneurin [Source:VGNC Symbol;Acc:VGNC:74958]  
ENSMMUG0000004437 OTU deubiquitinase 4 [Source:VGNC Symbol;Acc:VGNC:75675]  
ENSMMUG00000009394 sestrin 3 [Source:VGNC Symbol;Acc:VGNC:77291]  
ENSMMUG00000058336  
ENSMMUG00000057173  
ENSMMUG00000016812 coiled-coil domain containing 18 [Source:VGNC Symbol;Acc:VGNC:70913]  
ENSMMUG00000057986 transmembrane protein 17 [Source:NCBI gene;Acc:694384]  
ENSMMUG00000024448  
ENSMMUG00000052457 Metazoan signal recognition particle RNA [Source:RFAM;Acc:RF00017]  
ENSMMUG00000040046 lithostathine-1-alpha [Source:NCBI gene;Acc:711810]  
ENSMMUG0000004432 anaphase promoting complex subunit 10 [Source:VGNC Symbol;Acc:VGNC:69682]  
ENSMMUG00000018785 elongator acetyltransferase complex subunit 2 [Source:VGNC Symbol;Acc:VGNC:72069]  
ENSMMUG00000059848 olfactory receptor 5B2 [Source:NCBI gene;Acc:100429465]  
ENSMMUG00000026897 mml-mir-215 [Source:miRBase;Acc:MI0003025]  
ENSMMUG00000064507 beta-1,3-galactosyltransferase 4 [Source:NCBI gene;Acc:718178]  
ENSMMUG00000006705 FRY like transcription coactivator [Source:VGNC Symbol;Acc:VGNC:72803]  
ENSMMUG00000056769 C-C motif chemokine receptor 1 [Source:VGNC Symbol;Acc:VGNC:70737]  
ENSMMUG00000061118  
ENSMMUG00000063482  
ENSMMUG00000011338 SLAM family member 8 [Source:VGNC Symbol;Acc:VGNC:77545]  
ENSMMUG00000059145  
ENSMMUG00000003949 cholinergic receptor nicotinic alpha 10 subunit [Source:NCBI gene;Acc:718133]  
ENSMMUG00000012167 solute carrier family 2 member 8 [Source:VGNC Symbol;Acc:VGNC:77470]  
ENSMMUG00000023116 LIM domain binding 2 [Source:VGNC Symbol;Acc:VGNC:74246]  
ENSMMUG0000000021 catsper channel auxiliary subunit epsilon [Source:VGNC Symbol;Acc:VGNC:70657]  
ENSMMUG00000059068  
ENSMMUG00000009961 niban apoptosis regulator 2 [Source:VGNC Symbol;Acc:VGNC:75254]  
ENSMMUG00000002472 CLPTM1 regulator of GABA type A receptor forward trafficking [Source:VGNC Symbol;Acc:VGNC:71265]  
ENSMMUG00000060871 prefoldin subunit 2 [Source:NCBI gene;Acc:719886]  
ENSMMUG00000050534  
ENSMMUG00000002003 upstream transcription factor 1 [Source:NCBI gene;Acc:719835]  
ENSMMUG00000007923 phosphatidylinositol glycan anchor biosynthesis class W [Source:VGNC Symbol;Acc:VGNC:75850]  
ENSMMUG00000052326 U7 small nuclear RNA [Source:RFAM;Acc:RF00066]  
ENSMMUG00000055530 Metazoan signal recognition particle RNA [Source:RFAM;Acc:RF00017]  
ENSMMUG00000062704 Metazoan signal recognition particle RNA [Source:RFAM;Acc:RF00017]  
ENSMMUG00000001896 G protein subunit beta 1 [Source:VGNC Symbol;Acc:VGNC:73095]  
ENSMMUG00000049366 Metazoan signal recognition particle RNA [Source:RFAM;Acc:RF00017]  
ENSMMUG00000014540 acylaminoacyl-peptide hydrolase [Source:VGNC Symbol;Acc:VGNC:69982]

ENSMMUG00000031497  
 ENSMMUG00000046665 glutamyl-tRNA amidotransferase subunit C [Source:NCBI gene;Acc:702258]  
 ENSMMUG00000023298 F-box protein 15 [Source:VGNC Symbol;Acc:VGNC:72504]  
 ENSMMUG00000016925 laminin subunit beta 3 [Source:VGNC Symbol;Acc:VGNC:74230]  
 ENSMMUG00000051277  
 ENSMMUG00000011137 arylacetamide deacetylase like 4 [Source:VGNC Symbol;Acc:VGNC:81338]  
 ENSMMUG00000006163 malate dehydrogenase 1 [Source:VGNC Symbol;Acc:VGNC:74690]  
 ENSMMUG00000053454 Ras like without CAAX 1 [Source:NCBI gene;Acc:717985]  
 ENSMMUG00000016399 ral guanine nucleotide dissociation stimulator like 1 [Source:VGNC Symbol;Acc:VGNC:76868]  
 ENSMMUG00000006509 CREB regulated transcription coactivator 1 [Source:VGNC Symbol;Acc:VGNC:71418]  
 ENSMMUG00000013661 presenilin associated rhomboid like [Source:NCBI gene;Acc:704652]  
 ENSMMUG000000065108  
 ENSMMUG000000060524  
 ENSMMUG00000018745 chromosome 6 C5orf49 homolog [Source:VGNC Symbol;Acc:VGNC:70646]  
 ENSMMUG00000057951 U6 spliceosomal RNA [Source:RFAM;Acc:RF00026]  
 ENSMMUG00000054312  
 ENSMMUG00000004648 KH domain containing 4, pre-mRNA splicing factor [Source:VGNC Symbol;Acc:VGNC:73931]  
 ENSMMUG00000014702 TATA-box binding protein associated factor 2 [Source:VGNC Symbol;Acc:VGNC:78090]  
 ENSMMUG00000021385 carbonic anhydrase 14 [Source:VGNC Symbol;Acc:VGNC:70489]  
 ENSMMUG00000018634 methionine adenosyltransferase 1A [Source:VGNC Symbol;Acc:VGNC:74663]  
 ENSMMUG00000056602  
 ENSMMUG00000064587  
 ENSMMUG00000014173  
 ENSMMUG00000006454 kelch like family member 18 [Source:VGNC Symbol;Acc:VGNC:74154]  
 ENSMMUG00000055097  
 ENSMMUG00000063884  
 ENSMMUG00000015738 vascular endothelial growth factor D [Source:VGNC Symbol;Acc:VGNC:79953]  
 ENSMMUG00000049640  
 ENSMMUG00000000434 cyclin dependent kinase 2 associated protein 1 [Source:VGNC Symbol;Acc:VGNC:70944]  
 ENSMMUG00000012636 potassium channel tetramerization domain containing 4 [Source:VGNC Symbol;Acc:VGNC:73892]  
 ENSMMUG00000008155 POU class 2 homeobox 1 [Source:VGNC Symbol;Acc:VGNC:76223]  
 ENSMMUG00000057627  
 S\_D2 7 ENSMMUG00000011410 nuclear receptor subfamily 4 group A member 3 [Source:VGNC Symbol;Acc:VGNC:75519]  
 ENSMMUG00000007283 3-hydroxyisobutyryl-CoA hydrolase [Source:NCBI gene;Acc:713951]  
 ENSMMUG00000017191 zinc finger protein 546 [Source:VGNC Symbol;Acc:VGNC:79732]  
 ENSMMUG000000061002  
 ENSMMUG00000004223 ring finger protein 10 [Source:VGNC Symbol;Acc:VGNC:76702]  
 ENSMMUG00000052019  
 ENSMMUG00000060042  
 NS\_D2 91 ENSMMUG00000017427 ATPase Na<sup>+</sup>/K<sup>+</sup> transporting subunit alpha 3 [Source:NCBI gene;Acc:706513]  
 ENSMMUG00000013777 DDHD domain containing 2 [Source:VGNC Symbol;Acc:VGNC:83992]  
 ENSMMUG00000001024 ETS transcription factor ELK4 [Source:VGNC Symbol;Acc:VGNC:72211]  
 ENSMMUG00000022278 mitochondrial transcription termination factor 2 [Source:VGNC Symbol;Acc:VGNC:74868]  
 ENSMMUG00000052668  
 ENSMMUG00000055365  
 ENSMMUG00000059728 tumor protein p53 inducible protein 11 [Source:NCBI gene;Acc:715295]  
 ENSMMUG00000055903 Metazoan signal recognition particle RNA [Source:RFAM;Acc:RF00017]  
 ENSMMUG00000050435  
 ENSMMUG00000014299 chromosome 12 C2orf80 homolog [Source:VGNC Symbol;Acc:VGNC:70459]  
 ENSMMUG00000021354 corticotropin releasing hormone binding protein [Source:VGNC Symbol;Acc:VGNC:71491]  
 ENSMMUG00000058855 aquaporin 5 [Source:NCBI gene;Acc:711804]

ENSMMUG00000052372  
ENSMMUG00000052030 developing brain homeobox 2 [Source:NCBI gene;Acc:701170]  
ENSMMUG00000055887  
ENSMMUG00000045974 suppressor APC domain containing 1 [Source:VGNC Symbol;Acc:VGNC:83461]  
ENSMMUG00000061986  
ENSMMUG00000013878 ring finger protein 2 [Source:NCBI gene;Acc:717024]  
ENSMMUG0000006048 adaptor related protein complex 2 subunit beta 1 [Source:VGNC Symbol;Acc:VGNC:69964]  
ENSMMUG00000045592  
ENSMMUG00000048513 tudor domain containing 15 [Source:NCBI gene;Acc:703066]  
ENSMMUG00000010596 6-phosphofructo-2-kinase/fructose-2,6-biphosphatase 3 [Source:VGNC Symbol;Acc:VGNC:75959]  
ENSMMUG00000005900 GID complex subunit 4 homolog [Source:NCBI gene;Acc:699842]  
ENSMMUG00000057064  
ENSMMUG00000044277 ubiquitin conjugating enzyme E2 I [Source:NCBI gene;Acc:722434]  
ENSMMUG00000054020 U6 spliceosomal RNA [Source:RFAM;Acc:RF00026]  
ENSMMUG00000015355 R-spondin 3 [Source:VGNC Symbol;Acc:VGNC:77066]  
ENSMMUG00000019710 centrosomal protein 128 [Source:VGNC Symbol;Acc:VGNC:71062]  
ENSMMUG00000064364 sulfite oxidase [Source:NCBI gene;Acc:711164]  
ENSMMUG00000005119 histocompatibility minor 13 [Source:VGNC Symbol;Acc:VGNC:81418]  
ENSMMUG00000005572 arachidonate 5-lipoxygenase activating protein [Source:VGNC Symbol;Acc:VGNC:69799]  
ENSMMUG00000004084 GTP cyclohydrolase 1 [Source:VGNC Symbol;Acc:VGNC:72900]  
ENSMMUG00000046165 chromosome 3 C7orf33 homolog [Source:NCBI gene;Acc:710503]  
ENSMMUG00000060993 Metazoan signal recognition particle RNA [Source:RFAM;Acc:RF00017]  
ENSMMUG00000056585  
ENSMMUG00000051354  
ENSMMUG00000051589  
ENSMMUG00000023251 KN motif and ankyrin repeat domains 2 [Source:VGNC Symbol;Acc:VGNC:73938]  
ENSMMUG00000013220 cytochrome b-245 beta chain [Source:VGNC Symbol;Acc:VGNC:71576]  
ENSMMUG00000015540 BTB domain containing 11 [Source:VGNC Symbol;Acc:VGNC:70367]  
ENSMMUG00000017070 zinc finger and SCAN domain containing 29 [Source:VGNC Symbol;Acc:VGNC:79633]  
ENSMMUG00000015923 ankyrin repeat and EF-hand domain containing 1 [Source:VGNC Symbol;Acc:VGNC:69615]  
ENSMMUG00000016449 zinc finger protein 382 [Source:VGNC Symbol;Acc:VGNC:79078]  
ENSMMUG00000023450 tyrosylprotein sulfotransferase 2 [Source:VGNC Symbol;Acc:VGNC:78639]  
ENSMMUG00000004082 GRB10 interacting GYF protein 1 [Source:VGNC Symbol;Acc:VGNC:73158]  
ENSMMUG00000018459 G protein signaling modulator 3 [Source:VGNC Symbol;Acc:VGNC:72938]  
ENSMMUG00000014980 keratin 76 [Source:VGNC Symbol;Acc:VGNC:74112]  
ENSMMUG00000015845 beta-1,4-N-acetyl-galactosaminyltransferase 2 [Source:VGNC Symbol;Acc:VGNC:70120]  
ENSMMUG00000014610 ring finger protein 17 [Source:NCBI gene;Acc:708198]  
ENSMMUG00000050794 zinc finger protein 774 [Source:NCBI gene;Acc:702985]  
ENSMMUG00000004988 trace amine-associated receptor 3 [Source:NCBI gene;Acc:709130]  
ENSMMUG00000019887 synaptic vesicle glycoprotein 2C [Source:VGNC Symbol;Acc:VGNC:78252]  
ENSMMUG00000061967 carbohydrate sulfotransferase 4 [Source:NCBI gene;Acc:708116]  
ENSMMUG00000014001 protein phosphatase 2 scaffold subunit Abeta [Source:VGNC Symbol;Acc:VGNC:76375]  
ENSMMUG00000050015 Metazoan signal recognition particle RNA [Source:RFAM;Acc:RF00017]  
ENSMMUG00000061004 ubiquitin specific peptidase 26 [Source:NCBI gene;Acc:706435]  
ENSMMUG00000001402 solute carrier family 15 member 1 [Source:VGNC Symbol;Acc:VGNC:77393]  
ENSMMUG00000062559  
ENSMMUG00000043096 nuclear transcription factor, X-box binding 1 [Source:NCBI gene;Acc:702945]  
ENSMMUG00000064519  
ENSMMUG00000041067 Metazoan signal recognition particle RNA [Source:RFAM;Acc:RF00017]  
ENSMMUG00000022944 zinc finger and BTB domain containing 44 [Source:VGNC Symbol;Acc:VGNC:79466]  
ENSMMUG00000064626 U1 spliceosomal RNA [Source:RFAM;Acc:RF00003]

ENSMMUG00000011380 consortin, connexin sorting protein [Source:VGNC Symbol;Acc:VGNC:71355]  
 ENSMMUG00000041889 ADP ribosylation factor 6 [Source:VGNC Symbol;Acc:VGNC:84306]  
 ENSMMUG00000012819 pyruvate dehydrogenase kinase 3 [Source:VGNC Symbol;Acc:VGNC:75934]  
 ENSMMUG0000000224 RALBP1 associated Eps domain containing 1 [Source:VGNC Symbol;Acc:VGNC:76738]  
 ENSMMUG00000050770  
 ENSMMUG00000057840 leucine-rich repeat-containing protein 37A3 [Source:NCBI gene;Acc:715030]  
 ENSMMUG00000010980 S100 calcium binding protein A5 [Source:VGNC Symbol;Acc:VGNC:76959]  
 ENSMMUG00000013742 regulator of G protein signaling 22 [Source:VGNC Symbol;Acc:VGNC:82221]  
 ENSMMUG00000020050 salt inducible kinase 1 [Source:NCBI gene;Acc:722303]  
 ENSMMUG00000012775 nuclear receptor subfamily 0 group B member 1 [Source:NCBI gene;Acc:574154]  
 ENSMMUG00000064719  
 ENSMMUG00000008827 apoptosis inhibitor 5 [Source:NCBI gene;Acc:716346]  
 ENSMMUG00000021636 SAP30 binding protein [Source:VGNC Symbol;Acc:VGNC:77142]  
 ENSMMUG00000055226 DNA damage inducible transcript 4 [Source:NCBI gene;Acc:715307]  
 ENSMMUG00000057062  
 ENSMMUG00000050564  
 ENSMMUG00000022330 sulfotransferase family, cytosolic, 1A, phenol-preferring, member 3 [Source:NCBI gene;Acc:100428398]  
 ENSMMUG00000064880  
 ENSMMUG00000018284 mutS homolog 3 [Source:VGNC Symbol;Acc:VGNC:74932]  
 ENSMMUG00000032031  
 ENSMMUG00000011821 phosphatidylinositol transfer protein membrane associated 1 [Source:VGNC Symbol;Acc:VGNC:76007]  
 ENSMMUG00000001293 autophagy related 16 like 2 [Source:VGNC Symbol;Acc:VGNC:70130]  
 ENSMMUG00000064979 B9 domain containing 2 [Source:NCBI gene;Acc:704873]  
 ENSMMUG00000054655 immunoglobulin lambda variable 3-10 [Source:HGNC Symbol;Acc:HGNC:5897]  
 ENSMMUG0000007085 zinc finger and BTB domain containing 16 [Source:VGNC Symbol;Acc:VGNC:78845]  
 ENSMMUG00000012191 coiled-coil domain containing 153 [Source:NCBI gene;Acc:704216]  
 ENSMMUG00000033738 RNA, U6atac small nuclear 6, pseudogene [Source:HGNC Symbol;Acc:HGNC:46905]  
 ENSMMUG00000022309 ETS repressor factor like [Source:NCBI gene;Acc:722195]  
 79 ENSMMUG00000010788 ATP binding cassette subfamily B member 1 [Source:NCBI gene;Acc:574235]  
 ENSMMUG00000062784  
 ENSMMUG00000004603 zinc finger CCCH-type containing 14 [Source:VGNC Symbol;Acc:VGNC:79255]  
 ENSMMUG00000010878 adaptor related protein complex 1 subunit gamma 1 [Source:VGNC Symbol;Acc:VGNC:69958]  
 ENSMMUG00000022359 solute carrier family 38 member 2 [Source:VGNC Symbol;Acc:VGNC:77469]  
 ENSMMUG00000016641 ubiquitin conjugating enzyme E2 B [Source:VGNC Symbol;Acc:VGNC:78692]  
 ENSMMUG00000016753 dynein axonemal heavy chain 3 [Source:VGNC Symbol;Acc:VGNC:71941]  
 ENSMMUG00000020412 parkin coregulated [Source:VGNC Symbol;Acc:VGNC:75646]  
 ENSMMUG00000006340 solute carrier family 6 member 6 [Source:VGNC Symbol;Acc:VGNC:77622]  
 ENSMMUG00000061085  
 ENSMMUG00000003462 ankyrin repeat domain 6 [Source:VGNC Symbol;Acc:VGNC:81023]  
 ENSMMUG00000055970  
 ENSMMUG00000011850 cadherin 1 [Source:VGNC Symbol;Acc:VGNC:70803]  
 ENSMMUG00000014691 inhibitor of DNA binding 4, HLH protein [Source:VGNC Symbol;Acc:VGNC:73557]  
 ENSMMUG00000052581 upstream transcription factor family member 3 [Source:NCBI gene;Acc:709660]  
 ENSMMUG00000046195 MIS12 kinetochore complex component [Source:NCBI gene;Acc:712202]  
 ENSMMUG00000008313 zinc finger protein 792 [Source:VGNC Symbol;Acc:VGNC:79456]  
 ENSMMUG00000018814 diacylglycerol kinase alpha [Source:VGNC Symbol;Acc:VGNC:71780]  
 ENSMMUG00000015347 protein kinase, DNA-activated, catalytic subunit [Source:VGNC Symbol;Acc:VGNC:76418]  
 ENSMMUG00000015604 myosin binding protein C3 [Source:VGNC Symbol;Acc:VGNC:75094]  
 ENSMMUG00000004467 X-ray repair cross complementing 1 [Source:NCBI gene;Acc:711457]  
 ENSMMUG00000059973  
 ENSMMUG00000018738 alcohol dehydrogenase 1B (class I), beta polypeptide [Source:NCBI gene;Acc:707908]



ENSMMUG00000041976 zinc finger protein 780B [Source:NCBI gene;Acc:701034]  
ENSMMUG00000053298  
ENSMMUG00000054683 dynein axonemal heavy chain 12 [Source:NCBI gene;Acc:703670]  
ENSMMUG00000012036 RNA binding motif protein 47 [Source:VGNC Symbol;Acc:VGNC:76576]  
ENSMMUG00000017725 eukaryotic elongation factor 2 kinase [Source:VGNC Symbol;Acc:VGNC:72098]  
ENSMMUG00000060168  
ENSMMUG00000031853 RAB5B, member RAS oncogene family [Source:VGNC Symbol;Acc:VGNC:81546]  
ENSMMUG00000012218 calmodulin regulated spectrin associated protein family member 2 [Source:VGNC Symbol;Acc:VGNC:70666]  
ENSMMUG00000004614 potassium voltage-gated channel subfamily C member 4 [Source:VGNC Symbol;Acc:VGNC:73974]  
ENSMMUG00000008785 E74 like ETS transcription factor 4 [Source:VGNC Symbol;Acc:VGNC:72208]  
ENSMMUG00000006669 ubiquitin protein ligase E3 component n-recogin 4 [Source:VGNC Symbol;Acc:VGNC:79845]  
ENSMMUG00000022256 transglutaminase 5 [Source:VGNC Symbol;Acc:VGNC:78341]  
ENSMMUG00000006310 solute carrier family 3 member 1 [Source:VGNC Symbol;Acc:VGNC:77462]  
ENSMMUG00000049945  
ENSMMUG00000021620 ELKS/RAB6-interacting/CAST family member 2 [Source:VGNC Symbol;Acc:VGNC:72164]  
ENSMMUG00000062006 methionyl aminopeptidase 2 [Source:NCBI gene;Acc:712400]  
ENSMMUG00000009425 actin, cytoplasmic 2-like [Source:NCBI gene;Acc:705671]  
ENSMMUG00000047594  
ENSMMUG00000037975 solute carrier family 7 member 6 [Source:NCBI gene;Acc:702903]  
ENSMMUG00000050418 superoxide dismutase 2 [Source:NCBI gene;Acc:574097]  
ENSMMUG00000019665 SURP and G-patch domain containing 2 [Source:VGNC Symbol;Acc:VGNC:78163]  
ENSMMUG00000017025 zinc finger CCCH-type containing 13 [Source:VGNC Symbol;Acc:VGNC:79248]  
ENSMMUG00000008965 piwi like RNA-mediated gene silencing 4 [Source:VGNC Symbol;Acc:VGNC:81504]  
ENSMMUG00000063348  
ENSMMUG00000053233  
ENSMMUG00000018051 FAT atypical cadherin 1 [Source:VGNC Symbol;Acc:VGNC:72617]  
ENSMMUG00000060215 Y RNA [Source:RFAM;Acc:RF00019]  
ENSMMUG00000060845 F-box protein 48 [Source:NCBI gene;Acc:699202]  
ENSMMUG00000010647 inducible T cell costimulator ligand [Source:NCBI gene;Acc:722191]  
ENSMMUG00000015018 CD5 molecule [Source:VGNC Symbol;Acc:VGNC:70770]  
ENSMMUG00000016860 zinc finger protein 490 [Source:NCBI gene;Acc:100426568]  
ENSMMUG00000049999 cone-rod homeobox [Source:NCBI gene;Acc:717550]  
ENSMMUG00000010321 C2 domain containing 3 centriole elongation regulator [Source:VGNC Symbol;Acc:VGNC:70375]  
ENSMMUG00000007077 APOBEC1 complementation factor [Source:VGNC Symbol;Acc:VGNC:69523]  
ENSMMUG00000064114 zinc finger protein 709 [Source:NCBI gene;Acc:100427466]  
ENSMMUG00000022372 cytochrome b561 family member A3 [Source:VGNC Symbol;Acc:VGNC:71458]  
ENSMMUG00000018279 adaptor related protein complex 5 subunit mu 1 [Source:VGNC Symbol;Acc:VGNC:69868]  
ENSMMUG00000018566 Janus kinase 1 [Source:VGNC Symbol;Acc:VGNC:73810]  
ENSMMUG00000014884 ubiquitin specific peptidase 8 [Source:VGNC Symbol;Acc:VGNC:78748]  
ENSMMUG00000052328 FAM20C golgi associated secretory pathway kinase [Source:NCBI gene;Acc:695088]  
ENSMMUG00000029176 Rho GTPase activating protein 17 [Source:NCBI gene;Acc:701988]  
ENSMMUG00000011274 prolyl 4-hydroxylase subunit alpha 1 [Source:VGNC Symbol;Acc:VGNC:75741]  
ENSMMUG00000014697 nuclear factor I B [Source:VGNC Symbol;Acc:VGNC:75335]  
ENSMMUG00000022303 solute carrier family 7 member 2 [Source:VGNC Symbol;Acc:VGNC:77629]  
ENSMMUG00000010304 cilia and flagella associated protein 298 [Source:NCBI gene;Acc:700721]  
ENSMMUG00000059543 zinc finger protein 30 [Source:NCBI gene;Acc:718310]  
ENSMMUG00000021420 pleckstrin 2 [Source:VGNC Symbol;Acc:VGNC:76071]  
ENSMMUG00000006311 prolyl endopeptidase like [Source:VGNC Symbol;Acc:VGNC:76346]  
ENSMMUG0000002338 heterogeneous nuclear ribonucleoprotein L like [Source:VGNC Symbol;Acc:VGNC:73441]  
ENSMMUG00000042157 caspase recruitment domain-containing protein 8 [Source:NCBI gene;Acc:718594]  
ENSMMUG0000002121 armadillo like helical domain containing 4 [Source:VGNC Symbol;Acc:VGNC:82106]

NS\_D3

113 ENSMUG00000015317 HD domain containing 2 [Source:VGNC Symbol;Acc:VGNC:73209]  
ENSMUG00000060439 schlafen family member 12 like [Source:NCBI gene;Acc:106992394]  
ENSMUG00000012761 sialic acid binding Ig like lectin 5 [Source:NCBI gene;Acc:719730]  
ENSMUG00000057209  
ENSMUG00000005622 dynein axonemal heavy chain 7 [Source:VGNC Symbol;Acc:VGNC:71859]  
ENSMUG00000058754  
ENSMUG00000014424 ADP ribosylation factor guanine nucleotide exchange factor 1 [Source:VGNC Symbol;Acc:VGNC:69834]  
ENSMUG00000021772 nephrocystin 3 [Source:NCBI gene;Acc:717622]  
ENSMUG00000046428  
ENSMUG00000013476 PHD finger protein 11 [Source:VGNC Symbol;Acc:VGNC:75814]  
ENSMUG00000063718 Kruppel like factor 9 [Source:NCBI gene;Acc:700585]  
ENSMUG00000039781 sosondowah ankyrin repeat domain family member A [Source:VGNC Symbol;Acc:VGNC:84498]  
ENSMUG00000017143 LDL receptor related protein 2 [Source:VGNC Symbol;Acc:VGNC:81430]  
ENSMUG00000061372  
ENSMUG00000010060 serine rich single-pass membrane protein 1 [Source:VGNC Symbol;Acc:VGNC:78014]  
ENSMUG00000010621 heart and neural crest derivatives expressed 1 [Source:VGNC Symbol;Acc:VGNC:73345]  
ENSMUG00000037662 selenoprotein M [Source:NCBI gene;Acc:718290]  
ENSMUG00000021243 zinc finger and BTB domain containing 47 [Source:VGNC Symbol;Acc:VGNC:79645]  
ENSMUG00000064798  
ENSMUG00000001061 BICD cargo adaptor 2 [Source:VGNC Symbol;Acc:VGNC:70333]  
ENSMUG00000045775 macrophage expressed 1 [Source:NCBI gene;Acc:700274]  
ENSMUG00000009785 C-C motif chemokine ligand 13 [Source:VGNC Symbol;Acc:VGNC:70696]  
ENSMUG00000058698  
ENSMUG00000059852  
ENSMUG00000059850 immunoglobulin kappa variable 1-9 [Source:NCBI gene;Acc:106993071]  
ENSMUG00000050407  
ENSMUG00000009114 maestro heat like repeat family member 7 [Source:NCBI gene;Acc:715310]  
ENSMUG00000016717 polycystin 1 like 3, transient receptor potential channel interacting [Source:VGNC Symbol;Acc:VGNC:75846]  
ENSMUG00000064793 C-C motif chemokine ligand 11 [Source:NCBI gene;Acc:574218]  
ENSMUG00000009951 MARCKS like 1 [Source:VGNC Symbol;Acc:VGNC:74723]  
ENSMUG00000022442 single stranded DNA binding protein 1 [Source:VGNC Symbol;Acc:VGNC:77886]  
ENSMUG00000060221 growth differentiation factor 9 [Source:NCBI gene;Acc:712792]  
ENSMUG00000056113  
ENSMUG00000022553 pyruvate dehydrogenase kinase 1 [Source:VGNC Symbol;Acc:VGNC:75932]  
ENSMUG0000006866 CUGBP Elav-like family member 4 [Source:VGNC Symbol;Acc:VGNC:70945]  
ENSMUG00000061766  
ENSMUG00000010252 FERM and PDZ domain containing 4 [Source:VGNC Symbol;Acc:VGNC:72802]  
ENSMUG00000028736 hydroxysteroid 17-beta dehydrogenase 14 [Source:NCBI gene;Acc:106994816]  
ENSMUG00000059464  
ENSMUG00000015375 cadherin EGF LAG seven-pass G-type receptor 2 [Source:VGNC Symbol;Acc:VGNC:71149]  
ENSMUG00000020819 protein phosphatase 2 catalytic subunit beta [Source:VGNC Symbol;Acc:VGNC:76373]  
ENSMUG00000050445 ribonuclease A family member 8 [Source:NCBI gene;Acc:716333]  
ENSMUG00000017939 FA core complex associated protein 24 [Source:VGNC Symbol;Acc:VGNC:72388]  
ENSMUG00000014002 cyclin dependent kinase 16 [Source:VGNC Symbol;Acc:VGNC:71160]  
ENSMUG00000004885 quiescin sulphydryl oxidase 2 [Source:VGNC Symbol;Acc:VGNC:76568]  
ENSMUG00000010871 crystallin gamma B [Source:VGNC Symbol;Acc:VGNC:71507]  
ENSMUG00000002337 aquarius intron-binding spliceosomal factor [Source:VGNC Symbol;Acc:VGNC:69925]  
ENSMUG00000011845 hexokinase 2 [Source:VGNC Symbol;Acc:VGNC:73475]  
ENSMUG00000008199 leucine-rich repeat-containing protein 37A [Source:NCBI gene;Acc:714675]  
ENSMUG00000057747  
ENSMUG00000038389

ENSMMUG00000058864  
ENSMMUG00000062461 chromosome 15 C9orf43 homolog [Source:NCBI gene;Acc:704968]  
ENSMMUG00000007724 aprataxin [Source:VGNC Symbol;Acc:VGNC:69838]  
ENSMMUG00000011282 DnaJ heat shock protein family (Hsp40) member C9 [Source:NCBI gene;Acc:707599]  
ENSMMUG00000020114 cadherin 13 [Source:VGNC Symbol;Acc:VGNC:70807]  
ENSMMUG00000017243 ring finger protein 165 [Source:VGNC Symbol;Acc:VGNC:76877]  
ENSMMUG00000061261 Metazoan signal recognition particle RNA [Source:RFAM;Acc:RF00017]  
ENSMMUG00000016018 establishment of sister chromatid cohesion N-acetyltransferase 2 [Source:VGNC Symbol;Acc:VGNC:72374]  
ENSMMUG00000014334 dopamine receptor D2 [Source:VGNC Symbol;Acc:VGNC:71989]  
ENSMMUG00000041775 Metazoan signal recognition particle RNA [Source:RFAM;Acc:RF00017]  
ENSMMUG00000017678 kelch like family member 28 [Source:VGNC Symbol;Acc:VGNC:74085]  
ENSMMUG00000052176  
ENSMMUG00000052169 potassium two pore domain channel subfamily K member 12 [Source:NCBI gene;Acc:715556]  
ENSMMUG00000042299 DENN domain containing 2A [Source:VGNC Symbol;Acc:VGNC:81302]  
ENSMMUG00000058281 ITPRIP like 2 [Source:NCBI gene;Acc:694060]  
ENSMMUG00000020125 SUMO specific peptidase 1 [Source:NCBI gene;Acc:707603]  
ENSMMUG00000002775 U2 snRNP associated SURP domain containing [Source:VGNC Symbol;Acc:VGNC:79889]  
ENSMMUG00000059659  
ENSMMUG00000011811 anoctamin 6 [Source:VGNC Symbol;Acc:VGNC:69902]  
ENSMMUG00000049908 Metazoan signal recognition particle RNA [Source:RFAM;Acc:RF00017]  
ENSMMUG00000007917 carbonic anhydrase 4 [Source:NCBI gene;Acc:716919]  
ENSMMUG00000013862 ArfGAP with coiled-coil, ankyrin repeat and PH domains 3 [Source:VGNC Symbol;Acc:VGNC:69434]  
ENSMMUG00000007115 RALY RNA binding protein like [Source:VGNC Symbol;Acc:VGNC:82217]  
ENSMMUG00000017252 spermatogenesis associated 20 [Source:VGNC Symbol;Acc:VGNC:77993]  
ENSMMUG00000050773  
ENSMMUG00000048493 neuroblastoma breakpoint family member 6-like protein [Source:NCBI gene;Acc:711999]  
ENSMMUG00000055481 regulator of G protein signaling 16 [Source:NCBI gene;Acc:715599]  
ENSMMUG00000061953  
ENSMMUG00000064748 Metazoan signal recognition particle RNA [Source:RFAM;Acc:RF00017]  
ENSMMUG00000060158  
ENSMMUG00000023778 F-box protein 32 [Source:VGNC Symbol;Acc:VGNC:72517]  
ENSMMUG00000060080 U6 spliceosomal RNA [Source:RFAM;Acc:RF00026]  
ENSMMUG00000011367 BUD23 rRNA methyltransferase and ribosome maturation factor [Source:VGNC Symbol;Acc:VGNC:70325]  
ENSMMUG00000022430 splicing factor 3b subunit 1 [Source:VGNC Symbol;Acc:VGNC:77179]  
ENSMMUG00000054660 R-spondin 2 [Source:NCBI gene;Acc:697376]  
ENSMMUG00000056664 U6 spliceosomal RNA [Source:RFAM;Acc:RF00026]  
ENSMMUG00000052889 Metazoan signal recognition particle RNA [Source:RFAM;Acc:RF00017]  
ENSMMUG00000010495 MAPK activated protein kinase 3 [Source:VGNC Symbol;Acc:VGNC:74654]  
ENSMMUG00000050271  
ENSMMUG00000053323  
ENSMMUG00000021246 hedgehog acyltransferase like [Source:NCBI gene;Acc:717333]  
ENSMMUG00000054793  
ENSMMUG00000009222 pleckstrin homology domain containing A4 [Source:VGNC Symbol;Acc:VGNC:76027]  
ENSMMUG00000060011 hyaluronan and proteoglycan link protein 2 [Source:NCBI gene;Acc:718500]  
ENSMMUG00000012479 lysine demethylase 4A [Source:NCBI gene;Acc:701272]  
ENSMMUG00000001995 chromosome 14 C11orf16 homolog [Source:NCBI gene;Acc:705319]  
ENSMMUG00000016683 phosphorylated adaptor for RNA export [Source:NCBI gene;Acc:702980]  
ENSMMUG00000007626 intersectin 1 [Source:VGNC Symbol;Acc:VGNC:73806]  
ENSMMUG00000043458 transmembrane protein 178A [Source:NCBI gene;Acc:714010]  
ENSMMUG00000053845  
ENSMMUG00000022191 laeverin [Source:VGNC Symbol;Acc:VGNC:74372]

ENSMMUG00000003771 ubiquitin like 3 [Source:VGNC Symbol;Acc:VGNC:78701]  
ENSMMUG00000001040 nuclear GTPase, germinal center associated [Source:VGNC Symbol;Acc:VGNC:75497]  
ENSMMUG00000008346 structural maintenance of chromosomes 5 [Source:NCBI gene;Acc:702219]  
ENSMMUG000000061186  
ENSMMUG000000057793 dual specificity phosphatase 5 [Source:NCBI gene;Acc:698178]  
ENSMMUG00000000352 family with sequence similarity 229 member A [Source:NCBI gene;Acc:708770]  
ENSMMUG000000038667  
ENSMMUG000000019883 RNA binding motif protein 20 [Source:NCBI gene;Acc:698677]  
ENSMMUG000000013510 FMR1 autosomal homolog 2 [Source:NCBI gene;Acc:721889]  
ENSMMUG000000021094 desmoglein 3 [Source:VGNC Symbol;Acc:VGNC:72003]  
ENSMMUG000000013666 copine 8 [Source:NCBI gene;Acc:114669741]  
ENSMMUG000000060024  
ENSMMUG000000041905 protein phosphatase 2 regulatory subunit Balpha [Source:VGNC Symbol;Acc:VGNC:84103]  
ENSMMUG00000006828 valyl-tRNA synthetase 1 [Source:VGNC Symbol;Acc:VGNC:78755]  
ENSMMUG000000019423 zinc finger protein 2 [Source:NCBI gene;Acc:703864]  
ENSMMUG000000010689 fermitin family member 2 [Source:VGNC Symbol;Acc:VGNC:82144]

**Supp. Table 4. Ingenuity pathway analysis showing up and down regulated pathways in survivors and non-survivors of radiation injury**

**Survivors**

**Down regulated**

**Day 1 vs. Control**

| <b>Ingenuity Canonical Pathways</b>                        | <b>-log(p-value)</b> | <b>Ratio</b> | <b>Molecules</b>                                                                                         |
|------------------------------------------------------------|----------------------|--------------|----------------------------------------------------------------------------------------------------------|
| Huntington's Disease Signaling                             | 3.69                 | 0.073        | AKT2,CASP8,CASP9,CREB1,CREB5,DNM2,GNA11,HDAC1,MAPK9,NAPA,PENK,PIK3C2A,PSME1,PSME2,PSMF1,SP1,TP53         |
| Estrogen-Dependent Breast Cancer Signaling                 | 3.13                 | 0.11         | AKT2,CREB1,CREB5,DHRS11,ESR1,NFKB1,PIK3C2A,SP1                                                           |
| BAG2 Signaling Pathway                                     | 3.08                 | 0.143        | NFKB1,PSME1,PSME2,PSMF1,SP1,TP53                                                                         |
| Pancreatic Adenocarcinoma Signaling                        | 2.61                 | 0.083        | AKT2,CASP9,MAPK9,NFKB1,PIK3C2A,PTGS2,RAD51,SMAD2,TP53                                                    |
| B Cell Receptor Signaling                                  | 2.46                 | 0.067        | AKT2,CAMK2G,CAMK4,CREB1,CREB5,ETS1,MAP3K13,MAPK9,MEF2C,NFKB1,PIK3C2A,POU2F2                              |
| Apelin Endothelial Signaling Pathway                       | 2.45                 | 0.079        | AKT2,APLNR,CAMK4,GNA11,MAPK9,MEF2C,NFKB1,PIK3C2A,SP1                                                     |
| GP6 Signaling Pathway                                      | 2.4                  | 0.078        | AKT2,CAMK4,COL11A2,COL16A1,COL6A5,LAMC2,NOX1,PIK3C2A,TLN1                                                |
| Neuroinflammation Signaling Pathway                        | 2.28                 | 0.055        | AKT2,CASP8,CREB1,CREB5,GAD1,GJB1,MAPK9,NFKB1,NOX1,NOX4,PIK3C2A,PSEN2,PTGS2,SLC1A2,TGFBR3,TYROBP          |
| RAR Activation                                             | 2.26                 | 0.063        | AKT2,ARID2,CSNK2A1,GTF2H2,MAPK9,NFKB1,NRIP2,PRMT1,SDR16C5,SMAD2,SMARCD1,TNIP1                            |
| Sumoylation Pathway                                        | 2.24                 | 0.079        | ETS1,HDAC1,KDM1A,MAPK9,NFKB1,SP1,TP53,ZNF217                                                             |
| FAT10 Cancer Signaling Pathway                             | 2.12                 | 0.109        | AKT2,NFKB1,SMAD2,TGFBR3,TP53                                                                             |
| Myc Mediated Apoptosis Signaling                           | 2.11                 | 0.092        | AKT2,CASP8,CASP9,MAPK9,PIK3C2A,TP53                                                                      |
| Granzyme B Signaling                                       | 2.08                 | 0.188        | CASP8,CASP9,NUMA1                                                                                        |
| Glucocorticoid Receptor Signaling                          | 2.06                 | 0.051        | AKT2,ARID2,CD3E,CREB1,CREBZF,CSN2,ESR1,GTF2B,GTF2H2,MAPK9,NFKB1,NR3C2,PIK3C2A,POU2F2,PTGS2,SMAD2,SMARCD1 |
| Adipogenesis pathway                                       | 2.04                 | 0.068        | CLOCK,GTF2H2,HAT1,HDAC1,KDM1A,KLF5,SETDB1,SMO,TP53                                                       |
| Prostate Cancer Signaling                                  | 2                    | 0.079        | AKT2,CASP9,CREB1,CREB5,NFKB1,PIK3C2A,TP53                                                                |
| NGF Signaling                                              | 1.95                 | 0.071        | AKT2,CREB1,CREB5,MAP3K13,MAPK9,NFKB1,PIK3C2A,TP53                                                        |
| Circadian Rhythm Signaling                                 | 1.95                 | 0.121        | CLOCK,CREB1,CREB5,CRY1                                                                                   |
| FAT10 Signaling Pathway                                    | 1.94                 | 0.167        | PSME1,PSME2,PSMF1                                                                                        |
| Small Cell Lung Cancer Signaling                           | 1.93                 | 0.085        | AKT2,CASP9,NFKB1,PIK3C2A,PTGS2,TP53                                                                      |
| CD27 Signaling in Lymphocytes                              | 1.9                  | 0.096        | CASP8,CASP9,MAP3K13,MAPK9,NFKB1                                                                          |
| ATM Signaling                                              | 1.84                 | 0.073        | CREB1,CREB5,MAPK9,RAD51,TLK1,TP53                                                                        |
| Adrenomedullin signaling pathway                           | 1.83                 | 0.057        | AKT2,CAMK4,GAD1,GNA11,GPR182,KCNH2,KCNN1,MAPK9,NFKB1,PIK3C2A,TTN                                         |
| Wnt/ $\beta$ -catenin Signaling                            | 1.78                 | 0.059        | AKT2,APPL2,CSNK2A1,GJA1,HDAC1,SMO,SOX5,TGFBR3,TP53,WNT2B                                                 |
| NAD Salvage Pathway II                                     | 1.75                 | 0.143        | ACPP,NMNAT2,NT5E                                                                                         |
| Apelin Adipocyte Signaling Pathway                         | 1.74                 | 0.077        | APLNR,GNA11,GPX6,MAPK9,NOX1,NOX4                                                                         |
| Docosahexaenoic Acid (DHA) Signaling                       | 1.74                 | 0.105        | AKT2,ALOX15,CASP9,PIK3C2A                                                                                |
| Cancer Drug Resistance By Drug Efflux                      | 1.71                 | 0.086        | ABCG2,AKT2,NFKB1,PTGS2,TP53                                                                              |
| Polyamine Regulation in Colon Cancer                       | 1.7                  | 0.136        | PSME1,PSME2,PSMF1                                                                                        |
| Telomerase Signaling                                       | 1.66                 | 0.067        | AKT2,ETS1,HDAC1,IL2RA,PIK3C2A,SP1,TP53                                                                   |
| Induction of Apoptosis by HIV1                             | 1.66                 | 0.083        | CASP8,CASP9,MAPK9,NFKB1,TP53                                                                             |
| PEDF Signaling                                             | 1.64                 | 0.073        | AKT2,CASP8,NFKB1,PIK3C2A,TCF12,TP53                                                                      |
| Integrin Signaling                                         | 1.64                 | 0.054        | AKT2,ARHGEF7,ITGAV,ITGB6,ITGB8,NEDD9,PIK3C2A,PIKFYVE,TLN1,TSPAN5,TTN                                     |
| Heme Biosynthesis II                                       | 1.64                 | 0.222        | PPOX,UROS                                                                                                |
| Role of PKR in Interferon Induction and Antiviral Response | 1.63                 | 0.098        | CASP8,CASP9,NFKB1,TP53                                                                                   |
| iCOS-iCOSL Signaling in T Helper Cells                     | 1.62                 | 0.066        | AKT2,CAMK2G,CAMK4,CD3E,IL2RA,NFKB1,PIK3C2A                                                               |
| Paxillin Signaling                                         | 1.62                 | 0.066        | ARHGEF7,ITGAV,ITGB6,ITGB8,MAPK9,PIK3C2A,TLN1                                                             |
| Osteoarthritis Pathway                                     | 1.62                 | 0.053        | CASP8,CASP9,CREB1,CREB5,MEF2C,NFKB1,PTGS2,SLC39A8,SMAD2,SMO,SP1                                          |
| HOTAIR Regulatory Pathway                                  | 1.61                 | 0.058        | AGO3,AKT2,ESR1,HDAC1,KDM1A,NFKB1,PIK3C2A,SETDB1,WNT2B                                                    |
| HER-2 Signaling in Breast Cancer                           | 1.6                  | 0.071        | AKT2,CASP9,ITGB6,ITGB8,PIK3C2A,TP53                                                                      |
| FGF Signaling                                              | 1.6                  | 0.071        | AKT2,CREB1,CREB5,FGF10,FRS2,PIK3C2A                                                                      |
| MIF Regulation of Innate Immunity                          | 1.59                 | 0.095        | MAPK9,NFKB1,PTGS2,TP53                                                                                   |
| Tumoricidal Function of Hepatic Natural Killer Cells       | 1.59                 | 0.125        | AIFM1,CASP8,CASP9                                                                                        |
| Thio-molybdenum Cofactor Biosynthesis                      | 1.57                 | 1            | MOCOS                                                                                                    |

|                                                             |      |       |                                                              |
|-------------------------------------------------------------|------|-------|--------------------------------------------------------------|
| Apelin Pancreas Signaling Pathway                           | 1.56 | 0.093 | APLNR,MAPK9,NFKB1,PIK3C2A                                    |
| ILK Signaling                                               | 1.56 | 0.054 | AKT2,CREB1,CREB5,ITGB6,ITGB8,MAPK9,NFKB1,PIK3C2A,PTGS2,TESK1 |
| RANK Signaling in Osteoclasts                               | 1.55 | 0.07  | AKT2,CAMK4,MAP3K13,MAPK9,NFKB1,PIK3C2A                       |
| Glycine Betaine Degradation                                 | 1.55 | 0.2   | SARDH,SDS                                                    |
| Gluconeogenesis I                                           | 1.55 | 0.12  | ALDOA,GAPDH,ME3                                              |
| Hereditary Breast Cancer Signaling                          | 1.5  | 0.058 | AKT2,ARID2,HDAC1,PIK3C2A,RAD51,SMARCD1,TP53,XPC              |
| Apelin Liver Signaling Pathway                              | 1.5  | 0.115 | APLNR,COL11A2,MAPK9                                          |
| Ovarian Cancer Signaling                                    | 1.49 | 0.058 | AKT2,GJA1,PIK3C2A,PTGS2,RAD51,SMO,TP53,WNT2B                 |
| Regulation of the Epithelial-Mesenchymal Transition Pathway | 1.48 | 0.052 | AKT2,ETS1,FGF10,FRS2,NFKB1,PIK3C2A,PSEN2,SMAD2,SMO,WNT2B     |
| PFKFB4 Signaling Pathway                                    | 1.46 | 0.087 | CREB1,CREB5,HK3,TP53                                         |
| Phagosome Maturation                                        | 1.46 | 0.057 | ATP6V0A4,ATP6V1B1,EEA1,NAPA,NOX1,NOX4,PIKFYVE,VPS16          |
| Role of p14/p19ARF in Tumor Suppression                     | 1.42 | 0.107 | PIK3C2A,POLR3D,TP53                                          |
| GM-CSF Signaling                                            | 1.4  | 0.071 | AKT2,CAMK2G,ETS1,HCK,PIK3C2A                                 |
| Assembly of RNA Polymerase III Complex                      | 1.4  | 0.167 | GTF3C3,POLR3D                                                |
| Guanosine Nucleotides Degradation III                       | 1.4  | 0.167 | ACPP,NT5E                                                    |
| Sonic Hedgehog Signaling                                    | 1.38 | 0.103 | DYRK1B,HHIP,SMO                                              |



## Survivors

## Up regulated

## Day 1 vs. Control

## Ingenuity Canonical Pathways

|                                                                 | <b>-log(p-value)</b> | <b>Ratio</b> | <b>Molecules</b>                                                                                                |
|-----------------------------------------------------------------|----------------------|--------------|-----------------------------------------------------------------------------------------------------------------|
| Hepatic Cholestasis                                             | 4.13                 | 0.101        | ABCB11,ABCG5,ABCG8,CD14,CYP27A1,IL13,INSR,LTA,LTB,PRKACB,PRKCE,PRKCH,PRKD3,SLC10A1,TNF,TNFRSF1A,TNFRSF1B,TRAF2  |
| Fcγ Receptor-mediated Phagocytosis in Macrophages and Monocytes | 3.32                 | 0.118        | CBL,LYN,MAPK3,PAK1,PLD2,PRKCE,PRKCH,PRKD3,RAB11A,RPS6KB2,SYK                                                    |
| Neuregulin Signaling                                            | 3.27                 | 0.117        | DLG4,EGF,MAPK3,PRKCE,PRKCH,PRKD3,PSEN1,RALB,RPS6KB2,RRAS,STAT5B                                                 |
| Apoptosis Signaling                                             | 3.12                 | 0.112        | BID,BIRC2,CAPN3,MAP3K5,MAPK3,PRKCE,RALB,RRAS,TNF,TNFRSF1A,TNFRSF1B                                              |
| Germ Cell-Sertoli Cell Junction Signaling                       | 3.03                 | 0.09         | AFDN,CTNNA2,JUP,LAMC3,MAP3K5,MAPK3,PAK1,PAK6,RAB8B,RALB,RHOBTB2,RRAS,TNF,TNFRSF1A,ZYX                           |
| Natural Killer Cell Signaling                                   | 3                    | 0.103        | INPPL1,KLRD1,MAPK3,NCR3,PAK1,PAK6,PRKCE,PRKCH,PRKD3,RALB,RRAS,SYK                                               |
| Opioid Signaling Pathway                                        | 2.88                 | 0.078        | CACNA1F,CLTCL1,GRK2,GRK7,LYN,MAPK3,PLD2,PRKACB,PRKCE,PRKCH,PRKD3,RALB,RGS10,RGS6,RPS6KA4,RPS6KB2,RRAS,RYR2,RYR3 |
| TNFR1 Signaling                                                 | 2.82                 | 0.146        | BID,BIRC2,PAK1,PAK6,TNF,TNFRSF1A,TRAF2                                                                          |
| Erythropoietin Signaling                                        | 2.82                 | 0.118        | CBL,EPOR,MAPK3,PRKCE,PRKCH,PRKD3,RALB,RRAS,STAT5B                                                               |
| Type II Diabetes Mellitus Signaling                             | 2.8                  | 0.093        | CACNA1F,GCK,INSR,MAP3K5,MAPK3,PRKAG3,PRKCE,PRKCH,PRKD3,TNF,TNFRSF1A,TNFRSF1B,TRAF2                              |
| Amyloid Processing                                              | 2.72                 | 0.14         | BACE2,CAPN3,CSNK2B,MAPK3,PRKACB,PRKCE,PSEN1                                                                     |
| LPS-stimulated MAPK Signaling                                   | 2.58                 | 0.11         | CD14,MAP3K5,MAPK3,PAK1,PRKCE,PRKCH,PRKD3,RALB,RRAS                                                              |
| Fc Epsilon RI Signaling                                         | 2.5                  | 0.094        | IL13,INPPL1,LYN,MAPK3,PRKCE,PRKCH,PRKD3,RALB,RRAS,SYK,TNF                                                       |
| PPAR Signaling                                                  | 2.48                 | 0.099        | AIP,INSR,MAPK3,RALB,RRAS,STAT5B,TNF,TNFRSF1A,TNFRSF1B,TRAF2                                                     |
| TNFR2 Signaling                                                 | 2.47                 | 0.172        | BIRC2,LTA,TNF,TNFRSF1B,TRAF2                                                                                    |
| Semaphorin Signaling in Neurons                                 | 2.39                 | 0.123        | CRMP1,MAPK3,PAK1,PAK6,PLXNB1,RHOBTB2,ROCK2                                                                      |
| LXR/RXR Activation                                              | 2.38                 | 0.091        | ABCG5,ABCG8,ALB,APOM,ARG2,CD14,MMP9,SERPINF2,TNF,TNFRSF1A,TNFRSF1B                                              |
| Actin Cytoskeleton Signaling                                    | 2.36                 | 0.075        | ARHGAP35,CD14,CSK,EGF,GIT1,MAPK3,MYH14,MYL7,NCKAP1,PAK1,PAK6,PIP5K1B,RALB,ROCK2,RRAS,SSH2                       |
| Induction of Apoptosis by HIV1                                  | 2.26                 | 0.117        | BID,BIRC2,MAP3K5,TNF,TNFRSF1A,TNFRSF1B,TRAF2                                                                    |
| 14-3-3-mediated Signaling                                       | 2.25                 | 0.087        | CBL,MAP3K5,MAPK3,PRKCE,PRKCH,PRKD3,RALB,RRAS,TNF,TNFRSF1A,TRAF2                                                 |
| Sertoli Cell-Sertoli Cell Junction Signaling                    | 2.24                 | 0.077        | AFDN,CLDN2,CTNNA2,GUCY1A1,JUP,MAP3K5,MAPK3,PRKACB,RAB8B,RALB,RRAS,SPTB,TNF,TNFRSF1A                             |
| Macropinocytosis Signaling                                      | 2.24                 | 0.105        | CD14,EGF,PAK1,PRKCE,PRKCH,PRKD3,RALB,RRAS                                                                       |
| ErbB Signaling                                                  | 2.22                 | 0.097        | EGF,MAPK3,PAK1,PAK6,PRKCE,PRKCH,PRKD3,RALB,RRAS                                                                 |
| FAK Signaling                                                   | 2.19                 | 0.096        | ARHGAP26,CAPN3,CSK,EGF,MAPK3,PAK1,PAK6,RALB,RRAS                                                                |
| Nitric Oxide Signaling in the Cardiovascular System             | 2.19                 | 0.096        | ARG2,GUCY1A1,MAPK3,PRKACB,PRKCE,PRKCH,PRKD3,RYR2,VEGFB                                                          |
| mTOR Signaling                                                  | 2.19                 | 0.074        | EIF3C,EIF4G3,INSR,MAPK3,PLD2,PRKAG3,PRKCE,PRKCH,PRKD3,RALB,RHOBTB2,RPS6KA4,RPS6KB2,RRAS,VEGFB                   |
| Thrombopoietin Signaling                                        | 2.15                 | 0.111        | MAPK3,PRKCE,PRKCH,PRKD3,RALB,RRAS,STAT5B                                                                        |
| Integrin Signaling                                              | 2.15                 | 0.073        | ARHGAP26,BCAR3,CAPN3,GIT1,ITGA1,MAPK3,MYL7,PAK1,PAK6,PARVA,RALB,RHOBTB2,RRAS,WIPF1,ZYX                          |
| IL-3 Signaling                                                  | 2.14                 | 0.101        | MAPK3,PAK1,PRKCE,PRKCH,PRKD3,RALB,RRAS,STAT5B                                                                   |
| Systemic Lupus Erythematosus In B Cell Signaling Pathway        | 2.14                 | 0.068        | CBL,CSK,IL13,INPPL1,IRF5,LTA,LTB,LYN,MAPK3,PRKCE,PRKCH,PRKD3,RALB,RRAS,STAT2,SYK,TNF,TRAF2                      |
| Airway Inflammation in Asthma                                   | 2.14                 | 0.5          | IL13,TNF                                                                                                        |
| PAK Signaling                                                   | 2.13                 | 0.094        | GIT1,MAPK3,MYL7,PAK1,PAK1IP1,PAK6,RALB,RRAS,TNF                                                                 |
| Coagulation System                                              | 2.11                 | 0.143        | F5,F7,SERPINC1,SERPINF2,VWF                                                                                     |
| Prolactin Signaling                                             | 2.08                 | 0.099        | MAPK3,NR3C1,PRKCE,PRKCH,PRKD3,RALB,RRAS,STAT5B                                                                  |
| GP6 Signaling Pathway                                           | 2.06                 | 0.086        | COL11A1,COL18A1,COL4A2,COL9A2,LAMC3,LYN,PRKCE,PRKCH,PRKD3,SYK                                                   |
| NF-κB Activation by Viruses                                     | 2.05                 | 0.098        | ITGA1,MAPK3,PRKCE,PRKCH,PRKD3,RALB,RRAS,TRAF2                                                                   |
| ErbB4 Signaling                                                 | 2.04                 | 0.106        | MAPK3,PRKCE,PRKCH,PRKD3,PSEN1,RALB,RRAS                                                                         |
| Renin-Angiotensin Signaling                                     | 2.03                 | 0.086        | MAPK3,PAK1,PAK6,PRKACB,PRKCE,PRKCH,PRKD3,RALB,RRAS,TNF                                                          |
| UVC-Induced MAPK Signaling                                      | 2.03                 | 0.118        | MAPK3,PRKCE,PRKCH,PRKD3,RALB,RRAS                                                                               |
| HER-2 Signaling in Breast Cancer                                | 1.99                 | 0.095        | CCNE1,EGF,MAP3K5,PRKCE,PRKCH,PRKD3,RALB,RRAS                                                                    |
| NF-κB Signaling                                                 | 1.96                 | 0.074        | CARD10,CSNK2B,EGF,FGFR3,INSR,LTA,PRKACB,RALB,RRAS,TNF,TNFRSF1A,TNFRSF1B,TRAF2                                   |
| CCR3 Signaling in Eosinophils                                   | 1.96                 | 0.083        | CCR3,MAPK3,PAK1,PAK6,PRKCE,PRKCH,PRKD3,RALB,ROCK2,RRAS                                                          |
| Acute Phase Response Signaling                                  | 1.92                 | 0.073        | ALB,HRG,MAP3K5,MAPK3,NR3C1,RALB,RRAS,SERPINF2,TNF,TNFRSF1A,TNFRSF1B,TRAF2,VWF                                   |
| Growth Hormone Signaling                                        | 1.87                 | 0.099        | MAPK3,PRKCE,PRKCH,PRKD3,RPS6KA4,RPS6KB2,STAT5B                                                                  |
| Hepatic Fibrosis / Hepatic Stellate Cell Activation             | 1.85                 | 0.071        | CD14,COL11A1,COL18A1,COL4A2,COL9A2,EGF,MMP9,MYH14,MYL7,TNF,TNFRSF1A,TNFRSF1B,VEGFB                              |
| Virus Entry via Endocytic Pathways                              | 1.84                 | 0.084        | AP3S1,CLTCL1,FLNB,ITGA1,PRKCE,PRKCH,PRKD3,RALB,RRAS                                                             |

|                                                                                                       |      |       |                                                                                                                                 |
|-------------------------------------------------------------------------------------------------------|------|-------|---------------------------------------------------------------------------------------------------------------------------------|
| CXCR4 Signaling                                                                                       | 1.82 | 0.073 | LYN,MAPK3,MYL7,PAK1,PAK6,PRKCE,PRKCH,PRKD3,RALB,RHOBTB2,ROCK2,RRAS                                                              |
| Death Receptor Signaling                                                                              | 1.82 | 0.089 | BID,BIRC2,MAP3K5,TNF,TNFRSF10B,TNFRSF1A,TNFRSF1B,TRAF2                                                                          |
| Granulocyte Adhesion and Diapedesis                                                                   | 1.8  | 0.073 | CLDN2,CSF3,ITGA1,MMP19,MMP9,SELE,SELL,SELP,THY1,TNF,TNFRSF1A,TNFRSF1B                                                           |
| Extrinsic Prothrombin Activation Pathway                                                              | 1.74 | 0.188 | F5,F7,SERPINC1                                                                                                                  |
| Agrin Interactions at Neuromuscular Junction                                                          | 1.72 | 0.092 | ITGA1,MAPK3,PAK1,PAK6,RALB,RRAS,UTRN                                                                                            |
| Sperm Motility                                                                                        | 1.7  | 0.066 | CLK4,CSK,EPHA2,FGFR3,GUCY1A1,INSR,LYN,PEAK1,PRKACB,PRKCE,PRKCH,PRKD3,ROR2,SYK                                                   |
| Molecular Mechanisms of Cancer                                                                        | 1.68 | 0.057 | ARHGEF17,BID,BIRC2,BMP5,CBL,CCNE1,CTNNA2,E2F4,HHAT,MAP3K5,MAPK3,PAK1,PAK6,PRKACB,PRKCE,PRKCH,PRKD3,PSEN1,RALB,RHOBTB2,RRAS,ZBTB |
| D-myo-inositol (1,4,5)-trisphosphate Degradation                                                      | 1.67 | 0.176 | INPP5E,INPPL1,SEC16A                                                                                                            |
| Apelin Endothelial Signaling Pathway                                                                  | 1.67 | 0.079 | AQP2,MAPK3,PRKAG3,PRKCE,PRKCH,PRKD3,RALB,RPS6KB2,RRAS                                                                           |
| IL-2 Signaling                                                                                        | 1.67 | 0.098 | CSNK2B,MAPK3,RALB,RRAS,STAT5B,SYK                                                                                               |
| Leukocyte Extravasation Signaling                                                                     | 1.66 | 0.067 | AFDN,ARHGAP35,CLDN2,CTNNA2,ITGA1,MMP19,MMP9,PRKCE,PRKCH,PRKD3,ROCK2,THY1,WIPF1                                                  |
| Bladder Cancer Signaling                                                                              | 1.66 | 0.083 | EGF,FGFR3,MAPK3,MMP19,MMP9,RALB,RRAS,VEGFB                                                                                      |
| FLT3 Signaling in Hematopoietic Progenitor Cells                                                      | 1.64 | 0.089 | CBL,MAPK3,RALB,RPS6KA4,RRAS,STAT2,STAT5B                                                                                        |
| IL-8 Signaling                                                                                        | 1.63 | 0.067 | EGF,MAPK3,MMP9,MYL7,PLD2,PRKCE,PRKCH,PRKD3,RALB,RHOBTB2,ROCK2,RRAS,VEGFB                                                        |
| nNOS Signaling in Neurons                                                                             | 1.63 | 0.109 | CAPN3,DLG4,PRKCE,PRKCH,PRKD3                                                                                                    |
| Glucose and Glucose-1-phosphate Degradation                                                           | 1.62 | 0.286 | GCK,RGN                                                                                                                         |
| Cholecystokinin/Gastrin-mediated Signaling                                                            | 1.61 | 0.077 | MAPK3,PRKCE,PRKCH,PRKD3,RALB,RHOBTB2,ROCK2,RRAS,TNF                                                                             |
| Differential Regulation of Cytokine Production in Macrophages and T Helper Cells by IL-17A and IL-17F | 1.6  | 0.167 | CSF3,IL13,TNF                                                                                                                   |
| 1D-myo-inositol Hexakisphosphate Biosynthesis II (Mammalian)                                          | 1.6  | 0.167 | INPP5E,INPPL1,SEC16A                                                                                                            |
| D-myo-inositol (1,3,4)-trisphosphate Biosynthesis                                                     | 1.6  | 0.167 | INPP5E,INPPL1,SEC16A                                                                                                            |
| IL-15 Production                                                                                      | 1.59 | 0.076 | CLK4,CSK,EPHA2,FGFR3,INSR,LYN,PEAK1,ROR2,SYK                                                                                    |
| HMGB1 Signaling                                                                                       | 1.59 | 0.07  | IL13,LTA,LTB,MAPK3,RALB,RHOBTB2,RRAS,SELE,TNF,TNFRSF1A,TNFRSF1B                                                                 |
| Regulation of Cellular Mechanics by Calpain Protease                                                  | 1.57 | 0.094 | CAPN3,CCNE1,EGF,MAPK3,RALB,RRAS                                                                                                 |
| Tec Kinase Signaling                                                                                  | 1.53 | 0.069 | LYN,PAK1,PAK6,PRKCE,PRKCH,PRKD3,RHOBTB2,STAT2,STAT5B,TNF,TNFRSF10B                                                              |
| Atherosclerosis Signaling                                                                             | 1.53 | 0.074 | ALB,ALOX15B,APOM,CCR3,COL18A1,MMP9,SELE,SELP,TNF                                                                                |
| VEGF Family Ligand-Receptor Interactions                                                              | 1.51 | 0.083 | MAPK3,PRKCE,PRKCH,PRKD3,RALB,RRAS,VEGFB                                                                                         |
| Airway Pathology in Chronic Obstructive Pulmonary Disease                                             | 1.51 | 0.25  | MMP9,TNF                                                                                                                        |
| G Beta Gamma Signaling                                                                                | 1.51 | 0.074 | CACNA1F,MAPK3,PAK1,PRKACB,PRKCE,PRKCH,PRKD3,RALB,RRAS                                                                           |
| Production of Nitric Oxide and Reactive Oxygen Species in Macrophages                                 | 1.46 | 0.065 | ALB,APOM,ARG2,MAP3K5,MAPK3,PRKCE,PRKCH,PRKD3,RHOBTB2,TNF,TNFRSF1A,TNFRSF1B                                                      |
| FXR/RXR Activation                                                                                    | 1.45 | 0.072 | ABCB11,ABCG5,ABCG8,ALB,APOM,CYP27A1,SERPINF2,SLC10A1,TNF                                                                        |
| IL-6 Signaling                                                                                        | 1.45 | 0.072 | CD14,CSNK2B,MAPK3,RALB,RRAS,TNF,TNFRSF1A,TNFRSF1B,TRAF2                                                                         |
| Glutamine Biosynthesis I                                                                              | 1.45 | 1     | GLUL                                                                                                                            |
| PTEN Signaling                                                                                        | 1.43 | 0.071 | CBL,CSNK2B,FGFR3,INPPL1,INSR,MAPK3,RALB,RPS6KB2,RRAS                                                                            |
| Tight Junction Signaling                                                                              | 1.42 | 0.066 | AFDN,CLDN2,MYH14,MYL7,NSF,PRKACB,STX4,TNF,TNFRSF1A,TNFRSF1B,VTI1B                                                               |
| Ceramide Signaling                                                                                    | 1.42 | 0.08  | CTSD,MAPK3,RALB,RRAS,TNF,TNFRSF1A,TNFRSF1B                                                                                      |
| Crosstalk between Dendritic Cells and Natural Killer Cells                                            | 1.39 | 0.079 | CD209,KLRD1,LTA,LTB,NCR3,TNF,TNFRSF1B                                                                                           |
| Lymphotoxin $\beta$ Receptor Signaling                                                                | 1.39 | 0.094 | BIRC2,LTA,LTB,MAPK3,TRAF2                                                                                                       |
| IL-15 Signaling                                                                                       | 1.38 | 0.085 | MAPK3,RALB,RRAS,STAT5B,SYK,TNF                                                                                                  |
| Glioma Signaling                                                                                      | 1.38 | 0.073 | E2F4,EGF,MAPK3,PRKCE,PRKCH,PRKD3,RALB,RRAS                                                                                      |
| Neuroprotective Role of THOP1 in Alzheimer's Disease                                                  | 1.38 | 0.073 | CFD,DPP4,F7,KLK3,MMP9,PRKACB,PRSS36,ST14                                                                                        |
| GNRH Signaling                                                                                        | 1.37 | 0.065 | CACNA1F,MAP3K5,MAPK3,PAK1,PAK6,PRKACB,PRKCE,PRKCH,PRKD3,RALB,RRAS                                                               |

**Non-Survivors**

**Down regulated**

**Day 1 vs. Control**

| Inguenuity Canonical Pathways                                                             | <b>-log(p-value)</b> | <b>Ratio</b> | <b>Molecules</b>                                                                                                                                                 |
|-------------------------------------------------------------------------------------------|----------------------|--------------|------------------------------------------------------------------------------------------------------------------------------------------------------------------|
| Glucocorticoid Receptor Signaling                                                         | 4.57                 | 0.084        | A2M,AKT2,ARID2,CCL2,CD3E,CREB1,CREBZF,CSN2,ESR1,GTF2B,GTF2H2,HSP90B1,HSPA14,KRT85,MAPK9,MNAT1,NFKB1,NFKBID,NR3C2,PIK3C2A,PIK3R4,POLR2H,POU2F1,POU2F2,PTGS2,RASD1 |
| Huntington's Disease Signaling                                                            | 3.97                 | 0.09         | AKT2,CASP8,CASP9,CREB1,DNM1L,GNA11,GNB1,HDAC1,HSPA14,MAPK9,NAPA,PENK,PIK3C2A,PIK3R4,POLR2H,PSME1,PSME2,PSMF1,RPH3A,SP1,TP53                                      |
| Small Cell Lung Cancer Signaling                                                          | 3.69                 | 0.141        | AKT2,CASP9,NFKB1,NFKBID,NOS1,PIK3C2A,PIK3R4,PTGS2,RXRB,TP53                                                                                                      |
| Apelin Endothelial Signaling Pathway                                                      | 3.66                 | 0.114        | ADCY8,AKT2,APLNR,CAMK4,CCL2,GNA11,MAPK9,MEF2C,NFKB1,PIK3C2A,PIK3R4,RASD1,SP1                                                                                     |
| GP6 Signaling Pathway                                                                     | 3.59                 | 0.112        | AKT2,CAMK4,COL11A2,COL16A1,COL4A3,COL4A4,COL6A3,COL6A5,LAMB3,LAMC2,NOX1,PIK3C2A,PIK3R4                                                                           |
| Adrenomedullin signaling pathway                                                          | 3.26                 | 0.089        | ADCY8,AKT2,CAMK4,CFH,GNA11,GPR182,GUCY1A2,KCNH2,KCNN1,MAPK9,NFKB1,PIK3C2A,PIK3R4,RASD1,RXRB,SLC39A7,TTN                                                          |
| Role of IL-17A in Arthritis                                                               | 3.21                 | 0.148        | CCL2,IL17RC,MAPK9,NFKB1,NFKBID,PIK3C2A,PIK3R4,PTGS2                                                                                                              |
| BAG2 Signaling Pathway                                                                    | 3.18                 | 0.167        | HSPA14,NFKB1,PSME1,PSME2,PSMF1,SP1,TP53                                                                                                                          |
| PEDF Signaling                                                                            | 3.17                 | 0.122        | AKT2,CASP8,CFLAR,NFKB1,NFKBID,PIK3C2A,PIK3R4,RASD1,TCF12,TP53                                                                                                    |
| Estrogen-Dependent Breast Cancer Signaling                                                | 2.94                 | 0.123        | AKT2,CREB1,DHRS11,ESR1,NFKB1,PIK3C2A,PIK3R4,RASD1,SP1                                                                                                            |
| Prostate Cancer Signaling                                                                 | 2.89                 | 0.112        | AKT2,CASP9,CREB1,HSP90B1,NFKB1,NFKBID,PIK3C2A,PIK3R4,RASD1,TP53                                                                                                  |
| Superpathway of Methionine Degradation                                                    | 2.86                 | 0.171        | AHCYL1,BHMT2,MAT1A,MCEE,PCCA,PRMT1                                                                                                                               |
| Gluconeogenesis I                                                                         | 2.77                 | 0.2          | ALDOA,BPGM,GAPDH,MDH1,ME3                                                                                                                                        |
| B Cell Receptor Signaling                                                                 | 2.68                 | 0.083        | AKT2,CAMK2G,CAMK4,CREB1,ETS1,MAPK9,MEF2C,NFKB1,NFKBID,PIK3AP1,PIK3C2A,PIK3R4,POU2F2,RASD1,VAV3                                                                   |
| Myc Mediated Apoptosis Signaling                                                          | 2.67                 | 0.123        | AKT2,CASP8,CASP9,MAPK9,PIK3C2A,PIK3R4,RASD1,TP53                                                                                                                 |
| IL-17 Signaling                                                                           | 2.66                 | 0.113        | AKT2,CCL2,IL17RC,MAPK9,NFKB1,PIK3C2A,PIK3R4,PTGS2,RASD1                                                                                                          |
| Relaxin Signaling                                                                         | 2.64                 | 0.089        | ADCY8,AKT2,CREB1,GNA11,GNB1,GUCY1A2,NFKB1,NFKBID,PDE12,PDE8A,PIK3C2A,PIK3R4,SLC39A7                                                                              |
| Molecular Mechanisms of Cancer Role of PKR in Interferon Induction and Antiviral Response | 2.52                 | 0.065        | ADCY8,AKT2,ATM,BMP1,BMPR1B,CAMK2G,CASP8,CASP9,CDC25A,CDK11B,CFLAR,DAXX,GNA11,HAT1,MAPK9,NFKB1,NFKBID,PIK3C2A,PIK3R4,PSEN2,RASD1,SMAD2,SMO,TP53,WNT2B             |
| eNOS Signaling                                                                            | 2.49                 | 0.086        | ADCY8,AKT2,CAMK4,CASP8,CASP9,CHRNA10,ESR1,GUCY1A2,HSP90B1,HSPA14,PIK3C2A,PIK3R4,VEGFD                                                                            |
| Heme Biosynthesis II                                                                      | 2.49                 | 0.333        | ALAD,PPOX,UROS                                                                                                                                                   |
| Sumoylation Pathway                                                                       | 2.48                 | 0.099        | DAXX,ETS1,HDAC1,KDM1A,MAPK9,NFKB1,SP1,TDG,TP53,ZNF217                                                                                                            |
| Telomerase Signaling                                                                      | 2.39                 | 0.096        | AKT2,ETS1,HDAC1,HSP90B1,IL2RA,PIK3C2A,PIK3R4,RASD1,SP1,TP53                                                                                                      |
| Glycine Betaine Degradation                                                               | 2.34                 | 0.3          | BHMT2,SARDH,SDS                                                                                                                                                  |
| Pancreatic Adenocarcinoma Signaling                                                       | 2.27                 | 0.093        | AKT2,CASP9,MAPK9,NFKB1,PIK3C2A,PIK3R4,PTGS2,SMAD2,TP53,VEGFD                                                                                                     |
| Induction of Apoptosis by HIV1                                                            | 2.27                 | 0.117        | CASP8,CASP9,DAXX,MAPK9,NFKB1,NFKBID,TP53                                                                                                                         |
| Endometrial Cancer Signaling                                                              | 2.27                 | 0.117        | AKT2,APC2,CASP9,PIK3C2A,PIK3R4,RASD1,TP53                                                                                                                        |
| HIF1α Signaling                                                                           | 2.19                 | 0.09         | AKT2,MAPK9,MMP27,NOS1,PIK3C2A,PIK3R4,RASD1,SLC2A8,TP53,VEGFD                                                                                                     |
| Methylmalonyl Pathway                                                                     | 2.14                 | 0.5          | MCEE,PCCA                                                                                                                                                        |
| ATM Signaling                                                                             | 2.13                 | 0.094        | ATM,CDC25A,CREB1,GADD45B,MAPK9,TDP1,TLK2,TP53,TP53                                                                                                               |
| IL-17A Signaling in Airway Cells                                                          | 2.11                 | 0.109        | AKT2,IL17RC,MAPK9,NFKB1,NFKBID,PIK3C2A,PIK3R4                                                                                                                    |
| NF-κB Activation by Viruses                                                               | 2.05                 | 0.098        | AKT2,ITGA6,ITGAV,NFKB1,NFKBID,PIK3C2A,PIK3R4,RASD1                                                                                                               |
| Role of NANOG in Mammalian Embryonic Stem Cell Pluripotency                               | 2.03                 | 0.086        | AKT2,BMP1,BMPR1B,GATA6,PIK3C2A,PIK3R4,RASD1,SMO,TP53,WNT2B                                                                                                       |
| Hereditary Breast Cancer Signaling                                                        | 1.99                 | 0.08         | AKT2,ARID2,ATM,GADD45B,HDAC1,PIK3C2A,PIK3R4,POLR2H,RASD1,TP53,XPC                                                                                                |
| HER-2 Signaling in Breast Cancer                                                          | 1.99                 | 0.095        | AKT2,CASP9,ITGB6,ITGB8,PIK3C2A,PIK3R4,RASD1,TP53                                                                                                                 |
| Docosahexaenoic Acid (DHA) Signaling                                                      | 1.96                 | 0.132        | AKT2,ALOX15,CASP9,PIK3C2A,PIK3R4                                                                                                                                 |
| HMGB1 Signaling                                                                           | 1.96                 | 0.076        | AKT2,CCL2,HAT1,KAT6A,KAT6B,MAPK9,NFKB1,PIK3C2A,PIK3R4,RASD1,SP1,TNFSF8                                                                                           |
| Lymphotoxin β Receptor Signaling                                                          | 1.95                 | 0.113        | AKT2,CASP9,NFKB1,NFKBID,PIK3C2A,PIK3R4                                                                                                                           |
| Tetrapyrrole Biosynthesis II                                                              | 1.92                 | 0.4          | ALAD,UROS                                                                                                                                                        |
| 2-oxobutanoate Degradation I                                                              | 1.92                 | 0.4          | MCEE,PCCA                                                                                                                                                        |
| GM-CSF Signaling                                                                          | 1.91                 | 0.1          | AKT2,CAMK2G,ETS1,HCK,PIK3C2A,PIK3R4,RASD1                                                                                                                        |
| Endothelin-1 Signaling                                                                    | 1.87                 | 0.072        | ADCY8,CASP8,CASP9,GNA11,GUCY1A2,MAPK9,NOS1,PIK3C2A,PIK3R4,PLA2G7,PTGS2,RARRES3,RASD1                                                                             |

|                                                                      |      |       |                                                                                               |
|----------------------------------------------------------------------|------|-------|-----------------------------------------------------------------------------------------------|
| Regulation of IL-2 Expression in Activated and Anergic T Lymphocytes | 1.87 | 0.091 | CAMK4,CD3E,MAPK9,NFKB1,NFKBID,RASD1,SMAD2,VAV3                                                |
| iCOS-iCOSL Signaling in T Helper Cells                               | 1.86 | 0.085 | AKT2,CAMK2G,CAMK4,CD3E,IL2RA,NFKB1,NFKBID,PIK3C2A,PIK3R4                                      |
| Non-Small Cell Lung Cancer Signaling                                 | 1.82 | 0.096 | AKT2,CASP9,PIK3C2A,PIK3R4,RASD1,RXR,TP53                                                      |
| Colorectal Cancer Metastasis Signaling                               | 1.8  | 0.065 | ADCY8,AKT2,CASP9,GNB1,MAPK9,MMP27,NFKB1,PIK3C2A,PIK3R4,PTGS2,RASD1,SMAD2,SMO,TP53,VEGFD,WNT2B |
| MIF Regulation of Innate Immunity                                    | 1.79 | 0.119 | MAPK9,NFKB1,NFKBID,PTGS2,TP53                                                                 |
| Angiopoietin Signaling                                               | 1.79 | 0.095 | AKT2,CASP9,NFKB1,NFKBID,PIK3C2A,PIK3R4,RASD1                                                  |
| Antiproliferative Role of Somatostatin Receptor 2                    | 1.79 | 0.095 | GNB1,GUCY1A2,NOS1,PIK3C2A,PIK3R4,RASD1,SLC39A7                                                |
| Role of p14/p19ARF in Tumor Suppression                              | 1.77 | 0.143 | PIK3C2A,PIK3R4,POLR3D,TP53                                                                    |
| Cancer Drug Resistance By Drug Efflux                                | 1.77 | 0.103 | ABCG2,AKT2,NFKB1,PTGS2,RASD1,TP53                                                             |
| Granzyme B Signaling                                                 | 1.74 | 0.188 | CASP8,CASP9,NUMA1                                                                             |
| Apelin Pancreas Signaling Pathway                                    | 1.74 | 0.116 | APLNR,MAPK9,NFKB1,PIK3C2A,PIK3R4                                                              |
| Role of MAPK Signaling in the Pathogenesis of Influenza              | 1.73 | 0.092 | AKT2,CCL2,MAPK9,PLA2G7,PTGS2,RARRES3,RASD1                                                    |
| Nitric Oxide Signaling in the Cardiovascular System                  | 1.71 | 0.085 | AKT2,CACNA1D,CAMK4,GUCY1A2,HSP90B1,PIK3C2A,PIK3R4,VEGFD                                       |
| Wnt/ $\beta$ -catenin Signaling                                      | 1.71 | 0.071 | AKT2,APC2,APPL2,CSNK2A1,GJA1,HDAC1,KREMEN1,SMO,SOX5,TGFBR3,TP53,WNT2B                         |
| RAR Activation                                                       | 1.7  | 0.068 | ADCY8,AKT2,ARID2,CSNK2A1,GTF2H2,MAPK9,MNAT1,NFKB1,NRIP2,PRMT1,RXR,SDR16C5,SMAD2               |
| Regulation of the Epithelial-Mesenchymal Transition Pathway          | 1.7  | 0.068 | AKT2,ETS1,FGF10,FRS2,NFKB1,PIK3C2A,PIK3R4,PSEN2,RASD1,SMAD2,SMO,WNT2B,ZEB2                    |
| Adipogenesis pathway                                                 | 1.69 | 0.076 | GTF2H2,HAT1,HDAC1,KAT6A,KAT6B,KDM1A,KLF5,MNAT1,SMO,TP53                                       |
| Apelin Adipocyte Signaling Pathway                                   | 1.67 | 0.09  | ADCY8,APLNR,GNA11,GPX6,MAPK9,NOX1,NOX4                                                        |
| Role of PI3K/AKT Signaling in the Pathogenesis of Influenza          | 1.67 | 0.098 | AKT2,CASP9,NFKB1,NFKBID,PIK3C2A,PIK3R4                                                        |
| IL-2 Signaling                                                       | 1.67 | 0.098 | AKT2,CSNK2A1,IL2RA,PIK3C2A,PIK3R4,RASD1                                                       |
| Amyotrophic Lateral Sclerosis Signaling                              | 1.67 | 0.083 | CACNA1D,CASP9,NOS1,PIK3C2A,PIK3R4,SLC1A2,TP53,VEGFD                                           |
| fMLP Signaling in Neutrophils                                        | 1.65 | 0.078 | CAMK4,GNB1,NFKB1,NFKBID,NOX1,NOX4,PIK3C2A,PIK3R4,RASD1                                        |
| Aldosterone Signaling in Epithelial Cells                            | 1.65 | 0.071 | DNAJC16,HSP90B1,HSPA14,HSPH1,NR3C2,PIK3C2A,PIK3R4,PIKFYVE,SLC12A1,SLC12A2,SMO                 |
| Androgen Signaling                                                   | 1.63 | 0.074 | CACNA1D,CAMK4,GNA11,GNB1,GTF2B,GTF2H2,MNAT1,NFKB1,POLR2H,TAF2                                 |
| Role of Tissue Factor in Cancer                                      | 1.63 | 0.078 | AKT2,GNA11,HCK,ITGA6,ITGAV,PIK3C2A,PIK3R4,RASD1,TP53                                          |
| FAT10 Cancer Signaling Pathway                                       | 1.63 | 0.109 | AKT2,NFKB1,SMAD2,TGFBR3,TP53                                                                  |
| Systemic Lupus Erythematosus In T Cell Signaling Pathway             | 1.63 | 0.065 | AKT2,CAMK4,CASP8,CASP9,CD3E,CREB1,ESR1,HLA-DPA1,NOS1,PIK3C2A,PIK3R4,RASD1,SP1,STIM1           |
| p53 Signaling                                                        | 1.62 | 0.082 | AKT2,ATM,GADD45B,HDAC1,PIK3C2A,PIK3R4,TP53                                                    |
| NF- $\kappa$ B Signaling                                             | 1.61 | 0.068 | AKT2,BMPR1B,CASP8,CSNK2A1,HDAC1,NFKB1,NFKBID,NTRK3,PIK3C2A,PIK3R4,RASD1,TGFBR3                |
| FAT10 Signaling Pathway                                              | 1.6  | 0.167 | PSME1,PSME2,PSMF1                                                                             |
| Inhibition of Angiogenesis by TSP1                                   | 1.58 | 0.125 | AKT2,GUCY1A2,MAPK9,TP53                                                                       |
| CD40 Signaling                                                       | 1.58 | 0.094 | MAPK9,NFKB1,NFKBID,PIK3C2A,PIK3R4,PTGS2                                                       |
| Ovarian Cancer Signaling                                             | 1.58 | 0.073 | AKT2,GJA1,PIK3C2A,PIK3R4,PTGS2,RASD1,SMO,TP53,VEGFD,WNT2B                                     |
| LPS-stimulated MAPK Signaling                                        | 1.56 | 0.085 | CREB1,MAPK9,NFKB1,NFKBID,PIK3C2A,PIK3R4,RASD1                                                 |
| GADD45 Signaling                                                     | 1.54 | 0.158 | ATM,GADD45B,TP53                                                                              |
| DNA damage-induced 14-3-3 $\sigma$ Signaling                         | 1.54 | 0.158 | AKT2,ATM,TP53                                                                                 |
| BMP signaling pathway                                                | 1.54 | 0.084 | BMP1,BMPR1B,CAMK4,CREB1,MAPK9,NFKB1,RASD1                                                     |
| Antioxidant Action of Vitamin C                                      | 1.53 | 0.078 | GLRX,MAPK9,NFKB1,NFKBID,PLA2G7,RARRES3,SLC2A8,TXNRD1                                          |

|                                                |      |       |                                                                                                                                                           |
|------------------------------------------------|------|-------|-----------------------------------------------------------------------------------------------------------------------------------------------------------|
| Corticotropin Releasing Hormone Signaling      | 1.52 | 0.071 | ADCY8,CACNA1D,CAMK4,CREB1,GUCY1A2,MEF2C,NOS1,PTGS2,SLC39A7,SMO                                                                                            |
| TWEAK Signaling                                | 1.49 | 0.118 | CASP8,CASP9,NFKB1,NFKBID                                                                                                                                  |
| Neuroinflammation Signaling Pathway            | 1.49 | 0.059 | AKT2,CASP8,CCL2,CFLAR,CREB1,GJB1,MAPK9,NFKB1,NOX1,NOX4,PIK3C2A,PIK3R4,PSEN2,PTGS2,SLC1A2,TGFBR3,TYROBP                                                    |
| Melanoma Signaling                             | 1.49 | 0.1   | AKT2,PIK3C2A,PIK3R4,RASD1,TP53                                                                                                                            |
| Assembly of RNA Polymerase II Complex          | 1.49 | 0.1   | GTF2B,GTF2H2,MNAT1,POLR2H,TAF2                                                                                                                            |
| Methionine Degradation I (to Homocysteine)     | 1.48 | 0.15  | AHCYL1,MAT1A,PRMT1                                                                                                                                        |
| CREB Signaling in Neurons                      | 1.48 | 0.063 | ADCY8,AKT2,CACNA1D,CAMK2G,CAMK4,CREB1,GNA11,GNB1,GTF2B,PIK3C2A,PIK3R4,POLR2H,RASD1                                                                        |
| Integrin Signaling                             | 1.48 | 0.063 | AKT2,ITGA6,ITGAV,ITGB6,ITGB8,NEDD9,PIK3C2A,PIK3R4,PIKFYVE,RASD1,TNK2,TSPAN5,TTN                                                                           |
| RANK Signaling in Osteoclasts                  | 1.47 | 0.081 | AKT2,CAMK4,MAPK9,NFKB1,NFKBID,PIK3C2A,PIK3R4                                                                                                              |
| IL-17A Signaling in Fibroblasts                | 1.45 | 0.114 | CCL2,IL17RC,NFKB1,NFKBID                                                                                                                                  |
| Nucleotide Excision Repair Pathway             | 1.45 | 0.114 | GTF2H2,MNAT1,POLR2H,XPC                                                                                                                                   |
| Protein Kinase A Signaling                     | 1.45 | 0.055 | ADCY8,AKAP11,AKAP12,AKAP3,ANAPC10,CAMK2G,CAMK4,CDC25A,CREB1,GNB1,NFKB1,NFKBID,PDE12,PDE8A,PPP1R11,PTGS2,PTPDC1,PTPN4,PTPRU,SMO,TTN                        |
| IL-6 Signaling                                 | 1.45 | 0.072 | A2M,AKT2,CSNK2A1,MAPK9,NFKB1,NFKBID,PIK3C2A,PIK3R4,RASD1                                                                                                  |
| Cardiac Hypertrophy Signaling (Enhanced)       | 1.45 | 0.053 | ADCY8,AKT2,CACNA1D,CAMK2G,CAMK4,FGF10,GNA11,GNB1,HDAC1,IL17RC,IL2RA,MAPK9,MEF2C,NFKB1,PDE12,PDE8A,PIK3C2A,PIK3R4,PKN1,PTGS2,RASD1,SMO,TGFBR3,TNFSF8,WNT2B |
| Paxillin Signaling                             | 1.44 | 0.076 | ITGA6,ITGAV,ITGB6,ITGB8,MAPK9,PIK3C2A,PIK3R4,RASD1                                                                                                        |
| PTEN Signaling                                 | 1.43 | 0.071 | AKT2,BMPR1B,CASP9,CSNK2A1,MAST2,NFKB1,NTRK3,RASD1,TGFBR3                                                                                                  |
| NAD Salvage Pathway II                         | 1.43 | 0.143 | ACPP,NMNAT2,NT5E                                                                                                                                          |
| CD27 Signaling in Lymphocytes                  | 1.42 | 0.096 | CASP8,CASP9,MAPK9,NFKB1,NFKBID                                                                                                                            |
| Basal Cell Carcinoma Signaling                 | 1.41 | 0.086 | APC2,BMP1,HHIP,SMO,TP53,WNT2B                                                                                                                             |
| Glioma Signaling                               | 1.38 | 0.073 | AKT2,CAMK2G,CAMK4,IDH1,PIK3C2A,PIK3R4,RASD1,TP53                                                                                                          |
| Factors Promoting Cardiogenesis in Vertebrates | 1.37 | 0.078 | BMP1,BMPR1B,MEF2C,NOX4,SMAD2,SMO,TGFBR3                                                                                                                   |
| Polyamine Regulation in Colon Cancer           | 1.37 | 0.136 | PSME1,PSME2,PSMF1                                                                                                                                         |
| Cysteine Biosynthesis III (mammalia)           | 1.37 | 0.136 | AHCYL1,MAT1A,PRMT1                                                                                                                                        |

**Non-Survivors**  
**Up regulated**  
**Day 1 vs. Control**

| Ingenuity Canonical Pathways                                    | log(p-value) | Ratio | Molecules                                                                                                                |
|-----------------------------------------------------------------|--------------|-------|--------------------------------------------------------------------------------------------------------------------------|
| Natural Killer Cell Signaling                                   | 3.63         | 0.12  | FCER1G,INPPL1,KLRD1,MAPK3,NCR3,PAK1,PAK6,PRKCE,PRKCH,PRKD3,PTPN6,RALB,RRAS,SYK                                           |
| Airway Inflammation in Asthma                                   | 3.61         | 0.75  | IL13,IL4,TNF                                                                                                             |
| Type II Diabetes Mellitus Signaling                             | 3.32         | 0.107 | CACNA1F,CACNG3,ENPP7,GCK,INSR,MAP3K5,MAPK3,PRKAG3,PRKCE,PRKCH,PRKD3,SLC27A1,TNF,TNFRSF1B,TRAF2                           |
| Hepatic Cholestasis                                             | 3.1          | 0.096 | ABCB11,ABCG5,ABCG8,CD14,CYP27A1,IL13,IL4,INSR,LTA,PRKACB,PRKCE,PRKCH,PRKD3,SLC10A1,TNF,TNFRSF1B,TRAF2                    |
| Fc Epsilon RI Signaling                                         | 3.1          | 0.111 | FCER1G,IL13,IL4,INPPL1,LYN,MAPK3,PRKCE,PRKCH,PRKD3,RALB,RRAS,SYK,TNF                                                     |
| IL-3 Signaling                                                  | 2.94         | 0.127 | JAK1,MAPK3,PAK1,PRKCE,PRKCH,PRKD3,PTPN6,RALB,RRAS,STAT5B                                                                 |
| Neuregulin Signaling                                            | 2.89         | 0.117 | DLG4,EGF,MAPK3,PRKCE,PRKCH,PRKD3,PSEN1,RALB,RPS6KB2,RRAS,STAT5B                                                          |
| Apoptosis Signaling                                             | 2.74         | 0.112 | BID,BIRC2,CAPN3,LMNA,MAP3K5,MAPK3,PRKCE,RALB,RRAS,TNF,TNFRSF1B                                                           |
| Opioid Signaling Pathway                                        | 2.72         | 0.082 | CACNA1F,CACNG3,CLTCL1,GRIN2A,GRK7,LYN,MAPK3,PLD2,PRKACB,PRKCE,PRKCH,PRKD3,RALB,RGS10,RGS6,RPS6KA4,RPS6KB2,RRAS,RYR2,RYR3 |
| GP6 Signaling Pathway                                           | 2.64         | 0.103 | COL11A1,COL18A1,COL4A2,COL9A2,FCER1G,LAMB2,LAMC3,LYN,PRKCE,PRKCH,PRKD3,SYK                                               |
| Renin-Angiotensin Signaling                                     | 2.61         | 0.103 | MAPK3,PAK1,PAK6,PRKACB,PRKCE,PRKCH,PRKD3,PTGER2,PTPN6,RALB,RRAS,TNF                                                      |
| Germ Cell-Sertoli Cell Junction Signaling                       | 2.57         | 0.09  | AFDN,CFL2,CTNNA2,JUP,LAMC3,MAP3K5,MAPK3,PAK1,PAK6,RAB8B,RALB,RHOBTB2,RRAS,TNF,ZYX                                        |
| Erythropoietin Signaling                                        | 2.5          | 0.118 | EPOR,MAPK3,PRKCE,PRKCH,PRKD3,PTPN6,RALB,RRAS,STAT5B                                                                      |
| Amyloid Processing                                              | 2.46         | 0.14  | BACE2,CAPN3,CSNK2B,MAPK3,PRKACB,PRKCE,PSEN1                                                                              |
| Fcy Receptor-mediated Phagocytosis in Macrophages and Monocytes | 2.41         | 0.108 | LYN,MAPK3,PAK1,PLD2,PRKCE,PRKCH,PRKD3,RAB11A,RPS6KB2,SYK                                                                 |
| 1D-myo-inositol Hexakisphosphate Biosynthesis II (Mammalian)    | 2.31         | 0.222 | INPP5E,INPPL1,ITPK1,SEC16A                                                                                               |
| Systemic Lupus Erythematosus In B Cell Signaling Pathway        | 2.31         | 0.076 | IL13,IL4,INPPL1,IRF5,IRF7,JAK1,LTA,LYN,MAPK3,NFAT5,PRKCE,PRKCH,PRKD3,PTPN6,RALB,RRAS,STAT2,SYK,TNF,TRAF2                 |
| LPS-stimulated MAPK Signaling                                   | 2.27         | 0.11  | CD14,MAP3K5,MAPK3,PAK1,PRKCE,PRKCH,PRKD3,RALB,RRAS                                                                       |
| IL-4 Signaling                                                  | 2.27         | 0.11  | IL4,INPPL1,JAK1,NFAT5,NR3C1,PTPN6,RALB,RPS6KB2,RRAS                                                                      |
| TNFR2 Signaling                                                 | 2.27         | 0.172 | BIRC2,LTA,TNF,TNFRSF1B,TRAF2                                                                                             |
| HER-2 Signaling in Breast Cancer                                | 2.21         | 0.107 | CCNE1,CDK6,EGF,MAP3K5,PRKCE,PRKCH,PRKD3,RALB,RRAS                                                                        |
| IL-15 Signaling                                                 | 2.15         | 0.113 | IL4,JAK1,MAPK3,RALB,RRAS,STAT5B,SYK,TNF                                                                                  |
| Growth Hormone Signaling                                        | 2.15         | 0.113 | MAPK3,PRKCE,PRKCH,PRKD3,PTPN6,RPS6KA4,RPS6KB2,STAT5B                                                                     |
| Semaphorin Signaling in Neurons                                 | 2.14         | 0.123 | CFL2,CRMP1,MAPK3,PAK1,PAK6,RHOBTB2,ROCK2                                                                                 |
| CCR3 Signaling in Eosinophils                                   | 2.07         | 0.092 | CCR3,CFL2,MAPK3,PAK1,PAK6,PRKCE,PRKCH,PRKD3,RALB,ROCK2,RRAS                                                              |
| nNOS Signaling in Neurons                                       | 2.02         | 0.13  | CAPN3,DLG4,GRIN2A,PRKCE,PRKCH,PRKD3                                                                                      |
| Death Receptor Signaling                                        | 2.01         | 0.1   | BID,BIRC2,LMNA,MAP3K5,PARP12,TNF,TNFRSF10B,TNFRSF1B,TRAF2                                                                |
| Phagosome Maturation                                            | 1.99         | 0.086 | ATP6V1D,CTSA,CTSD,DCTN4,NSF,PRDX5,RILP,SNAP25,VPS11,VPS33B,VPS37C,VTI1B                                                  |
| IL-2 Signaling                                                  | 1.98         | 0.115 | CSNK2B,JAK1,MAPK3,RALB,RRAS,STAT5B,SYK                                                                                   |
| Macropinocytosis Signaling                                      | 1.97         | 0.105 | CD14,EGF,PAK1,PRKCE,PRKCH,PRKD3,RALB,RRAS                                                                                |
| TNFR1 Signaling                                                 | 1.94         | 0.125 | BID,BIRC2,PAK1,PAK6,TNF,TRAF2                                                                                            |
| Glioma Signaling                                                | 1.93         | 0.092 | CDK6,E2F4,E2F6,EGF,MAPK3,PRKCE,PRKCH,PRKD3,RALB,RRAS                                                                     |
| ErbB Signaling                                                  | 1.92         | 0.097 | EGF,MAPK3,PAK1,PAK6,PRKCE,PRKCH,PRKD3,RALB,RRAS                                                                          |
| Tec Kinase Signaling                                            | 1.92         | 0.081 | FCER1G,JAK1,LYN,PAK1,PAK6,PRKCE,PRKCH,PRKD3,RHOBTB2,STAT2,STAT5B,TNF,TNFRSF10B                                           |
| Coagulation System                                              | 1.92         | 0.143 | F5,F7,SERPINC1,SERPINF2,VWF                                                                                              |
| Thrombopoietin Signaling                                        | 1.91         | 0.111 | MAPK3,PRKCE,PRKCH,PRKD3,RALB,RRAS,STAT5B                                                                                 |
| Pyridoxal 5'-phosphate Salvage Pathway                          | 1.87         | 0.109 | CDK6,DMPK,MAK,MAPK3,PAK1,PRKCE,PRKCH                                                                                     |
| Regulation of Cellular Mechanics by Calpain Protease            | 1.87         | 0.109 | CAPN3,CCNE1,CDK6,EGF,MAPK3,RALB,RRAS                                                                                     |
| JAK/Stat Signaling                                              | 1.84         | 0.1   | JAK1,MAPK3,PIAS2,PTPN6,RALB,RRAS,STAT2,STAT5B                                                                            |
| Prolactin Signaling                                             | 1.82         | 0.099 | MAPK3,NR3C1,PRKCE,PRKCH,PRKD3,RALB,RRAS,STAT5B                                                                           |
| UVC-Induced MAPK Signaling                                      | 1.81         | 0.118 | MAPK3,PRKCE,PRKCH,PRKD3,RALB,RRAS                                                                                        |
| ErbB4 Signaling                                                 | 1.8          | 0.106 | MAPK3,PRKCE,PRKCH,PRKD3,PSEN1,RALB,RRAS                                                                                  |
| mTOR Signaling                                                  | 1.79         | 0.074 | EIF3C,EIF4G3,INSR,MAPK3,PLD2,PRKAG3,PRKCE,PRKCH,PRKD3,RALB,RHOBTB2,RPS6KA4,RPS6KB2,RRAS,VEGFB                            |



|                                                                                                       |      |       |                                                                                                                                           |
|-------------------------------------------------------------------------------------------------------|------|-------|-------------------------------------------------------------------------------------------------------------------------------------------|
| NF-κB Activation by Viruses                                                                           | 1.79 | 0.098 | ITGA1,MAPK3,PRKCE,PRKCH,PRKD3,RALB,RRAS,TRAF2                                                                                             |
| Production of Nitric Oxide and Reactive Oxygen Species in Macrophages                                 | 1.78 | 0.076 | ALB,APOM,ARG2,IL4,JAK1,MAP3K5,MAPK3,PRKCE,PRKCH,PRKD3,PTPN6,RHOBTB2,TNF,TNFRSF1B                                                          |
| Phenylalanine Degradation IV (Mammalian, via Side Chain)                                              | 1.78 | 0.214 | ALDH2,HPD,IL4I1                                                                                                                           |
| Role of JAK1 and JAK3 in γCytokine Signaling                                                          | 1.77 | 0.104 | IL4,JAK1,MAPK3,RALB,RRAS,STAT5B,SYK                                                                                                       |
| Epithelial Adherens Junction Signaling                                                                | 1.77 | 0.08  | ACVR2B,AFDN,CLIP1,CTNNA2,EGF,JUP,MYH14,MYL7,RALB,RRAS,TCF4,ZYX                                                                            |
| PPAR Signaling                                                                                        | 1.71 | 0.089 | AIP,INSR,MAPK3,RALB,RRAS,STAT5B,TNF,TNFRSF1B,TRAF2                                                                                        |
| Protein Kinase A Signaling                                                                            | 1.7  | 0.063 | ADD1,ADD3,AKAP10,AKAP4,APEX1,FLNB,GRK7,HHAT,MAPK3,MYL7,NFAT5,PRKACB,PRKCE,PRKCH,PRKD3,PTPN22,PTPN23,PTPN6,PTPRK,PYGB,ROCK2,RYR2,RYR3,TCF4 |
| nNOS Signaling in Skeletal Muscle Cells                                                               | 1.68 | 0.125 | CACNA1F,CACNG3,CAPN3,RYR2,RYR3                                                                                                            |
| Tryptophan Degradation to 2-amino-3-carboxymuconate Semialdehyde                                      | 1.67 | 0.333 | IDO1,KMO                                                                                                                                  |
| LPS/IL-1 Mediated Inhibition of RXR Function                                                          | 1.67 | 0.071 | ABCB11,ABCG5,ABCG8,ALDH1A3,ALDH2,CD14,CHST1,IL4I1,PPARGC1B,SLC10A1,SLC27A1,TNF,TNFRSF1B,TRAF2,XPO1                                        |
| Mechanisms of Viral Exit from Host Cells                                                              | 1.64 | 0.122 | PRKCE,PRKCH,PRKD3,VPS37C,XPO1                                                                                                             |
| LXR/RXR Activation                                                                                    | 1.64 | 0.083 | ABCG5,ABCG8,ALB,APOM,ARG2,CD14,MMP9,SERPINF2,TNF,TNFRSF1B                                                                                 |
| CNTF Signaling                                                                                        | 1.63 | 0.107 | JAK1,MAPK3,RALB,RPS6KA4,RPS6KB2,RRAS                                                                                                      |
| Extrinsic Prothrombin Activation Pathway                                                              | 1.62 | 0.188 | F5,F7,SERPINC1                                                                                                                            |
| G Beta Gamma Signaling                                                                                | 1.62 | 0.082 | CACNA1F,CACNG3,MAPK3,PAK1,PRKACB,PRKCE,PRKCH,PRKD3,RALB,RRAS                                                                              |
| NF-κB Signaling                                                                                       | 1.61 | 0.074 | CARD10,CSNK2B,EGF,FCER1G,FGFR3,INSR,LTA,PRKACB,RALB,RRAS,TNF,TNFRSF1B,TRAF2                                                               |
| IL-8 Signaling                                                                                        | 1.61 | 0.072 | EGF,LASP1,MAPK3,MMP9,MYL7,PLD2,PRKCE,PRKCH,PRKD3,RALB,RHOBTB2,ROCK2,RRAS,VEGFB                                                            |
| Caveolar-mediated Endocytosis Signaling                                                               | 1.58 | 0.096 | ALB,EGF,FLNB,FLOT2,INSR,ITGA1,ITGA8                                                                                                       |
| Estrogen-Dependent Breast Cancer Signaling                                                            | 1.58 | 0.096 | HSD17B1,HSD17B11,HSD17B13,MAPK3,RALB,RRAS,STAT5B                                                                                          |
| Acute Phase Response Signaling                                                                        | 1.58 | 0.073 | ALB,HRG,MAP3K5,MAPK3,NR3C1,RALB,RRAS,SERPINF2,TCF4,TNF,TNFRSF1B,TRAF2,VWF                                                                 |
| Ephrin Receptor Signaling                                                                             | 1.58 | 0.073 | CFL2,EFNB3,EGF,EPHA2,GRIN2A,MAPK3,PAK1,PAK6,RALB,ROCK2,RRAS,VEGFB,WIPF1                                                                   |
| Virus Entry via Endocytic Pathways                                                                    | 1.57 | 0.084 | AP3S1,CLTCL1,FLNB,ITGA1,PRKCE,PRKCH,PRKD3,RALB,RRAS                                                                                       |
| Oncostatin M Signaling                                                                                | 1.56 | 0.116 | JAK1,MAPK3,RALB,RRAS,STAT5B                                                                                                               |
| D-myo-inositol (1,4,5)-trisphosphate Degradation                                                      | 1.55 | 0.176 | INPP5E,INPPL1,SEC16A                                                                                                                      |
| Putrescine Degradation III                                                                            | 1.55 | 0.176 | ALDH1A3,ALDH2,IL4I1                                                                                                                       |
| Pancreatic Adenocarcinoma Signaling                                                                   | 1.54 | 0.083 | CCNE1,E2F4,E2F6,EGF,JAK1,MAPK3,MMP9,PLD2,VEGFB                                                                                            |
| Hepatic Fibrosis / Hepatic Stellate Cell Activation                                                   | 1.51 | 0.071 | CD14,COL11A1,COL18A1,COL4A2,COL9A2,EGF,IL4,MMP9,MYH14,MYL7,TNF,TNFRSF1B,VEGFB                                                             |
| CXCR4 Signaling                                                                                       | 1.5  | 0.073 | LYN,MAPK3,MYL7,PAK1,PAK6,PRKCE,PRKCH,PRKD3,RALB,RHOBTB2,ROCK2,RRAS                                                                        |
| Induction of Apoptosis by HIV1                                                                        | 1.5  | 0.1   | BID,BIRC2,MAP3K5,TNF,TNFRSF1B,TRAF2                                                                                                       |
| α-Adrenergic Signaling                                                                                | 1.49 | 0.086 | MAPK3,PRKACB,PRKCE,PRKCH,PRKD3,PYGB,RALB,RRAS                                                                                             |
| p70S6K Signaling                                                                                      | 1.49 | 0.078 | IL4,JAK1,LYN,MAPK3,PRKCE,PRKCH,PRKD3,RALB,RRAS,SYK                                                                                        |
| Granulocyte Adhesion and Diapedesis                                                                   | 1.48 | 0.073 | CCL25,CLDN2,CSF3,ITGA1,MMP16,MMP9,SELE,SELL,SELP,THY1,TNF,TNFRSF1B                                                                        |
| Differential Regulation of Cytokine Production in Macrophages and T Helper Cells by IL-17A and IL-17F | 1.48 | 0.167 | CSF3,IL13,TNF                                                                                                                             |
| D-myo-inositol (1,3,4)-trisphosphate Biosynthesis                                                     | 1.48 | 0.167 | INPP5E,INPPL1,SEC16A                                                                                                                      |
| FAK Signaling                                                                                         | 1.47 | 0.085 | ARHGAP26,CAPN3,EGF,MAPK3,PAK1,PAK6,RALB,RRAS                                                                                              |
| Nitric Oxide Signaling in the Cardiovascular System                                                   | 1.47 | 0.085 | ARG2,MAPK3,PRKACB,PRKCE,PRKCH,PRKD3,RYR2,VEGFB                                                                                            |
| Molecular Mechanisms of Cancer                                                                        | 1.46 | 0.06  | BID,BIRC2,CCNE1,CDK6,CTNNA2,E2F4,E2F6,HHAT,JAK1,MAP3K5,MAPK3,PAK1,PAK6,PRKACB,PRKCE,PRKCH,PRKD3,PTPN6,PTPN22,PTPN23,PTPN6,TPTE2           |
| Tight Junction Signaling                                                                              | 1.45 | 0.072 | AFDN,CLDN2,MARK2,MYH14,MYL7,NSF,PRKACB,SNAP25,STX4,TNF,TNFRSF1B,VTI1B                                                                     |
| Integrin Signaling                                                                                    | 1.45 | 0.068 | ARHGAP26,BCAR3,CAPN3,ITGA1,ITGA8,MAPK3,MYL7,PAK1,PAK6,RALB,RHOBTB2,RRAS,WIPF1,ZYX                                                         |
| Salvage Pathways of Pyrimidine Ribonucleotides                                                        | 1.44 | 0.084 | APOBEC3G,CDK6,DMPK,MAK,MAPK3,PAK1,PRKCE,PRKCH                                                                                             |
| 3-phosphoinositide Degradation                                                                        | 1.44 | 0.074 | ACP5,ALPL,EYA4,INPP4B,INPP5E,INPPL1,ITPK1,PTPN22,PTPN23,PTPN6,TPTE2                                                                       |
| Iron homeostasis signaling pathway                                                                    | 1.43 | 0.076 | ATP6V1D,CD163,EGF,FBXL5,HSCB,JAK1,MAPK3,SLC11A2,STAT5B,TFR2                                                                               |
| Role of JAK2 in Hormone-like Cytokine Signaling                                                       | 1.43 | 0.125 | EPOR,JAK1,PTPN6,STAT5B                                                                                                                    |
| Amyotrophic Lateral Sclerosis Signaling                                                               | 1.42 | 0.083 | BID,BIRC2,CAPN3,GLUL,GRIN2A,NEFL,PAK1,VEGFB                                                                                               |
| Airway Pathology in Chronic Obstructive Pulmonary Disease                                             | 1.42 | 0.25  | MMP9,TNF                                                                                                                                  |
| Bladder Cancer Signaling                                                                              | 1.42 | 0.083 | EGF,FGFR3,MAPK3,MMP16,MMP9,RALB,RRAS,VEGFB                                                                                                |
| PAK Signaling                                                                                         | 1.42 | 0.083 | CFL2,MAPK3,MYL7,PAK1,PAK6,RALB,RRAS,TNF                                                                                                   |
| Tryptophan Degradation X (Mammalian, via Tryptamine)                                                  | 1.42 | 0.158 | ALDH1A3,ALDH2,IL4I1                                                                                                                       |

|                                      |      |       |                                                                                                                 |
|--------------------------------------|------|-------|-----------------------------------------------------------------------------------------------------------------|
| Apelin Endothelial Signaling Pathway | 1.41 | 0.079 | AQP2,MAPK3,PRKAG3,PRKCE,PRKCH,PRKD3,RALB,RPS6KB2,RRAS                                                           |
| Synaptogenesis Signaling Pathway     | 1.4  | 0.062 | AFDN,CNTNAP1,DLG4,EFNB3,EPHA2,FARP1,GRIN2A,LYN,MAPK3,NSF,PAK1,PRKACB,PRKCE,RALB,RPS6KB2,RRAS,SNAP25,THBS3,VTI1B |
| Glutamine Biosynthesis I             | 1.4  | 1     | GLUL                                                                                                            |
| Threonine Degradation II             | 1.4  | 1     | GCAT                                                                                                            |
| GNRH Signaling                       | 1.4  | 0.071 | CACNA1F,CACNG3,MAP3K5,MAPK3,PAK1,PAK6,PRKACB,PRKCE,PRKCH,PRKD3,RALB,RRAS                                        |
| Cyclins and Cell Cycle Regulation    | 1.39 | 0.088 | CCNB3,CCNE1,CDK6,E2F4,E2F6,FBXL5,HDAC6                                                                          |
| eNOS Signaling                       | 1.39 | 0.072 | AQP2,AQP3,CHRM4,LPAR5,NOSIP,PRKACB,PRKAG3,PRKCE,PRKCH,PRKD3,VEGFB                                               |
| Role of Tissue Factor in Cancer      | 1.37 | 0.078 | CFL2,F7,LYN,MAPK3,PAK1,RALB,RPS6KA4,RRAS,STAT5B                                                                 |

### Survivors

#### Down regulated

#### Day 2 vs. Control

#### Ingenuity Canonical Pathways

|                                                                      | <b>-log(p-value)</b> | <b>Ratio</b> | <b>Molecules</b>                         |
|----------------------------------------------------------------------|----------------------|--------------|------------------------------------------|
| Sumoylation Pathway                                                  | 3.9                  | 0.069        | ETS1,HDAC1,KDM1A,MAPK9,NFKB1,TP53,ZNF217 |
| BAG2 Signaling Pathway                                               | 2.94                 | 0.095        | NFKB1,PSME1,PSMF1,TP53                   |
| FAT10 Cancer Signaling Pathway                                       | 2.79                 | 0.087        | NFKB1,SMAD2,TGFBR3,TP53                  |
| Adipogenesis pathway                                                 | 2.47                 | 0.046        | CLOCK,HAT1,HDAC1,KDM1A,SMO,TP53          |
| PCP pathway                                                          | 2.37                 | 0.067        | CELSR1,MAPK9,SMO,WNT2B                   |
| MIF Regulation of Innate Immunity                                    | 1.96                 | 0.071        | MAPK9,NFKB1,TP53                         |
| Wnt/ $\beta$ -catenin Signaling                                      | 1.95                 | 0.035        | HDAC1,SMO,SOX5,TGFBR3,TP53,WNT2B         |
| Apelin Pancreas Signaling Pathway                                    | 1.93                 | 0.07         | APLNR,MAPK9,NFKB1                        |
| Huntington's Disease Signaling                                       | 1.82                 | 0.03         | CREB5,HDAC1,MAPK9,PSME1,PSMF1,RPH3A,TP53 |
| Regulation of IL-2 Expression in Activated and Anergic T Lymphocytes | 1.79                 | 0.046        | CAMK4,MAPK9,NFKB1,SMAD2                  |
| FAT10 Signaling Pathway                                              | 1.79                 | 0.111        | PSME1,PSMF1                              |
| Androgen Signaling                                                   | 1.78                 | 0.037        | CACNA1S,CAMK4,GTF2B,NFKB1,SHBG           |
| RAR Activation                                                       | 1.72                 | 0.031        | MAPK9,NFKB1,NRIP2,PRMT1,SMAD2,TNIP1      |
| Phagosome Maturation                                                 | 1.71                 | 0.036        | ATP6VOA4,ATP6V1B1,NOX1,PIKFYVE,VPS16     |
| Adrenomedullin signaling pathway                                     | 1.71                 | 0.031        | CAMK4,GPR182,KCNN1,MAPK9,NFKB1,TTN       |
| L-DOPA Degradation                                                   | 1.66                 | 0.5          | LRTOMT                                   |
| Glycine Degradation (Creatine Biosynthesis)                          | 1.66                 | 0.5          | GATM                                     |
| Polyamine Regulation in Colon Cancer                                 | 1.62                 | 0.091        | PSME1,PSMF1                              |
| Integrin Signaling                                                   | 1.59                 | 0.029        | ITGAV,ITGB8,PIKFYVE,TNK2,TSPAN5,TTN      |
| Induction of Apoptosis by HIV1                                       | 1.55                 | 0.05         | MAPK9,NFKB1,TP53                         |
| HOTAIR Regulatory Pathway                                            | 1.54                 | 0.032        | AGO3,HDAC1,KDM1A,NFKB1,WNT2B             |
| Activation of IRF by Cytosolic Pattern Recognition Receptors         | 1.53                 | 0.049        | ADAR,MAPK9,NFKB1                         |
| Wnt/Ca+ pathway                                                      | 1.53                 | 0.049        | CREB5,NFKB1,SMO                          |
| IL-17A Signaling in Gastric Cells                                    | 1.52                 | 0.08         | MAPK9,NFKB1                              |
| Pancreatic Adenocarcinoma Signaling                                  | 1.5                  | 0.037        | MAPK9,NFKB1,SMAD2,TP53                   |
| PRPP Biosynthesis I                                                  | 1.49                 | 0.333        | PRPS1                                    |
| Apelin Liver Signaling Pathway                                       | 1.48                 | 0.077        | APLNR,MAPK9                              |
| NGF Signaling                                                        | 1.44                 | 0.035        | CREB5,MAPK9,NFKB1,TP53                   |
| Apelin Endothelial Signaling Pathway                                 | 1.43                 | 0.035        | APLNR,CAMK4,MAPK9,NFKB1                  |
| GNRH Signaling                                                       | 1.4                  | 0.029        | CACNA1S,CAMK4,CREB5,MAPK9,NFKB1          |

Basal Cell Carcinoma Signaling

1.38 0.043 SMO,TP53,WNT2B

Noradrenaline and Adrenaline Degradation

1.37 0.067 ADH1A,LRTOMT

## Survivors

## Up regulated

## Day 2 v.s. Control

## Ingenuity Canonical Pathways

|                                                                  | -log(p-value) | Ratio | Molecules                                                                                                 |
|------------------------------------------------------------------|---------------|-------|-----------------------------------------------------------------------------------------------------------|
| Natural Killer Cell Signaling                                    | 3.66          | 0.086 | FCER1G,INPPL1,MAPK3,NCR3,PAK1,PAK6,PRKCH,PRKD3,RALB,RRAS                                                  |
| Neuregulin Signaling                                             | 3.02          | 0.085 | MAPK3,PRKCH,PRKD3,RALB,RPS6KB2,RRAS,STAT5B,TMEFF2                                                         |
| Fc Epsilon RI Signaling                                          | 3.01          | 0.077 | FCER1G,IL13,IL4,INPPL1,MAPK3,PRKCH,PRKD3,RALB,RRAS                                                        |
| CCR3 Signaling in Eosinophils                                    | 2.94          | 0.075 | CCR3,MAPK3,PAK1,PAK6,PRKCH,PRKD3,RALB,ROCK2,RRAS                                                          |
| IL-3 Signaling                                                   | 2.81          | 0.089 | MAPK3,PAK1,PRKCH,PRKD3,RALB,RRAS,STAT5B                                                                   |
| Prolactin Signaling                                              | 2.74          | 0.086 | MAPK3,NR3C1,PRKCH,PRKD3,RALB,RRAS,STAT5B                                                                  |
| Thrombopoietin Signaling                                         | 2.64          | 0.095 | MAPK3,PRKCH,PRKD3,RALB,RRAS,STAT5B                                                                        |
| Opioid Signaling Pathway                                         | 2.6           | 0.053 | CACNB4,CLTCL1,GRK7,MAPK3,PLD2,PRKACB,PRKCH,PRKD3,RALB,RGS10,RPS6KB2,RRAS,RYR2                             |
| Rac Signaling                                                    | 2.58          | 0.073 | MAPK3,MCF2L,NCKAP1,PAK1,PAK6,PIP5K1B,RALB,RRAS                                                            |
| Airway Inflammation in Asthma                                    | 2.57          | 0.5   | IL13,IL4                                                                                                  |
| Germ Cell-Sertoli Cell Junction Signaling                        | 2.49          | 0.06  | AFDN,LAMC3,MAPK3,PAK1,PAK6,RAB8B,RALB,RRAS,TUBA1A,ZYX                                                     |
| Renin-Angiotensin Signaling                                      | 2.42          | 0.068 | MAPK3,PAK1,PAK6,PRKACB,PRKCH,PRKD3,RALB,RRAS                                                              |
| α-Adrenergic Signaling                                           | 2.4           | 0.075 | MAPK3,PRKACB,PRKCH,PRKD3,PYGB,RALB,RRAS                                                                   |
| ErbB Signaling                                                   | 2.4           | 0.075 | MAPK3,PAK1,PAK6,PRKCH,PRKD3,RALB,RRAS                                                                     |
| Protein Kinase A Signaling                                       | 2.39          | 0.044 | ADD1,ADD2,AKAP10,AKAP4,FLNB,GRK7,MAPK3,MYL7,PRKACB,PRKCH,PRKD3,PTPN22,PTPN23,PYGB,ROCK2,RYR2,TCF4         |
| Nitric Oxide Signaling in the Cardiovascular System              | 2.38          | 0.075 | ARG2,MAPK3,PRKACB,PRKCH,PRKD3,RYR2,VEGFB                                                                  |
| mTOR Signaling                                                   | 2.33          | 0.054 | EIF3C,EIF4G3,INSR,MAPK3,PLD2,PRKCH,PRKD3,RALB,RPS6KB2,RRAS,VEGFB                                          |
| UVC-Induced MAPK Signaling                                       | 2.33          | 0.098 | MAPK3,PRKCH,PRKD3,RALB,RRAS                                                                               |
| G Beta Gamma Signaling                                           | 2.31          | 0.066 | CACNB4,MAPK3,PAK1,PRKACB,PRKCH,PRKD3,RALB,RRAS                                                            |
| Integrin Signaling                                               | 2.3           | 0.054 | ARHGAP26,ITGA1,ITGA8,MAPK3,MYL7,PAK1,PAK6,RALB,RRAS,WIPF1,ZYX                                             |
| Erythropoietin Signaling                                         | 2.23          | 0.079 | MAPK3,PRKCH,PRKD3,RALB,RRAS,STAT5B                                                                        |
| Agrin Interactions at Neuromuscular Junction                     | 2.23          | 0.079 | ITGA1,MAPK3,PAK1,PAK6,RALB,RRAS                                                                           |
| Tryptophan Degradation to 2-amino-3-carboxymuconate Semialdehyde | 2.18          | 0.333 | IDO1,KMO                                                                                                  |
| Renal Cell Carcinoma Signaling                                   | 2.18          | 0.077 | FH,MAPK3,PAK1,PAK6,RALB,RRAS                                                                              |
| Synaptogenesis Signaling Pathway                                 | 2.16          | 0.046 | AFDN,CACNB4,CNTNAP1,EFNB3,FARP1,MAPK3,PAK1,PRKACB,RALB,RPS6KB2,RRAS,SNAP25,VTI1B,YKT6                     |
| Tryptophan Degradation X (Mammalian, via Tryptamine)             | 2.13          | 0.158 | ALDH1A3,DDC,IL4I1                                                                                         |
| Virus Entry via Endocytic Pathways                               | 2.08          | 0.065 | CLTCL1,FLNB,ITGA1,PRKCH,PRKD3,RALB,RRAS                                                                   |
| LPS-stimulated MAPK Signaling                                    | 2.07          | 0.073 | MAPK3,PAK1,PRKCH,PRKD3,RALB,RRAS                                                                          |
| NF-κB Activation by Viruses                                      | 2.07          | 0.073 | ITGA1,MAPK3,PRKCH,PRKD3,RALB,RRAS                                                                         |
| PEDF Signaling                                                   | 2.07          | 0.073 | DOCK3,MAPK3,RALB,ROCK2,RRAS,TCF4                                                                          |
| IL-4 Signaling                                                   | 2.07          | 0.073 | IL4,INPPL1,NR3C1,RALB,RPS6KB2,RRAS                                                                        |
| Leukocyte Extravasation Signaling                                | 2.04          | 0.052 | AFDN,ARHGAP35,CLDN2,ITGA1,MMP9,PRKCH,PRKD3,ROCK2,THY1,WIPF1                                               |
| CXCR4 Signaling                                                  | 2.03          | 0.055 | MAPK3,MYL7,PAK1,PAK6,PRKCH,PRKD3,RALB,ROCK2,RRAS                                                          |
| VEGF Family Ligand-Receptor Interactions                         | 2.02          | 0.071 | MAPK3,PRKCH,PRKD3,RALB,RRAS,VEGFB                                                                         |
| IL-8 Signaling                                                   | 2.01          | 0.051 | MAPK3,MMP9,MYL7,PLD2,PRKCH,PRKD3,RALB,ROCK2,RRAS,VEGFB                                                    |
| IL-2 Signaling                                                   | 2             | 0.082 | CSNK2B,MAPK3,RALB,RRAS,STAT5B                                                                             |
| Ovarian Cancer Signaling                                         | 2             | 0.058 | MAPK3,MMP9,PRKACB,RALB,RPS6KB2,RRAS,TCF4,VEGFB                                                            |
| Phagosome Maturation                                             | 1.96          | 0.057 | CTSA,CTSD,SNAP25,TUBA1A,VPS11,VPS33B,VTI1B,YKT6                                                           |
| Breast Cancer Regulation by Stathmin1                            | 1.95          | 0.05  | CCNE1,MAPK3,PAK1,PRKACB,PRKCH,PRKD3,RALB,ROCK2,RRAS,TUBA1A                                                |
| GNRH Signaling                                                   | 1.94          | 0.053 | CACNB4,MAPK3,PAK1,PAK6,PRKACB,PRKCH,PRKD3,RALB,RRAS                                                       |
| Acute Myeloid Leukemia Signaling                                 | 1.93          | 0.068 | MAPK3,RALB,RPS6KB2,RRAS,STAT5B,TCF4                                                                       |
| Axonal Guidance Signaling                                        | 1.89          | 0.039 | EFNB3,MAPK3,MMP9,MYL7,NTNG1,PAK1,PAK6,PLXNC1,PRKACB,PRKCH,PRKD3,RALB,ROCK2,RRAS,SEMA4B,TUBA1A,VEGFB,WIPF1 |
| Oncostatin M Signaling                                           | 1.87          | 0.093 | MAPK3,RALB,RRAS,STAT5B                                                                                    |
| ErbB4 Signaling                                                  | 1.86          | 0.076 | MAPK3,PRKCH,PRKD3,RALB,RRAS                                                                               |
| TCA Cycle II (Eukaryotic)                                        | 1.84          | 0.125 | ACO1,CS,FH                                                                                                |
| Role of JAK1 and JAK3 in γC Cytokine Signaling                   | 1.84          | 0.075 | IL4,MAPK3,RALB,RRAS,STAT5B                                                                                |

|                                                                 |      |       |                                                              |
|-----------------------------------------------------------------|------|-------|--------------------------------------------------------------|
| Hepatic Cholestasis                                             | 1.82 | 0.051 | ABCB11,ABCG5,IL13,IL4,INSR,PRKACB,PRKCH,PRKD3,SLC10A1        |
| Fcy Receptor-mediated Phagocytosis in Macrophages and Monocytes | 1.82 | 0.065 | MAPK3,PAK1,PLD2,PRKCH,PRKD3,RPS6KB2                          |
| Ephrin Receptor Signaling                                       | 1.82 | 0.051 | EFNB3,MAPK3,PAK1,PAK6,RALB,ROCK2,RRAS,VEGFB,WIPF1            |
| FAK Signaling                                                   | 1.8  | 0.064 | ARHGAP26,MAPK3,PAK1,PAK6,RALB,RRAS                           |
| Epithelial Adherens Junction Signaling                          | 1.79 | 0.053 | ACVR2B,AFDN,MYL7,RALB,RRAS,TCF4,TUBA1A,ZYX                   |
| Actin Cytoskeleton Signaling                                    | 1.76 | 0.047 | ARHGAP35,MAPK3,MYL7,NCKAP1,PAK1,PAK6,PIP5K1B,RALB,ROCK2,RRAS |
| PAK Signaling                                                   | 1.76 | 0.063 | MAPK3,MYL7,PAK1,PAK6,RALB,RRAS                               |
| IL-15 Signaling                                                 | 1.74 | 0.07  | IL4,MAPK3,RALB,RRAS,STAT5B                                   |
| Growth Hormone Signaling                                        | 1.74 | 0.07  | MAPK3,PRKCH,PRKD3,RPS6KB2,STAT5B                             |
| PTEN Signaling                                                  | 1.71 | 0.056 | CSNK2B,INPPL1,INSR,MAPK3,RALB,RPS6KB2,RRAS                   |
| Glutamine Biosynthesis I                                        | 1.67 | 1     | GLUL                                                         |
| Angiotensin Signaling                                           | 1.67 | 0.068 | PAK1,PAK6,RALB,RRAS,STAT5B                                   |
| PPAR Signaling                                                  | 1.66 | 0.059 | AIP,INSR,MAPK3,RALB,RRAS,STAT5B                              |
| Thyroid Cancer Signaling                                        | 1.65 | 0.08  | MAPK3,RALB,RRAS,TCF4                                         |
| Amyloid Processing                                              | 1.65 | 0.08  | BACE2,CSNK2B,MAPK3,PRKACB                                    |
| Macropinocytosis Signaling                                      | 1.62 | 0.066 | PAK1,PRKCH,PRKD3,RALB,RRAS                                   |
| IGF-1 Signaling                                                 | 1.6  | 0.058 | CSNK2B,MAPK3,PRKACB,RALB,RPS6KB2,RRAS                        |
| Chemokine Signaling                                             | 1.6  | 0.065 | CCR3,MAPK3,RALB,ROCK2,RRAS                                   |
| NAD biosynthesis II (from tryptophan)                           | 1.58 | 0.167 | IDO1,KMO                                                     |
| Granulocyte Adhesion and Diapedesis                             | 1.57 | 0.049 | CCL25,CLDN2,ITGA1,MMP9,SELE,SELL,SELP,THY1                   |
| Insulin Receptor Signaling                                      | 1.57 | 0.052 | INPPL1,INSR,MAPK3,PRKACB,RALB,RPS6KB2,RRAS                   |
| Paxillin Signaling                                              | 1.57 | 0.057 | ITGA1,ITGA8,PAK1,PAK6,RALB,RRAS                              |
| Autophagy                                                       | 1.57 | 0.076 | CTSA,CTSD,VPS11,VPS33B                                       |
| FLT3 Signaling in Hematopoietic Progenitor Cells                | 1.56 | 0.063 | MAPK3,RALB,RRAS,STAT2,STAT5B                                 |
| JAK/Stat Signaling                                              | 1.54 | 0.063 | MAPK3,RALB,RRAS,STAT2,STAT5B                                 |
| Neuroprotective Role of THOP1 in Alzheimer's Disease            | 1.52 | 0.055 | CFD,DPP4,F7,MMP9,PRKACB,ST14                                 |
| HGF Signaling                                                   | 1.5  | 0.055 | MAPK3,PAK1,PRKCH,PRKD3,RALB,RRAS                             |
| CNTF Signaling                                                  | 1.49 | 0.071 | MAPK3,RALB,RPS6KB2,RRAS                                      |
| BMP signaling pathway                                           | 1.48 | 0.06  | CHRD,MAPK3,PRKACB,RALB,RRAS                                  |
| Semaphorin Signaling in Neurons                                 | 1.47 | 0.07  | MAPK3,PAK1,PAK6,ROCK2                                        |
| HER-2 Signaling in Breast Cancer                                | 1.46 | 0.06  | CCNE1,PRKCH,PRKD3,RALB,RRAS                                  |
| Apelin Endothelial Signaling Pathway                            | 1.44 | 0.053 | MAPK3,PRKCH,PRKD3,RALB,RPS6KB2,RRAS                          |
| Agranulocyte Adhesion and Diapedesis                            | 1.43 | 0.046 | CCL25,CLDN2,ITGA1,MMP9,MYL7,SELE,SELL,SELP                   |
| PDGF Signaling                                                  | 1.42 | 0.058 | CSNK2B,INPPL1,MAPK3,RALB,RRAS                                |
| PPAR $\alpha$ /RXR $\alpha$ Activation                          | 1.41 | 0.045 | ACVR2B,AIP,INSR,MAPK3,PRKACB,RALB,RRAS,STAT5B                |
| Role of Tissue Factor in Cancer                                 | 1.4  | 0.052 | F7,MAPK3,PAK1,RALB,RRAS,STAT5B                               |
| Cholecystokinin/Gastrin-mediated Signaling                      | 1.39 | 0.051 | MAPK3,PRKCH,PRKD3,RALB,ROCK2,RRAS                            |
| Regulation of Actin-based Motility by Rho                       | 1.38 | 0.057 | MYL7,PAK1,PAK6,PIP5K1B,WIPF1                                 |
| Sertoli Cell-Sertoli Cell Junction Signaling                    | 1.37 | 0.044 | AFDN,CLDN2,MAPK3,PRKACB,RAB8B,RALB,RRAS,TUBA1A               |
| 3-phosphoinositide Degradation                                  | 1.37 | 0.047 | ALPL,EYA4,INPP4B,INPPL1,PTPN22,PTPN23,THTPA                  |
| Putrescine Biosynthesis III                                     | 1.37 | 0.5   | AZIN2                                                        |

**Non-Survivors****Down regulated****Day 2 vs. Control**

| <b>Ingenuity Canonical Pathways</b>                 | <b>-log(p-value)</b> | <b>Ratio</b> | <b>Molecules</b>                                                                                                     |
|-----------------------------------------------------|----------------------|--------------|----------------------------------------------------------------------------------------------------------------------|
| Sumoylation Pathway                                 | 3.28                 | 0.089        | DAXX,ETS1,HDAC1,KDM1A,MAPK9,NFKB1,TDG,UBE2I,ZNF217                                                                   |
| Rac Signaling                                       | 2.41                 | 0.073        | CYBB,ELK4,NFKB1,NOX1,NOX4,PIKFYVE,PLD1,RASD1                                                                         |
| Integrin Signaling                                  | 2.1                  | 0.054        | ARF6,ARHGEF7,ITGA6,ITGB6,ITGB8,NEDD9,PIKFYVE,RASD1,TNK2,TSPAN5,TTN                                                   |
| Apelin Adipocyte Signaling Pathway                  | 2.04                 | 0.077        | APLNR,CYBB,GNA11,MAPK9,NOX1,NOX4                                                                                     |
| Glucocorticoid Receptor Signaling                   | 1.98                 | 0.045        | A2M,ARID2,CREB1,CSN2,ESR1,GTF2B,HSPA14,KRT76,MAPK9,NFKB1,POLR2H,PTGS2,RASD1,SMAD2,UBE2I                              |
| Paxillin Signaling                                  | 1.95                 | 0.066        | ARF6,ARHGEF7,ITGA6,ITGB6,ITGB8,MAPK9,RASD1                                                                           |
| NAD Salvage Pathway II                              | 1.93                 | 0.143        | ACPP,NMNAT2,NT5E                                                                                                     |
| PCP pathway                                         | 1.92                 | 0.083        | CELSR1,MAPK9,RSPO3,SMO,WNT2B                                                                                         |
| Cardiac Hypertrophy Signaling (Enhanced)            | 1.85                 | 0.04         | CACNA1S,CAMK2G,CAMK4,CYBB,GNA11,HDAC1,IL2RA,MAP3K20,MAPK9,MEF2C,NFKB1,PDE12,PKN1,PTGS2,RASD1,SMO,TGFBR3,TNFSF8,WNT2B |
| BAG2 Signaling Pathway                              | 1.81                 | 0.095        | HSPA14,NFKB1,PSME1,PSME2                                                                                             |
| Apelin Endothelial Signaling Pathway                | 1.79                 | 0.061        | APLNR,CAMK4,GNA11,MAPK9,MEF2C,NFKB1,RASD1                                                                            |
| Stearate Biosynthesis I (Animals)                   | 1.74                 | 0.091        | DHRS11,GNPAT,LIPT2,SRD5A3                                                                                            |
| Glycine Betaine Degradation                         | 1.68                 | 0.2          | SARDH,SDS                                                                                                            |
| Signaling by Rho Family GTPases                     | 1.63                 | 0.046        | ARHGEF7,CYBB,GNA11,MAP3K20,MAPK9,NFKB1,NOX1,NOX4,PIKFYVE,PKN1,PLD1                                                   |
| Estrogen-Dependent Breast Cancer Signaling          | 1.58                 | 0.069        | CREB1,DHRS11,ESR1,NFKB1,RASD1                                                                                        |
| Sonic Hedgehog Signaling                            | 1.55                 | 0.103        | DYRK1B,HHIP,SMO                                                                                                      |
| Guanosine Nucleotides Degradation III               | 1.53                 | 0.167        | ACPP,NT5E                                                                                                            |
| Urate Biosynthesis/Inosine 5'-phosphate Degradation | 1.46                 | 0.154        | ACPP,NT5E                                                                                                            |
| Cell Cycle Control of Chromosomal Replication       | 1.4                  | 0.071        | CDK11B,MCM2,MCM9,TOP2A                                                                                               |
| BMP signaling pathway                               | 1.38                 | 0.06         | CAMK4,CREB1,MAPK9,NFKB1,RASD1                                                                                        |
| GNRH Signaling                                      | 1.37                 | 0.047        | CACNA1S,CAMK2G,CAMK4,CREB1,GNA11,MAPK9,NFKB1,RASD1                                                                   |
| Wnt/ $\beta$ -catenin Signaling                     | 1.37                 | 0.047        | APPL2,HDAC1,KREMEN1,PPP2R1B,SMO,SOX5,TGFBR3,WNT2B                                                                    |
| Phagosome Maturation                                | 1.37                 | 0.05         | ATP6V1B1,CYBB,NOS1,NOX1,NOX4,PIKFYVE,VPS16                                                                           |



**Non-Survivors**

**Up regulated**

**Day 2 vs. Control**

| Ingenuity Canonical Pathways                                          | <b>-log(p-value)</b> | <b>Ratio</b> | <b>Molecules</b>                                                                                         |
|-----------------------------------------------------------------------|----------------------|--------------|----------------------------------------------------------------------------------------------------------|
| LXR/RXR Activation                                                    | 3.92                 | 0.107        | ABCG5,ABCG8,ALB,APOA1,APOA2,APOM,ARG2,CD14,LDLR,MMP9,SERPINF2,TNF,TNFRSF1B                               |
| Airway Inflammation in Asthma                                         | 3.91                 | 0.75         | IL13,IL4,TNF                                                                                             |
| Natural Killer Cell Signaling                                         | 3.48                 | 0.103        | FCER1G,INPPL1,KLRD1,MAPK3,NCR3,PAK1,PAK6,PRKCH,PRKD3,PTPN6,RALB,RRAS                                     |
| Neuregulin Signaling                                                  | 3.11                 | 0.106        | ITGB1,MAPK3,NRG3,PRKCH,PRKD3,PTPN6,RALB,RRAS,STAT5B,TMEFF2                                               |
| Renin-Angiotensin Signaling                                           | 2.92                 | 0.094        | MAPK3,PAK1,PAK6,PRKACB,PRKCH,PRKD3,PTGER2,PTPN6,RALB,RRAS,TNF                                            |
| Hepatic Cholestasis                                                   | 2.79                 | 0.079        | ABCB11,ABCG5,ABCG8,CD14,CYP27A1,IL13,IL4,INSR,PRKACB,PRKCH,PRKD3,SLC10A1,TNF,TNFRSF1B                    |
| Type II Diabetes Mellitus Signaling                                   | 2.78                 | 0.086        | CACNA1A,CACNA1F,CACNB4,GCK,INSR,MAP3K5,MAPK3,PRKAG3,PRKCH,PRKD3,TNF,TNFRSF1B                             |
| Opioid Signaling Pathway                                              | 2.69                 | 0.07         | CACNA1A,CACNA1F,CACNB4,CLTCL1,GRK7,MAPK3,MAPK7,PLD2,PRKACB,PRKCH,PRKD3,RALB,RGS10,RGS6,RPS6KA4,RRAS,RYR2 |
| FXR/RXR Activation                                                    | 2.69                 | 0.088        | ABCB11,ABCG5,ABCG8,ALB,APOA1,APOA2,APOM,CYP27A1,SERPINF2,SLC10A1,TNF                                     |
| Germ Cell-Sertoli Cell Junction Signaling                             | 2.62                 | 0.078        | CTNNA2,ITGB1,LAMC3,MAP3K5,MAPK3,PAK1,PAK6,RAB8B,RALB,RRAS,TNF,TUBA1A,ZYX                                 |
| Agrin Interactions at Neuromuscular Junction                          | 2.57                 | 0.105        | ITGA1,ITGB1,MAPK3,NRG3,PAK1,PAK6,RALB,RRAS                                                               |
| GNRH Signaling                                                        | 2.53                 | 0.077        | CACNA1A,CACNA1F,CACNB4,MAP3K5,MAPK3,MAPK7,PAK1,PAK6,PRKACB,PRKCH,PRKD3,RALB,RRAS                         |
| PAK Signaling                                                         | 2.47                 | 0.094        | ITGB1,MAPK3,MYL4,MYL7,PAK1,PAK6,RALB,RRAS,TNF                                                            |
| IL-3 Signaling                                                        | 2.46                 | 0.101        | MAPK3,PAK1,PRKCH,PRKD3,PTPN6,RALB,RRAS,STAT5B                                                            |
| Fc Epsilon RI Signaling                                               | 2.4                  | 0.086        | FCER1G,IL13,IL4,INPPL1,MAPK3,PRKCH,PRKD3,RALB,RRAS,TNF                                                   |
| LPS-stimulated MAPK Signaling                                         | 2.36                 | 0.098        | CD14,MAP3K5,MAPK3,PAK1,PRKCH,PRKD3,RALB,RRAS                                                             |
| PPAR $\alpha$ /RXR $\alpha$ Activation                                | 2.36                 | 0.073        | ACVR2B,AIP,APOA1,APOA2,INSR,MAPK3,MED24,PRKACB,PRKAG3,RALB,RRAS,STAT5B,TGS1                              |
| Acute Phase Response Signaling                                        | 2.36                 | 0.073        | ALB,APOA1,APOA2,MAP3K5,MAPK3,NR3C1,RALB,RRAS,SERPINF2,TCF4,TNF,TNFRSF1B,VWF                              |
| Coagulation System                                                    | 2.34                 | 0.143        | F11,F5,F7,SERPINF2,VWF                                                                                   |
| ErbB4 Signaling                                                       | 2.33                 | 0.106        | MAPK3,NRG3,PRKCH,PRKD3,PTPN6,RALB,RRAS                                                                   |
| G Beta Gamma Signaling                                                | 2.27                 | 0.082        | CACNA1A,CACNA1F,CACNB4,MAPK3,PAK1,PRKACB,PRKCH,PRKD3,RALB,RRAS                                           |
| Production of Nitric Oxide and Reactive Oxygen Species in Macrophages | 2.22                 | 0.07         | ALB,APOA1,APOA2,APOM,ARG2,IL4,MAP3K5,MAPK3,PRKCH,PRKD3,PTPN6,TNF,TNFRSF1B                                |
| IL-12 Signaling and Production in Macrophages                         | 2.08                 | 0.077        | ALB,APOA1,APOA2,APOM,IL4,MAPK3,MST1R,PRKCH,PRKD3,TNF                                                     |
| Semaphorin Signaling in Neurons                                       | 2.05                 | 0.105        | CRMP1,ITGB1,MAPK3,PAK1,PAK6,ROCK2                                                                        |
| ErbB Signaling                                                        | 2.04                 | 0.086        | MAPK3,NRG3,PAK1,PAK6,PRKCH,PRKD3,RALB,RRAS                                                               |
| Nitric Oxide Signaling in the Cardiovascular System                   | 2.01                 | 0.085        | ARG2,CACNA1A,MAPK3,PRKACB,PRKCH,PRKD3,RYR2,VEGFB                                                         |
| Erythropoietin Signaling                                              | 2                    | 0.092        | MAPK3,PRKCH,PRKD3,PTPN6,RALB,RRAS,STAT5B                                                                 |
| Macropinocytosis Signaling                                            | 2                    | 0.092        | CD14,ITGB1,PAK1,PRKCH,PRKD3,RALB,RRAS                                                                    |
| mTOR Signaling                                                        | 1.9                  | 0.064        | EIF3C,EIF4G3,INSR,MAPK3,MAPKAP1,PLD2,PRKAG3,PRKCH,PRKD3,RALB,RPS6KA4,RRAS,VEGFB                          |
| Hepatic Fibrosis / Hepatic Stellate Cell Activation                   | 1.88                 | 0.066        | CD14,COL11A1,COL4A2,COL9A2,IL4,LEPR,MMP9,MYL4,MYL7,TNF,TNFRSF1B,VEGFB                                    |
| JAK/Stat Signaling                                                    | 1.88                 | 0.088        | MAPK3,PIAS2,PTPN6,RALB,RRAS,STAT2,STAT5B                                                                 |
| Tryptophan Degradation to 2-amino-3-carboxymuconate Semialdehyde      | 1.86                 | 0.333        | IDO1,KMO                                                                                                 |
| Prolactin Signaling                                                   | 1.85                 | 0.086        | MAPK3,NR3C1,PRKCH,PRKD3,RALB,RRAS,STAT5B                                                                 |
| Thrombopoietin Signaling                                              | 1.84                 | 0.095        | MAPK3,PRKCH,PRKD3,RALB,RRAS,STAT5B                                                                       |
| Atherosclerosis Signaling                                             | 1.83                 | 0.074        | ALB,AOX15B,APOA1,APOA2,APOM,MMP9,SELE,SELP,TNF                                                           |
| PPAR Signaling                                                        | 1.83                 | 0.079        | AIP,INSR,MAPK3,RALB,RRAS,STAT5B,TNF,TNFRSF1B                                                             |
| Osteoarthritis Pathway                                                | 1.83                 | 0.063        | ACVRL1,ALPL,CNMD,CTNNA2,ITGB1,MMP9,NAMPT,PRKAG3,SPHK1,TCF4,TNF,TNFRSF1B,VEGFB                            |
| NF- $\kappa$ B Activation by Viruses                                  | 1.82                 | 0.085        | ITGA1,ITGB1,MAPK3,PRKCH,PRKD3,RALB,RRAS                                                                  |
| D-myo-inositol (1,4,5)-trisphosphate Degradation                      | 1.81                 | 0.176        | INPP5E,INPPL1,SEC16A                                                                                     |
| Granulocyte Adhesion and Diapedesis                                   | 1.8                  | 0.067        | CLDN2,ITGA1,ITGB1,MMP16,MMP9,SELE,SELL,SELP,THY1,TNF,TNFRSF1B                                            |
| HER-2 Signaling in Breast Cancer                                      | 1.77                 | 0.083        | CCNE1,ITGB1,MAP3K5,PRKCH,PRKD3,RALB,RRAS                                                                 |
| 1D-myo-inositol Hexakisphosphate Biosynthesis II (Mammalian)          | 1.74                 | 0.167        | INPP5E,INPPL1,SEC16A                                                                                     |
| D-myo-inositol (1,3,4)-trisphosphate Biosynthesis                     | 1.74                 | 0.167        | INPP5E,INPPL1,SEC16A                                                                                     |
| Superpathway of Inositol Phosphate Compounds                          | 1.73                 | 0.063        | ALPL,EYA4,INPP5E,INPPL1,IP6K1,MTMR8,PI4K2B,PTPN22,PTPN23,PTPN6,SEC16A,THTPA                              |

|                                                                 |      |       |                                                                                                                                        |
|-----------------------------------------------------------------|------|-------|----------------------------------------------------------------------------------------------------------------------------------------|
| Glucose and Glucose-1-phosphate Degradation                     | 1.73 | 0.286 | GCK,RGN                                                                                                                                |
| Leukocyte Extravasation Signaling                               | 1.7  | 0.062 | ARHGAP35,CLDN2,CTNNA2,ITGA1,ITGB1,MMP16,MMP9,PRKCH,PRKD3,ROCK2,THY1,WIPF1                                                              |
| 3-phosphoinositide Degradation                                  | 1.7  | 0.067 | ALPL,EYA4,INPP4B,INPP5E,INPPL1,MTMR8,PTPN22,PTPN23,PTPN6,THTPA                                                                         |
| Virus Entry via Endocytic Pathways                              | 1.69 | 0.075 | CLTCL1,FLNB,ITGA1,ITGB1,PRKCH,PRKD3,RALB,RRAS                                                                                          |
| Amyloid Processing                                              | 1.69 | 0.1   | BACE2,CSNK2B,MAPK3,PRKACB,PSEN1                                                                                                        |
| Tryptophan Degradation X (Mammalian, via Tryptamine)            | 1.68 | 0.158 | ALDH1A3,DDC,IL4I1                                                                                                                      |
| Ceramide Signaling                                              | 1.67 | 0.08  | CTSD,MAPK3,RALB,RRAS,SPHK1,TNF,TNFRSF1B                                                                                                |
| UVC-Induced MAPK Signaling                                      | 1.66 | 0.098 | MAPK3,PRKCH,PRKD3,RALB,RRAS                                                                                                            |
| HGF Signaling                                                   | 1.63 | 0.073 | ITGB1,MAP3K5,MAPK3,PAK1,PRKCH,PRKD3,RALB,RRAS                                                                                          |
| Rac Signaling                                                   | 1.63 | 0.073 | ITGB1,MAPK3,MCF2L,NCKAP1,PAK1,PAK6,RALB,RRAS                                                                                           |
| Maturity Onset Diabetes of Young (MODY) Signaling               | 1.62 | 0.15  | CACNA1A,GCK,INSR                                                                                                                       |
| Agranulocyte Adhesion and Diapedesis                            | 1.61 | 0.063 | CLDN2,ITGA1,ITGB1,MMP16,MMP9,MYL4,MYL7,SELE,SELL,SELP,TNF                                                                              |
| Axonal Guidance Signaling                                       | 1.61 | 0.049 | EFNB3,EPHA2,ITGB1,MAPK3,MMP16,MMP9,MYL4,MYL7,NTNG1,PAK1,PAK6,PAPPA,PLXNC1,PRKACB,PRKCH,PRKD3,RALB,ROCK2,RRAS,SEMA4B,TUBA1A,VEGFB,WIPF1 |
| Airway Pathology in Chronic Obstructive Pulmonary Disease       | 1.61 | 0.25  | MMP9,TNF                                                                                                                               |
| IL-15 Signaling                                                 | 1.61 | 0.085 | IL4,MAPK3,RALB,RRAS,STAT5B,TNF                                                                                                         |
| Growth Hormone Signaling                                        | 1.61 | 0.085 | MAPK3,PRKCH,PRKD3,PTPN6,RPS6KA4,STAT5B                                                                                                 |
| Ephrin Receptor Signaling                                       | 1.58 | 0.062 | EFNB3,EPHA2,ITGB1,MAPK3,PAK1,PAK6,RALB,ROCK2,RRAS,VEGFB,WIPF1                                                                          |
| Caveolar-mediated Endocytosis Signaling                         | 1.56 | 0.082 | ALB,FLNB,INSR,ITGA1,ITGA8,ITGB1                                                                                                        |
| $\alpha$ -Adrenergic Signaling                                  | 1.55 | 0.075 | MAPK3,PRKACB,PRKCH,PRKD3,PYGB,RALB,RRAS                                                                                                |
| Sertoli Cell-Sertoli Cell Junction Signaling                    | 1.53 | 0.061 | CLDN2,CTNNA2,ITGB1,MAP3K5,MAPK3,PRKACB,RAB8B,RALB,RRAS,TNF,TUBA1A                                                                      |
| FAK Signaling                                                   | 1.53 | 0.075 | ARHGAP26,ITGB1,MAPK3,PAK1,PAK6,RALB,RRAS                                                                                               |
| Integrin Signaling                                              | 1.52 | 0.059 | ARHGAP26,ITGA1,ITGA8,ITGB1,MAPK3,MYL7,PAK1,PAK6,RALB,RRAS,WIPF1,ZYX                                                                    |
| Role of Tissue Factor in Cancer                                 | 1.51 | 0.069 | F7,ITGB1,MAPK3,PAK1,RALB,RPS6KA4,RRAS,STAT5B                                                                                           |
| Salvage Pathways of Pyrimidine Ribonucleotides                  | 1.51 | 0.074 | DAPK1,MAPK3,MAPK7,NME7,PAK1,PRKCH,UCK1                                                                                                 |
| Glutamine Biosynthesis I                                        | 1.5  | 1     | GLUL                                                                                                                                   |
| Threonine Degradation II                                        | 1.5  | 1     | GCAT                                                                                                                                   |
| Cholecystokinin/Gastrin-mediated Signaling                      | 1.49 | 0.068 | MAPK3,MAPK7,PRKCH,PRKD3,RALB,ROCK2,RRAS,TNF                                                                                            |
| Bladder Cancer Signaling                                        | 1.49 | 0.073 | DAPK1,MAPK3,MMP16,MMP9,RALB,RRAS,VEGFB                                                                                                 |
| Superpathway of D-myo-inositol (1,4,5)-trisphosphate Metabolism | 1.46 | 0.13  | INPP5E,INPPL1,SEC16A                                                                                                                   |
| Apoptosis Signaling                                             | 1.45 | 0.071 | BID,MAP3K5,MAPK3,RALB,RRAS,TNF,TNFRSF1B                                                                                                |
| CXCR4 Signaling                                                 | 1.45 | 0.061 | MAPK3,MYL4,MYL7,PAK1,PAK6,PRKCH,PRKD3,RALB,ROCK2,RRAS                                                                                  |
| Protein Kinase A Signaling                                      | 1.44 | 0.05  | ADD1,AKAP10,AKAP4,FLNB,GRK7,MAPK3,MYL4,MYL7,PRKACB,PRKCH,PRKD3,PTPN22,PTPN23,PTPN6,PTPRK,PYGB,ROCK2,RYR2,TCF4                          |
| CCR3 Signaling in Eosinophils                                   | 1.44 | 0.067 | MAPK3,PAK1,PAK6,PRKCH,PRKD3,RALB,ROCK2,RRAS                                                                                            |
| nNOS Signaling in Skeletal Muscle Cells                         | 1.43 | 0.1   | CACNA1A,CACNA1F,CACNB4,RYR2                                                                                                            |
| Actin Cytoskeleton Signaling                                    | 1.41 | 0.056 | ARHGAP35,CD14,ITGB1,MAPK3,MYL4,MYL7,NCKAP1,PAK1,PAK6,RALB,ROCK2,RRAS                                                                   |
| FLT3 Signaling in Hematopoietic Progenitor Cells                | 1.41 | 0.076 | MAPK3,RALB,RPS6KA4,RRAS,STAT2,STAT5B                                                                                                   |

## Survivors

## Down regulated

## Day 3 vs. Control

## Ingenuity Canonical Pathways

|                                                                      | <b>-log(p-value)</b> | <b>Ratio</b> | <b>Molecules</b>                                              |
|----------------------------------------------------------------------|----------------------|--------------|---------------------------------------------------------------|
| Inflammasome pathway                                                 | 3.8                  | 0.2          | AIM2,CASP8,NFKB1,NLRP1                                        |
| Sumoylation Pathway                                                  | 3.23                 | 0.069        | CDH1,ETS1,HDAC1,KDM1A,MAPK9,NFKB1,ZNF217                      |
| Granzyme B Signaling                                                 | 2.86                 | 0.188        | CASP8,NUMA1,PRKDC                                             |
| Regulation of the Epithelial-Mesenchymal Transition Pathway          | 2.78                 | 0.047        | AKT2,CDH1,ETS1,FRS2,JAK1,NFKB1,PSEN2,SMAD2,SMO                |
| IL-17A Signaling in Airway Cells                                     | 2.67                 | 0.078        | AKT2,IL17RC,JAK1,MAPK9,NFKB1                                  |
| FAT10 Cancer Signaling Pathway                                       | 2.39                 | 0.087        | AKT2,NFKB1,SMAD2,TGFBR3                                       |
| IL-22 Signaling                                                      | 2.34                 | 0.125        | AKT2,JAK1,MAPK9                                               |
| IL-17A Signaling in Gastric Cells                                    | 2.29                 | 0.12         | IL17RC,MAPK9,NFKB1                                            |
| IL-17 Signaling                                                      | 2.25                 | 0.063        | AKT2,IL17RC,JAK1,MAPK9,NFKB1                                  |
| RAR Activation                                                       | 2.22                 | 0.042        | AKT2,ARID2,MAPK9,NFKB1,NRIP2,PRMT1,SMAD2,TNIP1                |
| Regulation of IL-2 Expression in Activated and Anergic T Lymphocytes | 2.08                 | 0.057        | CAMK4,CD3E,MAPK9,NFKB1,SMAD2                                  |
| Wnt/ $\beta$ -catenin Signaling                                      | 1.96                 | 0.041        | AKT2,APPL2,CDH1,HDAC1,SMO,SOX5,TGFBR3                         |
| Wnt/Ca <sup>+</sup> pathway                                          | 1.96                 | 0.066        | CREB5,NFKB1,PDE6B,SMO                                         |
| Th2 Pathway                                                          | 1.93                 | 0.045        | CD3E,CHD4,JAK1,NFKB1,PSEN2,TGFBR3                             |
| Assembly of RNA Polymerase III Complex                               | 1.92                 | 0.167        | GTF3C3,POLR3D                                                 |
| B Cell Receptor Signaling                                            | 1.84                 | 0.039        | AKT2,CAMK2G,CAMK4,CREB5,ETS1,MAPK9,NFKB1                      |
| DNA Double-Strand Break Repair by Non-Homologous End Joining         | 1.79                 | 0.143        | PRKDC,XRCC1                                                   |
| ILK Signaling                                                        | 1.78                 | 0.038        | AKT2,CDH1,CREB5,ITGB8,MAPK9,MYH10,NFKB1                       |
| iCOS-iCOSL Signaling in T Helper Cells                               | 1.75                 | 0.047        | AKT2,CAMK2G,CAMK4,CD3E,NFKB1                                  |
| Type I Diabetes Mellitus Signaling                                   | 1.74                 | 0.047        | CASP8,CD3E,JAK1,MAPK9,NFKB1                                   |
| Huntington's Disease Signaling                                       | 1.72                 | 0.034        | AKT2,CASP8,CREB5,HDAC1,MAPK9,PSME1,PSMF1,RPH3A                |
| Pancreatic Adenocarcinoma Signaling                                  | 1.72                 | 0.046        | AKT2,JAK1,MAPK9,NFKB1,SMAD2                                   |
| Adrenomedullin signaling pathway                                     | 1.7                  | 0.037        | AKT2,CAMK4,KCNH2,KCNN1,MAPK9,NFKB1,TTN                        |
| Caveolar-mediated Endocytosis Signaling                              | 1.7                  | 0.055        | ITGA6,ITGAV,ITGB8,RAB5B                                       |
| Role of PKR in Interferon Induction and Antiviral Response           | 1.69                 | 0.073        | CASP8,NFKB1,RNASEL                                            |
| Role of IL-17F in Allergic Inflammatory Airway Diseases              | 1.69                 | 0.073        | CREB5,IL17RC,NFKB1                                            |
| BAG2 Signaling Pathway                                               | 1.67                 | 0.071        | NFKB1,PSME1,PSMF1                                             |
| Molecular Mechanisms of Cancer                                       | 1.66                 | 0.029        | AKT2,CAMK2G,CASP8,CDH1,JAK1,MAPK9,NFKB1,PRKDC,PSEN2,SMAD2,SMO |
| Neuroinflammation Signaling Pathway                                  | 1.64                 | 0.031        | AKT2,CASP8,CREB5,JAK1,MAPK9,NFKB1,NOX4,PSEN2,TGFBR3           |
| HOTAIR Regulatory Pathway                                            | 1.62                 | 0.039        | AGO3,AKT2,CDH1,HDAC1,KDM1A,NFKB1                              |
| CD28 Signaling in T Helper Cells                                     | 1.62                 | 0.044        | AKT2,CAMK4,CD3E,MAPK9,NFKB1                                   |
| iNOS Signaling                                                       | 1.61                 | 0.068        | CAMK4,JAK1,NFKB1                                              |
| FAT10 Signaling Pathway                                              | 1.58                 | 0.111        | PSME1,PSMF1                                                   |
| Glycine Degradation (Creatine Biosynthesis)                          | 1.55                 | 0.5          | GATM                                                          |
| NF- $\kappa$ B Activation by Viruses                                 | 1.53                 | 0.049        | AKT2,ITGA6,ITGAV,NFKB1                                        |
| PEDF Signaling                                                       | 1.53                 | 0.049        | AKT2,CASP8,NFKB1,TCF12                                        |
| Th1 and Th2 Activation Pathway                                       | 1.49                 | 0.036        | CD3E,CHD4,JAK1,NFKB1,PSEN2,TGFBR3                             |
| RANK Signaling in Osteoclasts                                        | 1.47                 | 0.047        | AKT2,CAMK4,MAPK9,NFKB1                                        |
| CD27 Signaling in Lymphocytes                                        | 1.43                 | 0.058        | CASP8,MAPK9,NFKB1                                             |
| IL-12 Signaling and Production in Macrophages                        | 1.42                 | 0.039        | AKT2,ALOX15,APOB,MAPK9,NFKB1                                  |
| Protein Ubiquitination Pathway                                       | 1.42                 | 0.03         | DNAJC10,DNAJC6,PSME1,SMO,UBE2B,USP32,USP44,USP8               |
| Polyamine Regulation in Colon Cancer                                 | 1.42                 | 0.091        | PSME1,PSMF1                                                   |
| Factors Promoting Cardiogenesis in Vertebrates                       | 1.41                 | 0.044        | NOX4,SMAD2,SMO,TGFBR3                                         |
| Nur77 Signaling in T Lymphocytes                                     | 1.41                 | 0.057        | CAMK4,CD3E,HDAC1                                              |
| NF- $\kappa$ B Signaling                                             | 1.4                  | 0.034        | AKT2,CASP8,HDAC1,NFKB1,TGFBR3,TNIP1                           |
| Role of IL-17A in Arthritis                                          | 1.39                 | 0.056        | IL17RC,MAPK9,NFKB1                                            |



## Survivors

## Up regulated

## Day 3 vs. Control

## Ingenuity Canonical Pathways

|                                                                 | -log(p-value) | Ratio | Molecules                                                                                                      |
|-----------------------------------------------------------------|---------------|-------|----------------------------------------------------------------------------------------------------------------|
| Natural Killer Cell Signaling                                   | 3.75          | 0.086 | INPPL1,MAPK3,NCR3,PAK1,PAK6,PRKCH,PRKD3,RALB,RRAS,SYK                                                          |
| CCR3 Signaling in Eosinophils                                   | 3.66          | 0.083 | CCR3,ITPR3,MAPK3,PAK1,PAK6,PRKCH,PRKD3,RALB,ROCK2,RRAS                                                         |
| mTOR Signaling                                                  | 3.43          | 0.064 | EIF3C,EIF4G3,INSR,MAPK3,PLD2,PRKAG3,PRKCH,PRKD3,RALB,RPS6KA4,RPS6KB2,RRAS,VEGFB                                |
| Opioid Signaling Pathway                                        | 3.17          | 0.057 | CACNA1F,GRK7,ITPR3,MAPK3,PLD2,PRKCH,PRKD3,RALB,RGS10,RGS6,RPS6KA4,RPS6KB2,RRAS,RYR2                            |
| Neuregulin Signaling                                            | 3.09          | 0.085 | MAPK3,PRKCH,PRKD3,RALB,RPS6KB2,RRAS,STAT5B,TMEFF2                                                              |
| Estrogen-Dependent Breast Cancer Signaling                      | 3.08          | 0.096 | HSD17B1,HSD17B11,HSD17B13,MAPK3,RALB,RRAS,STAT5B                                                               |
| IL-3 Signaling                                                  | 2.87          | 0.089 | MAPK3,PAK1,PRKCH,PRKD3,RALB,RRAS,STAT5B                                                                        |
| Integrin Signaling                                              | 2.87          | 0.059 | ARHGAP26,ITGA1,ITGA8,MAPK3,MYL7,PAK1,PAK6,PARVA,RALB,RRAS,WIPF1,ZYX                                            |
| Prolactin Signaling                                             | 2.81          | 0.086 | MAPK3,NR3C1,PRKCH,PRKD3,RALB,RRAS,STAT5B                                                                       |
| LPS-stimulated MAPK Signaling                                   | 2.78          | 0.085 | CD14,MAPK3,PAK1,PRKCH,PRKD3,RALB,RRAS                                                                          |
| Thrombopoietin Signaling                                        | 2.69          | 0.095 | MAPK3,PRKCH,PRKD3,RALB,RRAS,STAT5B                                                                             |
| CXCR4 Signaling                                                 | 2.61          | 0.061 | ITPR3,MAPK3,MYL7,PAK1,PAK6,PRKCH,PRKD3,RALB,ROCK2,RRAS                                                         |
| Granulocyte Adhesion and Diapedesis                             | 2.59          | 0.061 | CCL25,CLDN2,CSF3,ITGA1,MMP9,SELE,SELL,SELP,THY1,TNFRSF1B                                                       |
| Apelin Endothelial Signaling Pathway                            | 2.55          | 0.07  | AQP2,MAPK3,PRKAG3,PRKCH,PRKD3,RALB,RPS6KB2,RRAS                                                                |
| IL-8 Signaling                                                  | 2.55          | 0.056 | LASP1,MAPK3,MMP9,MYL7,PLD2,PRKCH,PRKD3,RALB,ROCK2,RRAS,VEGFB                                                   |
| Fc Epsilon RI Signaling                                         | 2.49          | 0.068 | IL13,INPPL1,MAPK3,PRKCH,PRKD3,RALB,RRAS,SYK                                                                    |
| Renin-Angiotensin Signaling                                     | 2.49          | 0.068 | ITPR3,MAPK3,PAK1,PAK6,PRKCH,PRKD3,RALB,RRAS                                                                    |
| α-Adrenergic Signaling                                          | 2.47          | 0.075 | ITPR3,MAPK3,PRKCH,PRKD3,PYGB,RALB,RRAS                                                                         |
| Fcγ Receptor-mediated Phagocytosis in Macrophages and Monocytes | 2.47          | 0.075 | MAPK3,PAK1,PLD2,PRKCH,PRKD3,RPS6KB2,SYK                                                                        |
| ErbB Signaling                                                  | 2.47          | 0.075 | MAPK3,PAK1,PAK6,PRKCH,PRKD3,RALB,RRAS                                                                          |
| Nitric Oxide Signaling in the Cardiovascular System             | 2.44          | 0.075 | ARG2,ITPR3,MAPK3,PRKCH,PRKD3,RYR2,VEGFB                                                                        |
| Growth Hormone Signaling                                        | 2.43          | 0.085 | MAPK3,PRKCH,PRKD3,RPS6KA4,RPS6KB2,STAT5B                                                                       |
| UVC-Induced MAPK Signaling                                      | 2.37          | 0.098 | MAPK3,PRKCH,PRKD3,RALB,RRAS                                                                                    |
| Hepatic Cholestasis                                             | 2.35          | 0.056 | ABCB11,ABCG5,CD14,CYP27A1,IL13,INSR,PRKCH,PRKD3,SLC10A1,TNFRSF1B                                               |
| Ephrin Receptor Signaling                                       | 2.35          | 0.056 | EFNB3,EPHA2,MAPK3,PAK1,PAK6,RALB,ROCK2,RRAS,VEGFB,WIPF1                                                        |
| Axonal Guidance Signaling                                       | 2.32          | 0.041 | EFNB3,EPHA2,MAPK3,MMP9,MYL7,NTNG1,PAK1,PAK6,PAPPA,PLXNC1,PRKCH,PRKD3,RALB,ROCK2,RRAS,SEMA4B,TUBA1A,VEGFB,WIPF1 |
| D-myo-inositol (1,4,5)-trisphosphate Degradation                | 2.3           | 0.176 | INPP5E,INPPL1,SEC16A                                                                                           |
| Erythropoietin Signaling                                        | 2.28          | 0.079 | MAPK3,PRKCH,PRKD3,RALB,RRAS,STAT5B                                                                             |
| Agrin Interactions at Neuromuscular Junction                    | 2.28          | 0.079 | ITGA1,MAPK3,PAK1,PAK6,RALB,RRAS                                                                                |
| Macropinocytosis Signaling                                      | 2.28          | 0.079 | CD14,PAK1,PRKCH,PRKD3,RALB,RRAS                                                                                |
| PPAR Signaling                                                  | 2.27          | 0.069 | AIP,INSR,MAPK3,RALB,RRAS,STAT5B,TNFRSF1B                                                                       |
| 1D-myo-inositol Hexakisphosphate Biosynthesis II (Mammalian)    | 2.23          | 0.167 | INPP5E,INPPL1,SEC16A                                                                                           |
| D-myo-inositol (1,3,4)-trisphosphate Biosynthesis               | 2.23          | 0.167 | INPP5E,INPPL1,SEC16A                                                                                           |
| CNTF Signaling                                                  | 2.2           | 0.089 | MAPK3,RALB,RPS6KA4,RPS6KB2,RRAS                                                                                |
| Semaphorin Signaling in Neurons                                 | 2.17          | 0.088 | CRMP1,MAPK3,PAK1,PAK6,ROCK2                                                                                    |
| Tryptophan Degradation X (Mammalian, via Tryptamine)            | 2.16          | 0.158 | ALDH1A3,DDC,IL4I1                                                                                              |
| Paxillin Signaling                                              | 2.15          | 0.066 | ITGA1,ITGA8,PAK1,PAK6,PARVA,RALB,RRAS                                                                          |
| Protein Kinase A Signaling                                      | 2.14          | 0.042 | ADD1,AKAP10,FLNB,GRK7,ITPR3,MAPK3,MYL7,PRKCH,PRKD3,PTPN22,PTPN23,PTPRS,PYGB,ROCK2,RYR2,YWHAB                   |
| NF-κB Activation by Viruses                                     | 2.12          | 0.073 | ITGA1,MAPK3,PRKCH,PRKD3,RALB,RRAS                                                                              |
| Leukocyte Extravasation Signaling                               | 2.11          | 0.052 | ARHGAP35,CLDN2,CTNNA2,ITGA1,MMP9,PRKCH,PRKD3,ROCK2,THY1,WIPF1                                                  |
| VEGF Family Ligand-Receptor Interactions                        | 2.07          | 0.071 | MAPK3,PRKCH,PRKD3,RALB,RRAS,VEGFB                                                                              |
| Germ Cell-Sertoli Cell Junction Signaling                       | 2.07          | 0.054 | CTNNA2,LAMC3,MAPK3,PAK1,PAK6,RALB,RRAS,TUBA1A,ZYX                                                              |
| Rac Signaling                                                   | 2.07          | 0.064 | MAPK3,MCF2L,NCKAP1,PAK1,PAK6,RALB,RRAS                                                                         |
| Estrogen Biosynthesis                                           | 2.06          | 0.103 | CYP1A1,HSD17B1,HSD17B11,HSD17B13                                                                               |
| IL-2 Signaling                                                  | 2.05          | 0.082 | MAPK3,RALB,RRAS,STAT5B,SYK                                                                                     |
| Type II Diabetes Mellitus Signaling                             | 2.02          | 0.057 | CACNA1F,GCK,INSR,MAPK3,PRKAG3,PRKCH,PRKD3,TNFRSF1B                                                             |



|                                                                 |      |       |                                                                 |
|-----------------------------------------------------------------|------|-------|-----------------------------------------------------------------|
| Phagosome Maturation                                            | 2.02 | 0.057 | CTSA,CTSD,DCTN4,PRDX5,SNAP25,TUBA1A,VPS33B,VTI1B                |
| Breast Cancer Regulation by Stathmin1                           | 2.02 | 0.05  | CCNE1,ITPR3,MAPK3,PAK1,PRKCH,PRKD3,RALB,ROCK2,RRAS,TUBA1A       |
| GNRH Signaling                                                  | 2.01 | 0.053 | CACNA1F,ITPR3,MAPK3,PAK1,PAK6,PRKCH,PRKD3,RALB,RRAS             |
| Role of Tissue Factor in Cancer                                 | 1.95 | 0.06  | F7,MAPK3,PAK1,RALB,RPS6KA4,RRAS,STAT5B                          |
| Cholecystokinin/Gastrin-mediated Signaling                      | 1.93 | 0.06  | ITPR3,MAPK3,PRKCH,PRKD3,RALB,ROCK2,RRAS                         |
| Superpathway of D-myo-inositol (1,4,5)-trisphosphate Metabolism | 1.92 | 0.13  | INPP5E,INPPL1,SEC16A                                            |
| Oncostatin M Signaling                                          | 1.91 | 0.093 | MAPK3,RALB,RRAS,STAT5B                                          |
| ErbB4 Signaling                                                 | 1.91 | 0.076 | MAPK3,PRKCH,PRKD3,RALB,RRAS                                     |
| PPAR $\alpha$ /RXR $\alpha$ Activation                          | 1.89 | 0.051 | ACVR2B,AIP,INSR,MAPK3,MED24,PRKAG3,RALB,RRAS,STAT5B             |
| Role of JAK1 and JAK3 in $\gamma$ c Cytokine Signaling          | 1.88 | 0.075 | MAPK3,RALB,RRAS,STAT5B,SYK                                      |
| FAK Signaling                                                   | 1.85 | 0.064 | ARHGAP26,MAPK3,PAK1,PAK6,RALB,RRAS                              |
| Synaptic Long Term Depression                                   | 1.84 | 0.05  | CACNA1F,CRHR1,ITPR3,MAPK3,PRKCH,PRKD3,RALB,RRAS,RYR2            |
| G Beta Gamma Signaling                                          | 1.84 | 0.057 | CACNA1F,MAPK3,PAK1,PRKCH,PRKD3,RALB,RRAS                        |
| Actin Cytoskeleton Signaling                                    | 1.83 | 0.047 | ARHGAP35,CD14,MAPK3,MYL7,NCKAP1,PAK1,PAK6,RALB,ROCK2,RRAS       |
| eNOS Signaling                                                  | 1.82 | 0.053 | AQP2,AQP7,ITPR3,NOSIP,PRKAG3,PRKCH,PRKD3,VEGFB                  |
| PAK Signaling                                                   | 1.8  | 0.063 | MAPK3,MYL7,PAK1,PAK6,RALB,RRAS                                  |
| IL-15 Signaling                                                 | 1.78 | 0.07  | MAPK3,RALB,RRAS,STAT5B,SYK                                      |
| 14-3-3-mediated Signaling                                       | 1.77 | 0.056 | MAPK3,PRKCH,PRKD3,RALB,RRAS,TUBA1A,YWHAB                        |
| ERK5 Signaling                                                  | 1.75 | 0.069 | RALB,RPS6KA4,RPS6KB2,RRAS,YWHAB                                 |
| p70S6K Signaling                                                | 1.74 | 0.055 | MAPK3,PRKCH,PRKD3,RALB,RRAS,SYK,YWHAB                           |
| Caveolar-mediated Endocytosis Signaling                         | 1.73 | 0.069 | FLNB,FLOT2,INSR,ITGA1,ITGA8                                     |
| Angiopoietin Signaling                                          | 1.71 | 0.068 | PAK1,PAK6,RALB,RRAS,STAT5B                                      |
| Glutamine Biosynthesis I                                        | 1.68 | 1     | GLUL                                                            |
| GDNF Family Ligand-Receptor Interactions                        | 1.66 | 0.066 | DOK6,ITPR3,MAPK3,RALB,RRAS                                      |
| Chemokine Signaling                                             | 1.64 | 0.065 | CCR3,MAPK3,RALB,ROCK2,RRAS                                      |
| Renal Cell Carcinoma Signaling                                  | 1.62 | 0.064 | MAPK3,PAK1,PAK6,RALB,RRAS                                       |
| FLT3 Signaling in Hematopoietic Progenitor Cells                | 1.6  | 0.063 | MAPK3,RALB,RPS6KA4,RRAS,STAT5B                                  |
| Virus Entry via Endocytic Pathways                              | 1.6  | 0.056 | FLNB,ITGA1,PRKCH,PRKD3,RALB,RRAS                                |
| Estrogen Receptor Signaling                                     | 1.59 | 0.051 | MAPK3,MED24,NR3C1,RALB,RBFOX2,RRAS,TAF5L                        |
| HGF Signaling                                                   | 1.55 | 0.055 | MAPK3,PAK1,PRKCH,PRKD3,RALB,RRAS                                |
| PEDF Signaling                                                  | 1.54 | 0.061 | DOCK3,MAPK3,RALB,ROCK2,RRAS                                     |
| IL-4 Signaling                                                  | 1.54 | 0.061 | INPPL1,NR3C1,RALB,RPS6KB2,RRAS                                  |
| HER-2 Signaling in Breast Cancer                                | 1.5  | 0.06  | CCNE1,PRKCH,PRKD3,RALB,RRAS                                     |
| NGF Signaling                                                   | 1.5  | 0.053 | MAPK3,RALB,ROCK2,RPS6KA4,RPS6KB2,RRAS                           |
| Agranulocyte Adhesion and Diapedesis                            | 1.49 | 0.046 | CCL25,CLDN2,ITGA1,MMP9,MYL7,SELE,SELL,SELP                      |
| LPS/IL-1 Mediated Inhibition of RXR Function                    | 1.47 | 0.043 | ABCB11,ABCG5,ALDH1A3,CD14,CHST1,IL4I1,PPARGC1B,SLC10A1,TNFRSF1B |
| MIF-mediated Glucocorticoid Regulation                          | 1.47 | 0.088 | CD14,MAPK3,NR3C1                                                |
| fMLP Signaling in Neutrophils                                   | 1.46 | 0.052 | ITPR3,MAPK3,PRKCH,PRKD3,RALB,RRAS                               |
| GP6 Signaling Pathway                                           | 1.45 | 0.052 | COL11A1,COL9A2,LAMC3,PRKCH,PRKD3,SYK                            |
| Coagulation System                                              | 1.44 | 0.086 | F5,F7,VWF                                                       |
| Endometrial Cancer Signaling                                    | 1.43 | 0.067 | CTNNA2,MAPK3,RALB,RRAS                                          |
| Ceramide Signaling                                              | 1.42 | 0.057 | CTSD,MAPK3,RALB,RRAS,TNFRSF1B                                   |
| Acute Myeloid Leukemia Signaling                                | 1.42 | 0.057 | MAPK3,RALB,RPS6KB2,RRAS,STAT5B                                  |
| 3-phosphoinositide Degradation                                  | 1.42 | 0.047 | ALPL,EYA4,INPP5E,INPPL1,PTPN22,PTPN23,TPTE2                     |
| Epithelial Adherens Junction Signaling                          | 1.41 | 0.047 | ACVR2B,CTNNA2,MYL7,RALB,RRAS,TUBA1A,ZYX                         |
| Putrescine Biosynthesis III                                     | 1.38 | 0.5   | AZIN2                                                           |
| Systemic Lupus Erythematosus Signaling                          | 1.38 | 0.041 | C8G,MAPK3,PPIH,PRPF19,PRPF8,RALB,RRAS,SNRPC,SNRPN               |

## Non-Survivors



Down regulated

Day 3 vs. Control

Ingenuity Canonical Pathways

|                                                            | -log(p-value) | Ratio | Molecules                                                                                                            |
|------------------------------------------------------------|---------------|-------|----------------------------------------------------------------------------------------------------------------------|
| Inflammasome pathway                                       | 3.06          | 0.2   | AIM2,CASP8,NFKB1,NLRP1                                                                                               |
| Sumoylation Pathway                                        | 2.74          | 0.079 | DAXX,ETS1,HDAC1,KDM1A,MAPK9,NFKB1,SP1,ZNF217                                                                         |
| Huntington's Disease Signaling                             | 2.65          | 0.056 | AKT2,CASP8,CASP9,CREB5,HDAC1,HSPA14,MAPK9,PENK,POLR2H,PSME1,PSME2,RPH3A,SP1                                          |
| BAG2 Signaling Pathway                                     | 2.65          | 0.119 | HSPA14,NFKB1,PSME1,PSME2,SP1                                                                                         |
| ILK Signaling                                              | 2.55          | 0.06  | AKT2,CREB5,FERMT2,ITGB6,ITGB8,MAPK9,MYH10,NFKB1,PPP2CB,PTGS2,TESK1                                                   |
| Tetrapyrrole Biosynthesis II                               | 2.33          | 0.4   | ALAD,UROS                                                                                                            |
| Granzyme B Signaling                                       | 2.31          | 0.188 | CASP8,CASP9,NUMA1                                                                                                    |
| Aldosterone Signaling in Epithelial Cells                  | 2.13          | 0.058 | DNAJC10,DNAJC6,DNAJC9,HSPA14,HSPH1,NR3C2,PIKFYVE,SLC12A1,SLC12A2                                                     |
| Cell Cycle Control of Chromosomal Replication              | 2.11          | 0.089 | CDK11B,CDK16,MCM2,MCM9,TOP2A                                                                                         |
| tRNA Charging                                              | 2.02          | 0.105 | DARS,IARS2,MARS2,VAR5                                                                                                |
| Pancreatic Adenocarcinoma Signaling                        | 2             | 0.065 | AKT2,CASP9,MAPK9,NFKB1,PLD1,PTGS2,SMAD2                                                                              |
| Induction of Apoptosis by HIV1                             | 1.98          | 0.083 | CASP8,CASP9,DAXX,MAPK9,NFKB1                                                                                         |
| nNOS Signaling in Skeletal Muscle Cells                    | 1.94          | 0.1   | CACNA1D,CACNA1S,CAMK4,NOS1                                                                                           |
| Cardiac $\beta$ -adrenergic Signaling                      | 1.91          | 0.058 | AKAP11,AKAP12,AKAP3,CACNA1D,CACNA1S,PDE12,PDE6B,PPP2CB                                                               |
| Apelin Endothelial Signaling Pathway                       | 1.87          | 0.061 | AKT2,CAMK4,CCL2,MAPK9,MEF2C,NFKB1,SP1                                                                                |
| Heme Biosynthesis II                                       | 1.8           | 0.222 | ALAD,UROS                                                                                                            |
| Glucocorticoid Receptor Signaling                          | 1.77          | 0.042 | AKT2,ARID2,CCL13,CCL2,CREBZF,GTF2B,GTF2H2,HSPA14,MAPK9,NFKB1,NR3C2,POLR2H,PTGS2,SMAD2                                |
| FAT10 Cancer Signaling Pathway                             | 1.73          | 0.087 | AKT2,NFKB1,SMAD2,TGFBR3                                                                                              |
| Cardiac Hypertrophy Signaling (Enhanced)                   | 1.71          | 0.038 | AKT2,CACNA1D,CACNA1S,CAMK2G,CAMK4,HAND1,HDAC1,IL2RA,MAP3K20,MAPK9,MAPKAPK3,MEF2C,NFKB1,PDE12,PDE6B,PKN1,PTGS2,TGFBR3 |
| ATM Signaling                                              | 1.71          | 0.063 | ATM,CREB5,MAPK9,PPP2CB,TLK2,TOPBP1                                                                                   |
| Small Cell Lung Cancer Signaling                           | 1.69          | 0.07  | AKT2,CASP9,NFKB1,NOS1,PTGS2                                                                                          |
| CD27 Signaling in Lymphocytes                              | 1.56          | 0.077 | CASP8,CASP9,MAPK9,NFKB1                                                                                              |
| cAMP-mediated signaling                                    | 1.56          | 0.045 | AKAP11,AKAP12,AKAP3,CAMK2G,CAMK4,CREB5,DRD2,PDE12,PDE6B,RAPGEF4                                                      |
| Telomerase Signaling                                       | 1.55          | 0.058 | AKT2,ETS1,HDAC1,IL2RA,PPP2CB,SP1                                                                                     |
| Chemokine Signaling                                        | 1.55          | 0.065 | CAMK2G,CAMK4,CCL13,CCL2,NOX1                                                                                         |
| Androgen Signaling                                         | 1.51          | 0.052 | CACNA1D,CACNA1S,CAMK4,GTF2B,GTF2H2,NFKB1,POLR2H                                                                      |
| Role of IL-17A in Arthritis                                | 1.5           | 0.074 | CCL2,MAPK9,NFKB1,PTGS2                                                                                               |
| IL-17 Signaling                                            | 1.49          | 0.063 | AKT2,CCL2,MAPK9,NFKB1,PTGS2                                                                                          |
| Calcium Signaling                                          | 1.49          | 0.046 | ATP2C1,CACNA1D,CACNA1S,CAMK2G,CAMK4,CREB5,HDAC1,MEF2C,MYH10                                                          |
| DNA Double-Strand Break Repair by Homologous Recombination | 1.43          | 0.143 | ATM,GEN1                                                                                                             |
| Corticotropin Releasing Hormone Signaling                  | 1.43          | 0.05  | CACNA1D,CACNA1S,CAMK4,CREB5,MEF2C,NOS1,PTGS2                                                                         |
| TWEAK Signaling                                            | 1.41          | 0.088 | CASP8,CASP9,NFKB1                                                                                                    |
| Cancer Drug Resistance By Drug Efflux                      | 1.41          | 0.069 | ABCG2,AKT2,NFKB1,PTGS2                                                                                               |
| Osteoarthritis Pathway                                     | 1.39          | 0.044 | CASP8,CASP9,CREB5,MEF2C,NFKB1,PTGS2,SLC39A8,SMAD2,SP1                                                                |
| Superpathway of Citrulline Metabolism                      | 1.37          | 0.133 | CPS1,NOS1                                                                                                            |

**Non-Survivors**  
**Up regulated**  
**Day 3 vs. Control**

| Ingenuity Canonical Pathways                                    | -log(p-value) | Ratio | Molecules                                                                                                         |
|-----------------------------------------------------------------|---------------|-------|-------------------------------------------------------------------------------------------------------------------|
| Airway Inflammation in Asthma                                   | 3.96          | 0.75  | IL13,IL4,TNF                                                                                                      |
| Natural Killer Cell Signaling                                   | 3.63          | 0.103 | FCER1G,INPPL1,KLRD1,MAPK3,NCR3,PAK1,PAK6,PRKCH,PRKD3,RALB,RRAS,SYK                                                |
| Neuregulin Signaling                                            | 3.24          | 0.106 | MAPK3,NRG3,PRKCH,PRKD3,PSEN1,RALB,RPS6KB2,RRAS,STAT5B,TMEFF2                                                      |
| Fc Epsilon RI Signaling                                         | 3.05          | 0.094 | FCER1G,IL13,IL4,INPPL1,MAPK3,PRKCH,PRKD3,RALB,RRAS,SYK,TNF                                                        |
| Opioid Signaling Pathway                                        | 2.87          | 0.07  | CACNA1F,CACNB4,CLTCL1,GRK7,MAPK3,MAPK7,PLD2,PRKACB,PRKCH,PRKD3,RALB,RGS10,RGS6,RPS6KB2,RRAS,RYR2,SLC12A5          |
| Renin-Angiotensin Signaling                                     | 2.52          | 0.086 | MAPK3,PAK1,PAK6,PRKACB,PRKCH,PRKD3,PTGER2,RALB,RRAS,TNF                                                           |
| Hepatic Cholestasis                                             | 2.49          | 0.073 | ABCB11,ABCG5,CD14,CYP27A1,IL13,IL4,INSR,PRKACB,PRKCH,PRKD3,SLC10A1,TJP2,TNF                                       |
| LPS-stimulated MAPK Signaling                                   | 2.46          | 0.098 | CD14,MAP3K5,MAPK3,PAK1,PRKCH,PRKD3,RALB,RRAS                                                                      |
| ErbB4 Signaling                                                 | 2.42          | 0.106 | MAPK3,NRG3,PRKCH,PRKD3,PSEN1,RALB,RRAS                                                                            |
| IL-15 Signaling                                                 | 2.24          | 0.099 | IL4,MAPK3,RALB,RRAS,STAT5B,SYK,TNF                                                                                |
| GNRH Signaling                                                  | 2.23          | 0.071 | CACNA1F,CACNB4,MAP3K5,MAPK3,MAPK7,PAK1,PAK6,PRKACB,PRKCH,PRKD3,RALB,RRAS                                          |
| ErbB Signaling                                                  | 2.13          | 0.086 | MAPK3,NRG3,PAK1,PAK6,PRKCH,PRKD3,RALB,RRAS                                                                        |
| Agrin Interactions at Neuromuscular Junction                    | 2.08          | 0.092 | ITGA1,MAPK3,NRG3,PAK1,PAK6,RALB,RRAS                                                                              |
| Protein Citrullination                                          | 2.06          | 0.4   | PADI2,PADI6                                                                                                       |
| PAK Signaling                                                   | 2.05          | 0.083 | MAPK3,MYL7,PAK1,PAK1IP1,PAK6,RALB,RRAS,TNF                                                                        |
| IL-3 Signaling                                                  | 1.99          | 0.089 | MAPK3,PAK1,PRKCH,PRKD3,RALB,RRAS,STAT5B                                                                           |
| IL-2 Signaling                                                  | 1.98          | 0.098 | CSNK2B,MAPK3,RALB,RRAS,STAT5B,SYK                                                                                 |
| Type II Diabetes Mellitus Signaling                             | 1.97          | 0.071 | CACNA1F,CACNB4,GCK,INSR,MAP3K5,MAPK3,PRKAG3,PRKCH,PRKD3,TNF                                                       |
| Prolactin Signaling                                             | 1.94          | 0.086 | MAPK3,NR3C1,PRKCH,PRKD3,RALB,RRAS,STAT5B                                                                          |
| Thrombopoietin Signaling                                        | 1.92          | 0.095 | MAPK3,PRKCH,PRKD3,RALB,RRAS,STAT5B                                                                                |
| G Beta Gamma Signaling                                          | 1.91          | 0.074 | CACNA1F,CACNB4,MAPK3,PAK1,PRKACB,PRKCH,PRKD3,RALB,RRAS                                                            |
| Protein Kinase A Signaling                                      | 1.86          | 0.052 | ADD1,ADD2,ADD3,AKAP10,AKAP4,APEX1,FLNB,GRK7,HHAT,MAPK3,MYL7,PRKACB,PRKCH,PRKD3,PTPN22,PTPN23,PYGB,ROCK2,RYR2,TCF4 |
| D-myo-inositol (1,4,5)-trisphosphate Degradation                | 1.86          | 0.176 | INPP5E,INPPL1,SEC16A                                                                                              |
| RAR Activation                                                  | 1.85          | 0.063 | AKR1B1,ALDH1A3,ARID1A,CSNK2B,CYP26A1,MAP3K5,PRKACB,PRKCH,PRKD3,PSMC5,STAT5B,TRIM24                                |
| Gαs Signaling                                                   | 1.81          | 0.076 | ADD1,ADD2,ADD3,CHRM5,MAPK3,PRKACB,PTGER2,RYR2                                                                     |
| Role of JAK1 and JAK3 in γc Cytokine Signaling                  | 1.79          | 0.09  | IL4,MAPK3,RALB,RRAS,STAT5B,SYK                                                                                    |
| 1D-myo-inositol Hexakisphosphate Biosynthesis II (Mammalian)    | 1.79          | 0.167 | INPP5E,INPPL1,SEC16A                                                                                              |
| D-myo-inositol (1,3,4)-trisphosphate Biosynthesis               | 1.79          | 0.167 | INPP5E,INPPL1,SEC16A                                                                                              |
| Amyloid Processing                                              | 1.75          | 0.1   | BACE2,CSNK2B,MAPK3,PRKACB,PSEN1                                                                                   |
| Tryptophan Degradation X (Mammalian, via Tryptamine)            | 1.72          | 0.158 | ALDH1A3,DDC,IL4I1                                                                                                 |
| UVC-Induced MAPK Signaling                                      | 1.72          | 0.098 | MAPK3,PRKCH,PRKD3,RALB,RRAS                                                                                       |
| HIF1α Signaling                                                 | 1.7           | 0.072 | APEX1,LDHB,MAPK3,MAPK7,MMP9,RALB,RRAS,VEGFB                                                                       |
| PPARα/RXRα Activation                                           | 1.69          | 0.062 | ACVR2B,AIP,INSR,MAPK3,MED24,PRKACB,PRKAG3,RALB,RRAS,STAT5B,TGS1                                                   |
| Coagulation System                                              | 1.68          | 0.114 | F11,F5,F7,VWF                                                                                                     |
| mTOR Signaling                                                  | 1.66          | 0.059 | EIF3C,EIF4G3,INSR,MAPK3,PLD2,PRKAG3,PRKCH,PRKD3,RALB,RPS6KB2,RRAS,VEGFB                                           |
| Airway Pathology in Chronic Obstructive Pulmonary Disease       | 1.64          | 0.25  | MMP9,TNF                                                                                                          |
| Apelin Endothelial Signaling Pathway                            | 1.63          | 0.07  | AQP2,MAPK3,PRKAG3,PRKCH,PRKD3,RALB,RPS6KB2,RRAS                                                                   |
| α-Adrenergic Signaling                                          | 1.63          | 0.075 | MAPK3,PRKACB,PRKCH,PRKD3,PYGB,RALB,RRAS                                                                           |
| Fcγ Receptor-mediated Phagocytosis in Macrophages and Monocytes | 1.63          | 0.075 | MAPK3,PAK1,PLD2,PRKCH,PRKD3,RPS6KB2,SYK                                                                           |
| Caveolar-mediated Endocytosis Signaling                         | 1.63          | 0.082 | ALB,FLNB,FLOT2,INSR,ITGA1,ITGA8                                                                                   |
| Estrogen-Dependent Breast Cancer Signaling                      | 1.63          | 0.082 | HSD17B1,HSD17B13,MAPK3,RALB,RRAS,STAT5B                                                                           |
| Nitric Oxide Signaling in the Cardiovascular System             | 1.61          | 0.075 | ARG2,MAPK3,PRKACB,PRKCH,PRKD3,RYR2,VEGFB                                                                          |
| Ovarian Cancer Signaling                                        | 1.6           | 0.065 | BRCA2,MAPK3,MMP9,PRKACB,RALB,RPS6KB2,RRAS,TCF4,VEGFB                                                              |
| GP6 Signaling Pathway                                           | 1.6           | 0.069 | COL11A1,COL4A2,COL9A2,FCER1G,LAMC3,PRKCH,PRKD3,SYK                                                                |
| Synaptogenesis Signaling Pathway                                | 1.58          | 0.052 | CACNB4,CDH17,CNTNAP1,EFNB3,EPHA2,FARP1,GRM3,MAPK3,PAK1,PRKACB,RALB,RPS6KB2,RRAS,SNAP25,VTI1B,YKT6                 |
| Cholecystokinin/Gastrin-mediated Signaling                      | 1.58          | 0.068 | MAPK3,MAPK7,PRKCH,PRKD3,RALB,ROCK2,RRAS,TNF                                                                       |
| Inhibition of Matrix Metalloproteases                           | 1.56          | 0.105 | HSPG2,MMP9,RECK,TIMP2                                                                                             |

|                                                                 |      |       |                                                                     |
|-----------------------------------------------------------------|------|-------|---------------------------------------------------------------------|
| Erythropoietin Signaling                                        | 1.55 | 0.079 | MAPK3,PRKCH,PRKD3,RALB,RRAS,STAT5B                                  |
| Macropinocytosis Signaling                                      | 1.55 | 0.079 | CD14,PAK1,PRKCH,PRKD3,RALB,RRAS                                     |
| Semaphorin Signaling in Neurons                                 | 1.53 | 0.088 | CRMP1,MAPK3,PAK1,PAK6,ROCK2                                         |
| Apoptosis Signaling                                             | 1.52 | 0.071 | BID,LMNA,MAP3K5,MAPK3,RALB,RRAS,TNF                                 |
| CCR3 Signaling in Eosinophils                                   | 1.52 | 0.067 | MAPK3,PAK1,PAK6,PRKCH,PRKD3,RALB,ROCK2,RRAS                         |
| Glutamine Biosynthesis I                                        | 1.52 | 1     | GLUL                                                                |
| Threonine Degradation II                                        | 1.52 | 1     | GCAT                                                                |
| Germ Cell-Sertoli Cell Junction Signaling                       | 1.51 | 0.06  | CTNNA2,LAMC3,MAP3K5,MAPK3,PAK1,PAK6,RALB,RRAS,TNF,ZYX               |
| LXR/RXR Activation                                              | 1.5  | 0.066 | ABCG5,ALB,APOM,ARG2,CD14,LDLR,MMP9,TNF                              |
| Superpathway of D-myo-inositol (1,4,5)-trisphosphate Metabolism | 1.5  | 0.13  | INPP5E,INPPL1,SEC16A                                                |
| Leukocyte Extravasation Signaling                               | 1.46 | 0.057 | ARHGAP35,CLDN2,CTNNA2,ITGA1,MMP9,PRKCH,PRKD3,ROCK2,THY1,TIMP2,WIPF1 |
| PPAR Signaling                                                  | 1.46 | 0.069 | AIP,INSR,MAPK3,RALB,RRAS,STAT5B,TNF                                 |
| JAK/Stat Signaling                                              | 1.46 | 0.075 | MAPK3,PIAS2,RALB,RRAS,STAT2,STAT5B                                  |
| IL-8 Signaling                                                  | 1.44 | 0.056 | LASP1,MAPK3,MMP9,MYL7,PLD2,PRKCH,PRKD3,RALB,ROCK2,RRAS,VEGFB        |
| NF- $\kappa$ B Activation by Viruses                            | 1.41 | 0.073 | ITGA1,MAPK3,PRKCH,PRKD3,RALB,RRAS                                   |
| PEDF Signaling                                                  | 1.41 | 0.073 | DOCK3,MAPK3,RALB,ROCK2,RRAS,TCF4                                    |
| IL-4 Signaling                                                  | 1.41 | 0.073 | IL4,INPPL1,NR3C1,RALB,RPS6KB2,RRAS                                  |
| Oncostatin M Signaling                                          | 1.39 | 0.093 | MAPK3,RALB,RRAS,STAT5B                                              |
| PXR/RXR Activation                                              | 1.37 | 0.079 | ABCB11,INSR,NR3C1,PRKACB,TNF                                        |
| HER-2 Signaling in Breast Cancer                                | 1.37 | 0.071 | CCNE1,MAP3K5,PRKCH,PRKD3,RALB,RRAS                                  |
| VEGF Family Ligand-Receptor Interactions                        | 1.37 | 0.071 | MAPK3,PRKCH,PRKD3,RALB,RRAS,VEGFB                                   |
| eNOS Signaling                                                  | 1.37 | 0.059 | AQP2,AQP7,CHRM5,NOSIP,PRKACB,PRKAG3,PRKCH,PRKD3,VEGFB               |

## Supplementary Table 5

### A. Pathways showing an increased trend in a time dependent manner in the survivor/non-survivor cohort.

| Up_D1-D3_survivors                                  |                  |                  |                  |  |
|-----------------------------------------------------|------------------|------------------|------------------|--|
| Canonical Pathways                                  | SD1 vs. Baseline | SD2 vs. Baseline | SD3 vs. Baseline |  |
| Ephrin Receptor Signaling                           | 1.2544           | 1.819            | 2.352            |  |
| Paxillin Signaling                                  | 1.0654           | 1.568            | 2.155            |  |
| Myc Mediated Apoptosis Signaling                    | 0.3844           | 0.784            | 1.323            |  |
| fMLP Signaling in Neutrophils                       | 0.6379           | 0.989            | 1.465            |  |
| CCR3 Signaling in Eosinophils                       | 1.9576           | 2.936            | 3.656            |  |
| Axonal Guidance Signaling                           | 1.3069           | 1.889            | 2.317            |  |
| IL-8 Signaling                                      | 1.6282           | 2.007            | 2.548            |  |
| NF-κB Activation by Viruses                         | 2.0458           | 2.071            | 2.123            |  |
| CXCR4 Signaling                                     | 1.8212           | 2.035            | 2.606            |  |
| Agranulocyte Adhesion and Diapedesis                | 1.2829           | 1.432            | 1.487            |  |
| p70S6K Signaling                                    | 1.0507           | 1.233            | 1.735            |  |
| GDNF Family Ligand-Receptor Interactions            | 0.2883           | 0.649            | 1.663            |  |
| HGF Signaling                                       | 1.3578           | 1.5              | 1.546            |  |
| ErbB Signaling                                      | 2.2168           | 2.405            | 2.465            |  |
| PPARα/RXRα Activation                               | 1.2544           | 1.407            | 1.885            |  |
| Nitric Oxide Signaling in the Cardiovascular System | 2.1867           | 2.379            | 2.439            |  |
| Role of Tissue Factor in Cancer                     | 1.2462           | 1.404            | 1.95             |  |
| Integrin Signaling                                  | 2.1479           | 2.302            | 2.867            |  |
| CNTF Signaling                                      | 1.3053           | 1.491            | 2.201            |  |
| Leukocyte Extravasation Signaling                   | 1.6606           | 2.037            | 2.11             |  |
| Systemic Lupus Erythematosus Signaling              | 0.5848           | 0.712            | 1.376            |  |
| Renin-Angiotensin Signaling                         | 2.031            | 2.418            | 2.485            |  |
| UVC-Induced MAPK Signaling                          | 2.0254           | 2.328            | 2.375            |  |
| Endometrial Cancer Signaling                        | 0.777            | 0.858            | 1.431            |  |
| Natural Killer Cell Signaling                       | 3.0006           | 3.657            | 3.746            |  |
| mTOR Signaling                                      | 2.1858           | 2.333            | 3.428            |  |
| IL-2 Signaling                                      | 1.6659           | 2.001            | 2.045            |  |
| IL-15 Signaling                                     | 1.3826           | 1.736            | 1.778            |  |
| NGF Signaling                                       | 0.9549           | 1.013            | 1.497            |  |
| GNRH Signaling                                      | 1.3723           | 1.939            | 2.006            |  |
| Thrombopoietin Signaling                            | 2.1481           | 2.636            | 2.691            |  |
| Melanocyte Development and Pigmentation Signaling   | 0.918            | 1.282            | 1.32             |  |
| Breast Cancer Regulation by Stathmin1               | 1.2614           | 1.95             | 2.022            |  |
| Agrin Interactions at Neuromuscular Junction        | 1.723            | 2.229            | 2.282            |  |

|                                                                 |        |       |       |
|-----------------------------------------------------------------|--------|-------|-------|
| VEGF Family Ligand-Receptor Interactions                        | 1.5114 | 2.022 | 2.073 |
| <b>IL-3 Signaling</b>                                           | 2.141  | 2.808 | 2.871 |
| Prolactin Signaling                                             | 2.077  | 2.745 | 2.808 |
| Synaptic Long Term Potentiation                                 | 0.7797 | 1.26  | 1.303 |
| Phagosome Maturation                                            | 1.19   | 1.961 | 2.023 |
| Superpathway of Inositol Phosphate Compounds                    | 0.4245 | 1.26  | 1.312 |
| 3-phosphoinositide Degradation                                  | 0.5442 | 1.372 | 1.421 |
| Chemokine Signaling                                             | 0.8488 | 1.599 | 1.641 |
| ErbB2-ErbB3 Signaling                                           | 0.7081 | 1.31  | 1.344 |
| Angiopoietin Signaling                                          | 0.9012 | 1.666 | 1.708 |
| $\alpha$ -Adrenergic Signaling                                  | 1.3081 | 2.405 | 2.465 |
| Role of JAK1 and JAK3 in $\gamma$ c Cytokine Signaling          | 1.0381 | 1.835 | 1.879 |
| Oncostatin M Signaling                                          | 1.1743 | 1.871 | 1.908 |
| Putrescine Biosynthesis III                                     | 1.153  | 1.371 | 1.382 |
| Glutamine Biosynthesis I                                        | 1.4462 | 1.667 | 1.678 |
| Tryptophan Degradation X (Mammalian, via Tryptamine)            | 0.8334 | 2.13  | 2.16  |
| Putrescine Degradation III                                      | 0.3354 | 1.294 | 1.314 |
| Estrogen-Dependent Breast Cancer Signaling                      | 1.3331 | 1.14  | 3.075 |
| Protein Kinase A Signaling                                      | 0.6695 | 2.388 | 2.137 |
| Estrogen Receptor Signaling                                     | 0.6568 | 0.467 | 1.591 |
| Growth Hormone Signaling                                        | 1.873  | 1.736 | 2.428 |
| MIF-mediated Glucocorticoid Regulation                          | 0.9177 | 0.781 | 1.47  |
| Apelin Endothelial Signaling Pathway                            | 1.6724 | 1.435 | 2.555 |
| Granulocyte Adhesion and Diapedesis                             | 1.8022 | 1.574 | 2.586 |
| ERK5 Signaling                                                  | 0.9381 | 0.694 | 1.754 |
| Synaptic Long Term Depression                                   | 1.2128 | 1.014 | 1.841 |
| Superpathway of D-myo-inositol (1,4,5)-trisphosphate Metabolism | 1.3233 | 1.061 | 1.925 |
| Caveolar-mediated Endocytosis Signaling                         | 1.3331 | 1.14  | 1.731 |
| D-myo-inositol (1,3,4)-trisphosphate Biosynthesis               | 1.6029 | 1.249 | 2.228 |
| 1D-myo-inositol Hexakisphosphate Biosynthesis II (Mammalian)    | 1.6029 | 1.249 | 2.228 |
| LPS/IL-1 Mediated Inhibition of RXR Function                    | 0.8726 | 0.525 | 1.474 |
| D-myo-inositol (1,4,5)-trisphosphate Degradation                | 1.6707 | 1.294 | 2.301 |
| Cholecystokinin/Gastrin-mediated Signaling                      | 1.6075 | 1.389 | 1.931 |
| IL-4 Signaling                                                  | 0.7687 | 2.071 | 1.537 |
| PEDF Signaling                                                  | 0.7687 | 2.071 | 1.537 |
| Renal Cell Carcinoma Signaling                                  | 0.8321 | 2.175 | 1.62  |
| Rac Signaling                                                   | 1.3578 | 2.583 | 2.07  |
| eNOS Signaling                                                  | 1.329  | 0.956 | 1.823 |
| Opioid Signaling Pathway                                        | 2.8837 | 2.598 | 3.168 |
| IGF-1 Signaling                                                 | 0.7715 | 1.604 | 1.168 |

|                                                                                                       |        |       |       |
|-------------------------------------------------------------------------------------------------------|--------|-------|-------|
| Autophagy                                                                                             | 0.5304 | 1.568 | 1.001 |
| Acute Myeloid Leukemia Signaling                                                                      | 1.0198 | 1.928 | 1.424 |
| G Beta Gamma Signaling                                                                                | 1.5053 | 2.309 | 1.838 |
| PDGF Signaling                                                                                        | 0.7106 | 1.42  | 0.971 |
| LPS-stimulated MAPK Signaling                                                                         | 2.5829 | 2.071 | 2.777 |
| Ovarian Cancer Signaling                                                                              | 0.9118 | 1.996 | 1.15  |
| NAD biosynthesis II (from tryptophan)                                                                 | 0.4506 | 1.578 | 0.649 |
| Tryptophan Degradation to 2-amino-3-carboxymuconate Semialdehyde                                      | 0.7068 | 2.184 | 0.923 |
| Thyroid Cancer Signaling                                                                              | 0.9862 | 1.651 | 1.059 |
| Epithelial Adherens Junction Signaling                                                                | 1.3614 | 1.794 | 1.408 |
| Macropinocytosis Signaling                                                                            | 2.2417 | 1.621 | 2.282 |
| Ceramide Signaling                                                                                    | 1.417  | 0.915 | 1.424 |
| Fc Epsilon RI Signaling                                                                               | 2.4962 | 3.014 | 2.485 |
| Synaptogenesis Signaling Pathway                                                                      | 1.2939 | 2.157 | 1.222 |
| Factors Promoting Cardiogenesis in Vertebrates                                                        | 0.9846 | 1.349 | 0.918 |
| Regulation of Actin-based Motility by Rho                                                             | 1.0198 | 1.384 | 0.944 |
| BMP signaling pathway                                                                                 | 1.114  | 1.477 | 1.014 |
| Insulin Receptor Signaling                                                                            | 1.2701 | 1.57  | 1.186 |
| Semaphorin Signaling in Neurons                                                                       | 2.3891 | 1.467 | 2.168 |
| JAK/Stat Signaling                                                                                    | 1.1751 | 1.536 | 1.058 |
| PPAR Signaling                                                                                        | 2.478  | 1.659 | 2.268 |
| Differential Regulation of Cytokine Production in Intestinal Epithelial Cells by IL-17A and IL-17F    | 1.3233 | 0.405 | 1.08  |
| Differential Regulation of Cytokine Production in Macrophages and T Helper Cells by IL-17A and IL-17F | 1.6029 | 0.489 | 1.269 |
| PTEN Signaling                                                                                        | 1.4285 | 1.714 | 1.303 |
| Extrinsic Prothrombin Activation Pathway                                                              | 1.7435 | 0.532 | 1.363 |
| Type II Diabetes Mellitus Signaling                                                                   | 2.8026 | 1.085 | 2.023 |
| 14-3-3-mediated Signaling                                                                             | 2.2514 | 1.26  | 1.768 |
| Virus Entry via Endocytic Pathways                                                                    | 1.8352 | 2.076 | 1.598 |
| Coagulation System                                                                                    | 2.1122 | 0.761 | 1.437 |
| FLT3 Signaling in Hematopoietic Progenitor Cells                                                      | 1.6398 | 1.557 | 1.598 |
| GP6 Signaling Pathway                                                                                 | 2.0561 | 0.977 | 1.449 |
| Fcγ Receptor-mediated Phagocytosis in Macrophages and Monocytes                                       | 3.3149 | 1.818 | 2.465 |
| Hepatic Fibrosis / Hepatic Stellate Cell Activation                                                   | 1.8503 | 0.451 | 1.049 |
| PXR/RXR Activation                                                                                    | 1.127  | 1.331 | 0.836 |
| IL-6 Signaling                                                                                        | 1.4473 | 0.549 | 0.91  |
| Neuroprotective Role of THOP1 in Alzheimer's Disease                                                  | 1.3774 | 1.516 | 1.1   |
| LXR/RXR Activation                                                                                    | 2.3839 | 0.315 | 0.954 |
| Airway Inflammation in Asthma                                                                         | 2.1358 | 2.57  | 1.09  |
| Systemic Lupus Erythematosus In B Cell Signaling Pathway                                              | 2.1383 | 0.922 | 1.27  |



|                                                                       |        |       |       |
|-----------------------------------------------------------------------|--------|-------|-------|
| Neuregulin Signaling                                                  | 3.2749 | 3.02  | 3.092 |
| ErbB4 Signaling                                                       | 2.0394 | 1.861 | 1.905 |
| Sperm Motility                                                        | 1.6995 | 0.519 | 0.806 |
| FXR/RXR Activation                                                    | 1.4473 | 0.296 | 0.573 |
| IL-15 Production                                                      | 1.5865 | 0.33  | 0.628 |
| Hepatic Cholestasis                                                   | 4.1316 | 1.819 | 2.352 |
| Apoptosis Signaling                                                   | 3.1205 | 0.794 | 1.257 |
| Induction of Apoptosis by HIV1                                        | 2.2644 | 0     | 0.444 |
| Death Receptor Signaling                                              | 1.8155 | 0     | 0.247 |
| PAK Signaling                                                         | 2.1279 | 1.756 | 1.805 |
| Regulation of Cellular Mechanics by Calpain Protease                  | 1.574  | 1.31  | 1.344 |
| FAK Signaling                                                         | 2.1867 | 1.797 | 1.847 |
| Glioma Signaling                                                      | 1.3774 | 1.064 | 1.1   |
| Actin Cytoskeleton Signaling                                          | 2.3643 | 1.761 | 1.83  |
| Bladder Cancer Signaling                                              | 1.6623 | 1.25  | 1.288 |
| Erythropoietin Signaling                                              | 2.8139 | 2.229 | 2.282 |
| HER-2 Signaling in Breast Cancer                                      | 1.9852 | 1.458 | 1.498 |
| Atherosclerosis Signaling                                             | 1.5252 | 0.92  | 0.954 |
| HMGB1 Signaling                                                       | 1.5874 | 0.908 | 0.946 |
| Acute Phase Response Signaling                                        | 1.9245 | 0.73  | 0.765 |
| Production of Nitric Oxide and Reactive Oxygen Species in Macrophages | 1.4616 | 0.435 | 0.459 |
| nNOS Signaling in Neurons                                             | 1.6256 | 0.584 | 0.6   |
| TNFR1 Signaling                                                       | 2.8241 | 1.075 | 1.1   |
| Airway Pathology in Chronic Obstructive Pulmonary Disease             | 1.5081 | 0.797 | 0.807 |
| Glucose and Glucose-1-phosphate Degradation                           | 1.6228 | 0.85  | 0.86  |
| Crosstalk between Dendritic Cells and Natural Killer Cells            | 1.3944 | 0.241 | 0.252 |
| Lymphotoxin $\beta$ Receptor Signaling                                | 1.3923 | 0     | 0     |
| Molecular Mechanisms of Cancer                                        | 1.6771 | 0.895 | 0.732 |
| Tec Kinase Signaling                                                  | 1.535  | 1.236 | 0.609 |
| Sertoli Cell-Sertoli Cell Junction Signaling                          | 2.2446 | 1.372 | 0.742 |
| Germ Cell-Sertoli Cell Junction Signaling                             | 3.0255 | 2.489 | 2.07  |
| NF- $\kappa$ B Signaling                                              | 1.9627 | 1.063 | 0.296 |
| Tight Junction Signaling                                              | 1.4192 | 1.157 | 0.855 |
| Amyloid Processing                                                    | 2.7184 | 1.651 | 0.549 |
| Estrogen Biosynthesis                                                 | 0.7888 | 0     | 2.056 |
| TNFR2 Signaling                                                       | 2.4725 | 0     | 0.338 |
| TCA Cycle II (Eukaryotic)                                             | 0      | 1.844 | 0.399 |
| Dolichyl-diphosphooligosaccharide Biosynthesis                        | 1.3226 | 0     | 0.719 |

| <b>Down_D1-D3_survivors</b>                                          |                             |                             |                             |
|----------------------------------------------------------------------|-----------------------------|-----------------------------|-----------------------------|
|                                                                      | <b>SD1 vs.<br/>Baseline</b> | <b>SD2 vs.<br/>Baseline</b> | <b>SD3 vs.<br/>Baseline</b> |
| Canonical Pathways                                                   |                             |                             |                             |
| Wnt/Ca+ pathway                                                      | 1.09                        | 1.53                        | 1.96                        |
| iNOS Signaling                                                       | 0.48                        | 1.08                        | 1.61                        |
| IL-17A Signaling in Gastric Cells                                    | 0.84                        | 1.52                        | 2.29                        |
| Role of JAK family kinases in IL-6-type Cytokine Signaling           | 0.31                        | 0.62                        | 1.31                        |
| Role of JAK1, JAK2 and TYK2 in Interferon Signaling                  | 0.32                        | 0.63                        | 1.35                        |
| Regulation of IL-2 Expression in Activated and Anergic T Lymphocytes | 1.06                        | 1.79                        | 2.08                        |
| OX40 Signaling Pathway                                               | 0.74                        | 0.91                        | 1.37                        |
| Factors Promoting Cardiogenesis in Vertebrates                       | 1.03                        | 1.12                        | 1.41                        |
| IL-12 Signaling and Production in Macrophages                        | 0.57                        | 0.76                        | 1.42                        |
| Role of IL-17F in Allergic Inflammatory Airway Diseases              | 1.02                        | 1.13                        | 1.69                        |
| Wnt/ $\beta$ -catenin Signaling                                      | 1.78                        | 1.95                        | 1.96                        |
| Inflammasome pathway                                                 | 1                           | 0.7                         | 3.8                         |
| Protein Ubiquitination Pathway                                       | 0.37                        | 0.25                        | 1.42                        |
| NF- $\kappa$ B Activation by Viruses                                 | 0.75                        | 0.64                        | 1.53                        |
| IL-17A Signaling in Airway Cells                                     | 1.03                        | 0.81                        | 2.67                        |
| IL-22 Signaling                                                      | 0.87                        | 0.63                        | 2.34                        |
| Regulation of the Epithelial-Mesenchymal Transition Pathway          | 1.48                        | 1.22                        | 2.78                        |
| Caveolar-mediated Endocytosis Signaling                              | 0.88                        | 0.72                        | 1.7                         |
| CD28 Signaling in T Helper Cells                                     | 1.05                        | 0.88                        | 1.62                        |
| Glycine Degradation (Creatine Biosynthesis)                          | 1.28                        | 1.66                        | 1.55                        |
| Heme Biosynthesis from Uroporphyrinogen-III I                        | 0.99                        | 1.36                        | 1.26                        |
| Catecholamine Biosynthesis                                           | 0.99                        | 1.36                        | 1.26                        |
| 4-1BB Signaling in T Lymphocytes                                     | 0.68                        | 1.32                        | 1.12                        |
| Activation of IRF by Cytosolic Pattern Recognition Receptors         | 0.65                        | 1.53                        | 1.25                        |
| IL-17 Signaling                                                      | 1.2                         | 0.66                        | 2.25                        |
| Sumoylation Pathway                                                  | 2.24                        | 3.9                         | 3.23                        |
| Th1 and Th2 Activation Pathway                                       | 0.79                        | 0.26                        | 1.49                        |
| Molecular Mechanisms of Cancer                                       | 1.26                        | 0.88                        | 1.66                        |
| Assembly of RNA Polymerase III Complex                               | 1.4                         | 0.91                        | 1.92                        |
| Protein Kinase A Signaling                                           | 1.27                        | 1.21                        | 1.32                        |
| Th2 Pathway                                                          | 1.17                        | 0.37                        | 1.93                        |
| Type I Diabetes Mellitus Signaling                                   | 1.17                        | 0.48                        | 1.74                        |
| FAT10 Cancer Signaling Pathway                                       | 2.12                        | 2.79                        | 2.39                        |
| Granzyme B Signaling                                                 | 2.08                        | 0.79                        | 2.86                        |
| Role of IL-17A in Arthritis                                          | 1.25                        | 0.93                        | 1.39                        |
| Nur77 Signaling in T Lymphocytes                                     | 1.27                        | 0.94                        | 1.41                        |
| ILK Signaling                                                        | 1.56                        | 0.83                        | 1.78                        |
| HOTAIR Regulatory Pathway                                            | 1.6                         | 1.54                        | 1.62                        |
| NF- $\kappa$ B Signaling                                             | 1.32                        | 0.89                        | 1.4                         |
| Role of PKR in Interferon Induction and Antiviral Response           | 1.63                        | 1.13                        | 1.69                        |

|                                            |      |      |      |
|--------------------------------------------|------|------|------|
| iCOS-iCOSL Signaling in T Helper Cells     | 1.62 | 0.49 | 1.76 |
| RAR Activation                             | 2.26 | 1.72 | 2.22 |
| GNRH Signaling                             | 1.06 | 1.4  | 1.02 |
| PEDF Signaling                             | 1.64 | 0.64 | 1.53 |
| RANK Signaling in Osteoclasts              | 1.55 | 1.16 | 1.47 |
| Androgen Signaling                         | 0.81 | 1.78 | 0.52 |
| GM-CSF Signaling                           | 1.4  | 0.27 | 1.11 |
| PCP pathway                                | 1.11 | 2.37 | 0.68 |
| Noradrenaline and Adrenaline Degradation   | 0.72 | 1.37 | 0.46 |
| Phagosome Maturation                       | 1.46 | 1.71 | 1.31 |
| Neuroinflammation Signaling Pathway        | 2.28 | 0.67 | 1.64 |
| Glucocorticoid Receptor Signaling          | 2.06 | 0.3  | 1.31 |
| Angiopoietin Signaling                     | 1.32 | 0.71 | 1.06 |
| FGF Signaling                              | 1.6  | 0.22 | 0.93 |
| Cancer Drug Resistance By Drug Efflux      | 1.71 | 0.88 | 1.31 |
| CD27 Signaling in Lymphocytes              | 1.9  | 0.95 | 1.43 |
| B Cell Receptor Signaling                  | 2.46 | 1.31 | 1.84 |
| Docosahexaenoic Acid (DHA) Signaling       | 1.74 | 0.46 | 1    |
| Basal Cell Carcinoma Signaling             | 0.93 | 1.38 | 0.2  |
| Apelin Pancreas Signaling Pathway          | 1.56 | 1.93 | 0.91 |
| Paxillin Signaling                         | 1.62 | 0.95 | 1.19 |
| Telomerase Signaling                       | 1.66 | 0.97 | 1.22 |
| MIF Regulation of Innate Immunity          | 1.59 | 1.96 | 0.92 |
| Myc Mediated Apoptosis Signaling           | 2.11 | 0.8  | 1.19 |
| Adipogenesis pathway                       | 2.04 | 2.47 | 0.93 |
| Inhibition of Angiogenesis by TSP1         | 1.27 | 1.32 | 1.12 |
| Dendritic Cell Maturation                  | 1.36 | 0.91 | 1    |
| Pancreatic Adenocarcinoma Signaling        | 2.61 | 1.5  | 1.72 |
| Estrogen-Dependent Breast Cancer Signaling | 3.13 | 0.72 | 1.07 |
| Hereditary Breast Cancer Signaling         | 1.5  | 0.35 | 0.51 |
| GP6 Signaling Pathway                      | 2.4  | 0.87 | 1.08 |
| Osteoarthritis Pathway                     | 1.62 | 1.11 | 1.12 |
| Apelin Liver Signaling Pathway             | 1.5  | 1.48 | 0.51 |
| Huntington's Disease Signaling             | 3.69 | 1.82 | 1.72 |
| Adrenomedullin signaling pathway           | 1.83 | 1.71 | 1.7  |
| NAD Salvage Pathway II                     | 1.75 | 0.68 | 0.59 |
| BAG2 Signaling Pathway                     | 3.08 | 2.94 | 1.67 |
| Role of p14/p19ARF in Tumor Suppression    | 1.42 | 0.58 | 0.48 |
| Sonic Hedgehog Signaling                   | 1.38 | 0.56 | 0.47 |
| Integrin Signaling                         | 1.64 | 1.59 | 1.14 |
| Small Cell Lung Cancer Signaling           | 1.93 | 0.74 | 0.57 |
| HER-2 Signaling in Breast Cancer           | 1.6  | 0.63 | 0.48 |
| Heme Biosynthesis II                       | 1.64 | 1.02 | 0.92 |

|                                                              |      |      |      |
|--------------------------------------------------------------|------|------|------|
| Glycine Betaine Degradation                                  | 1.55 | 0.98 | 0.88 |
| Prostate Cancer Signaling                                    | 2    | 1.13 | 0.88 |
| Circadian Rhythm Signaling                                   | 1.95 | 1.29 | 1.1  |
| ATM Signaling                                                | 1.83 | 1.05 | 0.81 |
| Apelin Endothelial Signaling Pathway                         | 2.45 | 1.43 | 1.1  |
| Polyamine Regulation in Colon Cancer                         | 1.7  | 1.62 | 1.42 |
| Induction of Apoptosis by HIV1                               | 1.66 | 1.55 | 1.27 |
| PFKFB4 Signaling Pathway                                     | 1.47 | 1.04 | 0.86 |
| Ovarian Cancer Signaling                                     | 1.49 | 0.71 | 0.23 |
| Apelin Adipocyte Signaling Pathway                           | 1.74 | 1.26 | 0.52 |
| NGF Signaling                                                | 1.96 | 1.44 | 1.11 |
| FAT10 Signaling Pathway                                      | 1.94 | 1.79 | 1.58 |
| PRPP Biosynthesis I                                          | 1.11 | 1.49 | 0    |
| NAD Biosynthesis III                                         | 0.99 | 1.36 | 0    |
| L-DOPA Degradation                                           | 1.28 | 1.66 | 0    |
| Guanosine Nucleotides Degradation III                        | 1.4  | 0    | 0.8  |
| Gluconeogenesis I                                            | 1.55 | 0.62 | 0    |
| Urate Biosynthesis/Inosine 5'-phosphate Degradation          | 1.34 | 0    | 0.77 |
| Tumoricidal Function of Hepatic Natural Killer Cells         | 1.59 | 0    | 0.54 |
| Thio-molybdenum Cofactor Biosynthesis                        | 1.57 | 0    | 0    |
| DNA Double-Strand Break Repair by Non-Homologous End Joining | 0    | 0    | 1.79 |

| <b>Up_D1-D3_non_survivors</b>                                   |                             |                             |                             |
|-----------------------------------------------------------------|-----------------------------|-----------------------------|-----------------------------|
|                                                                 | <b>SD1 vs.<br/>Baseline</b> | <b>SD2 vs.<br/>Baseline</b> | <b>SD3 vs.<br/>Baseline</b> |
| Canonical Pathways                                              |                             |                             |                             |
| <b>ErbB Signaling</b>                                           | 1.93                        | 2.04                        | 2.13                        |
| LPS-stimulated MAPK Signaling                                   | 2.28                        | 2.36                        | 2.46                        |
| Neuroprotective Role of THOP1 in Alzheimer's Disease            | 1.16                        | 1.24                        | 1.31                        |
| <b>HIF1<math>\alpha</math> Signaling</b>                        | 0.81                        | 1.21                        | 1.7                         |
| <b><math>\alpha</math>-Adrenergic Signaling</b>                 | 1.49                        | 1.55                        | 1.63                        |
| <b>Cholecystokinin/Gastrin-mediated Signaling</b>               | 1.35                        | 1.49                        | 1.58                        |
| Neuregulin Signaling                                            | 2.89                        | 3.11                        | 3.24                        |
| Prolactin Signaling                                             | 1.81                        | 1.85                        | 1.93                        |
| <b>Inhibition of Matrix Metalloproteases</b>                    | 0.72                        | 0.93                        | 1.56                        |
| Ovarian Cancer Signaling                                        | 1                           | 1.14                        | 1.6                         |
| RAR Activation                                                  | 0.63                        | 0.82                        | 1.85                        |
| PEDF Signaling                                                  | 0.96                        | 1.34                        | 1.41                        |
| PXR/RXR Activation                                              | 0.97                        | 1.31                        | 1.37                        |
| <b>ErbB4 Signaling</b>                                          | 1.8                         | 2.33                        | 2.42                        |
| Superpathway of D-myo-inositol (1,4,5)-trisphosphate Metabolism | 1.21                        | 1.46                        | 1.5                         |
| Tryptophan Degradation X (Mammalian, via Tryptamine)            | 1.42                        | 1.68                        | 1.72                        |
| D-myo-inositol (1,3,4)-trisphosphate Biosynthesis               | 1.48                        | 1.74                        | 1.79                        |
| D-myo-inositol (1,4,5)-trisphosphate Degradation                | 1.55                        | 1.81                        | 1.86                        |
| Airway Pathology in Chronic Obstructive Pulmonary Disease       | 1.42                        | 1.61                        | 1.64                        |
| Airway Inflammation in Asthma                                   | 3.61                        | 3.91                        | 3.96                        |
| Threonine Degradation II                                        | 1.4                         | 1.5                         | 1.52                        |
| Glutamine Biosynthesis I                                        | 1.4                         | 1.5                         | 1.52                        |
| G $\alpha$ 12/13 Signaling                                      | 0.58                        | 1.27                        | 1.34                        |
| ErbB2-ErbB3 Signaling                                           | 0.6                         | 1.29                        | 1.35                        |
| VEGF Family Ligand-Receptor Interactions                        | 1.3                         | 1.3                         | 1.37                        |
| Opioid Signaling Pathway                                        | 2.72                        | 2.69                        | 2.87                        |
| GNRH Signaling                                                  | 1.4                         | 2.53                        | 2.23                        |
| Agrin Interactions at Neuromuscular Junction                    | 1.08                        | 2.57                        | 2.08                        |
| Caveolar-mediated Endocytosis Signaling                         | 1.58                        | 1.56                        | 1.63                        |
| PAK Signaling                                                   | 1.42                        | 2.47                        | 2.05                        |
| G $\alpha$ s Signaling                                          | 1.21                        | 0.61                        | 1.81                        |
| Apelin Endothelial Signaling Pathway                            | 1.41                        | 1.16                        | 1.63                        |
| G Beta Gamma Signaling                                          | 1.62                        | 2.27                        | 1.91                        |
| PPAR $\alpha$ /RXR $\alpha$ Activation                          | 1.27                        | 2.36                        | 1.69                        |
| Protein Kinase A Signaling                                      | 1.7                         | 1.44                        | 1.86                        |
| Leukocyte Extravasation Signaling                               | 1.34                        | 1.7                         | 1.46                        |
| HGF Signaling                                                   | 1.14                        | 1.63                        | 1.29                        |
| Rac Signaling                                                   | 1.14                        | 1.63                        | 1.29                        |
| Synaptogenesis Signaling Pathway                                | 1.4                         | 0.96                        | 1.58                        |
| <b>Nitric Oxide Signaling in the Cardiovascular System</b>      | 1.47                        | 2.01                        | 1.61                        |

|                                                                         |      |      |      |
|-------------------------------------------------------------------------|------|------|------|
| BER pathway                                                             | 1.09 | 0.49 | 1.3  |
| Sertoli Cell-Sertoli Cell Junction Signaling                            | 1.23 | 1.53 | 1.3  |
| Maturity Onset Diabetes of Young (MODY) Signaling                       | 0.72 | 1.62 | 0.91 |
| Thrombopoietin Signaling                                                | 1.9  | 1.84 | 1.92 |
| IL-15 Signaling                                                         | 2.15 | 1.61 | 2.24 |
| IL-12 Signaling and Production in Macrophages                           | 0.83 | 2.08 | 0.99 |
| Glucose and Glucose-1-phosphate Degradation                             | 0.61 | 1.72 | 0.71 |
| Estrogen-Dependent Breast Cancer Signaling                              | 1.58 | 1.09 | 1.63 |
| Role of JAK1 and JAK3 in $\gamma$ c Cytokine Signaling                  | 1.77 | 1.22 | 1.79 |
| Agranulocyte Adhesion and Diapedesis                                    | 1.02 | 1.61 | 1.05 |
| FLT3 Signaling in Hematopoietic Progenitor Cells                        | 1.02 | 1.41 | 1.03 |
| IL-2 Signaling                                                          | 1.98 | 1.36 | 1.98 |
| Natural Killer Cell Signaling                                           | 3.63 | 3.48 | 3.63 |
| Axonal Guidance Signaling                                               | 0.76 | 1.61 | 0.74 |
| LXR/RXR Activation                                                      | 1.64 | 3.92 | 1.5  |
| Fc Epsilon RI Signaling                                                 | 3.1  | 2.4  | 3.05 |
| FXR/RXR Activation                                                      | 1.2  | 2.69 | 1.06 |
| Osteoarthritis Pathway                                                  | 1.14 | 1.83 | 0.99 |
| eNOS Signaling                                                          | 1.39 | 1.28 | 1.37 |
| Atherosclerosis Signaling                                               | 1.28 | 1.83 | 1.12 |
| Renin-Angiotensin Signaling                                             | 2.61 | 2.92 | 2.52 |
| Superpathway of Inositol Phosphate Compounds                            | 1.09 | 1.73 | 0.89 |
| Pancreatic Adenocarcinoma Signaling                                     | 1.54 | 0.89 | 1.33 |
| Coagulation System                                                      | 1.92 | 2.34 | 1.68 |
| Hepatic Fibrosis / Hepatic Stellate Cell Activation                     | 1.51 | 1.88 | 1.28 |
| Ceramide Signaling                                                      | 1.21 | 1.67 | 0.89 |
| Acute Phase Response Signaling                                          | 1.58 | 2.36 | 1.02 |
| Granulocyte Adhesion and Diapedesis                                     | 1.48 | 1.8  | 1.18 |
| 14-3-3-mediated Signaling                                               | 1.19 | 1.33 | 1.04 |
| mTOR Signaling                                                          | 1.79 | 1.9  | 1.66 |
| Molecular Mechanisms of Cancer                                          | 1.46 | 0.8  | 1.1  |
| Aryl Hydrocarbon Receptor Signaling                                     | 1.32 | 0.57 | 0.9  |
| p70S6K Signaling                                                        | 1.49 | 0.66 | 1.02 |
| UVC-Induced MAPK Signaling                                              | 1.81 | 1.66 | 1.72 |
| 3-phosphoinositide Degradation                                          | 1.44 | 1.7  | 1.07 |
| Fc $\gamma$ Receptor-mediated Phagocytosis in Macrophages and Monocytes | 2.41 | 1.13 | 1.63 |
| Virus Entry via Endocytic Pathways                                      | 1.57 | 1.69 | 1.35 |
| IL-8 Signaling                                                          | 1.61 | 1.34 | 1.44 |
| Production of Nitric Oxide and Reactive Oxygen Species in Macrophages   | 1.78 | 2.22 | 0.95 |
| Integrin Signaling                                                      | 1.45 | 1.52 | 1.31 |
| PPAR Signaling                                                          | 1.71 | 1.83 | 1.46 |
| GP6 Signaling Pathway                                                   | 2.64 | 1.12 | 1.59 |
| Thyroid Cancer Signaling                                                | 1.32 | 1.14 | 1.19 |



|                                                                                                       |      |      |      |
|-------------------------------------------------------------------------------------------------------|------|------|------|
| Glioma Signaling                                                                                      | 1.93 | 0.58 | 0.94 |
| Oncostatin M Signaling                                                                                | 1.56 | 1.34 | 1.39 |
| Tight Junction Signaling                                                                              | 1.45 | 1.08 | 1.16 |
| Role of Tissue Factor in Cancer                                                                       | 1.37 | 1.51 | 0.85 |
| FAK Signaling                                                                                         | 1.47 | 1.53 | 1.17 |
| Systemic Lupus Erythematosus In B Cell Signaling Pathway                                              | 2.31 | 0.66 | 0.95 |
| Tryptophan Degradation to 2-amino-3-carboxymuconate Semialdehyde                                      | 1.67 | 1.86 | 0.77 |
| Actin Cytoskeleton Signaling                                                                          | 1.33 | 1.41 | 0.93 |
| CCR3 Signaling in Eosinophils                                                                         | 2.07 | 1.44 | 1.52 |
| Pyridoxal 5'-phosphate Salvage Pathway                                                                | 1.87 | 1.29 | 1.35 |
| NF-κB Activation by Viruses                                                                           | 1.78 | 1.82 | 1.41 |
| Bladder Cancer Signaling                                                                              | 1.42 | 1.49 | 0.77 |
| Salvage Pathways of Pyrimidine Ribonucleotides                                                        | 1.44 | 1.51 | 0.79 |
| Phagosome Maturation                                                                                  | 1.99 | 1.12 | 1.19 |
| Amyloid Processing                                                                                    | 2.46 | 1.69 | 1.75 |
| JAK/Stat Signaling                                                                                    | 1.84 | 1.88 | 1.46 |
| 1D-myo-inositol Hexakisphosphate Biosynthesis II (Mammalian)                                          | 2.31 | 1.74 | 1.79 |
| CNTF Signaling                                                                                        | 1.63 | 1    | 1.04 |
| IL-4 Signaling                                                                                        | 2.28 | 1.34 | 1.41 |
| TNFR1 Signaling                                                                                       | 1.93 | 1.19 | 1.24 |
| Apoptosis Signaling                                                                                   | 2.74 | 1.45 | 1.52 |
| Differential Regulation of Cytokine Production in Macrophages and T Helper Cells by IL-17A and IL-17F | 1.48 | 0.96 | 0.99 |
| Putrescine Degradation III                                                                            | 1.55 | 1    | 1.03 |
| Macropinocytosis Signaling                                                                            | 1.97 | 1.99 | 1.55 |
| Extrinsic Prothrombin Activation Pathway                                                              | 1.62 | 1.05 | 1.08 |
| Mechanisms of Viral Exit from Host Cells                                                              | 1.64 | 0.86 | 0.89 |
| Germ Cell-Sertoli Cell Junction Signaling                                                             | 2.57 | 2.62 | 1.51 |
| Cell Cycle: G1/S Checkpoint Regulation                                                                | 1.32 | 0.46 | 0.49 |
| IL-15 Production                                                                                      | 1.33 | 0.29 | 0.31 |
| nNOS Signaling in Neurons                                                                             | 2.02 | 0.37 | 0.39 |
| Phenylalanine Degradation IV (Mammalian, via Side Chain)                                              | 1.78 | 0.44 | 0.45 |
| Ephrin Receptor Signaling                                                                             | 1.58 | 1.58 | 1.34 |
| Semaphorin Signaling in Neurons                                                                       | 2.14 | 2.05 | 1.53 |
| Netrin Signaling                                                                                      | 1.35 | 1.26 | 0.87 |
| CXCR4 Signaling                                                                                       | 1.5  | 1.45 | 1.2  |
| Death Receptor Signaling                                                                              | 2.01 | 0.81 | 0.53 |
| TNFR2 Signaling                                                                                       | 2.27 | 0.63 | 0.23 |
| Tec Kinase Signaling                                                                                  | 1.92 | 1.17 | 0.94 |
| Cyclins and Cell Cycle Regulation                                                                     | 1.39 | 0.61 | 0.36 |
| LPS/IL-1 Mediated Inhibition of RXR Function                                                          | 1.67 | 1.15 | 0.96 |
| Role of JAK2 in Hormone-like Cytokine Signaling                                                       | 1.43 | 0.57 | 0.2  |
| Iron homeostasis signaling pathway                                                                    | 1.43 | 0.63 | 0.25 |

|                                                      |      |      |      |
|------------------------------------------------------|------|------|------|
| nNOS Signaling in Skeletal Muscle Cells              | 1.68 | 1.43 | 0.92 |
| Induction of Apoptosis by HIV1                       | 1.5  | 0.92 | 0.56 |
| Type II Diabetes Mellitus Signaling                  | 3.32 | 2.78 | 1.97 |
| NF-κB Signaling                                      | 1.61 | 0.97 | 0.54 |
| Regulation of Cellular Mechanics by Calpain Protease | 1.87 | 1.29 | 0.89 |
| Growth Hormone Signaling                             | 2.15 | 1.61 | 1.19 |
| Epithelial Adherens Junction Signaling               | 1.77 | 1.31 | 0.76 |
| Erythropoietin Signaling                             | 2.5  | 1.99 | 1.55 |
| Amyotrophic Lateral Sclerosis Signaling              | 1.42 | 1.08 | 0.77 |
| HER-2 Signaling in Breast Cancer                     | 2.21 | 1.77 | 1.37 |
| Hepatic Cholestasis                                  | 3.1  | 2.79 | 2.49 |
| IL-3 Signaling                                       | 2.94 | 2.46 | 1.99 |
| Protein Citrullination                               | 0.73 | 0    | 2.06 |

## Down\_D1-D3\_non\_survivors

|                                                            | SD1 vs.<br>Baseline | SD2 vs.<br>Baseline | SD3 vs.<br>Baseline |
|------------------------------------------------------------|---------------------|---------------------|---------------------|
| Canonical Pathways                                         |                     |                     |                     |
| Cell Cycle Control of Chromosomal Replication              | 0.86                | 1.4                 | 2.11                |
| nNOS Signaling in Skeletal Muscle Cells                    | 0.77                | 1.2                 | 1.94                |
| Chemokine Signaling                                        | 0.85                | 1                   | 1.56                |
| Inflammasome pathway                                       | 0.8                 | 1.12                | 3.06                |
| cAMP-mediated signaling                                    | 0.74                | 0.84                | 1.56                |
| Fatty Acid $\alpha$ -oxidation                             | 0.96                | 1.29                | 1.32                |
| Superpathway of Citrulline Metabolism                      | 1.01                | 1.34                | 1.37                |
| Glycine Degradation (Creatine Biosynthesis)                | 1.15                | 1.34                | 1.36                |
| L-DOPA Degradation                                         | 1.15                | 1.34                | 1.36                |
| ILK Signaling                                              | 1.16                | 1.19                | 2.55                |
| Opioid Signaling Pathway                                   | 1                   | 0.96                | 1.34                |
| Osteoarthritis Pathway                                     | 0.91                | 0.7                 | 1.39                |
| tRNA Charging                                              | 0.81                | 0.23                | 2.02                |
| Cardiac Hypertrophy Signaling (Enhanced)                   | 1.45                | 1.85                | 1.71                |
| Cardiac $\beta$ -adrenergic Signaling                      | 1.21                | 0.67                | 1.91                |
| Signaling by Rho Family GTPases                            | 0.45                | 1.63                | 1.06                |
| Stearate Biosynthesis I (Animals)                          | 0.68                | 1.74                | 1.14                |
| DNA Double-Strand Break Repair by Homologous Recombination | 1.06                | 0.56                | 1.43                |
| Aldosterone Signaling in Epithelial Cells                  | 1.65                | 0.84                | 2.13                |
| Role of NFAT in Cardiac Hypertrophy                        | 1.11                | 0.67                | 1.34                |
| Sumoylation Pathway                                        | 2.48                | 3.28                | 2.74                |
| Granzyme B Signaling                                       | 1.75                | 0.51                | 2.31                |
| Tetrapyrrole Biosynthesis II                               | 1.93                | 0.96                | 2.33                |
| FAT10 Cancer Signaling Pathway                             | 1.63                | 1.05                | 1.73                |
| CD27 Signaling in Lymphocytes                              | 1.43                | 0.47                | 1.56                |
| GNRH Signaling                                             | 1.07                | 1.37                | 1.08                |
| Rac Signaling                                              | 1                   | 2.41                | 1.01                |
| TWEAK Signaling                                            | 1.49                | 0.26                | 1.41                |
| Induction of Apoptosis by HIV1                             | 2.27                | 0.8                 | 1.98                |
| Androgen Signaling                                         | 1.63                | 1.04                | 1.51                |
| Pancreatic Adenocarcinoma Signaling                        | 2.27                | 0.99                | 1.99                |
| PCP pathway                                                | 0.78                | 1.92                | 0.42                |
| ATM Signaling                                              | 2.13                | 0.42                | 1.7                 |
| Systemic Lupus Erythematosus In T Cell Signaling Pathway   | 1.63                | 0.42                | 1.29                |
| NAD Salvage Pathway II                                     | 1.43                | 1.93                | 1.11                |
| BAG2 Signaling Pathway                                     | 3.18                | 1.81                | 2.65                |
| Heme Biosynthesis II                                       | 2.49                | 0.72                | 1.8                 |
| Neuroinflammation Signaling Pathway                        | 1.49                | 0.88                | 1.23                |
| Phagosome Maturation                                       | 1.19                | 1.37                | 1.04                |
| OX40 Signaling Pathway                                     | 1.34                | 0.44                | 0.91                |

|                                                             |      |      |      |
|-------------------------------------------------------------|------|------|------|
| Assembly of RNA Polymerase II Complex                       | 1.49 | 0.5  | 1.01 |
| Huntington's Disease Signaling                              | 3.97 | 1.35 | 2.65 |
| Role of PI3K/AKT Signaling in the Pathogenesis of Influenza | 1.67 | 0    | 0.82 |
| Lymphotoxin $\beta$ Receptor Signaling                      | 1.95 | 0    | 0.95 |
| p53 Signaling                                               | 1.62 | 0    | 0.76 |
| Amyotrophic Lateral Sclerosis Signaling                     | 1.67 | 0    | 0.79 |
| Nitric Oxide Signaling in the Cardiovascular System         | 1.71 | 0    | 0.81 |
| Protein Kinase A Signaling                                  | 1.45 | 0.76 | 1.07 |
| Corticotropin Releasing Hormone Signaling                   | 1.52 | 1.35 | 1.43 |
| RANK Signaling in Osteoclasts                               | 1.47 | 0.5  | 0.91 |
| Adenosine Nucleotides Degradation II                        | 1.01 | 1.34 | 0.55 |
| Nucleotide Excision Repair Pathway                          | 1.45 | 0.25 | 0.74 |
| IL-17A Signaling in Fibroblasts                             | 1.45 | 0.25 | 0.74 |
| Inhibition of Angiogenesis by TSP1                          | 1.58 | 0.28 | 0.8  |
| Urate Biosynthesis/Inosine 5'-phosphate Degradation         | 1.12 | 1.46 | 0.6  |
| <b>Integrin Signaling</b>                                   | 1.48 | 2.1  | 0.52 |
| Myc Mediated Apoptosis Signaling                            | 2.67 | 0.36 | 1.25 |
| Guanosine Nucleotides Degradation III                       | 1.18 | 1.53 | 0.63 |
| Sonic Hedgehog Signaling                                    | 1.08 | 1.55 | 0.32 |
| Telomerase Signaling                                        | 2.39 | 1.04 | 1.55 |
| G $\alpha$ 12/13 Signaling                                  | 1.36 | 0.46 | 0.79 |
| iCOS-iCOSL Signaling in T Helper Cells                      | 1.86 | 0.65 | 1.06 |
| Small Cell Lung Cancer Signaling                            | 3.69 | 0.65 | 1.69 |
| Paxillin Signaling                                          | 1.44 | 1.95 | 0.38 |
| IL-17 Signaling                                             | 2.66 | 0.95 | 1.49 |
| Role of PKR in Interferon Induction and Antiviral Response  | 2.5  | 0.62 | 1.21 |
| HER-2 Signaling in Breast Cancer                            | 1.99 | 0.52 | 0.94 |
| NF- $\kappa$ B Signaling                                    | 1.61 | 0    | 0.46 |
| Docosahexaenoic Acid (DHA) Signaling                        | 1.96 | 0.23 | 0.69 |
| GP6 Signaling Pathway                                       | 3.58 | 0.56 | 1.36 |
| Role of IL-17A in Arthritis                                 | 3.21 | 0.9  | 1.5  |
| Adipogenesis pathway                                        | 1.7  | 0.44 | 0.77 |
| Apelin Adipocyte Signaling Pathway                          | 1.67 | 2.04 | 0.61 |
| eNOS Signaling                                              | 2.49 | 0    | 0.61 |
| Angiopoietin Signaling                                      | 1.78 | 0.29 | 0.65 |
| IL-17A Signaling in Airway Cells                            | 2.11 | 0.36 | 0.77 |
| HMGB1 Signaling                                             | 1.96 | 0.53 | 0.87 |
| Hereditary Breast Cancer Signaling                          | 1.99 | 0.41 | 0.73 |
| Endometrial Cancer Signaling                                | 2.27 | 0    | 0.42 |
| Non-Small Cell Lung Cancer Signaling                        | 1.81 | 0    | 0.32 |
| Prostate Cancer Signaling                                   | 2.89 | 0.48 | 0.87 |
| CREB Signaling in Neurons                                   | 1.48 | 1    | 1.07 |
| Cancer Drug Resistance By Drug Efflux                       | 1.77 | 1.36 | 1.41 |

|                                                                      |      |      |      |
|----------------------------------------------------------------------|------|------|------|
| PEDF Signaling                                                       | 3.17 | 0.25 | 0.57 |
| Polyamine Regulation in Colon Cancer                                 | 1.37 | 1.05 | 1.07 |
| FAT10 Signaling Pathway                                              | 1.6  | 1.2  | 1.23 |
| Role of MAPK Signaling in the Pathogenesis of Influenza              | 1.73 | 1.01 | 1.06 |
| MIF Regulation of Innate Immunity                                    | 1.78 | 1.15 | 1.18 |
| GM-CSF Signaling                                                     | 1.91 | 1.11 | 1.16 |
| B Cell Receptor Signaling                                            | 2.68 | 1.25 | 1.33 |
| NGF Signaling                                                        | 1.3  | 0.58 | 0.62 |
| Glioma Signaling                                                     | 1.38 | 0.62 | 0.65 |
| Molecular Mechanisms of Cancer                                       | 2.52 | 0.76 | 0.84 |
| Apelin Endothelial Signaling Pathway                                 | 3.66 | 1.79 | 1.87 |
| CD40 Signaling                                                       | 1.58 | 0.74 | 0.77 |
| PTEN Signaling                                                       | 1.43 | 0.48 | 0.52 |
| PKC $\theta$ Signaling in T Lymphocytes                              | 1.36 | 0.34 | 0.37 |
| NAD Phosphorylation and Dephosphorylation                            | 1.32 | 0.68 | 0.7  |
| IL-2 Signaling                                                       | 1.67 | 0.39 | 0.41 |
| Gluconeogenesis I                                                    | 2.77 | 0.95 | 0.98 |
| Relaxin Signaling                                                    | 2.64 | 0.36 | 0.39 |
| HIF1 $\alpha$ Signaling                                              | 2.19 | 0.33 | 0.35 |
| Melanoma Signaling                                                   | 1.49 | 0    | 0    |
| Glucocorticoid Receptor Signaling                                    | 4.57 | 1.98 | 1.78 |
| Role of NANOG in Mammalian Embryonic Stem Cell Pluripotency          | 2.03 | 0.3  | 0    |
| F- $\kappa$ B Activation by Viruses                                  | 2.05 | 0.54 | 0.26 |
| Antiproliferative Role of Somatostatin Receptor 2                    | 1.78 | 0.29 | 0    |
| BMP signaling pathway                                                | 1.54 | 1.38 | 0.56 |
| IL-6 Signaling                                                       | 1.45 | 0.49 | 0.28 |
| Endothelin-1 Signaling                                               | 1.87 | 0.91 | 0.67 |
| Colorectal Cancer Metastasis Signaling                               | 1.8  | 0.69 | 0.34 |
| Factors Promoting Cardiogenesis in Vertebrates                       | 1.37 | 1.25 | 0.86 |
| Antioxidant Action of Vitamin C                                      | 1.53 | 0.68 | 0.41 |
| Adrenomedullin signaling pathway                                     | 3.26 | 1.12 | 0.38 |
| Ovarian Cancer Signaling                                             | 1.58 | 0.41 | 0    |
| Estrogen-Dependent Breast Cancer Signaling                           | 2.94 | 1.58 | 1.11 |
| RAR Activation                                                       | 1.7  | 1.13 | 0.88 |
| fMLP Signaling in Neutrophils                                        | 1.65 | 1.31 | 0.6  |
| Role of Tissue Factor in Cancer                                      | 1.63 | 0.56 | 0    |
| Wnt/ $\beta$ -catenin Signaling                                      | 1.71 | 1.37 | 0.76 |
| Glycine Betaine Degradation                                          | 2.34 | 1.68 | 0.7  |
| Regulation of IL-2 Expression in Activated and Anergic T Lymphocytes | 1.87 | 1.29 | 0.88 |
| Apelin Pancreas Signaling Pathway                                    | 1.74 | 1.12 | 0.61 |
| Regulation of the Epithelial-Mesenchymal Transition Pathway          | 1.7  | 1.13 | 0.6  |
| IL-8 Signaling                                                       | 1.32 | 1.09 | 0.85 |
| LPS-stimulated MAPK Signaling                                        | 1.56 | 0.92 | 0.26 |

|                                                 |      |      |      |
|-------------------------------------------------|------|------|------|
| Alanine Degradation III                         | 1.15 | 0    | 1.36 |
| UDP-D-xylose and UDP-D-glucuronate Biosynthesis | 1.15 | 0    | 1.36 |
| Alanine Biosynthesis II                         | 1.15 | 0    | 1.36 |
| GADD45 Signaling                                | 1.54 | 0    | 0.46 |
| Superpathway of Methionine Degradation          | 2.86 | 0.72 | 0    |
| Cysteine Biosynthesis III (mammalia)            | 1.37 | 0.4  | 0    |
| 2-oxobutanoate Degradation I                    | 1.93 | 0.96 | 0    |
| Basal Cell Carcinoma Signaling                  | 1.41 | 0.66 | 0    |
| Methylmalonyl Pathway                           | 2.14 | 1.05 | 0    |
| Methionine Degradation I (to Homocysteine)      | 1.48 | 0.43 | 0    |
| DNA damage-induced 14-3-3 $\sigma$ Signaling    | 1.54 | 0    | 1.19 |
| Role of p14/p19ARF in Tumor Suppression         | 1.78 | 0    | 0    |



## B. Pathways showing a decreased trend in a time dependent manner in the survivor/non-survivor cohort.

| Up_D1-D3_survivors                                                    |                  |                  |                  |
|-----------------------------------------------------------------------|------------------|------------------|------------------|
| Canonical Pathways                                                    | SD1 vs. Baseline | SD2 vs. Baseline | SD3 vs. Baseline |
| Amyloid Processing                                                    | 2.72             | 1.651            | 0.549            |
| Tight Junction Signaling                                              | 1.42             | 1.157            | 0.855            |
| NF-κB Signaling                                                       | 1.96             | 1.063            | 0.296            |
| Germ Cell-Sertoli Cell Junction Signaling                             | 3.03             | 2.489            | 2.07             |
| Sertoli Cell-Sertoli Cell Junction Signaling                          | 2.24             | 1.372            | 0.742            |
| Tec Kinase Signaling                                                  | 1.53             | 1.236            | 0.609            |
| Molecular Mechanisms of Cancer                                        | 1.68             | 0.895            | 0.732            |
| Lymphotoxin β Receptor Signaling                                      | 1.39             | 0                | 0                |
| Crosstalk between Dendritic Cells and Natural Killer Cells            | 1.39             | 0.241            | 0.252            |
| Glucose and Glucose-1-phosphate Degradation                           | 1.62             | 0.85             | 0.86             |
| Airway Pathology in Chronic Obstructive Pulmonary Disease             | 1.51             | 0.797            | 0.807            |
| TNFR1 Signaling                                                       | 2.82             | 1.075            | 1.1              |
| nNOS Signaling in Neurons                                             | 1.63             | 0.584            | 0.6              |
| Production of Nitric Oxide and Reactive Oxygen Species in Macrophages | 1.46             | 0.435            | 0.459            |
| Acute Phase Response Signaling                                        | 1.92             | 0.73             | 0.765            |
| HMGB1 Signaling                                                       | 1.59             | 0.908            | 0.946            |
| Atherosclerosis Signaling                                             | 1.53             | 0.92             | 0.954            |
| HER-2 Signaling in Breast Cancer                                      | 1.99             | 1.458            | 1.498            |
| Erythropoietin Signaling                                              | 2.81             | 2.229            | 2.282            |
| Bladder Cancer Signaling                                              | 1.66             | 1.25             | 1.288            |
| Actin Cytoskeleton Signaling                                          | 2.36             | 1.761            | 1.83             |
| Glioma Signaling                                                      | 1.38             | 1.064            | 1.1              |
| FAK Signaling                                                         | 2.19             | 1.797            | 1.847            |
| Regulation of Cellular Mechanics by Calpain Protease                  | 1.57             | 1.31             | 1.344            |
| PAK Signaling                                                         | 2.13             | 1.756            | 1.805            |
| Death Receptor Signaling                                              | 1.82             | 0                | 0.247            |
| Induction of Apoptosis by HIV1                                        | 2.26             | 0                | 0.444            |
| Apoptosis Signaling                                                   | 3.12             | 0.794            | 1.257            |
| Hepatic Cholestasis                                                   | 4.13             | 1.819            | 2.352            |
| IL-15 Production                                                      | 1.59             | 0.33             | 0.628            |
| FXR/RXR Activation                                                    | 1.45             | 0.296            | 0.573            |
| Sperm Motility                                                        | 1.7              | 0.519            | 0.806            |
| ErbB4 Signaling                                                       | 2.04             | 1.861            | 1.905            |
| Neuregulin Signaling                                                  | 3.27             | 3.02             | 3.092            |

|                                                                                                       |      |       |       |
|-------------------------------------------------------------------------------------------------------|------|-------|-------|
| Systemic Lupus Erythematosus In B Cell Signaling Pathway                                              | 2.14 | 0.922 | 1.27  |
| Airway Inflammation in Asthma                                                                         | 2.14 | 2.57  | 1.09  |
| LXR/RXR Activation                                                                                    | 2.38 | 0.315 | 0.954 |
| Neuroprotective Role of THOP1 in Alzheimer's Disease                                                  | 1.38 | 1.516 | 1.1   |
| IL-6 Signaling                                                                                        | 1.45 | 0.549 | 0.91  |
| PXR/RXR Activation                                                                                    | 1.13 | 1.331 | 0.836 |
| Hepatic Fibrosis / Hepatic Stellate Cell Activation                                                   | 1.85 | 0.451 | 1.049 |
| Fcy Receptor-mediated Phagocytosis in Macrophages and Monocytes                                       | 3.31 | 1.818 | 2.465 |
| GP6 Signaling Pathway                                                                                 | 2.06 | 0.977 | 1.449 |
| FLT3 Signaling in Hematopoietic Progenitor Cells                                                      | 1.64 | 1.557 | 1.598 |
| Coagulation System                                                                                    | 2.11 | 0.761 | 1.437 |
| Virus Entry via Endocytic Pathways                                                                    | 1.84 | 2.076 | 1.598 |
| 14-3-3-mediated Signaling                                                                             | 2.25 | 1.26  | 1.768 |
| Type II Diabetes Mellitus Signaling                                                                   | 2.8  | 1.085 | 2.023 |
| Extrinsic Prothrombin Activation Pathway                                                              | 1.74 | 0.532 | 1.363 |
| PTEN Signaling                                                                                        | 1.43 | 1.714 | 1.303 |
| Differential Regulation of Cytokine Production in Macrophages and T Helper Cells by IL-17A and IL-17F | 1.6  | 0.489 | 1.269 |
| Differential Regulation of Cytokine Production in Intestinal Epithelial Cells by IL-17A and IL-17F    | 1.32 | 0.405 | 1.08  |
| PPAR Signaling                                                                                        | 2.48 | 1.659 | 2.268 |
| JAK/Stat Signaling                                                                                    | 1.18 | 1.536 | 1.058 |
| Semaphorin Signaling in Neurons                                                                       | 2.39 | 1.467 | 2.168 |
| Insulin Receptor Signaling                                                                            | 1.27 | 1.57  | 1.186 |
| BMP signaling pathway                                                                                 | 1.11 | 1.477 | 1.014 |
| Regulation of Actin-based Motility by Rho Factors Promoting Cardiogenesis in Vertebrates              | 1.02 | 1.384 | 0.944 |
|                                                                                                       | 0.98 | 1.349 | 0.918 |
| Synaptogenesis Signaling Pathway                                                                      | 1.29 | 2.157 | 1.222 |
| Fc Epsilon RI Signaling                                                                               | 2.5  | 3.014 | 2.485 |
| Ceramide Signaling                                                                                    | 1.42 | 0.915 | 1.424 |
| Macropinocytosis Signaling                                                                            | 2.24 | 1.621 | 2.282 |
| Epithelial Adherens Junction Signaling                                                                | 1.36 | 1.794 | 1.408 |
| Thyroid Cancer Signaling                                                                              | 0.99 | 1.651 | 1.059 |
| Tryptophan Degradation to 2-amino-3-carboxymuconate Semialdehyde                                      | 0.71 | 2.184 | 0.923 |
| NAD biosynthesis II (from tryptophan)                                                                 | 0.45 | 1.578 | 0.649 |
| Ovarian Cancer Signaling                                                                              | 0.91 | 1.996 | 1.15  |

|                                                                 |      |       |       |
|-----------------------------------------------------------------|------|-------|-------|
| LPS-stimulated MAPK Signaling                                   | 2.58 | 2.071 | 2.777 |
| PDGF Signaling                                                  | 0.71 | 1.42  | 0.971 |
| G Beta Gamma Signaling                                          | 1.51 | 2.309 | 1.838 |
| Acute Myeloid Leukemia Signaling                                | 1.02 | 1.928 | 1.424 |
| Autophagy                                                       | 0.53 | 1.568 | 1.001 |
| IGF-1 Signaling                                                 | 0.77 | 1.604 | 1.168 |
| Opioid Signaling Pathway                                        | 2.88 | 2.598 | 3.168 |
| eNOS Signaling                                                  | 1.33 | 0.956 | 1.823 |
| Rac Signaling                                                   | 1.36 | 2.583 | 2.07  |
| Renal Cell Carcinoma Signaling                                  | 0.83 | 2.175 | 1.62  |
| IL-4 Signaling                                                  | 0.77 | 2.071 | 1.537 |
| PEDF Signaling                                                  | 0.77 | 2.071 | 1.537 |
| Cholecystokinin/Gastrin-mediated Signaling                      | 1.61 | 1.389 | 1.931 |
| D-myo-inositol (1,4,5)-trisphosphate Degradation                | 1.67 | 1.294 | 2.301 |
| LPS/IL-1 Mediated Inhibition of RXR Function                    | 0.87 | 0.525 | 1.474 |
| D-myo-inositol (1,3,4)-trisphosphate Biosynthesis               | 1.6  | 1.249 | 2.228 |
| 1D-myo-inositol Hexakisphosphate Biosynthesis II (Mammalian)    | 1.6  | 1.249 | 2.228 |
| Caveolar-mediated Endocytosis Signaling                         | 1.33 | 1.14  | 1.731 |
| Superpathway of D-myo-inositol (1,4,5)-trisphosphate Metabolism | 1.32 | 1.061 | 1.925 |
| Synaptic Long Term Depression                                   | 1.21 | 1.014 | 1.841 |
| ERK5 Signaling                                                  | 0.94 | 0.694 | 1.754 |
| Granulocyte Adhesion and Diapedesis                             | 1.8  | 1.574 | 2.586 |
| Apelin Endothelial Signaling Pathway                            | 1.67 | 1.435 | 2.555 |
| MIF-mediated Glucocorticoid Regulation                          | 0.92 | 0.781 | 1.47  |
| Growth Hormone Signaling                                        | 1.87 | 1.736 | 2.428 |
| Estrogen Receptor Signaling                                     | 0.66 | 0.467 | 1.591 |
| Protein Kinase A Signaling                                      | 0.67 | 2.388 | 2.137 |
| Estrogen-Dependent Breast Cancer Signaling                      | 1.33 | 1.14  | 3.075 |
| Putrescine Degradation III                                      | 0.34 | 1.294 | 1.314 |
| Tryptophan Degradation X (Mammalian, via Tryptamine)            | 0.83 | 2.13  | 2.16  |
| Glutamine Biosynthesis I                                        | 1.45 | 1.667 | 1.678 |
| Putrescine Biosynthesis III                                     | 1.15 | 1.371 | 1.382 |
| Oncostatin M Signaling                                          | 1.17 | 1.871 | 1.908 |
| Role of JAK1 and JAK3 in $\gamma$ c Cytokine Signaling          | 1.04 | 1.835 | 1.879 |
| $\alpha$ -Adrenergic Signaling                                  | 1.31 | 2.405 | 2.465 |
| Angiopoietin Signaling                                          | 0.9  | 1.666 | 1.708 |
| ErbB2-ErbB3 Signaling                                           | 0.71 | 1.31  | 1.344 |

|                                                                             |      |       |       |
|-----------------------------------------------------------------------------|------|-------|-------|
| Chemokine Signaling                                                         | 0.85 | 1.599 | 1.641 |
| 3-phosphoinositide Degradation Superpathway of Inositol Phosphate Compounds | 0.54 | 1.372 | 1.421 |
| Phagosome Maturation                                                        | 1.19 | 1.26  | 1.312 |
| Synaptic Long Term Potentiation                                             | 0.78 | 1.961 | 2.023 |
| Prolactin Signaling                                                         | 2.08 | 1.26  | 1.303 |
| IL-3 Signaling                                                              | 2.14 | 2.745 | 2.808 |
| VEGF Family Ligand-Receptor Interactions                                    | 1.51 | 2.808 | 2.871 |
| Agrin Interactions at Neuromuscular Junction                                | 1.72 | 2.022 | 2.073 |
| Breast Cancer Regulation by Stathmin1                                       | 1.26 | 2.229 | 2.282 |
| Melanocyte Development and Pigmentation Signaling                           | 0.92 | 1.95  | 2.022 |
| Thrombopoietin Signaling                                                    | 2.15 | 1.282 | 1.32  |
| GNRH Signaling                                                              | 1.37 | 2.636 | 2.691 |
| NGF Signaling                                                               | 0.95 | 1.939 | 2.006 |
| IL-15 Signaling                                                             | 1.38 | 1.013 | 1.497 |
| IL-2 Signaling                                                              | 1.67 | 1.736 | 1.778 |
| mTOR Signaling                                                              | 2.19 | 2.001 | 2.045 |
| Natural Killer Cell Signaling                                               | 3    | 2.333 | 3.428 |
| Endometrial Cancer Signaling                                                | 0.78 | 3.657 | 3.746 |
| UVC-Induced MAPK Signaling                                                  | 2.03 | 0.858 | 1.431 |
| Renin-Angiotensin Signaling                                                 | 2.03 | 2.328 | 2.375 |
| Systemic Lupus Erythematosus Signaling                                      | 0.58 | 2.418 | 2.485 |
| Leukocyte Extravasation Signaling                                           | 1.66 | 0.712 | 1.376 |
| CNTF Signaling                                                              | 1.31 | 2.037 | 2.11  |
| Integrin Signaling                                                          | 2.15 | 1.491 | 2.201 |
| Role of Tissue Factor in Cancer                                             | 1.25 | 2.302 | 2.867 |
| Nitric Oxide Signaling in the Cardiovascular System                         | 2.19 | 1.404 | 1.95  |
| PPAR $\alpha$ /RXR $\alpha$ Activation                                      | 1.25 | 2.379 | 2.439 |
| ErbB Signaling                                                              | 2.22 | 1.407 | 1.885 |
| HGF Signaling                                                               | 1.36 | 2.405 | 2.465 |
| GDNF Family Ligand-Receptor Interactions                                    | 0.29 | 1.5   | 1.546 |
| p70S6K Signaling                                                            | 1.05 | 0.649 | 1.663 |
| Agranulocyte Adhesion and Diapedesis                                        | 1.28 | 1.233 | 1.735 |
| CXCR4 Signaling                                                             | 1.82 | 1.432 | 1.487 |
| NF- $\kappa$ B Activation by Viruses                                        | 2.05 | 2.035 | 2.606 |
| IL-8 Signaling                                                              | 1.63 | 2.071 | 2.123 |
| Axonal Guidance Signaling                                                   | 1.31 | 2.007 | 2.548 |
| CCR3 Signaling in Eosinophils                                               | 1.96 | 1.889 | 2.317 |
| fMLP Signaling in Neutrophils                                               | 0.64 | 2.936 | 3.656 |
| Myc Mediated Apoptosis Signaling                                            | 0.38 | 0.989 | 1.465 |
|                                                                             |      | 0.784 | 1.323 |

|                                                |      |       |       |
|------------------------------------------------|------|-------|-------|
| Paxillin Signaling                             | 1.07 | 1.568 | 2.155 |
| Ephrin Receptor Signaling                      | 1.25 | 1.819 | 2.352 |
| TNFR2 Signaling                                | 2.47 | 0     | 0.338 |
| TCA Cycle II (Eukaryotic)                      | 0    | 1.844 | 0.399 |
| Dolichyl-diphosphooligosaccharide Biosynthesis | 1.32 | 0     | 0.719 |
| Estrogen Biosynthesis                          | 0.79 | 0     | 2.056 |

## Down\_D1-D3\_survivors

|                                            | SD1 vs.<br>Baseline | SD2 vs.<br>Baseline | SD3 vs.<br>Baseline |
|--------------------------------------------|---------------------|---------------------|---------------------|
| Canonical Pathways                         |                     |                     |                     |
| FAT10 Signaling Pathway                    | 1.94                | 1.79                | 1.58                |
| NGF Signaling                              | 1.96                | 1.44                | 1.11                |
| Apelin Adipocyte Signaling Pathway         | 1.74                | 1.26                | 0.52                |
| Ovarian Cancer Signaling                   | 1.49                | 0.71                | 0.23                |
| PFKFB4 Signaling Pathway                   | 1.47                | 1.04                | 0.86                |
| Induction of Apoptosis by HIV1             | 1.66                | 1.55                | 1.27                |
| Polyamine Regulation in Colon Cancer       | 1.7                 | 1.62                | 1.42                |
| Apelin Endothelial Signaling Pathway       | 2.45                | 1.43                | 1.1                 |
| ATM Signaling                              | 1.83                | 1.05                | 0.81                |
| Circadian Rhythm Signaling                 | 1.95                | 1.29                | 1.1                 |
| Prostate Cancer Signaling                  | 2                   | 1.13                | 0.88                |
| Glycine Betaine Degradation                | 1.55                | 0.98                | 0.88                |
| Heme Biosynthesis II                       | 1.64                | 1.02                | 0.92                |
| HER-2 Signaling in Breast Cancer           | 1.6                 | 0.63                | 0.48                |
| Small Cell Lung Cancer Signaling           | 1.93                | 0.74                | 0.57                |
| Integrin Signaling                         | 1.64                | 1.59                | 1.14                |
| Sonic Hedgehog Signaling                   | 1.38                | 0.56                | 0.47                |
| Role of p14/p19ARF in Tumor Suppression    | 1.42                | 0.58                | 0.48                |
| BAG2 Signaling Pathway                     | 3.08                | 2.94                | 1.67                |
| NAD Salvage Pathway II                     | 1.75                | 0.68                | 0.59                |
| Adrenomedullin signaling pathway           | 1.83                | 1.71                | 1.7                 |
| Huntington's Disease Signaling             | 3.69                | 1.82                | 1.72                |
| Apelin Liver Signaling Pathway             | 1.5                 | 1.48                | 0.51                |
| Osteoarthritis Pathway                     | 1.62                | 1.11                | 1.12                |
| GP6 Signaling Pathway                      | 2.4                 | 0.87                | 1.08                |
| Hereditary Breast Cancer Signaling         | 1.5                 | 0.35                | 0.51                |
| Estrogen-Dependent Breast Cancer Signaling | 3.13                | 0.72                | 1.07                |
| Pancreatic Adenocarcinoma Signaling        | 2.61                | 1.5                 | 1.72                |
| Dendritic Cell Maturation                  | 1.36                | 0.91                | 1                   |
| Inhibition of Angiogenesis by TSP1         | 1.27                | 1.32                | 1.12                |
| Adipogenesis pathway                       | 2.04                | 2.47                | 0.93                |
| Myc Mediated Apoptosis Signaling           | 2.11                | 0.8                 | 1.19                |
| MIF Regulation of Innate Immunity          | 1.59                | 1.96                | 0.92                |
| Telomerase Signaling                       | 1.66                | 0.97                | 1.22                |
| Paxillin Signaling                         | 1.62                | 0.95                | 1.19                |
| Apelin Pancreas Signaling Pathway          | 1.56                | 1.93                | 0.91                |
| Basal Cell Carcinoma Signaling             | 0.93                | 1.38                | 0.2                 |
| Docosahexaenoic Acid (DHA) Signaling       | 1.74                | 0.46                | 1                   |
| B Cell Receptor Signaling                  | 2.46                | 1.31                | 1.84                |
| CD27 Signaling in Lymphocytes              | 1.9                 | 0.95                | 1.43                |



|                                                              |      |      |      |
|--------------------------------------------------------------|------|------|------|
| Cancer Drug Resistance By Drug Efflux                        | 1.71 | 0.88 | 1.31 |
| FGF Signaling                                                | 1.6  | 0.22 | 0.93 |
| Angiopoietin Signaling                                       | 1.32 | 0.71 | 1.06 |
| Glucocorticoid Receptor Signaling                            | 2.06 | 0.3  | 1.31 |
| Neuroinflammation Signaling Pathway                          | 2.28 | 0.67 | 1.64 |
| Phagosome Maturation                                         | 1.46 | 1.71 | 1.31 |
| Noradrenaline and Adrenaline Degradation                     | 0.72 | 1.37 | 0.46 |
| PCP pathway                                                  | 1.11 | 2.37 | 0.68 |
| GM-CSF Signaling                                             | 1.4  | 0.27 | 1.11 |
| Androgen Signaling                                           | 0.81 | 1.78 | 0.52 |
| RANK Signaling in Osteoclasts                                | 1.55 | 1.16 | 1.47 |
| PEDF Signaling                                               | 1.64 | 0.64 | 1.53 |
| GNRH Signaling                                               | 1.06 | 1.4  | 1.02 |
| RAR Activation                                               | 2.26 | 1.72 | 2.22 |
| iCOS-iCOSL Signaling in T Helper Cells                       | 1.62 | 0.49 | 1.76 |
| Role of PKR in Interferon Induction and Antiviral Response   | 1.63 | 1.13 | 1.69 |
| NF-κB Signaling                                              | 1.32 | 0.89 | 1.4  |
| HOTAIR Regulatory Pathway                                    | 1.6  | 1.54 | 1.62 |
| ILK Signaling                                                | 1.56 | 0.83 | 1.78 |
| Nur77 Signaling in T Lymphocytes                             | 1.27 | 0.94 | 1.41 |
| Role of IL-17A in Arthritis                                  | 1.25 | 0.93 | 1.39 |
| Granzyme B Signaling                                         | 2.08 | 0.79 | 2.86 |
| FAT10 Cancer Signaling Pathway                               | 2.12 | 2.79 | 2.39 |
| Type I Diabetes Mellitus Signaling                           | 1.17 | 0.48 | 1.74 |
| Th2 Pathway                                                  | 1.17 | 0.37 | 1.93 |
| Protein Kinase A Signaling                                   | 1.27 | 1.21 | 1.32 |
| Assembly of RNA Polymerase III Complex                       | 1.4  | 0.91 | 1.92 |
| Molecular Mechanisms of Cancer                               | 1.26 | 0.88 | 1.66 |
| Th1 and Th2 Activation Pathway                               | 0.79 | 0.26 | 1.49 |
| Sumoylation Pathway                                          | 2.24 | 3.9  | 3.23 |
| IL-17 Signaling                                              | 1.2  | 0.66 | 2.25 |
| Activation of IRF by Cytosolic Pattern Recognition Receptors | 0.65 | 1.53 | 1.25 |
| 4-1BB Signaling in T Lymphocytes                             | 0.68 | 1.32 | 1.12 |
| Heme Biosynthesis from Uroporphyrinogen-III I                | 0.99 | 1.36 | 1.26 |
| Catecholamine Biosynthesis                                   | 0.99 | 1.36 | 1.26 |
| Glycine Degradation (Creatine Biosynthesis)                  | 1.28 | 1.66 | 1.55 |
| CD28 Signaling in T Helper Cells                             | 1.05 | 0.88 | 1.62 |
| Caveolar-mediated Endocytosis Signaling                      | 0.88 | 0.72 | 1.7  |
| Regulation of the Epithelial-Mesenchymal Transition Pathway  | 1.48 | 1.22 | 2.78 |
| IL-22 Signaling                                              | 0.87 | 0.63 | 2.34 |
| IL-17A Signaling in Airway Cells                             | 1.03 | 0.81 | 2.67 |
| NF-κB Activation by Viruses                                  | 0.75 | 0.64 | 1.53 |
| Protein Ubiquitination Pathway                               | 0.37 | 0.25 | 1.42 |

|                                                                      |      |      |      |
|----------------------------------------------------------------------|------|------|------|
| Inflammasome pathway                                                 | 1    | 0.7  | 3.8  |
| Wnt/ $\beta$ -catenin Signaling                                      | 1.78 | 1.95 | 1.96 |
| Role of IL-17F in Allergic Inflammatory Airway Diseases              | 1.02 | 1.13 | 1.69 |
| IL-12 Signaling and Production in Macrophages                        | 0.57 | 0.76 | 1.42 |
| Factors Promoting Cardiogenesis in Vertebrates                       | 1.03 | 1.12 | 1.41 |
| OX40 Signaling Pathway                                               | 0.74 | 0.91 | 1.37 |
| Regulation of IL-2 Expression in Activated and Anergic T Lymphocytes | 1.06 | 1.79 | 2.08 |
| Role of JAK1, JAK2 and TYK2 in Interferon Signaling                  | 0.32 | 0.63 | 1.35 |
| Role of JAK family kinases in IL-6-type Cytokine Signaling           | 0.31 | 0.62 | 1.31 |
| IL-17A Signaling in Gastric Cells                                    | 0.84 | 1.52 | 2.29 |
| iNOS Signaling                                                       | 0.48 | 1.08 | 1.61 |
| Wnt/Ca <sup>+</sup> pathway                                          | 1.09 | 1.53 | 1.96 |
| Guanosine Nucleotides Degradation III                                | 1.4  | 0    | 0.8  |
| Gluconeogenesis I                                                    | 1.55 | 0.62 | 0    |
| Urate Biosynthesis/Inosine 5'-phosphate Degradation                  | 1.34 | 0    | 0.77 |
| Tumoricidal Function of Hepatic Natural Killer Cells                 | 1.59 | 0    | 0.54 |
| PRPP Biosynthesis I                                                  | 1.11 | 1.49 | 0    |
| NAD Biosynthesis III                                                 | 0.99 | 1.36 | 0    |
| L-DOPA Degradation                                                   | 1.28 | 1.66 | 0    |
| Thio-molybdenum Cofactor Biosynthesis                                | 1.57 | 0    | 0    |
| DNA Double-Strand Break Repair by Non-Homologous End Joining         | 0    | 0    | 1.79 |

| <b>Up_D1-D3_non_survivors</b>                                                                         |                             |                             |                             |
|-------------------------------------------------------------------------------------------------------|-----------------------------|-----------------------------|-----------------------------|
|                                                                                                       | <b>SD1 vs.<br/>Baseline</b> | <b>SD2 vs.<br/>Baseline</b> | <b>SD3 vs.<br/>Baseline</b> |
| Canonical Pathways                                                                                    |                             |                             |                             |
| <b>IL-3 Signaling</b>                                                                                 | 2.94                        | 2.46                        | 1.99                        |
| Hepatic Cholestasis                                                                                   | 3.1                         | 2.79                        | 2.49                        |
| <b>HER-2 Signaling in Breast Cancer</b>                                                               | 2.21                        | 1.77                        | 1.37                        |
| Amyotrophic Lateral Sclerosis Signaling                                                               | 1.42                        | 1.08                        | 0.77                        |
| Erythropoietin Signaling                                                                              | 2.5                         | 1.99                        | 1.55                        |
| <b>Epithelial Adherens Junction Signaling</b>                                                         | 1.77                        | 1.31                        | 0.76                        |
| Growth Hormone Signaling                                                                              | 2.15                        | 1.61                        | 1.19                        |
| Regulation of Cellular Mechanics by Calpain Protease                                                  | 1.87                        | 1.29                        | 0.89                        |
| NF-κB Signaling                                                                                       | 1.61                        | 0.97                        | 0.54                        |
| Type II Diabetes Mellitus Signaling                                                                   | 3.32                        | 2.78                        | 1.97                        |
| Induction of Apoptosis by HIV1                                                                        | 1.5                         | 0.92                        | 0.56                        |
| nNOS Signaling in Skeletal Muscle Cells                                                               | 1.68                        | 1.43                        | 0.92                        |
| Iron homeostasis signaling pathway                                                                    | 1.43                        | 0.63                        | 0.25                        |
| Role of JAK2 in Hormone-like Cytokine Signaling                                                       | 1.43                        | 0.57                        | 0.2                         |
| LPS/IL-1 Mediated Inhibition of RXR Function                                                          | 1.67                        | 1.15                        | 0.96                        |
| Cyclins and Cell Cycle Regulation                                                                     | 1.39                        | 0.61                        | 0.36                        |
| Tec Kinase Signaling                                                                                  | 1.92                        | 1.17                        | 0.94                        |
| TNFR2 Signaling                                                                                       | 2.27                        | 0.63                        | 0.23                        |
| Death Receptor Signaling                                                                              | 2.01                        | 0.81                        | 0.53                        |
| CXCR4 Signaling                                                                                       | 1.5                         | 1.45                        | 1.2                         |
| Netrin Signaling                                                                                      | 1.35                        | 1.26                        | 0.87                        |
| Semaphorin Signaling in Neurons                                                                       | 2.14                        | 2.05                        | 1.53                        |
| <b>Ephrin Receptor Signaling</b>                                                                      | 1.58                        | 1.58                        | 1.34                        |
| Phenylalanine Degradation IV (Mammalian, via Side Chain)                                              | 1.78                        | 0.44                        | 0.45                        |
| nNOS Signaling in Neurons                                                                             | 2.02                        | 0.37                        | 0.39                        |
| IL-15 Production                                                                                      | 1.33                        | 0.29                        | 0.31                        |
| Cell Cycle: G1/S Checkpoint Regulation                                                                | 1.32                        | 0.46                        | 0.49                        |
| Germ Cell-Sertoli Cell Junction Signaling                                                             | 2.57                        | 2.62                        | 1.51                        |
| Mechanisms of Viral Exit from Host Cells                                                              | 1.64                        | 0.86                        | 0.89                        |
| Extrinsic Prothrombin Activation Pathway                                                              | 1.62                        | 1.05                        | 1.08                        |
| <b>Macropinocytosis Signaling</b>                                                                     | 1.97                        | 1.99                        | 1.55                        |
| Putrescine Degradation III                                                                            | 1.55                        | 1                           | 1.03                        |
| Differential Regulation of Cytokine Production in Macrophages and T Helper Cells by IL-17A and IL-17F | 1.48                        | 0.96                        | 0.99                        |
| <b>Apoptosis Signaling</b>                                                                            | 2.74                        | 1.45                        | 1.52                        |
| TNFR1 Signaling                                                                                       | 1.93                        | 1.19                        | 1.24                        |
| IL-4 Signaling                                                                                        | 2.28                        | 1.34                        | 1.41                        |
| CNTF Signaling                                                                                        | 1.63                        | 1                           | 1.04                        |
| 1D-myo-inositol Hexakisphosphate Biosynthesis II (Mammalian)                                          | 2.31                        | 1.74                        | 1.79                        |
| JAK/Stat Signaling                                                                                    | 1.84                        | 1.88                        | 1.46                        |

|                                                                       |      |      |      |
|-----------------------------------------------------------------------|------|------|------|
| Amyloid Processing                                                    | 2.46 | 1.69 | 1.75 |
| Phagosome Maturation                                                  | 1.99 | 1.12 | 1.19 |
| Salvage Pathways of Pyrimidine Ribonucleotides                        | 1.44 | 1.51 | 0.79 |
| Bladder Cancer Signaling                                              | 1.42 | 1.49 | 0.77 |
| NF-κB Activation by Viruses                                           | 1.78 | 1.82 | 1.41 |
| Pyridoxal 5'-phosphate Salvage Pathway                                | 1.87 | 1.29 | 1.35 |
| CCR3 Signaling in Eosinophils                                         | 2.07 | 1.44 | 1.52 |
| Actin Cytoskeleton Signaling                                          | 1.33 | 1.41 | 0.93 |
| Tryptophan Degradation to 2-amino-3-carboxymuconate Semialdehyde      | 1.67 | 1.86 | 0.77 |
| Systemic Lupus Erythematosus In B Cell Signaling Pathway              | 2.31 | 0.66 | 0.95 |
| FAK Signaling                                                         | 1.47 | 1.53 | 1.17 |
| Role of Tissue Factor in Cancer                                       | 1.37 | 1.51 | 0.85 |
| Tight Junction Signaling                                              | 1.45 | 1.08 | 1.16 |
| Oncostatin M Signaling                                                | 1.56 | 1.34 | 1.39 |
| Glioma Signaling                                                      | 1.93 | 0.58 | 0.94 |
| Thyroid Cancer Signaling                                              | 1.32 | 1.14 | 1.19 |
| GP6 Signaling Pathway                                                 | 2.64 | 1.12 | 1.59 |
| PPAR Signaling                                                        | 1.71 | 1.83 | 1.46 |
| Integrin Signaling                                                    | 1.45 | 1.52 | 1.31 |
| Production of Nitric Oxide and Reactive Oxygen Species in Macrophages | 1.78 | 2.22 | 0.95 |
| IL-8 Signaling                                                        | 1.61 | 1.34 | 1.44 |
| Virus Entry via Endocytic Pathways                                    | 1.57 | 1.69 | 1.35 |
| Fcy Receptor-mediated Phagocytosis in Macrophages and Monocytes       | 2.41 | 1.13 | 1.63 |
| 3-phosphoinositide Degradation                                        | 1.44 | 1.7  | 1.07 |
| UVC-Induced MAPK Signaling                                            | 1.81 | 1.66 | 1.72 |
| p70S6K Signaling                                                      | 1.49 | 0.66 | 1.02 |
| Aryl Hydrocarbon Receptor Signaling                                   | 1.32 | 0.57 | 0.9  |
| Molecular Mechanisms of Cancer                                        | 1.46 | 0.8  | 1.1  |
| mTOR Signaling                                                        | 1.79 | 1.9  | 1.66 |
| 14-3-3-mediated Signaling                                             | 1.19 | 1.33 | 1.04 |
| Granulocyte Adhesion and Diapedesis                                   | 1.48 | 1.8  | 1.18 |
| Acute Phase Response Signaling                                        | 1.58 | 2.36 | 1.02 |
| Ceramide Signaling                                                    | 1.21 | 1.67 | 0.89 |
| Hepatic Fibrosis / Hepatic Stellate Cell Activation                   | 1.51 | 1.88 | 1.28 |
| Coagulation System                                                    | 1.92 | 2.34 | 1.68 |
| Pancreatic Adenocarcinoma Signaling                                   | 1.54 | 0.89 | 1.33 |
| Superpathway of Inositol Phosphate Compounds                          | 1.09 | 1.73 | 0.89 |
| Renin-Angiotensin Signaling                                           | 2.61 | 2.92 | 2.52 |
| Atherosclerosis Signaling                                             | 1.28 | 1.83 | 1.12 |
| eNOS Signaling                                                        | 1.39 | 1.28 | 1.37 |
| Osteoarthritis Pathway                                                | 1.14 | 1.83 | 0.99 |
| FXR/RXR Activation                                                    | 1.2  | 2.69 | 1.06 |
| Fc Epsilon RI Signaling                                               | 3.1  | 2.4  | 3.05 |

|                                                                 |      |      |      |
|-----------------------------------------------------------------|------|------|------|
| LXR/RXR Activation                                              | 1.64 | 3.92 | 1.5  |
| Axonal Guidance Signaling                                       | 0.76 | 1.61 | 0.74 |
| Natural Killer Cell Signaling                                   | 3.63 | 3.48 | 3.63 |
| IL-2 Signaling                                                  | 1.98 | 1.36 | 1.98 |
| FLT3 Signaling in Hematopoietic Progenitor Cells                | 1.02 | 1.41 | 1.03 |
| Agranulocyte Adhesion and Diapedesis                            | 1.02 | 1.61 | 1.05 |
| Role of JAK1 and JAK3 in $\gamma$ c Cytokine Signaling          | 1.77 | 1.22 | 1.79 |
| Estrogen-Dependent Breast Cancer Signaling                      | 1.58 | 1.09 | 1.63 |
| Glucose and Glucose-1-phosphate Degradation                     | 0.61 | 1.72 | 0.71 |
| IL-12 Signaling and Production in Macrophages                   | 0.83 | 2.08 | 0.99 |
| IL-15 Signaling                                                 | 2.15 | 1.61 | 2.24 |
| Thrombopoietin Signaling                                        | 1.9  | 1.84 | 1.92 |
| Maturity Onset Diabetes of Young (MODY) Signaling               | 0.72 | 1.62 | 0.91 |
| Sertoli Cell-Sertoli Cell Junction Signaling                    | 1.23 | 1.53 | 1.3  |
| BER pathway                                                     | 1.09 | 0.49 | 1.3  |
| Nitric Oxide Signaling in the Cardiovascular System             | 1.47 | 2.01 | 1.61 |
| Synaptogenesis Signaling Pathway                                | 1.4  | 0.96 | 1.58 |
| HGF Signaling                                                   | 1.14 | 1.63 | 1.29 |
| Rac Signaling                                                   | 1.14 | 1.63 | 1.29 |
| Leukocyte Extravasation Signaling                               | 1.34 | 1.7  | 1.46 |
| Protein Kinase A Signaling                                      | 1.7  | 1.44 | 1.86 |
| PPAR $\alpha$ /RXR $\alpha$ Activation                          | 1.27 | 2.36 | 1.69 |
| G Beta Gamma Signaling                                          | 1.62 | 2.27 | 1.91 |
| Apelin Endothelial Signaling Pathway                            | 1.41 | 1.16 | 1.63 |
| G $\alpha$ s Signaling                                          | 1.21 | 0.61 | 1.81 |
| PAK Signaling                                                   | 1.42 | 2.47 | 2.05 |
| Caveolar-mediated Endocytosis Signaling                         | 1.58 | 1.56 | 1.63 |
| Agrin Interactions at Neuromuscular Junction                    | 1.08 | 2.57 | 2.08 |
| GNRH Signaling                                                  | 1.4  | 2.53 | 2.23 |
| Opioid Signaling Pathway                                        | 2.72 | 2.69 | 2.87 |
| VEGF Family Ligand-Receptor Interactions                        | 1.3  | 1.3  | 1.37 |
| ErbB2-ErbB3 Signaling                                           | 0.6  | 1.29 | 1.35 |
| G $\alpha$ 12/13 Signaling                                      | 0.58 | 1.27 | 1.34 |
| Threonine Degradation II                                        | 1.4  | 1.5  | 1.52 |
| Glutamine Biosynthesis I                                        | 1.4  | 1.5  | 1.52 |
| Airway Inflammation in Asthma                                   | 3.61 | 3.91 | 3.96 |
| Airway Pathology in Chronic Obstructive Pulmonary Disease       | 1.42 | 1.61 | 1.64 |
| D-myo-inositol (1,4,5)-trisphosphate Degradation                | 1.55 | 1.81 | 1.86 |
| D-myo-inositol (1,3,4)-trisphosphate Biosynthesis               | 1.48 | 1.74 | 1.79 |
| Tryptophan Degradation X (Mammalian, via Tryptamine)            | 1.42 | 1.68 | 1.72 |
| Superpathway of D-myo-inositol (1,4,5)-trisphosphate Metabolism | 1.21 | 1.46 | 1.5  |
| ErbB4 Signaling                                                 | 1.8  | 2.33 | 2.42 |
| PXR/RXR Activation                                              | 0.97 | 1.31 | 1.37 |

|                                                      |      |      |      |
|------------------------------------------------------|------|------|------|
| PEDF Signaling                                       | 0.96 | 1.34 | 1.41 |
| RAR Activation                                       | 0.63 | 0.82 | 1.85 |
| Ovarian Cancer Signaling                             | 1    | 1.14 | 1.6  |
| Inhibition of Matrix Metalloproteases                | 0.72 | 0.93 | 1.56 |
| Prolactin Signaling                                  | 1.81 | 1.85 | 1.93 |
| Neuregulin Signaling                                 | 2.89 | 3.11 | 3.24 |
| Cholecystokinin/Gastrin-mediated Signaling           | 1.35 | 1.49 | 1.58 |
| $\alpha$ -Adrenergic Signaling                       | 1.49 | 1.55 | 1.63 |
| HIF1 $\alpha$ Signaling                              | 0.81 | 1.21 | 1.7  |
| Neuroprotective Role of THOP1 in Alzheimer's Disease | 1.16 | 1.24 | 1.31 |
| LPS-stimulated MAPK Signaling                        | 2.28 | 2.36 | 2.46 |
| ErbB Signaling                                       | 1.93 | 2.04 | 2.13 |
| Protein Citrullination                               | 0.73 | 0    | 2.06 |



| <b>Down_D1-D3_non_survivors</b>                                      |                             |                             |                             |
|----------------------------------------------------------------------|-----------------------------|-----------------------------|-----------------------------|
|                                                                      | <b>SD1 vs.<br/>Baseline</b> | <b>SD2 vs.<br/>Baseline</b> | <b>SD3 vs.<br/>Baseline</b> |
| Canonical Pathways                                                   |                             |                             |                             |
| LPS-stimulated MAPK Signaling                                        | 1.56                        | 0.92                        | 0.26                        |
| IL-8 Signaling                                                       | 1.32                        | 1.09                        | 0.85                        |
| Regulation of the Epithelial-Mesenchymal Transition Pathway          | 1.7                         | 1.13                        | 0.6                         |
| Apelin Pancreas Signaling Pathway                                    | 1.74                        | 1.12                        | 0.61                        |
| Regulation of IL-2 Expression in Activated and Anergic T Lymphocytes | 1.87                        | 1.29                        | 0.88                        |
| Glycine Betaine Degradation                                          | 2.34                        | 1.68                        | 0.7                         |
| Wnt/ $\beta$ -catenin Signaling                                      | 1.71                        | 1.37                        | 0.76                        |
| Role of Tissue Factor in Cancer                                      | 1.63                        | 0.56                        | 0                           |
| fMLP Signaling in Neutrophils                                        | 1.65                        | 1.31                        | 0.6                         |
| RAR Activation                                                       | 1.7                         | 1.13                        | 0.88                        |
| Estrogen-Dependent Breast Cancer Signaling                           | 2.94                        | 1.58                        | 1.11                        |
| Ovarian Cancer Signaling                                             | 1.58                        | 0.41                        | 0                           |
| Adrenomedullin signaling pathway                                     | 3.26                        | 1.12                        | 0.38                        |
| Antioxidant Action of Vitamin C                                      | 1.53                        | 0.68                        | 0.41                        |
| Factors Promoting Cardiogenesis in Vertebrates                       | 1.37                        | 1.25                        | 0.86                        |
| Colorectal Cancer Metastasis Signaling                               | 1.8                         | 0.69                        | 0.34                        |
| Endothelin-1 Signaling                                               | 1.87                        | 0.91                        | 0.67                        |
| IL-6 Signaling                                                       | 1.45                        | 0.49                        | 0.28                        |
| BMP signaling pathway                                                | 1.54                        | 1.38                        | 0.56                        |
| Antiproliferative Role of Somatostatin Receptor 2                    | 1.78                        | 0.29                        | 0                           |
| NF- $\kappa$ B Activation by Viruses                                 | 2.05                        | 0.54                        | 0.26                        |
| Role of NANOG in Mammalian Embryonic Stem Cell Pluripotency          | 2.03                        | 0.3                         | 0                           |
| Glucocorticoid Receptor Signaling                                    | 4.57                        | 1.98                        | 1.78                        |
| Melanoma Signaling                                                   | 1.49                        | 0                           | 0                           |
| HIF1 $\alpha$ Signaling                                              | 2.19                        | 0.33                        | 0.35                        |
| Relaxin Signaling                                                    | 2.64                        | 0.36                        | 0.39                        |
| Gluconeogenesis I                                                    | 2.77                        | 0.95                        | 0.98                        |
| IL-2 Signaling                                                       | 1.67                        | 0.39                        | 0.41                        |
| NAD Phosphorylation and Dephosphorylation                            | 1.32                        | 0.68                        | 0.7                         |
| PKC $\theta$ Signaling in T Lymphocytes                              | 1.36                        | 0.34                        | 0.37                        |
| PTEN Signaling                                                       | 1.43                        | 0.48                        | 0.52                        |
| CD40 Signaling                                                       | 1.58                        | 0.74                        | 0.77                        |
| Apelin Endothelial Signaling Pathway                                 | 3.66                        | 1.79                        | 1.87                        |
| Molecular Mechanisms of Cancer                                       | 2.52                        | 0.76                        | 0.84                        |
| Glioma Signaling                                                     | 1.38                        | 0.62                        | 0.65                        |
| NGF Signaling                                                        | 1.3                         | 0.58                        | 0.62                        |
| B Cell Receptor Signaling                                            | 2.68                        | 1.25                        | 1.33                        |
| GM-CSF Signaling                                                     | 1.91                        | 1.11                        | 1.16                        |
| MIF Regulation of Innate Immunity                                    | 1.78                        | 1.15                        | 1.18                        |
| Role of MAPK Signaling in the Pathogenesis of Influenza              | 1.73                        | 1.01                        | 1.06                        |

|                                                            |      |      |      |
|------------------------------------------------------------|------|------|------|
| FAT10 Signaling Pathway                                    | 1.6  | 1.2  | 1.23 |
| Polyamine Regulation in Colon Cancer                       | 1.37 | 1.05 | 1.07 |
| PEDF Signaling                                             | 3.17 | 0.25 | 0.57 |
| Cancer Drug Resistance By Drug Efflux                      | 1.77 | 1.36 | 1.41 |
| CREB Signaling in Neurons                                  | 1.48 | 1    | 1.07 |
| Prostate Cancer Signaling                                  | 2.89 | 0.48 | 0.87 |
| Non-Small Cell Lung Cancer Signaling                       | 1.81 | 0    | 0.32 |
| Endometrial Cancer Signaling                               | 2.27 | 0    | 0.42 |
| Hereditary Breast Cancer Signaling                         | 1.99 | 0.41 | 0.73 |
| HMGB1 Signaling                                            | 1.96 | 0.53 | 0.87 |
| IL-17A Signaling in Airway Cells                           | 2.11 | 0.36 | 0.77 |
| Angiopoietin Signaling                                     | 1.78 | 0.29 | 0.65 |
| eNOS Signaling                                             | 2.49 | 0    | 0.61 |
| Apelin Adipocyte Signaling Pathway                         | 1.67 | 2.04 | 0.61 |
| Adipogenesis pathway                                       | 1.7  | 0.44 | 0.77 |
| Role of IL-17A in Arthritis                                | 3.21 | 0.9  | 1.5  |
| GP6 Signaling Pathway                                      | 3.58 | 0.56 | 1.36 |
| Docosahexaenoic Acid (DHA) Signaling                       | 1.96 | 0.23 | 0.69 |
| NF-κB Signaling                                            | 1.61 | 0    | 0.46 |
| HER-2 Signaling in Breast Cancer                           | 1.99 | 0.52 | 0.94 |
| Role of PKR in Interferon Induction and Antiviral Response | 2.5  | 0.62 | 1.21 |
| IL-17 Signaling                                            | 2.66 | 0.95 | 1.49 |
| Paxillin Signaling                                         | 1.44 | 1.95 | 0.38 |
| Small Cell Lung Cancer Signaling                           | 3.69 | 0.65 | 1.69 |
| iCOS-iCOSL Signaling in T Helper Cells                     | 1.86 | 0.65 | 1.06 |
| Gα12/13 Signaling                                          | 1.36 | 0.46 | 0.79 |
| Telomerase Signaling                                       | 2.39 | 1.04 | 1.55 |
| Sonic Hedgehog Signaling                                   | 1.08 | 1.55 | 0.32 |
| Guanosine Nucleotides Degradation III                      | 1.18 | 1.53 | 0.63 |
| Myc Mediated Apoptosis Signaling                           | 2.67 | 0.36 | 1.25 |
| Integrin Signaling                                         | 1.48 | 2.1  | 0.52 |
| Urate Biosynthesis/Inosine 5'-phosphate Degradation        | 1.12 | 1.46 | 0.6  |
| Inhibition of Angiogenesis by TSP1                         | 1.58 | 0.28 | 0.8  |
| Nucleotide Excision Repair Pathway                         | 1.45 | 0.25 | 0.74 |
| IL-17A Signaling in Fibroblasts                            | 1.45 | 0.25 | 0.74 |
| Adenosine Nucleotides Degradation II                       | 1.01 | 1.34 | 0.55 |
| RANK Signaling in Osteoclasts                              | 1.47 | 0.5  | 0.91 |
| Corticotropin Releasing Hormone Signaling                  | 1.52 | 1.35 | 1.43 |
| Protein Kinase A Signaling                                 | 1.45 | 0.76 | 1.07 |
| Nitric Oxide Signaling in the Cardiovascular System        | 1.71 | 0    | 0.81 |
| Amyotrophic Lateral Sclerosis Signaling                    | 1.67 | 0    | 0.79 |
| p53 Signaling                                              | 1.62 | 0    | 0.76 |
| Lymphotoxin β Receptor Signaling                           | 1.95 | 0    | 0.95 |

|                                                             |      |      |      |
|-------------------------------------------------------------|------|------|------|
| Role of PI3K/AKT Signaling in the Pathogenesis of Influenza | 1.67 | 0    | 0.82 |
| Huntington's Disease Signaling                              | 3.97 | 1.35 | 2.65 |
| Assembly of RNA Polymerase II Complex                       | 1.49 | 0.5  | 1.01 |
| OX40 Signaling Pathway                                      | 1.34 | 0.44 | 0.91 |
| Phagosome Maturation                                        | 1.19 | 1.37 | 1.04 |
| Neuroinflammation Signaling Pathway                         | 1.49 | 0.88 | 1.23 |
| Heme Biosynthesis II                                        | 2.49 | 0.72 | 1.8  |
| BAG2 Signaling Pathway                                      | 3.18 | 1.81 | 2.65 |
| NAD Salvage Pathway II                                      | 1.43 | 1.93 | 1.11 |
| Systemic Lupus Erythematosus In T Cell Signaling Pathway    | 1.63 | 0.42 | 1.29 |
| ATM Signaling                                               | 2.13 | 0.42 | 1.7  |
| PCP pathway                                                 | 0.78 | 1.92 | 0.42 |
| Pancreatic Adenocarcinoma Signaling                         | 2.27 | 0.99 | 1.99 |
| Androgen Signaling                                          | 1.63 | 1.04 | 1.51 |
| Induction of Apoptosis by HIV1                              | 2.27 | 0.8  | 1.98 |
| TWEAK Signaling                                             | 1.49 | 0.26 | 1.41 |
| Rac Signaling                                               | 1    | 2.41 | 1.01 |
| GNRH Signaling                                              | 1.07 | 1.37 | 1.08 |
| CD27 Signaling in Lymphocytes                               | 1.43 | 0.47 | 1.56 |
| FAT10 Cancer Signaling Pathway                              | 1.63 | 1.05 | 1.73 |
| Tetrapyrrole Biosynthesis II                                | 1.93 | 0.96 | 2.33 |
| Granzyme B Signaling                                        | 1.75 | 0.51 | 2.31 |
| Sumoylation Pathway                                         | 2.48 | 3.28 | 2.74 |
| Role of NFAT in Cardiac Hypertrophy                         | 1.11 | 0.67 | 1.34 |
| Aldosterone Signaling in Epithelial Cells                   | 1.65 | 0.84 | 2.13 |
| DNA Double-Strand Break Repair by Homologous Recombination  | 1.06 | 0.56 | 1.43 |
| Stearate Biosynthesis I (Animals)                           | 0.68 | 1.74 | 1.14 |
| Signaling by Rho Family GTPases                             | 0.45 | 1.63 | 1.06 |
| Cardiac $\beta$ -adrenergic Signaling                       | 1.21 | 0.67 | 1.91 |
| Cardiac Hypertrophy Signaling (Enhanced)                    | 1.45 | 1.85 | 1.71 |
| tRNA Charging                                               | 0.81 | 0.23 | 2.02 |
| Osteoarthritis Pathway                                      | 0.91 | 0.7  | 1.39 |
| Opioid Signaling Pathway                                    | 1    | 0.96 | 1.34 |
| ILK Signaling                                               | 1.16 | 1.19 | 2.55 |
| Glycine Degradation (Creatine Biosynthesis)                 | 1.15 | 1.34 | 1.36 |
| L-DOPA Degradation                                          | 1.15 | 1.34 | 1.36 |
| Superpathway of Citrulline Metabolism                       | 1.01 | 1.34 | 1.37 |
| Fatty Acid $\alpha$ -oxidation                              | 0.96 | 1.29 | 1.32 |
| cAMP-mediated signaling                                     | 0.74 | 0.84 | 1.56 |
| Inflammasome pathway                                        | 0.8  | 1.12 | 3.06 |
| Chemokine Signaling                                         | 0.85 | 1    | 1.56 |
| Calcium Signaling                                           | 0.38 | 0.77 | 1.49 |
| nNOS Signaling in Skeletal Muscle Cells                     | 0.77 | 1.2  | 1.94 |

|                                                 |      |      |      |
|-------------------------------------------------|------|------|------|
| Cell Cycle Control of Chromosomal Replication   | 0.86 | 1.4  | 2.11 |
| GADD45 Signaling                                | 1.54 | 0    | 0.46 |
| Superpathway of Methionine Degradation          | 2.86 | 0.72 | 0    |
| Cysteine Biosynthesis III (mammalia)            | 1.37 | 0.4  | 0    |
| 2-oxobutanoate Degradation I                    | 1.93 | 0.96 | 0    |
| Basal Cell Carcinoma Signaling                  | 1.41 | 0.66 | 0    |
| Methylmalonyl Pathway                           | 2.14 | 1.05 | 0    |
| Methionine Degradation I (to Homocysteine)      | 1.48 | 0.43 | 0    |
| DNA damage-induced 14-3-3 $\sigma$ Signaling    | 1.54 | 0    | 1.19 |
| Alanine Degradation III                         | 1.15 | 0    | 1.36 |
| UDP-D-xylose and UDP-D-glucuronate Biosynthesis | 1.15 | 0    | 1.36 |
| Alanine Biosynthesis II                         | 1.15 | 0    | 1.36 |
| Role of p14/p19ARF in Tumor Suppression         | 1.78 | 0    | 0    |
